# Supplementary material for: Whole-Genome Resequencing Analysis of Hanwoo and Yanbian Cattle to Identify Genome-Wide SNPs and Signatures of Selection
Source: PubMed Central journal article supplement — Mol Cells. 2015 May 15;38(5):466–73. doi: 10.14348/molcells.2015.0019 (PMC4443289; doi:10.14348/molcells.2015.0019), 2015-05-15
Supplement: molce-38-5-466-supplementary.pdf [file molce-38-5-466-supplementary.pdf]

## Supplementary File 1. The complete list of HAN-specific nsSNPs

| Chr | Position    | ID          | REF | ALT | Codon   | Amino acid change      | Gene               | Transcript_ID      |
|-----|-------------|-------------|-----|-----|---------|------------------------|--------------------|--------------------|
| 1   | 3,082,169   | rs209608633 | A   | G   | Acc/Gcc | p.Thr305Ala/c.913A>G   | SCAF4              | ENSBTAT00000025104 |
| 1   | 4,955,871   | rs109517566 | A   | G   | Atc/Gtc | p.Ile111Val/c.331A>G   | KRTAP24-1          | ENSBTAT00000063306 |
| 1   | 37,808,456  | rs109321353 | C   | G   | gGt/gCt | p.Gly559Ala/c.1676G>C  | PROS1              | ENSBTAT00000032377 |
| 1   | 42,095,848  | rs110127404 | A   | G   | Aat/Gat | p.Asn154Asp/c.460A>G   | ENSBTAG00000022908 | ENSBTAT00000008047 |
| 1   | 42,767,463  | rs43229741  | T   | C   | Atc/Gtc | p.Ile179Val/c.535A>G   | DCBLD2             | ENSBTAT00000019822 |
| 1   | 44,124,239  | rs43232395  | A   | G   | aAt/aGt | p.Asn267Ser/c.800A>G   | CMSS1              | ENSBTAT00000018160 |
| 1   | 44,657,432  | rs43050079  | T   | C   | aAg/aGg | p.Lys665Arg/c.1994A>G  | EFHB               | ENSBTAT00000061194 |
| 1   | 45,636,985  | rs136975400 | T   | C   | Aaa/Gaa | p.Lys118Glu/c.352A>G   | ENSBTAG00000048157 | ENSBTAT00000021766 |
| 1   | 57,279,738  | rs110399411 | C   | T   | tCa/tTa | p.Ser38Leu/c.113C>T    | C3orf52            | ENSBTAT00000022018 |
| 1   | 66,788,454  | rs43240800  | T   | G   | aAc/aCc | p.Asn2119Thr/c.6356A>C | GOLGB1             | ENSBTAT00000011669 |
| 1   | 66,788,455  | rs43240801  | T   | A   | Aac/Tac | p.Asn2119Tyr/c.6355A>T | GOLGB1             | ENSBTAT00000011669 |
| 1   | 70,784,086  | rs109715703 | T   | G   | Att/Ctt | p.Ile35Leu/c.103A>C    | LMLN               | ENSBTAT00000061181 |
| 1   | 70,784,160  | rs110521929 | A   | C   | gTc/gGc | p.Val10Gly/c.29T>G     | LMLN               | ENSBTAT00000061181 |
| 1   | 71,016,832  | rs109572634 | T   | C   | Ttt/Ctt | p.Phe97Leu/c.289T>C    | KIAA0226           | ENSBTAT00000061001 |
| 1   | 71,079,020  | rs133282725 | A   | G   | Aaa/Gaa | p.Lys296Glu/c.886A>G   | MUC20              | ENSBTAT00000015160 |
| 1   | 71,105,876  | rs109704859 | T   | C   | Act/Gct | p.Thr649Ala/c.1945A>G  | MUC4               | ENSBTAT00000019591 |
| 1   | 71,117,960  | rs110695194 | C   | T   | Gcg/Acg | p.Ala143Thr/c.427G>A   | MUC4               | ENSBTAT00000019591 |
| 1   | 80,251,288  | rs17870997  | A   | G   | Aaa/Gaa | p.Lys47Glu/c.139A>G    | SST                | ENSBTAT00000023020 |
| 1   | 84,033,144  | rs137553859 | G   | C   | Gtc/Ctc | p.Val15Leu/c.43G>C     | ENSBTAG00000014449 | ENSBTAT00000019214 |
| 1   | 84,428,011  | rs42820807  | G   | C   | gaC/gaG | p.Asp70Glu/c.210C>G    | B3GNT5             | ENSBTAT00000052404 |
| 1   | 99,124,783  | rs109365090 | A   | G   | aAc/aGc | p.Asn693Ser/c.2078A>G  | MECOM              | ENSBTAT00000007717 |
| 1   | 103,164,202 | rs43257729  | A   | T   | Agg/Tgg | p.Arg1320Trp/c.3958A>T | SI                 | ENSBTAT00000023366 |
| 1   | 114,144,944 | rs42223544  | A   | G   | Act/Gct | p.Thr236Ala/c.706A>G   | GPR149             | ENSBTAT00000008088 |
| 1   | 128,532,777 | rs110597097 | T   | C   | Att/Gtt | p.Ile1199Val/c.3595A>G | ZBTB38             | ENSBTAT00000052575 |
| 1   | 138,084,824 | rs137771776 | G   | A   | aGt/aAt | p.Ser532Asn/c.1595G>A  | ACAD11             | ENSBTAT00000054042 |
| 1   | 143,864,921 | rs43277842  | G   | T   | tGc/tTc | p.Cys418Phe/c.1253G>T  | UMODL1             | ENSBTAT00000043589 |
| 1   | 143,997,412 | rs110829356 | T   | C   | Tca/Cca | p.Ser86Pro/c.256T>C    | ABCG1              | ENSBTAT00000028342 |
| 1   | 145,848,744 | rs43280326  | A   | G   | Atc/Gtc | p.Ile517Val/c.1549A>G  | TRPM2              | ENSBTAT00000029198 |
| 1   | 150,064,353 | rs137212409 | C   | A   | Ctg/Atg | p.Leu212Met/c.634C>A   | ENSBTAG00000023384 | ENSBTAT00000031838 |
| 1   | 150,064,440 | rs210566526 | T   | C   | Tcc/Ccc | p.Ser241Pro/c.721T>C   | ENSBTAG00000023384 | ENSBTAT00000031838 |
| 1   | 152,403,659 | rs209263012 | G   | T   | aaC/aaA | p.Asn210Lys/c.630C>A   | ERG                | ENSBTAT00000014608 |
| 2   | 6,736,017   | rs134186279 | A   | G   | Atg/Gtg | p.Met218Val/c.652A>G   | SLC40A1            | ENSBTAT00000048226 |
| 2   | 25,063,857  | rs135304051 | T   | C   | Agt/Ggt | p.Ser173Gly/c.517A>G   | DCAF17             | ENSBTAT00000010105 |
| 2   | 44,771,350  | rs108992629 | A   | G   | aTa/aCa | p.Ile1986Thr/c.5957T>C | RIF1               | ENSBTAT00000027997 |
| 2   | 62,407,285  | rs41637228  | A   | G   | aAc/aGc | p.Asn583Ser/c.1748A>G  | ZRANB3             | ENSBTAT00000038374 |
| 2   | 89,749,104  | rs109089512 | G   | A   | aGc/aAc | p.Ser788Asn/c.2363G>A  | ENSBTAG00000038878 | ENSBTAT00000065376 |
| 2   | 89,754,760  | rs110260576 | A   | G   | Aca/Gca | p.Thr1090Ala/c.3268A>G | ENSBTAG00000038878 | ENSBTAT00000065376 |
| 2   | 89,759,150  | rs109157439 | C   | T   | gCg/gTg | p.Ala1122Val/c.3365C>T | ENSBTAG00000038878 | ENSBTAT00000065376 |
| 2   | 107,370,352 | rs43320333  | T   | C   | Tgc/Cgc | p.Cys471Arg/c.1411T>C  | STK36              | ENSBTAT00000038254 |
| 2   | 107,412,129 | rs43313905  | T   | C   | cTg/cCg | p.Leu31Pro/c.92T>C     | TLL4               | ENSBTAT00000024502 |
| 2   | 107,412,386 | rs43313903  | A   | C   | Ata/Cta | p.Ile117Leu/c.349A>C   | TLL4               | ENSBTAT00000024502 |
| 2   | 119,029,831 | rs136683624 | T   | C   | cTt/cCt | p.Leu216Pro/c.647T>C   | ENSBTAG00000007280 | ENSBTAT00000009573 |
| 2   | 119,109,955 | rs110480812 | C   | T   | aGc/aAc | p.Ser148Asn/c.443G>A   | SP110              | ENSBTAT00000020915 |
| 2   | 119,795,709 | rs109006741 | T   | C   | Tca/Cca | p.Ser173Pro/c.517T>C   | ARMC9              | ENSBTAT00000024631 |

|   |             |             |   |   |         |                        |                    |                    |
|---|-------------|-------------|---|---|---------|------------------------|--------------------|--------------------|
| 2 | 121,711,663 | rs42309919  | C | A | Ctg/Atg | p.Leu514Met/c.1540C>A  | YARS               | ENSBTAT00000024051 |
| 2 | 123,237,438 | rs134375684 | G | A | Gga/Agg | p.Gly42Arg/c.124G>A    | SDC3               | ENSBTAT00000038035 |
| 2 | 127,359,441 | rs109833128 | A | G | gAg/gGg | p.Glu248Gly/c.743A>G   | ZNF683             | ENSBTAT00000012691 |
| 2 | 127,362,043 | rs109350984 | G | A | Gtt/Att | p.Val439Ile/c.1315G>A  | ZNF683             | ENSBTAT00000012691 |
| 2 | 127,362,086 | rs109201878 | G | T | tGc/tTc | p.Cys453Phe/c.1358G>T  | ZNF683             | ENSBTAT00000012691 |
| 2 | 127,362,393 | rs109640433 | T | G | Tgg/Ggg | p.Trp515Gly/c.1543T>G  | ZNF683             | ENSBTAT00000012691 |
| 2 | 127,377,626 | rs110942459 | G | T | cGg/cTg | p.Arg491Leu/c.1472G>T  | AIM1L              | ENSBTAT00000037934 |
| 2 | 127,394,703 | rs109200184 | C | G | caC/caG | p.His1514Gln/c.4542C>G | AIM1L              | ENSBTAT00000037934 |
| 2 | 133,182,088 | rs42928821  | T | A | aaT/aaA | p.Asn94Lys/c.282T>A    | PLA2G2D3           | ENSBTAT00000032588 |
| 2 | 133,291,746 | rs109073882 | A | G | gAt/gGt | p.Asp21Gly/c.62A>G     | PLA2G2A            | ENSBTAT00000007570 |
| 2 | 133,292,151 | rs110494619 | A | G | aAa/aGa | p.Lys72Arg/c.215A>G    | PLA2G2A            | ENSBTAT00000007570 |
| 2 | 133,294,953 | rs108954429 | A | C | aAg/aCg | p.Lys128Thr/c.383A>C   | PLA2G2A            | ENSBTAT00000007570 |
| 3 | 8,445,867   | rs110174322 | A | G | Act/Gct | p.Thr72Ala/c.214A>G    | ARHGAP30           | ENSBTAT00000023764 |
| 3 | 8,463,006   | rs132981682 | A | G | Act/Gct | p.Thr65Ala/c.193A>G    | TSTD1              | ENSBTAT00000023735 |
| 3 | 8,686,020   | rs109022308 | T | C | Tgg/Cgg | p.Trp186Arg/c.556T>C   | ITLN2              | ENSBTAT00000013594 |
| 3 | 8,889,868   | rs109920094 | T | C | gTg/gCg | p.Val191Ala/c.572T>C   | ENSBTAG00000010458 | ENSBTAT00000013826 |
| 3 | 11,610,785  | rs109498050 | C | G | Gta/Cta | p.Val230Leu/c.688G>C   | ENSBTAG00000037546 | ENSBTAT00000054597 |
| 3 | 11,727,194  | rs110969567 | C | A | Gcc/Tcc | p.Ala85Ser/c.253G>T    | CD1E               | ENSBTAT00000038392 |
| 3 | 11,727,350  | rs110068260 | C | G | Gtg/Ctg | p.Val33Leu/c.97G>C     | CD1E               | ENSBTAT00000038392 |
| 3 | 11,995,423  | rs210996599 | C | T | Ggg/Agg | p.Gly202Arg/c.604G>A   | CD1A               | ENSBTAT00000009739 |
| 3 | 11,995,528  | rs478231727 | G | A | Caa/Taa | p.Gln167*/c.499C>T     | CD1A               | ENSBTAT00000009739 |
| 3 | 11,995,674  | rs110065214 | G | C | cCc/cGc | p.Pro118Arg/c.353C>G   | CD1A               | ENSBTAT00000009739 |
| 3 | 11,996,378  | rs133164776 | A | T | aTg/aAg | p.Met89Lys/c.266T>A    | CD1A               | ENSBTAT00000009739 |
| 3 | 11,996,538  | rs132748411 | C | T | Gaa/Aaa | p.Glu36Lys/c.106G>A    | CD1A               | ENSBTAT00000009739 |
| 3 | 14,286,546  | rs109801477 | A | G | cAg/cGg | p.Gln184Arg/c.551A>G   | GPATCH4            | ENSBTAT00000033914 |
| 3 | 14,286,726  | rs109324844 | A | G | cAg/cGg | p.Gln244Arg/c.731A>G   | GPATCH4            | ENSBTAT00000033914 |
| 3 | 14,286,771  | rs110823042 | T | C | aTa/aCa | p.Ile259Thr/c.776T>C   | GPATCH4            | ENSBTAT00000033914 |
| 3 | 14,286,885  | rs209666172 | G | A | aGg/aAg | p.Arg297Lys/c.890G>A   | GPATCH4            | ENSBTAT00000033914 |
| 3 | 14,286,936  | rs133388741 | A | G | gAa/gGa | p.Glu314Gly/c.941A>G   | GPATCH4            | ENSBTAT00000033914 |
| 3 | 14,411,769  | rs210533410 | A | G | Atc/Gtc | p.Ile416Val/c.1246A>G  | MEF2D              | ENSBTAT00000066030 |
| 3 | 15,080,726  | rs109478785 | G | A | Gag/Aag | p.Glu1552Lys/c.4654G>A | ENSBTAG00000020356 | ENSBTAT00000027126 |
| 3 | 16,097,275  | rs132833170 | T | C | Aaa/Gaa | p.Lys254Glu/c.760A>G   | TDRD10             | ENSBTAT00000015765 |
| 3 | 17,883,645  | rs109416672 | G | C | Caa/Gaa | p.Gln309Glu/c.925C>G   | IVL                | ENSBTAT00000023700 |
| 3 | 19,048,207  | rs109342730 | A | G | Act/Gct | p.Thr235Ala/c.703A>G   | TDRKH              | ENSBTAT00000028777 |
| 3 | 19,532,074  | rs110213506 | C | A | cCc/cAc | p.Pro224His/c.671C>A   | PI4KB              | ENSBTAT00000009627 |
| 3 | 19,721,732  | rs110497434 | A | G | Atg/Gtg | p.Met95Val/c.283A>G    | SEMA6C             | ENSBTAT00000009575 |
| 3 | 19,811,302  | rs108958479 | T | C | Tat/Cat | p.Tyr4His/c.10T>C      | FAM63A             | ENSBTAT00000033792 |
| 3 | 20,191,884  | rs137735321 | A | G | tTg/tCg | p.Leu483Ser/c.1448T>C  | ADAMTSL4           | ENSBTAT00000004686 |
| 3 | 20,770,732  | rs209339830 | G | T | aCc/aAc | p.Thr95Asn/c.284C>A    | ENSBTAG00000040098 | ENSBTAT00000053588 |
| 3 | 23,469,814  | rs137388363 | T | G | Tct/Gct | p.Ser1582Ala/c.4744T>G | NOTCH2             | ENSBTAT00000010400 |
| 3 | 23,469,815  | rs135191826 | C | A | tCt/tAt | p.Ser1582Tyr/c.4745C>A | NOTCH2             | ENSBTAT00000010400 |
| 3 | 39,114,194  | rs110083562 | T | C | Aca/Gca | p.Thr254Ala/c.760A>G   | ENSBTAG00000015180 | ENSBTAT00000020198 |
| 3 | 45,830,139  | rs134749204 | C | T | Cat/Tat | p.His238Tyr/c.712C>T   | DPYD               | ENSBTAT00000007139 |
| 3 | 49,636,018  | rs109664115 | A | G | Aag/Gag | p.Lys1037Glu/c.3109A>G | ABCA4              | ENSBTAT00000023982 |
| 3 | 54,607,129  | rs134573471 | G | T | caG/caT | p.Gln476His/c.1428G>T  | ENSBTAG00000037634 | ENSBTAT00000056121 |
| 3 | 54,608,122  | rs208524731 | C | G | Cag/Gag | p.Gln551Glu/c.1651C>G  | ENSBTAG00000037634 | ENSBTAT00000056121 |
| 3 | 59,272,631  | rs109745895 | T | C | aTa/aCa | p.Ile295Thr/c.884T>C   | MCOLN3             | ENSBTAT00000022589 |
| 3 | 81,614,105  | rs43344732  | T | A | Aca/Tca | p.Thr171Ser/c.511A>T   | UBE2U              | ENSBTAT00000054674 |

|   |             |             |   |   |         |                        |                    |                    |
|---|-------------|-------------|---|---|---------|------------------------|--------------------|--------------------|
| 3 | 95,583,153  | rs210402514 | A | C | gaA/gaC | p.Glu363Asp/c.1089A>C  | TTC39A             | ENSBTAT00000003183 |
| 3 | 99,926,046  | rs457292542 | A | T | Aag/Tag | p.Lys388*/c.1162A>T    | CYP4A22            | ENSBTAT00000017936 |
| 3 | 103,422,821 | rs43362127  | G | C | tGt/tCt | p.Cys16Ser/c.47G>C     | EBNA1BP2           | ENSBTAT00000028708 |
| 3 | 107,243,463 | rs134844203 | C | T | Gcc/Acc | p.Ala1123Thr/c.3367G>A | bta-mir-2416       | ENSBTAT00000063146 |
| 3 | 107,245,808 | rs110068747 | T | G | tAt/tCt | p.Tyr341Ser/c.1022A>C  | bta-mir-2416       | ENSBTAT00000063146 |
| 3 | 120,080,518 | rs42992081  | G | A | cGc/cAc | p.Arg127His/c.380G>A   | ENSBTAG00000038082 | ENSBTAT00000054210 |
| 3 | 120,081,022 | rs42992061  | A | C | tAc/tCc | p.Tyr295Ser/c.884A>C   | ENSBTAG00000038082 | ENSBTAT00000054210 |
| 3 | 120,081,052 | rs42992059  | C | T | gCc/gTc | p.Ala305Val/c.914C>T   | ENSBTAG00000038082 | ENSBTAT00000054210 |
| 3 | 120,081,058 | rs42992058  | G | A | cGg/cAg | p.Arg307Gln/c.920G>A   | ENSBTAG00000038082 | ENSBTAT00000054210 |
| 4 | 7,400,857   | rs209781005 | C | G | agG/agC | p.Arg3185Ser/c.9555G>C | ABCA13             | ENSBTAT00000061018 |
| 4 | 29,474,101  | rs42356839  | A | C | agA/agC | p.Arg153Ser/c.459A>C   | ABCB5              | ENSBTAT00000031698 |
| 4 | 32,623,675  | rs42557056  | T | C | Att/Gtt | p.Ile316Val/c.946A>G   | ENSBTAG00000015666 | ENSBTAT00000047541 |
| 4 | 32,627,839  | rs42557089  | G | A | aCt/aTt | p.Thr238Ile/c.713C>T   | ENSBTAG00000015666 | ENSBTAT00000047541 |
| 4 | 32,862,523  | rs379218588 | G | T | ttC/ttA | p.Phe211Leu/c.633C>A   | SLC25A40           | ENSBTAT00000047578 |
| 4 | 33,050,302  | rs42556059  | A | G | Att/Gtt | p.Ile336Val/c.1006A>G  | ABCB1              | ENSBTAT00000020806 |
| 4 | 66,275,941  | rs42935035  | T | C | Tgc/Cgc | p.Cys6Arg/c.16T>C      | NOD1               | ENSBTAT00000061183 |
| 4 | 70,211,855  | rs110389782 | T | C | atA/atG | p.Ile676Met/c.2028A>G  | NFE2L3             | ENSBTAT00000005413 |
| 4 | 70,212,276  | rs109522259 | T | C | cAa/cGa | p.Gln536Arg/c.1607A>G  | NFE2L3             | ENSBTAT00000005413 |
| 4 | 72,836,984  | rs133448500 | C | A | atG/atT | p.Met189Ile/c.567G>T   | STEAP4             | ENSBTAT00000030838 |
| 4 | 73,610,448  | rs43408404  | G | A | aCa/aTa | p.Thr289Ile/c.866C>T   | ENSBTAG00000015800 | ENSBTAT00000020986 |
| 4 | 73,610,710  | rs211272083 | T | A | Act/Tct | p.Thr207Ser/c.619A>T   | ENSBTAG00000015800 | ENSBTAT00000020986 |
| 4 | 106,459,729 | rs134858851 | C | T | Ccc/Tcc | p.Pro3Ser/c.7C>T       | TRB@               | ENSBTAT00000017687 |
| 4 | 106,459,760 | rs110617776 | T | A | cTc/cAc | p.Leu13His/c.38T>A     | TRB@               | ENSBTAT00000017687 |
| 4 | 106,472,919 | rs381387548 | A | T | cAc/cTc | p.His5Leu/c.14A>T      | ENSBTAG00000046164 | ENSBTAT00000065554 |
| 4 | 106,473,092 | rs207903776 | A | C | aAg/aCg | p.Lys34Thr/c.101A>C    | ENSBTAG00000046164 | ENSBTAT00000065554 |
| 4 | 106,473,136 | rs42994317  | G | A | Gac/Aac | p.Asp49Asn/c.145G>A    | ENSBTAG00000046164 | ENSBTAT00000065554 |
| 4 | 106,474,538 | rs209282304 | G | A | Gac/Aac | p.Asp49Asn/c.145G>A    | ENSBTAG00000039956 | ENSBTAT00000052434 |
| 4 | 106,474,544 | rs210907277 | G | A | Gtg/Atg | p.Val51Met/c.151G>A    | ENSBTAG00000039956 | ENSBTAT00000052434 |
| 4 | 106,474,614 | rs209865929 | T | C | aTg/aCg | p.Met74Thr/c.221T>C    | ENSBTAG00000039956 | ENSBTAT00000052434 |
| 4 | 106,474,615 | rs210572761 | G | A | atG/atA | p.Met74Ile/c.222G>A    | ENSBTAG00000039956 | ENSBTAT00000052434 |
| 4 | 106,523,525 | rs43419601  | C | G | Ccc/Gcc | p.Pro56Ala/c.166C>G    | ENSBTAG00000038690 | ENSBTAT00000053610 |
| 4 | 106,523,599 | rs432369816 | C | T | Cga/Tga | p.Arg80*/c.238C>T      | ENSBTAG00000038690 | ENSBTAT00000053610 |
| 4 | 106,541,865 | rs461181900 | C | G | Caa/Gaa | p.Gln85Glu/c.253C>G    | ENSBTAG00000038307 | ENSBTAT00000052905 |
| 4 | 106,541,879 | rs209747773 | C | G | gaC/gaG | p.Asp89Glu/c.267C>G    | ENSBTAG00000038307 | ENSBTAT00000052905 |
| 4 | 106,550,120 | rs136117939 | C | A | Cgc/Agc | p.Arg92Ser/c.274C>A    | ENSBTAG00000040261 | ENSBTAT00000050415 |
| 4 | 106,552,605 | rs136301638 | C | A | Cag/Aag | p.Gln104Lys/c.310C>A   | ENSBTAG00000038127 | ENSBTAT00000053963 |
| 4 | 106,883,051 | rs109667221 | A | G | gAg/gGg | p.Glu144Gly/c.431A>G   | TRBV29-1           | ENSBTAT00000064277 |
| 4 | 108,083,311 | rs134338219 | A | G | Aac/Gac | p.Asn193Asp/c.577A>G   | OR2A12             | ENSBTAT00000055484 |
| 4 | 108,448,796 | rs110442766 | A | C | agA/agC | p.Arg74Ser/c.222A>C    | ARHGEF5            | ENSBTAT00000002373 |
| 4 | 113,486,269 | rs43415882  | A | G | cAg/cGg | p.Gln480Arg/c.14399A>G | ENSBTAG00000008542 | ENSBTAT00000043975 |
| 4 | 113,696,392 | rs109565987 | T | G | Tta/Gta | p.Leu535Val/c.1603T>G  | GIMAP8             | ENSBTAT00000065457 |
| 4 | 113,696,573 | rs457365460 | C | A | gCa/gAa | p.Ala595Glu/c.1784C>A  | GIMAP8             | ENSBTAT00000065457 |
| 4 | 113,696,641 | rs109585623 | A | G | Aaa/Gaa | p.Lys618Glu/c.1852A>G  | GIMAP8             | ENSBTAT00000065457 |
| 4 | 113,763,408 | rs467852972 | T | C | cAt/cGt | p.His297Arg/c.890A>G   | ENSBTAG00000039588 | ENSBTAT00000057366 |
| 4 | 113,764,083 | rs109067167 | A | G | aTg/aCg | p.Met72Thr/c.215T>C    | ENSBTAG00000039588 | ENSBTAT00000057366 |
| 4 | 113,912,149 | rs132796098 | C | T | aGc/aAc | p.Ser7Asn/c.20G>A      | GIMAP7             | ENSBTAT00000014926 |
| 4 | 113,912,157 | rs382855124 | A | C | atT/atG | p.Ile4Met/c.12T>G      | GIMAP7             | ENSBTAT00000014926 |
| 4 | 113,954,575 | rs441410917 | G | A | gCc/gTc | p.Ala13Val/c.38C>T     | GIMAP1             | ENSBTAT00000052584 |

|   |             |             |   |   |         |                        |                    |                    |
|---|-------------|-------------|---|---|---------|------------------------|--------------------|--------------------|
| 4 | 114,492,757 | rs43416275  | G | A | gGt/gAt | p.Gly245Asp/c.734G>A   | AGAP3              | ENSBTAT00000033398 |
| 4 | 119,142,532 | rs134859439 | T | C | Tca/Cca | p.Ser733Pro/c.2197T>C  | NOM1               | ENSBTAT00000043572 |
| 4 | 119,161,971 | rs134872526 | T | A | Agc/Tgc | p.Ser29Cys/c.85A>T     | MNX1               | ENSBTAT0000006046  |
| 4 | 120,157,221 | rs109353025 | A | T | tTc/tAc | p.Phe760Tyr/c.2279T>A  | NCAPG2             | ENSBTAT00000021476 |
| 5 | 298,300     | rs109472879 | A | G | tTc/tCc | p.Phe342Ser/c.1025T>C  | ENSBTAG00000027770 | ENSBTAT00000014687 |
| 5 | 6,433,775   | rs43425710  | C | T | Gct/Act | p.Ala753Thr/c.2257G>A  | E2F7               | ENSBTAT00000022518 |
| 5 | 15,546,239  | rs135391607 | G | T | gaC/gaA | p.Asp374Glu/c.1122C>A  | RASSF9             | ENSBTAT00000038601 |
| 5 | 30,663,785  | rs109638434 | T | C | aAg/aGg | p.Lys161Arg/c.482A>G   | TROAP              | ENSBTAT00000011203 |
| 5 | 38,386,154  | rs110835299 | T | C | Tac/Cac | p.Tyr673His/c.2017T>C  | PRICKLE1           | ENSBTAT00000011340 |
| 5 | 44,448,143  | rs210236065 | C | A | aCa/aAa | p.Thr130Lys/c.389C>A   | ENSBTAG00000000198 | ENSBTAT00000000231 |
| 5 | 44,505,495  | rs136103310 | C | T | aGt/aAt | p.Ser55Asn/c.164G>A    | ENSBTAG00000039170 | ENSBTAT00000056893 |
| 5 | 44,505,520  | rs385016674 | C | T | Gtg/Atg | p.Val47Met/c.139G>A    | ENSBTAG00000039170 | ENSBTAT00000056893 |
| 5 | 44,506,988  | rs379130920 | T | C | Atc/Gtc | p.Ile41Val/c.121A>G    | ENSBTAG00000039170 | ENSBTAT00000056893 |
| 5 | 47,736,998  | rs110356806 | A | G | cAt/cGt | p.His82Arg/c.245A>G    | FAU                | ENSBTAT00000045066 |
| 5 | 50,174,719  | rs133958915 | T | C | Agc/Ggc | p.Ser55Gly/c.163A>G    | TMEM5              | ENSBTAT00000006237 |
| 5 | 57,292,794  | rs134373282 | A | G | Atc/Gtc | p.Ile1000Val/c.2998A>G | TIMELESS           | ENSBTAT00000027263 |
| 5 | 60,604,118  | rs29002687  | A | G | aAt/aGt | p.Asn162Ser/c.485A>G   | AMDHD1             | ENSBTAT00000021647 |
| 5 | 60,604,166  | rs29002689  | A | G | cAg/cGg | p.Gln178Arg/c.533A>G   | AMDHD1             | ENSBTAT00000021647 |
| 5 | 60,606,645  | rs137279356 | A | G | gAt/gGt | p.Asp236Gly/c.707A>G   | AMDHD1             | ENSBTAT00000021647 |
| 5 | 65,924,592  | rs110977717 | A | T | tTt/tAt | p.Phe1098Tyr/c.3293T>A | GNPTAB             | ENSBTAT00000025859 |
| 5 | 78,896,888  | rs137643963 | A | G | Atg/Gtg | p.Met428Val/c.1282A>G  | DENND5B            | ENSBTAT00000027075 |
| 5 | 94,091,069  | rs210935541 | C | T | tCg/tTg | p.Ser492Leu/c.1475C>T  | SLC15A5            | ENSBTAT00000043043 |
| 5 | 97,490,933  | rs42312273  | A | G | gTt/gCt | p.Val430Ala/c.1289T>C  | DDX47              | ENSBTAT00000003058 |
| 5 | 99,192,547  | rs110355369 | T | C | tTt/tCt | p.Phe78Ser/c.233T>C    | BOTA-T2R10B        | ENSBTAT00000043004 |
| 5 | 99,192,940  | rs110609472 | C | T | aCg/aTg | p.Thr209Met/c.626C>T   | BOTA-T2R10B        | ENSBTAT00000043004 |
| 5 | 99,778,962  | rs477133421 | T | C | Atg/Gtg | p.Met90Val/c.268A>G    | NKG2A              | ENSBTAT00000018811 |
| 5 | 101,582,551 | rs109424039 | T | G | cAa/cCa | p.Gln336Pro/c.1007A>C  | RIMKLB             | ENSBTAT00000004262 |
| 5 | 102,332,646 | rs43241474  | G | C | caG/caC | p.Gln320His/c.960G>C   | ENSBTAG00000039847 | ENSBTAT00000028129 |
| 5 | 102,332,963 | rs43241464  | C | T | gCt/gTt | p.Ala426Val/c.1277C>T  | ENSBTAG00000039847 | ENSBTAT00000028129 |
| 5 | 102,414,585 | rs208650795 | T | C | aTg/aCg | p.Met765Thr/c.2294T>C  | ENSBTAG00000039817 | ENSBTAT00000055624 |
| 5 | 102,715,850 | rs109963918 | T | A | cTt/cAt | p.Leu178His/c.533T>A   | BT.53519           | ENSBTAT00000056482 |
| 5 | 102,722,980 | rs134295235 | A | G | cAt/cGt | p.His258Arg/c.773A>G   | BT.53519           | ENSBTAT00000056482 |
| 5 | 102,723,133 | rs136428127 | A | G | cAg/cGg | p.Gln309Arg/c.926A>G   | BT.53519           | ENSBTAT00000056482 |
| 5 | 102,901,058 | rs136972157 | A | G | gAc/gGc | p.Asp160Gly/c.479A>G   | ENSBTAG00000048175 | ENSBTAT00000052602 |
| 5 | 102,901,059 | rs137696049 | C | A | gaC/gaA | p.Asp160Glu/c.480C>A   | ENSBTAG00000048175 | ENSBTAT00000052602 |
| 5 | 103,460,257 | rs136554056 | A | G | Tgc/Cgc | p.Cys20Arg/c.58T>C     | BT.105910          | ENSBTAT00000034486 |
| 5 | 116,458,307 | rs110995763 | G | A | cGg/cAg | p.Arg348Gln/c.1043G>A  | FAM118A            | ENSBTAT00000013993 |
| 5 | 116,629,337 | rs207506848 | A | G | Acc/Gcc | p.Thr55Ala/c.163A>G    | FBLN1              | ENSBTAT00000016040 |
| 6 | 32,766      | rs43136285  | A | G | aTa/aCa | p.Ile158Thr/c.473T>C   | ENSBTAG00000040324 | ENSBTAT00000055066 |
| 6 | 26,045,538  | rs109826311 | T | G | gAa/gCa | p.Glu71Ala/c.212A>C    | MGC157237          | ENSBTAT00000055953 |
| 6 | 32,225,787  | rs137093945 | C | T | gCg/gTg | p.Ala16Val/c.47C>T     | ENSBTAG00000046473 | ENSBTAT00000063405 |
| 6 | 38,280,426  | rs110493242 | A | G | cTg/cCg | p.Leu371Pro/c.1112T>C  | MEPE               | ENSBTAT00000009958 |
| 6 | 46,286,602  | rs110524393 | A | G | Ttc/Ctc | p.Phe5Leu/c.13T>C      | SEPSECS            | ENSBTAT00000019464 |
| 6 | 79,125,553  | rs137629667 | G | C | Gtt/Ctt | p.Val353Leu/c.1057G>C  | LPHN3              | ENSBTAT00000039682 |
| 6 | 93,366,296  | rs110907325 | T | C | tTg/tCg | p.Leu612Ser/c.1835T>C  | SHROOM3            | ENSBTAT00000026154 |
| 6 | 94,970,617  | rs136858118 | A | G | Agt/Ggt | p.Ser2276Gly/c.6826A>G | FRAS1              | ENSBTAT00000060947 |
| 6 | 99,517,968  | rs42256750  | G | A | Gtg/Atg | p.Val632Met/c.1894G>A  | THAP9              | ENSBTAT00000030398 |
| 6 | 100,005,141 | rs42562574  | G | A | Ctt/Ttt | p.Leu82Phe/c.244C>T    | HELQ               | ENSBTAT00000064268 |

|   |             |             |   |     |         |                       |                    |                    |
|---|-------------|-------------|---|-----|---------|-----------------------|--------------------|--------------------|
| 6 | 103,802,133 | .           | A | G   | Act/Gct | p.Thr766Ala/c.2296A>G | AFF1               | ENSBTAT00000024607 |
| 6 | 104,438,476 | rs43490484  | T | C   | gTc/gCc | p.Val479Ala/c.1436T>C | ENSBTAG00000006508 | ENSBTAT00000008532 |
| 6 | 104,441,287 | rs108978254 | T | C   | tTc/tCc | p.Phe586Ser/c.1757T>C | ENSBTAG00000006508 | ENSBTAT00000008532 |
| 6 | 109,184,852 | rs43494493  | G | A   | aCt/aTt | p.Thr155Ile/c.464C>T  | ENSBTAG00000002247 | ENSBTAT00000002902 |
| 6 | 117,856,742 | rs211666591 | A | G   | Tgg/Cgg | p.Trp19Arg/c.55T>C    | ENSBTAG00000019584 | ENSBTAT00000026090 |
| 6 | 117,856,783 | rs135418570 | C | G   | aGc/aCc | p.Ser5Thr/c.14G>C     | ENSBTAG00000019584 | ENSBTAT00000026090 |
| 6 | 119,331,677 | rs43766787  | A | G   | Acc/Gcc | p.Thr121Ala/c.361A>G  | SH3TC1             | ENSBTAT00000066026 |
| 7 | 3,966,217   | rs110038724 | T | C   | Aag/Gag | p.Lys630Glu/c.1888A>G | NCAN               | ENSBTAT00000002312 |
| 7 | 3,969,491   | rs29010184  | A | C   | cTt/cGt | p.Leu186Arg/c.557T>G  | NCAN               | ENSBTAT00000002312 |
| 7 | 4,570,185   | rs208777049 | C | T   | Cgg/Tgg | p.Arg224Trp/c.670C>T  | FKBP8              | ENSBTAT00000021634 |
| 7 | 4,875,781   | rs43196997  | G | C   | cGc/cCc | p.Arg35Pro/c.104G>C   | KIAA1683           | ENSBTAT00000000218 |
| 7 | 4,876,976   | rs211339277 | T | C   | gTt/gCt | p.Val412Ala/c.1235T>C | KIAA1683           | ENSBTAT00000000218 |
| 7 | 4,877,804   | rs41922298  | A | C   | gAg/gCg | p.Glu565Ala/c.1694A>C | KIAA1683           | ENSBTAT00000000218 |
| 7 | 4,877,816   | rs41922297  | T | C   | tTg/tCg | p.Leu569Ser/c.1706T>C | KIAA1683           | ENSBTAT00000000218 |
| 7 | 4,878,217   | rs109679504 | G | T   | Gct/Tct | p.Ala663Ser/c.1987G>T | KIAA1683           | ENSBTAT00000000218 |
| 7 | 5,602,912   | rs43497544  | T | C   | Tgc/Cgc | p.Cys197Arg/c.589T>C  | ENSBTAG00000025767 | ENSBTAT00000047511 |
| 7 | 8,565,774   | rs133939350 | T | C   | gTg/gCg | p.Val463Ala/c.1388T>C | ENSBTAG00000025748 | ENSBTAT00000036366 |
| 7 | 9,714,452   | rs42893540  | A | G   | gAa/gGa | p.Glu17Gly/c.50A>G    | ENSBTAG00000046423 | ENSBTAT00000063607 |
| 7 | 9,714,453   | rs137131016 | A | T   | gaA/gaT | p.Glu17Asp/c.51A>T    | ENSBTAG00000046423 | ENSBTAT00000063607 |
| 7 | 9,714,867   | rs42893535  | T | G   | tgT/tgG | p.Cys155Trp/c.465T>G  | ENSBTAG00000046423 | ENSBTAT00000063607 |
| 7 | 9,715,022   | rs42900929  | G | T   | tGt/tTt | p.Cys207Phe/c.620G>T  | ENSBTAG00000046423 | ENSBTAT00000063607 |
| 7 | 9,715,166   | rs42900925  | T | C   | tTc/tCc | p.Phe255Ser/c.764T>C  | ENSBTAG00000046423 | ENSBTAT00000063607 |
| 7 | 9,715,223   | rs42900924  | C | T   | cCa/cTa | p.Pro274Leu/c.821C>T  | ENSBTAG00000046423 | ENSBTAT00000063607 |
| 7 | 9,715,258   | rs42900923  | A | G   | Atg/Gtg | p.Met286Val/c.856A>G  | ENSBTAG00000046423 | ENSBTAT00000063607 |
| 7 | 10,430,569  | rs109507551 | C | A   | cCa/cAa | p.Pro186Gln/c.557C>A  | ENSBTAG00000048066 | ENSBTAT00000053756 |
| 7 | 14,343,225  | rs134729326 | C | T   | Ggc/Agc | p.Gly715Ser/c.2143G>A | MUC16              | ENSBTAT00000065546 |
| 7 | 15,224,311  | rs134197303 | A | G   | Atc/Gtc | p.Ile9Val/c.25A>G     | ENSBTAG00000046139 | ENSBTAT00000054272 |
| 7 | 15,343,575  | rs109787778 | A | G   | aAt/aGt | p.Asn118Ser/c.353A>G  | ENSBTAG00000039493 | ENSBTAT00000056477 |
| 7 | 15,344,698  | rs110682729 | A | G   | cAt/cGt | p.His202Arg/c.605A>G  | ENSBTAG00000039493 | ENSBTAT00000056477 |
| 7 | 15,691,661  | rs460298838 | T | G   | Aac/Cac | p.Asn135His/c.403A>C  | ENSBTAG00000046813 | ENSBTAT00000063019 |
| 7 | 20,835,781  | rs385776717 | A | G   | Atc/Gtc | p.Ile346Val/c.1036A>G | PLIN4              | ENSBTAT00000020833 |
| 7 | 20,836,494  | rs383685203 | G | C   | gaG/gaC | p.Glu583Asp/c.1749G>C | PLIN4              | ENSBTAT00000020833 |
| 7 | 23,111,193  | rs210626532 | G | A   | aCt/aTt | p.Thr613Ile/c.1838C>T | RAD50              | ENSBTAT00000014945 |
| 7 | 29,648,522  | rs42649485  | A | G,T | Tgt/Cgt | p.Cys127Arg/c.379T>C  | ENSBTAG00000046696 | ENSBTAT00000065293 |
| 7 | 41,444,799  | rs136551204 | G | C   | ttC/ttG | p.Phe299Leu/c.897C>G  | ENSBTAG00000046424 | ENSBTAT00000064254 |
| 7 | 41,444,881  | rs209852104 | G | A   | aCc/aTc | p.Thr272Ile/c.815C>T  | ENSBTAG00000046424 | ENSBTAT00000064254 |
| 7 | 41,445,422  | rs134159339 | G | A   | Cgg/Tgg | p.Arg92Trp/c.274C>T   | ENSBTAG00000046424 | ENSBTAT00000064254 |
| 7 | 41,445,581  | rs134995545 | C | T   | Ggc/Agc | p.Gly39Ser/c.115G>A   | ENSBTAG00000046424 | ENSBTAT00000064254 |
| 7 | 41,445,637  | rs209877054 | G | A   | cCa/cTa | p.Pro20Leu/c.59C>T    | ENSBTAG00000046424 | ENSBTAT00000064254 |
| 7 | 43,739,690  | rs135198319 | T | C   | aTg/aCg | p.Met59Thr/c.176T>C   | ENSBTAG00000047519 | ENSBTAT00000064214 |
| 7 | 43,739,884  | rs133160398 | T | C   | Tgc/Cgc | p.Cys124Arg/c.370T>C  | ENSBTAG00000047519 | ENSBTAT00000064214 |
| 7 | 43,740,212  | rs136627077 | A | G   | cAa/cGa | p.Gln233Arg/c.698A>G  | ENSBTAG00000047519 | ENSBTAT00000064214 |
| 7 | 51,022,457  | rs210354016 | C | A   | aGa/aTa | p.Arg449Ile/c.1346G>T | FAM13B             | ENSBTAT00000063540 |
| 7 | 53,250,424  | rs211122811 | G | C   | Gta/Cta | p.Val696Leu/c.2086G>C | SLC4A9             | ENSBTAT00000029024 |
| 7 | 53,417,346  | rs42309878  | T | C   | cAg/cGg | p.Gln323Arg/c.968A>G  | APBB3              | ENSBTAT00000043198 |
| 7 | 53,501,998  | rs109574176 | A | T   | Att/Ttt | p.Ile42Phe/c.124A>T   | HARS2              | ENSBTAT00000035338 |
| 7 | 53,585,497  | rs109589164 | C | G   | gaC/gaG | p.Asp94Glu/c.282C>G   | PCDHA3             | ENSBTAT00000065348 |
| 7 | 53,586,377  | rs109762971 | T | A   | Tcc/Acc | p.Ser367Thr/c.1099T>A | PCDHA3             | ENSBTAT00000065348 |

|   |            |             |   |   |         |                         |                    |                    |
|---|------------|-------------|---|---|---------|-------------------------|--------------------|--------------------|
| 7 | 53,586,431 | rs132817765 | A | T | Aca/Tca | p.Thr385Ser/c.1153A>T   | PCDHA3             | ENSBTAT00000065348 |
| 7 | 53,586,482 | rs134085302 | A | G | Ata/Gta | p.Ile402Val/c.1204A>G   | PCDHA3             | ENSBTAT00000065348 |
| 7 | 53,586,530 | rs110117998 | G | A | Gcc/Acc | p.Ala418Thr/c.1252G>A   | PCDHA3             | ENSBTAT00000065348 |
| 7 | 53,586,582 | rs133071773 | C | T | gCg/gTg | p.Ala435Val/c.1304C>T   | PCDHA3             | ENSBTAT00000065348 |
| 7 | 53,586,587 | rs137120461 | C | G | Cca/Gca | p.Pro437Ala/c.1309C>G   | PCDHA3             | ENSBTAT00000065348 |
| 7 | 53,587,574 | rs110052407 | G | A | Gag/Aag | p.Glu766Lys/c.2296G>A   | PCDHA3             | ENSBTAT00000065348 |
| 7 | 53,587,733 | rs136302106 | A | G | Att/Gtt | p.Ile783Val/c.2347A>G   | PCDHA3             | ENSBTAT00000065348 |
| 7 | 53,603,814 | rs136809873 | A | C | caA/caC | p.Gln32His/c.96A>C      | PCDHA5             | ENSBTAT00000020506 |
| 7 | 53,604,314 | rs110819140 | T | C | cTa/cCa | p.Leu199Pro/c.596T>C    | PCDHA5             | ENSBTAT00000020506 |
| 7 | 53,604,626 | rs110562984 | T | C | aTa/aCa | p.Ile303Thr/c.908T>C    | PCDHA5             | ENSBTAT00000020506 |
| 7 | 53,604,871 | rs110973703 | A | G | Atc/Gtc | p.Ile385Val/c.1153A>G   | PCDHA5             | ENSBTAT00000020506 |
| 7 | 53,606,000 | rs110664576 | G | A | gGg/gAg | p.Gly761Glu/c.2282G>A   | PCDHA5             | ENSBTAT00000020506 |
| 7 | 53,614,122 | rs110151823 | C | A | tCc/tAc | p.Ser130Tyr/c.389C>A    | ENSBTAG00000015439 | ENSBTAT00000063152 |
| 7 | 53,614,559 | rs108986722 | G | A | Gtt/Att | p.Val276Ile/c.826G>A    | ENSBTAG00000015439 | ENSBTAT00000063152 |
| 7 | 53,614,608 | rs110469771 | A | G | cAa/cGa | p.Gln292Arg/c.875A>G    | ENSBTAG00000015439 | ENSBTAT00000063152 |
| 7 | 53,614,789 | rs110616496 | A | C | ttA/ttC | p.Leu352Phe/c.1056A>C   | ENSBTAG00000015439 | ENSBTAT00000063152 |
| 7 | 53,614,929 | rs109663998 | T | C | aTc/aCc | p.Ile399Thr/c.1196T>C   | ENSBTAG00000015439 | ENSBTAT00000063152 |
| 7 | 53,614,945 | rs136243347 | G | C | aaG/aaC | p.Lys404Asn/c.1212G>C   | ENSBTAG00000015439 | ENSBTAT00000063152 |
| 7 | 53,614,950 | rs111010989 | C | A | gCt/gAt | p.Ala406Asp/c.1217C>A   | ENSBTAG00000015439 | ENSBTAT00000063152 |
| 7 | 53,616,077 | rs109347244 | T | A | Tgt/Agt | p.Cys782Ser/c.2344T>A   | ENSBTAG00000015439 | ENSBTAT00000063152 |
| 7 | 53,616,084 | rs110265542 | T | C | tTc/tCc | p.Phe784Ser/c.2351T>C   | ENSBTAG00000015439 | ENSBTAT00000063152 |
| 7 | 53,618,906 | rs110048773 | C | T | Ctc/Ttc | p.Leu20Phe/c.58C>T      | ENSBTAG00000046717 | ENSBTAT00000020521 |
| 7 | 53,618,917 | rs134285229 | C | G | tgC/tgG | p.Cys23Trp/c.69C>G      | ENSBTAG00000046717 | ENSBTAT00000020521 |
| 7 | 53,651,345 | rs135963121 | T | C | Tgc/Cgc | p.Cys231Arg/c.691T>C    | PCDHA11            | ENSBTAT00000020511 |
| 7 | 53,664,924 | rs41606036  | C | T | aCa/aTa | p.Thr343Ile/c.1028C>T   | PCDHA13            | ENSBTAT00000020497 |
| 7 | 59,689,681 | rs43517712  | T | G | Atg/Ctg | p.Met85Leu/c.253A>C     | GPR151             | ENSBTAT00000004224 |
| 7 | 63,161,107 | rs110999848 | T | G | ttT/ttG | p.Phe111Leu/c.333T>G    | PPARGC1B           | ENSBTAT00000017197 |
| 7 | 63,168,286 | rs42862780  | T | C | cTg/cCg | p.Leu563Pro/c.1688T>C   | PPARGC1B           | ENSBTAT00000017197 |
| 7 | 64,042,930 | rs43522646  | T | C | gTg/gCg | p.Val183Ala/c.548T>C    | MYOZ3              | ENSBTAT00000035177 |
| 7 | 70,708,956 | rs211450429 | G | A | Cca/Tca | p.Pro212Ser/c.634C>T    | ENSBTAG00000036102 | ENSBTAT00000065153 |
| 7 | 70,708,997 | rs211168618 | C | T | aGg/aAg | p.Arg198Lys/c.593G>A    | ENSBTAG00000036102 | ENSBTAT00000065153 |
| 7 | 70,709,012 | rs384167318 | A | G | aTc/aCc | p.Ile193Thr/c.578T>C    | ENSBTAG00000036102 | ENSBTAT00000065153 |
| 7 | 70,709,033 | rs467990423 | G | A | aCt/aTt | p.Thr186Ile/c.557C>T    | ENSBTAG00000036102 | ENSBTAT00000065153 |
| 7 | 70,709,124 | rs473671451 | C | T | Gct/Act | p.Ala156Thr/c.466G>A    | ENSBTAG00000036102 | ENSBTAT00000065153 |
| 7 | 92,693,288 | rs133575952 | T | C | aTt/aCt | p.Ile5002Thr/c.15005T>C | GPR98              | ENSBTAT00000007926 |
| 8 | 1,558,331  | rs109923857 | C | T | gCg/gTg | p.Ala2Val/c.5C>T        | ENSBTAG00000035293 | ENSBTAT00000049801 |
| 8 | 1,558,942  | rs110884199 | G | C | gGt/gCt | p.Gly54Ala/c.161G>C     | ENSBTAG00000035293 | ENSBTAT00000049801 |
| 8 | 7,101,793  | rs208160070 | A | G | aAt/aGt | p.Asn486Ser/c.1457A>G   | ENSBTAG00000035768 | ENSBTAT00000050255 |
| 8 | 7,161,026  | rs136752022 | A | C | Aaa/Caa | p.Lys216Gln/c.646A>C    | ENSBTAG00000039873 | ENSBTAT00000053102 |
| 8 | 11,501,647 | rs137538166 | A | G | gTt/gCt | p.Val339Ala/c.1016T>C   | ACO1               | ENSBTAT00000000731 |
| 8 | 22,608,277 | rs134550089 | C | T | Gtg/Atg | p.Val169Met/c.505G>A    | IFNT               | ENSBTAT00000054734 |
| 8 | 22,608,336 | rs447721347 | C | T | gGc/gAc | p.Gly149Asp/c.446G>A    | IFNT               | ENSBTAT00000054734 |
| 8 | 22,633,690 | rs209324924 | G | A | Cac/Tac | p.His92Tyr/c.274C>T     | IFNT               | ENSBTAT00000054734 |
| 8 | 22,633,702 | rs133621844 | A | G | Ttc/Ctc | p.Phe88Leu/c.262T>C     | IFNT               | ENSBTAT00000054734 |
| 8 | 22,633,879 | rs208435116 | T | C | Aac/Gac | p.Asn29Asp/c.85A>G      | IFNT               | ENSBTAT00000054734 |
| 8 | 22,633,915 | rs209484018 | T | C | Agc/Ggc | p.Ser17Gly/c.49A>G      | IFNT               | ENSBTAT00000054734 |
| 8 | 23,500,361 | rs110722896 | A | G | cTt/cCt | p.Leu772Pro/c.2315T>C   | KIAA1797           | ENSBTAT00000061612 |
| 8 | 46,638,029 | rs110623488 | A | G | Att/Gtt | p.Ile413Val/c.1237A>G   | MAMDC2             | ENSBTAT00000023092 |

|    |             |             |   |   |         |                        |                    |                    |
|----|-------------|-------------|---|---|---------|------------------------|--------------------|--------------------|
| 8  | 49,301,911  | rs43597403  | A | T | caA/caT | p.Gln683His/c.2049A>T  | TMC1               | ENSBTAT00000025003 |
| 8  | 60,562,323  | rs208906786 | C | T | cGc/cAc | p.Arg238His/c.713G>A   | ENSBTAG00000032668 | ENSBTAT00000052230 |
| 8  | 62,995,760  | rs109961766 | T | G | Tgg/Ggg | p.Trp18Gly/c.52T>G     | CCDC180            | ENSBTAT00000030764 |
| 8  | 63,801,805  | rs43557893  | A | C | aTc/aGc | p.Ile249Ser/c.746T>G   | TBC1D2             | ENSBTAT00000026052 |
| 8  | 64,322,470  | rs209452896 | C | A | Cgt/Agt | p.Arg63Ser/c.187C>A    | GALNT12            | ENSBTAT00000011895 |
| 8  | 65,840,281  | rs133967125 | C | A | Gtc/Ttc | p.Val262Phe/c.784G>T   | ENSBTAG00000035708 | ENSBTAT00000050195 |
| 8  | 76,026,062  | rs43432629  | G | A | gCg/gTg | p.Ala274Val/c.821C>T   | ENSBTAG00000015027 | ENSBTAT00000020003 |
| 8  | 82,308,696  | rs42248404  | A | C | aAc/aCc | p.Asn1159Thr/c.3476A>C | DAPK1              | ENSBTAT00000000982 |
| 8  | 82,366,548  | rs42247943  | C | G | gCc/gGc | p.Ala79Gly/c.236C>G    | CTSL1              | ENSBTAT00000000962 |
| 8  | 82,369,137  | rs133002554 | A | C | aAt/aCt | p.Asn241Thr/c.722A>C   | CTSL1              | ENSBTAT00000000962 |
| 8  | 84,591,924  | rs43565425  | A | G | cAc/cGc | p.His243Arg/c.728A>G   | HABP4              | ENSBTAT00000015392 |
| 8  | 84,612,244  | rs43566442  | G | T | Gcc/Tcc | p.Ala394Ser/c.1180G>T  | HABP4              | ENSBTAT00000015392 |
| 8  | 86,801,922  | rs41807235  | A | G | cAg/cGg | p.Gln36Arg/c.107A>G    | PTPDC1             | ENSBTAT00000007630 |
| 8  | 87,577,501  | rs43572154  | A | G | Atg/Gtg | p.Met901Val/c.2701A>G  | ROR2               | ENSBTAT00000061589 |
| 8  | 111,811,142 | rs109773828 | A | G | cTg/cCg | p.Leu511Pro/c.1532T>C  | CDK5RAP2           | ENSBTAT00000008586 |
| 9  | 22,317,715  | rs43588330  | T | C | Att/Gtt | p.Ile571Val/c.1711A>G  | IBTK               | ENSBTAT00000038116 |
| 9  | 28,812,227  | rs43589466  | C | T | gGc/gAc | p.Gly412Asp/c.1235G>A  | SMPDL3A            | ENSBTAT00000028765 |
| 9  | 34,167,150  | rs43591368  | A | G | cTg/cCg | p.Leu615Pro/c.1844T>C  | RFX6               | ENSBTAT00000000329 |
| 9  | 39,310,482  | rs110375472 | A | G | Atg/Gtg | p.Met255Val/c.763A>G   | TRAF3IP2           | ENSBTAT00000011347 |
| 9  | 40,292,376  | rs110457212 | A | G | Ata/Gta | p.Ile228Val/c.682A>G   | DDO                | ENSBTAT00000013892 |
| 9  | 41,378,011  | rs454180059 | C | G | Ggt/Cgt | p.Gly179Arg/c.535G>C   | ENSBTAG00000047024 | ENSBTAT00000064270 |
| 9  | 49,838,232  | rs211587812 | T | G | atT/atG | p.Ile80Met/c.240T>G    | ENSBTAG00000045624 | ENSBTAT00000064018 |
| 9  | 57,516,987  | rs444956031 | T | A | aaT/aaA | p.Asn278Lys/c.834T>A   | ENSBTAG00000003743 | ENSBTAT00000004870 |
| 9  | 57,517,130  | rs209817791 | C | A | aCa/aAa | p.Thr326Lys/c.977C>A   | ENSBTAG00000003743 | ENSBTAT00000004870 |
| 9  | 61,240,110  | rs43601234  | C | A | aGt/aTt | p.Ser251Ile/c.752G>T   | GJA10              | ENSBTAT00000015039 |
| 9  | 70,797,078  | rs109606977 | G | C | ttG/ttC | p.Leu738Phe/c.2214G>C  | ENPP1              | ENSBTAT00000061365 |
| 9  | 88,573,857  | rs133615483 | C | T | gCc/gTc | p.Ala11Val/c.32C>T     | IYD                | ENSBTAT00000021191 |
| 9  | 98,064,110  | rs133586190 | T | G | Att/Ctt | p.Ile17Leu/c.49A>C     | PLG                | ENSBTAT00000001674 |
| 9  | 103,285,490 | rs137672594 | T | A | Agc/Tgc | p.Ser147Cys/c.439A>T   | RNASSET2           | ENSBTAT00000019270 |
| 9  | 103,504,778 | rs134959976 | G | A | Gct/Act | p.Ala240Thr/c.718G>A   | ENSBTAG00000026133 | ENSBTAT00000037035 |
| 9  | 103,504,835 | rs135795511 | C | A | Cgt/Agt | p.Arg259Ser/c.775C>A   | ENSBTAG00000026133 | ENSBTAT00000037035 |
| 9  | 103,507,929 | rs135645533 | G | A | aGc/aAc | p.Ser300Asn/c.899G>A   | ENSBTAG00000026133 | ENSBTAT00000037035 |
| 9  | 103,513,968 | rs136460358 | A | G | Atc/Gtc | p.Ile358Val/c.1072A>G  | ENSBTAG00000026133 | ENSBTAT00000037035 |
| 9  | 103,514,010 | rs134218065 | A | G | Acc/Gcc | p.Thr372Ala/c.1114A>G  | ENSBTAG00000026133 | ENSBTAT00000037035 |
| 9  | 103,514,097 | rs135813560 | A | G | Atc/Gtc | p.Ile401Val/c.1201A>G  | ENSBTAG00000026133 | ENSBTAT00000037035 |
| 10 | 5,010,553   | rs110586805 | C | G | Gcc/Ccc | p.Ala230Pro/c.688G>C   | SIMC1              | ENSBTAT00000020753 |
| 10 | 10,667,813  | rs137473755 | T | C | aTa/aCa | p.Ile3262Thr/c.9785T>C | CMYA5              | ENSBTAT00000008967 |
| 10 | 12,106,270  | rs110142646 | A | G | aTg/aCg | p.Met265Thr/c.794T>C   | CILP               | ENSBTAT00000003651 |
| 10 | 15,028,689  | rs137322585 | T | C | Agc/Ggc | p.Ser195Gly/c.583A>G   | CLN6               | ENSBTAT00000007315 |
| 10 | 15,843,080  | rs110646944 | T | G | Tcc/Gcc | p.Ser254Ala/c.760T>G   | NOX5               | ENSBTAT00000011888 |
| 10 | 22,007,832  | rs132853558 | T | C | Tct/Cct | p.Ser6Pro/c.16T>C      | OR6J1              | ENSBTAT00000066332 |
| 10 | 22,007,890  | rs137158654 | C | T | cCg/cTg | p.Pro25Leu/c.74C>T     | OR6J1              | ENSBTAT00000066332 |
| 10 | 22,007,941  | rs109022481 | G | A | cGc/cAc | p.Arg38His/c.113G>A    | OR6J1              | ENSBTAT00000066332 |
| 10 | 22,008,180  | rs109200916 | G | C | aGc/aCc | p.Ser117Thr/c.350G>C   | OR6J1              | ENSBTAT00000066332 |
| 10 | 22,008,389  | rs111031120 | C | T | aCg/aTg | p.Thr186Met/c.557C>T   | OR6J1              | ENSBTAT00000066332 |
| 10 | 22,008,462  | rs136988790 | C | A | ttC/ttA | p.Phe210Leu/c.630C>A   | OR6J1              | ENSBTAT00000066332 |
| 10 | 22,008,536  | rs135446869 | T | C | aTg/aCg | p.Met235Thr/c.704T>C   | OR6J1              | ENSBTAT00000066332 |
| 10 | 22,008,567  | rs110909431 | C | A | aaC/aaA | p.Asn245Lys/c.735C>A   | OR6J1              | ENSBTAT00000066332 |

|    |             |             |   |   |         |                         |                    |                    |
|----|-------------|-------------|---|---|---------|-------------------------|--------------------|--------------------|
| 10 | 22,008,641  | rs109817990 | G | A | tGt/tAt | p.Cys270Tyr/c.809G>A    | OR6J1              | ENSBTAT00000066332 |
| 10 | 22,008,668  | rs132979062 | A | G | aAg/aGg | p.Lys279Arg/c.836A>G    | OR6J1              | ENSBTAT00000066332 |
| 10 | 22,009,392  | rs135592950 | C | G | tCt/tGt | p.Ser292Cys/c.875C>G    | OR6J1              | ENSBTAT00000066332 |
| 10 | 24,759,625  | rs208414253 | A | G | tTg/tCg | p.Leu22Ser/c.65T>C      | ENSBTAG00000035785 | ENSBTAT00000052701 |
| 10 | 25,637,230  | rs377792870 | C | T | aCg/aTg | p.Thr139Met/c.416C>T    | ENSBTAG00000047746 | ENSBTAT00000065405 |
| 10 | 26,226,949  | rs43623326  | C | G | gaG/gaC | p.Glu137Asp/c.411G>C    | ENSBTAG00000025664 | ENSBTAT00000036230 |
| 10 | 26,812,016  | rs43619690  | A | C | tTt/tGt | p.Phe106Cys/c.317T>G    | PARP2              | ENSBTAT00000063765 |
| 10 | 27,153,962  | rs109278011 | G | C | Gtg/Ctg | p.Val149Leu/c.445G>C    | ENSBTAG00000039416 | ENSBTAT00000052198 |
| 10 | 27,153,978  | rs137600340 | T | C | aTt/aCt | p.Ile154Thr/c.461T>C    | ENSBTAG00000039416 | ENSBTAT00000052198 |
| 10 | 37,360,719  | rs109335892 | T | C | Aag/Gag | p.Lys3360Glu/c.10078A>G | SPTBN5             | ENSBTAT00000008931 |
| 10 | 43,092,094  | rs110708865 | G | T | aaC/aaA | p.Asn224Lys/c.672C>A    | VCPKMT             | ENSBTAT00000007295 |
| 10 | 54,834,912  | rs43631943  | A | G | Act/Gct | p.Thr875Ala/c.2623A>G   | PRTG               | ENSBTAT00000061599 |
| 10 | 62,345,549  | rs43642614  | C | T | cGa/cAa | p.Arg842Gln/c.2525G>A   | SLC12A1            | ENSBTAT00000046583 |
| 10 | 66,693,033  | rs110019329 | G | A | aGc/aAc | p.Ser67Asn/c.200G>A     | ENSBTAG00000047239 | ENSBTAT00000064748 |
| 10 | 66,693,034  | rs110669306 | C | G | agC/agG | p.Ser67Arg/c.201C>G     | ENSBTAG00000047239 | ENSBTAT00000064748 |
| 10 | 66,693,359  | rs137755940 | A | G | Aaa/Gaa | p.Lys169Glu/c.505A>G    | ENSBTAG00000047239 | ENSBTAT00000064748 |
| 10 | 70,069,617  | rs43638586  | C | T | Gaa/Aaa | p.Glu313Lys/c.937G>A    | C14orf105          | ENSBTAT00000043680 |
| 10 | 70,153,376  | rs43637109  | T | C | Atc/Gtc | p.Ile378Val/c.1132A>G   | SLC35F4            | ENSBTAT00000008321 |
| 10 | 71,040,292  | rs110740827 | A | T | agA/agT | p.Arg1425Ser/c.4275A>T  | KIAA0586           | ENSBTAT00000008528 |
| 10 | 76,470,872  | rs109875322 | T | G | caT/caG | p.His288Gln/c.864T>G    | SYNE2              | ENSBTAT00000029285 |
| 10 | 76,521,012  | rs110266857 | T | C | aTg/aCg | p.Met1705Thr/c.5114T>C  | SYNE2              | ENSBTAT00000029285 |
| 10 | 76,528,815  | rs136898885 | T | C | gTa/gCa | p.Val2254Ala/c.6761T>C  | SYNE2              | ENSBTAT00000029285 |
| 10 | 76,544,237  | rs133260103 | T | A | gTt/gAt | p.Val3178Asp/c.9533T>A  | SYNE2              | ENSBTAT00000029285 |
| 10 | 76,927,533  | rs109233154 | A | G | Att/Gtt | p.Ile21Val/c.61A>G      | AKAP5              | ENSBTAT00000012705 |
| 10 | 77,225,774  | rs110180274 | T | C | cAg/cGg | p.Gln1574Arg/c.4721A>G  | SPTB               | ENSBTAT00000006213 |
| 10 | 79,786,335  | rs210375252 | G | A | Gcc/Acc | p.Ala165Thr/c.493G>A    | PLEKHH1            | ENSBTAT00000024351 |
| 10 | 79,786,545  | rs209245402 | A | G | cAg/cGg | p.Gln191Arg/c.572A>G    | PLEKHH1            | ENSBTAT00000024351 |
| 10 | 86,512,118  | rs43642912  | A | G | gTc/gCc | p.Val117Ala/c.350T>C    | PROX2              | ENSBTAT00000020033 |
| 10 | 86,512,193  | rs43642913  | C | T | cGc/cAc | p.Arg92His/c.275G>A     | PROX2              | ENSBTAT00000020033 |
| 10 | 86,722,036  | rs43640519  | G | A | cGt/cAt | p.Arg461His/c.1382G>A   | ZC2HC1C            | ENSBTAT00000018587 |
| 10 | 102,147,332 | rs210322401 | C | G | Gaa/Caa | p.Glu146Gln/c.436G>C    | FOXN3              | ENSBTAT00000065076 |
| 10 | 102,953,391 | rs110515225 | T | G | aAt/aCt | p.Asn189Thr/c.566A>C    | NRDE2              | ENSBTAT00000007147 |
| 11 | 333,399     | rs210629525 | C | T | Gcc/Acc | p.Ala844Thr/c.2530G>A   | MERTK              | ENSBTAT00000007664 |
| 11 | 4,668,472   | rs42275290  | A | G | gTg/gCg | p.Val482Ala/c.1445T>C   | AFF3               | ENSBTAT00000061254 |
| 11 | 6,641,961   | rs110956359 | T | C | gTg/gCg | p.Val728Ala/c.2183T>C   | MAP4K4             | ENSBTAT00000006458 |
| 11 | 11,383,367  | rs43658801  | A | G | cAc/cGc | p.His76Arg/c.227A>G     | SFXN5              | ENSBTAT00000047335 |
| 11 | 13,018,347  | rs209802563 | G | A | gCg/gTg | p.Ala707Val/c.2120C>T   | DYSF               | ENSBTAT00000033154 |
| 11 | 30,962,509  | rs207548983 | G | T | aaC/aaA | p.Asn140Lys/c.420C>A    | ENSBTAG00000027015 | ENSBTAT00000038679 |
| 11 | 44,525,375  | rs134352471 | T | C | Act/Gct | p.Thr2356Ala/c.7066A>G  | RANBP2             | ENSBTAT00000045527 |
| 11 | 44,525,662  | rs109065782 | G | T | aCa/aAa | p.Thr2260Lys/c.6779C>A  | RANBP2             | ENSBTAT00000045527 |
| 11 | 47,829,531  | rs109919675 | A | G | aTg/aCg | p.Met153Thr/c.458T>C    | SMYD1              | ENSBTAT00000028141 |
| 11 | 49,479,117  | rs110836222 | A | G | cAg/cGg | p.Gln246Arg/c.737A>G    | RETSAT             | ENSBTAT00000029241 |
| 11 | 72,100,159  | rs210343062 | C | A | aGg/aTg | p.Arg925Met/c.2774G>T   | C2orf16            | ENSBTAT00000065671 |
| 11 | 74,567,885  | rs134150948 | T | C | cAa/cGa | p.Gln199Arg/c.596A>G    | NCOA1              | ENSBTAT00000064008 |
| 11 | 87,532,476  | rs109905001 | T | C | Atg/Gtg | p.Met330Val/c.988A>G    | TIEG2              | ENSBTAT00000066246 |
| 11 | 87,532,659  | rs110702390 | T | C | Atc/Gtc | p.Ile269Val/c.805A>G    | TIEG2              | ENSBTAT00000066246 |
| 11 | 87,532,731  | rs135871423 | T | C | Att/Gtt | p.Ile245Val/c.733A>G    | TIEG2              | ENSBTAT00000066246 |
| 11 | 88,009,463  | rs136098975 | T | G | Tca/Gca | p.Ser150Ala/c.448T>G    | ITGB1BP1           | ENSBTAT00000017362 |



|    |             |             |   |   |         |                        |                    |                     |
|----|-------------|-------------|---|---|---------|------------------------|--------------------|---------------------|
| 11 | 93,078,032  | rs110295726 | T | G | cAg/cCg | p.Gln318Pro/c.953A>C   | LHX6               | ENSBTAT00000007266  |
| 11 | 93,305,805  | rs384022426 | A | G | aTc/aCc | p.Ile48Thr/c.143T>C    | ENSBTAG00000046018 | ENSBTAT00000056578  |
| 11 | 93,305,812  | rs378316035 | G | C | Ctg/Gtg | p.Leu46Val/c.136C>G    | ENSBTAG00000046018 | ENSBTAT00000056578  |
| 11 | 93,459,981  | rs43163263  | T | C | gTt/gCt | p.Val29Ala/c.86T>C     | ENSBTAG00000039225 | ENSBTAT00000055838  |
| 11 | 93,585,259  | rs209013867 | C | G | aCa/aGa | p.Thr309Arg/c.926C>G   | ENSBTAG00000037542 | ENSBTAT00000052043  |
| 11 | 94,016,207  | rs134231856 | C | T | Gtg/Atg | p.Val705Met/c.2113G>A  | RC3H2              | ENSBTAT00000032789  |
| 11 | 95,882,031  | rs110131751 | T | C | Aca/Gca | p.Thr433Ala/c.1297A>G  | GOLGA1             | ENSBTAT00000020327  |
| 11 | 97,606,815  | rs135084286 | A | G | Act/Gct | p.Thr483Ala/c.1447A>G  | ZNF297B            | ENSBTAT00000004465  |
| 11 | 98,967,563  | rs135578862 | G | A | Ggg/Agg | p.Gly475Arg/c.1423G>A  | SLC27A4            | ENSBTAT00000020526  |
| 11 | 101,149,460 | rs110919562 | C | T | cCa/cTa | p.Pro664Leu/c.1991C>T  | ABL1               | ENSBTAT00000023920  |
| 11 | 101,297,747 | rs109210288 | A | G | Atg/Gtg | p.Met978Val/c.2932A>G  | LAMC3              | ENSBTAT00000023245  |
| 11 | 101,311,343 | rs450917726 | A | G | aAa/aGa | p.Lys1495Arg/c.4484A>G | LAMC3              | ENSBTAT00000023245  |
| 11 | 102,780,564 | rs110569271 | T | C | tTa/tCa | p.Leu643Ser/c.1928T>C  | GTF3C4             | ENSBTAT00000005344  |
| 11 | 103,917,923 | rs110908056 | G | C | gGg/gCg | p.Gly37Ala/c.110G>C    | PMPCA              | ENSBTAT00000001782  |
| 11 | 103,961,639 | rs110779122 | A | G | gTt/gCt | p.Val798Ala/c.2393T>C  | SEC16A             | ENSBTAT000000042743 |
| 11 | 105,769,924 | rs109707011 | T | G | caT/caG | p.His657Gln/c.1971T>G  | EXD3               | ENSBTAT00000032625  |
| 12 | 23,469,255  | rs110205273 | T | C | Act/Gct | p.Thr1017Ala/c.3049A>G | FREM2              | ENSBTAT00000022647  |
| 12 | 23,470,544  | rs110918614 | A | G | aTt/aCt | p.Ile587Thr/c.1760T>C  | FREM2              | ENSBTAT00000022647  |
| 12 | 23,470,700  | rs109916591 | A | C | cTa/cGa | p.Leu535Arg/c.1604T>G  | FREM2              | ENSBTAT00000022647  |
| 12 | 26,115,191  | rs110605210 | T | C | atA/atG | p.Ile1Met/c.3A>G       | ENSBTAG00000019268 | ENSBTAT00000025656  |
| 12 | 34,527,118  | rs110532467 | T | C | gTg/gCg | p.Val1003Ala/c.3008T>C | ENSBTAG00000019545 | ENSBTAT00000026040  |
| 12 | 34,545,458  | rs109611818 | T | C | aTg/aCg | p.Met16Thr/c.47T>C     | C1QTNF9            | ENSBTAT00000001799  |
| 12 | 36,671,546  | rs441688469 | A | G | cTt/cCt | p.Leu1465Pro/c.4394T>C | PARP4              | ENSBTAT00000035651  |
| 12 | 36,671,549  | rs456940499 | T | G | cAt/cCt | p.His1464Pro/c.4391A>C | PARP4              | ENSBTAT00000035651  |
| 12 | 36,672,231  | rs109816907 | A | C | Ttt/Gtt | p.Phe1311Val/c.3931T>G | PARP4              | ENSBTAT00000035651  |
| 12 | 91,086,329  | rs41682216  | T | C | cTg/cCg | p.Leu421Pro/c.1262T>C  | UPF3A              | ENSBTAT00000027791  |
| 12 | 91,150,046  | rs207533122 | T | A | Tgg/Agg | p.Trp263Arg/c.787T>A   | ENSBTAG00000038732 | ENSBTAT00000054687  |
| 13 | 10,971,916  | rs210275069 | A | G | cAg/cGg | p.Gln686Arg/c.2057A>G  | ENSBTAG00000023169 | ENSBTAT00000050711  |
| 13 | 10,971,920  | rs383169954 | C | G | gaC/gaG | p.Asp687Glu/c.2061C>G  | ENSBTAG00000023169 | ENSBTAT00000050711  |
| 13 | 10,979,892  | rs211132945 | G | A | cGc/cAc | p.Arg1147His/c.3440G>A | ENSBTAG00000023169 | ENSBTAT00000050711  |
| 13 | 10,989,141  | rs208113184 | T | G | tTg/tGg | p.Leu1287Trp/c.3860T>G | ENSBTAG00000023169 | ENSBTAT00000050711  |
| 13 | 10,990,667  | rs208707189 | G | A | aGg/aAg | p.Arg1302Lys/c.3905G>A | ENSBTAG00000023169 | ENSBTAT00000050711  |
| 13 | 10,992,654  | rs207490831 | T | G | Tcc/Gcc | p.Ser1374Ala/c.4120T>G | ENSBTAG00000023169 | ENSBTAT00000050711  |
| 13 | 11,161,846  | rs207635103 | T | C | Tgt/Cgt | p.Cys37Arg/c.109T>C    | ENSBTAG00000004354 | ENSBTAT00000011189  |
| 13 | 11,163,571  | rs137164781 | T | C | aTt/aCt | p.Ile46Thr/c.137T>C    | ENSBTAG00000004354 | ENSBTAT00000011189  |
| 13 | 11,176,608  | rs42886290  | A | C | Aaa/Caa | p.Lys302Gln/c.904A>C   | ENSBTAG00000004354 | ENSBTAT00000011189  |
| 13 | 11,176,635  | rs42886289  | C | G | Cag/Gag | p.Gln311Glu/c.931C>G   | ENSBTAG00000004354 | ENSBTAT00000011189  |
| 13 | 11,178,926  | rs109412166 | C | T | aCg/aTg | p.Thr458Met/c.1373C>T  | ENSBTAG00000004354 | ENSBTAT00000011189  |
| 13 | 17,800,427  | rs132870911 | A | C | gAa/gCa | p.Glu247Ala/c.740A>C   | ENSBTAG00000017012 | ENSBTAT00000053112  |
| 13 | 22,967,429  | rs209281070 | A | G | gTt/gCt | p.Val616Ala/c.1847T>C  | SKIDA1             | ENSBTAT00000061347  |
| 13 | 24,528,282  | rs207986328 | G | C | Ctc/Gtc | p.Leu315Val/c.943C>G   | C10orf67           | ENSBTAT00000061590  |
| 13 | 30,070,321  | rs134755178 | A | G | Tct/Cct | p.Ser390Pro/c.1168T>C  | C13H10ORF38        | ENSBTAT00000032523  |
| 13 | 31,628,471  | rs109728359 | C | G | Gtc/Ctc | p.Val2956Leu/c.8866G>C | CUBN               | ENSBTAT00000039417  |
| 13 | 31,647,466  | rs110934769 | C | T | atG/atA | p.Met2416Ile/c.7248G>A | CUBN               | ENSBTAT00000039417  |
| 13 | 37,841,586  | rs41685757  | G | T | caG/caT | p.Gln68His/c.204G>T    | PCSK2              | ENSBTAT00000052049  |
| 13 | 39,631,200  | rs41686567  | A | G | aAg/aGg | p.Lys513Arg/c.1538A>G  | SLC24A3            | ENSBTAT00000015768  |
| 13 | 46,492,284  | rs41695089  | C | G | aCa/aGa | p.Thr46Arg/c.137C>G    | ENSBTAG00000039356 | ENSBTAT00000014388  |
| 13 | 46,494,066  | rs41695097  | G | A | cGc/cAc | p.Arg116His/c.347G>A   | ENSBTAG00000039356 | ENSBTAT00000014388  |

|    |            |             |   |   |         |                       |                    |                    |
|----|------------|-------------|---|---|---------|-----------------------|--------------------|--------------------|
| 13 | 54,541,735 | rs109165789 | A | G | Atg/Gtg | p.Met281Val/c.841A>G  | RTEL1              | ENSBTAT00000052120 |
| 13 | 54,755,327 | rs110257612 | G | A | Cac/Tac | p.His8Tyr/c.22C>T     | COL20A1            | ENSBTAT00000063888 |
| 13 | 57,862,027 | rs379767794 | T | A | aaT/aaA | p.Asn113Lys/c.339T>A  | SLMO2              | ENSBTAT00000005773 |
| 13 | 62,927,733 | rs111018100 | C | G | Cac/Gac | p.His31Asp/c.91C>G    | BPIFB4             | ENSBTAT00000053654 |
| 13 | 62,928,756 | rs110489811 | T | C | Ttt/Ctt | p.Phe47Leu/c.139T>C   | BPIFB4             | ENSBTAT00000053654 |
| 13 | 74,237,965 | rs133413824 | A | G | Aga/Gga | p.Arg75Gly/c.223A>G   | ENSBTAG00000046375 | ENSBTAT00000064589 |
| 13 | 74,274,209 | rs135529383 | G | A | gGt/gAt | p.Gly64Asp/c.191G>A   | PI3                | ENSBTAT00000056512 |
| 13 | 74,274,371 | rs133273328 | A | G | gAc/gGc | p.Asp118Gly/c.353A>G  | PI3                | ENSBTAT00000056512 |
| 13 | 74,274,394 | rs134475545 | C | A | Cct/Act | p.Pro126Thr/c.376C>A  | PI3                | ENSBTAT00000056512 |
| 13 | 74,274,401 | rs137817490 | G | C | cGt/cCt | p.Arg128Pro/c.383G>C  | PI3                | ENSBTAT00000056512 |
| 13 | 74,274,502 | rs133824770 | A | G | Agc/Ggc | p.Ser162Gly/c.484A>G  | PI3                | ENSBTAT00000056512 |
| 13 | 74,274,533 | rs137420399 | G | A | cGg/cAg | p.Arg172Gln/c.515G>A  | PI3                | ENSBTAT00000056512 |
| 13 | 74,944,637 | rs43024358  | G | A | Cgg/Tgg | p.Arg97Trp/c.289C>T   | PTI                | ENSBTAT00000023042 |
| 13 | 78,885,247 | rs43710321  | A | G | Tgc/Cgc | p.Cys173Arg/c.517T>C  | TMEM189            | ENSBTAT00000013376 |
| 14 | 2,330,528  | rs109569063 | A | G | gAc/gGc | p.Asp449Gly/c.1346A>G | NAPRT1             | ENSBTAT00000019496 |
| 14 | 5,603,441  | rs109575847 | G | A | Gtg/Atg | p.Val137Met/c.409G>A  | ENSBTAG00000018218 | ENSBTAT00000037370 |
| 14 | 9,187,841  | rs41632201  | G | A | Ccg/Tcg | p.Pro4Ser/c.10C>T     | WISP1              | ENSBTAT00000000946 |
| 14 | 11,894,621 | rs109131803 | T | C | atA/atG | p.Ile310Met/c.930A>G  | GSDMC              | ENSBTAT00000023238 |
| 14 | 11,898,321 | rs110883072 | T | A | gAa/gTa | p.Glu200Val/c.599A>T  | GSDMC              | ENSBTAT00000023238 |
| 14 | 11,905,327 | rs109846883 | A | G | cTg/cCg | p.Leu27Pro/c.80T>C    | GSDMC              | ENSBTAT00000023238 |
| 14 | 24,070,385 | rs42545185  | A | G | Aca/Gca | p.Thr349Ala/c.1045A>G | ENSBTAG00000047303 | ENSBTAT00000064580 |
| 14 | 33,607,557 | rs42842018  | C | T | cGc/cAc | p.Arg186His/c.557G>A  | CPA6               | ENSBTAT00000061366 |
| 14 | 62,859,104 | rs110636475 | T | C | Aag/Gag | p.Lys80Glu/c.238A>G   | RIMS2              | ENSBTAT00000060962 |
| 14 | 75,454,033 | rs110513113 | A | C | ttT/ttG | p.Phe389Leu/c.1167T>G | SLC26A7            | ENSBTAT00000045797 |
| 14 | 75,482,083 | rs135261459 | C | T | Gat/Aat | p.Asp277Asn/c.829G>A  | SLC26A7            | ENSBTAT00000045797 |
| 14 | 77,386,748 | rs109173725 | T | G | Ttt/Gtt | p.Phe347Val/c.1039T>G | ENSBTAG00000048317 | ENSBTAT00000065964 |
| 14 | 79,388,456 | rs108982026 | T | C | cAg/cGg | p.Gln46Arg/c.137A>G   | CA2                | ENSBTAT00000023581 |
| 14 | 79,525,629 | rs444520816 | C | A | Ccc/Acc | p.Pro130Thr/c.388C>A  | CA1                | ENSBTAT00000045723 |
| 15 | 183,078    | rs210570798 | A | G | Aca/Gca | p.Thr145Ala/c.433A>G  | ENSBTAG00000046228 | ENSBTAT00000064530 |
| 15 | 968,551    | rs383850517 | G | A | aGg/aAg | p.Arg51Lys/c.152G>A   | ENSBTAG00000016807 | ENSBTAT00000022357 |
| 15 | 968,809    | rs211439766 | G | A | cGa/cAa | p.Arg137Gln/c.410G>A  | ENSBTAG00000016807 | ENSBTAT00000022357 |
| 15 | 17,647,017 | rs42929124  | G | T | Ctg/Atg | p.Leu198Met/c.592C>A  | ENSBTAG00000003661 | ENSBTAT00000004769 |
| 15 | 29,356,000 | rs43573272  | T | C | aAc/aGc | p.Asn116Ser/c.347A>G  | MPZL3              | ENSBTAT00000001630 |
| 15 | 35,819,911 | rs41757727  | A | G | Agc/Ggc | p.Ser299Gly/c.895A>G  | ENSBTAG00000015244 | ENSBTAT00000036864 |
| 15 | 35,836,937 | rs41758331  | G | T | ttG/ttT | p.Leu104Phe/c.312G>T  | ENSBTAG00000032859 | ENSBTAT00000055476 |
| 15 | 41,980,431 | rs109161209 | A | G | Acg/Gcg | p.Thr606Ala/c.1816A>G | GALNTL4            | ENSBTAT00000003784 |
| 15 | 46,603,256 | rs110381723 | C | T | Cct/Tct | p.Pro19Ser/c.55C>T    | ENSBTAG00000037603 | ENSBTAT00000052569 |
| 15 | 46,603,745 | rs42997066  | C | A | Ctc/Atc | p.Leu182Ile/c.544C>A  | ENSBTAG00000037603 | ENSBTAT00000052569 |
| 15 | 46,604,031 | rs208510550 | C | T | gCa/gTa | p.Ala277Val/c.830C>T  | ENSBTAG00000037603 | ENSBTAT00000052569 |
| 15 | 46,604,091 | rs208521431 | A | T | aAt/aTt | p.Asn297Ile/c.890A>T  | ENSBTAG00000037603 | ENSBTAT00000052569 |
| 15 | 46,624,389 | rs110987354 | G | A | Gtc/Atc | p.Val13Ile/c.37G>A    | ENSBTAG00000038031 | ENSBTAT00000053108 |
| 15 | 46,624,438 | rs475452092 | C | T | aCt/aTt | p.Thr29Ile/c.86C>T    | ENSBTAG00000038031 | ENSBTAT00000053108 |
| 15 | 46,624,488 | rs109121972 | C | T | Ctc/Ttc | p.Leu46Phe/c.136C>T   | ENSBTAG00000038031 | ENSBTAT00000053108 |
| 15 | 46,624,536 | rs478456790 | C | A | Ctg/Atg | p.Leu62Met/c.184C>A   | ENSBTAG00000038031 | ENSBTAT00000053108 |
| 15 | 46,624,617 | rs447041657 | G | A | Gag/Aag | p.Glu89Lys/c.265G>A   | ENSBTAG00000038031 | ENSBTAT00000053108 |
| 15 | 46,624,687 | rs208532383 | G | A | gGc/gAc | p.Gly112Asp/c.335G>A  | ENSBTAG00000038031 | ENSBTAT00000053108 |
| 15 | 46,624,734 | rs108955631 | C | A | Cat/Aat | p.His128Asn/c.382C>A  | ENSBTAG00000038031 | ENSBTAT00000053108 |
| 15 | 46,624,826 | rs109130187 | A | G | atA/atG | p.Ile158Met/c.474A>G  | ENSBTAG00000038031 | ENSBTAT00000053108 |

|    |            |             |   |   |         |                         |                    |                    |
|----|------------|-------------|---|---|---------|-------------------------|--------------------|--------------------|
| 15 | 46,624,852 | rs445329575 | C | T | cCt/cTt | p.Pro167Leu/c.500C>T    | ENSBTAG00000038031 | ENSBTAT00000053108 |
| 15 | 46,624,905 | rs109074408 | C | A | Ctg/Atg | p.Leu185Met/c.553C>A    | ENSBTAG00000038031 | ENSBTAT00000053108 |
| 15 | 46,624,992 | rs109895924 | G | A | Gtc/Atc | p.Val214Ile/c.640G>A    | ENSBTAG00000038031 | ENSBTAT00000053108 |
| 15 | 46,625,221 | rs443900297 | A | G | tAt/tGt | p.Tyr290Cys/c.869A>G    | ENSBTAG00000038031 | ENSBTAT00000053108 |
| 15 | 46,682,382 | rs444871101 | G | A | atG/atA | p.Met13Ile/c.39G>A      | ENSBTAG00000035675 | ENSBTAT00000050165 |
| 15 | 46,682,858 | rs472804343 | G | A | cGg/cAg | p.Arg172Gln/c.515G>A    | ENSBTAG00000035675 | ENSBTAT00000050165 |
| 15 | 46,693,089 | rs472874069 | T | C | Aac/Gac | p.Asn265Asp/c.793A>G    | ENSBTAG00000015791 | ENSBTAT00000020969 |
| 15 | 46,693,706 | rs463943180 | G | A | aCa/aTa | p.Thr59Ile/c.176C>T     | ENSBTAG00000015791 | ENSBTAT00000020969 |
| 15 | 46,712,519 | rs209553310 | A | G | gTc/gCc | p.Val188Ala/c.563T>C    | ENSBTAG00000047025 | ENSBTAT00000028184 |
| 15 | 46,712,960 | rs385885871 | G | C | aCc/aGc | p.Thr41Ser/c.122C>G     | ENSBTAG00000047025 | ENSBTAT00000028184 |
| 15 | 46,712,994 | rs211062875 | C | T | Gca/Aca | p.Ala30Thr/c.88G>A      | ENSBTAG00000047025 | ENSBTAT00000028184 |
| 15 | 46,719,926 | rs445121109 | C | T | aGa/aAa | p.Arg303Lys/c.908G>A    | ENSBTAG00000021147 | ENSBTAT00000028185 |
| 15 | 46,719,989 | rs465456486 | G | A | aCt/aTt | p.Thr282Ile/c.845C>T    | ENSBTAG00000021147 | ENSBTAT00000028185 |
| 15 | 46,720,175 | rs445139573 | C | T | cGt/cAt | p.Arg220His/c.659G>A    | ENSBTAG00000021147 | ENSBTAT00000028185 |
| 15 | 46,720,178 | rs476744657 | C | T | tGg/tAg | p.Trp219*/c.656G>A      | ENSBTAG00000021147 | ENSBTAT00000028185 |
| 15 | 46,720,320 | rs208523743 | T | C | Aac/Gac | p.Asn172Asp/c.514A>G    | ENSBTAG00000021147 | ENSBTAT00000028185 |
| 15 | 46,720,396 | rs483146238 | T | C | atA/atG | p.Ile146Met/c.438A>G    | ENSBTAG00000021147 | ENSBTAT00000028185 |
| 15 | 46,731,889 | rs110915292 | T | C | gTc/gCc | p.Val188Ala/c.563T>C    | OR2AG1             | ENSBTAT00000064813 |
| 15 | 46,732,146 | rs209575001 | G | A | Gtc/Atc | p.Val274Ile/c.820G>A    | OR2AG1             | ENSBTAT00000064813 |
| 15 | 46,855,522 | rs208409242 | T | A | aTg/aAg | p.Met430Lys/c.1289T>A   | ENSBTAG00000037937 | ENSBTAT00000055625 |
| 15 | 47,113,447 | rs41767729  | T | G | gAc/gCc | p.Asp3798Ala/c.11393A>C | DNHD1              | ENSBTAT00000019733 |
| 15 | 47,126,285 | rs41767670  | T | C | cAc/cGc | p.His2949Arg/c.8846A>G  | DNHD1              | ENSBTAT00000019733 |
| 15 | 47,439,101 | rs43016031  | T | C | tTa/tCa | p.Leu43Ser/c.128T>C     | OR56B4             | ENSBTAT00000064434 |
| 15 | 47,439,160 | rs43016032  | C | G | Cag/Gag | p.Gln63Glu/c.187C>G     | OR56B4             | ENSBTAT00000064434 |
| 15 | 47,439,907 | rs43016051  | T | A | Ttt/Att | p.Phe310Ile/c.928T>A    | OR56B4             | ENSBTAT00000064434 |
| 15 | 47,982,345 | rs43018556  | A | G | cAc/cGc | p.His133Arg/c.398A>G    | OR52N1             | ENSBTAT00000011915 |
| 15 | 48,164,661 | rs41986321  | C | T | Gta/Ata | p.Val323Ile/c.967G>A    | ENSBTAG00000026924 | ENSBTAT00000038532 |
| 15 | 48,191,469 | rs210732300 | T | C | cAa/cGa | p.Gln230Arg/c.689A>G    | ENSBTAG00000046618 | ENSBTAT00000064814 |
| 15 | 48,191,574 | rs135441451 | T | C | cAg/cGg | p.Gln195Arg/c.584A>G    | ENSBTAG00000046618 | ENSBTAT00000064814 |
| 15 | 48,191,646 | rs209938116 | T | A | aAg/aTg | p.Lys171Met/c.512A>T    | ENSBTAG00000046618 | ENSBTAT00000064814 |
| 15 | 48,330,022 | rs380392884 | G | A | gGt/gAt | p.Gly250Asp/c.749G>A    | ENSBTAG00000005609 | ENSBTAT00000040169 |
| 15 | 48,332,023 | rs379066355 | T | C | Tca/Cca | p.Ser340Pro/c.1018T>C   | ENSBTAG00000005609 | ENSBTAT00000040169 |
| 15 | 48,332,231 | rs211114572 | T | G | gaT/gaG | p.Asp395Glu/c.1185T>G   | ENSBTAG00000005609 | ENSBTAT00000040169 |
| 15 | 48,332,385 | rs208821675 | T | A | Tct/Act | p.Ser447Thr/c.1339T>A   | ENSBTAG00000005609 | ENSBTAT00000040169 |
| 15 | 48,332,403 | rs208688331 | C | T | Cat/Tat | p.His453Tyr/c.1357C>T   | ENSBTAG00000005609 | ENSBTAT00000040169 |
| 15 | 48,429,525 | rs208891153 | T | C | tAt/tGt | p.Tyr339Cys/c.1016A>G   | TRIM5              | ENSBTAT00000005971 |
| 15 | 48,430,200 | rs209750435 | A | G | gTt/gCt | p.Val280Ala/c.839T>C    | TRIM5              | ENSBTAT00000005971 |
| 15 | 48,436,739 | rs209504468 | G | C | gCt/gGt | p.Ala127Gly/c.380C>G    | TRIM5              | ENSBTAT00000005971 |
| 15 | 49,527,750 | rs137737718 | A | G | Atc/Gtc | p.Ile41Val/c.121A>G     | ENSBTAG00000038899 | ENSBTAT00000052925 |
| 15 | 49,528,056 | rs42923029  | C | T | Cgc/Tgc | p.Arg143Cys/c.427C>T    | ENSBTAG00000038899 | ENSBTAT00000052925 |
| 15 | 50,965,034 | rs134840070 | A | G | Atc/Gtc | p.Ile297Val/c.889A>G    | ENSBTAG00000034711 | ENSBTAT00000049151 |
| 15 | 53,633,847 | rs133504747 | A | G | Atc/Gtc | p.Ile1156Val/c.3466A>G  | ARHGEF17           | ENSBTAT00000061460 |
| 15 | 64,391,731 | rs42868046  | C | T | aCc/aTc | p.Thr610Ile/c.1829C>T   | QSER1              | ENSBTAT00000019146 |
| 15 | 64,984,314 | rs41774011  | A | G | aAt/aGt | p.Asn563Ser/c.1688A>G   | KIAA1549L          | ENSBTAT00000017070 |
| 15 | 64,984,460 | rs41774012  | C | G | Cct/Gct | p.Pro612Ala/c.1834C>G   | KIAA1549L          | ENSBTAT00000017070 |
| 15 | 66,208,534 | rs43705159  | C | T | Gtg/Atg | p.Val181Met/c.541G>A    | APIP               | ENSBTAT00000024300 |
| 15 | 79,209,012 | rs41789924  | A | G | cAg/cGg | p.Gln231Arg/c.692A>G    | OR4S1              | ENSBTAT00000044039 |
| 15 | 79,573,436 | rs134346311 | T | G | ttT/ttG | p.Phe82Leu/c.246T>G     | ENSBTAG00000027275 | ENSBTAT00000039086 |

|    |            |             |   |   |         |                         |                    |                    |
|----|------------|-------------|---|---|---------|-------------------------|--------------------|--------------------|
| 15 | 79,573,839 | rs380768572 | A | G | Att/Gtt | p.Ile217Val/c.649A>G    | ENSBTAG00000027275 | ENSBTAT00000039086 |
| 15 | 81,106,711 | rs43001469  | A | C | Tcc/Gcc | p.Ser119Ala/c.355T>G    | ENSBTAG00000023542 | ENSBTAT00000004430 |
| 15 | 81,220,101 | rs211683493 | A | G | Tgc/Cgc | p.Cys234Arg/c.700T>C    | ENSBTAG00000040463 | ENSBTAT00000055990 |
| 15 | 81,872,510 | rs209026236 | C | G | aGc/aCc | p.Ser102Thr/c.305G>C    | PRG3               | ENSBTAT00000014055 |
| 15 | 81,872,621 | rs207681163 | A | T | gTg/gAg | p.Val65Glu/c.194T>A     | PRG3               | ENSBTAT00000014055 |
| 15 | 81,949,123 | rs135462315 | T | C | cAa/cGa | p.Gln206Arg/c.617A>G    | ENSBTAG00000040320 | ENSBTAT00000027035 |
| 15 | 81,949,943 | rs132806506 | T | C | cAa/cGa | p.Gln185Arg/c.554A>G    | ENSBTAG00000040320 | ENSBTAT00000027035 |
| 15 | 81,949,967 | rs134646373 | T | C | cAc/cGc | p.His177Arg/c.530A>G    | ENSBTAG00000040320 | ENSBTAT00000027035 |
| 15 | 81,955,560 | rs136395049 | G | C | caC/caG | p.His120Gln/c.360C>G    | ENSBTAG00000040320 | ENSBTAT00000027035 |
| 15 | 81,955,580 | rs136907367 | C | T | Ggg/Agg | p.Gly114Arg/c.340G>A    | ENSBTAG00000040320 | ENSBTAT00000027035 |
| 15 | 81,955,744 | rs137794691 | A | G | tTg/tCg | p.Leu59Ser/c.176T>C     | ENSBTAG00000040320 | ENSBTAT00000027035 |
| 15 | 82,561,297 | rs42804861  | T | C | tTg/tCg | p.Leu194Ser/c.581T>C    | OR6Q1              | ENSBTAT00000010481 |
| 15 | 83,053,481 | rs109895992 | C | T | Gtc/Atc | p.Val302Ile/c.904G>A    | ENSBTAG00000047464 | ENSBTAT00000037031 |
| 15 | 83,477,833 | rs41787690  | A | G | Ttt/Ctt | p.Phe122Leu/c.364T>C    | ENSBTAG00000012540 | ENSBTAT00000038874 |
| 15 | 83,477,857 | rs41787689  | C | T | Gta/Ata | p.Val114Ile/c.340G>A    | ENSBTAG00000012540 | ENSBTAT00000038874 |
| 15 | 83,887,402 | rs110985622 | T | C | aAg/aGg | p.Lys87Arg/c.260A>G     | ENSBTAG00000040023 | ENSBTAT00000053955 |
| 16 | 6,104,470  | rs135576379 | G | A | aGc/aAc | p.Ser497Asn/c.1490G>A   | CFH                | ENSBTAT00000029340 |
| 16 | 12,792,815 | rs136040928 | C | T | tGt/tAt | p.Cys47Tyr/c.140G>A     | TROVE2             | ENSBTAT00000018350 |
| 16 | 16,039,905 | rs135071345 | C | T | tCg/tTg | p.Ser171Leu/c.512C>T    | BRINP3             | ENSBTAT00000011078 |
| 16 | 24,285,777 | rs438041506 | T | A | tTt/tAt | p.Phe20Tyr/c.59T>A      | IARS2              | ENSBTAT00000061457 |
| 16 | 26,810,995 | rs109913603 | A | G | Att/Gtt | p.Ile605Val/c.1813A>G   | MIA3               | ENSBTAT00000025055 |
| 16 | 37,994,022 | rs469121151 | T | C | Agc/Ggc | p.Ser1248Gly/c.3742A>G  | ENSBTAG00000017722 | ENSBTAT00000023573 |
| 16 | 38,058,396 | rs133251425 | G | T | Cct/Act | p.Pro617Thr/c.1849C>A   | SELP               | ENSBTAT00000046869 |
| 16 | 38,071,757 | rs110850856 | G | C | Ctg/Gtg | p.Leu420Val/c.1258C>G   | SELP               | ENSBTAT00000046869 |
| 16 | 39,527,998 | rs109214892 | A | G | gAa/gGa | p.Glu287Gly/c.860A>G    | FMO3               | ENSBTAT00000027444 |
| 16 | 47,673,287 | rs43713342  | T | C | Atg/Gtg | p.Met324Val/c.970A>G    | TAS1R1             | ENSBTAT00000022243 |
| 16 | 47,749,911 | rs109051997 | A | C | Atc/Ctc | p.Ile983Leu/c.2947A>C   | PLEKHG5            | ENSBTAT00000022238 |
| 16 | 52,889,618 | rs41810760  | C | T | cGt/cAt | p.Arg2066His/c.6197G>A  | SPEN               | ENSBTAT00000024930 |
| 16 | 55,244,650 | rs42599931  | C | T | atG/atA | p.Met1244Ile/c.3732G>A  | KDM5B              | ENSBTAT00000028871 |
| 16 | 55,566,550 | rs42900152  | G | C | tGc/tCc | p.Cys148Ser/c.443G>C    | ENSBTAG00000019931 | ENSBTAT00000026550 |
| 16 | 56,044,240 | rs43122206  | T | C | cTc/cCc | p.Leu34Pro/c.101T>C     | ENSBTAG00000015600 | ENSBTAT00000020723 |
| 16 | 56,044,840 | rs43122204  | G | A | Ggg/Agg | p.Gly99Arg/c.295G>A     | ENSBTAG00000015600 | ENSBTAT00000020723 |
| 16 | 67,328,203 | rs135740980 | T | C | Ata/Gta | p.Ile451Val/c.1351A>G   | FAM129A            | ENSBTAT00000019338 |
| 16 | 68,698,941 | rs41820800  | T | C | aTt/aCt | p.Ile5132Thr/c.15395T>C | HMCN1              | ENSBTAT00000061144 |
| 16 | 68,874,509 | rs110452465 | A | G | Act/Gct | p.Thr101Ala/c.301A>G    | PRG4               | ENSBTAT00000015839 |
| 16 | 68,877,102 | rs110320589 | T | C | aTt/aCt | p.Ile144Thr/c.431T>C    | PRG4               | ENSBTAT00000015839 |
| 16 | 68,882,016 | rs109282393 | C | T | Cca/Tca | p.Pro1025Ser/c.3073C>T  | PRG4               | ENSBTAT00000015839 |
| 16 | 72,633,084 | rs41820186  | C | T | Ctt/Ttt | p.Leu57Phe/c.169C>T     | C16H1orf227        | ENSBTAT00000013209 |
| 16 | 72,753,195 | rs41822500  | G | A | Gcg/Acg | p.Ala94Thr/c.280G>A     | BATF3              | ENSBTAT00000015898 |
| 16 | 72,812,412 | rs41823560  | C | T | cGg/cAg | p.Arg455Gln/c.1364G>A   | FAM71A             | ENSBTAT00000028208 |
| 16 | 72,812,491 | rs41823561  | G | A | Cgc/Tgc | p.Arg429Cys/c.1285C>T   | FAM71A             | ENSBTAT00000028208 |
| 16 | 72,812,556 | rs41823562  | T | C | cAc/cGc | p.His407Arg/c.1220A>G   | FAM71A             | ENSBTAT00000028208 |
| 16 | 75,599,601 | .           | A | G | Agt/Ggt | p.Ser763Gly/c.2287A>G   | LAMB3              | ENSBTAT00000022005 |
| 16 | 77,507,247 | rs137319897 | C | T | aGc/aAc | p.Ser184Asn/c.551G>A    | CD46               | ENSBTAT00000007107 |
| 16 | 77,943,372 | rs134424120 | C | T | Gcc/Acc | p.Ala2879Thr/c.8635G>A  | ASPM               | ENSBTAT00000010340 |
| 16 | 77,943,440 | rs110954010 | A | G | aTa/aCa | p.Ile2856Thr/c.8567T>C  | ASPM               | ENSBTAT00000010340 |
| 16 | 77,944,646 | rs110333888 | C | T | cGa/cAa | p.Arg2454Gln/c.7361G>A  | ASPM               | ENSBTAT00000010340 |
| 16 | 77,944,694 | rs110433825 | C | T | cGa/cAa | p.Arg2438Gln/c.7313G>A  | ASPM               | ENSBTAT00000010340 |

|    |            |             |   |   |         |                        |                    |                    |
|----|------------|-------------|---|---|---------|------------------------|--------------------|--------------------|
| 16 | 77,944,914 | rs109449991 | C | G | Gag/Cag | p.Glu2365Gln/c.7093G>C | ASPM               | ENSBTAT00000010340 |
| 16 | 77,945,558 | rs110448352 | G | A | aCg/aTg | p.Thr2150Met/c.6449C>T | ASPM               | ENSBTAT00000010340 |
| 16 | 77,945,592 | rs109575492 | G | A | Cgc/Tgc | p.Arg2139Cys/c.6415C>T | ASPM               | ENSBTAT00000010340 |
| 16 | 77,945,716 | rs135113687 | C | G | caG/caC | p.Gln2097His/c.6291G>C | ASPM               | ENSBTAT00000010340 |
| 16 | 77,945,988 | rs110722621 | C | T | Gca/Aca | p.Ala2007Thr/c.6019G>A | ASPM               | ENSBTAT00000010340 |
| 16 | 77,946,092 | rs109988537 | C | T | cGg/cAg | p.Arg1972Gln/c.5915G>A | ASPM               | ENSBTAT00000010340 |
| 16 | 77,947,628 | rs109049313 | C | T | cGg/cAg | p.Arg1460Gln/c.4379G>A | ASPM               | ENSBTAT00000010340 |
| 16 | 77,960,722 | rs109784274 | G | A | aCg/aTg | p.Thr1080Met/c.3239C>T | ASPM               | ENSBTAT00000010340 |
| 17 | 7,488,795  | rs41660814  | A | G | Aaa/Gaa | p.Lys2390Glu/c.7168A>G | LRBA               | ENSBTAT00000061161 |
| 17 | 17,425,323 | rs109655987 | C | T | aCt/aTt | p.Thr783Ile/c.2348C>T  | TBC1D9             | ENSBTAT00000029790 |
| 17 | 17,440,214 | rs108968643 | G | A | aGt/aAt | p.Ser961Asn/c.2882G>A  | TBC1D9             | ENSBTAT00000029790 |
| 17 | 25,033,897 | rs109399185 | C | T | cCc/cTc | p.Pro76Leu/c.227C>T    | ENSBTAG00000035012 | ENSBTAT00000049474 |
| 17 | 25,034,082 | rs109672675 | C | A | Cag/Aag | p.Gln138Lys/c.412C>A   | ENSBTAG00000035012 | ENSBTAT00000049474 |
| 17 | 25,034,091 | rs110038283 | C | G | Caa/Gaa | p.Gln141Glu/c.421C>G   | ENSBTAG00000035012 | ENSBTAT00000049474 |
| 17 | 25,035,280 | rs109228364 | G | A | cGt/cAt | p.Arg245His/c.734G>A   | ENSBTAG00000035012 | ENSBTAT00000049474 |
| 17 | 25,054,494 | rs110609282 | G | A | cGg/cAg | p.Arg95Gln/c.284G>A    | ENSBTAG00000040370 | ENSBTAT00000065402 |
| 17 | 25,054,674 | rs110623065 | A | G | aAg/aGg | p.Lys155Arg/c.464A>G   | ENSBTAG00000040370 | ENSBTAT00000065402 |
| 17 | 25,057,101 | rs209521246 | G | C | aGa/aCa | p.Arg212Thr/c.635G>C   | ENSBTAG00000040370 | ENSBTAT00000065402 |
| 17 | 25,057,348 | rs211035251 | G | A | gGa/gAa | p.Gly263Glu/c.788G>A   | ENSBTAG00000040370 | ENSBTAT00000065402 |
| 17 | 25,121,819 | rs210564028 | A | C | gAg/gCg | p.Glu489Ala/c.1466A>C  | PRAME              | ENSBTAT00000050480 |
| 17 | 30,197,587 | rs136665745 | A | C | aTc/aGc | p.Ile341Ser/c.1022T>G  | PLK4               | ENSBTAT00000055868 |
| 17 | 30,228,864 | rs381209772 | G | T | aCc/aAc | p.Thr815Asn/c.2444C>A  | HSPA4L             | ENSBTAT00000020838 |
| 17 | 34,751,067 | rs109140241 | T | C | Aca/Gca | p.Thr68Ala/c.202A>G    | SPRY1              | ENSBTAT00000028307 |
| 17 | 35,151,069 | rs110484542 | A | G | Acg/Gcg | p.Thr59Ala/c.175A>G    | NUDT6              | ENSBTAT00000007480 |
| 17 | 35,768,977 | rs110269914 | A | G | Agc/Ggc | p.Ser88Gly/c.262A>G    | ENSBTAG00000046302 | ENSBTAT00000064593 |
| 17 | 35,769,396 | rs456121395 | A | T | gAg/gTg | p.Glu133Val/c.398A>T   | ENSBTAG00000046302 | ENSBTAT00000064593 |
| 17 | 35,769,803 | rs210978271 | A | G | Atc/Gtc | p.Ile269Val/c.805A>G   | ENSBTAG00000046302 | ENSBTAT00000064593 |
| 17 | 41,144,240 | rs134655494 | C | T | Gtg/Atg | p.Val40Met/c.118G>A    | FNIP2              | ENSBTAT00000015882 |
| 17 | 47,049,950 | rs110835869 | C | T | Gcc/Acc | p.Ala740Thr/c.2218G>A  | GPR133             | ENSBTAT00000027783 |
| 17 | 47,166,582 | rs135805520 | G | A | Cca/Tca | p.Pro286Ser/c.856C>T   | GPR133             | ENSBTAT00000027783 |
| 17 | 47,169,621 | rs109650119 | C | T | aGc/aAc | p.Ser247Asn/c.740G>A   | GPR133             | ENSBTAT00000027783 |
| 17 | 50,736,489 | rs378451459 | G | A | cGg/cAg | p.Arg228Gln/c.683G>A   | ENSBTAG00000046439 | ENSBTAT00000063097 |
| 17 | 51,217,685 | rs211484130 | G | A | cCa/cTa | p.Pro260Leu/c.779C>T   | ENSBTAG00000047597 | ENSBTAT00000030104 |
| 17 | 51,219,178 | rs109124609 | C | A | ttG/tTt | p.Leu113Phe/c.339G>T   | ENSBTAG00000047597 | ENSBTAT00000030104 |
| 17 | 51,219,556 | rs210083855 | T | C | Agg/Ggg | p.Arg13Gly/c.37A>G     | ENSBTAG00000047597 | ENSBTAT00000030104 |
| 17 | 51,818,571 | rs207888791 | A | G | Atg/Gtg | p.Met339Val/c.1015A>G  | ENSBTAG00000046986 | ENSBTAT00000064350 |
| 17 | 51,818,607 | .           | G | A | Gtg/Atg | p.Val351Met/c.1051G>A  | ENSBTAG00000046986 | ENSBTAT00000064350 |
| 17 | 51,818,622 | .           | A | C | Aac/Cac | p.Asn356His/c.1066A>C  | ENSBTAG00000046986 | ENSBTAT00000064350 |
| 17 | 53,104,143 | rs134909706 | G | A | Gtc/Atc | p.Val298Ile/c.892G>A   | DHX37              | ENSBTAT00000027206 |
| 17 | 53,112,655 | rs109941441 | C | T | Cgc/Tgc | p.Arg654Cys/c.1960C>T  | DHX37              | ENSBTAT00000027206 |
| 17 | 54,260,546 | rs110741660 | T | C | Aaa/Gaa | p.Lys427Glu/c.1279A>G  | TCTN2              | ENSBTAT00000009562 |
| 17 | 65,887,074 | rs110100690 | T | C | gTt/gCt | p.Val93Ala/c.278T>C    | MMAB               | ENSBTAT00000006821 |
| 17 | 71,314,935 | rs41852917  | G | A | Gaa/Aaa | p.Glu143Lys/c.427G>A   | HORMAD2            | ENSBTAT00000029451 |
| 17 | 72,747,746 | rs110402225 | C | T | Ggt/Agt | p.Gly608Ser/c.1822G>A  | SLC5A4             | ENSBTAT00000010678 |
| 17 | 73,302,567 | rs41856326  | A | G | Atc/Gtc | p.Ile56Val/c.166A>G    | GSTT1              | ENSBTAT00000007403 |
| 18 | 1,934,548  | rs209621489 | T | C | aAa/aGa | p.Lys218Arg/c.653A>G   | PDPR               | ENSBTAT00000021895 |
| 18 | 1,935,444  | rs384918556 | C | T | Gtc/Atc | p.Val179Ile/c.535G>A   | PDPR               | ENSBTAT00000021895 |
| 18 | 10,072,719 | rs109709733 | C | T | gCc/gTc | p.Ala421Val/c.1262C>T  | CDH13              | ENSBTAT00000054165 |

|    |            |             |   |   |         |                        |                    |                    |
|----|------------|-------------|---|---|---------|------------------------|--------------------|--------------------|
| 18 | 15,402,202 | rs41861333  | T | C | gTg/gCg | p.Val449Ala/c.1346T>C  | GPT2               | ENSBTAT00000003881 |
| 18 | 38,484,964 | rs41874213  | C | T | aCg/aTg | p.Thr2811Met/c.8432C>T | ZFHX3              | ENSBTAT00000019489 |
| 18 | 43,585,004 | rs41879795  | C | G | gaG/gaC | p.Glu448Asp/c.1344G>C  | RHPN2              | ENSBTAT00000004021 |
| 18 | 43,685,890 | rs133428188 | T | C | Tgc/Cgc | p.Cys341Arg/c.1021T>C  | GPATCH1            | ENSBTAT00000000963 |
| 18 | 43,694,038 | rs41881585  | G | A | aGc/aAc | p.Ser649Asn/c.1946G>A  | GPATCH1            | ENSBTAT00000000963 |
| 18 | 46,232,631 | rs41883772  | T | C | aTg/aCg | p.Met306Thr/c.917T>C   | CD22               | ENSBTAT00000015781 |
| 18 | 46,533,798 | rs134341733 | T | C | aTg/aCg | p.Met432Thr/c.1295T>C  | HAUS5              | ENSBTAT00000017877 |
| 18 | 46,617,862 | rs110291316 | G | T | gGc/gTc | p.Gly141Val/c.422G>T   | ZBTB32             | ENSBTAT00000032282 |
| 18 | 46,661,460 | rs211183385 | G | A | Gtc/Atc | p.Val189Ile/c.565G>A   | PROSER3            | ENSBTAT00000064272 |
| 18 | 46,667,479 | rs207761391 | G | C | cGc/cCc | p.Arg311Pro/c.932G>C   | PROSER3            | ENSBTAT00000064272 |
| 18 | 49,740,502 | rs42801405  | T | C | Aga/Gga | p.Arg952Gly/c.2854A>G  | FCGBP              | ENSBTAT00000006924 |
| 18 | 50,193,397 | rs132762093 | T | C | Tcc/Ccc | p.Ser1166Pro/c.3496T>C | LTBP4              | ENSBTAT00000065855 |
| 18 | 51,754,558 | rs211256933 | A | G | Tgt/Cgt | p.Cys475Arg/c.1423T>C  | ENSBTAG00000006859 | ENSBTAT00000007381 |
| 18 | 51,992,025 | rs41622427  | G | A | aCg/aTg | p.Thr324Met/c.971C>T   | LYPD3              | ENSBTAT00000024068 |
| 18 | 52,120,420 | rs133189900 | A | T | Atg/Ttg | p.Met1?/c.1A>T         | PINLYP             | ENSBTAT00000031940 |
| 18 | 52,120,448 | rs41892363  | C | T | aCc/aTc | p.Thr10Ile/c.29C>T     | PINLYP             | ENSBTAT00000031940 |
| 18 | 56,208,157 | rs133628033 | C | A | Gat/Tat | p.Asp69Tyr/c.205G>T    | ENSBTAG00000030502 | ENSBTAT00000010986 |
| 18 | 56,374,145 | rs211041653 | T | C | aTg/aCg | p.Met464Thr/c.1391T>C  | ALDH16A1           | ENSBTAT00000043139 |
| 18 | 57,618,804 | rs110127028 | A | T | gaT/gaA | p.Asp113Glu/c.339T>A   | ENSBTAG00000047301 | ENSBTAT00000053046 |
| 18 | 57,681,249 | rs136849210 | A | G | cAt/cGt | p.His906Arg/c.2717A>G  | ENSBTAG00000037699 | ENSBTAT00000022417 |
| 18 | 60,070,095 | rs135056031 | T | C | cAg/cGg | p.Gln781Arg/c.2342A>G  | ZNF845             | ENSBTAT00000028697 |
| 18 | 60,070,420 | rs133670857 | C | T | Gct/Act | p.Ala673Thr/c.2017G>A  | ZNF845             | ENSBTAT00000028697 |
| 18 | 60,071,099 | rs210481378 | C | T | Gtt/Att | p.Val451Ile/c.1351G>A  | ZNF845             | ENSBTAT00000028697 |
| 18 | 60,071,165 | rs447583392 | G | A | Cct/Tct | p.Pro429Ser/c.1285C>T  | ZNF845             | ENSBTAT00000028697 |
| 18 | 60,071,185 | rs208933449 | T | C | aAa/aGa | p.Lys422Arg/c.1265A>G  | ZNF845             | ENSBTAT00000028697 |
| 18 | 60,071,198 | rs382374202 | T | C | Aga/Gga | p.Arg418Gly/c.1252A>G  | ZNF845             | ENSBTAT00000028697 |
| 18 | 60,071,282 | rs207642753 | T | C | Act/Gct | p.Thr390Ala/c.1168A>G  | ZNF845             | ENSBTAT00000028697 |
| 18 | 60,071,299 | rs132952535 | T | C | aAt/aGt | p.Asn384Ser/c.1151A>G  | ZNF845             | ENSBTAT00000028697 |
| 18 | 60,074,031 | rs43024479  | T | C | Aaa/Gaa | p.Lys138Glu/c.412A>G   | ZNF845             | ENSBTAT00000028697 |
| 18 | 60,074,788 | rs43024497  | G | A | Caa/Taa | p.Gln116*/c.346C>T     | ZNF845             | ENSBTAT00000028697 |
| 18 | 60,074,802 | rs43024498  | A | G | gTt/gCt | p.Val111Ala/c.332T>C   | ZNF845             | ENSBTAT00000028697 |
| 18 | 61,208,010 | rs207890454 | A | G | gTc/gCc | p.Val425Ala/c.1274T>C  | ENSBTAG00000040392 | ENSBTAT00000010394 |
| 18 | 61,208,899 | rs132724528 | A | G | aTt/aCt | p.Ile270Thr/c.809T>C   | ENSBTAG00000040392 | ENSBTAT00000010394 |
| 18 | 61,208,944 | rs137426723 | C | T | cGa/cAa | p.Arg255Gln/c.764G>A   | ENSBTAG00000040392 | ENSBTAT00000010394 |
| 18 | 61,230,777 | rs383959294 | A | C | aAc/aCc | p.Asn465Thr/c.1394A>C  | ENSBTAG00000000336 | ENSBTAT00000002953 |
| 18 | 61,832,948 | rs379802701 | T | C | cTc/cCc | p.Leu109Pro/c.326T>C   | ENSBTAG00000013345 | ENSBTAT00000020050 |
| 18 | 63,759,874 | rs133653983 | T | C | cAa/cGa | p.Gln348Arg/c.1043A>G  | ENSBTAG00000046087 | ENSBTAT00000056913 |
| 18 | 63,759,883 | rs137759520 | C | G | aGt/aCt | p.Ser345Thr/c.1034G>C  | ENSBTAG00000046087 | ENSBTAT00000056913 |
| 18 | 63,759,947 | rs210781267 | T | A | Acc/Tcc | p.Thr324Ser/c.970A>T   | ENSBTAG00000046087 | ENSBTAT00000056913 |
| 18 | 63,760,823 | rs435401323 | G | A | tCg/tTg | p.Ser156Leu/c.467C>T   | ENSBTAG00000046087 | ENSBTAT00000056913 |
| 18 | 63,905,410 | rs110118869 | T | C | cAt/cGt | p.His197Arg/c.590A>G   | ZNF583             | ENSBTAT00000053429 |
| 18 | 64,273,773 | rs209132062 | T | C | tAc/tGc | p.Tyr1360Cys/c.4079A>G | bta-mir-2900       | ENSBTAT00000031743 |
| 18 | 65,048,379 | rs41892907  | A | T | Act/Tct | p.Thr91Ser/c.271A>T    | ZNF134             | ENSBTAT00000006170 |
| 19 | 5,340,016  | rs135295022 | G | C | Gaa/Caa | p.Glu125Gln/c.373G>C   | STXBP4             | ENSBTAT00000021395 |
| 19 | 9,253,002  | rs135910608 | T | C | aTg/aCg | p.Met48Thr/c.143T>C    | ENSBTAG00000047870 | ENSBTAT00000063392 |
| 19 | 9,253,337  | rs133699826 | G | C | Gtg/Ctg | p.Val160Leu/c.478G>C   | ENSBTAG00000047870 | ENSBTAT00000063392 |
| 19 | 9,253,449  | rs137368487 | T | C | tTc/tCc | p.Phe197Ser/c.590T>C   | ENSBTAG00000047870 | ENSBTAT00000063392 |
| 19 | 9,316,595  | rs133731539 | G | A | Gtt/Att | p.Val157Ile/c.469G>A   | ENSBTAG00000045769 | ENSBTAT00000063437 |

|    |            |             |   |   |         |                        |                    |                    |
|----|------------|-------------|---|---|---------|------------------------|--------------------|--------------------|
| 19 | 9,676,673  | rs109649580 | T | C | tAc/tGc | p.Tyr823Cys/c.2468A>G  | MTMR4              | ENSBTAT00000030189 |
| 19 | 9,851,943  | rs110567784 | G | C | Ggg/Cgg | p.Gly92Arg/c.274G>C    | MGC137055          | ENSBTAT00000004247 |
| 19 | 12,571,398 | rs441173913 | C | T | Cga/Tga | p.Arg21*/c.61C>T       | ENSBTAG00000045964 | ENSBTAT00000034857 |
| 19 | 13,526,663 | rs135272474 | A | C | gAa/gCa | p.Glu411Ala/c.1232A>C  | ENSBTAG00000000560 | ENSBTAT00000000730 |
| 19 | 14,160,423 | rs133348831 | C | T | Ggt/Agt | p.Gly735Ser/c.2203G>A  | SYNRG              | ENSBTAT00000013601 |
| 19 | 14,640,978 | rs111002312 | G | T | Cat/Aat | p.His66Asn/c.196C>A    | ENSBTAG00000039504 | ENSBTAT00000048097 |
| 19 | 21,753,544 | rs109496421 | C | A | gCg/gAg | p.Ala654Glu/c.1961C>A  | EFCAB5             | ENSBTAT00000063069 |
| 19 | 22,115,063 | rs109461583 | A | G | Ata/Gta | p.Ile78Val/c.232A>G    | GOSR1              | ENSBTAT00000006525 |
| 19 | 22,652,502 | rs110509854 | T | G | Tca/Gca | p.Ser280Ala/c.838T>G   | GLOD4              | ENSBTAT00000025501 |
| 19 | 23,310,008 | .           | T | C | Agc/Ggc | p.Ser794Gly/c.2380A>G  | SCARF1             | ENSBTAT00000015261 |
| 19 | 23,395,854 | rs132653867 | A | G | Agc/Ggc | p.Ser220Gly/c.658A>G   | WDR81              | ENSBTAT00000015274 |
| 19 | 23,397,766 | rs136879266 | C | T | Cgt/Tgt | p.Arg479Cys/c.1435C>T  | WDR81              | ENSBTAT00000015274 |
| 19 | 23,397,793 | rs109841018 | G | A | Gcg/Acg | p.Ala488Thr/c.1462G>A  | WDR81              | ENSBTAT00000015274 |
| 19 | 23,453,974 | rs133153788 | C | A | Gtg/Ttg | p.Val346Leu/c.1036G>T  | SMYD4              | ENSBTAT00000012805 |
| 19 | 23,454,181 | rs137246711 | G | A | Cgg/Tgg | p.Arg277Trp/c.829C>T   | SMYD4              | ENSBTAT00000012805 |
| 19 | 23,454,295 | rs109098013 | T | C | Ata/Gta | p.Ile239Val/c.715A>G   | SMYD4              | ENSBTAT00000012805 |
| 19 | 23,454,441 | rs136848887 | G | A | aCc/aTc | p.Thr190Ile/c.569C>T   | SMYD4              | ENSBTAT00000012805 |
| 19 | 23,454,510 | rs109702262 | G | A | aCt/aTt | p.Thr167Ile/c.500C>T   | SMYD4              | ENSBTAT00000012805 |
| 19 | 23,454,639 | rs132983096 | A | G | aTa/aCa | p.Ile124Thr/c.371T>C   | SMYD4              | ENSBTAT00000012805 |
| 19 | 23,508,655 | .           | A | G | Acc/Gcc | p.Thr135Ala/c.403A>G   | RPA1               | ENSBTAT00000012812 |
| 19 | 23,806,402 | rs137665756 | A | C | Tta/Gta | p.Leu916Val/c.2746T>G  | SMG6               | ENSBTAT00000000333 |
| 19 | 24,711,670 | rs109444163 | G | A | tCt/tTt | p.Ser215Phe/c.644C>T   | ENSBTAG00000038059 | ENSBTAT00000053598 |
| 19 | 24,814,910 | rs41598102  | A | G | Tgt/Cgt | p.Cys255Arg/c.763T>C   | SPATA22            | ENSBTAT00000020932 |
| 19 | 25,265,735 | rs41905222  | T | C | Atg/Gtg | p.Met1493Val/c.4477A>G | ZZEF1              | ENSBTAT00000061398 |
| 19 | 25,902,273 | rs211337871 | T | C | tTt/tCt | p.Phe147Ser/c.440T>C   | ENSBTAG00000047858 | ENSBTAT00000064610 |
| 19 | 27,671,010 | rs41904721  | C | T | gCc/gTc | p.Ala336Val/c.1007C>T  | ENSBTAG00000045892 | ENSBTAT00000064525 |
| 19 | 27,894,909 | rs110238037 | A | G | tAt/tGt | p.Tyr110Cys/c.329A>G   | TNFSF12            | ENSBTAT00000045584 |
| 19 | 28,312,344 | rs41907896  | A | G | gAt/gGt | p.Asp335Gly/c.1004A>G  | ALOX15B            | ENSBTAT00000011570 |
| 19 | 28,393,172 | rs110179795 | A | G | Tct/Cct | p.Ser893Pro/c.2677T>C  | PER1               | ENSBTAT00000005076 |
| 19 | 29,970,036 | rs109499590 | A | C | cTc/cGc | p.Leu1179Arg/c.3536T>G | MYH13              | ENSBTAT00000035550 |
| 19 | 36,034,198 | rs41909774  | A | G | Tgt/Cgt | p.Cys403Arg/c.1207T>C  | ENSBTAG00000018840 | ENSBTAT00000025086 |
| 19 | 41,559,054 | rs110891678 | T | C | aAt/aGt | p.Asn326Ser/c.977A>G   | KRT24              | ENSBTAT00000027749 |
| 19 | 42,328,121 | rs43728354  | T | C | cAg/cGg | p.Gln198Arg/c.593A>G   | KRT36              | ENSBTAT00000006440 |
| 19 | 42,886,802 | rs43756545  | A | G | gTc/gCc | p.Val175Ala/c.524T>C   | LGP2               | ENSBTAT00000065738 |
| 19 | 44,545,686 | rs378714431 | A | T | gTg/gAg | p.Val594Glu/c.1781T>A  | HDAC5              | ENSBTAT00000061581 |
| 19 | 49,068,123 | rs42993792  | G | C | cCc/cGc | p.Pro141Arg/c.422C>G   | TEX2               | ENSBTAT00000006196 |
| 19 | 50,631,870 | rs109545022 | T | C | aTg/aCg | p.Met161Thr/c.482T>C   | WDR45L             | ENSBTAT00000004811 |
| 19 | 54,639,181 | rs109065101 | G | C | caC/caG | p.His293Gln/c.879C>G   | TMC8               | ENSBTAT00000025384 |
| 19 | 54,642,087 | rs133278144 | A | C | gTg/gGg | p.Val7Gly/c.20T>G      | TMC8               | ENSBTAT00000025384 |
| 19 | 54,642,092 | rs134981643 | C | G | tgG/tgC | p.Trp5Cys/c.15G>C      | TMC8               | ENSBTAT00000025384 |
| 19 | 57,090,902 | rs208485085 | T | G | Tcc/Gcc | p.Ser501Ala/c.1501T>G  | HID1               | ENSBTAT00000014318 |
| 19 | 57,726,930 | rs208886514 | G | C | aaC/aaG | p.Asn879Lys/c.2637C>G  | KIF19              | ENSBTAT00000006057 |
| 19 | 57,728,231 | rs132934030 | T | C | Acc/Gcc | p.Thr714Ala/c.2140A>G  | KIF19              | ENSBTAT00000006057 |
| 19 | 57,728,555 | rs135047844 | G | A | cCg/cTg | p.Pro687Leu/c.2060C>T  | KIF19              | ENSBTAT00000006057 |
| 19 | 63,844,912 | rs136152684 | T | C | Aga/Gga | p.Arg533Gly/c.1597A>G  | HELZ               | ENSBTAT00000006233 |
| 20 | 499,501    | rs108961511 | A | G | Tca/Cca | p.Ser78Pro/c.232T>C    | SLIT3              | ENSBTAT00000049620 |
| 20 | 6,646,753  | rs41930641  | T | C | tTa/tCa | p.Leu365Ser/c.1094T>C  | FAM169A            | ENSBTAT00000021301 |
| 20 | 9,973,396  | rs41934002  | C | T | gGt/gAt | p.Gly1471Asp/c.4412G>A | BDP1               | ENSBTAT00000000474 |

|    |            |             |   |   |         |                         |                     |                     |
|----|------------|-------------|---|---|---------|-------------------------|---------------------|---------------------|
| 20 | 22,375,058 | rs109890744 | C | T | Ggt/Agt | p.Gly615Ser/c.1843G>A   | MAP3K1              | ENSBTAT00000018325  |
| 20 | 33,479,090 | rs41949012  | A | G | Act/Gct | p.Thr503Ala/c.1507A>G   | MROH2B              | ENSBTAT00000002589  |
| 20 | 33,570,528 | rs109103020 | C | T | gGg/gAg | p.Gly548Glu/c.1643G>A   | C7                  | ENSBTAT000000056663 |
| 20 | 37,109,496 | rs41946451  | A | G | cAa/cGa | p.Gln514Arg/c.1541A>G   | C5orf42             | ENSBTAT00000000774  |
| 20 | 37,116,700 | rs41946440  | G | A | Gat/Aat | p.Asp906Asn/c.2716G>A   | C5orf42             | ENSBTAT00000000774  |
| 20 | 56,431,209 | rs42809089  | G | A | Gcg/Acg | p.Ala110Thr/c.328G>A    | MYO10               | ENSBTAT000000026812 |
| 21 | 1,641,297  | rs109356637 | A | G | cAt/cGt | p.His386Arg/c.1157A>G   | ENSBTAG000000023079 | ENSBTAT000000031388 |
| 21 | 6,102,031  | rs43757179  | T | G | Agt/Cgt | p.Ser122Arg/c.364A>C    | ENSBTAG000000048048 | ENSBTAT000000065970 |
| 21 | 9,617,285  | rs41670790  | C | T | Gtt/Att | p.Val249Ile/c.745G>A    | ENSBTAG000000046611 | ENSBTAT000000031701 |
| 21 | 20,427,478 | rs42898907  | A | G | Atg/Gtg | p.Met13Val/c.37A>G      | ENSBTAG000000004339 | ENSBTAT000000005678 |
| 21 | 21,364,025 | rs109132136 | A | G | gTg/gCg | p.Val408Ala/c.1223T>C   | RHCG                | ENSBTAT000000007196 |
| 21 | 21,364,079 | rs110497704 | A | G | aTg/aCg | p.Met390Thr/c.1169T>C   | RHCG                | ENSBTAT000000007196 |
| 21 | 21,477,000 | rs110924425 | A | C | gaA/gaC | p.Glu1864Asp/c.5592A>C  | TICRR               | ENSBTAT000000003143 |
| 21 | 29,991,783 | rs137045209 | C | T | cCg/cTg | p.Pro204Leu/c.611C>T    | ENSBTAG000000047130 | ENSBTAT000000065139 |
| 21 | 35,207,757 | rs110772105 | C | A | tgG/tgT | p.Trp50Cys/c.150G>T     | ENSBTAG000000010828 | ENSBTAT000000014364 |
| 21 | 35,207,770 | rs109485745 | C | T | gGt/gAt | p.Gly46Asp/c.137G>A     | ENSBTAG000000010828 | ENSBTAT000000014364 |
| 21 | 35,213,330 | rs132636886 | C | G | Gag/Cag | p.Glu16Gln/c.46G>C      | ENSBTAG000000013055 | ENSBTAT000000017359 |
| 21 | 35,213,362 | rs447257630 | A | G | cTg/cCg | p.Leu5Pro/c.14T>C       | ENSBTAG000000013055 | ENSBTAT000000017359 |
| 21 | 56,567,083 | rs41584199  | T | C | gTg/gCg | p.Val396Ala/c.1187T>C   | C14orf159           | ENSBTAT000000061238 |
| 21 | 59,266,624 | rs207506043 | C | G | gGg/gCg | p.Gly275Ala/c.824G>C    | DDX24               | ENSBTAT000000004441 |
| 21 | 69,465,667 | rs43005016  | A | G | Acc/Gcc | p.Thr520Ala/c.1558A>G   | TNFAIP2             | ENSBTAT000000050485 |
| 21 | 71,045,057 | rs137491730 | C | T | aCc/aTc | p.Thr243Ile/c.728C>T    | C14orf79            | ENSBTAT000000013688 |
| 22 | 7,526,148  | rs135777849 | A | G | Aat/Gat | p.Asn241Asp/c.721A>G    | ENSBTAG000000034871 | ENSBTAT000000039410 |
| 22 | 7,597,212  | rs132926373 | T | C | aAc/aGc | p.Asn95Ser/c.284A>G     | SUSD5               | ENSBTAT000000049275 |
| 22 | 12,088,551 | rs109649643 | A | G | aTc/aCc | p.Ile163Thr/c.488T>C    | SCN5A               | ENSBTAT000000012068 |
| 22 | 12,356,042 | rs109228784 | A | G | Tgc/Cgc | p.Cys48Arg/c.142T>C     | SCN11A              | ENSBTAT000000022822 |
| 22 | 15,246,226 | rs208440455 | T | G | Atc/Ctc | p.Ile128Leu/c.382A>C    | LYZL4               | ENSBTAT000000024756 |
| 22 | 15,829,966 | rs110264478 | C | G | Gag/Cag | p.Glu215Gln/c.643G>C    | ENSBTAG000000008244 | ENSBTAT000000010845 |
| 22 | 16,817,881 | rs41999637  | C | T | cGg/cAg | p.Arg418Gln/c.1253G>A   | FANCD2              | ENSBTAT000000013299 |
| 22 | 35,299,377 | rs211437787 | A | G | gTt/gCt | p.Val120Ala/c.359T>C    | SLC25A26            | ENSBTAT000000054584 |
| 22 | 48,314,004 | rs110946558 | T | C | Aca/Gca | p.Thr327Ala/c.979A>G    | PRKCD               | ENSBTAT000000011487 |
| 22 | 48,903,821 | rs109421999 | C | T | cGc/cAc | p.Arg192His/c.575G>A    | STAB1               | ENSBTAT000000019663 |
| 22 | 49,073,708 | rs208206440 | C | G | gGt/gCt | p.Gly1578Ala/c.4733G>C  | DNAH1               | ENSBTAT000000066095 |
| 22 | 50,351,313 | rs210898565 | T | G | Acc/Ccc | p.Thr209Pro/c.625A>C    | HEMK1               | ENSBTAT000000005382 |
| 22 | 50,351,330 | rs208149156 | G | T | gCc/gAc | p.Ala203Asp/c.608C>A    | HEMK1               | ENSBTAT000000005382 |
| 22 | 50,708,448 | rs42019238  | A | G | gTg/gCg | p.Val144Ala/c.431T>C    | SLC38A3             | ENSBTAT000000011214 |
| 22 | 51,112,806 | rs42015565  | A | C | Tca/Gca | p.Ser1867Ala/c.5599T>G  | BSN                 | ENSBTAT000000015386 |
| 22 | 51,114,698 | rs42015563  | T | C | cAc/cGc | p.His1236Arg/c.3707A>G  | BSN                 | ENSBTAT000000015386 |
| 22 | 52,815,353 | rs110862179 | G | A | aGa/aAa | p.Arg1017Lys/c.3050G>A  | SCAP                | ENSBTAT000000020961 |
| 22 | 53,979,197 | rs42017539  | C | A | gCg/gAg | p.Ala677Glu/c.2030C>A   | FYCO1               | ENSBTAT000000063071 |
| 22 | 54,002,329 | rs42018144  | T | C | cTg/cCg | p.Leu1300Pro/c.3899T>C  | FYCO1               | ENSBTAT000000063071 |
| 22 | 56,086,663 | rs209194776 | G | A | tCt/tTt | p.Ser7Phe/c.20C>T       | ENSBTAG000000031065 | ENSBTAT000000043977 |
| 22 | 58,419,370 | rs42286349  | T | C | Tgg/Cgg | p.Trp827Arg/c.2479T>C   | GRIP2               | ENSBTAT000000015785 |
| 22 | 59,604,948 | rs110857852 | A | G | atA/atG | p.Ile355Met/c.1065A>G   | ACAD9               | ENSBTAT000000050397 |
| 22 | 59,636,414 | rs209532566 | T | C | Atg/Gtg | p.Met141Val/c.421A>G    | KIAA1257            | ENSBTAT000000065742 |
| 23 | 3,612,115  | rs109309915 | A | G | Act/Gct | p.Thr5480Ala/c.16438A>G | DST                 | ENSBTAT000000061451 |
| 23 | 7,204,606  | rs110978910 | T | C | Tca/Cca | p.Ser85Pro/c.253T>C     | BOLA-DMA            | ENSBTAT000000020881 |
| 23 | 7,219,659  | rs41255857  | T | C | cAc/cGc | p.His108Arg/c.323A>G    | BOLA-DNA            | ENSBTAT000000008504 |



|    |            |             |   |   |         |                        |                    |                    |
|----|------------|-------------|---|---|---------|------------------------|--------------------|--------------------|
| 23 | 16,340,958 | rs110696617 | A | G | aAa/aGa | p.Lys865Arg/c.2594A>G  | UBR2               | ENSBTAT00000007833 |
| 23 | 20,225,619 | rs110692063 | T | C | Aag/Gag | p.Lys190Glu/c.568A>G   | GPR110             | ENSBTAT00000028795 |
| 23 | 27,163,037 | rs133208780 | A | G | Acg/Gcg | p.Thr1483Ala/c.4447A>G | ENSBTAG00000006864 | ENSBTAT00000045468 |
| 23 | 27,207,359 | rs110310622 | T | C | aTa/aCa | p.Ile31Thr/c.92T>C     | DOM3Z              | ENSBTAT00000007340 |
| 23 | 27,217,994 | rs109186623 | C | T | Gaa/Aaa | p.Glu80Lys/c.238G>A    | SKIV2L             | ENSBTAT00000007339 |
| 23 | 27,333,684 | rs382492082 | C | T | atG/atA | p.Met5Ile/c.15G>A      | HSPA1A             | ENSBTAT00000017500 |
| 23 | 27,333,685 | rs385826597 | A | G | aTg/aCg | p.Met5Thr/c.14T>C      | HSPA1A             | ENSBTAT00000017500 |
| 23 | 27,602,261 | rs110901351 | T | C | Tgg/Cgg | p.Trp255Arg/c.763T>C   | ENSBTAG00000008959 | ENSBTAT00000035878 |
| 23 | 27,844,805 | rs133109032 | T | C | tTa/tCa | p.Leu237Ser/c.710T>C   | ENSBTAG00000007075 | ENSBTAT00000009299 |
| 23 | 28,739,018 | rs109457742 | T | C | cTg/cCg | p.Leu329Pro/c.986T>C   | ZFP57              | ENSBTAT00000023710 |
| 23 | 29,032,579 | rs137849782 | T | C | Act/Gct | p.Thr252Ala/c.754A>G   | ENSBTAG00000047763 | ENSBTAT00000063649 |
| 23 | 29,033,059 | rs208702780 | A | G | Ttc/Ctc | p.Phe92Leu/c.274T>C    | ENSBTAG00000047763 | ENSBTAT00000063649 |
| 23 | 29,033,070 | rs210826763 | C | T | aGa/aAa | p.Arg88Lys/c.263G>A    | ENSBTAG00000047763 | ENSBTAT00000063649 |
| 23 | 29,637,024 | rs109541853 | T | C | Aga/Gga | p.Arg170Gly/c.508A>G   | ENSBTAG00000040187 | ENSBTAT00000052674 |
| 23 | 30,607,460 | rs109847091 | C | A | gCt/gAt | p.Ala19Asp/c.56C>A     | ENSBTAG00000038597 | ENSBTAT00000056344 |
| 23 | 31,041,034 | rs211420919 | T | C | Tcg/Ccg | p.Ser60Pro/c.178T>C    | POM121L2           | ENSBTAT00000033358 |
| 23 | 31,042,989 | rs109938786 | A | T | aaA/aaT | p.Lys711Asn/c.2133A>T  | POM121L2           | ENSBTAT00000033358 |
| 23 | 32,757,188 | rs110040419 | T | C | tTg/tCg | p.Leu858Ser/c.2573T>C  | FAM65B             | ENSBTAT00000024178 |
| 23 | 43,014,007 | rs42039414  | T | C | aTg/aCg | p.Met155Thr/c.464T>C   | TBC1D7             | ENSBTAT00000022819 |
| 23 | 50,490,560 | rs109183457 | T | C | Aac/Gac | p.Asn96Asp/c.286A>G    | NQO2               | ENSBTAT00000040161 |
| 23 | 50,614,242 | rs210780870 | G | A | Gtc/Atc | p.Val125Ile/c.373G>A   | ENSBTAG00000025280 | ENSBTAT00000026816 |
| 23 | 50,615,327 | rs208585354 | A | G | Atc/Gtc | p.Ile168Val/c.502A>G   | ENSBTAG00000025280 | ENSBTAT00000026816 |
| 23 | 50,615,354 | rs207891256 | C | G | Cag/Gag | p.Gln177Glu/c.529C>G   | ENSBTAG00000025280 | ENSBTAT00000026816 |
| 24 | 9,741,756  | rs137672818 | T | A | Tct/Act | p.Ser245Thr/c.733T>A   | DSEL               | ENSBTAT00000056960 |
| 24 | 25,644,590 | rs109277335 | G | A | cGt/cAt | p.Arg921His/c.2762G>A  | ENSBTAG00000007696 | ENSBTAT00000010121 |
| 24 | 33,176,129 | rs43176240  | A | T | cTt/cAt | p.Leu1373His/c.4118T>A | LAMA3              | ENSBTAT00000060991 |
| 24 | 33,626,581 | rs110927432 | T | C | Ttt/Ctt | p.Phe241Leu/c.721T>C   | TMEM241            | ENSBTAT00000031064 |
| 24 | 54,177,321 | rs110827826 | G | C | ttG/ttC | p.Leu535Phe/c.1605G>C  | POLI               | ENSBTAT00000012034 |
| 24 | 56,568,338 | rs42057068  | T | C | Tgg/Cgg | p.Trp770Arg/c.2308T>C  | WDR7               | ENSBTAT00000005230 |
| 24 | 62,365,234 | rs43200829  | G | T | Ctc/Atc | p.Leu303Ile/c.907C>A   | SERPINB4           | ENSBTAT00000055709 |
| 24 | 62,518,295 | rs109741893 | T | C | tTt/tCt | p.Phe109Ser/c.326T>C   | SERPINB7           | ENSBTAT00000053904 |
| 25 | 560,467    | rs436323460 | T | G | cTa/cGa | p.Leu302Arg/c.905T>G   | STUB1              | ENSBTAT00000025473 |
| 25 | 560,469    | rs432656507 | A | T | Ata/Tta | p.Ile303Leu/c.907A>T   | STUB1              | ENSBTAT00000025473 |
| 25 | 621,349    | rs110931297 | G | T | caC/caA | p.His344Gln/c.1032C>A  | CCDC78             | ENSBTAT00000003211 |
| 25 | 656,972    | rs109320760 | A | G | Tgg/Cgg | p.Trp241Arg/c.721T>C   | MSLNL              | ENSBTAT00000047719 |
| 25 | 669,038    | rs110978775 | G | A | Gct/Act | p.Ala96Thr/c.286G>A    | CHTF18             | ENSBTAT00000026311 |
| 25 | 2,963,192  | rs110609415 | G | A | cCg/cTg | p.Pro1194Leu/c.3581C>T | SLX4               | ENSBTAT00000005923 |
| 25 | 10,180,671 | rs110582892 | A | G | Tgg/Cgg | p.Trp394Arg/c.1180T>C  | ENSBTAG00000013305 | ENSBTAT00000046675 |
| 25 | 11,273,964 | rs42056702  | T | G | Ttg/Gtg | p.Leu775Val/c.2323T>G  | SNX29              | ENSBTAT00000037460 |
| 25 | 11,602,889 | rs109083142 | T | C | Act/Gct | p.Thr3Ala/c.7A>G       | CPPED1             | ENSBTAT00000007071 |
| 25 | 26,312,729 | rs42072538  | G | C | cCg/cGg | p.Pro26Arg/c.77C>G     | ENSBTAG00000018000 | ENSBTAT00000023952 |
| 25 | 26,317,395 | rs42071217  | A | G | Aat/Gat | p.Asn704Asp/c.2110A>G  | APOBR              | ENSBTAT00000037341 |
| 25 | 26,317,882 | rs42071214  | G | C | gGt/gCt | p.Gly866Ala/c.2597G>C  | APOBR              | ENSBTAT00000037341 |
| 25 | 26,318,276 | rs42071211  | A | G | gAg/gGg | p.Glu967Gly/c.2900A>G  | APOBR              | ENSBTAT00000037341 |
| 25 | 26,318,284 | rs42071210  | C | A | Ctc/Atc | p.Leu970Ile/c.2908C>A  | APOBR              | ENSBTAT00000037341 |
| 25 | 27,161,922 | rs42069062  | G | A | Ccg/Tcg | p.Pro126Ser/c.376C>T   | ZNF629             | ENSBTAT00000037326 |
| 25 | 27,162,187 | rs42069061  | A | C | caT/caG | p.His37Gln/c.111T>G    | ZNF629             | ENSBTAT00000037326 |
| 25 | 27,723,173 | rs42066019  | G | A | Gtc/Atc | p.Val480Ile/c.1438G>A  | ITGAD              | ENSBTAT00000026008 |

|    |            |             |   |   |         |                        |                    |                    |
|----|------------|-------------|---|---|---------|------------------------|--------------------|--------------------|
| 25 | 28,294,274 | rs42986714  | G | A | Gac/Aac | p.Asp138Asn/c.412G>A   | CRCP               | ENSBTAT00000053944 |
| 25 | 35,105,527 | rs42074328  | G | A | aGa/aAa | p.Arg42Lys/c.125G>A    | ALKBH4             | ENSBTAT00000004717 |
| 25 | 38,264,342 | rs208937667 | C | G | atC/atG | p.Ile224Met/c.672C>G   | BAIAP2L1           | ENSBTAT00000030984 |
| 25 | 38,927,249 | rs109294673 | T | C | Acc/Gcc | p.Thr179Ala/c.535A>G   | GRID2IP            | ENSBTAT00000004281 |
| 25 | 39,052,533 | rs109653367 | A | G | aTt/aCt | p.Ile186Thr/c.557T>C   | ZNF12              | ENSBTAT00000053303 |
| 26 | 10,234,027 | rs207748307 | G | A | Gaa/Aaa | p.Glu104Lys/c.310G>A   | LIPJ               | ENSBTAT00000049487 |
| 26 | 10,438,698 | rs42775592  | G | A | Gag/Aag | p.Glu171Lys/c.511G>A   | LIPK               | ENSBTAT00000017773 |
| 26 | 17,591,768 | rs42085774  | C | G | gaG/gaC | p.Glu345Asp/c.1035G>C  | TLL2               | ENSBTAT00000015593 |
| 26 | 19,166,147 | rs42092895  | A | G | Act/Gct | p.Thr580Ala/c.1738A>G  | R3HCC1L            | ENSBTAT00000029136 |
| 26 | 19,367,460 | rs42092098  | A | G | Tgg/Cgg | p.Trp485Arg/c.1453T>C  | HPS1               | ENSBTAT00000019034 |
| 26 | 20,615,740 | rs378023463 | A | C | Att/Ctt | p.Ile25Leu/c.73A>C     | ABCC2              | ENSBTAT00000047274 |
| 26 | 20,767,440 | rs42092981  | T | C | cAg/cGg | p.Gln544Arg/c.1631A>G  | DNMBP              | ENSBTAT00000011772 |
| 26 | 23,694,514 | rs209230756 | A | G | Tca/Cca | p.Ser509Pro/c.1525T>C  | CYP17A1            | ENSBTAT00000019061 |
| 26 | 23,694,667 | rs136019502 | A | G | Tgg/Cgg | p.Trp458Arg/c.1372T>C  | CYP17A1            | ENSBTAT00000019061 |
| 26 | 23,694,772 | rs211334387 | C | T | Gcg/Acg | p.Ala423Thr/c.1267G>A  | CYP17A1            | ENSBTAT00000019061 |
| 26 | 23,697,090 | rs210616088 | A | G | aTg/aCg | p.Met238Thr/c.713T>C   | CYP17A1            | ENSBTAT00000019061 |
| 26 | 24,676,360 | rs210539474 | T | C | tAc/tGc | p.Tyr60Cys/c.179A>G    | ASMTL              | ENSBTAT00000063610 |
| 26 | 24,854,246 | rs42093868  | G | A | Cct/Tct | p.Pro1036Ser/c.3106C>T | COL17A1            | ENSBTAT00000013271 |
| 26 | 25,719,142 | rs42110643  | G | A | aCg/aTg | p.Thr516Met/c.1547C>T  | ENSBTAG00000010522 | ENSBTAT00000013918 |
| 26 | 43,851,248 | rs109049004 | A | G | aTg/aCg | p.Met394Thr/c.1181T>C  | CPXM2              | ENSBTAT00000025207 |
| 26 | 50,638,138 | rs133031841 | T | C | gTg/gCg | p.Val260Ala/c.779T>C   | ENSBTAG00000026185 | ENSBTAT00000037095 |
| 26 | 51,632,138 | rs133338619 | G | A | Gta/Ata | p.Val188Ile/c.562G>A   | LRRC27             | ENSBTAT00000004943 |
| 27 | 1,333,400  | rs135558482 | A | T | gTc/gAc | p.Val765Asp/c.2294T>A  | CSMD1              | ENSBTAT00000012850 |
| 27 | 4,800,159  | rs132667878 | G | A | Cgt/Tgt | p.Arg124Cys/c.370C>T   | ENSBTAG00000008519 | ENSBTAT00000024416 |
| 27 | 4,998,837  | rs137380417 | A | T | tAc/tTc | p.Tyr178Phe/c.533A>T   | ZNF705A            | ENSBTAT00000065604 |
| 27 | 5,425,568  | rs43108924  | C | A | tGg/tTg | p.Trp42Leu/c.125G>T    | ENSBTAG00000047284 | ENSBTAT00000065980 |
| 27 | 5,457,277  | rs133161383 | G | A | Ggc/Agc | p.Gly12Ser/c.34G>A     | DEFB               | ENSBTAT00000049993 |
| 27 | 15,357,133 | rs110400846 | A | G | Atg/Gtg | p.Met114Val/c.340A>G   | F11                | ENSBTAT00000004648 |
| 27 | 15,357,257 | rs110060381 | A | G | cAc/cGc | p.His155Arg/c.464A>G   | F11                | ENSBTAT00000004648 |
| 27 | 15,359,778 | rs110233554 | A | G | Atg/Gtg | p.Met219Val/c.655A>G   | F11                | ENSBTAT00000004648 |
| 27 | 15,366,951 | rs110792040 | A | G | Aag/Gag | p.Lys437Glu/c.1309A>G  | F11                | ENSBTAT00000004648 |
| 27 | 15,367,107 | rs137383357 | G | A | Gca/Aca | p.Ala489Thr/c.1465G>A  | F11                | ENSBTAT00000004648 |
| 27 | 15,369,397 | rs110586435 | T | G | Ttg/Gtg | p.Leu615Val/c.1843T>G  | F11                | ENSBTAT00000004648 |
| 27 | 34,914,268 | rs43731491  | T | A | ttA/tTt | p.Leu255Phe/c.765A>T   | ENSBTAG00000018713 | ENSBTAT00000024910 |
| 27 | 39,862,074 | rs136564029 | A | G | gTc/gCc | p.Val374Ala/c.1121T>C  | OXSM               | ENSBTAT00000009250 |
| 28 | 6,084,058  | rs43682902  | A | G | tTg/tCg | p.Leu1091Ser/c.3272T>C | PCNXL2             | ENSBTAT00000017452 |
| 28 | 13,167,199 | rs137520061 | A | G | Tcc/Ccc | p.Ser483Pro/c.1447T>C  | ZNF37A             | ENSBTAT00000016862 |
| 28 | 13,589,389 | rs110056366 | G | C | Gcc/Ccc | p.Ala161Pro/c.481G>C   | RET                | ENSBTAT00000000744 |
| 28 | 15,122,549 | rs42135275  | C | G | cGg/cCg | p.Arg58Pro/c.173G>C    | FAM13C             | ENSBTAT00000023314 |
| 28 | 15,127,565 | rs109369836 | T | C | Aca/Gca | p.Thr26Ala/c.76A>G     | FAM13C             | ENSBTAT00000023314 |
| 28 | 19,797,293 | rs42177112  | A | G | Aca/Gca | p.Thr187Ala/c.559A>G   | REEP3              | ENSBTAT00000052725 |
| 28 | 23,320,833 | rs42681735  | G | A | aCt/aTt | p.Thr400Ile/c.1199C>T  | CTNNA3             | ENSBTAT00000063012 |
| 28 | 29,789,301 | rs449821648 | C | G | gGg/gCg | p.Gly138Ala/c.413G>C   | MYOZ1              | ENSBTAT00000055220 |
| 28 | 35,700,054 | rs110467597 | A | G | Ata/Gta | p.Ile359Val/c.1075A>G  | CL46               | ENSBTAT00000028716 |
| 28 | 39,436,869 | rs136134544 | T | C | gTt/gCt | p.Val27Ala/c.80T>C     | GHITM              | ENSBTAT00000046599 |
| 29 | 5,104,264  | rs109245189 | A | T | agT/agA | p.Ser397Arg/c.1191T>A  | NAALAD2            | ENSBTAT00000000354 |
| 29 | 5,682,531  | rs42981617  | C | G | caG/caC | p.Gln433His/c.1299G>C  | TRIM43             | ENSBTAT00000012117 |
| 29 | 5,748,349  | rs137442187 | T | G | agT/agG | p.Ser11Arg/c.33T>G     | ENSBTAG00000038209 | ENSBTAT00000000458 |

|        |            |             |   |   |         |                         |                    |                     |
|--------|------------|-------------|---|---|---------|-------------------------|--------------------|---------------------|
| 29     | 5,751,066  | rs208046720 | G | A | Gaa/Aaa | p.Glu253Lys/c.757G>A    | ENSBTAG00000038209 | ENSBTAT00000000458  |
| 29     | 5,751,070  | rs209421286 | C | T | aCg/aTg | p.Thr254Met/c.761C>T    | ENSBTAG00000038209 | ENSBTAT00000000458  |
| 29     | 5,757,552  | rs209894977 | A | T | Acc/Tcc | p.Thr364Ser/c.1090A>T   | ENSBTAG00000038209 | ENSBTAT00000000458  |
| 29     | 5,757,789  | rs210083106 | C | T | Ctt/Ttt | p.Leu443Phe/c.1327C>T   | ENSBTAG00000038209 | ENSBTAT00000000458  |
| 29     | 17,389,281 | rs110865730 | C | G | gCc/gGc | p.Ala848Gly/c.2543C>G   | TENM4              | ENSBTAT000000061315 |
| 29     | 27,150,961 | rs42179775  | A | G | Ttc/Ctc | p.Phe42Leu/c.124T>C     | ENSBTAG00000022384 | ENSBTAT000000030301 |
| 29     | 27,693,354 | rs136019804 | G | A | gGt/gAt | p.Gly72Asp/c.215G>A     | ENSBTAG00000017495 | ENSBTAT000000023280 |
| 29     | 27,787,219 | rs109414706 | C | T | Gca/Aca | p.Ala190Thr/c.568G>A    | ENSBTAG00000040250 | ENSBTAT000000053331 |
| 29     | 27,904,069 | rs42459283  | A | G | aAc/aGc | p.Asn84Ser/c.251A>G     | ENSBTAG00000047020 | ENSBTAT000000063948 |
| 29     | 28,303,483 | rs109058114 | T | C | aAc/aGc | p.Asn161Ser/c.482A>G    | ENSBTAG00000038182 | ENSBTAT000000052524 |
| 29     | 28,732,222 | rs42177913  | A | G | gTc/gCc | p.Val298Ala/c.893T>C    | ROBO4              | ENSBTAT000000005698 |
| 29     | 29,433,038 | rs41650995  | A | G | gTt/gCt | p.Val53Ala/c.158T>C     | ACRV1              | ENSBTAT000000047491 |
| 29     | 43,599,412 | rs42188874  | A | G | cTg/cCg | p.Leu218Pro/c.653T>C    | RASGRP2            | ENSBTAT000000001368 |
| 29     | 43,753,213 | rs109133044 | T | G | aAt/aCt | p.Asn344Thr/c.1031A>C   | ATG2A              | ENSBTAT000000009283 |
| 29     | 44,634,280 | rs42187382  | G | A | Gga/Aga | p.Gly23Arg/c.67G>A      | SNX32              | ENSBTAT000000053283 |
| 29     | 44,647,736 | rs42187426  | A | G | Atc/Gtc | p.Ile256Val/c.766A>G    | MUS81              | ENSBTAT000000053203 |
| 29     | 44,976,428 | rs209861184 | A | G | atA/atG | p.Ile113Met/c.339A>G    | RAB1B              | ENSBTAT000000064628 |
| 29     | 45,388,361 | rs42197402  | C | T | Gaa/Aaa | p.Glu838Lys/c.2512G>A   | SPTBN2             | ENSBTAT000000007787 |
| 29     | 46,081,220 | rs42188167  | T | G | agT/agG | p.Ser123Arg/c.369T>G    | ENSBTAG00000038054 | ENSBTAT000000056618 |
| 29     | 48,988,657 | rs42191587  | A | G | tTg/tCg | p.Leu147Ser/c.440T>C    | ENSBTAG00000000776 | ENSBTAT000000001031 |
| 058431 | 38,670     | .           | A | G | gTg/gCg | p.Val118Ala/c.353T>C    | TMEM18             | ENSBTAT000000029309 |
| MT     | 4,537      | rs110211386 | G | A | aGc/aAc | p.Ser91Asn/c.272G>A     | ND2                | ENSBTAT000000060548 |
| MT     | 5,718      | rs109334123 | G | A | aGc/aAc | p.Ser11Asn/c.32G>A      | COX1               | ENSBTAT000000060569 |
| MT     | 5,754      | rs110197092 | A | G | gAt/gGt | p.Asp23Gly/c.68A>G      | COX1               | ENSBTAT000000060569 |
| MT     | 5,853      | rs81184152  | C | T | gCa/gTa | p.Ala56Val/c.167C>T     | COX1               | ENSBTAT000000060569 |
| X      | 3,537,157  | rs42199006  | C | G | Cac/Gac | p.His89Asp/c.265C>G     | ENSBTAG00000047757 | ENSBTAT000000066204 |
| X      | 14,280,063 | rs209729762 | G | A | Ggg/Agg | p.Gly60Arg/c.178G>A     | RBMX2              | ENSBTAT000000019649 |
| X      | 14,280,091 | rs211461315 | G | C | cGg/cCg | p.Arg69Pro/c.206G>C     | RBMX2              | ENSBTAT000000019649 |
| X      | 14,280,156 | rs208214483 | G | A | Gtt/Att | p.Val91Ile/c.271G>A     | RBMX2              | ENSBTAT000000019649 |
| X      | 14,280,172 | rs210909133 | A | G | aAt/aGt | p.Asn96Ser/c.287A>G     | RBMX2              | ENSBTAT000000019649 |
| X      | 14,282,446 | rs384575317 | A | G | Aaa/Gaa | p.Lys165Glu/c.493A>G    | RBMX2              | ENSBTAT000000019649 |
| X      | 14,282,500 | rs211364380 | C | T | Cag/Tag | p.Gln183*/c.547C>T      | RBMX2              | ENSBTAT000000019649 |
| X      | 14,314,496 | rs207545829 | C | G | aGt/aCt | p.Ser4042Thr/c.12125G>C | ENSBTAG00000010463 | ENSBTAT000000013812 |
| X      | 14,322,900 | rs380052227 | G | A | aCc/aTc | p.Thr1848Ile/c.5543C>T  | ENSBTAG00000010463 | ENSBTAT000000013812 |
| X      | 14,324,467 | rs383860350 | C | T | Gat/Aat | p.Asp1326Asn/c.3976G>A  | ENSBTAG00000010463 | ENSBTAT000000013812 |
| X      | 14,324,938 | rs380612108 | G | T | Cat/Aat | p.His1183Asn/c.3547C>A  | ENSBTAG00000010463 | ENSBTAT000000013812 |
| X      | 14,326,581 | rs210927069 | G | A | tCt/tTt | p.Ser635Phe/c.1904C>T   | ENSBTAG00000010463 | ENSBTAT000000013812 |
| X      | 14,362,463 | rs43200261  | G | A | Cgt/Tgt | p.Arg281Cys/c.841C>T    | ENSBTAG00000010463 | ENSBTAT000000013812 |
| X      | 14,365,645 | rs43209786  | C | T | gGc/gAc | p.Gly96Asp/c.287G>A     | ENSBTAG00000010463 | ENSBTAT000000013812 |
| X      | 14,365,660 | rs110187729 | T | C | cAg/cGg | p.Gln91Arg/c.272A>G     | ENSBTAG00000010463 | ENSBTAT000000013812 |
| X      | 14,367,549 | rs211403688 | T | C | Agt/Ggt | p.Ser73Gly/c.217A>G     | ENSBTAG00000010463 | ENSBTAT000000013812 |
| X      | 18,837,160 | rs211581301 | C | T | gGa/gAa | p.Gly131Glu/c.392G>A    | ENSBTAG00000046047 | ENSBTAT000000065493 |
| X      | 23,650,933 | rs379906801 | T | A | Acg/Tcg | p.Thr63Ser/c.187A>T     | CXHXorf66          | ENSBTAT000000063340 |
| X      | 29,091,608 | rs135967396 | C | T | Cat/Tat | p.His62Tyr/c.184C>T     | MGC148328          | ENSBTAT000000054670 |
| X      | 31,791,354 | rs136124109 | T | A | ttT/ttA | p.Phe408Leu/c.1224T>A   | AFF2               | ENSBTAT000000061034 |
| X      | 39,193,025 | rs210285972 | C | A | aGa/aTa | p.Arg59Ile/c.176G>T     | ENSBTAG00000022807 | ENSBTAT000000025764 |
| X      | 50,876,903 | rs211689565 | T | C | cAg/cGg | p.Gln342Arg/c.1025A>G   | SRPX2              | ENSBTAT000000053743 |
| X      | 50,952,417 | rs133584450 | C | T | Gcc/Acc | p.Ala235Thr/c.703G>A    | TNMD               | ENSBTAT000000028045 |

|   |             |             |   |   |         |                        |                    |                    |
|---|-------------|-------------|---|---|---------|------------------------|--------------------|--------------------|
| X | 56,116,881  | rs208551491 | G | A | Cct/Tct | p.Pro515Ser/c.1543C>T  | ENSBTAG00000038449 | ENSBTAT00000030459 |
| X | 56,507,444  | .           | A | G | cAa/cGa | p.Gln21Arg/c.62A>G     | ENSBTAG00000032787 | ENSBTAT00000030458 |
| X | 58,504,253  | rs378278903 | G | A | Gtt/Att | p.Val47Ile/c.139G>A    | ENSBTAG00000040363 | ENSBTAT00000055136 |
| X | 58,504,368  | rs381257423 | A | G | cAt/cGt | p.His85Arg/c.254A>G    | ENSBTAG00000040363 | ENSBTAT00000055136 |
| X | 58,504,416  | rs382801496 | A | G | cAt/cGt | p.His101Arg/c.302A>G   | ENSBTAG00000040363 | ENSBTAT00000055136 |
| X | 58,504,452  | rs378659504 | G | A | aGc/aAc | p.Ser113Asn/c.338G>A   | ENSBTAG00000040363 | ENSBTAT00000055136 |
| X | 58,505,135  | rs444284055 | T | C | Tca/Cca | p.Ser341Pro/c.1021T>C  | ENSBTAG00000040363 | ENSBTAT00000055136 |
| X | 58,505,257  | rs478858743 | A | C | Aac/Cac | p.Asn381His/c.1141A>C  | ENSBTAG00000040363 | ENSBTAT00000055136 |
| X | 68,141,906  | rs443225734 | A | G | aAg/aGg | p.Lys248Arg/c.743A>G   | ENSBTAG00000006252 | ENSBTAT00000008205 |
| X | 84,071,708  | rs434026494 | C | T | tCg/tTg | p.Ser341Leu/c.1022C>T  | ENSBTAG00000048245 | ENSBTAT00000063316 |
| X | 89,908,020  | rs446746200 | C | G | aGc/aCc | p.Ser220Thr/c.659G>C   | ENSBTAG00000047411 | ENSBTAT00000064378 |
| X | 89,908,501  | rs41665091  | C | A | Gta/Tta | p.Val60Leu/c.178G>T    | ENSBTAG00000047411 | ENSBTAT00000064378 |
| X | 96,043,070  | rs109657212 | G | A | Cgc/Tgc | p.Arg1432Cys/c.4294C>T | SMCX               | ENSBTAT00000019893 |
| X | 96,265,816  | rs135431223 | A | G | cAc/cGc | p.His207Arg/c.620A>G   | RIBC1              | ENSBTAT00000023625 |
| X | 108,280,085 | rs384059400 | G | C | aGt/aCt | p.Ser792Thr/c.2375G>C  | MED14              | ENSBTAT00000015654 |
| X | 123,604,576 | rs208619435 | T | C | Act/Gct | p.Thr304Ala/c.910A>G   | ENSBTAG00000047709 | ENSBTAT00000011510 |
| X | 123,604,806 | rs476334614 | T | C | gAt/gGt | p.Asp227Gly/c.680A>G   | ENSBTAG00000047709 | ENSBTAT00000011510 |
| X | 123,605,072 | rs384840357 | G | C | aaC/aaG | p.Asn138Lys/c.414C>G   | ENSBTAG00000047709 | ENSBTAT00000011510 |
| X | 123,605,138 | rs382065763 | C | A | ttG/tTt | p.Leu116Phe/c.348G>T   | ENSBTAG00000047709 | ENSBTAT00000011510 |
| X | 124,200,488 | rs378508270 | A | G | aTa/aCa | p.Ile329Thr/c.986T>C   | ENSBTAG00000038876 | ENSBTAT00000056942 |
| X | 124,200,515 | rs381151096 | C | T | aGg/aAg | p.Arg320Lys/c.959G>A   | ENSBTAG00000038876 | ENSBTAT00000056942 |
| X | 126,149,209 | rs135258231 | C | T | aGa/aAa | p.Arg720Lys/c.2159G>A  | ZFX                | ENSBTAT00000010165 |
| X | 126,152,331 | rs137584372 | C | T | Gtg/Atg | p.Val288Met/c.862G>A   | ZFX                | ENSBTAT00000010165 |
| X | 126,164,343 | rs42309882  | C | A | gaG/gaT | p.Glu197Asp/c.591G>T   | ZFX                | ENSBTAT00000010165 |
| X | 126,164,870 | rs385936931 | C | T | Gct/Act | p.Ala22Thr/c.64G>A     | ZFX                | ENSBTAT00000010165 |
| X | 127,361,310 | rs210143643 | T | C | cAa/cGa | p.Gln589Arg/c.1766A>G  | DDX53              | ENSBTAT00000065115 |
| X | 130,065,416 | rs109923914 | A | G | Atg/Gtg | p.Met59Val/c.175A>G    | HSP90AB1           | ENSBTAT00000063700 |
| X | 131,772,933 | rs133299196 | T | G | aaT/aaG | p.Asn363Lys/c.1089T>G  | PHKA2              | ENSBTAT00000020422 |
| X | 137,215,931 | rs450288269 | A | G | aTg/aCg | p.Met293Thr/c.878T>C   | ENSBTAG00000032833 | ENSBTAT00000053697 |
| X | 139,028,092 | rs42206609  | A | G | Atc/Gtc | p.Ile280Val/c.838A>G   | ARSE               | ENSBTAT00000050377 |
| X | 142,861,287 | rs134971387 | A | G | aTc/aCc | p.Ile563Thr/c.1688T>C  | WWC3               | ENSBTAT00000018367 |
| X | 143,414,403 | rs137706463 | A | T | gTg/gAg | p.Val905Glu/c.2714T>A  | ENSBTAG00000002158 | ENSBTAT00000056084 |
| X | 143,414,415 | rs133956309 | C | T | cGa/cAa | p.Arg901Gln/c.2702G>A  | ENSBTAG00000002158 | ENSBTAT00000056084 |
| X | 143,414,418 | rs135219090 | C | T | gGg/gAg | p.Gly900Glu/c.2699G>A  | ENSBTAG00000002158 | ENSBTAT00000056084 |
| X | 143,414,483 | rs109832412 | C | T | atG/atA | p.Met878Ile/c.2634G>A  | ENSBTAG00000002158 | ENSBTAT00000056084 |
| X | 143,414,637 | rs137366551 | A | G | aTa/aCa | p.Ile827Thr/c.2480T>C  | ENSBTAG00000002158 | ENSBTAT00000056084 |
| X | 143,414,680 | rs133043545 | T | C | Agg/Ggg | p.Arg813Gly/c.2437A>G  | ENSBTAG00000002158 | ENSBTAT00000056084 |
| X | 143,414,751 | rs137132643 | C | T | cGa/cAa | p.Arg789Gln/c.2366G>A  | ENSBTAG00000002158 | ENSBTAT00000056084 |
| X | 143,416,278 | rs210568809 | G | A | cCg/cTg | p.Pro478Leu/c.1433C>T  | ENSBTAG00000002158 | ENSBTAT00000056084 |
| X | 143,416,387 | rs208682645 | G | C | Cag/Gag | p.Gln442Glu/c.1324C>G  | ENSBTAG00000002158 | ENSBTAT00000056084 |
| X | 143,451,547 | rs381313132 | T | C | Agt/Ggt | p.Ser1229Gly/c.3685A>G | ENSBTAG00000035438 | ENSBTAT00000065773 |
| X | 146,098,917 | rs208099974 | C | T | tCc/tTc | p.Ser224Phe/c.671C>T   | PNPLA4             | ENSBTAT00000021067 |
| X | 146,098,944 | rs110814398 | T | C | tTg/tCg | p.Leu233Ser/c.698T>C   | PNPLA4             | ENSBTAT00000021067 |

## Supplementary File 2. The complete list of YAN-specific nsSNPs

| Chr | Position    | ID          | REF | ALT | Codon   | Amino acid change         | Gene               | Transcript_ID      |
|-----|-------------|-------------|-----|-----|---------|---------------------------|--------------------|--------------------|
| 1   | 117,534,960 | rs42435748  | C   | A   | aCg/aAg | p.Thr975Lys/c.2924C>A     | IGSF10             | ENSBTAT00000002263 |
| 1   | 138,508,913 | rs134200010 | A   | G   | Atc/Gtc | p.Ile174Val/c.520A>G      | KCNH8              | ENSBTAT00000017003 |
| 1   | 150,064,440 | rs210566526 | T   | C   | Tcc/Ccc | p.Ser241Pro/c.721T>C      | ENSBTAG00000023384 | ENSBTAT00000031838 |
| 1   | 152,403,659 | rs209263012 | G   | T   | aaC/aaA | p.Asn210Lys/c.630C>A      | ERG                | ENSBTAT00000014608 |
| 2   | 528,264     | rs42362249  | T   | C   | Atg/Gtg | p.Met517Val/c.1549A>G     | OCA2               | ENSBTAT00000012974 |
| 2   | 10,623,117  | rs136608302 | C   | A   | Gca/Tca | p.Ala2929Ser/c.8785G>T    | FSIP2              | ENSBTAT00000013129 |
| 2   | 18,329,673  | rs383480213 | G   | T   | atG/atT | p.Met34334Ile/c.103002G>T | TTN                | ENSBTAT00000061449 |
| 2   | 28,017,098  | rs43302275  | G   | A   | Gaa/Aaa | p.Glu207Lys/c.619G>A      | STK39              | ENSBTAT00000030845 |
| 2   | 62,407,285  | rs41637228  | A   | G   | aAc/aGc | p.Asn583Ser/c.1748A>G     | ZRANB3             | ENSBTAT00000038374 |
| 2   | 122,147,876 | rs110075922 | A   | G   | aTa/aCa | p.Ile272Thr/c.815T>C      | IQCC               | ENSBTAT00000043275 |
| 2   | 131,426,367 | rs133256338 | C   | T   | Gcc/Acc | p.Ala236Thr/c.706G>A      | CELA3B             | ENSBTAT00000017401 |
| 2   | 133,291,746 | rs109073882 | A   | G   | gAt/gGt | p.Asp21Gly/c.62A>G        | PLA2G2A            | ENSBTAT00000007570 |
| 2   | 133,292,151 | rs110494619 | A   | G   | aAa/aGa | p.Lys72Arg/c.215A>G       | PLA2G2A            | ENSBTAT00000007570 |
| 2   | 133,294,953 | rs108954429 | A   | C   | aAg/aCg | p.Lys128Thr/c.383A>C      | PLA2G2A            | ENSBTAT00000007570 |
| 3   | 11,995,423  | rs210996599 | C   | T   | Ggg/Agg | p.Gly202Arg/c.604G>A      | CD1A               | ENSBTAT00000009739 |
| 3   | 11,995,528  | rs478231727 | G   | A   | Caa/Taa | p.Gln167*/c.499C>T        | CD1A               | ENSBTAT00000009739 |
| 3   | 11,995,626  | rs209949144 | A   | G   | gTc/gCc | p.Val134Ala/c.401T>C      | CD1A               | ENSBTAT00000009739 |
| 3   | 11,995,674  | rs110065214 | G   | C   | cCc/cGc | p.Pro118Arg/c.353C>G      | CD1A               | ENSBTAT00000009739 |
| 3   | 11,996,378  | rs133164776 | A   | T   | aTg/aAg | p.Met89Lys/c.266T>A       | CD1A               | ENSBTAT00000009739 |
| 3   | 11,996,538  | rs132748411 | C   | T   | Gaa/Aaa | p.Glu36Lys/c.106G>A       | CD1A               | ENSBTAT00000009739 |
| 3   | 19,532,074  | rs110213506 | C   | A   | cCc/cAc | p.Pro224His/c.671C>A      | PI4KB              | ENSBTAT00000009627 |
| 3   | 19,811,302  | rs108958479 | T   | C   | Tat/Cat | p.Tyr4His/c.10T>C         | FAM63A             | ENSBTAT00000033792 |
| 3   | 20,191,884  | rs137735321 | A   | G   | tTg/tCg | p.Leu483Ser/c.1448T>C     | ADAMTSL4           | ENSBTAT00000004686 |
| 3   | 49,636,018  | rs109664115 | A   | G   | Aag/Gag | p.Lys1037Glu/c.3109A>G    | ABCA4              | ENSBTAT00000023982 |
| 3   | 57,338,598  | rs137346362 | T   | C   | Atc/Gtc | p.Ile85Val/c.253A>G       | ENSBTAG00000012502 | ENSBTAT00000016590 |
| 3   | 60,357,762  | rs42447624  | G   | A   | aGt/aAt | p.Ser19Asn/c.56G>A        | TTLL7              | ENSBTAT00000004304 |
| 3   | 80,092,003  | rs43349286  | T   | C   | cAg/cGg | p.Gln733Arg/c.2198A>G     | OB-R               | ENSBTAT00000007764 |
| 3   | 83,945,819  | rs134555912 | C   | T   | cGt/cAt | p.Arg193His/c.578G>A      | ENSBTAG00000045912 | ENSBTAT00000063864 |
| 3   | 83,946,277  | rs136522437 | C   | T   | Gct/Act | p.Ala76Thr/c.226G>A       | ENSBTAG00000045912 | ENSBTAT00000063864 |
| 3   | 83,946,433  | rs133823736 | C   | T   | Gca/Aca | p.Ala24Thr/c.70G>A        | ENSBTAG00000045912 | ENSBTAT00000063864 |
| 3   | 93,374,459  | rs110908011 | A   | G   | Aga/Gga | p.Arg13Gly/c.37A>G        | ENSBTAG00000039540 | ENSBTAT00000057350 |
| 3   | 95,583,153  | rs210402514 | A   | C   | gaA/gaC | p.Glu363Asp/c.1089A>C     | TTC39A             | ENSBTAT00000003183 |
| 3   | 99,926,046  | rs457292542 | A   | T   | Aag/Tag | p.Lys388*/c.1162A>T       | CYP4A22            | ENSBTAT00000017936 |
| 3   | 101,048,567 | rs133241821 | G   | C   | tGt/tCt | p.Cys266Ser/c.797G>C      | ENSBTAG00000008810 | ENSBTAT00000011603 |
| 3   | 106,629,521 | rs42791314  | T   | C   | Tgc/Cgc | p.Cys179Arg/c.535T>C      | CLN1               | ENSBTAT00000017780 |
| 3   | 107,265,060 | rs110739846 | A   | G   | tTt/tCt | p.Phe4978Ser/c.14933T>C   | MACF1              | ENSBTAT00000033270 |
| 3   | 107,296,746 | rs43362173  | C   | G   | Gag/Cag | p.Glu3336Gln/c.10006G>C   | MACF1              | ENSBTAT00000033270 |
| 3   | 107,317,601 | rs43362189  | T   | C   | Ata/Gta | p.Ile1155Val/c.3463A>G    | MACF1              | ENSBTAT00000033270 |
| 3   | 113,167,424 | rs109242899 | A   | G   | cAa/cGa | p.Gln805Arg/c.2414A>G     | GIGYF2             | ENSBTAT00000018720 |
| 3   | 120,081,052 | rs42992059  | C   | T   | gCc/gTc | p.Ala305Val/c.914C>T      | ENSBTAG00000038082 | ENSBTAT00000054210 |
| 3   | 120,081,058 | rs42992058  | G   | A   | cGg/cAg | p.Arg307Gln/c.920G>A      | ENSBTAG00000038082 | ENSBTAT00000054210 |
| 4   | 32,617,906  | rs211621113 | C   | T   | Gta/Ata | p.Val402Ile/c.1204G>A     | ENSBTAG00000015666 | ENSBTAT00000047541 |
| 4   | 32,617,911  | rs136447340 | T   | A   | gAg/gTg | p.Glu400Val/c.1199A>T     | ENSBTAG00000015666 | ENSBTAT00000047541 |
| 4   | 32,617,935  | rs42556440  | G   | C   | tCg/tGg | p.Ser392Trp/c.1175C>G     | ENSBTAG00000015666 | ENSBTAT00000047541 |
| 4   | 32,618,193  | rs42556449  | A   | G   | aTa/aCa | p.Ile376Thr/c.1127T>C     | ENSBTAG00000015666 | ENSBTAT00000047541 |

|   |             |             |   |   |         |                       |                    |                    |
|---|-------------|-------------|---|---|---------|-----------------------|--------------------|--------------------|
| 4 | 32,623,675  | rs42557056  | T | C | Att/Gtt | p.Ile316Val/c.946A>G  | ENSBTAG00000015666 | ENSBTAT00000047541 |
| 4 | 32,627,839  | rs42557089  | G | A | aCt/aTt | p.Thr238Ile/c.713C>T  | ENSBTAG00000015666 | ENSBTAT00000047541 |
| 4 | 33,050,302  | rs42556059  | A | G | Att/Gtt | p.Ile336Val/c.1006A>G | ABCB1              | ENSBTAT00000020806 |
| 4 | 69,736,307  | rs110738602 | A | G | Aat/Gat | p.Asn296Asp/c.886A>G  | SKAP2              | ENSBTAT00000046037 |
| 4 | 72,836,984  | rs133448500 | C | A | atG/atT | p.Met189Ile/c.567G>T  | STEAP4             | ENSBTAT00000030838 |
| 4 | 73,610,448  | rs43408404  | G | A | aCa/aTa | p.Thr289Ile/c.866C>T  | ENSBTAG00000015800 | ENSBTAT00000020986 |
| 4 | 73,610,710  | rs211272083 | T | A | Act/Tct | p.Thr207Ser/c.619A>T  | ENSBTAG00000015800 | ENSBTAT00000020986 |
| 4 | 99,712,896  | rs110448204 | T | C | Ttc/Ctc | p.Phe84Leu/c.250T>C   | TMEM140            | ENSBTAT0000002060  |
| 4 | 106,456,070 | rs43415012  | G | T | cGc/cTc | p.Arg49Leu/c.146G>T   | ENSBTAG00000048016 | ENSBTAT00000065196 |
| 4 | 106,459,729 | rs134858851 | C | T | Ccc/Tcc | p.Pro3Ser/c.7C>T      | TRB@               | ENSBTAT00000017687 |
| 4 | 106,459,760 | rs110617776 | T | A | cTc/cAc | p.Leu13His/c.38T>A    | TRB@               | ENSBTAT00000017687 |
| 4 | 106,467,536 | rs441071383 | C | G | aCa/aGa | p.Thr49Arg/c.146C>G   | ENSBTAG00000047072 | ENSBTAT00000065923 |
| 4 | 106,473,049 | rs137653638 | T | C | Tat/Cat | p.Tyr20His/c.58T>C    | ENSBTAG00000046164 | ENSBTAT00000065554 |
| 4 | 106,473,092 | rs207903776 | A | C | aAg/aCg | p.Lys34Thr/c.101A>C   | ENSBTAG00000046164 | ENSBTAT00000065554 |
| 4 | 106,473,136 | rs42994317  | G | A | Gac/Aac | p.Asp49Asn/c.145G>A   | ENSBTAG00000046164 | ENSBTAT00000065554 |
| 4 | 106,474,538 | rs209282304 | G | A | Gac/Aac | p.Asp49Asn/c.145G>A   | ENSBTAG00000039956 | ENSBTAT00000052434 |
| 4 | 106,474,544 | rs210907277 | G | A | Gtg/Atg | p.Val51Met/c.151G>A   | ENSBTAG00000039956 | ENSBTAT00000052434 |
| 4 | 106,474,614 | rs209865929 | T | C | aTg/aCg | p.Met74Thr/c.221T>C   | ENSBTAG00000039956 | ENSBTAT00000052434 |
| 4 | 106,474,615 | rs210572761 | G | A | atG/atA | p.Met74Ile/c.222G>A   | ENSBTAG00000039956 | ENSBTAT00000052434 |
| 4 | 106,500,248 | rs137521883 | T | C | gTc/gCc | p.Val57Ala/c.170T>C   | ENSBTAG00000047657 | ENSBTAT00000054585 |
| 4 | 106,502,197 | rs137676988 | A | G | cAc/cGc | p.His102Arg/c.305A>G  | ENSBTAG00000047922 | ENSBTAT00000064293 |
| 4 | 106,523,525 | rs43419601  | C | G | Ccc/Gcc | p.Pro56Ala/c.166C>G   | ENSBTAG00000038690 | ENSBTAT00000053610 |
| 4 | 106,550,120 | rs136117939 | C | A | Cgc/Agc | p.Arg92Ser/c.274C>A   | ENSBTAG00000040261 | ENSBTAT00000050415 |
| 4 | 114,085,087 | rs42881402  | C | G | Caa/Gaa | p.Gln107Glu/c.319C>G  | ENSBTAG00000008550 | ENSBTAT00000043789 |
| 4 | 114,492,757 | rs43416275  | G | A | gGt/gAt | p.Gly245Asp/c.734G>A  | AGAP3              | ENSBTAT00000033398 |
| 5 | 5,815,048   | rs42361823  | A | C | tTt/tGt | p.Phe124Cys/c.371T>G  | BBS10              | ENSBTAT00000057299 |
| 5 | 25,408,481  | rs136487958 | T | C | Aaa/Gaa | p.Lys136Glu/c.406A>G  | ENSBTAG00000023670 | ENSBTAT00000032405 |
| 5 | 32,708,704  | rs43432375  | T | C | gTg/gCg | p.Val527Ala/c.1580T>C | RAPGEF3            | ENSBTAT00000008976 |
| 5 | 44,448,143  | rs210236065 | C | A | aCa/aAa | p.Thr130Lys/c.389C>A  | ENSBTAG00000000198 | ENSBTAT00000000231 |
| 5 | 75,736,554  | rs43435956  | T | C | Tct/Cct | p.Ser89Pro/c.265T>C   | CSF2RB             | ENSBTAT00000011947 |
| 5 | 99,778,962  | rs477133421 | T | C | Atg/Gtg | p.Met90Val/c.268A>G   | NKG2A              | ENSBTAT00000018811 |
| 5 | 102,414,585 | rs208650795 | T | C | aTg/aCg | p.Met765Thr/c.2294T>C | ENSBTAG00000039817 | ENSBTAT00000055624 |
| 5 | 103,145,920 | rs207551815 | T | C | Aag/Gag | p.Lys206Glu/c.616A>G  | ENSBTAG00000039470 | ENSBTAT00000028127 |
| 5 | 103,387,982 | rs208933027 | A | G | aTg/aCg | p.Met977Thr/c.2930T>C | CD163L1            | ENSBTAT00000052415 |
| 6 | 32,766      | rs43136285  | A | G | aTa/aCa | p.Ile158Thr/c.473T>C  | ENSBTAG00000040324 | ENSBTAT00000055066 |
| 6 | 26,934,819  | rs109157548 | A | C | Tcc/Gcc | p.Ser310Ala/c.928T>G  | METAP1             | ENSBTAT00000021303 |
| 6 | 32,225,787  | rs137093945 | C | T | gCg/gTg | p.Ala16Val/c.47C>T    | ENSBTAG00000046473 | ENSBTAT00000063405 |
| 6 | 36,147,683  | rs109886302 | C | A | Gtt/Ttt | p.Val846Phe/c.2536G>T | MMRN1              | ENSBTAT00000047683 |
| 6 | 58,606,973  | rs135828075 | T | C | aAc/aGc | p.Asn142Ser/c.425A>G  | RELL1              | ENSBTAT00000005668 |
| 6 | 104,319,282 | rs43483745  | T | C | cTg/cCg | p.Leu444Pro/c.1331T>C | DMP1               | ENSBTAT00000025468 |
| 6 | 104,422,369 | rs43489250  | T | C | Tct/Cct | p.Ser218Pro/c.652T>C  | ENSBTAG00000006508 | ENSBTAT00000008532 |
| 6 | 117,856,742 | rs211666591 | A | G | Tgg/Cgg | p.Trp19Arg/c.55T>C    | ENSBTAG00000019584 | ENSBTAT00000026090 |
| 6 | 117,856,783 | rs135418570 | C | G | aGc/aCc | p.Ser5Thr/c.14G>C     | ENSBTAG00000019584 | ENSBTAT00000026090 |
| 7 | 4,570,185   | rs208777049 | C | T | Cgg/Tgg | p.Arg224Trp/c.670C>T  | FKBP8              | ENSBTAT00000021634 |
| 7 | 4,875,781   | rs43196997  | G | C | cGc/cCc | p.Arg35Pro/c.104G>C   | KIAA1683           | ENSBTAT00000000218 |
| 7 | 4,877,804   | rs41922298  | A | C | gAg/gCg | p.Glu565Ala/c.1694A>C | KIAA1683           | ENSBTAT00000000218 |
| 7 | 4,877,816   | rs41922297  | T | C | tTg/tCg | p.Leu569Ser/c.1706T>C | KIAA1683           | ENSBTAT00000000218 |
| 7 | 5,602,912   | rs43497544  | T | C | Tgc/Cgc | p.Cys197Arg/c.589T>C  | ENSBTAG00000025767 | ENSBTAT00000047511 |

|   |             |             |   |   |         |                        |                    |                    |
|---|-------------|-------------|---|---|---------|------------------------|--------------------|--------------------|
| 7 | 9,714,452   | rs42893540  | A | G | gAa/gGa | p.Glu17Gly/c.50A>G     | ENSBTAG00000046423 | ENSBTAT00000063607 |
| 7 | 9,714,453   | rs137131016 | A | T | gaA/gaT | p.Glu17Asp/c.51A>T     | ENSBTAG00000046423 | ENSBTAT00000063607 |
| 7 | 9,714,867   | rs42893535  | T | G | tgT/tgG | p.Cys155Trp/c.465T>G   | ENSBTAG00000046423 | ENSBTAT00000063607 |
| 7 | 9,715,166   | rs42900925  | T | C | tTc/tCc | p.Phe255Ser/c.764T>C   | ENSBTAG00000046423 | ENSBTAT00000063607 |
| 7 | 9,715,223   | rs42900924  | C | T | cCa/cTa | p.Pro274Leu/c.821C>T   | ENSBTAG00000046423 | ENSBTAT00000063607 |
| 7 | 9,715,258   | rs42900923  | A | G | Atg/Gtg | p.Met286Val/c.856A>G   | ENSBTAG00000046423 | ENSBTAT00000063607 |
| 7 | 20,836,494  | rs383685203 | G | C | gaG/gaC | p.Glu583Asp/c.1749G>C  | PLIN4              | ENSBTAT00000020833 |
| 7 | 40,692,591  | rs43505050  | C | T | gGt/gAt | p.Gly77Asp/c.230G>A    | COL23A1            | ENSBTAT00000017548 |
| 7 | 41,445,422  | rs134159339 | G | A | Cgg/Tgg | p.Arg92Trp/c.274C>T    | ENSBTAG00000046424 | ENSBTAT00000064254 |
| 7 | 51,022,457  | rs210354016 | C | A | aGa/aTa | p.Arg449Ile/c.1346G>T  | FAM13B             | ENSBTAT00000063540 |
| 7 | 51,131,500  | rs109709477 | T | C | Tcc/Ccc | p.Ser345Pro/c.1033T>C  | WNT8A              | ENSBTAT00000035270 |
| 7 | 52,228,903  | rs136131104 | C | T | Cgt/Tgt | p.Arg102Cys/c.304C>T   | ENSBTAG00000006756 | ENSBTAT00000057156 |
| 7 | 53,250,424  | rs211122811 | G | C | Gta/Cta | p.Val696Leu/c.2086G>C  | SLC4A9             | ENSBTAT00000029024 |
| 7 | 70,708,956  | rs211450429 | G | A | Cca/Tca | p.Pro212Ser/c.634C>T   | ENSBTAG00000036102 | ENSBTAT00000065153 |
| 7 | 70,708,997  | rs211168618 | C | T | aGg/aAg | p.Arg198Lys/c.593G>A   | ENSBTAG00000036102 | ENSBTAT00000065153 |
| 7 | 70,709,012  | rs384167318 | A | G | aTc/aCc | p.Ile193Thr/c.578T>C   | ENSBTAG00000036102 | ENSBTAT00000065153 |
| 7 | 70,709,021  | rs451083000 | A | G | aTg/aCg | p.Met190Thr/c.569T>C   | ENSBTAG00000036102 | ENSBTAT00000065153 |
| 7 | 70,709,033  | rs467990423 | G | A | aCt/aTt | p.Thr186Ile/c.557C>T   | ENSBTAG00000036102 | ENSBTAT00000065153 |
| 7 | 70,709,124  | rs473671451 | C | T | Gct/Act | p.Ala156Thr/c.466G>A   | ENSBTAG00000036102 | ENSBTAT00000065153 |
| 8 | 1,558,331   | rs109923857 | C | T | gCg/gTg | p.Ala2Val/c.5C>T       | ENSBTAG00000035293 | ENSBTAT00000049801 |
| 8 | 7,161,026   | rs136752022 | A | C | Aaa/Caa | p.Lys216Gln/c.646A>C   | ENSBTAG00000039873 | ENSBTAT00000053102 |
| 8 | 22,608,277  | rs134550089 | C | T | Gtg/Atg | p.Val169Met/c.505G>A   | IFNT               | ENSBTAT00000054734 |
| 8 | 22,608,336  | rs447721347 | C | T | gGc/gAc | p.Gly149Asp/c.446G>A   | IFNT               | ENSBTAT00000054734 |
| 8 | 22,633,690  | rs209324924 | G | A | Cac/Tac | p.His92Tyr/c.274C>T    | IFNT               | ENSBTAT00000054734 |
| 8 | 22,633,702  | rs133621844 | A | G | Ttc/Ctc | p.Phe88Leu/c.262T>C    | IFNT               | ENSBTAT00000054734 |
| 8 | 22,633,879  | rs208435116 | T | C | Aac/Gac | p.Asn29Asp/c.85A>G     | IFNT               | ENSBTAT00000054734 |
| 8 | 22,633,915  | rs209484018 | T | C | Agc/Ggc | p.Ser17Gly/c.49A>G     | IFNT               | ENSBTAT00000054734 |
| 8 | 23,073,258  | rs133468994 | C | T | gCc/gTc | p.Ala2Val/c.5C>T       | IFNAH              | ENSBTAT00000034453 |
| 8 | 60,562,323  | rs208906786 | C | T | cGc/cAc | p.Arg238His/c.713G>A   | ENSBTAG00000032668 | ENSBTAT00000052230 |
| 8 | 64,322,470  | rs209452896 | C | A | Cgt/Agt | p.Arg63Ser/c.187C>A    | GALNT12            | ENSBTAT00000011895 |
| 8 | 82,308,696  | rs42248404  | A | C | aAc/aCc | p.Asn1159Thr/c.3476A>C | DAPK1              | ENSBTAT00000000982 |
| 8 | 112,485,089 | rs209578275 | A | G | Acg/Gcg | p.Thr1854Ala/c.5560A>G | CNTRL              | ENSBTAT00000061592 |
| 9 | 703,681     | rs43583477  | T | C | tTg/tCg | p.Leu1092Ser/c.3275T>C | PHF3               | ENSBTAT00000025476 |
| 9 | 712,768     | rs43583494  | A | G | Act/Gct | p.Thr1468Ala/c.4402A>G | PHF3               | ENSBTAT00000025476 |
| 9 | 712,778     | rs43583493  | C | T | aCg/aTg | p.Thr1471Met/c.4412C>T | PHF3               | ENSBTAT00000025476 |
| 9 | 19,327,747  | rs132850699 | C | T | Ggc/Agc | p.Gly602Ser/c.1804G>A  | LCA5               | ENSBTAT00000061609 |
| 9 | 33,840,470  | rs211523549 | G | A | Gtc/Atc | p.Val503Ile/c.1507G>A  | ROS1               | ENSBTAT00000065858 |
| 9 | 34,687,630  | rs43595268  | A | G | aTg/aCg | p.Met231Thr/c.692T>C   | FAM26F             | ENSBTAT00000038044 |
| 9 | 41,378,011  | rs454180059 | C | G | Ggt/Cgt | p.Gly179Arg/c.535G>C   | ENSBTAG00000047024 | ENSBTAT00000064270 |
| 9 | 57,516,987  | rs444956031 | T | A | aaT/aaA | p.Asn278Lys/c.834T>A   | ENSBTAG00000003743 | ENSBTAT00000004870 |
| 9 | 57,517,130  | rs209817791 | C | A | aCa/aAa | p.Thr326Lys/c.977C>A   | ENSBTAG00000003743 | ENSBTAT00000004870 |
| 9 | 61,240,110  | rs43601234  | C | A | aGt/aTt | p.Ser251Ile/c.752G>T   | GJA10              | ENSBTAT00000015039 |
| 9 | 61,240,432  | rs43601233  | C | T | Gtc/Atc | p.Val144Ile/c.430G>A   | GJA10              | ENSBTAT00000015039 |
| 9 | 68,430,923  | rs133416021 | T | C | aTg/aCg | p.Met1039Thr/c.3116T>C | LAMA2              | ENSBTAT00000061257 |
| 9 | 71,587,971  | rs211571832 | T | C | Tgt/Cgt | p.Cys32Arg/c.94T>C     | ENSBTAG00000039058 | ENSBTAT00000053010 |
| 9 | 71,588,841  | rs43066078  | G | A | Gta/Ata | p.Val322Ile/c.964G>A   | ENSBTAG00000039058 | ENSBTAT00000053010 |
| 9 | 71,588,907  | rs43066082  | C | T | Caa/Taa | p.Gln344*/c.1030C>T    | ENSBTAG00000039058 | ENSBTAT00000053010 |
| 9 | 71,629,244  | rs133620617 | G | C | aaC/aaG | p.Asn232Lys/c.696C>G   | ENSBTAG00000026548 | ENSBTAT00000037774 |

|    |             |             |   |   |         |                         |                    |                    |
|----|-------------|-------------|---|---|---------|-------------------------|--------------------|--------------------|
| 9  | 71,629,363  | rs136139765 | C | G | Gta/Cta | p.Val193Leu/c.577G>C    | ENSBTAG00000026548 | ENSBTAT00000037774 |
| 9  | 74,542,497  | rs137279701 | C | A | aGa/aTa | p.Arg27Ile/c.80G>T      | AHI1               | ENSBTAT00000023877 |
| 9  | 88,573,857  | rs133615483 | C | T | gCc/gTc | p.Ala11Val/c.32C>T      | IYD                | ENSBTAT00000021191 |
| 9  | 93,261,413  | rs109651398 | T | C | aTg/aCg | p.Met55Thr/c.164T>C     | CLDN20             | ENSBTAT00000063680 |
| 9  | 98,064,110  | rs133586190 | T | G | Att/Ctt | p.Ile17Leu/c.49A>C      | PLG                | ENSBTAT00000001674 |
| 9  | 105,084,709 | rs109887321 | C | G | Ggg/Cgg | p.Gly225Arg/c.673G>C    | PHF10              | ENSBTAT00000005130 |
| 10 | 10,075,216  | rs109897842 | A | G | Act/Gct | p.Thr95Ala/c.283A>G     | BHMT2              | ENSBTAT00000048928 |
| 10 | 26,226,949  | rs43623326  | C | G | gaG/gaC | p.Glu137Asp/c.411G>C    | ENSBTAG00000025664 | ENSBTAT00000036230 |
| 10 | 27,153,978  | rs137600340 | T | C | aTt/aCt | p.Ile154Thr/c.461T>C    | ENSBTAG00000039416 | ENSBTAT00000052198 |
| 10 | 27,490,341  | rs42815212  | A | G | aTt/aCt | p.Ile280Thr/c.839T>C    | OR4K14             | ENSBTAT00000006329 |
| 10 | 27,490,402  | rs42815211  | T | C | Atg/Gtg | p.Met260Val/c.778A>G    | OR4K14             | ENSBTAT00000006329 |
| 10 | 27,491,022  | rs42815205  | A | G | cTc/cCc | p.Leu53Pro/c.158T>C     | OR4K14             | ENSBTAT00000006329 |
| 10 | 45,442,703  | rs43625877  | T | C | Act/Gct | p.Thr1111Ala/c.3331A>G  | ZNF609             | ENSBTAT00000020995 |
| 10 | 54,113,663  | rs384140961 | T | C | cAt/cGt | p.His87Arg/c.260A>G     | TEX9               | ENSBTAT00000044543 |
| 10 | 62,873,859  | rs110243606 | T | C | Att/Gtt | p.Ile300Val/c.898A>G    | SEMA6D             | ENSBTAT00000022349 |
| 10 | 71,040,292  | rs110740827 | A | T | agA/agT | p.Arg1425Ser/c.4275A>T  | KIAA0586           | ENSBTAT00000008528 |
| 10 | 76,604,426  | rs109463332 | A | G | cAc/cGc | p.His4588Arg/c.13763A>G | SYNE2              | ENSBTAT00000029285 |
| 10 | 102,147,403 | rs207640524 | A | T | cTc/cAc | p.Leu122His/c.365T>A    | FOXN3              | ENSBTAT00000065076 |
| 11 | 13,018,347  | rs209802563 | G | A | gCg/gTg | p.Ala707Val/c.2120C>T   | DYSF               | ENSBTAT00000033154 |
| 11 | 47,829,531  | rs109919675 | A | G | aTg/aCg | p.Met153Thr/c.458T>C    | SMYD1              | ENSBTAT00000028141 |
| 11 | 49,096,891  | rs43684310  | T | C | cAg/cGg | p.Gln18Arg/c.53A>G      | ENSBTAG00000047816 | ENSBTAT00000021088 |
| 11 | 72,100,159  | rs210343062 | C | A | aGg/aTg | p.Arg925Met/c.2774G>T   | C2orf16            | ENSBTAT00000065671 |
| 11 | 73,208,603  | rs109389324 | C | A | Ctc/Atc | p.Leu1032Ile/c.3094C>A  | GPR113             | ENSBTAT00000044022 |
| 11 | 74,567,885  | rs134150948 | T | C | cAa/cGa | p.Gln199Arg/c.596A>G    | NCOA1              | ENSBTAT00000064008 |
| 11 | 78,511,514  | rs110210885 | G | A | cCc/cTc | p.Pro279Leu/c.836C>T    | ENSBTAG00000016270 | ENSBTAT00000021642 |
| 11 | 86,082,377  | rs137642654 | T | G | cAt/cCt | p.His409Pro/c.1226A>C   | LPIN1              | ENSBTAT00000043424 |
| 11 | 86,959,759  | rs109134158 | A | G | Atc/Gtc | p.Ile119Val/c.355A>G    | NOL10              | ENSBTAT00000003521 |
| 11 | 104,396,778 | rs110079197 | G | A | Gca/Aca | p.Ala829Thr/c.2485G>A   | ADAMTS13           | ENSBTAT00000020085 |
| 12 | 19,142,613  | rs109085996 | G | A | aGc/aAc | p.Ser537Asn/c.1610G>A   | SETDB2             | ENSBTAT00000009641 |
| 12 | 19,142,767  | rs110055733 | T | G | caT/caG | p.His588Gln/c.1764T>G   | SETDB2             | ENSBTAT00000009641 |
| 12 | 21,792,909  | rs109619330 | G | A | aGa/aAa | p.Arg405Lys/c.1214G>A   | ENSBTAG00000011654 | ENSBTAT00000035777 |
| 12 | 72,108,623  | rs136802062 | T | C | Tac/Cac | p.Tyr538His/c.1612T>C   | ENSBTAG00000045751 | ENSBTAT00000035486 |
| 13 | 10,979,892  | rs211132945 | G | A | cGc/cAc | p.Arg1147His/c.3440G>A  | ENSBTAG00000023169 | ENSBTAT00000050711 |
| 13 | 10,990,667  | rs208707189 | G | A | aGg/aAg | p.Arg1302Lys/c.3905G>A  | ENSBTAG00000023169 | ENSBTAT00000050711 |
| 13 | 10,992,654  | rs207490831 | T | G | Tcc/Gcc | p.Ser1374Ala/c.4120T>G  | ENSBTAG00000023169 | ENSBTAT00000050711 |
| 13 | 11,176,608  | rs42886290  | A | C | Aaa/Caa | p.Lys302Gln/c.904A>C    | ENSBTAG00000004354 | ENSBTAT00000011189 |
| 13 | 11,176,635  | rs42886289  | C | G | Cag/Gag | p.Gln311Glu/c.931C>G    | ENSBTAG00000004354 | ENSBTAT00000011189 |
| 13 | 11,176,672  | rs445139748 | T | C | cTg/cCg | p.Leu323Pro/c.968T>C    | ENSBTAG00000004354 | ENSBTAT00000011189 |
| 13 | 11,177,453  | rs42886273  | C | G | Cat/Gat | p.His374Asp/c.1120C>G   | ENSBTAG00000004354 | ENSBTAT00000011189 |
| 13 | 11,178,926  | rs109412166 | C | T | aCg/aTg | p.Thr458Met/c.1373C>T   | ENSBTAG00000004354 | ENSBTAT00000011189 |
| 13 | 17,745,758  | rs43096969  | A | G | cAg/cGg | p.Gln103Arg/c.308A>G    | ENSBTAG00000036222 | ENSBTAT00000050712 |
| 13 | 17,800,427  | rs132870911 | A | C | gAa/gCa | p.Glu247Ala/c.740A>C    | ENSBTAG00000017012 | ENSBTAT00000053112 |
| 13 | 22,967,429  | rs209281070 | A | G | gTt/gCt | p.Val616Ala/c.1847T>C   | SKIDA1             | ENSBTAT00000061347 |
| 13 | 37,841,586  | rs41685757  | G | T | caG/caT | p.Gln68His/c.204G>T     | PCSK2              | ENSBTAT00000052049 |
| 13 | 43,340,888  | rs41690976  | A | G | tTc/tCc | p.Phe1434Ser/c.4301T>C  | FAM208B            | ENSBTAT00000046340 |
| 13 | 51,951,303  | rs41692197  | T | C | gTg/gCg | p.Val526Ala/c.1577T>C   | SIGLEC1            | ENSBTAT00000017523 |
| 13 | 54,573,695  | rs41692849  | T | C | aTg/aCg | p.Met48Thr/c.143T>C     | GMEB2              | ENSBTAT00000019648 |
| 13 | 57,655,586  | rs208891549 | A | G | aTg/aCg | p.Met1559Thr/c.4676T>C  | ZNF831             | ENSBTAT00000015842 |



|    |            |             |   |     |         |                        |                    |                    |
|----|------------|-------------|---|-----|---------|------------------------|--------------------|--------------------|
| 13 | 57,862,027 | rs379767794 | T | A   | aaT/aaA | p.Asn113Lys/c.339T>A   | SLMO2              | ENSBTAT00000005773 |
| 13 | 70,538,840 | rs109202029 | A | C   | gaT/gaG | p.Asp213Glu/c.639T>G   | ZHX3               | ENSBTAT00000023393 |
| 13 | 74,079,069 | rs41712252  | T | C   | Acg/Gcg | p.Thr180Ala/c.538A>G   | TOMM34             | ENSBTAT00000004220 |
| 13 | 74,944,637 | rs43024358  | G | A   | Cgg/Tgg | p.Arg97Trp/c.289C>T    | PTI                | ENSBTAT00000023042 |
| 13 | 75,942,271 | rs41710053  | T | C   | Tgt/Cgt | p.Cys458Arg/c.1372T>C  | ENSBTAG00000009675 | ENSBTAT00000065334 |
| 13 | 80,093,619 | rs110875282 | G | C   | gaC/gaG | p.Asp351Glu/c.1053C>G  | NFATC2             | ENSBTAT00000024318 |
| 13 | 82,402,452 | rs109071715 | G | A   | Gcc/Acc | p.Ala99Thr/c.295G>A    | PFDN4              | ENSBTAT00000011605 |
| 14 | 2,330,528  | rs109569063 | A | G   | gAc/gGc | p.Asp449Gly/c.1346A>G  | NAPRT1             | ENSBTAT00000019496 |
| 14 | 2,358,500  | rs109407779 | T | G   | Tcc/Gcc | p.Ser374Ala/c.1120T>G  | ZC3H3              | ENSBTAT00000028621 |
| 14 | 4,235,307  | rs109952887 | T | C   | aTt/aCt | p.Ile95Thr/c.284T>C    | TRAPPC9            | ENSBTAT00000037373 |
| 14 | 25,154,132 | rs43151427  | C | T   | Ggg/Agg | p.Gly313Arg/c.937G>A   | SDR16C6            | ENSBTAT00000052250 |
| 14 | 25,175,575 | rs110359276 | T | C   | atA/atG | p.Ile79Met/c.237A>G    | SDR16C6            | ENSBTAT00000052250 |
| 14 | 33,607,557 | rs42842018  | C | T   | cGc/cAc | p.Arg186His/c.557G>A   | CPA6               | ENSBTAT00000061366 |
| 14 | 62,859,104 | rs110636475 | T | C   | Aag/Gag | p.Lys80Glu/c.238A>G    | RIMS2              | ENSBTAT00000060962 |
| 14 | 77,386,748 | rs109173725 | T | G   | Ttt/Gtt | p.Phe347Val/c.1039T>G  | ENSBTAG00000048317 | ENSBTAT00000065964 |
| 14 | 79,525,629 | rs444520816 | C | A   | Ccc/Acc | p.Pro130Thr/c.388C>A   | CA1                | ENSBTAT00000045723 |
| 14 | 79,580,589 | rs134324448 | T | A   | Tgt/Agt | p.Cys229Ser/c.685T>A   | ENSBTAG00000036116 | ENSBTAT00000031225 |
| 15 | 8,222,672  | rs42676011  | T | C   | Tgg/Cgg | p.Trp304Arg/c.910T>C   | PGR                | ENSBTAT00000010545 |
| 15 | 44,996,902 | rs109007860 | T | G   | Tcc/Gcc | p.Ser79Ala/c.235T>G    | RIC3               | ENSBTAT00000006392 |
| 15 | 45,498,311 | rs109401533 | C | T   | tCt/tTt | p.Ser212Phe/c.635C>T   | ENSBTAG00000026826 | ENSBTAT00000013417 |
| 15 | 45,559,449 | rs110106990 | G | T   | Cca/Aca | p.Pro10Thr/c.28C>A     | ENSBTAG00000047850 | ENSBTAT00000064976 |
| 15 | 46,603,256 | rs110381723 | C | T   | Cct/Tct | p.Pro19Ser/c.55C>T     | ENSBTAG00000037603 | ENSBTAT00000052569 |
| 15 | 46,624,389 | rs110987354 | G | A   | Gtc/Atc | p.Val13Ile/c.37G>A     | ENSBTAG00000038031 | ENSBTAT00000053108 |
| 15 | 46,624,488 | rs109121972 | C | T   | Ctc/Ttc | p.Leu46Phe/c.136C>T    | ENSBTAG00000038031 | ENSBTAT00000053108 |
| 15 | 46,624,617 | rs447041657 | G | A   | Gag/Aag | p.Glu89Lys/c.265G>A    | ENSBTAG00000038031 | ENSBTAT00000053108 |
| 15 | 46,624,687 | rs208532383 | G | A   | gGc/gAc | p.Gly112Asp/c.335G>A   | ENSBTAG00000038031 | ENSBTAT00000053108 |
| 15 | 46,624,734 | rs108955631 | C | A   | Cat/Aat | p.His128Asn/c.382C>A   | ENSBTAG00000038031 | ENSBTAT00000053108 |
| 15 | 46,624,826 | rs109130187 | A | G   | atA/atG | p.Ile158Met/c.474A>G   | ENSBTAG00000038031 | ENSBTAT00000053108 |
| 15 | 46,624,992 | rs109895924 | G | A   | Gtc/Atc | p.Val214Ile/c.640G>A   | ENSBTAG00000038031 | ENSBTAT00000053108 |
| 15 | 46,625,221 | rs443900297 | A | G   | tAt/tGt | p.Tyr290Cys/c.869A>G   | ENSBTAG00000038031 | ENSBTAT00000053108 |
| 15 | 46,719,926 | rs445121109 | C | T   | aGa/aAa | p.Arg303Lys/c.908G>A   | ENSBTAG00000021147 | ENSBTAT00000028185 |
| 15 | 46,732,116 | rs210824250 | T | C   | Tcc/Ccc | p.Ser264Pro/c.790T>C   | OR2AG1             | ENSBTAT00000064813 |
| 15 | 46,732,146 | rs209575001 | G | A   | Gtc/Atc | p.Val274Ile/c.820G>A   | OR2AG1             | ENSBTAT00000064813 |
| 15 | 46,852,624 | rs380392199 | A | T   | tAt/tTt | p.Tyr124Phe/c.371A>T   | ENSBTAG00000004443 | ENSBTAT00000005825 |
| 15 | 46,854,641 | rs208736258 | A | T   | agA/agT | p.Arg136Ser/c.408A>T   | ENSBTAG00000037937 | ENSBTAT00000055625 |
| 15 | 46,855,377 | rs110041446 | T | C   | Tct/Cct | p.Ser382Pro/c.1144T>C  | ENSBTAG00000037937 | ENSBTAT00000055625 |
| 15 | 46,855,572 | rs109514757 | T | C   | Tgt/Cgt | p.Cys447Arg/c.1339T>C  | ENSBTAG00000037937 | ENSBTAT00000055625 |
| 15 | 46,855,831 | rs110968599 | C | T   | gCt/gTt | p.Ala522Val/c.1565C>T  | ENSBTAG00000037937 | ENSBTAT00000055625 |
| 15 | 46,855,975 | rs209396668 | A | G   | aAg/aGg | p.Lys570Arg/c.1709A>G  | ENSBTAG00000037937 | ENSBTAT00000055625 |
| 15 | 46,858,343 | rs210174861 | T | G   | gaT/gaG | p.Asp1359Glu/c.4077T>G | ENSBTAG00000037937 | ENSBTAT00000055625 |
| 15 | 46,858,381 | rs133443773 | A | G,T | aAa/aGa | p.Lys1372Arg/c.4115A>G | ENSBTAG00000037937 | ENSBTAT00000055625 |
| 15 | 47,439,101 | rs43016031  | T | C   | tTa/tCa | p.Leu43Ser/c.128T>C    | OR56B4             | ENSBTAT00000064434 |
| 15 | 47,439,160 | rs43016032  | C | G   | Cag/Gag | p.Gln63Glu/c.187C>G    | OR56B4             | ENSBTAT00000064434 |
| 15 | 47,439,458 | rs43016037  | T | C   | aTc/aCc | p.Ile162Thr/c.485T>C   | OR56B4             | ENSBTAT00000064434 |
| 15 | 47,439,907 | rs43016051  | T | A   | Ttt/Att | p.Phe310Ile/c.928T>A   | OR56B4             | ENSBTAT00000064434 |
| 15 | 47,448,126 | rs41771204  | A | G   | cAc/cGc | p.His414Arg/c.1241A>G  | FAM160A2           | ENSBTAT00000027334 |
| 15 | 48,429,448 | rs380317836 | T | G   | Agt/Cgt | p.Ser365Arg/c.1093A>C  | TRIM5              | ENSBTAT00000005971 |
| 15 | 48,430,200 | rs209750435 | A | G   | gTt/gCt | p.Val280Ala/c.839T>C   | TRIM5              | ENSBTAT00000005971 |

|    |            |             |   |   |         |                        |                    |                    |
|----|------------|-------------|---|---|---------|------------------------|--------------------|--------------------|
| 15 | 48,436,739 | rs209504468 | G | C | gCt/gGt | p.Ala127Gly/c.380C>G   | TRIM5              | ENSBTAT0000005971  |
| 15 | 48,659,432 | rs41767920  | T | C | Tgt/Cgt | p.Cys172Arg/c.514T>C   | ENSBTAG00000046489 | ENSBTAT00000064789 |
| 15 | 49,528,056 | rs42923029  | C | T | Cgc/Tgc | p.Arg143Cys/c.427C>T   | ENSBTAG00000038899 | ENSBTAT00000052925 |
| 15 | 49,528,517 | rs42923018  | G | T | atG/atT | p.Met296Ile/c.888G>T   | ENSBTAG00000038899 | ENSBTAT00000052925 |
| 15 | 49,681,938 | rs383697644 | G | A | cCt/cTt | p.Pro92Leu/c.275C>T    | ENSBTAG00000014853 | ENSBTAT00000019780 |
| 15 | 79,874,377 | rs42746615  | A | G | Tgc/Cgc | p.Cys137Arg/c.409T>C   | ENSBTAG00000014594 | ENSBTAT00000057312 |
| 15 | 80,842,722 | rs137683840 | A | G | cAc/cGc | p.His122Arg/c.365A>G   | ENSBTAG00000035031 | ENSBTAT00000028631 |
| 15 | 83,472,947 | rs41788155  | C | T | Gag/Aag | p.Glu190Lys/c.568G>A   | ENSBTAG00000012540 | ENSBTAT00000038874 |
| 15 | 83,477,833 | rs41787690  | A | G | Ttt/Ctt | p.Phe122Leu/c.364T>C   | ENSBTAG00000012540 | ENSBTAT00000038874 |
| 15 | 83,477,857 | rs41787689  | C | T | Gta/Ata | p.Val114Ile/c.340G>A   | ENSBTAG00000012540 | ENSBTAT00000038874 |
| 15 | 83,481,880 | .           | G | A | aCc/aTc | p.Thr30Ile/c.89C>T     | ENSBTAG00000012540 | ENSBTAT00000038874 |
| 16 | 1,738,062  | rs42022909  | G | T | aaC/aaA | p.Asn232Lys/c.696C>A   | ETNK2              | ENSBTAT00000024637 |
| 16 | 1,776,926  | rs42022871  | G | A | gCg/gTg | p.Ala26Val/c.77C>T     | KISS1              | ENSBTAT00000028248 |
| 16 | 26,810,995 | rs109913603 | A | G | Att/Gtt | p.Ile605Val/c.1813A>G  | MIA3               | ENSBTAT00000025055 |
| 16 | 30,490,348 | rs457463931 | T | C | Aag/Gag | p.Lys1Glu/c.1A>G       | ITPKB              | ENSBTAT00000025755 |
| 16 | 37,849,828 | rs109597764 | A | G | aAt/aGt | p.Asn50Ser/c.149A>G    | BLZF1              | ENSBTAT0000003484  |
| 16 | 53,067,319 | rs207900508 | T | C | Aag/Gag | p.Lys115Glu/c.343A>G   | TMEM82             | ENSBTAT00000064858 |
| 16 | 63,557,827 | rs110614075 | A | G | aAg/aGg | p.Lys996Arg/c.2987A>G  | KIAA1614           | ENSBTAT00000008215 |
| 16 | 77,909,017 | rs42811153  | A | G | cAg/cGg | p.Gln786Arg/c.2357A>G  | ENSBTAG00000038171 | ENSBTAT00000000078 |
| 16 | 77,943,440 | rs110954010 | A | G | aTa/aCa | p.Ile2856Thr/c.8567T>C | ASPM               | ENSBTAT00000010340 |
| 16 | 77,944,914 | rs109449991 | C | G | Gag/Cag | p.Glu2365Gln/c.7093G>C | ASPM               | ENSBTAT00000010340 |
| 17 | 30,228,864 | rs381209772 | G | T | aCc/aAc | p.Thr815Asn/c.2444C>A  | HSPA4L             | ENSBTAT00000020838 |
| 17 | 45,162,113 | rs136174173 | G | A | Gtc/Atc | p.Val128Ile/c.382G>A   | ZNF10              | ENSBTAT00000056931 |
| 17 | 55,054,337 | rs110085274 | G | A | aGg/aAg | p.Arg224Lys/c.671G>A   | ENSBTAG00000047904 | ENSBTAT00000065393 |
| 17 | 72,395,510 | rs110562281 | C | A | gaC/gaA | p.Asp374Glu/c.1122C>A  | SFI1               | ENSBTAT00000011845 |
| 17 | 72,416,368 | rs110696250 | G | C | Gag/Cag | p.Glu736Gln/c.2206G>C  | SFI1               | ENSBTAT00000011845 |
| 17 | 72,482,173 | rs133770451 | A | G | aTg/aCg | p.Met1293Thr/c.3878T>C | PRR14L             | ENSBTAT00000011858 |
| 17 | 73,442,633 | rs41854708  | T | C | Acc/Gcc | p.Thr234Ala/c.700A>G   | ENSBTAG00000046900 | ENSBTAT00000063999 |
| 18 | 40,267,972 | rs42674900  | G | A | cGt/cAt | p.Arg3226His/c.9677G>A | HYDIN              | ENSBTAT00000005218 |
| 18 | 52,667,712 | rs137315779 | A | G | gTg/gCg | p.Val366Ala/c.1097T>C  | CEACAM20           | ENSBTAT00000014658 |
| 18 | 57,998,139 | rs210044089 | C | T | Cgg/Tgg | p.Arg53Trp/c.157C>T    | ENSBTAG00000019227 | ENSBTAT00000026431 |
| 18 | 60,070,095 | rs135056031 | T | C | cAg/cGg | p.Gln781Arg/c.2342A>G  | ZNF845             | ENSBTAT00000028697 |
| 18 | 60,070,420 | rs133670857 | C | T | Gct/Act | p.Ala673Thr/c.2017G>A  | ZNF845             | ENSBTAT00000028697 |
| 18 | 60,071,165 | rs447583392 | G | A | Cct/Tct | p.Pro429Ser/c.1285C>T  | ZNF845             | ENSBTAT00000028697 |
| 18 | 60,071,185 | rs208933449 | T | C | aAa/aGa | p.Lys422Arg/c.1265A>G  | ZNF845             | ENSBTAT00000028697 |
| 18 | 60,071,198 | rs382374202 | T | C | Aga/Gga | p.Arg418Gly/c.1252A>G  | ZNF845             | ENSBTAT00000028697 |
| 18 | 60,071,282 | rs207642753 | T | C | Act/Gct | p.Thr390Ala/c.1168A>G  | ZNF845             | ENSBTAT00000028697 |
| 18 | 60,071,299 | rs132952535 | T | C | aAt/aGt | p.Asn384Ser/c.1151A>G  | ZNF845             | ENSBTAT00000028697 |
| 18 | 60,074,031 | rs43024479  | T | C | Aaa/Gaa | p.Lys138Glu/c.412A>G   | ZNF845             | ENSBTAT00000028697 |
| 18 | 60,074,788 | rs43024497  | G | A | Caa/Taa | p.Gln116*/c.346C>T     | ZNF845             | ENSBTAT00000028697 |
| 18 | 60,074,802 | rs43024498  | A | G | gTt/gCt | p.Val111Ala/c.332T>C   | ZNF845             | ENSBTAT00000028697 |
| 18 | 61,208,010 | rs207890454 | A | G | gTc/gCc | p.Val425Ala/c.1274T>C  | ENSBTAG00000040392 | ENSBTAT00000010394 |
| 18 | 61,208,899 | rs132724528 | A | G | aTt/aCt | p.Ile270Thr/c.809T>C   | ENSBTAG00000040392 | ENSBTAT00000010394 |
| 18 | 61,208,944 | rs137426723 | C | T | cGa/cAa | p.Arg255Gln/c.764G>A   | ENSBTAG00000040392 | ENSBTAT00000010394 |
| 18 | 63,049,767 | rs135446511 | G | C | gCg/gGg | p.Ala123Gly/c.368C>G   | ENSBTAG00000026080 | ENSBTAT00000036984 |
| 18 | 63,760,823 | rs435401323 | G | A | tCg/tTg | p.Ser156Leu/c.467C>T   | ENSBTAG00000046087 | ENSBTAT00000056913 |
| 18 | 65,048,379 | rs41892907  | A | T | Act/Tct | p.Thr91Ser/c.271A>T    | ZNF134             | ENSBTAT00000006170 |
| 19 | 8,089,799  | rs382047915 | C | A | Ccc/Acc | p.Pro53Thr/c.157C>A    | ENSBTAG00000046559 | ENSBTAT00000064794 |

|    |            |             |   |   |         |                         |                    |                    |
|----|------------|-------------|---|---|---------|-------------------------|--------------------|--------------------|
| 19 | 9,676,673  | rs109649580 | T | C | tAc/tGc | p.Tyr823Cys/c.2468A>G   | MTMR4              | ENSBTAT00000030189 |
| 19 | 14,640,978 | rs111002312 | G | T | Cat/Aat | p.His66Asn/c.196C>A     | ENSBTAG00000039504 | ENSBTAT00000048097 |
| 19 | 18,401,661 | rs42727272  | A | G | aAa/aGa | p.Lys12Arg/c.35A>G      | C19H17orf42        | ENSBTAT00000024467 |
| 19 | 22,652,502 | rs110509854 | T | G | Tca/Gca | p.Ser280Ala/c.838T>G    | GLOD4              | ENSBTAT00000025501 |
| 19 | 23,806,402 | rs137665756 | A | C | Tta/Gta | p.Leu916Val/c.2746T>G   | SMG6               | ENSBTAT00000000333 |
| 19 | 24,711,670 | rs109444163 | G | A | tCt/tTt | p.Ser215Phe/c.644C>T    | ENSBTAG00000038059 | ENSBTAT00000053598 |
| 19 | 25,255,424 | rs41905209  | A | G | cTa/cCa | p.Leu1972Pro/c.5915T>C  | ZZEF1              | ENSBTAT00000061398 |
| 19 | 41,708,828 | rs43723001  | G | T | Caa/Aaa | p.Gln433Lys/c.1297C>A   | KRT12              | ENSBTAT00000020622 |
| 19 | 50,631,870 | rs109545022 | T | C | aTg/aCg | p.Met161Thr/c.482T>C    | WDR45L             | ENSBTAT00000004811 |
| 19 | 51,147,022 | rs211259962 | C | A | cCc/cAc | p.Pro70His/c.209C>A     | SECTM1             | ENSBTAT00000057166 |
| 19 | 51,563,265 | rs209740286 | A | G | Atc/Gtc | p.Ile286Val/c.856A>G    | MYADML2            | ENSBTAT00000000049 |
| 19 | 53,958,697 | rs209690918 | A | C | Tcc/Gcc | p.Ser450Ala/c.1348T>G   | ENGASE             | ENSBTAT00000008236 |
| 19 | 54,639,181 | rs109065101 | G | C | caC/caG | p.His293Gln/c.879C>G    | TMC8               | ENSBTAT00000025384 |
| 19 | 55,904,948 | rs132803163 | C | T | cGg/cAg | p.Arg71Gln/c.212G>A     | ENSBTAG00000039119 | ENSBTAT00000034708 |
| 19 | 57,726,622 | rs134864960 | A | C | gTg/gGg | p.Val916Gly/c.2747T>G   | KIF19              | ENSBTAT00000006057 |
| 19 | 57,728,200 | rs110238399 | A | G | tTc/tCc | p.Phe724Ser/c.2171T>C   | KIF19              | ENSBTAT00000006057 |
| 19 | 57,728,555 | rs135047844 | G | A | cCg/cTg | p.Pro687Leu/c.2060C>T   | KIF19              | ENSBTAT00000006057 |
| 20 | 3,795,064  | rs110596148 | C | T | Ggg/Agg | p.Gly385Arg/c.1153G>A   | STK10              | ENSBTAT00000023199 |
| 21 | 6,102,031  | rs43757179  | T | G | Agt/Cgt | p.Ser122Arg/c.364A>C    | ENSBTAG00000048048 | ENSBTAT00000065970 |
| 21 | 20,346,137 | rs135844154 | C | T | gCt/gTt | p.Ala164Val/c.491C>T    | ENSBTAG00000012326 | ENSBTAT00000016351 |
| 21 | 20,346,139 | rs133102945 | G | C | Gtg/Ctg | p.Val165Leu/c.493G>C    | ENSBTAG00000012326 | ENSBTAT00000016351 |
| 21 | 20,357,652 | rs109860250 | G | T | gaC/gaA | p.Asp158Glu/c.474C>A    | ENSBTAG00000038494 | ENSBTAT00000052975 |
| 21 | 20,357,798 | rs110220087 | C | T | Gta/Ata | p.Val110Ile/c.328G>A    | ENSBTAG00000038494 | ENSBTAT00000052975 |
| 21 | 34,649,608 | rs109373230 | T | C | Tgg/Cgg | p.Trp443Arg/c.1327T>C   | SEMA7A             | ENSBTAT00000015210 |
| 21 | 35,207,757 | rs110772105 | C | A | tgG/tgT | p.Trp50Cys/c.150G>T     | ENSBTAG00000010828 | ENSBTAT00000014364 |
| 21 | 35,207,770 | rs109485745 | C | T | gGt/gAt | p.Gly46Asp/c.137G>A     | ENSBTAG00000010828 | ENSBTAT00000014364 |
| 21 | 35,213,330 | rs132636886 | C | G | Gag/Cag | p.Glu16Gln/c.46G>C      | ENSBTAG00000013055 | ENSBTAT00000017359 |
| 21 | 61,631,142 | rs137067628 | T | G | agA/agC | p.Arg673Ser/c.2019A>C   | CLMN               | ENSBTAT00000026533 |
| 21 | 69,465,667 | rs43005016  | A | G | Acc/Gcc | p.Thr520Ala/c.1558A>G   | TNFAIP2            | ENSBTAT00000050485 |
| 22 | 15,246,226 | rs208440455 | T | G | Atc/Ctc | p.Ile128Leu/c.382A>C    | LYZL4              | ENSBTAT00000024756 |
| 22 | 19,647,573 | rs41858117  | A | C | Tcg/Gcg | p.Ser59Ala/c.175T>G     | GRM7               | ENSBTAT00000017342 |
| 22 | 44,297,497 | rs42691583  | G | A | Gca/Aca | p.Ala1484Thr/c.4450G>A  | ENSBTAG00000020802 | ENSBTAT00000013592 |
| 22 | 48,314,004 | rs110946558 | T | C | Aca/Gca | p.Thr327Ala/c.979A>G    | PRKCD              | ENSBTAT00000011487 |
| 22 | 49,073,708 | rs208206440 | C | G | gGt/gCt | p.Gly1578Ala/c.4733G>C  | DNAH1              | ENSBTAT00000066095 |
| 22 | 50,351,313 | rs210898565 | T | G | Acc/Ccc | p.Thr209Pro/c.625A>C    | HEMK1              | ENSBTAT00000005382 |
| 22 | 50,351,330 | rs208149156 | G | T | gCc/gAc | p.Ala203Asp/c.608C>A    | HEMK1              | ENSBTAT00000005382 |
| 22 | 53,341,684 | rs42019570  | A | C | Atg/Ctg | p.Met265Leu/c.793A>C    | PRSS50             | ENSBTAT00000055134 |
| 23 | 3,612,115  | rs109309915 | A | G | Act/Gct | p.Thr5480Ala/c.16438A>G | DST                | ENSBTAT00000061451 |
| 23 | 7,219,435  | rs43705225  | C | G | Gac/Cac | p.Asp183His/c.547G>C    | BOLA-DNA           | ENSBTAT00000008504 |
| 23 | 7,219,659  | rs41255857  | T | C | cAc/cGc | p.His108Arg/c.323A>G    | BOLA-DNA           | ENSBTAT00000008504 |
| 23 | 7,431,082  | rs137676160 | C | T | atG/atA | p.Met507Ile/c.1521G>A   | DAXX               | ENSBTAT00000036227 |
| 23 | 7,431,084  | rs133196782 | T | C | Atg/Gtg | p.Met507Val/c.1519A>G   | DAXX               | ENSBTAT00000036227 |
| 23 | 7,432,512  | rs109148673 | A | C | gaT/gaG | p.Asp171Glu/c.513T>G    | DAXX               | ENSBTAT00000036227 |
| 23 | 7,810,489  | rs134864019 | T | C | aAc/aGc | p.Asn6Ser/c.17A>G       | MNF1               | ENSBTAT00000047737 |
| 23 | 9,383,592  | rs208839216 | C | G | gaC/gaG | p.Asp235Glu/c.705C>G    | FANCE              | ENSBTAT00000038911 |
| 23 | 23,911,643 | rs43246754  | T | C | aAg/aGg | p.Lys3195Arg/c.9584A>G  | PKHD1              | ENSBTAT00000032221 |
| 23 | 27,333,684 | rs382492082 | C | T | atG/atA | p.Met5Ile/c.15G>A       | HSPA1A             | ENSBTAT00000017500 |
| 23 | 27,333,685 | rs385826597 | A | G | aTg/aCg | p.Met5Thr/c.14T>C       | HSPA1A             | ENSBTAT00000017500 |

|    |            |             |   |   |         |                        |                    |                    |
|----|------------|-------------|---|---|---------|------------------------|--------------------|--------------------|
| 23 | 27,453,893 | rs110889596 | A | G | aAt/aGt | p.Asn200Ser/c.599A>G   | BAT4               | ENSBTAT00000045541 |
| 23 | 27,725,630 | rs135940610 | C | T | tGc/tAc | p.Cys207Tyr/c.620G>A   | ENSBTAG00000010166 | ENSBTAT00000013413 |
| 23 | 28,120,390 | rs109389455 | C | T | aGa/aAa | p.Arg1410Lys/c.4229G>A | MDC1               | ENSBTAT00000035900 |
| 23 | 28,355,835 | rs135506929 | T | C | Aga/Gga | p.Arg325Gly/c.973A>G   | BOLA-NC            | ENSBTAT00000021451 |
| 23 | 28,889,546 | rs110670022 | A | C | gaT/gaG | p.Asp194Glu/c.582T>G   | ENSBTAG00000003250 | ENSBTAT00000004214 |
| 23 | 29,463,608 | rs137409029 | C | T | tCc/tTc | p.Ser276Phe/c.827C>T   | ENSBTAG00000040582 | ENSBTAT00000054481 |
| 23 | 29,481,179 | rs109489261 | T | C | tTc/tCc | p.Phe217Ser/c.650T>C   | ENSBTAG00000047558 | ENSBTAT00000051892 |
| 23 | 30,475,204 | rs134913274 | T | A | aAt/aTt | p.Asn195Ile/c.584A>T   | ENSBTAG00000040454 | ENSBTAT00000056033 |
| 23 | 30,696,638 | rs134204444 | A | G | aAa/aGa | p.Lys228Arg/c.683A>G   | ENSBTAG00000039274 | ENSBTAT00000056927 |
| 23 | 31,461,230 | rs110884109 | A | G | gTg/gCg | p.Val22Ala/c.65T>C     | H2B                | ENSBTAT00000045034 |
| 23 | 50,490,560 | rs109183457 | T | C | Aac/Gac | p.Asn96Asp/c.286A>G    | NQO2               | ENSBTAT00000040161 |
| 23 | 50,529,819 | rs475681199 | C | T | Gaa/Aaa | p.Glu25Lys/c.73G>A     | ENSBTAG00000017483 | ENSBTAT00000023242 |
| 23 | 50,614,242 | rs210780870 | G | A | Gtc/Atc | p.Val125Ile/c.373G>A   | ENSBTAG00000025280 | ENSBTAT00000026816 |
| 23 | 50,615,327 | rs208585354 | A | G | Atc/Gtc | p.Ile168Val/c.502A>G   | ENSBTAG00000025280 | ENSBTAT00000026816 |
| 23 | 50,615,354 | rs207891256 | C | G | Cag/Gag | p.Gln177Glu/c.529C>G   | ENSBTAG00000025280 | ENSBTAT00000026816 |
| 23 | 50,617,237 | rs135027114 | A | G | cAa/cGa | p.Gln288Arg/c.863A>G   | ENSBTAG00000025280 | ENSBTAT00000026816 |
| 24 | 216,326    | rs207679261 | T | C | aAa/aGa | p.Lys196Arg/c.587A>G   | ENSBTAG00000013809 | ENSBTAT00000026739 |
| 24 | 26,406,555 | rs110930689 | T | C | Tgg/Cgg | p.Trp94Arg/c.280T>C    | DSC3               | ENSBTAT00000020274 |
| 24 | 33,626,581 | rs110927432 | T | C | Ttt/Ctt | p.Phe241Leu/c.721T>C   | TMEM241            | ENSBTAT00000031064 |
| 24 | 46,313,383 | rs109578809 | T | C | Tgg/Cgg | p.Trp32Arg/c.94T>C     | HAUS1              | ENSBTAT00000003262 |
| 25 | 560,467    | rs436323460 | T | G | cTa/cGa | p.Leu302Arg/c.905T>G   | STUB1              | ENSBTAT00000025473 |
| 25 | 560,469    | rs432656507 | A | T | Ata/Tta | p.Ile303Leu/c.907A>T   | STUB1              | ENSBTAT00000025473 |
| 25 | 14,582,913 | rs41587235  | C | A | ttG/ttT | p.Leu1271Phe/c.3813G>T | ABCC6              | ENSBTAT00000050284 |
| 25 | 28,294,181 | rs211291098 | C | T | Cgg/Tgg | p.Arg107Trp/c.319C>T   | CRCP               | ENSBTAT00000053944 |
| 25 | 35,105,527 | rs42074328  | G | A | aGa/aAa | p.Arg42Lys/c.125G>A    | ALKBH4             | ENSBTAT00000004717 |
| 25 | 36,088,117 | rs135351842 | A | G | Aag/Gag | p.Lys330Glu/c.988A>G   | ENSBTAG00000020157 | ENSBTAT00000026848 |
| 25 | 36,604,449 | rs43724448  | T | C | cAt/cGt | p.His668Arg/c.2003A>G  | NYAP1              | ENSBTAT00000023195 |
| 25 | 36,659,603 | rs43724466  | T | A | Tat/Aat | p.Tyr17Asn/c.49T>A     | ZCWPW1             | ENSBTAT00000001417 |
| 25 | 39,180,577 | rs109143338 | T | G | Tac/Gac | p.Tyr281Asp/c.841T>G   | RNF216             | ENSBTAT00000022820 |
| 26 | 8,249,362  | rs42236914  | G | T | Ccc/Acc | p.Pro67Thr/c.199C>A    | PRKG1              | ENSBTAT00000030539 |
| 26 | 20,615,740 | rs378023463 | A | C | Att/Ctt | p.Ile25Leu/c.73A>C     | ABCC2              | ENSBTAT00000047274 |
| 26 | 20,670,595 | rs208313395 | T | G | tgT/tgG | p.Cys1100Trp/c.3300T>G | ABCC2              | ENSBTAT00000047274 |
| 26 | 23,694,514 | rs209230756 | A | G | Tca/Cca | p.Ser509Pro/c.1525T>C  | CYP17A1            | ENSBTAT00000019061 |
| 26 | 23,694,772 | rs211334387 | C | T | Gcg/Acg | p.Ala423Thr/c.1267G>A  | CYP17A1            | ENSBTAT00000019061 |
| 26 | 23,697,090 | rs210616088 | A | G | aTg/aCg | p.Met238Thr/c.713T>C   | CYP17A1            | ENSBTAT00000019061 |
| 26 | 25,835,202 | rs41649598  | T | C | tAc/tGc | p.Tyr278Cys/c.833A>G   | PAOX               | ENSBTAT00000057083 |
| 26 | 25,836,239 | rs110818830 | A | T | cTg/cAg | p.Leu147Gln/c.440T>A   | PAOX               | ENSBTAT00000057083 |
| 26 | 37,860,707 | rs42098266  | T | C | aTg/aCg | p.Met116Thr/c.347T>C   | KCNK18             | ENSBTAT00000020046 |
| 26 | 42,831,090 | rs41621657  | C | T | aCa/aTa | p.Thr82Ile/c.245C>T    | ENSBTAG00000038684 | ENSBTAT00000054001 |
| 26 | 42,930,137 | rs110013295 | A | G | Aag/Gag | p.Lys54Glu/c.160A>G    | ENSBTAG00000039755 | ENSBTAT00000066099 |
| 26 | 42,930,224 | rs110285842 | A | G | Agc/Ggc | p.Ser83Gly/c.247A>G    | ENSBTAG00000039755 | ENSBTAT00000066099 |
| 26 | 50,638,138 | rs133031841 | T | C | gTg/gCg | p.Val260Ala/c.779T>C   | ENSBTAG00000026185 | ENSBTAT00000037095 |
| 27 | 4,800,159  | rs132667878 | G | A | Cgt/Tgt | p.Arg124Cys/c.370C>T   | ENSBTAG00000008519 | ENSBTAT00000024416 |
| 27 | 5,425,568  | rs43108924  | C | A | tGg/tTg | p.Trp42Leu/c.125G>T    | ENSBTAG00000047284 | ENSBTAT00000065980 |
| 27 | 19,008,706 | rs42117836  | A | C | Aaa/Caa | p.Lys451Gln/c.1351A>C  | MTMR7              | ENSBTAT00000055365 |
| 27 | 26,260,482 | rs41680913  | T | C | Atg/Gtg | p.Met262Val/c.784A>G   | PURG               | ENSBTAT00000052030 |
| 28 | 6,084,058  | rs43682902  | A | G | tTg/tCg | p.Leu1091Ser/c.3272T>C | PCNXL2             | ENSBTAT00000017452 |
| 28 | 8,798,180  | rs208559281 | T | C | Aca/Gca | p.Thr214Ala/c.640A>G   | NID1               | ENSBTAT00000009531 |

|       |            |             |   |   |         |                       |                    |                    |
|-------|------------|-------------|---|---|---------|-----------------------|--------------------|--------------------|
| 28    | 8,798,200  | rs210307350 | A | G | tTt/tCt | p.Phe207Ser/c.620T>C  | NID1               | ENSBTAT00000009531 |
| 28    | 8,798,242  | rs210815305 | A | G | tTg/tCg | p.Leu193Ser/c.578T>C  | NID1               | ENSBTAT00000009531 |
| 28    | 35,700,054 | rs110467597 | A | G | Ata/Gta | p.Ile359Val/c.1075A>G | CL46               | ENSBTAT00000028716 |
| 29    | 5,748,349  | rs137442187 | T | G | agT/agG | p.Ser11Arg/c.33T>G    | ENSBTAG00000038209 | ENSBTAT00000000458 |
| 29    | 5,751,066  | rs208046720 | G | A | Gaa/Aaa | p.Glu253Lys/c.757G>A  | ENSBTAG00000038209 | ENSBTAT00000000458 |
| 29    | 5,751,070  | rs209421286 | C | T | aCg/aTg | p.Thr254Met/c.761C>T  | ENSBTAG00000038209 | ENSBTAT00000000458 |
| 29    | 5,757,552  | rs209894977 | A | T | Acc/Tcc | p.Thr364Ser/c.1090A>T | ENSBTAG00000038209 | ENSBTAT00000000458 |
| 29    | 5,757,789  | rs210083106 | C | T | Ctt/Ttt | p.Leu443Phe/c.1327C>T | ENSBTAG00000038209 | ENSBTAT00000000458 |
| 29    | 9,892,100  | rs42157724  | G | A | aGt/aAt | p.Ser227Asn/c.680G>A  | SYTL2              | ENSBTAT00000030378 |
| 29    | 18,090,509 | rs42714483  | T | C | Atc/Gtc | p.Ile16Val/c.46A>G    | THRSP              | ENSBTAT00000015490 |
| 29    | 27,150,961 | rs42179775  | A | G | Ttc/Ctc | p.Phe42Leu/c.124T>C   | ENSBTAG00000022384 | ENSBTAT00000030301 |
| 29    | 29,596,363 | rs210749927 | C | T | Gtg/Atg | p.Val1Met/c.1G>A      | ENSBTAG00000033377 | ENSBTAT00000047481 |
| 29    | 29,744,242 | rs42175743  | T | C | Aca/Gca | p.Thr506Ala/c.1516A>G | CDON               | ENSBTAT00000012270 |
| 29    | 43,753,213 | rs109133044 | T | G | aAt/aCt | p.Asn344Thr/c.1031A>C | ATG2A              | ENSBTAT00000009283 |
| 29    | 46,531,663 | rs42190879  | G | A | Gat/Aat | p.Asp527Asn/c.1579G>A | LRP5               | ENSBTAT00000007756 |
| 29    | 49,184,427 | rs132678679 | A | G | aAt/aGt | p.Asn140Ser/c.419A>G  | TNFRSF10A          | ENSBTAT00000054963 |
| 16011 | 6,954      | .           | C | T | Ccc/Tcc | p.Pro165Ser/c.493C>T  | PLCXD1             | ENSBTAT00000066297 |
| MT    | 4,537      | rs110211386 | G | A | aGc/aAc | p.Ser91Asn/c.272G>A   | ND2                | ENSBTAT00000060548 |
| MT    | 5,718      | rs109334123 | G | A | aGc/aAc | p.Ser11Asn/c.32G>A    | COX1               | ENSBTAT00000060569 |
| MT    | 5,754      | rs110197092 | A | G | gAt/gGt | p.Asp23Gly/c.68A>G    | COX1               | ENSBTAT00000060569 |
| MT    | 5,853      | rs81184152  | C | T | gCa/gTa | p.Ala56Val/c.167C>T   | COX1               | ENSBTAT00000060569 |
| MT    | 7,994      | rs109369303 | G | A | atG/atA | p.Met207Ile/c.621G>A  | MT-CO2             | ENSBTAT00000060549 |
| X     | 11,967,545 | rs41658512  | G | A | gGg/gAg | p.Gly311Glu/c.932G>A  | IRF2BP1            | ENSBTAT00000000177 |
| X     | 14,280,063 | rs209729762 | G | A | Ggg/Agg | p.Gly60Arg/c.178G>A   | RBMX2              | ENSBTAT00000019649 |
| X     | 14,280,091 | rs211461315 | G | C | cGg/cCg | p.Arg69Pro/c.206G>C   | RBMX2              | ENSBTAT00000019649 |
| X     | 14,280,172 | rs210909133 | A | G | aAt/aGt | p.Asn96Ser/c.287A>G   | RBMX2              | ENSBTAT00000019649 |
| X     | 14,282,500 | rs211364380 | C | T | Cag/Tag | p.Gln183*/c.547C>T    | RBMX2              | ENSBTAT00000019649 |
| X     | 14,282,591 | rs209480453 | C | A | aCg/aAg | p.Thr213Lys/c.638C>A  | RBMX2              | ENSBTAT00000019649 |
| X     | 14,282,594 | rs379596905 | G | C | gGa/gCa | p.Gly214Ala/c.641G>C  | RBMX2              | ENSBTAT00000019649 |
| X     | 14,282,650 | rs382280146 | C | G | Cct/Gct | p.Pro233Ala/c.697C>G  | RBMX2              | ENSBTAT00000019649 |
| X     | 14,282,663 | rs438965177 | T | C | aTg/aCg | p.Met237Thr/c.710T>C  | RBMX2              | ENSBTAT00000019649 |
| X     | 14,282,812 | rs383854441 | C | T | Cga/Tga | p.Arg287*/c.859C>T    | RBMX2              | ENSBTAT00000019649 |
| X     | 14,282,962 | rs385912051 | T | C | Tat/Cat | p.Tyr337His/c.1009T>C | RBMX2              | ENSBTAT00000019649 |
| X     | 14,362,463 | rs43200261  | G | A | Cgt/Tgt | p.Arg281Cys/c.841C>T  | ENSBTAG00000010463 | ENSBTAT00000013812 |
| X     | 14,365,645 | rs43209786  | C | T | gGc/gAc | p.Gly96Asp/c.287G>A   | ENSBTAG00000010463 | ENSBTAT00000013812 |
| X     | 14,365,660 | rs110187729 | T | C | cAg/cGg | p.Gln91Arg/c.272A>G   | ENSBTAG00000010463 | ENSBTAT00000013812 |
| X     | 14,367,549 | rs211403688 | T | C | Agt/Ggt | p.Ser73Gly/c.217A>G   | ENSBTAG00000010463 | ENSBTAT00000013812 |
| X     | 14,367,588 | rs110977669 | C | T | Gtt/Att | p.Val60Ile/c.178G>A   | ENSBTAG00000010463 | ENSBTAT00000013812 |
| X     | 18,837,160 | rs211581301 | C | T | gGa/gAa | p.Gly131Glu/c.392G>A  | ENSBTAG00000046047 | ENSBTAT00000065493 |
| X     | 23,650,884 | rs211672749 | T | G | aAa/aCa | p.Lys79Thr/c.236A>C   | CXHXorf66          | ENSBTAT00000063340 |
| X     | 23,650,933 | rs379906801 | T | A | Acg/Tcg | p.Thr63Ser/c.187A>T   | CXHXorf66          | ENSBTAT00000063340 |
| X     | 29,091,608 | rs135967396 | C | T | Cat/Tat | p.His62Tyr/c.184C>T   | MGC148328          | ENSBTAT00000054670 |
| X     | 50,719,395 | rs109317963 | A | G | cAa/cGa | p.Gln261Arg/c.782A>G  | ENSBTAG00000048265 | ENSBTAT00000064195 |
| X     | 50,811,372 | rs380874026 | T | A | tTt/tAt | p.Phe84Tyr/c.251T>A   | ENSBTAG00000040255 | ENSBTAT00000066229 |
| X     | 50,876,903 | rs211689565 | T | C | cAg/cGg | p.Gln342Arg/c.1025A>G | SRPX2              | ENSBTAT00000053743 |
| X     | 56,116,881 | rs208551491 | G | A | Cct/Tct | p.Pro515Ser/c.1543C>T | ENSBTAG00000038449 | ENSBTAT00000030459 |
| X     | 56,507,444 | .           | A | G | cAa/cGa | p.Gln21Arg/c.62A>G    | ENSBTAG00000032787 | ENSBTAT00000030458 |
| X     | 68,142,022 | rs381689687 | C | T | Cgg/Tgg | p.Arg287Trp/c.859C>T  | ENSBTAG00000006252 | ENSBTAT00000008205 |

|   |             |             |   |   |         |                       |                    |                    |
|---|-------------|-------------|---|---|---------|-----------------------|--------------------|--------------------|
| X | 84,071,708  | rs434026494 | C | T | tCg/tTg | p.Ser341Leu/c.1022C>T | ENSBTAG00000048245 | ENSBTAT00000063316 |
| X | 89,908,020  | rs446746200 | C | G | aGc/aCc | p.Ser220Thr/c.659G>C  | ENSBTAG00000047411 | ENSBTAT00000064378 |
| X | 89,908,501  | rs41665091  | C | A | Gta/Tta | p.Val60Leu/c.178G>T   | ENSBTAG00000047411 | ENSBTAT00000064378 |
| X | 94,701,460  | rs208247262 | A | G | cAg/cGg | p.Gln6Arg/c.17A>G     | ENSBTAG00000047547 | ENSBTAT00000024424 |
| X | 94,701,490  | rs384124497 | G | A | cGa/cAa | p.Arg16Gln/c.47G>A    | ENSBTAG00000047547 | ENSBTAT00000024424 |
| X | 94,701,678  | rs460944365 | A | G | Atc/Gtc | p.Ile79Val/c.235A>G   | ENSBTAG00000047547 | ENSBTAT00000024424 |
| X | 118,801,083 | rs458707170 | C | G | cCt/cGt | p.Pro61Arg/c.182C>G   | ENSBTAG00000004563 | ENSBTAT00000055351 |
| X | 123,604,576 | rs208619435 | T | C | Act/Gct | p.Thr304Ala/c.910A>G  | ENSBTAG00000047709 | ENSBTAT00000011510 |
| X | 123,604,806 | rs476334614 | T | C | gAt/gGt | p.Asp227Gly/c.680A>G  | ENSBTAG00000047709 | ENSBTAT00000011510 |
| X | 123,605,072 | rs384840357 | G | C | aaC/aaG | p.Asn138Lys/c.414C>G  | ENSBTAG00000047709 | ENSBTAT00000011510 |
| X | 123,605,138 | rs382065763 | C | A | ttG/ttT | p.Leu116Phe/c.348G>T  | ENSBTAG00000047709 | ENSBTAT00000011510 |
| X | 123,605,275 | rs209001633 | T | C | Acc/Gcc | p.Thr71Ala/c.211A>G   | ENSBTAG00000047709 | ENSBTAT00000011510 |
| X | 124,199,173 | rs380122483 | G | A | tCt/tTt | p.Ser345Phe/c.1034C>T | ENSBTAG00000038876 | ENSBTAT00000056942 |
| X | 127,192,076 | rs479843617 | C | T | Cgt/Tgt | p.Arg170Cys/c.508C>T  | ENSBTAG00000047581 | ENSBTAT00000009925 |
| X | 127,361,310 | rs210143643 | T | C | cAa/cGa | p.Gln589Arg/c.1766A>G | DDX53              | ENSBTAT00000065115 |
| X | 137,215,889 | rs378538260 | C | T | cGa/cAa | p.Arg307Gln/c.920G>A  | ENSBTAG00000032833 | ENSBTAT00000053697 |
| X | 137,215,931 | rs450288269 | A | G | aTg/aCg | p.Met293Thr/c.878T>C  | ENSBTAG00000032833 | ENSBTAT00000053697 |
| X | 143,414,403 | rs137706463 | A | T | gTg/gAg | p.Val905Glu/c.2714T>A | ENSBTAG00000002158 | ENSBTAT00000056084 |
| X | 143,414,415 | rs133956309 | C | T | cGa/cAa | p.Arg901Gln/c.2702G>A | ENSBTAG00000002158 | ENSBTAT00000056084 |
| X | 143,414,418 | rs135219090 | C | T | gGg/gAg | p.Gly900Glu/c.2699G>A | ENSBTAG00000002158 | ENSBTAT00000056084 |
| X | 143,414,483 | rs109832412 | C | T | atG/atA | p.Met878Ile/c.2634G>A | ENSBTAG00000002158 | ENSBTAT00000056084 |
| X | 143,414,751 | rs137132643 | C | T | cGa/cAa | p.Arg789Gln/c.2366G>A | ENSBTAG00000002158 | ENSBTAT00000056084 |
| X | 143,416,278 | rs210568809 | G | A | cCg/cTg | p.Pro478Leu/c.1433C>T | ENSBTAG00000002158 | ENSBTAT00000056084 |
| X | 143,416,387 | rs208682645 | G | C | Cag/Gag | p.Gln442Glu/c.1324C>G | ENSBTAG00000002158 | ENSBTAT00000056084 |

**Supplementary File 3.** The complete list of the Z-transformation of the pooled heterozygosity (ZHp) scores for all the overlapping sliding windows across all 29 autosomes in HAN.

| Chr | Start     | End       | Bin | No. SNP | ZHp          | Gene List                                       |
|-----|-----------|-----------|-----|---------|--------------|-------------------------------------------------|
| 1   | 0         | 150,000   | 1   | 1251    | 0.874118575  | ENSBTAG00000001753,ENSBTAG000000039257          |
| 1   | 75,000    | 225,000   | 2   | 888     | 0.049786532  | ENSBTAG00000001753                              |
| 1   | 150,000   | 300,000   | 3   | 564     | -0.61021598  | CBX3,ENSBTAG00000001753                         |
| 1   | 225,000   | 375,000   | 4   | 437     | -3.139091265 | CBX3,RCAN1                                      |
| 1   | 300,000   | 450,000   | 5   | 693     | -3.738893848 | KCNE1,RCAN1,ENSBTAG00000026259                  |
| 1   | 375,000   | 525,000   | 6   | 876     | -2.76475332  | C21orf140,KCNE1,KCNE2,SMIM11,ENSBTAG00000026259 |
| 1   | 450,000   | 600,000   | 7   | 771     | -2.269928098 | C21orf140,KCNE2,SMIM11,ENSBTAG00000045984       |
| 1   | 525,000   | 675,000   | 8   | 588     | -2.837481057 | MRPS6,ENSBTAG00000045984                        |
| 1   | 600,000   | 750,000   | 9   | 410     | -2.149728126 | MRPS6                                           |
| 1   | 675,000   | 825,000   | 10  | 306     | -1.13431812  | MRPS6                                           |
| 1   | 750,000   | 900,000   | 11  | 678     | -0.897661565 |                                                 |
| 1   | 825,000   | 975,000   | 12  | 805     | -0.392257984 | ATP5O,ITSN1                                     |
| 1   | 900,000   | 1,050,000 | 13  | 458     | 0.394788328  | ATP5O,ITSN1                                     |
| 1   | 975,000   | 1,125,000 | 14  | 493     | 0.766538508  | ITSN1                                           |
| 1   | 1,050,000 | 1,200,000 | 15  | 455     | 0.72688877   | CRYZL1,ITSN1                                    |
| 1   | 1,125,000 | 1,275,000 | 16  | 255     | 0.159487254  | CRYZL1,DONSON,GART,ITSN1,SON                    |
| 1   | 1,200,000 | 1,350,000 | 17  | 426     | -0.013106276 | CRYZL1,DNAJC28,DONSON,GART,SON,TMEM50B          |
| 1   | 1,275,000 | 1,425,000 | 18  | 662     | 0.487829913  | DNAJC28,GART,IFNGR2,TMEM50B                     |
| 1   | 1,350,000 | 1,500,000 | 19  | 718     | 1.077757568  | IFNAR1,IFNGR2,TMEM50B                           |
| 1   | 1,425,000 | 1,575,000 | 20  | 1000    | 0.759834068  | IFNAR1,IL10RB                                   |
| 1   | 1,500,000 | 1,650,000 | 21  | 805     | 0.544635892  | IFNAR2,IL10RB                                   |
| 1   | 1,575,000 | 1,725,000 | 22  | 490     | -1.106398979 | HIST1H4H,IFNAR2,IL10RB                          |
| 1   | 1,650,000 | 1,800,000 | 23  | 647     | -0.999665501 | HIST1H4H,OLIG1                                  |
| 1   | 1,725,000 | 1,875,000 | 24  | 573     | 1.057734968  | OLIG1                                           |
| 1   | 1,800,000 | 1,950,000 | 25  | 720     | 0.299252775  |                                                 |
| 1   | 1,875,000 | 2,025,000 | 26  | 780     | 0.353081583  |                                                 |
| 1   | 1,950,000 | 2,100,000 | 27  | 485     | 0.630536146  | C21orf62,GCFC                                   |
| 1   | 2,025,000 | 2,175,000 | 28  | 249     | -0.329157714 | C21orf62,GCFC,SYNJ1                             |
| 1   | 2,100,000 | 2,250,000 | 29  | 178     | -0.774430116 | C1H21orf59,SYNJ1                                |
| 1   | 2,175,000 | 2,325,000 | 30  | 425     | 0.535524408  | C1H21orf59,EVA1C,SYNJ1                          |
| 1   | 2,250,000 | 2,400,000 | 31  | 752     | 0.471420255  | EVA1C,URB1                                      |
| 1   | 2,325,000 | 2,475,000 | 32  | 1232    | -0.096481995 | EVA1C,MRAP,URB1                                 |
| 1   | 2,400,000 | 2,550,000 | 33  | 1569    | 0.295329537  | MIS18A,MRAP,URB1                                |
| 1   | 2,475,000 | 2,625,000 | 34  | 1399    | 0.690781589  | MIS18A,MRAP                                     |
| 1   | 2,550,000 | 2,700,000 | 35  | 1226    | 0.655923462  |                                                 |
| 1   | 2,625,000 | 2,775,000 | 36  | 1455    | 0.618610002  |                                                 |
| 1   | 2,700,000 | 2,850,000 | 37  | 1550    | 0.601394178  | HUNK                                            |
| 1   | 2,775,000 | 2,925,000 | 38  | 1284    | 0.686093616  | HUNK                                            |
| 1   | 2,850,000 | 3,000,000 | 39  | 1519    | 1.030920669  | HUNK                                            |
| 1   | 2,925,000 | 3,075,000 | 40  | 1381    | 1.055205239  | SCAF4                                           |
| 1   | 3,000,000 | 3,150,000 | 41  | 809     | 0.935260247  | SCAF4,SOD1                                      |
| 1   | 3,075,000 | 3,225,000 | 42  | 1199    | 1.045666925  | SCAF4,SOD1                                      |
| 1   | 3,150,000 | 3,300,000 | 43  | 1355    | 0.816329735  |                                                 |
| 1   | 3,225,000 | 3,375,000 | 44  | 1012    | 0.438745302  |                                                 |
| 1   | 3,300,000 | 3,450,000 | 45  | 1012    | -0.280410051 |                                                 |
| 1   | 3,375,000 | 3,525,000 | 46  | 995     | 0.39849034   | TIAM1                                           |
| 1   | 3,450,000 | 3,600,000 | 47  | 790     | -0.3294078   | TIAM1                                           |
| 1   | 3,525,000 | 3,675,000 | 48  | 634     | -2.12243531  | TIAM1                                           |

|   |           |           |     |      |              |                                         |
|---|-----------|-----------|-----|------|--------------|-----------------------------------------|
| 1 | 3,600,000 | 3,750,000 | 49  | 671  | -0.683499581 | TIAM1                                   |
| 1 | 3,675,000 | 3,825,000 | 50  | 813  | 0.926647396  | TIAM1                                   |
| 1 | 3,750,000 | 3,900,000 | 51  | 947  | 0.666775445  |                                         |
| 1 | 3,825,000 | 3,975,000 | 52  | 939  | 0.517604728  | KRTAP11-1                               |
| 1 | 3,900,000 | 4,050,000 | 53  | 975  | 0.551468931  | KRTAP11-1,KRTAP7-1                      |
| 1 | 3,975,000 | 4,125,000 | 54  | 825  | 0.152857444  | KRTAP7-1,KRTAP8-1                       |
| 1 | 4,050,000 | 4,200,000 | 55  | 649  | -0.220244589 | KRTAP8-1                                |
| 1 | 4,125,000 | 4,275,000 | 56  | 804  | -0.297623224 | ENSBTAG00000044154                      |
| 1 | 4,200,000 | 4,350,000 | 57  | 703  | -0.324799722 | ENSBTAG00000044154                      |
| 1 | 4,275,000 | 4,425,000 | 58  | 704  | -1.661718517 |                                         |
| 1 | 4,350,000 | 4,500,000 | 59  | 704  | -1.828619937 |                                         |
| 1 | 4,425,000 | 4,575,000 | 60  | 755  | 0.259956799  |                                         |
| 1 | 4,500,000 | 4,650,000 | 61  | 1062 | 0.013226587  |                                         |
| 1 | 4,575,000 | 4,725,000 | 62  | 1120 | -0.410388506 |                                         |
| 1 | 4,650,000 | 4,800,000 | 63  | 1239 | 0.067398772  | KRTAP13-1                               |
| 1 | 4,725,000 | 4,875,000 | 64  | 1361 | 0.037182795  | KRTAP13-1,ENSBTAG00000037933            |
| 1 | 4,800,000 | 4,950,000 | 65  | 1317 | 0.086821625  | KRTAP27-1,ENSBTAG00000037933            |
| 1 | 4,875,000 | 5,025,000 | 66  | 1352 | 0.655386832  | KRTAP24-1,KRTAP27-1                     |
| 1 | 4,950,000 | 5,100,000 | 67  | 1337 | 0.669785443  | CLDN17,CLDN8,KRTAP24-1                  |
| 1 | 5,025,000 | 5,175,000 | 68  | 986  | 0.519939856  | CLDN17,CLDN8                            |
| 1 | 5,100,000 | 5,250,000 | 69  | 623  | 0.742006701  |                                         |
| 1 | 5,175,000 | 5,325,000 | 70  | 540  | 0.678361747  |                                         |
| 1 | 5,250,000 | 5,400,000 | 71  | 883  | 0.33138816   |                                         |
| 1 | 5,325,000 | 5,475,000 | 72  | 1219 | 0.2314277    |                                         |
| 1 | 5,400,000 | 5,550,000 | 73  | 1176 | 0.240209214  |                                         |
| 1 | 5,475,000 | 5,625,000 | 74  | 982  | 0.526531965  |                                         |
| 1 | 5,550,000 | 5,700,000 | 75  | 751  | 0.008738742  |                                         |
| 1 | 5,625,000 | 5,775,000 | 76  | 940  | 0.561165499  | GRIK1                                   |
| 1 | 5,700,000 | 5,850,000 | 77  | 983  | 1.013247266  | GRIK1                                   |
| 1 | 5,775,000 | 5,925,000 | 78  | 711  | -0.580647679 | GRIK1,ENSBTAG00000045873                |
| 1 | 5,850,000 | 6,000,000 | 79  | 994  | -0.647624757 | GRIK1,ENSBTAG00000045873                |
| 1 | 5,925,000 | 6,075,000 | 80  | 994  | -0.613568155 |                                         |
| 1 | 6,000,000 | 6,150,000 | 81  | 816  | -0.542515022 |                                         |
| 1 | 6,075,000 | 6,225,000 | 82  | 578  | 0.142336751  | BACH1                                   |
| 1 | 6,150,000 | 6,300,000 | 83  | 298  | -0.861874044 | BACH1                                   |
| 1 | 6,225,000 | 6,375,000 | 84  | 446  | -0.768146351 | C1H21ORF7                               |
| 1 | 6,300,000 | 6,450,000 | 85  | 747  | 0.19882891   | C1H21ORF7                               |
| 1 | 6,375,000 | 6,525,000 | 86  | 733  | 0.423212252  | C1H21ORF7,CCT8,RWDD2B,USP16             |
| 1 | 6,450,000 | 6,600,000 | 87  | 532  | -0.075306572 | CCT8,RNF160,RWDD2B,USP16                |
| 1 | 6,525,000 | 6,675,000 | 88  | 994  | 0.9585527    | N6AMT1,RNF160,RWDD2B,ENSBTAG00000038433 |
| 1 | 6,600,000 | 6,750,000 | 89  | 1145 | 0.994972404  | N6AMT1,RNF160,ENSBTAG00000038433        |
| 1 | 6,675,000 | 6,825,000 | 90  | 848  | 0.430393646  |                                         |
| 1 | 6,750,000 | 6,900,000 | 91  | 1118 | 0.043806966  |                                         |
| 1 | 6,825,000 | 6,975,000 | 92  | 1252 | 1.050649353  |                                         |
| 1 | 6,900,000 | 7,050,000 | 93  | 1092 | 1.060307166  |                                         |
| 1 | 6,975,000 | 7,125,000 | 94  | 884  | 0.839339712  |                                         |
| 1 | 7,050,000 | 7,200,000 | 95  | 666  | 0.815780396  |                                         |
| 1 | 7,125,000 | 7,275,000 | 96  | 593  | 0.597130173  |                                         |
| 1 | 7,200,000 | 7,350,000 | 97  | 456  | 0.728162747  |                                         |
| 1 | 7,275,000 | 7,425,000 | 98  | 428  | -1.843272437 |                                         |
| 1 | 7,350,000 | 7,500,000 | 99  | 455  | -3.923365244 |                                         |
| 1 | 7,425,000 | 7,575,000 | 100 | 478  | -1.703920852 |                                         |
| 1 | 7,500,000 | 7,650,000 | 101 | 518  | -0.19596685  |                                         |



|   |            |            |     |      |              |                    |
|---|------------|------------|-----|------|--------------|--------------------|
| 1 | 7,575,000  | 7,725,000  | 102 | 771  | -2.238834926 |                    |
| 1 | 7,650,000  | 7,800,000  | 103 | 802  | -2.706232047 |                    |
| 1 | 7,725,000  | 7,875,000  | 104 | 473  | -0.824716268 |                    |
| 1 | 7,800,000  | 7,950,000  | 105 | 600  | 0.552709528  |                    |
| 1 | 7,875,000  | 8,025,000  | 106 | 933  | 0.134482029  |                    |
| 1 | 7,950,000  | 8,100,000  | 107 | 1175 | -0.198086333 |                    |
| 1 | 8,025,000  | 8,175,000  | 108 | 1164 | -0.250105408 |                    |
| 1 | 8,100,000  | 8,250,000  | 109 | 962  | 0.252686443  |                    |
| 1 | 8,175,000  | 8,325,000  | 110 | 924  | 0.602417013  |                    |
| 1 | 8,250,000  | 8,400,000  | 111 | 1172 | 0.795367404  | ENSBTAG00000040155 |
| 1 | 8,325,000  | 8,475,000  | 112 | 1217 | 0.737260953  | ENSBTAG00000040155 |
| 1 | 8,400,000  | 8,550,000  | 113 | 842  | 0.378335172  |                    |
| 1 | 8,475,000  | 8,625,000  | 114 | 596  | 0.307209624  |                    |
| 1 | 8,550,000  | 8,700,000  | 115 | 507  | 0.28939917   |                    |
| 1 | 8,625,000  | 8,775,000  | 116 | 372  | 0.237027341  |                    |
| 1 | 8,700,000  | 8,850,000  | 117 | 218  | 0.175225215  | ADAMTS5            |
| 1 | 8,775,000  | 8,925,000  | 118 | 238  | 0.863033879  | ADAMTS5            |
| 1 | 8,850,000  | 9,000,000  | 119 | 512  | 0.98395754   | ADAMTS1,ADAMTS5    |
| 1 | 8,925,000  | 9,075,000  | 120 | 726  | 0.852468875  | ADAMTS1            |
| 1 | 9,000,000  | 9,150,000  | 121 | 684  | 0.7302568    |                    |
| 1 | 9,075,000  | 9,225,000  | 122 | 646  | 0.051460291  |                    |
| 1 | 9,150,000  | 9,300,000  | 123 | 659  | 0.072272215  | CYR1               |
| 1 | 9,225,000  | 9,375,000  | 124 | 548  | 1.125128791  | CYR1               |
| 1 | 9,300,000  | 9,450,000  | 125 | 759  | 0.85170616   |                    |
| 1 | 9,375,000  | 9,525,000  | 126 | 1254 | 0.954467835  |                    |
| 1 | 9,450,000  | 9,600,000  | 127 | 1479 | 1.024831741  |                    |
| 1 | 9,525,000  | 9,675,000  | 128 | 1353 | 0.178891749  | APP                |
| 1 | 9,600,000  | 9,750,000  | 129 | 1114 | -0.712357272 | APP                |
| 1 | 9,675,000  | 9,825,000  | 130 | 1118 | 0.062592578  | APP                |
| 1 | 9,750,000  | 9,900,000  | 131 | 965  | 0.081321806  | APP                |
| 1 | 9,825,000  | 9,975,000  | 132 | 1122 | -2.872726054 | APP                |
| 1 | 9,900,000  | 10,050,000 | 133 | 992  | -2.732420422 | APP,GABPA          |
| 1 | 9,975,000  | 10,125,000 | 134 | 420  | 0.903285117  | ATP5J,GABPA,JAM2   |
| 1 | 10,050,000 | 10,200,000 | 135 | 705  | 0.705650234  | ATP5J,GABPA,JAM2   |
| 1 | 10,125,000 | 10,275,000 | 136 | 736  | 0.738616787  | JAM2,MRPL39        |
| 1 | 10,200,000 | 10,350,000 | 137 | 374  | 0.813289433  | MRPL39             |
| 1 | 10,275,000 | 10,425,000 | 138 | 361  | 0.24054479   |                    |
| 1 | 10,350,000 | 10,500,000 | 139 | 415  | -0.658864049 |                    |
| 1 | 10,425,000 | 10,575,000 | 140 | 375  | -1.004213771 |                    |
| 1 | 10,500,000 | 10,650,000 | 141 | 603  | -1.449330487 |                    |
| 1 | 10,575,000 | 10,725,000 | 142 | 649  | -1.293509864 |                    |
| 1 | 10,650,000 | 10,800,000 | 143 | 408  | -0.123616822 |                    |
| 1 | 10,725,000 | 10,875,000 | 144 | 771  | 0.934795839  |                    |
| 1 | 10,800,000 | 10,950,000 | 145 | 993  | 1.08938916   |                    |
| 1 | 10,875,000 | 11,025,000 | 146 | 648  | 1.102572818  | ENSBTAG00000038900 |
| 1 | 10,950,000 | 11,100,000 | 147 | 664  | 0.462653212  | ENSBTAG00000038900 |
| 1 | 11,025,000 | 11,175,000 | 148 | 1001 | 0.853768902  |                    |
| 1 | 11,100,000 | 11,250,000 | 149 | 905  | 0.963121759  |                    |
| 1 | 11,175,000 | 11,325,000 | 150 | 964  | -0.728874438 |                    |
| 1 | 11,250,000 | 11,400,000 | 151 | 974  | -1.01575449  |                    |
| 1 | 11,325,000 | 11,475,000 | 152 | 652  | -0.987419569 |                    |
| 1 | 11,400,000 | 11,550,000 | 153 | 493  | -0.876648995 |                    |
| 1 | 11,475,000 | 11,625,000 | 154 | 511  | 0.464273877  |                    |

|   |            |            |     |      |              |       |
|---|------------|------------|-----|------|--------------|-------|
| 1 | 11,550,000 | 11,700,000 | 155 | 905  | 0.452881373  |       |
| 1 | 11,625,000 | 11,775,000 | 156 | 1162 | 0.495790772  |       |
| 1 | 11,700,000 | 11,850,000 | 157 | 1204 | 0.66836007   |       |
| 1 | 11,775,000 | 11,925,000 | 158 | 1163 | 0.217628567  |       |
| 1 | 11,850,000 | 12,000,000 | 159 | 643  | -0.180927333 |       |
| 1 | 11,925,000 | 12,075,000 | 160 | 319  | 1.073791215  |       |
| 1 | 12,000,000 | 12,150,000 | 161 | 373  | 0.965101941  |       |
| 1 | 12,075,000 | 12,225,000 | 162 | 439  | 0.458257153  |       |
| 1 | 12,150,000 | 12,300,000 | 163 | 617  | 0.71048756   |       |
| 1 | 12,225,000 | 12,375,000 | 164 | 906  | 0.916982221  |       |
| 1 | 12,300,000 | 12,450,000 | 165 | 1316 | 0.706215507  |       |
| 1 | 12,375,000 | 12,525,000 | 166 | 1564 | 0.445529795  |       |
| 1 | 12,450,000 | 12,600,000 | 167 | 1261 | -0.054294774 |       |
| 1 | 12,525,000 | 12,675,000 | 168 | 909  | -2.926583726 |       |
| 1 | 12,600,000 | 12,750,000 | 169 | 1216 | -2.468777499 |       |
| 1 | 12,675,000 | 12,825,000 | 170 | 1495 | -0.68931759  |       |
| 1 | 12,750,000 | 12,900,000 | 171 | 1410 | -0.808260394 |       |
| 1 | 12,825,000 | 12,975,000 | 172 | 1505 | -0.540976699 |       |
| 1 | 12,900,000 | 13,050,000 | 173 | 1512 | -0.200221366 |       |
| 1 | 12,975,000 | 13,125,000 | 174 | 1034 | -0.410757794 |       |
| 1 | 13,050,000 | 13,200,000 | 175 | 927  | 0.464883955  |       |
| 1 | 13,125,000 | 13,275,000 | 176 | 979  | 0.433303934  |       |
| 1 | 13,200,000 | 13,350,000 | 177 | 1123 | 0.155905331  |       |
| 1 | 13,275,000 | 13,425,000 | 178 | 1200 | 0.098875757  |       |
| 1 | 13,350,000 | 13,500,000 | 179 | 965  | -2.558150474 |       |
| 1 | 13,425,000 | 13,575,000 | 180 | 798  | -2.834091121 |       |
| 1 | 13,500,000 | 13,650,000 | 181 | 885  | -0.501533775 |       |
| 1 | 13,575,000 | 13,725,000 | 182 | 1330 | -1.622732115 |       |
| 1 | 13,650,000 | 13,800,000 | 183 | 1817 | -1.634494353 |       |
| 1 | 13,725,000 | 13,875,000 | 184 | 1872 | -0.436672689 |       |
| 1 | 13,800,000 | 13,950,000 | 185 | 1550 | -0.020197065 |       |
| 1 | 13,875,000 | 14,025,000 | 186 | 1510 | -0.156214997 |       |
| 1 | 13,950,000 | 14,100,000 | 187 | 1603 | 0.441532038  |       |
| 1 | 14,025,000 | 14,175,000 | 188 | 1629 | 1.036973757  |       |
| 1 | 14,100,000 | 14,250,000 | 189 | 1531 | 1.207114727  |       |
| 1 | 14,175,000 | 14,325,000 | 190 | 1393 | -0.291492494 |       |
| 1 | 14,250,000 | 14,400,000 | 191 | 1066 | -3.055042898 |       |
| 1 | 14,325,000 | 14,475,000 | 192 | 929  | -1.448813009 |       |
| 1 | 14,400,000 | 14,550,000 | 193 | 979  | 0.379171841  |       |
| 1 | 14,475,000 | 14,625,000 | 194 | 657  | -0.82968932  |       |
| 1 | 14,550,000 | 14,700,000 | 195 | 707  | -1.502423989 |       |
| 1 | 14,625,000 | 14,775,000 | 196 | 808  | -0.398071271 |       |
| 1 | 14,700,000 | 14,850,000 | 197 | 579  | 0.784062572  | NCAM2 |
| 1 | 14,775,000 | 14,925,000 | 198 | 601  | 0.475167805  | NCAM2 |
| 1 | 14,850,000 | 15,000,000 | 199 | 1108 | -0.151012746 | NCAM2 |
| 1 | 14,925,000 | 15,075,000 | 200 | 1364 | -0.643848088 | NCAM2 |
| 1 | 15,000,000 | 15,150,000 | 201 | 1223 | -0.531577797 | NCAM2 |
| 1 | 15,075,000 | 15,225,000 | 202 | 1169 | 0.046791262  |       |
| 1 | 15,150,000 | 15,300,000 | 203 | 711  | 0.355287625  |       |
| 1 | 15,225,000 | 15,375,000 | 204 | 570  | 0.864478041  |       |
| 1 | 15,300,000 | 15,450,000 | 205 | 811  | 0.432704817  |       |
| 1 | 15,375,000 | 15,525,000 | 206 | 891  | 0.438393594  |       |
| 1 | 15,450,000 | 15,600,000 | 207 | 966  | 0.546767839  |       |

|   |            |            |     |      |              |                               |
|---|------------|------------|-----|------|--------------|-------------------------------|
| 1 | 15,525,000 | 15,675,000 | 208 | 968  | 0.125792453  |                               |
| 1 | 15,600,000 | 15,750,000 | 209 | 763  | -0.497248446 |                               |
| 1 | 15,675,000 | 15,825,000 | 210 | 616  | 0.346362322  |                               |
| 1 | 15,750,000 | 15,900,000 | 211 | 682  | 0.976483048  |                               |
| 1 | 15,825,000 | 15,975,000 | 212 | 673  | 0.663162929  |                               |
| 1 | 15,900,000 | 16,050,000 | 213 | 801  | 0.733799413  |                               |
| 1 | 15,975,000 | 16,125,000 | 214 | 1011 | 0.777710789  |                               |
| 1 | 16,050,000 | 16,200,000 | 215 | 1176 | 0.825722851  |                               |
| 1 | 16,125,000 | 16,275,000 | 216 | 897  | 0.7770269    |                               |
| 1 | 16,200,000 | 16,350,000 | 217 | 643  | -0.386985252 |                               |
| 1 | 16,275,000 | 16,425,000 | 218 | 608  | -0.916808974 |                               |
| 1 | 16,350,000 | 16,500,000 | 219 | 484  | -1.880755858 |                               |
| 1 | 16,425,000 | 16,575,000 | 220 | 1079 | -1.470796561 |                               |
| 1 | 16,500,000 | 16,650,000 | 221 | 1425 | -1.266344089 |                               |
| 1 | 16,575,000 | 16,725,000 | 222 | 1006 | -0.884637307 |                               |
| 1 | 16,650,000 | 16,800,000 | 223 | 612  | 0.19361639   |                               |
| 1 | 16,725,000 | 16,875,000 | 224 | 449  | -0.119067203 |                               |
| 1 | 16,800,000 | 16,950,000 | 225 | 847  | 0.249677426  |                               |
| 1 | 16,875,000 | 17,025,000 | 226 | 1419 | -0.826704656 |                               |
| 1 | 16,950,000 | 17,100,000 | 227 | 1640 | -0.413994704 |                               |
| 1 | 17,025,000 | 17,175,000 | 228 | 1176 | 0.467592979  |                               |
| 1 | 17,100,000 | 17,250,000 | 229 | 622  | -0.062375744 |                               |
| 1 | 17,175,000 | 17,325,000 | 230 | 431  | -0.527884384 |                               |
| 1 | 17,250,000 | 17,400,000 | 231 | 710  | 0.302772863  |                               |
| 1 | 17,325,000 | 17,475,000 | 232 | 1020 | 0.694841676  |                               |
| 1 | 17,400,000 | 17,550,000 | 233 | 1129 | -0.099342058 |                               |
| 1 | 17,475,000 | 17,625,000 | 234 | 1286 | -0.616718217 |                               |
| 1 | 17,550,000 | 17,700,000 | 235 | 1201 | -0.483081277 |                               |
| 1 | 17,625,000 | 17,775,000 | 236 | 998  | 0.074200791  |                               |
| 1 | 17,700,000 | 17,850,000 | 237 | 869  | -0.045982583 |                               |
| 1 | 17,775,000 | 17,925,000 | 238 | 1020 | -0.892862807 |                               |
| 1 | 17,850,000 | 18,000,000 | 239 | 957  | -0.460191977 |                               |
| 1 | 17,925,000 | 18,075,000 | 240 | 905  | 0.680073143  | TMPRSS15                      |
| 1 | 18,000,000 | 18,150,000 | 241 | 947  | 0.62853239   | TMPRSS15                      |
| 1 | 18,075,000 | 18,225,000 | 242 | 1026 | 1.065831346  | CHODL,TMPRSS15                |
| 1 | 18,150,000 | 18,300,000 | 243 | 1291 | 1.279953392  | CHODL,TMPRSS15                |
| 1 | 18,225,000 | 18,375,000 | 244 | 1079 | 1.289767476  | CHODL                         |
| 1 | 18,300,000 | 18,450,000 | 245 | 594  | 0.791939147  |                               |
| 1 | 18,375,000 | 18,525,000 | 246 | 460  | 0.149747554  |                               |
| 1 | 18,450,000 | 18,600,000 | 247 | 466  | 0.607017295  |                               |
| 1 | 18,525,000 | 18,675,000 | 248 | 473  | 1.311526244  |                               |
| 1 | 18,600,000 | 18,750,000 | 249 | 442  | 1.416727277  | C1H21ORF91                    |
| 1 | 18,675,000 | 18,825,000 | 250 | 688  | 1.400983943  | C1H21ORF91                    |
| 1 | 18,750,000 | 18,900,000 | 251 | 1046 | 1.182321556  |                               |
| 1 | 18,825,000 | 18,975,000 | 252 | 930  | 0.653931816  | BTG3,CXADR,ENSBTAG00000047943 |
| 1 | 18,900,000 | 19,050,000 | 253 | 997  | -0.241425613 | BTG3,CXADR,ENSBTAG00000047943 |
| 1 | 18,975,000 | 19,125,000 | 254 | 926  | -0.085763851 | CXADR                         |
| 1 | 19,050,000 | 19,200,000 | 255 | 616  | 1.080774919  |                               |
| 1 | 19,125,000 | 19,275,000 | 256 | 647  | 0.971233188  |                               |
| 1 | 19,200,000 | 19,350,000 | 257 | 864  | 1.14339333   |                               |
| 1 | 19,275,000 | 19,425,000 | 258 | 1017 | 1.250786635  |                               |
| 1 | 19,350,000 | 19,500,000 | 259 | 993  | 0.976827919  |                               |
| 1 | 19,425,000 | 19,575,000 | 260 | 921  | 0.905906031  |                               |

|   |            |            |     |      |              |                    |
|---|------------|------------|-----|------|--------------|--------------------|
| 1 | 19,500,000 | 19,650,000 | 261 | 616  | 0.356109825  |                    |
| 1 | 19,575,000 | 19,725,000 | 262 | 392  | -2.05192664  |                    |
| 1 | 19,650,000 | 19,800,000 | 263 | 731  | -1.717860205 |                    |
| 1 | 19,725,000 | 19,875,000 | 264 | 726  | -1.272644968 | PPP1CA             |
| 1 | 19,800,000 | 19,950,000 | 265 | 339  | 0.289745845  | PPP1CA             |
| 1 | 19,875,000 | 20,025,000 | 266 | 605  | -0.46692415  |                    |
| 1 | 19,950,000 | 20,100,000 | 267 | 1002 | -0.390387186 |                    |
| 1 | 20,025,000 | 20,175,000 | 268 | 978  | 0.082444379  |                    |
| 1 | 20,100,000 | 20,250,000 | 269 | 733  | 0.301500462  |                    |
| 1 | 20,175,000 | 20,325,000 | 270 | 438  | 0.182173143  |                    |
| 1 | 20,250,000 | 20,400,000 | 271 | 332  | 0.735566363  |                    |
| 1 | 20,325,000 | 20,475,000 | 272 | 405  | 0.640755206  | ENSBTAG00000047183 |
| 1 | 20,400,000 | 20,550,000 | 273 | 372  | 0.424884805  | ENSBTAG00000047183 |
| 1 | 20,475,000 | 20,625,000 | 274 | 407  | -2.334809391 |                    |
| 1 | 20,550,000 | 20,700,000 | 275 | 530  | -2.115936563 | USP25              |
| 1 | 20,625,000 | 20,775,000 | 276 | 553  | -0.074980919 | USP25              |
| 1 | 20,700,000 | 20,850,000 | 277 | 603  | -0.899180289 | USP25              |
| 1 | 20,775,000 | 20,925,000 | 278 | 545  | -0.607184849 | USP25              |
| 1 | 20,850,000 | 21,000,000 | 279 | 446  | 0.635595674  |                    |
| 1 | 20,925,000 | 21,075,000 | 280 | 605  | 0.163603629  |                    |
| 1 | 21,000,000 | 21,150,000 | 281 | 622  | -0.976747842 |                    |
| 1 | 21,075,000 | 21,225,000 | 282 | 550  | -1.64355193  |                    |
| 1 | 21,150,000 | 21,300,000 | 283 | 656  | -0.57917364  |                    |
| 1 | 21,225,000 | 21,375,000 | 284 | 686  | 0.657989113  |                    |
| 1 | 21,300,000 | 21,450,000 | 285 | 589  | 0.255608896  |                    |
| 1 | 21,375,000 | 21,525,000 | 286 | 432  | -0.021175382 |                    |
| 1 | 21,450,000 | 21,600,000 | 287 | 334  | 0.187446934  |                    |
| 1 | 21,525,000 | 21,675,000 | 288 | 227  | -0.950063988 |                    |
| 1 | 21,600,000 | 21,750,000 | 289 | 147  | -2.520089787 | NRIP1              |
| 1 | 21,675,000 | 21,825,000 | 290 | 303  | -2.980945916 | NRIP1              |
| 1 | 21,750,000 | 21,900,000 | 291 | 607  | -0.564001565 |                    |
| 1 | 21,825,000 | 21,975,000 | 292 | 987  | 0.803680915  |                    |
| 1 | 21,900,000 | 22,050,000 | 293 | 942  | 0.444194282  |                    |
| 1 | 21,975,000 | 22,125,000 | 294 | 837  | -0.584718599 | SAMSN1             |
| 1 | 22,050,000 | 22,200,000 | 295 | 878  | -1.039637369 | SAMSN1             |
| 1 | 22,125,000 | 22,275,000 | 296 | 935  | -0.99184146  | SAMSN1             |
| 1 | 22,200,000 | 22,350,000 | 297 | 971  | -0.510707761 | HSPA13             |
| 1 | 22,275,000 | 22,425,000 | 298 | 873  | 0.78939069   | HSPA13             |
| 1 | 22,350,000 | 22,500,000 | 299 | 921  | 0.913758325  | LIPI,RBM11         |
| 1 | 22,425,000 | 22,575,000 | 300 | 677  | -0.915347053 | LIPI,RBM11         |
| 1 | 22,500,000 | 22,650,000 | 301 | 417  | -2.769469573 |                    |
| 1 | 22,575,000 | 22,725,000 | 302 | 742  | 0.001455141  |                    |
| 1 | 22,650,000 | 22,800,000 | 303 | 754  | 0.204918722  |                    |
| 1 | 22,725,000 | 22,875,000 | 304 | 705  | 0.598505741  |                    |
| 1 | 22,800,000 | 22,950,000 | 305 | 1044 | 0.598278979  |                    |
| 1 | 22,875,000 | 23,025,000 | 306 | 915  | 0.514577874  |                    |
| 1 | 22,950,000 | 23,100,000 | 307 | 908  | -1.190671554 |                    |
| 1 | 23,025,000 | 23,175,000 | 308 | 1080 | -0.740958163 |                    |
| 1 | 23,100,000 | 23,250,000 | 309 | 1132 | 0.447182035  |                    |
| 1 | 23,175,000 | 23,325,000 | 310 | 970  | -0.17314449  |                    |
| 1 | 23,250,000 | 23,400,000 | 311 | 769  | -0.932752684 |                    |
| 1 | 23,325,000 | 23,475,000 | 312 | 922  | -2.208446835 |                    |
| 1 | 23,400,000 | 23,550,000 | 313 | 690  | -2.544659404 |                    |

|   |            |            |     |      |              |                    |
|---|------------|------------|-----|------|--------------|--------------------|
| 1 | 23,475,000 | 23,625,000 | 314 | 435  | 0.095840133  |                    |
| 1 | 23,550,000 | 23,700,000 | 315 | 584  | 0.462571504  |                    |
| 1 | 23,625,000 | 23,775,000 | 316 | 561  | -0.10126982  |                    |
| 1 | 23,700,000 | 23,850,000 | 317 | 896  | 0.435488622  |                    |
| 1 | 23,775,000 | 23,925,000 | 318 | 1189 | -0.059454179 |                    |
| 1 | 23,850,000 | 24,000,000 | 319 | 1053 | -1.57006962  | ENSBTAG00000046755 |
| 1 | 23,925,000 | 24,075,000 | 320 | 1093 | -0.52297924  | ENSBTAG00000046755 |
| 1 | 24,000,000 | 24,150,000 | 321 | 1392 | 0.780974845  |                    |
| 1 | 24,075,000 | 24,225,000 | 322 | 1544 | 0.720122611  |                    |
| 1 | 24,150,000 | 24,300,000 | 323 | 1276 | 0.275855538  |                    |
| 1 | 24,225,000 | 24,375,000 | 324 | 770  | -0.149756623 |                    |
| 1 | 24,300,000 | 24,450,000 | 325 | 580  | 0.156685518  | ROBO2              |
| 1 | 24,375,000 | 24,525,000 | 326 | 663  | 0.69009162   | ROBO2              |
| 1 | 24,450,000 | 24,600,000 | 327 | 625  | 0.366491404  | ROBO2              |
| 1 | 24,525,000 | 24,675,000 | 328 | 793  | -0.851139492 | ROBO2              |
| 1 | 24,600,000 | 24,750,000 | 329 | 810  | -1.055371514 |                    |
| 1 | 24,675,000 | 24,825,000 | 330 | 903  | -0.447778579 |                    |
| 1 | 24,750,000 | 24,900,000 | 331 | 913  | -0.294429767 |                    |
| 1 | 24,825,000 | 24,975,000 | 332 | 957  | -0.571805893 |                    |
| 1 | 24,900,000 | 25,050,000 | 333 | 1052 | -0.414237863 |                    |
| 1 | 24,975,000 | 25,125,000 | 334 | 1057 | 0.746612091  |                    |
| 1 | 25,050,000 | 25,200,000 | 335 | 949  | 0.508088592  |                    |
| 1 | 25,125,000 | 25,275,000 | 336 | 889  | 0.122651487  |                    |
| 1 | 25,200,000 | 25,350,000 | 337 | 1146 | 0.756071563  |                    |
| 1 | 25,275,000 | 25,425,000 | 338 | 1079 | 0.856776727  |                    |
| 1 | 25,350,000 | 25,500,000 | 339 | 988  | 0.950831713  |                    |
| 1 | 25,425,000 | 25,575,000 | 340 | 1019 | 0.632021479  |                    |
| 1 | 25,500,000 | 25,650,000 | 341 | 803  | 0.097466526  | ROBO1              |
| 1 | 25,575,000 | 25,725,000 | 342 | 484  | 0.075332522  | ROBO1              |
| 1 | 25,650,000 | 25,800,000 | 343 | 434  | -0.777338399 | ROBO1              |
| 1 | 25,725,000 | 25,875,000 | 344 | 704  | -1.614345118 | ROBO1              |
| 1 | 25,800,000 | 25,950,000 | 345 | 669  | -1.454501168 | ROBO1              |
| 1 | 25,875,000 | 26,025,000 | 346 | 622  | -0.28966592  | ROBO1              |
| 1 | 25,950,000 | 26,100,000 | 347 | 867  | 0.323275572  | ROBO1              |
| 1 | 26,025,000 | 26,175,000 | 348 | 1017 | 0.564916336  | ROBO1              |
| 1 | 26,100,000 | 26,250,000 | 349 | 1045 | 0.772016493  | ROBO1              |
| 1 | 26,175,000 | 26,325,000 | 350 | 969  | 0.670183885  | ROBO1              |
| 1 | 26,250,000 | 26,400,000 | 351 | 986  | 0.55044448   |                    |
| 1 | 26,325,000 | 26,475,000 | 352 | 921  | -0.095583321 |                    |
| 1 | 26,400,000 | 26,550,000 | 353 | 643  | -0.261534793 |                    |
| 1 | 26,475,000 | 26,625,000 | 354 | 519  | 0.205364136  |                    |
| 1 | 26,550,000 | 26,700,000 | 355 | 896  | 0.414645471  |                    |
| 1 | 26,625,000 | 26,775,000 | 356 | 1095 | 0.295042358  |                    |
| 1 | 26,700,000 | 26,850,000 | 357 | 1058 | -0.438681532 |                    |
| 1 | 26,775,000 | 26,925,000 | 358 | 1315 | 0.445400411  |                    |
| 1 | 26,850,000 | 27,000,000 | 359 | 1599 | 0.443795401  |                    |
| 1 | 26,925,000 | 27,075,000 | 360 | 1194 | 0.393835631  |                    |
| 1 | 27,000,000 | 27,150,000 | 361 | 768  | 1.01001988   |                    |
| 1 | 27,075,000 | 27,225,000 | 362 | 530  | 0.954220429  |                    |
| 1 | 27,150,000 | 27,300,000 | 363 | 519  | -1.040095323 |                    |
| 1 | 27,225,000 | 27,375,000 | 364 | 1098 | -0.369588199 |                    |
| 1 | 27,300,000 | 27,450,000 | 365 | 1058 | 0.191118589  |                    |
| 1 | 27,375,000 | 27,525,000 | 366 | 763  | 0.315010475  |                    |

|   |            |            |     |      |              |                         |
|---|------------|------------|-----|------|--------------|-------------------------|
| 1 | 27,450,000 | 27,600,000 | 367 | 674  | 0.384906751  |                         |
| 1 | 27,525,000 | 27,675,000 | 368 | 464  | 0.223577429  |                         |
| 1 | 27,600,000 | 27,750,000 | 369 | 427  | -0.48312956  |                         |
| 1 | 27,675,000 | 27,825,000 | 370 | 813  | 0.927318381  |                         |
| 1 | 27,750,000 | 27,900,000 | 371 | 1033 | 0.930503189  |                         |
| 1 | 27,825,000 | 27,975,000 | 372 | 1025 | 0.351494558  |                         |
| 1 | 27,900,000 | 28,050,000 | 373 | 981  | 0.507453761  |                         |
| 1 | 27,975,000 | 28,125,000 | 374 | 771  | -0.187988941 |                         |
| 1 | 28,050,000 | 28,200,000 | 375 | 614  | -1.130001754 |                         |
| 1 | 28,125,000 | 28,275,000 | 376 | 505  | -1.217837524 |                         |
| 1 | 28,200,000 | 28,350,000 | 377 | 816  | 0.188924554  |                         |
| 1 | 28,275,000 | 28,425,000 | 378 | 989  | 0.644332519  |                         |
| 1 | 28,350,000 | 28,500,000 | 379 | 703  | 0.121533276  |                         |
| 1 | 28,425,000 | 28,575,000 | 380 | 416  | -0.219324232 |                         |
| 1 | 28,500,000 | 28,650,000 | 381 | 563  | 0.401762906  | ENSBTAG00000008359      |
| 1 | 28,575,000 | 28,725,000 | 382 | 791  | 0.245641076  | GBE1,ENSBTAG00000008359 |
| 1 | 28,650,000 | 28,800,000 | 383 | 526  | -0.394927496 | GBE1                    |
| 1 | 28,725,000 | 28,875,000 | 384 | 646  | 0.331416788  | GBE1                    |
| 1 | 28,800,000 | 28,950,000 | 385 | 822  | -0.025643367 | GBE1                    |
| 1 | 28,875,000 | 29,025,000 | 386 | 562  | -0.671619626 | GBE1                    |
| 1 | 28,950,000 | 29,100,000 | 387 | 577  | 0.607206668  |                         |
| 1 | 29,025,000 | 29,175,000 | 388 | 537  | 0.162543717  |                         |
| 1 | 29,100,000 | 29,250,000 | 389 | 334  | -1.570221673 |                         |
| 1 | 29,175,000 | 29,325,000 | 390 | 808  | 1.120667441  |                         |
| 1 | 29,250,000 | 29,400,000 | 391 | 959  | 0.934884712  |                         |
| 1 | 29,325,000 | 29,475,000 | 392 | 814  | 0.234467002  |                         |
| 1 | 29,400,000 | 29,550,000 | 393 | 1066 | 0.737045031  |                         |
| 1 | 29,475,000 | 29,625,000 | 394 | 805  | 0.52642807   |                         |
| 1 | 29,550,000 | 29,700,000 | 395 | 455  | -0.429490395 |                         |
| 1 | 29,625,000 | 29,775,000 | 396 | 437  | -0.249240675 |                         |
| 1 | 29,700,000 | 29,850,000 | 397 | 898  | 0.36869441   |                         |
| 1 | 29,775,000 | 29,925,000 | 398 | 1270 | 0.861540722  |                         |
| 1 | 29,850,000 | 30,000,000 | 399 | 1267 | 1.055576103  |                         |
| 1 | 29,925,000 | 30,075,000 | 400 | 895  | 0.745610516  |                         |
| 1 | 30,000,000 | 30,150,000 | 401 | 725  | -0.014196641 |                         |
| 1 | 30,075,000 | 30,225,000 | 402 | 1175 | -1.654081066 |                         |
| 1 | 30,150,000 | 30,300,000 | 403 | 1427 | -1.210680803 |                         |
| 1 | 30,225,000 | 30,375,000 | 404 | 1453 | -0.273334539 | ENSBTAG00000046383      |
| 1 | 30,300,000 | 30,450,000 | 405 | 919  | -0.522838818 | ENSBTAG00000046383      |
| 1 | 30,375,000 | 30,525,000 | 406 | 504  | 0.177697728  |                         |
| 1 | 30,450,000 | 30,600,000 | 407 | 679  | 0.00240187   |                         |
| 1 | 30,525,000 | 30,675,000 | 408 | 1347 | -0.285322333 |                         |
| 1 | 30,600,000 | 30,750,000 | 409 | 1574 | -0.789566237 |                         |
| 1 | 30,675,000 | 30,825,000 | 410 | 1001 | -1.252443724 |                         |
| 1 | 30,750,000 | 30,900,000 | 411 | 767  | 0.157975508  |                         |
| 1 | 30,825,000 | 30,975,000 | 412 | 758  | 0.896372392  |                         |
| 1 | 30,900,000 | 31,050,000 | 413 | 702  | -0.000879291 |                         |
| 1 | 30,975,000 | 31,125,000 | 414 | 1006 | -0.181409153 |                         |
| 1 | 31,050,000 | 31,200,000 | 415 | 1257 | 0.84311868   |                         |
| 1 | 31,125,000 | 31,275,000 | 416 | 1124 | 0.894300219  |                         |
| 1 | 31,200,000 | 31,350,000 | 417 | 1118 | 0.67185614   |                         |
| 1 | 31,275,000 | 31,425,000 | 418 | 1003 | 0.597694097  |                         |
| 1 | 31,350,000 | 31,500,000 | 419 | 617  | 0.586889068  |                         |

|   |            |            |     |      |              |              |
|---|------------|------------|-----|------|--------------|--------------|
| 1 | 31,425,000 | 31,575,000 | 420 | 368  | 0.935522098  |              |
| 1 | 31,500,000 | 31,650,000 | 421 | 368  | 1.216718695  |              |
| 1 | 31,575,000 | 31,725,000 | 422 | 723  | 1.205431683  |              |
| 1 | 31,650,000 | 31,800,000 | 423 | 933  | 1.039064524  |              |
| 1 | 31,725,000 | 31,875,000 | 424 | 1151 | 0.425185146  |              |
| 1 | 31,800,000 | 31,950,000 | 425 | 1451 | 0.701022183  |              |
| 1 | 31,875,000 | 32,025,000 | 426 | 1277 | 1.136841306  |              |
| 1 | 31,950,000 | 32,100,000 | 427 | 1050 | 1.109685645  |              |
| 1 | 32,025,000 | 32,175,000 | 428 | 784  | 0.712854589  |              |
| 1 | 32,100,000 | 32,250,000 | 429 | 722  | 0.338902483  |              |
| 1 | 32,175,000 | 32,325,000 | 430 | 646  | -0.125905206 |              |
| 1 | 32,250,000 | 32,400,000 | 431 | 515  | -0.134479295 |              |
| 1 | 32,325,000 | 32,475,000 | 432 | 700  | 0.167066278  |              |
| 1 | 32,400,000 | 32,550,000 | 433 | 1012 | 0.355000506  |              |
| 1 | 32,475,000 | 32,625,000 | 434 | 1378 | -0.056325537 |              |
| 1 | 32,550,000 | 32,700,000 | 435 | 1582 | 0.109713063  |              |
| 1 | 32,625,000 | 32,775,000 | 436 | 1343 | 1.005959372  |              |
| 1 | 32,700,000 | 32,850,000 | 437 | 1274 | 1.156064496  |              |
| 1 | 32,775,000 | 32,925,000 | 438 | 1317 | 1.002706194  |              |
| 1 | 32,850,000 | 33,000,000 | 439 | 1136 | 0.296666891  |              |
| 1 | 32,925,000 | 33,075,000 | 440 | 1208 | 0.008739818  |              |
| 1 | 33,000,000 | 33,150,000 | 441 | 1612 | 0.418650469  |              |
| 1 | 33,075,000 | 33,225,000 | 442 | 1721 | 0.794798238  |              |
| 1 | 33,150,000 | 33,300,000 | 443 | 1317 | 0.504938442  | CADM2        |
| 1 | 33,225,000 | 33,375,000 | 444 | 1015 | -0.027319977 | CADM2        |
| 1 | 33,300,000 | 33,450,000 | 445 | 867  | 0.187153069  | CADM2        |
| 1 | 33,375,000 | 33,525,000 | 446 | 899  | 0.506336185  | CADM2        |
| 1 | 33,450,000 | 33,600,000 | 447 | 857  | 0.715798282  | CADM2        |
| 1 | 33,525,000 | 33,675,000 | 448 | 905  | -0.706539196 | CADM2        |
| 1 | 33,600,000 | 33,750,000 | 449 | 1026 | -0.45746072  | CADM2        |
| 1 | 33,675,000 | 33,825,000 | 450 | 668  | 1.078913761  |              |
| 1 | 33,750,000 | 33,900,000 | 451 | 281  | 1.205073964  |              |
| 1 | 33,825,000 | 33,975,000 | 452 | 390  | 1.116337931  |              |
| 1 | 33,900,000 | 34,050,000 | 453 | 709  | 0.371150692  |              |
| 1 | 33,975,000 | 34,125,000 | 454 | 811  | -0.414369153 |              |
| 1 | 34,050,000 | 34,200,000 | 455 | 819  | -0.969468923 |              |
| 1 | 34,125,000 | 34,275,000 | 456 | 904  | -3.1072595   |              |
| 1 | 34,200,000 | 34,350,000 | 457 | 783  | -3.98919372  |              |
| 1 | 34,275,000 | 34,425,000 | 458 | 603  | -0.659228216 |              |
| 1 | 34,350,000 | 34,500,000 | 459 | 753  | -0.396053912 |              |
| 1 | 34,425,000 | 34,575,000 | 460 | 751  | -0.798132637 |              |
| 1 | 34,500,000 | 34,650,000 | 461 | 538  | -0.987844297 |              |
| 1 | 34,575,000 | 34,725,000 | 462 | 379  | -0.397666481 | VGLL3        |
| 1 | 34,650,000 | 34,800,000 | 463 | 513  | 0.988381283  | VGLL3        |
| 1 | 34,725,000 | 34,875,000 | 464 | 735  | 0.610507567  |              |
| 1 | 34,800,000 | 34,950,000 | 465 | 833  | 0.470704931  |              |
| 1 | 34,875,000 | 35,025,000 | 466 | 924  | 0.916029687  | CHMP2B,PIT-1 |
| 1 | 34,950,000 | 35,100,000 | 467 | 896  | 0.464750618  | CHMP2B,PIT-1 |
| 1 | 35,025,000 | 35,175,000 | 468 | 989  | 0.72994539   |              |
| 1 | 35,100,000 | 35,250,000 | 469 | 1333 | 0.306605388  |              |
| 1 | 35,175,000 | 35,325,000 | 470 | 1339 | -0.400596573 |              |
| 1 | 35,250,000 | 35,400,000 | 471 | 783  | -0.343169958 |              |
| 1 | 35,325,000 | 35,475,000 | 472 | 663  | 0.843403155  |              |

|   |            |            |     |      |              |                       |
|---|------------|------------|-----|------|--------------|-----------------------|
| 1 | 35,400,000 | 35,550,000 | 473 | 626  | 1.060809382  |                       |
| 1 | 35,475,000 | 35,625,000 | 474 | 481  | 1.088152238  | 5HTR1F                |
| 1 | 35,550,000 | 35,700,000 | 475 | 418  | 1.071225439  | 5HTR1F,CGGBP1,ZNF654  |
| 1 | 35,625,000 | 35,775,000 | 476 | 257  | 0.981051033  | C3orf38,CGGBP1,ZNF654 |
| 1 | 35,700,000 | 35,850,000 | 477 | 456  | 0.93185735   | C3orf38,ZNF654        |
| 1 | 35,775,000 | 35,925,000 | 478 | 639  | 0.743677705  |                       |
| 1 | 35,850,000 | 36,000,000 | 479 | 827  | 0.564703993  |                       |
| 1 | 35,925,000 | 36,075,000 | 480 | 1089 | 0.513946091  |                       |
| 1 | 36,000,000 | 36,150,000 | 481 | 888  | 0.503779778  | ENSBTAG00000045590    |
| 1 | 36,075,000 | 36,225,000 | 482 | 495  | 0.730308863  | ENSBTAG00000045590    |
| 1 | 36,150,000 | 36,300,000 | 483 | 695  | 0.601826646  |                       |
| 1 | 36,225,000 | 36,375,000 | 484 | 689  | 0.346546362  |                       |
| 1 | 36,300,000 | 36,450,000 | 485 | 575  | 0.532923825  |                       |
| 1 | 36,375,000 | 36,525,000 | 486 | 659  | 0.820910709  |                       |
| 1 | 36,450,000 | 36,600,000 | 487 | 609  | 0.417590024  |                       |
| 1 | 36,525,000 | 36,675,000 | 488 | 812  | -0.338345731 |                       |
| 1 | 36,600,000 | 36,750,000 | 489 | 708  | -0.467029461 |                       |
| 1 | 36,675,000 | 36,825,000 | 490 | 369  | 0.055169453  |                       |
| 1 | 36,750,000 | 36,900,000 | 491 | 467  | 0.319717967  | EPHA3                 |
| 1 | 36,825,000 | 36,975,000 | 492 | 728  | 0.356780847  | EPHA3                 |
| 1 | 36,900,000 | 37,050,000 | 493 | 711  | 0.76301653   | EPHA3                 |
| 1 | 36,975,000 | 37,125,000 | 494 | 401  | 1.260576638  | EPHA3                 |
| 1 | 37,050,000 | 37,200,000 | 495 | 376  | 0.65055388   | EPHA3                 |
| 1 | 37,125,000 | 37,275,000 | 496 | 682  | -2.382466409 |                       |
| 1 | 37,200,000 | 37,350,000 | 497 | 918  | -3.78252059  |                       |
| 1 | 37,275,000 | 37,425,000 | 498 | 1019 | -3.465599238 |                       |
| 1 | 37,350,000 | 37,500,000 | 499 | 748  | -2.082299437 |                       |
| 1 | 37,425,000 | 37,575,000 | 500 | 808  | 0.667068825  |                       |
| 1 | 37,500,000 | 37,650,000 | 501 | 1043 | 0.899272162  |                       |
| 1 | 37,575,000 | 37,725,000 | 502 | 692  | 0.801189045  |                       |
| 1 | 37,650,000 | 37,800,000 | 503 | 460  | -0.391393403 |                       |
| 1 | 37,725,000 | 37,875,000 | 504 | 871  | -0.888148328 | PROS1                 |
| 1 | 37,800,000 | 37,950,000 | 505 | 743  | -0.694856054 | ARL13B,PROS1,STX19    |
| 1 | 37,875,000 | 38,025,000 | 506 | 209  | 0.50828426   | ARL13B,NSUN3,STX19    |
| 1 | 37,950,000 | 38,100,000 | 507 | 162  | 0.998661102  | ARL13B,NSUN3          |
| 1 | 38,025,000 | 38,175,000 | 508 | 345  | 0.917031671  |                       |
| 1 | 38,100,000 | 38,250,000 | 509 | 800  | 1.149422362  |                       |
| 1 | 38,175,000 | 38,325,000 | 510 | 1287 | 1.158281208  |                       |
| 1 | 38,250,000 | 38,400,000 | 511 | 1146 | 1.022988537  |                       |
| 1 | 38,325,000 | 38,475,000 | 512 | 826  | 0.921491367  |                       |
| 1 | 38,400,000 | 38,550,000 | 513 | 746  | 0.649349049  |                       |
| 1 | 38,475,000 | 38,625,000 | 514 | 523  | 0.005315159  |                       |
| 1 | 38,550,000 | 38,700,000 | 515 | 471  | -0.186279677 |                       |
| 1 | 38,625,000 | 38,775,000 | 516 | 456  | 0.047203594  |                       |
| 1 | 38,700,000 | 38,850,000 | 517 | 426  | -0.465680212 |                       |
| 1 | 38,775,000 | 38,925,000 | 518 | 828  | -0.245664969 |                       |
| 1 | 38,850,000 | 39,000,000 | 519 | 1439 | 0.404730168  |                       |
| 1 | 38,925,000 | 39,075,000 | 520 | 1192 | 0.448423644  |                       |
| 1 | 39,000,000 | 39,150,000 | 521 | 691  | 0.136189641  |                       |
| 1 | 39,075,000 | 39,225,000 | 522 | 610  | -0.104542617 |                       |
| 1 | 39,150,000 | 39,300,000 | 523 | 1003 | 0.096522494  |                       |
| 1 | 39,225,000 | 39,375,000 | 524 | 1531 | 0.445905253  |                       |
| 1 | 39,300,000 | 39,450,000 | 525 | 1077 | 0.299541656  |                       |



|   |            |            |     |      |              |                                                         |
|---|------------|------------|-----|------|--------------|---------------------------------------------------------|
| 1 | 39,375,000 | 39,525,000 | 526 | 629  | -0.820449757 |                                                         |
| 1 | 39,450,000 | 39,600,000 | 527 | 1103 | -2.388263188 |                                                         |
| 1 | 39,525,000 | 39,675,000 | 528 | 1377 | -2.408841478 |                                                         |
| 1 | 39,600,000 | 39,750,000 | 529 | 1212 | -0.612959295 |                                                         |
| 1 | 39,675,000 | 39,825,000 | 530 | 1030 | -0.85358794  |                                                         |
| 1 | 39,750,000 | 39,900,000 | 531 | 1248 | -0.541913153 |                                                         |
| 1 | 39,825,000 | 39,975,000 | 532 | 1167 | 0.318847129  |                                                         |
| 1 | 39,900,000 | 40,050,000 | 533 | 522  | -0.640571156 |                                                         |
| 1 | 39,975,000 | 40,125,000 | 534 | 400  | -1.283314777 |                                                         |
| 1 | 40,050,000 | 40,200,000 | 535 | 558  | -0.2136033   |                                                         |
| 1 | 40,125,000 | 40,275,000 | 536 | 903  | -0.172086184 |                                                         |
| 1 | 40,200,000 | 40,350,000 | 537 | 972  | -0.559414593 |                                                         |
| 1 | 40,275,000 | 40,425,000 | 538 | 761  | 0.067147228  |                                                         |
| 1 | 40,350,000 | 40,500,000 | 539 | 564  | 0.628073083  |                                                         |
| 1 | 40,425,000 | 40,575,000 | 540 | 479  | 0.785609445  |                                                         |
| 1 | 40,500,000 | 40,650,000 | 541 | 846  | 0.742806803  | EPHA6                                                   |
| 1 | 40,575,000 | 40,725,000 | 542 | 818  | 0.388813195  | EPHA6                                                   |
| 1 | 40,650,000 | 40,800,000 | 543 | 505  | 0.574496038  | EPHA6                                                   |
| 1 | 40,725,000 | 40,875,000 | 544 | 613  | -0.043594185 | EPHA6                                                   |
| 1 | 40,800,000 | 40,950,000 | 545 | 850  | -0.272472142 | EPHA6                                                   |
| 1 | 40,875,000 | 41,025,000 | 546 | 869  | -0.575762361 | EPHA6                                                   |
| 1 | 40,950,000 | 41,100,000 | 547 | 702  | -0.287077313 | EPHA6                                                   |
| 1 | 41,025,000 | 41,175,000 | 548 | 511  | 0.863604307  | EPHA6                                                   |
| 1 | 41,100,000 | 41,250,000 | 549 | 493  | 0.620674584  | EPHA6                                                   |
| 1 | 41,175,000 | 41,325,000 | 550 | 527  | 0.190411048  | EPHA6                                                   |
| 1 | 41,250,000 | 41,400,000 | 551 | 490  | 0.37866247   | EPHA6                                                   |
| 1 | 41,325,000 | 41,475,000 | 552 | 506  | 0.521614425  | EPHA6                                                   |
| 1 | 41,400,000 | 41,550,000 | 553 | 624  | 0.499882098  | EPHA6                                                   |
| 1 | 41,475,000 | 41,625,000 | 554 | 796  | 0.392634762  | EPHA6                                                   |
| 1 | 41,550,000 | 41,700,000 | 555 | 669  | 0.516245702  | ARL6,EPHA6                                              |
| 1 | 41,625,000 | 41,775,000 | 556 | 683  | 0.707708778  | ARL6,CRYBG3,ENSBTAG00000047147                          |
| 1 | 41,700,000 | 41,850,000 | 557 | 666  | 0.366835994  | CRYBG3,MINA,ENSBTAG00000047147                          |
| 1 | 41,775,000 | 41,925,000 | 558 | 569  | 0.719649698  | CRYBG3,GABRR3,MINA                                      |
| 1 | 41,850,000 | 42,000,000 | 559 | 928  | 0.760522953  | GABRR3,MINA,ENSBTAG00000023668,ENSBTAG00000047095       |
| 1 | 41,925,000 | 42,075,000 | 560 | 988  | 0.543016672  | ENSBTAG00000023668,ENSBTAG00000047095                   |
| 1 | 42,000,000 | 42,150,000 | 561 | 1468 | 0.621741685  | ENSBTAG00000022908,ENSBTAG00000027113                   |
| 1 | 42,075,000 | 42,225,000 | 562 | 1785 | -0.085730644 | ENSBTAG00000022908,ENSBTAG00000027113,ENSBTAG0000033437 |
| 1 | 42,150,000 | 42,300,000 | 563 | 1501 | 0.12224918   | ENSBTAG00000033437                                      |
| 1 | 42,225,000 | 42,375,000 | 564 | 1534 | 0.901709089  | ENSBTAG00000037820,ENSBTAG00000047371                   |
| 1 | 42,300,000 | 42,450,000 | 565 | 999  | 0.989204601  | ENSBTAG00000027782,ENSBTAG00000037820,ENSBTAG0000047371 |
| 1 | 42,375,000 | 42,525,000 | 566 | 477  | 0.939453352  | CLDND1,CPOX,GPR15,ENSBTAG00000027782                    |
| 1 | 42,450,000 | 42,600,000 | 567 | 849  | 1.066766913  | CLDND1,CPOX,GPR15,ENSBTAG00000023666                    |
| 1 | 42,525,000 | 42,675,000 | 568 | 916  | 0.899450286  | CPOX,ENSBTAG00000023666                                 |
| 1 | 42,600,000 | 42,750,000 | 569 | 445  | 0.572479496  | DCBLD2,ST3GAL6                                          |
| 1 | 42,675,000 | 42,825,000 | 570 | 405  | 0.644321268  | DCBLD2,ST3GAL6                                          |
| 1 | 42,750,000 | 42,900,000 | 571 | 438  | 0.378698419  | DCBLD2                                                  |
| 1 | 42,825,000 | 42,975,000 | 572 | 449  | 0.03396324   |                                                         |
| 1 | 42,900,000 | 43,050,000 | 573 | 491  | -0.230489752 |                                                         |
| 1 | 42,975,000 | 43,125,000 | 574 | 388  | -0.597010551 |                                                         |
| 1 | 43,050,000 | 43,200,000 | 575 | 470  | -0.527981209 |                                                         |

|   |            |            |     |      |              |                                                  |
|---|------------|------------|-----|------|--------------|--------------------------------------------------|
| 1 | 43,125,000 | 43,275,000 | 576 | 611  | -1.619782419 |                                                  |
| 1 | 43,200,000 | 43,350,000 | 577 | 764  | -1.5482815   |                                                  |
| 1 | 43,275,000 | 43,425,000 | 578 | 996  | -0.509523347 |                                                  |
| 1 | 43,350,000 | 43,500,000 | 579 | 913  | 0.150932367  |                                                  |
| 1 | 43,425,000 | 43,575,000 | 580 | 649  | 0.50615596   | COL8A1                                           |
| 1 | 43,500,000 | 43,650,000 | 581 | 660  | 0.619126697  | COL8A1                                           |
| 1 | 43,575,000 | 43,725,000 | 582 | 689  | 0.586686595  | COL8A1                                           |
| 1 | 43,650,000 | 43,800,000 | 583 | 604  | 0.729718938  | CMSS1, COL8A1, FILIP1L                           |
| 1 | 43,725,000 | 43,875,000 | 584 | 511  | 1.040282806  | CMSS1, FILIP1L                                   |
| 1 | 43,800,000 | 43,950,000 | 585 | 516  | 0.837391728  | CMSS1                                            |
| 1 | 43,875,000 | 44,025,000 | 586 | 504  | 0.55000066   | CMSS1                                            |
| 1 | 43,950,000 | 44,100,000 | 587 | 318  | -0.152910899 | CMSS1                                            |
| 1 | 44,025,000 | 44,175,000 | 588 | 249  | -2.165242567 | CMSS1, TMEM30C                                   |
| 1 | 44,100,000 | 44,250,000 | 589 | 305  | -2.338695365 | CMSS1, TBC1D23, TMEM30C                          |
| 1 | 44,175,000 | 44,325,000 | 590 | 451  | -0.08209393  | NIT2, TBC1D23, TOMM70A                           |
| 1 | 44,250,000 | 44,400,000 | 591 | 445  | 0.805166902  | LNP1, NIT2, TBC1D23, TOMM70A, ENSBTAG00000013321 |
| 1 | 44,325,000 | 44,475,000 | 592 | 431  | 0.729698233  | LNP1, TOMM70A, ENSBTAG00000013321                |
| 1 | 44,400,000 | 44,550,000 | 593 | 707  | 0.903075301  | ENSBTAG00000013321                               |
| 1 | 44,475,000 | 44,625,000 | 594 | 1044 | 0.147264344  | ENSBTAG00000013321                               |
| 1 | 44,550,000 | 44,700,000 | 595 | 1051 | 0.00625193   | EFHB                                             |
| 1 | 44,625,000 | 44,775,000 | 596 | 772  | 0.392273329  | EFHB, PP2D1, RAB5A                               |
| 1 | 44,700,000 | 44,850,000 | 597 | 938  | 0.856657769  | EFHB, PP2D1, RAB5A                               |
| 1 | 44,775,000 | 44,925,000 | 598 | 933  | 0.761813213  | PCAF                                             |
| 1 | 44,850,000 | 45,000,000 | 599 | 709  | -0.079046929 | PCAF, SGOL1                                      |
| 1 | 44,925,000 | 45,075,000 | 600 | 934  | 0.726201348  | PCAF, PRDM9, SGOL1                               |
| 1 | 45,000,000 | 45,150,000 | 601 | 874  | 0.804787749  | PRDM9, ENSBTAG00000047076                        |
| 1 | 45,075,000 | 45,225,000 | 602 | 1006 | -1.161371593 | PRDM9, ENSBTAG00000047076                        |
| 1 | 45,150,000 | 45,300,000 | 603 | 1150 | -0.987306879 | ENSBTAG00000004459                               |
| 1 | 45,225,000 | 45,375,000 | 604 | 969  | 0.772892533  | ENSBTAG00000004459                               |
| 1 | 45,300,000 | 45,450,000 | 605 | 889  | 0.378400876  | GPR128, ENSBTAG00000004459                       |
| 1 | 45,375,000 | 45,525,000 | 606 | 694  | 0.614752337  | ABI3BP, GPR128, TFG, ENSBTAG00000004459          |
| 1 | 45,450,000 | 45,600,000 | 607 | 737  | 0.974272768  | ABI3BP, GPR128, TFG                              |
| 1 | 45,525,000 | 45,675,000 | 608 | 867  | 0.733906204  | ABI3BP                                           |
| 1 | 45,600,000 | 45,750,000 | 609 | 937  | 0.287755496  | ABI3BP                                           |
| 1 | 45,675,000 | 45,825,000 | 610 | 996  | 0.131723196  | ABI3BP                                           |
| 1 | 45,750,000 | 45,900,000 | 611 | 647  | -0.129481265 | ABI3BP                                           |
| 1 | 45,825,000 | 45,975,000 | 612 | 390  | 0.016711756  |                                                  |
| 1 | 45,900,000 | 46,050,000 | 613 | 329  | 0.746843634  |                                                  |
| 1 | 45,975,000 | 46,125,000 | 614 | 287  | 0.461755026  | IMPG2                                            |
| 1 | 46,050,000 | 46,200,000 | 615 | 295  | 0.29799198   | IMPG2, SENP7                                     |
| 1 | 46,125,000 | 46,275,000 | 616 | 213  | 0.789387448  | IMPG2, SENP7                                     |
| 1 | 46,200,000 | 46,350,000 | 617 | 177  | 0.350940622  | FAM172A, SENP7, TRMT10C                          |
| 1 | 46,275,000 | 46,425,000 | 618 | 133  | 0.158262781  | FAM172A, PCNP, RPL24, SENP7, TRMT10C, ZBTB11     |
| 1 | 46,350,000 | 46,500,000 | 619 | 180  | 1.161986386  | CEP97, NXPE3, PCNP, RPL24, ZBTB11                |
| 1 | 46,425,000 | 46,575,000 | 620 | 307  | 1.327070882  | CEP97, NFKBIZ, NXPE3                             |
| 1 | 46,500,000 | 46,650,000 | 621 | 243  | 0.743807651  | NFKBIZ, NXPE3                                    |
| 1 | 46,575,000 | 46,725,000 | 622 | 337  | -0.474788536 |                                                  |
| 1 | 46,650,000 | 46,800,000 | 623 | 682  | 0.238719218  |                                                  |
| 1 | 46,725,000 | 46,875,000 | 624 | 830  | -0.302882179 |                                                  |
| 1 | 46,800,000 | 46,950,000 | 625 | 631  | -0.713270391 |                                                  |
| 1 | 46,875,000 | 47,025,000 | 626 | 487  | 0.559777939  | ENSBTAG00000024806                               |
| 1 | 46,950,000 | 47,100,000 | 627 | 587  | 0.696332626  | ENSBTAG00000024806, ENSBTAG00000047093           |
| 1 | 47,025,000 | 47,175,000 | 628 | 1140 | 0.486621822  | ENSBTAG00000047093                               |

|   |            |            |     |      |              |                    |
|---|------------|------------|-----|------|--------------|--------------------|
| 1 | 47,100,000 | 47,250,000 | 629 | 1497 | 0.780848506  |                    |
| 1 | 47,175,000 | 47,325,000 | 630 | 994  | 0.902730043  | ZPLD1              |
| 1 | 47,250,000 | 47,400,000 | 631 | 905  | 1.039015003  | ZPLD1              |
| 1 | 47,325,000 | 47,475,000 | 632 | 949  | 0.418015036  |                    |
| 1 | 47,400,000 | 47,550,000 | 633 | 552  | -1.117366139 |                    |
| 1 | 47,475,000 | 47,625,000 | 634 | 592  | 0.946064965  |                    |
| 1 | 47,550,000 | 47,700,000 | 635 | 981  | 1.056006839  |                    |
| 1 | 47,625,000 | 47,775,000 | 636 | 1082 | 0.735317972  |                    |
| 1 | 47,700,000 | 47,850,000 | 637 | 645  | 0.312080887  |                    |
| 1 | 47,775,000 | 47,925,000 | 638 | 295  | 0.32055155   |                    |
| 1 | 47,850,000 | 48,000,000 | 639 | 746  | 0.314048955  |                    |
| 1 | 47,925,000 | 48,075,000 | 640 | 1351 | 0.49962712   |                    |
| 1 | 48,000,000 | 48,150,000 | 641 | 1565 | 0.874919401  |                    |
| 1 | 48,075,000 | 48,225,000 | 642 | 1274 | 0.919079085  |                    |
| 1 | 48,150,000 | 48,300,000 | 643 | 751  | 0.638168908  |                    |
| 1 | 48,225,000 | 48,375,000 | 644 | 880  | 1.079721979  |                    |
| 1 | 48,300,000 | 48,450,000 | 645 | 1159 | 1.131923872  |                    |
| 1 | 48,375,000 | 48,525,000 | 646 | 1391 | 0.423560739  |                    |
| 1 | 48,450,000 | 48,600,000 | 647 | 1453 | 0.527634243  |                    |
| 1 | 48,525,000 | 48,675,000 | 648 | 1296 | 0.553984502  |                    |
| 1 | 48,600,000 | 48,750,000 | 649 | 1110 | -0.024744023 |                    |
| 1 | 48,675,000 | 48,825,000 | 650 | 983  | 0.892599161  |                    |
| 1 | 48,750,000 | 48,900,000 | 651 | 1286 | 0.729475437  |                    |
| 1 | 48,825,000 | 48,975,000 | 652 | 1365 | 0.595870914  |                    |
| 1 | 48,900,000 | 49,050,000 | 653 | 1177 | 0.7967727    |                    |
| 1 | 48,975,000 | 49,125,000 | 654 | 1177 | 0.634680278  |                    |
| 1 | 49,050,000 | 49,200,000 | 655 | 1017 | 0.23284414   |                    |
| 1 | 49,125,000 | 49,275,000 | 656 | 930  | 0.308132318  |                    |
| 1 | 49,200,000 | 49,350,000 | 657 | 1083 | 0.863678506  |                    |
| 1 | 49,275,000 | 49,425,000 | 658 | 912  | 0.781907163  |                    |
| 1 | 49,350,000 | 49,500,000 | 659 | 734  | 0.522246261  |                    |
| 1 | 49,425,000 | 49,575,000 | 660 | 563  | 0.427825506  |                    |
| 1 | 49,500,000 | 49,650,000 | 661 | 731  | 0.558369964  |                    |
| 1 | 49,575,000 | 49,725,000 | 662 | 984  | 0.894210775  |                    |
| 1 | 49,650,000 | 49,800,000 | 663 | 680  | 0.684756104  |                    |
| 1 | 49,725,000 | 49,875,000 | 664 | 453  | 0.088487587  |                    |
| 1 | 49,800,000 | 49,950,000 | 665 | 405  | 0.212511603  |                    |
| 1 | 49,875,000 | 50,025,000 | 666 | 770  | 1.163525938  |                    |
| 1 | 49,950,000 | 50,100,000 | 667 | 1127 | 0.852668078  |                    |
| 1 | 50,025,000 | 50,175,000 | 668 | 964  | 0.519347583  |                    |
| 1 | 50,100,000 | 50,250,000 | 669 | 1026 | 1.020599388  |                    |
| 1 | 50,175,000 | 50,325,000 | 670 | 1225 | 1.105555898  |                    |
| 1 | 50,250,000 | 50,400,000 | 671 | 868  | 0.910507111  | ALCAM              |
| 1 | 50,325,000 | 50,475,000 | 672 | 575  | 0.09942774   | ALCAM              |
| 1 | 50,400,000 | 50,550,000 | 673 | 764  | 0.729244607  | ALCAM              |
| 1 | 50,475,000 | 50,625,000 | 674 | 996  | 0.969832219  | ALCAM              |
| 1 | 50,550,000 | 50,700,000 | 675 | 1055 | 0.826931292  | ALCAM,CBLB         |
| 1 | 50,625,000 | 50,775,000 | 676 | 718  | 0.88844325   | CBLB               |
| 1 | 50,700,000 | 50,850,000 | 677 | 523  | 0.588247742  | CBLB               |
| 1 | 50,775,000 | 50,925,000 | 678 | 734  | 0.959872898  | CBLB               |
| 1 | 50,850,000 | 51,000,000 | 679 | 1215 | 1.338784475  | CBLB               |
| 1 | 50,925,000 | 51,075,000 | 680 | 1434 | 1.199455482  | ENSBTAG00000005414 |
| 1 | 51,000,000 | 51,150,000 | 681 | 921  | 0.944719735  | ENSBTAG00000005414 |

|   |            |            |     |      |              |                          |
|---|------------|------------|-----|------|--------------|--------------------------|
| 1 | 51,075,000 | 51,225,000 | 682 | 763  | 1.191348002  |                          |
| 1 | 51,150,000 | 51,300,000 | 683 | 1141 | 0.995616909  |                          |
| 1 | 51,225,000 | 51,375,000 | 684 | 1120 | 1.173497358  |                          |
| 1 | 51,300,000 | 51,450,000 | 685 | 1059 | 1.05669968   |                          |
| 1 | 51,375,000 | 51,525,000 | 686 | 1296 | 0.709089507  |                          |
| 1 | 51,450,000 | 51,600,000 | 687 | 1425 | 0.73519996   |                          |
| 1 | 51,525,000 | 51,675,000 | 688 | 945  | 0.52723481   |                          |
| 1 | 51,600,000 | 51,750,000 | 689 | 734  | 0.692902067  |                          |
| 1 | 51,675,000 | 51,825,000 | 690 | 878  | 0.965822011  |                          |
| 1 | 51,750,000 | 51,900,000 | 691 | 699  | 0.557048269  |                          |
| 1 | 51,825,000 | 51,975,000 | 692 | 513  | 0.197184629  |                          |
| 1 | 51,900,000 | 52,050,000 | 693 | 700  | 0.136633185  |                          |
| 1 | 51,975,000 | 52,125,000 | 694 | 1040 | 0.254997821  |                          |
| 1 | 52,050,000 | 52,200,000 | 695 | 890  | 0.538188064  |                          |
| 1 | 52,125,000 | 52,275,000 | 696 | 753  | 0.50606324   |                          |
| 1 | 52,200,000 | 52,350,000 | 697 | 655  | 0.367567956  |                          |
| 1 | 52,275,000 | 52,425,000 | 698 | 657  | 0.373703637  | CCDC54                   |
| 1 | 52,350,000 | 52,500,000 | 699 | 544  | 0.378203731  | CCDC54                   |
| 1 | 52,425,000 | 52,575,000 | 700 | 307  | 0.260165576  | BBX                      |
| 1 | 52,500,000 | 52,650,000 | 701 | 321  | -0.293601556 | BBX                      |
| 1 | 52,575,000 | 52,725,000 | 702 | 319  | -0.26019433  | BBX                      |
| 1 | 52,650,000 | 52,800,000 | 703 | 478  | 0.135260064  | BBX                      |
| 1 | 52,725,000 | 52,875,000 | 704 | 690  | 0.412437361  | BBX                      |
| 1 | 52,800,000 | 52,950,000 | 705 | 770  | 0.979222796  | BBX                      |
| 1 | 52,875,000 | 53,025,000 | 706 | 822  | 1.095274689  |                          |
| 1 | 52,950,000 | 53,100,000 | 707 | 768  | 0.883841875  |                          |
| 1 | 53,025,000 | 53,175,000 | 708 | 541  | 0.592738921  | CD47                     |
| 1 | 53,100,000 | 53,250,000 | 709 | 517  | 0.448908302  | CD47                     |
| 1 | 53,175,000 | 53,325,000 | 710 | 679  | 0.544333901  | IFT57                    |
| 1 | 53,250,000 | 53,400,000 | 711 | 736  | 0.333394135  | IFT57                    |
| 1 | 53,325,000 | 53,475,000 | 712 | 597  | -0.053682947 | IFT57                    |
| 1 | 53,400,000 | 53,550,000 | 713 | 431  | 0.144822242  | HHLA2,MYH15              |
| 1 | 53,475,000 | 53,625,000 | 714 | 591  | -0.315542787 | HHLA2,MYH15              |
| 1 | 53,550,000 | 53,700,000 | 715 | 654  | -0.467930887 | MYH15                    |
| 1 | 53,625,000 | 53,775,000 | 716 | 464  | -0.51832709  | DZIP3,KIAA1524,MYH15     |
| 1 | 53,700,000 | 53,850,000 | 717 | 297  | -0.675598751 | DZIP3,KIAA1524           |
| 1 | 53,775,000 | 53,925,000 | 718 | 298  | 0.1940777    | DZIP3                    |
| 1 | 53,850,000 | 54,000,000 | 719 | 451  | 0.794835543  | DZIP3,TRAT1              |
| 1 | 53,925,000 | 54,075,000 | 720 | 749  | 0.85512752   | TRAT1                    |
| 1 | 54,000,000 | 54,150,000 | 721 | 1382 | 0.427168264  | MORC1,TRAT1              |
| 1 | 54,075,000 | 54,225,000 | 722 | 1577 | 0.406351335  | MORC1                    |
| 1 | 54,150,000 | 54,300,000 | 723 | 1398 | 0.928543513  | MORC1                    |
| 1 | 54,225,000 | 54,375,000 | 724 | 1412 | 0.518516658  | MORC1                    |
| 1 | 54,300,000 | 54,450,000 | 725 | 1332 | -0.49102604  | MORC1                    |
| 1 | 54,375,000 | 54,525,000 | 726 | 1011 | -0.413718545 | DPPA2,ENSBTAG00000038103 |
| 1 | 54,450,000 | 54,600,000 | 727 | 1247 | 0.589117933  | DPPA2,ENSBTAG00000038103 |
| 1 | 54,525,000 | 54,675,000 | 728 | 1734 | 0.782111114  | RPL10                    |
| 1 | 54,600,000 | 54,750,000 | 729 | 1226 | 0.605694744  | RPL10                    |
| 1 | 54,675,000 | 54,825,000 | 730 | 912  | -2.540268306 |                          |
| 1 | 54,750,000 | 54,900,000 | 731 | 1016 | -2.696034181 |                          |
| 1 | 54,825,000 | 54,975,000 | 732 | 908  | -0.991714072 |                          |
| 1 | 54,900,000 | 55,050,000 | 733 | 867  | -0.047276152 |                          |
| 1 | 54,975,000 | 55,125,000 | 734 | 829  | 0.295593204  |                          |

|   |            |            |     |      |              |                                       |
|---|------------|------------|-----|------|--------------|---------------------------------------|
| 1 | 55,050,000 | 55,200,000 | 735 | 996  | 0.278724227  |                                       |
| 1 | 55,125,000 | 55,275,000 | 736 | 992  | 0.366651641  |                                       |
| 1 | 55,200,000 | 55,350,000 | 737 | 665  | 0.100023775  |                                       |
| 1 | 55,275,000 | 55,425,000 | 738 | 561  | -1.288915084 |                                       |
| 1 | 55,350,000 | 55,500,000 | 739 | 753  | -0.300336869 |                                       |
| 1 | 55,425,000 | 55,575,000 | 740 | 699  | 0.859067588  |                                       |
| 1 | 55,500,000 | 55,650,000 | 741 | 480  | 0.665950642  |                                       |
| 1 | 55,575,000 | 55,725,000 | 742 | 463  | -0.527011728 |                                       |
| 1 | 55,650,000 | 55,800,000 | 743 | 567  | -1.323520571 |                                       |
| 1 | 55,725,000 | 55,875,000 | 744 | 774  | 0.107787163  | ENSBTAG00000045855                    |
| 1 | 55,800,000 | 55,950,000 | 745 | 1062 | 1.126852369  | ENSBTAG00000045855                    |
| 1 | 55,875,000 | 56,025,000 | 746 | 1204 | 1.024992987  |                                       |
| 1 | 55,950,000 | 56,100,000 | 747 | 1450 | 0.826473231  | ENSBTAG00000045820                    |
| 1 | 56,025,000 | 56,175,000 | 748 | 1664 | 0.862267446  | ENSBTAG00000038651,ENSBTAG00000045820 |
| 1 | 56,100,000 | 56,250,000 | 749 | 1182 | 0.783114941  | ENSBTAG00000038651                    |
| 1 | 56,175,000 | 56,325,000 | 750 | 955  | 0.935067928  |                                       |
| 1 | 56,250,000 | 56,400,000 | 751 | 764  | 1.027125859  | PVRL3                                 |
| 1 | 56,325,000 | 56,475,000 | 752 | 557  | 1.201809319  | PVRL3                                 |
| 1 | 56,400,000 | 56,550,000 | 753 | 976  | 1.365603494  |                                       |
| 1 | 56,475,000 | 56,625,000 | 754 | 1149 | 0.911634161  |                                       |
| 1 | 56,550,000 | 56,700,000 | 755 | 1347 | -0.135676824 |                                       |
| 1 | 56,625,000 | 56,775,000 | 756 | 1433 | -0.123313261 | CD96,ZBED2                            |
| 1 | 56,700,000 | 56,850,000 | 757 | 1493 | -0.374144253 | CD96,PLCXD2,ZBED2                     |
| 1 | 56,775,000 | 56,925,000 | 758 | 1378 | -0.333553944 | CD96,PLCXD2                           |
| 1 | 56,850,000 | 57,000,000 | 759 | 894  | -0.111179143 | PLCXD2                                |
| 1 | 56,925,000 | 57,075,000 | 760 | 765  | -0.209669198 | PHLDB2                                |
| 1 | 57,000,000 | 57,150,000 | 761 | 696  | 0.717620209  | PHLDB2                                |
| 1 | 57,075,000 | 57,225,000 | 762 | 901  | -0.429909035 | ABHD10,PHLDB2,TAGLN3,TMPRSS7          |
| 1 | 57,150,000 | 57,300,000 | 763 | 1008 | -0.696188291 | ABHD10,C3orf52,TAGLN3,TMPRSS7         |
| 1 | 57,225,000 | 57,375,000 | 764 | 1079 | 0.205090619  | C3orf52,GCSAM,SLC9C1,TMPRSS7          |
| 1 | 57,300,000 | 57,450,000 | 765 | 1140 | 0.338833741  | C3orf52,GCSAM,SLC9C1                  |
| 1 | 57,375,000 | 57,525,000 | 766 | 742  | 0.711119567  | SLC9C1                                |
| 1 | 57,450,000 | 57,600,000 | 767 | 575  | 0.529366697  | CD200,SLC9C1                          |
| 1 | 57,525,000 | 57,675,000 | 768 | 919  | 0.614018443  | BTLA,CD200                            |
| 1 | 57,600,000 | 57,750,000 | 769 | 840  | 0.749715787  | BTLA                                  |
| 1 | 57,675,000 | 57,825,000 | 770 | 454  | 0.986429877  | ATG3,BTLA,CCDC80,SLC35A5              |
| 1 | 57,750,000 | 57,900,000 | 771 | 422  | 1.094330113  | ATG3,CCDC80,SLC35A5                   |
| 1 | 57,825,000 | 57,975,000 | 772 | 540  | 0.377698505  | CCDC80                                |
| 1 | 57,900,000 | 58,050,000 | 773 | 750  | 0.480902739  | ENSBTAG00000040144                    |
| 1 | 57,975,000 | 58,125,000 | 774 | 1020 | 0.93557474   | CD200R1,ENSBTAG00000040144            |
| 1 | 58,050,000 | 58,200,000 | 775 | 916  | 1.250897295  | C3orf17,CD200R1,GTPBP8                |
| 1 | 58,125,000 | 58,275,000 | 776 | 650  | 1.330934325  | C3orf17,CD200R1,GTPBP8                |
| 1 | 58,200,000 | 58,350,000 | 777 | 1028 | 0.805539217  |                                       |
| 1 | 58,275,000 | 58,425,000 | 778 | 946  | 0.433608577  |                                       |
| 1 | 58,350,000 | 58,500,000 | 779 | 540  | 0.160266028  | BOC,CFAP44                            |
| 1 | 58,425,000 | 58,575,000 | 780 | 887  | 0.920319855  | BOC,CFAP44                            |
| 1 | 58,500,000 | 58,650,000 | 781 | 879  | 1.03559916   | CFAP44,SPICE1                         |
| 1 | 58,575,000 | 58,725,000 | 782 | 761  | -0.90583128  | CFAP44,SIDT1,SPICE1                   |
| 1 | 58,650,000 | 58,800,000 | 783 | 785  | -1.390667707 | KIAA2018,SIDT1                        |
| 1 | 58,725,000 | 58,875,000 | 784 | 358  | 0.390407139  | KIAA2018,NAA50,SIDT1                  |
| 1 | 58,800,000 | 58,950,000 | 785 | 498  | 1.313383282  | ATP6V1A,KIAA2018,NAA50                |
| 1 | 58,875,000 | 59,025,000 | 786 | 576  | 1.289863201  | ATP6V1A,GRAMD1C,NAA50                 |
| 1 | 58,950,000 | 59,100,000 | 787 | 429  | 1.049001573  | GRAMD1C,KIAA1407,ZDHHC23              |

|   |            |            |     |      |              |                          |
|---|------------|------------|-----|------|--------------|--------------------------|
| 1 | 59,025,000 | 59,175,000 | 788 | 533  | 1.031517215  | GRAMD1C,KIAA1407,ZDHHC23 |
| 1 | 59,100,000 | 59,250,000 | 789 | 536  | 1.131852325  | KIAA1407,QTRTD1          |
| 1 | 59,175,000 | 59,325,000 | 790 | 591  | 1.152306496  | DRD3,KIAA1407,QTRTD1     |
| 1 | 59,250,000 | 59,400,000 | 791 | 582  | 1.097226169  | DRD3,TIGIT               |
| 1 | 59,325,000 | 59,475,000 | 792 | 548  | 0.895922772  | DRD3,TIGIT,ZBTB20        |
| 1 | 59,400,000 | 59,550,000 | 793 | 409  | 0.738419936  | ZBTB20                   |
| 1 | 59,475,000 | 59,625,000 | 794 | 384  | 0.703121112  | ZBTB20                   |
| 1 | 59,550,000 | 59,700,000 | 795 | 561  | 0.583571825  | ZBTB20                   |
| 1 | 59,625,000 | 59,775,000 | 796 | 547  | 0.440092339  | ZBTB20                   |
| 1 | 59,700,000 | 59,850,000 | 797 | 366  | 0.275784839  | ZBTB20                   |
| 1 | 59,775,000 | 59,925,000 | 798 | 384  | -0.329746781 |                          |
| 1 | 59,850,000 | 60,000,000 | 799 | 372  | 0.140880343  |                          |
| 1 | 59,925,000 | 60,075,000 | 800 | 398  | 1.174337505  |                          |
| 1 | 60,000,000 | 60,150,000 | 801 | 571  | -0.096496229 |                          |
| 1 | 60,075,000 | 60,225,000 | 802 | 769  | -1.189727793 |                          |
| 1 | 60,150,000 | 60,300,000 | 803 | 675  | -0.686869446 |                          |
| 1 | 60,225,000 | 60,375,000 | 804 | 477  | -0.335231504 |                          |
| 1 | 60,300,000 | 60,450,000 | 805 | 663  | -0.360941118 |                          |
| 1 | 60,375,000 | 60,525,000 | 806 | 776  | -0.118105612 |                          |
| 1 | 60,450,000 | 60,600,000 | 807 | 678  | 1.007506606  |                          |
| 1 | 60,525,000 | 60,675,000 | 808 | 588  | -0.963153616 |                          |
| 1 | 60,600,000 | 60,750,000 | 809 | 622  | -1.572556174 |                          |
| 1 | 60,675,000 | 60,825,000 | 810 | 748  | 1.334385268  |                          |
| 1 | 60,750,000 | 60,900,000 | 811 | 728  | 1.354840185  | GAP43                    |
| 1 | 60,825,000 | 60,975,000 | 812 | 693  | 1.003773143  | GAP43                    |
| 1 | 60,900,000 | 61,050,000 | 813 | 588  | 0.445794441  | GAP43                    |
| 1 | 60,975,000 | 61,125,000 | 814 | 747  | -0.08442923  |                          |
| 1 | 61,050,000 | 61,200,000 | 815 | 1208 | -0.493161818 |                          |
| 1 | 61,125,000 | 61,275,000 | 816 | 822  | -0.135317791 |                          |
| 1 | 61,200,000 | 61,350,000 | 817 | 357  | -0.45626051  |                          |
| 1 | 61,275,000 | 61,425,000 | 818 | 482  | -0.542001253 |                          |
| 1 | 61,350,000 | 61,500,000 | 819 | 498  | -0.277572701 |                          |
| 1 | 61,425,000 | 61,575,000 | 820 | 601  | -0.15729944  |                          |
| 1 | 61,500,000 | 61,650,000 | 821 | 887  | 0.629823546  |                          |
| 1 | 61,575,000 | 61,725,000 | 822 | 911  | 0.56902855   |                          |
| 1 | 61,650,000 | 61,800,000 | 823 | 915  | 0.165068182  |                          |
| 1 | 61,725,000 | 61,875,000 | 824 | 1203 | -0.192116832 |                          |
| 1 | 61,800,000 | 61,950,000 | 825 | 1252 | -0.15948378  |                          |
| 1 | 61,875,000 | 62,025,000 | 826 | 1210 | -0.158506346 |                          |
| 1 | 61,950,000 | 62,100,000 | 827 | 990  | 0.05111669   |                          |
| 1 | 62,025,000 | 62,175,000 | 828 | 961  | 0.809864821  | ENSBTAG00000040393       |
| 1 | 62,100,000 | 62,250,000 | 829 | 1129 | 0.875941851  | ENSBTAG00000040393       |
| 1 | 62,175,000 | 62,325,000 | 830 | 1065 | 1.107745542  |                          |
| 1 | 62,250,000 | 62,400,000 | 831 | 1144 | 1.204946389  | ENSBTAG00000046854       |
| 1 | 62,325,000 | 62,475,000 | 832 | 1013 | 1.273292821  | ENSBTAG00000046854       |
| 1 | 62,400,000 | 62,550,000 | 833 | 933  | 1.34267549   |                          |
| 1 | 62,475,000 | 62,625,000 | 834 | 1088 | 1.337730633  |                          |
| 1 | 62,550,000 | 62,700,000 | 835 | 1050 | 1.1887945    |                          |
| 1 | 62,625,000 | 62,775,000 | 836 | 923  | 0.989897506  |                          |
| 1 | 62,700,000 | 62,850,000 | 837 | 1123 | 1.08490399   |                          |
| 1 | 62,775,000 | 62,925,000 | 838 | 1097 | 0.996514702  |                          |
| 1 | 62,850,000 | 63,000,000 | 839 | 1069 | 0.816707067  |                          |
| 1 | 62,925,000 | 63,075,000 | 840 | 1285 | 0.778545782  |                          |

|   |            |            |     |      |              |                                          |
|---|------------|------------|-----|------|--------------|------------------------------------------|
| 1 | 63,000,000 | 63,150,000 | 841 | 1381 | 0.794238979  |                                          |
| 1 | 63,075,000 | 63,225,000 | 842 | 1277 | 0.634825961  |                                          |
| 1 | 63,150,000 | 63,300,000 | 843 | 1072 | -0.678097084 |                                          |
| 1 | 63,225,000 | 63,375,000 | 844 | 984  | -0.949225771 |                                          |
| 1 | 63,300,000 | 63,450,000 | 845 | 790  | 0.163978193  |                                          |
| 1 | 63,375,000 | 63,525,000 | 846 | 690  | -0.046693343 |                                          |
| 1 | 63,450,000 | 63,600,000 | 847 | 966  | 0.023837163  |                                          |
| 1 | 63,525,000 | 63,675,000 | 848 | 1026 | 0.584517717  |                                          |
| 1 | 63,600,000 | 63,750,000 | 849 | 947  | 0.551894234  |                                          |
| 1 | 63,675,000 | 63,825,000 | 850 | 835  | 0.556980703  |                                          |
| 1 | 63,750,000 | 63,900,000 | 851 | 640  | 0.457620198  |                                          |
| 1 | 63,825,000 | 63,975,000 | 852 | 670  | -0.108473581 |                                          |
| 1 | 63,900,000 | 64,050,000 | 853 | 730  | -0.546688445 |                                          |
| 1 | 63,975,000 | 64,125,000 | 854 | 875  | 0.330482863  |                                          |
| 1 | 64,050,000 | 64,200,000 | 855 | 629  | 0.921499722  |                                          |
| 1 | 64,125,000 | 64,275,000 | 856 | 417  | 0.882666742  |                                          |
| 1 | 64,200,000 | 64,350,000 | 857 | 508  | 0.431170358  |                                          |
| 1 | 64,275,000 | 64,425,000 | 858 | 604  | 0.506073876  | IGSF11                                   |
| 1 | 64,350,000 | 64,500,000 | 859 | 689  | 0.726412547  | IGSF11                                   |
| 1 | 64,425,000 | 64,575,000 | 860 | 424  | 0.611470539  | C3orf30,IGSF11                           |
| 1 | 64,500,000 | 64,650,000 | 861 | 379  | -0.340982343 | B4GALT4,C3orf30,UPK1B                    |
| 1 | 64,575,000 | 64,725,000 | 862 | 480  | 0.000360284  | B4GALT4,UPK1B                            |
| 1 | 64,650,000 | 64,800,000 | 863 | 396  | 0.214675558  | ARHGAP31                                 |
| 1 | 64,725,000 | 64,875,000 | 864 | 381  | -0.105311069 | ARHGAP31,POGLUT1,TIMMDC1,TMEM39A         |
| 1 | 64,800,000 | 64,950,000 | 865 | 382  | 0.205668256  | ADPRH,CD80,PLA1A,POGLUT1,TIMMDC1,TMEM39A |
| 1 | 64,875,000 | 65,025,000 | 866 | 491  | 0.408812553  | ADPRH,CD80,COX17,PLA1A,POPDC2,TIMMDC1    |
| 1 | 64,950,000 | 65,100,000 | 867 | 731  | 0.644460682  | COX17,MAATS1,PLA1A,POPDC2                |
| 1 | 65,025,000 | 65,175,000 | 868 | 554  | 0.715153158  | COX17,MAATS1                             |
| 1 | 65,100,000 | 65,250,000 | 869 | 247  | -0.121672807 | MAATS1,NR1I2                             |
| 1 | 65,175,000 | 65,325,000 | 870 | 244  | -0.975726828 | GSK3B,NR1I2,ENSBTAG00000040597           |
| 1 | 65,250,000 | 65,400,000 | 871 | 232  | -1.985773203 | GSK3B,ENSBTAG00000040597                 |
| 1 | 65,325,000 | 65,475,000 | 872 | 251  | -2.006494177 | GSK3B                                    |
| 1 | 65,400,000 | 65,550,000 | 873 | 253  | -0.886288967 | GPR156,GSK3B                             |
| 1 | 65,475,000 | 65,625,000 | 874 | 278  | -0.384086893 | GPR156                                   |
| 1 | 65,550,000 | 65,700,000 | 875 | 311  | -0.150824141 | GPR156,LRRC58                            |
| 1 | 65,625,000 | 65,775,000 | 876 | 463  | 0.518850968  | FSTL1,LRRC58                             |
| 1 | 65,700,000 | 65,850,000 | 877 | 380  | 0.561635469  | FSTL1,LRRC58                             |
| 1 | 65,775,000 | 65,925,000 | 878 | 154  | -0.074571437 | FSTL1,NDUFB4                             |
| 1 | 65,850,000 | 66,000,000 | 879 | 520  | -1.108849157 | HGD,NDUFB4,RABL3                         |
| 1 | 65,925,000 | 66,075,000 | 880 | 597  | -0.730224914 | GTF2E1,HGD,NDUFB4,RABL3                  |
| 1 | 66,000,000 | 66,150,000 | 881 | 440  | 0.489208895  | GTF2E1,RABL3                             |
| 1 | 66,075,000 | 66,225,000 | 882 | 584  | 0.116974008  | STXBP5L                                  |
| 1 | 66,150,000 | 66,300,000 | 883 | 426  | -0.153309472 | STXBP5L                                  |
| 1 | 66,225,000 | 66,375,000 | 884 | 242  | -0.612767322 | STXBP5L                                  |
| 1 | 66,300,000 | 66,450,000 | 885 | 588  | -1.401692981 | STXBP5L                                  |
| 1 | 66,375,000 | 66,525,000 | 886 | 1161 | -0.645440283 | STXBP5L                                  |
| 1 | 66,450,000 | 66,600,000 | 887 | 1173 | 0.550438725  | POLQ,STXBP5L                             |
| 1 | 66,525,000 | 66,675,000 | 888 | 958  | 0.906577316  | POLQ,STXBP5L                             |
| 1 | 66,600,000 | 66,750,000 | 889 | 646  | 0.713749422  | ARGFX,FBXO40,HCLS1,POLQ                  |
| 1 | 66,675,000 | 66,825,000 | 890 | 385  | -0.197463532 | ARGFX,FBXO40,GOLGB1,HCLS1                |
| 1 | 66,750,000 | 66,900,000 | 891 | 287  | -0.774384271 | GOLGB1,HCLS1,IQCB1                       |
| 1 | 66,825,000 | 66,975,000 | 892 | 151  | -1.115742006 | EAF2,IQCB1,SLC15A2                       |
| 1 | 66,900,000 | 67,050,000 | 893 | 213  | 0.135399252  | EAF2,IQCB1,SLC15A2,ENSBTAG00000001442    |

|   |            |            |     |      |              |                                              |
|---|------------|------------|-----|------|--------------|----------------------------------------------|
| 1 | 66,975,000 | 67,125,000 | 894 | 462  | 0.241238813  | ILDRI,SLC15A2,ENSBTAG00000001442             |
| 1 | 67,050,000 | 67,200,000 | 895 | 493  | -0.06679637  | CD86,ILDRI                                   |
| 1 | 67,125,000 | 67,275,000 | 896 | 300  | -0.612738149 | CASR,CD86                                    |
| 1 | 67,200,000 | 67,350,000 | 897 | 471  | -0.223179313 | CASR,CD86                                    |
| 1 | 67,275,000 | 67,425,000 | 898 | 846  | 0.219393723  | CASR,CCDC58,CSTA,FAM162A,ENSBTAG00000014133  |
| 1 | 67,350,000 | 67,500,000 | 899 | 890  | 0.966037375  | CCDC58,CSTA,FAM162A,KPNA1,ENSBTAG00000014133 |
| 1 | 67,425,000 | 67,575,000 | 900 | 769  | 1.010687969  | CCDC58,FAM162A,KPNA1,PARP9                   |
| 1 | 67,500,000 | 67,650,000 | 901 | 682  | 0.551550365  | DTX3L,KPNA1,PARP14,PARP9                     |
| 1 | 67,575,000 | 67,725,000 | 902 | 563  | -1.428550379 | DIRC2,DTX3L,HSPBAP1,PARP14,PARP9             |
| 1 | 67,650,000 | 67,800,000 | 903 | 379  | -1.910372634 | DIRC2,HSPBAP1,PARP14                         |
| 1 | 67,725,000 | 67,875,000 | 904 | 259  | -0.39663297  | DIRC2,SEMA5B                                 |
| 1 | 67,800,000 | 67,950,000 | 905 | 518  | -0.214772409 | DIRC2,SEMA5B                                 |
| 1 | 67,875,000 | 68,025,000 | 906 | 637  | 0.287374396  | PDIA5,SEMA5B                                 |
| 1 | 67,950,000 | 68,100,000 | 907 | 604  | -0.032416539 | PDIA5                                        |
| 1 | 68,025,000 | 68,175,000 | 908 | 919  | -1.944410187 | PDIA5,SEC22A                                 |
| 1 | 68,100,000 | 68,250,000 | 909 | 922  | -2.8085257   | PDIA5,SEC22A                                 |
| 1 | 68,175,000 | 68,325,000 | 910 | 698  | -0.691727818 | ADCY5,SEC22A                                 |
| 1 | 68,250,000 | 68,400,000 | 911 | 495  | 0.193649313  | ADCY5                                        |
| 1 | 68,325,000 | 68,475,000 | 912 | 329  | -1.419192302 | ADCY5,PTPLB                                  |
| 1 | 68,400,000 | 68,550,000 | 913 | 372  | -1.625206988 | ADCY5,PTPLB                                  |
| 1 | 68,475,000 | 68,625,000 | 914 | 463  | -1.082131807 | MYLK,PTPLB                                   |
| 1 | 68,550,000 | 68,700,000 | 915 | 644  | -0.476002359 | MYLK,PTPLB                                   |
| 1 | 68,625,000 | 68,775,000 | 916 | 629  | -0.453828068 | MYLK                                         |
| 1 | 68,700,000 | 68,850,000 | 917 | 663  | 0.393757299  |                                              |
| 1 | 68,775,000 | 68,925,000 | 918 | 937  | 0.836082972  | CCDC14                                       |
| 1 | 68,850,000 | 69,000,000 | 919 | 779  | 0.535553138  | CCDC14,ROPN1                                 |
| 1 | 68,925,000 | 69,075,000 | 920 | 624  | 0.000534113  | CCDC14,ROPN1                                 |
| 1 | 69,000,000 | 69,150,000 | 921 | 609  | 0.203602759  |                                              |
| 1 | 69,075,000 | 69,225,000 | 922 | 576  | 0.749780319  |                                              |
| 1 | 69,150,000 | 69,300,000 | 923 | 948  | -0.46843292  | KALRN                                        |
| 1 | 69,225,000 | 69,375,000 | 924 | 987  | -0.554517956 | KALRN                                        |
| 1 | 69,300,000 | 69,450,000 | 925 | 956  | 0.849088106  | KALRN,ENSBTAG00000046935                     |
| 1 | 69,375,000 | 69,525,000 | 926 | 1289 | 0.939412175  | KALRN,ENSBTAG00000046935                     |
| 1 | 69,450,000 | 69,600,000 | 927 | 1085 | 0.831806236  | KALRN                                        |
| 1 | 69,525,000 | 69,675,000 | 928 | 894  | 0.972572002  | KALRN                                        |
| 1 | 69,600,000 | 69,750,000 | 929 | 1022 | 1.093072756  | KALRN,UMPS                                   |
| 1 | 69,675,000 | 69,825,000 | 930 | 1260 | 0.881942132  | ITGB5,KALRN,UMPS                             |
| 1 | 69,750,000 | 69,900,000 | 931 | 1217 | 0.332416089  | ITGB5,UMPS                                   |
| 1 | 69,825,000 | 69,975,000 | 932 | 981  | -0.517716089 | ITGB5,MUC13                                  |
| 1 | 69,900,000 | 70,050,000 | 933 | 1123 | 0.639768787  | HEG1,MUC13                                   |
| 1 | 69,975,000 | 70,125,000 | 934 | 948  | 1.212650156  | HEG1                                         |
| 1 | 70,050,000 | 70,200,000 | 935 | 800  | 0.983027617  | HEG1,SLC12A8                                 |
| 1 | 70,125,000 | 70,275,000 | 936 | 523  | 0.322140663  | SLC12A8                                      |
| 1 | 70,200,000 | 70,350,000 | 937 | 154  | 0.182546284  | SLC12A8,ZNF148                               |
| 1 | 70,275,000 | 70,425,000 | 938 | 172  | 0.345638107  | ZNF148                                       |
| 1 | 70,350,000 | 70,500,000 | 939 | 420  | 0.845567713  | ZNF148                                       |
| 1 | 70,425,000 | 70,575,000 | 940 | 749  | 1.071958798  | OSBPL11,SNX4                                 |
| 1 | 70,500,000 | 70,650,000 | 941 | 649  | 1.085125363  | OSBPL11,SNX4                                 |
| 1 | 70,575,000 | 70,725,000 | 942 | 704  | 0.332586755  | OSBPL11,ENSBTAG00000003383                   |
| 1 | 70,650,000 | 70,800,000 | 943 | 1006 | -1.356887349 | IQCG,LMLN,OSBPL11,RPL35A,ENSBTAG00000003383  |
| 1 | 70,725,000 | 70,875,000 | 944 | 882  | -3.708541007 | IQCG,LMLN,LRCH3,RPL35A                       |
| 1 | 70,800,000 | 70,950,000 | 945 | 583  | -4.019802895 | IQCG,LRCH3                                   |
| 1 | 70,875,000 | 71,025,000 | 946 | 589  | -0.863876041 | FYTTD1,KIAA0226,LRCH3                        |



|   |            |            |     |      |              |                                                        |
|---|------------|------------|-----|------|--------------|--------------------------------------------------------|
| 1 | 70,950,000 | 71,100,000 | 947 | 964  | -1.363009157 | FYTDD1,KIAA0226,MUC20,MUC4                             |
| 1 | 71,025,000 | 71,175,000 | 948 | 1200 | -2.61144161  | KIAA0226,MUC20,MUC4                                    |
| 1 | 71,100,000 | 71,250,000 | 949 | 1224 | -2.997257007 | MUC4,TNK2                                              |
| 1 | 71,175,000 | 71,325,000 | 950 | 841  | -2.970312842 | TFRC,TNK2                                              |
| 1 | 71,250,000 | 71,400,000 | 951 | 458  | -1.320045017 | TFRC,ZDHHC19                                           |
| 1 | 71,325,000 | 71,475,000 | 952 | 478  | 0.707005882  | PCYT1A,SLC51A,ZDHHC19                                  |
| 1 | 71,400,000 | 71,550,000 | 953 | 451  | 0.856418191  | PCYT1A,SLC51A,TCTEX1D2,UBXN7,ZDHHC19,ENSBTAG0000040161 |
| 1 | 71,475,000 | 71,625,000 | 954 | 442  | 0.455168798  | PCYT1A,TCTEX1D2,UBXN7,ENSBTAG0000040161                |
| 1 | 71,550,000 | 71,700,000 | 955 | 405  | 0.291785462  | MGC152484,RNF168,UBXN7,WDR53                           |
| 1 | 71,625,000 | 71,775,000 | 956 | 536  | 0.559334822  | FBXO45,MGC152484,NRROS,RNF168,WDR53                    |
| 1 | 71,700,000 | 71,850,000 | 957 | 754  | 0.633489214  | CEP19,FBXO45,NRROS,PIGX,WDR53                          |
| 1 | 71,775,000 | 71,925,000 | 958 | 701  | 0.847303116  | CEP19,NRROS,PAK2,PIGX                                  |
| 1 | 71,850,000 | 72,000,000 | 959 | 529  | 0.809514102  | PAK2,PIGX,SENP5                                        |
| 1 | 71,925,000 | 72,075,000 | 960 | 461  | 0.402503552  | NCBP2,PAK2,PIGZ,SENP5                                  |
| 1 | 72,000,000 | 72,150,000 | 961 | 426  | 0.344711259  | DLG1,MFI2,NCBP2,PIGZ,SENP5                             |
| 1 | 72,075,000 | 72,225,000 | 962 | 326  | 0.524507481  | DLG1,MFI2                                              |
| 1 | 72,150,000 | 72,300,000 | 963 | 289  | 0.941929616  | DLG1                                                   |
| 1 | 72,225,000 | 72,375,000 | 964 | 323  | 0.875593664  | DLG1                                                   |
| 1 | 72,300,000 | 72,450,000 | 965 | 299  | 1.023335189  |                                                        |
| 1 | 72,375,000 | 72,525,000 | 966 | 291  | 1.126794159  | ENSBTAG0000048225                                      |
| 1 | 72,450,000 | 72,600,000 | 967 | 371  | 1.040697541  | BDH1,ENSBTAG0000048225                                 |
| 1 | 72,525,000 | 72,675,000 | 968 | 627  | 0.255054695  | APOD,BDH1                                              |
| 1 | 72,600,000 | 72,750,000 | 969 | 643  | 0.413257774  | APOD,BDH1,PPP1R2                                       |
| 1 | 72,675,000 | 72,825,000 | 970 | 406  | 0.741228621  | ACAP2,APOD,PPP1R2                                      |
| 1 | 72,750,000 | 72,900,000 | 971 | 516  | 0.391290375  | ACAP2                                                  |
| 1 | 72,825,000 | 72,975,000 | 972 | 586  | 0.837944371  | ACAP2,XXYLT1                                           |
| 1 | 72,900,000 | 73,050,000 | 973 | 657  | 0.383695702  | ACAP2,XXYLT1                                           |
| 1 | 72,975,000 | 73,125,000 | 974 | 1006 | 0.430876193  | XXYLT1                                                 |
| 1 | 73,050,000 | 73,200,000 | 975 | 1100 | 0.325312565  | XXYLT1                                                 |
| 1 | 73,125,000 | 73,275,000 | 976 | 693  | -0.130323992 |                                                        |
| 1 | 73,200,000 | 73,350,000 | 977 | 554  | 0.107158478  |                                                        |
| 1 | 73,275,000 | 73,425,000 | 978 | 757  | 0.512048568  |                                                        |
| 1 | 73,350,000 | 73,500,000 | 979 | 737  | 0.894789928  | FAM43A,LSG1                                            |
| 1 | 73,425,000 | 73,575,000 | 980 | 465  | 0.727772334  | FAM43A,LSG1,TMEM44                                     |
| 1 | 73,500,000 | 73,650,000 | 981 | 243  | 0.251263636  | LSG1,TMEM44                                            |
| 1 | 73,575,000 | 73,725,000 | 982 | 254  | -0.297961159 | ATP13A3                                                |
| 1 | 73,650,000 | 73,800,000 | 983 | 290  | -1.001523101 | ATP13A3,CPN2,GP5,LRRRC15                               |
| 1 | 73,725,000 | 73,875,000 | 984 | 306  | -1.967731664 | ATP13A3,CPN2,GP5,LRRRC15                               |
| 1 | 73,800,000 | 73,950,000 | 985 | 432  | -1.859276598 | CPN2                                                   |
| 1 | 73,875,000 | 74,025,000 | 986 | 498  | -1.122009651 | HES1                                                   |
| 1 | 73,950,000 | 74,100,000 | 987 | 333  | -0.545221262 | HES1                                                   |
| 1 | 74,025,000 | 74,175,000 | 988 | 286  | -0.075050811 |                                                        |
| 1 | 74,100,000 | 74,250,000 | 989 | 311  | -0.037295221 |                                                        |
| 1 | 74,175,000 | 74,325,000 | 990 | 281  | -0.023793823 |                                                        |
| 1 | 74,250,000 | 74,400,000 | 991 | 362  | -0.094349248 | OPA1                                                   |
| 1 | 74,325,000 | 74,475,000 | 992 | 302  | 0.272230492  | OPA1                                                   |
| 1 | 74,400,000 | 74,550,000 | 993 | 277  | 1.322558342  | ATP13A4,OPA1                                           |
| 1 | 74,475,000 | 74,625,000 | 994 | 587  | -0.522798117 | ATP13A4                                                |
| 1 | 74,550,000 | 74,700,000 | 995 | 813  | -0.548219529 | ATP13A4,ATP13A5                                        |
| 1 | 74,625,000 | 74,775,000 | 996 | 623  | 0.263264012  | ATP13A4,ATP13A5                                        |
| 1 | 74,700,000 | 74,850,000 | 997 | 686  | 0.937633674  | ATP13A5,HRASLS                                         |
| 1 | 74,775,000 | 74,925,000 | 998 | 1052 | 1.128020195  | HRASLS                                                 |

|   |            |            |      |      |              |                       |
|---|------------|------------|------|------|--------------|-----------------------|
| 1 | 74,850,000 | 75,000,000 | 999  | 806  | 1.079796826  |                       |
| 1 | 74,925,000 | 75,075,000 | 1000 | 465  | 0.233890216  |                       |
| 1 | 75,000,000 | 75,150,000 | 1001 | 872  | 0.631156776  |                       |
| 1 | 75,075,000 | 75,225,000 | 1002 | 1276 | 0.329273701  | MB21D2                |
| 1 | 75,150,000 | 75,300,000 | 1003 | 1132 | 0.039556075  | MB21D2                |
| 1 | 75,225,000 | 75,375,000 | 1004 | 951  | 0.576538857  |                       |
| 1 | 75,300,000 | 75,450,000 | 1005 | 952  | -0.772598348 |                       |
| 1 | 75,375,000 | 75,525,000 | 1006 | 657  | -2.207091862 |                       |
| 1 | 75,450,000 | 75,600,000 | 1007 | 473  | -0.808354582 |                       |
| 1 | 75,525,000 | 75,675,000 | 1008 | 489  | -0.755102917 | ENSBTAG00000012413    |
| 1 | 75,600,000 | 75,750,000 | 1009 | 386  | -0.34013077  | ENSBTAG00000012413    |
| 1 | 75,675,000 | 75,825,000 | 1010 | 532  | 0.192602125  | ENSBTAG00000012413    |
| 1 | 75,750,000 | 75,900,000 | 1011 | 503  | 0.351822126  | ENSBTAG00000012413    |
| 1 | 75,825,000 | 75,975,000 | 1012 | 599  | 0.350193047  | ENSBTAG00000012413    |
| 1 | 75,900,000 | 76,050,000 | 1013 | 991  | 0.565249554  |                       |
| 1 | 75,975,000 | 76,125,000 | 1014 | 988  | 0.493515271  |                       |
| 1 | 76,050,000 | 76,200,000 | 1015 | 995  | 0.868223265  |                       |
| 1 | 76,125,000 | 76,275,000 | 1016 | 1008 | 0.863597162  |                       |
| 1 | 76,200,000 | 76,350,000 | 1017 | 883  | -0.399974128 |                       |
| 1 | 76,275,000 | 76,425,000 | 1018 | 873  | -0.429390406 |                       |
| 1 | 76,350,000 | 76,500,000 | 1019 | 1030 | -1.992807813 |                       |
| 1 | 76,425,000 | 76,575,000 | 1020 | 916  | -1.945231611 | CCDC50                |
| 1 | 76,500,000 | 76,650,000 | 1021 | 481  | 0.533274773  | CCDC50                |
| 1 | 76,575,000 | 76,725,000 | 1022 | 573  | 0.85764835   | CCDC50,OSTN,UTS2B     |
| 1 | 76,650,000 | 76,800,000 | 1023 | 842  | 0.778353238  | OSTN,UTS2B            |
| 1 | 76,725,000 | 76,875,000 | 1024 | 868  | 0.819750645  |                       |
| 1 | 76,800,000 | 76,950,000 | 1025 | 930  | 1.000438947  |                       |
| 1 | 76,875,000 | 77,025,000 | 1026 | 719  | 0.251440815  | GMNC                  |
| 1 | 76,950,000 | 77,100,000 | 1027 | 477  | -0.387787618 | GMNC                  |
| 1 | 77,025,000 | 77,175,000 | 1028 | 485  | 0.088325797  |                       |
| 1 | 77,100,000 | 77,250,000 | 1029 | 521  | 0.677962396  | IL1RAP                |
| 1 | 77,175,000 | 77,325,000 | 1030 | 577  | 0.625688887  | IL1RAP                |
| 1 | 77,250,000 | 77,400,000 | 1031 | 396  | -0.231163315 | IL1RAP                |
| 1 | 77,325,000 | 77,475,000 | 1032 | 654  | -0.573403454 | CLDN16,IL1RAP,TMEM207 |
| 1 | 77,400,000 | 77,550,000 | 1033 | 792  | -1.300989339 | CLDN16,TMEM207        |
| 1 | 77,475,000 | 77,625,000 | 1034 | 691  | 0.082870764  | CLDN1,CLDN16          |
| 1 | 77,550,000 | 77,700,000 | 1035 | 1027 | 1.040616645  | CLDN1                 |
| 1 | 77,625,000 | 77,775,000 | 1036 | 910  | 1.034463618  | LEPREL1               |
| 1 | 77,700,000 | 77,850,000 | 1037 | 513  | 0.241543704  | LEPREL1               |
| 1 | 77,775,000 | 77,925,000 | 1038 | 453  | -1.683320119 | LEPREL1               |
| 1 | 77,850,000 | 78,000,000 | 1039 | 656  | -1.852707409 | LEPREL1               |
| 1 | 77,925,000 | 78,075,000 | 1040 | 644  | -0.936749748 | LEPREL1,TP63          |
| 1 | 78,000,000 | 78,150,000 | 1041 | 687  | -0.325546084 | TP63                  |
| 1 | 78,075,000 | 78,225,000 | 1042 | 945  | 0.177080401  | TP63                  |
| 1 | 78,150,000 | 78,300,000 | 1043 | 860  | 0.774260882  | TP63                  |
| 1 | 78,225,000 | 78,375,000 | 1044 | 724  | 0.281010046  | TP63                  |
| 1 | 78,300,000 | 78,450,000 | 1045 | 846  | 0.02627822   |                       |
| 1 | 78,375,000 | 78,525,000 | 1046 | 832  | -0.481696919 |                       |
| 1 | 78,450,000 | 78,600,000 | 1047 | 529  | -0.353680707 |                       |
| 1 | 78,525,000 | 78,675,000 | 1048 | 492  | 1.127416138  | TPRG1                 |
| 1 | 78,600,000 | 78,750,000 | 1049 | 783  | 0.670752907  | TPRG1                 |
| 1 | 78,675,000 | 78,825,000 | 1050 | 646  | -0.05068683  | TPRG1                 |
| 1 | 78,750,000 | 78,900,000 | 1051 | 315  | 0.027657153  | TPRG1                 |

|   |            |            |      |      |              |                                                      |
|---|------------|------------|------|------|--------------|------------------------------------------------------|
| 1 | 78,825,000 | 78,975,000 | 1052 | 317  | 0.773165588  |                                                      |
| 1 | 78,900,000 | 79,050,000 | 1053 | 329  | 0.669113017  | LPP                                                  |
| 1 | 78,975,000 | 79,125,000 | 1054 | 329  | 0.300275928  | LPP                                                  |
| 1 | 79,050,000 | 79,200,000 | 1055 | 443  | 0.521176369  | LPP                                                  |
| 1 | 79,125,000 | 79,275,000 | 1056 | 481  | 0.399140202  | LPP                                                  |
| 1 | 79,200,000 | 79,350,000 | 1057 | 501  | 0.330143836  | LPP                                                  |
| 1 | 79,275,000 | 79,425,000 | 1058 | 598  | 0.434580653  | LPP                                                  |
| 1 | 79,350,000 | 79,500,000 | 1059 | 584  | 0.403646638  | LPP                                                  |
| 1 | 79,425,000 | 79,575,000 | 1060 | 615  | 0.185586068  | LPP                                                  |
| 1 | 79,500,000 | 79,650,000 | 1061 | 637  | -0.31882087  | LPP                                                  |
| 1 | 79,575,000 | 79,725,000 | 1062 | 677  | 0.484320555  | LPP                                                  |
| 1 | 79,650,000 | 79,800,000 | 1063 | 784  | 0.650911082  | LPP                                                  |
| 1 | 79,725,000 | 79,875,000 | 1064 | 1017 | 0.780169165  | LPP                                                  |
| 1 | 79,800,000 | 79,950,000 | 1065 | 1149 | 1.03349501   |                                                      |
| 1 | 79,875,000 | 80,025,000 | 1066 | 886  | 0.903964417  |                                                      |
| 1 | 79,950,000 | 80,100,000 | 1067 | 989  | 0.608853309  |                                                      |
| 1 | 80,025,000 | 80,175,000 | 1068 | 1333 | 0.835736772  |                                                      |
| 1 | 80,100,000 | 80,250,000 | 1069 | 992  | 1.054696051  | BCL6,RTP2                                            |
| 1 | 80,175,000 | 80,325,000 | 1070 | 944  | 1.019822398  | BCL6,RTP2,SST                                        |
| 1 | 80,250,000 | 80,400,000 | 1071 | 1153 | 1.154509872  | SST                                                  |
| 1 | 80,325,000 | 80,475,000 | 1072 | 921  | 1.08032928   |                                                      |
| 1 | 80,400,000 | 80,550,000 | 1073 | 715  | 0.677000206  | RTP4                                                 |
| 1 | 80,475,000 | 80,625,000 | 1074 | 920  | 0.357956578  | MASP1,RTP4                                           |
| 1 | 80,550,000 | 80,700,000 | 1075 | 1108 | -0.493325404 | MASP1,RTP1                                           |
| 1 | 80,625,000 | 80,775,000 | 1076 | 861  | -0.265224567 | MASP1,RTP1                                           |
| 1 | 80,700,000 | 80,850,000 | 1077 | 797  | 1.089504718  | ST6GAL1                                              |
| 1 | 80,775,000 | 80,925,000 | 1078 | 686  | 0.886780564  | ST6GAL1                                              |
| 1 | 80,850,000 | 81,000,000 | 1079 | 542  | 0.328701685  |                                                      |
| 1 | 80,925,000 | 81,075,000 | 1080 | 579  | 0.044338985  | ADIPOQ,EIF4A2,RFC4                                   |
| 1 | 81,000,000 | 81,150,000 | 1081 | 717  | 0.402947185  | ADIPOQ,EIF4A2,HRG,KNG1,RFC4                          |
| 1 | 81,075,000 | 81,225,000 | 1082 | 650  | 0.904920805  | AHSG,FETUB,HRG,KNG1                                  |
| 1 | 81,150,000 | 81,300,000 | 1083 | 513  | 0.422941222  | AHSG,CRYGS,DNAJB11,FETUB,TBCCD1                      |
| 1 | 81,225,000 | 81,375,000 | 1084 | 553  | -0.749718099 | CRYGS,DNAJB11,TBCCD1                                 |
| 1 | 81,300,000 | 81,450,000 | 1085 | 523  | -0.871689714 |                                                      |
| 1 | 81,375,000 | 81,525,000 | 1086 | 427  | -0.772820492 | DGKG                                                 |
| 1 | 81,450,000 | 81,600,000 | 1087 | 431  | 0.468361844  | DGKG                                                 |
| 1 | 81,525,000 | 81,675,000 | 1088 | 574  | 0.750902362  | DGKG                                                 |
| 1 | 81,600,000 | 81,750,000 | 1089 | 599  | 0.283775412  | DGKG,ETV5                                            |
| 1 | 81,675,000 | 81,825,000 | 1090 | 524  | 0.136630595  | DGKG,ETV5                                            |
| 1 | 81,750,000 | 81,900,000 | 1091 | 409  | 0.191836344  | ETV5,TRA2B,ENSBTAG00000011305,ENSBTAG0000004784<br>1 |
| 1 | 81,825,000 | 81,975,000 | 1092 | 459  | 0.71261104   | TRA2B,ENSBTAG00000011305,ENSBTAG00000047841          |
| 1 | 81,900,000 | 82,050,000 | 1093 | 461  | 0.62308082   | IGF2BP2                                              |
| 1 | 81,975,000 | 82,125,000 | 1094 | 319  | 0.511986364  | IGF2BP2                                              |
| 1 | 82,050,000 | 82,200,000 | 1095 | 290  | 0.613248964  | IGF2BP2,SEN2                                         |
| 1 | 82,125,000 | 82,275,000 | 1096 | 390  | 0.453007489  | IGF2BP2,LIPH,SEN2                                    |
| 1 | 82,200,000 | 82,350,000 | 1097 | 488  | 0.640328152  | LIPH,MAP3K13,SEN2,TMEM41A                            |
| 1 | 82,275,000 | 82,425,000 | 1098 | 534  | 0.922818217  | LIPH,MAP3K13,TMEM41A                                 |
| 1 | 82,350,000 | 82,500,000 | 1099 | 571  | 0.866986126  | EHHADH,MAP3K13                                       |
| 1 | 82,425,000 | 82,575,000 | 1100 | 703  | 0.679018603  | C3orf70,EHHADH,MAP3K13,ENSBTAG00000007296            |
| 1 | 82,500,000 | 82,650,000 | 1101 | 624  | 0.555500763  | C3orf70,EHHADH,ENSBTAG00000007296                    |
| 1 | 82,575,000 | 82,725,000 | 1102 | 478  | 0.324445544  | C3orf70,VPS8                                         |
| 1 | 82,650,000 | 82,800,000 | 1103 | 680  | 0.828431396  | C3orf70,VPS8                                         |

|   |            |            |      |      |              |                                                                      |
|---|------------|------------|------|------|--------------|----------------------------------------------------------------------|
| 1 | 82,725,000 | 82,875,000 | 1104 | 812  | 1.123373961  | VPS8                                                                 |
| 1 | 82,800,000 | 82,950,000 | 1105 | 1060 | 1.292931351  | VPS8                                                                 |
| 1 | 82,875,000 | 83,025,000 | 1106 | 857  | 1.297623418  | VPS8                                                                 |
| 1 | 82,950,000 | 83,100,000 | 1107 | 494  | 0.918657601  | MAGEF1,VPS8                                                          |
| 1 | 83,025,000 | 83,175,000 | 1108 | 442  | 1.089086437  | MAGEF1                                                               |
| 1 | 83,100,000 | 83,250,000 | 1109 | 230  | 1.303172013  | EPHB3                                                                |
| 1 | 83,175,000 | 83,325,000 | 1110 | 227  | 1.173214579  | EPHB3,ENSBTAG00000008343                                             |
| 1 | 83,250,000 | 83,400,000 | 1111 | 382  | 1.210084023  | GTF2F1,ENSBTAG00000008343                                            |
| 1 | 83,325,000 | 83,475,000 | 1112 | 453  | 1.155216793  | CHRD,CLCN2,EIF4G1,FAM131A,GTF2F1,POLR2H,THPO                         |
| 1 | 83,400,000 | 83,550,000 | 1113 | 365  | 0.729097797  | ALG3,CAMK2N2,CHRD,CLCN2,ECE2,EIF4G1,FAM131A,POLR2H,PSMD2,THPO,VWA5B2 |
| 1 | 83,475,000 | 83,625,000 | 1114 | 248  | 0.561806723  | ABCF3,ALG3,AP2M1,CAMK2N2,DVL3,ECE2,EIF2B5,EIF4G1,PSMD2,VWA5B2        |
| 1 | 83,550,000 | 83,700,000 | 1115 | 225  | 0.769459445  | ABCF3,AP2M1,DVL3,EIF2B5,HTR3C,HTR3E,VWA5B2                           |
| 1 | 83,625,000 | 83,775,000 | 1116 | 374  | 0.330702671  | ABCC5,EIF2B5,HTR3C,HTR3E                                             |
| 1 | 83,700,000 | 83,850,000 | 1117 | 368  | -0.019436263 | ABCC5,HTR3C                                                          |
| 1 | 83,775,000 | 83,925,000 | 1118 | 273  | -0.46746705  | ABCC5,MAP6D1,PARL                                                    |
| 1 | 83,850,000 | 84,000,000 | 1119 | 374  | -0.408390291 | MAP6D1,PARL,YEATS2                                                   |
| 1 | 83,925,000 | 84,075,000 | 1120 | 334  | -0.886797287 | KLHL24,MAP6D1,YEATS2,ENSBTAG00000014449                              |
| 1 | 84,000,000 | 84,150,000 | 1121 | 244  | -1.510713985 | KLHL24,YEATS2,ENSBTAG00000014449                                     |
| 1 | 84,075,000 | 84,225,000 | 1122 | 508  | -3.954958092 | KLHL24,KLHL6                                                         |
| 1 | 84,150,000 | 84,300,000 | 1123 | 810  | -2.238778549 | KLHL6                                                                |
| 1 | 84,225,000 | 84,375,000 | 1124 | 962  | -0.188743278 | B3GNT5,MCF2L2                                                        |
| 1 | 84,300,000 | 84,450,000 | 1125 | 668  | 0.047987824  | B3GNT5,MCF2L2                                                        |
| 1 | 84,375,000 | 84,525,000 | 1126 | 346  | 0.374158911  | B3GNT5,MCF2L2                                                        |
| 1 | 84,450,000 | 84,600,000 | 1127 | 366  | 0.171934814  | LAMP3,MCCC1,MCF2L2                                                   |
| 1 | 84,525,000 | 84,675,000 | 1128 | 341  | 0.070713524  | DCUN1D1,LAMP3,MCCC1,MCF2L2                                           |
| 1 | 84,600,000 | 84,750,000 | 1129 | 350  | 0.056310424  | ATP11B,DCUN1D1,MCCC1                                                 |
| 1 | 84,675,000 | 84,825,000 | 1130 | 324  | -0.697893232 | ATP11B,DCUN1D1                                                       |
| 1 | 84,750,000 | 84,900,000 | 1131 | 424  | -0.52799813  | ATP11B                                                               |
| 1 | 84,825,000 | 84,975,000 | 1132 | 481  | -0.735467326 |                                                                      |
| 1 | 84,900,000 | 85,050,000 | 1133 | 367  | -1.004484195 |                                                                      |
| 1 | 84,975,000 | 85,125,000 | 1134 | 298  | -0.396929009 |                                                                      |
| 1 | 85,050,000 | 85,200,000 | 1135 | 532  | -0.608132591 |                                                                      |
| 1 | 85,125,000 | 85,275,000 | 1136 | 869  | 0.221755215  |                                                                      |
| 1 | 85,200,000 | 85,350,000 | 1137 | 675  | 0.582111856  |                                                                      |
| 1 | 85,275,000 | 85,425,000 | 1138 | 395  | 0.735110497  |                                                                      |
| 1 | 85,350,000 | 85,500,000 | 1139 | 336  | 1.146177878  |                                                                      |
| 1 | 85,425,000 | 85,575,000 | 1140 | 251  | 1.216501833  |                                                                      |
| 1 | 85,500,000 | 85,650,000 | 1141 | 543  | 1.19478189   |                                                                      |
| 1 | 85,575,000 | 85,725,000 | 1142 | 860  | 1.117935458  |                                                                      |
| 1 | 85,650,000 | 85,800,000 | 1143 | 796  | 0.697179713  |                                                                      |
| 1 | 85,725,000 | 85,875,000 | 1144 | 635  | 0.228025738  |                                                                      |
| 1 | 85,800,000 | 85,950,000 | 1145 | 565  | 0.69424731   | SOX2                                                                 |
| 1 | 85,875,000 | 86,025,000 | 1146 | 478  | -0.165929652 | SOX2                                                                 |
| 1 | 85,950,000 | 86,100,000 | 1147 | 337  | -1.015591622 |                                                                      |
| 1 | 86,025,000 | 86,175,000 | 1148 | 294  | 0.205232346  |                                                                      |
| 1 | 86,100,000 | 86,250,000 | 1149 | 301  | 1.12860085   |                                                                      |
| 1 | 86,175,000 | 86,325,000 | 1150 | 273  | 1.372825911  |                                                                      |
| 1 | 86,250,000 | 86,400,000 | 1151 | 342  | 1.454013755  |                                                                      |
| 1 | 86,325,000 | 86,475,000 | 1152 | 749  | 1.348332836  |                                                                      |
| 1 | 86,400,000 | 86,550,000 | 1153 | 660  | 1.201893663  |                                                                      |
| 1 | 86,475,000 | 86,625,000 | 1154 | 280  | 1.118434367  |                                                                      |

|   |            |            |      |      |              |                            |
|---|------------|------------|------|------|--------------|----------------------------|
| 1 | 86,550,000 | 86,700,000 | 1155 | 260  | 1.123165951  | DNAJC19,FXR1               |
| 1 | 86,625,000 | 86,775,000 | 1156 | 278  | 1.072740233  | DNAJC19,FXR1               |
| 1 | 86,700,000 | 86,850,000 | 1157 | 418  | 0.899884054  | FXR1                       |
| 1 | 86,775,000 | 86,925,000 | 1158 | 503  | 0.688363582  |                            |
| 1 | 86,850,000 | 87,000,000 | 1159 | 311  | 0.464509731  | CCDC39                     |
| 1 | 86,925,000 | 87,075,000 | 1160 | 257  | 0.300053614  | CCDC39,TTC14               |
| 1 | 87,000,000 | 87,150,000 | 1161 | 382  | 0.574096587  | CCDC39,TTC14               |
| 1 | 87,075,000 | 87,225,000 | 1162 | 354  | -0.391737553 |                            |
| 1 | 87,150,000 | 87,300,000 | 1163 | 379  | -2.128708275 |                            |
| 1 | 87,225,000 | 87,375,000 | 1164 | 555  | -1.019217881 |                            |
| 1 | 87,300,000 | 87,450,000 | 1165 | 813  | -2.145914287 |                            |
| 1 | 87,375,000 | 87,525,000 | 1166 | 990  | -1.83507428  |                            |
| 1 | 87,450,000 | 87,600,000 | 1167 | 820  | -0.197787895 |                            |
| 1 | 87,525,000 | 87,675,000 | 1168 | 557  | 0.654704599  |                            |
| 1 | 87,600,000 | 87,750,000 | 1169 | 451  | -0.205326209 |                            |
| 1 | 87,675,000 | 87,825,000 | 1170 | 269  | -1.955130502 | PEX5L                      |
| 1 | 87,750,000 | 87,900,000 | 1171 | 457  | -0.639266449 | PEX5L                      |
| 1 | 87,825,000 | 87,975,000 | 1172 | 641  | -0.304221779 | PEX5L,USP13                |
| 1 | 87,900,000 | 88,050,000 | 1173 | 557  | -0.060845562 | PEX5L,USP13                |
| 1 | 87,975,000 | 88,125,000 | 1174 | 452  | 0.159879541  | MRPL47,NDUFB5,USP13        |
| 1 | 88,050,000 | 88,200,000 | 1175 | 309  | 0.129718564  | ACTL6A,MRPL47,NDUFB5,USP13 |
| 1 | 88,125,000 | 88,275,000 | 1176 | 453  | -0.631128007 | ACTL6A,GNB4,MFN1,MRPL47    |
| 1 | 88,200,000 | 88,350,000 | 1177 | 437  | -1.129815854 | GNB4,MFN1                  |
| 1 | 88,275,000 | 88,425,000 | 1178 | 439  | -0.32560752  | MFN1,ZNF639                |
| 1 | 88,350,000 | 88,500,000 | 1179 | 429  | -0.108975326 | KCNMB3,MFN1,ZNF639         |
| 1 | 88,425,000 | 88,575,000 | 1180 | 200  | 0.072758998  | KCNMB3,PIK3CA              |
| 1 | 88,500,000 | 88,650,000 | 1181 | 326  | 1.174378194  | PIK3CA,ZMAT3               |
| 1 | 88,575,000 | 88,725,000 | 1182 | 807  | 0.885187097  | ZMAT3                      |
| 1 | 88,650,000 | 88,800,000 | 1183 | 848  | 0.645528818  | KCNMB3,ZMAT3               |
| 1 | 88,725,000 | 88,875,000 | 1184 | 612  | 0.457067023  | KCNMB3                     |
| 1 | 88,800,000 | 88,950,000 | 1185 | 533  | 0.182865705  | KCNMB3                     |
| 1 | 88,875,000 | 89,025,000 | 1186 | 345  | -1.074127482 |                            |
| 1 | 88,950,000 | 89,100,000 | 1187 | 241  | -1.571052184 |                            |
| 1 | 89,025,000 | 89,175,000 | 1188 | 408  | -2.899753608 |                            |
| 1 | 89,100,000 | 89,250,000 | 1189 | 896  | -0.807033394 |                            |
| 1 | 89,175,000 | 89,325,000 | 1190 | 1005 | 0.143735839  |                            |
| 1 | 89,250,000 | 89,400,000 | 1191 | 805  | -1.635457165 |                            |
| 1 | 89,325,000 | 89,475,000 | 1192 | 624  | -2.147451252 |                            |
| 1 | 89,400,000 | 89,550,000 | 1193 | 632  | -0.718777236 |                            |
| 1 | 89,475,000 | 89,625,000 | 1194 | 992  | -2.183226741 |                            |
| 1 | 89,550,000 | 89,700,000 | 1195 | 798  | -2.379794547 |                            |
| 1 | 89,625,000 | 89,775,000 | 1196 | 457  | -0.157063398 |                            |
| 1 | 89,700,000 | 89,850,000 | 1197 | 794  | -0.204858158 |                            |
| 1 | 89,775,000 | 89,925,000 | 1198 | 730  | -0.184669254 |                            |
| 1 | 89,850,000 | 90,000,000 | 1199 | 698  | 0.933074566  |                            |
| 1 | 89,925,000 | 90,075,000 | 1200 | 768  | 0.987537642  |                            |
| 1 | 90,000,000 | 90,150,000 | 1201 | 550  | 0.093638325  |                            |
| 1 | 90,075,000 | 90,225,000 | 1202 | 687  | 0.069688308  |                            |
| 1 | 90,150,000 | 90,300,000 | 1203 | 692  | 0.486417108  |                            |
| 1 | 90,225,000 | 90,375,000 | 1204 | 471  | 0.49613751   |                            |
| 1 | 90,300,000 | 90,450,000 | 1205 | 431  | 0.058823037  |                            |
| 1 | 90,375,000 | 90,525,000 | 1206 | 455  | 0.338465495  | TBL1XR1                    |
| 1 | 90,450,000 | 90,600,000 | 1207 | 536  | 0.982630414  | TBL1XR1                    |

|   |            |            |      |      |              |         |
|---|------------|------------|------|------|--------------|---------|
| 1 | 90,525,000 | 90,675,000 | 1208 | 651  | 0.786577064  | TBL1XR1 |
| 1 | 90,600,000 | 90,750,000 | 1209 | 468  | -0.401715424 | TBL1XR1 |
| 1 | 90,675,000 | 90,825,000 | 1210 | 363  | -0.084602011 |         |
| 1 | 90,750,000 | 90,900,000 | 1211 | 462  | 0.664010216  |         |
| 1 | 90,825,000 | 90,975,000 | 1212 | 631  | -0.606611765 |         |
| 1 | 90,900,000 | 91,050,000 | 1213 | 605  | -0.933441204 |         |
| 1 | 90,975,000 | 91,125,000 | 1214 | 572  | 0.984705124  |         |
| 1 | 91,050,000 | 91,200,000 | 1215 | 565  | 0.729196826  |         |
| 1 | 91,125,000 | 91,275,000 | 1216 | 323  | 0.105340208  |         |
| 1 | 91,200,000 | 91,350,000 | 1217 | 268  | -0.257067043 |         |
| 1 | 91,275,000 | 91,425,000 | 1218 | 426  | -0.40326688  |         |
| 1 | 91,350,000 | 91,500,000 | 1219 | 710  | -1.480340093 |         |
| 1 | 91,425,000 | 91,575,000 | 1220 | 984  | -1.791180297 |         |
| 1 | 91,500,000 | 91,650,000 | 1221 | 996  | -1.481596242 |         |
| 1 | 91,575,000 | 91,725,000 | 1222 | 717  | -0.6677812   |         |
| 1 | 91,650,000 | 91,800,000 | 1223 | 584  | 0.647215049  |         |
| 1 | 91,725,000 | 91,875,000 | 1224 | 1172 | 0.694680251  |         |
| 1 | 91,800,000 | 91,950,000 | 1225 | 1129 | 0.598876409  |         |
| 1 | 91,875,000 | 92,025,000 | 1226 | 877  | 0.799407077  |         |
| 1 | 91,950,000 | 92,100,000 | 1227 | 1277 | 0.189877324  |         |
| 1 | 92,025,000 | 92,175,000 | 1228 | 1218 | -0.124844536 |         |
| 1 | 92,100,000 | 92,250,000 | 1229 | 1200 | -1.254661737 |         |
| 1 | 92,175,000 | 92,325,000 | 1230 | 1234 | -1.963658035 |         |
| 1 | 92,250,000 | 92,400,000 | 1231 | 1281 | -0.343194276 |         |
| 1 | 92,325,000 | 92,475,000 | 1232 | 1269 | 0.398487834  |         |
| 1 | 92,400,000 | 92,550,000 | 1233 | 1036 | 0.99707238   |         |
| 1 | 92,475,000 | 92,625,000 | 1234 | 1049 | 0.419265282  |         |
| 1 | 92,550,000 | 92,700,000 | 1235 | 955  | 0.180221897  |         |
| 1 | 92,625,000 | 92,775,000 | 1236 | 525  | 0.192399501  |         |
| 1 | 92,700,000 | 92,850,000 | 1237 | 287  | -1.004676387 |         |
| 1 | 92,775,000 | 92,925,000 | 1238 | 408  | -1.326169662 |         |
| 1 | 92,850,000 | 93,000,000 | 1239 | 539  | -0.64080869  |         |
| 1 | 92,925,000 | 93,075,000 | 1240 | 581  | 0.004356058  |         |
| 1 | 93,000,000 | 93,150,000 | 1241 | 559  | 0.337767079  |         |
| 1 | 93,075,000 | 93,225,000 | 1242 | 577  | 1.013760642  |         |
| 1 | 93,150,000 | 93,300,000 | 1243 | 644  | 0.526784047  |         |
| 1 | 93,225,000 | 93,375,000 | 1244 | 971  | 0.507118229  |         |
| 1 | 93,300,000 | 93,450,000 | 1245 | 855  | 0.753379182  |         |
| 1 | 93,375,000 | 93,525,000 | 1246 | 458  | 0.921024956  |         |
| 1 | 93,450,000 | 93,600,000 | 1247 | 716  | -0.893920359 |         |
| 1 | 93,525,000 | 93,675,000 | 1248 | 855  | -0.758218176 | NLGN1   |
| 1 | 93,600,000 | 93,750,000 | 1249 | 746  | -0.692159607 | NLGN1   |
| 1 | 93,675,000 | 93,825,000 | 1250 | 657  | -3.283283057 |         |
| 1 | 93,750,000 | 93,900,000 | 1251 | 679  | -6.440209307 |         |
| 1 | 93,825,000 | 93,975,000 | 1252 | 888  | -1.468744431 |         |
| 1 | 93,900,000 | 94,050,000 | 1253 | 908  | 1.126650212  |         |
| 1 | 93,975,000 | 94,125,000 | 1254 | 998  | 0.627031079  |         |
| 1 | 94,050,000 | 94,200,000 | 1255 | 877  | -0.211312721 |         |
| 1 | 94,125,000 | 94,275,000 | 1256 | 538  | -0.309439259 |         |
| 1 | 94,200,000 | 94,350,000 | 1257 | 619  | 0.587827922  |         |
| 1 | 94,275,000 | 94,425,000 | 1258 | 1002 | 0.401806442  |         |
| 1 | 94,350,000 | 94,500,000 | 1259 | 1106 | 0.086866209  |         |
| 1 | 94,425,000 | 94,575,000 | 1260 | 756  | 0.111460607  |         |

|   |            |            |      |      |              |                                     |
|---|------------|------------|------|------|--------------|-------------------------------------|
| 1 | 94,500,000 | 94,650,000 | 1261 | 779  | 0.772801499  |                                     |
| 1 | 94,575,000 | 94,725,000 | 1262 | 799  | 0.188146898  |                                     |
| 1 | 94,650,000 | 94,800,000 | 1263 | 616  | 0.165314699  |                                     |
| 1 | 94,725,000 | 94,875,000 | 1264 | 710  | -0.370098222 |                                     |
| 1 | 94,800,000 | 94,950,000 | 1265 | 694  | -0.924120805 |                                     |
| 1 | 94,875,000 | 95,025,000 | 1266 | 490  | 0.714047066  | SPATA16                             |
| 1 | 94,950,000 | 95,100,000 | 1267 | 649  | 0.46065551   | SPATA16                             |
| 1 | 95,025,000 | 95,175,000 | 1268 | 1482 | 0.355473695  | GPX5,GPX6,SPATA16                   |
| 1 | 95,100,000 | 95,250,000 | 1269 | 1616 | 0.336383553  | GPX5,GPX6,SPATA16,ZSCAN23           |
| 1 | 95,175,000 | 95,325,000 | 1270 | 1080 | -0.07168793  | SPATA16,ZSCAN23                     |
| 1 | 95,250,000 | 95,400,000 | 1271 | 854  | 0.167364627  | SPATA16                             |
| 1 | 95,325,000 | 95,475,000 | 1272 | 590  | 0.486819274  | SPATA16                             |
| 1 | 95,400,000 | 95,550,000 | 1273 | 367  | -0.139682167 | ECT2                                |
| 1 | 95,475,000 | 95,625,000 | 1274 | 272  | 0.103050268  | ECT2,NCEH1                          |
| 1 | 95,550,000 | 95,700,000 | 1275 | 425  | 0.954149581  | NCEH1                               |
| 1 | 95,625,000 | 95,775,000 | 1276 | 648  | 0.935809976  | NCEH1,TNFSF10                       |
| 1 | 95,700,000 | 95,850,000 | 1277 | 786  | 0.593949272  | GHSR,TNFSF10                        |
| 1 | 95,775,000 | 95,925,000 | 1278 | 664  | 0.167165736  | FNDC3B,GHSR                         |
| 1 | 95,850,000 | 96,000,000 | 1279 | 479  | -0.394455857 | FNDC3B                              |
| 1 | 95,925,000 | 96,075,000 | 1280 | 413  | 0.053513424  | FNDC3B                              |
| 1 | 96,000,000 | 96,150,000 | 1281 | 341  | 0.521926643  | FNDC3B                              |
| 1 | 96,075,000 | 96,225,000 | 1282 | 496  | 0.914928358  | FNDC3B                              |
| 1 | 96,150,000 | 96,300,000 | 1283 | 531  | 0.308075057  | FNDC3B                              |
| 1 | 96,225,000 | 96,375,000 | 1284 | 469  | -1.202463954 |                                     |
| 1 | 96,300,000 | 96,450,000 | 1285 | 517  | -0.636772751 | TMEM212                             |
| 1 | 96,375,000 | 96,525,000 | 1286 | 611  | -1.050283517 | PRKCSH,TMEM212                      |
| 1 | 96,450,000 | 96,600,000 | 1287 | 749  | -0.90408841  | PRKCSH                              |
| 1 | 96,525,000 | 96,675,000 | 1288 | 733  | 0.607389334  | PRKCSH                              |
| 1 | 96,600,000 | 96,750,000 | 1289 | 533  | 0.865635006  | PRKCSH                              |
| 1 | 96,675,000 | 96,825,000 | 1290 | 533  | -0.141229262 | PRKCSH,TNIK                         |
| 1 | 96,750,000 | 96,900,000 | 1291 | 558  | -0.051535669 | TNIK                                |
| 1 | 96,825,000 | 96,975,000 | 1292 | 774  | 1.020965402  | TNIK,ENSBTAG00000031795             |
| 1 | 96,900,000 | 97,050,000 | 1293 | 1002 | 1.071338008  | TNIK,ENSBTAG00000031795             |
| 1 | 96,975,000 | 97,125,000 | 1294 | 1187 | 0.659521049  | TNIK                                |
| 1 | 97,050,000 | 97,200,000 | 1295 | 1130 | 0.682717293  | TNIK                                |
| 1 | 97,125,000 | 97,275,000 | 1296 | 1061 | 0.510977761  | SLC2A2,TNIK                         |
| 1 | 97,200,000 | 97,350,000 | 1297 | 1408 | -1.975993808 | EIF5A2,RPL22L1,SLC2A2               |
| 1 | 97,275,000 | 97,425,000 | 1298 | 1382 | -2.148044144 | EIF5A2,RPL22L1                      |
| 1 | 97,350,000 | 97,500,000 | 1299 | 1282 | 0.611808491  |                                     |
| 1 | 97,425,000 | 97,575,000 | 1300 | 1287 | 0.32576728   |                                     |
| 1 | 97,500,000 | 97,650,000 | 1301 | 1004 | 0.268279254  |                                     |
| 1 | 97,575,000 | 97,725,000 | 1302 | 851  | 0.149616682  | SLC7A14                             |
| 1 | 97,650,000 | 97,800,000 | 1303 | 666  | 0.215129255  | CLDN11,SLC7A14                      |
| 1 | 97,725,000 | 97,875,000 | 1304 | 527  | 0.807504635  | CLDN11,SKIL,SLC7A14                 |
| 1 | 97,800,000 | 97,950,000 | 1305 | 837  | -0.915708503 | CLDN11,PRKCI,SKIL                   |
| 1 | 97,875,000 | 98,025,000 | 1306 | 795  | -1.248598603 | PHC3,PRKCI                          |
| 1 | 97,950,000 | 98,100,000 | 1307 | 765  | 0.439996515  | GPR160,PHC3,PRKCI                   |
| 1 | 98,025,000 | 98,175,000 | 1308 | 1109 | 0.730302244  | GPR160,PHC3,ENSBTAG00000045991      |
| 1 | 98,100,000 | 98,250,000 | 1309 | 1109 | 0.8742842    | SAMD7,SEC62,ENSBTAG00000045991      |
| 1 | 98,175,000 | 98,325,000 | 1310 | 829  | 0.839889277  | LRR31,SAMD7,SEC62                   |
| 1 | 98,250,000 | 98,400,000 | 1311 | 674  | 0.726094922  | ARPM1,LRR31,LRR34,LRR1Q4,MYNN,SAMD7 |
| 1 | 98,325,000 | 98,475,000 | 1312 | 487  | 0.849374221  | ARPM1,LRR31,LRR34,LRR1Q4,MYNN       |
| 1 | 98,400,000 | 98,550,000 | 1313 | 686  | 0.183226251  |                                     |

|   |             |             |      |      |              |                           |
|---|-------------|-------------|------|------|--------------|---------------------------|
| 1 | 98,475,000  | 98,625,000  | 1314 | 862  | 0.090102869  |                           |
| 1 | 98,550,000  | 98,700,000  | 1315 | 1036 | 0.006554497  |                           |
| 1 | 98,625,000  | 98,775,000  | 1316 | 922  | -0.487614909 |                           |
| 1 | 98,700,000  | 98,850,000  | 1317 | 655  | -0.616380497 | ENSBTAG00000047144        |
| 1 | 98,775,000  | 98,925,000  | 1318 | 667  | 0.072422318  | ENSBTAG00000047144        |
| 1 | 98,850,000  | 99,000,000  | 1319 | 506  | 0.55910695   |                           |
| 1 | 98,925,000  | 99,075,000  | 1320 | 386  | 0.09518301   |                           |
| 1 | 99,000,000  | 99,150,000  | 1321 | 405  | -3.794643294 | MECOM                     |
| 1 | 99,075,000  | 99,225,000  | 1322 | 496  | -2.936397165 | MECOM                     |
| 1 | 99,150,000  | 99,300,000  | 1323 | 674  | 0.347255509  |                           |
| 1 | 99,225,000  | 99,375,000  | 1324 | 747  | 0.196926638  |                           |
| 1 | 99,300,000  | 99,450,000  | 1325 | 534  | -1.000070838 |                           |
| 1 | 99,375,000  | 99,525,000  | 1326 | 401  | -0.518022886 |                           |
| 1 | 99,450,000  | 99,600,000  | 1327 | 424  | -1.275854928 |                           |
| 1 | 99,525,000  | 99,675,000  | 1328 | 590  | -0.442100035 |                           |
| 1 | 99,600,000  | 99,750,000  | 1329 | 712  | 0.49270547   |                           |
| 1 | 99,675,000  | 99,825,000  | 1330 | 529  | 0.494331136  |                           |
| 1 | 99,750,000  | 99,900,000  | 1331 | 295  | 0.062400424  |                           |
| 1 | 99,825,000  | 99,975,000  | 1332 | 435  | 0.882147284  |                           |
| 1 | 99,900,000  | 100,050,000 | 1333 | 747  | 0.709899261  |                           |
| 1 | 99,975,000  | 100,125,000 | 1334 | 819  | 0.200745492  |                           |
| 1 | 100,050,000 | 100,200,000 | 1335 | 659  | -0.29835311  | GOLIM4                    |
| 1 | 100,125,000 | 100,275,000 | 1336 | 556  | 0.111181635  | GOLIM4                    |
| 1 | 100,200,000 | 100,350,000 | 1337 | 753  | 0.986938501  | GOLIM4,MGC133804          |
| 1 | 100,275,000 | 100,425,000 | 1338 | 746  | 0.897727034  | MGC133804                 |
| 1 | 100,350,000 | 100,500,000 | 1339 | 560  | 0.707308114  | MGC133804,SERPINI1        |
| 1 | 100,425,000 | 100,575,000 | 1340 | 479  | 0.883782967  | PDCD10,SERPINI1           |
| 1 | 100,500,000 | 100,650,000 | 1341 | 363  | 0.564113171  | MGC151671,PDCD10,SERPINI1 |
| 1 | 100,575,000 | 100,725,000 | 1342 | 482  | -1.52831413  | MGC151671,PDCD10,WDR49    |
| 1 | 100,650,000 | 100,800,000 | 1343 | 758  | -1.121574786 | MGC151671,SERPINI2,WDR49  |
| 1 | 100,725,000 | 100,875,000 | 1344 | 1182 | -0.001567222 | SERPINI2,WDR49            |
| 1 | 100,800,000 | 100,950,000 | 1345 | 1062 | -0.023836623 | SERPINI2,ZBBX             |
| 1 | 100,875,000 | 101,025,000 | 1346 | 858  | 0.258381144  | ZBBX                      |
| 1 | 100,950,000 | 101,100,000 | 1347 | 1099 | 0.482480576  | ZBBX                      |
| 1 | 101,025,000 | 101,175,000 | 1348 | 1248 | 0.650198972  |                           |
| 1 | 101,100,000 | 101,250,000 | 1349 | 918  | 0.732797561  |                           |
| 1 | 101,175,000 | 101,325,000 | 1350 | 1097 | 0.920697134  |                           |
| 1 | 101,250,000 | 101,400,000 | 1351 | 1543 | 0.600160631  |                           |
| 1 | 101,325,000 | 101,475,000 | 1352 | 1744 | 0.697138988  |                           |
| 1 | 101,400,000 | 101,550,000 | 1353 | 2014 | 1.13173352   |                           |
| 1 | 101,475,000 | 101,625,000 | 1354 | 1847 | 1.172268475  |                           |
| 1 | 101,550,000 | 101,700,000 | 1355 | 2101 | 1.196715975  |                           |
| 1 | 101,625,000 | 101,775,000 | 1356 | 2137 | 1.155013533  |                           |
| 1 | 101,700,000 | 101,850,000 | 1357 | 1608 | 0.808419472  |                           |
| 1 | 101,775,000 | 101,925,000 | 1358 | 1530 | 0.347306253  |                           |
| 1 | 101,850,000 | 102,000,000 | 1359 | 2116 | 0.595458803  |                           |
| 1 | 101,925,000 | 102,075,000 | 1360 | 2306 | 0.049357829  |                           |
| 1 | 102,000,000 | 102,150,000 | 1361 | 1747 | -0.103661465 |                           |
| 1 | 102,075,000 | 102,225,000 | 1362 | 1658 | 0.940208414  |                           |
| 1 | 102,150,000 | 102,300,000 | 1363 | 1646 | 0.917701778  |                           |
| 1 | 102,225,000 | 102,375,000 | 1364 | 1314 | 0.44448708   | BCHE                      |
| 1 | 102,300,000 | 102,450,000 | 1365 | 1268 | -0.075807898 | BCHE                      |
| 1 | 102,375,000 | 102,525,000 | 1366 | 1431 | 0.456115444  | BCHE                      |



|   |             |             |      |      |              |                                       |
|---|-------------|-------------|------|------|--------------|---------------------------------------|
| 1 | 102,450,000 | 102,600,000 | 1367 | 1527 | 0.654913521  |                                       |
| 1 | 102,525,000 | 102,675,000 | 1368 | 1596 | 0.547423301  |                                       |
| 1 | 102,600,000 | 102,750,000 | 1369 | 1569 | -0.621541066 |                                       |
| 1 | 102,675,000 | 102,825,000 | 1370 | 1315 | -1.388037411 |                                       |
| 1 | 102,750,000 | 102,900,000 | 1371 | 1118 | -0.84372104  |                                       |
| 1 | 102,825,000 | 102,975,000 | 1372 | 1057 | -0.914891838 |                                       |
| 1 | 102,900,000 | 103,050,000 | 1373 | 805  | -1.184814129 | SLITRK3                               |
| 1 | 102,975,000 | 103,125,000 | 1374 | 809  | -2.095970176 | SI,SLITRK3                            |
| 1 | 103,050,000 | 103,200,000 | 1375 | 861  | -1.152156078 | SI                                    |
| 1 | 103,125,000 | 103,275,000 | 1376 | 582  | 0.733736645  | SI                                    |
| 1 | 103,200,000 | 103,350,000 | 1377 | 527  | 0.60095146   | SI                                    |
| 1 | 103,275,000 | 103,425,000 | 1378 | 714  | -0.056578085 |                                       |
| 1 | 103,350,000 | 103,500,000 | 1379 | 751  | -0.44384929  |                                       |
| 1 | 103,425,000 | 103,575,000 | 1380 | 604  | -0.803761746 |                                       |
| 1 | 103,500,000 | 103,650,000 | 1381 | 937  | -0.066034594 |                                       |
| 1 | 103,575,000 | 103,725,000 | 1382 | 1390 | 0.116875719  |                                       |
| 1 | 103,650,000 | 103,800,000 | 1383 | 1315 | -0.033292388 |                                       |
| 1 | 103,725,000 | 103,875,000 | 1384 | 1142 | -0.495480492 |                                       |
| 1 | 103,800,000 | 103,950,000 | 1385 | 787  | -0.778116035 |                                       |
| 1 | 103,875,000 | 104,025,000 | 1386 | 804  | -0.216416239 |                                       |
| 1 | 103,950,000 | 104,100,000 | 1387 | 1491 | -0.22044522  |                                       |
| 1 | 104,025,000 | 104,175,000 | 1388 | 1139 | -0.488133409 | ENSBTAG00000018312                    |
| 1 | 104,100,000 | 104,250,000 | 1389 | 453  | -1.448658874 | ENSBTAG00000018312                    |
| 1 | 104,175,000 | 104,325,000 | 1390 | 607  | -1.612611695 |                                       |
| 1 | 104,250,000 | 104,400,000 | 1391 | 595  | -1.127023405 |                                       |
| 1 | 104,325,000 | 104,475,000 | 1392 | 538  | 0.887525991  |                                       |
| 1 | 104,400,000 | 104,550,000 | 1393 | 777  | 1.180577879  |                                       |
| 1 | 104,475,000 | 104,625,000 | 1394 | 645  | 1.029645022  |                                       |
| 1 | 104,550,000 | 104,700,000 | 1395 | 413  | 1.033379736  |                                       |
| 1 | 104,625,000 | 104,775,000 | 1396 | 458  | -1.018109816 |                                       |
| 1 | 104,700,000 | 104,850,000 | 1397 | 657  | -2.669328871 |                                       |
| 1 | 104,775,000 | 104,925,000 | 1398 | 895  | -0.873872208 |                                       |
| 1 | 104,850,000 | 105,000,000 | 1399 | 1303 | -0.081996462 |                                       |
| 1 | 104,925,000 | 105,075,000 | 1400 | 1300 | 0.053937871  |                                       |
| 1 | 105,000,000 | 105,150,000 | 1401 | 851  | 0.250801738  |                                       |
| 1 | 105,075,000 | 105,225,000 | 1402 | 1107 | 0.96623232   | ENSBTAG00000027213                    |
| 1 | 105,150,000 | 105,300,000 | 1403 | 1204 | 1.207752282  | ENSBTAG00000025847,ENSBTAG00000027213 |
| 1 | 105,225,000 | 105,375,000 | 1404 | 1213 | 0.952908115  | ENSBTAG00000025847                    |
| 1 | 105,300,000 | 105,450,000 | 1405 | 1367 | 0.925831799  |                                       |
| 1 | 105,375,000 | 105,525,000 | 1406 | 1078 | 0.429672788  |                                       |
| 1 | 105,450,000 | 105,600,000 | 1407 | 640  | -0.476957999 |                                       |
| 1 | 105,525,000 | 105,675,000 | 1408 | 478  | 0.700552317  |                                       |
| 1 | 105,600,000 | 105,750,000 | 1409 | 1394 | 0.617628854  |                                       |
| 1 | 105,675,000 | 105,825,000 | 1410 | 1611 | 0.000967422  |                                       |
| 1 | 105,750,000 | 105,900,000 | 1411 | 644  | -1.058766645 |                                       |
| 1 | 105,825,000 | 105,975,000 | 1412 | 517  | 0.627269429  |                                       |
| 1 | 105,900,000 | 106,050,000 | 1413 | 717  | 0.74049968   |                                       |
| 1 | 105,975,000 | 106,125,000 | 1414 | 529  | 0.888849655  |                                       |
| 1 | 106,050,000 | 106,200,000 | 1415 | 354  | 0.861711501  |                                       |
| 1 | 106,125,000 | 106,275,000 | 1416 | 336  | 0.457445901  |                                       |
| 1 | 106,200,000 | 106,350,000 | 1417 | 378  | 0.483329094  |                                       |
| 1 | 106,275,000 | 106,425,000 | 1418 | 588  | 0.950699446  |                                       |
| 1 | 106,350,000 | 106,500,000 | 1419 | 648  | 1.035256966  |                                       |

|   |             |             |      |      |              |                          |
|---|-------------|-------------|------|------|--------------|--------------------------|
| 1 | 106,425,000 | 106,575,000 | 1420 | 549  | 0.892370004  |                          |
| 1 | 106,500,000 | 106,650,000 | 1421 | 530  | 0.30136519   |                          |
| 1 | 106,575,000 | 106,725,000 | 1422 | 628  | -0.182019472 | OTOL1                    |
| 1 | 106,650,000 | 106,800,000 | 1423 | 632  | 0.458529413  | OTOL1                    |
| 1 | 106,725,000 | 106,875,000 | 1424 | 568  | 0.670163281  | OTOL1                    |
| 1 | 106,800,000 | 106,950,000 | 1425 | 479  | 0.290924539  | SPTSSB                   |
| 1 | 106,875,000 | 107,025,000 | 1426 | 655  | 0.612917763  | NMD3,SPTSSB              |
| 1 | 106,950,000 | 107,100,000 | 1427 | 1322 | 1.072949103  | NMD3                     |
| 1 | 107,025,000 | 107,175,000 | 1428 | 1023 | 0.307309184  |                          |
| 1 | 107,100,000 | 107,250,000 | 1429 | 607  | 0.330566917  | B3GALNT1,PPM1L           |
| 1 | 107,175,000 | 107,325,000 | 1430 | 648  | 0.31194352   | B3GALNT1,PPM1L           |
| 1 | 107,250,000 | 107,400,000 | 1431 | 403  | -1.408488424 | PPM1L                    |
| 1 | 107,325,000 | 107,475,000 | 1432 | 379  | -1.222095162 | PPM1L                    |
| 1 | 107,400,000 | 107,550,000 | 1433 | 473  | -2.164998398 | PPM1L                    |
| 1 | 107,475,000 | 107,625,000 | 1434 | 473  | -1.487362863 | PPM1L                    |
| 1 | 107,550,000 | 107,700,000 | 1435 | 437  | -1.235746986 | ARL14,PPM1L              |
| 1 | 107,625,000 | 107,775,000 | 1436 | 495  | -1.033390077 | ARL14,KPNA4              |
| 1 | 107,700,000 | 107,850,000 | 1437 | 418  | 0.466530298  | KPNA4                    |
| 1 | 107,775,000 | 107,925,000 | 1438 | 383  | 1.1657153    | KPNA4,MGC137058,SMC4     |
| 1 | 107,850,000 | 108,000,000 | 1439 | 395  | 1.271532286  | IFT80,MGC137058,SMC4     |
| 1 | 107,925,000 | 108,075,000 | 1440 | 379  | 1.291332681  | IFT80,SMC4               |
| 1 | 108,000,000 | 108,150,000 | 1441 | 388  | 0.260726162  | C3orf80,IFT80            |
| 1 | 108,075,000 | 108,225,000 | 1442 | 580  | -0.494344218 | C3orf80                  |
| 1 | 108,150,000 | 108,300,000 | 1443 | 773  | -0.106426126 | IL12A                    |
| 1 | 108,225,000 | 108,375,000 | 1444 | 657  | -0.060432776 | IL12A                    |
| 1 | 108,300,000 | 108,450,000 | 1445 | 683  | 0.682287188  | SCHIP1                   |
| 1 | 108,375,000 | 108,525,000 | 1446 | 621  | 0.654124485  | SCHIP1                   |
| 1 | 108,450,000 | 108,600,000 | 1447 | 402  | 0.209247619  | SCHIP1                   |
| 1 | 108,525,000 | 108,675,000 | 1448 | 759  | 0.929971042  |                          |
| 1 | 108,600,000 | 108,750,000 | 1449 | 1368 | 1.049044536  |                          |
| 1 | 108,675,000 | 108,825,000 | 1450 | 1433 | 0.915294613  |                          |
| 1 | 108,750,000 | 108,900,000 | 1451 | 1280 | 1.076011535  |                          |
| 1 | 108,825,000 | 108,975,000 | 1452 | 1297 | 1.294772242  |                          |
| 1 | 108,900,000 | 109,050,000 | 1453 | 1208 | 1.230033734  |                          |
| 1 | 108,975,000 | 109,125,000 | 1454 | 1155 | 1.282578503  | IQCJ                     |
| 1 | 109,050,000 | 109,200,000 | 1455 | 1392 | 1.29112995   | IQCJ                     |
| 1 | 109,125,000 | 109,275,000 | 1456 | 1465 | 1.163517738  |                          |
| 1 | 109,200,000 | 109,350,000 | 1457 | 1148 | 1.087809875  |                          |
| 1 | 109,275,000 | 109,425,000 | 1458 | 801  | 0.917720589  |                          |
| 1 | 109,350,000 | 109,500,000 | 1459 | 758  | 0.824705197  |                          |
| 1 | 109,425,000 | 109,575,000 | 1460 | 836  | -0.357549446 | MFSD1,ENSBTAG00000038395 |
| 1 | 109,500,000 | 109,650,000 | 1461 | 646  | -1.757857927 | MFSD1,ENSBTAG00000038395 |
| 1 | 109,575,000 | 109,725,000 | 1462 | 884  | -0.382301746 | GFM1,LXN,MFSD1,RARRES1   |
| 1 | 109,650,000 | 109,800,000 | 1463 | 996  | 0.332885275  | GFM1,LXN,MLF1,RARRES1    |
| 1 | 109,725,000 | 109,875,000 | 1464 | 750  | 0.474039482  | GFM1,LXN,MLF1,RSRC1      |
| 1 | 109,800,000 | 109,950,000 | 1465 | 649  | 0.732253392  | RSRC1                    |
| 1 | 109,875,000 | 110,025,000 | 1466 | 372  | 0.338830972  | RSRC1,ENSBTAG00000047570 |
| 1 | 109,950,000 | 110,100,000 | 1467 | 383  | 0.007325821  | RSRC1,ENSBTAG00000047570 |
| 1 | 110,025,000 | 110,175,000 | 1468 | 577  | 0.785675286  | RSRC1,ENSBTAG00000047570 |
| 1 | 110,100,000 | 110,250,000 | 1469 | 527  | 1.057284141  | RSRC1                    |
| 1 | 110,175,000 | 110,325,000 | 1470 | 312  | 0.873896226  | RSRC1,SHOX2              |
| 1 | 110,250,000 | 110,400,000 | 1471 | 579  | 1.059275164  | RSRC1,SHOX2              |
| 1 | 110,325,000 | 110,475,000 | 1472 | 722  | 1.125729681  |                          |

|   |             |             |      |      |              |                           |
|---|-------------|-------------|------|------|--------------|---------------------------|
| 1 | 110,400,000 | 110,550,000 | 1473 | 505  | 0.949869628  |                           |
| 1 | 110,475,000 | 110,625,000 | 1474 | 520  | 0.626845091  |                           |
| 1 | 110,550,000 | 110,700,000 | 1475 | 359  | 0.431223028  |                           |
| 1 | 110,625,000 | 110,775,000 | 1476 | 338  | -0.52481519  |                           |
| 1 | 110,700,000 | 110,850,000 | 1477 | 490  | -0.780907466 |                           |
| 1 | 110,775,000 | 110,925,000 | 1478 | 471  | -0.441673922 |                           |
| 1 | 110,850,000 | 111,000,000 | 1479 | 482  | -0.172807431 | VEPH1                     |
| 1 | 110,925,000 | 111,075,000 | 1480 | 522  | 0.121584494  | PTX3,VEPH1                |
| 1 | 111,000,000 | 111,150,000 | 1481 | 768  | 0.767227204  | PTX3,VEPH1                |
| 1 | 111,075,000 | 111,225,000 | 1482 | 951  | 0.278951819  | VEPH1                     |
| 1 | 111,150,000 | 111,300,000 | 1483 | 802  | -1.59956774  | VEPH1                     |
| 1 | 111,225,000 | 111,375,000 | 1484 | 642  | -1.77445884  | CCNL1                     |
| 1 | 111,300,000 | 111,450,000 | 1485 | 505  | -0.095847332 | CCNL1,ENSBTAG00000018009  |
| 1 | 111,375,000 | 111,525,000 | 1486 | 417  | 0.531540095  | ENSBTAG00000018009        |
| 1 | 111,450,000 | 111,600,000 | 1487 | 639  | 0.765450604  | ENSBTAG00000018009        |
| 1 | 111,525,000 | 111,675,000 | 1488 | 648  | -0.316719807 |                           |
| 1 | 111,600,000 | 111,750,000 | 1489 | 342  | -0.67601003  |                           |
| 1 | 111,675,000 | 111,825,000 | 1490 | 169  | 0.839914269  |                           |
| 1 | 111,750,000 | 111,900,000 | 1491 | 143  | 0.730702071  | TIPARP                    |
| 1 | 111,825,000 | 111,975,000 | 1492 | 358  | 0.305948261  | TIPARP                    |
| 1 | 111,900,000 | 112,050,000 | 1493 | 382  | -0.018930991 | KCNAB1,SSR3               |
| 1 | 111,975,000 | 112,125,000 | 1494 | 384  | 1.197831452  | KCNAB1,SSR3               |
| 1 | 112,050,000 | 112,200,000 | 1495 | 685  | 1.418816847  | KCNAB1                    |
| 1 | 112,125,000 | 112,275,000 | 1496 | 727  | 0.139363252  | KCNAB1                    |
| 1 | 112,200,000 | 112,350,000 | 1497 | 859  | -0.048206949 | KCNAB1                    |
| 1 | 112,275,000 | 112,425,000 | 1498 | 835  | 0.829789405  | KCNAB1                    |
| 1 | 112,350,000 | 112,500,000 | 1499 | 750  | 0.695500479  | KCNAB1                    |
| 1 | 112,425,000 | 112,575,000 | 1500 | 907  | 0.85696267   | KCNAB1,ENSBTAG00000009622 |
| 1 | 112,500,000 | 112,650,000 | 1501 | 1166 | 0.966454843  | GMPS,ENSBTAG00000009622   |
| 1 | 112,575,000 | 112,725,000 | 1502 | 1306 | 1.02646096   | GMPS                      |
| 1 | 112,650,000 | 112,800,000 | 1503 | 969  | 0.846985314  | C3orf33,GMPS,SLC33A1      |
| 1 | 112,725,000 | 112,875,000 | 1504 | 703  | 0.302588062  | C3orf33,SLC33A1           |
| 1 | 112,800,000 | 112,950,000 | 1505 | 452  | 0.047849475  | C3orf33                   |
| 1 | 112,875,000 | 113,025,000 | 1506 | 378  | -0.642299693 | PLCH1                     |
| 1 | 112,950,000 | 113,100,000 | 1507 | 751  | -0.32146784  | PLCH1                     |
| 1 | 113,025,000 | 113,175,000 | 1508 | 1143 | 0.008386054  | PLCH1                     |
| 1 | 113,100,000 | 113,250,000 | 1509 | 962  | 0.296256298  |                           |
| 1 | 113,175,000 | 113,325,000 | 1510 | 907  | 0.596995145  |                           |
| 1 | 113,250,000 | 113,400,000 | 1511 | 868  | 0.633249077  | MME                       |
| 1 | 113,325,000 | 113,475,000 | 1512 | 671  | 0.285822575  | MME                       |
| 1 | 113,400,000 | 113,550,000 | 1513 | 928  | 0.236163029  | MME                       |
| 1 | 113,475,000 | 113,625,000 | 1514 | 1024 | 0.698561812  | MME,ENSBTAG00000024623    |
| 1 | 113,550,000 | 113,700,000 | 1515 | 896  | 0.375588195  | ENSBTAG00000024623        |
| 1 | 113,625,000 | 113,775,000 | 1516 | 1154 | 0.427104733  |                           |
| 1 | 113,700,000 | 113,850,000 | 1517 | 1082 | 0.904497272  |                           |
| 1 | 113,775,000 | 113,925,000 | 1518 | 774  | 0.527179638  |                           |
| 1 | 113,850,000 | 114,000,000 | 1519 | 1121 | 0.993831682  |                           |
| 1 | 113,925,000 | 114,075,000 | 1520 | 1024 | 1.189787479  |                           |
| 1 | 114,000,000 | 114,150,000 | 1521 | 965  | 1.172233758  | GPR149                    |
| 1 | 114,075,000 | 114,225,000 | 1522 | 1382 | 0.998610208  | GPR149                    |
| 1 | 114,150,000 | 114,300,000 | 1523 | 1347 | 0.758885351  | ARHGEF26,DHX36,GPR149     |
| 1 | 114,225,000 | 114,375,000 | 1524 | 1367 | 0.343345465  | ARHGEF26,DHX36,GPR149     |
| 1 | 114,300,000 | 114,450,000 | 1525 | 1303 | 0.199155994  | ARHGEF26                  |

|   |             |             |      |      |              |                                               |
|---|-------------|-------------|------|------|--------------|-----------------------------------------------|
| 1 | 114,375,000 | 114,525,000 | 1526 | 939  | 0.314255403  | ARHGEF26                                      |
| 1 | 114,450,000 | 114,600,000 | 1527 | 986  | -0.449532092 |                                               |
| 1 | 114,525,000 | 114,675,000 | 1528 | 946  | -0.547162456 |                                               |
| 1 | 114,600,000 | 114,750,000 | 1529 | 516  | -0.905574716 | YWHAH                                         |
| 1 | 114,675,000 | 114,825,000 | 1530 | 321  | -1.126458412 | YWHAH                                         |
| 1 | 114,750,000 | 114,900,000 | 1531 | 660  | -0.686876543 |                                               |
| 1 | 114,825,000 | 114,975,000 | 1532 | 847  | 0.109273016  |                                               |
| 1 | 114,900,000 | 115,050,000 | 1533 | 803  | -0.049429868 |                                               |
| 1 | 114,975,000 | 115,125,000 | 1534 | 1466 | -1.056712497 |                                               |
| 1 | 115,050,000 | 115,200,000 | 1535 | 1932 | -0.163863073 |                                               |
| 1 | 115,125,000 | 115,275,000 | 1536 | 1794 | 0.835061142  |                                               |
| 1 | 115,200,000 | 115,350,000 | 1537 | 1155 | 0.885441862  | ENSBTAG00000047341                            |
| 1 | 115,275,000 | 115,425,000 | 1538 | 1061 | -0.278944212 | ENSBTAG00000047341                            |
| 1 | 115,350,000 | 115,500,000 | 1539 | 1177 | -0.205930559 | RAP2B                                         |
| 1 | 115,425,000 | 115,575,000 | 1540 | 948  | 0.662701004  | RAP2B                                         |
| 1 | 115,500,000 | 115,650,000 | 1541 | 1042 | 0.667652904  |                                               |
| 1 | 115,575,000 | 115,725,000 | 1542 | 1126 | 0.803142496  |                                               |
| 1 | 115,650,000 | 115,800,000 | 1543 | 1036 | 0.285104343  |                                               |
| 1 | 115,725,000 | 115,875,000 | 1544 | 734  | 0.05138947   | P2RY1                                         |
| 1 | 115,800,000 | 115,950,000 | 1545 | 859  | 0.98554149   | P2RY1                                         |
| 1 | 115,875,000 | 116,025,000 | 1546 | 826  | 0.898436511  |                                               |
| 1 | 115,950,000 | 116,100,000 | 1547 | 520  | 0.795675499  |                                               |
| 1 | 116,025,000 | 116,175,000 | 1548 | 573  | 0.734624977  |                                               |
| 1 | 116,100,000 | 116,250,000 | 1549 | 848  | 0.948715799  | MBNL1                                         |
| 1 | 116,175,000 | 116,325,000 | 1550 | 852  | 1.086106736  | MBNL1                                         |
| 1 | 116,250,000 | 116,400,000 | 1551 | 869  | -1.328990319 | MBNL1                                         |
| 1 | 116,325,000 | 116,475,000 | 1552 | 1028 | -0.794739305 | MBNL1                                         |
| 1 | 116,400,000 | 116,550,000 | 1553 | 920  | 0.833043863  |                                               |
| 1 | 116,475,000 | 116,625,000 | 1554 | 866  | 0.638549161  |                                               |
| 1 | 116,550,000 | 116,700,000 | 1555 | 773  | -0.183600402 |                                               |
| 1 | 116,625,000 | 116,775,000 | 1556 | 825  | -1.129996325 |                                               |
| 1 | 116,700,000 | 116,850,000 | 1557 | 985  | -0.130937173 |                                               |
| 1 | 116,775,000 | 116,925,000 | 1558 | 684  | 0.277331123  | SUCNR1                                        |
| 1 | 116,850,000 | 117,000,000 | 1559 | 404  | -0.054272063 | AADAC,SUCNR1                                  |
| 1 | 116,925,000 | 117,075,000 | 1560 | 537  | 0.820294461  | AADAC                                         |
| 1 | 117,000,000 | 117,150,000 | 1561 | 784  | 0.808882437  | AADACL2                                       |
| 1 | 117,075,000 | 117,225,000 | 1562 | 609  | 0.792630215  | AADACL2                                       |
| 1 | 117,150,000 | 117,300,000 | 1563 | 592  | -1.316707947 | AADACL2,ENSBTAG00000010385                    |
| 1 | 117,225,000 | 117,375,000 | 1564 | 1033 | -0.363373198 | ENSBTAG00000010385                            |
| 1 | 117,300,000 | 117,450,000 | 1565 | 1120 | 0.2495038    | ENSBTAG00000023447                            |
| 1 | 117,375,000 | 117,525,000 | 1566 | 993  | 0.384499259  | ENSBTAG00000023447                            |
| 1 | 117,450,000 | 117,600,000 | 1567 | 937  | 0.107144548  | IGSF10,MED12L,P2RY12                          |
| 1 | 117,525,000 | 117,675,000 | 1568 | 751  | -0.188788709 | IGSF10,MED12L,P2RY12                          |
| 1 | 117,600,000 | 117,750,000 | 1569 | 893  | 0.210819616  | GPR87,MED12L,P2RY12,P2RY13,ENSBTAG00000046051 |
| 1 | 117,675,000 | 117,825,000 | 1570 | 1131 | 0.153555768  | GPR87,MED12L,P2RY13,P2RY14,ENSBTAG00000046051 |
| 1 | 117,750,000 | 117,900,000 | 1571 | 906  | 0.16419676   | GPR171,MED12L,P2RY14                          |
| 1 | 117,825,000 | 117,975,000 | 1572 | 909  | 0.14470908   | GPR171,MED12L                                 |
| 1 | 117,900,000 | 118,050,000 | 1573 | 1127 | 0.260300024  | MED12L                                        |
| 1 | 117,975,000 | 118,125,000 | 1574 | 1319 | -0.017945065 | ENSBTAG00000011267                            |
| 1 | 118,050,000 | 118,200,000 | 1575 | 1575 | 0.392032131  | ENSBTAG00000011267,ENSBTAG00000038069         |
| 1 | 118,125,000 | 118,275,000 | 1576 | 1348 | 0.83608124   | ENSBTAG00000011267,ENSBTAG00000038069         |
| 1 | 118,200,000 | 118,350,000 | 1577 | 684  | 0.534855992  | SIAH2,ENSBTAG00000038069                      |
| 1 | 118,275,000 | 118,425,000 | 1578 | 926  | 1.155097953  | ERICH6,SIAH2                                  |

|   |             |             |      |      |              |                                 |
|---|-------------|-------------|------|------|--------------|---------------------------------|
| 1 | 118,350,000 | 118,500,000 | 1579 | 1195 | 1.022418376  | EIF2A,ERICH6,SELT               |
| 1 | 118,425,000 | 118,575,000 | 1580 | 791  | 0.323416413  | EIF2A,SELT,SERP1                |
| 1 | 118,500,000 | 118,650,000 | 1581 | 641  | 0.078372146  | EIF2A,SERP1,TSC22D2             |
| 1 | 118,575,000 | 118,725,000 | 1582 | 639  | -0.581543336 | TSC22D2                         |
| 1 | 118,650,000 | 118,800,000 | 1583 | 612  | -0.072921142 | TSC22D2                         |
| 1 | 118,725,000 | 118,875,000 | 1584 | 539  | -0.33994505  |                                 |
| 1 | 118,800,000 | 118,950,000 | 1585 | 664  | -1.331242687 |                                 |
| 1 | 118,875,000 | 119,025,000 | 1586 | 786  | -1.781871539 |                                 |
| 1 | 118,950,000 | 119,100,000 | 1587 | 659  | -2.525349816 |                                 |
| 1 | 119,025,000 | 119,175,000 | 1588 | 553  | -0.933963906 | PFN2,RNF13                      |
| 1 | 119,100,000 | 119,250,000 | 1589 | 896  | -0.212589905 | PFN2,RNF13                      |
| 1 | 119,175,000 | 119,325,000 | 1590 | 1216 | -0.450577201 | ANKUB1,RNF13                    |
| 1 | 119,250,000 | 119,400,000 | 1591 | 1061 | -2.165417217 | ANKUB1,COMMD2,RNF13             |
| 1 | 119,325,000 | 119,475,000 | 1592 | 762  | -3.744333139 | ANKUB1,COMMD2,WWTR1             |
| 1 | 119,400,000 | 119,550,000 | 1593 | 456  | -2.361192329 | WWTR1                           |
| 1 | 119,475,000 | 119,625,000 | 1594 | 302  | -2.378061181 | TM4SF4,WWTR1                    |
| 1 | 119,550,000 | 119,700,000 | 1595 | 482  | -1.688172721 | TM4SF4,WWTR1                    |
| 1 | 119,625,000 | 119,775,000 | 1596 | 707  | -1.060343664 | TM4SF1,TM4SF4                   |
| 1 | 119,700,000 | 119,850,000 | 1597 | 678  | -1.045850565 | TM4SF1,TM4SF18                  |
| 1 | 119,775,000 | 119,925,000 | 1598 | 785  | -1.55881463  | CP,TM4SF18                      |
| 1 | 119,850,000 | 120,000,000 | 1599 | 901  | -0.98035297  | CP,HPS3,ENSBTAG00000048150      |
| 1 | 119,925,000 | 120,075,000 | 1600 | 702  | -0.550309228 | CP,HLTF,HPS3,ENSBTAG00000048150 |
| 1 | 120,000,000 | 120,150,000 | 1601 | 569  | -0.425672937 | GYG1,HLTF                       |
| 1 | 120,075,000 | 120,225,000 | 1602 | 400  | -0.130174954 | GYG1,HLTF                       |
| 1 | 120,150,000 | 120,300,000 | 1603 | 510  | -0.230656565 | CPA3,PCPB                       |
| 1 | 120,225,000 | 120,375,000 | 1604 | 905  | -0.070018665 | CPA3,PCPB                       |
| 1 | 120,300,000 | 120,450,000 | 1605 | 906  | 0.152791511  | AGTR1,PCPB                      |
| 1 | 120,375,000 | 120,525,000 | 1606 | 903  | 0.742973998  | AGTR1                           |
| 1 | 120,450,000 | 120,600,000 | 1607 | 840  | 0.694856243  |                                 |
| 1 | 120,525,000 | 120,675,000 | 1608 | 558  | 0.438111399  |                                 |
| 1 | 120,600,000 | 120,750,000 | 1609 | 453  | -0.023676307 | ENSBTAG00000046008              |
| 1 | 120,675,000 | 120,825,000 | 1610 | 584  | 0.423796496  | ENSBTAG00000046008              |
| 1 | 120,750,000 | 120,900,000 | 1611 | 941  | 0.853330353  |                                 |
| 1 | 120,825,000 | 120,975,000 | 1612 | 880  | 0.403434486  |                                 |
| 1 | 120,900,000 | 121,050,000 | 1613 | 760  | -1.499264981 |                                 |
| 1 | 120,975,000 | 121,125,000 | 1614 | 644  | -2.356320151 |                                 |
| 1 | 121,050,000 | 121,200,000 | 1615 | 674  | 0.088475277  |                                 |
| 1 | 121,125,000 | 121,275,000 | 1616 | 924  | 0.673677745  |                                 |
| 1 | 121,200,000 | 121,350,000 | 1617 | 739  | 0.745873717  | ENSBTAG00000039334              |
| 1 | 121,275,000 | 121,425,000 | 1618 | 999  | 0.19776242   | ENSBTAG00000039334              |
| 1 | 121,350,000 | 121,500,000 | 1619 | 1260 | 0.182167429  | ENSBTAG00000025146              |
| 1 | 121,425,000 | 121,575,000 | 1620 | 1014 | -0.097928889 | ENSBTAG00000025146              |
| 1 | 121,500,000 | 121,650,000 | 1621 | 629  | -0.633701892 |                                 |
| 1 | 121,575,000 | 121,725,000 | 1622 | 649  | -0.236907193 |                                 |
| 1 | 121,650,000 | 121,800,000 | 1623 | 650  | -0.813833049 |                                 |
| 1 | 121,725,000 | 121,875,000 | 1624 | 508  | -3.083149788 | ZIC1,ZIC4                       |
| 1 | 121,800,000 | 121,950,000 | 1625 | 559  | -3.620897664 | ZIC1,ZIC4                       |
| 1 | 121,875,000 | 122,025,000 | 1626 | 501  | -1.773772427 | ZIC4                            |
| 1 | 121,950,000 | 122,100,000 | 1627 | 581  | 0.673428759  |                                 |
| 1 | 122,025,000 | 122,175,000 | 1628 | 481  | 0.207644736  |                                 |
| 1 | 122,100,000 | 122,250,000 | 1629 | 349  | -2.554014165 |                                 |
| 1 | 122,175,000 | 122,325,000 | 1630 | 358  | -3.85510622  |                                 |
| 1 | 122,250,000 | 122,400,000 | 1631 | 359  | -2.025437218 |                                 |

|   |             |             |      |      |              |               |
|---|-------------|-------------|------|------|--------------|---------------|
| 1 | 122,325,000 | 122,475,000 | 1632 | 651  | 0.427593786  |               |
| 1 | 122,400,000 | 122,550,000 | 1633 | 726  | 0.40043793   |               |
| 1 | 122,475,000 | 122,625,000 | 1634 | 496  | 0.169318266  |               |
| 1 | 122,550,000 | 122,700,000 | 1635 | 780  | 0.208520647  |               |
| 1 | 122,625,000 | 122,775,000 | 1636 | 865  | 0.247313672  |               |
| 1 | 122,700,000 | 122,850,000 | 1637 | 810  | 0.312004918  | PLSCR5        |
| 1 | 122,775,000 | 122,925,000 | 1638 | 921  | 0.413345853  | PLSCR2,PLSCR5 |
| 1 | 122,850,000 | 123,000,000 | 1639 | 1070 | 0.383559043  | PLSCR2        |
| 1 | 122,925,000 | 123,075,000 | 1640 | 1159 | 0.73641177   | PLSCR1,PLSCR2 |
| 1 | 123,000,000 | 123,150,000 | 1641 | 665  | 1.033478424  | PLSCR1        |
| 1 | 123,075,000 | 123,225,000 | 1642 | 400  | -1.407750903 |               |
| 1 | 123,150,000 | 123,300,000 | 1643 | 571  | -0.058036678 | PLSCR4        |
| 1 | 123,225,000 | 123,375,000 | 1644 | 614  | 1.144676079  | PLOD2,PLSCR4  |
| 1 | 123,300,000 | 123,450,000 | 1645 | 602  | 1.115959922  | PLOD2         |
| 1 | 123,375,000 | 123,525,000 | 1646 | 805  | 0.117266416  | PLOD2         |
| 1 | 123,450,000 | 123,600,000 | 1647 | 1182 | -0.032691452 |               |
| 1 | 123,525,000 | 123,675,000 | 1648 | 1104 | 0.044089697  |               |
| 1 | 123,600,000 | 123,750,000 | 1649 | 985  | 0.7283692    |               |
| 1 | 123,675,000 | 123,825,000 | 1650 | 858  | 1.152190072  |               |
| 1 | 123,750,000 | 123,900,000 | 1651 | 924  | 1.15154372   |               |
| 1 | 123,825,000 | 123,975,000 | 1652 | 804  | 1.017247804  |               |
| 1 | 123,900,000 | 124,050,000 | 1653 | 571  | -0.514298341 |               |
| 1 | 123,975,000 | 124,125,000 | 1654 | 914  | -2.456723321 |               |
| 1 | 124,050,000 | 124,200,000 | 1655 | 947  | -5.010022719 |               |
| 1 | 124,125,000 | 124,275,000 | 1656 | 594  | -4.742269639 |               |
| 1 | 124,200,000 | 124,350,000 | 1657 | 361  | -0.009193444 |               |
| 1 | 124,275,000 | 124,425,000 | 1658 | 331  | 0.311220745  |               |
| 1 | 124,350,000 | 124,500,000 | 1659 | 344  | 0.525274388  |               |
| 1 | 124,425,000 | 124,575,000 | 1660 | 617  | 0.596345849  |               |
| 1 | 124,500,000 | 124,650,000 | 1661 | 924  | 0.618905145  |               |
| 1 | 124,575,000 | 124,725,000 | 1662 | 1205 | 0.868412796  |               |
| 1 | 124,650,000 | 124,800,000 | 1663 | 1247 | 0.689708308  |               |
| 1 | 124,725,000 | 124,875,000 | 1664 | 900  | -0.162617433 |               |
| 1 | 124,800,000 | 124,950,000 | 1665 | 472  | -0.478101112 |               |
| 1 | 124,875,000 | 125,025,000 | 1666 | 632  | 0.447672244  |               |
| 1 | 124,950,000 | 125,100,000 | 1667 | 1022 | 0.862683088  |               |
| 1 | 125,025,000 | 125,175,000 | 1668 | 834  | 0.70569176   |               |
| 1 | 125,100,000 | 125,250,000 | 1669 | 867  | -0.409115392 |               |
| 1 | 125,175,000 | 125,325,000 | 1670 | 970  | -0.284788251 |               |
| 1 | 125,250,000 | 125,400,000 | 1671 | 715  | 0.563745615  |               |
| 1 | 125,325,000 | 125,475,000 | 1672 | 625  | 1.240463724  |               |
| 1 | 125,400,000 | 125,550,000 | 1673 | 712  | 1.175057807  |               |
| 1 | 125,475,000 | 125,625,000 | 1674 | 672  | -0.0209077   |               |
| 1 | 125,550,000 | 125,700,000 | 1675 | 846  | -1.089595243 |               |
| 1 | 125,625,000 | 125,775,000 | 1676 | 1102 | -0.726928173 |               |
| 1 | 125,700,000 | 125,850,000 | 1677 | 918  | 0.336524718  |               |
| 1 | 125,775,000 | 125,925,000 | 1678 | 679  | 1.169311608  | C1H3orf58     |
| 1 | 125,850,000 | 126,000,000 | 1679 | 748  | 1.10429899   | C1H3orf58     |
| 1 | 125,925,000 | 126,075,000 | 1680 | 749  | 0.463609117  | SLC9A9        |
| 1 | 126,000,000 | 126,150,000 | 1681 | 792  | 0.09015013   | SLC9A9        |
| 1 | 126,075,000 | 126,225,000 | 1682 | 935  | -0.334293765 | SLC9A9        |
| 1 | 126,150,000 | 126,300,000 | 1683 | 795  | -0.458549656 | SLC9A9        |
| 1 | 126,225,000 | 126,375,000 | 1684 | 752  | 1.018944774  | SLC9A9        |

|   |             |             |      |      |              |                                      |
|---|-------------|-------------|------|------|--------------|--------------------------------------|
| 1 | 126,300,000 | 126,450,000 | 1685 | 646  | 0.765888388  | SLC9A9                               |
| 1 | 126,375,000 | 126,525,000 | 1686 | 581  | 0.239783251  | SLC9A9                               |
| 1 | 126,450,000 | 126,600,000 | 1687 | 911  | 0.380458837  | SLC9A9                               |
| 1 | 126,525,000 | 126,675,000 | 1688 | 986  | 0.338171627  | SLC9A9                               |
| 1 | 126,600,000 | 126,750,000 | 1689 | 1003 | 0.921880917  | SLC9A9                               |
| 1 | 126,675,000 | 126,825,000 | 1690 | 911  | 1.015296562  | SLC9A9                               |
| 1 | 126,750,000 | 126,900,000 | 1691 | 802  | 0.048211026  | CHST2                                |
| 1 | 126,825,000 | 126,975,000 | 1692 | 1022 | 0.322240556  | CHST2,U2SURP                         |
| 1 | 126,900,000 | 127,050,000 | 1693 | 912  | 0.609136038  | PAQR9,U2SURP                         |
| 1 | 126,975,000 | 127,125,000 | 1694 | 690  | 0.677444779  | PAQR9,U2SURP                         |
| 1 | 127,050,000 | 127,200,000 | 1695 | 540  | 0.404083108  | PCOLCE2,ENSBTAG00000038111           |
| 1 | 127,125,000 | 127,275,000 | 1696 | 374  | 0.337297274  | PCOLCE2,TRPC1,ENSBTAG00000038111     |
| 1 | 127,200,000 | 127,350,000 | 1697 | 325  | 0.759037593  | PCOLCE2,PLS1,TRPC1                   |
| 1 | 127,275,000 | 127,425,000 | 1698 | 539  | 1.049925068  | PLS1,TRPC1                           |
| 1 | 127,350,000 | 127,500,000 | 1699 | 597  | 1.219912042  | ATR,PLS1                             |
| 1 | 127,425,000 | 127,575,000 | 1700 | 365  | 1.137341888  | ATR                                  |
| 1 | 127,500,000 | 127,650,000 | 1701 | 248  | 0.97242755   | ATR,XRN1                             |
| 1 | 127,575,000 | 127,725,000 | 1702 | 182  | 1.100786416  | ATR,XRN1                             |
| 1 | 127,650,000 | 127,800,000 | 1703 | 264  | 0.501569641  | GK5,XRN1                             |
| 1 | 127,725,000 | 127,875,000 | 1704 | 503  | -0.035578891 | GK5                                  |
| 1 | 127,800,000 | 127,950,000 | 1705 | 482  | -0.454580924 | GK5                                  |
| 1 | 127,875,000 | 128,025,000 | 1706 | 282  | -0.52893808  | TFDP2                                |
| 1 | 127,950,000 | 128,100,000 | 1707 | 338  | -0.308600525 | ATP1B3,TFDP2,ENSBTAG00000019007      |
| 1 | 128,025,000 | 128,175,000 | 1708 | 481  | -1.64888149  | ATP1B3,GRK7,TFDP2,ENSBTAG00000019007 |
| 1 | 128,100,000 | 128,250,000 | 1709 | 837  | -1.898989829 | GRK7,RNF7                            |
| 1 | 128,175,000 | 128,325,000 | 1710 | 1062 | -2.783915473 | GRK7,RNF7                            |
| 1 | 128,250,000 | 128,400,000 | 1711 | 696  | -3.190450581 | RASA2                                |
| 1 | 128,325,000 | 128,475,000 | 1712 | 584  | -1.778961908 | RASA2                                |
| 1 | 128,400,000 | 128,550,000 | 1713 | 1004 | -1.014212098 | RASA2,ZBTB38                         |
| 1 | 128,475,000 | 128,625,000 | 1714 | 959  | -0.108456197 | ZBTB38                               |
| 1 | 128,550,000 | 128,700,000 | 1715 | 528  | 0.096979825  | PXYLP1                               |
| 1 | 128,625,000 | 128,775,000 | 1716 | 315  | -1.709753164 | PXYLP1                               |
| 1 | 128,700,000 | 128,850,000 | 1717 | 445  | -0.098763204 | PXYLP1,SPSB4                         |
| 1 | 128,775,000 | 128,925,000 | 1718 | 691  | 1.001363466  | SPSB4                                |
| 1 | 128,850,000 | 129,000,000 | 1719 | 842  | 0.836246556  | SPSB4                                |
| 1 | 128,925,000 | 129,075,000 | 1720 | 807  | 0.968311683  | SLC25A36                             |
| 1 | 129,000,000 | 129,150,000 | 1721 | 1069 | 0.899952601  | SLC25A36                             |
| 1 | 129,075,000 | 129,225,000 | 1722 | 1391 | 0.741725531  |                                      |
| 1 | 129,150,000 | 129,300,000 | 1723 | 1318 | 0.447956613  | TRIM42                               |
| 1 | 129,225,000 | 129,375,000 | 1724 | 1243 | 0.019545812  | TRIM42                               |
| 1 | 129,300,000 | 129,450,000 | 1725 | 1099 | 0.070379971  | CLSTN2                               |
| 1 | 129,375,000 | 129,525,000 | 1726 | 1127 | 0.069902379  | CLSTN2                               |
| 1 | 129,450,000 | 129,600,000 | 1727 | 892  | -0.00218022  | CLSTN2                               |
| 1 | 129,525,000 | 129,675,000 | 1728 | 781  | 0.487042156  | CLSTN2                               |
| 1 | 129,600,000 | 129,750,000 | 1729 | 992  | 0.384627047  |                                      |
| 1 | 129,675,000 | 129,825,000 | 1730 | 1163 | 0.169214996  |                                      |
| 1 | 129,750,000 | 129,900,000 | 1731 | 1313 | 0.015051127  |                                      |
| 1 | 129,825,000 | 129,975,000 | 1732 | 1251 | -0.187594153 |                                      |
| 1 | 129,900,000 | 130,050,000 | 1733 | 822  | 0.045895617  |                                      |
| 1 | 129,975,000 | 130,125,000 | 1734 | 335  | 1.207228441  |                                      |
| 1 | 130,050,000 | 130,200,000 | 1735 | 295  | 1.25424332   |                                      |
| 1 | 130,125,000 | 130,275,000 | 1736 | 319  | 1.212561754  |                                      |
| 1 | 130,200,000 | 130,350,000 | 1737 | 661  | 1.287474596  |                                      |

|   |             |             |      |      |              |                                                         |
|---|-------------|-------------|------|------|--------------|---------------------------------------------------------|
| 1 | 130,275,000 | 130,425,000 | 1738 | 1019 | 0.413581008  |                                                         |
| 1 | 130,350,000 | 130,500,000 | 1739 | 937  | -0.759425864 | NMNAT3                                                  |
| 1 | 130,425,000 | 130,575,000 | 1740 | 749  | -0.047740129 | KPNA6,NMNAT3                                            |
| 1 | 130,500,000 | 130,650,000 | 1741 | 764  | -1.550733932 | KPNA6,NMNAT3,RBP1                                       |
| 1 | 130,575,000 | 130,725,000 | 1742 | 790  | -2.596898036 | KPNA6,RBP1,RBP2,TXLNA                                   |
| 1 | 130,650,000 | 130,800,000 | 1743 | 610  | -2.035361074 | COPB2,MRPS22,RBP2,TXLNA                                 |
| 1 | 130,725,000 | 130,875,000 | 1744 | 482  | -0.072172505 | COPB2,MRPS22                                            |
| 1 | 130,800,000 | 130,950,000 | 1745 | 302  | 0.748047371  | COPB2                                                   |
| 1 | 130,875,000 | 131,025,000 | 1746 | 252  | 0.32986512   |                                                         |
| 1 | 130,950,000 | 131,100,000 | 1747 | 403  | -0.297166124 | ENSBTAG00000046040                                      |
| 1 | 131,025,000 | 131,175,000 | 1748 | 569  | 0.294023194  | ENSBTAG00000045637,ENSBTAG00000046040,ENSBTAG0000046738 |
| 1 | 131,100,000 | 131,250,000 | 1749 | 586  | 0.057209529  | FOXL2,ENSBTAG00000045637,ENSBTAG00000046738             |
| 1 | 131,175,000 | 131,325,000 | 1750 | 536  | -3.323128332 | FOXL2                                                   |
| 1 | 131,250,000 | 131,400,000 | 1751 | 491  | -3.390385173 |                                                         |
| 1 | 131,325,000 | 131,475,000 | 1752 | 534  | -1.003179551 | PIK3CB                                                  |
| 1 | 131,400,000 | 131,550,000 | 1753 | 745  | 0.328579962  | FAIM,PIK3CB                                             |
| 1 | 131,475,000 | 131,625,000 | 1754 | 795  | 0.969289515  | CEP70,FAIM,PIK3CB                                       |
| 1 | 131,550,000 | 131,700,000 | 1755 | 745  | 1.274348758  | CEP70,ESYT3,FAIM                                        |
| 1 | 131,625,000 | 131,775,000 | 1756 | 845  | 0.269381762  | CEP70,ESYT3,MRAS                                        |
| 1 | 131,700,000 | 131,850,000 | 1757 | 802  | -3.553007021 | ESYT3,MRAS                                              |
| 1 | 131,775,000 | 131,925,000 | 1758 | 528  | -3.576607434 | ARMC8,MRAS,NME9                                         |
| 1 | 131,850,000 | 132,000,000 | 1759 | 265  | 1.076187044  | ARMC8,NME9                                              |
| 1 | 131,925,000 | 132,075,000 | 1760 | 445  | -0.116117055 | A4GNT,ARMC8,DBR1                                        |
| 1 | 132,000,000 | 132,150,000 | 1761 | 808  | 0.358972841  | A4GNT,DBR1,DZIP1L                                       |
| 1 | 132,075,000 | 132,225,000 | 1762 | 877  | 1.239809696  | CLDN18,DZIP1L                                           |
| 1 | 132,150,000 | 132,300,000 | 1763 | 879  | 1.290550381  | CLDN18                                                  |
| 1 | 132,225,000 | 132,375,000 | 1764 | 894  | 0.935309539  |                                                         |
| 1 | 132,300,000 | 132,450,000 | 1765 | 571  | 0.574899634  |                                                         |
| 1 | 132,375,000 | 132,525,000 | 1766 | 488  | 1.018608366  |                                                         |
| 1 | 132,450,000 | 132,600,000 | 1767 | 836  | 1.141571257  |                                                         |
| 1 | 132,525,000 | 132,675,000 | 1768 | 1016 | 1.082532214  |                                                         |
| 1 | 132,600,000 | 132,750,000 | 1769 | 1087 | 1.071211256  |                                                         |
| 1 | 132,675,000 | 132,825,000 | 1770 | 1010 | 1.07160508   |                                                         |
| 1 | 132,750,000 | 132,900,000 | 1771 | 1064 | 1.219790661  |                                                         |
| 1 | 132,825,000 | 132,975,000 | 1772 | 939  | 1.239519802  |                                                         |
| 1 | 132,900,000 | 133,050,000 | 1773 | 704  | 1.02227012   |                                                         |
| 1 | 132,975,000 | 133,125,000 | 1774 | 661  | 0.998693891  |                                                         |
| 1 | 133,050,000 | 133,200,000 | 1775 | 575  | 0.422571576  |                                                         |
| 1 | 133,125,000 | 133,275,000 | 1776 | 857  | -0.620506252 | IL20RB,ENSBTAG00000046781                               |
| 1 | 133,200,000 | 133,350,000 | 1777 | 931  | 0.02241599   | IL20RB,NCK1,ENSBTAG00000046781                          |
| 1 | 133,275,000 | 133,425,000 | 1778 | 463  | 0.918449956  | IL20RB,NCK1,TMEM22                                      |
| 1 | 133,350,000 | 133,500,000 | 1779 | 386  | 1.120321149  | NCK1,TMEM22,ENSBTAG00000048305                          |
| 1 | 133,425,000 | 133,575,000 | 1780 | 386  | 0.665107414  | TMEM22,ENSBTAG00000048305                               |
| 1 | 133,500,000 | 133,650,000 | 1781 | 278  | -1.229771333 |                                                         |
| 1 | 133,575,000 | 133,725,000 | 1782 | 365  | -0.657981492 | PFDN4,STAG1                                             |
| 1 | 133,650,000 | 133,800,000 | 1783 | 386  | -0.131715813 | PFDN4,STAG1                                             |
| 1 | 133,725,000 | 133,875,000 | 1784 | 363  | -0.268760223 | STAG1                                                   |
| 1 | 133,800,000 | 133,950,000 | 1785 | 367  | -0.770449383 | STAG1                                                   |
| 1 | 133,875,000 | 134,025,000 | 1786 | 323  | -0.831199072 | STAG1                                                   |
| 1 | 133,950,000 | 134,100,000 | 1787 | 420  | 0.484248206  | PCCB,STAG1                                              |
| 1 | 134,025,000 | 134,175,000 | 1788 | 488  | -0.13823824  | PCCB,STAG1                                              |
| 1 | 134,100,000 | 134,250,000 | 1789 | 348  | -1.163569561 | MSL2,PCCB,PPP2R3A                                       |



|   |             |             |      |      |              |                                 |
|---|-------------|-------------|------|------|--------------|---------------------------------|
| 1 | 134,175,000 | 134,325,000 | 1790 | 305  | -0.043295009 | MSL2,PPP2R3A                    |
| 1 | 134,250,000 | 134,400,000 | 1791 | 347  | 0.301850886  | PPP2R3A                         |
| 1 | 134,325,000 | 134,475,000 | 1792 | 432  | 0.23063526   | PPP2R3A                         |
| 1 | 134,400,000 | 134,550,000 | 1793 | 453  | -0.317318354 |                                 |
| 1 | 134,475,000 | 134,625,000 | 1794 | 695  | 0.006411618  |                                 |
| 1 | 134,550,000 | 134,700,000 | 1795 | 706  | -0.009129507 |                                 |
| 1 | 134,625,000 | 134,775,000 | 1796 | 446  | -0.696197738 |                                 |
| 1 | 134,700,000 | 134,850,000 | 1797 | 653  | -0.975076968 |                                 |
| 1 | 134,775,000 | 134,925,000 | 1798 | 647  | -1.068351    |                                 |
| 1 | 134,850,000 | 135,000,000 | 1799 | 333  | -0.696943317 |                                 |
| 1 | 134,925,000 | 135,075,000 | 1800 | 366  | -6.060105115 |                                 |
| 1 | 135,000,000 | 135,150,000 | 1801 | 419  | -6.712176455 |                                 |
| 1 | 135,075,000 | 135,225,000 | 1802 | 342  | -1.437590984 | EPHB1                           |
| 1 | 135,150,000 | 135,300,000 | 1803 | 430  | 0.435848001  | EPHB1                           |
| 1 | 135,225,000 | 135,375,000 | 1804 | 746  | 0.761253537  | EPHB1                           |
| 1 | 135,300,000 | 135,450,000 | 1805 | 782  | 0.178995828  | EPHB1                           |
| 1 | 135,375,000 | 135,525,000 | 1806 | 632  | -2.073935134 | EPHB1                           |
| 1 | 135,450,000 | 135,600,000 | 1807 | 726  | -1.339020358 | EPHB1                           |
| 1 | 135,525,000 | 135,675,000 | 1808 | 585  | 0.431696983  |                                 |
| 1 | 135,600,000 | 135,750,000 | 1809 | 614  | 0.725335836  |                                 |
| 1 | 135,675,000 | 135,825,000 | 1810 | 582  | 0.235070813  |                                 |
| 1 | 135,750,000 | 135,900,000 | 1811 | 301  | -0.701121444 | CEP63                           |
| 1 | 135,825,000 | 135,975,000 | 1812 | 463  | 0.261949068  | ANAPC13,CEP63                   |
| 1 | 135,900,000 | 136,050,000 | 1813 | 631  | -0.197546554 | ANAPC13,CEP63                   |
| 1 | 135,975,000 | 136,125,000 | 1814 | 591  | -0.421580648 | AMOTL2                          |
| 1 | 136,050,000 | 136,200,000 | 1815 | 655  | -0.302417184 | AMOTL2                          |
| 1 | 136,125,000 | 136,275,000 | 1816 | 586  | -0.776546617 | RYK                             |
| 1 | 136,200,000 | 136,350,000 | 1817 | 399  | -0.762297069 | RYK                             |
| 1 | 136,275,000 | 136,425,000 | 1818 | 673  | 1.348636162  | RYK                             |
| 1 | 136,350,000 | 136,500,000 | 1819 | 717  | 1.350076413  | SLCO2A1                         |
| 1 | 136,425,000 | 136,575,000 | 1820 | 386  | 0.88591132   | RAB6B,SLCO2A1                   |
| 1 | 136,500,000 | 136,650,000 | 1821 | 926  | 0.672852     | RAB6B,SLCO2A1,SRPRB             |
| 1 | 136,575,000 | 136,725,000 | 1822 | 1191 | 0.324922707  | RAB6B,SRPRB,TF                  |
| 1 | 136,650,000 | 136,800,000 | 1823 | 1125 | 0.25810887   | SRPRB,TF,ENSBTAG00000023411     |
| 1 | 136,725,000 | 136,875,000 | 1824 | 1082 | 0.470169339  | TOPBP1,ENSBTAG00000023411       |
| 1 | 136,800,000 | 136,950,000 | 1825 | 922  | 0.926725973  | TOPBP1,ENSBTAG00000035556       |
| 1 | 136,875,000 | 137,025,000 | 1826 | 821  | 0.199031055  | TOPBP1,ENSBTAG00000035556       |
| 1 | 136,950,000 | 137,100,000 | 1827 | 770  | -2.01239483  | BFSP2,ENSBTAG00000035556        |
| 1 | 137,025,000 | 137,175,000 | 1828 | 860  | -2.046117703 | BFSP2,TMEM108                   |
| 1 | 137,100,000 | 137,250,000 | 1829 | 1032 | -0.363766349 | BFSP2,TMEM108                   |
| 1 | 137,175,000 | 137,325,000 | 1830 | 1021 | 0.732291824  |                                 |
| 1 | 137,250,000 | 137,400,000 | 1831 | 755  | 0.895125559  |                                 |
| 1 | 137,325,000 | 137,475,000 | 1832 | 1013 | 1.244089382  |                                 |
| 1 | 137,400,000 | 137,550,000 | 1833 | 932  | 1.063527254  |                                 |
| 1 | 137,475,000 | 137,625,000 | 1834 | 520  | 0.88700881   |                                 |
| 1 | 137,550,000 | 137,700,000 | 1835 | 394  | 0.725559475  |                                 |
| 1 | 137,625,000 | 137,775,000 | 1836 | 753  | -0.342117852 |                                 |
| 1 | 137,700,000 | 137,850,000 | 1837 | 1062 | 0.068544115  | ENSBTAG00000035654              |
| 1 | 137,775,000 | 137,925,000 | 1838 | 780  | 0.570126779  | NPHP3-ACAD11,ENSBTAG00000035654 |
| 1 | 137,850,000 | 138,000,000 | 1839 | 688  | 0.830222409  | ACAD11,NPHP3-ACAD11,UBA5        |
| 1 | 137,925,000 | 138,075,000 | 1840 | 804  | 0.766423923  | ACAD11,ACKR4,NPHP3-ACAD11,UBA5  |
| 1 | 138,000,000 | 138,150,000 | 1841 | 1057 | 0.159535926  | ACAD11,ACKR4,DNAJC13            |
| 1 | 138,075,000 | 138,225,000 | 1842 | 1740 | 0.059562321  | ACAD11,DNAJC13                  |

|   |             |             |      |      |              |                                       |
|---|-------------|-------------|------|------|--------------|---------------------------------------|
| 1 | 138,150,000 | 138,300,000 | 1843 | 1772 | 0.307776658  | DNAJC13                               |
| 1 | 138,225,000 | 138,375,000 | 1844 | 1383 | 1.152326393  | ACPP,DNAJC13                          |
| 1 | 138,300,000 | 138,450,000 | 1845 | 1215 | 1.058016064  | ACPP,DNAJC13                          |
| 1 | 138,375,000 | 138,525,000 | 1846 | 947  | -0.663465437 | ACPP,KCNH8                            |
| 1 | 138,450,000 | 138,600,000 | 1847 | 838  | -0.728086926 | KCNH8                                 |
| 1 | 138,525,000 | 138,675,000 | 1848 | 997  | -0.226667888 | KCNH8                                 |
| 1 | 138,600,000 | 138,750,000 | 1849 | 1359 | 0.025711594  | KCNH8                                 |
| 1 | 138,675,000 | 138,825,000 | 1850 | 1256 | 0.561075734  | KCNH8                                 |
| 1 | 138,750,000 | 138,900,000 | 1851 | 1176 | 0.673424799  |                                       |
| 1 | 138,825,000 | 138,975,000 | 1852 | 1144 | 0.871158265  |                                       |
| 1 | 138,900,000 | 139,050,000 | 1853 | 830  | 0.23833152   |                                       |
| 1 | 138,975,000 | 139,125,000 | 1854 | 574  | -0.28768491  |                                       |
| 1 | 139,050,000 | 139,200,000 | 1855 | 390  | 0.287797741  |                                       |
| 1 | 139,125,000 | 139,275,000 | 1856 | 754  | 0.931150226  |                                       |
| 1 | 139,200,000 | 139,350,000 | 1857 | 1401 | 1.126080913  |                                       |
| 1 | 139,275,000 | 139,425,000 | 1858 | 1088 | 1.08550032   |                                       |
| 1 | 139,350,000 | 139,500,000 | 1859 | 590  | 0.717687272  |                                       |
| 1 | 139,425,000 | 139,575,000 | 1860 | 891  | 0.68844754   |                                       |
| 1 | 139,500,000 | 139,650,000 | 1861 | 1205 | 0.84262894   |                                       |
| 1 | 139,575,000 | 139,725,000 | 1862 | 1113 | 0.962728653  | CPNE4                                 |
| 1 | 139,650,000 | 139,800,000 | 1863 | 1012 | 0.935291962  | CPNE4                                 |
| 1 | 139,725,000 | 139,875,000 | 1864 | 864  | 0.838873102  | CPNE4                                 |
| 1 | 139,800,000 | 139,950,000 | 1865 | 792  | 0.664431065  | CPNE4,MRPL3                           |
| 1 | 139,875,000 | 140,025,000 | 1866 | 1102 | 0.70032598   | MRPL3                                 |
| 1 | 139,950,000 | 140,100,000 | 1867 | 1080 | 0.57630067   | NEK11,NUDT16                          |
| 1 | 140,025,000 | 140,175,000 | 1868 | 744  | 0.437699899  | NEK11,NUDT16                          |
| 1 | 140,100,000 | 140,250,000 | 1869 | 580  | 0.32832739   | NEK11                                 |
| 1 | 140,175,000 | 140,325,000 | 1870 | 882  | -0.295061711 | NEK11                                 |
| 1 | 140,250,000 | 140,400,000 | 1871 | 999  | -0.207967775 | ASTE1,ATP2C1,NEK11                    |
| 1 | 140,325,000 | 140,475,000 | 1872 | 920  | 0.287984399  | ASTE1,ATP2C1,NEK11,ENSBTAG00000035701 |
| 1 | 140,400,000 | 140,550,000 | 1873 | 1190 | 0.020158308  | ATP2C1,ENSBTAG00000035701             |
| 1 | 140,475,000 | 140,625,000 | 1874 | 1336 | -0.594033974 | ATP2C1,RPL38                          |
| 1 | 140,550,000 | 140,700,000 | 1875 | 1328 | -1.542696544 | RPL38                                 |
| 1 | 140,625,000 | 140,775,000 | 1876 | 884  | -2.438204205 | BRWD1,PSMG1                           |
| 1 | 140,700,000 | 140,850,000 | 1877 | 337  | -2.377019085 | BRWD1,PSMG1                           |
| 1 | 140,775,000 | 140,925,000 | 1878 | 322  | 0.595518218  | BRWD1,HMGN1,SETMAR                    |
| 1 | 140,850,000 | 141,000,000 | 1879 | 429  | 0.903539071  | BRWD1,HMGN1,LCA5L,SETMAR,WRB          |
| 1 | 140,925,000 | 141,075,000 | 1880 | 367  | 0.696965597  | LCA5L,SETMAR,SH3BGR,WRB               |
| 1 | 141,000,000 | 141,150,000 | 1881 | 619  | 0.911380079  | LCA5L,SH3BGR                          |
| 1 | 141,075,000 | 141,225,000 | 1882 | 815  | 0.632903098  | SH3BGR                                |
| 1 | 141,150,000 | 141,300,000 | 1883 | 463  | -0.051614868 | B3GALT5                               |
| 1 | 141,225,000 | 141,375,000 | 1884 | 520  | 0.553075774  | B3GALT5,IGSF5                         |
| 1 | 141,300,000 | 141,450,000 | 1885 | 1390 | 1.009636382  | IGSF5                                 |
| 1 | 141,375,000 | 141,525,000 | 1886 | 1586 | 1.080107765  | IGSF5                                 |
| 1 | 141,450,000 | 141,600,000 | 1887 | 1202 | 0.749766479  |                                       |
| 1 | 141,525,000 | 141,675,000 | 1888 | 1041 | 0.32342124   | DSCAM                                 |
| 1 | 141,600,000 | 141,750,000 | 1889 | 977  | -0.232075234 | DSCAM                                 |
| 1 | 141,675,000 | 141,825,000 | 1890 | 1097 | 0.151910262  | DSCAM                                 |
| 1 | 141,750,000 | 141,900,000 | 1891 | 1019 | -0.625887608 | DSCAM                                 |
| 1 | 141,825,000 | 141,975,000 | 1892 | 1149 | -1.816565232 | DSCAM                                 |
| 1 | 141,900,000 | 142,050,000 | 1893 | 1225 | -0.598589645 | DSCAM                                 |
| 1 | 141,975,000 | 142,125,000 | 1894 | 1075 | 0.055562064  | DSCAM                                 |
| 1 | 142,050,000 | 142,200,000 | 1895 | 1320 | 0.667842521  |                                       |

|   |             |             |      |      |              |                                                            |
|---|-------------|-------------|------|------|--------------|------------------------------------------------------------|
| 1 | 142,125,000 | 142,275,000 | 1896 | 1372 | 0.867924512  |                                                            |
| 1 | 142,200,000 | 142,350,000 | 1897 | 1483 | 0.927538666  |                                                            |
| 1 | 142,275,000 | 142,425,000 | 1898 | 1217 | 0.932895685  |                                                            |
| 1 | 142,350,000 | 142,500,000 | 1899 | 828  | 0.197801297  |                                                            |
| 1 | 142,425,000 | 142,575,000 | 1900 | 1080 | 0.076478061  |                                                            |
| 1 | 142,500,000 | 142,650,000 | 1901 | 829  | -0.129384916 |                                                            |
| 1 | 142,575,000 | 142,725,000 | 1902 | 499  | 0.144194638  |                                                            |
| 1 | 142,650,000 | 142,800,000 | 1903 | 416  | -0.309419157 |                                                            |
| 1 | 142,725,000 | 142,875,000 | 1904 | 492  | -0.210102054 |                                                            |
| 1 | 142,800,000 | 142,950,000 | 1905 | 505  | 0.025212633  | BACE2                                                      |
| 1 | 142,875,000 | 143,025,000 | 1906 | 768  | -0.235918301 | BACE2                                                      |
| 1 | 142,950,000 | 143,100,000 | 1907 | 1090 | -0.008311089 | BACE2,FAM3B                                                |
| 1 | 143,025,000 | 143,175,000 | 1908 | 1096 | 0.346911209  | FAM3B,MX2                                                  |
| 1 | 143,100,000 | 143,250,000 | 1909 | 1392 | 0.809132255  | FAM3B,MX1,MX2,TMPRSS2                                      |
| 1 | 143,175,000 | 143,325,000 | 1910 | 1446 | 0.863661538  | MX1,TMPRSS2                                                |
| 1 | 143,250,000 | 143,400,000 | 1911 | 1518 | 0.445299015  | ENSBTAG00000045771,ENSBTAG00000046015                      |
| 1 | 143,325,000 | 143,475,000 | 1912 | 1697 | 0.623641537  | ENSBTAG00000045771,ENSBTAG00000046015                      |
| 1 | 143,400,000 | 143,550,000 | 1913 | 1463 | 0.974441074  | RIPK4                                                      |
| 1 | 143,475,000 | 143,625,000 | 1914 | 1002 | 0.156438354  | PRDM15,RIPK4                                               |
| 1 | 143,550,000 | 143,700,000 | 1915 | 526  | -0.795070012 | C2CD2,PRDM15                                               |
| 1 | 143,625,000 | 143,775,000 | 1916 | 354  | 0.272590657  | C2CD2,ZNF295                                               |
| 1 | 143,700,000 | 143,850,000 | 1917 | 907  | 1.299183952  | C2CD2,UMODL1,ZNF295                                        |
| 1 | 143,775,000 | 143,925,000 | 1918 | 1774 | 1.236063019  | UMODL1                                                     |
| 1 | 143,850,000 | 144,000,000 | 1919 | 1738 | 0.947228687  | ABCG1,UMODL1                                               |
| 1 | 143,925,000 | 144,075,000 | 1920 | 1126 | -0.3742603   | ABCG1,TFF3                                                 |
| 1 | 144,000,000 | 144,150,000 | 1921 | 572  | -1.529279872 | ABCG1,TFF3                                                 |
| 1 | 144,075,000 | 144,225,000 | 1922 | 1001 | 0.029742659  | TFF1,TFF2,TMPRSS3                                          |
| 1 | 144,150,000 | 144,300,000 | 1923 | 1160 | 0.485826995  | TFF1,TFF2,TMPRSS3,UBASH3A                                  |
| 1 | 144,225,000 | 144,375,000 | 1924 | 860  | 0.821483937  | RSPH1,SLC37A1,TMPRSS3,UBASH3A                              |
| 1 | 144,300,000 | 144,450,000 | 1925 | 1174 | -1.148600273 | RSPH1,SLC37A1                                              |
| 1 | 144,375,000 | 144,525,000 | 1926 | 1136 | -2.309975224 | PDE9A,SLC37A1                                              |
| 1 | 144,450,000 | 144,600,000 | 1927 | 787  | -1.070469115 | PDE9A                                                      |
| 1 | 144,525,000 | 144,675,000 | 1928 | 642  | -0.287338162 | PDE9A,WDR4,ENSBTAG00000046859                              |
| 1 | 144,600,000 | 144,750,000 | 1929 | 841  | -1.418814331 | NDUFV3,PDE9A,WDR4,ENSBTAG00000046859                       |
| 1 | 144,675,000 | 144,825,000 | 1930 | 1035 | -0.5047928   | NDUFV3,PKNOX1,WDR4,ENSBTAG00000000160                      |
| 1 | 144,750,000 | 144,900,000 | 1931 | 859  | 0.740233819  | CRYAA,PKNOX1,U2AF1,ENSBTAG00000000160                      |
| 1 | 144,825,000 | 144,975,000 | 1932 | 826  | -1.657824538 | CRYAA,U2AF1                                                |
| 1 | 144,900,000 | 145,050,000 | 1933 | 765  | -1.985312635 | SUMO3                                                      |
| 1 | 144,975,000 | 145,125,000 | 1934 | 473  | -0.553430905 | ITGB2,PTTG1IP,SUMO3                                        |
| 1 | 145,050,000 | 145,200,000 | 1935 | 1008 | -1.507689696 | C1H21ORF70,ITGB2,PTTG1IP                                   |
| 1 | 145,125,000 | 145,275,000 | 1936 | 1416 | -1.209738861 | C1H21ORF70,ITGB2                                           |
| 1 | 145,200,000 | 145,350,000 | 1937 | 788  | -0.374482847 |                                                            |
| 1 | 145,275,000 | 145,425,000 | 1938 | 128  | 0.803798361  |                                                            |
| 1 | 145,350,000 | 145,500,000 | 1939 | 256  | 0.870785561  |                                                            |
| 1 | 145,425,000 | 145,575,000 | 1940 | 788  | 0.455412515  | ADARB1                                                     |
| 1 | 145,500,000 | 145,650,000 | 1941 | 896  | -0.350653961 | ADARB1,POFUT2                                              |
| 1 | 145,575,000 | 145,725,000 | 1942 | 760  | -0.04748457  | POFUT2,ENSBTAG00000014880,ENSBTAG00000014882               |
| 1 | 145,650,000 | 145,800,000 | 1943 | 804  | 1.146264932  | AIRE,PFKL,ENSBTAG00000014880,ENSBTAG00000014882            |
| 1 | 145,725,000 | 145,875,000 | 1944 | 815  | 0.98309441   | AIRE,C1H21ORF2,PFKL,TRPM2                                  |
| 1 | 145,800,000 | 145,950,000 | 1945 | 1115 | 0.781936111  | C1H21ORF2,KRTAP10-8,LRRRC3,TRPM2,TSPEAR,ENSBTAG00000037662 |

|   |             |             |      |      |              |                                                                               |
|---|-------------|-------------|------|------|--------------|-------------------------------------------------------------------------------|
| 1 | 145,875,000 | 146,025,000 | 1946 | 1168 | 0.679468414  | KRTAP10-8,KRTAP12-<br>2,LRR3,TSPEAR,ENSBTAG00000030862,ENSBTAG000000<br>37662 |
| 1 | 145,950,000 | 146,100,000 | 1947 | 912  | 0.789372254  | KRTAP10-2,KRTAP12-<br>2,TSPEAR,ENSBTAG00000011012,ENSBTAG00000030862          |
| 1 | 146,025,000 | 146,175,000 | 1948 | 843  | 0.351300974  | KRTAP10-2,UBE2G2,ENSBTAG00000011012                                           |
| 1 | 146,100,000 | 146,250,000 | 1949 | 774  | 0.740962453  | UBE2G2,ENSBTAG00000011437                                                     |
| 1 | 146,175,000 | 146,325,000 | 1950 | 829  | 0.906132419  | ENSBTAG00000011437                                                            |
| 1 | 146,250,000 | 146,400,000 | 1951 | 624  | 0.807972464  | HSF2BP                                                                        |
| 1 | 146,325,000 | 146,475,000 | 1952 | 446  | 0.624909166  | HSF2BP,RRP1B                                                                  |
| 1 | 146,400,000 | 146,550,000 | 1953 | 678  | 0.331765936  | CSTB,HSF2BP,PDXK,RRP1B                                                        |
| 1 | 146,475,000 | 146,625,000 | 1954 | 759  | 0.493625596  | CSTB,PDXK,RRP1                                                                |
| 1 | 146,550,000 | 146,700,000 | 1955 | 550  | 0.66386242   | CSTB,RRP1                                                                     |
| 1 | 146,625,000 | 146,775,000 | 1956 | 673  | 0.9697102    | AGPAT3                                                                        |
| 1 | 146,700,000 | 146,850,000 | 1957 | 751  | 1.08514424   | AGPAT3,ENSBTAG00000007100,ENSBTAG00000007105                                  |
| 1 | 146,775,000 | 146,925,000 | 1958 | 586  | 0.135983448  | ES1,ENSBTAG00000007100,ENSBTAG00000007105                                     |
| 1 | 146,850,000 | 147,000,000 | 1959 | 551  | -0.450499978 | COL18A1,ES1,ENSBTAG00000007105                                                |
| 1 | 146,925,000 | 147,075,000 | 1960 | 569  | -0.296306454 | COL18A1,SLC19A1                                                               |
| 1 | 147,000,000 | 147,150,000 | 1961 | 780  | -1.513387939 | COL18A1,PCBP3,SLC19A1                                                         |
| 1 | 147,075,000 | 147,225,000 | 1962 | 604  | -2.009781476 | PCBP3                                                                         |
| 1 | 147,150,000 | 147,300,000 | 1963 | 273  | -1.171929472 | PCBP3                                                                         |
| 1 | 147,225,000 | 147,375,000 | 1964 | 593  | 0.009562962  | PCBP3                                                                         |
| 1 | 147,300,000 | 147,450,000 | 1965 | 870  | 0.47639466   | COL6A1,PCBP3                                                                  |
| 1 | 147,375,000 | 147,525,000 | 1966 | 718  | 0.496860387  | COL6A1                                                                        |
| 1 | 147,450,000 | 147,600,000 | 1967 | 506  | 0.34503041   | COL6A2,FTCD                                                                   |
| 1 | 147,525,000 | 147,675,000 | 1968 | 584  | 0.548160298  | C1H21ORF56,COL6A2,FTCD,LSS,MCM3AP                                             |
| 1 | 147,600,000 | 147,750,000 | 1969 | 1007 | 0.625668844  | C1H21ORF56,C21orf58,LSS,MCM3AP,PCNT,YBEY                                      |
| 1 | 147,675,000 | 147,825,000 | 1970 | 1371 | 0.888760804  | C21orf58,MCM3AP,PCNT,YBEY                                                     |
| 1 | 147,750,000 | 147,900,000 | 1971 | 1429 | 0.749427677  | DIP2A,PCNT                                                                    |
| 1 | 147,825,000 | 147,975,000 | 1972 | 1542 | 0.187260805  | DIP2A,PCNT                                                                    |
| 1 | 147,900,000 | 148,050,000 | 1973 | 1435 | 0.284132102  | DIP2A,S100B                                                                   |
| 1 | 147,975,000 | 148,125,000 | 1974 | 1238 | 0.719518289  | DIP2A,HRMT1L1,S100B                                                           |
| 1 | 148,050,000 | 148,200,000 | 1975 | 1174 | 0.694741989  | HRMT1L1                                                                       |
| 1 | 148,125,000 | 148,275,000 | 1976 | 727  | 0.761985984  | FBXO25                                                                        |
| 1 | 148,200,000 | 148,350,000 | 1977 | 366  | 0.721749882  | FBXO25,TDRP                                                                   |
| 1 | 148,275,000 | 148,425,000 | 1978 | 322  | 0.918275366  | FBXO25,TDRP                                                                   |
| 1 | 148,350,000 | 148,500,000 | 1979 | 518  | 0.972163003  |                                                                               |
| 1 | 148,425,000 | 148,575,000 | 1980 | 765  | 0.907760759  | ENSBTAG00000046447                                                            |
| 1 | 148,500,000 | 148,650,000 | 1981 | 746  | 0.845284166  | ENSBTAG00000046447                                                            |
| 1 | 148,575,000 | 148,725,000 | 1982 | 494  | 0.404092478  | RUNX1,ENSBTAG00000046447                                                      |
| 1 | 148,650,000 | 148,800,000 | 1983 | 565  | -1.228518497 | RUNX1                                                                         |
| 1 | 148,725,000 | 148,875,000 | 1984 | 656  | -2.024680294 | RUNX1                                                                         |
| 1 | 148,800,000 | 148,950,000 | 1985 | 710  | -0.834985377 |                                                                               |
| 1 | 148,875,000 | 149,025,000 | 1986 | 841  | -0.748536264 |                                                                               |
| 1 | 148,950,000 | 149,100,000 | 1987 | 801  | -1.948420979 |                                                                               |
| 1 | 149,025,000 | 149,175,000 | 1988 | 578  | -1.256607454 |                                                                               |
| 1 | 149,100,000 | 149,250,000 | 1989 | 481  | 0.487983043  |                                                                               |
| 1 | 149,175,000 | 149,325,000 | 1990 | 469  | 0.530389258  |                                                                               |
| 1 | 149,250,000 | 149,400,000 | 1991 | 696  | 0.770604929  |                                                                               |
| 1 | 149,325,000 | 149,475,000 | 1992 | 1167 | 0.777911498  |                                                                               |
| 1 | 149,400,000 | 149,550,000 | 1993 | 839  | 0.669329652  |                                                                               |
| 1 | 149,475,000 | 149,625,000 | 1994 | 828  | -0.873691632 |                                                                               |
| 1 | 149,550,000 | 149,700,000 | 1995 | 802  | -1.00253626  |                                                                               |

|   |             |             |      |      |              |                                         |
|---|-------------|-------------|------|------|--------------|-----------------------------------------|
| 1 | 149,625,000 | 149,775,000 | 1996 | 594  | 0.174535686  |                                         |
| 1 | 149,700,000 | 149,850,000 | 1997 | 801  | 0.630960436  |                                         |
| 1 | 149,775,000 | 149,925,000 | 1998 | 572  | 0.735054519  |                                         |
| 1 | 149,850,000 | 150,000,000 | 1999 | 503  | 0.324457642  |                                         |
| 1 | 149,925,000 | 150,075,000 | 2000 | 573  | 0.68165642   | SETD4,ENSBTAG00000023384                |
| 1 | 150,000,000 | 150,150,000 | 2001 | 474  | 0.690515956  | CBR3,MGC127133,SETD4,ENSBTAG00000023384 |
| 1 | 150,075,000 | 150,225,000 | 2002 | 847  | 0.907409878  | CBR3,DOPEY2,MGC127133                   |
| 1 | 150,150,000 | 150,300,000 | 2003 | 1370 | 1.051472074  | CBR3,DOPEY2                             |
| 1 | 150,225,000 | 150,375,000 | 2004 | 965  | 0.983788728  | CHAF1B,DOPEY2,MORC3                     |
| 1 | 150,300,000 | 150,450,000 | 2005 | 529  | 0.423346292  | CHAF1B,CLDN14,MORC3                     |
| 1 | 150,375,000 | 150,525,000 | 2006 | 666  | 0.889289638  | CHAF1B,CLDN14                           |
| 1 | 150,450,000 | 150,600,000 | 2007 | 800  | 1.17934948   |                                         |
| 1 | 150,525,000 | 150,675,000 | 2008 | 915  | 0.463291542  |                                         |
| 1 | 150,600,000 | 150,750,000 | 2009 | 705  | 0.152654175  | HLCS,SIM2                               |
| 1 | 150,675,000 | 150,825,000 | 2010 | 499  | 0.858239445  | HLCS,SIM2                               |
| 1 | 150,750,000 | 150,900,000 | 2011 | 504  | 0.919145708  | HLCS                                    |
| 1 | 150,825,000 | 150,975,000 | 2012 | 581  | 0.79146664   | HLCS,RIPPLY3                            |
| 1 | 150,900,000 | 151,050,000 | 2013 | 777  | 0.80596957   | HLCS,PIGP,RIPPLY3,TTC3                  |
| 1 | 150,975,000 | 151,125,000 | 2014 | 858  | 0.864336487  | PIGP,TTC3                               |
| 1 | 151,050,000 | 151,200,000 | 2015 | 956  | 1.002277478  | DSCR3,TTC3                              |
| 1 | 151,125,000 | 151,275,000 | 2016 | 707  | 0.842051203  | DSCR3,TTC3                              |
| 1 | 151,200,000 | 151,350,000 | 2017 | 330  | -0.049766339 |                                         |
| 1 | 151,275,000 | 151,425,000 | 2018 | 409  | 0.4704635    | DYRK1A                                  |
| 1 | 151,350,000 | 151,500,000 | 2019 | 624  | -0.522841378 | DYRK1A                                  |
| 1 | 151,425,000 | 151,575,000 | 2020 | 719  | -0.539590593 |                                         |
| 1 | 151,500,000 | 151,650,000 | 2021 | 763  | -1.13530789  | KCNJ6                                   |
| 1 | 151,575,000 | 151,725,000 | 2022 | 874  | -0.939199458 | KCNJ6                                   |
| 1 | 151,650,000 | 151,800,000 | 2023 | 1127 | -0.346981509 |                                         |
| 1 | 151,725,000 | 151,875,000 | 2024 | 1061 | -1.12871277  |                                         |
| 1 | 151,800,000 | 151,950,000 | 2025 | 724  | -0.717244638 |                                         |
| 1 | 151,875,000 | 152,025,000 | 2026 | 681  | 0.501331696  |                                         |
| 1 | 151,950,000 | 152,100,000 | 2027 | 684  | 0.564990714  |                                         |
| 1 | 152,025,000 | 152,175,000 | 2028 | 687  | -0.044172692 |                                         |
| 1 | 152,100,000 | 152,250,000 | 2029 | 722  | -0.522553715 |                                         |
| 1 | 152,175,000 | 152,325,000 | 2030 | 633  | 0.14972189   | KCNJ15                                  |
| 1 | 152,250,000 | 152,400,000 | 2031 | 773  | 0.843260633  | ERG,KCNJ15                              |
| 1 | 152,325,000 | 152,475,000 | 2032 | 744  | 0.60098687   | ERG                                     |
| 1 | 152,400,000 | 152,550,000 | 2033 | 497  | 0.085203948  | ERG                                     |
| 1 | 152,475,000 | 152,625,000 | 2034 | 449  | 0.0059596    | ERG                                     |
| 1 | 152,550,000 | 152,700,000 | 2035 | 551  | -0.571901428 |                                         |
| 1 | 152,625,000 | 152,775,000 | 2036 | 919  | -0.218002304 |                                         |
| 1 | 152,700,000 | 152,850,000 | 2037 | 1186 | 0.251834984  |                                         |
| 1 | 152,775,000 | 152,925,000 | 2038 | 1240 | 0.335763394  | ETS2                                    |
| 1 | 152,850,000 | 153,000,000 | 2039 | 1167 | 0.203870809  | ETS2                                    |
| 1 | 152,925,000 | 153,075,000 | 2040 | 1378 | 0.529460135  |                                         |
| 1 | 153,000,000 | 153,150,000 | 2041 | 1362 | -0.014596687 |                                         |
| 1 | 153,075,000 | 153,225,000 | 2042 | 974  | -1.941369109 |                                         |
| 1 | 153,150,000 | 153,300,000 | 2043 | 871  | -1.761656003 | PIK3R4                                  |
| 1 | 153,225,000 | 153,375,000 | 2044 | 968  | 0.000173219  | COL6A6,PIK3R4                           |
| 1 | 153,300,000 | 153,450,000 | 2045 | 1298 | 0.289008158  | COL6A6,PIK3R4                           |
| 1 | 153,375,000 | 153,525,000 | 2046 | 1542 | 0.11701961   | COL6A6                                  |
| 1 | 153,450,000 | 153,600,000 | 2047 | 1413 | 0.313674815  | ENSBTAG00000021906                      |
| 1 | 153,525,000 | 153,675,000 | 2048 | 1361 | 0.53068798   | ENSBTAG00000021906                      |

|   |             |             |      |      |              |                         |
|---|-------------|-------------|------|------|--------------|-------------------------|
| 1 | 153,600,000 | 153,750,000 | 2049 | 1241 | 0.572496962  |                         |
| 1 | 153,675,000 | 153,825,000 | 2050 | 1337 | 0.208527444  | ENSBTAG00000021139      |
| 1 | 153,750,000 | 153,900,000 | 2051 | 1559 | -0.421906502 | ENSBTAG00000021139      |
| 1 | 153,825,000 | 153,975,000 | 2052 | 1908 | 0.172484043  | CAPN7                   |
| 1 | 153,900,000 | 154,050,000 | 2053 | 2204 | 0.719771594  | CAPN7,SH3BP5            |
| 1 | 153,975,000 | 154,125,000 | 2054 | 1886 | 0.604912976  | CAPN7,SH3BP5            |
| 1 | 154,050,000 | 154,200,000 | 2055 | 1683 | 0.3134798    | EAF1,METTL6,SH3BP5,UBL5 |
| 1 | 154,125,000 | 154,275,000 | 2056 | 1685 | 0.205202155  | COLQ,EAF1,METTL6,UBL5   |
| 1 | 154,200,000 | 154,350,000 | 2057 | 1541 | 0.851842081  | COLQ,EAF1,HACL1         |
| 1 | 154,275,000 | 154,425,000 | 2058 | 1157 | 0.566725477  | BTD,COLQ,HACL1          |
| 1 | 154,350,000 | 154,500,000 | 2059 | 790  | -0.04884045  | ANKRD28,BTD,HACL1       |
| 1 | 154,425,000 | 154,575,000 | 2060 | 677  | 0.444584342  | ANKRD28                 |
| 1 | 154,500,000 | 154,650,000 | 2061 | 1023 | 0.58533162   | ANKRD28                 |
| 1 | 154,575,000 | 154,725,000 | 2062 | 1125 | 0.784462569  |                         |
| 1 | 154,650,000 | 154,800,000 | 2063 | 1146 | 0.752753302  |                         |
| 1 | 154,725,000 | 154,875,000 | 2064 | 1456 | 0.552716183  |                         |
| 1 | 154,800,000 | 154,950,000 | 2065 | 1564 | -0.450309243 | GALNT15                 |
| 1 | 154,875,000 | 155,025,000 | 2066 | 1681 | -0.537692789 | DPH3,GALNT15,OXNAD1     |
| 1 | 154,950,000 | 155,100,000 | 2067 | 1666 | 0.468820165  | DPH3,GALNT15,OXNAD1     |
| 1 | 155,025,000 | 155,175,000 | 2068 | 1455 | -0.028058745 | OXNAD1                  |
| 1 | 155,100,000 | 155,250,000 | 2069 | 1272 | -0.144010972 | OXNAD1,RFTN1            |
| 1 | 155,175,000 | 155,325,000 | 2070 | 1360 | 0.162341938  | RFTN1                   |
| 1 | 155,250,000 | 155,400,000 | 2071 | 1375 | 0.419350205  | DAZL                    |
| 1 | 155,325,000 | 155,475,000 | 2072 | 1044 | 0.764063795  | DAZL                    |
| 1 | 155,400,000 | 155,550,000 | 2073 | 836  | 0.093525417  | DAZL                    |
| 1 | 155,475,000 | 155,625,000 | 2074 | 743  | -1.486222972 | PLCL2                   |
| 1 | 155,550,000 | 155,700,000 | 2075 | 662  | -1.206857269 | PLCL2                   |
| 1 | 155,625,000 | 155,775,000 | 2076 | 769  | 1.055359295  | PLCL2                   |
| 1 | 155,700,000 | 155,850,000 | 2077 | 809  | 1.165245364  | PLCL2,TBC1D5            |
| 1 | 155,775,000 | 155,925,000 | 2078 | 616  | 0.159102092  | PLCL2,TBC1D5            |
| 1 | 155,850,000 | 156,000,000 | 2079 | 456  | -0.399543511 | TBC1D5                  |
| 1 | 155,925,000 | 156,075,000 | 2080 | 514  | -0.649356372 | TBC1D5                  |
| 1 | 156,000,000 | 156,150,000 | 2081 | 529  | -0.693438541 | TBC1D5                  |
| 1 | 156,075,000 | 156,225,000 | 2082 | 513  | -0.499400841 | TBC1D5                  |
| 1 | 156,150,000 | 156,300,000 | 2083 | 766  | -1.440743795 | TBC1D5                  |
| 1 | 156,225,000 | 156,375,000 | 2084 | 848  | -1.606523379 |                         |
| 1 | 156,300,000 | 156,450,000 | 2085 | 598  | -0.678176317 |                         |
| 1 | 156,375,000 | 156,525,000 | 2086 | 805  | -0.304675914 |                         |
| 1 | 156,450,000 | 156,600,000 | 2087 | 959  | -0.365887508 |                         |
| 1 | 156,525,000 | 156,675,000 | 2088 | 1054 | 0.567120713  |                         |
| 1 | 156,600,000 | 156,750,000 | 2089 | 1078 | 0.740213493  |                         |
| 1 | 156,675,000 | 156,825,000 | 2090 | 836  | 0.297751122  |                         |
| 1 | 156,750,000 | 156,900,000 | 2091 | 941  | 0.528630868  |                         |
| 1 | 156,825,000 | 156,975,000 | 2092 | 1197 | 0.866545975  |                         |
| 1 | 156,900,000 | 157,050,000 | 2093 | 1683 | 0.517520181  |                         |
| 1 | 156,975,000 | 157,125,000 | 2094 | 1468 | 0.224826015  |                         |
| 1 | 157,050,000 | 157,200,000 | 2095 | 886  | 0.176589281  | SATB1                   |
| 1 | 157,125,000 | 157,275,000 | 2096 | 713  | 0.231751079  | SATB1                   |
| 1 | 157,200,000 | 157,350,000 | 2097 | 590  | -0.225576971 | SATB1                   |
| 1 | 157,275,000 | 157,425,000 | 2098 | 865  | -0.861936568 |                         |
| 1 | 157,350,000 | 157,500,000 | 2099 | 1061 | -0.388123945 |                         |
| 1 | 157,425,000 | 157,575,000 | 2100 | 915  | 0.767514575  |                         |
| 1 | 157,500,000 | 157,650,000 | 2101 | 849  | 1.043901037  |                         |

|   |             |             |      |      |              |                             |
|---|-------------|-------------|------|------|--------------|-----------------------------|
| 1 | 157,575,000 | 157,725,000 | 2102 | 991  | 0.617841271  |                             |
| 1 | 157,650,000 | 157,800,000 | 2103 | 1352 | 0.311132803  |                             |
| 1 | 157,725,000 | 157,875,000 | 2104 | 1509 | 0.461925267  |                             |
| 1 | 157,800,000 | 157,950,000 | 2105 | 1475 | -0.028993877 |                             |
| 1 | 157,875,000 | 158,025,000 | 2106 | 1647 | 0.018639003  |                             |
| 1 | 157,950,000 | 158,100,000 | 2107 | 1836 | 0.931042086  |                             |
| 1 | 158,025,000 | 158,175,000 | 2108 | 1447 | 0.965133508  |                             |
| 1 | 158,100,000 | 158,250,000 | 2109 | 1047 | 0.627933979  |                             |
| 1 | 158,175,000 | 158,325,000 | 2110 | 1123 | 0.348471872  | ENSBTAG00000047978          |
| 1 | 158,250,000 | 158,337,067 | 2111 | 682  | 0.2812599    | ENSBTAG00000047978          |
| 2 | 0           | 150,000     | 1    | 891  | 0.474520573  |                             |
| 2 | 75,000      | 225,000     | 2    | 788  | 0.554608117  |                             |
| 2 | 150,000     | 300,000     | 3    | 481  | 0.236003963  | LGSN                        |
| 2 | 225,000     | 375,000     | 4    | 473  | -0.055638102 | LGSN,OCA2                   |
| 2 | 300,000     | 450,000     | 5    | 574  | -0.126785517 | LGSN,OCA2                   |
| 2 | 375,000     | 525,000     | 6    | 643  | -0.189483248 | OCA2                        |
| 2 | 450,000     | 600,000     | 7    | 892  | 0.043825074  | OCA2                        |
| 2 | 525,000     | 675,000     | 8    | 1152 | -1.279544003 | HERC2,OCA2                  |
| 2 | 600,000     | 750,000     | 9    | 843  | -2.140702009 | HERC2                       |
| 2 | 675,000     | 825,000     | 10   | 492  | 0.011034614  | HERC2                       |
| 2 | 750,000     | 900,000     | 11   | 671  | 0.535900642  | HERC2                       |
| 2 | 825,000     | 975,000     | 12   | 789  | -0.139000845 | HERC2,NIPA1,NIPA2           |
| 2 | 900,000     | 1,050,000   | 13   | 760  | -0.778144686 | CYFIP1,NIPA1,NIPA2          |
| 2 | 975,000     | 1,125,000   | 14   | 597  | -0.858502455 | CYFIP1,NIPA2                |
| 2 | 1,050,000   | 1,200,000   | 15   | 412  | 0.067769486  | CYFIP1,TUBGCP5              |
| 2 | 1,125,000   | 1,275,000   | 16   | 439  | 0.535608264  | CCDC115,IMP4,PTPN18,TUBGCP5 |
| 2 | 1,200,000   | 1,350,000   | 17   | 549  | 0.097658388  | CCDC115,IMP4,PTPN18,TUBGCP5 |
| 2 | 1,275,000   | 1,425,000   | 18   | 646  | -1.68865797  | AMER3,PTPN18                |
| 2 | 1,350,000   | 1,500,000   | 19   | 508  | -2.126545786 | AMER3                       |
| 2 | 1,425,000   | 1,575,000   | 20   | 604  | -0.747056122 |                             |
| 2 | 1,500,000   | 1,650,000   | 21   | 731  | -2.023053047 | ARHGEF4                     |
| 2 | 1,575,000   | 1,725,000   | 22   | 427  | -3.584754883 | ARHGEF4                     |
| 2 | 1,650,000   | 1,800,000   | 23   | 589  | 0.251776093  | ARHGEF4,FAM168B             |
| 2 | 1,725,000   | 1,875,000   | 24   | 835  | 0.522405742  | ARHGEF4,FAM168B,PLEKHB2     |
| 2 | 1,800,000   | 1,950,000   | 25   | 815  | -0.017699425 | FAM168B,PLEKHB2             |
| 2 | 1,875,000   | 2,025,000   | 26   | 566  | -0.051842249 | PLEKHB2                     |
| 2 | 1,950,000   | 2,100,000   | 27   | 301  | 0.267559646  |                             |
| 2 | 2,025,000   | 2,175,000   | 28   | 314  | -0.007748941 |                             |
| 2 | 2,100,000   | 2,250,000   | 29   | 476  | 0.101482981  |                             |
| 2 | 2,175,000   | 2,325,000   | 30   | 1079 | -0.790014101 |                             |
| 2 | 2,250,000   | 2,400,000   | 31   | 1025 | -1.795857501 |                             |
| 2 | 2,325,000   | 2,475,000   | 32   | 456  | -3.929399491 |                             |
| 2 | 2,400,000   | 2,550,000   | 33   | 351  | -1.794497479 |                             |
| 2 | 2,475,000   | 2,625,000   | 34   | 492  | -3.783905338 |                             |
| 2 | 2,550,000   | 2,700,000   | 35   | 565  | -3.402925164 |                             |
| 2 | 2,625,000   | 2,775,000   | 36   | 674  | -0.768292634 |                             |
| 2 | 2,700,000   | 2,850,000   | 37   | 670  | -0.299969562 |                             |
| 2 | 2,775,000   | 2,925,000   | 38   | 512  | -0.632586045 |                             |
| 2 | 2,850,000   | 3,000,000   | 39   | 628  | -2.896016155 |                             |
| 2 | 2,925,000   | 3,075,000   | 40   | 704  | -1.768827501 |                             |
| 2 | 3,000,000   | 3,150,000   | 41   | 543  | 0.536023128  |                             |
| 2 | 3,075,000   | 3,225,000   | 42   | 575  | 0.398794492  |                             |
| 2 | 3,150,000   | 3,300,000   | 43   | 921  | 0.315950731  |                             |

|   |           |           |    |      |              |                                 |
|---|-----------|-----------|----|------|--------------|---------------------------------|
| 2 | 3,225,000 | 3,375,000 | 44 | 879  | 0.902995016  |                                 |
| 2 | 3,300,000 | 3,450,000 | 45 | 956  | 1.337055328  |                                 |
| 2 | 3,375,000 | 3,525,000 | 46 | 1059 | 1.349140402  |                                 |
| 2 | 3,450,000 | 3,600,000 | 47 | 781  | 1.364406895  |                                 |
| 2 | 3,525,000 | 3,675,000 | 48 | 1052 | 1.250806831  |                                 |
| 2 | 3,600,000 | 3,750,000 | 49 | 1585 | 0.738944932  |                                 |
| 2 | 3,675,000 | 3,825,000 | 50 | 1194 | -0.127006235 |                                 |
| 2 | 3,750,000 | 3,900,000 | 51 | 874  | 0.326072015  |                                 |
| 2 | 3,825,000 | 3,975,000 | 52 | 981  | 1.113071742  |                                 |
| 2 | 3,900,000 | 4,050,000 | 53 | 773  | 1.013349335  |                                 |
| 2 | 3,975,000 | 4,125,000 | 54 | 681  | 0.553703133  | HS6ST1                          |
| 2 | 4,050,000 | 4,200,000 | 55 | 1172 | 0.605512307  | HS6ST1                          |
| 2 | 4,125,000 | 4,275,000 | 56 | 1585 | 0.069561746  | HS6ST1,UGGT1                    |
| 2 | 4,200,000 | 4,350,000 | 57 | 1308 | -0.481535307 | UGGT1                           |
| 2 | 4,275,000 | 4,425,000 | 58 | 879  | 0.269563668  | SAP130,UGGT1                    |
| 2 | 4,350,000 | 4,500,000 | 59 | 606  | 0.472562282  | SAP130                          |
| 2 | 4,425,000 | 4,575,000 | 60 | 787  | 0.210031411  | AMMECR1L,POLR2D,SAP130          |
| 2 | 4,500,000 | 4,650,000 | 61 | 740  | -0.103792006 | AMMECR1L,POLR2D,WDR33           |
| 2 | 4,575,000 | 4,725,000 | 62 | 411  | -0.502519805 | SFT2D3,WDR33                    |
| 2 | 4,650,000 | 4,800,000 | 63 | 365  | -0.106615221 | LIMS2,SFT2D3,WDR33              |
| 2 | 4,725,000 | 4,875,000 | 64 | 688  | 0.989255469  | GPR17,LIMS2,MYO7B               |
| 2 | 4,800,000 | 4,950,000 | 65 | 1002 | -0.266307015 | GPR17,IWS1,LIMS2,MYO7B          |
| 2 | 4,875,000 | 5,025,000 | 66 | 728  | -1.536746256 | IWS1,MYO7B                      |
| 2 | 4,950,000 | 5,100,000 | 67 | 481  | -0.310161265 | IWS1,PROC                       |
| 2 | 5,025,000 | 5,175,000 | 68 | 511  | -0.772034914 | MAP3K2,PROC                     |
| 2 | 5,100,000 | 5,250,000 | 69 | 617  | -1.02592589  | CYP27C1,ERCC3,MAP3K2            |
| 2 | 5,175,000 | 5,325,000 | 70 | 867  | -0.888609639 | CYP27C1,ERCC3                   |
| 2 | 5,250,000 | 5,400,000 | 71 | 857  | -1.075363321 | BIN1,CYP27C1,ENSBTAG00000034949 |
| 2 | 5,325,000 | 5,475,000 | 72 | 1030 | -0.758204883 | BIN1,ENSBTAG00000034949         |
| 2 | 5,400,000 | 5,550,000 | 73 | 1263 | -0.165306103 | BIN1,ENSBTAG00000017214         |
| 2 | 5,475,000 | 5,625,000 | 74 | 739  | 0.337246113  | NAB1,ENSBTAG00000017214         |
| 2 | 5,550,000 | 5,700,000 | 75 | 540  | 0.686258948  | NAB1                            |
| 2 | 5,625,000 | 5,775,000 | 76 | 682  | -0.45174598  | MFSD6,TMEM194B                  |
| 2 | 5,700,000 | 5,850,000 | 77 | 708  | -0.458021318 | MFSD6,TMEM194B                  |
| 2 | 5,775,000 | 5,925,000 | 78 | 753  | 0.316084036  | INPP1,MFSD6                     |
| 2 | 5,850,000 | 6,000,000 | 79 | 665  | -0.537152548 | HIBCH,INPP1                     |
| 2 | 5,925,000 | 6,075,000 | 80 | 512  | -1.192592617 | C2H2orf88,HIBCH                 |
| 2 | 6,000,000 | 6,150,000 | 81 | 700  | -4.225261703 | C2H2orf88,HIBCH                 |
| 2 | 6,075,000 | 6,225,000 | 82 | 1012 | -1.863583961 | C2H2orf88,MSTN                  |
| 2 | 6,150,000 | 6,300,000 | 83 | 778  | 0.464356201  | MSTN                            |
| 2 | 6,225,000 | 6,375,000 | 84 | 512  | 0.714249053  |                                 |
| 2 | 6,300,000 | 6,450,000 | 85 | 395  | 0.695519     | PMS1                            |
| 2 | 6,375,000 | 6,525,000 | 86 | 299  | -0.114137037 | ORMDL1,PMS1                     |
| 2 | 6,450,000 | 6,600,000 | 87 | 661  | 0.2399877    | ANKAR,ORMDL1,OSGEPL1,PMS1       |
| 2 | 6,525,000 | 6,675,000 | 88 | 984  | 0.931956192  | ANKAR,ASNSD1,OSGEPL1            |
| 2 | 6,600,000 | 6,750,000 | 89 | 1160 | 0.990658712  | ASNSD1,SLC40A1                  |
| 2 | 6,675,000 | 6,825,000 | 90 | 1246 | 0.846557175  | SLC40A1                         |
| 2 | 6,750,000 | 6,900,000 | 91 | 1413 | 0.14442028   | WDR75                           |
| 2 | 6,825,000 | 6,975,000 | 92 | 1405 | -0.253860377 | WDR75                           |
| 2 | 6,900,000 | 7,050,000 | 93 | 1063 | -0.985388478 | WDR75                           |
| 2 | 6,975,000 | 7,125,000 | 94 | 969  | -2.21423497  |                                 |
| 2 | 7,050,000 | 7,200,000 | 95 | 1142 | -0.13720857  | COL5A2                          |
| 2 | 7,125,000 | 7,275,000 | 96 | 1106 | 1.01416817   | COL5A2                          |



|   |            |            |     |      |              |                |
|---|------------|------------|-----|------|--------------|----------------|
| 2 | 7,200,000  | 7,350,000  | 97  | 714  | 0.807169285  | COL3A1,COL5A2  |
| 2 | 7,275,000  | 7,425,000  | 98  | 584  | 1.039135411  | COL3A1,COL5A2  |
| 2 | 7,350,000  | 7,500,000  | 99  | 679  | 0.867153976  | COL3A1         |
| 2 | 7,425,000  | 7,575,000  | 100 | 780  | 0.706866595  |                |
| 2 | 7,500,000  | 7,650,000  | 101 | 938  | 0.13562549   |                |
| 2 | 7,575,000  | 7,725,000  | 102 | 1092 | -0.049006241 |                |
| 2 | 7,650,000  | 7,800,000  | 103 | 1075 | 0.018277006  | GULP1          |
| 2 | 7,725,000  | 7,875,000  | 104 | 809  | 0.412257465  | GULP1          |
| 2 | 7,800,000  | 7,950,000  | 105 | 668  | 1.361167649  | GULP1          |
| 2 | 7,875,000  | 8,025,000  | 106 | 696  | 1.03489443   | GULP1          |
| 2 | 7,950,000  | 8,100,000  | 107 | 864  | 0.387226327  |                |
| 2 | 8,025,000  | 8,175,000  | 108 | 1330 | 0.053450376  |                |
| 2 | 8,100,000  | 8,250,000  | 109 | 1142 | -0.467860219 |                |
| 2 | 8,175,000  | 8,325,000  | 110 | 1140 | -0.720732995 |                |
| 2 | 8,250,000  | 8,400,000  | 111 | 1627 | 0.240773501  |                |
| 2 | 8,325,000  | 8,475,000  | 112 | 1652 | -0.327828772 |                |
| 2 | 8,400,000  | 8,550,000  | 113 | 1643 | -0.786336505 |                |
| 2 | 8,475,000  | 8,625,000  | 114 | 1840 | 1.02154322   |                |
| 2 | 8,550,000  | 8,700,000  | 115 | 1603 | 1.283604421  |                |
| 2 | 8,625,000  | 8,775,000  | 116 | 1527 | 1.167979822  |                |
| 2 | 8,700,000  | 8,850,000  | 117 | 1550 | 1.108202177  |                |
| 2 | 8,775,000  | 8,925,000  | 118 | 1187 | 0.892683648  | CALCRL         |
| 2 | 8,850,000  | 9,000,000  | 119 | 977  | 0.322214445  | CALCRL         |
| 2 | 8,925,000  | 9,075,000  | 120 | 710  | -0.134257982 | CALCRL         |
| 2 | 9,000,000  | 9,150,000  | 121 | 857  | 0.618309601  | CALCRL         |
| 2 | 9,075,000  | 9,225,000  | 122 | 1140 | 0.716751541  |                |
| 2 | 9,150,000  | 9,300,000  | 123 | 813  | -0.049050584 |                |
| 2 | 9,225,000  | 9,375,000  | 124 | 543  | -0.849436695 |                |
| 2 | 9,300,000  | 9,450,000  | 125 | 531  | -1.55278651  |                |
| 2 | 9,375,000  | 9,525,000  | 126 | 410  | -1.5214024   | ZSWIM2         |
| 2 | 9,450,000  | 9,600,000  | 127 | 506  | 0.127709682  | FAM171B,ZSWIM2 |
| 2 | 9,525,000  | 9,675,000  | 128 | 657  | 0.326186008  | FAM171B,ITGAV  |
| 2 | 9,600,000  | 9,750,000  | 129 | 728  | 0.696476752  | ITGAV          |
| 2 | 9,675,000  | 9,825,000  | 130 | 717  | 0.884742785  | ITGAV          |
| 2 | 9,750,000  | 9,900,000  | 131 | 601  | 1.020965555  | ITGAV,ZC3H15   |
| 2 | 9,825,000  | 9,975,000  | 132 | 471  | 1.10589782   | ZC3H15         |
| 2 | 9,900,000  | 10,050,000 | 133 | 424  | 0.640629369  |                |
| 2 | 9,975,000  | 10,125,000 | 134 | 439  | 0.295898075  |                |
| 2 | 10,050,000 | 10,200,000 | 135 | 441  | -0.020927344 |                |
| 2 | 10,125,000 | 10,275,000 | 136 | 504  | 0.614101683  |                |
| 2 | 10,200,000 | 10,350,000 | 137 | 521  | 0.931748118  |                |
| 2 | 10,275,000 | 10,425,000 | 138 | 889  | 0.627829481  |                |
| 2 | 10,350,000 | 10,500,000 | 139 | 1347 | -0.004152544 |                |
| 2 | 10,425,000 | 10,575,000 | 140 | 1219 | 0.371851402  |                |
| 2 | 10,500,000 | 10,650,000 | 141 | 960  | 1.131399507  | FSIP2          |
| 2 | 10,575,000 | 10,725,000 | 142 | 714  | 1.182254262  | FSIP2          |
| 2 | 10,650,000 | 10,800,000 | 143 | 495  | 1.130009737  | FSIP2          |
| 2 | 10,725,000 | 10,875,000 | 144 | 358  | 0.511317556  | FSIP2          |
| 2 | 10,800,000 | 10,950,000 | 145 | 354  | 0.172743173  |                |
| 2 | 10,875,000 | 11,025,000 | 146 | 772  | 1.191321277  |                |
| 2 | 10,950,000 | 11,100,000 | 147 | 1110 | 1.113584911  |                |
| 2 | 11,025,000 | 11,175,000 | 148 | 984  | -0.682681949 |                |
| 2 | 11,100,000 | 11,250,000 | 149 | 638  | -2.876113278 |                |

|   |            |            |     |      |              |                                  |
|---|------------|------------|-----|------|--------------|----------------------------------|
| 2 | 11,175,000 | 11,325,000 | 150 | 580  | -1.141653482 |                                  |
| 2 | 11,250,000 | 11,400,000 | 151 | 963  | -1.98162123  |                                  |
| 2 | 11,325,000 | 11,475,000 | 152 | 1123 | -2.014435496 |                                  |
| 2 | 11,400,000 | 11,550,000 | 153 | 1248 | -0.131605916 |                                  |
| 2 | 11,475,000 | 11,625,000 | 154 | 1191 | 0.447652129  | ZNF804A                          |
| 2 | 11,550,000 | 11,700,000 | 155 | 1063 | 0.780459069  | ZNF804A                          |
| 2 | 11,625,000 | 11,775,000 | 156 | 1064 | 0.647107592  | ENSBTAG00000038064               |
| 2 | 11,700,000 | 11,850,000 | 157 | 1164 | -0.171128159 | ENSBTAG00000038064               |
| 2 | 11,775,000 | 11,925,000 | 158 | 1297 | 0.394662752  |                                  |
| 2 | 11,850,000 | 12,000,000 | 159 | 1149 | 0.487800681  |                                  |
| 2 | 11,925,000 | 12,075,000 | 160 | 1416 | -0.601605385 |                                  |
| 2 | 12,000,000 | 12,150,000 | 161 | 1566 | -0.442005557 |                                  |
| 2 | 12,075,000 | 12,225,000 | 162 | 1090 | -0.478075237 |                                  |
| 2 | 12,150,000 | 12,300,000 | 163 | 1017 | -1.385457534 |                                  |
| 2 | 12,225,000 | 12,375,000 | 164 | 1036 | -0.341003957 |                                  |
| 2 | 12,300,000 | 12,450,000 | 165 | 1261 | 1.256588847  |                                  |
| 2 | 12,375,000 | 12,525,000 | 166 | 1431 | 0.99316919   |                                  |
| 2 | 12,450,000 | 12,600,000 | 167 | 993  | 0.335079763  |                                  |
| 2 | 12,525,000 | 12,675,000 | 168 | 1159 | 0.683555104  |                                  |
| 2 | 12,600,000 | 12,750,000 | 169 | 1342 | 0.264462233  |                                  |
| 2 | 12,675,000 | 12,825,000 | 170 | 1248 | -0.712028278 |                                  |
| 2 | 12,750,000 | 12,900,000 | 171 | 1027 | -0.553391858 |                                  |
| 2 | 12,825,000 | 12,975,000 | 172 | 842  | -0.08349961  |                                  |
| 2 | 12,900,000 | 13,050,000 | 173 | 1081 | -0.175771126 |                                  |
| 2 | 12,975,000 | 13,125,000 | 174 | 1259 | -0.146991083 |                                  |
| 2 | 13,050,000 | 13,200,000 | 175 | 1265 | -0.392914807 |                                  |
| 2 | 13,125,000 | 13,275,000 | 176 | 1297 | 0.321258461  |                                  |
| 2 | 13,200,000 | 13,350,000 | 177 | 1183 | 0.986327998  |                                  |
| 2 | 13,275,000 | 13,425,000 | 178 | 989  | 0.710259537  |                                  |
| 2 | 13,350,000 | 13,500,000 | 179 | 1118 | 0.612689025  | NUP35                            |
| 2 | 13,425,000 | 13,575,000 | 180 | 1287 | 0.782760794  | DUSP19,NUP35                     |
| 2 | 13,500,000 | 13,650,000 | 181 | 874  | 0.469589648  | DUSP19,NCKAP1                    |
| 2 | 13,575,000 | 13,725,000 | 182 | 673  | -0.345558052 | FRZB,NCKAP1                      |
| 2 | 13,650,000 | 13,800,000 | 183 | 1027 | -0.314019877 | FRZB,NCKAP1                      |
| 2 | 13,725,000 | 13,875,000 | 184 | 1226 | -0.438986716 | DNAJC10,FRZB                     |
| 2 | 13,800,000 | 13,950,000 | 185 | 1317 | 0.256289404  | DNAJC10                          |
| 2 | 13,875,000 | 14,025,000 | 186 | 1251 | 0.837351001  |                                  |
| 2 | 13,950,000 | 14,100,000 | 187 | 1010 | 0.413731941  | PDE1A                            |
| 2 | 14,025,000 | 14,175,000 | 188 | 627  | 0.37985135   | PDE1A                            |
| 2 | 14,100,000 | 14,250,000 | 189 | 425  | 0.675285016  | PDE1A                            |
| 2 | 14,175,000 | 14,325,000 | 190 | 528  | 0.689079432  | PDE1A                            |
| 2 | 14,250,000 | 14,400,000 | 191 | 718  | 1.266309728  | PDE1A                            |
| 2 | 14,325,000 | 14,475,000 | 192 | 677  | 0.642473937  | PDE1A,ENSBTAG00000033523         |
| 2 | 14,400,000 | 14,550,000 | 193 | 668  | -0.308927877 | PDE1A,PPP1R1C,ENSBTAG00000033523 |
| 2 | 14,475,000 | 14,625,000 | 194 | 897  | -0.683031152 | PDE1A,PPP1R1C                    |
| 2 | 14,550,000 | 14,700,000 | 195 | 874  | -1.211440441 | PPP1R1C,SSFA2                    |
| 2 | 14,625,000 | 14,775,000 | 196 | 754  | -0.03256515  | SSFA2                            |
| 2 | 14,700,000 | 14,850,000 | 197 | 575  | 0.185071833  | SSFA2                            |
| 2 | 14,775,000 | 14,925,000 | 198 | 773  | 0.189222092  |                                  |
| 2 | 14,850,000 | 15,000,000 | 199 | 975  | 0.444303422  | NEUROD1                          |
| 2 | 14,925,000 | 15,075,000 | 200 | 1057 | 0.754617886  | CERKL,NEUROD1                    |
| 2 | 15,000,000 | 15,150,000 | 201 | 1132 | 0.900015538  | CERKL,ITGA4                      |
| 2 | 15,075,000 | 15,225,000 | 202 | 876  | 0.302856343  | CERKL,ITGA4                      |

|   |            |            |     |      |              |                                   |
|---|------------|------------|-----|------|--------------|-----------------------------------|
| 2 | 15,150,000 | 15,300,000 | 203 | 619  | -0.257322727 | ITGA4                             |
| 2 | 15,225,000 | 15,375,000 | 204 | 528  | -1.166389475 |                                   |
| 2 | 15,300,000 | 15,450,000 | 205 | 900  | -1.415130418 |                                   |
| 2 | 15,375,000 | 15,525,000 | 206 | 1068 | -0.674848623 |                                   |
| 2 | 15,450,000 | 15,600,000 | 207 | 1099 | 0.136099144  |                                   |
| 2 | 15,525,000 | 15,675,000 | 208 | 1000 | 0.171301465  | UBE2E3                            |
| 2 | 15,600,000 | 15,750,000 | 209 | 695  | -2.063216848 | UBE2E3                            |
| 2 | 15,675,000 | 15,825,000 | 210 | 492  | -2.715066328 | UBE2E3                            |
| 2 | 15,750,000 | 15,900,000 | 211 | 540  | -1.047009419 | UBE2E3                            |
| 2 | 15,825,000 | 15,975,000 | 212 | 706  | -1.0794016   |                                   |
| 2 | 15,900,000 | 16,050,000 | 213 | 839  | -0.782442391 |                                   |
| 2 | 15,975,000 | 16,125,000 | 214 | 1060 | 0.218701314  |                                   |
| 2 | 16,050,000 | 16,200,000 | 215 | 875  | 0.864007822  |                                   |
| 2 | 16,125,000 | 16,275,000 | 216 | 459  | 0.657340434  |                                   |
| 2 | 16,200,000 | 16,350,000 | 217 | 426  | -0.356707578 |                                   |
| 2 | 16,275,000 | 16,425,000 | 218 | 691  | 1.010935304  |                                   |
| 2 | 16,350,000 | 16,500,000 | 219 | 780  | 0.516919128  |                                   |
| 2 | 16,425,000 | 16,575,000 | 220 | 704  | -0.33748333  |                                   |
| 2 | 16,500,000 | 16,650,000 | 221 | 775  | 0.831036766  |                                   |
| 2 | 16,575,000 | 16,725,000 | 222 | 988  | 0.9732266    |                                   |
| 2 | 16,650,000 | 16,800,000 | 223 | 1272 | 0.022805501  |                                   |
| 2 | 16,725,000 | 16,875,000 | 224 | 1242 | -0.738581487 | CWC22                             |
| 2 | 16,800,000 | 16,950,000 | 225 | 644  | -0.938576046 | CWC22                             |
| 2 | 16,875,000 | 17,025,000 | 226 | 191  | -2.512374521 | CWC22                             |
| 2 | 16,950,000 | 17,100,000 | 227 | 584  | 0.69056464   | MGC139239                         |
| 2 | 17,025,000 | 17,175,000 | 228 | 1144 | 0.54953059   | MGC139239                         |
| 2 | 17,100,000 | 17,250,000 | 229 | 1112 | 0.137386436  | MGC139239                         |
| 2 | 17,175,000 | 17,325,000 | 230 | 804  | 0.212527495  | MGC139239                         |
| 2 | 17,250,000 | 17,400,000 | 231 | 670  | 0.178987213  | MGC139239                         |
| 2 | 17,325,000 | 17,475,000 | 232 | 592  | 0.002605631  | MGC139239                         |
| 2 | 17,400,000 | 17,550,000 | 233 | 756  | 0.693944436  | MGC139239                         |
| 2 | 17,475,000 | 17,625,000 | 234 | 824  | 0.708336575  |                                   |
| 2 | 17,550,000 | 17,700,000 | 235 | 641  | 0.087210322  |                                   |
| 2 | 17,625,000 | 17,775,000 | 236 | 674  | 0.225931314  | SESTD1                            |
| 2 | 17,700,000 | 17,850,000 | 237 | 678  | -0.649294501 | CCDC141,SESTD1                    |
| 2 | 17,775,000 | 17,925,000 | 238 | 1067 | -1.763879314 | CCDC141                           |
| 2 | 17,850,000 | 18,000,000 | 239 | 1348 | -0.42020358  | CCDC141                           |
| 2 | 17,925,000 | 18,075,000 | 240 | 1049 | 0.713511091  | CCDC141,TTN                       |
| 2 | 18,000,000 | 18,150,000 | 241 | 882  | -0.034762978 | CCDC141,TTN                       |
| 2 | 18,075,000 | 18,225,000 | 242 | 917  | 0.137734195  | TTN                               |
| 2 | 18,150,000 | 18,300,000 | 243 | 659  | 0.782730158  | TTN                               |
| 2 | 18,225,000 | 18,375,000 | 244 | 384  | 0.989608625  | TTN                               |
| 2 | 18,300,000 | 18,450,000 | 245 | 317  | 0.823375795  | DFNB59,FKBP7,PLEKHA3,PRKRA,TTN    |
| 2 | 18,375,000 | 18,525,000 | 246 | 606  | 1.042130349  | DFNB59,FKBP7,OSBPL6,PLEKHA3,PRKRA |
| 2 | 18,450,000 | 18,600,000 | 247 | 869  | 0.737405619  | OSBPL6                            |
| 2 | 18,525,000 | 18,675,000 | 248 | 916  | 0.362724019  | OSBPL6                            |
| 2 | 18,600,000 | 18,750,000 | 249 | 960  | 0.492521573  |                                   |
| 2 | 18,675,000 | 18,825,000 | 250 | 777  | 0.245822803  | CYCT,PDE11A,RBM45                 |
| 2 | 18,750,000 | 18,900,000 | 251 | 626  | 0.289059171  | CYCT,PDE11A,RBM45                 |
| 2 | 18,825,000 | 18,975,000 | 252 | 798  | -0.393674792 | PDE11A                            |
| 2 | 18,900,000 | 19,050,000 | 253 | 1116 | -0.354636671 | PDE11A                            |
| 2 | 18,975,000 | 19,125,000 | 254 | 933  | 0.390155986  | PDE11A                            |
| 2 | 19,050,000 | 19,200,000 | 255 | 654  | 0.553848401  | PDE11A                            |

|   |            |            |     |      |              |                                             |
|---|------------|------------|-----|------|--------------|---------------------------------------------|
| 2 | 19,125,000 | 19,275,000 | 256 | 551  | 0.575144192  | PDE11A,TTC30A                               |
| 2 | 19,200,000 | 19,350,000 | 257 | 388  | 0.572097888  | AGPS,PDE11A,TTC30A,TTC30B                   |
| 2 | 19,275,000 | 19,425,000 | 258 | 437  | 0.467358057  | AGPS,TTC30B                                 |
| 2 | 19,350,000 | 19,500,000 | 259 | 468  | -0.324278854 | AGPS                                        |
| 2 | 19,425,000 | 19,575,000 | 260 | 436  | -0.222862629 | AGPS                                        |
| 2 | 19,500,000 | 19,650,000 | 261 | 584  | -1.40179322  |                                             |
| 2 | 19,575,000 | 19,725,000 | 262 | 556  | -2.274432246 | HNRNPA3,NFE2L2                              |
| 2 | 19,650,000 | 19,800,000 | 263 | 370  | -1.620006581 | HNRNPA3,NFE2L2                              |
| 2 | 19,725,000 | 19,875,000 | 264 | 327  | -1.227563099 |                                             |
| 2 | 19,800,000 | 19,950,000 | 265 | 415  | 0.091785814  |                                             |
| 2 | 19,875,000 | 20,025,000 | 266 | 513  | 0.14947313   |                                             |
| 2 | 19,950,000 | 20,100,000 | 267 | 662  | -0.740002157 |                                             |
| 2 | 20,025,000 | 20,175,000 | 268 | 665  | -1.081605902 |                                             |
| 2 | 20,100,000 | 20,250,000 | 269 | 375  | -0.61311661  |                                             |
| 2 | 20,175,000 | 20,325,000 | 270 | 327  | -0.621428266 |                                             |
| 2 | 20,250,000 | 20,400,000 | 271 | 560  | 0.004232826  |                                             |
| 2 | 20,325,000 | 20,475,000 | 272 | 700  | 0.762921247  |                                             |
| 2 | 20,400,000 | 20,550,000 | 273 | 742  | 0.415885046  |                                             |
| 2 | 20,475,000 | 20,625,000 | 274 | 864  | 0.50412218   | MTX2                                        |
| 2 | 20,550,000 | 20,700,000 | 275 | 674  | 0.836279582  | MTX2                                        |
| 2 | 20,625,000 | 20,775,000 | 276 | 310  | 0.757650107  | HOXD1,MTX2                                  |
| 2 | 20,700,000 | 20,850,000 | 277 | 223  | 0.443710676  | HOXD,HOXD1,HOXD10,HOXD12,HOXD3,HOXD4,HOXD9  |
| 2 | 20,775,000 | 20,925,000 | 278 | 229  | -0.255550384 | HOXD,HOXD10,HOXD12,HOXD13,HOXD3,HOXD4,HOXD9 |
| 2 | 20,850,000 | 21,000,000 | 279 | 228  | -0.520430948 | HOXD13,KIAA1715                             |
| 2 | 20,925,000 | 21,075,000 | 280 | 231  | -0.849715461 | KIAA1715,ENSBTAG00000031711                 |
| 2 | 21,000,000 | 21,150,000 | 281 | 218  | -0.58831183  | KIAA1715,ENSBTAG00000031711                 |
| 2 | 21,075,000 | 21,225,000 | 282 | 276  | 0.435594466  |                                             |
| 2 | 21,150,000 | 21,300,000 | 283 | 487  | 0.200714514  |                                             |
| 2 | 21,225,000 | 21,375,000 | 284 | 583  | 0.013505631  |                                             |
| 2 | 21,300,000 | 21,450,000 | 285 | 937  | 0.475615407  |                                             |
| 2 | 21,375,000 | 21,525,000 | 286 | 1140 | 0.259964896  |                                             |
| 2 | 21,450,000 | 21,600,000 | 287 | 729  | -0.164404388 |                                             |
| 2 | 21,525,000 | 21,675,000 | 288 | 740  | 0.079674491  |                                             |
| 2 | 21,600,000 | 21,750,000 | 289 | 695  | 0.067568433  | ATF2,ATP5G3                                 |
| 2 | 21,675,000 | 21,825,000 | 290 | 321  | -0.019635342 | ATF2,ATP5G3                                 |
| 2 | 21,750,000 | 21,900,000 | 291 | 366  | 0.147912024  | ATF2,CHN1                                   |
| 2 | 21,825,000 | 21,975,000 | 292 | 520  | 0.394983244  | ATF2,CHN1                                   |
| 2 | 21,900,000 | 22,050,000 | 293 | 497  | 0.545266097  | CHN1                                        |
| 2 | 21,975,000 | 22,125,000 | 294 | 461  | 0.729607417  | CHN1,CHRNA1                                 |
| 2 | 22,050,000 | 22,200,000 | 295 | 529  | 0.738932441  | CHN1,CHRNA1                                 |
| 2 | 22,125,000 | 22,275,000 | 296 | 553  | 0.129644217  | CHRNA1,WIPF1                                |
| 2 | 22,200,000 | 22,350,000 | 297 | 549  | 0.071693202  | WIPF1                                       |
| 2 | 22,275,000 | 22,425,000 | 298 | 621  | -0.209056736 | GPR155,SCRN3,WIPF1                          |
| 2 | 22,350,000 | 22,500,000 | 299 | 645  | -0.844995146 | CIR1,GPR155,SCRN3,SP9                       |
| 2 | 22,425,000 | 22,575,000 | 300 | 629  | -0.963005264 | CIR1,OLA1,SCRN3,SP9                         |
| 2 | 22,500,000 | 22,650,000 | 301 | 509  | -1.185627561 | OLA1                                        |
| 2 | 22,575,000 | 22,725,000 | 302 | 443  | -0.257850731 | OLA1                                        |
| 2 | 22,650,000 | 22,800,000 | 303 | 367  | 0.434812955  | OLA1                                        |
| 2 | 22,725,000 | 22,875,000 | 304 | 230  | 0.218918521  | OLA1,SP3                                    |
| 2 | 22,800,000 | 22,950,000 | 305 | 296  | -0.303554944 | SP3                                         |
| 2 | 22,875,000 | 23,025,000 | 306 | 418  | -0.514120908 | SP3                                         |

|   |            |            |     |      |              |                                                        |
|---|------------|------------|-----|------|--------------|--------------------------------------------------------|
| 2 | 22,950,000 | 23,100,000 | 307 | 669  | -0.471812466 |                                                        |
| 2 | 23,025,000 | 23,175,000 | 308 | 629  | -0.108599603 |                                                        |
| 2 | 23,100,000 | 23,250,000 | 309 | 560  | 0.697234146  |                                                        |
| 2 | 23,175,000 | 23,325,000 | 310 | 737  | -0.289174006 | UBL5                                                   |
| 2 | 23,250,000 | 23,400,000 | 311 | 694  | -1.233536055 | CDCA7,UBL5                                             |
| 2 | 23,325,000 | 23,475,000 | 312 | 499  | -0.689442362 | CDCA7,ENSBTAG00000001083                               |
| 2 | 23,400,000 | 23,550,000 | 313 | 394  | 0.705643872  | ENSBTAG00000001083                                     |
| 2 | 23,475,000 | 23,625,000 | 314 | 484  | 0.382517402  | ENSBTAG00000001083                                     |
| 2 | 23,550,000 | 23,700,000 | 315 | 764  | 0.434157761  | RAPGEF4,ENSBTAG00000001083                             |
| 2 | 23,625,000 | 23,775,000 | 316 | 930  | 0.694025205  | RAPGEF4                                                |
| 2 | 23,700,000 | 23,850,000 | 317 | 671  | 0.97322743   | RAPGEF4                                                |
| 2 | 23,775,000 | 23,925,000 | 318 | 595  | -0.715131171 | RAPGEF4                                                |
| 2 | 23,850,000 | 24,000,000 | 319 | 528  | -1.136021671 | RAPGEF4                                                |
| 2 | 23,925,000 | 24,075,000 | 320 | 384  | 0.787199183  | PDK1,RAPGEF4                                           |
| 2 | 24,000,000 | 24,150,000 | 321 | 352  | 0.587182934  | ITGA6,PDK1                                             |
| 2 | 24,075,000 | 24,225,000 | 322 | 442  | 0.279187492  | ITGA6,PDK1                                             |
| 2 | 24,150,000 | 24,300,000 | 323 | 707  | -0.117664494 | ITGA6                                                  |
| 2 | 24,225,000 | 24,375,000 | 324 | 1066 | -0.069177788 |                                                        |
| 2 | 24,300,000 | 24,450,000 | 325 | 957  | 0.047037204  |                                                        |
| 2 | 24,375,000 | 24,525,000 | 326 | 564  | 0.508297846  | DLX1,DLX2,MAP1D                                        |
| 2 | 24,450,000 | 24,600,000 | 327 | 646  | -0.590988894 | DLX1,DLX2,MAP1D                                        |
| 2 | 24,525,000 | 24,675,000 | 328 | 490  | -1.572026251 | HAT1,MAP1D                                             |
| 2 | 24,600,000 | 24,750,000 | 329 | 301  | 0.711398464  | HAT1,SLC25A12                                          |
| 2 | 24,675,000 | 24,825,000 | 330 | 323  | 0.466447489  | DYNC1I2,SLC25A12                                       |
| 2 | 24,750,000 | 24,900,000 | 331 | 373  | -0.242535996 | DYNC1I2,SLC25A12                                       |
| 2 | 24,825,000 | 24,975,000 | 332 | 621  | -0.188701954 | CYBRD1,DYNC1I2                                         |
| 2 | 24,900,000 | 25,050,000 | 333 | 528  | -0.275390082 | CYBRD1,DCAF17                                          |
| 2 | 24,975,000 | 25,125,000 | 334 | 340  | -0.410255102 | CYBRD1,DCAF17,METTL8                                   |
| 2 | 25,050,000 | 25,200,000 | 335 | 340  | -0.07446651  | DCAF17,METTL8                                          |
| 2 | 25,125,000 | 25,275,000 | 336 | 365  | -0.498618438 | METTL8                                                 |
| 2 | 25,200,000 | 25,350,000 | 337 | 416  | -0.530019298 |                                                        |
| 2 | 25,275,000 | 25,425,000 | 338 | 473  | -0.604027317 | TLK1                                                   |
| 2 | 25,350,000 | 25,500,000 | 339 | 512  | -0.719099585 | TLK1                                                   |
| 2 | 25,425,000 | 25,575,000 | 340 | 594  | -0.694036786 | GORASP2,TLK1,ENSBTAG00000036258                        |
| 2 | 25,500,000 | 25,650,000 | 341 | 930  | -0.67614607  | GAD1,GORASP2,ENSBTAG00000036258                        |
| 2 | 25,575,000 | 25,725,000 | 342 | 987  | -1.280593404 | ERICH2,GAD1,GORASP2                                    |
| 2 | 25,650,000 | 25,800,000 | 343 | 646  | -2.037151658 | ERICH2,GAD1,SP5                                        |
| 2 | 25,725,000 | 25,875,000 | 344 | 657  | -1.355914169 | SP5                                                    |
| 2 | 25,800,000 | 25,950,000 | 345 | 808  | -0.521255788 |                                                        |
| 2 | 25,875,000 | 26,025,000 | 346 | 856  | 0.371307001  | MYO3B                                                  |
| 2 | 25,950,000 | 26,100,000 | 347 | 692  | 0.845575843  | MYO3B                                                  |
| 2 | 26,025,000 | 26,175,000 | 348 | 639  | 0.85122669   | MYO3B                                                  |
| 2 | 26,100,000 | 26,250,000 | 349 | 900  | 0.459016564  | MYO3B                                                  |
| 2 | 26,175,000 | 26,325,000 | 350 | 1250 | -2.171653837 | MYO3B                                                  |
| 2 | 26,250,000 | 26,400,000 | 351 | 1191 | -3.435236011 | MYO3B,UBR3                                             |
| 2 | 26,325,000 | 26,475,000 | 352 | 558  | -0.602248656 | UBR3                                                   |
| 2 | 26,400,000 | 26,550,000 | 353 | 327  | 0.417638409  | UBR3                                                   |
| 2 | 26,475,000 | 26,625,000 | 354 | 308  | 0.455977556  | KLHL23,METTL5,SSB,UBR3                                 |
| 2 | 26,550,000 | 26,700,000 | 355 | 274  | 0.807542427  | CCDC173,KLHL23,METTL5,PHOSPHO2,PPIG,SSB,UBR3           |
| 2 | 26,625,000 | 26,775,000 | 356 | 292  | 0.9339668    | CCDC173,FASTKD1,KLHL23,PHOSPHO2,PPIG,ENSBTAG0000046878 |
| 2 | 26,700,000 | 26,850,000 | 357 | 399  | -0.242780737 | BBS5,FASTKD1,KBTBD10,PPIG,ENSBTAG00000046878           |
| 2 | 26,775,000 | 26,925,000 | 358 | 425  | -3.290898228 | BBS5,FASTKD1,KBTBD10                                   |

|   |            |            |     |      |              |                            |
|---|------------|------------|-----|------|--------------|----------------------------|
| 2 | 26,850,000 | 27,000,000 | 359 | 379  | -2.131031156 | LRP2                       |
| 2 | 26,925,000 | 27,075,000 | 360 | 713  | 0.050041299  | LRP2                       |
| 2 | 27,000,000 | 27,150,000 | 361 | 839  | 0.33969253   | DHRS9,LRP2                 |
| 2 | 27,075,000 | 27,225,000 | 362 | 661  | 0.031981     | ABCB11,DHRS9,LRP2          |
| 2 | 27,150,000 | 27,300,000 | 363 | 713  | 0.030202279  | ABCB11,G6PC2,SPC25         |
| 2 | 27,225,000 | 27,375,000 | 364 | 1142 | 0.663842294  | ABCB11,G6PC2,NOSTRIN,SPC25 |
| 2 | 27,300,000 | 27,450,000 | 365 | 1306 | 0.644124507  | CERS6,NOSTRIN,SPC25        |
| 2 | 27,375,000 | 27,525,000 | 366 | 1035 | -0.490493228 | CERS6,NOSTRIN              |
| 2 | 27,450,000 | 27,600,000 | 367 | 803  | -1.652782235 | CERS6                      |
| 2 | 27,525,000 | 27,675,000 | 368 | 728  | -2.071046416 | CERS6                      |
| 2 | 27,600,000 | 27,750,000 | 369 | 773  | -0.711250828 | CERS6                      |
| 2 | 27,675,000 | 27,825,000 | 370 | 777  | 0.171298357  | CERS6                      |
| 2 | 27,750,000 | 27,900,000 | 371 | 651  | -0.062571172 | CERS6                      |
| 2 | 27,825,000 | 27,975,000 | 372 | 469  | -0.275089718 | STK39                      |
| 2 | 27,900,000 | 28,050,000 | 373 | 529  | 0.110594564  | STK39                      |
| 2 | 27,975,000 | 28,125,000 | 374 | 825  | 0.408664534  | STK39                      |
| 2 | 28,050,000 | 28,200,000 | 375 | 793  | 0.196741222  |                            |
| 2 | 28,125,000 | 28,275,000 | 376 | 615  | -0.724843418 |                            |
| 2 | 28,200,000 | 28,350,000 | 377 | 931  | 0.64726417   |                            |
| 2 | 28,275,000 | 28,425,000 | 378 | 1085 | 0.566618949  | B3GALT1                    |
| 2 | 28,350,000 | 28,500,000 | 379 | 1131 | -0.913115733 | B3GALT1                    |
| 2 | 28,425,000 | 28,575,000 | 380 | 1269 | -0.575388487 |                            |
| 2 | 28,500,000 | 28,650,000 | 381 | 1218 | 0.326662103  |                            |
| 2 | 28,575,000 | 28,725,000 | 382 | 1207 | 0.882766819  |                            |
| 2 | 28,650,000 | 28,800,000 | 383 | 1343 | 0.96072236   |                            |
| 2 | 28,725,000 | 28,875,000 | 384 | 1390 | 0.329802297  |                            |
| 2 | 28,800,000 | 28,950,000 | 385 | 1423 | 0.128848181  |                            |
| 2 | 28,875,000 | 29,025,000 | 386 | 1224 | 0.662186455  |                            |
| 2 | 28,950,000 | 29,100,000 | 387 | 691  | 0.468868785  | XIRP2                      |
| 2 | 29,025,000 | 29,175,000 | 388 | 512  | -0.155418349 | XIRP2                      |
| 2 | 29,100,000 | 29,250,000 | 389 | 957  | -2.128373816 | XIRP2                      |
| 2 | 29,175,000 | 29,325,000 | 390 | 1299 | -1.898917994 |                            |
| 2 | 29,250,000 | 29,400,000 | 391 | 1274 | -1.472703387 |                            |
| 2 | 29,325,000 | 29,475,000 | 392 | 1031 | -1.048323919 | ENSBTAG00000046347         |
| 2 | 29,400,000 | 29,550,000 | 393 | 897  | -0.353870031 | ENSBTAG00000046347         |
| 2 | 29,475,000 | 29,625,000 | 394 | 757  | -0.585479825 |                            |
| 2 | 29,550,000 | 29,700,000 | 395 | 463  | -0.002959926 |                            |
| 2 | 29,625,000 | 29,775,000 | 396 | 541  | 0.391120361  |                            |
| 2 | 29,700,000 | 29,850,000 | 397 | 863  | 0.012327137  |                            |
| 2 | 29,775,000 | 29,925,000 | 398 | 895  | -0.010885558 |                            |
| 2 | 29,850,000 | 30,000,000 | 399 | 958  | -0.506313617 | SCN7A                      |
| 2 | 29,925,000 | 30,075,000 | 400 | 1261 | -0.678638581 | SCN7A                      |
| 2 | 30,000,000 | 30,150,000 | 401 | 986  | -0.454275264 | SCN9A,ENSBTAG00000026882   |
| 2 | 30,075,000 | 30,225,000 | 402 | 550  | -0.724460717 | SCN9A,ENSBTAG00000026882   |
| 2 | 30,150,000 | 30,300,000 | 403 | 502  | -1.273183596 | SCN9A                      |
| 2 | 30,225,000 | 30,375,000 | 404 | 813  | -1.471835687 | SCN1A                      |
| 2 | 30,300,000 | 30,450,000 | 405 | 1121 | -0.377893672 | SCN1A,TTC21B               |
| 2 | 30,375,000 | 30,525,000 | 406 | 1038 | 0.656542637  | SCN1A,TTC21B               |
| 2 | 30,450,000 | 30,600,000 | 407 | 782  | 0.853474432  | TTC21B                     |
| 2 | 30,525,000 | 30,675,000 | 408 | 579  | 0.077392924  | GALNT3,TTC21B              |
| 2 | 30,600,000 | 30,750,000 | 409 | 580  | -1.267009926 | CSRNP3,GALNT3              |
| 2 | 30,675,000 | 30,825,000 | 410 | 842  | -1.142875924 | CSRNP3                     |
| 2 | 30,750,000 | 30,900,000 | 411 | 962  | -1.305716692 | CSRNP3                     |

|   |            |            |     |      |              |                                             |
|---|------------|------------|-----|------|--------------|---------------------------------------------|
| 2 | 30,825,000 | 30,975,000 | 412 | 701  | -2.211264077 |                                             |
| 2 | 30,900,000 | 31,050,000 | 413 | 649  | -1.232793898 | SCN2A                                       |
| 2 | 30,975,000 | 31,125,000 | 414 | 931  | -0.455769125 | SCN2A                                       |
| 2 | 31,050,000 | 31,200,000 | 415 | 839  | -0.32787043  | SCN2A,SCN3A                                 |
| 2 | 31,125,000 | 31,275,000 | 416 | 663  | -0.565331267 | SCN3A                                       |
| 2 | 31,200,000 | 31,350,000 | 417 | 644  | -2.098259393 | SCN3A                                       |
| 2 | 31,275,000 | 31,425,000 | 418 | 439  | -3.17190377  | SCN3A,SLC38A11                              |
| 2 | 31,350,000 | 31,500,000 | 419 | 386  | -1.102659009 | SLC38A11                                    |
| 2 | 31,425,000 | 31,575,000 | 420 | 387  | -0.313712308 | SLC38A11                                    |
| 2 | 31,500,000 | 31,650,000 | 421 | 514  | 0.019922992  | ENSBTAG00000005501                          |
| 2 | 31,575,000 | 31,725,000 | 422 | 720  | 0.920288514  | ENSBTAG00000005501,ENSBTAG00000047880       |
| 2 | 31,650,000 | 31,800,000 | 423 | 814  | 1.227759349  | GRB14,ENSBTAG00000005501,ENSBTAG00000047880 |
| 2 | 31,725,000 | 31,875,000 | 424 | 713  | 1.225462779  | GRB14                                       |
| 2 | 31,800,000 | 31,950,000 | 425 | 435  | 0.881802666  | GRB14                                       |
| 2 | 31,875,000 | 32,025,000 | 426 | 500  | 0.848499072  | GRB14                                       |
| 2 | 31,950,000 | 32,100,000 | 427 | 513  | 0.498700322  |                                             |
| 2 | 32,025,000 | 32,175,000 | 428 | 562  | -1.156847328 |                                             |
| 2 | 32,100,000 | 32,250,000 | 429 | 544  | -1.241757712 |                                             |
| 2 | 32,175,000 | 32,325,000 | 430 | 743  | -0.199822034 |                                             |
| 2 | 32,250,000 | 32,400,000 | 431 | 1025 | -0.156269162 |                                             |
| 2 | 32,325,000 | 32,475,000 | 432 | 675  | 0.00128732   |                                             |
| 2 | 32,400,000 | 32,550,000 | 433 | 595  | 0.681003713  |                                             |
| 2 | 32,475,000 | 32,625,000 | 434 | 598  | 0.697626281  |                                             |
| 2 | 32,550,000 | 32,700,000 | 435 | 420  | 0.294023377  |                                             |
| 2 | 32,625,000 | 32,775,000 | 436 | 319  | 0.082435653  |                                             |
| 2 | 32,700,000 | 32,850,000 | 437 | 311  | 0.132568723  |                                             |
| 2 | 32,775,000 | 32,925,000 | 438 | 305  | -0.029547172 | FIGN                                        |
| 2 | 32,850,000 | 33,000,000 | 439 | 273  | -1.321600974 | FIGN                                        |
| 2 | 32,925,000 | 33,075,000 | 440 | 344  | -0.671056655 |                                             |
| 2 | 33,000,000 | 33,150,000 | 441 | 628  | 0.086172285  |                                             |
| 2 | 33,075,000 | 33,225,000 | 442 | 620  | 0.02450481   |                                             |
| 2 | 33,150,000 | 33,300,000 | 443 | 336  | -0.116393646 |                                             |
| 2 | 33,225,000 | 33,375,000 | 444 | 722  | -0.231268971 |                                             |
| 2 | 33,300,000 | 33,450,000 | 445 | 1401 | -0.05786206  |                                             |
| 2 | 33,375,000 | 33,525,000 | 446 | 1582 | 0.399326294  |                                             |
| 2 | 33,450,000 | 33,600,000 | 447 | 1569 | 0.702852624  |                                             |
| 2 | 33,525,000 | 33,675,000 | 448 | 1602 | 0.775561535  |                                             |
| 2 | 33,600,000 | 33,750,000 | 449 | 1656 | 0.629515318  |                                             |
| 2 | 33,675,000 | 33,825,000 | 450 | 1606 | -0.01695602  |                                             |
| 2 | 33,750,000 | 33,900,000 | 451 | 1380 | -0.068155859 |                                             |
| 2 | 33,825,000 | 33,975,000 | 452 | 1508 | 0.446240583  |                                             |
| 2 | 33,900,000 | 34,050,000 | 453 | 1602 | 0.583488524  | KCNH7                                       |
| 2 | 33,975,000 | 34,125,000 | 454 | 998  | 0.787095557  | KCNH7                                       |
| 2 | 34,050,000 | 34,200,000 | 455 | 418  | 0.420487709  | GCA,KCNH7                                   |
| 2 | 34,125,000 | 34,275,000 | 456 | 318  | -0.376067458 | GCA,IFIH1,KCNH7                             |
| 2 | 34,200,000 | 34,350,000 | 457 | 367  | -1.59955962  | FAP,IFIH1                                   |
| 2 | 34,275,000 | 34,425,000 | 458 | 466  | -0.809526412 | FAP,GCG                                     |
| 2 | 34,350,000 | 34,500,000 | 459 | 759  | -1.470757857 | DPP4,FAP,GCG                                |
| 2 | 34,425,000 | 34,575,000 | 460 | 671  | -1.279550976 | DPP4,SLC4A10,ENSBTAG00000048246             |
| 2 | 34,500,000 | 34,650,000 | 461 | 630  | -0.382408076 | DPP4,SLC4A10,ENSBTAG00000048246             |
| 2 | 34,575,000 | 34,725,000 | 462 | 656  | -0.656999049 | SLC4A10                                     |
| 2 | 34,650,000 | 34,800,000 | 463 | 482  | -1.598157299 | SLC4A10                                     |
| 2 | 34,725,000 | 34,875,000 | 464 | 520  | -1.73807397  | SLC4A10                                     |

|   |            |            |     |     |              |                    |
|---|------------|------------|-----|-----|--------------|--------------------|
| 2 | 34,800,000 | 34,950,000 | 465 | 535 | -0.556570166 | SLC4A10            |
| 2 | 34,875,000 | 35,025,000 | 466 | 666 | -1.508050343 |                    |
| 2 | 34,950,000 | 35,100,000 | 467 | 495 | -1.720953238 | PSMD14,TBR1        |
| 2 | 35,025,000 | 35,175,000 | 468 | 299 | 0.814375249  | PSMD14,TBR1        |
| 2 | 35,100,000 | 35,250,000 | 469 | 410 | 1.132463798  | PSMD14,TANK        |
| 2 | 35,175,000 | 35,325,000 | 470 | 362 | 1.237601777  | PSMD14,TANK        |
| 2 | 35,250,000 | 35,400,000 | 471 | 286 | 1.20288604   | TANK               |
| 2 | 35,325,000 | 35,475,000 | 472 | 388 | 1.21417641   | TANK               |
| 2 | 35,400,000 | 35,550,000 | 473 | 355 | 0.693149384  |                    |
| 2 | 35,475,000 | 35,625,000 | 474 | 317 | -1.206135837 |                    |
| 2 | 35,550,000 | 35,700,000 | 475 | 498 | -0.962790032 |                    |
| 2 | 35,625,000 | 35,775,000 | 476 | 470 | -0.619748903 |                    |
| 2 | 35,700,000 | 35,850,000 | 477 | 274 | -0.43899963  |                    |
| 2 | 35,775,000 | 35,925,000 | 478 | 309 | -3.235241923 |                    |
| 2 | 35,850,000 | 36,000,000 | 479 | 445 | -5.307561219 | RBMS1              |
| 2 | 35,925,000 | 36,075,000 | 480 | 397 | -5.107739123 | RBMS1              |
| 2 | 36,000,000 | 36,150,000 | 481 | 272 | -4.585565026 | RBMS1              |
| 2 | 36,075,000 | 36,225,000 | 482 | 308 | -3.655086825 | RBMS1              |
| 2 | 36,150,000 | 36,300,000 | 483 | 673 | -1.045695434 | ITGB6,RBMS1        |
| 2 | 36,225,000 | 36,375,000 | 484 | 718 | -0.168634521 | ITGB6,PLA2R1       |
| 2 | 36,300,000 | 36,450,000 | 485 | 701 | 1.064353296  | ITGB6,PLA2R1       |
| 2 | 36,375,000 | 36,525,000 | 486 | 963 | 1.232237129  | PLA2R1             |
| 2 | 36,450,000 | 36,600,000 | 487 | 656 | 1.078481831  | LY75,PLA2R1        |
| 2 | 36,525,000 | 36,675,000 | 488 | 297 | 1.083408033  | CD302,LY75         |
| 2 | 36,600,000 | 36,750,000 | 489 | 290 | 0.729376494  | CD302,LY75,MARCH7  |
| 2 | 36,675,000 | 36,825,000 | 490 | 309 | 0.35940001   | BAZ2B,CD302,MARCH7 |
| 2 | 36,750,000 | 36,900,000 | 491 | 354 | 0.058201428  | BAZ2B              |
| 2 | 36,825,000 | 36,975,000 | 492 | 375 | 0.075252659  | BAZ2B              |
| 2 | 36,900,000 | 37,050,000 | 493 | 337 | 0.109850595  | BAZ2B              |
| 2 | 36,975,000 | 37,125,000 | 494 | 325 | -0.135229196 | BAZ2B              |
| 2 | 37,050,000 | 37,200,000 | 495 | 306 | 0.447855685  | BAZ2B,WDSUB1       |
| 2 | 37,125,000 | 37,275,000 | 496 | 348 | 0.812415169  | BAZ2B,TANC1,WDSUB1 |
| 2 | 37,200,000 | 37,350,000 | 497 | 464 | 0.791847863  | TANC1,WDSUB1       |
| 2 | 37,275,000 | 37,425,000 | 498 | 571 | 0.470704931  | TANC1              |
| 2 | 37,350,000 | 37,500,000 | 499 | 654 | 0.404156883  | TANC1              |
| 2 | 37,425,000 | 37,575,000 | 500 | 561 | 0.445065696  | TANC1              |
| 2 | 37,500,000 | 37,650,000 | 501 | 537 | -0.092079026 | DAPL1              |
| 2 | 37,575,000 | 37,725,000 | 502 | 603 | -2.793124369 | DAPL1              |
| 2 | 37,650,000 | 37,800,000 | 503 | 588 | -1.997436643 |                    |
| 2 | 37,725,000 | 37,875,000 | 504 | 400 | -0.645074274 | PKP4               |
| 2 | 37,800,000 | 37,950,000 | 505 | 328 | 0.1588296    | PKP4               |
| 2 | 37,875,000 | 38,025,000 | 506 | 439 | 0.397371168  | CCDC148,PKP4       |
| 2 | 37,950,000 | 38,100,000 | 507 | 317 | -0.10446417  | CCDC148            |
| 2 | 38,025,000 | 38,175,000 | 508 | 672 | -1.70113348  | CCDC148            |
| 2 | 38,100,000 | 38,250,000 | 509 | 778 | -0.62456979  | CCDC148            |
| 2 | 38,175,000 | 38,325,000 | 510 | 425 | 1.214404441  |                    |
| 2 | 38,250,000 | 38,400,000 | 511 | 709 | 0.780135562  | UPP2               |
| 2 | 38,325,000 | 38,475,000 | 512 | 909 | 0.497474182  | UPP2               |
| 2 | 38,400,000 | 38,550,000 | 513 | 847 | 0.510584476  | ACVR1C             |
| 2 | 38,475,000 | 38,625,000 | 514 | 664 | 0.030894087  | ACVR1C             |
| 2 | 38,550,000 | 38,700,000 | 515 | 584 | -0.823286144 | ACVR1C,CYTIP       |
| 2 | 38,625,000 | 38,775,000 | 516 | 599 | -0.639601871 | CYTIP              |
| 2 | 38,700,000 | 38,850,000 | 517 | 676 | 0.244551897  | CYTIP,ERMN,GALNT5  |



|   |            |            |     |     |              |                    |
|---|------------|------------|-----|-----|--------------|--------------------|
| 2 | 38,775,000 | 38,925,000 | 518 | 627 | 0.665979376  | ERMN,GALNT5        |
| 2 | 38,850,000 | 39,000,000 | 519 | 604 | 0.271470889  |                    |
| 2 | 38,925,000 | 39,075,000 | 520 | 780 | -0.00445467  |                    |
| 2 | 39,000,000 | 39,150,000 | 521 | 728 | -1.140432373 |                    |
| 2 | 39,075,000 | 39,225,000 | 522 | 686 | -1.130965355 |                    |
| 2 | 39,150,000 | 39,300,000 | 523 | 582 | 0.801511253  | ACVR1              |
| 2 | 39,225,000 | 39,375,000 | 524 | 455 | 1.037348943  | ACVR1              |
| 2 | 39,300,000 | 39,450,000 | 525 | 684 | 0.703775686  | ACVR1              |
| 2 | 39,375,000 | 39,525,000 | 526 | 772 | -0.069848214 |                    |
| 2 | 39,450,000 | 39,600,000 | 527 | 531 | -0.040838145 | ENSBTAG00000032405 |
| 2 | 39,525,000 | 39,675,000 | 528 | 477 | 0.350680659  | ENSBTAG00000032405 |
| 2 | 39,600,000 | 39,750,000 | 529 | 678 | 0.318590842  |                    |
| 2 | 39,675,000 | 39,825,000 | 530 | 737 | -0.174942313 | GPD2               |
| 2 | 39,750,000 | 39,900,000 | 531 | 413 | -1.183256962 | GPD2               |
| 2 | 39,825,000 | 39,975,000 | 532 | 262 | 0.235637514  | GPD2               |
| 2 | 39,900,000 | 40,050,000 | 533 | 233 | 0.27885216   | GPD2,NR4A2         |
| 2 | 39,975,000 | 40,125,000 | 534 | 567 | 0.164602907  | NR4A2              |
| 2 | 40,050,000 | 40,200,000 | 535 | 645 | -0.374061    |                    |
| 2 | 40,125,000 | 40,275,000 | 536 | 365 | -0.797716891 |                    |
| 2 | 40,200,000 | 40,350,000 | 537 | 434 | -0.174633994 |                    |
| 2 | 40,275,000 | 40,425,000 | 538 | 451 | 0.35919206   |                    |
| 2 | 40,350,000 | 40,500,000 | 539 | 454 | 0.605492626  |                    |
| 2 | 40,425,000 | 40,575,000 | 540 | 670 | 0.261619992  |                    |
| 2 | 40,500,000 | 40,650,000 | 541 | 599 | 0.32363746   |                    |
| 2 | 40,575,000 | 40,725,000 | 542 | 385 | 0.679950927  |                    |
| 2 | 40,650,000 | 40,800,000 | 543 | 518 | 0.627505714  |                    |
| 2 | 40,725,000 | 40,875,000 | 544 | 639 | 0.531935242  |                    |
| 2 | 40,800,000 | 40,950,000 | 545 | 491 | 0.165760609  |                    |
| 2 | 40,875,000 | 41,025,000 | 546 | 400 | -0.818777118 |                    |
| 2 | 40,950,000 | 41,100,000 | 547 | 688 | -0.662580689 |                    |
| 2 | 41,025,000 | 41,175,000 | 548 | 903 | 0.044303005  |                    |
| 2 | 41,100,000 | 41,250,000 | 549 | 693 | 0.303286655  |                    |
| 2 | 41,175,000 | 41,325,000 | 550 | 527 | 0.506497921  |                    |
| 2 | 41,250,000 | 41,400,000 | 551 | 744 | 0.282449198  | KCNJ3              |
| 2 | 41,325,000 | 41,475,000 | 552 | 875 | 0.498545119  | KCNJ3              |
| 2 | 41,400,000 | 41,550,000 | 553 | 634 | 0.773819028  | KCNJ3              |
| 2 | 41,475,000 | 41,625,000 | 554 | 774 | 0.013249201  | KCNJ3              |
| 2 | 41,550,000 | 41,700,000 | 555 | 858 | 0.190753509  |                    |
| 2 | 41,625,000 | 41,775,000 | 556 | 439 | 0.864669261  |                    |
| 2 | 41,700,000 | 41,850,000 | 557 | 335 | 0.583451053  | GALNT13            |
| 2 | 41,775,000 | 41,925,000 | 558 | 535 | 0.424102954  | GALNT13            |
| 2 | 41,850,000 | 42,000,000 | 559 | 527 | 0.426482473  | GALNT13            |
| 2 | 41,925,000 | 42,075,000 | 560 | 634 | 0.256117282  | GALNT13            |
| 2 | 42,000,000 | 42,150,000 | 561 | 791 | -0.363050969 | GALNT13            |
| 2 | 42,075,000 | 42,225,000 | 562 | 713 | -0.929674713 | GALNT13            |
| 2 | 42,150,000 | 42,300,000 | 563 | 621 | -0.289771045 | GALNT13            |
| 2 | 42,225,000 | 42,375,000 | 564 | 693 | 0.30160383   | GALNT13            |
| 2 | 42,300,000 | 42,450,000 | 565 | 697 | -0.105488112 | GALNT13            |
| 2 | 42,375,000 | 42,525,000 | 566 | 458 | -0.494596974 |                    |
| 2 | 42,450,000 | 42,600,000 | 567 | 581 | -0.246123444 |                    |
| 2 | 42,525,000 | 42,675,000 | 568 | 713 | 0.137415007  |                    |
| 2 | 42,600,000 | 42,750,000 | 569 | 812 | 0.857498069  |                    |
| 2 | 42,675,000 | 42,825,000 | 570 | 851 | 0.394816402  | RPRM               |

|   |            |            |     |      |              |                                 |
|---|------------|------------|-----|------|--------------|---------------------------------|
| 2 | 42,750,000 | 42,900,000 | 571 | 944  | -0.367962648 | RPRM                            |
| 2 | 42,825,000 | 42,975,000 | 572 | 760  | -0.369202493 |                                 |
| 2 | 42,900,000 | 43,050,000 | 573 | 480  | -1.122134323 |                                 |
| 2 | 42,975,000 | 43,125,000 | 574 | 797  | -1.063050991 |                                 |
| 2 | 43,050,000 | 43,200,000 | 575 | 771  | -0.812035556 |                                 |
| 2 | 43,125,000 | 43,275,000 | 576 | 539  | -0.101462203 |                                 |
| 2 | 43,200,000 | 43,350,000 | 577 | 466  | 0.174835972  |                                 |
| 2 | 43,275,000 | 43,425,000 | 578 | 843  | 0.881573621  | ENSBTAG00000012816              |
| 2 | 43,350,000 | 43,500,000 | 579 | 969  | 0.277964811  | ENSBTAG00000012816              |
| 2 | 43,425,000 | 43,575,000 | 580 | 607  | -1.068008372 | ARL6IP6                         |
| 2 | 43,500,000 | 43,650,000 | 581 | 373  | 0.240983478  | ARL6IP6,PRPF40A                 |
| 2 | 43,575,000 | 43,725,000 | 582 | 217  | 0.233684774  | ARL6IP6,FMNL2,PRPF40A           |
| 2 | 43,650,000 | 43,800,000 | 583 | 310  | 0.086459913  | FMNL2,ENSBTAG00000034503        |
| 2 | 43,725,000 | 43,875,000 | 584 | 480  | -0.079738878 | FMNL2,ENSBTAG00000034503        |
| 2 | 43,800,000 | 43,950,000 | 585 | 604  | -0.164279112 | FMNL2                           |
| 2 | 43,875,000 | 44,025,000 | 586 | 691  | -0.334870933 | FMNL2                           |
| 2 | 43,950,000 | 44,100,000 | 587 | 795  | 0.02983973   | FMNL2                           |
| 2 | 44,025,000 | 44,175,000 | 588 | 909  | 0.642617822  | STAM2,ENSBTAG00000048306        |
| 2 | 44,100,000 | 44,250,000 | 589 | 1154 | 0.217615749  | CACNB4,STAM2,ENSBTAG00000048306 |
| 2 | 44,175,000 | 44,325,000 | 590 | 1176 | 0.161442406  | CACNB4                          |
| 2 | 44,250,000 | 44,400,000 | 591 | 960  | 0.403469345  | CACNB4                          |
| 2 | 44,325,000 | 44,475,000 | 592 | 681  | -0.729346868 | ARL5A,CACNB4                    |
| 2 | 44,400,000 | 44,550,000 | 593 | 521  | -1.355839831 | ARL5A,CACNB4,NEB                |
| 2 | 44,475,000 | 44,625,000 | 594 | 387  | -1.327167515 | ARL5A,NEB                       |
| 2 | 44,550,000 | 44,700,000 | 595 | 241  | 0.292006695  | NEB                             |
| 2 | 44,625,000 | 44,775,000 | 596 | 244  | 0.255323024  | NEB,RIF1                        |
| 2 | 44,700,000 | 44,850,000 | 597 | 260  | -0.402626289 | NEB,RIF1                        |
| 2 | 44,775,000 | 44,925,000 | 598 | 360  | 0.635162641  | RIF1,TSG-6                      |
| 2 | 44,850,000 | 45,000,000 | 599 | 472  | 0.434511186  | NMI,RBM43,TSG-6                 |
| 2 | 44,925,000 | 45,075,000 | 600 | 677  | -0.094133907 | NMI,RBM43                       |
| 2 | 45,000,000 | 45,150,000 | 601 | 809  | 0.165508807  |                                 |
| 2 | 45,075,000 | 45,225,000 | 602 | 1056 | 0.264332133  |                                 |
| 2 | 45,150,000 | 45,300,000 | 603 | 978  | -0.074171981 |                                 |
| 2 | 45,225,000 | 45,375,000 | 604 | 507  | -0.183014307 |                                 |
| 2 | 45,300,000 | 45,450,000 | 605 | 398  | 0.480653936  |                                 |
| 2 | 45,375,000 | 45,525,000 | 606 | 378  | 0.750400303  |                                 |
| 2 | 45,450,000 | 45,600,000 | 607 | 478  | 0.810708178  |                                 |
| 2 | 45,525,000 | 45,675,000 | 608 | 542  | 0.588809101  |                                 |
| 2 | 45,600,000 | 45,750,000 | 609 | 564  | 0.122399422  |                                 |
| 2 | 45,675,000 | 45,825,000 | 610 | 558  | -1.111075576 | RND3                            |
| 2 | 45,750,000 | 45,900,000 | 611 | 406  | -1.045930858 | RND3                            |
| 2 | 45,825,000 | 45,975,000 | 612 | 438  | 0.767921068  |                                 |
| 2 | 45,900,000 | 46,050,000 | 613 | 616  | 0.471645496  |                                 |
| 2 | 45,975,000 | 46,125,000 | 614 | 532  | -0.186173807 |                                 |
| 2 | 46,050,000 | 46,200,000 | 615 | 403  | -1.360566462 |                                 |
| 2 | 46,125,000 | 46,275,000 | 616 | 525  | -0.927486551 |                                 |
| 2 | 46,200,000 | 46,350,000 | 617 | 516  | -0.529745635 |                                 |
| 2 | 46,275,000 | 46,425,000 | 618 | 373  | -0.142975606 |                                 |
| 2 | 46,350,000 | 46,500,000 | 619 | 518  | -3.520443175 |                                 |
| 2 | 46,425,000 | 46,575,000 | 620 | 796  | -2.582901569 |                                 |
| 2 | 46,500,000 | 46,650,000 | 621 | 614  | -0.06711369  | MMADHC                          |
| 2 | 46,575,000 | 46,725,000 | 622 | 781  | -0.738426087 | LYPD6,MMADHC                    |
| 2 | 46,650,000 | 46,800,000 | 623 | 878  | -0.532154646 | LYPD6,MMADHC                    |

|   |            |            |     |      |              |                    |
|---|------------|------------|-----|------|--------------|--------------------|
| 2 | 46,725,000 | 46,875,000 | 624 | 519  | 0.66135069   | LYPD6              |
| 2 | 46,800,000 | 46,950,000 | 625 | 431  | 0.187026654  |                    |
| 2 | 46,875,000 | 47,025,000 | 626 | 608  | -1.09497681  |                    |
| 2 | 46,950,000 | 47,100,000 | 627 | 959  | -0.131797858 | LYPD6B             |
| 2 | 47,025,000 | 47,175,000 | 628 | 856  | 0.14536469   | LYPD6B             |
| 2 | 47,100,000 | 47,250,000 | 629 | 966  | -0.15476754  |                    |
| 2 | 47,175,000 | 47,325,000 | 630 | 1188 | 0.434081964  | KIF5C              |
| 2 | 47,250,000 | 47,400,000 | 631 | 1052 | 0.791779779  | KIF5C              |
| 2 | 47,325,000 | 47,475,000 | 632 | 777  | 0.715969399  | KIF5C              |
| 2 | 47,400,000 | 47,550,000 | 633 | 482  | 0.475270058  | EPC2,KIF5C         |
| 2 | 47,475,000 | 47,625,000 | 634 | 385  | 0.853539827  | EPC2               |
| 2 | 47,550,000 | 47,700,000 | 635 | 378  | 0.869863741  | EPC2               |
| 2 | 47,625,000 | 47,775,000 | 636 | 433  | 0.176769651  | EPC2               |
| 2 | 47,700,000 | 47,850,000 | 637 | 349  | -0.939959782 | MBD5               |
| 2 | 47,775,000 | 47,925,000 | 638 | 234  | -1.181954463 | MBD5               |
| 2 | 47,850,000 | 48,000,000 | 639 | 300  | -0.936001379 | MBD5,PTMA          |
| 2 | 47,925,000 | 48,075,000 | 640 | 364  | -1.088861898 | PTMA               |
| 2 | 48,000,000 | 48,150,000 | 641 | 350  | -1.158275759 |                    |
| 2 | 48,075,000 | 48,225,000 | 642 | 472  | -1.303939686 |                    |
| 2 | 48,150,000 | 48,300,000 | 643 | 781  | -0.194349355 | ORC4               |
| 2 | 48,225,000 | 48,375,000 | 644 | 705  | 0.506784751  | ORC4               |
| 2 | 48,300,000 | 48,450,000 | 645 | 400  | 0.230934336  | ACVR2A,ORC4        |
| 2 | 48,375,000 | 48,525,000 | 646 | 372  | 0.239684175  | ACVR2A,ORC4        |
| 2 | 48,450,000 | 48,600,000 | 647 | 509  | -0.592590565 | ACVR2A             |
| 2 | 48,525,000 | 48,675,000 | 648 | 442  | -1.251245436 |                    |
| 2 | 48,600,000 | 48,750,000 | 649 | 218  | -1.565261711 |                    |
| 2 | 48,675,000 | 48,825,000 | 650 | 387  | -0.463559398 |                    |
| 2 | 48,750,000 | 48,900,000 | 651 | 510  | -0.035484021 |                    |
| 2 | 48,825,000 | 48,975,000 | 652 | 477  | -0.904274832 |                    |
| 2 | 48,900,000 | 49,050,000 | 653 | 586  | -0.968496565 |                    |
| 2 | 48,975,000 | 49,125,000 | 654 | 832  | -2.66803885  |                    |
| 2 | 49,050,000 | 49,200,000 | 655 | 968  | -3.244179478 |                    |
| 2 | 49,125,000 | 49,275,000 | 656 | 657  | -2.487474248 |                    |
| 2 | 49,200,000 | 49,350,000 | 657 | 384  | -0.224040579 |                    |
| 2 | 49,275,000 | 49,425,000 | 658 | 455  | -0.964038318 | ENSBTAG00000046032 |
| 2 | 49,350,000 | 49,500,000 | 659 | 395  | -1.834258991 | ENSBTAG00000046032 |
| 2 | 49,425,000 | 49,575,000 | 660 | 536  | -1.202950133 |                    |
| 2 | 49,500,000 | 49,650,000 | 661 | 563  | -1.336559585 |                    |
| 2 | 49,575,000 | 49,725,000 | 662 | 356  | -0.701827486 |                    |
| 2 | 49,650,000 | 49,800,000 | 663 | 544  | -0.054261551 | SNRPD1             |
| 2 | 49,725,000 | 49,875,000 | 664 | 722  | 0.216556564  | SNRPD1             |
| 2 | 49,800,000 | 49,950,000 | 665 | 737  | 0.164639908  |                    |
| 2 | 49,875,000 | 50,025,000 | 666 | 887  | -1.357580436 |                    |
| 2 | 49,950,000 | 50,100,000 | 667 | 844  | -1.671611122 |                    |
| 2 | 50,025,000 | 50,175,000 | 668 | 588  | -0.379700946 |                    |
| 2 | 50,100,000 | 50,250,000 | 669 | 554  | 0.112982208  |                    |
| 2 | 50,175,000 | 50,325,000 | 670 | 484  | -0.167498709 |                    |
| 2 | 50,250,000 | 50,400,000 | 671 | 379  | -0.259363837 |                    |
| 2 | 50,325,000 | 50,475,000 | 672 | 355  | 0.062626366  |                    |
| 2 | 50,400,000 | 50,550,000 | 673 | 464  | 0.017725993  |                    |
| 2 | 50,475,000 | 50,625,000 | 674 | 577  | 0.125073716  |                    |
| 2 | 50,550,000 | 50,700,000 | 675 | 507  | 0.248971925  |                    |
| 2 | 50,625,000 | 50,775,000 | 676 | 634  | 0.659733601  |                    |

|   |            |            |     |      |              |               |
|---|------------|------------|-----|------|--------------|---------------|
| 2 | 50,700,000 | 50,850,000 | 677 | 745  | 0.458003375  |               |
| 2 | 50,775,000 | 50,925,000 | 678 | 585  | -1.030671557 |               |
| 2 | 50,850,000 | 51,000,000 | 679 | 763  | -0.3507397   |               |
| 2 | 50,925,000 | 51,075,000 | 680 | 1101 | 0.581547103  |               |
| 2 | 51,000,000 | 51,150,000 | 681 | 858  | 0.673757217  |               |
| 2 | 51,075,000 | 51,225,000 | 682 | 629  | 0.15138342   |               |
| 2 | 51,150,000 | 51,300,000 | 683 | 830  | 0.025010399  |               |
| 2 | 51,225,000 | 51,375,000 | 684 | 703  | -0.598575813 |               |
| 2 | 51,300,000 | 51,450,000 | 685 | 1150 | -0.621193615 |               |
| 2 | 51,375,000 | 51,525,000 | 686 | 1258 | -0.308303974 |               |
| 2 | 51,450,000 | 51,600,000 | 687 | 490  | -0.069183349 |               |
| 2 | 51,525,000 | 51,675,000 | 688 | 313  | -0.057288377 |               |
| 2 | 51,600,000 | 51,750,000 | 689 | 463  | -0.493976349 |               |
| 2 | 51,675,000 | 51,825,000 | 690 | 499  | -0.19695195  |               |
| 2 | 51,750,000 | 51,900,000 | 691 | 405  | -0.848543483 |               |
| 2 | 51,825,000 | 51,975,000 | 692 | 686  | -1.973725042 |               |
| 2 | 51,900,000 | 52,050,000 | 693 | 742  | -2.178168285 |               |
| 2 | 51,975,000 | 52,125,000 | 694 | 701  | -1.712744307 |               |
| 2 | 52,050,000 | 52,200,000 | 695 | 685  | -0.442200658 |               |
| 2 | 52,125,000 | 52,275,000 | 696 | 490  | 0.252646591  |               |
| 2 | 52,200,000 | 52,350,000 | 697 | 381  | -0.400692731 | ZEB2          |
| 2 | 52,275,000 | 52,425,000 | 698 | 285  | -0.800554898 | ZEB2          |
| 2 | 52,350,000 | 52,500,000 | 699 | 281  | -1.049082518 | ZEB2          |
| 2 | 52,425,000 | 52,575,000 | 700 | 256  | -1.279721292 |               |
| 2 | 52,500,000 | 52,650,000 | 701 | 342  | -0.587744316 | GTDC1         |
| 2 | 52,575,000 | 52,725,000 | 702 | 380  | -0.036733216 | GTDC1         |
| 2 | 52,650,000 | 52,800,000 | 703 | 327  | -0.14006263  | GTDC1         |
| 2 | 52,725,000 | 52,875,000 | 704 | 371  | -0.141702729 | GTDC1         |
| 2 | 52,800,000 | 52,950,000 | 705 | 455  | -0.541893284 | GTDC1         |
| 2 | 52,875,000 | 53,025,000 | 706 | 589  | -0.249408273 | GTDC1         |
| 2 | 52,950,000 | 53,100,000 | 707 | 600  | -0.325839534 | ARHGAP15      |
| 2 | 53,025,000 | 53,175,000 | 708 | 477  | -0.373720402 | ARHGAP15      |
| 2 | 53,100,000 | 53,250,000 | 709 | 580  | 0.553331328  | ARHGAP15      |
| 2 | 53,175,000 | 53,325,000 | 710 | 612  | 0.525170568  | ARHGAP15      |
| 2 | 53,250,000 | 53,400,000 | 711 | 457  | 0.31576457   | ARHGAP15      |
| 2 | 53,325,000 | 53,475,000 | 712 | 447  | 0.057405368  | ARHGAP15      |
| 2 | 53,400,000 | 53,550,000 | 713 | 614  | 0.222953815  | ARHGAP15      |
| 2 | 53,475,000 | 53,625,000 | 714 | 781  | -0.046485223 | ARHGAP15      |
| 2 | 53,550,000 | 53,700,000 | 715 | 880  | -0.549580313 | ARHGAP15      |
| 2 | 53,625,000 | 53,775,000 | 716 | 800  | -0.092256282 | ARHGAP15      |
| 2 | 53,700,000 | 53,850,000 | 717 | 1159 | -0.256195552 | ARHGAP15,KYNU |
| 2 | 53,775,000 | 53,925,000 | 718 | 1290 | -0.600723154 | KYNU          |
| 2 | 53,850,000 | 54,000,000 | 719 | 753  | -1.712219534 | KYNU          |
| 2 | 53,925,000 | 54,075,000 | 720 | 585  | -1.464028937 | KYNU          |
| 2 | 54,000,000 | 54,150,000 | 721 | 604  | -0.147575276 |               |
| 2 | 54,075,000 | 54,225,000 | 722 | 706  | 0.169673271  |               |
| 2 | 54,150,000 | 54,300,000 | 723 | 905  | 0.940321565  |               |
| 2 | 54,225,000 | 54,375,000 | 724 | 788  | 0.864205289  |               |
| 2 | 54,300,000 | 54,450,000 | 725 | 797  | -0.735103844 |               |
| 2 | 54,375,000 | 54,525,000 | 726 | 865  | -1.139696348 |               |
| 2 | 54,450,000 | 54,600,000 | 727 | 747  | -0.003718177 |               |
| 2 | 54,525,000 | 54,675,000 | 728 | 514  | 0.795817108  |               |
| 2 | 54,600,000 | 54,750,000 | 729 | 500  | 0.400509899  |               |

|   |            |            |     |      |              |                         |
|---|------------|------------|-----|------|--------------|-------------------------|
| 2 | 54,675,000 | 54,825,000 | 730 | 810  | 0.223653169  |                         |
| 2 | 54,750,000 | 54,900,000 | 731 | 854  | 0.403961436  |                         |
| 2 | 54,825,000 | 54,975,000 | 732 | 921  | 0.395370255  |                         |
| 2 | 54,900,000 | 55,050,000 | 733 | 1221 | -0.980019853 |                         |
| 2 | 54,975,000 | 55,125,000 | 734 | 1411 | -1.658447042 |                         |
| 2 | 55,050,000 | 55,200,000 | 735 | 1064 | -0.963993671 |                         |
| 2 | 55,125,000 | 55,275,000 | 736 | 914  | 0.075802658  |                         |
| 2 | 55,200,000 | 55,350,000 | 737 | 1072 | -0.307904935 |                         |
| 2 | 55,275,000 | 55,425,000 | 738 | 931  | -0.272020824 |                         |
| 2 | 55,350,000 | 55,500,000 | 739 | 789  | 0.647563892  |                         |
| 2 | 55,425,000 | 55,575,000 | 740 | 920  | 0.592785261  | ENSBTAG00000032264      |
| 2 | 55,500,000 | 55,650,000 | 741 | 1040 | -0.299460261 | ENSBTAG00000032264      |
| 2 | 55,575,000 | 55,725,000 | 742 | 1050 | -0.651754069 |                         |
| 2 | 55,650,000 | 55,800,000 | 743 | 738  | -0.966316141 |                         |
| 2 | 55,725,000 | 55,875,000 | 744 | 895  | -1.808228352 |                         |
| 2 | 55,800,000 | 55,950,000 | 745 | 1067 | -1.756364118 |                         |
| 2 | 55,875,000 | 56,025,000 | 746 | 641  | -1.242121413 |                         |
| 2 | 55,950,000 | 56,100,000 | 747 | 736  | 0.284693854  |                         |
| 2 | 56,025,000 | 56,175,000 | 748 | 998  | 0.998883323  |                         |
| 2 | 56,100,000 | 56,250,000 | 749 | 715  | 0.639874058  |                         |
| 2 | 56,175,000 | 56,325,000 | 750 | 650  | 0.175289842  |                         |
| 2 | 56,250,000 | 56,400,000 | 751 | 1229 | 0.666657563  |                         |
| 2 | 56,325,000 | 56,475,000 | 752 | 1434 | 0.449598846  |                         |
| 2 | 56,400,000 | 56,550,000 | 753 | 1012 | 0.09813991   |                         |
| 2 | 56,475,000 | 56,625,000 | 754 | 646  | -0.114192745 |                         |
| 2 | 56,550,000 | 56,700,000 | 755 | 814  | -0.711992067 |                         |
| 2 | 56,625,000 | 56,775,000 | 756 | 1016 | -0.585991112 | LRP1B                   |
| 2 | 56,700,000 | 56,850,000 | 757 | 963  | -0.061421332 | LRP1B                   |
| 2 | 56,775,000 | 56,925,000 | 758 | 1110 | -0.038840493 | LRP1B                   |
| 2 | 56,850,000 | 57,000,000 | 759 | 842  | -0.121393421 | LRP1B                   |
| 2 | 56,925,000 | 57,075,000 | 760 | 364  | -0.026621216 | LRP1B                   |
| 2 | 57,000,000 | 57,150,000 | 761 | 461  | 0.333299405  | LRP1B                   |
| 2 | 57,075,000 | 57,225,000 | 762 | 480  | -0.109716477 |                         |
| 2 | 57,150,000 | 57,300,000 | 763 | 464  | -1.065928378 |                         |
| 2 | 57,225,000 | 57,375,000 | 764 | 504  | -0.97848419  |                         |
| 2 | 57,300,000 | 57,450,000 | 765 | 415  | -1.370535177 |                         |
| 2 | 57,375,000 | 57,525,000 | 766 | 446  | -2.850833316 |                         |
| 2 | 57,450,000 | 57,600,000 | 767 | 647  | -2.114197073 |                         |
| 2 | 57,525,000 | 57,675,000 | 768 | 925  | 0.02998373   |                         |
| 2 | 57,600,000 | 57,750,000 | 769 | 1137 | 0.873060188  |                         |
| 2 | 57,675,000 | 57,825,000 | 770 | 779  | 0.974048212  |                         |
| 2 | 57,750,000 | 57,900,000 | 771 | 748  | 0.276782968  |                         |
| 2 | 57,825,000 | 57,975,000 | 772 | 1168 | -0.340390759 |                         |
| 2 | 57,900,000 | 58,050,000 | 773 | 797  | -0.599450669 |                         |
| 2 | 57,975,000 | 58,125,000 | 774 | 421  | -0.306512444 |                         |
| 2 | 58,050,000 | 58,200,000 | 775 | 441  | -0.287546908 |                         |
| 2 | 58,125,000 | 58,275,000 | 776 | 502  | 0.283393002  |                         |
| 2 | 58,200,000 | 58,350,000 | 777 | 602  | 0.661219249  |                         |
| 2 | 58,275,000 | 58,425,000 | 778 | 980  | 0.575897457  |                         |
| 2 | 58,350,000 | 58,500,000 | 779 | 1091 | 0.584400139  |                         |
| 2 | 58,425,000 | 58,575,000 | 780 | 868  | 0.685946333  | ENSBTAG00000017629      |
| 2 | 58,500,000 | 58,650,000 | 781 | 1074 | 0.080591163  | NXP2,ENSBTAG00000017629 |
| 2 | 58,575,000 | 58,725,000 | 782 | 811  | -0.485213903 | NXP2                    |

|   |            |            |     |      |              |                              |
|---|------------|------------|-----|------|--------------|------------------------------|
| 2 | 58,650,000 | 58,800,000 | 783 | 480  | -0.227680453 | NXPH2,SPOPL                  |
| 2 | 58,725,000 | 58,875,000 | 784 | 409  | 0.288470526  | SPOPL                        |
| 2 | 58,800,000 | 58,950,000 | 785 | 230  | 0.877228771  | SPOPL                        |
| 2 | 58,875,000 | 59,025,000 | 786 | 358  | -0.025559908 |                              |
| 2 | 58,950,000 | 59,100,000 | 787 | 927  | 0.463072108  |                              |
| 2 | 59,025,000 | 59,175,000 | 788 | 1335 | 0.418538428  | ENSBTAG00000001627           |
| 2 | 59,100,000 | 59,250,000 | 789 | 1120 | 0.392142064  | ENSBTAG00000001627           |
| 2 | 59,175,000 | 59,325,000 | 790 | 697  | -0.032166998 |                              |
| 2 | 59,250,000 | 59,400,000 | 791 | 362  | -1.008045474 | HNMT                         |
| 2 | 59,325,000 | 59,475,000 | 792 | 499  | 1.017810574  | HNMT                         |
| 2 | 59,400,000 | 59,550,000 | 793 | 755  | 0.947557039  | HNMT                         |
| 2 | 59,475,000 | 59,625,000 | 794 | 1187 | 0.405899596  |                              |
| 2 | 59,550,000 | 59,700,000 | 795 | 1317 | 0.417704876  | ENSBTAG00000039437           |
| 2 | 59,625,000 | 59,775,000 | 796 | 1262 | 0.505981485  | THSD7B,ENSBTAG00000039437    |
| 2 | 59,700,000 | 59,850,000 | 797 | 1902 | 0.818727735  | THSD7B                       |
| 2 | 59,775,000 | 59,925,000 | 798 | 2005 | 0.84690097   | THSD7B                       |
| 2 | 59,850,000 | 60,000,000 | 799 | 1278 | 0.802483437  | THSD7B                       |
| 2 | 59,925,000 | 60,075,000 | 800 | 854  | 0.762090455  | THSD7B                       |
| 2 | 60,000,000 | 60,150,000 | 801 | 926  | 0.628190238  | THSD7B                       |
| 2 | 60,075,000 | 60,225,000 | 802 | 1094 | 0.514388093  | THSD7B                       |
| 2 | 60,150,000 | 60,300,000 | 803 | 1152 | 0.103931948  | THSD7B                       |
| 2 | 60,225,000 | 60,375,000 | 804 | 903  | -0.178540002 | THSD7B                       |
| 2 | 60,300,000 | 60,450,000 | 805 | 1088 | -0.374076121 | THSD7B                       |
| 2 | 60,375,000 | 60,525,000 | 806 | 1442 | 0.029912545  | THSD7B                       |
| 2 | 60,450,000 | 60,600,000 | 807 | 1136 | 0.202702482  | THSD7B                       |
| 2 | 60,525,000 | 60,675,000 | 808 | 718  | -0.478487293 | THSD7B                       |
| 2 | 60,600,000 | 60,750,000 | 809 | 806  | -1.241727287 |                              |
| 2 | 60,675,000 | 60,825,000 | 810 | 948  | -2.205988549 |                              |
| 2 | 60,750,000 | 60,900,000 | 811 | 730  | -2.348647975 |                              |
| 2 | 60,825,000 | 60,975,000 | 812 | 560  | -1.033023438 |                              |
| 2 | 60,900,000 | 61,050,000 | 813 | 699  | -5.011734538 |                              |
| 2 | 60,975,000 | 61,125,000 | 814 | 963  | -4.267017798 |                              |
| 2 | 61,050,000 | 61,200,000 | 815 | 998  | -0.131430814 |                              |
| 2 | 61,125,000 | 61,275,000 | 816 | 785  | 0.737204725  |                              |
| 2 | 61,200,000 | 61,350,000 | 817 | 898  | 1.056807336  |                              |
| 2 | 61,275,000 | 61,425,000 | 818 | 1059 | 0.759132731  |                              |
| 2 | 61,350,000 | 61,500,000 | 819 | 599  | 0.047473168  |                              |
| 2 | 61,425,000 | 61,575,000 | 820 | 342  | -0.597945881 |                              |
| 2 | 61,500,000 | 61,650,000 | 821 | 578  | 0.508806417  | CXCR4                        |
| 2 | 61,575,000 | 61,725,000 | 822 | 740  | 0.783389601  | CXCR4,DARS                   |
| 2 | 61,650,000 | 61,800,000 | 823 | 880  | -1.12092333  | DARS                         |
| 2 | 61,725,000 | 61,875,000 | 824 | 1153 | -0.928931175 | DARS,LCT,MCM6                |
| 2 | 61,800,000 | 61,950,000 | 825 | 914  | -0.44120323  | LCT,MCM6,UBXN4               |
| 2 | 61,875,000 | 62,025,000 | 826 | 649  | -1.72964126  | LCT,R3HDM1,UBXN4             |
| 2 | 61,950,000 | 62,100,000 | 827 | 910  | -1.895356653 | R3HDM1                       |
| 2 | 62,025,000 | 62,175,000 | 828 | 1077 | -1.599172216 | R3HDM1                       |
| 2 | 62,100,000 | 62,250,000 | 829 | 1116 | -0.383297571 | R3HDM1                       |
| 2 | 62,175,000 | 62,325,000 | 830 | 899  | 0.567523942  | ZRANB3                       |
| 2 | 62,250,000 | 62,400,000 | 831 | 838  | 0.034114086  | ZRANB3                       |
| 2 | 62,325,000 | 62,475,000 | 832 | 952  | 0.270162325  | RAB3GAP1,ZRANB3              |
| 2 | 62,400,000 | 62,550,000 | 833 | 708  | 0.420636646  | RAB3GAP1,ZRANB3              |
| 2 | 62,475,000 | 62,625,000 | 834 | 616  | 0.334381472  | MAP3K19,RAB3GAP1             |
| 2 | 62,550,000 | 62,700,000 | 835 | 705  | 0.069325062  | ACMSD,CCNT2,MAP3K19,RAB3GAP1 |

|   |            |            |     |      |              |                          |
|---|------------|------------|-----|------|--------------|--------------------------|
| 2 | 62,625,000 | 62,775,000 | 836 | 695  | -0.045303509 | ACMSD,CCNT2,MAP3K19      |
| 2 | 62,700,000 | 62,850,000 | 837 | 790  | 0.594073079  | ACMSD,TMEM163            |
| 2 | 62,775,000 | 62,925,000 | 838 | 941  | 0.022078008  | TMEM163                  |
| 2 | 62,850,000 | 63,000,000 | 839 | 799  | -0.503819024 | TMEM163                  |
| 2 | 62,925,000 | 63,075,000 | 840 | 534  | -0.474049962 | TMEM163                  |
| 2 | 63,000,000 | 63,150,000 | 841 | 598  | 0.145106949  | MGAT5,TMEM163            |
| 2 | 63,075,000 | 63,225,000 | 842 | 631  | 0.891380334  | MGAT5,TMEM163            |
| 2 | 63,150,000 | 63,300,000 | 843 | 717  | 0.758195702  | MGAT5                    |
| 2 | 63,225,000 | 63,375,000 | 844 | 969  | 0.73481941   | MGAT5                    |
| 2 | 63,300,000 | 63,450,000 | 845 | 820  | -0.37465572  | MGAT5                    |
| 2 | 63,375,000 | 63,525,000 | 846 | 524  | -2.93031519  |                          |
| 2 | 63,450,000 | 63,600,000 | 847 | 484  | -2.294059963 |                          |
| 2 | 63,525,000 | 63,675,000 | 848 | 463  | -1.353144627 |                          |
| 2 | 63,600,000 | 63,750,000 | 849 | 442  | -0.722080504 |                          |
| 2 | 63,675,000 | 63,825,000 | 850 | 426  | -0.541984175 |                          |
| 2 | 63,750,000 | 63,900,000 | 851 | 373  | -1.02061005  |                          |
| 2 | 63,825,000 | 63,975,000 | 852 | 542  | -0.820431915 |                          |
| 2 | 63,900,000 | 64,050,000 | 853 | 615  | -1.064947364 |                          |
| 2 | 63,975,000 | 64,125,000 | 854 | 401  | -0.748208474 |                          |
| 2 | 64,050,000 | 64,200,000 | 855 | 370  | -0.432620627 |                          |
| 2 | 64,125,000 | 64,275,000 | 856 | 543  | -1.759774459 |                          |
| 2 | 64,200,000 | 64,350,000 | 857 | 455  | -1.715100881 |                          |
| 2 | 64,275,000 | 64,425,000 | 858 | 502  | 0.554575295  |                          |
| 2 | 64,350,000 | 64,500,000 | 859 | 664  | -0.053104855 |                          |
| 2 | 64,425,000 | 64,575,000 | 860 | 639  | -3.231299445 |                          |
| 2 | 64,500,000 | 64,650,000 | 861 | 593  | -3.384357482 |                          |
| 2 | 64,575,000 | 64,725,000 | 862 | 379  | -1.109927586 |                          |
| 2 | 64,650,000 | 64,800,000 | 863 | 277  | 0.836379495  |                          |
| 2 | 64,725,000 | 64,875,000 | 864 | 344  | 0.498218113  |                          |
| 2 | 64,800,000 | 64,950,000 | 865 | 255  | -0.406996281 |                          |
| 2 | 64,875,000 | 65,025,000 | 866 | 724  | 0.617263759  |                          |
| 2 | 64,950,000 | 65,100,000 | 867 | 1092 | 0.637517826  | NCKAP5                   |
| 2 | 65,025,000 | 65,175,000 | 868 | 939  | 0.745900908  | NCKAP5                   |
| 2 | 65,100,000 | 65,250,000 | 869 | 826  | 0.862977391  | LYPD1,NCKAP5             |
| 2 | 65,175,000 | 65,325,000 | 870 | 721  | 0.702121359  | LYPD1,ENSBTAG00000047466 |
| 2 | 65,250,000 | 65,400,000 | 871 | 608  | 0.913610182  | LYPD1,ENSBTAG00000047466 |
| 2 | 65,325,000 | 65,475,000 | 872 | 979  | 1.256763192  |                          |
| 2 | 65,400,000 | 65,550,000 | 873 | 1452 | 0.986995034  | GPR39                    |
| 2 | 65,475,000 | 65,625,000 | 874 | 1244 | 0.571917034  | GPR39                    |
| 2 | 65,550,000 | 65,700,000 | 875 | 834  | 0.568984114  | SLC35F5                  |
| 2 | 65,625,000 | 65,775,000 | 876 | 458  | 0.535193751  | SLC35F5                  |
| 2 | 65,700,000 | 65,850,000 | 877 | 464  | -1.073399328 | SLC35F5                  |
| 2 | 65,775,000 | 65,925,000 | 878 | 540  | -1.02431677  | ACTR3                    |
| 2 | 65,850,000 | 66,000,000 | 879 | 839  | 0.431133015  | ACTR3                    |
| 2 | 65,925,000 | 66,075,000 | 880 | 946  | 1.121169921  |                          |
| 2 | 66,000,000 | 66,150,000 | 881 | 927  | 1.09994697   |                          |
| 2 | 66,075,000 | 66,225,000 | 882 | 1016 | 0.892515704  |                          |
| 2 | 66,150,000 | 66,300,000 | 883 | 771  | 0.011585622  |                          |
| 2 | 66,225,000 | 66,375,000 | 884 | 529  | -0.486286877 |                          |
| 2 | 66,300,000 | 66,450,000 | 885 | 1008 | 0.927644915  |                          |
| 2 | 66,375,000 | 66,525,000 | 886 | 1640 | 0.992752158  |                          |
| 2 | 66,450,000 | 66,600,000 | 887 | 1613 | 0.6737094    |                          |
| 2 | 66,525,000 | 66,675,000 | 888 | 1502 | 0.633967728  |                          |

|   |            |            |     |      |              |                                              |
|---|------------|------------|-----|------|--------------|----------------------------------------------|
| 2 | 66,600,000 | 66,750,000 | 889 | 1347 | 0.754556981  |                                              |
| 2 | 66,675,000 | 66,825,000 | 890 | 1309 | 0.836344291  |                                              |
| 2 | 66,750,000 | 66,900,000 | 891 | 1378 | 1.092000315  |                                              |
| 2 | 66,825,000 | 66,975,000 | 892 | 1418 | 1.134674198  |                                              |
| 2 | 66,900,000 | 67,050,000 | 893 | 1433 | 0.772609223  |                                              |
| 2 | 66,975,000 | 67,125,000 | 894 | 1671 | 0.433166274  |                                              |
| 2 | 67,050,000 | 67,200,000 | 895 | 1638 | 0.420931253  |                                              |
| 2 | 67,125,000 | 67,275,000 | 896 | 917  | 0.348739493  |                                              |
| 2 | 67,200,000 | 67,350,000 | 897 | 775  | 1.1951338    |                                              |
| 2 | 67,275,000 | 67,425,000 | 898 | 945  | 1.212042357  |                                              |
| 2 | 67,350,000 | 67,500,000 | 899 | 839  | 1.127540413  |                                              |
| 2 | 67,425,000 | 67,575,000 | 900 | 945  | 0.752620649  |                                              |
| 2 | 67,500,000 | 67,650,000 | 901 | 913  | 0.005099946  |                                              |
| 2 | 67,575,000 | 67,725,000 | 902 | 836  | -0.210776803 |                                              |
| 2 | 67,650,000 | 67,800,000 | 903 | 891  | 0.128357854  |                                              |
| 2 | 67,725,000 | 67,875,000 | 904 | 1075 | -0.013893073 |                                              |
| 2 | 67,800,000 | 67,950,000 | 905 | 1271 | 0.201058488  | DPP10                                        |
| 2 | 67,875,000 | 68,025,000 | 906 | 1025 | 0.201566817  | DPP10                                        |
| 2 | 67,950,000 | 68,100,000 | 907 | 815  | -0.767810585 | DPP10                                        |
| 2 | 68,025,000 | 68,175,000 | 908 | 939  | -1.659815549 | DPP10                                        |
| 2 | 68,100,000 | 68,250,000 | 909 | 969  | -2.435570209 | DPP10                                        |
| 2 | 68,175,000 | 68,325,000 | 910 | 968  | -2.705245483 |                                              |
| 2 | 68,250,000 | 68,400,000 | 911 | 947  | -2.648766245 |                                              |
| 2 | 68,325,000 | 68,475,000 | 912 | 807  | -2.288555796 |                                              |
| 2 | 68,400,000 | 68,550,000 | 913 | 985  | -0.104848008 | ENSBTAG00000046281                           |
| 2 | 68,475,000 | 68,625,000 | 914 | 1189 | 0.94394492   | ENSBTAG00000046281                           |
| 2 | 68,550,000 | 68,700,000 | 915 | 950  | 1.000716688  |                                              |
| 2 | 68,625,000 | 68,775,000 | 916 | 641  | -0.022996007 |                                              |
| 2 | 68,700,000 | 68,850,000 | 917 | 540  | -2.25024756  |                                              |
| 2 | 68,775,000 | 68,925,000 | 918 | 884  | -1.310249928 |                                              |
| 2 | 68,850,000 | 69,000,000 | 919 | 986  | -0.636529582 |                                              |
| 2 | 68,925,000 | 69,075,000 | 920 | 985  | -0.301755912 |                                              |
| 2 | 69,000,000 | 69,150,000 | 921 | 960  | 0.10156238   |                                              |
| 2 | 69,075,000 | 69,225,000 | 922 | 573  | 0.522043182  |                                              |
| 2 | 69,150,000 | 69,300,000 | 923 | 504  | 0.195556836  |                                              |
| 2 | 69,225,000 | 69,375,000 | 924 | 700  | -1.147284473 |                                              |
| 2 | 69,300,000 | 69,450,000 | 925 | 710  | -2.059729713 |                                              |
| 2 | 69,375,000 | 69,525,000 | 926 | 501  | -1.315108921 |                                              |
| 2 | 69,450,000 | 69,600,000 | 927 | 672  | -0.278390141 |                                              |
| 2 | 69,525,000 | 69,675,000 | 928 | 987  | 0.56495379   |                                              |
| 2 | 69,600,000 | 69,750,000 | 929 | 882  | 0.995705385  |                                              |
| 2 | 69,675,000 | 69,825,000 | 930 | 655  | 1.104733622  |                                              |
| 2 | 69,750,000 | 69,900,000 | 931 | 614  | 1.024914281  | ENSBTAG00000015077,ENSBTAG00000016785        |
| 2 | 69,825,000 | 69,975,000 | 932 | 975  | 0.797245574  | CCDC93,ENSBTAG00000015077,ENSBTAG00000016785 |
| 2 | 69,900,000 | 70,050,000 | 933 | 939  | 0.885232971  | CCDC93,ENSBTAG00000016785                    |
| 2 | 69,975,000 | 70,125,000 | 934 | 551  | 1.287635687  | CCDC93,INSIG2                                |
| 2 | 70,050,000 | 70,200,000 | 935 | 679  | 1.211860952  | INSIG2                                       |
| 2 | 70,125,000 | 70,275,000 | 936 | 775  | 1.122389695  | INSIG2                                       |
| 2 | 70,200,000 | 70,350,000 | 937 | 762  | 1.100371988  |                                              |
| 2 | 70,275,000 | 70,425,000 | 938 | 779  | 0.859057434  |                                              |
| 2 | 70,350,000 | 70,500,000 | 939 | 905  | 0.801968745  |                                              |
| 2 | 70,425,000 | 70,575,000 | 940 | 1000 | 0.719010033  |                                              |
| 2 | 70,500,000 | 70,650,000 | 941 | 874  | 0.46456209   |                                              |



|   |            |            |     |      |              |                                 |
|---|------------|------------|-----|------|--------------|---------------------------------|
| 2 | 70,575,000 | 70,725,000 | 942 | 886  | 0.239783883  |                                 |
| 2 | 70,650,000 | 70,800,000 | 943 | 969  | 0.062192426  |                                 |
| 2 | 70,725,000 | 70,875,000 | 944 | 901  | 0.297280221  |                                 |
| 2 | 70,800,000 | 70,950,000 | 945 | 691  | 0.353665826  |                                 |
| 2 | 70,875,000 | 71,025,000 | 946 | 706  | 0.581684651  | EN1                             |
| 2 | 70,950,000 | 71,100,000 | 947 | 900  | 0.564190772  | EN1,MARCO                       |
| 2 | 71,025,000 | 71,175,000 | 948 | 982  | 0.465542207  | MARCO                           |
| 2 | 71,100,000 | 71,250,000 | 949 | 673  | -0.023461888 | MARCO                           |
| 2 | 71,175,000 | 71,325,000 | 950 | 678  | 0.101120659  | C1QL2,ENSBTAG00000020794        |
| 2 | 71,250,000 | 71,400,000 | 951 | 1210 | 1.078023593  | C1QL2,STEAP3,ENSBTAG00000020794 |
| 2 | 71,325,000 | 71,475,000 | 952 | 1438 | 1.247629954  | C2orf76,STEAP3                  |
| 2 | 71,400,000 | 71,550,000 | 953 | 1326 | 1.189202745  | C2orf76,STEAP3                  |
| 2 | 71,475,000 | 71,625,000 | 954 | 1208 | 0.813470016  | C2orf76,DBI,SCTR,TMEM37         |
| 2 | 71,550,000 | 71,700,000 | 955 | 1148 | 0.682472286  | C2orf76,DBI,SCTR,TMEM37         |
| 2 | 71,625,000 | 71,775,000 | 956 | 871  | 0.394241499  | CFAP221,SCTR                    |
| 2 | 71,700,000 | 71,850,000 | 957 | 725  | 0.544652513  | CFAP221,SCTR                    |
| 2 | 71,775,000 | 71,925,000 | 958 | 727  | 0.711325477  | CFAP221,TMEM177                 |
| 2 | 71,850,000 | 72,000,000 | 959 | 504  | 0.672867024  | CFAP221,TMEM177                 |
| 2 | 71,925,000 | 72,075,000 | 960 | 250  | 0.930095706  | PTPN4                           |
| 2 | 72,000,000 | 72,150,000 | 961 | 195  | 0.917438461  | PTPN4                           |
| 2 | 72,075,000 | 72,225,000 | 962 | 226  | 1.039104118  | EPB41L5,PTPN4                   |
| 2 | 72,150,000 | 72,300,000 | 963 | 232  | 1.251416786  | EPB41L5                         |
| 2 | 72,225,000 | 72,375,000 | 964 | 177  | 1.353470827  | EPB41L5,RALB,TMEM185B           |
| 2 | 72,300,000 | 72,450,000 | 965 | 128  | 1.241453736  | EPB41L5,RALB,TMEM185B           |
| 2 | 72,375,000 | 72,525,000 | 966 | 298  | 1.265373955  | INHBB,RALB                      |
| 2 | 72,450,000 | 72,600,000 | 967 | 434  | 1.110393143  | INHBB                           |
| 2 | 72,525,000 | 72,675,000 | 968 | 474  | 0.864640973  | INHBB                           |
| 2 | 72,600,000 | 72,750,000 | 969 | 459  | 0.404084396  |                                 |
| 2 | 72,675,000 | 72,825,000 | 970 | 563  | 0.226497957  |                                 |
| 2 | 72,750,000 | 72,900,000 | 971 | 512  | 0.836262172  |                                 |
| 2 | 72,825,000 | 72,975,000 | 972 | 284  | 1.34012536   |                                 |
| 2 | 72,900,000 | 73,050,000 | 973 | 384  | 1.240593406  | GLI2                            |
| 2 | 72,975,000 | 73,125,000 | 974 | 366  | 1.224828308  | GLI2                            |
| 2 | 73,050,000 | 73,200,000 | 975 | 330  | 1.151602277  | GLI2                            |
| 2 | 73,125,000 | 73,275,000 | 976 | 544  | 0.983720125  | GLI2                            |
| 2 | 73,200,000 | 73,350,000 | 977 | 839  | -0.622040042 |                                 |
| 2 | 73,275,000 | 73,425,000 | 978 | 639  | -2.236749573 | TFCP2L1                         |
| 2 | 73,350,000 | 73,500,000 | 979 | 254  | -1.122281071 | CLASP1,TFCP2L1                  |
| 2 | 73,425,000 | 73,575,000 | 980 | 322  | -0.218090674 | CLASP1,TFCP2L1                  |
| 2 | 73,500,000 | 73,650,000 | 981 | 752  | 0.629673689  | CLASP1                          |
| 2 | 73,575,000 | 73,725,000 | 982 | 757  | 1.213787697  | CLASP1                          |
| 2 | 73,650,000 | 73,800,000 | 983 | 476  | 1.34219862   | CLASP1                          |
| 2 | 73,725,000 | 73,875,000 | 984 | 407  | 1.209531955  | NIFK,TSN                        |
| 2 | 73,800,000 | 73,950,000 | 985 | 508  | -0.145106255 | NIFK,TSN                        |
| 2 | 73,875,000 | 74,025,000 | 986 | 521  | -0.21770987  |                                 |
| 2 | 73,950,000 | 74,100,000 | 987 | 572  | 0.716900118  | ENSBTAG00000026822              |
| 2 | 74,025,000 | 74,175,000 | 988 | 636  | 0.765799573  | ENSBTAG00000026822              |
| 2 | 74,100,000 | 74,250,000 | 989 | 761  | -2.346734153 |                                 |
| 2 | 74,175,000 | 74,325,000 | 990 | 779  | -2.701276381 |                                 |
| 2 | 74,250,000 | 74,400,000 | 991 | 704  | -0.47523516  |                                 |
| 2 | 74,325,000 | 74,475,000 | 992 | 893  | -3.153931458 |                                 |
| 2 | 74,400,000 | 74,550,000 | 993 | 980  | -4.148450349 |                                 |
| 2 | 74,475,000 | 74,625,000 | 994 | 936  | -2.970925121 |                                 |

|   |            |            |      |      |              |                    |
|---|------------|------------|------|------|--------------|--------------------|
| 2 | 74,550,000 | 74,700,000 | 995  | 607  | -1.042456675 | ENSBTAG00000031918 |
| 2 | 74,625,000 | 74,775,000 | 996  | 458  | 0.094794577  | ENSBTAG00000031918 |
| 2 | 74,700,000 | 74,850,000 | 997  | 483  | -0.88834668  |                    |
| 2 | 74,775,000 | 74,925,000 | 998  | 678  | -0.994261236 |                    |
| 2 | 74,850,000 | 75,000,000 | 999  | 967  | -1.653304049 |                    |
| 2 | 74,925,000 | 75,075,000 | 1000 | 1047 | -0.546225369 |                    |
| 2 | 75,000,000 | 75,150,000 | 1001 | 1254 | 0.634051257  |                    |
| 2 | 75,075,000 | 75,225,000 | 1002 | 1150 | 0.499793032  |                    |
| 2 | 75,150,000 | 75,300,000 | 1003 | 767  | -0.92357817  |                    |
| 2 | 75,225,000 | 75,375,000 | 1004 | 673  | -1.822070067 |                    |
| 2 | 75,300,000 | 75,450,000 | 1005 | 1101 | -0.265209229 | ENSBTAG00000047681 |
| 2 | 75,375,000 | 75,525,000 | 1006 | 1323 | -0.245626949 | ENSBTAG00000047681 |
| 2 | 75,450,000 | 75,600,000 | 1007 | 749  | -1.623668585 |                    |
| 2 | 75,525,000 | 75,675,000 | 1008 | 748  | -3.467116362 |                    |
| 2 | 75,600,000 | 75,750,000 | 1009 | 1569 | -1.300719808 |                    |
| 2 | 75,675,000 | 75,825,000 | 1010 | 1914 | 0.079463576  |                    |
| 2 | 75,750,000 | 75,900,000 | 1011 | 1307 | -0.239038753 |                    |
| 2 | 75,825,000 | 75,975,000 | 1012 | 982  | -0.25604082  |                    |
| 2 | 75,900,000 | 76,050,000 | 1013 | 1438 | -0.564795723 |                    |
| 2 | 75,975,000 | 76,125,000 | 1014 | 1424 | -1.211391893 |                    |
| 2 | 76,050,000 | 76,200,000 | 1015 | 1132 | 0.169262268  |                    |
| 2 | 76,125,000 | 76,275,000 | 1016 | 1264 | 0.358576942  |                    |
| 2 | 76,200,000 | 76,350,000 | 1017 | 1282 | 0.102133428  |                    |
| 2 | 76,275,000 | 76,425,000 | 1018 | 1018 | 0.320540661  |                    |
| 2 | 76,350,000 | 76,500,000 | 1019 | 800  | 0.646246919  |                    |
| 2 | 76,425,000 | 76,575,000 | 1020 | 793  | 0.608912506  |                    |
| 2 | 76,500,000 | 76,650,000 | 1021 | 996  | 0.139572024  |                    |
| 2 | 76,575,000 | 76,725,000 | 1022 | 1277 | -0.005104745 |                    |
| 2 | 76,650,000 | 76,800,000 | 1023 | 1188 | -0.456411242 | CNTNAP5            |
| 2 | 76,725,000 | 76,875,000 | 1024 | 1176 | 0.105386694  | CNTNAP5            |
| 2 | 76,800,000 | 76,950,000 | 1025 | 1148 | 0.942811293  | CNTNAP5            |
| 2 | 76,875,000 | 77,025,000 | 1026 | 728  | 0.637550485  | CNTNAP5            |
| 2 | 76,950,000 | 77,100,000 | 1027 | 616  | 0.122287477  | CNTNAP5            |
| 2 | 77,025,000 | 77,175,000 | 1028 | 975  | 0.461343358  | CNTNAP5            |
| 2 | 77,100,000 | 77,250,000 | 1029 | 1308 | 0.580537208  | CNTNAP5            |
| 2 | 77,175,000 | 77,325,000 | 1030 | 1328 | 0.978815576  | CNTNAP5            |
| 2 | 77,250,000 | 77,400,000 | 1031 | 1469 | 1.051818789  | CNTNAP5            |
| 2 | 77,325,000 | 77,475,000 | 1032 | 1524 | 0.708122393  |                    |
| 2 | 77,400,000 | 77,550,000 | 1033 | 1258 | 0.424039208  |                    |
| 2 | 77,475,000 | 77,625,000 | 1034 | 1371 | 0.64975425   |                    |
| 2 | 77,550,000 | 77,700,000 | 1035 | 1421 | 0.794513937  |                    |
| 2 | 77,625,000 | 77,775,000 | 1036 | 1122 | 0.946458508  |                    |
| 2 | 77,700,000 | 77,850,000 | 1037 | 819  | 0.934395502  |                    |
| 2 | 77,775,000 | 77,925,000 | 1038 | 694  | 0.404248706  |                    |
| 2 | 77,850,000 | 78,000,000 | 1039 | 610  | 0.459992163  |                    |
| 2 | 77,925,000 | 78,075,000 | 1040 | 526  | -2.010849616 |                    |
| 2 | 78,000,000 | 78,150,000 | 1041 | 503  | -3.200073001 |                    |
| 2 | 78,075,000 | 78,225,000 | 1042 | 637  | -2.176557913 |                    |
| 2 | 78,150,000 | 78,300,000 | 1043 | 868  | -1.839545426 |                    |
| 2 | 78,225,000 | 78,375,000 | 1044 | 961  | 0.678306232  |                    |
| 2 | 78,300,000 | 78,450,000 | 1045 | 771  | 1.198133633  |                    |
| 2 | 78,375,000 | 78,525,000 | 1046 | 443  | 0.863261854  |                    |
| 2 | 78,450,000 | 78,600,000 | 1047 | 612  | 0.260370715  |                    |

|   |            |            |      |      |              |                    |
|---|------------|------------|------|------|--------------|--------------------|
| 2 | 78,525,000 | 78,675,000 | 1048 | 962  | 0.317314751  |                    |
| 2 | 78,600,000 | 78,750,000 | 1049 | 948  | -1.820009797 |                    |
| 2 | 78,675,000 | 78,825,000 | 1050 | 796  | -1.679480881 |                    |
| 2 | 78,750,000 | 78,900,000 | 1051 | 1084 | 0.538541277  |                    |
| 2 | 78,825,000 | 78,975,000 | 1052 | 1316 | 0.268179684  |                    |
| 2 | 78,900,000 | 79,050,000 | 1053 | 1153 | 0.469546441  |                    |
| 2 | 78,975,000 | 79,125,000 | 1054 | 1012 | 0.3747995    |                    |
| 2 | 79,050,000 | 79,200,000 | 1055 | 901  | 0.131276075  |                    |
| 2 | 79,125,000 | 79,275,000 | 1056 | 849  | 0.608224906  | GPC                |
| 2 | 79,200,000 | 79,350,000 | 1057 | 864  | 0.415396302  | GPC                |
| 2 | 79,275,000 | 79,425,000 | 1058 | 685  | -0.798352942 | GPC                |
| 2 | 79,350,000 | 79,500,000 | 1059 | 739  | -4.134970116 |                    |
| 2 | 79,425,000 | 79,575,000 | 1060 | 786  | -3.280963157 |                    |
| 2 | 79,500,000 | 79,650,000 | 1061 | 403  | 0.86719884   |                    |
| 2 | 79,575,000 | 79,725,000 | 1062 | 204  | 0.60936845   |                    |
| 2 | 79,650,000 | 79,800,000 | 1063 | 218  | 0.71463054   | GLS                |
| 2 | 79,725,000 | 79,875,000 | 1064 | 266  | 0.74732632   | GLS                |
| 2 | 79,800,000 | 79,950,000 | 1065 | 309  | 1.016894544  | GLS,STAT1          |
| 2 | 79,875,000 | 80,025,000 | 1066 | 523  | 1.011289191  | STAT1,STAT4        |
| 2 | 79,950,000 | 80,100,000 | 1067 | 621  | 1.08265709   | STAT1,STAT4        |
| 2 | 80,025,000 | 80,175,000 | 1068 | 569  | 1.055350695  | MYO1B,STAT4        |
| 2 | 80,100,000 | 80,250,000 | 1069 | 619  | 0.831999325  | MYO1B              |
| 2 | 80,175,000 | 80,325,000 | 1070 | 539  | 0.737879307  | MYO1B              |
| 2 | 80,250,000 | 80,400,000 | 1071 | 568  | 0.879660662  | MYO1B              |
| 2 | 80,325,000 | 80,475,000 | 1072 | 667  | 0.995310136  | MYO1B              |
| 2 | 80,400,000 | 80,550,000 | 1073 | 586  | 0.69514025   |                    |
| 2 | 80,475,000 | 80,625,000 | 1074 | 384  | 0.339630906  |                    |
| 2 | 80,550,000 | 80,700,000 | 1075 | 565  | 0.861367481  | NABP1              |
| 2 | 80,625,000 | 80,775,000 | 1076 | 901  | 0.993869573  | NABP1              |
| 2 | 80,700,000 | 80,850,000 | 1077 | 988  | 0.810701085  |                    |
| 2 | 80,775,000 | 80,925,000 | 1078 | 788  | 0.84172858   | SDPR               |
| 2 | 80,850,000 | 81,000,000 | 1079 | 386  | 1.080897471  | SDPR,TMEFF2        |
| 2 | 80,925,000 | 81,075,000 | 1080 | 342  | 0.060070039  | TMEFF2             |
| 2 | 81,000,000 | 81,150,000 | 1081 | 472  | -0.443566682 | TMEFF2             |
| 2 | 81,075,000 | 81,225,000 | 1082 | 495  | -0.635710275 | TMEFF2             |
| 2 | 81,150,000 | 81,300,000 | 1083 | 544  | -0.3406932   | TMEFF2             |
| 2 | 81,225,000 | 81,375,000 | 1084 | 643  | -1.155843151 | TMEFF2             |
| 2 | 81,300,000 | 81,450,000 | 1085 | 642  | -1.993197213 |                    |
| 2 | 81,375,000 | 81,525,000 | 1086 | 541  | -2.120387949 |                    |
| 2 | 81,450,000 | 81,600,000 | 1087 | 447  | -1.83898231  |                    |
| 2 | 81,525,000 | 81,675,000 | 1088 | 357  | -0.726041544 | ENSBTAG00000047783 |
| 2 | 81,600,000 | 81,750,000 | 1089 | 373  | -0.295442423 | ENSBTAG00000047783 |
| 2 | 81,675,000 | 81,825,000 | 1090 | 482  | -0.110320009 |                    |
| 2 | 81,750,000 | 81,900,000 | 1091 | 761  | -0.784518848 |                    |
| 2 | 81,825,000 | 81,975,000 | 1092 | 819  | -1.112235728 |                    |
| 2 | 81,900,000 | 82,050,000 | 1093 | 608  | -0.201800223 |                    |
| 2 | 81,975,000 | 82,125,000 | 1094 | 1114 | 0.219092927  |                    |
| 2 | 82,050,000 | 82,200,000 | 1095 | 1242 | -2.430831252 |                    |
| 2 | 82,125,000 | 82,275,000 | 1096 | 1028 | -1.271428027 |                    |
| 2 | 82,200,000 | 82,350,000 | 1097 | 880  | 0.691826707  |                    |
| 2 | 82,275,000 | 82,425,000 | 1098 | 749  | 0.288580635  |                    |
| 2 | 82,350,000 | 82,500,000 | 1099 | 817  | -0.184885982 |                    |
| 2 | 82,425,000 | 82,575,000 | 1100 | 742  | -1.965798491 |                    |

|   |            |            |      |      |              |                                                    |
|---|------------|------------|------|------|--------------|----------------------------------------------------|
| 2 | 82,500,000 | 82,650,000 | 1101 | 841  | -3.701774921 |                                                    |
| 2 | 82,575,000 | 82,725,000 | 1102 | 1000 | -1.483098222 |                                                    |
| 2 | 82,650,000 | 82,800,000 | 1103 | 1083 | 0.725906191  |                                                    |
| 2 | 82,725,000 | 82,875,000 | 1104 | 780  | 0.782423911  |                                                    |
| 2 | 82,800,000 | 82,950,000 | 1105 | 747  | 0.082654738  | ENSBTAG00000037816                                 |
| 2 | 82,875,000 | 83,025,000 | 1106 | 884  | 0.562460317  | ENSBTAG00000037816                                 |
| 2 | 82,950,000 | 83,100,000 | 1107 | 1238 | 1.285450114  |                                                    |
| 2 | 83,025,000 | 83,175,000 | 1108 | 1371 | 1.340623658  |                                                    |
| 2 | 83,100,000 | 83,250,000 | 1109 | 1110 | 1.243546558  |                                                    |
| 2 | 83,175,000 | 83,325,000 | 1110 | 1380 | 0.961009943  |                                                    |
| 2 | 83,250,000 | 83,400,000 | 1111 | 1401 | 0.70262309   |                                                    |
| 2 | 83,325,000 | 83,475,000 | 1112 | 1139 | 0.405952858  |                                                    |
| 2 | 83,400,000 | 83,550,000 | 1113 | 813  | -0.438240442 |                                                    |
| 2 | 83,475,000 | 83,625,000 | 1114 | 729  | -1.146560565 |                                                    |
| 2 | 83,550,000 | 83,700,000 | 1115 | 758  | -0.41944852  |                                                    |
| 2 | 83,625,000 | 83,775,000 | 1116 | 483  | -0.349839808 |                                                    |
| 2 | 83,700,000 | 83,850,000 | 1117 | 333  | -1.125927539 |                                                    |
| 2 | 83,775,000 | 83,925,000 | 1118 | 408  | -0.075286008 |                                                    |
| 2 | 83,850,000 | 84,000,000 | 1119 | 503  | 0.446276505  |                                                    |
| 2 | 83,925,000 | 84,075,000 | 1120 | 629  | 0.623999125  |                                                    |
| 2 | 84,000,000 | 84,150,000 | 1121 | 759  | 0.686038481  |                                                    |
| 2 | 84,075,000 | 84,225,000 | 1122 | 439  | 0.591600286  |                                                    |
| 2 | 84,150,000 | 84,300,000 | 1123 | 225  | 0.202205359  |                                                    |
| 2 | 84,225,000 | 84,375,000 | 1124 | 274  | -0.409870444 |                                                    |
| 2 | 84,300,000 | 84,450,000 | 1125 | 364  | -0.285733723 |                                                    |
| 2 | 84,375,000 | 84,525,000 | 1126 | 421  | 0.137580858  |                                                    |
| 2 | 84,450,000 | 84,600,000 | 1127 | 364  | -0.49564545  |                                                    |
| 2 | 84,525,000 | 84,675,000 | 1128 | 489  | -0.599200161 |                                                    |
| 2 | 84,600,000 | 84,750,000 | 1129 | 408  | -0.435185749 | SLC39A10                                           |
| 2 | 84,675,000 | 84,825,000 | 1130 | 525  | 0.129623816  | DNAH7,SLC39A10                                     |
| 2 | 84,750,000 | 84,900,000 | 1131 | 900  | 0.476787629  | DNAH7,SLC39A10                                     |
| 2 | 84,825,000 | 84,975,000 | 1132 | 1270 | 0.393869255  | DNAH7                                              |
| 2 | 84,900,000 | 85,050,000 | 1133 | 1100 | -1.036085535 | DNAH7                                              |
| 2 | 84,975,000 | 85,125,000 | 1134 | 355  | -2.878604387 | DNAH7,STK17B                                       |
| 2 | 85,050,000 | 85,200,000 | 1135 | 136  | -3.382164102 | HECW2,STK17B,ENSBTAG00000047862                    |
| 2 | 85,125,000 | 85,275,000 | 1136 | 303  | -0.545056548 | HECW2,ENSBTAG00000047862                           |
| 2 | 85,200,000 | 85,350,000 | 1137 | 512  | 1.180791017  | HECW2                                              |
| 2 | 85,275,000 | 85,425,000 | 1138 | 1015 | 1.207946085  | HECW2                                              |
| 2 | 85,350,000 | 85,500,000 | 1139 | 912  | 0.777431371  |                                                    |
| 2 | 85,425,000 | 85,575,000 | 1140 | 535  | -1.336606523 |                                                    |
| 2 | 85,500,000 | 85,650,000 | 1141 | 435  | -1.168276326 | CCDC150                                            |
| 2 | 85,575,000 | 85,725,000 | 1142 | 333  | 0.427814386  | CCDC150                                            |
| 2 | 85,650,000 | 85,800,000 | 1143 | 314  | 0.876483241  | CCDC150,GTF3C3,ENSBTAG00000047452                  |
| 2 | 85,725,000 | 85,875,000 | 1144 | 202  | 0.514216856  | CCDC150,GTF3C3,PGAP1,ENSBTAG00000047452            |
| 2 | 85,800,000 | 85,950,000 | 1145 | 357  | 0.411472769  | PGAP1,ENSBTAG00000047452                           |
| 2 | 85,875,000 | 86,025,000 | 1146 | 592  | -0.329792108 | ANKRD44,PGAP1                                      |
| 2 | 85,950,000 | 86,100,000 | 1147 | 861  | -0.32490616  | ANKRD44                                            |
| 2 | 86,025,000 | 86,175,000 | 1148 | 995  | 0.598684081  | ANKRD44                                            |
| 2 | 86,100,000 | 86,250,000 | 1149 | 856  | 0.910259023  | ANKRD44                                            |
| 2 | 86,175,000 | 86,325,000 | 1150 | 587  | 0.608217921  |                                                    |
| 2 | 86,250,000 | 86,400,000 | 1151 | 317  | 0.081882544  | SF3B1,ENSBTAG00000012171                           |
| 2 | 86,325,000 | 86,475,000 | 1152 | 240  | 0.848273098  | COQ10B,HSPD1,HSPE1,MOBKL3,SF3B1,ENSBTAG00000012171 |

|   |            |            |      |      |              |                                                         |
|---|------------|------------|------|------|--------------|---------------------------------------------------------|
| 2 | 86,400,000 | 86,550,000 | 1153 | 409  | 1.22759716   | COQ10B,HSPD1,HSPE1,MOBKL3,RFTN2                         |
| 2 | 86,475,000 | 86,625,000 | 1154 | 437  | 1.21408603   | MARS2,MOBKL3,RFTN2                                      |
| 2 | 86,550,000 | 86,700,000 | 1155 | 299  | 0.929510696  | BOLL,MARS2,RFTN2                                        |
| 2 | 86,625,000 | 86,775,000 | 1156 | 302  | 0.234650701  | BOLL,PLCL1                                              |
| 2 | 86,700,000 | 86,850,000 | 1157 | 476  | 0.576671433  | PLCL1                                                   |
| 2 | 86,775,000 | 86,925,000 | 1158 | 578  | 0.783033481  | PLCL1                                                   |
| 2 | 86,850,000 | 87,000,000 | 1159 | 583  | 0.986231131  | PLCL1                                                   |
| 2 | 86,925,000 | 87,075,000 | 1160 | 707  | 0.718262516  | PLCL1                                                   |
| 2 | 87,000,000 | 87,150,000 | 1161 | 528  | 0.166842563  | PLCL1                                                   |
| 2 | 87,075,000 | 87,225,000 | 1162 | 320  | -0.096677555 | PLCL1                                                   |
| 2 | 87,150,000 | 87,300,000 | 1163 | 369  | 0.180359795  |                                                         |
| 2 | 87,225,000 | 87,375,000 | 1164 | 280  | -0.275520053 |                                                         |
| 2 | 87,300,000 | 87,450,000 | 1165 | 238  | -0.233124747 |                                                         |
| 2 | 87,375,000 | 87,525,000 | 1166 | 570  | 0.876042104  |                                                         |
| 2 | 87,450,000 | 87,600,000 | 1167 | 806  | 0.839777155  |                                                         |
| 2 | 87,525,000 | 87,675,000 | 1168 | 662  | 0.019566311  |                                                         |
| 2 | 87,600,000 | 87,750,000 | 1169 | 600  | -0.080441588 |                                                         |
| 2 | 87,675,000 | 87,825,000 | 1170 | 484  | 0.355392619  |                                                         |
| 2 | 87,750,000 | 87,900,000 | 1171 | 423  | 0.373925153  |                                                         |
| 2 | 87,825,000 | 87,975,000 | 1172 | 594  | -0.275658607 |                                                         |
| 2 | 87,900,000 | 88,050,000 | 1173 | 648  | 0.118012883  |                                                         |
| 2 | 87,975,000 | 88,125,000 | 1174 | 466  | 0.901755238  |                                                         |
| 2 | 88,050,000 | 88,200,000 | 1175 | 341  | 0.815702074  |                                                         |
| 2 | 88,125,000 | 88,275,000 | 1176 | 506  | 0.148430178  | SATB2                                                   |
| 2 | 88,200,000 | 88,350,000 | 1177 | 480  | -0.11213351  | SATB2                                                   |
| 2 | 88,275,000 | 88,425,000 | 1178 | 330  | 0.064567737  | SATB2                                                   |
| 2 | 88,350,000 | 88,500,000 | 1179 | 371  | 0.126963076  | SATB2                                                   |
| 2 | 88,425,000 | 88,575,000 | 1180 | 576  | 0.828021328  | SATB2                                                   |
| 2 | 88,500,000 | 88,650,000 | 1181 | 835  | 0.801668082  |                                                         |
| 2 | 88,575,000 | 88,725,000 | 1182 | 636  | 0.254186808  |                                                         |
| 2 | 88,650,000 | 88,800,000 | 1183 | 238  | -0.768256545 |                                                         |
| 2 | 88,725,000 | 88,875,000 | 1184 | 148  | -1.450530197 | FTCDNL1                                                 |
| 2 | 88,800,000 | 88,950,000 | 1185 | 162  | -1.495034616 | C2orf47,C2orf69,FTCDNL1,TYW5                            |
| 2 | 88,875,000 | 89,025,000 | 1186 | 164  | -1.280516066 | C2orf47,C2orf69,TYW5                                    |
| 2 | 88,950,000 | 89,100,000 | 1187 | 341  | -0.850116209 |                                                         |
| 2 | 89,025,000 | 89,175,000 | 1188 | 550  | 0.132107814  | ENSBTAG00000024003                                      |
| 2 | 89,100,000 | 89,250,000 | 1189 | 545  | 1.074581248  | SPATS2L,ENSBTAG00000024003                              |
| 2 | 89,175,000 | 89,325,000 | 1190 | 352  | 0.617250462  | SPATS2L                                                 |
| 2 | 89,250,000 | 89,400,000 | 1191 | 426  | 0.738218528  | SPATS2L                                                 |
| 2 | 89,325,000 | 89,475,000 | 1192 | 531  | 0.956676629  | KCTD18,SPATS2L                                          |
| 2 | 89,400,000 | 89,550,000 | 1193 | 755  | 0.657645862  | AOX1,KCTD18,SGOL2,SPATS2L                               |
| 2 | 89,475,000 | 89,625,000 | 1194 | 1346 | 0.936676931  | AOX1,SGOL2                                              |
| 2 | 89,550,000 | 89,700,000 | 1195 | 1519 | 1.202712815  | AOX1,AOX4                                               |
| 2 | 89,625,000 | 89,775,000 | 1196 | 1407 | 0.38212002   | AOX4                                                    |
| 2 | 89,700,000 | 89,850,000 | 1197 | 1128 | -0.422798582 | AOX4,ENSBTAG00000026812                                 |
| 2 | 89,775,000 | 89,925,000 | 1198 | 648  | 0.741490482  | BZW1,CLK1,ENSBTAG00000026812                            |
| 2 | 89,850,000 | 90,000,000 | 1199 | 437  | -1.001161639 | BZW1,CLK1,NIF3L1,ORC2,PPIL3,ENSBTAG00000026812          |
| 2 | 89,925,000 | 90,075,000 | 1200 | 335  | -1.650712638 | CLK1,FAM126B,NIF3L1,ORC2,PPIL3                          |
| 2 | 90,000,000 | 90,150,000 | 1201 | 309  | -0.043631541 | FAM126B,FLIP,NDUFB3,ORC2,ENSBTAG00000012763             |
| 2 | 90,075,000 | 90,225,000 | 1202 | 386  | 0.61319838   | FAM126B,FLIP,NDUFB3,ENSBTAG0000003731,ENSBTAG0000012763 |
| 2 | 90,150,000 | 90,300,000 | 1203 | 609  | 0.207484367  | CASP8,FLIP,ENSBTAG0000003731                            |
| 2 | 90,225,000 | 90,375,000 | 1204 | 813  | -0.755782598 | ALS2CR12,CASP8,TRAK2                                    |

|   |            |            |      |      |              |                                |
|---|------------|------------|------|------|--------------|--------------------------------|
| 2 | 90,300,000 | 90,450,000 | 1205 | 883  | -0.625570501 | ALS2CR12,CASP8,STRADB,TRAK2    |
| 2 | 90,375,000 | 90,525,000 | 1206 | 944  | -0.049859869 | ALS2CR11,STRADB,TRAK2          |
| 2 | 90,450,000 | 90,600,000 | 1207 | 997  | -4.006284628 | ALS2CR11,STRADB,TMEM237        |
| 2 | 90,525,000 | 90,675,000 | 1208 | 636  | -6.432621198 | ALS2,ALS2CR11,TMEM237          |
| 2 | 90,600,000 | 90,750,000 | 1209 | 254  | -3.593354683 | ALS2,TMEM237                   |
| 2 | 90,675,000 | 90,825,000 | 1210 | 440  | -2.223897927 | ALS2                           |
| 2 | 90,750,000 | 90,900,000 | 1211 | 389  | -1.754061426 |                                |
| 2 | 90,825,000 | 90,975,000 | 1212 | 294  | -1.019474225 |                                |
| 2 | 90,900,000 | 91,050,000 | 1213 | 339  | -0.502794033 | FZD7,ENSBTAG00000034192        |
| 2 | 90,975,000 | 91,125,000 | 1214 | 339  | -2.685234748 | FZD7,ENSBTAG00000034192        |
| 2 | 91,050,000 | 91,200,000 | 1215 | 371  | -4.021711697 | SUMO1,ENSBTAG00000034192       |
| 2 | 91,125,000 | 91,275,000 | 1216 | 261  | -2.733572784 | NOP58,SUMO1,ENSBTAG00000034192 |
| 2 | 91,200,000 | 91,350,000 | 1217 | 170  | -1.147841439 | NOP58                          |
| 2 | 91,275,000 | 91,425,000 | 1218 | 258  | -3.315034509 | BMPRII                         |
| 2 | 91,350,000 | 91,500,000 | 1219 | 370  | -4.977516093 | ALS2CR13,BMPRII                |
| 2 | 91,425,000 | 91,575,000 | 1220 | 322  | -4.321242128 | ALS2CR13,BMPRII,ICA1L          |
| 2 | 91,500,000 | 91,650,000 | 1221 | 325  | -1.016647192 | ALS2CR13,ICA1L,WDR12           |
| 2 | 91,575,000 | 91,725,000 | 1222 | 330  | -0.134312033 | CARF,ICA1L,WDR12               |
| 2 | 91,650,000 | 91,800,000 | 1223 | 372  | 1.306753281  | CARF,NBEAL1                    |
| 2 | 91,725,000 | 91,875,000 | 1224 | 435  | 1.178325265  | CARF,NBEAL1                    |
| 2 | 91,800,000 | 91,950,000 | 1225 | 241  | -0.272522027 | CYP20A1,NBEAL1                 |
| 2 | 91,875,000 | 92,025,000 | 1226 | 169  | -0.710674345 | ABI2,CYP20A1,NBEAL1            |
| 2 | 91,950,000 | 92,100,000 | 1227 | 194  | 0.064054415  | ABI2,RAPH1                     |
| 2 | 92,025,000 | 92,175,000 | 1228 | 400  | -0.361136106 | ABI2,RAPH1                     |
| 2 | 92,100,000 | 92,250,000 | 1229 | 632  | -3.601998646 | RAPH1                          |
| 2 | 92,175,000 | 92,325,000 | 1230 | 768  | -2.809509272 |                                |
| 2 | 92,250,000 | 92,400,000 | 1231 | 703  | -0.939146711 | CD28                           |
| 2 | 92,325,000 | 92,475,000 | 1232 | 582  | -2.949931281 | CD28                           |
| 2 | 92,400,000 | 92,550,000 | 1233 | 413  | -4.535633267 | CTLA4                          |
| 2 | 92,475,000 | 92,625,000 | 1234 | 256  | -4.578909536 | CTLA4,ICOS                     |
| 2 | 92,550,000 | 92,700,000 | 1235 | 350  | -3.353443486 | ICOS                           |
| 2 | 92,625,000 | 92,775,000 | 1236 | 436  | -0.820442965 |                                |
| 2 | 92,700,000 | 92,850,000 | 1237 | 502  | -1.33959745  |                                |
| 2 | 92,775,000 | 92,925,000 | 1238 | 675  | -1.804805756 |                                |
| 2 | 92,850,000 | 93,000,000 | 1239 | 792  | -2.027099036 | ENSBTAG00000040367             |
| 2 | 92,925,000 | 93,075,000 | 1240 | 1022 | -2.04968799  | ENSBTAG00000040367             |
| 2 | 93,000,000 | 93,150,000 | 1241 | 1088 | -1.357789378 |                                |
| 2 | 93,075,000 | 93,225,000 | 1242 | 849  | -0.244050927 |                                |
| 2 | 93,150,000 | 93,300,000 | 1243 | 686  | -0.097800568 |                                |
| 2 | 93,225,000 | 93,375,000 | 1244 | 537  | -0.304773195 |                                |
| 2 | 93,300,000 | 93,450,000 | 1245 | 598  | -1.079060758 |                                |
| 2 | 93,375,000 | 93,525,000 | 1246 | 633  | -0.932578372 |                                |
| 2 | 93,450,000 | 93,600,000 | 1247 | 550  | 0.084563611  |                                |
| 2 | 93,525,000 | 93,675,000 | 1248 | 683  | -0.107995334 |                                |
| 2 | 93,600,000 | 93,750,000 | 1249 | 665  | -0.056282607 | ENSBTAG00000046521             |
| 2 | 93,675,000 | 93,825,000 | 1250 | 700  | 1.132018643  | ENSBTAG00000046521             |
| 2 | 93,750,000 | 93,900,000 | 1251 | 979  | 1.108290019  | PARD3B                         |
| 2 | 93,825,000 | 93,975,000 | 1252 | 957  | -0.462944887 | PARD3B                         |
| 2 | 93,900,000 | 94,050,000 | 1253 | 1017 | -1.817602646 | PARD3B                         |
| 2 | 93,975,000 | 94,125,000 | 1254 | 835  | -1.112191636 |                                |
| 2 | 94,050,000 | 94,200,000 | 1255 | 797  | 0.034810877  |                                |
| 2 | 94,125,000 | 94,275,000 | 1256 | 973  | 0.069406443  | ENSBTAG00000046783             |
| 2 | 94,200,000 | 94,350,000 | 1257 | 877  | -1.080746207 | ENSBTAG00000046783             |

|   |            |            |      |      |              |                                                                       |
|---|------------|------------|------|------|--------------|-----------------------------------------------------------------------|
| 2 | 94,275,000 | 94,425,000 | 1258 | 929  | -1.072749779 | ENSBTAG00000046029                                                    |
| 2 | 94,350,000 | 94,500,000 | 1259 | 777  | -1.21254388  | NRP2,ENSBTAG00000046029                                               |
| 2 | 94,425,000 | 94,575,000 | 1260 | 624  | -1.7412061   | NRP2                                                                  |
| 2 | 94,500,000 | 94,650,000 | 1261 | 721  | -0.875000697 | NRP2                                                                  |
| 2 | 94,575,000 | 94,725,000 | 1262 | 727  | -0.077699311 |                                                                       |
| 2 | 94,650,000 | 94,800,000 | 1263 | 495  | -0.374727295 | INO80D                                                                |
| 2 | 94,725,000 | 94,875,000 | 1264 | 366  | -2.943114341 | INO80D                                                                |
| 2 | 94,800,000 | 94,950,000 | 1265 | 402  | -2.705223279 | EEF1B,GPR1,INO80D,NDUFS1                                              |
| 2 | 94,875,000 | 95,025,000 | 1266 | 309  | -0.087537117 | EEF1B,GPR1,NDUFS1                                                     |
| 2 | 94,950,000 | 95,100,000 | 1267 | 335  | 0.97761533   | ZDBF2                                                                 |
| 2 | 95,025,000 | 95,175,000 | 1268 | 521  | 0.254074175  | ADAM23,ZDBF2                                                          |
| 2 | 95,100,000 | 95,250,000 | 1269 | 625  | -0.112444669 | ADAM23                                                                |
| 2 | 95,175,000 | 95,325,000 | 1270 | 588  | 0.221496802  | ADAM23                                                                |
| 2 | 95,250,000 | 95,400,000 | 1271 | 607  | 0.534420549  | ADAM23,DYTN                                                           |
| 2 | 95,325,000 | 95,475,000 | 1272 | 774  | 0.853507848  | ADAM23,DYTN                                                           |
| 2 | 95,400,000 | 95,550,000 | 1273 | 923  | 0.825352608  | DYTN,FASTKD2,MDH1B                                                    |
| 2 | 95,475,000 | 95,625,000 | 1274 | 749  | 0.48571494   | FASTKD2,MDH1B                                                         |
| 2 | 95,550,000 | 95,700,000 | 1275 | 622  | 0.535331931  | CPO                                                                   |
| 2 | 95,625,000 | 95,775,000 | 1276 | 653  | 0.366379375  | CPO                                                                   |
| 2 | 95,700,000 | 95,850,000 | 1277 | 672  | 0.345701342  | CPO,KLF7                                                              |
| 2 | 95,775,000 | 95,925,000 | 1278 | 714  | 0.614144692  | KLF7                                                                  |
| 2 | 95,850,000 | 96,000,000 | 1279 | 621  | 0.359933905  | KLF7                                                                  |
| 2 | 95,925,000 | 96,075,000 | 1280 | 559  | -0.286900312 |                                                                       |
| 2 | 96,000,000 | 96,150,000 | 1281 | 634  | -0.159663454 |                                                                       |
| 2 | 96,075,000 | 96,225,000 | 1282 | 536  | 0.77190424   |                                                                       |
| 2 | 96,150,000 | 96,300,000 | 1283 | 466  | 0.929697239  | CREB1                                                                 |
| 2 | 96,225,000 | 96,375,000 | 1284 | 529  | 0.492700769  | CREB1,METTL21A                                                        |
| 2 | 96,300,000 | 96,450,000 | 1285 | 364  | -0.250350455 | CCNYL1,CREB1,METTL21A                                                 |
| 2 | 96,375,000 | 96,525,000 | 1286 | 239  | -0.788460502 | CCNYL1,FZD5                                                           |
| 2 | 96,450,000 | 96,600,000 | 1287 | 323  | -0.568549594 | CCNYL1,FZD5                                                           |
| 2 | 96,525,000 | 96,675,000 | 1288 | 401  | -0.008766874 | PLEKHM3                                                               |
| 2 | 96,600,000 | 96,750,000 | 1289 | 666  | 0.66681012   | PLEKHM3                                                               |
| 2 | 96,675,000 | 96,825,000 | 1290 | 906  | 0.860970949  | PLEKHM3,ENSBTAG00000014094                                            |
| 2 | 96,750,000 | 96,900,000 | 1291 | 1084 | -0.060282426 | C2H2orf80,CRYGB,CRYGC,CRYGD,ENSBTAG00000014094,<br>ENSBTAG00000046832 |
| 2 | 96,825,000 | 96,975,000 | 1292 | 1350 | -0.302559991 | C2H2orf80,CRYGB,CRYGC,CRYGD,IDH1,ENSBTAG0000004<br>6832               |
| 2 | 96,900,000 | 97,050,000 | 1293 | 1271 | -0.262249882 | IDH1,PIKFYVE                                                          |
| 2 | 96,975,000 | 97,125,000 | 1294 | 1038 | 0.08139806   | PIKFYVE,PTH2R                                                         |
| 2 | 97,050,000 | 97,200,000 | 1295 | 1285 | 1.12345582   | PIKFYVE,PTH2R                                                         |
| 2 | 97,125,000 | 97,275,000 | 1296 | 1478 | 0.845671123  | PTH2R                                                                 |
| 2 | 97,200,000 | 97,350,000 | 1297 | 1149 | 0.702347969  |                                                                       |
| 2 | 97,275,000 | 97,425,000 | 1298 | 1071 | 0.923004598  |                                                                       |
| 2 | 97,350,000 | 97,500,000 | 1299 | 744  | 0.572458157  |                                                                       |
| 2 | 97,425,000 | 97,575,000 | 1300 | 244  | -1.097354759 | CRYGF                                                                 |
| 2 | 97,500,000 | 97,650,000 | 1301 | 507  | 0.817022558  | CRYGF                                                                 |
| 2 | 97,575,000 | 97,725,000 | 1302 | 687  | 1.145537592  |                                                                       |
| 2 | 97,650,000 | 97,800,000 | 1303 | 569  | 1.122256911  |                                                                       |
| 2 | 97,725,000 | 97,875,000 | 1304 | 721  | 0.954732076  | MAP-2                                                                 |
| 2 | 97,800,000 | 97,950,000 | 1305 | 805  | 0.893242239  | MAP-2                                                                 |
| 2 | 97,875,000 | 98,025,000 | 1306 | 806  | 1.002185692  | MAP-2,UNC80                                                           |
| 2 | 97,950,000 | 98,100,000 | 1307 | 838  | 0.691973295  | MAP-2,UNC80                                                           |
| 2 | 98,025,000 | 98,175,000 | 1308 | 855  | 0.475057873  | UNC80                                                                 |

|   |             |             |      |      |              |                                       |
|---|-------------|-------------|------|------|--------------|---------------------------------------|
| 2 | 98,100,000  | 98,250,000  | 1309 | 628  | 0.211998306  | UNC80                                 |
| 2 | 98,175,000  | 98,325,000  | 1310 | 458  | -0.240157228 | KANSL1L,RPE,UNC80                     |
| 2 | 98,250,000  | 98,400,000  | 1311 | 571  | 0.486573567  | KANSL1L,RPE,UNC80                     |
| 2 | 98,325,000  | 98,475,000  | 1312 | 763  | 0.532893093  | ACADL,KANSL1L                         |
| 2 | 98,400,000  | 98,550,000  | 1313 | 937  | -0.633415342 | ACADL,MYL1                            |
| 2 | 98,475,000  | 98,625,000  | 1314 | 1112 | -1.161758721 | LANCL1,MYL1                           |
| 2 | 98,550,000  | 98,700,000  | 1315 | 1343 | -0.34043885  | LANCL1,MYL1                           |
| 2 | 98,625,000  | 98,775,000  | 1316 | 1298 | 0.629841887  | CPS1,LANCL1                           |
| 2 | 98,700,000  | 98,850,000  | 1317 | 1153 | 0.357598518  | CPS1                                  |
| 2 | 98,775,000  | 98,925,000  | 1318 | 1214 | -0.187612172 | CPS1                                  |
| 2 | 98,850,000  | 99,000,000  | 1319 | 1458 | 0.391577346  | CPS1                                  |
| 2 | 98,925,000  | 99,075,000  | 1320 | 1606 | 0.724498963  |                                       |
| 2 | 99,000,000  | 99,150,000  | 1321 | 1594 | 0.478763274  |                                       |
| 2 | 99,075,000  | 99,225,000  | 1322 | 1553 | 0.150559161  |                                       |
| 2 | 99,150,000  | 99,300,000  | 1323 | 1494 | 0.007905031  |                                       |
| 2 | 99,225,000  | 99,375,000  | 1324 | 1491 | 0.455132254  |                                       |
| 2 | 99,300,000  | 99,450,000  | 1325 | 1804 | 0.717839036  |                                       |
| 2 | 99,375,000  | 99,525,000  | 1326 | 1665 | 0.822412508  |                                       |
| 2 | 99,450,000  | 99,600,000  | 1327 | 932  | -1.443770985 |                                       |
| 2 | 99,525,000  | 99,675,000  | 1328 | 487  | -4.163559851 | ENSBTAG00000012647                    |
| 2 | 99,600,000  | 99,750,000  | 1329 | 411  | -0.154549386 | ENSBTAG00000012647,ENSBTAG00000047490 |
| 2 | 99,675,000  | 99,825,000  | 1330 | 411  | -0.135633262 | ENSBTAG00000012647,ENSBTAG00000047490 |
| 2 | 99,750,000  | 99,900,000  | 1331 | 620  | -1.623307474 | ENSBTAG00000012647                    |
| 2 | 99,825,000  | 99,975,000  | 1332 | 759  | -1.082881478 | ENSBTAG00000012647                    |
| 2 | 99,900,000  | 100,050,000 | 1333 | 449  | 0.431196308  | ENSBTAG00000012647                    |
| 2 | 99,975,000  | 100,125,000 | 1334 | 464  | 0.590011135  | ENSBTAG00000012647                    |
| 2 | 100,050,000 | 100,200,000 | 1335 | 614  | 0.505164995  |                                       |
| 2 | 100,125,000 | 100,275,000 | 1336 | 654  | 0.359413161  |                                       |
| 2 | 100,200,000 | 100,350,000 | 1337 | 1059 | 0.150160434  | ENSBTAG00000005239                    |
| 2 | 100,275,000 | 100,425,000 | 1338 | 1321 | -0.225448942 | ENSBTAG00000005239                    |
| 2 | 100,350,000 | 100,500,000 | 1339 | 1014 | -0.562366119 |                                       |
| 2 | 100,425,000 | 100,575,000 | 1340 | 1100 | -0.614879744 |                                       |
| 2 | 100,500,000 | 100,650,000 | 1341 | 1042 | -0.667221249 |                                       |
| 2 | 100,575,000 | 100,725,000 | 1342 | 708  | 0.114695992  |                                       |
| 2 | 100,650,000 | 100,800,000 | 1343 | 1033 | 0.866642769  |                                       |
| 2 | 100,725,000 | 100,875,000 | 1344 | 1224 | 1.144949969  |                                       |
| 2 | 100,800,000 | 100,950,000 | 1345 | 1128 | 1.174471046  |                                       |
| 2 | 100,875,000 | 101,025,000 | 1346 | 1040 | 0.709118824  |                                       |
| 2 | 100,950,000 | 101,100,000 | 1347 | 1373 | 0.267916997  |                                       |
| 2 | 101,025,000 | 101,175,000 | 1348 | 1526 | 0.45397393   |                                       |
| 2 | 101,100,000 | 101,250,000 | 1349 | 1274 | 0.681751483  |                                       |
| 2 | 101,175,000 | 101,325,000 | 1350 | 1271 | 0.999145232  |                                       |
| 2 | 101,250,000 | 101,400,000 | 1351 | 1302 | 1.104392185  |                                       |
| 2 | 101,325,000 | 101,475,000 | 1352 | 893  | 0.840644623  |                                       |
| 2 | 101,400,000 | 101,550,000 | 1353 | 287  | 0.270390406  | IKZF2                                 |
| 2 | 101,475,000 | 101,625,000 | 1354 | 219  | 0.851406685  | IKZF2                                 |
| 2 | 101,550,000 | 101,700,000 | 1355 | 379  | 0.194256683  | IKZF2                                 |
| 2 | 101,625,000 | 101,775,000 | 1356 | 458  | -0.141940406 | IKZF2                                 |
| 2 | 101,700,000 | 101,850,000 | 1357 | 791  | -0.937229328 | IKZF2                                 |
| 2 | 101,775,000 | 101,925,000 | 1358 | 1131 | -1.135693283 | SPAG16                                |
| 2 | 101,850,000 | 102,000,000 | 1359 | 950  | -1.424533354 | SPAG16                                |
| 2 | 101,925,000 | 102,075,000 | 1360 | 587  | -1.387814959 |                                       |
| 2 | 102,000,000 | 102,150,000 | 1361 | 682  | 0.090407956  |                                       |



|   |             |             |      |      |              |                                  |
|---|-------------|-------------|------|------|--------------|----------------------------------|
| 2 | 102,075,000 | 102,225,000 | 1362 | 726  | 0.318537144  |                                  |
| 2 | 102,150,000 | 102,300,000 | 1363 | 421  | -0.011111856 |                                  |
| 2 | 102,225,000 | 102,375,000 | 1364 | 388  | -0.78275296  |                                  |
| 2 | 102,300,000 | 102,450,000 | 1365 | 902  | 0.197553884  |                                  |
| 2 | 102,375,000 | 102,525,000 | 1366 | 1217 | 0.744073764  |                                  |
| 2 | 102,450,000 | 102,600,000 | 1367 | 1330 | 0.858238593  |                                  |
| 2 | 102,525,000 | 102,675,000 | 1368 | 1159 | 0.8514065    |                                  |
| 2 | 102,600,000 | 102,750,000 | 1369 | 816  | 0.416508836  |                                  |
| 2 | 102,675,000 | 102,825,000 | 1370 | 1064 | 0.650496643  |                                  |
| 2 | 102,750,000 | 102,900,000 | 1371 | 1275 | 0.74188453   |                                  |
| 2 | 102,825,000 | 102,975,000 | 1372 | 1007 | 0.642546613  | VWC2L,ENSBTAG00000048219         |
| 2 | 102,900,000 | 103,050,000 | 1373 | 811  | 0.720321568  | VWC2L,ENSBTAG00000048219         |
| 2 | 102,975,000 | 103,125,000 | 1374 | 871  | 0.706192091  | VWC2L                            |
| 2 | 103,050,000 | 103,200,000 | 1375 | 1233 | -0.110145832 | VWC2L                            |
| 2 | 103,125,000 | 103,275,000 | 1376 | 1618 | -0.587105826 | VWC2L                            |
| 2 | 103,200,000 | 103,350,000 | 1377 | 1149 | -0.420527088 | BARD1                            |
| 2 | 103,275,000 | 103,425,000 | 1378 | 732  | 0.425805599  | BARD1                            |
| 2 | 103,350,000 | 103,500,000 | 1379 | 920  | 0.293838367  | BARD1                            |
| 2 | 103,425,000 | 103,575,000 | 1380 | 1096 | -0.989340867 | ABCA12                           |
| 2 | 103,500,000 | 103,650,000 | 1381 | 1044 | -1.232023611 | ABCA12                           |
| 2 | 103,575,000 | 103,725,000 | 1382 | 1085 | 0.692646637  | ABCA12                           |
| 2 | 103,650,000 | 103,800,000 | 1383 | 1466 | 0.851386662  | ABCA12                           |
| 2 | 103,725,000 | 103,875,000 | 1384 | 1540 | 0.808380493  | ATIC                             |
| 2 | 103,800,000 | 103,950,000 | 1385 | 1065 | 0.393913383  | ATIC, FN1                        |
| 2 | 103,875,000 | 104,025,000 | 1386 | 893  | 0.339501519  | FN1                              |
| 2 | 103,950,000 | 104,100,000 | 1387 | 801  | 0.35149029   | FN1                              |
| 2 | 104,025,000 | 104,175,000 | 1388 | 590  | 0.062577273  |                                  |
| 2 | 104,100,000 | 104,250,000 | 1389 | 601  | 0.418892646  |                                  |
| 2 | 104,175,000 | 104,325,000 | 1390 | 719  | 0.445563283  |                                  |
| 2 | 104,250,000 | 104,400,000 | 1391 | 891  | 0.560372691  |                                  |
| 2 | 104,325,000 | 104,475,000 | 1392 | 880  | 0.938366512  |                                  |
| 2 | 104,400,000 | 104,550,000 | 1393 | 1057 | 1.232745383  | MREG                             |
| 2 | 104,475,000 | 104,625,000 | 1394 | 1086 | 1.227773941  | MREG,PECR,TMEM169                |
| 2 | 104,550,000 | 104,700,000 | 1395 | 696  | 1.263872818  | MREG,PECR,TMEM169,XRCC5          |
| 2 | 104,625,000 | 104,775,000 | 1396 | 562  | 1.214066277  | PECR,TMEM169,XRCC5               |
| 2 | 104,700,000 | 104,850,000 | 1397 | 846  | 0.165041634  | MARCH4,XRCC5                     |
| 2 | 104,775,000 | 104,925,000 | 1398 | 1118 | -0.770373547 |                                  |
| 2 | 104,850,000 | 105,000,000 | 1399 | 961  | -0.460955539 | SHOX                             |
| 2 | 104,925,000 | 105,075,000 | 1400 | 1055 | 0.790007119  | SHOX                             |
| 2 | 105,000,000 | 105,150,000 | 1401 | 890  | 0.587420415  | SMARCAL1                         |
| 2 | 105,075,000 | 105,225,000 | 1402 | 590  | 0.027151983  | RPL37A,SMARCAL1                  |
| 2 | 105,150,000 | 105,300,000 | 1403 | 535  | 0.585955216  | RPL37A,SMARCAL1                  |
| 2 | 105,225,000 | 105,375,000 | 1404 | 494  | 0.073954972  | IGFBP2,ENSBTAG00000048210        |
| 2 | 105,300,000 | 105,450,000 | 1405 | 556  | -0.280353647 | IGFBP2,IGFBP5,ENSBTAG00000048210 |
| 2 | 105,375,000 | 105,525,000 | 1406 | 494  | 0.103222719  | IGFBP5,ENSBTAG00000048210        |
| 2 | 105,450,000 | 105,600,000 | 1407 | 491  | 0.59706501   | TNP1                             |
| 2 | 105,525,000 | 105,675,000 | 1408 | 680  | 0.617586442  | TNP1                             |
| 2 | 105,600,000 | 105,750,000 | 1409 | 951  | 0.324588265  |                                  |
| 2 | 105,675,000 | 105,825,000 | 1410 | 882  | 0.225541325  |                                  |
| 2 | 105,750,000 | 105,900,000 | 1411 | 768  | -0.432419074 |                                  |
| 2 | 105,825,000 | 105,975,000 | 1412 | 634  | -0.735944158 |                                  |
| 2 | 105,900,000 | 106,050,000 | 1413 | 389  | -0.772669462 |                                  |
| 2 | 105,975,000 | 106,125,000 | 1414 | 556  | -1.286705995 |                                  |

04-Mar

|   |             |             |      |      |              |                                                                                  |
|---|-------------|-------------|------|------|--------------|----------------------------------------------------------------------------------|
| 2 | 106,050,000 | 106,200,000 | 1415 | 601  | -0.563467169 |                                                                                  |
| 2 | 106,125,000 | 106,275,000 | 1416 | 513  | -0.792145649 |                                                                                  |
| 2 | 106,200,000 | 106,350,000 | 1417 | 624  | -0.189960356 |                                                                                  |
| 2 | 106,275,000 | 106,425,000 | 1418 | 445  | 0.392247365  |                                                                                  |
| 2 | 106,350,000 | 106,500,000 | 1419 | 304  | 0.912122186  |                                                                                  |
| 2 | 106,425,000 | 106,575,000 | 1420 | 479  | 0.277485132  |                                                                                  |
| 2 | 106,500,000 | 106,650,000 | 1421 | 565  | 0.264591537  | TNS1                                                                             |
| 2 | 106,575,000 | 106,725,000 | 1422 | 412  | 0.436926245  | TNS1                                                                             |
| 2 | 106,650,000 | 106,800,000 | 1423 | 323  | 0.295960085  | TNS1                                                                             |
| 2 | 106,725,000 | 106,875,000 | 1424 | 292  | 0.020226022  | TNS1                                                                             |
| 2 | 106,800,000 | 106,950,000 | 1425 | 374  | -0.456705989 | CXCR2,MGC157327                                                                  |
| 2 | 106,875,000 | 107,025,000 | 1426 | 448  | -0.659019918 | AAMP,ARPC2,CXCR2,GPBAR1,MGC157327,PNKD,RECS1                                     |
| 2 | 106,950,000 | 107,100,000 | 1427 | 313  | -0.383280816 | AAMP,ARPC2,GPBAR1,PNKD,RECS1                                                     |
| 2 | 107,025,000 | 107,175,000 | 1428 | 352  | 0.833810271  | CATIP,CTDSP1,PNKD,RECS1,SLC11A1,USP37,VIL1                                       |
| 2 | 107,100,000 | 107,250,000 | 1429 | 462  | 0.454848161  | CATIP,CTDSP1,SLC11A1,USP37,VIL1                                                  |
| 2 | 107,175,000 | 107,325,000 | 1430 | 588  | 0.218282954  | PLCD4,RQCD1,USP37,ZNF142                                                         |
| 2 | 107,250,000 | 107,400,000 | 1431 | 544  | -0.040415288 | BCS1L,PLCD4,RNF25,RQCD1,STK36,ZNF142                                             |
| 2 | 107,325,000 | 107,475,000 | 1432 | 367  | -0.631960307 | BCS1L,CYP27A1,RNF25,STK36,TLL4,ZNF142                                            |
| 2 | 107,400,000 | 107,550,000 | 1433 | 586  | -0.944655202 | CYP27A1,PRKAG3,TLL4,WNT6                                                         |
| 2 | 107,475,000 | 107,625,000 | 1434 | 532  | -0.803630545 | CDK5R2,CYP27A1,PRKAG3,WNT10A,WNT6                                                |
| 2 | 107,550,000 | 107,700,000 | 1435 | 288  | -0.304313387 | CCDC108,CDK5R2,CRYBA2,FEV,WNT10A,WNT6                                            |
| 2 | 107,625,000 | 107,775,000 | 1436 | 299  | -0.338108788 | CCDC108,CRYBA2,FEV,IHH,NHEJ1                                                     |
| 2 | 107,700,000 | 107,850,000 | 1437 | 266  | 0.30496168   | C2H2ORF24,CCDC108,IHH,NHEJ1,SLC23A3                                              |
| 2 | 107,775,000 | 107,925,000 | 1438 | 245  | -0.510199106 | ABCB6,ANKZF1,ATG9A,C2H2ORF24,C2ORF17,GLB1L,NHEJ1,SLC23A3,STK16,TUBA4A,ZFAND2B    |
| 2 | 107,850,000 | 108,000,000 | 1439 | 237  | -1.577760805 | ABCB6,ANKZF1,ATG9A,C2ORF17,DNAJB2,GLB1L,PTPRN,RESP18,STK16,TUBA1D,TUBA4A,ZFAND2B |
| 2 | 107,925,000 | 108,075,000 | 1440 | 227  | -0.569737811 | DNAJB2,DNPEP,PTPRN,RESP18,TUBA1D,TUBA4A                                          |
| 2 | 108,000,000 | 108,150,000 | 1441 | 274  | -0.045332841 | DES,DNPEP,SPEG                                                                   |
| 2 | 108,075,000 | 108,225,000 | 1442 | 338  | -0.503621563 | ASIC4,CHPF,DES,GMPPA,OBSL1,SPEG,TMEM198                                          |
| 2 | 108,150,000 | 108,300,000 | 1443 | 555  | -0.957155593 | ASIC4,CHPF,GMPPA,INHA,OBSL1,SLC4A3,STK11IP,TMEM198                               |
| 2 | 108,225,000 | 108,375,000 | 1444 | 774  | -0.72126993  | INHA,OBSL1,SLC4A3,STK11IP                                                        |
| 2 | 108,300,000 | 108,450,000 | 1445 | 897  | -0.112021345 |                                                                                  |
| 2 | 108,375,000 | 108,525,000 | 1446 | 1141 | 0.417607517  |                                                                                  |
| 2 | 108,450,000 | 108,600,000 | 1447 | 902  | 0.515664093  |                                                                                  |
| 2 | 108,525,000 | 108,675,000 | 1448 | 480  | -0.61682769  |                                                                                  |
| 2 | 108,600,000 | 108,750,000 | 1449 | 607  | -0.783325746 |                                                                                  |
| 2 | 108,675,000 | 108,825,000 | 1450 | 862  | 0.409226974  |                                                                                  |
| 2 | 108,750,000 | 108,900,000 | 1451 | 1038 | -0.076990963 |                                                                                  |
| 2 | 108,825,000 | 108,975,000 | 1452 | 1057 | -0.057529272 |                                                                                  |
| 2 | 108,900,000 | 109,050,000 | 1453 | 755  | 0.316248616  |                                                                                  |
| 2 | 108,975,000 | 109,125,000 | 1454 | 543  | -1.612973366 |                                                                                  |
| 2 | 109,050,000 | 109,200,000 | 1455 | 573  | -1.019171987 |                                                                                  |
| 2 | 109,125,000 | 109,275,000 | 1456 | 805  | 0.36654072   |                                                                                  |
| 2 | 109,200,000 | 109,350,000 | 1457 | 1022 | 0.767600721  |                                                                                  |
| 2 | 109,275,000 | 109,425,000 | 1458 | 735  | 1.060701471  |                                                                                  |
| 2 | 109,350,000 | 109,500,000 | 1459 | 852  | 0.743809659  |                                                                                  |
| 2 | 109,425,000 | 109,575,000 | 1460 | 799  | 0.682650452  |                                                                                  |
| 2 | 109,500,000 | 109,650,000 | 1461 | 333  | 0.310621006  |                                                                                  |
| 2 | 109,575,000 | 109,725,000 | 1462 | 481  | -0.320760983 |                                                                                  |
| 2 | 109,650,000 | 109,800,000 | 1463 | 618  | -0.458446045 |                                                                                  |
| 2 | 109,725,000 | 109,875,000 | 1464 | 658  | -0.379402518 |                                                                                  |

|   |             |             |      |      |              |                                 |
|---|-------------|-------------|------|------|--------------|---------------------------------|
| 2 | 109,800,000 | 109,950,000 | 1465 | 960  | 0.818522656  |                                 |
| 2 | 109,875,000 | 110,025,000 | 1466 | 812  | 1.226565561  |                                 |
| 2 | 109,950,000 | 110,100,000 | 1467 | 479  | 0.860986265  |                                 |
| 2 | 110,025,000 | 110,175,000 | 1468 | 437  | 0.862176964  |                                 |
| 2 | 110,100,000 | 110,250,000 | 1469 | 446  | 0.161556489  |                                 |
| 2 | 110,175,000 | 110,325,000 | 1470 | 454  | -0.142382683 | EPHA4                           |
| 2 | 110,250,000 | 110,400,000 | 1471 | 384  | -0.125844292 | EPHA4                           |
| 2 | 110,325,000 | 110,475,000 | 1472 | 473  | -0.948538963 | EPHA4                           |
| 2 | 110,400,000 | 110,550,000 | 1473 | 440  | -0.310752932 | EPHA4                           |
| 2 | 110,475,000 | 110,625,000 | 1474 | 563  | -0.159610336 |                                 |
| 2 | 110,550,000 | 110,700,000 | 1475 | 863  | 0.073162661  |                                 |
| 2 | 110,625,000 | 110,775,000 | 1476 | 1041 | -0.703925826 |                                 |
| 2 | 110,700,000 | 110,850,000 | 1477 | 852  | -1.813598836 |                                 |
| 2 | 110,775,000 | 110,925,000 | 1478 | 718  | -1.422695087 |                                 |
| 2 | 110,850,000 | 111,000,000 | 1479 | 698  | -0.29072245  |                                 |
| 2 | 110,925,000 | 111,075,000 | 1480 | 428  | -0.60870633  |                                 |
| 2 | 111,000,000 | 111,150,000 | 1481 | 435  | -1.119909226 | PAX3                            |
| 2 | 111,075,000 | 111,225,000 | 1482 | 502  | 0.570794917  | PAX3                            |
| 2 | 111,150,000 | 111,300,000 | 1483 | 490  | 0.810110076  | PAX3                            |
| 2 | 111,225,000 | 111,375,000 | 1484 | 400  | 0.113343173  | PAX3                            |
| 2 | 111,300,000 | 111,450,000 | 1485 | 693  | 0.163407407  | SGPP2                           |
| 2 | 111,375,000 | 111,525,000 | 1486 | 872  | -0.204453862 | FARSB,SGPP2                     |
| 2 | 111,450,000 | 111,600,000 | 1487 | 756  | -0.465618571 | FARSB,SGPP2,ENSBTAG00000000301  |
| 2 | 111,525,000 | 111,675,000 | 1488 | 733  | 0.338640644  | FARSB,MOGAT1,ENSBTAG00000000301 |
| 2 | 111,600,000 | 111,750,000 | 1489 | 757  | 0.540867109  | MOGAT1,ENSBTAG00000000301       |
| 2 | 111,675,000 | 111,825,000 | 1490 | 670  | 0.391432739  | ACSL3,RPS6                      |
| 2 | 111,750,000 | 111,900,000 | 1491 | 355  | -0.023352952 | ACSL3,RPS6                      |
| 2 | 111,825,000 | 111,975,000 | 1492 | 564  | 0.570788212  | ACSL3                           |
| 2 | 111,900,000 | 112,050,000 | 1493 | 650  | 0.750787092  | KCNE4                           |
| 2 | 111,975,000 | 112,125,000 | 1494 | 574  | 0.479862921  | KCNE4                           |
| 2 | 112,050,000 | 112,200,000 | 1495 | 593  | 0.620856118  |                                 |
| 2 | 112,125,000 | 112,275,000 | 1496 | 614  | 0.679540448  |                                 |
| 2 | 112,200,000 | 112,350,000 | 1497 | 834  | -1.174794746 |                                 |
| 2 | 112,275,000 | 112,425,000 | 1498 | 752  | -2.043661123 |                                 |
| 2 | 112,350,000 | 112,500,000 | 1499 | 558  | -1.094665679 |                                 |
| 2 | 112,425,000 | 112,575,000 | 1500 | 422  | -0.213271739 | SCG2                            |
| 2 | 112,500,000 | 112,650,000 | 1501 | 628  | -0.303568487 | SCG2                            |
| 2 | 112,575,000 | 112,725,000 | 1502 | 685  | -0.187458915 | AP1S3                           |
| 2 | 112,650,000 | 112,800,000 | 1503 | 597  | 0.847892615  | AP1S3,WDFY1                     |
| 2 | 112,725,000 | 112,875,000 | 1504 | 718  | 0.908892696  | AP1S3,MRPL44,SERPINE2,WDFY1     |
| 2 | 112,800,000 | 112,950,000 | 1505 | 689  | 0.834532209  | MRPL44,SERPINE2,WDFY1           |
| 2 | 112,875,000 | 113,025,000 | 1506 | 546  | 0.888065285  | SERPINE2                        |
| 2 | 112,950,000 | 113,100,000 | 1507 | 528  | 0.413397909  |                                 |
| 2 | 113,025,000 | 113,175,000 | 1508 | 661  | 0.074950581  |                                 |
| 2 | 113,100,000 | 113,250,000 | 1509 | 691  | -0.811992657 |                                 |
| 2 | 113,175,000 | 113,325,000 | 1510 | 855  | -1.333141824 | FAM124B                         |
| 2 | 113,250,000 | 113,400,000 | 1511 | 797  | -0.285982068 | CUL3,FAM124B                    |
| 2 | 113,325,000 | 113,475,000 | 1512 | 570  | -0.131161459 | CUL3                            |
| 2 | 113,400,000 | 113,550,000 | 1513 | 582  | -0.354995412 | CUL3                            |
| 2 | 113,475,000 | 113,625,000 | 1514 | 1028 | 0.48582693   | CUL3                            |
| 2 | 113,550,000 | 113,700,000 | 1515 | 1248 | 0.402335346  | DOCK10                          |
| 2 | 113,625,000 | 113,775,000 | 1516 | 1192 | 0.940311698  | DOCK10                          |
| 2 | 113,700,000 | 113,850,000 | 1517 | 1071 | 1.200284406  | DOCK10                          |

|   |             |             |      |      |              |                                |
|---|-------------|-------------|------|------|--------------|--------------------------------|
| 2 | 113,775,000 | 113,925,000 | 1518 | 981  | 0.304332781  | DOCK10                         |
| 2 | 113,850,000 | 114,000,000 | 1519 | 1172 | 0.581984052  | DOCK10                         |
| 2 | 113,925,000 | 114,075,000 | 1520 | 1282 | 0.733715336  |                                |
| 2 | 114,000,000 | 114,150,000 | 1521 | 1204 | -0.079191878 |                                |
| 2 | 114,075,000 | 114,225,000 | 1522 | 924  | -0.063244121 |                                |
| 2 | 114,150,000 | 114,300,000 | 1523 | 837  | 0.867184613  |                                |
| 2 | 114,225,000 | 114,375,000 | 1524 | 867  | 0.954541928  | NYAP2                          |
| 2 | 114,300,000 | 114,450,000 | 1525 | 1056 | 0.935525537  | NYAP2                          |
| 2 | 114,375,000 | 114,525,000 | 1526 | 1327 | 0.794840026  | NYAP2                          |
| 2 | 114,450,000 | 114,600,000 | 1527 | 942  | 0.607443735  | NYAP2                          |
| 2 | 114,525,000 | 114,675,000 | 1528 | 568  | 0.450709852  | NYAP2                          |
| 2 | 114,600,000 | 114,750,000 | 1529 | 658  | -0.405628454 |                                |
| 2 | 114,675,000 | 114,825,000 | 1530 | 623  | -0.190488552 |                                |
| 2 | 114,750,000 | 114,900,000 | 1531 | 717  | 1.059812777  |                                |
| 2 | 114,825,000 | 114,975,000 | 1532 | 673  | 0.806065794  |                                |
| 2 | 114,900,000 | 115,050,000 | 1533 | 507  | -0.073533994 |                                |
| 2 | 114,975,000 | 115,125,000 | 1534 | 639  | -0.09066403  |                                |
| 2 | 115,050,000 | 115,200,000 | 1535 | 845  | 0.245484572  |                                |
| 2 | 115,125,000 | 115,275,000 | 1536 | 690  | 0.114359285  |                                |
| 2 | 115,200,000 | 115,350,000 | 1537 | 375  | -0.448419388 |                                |
| 2 | 115,275,000 | 115,425,000 | 1538 | 333  | -0.132697364 |                                |
| 2 | 115,350,000 | 115,500,000 | 1539 | 377  | 0.263470954  |                                |
| 2 | 115,425,000 | 115,575,000 | 1540 | 450  | 0.179969686  |                                |
| 2 | 115,500,000 | 115,650,000 | 1541 | 722  | 0.576715033  |                                |
| 2 | 115,575,000 | 115,725,000 | 1542 | 766  | 0.712994833  |                                |
| 2 | 115,650,000 | 115,800,000 | 1543 | 466  | 0.456236627  | IRS1                           |
| 2 | 115,725,000 | 115,875,000 | 1544 | 414  | 0.403434091  | IRS1,RHBDD1,ENSBTAG00000023964 |
| 2 | 115,800,000 | 115,950,000 | 1545 | 572  | 0.678007017  | RHBDD1,ENSBTAG00000023964      |
| 2 | 115,875,000 | 116,025,000 | 1546 | 577  | 0.37479146   | COL4A4,RHBDD1                  |
| 2 | 115,950,000 | 116,100,000 | 1547 | 788  | -0.055022406 | COL4A4,RHBDD1                  |
| 2 | 116,025,000 | 116,175,000 | 1548 | 942  | -0.227484393 | COL4A3,COL4A4                  |
| 2 | 116,100,000 | 116,250,000 | 1549 | 495  | -0.40983911  | COL4A3,COL4A4                  |
| 2 | 116,175,000 | 116,325,000 | 1550 | 443  | 0.497771452  | C2H2ORF33,COL4A3               |
| 2 | 116,250,000 | 116,400,000 | 1551 | 719  | 0.192388374  | C2H2ORF33,COL4A3,TM4SF20       |
| 2 | 116,325,000 | 116,475,000 | 1552 | 545  | -0.630011633 | AGFG1,C2H2ORF33,TM4SF20        |
| 2 | 116,400,000 | 116,550,000 | 1553 | 295  | -1.902024308 | AGFG1                          |
| 2 | 116,475,000 | 116,625,000 | 1554 | 457  | -0.171173472 | AGFG1,SLC19A3                  |
| 2 | 116,550,000 | 116,700,000 | 1555 | 662  | 0.320761577  | SLC19A3                        |
| 2 | 116,625,000 | 116,775,000 | 1556 | 794  | 0.264501687  | CCL20,SLC19A3                  |
| 2 | 116,700,000 | 116,850,000 | 1557 | 802  | -0.351195891 | CCL20,DAW1                     |
| 2 | 116,775,000 | 116,925,000 | 1558 | 724  | -0.593728536 | DAW1,SPHKAP                    |
| 2 | 116,850,000 | 117,000,000 | 1559 | 934  | 0.623665292  | SPHKAP                         |
| 2 | 116,925,000 | 117,075,000 | 1560 | 878  | 0.317401761  | SPHKAP                         |
| 2 | 117,000,000 | 117,150,000 | 1561 | 850  | -1.227667186 |                                |
| 2 | 117,075,000 | 117,225,000 | 1562 | 690  | -0.403777279 |                                |
| 2 | 117,150,000 | 117,300,000 | 1563 | 488  | 0.957176927  |                                |
| 2 | 117,225,000 | 117,375,000 | 1564 | 870  | 1.180019104  |                                |
| 2 | 117,300,000 | 117,450,000 | 1565 | 979  | 1.078963344  |                                |
| 2 | 117,375,000 | 117,525,000 | 1566 | 770  | 0.552622277  |                                |
| 2 | 117,450,000 | 117,600,000 | 1567 | 830  | -0.003233359 |                                |
| 2 | 117,525,000 | 117,675,000 | 1568 | 815  | -0.913969036 |                                |
| 2 | 117,600,000 | 117,750,000 | 1569 | 430  | -1.72572822  |                                |
| 2 | 117,675,000 | 117,825,000 | 1570 | 224  | 0.120655301  |                                |

|   |             |             |      |     |              |                                                                                   |
|---|-------------|-------------|------|-----|--------------|-----------------------------------------------------------------------------------|
| 2 | 117,750,000 | 117,900,000 | 1571 | 504 | 1.09901586   | PID1                                                                              |
| 2 | 117,825,000 | 117,975,000 | 1572 | 732 | 1.014443634  | PID1                                                                              |
| 2 | 117,900,000 | 118,050,000 | 1573 | 667 | 0.727025207  | PID1                                                                              |
| 2 | 117,975,000 | 118,125,000 | 1574 | 645 | 0.845394308  | PID1                                                                              |
| 2 | 118,050,000 | 118,200,000 | 1575 | 635 | 1.026722859  | DNER,PID1                                                                         |
| 2 | 118,125,000 | 118,275,000 | 1576 | 634 | -0.311570873 | DNER                                                                              |
| 2 | 118,200,000 | 118,350,000 | 1577 | 775 | -0.330132588 | DNER                                                                              |
| 2 | 118,275,000 | 118,425,000 | 1578 | 835 | 1.258899418  | DNER                                                                              |
| 2 | 118,350,000 | 118,500,000 | 1579 | 681 | 1.095593941  | DNER                                                                              |
| 2 | 118,425,000 | 118,575,000 | 1580 | 532 | -0.26380639  | DNER                                                                              |
| 2 | 118,500,000 | 118,650,000 | 1581 | 336 | -1.982204657 | MGC127538,TRIP12                                                                  |
| 2 | 118,575,000 | 118,725,000 | 1582 | 204 | -3.152083542 | MGC127538,TRIP12                                                                  |
| 2 | 118,650,000 | 118,800,000 | 1583 | 285 | -0.927340417 | FBXO36,TRIP12                                                                     |
| 2 | 118,725,000 | 118,875,000 | 1584 | 536 | 0.592873782  | FBXO36,TRIP12                                                                     |
| 2 | 118,800,000 | 118,950,000 | 1585 | 793 | 0.582383285  | FBXO36,SLC16A14,SP140L                                                            |
| 2 | 118,875,000 | 119,025,000 | 1586 | 915 | -0.830855581 | FBXO36,SLC16A14,SP140L                                                            |
| 2 | 118,950,000 | 119,100,000 | 1587 | 834 | -1.674285438 | SP110,SP140L,ENSBTAG00000007280,ENSBTAG00000047133                                |
| 2 | 119,025,000 | 119,175,000 | 1588 | 694 | -1.110212557 | SP110,SP140L,ENSBTAG00000007280,ENSBTAG00000037989,ENSBTAG00000047133             |
| 2 | 119,100,000 | 119,250,000 | 1589 | 930 | 0.03100256   | SP110,SP140L,ENSBTAG00000037989,ENSBTAG00000038710                                |
| 2 | 119,175,000 | 119,325,000 | 1590 | 845 | 0.638148672  | SP140L,ENSBTAG00000038710                                                         |
| 2 | 119,250,000 | 119,400,000 | 1591 | 503 | -0.697086254 | CAB39,ENSBTAG00000038710                                                          |
| 2 | 119,325,000 | 119,475,000 | 1592 | 566 | -1.679776272 | CAB39                                                                             |
| 2 | 119,400,000 | 119,550,000 | 1593 | 643 | -1.473851391 | CAB39,GPR55,ITM2C                                                                 |
| 2 | 119,475,000 | 119,625,000 | 1594 | 802 | -2.111035416 | GPR55,ITM2C,SPATA3                                                                |
| 2 | 119,550,000 | 119,700,000 | 1595 | 806 | -1.813733611 | C2orf72,PSMD1,SPATA3                                                              |
| 2 | 119,625,000 | 119,775,000 | 1596 | 604 | -1.872766279 | 5HTR2B,C2orf72,PSMD1,SPATA3                                                       |
| 2 | 119,700,000 | 119,850,000 | 1597 | 632 | -2.596496901 | 5HTR2B,ARMC9,PSMD1                                                                |
| 2 | 119,775,000 | 119,925,000 | 1598 | 592 | -2.163193901 | ARMC9                                                                             |
| 2 | 119,850,000 | 120,000,000 | 1599 | 507 | -1.319285688 | ARMC9,B3GNT7                                                                      |
| 2 | 119,925,000 | 120,075,000 | 1600 | 471 | -0.094674532 | ARMC9,B3GNT7,NCL,ENSBTAG00000001357                                               |
| 2 | 120,000,000 | 120,150,000 | 1601 | 551 | -0.441798909 | C2orf57,NCL,NMUR1,ENSBTAG00000001357                                              |
| 2 | 120,075,000 | 120,225,000 | 1602 | 463 | -1.132659225 | C2orf57,NMUR1                                                                     |
| 2 | 120,150,000 | 120,300,000 | 1603 | 194 | -2.748157496 | PDE6D,PTMA,ENSBTAG00000014988                                                     |
| 2 | 120,225,000 | 120,375,000 | 1604 | 242 | -1.742288646 | COPS7B,PDE6D,PTMA,ENSBTAG00000014988                                              |
| 2 | 120,300,000 | 120,450,000 | 1605 | 281 | -0.095235601 | COPS7B,NPPC,PDE6D                                                                 |
| 2 | 120,375,000 | 120,525,000 | 1606 | 219 | 0.813965713  | DIS3L2,NPPC                                                                       |
| 2 | 120,450,000 | 120,600,000 | 1607 | 180 | 0.476463103  | DIS3L2                                                                            |
| 2 | 120,525,000 | 120,675,000 | 1608 | 190 | 0.561371205  | DIS3L2                                                                            |
| 2 | 120,600,000 | 120,750,000 | 1609 | 240 | 1.07061103   | DIS3L2                                                                            |
| 2 | 120,675,000 | 120,825,000 | 1610 | 337 | 1.023452121  | DIS3L2                                                                            |
| 2 | 120,750,000 | 120,900,000 | 1611 | 719 | 0.139441054  | DIS3L2,ENSBTAG00000016748,ENSBTAG00000039346                                      |
| 2 | 120,825,000 | 120,975,000 | 1612 | 785 | 0.131042846  | ECEL1,ENSBTAG00000004519,ENSBTAG00000012363,ENSBTAG00000016748,ENSBTAG00000039346 |
| 2 | 120,900,000 | 121,050,000 | 1613 | 618 | 0.962760474  | CHRND,CHRNG,ECEL1,EIF4E2,ENSBTAG00000004519,ENSBTAG00000012363                    |
| 2 | 120,975,000 | 121,125,000 | 1614 | 627 | 0.904355711  | CHRND,CHRNG,EIF4E2,ENSBTAG00000045513                                             |
| 2 | 121,050,000 | 121,200,000 | 1615 | 445 | 0.781785787  | PHC2,ENSBTAG00000045513                                                           |
| 2 | 121,125,000 | 121,275,000 | 1616 | 316 | 0.802105072  | A3GALT2,PHC2,ZNF362                                                               |
| 2 | 121,200,000 | 121,350,000 | 1617 | 227 | 0.290699772  | A3GALT2,PHC2,TRIM62,ZNF362                                                        |
| 2 | 121,275,000 | 121,425,000 | 1618 | 371 | -0.432151582 | AZIN2,TRIM62                                                                      |

|   |             |             |      |      |              |                                                                                                           |
|---|-------------|-------------|------|------|--------------|-----------------------------------------------------------------------------------------------------------|
| 2 | 121,350,000 | 121,500,000 | 1619 | 461  | 0.036261764  | AK2,AZIN2,TRIM62                                                                                          |
| 2 | 121,425,000 | 121,575,000 | 1620 | 253  | 0.812100555  | AK2,AZIN2,RNF19B                                                                                          |
| 2 | 121,500,000 | 121,650,000 | 1621 | 187  | 0.838185619  | AK2,FNDC5,HPCA,RNF19B,S100PBP,TMEM54                                                                      |
| 2 | 121,575,000 | 121,725,000 | 1622 | 254  | 0.242937482  | FNDC5,HPCA,KIAA1522,RNF19B,S100PBP,TMEM54,YARS                                                            |
| 2 | 121,650,000 | 121,800,000 | 1623 | 570  | -1.766606423 | KIAA1522,S100PBP,SYNC,YARS                                                                                |
| 2 | 121,725,000 | 121,875,000 | 1624 | 705  | -1.274670921 | RBBP4,SYNC,ZBTB8A,ZBTB8OS                                                                                 |
| 2 | 121,800,000 | 121,950,000 | 1625 | 640  | -0.095934962 | RBBP4,SYNC,ZBTB8A,ZBTB8OS                                                                                 |
| 2 | 121,875,000 | 122,025,000 | 1626 | 975  | 0.372158694  | BSDC1,ZBTB8A,ENSBTAG00000046044                                                                           |
| 2 | 121,950,000 | 122,100,000 | 1627 | 834  | 0.696048514  | BSDC1,FAM229A,HDAC1,LCK,MARCKSL1,TSSK3,ENSBTAG00000046044                                                 |
| 2 | 122,025,000 | 122,175,000 | 1628 | 445  | 0.295813911  | BSDC1,CCDC28B,DCDC2B,EIF3I,FAM167B,FAM229A,HDAC1,IQCC,LCK,MARCKSL1,MTMR9,TMEM234,TSSK3,ENSBTAG00000027930 |
| 2 | 122,100,000 | 122,250,000 | 1629 | 516  | 0.468027254  | CCDC28B,DCDC2B,EIF3I,FAM167B,IQCC,KHDRBS1,LCK,MTMR9,TMEM234,TMEM39B,ENSBTAG00000027930                    |
| 2 | 122,175,000 | 122,325,000 | 1630 | 723  | 0.70377668   | KHDRBS1,TMEM39B                                                                                           |
| 2 | 122,250,000 | 122,400,000 | 1631 | 666  | 1.019405135  | KHDRBS1,PTP4A2                                                                                            |
| 2 | 122,325,000 | 122,475,000 | 1632 | 436  | 0.928352861  | PTP4A2,SPOCD1                                                                                             |
| 2 | 122,400,000 | 122,550,000 | 1633 | 424  | 0.276614026  | BAI2,SPOCD1                                                                                               |
| 2 | 122,475,000 | 122,625,000 | 1634 | 420  | 0.245422189  | BAI2,COL16A1,PEF1                                                                                         |
| 2 | 122,550,000 | 122,700,000 | 1635 | 374  | 0.766931149  | COL16A1,HCRTR1,PEF1,TINAGL1                                                                               |
| 2 | 122,625,000 | 122,775,000 | 1636 | 491  | 0.963457727  | FABP3,HCRTR1,PEF1,TINAGL1,ENSBTAG00000039994                                                              |
| 2 | 122,700,000 | 122,850,000 | 1637 | 611  | 0.698172234  | FABP3,SERINC2,ZCCHC17,ENSBTAG00000039994                                                                  |
| 2 | 122,775,000 | 122,925,000 | 1638 | 435  | 0.334490597  | FABP3,SERINC2,SNRNP40,ZCCHC17                                                                             |
| 2 | 122,850,000 | 123,000,000 | 1639 | 302  | 0.441681129  | NKAIN1,SNRNP40,ZCCHC17                                                                                    |
| 2 | 122,925,000 | 123,075,000 | 1640 | 483  | 0.227767891  | NKAIN1,PUM1                                                                                               |
| 2 | 123,000,000 | 123,150,000 | 1641 | 502  | 0.06649305   | PUM1                                                                                                      |
| 2 | 123,075,000 | 123,225,000 | 1642 | 388  | 0.662644522  | PUM1                                                                                                      |
| 2 | 123,150,000 | 123,300,000 | 1643 | 353  | 0.584119261  | PUM1,SDC3                                                                                                 |
| 2 | 123,225,000 | 123,375,000 | 1644 | 618  | 1.12217324   | LAPTM5,SDC3                                                                                               |
| 2 | 123,300,000 | 123,450,000 | 1645 | 1054 | 0.774565625  | LAPTM5,MATN1                                                                                              |
| 2 | 123,375,000 | 123,525,000 | 1646 | 1209 | 0.44009797   | LAPTM5,MATN1                                                                                              |
| 2 | 123,450,000 | 123,600,000 | 1647 | 1265 | 0.116148812  |                                                                                                           |
| 2 | 123,525,000 | 123,675,000 | 1648 | 1097 | 0.308625285  |                                                                                                           |
| 2 | 123,600,000 | 123,750,000 | 1649 | 1391 | 0.796156939  |                                                                                                           |
| 2 | 123,675,000 | 123,825,000 | 1650 | 1502 | 0.841529261  |                                                                                                           |
| 2 | 123,750,000 | 123,900,000 | 1651 | 936  | 1.043377769  |                                                                                                           |
| 2 | 123,825,000 | 123,975,000 | 1652 | 892  | 0.83930523   |                                                                                                           |
| 2 | 123,900,000 | 124,050,000 | 1653 | 1032 | 1.07244954   |                                                                                                           |
| 2 | 123,975,000 | 124,125,000 | 1654 | 828  | 0.517445041  |                                                                                                           |
| 2 | 124,050,000 | 124,200,000 | 1655 | 567  | -0.185906341 |                                                                                                           |
| 2 | 124,125,000 | 124,275,000 | 1656 | 541  | 0.016565793  |                                                                                                           |
| 2 | 124,200,000 | 124,350,000 | 1657 | 911  | -0.694024793 |                                                                                                           |
| 2 | 124,275,000 | 124,425,000 | 1658 | 1011 | -0.231594261 |                                                                                                           |
| 2 | 124,350,000 | 124,500,000 | 1659 | 694  | 0.780982431  |                                                                                                           |
| 2 | 124,425,000 | 124,575,000 | 1660 | 626  | -1.287188008 |                                                                                                           |
| 2 | 124,500,000 | 124,650,000 | 1661 | 620  | -1.576629518 |                                                                                                           |
| 2 | 124,575,000 | 124,725,000 | 1662 | 632  | 0.198490373  |                                                                                                           |
| 2 | 124,650,000 | 124,800,000 | 1663 | 595  | 0.602113053  |                                                                                                           |
| 2 | 124,725,000 | 124,875,000 | 1664 | 588  | 0.381807123  | PTPRU                                                                                                     |
| 2 | 124,800,000 | 124,950,000 | 1665 | 565  | -0.247057364 | MECR,PTPRU                                                                                                |
| 2 | 124,875,000 | 125,025,000 | 1666 | 379  | -0.402939375 | EPB41,MECR,PTPRU,SFRS4,TMEM200B                                                                           |
| 2 | 124,950,000 | 125,100,000 | 1667 | 388  | 0.975760754  | EPB41,SFRS4,TMEM200B                                                                                      |

|   |             |             |      |      |              |                                                                                                                       |
|---|-------------|-------------|------|------|--------------|-----------------------------------------------------------------------------------------------------------------------|
| 2 | 125,025,000 | 125,175,000 | 1668 | 718  | 1.072079326  | EPB41                                                                                                                 |
| 2 | 125,100,000 | 125,250,000 | 1669 | 778  | 0.563395301  | EPB41,OPRD1                                                                                                           |
| 2 | 125,175,000 | 125,325,000 | 1670 | 499  | 0.434417209  | OPRD1,YTHDF2                                                                                                          |
| 2 | 125,250,000 | 125,400,000 | 1671 | 377  | 1.088631075  | GMEB1,OPRD1,TAF12,YTHDF2                                                                                              |
| 2 | 125,325,000 | 125,475,000 | 1672 | 349  | 1.159749033  | GMEB1,RAB42,RCC1,TAF12,TRNAU1AP,ENSBTAG0000004<br>8228                                                                |
| 2 | 125,400,000 | 125,550,000 | 1673 | 300  | 1.201960403  | PHACTR4,RAB42,RCC1,TAF12,TRNAU1AP,ENSBTAG00000<br>048228                                                              |
| 2 | 125,475,000 | 125,625,000 | 1674 | 299  | 0.783411086  | PHACTR4,RCC1,ENSBTAG00000003676                                                                                       |
| 2 | 125,550,000 | 125,700,000 | 1675 | 415  | 0.725848853  | MED18,PHACTR4,SESN2,ENSBTAG00000003676                                                                                |
| 2 | 125,625,000 | 125,775,000 | 1676 | 488  | 1.028226632  | ATPIF1,DNAJC8,MED18,SESN2                                                                                             |
| 2 | 125,700,000 | 125,850,000 | 1677 | 599  | 0.657486345  | ATPIF1,DNAJC8,PTAFR,SESN2,ENSBTAG00000009937                                                                          |
| 2 | 125,775,000 | 125,925,000 | 1678 | 648  | -0.128866317 | EYA3,PTAFR,ENSBTAG00000009937                                                                                         |
| 2 | 125,850,000 | 126,000,000 | 1679 | 795  | 0.139705931  | EYA3,SMPDL3B,XKR8                                                                                                     |
| 2 | 125,925,000 | 126,075,000 | 1680 | 1017 | -0.260589734 | EYA3,RPA2,SMPDL3B,THEMIS2,XKR8                                                                                        |
| 2 | 126,000,000 | 126,150,000 | 1681 | 911  | -1.74344239  | PPP1R8,RPA2,SMPDL3B,STX12,THEMIS2,ENSBTAG000000<br>03867                                                              |
| 2 | 126,075,000 | 126,225,000 | 1682 | 623  | -2.26688876  | FAM76A,PPP1R8,STX12,ENSBTAG00000003867                                                                                |
| 2 | 126,150,000 | 126,300,000 | 1683 | 451  | 0.53142693   | FAM76A,FGR,IFI6,STX12                                                                                                 |
| 2 | 126,225,000 | 126,375,000 | 1684 | 301  | 0.305488852  | AHDC1,FGR,IFI6                                                                                                        |
| 2 | 126,300,000 | 126,450,000 | 1685 | 158  | -0.244995875 | AHDC1,WASF2                                                                                                           |
| 2 | 126,375,000 | 126,525,000 | 1686 | 171  | 0.029041025  | CD164L2,GPR3,MAP3K6,SYTL1,WASF2                                                                                       |
| 2 | 126,450,000 | 126,600,000 | 1687 | 261  | 0.106804698  | CD164L2,GPR3,MAP3K6,SYTL1,TMEM222,WASF2                                                                               |
| 2 | 126,525,000 | 126,675,000 | 1688 | 347  | -0.122271391 | SYTL1,TMEM222                                                                                                         |
| 2 | 126,600,000 | 126,750,000 | 1689 | 429  | -1.586606686 | SLC9A1                                                                                                                |
| 2 | 126,675,000 | 126,825,000 | 1690 | 472  | -1.500473334 | FAM46B,SLC9A1                                                                                                         |
| 2 | 126,750,000 | 126,900,000 | 1691 | 365  | -0.836344508 | FAM46B,MGC159903,NR0B2,NUDC                                                                                           |
| 2 | 126,825,000 | 126,975,000 | 1692 | 331  | -1.603498136 | GPATCH3,GPN2,MGC159903,NR0B2,NUDC,SFN,ZDHHC18                                                                         |
| 2 | 126,900,000 | 127,050,000 | 1693 | 363  | -0.506595455 | ARID1A,GPATCH3,GPN2,PIGV,SFN,ZDHHC18                                                                                  |
| 2 | 126,975,000 | 127,125,000 | 1694 | 354  | 0.673637351  | ARID1A,PIGV                                                                                                           |
| 2 | 127,050,000 | 127,200,000 | 1695 | 424  | 1.378160465  | ARID1A,RPS6KA1                                                                                                        |
| 2 | 127,125,000 | 127,275,000 | 1696 | 465  | 1.179901479  | DHDDS,RPS6KA1,ENSBTAG00000038104                                                                                      |
| 2 | 127,200,000 | 127,350,000 | 1697 | 438  | -0.18945157  | DHDDS,RPS6KA1,ENSBTAG00000038104,ENSBTAG000000<br>40497                                                               |
| 2 | 127,275,000 | 127,425,000 | 1698 | 425  | -2.394503158 | AIM1L,CD52,DHDDS,UBXN11,ZNF683,ENSBTAG0000004<br>497                                                                  |
| 2 | 127,350,000 | 127,500,000 | 1699 | 425  | -2.337818577 | AIM1L,CATSPER4,CD52,CEP85,SH3BGRL3,UBXN11,ZNF683<br>,ENSBTAG00000039276                                               |
| 2 | 127,425,000 | 127,575,000 | 1700 | 351  | 0.032784801  | CATSPER4,CEP85,FAM110D,PDIK1L,SH3BGRL3,UBXN11,Z<br>NF593,ENSBTAG00000019399,ENSBTAG00000039276,ENS<br>BTAG00000047148 |
| 2 | 127,500,000 | 127,650,000 | 1701 | 478  | -0.199809119 | EXTL1,FAM110D,PDIK1L,SLC30A2,TRIM63,ZNF593,ENSBTA<br>G00000019399,ENSBTAG00000047148                                  |
| 2 | 127,575,000 | 127,725,000 | 1702 | 601  | 0.331208676  | EXTL1,PAFAH2,SLC30A2,TRIM63                                                                                           |
| 2 | 127,650,000 | 127,800,000 | 1703 | 470  | 0.78471668   | EXTL1,PAFAH2,STMN1                                                                                                    |
| 2 | 127,725,000 | 127,875,000 | 1704 | 437  | -0.137926914 | AUNIP,MTFR1L,PAQR7,SEPN1,STMN1                                                                                        |
| 2 | 127,800,000 | 127,950,000 | 1705 | 742  | 0.819478806  | AUNIP,MAN1C1,MTFR1L,PAQR7,SEPN1                                                                                       |
| 2 | 127,875,000 | 128,025,000 | 1706 | 905  | 1.040977309  | MAN1C1                                                                                                                |
| 2 | 127,950,000 | 128,100,000 | 1707 | 666  | 0.367769608  | LDLRAP1,MAN1C1                                                                                                        |
| 2 | 128,025,000 | 128,175,000 | 1708 | 470  | 0.026071666  | LDLRAP1,TMEM57                                                                                                        |
| 2 | 128,100,000 | 128,250,000 | 1709 | 432  | 0.057539782  | LDLRAP1,TMEM57,ENSBTAG00000001297                                                                                     |
| 2 | 128,175,000 | 128,325,000 | 1710 | 627  | 0.250375388  | RSRP1,SYF2,TMEM50A,TMEM57,ENSBTAG00000001297                                                                          |

|   |             |             |      |      |              |                                                                  |
|---|-------------|-------------|------|------|--------------|------------------------------------------------------------------|
| 2 | 128,250,000 | 128,400,000 | 1711 | 779  | -0.297269513 | RSRP1,SYF2,TMEM50A,ENSBTAG00000001297                            |
| 2 | 128,325,000 | 128,475,000 | 1712 | 658  | -0.509179115 | SYF2                                                             |
| 2 | 128,400,000 | 128,550,000 | 1713 | 479  | 0.249199919  |                                                                  |
| 2 | 128,475,000 | 128,625,000 | 1714 | 551  | 0.685607689  |                                                                  |
| 2 | 128,550,000 | 128,700,000 | 1715 | 730  | 0.26200728   | RUNX3                                                            |
| 2 | 128,625,000 | 128,775,000 | 1716 | 575  | 0.064949879  | CLIC4,RUNX3                                                      |
| 2 | 128,700,000 | 128,850,000 | 1717 | 643  | 0.714782404  | CLIC4,SRRM1                                                      |
| 2 | 128,775,000 | 128,925,000 | 1718 | 939  | 0.541476717  | CLIC4,NCMAP,SRRM1                                                |
| 2 | 128,850,000 | 129,000,000 | 1719 | 906  | 0.227795489  | NCMAP,RCAN3,SRRM1                                                |
| 2 | 128,925,000 | 129,075,000 | 1720 | 711  | 0.260262951  | NCMAP,NIPAL3,RCAN3                                               |
| 2 | 129,000,000 | 129,150,000 | 1721 | 849  | 0.729715085  | NIPAL3,RCAN3,STPG1                                               |
| 2 | 129,075,000 | 129,225,000 | 1722 | 1155 | 0.763956655  | GRHL3,NIPAL3,STPG1                                               |
| 2 | 129,150,000 | 129,300,000 | 1723 | 1054 | 0.79055975   | GRHL3,STPG1                                                      |
| 2 | 129,225,000 | 129,375,000 | 1724 | 1236 | 0.846052437  | IFNLR1,IL22RA1                                                   |
| 2 | 129,300,000 | 129,450,000 | 1725 | 1477 | 0.859357606  | IFNLR1,IL22RA1,MYOM3                                             |
| 2 | 129,375,000 | 129,525,000 | 1726 | 1116 | 0.810890981  | FUSIP1,IL22RA1,MYOM3                                             |
| 2 | 129,450,000 | 129,600,000 | 1727 | 758  | 0.779537558  | CNR2,FUSIP1,PNRC2                                                |
| 2 | 129,525,000 | 129,675,000 | 1728 | 617  | 0.290331666  | CNR2,FUCA1,FUSIP1,PNRC2                                          |
| 2 | 129,600,000 | 129,750,000 | 1729 | 436  | -1.425018253 | CNR2,FUCA1,GALE,HMGCL,LYPLA2,MGC159500,TCEB3,ENSBTAG00000047467  |
| 2 | 129,675,000 | 129,825,000 | 1730 | 440  | 0.03225045   | FUCA1,GALE,HMGCL,LYPLA2,MGC159500,RPL11,TCEB3,ENSBTAG00000047467 |
| 2 | 129,750,000 | 129,900,000 | 1731 | 506  | 0.724129604  | ID3,RPL11,TCEB3                                                  |
| 2 | 129,825,000 | 129,975,000 | 1732 | 571  | 0.813884986  | ASAP3,E2F2,ID3                                                   |
| 2 | 129,900,000 | 130,050,000 | 1733 | 549  | 1.005205325  | ASAP3,E2F2,TCEA3                                                 |
| 2 | 129,975,000 | 130,125,000 | 1734 | 414  | 1.113797873  | ASAP3,HNRNPR,TCEA3,ZNF436                                        |
| 2 | 130,050,000 | 130,200,000 | 1735 | 509  | 0.974004005  | HNRNPR,TCEA3,ZNF436                                              |
| 2 | 130,125,000 | 130,275,000 | 1736 | 554  | 0.585004071  | HNRNPR,HTR1D                                                     |
| 2 | 130,200,000 | 130,350,000 | 1737 | 398  | 0.542362419  | HTR1D                                                            |
| 2 | 130,275,000 | 130,425,000 | 1738 | 294  | 0.564231318  | KDM1A,LUZP1                                                      |
| 2 | 130,350,000 | 130,500,000 | 1739 | 511  | 0.418849663  | EPHB2,KDM1A,LACTBL1,LUZP1                                        |
| 2 | 130,425,000 | 130,575,000 | 1740 | 1092 | 0.997266853  | EPHB2,KDM1A,LACTBL1                                              |
| 2 | 130,500,000 | 130,650,000 | 1741 | 1416 | 0.608543245  | EPHB2                                                            |
| 2 | 130,575,000 | 130,725,000 | 1742 | 938  | -0.175007434 |                                                                  |
| 2 | 130,650,000 | 130,800,000 | 1743 | 771  | -0.094722671 | C1QA,C1QB,C1QC,ENSBTAG00000011195                                |
| 2 | 130,725,000 | 130,875,000 | 1744 | 1201 | -1.096807316 | C1QA,C1QB,C1QC,EPHA8,ENSBTAG00000011195                          |
| 2 | 130,800,000 | 130,950,000 | 1745 | 1203 | -1.12277204  | EPHA8,ZBTB40                                                     |
| 2 | 130,875,000 | 131,025,000 | 1746 | 967  | -0.001696703 | ZBTB40                                                           |
| 2 | 130,950,000 | 131,100,000 | 1747 | 1035 | 0.508765687  |                                                                  |
| 2 | 131,025,000 | 131,175,000 | 1748 | 1099 | 0.609030903  |                                                                  |
| 2 | 131,100,000 | 131,250,000 | 1749 | 913  | 0.680598847  |                                                                  |
| 2 | 131,175,000 | 131,325,000 | 1750 | 815  | 0.828100248  | WNT4                                                             |
| 2 | 131,250,000 | 131,400,000 | 1751 | 712  | 0.749414064  | CDC42,WNT4                                                       |
| 2 | 131,325,000 | 131,475,000 | 1752 | 791  | -0.636530369 | CDC42,CELA3B,ENSBTAG00000030269,ENSBTAG00000040602               |
| 2 | 131,400,000 | 131,550,000 | 1753 | 937  | -1.21170459  | CELA3B,HSPG2,ENSBTAG00000030269,ENSBTAG00000040602               |
| 2 | 131,475,000 | 131,625,000 | 1754 | 640  | -0.649796861 | HSPG2,LDLRAD2,USP48                                              |
| 2 | 131,550,000 | 131,700,000 | 1755 | 559  | -0.78176162  | HSPG2,LDLRAD2,USP48                                              |
| 2 | 131,625,000 | 131,775,000 | 1756 | 1030 | -0.904581666 | RAP1GAP,USP48                                                    |
| 2 | 131,700,000 | 131,850,000 | 1757 | 1254 | -1.114899774 | ALPL,RAP1GAP                                                     |
| 2 | 131,775,000 | 131,925,000 | 1758 | 1316 | -0.968141621 | ALPL,RAP1GAP                                                     |
| 2 | 131,850,000 | 132,000,000 | 1759 | 1207 | -0.261783559 | ALPL,ECE1                                                        |



|   |             |             |      |      |              |                                                   |
|---|-------------|-------------|------|------|--------------|---------------------------------------------------|
| 2 | 131,925,000 | 132,075,000 | 1760 | 656  | 0.103257857  | ECE1                                              |
| 2 | 132,000,000 | 132,150,000 | 1761 | 282  | 0.449704041  | ECE1,EIF4G3                                       |
| 2 | 132,075,000 | 132,225,000 | 1762 | 349  | 0.917830902  | EIF4G3                                            |
| 2 | 132,150,000 | 132,300,000 | 1763 | 551  | 0.840777615  | EIF4G3                                            |
| 2 | 132,225,000 | 132,375,000 | 1764 | 553  | 0.958015466  | EIF4G3                                            |
| 2 | 132,300,000 | 132,450,000 | 1765 | 407  | 1.086031234  | EIF4G3                                            |
| 2 | 132,375,000 | 132,525,000 | 1766 | 309  | 0.948740291  | EIF4G3,HP1BP3,SH2D5                               |
| 2 | 132,450,000 | 132,600,000 | 1767 | 562  | -0.091382525 | DDOST,EIF4G3,HP1BP3,KIF17,SH2D5                   |
| 2 | 132,525,000 | 132,675,000 | 1768 | 882  | -0.212948441 | CDA,DDOST,KIF17,PINK1,SH2D5                       |
| 2 | 132,600,000 | 132,750,000 | 1769 | 868  | -0.985426578 | CDA,DDOST,FAM43B,MUL1,PINK1                       |
| 2 | 132,675,000 | 132,825,000 | 1770 | 633  | -2.062293061 | CAMK2N1,FAM43B,MUL1                               |
| 2 | 132,750,000 | 132,900,000 | 1771 | 394  | -0.622973714 | CAMK2N1,VWA5B1                                    |
| 2 | 132,825,000 | 132,975,000 | 1772 | 698  | 0.575724595  | VWA5B1                                            |
| 2 | 132,900,000 | 133,050,000 | 1773 | 674  | 0.385775185  | VWA5B1                                            |
| 2 | 132,975,000 | 133,125,000 | 1774 | 464  | -1.01537066  | PLA2G2C,PLA2G2F,UBXN10                            |
| 2 | 133,050,000 | 133,200,000 | 1775 | 1238 | 0.344907971  | PLA2G2C,PLA2G2D3,PLA2G2D4,PLA2G2F,UBXN10          |
| 2 | 133,125,000 | 133,275,000 | 1776 | 1704 | 0.287493062  | PLA2G2A,PLA2G2D3,PLA2G2D4,PLA2G5                  |
| 2 | 133,200,000 | 133,350,000 | 1777 | 1961 | 0.067077718  | PLA2G2A,PLA2G5,ENSBTAG00000013039                 |
| 2 | 133,275,000 | 133,425,000 | 1778 | 1919 | 0.394662177  | OTUD3,PLA2G2A,PLA2G2E,ENSBTAG00000013039          |
| 2 | 133,350,000 | 133,500,000 | 1779 | 1483 | 0.573203219  | OTUD3,PLA2G2E,RNF186                              |
| 2 | 133,425,000 | 133,575,000 | 1780 | 1392 | 0.673254219  | RNF186,TMCO4                                      |
| 2 | 133,500,000 | 133,650,000 | 1781 | 1007 | 1.05206453   | HTR6,TMCO4,ENSBTAG00000005140                     |
| 2 | 133,575,000 | 133,725,000 | 1782 | 559  | 0.811428016  | HTR6,TMCO4,ENSBTAG00000005140                     |
| 2 | 133,650,000 | 133,800,000 | 1783 | 479  | 0.365026872  | CAPZB                                             |
| 2 | 133,725,000 | 133,875,000 | 1784 | 555  | 0.454772057  | CAPZB                                             |
| 2 | 133,800,000 | 133,950,000 | 1785 | 840  | 0.144979338  | CAPZB,PQLC2                                       |
| 2 | 133,875,000 | 134,025,000 | 1786 | 907  | -0.064654079 | AKR7A2,CAPZB,EMC1,MRTO4,PQLC2,ENSBTAG000000026758 |
| 2 | 133,950,000 | 134,100,000 | 1787 | 535  | 0.120819732  | AKR7A2,EMC1,MRTO4,UBR4,ENSBTAG000000026758        |
| 2 | 134,025,000 | 134,175,000 | 1788 | 427  | 0.684113615  | UBR4                                              |
| 2 | 134,100,000 | 134,250,000 | 1789 | 762  | 0.459199064  | UBR4                                              |
| 2 | 134,175,000 | 134,325,000 | 1790 | 1031 | -0.320830582 | UBR4,ENSBTAG000000030340                          |
| 2 | 134,250,000 | 134,400,000 | 1791 | 915  | -1.164612461 | ALDH4A1,TAS1R2,ENSBTAG000000030340                |
| 2 | 134,325,000 | 134,475,000 | 1792 | 1029 | 0.28047664   | ALDH4A1,TAS1R2,ENSBTAG000000030340                |
| 2 | 134,400,000 | 134,550,000 | 1793 | 986  | 0.745105673  | PAX7,TAS1R2                                       |
| 2 | 134,475,000 | 134,625,000 | 1794 | 780  | 0.046646643  | PAX7                                              |
| 2 | 134,550,000 | 134,700,000 | 1795 | 1188 | 0.249958564  | PAX7                                              |
| 2 | 134,625,000 | 134,775,000 | 1796 | 1310 | 0.650069773  |                                                   |
| 2 | 134,700,000 | 134,850,000 | 1797 | 1054 | -0.20215888  | KLHDC7A                                           |
| 2 | 134,775,000 | 134,925,000 | 1798 | 1502 | 0.360203998  | IGSF21,KLHDC7A                                    |
| 2 | 134,850,000 | 135,000,000 | 1799 | 1809 | 0.865230047  | IGSF21                                            |
| 2 | 134,925,000 | 135,075,000 | 1800 | 1338 | 0.364435207  |                                                   |
| 2 | 135,000,000 | 135,150,000 | 1801 | 989  | -0.283521474 |                                                   |
| 2 | 135,075,000 | 135,225,000 | 1802 | 1323 | 0.300216263  |                                                   |
| 2 | 135,150,000 | 135,300,000 | 1803 | 1356 | -0.052593476 |                                                   |
| 2 | 135,225,000 | 135,375,000 | 1804 | 1296 | -0.977613118 |                                                   |
| 2 | 135,300,000 | 135,450,000 | 1805 | 1397 | -0.145885638 | ACTL8                                             |
| 2 | 135,375,000 | 135,525,000 | 1806 | 1219 | 0.814985908  | ACTL8                                             |
| 2 | 135,450,000 | 135,600,000 | 1807 | 1202 | 0.895817153  | ARHGEF10L                                         |
| 2 | 135,525,000 | 135,675,000 | 1808 | 1257 | 0.812521221  | ARHGEF10L                                         |
| 2 | 135,600,000 | 135,750,000 | 1809 | 1301 | 0.74771257   | ARHGEF10L                                         |
| 2 | 135,675,000 | 135,825,000 | 1810 | 871  | 0.538364373  | PADI6,RCC2                                        |
| 2 | 135,750,000 | 135,900,000 | 1811 | 837  | 0.229736803  | PADI3,PADI4,PADI6,RCC2                            |

|   |             |             |      |      |              |                                                  |
|---|-------------|-------------|------|------|--------------|--------------------------------------------------|
| 2 | 135,825,000 | 135,975,000 | 1812 | 1021 | -0.197378249 | PADI1,PADI3,PADI4,PADI6                          |
| 2 | 135,900,000 | 136,050,000 | 1813 | 742  | -0.267118683 | PADI1,PADI2,PADI3                                |
| 2 | 135,975,000 | 136,125,000 | 1814 | 806  | 0.517501911  | PADI2                                            |
| 2 | 136,050,000 | 136,200,000 | 1815 | 1090 | 0.942848887  | ATP13A2,CROCC,MFAP2,PADI2,SDHB                   |
| 2 | 136,125,000 | 136,275,000 | 1816 | 1128 | 0.684407779  | ATP13A2,CROCC,MFAP2,NECAP2,SDHB                  |
| 2 | 136,200,000 | 136,350,000 | 1817 | 911  | 0.527941622  | CROCC,NECAP2,SPATA21,SZRD1,ENSBTAG00000047837    |
| 2 | 136,275,000 | 136,425,000 | 1818 | 819  | -0.804263412 | FBXO42,SPATA21,SZRD1,ENSBTAG00000047837          |
| 2 | 136,350,000 | 136,500,000 | 1819 | 668  | -1.267126429 | ARHGEF19,FBXO42,RSG1,ENSBTAG00000047837          |
| 2 | 136,425,000 | 136,575,000 | 1820 | 591  | 0.760694193  | ARHGEF19,EPHA2,FBXO42,RSG1                       |
| 2 | 136,500,000 | 136,650,000 | 1821 | 465  | 0.449667348  | C2H1orf64,EPHA2,FAM131C,HSPB7,ENSBTAG00000034674 |
| 2 | 136,575,000 | 136,725,000 | 1822 | 455  | -0.845117746 | C2H1orf64,FAM131C,HSPB7,ENSBTAG00000034674       |
| 2 | 136,650,000 | 136,800,000 | 1823 | 808  | 0.07675973   | C2H1orf64                                        |
| 2 | 136,725,000 | 136,875,000 | 1824 | 585  | 0.385188051  |                                                  |
| 2 | 136,800,000 | 136,950,000 | 1825 | 144  | -0.119489843 |                                                  |
| 2 | 136,875,000 | 137,025,000 | 1826 | 174  | 0.294946143  |                                                  |
| 2 | 136,950,000 | 137,060,424 | 1827 | 223  | 0.166292178  |                                                  |
| 3 | 0           | 150,000     | 1    | 1241 | 0.870029016  | ENSBTAG00000003249,ENSBTAG00000047047            |
| 3 | 75,000      | 225,000     | 2    | 1505 | 0.580821343  | ENSBTAG00000000584,ENSBTAG00000003249            |
| 3 | 150,000     | 300,000     | 3    | 1523 | 0.462440377  | TBX19,ENSBTAG00000000584                         |
| 3 | 225,000     | 375,000     | 4    | 1373 | 0.759768792  | SFT2D2,TBX19                                     |
| 3 | 300,000     | 450,000     | 5    | 1084 | 0.92712574   | SFT2D2,TIPRL                                     |
| 3 | 375,000     | 525,000     | 6    | 648  | 0.346243553  | TIPRL                                            |
| 3 | 450,000     | 600,000     | 7    | 521  | -0.911605405 | GPR161,IQWD1,TIPRL,ENSBTAG00000047162            |
| 3 | 525,000     | 675,000     | 8    | 516  | -1.171427745 | GPR161,IQWD1,ENSBTAG00000047162                  |
| 3 | 600,000     | 750,000     | 9    | 349  | -1.295664172 | IQWD1                                            |
| 3 | 675,000     | 825,000     | 10   | 343  | -0.098057981 | IQWD1,MPC2                                       |
| 3 | 750,000     | 900,000     | 11   | 536  | 0.822749966  | ADCY10,IQWD1,MPC2                                |
| 3 | 825,000     | 975,000     | 12   | 873  | 0.025709732  | ADCY10,MPZL1                                     |
| 3 | 900,000     | 1,050,000   | 13   | 848  | -1.654266658 | ADCY10,MPZL1                                     |
| 3 | 975,000     | 1,125,000   | 14   | 627  | -1.787099609 | MPZL1,RCSD1                                      |
| 3 | 1,050,000   | 1,200,000   | 15   | 747  | -0.536104004 | CREG1,RCSD1                                      |
| 3 | 1,125,000   | 1,275,000   | 16   | 1234 | 0.185323067  | CD247,CREG1,RCSD1                                |
| 3 | 1,200,000   | 1,350,000   | 17   | 1302 | 0.583407306  | CD247,CREG1,POU2F1                               |
| 3 | 1,275,000   | 1,425,000   | 18   | 910  | 0.683834184  | CD247,POU2F1                                     |
| 3 | 1,350,000   | 1,500,000   | 19   | 845  | -0.232316056 | POU2F1                                           |
| 3 | 1,425,000   | 1,575,000   | 20   | 804  | -0.134164029 |                                                  |
| 3 | 1,500,000   | 1,650,000   | 21   | 864  | 0.977784873  |                                                  |
| 3 | 1,575,000   | 1,725,000   | 22   | 1217 | 0.985245321  | DUSP27                                           |
| 3 | 1,650,000   | 1,800,000   | 23   | 1328 | 0.955324969  | DUSP27,GPA33                                     |
| 3 | 1,725,000   | 1,875,000   | 24   | 1327 | 0.840142242  | GPA33                                            |
| 3 | 1,800,000   | 1,950,000   | 25   | 953  | 0.823471906  | MAEL                                             |
| 3 | 1,875,000   | 2,025,000   | 26   | 408  | 0.890534578  | ILDR2,MAEL                                       |
| 3 | 1,950,000   | 2,100,000   | 27   | 853  | 0.053326113  | ILDR2,TADA1                                      |
| 3 | 2,025,000   | 2,175,000   | 28   | 1257 | 0.492768662  | POGK,TADA1                                       |
| 3 | 2,100,000   | 2,250,000   | 29   | 923  | 0.500373941  | POGK,TADA1                                       |
| 3 | 2,175,000   | 2,325,000   | 30   | 881  | 0.577227544  |                                                  |
| 3 | 2,250,000   | 2,400,000   | 31   | 1292 | 1.185799492  | ENSBTAG00000022504                               |
| 3 | 2,325,000   | 2,475,000   | 32   | 1108 | 0.842600407  | ENSBTAG00000022504                               |
| 3 | 2,400,000   | 2,550,000   | 33   | 1049 | 0.401037605  |                                                  |
| 3 | 2,475,000   | 2,625,000   | 34   | 1168 | 0.310183847  |                                                  |
| 3 | 2,550,000   | 2,700,000   | 35   | 1429 | -0.131422298 | ENSBTAG00000022954                               |
| 3 | 2,625,000   | 2,775,000   | 36   | 1567 | 0.040467793  | ENSBTAG00000022954                               |

|   |           |           |    |      |              |                          |
|---|-----------|-----------|----|------|--------------|--------------------------|
| 3 | 2,700,000 | 2,850,000 | 37 | 973  | -0.035375041 |                          |
| 3 | 2,775,000 | 2,925,000 | 38 | 894  | 0.59329484   | FAM78B                   |
| 3 | 2,850,000 | 3,000,000 | 39 | 1054 | 0.772290287  | FAM78B                   |
| 3 | 2,925,000 | 3,075,000 | 40 | 1165 | -0.052524891 | UCK2                     |
| 3 | 3,000,000 | 3,150,000 | 41 | 939  | -0.136836582 | UCK2                     |
| 3 | 3,075,000 | 3,225,000 | 42 | 792  | 0.479111012  | TMCO1,UCK2               |
| 3 | 3,150,000 | 3,300,000 | 43 | 994  | -0.089350907 | ALDH9A1,MGST3,TMCO1      |
| 3 | 3,225,000 | 3,375,000 | 44 | 1227 | -0.399023682 | ALDH9A1,MGST3            |
| 3 | 3,300,000 | 3,450,000 | 45 | 1121 | 0.095636744  | LRRC52,MGST3             |
| 3 | 3,375,000 | 3,525,000 | 46 | 804  | -0.280689494 | LRRC52                   |
| 3 | 3,450,000 | 3,600,000 | 47 | 986  | -0.804770797 | RXRG                     |
| 3 | 3,525,000 | 3,675,000 | 48 | 825  | -0.666317852 | RXRG                     |
| 3 | 3,600,000 | 3,750,000 | 49 | 786  | 0.555738781  | LMX1A,RXRG               |
| 3 | 3,675,000 | 3,825,000 | 50 | 945  | 0.995131899  | LMX1A                    |
| 3 | 3,750,000 | 3,900,000 | 51 | 922  | 1.394973148  | LMX1A                    |
| 3 | 3,825,000 | 3,975,000 | 52 | 666  | 1.329824052  | LMX1A                    |
| 3 | 3,900,000 | 4,050,000 | 53 | 555  | 0.725773931  |                          |
| 3 | 3,975,000 | 4,125,000 | 54 | 1138 | 0.894444038  |                          |
| 3 | 4,050,000 | 4,200,000 | 55 | 1199 | 0.846101687  |                          |
| 3 | 4,125,000 | 4,275,000 | 56 | 678  | 0.535912077  | PBX1                     |
| 3 | 4,200,000 | 4,350,000 | 57 | 480  | -0.165759966 | PBX1                     |
| 3 | 4,275,000 | 4,425,000 | 58 | 515  | 0.326956448  | PBX1                     |
| 3 | 4,350,000 | 4,500,000 | 59 | 621  | 0.705865164  | PBX1                     |
| 3 | 4,425,000 | 4,575,000 | 60 | 644  | 0.536696846  | PBX1                     |
| 3 | 4,500,000 | 4,650,000 | 61 | 848  | 0.52242297   | PBX1                     |
| 3 | 4,575,000 | 4,725,000 | 62 | 869  | 0.648092093  |                          |
| 3 | 4,650,000 | 4,800,000 | 63 | 796  | 0.742771947  |                          |
| 3 | 4,725,000 | 4,875,000 | 64 | 973  | -0.096407161 |                          |
| 3 | 4,800,000 | 4,950,000 | 65 | 794  | -1.119758757 |                          |
| 3 | 4,875,000 | 5,025,000 | 66 | 894  | 0.251310537  |                          |
| 3 | 4,950,000 | 5,100,000 | 67 | 1089 | 0.863625332  |                          |
| 3 | 5,025,000 | 5,175,000 | 68 | 936  | 0.756035186  |                          |
| 3 | 5,100,000 | 5,250,000 | 69 | 919  | -0.209763868 |                          |
| 3 | 5,175,000 | 5,325,000 | 70 | 1152 | 0.339282256  |                          |
| 3 | 5,250,000 | 5,400,000 | 71 | 1293 | 0.278479806  | ENSBTAG00000045987       |
| 3 | 5,325,000 | 5,475,000 | 72 | 1094 | -0.537570509 | GNG11,ENSBTAG00000045987 |
| 3 | 5,400,000 | 5,550,000 | 73 | 942  | -0.762913924 | GNG11                    |
| 3 | 5,475,000 | 5,625,000 | 74 | 1149 | 0.20683434   |                          |
| 3 | 5,550,000 | 5,700,000 | 75 | 1080 | 0.530558809  |                          |
| 3 | 5,625,000 | 5,775,000 | 76 | 580  | 0.053141865  |                          |
| 3 | 5,700,000 | 5,850,000 | 77 | 577  | 0.161667815  |                          |
| 3 | 5,775,000 | 5,925,000 | 78 | 859  | 0.242673582  |                          |
| 3 | 5,850,000 | 6,000,000 | 79 | 775  | -0.045140388 |                          |
| 3 | 5,925,000 | 6,075,000 | 80 | 704  | -0.348330283 | NUF2                     |
| 3 | 6,000,000 | 6,150,000 | 81 | 638  | 0.526964677  | NUF2                     |
| 3 | 6,075,000 | 6,225,000 | 82 | 994  | -1.232321529 |                          |
| 3 | 6,150,000 | 6,300,000 | 83 | 1254 | -1.010551941 | RGS4,RGS5                |
| 3 | 6,225,000 | 6,375,000 | 84 | 1097 | 0.344041056  | RGS4,RGS5                |
| 3 | 6,300,000 | 6,450,000 | 85 | 1075 | -0.1202688   | RGS5                     |
| 3 | 6,375,000 | 6,525,000 | 86 | 839  | 0.180149331  | RGS5                     |
| 3 | 6,450,000 | 6,600,000 | 87 | 912  | 0.872793698  | C1orf110                 |
| 3 | 6,525,000 | 6,675,000 | 88 | 1263 | 0.12382866   | C1orf110,DDR2,HSD17B7    |
| 3 | 6,600,000 | 6,750,000 | 89 | 1129 | -0.219928915 | DDR2,HSD17B7             |

|   |           |            |     |      |              |                                                                                          |
|---|-----------|------------|-----|------|--------------|------------------------------------------------------------------------------------------|
| 3 | 6,675,000 | 6,825,000  | 90  | 1111 | 0.16852501   | DDR2                                                                                     |
| 3 | 6,750,000 | 6,900,000  | 91  | 997  | 0.103607551  | DDR2                                                                                     |
| 3 | 6,825,000 | 6,975,000  | 92  | 552  | -0.142860737 | DDR2,UAP1                                                                                |
| 3 | 6,900,000 | 7,050,000  | 93  | 647  | 0.033196767  | UAP1,UHMK1                                                                               |
| 3 | 6,975,000 | 7,125,000  | 94  | 996  | 0.120603526  | C3H1orf111,NOS1AP,SH2D1B,UHMK1                                                           |
| 3 | 7,050,000 | 7,200,000  | 95  | 1134 | -0.251148664 | C3H1orf111,NOS1AP,SH2D1B                                                                 |
| 3 | 7,125,000 | 7,275,000  | 96  | 1139 | 0.262220903  | NOS1AP                                                                                   |
| 3 | 7,200,000 | 7,350,000  | 97  | 954  | 0.408483449  | NOS1AP                                                                                   |
| 3 | 7,275,000 | 7,425,000  | 98  | 1014 | 0.315815613  | NOS1AP                                                                                   |
| 3 | 7,350,000 | 7,500,000  | 99  | 1102 | 0.15454243   | NOS1AP                                                                                   |
| 3 | 7,425,000 | 7,575,000  | 100 | 644  | -0.618786273 | NOS1AP,OLFML2B,ENSBTAG00000046175                                                        |
| 3 | 7,500,000 | 7,650,000  | 101 | 573  | -1.539963673 | ATF6,OLFML2B,ENSBTAG00000046175                                                          |
| 3 | 7,575,000 | 7,725,000  | 102 | 634  | -0.435161293 | ATF6,OLFML2B                                                                             |
| 3 | 7,650,000 | 7,800,000  | 103 | 493  | 1.093408353  | ATF6                                                                                     |
| 3 | 7,725,000 | 7,875,000  | 104 | 626  | 0.95988942   | ATF6,DUSP12                                                                              |
| 3 | 7,800,000 | 7,950,000  | 105 | 965  | 0.99167903   | ATF6,DUSP12,FCGR2,FCRLA,FCRLB                                                            |
| 3 | 7,875,000 | 8,025,000  | 106 | 1099 | 0.731354775  | FCGR2,FCGR3A,FCRLA,FCRLB                                                                 |
| 3 | 7,950,000 | 8,100,000  | 107 | 767  | -0.499609185 | FCGR2C,FCGR3A,HSPA6                                                                      |
| 3 | 8,025,000 | 8,175,000  | 108 | 655  | -1.074101249 | C1ORF192,FCGR2C,HSPA6                                                                    |
| 3 | 8,100,000 | 8,250,000  | 109 | 752  | -0.276682963 | C1ORF192,MPZ,PCP4L1,SDHC                                                                 |
| 3 | 8,175,000 | 8,325,000  | 110 | 691  | 0.301783     | ADAMTS4,APOA2,C1ORF192,FCER1G,MPZ,NDUFS2,NR1I3,PCP4L1,SDHC,TOMM40L                       |
| 3 | 8,250,000 | 8,400,000  | 111 | 633  | -1.732274413 | ADAMTS4,APOA2,B4GALT3,DEDD,FCER1G,NDUFS2,NIT1,NR1I3,PCP4L1,PFDN2,PPOX,TOMM40L,UFC1,USP21 |
| 3 | 8,325,000 | 8,475,000  | 112 | 550  | -1.579187748 | ADAMTS4,ARHGAP30,B4GALT3,DEDD,KLHDC9,NIT1,PFDN2,PPOX,PVRL4,TSTD1,UFC1,USF1,USP21         |
| 3 | 8,400,000 | 8,550,000  | 113 | 584  | 0.590793032  | ARHGAP30,F11R,ITLN2,KLHDC9,PFDN2,PVRL4,TSTD1,USF1                                        |
| 3 | 8,475,000 | 8,625,000  | 114 | 1419 | 0.802044526  | F11R,ITLN2,ENSBTAG00000027775                                                            |
| 3 | 8,550,000 | 8,700,000  | 115 | 1912 | 0.193820355  | ITLN2,ENSBTAG00000027775                                                                 |
| 3 | 8,625,000 | 8,775,000  | 116 | 1574 | -1.081970987 | ITLN2,ENSBTAG00000027775,ENSBTAG00000040437,ENSBTAG00000046231                           |
| 3 | 8,700,000 | 8,850,000  | 117 | 1128 | -0.844508222 | CD244,LY9,ENSBTAG00000040437,ENSBTAG00000046231                                          |
| 3 | 8,775,000 | 8,925,000  | 118 | 697  | 0.166158447  | CD244,LY9,PIFO,ENSBTAG00000010458                                                        |
| 3 | 8,850,000 | 9,000,000  | 119 | 753  | 0.167942508  | LY9,PIFO,SLAMF7,ENSBTAG00000010458,ENSBTAG00000024849                                    |
| 3 | 8,925,000 | 9,075,000  | 120 | 777  | 0.022565119  | CD48,PIFO,SLAMF7,ENSBTAG00000024849                                                      |
| 3 | 9,000,000 | 9,150,000  | 121 | 651  | 0.422715763  | CD48,SLAMF1                                                                              |
| 3 | 9,075,000 | 9,225,000  | 122 | 480  | 0.893023677  | CD84,SLAMF1                                                                              |
| 3 | 9,150,000 | 9,300,000  | 123 | 635  | 0.515725407  | CD84,SLAMF6                                                                              |
| 3 | 9,225,000 | 9,375,000  | 124 | 813  | 0.536978733  | CD84,SLAMF6                                                                              |
| 3 | 9,300,000 | 9,450,000  | 125 | 615  | 0.670277416  | NHLH1,VANGL2                                                                             |
| 3 | 9,375,000 | 9,525,000  | 126 | 377  | 0.026314809  | COPA,NCSTN,NHLH1,PEX19,VANGL2                                                            |
| 3 | 9,450,000 | 9,600,000  | 127 | 272  | -0.805497542 | CASQ1,COPA,NCSTN,PEA15,PEX19,ENSBTAG00000005796                                          |
| 3 | 9,525,000 | 9,675,000  | 128 | 486  | 0.376451235  | ATP1A2,ATP1A4,CASQ1,PEA15,ENSBTAG00000005796                                             |
| 3 | 9,600,000 | 9,750,000  | 129 | 834  | 0.662629678  | ATP1A2,ATP1A4,CASQ1,IGSF8,KCNJ10,KCNJ9                                                   |
| 3 | 9,675,000 | 9,825,000  | 130 | 1124 | 0.347412426  | IGSF8,KCNJ10,KCNJ9,PIGM                                                                  |
| 3 | 9,750,000 | 9,900,000  | 131 | 1204 | -1.366827565 | IGSF9,KCNJ10,PIGM,SLAMF9,TAGLN2                                                          |
| 3 | 9,825,000 | 9,975,000  | 132 | 989  | -2.132048499 | CCDC19,IGSF9,SLAMF8,SLAMF9,TAGLN2,VSIG8                                                  |
| 3 | 9,900,000 | 10,050,000 | 133 | 892  | -1.191382045 | CCDC19,DUSP23,FCRL6,SLAMF8,VSIG8                                                         |
| 3 | 9,975,000 | 10,125,000 | 134 | 1130 | -0.901671181 | CRP,DUSP23,FCRL6,SLAMF8                                                                  |

|   |            |            |     |      |              |                                                                                                      |
|---|------------|------------|-----|------|--------------|------------------------------------------------------------------------------------------------------|
| 3 | 10,050,000 | 10,200,000 | 135 | 1189 | -0.181672116 | CRP                                                                                                  |
| 3 | 10,125,000 | 10,275,000 | 136 | 1069 | -0.839244049 | APCS,ENSBTAG00000046656                                                                              |
| 3 | 10,200,000 | 10,350,000 | 137 | 1185 | -0.378361463 | APCS,OR10J5,ENSBTAG00000046656                                                                       |
| 3 | 10,275,000 | 10,425,000 | 138 | 1335 | 0.215312817  | OR10J1,OR10J5,ENSBTAG00000019618                                                                     |
| 3 | 10,350,000 | 10,500,000 | 139 | 1158 | -0.165967279 | OR10J1,ENSBTAG00000019618,ENSBTAG00000020765                                                         |
| 3 | 10,425,000 | 10,575,000 | 140 | 1198 | 0.478666884  | FCER1A,OR10J3,ENSBTAG00000020765                                                                     |
| 3 | 10,500,000 | 10,650,000 | 141 | 1505 | 0.887306772  | ACKR1,FCER1A,MPTX,OR10J3,ENSBTAG00000022528                                                          |
| 3 | 10,575,000 | 10,725,000 | 142 | 1282 | 0.753482697  | ACKR1,CADM3,MPTX,ENSBTAG00000022528                                                                  |
| 3 | 10,650,000 | 10,800,000 | 143 | 599  | 0.591602747  | CADM3                                                                                                |
| 3 | 10,725,000 | 10,875,000 | 144 | 176  | 0.635899579  | ENSBTAG00000011511                                                                                   |
| 3 | 10,800,000 | 10,950,000 | 145 | 258  | 0.733636168  | ENSBTAG00000011511                                                                                   |
| 3 | 10,875,000 | 11,025,000 | 146 | 807  | 0.735275211  | OR6N2,ENSBTAG00000020838,ENSBTAG00000048292                                                          |
| 3 | 10,950,000 | 11,100,000 | 147 | 1460 | 0.500174266  | OR6K3,OR6K6,OR6N1,OR6N2,ENSBTAG00000020838,ENSBTAG00000038961,ENSBTAG00000048292                     |
| 3 | 11,025,000 | 11,175,000 | 148 | 1829 | 0.620210116  | OR6K2,OR6K3,OR6K6,OR6N1,SPTA1,ENSBTAG00000038961                                                     |
| 3 | 11,100,000 | 11,250,000 | 149 | 1805 | 0.348456157  | OR10Z1,OR6K2,SPTA1,ENSBTAG00000039653                                                                |
| 3 | 11,175,000 | 11,325,000 | 150 | 1467 | -0.783015673 | OR10Z1,SPTA1,ENSBTAG00000038362,ENSBTAG00000038669,ENSBTAG00000039653,ENSBTAG00000047541             |
| 3 | 11,250,000 | 11,400,000 | 151 | 1016 | -1.141072342 | OR6P1,OR6Y1,ENSBTAG00000038362,ENSBTAG00000038669,ENSBTAG00000047541                                 |
| 3 | 11,325,000 | 11,475,000 | 152 | 707  | -0.126701145 | OR10K2,OR6P1,OR6Y1,ENSBTAG00000022556,ENSBTAG00000023247                                             |
| 3 | 11,400,000 | 11,550,000 | 153 | 635  | 0.01613563   | CD1A,OR10K2,OR10R2,ENSBTAG00000022556,ENSBTAG00000023247                                             |
| 3 | 11,475,000 | 11,625,000 | 154 | 672  | 0.625915293  | CD1A,OR10R2,ENSBTAG00000037546                                                                       |
| 3 | 11,550,000 | 11,700,000 | 155 | 787  | 0.838250028  | OR10T2,ENSBTAG00000037546,ENSBTAG00000037575,ENSBTAG00000037807                                      |
| 3 | 11,625,000 | 11,775,000 | 156 | 902  | 0.628730941  | CD1B5,CD1E,OR10T2,ENSBTAG00000037575,ENSBTAG00000037807                                              |
| 3 | 11,700,000 | 11,850,000 | 157 | 1151 | 0.418242607  | CD1B3,CD1B5,CD1E,ENSBTAG00000000963                                                                  |
| 3 | 11,775,000 | 11,925,000 | 158 | 1332 | 0.447241906  | CD1B3,ENSBTAG00000000963,ENSBTAG00000026180,ENSBTAG00000038366,ENSBTAG00000038426,ENSBTAG00000039189 |
| 3 | 11,850,000 | 12,000,000 | 159 | 1595 | 0.64355711   | CD1A,CD1B3,ENSBTAG00000026180,ENSBTAG00000038366,ENSBTAG00000038426,ENSBTAG00000039189               |
| 3 | 11,925,000 | 12,075,000 | 160 | 1657 | 0.622650547  | CD1A                                                                                                 |
| 3 | 12,000,000 | 12,150,000 | 161 | 1178 | 0.722706209  | CD1D,ENSBTAG00000047988                                                                              |
| 3 | 12,075,000 | 12,225,000 | 162 | 699  | 0.945028119  | CD1D,ENSBTAG00000039993,ENSBTAG00000047776,ENSBTAG00000047988                                        |
| 3 | 12,150,000 | 12,300,000 | 163 | 729  | -1.770260108 | ENSBTAG00000039993,ENSBTAG00000047776                                                                |
| 3 | 12,225,000 | 12,375,000 | 164 | 851  | -1.533105261 | KIRREL                                                                                               |
| 3 | 12,300,000 | 12,450,000 | 165 | 946  | 0.022951032  | KIRREL                                                                                               |
| 3 | 12,375,000 | 12,525,000 | 166 | 1481 | 0.761702979  | FCRL2                                                                                                |
| 3 | 12,450,000 | 12,600,000 | 167 | 1422 | 0.936612712  | CD5L,FCRL2                                                                                           |
| 3 | 12,525,000 | 12,675,000 | 168 | 831  | 0.922329925  | CD5L,FCRL1                                                                                           |
| 3 | 12,600,000 | 12,750,000 | 169 | 1007 | 0.932833351  | FCRL1,FCRL3                                                                                          |
| 3 | 12,675,000 | 12,825,000 | 170 | 1151 | 0.855255688  | FCRL3                                                                                                |
| 3 | 12,750,000 | 12,900,000 | 171 | 895  | 0.836585431  | FCRL5                                                                                                |
| 3 | 12,825,000 | 12,975,000 | 172 | 790  | 0.413389106  | FCRL5                                                                                                |
| 3 | 12,900,000 | 13,050,000 | 173 | 783  | -0.380478333 | FCRL5                                                                                                |
| 3 | 12,975,000 | 13,125,000 | 174 | 639  | -0.119303433 |                                                                                                      |
| 3 | 13,050,000 | 13,200,000 | 175 | 723  | 0.872135401  |                                                                                                      |

|   |            |            |     |      |              |                                                                                      |
|---|------------|------------|-----|------|--------------|--------------------------------------------------------------------------------------|
| 3 | 13,125,000 | 13,275,000 | 176 | 1070 | 1.156764434  |                                                                                      |
| 3 | 13,200,000 | 13,350,000 | 177 | 1006 | 0.69176308   |                                                                                      |
| 3 | 13,275,000 | 13,425,000 | 178 | 697  | -0.055879828 |                                                                                      |
| 3 | 13,350,000 | 13,500,000 | 179 | 987  | 0.954237979  |                                                                                      |
| 3 | 13,425,000 | 13,575,000 | 180 | 1289 | 0.586547931  |                                                                                      |
| 3 | 13,500,000 | 13,650,000 | 181 | 1436 | 0.013615256  |                                                                                      |
| 3 | 13,575,000 | 13,725,000 | 182 | 1607 | -0.264700507 |                                                                                      |
| 3 | 13,650,000 | 13,800,000 | 183 | 1477 | 0.084614527  | ETV3,ETV3L                                                                           |
| 3 | 13,725,000 | 13,875,000 | 184 | 1581 | 0.988277595  | ETV3,ETV3L                                                                           |
| 3 | 13,800,000 | 13,950,000 | 185 | 1275 | 0.978571353  | ARHGEF11                                                                             |
| 3 | 13,875,000 | 14,025,000 | 186 | 1043 | 0.616100289  | ARHGEF11,C3H1ORF92,NTRK1,PEAR1                                                       |
| 3 | 13,950,000 | 14,100,000 | 187 | 1129 | 0.414677651  | ARHGEF11,C3H1ORF92,INSRR,NTRK1,PEAR1,PRCC,SH2D2A                                     |
| 3 | 14,025,000 | 14,175,000 | 188 | 1012 | 0.485875003  | CRABP2,HDGF,INSRR,ISG20L2,MRPL24,NTRK1,PRCC,RRNA D1,SH2D2A                           |
| 3 | 14,100,000 | 14,250,000 | 189 | 1183 | 0.727026958  | BCAN,CRABP2,HDGF,ISG20L2,MRPL24,NES,PRCC,RRNAD1                                      |
| 3 | 14,175,000 | 14,325,000 | 190 | 1514 | -1.450990036 | APOA1BP,BCAN,CRABP2,GPATCH4,HAPLN2,IQGAP3,NES, TTC24                                 |
| 3 | 14,250,000 | 14,400,000 | 191 | 1221 | -2.407920069 | APOA1BP,GPATCH4,HAPLN2,IQGAP3,MEF2D,TTC24,ENSB TAG00000021649                        |
| 3 | 14,325,000 | 14,475,000 | 192 | 879  | -0.852194307 | IQGAP3,MEF2D,ENSBTAG00000021649                                                      |
| 3 | 14,400,000 | 14,550,000 | 193 | 1057 | 0.173054728  | CCT3,MEF2D,RHBG,TSACC                                                                |
| 3 | 14,475,000 | 14,625,000 | 194 | 1222 | 0.512971454  | BGLAP,C1orf85,CCT3,PAQR6,PMF1,RHBG,SMG5,TMEM79, TSACC                                |
| 3 | 14,550,000 | 14,700,000 | 195 | 1333 | 0.887598972  | BGLAP,C1orf85,CCT3,LMNA,PAQR6,PMF1,SEMA4A,SLC25 A44,SMG5,TMEM79                      |
| 3 | 14,625,000 | 14,775,000 | 196 | 1074 | 1.087826511  | LAMTOR2,LMNA,MEX3A,PMF1,RAB25,SEMA4A,SLC25A44, UBQLN4                                |
| 3 | 14,700,000 | 14,850,000 | 197 | 895  | 0.805307399  | ARHGEF2,LAMTOR2,LMNA,MEX3A,RAB25,SSR2,UBQLN4                                         |
| 3 | 14,775,000 | 14,925,000 | 198 | 835  | 0.627889221  | ARHGEF2,KIAA0907,RIT1,RXFP4,SSR2,UBQLN4                                              |
| 3 | 14,850,000 | 15,000,000 | 199 | 617  | 0.729134233  | ARHGEF2,KIAA0907,RIT1,RXFP4,SYT11,YY1AP1                                             |
| 3 | 14,925,000 | 15,075,000 | 200 | 548  | -0.974490859 | GON4L,SYT11,YY1AP1                                                                   |
| 3 | 15,000,000 | 15,150,000 | 201 | 442  | -3.217504483 | DAP3,GON4L,MSTO1                                                                     |
| 3 | 15,075,000 | 15,225,000 | 202 | 332  | -3.563315052 | ASH1L,DAP3,GON4L,MSTO1                                                               |
| 3 | 15,150,000 | 15,300,000 | 203 | 317  | -3.143490829 | ASH1L                                                                                |
| 3 | 15,225,000 | 15,375,000 | 204 | 365  | -4.128932385 | ASH1L,FDPS                                                                           |
| 3 | 15,300,000 | 15,450,000 | 205 | 455  | -4.012834102 | ASH1L,CLK2,FAM189B,FDPS,GBA,HCN3,PKLR,SCAMP3                                         |
| 3 | 15,375,000 | 15,525,000 | 206 | 477  | -3.742441427 | CLK2,DPM3,EFNA1,FAM189B,GBA,HCN3,KRTCAP2,MTX1, MUC1,PKLR,SCAMP3,SLC50A1,THBS3,TRIM46 |
| 3 | 15,450,000 | 15,600,000 | 207 | 459  | -2.36072504  | ADAM15,DPM3,EFNA1,EFNA3,EFNA4,GBA,KRTCAP2,MTX1 ,MUC1,SLC50A1,THBS3,TRIM46            |
| 3 | 15,525,000 | 15,675,000 | 208 | 436  | -0.643719411 | ADAM15,CKS1B,DCST1,DCST2,EFNA1,EFNA3,EFNA4,FLAD 1,LENEP,SHC1,ZBTB7B                  |
| 3 | 15,600,000 | 15,750,000 | 209 | 480  | 0.242366112  | ADAM15,CKS1B,DCST1,DCST2,FLAD1,LENEP,PBXIP1,PMVK ,PYGO2,SHC1,ZBTB7B                  |
| 3 | 15,675,000 | 15,825,000 | 210 | 536  | 0.757607024  | KCNN3,PBXIP1,PMVK,PYGO2,SHC1                                                         |
| 3 | 15,750,000 | 15,900,000 | 211 | 453  | 0.77222325   | KCNN3                                                                                |
| 3 | 15,825,000 | 15,975,000 | 212 | 563  | 0.243872678  | KCNN3                                                                                |
| 3 | 15,900,000 | 16,050,000 | 213 | 687  | -0.466903654 | ADAR,KCNN3                                                                           |
| 3 | 15,975,000 | 16,125,000 | 214 | 528  | -1.806098462 | ADAR,CHRN2,TDRD10,UBE2Q1                                                             |
| 3 | 16,050,000 | 16,200,000 | 215 | 409  | -2.072298738 | ADAR,CHRN2,IL6R,SHE,TDRD10,UBE2Q1,ENSBTAG00000 045672                                |

|   |            |            |     |      |              |                                                                         |
|---|------------|------------|-----|------|--------------|-------------------------------------------------------------------------|
| 3 | 16,125,000 | 16,275,000 | 216 | 499  | -1.01354232  | ATP8B2,IL6R,SHE,TDRD10,ENSBTAG00000045672                               |
| 3 | 16,200,000 | 16,350,000 | 217 | 420  | -0.577702453 | AQP10,ATP8B2,HAX1,IL6R,UBAP2L                                           |
| 3 | 16,275,000 | 16,425,000 | 218 | 252  | -0.854898625 | AQP10,ATP8B2,C3H1orf189,HAX1,NUP210L,TPM3,UBAP2L<br>,ENSBTAG00000020026 |
| 3 | 16,350,000 | 16,500,000 | 219 | 219  | 0.289100763  | C3H1orf189,NUP210L,TPM3,UBAP2L,ENSBTAG000000200<br>26                   |
| 3 | 16,425,000 | 16,575,000 | 220 | 216  | 1.081675335  | CREB3L4,CRTC2,DENND4B,JTB,NUP210L,RAB13,RPS25,RP<br>S27,SLC39A1         |
| 3 | 16,500,000 | 16,650,000 | 221 | 272  | 1.016331546  | CREB3L4,CRTC2,DENND4B,GATAD2B,JTB,NUP210L,RAB13,<br>RPS25,RPS27,SLC39A1 |
| 3 | 16,575,000 | 16,725,000 | 222 | 436  | 1.075289725  | GATAD2B,INTS3,SLC27A3                                                   |
| 3 | 16,650,000 | 16,800,000 | 223 | 495  | 1.097460522  | ILF2,INTS3,NPR1,SLC27A3,SNAPIN                                          |
| 3 | 16,725,000 | 16,875,000 | 224 | 436  | 1.020754768  | CHTOP,ILF2,NPR1,S100A1,S100A13,S100A14,S100A16,S10<br>0A2,SNAPIN        |
| 3 | 16,800,000 | 16,950,000 | 225 | 362  | 0.707066596  | CHTOP,S100A1,S100A13,S100A14,S100A16,S100A2,S100A<br>3,S100A4,S100A5    |
| 3 | 16,875,000 | 17,025,000 | 226 | 732  | 0.822928489  | S100A3,S100A4,S100A5,S100A7                                             |
| 3 | 16,950,000 | 17,100,000 | 227 | 1262 | 0.412864218  | S100A7,ENSBTAG00000033007                                               |
| 3 | 17,025,000 | 17,175,000 | 228 | 1204 | 0.498528577  | S100A12,S100A8,ENSBTAG00000024437,ENSBTAG000000<br>33007                |
| 3 | 17,100,000 | 17,250,000 | 229 | 1317 | 0.532618967  | PGLYRP3,S100A12,S100A8,S100A9,ENSBTAG00000024437                        |
| 3 | 17,175,000 | 17,325,000 | 230 | 1439 | -0.134782502 | LOR,PGLYRP3,S100A9,ENSBTAG00000039487                                   |
| 3 | 17,250,000 | 17,400,000 | 231 | 953  | -0.772894565 | LELP1,LOR,ENSBTAG00000039487                                            |
| 3 | 17,325,000 | 17,475,000 | 232 | 607  | -0.936438047 | LELP1,ENSBTAG00000039487                                                |
| 3 | 17,400,000 | 17,550,000 | 233 | 586  | -0.579548692 |                                                                         |
| 3 | 17,475,000 | 17,625,000 | 234 | 928  | 0.637296017  |                                                                         |
| 3 | 17,550,000 | 17,700,000 | 235 | 1220 | 0.77192288   |                                                                         |
| 3 | 17,625,000 | 17,775,000 | 236 | 888  | 0.641849457  |                                                                         |
| 3 | 17,700,000 | 17,850,000 | 237 | 638  | -2.303004283 | SPRR3                                                                   |
| 3 | 17,775,000 | 17,925,000 | 238 | 621  | -3.000279592 | IVL,SMCP,SPRR3                                                          |
| 3 | 17,850,000 | 18,000,000 | 239 | 884  | -0.500944228 | IVL,SMCP                                                                |
| 3 | 17,925,000 | 18,075,000 | 240 | 1092 | -1.00798417  | KPRP                                                                    |
| 3 | 18,000,000 | 18,150,000 | 241 | 932  | -1.327292508 | C1orf68,KPRP                                                            |
| 3 | 18,075,000 | 18,225,000 | 242 | 909  | -0.483618894 | C1orf68,CRCT1                                                           |
| 3 | 18,150,000 | 18,300,000 | 243 | 635  | -0.971138562 | CRCT1,ENSBTAG00000032446                                                |
| 3 | 18,225,000 | 18,375,000 | 244 | 986  | 0.085850187  | CRNN,ENSBTAG00000032446                                                 |
| 3 | 18,300,000 | 18,450,000 | 245 | 1136 | 0.566378066  | CRNN,FLG2                                                               |
| 3 | 18,375,000 | 18,525,000 | 246 | 590  | -1.260039013 | FLG2,ENSBTAG00000039357                                                 |
| 3 | 18,450,000 | 18,600,000 | 247 | 604  | -2.650037013 | FLG2,ENSBTAG00000039357                                                 |
| 3 | 18,525,000 | 18,675,000 | 248 | 691  | -1.726252047 | RPTN                                                                    |
| 3 | 18,600,000 | 18,750,000 | 249 | 556  | -0.042466509 | RPTN,TCHHL1                                                             |
| 3 | 18,675,000 | 18,825,000 | 250 | 630  | 0.579741171  | S100A10,S100A11,TCHHL1                                                  |
| 3 | 18,750,000 | 18,900,000 | 251 | 848  | 0.366330265  | S100A10,S100A11,THEM4                                                   |
| 3 | 18,825,000 | 18,975,000 | 252 | 590  | 0.404680026  | THEM4,THEM5                                                             |
| 3 | 18,900,000 | 19,050,000 | 253 | 310  | -0.064774726 | C2CD4D,LINGO4,RORC,TDRKH,THEM4,THEM5                                    |
| 3 | 18,975,000 | 19,125,000 | 254 | 317  | 0.684242138  | C2CD4D,LINGO4,MRPL9,OAZ3,RIIAD1,RORC,TDRKH,TNRC<br>4                    |
| 3 | 19,050,000 | 19,200,000 | 255 | 409  | 0.884186005  | MRPL9,OAZ3,RIIAD1,SNX27,TDRKH,TNRC4                                     |
| 3 | 19,125,000 | 19,275,000 | 256 | 423  | 0.35870336   | SNX27,TUFT1                                                             |
| 3 | 19,200,000 | 19,350,000 | 257 | 431  | 0.267036377  | CGN,SNX27,TUFT1                                                         |
| 3 | 19,275,000 | 19,425,000 | 258 | 334  | 0.342840276  | CGN,POGZ,PSMB4,TUFT1                                                    |
| 3 | 19,350,000 | 19,500,000 | 259 | 284  | 0.424639124  | POGZ,PSMB4,SELENBP1                                                     |

|   |            |            |     |      |              |                                                                                                                                                              |
|---|------------|------------|-----|------|--------------|--------------------------------------------------------------------------------------------------------------------------------------------------------------|
| 3 | 19,425,000 | 19,575,000 | 260 | 308  | 0.375352898  | PI4KB,RFX5,SELENBP1,ZNF687                                                                                                                                   |
| 3 | 19,500,000 | 19,650,000 | 261 | 286  | 0.428087274  | PI4KB,PIP5K1A,PSMD4,RFX5,ZNF687,ENSBTAG00000019709                                                                                                           |
| 3 | 19,575,000 | 19,725,000 | 262 | 305  | 0.80216655   | LYSMD1,PIP5K1A,PSMD4,SCNM1,SEMA6C,TMOD4,TNFAIP8L2,VPS72,ENSBTAG00000019709                                                                                   |
| 3 | 19,650,000 | 19,800,000 | 263 | 340  | 0.828702397  | BNIPL,C1orf56,CDC42SE1,GABPB2,LYSMD1,MLLT11,PIP5K1A,PRUNE,SCNM1,SEMA6C,TMOD4,TNFAIP8L2,VPS72                                                                 |
| 3 | 19,725,000 | 19,875,000 | 264 | 313  | 0.072713239  | ANXA9,BNIPL,C1orf56,CDC42SE1,CERS2,FAM63A,GABPB2,MLLT11,PRUNE,SEMA6C,SETDB1                                                                                  |
| 3 | 19,800,000 | 19,950,000 | 265 | 391  | 0.160098952  | ANXA9,CERS2,FAM63A,PRUNE,SETDB1                                                                                                                              |
| 3 | 19,875,000 | 20,025,000 | 266 | 533  | -0.69841586  | ARNT,CTSK,CTSS,SETDB1                                                                                                                                        |
| 3 | 19,950,000 | 20,100,000 | 267 | 559  | -0.845556086 | ARNT,CTSK,CTSS,GOLPH3L,HORMAD1                                                                                                                               |
| 3 | 20,025,000 | 20,175,000 | 268 | 661  | 0.880835005  | CTSS,ENSA,GOLPH3L,HORMAD1,MCL1                                                                                                                               |
| 3 | 20,100,000 | 20,250,000 | 269 | 547  | 0.345757505  | ADAMTSL4,ECM1,ENSA,GOLPH3L,MCL1,TARS2                                                                                                                        |
| 3 | 20,175,000 | 20,325,000 | 270 | 298  | -1.192630298 | ADAMTSL4,ECM1,MCL1,RPRD2,TARS2                                                                                                                               |
| 3 | 20,250,000 | 20,400,000 | 271 | 201  | -0.375994822 | MRPS21,PRPF3,RPRD2                                                                                                                                           |
| 3 | 20,325,000 | 20,475,000 | 272 | 126  | -0.245482811 | ANP32E,APH1A,C1orf54,CA14,CIART,MRPS21,PRPF3,RPRD2                                                                                                           |
| 3 | 20,400,000 | 20,550,000 | 273 | 307  | 0.256363506  | ANP32E,APH1A,C1orf54,CA14,CIART,PLEKHO1,VPS45                                                                                                                |
| 3 | 20,475,000 | 20,625,000 | 274 | 512  | 0.219173124  | PLEKHO1,VPS45                                                                                                                                                |
| 3 | 20,550,000 | 20,700,000 | 275 | 607  | 0.149108115  | OTUD7B,VPS45                                                                                                                                                 |
| 3 | 20,625,000 | 20,775,000 | 276 | 603  | -0.375826045 | BOLA1,H2B,HIST2H2AB,MTMR11,OTUD7B,SF3B4,SV2A,ENSBTAG00000040098                                                                                              |
| 3 | 20,700,000 | 20,850,000 | 277 | 560  | -1.24856138  | BOLA1,FCGR1A,H2B,HIST2H2AB,HIST2H2AC,MTMR11,OTUD7B,SF3B4,SV2A,ENSBTAG00000032452,ENSBTAG00000032453,ENSBTAG00000032458,ENSBTAG00000040098,ENSBTAG00000046368 |
| 3 | 20,775,000 | 20,925,000 | 278 | 646  | -1.247595614 | FCGR1A,H2B,HIST2H2AC,MGC152321,ENSBTAG00000032452,ENSBTAG00000032453,ENSBTAG00000032458,ENSBTAG00000046368                                                   |
| 3 | 20,850,000 | 21,000,000 | 279 | 879  | 0.10908889   | FCGR1A,MGC152321,ENSBTAG00000022741                                                                                                                          |
| 3 | 20,925,000 | 21,075,000 | 280 | 1115 | 0.804627609  | ENSBTAG00000022741                                                                                                                                           |
| 3 | 21,000,000 | 21,150,000 | 281 | 823  | 0.73018135   |                                                                                                                                                              |
| 3 | 21,075,000 | 21,225,000 | 282 | 586  | 0.676983546  |                                                                                                                                                              |
| 3 | 21,150,000 | 21,300,000 | 283 | 695  | 0.796494739  |                                                                                                                                                              |
| 3 | 21,225,000 | 21,375,000 | 284 | 777  | 0.864793605  |                                                                                                                                                              |
| 3 | 21,300,000 | 21,450,000 | 285 | 584  | 0.714353743  |                                                                                                                                                              |
| 3 | 21,375,000 | 21,525,000 | 286 | 317  | -0.117942214 | ANKRD34A,HFE2,LIX1L,POLR3GL,TXNIP                                                                                                                            |
| 3 | 21,450,000 | 21,600,000 | 287 | 277  | 0.029091697  | ANKRD34A,ANKRD35,HFE2,ITGA10,LIX1L,PEX11B,POLR3GL,RBM8A,TXNIP,ENSBTAG00000008370                                                                             |
| 3 | 21,525,000 | 21,675,000 | 288 | 310  | -0.105456852 | ANKRD35,ITGA10,LIX1L,NUDT17,PEX11B,PIAS3,POLR3C,RBM8A,RNF115,ENSBTAG00000008370                                                                              |
| 3 | 21,600,000 | 21,750,000 | 289 | 406  | -0.55246599  | ANKRD35,NUDT17,PIAS3,POLR3C,RNF115                                                                                                                           |
| 3 | 21,675,000 | 21,825,000 | 290 | 403  | -0.972722697 | GPR89,PDZK1,RNF115                                                                                                                                           |
| 3 | 21,750,000 | 21,900,000 | 291 | 391  | -0.731633262 | GJA8,GPR89,PDZK1                                                                                                                                             |
| 3 | 21,825,000 | 21,975,000 | 292 | 685  | 0.137955048  | GJA8,GPR89                                                                                                                                                   |
| 3 | 21,900,000 | 22,050,000 | 293 | 1050 | 0.404152506  | GJA5                                                                                                                                                         |
| 3 | 21,975,000 | 22,125,000 | 294 | 749  | 0.199303245  | ACP6,BCL9,GJA5                                                                                                                                               |
| 3 | 22,050,000 | 22,200,000 | 295 | 451  | -0.150935978 | ACP6,BCL9                                                                                                                                                    |
| 3 | 22,125,000 | 22,275,000 | 296 | 487  | 0.248695358  |                                                                                                                                                              |
| 3 | 22,200,000 | 22,350,000 | 297 | 775  | 0.964578701  | ENSBTAG00000046242,ENSBTAG00000046872                                                                                                                        |
| 3 | 22,275,000 | 22,425,000 | 298 | 1011 | -0.129641714 | ENSBTAG00000046242,ENSBTAG00000046872                                                                                                                        |
| 3 | 22,350,000 | 22,500,000 | 299 | 914  | -2.389216581 | CHD1L,ENSBTAG00000046766                                                                                                                                     |



|   |            |            |     |      |              |                                                   |
|---|------------|------------|-----|------|--------------|---------------------------------------------------|
| 3 | 22,425,000 | 22,575,000 | 300 | 1001 | -1.497645334 | CHD1L,FMO5,ENSBTAG00000046766                     |
| 3 | 22,500,000 | 22,650,000 | 301 | 750  | -0.939078195 | CHD1L,FMO5,PRKAB2                                 |
| 3 | 22,575,000 | 22,725,000 | 302 | 655  | 0.091024464  | FMO5,PRKAB2                                       |
| 3 | 22,650,000 | 22,800,000 | 303 | 1132 | 0.340815429  | ENSBTAG00000021104                                |
| 3 | 22,725,000 | 22,875,000 | 304 | 1482 | 0.275394927  | ENSBTAG00000021104                                |
| 3 | 22,800,000 | 22,950,000 | 305 | 1433 | 0.246359469  | PDE4DIP,ENSBTAG00000017316                        |
| 3 | 22,875,000 | 23,025,000 | 306 | 1174 | 0.451221939  | PDE4DIP,ENSBTAG00000017316                        |
| 3 | 22,950,000 | 23,100,000 | 307 | 924  | 0.787958057  | PDE4DIP                                           |
| 3 | 23,025,000 | 23,175,000 | 308 | 672  | 0.832488759  | PDE4DIP                                           |
| 3 | 23,100,000 | 23,250,000 | 309 | 441  | 1.089442618  | SEC22B,ENSBTAG00000047910                         |
| 3 | 23,175,000 | 23,325,000 | 310 | 537  | 0.968511243  | NOTCH2,SEC22B,ENSBTAG00000047910                  |
| 3 | 23,250,000 | 23,400,000 | 311 | 676  | 0.807731907  | NOTCH2                                            |
| 3 | 23,325,000 | 23,475,000 | 312 | 674  | 0.718261639  | NOTCH2                                            |
| 3 | 23,400,000 | 23,550,000 | 313 | 891  | 1.019489944  | NOTCH2,ENSBTAG00000006903,ENSBTAG00000046315      |
| 3 | 23,475,000 | 23,625,000 | 314 | 964  | 1.125350053  | NOTCH2,REG4,ENSBTAG00000006903,ENSBTAG00000046315 |
| 3 | 23,550,000 | 23,700,000 | 315 | 938  | -2.11981381  | HMGCS2,PHGDH,REG4,ENSBTAG00000046293              |
| 3 | 23,625,000 | 23,775,000 | 316 | 727  | -2.959032426 | HMGCS2,PHGDH                                      |
| 3 | 23,700,000 | 23,850,000 | 317 | 509  | 0.140815633  | HAO2,HSD3B,PHGDH,ZNF697                           |
| 3 | 23,775,000 | 23,925,000 | 318 | 767  | 0.369976958  | HAO2,HSD3B,ZNF697                                 |
| 3 | 23,850,000 | 24,000,000 | 319 | 1117 | 0.92451024   | HAO2                                              |
| 3 | 23,925,000 | 24,075,000 | 320 | 1357 | 1.023425777  |                                                   |
| 3 | 24,000,000 | 24,150,000 | 321 | 1039 | 0.996980254  | WARS2                                             |
| 3 | 24,075,000 | 24,225,000 | 322 | 642  | 1.208305738  | WARS2                                             |
| 3 | 24,150,000 | 24,300,000 | 323 | 655  | 0.590875812  | TBX15,WARS2                                       |
| 3 | 24,225,000 | 24,375,000 | 324 | 760  | 0.460233594  | TBX15                                             |
| 3 | 24,300,000 | 24,450,000 | 325 | 790  | 0.080484257  | TBX15                                             |
| 3 | 24,375,000 | 24,525,000 | 326 | 549  | -1.398236385 |                                                   |
| 3 | 24,450,000 | 24,600,000 | 327 | 675  | -0.064104874 |                                                   |
| 3 | 24,525,000 | 24,675,000 | 328 | 854  | 0.039757123  |                                                   |
| 3 | 24,600,000 | 24,750,000 | 329 | 735  | -1.319290862 |                                                   |
| 3 | 24,675,000 | 24,825,000 | 330 | 799  | -0.348024341 |                                                   |
| 3 | 24,750,000 | 24,900,000 | 331 | 804  | 1.078738737  |                                                   |
| 3 | 24,825,000 | 24,975,000 | 332 | 676  | 1.129136743  |                                                   |
| 3 | 24,900,000 | 25,050,000 | 333 | 879  | -1.065884474 |                                                   |
| 3 | 24,975,000 | 25,125,000 | 334 | 1146 | -1.937871863 | SPAG17                                            |
| 3 | 25,050,000 | 25,200,000 | 335 | 915  | -1.367898833 | SPAG17                                            |
| 3 | 25,125,000 | 25,275,000 | 336 | 605  | -0.274385659 | SPAG17                                            |
| 3 | 25,200,000 | 25,350,000 | 337 | 559  | 0.67365753   | SPAG17                                            |
| 3 | 25,275,000 | 25,425,000 | 338 | 983  | 0.29784503   | GDAP2,SPAG17,WDR3                                 |
| 3 | 25,350,000 | 25,500,000 | 339 | 980  | 0.299271335  | GDAP2,SPAG17,WDR3                                 |
| 3 | 25,425,000 | 25,575,000 | 340 | 637  | -1.027953072 | GDAP2                                             |
| 3 | 25,500,000 | 25,650,000 | 341 | 749  | -1.613568891 |                                                   |
| 3 | 25,575,000 | 25,725,000 | 342 | 592  | -1.035678643 | FAM46C                                            |
| 3 | 25,650,000 | 25,800,000 | 343 | 366  | -0.110389778 | FAM46C                                            |
| 3 | 25,725,000 | 25,875,000 | 344 | 603  | 1.089707758  | MAN1A2                                            |
| 3 | 25,800,000 | 25,950,000 | 345 | 1074 | 0.8229073    | MAN1A2                                            |
| 3 | 25,875,000 | 26,025,000 | 346 | 909  | 0.482289396  | MAN1A2                                            |
| 3 | 25,950,000 | 26,100,000 | 347 | 738  | 0.869130073  | MAN1A2                                            |
| 3 | 26,025,000 | 26,175,000 | 348 | 1033 | 0.781952074  | VTCN1                                             |
| 3 | 26,100,000 | 26,250,000 | 349 | 946  | 0.310432381  | TRIM45,TTF2,VTCN1                                 |
| 3 | 26,175,000 | 26,325,000 | 350 | 951  | 0.215253764  | CD101,TRIM45,TTF2,VTCN1                           |
| 3 | 26,250,000 | 26,400,000 | 351 | 919  | 0.389204728  | CD101,PTGFRN,TTF2                                 |

|   |            |            |     |      |              |                                             |
|---|------------|------------|-----|------|--------------|---------------------------------------------|
| 3 | 26,325,000 | 26,475,000 | 352 | 717  | 0.287577197  | CD101,PTGFRN                                |
| 3 | 26,400,000 | 26,550,000 | 353 | 899  | -0.440927807 | PTGFRN                                      |
| 3 | 26,475,000 | 26,625,000 | 354 | 985  | -0.402148207 | CD2                                         |
| 3 | 26,550,000 | 26,700,000 | 355 | 806  | -0.306351055 | CD2                                         |
| 3 | 26,625,000 | 26,775,000 | 356 | 776  | 0.655264711  | IGSF3                                       |
| 3 | 26,700,000 | 26,850,000 | 357 | 602  | 1.012503407  | CD58,IGSF3                                  |
| 3 | 26,775,000 | 26,925,000 | 358 | 406  | -0.225405812 | CD58,IGSF3                                  |
| 3 | 26,850,000 | 27,000,000 | 359 | 804  | 0.149840643  | CD58                                        |
| 3 | 26,925,000 | 27,075,000 | 360 | 871  | 0.386572755  | ATP1A1                                      |
| 3 | 27,000,000 | 27,150,000 | 361 | 595  | -0.777139872 | ATP1A1                                      |
| 3 | 27,075,000 | 27,225,000 | 362 | 612  | -0.99423806  |                                             |
| 3 | 27,150,000 | 27,300,000 | 363 | 836  | 0.442818627  |                                             |
| 3 | 27,225,000 | 27,375,000 | 364 | 968  | 0.48958914   | MAB21L3                                     |
| 3 | 27,300,000 | 27,450,000 | 365 | 759  | 0.423529379  | MAB21L3,SLC22A15                            |
| 3 | 27,375,000 | 27,525,000 | 366 | 641  | 0.531428244  | SLC22A15                                    |
| 3 | 27,450,000 | 27,600,000 | 367 | 913  | -1.803594725 | NHLH2,SLC22A15                              |
| 3 | 27,525,000 | 27,675,000 | 368 | 1173 | -1.199054574 | CASQ2,NHLH2                                 |
| 3 | 27,600,000 | 27,750,000 | 369 | 1145 | 0.243242719  | CASQ2,VANGL1                                |
| 3 | 27,675,000 | 27,825,000 | 370 | 1191 | 0.693302573  | CASQ2,VANGL1                                |
| 3 | 27,750,000 | 27,900,000 | 371 | 959  | -1.174646524 | VANGL1                                      |
| 3 | 27,825,000 | 27,975,000 | 372 | 483  | -3.391408792 |                                             |
| 3 | 27,900,000 | 28,050,000 | 373 | 280  | 0.102210826  |                                             |
| 3 | 27,975,000 | 28,125,000 | 374 | 207  | 1.251451033  | NGF                                         |
| 3 | 28,050,000 | 28,200,000 | 375 | 190  | 1.245704848  | NGF                                         |
| 3 | 28,125,000 | 28,275,000 | 376 | 327  | -1.37450333  | NGF                                         |
| 3 | 28,200,000 | 28,350,000 | 377 | 396  | -1.442861653 |                                             |
| 3 | 28,275,000 | 28,425,000 | 378 | 337  | -0.659532982 | TSHB,TSPAN2                                 |
| 3 | 28,350,000 | 28,500,000 | 379 | 404  | 0.132976592  | SYCP1,TSHB,TSPAN2                           |
| 3 | 28,425,000 | 28,575,000 | 380 | 474  | 0.332487601  | SYCP1,TSPAN2                                |
| 3 | 28,500,000 | 28,650,000 | 381 | 456  | 0.30554785   | SYCP1,ENSBTAG00000032057                    |
| 3 | 28,575,000 | 28,725,000 | 382 | 362  | 0.434507742  | CSDE1,NRAS,SIKE1,SYCP1,ENSBTAG00000032057   |
| 3 | 28,650,000 | 28,800,000 | 383 | 261  | 0.825439531  | AMPD1,CSDE1,NRAS,SIKE1,ENSBTAG00000045889   |
| 3 | 28,725,000 | 28,875,000 | 384 | 267  | 0.703980301  | AMPD1,BCAS2,DENND2C,NRAS,ENSBTAG00000045889 |
| 3 | 28,800,000 | 28,950,000 | 385 | 357  | -0.206902483 | BCAS2,DENND2C,TRIM33                        |
| 3 | 28,875,000 | 29,025,000 | 386 | 544  | 0.204762335  | BCAS2,TRIM33                                |
| 3 | 28,950,000 | 29,100,000 | 387 | 454  | 0.521354775  | TRIM33                                      |
| 3 | 29,025,000 | 29,175,000 | 388 | 737  | -0.98335862  | TRIM33                                      |
| 3 | 29,100,000 | 29,250,000 | 389 | 1215 | -0.250553251 |                                             |
| 3 | 29,175,000 | 29,325,000 | 390 | 991  | 0.77681701   |                                             |
| 3 | 29,250,000 | 29,400,000 | 391 | 632  | 0.869344196  | SYT6                                        |
| 3 | 29,325,000 | 29,475,000 | 392 | 366  | 0.774840107  | SYT6                                        |
| 3 | 29,400,000 | 29,550,000 | 393 | 353  | 0.637627271  | HIPK1,OLFML3,SYT6                           |
| 3 | 29,475,000 | 29,625,000 | 394 | 356  | 0.650053697  | AP4B1,DCLRE1B,HIPK1,OLFML3                  |
| 3 | 29,550,000 | 29,700,000 | 395 | 492  | 0.689101951  | AP4B1,BCL2L15,DCLRE1B,HIPK1,PTPN22          |
| 3 | 29,625,000 | 29,775,000 | 396 | 601  | 0.819522183  | AP4B1,BCL2L15,PHTF1,PTPN22,RSBN1            |
| 3 | 29,700,000 | 29,850,000 | 397 | 717  | 0.65725216   | MAGI3,PHTF1,PTPN22,RSBN1                    |
| 3 | 29,775,000 | 29,925,000 | 398 | 738  | 0.698065202  | MAGI3,PHTF1                                 |
| 3 | 29,850,000 | 30,000,000 | 399 | 527  | 0.896524865  | MAGI3                                       |
| 3 | 29,925,000 | 30,075,000 | 400 | 558  | 0.624002919  | MAGI3                                       |
| 3 | 30,000,000 | 30,150,000 | 401 | 630  | 0.590091788  | MAGI3                                       |
| 3 | 30,075,000 | 30,225,000 | 402 | 566  | 0.68586327   | MAGI3                                       |
| 3 | 30,150,000 | 30,300,000 | 403 | 426  | 0.790527002  |                                             |
| 3 | 30,225,000 | 30,375,000 | 404 | 947  | 0.28977004   | LRIG2,ENSBTAG00000027172                    |

|   |            |            |     |      |              |                                                   |
|---|------------|------------|-----|------|--------------|---------------------------------------------------|
| 3 | 30,300,000 | 30,450,000 | 405 | 1091 | 0.378822703  | LRIG2,ENSBTAG00000027172                          |
| 3 | 30,375,000 | 30,525,000 | 406 | 688  | 0.752509086  | LRIG2                                             |
| 3 | 30,450,000 | 30,600,000 | 407 | 538  | 0.132031142  | SLC16A1                                           |
| 3 | 30,525,000 | 30,675,000 | 408 | 448  | -0.633683853 | SLC16A1                                           |
| 3 | 30,600,000 | 30,750,000 | 409 | 398  | -0.494603732 |                                                   |
| 3 | 30,675,000 | 30,825,000 | 410 | 263  | -0.274870941 | CAPZA1,MOV10,PPM1J,RHOC                           |
| 3 | 30,750,000 | 30,900,000 | 411 | 278  | 0.053497557  | CAPZA1,MOV10,PPM1J,RHOC,ST7L                      |
| 3 | 30,825,000 | 30,975,000 | 412 | 241  | 0.130846792  | CAPZA1,ST7L,WNT2B                                 |
| 3 | 30,900,000 | 31,050,000 | 413 | 325  | -0.47775949  | CTTNBP2NL,ST7L,WNT2B                              |
| 3 | 30,975,000 | 31,125,000 | 414 | 896  | -0.045813919 | CTTNBP2NL                                         |
| 3 | 31,050,000 | 31,200,000 | 415 | 953  | -0.138842979 |                                                   |
| 3 | 31,125,000 | 31,275,000 | 416 | 667  | -0.022246655 |                                                   |
| 3 | 31,200,000 | 31,350,000 | 417 | 574  | 0.640256235  |                                                   |
| 3 | 31,275,000 | 31,425,000 | 418 | 743  | 0.93284395   |                                                   |
| 3 | 31,350,000 | 31,500,000 | 419 | 817  | 0.983031184  | KCND3                                             |
| 3 | 31,425,000 | 31,575,000 | 420 | 453  | 0.880987365  | KCND3                                             |
| 3 | 31,500,000 | 31,650,000 | 421 | 339  | 0.077035158  | KCND3                                             |
| 3 | 31,575,000 | 31,725,000 | 422 | 443  | -0.42104411  | DDX20,FAM212B,KCND3                               |
| 3 | 31,650,000 | 31,800,000 | 423 | 542  | 0.019341867  | DDX20,FAM212B,KCND3,RAP1A                         |
| 3 | 31,725,000 | 31,875,000 | 424 | 482  | 0.198575536  | FAM212B,RAP1A                                     |
| 3 | 31,800,000 | 31,950,000 | 425 | 385  | 0.337536144  | ADORA3                                            |
| 3 | 31,875,000 | 32,025,000 | 426 | 452  | 0.713931165  | ADORA3,ATP5F1,WDR77                               |
| 3 | 31,950,000 | 32,100,000 | 427 | 1085 | 1.091827455  | ADORA3,ATP5F1,OVGP1,WDR77,ENSBTAG00000034841      |
| 3 | 32,025,000 | 32,175,000 | 428 | 1362 | 0.566760613  | OVGP1,WDR77,ENSBTAG00000023535,ENSBTAG00000034841 |
| 3 | 32,100,000 | 32,250,000 | 429 | 984  | -0.467240304 | CHIA,ENSBTAG00000023535                           |
| 3 | 32,175,000 | 32,325,000 | 430 | 682  | -0.88585642  | CHI3L2,CHIA,DENND2D                               |
| 3 | 32,250,000 | 32,400,000 | 431 | 462  | -1.425348123 | CEPT1,CHI3L2,DENND2D,DRAM2                        |
| 3 | 32,325,000 | 32,475,000 | 432 | 400  | -0.874486845 | CEPT1,DENND2D,DRAM2                               |
| 3 | 32,400,000 | 32,550,000 | 433 | 402  | -0.03685797  | DRAM2,LRIF1                                       |
| 3 | 32,475,000 | 32,625,000 | 434 | 448  | 0.161547663  | CD53,LRIF1                                        |
| 3 | 32,550,000 | 32,700,000 | 435 | 448  | 0.412124497  | CD53                                              |
| 3 | 32,625,000 | 32,775,000 | 436 | 422  | 0.659814403  | CD53                                              |
| 3 | 32,700,000 | 32,850,000 | 437 | 357  | -0.305382134 |                                                   |
| 3 | 32,775,000 | 32,925,000 | 438 | 305  | -1.045160177 | KCNA3                                             |
| 3 | 32,850,000 | 33,000,000 | 439 | 283  | -0.797595962 | KCNA2,KCNA3                                       |
| 3 | 32,925,000 | 33,075,000 | 440 | 303  | -1.242894966 | CYM,KCNA10,KCNA2                                  |
| 3 | 33,000,000 | 33,150,000 | 441 | 329  | -0.729851737 | CYM,KCNA10,LAMTOR5,PROK1                          |
| 3 | 33,075,000 | 33,225,000 | 442 | 263  | -0.298684143 | LAMTOR5,PROK1,RBM15,SLC16A4                       |
| 3 | 33,150,000 | 33,300,000 | 443 | 325  | -0.199260203 | RBM15,SLC16A4                                     |
| 3 | 33,225,000 | 33,375,000 | 444 | 479  | -0.595230878 | KCNC4,SLC6A17                                     |
| 3 | 33,300,000 | 33,450,000 | 445 | 502  | -1.409027638 | KCNC4,SLC6A17,UBL4B                               |
| 3 | 33,375,000 | 33,525,000 | 446 | 292  | -2.620348829 | AHCYL1,ALX3,STRIP1,UBL4B                          |
| 3 | 33,450,000 | 33,600,000 | 447 | 202  | -3.173468454 | AHCYL1,ALX3,STRIP1                                |
| 3 | 33,525,000 | 33,675,000 | 448 | 335  | -1.024340325 | AHCYL1,CSF1                                       |
| 3 | 33,600,000 | 33,750,000 | 449 | 471  | -1.999195773 | CSF1,EPS8L3                                       |
| 3 | 33,675,000 | 33,825,000 | 450 | 378  | -2.774987944 | EPS8L3,GSTM1,GSTM2,GSTM3                          |
| 3 | 33,750,000 | 33,900,000 | 451 | 292  | -0.357843572 | EPS8L3,GSTM1,GSTM2,GSTM3,GSTM4,ENSBTAG00000012692 |
| 3 | 33,825,000 | 33,975,000 | 452 | 370  | 0.292428571  | AMPD2,GNAI3,GNAT2,GSTM2,GSTM4,ENSBTAG00000012692  |
| 3 | 33,900,000 | 34,050,000 | 453 | 338  | 0.758500078  | AMPD2,GNAI3,GNAT2,GPR61                           |
| 3 | 33,975,000 | 34,125,000 | 454 | 309  | 0.829945379  | AMIGO1,ATXN7L2,CYB561D1,GNAI3,GPR61,SYPL2         |

|   |            |            |     |      |              |                                           |
|---|------------|------------|-----|------|--------------|-------------------------------------------|
| 3 | 34,050,000 | 34,200,000 | 455 | 360  | 0.095741878  | AMIGO1,ATXN7L2,CYB561D1,PSMA5,SORT1,SYPL2 |
| 3 | 34,125,000 | 34,275,000 | 456 | 504  | 0.224064452  | CELSR2,MYBPHL,PSMA5,PSRC1,SORT1           |
| 3 | 34,200,000 | 34,350,000 | 457 | 512  | 0.62919755   | CELSR2,KIAA1324,MYBPHL,PSRC1,SARS,SORT1   |
| 3 | 34,275,000 | 34,425,000 | 458 | 366  | 0.137826178  | C1orf194,KIAA1324,SARS,TAF13,TMEM167B     |
| 3 | 34,350,000 | 34,500,000 | 459 | 345  | 0.715701248  | C1orf194,KIAA1324,TAF13,TMEM167B,WDR47    |
| 3 | 34,425,000 | 34,575,000 | 460 | 473  | 1.136908859  | CLCC1,GPSM2,TAF13,WDR47                   |
| 3 | 34,500,000 | 34,650,000 | 461 | 588  | 0.794105032  | CLCC1,GPSM2,WDR47,ENSBTAG00000007333      |
| 3 | 34,575,000 | 34,725,000 | 462 | 526  | -0.813332007 | GPSM2,STXBP3,ENSBTAG00000007333           |
| 3 | 34,650,000 | 34,800,000 | 463 | 481  | -0.329269202 | FNDC7,PRPF38B,STXBP3,ENSBTAG00000007333   |
| 3 | 34,725,000 | 34,875,000 | 464 | 522  | 1.0446201    | FAM102B,FNDC7,HENMT1,PRPF38B,STXBP3       |
| 3 | 34,800,000 | 34,950,000 | 465 | 629  | 1.036881474  | FAM102B,HENMT1                            |
| 3 | 34,875,000 | 35,025,000 | 466 | 945  | 1.118379118  | FAM102B                                   |
| 3 | 34,950,000 | 35,100,000 | 467 | 1363 | 1.305239154  |                                           |
| 3 | 35,025,000 | 35,175,000 | 468 | 1697 | 1.293580659  | SLC25A24                                  |
| 3 | 35,100,000 | 35,250,000 | 469 | 1750 | 0.81861611   | SLC25A24                                  |
| 3 | 35,175,000 | 35,325,000 | 470 | 1239 | 0.555984169  | SLC25A24                                  |
| 3 | 35,250,000 | 35,400,000 | 471 | 771  | -0.443106488 |                                           |
| 3 | 35,325,000 | 35,475,000 | 472 | 867  | -0.467109429 | VAV3                                      |
| 3 | 35,400,000 | 35,550,000 | 473 | 940  | 0.080366521  | VAV3                                      |
| 3 | 35,475,000 | 35,625,000 | 474 | 737  | -0.653303415 | VAV3                                      |
| 3 | 35,550,000 | 35,700,000 | 475 | 791  | -0.016252918 | VAV3                                      |
| 3 | 35,625,000 | 35,775,000 | 476 | 1081 | -0.175992188 | VAV3                                      |
| 3 | 35,700,000 | 35,850,000 | 477 | 872  | -0.801104607 | VAV3                                      |
| 3 | 35,775,000 | 35,925,000 | 478 | 484  | 0.197851751  | VAV3                                      |
| 3 | 35,850,000 | 36,000,000 | 479 | 546  | -0.991603953 | MGC139448,VAV3                            |
| 3 | 35,925,000 | 36,075,000 | 480 | 549  | -1.099157132 | MGC139448                                 |
| 3 | 36,000,000 | 36,150,000 | 481 | 453  | 0.614418777  | MGC139448                                 |
| 3 | 36,075,000 | 36,225,000 | 482 | 479  | 0.776264093  | MGC139448                                 |
| 3 | 36,150,000 | 36,300,000 | 483 | 640  | 1.046785195  | MGC139448                                 |
| 3 | 36,225,000 | 36,375,000 | 484 | 847  | 0.224959432  | MGC139448                                 |
| 3 | 36,300,000 | 36,450,000 | 485 | 808  | -0.201572694 | MGC139448,PRMT6                           |
| 3 | 36,375,000 | 36,525,000 | 486 | 889  | 0.403698267  | PRMT6                                     |
| 3 | 36,450,000 | 36,600,000 | 487 | 764  | 0.696148103  |                                           |
| 3 | 36,525,000 | 36,675,000 | 488 | 771  | 1.219818896  |                                           |
| 3 | 36,600,000 | 36,750,000 | 489 | 1002 | 1.068402309  |                                           |
| 3 | 36,675,000 | 36,825,000 | 490 | 778  | 0.564031287  |                                           |
| 3 | 36,750,000 | 36,900,000 | 491 | 1046 | 0.530431952  |                                           |
| 3 | 36,825,000 | 36,975,000 | 492 | 1672 | 0.742770219  |                                           |
| 3 | 36,900,000 | 37,050,000 | 493 | 1487 | 0.917351737  |                                           |
| 3 | 36,975,000 | 37,125,000 | 494 | 869  | 0.935713427  |                                           |
| 3 | 37,050,000 | 37,200,000 | 495 | 964  | 0.050540024  |                                           |
| 3 | 37,125,000 | 37,275,000 | 496 | 1042 | -0.29574916  |                                           |
| 3 | 37,200,000 | 37,350,000 | 497 | 1169 | 0.530817388  |                                           |
| 3 | 37,275,000 | 37,425,000 | 498 | 1478 | 0.461600157  |                                           |
| 3 | 37,350,000 | 37,500,000 | 499 | 1142 | 0.427975593  |                                           |
| 3 | 37,425,000 | 37,575,000 | 500 | 1053 | 0.612270747  |                                           |
| 3 | 37,500,000 | 37,650,000 | 501 | 1366 | 0.40018839   |                                           |
| 3 | 37,575,000 | 37,725,000 | 502 | 1305 | 0.570203303  |                                           |
| 3 | 37,650,000 | 37,800,000 | 503 | 1247 | 1.073487406  |                                           |
| 3 | 37,725,000 | 37,875,000 | 504 | 1276 | 0.999945598  |                                           |
| 3 | 37,800,000 | 37,950,000 | 505 | 1313 | 0.323171672  |                                           |
| 3 | 37,875,000 | 38,025,000 | 506 | 1532 | -0.148284857 |                                           |
| 3 | 37,950,000 | 38,100,000 | 507 | 1618 | -0.717504785 |                                           |

|   |            |            |     |      |              |                          |
|---|------------|------------|-----|------|--------------|--------------------------|
| 3 | 38,025,000 | 38,175,000 | 508 | 1265 | -0.636681173 |                          |
| 3 | 38,100,000 | 38,250,000 | 509 | 807  | -0.165573825 |                          |
| 3 | 38,175,000 | 38,325,000 | 510 | 993  | -0.985321559 |                          |
| 3 | 38,250,000 | 38,400,000 | 511 | 1320 | -0.897725876 |                          |
| 3 | 38,325,000 | 38,475,000 | 512 | 1372 | -0.568179879 |                          |
| 3 | 38,400,000 | 38,550,000 | 513 | 1268 | -0.020678869 |                          |
| 3 | 38,475,000 | 38,625,000 | 514 | 1435 | 0.68049932   |                          |
| 3 | 38,550,000 | 38,700,000 | 515 | 1731 | 1.215849388  |                          |
| 3 | 38,625,000 | 38,775,000 | 516 | 1517 | 1.122222875  |                          |
| 3 | 38,700,000 | 38,850,000 | 517 | 1024 | -0.00971101  |                          |
| 3 | 38,775,000 | 38,925,000 | 518 | 1078 | -0.9502581   |                          |
| 3 | 38,850,000 | 39,000,000 | 519 | 1001 | -0.790265302 |                          |
| 3 | 38,925,000 | 39,075,000 | 520 | 841  | 0.436801373  |                          |
| 3 | 39,000,000 | 39,150,000 | 521 | 829  | 0.391574454  | ENSBTAG00000015180       |
| 3 | 39,075,000 | 39,225,000 | 522 | 580  | -0.021035277 | ENSBTAG00000015180       |
| 3 | 39,150,000 | 39,300,000 | 523 | 750  | 0.236032916  |                          |
| 3 | 39,225,000 | 39,375,000 | 524 | 957  | 0.178325717  |                          |
| 3 | 39,300,000 | 39,450,000 | 525 | 939  | 0.468170367  |                          |
| 3 | 39,375,000 | 39,525,000 | 526 | 910  | 0.937499764  |                          |
| 3 | 39,450,000 | 39,600,000 | 527 | 1249 | 0.729451378  |                          |
| 3 | 39,525,000 | 39,675,000 | 528 | 1371 | 0.62291322   |                          |
| 3 | 39,600,000 | 39,750,000 | 529 | 1225 | 0.58170453   |                          |
| 3 | 39,675,000 | 39,825,000 | 530 | 865  | 0.493881735  |                          |
| 3 | 39,750,000 | 39,900,000 | 531 | 575  | 0.94933437   | ENSBTAG00000024288       |
| 3 | 39,825,000 | 39,975,000 | 532 | 627  | 0.794302754  | AMY2B,ENSBTAG00000024288 |
| 3 | 39,900,000 | 40,050,000 | 533 | 465  | 0.279394442  | AMY2B,RNPC3              |
| 3 | 39,975,000 | 40,125,000 | 534 | 648  | 0.098360131  | RNPC3                    |
| 3 | 40,050,000 | 40,200,000 | 535 | 1089 | -0.7496162   |                          |
| 3 | 40,125,000 | 40,275,000 | 536 | 1099 | -0.826560047 |                          |
| 3 | 40,200,000 | 40,350,000 | 537 | 761  | 0.093251063  |                          |
| 3 | 40,275,000 | 40,425,000 | 538 | 845  | 0.094722878  |                          |
| 3 | 40,350,000 | 40,500,000 | 539 | 1021 | 0.193035288  | COL11A1                  |
| 3 | 40,425,000 | 40,575,000 | 540 | 876  | -0.313461676 | COL11A1                  |
| 3 | 40,500,000 | 40,650,000 | 541 | 835  | -1.199827037 | COL11A1                  |
| 3 | 40,575,000 | 40,725,000 | 542 | 984  | -0.224173236 | COL11A1                  |
| 3 | 40,650,000 | 40,800,000 | 543 | 865  | 0.341789499  | COL11A1                  |
| 3 | 40,725,000 | 40,875,000 | 544 | 629  | 0.379589032  |                          |
| 3 | 40,800,000 | 40,950,000 | 545 | 620  | -1.096754574 |                          |
| 3 | 40,875,000 | 41,025,000 | 546 | 934  | -0.591953079 |                          |
| 3 | 40,950,000 | 41,100,000 | 547 | 1212 | 0.56853294   |                          |
| 3 | 41,025,000 | 41,175,000 | 548 | 1246 | 0.977269136  |                          |
| 3 | 41,100,000 | 41,250,000 | 549 | 1743 | 0.753388728  |                          |
| 3 | 41,175,000 | 41,325,000 | 550 | 1775 | 0.607896552  |                          |
| 3 | 41,250,000 | 41,400,000 | 551 | 1022 | 0.676950188  |                          |
| 3 | 41,325,000 | 41,475,000 | 552 | 623  | 0.527088153  | OLFM3                    |
| 3 | 41,400,000 | 41,550,000 | 553 | 773  | -0.39441168  | OLFM3                    |
| 3 | 41,475,000 | 41,625,000 | 554 | 940  | -2.681671924 | OLFM3                    |
| 3 | 41,550,000 | 41,700,000 | 555 | 943  | -4.98451314  | OLFM3                    |
| 3 | 41,625,000 | 41,775,000 | 556 | 1073 | -2.138606405 | OLFM3                    |
| 3 | 41,700,000 | 41,850,000 | 557 | 1251 | -0.351323905 |                          |
| 3 | 41,775,000 | 41,925,000 | 558 | 1035 | -1.248086852 |                          |
| 3 | 41,850,000 | 42,000,000 | 559 | 860  | 0.76858614   |                          |
| 3 | 41,925,000 | 42,075,000 | 560 | 1320 | 1.222125614  |                          |

|   |            |            |     |      |              |                                    |
|---|------------|------------|-----|------|--------------|------------------------------------|
| 3 | 42,000,000 | 42,150,000 | 561 | 1117 | 0.968400181  |                                    |
| 3 | 42,075,000 | 42,225,000 | 562 | 460  | -0.174926597 | S1PR1                              |
| 3 | 42,150,000 | 42,300,000 | 563 | 586  | -1.285910049 | S1PR1                              |
| 3 | 42,225,000 | 42,375,000 | 564 | 861  | -0.416962761 |                                    |
| 3 | 42,300,000 | 42,450,000 | 565 | 907  | 0.324960615  | DPH5                               |
| 3 | 42,375,000 | 42,525,000 | 566 | 877  | 0.642461608  | DPH5,SLC30A7                       |
| 3 | 42,450,000 | 42,600,000 | 567 | 861  | 0.719834607  | EXTL2,SLC30A7                      |
| 3 | 42,525,000 | 42,675,000 | 568 | 963  | 0.412882489  | EXTL2,SLC30A7                      |
| 3 | 42,600,000 | 42,750,000 | 569 | 920  | 0.206941884  | VCAM1                              |
| 3 | 42,675,000 | 42,825,000 | 570 | 739  | 0.603068014  | VCAM1                              |
| 3 | 42,750,000 | 42,900,000 | 571 | 706  | 0.960659348  | GPR88,VCAM1                        |
| 3 | 42,825,000 | 42,975,000 | 572 | 842  | 1.158505867  | CDC14A,GPR88                       |
| 3 | 42,900,000 | 43,050,000 | 573 | 866  | 1.299016621  | CDC14A                             |
| 3 | 42,975,000 | 43,125,000 | 574 | 747  | 1.157634006  | CDC14A                             |
| 3 | 43,050,000 | 43,200,000 | 575 | 927  | 0.33115428   | CDC14A,DBT,RTCA                    |
| 3 | 43,125,000 | 43,275,000 | 576 | 784  | 0.071339266  | CCDC76,DBT,LRRC39,RTCA             |
| 3 | 43,200,000 | 43,350,000 | 577 | 445  | 0.296727163  | CCDC76,DBT,HIAT1,LRRC39,SASS6      |
| 3 | 43,275,000 | 43,425,000 | 578 | 597  | -0.281743941 | CCDC76,HIAT1,SASS6,SLC35A3         |
| 3 | 43,350,000 | 43,500,000 | 579 | 862  | 0.213716924  | HIAT1,SLC35A3                      |
| 3 | 43,425,000 | 43,575,000 | 580 | 1222 | 0.277206038  | AGL,SLC35A3                        |
| 3 | 43,500,000 | 43,650,000 | 581 | 1307 | 0.149314169  | AGL,ENSBTAG00000048022             |
| 3 | 43,575,000 | 43,725,000 | 582 | 1092 | 0.302847574  | AGL,FRRS1,PALMD,ENSBTAG00000048022 |
| 3 | 43,650,000 | 43,800,000 | 583 | 1002 | 0.186367238  | FRRS1,PALMD                        |
| 3 | 43,725,000 | 43,875,000 | 584 | 1120 | 0.199534464  | PALMD                              |
| 3 | 43,800,000 | 43,950,000 | 585 | 1477 | 0.838933547  |                                    |
| 3 | 43,875,000 | 44,025,000 | 586 | 1410 | 1.138999679  |                                    |
| 3 | 43,950,000 | 44,100,000 | 587 | 1282 | 0.171868315  | ENSBTAG00000019031                 |
| 3 | 44,025,000 | 44,175,000 | 588 | 1371 | -0.590607812 | ENSBTAG00000019031                 |
| 3 | 44,100,000 | 44,250,000 | 589 | 1029 | -1.83387833  | ENSBTAG00000019031                 |
| 3 | 44,175,000 | 44,325,000 | 590 | 812  | -1.714982112 |                                    |
| 3 | 44,250,000 | 44,400,000 | 591 | 1014 | -1.585746297 | ENSBTAG00000004591                 |
| 3 | 44,325,000 | 44,475,000 | 592 | 1099 | -1.680297037 | ENSBTAG00000004591                 |
| 3 | 44,400,000 | 44,550,000 | 593 | 1056 | -0.520309879 | ENSBTAG00000004591                 |
| 3 | 44,475,000 | 44,625,000 | 594 | 752  | 0.174255394  |                                    |
| 3 | 44,550,000 | 44,700,000 | 595 | 620  | 0.680385631  | SNX7                               |
| 3 | 44,625,000 | 44,775,000 | 596 | 701  | 0.643580119  | SNX7                               |
| 3 | 44,700,000 | 44,850,000 | 597 | 745  | 0.274767497  | SNX7                               |
| 3 | 44,775,000 | 44,925,000 | 598 | 725  | 0.31104982   | SNX7                               |
| 3 | 44,850,000 | 45,000,000 | 599 | 397  | 1.258615599  |                                    |
| 3 | 44,925,000 | 45,075,000 | 600 | 271  | 1.264730241  |                                    |
| 3 | 45,000,000 | 45,150,000 | 601 | 263  | 1.179020671  |                                    |
| 3 | 45,075,000 | 45,225,000 | 602 | 362  | 1.030747031  |                                    |
| 3 | 45,150,000 | 45,300,000 | 603 | 400  | 0.666036426  |                                    |
| 3 | 45,225,000 | 45,375,000 | 604 | 334  | 0.282073674  |                                    |
| 3 | 45,300,000 | 45,450,000 | 605 | 285  | -0.407524182 |                                    |
| 3 | 45,375,000 | 45,525,000 | 606 | 240  | -1.906722802 |                                    |
| 3 | 45,450,000 | 45,600,000 | 607 | 246  | -1.428456286 | DPYD                               |
| 3 | 45,525,000 | 45,675,000 | 608 | 525  | -1.143143621 | DPYD                               |
| 3 | 45,600,000 | 45,750,000 | 609 | 615  | -0.888771474 | DPYD                               |
| 3 | 45,675,000 | 45,825,000 | 610 | 837  | -0.310572404 | DPYD                               |
| 3 | 45,750,000 | 45,900,000 | 611 | 1265 | -0.132172261 | DPYD                               |
| 3 | 45,825,000 | 45,975,000 | 612 | 1234 | 0.779471925  | DPYD                               |
| 3 | 45,900,000 | 46,050,000 | 613 | 1252 | 0.716996591  | DPYD                               |

|   |            |            |     |      |              |                          |
|---|------------|------------|-----|------|--------------|--------------------------|
| 3 | 45,975,000 | 46,125,000 | 614 | 1308 | 0.622526852  | DPYD                     |
| 3 | 46,050,000 | 46,200,000 | 615 | 1238 | 0.804712558  | DPYD                     |
| 3 | 46,125,000 | 46,275,000 | 616 | 1072 | 0.603408873  | DPYD                     |
| 3 | 46,200,000 | 46,350,000 | 617 | 904  | 0.539095329  | DPYD                     |
| 3 | 46,275,000 | 46,425,000 | 618 | 933  | -1.039350369 | DPYD                     |
| 3 | 46,350,000 | 46,500,000 | 619 | 1183 | -0.976211804 | DPYD                     |
| 3 | 46,425,000 | 46,575,000 | 620 | 1405 | 0.098304959  | DPYD                     |
| 3 | 46,500,000 | 46,650,000 | 621 | 1119 | 0.229502297  |                          |
| 3 | 46,575,000 | 46,725,000 | 622 | 975  | 0.556234414  |                          |
| 3 | 46,650,000 | 46,800,000 | 623 | 1214 | 0.866986299  |                          |
| 3 | 46,725,000 | 46,875,000 | 624 | 1027 | 0.770804343  | PTBP2                    |
| 3 | 46,800,000 | 46,950,000 | 625 | 892  | 0.889206432  | PTBP2                    |
| 3 | 46,875,000 | 47,025,000 | 626 | 1121 | 0.890068583  | PTBP2                    |
| 3 | 46,950,000 | 47,100,000 | 627 | 1235 | 0.892978164  |                          |
| 3 | 47,025,000 | 47,175,000 | 628 | 1254 | 0.478164038  |                          |
| 3 | 47,100,000 | 47,250,000 | 629 | 1113 | 0.0359503    |                          |
| 3 | 47,175,000 | 47,325,000 | 630 | 1029 | 0.599817692  |                          |
| 3 | 47,250,000 | 47,400,000 | 631 | 1271 | 0.752823432  |                          |
| 3 | 47,325,000 | 47,475,000 | 632 | 1299 | 0.674706943  |                          |
| 3 | 47,400,000 | 47,550,000 | 633 | 1277 | 0.796405866  |                          |
| 3 | 47,475,000 | 47,625,000 | 634 | 961  | 0.337077844  |                          |
| 3 | 47,550,000 | 47,700,000 | 635 | 624  | -1.001340436 |                          |
| 3 | 47,625,000 | 47,775,000 | 636 | 817  | 0.532300712  |                          |
| 3 | 47,700,000 | 47,850,000 | 637 | 768  | 1.273995114  |                          |
| 3 | 47,775,000 | 47,925,000 | 638 | 645  | 1.016872214  |                          |
| 3 | 47,850,000 | 48,000,000 | 639 | 594  | 0.870224117  |                          |
| 3 | 47,925,000 | 48,075,000 | 640 | 579  | -0.243180796 |                          |
| 3 | 48,000,000 | 48,150,000 | 641 | 756  | 0.118028284  |                          |
| 3 | 48,075,000 | 48,225,000 | 642 | 759  | 0.931339443  |                          |
| 3 | 48,150,000 | 48,300,000 | 643 | 637  | -0.174903768 |                          |
| 3 | 48,225,000 | 48,375,000 | 644 | 431  | -0.870090789 |                          |
| 3 | 48,300,000 | 48,450,000 | 645 | 412  | -0.014052143 | RWDD3                    |
| 3 | 48,375,000 | 48,525,000 | 646 | 652  | 0.551828876  | RWDD3,ENSBTAG00000044125 |
| 3 | 48,450,000 | 48,600,000 | 647 | 904  | 0.935630903  | ENSBTAG00000044125       |
| 3 | 48,525,000 | 48,675,000 | 648 | 883  | 0.65460707   | ALG14                    |
| 3 | 48,600,000 | 48,750,000 | 649 | 588  | -0.591456742 | ALG14                    |
| 3 | 48,675,000 | 48,825,000 | 650 | 511  | -0.210228355 | ALG14,CNN3,SLC44A3       |
| 3 | 48,750,000 | 48,900,000 | 651 | 698  | 1.196108585  | CNN3,SLC44A3             |
| 3 | 48,825,000 | 48,975,000 | 652 | 856  | 1.216735523  | SLC44A3                  |
| 3 | 48,900,000 | 49,050,000 | 653 | 1074 | 0.709846009  |                          |
| 3 | 48,975,000 | 49,125,000 | 654 | 1223 | 0.663359592  | F3                       |
| 3 | 49,050,000 | 49,200,000 | 655 | 1094 | 1.004003312  | ABCD3,F3                 |
| 3 | 49,125,000 | 49,275,000 | 656 | 822  | 1.118492551  | ABCD3                    |
| 3 | 49,200,000 | 49,350,000 | 657 | 891  | 1.290431187  | ABCD3                    |
| 3 | 49,275,000 | 49,425,000 | 658 | 934  | 1.151354435  | ARHGAP29                 |
| 3 | 49,350,000 | 49,500,000 | 659 | 723  | -0.300741081 | ARHGAP29                 |
| 3 | 49,425,000 | 49,575,000 | 660 | 879  | -1.138727398 | ABCA4,ARHGAP29           |
| 3 | 49,500,000 | 49,650,000 | 661 | 1034 | -0.047830262 | ABCA4                    |
| 3 | 49,575,000 | 49,725,000 | 662 | 1030 | 0.744484508  | ABCA4                    |
| 3 | 49,650,000 | 49,800,000 | 663 | 808  | 0.716142998  | ABCA4,DNTTIP2,GCLM       |
| 3 | 49,725,000 | 49,875,000 | 664 | 737  | 0.618726139  | BCAR3,DNTTIP2,GCLM       |
| 3 | 49,800,000 | 49,950,000 | 665 | 1098 | 0.22469889   | BCAR3                    |
| 3 | 49,875,000 | 50,025,000 | 666 | 1356 | 0.711307946  | BCAR3                    |

|   |            |            |     |      |              |                                     |
|---|------------|------------|-----|------|--------------|-------------------------------------|
| 3 | 49,950,000 | 50,100,000 | 667 | 1036 | 1.126972232  | BCAR3,FNBP1L                        |
| 3 | 50,025,000 | 50,175,000 | 668 | 554  | 0.582001526  | BCAR3,FNBP1L                        |
| 3 | 50,100,000 | 50,250,000 | 669 | 428  | -0.13049652  | DR1,FNBP1L                          |
| 3 | 50,175,000 | 50,325,000 | 670 | 437  | -0.753564165 | DR1                                 |
| 3 | 50,250,000 | 50,400,000 | 671 | 416  | -0.391659868 | CCDC18,DR1                          |
| 3 | 50,325,000 | 50,475,000 | 672 | 406  | 0.789367468  | CCDC18,TMED5                        |
| 3 | 50,400,000 | 50,550,000 | 673 | 429  | 0.785856173  | CCDC18,MTF2,TMED5                   |
| 3 | 50,475,000 | 50,625,000 | 674 | 673  | 0.727975043  | MTF2                                |
| 3 | 50,550,000 | 50,700,000 | 675 | 958  | 0.391863934  | MGC143035,MTF2                      |
| 3 | 50,625,000 | 50,775,000 | 676 | 964  | 0.044387839  | MGC143035                           |
| 3 | 50,700,000 | 50,850,000 | 677 | 714  | 0.271796207  | MGC143035,RPL5                      |
| 3 | 50,775,000 | 50,925,000 | 678 | 570  | -0.081100112 | EVI5,MGC143035,RPL5                 |
| 3 | 50,850,000 | 51,000,000 | 679 | 666  | 0.638102938  | EVI5                                |
| 3 | 50,925,000 | 51,075,000 | 680 | 557  | 1.310054184  | EVI5                                |
| 3 | 51,000,000 | 51,150,000 | 681 | 488  | 0.729895106  | EVI5,GFI1                           |
| 3 | 51,075,000 | 51,225,000 | 682 | 506  | -0.097282776 | GFI1,RPAP2                          |
| 3 | 51,150,000 | 51,300,000 | 683 | 519  | -1.422655662 | GLMN,RPAP2                          |
| 3 | 51,225,000 | 51,375,000 | 684 | 462  | -2.168394926 | C1orf146,GLMN,RPAP2                 |
| 3 | 51,300,000 | 51,450,000 | 685 | 392  | -1.312843463 | BTBD8,C1orf146,GLMN                 |
| 3 | 51,375,000 | 51,525,000 | 686 | 808  | -0.350795593 | ABHD7,BTBD8,ENSBTAG00000040248      |
| 3 | 51,450,000 | 51,600,000 | 687 | 969  | -0.612280283 | ABHD7,BRDT,BTBD8,ENSBTAG00000040248 |
| 3 | 51,525,000 | 51,675,000 | 688 | 782  | -1.194815434 | ABHD7,BRDT,TGFBR3                   |
| 3 | 51,600,000 | 51,750,000 | 689 | 815  | 0.029866736  | TGFBR3                              |
| 3 | 51,675,000 | 51,825,000 | 690 | 773  | 0.725415122  | TGFBR3                              |
| 3 | 51,750,000 | 51,900,000 | 691 | 636  | 0.58366516   | TGFBR3,ENSBTAG00000048081           |
| 3 | 51,825,000 | 51,975,000 | 692 | 765  | 0.949406703  | TGFBR3,ENSBTAG00000048081           |
| 3 | 51,900,000 | 52,050,000 | 693 | 779  | 1.127787429  | CDC7L1                              |
| 3 | 51,975,000 | 52,125,000 | 694 | 410  | 1.026840772  | CDC7L1                              |
| 3 | 52,050,000 | 52,200,000 | 695 | 689  | 0.867661765  | HFM1                                |
| 3 | 52,125,000 | 52,275,000 | 696 | 726  | 0.674264613  | HFM1,ENSBTAG00000046077             |
| 3 | 52,200,000 | 52,350,000 | 697 | 724  | -0.252351717 | HFM1,ENSBTAG00000046077             |
| 3 | 52,275,000 | 52,425,000 | 698 | 1013 | -0.309071487 | ZNF644                              |
| 3 | 52,350,000 | 52,500,000 | 699 | 891  | 0.020456237  | ZNF644                              |
| 3 | 52,425,000 | 52,575,000 | 700 | 936  | 0.531069332  | ZNF644                              |
| 3 | 52,500,000 | 52,650,000 | 701 | 749  | 0.74156207   | ZNF644                              |
| 3 | 52,575,000 | 52,725,000 | 702 | 476  | 0.575239005  | BARHL2                              |
| 3 | 52,650,000 | 52,800,000 | 703 | 561  | 0.958250595  | BARHL2                              |
| 3 | 52,725,000 | 52,875,000 | 704 | 849  | 0.89715489   |                                     |
| 3 | 52,800,000 | 52,950,000 | 705 | 922  | 0.427481399  |                                     |
| 3 | 52,875,000 | 53,025,000 | 706 | 694  | -1.332531362 |                                     |
| 3 | 52,950,000 | 53,100,000 | 707 | 478  | -2.294965278 |                                     |
| 3 | 53,025,000 | 53,175,000 | 708 | 400  | -1.792125077 |                                     |
| 3 | 53,100,000 | 53,250,000 | 709 | 699  | -1.242227951 |                                     |
| 3 | 53,175,000 | 53,325,000 | 710 | 822  | -0.350687826 |                                     |
| 3 | 53,250,000 | 53,400,000 | 711 | 641  | 0.526376826  | ZNF326                              |
| 3 | 53,325,000 | 53,475,000 | 712 | 522  | 0.503887162  | ZNF326                              |
| 3 | 53,400,000 | 53,550,000 | 713 | 414  | 0.180453768  | LRR8D,ZNF326                        |
| 3 | 53,475,000 | 53,625,000 | 714 | 531  | -0.160328769 | LRR8D                               |
| 3 | 53,550,000 | 53,700,000 | 715 | 690  | 0.606493716  | LRR8D                               |
| 3 | 53,625,000 | 53,775,000 | 716 | 981  | 1.206709762  | LRR8C                               |
| 3 | 53,700,000 | 53,850,000 | 717 | 1101 | 1.183970233  | LRR8C                               |
| 3 | 53,775,000 | 53,925,000 | 718 | 985  | 0.562270395  | LRR8B,LRR8C                         |
| 3 | 53,850,000 | 54,000,000 | 719 | 1219 | 0.068914418  | LRR8B                               |



|   |            |            |     |      |              |                                                                    |
|---|------------|------------|-----|------|--------------|--------------------------------------------------------------------|
| 3 | 53,925,000 | 54,075,000 | 720 | 1143 | 0.053644733  | ENSBTAG00000014857                                                 |
| 3 | 54,000,000 | 54,150,000 | 721 | 1027 | -0.866891358 | ENSBTAG00000014857                                                 |
| 3 | 54,075,000 | 54,225,000 | 722 | 1115 | -0.803161317 | GBP6,ENSBTAG00000046294                                            |
| 3 | 54,150,000 | 54,300,000 | 723 | 1329 | -0.544676831 | GBP5,GBP6,ENSBTAG00000046294                                       |
| 3 | 54,225,000 | 54,375,000 | 724 | 1555 | -1.197822298 | GBP5,ENSBTAG00000017670,ENSBTAG00000038938                         |
| 3 | 54,300,000 | 54,450,000 | 725 | 1010 | -1.885821924 | HNRNPA1L2,ENSBTAG00000017670,ENSBTAG00000038233,ENSBTAG00000038938 |
| 3 | 54,375,000 | 54,525,000 | 726 | 489  | -2.041078587 | HNRNPA1L2,ENSBTAG00000037490,ENSBTAG00000038233                    |
| 3 | 54,450,000 | 54,600,000 | 727 | 829  | -0.860453972 | ENSBTAG00000037490,ENSBTAG00000037634                              |
| 3 | 54,525,000 | 54,675,000 | 728 | 1329 | -0.354436208 | GBP4,ENSBTAG00000037490,ENSBTAG00000037634                         |
| 3 | 54,600,000 | 54,750,000 | 729 | 1215 | 0.100752355  | GBP4,ENSBTAG00000037634                                            |
| 3 | 54,675,000 | 54,825,000 | 730 | 1216 | 1.077365586  | GBP4,GBP6,ENSBTAG00000024272                                       |
| 3 | 54,750,000 | 54,900,000 | 731 | 1301 | 1.079776056  | GBP6,ENSBTAG00000024272,ENSBTAG00000038625                         |
| 3 | 54,825,000 | 54,975,000 | 732 | 1034 | 0.982158323  | ENSBTAG0000002416,ENSBTAG00000038625                               |
| 3 | 54,900,000 | 55,050,000 | 733 | 818  | 0.795178934  | ENSBTAG0000002416,ENSBTAG00000038500                               |
| 3 | 54,975,000 | 55,125,000 | 734 | 969  | 0.797768944  | CCBL2,ENSBTAG00000001143,ENSBTAG00000038500                        |
| 3 | 55,050,000 | 55,200,000 | 735 | 1274 | 0.973742769  | CCBL2,GTF2B,ENSBTAG00000001143                                     |
| 3 | 55,125,000 | 55,275,000 | 736 | 1057 | 0.91433242   | CCBL2,GTF2B,PKN2                                                   |
| 3 | 55,200,000 | 55,350,000 | 737 | 949  | 0.512168998  | GTF2B,PKN2                                                         |
| 3 | 55,275,000 | 55,425,000 | 738 | 1207 | -0.064286504 | PKN2                                                               |
| 3 | 55,350,000 | 55,500,000 | 739 | 1326 | -0.072355011 | PKN2                                                               |
| 3 | 55,425,000 | 55,575,000 | 740 | 1206 | 0.168430591  |                                                                    |
| 3 | 55,500,000 | 55,650,000 | 741 | 962  | 0.126763356  |                                                                    |
| 3 | 55,575,000 | 55,725,000 | 742 | 910  | 0.387543264  |                                                                    |
| 3 | 55,650,000 | 55,800,000 | 743 | 832  | -1.226016063 |                                                                    |
| 3 | 55,725,000 | 55,875,000 | 744 | 575  | -2.014362273 |                                                                    |
| 3 | 55,800,000 | 55,950,000 | 745 | 597  | 1.073959976  |                                                                    |
| 3 | 55,875,000 | 56,025,000 | 746 | 457  | 1.110640686  |                                                                    |
| 3 | 55,950,000 | 56,100,000 | 747 | 272  | 0.832045291  |                                                                    |
| 3 | 56,025,000 | 56,175,000 | 748 | 307  | 0.884902445  |                                                                    |
| 3 | 56,100,000 | 56,250,000 | 749 | 323  | 0.56772516   | ENSBTAG00000001873                                                 |
| 3 | 56,175,000 | 56,325,000 | 750 | 476  | 0.07094491   | ENSBTAG00000001873                                                 |
| 3 | 56,250,000 | 56,400,000 | 751 | 535  | 0.672147049  |                                                                    |
| 3 | 56,325,000 | 56,475,000 | 752 | 752  | 1.265668049  |                                                                    |
| 3 | 56,400,000 | 56,550,000 | 753 | 940  | 0.993639278  |                                                                    |
| 3 | 56,475,000 | 56,625,000 | 754 | 676  | 0.693427704  |                                                                    |
| 3 | 56,550,000 | 56,700,000 | 755 | 401  | 0.651537318  |                                                                    |
| 3 | 56,625,000 | 56,775,000 | 756 | 398  | 0.635350962  |                                                                    |
| 3 | 56,700,000 | 56,850,000 | 757 | 645  | 0.901475107  | LMO4                                                               |
| 3 | 56,775,000 | 56,925,000 | 758 | 692  | 0.738597648  | LMO4                                                               |
| 3 | 56,850,000 | 57,000,000 | 759 | 471  | 0.307455318  |                                                                    |
| 3 | 56,925,000 | 57,075,000 | 760 | 729  | 0.335367298  |                                                                    |
| 3 | 57,000,000 | 57,150,000 | 761 | 1075 | -0.329723325 | ENSBTAG00000017595                                                 |
| 3 | 57,075,000 | 57,225,000 | 762 | 1240 | -0.676990242 | ENSBTAG00000017595                                                 |
| 3 | 57,150,000 | 57,300,000 | 763 | 1322 | 0.320420153  |                                                                    |
| 3 | 57,225,000 | 57,375,000 | 764 | 1327 | 0.900528559  | ENSBTAG00000012502                                                 |
| 3 | 57,300,000 | 57,450,000 | 765 | 1225 | 0.644768571  | SH3GLB1,ENSBTAG00000012502                                         |
| 3 | 57,375,000 | 57,525,000 | 766 | 1087 | 0.448815171  | SH3GLB1,ENSBTAG00000021501                                         |
| 3 | 57,450,000 | 57,600,000 | 767 | 882  | 0.423674553  | SH3GLB1,ENSBTAG00000016712,ENSBTAG00000021501                      |
| 3 | 57,525,000 | 57,675,000 | 768 | 830  | -1.810750773 | CLCA4,ENSBTAG00000016712,ENSBTAG00000021501                        |
| 3 | 57,600,000 | 57,750,000 | 769 | 1199 | -0.527035736 | CLCA1,CLCA4                                                        |
| 3 | 57,675,000 | 57,825,000 | 770 | 1545 | 0.638310773  | CLCA1,CLCA2,ODF2L                                                  |

|   |            |            |     |      |              |                                        |
|---|------------|------------|-----|------|--------------|----------------------------------------|
| 3 | 57,750,000 | 57,900,000 | 771 | 1160 | 0.634808715  | CLCA2,ODF2L                            |
| 3 | 57,825,000 | 57,975,000 | 772 | 1137 | 0.74980547   | ODF2L                                  |
| 3 | 57,900,000 | 58,050,000 | 773 | 1163 | 0.808269575  |                                        |
| 3 | 57,975,000 | 58,125,000 | 774 | 610  | 0.596563699  |                                        |
| 3 | 58,050,000 | 58,200,000 | 775 | 773  | 0.356431556  |                                        |
| 3 | 58,125,000 | 58,275,000 | 776 | 1402 | -0.184904848 |                                        |
| 3 | 58,200,000 | 58,350,000 | 777 | 1161 | -0.217051663 |                                        |
| 3 | 58,275,000 | 58,425,000 | 778 | 636  | 0.506230059  |                                        |
| 3 | 58,350,000 | 58,500,000 | 779 | 666  | 0.626263291  |                                        |
| 3 | 58,425,000 | 58,575,000 | 780 | 714  | 0.215463887  | ZNHIT6,ENSBTAG00000048312              |
| 3 | 58,500,000 | 58,650,000 | 781 | 673  | -0.292509963 | ZNHIT6,ENSBTAG00000048312              |
| 3 | 58,575,000 | 58,725,000 | 782 | 709  | 1.07315677   | CYR61,ZNHIT6                           |
| 3 | 58,650,000 | 58,800,000 | 783 | 827  | 0.77668524   | CYR61                                  |
| 3 | 58,725,000 | 58,875,000 | 784 | 550  | -0.822760977 | DDAH1                                  |
| 3 | 58,800,000 | 58,950,000 | 785 | 367  | -0.393804879 | DDAH1                                  |
| 3 | 58,875,000 | 59,025,000 | 786 | 380  | -1.106356171 | BCL10,DDAH1                            |
| 3 | 58,950,000 | 59,100,000 | 787 | 378  | -1.638380283 | BCL10,C1orf52,DDAH1,SYDE2              |
| 3 | 59,025,000 | 59,175,000 | 788 | 433  | -1.39938782  | C1orf52,SYDE2,WDR63,ENSBTAG00000047351 |
| 3 | 59,100,000 | 59,250,000 | 789 | 432  | -0.739053041 | SYDE2,WDR63,ENSBTAG00000047351         |
| 3 | 59,175,000 | 59,325,000 | 790 | 469  | -2.787017033 | MCOLN2,MCOLN3,WDR63,ENSBTAG00000047351 |
| 3 | 59,250,000 | 59,400,000 | 791 | 461  | -2.842243882 | MCOLN2,MCOLN3                          |
| 3 | 59,325,000 | 59,475,000 | 792 | 485  | -0.913230512 | LPAR3,MCOLN2                           |
| 3 | 59,400,000 | 59,550,000 | 793 | 480  | -0.980912612 | LPAR3                                  |
| 3 | 59,475,000 | 59,625,000 | 794 | 328  | -0.43116544  | SSX2IP                                 |
| 3 | 59,550,000 | 59,700,000 | 795 | 273  | -0.493326921 | SSX2IP                                 |
| 3 | 59,625,000 | 59,775,000 | 796 | 213  | -0.394839678 | CTB,SSX2IP,ENSBTAG00000020010          |
| 3 | 59,700,000 | 59,850,000 | 797 | 395  | -0.405372659 | BXDC5,CTB,GNG5,ENSBTAG00000020010      |
| 3 | 59,775,000 | 59,925,000 | 798 | 697  | -0.359851083 | BXDC5,DNASE2B,GNG5,UOX                 |
| 3 | 59,850,000 | 60,000,000 | 799 | 620  | -0.247485771 | DNASE2B,SAMD13,UOX,ENSBTAG0000007724   |
| 3 | 59,925,000 | 60,075,000 | 800 | 454  | 0.678458326  | SAMD13,UOX,ENSBTAG0000007724           |
| 3 | 60,000,000 | 60,150,000 | 801 | 438  | 0.630455676  | PRKACB,SAMD13                          |
| 3 | 60,075,000 | 60,225,000 | 802 | 504  | 0.018344329  | PRKACB                                 |
| 3 | 60,150,000 | 60,300,000 | 803 | 815  | 0.456259894  | PRKACB                                 |
| 3 | 60,225,000 | 60,375,000 | 804 | 1027 | 0.080627489  | EIF1,TTLL7                             |
| 3 | 60,300,000 | 60,450,000 | 805 | 1043 | 0.263551748  | EIF1,TTLL7                             |
| 3 | 60,375,000 | 60,525,000 | 806 | 865  | 0.898737574  | TTLL7                                  |
| 3 | 60,450,000 | 60,600,000 | 807 | 788  | 0.042831835  |                                        |
| 3 | 60,525,000 | 60,675,000 | 808 | 851  | -0.332983088 |                                        |
| 3 | 60,600,000 | 60,750,000 | 809 | 986  | -0.364427466 |                                        |
| 3 | 60,675,000 | 60,825,000 | 810 | 916  | -0.565561683 |                                        |
| 3 | 60,750,000 | 60,900,000 | 811 | 968  | -0.168973947 |                                        |
| 3 | 60,825,000 | 60,975,000 | 812 | 1264 | 0.016661626  |                                        |
| 3 | 60,900,000 | 61,050,000 | 813 | 1418 | -0.242244984 |                                        |
| 3 | 60,975,000 | 61,125,000 | 814 | 1361 | -0.579504333 |                                        |
| 3 | 61,050,000 | 61,200,000 | 815 | 1180 | -0.457081273 |                                        |
| 3 | 61,125,000 | 61,275,000 | 816 | 1068 | -0.576794225 | ENSBTAG00000031088                     |
| 3 | 61,200,000 | 61,350,000 | 817 | 878  | -0.389657126 | ENSBTAG00000031088                     |
| 3 | 61,275,000 | 61,425,000 | 818 | 878  | 0.602854422  |                                        |
| 3 | 61,350,000 | 61,500,000 | 819 | 829  | 0.678418015  |                                        |
| 3 | 61,425,000 | 61,575,000 | 820 | 907  | 0.984951697  |                                        |
| 3 | 61,500,000 | 61,650,000 | 821 | 1056 | 0.589266514  |                                        |
| 3 | 61,575,000 | 61,725,000 | 822 | 1011 | 0.305859172  |                                        |
| 3 | 61,650,000 | 61,800,000 | 823 | 1034 | 0.449094311  |                                        |

|   |            |            |     |      |              |                    |
|---|------------|------------|-----|------|--------------|--------------------|
| 3 | 61,725,000 | 61,875,000 | 824 | 933  | 0.142374074  |                    |
| 3 | 61,800,000 | 61,950,000 | 825 | 844  | 0.520960099  |                    |
| 3 | 61,875,000 | 62,025,000 | 826 | 928  | 0.668887699  |                    |
| 3 | 61,950,000 | 62,100,000 | 827 | 899  | 0.87412331   |                    |
| 3 | 62,025,000 | 62,175,000 | 828 | 882  | 0.604827112  |                    |
| 3 | 62,100,000 | 62,250,000 | 829 | 853  | -0.051860506 |                    |
| 3 | 62,175,000 | 62,325,000 | 830 | 822  | 0.648307073  |                    |
| 3 | 62,250,000 | 62,400,000 | 831 | 928  | 1.196182185  |                    |
| 3 | 62,325,000 | 62,475,000 | 832 | 1201 | 1.298990945  |                    |
| 3 | 62,400,000 | 62,550,000 | 833 | 1125 | 1.179906106  |                    |
| 3 | 62,475,000 | 62,625,000 | 834 | 631  | 0.858845238  |                    |
| 3 | 62,550,000 | 62,700,000 | 835 | 535  | -1.108459652 | LPHN2              |
| 3 | 62,625,000 | 62,775,000 | 836 | 525  | -1.461335551 | LPHN2              |
| 3 | 62,700,000 | 62,850,000 | 837 | 455  | 0.253314797  | LPHN2              |
| 3 | 62,775,000 | 62,925,000 | 838 | 665  | 0.737916563  | LPHN2              |
| 3 | 62,850,000 | 63,000,000 | 839 | 842  | 0.121639607  |                    |
| 3 | 62,925,000 | 63,075,000 | 840 | 703  | -0.076839838 | ENSBTAG00000047248 |
| 3 | 63,000,000 | 63,150,000 | 841 | 679  | 0.185594779  | ENSBTAG00000047248 |
| 3 | 63,075,000 | 63,225,000 | 842 | 606  | -0.178099026 |                    |
| 3 | 63,150,000 | 63,300,000 | 843 | 490  | -1.083345133 |                    |
| 3 | 63,225,000 | 63,375,000 | 844 | 607  | 0.039509386  |                    |
| 3 | 63,300,000 | 63,450,000 | 845 | 651  | 0.380913545  |                    |
| 3 | 63,375,000 | 63,525,000 | 846 | 561  | 0.150960385  |                    |
| 3 | 63,450,000 | 63,600,000 | 847 | 353  | 0.826460129  |                    |
| 3 | 63,525,000 | 63,675,000 | 848 | 312  | 0.524231602  |                    |
| 3 | 63,600,000 | 63,750,000 | 849 | 495  | 0.581422319  |                    |
| 3 | 63,675,000 | 63,825,000 | 850 | 568  | -0.432864906 |                    |
| 3 | 63,750,000 | 63,900,000 | 851 | 569  | -0.432831096 |                    |
| 3 | 63,825,000 | 63,975,000 | 852 | 807  | 0.272374148  |                    |
| 3 | 63,900,000 | 64,050,000 | 853 | 662  | -0.170615283 |                    |
| 3 | 63,975,000 | 64,125,000 | 854 | 673  | -0.387535304 |                    |
| 3 | 64,050,000 | 64,200,000 | 855 | 924  | -0.368534052 |                    |
| 3 | 64,125,000 | 64,275,000 | 856 | 675  | -1.438414146 |                    |
| 3 | 64,200,000 | 64,350,000 | 857 | 516  | -0.506721513 |                    |
| 3 | 64,275,000 | 64,425,000 | 858 | 371  | 0.841798052  |                    |
| 3 | 64,350,000 | 64,500,000 | 859 | 580  | -0.561717577 |                    |
| 3 | 64,425,000 | 64,575,000 | 860 | 725  | -0.80471282  |                    |
| 3 | 64,500,000 | 64,650,000 | 861 | 463  | -0.219242007 |                    |
| 3 | 64,575,000 | 64,725,000 | 862 | 533  | 0.283723851  |                    |
| 3 | 64,650,000 | 64,800,000 | 863 | 1006 | 0.539500561  |                    |
| 3 | 64,725,000 | 64,875,000 | 864 | 900  | 0.554947002  |                    |
| 3 | 64,800,000 | 64,950,000 | 865 | 625  | 0.911524778  |                    |
| 3 | 64,875,000 | 65,025,000 | 866 | 745  | 1.101036077  |                    |
| 3 | 64,950,000 | 65,100,000 | 867 | 599  | 1.011460245  |                    |
| 3 | 65,025,000 | 65,175,000 | 868 | 691  | 0.80773992   |                    |
| 3 | 65,100,000 | 65,250,000 | 869 | 948  | 0.910580106  |                    |
| 3 | 65,175,000 | 65,325,000 | 870 | 825  | 0.891594672  |                    |
| 3 | 65,250,000 | 65,400,000 | 871 | 527  | 0.108862081  |                    |
| 3 | 65,325,000 | 65,475,000 | 872 | 802  | 0.055238649  |                    |
| 3 | 65,400,000 | 65,550,000 | 873 | 1150 | 0.506895235  |                    |
| 3 | 65,475,000 | 65,625,000 | 874 | 796  | 0.919131825  |                    |
| 3 | 65,550,000 | 65,700,000 | 875 | 563  | 1.197616193  |                    |
| 3 | 65,625,000 | 65,775,000 | 876 | 805  | 1.141456088  |                    |

|   |            |            |     |      |              |                          |
|---|------------|------------|-----|------|--------------|--------------------------|
| 3 | 65,700,000 | 65,850,000 | 877 | 1006 | -0.261171781 |                          |
| 3 | 65,775,000 | 65,925,000 | 878 | 902  | -0.805354717 | ELTD1                    |
| 3 | 65,850,000 | 66,000,000 | 879 | 710  | 1.108759098  | ELTD1                    |
| 3 | 65,925,000 | 66,075,000 | 880 | 1109 | 1.032976476  | ELTD1                    |
| 3 | 66,000,000 | 66,150,000 | 881 | 1349 | 0.749946619  | ELTD1                    |
| 3 | 66,075,000 | 66,225,000 | 882 | 1273 | 0.442321145  |                          |
| 3 | 66,150,000 | 66,300,000 | 883 | 1007 | 0.221777909  | IFI44                    |
| 3 | 66,225,000 | 66,375,000 | 884 | 664  | -0.60648745  | IFI44,IFI44L             |
| 3 | 66,300,000 | 66,450,000 | 885 | 501  | -0.632629891 | FP,IFI44L                |
| 3 | 66,375,000 | 66,525,000 | 886 | 503  | 0.251562336  | FP                       |
| 3 | 66,450,000 | 66,600,000 | 887 | 820  | 0.644124981  |                          |
| 3 | 66,525,000 | 66,675,000 | 888 | 804  | 0.571477753  |                          |
| 3 | 66,600,000 | 66,750,000 | 889 | 981  | 0.560296465  |                          |
| 3 | 66,675,000 | 66,825,000 | 890 | 1044 | 0.599329145  | GIPC2,ENSBTAG00000031082 |
| 3 | 66,750,000 | 66,900,000 | 891 | 645  | 0.728090197  | GIPC2,ENSBTAG00000031082 |
| 3 | 66,825,000 | 66,975,000 | 892 | 462  | 1.144435878  | DNAJB4,FUBP1,GIPC2       |
| 3 | 66,900,000 | 67,050,000 | 893 | 431  | 1.002473081  | DNAJB4,FUBP1,NEXN        |
| 3 | 66,975,000 | 67,125,000 | 894 | 807  | 0.991211818  | FAM73A,FUBP1,NEXN        |
| 3 | 67,050,000 | 67,200,000 | 895 | 1050 | 0.845921806  | FAM73A,NEXN,USP33        |
| 3 | 67,125,000 | 67,275,000 | 896 | 771  | 0.534307503  | FAM73A,USP33,ZZZ3        |
| 3 | 67,200,000 | 67,350,000 | 897 | 531  | 0.214495353  | USP33,ZZZ3               |
| 3 | 67,275,000 | 67,425,000 | 898 | 773  | -0.679108159 | AK5,ZZZ3                 |
| 3 | 67,350,000 | 67,500,000 | 899 | 1424 | 0.039000292  | AK5                      |
| 3 | 67,425,000 | 67,575,000 | 900 | 1388 | 0.812663591  | AK5                      |
| 3 | 67,500,000 | 67,650,000 | 901 | 713  | 0.792213386  | AK5                      |
| 3 | 67,575,000 | 67,725,000 | 902 | 387  | -0.936484829 | AK5,PIGK                 |
| 3 | 67,650,000 | 67,800,000 | 903 | 541  | -0.692659598 | PIGK                     |
| 3 | 67,725,000 | 67,875,000 | 904 | 614  | -0.451356367 | PIGK,ST6GALNAC5          |
| 3 | 67,800,000 | 67,950,000 | 905 | 627  | -0.10646594  | PIGK,ST6GALNAC5          |
| 3 | 67,875,000 | 68,025,000 | 906 | 497  | 0.30171743   | ST6GALNAC5               |
| 3 | 67,950,000 | 68,100,000 | 907 | 344  | -0.062713811 | ST6GALNAC5               |
| 3 | 68,025,000 | 68,175,000 | 908 | 828  | 0.091813492  | ST6GALNAC5               |
| 3 | 68,100,000 | 68,250,000 | 909 | 864  | 0.092046336  |                          |
| 3 | 68,175,000 | 68,325,000 | 910 | 722  | 0.253309453  |                          |
| 3 | 68,250,000 | 68,400,000 | 911 | 1024 | 0.516645265  |                          |
| 3 | 68,325,000 | 68,475,000 | 912 | 1078 | 0.554308023  |                          |
| 3 | 68,400,000 | 68,550,000 | 913 | 1204 | 0.429503235  |                          |
| 3 | 68,475,000 | 68,625,000 | 914 | 1038 | 0.158428841  |                          |
| 3 | 68,550,000 | 68,700,000 | 915 | 908  | 0.545879696  |                          |
| 3 | 68,625,000 | 68,775,000 | 916 | 998  | -0.430741845 |                          |
| 3 | 68,700,000 | 68,850,000 | 917 | 970  | -0.102602387 |                          |
| 3 | 68,775,000 | 68,925,000 | 918 | 857  | 0.985588004  |                          |
| 3 | 68,850,000 | 69,000,000 | 919 | 716  | 0.666720609  |                          |
| 3 | 68,925,000 | 69,075,000 | 920 | 589  | 0.488143178  |                          |
| 3 | 69,000,000 | 69,150,000 | 921 | 736  | -0.690045945 |                          |
| 3 | 69,075,000 | 69,225,000 | 922 | 629  | -0.621986995 | ASB17,MSH4               |
| 3 | 69,150,000 | 69,300,000 | 923 | 288  | -0.166527074 | ASB17,MSH4               |
| 3 | 69,225,000 | 69,375,000 | 924 | 356  | -1.179793171 | ACADM,MSH4,RABGGTB       |
| 3 | 69,300,000 | 69,450,000 | 925 | 420  | -0.876110527 | ACADM,MSH4,RABGGTB       |
| 3 | 69,375,000 | 69,525,000 | 926 | 575  | 0.798570631  | ACADM                    |
| 3 | 69,450,000 | 69,600,000 | 927 | 559  | 0.844037292  |                          |
| 3 | 69,525,000 | 69,675,000 | 928 | 466  | -0.94669469  |                          |
| 3 | 69,600,000 | 69,750,000 | 929 | 709  | -0.935237835 |                          |

|   |            |            |     |      |              |                    |
|---|------------|------------|-----|------|--------------|--------------------|
| 3 | 69,675,000 | 69,825,000 | 930 | 1046 | -0.194869563 | SLC44A5            |
| 3 | 69,750,000 | 69,900,000 | 931 | 1010 | -0.258284996 | LHX8,SLC44A5       |
| 3 | 69,825,000 | 69,975,000 | 932 | 642  | -0.221715742 | LHX8,SLC44A5       |
| 3 | 69,900,000 | 70,050,000 | 933 | 532  | 0.813156668  | LHX8               |
| 3 | 69,975,000 | 70,125,000 | 934 | 538  | 0.444168047  |                    |
| 3 | 70,050,000 | 70,200,000 | 935 | 419  | 0.577179389  |                    |
| 3 | 70,125,000 | 70,275,000 | 936 | 642  | 0.260833129  | CRYZ,TYW3          |
| 3 | 70,200,000 | 70,350,000 | 937 | 773  | 0.308871311  | CRYZ,ERICH3,TYW3   |
| 3 | 70,275,000 | 70,425,000 | 938 | 581  | 0.710695637  | CRYZ,ERICH3        |
| 3 | 70,350,000 | 70,500,000 | 939 | 451  | 0.431887391  | ERICH3,TNNI3K      |
| 3 | 70,425,000 | 70,575,000 | 940 | 570  | -0.507016679 | TNNI3K             |
| 3 | 70,500,000 | 70,650,000 | 941 | 825  | -1.134596248 | TNNI3K             |
| 3 | 70,575,000 | 70,725,000 | 942 | 843  | -1.151539142 | TNNI3K             |
| 3 | 70,650,000 | 70,800,000 | 943 | 960  | -0.704817688 | TNNI3K             |
| 3 | 70,725,000 | 70,875,000 | 944 | 873  | 0.170612633  | TNNI3K             |
| 3 | 70,800,000 | 70,950,000 | 945 | 436  | 1.122196009  | FPGT,LRRIQ3,TNNI3K |
| 3 | 70,875,000 | 71,025,000 | 946 | 295  | 0.954268908  | FPGT,LRRIQ3        |
| 3 | 70,950,000 | 71,100,000 | 947 | 540  | 1.219334241  | LRRIQ3             |
| 3 | 71,025,000 | 71,175,000 | 948 | 777  | 1.277923388  |                    |
| 3 | 71,100,000 | 71,250,000 | 949 | 722  | 0.730347587  |                    |
| 3 | 71,175,000 | 71,325,000 | 950 | 687  | 0.34384571   |                    |
| 3 | 71,250,000 | 71,400,000 | 951 | 847  | 0.694387224  |                    |
| 3 | 71,325,000 | 71,475,000 | 952 | 962  | 0.882330866  |                    |
| 3 | 71,400,000 | 71,550,000 | 953 | 804  | 1.039045555  |                    |
| 3 | 71,475,000 | 71,625,000 | 954 | 656  | 0.760417662  |                    |
| 3 | 71,550,000 | 71,700,000 | 955 | 720  | 0.995921548  |                    |
| 3 | 71,625,000 | 71,775,000 | 956 | 900  | 1.07376942   |                    |
| 3 | 71,700,000 | 71,850,000 | 957 | 1221 | 0.965016653  |                    |
| 3 | 71,775,000 | 71,925,000 | 958 | 1336 | 0.86408165   |                    |
| 3 | 71,850,000 | 72,000,000 | 959 | 1416 | 0.8559274    |                    |
| 3 | 71,925,000 | 72,075,000 | 960 | 1429 | 0.856843637  |                    |
| 3 | 72,000,000 | 72,150,000 | 961 | 1335 | 0.396180541  |                    |
| 3 | 72,075,000 | 72,225,000 | 962 | 1522 | -0.514796054 |                    |
| 3 | 72,150,000 | 72,300,000 | 963 | 1373 | -0.021535286 |                    |
| 3 | 72,225,000 | 72,375,000 | 964 | 1200 | 0.914826982  |                    |
| 3 | 72,300,000 | 72,450,000 | 965 | 1055 | 0.892734272  |                    |
| 3 | 72,375,000 | 72,525,000 | 966 | 774  | 0.646126956  | ENSBTAG00000006600 |
| 3 | 72,450,000 | 72,600,000 | 967 | 962  | 0.522725471  | ENSBTAG00000006600 |
| 3 | 72,525,000 | 72,675,000 | 968 | 1223 | 0.520953514  |                    |
| 3 | 72,600,000 | 72,750,000 | 969 | 1185 | 0.418733904  |                    |
| 3 | 72,675,000 | 72,825,000 | 970 | 1362 | -0.081956338 |                    |
| 3 | 72,750,000 | 72,900,000 | 971 | 1203 | -0.154539252 |                    |
| 3 | 72,825,000 | 72,975,000 | 972 | 515  | 0.136685498  |                    |
| 3 | 72,900,000 | 73,050,000 | 973 | 278  | 0.081338988  |                    |
| 3 | 72,975,000 | 73,125,000 | 974 | 502  | -0.303821375 |                    |
| 3 | 73,050,000 | 73,200,000 | 975 | 616  | 0.392691338  |                    |
| 3 | 73,125,000 | 73,275,000 | 976 | 657  | 0.800349854  |                    |
| 3 | 73,200,000 | 73,350,000 | 977 | 733  | -0.071383738 |                    |
| 3 | 73,275,000 | 73,425,000 | 978 | 540  | -0.683023799 |                    |
| 3 | 73,350,000 | 73,500,000 | 979 | 540  | 0.382300171  |                    |
| 3 | 73,425,000 | 73,575,000 | 980 | 735  | 1.065589999  |                    |
| 3 | 73,500,000 | 73,650,000 | 981 | 708  | 0.896805017  |                    |
| 3 | 73,575,000 | 73,725,000 | 982 | 657  | 0.660974775  |                    |

|   |            |            |      |      |              |                                 |
|---|------------|------------|------|------|--------------|---------------------------------|
| 3 | 73,650,000 | 73,800,000 | 983  | 851  | 0.137989112  |                                 |
| 3 | 73,725,000 | 73,875,000 | 984  | 965  | -1.688392464 |                                 |
| 3 | 73,800,000 | 73,950,000 | 985  | 787  | -5.615171061 |                                 |
| 3 | 73,875,000 | 74,025,000 | 986  | 819  | -4.282230812 |                                 |
| 3 | 73,950,000 | 74,100,000 | 987  | 1013 | -0.958150176 |                                 |
| 3 | 74,025,000 | 74,175,000 | 988  | 764  | -0.868345047 |                                 |
| 3 | 74,100,000 | 74,250,000 | 989  | 576  | 0.316990564  |                                 |
| 3 | 74,175,000 | 74,325,000 | 990  | 876  | 0.435915854  |                                 |
| 3 | 74,250,000 | 74,400,000 | 991  | 700  | 0.390564547  |                                 |
| 3 | 74,325,000 | 74,475,000 | 992  | 331  | -0.893217665 | ZRANB2                          |
| 3 | 74,400,000 | 74,550,000 | 993  | 362  | -1.413126447 | PTGER3,ZRANB2                   |
| 3 | 74,475,000 | 74,625,000 | 994  | 557  | -0.404252078 | PTGER3                          |
| 3 | 74,550,000 | 74,700,000 | 995  | 660  | 0.616392953  |                                 |
| 3 | 74,625,000 | 74,775,000 | 996  | 946  | 1.307116514  |                                 |
| 3 | 74,700,000 | 74,850,000 | 997  | 1255 | 1.22721751   |                                 |
| 3 | 74,775,000 | 74,925,000 | 998  | 945  | 1.035786961  |                                 |
| 3 | 74,850,000 | 75,000,000 | 999  | 556  | -0.634708471 |                                 |
| 3 | 74,925,000 | 75,075,000 | 1000 | 454  | -1.093242495 |                                 |
| 3 | 75,000,000 | 75,150,000 | 1001 | 548  | 0.358049131  | ANKRD13C,CTH                    |
| 3 | 75,075,000 | 75,225,000 | 1002 | 585  | 0.276667498  | ANKRD13C,CTH                    |
| 3 | 75,150,000 | 75,300,000 | 1003 | 482  | -0.135914953 | ANKRD13C,LRRC40,SFRS11          |
| 3 | 75,225,000 | 75,375,000 | 1004 | 509  | 0.484607405  | ANKRD13C,LRRC40,LRRC7,SFRS11    |
| 3 | 75,300,000 | 75,450,000 | 1005 | 857  | 0.795305921  | LRRC40,LRRC7                    |
| 3 | 75,375,000 | 75,525,000 | 1006 | 849  | 0.82510954   | LRRC7                           |
| 3 | 75,450,000 | 75,600,000 | 1007 | 716  | 1.099814125  | LRRC7                           |
| 3 | 75,525,000 | 75,675,000 | 1008 | 781  | 0.943280626  | LRRC7                           |
| 3 | 75,600,000 | 75,750,000 | 1009 | 919  | 0.214658166  | LRRC7                           |
| 3 | 75,675,000 | 75,825,000 | 1010 | 884  | -0.086585346 | LRRC7                           |
| 3 | 75,750,000 | 75,900,000 | 1011 | 692  | -0.23847599  |                                 |
| 3 | 75,825,000 | 75,975,000 | 1012 | 601  | 0.006370763  |                                 |
| 3 | 75,900,000 | 76,050,000 | 1013 | 797  | -0.037148629 |                                 |
| 3 | 75,975,000 | 76,125,000 | 1014 | 759  | -0.382318243 |                                 |
| 3 | 76,050,000 | 76,200,000 | 1015 | 600  | -1.381158872 |                                 |
| 3 | 76,125,000 | 76,275,000 | 1016 | 613  | -1.415525972 |                                 |
| 3 | 76,200,000 | 76,350,000 | 1017 | 406  | -0.932703265 |                                 |
| 3 | 76,275,000 | 76,425,000 | 1018 | 362  | 0.238726175  |                                 |
| 3 | 76,350,000 | 76,500,000 | 1019 | 402  | 0.533709122  |                                 |
| 3 | 76,425,000 | 76,575,000 | 1020 | 623  | 0.605608917  |                                 |
| 3 | 76,500,000 | 76,650,000 | 1021 | 507  | 0.661509189  |                                 |
| 3 | 76,575,000 | 76,725,000 | 1022 | 537  | -0.003990081 |                                 |
| 3 | 76,650,000 | 76,800,000 | 1023 | 651  | -0.023680093 |                                 |
| 3 | 76,725,000 | 76,875,000 | 1024 | 554  | -0.073817446 |                                 |
| 3 | 76,800,000 | 76,950,000 | 1025 | 632  | 0.068975673  |                                 |
| 3 | 76,875,000 | 77,025,000 | 1026 | 567  | 0.753776179  |                                 |
| 3 | 76,950,000 | 77,100,000 | 1027 | 660  | 1.008130189  | DEPDC1                          |
| 3 | 77,025,000 | 77,175,000 | 1028 | 566  | 0.984961839  | DEPDC1,RPE65,ENSBTAG00000030890 |
| 3 | 77,100,000 | 77,250,000 | 1029 | 308  | 0.614422989  | DEPDC1,RPE65,ENSBTAG00000030890 |
| 3 | 77,175,000 | 77,325,000 | 1030 | 300  | 0.428048958  | RPE65                           |
| 3 | 77,250,000 | 77,400,000 | 1031 | 282  | 0.655415396  | WLS                             |
| 3 | 77,325,000 | 77,475,000 | 1032 | 318  | 0.592031946  | WLS                             |
| 3 | 77,400,000 | 77,550,000 | 1033 | 333  | 0.30281315   | WLS                             |
| 3 | 77,475,000 | 77,625,000 | 1034 | 311  | 0.311239401  | DIRAS3,WLS                      |
| 3 | 77,550,000 | 77,700,000 | 1035 | 306  | 0.202642283  | DIRAS3                          |

|   |            |            |      |      |              |                            |
|---|------------|------------|------|------|--------------|----------------------------|
| 3 | 77,625,000 | 77,775,000 | 1036 | 352  | 0.593753597  |                            |
| 3 | 77,700,000 | 77,850,000 | 1037 | 450  | 0.846325994  |                            |
| 3 | 77,775,000 | 77,925,000 | 1038 | 418  | 0.769170517  | GNG12                      |
| 3 | 77,850,000 | 78,000,000 | 1039 | 303  | 0.265244505  | GADD45A,GNG12              |
| 3 | 77,925,000 | 78,075,000 | 1040 | 292  | -0.357582466 | GADD45A,GNG12              |
| 3 | 78,000,000 | 78,150,000 | 1041 | 533  | 0.720449812  |                            |
| 3 | 78,075,000 | 78,225,000 | 1042 | 812  | 0.86794905   |                            |
| 3 | 78,150,000 | 78,300,000 | 1043 | 600  | 0.4768005    | IL12RB2,SERBP1             |
| 3 | 78,225,000 | 78,375,000 | 1044 | 489  | 0.178494633  | IL12RB2,SERBP1             |
| 3 | 78,300,000 | 78,450,000 | 1045 | 652  | 0.263195606  | IL12RB2,IL23R              |
| 3 | 78,375,000 | 78,525,000 | 1046 | 964  | 0.471289761  | C1orf141,IL23R             |
| 3 | 78,450,000 | 78,600,000 | 1047 | 1273 | 0.108369977  | C1orf141,IL23R             |
| 3 | 78,525,000 | 78,675,000 | 1048 | 898  | -0.460521756 | C1orf141,MIER1,SLC35D2     |
| 3 | 78,600,000 | 78,750,000 | 1049 | 411  | -0.03910091  | MIER1,SLC35D2,WDR78        |
| 3 | 78,675,000 | 78,825,000 | 1050 | 619  | -0.847413631 | MIER1,WDR78                |
| 3 | 78,750,000 | 78,900,000 | 1051 | 869  | -0.872966649 | INSL5,TCTEX1D1,WDR78       |
| 3 | 78,825,000 | 78,975,000 | 1052 | 711  | -0.418760722 | INSL5,SGIP1,TCTEX1D1,WDR78 |
| 3 | 78,900,000 | 79,050,000 | 1053 | 548  | 0.293264958  | SGIP1,TCTEX1D1             |
| 3 | 78,975,000 | 79,125,000 | 1054 | 393  | 0.458869024  | SGIP1                      |
| 3 | 79,050,000 | 79,200,000 | 1055 | 604  | 0.681727967  | SGIP1                      |
| 3 | 79,125,000 | 79,275,000 | 1056 | 938  | 0.874197182  | SGIP1                      |
| 3 | 79,200,000 | 79,350,000 | 1057 | 850  | 0.860767273  | PDE4B                      |
| 3 | 79,275,000 | 79,425,000 | 1058 | 799  | 0.708066149  | PDE4B                      |
| 3 | 79,350,000 | 79,500,000 | 1059 | 877  | 0.301587117  | PDE4B                      |
| 3 | 79,425,000 | 79,575,000 | 1060 | 938  | -0.056284616 | PDE4B                      |
| 3 | 79,500,000 | 79,650,000 | 1061 | 711  | 0.278628847  | MGC137454,PDE4B            |
| 3 | 79,575,000 | 79,725,000 | 1062 | 560  | 0.829752368  | MGC137454,PDE4B            |
| 3 | 79,650,000 | 79,800,000 | 1063 | 936  | 0.61245894   | MGC137454,PDE4B            |
| 3 | 79,725,000 | 79,875,000 | 1064 | 860  | 0.469453461  | MGC137454,PDE4B            |
| 3 | 79,800,000 | 79,950,000 | 1065 | 637  | 0.314063619  | MGC137454                  |
| 3 | 79,875,000 | 80,025,000 | 1066 | 776  | 0.603243857  |                            |
| 3 | 79,950,000 | 80,100,000 | 1067 | 628  | 0.267404048  | OB-R                       |
| 3 | 80,025,000 | 80,175,000 | 1068 | 377  | -1.417823054 | OB-R                       |
| 3 | 80,100,000 | 80,250,000 | 1069 | 322  | -1.79102472  | LEPROT,OB-R                |
| 3 | 80,175,000 | 80,325,000 | 1070 | 667  | -1.018249303 | DNAJC6,LEPROT              |
| 3 | 80,250,000 | 80,400,000 | 1071 | 690  | -0.891123869 | DNAJC6,LEPROT              |
| 3 | 80,325,000 | 80,475,000 | 1072 | 477  | 0.122316704  | DNAJC6                     |
| 3 | 80,400,000 | 80,550,000 | 1073 | 421  | 0.917055419  | AK4                        |
| 3 | 80,475,000 | 80,625,000 | 1074 | 327  | 0.220957269  | AK4                        |
| 3 | 80,550,000 | 80,700,000 | 1075 | 431  | 0.479479921  | AK4                        |
| 3 | 80,625,000 | 80,775,000 | 1076 | 518  | 0.86501541   |                            |
| 3 | 80,700,000 | 80,850,000 | 1077 | 644  | 0.868329326  |                            |
| 3 | 80,775,000 | 80,925,000 | 1078 | 884  | 0.955094597  | JAK1                       |
| 3 | 80,850,000 | 81,000,000 | 1079 | 1360 | 0.536636779  | JAK1,RAVER2                |
| 3 | 80,925,000 | 81,075,000 | 1080 | 1462 | 0.12901626   | RAVER2                     |
| 3 | 81,000,000 | 81,150,000 | 1081 | 1184 | -0.123319248 | CACHD1,RAVER2              |
| 3 | 81,075,000 | 81,225,000 | 1082 | 978  | -0.035568637 | CACHD1                     |
| 3 | 81,150,000 | 81,300,000 | 1083 | 833  | -0.287238427 | CACHD1                     |
| 3 | 81,225,000 | 81,375,000 | 1084 | 617  | -0.578210879 |                            |
| 3 | 81,300,000 | 81,450,000 | 1085 | 820  | 0.293875434  |                            |
| 3 | 81,375,000 | 81,525,000 | 1086 | 1112 | 0.294369964  |                            |
| 3 | 81,450,000 | 81,600,000 | 1087 | 1219 | 0.488046834  | UBE2U                      |
| 3 | 81,525,000 | 81,675,000 | 1088 | 1196 | 0.546510276  | ROR1,UBE2U                 |

|   |            |            |      |     |              |                                             |
|---|------------|------------|------|-----|--------------|---------------------------------------------|
| 3 | 81,600,000 | 81,750,000 | 1089 | 673 | 0.386067119  | ROR1,UBE2U                                  |
| 3 | 81,675,000 | 81,825,000 | 1090 | 502 | 0.464805791  | ROR1                                        |
| 3 | 81,750,000 | 81,900,000 | 1091 | 486 | -0.392864878 |                                             |
| 3 | 81,825,000 | 81,975,000 | 1092 | 313 | -3.282094494 |                                             |
| 3 | 81,900,000 | 82,050,000 | 1093 | 259 | -3.672549053 |                                             |
| 3 | 81,975,000 | 82,125,000 | 1094 | 389 | -1.25639826  |                                             |
| 3 | 82,050,000 | 82,200,000 | 1095 | 523 | -0.064648045 |                                             |
| 3 | 82,125,000 | 82,275,000 | 1096 | 468 | 0.452981952  | PGM1                                        |
| 3 | 82,200,000 | 82,350,000 | 1097 | 616 | 0.724647301  | EFCAB7,PGM1                                 |
| 3 | 82,275,000 | 82,425,000 | 1098 | 697 | 0.549297111  | EFCAB7,ITGB3BP,PGM1                         |
| 3 | 82,350,000 | 82,500,000 | 1099 | 465 | -0.08536314  | ALG6,EFCAB7,ITGB3BP                         |
| 3 | 82,425,000 | 82,575,000 | 1100 | 442 | -0.404450876 | ALG6,ITGB3BP                                |
| 3 | 82,500,000 | 82,650,000 | 1101 | 488 | 0.398174109  | ALG6,FOXD3                                  |
| 3 | 82,575,000 | 82,725,000 | 1102 | 623 | 1.072381963  | FOXD3                                       |
| 3 | 82,650,000 | 82,800,000 | 1103 | 390 | 1.140437206  |                                             |
| 3 | 82,725,000 | 82,875,000 | 1104 | 2   | 1.467400758  |                                             |
| 3 | 82,800,000 | 82,950,000 | 1105 | 79  | 0.265000976  |                                             |
| 3 | 82,875,000 | 83,025,000 | 1106 | 302 | -0.270426099 |                                             |
| 3 | 82,950,000 | 83,100,000 | 1107 | 527 | -0.705872936 |                                             |
| 3 | 83,025,000 | 83,175,000 | 1108 | 882 | -0.074968187 |                                             |
| 3 | 83,100,000 | 83,250,000 | 1109 | 845 | 0.155791939  |                                             |
| 3 | 83,175,000 | 83,325,000 | 1110 | 710 | -0.713570181 | ATG4C                                       |
| 3 | 83,250,000 | 83,400,000 | 1111 | 655 | -0.632920622 | ATG4C                                       |
| 3 | 83,325,000 | 83,475,000 | 1112 | 632 | 0.707104066  | ATG4C,ENSBTAG00000048179                    |
| 3 | 83,400,000 | 83,550,000 | 1113 | 721 | 0.825037725  | ANGPTL3,DOCK7,ENSBTAG00000048179            |
| 3 | 83,475,000 | 83,625,000 | 1114 | 613 | -1.587275378 | ANGPTL3,DOCK7                               |
| 3 | 83,550,000 | 83,700,000 | 1115 | 553 | -3.285948765 | DOCK7,USP1                                  |
| 3 | 83,625,000 | 83,775,000 | 1116 | 894 | -0.482600997 | DOCK7,USP1                                  |
| 3 | 83,700,000 | 83,850,000 | 1117 | 861 | 0.222821146  | KANK4                                       |
| 3 | 83,775,000 | 83,925,000 | 1118 | 429 | -1.658193721 | KANK4                                       |
| 3 | 83,850,000 | 84,000,000 | 1119 | 489 | -3.389267625 | KANK4,ENSBTAG00000045912                    |
| 3 | 83,925,000 | 84,075,000 | 1120 | 483 | -1.772905877 | ENSBTAG00000045912,ENSBTAG00000047830       |
| 3 | 84,000,000 | 84,150,000 | 1121 | 706 | 0.485051561  | INADL,ENSBTAG00000046720,ENSBTAG00000047830 |
| 3 | 84,075,000 | 84,225,000 | 1122 | 834 | 0.633861489  | INADL,ENSBTAG00000046720                    |
| 3 | 84,150,000 | 84,300,000 | 1123 | 514 | 0.634298851  | INADL                                       |
| 3 | 84,225,000 | 84,375,000 | 1124 | 657 | 0.469405769  | INADL                                       |
| 3 | 84,300,000 | 84,450,000 | 1125 | 744 | 0.411280231  | INADL                                       |
| 3 | 84,375,000 | 84,525,000 | 1126 | 526 | -0.31683493  | INADL,TM2D1                                 |
| 3 | 84,450,000 | 84,600,000 | 1127 | 571 | -0.530399186 | INADL,TM2D1                                 |
| 3 | 84,525,000 | 84,675,000 | 1128 | 603 | 0.108540586  | TM2D1                                       |
| 3 | 84,600,000 | 84,750,000 | 1129 | 721 | 0.857015844  | NFIA                                        |
| 3 | 84,675,000 | 84,825,000 | 1130 | 594 | 0.923103106  | NFIA                                        |
| 3 | 84,750,000 | 84,900,000 | 1131 | 358 | 0.339391724  | NFIA                                        |
| 3 | 84,825,000 | 84,975,000 | 1132 | 302 | 0.570697831  | NFIA                                        |
| 3 | 84,900,000 | 85,050,000 | 1133 | 223 | 1.074848763  | NFIA                                        |
| 3 | 84,975,000 | 85,125,000 | 1134 | 308 | 0.648535799  | NFIA                                        |
| 3 | 85,050,000 | 85,200,000 | 1135 | 496 | 0.416335317  | NFIA                                        |
| 3 | 85,125,000 | 85,275,000 | 1136 | 772 | 0.840355744  | NFIA                                        |
| 3 | 85,200,000 | 85,350,000 | 1137 | 695 | 0.911433088  |                                             |
| 3 | 85,275,000 | 85,425,000 | 1138 | 410 | 0.448909127  |                                             |
| 3 | 85,350,000 | 85,500,000 | 1139 | 519 | 0.612404441  |                                             |
| 3 | 85,425,000 | 85,575,000 | 1140 | 605 | 0.79113008   |                                             |
| 3 | 85,500,000 | 85,650,000 | 1141 | 681 | 1.053740708  |                                             |



|   |            |            |      |      |              |                                                         |
|---|------------|------------|------|------|--------------|---------------------------------------------------------|
| 3 | 85,575,000 | 85,725,000 | 1142 | 715  | 1.153850599  |                                                         |
| 3 | 85,650,000 | 85,800,000 | 1143 | 854  | 0.816972796  |                                                         |
| 3 | 85,725,000 | 85,875,000 | 1144 | 826  | 0.6392703    |                                                         |
| 3 | 85,800,000 | 85,950,000 | 1145 | 628  | 0.473449668  |                                                         |
| 3 | 85,875,000 | 86,025,000 | 1146 | 918  | 0.037660122  |                                                         |
| 3 | 85,950,000 | 86,100,000 | 1147 | 802  | -0.028261656 |                                                         |
| 3 | 86,025,000 | 86,175,000 | 1148 | 702  | -0.160991158 |                                                         |
| 3 | 86,100,000 | 86,250,000 | 1149 | 861  | 0.300335887  |                                                         |
| 3 | 86,175,000 | 86,325,000 | 1150 | 724  | 0.873126183  | C1orf87                                                 |
| 3 | 86,250,000 | 86,400,000 | 1151 | 789  | 0.756847698  | C1orf87,ENSBTAG00000038085                              |
| 3 | 86,325,000 | 86,475,000 | 1152 | 1041 | 0.48081513   | C1orf87,ENSBTAG00000038085                              |
| 3 | 86,400,000 | 86,550,000 | 1153 | 1083 | 0.001096434  | ENSBTAG00000000258,ENSBTAG00000013693,ENSBTAG0000038085 |
| 3 | 86,475,000 | 86,625,000 | 1154 | 797  | 0.05084182   | ENSBTAG00000000258,ENSBTAG00000010033,ENSBTAG0000013693 |
| 3 | 86,550,000 | 86,700,000 | 1155 | 582  | 0.528512859  | HOOK1,ENSBTAG00000010033                                |
| 3 | 86,625,000 | 86,775,000 | 1156 | 572  | 0.441348893  | HOOK1,ENSBTAG00000010033                                |
| 3 | 86,700,000 | 86,850,000 | 1157 | 638  | 0.340347897  | FGGY,HOOK1                                              |
| 3 | 86,775,000 | 86,925,000 | 1158 | 557  | 0.399274603  | FGGY                                                    |
| 3 | 86,850,000 | 87,000,000 | 1159 | 456  | 0.199403137  | FGGY                                                    |
| 3 | 86,925,000 | 87,075,000 | 1160 | 522  | -0.224368993 | FGGY                                                    |
| 3 | 87,000,000 | 87,150,000 | 1161 | 605  | -1.744790159 | FGGY                                                    |
| 3 | 87,075,000 | 87,225,000 | 1162 | 544  | -1.324213556 | FGGY                                                    |
| 3 | 87,150,000 | 87,300,000 | 1163 | 569  | 0.610910014  | FGGY                                                    |
| 3 | 87,225,000 | 87,375,000 | 1164 | 578  | 0.185184616  | FGGY                                                    |
| 3 | 87,300,000 | 87,450,000 | 1165 | 606  | 0.223014926  |                                                         |
| 3 | 87,375,000 | 87,525,000 | 1166 | 572  | 0.411655453  |                                                         |
| 3 | 87,450,000 | 87,600,000 | 1167 | 421  | 0.358122984  |                                                         |
| 3 | 87,525,000 | 87,675,000 | 1168 | 656  | 0.178975657  |                                                         |
| 3 | 87,600,000 | 87,750,000 | 1169 | 700  | 0.342953406  |                                                         |
| 3 | 87,675,000 | 87,825,000 | 1170 | 546  | 0.396631029  |                                                         |
| 3 | 87,750,000 | 87,900,000 | 1171 | 719  | 0.189018154  | JUN                                                     |
| 3 | 87,825,000 | 87,975,000 | 1172 | 587  | 0.239159237  | JUN,MYSM1                                               |
| 3 | 87,900,000 | 88,050,000 | 1173 | 537  | -0.848476573 | MYSM1,TACSTD2                                           |
| 3 | 87,975,000 | 88,125,000 | 1174 | 549  | -0.591313312 | OMA1,TACSTD2                                            |
| 3 | 88,050,000 | 88,200,000 | 1175 | 440  | 1.178496196  | OMA1                                                    |
| 3 | 88,125,000 | 88,275,000 | 1176 | 440  | 1.131943686  |                                                         |
| 3 | 88,200,000 | 88,350,000 | 1177 | 766  | 0.095154678  |                                                         |
| 3 | 88,275,000 | 88,425,000 | 1178 | 828  | -0.189481063 |                                                         |
| 3 | 88,350,000 | 88,500,000 | 1179 | 517  | 0.57943353   |                                                         |
| 3 | 88,425,000 | 88,575,000 | 1180 | 635  | 1.028869139  |                                                         |
| 3 | 88,500,000 | 88,650,000 | 1181 | 984  | 0.668021534  |                                                         |
| 3 | 88,575,000 | 88,725,000 | 1182 | 1341 | 0.907425218  |                                                         |
| 3 | 88,650,000 | 88,800,000 | 1183 | 1304 | 0.884465346  |                                                         |
| 3 | 88,725,000 | 88,875,000 | 1184 | 963  | 0.103179848  |                                                         |
| 3 | 88,800,000 | 88,950,000 | 1185 | 797  | 0.08241361   |                                                         |
| 3 | 88,875,000 | 89,025,000 | 1186 | 925  | 0.660945974  |                                                         |
| 3 | 88,950,000 | 89,100,000 | 1187 | 1123 | 0.177102136  |                                                         |
| 3 | 89,025,000 | 89,175,000 | 1188 | 1302 | 0.549762119  |                                                         |
| 3 | 89,100,000 | 89,250,000 | 1189 | 1154 | 0.795815652  |                                                         |
| 3 | 89,175,000 | 89,325,000 | 1190 | 1180 | -0.318558057 | ENSBTAG00000024201                                      |
| 3 | 89,250,000 | 89,400,000 | 1191 | 1334 | -1.054850078 | ENSBTAG00000024201                                      |
| 3 | 89,325,000 | 89,475,000 | 1192 | 1034 | -0.723897807 |                                                         |

|   |            |            |      |      |              |                                                     |
|---|------------|------------|------|------|--------------|-----------------------------------------------------|
| 3 | 89,400,000 | 89,550,000 | 1193 | 1013 | 0.482449602  |                                                     |
| 3 | 89,475,000 | 89,625,000 | 1194 | 985  | -0.31938539  |                                                     |
| 3 | 89,550,000 | 89,700,000 | 1195 | 678  | -1.371952714 | DAB1                                                |
| 3 | 89,625,000 | 89,775,000 | 1196 | 610  | -0.176625835 | C8B,DAB1                                            |
| 3 | 89,700,000 | 89,850,000 | 1197 | 806  | -0.445587163 | C8A,C8B                                             |
| 3 | 89,775,000 | 89,925,000 | 1198 | 996  | -0.237359448 | C8A,C8B                                             |
| 3 | 89,850,000 | 90,000,000 | 1199 | 904  | 0.258934551  | C1orf168,C8A                                        |
| 3 | 89,925,000 | 90,075,000 | 1200 | 980  | 0.254423851  | C1orf168,PRKAA2                                     |
| 3 | 90,000,000 | 90,150,000 | 1201 | 750  | 0.604202822  | C1orf168,PRKAA2                                     |
| 3 | 90,075,000 | 90,225,000 | 1202 | 464  | 0.305067089  | PPAP2B,PRKAA2                                       |
| 3 | 90,150,000 | 90,300,000 | 1203 | 443  | 0.016377158  | PPAP2B                                              |
| 3 | 90,225,000 | 90,375,000 | 1204 | 534  | -0.153232308 | PPAP2B                                              |
| 3 | 90,300,000 | 90,450,000 | 1205 | 840  | 0.160542965  |                                                     |
| 3 | 90,375,000 | 90,525,000 | 1206 | 819  | 0.51658885   |                                                     |
| 3 | 90,450,000 | 90,600,000 | 1207 | 788  | 1.194556872  |                                                     |
| 3 | 90,525,000 | 90,675,000 | 1208 | 978  | 1.281433855  |                                                     |
| 3 | 90,600,000 | 90,750,000 | 1209 | 1075 | 0.827752987  |                                                     |
| 3 | 90,675,000 | 90,825,000 | 1210 | 753  | 0.256972217  |                                                     |
| 3 | 90,750,000 | 90,900,000 | 1211 | 662  | 0.39071021   |                                                     |
| 3 | 90,825,000 | 90,975,000 | 1212 | 819  | 0.60762111   |                                                     |
| 3 | 90,900,000 | 91,050,000 | 1213 | 1027 | 0.834401844  |                                                     |
| 3 | 90,975,000 | 91,125,000 | 1214 | 1337 | 0.698383258  |                                                     |
| 3 | 91,050,000 | 91,200,000 | 1215 | 837  | 0.234366668  |                                                     |
| 3 | 91,125,000 | 91,275,000 | 1216 | 571  | 0.842243918  |                                                     |
| 3 | 91,200,000 | 91,350,000 | 1217 | 858  | 0.768042401  |                                                     |
| 3 | 91,275,000 | 91,425,000 | 1218 | 822  | 0.780228952  |                                                     |
| 3 | 91,350,000 | 91,500,000 | 1219 | 775  | 0.642344191  |                                                     |
| 3 | 91,425,000 | 91,575,000 | 1220 | 797  | 0.497070368  | ENSBTAG00000046915                                  |
| 3 | 91,500,000 | 91,650,000 | 1221 | 982  | -0.225819491 | ENSBTAG00000046915                                  |
| 3 | 91,575,000 | 91,725,000 | 1222 | 889  | -0.673798795 | USP24                                               |
| 3 | 91,650,000 | 91,800,000 | 1223 | 481  | -0.369999581 | USP24                                               |
| 3 | 91,725,000 | 91,875,000 | 1224 | 470  | -0.656611763 | USP24                                               |
| 3 | 91,800,000 | 91,950,000 | 1225 | 976  | 0.790223851  | BSND,TMEM61,USP24                                   |
| 3 | 91,875,000 | 92,025,000 | 1226 | 963  | 1.190820482  | BSND,C1orf177,DHCR24,TMEM61                         |
| 3 | 91,950,000 | 92,100,000 | 1227 | 827  | 1.081640632  | C1orf177,DHCR24,PARS2,TTC22                         |
| 3 | 92,025,000 | 92,175,000 | 1228 | 869  | 0.711058157  | C1orf177,HEATR8,PARS2,TTC22,TTC4,ENSBTAG00000030623 |
| 3 | 92,100,000 | 92,250,000 | 1229 | 1024 | 0.624277423  | FAM151A,HEATR8,PARS2,TTC4,ENSBTAG00000030623        |
| 3 | 92,175,000 | 92,325,000 | 1230 | 1070 | 0.537599262  | ACOT11,FAM151A,ENSBTAG00000030623                   |
| 3 | 92,250,000 | 92,400,000 | 1231 | 715  | 0.454054133  | ACOT11,FAM151A                                      |
| 3 | 92,325,000 | 92,475,000 | 1232 | 524  | 0.820140667  | SSBP3                                               |
| 3 | 92,400,000 | 92,550,000 | 1233 | 414  | 0.706148132  | SSBP3                                               |
| 3 | 92,475,000 | 92,625,000 | 1234 | 824  | 0.750052975  | CYB5RL,MRPL37,SSBP3                                 |
| 3 | 92,550,000 | 92,700,000 | 1235 | 1231 | 0.954347329  | CDCP2,CYB5RL,MRPL37,SSBP3                           |
| 3 | 92,625,000 | 92,775,000 | 1236 | 1152 | 0.660137642  | CDCP2,TCEANC2,TMEM59                                |
| 3 | 92,700,000 | 92,850,000 | 1237 | 967  | 0.349396326  | C3H1ORF41,LDLRAD1,LRR42,TCEANC2,TMEM59              |
| 3 | 92,775,000 | 92,925,000 | 1238 | 899  | 0.405399274  | C3H1ORF41,DIO1,LDLRAD1,LRR42                        |
| 3 | 92,850,000 | 93,000,000 | 1239 | 667  | -0.273859648 | C3H1ORF41,DIO1,NDC1                                 |
| 3 | 92,925,000 | 93,075,000 | 1240 | 549  | 0.494135051  | NDC1                                                |
| 3 | 93,000,000 | 93,150,000 | 1241 | 581  | 0.920279994  | NDC1                                                |
| 3 | 93,075,000 | 93,225,000 | 1242 | 625  | 0.829838491  | GLIS1                                               |
| 3 | 93,150,000 | 93,300,000 | 1243 | 662  | 0.626780843  | GLIS1                                               |
| 3 | 93,225,000 | 93,375,000 | 1244 | 559  | 0.563559994  | DMRTB1,GLIS1,ENSBTAG00000039540                     |

|   |            |            |      |     |              |                                         |
|---|------------|------------|------|-----|--------------|-----------------------------------------|
| 3 | 93,300,000 | 93,450,000 | 1245 | 749 | 0.566965225  | DMRTB1,GLIS1,ENSBTAG00000039540         |
| 3 | 93,375,000 | 93,525,000 | 1246 | 808 | 0.676021277  | LRP8,ENSBTAG00000039540                 |
| 3 | 93,450,000 | 93,600,000 | 1247 | 583 | 0.316112837  | C3H1orf123,LRP8,MAGOH                   |
| 3 | 93,525,000 | 93,675,000 | 1248 | 640 | -0.457446645 | C3H1orf123,CPT2,LRP8,MAGOH,SLC1A7       |
| 3 | 93,600,000 | 93,750,000 | 1249 | 590 | -0.290865395 | CPT2,PODN,SLC1A7                        |
| 3 | 93,675,000 | 93,825,000 | 1250 | 573 | -0.213512151 | PODN,SLC1A7                             |
| 3 | 93,750,000 | 93,900,000 | 1251 | 655 | -0.356302824 | PODN,SCP2                               |
| 3 | 93,825,000 | 93,975,000 | 1252 | 534 | -0.42456036  | SCP2                                    |
| 3 | 93,900,000 | 94,050,000 | 1253 | 608 | -0.093514883 | ECHDC2,SCP2,ZYG11A,ENSBTAG00000047375   |
| 3 | 93,975,000 | 94,125,000 | 1254 | 676 | -1.01525426  | ECHDC2,ZYG11A,ZYG11B,ENSBTAG00000047375 |
| 3 | 94,050,000 | 94,200,000 | 1255 | 614 | -0.742877108 | ZYG11A,ZYG11B                           |
| 3 | 94,125,000 | 94,275,000 | 1256 | 589 | 0.685718348  | COA7,ZYG11B                             |
| 3 | 94,200,000 | 94,350,000 | 1257 | 417 | 0.7743973    | COA7,FAM159A,GPX7                       |
| 3 | 94,275,000 | 94,425,000 | 1258 | 450 | 0.849517029  | FAM159A,GPX7,ZCCHC11                    |
| 3 | 94,350,000 | 94,500,000 | 1259 | 562 | 0.54041146   | ZCCHC11                                 |
| 3 | 94,425,000 | 94,575,000 | 1260 | 439 | 0.639253246  | ORC1,PRPF38A,ZCCHC11                    |
| 3 | 94,500,000 | 94,650,000 | 1261 | 387 | 0.693038849  | CC2D1B,ORC1,PRPF38A,ZCCHC11,ZFYVE9      |
| 3 | 94,575,000 | 94,725,000 | 1262 | 319 | 0.755903792  | CC2D1B,ORC1,ZFYVE9                      |
| 3 | 94,650,000 | 94,800,000 | 1263 | 268 | 0.686491822  | ZFYVE9                                  |
| 3 | 94,725,000 | 94,875,000 | 1264 | 323 | 0.266969229  | BTF3L4,TXNDC12                          |
| 3 | 94,800,000 | 94,950,000 | 1265 | 369 | 0.556650519  | BTF3L4,RAB3B,TXNDC12                    |
| 3 | 94,875,000 | 95,025,000 | 1266 | 341 | 1.191440591  | RAB3B,TXNDC12                           |
| 3 | 94,950,000 | 95,100,000 | 1267 | 272 | 1.362952575  | NRD1,RAB3B                              |
| 3 | 95,025,000 | 95,175,000 | 1268 | 256 | 1.38732289   | NRD1,OSBPL9                             |
| 3 | 95,100,000 | 95,250,000 | 1269 | 257 | 1.231581099  | NRD1,OSBPL9                             |
| 3 | 95,175,000 | 95,325,000 | 1270 | 393 | 1.148444845  | OSBPL9                                  |
| 3 | 95,250,000 | 95,400,000 | 1271 | 400 | 0.854899576  | EPS15,OSBPL9,ENSBTAG00000024153         |
| 3 | 95,325,000 | 95,475,000 | 1272 | 250 | 0.337061569  | EPS15,ENSBTAG00000024153                |
| 3 | 95,400,000 | 95,550,000 | 1273 | 285 | 0.587355737  | EPS15                                   |
| 3 | 95,475,000 | 95,625,000 | 1274 | 343 | 0.602059339  | EPS15,RNF11,TTC39A                      |
| 3 | 95,550,000 | 95,700,000 | 1275 | 346 | 0.579259354  | RNF11,TTC39A                            |
| 3 | 95,625,000 | 95,775,000 | 1276 | 340 | 0.728342924  | C3H1orf185                              |
| 3 | 95,700,000 | 95,850,000 | 1277 | 462 | 1.232605743  | C3H1orf185                              |
| 3 | 95,775,000 | 95,925,000 | 1278 | 409 | 1.307108684  | CDKN2C                                  |
| 3 | 95,850,000 | 96,000,000 | 1279 | 232 | 0.948663262  | CDKN2C,FAF1                             |
| 3 | 95,925,000 | 96,075,000 | 1280 | 224 | 0.545934112  | CDKN2C,FAF1                             |
| 3 | 96,000,000 | 96,150,000 | 1281 | 252 | 0.473646268  | FAF1                                    |
| 3 | 96,075,000 | 96,225,000 | 1282 | 252 | 0.127282076  | FAF1                                    |
| 3 | 96,150,000 | 96,300,000 | 1283 | 293 | 0.434640644  | FAF1                                    |
| 3 | 96,225,000 | 96,375,000 | 1284 | 400 | 0.877140533  | FAF1                                    |
| 3 | 96,300,000 | 96,450,000 | 1285 | 588 | 0.986093926  | FAF1                                    |
| 3 | 96,375,000 | 96,525,000 | 1286 | 549 | 0.811415852  | DMRTA2,FAF1                             |
| 3 | 96,450,000 | 96,600,000 | 1287 | 689 | 0.718344418  | DMRTA2                                  |
| 3 | 96,525,000 | 96,675,000 | 1288 | 681 | -0.029859036 | ELAVL4                                  |
| 3 | 96,600,000 | 96,750,000 | 1289 | 311 | -2.869066255 | ELAVL4                                  |
| 3 | 96,675,000 | 96,825,000 | 1290 | 321 | -0.738864326 | ELAVL4                                  |
| 3 | 96,750,000 | 96,900,000 | 1291 | 285 | 0.958756949  |                                         |
| 3 | 96,825,000 | 96,975,000 | 1292 | 209 | 1.158749891  |                                         |
| 3 | 96,900,000 | 97,050,000 | 1293 | 395 | 1.143821606  |                                         |
| 3 | 96,975,000 | 97,125,000 | 1294 | 634 | 1.05188307   |                                         |
| 3 | 97,050,000 | 97,200,000 | 1295 | 639 | 1.009375321  |                                         |
| 3 | 97,125,000 | 97,275,000 | 1296 | 827 | 1.081241064  |                                         |
| 3 | 97,200,000 | 97,350,000 | 1297 | 663 | 0.948302713  |                                         |

|   |             |             |      |      |              |                                                                      |
|---|-------------|-------------|------|------|--------------|----------------------------------------------------------------------|
| 3 | 97,275,000  | 97,425,000  | 1298 | 508  | 0.435289844  |                                                                      |
| 3 | 97,350,000  | 97,500,000  | 1299 | 888  | -0.159958571 |                                                                      |
| 3 | 97,425,000  | 97,575,000  | 1300 | 1220 | 0.172714186  |                                                                      |
| 3 | 97,500,000  | 97,650,000  | 1301 | 1072 | 0.107658256  |                                                                      |
| 3 | 97,575,000  | 97,725,000  | 1302 | 634  | -0.538771757 |                                                                      |
| 3 | 97,650,000  | 97,800,000  | 1303 | 536  | 0.306145608  |                                                                      |
| 3 | 97,725,000  | 97,875,000  | 1304 | 582  | -0.114303807 |                                                                      |
| 3 | 97,800,000  | 97,950,000  | 1305 | 541  | -0.594926726 |                                                                      |
| 3 | 97,875,000  | 98,025,000  | 1306 | 576  | 0.391666445  |                                                                      |
| 3 | 97,950,000  | 98,100,000  | 1307 | 550  | 0.501725711  | BEND5                                                                |
| 3 | 98,025,000  | 98,175,000  | 1308 | 649  | 0.514474579  | BEND5                                                                |
| 3 | 98,100,000  | 98,250,000  | 1309 | 851  | 0.234081583  | BEND5                                                                |
| 3 | 98,175,000  | 98,325,000  | 1310 | 865  | 0.947655495  | AGBL4                                                                |
| 3 | 98,250,000  | 98,400,000  | 1311 | 852  | 1.283638537  | AGBL4,SPATA6                                                         |
| 3 | 98,325,000  | 98,475,000  | 1312 | 1206 | 0.990319374  | SPATA6                                                               |
| 3 | 98,400,000  | 98,550,000  | 1313 | 1442 | 1.033164357  | SPATA6                                                               |
| 3 | 98,475,000  | 98,625,000  | 1314 | 871  | 0.865670868  | SLC5A9,SPATA6                                                        |
| 3 | 98,550,000  | 98,700,000  | 1315 | 445  | -0.126265974 | SKINT1,SLC5A9                                                        |
| 3 | 98,625,000  | 98,775,000  | 1316 | 466  | -0.263138006 | SKINT1,ENSBTAG00000030553                                            |
| 3 | 98,700,000  | 98,850,000  | 1317 | 616  | 0.051335605  | ENSBTAG00000030553                                                   |
| 3 | 98,775,000  | 98,925,000  | 1318 | 747  | 0.207683145  |                                                                      |
| 3 | 98,850,000  | 99,000,000  | 1319 | 751  | -0.154582802 |                                                                      |
| 3 | 98,925,000  | 99,075,000  | 1320 | 593  | -0.260018344 |                                                                      |
| 3 | 99,000,000  | 99,150,000  | 1321 | 801  | -0.138769648 |                                                                      |
| 3 | 99,075,000  | 99,225,000  | 1322 | 1017 | 0.004892752  |                                                                      |
| 3 | 99,150,000  | 99,300,000  | 1323 | 618  | 0.29510858   |                                                                      |
| 3 | 99,225,000  | 99,375,000  | 1324 | 312  | 0.008231885  |                                                                      |
| 3 | 99,300,000  | 99,450,000  | 1325 | 335  | 0.159994524  | FOXD2                                                                |
| 3 | 99,375,000  | 99,525,000  | 1326 | 536  | 0.514377191  | CMPK1,FOXD2                                                          |
| 3 | 99,450,000  | 99,600,000  | 1327 | 646  | -0.376808039 | CMPK1,STIL                                                           |
| 3 | 99,525,000  | 99,675,000  | 1328 | 707  | -1.711161861 | CYP4X1,PDZK1IP1,STIL,TAL1                                            |
| 3 | 99,600,000  | 99,750,000  | 1329 | 664  | -0.585025047 | CYP4X1,PDZK1IP1,TAL1                                                 |
| 3 | 99,675,000  | 99,825,000  | 1330 | 454  | 0.946717231  | CYP4X1,ENSBTAG00000037890                                            |
| 3 | 99,750,000  | 99,900,000  | 1331 | 439  | 1.255124244  | ENSBTAG00000000229,ENSBTAG00000037890                                |
| 3 | 99,825,000  | 99,975,000  | 1332 | 549  | 0.79402763   | CYP4A22,CYP4B1,ENSBTAG00000000229                                    |
| 3 | 99,900,000  | 100,050,000 | 1333 | 690  | 0.884017838  | CYP4A22,CYP4B1,EFCAB14                                               |
| 3 | 99,975,000  | 100,125,000 | 1334 | 932  | 1.264116933  | ATPAF1,EFCAB14,MOB3C,TEX38                                           |
| 3 | 100,050,000 | 100,200,000 | 1335 | 1005 | 1.316523325  | ATPAF1,EFCAB14,KNCN,MKNK1,MOB3C,TEX38                                |
| 3 | 100,125,000 | 100,275,000 | 1336 | 767  | 1.355597152  | DMBX1,KNCN,MKNK1                                                     |
| 3 | 100,200,000 | 100,350,000 | 1337 | 503  | 1.087643189  | DMBX1,FAAH,ENSBTAG00000037858                                        |
| 3 | 100,275,000 | 100,425,000 | 1338 | 492  | 0.182677458  | FAAH,LRRC41,NSUN4,RAD54L,UQCRH,ENSBTAG00000001904,ENSBTAG00000037858 |
| 3 | 100,350,000 | 100,500,000 | 1339 | 771  | 0.21958913   | LRRC41,LURAP1,NSUN4,POMGNT1,RAD54L,TSPAN1,UQCRH,ENSBTAG00000019904   |
| 3 | 100,425,000 | 100,575,000 | 1340 | 928  | -0.018908956 | LURAP1,PIK3R3,POMGNT1,RAD54L,TSPAN1                                  |
| 3 | 100,500,000 | 100,650,000 | 1341 | 1025 | 0.026041254  | PIK3R3,TSPAN1                                                        |
| 3 | 100,575,000 | 100,725,000 | 1342 | 850  | 0.513057811  | MAST2,PIK3R3                                                         |
| 3 | 100,650,000 | 100,800,000 | 1343 | 615  | 0.541435745  | MAST2,PIK3R3                                                         |
| 3 | 100,725,000 | 100,875,000 | 1344 | 571  | 0.527846519  | MAST2                                                                |
| 3 | 100,800,000 | 100,950,000 | 1345 | 568  | 1.03953453   | IPP                                                                  |
| 3 | 100,875,000 | 101,025,000 | 1346 | 480  | 0.877631183  | IPP,ENSBTAG00000008810                                               |
| 3 | 100,950,000 | 101,100,000 | 1347 | 351  | -0.181017363 | CCDC17,IPP,NASP,ENSBTAG00000008810                                   |

|   |             |             |      |      |              |                                                                                                                       |
|---|-------------|-------------|------|------|--------------|-----------------------------------------------------------------------------------------------------------------------|
| 3 | 101,025,000 | 101,175,000 | 1348 | 341  | 0.063695114  | AKR1A1,CCDC17,MMACHC,NASP,PRDX1,ENSBTAG00000008810,ENSBTAG000000017029                                                |
| 3 | 101,100,000 | 101,250,000 | 1349 | 275  | 0.532148099  | AKR1A1,MMACHC,PRDX1,TESK2,ENSBTAG000000017029                                                                         |
| 3 | 101,175,000 | 101,325,000 | 1350 | 367  | 0.758727264  | MUTYH,TESK2,TOE1,ENSBTAG000000017029                                                                                  |
| 3 | 101,250,000 | 101,400,000 | 1351 | 637  | 0.898791053  | HPDL,MUTYH,RPS27L,TESK2,TOE1                                                                                          |
| 3 | 101,325,000 | 101,475,000 | 1352 | 805  | 0.762713216  | HPDL,MUTYH,RPS27L                                                                                                     |
| 3 | 101,400,000 | 101,550,000 | 1353 | 724  | 0.348940372  |                                                                                                                       |
| 3 | 101,475,000 | 101,625,000 | 1354 | 545  | 0.008034654  | HECTD3,UROD,ZSWIM5                                                                                                    |
| 3 | 101,550,000 | 101,700,000 | 1355 | 427  | 0.456510739  | EIF2B3,HECTD3,UROD,ZSWIM5                                                                                             |
| 3 | 101,625,000 | 101,775,000 | 1356 | 475  | -0.204122963 | EIF2B3,HECTD3,PTCH2                                                                                                   |
| 3 | 101,700,000 | 101,850,000 | 1357 | 484  | 0.118130318  | BEST4,BTBD19,EIF2B3,KIF2C,PLK3,PTCH2,RPS8,TCTEX1D4                                                                    |
| 3 | 101,775,000 | 101,925,000 | 1358 | 544  | 0.83153538   | BEST4,BTBD19,C1orf228,KIF2C,PLK3,PTCH2,RPS8,TCTEX1D4                                                                  |
| 3 | 101,850,000 | 102,000,000 | 1359 | 585  | 0.396822466  | C1orf228,KIF2C,RNF220,TMEM53                                                                                          |
| 3 | 101,925,000 | 102,075,000 | 1360 | 513  | 0.39106238   | C1orf228,RNF220,TMEM53                                                                                                |
| 3 | 102,000,000 | 102,150,000 | 1361 | 754  | -0.625135351 | RNF220                                                                                                                |
| 3 | 102,075,000 | 102,225,000 | 1362 | 949  | -0.292152045 | RNF220                                                                                                                |
| 3 | 102,150,000 | 102,300,000 | 1363 | 827  | 0.860113898  | ERI3,RNF220                                                                                                           |
| 3 | 102,225,000 | 102,375,000 | 1364 | 775  | 0.942426301  | ERI3,RNF220                                                                                                           |
| 3 | 102,300,000 | 102,450,000 | 1365 | 698  | 1.10926042   | DMAP1,ERI3                                                                                                            |
| 3 | 102,375,000 | 102,525,000 | 1366 | 1239 | 0.922943371  | DMAP1,ERI3                                                                                                            |
| 3 | 102,450,000 | 102,600,000 | 1367 | 1248 | 0.32074982   | ENSBTAG00000005143,ENSBTAG000000047871                                                                                |
| 3 | 102,525,000 | 102,675,000 | 1368 | 503  | -1.491696989 | ATP6V0B,B4GALT2,CCDC24,ENSBTAG00000005143,ENSBTAG00000008690,ENSBTAG000000047871                                      |
| 3 | 102,600,000 | 102,750,000 | 1369 | 546  | -1.864062205 | ARTN,ATP6V0B,B4GALT2,CCDC24,DPH2,IPO13,SIAT6,ENSBTAG00000008690                                                       |
| 3 | 102,675,000 | 102,825,000 | 1370 | 942  | -0.536819191 | ARTN,DPH2,IPO13,SIAT6                                                                                                 |
| 3 | 102,750,000 | 102,900,000 | 1371 | 961  | 0.634592011  |                                                                                                                       |
| 3 | 102,825,000 | 102,975,000 | 1372 | 609  | 1.216346735  | KDM4A                                                                                                                 |
| 3 | 102,900,000 | 103,050,000 | 1373 | 528  | 1.247354326  | KDM4A,PTPRF                                                                                                           |
| 3 | 102,975,000 | 103,125,000 | 1374 | 870  | 1.154661176  | PTPRF                                                                                                                 |
| 3 | 103,050,000 | 103,200,000 | 1375 | 1165 | 0.99733861   | HYI,PTPRF,SZT2                                                                                                        |
| 3 | 103,125,000 | 103,275,000 | 1376 | 936  | 0.317210877  | CDC20,ELOVL1,HYI,MED8,MPL,SZT2                                                                                        |
| 3 | 103,200,000 | 103,350,000 | 1377 | 751  | 0.466101587  | C3H1ORF210,CDC20,ELOVL1,HPRT1,MED8,MPL,SZT2,TIE1,TMEM125                                                              |
| 3 | 103,275,000 | 103,425,000 | 1378 | 802  | 0.474005299  | C3H1ORF210,CFAP57,EBNA1BP2,HPRT1,TIE1,TMEM125                                                                         |
| 3 | 103,350,000 | 103,500,000 | 1379 | 907  | -1.623166428 | CFAP57,EBNA1BP2,FAM183A,ENSBTAG000000030386,ENSBTAG000000037432                                                       |
| 3 | 103,425,000 | 103,575,000 | 1380 | 1189 | -4.661820669 | EBNA1BP2,FAM183A,ENSBTAG00000001397,ENSBTAG000000030385,ENSBTAG000000030386,ENSBTAG000000037432                       |
| 3 | 103,500,000 | 103,650,000 | 1381 | 1325 | -2.114583997 | ENSBTAG00000001397,ENSBTAG000000023748,ENSBTAG000000030385,ENSBTAG000000030386,ENSBTAG00000003770,ENSBTAG000000037810 |
| 3 | 103,575,000 | 103,725,000 | 1382 | 787  | 0.184291248  | ENSBTAG00000007627,ENSBTAG00000012414,ENSBTAG00000023748,ENSBTAG00000037770,ENSBTAG00000037810                        |
| 3 | 103,650,000 | 103,800,000 | 1383 | 592  | 1.063226086  | ENSBTAG00000007627,ENSBTAG00000012414                                                                                 |
| 3 | 103,725,000 | 103,875,000 | 1384 | 628  | 1.228816098  |                                                                                                                       |
| 3 | 103,800,000 | 103,950,000 | 1385 | 440  | 0.765072882  | SLC2A1,ENSBTAG00000023986                                                                                             |
| 3 | 103,875,000 | 104,025,000 | 1386 | 435  | 0.141225219  | SLC2A1,ZNF691,ENSBTAG00000023986                                                                                      |
| 3 | 103,950,000 | 104,100,000 | 1387 | 373  | -0.17884291  | C3H1ORF50,CCDC23,CLDN19,LEPRE1,ZNF691,ENSBTAG0000017387                                                               |

|   |             |             |      |      |              |                                                                    |
|---|-------------|-------------|------|------|--------------|--------------------------------------------------------------------|
| 3 | 104,025,000 | 104,175,000 | 1388 | 367  | -0.359175414 | C3H1ORF50,CCDC23,CCDC30,CLDN19,LEPRE1,PPIH,YBX1,ENSBTAG00000017387 |
| 3 | 104,100,000 | 104,250,000 | 1389 | 370  | -1.078422347 | CCDC30,PPIH,YBX1                                                   |
| 3 | 104,175,000 | 104,325,000 | 1390 | 433  | -0.727900624 | CCDC30,PPCS,ZMYND12                                                |
| 3 | 104,250,000 | 104,400,000 | 1391 | 564  | 0.290289941  | CCDC30,PPCS,RIMKLA,ZMYND12                                         |
| 3 | 104,325,000 | 104,475,000 | 1392 | 680  | 0.220365065  | RIMKLA,ZMYND12                                                     |
| 3 | 104,400,000 | 104,550,000 | 1393 | 520  | -0.23336075  | FOXJ3,RIMKLA                                                       |
| 3 | 104,475,000 | 104,625,000 | 1394 | 691  | -0.065835281 | FOXJ3,GUCA2A,GUCA2B                                                |
| 3 | 104,550,000 | 104,700,000 | 1395 | 1032 | 0.576228264  | FOXJ3,GUCA2A,GUCA2B                                                |
| 3 | 104,625,000 | 104,775,000 | 1396 | 832  | -1.338614255 |                                                                    |
| 3 | 104,700,000 | 104,850,000 | 1397 | 573  | -2.89246286  |                                                                    |
| 3 | 104,775,000 | 104,925,000 | 1398 | 622  | 0.237033589  |                                                                    |
| 3 | 104,850,000 | 105,000,000 | 1399 | 685  | -0.187746532 |                                                                    |
| 3 | 104,925,000 | 105,075,000 | 1400 | 635  | -0.942201248 |                                                                    |
| 3 | 105,000,000 | 105,150,000 | 1401 | 586  | -0.037053098 |                                                                    |
| 3 | 105,075,000 | 105,225,000 | 1402 | 547  | -0.312051442 | HIVEP3                                                             |
| 3 | 105,150,000 | 105,300,000 | 1403 | 619  | -0.278748438 | EDN2,HIVEP3                                                        |
| 3 | 105,225,000 | 105,375,000 | 1404 | 569  | 0.120854569  | EDN2,HIVEP3                                                        |
| 3 | 105,300,000 | 105,450,000 | 1405 | 421  | -0.47105054  | EDN2,FOXO6                                                         |
| 3 | 105,375,000 | 105,525,000 | 1406 | 511  | -1.221105286 | FOXO6                                                              |
| 3 | 105,450,000 | 105,600,000 | 1407 | 566  | -1.714684323 |                                                                    |
| 3 | 105,525,000 | 105,675,000 | 1408 | 414  | -3.813397209 | SCMH1                                                              |
| 3 | 105,600,000 | 105,750,000 | 1409 | 325  | -3.767123275 | SCMH1                                                              |
| 3 | 105,675,000 | 105,825,000 | 1410 | 376  | -1.609272192 | CTPS,SCMH1,SLFNL1                                                  |
| 3 | 105,750,000 | 105,900,000 | 1411 | 435  | -0.655575454 | CTPS,SCMH1,SLFNL1                                                  |
| 3 | 105,825,000 | 105,975,000 | 1412 | 365  | 0.255012389  | CITED4,CTPS                                                        |
| 3 | 105,900,000 | 106,050,000 | 1413 | 397  | 0.85724698   | CITED4,KCNQ4,NFYC                                                  |
| 3 | 105,975,000 | 106,125,000 | 1414 | 425  | 1.265749076  | KCNQ4,NFYC                                                         |
| 3 | 106,050,000 | 106,200,000 | 1415 | 760  | -0.114462238 | NFYC,RIMS3,ENSBTAG00000034332                                      |
| 3 | 106,125,000 | 106,275,000 | 1416 | 1000 | -0.319143496 | EXO5,RIMS3,ZFP69,ZNF684,ENSBTAG00000034332                         |
| 3 | 106,200,000 | 106,350,000 | 1417 | 633  | -0.414977392 | EXO5,SMAP2,ZFP69,ZNF684                                            |
| 3 | 106,275,000 | 106,425,000 | 1418 | 787  | -0.538621693 | COL9A2,SMAP2,ZFP69                                                 |
| 3 | 106,350,000 | 106,500,000 | 1419 | 1141 | -0.618319259 | COL9A2,RLF,SMAP2,TMCO2,ZMPSTE24                                    |
| 3 | 106,425,000 | 106,575,000 | 1420 | 949  | -0.449642367 | RLF,TMCO2,ZMPSTE24                                                 |
| 3 | 106,500,000 | 106,650,000 | 1421 | 1028 | 0.56196905   | CAP1,CLN1,RLF                                                      |
| 3 | 106,575,000 | 106,725,000 | 1422 | 1147 | 0.730200029  | CAP1,CLN1,MFSD2,RLF                                                |
| 3 | 106,650,000 | 106,800,000 | 1423 | 930  | 0.620754953  | CAP1,MFSD2,MYCL                                                    |
| 3 | 106,725,000 | 106,875,000 | 1424 | 1057 | 0.894538274  | MFSD2,MYCL,TRIT1                                                   |
| 3 | 106,800,000 | 106,950,000 | 1425 | 1548 | 0.888386009  | PPIE,TRIT1,ENSBTAG00000017892                                      |
| 3 | 106,875,000 | 107,025,000 | 1426 | 1239 | 0.712921776  | HPCAL4,NT5C1A,PPIE,ENSBTAG00000017892                              |
| 3 | 106,950,000 | 107,100,000 | 1427 | 701  | 0.960930609  | HEYL,HPCAL4,NT5C1A,PABPC4                                          |
| 3 | 107,025,000 | 107,175,000 | 1428 | 735  | 1.116937919  | HEYL,PABPC4,ENSBTAG00000046807                                     |
| 3 | 107,100,000 | 107,250,000 | 1429 | 805  | 0.702614238  | KIAA0754,MACF1,ENSBTAG00000046807                                  |
| 3 | 107,175,000 | 107,325,000 | 1430 | 795  | 0.360425671  | KIAA0754,MACF1                                                     |
| 3 | 107,250,000 | 107,400,000 | 1431 | 798  | 0.128989603  | MACF1                                                              |
| 3 | 107,325,000 | 107,475,000 | 1432 | 971  | 0.35941983   | MACF1                                                              |
| 3 | 107,400,000 | 107,550,000 | 1433 | 944  | 0.780028529  | ENSBTAG00000047038                                                 |
| 3 | 107,475,000 | 107,625,000 | 1434 | 853  | 0.904017781  | AKIRIN1,NDUFS5,ENSBTAG00000047038                                  |
| 3 | 107,550,000 | 107,700,000 | 1435 | 921  | 0.927680987  | AKIRIN1,GJA9,NDUFS5,RHBDL2                                         |
| 3 | 107,625,000 | 107,775,000 | 1436 | 776  | 0.89975073   | GJA9,MYCBP,RHBDL2,RRAGC                                            |
| 3 | 107,700,000 | 107,850,000 | 1437 | 624  | 0.753356363  | MYCBP,RRAGC                                                        |
| 3 | 107,775,000 | 107,925,000 | 1438 | 572  | 0.353679427  |                                                                    |
| 3 | 107,850,000 | 108,000,000 | 1439 | 638  | 0.035675035  |                                                                    |

|   |             |             |      |      |              |                                                   |
|---|-------------|-------------|------|------|--------------|---------------------------------------------------|
| 3 | 107,925,000 | 108,075,000 | 1440 | 683  | -0.122719782 |                                                   |
| 3 | 108,000,000 | 108,150,000 | 1441 | 786  | -1.76212349  |                                                   |
| 3 | 108,075,000 | 108,225,000 | 1442 | 921  | -1.064362463 |                                                   |
| 3 | 108,150,000 | 108,300,000 | 1443 | 513  | 0.603936952  |                                                   |
| 3 | 108,225,000 | 108,375,000 | 1444 | 459  | -0.235437935 |                                                   |
| 3 | 108,300,000 | 108,450,000 | 1445 | 706  | -0.704148998 |                                                   |
| 3 | 108,375,000 | 108,525,000 | 1446 | 496  | -0.473938877 | POU3F1                                            |
| 3 | 108,450,000 | 108,600,000 | 1447 | 284  | 0.412397508  | FHL3,INPP5B,POU3F1,SF3A3,UTP11L                   |
| 3 | 108,525,000 | 108,675,000 | 1448 | 395  | 0.246524501  | FHL3,INPP5B,MTF1,SF3A3,UTP11L                     |
| 3 | 108,600,000 | 108,750,000 | 1449 | 387  | 0.085781005  | C1orf122,EPHA10,INPP5B,MANEAL,MTF1,YRDC           |
| 3 | 108,675,000 | 108,825,000 | 1450 | 431  | -0.558394077 | C1orf122,CDCA8,EPHA10,MANEAL,MGC166151,MTF1,YRDC  |
| 3 | 108,750,000 | 108,900,000 | 1451 | 490  | -1.066190597 | CDCA8,EPHA10,GNL2,MGC166151,RSPO1                 |
| 3 | 108,825,000 | 108,975,000 | 1452 | 345  | -0.555352537 | DNALI1,GNL2,MEAF6,RSPO1,SNIP1                     |
| 3 | 108,900,000 | 109,050,000 | 1453 | 433  | -0.004663082 | DNALI1,GNL2,MEAF6,SNIP1,ZC3H12A                   |
| 3 | 108,975,000 | 109,125,000 | 1454 | 705  | 0.448172898  | MEAF6,ZC3H12A                                     |
| 3 | 109,050,000 | 109,200,000 | 1455 | 865  | 0.611598753  |                                                   |
| 3 | 109,125,000 | 109,275,000 | 1456 | 789  | 0.45545632   |                                                   |
| 3 | 109,200,000 | 109,350,000 | 1457 | 1036 | -0.444187633 |                                                   |
| 3 | 109,275,000 | 109,425,000 | 1458 | 999  | -0.599116821 |                                                   |
| 3 | 109,350,000 | 109,500,000 | 1459 | 840  | 0.571305944  |                                                   |
| 3 | 109,425,000 | 109,575,000 | 1460 | 795  | 0.72511083   | GRIK3                                             |
| 3 | 109,500,000 | 109,650,000 | 1461 | 622  | 0.100268596  | GRIK3                                             |
| 3 | 109,575,000 | 109,725,000 | 1462 | 709  | 0.064194955  | GRIK3                                             |
| 3 | 109,650,000 | 109,800,000 | 1463 | 673  | 0.370561243  | GRIK3                                             |
| 3 | 109,725,000 | 109,875,000 | 1464 | 715  | 0.097476127  |                                                   |
| 3 | 109,800,000 | 109,950,000 | 1465 | 754  | 0.439691097  |                                                   |
| 3 | 109,875,000 | 110,025,000 | 1466 | 767  | 0.7142662    | CSF3R,ENSBTAG00000024097                          |
| 3 | 109,950,000 | 110,100,000 | 1467 | 915  | -0.210650597 | CSF3R,LSM10,OSCP1,STK40,ENSBTAG00000024097        |
| 3 | 110,025,000 | 110,175,000 | 1468 | 744  | -0.411415003 | EVA1B,LSM10,OSCP1,STK40,THRAP3,ENSBTAG00000038617 |
| 3 | 110,100,000 | 110,250,000 | 1469 | 552  | 0.065832625  | EVA1B,MAP7D1,STK40,THRAP3,ENSBTAG00000038617      |
| 3 | 110,175,000 | 110,325,000 | 1470 | 561  | 0.42259234   | ADPRHL2,COL8A2,MAP7D1,TEKT2,THRAP3,TRAPPC3        |
| 3 | 110,250,000 | 110,400,000 | 1471 | 407  | 1.068021688  | ADPRHL2,AGO3,COL8A2,TEKT2,TRAPPC3                 |
| 3 | 110,325,000 | 110,475,000 | 1472 | 366  | 1.117278556  | AGO3,EIF2C1                                       |
| 3 | 110,400,000 | 110,550,000 | 1473 | 342  | 0.363566644  | AGO3,AGO4,EIF2C1                                  |
| 3 | 110,475,000 | 110,625,000 | 1474 | 341  | -0.677072043 | AGO4,CLSPN,EIF2C1                                 |
| 3 | 110,550,000 | 110,700,000 | 1475 | 471  | -1.263219898 | AGO4,C1orf216,CLSPN                               |
| 3 | 110,625,000 | 110,775,000 | 1476 | 612  | -0.564324207 | C1orf216,CLSPN,PSMB2,TFAP2E                       |
| 3 | 110,700,000 | 110,850,000 | 1477 | 482  | 0.586093856  | KIAA0319L,NCDN,PSMB2,TFAP2E                       |
| 3 | 110,775,000 | 110,925,000 | 1478 | 351  | 0.766511664  | KIAA0319L,NCDN,TFAP2E,ZMYM4                       |
| 3 | 110,850,000 | 111,000,000 | 1479 | 449  | 0.571088254  | KIAA0319L,ZMYM4                                   |
| 3 | 110,925,000 | 111,075,000 | 1480 | 443  | 0.450150705  | ZMYM4                                             |
| 3 | 111,000,000 | 111,150,000 | 1481 | 387  | 0.563783993  | SFPQ                                              |
| 3 | 111,075,000 | 111,225,000 | 1482 | 466  | 0.528813491  | SFPQ,ZMYM1                                        |
| 3 | 111,150,000 | 111,300,000 | 1483 | 551  | 0.280583792  | ZMYM1,ZMYM6NB,ENSBTAG00000021948                  |
| 3 | 111,225,000 | 111,375,000 | 1484 | 401  | 0.258400989  | ZMYM6NB,ENSBTAG00000021948                        |
| 3 | 111,300,000 | 111,450,000 | 1485 | 431  | 0.339979967  | DLGAP3,SMIM12                                     |
| 3 | 111,375,000 | 111,525,000 | 1486 | 738  | -0.716170651 | DLGAP3,GJA4,GJB3,GJB4,GJB5,SMIM12                 |
| 3 | 111,450,000 | 111,600,000 | 1487 | 865  | -0.570618473 | GJA4,GJB3,GJB4,GJB5                               |
| 3 | 111,525,000 | 111,675,000 | 1488 | 595  | 0.152658967  | GJB5                                              |
| 3 | 111,600,000 | 111,750,000 | 1489 | 689  | 0.25154371   |                                                   |
| 3 | 111,675,000 | 111,825,000 | 1490 | 873  | 0.061124624  |                                                   |

|   |             |             |      |      |              |                                                                               |
|---|-------------|-------------|------|------|--------------|-------------------------------------------------------------------------------|
| 3 | 111,750,000 | 111,900,000 | 1491 | 641  | 0.246471796  |                                                                               |
| 3 | 111,825,000 | 111,975,000 | 1492 | 506  | 0.667240268  |                                                                               |
| 3 | 111,900,000 | 112,050,000 | 1493 | 445  | 0.035941175  |                                                                               |
| 3 | 111,975,000 | 112,125,000 | 1494 | 750  | 0.479392832  |                                                                               |
| 3 | 112,050,000 | 112,200,000 | 1495 | 880  | 0.84336447   | C1orf94                                                                       |
| 3 | 112,125,000 | 112,275,000 | 1496 | 768  | 0.903519583  | C1orf94                                                                       |
| 3 | 112,200,000 | 112,350,000 | 1497 | 692  | 0.475618581  |                                                                               |
| 3 | 112,275,000 | 112,425,000 | 1498 | 833  | -0.80828708  |                                                                               |
| 3 | 112,350,000 | 112,500,000 | 1499 | 920  | -0.429830908 |                                                                               |
| 3 | 112,425,000 | 112,575,000 | 1500 | 940  | 1.041543102  | CSMD2,HMGB4                                                                   |
| 3 | 112,500,000 | 112,650,000 | 1501 | 1008 | 1.238574853  | CSMD2,HMGB4                                                                   |
| 3 | 112,575,000 | 112,725,000 | 1502 | 793  | 1.188907231  | CSMD2                                                                         |
| 3 | 112,650,000 | 112,800,000 | 1503 | 807  | -0.599319246 | CSMD2                                                                         |
| 3 | 112,725,000 | 112,875,000 | 1504 | 1241 | -0.892144023 | CSMD2                                                                         |
| 3 | 112,800,000 | 112,950,000 | 1505 | 1298 | -0.063542775 | CSMD2,ZSCAN20                                                                 |
| 3 | 112,875,000 | 113,025,000 | 1506 | 759  | 0.255929103  | CSMD2,EFHD1,ZSCAN20                                                           |
| 3 | 112,950,000 | 113,100,000 | 1507 | 478  | 1.355968671  | EFHD1,GIGYF2                                                                  |
| 3 | 113,025,000 | 113,175,000 | 1508 | 327  | 1.301750178  | EFHD1,GIGYF2,KCNJ13                                                           |
| 3 | 113,100,000 | 113,250,000 | 1509 | 354  | 1.207884711  | C2orf82,GIGYF2,KCNJ13,NGEF                                                    |
| 3 | 113,175,000 | 113,325,000 | 1510 | 598  | 0.830236894  | C2orf82,GIGYF2,NGEF                                                           |
| 3 | 113,250,000 | 113,400,000 | 1511 | 837  | -0.186107027 | NEU2,NGEF                                                                     |
| 3 | 113,325,000 | 113,475,000 | 1512 | 813  | -0.422689381 | INPP5D,NEU2                                                                   |
| 3 | 113,400,000 | 113,550,000 | 1513 | 685  | -0.202680498 | INPP5D,ENSBTAG00000030239                                                     |
| 3 | 113,475,000 | 113,625,000 | 1514 | 574  | -0.494693001 | ATG16L1,INPP5D,ENSBTAG00000030239                                             |
| 3 | 113,550,000 | 113,700,000 | 1515 | 518  | 0.443858645  | ATG16L1,SAG                                                                   |
| 3 | 113,625,000 | 113,775,000 | 1516 | 586  | 0.665861652  | DGKH,SAG                                                                      |
| 3 | 113,700,000 | 113,850,000 | 1517 | 643  | 0.886798348  | DGKH,USP40                                                                    |
| 3 | 113,775,000 | 113,925,000 | 1518 | 475  | 0.891410376  | DGKH,UGT1A1,USP40                                                             |
| 3 | 113,850,000 | 114,000,000 | 1519 | 438  | 1.056592542  | UGT1A1,USP40,ENSBTAG00000046353,ENSBTAG00000048275                            |
| 3 | 113,925,000 | 114,075,000 | 1520 | 530  | 0.3949828    | DNAJB3,MROH2A,UGT1A1,ENSBTAG00000046353,ENSBTAG00000048212,ENSBTAG00000048275 |
| 3 | 114,000,000 | 114,150,000 | 1521 | 431  | -0.914753515 | DNAJB3,HJURP,MROH2A,UGT1A1,ENSBTAG00000048212                                 |
| 3 | 114,075,000 | 114,225,000 | 1522 | 1109 | -0.156040774 | HJURP,MROH2A,TRPM8                                                            |
| 3 | 114,150,000 | 114,300,000 | 1523 | 1319 | -0.169482239 | TRPM8                                                                         |
| 3 | 114,225,000 | 114,375,000 | 1524 | 1205 | 0.142907385  | SPP2,TRPM8                                                                    |
| 3 | 114,300,000 | 114,450,000 | 1525 | 1613 | -0.149397508 | SPP2                                                                          |
| 3 | 114,375,000 | 114,525,000 | 1526 | 1334 | -0.046989204 |                                                                               |
| 3 | 114,450,000 | 114,600,000 | 1527 | 921  | 0.555586836  |                                                                               |
| 3 | 114,525,000 | 114,675,000 | 1528 | 877  | 0.373465865  |                                                                               |
| 3 | 114,600,000 | 114,750,000 | 1529 | 977  | 0.890789787  | ARL4C                                                                         |
| 3 | 114,675,000 | 114,825,000 | 1530 | 1468 | 0.859306859  | ARL4C                                                                         |
| 3 | 114,750,000 | 114,900,000 | 1531 | 1310 | 0.721472714  |                                                                               |
| 3 | 114,825,000 | 114,975,000 | 1532 | 893  | 0.667934188  |                                                                               |
| 3 | 114,900,000 | 115,050,000 | 1533 | 792  | 0.511954574  |                                                                               |
| 3 | 114,975,000 | 115,125,000 | 1534 | 681  | 0.191200579  |                                                                               |
| 3 | 115,050,000 | 115,200,000 | 1535 | 706  | -0.244993547 |                                                                               |
| 3 | 115,125,000 | 115,275,000 | 1536 | 1324 | 0.735154626  | SH3BP4                                                                        |
| 3 | 115,200,000 | 115,350,000 | 1537 | 1446 | 0.39585242   | SH3BP4                                                                        |
| 3 | 115,275,000 | 115,425,000 | 1538 | 885  | -0.58751629  |                                                                               |
| 3 | 115,350,000 | 115,500,000 | 1539 | 846  | -0.048446619 |                                                                               |
| 3 | 115,425,000 | 115,575,000 | 1540 | 755  | -0.451254478 |                                                                               |



|   |             |             |      |      |              |                                                                  |
|---|-------------|-------------|------|------|--------------|------------------------------------------------------------------|
| 3 | 115,500,000 | 115,650,000 | 1541 | 965  | -1.036704541 |                                                                  |
| 3 | 115,575,000 | 115,725,000 | 1542 | 1114 | -0.375475482 |                                                                  |
| 3 | 115,650,000 | 115,800,000 | 1543 | 812  | 0.740880657  |                                                                  |
| 3 | 115,725,000 | 115,875,000 | 1544 | 695  | 0.570428464  | AGAP1                                                            |
| 3 | 115,800,000 | 115,950,000 | 1545 | 962  | 0.538875478  | AGAP1                                                            |
| 3 | 115,875,000 | 116,025,000 | 1546 | 1352 | 0.488702947  | AGAP1                                                            |
| 3 | 115,950,000 | 116,100,000 | 1547 | 1308 | 0.141921765  | AGAP1                                                            |
| 3 | 116,025,000 | 116,175,000 | 1548 | 738  | 0.057133237  | AGAP1                                                            |
| 3 | 116,100,000 | 116,250,000 | 1549 | 649  | 0.478585454  | AGAP1                                                            |
| 3 | 116,175,000 | 116,325,000 | 1550 | 602  | 0.497144511  | AGAP1,ASB18,GBX2                                                 |
| 3 | 116,250,000 | 116,400,000 | 1551 | 731  | -0.044447603 | ASB18,GBX2                                                       |
| 3 | 116,325,000 | 116,475,000 | 1552 | 1275 | -0.325910043 | ASB18,IQCA1                                                      |
| 3 | 116,400,000 | 116,550,000 | 1553 | 923  | -0.396894632 | IQCA1                                                            |
| 3 | 116,475,000 | 116,625,000 | 1554 | 718  | 0.173474875  | IQCA1                                                            |
| 3 | 116,550,000 | 116,700,000 | 1555 | 1418 | 0.629345742  | CXCR7,IQCA1                                                      |
| 3 | 116,625,000 | 116,775,000 | 1556 | 1252 | 0.856582379  | CXCR7                                                            |
| 3 | 116,700,000 | 116,850,000 | 1557 | 1114 | 1.063577906  |                                                                  |
| 3 | 116,775,000 | 116,925,000 | 1558 | 1521 | 1.041257167  |                                                                  |
| 3 | 116,850,000 | 117,000,000 | 1559 | 1307 | 0.305380188  |                                                                  |
| 3 | 116,925,000 | 117,075,000 | 1560 | 1403 | 0.11586419   |                                                                  |
| 3 | 117,000,000 | 117,150,000 | 1561 | 1712 | 0.820014028  |                                                                  |
| 3 | 117,075,000 | 117,225,000 | 1562 | 1390 | 0.833174384  | COPS8                                                            |
| 3 | 117,150,000 | 117,300,000 | 1563 | 1209 | 0.661067236  | COPS8                                                            |
| 3 | 117,225,000 | 117,375,000 | 1564 | 1106 | 0.455328745  |                                                                  |
| 3 | 117,300,000 | 117,450,000 | 1565 | 839  | 0.639335915  | COL6A3                                                           |
| 3 | 117,375,000 | 117,525,000 | 1566 | 836  | 0.757698995  | COL6A3,RPS16                                                     |
| 3 | 117,450,000 | 117,600,000 | 1567 | 1240 | 0.189244013  | COL6A3,MLPH,RPS16                                                |
| 3 | 117,525,000 | 117,675,000 | 1568 | 1626 | 0.017520535  | MLPH,PRLH,RAB17                                                  |
| 3 | 117,600,000 | 117,750,000 | 1569 | 1683 | 0.101264085  | LRRFIP1,MLPH,PRLH,RAB17                                          |
| 3 | 117,675,000 | 117,825,000 | 1570 | 1259 | 0.200022835  | LRRFIP1                                                          |
| 3 | 117,750,000 | 117,900,000 | 1571 | 1053 | 0.509683593  | LRRFIP1,RBM44                                                    |
| 3 | 117,825,000 | 117,975,000 | 1572 | 1213 | 0.471584447  | LRRFIP1,RAMP1,RBM44,ENSBTAG00000045970                           |
| 3 | 117,900,000 | 118,050,000 | 1573 | 1116 | 0.637438044  | RAMP1,RBM44,SCLY,UBE2F,ENSBTAG00000045970                        |
| 3 | 117,975,000 | 118,125,000 | 1574 | 1027 | 0.878358239  | ESPNL,FAM132B,SCLY,UBE2F                                         |
| 3 | 118,050,000 | 118,200,000 | 1575 | 915  | 0.276238457  | ESPNL,FAM132B,HES6,ILKAP,SCLY,ENSBTAG0000001879                  |
| 3 | 118,125,000 | 118,275,000 | 1576 | 1048 | -0.08914173  | FAM132B,HES6,ILKAP,TRAF3IP1,ENSBTAG0000001879,ENSBTAG00000045685 |
| 3 | 118,200,000 | 118,350,000 | 1577 | 1225 | -0.017434664 | TRAF3IP1,ENSBTAG0000001879,ENSBTAG00000045685                    |
| 3 | 118,275,000 | 118,425,000 | 1578 | 1064 | -0.077945912 | ASB1,TRAF3IP1                                                    |
| 3 | 118,350,000 | 118,500,000 | 1579 | 963  | 0.30574808   | ASB1                                                             |
| 3 | 118,425,000 | 118,575,000 | 1580 | 1149 | 1.039189048  |                                                                  |
| 3 | 118,500,000 | 118,650,000 | 1581 | 1140 | 0.592563601  | TWIST2                                                           |
| 3 | 118,575,000 | 118,725,000 | 1582 | 1025 | 0.54066367   | TWIST2                                                           |
| 3 | 118,650,000 | 118,800,000 | 1583 | 953  | 0.696926038  | TWIST2                                                           |
| 3 | 118,725,000 | 118,875,000 | 1584 | 827  | 0.624357206  |                                                                  |
| 3 | 118,800,000 | 118,950,000 | 1585 | 846  | 0.378244834  | HDAC4                                                            |
| 3 | 118,875,000 | 119,025,000 | 1586 | 770  | -0.043977719 | HDAC4                                                            |
| 3 | 118,950,000 | 119,100,000 | 1587 | 565  | -0.200954088 | HDAC4                                                            |
| 3 | 119,025,000 | 119,175,000 | 1588 | 721  | -0.563199577 | HDAC4                                                            |
| 3 | 119,100,000 | 119,250,000 | 1589 | 784  | -0.240609499 | HDAC4,ENSBTAG00000045515                                         |
| 3 | 119,175,000 | 119,325,000 | 1590 | 1167 | -0.69743601  | HDAC4,ENSBTAG00000045515                                         |
| 3 | 119,250,000 | 119,400,000 | 1591 | 1189 | -1.190739779 | HDAC4                                                            |
| 3 | 119,325,000 | 119,475,000 | 1592 | 1007 | -1.164191059 | CSF2RA,HDAC4                                                     |

|   |             |             |      |      |              |                                                                                                                          |
|---|-------------|-------------|------|------|--------------|--------------------------------------------------------------------------------------------------------------------------|
| 3 | 119,400,000 | 119,550,000 | 1593 | 1338 | -0.919571031 | CSF2RA,HDAC4                                                                                                             |
| 3 | 119,475,000 | 119,625,000 | 1594 | 1036 | -0.450550509 |                                                                                                                          |
| 3 | 119,550,000 | 119,700,000 | 1595 | 1105 | -1.260886436 | ENSBTAG00000046002,ENSBTAG00000046792                                                                                    |
| 3 | 119,625,000 | 119,775,000 | 1596 | 1212 | -1.86108774  | ENSBTAG00000045833,ENSBTAG00000045911,ENSBTAG0000046002,ENSBTAG00000046792                                               |
| 3 | 119,700,000 | 119,850,000 | 1597 | 976  | -2.542467294 | NDUFA10,ENSBTAG00000003281,ENSBTAG00000030221,ENSBTAG00000040084,ENSBTAG00000045833,ENSBTAG0000045911                    |
| 3 | 119,775,000 | 119,925,000 | 1598 | 1173 | -2.267051637 | NDUFA10,ENSBTAG00000003281,ENSBTAG00000030221,ENSBTAG00000039566,ENSBTAG00000040084,ENSBTAG0000047496,ENSBTAG00000048084 |
| 3 | 119,850,000 | 120,000,000 | 1599 | 1493 | -0.425143674 | ENSBTAG00000039566,ENSBTAG00000046632,ENSBTAG0000047496,ENSBTAG00000047813,ENSBTAG00000048084                            |
| 3 | 119,925,000 | 120,075,000 | 1600 | 1470 | 0.144254359  | ENSBTAG00000039281,ENSBTAG00000040217,ENSBTAG0000040382,ENSBTAG00000046632,ENSBTAG00000047813                            |
| 3 | 120,000,000 | 120,150,000 | 1601 | 1081 | 0.399874392  | MYEOV2,OTOS,ENSBTAG00000033837,ENSBTAG00000038082,ENSBTAG00000039281,ENSBTAG00000040217,ENSBTAG00000040382               |
| 3 | 120,075,000 | 120,225,000 | 1602 | 1030 | -0.059871666 | MYEOV2,OTOS,ENSBTAG00000033837,ENSBTAG00000038082                                                                        |
| 3 | 120,150,000 | 120,300,000 | 1603 | 914  | -0.243663751 | ANKMY1                                                                                                                   |
| 3 | 120,225,000 | 120,375,000 | 1604 | 633  | 0.718194665  | ANKMY1,CAPN10,RNPEPL1                                                                                                    |
| 3 | 120,300,000 | 120,450,000 | 1605 | 808  | 0.188865713  | CAPN10,GPC1,GPR35,RNPEPL1                                                                                                |
| 3 | 120,375,000 | 120,525,000 | 1606 | 847  | -0.815633707 | GPC1,GPR35,KIF1A,ENSBTAG00000003389                                                                                      |
| 3 | 120,450,000 | 120,600,000 | 1607 | 738  | -0.854254348 | GPC1,KIF1A,ENSBTAG00000003389                                                                                            |
| 3 | 120,525,000 | 120,675,000 | 1608 | 846  | -0.090270644 | AGXT,C2orf54,KIF1A                                                                                                       |
| 3 | 120,600,000 | 120,750,000 | 1609 | 808  | 0.111010144  | AGXT,C2orf54,KIF1A,ENSBTAG00000005168                                                                                    |
| 3 | 120,675,000 | 120,825,000 | 1610 | 799  | 0.055198711  | MTERFD2,PASK,SNED1,ENSBTAG00000005168                                                                                    |
| 3 | 120,750,000 | 120,900,000 | 1611 | 941  | -0.024489505 | MTERFD2,PASK,PPP1R7,SNED1                                                                                                |
| 3 | 120,825,000 | 120,975,000 | 1612 | 1140 | 0.423667756  | HDLBP,PASK,PPP1R7,SEPT2                                                                                                  |
| 3 | 120,900,000 | 121,050,000 | 1613 | 1413 | 0.256545391  | HDLBP,SEPT2                                                                                                              |
| 3 | 120,975,000 | 121,125,000 | 1614 | 1341 | 0.295016249  | BOK,SEPT2,STK25,THAP4,ENSBTAG00000013110                                                                                 |
| 3 | 121,050,000 | 121,200,000 | 1615 | 1216 | 0.647386599  | ATG4B,BOK,DTYMK,ING5,STK25,THAP4,ENSBTAG00000013110                                                                      |
| 3 | 121,125,000 | 121,275,000 | 1616 | 1343 | 0.859053638  | ATG4B,D2HGDH,DTYMK,GAL3ST2,ING5,NEU4,THAP4                                                                               |
| 3 | 121,200,000 | 121,350,000 | 1617 | 1199 | 0.906787815  | D2HGDH,GAL3ST2,ING5,NEU4,PDCD1,RTP5                                                                                      |
| 3 | 121,275,000 | 121,425,000 | 1618 | 1070 | 0.755606006  | PDCD1,RTP5                                                                                                               |
| 3 | 121,350,000 | 121,430,405 | 1619 | 584  | 0.843558367  |                                                                                                                          |
| 4 | 0           | 150,000     | 1    | 497  | 0.992621869  |                                                                                                                          |
| 4 | 75,000      | 225,000     | 2    | 201  | -0.59538752  |                                                                                                                          |
| 4 | 150,000     | 300,000     | 3    | 316  | -0.031352535 |                                                                                                                          |
| 4 | 225,000     | 375,000     | 4    | 472  | 0.748960588  |                                                                                                                          |
| 4 | 300,000     | 450,000     | 5    | 586  | 0.574340863  | VSTM2A                                                                                                                   |
| 4 | 375,000     | 525,000     | 6    | 742  | 0.097744593  | VSTM2A                                                                                                                   |
| 4 | 450,000     | 600,000     | 7    | 868  | -2.351763277 |                                                                                                                          |
| 4 | 525,000     | 675,000     | 8    | 999  | -2.666171515 |                                                                                                                          |
| 4 | 600,000     | 750,000     | 9    | 1156 | -0.104729656 |                                                                                                                          |
| 4 | 675,000     | 825,000     | 10   | 1327 | -0.069990309 |                                                                                                                          |
| 4 | 750,000     | 900,000     | 11   | 1570 | -0.268040066 |                                                                                                                          |
| 4 | 825,000     | 975,000     | 12   | 1523 | -0.162688587 |                                                                                                                          |
| 4 | 900,000     | 1,050,000   | 13   | 1132 | -0.175450378 |                                                                                                                          |

|   |           |           |    |      |              |      |
|---|-----------|-----------|----|------|--------------|------|
| 4 | 975,000   | 1,125,000 | 14 | 998  | -0.080570753 |      |
| 4 | 1,050,000 | 1,200,000 | 15 | 1031 | 0.011778999  |      |
| 4 | 1,125,000 | 1,275,000 | 16 | 905  | -0.014681084 |      |
| 4 | 1,200,000 | 1,350,000 | 17 | 1095 | 0.020368848  |      |
| 4 | 1,275,000 | 1,425,000 | 18 | 1495 | 0.313362091  |      |
| 4 | 1,350,000 | 1,500,000 | 19 | 1499 | -0.243040677 |      |
| 4 | 1,425,000 | 1,575,000 | 20 | 1136 | -1.465622952 |      |
| 4 | 1,500,000 | 1,650,000 | 21 | 832  | -1.124631408 |      |
| 4 | 1,575,000 | 1,725,000 | 22 | 866  | -3.18640193  |      |
| 4 | 1,650,000 | 1,800,000 | 23 | 917  | -2.436522491 |      |
| 4 | 1,725,000 | 1,875,000 | 24 | 698  | -0.072722271 |      |
| 4 | 1,800,000 | 1,950,000 | 25 | 707  | 0.117169296  |      |
| 4 | 1,875,000 | 2,025,000 | 26 | 650  | 0.03762749   |      |
| 4 | 1,950,000 | 2,100,000 | 27 | 618  | -1.165210591 |      |
| 4 | 2,025,000 | 2,175,000 | 28 | 631  | -1.279336853 |      |
| 4 | 2,100,000 | 2,250,000 | 29 | 286  | -0.117653438 |      |
| 4 | 2,175,000 | 2,325,000 | 30 | 584  | -0.672054708 |      |
| 4 | 2,250,000 | 2,400,000 | 31 | 980  | -1.49395282  |      |
| 4 | 2,325,000 | 2,475,000 | 32 | 1030 | -2.896018787 |      |
| 4 | 2,400,000 | 2,550,000 | 33 | 878  | -1.674802768 |      |
| 4 | 2,475,000 | 2,625,000 | 34 | 888  | -0.769551146 |      |
| 4 | 2,550,000 | 2,700,000 | 35 | 931  | -0.819701089 |      |
| 4 | 2,625,000 | 2,775,000 | 36 | 800  | -1.192267331 |      |
| 4 | 2,700,000 | 2,850,000 | 37 | 1020 | -0.059263529 |      |
| 4 | 2,775,000 | 2,925,000 | 38 | 1024 | 0.885783965  |      |
| 4 | 2,850,000 | 3,000,000 | 39 | 843  | 0.915370179  |      |
| 4 | 2,925,000 | 3,075,000 | 40 | 865  | 0.979273072  |      |
| 4 | 3,000,000 | 3,150,000 | 41 | 1038 | -2.858994764 |      |
| 4 | 3,075,000 | 3,225,000 | 42 | 1368 | -3.580831289 |      |
| 4 | 3,150,000 | 3,300,000 | 43 | 1429 | -2.435959096 |      |
| 4 | 3,225,000 | 3,375,000 | 44 | 1413 | -0.074524436 |      |
| 4 | 3,300,000 | 3,450,000 | 45 | 1283 | 0.318459119  |      |
| 4 | 3,375,000 | 3,525,000 | 46 | 989  | 0.105211122  |      |
| 4 | 3,450,000 | 3,600,000 | 47 | 1083 | 0.540184118  |      |
| 4 | 3,525,000 | 3,675,000 | 48 | 1229 | 0.260661073  |      |
| 4 | 3,600,000 | 3,750,000 | 49 | 1540 | 0.832809442  |      |
| 4 | 3,675,000 | 3,825,000 | 50 | 1699 | 1.289385566  |      |
| 4 | 3,750,000 | 3,900,000 | 51 | 1346 | 1.13874235   |      |
| 4 | 3,825,000 | 3,975,000 | 52 | 1176 | 0.119237865  |      |
| 4 | 3,900,000 | 4,050,000 | 53 | 1119 | -0.033475134 |      |
| 4 | 3,975,000 | 4,125,000 | 54 | 1112 | 0.812684279  |      |
| 4 | 4,050,000 | 4,200,000 | 55 | 1228 | 0.973662893  |      |
| 4 | 4,125,000 | 4,275,000 | 56 | 998  | 0.666541325  |      |
| 4 | 4,200,000 | 4,350,000 | 57 | 1118 | 0.580500897  |      |
| 4 | 4,275,000 | 4,425,000 | 58 | 1257 | 0.819739649  |      |
| 4 | 4,350,000 | 4,500,000 | 59 | 1233 | 0.988932841  | COBL |
| 4 | 4,425,000 | 4,575,000 | 60 | 1289 | 1.032611452  | COBL |
| 4 | 4,500,000 | 4,650,000 | 61 | 1111 | 0.312075598  | COBL |
| 4 | 4,575,000 | 4,725,000 | 62 | 880  | -0.899233486 | COBL |
| 4 | 4,650,000 | 4,800,000 | 63 | 955  | 0.302316337  | COBL |
| 4 | 4,725,000 | 4,875,000 | 64 | 1114 | 0.253117444  | COBL |
| 4 | 4,800,000 | 4,950,000 | 65 | 934  | -0.447641487 |      |
| 4 | 4,875,000 | 5,025,000 | 66 | 1019 | -0.549308363 |      |

|   |           |           |     |      |              |                                     |
|---|-----------|-----------|-----|------|--------------|-------------------------------------|
| 4 | 4,950,000 | 5,100,000 | 67  | 1265 | -0.893185428 |                                     |
| 4 | 5,025,000 | 5,175,000 | 68  | 1227 | -0.821092791 | GRB10                               |
| 4 | 5,100,000 | 5,250,000 | 69  | 899  | 0.059619143  | GRB10                               |
| 4 | 5,175,000 | 5,325,000 | 70  | 891  | 0.503979594  | DDC,GRB10                           |
| 4 | 5,250,000 | 5,400,000 | 71  | 1156 | 0.887049758  | DDC,FIGNL1,ENSBTAG00000001502       |
| 4 | 5,325,000 | 5,475,000 | 72  | 1048 | 1.093965636  | DDC,FIGNL1,IKZF1,ENSBTAG00000001502 |
| 4 | 5,400,000 | 5,550,000 | 73  | 888  | 0.866235357  | IKZF1                               |
| 4 | 5,475,000 | 5,625,000 | 74  | 879  | 0.298898892  | IKZF1                               |
| 4 | 5,550,000 | 5,700,000 | 75  | 884  | -0.418646458 | C7orf72                             |
| 4 | 5,625,000 | 5,775,000 | 76  | 777  | -0.596672569 | C7orf72,ZPBP                        |
| 4 | 5,700,000 | 5,850,000 | 77  | 820  | 0.041670578  | C7orf72,ZPBP                        |
| 4 | 5,775,000 | 5,925,000 | 78  | 1324 | 0.909014067  | VWC2,ZPBP                           |
| 4 | 5,850,000 | 6,000,000 | 79  | 1532 | 0.768997692  | VWC2                                |
| 4 | 5,925,000 | 6,075,000 | 80  | 1028 | 0.449286292  | VWC2                                |
| 4 | 6,000,000 | 6,150,000 | 81  | 1010 | -0.023786138 | VWC2                                |
| 4 | 6,075,000 | 6,225,000 | 82  | 1251 | -0.158865396 |                                     |
| 4 | 6,150,000 | 6,300,000 | 83  | 1237 | 0.148109946  |                                     |
| 4 | 6,225,000 | 6,375,000 | 84  | 1374 | -0.102876476 |                                     |
| 4 | 6,300,000 | 6,450,000 | 85  | 1129 | -1.297993239 |                                     |
| 4 | 6,375,000 | 6,525,000 | 86  | 1097 | -1.039939704 |                                     |
| 4 | 6,450,000 | 6,600,000 | 87  | 1120 | -1.635733651 |                                     |
| 4 | 6,525,000 | 6,675,000 | 88  | 990  | -2.131515253 |                                     |
| 4 | 6,600,000 | 6,750,000 | 89  | 775  | -0.618012729 |                                     |
| 4 | 6,675,000 | 6,825,000 | 90  | 905  | 0.874050286  |                                     |
| 4 | 6,750,000 | 6,900,000 | 91  | 1444 | 0.525323309  |                                     |
| 4 | 6,825,000 | 6,975,000 | 92  | 1425 | -0.122575452 |                                     |
| 4 | 6,900,000 | 7,050,000 | 93  | 1360 | -0.28351851  |                                     |
| 4 | 6,975,000 | 7,125,000 | 94  | 1527 | 0.319996605  | ABCA13                              |
| 4 | 7,050,000 | 7,200,000 | 95  | 1568 | 0.693808232  | ABCA13                              |
| 4 | 7,125,000 | 7,275,000 | 96  | 1506 | 0.59155385   | ABCA13                              |
| 4 | 7,200,000 | 7,350,000 | 97  | 1383 | 0.275272926  | ABCA13                              |
| 4 | 7,275,000 | 7,425,000 | 98  | 1355 | 0.790792591  | ABCA13                              |
| 4 | 7,350,000 | 7,500,000 | 99  | 1585 | 0.987456251  | ABCA13                              |
| 4 | 7,425,000 | 7,575,000 | 100 | 1676 | 0.929129884  | ABCA13,UPP1                         |
| 4 | 7,500,000 | 7,650,000 | 101 | 1713 | 0.947042731  | C4H7orf57,SUN3,UPP1                 |
| 4 | 7,575,000 | 7,725,000 | 102 | 1861 | 1.033872454  | C4H7orf57,CLDN12,SUN3               |
| 4 | 7,650,000 | 7,800,000 | 103 | 1633 | 1.10585893   | CLDN12,SUN3                         |
| 4 | 7,725,000 | 7,875,000 | 104 | 1100 | 0.777688808  |                                     |
| 4 | 7,800,000 | 7,950,000 | 105 | 1093 | 0.429360422  |                                     |
| 4 | 7,875,000 | 8,025,000 | 106 | 1126 | 0.224048862  |                                     |
| 4 | 7,950,000 | 8,100,000 | 107 | 1103 | 0.28926753   |                                     |
| 4 | 8,025,000 | 8,175,000 | 108 | 1310 | 0.545868118  |                                     |
| 4 | 8,100,000 | 8,250,000 | 109 | 906  | 0.388255013  |                                     |
| 4 | 8,175,000 | 8,325,000 | 110 | 665  | 0.304557371  |                                     |
| 4 | 8,250,000 | 8,400,000 | 111 | 870  | 0.305797947  |                                     |
| 4 | 8,325,000 | 8,475,000 | 112 | 868  | 0.441212741  |                                     |
| 4 | 8,400,000 | 8,550,000 | 113 | 1008 | 0.601635268  | FZD1                                |
| 4 | 8,475,000 | 8,625,000 | 114 | 911  | 0.793925485  | FZD1,ENSBTAG00000027319             |
| 4 | 8,550,000 | 8,700,000 | 115 | 984  | 0.531941254  | ENSBTAG00000027319                  |
| 4 | 8,625,000 | 8,775,000 | 116 | 1181 | -0.312804228 |                                     |
| 4 | 8,700,000 | 8,850,000 | 117 | 740  | -1.26563799  |                                     |
| 4 | 8,775,000 | 8,925,000 | 118 | 468  | -0.425508519 |                                     |
| 4 | 8,850,000 | 9,000,000 | 119 | 518  | 0.603028647  |                                     |

|   |            |            |     |      |              |                                               |
|---|------------|------------|-----|------|--------------|-----------------------------------------------|
| 4 | 8,925,000  | 9,075,000  | 120 | 878  | 0.579463743  |                                               |
| 4 | 9,000,000  | 9,150,000  | 121 | 1115 | 0.632152759  | MTERF1                                        |
| 4 | 9,075,000  | 9,225,000  | 122 | 1146 | 0.934605974  | AKAP9,MTERF1                                  |
| 4 | 9,150,000  | 9,300,000  | 123 | 1162 | 1.058611439  | AKAP9                                         |
| 4 | 9,225,000  | 9,375,000  | 124 | 987  | 1.027114143  | AKAP9,CYP51A1,LRRD1                           |
| 4 | 9,300,000  | 9,450,000  | 125 | 581  | 0.792253151  | AKAP9,CYP51A1,KRIT1,LRRD1                     |
| 4 | 9,375,000  | 9,525,000  | 126 | 265  | -0.341149214 | ANKIB1,KRIT1                                  |
| 4 | 9,450,000  | 9,600,000  | 127 | 317  | -0.252874898 | ANKIB1,TMBIM1B,ENSBTAG00000048169             |
| 4 | 9,525,000  | 9,675,000  | 128 | 674  | -1.05644695  | ANKIB1,GATAD1,PEX1,TMBIM1B,ENSBTAG00000048169 |
| 4 | 9,600,000  | 9,750,000  | 129 | 1122 | -1.170645395 | GATAD1,PEX1,RBM48,TMBIM1B,ENSBTAG0000003810   |
| 4 | 9,675,000  | 9,825,000  | 130 | 1197 | -0.207394962 | CDK6,PEX1,RBM48,ENSBTAG0000003810             |
| 4 | 9,750,000  | 9,900,000  | 131 | 861  | 0.412475063  | CDK6                                          |
| 4 | 9,825,000  | 9,975,000  | 132 | 823  | -0.237837357 | CDK6                                          |
| 4 | 9,900,000  | 10,050,000 | 133 | 1037 | -0.632588459 | CDK6                                          |
| 4 | 9,975,000  | 10,125,000 | 134 | 952  | -0.425457315 | CDK6                                          |
| 4 | 10,050,000 | 10,200,000 | 135 | 774  | -0.541277881 |                                               |
| 4 | 10,125,000 | 10,275,000 | 136 | 791  | 0.197420897  |                                               |
| 4 | 10,200,000 | 10,350,000 | 137 | 995  | 1.026982241  | SAMD9                                         |
| 4 | 10,275,000 | 10,425,000 | 138 | 809  | 1.041921576  | HEPACAM2,SAMD9                                |
| 4 | 10,350,000 | 10,500,000 | 139 | 601  | 0.815074414  | CCDC132,HEPACAM2                              |
| 4 | 10,425,000 | 10,575,000 | 140 | 891  | 1.297448237  | CCDC132                                       |
| 4 | 10,500,000 | 10,650,000 | 141 | 861  | 0.972511877  | CALCR,CCDC132                                 |
| 4 | 10,575,000 | 10,725,000 | 142 | 541  | 0.487613835  | CALCR                                         |
| 4 | 10,650,000 | 10,800,000 | 143 | 450  | 0.946520693  | CALCR                                         |
| 4 | 10,725,000 | 10,875,000 | 144 | 401  | -0.213389164 |                                               |
| 4 | 10,800,000 | 10,950,000 | 145 | 521  | -1.18123542  |                                               |
| 4 | 10,875,000 | 11,025,000 | 146 | 741  | -0.606565118 |                                               |
| 4 | 10,950,000 | 11,100,000 | 147 | 921  | 0.35371863   | GNG11,GNGT1,TFPI2                             |
| 4 | 11,025,000 | 11,175,000 | 148 | 1358 | 0.093534267  | BET1,GNG11,GNGT1,TFPI2                        |
| 4 | 11,100,000 | 11,250,000 | 149 | 1417 | -0.126039194 | BET1                                          |
| 4 | 11,175,000 | 11,325,000 | 150 | 862  | 0.586983913  | BET1                                          |
| 4 | 11,250,000 | 11,400,000 | 151 | 913  | 1.22586899   |                                               |
| 4 | 11,325,000 | 11,475,000 | 152 | 928  | 1.216865075  |                                               |
| 4 | 11,400,000 | 11,550,000 | 153 | 632  | 0.968828496  |                                               |
| 4 | 11,475,000 | 11,625,000 | 154 | 758  | -0.026781813 | COL1A2                                        |
| 4 | 11,550,000 | 11,700,000 | 155 | 608  | -0.565265997 | COL1A2                                        |
| 4 | 11,625,000 | 11,775,000 | 156 | 348  | 0.227260071  | CASD1,COL1A2                                  |
| 4 | 11,700,000 | 11,850,000 | 157 | 443  | 0.887985065  | CASD1,SGCE                                    |
| 4 | 11,775,000 | 11,925,000 | 158 | 390  | 0.991420698  | CASD1,PEG10,SGCE                              |
| 4 | 11,850,000 | 12,000,000 | 159 | 548  | -1.598027977 | PEG10,SGCE                                    |
| 4 | 11,925,000 | 12,075,000 | 160 | 725  | -0.816667785 | PPP1R9A                                       |
| 4 | 12,000,000 | 12,150,000 | 161 | 589  | 0.996373922  | PPP1R9A                                       |
| 4 | 12,075,000 | 12,225,000 | 162 | 892  | 1.180204064  | PPP1R9A                                       |
| 4 | 12,150,000 | 12,300,000 | 163 | 934  | 1.155727752  | PPP1R9A                                       |
| 4 | 12,225,000 | 12,375,000 | 164 | 464  | 0.935523237  | PPP1R9A                                       |
| 4 | 12,300,000 | 12,450,000 | 165 | 368  | 1.045362681  | PON1,PON3,PPP1R9A                             |
| 4 | 12,375,000 | 12,525,000 | 166 | 331  | 0.603408846  | PON1,PON2,PON3,PPP1R9A                        |
| 4 | 12,450,000 | 12,600,000 | 167 | 644  | -1.782185658 | ASB4,PON2,PON3                                |
| 4 | 12,525,000 | 12,675,000 | 168 | 796  | -1.983319828 | ASB4,ENSBTAG00000038030                       |
| 4 | 12,600,000 | 12,750,000 | 169 | 392  | -1.453395035 | ASB4,ENSBTAG00000038030,ENSBTAG00000047555    |
| 4 | 12,675,000 | 12,825,000 | 170 | 298  | -1.237698088 | ASB4,PDK4,ENSBTAG00000047555                  |
| 4 | 12,750,000 | 12,900,000 | 171 | 334  | -0.401803229 | PDK4                                          |
| 4 | 12,825,000 | 12,975,000 | 172 | 427  | 0.893599871  | DYNC1I1                                       |

|   |            |            |     |      |              |                             |
|---|------------|------------|-----|------|--------------|-----------------------------|
| 4 | 12,900,000 | 13,050,000 | 173 | 615  | 0.781432685  | DYNC1I1                     |
| 4 | 12,975,000 | 13,125,000 | 174 | 732  | 0.119043962  | DYNC1I1                     |
| 4 | 13,050,000 | 13,200,000 | 175 | 892  | 0.253934413  | DYNC1I1                     |
| 4 | 13,125,000 | 13,275,000 | 176 | 893  | -0.407572921 | DYNC1I1                     |
| 4 | 13,200,000 | 13,350,000 | 177 | 609  | -1.365920141 | DYNC1I1,SLC25A13            |
| 4 | 13,275,000 | 13,425,000 | 178 | 363  | -0.463453992 | DYNC1I1,SLC25A13            |
| 4 | 13,350,000 | 13,500,000 | 179 | 444  | 1.130086167  | SLC25A13                    |
| 4 | 13,425,000 | 13,575,000 | 180 | 511  | 1.176032464  | SLC25A13                    |
| 4 | 13,500,000 | 13,650,000 | 181 | 523  | 0.549108647  | SLC25A13,ENSBTAG00000035660 |
| 4 | 13,575,000 | 13,725,000 | 182 | 672  | 0.40965537   | ENSBTAG00000035660          |
| 4 | 13,650,000 | 13,800,000 | 183 | 787  | 1.005845217  |                             |
| 4 | 13,725,000 | 13,875,000 | 184 | 870  | 0.363462711  |                             |
| 4 | 13,800,000 | 13,950,000 | 185 | 843  | 0.152348919  |                             |
| 4 | 13,875,000 | 14,025,000 | 186 | 835  | 0.331909807  | ENSBTAG00000020685          |
| 4 | 13,950,000 | 14,100,000 | 187 | 815  | 0.810967779  | ENSBTAG00000020685          |
| 4 | 14,025,000 | 14,175,000 | 188 | 740  | 0.999991164  |                             |
| 4 | 14,100,000 | 14,250,000 | 189 | 520  | 0.659266813  |                             |
| 4 | 14,175,000 | 14,325,000 | 190 | 210  | 0.407496728  | DLX5,DLX6                   |
| 4 | 14,250,000 | 14,400,000 | 191 | 367  | 1.365721353  | ACN9,DLX5,DLX6              |
| 4 | 14,325,000 | 14,475,000 | 192 | 570  | 1.253023682  | ACN9                        |
| 4 | 14,400,000 | 14,550,000 | 193 | 481  | 0.710408214  | ACN9                        |
| 4 | 14,475,000 | 14,625,000 | 194 | 468  | -0.362385661 | ENSBTAG00000020550          |
| 4 | 14,550,000 | 14,700,000 | 195 | 850  | 0.717445364  | ENSBTAG00000020550          |
| 4 | 14,625,000 | 14,775,000 | 196 | 1380 | 0.812818598  |                             |
| 4 | 14,700,000 | 14,850,000 | 197 | 1174 | 0.173549376  |                             |
| 4 | 14,775,000 | 14,925,000 | 198 | 822  | 0.221444039  | TAC1                        |
| 4 | 14,850,000 | 15,000,000 | 199 | 1233 | 0.80501783   | TAC1                        |
| 4 | 14,925,000 | 15,075,000 | 200 | 1670 | 0.518394272  | ASNS,TAC1                   |
| 4 | 15,000,000 | 15,150,000 | 201 | 1591 | 0.365572671  | ASNS                        |
| 4 | 15,075,000 | 15,225,000 | 202 | 1407 | 0.416016338  | ASNS,C1GALT1                |
| 4 | 15,150,000 | 15,300,000 | 203 | 1519 | 0.37915966   | ASNS,C1GALT1                |
| 4 | 15,225,000 | 15,375,000 | 204 | 1946 | 0.876427173  | C1GALT1,COL28A1             |
| 4 | 15,300,000 | 15,450,000 | 205 | 1788 | 0.358843906  | COL28A1                     |
| 4 | 15,375,000 | 15,525,000 | 206 | 1713 | -0.690694673 | COL28A1                     |
| 4 | 15,450,000 | 15,600,000 | 207 | 1663 | 0.106780286  | COL28A1,MIOS                |
| 4 | 15,525,000 | 15,675,000 | 208 | 1685 | 1.18467172   | MIOS,RPA3                   |
| 4 | 15,600,000 | 15,750,000 | 209 | 1767 | 1.247826626  | RPA3                        |
| 4 | 15,675,000 | 15,825,000 | 210 | 1320 | 1.183657014  |                             |
| 4 | 15,750,000 | 15,900,000 | 211 | 1192 | 0.151337722  |                             |
| 4 | 15,825,000 | 15,975,000 | 212 | 871  | -1.906558847 |                             |
| 4 | 15,900,000 | 16,050,000 | 213 | 609  | -2.022420848 |                             |
| 4 | 15,975,000 | 16,125,000 | 214 | 1125 | 0.3468164    |                             |
| 4 | 16,050,000 | 16,200,000 | 215 | 951  | 0.301069942  |                             |
| 4 | 16,125,000 | 16,275,000 | 216 | 589  | 0.315797402  |                             |
| 4 | 16,200,000 | 16,350,000 | 217 | 748  | -0.087003599 |                             |
| 4 | 16,275,000 | 16,425,000 | 218 | 601  | -1.243391872 |                             |
| 4 | 16,350,000 | 16,500,000 | 219 | 686  | -0.651602108 |                             |
| 4 | 16,425,000 | 16,575,000 | 220 | 811  | -0.050742156 |                             |
| 4 | 16,500,000 | 16,650,000 | 221 | 853  | -0.69735566  |                             |
| 4 | 16,575,000 | 16,725,000 | 222 | 898  | 0.071261829  |                             |
| 4 | 16,650,000 | 16,800,000 | 223 | 606  | 0.912045987  |                             |
| 4 | 16,725,000 | 16,875,000 | 224 | 373  | 0.114459074  |                             |
| 4 | 16,800,000 | 16,950,000 | 225 | 776  | 0.229676555  |                             |

|   |            |            |     |      |              |                                 |
|---|------------|------------|-----|------|--------------|---------------------------------|
| 4 | 16,875,000 | 17,025,000 | 226 | 1407 | 0.582395489  |                                 |
| 4 | 16,950,000 | 17,100,000 | 227 | 1452 | 0.894638763  | GLCCI1                          |
| 4 | 17,025,000 | 17,175,000 | 228 | 1593 | 0.758625969  | GLCCI1                          |
| 4 | 17,100,000 | 17,250,000 | 229 | 1848 | 0.495148933  | GLCCI1,ICA1                     |
| 4 | 17,175,000 | 17,325,000 | 230 | 1789 | -0.765539008 | ICA1                            |
| 4 | 17,250,000 | 17,400,000 | 231 | 1858 | -1.11267053  | ICA1                            |
| 4 | 17,325,000 | 17,475,000 | 232 | 1607 | -0.014164176 | ICA1                            |
| 4 | 17,400,000 | 17,550,000 | 233 | 1450 | 0.257801328  |                                 |
| 4 | 17,475,000 | 17,625,000 | 234 | 1501 | 0.212268509  |                                 |
| 4 | 17,550,000 | 17,700,000 | 235 | 1471 | 0.859892552  |                                 |
| 4 | 17,625,000 | 17,775,000 | 236 | 1526 | 0.710587217  |                                 |
| 4 | 17,700,000 | 17,850,000 | 237 | 1038 | 0.369329775  |                                 |
| 4 | 17,775,000 | 17,925,000 | 238 | 573  | -1.807647938 | NXPH1                           |
| 4 | 17,850,000 | 18,000,000 | 239 | 934  | -1.864946782 | NXPH1                           |
| 4 | 17,925,000 | 18,075,000 | 240 | 1164 | -0.073920912 | ENSBTAG00000046275              |
| 4 | 18,000,000 | 18,150,000 | 241 | 1133 | -0.195274281 | ENSBTAG00000046275              |
| 4 | 18,075,000 | 18,225,000 | 242 | 1199 | -1.086903798 |                                 |
| 4 | 18,150,000 | 18,300,000 | 243 | 881  | -1.383136272 |                                 |
| 4 | 18,225,000 | 18,375,000 | 244 | 767  | -1.419902587 |                                 |
| 4 | 18,300,000 | 18,450,000 | 245 | 804  | -0.502998699 |                                 |
| 4 | 18,375,000 | 18,525,000 | 246 | 717  | 0.484735771  |                                 |
| 4 | 18,450,000 | 18,600,000 | 247 | 1274 | 1.057366095  |                                 |
| 4 | 18,525,000 | 18,675,000 | 248 | 1206 | 0.872983864  |                                 |
| 4 | 18,600,000 | 18,750,000 | 249 | 989  | 0.234031222  |                                 |
| 4 | 18,675,000 | 18,825,000 | 250 | 984  | 0.457970014  |                                 |
| 4 | 18,750,000 | 18,900,000 | 251 | 1069 | 1.08902598   |                                 |
| 4 | 18,825,000 | 18,975,000 | 252 | 1036 | 0.86130056   | NDUFA4,ENSBTAG00000038527       |
| 4 | 18,900,000 | 19,050,000 | 253 | 560  | -0.903935402 | NDUFA4,PHF14,ENSBTAG00000038527 |
| 4 | 18,975,000 | 19,125,000 | 254 | 478  | -0.542601535 | NDUFA4,PHF14                    |
| 4 | 19,050,000 | 19,200,000 | 255 | 392  | 0.16134841   | PHF14                           |
| 4 | 19,125,000 | 19,275,000 | 256 | 362  | -0.451898007 |                                 |
| 4 | 19,200,000 | 19,350,000 | 257 | 385  | -2.071810784 |                                 |
| 4 | 19,275,000 | 19,425,000 | 258 | 633  | -0.191160858 |                                 |
| 4 | 19,350,000 | 19,500,000 | 259 | 780  | 0.532346549  | THSD7A                          |
| 4 | 19,425,000 | 19,575,000 | 260 | 774  | -0.55439108  | THSD7A                          |
| 4 | 19,500,000 | 19,650,000 | 261 | 838  | -2.626498865 | THSD7A                          |
| 4 | 19,575,000 | 19,725,000 | 262 | 587  | -3.765113161 | THSD7A                          |
| 4 | 19,650,000 | 19,800,000 | 263 | 478  | -1.455617411 | THSD7A                          |
| 4 | 19,725,000 | 19,875,000 | 264 | 797  | 0.110052131  | THSD7A                          |
| 4 | 19,800,000 | 19,950,000 | 265 | 1079 | 0.776824913  | TMEM106B                        |
| 4 | 19,875,000 | 20,025,000 | 266 | 1278 | 0.574901605  | TMEM106B                        |
| 4 | 19,950,000 | 20,100,000 | 267 | 996  | 0.075482375  |                                 |
| 4 | 20,025,000 | 20,175,000 | 268 | 953  | 0.504826147  | SCIN                            |
| 4 | 20,100,000 | 20,250,000 | 269 | 1203 | 0.692731717  | SCIN                            |
| 4 | 20,175,000 | 20,325,000 | 270 | 1290 | -0.146699616 | ARL4A,SCIN                      |
| 4 | 20,250,000 | 20,400,000 | 271 | 1471 | 0.466545299  | ARL4A                           |
| 4 | 20,325,000 | 20,475,000 | 272 | 1344 | 0.88651655   |                                 |
| 4 | 20,400,000 | 20,550,000 | 273 | 1002 | 0.652456349  |                                 |
| 4 | 20,475,000 | 20,625,000 | 274 | 937  | -0.125872955 |                                 |
| 4 | 20,550,000 | 20,700,000 | 275 | 1006 | -0.100301759 |                                 |
| 4 | 20,625,000 | 20,775,000 | 276 | 1057 | 0.034809016  |                                 |
| 4 | 20,700,000 | 20,850,000 | 277 | 961  | -0.057744101 |                                 |
| 4 | 20,775,000 | 20,925,000 | 278 | 734  | -2.899299622 |                                 |

|   |            |            |     |      |              |                    |
|---|------------|------------|-----|------|--------------|--------------------|
| 4 | 20,850,000 | 21,000,000 | 279 | 879  | -1.947380566 |                    |
| 4 | 20,925,000 | 21,075,000 | 280 | 1090 | 0.637114493  |                    |
| 4 | 21,000,000 | 21,150,000 | 281 | 1209 | 0.658545329  |                    |
| 4 | 21,075,000 | 21,225,000 | 282 | 1321 | -0.031757427 |                    |
| 4 | 21,150,000 | 21,300,000 | 283 | 1168 | -0.167290912 |                    |
| 4 | 21,225,000 | 21,375,000 | 284 | 1350 | 0.617602027  |                    |
| 4 | 21,300,000 | 21,450,000 | 285 | 1209 | 0.808867538  |                    |
| 4 | 21,375,000 | 21,525,000 | 286 | 513  | 0.967812591  |                    |
| 4 | 21,450,000 | 21,600,000 | 287 | 527  | 0.608996027  |                    |
| 4 | 21,525,000 | 21,675,000 | 288 | 674  | 0.343321508  |                    |
| 4 | 21,600,000 | 21,750,000 | 289 | 714  | 0.520551579  |                    |
| 4 | 21,675,000 | 21,825,000 | 290 | 721  | 0.900182714  |                    |
| 4 | 21,750,000 | 21,900,000 | 291 | 695  | 1.030029558  |                    |
| 4 | 21,825,000 | 21,975,000 | 292 | 854  | 0.861651312  |                    |
| 4 | 21,900,000 | 22,050,000 | 293 | 782  | 0.825326214  | ETV1               |
| 4 | 21,975,000 | 22,125,000 | 294 | 506  | 0.632222468  | ETV1               |
| 4 | 22,050,000 | 22,200,000 | 295 | 372  | -0.502037108 | ETV1               |
| 4 | 22,125,000 | 22,275,000 | 296 | 396  | -0.682528451 | ETV1               |
| 4 | 22,200,000 | 22,350,000 | 297 | 543  | -0.125234019 | DGKB               |
| 4 | 22,275,000 | 22,425,000 | 298 | 900  | 0.214518128  | DGKB               |
| 4 | 22,350,000 | 22,500,000 | 299 | 883  | 0.264236722  | DGKB               |
| 4 | 22,425,000 | 22,575,000 | 300 | 701  | 0.660170536  | DGKB               |
| 4 | 22,500,000 | 22,650,000 | 301 | 1073 | 0.628754782  | DGKB               |
| 4 | 22,575,000 | 22,725,000 | 302 | 993  | 0.348490366  | DGKB               |
| 4 | 22,650,000 | 22,800,000 | 303 | 478  | -0.121162284 | DGKB               |
| 4 | 22,725,000 | 22,875,000 | 304 | 676  | -0.455144749 | DGKB               |
| 4 | 22,800,000 | 22,950,000 | 305 | 931  | 0.015527786  | DGKB               |
| 4 | 22,875,000 | 23,025,000 | 306 | 945  | 0.324299332  | DGKB               |
| 4 | 22,950,000 | 23,100,000 | 307 | 1260 | -0.230981958 | DGKB               |
| 4 | 23,025,000 | 23,175,000 | 308 | 1138 | -0.250162207 | DGKB               |
| 4 | 23,100,000 | 23,250,000 | 309 | 922  | 0.530799626  | DGKB               |
| 4 | 23,175,000 | 23,325,000 | 310 | 1174 | 0.459783568  |                    |
| 4 | 23,250,000 | 23,400,000 | 311 | 1390 | 0.582452323  |                    |
| 4 | 23,325,000 | 23,475,000 | 312 | 1315 | 0.48414835   |                    |
| 4 | 23,400,000 | 23,550,000 | 313 | 1299 | 0.33280799   | AGMO               |
| 4 | 23,475,000 | 23,625,000 | 314 | 1269 | 0.509717441  | AGMO               |
| 4 | 23,550,000 | 23,700,000 | 315 | 955  | 0.419946509  | AGMO               |
| 4 | 23,625,000 | 23,775,000 | 316 | 987  | 0.453924465  | AGMO               |
| 4 | 23,700,000 | 23,850,000 | 317 | 1202 | 0.664307307  | AGMO               |
| 4 | 23,775,000 | 23,925,000 | 318 | 1193 | 0.626098001  | AGMO               |
| 4 | 23,850,000 | 24,000,000 | 319 | 1207 | 0.791439872  | AGMO,MEOX2         |
| 4 | 23,925,000 | 24,075,000 | 320 | 1028 | 0.944580462  | MEOX2              |
| 4 | 24,000,000 | 24,150,000 | 321 | 796  | 0.736696441  | MEOX2              |
| 4 | 24,075,000 | 24,225,000 | 322 | 841  | 0.849368124  | ENSBTAG00000010168 |
| 4 | 24,150,000 | 24,300,000 | 323 | 1094 | 0.974184829  | ENSBTAG00000010168 |
| 4 | 24,225,000 | 24,375,000 | 324 | 1176 | 0.77498515   |                    |
| 4 | 24,300,000 | 24,450,000 | 325 | 968  | 0.486494846  |                    |
| 4 | 24,375,000 | 24,525,000 | 326 | 1028 | 0.948045231  | ISPD               |
| 4 | 24,450,000 | 24,600,000 | 327 | 1386 | 0.761152703  | ISPD               |
| 4 | 24,525,000 | 24,675,000 | 328 | 1440 | -0.079477239 | ISPD               |
| 4 | 24,600,000 | 24,750,000 | 329 | 1174 | 0.180074605  | ISPD               |
| 4 | 24,675,000 | 24,825,000 | 330 | 976  | 0.666875803  | ISPD               |
| 4 | 24,750,000 | 24,900,000 | 331 | 953  | 0.618524529  | ISPD               |



|   |            |            |     |      |              |                                       |
|---|------------|------------|-----|------|--------------|---------------------------------------|
| 4 | 24,825,000 | 24,975,000 | 332 | 846  | 1.138434893  | ISPD,SOSTDC1                          |
| 4 | 24,900,000 | 25,050,000 | 333 | 495  | 0.855442909  | LRRC72,SOSTDC1,ENSBTAG00000045648     |
| 4 | 24,975,000 | 25,125,000 | 334 | 243  | -0.395108842 | ANKMY2,BZW2,LRRC72,ENSBTAG00000045648 |
| 4 | 25,050,000 | 25,200,000 | 335 | 284  | -0.581254906 | ANKMY2,BZW2,LRRC72,ENSBTAG00000045648 |
| 4 | 25,125,000 | 25,275,000 | 336 | 628  | -0.121810866 | AGR2,BZW2,TSPAN13                     |
| 4 | 25,200,000 | 25,350,000 | 337 | 1141 | 0.131761729  | AGR2,AGR3,TSPAN13                     |
| 4 | 25,275,000 | 25,425,000 | 338 | 1399 | 0.168315426  | AGR3                                  |
| 4 | 25,350,000 | 25,500,000 | 339 | 1131 | 0.283691856  |                                       |
| 4 | 25,425,000 | 25,575,000 | 340 | 893  | 0.885772411  |                                       |
| 4 | 25,500,000 | 25,650,000 | 341 | 624  | 0.985173053  |                                       |
| 4 | 25,575,000 | 25,725,000 | 342 | 314  | 0.00660725   |                                       |
| 4 | 25,650,000 | 25,800,000 | 343 | 316  | -0.221155118 | AHR                                   |
| 4 | 25,725,000 | 25,875,000 | 344 | 483  | 0.470113933  | AHR                                   |
| 4 | 25,800,000 | 25,950,000 | 345 | 666  | 0.77621985   | AHR                                   |
| 4 | 25,875,000 | 26,025,000 | 346 | 632  | 0.591774736  |                                       |
| 4 | 25,950,000 | 26,100,000 | 347 | 505  | 0.027379198  |                                       |
| 4 | 26,025,000 | 26,175,000 | 348 | 384  | 0.462956771  |                                       |
| 4 | 26,100,000 | 26,250,000 | 349 | 463  | 1.073342844  |                                       |
| 4 | 26,175,000 | 26,325,000 | 350 | 382  | 1.0680888    |                                       |
| 4 | 26,250,000 | 26,400,000 | 351 | 176  | 0.5395183    | SNX13                                 |
| 4 | 26,325,000 | 26,475,000 | 352 | 220  | 0.050832124  | SNX13                                 |
| 4 | 26,400,000 | 26,550,000 | 353 | 702  | 0.010828406  | PRPS1L1,SNX13                         |
| 4 | 26,475,000 | 26,625,000 | 354 | 790  | -0.240147459 | PRPS1L1                               |
| 4 | 26,550,000 | 26,700,000 | 355 | 401  | -0.396831529 |                                       |
| 4 | 26,625,000 | 26,775,000 | 356 | 328  | 0.160391986  |                                       |
| 4 | 26,700,000 | 26,850,000 | 357 | 452  | -0.54055829  |                                       |
| 4 | 26,775,000 | 26,925,000 | 358 | 538  | -1.461980941 |                                       |
| 4 | 26,850,000 | 27,000,000 | 359 | 421  | -2.069216755 |                                       |
| 4 | 26,925,000 | 27,075,000 | 360 | 698  | -0.039583911 |                                       |
| 4 | 27,000,000 | 27,150,000 | 361 | 922  | 0.252183676  |                                       |
| 4 | 27,075,000 | 27,225,000 | 362 | 568  | 0.203240041  | HDAC9                                 |
| 4 | 27,150,000 | 27,300,000 | 363 | 361  | 0.403142603  | HDAC9                                 |
| 4 | 27,225,000 | 27,375,000 | 364 | 702  | -1.537978815 | HDAC9                                 |
| 4 | 27,300,000 | 27,450,000 | 365 | 795  | -2.796376023 | HDAC9                                 |
| 4 | 27,375,000 | 27,525,000 | 366 | 570  | -1.777698438 | HDAC9                                 |
| 4 | 27,450,000 | 27,600,000 | 367 | 486  | 0.314726895  | HDAC9                                 |
| 4 | 27,525,000 | 27,675,000 | 368 | 392  | 0.06138186   |                                       |
| 4 | 27,600,000 | 27,750,000 | 369 | 289  | 0.231422365  |                                       |
| 4 | 27,675,000 | 27,825,000 | 370 | 346  | -0.282387906 |                                       |
| 4 | 27,750,000 | 27,900,000 | 371 | 474  | -0.173468147 | FERD3L,TWIST1                         |
| 4 | 27,825,000 | 27,975,000 | 372 | 474  | 0.044826857  | FERD3L,TWIST1                         |
| 4 | 27,900,000 | 28,050,000 | 373 | 733  | 0.767202571  |                                       |
| 4 | 27,975,000 | 28,125,000 | 374 | 646  | 1.091665788  |                                       |
| 4 | 28,050,000 | 28,200,000 | 375 | 492  | 0.783432401  |                                       |
| 4 | 28,125,000 | 28,275,000 | 376 | 572  | -0.285909735 |                                       |
| 4 | 28,200,000 | 28,350,000 | 377 | 435  | -0.887907633 |                                       |
| 4 | 28,275,000 | 28,425,000 | 378 | 721  | -0.497599913 |                                       |
| 4 | 28,350,000 | 28,500,000 | 379 | 751  | -0.553763021 | TMEM196,TWISTNB                       |
| 4 | 28,425,000 | 28,575,000 | 380 | 752  | 0.413883355  | TMEM196,TWISTNB                       |
| 4 | 28,500,000 | 28,650,000 | 381 | 1157 | 1.018806682  |                                       |
| 4 | 28,575,000 | 28,725,000 | 382 | 1212 | 1.05798653   |                                       |
| 4 | 28,650,000 | 28,800,000 | 383 | 1568 | 0.882992985  |                                       |
| 4 | 28,725,000 | 28,875,000 | 384 | 1722 | 0.883302577  | MACC1                                 |

|   |            |            |     |      |              |                                  |
|---|------------|------------|-----|------|--------------|----------------------------------|
| 4 | 28,800,000 | 28,950,000 | 385 | 1128 | 0.871479854  | MACC1                            |
| 4 | 28,875,000 | 29,025,000 | 386 | 502  | 0.957825298  |                                  |
| 4 | 28,950,000 | 29,100,000 | 387 | 524  | -1.990236331 |                                  |
| 4 | 29,025,000 | 29,175,000 | 388 | 691  | -1.724614863 | ITGB8                            |
| 4 | 29,100,000 | 29,250,000 | 389 | 799  | 0.788826429  | ITGB8                            |
| 4 | 29,175,000 | 29,325,000 | 390 | 874  | 1.174928474  | ITGB8                            |
| 4 | 29,250,000 | 29,400,000 | 391 | 594  | 1.300021022  |                                  |
| 4 | 29,325,000 | 29,475,000 | 392 | 517  | 1.076888751  | ABCB5                            |
| 4 | 29,400,000 | 29,550,000 | 393 | 890  | 0.715577904  | ABCB5                            |
| 4 | 29,475,000 | 29,625,000 | 394 | 978  | 0.760553299  | ABCB5,SP8                        |
| 4 | 29,550,000 | 29,700,000 | 395 | 682  | 0.819168458  | ABCB5,SP8                        |
| 4 | 29,625,000 | 29,775,000 | 396 | 657  | 0.787213921  |                                  |
| 4 | 29,700,000 | 29,850,000 | 397 | 699  | 1.019281285  |                                  |
| 4 | 29,775,000 | 29,925,000 | 398 | 824  | 1.237371128  |                                  |
| 4 | 29,850,000 | 30,000,000 | 399 | 817  | 1.288043051  |                                  |
| 4 | 29,925,000 | 30,075,000 | 400 | 1040 | 0.928898894  |                                  |
| 4 | 30,000,000 | 30,150,000 | 401 | 1429 | -0.107401898 | ENSBTAG00000045673               |
| 4 | 30,075,000 | 30,225,000 | 402 | 1662 | 0.072227568  | ENSBTAG00000045673               |
| 4 | 30,150,000 | 30,300,000 | 403 | 1510 | 0.928753938  |                                  |
| 4 | 30,225,000 | 30,375,000 | 404 | 965  | 0.601903076  | SP4                              |
| 4 | 30,300,000 | 30,450,000 | 405 | 731  | 0.415642972  | DNAH11,SP4                       |
| 4 | 30,375,000 | 30,525,000 | 406 | 846  | -0.065945425 | DNAH11,SP4                       |
| 4 | 30,450,000 | 30,600,000 | 407 | 943  | 0.181627147  | DNAH11                           |
| 4 | 30,525,000 | 30,675,000 | 408 | 1001 | 0.772478502  | DNAH11                           |
| 4 | 30,600,000 | 30,750,000 | 409 | 1088 | 0.590695476  | DNAH11                           |
| 4 | 30,675,000 | 30,825,000 | 410 | 1115 | 0.842816079  | CDCA7L,DNAH11                    |
| 4 | 30,750,000 | 30,900,000 | 411 | 1184 | 0.937950816  | CDCA7L,DNAH11                    |
| 4 | 30,825,000 | 30,975,000 | 412 | 1131 | -0.017230182 | CDCA7L                           |
| 4 | 30,900,000 | 31,050,000 | 413 | 924  | -0.299058054 | RAPGEF5                          |
| 4 | 30,975,000 | 31,125,000 | 414 | 625  | 0.285090021  | RAPGEF5                          |
| 4 | 31,050,000 | 31,200,000 | 415 | 463  | -0.063513462 | RAPGEF5                          |
| 4 | 31,125,000 | 31,275,000 | 416 | 816  | 0.371499972  | RAPGEF5                          |
| 4 | 31,200,000 | 31,350,000 | 417 | 767  | 0.842076565  | RAPGEF5                          |
| 4 | 31,275,000 | 31,425,000 | 418 | 578  | 0.355562745  |                                  |
| 4 | 31,350,000 | 31,500,000 | 419 | 763  | -0.177920938 |                                  |
| 4 | 31,425,000 | 31,575,000 | 420 | 654  | 0.705326459  |                                  |
| 4 | 31,500,000 | 31,650,000 | 421 | 494  | 1.083629798  | IL6                              |
| 4 | 31,575,000 | 31,725,000 | 422 | 463  | 1.231615139  | IL6,ENSBTAG00000033806           |
| 4 | 31,650,000 | 31,800,000 | 423 | 476  | 0.96761021   | FAM126A,ENSBTAG00000033806       |
| 4 | 31,725,000 | 31,875,000 | 424 | 956  | 0.391649806  | FAM126A                          |
| 4 | 31,800,000 | 31,950,000 | 425 | 1096 | -0.169075637 | KLHL7                            |
| 4 | 31,875,000 | 32,025,000 | 426 | 988  | -1.1698962   | GPNMB,KLHL7,NUPL2                |
| 4 | 31,950,000 | 32,100,000 | 427 | 1252 | -0.800262168 | GPNMB,IGF2BP3,KLHL7,MALSU1,NUPL2 |
| 4 | 32,025,000 | 32,175,000 | 428 | 1108 | 0.2485433    | GPNMB,IGF2BP3,MALSU1             |
| 4 | 32,100,000 | 32,250,000 | 429 | 784  | 1.083104315  | IGF2BP3                          |
| 4 | 32,175,000 | 32,325,000 | 430 | 793  | 1.0580713    | IGF2BP3,TRA2A                    |
| 4 | 32,250,000 | 32,400,000 | 431 | 1101 | 1.138940519  | CCDC126,TRA2A                    |
| 4 | 32,325,000 | 32,475,000 | 432 | 1329 | 1.237829977  | CCDC126,DBF4                     |
| 4 | 32,400,000 | 32,550,000 | 433 | 1586 | 1.249694072  | DBF4                             |
| 4 | 32,475,000 | 32,625,000 | 434 | 1654 | 0.725589595  | ENSBTAG00000015666               |
| 4 | 32,550,000 | 32,700,000 | 435 | 1546 | 0.625376916  | RUNDC3B,ENSBTAG00000015666       |
| 4 | 32,625,000 | 32,775,000 | 436 | 1664 | 0.878550415  | RUNDC3B,ENSBTAG00000015666       |
| 4 | 32,700,000 | 32,850,000 | 437 | 1885 | 1.121162642  | RUNDC3B                          |

|   |            |            |     |      |              |                    |
|---|------------|------------|-----|------|--------------|--------------------|
| 4 | 32,775,000 | 32,925,000 | 438 | 1940 | 1.129994764  | RUNDC3B,SLC25A40   |
| 4 | 32,850,000 | 33,000,000 | 439 | 2021 | 1.075776047  | RUNDC3B,SLC25A40   |
| 4 | 32,925,000 | 33,075,000 | 440 | 2202 | 0.977687249  | ABCB1              |
| 4 | 33,000,000 | 33,150,000 | 441 | 1912 | 0.82220452   | ABCB1,ABCB4        |
| 4 | 33,075,000 | 33,225,000 | 442 | 1416 | 0.901265254  | ABCB1,ABCB4,CROT   |
| 4 | 33,150,000 | 33,300,000 | 443 | 1330 | 0.976922295  | ABCB4,CROT         |
| 4 | 33,225,000 | 33,375,000 | 444 | 1518 | 1.06916169   | CROT,DMTF1,TMEM243 |
| 4 | 33,300,000 | 33,450,000 | 445 | 1518 | 1.241198559  | DMTF1,TMEM243      |
| 4 | 33,375,000 | 33,525,000 | 446 | 1927 | 1.101325934  | DMTF1,KIAA1324L    |
| 4 | 33,450,000 | 33,600,000 | 447 | 1976 | 0.681986253  | KIAA1324L          |
| 4 | 33,525,000 | 33,675,000 | 448 | 1722 | 0.508731421  | KIAA1324L          |
| 4 | 33,600,000 | 33,750,000 | 449 | 1795 | 0.944280312  | KIAA1324L          |
| 4 | 33,675,000 | 33,825,000 | 450 | 1560 | -0.026778847 | GRM3,KIAA1324L     |
| 4 | 33,750,000 | 33,900,000 | 451 | 1433 | -0.753135284 | GRM3,KIAA1324L     |
| 4 | 33,825,000 | 33,975,000 | 452 | 1431 | 0.581704544  | GRM3               |
| 4 | 33,900,000 | 34,050,000 | 453 | 1298 | 0.964744429  | GRM3               |
| 4 | 33,975,000 | 34,125,000 | 454 | 903  | 0.860201603  | GRM3               |
| 4 | 34,050,000 | 34,200,000 | 455 | 944  | 0.681422649  |                    |
| 4 | 34,125,000 | 34,275,000 | 456 | 1270 | 0.640983614  |                    |
| 4 | 34,200,000 | 34,350,000 | 457 | 1329 | 0.552151723  |                    |
| 4 | 34,275,000 | 34,425,000 | 458 | 1223 | 0.998139286  |                    |
| 4 | 34,350,000 | 34,500,000 | 459 | 1019 | 1.126514894  |                    |
| 4 | 34,425,000 | 34,575,000 | 460 | 946  | -0.513078614 |                    |
| 4 | 34,500,000 | 34,650,000 | 461 | 1067 | -0.80499807  |                    |
| 4 | 34,575,000 | 34,725,000 | 462 | 856  | 0.147934935  |                    |
| 4 | 34,650,000 | 34,800,000 | 463 | 462  | 0.23035119   |                    |
| 4 | 34,725,000 | 34,875,000 | 464 | 759  | -0.146129753 |                    |
| 4 | 34,800,000 | 34,950,000 | 465 | 1075 | 0.413431538  |                    |
| 4 | 34,875,000 | 35,025,000 | 466 | 773  | 0.897044785  |                    |
| 4 | 34,950,000 | 35,100,000 | 467 | 634  | 0.742044291  |                    |
| 4 | 35,025,000 | 35,175,000 | 468 | 661  | 0.882368404  |                    |
| 4 | 35,100,000 | 35,250,000 | 469 | 429  | 1.029448638  |                    |
| 4 | 35,175,000 | 35,325,000 | 470 | 264  | 0.89598699   |                    |
| 4 | 35,250,000 | 35,400,000 | 471 | 343  | 0.50551049   |                    |
| 4 | 35,325,000 | 35,475,000 | 472 | 490  | 0.448010775  |                    |
| 4 | 35,400,000 | 35,550,000 | 473 | 591  | 0.093251039  |                    |
| 4 | 35,475,000 | 35,625,000 | 474 | 659  | -0.764903232 | SEMA3D             |
| 4 | 35,550,000 | 35,700,000 | 475 | 614  | -0.527070761 | SEMA3D             |
| 4 | 35,625,000 | 35,775,000 | 476 | 546  | 0.4716894    | SEMA3D             |
| 4 | 35,700,000 | 35,850,000 | 477 | 436  | 0.541433675  | SEMA3D             |
| 4 | 35,775,000 | 35,925,000 | 478 | 646  | 1.220240386  | SEMA3D             |
| 4 | 35,850,000 | 36,000,000 | 479 | 1089 | 1.059689107  |                    |
| 4 | 35,925,000 | 36,075,000 | 480 | 1149 | 0.704675361  |                    |
| 4 | 36,000,000 | 36,150,000 | 481 | 839  | 0.485830326  |                    |
| 4 | 36,075,000 | 36,225,000 | 482 | 753  | 0.409114101  |                    |
| 4 | 36,150,000 | 36,300,000 | 483 | 952  | 0.688537881  |                    |
| 4 | 36,225,000 | 36,375,000 | 484 | 913  | 0.6068405    |                    |
| 4 | 36,300,000 | 36,450,000 | 485 | 830  | -0.57026993  |                    |
| 4 | 36,375,000 | 36,525,000 | 486 | 1139 | -0.102083712 |                    |
| 4 | 36,450,000 | 36,600,000 | 487 | 1198 | 0.67390596   |                    |
| 4 | 36,525,000 | 36,675,000 | 488 | 933  | 0.73690123   | SEMA3A             |
| 4 | 36,600,000 | 36,750,000 | 489 | 856  | -1.45042718  | SEMA3A             |
| 4 | 36,675,000 | 36,825,000 | 490 | 670  | -3.319426341 | SEMA3A             |

|   |            |            |     |      |              |                                                         |
|---|------------|------------|-----|------|--------------|---------------------------------------------------------|
| 4 | 36,750,000 | 36,900,000 | 491 | 445  | -1.92195537  | SEMA3A                                                  |
| 4 | 36,825,000 | 36,975,000 | 492 | 501  | -3.303632272 |                                                         |
| 4 | 36,900,000 | 37,050,000 | 493 | 760  | -2.874001252 |                                                         |
| 4 | 36,975,000 | 37,125,000 | 494 | 879  | -0.91978674  |                                                         |
| 4 | 37,050,000 | 37,200,000 | 495 | 1036 | 0.267163723  |                                                         |
| 4 | 37,125,000 | 37,275,000 | 496 | 996  | 0.329895348  |                                                         |
| 4 | 37,200,000 | 37,350,000 | 497 | 861  | -0.051330685 | SEMA3E                                                  |
| 4 | 37,275,000 | 37,425,000 | 498 | 804  | -0.157896829 | SEMA3E                                                  |
| 4 | 37,350,000 | 37,500,000 | 499 | 882  | 0.302274255  | SEMA3E                                                  |
| 4 | 37,425,000 | 37,575,000 | 500 | 936  | -0.376269842 |                                                         |
| 4 | 37,500,000 | 37,650,000 | 501 | 801  | -1.323273903 | PCLO                                                    |
| 4 | 37,575,000 | 37,725,000 | 502 | 791  | -0.05374951  | PCLO                                                    |
| 4 | 37,650,000 | 37,800,000 | 503 | 903  | 1.044557028  | PCLO                                                    |
| 4 | 37,725,000 | 37,875,000 | 504 | 790  | 0.975985874  | PCLO                                                    |
| 4 | 37,800,000 | 37,950,000 | 505 | 636  | 0.832893265  | PCLO                                                    |
| 4 | 37,875,000 | 38,025,000 | 506 | 738  | 0.40628236   | PCLO                                                    |
| 4 | 37,950,000 | 38,100,000 | 507 | 732  | -0.237899993 | PCLO                                                    |
| 4 | 38,025,000 | 38,175,000 | 508 | 806  | -0.761259212 |                                                         |
| 4 | 38,100,000 | 38,250,000 | 509 | 964  | -2.334393613 |                                                         |
| 4 | 38,175,000 | 38,325,000 | 510 | 1150 | -2.682611793 |                                                         |
| 4 | 38,250,000 | 38,400,000 | 511 | 1298 | -0.399630892 |                                                         |
| 4 | 38,325,000 | 38,475,000 | 512 | 1377 | 0.349278881  |                                                         |
| 4 | 38,400,000 | 38,550,000 | 513 | 1359 | 0.595642374  |                                                         |
| 4 | 38,475,000 | 38,625,000 | 514 | 1374 | 0.917428126  |                                                         |
| 4 | 38,550,000 | 38,700,000 | 515 | 1115 | 0.795963952  |                                                         |
| 4 | 38,625,000 | 38,775,000 | 516 | 1102 | 1.025569683  | CACNA2D1                                                |
| 4 | 38,700,000 | 38,850,000 | 517 | 1076 | 0.913648637  | CACNA2D1                                                |
| 4 | 38,775,000 | 38,925,000 | 518 | 936  | 0.191867711  | CACNA2D1                                                |
| 4 | 38,850,000 | 39,000,000 | 519 | 1167 | 0.037222574  | CACNA2D1                                                |
| 4 | 38,925,000 | 39,075,000 | 520 | 1027 | 0.016193129  |                                                         |
| 4 | 39,000,000 | 39,150,000 | 521 | 901  | 0.365778054  | HGF                                                     |
| 4 | 39,075,000 | 39,225,000 | 522 | 714  | 0.660000305  | HGF                                                     |
| 4 | 39,150,000 | 39,300,000 | 523 | 468  | 0.749656235  | HGF                                                     |
| 4 | 39,225,000 | 39,375,000 | 524 | 373  | 0.678769962  |                                                         |
| 4 | 39,300,000 | 39,450,000 | 525 | 607  | 0.162212694  |                                                         |
| 4 | 39,375,000 | 39,525,000 | 526 | 730  | -0.150243742 |                                                         |
| 4 | 39,450,000 | 39,600,000 | 527 | 677  | 0.042109266  | ENSBTAG00000033359                                      |
| 4 | 39,525,000 | 39,675,000 | 528 | 814  | 0.213392004  | ENSBTAG00000033359                                      |
| 4 | 39,600,000 | 39,750,000 | 529 | 725  | -0.276236772 |                                                         |
| 4 | 39,675,000 | 39,825,000 | 530 | 519  | -0.805890938 |                                                         |
| 4 | 39,750,000 | 39,900,000 | 531 | 414  | -0.810937862 |                                                         |
| 4 | 39,825,000 | 39,975,000 | 532 | 431  | -1.219143897 |                                                         |
| 4 | 39,900,000 | 40,050,000 | 533 | 990  | -2.507858973 |                                                         |
| 4 | 39,975,000 | 40,125,000 | 534 | 1505 | -1.807356819 |                                                         |
| 4 | 40,050,000 | 40,200,000 | 535 | 1155 | -0.962051646 | SEMA3C                                                  |
| 4 | 40,125,000 | 40,275,000 | 536 | 638  | -0.910388358 | SEMA3C                                                  |
| 4 | 40,200,000 | 40,350,000 | 537 | 562  | -0.271113406 | SEMA3C                                                  |
| 4 | 40,275,000 | 40,425,000 | 538 | 507  | 0.313729686  | SEMA3C                                                  |
| 4 | 40,350,000 | 40,500,000 | 539 | 865  | 0.899722933  | ENSBTAG00000014220,ENSBTAG00000047646                   |
| 4 | 40,425,000 | 40,575,000 | 540 | 1039 | 0.877121935  | ENSBTAG00000014220,ENSBTAG00000046905,ENSBTAG0000047646 |
| 4 | 40,500,000 | 40,650,000 | 541 | 759  | 0.854385105  | CD36,ENSBTAG00000014220,ENSBTAG00000046905              |
| 4 | 40,575,000 | 40,725,000 | 542 | 868  | 0.936529077  | CD36                                                    |

|   |            |            |     |      |              |                          |
|---|------------|------------|-----|------|--------------|--------------------------|
| 4 | 40,650,000 | 40,800,000 | 543 | 1015 | 0.791105752  | GNAT3                    |
| 4 | 40,725,000 | 40,875,000 | 544 | 1070 | 0.784274884  | GNAT3                    |
| 4 | 40,800,000 | 40,950,000 | 545 | 899  | 0.775156655  | GNAT3                    |
| 4 | 40,875,000 | 41,025,000 | 546 | 623  | 0.386189392  |                          |
| 4 | 40,950,000 | 41,100,000 | 547 | 524  | 0.391948257  | ENSBTAG00000047294       |
| 4 | 41,025,000 | 41,175,000 | 548 | 811  | 0.489505997  | GNAI1,ENSBTAG00000047294 |
| 4 | 41,100,000 | 41,250,000 | 549 | 1083 | 0.788533659  | GNAI1                    |
| 4 | 41,175,000 | 41,325,000 | 550 | 880  | 0.956523997  | GNAI1                    |
| 4 | 41,250,000 | 41,400,000 | 551 | 819  | -0.599153039 | GNAI1                    |
| 4 | 41,325,000 | 41,475,000 | 552 | 763  | -1.944163093 |                          |
| 4 | 41,400,000 | 41,550,000 | 553 | 421  | -2.181998508 |                          |
| 4 | 41,475,000 | 41,625,000 | 554 | 563  | -3.250779002 |                          |
| 4 | 41,550,000 | 41,700,000 | 555 | 548  | -3.827801178 |                          |
| 4 | 41,625,000 | 41,775,000 | 556 | 250  | -2.35781602  |                          |
| 4 | 41,700,000 | 41,850,000 | 557 | 276  | -1.134416732 |                          |
| 4 | 41,775,000 | 41,925,000 | 558 | 467  | -0.260379021 |                          |
| 4 | 41,850,000 | 42,000,000 | 559 | 1060 | -0.403887539 |                          |
| 4 | 41,925,000 | 42,075,000 | 560 | 927  | -0.722286345 |                          |
| 4 | 42,000,000 | 42,150,000 | 561 | 297  | -1.054878691 |                          |
| 4 | 42,075,000 | 42,225,000 | 562 | 230  | -0.616438281 |                          |
| 4 | 42,150,000 | 42,300,000 | 563 | 233  | -0.619185882 |                          |
| 4 | 42,225,000 | 42,375,000 | 564 | 468  | -1.467697343 |                          |
| 4 | 42,300,000 | 42,450,000 | 565 | 485  | -0.96595497  |                          |
| 4 | 42,375,000 | 42,525,000 | 566 | 305  | -0.188684409 |                          |
| 4 | 42,450,000 | 42,600,000 | 567 | 391  | -1.096982021 |                          |
| 4 | 42,525,000 | 42,675,000 | 568 | 779  | 0.717808023  |                          |
| 4 | 42,600,000 | 42,750,000 | 569 | 754  | 1.09456062   |                          |
| 4 | 42,675,000 | 42,825,000 | 570 | 770  | 0.589443445  |                          |
| 4 | 42,750,000 | 42,900,000 | 571 | 975  | 0.776263728  |                          |
| 4 | 42,825,000 | 42,975,000 | 572 | 1093 | 0.698863292  |                          |
| 4 | 42,900,000 | 43,050,000 | 573 | 1128 | 0.777593029  |                          |
| 4 | 42,975,000 | 43,125,000 | 574 | 889  | 0.699427872  |                          |
| 4 | 43,050,000 | 43,200,000 | 575 | 876  | 0.696279486  |                          |
| 4 | 43,125,000 | 43,275,000 | 576 | 611  | 0.695504834  |                          |
| 4 | 43,200,000 | 43,350,000 | 577 | 598  | -0.99368161  |                          |
| 4 | 43,275,000 | 43,425,000 | 578 | 866  | -0.328238043 | ENSBTAG00000022498       |
| 4 | 43,350,000 | 43,500,000 | 579 | 873  | -0.110951068 | ENSBTAG00000022498       |
| 4 | 43,425,000 | 43,575,000 | 580 | 573  | -0.423104643 | PHTF2                    |
| 4 | 43,500,000 | 43,650,000 | 581 | 323  | 0.203607728  | PHTF2                    |
| 4 | 43,575,000 | 43,725,000 | 582 | 343  | -0.158035974 | PHTF2,RSBN1L,TMEM60      |
| 4 | 43,650,000 | 43,800,000 | 583 | 338  | -0.659404719 | RSBN1L,TMEM60            |
| 4 | 43,725,000 | 43,875,000 | 584 | 261  | -0.449456049 | PTPN12,RSBN1L            |
| 4 | 43,800,000 | 43,950,000 | 585 | 284  | 0.987149493  | PTPN12                   |
| 4 | 43,875,000 | 44,025,000 | 586 | 484  | 0.986422446  | PTPN12                   |
| 4 | 43,950,000 | 44,100,000 | 587 | 449  | 0.853624462  | PION                     |
| 4 | 44,025,000 | 44,175,000 | 588 | 463  | 0.934399743  | CCDC146,PION             |
| 4 | 44,100,000 | 44,250,000 | 589 | 876  | 0.623620305  | CCDC146,FGL2,PION        |
| 4 | 44,175,000 | 44,325,000 | 590 | 1065 | 0.314547082  | CCDC146,FAM185A,FGL2     |
| 4 | 44,250,000 | 44,400,000 | 591 | 691  | 0.437104661  | FAM185A,FBXL13           |
| 4 | 44,325,000 | 44,475,000 | 592 | 783  | 0.28909682   | FAM185A,FBXL13           |
| 4 | 44,400,000 | 44,550,000 | 593 | 1170 | 0.307986782  | FBXL13,LRRC17            |
| 4 | 44,475,000 | 44,625,000 | 594 | 1210 | 0.585019125  | ARMC10,FBXL13,LRRC17     |
| 4 | 44,550,000 | 44,700,000 | 595 | 1178 | 0.800406258  | ARMC10,FBXL13,NAPEPLD    |

|   |            |            |     |      |              |                                    |
|---|------------|------------|-----|------|--------------|------------------------------------|
| 4 | 44,625,000 | 44,775,000 | 596 | 1303 | 0.997565144  | ARMC10,DNAJC2,NAPEPLD,PMPCB        |
| 4 | 44,700,000 | 44,850,000 | 597 | 1289 | 0.971171272  | DNAJC2,NAPEPLD,PMPCB,PSMC2,SLC26A5 |
| 4 | 44,775,000 | 44,925,000 | 598 | 1279 | 0.463386659  | DNAJC2,PSMC2,RELN,SLC26A5          |
| 4 | 44,850,000 | 45,000,000 | 599 | 1192 | -0.043711124 | RELN,SLC26A5                       |
| 4 | 44,925,000 | 45,075,000 | 600 | 786  | 0.023930222  | RELN                               |
| 4 | 45,000,000 | 45,150,000 | 601 | 538  | 0.402715645  | RELN                               |
| 4 | 45,075,000 | 45,225,000 | 602 | 387  | 0.311638926  | RELN                               |
| 4 | 45,150,000 | 45,300,000 | 603 | 309  | -0.09222101  | RELN                               |
| 4 | 45,225,000 | 45,375,000 | 604 | 338  | 0.555166611  | RELN                               |
| 4 | 45,300,000 | 45,450,000 | 605 | 500  | 0.804691262  |                                    |
| 4 | 45,375,000 | 45,525,000 | 606 | 456  | 0.811818544  | ENSBTAG00000046817                 |
| 4 | 45,450,000 | 45,600,000 | 607 | 568  | 1.225626474  | ORC5L,ENSBTAG00000046817           |
| 4 | 45,525,000 | 45,675,000 | 608 | 905  | 1.099176141  | ORC5L                              |
| 4 | 45,600,000 | 45,750,000 | 609 | 710  | 0.716647284  | ORC5L                              |
| 4 | 45,675,000 | 45,825,000 | 610 | 373  | 0.450638393  | LHFPL3,ORC5L                       |
| 4 | 45,750,000 | 45,900,000 | 611 | 353  | 0.188699695  | LHFPL3                             |
| 4 | 45,825,000 | 45,975,000 | 612 | 462  | -0.103200832 | LHFPL3                             |
| 4 | 45,900,000 | 46,050,000 | 613 | 711  | -0.075989085 | LHFPL3                             |
| 4 | 45,975,000 | 46,125,000 | 614 | 708  | -0.164666964 | LHFPL3                             |
| 4 | 46,050,000 | 46,200,000 | 615 | 539  | -1.961529039 | LHFPL3                             |
| 4 | 46,125,000 | 46,275,000 | 616 | 541  | -2.624825887 | LHFPL3                             |
| 4 | 46,200,000 | 46,350,000 | 617 | 860  | -1.000645399 | LHFPL3                             |
| 4 | 46,275,000 | 46,425,000 | 618 | 885  | 0.206796603  |                                    |
| 4 | 46,350,000 | 46,500,000 | 619 | 553  | 0.532385662  | KMT2E                              |
| 4 | 46,425,000 | 46,575,000 | 620 | 494  | -0.247131364 | KMT2E,SRPK2                        |
| 4 | 46,500,000 | 46,650,000 | 621 | 485  | -0.46018651  | KMT2E,SRPK2                        |
| 4 | 46,575,000 | 46,725,000 | 622 | 490  | 0.544213518  | SRPK2                              |
| 4 | 46,650,000 | 46,800,000 | 623 | 448  | 0.764802143  |                                    |
| 4 | 46,725,000 | 46,875,000 | 624 | 690  | 0.807460447  | PUS7                               |
| 4 | 46,800,000 | 46,950,000 | 625 | 1040 | 0.409371781  | PUS7,RINT1                         |
| 4 | 46,875,000 | 47,025,000 | 626 | 977  | 0.423412437  | ATXN7L1,PUS7,RINT1                 |
| 4 | 46,950,000 | 47,100,000 | 627 | 989  | 0.698442517  | ATXN7L1                            |
| 4 | 47,025,000 | 47,175,000 | 628 | 952  | 0.546120287  | ATXN7L1                            |
| 4 | 47,100,000 | 47,250,000 | 629 | 986  | 0.453818637  | ATXN7L1                            |
| 4 | 47,175,000 | 47,325,000 | 630 | 856  | 0.120594451  | ATXN7L1,CDHR3                      |
| 4 | 47,250,000 | 47,400,000 | 631 | 460  | -1.212405793 | CDHR3                              |
| 4 | 47,325,000 | 47,475,000 | 632 | 459  | -2.058199986 | CDHR3,SYPL1                        |
| 4 | 47,400,000 | 47,550,000 | 633 | 829  | -0.839905777 | SYPL1                              |
| 4 | 47,475,000 | 47,625,000 | 634 | 960  | -0.026979752 | NAMPT                              |
| 4 | 47,550,000 | 47,700,000 | 635 | 1023 | -0.462848022 | NAMPT                              |
| 4 | 47,625,000 | 47,775,000 | 636 | 1161 | -0.980838492 | NAMPT                              |
| 4 | 47,700,000 | 47,850,000 | 637 | 1079 | -0.499915801 |                                    |
| 4 | 47,775,000 | 47,925,000 | 638 | 1106 | -0.187270048 |                                    |
| 4 | 47,850,000 | 48,000,000 | 639 | 1130 | -1.056848016 |                                    |
| 4 | 47,925,000 | 48,075,000 | 640 | 1180 | -1.294735482 |                                    |
| 4 | 48,000,000 | 48,150,000 | 641 | 1140 | -0.436208073 |                                    |
| 4 | 48,075,000 | 48,225,000 | 642 | 1030 | 0.19770302   |                                    |
| 4 | 48,150,000 | 48,300,000 | 643 | 774  | 0.082179285  | PIK3CG                             |
| 4 | 48,225,000 | 48,375,000 | 644 | 615  | -1.002142054 | PIK3CG                             |
| 4 | 48,300,000 | 48,450,000 | 645 | 823  | -1.387853433 | PIK3CG,PRKAR2B                     |
| 4 | 48,375,000 | 48,525,000 | 646 | 747  | -0.838519815 | PRKAR2B                            |
| 4 | 48,450,000 | 48,600,000 | 647 | 630  | -1.189029984 | COG5,HBP1,PRKAR2B                  |
| 4 | 48,525,000 | 48,675,000 | 648 | 803  | -0.341524125 | COG5,HBP1,PRKAR2B                  |

|   |            |            |     |      |              |                                      |
|---|------------|------------|-----|------|--------------|--------------------------------------|
| 4 | 48,600,000 | 48,750,000 | 649 | 807  | 0.739576626  | COG5                                 |
| 4 | 48,675,000 | 48,825,000 | 650 | 607  | 0.840110647  | COG5,GPR22                           |
| 4 | 48,750,000 | 48,900,000 | 651 | 523  | 0.971788575  | BCAP29,COG5,DUS4L,GPR22              |
| 4 | 48,825,000 | 48,975,000 | 652 | 710  | 0.770811024  | BCAP29,COG5,DUS4L,SLC26A4            |
| 4 | 48,900,000 | 49,050,000 | 653 | 845  | 0.529825116  | BCAP29,SLC26A4,ENSBTAG00000018348    |
| 4 | 48,975,000 | 49,125,000 | 654 | 974  | -0.04289411  | SLC26A3,SLC26A4,ENSBTAG00000018348   |
| 4 | 49,050,000 | 49,200,000 | 655 | 1251 | 0.285053018  | SLC26A3,ENSBTAG00000018348           |
| 4 | 49,125,000 | 49,275,000 | 656 | 1141 | 0.729338032  | DLD,LAMB1                            |
| 4 | 49,200,000 | 49,350,000 | 657 | 1149 | 0.774369845  | DLD,LAMB1                            |
| 4 | 49,275,000 | 49,425,000 | 658 | 1526 | 0.871878425  | LAMB1,LAMB4                          |
| 4 | 49,350,000 | 49,500,000 | 659 | 1286 | 0.894645097  | LAMB4                                |
| 4 | 49,425,000 | 49,575,000 | 660 | 798  | 0.390312032  | LAMB4,NRCAM                          |
| 4 | 49,500,000 | 49,650,000 | 661 | 564  | -0.140643316 | NRCAM                                |
| 4 | 49,575,000 | 49,725,000 | 662 | 783  | 0.876524992  | NRCAM                                |
| 4 | 49,650,000 | 49,800,000 | 663 | 1202 | 0.978982849  |                                      |
| 4 | 49,725,000 | 49,875,000 | 664 | 946  | -0.288595737 | PNPLA8                               |
| 4 | 49,800,000 | 49,950,000 | 665 | 582  | -1.68908599  | PNPLA8,ENSBTAG00000014795            |
| 4 | 49,875,000 | 50,025,000 | 666 | 544  | 0.345070456  | NME8,PNPLA8,SFRP4,ENSBTAG00000014795 |
| 4 | 49,950,000 | 50,100,000 | 667 | 412  | 0.563453067  | EPDR1,NME8,SFRP4                     |
| 4 | 50,025,000 | 50,175,000 | 668 | 347  | 0.416056344  | EPDR1                                |
| 4 | 50,100,000 | 50,250,000 | 669 | 302  | 0.528664892  |                                      |
| 4 | 50,175,000 | 50,325,000 | 670 | 283  | 0.527388173  | STARD3NL                             |
| 4 | 50,250,000 | 50,400,000 | 671 | 483  | 0.499991979  | STARD3NL,ENSBTAG00000035945          |
| 4 | 50,325,000 | 50,475,000 | 672 | 905  | 0.838452737  | STARD3NL,ENSBTAG00000035945          |
| 4 | 50,400,000 | 50,550,000 | 673 | 1119 | 1.101445287  |                                      |
| 4 | 50,475,000 | 50,625,000 | 674 | 1107 | 0.335073693  |                                      |
| 4 | 50,550,000 | 50,700,000 | 675 | 690  | -0.834450006 |                                      |
| 4 | 50,625,000 | 50,775,000 | 676 | 485  | 0.830415165  |                                      |
| 4 | 50,700,000 | 50,850,000 | 677 | 976  | 0.686116008  | CTTNBP2,ENSBTAG00000036154           |
| 4 | 50,775,000 | 50,925,000 | 678 | 822  | 0.221333968  | CTTNBP2,ENSBTAG00000036154           |
| 4 | 50,850,000 | 51,000,000 | 679 | 586  | -1.04705748  | CTTNBP2                              |
| 4 | 50,925,000 | 51,075,000 | 680 | 693  | -0.582345996 | CFTR,CTTNBP2                         |
| 4 | 51,000,000 | 51,150,000 | 681 | 695  | -2.233785016 | CFTR                                 |
| 4 | 51,075,000 | 51,225,000 | 682 | 692  | -1.755945684 | CFTR                                 |
| 4 | 51,150,000 | 51,300,000 | 683 | 474  | -0.382214893 | ASZ1,CFTR                            |
| 4 | 51,225,000 | 51,375,000 | 684 | 323  | -0.610491611 | ASZ1,CFTR                            |
| 4 | 51,300,000 | 51,450,000 | 685 | 383  | -0.355979002 | ASZ1,WNT2                            |
| 4 | 51,375,000 | 51,525,000 | 686 | 391  | 0.171793565  | ST7,WNT2                             |
| 4 | 51,450,000 | 51,600,000 | 687 | 385  | 0.551412029  | ST7                                  |
| 4 | 51,525,000 | 51,675,000 | 688 | 324  | 0.52839675   | ST7                                  |
| 4 | 51,600,000 | 51,750,000 | 689 | 320  | 0.575421676  | ST7                                  |
| 4 | 51,675,000 | 51,825,000 | 690 | 549  | 1.095473191  | CAPZA2,ST7                           |
| 4 | 51,750,000 | 51,900,000 | 691 | 910  | 1.016881577  | CAPZA2                               |
| 4 | 51,825,000 | 51,975,000 | 692 | 902  | 0.612228505  | C-MET,CAPZA2                         |
| 4 | 51,900,000 | 52,050,000 | 693 | 590  | 0.147115136  | C-MET                                |
| 4 | 51,975,000 | 52,125,000 | 694 | 675  | 0.486670394  | C-MET                                |
| 4 | 52,050,000 | 52,200,000 | 695 | 865  | 0.333968688  | CAV1                                 |
| 4 | 52,125,000 | 52,275,000 | 696 | 1031 | 0.39894383   | CAV1,CAV2                            |
| 4 | 52,200,000 | 52,350,000 | 697 | 891  | 0.435000552  | CAV1,CAV2                            |
| 4 | 52,275,000 | 52,425,000 | 698 | 566  | 0.003315547  |                                      |
| 4 | 52,350,000 | 52,500,000 | 699 | 423  | -0.660339276 | TES                                  |
| 4 | 52,425,000 | 52,575,000 | 700 | 340  | -0.623689722 | TES                                  |
| 4 | 52,500,000 | 52,650,000 | 701 | 763  | 0.095439153  | TES,TFEC                             |

|   |            |            |     |      |              |                                    |
|---|------------|------------|-----|------|--------------|------------------------------------|
| 4 | 52,575,000 | 52,725,000 | 702 | 890  | -0.044718095 | TFEC                               |
| 4 | 52,650,000 | 52,800,000 | 703 | 739  | -0.601580624 | TFEC                               |
| 4 | 52,725,000 | 52,875,000 | 704 | 772  | -0.401944751 | TFEC                               |
| 4 | 52,800,000 | 52,950,000 | 705 | 774  | 0.582818244  | TFEC                               |
| 4 | 52,875,000 | 53,025,000 | 706 | 1084 | 1.106643393  |                                    |
| 4 | 52,950,000 | 53,100,000 | 707 | 1079 | 1.028104292  |                                    |
| 4 | 53,025,000 | 53,175,000 | 708 | 1024 | 0.719767117  |                                    |
| 4 | 53,100,000 | 53,250,000 | 709 | 1255 | 0.32007085   |                                    |
| 4 | 53,175,000 | 53,325,000 | 710 | 1123 | 0.135277286  |                                    |
| 4 | 53,250,000 | 53,400,000 | 711 | 679  | 0.148439206  |                                    |
| 4 | 53,325,000 | 53,475,000 | 712 | 573  | 1.039636259  |                                    |
| 4 | 53,400,000 | 53,550,000 | 713 | 607  | 0.964380103  |                                    |
| 4 | 53,475,000 | 53,625,000 | 714 | 571  | -0.485674001 |                                    |
| 4 | 53,550,000 | 53,700,000 | 715 | 435  | -0.774918169 |                                    |
| 4 | 53,625,000 | 53,775,000 | 716 | 326  | -0.77083359  | MDFIC                              |
| 4 | 53,700,000 | 53,850,000 | 717 | 519  | 0.662098169  | MDFIC                              |
| 4 | 53,775,000 | 53,925,000 | 718 | 581  | 0.939938576  | MDFIC                              |
| 4 | 53,850,000 | 54,000,000 | 719 | 527  | -1.423263948 | MDFIC                              |
| 4 | 53,925,000 | 54,075,000 | 720 | 779  | -2.722867719 |                                    |
| 4 | 54,000,000 | 54,150,000 | 721 | 623  | -2.102682924 | FOXP2                              |
| 4 | 54,075,000 | 54,225,000 | 722 | 263  | 1.396922343  | FOXP2                              |
| 4 | 54,150,000 | 54,300,000 | 723 | 297  | 1.465681569  | FOXP2                              |
| 4 | 54,225,000 | 54,375,000 | 724 | 355  | 0.62412931   |                                    |
| 4 | 54,300,000 | 54,450,000 | 725 | 333  | 0.395247995  |                                    |
| 4 | 54,375,000 | 54,525,000 | 726 | 232  | 0.143884101  |                                    |
| 4 | 54,450,000 | 54,600,000 | 727 | 238  | 0.273430355  |                                    |
| 4 | 54,525,000 | 54,675,000 | 728 | 323  | 0.798179191  |                                    |
| 4 | 54,600,000 | 54,750,000 | 729 | 289  | 1.064885127  |                                    |
| 4 | 54,675,000 | 54,825,000 | 730 | 154  | 1.240094224  |                                    |
| 4 | 54,750,000 | 54,900,000 | 731 | 382  | 1.136191398  | PPP1R3A                            |
| 4 | 54,825,000 | 54,975,000 | 732 | 471  | 0.71113705   | PPP1R3A                            |
| 4 | 54,900,000 | 55,050,000 | 733 | 368  | 0.285201038  | PPP1R3A                            |
| 4 | 54,975,000 | 55,125,000 | 734 | 364  | 0.538152628  |                                    |
| 4 | 55,050,000 | 55,200,000 | 735 | 293  | 0.611269966  |                                    |
| 4 | 55,125,000 | 55,275,000 | 736 | 260  | 0.934820705  |                                    |
| 4 | 55,200,000 | 55,350,000 | 737 | 276  | 0.80629182   |                                    |
| 4 | 55,275,000 | 55,425,000 | 738 | 276  | 0.570364279  |                                    |
| 4 | 55,350,000 | 55,500,000 | 739 | 276  | 0.281013419  |                                    |
| 4 | 55,425,000 | 55,575,000 | 740 | 292  | -0.166292222 |                                    |
| 4 | 55,500,000 | 55,650,000 | 741 | 308  | -0.022841698 | GPR85,ENSBTAG00000046823           |
| 4 | 55,575,000 | 55,725,000 | 742 | 530  | 0.041098118  | GPR85,ENSBTAG00000046823           |
| 4 | 55,650,000 | 55,800,000 | 743 | 614  | 0.250787119  |                                    |
| 4 | 55,725,000 | 55,875,000 | 744 | 765  | 0.320751824  | IFRD1,LSMEM1                       |
| 4 | 55,800,000 | 55,950,000 | 745 | 979  | 0.579019224  | IFRD1,LSMEM1                       |
| 4 | 55,875,000 | 56,025,000 | 746 | 849  | 1.153705066  | IFRD1,ZNF277                       |
| 4 | 55,950,000 | 56,100,000 | 747 | 697  | 1.216639863  | ZNF277                             |
| 4 | 56,025,000 | 56,175,000 | 748 | 670  | 0.911287776  | ZNF277                             |
| 4 | 56,100,000 | 56,250,000 | 749 | 797  | 0.602662588  | ZNF277                             |
| 4 | 56,175,000 | 56,325,000 | 750 | 932  | 0.83450651   |                                    |
| 4 | 56,250,000 | 56,400,000 | 751 | 600  | 0.93539702   | C7orf60                            |
| 4 | 56,325,000 | 56,475,000 | 752 | 273  | 0.708152623  | C7orf60,TMEM168                    |
| 4 | 56,400,000 | 56,550,000 | 753 | 712  | 1.219953019  | C7orf60,TMEM168,ENSBTAG00000024361 |
| 4 | 56,475,000 | 56,625,000 | 754 | 1036 | 0.700557115  | TMEM168,ENSBTAG00000024361         |



|   |            |            |     |      |              |                                        |
|---|------------|------------|-----|------|--------------|----------------------------------------|
| 4 | 56,550,000 | 56,700,000 | 755 | 821  | -1.040658166 | DOCK4                                  |
| 4 | 56,625,000 | 56,775,000 | 756 | 593  | -0.612126227 | DOCK4                                  |
| 4 | 56,700,000 | 56,850,000 | 757 | 617  | 0.221341639  | DOCK4                                  |
| 4 | 56,775,000 | 56,925,000 | 758 | 729  | 0.21660141   | DOCK4                                  |
| 4 | 56,850,000 | 57,000,000 | 759 | 641  | 0.534009805  | DOCK4                                  |
| 4 | 56,925,000 | 57,075,000 | 760 | 491  | 0.609870721  |                                        |
| 4 | 57,000,000 | 57,150,000 | 761 | 404  | 0.465156014  | IMMP2L                                 |
| 4 | 57,075,000 | 57,225,000 | 762 | 345  | -0.223044618 | IMMP2L,ENSBTAG00000045592              |
| 4 | 57,150,000 | 57,300,000 | 763 | 481  | -1.827309684 | IMMP2L,ENSBTAG00000045592              |
| 4 | 57,225,000 | 57,375,000 | 764 | 653  | -4.096640849 | IMMP2L                                 |
| 4 | 57,300,000 | 57,450,000 | 765 | 473  | -4.548977034 | IMMP2L                                 |
| 4 | 57,375,000 | 57,525,000 | 766 | 461  | 0.296591561  | IMMP2L                                 |
| 4 | 57,450,000 | 57,600,000 | 767 | 646  | 0.764870361  | IMMP2L,LRRN3                           |
| 4 | 57,525,000 | 57,675,000 | 768 | 559  | 0.555341559  | IMMP2L,LRRN3                           |
| 4 | 57,600,000 | 57,750,000 | 769 | 503  | 0.043405472  | IMMP2L                                 |
| 4 | 57,675,000 | 57,825,000 | 770 | 657  | 0.135388259  | IMMP2L                                 |
| 4 | 57,750,000 | 57,900,000 | 771 | 1197 | 0.373174847  | IMMP2L                                 |
| 4 | 57,825,000 | 57,975,000 | 772 | 1143 | 0.25442568   | IMMP2L                                 |
| 4 | 57,900,000 | 58,050,000 | 773 | 966  | 0.426770471  | IMMP2L                                 |
| 4 | 57,975,000 | 58,125,000 | 774 | 1197 | 0.830397741  | IMMP2L                                 |
| 4 | 58,050,000 | 58,200,000 | 775 | 1180 | 0.955111007  | IMMP2L                                 |
| 4 | 58,125,000 | 58,275,000 | 776 | 1093 | 0.92707587   |                                        |
| 4 | 58,200,000 | 58,350,000 | 777 | 1001 | 0.784898876  |                                        |
| 4 | 58,275,000 | 58,425,000 | 778 | 1177 | 0.742604207  |                                        |
| 4 | 58,350,000 | 58,500,000 | 779 | 900  | 0.573372232  |                                        |
| 4 | 58,425,000 | 58,575,000 | 780 | 420  | -0.062143494 |                                        |
| 4 | 58,500,000 | 58,650,000 | 781 | 305  | -0.46896681  |                                        |
| 4 | 58,575,000 | 58,725,000 | 782 | 257  | -0.621516737 |                                        |
| 4 | 58,650,000 | 58,800,000 | 783 | 386  | -0.069245562 |                                        |
| 4 | 58,725,000 | 58,875,000 | 784 | 417  | 0.278108441  |                                        |
| 4 | 58,800,000 | 58,950,000 | 785 | 445  | -0.038888503 |                                        |
| 4 | 58,875,000 | 59,025,000 | 786 | 845  | -0.714346627 |                                        |
| 4 | 58,950,000 | 59,100,000 | 787 | 1244 | -0.325497177 |                                        |
| 4 | 59,025,000 | 59,175,000 | 788 | 1224 | 0.346745647  |                                        |
| 4 | 59,100,000 | 59,250,000 | 789 | 877  | 1.06350785   |                                        |
| 4 | 59,175,000 | 59,325,000 | 790 | 961  | 0.620734337  |                                        |
| 4 | 59,250,000 | 59,400,000 | 791 | 1127 | 0.467271214  |                                        |
| 4 | 59,325,000 | 59,475,000 | 792 | 1169 | 0.524495886  |                                        |
| 4 | 59,400,000 | 59,550,000 | 793 | 887  | 0.326745254  |                                        |
| 4 | 59,475,000 | 59,625,000 | 794 | 556  | -0.333355636 |                                        |
| 4 | 59,550,000 | 59,700,000 | 795 | 890  | -1.117991244 |                                        |
| 4 | 59,625,000 | 59,775,000 | 796 | 1141 | -1.624139123 |                                        |
| 4 | 59,700,000 | 59,850,000 | 797 | 1133 | -1.161019842 |                                        |
| 4 | 59,775,000 | 59,925,000 | 798 | 929  | -1.55540936  |                                        |
| 4 | 59,850,000 | 60,000,000 | 799 | 669  | -2.067714683 | DNAJB9,THAP5                           |
| 4 | 59,925,000 | 60,075,000 | 800 | 930  | 0.759131359  | DNAJB9,GPR141,THAP5,ENSBTAG00000046491 |
| 4 | 60,000,000 | 60,150,000 | 801 | 1379 | 0.267378685  | GPR141,ENSBTAG00000046491              |
| 4 | 60,075,000 | 60,225,000 | 802 | 1529 | -0.358546664 |                                        |
| 4 | 60,150,000 | 60,300,000 | 803 | 1405 | 0.376806649  |                                        |
| 4 | 60,225,000 | 60,375,000 | 804 | 1153 | 0.722838258  | ELMO1                                  |
| 4 | 60,300,000 | 60,450,000 | 805 | 872  | 0.363241637  | ELMO1                                  |
| 4 | 60,375,000 | 60,525,000 | 806 | 781  | -0.133657572 | ELMO1                                  |
| 4 | 60,450,000 | 60,600,000 | 807 | 1018 | -0.06923523  | ELMO1                                  |

|   |            |            |     |      |              |                                       |
|---|------------|------------|-----|------|--------------|---------------------------------------|
| 4 | 60,525,000 | 60,675,000 | 808 | 1050 | -1.137873365 | ELMO1                                 |
| 4 | 60,600,000 | 60,750,000 | 809 | 984  | -1.251896282 | ELMO1                                 |
| 4 | 60,675,000 | 60,825,000 | 810 | 1034 | 0.528480821  | ELMO1                                 |
| 4 | 60,750,000 | 60,900,000 | 811 | 1088 | 0.374173196  | ELMO1                                 |
| 4 | 60,825,000 | 60,975,000 | 812 | 1089 | -0.359643869 | AOAH,ELMO1                            |
| 4 | 60,900,000 | 61,050,000 | 813 | 1275 | -1.844551298 | AOAH                                  |
| 4 | 60,975,000 | 61,125,000 | 814 | 1246 | -1.556742535 | AOAH                                  |
| 4 | 61,050,000 | 61,200,000 | 815 | 853  | 0.150195844  | ANLN,AOAH,ENSBTAG00000048186          |
| 4 | 61,125,000 | 61,275,000 | 816 | 690  | -1.799617367 | ANLN,AOAH,KIAA0895,ENSBTAG00000048186 |
| 4 | 61,200,000 | 61,350,000 | 817 | 873  | -1.391068157 | ANLN,KIAA0895                         |
| 4 | 61,275,000 | 61,425,000 | 818 | 1169 | -0.837579842 | EEPD1,KIAA0895                        |
| 4 | 61,350,000 | 61,500,000 | 819 | 1089 | -0.604751612 | EEPD1                                 |
| 4 | 61,425,000 | 61,575,000 | 820 | 1042 | 0.317304008  | EEPD1                                 |
| 4 | 61,500,000 | 61,650,000 | 821 | 965  | 0.139703537  | CDC10                                 |
| 4 | 61,575,000 | 61,725,000 | 822 | 597  | 0.16347997   | CDC10                                 |
| 4 | 61,650,000 | 61,800,000 | 823 | 522  | -0.347704485 | CDC10                                 |
| 4 | 61,725,000 | 61,875,000 | 824 | 499  | 0.014884913  | HERPUD2                               |
| 4 | 61,800,000 | 61,950,000 | 825 | 674  | 0.291028717  | HERPUD2                               |
| 4 | 61,875,000 | 62,025,000 | 826 | 1009 | 0.371691635  |                                       |
| 4 | 61,950,000 | 62,100,000 | 827 | 973  | 0.512358497  | RBX1                                  |
| 4 | 62,025,000 | 62,175,000 | 828 | 950  | 0.122806986  | RBX1                                  |
| 4 | 62,100,000 | 62,250,000 | 829 | 1031 | 0.241550124  | TBX20                                 |
| 4 | 62,175,000 | 62,325,000 | 830 | 1068 | 0.717413573  | DPY19L2,TBX20                         |
| 4 | 62,250,000 | 62,400,000 | 831 | 1017 | 0.494806967  | DPY19L1,DPY19L2                       |
| 4 | 62,325,000 | 62,475,000 | 832 | 1133 | -0.525395327 | DPY19L1,DPY19L2                       |
| 4 | 62,400,000 | 62,550,000 | 833 | 1248 | -0.309903526 | DPY19L1,NPSR1                         |
| 4 | 62,475,000 | 62,625,000 | 834 | 1023 | 0.321677932  | DPY19L1,NPSR1                         |
| 4 | 62,550,000 | 62,700,000 | 835 | 945  | 0.658120052  | NPSR1                                 |
| 4 | 62,625,000 | 62,775,000 | 836 | 1309 | 0.667813096  | NPSR1                                 |
| 4 | 62,700,000 | 62,850,000 | 837 | 1280 | 0.02298409   |                                       |
| 4 | 62,775,000 | 62,925,000 | 838 | 837  | -1.131980581 |                                       |
| 4 | 62,850,000 | 63,000,000 | 839 | 796  | -0.483514337 |                                       |
| 4 | 62,925,000 | 63,075,000 | 840 | 771  | -0.18656811  | BMPER                                 |
| 4 | 63,000,000 | 63,150,000 | 841 | 805  | 0.138394034  | BMPER                                 |
| 4 | 63,075,000 | 63,225,000 | 842 | 871  | 0.418881949  | BMPER                                 |
| 4 | 63,150,000 | 63,300,000 | 843 | 849  | 0.695824271  | BMPER                                 |
| 4 | 63,225,000 | 63,375,000 | 844 | 765  | -0.013523291 | BMPER                                 |
| 4 | 63,300,000 | 63,450,000 | 845 | 695  | -0.321559188 | BMPER                                 |
| 4 | 63,375,000 | 63,525,000 | 846 | 634  | -0.536492933 |                                       |
| 4 | 63,450,000 | 63,600,000 | 847 | 465  | -0.907258152 |                                       |
| 4 | 63,525,000 | 63,675,000 | 848 | 359  | -0.299608023 | BBS9                                  |
| 4 | 63,600,000 | 63,750,000 | 849 | 386  | 0.163293562  | BBS9                                  |
| 4 | 63,675,000 | 63,825,000 | 850 | 525  | 0.630583126  | BBS9                                  |
| 4 | 63,750,000 | 63,900,000 | 851 | 505  | 0.77983634   | BBS9                                  |
| 4 | 63,825,000 | 63,975,000 | 852 | 415  | 0.425372859  | BBS9                                  |
| 4 | 63,900,000 | 64,050,000 | 853 | 593  | -0.105412528 | BBS9                                  |
| 4 | 63,975,000 | 64,125,000 | 854 | 724  | -0.23781959  | BBS9                                  |
| 4 | 64,050,000 | 64,200,000 | 855 | 512  | -0.46771158  | BBS9,NT5C3,RP9                        |
| 4 | 64,125,000 | 64,275,000 | 856 | 620  | 0.141560573  | FKBP9,NT5C3,RP9                       |
| 4 | 64,200,000 | 64,350,000 | 857 | 782  | 0.367265728  | FKBP9,KBTBD2,NT5C3                    |
| 4 | 64,275,000 | 64,425,000 | 858 | 757  | 0.358561838  | AVL9,KBTBD2,LSM5                      |
| 4 | 64,350,000 | 64,500,000 | 859 | 901  | 0.445721293  | AVL9,LSM5                             |
| 4 | 64,425,000 | 64,575,000 | 860 | 845  | -0.486136379 |                                       |

|   |            |            |     |      |              |                                            |
|---|------------|------------|-----|------|--------------|--------------------------------------------|
| 4 | 64,500,000 | 64,650,000 | 861 | 541  | -1.271884429 |                                            |
| 4 | 64,575,000 | 64,725,000 | 862 | 375  | -0.044531303 |                                            |
| 4 | 64,650,000 | 64,800,000 | 863 | 513  | -0.413141606 |                                            |
| 4 | 64,725,000 | 64,875,000 | 864 | 638  | 0.080264582  |                                            |
| 4 | 64,800,000 | 64,950,000 | 865 | 818  | 0.546155761  |                                            |
| 4 | 64,875,000 | 65,025,000 | 866 | 967  | 0.651829318  | PDE1C                                      |
| 4 | 64,950,000 | 65,100,000 | 867 | 1130 | 0.054081589  | PDE1C                                      |
| 4 | 65,025,000 | 65,175,000 | 868 | 1050 | -0.776388052 | PDE1C,PPP1R17                              |
| 4 | 65,100,000 | 65,250,000 | 869 | 1027 | -0.094181111 | CCDC129,PPP1R17                            |
| 4 | 65,175,000 | 65,325,000 | 870 | 1059 | -0.302366689 | CCDC129,PPP1R17                            |
| 4 | 65,250,000 | 65,400,000 | 871 | 908  | -1.740472191 | CCDC129                                    |
| 4 | 65,325,000 | 65,475,000 | 872 | 855  | -1.18592094  |                                            |
| 4 | 65,400,000 | 65,550,000 | 873 | 876  | 0.042659782  | NEUROD6                                    |
| 4 | 65,475,000 | 65,625,000 | 874 | 1068 | 0.704701613  | NEUROD6                                    |
| 4 | 65,550,000 | 65,700,000 | 875 | 1001 | 0.852148689  | ADCYAP1R1                                  |
| 4 | 65,625,000 | 65,775,000 | 876 | 860  | 0.857174038  | ADCYAP1R1                                  |
| 4 | 65,700,000 | 65,850,000 | 877 | 873  | 1.223393255  | ADCYAP1R1,AQP1,GHRHR                       |
| 4 | 65,775,000 | 65,925,000 | 878 | 1047 | 1.345469596  | AQP1,FAM188B,GHRHR                         |
| 4 | 65,850,000 | 66,000,000 | 879 | 1036 | 1.058169799  | FAM188B                                    |
| 4 | 65,925,000 | 66,075,000 | 880 | 1287 | 0.154268841  | CRHR2,FAM188B,INMT                         |
| 4 | 66,000,000 | 66,150,000 | 881 | 1291 | 0.048412809  | CRHR2,GARS,INMT                            |
| 4 | 66,075,000 | 66,225,000 | 882 | 980  | 1.005950822  | CRHR2,GARS,GGCT                            |
| 4 | 66,150,000 | 66,300,000 | 883 | 1100 | 0.566656525  | GARS,GGCT,NOD1                             |
| 4 | 66,225,000 | 66,375,000 | 884 | 1117 | 0.425418585  | NOD1,ZNRF2                                 |
| 4 | 66,300,000 | 66,450,000 | 885 | 1036 | 0.697522419  | NOD1,ZNRF2                                 |
| 4 | 66,375,000 | 66,525,000 | 886 | 849  | -1.32233979  | ZNRF2                                      |
| 4 | 66,450,000 | 66,600,000 | 887 | 512  | -1.381859533 | ZNRF2                                      |
| 4 | 66,525,000 | 66,675,000 | 888 | 526  | 1.271046466  | MTURN                                      |
| 4 | 66,600,000 | 66,750,000 | 889 | 760  | 1.31226086   | MTURN,PLEKHA8                              |
| 4 | 66,675,000 | 66,825,000 | 890 | 742  | 0.378995072  | FKBP14,PLEKHA8,SCRN1                       |
| 4 | 66,750,000 | 66,900,000 | 891 | 761  | -0.81113605  | FKBP14,PLEKHA8,SCRN1,WIPF3                 |
| 4 | 66,825,000 | 66,975,000 | 892 | 514  | -1.63516709  | SCRN1,WIPF3                                |
| 4 | 66,900,000 | 67,050,000 | 893 | 707  | -0.528205446 | PRR15                                      |
| 4 | 66,975,000 | 67,125,000 | 894 | 902  | 0.049412254  | CHN2,PRR15                                 |
| 4 | 67,050,000 | 67,200,000 | 895 | 754  | 0.589614019  | CHN2                                       |
| 4 | 67,125,000 | 67,275,000 | 896 | 916  | 0.833437702  | CHN2                                       |
| 4 | 67,200,000 | 67,350,000 | 897 | 1022 | 0.851502246  | CHN2                                       |
| 4 | 67,275,000 | 67,425,000 | 898 | 876  | 0.891721799  | CHN2                                       |
| 4 | 67,350,000 | 67,500,000 | 899 | 620  | 0.659051793  | CHN2,CPVL                                  |
| 4 | 67,425,000 | 67,575,000 | 900 | 518  | 0.592546676  | CPVL                                       |
| 4 | 67,500,000 | 67,650,000 | 901 | 394  | 0.957900849  | CPVL                                       |
| 4 | 67,575,000 | 67,725,000 | 902 | 376  | 0.608301673  | CPVL,TRIL                                  |
| 4 | 67,650,000 | 67,800,000 | 903 | 353  | 0.25504786   | TRIL,ENSBTAG00000018909,ENSBTAG00000046308 |
| 4 | 67,725,000 | 67,875,000 | 904 | 317  | 0.204108802  | ENSBTAG00000018909,ENSBTAG00000046308      |
| 4 | 67,800,000 | 67,950,000 | 905 | 360  | -0.194131313 | ENSBTAG00000018909,ENSBTAG00000046308      |
| 4 | 67,875,000 | 68,025,000 | 906 | 380  | 0.140079514  | ENSBTAG00000018909,ENSBTAG00000046308      |
| 4 | 67,950,000 | 68,100,000 | 907 | 370  | -0.099642887 | ENSBTAG00000046308                         |
| 4 | 68,025,000 | 68,175,000 | 908 | 323  | -0.471095375 | ENSBTAG00000046308                         |
| 4 | 68,100,000 | 68,250,000 | 909 | 473  | -0.952063639 | ENSBTAG00000046308                         |
| 4 | 68,175,000 | 68,325,000 | 910 | 653  | -0.468800222 | ENSBTAG00000046308                         |
| 4 | 68,250,000 | 68,400,000 | 911 | 963  | 0.104238282  |                                            |
| 4 | 68,325,000 | 68,475,000 | 912 | 1001 | 0.216004114  | JAZF1                                      |
| 4 | 68,400,000 | 68,550,000 | 913 | 857  | 0.892958782  | JAZF1                                      |

|   |            |            |     |      |              |                                                               |
|---|------------|------------|-----|------|--------------|---------------------------------------------------------------|
| 4 | 68,475,000 | 68,625,000 | 914 | 981  | 1.024119664  | JAZF1                                                         |
| 4 | 68,550,000 | 68,700,000 | 915 | 974  | 0.887999024  | JAZF1                                                         |
| 4 | 68,625,000 | 68,775,000 | 916 | 977  | 0.954813259  | JAZF1                                                         |
| 4 | 68,700,000 | 68,850,000 | 917 | 763  | 0.89799814   | JAZF1,TAX1BP1                                                 |
| 4 | 68,775,000 | 68,925,000 | 918 | 722  | 0.847523462  | TAX1BP1                                                       |
| 4 | 68,850,000 | 69,000,000 | 919 | 791  | 0.871760952  | HIBADH,TAX1BP1                                                |
| 4 | 68,925,000 | 69,075,000 | 920 | 719  | 0.771681033  | HIBADH                                                        |
| 4 | 69,000,000 | 69,150,000 | 921 | 904  | 0.812835259  | HIBADH                                                        |
| 4 | 69,075,000 | 69,225,000 | 922 | 729  | 0.8395531    |                                                               |
| 4 | 69,150,000 | 69,300,000 | 923 | 390  | 1.003249891  | EVX1,HOXA13                                                   |
| 4 | 69,225,000 | 69,375,000 | 924 | 313  | 1.141034916  | EVX1,HOXA10,HOXA11,HOXA13,HOXA3,HOXA4,HOXA5,HOXA6,HOXA7,HOXA9 |
| 4 | 69,300,000 | 69,450,000 | 925 | 286  | 0.966749925  | HOXA1,HOXA10,HOXA11,HOXA2,HOXA3,HOXA4,HOXA5,HOXA6,HOXA7,HOXA9 |
| 4 | 69,375,000 | 69,525,000 | 926 | 401  | 1.009018171  | HOXA1,HOXA2,HOXA3                                             |
| 4 | 69,450,000 | 69,600,000 | 927 | 556  | 1.02731025   | SKAP2                                                         |
| 4 | 69,525,000 | 69,675,000 | 928 | 658  | 0.855006965  | SKAP2                                                         |
| 4 | 69,600,000 | 69,750,000 | 929 | 594  | 0.740652461  | SKAP2                                                         |
| 4 | 69,675,000 | 69,825,000 | 930 | 719  | 0.223183039  | SKAP2                                                         |
| 4 | 69,750,000 | 69,900,000 | 931 | 933  | 0.262218188  | SKAP2                                                         |
| 4 | 69,825,000 | 69,975,000 | 932 | 1320 | -0.268893685 |                                                               |
| 4 | 69,900,000 | 70,050,000 | 933 | 1234 | -0.285265391 | SNX10                                                         |
| 4 | 69,975,000 | 70,125,000 | 934 | 750  | 0.471615832  | SNX10                                                         |
| 4 | 70,050,000 | 70,200,000 | 935 | 679  | 0.586311735  | HNRNPA2B1,SNX10                                               |
| 4 | 70,125,000 | 70,275,000 | 936 | 805  | 0.924955853  | HNRNPA2B1,NFE2L3                                              |
| 4 | 70,200,000 | 70,350,000 | 937 | 825  | 0.523567328  | HNRNPA2B1,NFE2L3                                              |
| 4 | 70,275,000 | 70,425,000 | 938 | 447  | 0.06167983   |                                                               |
| 4 | 70,350,000 | 70,500,000 | 939 | 230  | 0.34387128   |                                                               |
| 4 | 70,425,000 | 70,575,000 | 940 | 257  | 0.594402609  |                                                               |
| 4 | 70,500,000 | 70,650,000 | 941 | 399  | 0.772388865  |                                                               |
| 4 | 70,575,000 | 70,725,000 | 942 | 426  | 0.978823957  |                                                               |
| 4 | 70,650,000 | 70,800,000 | 943 | 299  | 0.560492972  |                                                               |
| 4 | 70,725,000 | 70,875,000 | 944 | 385  | 0.215065152  |                                                               |
| 4 | 70,800,000 | 70,950,000 | 945 | 538  | 0.829980095  |                                                               |
| 4 | 70,875,000 | 71,025,000 | 946 | 503  | 0.591206305  |                                                               |
| 4 | 70,950,000 | 71,100,000 | 947 | 661  | 1.234600045  |                                                               |
| 4 | 71,025,000 | 71,175,000 | 948 | 877  | 1.393550802  | C7orf31,NPVF                                                  |
| 4 | 71,100,000 | 71,250,000 | 949 | 656  | 1.032435696  | C7orf31,CYCS,NPVF                                             |
| 4 | 71,175,000 | 71,325,000 | 950 | 615  | 0.6900848    | C7orf31,CYCS                                                  |
| 4 | 71,250,000 | 71,400,000 | 951 | 670  | 0.726672978  | OSBPL3                                                        |
| 4 | 71,325,000 | 71,475,000 | 952 | 921  | -0.717230624 | OSBPL3                                                        |
| 4 | 71,400,000 | 71,550,000 | 953 | 1265 | -1.070615003 | DFNA5,OSBPL3,ENSBTAG00000046586                               |
| 4 | 71,475,000 | 71,625,000 | 954 | 1129 | -0.697365857 | DFNA5,OSBPL3,ENSBTAG00000046586                               |
| 4 | 71,550,000 | 71,700,000 | 955 | 834  | -0.141222963 | DFNA5,MPP6                                                    |
| 4 | 71,625,000 | 71,775,000 | 956 | 580  | 0.571670842  | MPP6                                                          |
| 4 | 71,700,000 | 71,850,000 | 957 | 485  | -0.249652514 |                                                               |
| 4 | 71,775,000 | 71,925,000 | 958 | 511  | -1.215313274 |                                                               |
| 4 | 71,850,000 | 72,000,000 | 959 | 576  | -0.329470973 |                                                               |
| 4 | 71,925,000 | 72,075,000 | 960 | 576  | -0.447598063 | NPY                                                           |
| 4 | 72,000,000 | 72,150,000 | 961 | 645  | -1.874435114 | NPY                                                           |
| 4 | 72,075,000 | 72,225,000 | 962 | 581  | -0.712175781 | NPY                                                           |
| 4 | 72,150,000 | 72,300,000 | 963 | 582  | 0.887751025  |                                                               |
| 4 | 72,225,000 | 72,375,000 | 964 | 601  | 0.868906542  |                                                               |

|   |            |            |      |      |              |                                    |
|---|------------|------------|------|------|--------------|------------------------------------|
| 4 | 72,300,000 | 72,450,000 | 965  | 510  | 0.629723874  | STK31                              |
| 4 | 72,375,000 | 72,525,000 | 966  | 437  | 0.523661784  | MGC134574,STK31                    |
| 4 | 72,450,000 | 72,600,000 | 967  | 383  | 0.679825588  | MGC134574,STK31,ENSBTAG00000046457 |
| 4 | 72,525,000 | 72,675,000 | 968  | 493  | -0.015549269 | ENSBTAG00000046457                 |
| 4 | 72,600,000 | 72,750,000 | 969  | 644  | 0.542123085  | ADAM22                             |
| 4 | 72,675,000 | 72,825,000 | 970  | 576  | 0.394919353  | ADAM22,SRI                         |
| 4 | 72,750,000 | 72,900,000 | 971  | 645  | 0.375627665  | ADAM22,SRI,STEAP4                  |
| 4 | 72,825,000 | 72,975,000 | 972  | 680  | 0.68261325   | STEAP4                             |
| 4 | 72,900,000 | 73,050,000 | 973  | 731  | 0.302840401  |                                    |
| 4 | 72,975,000 | 73,125,000 | 974  | 1020 | 0.328974029  |                                    |
| 4 | 73,050,000 | 73,200,000 | 975  | 759  | 0.323843912  |                                    |
| 4 | 73,125,000 | 73,275,000 | 976  | 1053 | 0.692375597  |                                    |
| 4 | 73,200,000 | 73,350,000 | 977  | 1488 | 0.267397449  | ZNF804B                            |
| 4 | 73,275,000 | 73,425,000 | 978  | 1026 | 0.065721616  | C4H7orf62,ZNF804B                  |
| 4 | 73,350,000 | 73,500,000 | 979  | 633  | 0.305332198  | C4H7orf62,ZNF804B                  |
| 4 | 73,425,000 | 73,575,000 | 980  | 788  | -3.999643549 | ZNF804B                            |
| 4 | 73,500,000 | 73,650,000 | 981  | 1117 | -4.146435068 | ZNF804B,ENSBTAG00000015800         |
| 4 | 73,575,000 | 73,725,000 | 982  | 1255 | -0.994194948 | ZNF804B,ENSBTAG00000015800         |
| 4 | 73,650,000 | 73,800,000 | 983  | 900  | 0.556847586  | ZNF804B                            |
| 4 | 73,725,000 | 73,875,000 | 984  | 838  | 1.262571558  | ZNF804B                            |
| 4 | 73,800,000 | 73,950,000 | 985  | 1070 | 1.30036781   | ZNF804B                            |
| 4 | 73,875,000 | 74,025,000 | 986  | 1360 | 1.111808726  | ZNF804B                            |
| 4 | 73,950,000 | 74,100,000 | 987  | 1263 | 0.975979001  |                                    |
| 4 | 74,025,000 | 74,175,000 | 988  | 1004 | 0.307060211  |                                    |
| 4 | 74,100,000 | 74,250,000 | 989  | 1176 | 0.588858731  |                                    |
| 4 | 74,175,000 | 74,325,000 | 990  | 1173 | -1.043632888 |                                    |
| 4 | 74,250,000 | 74,400,000 | 991  | 1195 | -1.9461117   |                                    |
| 4 | 74,325,000 | 74,475,000 | 992  | 1282 | 0.38569931   |                                    |
| 4 | 74,400,000 | 74,550,000 | 993  | 1231 | 0.733398333  |                                    |
| 4 | 74,475,000 | 74,625,000 | 994  | 754  | 0.549619468  |                                    |
| 4 | 74,550,000 | 74,700,000 | 995  | 496  | 0.538016129  |                                    |
| 4 | 74,625,000 | 74,775,000 | 996  | 664  | 0.569912048  |                                    |
| 4 | 74,700,000 | 74,850,000 | 997  | 961  | -0.714689231 | ENSBTAG00000015749                 |
| 4 | 74,775,000 | 74,925,000 | 998  | 1117 | -0.809855104 | CFAP69,STEAP2,ENSBTAG00000015749   |
| 4 | 74,850,000 | 75,000,000 | 999  | 965  | 0.248012477  | CFAP69,STEAP2                      |
| 4 | 74,925,000 | 75,075,000 | 1000 | 736  | 0.22107957   | CFAP69,GTPBP10                     |
| 4 | 75,000,000 | 75,150,000 | 1001 | 732  | 0.295601369  | GTPBP10,HUS1,ENSBTAG00000047435    |
| 4 | 75,075,000 | 75,225,000 | 1002 | 1092 | 0.722286854  | GTPBP10,HUS1,ENSBTAG00000047435    |
| 4 | 75,150,000 | 75,300,000 | 1003 | 1316 | 0.781993909  | HUS1                               |
| 4 | 75,225,000 | 75,375,000 | 1004 | 1074 | 0.844708838  |                                    |
| 4 | 75,300,000 | 75,450,000 | 1005 | 1108 | 0.985457988  |                                    |
| 4 | 75,375,000 | 75,525,000 | 1006 | 1102 | 0.597480315  | TNS3                               |
| 4 | 75,450,000 | 75,600,000 | 1007 | 1116 | 0.214524783  | TNS3                               |
| 4 | 75,525,000 | 75,675,000 | 1008 | 1137 | 0.083447086  | TNS3                               |
| 4 | 75,600,000 | 75,750,000 | 1009 | 912  | 0.104609819  |                                    |
| 4 | 75,675,000 | 75,825,000 | 1010 | 889  | -1.845096939 |                                    |
| 4 | 75,750,000 | 75,900,000 | 1011 | 788  | -1.575637917 |                                    |
| 4 | 75,825,000 | 75,975,000 | 1012 | 775  | 0.591460592  |                                    |
| 4 | 75,900,000 | 76,050,000 | 1013 | 840  | 0.543190372  |                                    |
| 4 | 75,975,000 | 76,125,000 | 1014 | 762  | -0.218275235 |                                    |
| 4 | 76,050,000 | 76,200,000 | 1015 | 848  | -0.795721534 |                                    |
| 4 | 76,125,000 | 76,275,000 | 1016 | 973  | -0.349216239 |                                    |
| 4 | 76,200,000 | 76,350,000 | 1017 | 872  | -0.603389839 |                                    |

|   |            |            |      |      |              |                                                 |
|---|------------|------------|------|------|--------------|-------------------------------------------------|
| 4 | 76,275,000 | 76,425,000 | 1018 | 1128 | -0.334417247 |                                                 |
| 4 | 76,350,000 | 76,500,000 | 1019 | 1120 | -0.048789829 |                                                 |
| 4 | 76,425,000 | 76,575,000 | 1020 | 665  | -0.555704857 |                                                 |
| 4 | 76,500,000 | 76,650,000 | 1021 | 447  | -0.406130276 |                                                 |
| 4 | 76,575,000 | 76,725,000 | 1022 | 293  | -0.164867432 | IGFBP1,IGFBP3                                   |
| 4 | 76,650,000 | 76,800,000 | 1023 | 289  | 0.690472067  | IGFBP1,IGFBP3                                   |
| 4 | 76,725,000 | 76,875,000 | 1024 | 332  | 0.600400608  | ADCY1,IGFBP1                                    |
| 4 | 76,800,000 | 76,950,000 | 1025 | 699  | -0.031151101 | ADCY1                                           |
| 4 | 76,875,000 | 77,025,000 | 1026 | 1099 | -0.429342612 | ADCY1                                           |
| 4 | 76,950,000 | 77,100,000 | 1027 | 1112 | -1.180025505 | ADCY1                                           |
| 4 | 77,025,000 | 77,175,000 | 1028 | 1012 | -0.227881053 | RAMP3                                           |
| 4 | 77,100,000 | 77,250,000 | 1029 | 677  | -0.064662229 | NACAD,RAMP3,TBRG4,ENSBTAG00000046334            |
| 4 | 77,175,000 | 77,325,000 | 1030 | 389  | -1.18545003  | CCM2,MYO1G,NACAD,RAMP3,TBRG4,ENSBTAG00000046334 |
| 4 | 77,250,000 | 77,400,000 | 1031 | 366  | -0.49363894  | CCM2,H2AFV,MYO1G,PURB                           |
| 4 | 77,325,000 | 77,475,000 | 1032 | 376  | -0.09076179  | H2AFV,MYO1G,OGDH,PPIA,PURB,ZMIZ2                |
| 4 | 77,400,000 | 77,550,000 | 1033 | 309  | 0.106159532  | DDX56,H2AFV,OGDH,PPIA,TMED4,ZMIZ2               |
| 4 | 77,475,000 | 77,625,000 | 1034 | 286  | -0.15084069  | DDX56,NPC1L1,NUDCD3,OGDH,TMED4                  |
| 4 | 77,550,000 | 77,700,000 | 1035 | 368  | 0.04787073   | DDX56,NPC1L1,NUDCD3                             |
| 4 | 77,625,000 | 77,775,000 | 1036 | 505  | 0.488276932  | CAMK2B,NUDCD3                                   |
| 4 | 77,700,000 | 77,850,000 | 1037 | 710  | 0.508379888  | CAMK2B,GCK,YKT6                                 |
| 4 | 77,775,000 | 77,925,000 | 1038 | 578  | 0.465623717  | AEBP1,CAMK2B,GCK,MYL7,POLD2,POLM,YKT6           |
| 4 | 77,850,000 | 78,000,000 | 1039 | 419  | 0.767583924  | AEBP1,BLVRA,GCK,MYL7,POLD2,POLM                 |
| 4 | 77,925,000 | 78,075,000 | 1040 | 662  | -0.502652668 | BLVRA                                           |
| 4 | 78,000,000 | 78,150,000 | 1041 | 991  | -0.268279701 | BLVRA,FLJ10803                                  |
| 4 | 78,075,000 | 78,225,000 | 1042 | 1150 | 0.723990788  | FLJ10803,HECW1,STK17A                           |
| 4 | 78,150,000 | 78,300,000 | 1043 | 1055 | 0.707402221  | HECW1,STK17A                                    |
| 4 | 78,225,000 | 78,375,000 | 1044 | 1071 | -0.325468428 | HECW1                                           |
| 4 | 78,300,000 | 78,450,000 | 1045 | 1173 | -1.413477325 | HECW1                                           |
| 4 | 78,375,000 | 78,525,000 | 1046 | 812  | -1.198702465 | HECW1                                           |
| 4 | 78,450,000 | 78,600,000 | 1047 | 613  | -1.095176532 | HECW1                                           |
| 4 | 78,525,000 | 78,675,000 | 1048 | 673  | -0.931938342 |                                                 |
| 4 | 78,600,000 | 78,750,000 | 1049 | 547  | -2.595190123 |                                                 |
| 4 | 78,675,000 | 78,825,000 | 1050 | 500  | -3.482051353 | MRPL32,PSMA2                                    |
| 4 | 78,750,000 | 78,900,000 | 1051 | 466  | -1.940757672 | C7orf25,MRPL32,PSMA2                            |
| 4 | 78,825,000 | 78,975,000 | 1052 | 363  | -1.923311727 | C7orf25,PSMA2                                   |
| 4 | 78,900,000 | 79,050,000 | 1053 | 371  | -1.121906371 |                                                 |
| 4 | 78,975,000 | 79,125,000 | 1054 | 376  | -0.331819594 |                                                 |
| 4 | 79,050,000 | 79,200,000 | 1055 | 348  | -0.251815263 |                                                 |
| 4 | 79,125,000 | 79,275,000 | 1056 | 590  | 0.260712454  |                                                 |
| 4 | 79,200,000 | 79,350,000 | 1057 | 613  | 0.521784981  |                                                 |
| 4 | 79,275,000 | 79,425,000 | 1058 | 430  | 0.396742192  |                                                 |
| 4 | 79,350,000 | 79,500,000 | 1059 | 396  | -0.145412048 | GLI3                                            |
| 4 | 79,425,000 | 79,575,000 | 1060 | 529  | 0.265695008  | GLI3                                            |
| 4 | 79,500,000 | 79,650,000 | 1061 | 566  | 0.423094161  | GLI3                                            |
| 4 | 79,575,000 | 79,725,000 | 1062 | 633  | 0.443498285  | GLI3                                            |
| 4 | 79,650,000 | 79,800,000 | 1063 | 974  | 0.655999253  | GLI3                                            |
| 4 | 79,725,000 | 79,875,000 | 1064 | 1059 | 0.776677034  | GLI3                                            |
| 4 | 79,800,000 | 79,950,000 | 1065 | 889  | 0.58553367   |                                                 |
| 4 | 79,875,000 | 80,025,000 | 1066 | 604  | -0.312142656 | INHBA                                           |
| 4 | 79,950,000 | 80,100,000 | 1067 | 403  | -1.448981887 | INHBA                                           |
| 4 | 80,025,000 | 80,175,000 | 1068 | 474  | -1.992785198 |                                                 |
| 4 | 80,100,000 | 80,250,000 | 1069 | 565  | -3.805904182 |                                                 |

|   |            |            |      |      |              |                                                               |
|---|------------|------------|------|------|--------------|---------------------------------------------------------------|
| 4 | 80,175,000 | 80,325,000 | 1070 | 401  | -4.430924233 |                                                               |
| 4 | 80,250,000 | 80,400,000 | 1071 | 229  | -0.212959512 |                                                               |
| 4 | 80,325,000 | 80,475,000 | 1072 | 281  | 0.829856941  |                                                               |
| 4 | 80,400,000 | 80,550,000 | 1073 | 452  | 0.534709203  |                                                               |
| 4 | 80,475,000 | 80,625,000 | 1074 | 645  | 0.62213981   |                                                               |
| 4 | 80,550,000 | 80,700,000 | 1075 | 529  | -0.778578436 |                                                               |
| 4 | 80,625,000 | 80,775,000 | 1076 | 447  | -1.125851767 |                                                               |
| 4 | 80,700,000 | 80,850,000 | 1077 | 676  | 0.416164612  |                                                               |
| 4 | 80,775,000 | 80,925,000 | 1078 | 851  | 0.474165587  | SUGCT                                                         |
| 4 | 80,850,000 | 81,000,000 | 1079 | 742  | 0.350324536  | SUGCT                                                         |
| 4 | 80,925,000 | 81,075,000 | 1080 | 583  | 0.191552373  | SUGCT                                                         |
| 4 | 81,000,000 | 81,150,000 | 1081 | 788  | 0.092255802  | SUGCT                                                         |
| 4 | 81,075,000 | 81,225,000 | 1082 | 1050 | 0.48201899   | SUGCT                                                         |
| 4 | 81,150,000 | 81,300,000 | 1083 | 1070 | 0.680947832  | SUGCT                                                         |
| 4 | 81,225,000 | 81,375,000 | 1084 | 1112 | 0.862518381  | SUGCT                                                         |
| 4 | 81,300,000 | 81,450,000 | 1085 | 1012 | 1.061319596  | SUGCT                                                         |
| 4 | 81,375,000 | 81,525,000 | 1086 | 1157 | 0.990009951  | SUGCT                                                         |
| 4 | 81,450,000 | 81,600,000 | 1087 | 1355 | 0.956089681  | SUGCT                                                         |
| 4 | 81,525,000 | 81,675,000 | 1088 | 1066 | 0.278428881  | C4H7ORF11,CDK13,SUGCT                                         |
| 4 | 81,600,000 | 81,750,000 | 1089 | 793  | -0.771502454 | C4H7ORF11,CDK13,SUGCT                                         |
| 4 | 81,675,000 | 81,825,000 | 1090 | 903  | -0.696487514 | CDK13                                                         |
| 4 | 81,750,000 | 81,900,000 | 1091 | 1106 | -0.654372456 | CDK13                                                         |
| 4 | 81,825,000 | 81,975,000 | 1092 | 1322 | -0.414725847 | RALA                                                          |
| 4 | 81,900,000 | 82,050,000 | 1093 | 1255 | -0.14563529  | RALA,YAE1D1                                                   |
| 4 | 81,975,000 | 82,125,000 | 1094 | 958  | -0.01709707  | POU6F2,YAE1D1                                                 |
| 4 | 82,050,000 | 82,200,000 | 1095 | 1228 | 0.243282637  | POU6F2                                                        |
| 4 | 82,125,000 | 82,275,000 | 1096 | 1691 | 0.645533462  | POU6F2                                                        |
| 4 | 82,200,000 | 82,350,000 | 1097 | 1571 | 0.403158558  | POU6F2                                                        |
| 4 | 82,275,000 | 82,425,000 | 1098 | 1230 | 0.305055533  | POU6F2                                                        |
| 4 | 82,350,000 | 82,500,000 | 1099 | 859  | 0.333802734  | POU6F2                                                        |
| 4 | 82,425,000 | 82,575,000 | 1100 | 540  | 0.347341917  | POU6F2                                                        |
| 4 | 82,500,000 | 82,650,000 | 1101 | 574  | 0.779858732  |                                                               |
| 4 | 82,575,000 | 82,725,000 | 1102 | 525  | 0.003501346  | VPS41                                                         |
| 4 | 82,650,000 | 82,800,000 | 1103 | 624  | 0.01214951   | VPS41                                                         |
| 4 | 82,725,000 | 82,875,000 | 1104 | 627  | -0.216796341 | VPS41                                                         |
| 4 | 82,800,000 | 82,950,000 | 1105 | 542  | 0.199325587  | VPS41                                                         |
| 4 | 82,875,000 | 83,025,000 | 1106 | 736  | 0.548744585  | VPS41                                                         |
| 4 | 82,950,000 | 83,100,000 | 1107 | 951  | 0.439325149  | AMPH                                                          |
| 4 | 83,025,000 | 83,175,000 | 1108 | 910  | 0.857393625  | AMPH                                                          |
| 4 | 83,100,000 | 83,250,000 | 1109 | 734  | 0.800794585  | AMPH                                                          |
| 4 | 83,175,000 | 83,325,000 | 1110 | 1013 | 0.937713598  | AMPH,TRGV11,ENSBTAG00000000144                                |
| 4 | 83,250,000 | 83,400,000 | 1111 | 1925 | 1.108851058  | TRGV11,ENSBTAG00000000144,ENSBTAG00000010300                  |
| 4 | 83,325,000 | 83,475,000 | 1112 | 2491 | 0.889003139  | ENSBTAG00000002859,ENSBTAG00000010300,ENSBTAG0000047684       |
| 4 | 83,400,000 | 83,550,000 | 1113 | 1768 | -0.034047698 | LSM8,ENSBTAG00000002859,ENSBTAG00000010300,ENSBTAG00000047684 |
| 4 | 83,475,000 | 83,625,000 | 1114 | 1272 | -1.675622326 | LSM8,ENSBTAG00000002859                                       |
| 4 | 83,550,000 | 83,700,000 | 1115 | 1145 | -0.662057392 |                                                               |
| 4 | 83,625,000 | 83,775,000 | 1116 | 912  | 0.282712516  |                                                               |
| 4 | 83,700,000 | 83,850,000 | 1117 | 1351 | -0.033988418 |                                                               |
| 4 | 83,775,000 | 83,925,000 | 1118 | 1318 | -0.036640889 |                                                               |
| 4 | 83,850,000 | 84,000,000 | 1119 | 951  | 0.214174613  |                                                               |
| 4 | 83,925,000 | 84,075,000 | 1120 | 1041 | 0.614095715  |                                                               |

|   |            |            |      |      |              |                   |
|---|------------|------------|------|------|--------------|-------------------|
| 4 | 84,000,000 | 84,150,000 | 1121 | 1040 | 1.038019797  |                   |
| 4 | 84,075,000 | 84,225,000 | 1122 | 937  | 0.584962668  |                   |
| 4 | 84,150,000 | 84,300,000 | 1123 | 1403 | 0.913123058  |                   |
| 4 | 84,225,000 | 84,375,000 | 1124 | 1425 | 1.10405394   |                   |
| 4 | 84,300,000 | 84,450,000 | 1125 | 1025 | 0.090400839  |                   |
| 4 | 84,375,000 | 84,525,000 | 1126 | 1120 | -0.396128312 |                   |
| 4 | 84,450,000 | 84,600,000 | 1127 | 953  | -0.760934302 |                   |
| 4 | 84,525,000 | 84,675,000 | 1128 | 721  | -0.290262748 |                   |
| 4 | 84,600,000 | 84,750,000 | 1129 | 766  | 0.607531732  |                   |
| 4 | 84,675,000 | 84,825,000 | 1130 | 1227 | 0.921036049  |                   |
| 4 | 84,750,000 | 84,900,000 | 1131 | 1200 | 1.177938589  |                   |
| 4 | 84,825,000 | 84,975,000 | 1132 | 581  | 0.911951385  |                   |
| 4 | 84,900,000 | 85,050,000 | 1133 | 518  | 0.299449765  |                   |
| 4 | 84,975,000 | 85,125,000 | 1134 | 790  | 0.560635352  |                   |
| 4 | 85,050,000 | 85,200,000 | 1135 | 987  | 0.511911794  |                   |
| 4 | 85,125,000 | 85,275,000 | 1136 | 826  | 0.432576211  |                   |
| 4 | 85,200,000 | 85,350,000 | 1137 | 592  | 0.928764083  |                   |
| 4 | 85,275,000 | 85,425,000 | 1138 | 640  | 1.285233843  |                   |
| 4 | 85,350,000 | 85,500,000 | 1139 | 463  | 1.223911425  | KCND2             |
| 4 | 85,425,000 | 85,575,000 | 1140 | 520  | 0.700832162  | KCND2             |
| 4 | 85,500,000 | 85,650,000 | 1141 | 715  | 0.584411778  | KCND2             |
| 4 | 85,575,000 | 85,725,000 | 1142 | 748  | 0.706542387  | KCND2             |
| 4 | 85,650,000 | 85,800,000 | 1143 | 1115 | 0.950911654  | KCND2             |
| 4 | 85,725,000 | 85,875,000 | 1144 | 914  | 0.858863854  | KCND2             |
| 4 | 85,800,000 | 85,950,000 | 1145 | 748  | -0.075530501 | KCND2             |
| 4 | 85,875,000 | 86,025,000 | 1146 | 1111 | -0.70331394  | KCND2             |
| 4 | 85,950,000 | 86,100,000 | 1147 | 1063 | -0.684223944 | KCND2,TSPAN12     |
| 4 | 86,025,000 | 86,175,000 | 1148 | 959  | 0.408916744  | TSPAN12           |
| 4 | 86,100,000 | 86,250,000 | 1149 | 738  | 0.636896411  | ING3,TSPAN12      |
| 4 | 86,175,000 | 86,325,000 | 1150 | 626  | 0.305413292  | CPED1,ING3        |
| 4 | 86,250,000 | 86,400,000 | 1151 | 1102 | 1.006242431  | CPED1             |
| 4 | 86,325,000 | 86,475,000 | 1152 | 1282 | 1.062275209  | CPED1             |
| 4 | 86,400,000 | 86,550,000 | 1153 | 970  | 0.805376986  | CPED1             |
| 4 | 86,475,000 | 86,625,000 | 1154 | 646  | 0.742023483  | CPED1,FAM3C,WNT16 |
| 4 | 86,550,000 | 86,700,000 | 1155 | 498  | 0.32255556   | CPED1,FAM3C,WNT16 |
| 4 | 86,625,000 | 86,775,000 | 1156 | 629  | 0.124278828  | FAM3C             |
| 4 | 86,700,000 | 86,850,000 | 1157 | 902  | 0.480160792  |                   |
| 4 | 86,775,000 | 86,925,000 | 1158 | 1243 | 0.762094834  |                   |
| 4 | 86,850,000 | 87,000,000 | 1159 | 1306 | 0.811517336  |                   |
| 4 | 86,925,000 | 87,075,000 | 1160 | 879  | 0.36018303   |                   |
| 4 | 87,000,000 | 87,150,000 | 1161 | 756  | 0.281201563  | PTPRZ1            |
| 4 | 87,075,000 | 87,225,000 | 1162 | 762  | 1.021399045  | PTPRZ1            |
| 4 | 87,150,000 | 87,300,000 | 1163 | 423  | 0.783189876  | PTPRZ1            |
| 4 | 87,225,000 | 87,375,000 | 1164 | 313  | -0.606335041 | AASS,PTPRZ1       |
| 4 | 87,300,000 | 87,450,000 | 1165 | 460  | 0.124121021  | AASS              |
| 4 | 87,375,000 | 87,525,000 | 1166 | 682  | 0.435540856  | CADPS2,FEZF1      |
| 4 | 87,450,000 | 87,600,000 | 1167 | 477  | 0.413518218  | CADPS2,FEZF1      |
| 4 | 87,525,000 | 87,675,000 | 1168 | 474  | -0.977869078 | CADPS2            |
| 4 | 87,600,000 | 87,750,000 | 1169 | 752  | -1.402785604 | CADPS2            |
| 4 | 87,675,000 | 87,825,000 | 1170 | 1060 | -0.853569839 | CADPS2            |
| 4 | 87,750,000 | 87,900,000 | 1171 | 1336 | 0.399916244  | CADPS2            |
| 4 | 87,825,000 | 87,975,000 | 1172 | 1207 | 1.06648535   | CADPS2            |
| 4 | 87,900,000 | 88,050,000 | 1173 | 1045 | 0.699578312  | CADPS2            |



|   |            |            |      |      |              |                                             |
|---|------------|------------|------|------|--------------|---------------------------------------------|
| 4 | 87,975,000 | 88,125,000 | 1174 | 872  | 0.703191153  | CADPS2                                      |
| 4 | 88,050,000 | 88,200,000 | 1175 | 728  | 0.751548467  | CADPS2,TAS2R16                              |
| 4 | 88,125,000 | 88,275,000 | 1176 | 647  | 0.746796667  | SLC13A1,TAS2R16                             |
| 4 | 88,200,000 | 88,350,000 | 1177 | 624  | 0.832234572  | SLC13A1                                     |
| 4 | 88,275,000 | 88,425,000 | 1178 | 552  | 0.242484313  | SLC13A1                                     |
| 4 | 88,350,000 | 88,500,000 | 1179 | 450  | -0.635422387 | SLC13A1                                     |
| 4 | 88,425,000 | 88,575,000 | 1180 | 285  | -1.213356623 | IQUB                                        |
| 4 | 88,500,000 | 88,650,000 | 1181 | 163  | -0.675548602 | IQUB                                        |
| 4 | 88,575,000 | 88,725,000 | 1182 | 243  | -1.264997632 | ASB15,IQUB,NDUFA5                           |
| 4 | 88,650,000 | 88,800,000 | 1183 | 485  | -0.960461419 | ASB15,LMOD2,NDUFA5,WASL                     |
| 4 | 88,725,000 | 88,875,000 | 1184 | 603  | -1.120834049 | ASB15,LMOD2,WASL                            |
| 4 | 88,800,000 | 88,950,000 | 1185 | 662  | -1.671750298 | WASL                                        |
| 4 | 88,875,000 | 89,025,000 | 1186 | 1090 | -0.913673323 | HYAL4,ENSBTAG00000004640                    |
| 4 | 88,950,000 | 89,100,000 | 1187 | 1225 | -0.109205889 | HYAL4,ENSBTAG00000004640,ENSBTAG00000040349 |
| 4 | 89,025,000 | 89,175,000 | 1188 | 921  | 0.612916487  | ENSBTAG00000031958,ENSBTAG00000040349       |
| 4 | 89,100,000 | 89,250,000 | 1189 | 803  | 0.681679923  | ENSBTAG00000031958                          |
| 4 | 89,175,000 | 89,325,000 | 1190 | 1206 | 0.730129667  |                                             |
| 4 | 89,250,000 | 89,400,000 | 1191 | 1285 | 0.483778504  |                                             |
| 4 | 89,325,000 | 89,475,000 | 1192 | 1100 | 0.744496115  |                                             |
| 4 | 89,400,000 | 89,550,000 | 1193 | 1034 | 0.857256447  |                                             |
| 4 | 89,475,000 | 89,625,000 | 1194 | 893  | 0.380251921  |                                             |
| 4 | 89,550,000 | 89,700,000 | 1195 | 631  | -0.078940439 |                                             |
| 4 | 89,625,000 | 89,775,000 | 1196 | 446  | -1.555499484 |                                             |
| 4 | 89,700,000 | 89,850,000 | 1197 | 564  | -0.943408512 | GPR37                                       |
| 4 | 89,775,000 | 89,925,000 | 1198 | 903  | -1.349222287 | GPR37,POT1                                  |
| 4 | 89,850,000 | 90,000,000 | 1199 | 1157 | -2.337223896 | POT1                                        |
| 4 | 89,925,000 | 90,075,000 | 1200 | 1324 | -0.717802766 | POT1                                        |
| 4 | 90,000,000 | 90,150,000 | 1201 | 1325 | -0.362943823 |                                             |
| 4 | 90,075,000 | 90,225,000 | 1202 | 1198 | -1.133976287 |                                             |
| 4 | 90,150,000 | 90,300,000 | 1203 | 1121 | 0.074192667  |                                             |
| 4 | 90,225,000 | 90,375,000 | 1204 | 921  | 0.018295125  |                                             |
| 4 | 90,300,000 | 90,450,000 | 1205 | 1166 | 0.518723189  |                                             |
| 4 | 90,375,000 | 90,525,000 | 1206 | 1265 | 0.259251632  |                                             |
| 4 | 90,450,000 | 90,600,000 | 1207 | 1272 | -0.127682906 |                                             |
| 4 | 90,525,000 | 90,675,000 | 1208 | 1332 | -0.006088259 |                                             |
| 4 | 90,600,000 | 90,750,000 | 1209 | 1349 | 0.20742857   |                                             |
| 4 | 90,675,000 | 90,825,000 | 1210 | 1228 | 0.723446722  |                                             |
| 4 | 90,750,000 | 90,900,000 | 1211 | 1268 | -0.32766351  |                                             |
| 4 | 90,825,000 | 90,975,000 | 1212 | 1365 | -1.103745782 |                                             |
| 4 | 90,900,000 | 91,050,000 | 1213 | 1354 | -0.258645875 |                                             |
| 4 | 90,975,000 | 91,125,000 | 1214 | 1559 | 0.585145316  |                                             |
| 4 | 91,050,000 | 91,200,000 | 1215 | 1597 | -0.88340042  |                                             |
| 4 | 91,125,000 | 91,275,000 | 1216 | 1423 | -2.878095045 |                                             |
| 4 | 91,200,000 | 91,350,000 | 1217 | 971  | -2.759966617 |                                             |
| 4 | 91,275,000 | 91,425,000 | 1218 | 895  | -0.990774824 |                                             |
| 4 | 91,350,000 | 91,500,000 | 1219 | 1038 | 0.282289216  |                                             |
| 4 | 91,425,000 | 91,575,000 | 1220 | 1003 | 0.367528698  |                                             |
| 4 | 91,500,000 | 91,650,000 | 1221 | 921  | 0.501089808  |                                             |
| 4 | 91,575,000 | 91,725,000 | 1222 | 601  | 0.467624534  |                                             |
| 4 | 91,650,000 | 91,800,000 | 1223 | 936  | -0.117815761 |                                             |
| 4 | 91,725,000 | 91,875,000 | 1224 | 1285 | -0.491486591 |                                             |
| 4 | 91,800,000 | 91,950,000 | 1225 | 1235 | -0.182925613 |                                             |
| 4 | 91,875,000 | 92,025,000 | 1226 | 1187 | 0.572113075  |                                             |

|   |            |            |      |      |              |                                                        |
|---|------------|------------|------|------|--------------|--------------------------------------------------------|
| 4 | 91,950,000 | 92,100,000 | 1227 | 1128 | 0.9388069    |                                                        |
| 4 | 92,025,000 | 92,175,000 | 1228 | 1338 | 1.091297735  |                                                        |
| 4 | 92,100,000 | 92,250,000 | 1229 | 1040 | 1.138027608  |                                                        |
| 4 | 92,175,000 | 92,325,000 | 1230 | 616  | 0.561129148  |                                                        |
| 4 | 92,250,000 | 92,400,000 | 1231 | 526  | 0.140696437  |                                                        |
| 4 | 92,325,000 | 92,475,000 | 1232 | 391  | 0.700341196  | ZNF800                                                 |
| 4 | 92,400,000 | 92,550,000 | 1233 | 305  | -0.007621457 | ZNF800                                                 |
| 4 | 92,475,000 | 92,625,000 | 1234 | 866  | 0.69455708   | ARF5,GCC1                                              |
| 4 | 92,550,000 | 92,700,000 | 1235 | 1219 | 0.976897526  | ARF5,FSCN3,GCC1,PAX4,SND1                              |
| 4 | 92,625,000 | 92,775,000 | 1236 | 1036 | 1.009576722  | ARF5,FSCN3,PAX4,SND1                                   |
| 4 | 92,700,000 | 92,850,000 | 1237 | 858  | 1.039154466  | SND1                                                   |
| 4 | 92,775,000 | 92,925,000 | 1238 | 757  | 0.902047005  | SND1                                                   |
| 4 | 92,850,000 | 93,000,000 | 1239 | 1107 | 0.883121543  | LRRC4,SND1                                             |
| 4 | 92,925,000 | 93,075,000 | 1240 | 1094 | 0.602624439  | LRRC4,SND1                                             |
| 4 | 93,000,000 | 93,150,000 | 1241 | 1078 | 0.765611348  | LRRC4,SND1                                             |
| 4 | 93,075,000 | 93,225,000 | 1242 | 1353 | 0.987361692  | SND1                                                   |
| 4 | 93,150,000 | 93,300,000 | 1243 | 1480 | 0.48499172   | OB                                                     |
| 4 | 93,225,000 | 93,375,000 | 1244 | 1315 | 0.429394023  | OB,PRRT4,RBM28                                         |
| 4 | 93,300,000 | 93,450,000 | 1245 | 818  | 0.673170804  | IMPDH1,PRRT4,RBM28,ENSBTAG00000031866                  |
| 4 | 93,375,000 | 93,525,000 | 1246 | 762  | 0.777751417  | FAM71F1,FAM71F2,HIG2,IMPDH1,ENSBTAG00000031866         |
| 4 | 93,450,000 | 93,600,000 | 1247 | 797  | 0.977010979  | CALU,CCDC136,FAM71F1,FAM71F2,HIG2,OPN1SW               |
| 4 | 93,525,000 | 93,675,000 | 1248 | 611  | 0.94632671   | ATP6V1F,CALU,CCDC136,FLNC,KCP,OPN1SW,ENSBTAG0000045645 |
| 4 | 93,600,000 | 93,750,000 | 1249 | 614  | 0.836309033  | ATP6V1F,CCDC136,FLNC,IRF5,KCP,TNPO3,ENSBTAG0000045645  |
| 4 | 93,675,000 | 93,825,000 | 1250 | 626  | 0.862518897  | IRF5,KCP,TNPO3                                         |
| 4 | 93,750,000 | 93,900,000 | 1251 | 596  | 1.020826129  | TNPO3,TSPAN33                                          |
| 4 | 93,825,000 | 93,975,000 | 1252 | 521  | 1.181028346  | AHCYL2,SMO,TSPAN33                                     |
| 4 | 93,900,000 | 94,050,000 | 1253 | 566  | 1.006979792  | AHCYL2,SMO,TSPAN33                                     |
| 4 | 93,975,000 | 94,125,000 | 1254 | 766  | 1.032207445  | AHCYL2                                                 |
| 4 | 94,050,000 | 94,200,000 | 1255 | 812  | 1.10222548   | AHCYL2,STRIP2                                          |
| 4 | 94,125,000 | 94,275,000 | 1256 | 863  | 0.843935243  | AHCYL2,NRF1,STRIP2                                     |
| 4 | 94,200,000 | 94,350,000 | 1257 | 698  | 0.737771543  | NRF1,STRIP2                                            |
| 4 | 94,275,000 | 94,425,000 | 1258 | 356  | 0.858632594  | NRF1                                                   |
| 4 | 94,350,000 | 94,500,000 | 1259 | 207  | 0.659360626  | NRF1,UBE2H,ENSBTAG00000047845                          |
| 4 | 94,425,000 | 94,575,000 | 1260 | 146  | 0.179708628  | UBE2H,ENSBTAG00000047845                               |
| 4 | 94,500,000 | 94,650,000 | 1261 | 202  | -0.927271425 | UBE2H,ZC3HC1                                           |
| 4 | 94,575,000 | 94,725,000 | 1262 | 237  | -0.771653699 | KLHDC10,ZC3HC1                                         |
| 4 | 94,650,000 | 94,800,000 | 1263 | 259  | -0.582415411 | KLHDC10,TMEM209,ZC3HC1                                 |
| 4 | 94,725,000 | 94,875,000 | 1264 | 226  | -0.800678068 | CPA4,KLHDC10,MGC127766,TMEM209                         |
| 4 | 94,800,000 | 94,950,000 | 1265 | 155  | -1.460949208 | CPA1,CPA4,CPA5,MGC127766                               |
| 4 | 94,875,000 | 95,025,000 | 1266 | 166  | -1.44178961  | CEP41,CPA1,CPA4,CPA5                                   |
| 4 | 94,950,000 | 95,100,000 | 1267 | 178  | -0.73720182  | CEP41,COPG2,MEST                                       |
| 4 | 95,025,000 | 95,175,000 | 1268 | 224  | 0.521469302  | COPG2,MEST                                             |
| 4 | 95,100,000 | 95,250,000 | 1269 | 295  | 1.047884478  | COPG2,TSGA13                                           |
| 4 | 95,175,000 | 95,325,000 | 1270 | 341  | 1.030861515  | COPG2,TSGA13                                           |
| 4 | 95,250,000 | 95,400,000 | 1271 | 507  | 0.569166498  |                                                        |
| 4 | 95,325,000 | 95,475,000 | 1272 | 527  | 0.687356137  |                                                        |
| 4 | 95,400,000 | 95,550,000 | 1273 | 639  | 1.094628357  |                                                        |
| 4 | 95,475,000 | 95,625,000 | 1274 | 832  | 1.091154882  |                                                        |
| 4 | 95,550,000 | 95,700,000 | 1275 | 839  | 0.955460888  |                                                        |
| 4 | 95,625,000 | 95,775,000 | 1276 | 627  | 0.970254116  |                                                        |
| 4 | 95,700,000 | 95,850,000 | 1277 | 621  | 0.57253665   | MKLN1                                                  |

|   |            |            |      |      |              |                             |
|---|------------|------------|------|------|--------------|-----------------------------|
| 4 | 95,775,000 | 95,925,000 | 1278 | 740  | 0.692922199  | MKLN1                       |
| 4 | 95,850,000 | 96,000,000 | 1279 | 617  | 1.119705824  | MKLN1                       |
| 4 | 95,925,000 | 96,075,000 | 1280 | 1082 | 0.351616723  | MKLN1,PODXL                 |
| 4 | 96,000,000 | 96,150,000 | 1281 | 1584 | 0.296901543  | MKLN1,PODXL                 |
| 4 | 96,075,000 | 96,225,000 | 1282 | 1407 | 0.489523863  |                             |
| 4 | 96,150,000 | 96,300,000 | 1283 | 1254 | 0.753014585  |                             |
| 4 | 96,225,000 | 96,375,000 | 1284 | 906  | 0.57475584   |                             |
| 4 | 96,300,000 | 96,450,000 | 1285 | 403  | -0.147692078 |                             |
| 4 | 96,375,000 | 96,525,000 | 1286 | 701  | 0.558233248  |                             |
| 4 | 96,450,000 | 96,600,000 | 1287 | 1070 | 0.35437484   | PLEX2                       |
| 4 | 96,525,000 | 96,675,000 | 1288 | 1008 | 0.613335424  | PLEX2                       |
| 4 | 96,600,000 | 96,750,000 | 1289 | 962  | 0.915786266  | PLEX2                       |
| 4 | 96,675,000 | 96,825,000 | 1290 | 1356 | -1.63271081  | PLEX2                       |
| 4 | 96,750,000 | 96,900,000 | 1291 | 1133 | -2.94254556  | PLEX2,ENSBTAG00000038448    |
| 4 | 96,825,000 | 96,975,000 | 1292 | 479  | 0.100414897  | PLEX2,ENSBTAG00000038448    |
| 4 | 96,900,000 | 97,050,000 | 1293 | 548  | 0.3297782    | PLEX2                       |
| 4 | 96,975,000 | 97,125,000 | 1294 | 937  | 0.276977795  | PLEX2                       |
| 4 | 97,050,000 | 97,200,000 | 1295 | 1233 | 0.88013705   |                             |
| 4 | 97,125,000 | 97,275,000 | 1296 | 1302 | 0.251922234  |                             |
| 4 | 97,200,000 | 97,350,000 | 1297 | 1067 | -0.425391521 | CHCHD3                      |
| 4 | 97,275,000 | 97,425,000 | 1298 | 734  | -0.317341661 | CHCHD3                      |
| 4 | 97,350,000 | 97,500,000 | 1299 | 515  | -0.585744886 | CHCHD3                      |
| 4 | 97,425,000 | 97,575,000 | 1300 | 355  | -0.393129236 | CHCHD3                      |
| 4 | 97,500,000 | 97,650,000 | 1301 | 256  | 0.028994849  | CHCHD3                      |
| 4 | 97,575,000 | 97,725,000 | 1302 | 679  | -0.051581259 | CHCHD3                      |
| 4 | 97,650,000 | 97,800,000 | 1303 | 1199 | 0.447875286  | EXOC4                       |
| 4 | 97,725,000 | 97,875,000 | 1304 | 1370 | 1.104321796  | EXOC4                       |
| 4 | 97,800,000 | 97,950,000 | 1305 | 1021 | 1.01051434   | EXOC4                       |
| 4 | 97,875,000 | 98,025,000 | 1306 | 519  | 1.019124964  | EXOC4                       |
| 4 | 97,950,000 | 98,100,000 | 1307 | 492  | 0.471710505  | EXOC4                       |
| 4 | 98,025,000 | 98,175,000 | 1308 | 393  | -0.699079041 | EXOC4                       |
| 4 | 98,100,000 | 98,250,000 | 1309 | 691  | 0.497545422  | EXOC4                       |
| 4 | 98,175,000 | 98,325,000 | 1310 | 940  | 0.940810265  | EXOC4                       |
| 4 | 98,250,000 | 98,400,000 | 1311 | 745  | 0.535123802  | EXOC4                       |
| 4 | 98,325,000 | 98,475,000 | 1312 | 762  | 0.053601573  | EXOC4                       |
| 4 | 98,400,000 | 98,550,000 | 1313 | 988  | 0.369649316  | EXOC4                       |
| 4 | 98,475,000 | 98,625,000 | 1314 | 1000 | 0.497882459  | EXOC4                       |
| 4 | 98,550,000 | 98,700,000 | 1315 | 871  | 0.858507956  | EXOC4,LRGUK                 |
| 4 | 98,625,000 | 98,775,000 | 1316 | 472  | 1.163430859  | LRGUK                       |
| 4 | 98,700,000 | 98,850,000 | 1317 | 446  | 1.222073122  | LRGUK,SLC35B4               |
| 4 | 98,775,000 | 98,925,000 | 1318 | 919  | 0.784415394  | LRGUK,SLC35B4               |
| 4 | 98,850,000 | 99,000,000 | 1319 | 1040 | 0.753210463  | SLC35B4                     |
| 4 | 98,925,000 | 99,075,000 | 1320 | 722  | 0.657618837  | AKR1B1                      |
| 4 | 99,000,000 | 99,150,000 | 1321 | 664  | 0.588562395  | AKR1B1,ENSBTAG00000001582   |
| 4 | 99,075,000 | 99,225,000 | 1322 | 657  | 0.755135394  | BPGM,ENSBTAG00000001582     |
| 4 | 99,150,000 | 99,300,000 | 1323 | 387  | 0.469396285  | BPGM                        |
| 4 | 99,225,000 | 99,375,000 | 1324 | 483  | 0.573570852  | BPGM                        |
| 4 | 99,300,000 | 99,450,000 | 1325 | 633  | 0.459485685  |                             |
| 4 | 99,375,000 | 99,525,000 | 1326 | 615  | 0.059685473  | CALD1                       |
| 4 | 99,450,000 | 99,600,000 | 1327 | 506  | -0.420700975 | AGBL3,CALD1                 |
| 4 | 99,525,000 | 99,675,000 | 1328 | 345  | -0.169852599 | AGBL3,CALD1                 |
| 4 | 99,600,000 | 99,750,000 | 1329 | 503  | 0.453654588  | AGBL3,C7orf49,TMEM140,WDR91 |

|   |             |             |      |      |              |                                                      |
|---|-------------|-------------|------|------|--------------|------------------------------------------------------|
| 4 | 99,675,000  | 99,825,000  | 1330 | 780  | 0.086448532  | AGBL3,C7orf49,STRA8,TMEM140,WDR91,ENSBTAG00000031548 |
| 4 | 99,750,000  | 99,900,000  | 1331 | 899  | 0.023605907  | STRA8,WDR91,ENSBTAG00000031548,ENSBTAG00000047605    |
| 4 | 99,825,000  | 99,975,000  | 1332 | 1338 | 0.563252367  | ENSBTAG00000031548,ENSBTAG00000047605                |
| 4 | 99,900,000  | 100,050,000 | 1333 | 1072 | 0.672956215  | CNOT4,ENSBTAG00000031548,ENSBTAG00000047605          |
| 4 | 99,975,000  | 100,125,000 | 1334 | 464  | 0.440963198  | CNOT4                                                |
| 4 | 100,050,000 | 100,200,000 | 1335 | 470  | 0.460931745  | CNOT4,NUP205                                         |
| 4 | 100,125,000 | 100,275,000 | 1336 | 407  | -0.122449275 | CNOT4,NUP205,PL-5283                                 |
| 4 | 100,200,000 | 100,350,000 | 1337 | 366  | -0.654075885 | FAM180A,NUP205,PL-5283,SLC13A4                       |
| 4 | 100,275,000 | 100,425,000 | 1338 | 465  | -0.788136463 | FAM180A,PL-5283,SLC13A4                              |
| 4 | 100,350,000 | 100,500,000 | 1339 | 546  | -1.030638553 |                                                      |
| 4 | 100,425,000 | 100,575,000 | 1340 | 664  | -0.891817812 | MTPN                                                 |
| 4 | 100,500,000 | 100,650,000 | 1341 | 855  | -0.73639662  | MTPN                                                 |
| 4 | 100,575,000 | 100,725,000 | 1342 | 1009 | 0.410398806  | MTPN                                                 |
| 4 | 100,650,000 | 100,800,000 | 1343 | 882  | 1.160047711  |                                                      |
| 4 | 100,725,000 | 100,875,000 | 1344 | 896  | 0.180173003  |                                                      |
| 4 | 100,800,000 | 100,950,000 | 1345 | 1007 | 0.138835893  |                                                      |
| 4 | 100,875,000 | 101,025,000 | 1346 | 884  | 0.863614411  |                                                      |
| 4 | 100,950,000 | 101,100,000 | 1347 | 980  | 1.269561243  |                                                      |
| 4 | 101,025,000 | 101,175,000 | 1348 | 895  | 1.014437376  |                                                      |
| 4 | 101,100,000 | 101,250,000 | 1349 | 735  | 0.151476427  |                                                      |
| 4 | 101,175,000 | 101,325,000 | 1350 | 816  | -0.371809705 |                                                      |
| 4 | 101,250,000 | 101,400,000 | 1351 | 699  | -0.31414733  |                                                      |
| 4 | 101,325,000 | 101,475,000 | 1352 | 899  | 0.784221709  |                                                      |
| 4 | 101,400,000 | 101,550,000 | 1353 | 855  | 0.700587514  |                                                      |
| 4 | 101,475,000 | 101,625,000 | 1354 | 705  | -7.78E-05    | CHRM2                                                |
| 4 | 101,550,000 | 101,700,000 | 1355 | 746  | -0.635800363 | CHRM2,PTN                                            |
| 4 | 101,625,000 | 101,775,000 | 1356 | 533  | -0.36195482  | PTN                                                  |
| 4 | 101,700,000 | 101,850,000 | 1357 | 613  | -0.774593578 | PTN                                                  |
| 4 | 101,775,000 | 101,925,000 | 1358 | 811  | -0.576142296 | DGKI,PTN                                             |
| 4 | 101,850,000 | 102,000,000 | 1359 | 1027 | 0.585872068  | DGKI                                                 |
| 4 | 101,925,000 | 102,075,000 | 1360 | 1001 | 0.120212064  | DGKI                                                 |
| 4 | 102,000,000 | 102,150,000 | 1361 | 761  | -1.336918241 | DGKI                                                 |
| 4 | 102,075,000 | 102,225,000 | 1362 | 760  | -1.353031337 | DGKI                                                 |
| 4 | 102,150,000 | 102,300,000 | 1363 | 710  | -0.841295638 | DGKI                                                 |
| 4 | 102,225,000 | 102,375,000 | 1364 | 408  | -0.533820395 |                                                      |
| 4 | 102,300,000 | 102,450,000 | 1365 | 487  | 0.389396336  | CREB3L2                                              |
| 4 | 102,375,000 | 102,525,000 | 1366 | 770  | 0.853231458  | CREB3L2                                              |
| 4 | 102,450,000 | 102,600,000 | 1367 | 745  | 0.886233848  | AKR1D1,CREB3L2                                       |
| 4 | 102,525,000 | 102,675,000 | 1368 | 706  | 0.858709985  | AKR1D1,CREB3L2                                       |
| 4 | 102,600,000 | 102,750,000 | 1369 | 543  | 0.518156895  | AKR1D1                                               |
| 4 | 102,675,000 | 102,825,000 | 1370 | 440  | 0.122029392  |                                                      |
| 4 | 102,750,000 | 102,900,000 | 1371 | 469  | 0.313933133  |                                                      |
| 4 | 102,825,000 | 102,975,000 | 1372 | 373  | 0.663975639  |                                                      |
| 4 | 102,900,000 | 103,050,000 | 1373 | 441  | 1.082886604  | TRIM24                                               |
| 4 | 102,975,000 | 103,125,000 | 1374 | 651  | 0.603480085  | SVOPL,TRIM24                                         |
| 4 | 103,050,000 | 103,200,000 | 1375 | 796  | -0.042858097 | ATP6V0A4,SVOPL,TRIM24                                |
| 4 | 103,125,000 | 103,275,000 | 1376 | 588  | -0.293202528 | ATP6V0A4,SVOPL,TMEM213                               |
| 4 | 103,200,000 | 103,350,000 | 1377 | 481  | 0.79765621   | ATP6V0A4,KIAA1549,TMEM213                            |
| 4 | 103,275,000 | 103,425,000 | 1378 | 926  | 1.274373322  | KIAA1549,TMEM213                                     |
| 4 | 103,350,000 | 103,500,000 | 1379 | 950  | 1.168411564  | KIAA1549,ZC3HAV1,ZC3HAV1L                            |
| 4 | 103,425,000 | 103,575,000 | 1380 | 565  | 0.808693609  | TTC26,ZC3HAV1,ZC3HAV1L                               |

|   |             |             |      |      |              |                                                                                                                                                                                                                                                                                                                                             |
|---|-------------|-------------|------|------|--------------|---------------------------------------------------------------------------------------------------------------------------------------------------------------------------------------------------------------------------------------------------------------------------------------------------------------------------------------------|
| 4 | 103,500,000 | 103,650,000 | 1381 | 434  | 0.432197759  | TTC26,UBN2,ZC3HAV1                                                                                                                                                                                                                                                                                                                          |
| 4 | 103,575,000 | 103,725,000 | 1382 | 384  | -0.446725922 | TTC26,UBN2,ENSBTAG00000017770                                                                                                                                                                                                                                                                                                               |
| 4 | 103,650,000 | 103,800,000 | 1383 | 607  | -0.990673951 | KLRG2,UBN2,ENSBTAG00000017770                                                                                                                                                                                                                                                                                                               |
| 4 | 103,725,000 | 103,875,000 | 1384 | 1035 | -0.226422987 | CLEC2L,KLRG2,ENSBTAG00000017770                                                                                                                                                                                                                                                                                                             |
| 4 | 103,800,000 | 103,950,000 | 1385 | 1322 | 0.70510676   | CLEC2L,HIPK2,KLRG2                                                                                                                                                                                                                                                                                                                          |
| 4 | 103,875,000 | 104,025,000 | 1386 | 1268 | 1.255812876  | HIPK2                                                                                                                                                                                                                                                                                                                                       |
| 4 | 103,950,000 | 104,100,000 | 1387 | 1034 | 1.190662866  | HIPK2                                                                                                                                                                                                                                                                                                                                       |
| 4 | 104,025,000 | 104,175,000 | 1388 | 1178 | 1.134007877  | TBXAS1                                                                                                                                                                                                                                                                                                                                      |
| 4 | 104,100,000 | 104,250,000 | 1389 | 1375 | 0.621733605  | TBXAS1                                                                                                                                                                                                                                                                                                                                      |
| 4 | 104,175,000 | 104,325,000 | 1390 | 1284 | 0.479564579  | PARP12,TBXAS1                                                                                                                                                                                                                                                                                                                               |
| 4 | 104,250,000 | 104,400,000 | 1391 | 859  | 0.742922253  | KDM7A,PARP12,TBXAS1                                                                                                                                                                                                                                                                                                                         |
| 4 | 104,325,000 | 104,475,000 | 1392 | 772  | 0.611025874  | KDM7A,PARP12                                                                                                                                                                                                                                                                                                                                |
| 4 | 104,400,000 | 104,550,000 | 1393 | 1026 | -0.264035467 | KDM7A                                                                                                                                                                                                                                                                                                                                       |
| 4 | 104,475,000 | 104,625,000 | 1394 | 909  | -1.339516337 | SLC37A3                                                                                                                                                                                                                                                                                                                                     |
| 4 | 104,550,000 | 104,700,000 | 1395 | 948  | -0.262311777 | MKRN1,RAB19,SLC37A3                                                                                                                                                                                                                                                                                                                         |
| 4 | 104,625,000 | 104,775,000 | 1396 | 1038 | 0.754010453  | DENND2A,MKRN1,RAB19                                                                                                                                                                                                                                                                                                                         |
| 4 | 104,700,000 | 104,850,000 | 1397 | 798  | 0.965749636  | ADCK2,DENND2A                                                                                                                                                                                                                                                                                                                               |
| 4 | 104,775,000 | 104,925,000 | 1398 | 509  | 1.202929859  | ADCK2,BRAF,DENND2A,NDUFB2                                                                                                                                                                                                                                                                                                                   |
| 4 | 104,850,000 | 105,000,000 | 1399 | 377  | 1.114884841  | BRAF,NDUFB2                                                                                                                                                                                                                                                                                                                                 |
| 4 | 104,925,000 | 105,075,000 | 1400 | 511  | 1.112387906  | BRAF,ENSBTAG00000046211                                                                                                                                                                                                                                                                                                                     |
| 4 | 105,000,000 | 105,150,000 | 1401 | 866  | 1.059349569  | BRAF,MRPS33,ENSBTAG00000046211                                                                                                                                                                                                                                                                                                              |
| 4 | 105,075,000 | 105,225,000 | 1402 | 991  | 0.461678459  | MRPS33                                                                                                                                                                                                                                                                                                                                      |
| 4 | 105,150,000 | 105,300,000 | 1403 | 1043 | 0.296478741  |                                                                                                                                                                                                                                                                                                                                             |
| 4 | 105,225,000 | 105,375,000 | 1404 | 1238 | 0.340651956  |                                                                                                                                                                                                                                                                                                                                             |
| 4 | 105,300,000 | 105,450,000 | 1405 | 1242 | 0.413852817  |                                                                                                                                                                                                                                                                                                                                             |
| 4 | 105,375,000 | 105,525,000 | 1406 | 1272 | 0.395100609  |                                                                                                                                                                                                                                                                                                                                             |
| 4 | 105,450,000 | 105,600,000 | 1407 | 1352 | -0.299826494 | ENSBTAG00000046341                                                                                                                                                                                                                                                                                                                          |
| 4 | 105,525,000 | 105,675,000 | 1408 | 934  | -0.504115997 | AGK,ENSBTAG00000046341                                                                                                                                                                                                                                                                                                                      |
| 4 | 105,600,000 | 105,750,000 | 1409 | 442  | 0.861470587  | AGK                                                                                                                                                                                                                                                                                                                                         |
| 4 | 105,675,000 | 105,825,000 | 1410 | 683  | 0.554307624  | AGK,KIAA1147,WEE2                                                                                                                                                                                                                                                                                                                           |
| 4 | 105,750,000 | 105,900,000 | 1411 | 749  | 0.142117514  | KIAA1147,SSBP1,TAS2R3,TAS2R4,WEE2                                                                                                                                                                                                                                                                                                           |
| 4 | 105,825,000 | 105,975,000 | 1412 | 710  | -0.429821543 | PRSS37,SSBP1,TAS2R3,TAS2R4,WEE2,ENSBTAG00000027341                                                                                                                                                                                                                                                                                          |
| 4 | 105,900,000 | 106,050,000 | 1413 | 1322 | 0.6088595    | OR9A4,PRSS37,ENSBTAG00000027341                                                                                                                                                                                                                                                                                                             |
| 4 | 105,975,000 | 106,125,000 | 1414 | 1666 | 1.043506201  | CLEC5A,MGAM,OR9A4,TAS2R38,ENSBTAG00000003664                                                                                                                                                                                                                                                                                                |
| 4 | 106,050,000 | 106,200,000 | 1415 | 1980 | 0.221577702  | CLEC5A,MGAM,TAS2R38,ENSBTAG00000003664                                                                                                                                                                                                                                                                                                      |
| 4 | 106,125,000 | 106,275,000 | 1416 | 1937 | 0.351990097  | MGAM,ENSBTAG00000046616                                                                                                                                                                                                                                                                                                                     |
| 4 | 106,200,000 | 106,350,000 | 1417 | 1133 | 0.828580514  | MGAM,PRSS58,ENSBTAG00000003621,ENSBTAG000000031236,ENSBTAG00000046616,ENSBTAG00000048012                                                                                                                                                                                                                                                    |
| 4 | 106,275,000 | 106,425,000 | 1418 | 967  | 0.28988046   | PRSS58,ENSBTAG00000003621,ENSBTAG00000003633,ENSBTAG000000024245,ENSBTAG000000031236,ENSBTAG00000046616,ENSBTAG00000048012                                                                                                                                                                                                                  |
| 4 | 106,350,000 | 106,500,000 | 1419 | 1873 | 0.315081804  | TRB@,ENSBTAG00000003633,ENSBTAG00000024245,ENSBTAG000000031232,ENSBTAG000000031236,ENSBTAG000000038385,ENSBTAG000000039956,ENSBTAG00000040281,ENSBTAG00000045978,ENSBTAG00000046164,ENSBTAG00000046660,ENSBTAG00000046793,ENSBTAG00000047072,ENSBTAG00000047562,ENSBTAG00000047657,ENSBTAG00000047722,ENSBTAG00000047725,ENSBTAG00000048016 |

|   |             |             |      |      |              |                                                                                                                                                                                                                                                                                                                                                                                                                                                                                                                                                                                                |
|---|-------------|-------------|------|------|--------------|------------------------------------------------------------------------------------------------------------------------------------------------------------------------------------------------------------------------------------------------------------------------------------------------------------------------------------------------------------------------------------------------------------------------------------------------------------------------------------------------------------------------------------------------------------------------------------------------|
| 4 | 106,425,000 | 106,575,000 | 1420 | 2147 | 0.007408217  | TRB@,ENSBTAG00000031232,ENSBTAG00000031234,ENSBTAG00000038127,ENSBTAG00000038307,ENSBTAG00000038385,ENSBTAG00000038690,ENSBTAG00000038934,ENSBTAG00000038943,ENSBTAG00000038960,ENSBTAG00000039093,ENSBTAG00000039956,ENSBTAG00000040261,ENSBTAG00000040281,ENSBTAG00000040387,ENSBTAG00000040388,ENSBTAG00000045978,ENSBTAG00000046164,ENSBTAG00000046496,ENSBTAG00000046660,ENSBTAG00000046793,ENSBTAG00000047072,ENSBTAG00000047193,ENSBTAG00000047562,ENSBTAG00000047657,ENSBTAG00000047722,ENSBTAG00000047725,ENSBTAG00000047844,ENSBTAG00000047922,ENSBTAG00000048016,ENSBTAG00000048189 |
| 4 | 106,500,000 | 106,650,000 | 1421 | 1777 | -0.523950934 | TRB@,TRBV16,ENSBTAG00000031234,ENSBTAG00000038127,ENSBTAG00000038307,ENSBTAG00000038605,ENSBTAG00000038690,ENSBTAG00000038934,ENSBTAG00000038943,ENSBTAG00000038960,ENSBTAG00000039093,ENSBTAG00000039559,ENSBTAG00000039674,ENSBTAG00000040261,ENSBTAG00000040387,ENSBTAG00000040388,ENSBTAG00000046496,ENSBTAG00000047193,ENSBTAG00000047657,ENSBTAG00000047844,ENSBTAG00000047922,ENSBTAG00000048189                                                                                                                                                                                        |
| 4 | 106,575,000 | 106,725,000 | 1422 | 1353 | -0.201845896 | TRB@,TRBV16,ENSBTAG00000031216,ENSBTAG00000038605,ENSBTAG00000039559,ENSBTAG00000039674                                                                                                                                                                                                                                                                                                                                                                                                                                                                                                        |
| 4 | 106,650,000 | 106,800,000 | 1423 | 1057 | 0.071368664  | ENSBTAG00000031216                                                                                                                                                                                                                                                                                                                                                                                                                                                                                                                                                                             |
| 4 | 106,725,000 | 106,875,000 | 1424 | 1502 | -0.283032766 | TRBV29-1,ENSBTAG00000027204,ENSBTAG00000034609                                                                                                                                                                                                                                                                                                                                                                                                                                                                                                                                                 |
| 4 | 106,800,000 | 106,950,000 | 1425 | 1554 | -0.234145285 | PRSS2,TRBV29-1,TRBV30,ENSBTAG00000002259,ENSBTAG00000027204,ENSBTAG00000034609                                                                                                                                                                                                                                                                                                                                                                                                                                                                                                                 |
| 4 | 106,875,000 | 107,025,000 | 1426 | 1181 | -0.19966791  | EPHB6,PRSS2,TRBV29-1,TRBV30,TRPV6,ENSBTAG00000002259,ENSBTAG00000027204,ENSBTAG00000034609                                                                                                                                                                                                                                                                                                                                                                                                                                                                                                     |
| 4 | 106,950,000 | 107,100,000 | 1427 | 826  | -0.920935749 | C7orf34,EPHB6,KEL,TRPV5,TRPV6                                                                                                                                                                                                                                                                                                                                                                                                                                                                                                                                                                  |
| 4 | 107,025,000 | 107,175,000 | 1428 | 634  | -1.821868812 | C7orf34,KEL,TRPV5                                                                                                                                                                                                                                                                                                                                                                                                                                                                                                                                                                              |
| 4 | 107,100,000 | 107,250,000 | 1429 | 1126 | -0.147495497 | ENSBTAG00000024230,ENSBTAG00000024231,ENSBTAG00000037918                                                                                                                                                                                                                                                                                                                                                                                                                                                                                                                                       |
| 4 | 107,175,000 | 107,325,000 | 1430 | 1367 | 0.206751034  | PIP,ENSBTAG00000024230,ENSBTAG00000024231,ENSBTAG00000037918,ENSBTAG00000045677                                                                                                                                                                                                                                                                                                                                                                                                                                                                                                                |
| 4 | 107,250,000 | 107,400,000 | 1431 | 974  | -0.270432981 | PIP,ENSBTAG00000031212,ENSBTAG00000045677                                                                                                                                                                                                                                                                                                                                                                                                                                                                                                                                                      |
| 4 | 107,325,000 | 107,475,000 | 1432 | 885  | 0.350576874  | GSTK1,TAS2R40,ENSBTAG00000031212                                                                                                                                                                                                                                                                                                                                                                                                                                                                                                                                                               |
| 4 | 107,400,000 | 107,550,000 | 1433 | 909  | 0.867534575  | CASP2,CLCN1,GSTK1,TAS2R40,TMEM139                                                                                                                                                                                                                                                                                                                                                                                                                                                                                                                                                              |
| 4 | 107,475,000 | 107,625,000 | 1434 | 561  | 0.821305529  | CASP2,CLCN1,EPHA1,FAM131B,TMEM139,ZYX                                                                                                                                                                                                                                                                                                                                                                                                                                                                                                                                                          |
| 4 | 107,550,000 | 107,700,000 | 1435 | 621  | 0.035286898  | CLCN1,EPHA1,FAM131B,ZYX,ENSBTAG00000038649                                                                                                                                                                                                                                                                                                                                                                                                                                                                                                                                                     |
| 4 | 107,625,000 | 107,775,000 | 1436 | 1172 | -0.353545306 | ENSBTAG00000013248,ENSBTAG00000038649,ENSBTAG00000039614                                                                                                                                                                                                                                                                                                                                                                                                                                                                                                                                       |
| 4 | 107,700,000 | 107,850,000 | 1437 | 1060 | -0.224200224 | FAM115A,FAM115C,ENSBTAG00000013248,ENSBTAG00000039614                                                                                                                                                                                                                                                                                                                                                                                                                                                                                                                                          |
| 4 | 107,775,000 | 107,925,000 | 1438 | 831  | 0.815686845  | FAM115A,FAM115C,ENSBTAG00000045576                                                                                                                                                                                                                                                                                                                                                                                                                                                                                                                                                             |
| 4 | 107,850,000 | 108,000,000 | 1439 | 975  | 0.656559869  | FAM115A,ENSBTAG00000011191,ENSBTAG00000045576,ENSBTAG00000046020,ENSBTAG00000047188,ENSBTAG00000048115                                                                                                                                                                                                                                                                                                                                                                                                                                                                                         |
| 4 | 107,925,000 | 108,075,000 | 1440 | 1146 | 0.189497519  | OR2A5,OR6B1,ENSBTAG00000011191,ENSBTAG00000046020,ENSBTAG00000047188,ENSBTAG00000048115                                                                                                                                                                                                                                                                                                                                                                                                                                                                                                        |

|   |             |             |      |      |              |                                                                 |
|---|-------------|-------------|------|------|--------------|-----------------------------------------------------------------|
| 4 | 108,000,000 | 108,150,000 | 1441 | 1045 | 0.297061128  | OR2A12,OR2A2,OR2A5,OR6B1,ENSBTAG00000013673,ENSBTAG000000037927 |
| 4 | 108,075,000 | 108,225,000 | 1442 | 914  | 0.870102978  | OR2A12,OR2A2,ENSBTAG00000013673,ENSBTAG000000037927             |
| 4 | 108,150,000 | 108,300,000 | 1443 | 838  | 0.801834536  |                                                                 |
| 4 | 108,225,000 | 108,375,000 | 1444 | 796  | 0.808861623  |                                                                 |
| 4 | 108,300,000 | 108,450,000 | 1445 | 789  | 0.906407131  | ARHGEF5,ENSBTAG00000020364                                      |
| 4 | 108,375,000 | 108,525,000 | 1446 | 1055 | 0.67620406   | ARHGEF5,NOBOX,ENSBTAG00000020364                                |
| 4 | 108,450,000 | 108,600,000 | 1447 | 1213 | 0.890461029  | ARHGEF5,NOBOX,TPK1                                              |
| 4 | 108,525,000 | 108,675,000 | 1448 | 782  | 0.621752991  | TPK1                                                            |
| 4 | 108,600,000 | 108,750,000 | 1449 | 752  | -0.949958769 | TPK1                                                            |
| 4 | 108,675,000 | 108,825,000 | 1450 | 776  | -0.63927057  | TPK1                                                            |
| 4 | 108,750,000 | 108,900,000 | 1451 | 1006 | -0.038113214 | TPK1                                                            |
| 4 | 108,825,000 | 108,975,000 | 1452 | 1214 | -0.395594323 | TPK1                                                            |
| 4 | 108,900,000 | 109,050,000 | 1453 | 1133 | -0.244867485 | TPK1                                                            |
| 4 | 108,975,000 | 109,125,000 | 1454 | 1092 | 0.487329287  |                                                                 |
| 4 | 109,050,000 | 109,200,000 | 1455 | 1042 | -0.059626923 |                                                                 |
| 4 | 109,125,000 | 109,275,000 | 1456 | 1160 | -0.118154187 |                                                                 |
| 4 | 109,200,000 | 109,350,000 | 1457 | 1323 | 0.694069523  |                                                                 |
| 4 | 109,275,000 | 109,425,000 | 1458 | 1207 | 0.144455296  |                                                                 |
| 4 | 109,350,000 | 109,500,000 | 1459 | 1437 | -0.22164879  |                                                                 |
| 4 | 109,425,000 | 109,575,000 | 1460 | 1610 | 0.486085722  |                                                                 |
| 4 | 109,500,000 | 109,650,000 | 1461 | 1088 | 1.098672069  |                                                                 |
| 4 | 109,575,000 | 109,725,000 | 1462 | 1388 | 0.005372214  |                                                                 |
| 4 | 109,650,000 | 109,800,000 | 1463 | 1728 | -0.432989298 |                                                                 |
| 4 | 109,725,000 | 109,875,000 | 1464 | 1562 | -0.443146675 |                                                                 |
| 4 | 109,800,000 | 109,950,000 | 1465 | 1509 | -0.49805324  |                                                                 |
| 4 | 109,875,000 | 110,025,000 | 1466 | 915  | -0.740559182 |                                                                 |
| 4 | 109,950,000 | 110,100,000 | 1467 | 619  | 0.078116056  |                                                                 |
| 4 | 110,025,000 | 110,175,000 | 1468 | 898  | 0.949258008  |                                                                 |
| 4 | 110,100,000 | 110,250,000 | 1469 | 1027 | 0.473448368  |                                                                 |
| 4 | 110,175,000 | 110,325,000 | 1470 | 1019 | 0.050891517  |                                                                 |
| 4 | 110,250,000 | 110,400,000 | 1471 | 1071 | -0.550279452 |                                                                 |
| 4 | 110,325,000 | 110,475,000 | 1472 | 1262 | -0.14063675  |                                                                 |
| 4 | 110,400,000 | 110,550,000 | 1473 | 1117 | 0.953341752  |                                                                 |
| 4 | 110,475,000 | 110,625,000 | 1474 | 975  | 1.198988492  |                                                                 |
| 4 | 110,550,000 | 110,700,000 | 1475 | 1223 | 0.200025125  |                                                                 |
| 4 | 110,625,000 | 110,775,000 | 1476 | 1383 | 0.104111934  |                                                                 |
| 4 | 110,700,000 | 110,850,000 | 1477 | 1265 | 0.421438212  |                                                                 |
| 4 | 110,775,000 | 110,925,000 | 1478 | 1259 | 0.594357142  |                                                                 |
| 4 | 110,850,000 | 111,000,000 | 1479 | 1472 | 1.141799113  | ENSBTAG00000048097                                              |
| 4 | 110,925,000 | 111,075,000 | 1480 | 1555 | 1.004602288  | ENSBTAG00000048097                                              |
| 4 | 111,000,000 | 111,150,000 | 1481 | 1524 | 0.414145253  |                                                                 |
| 4 | 111,075,000 | 111,225,000 | 1482 | 1209 | 0.44001259   | ENSBTAG00000000719                                              |
| 4 | 111,150,000 | 111,300,000 | 1483 | 777  | 1.109801907  | ENSBTAG00000000719                                              |
| 4 | 111,225,000 | 111,375,000 | 1484 | 1155 | 1.288262023  | ENSBTAG00000000719                                              |
| 4 | 111,300,000 | 111,450,000 | 1485 | 1495 | 1.334174899  |                                                                 |
| 4 | 111,375,000 | 111,525,000 | 1486 | 1008 | 1.17996971   |                                                                 |
| 4 | 111,450,000 | 111,600,000 | 1487 | 815  | 0.755763954  | ENSBTAG00000047459                                              |
| 4 | 111,525,000 | 111,675,000 | 1488 | 935  | 0.552313795  | ENSBTAG00000047459                                              |
| 4 | 111,600,000 | 111,750,000 | 1489 | 804  | 0.268587599  |                                                                 |
| 4 | 111,675,000 | 111,825,000 | 1490 | 887  | -0.086580479 |                                                                 |
| 4 | 111,750,000 | 111,900,000 | 1491 | 744  | -0.254918212 |                                                                 |

|   |             |             |      |      |              |                                                                                             |
|---|-------------|-------------|------|------|--------------|---------------------------------------------------------------------------------------------|
| 4 | 111,825,000 | 111,975,000 | 1492 | 816  | 0.374082162  |                                                                                             |
| 4 | 111,900,000 | 112,050,000 | 1493 | 1011 | 0.422851207  | ENSBTAG00000047873                                                                          |
| 4 | 111,975,000 | 112,125,000 | 1494 | 873  | 0.319310448  | ENSBTAG00000047873                                                                          |
| 4 | 112,050,000 | 112,200,000 | 1495 | 1054 | 0.301690047  | ENSBTAG00000045871                                                                          |
| 4 | 112,125,000 | 112,275,000 | 1496 | 1188 | -0.330333878 | ENSBTAG00000027832,ENSBTAG00000045871                                                       |
| 4 | 112,200,000 | 112,350,000 | 1497 | 1179 | -0.768760709 | ENSBTAG00000027832                                                                          |
| 4 | 112,275,000 | 112,425,000 | 1498 | 1039 | -0.844819025 | ENSBTAG00000027832                                                                          |
| 4 | 112,350,000 | 112,500,000 | 1499 | 1117 | -0.365740395 | ENSBTAG00000027832                                                                          |
| 4 | 112,425,000 | 112,575,000 | 1500 | 1210 | 0.182529653  | ENSBTAG00000027832                                                                          |
| 4 | 112,500,000 | 112,650,000 | 1501 | 1403 | 0.291507489  | ENSBTAG00000027832                                                                          |
| 4 | 112,575,000 | 112,725,000 | 1502 | 1202 | 0.09879728   |                                                                                             |
| 4 | 112,650,000 | 112,800,000 | 1503 | 630  | -0.247503519 | CUL1                                                                                        |
| 4 | 112,725,000 | 112,875,000 | 1504 | 368  | -0.15284263  | CUL1,EZH2                                                                                   |
| 4 | 112,800,000 | 112,950,000 | 1505 | 386  | -0.796104009 | CUL1,EZH2                                                                                   |
| 4 | 112,875,000 | 113,025,000 | 1506 | 718  | -0.669733809 | ERP70,ZNF786                                                                                |
| 4 | 112,950,000 | 113,100,000 | 1507 | 968  | -0.215514095 | ERP70,ZNF282,ZNF398,ZNF786                                                                  |
| 4 | 113,025,000 | 113,175,000 | 1508 | 781  | 0.231343515  | ZNF212,ZNF282,ZNF398,ZNF783,ZNF786                                                          |
| 4 | 113,100,000 | 113,250,000 | 1509 | 749  | 1.255178607  | ZNF212,ZNF282,ZNF777,ZNF783                                                                 |
| 4 | 113,175,000 | 113,325,000 | 1510 | 876  | 1.30242766   | ZNF746,ZNF777                                                                               |
| 4 | 113,250,000 | 113,400,000 | 1511 | 832  | 0.686491748  | KRBA1,ZNF746,ZNF777                                                                         |
| 4 | 113,325,000 | 113,475,000 | 1512 | 839  | 0.60771901   | KRBA1,SSPO,ZNF467                                                                           |
| 4 | 113,400,000 | 113,550,000 | 1513 | 894  | 1.284078207  | ATP6V0E2,SSPO,ZNF467,ZNF862                                                                 |
| 4 | 113,475,000 | 113,625,000 | 1514 | 1096 | 1.233613299  | ATP6V0E2,LRRC61,RARRES2,REPIN1,SSPO,ZNF862                                                  |
| 4 | 113,550,000 | 113,700,000 | 1515 | 1730 | 0.572917324  | GIMAP8,LRRC61,RARRES2,REPIN1,ZNF775                                                         |
| 4 | 113,625,000 | 113,775,000 | 1516 | 2133 | 0.373060845  | GIMAP7,GIMAP8,ZNF775,ENSBTAG00000039588                                                     |
| 4 | 113,700,000 | 113,850,000 | 1517 | 1679 | 0.41039312   | GIMAP7,ENSBTAG00000039588                                                                   |
| 4 | 113,775,000 | 113,925,000 | 1518 | 1370 | 0.547352685  | GIMAP4,GIMAP7                                                                               |
| 4 | 113,850,000 | 114,000,000 | 1519 | 1452 | -0.191835387 | GIMAP1,GIMAP4,GIMAP7                                                                        |
| 4 | 113,925,000 | 114,075,000 | 1520 | 1374 | -0.231455037 | GIMAP1,GIMAP7,ENSBTAG00000039928                                                            |
| 4 | 114,000,000 | 114,150,000 | 1521 | 1554 | -0.065273591 | ENSBTAG0000000715,ENSBTAG0000004894,ENSBTAG0000008550,ENSBTAG00000037510,ENSBTAG00000039928 |
| 4 | 114,075,000 | 114,225,000 | 1522 | 1612 | -0.176387973 | TMEM176A, TMEM176B,ENSBTAG0000000715,ENSBTAG0000004894,ENSBTAG0000008550,ENSBTAG00000037510 |
| 4 | 114,150,000 | 114,300,000 | 1523 | 1320 | 0.361587365  | ABP1, TMEM176A, TMEM176B,ENSBTAG0000000715                                                  |
| 4 | 114,225,000 | 114,375,000 | 1524 | 1217 | 0.635925302  | ABP1,KCNH2                                                                                  |
| 4 | 114,300,000 | 114,450,000 | 1525 | 1073 | 0.366331152  | ABCB8,ACCN3,ATG9B,CDK5,KCNH2,NOS3,SLC4A2                                                    |
| 4 | 114,375,000 | 114,525,000 | 1526 | 910  | -0.330888192 | ABCB8,ACCN3,AGAP3,ATG9B,CDK5,FASTK,GBX1,NOS3,SLC4A2,TMUB1                                   |
| 4 | 114,450,000 | 114,600,000 | 1527 | 933  | -0.16217319  | ABCF2,AGAP3,ASB10,FASTK,GBX1,IQCA1P1,SLC4A2,TMUB1,ENSBTAG00000024204                        |
| 4 | 114,525,000 | 114,675,000 | 1528 | 1250 | 0.444774132  | ABCF2,ASB10,CHPF2,GBX1,IQCA1P1,SMARCD3,ENSBTAG00000024204                                   |
| 4 | 114,600,000 | 114,750,000 | 1529 | 1224 | 0.4825956    | ABCF2,CHPF2,NUB1,SMARCD3,WDR86                                                              |
| 4 | 114,675,000 | 114,825,000 | 1530 | 1204 | 0.218249171  | CRYGN,NUB1,RHEB,SMARCD3,WDR86                                                               |
| 4 | 114,750,000 | 114,900,000 | 1531 | 927  | 0.584279501  | CRYGN,PRKAG2,RHEB,WDR86                                                                     |
| 4 | 114,825,000 | 114,975,000 | 1532 | 455  | 0.464490421  | PRKAG2,RHEB,ENSBTAG00000046461                                                              |
| 4 | 114,900,000 | 115,050,000 | 1533 | 744  | 0.515154017  | PRKAG2,ENSBTAG00000046461                                                                   |
| 4 | 114,975,000 | 115,125,000 | 1534 | 1022 | 0.72092642   |                                                                                             |
| 4 | 115,050,000 | 115,200,000 | 1535 | 1011 | 0.951267565  |                                                                                             |
| 4 | 115,125,000 | 115,275,000 | 1536 | 1196 | 0.735455123  | GALNTL5                                                                                     |
| 4 | 115,200,000 | 115,350,000 | 1537 | 1034 | 0.02854366   | GALNT11,GALNTL5                                                                             |



|   |             |             |      |      |              |                          |
|---|-------------|-------------|------|------|--------------|--------------------------|
| 4 | 115,275,000 | 115,425,000 | 1538 | 485  | -0.395332179 | GALNT11,GALNTL5,KMT2C    |
| 4 | 115,350,000 | 115,500,000 | 1539 | 453  | 0.83792853   | GALNT11,KMT2C            |
| 4 | 115,425,000 | 115,575,000 | 1540 | 717  | 0.654379732  | KMT2C                    |
| 4 | 115,500,000 | 115,650,000 | 1541 | 594  | -0.60963455  | CCT8L2,KMT2C             |
| 4 | 115,575,000 | 115,725,000 | 1542 | 523  | -1.38751707  | CCT8L2                   |
| 4 | 115,650,000 | 115,800,000 | 1543 | 732  | -0.898163645 | XRCC2                    |
| 4 | 115,725,000 | 115,875,000 | 1544 | 863  | -0.897626088 | XRCC2                    |
| 4 | 115,800,000 | 115,950,000 | 1545 | 748  | -0.441593463 | XRCC2,ENSBTAG00000008032 |
| 4 | 115,875,000 | 116,025,000 | 1546 | 930  | -0.079957708 | ENSBTAG00000008032       |
| 4 | 115,950,000 | 116,100,000 | 1547 | 1165 | -0.168340472 | ENSBTAG00000008032       |
| 4 | 116,025,000 | 116,175,000 | 1548 | 1163 | 0.602707545  |                          |
| 4 | 116,100,000 | 116,250,000 | 1549 | 1379 | 0.749769845  | PPDPF                    |
| 4 | 116,175,000 | 116,325,000 | 1550 | 1233 | 0.014076837  | PPDPF                    |
| 4 | 116,250,000 | 116,400,000 | 1551 | 1043 | -0.776136694 |                          |
| 4 | 116,325,000 | 116,475,000 | 1552 | 1327 | -1.315209685 |                          |
| 4 | 116,400,000 | 116,550,000 | 1553 | 1664 | -0.19324305  |                          |
| 4 | 116,475,000 | 116,625,000 | 1554 | 1563 | 1.087640109  |                          |
| 4 | 116,550,000 | 116,700,000 | 1555 | 1543 | 0.874639079  |                          |
| 4 | 116,625,000 | 116,775,000 | 1556 | 1633 | 0.836910678  |                          |
| 4 | 116,700,000 | 116,850,000 | 1557 | 1334 | 0.70538333   |                          |
| 4 | 116,775,000 | 116,925,000 | 1558 | 801  | 0.343120419  |                          |
| 4 | 116,850,000 | 117,000,000 | 1559 | 1150 | 0.587358059  |                          |
| 4 | 116,925,000 | 117,075,000 | 1560 | 1676 | 0.259135183  |                          |
| 4 | 117,000,000 | 117,150,000 | 1561 | 1354 | -0.986170849 |                          |
| 4 | 117,075,000 | 117,225,000 | 1562 | 1278 | -0.094048308 | ENSBTAG00000047979       |
| 4 | 117,150,000 | 117,300,000 | 1563 | 1749 | 0.84580227   | ENSBTAG00000047979       |
| 4 | 117,225,000 | 117,375,000 | 1564 | 1595 | 0.174444292  | ENSBTAG00000047979       |
| 4 | 117,300,000 | 117,450,000 | 1565 | 1048 | -0.775922306 | ENSBTAG00000047979       |
| 4 | 117,375,000 | 117,525,000 | 1566 | 955  | 0.006353432  | ENSBTAG00000047979       |
| 4 | 117,450,000 | 117,600,000 | 1567 | 1524 | 0.65614064   | DPP6                     |
| 4 | 117,525,000 | 117,675,000 | 1568 | 1594 | 0.408902817  | DPP6                     |
| 4 | 117,600,000 | 117,750,000 | 1569 | 1094 | -0.115288254 | DPP6,HTR5A               |
| 4 | 117,675,000 | 117,825,000 | 1570 | 1199 | 0.425967064  | DPP6,HTR5A,PAXIP1        |
| 4 | 117,750,000 | 117,900,000 | 1571 | 988  | 0.569321284  | DPP6,PAXIP1              |
| 4 | 117,825,000 | 117,975,000 | 1572 | 798  | 0.701919764  | INSIG1,PAXIP1            |
| 4 | 117,900,000 | 118,050,000 | 1573 | 755  | 0.22458299   | CNPY1,EN2,INSIG1         |
| 4 | 117,975,000 | 118,125,000 | 1574 | 779  | -0.329624479 | CNPY1,EN2                |
| 4 | 118,050,000 | 118,200,000 | 1575 | 890  | 0.609975489  | RBM33                    |
| 4 | 118,125,000 | 118,275,000 | 1576 | 741  | 0.44139568   | RBM33,SHH                |
| 4 | 118,200,000 | 118,350,000 | 1577 | 720  | -0.128533223 | RBM33,SHH                |
| 4 | 118,275,000 | 118,425,000 | 1578 | 1014 | -0.634133137 |                          |
| 4 | 118,350,000 | 118,500,000 | 1579 | 1187 | -0.677700538 |                          |
| 4 | 118,425,000 | 118,575,000 | 1580 | 1330 | -0.620924079 |                          |
| 4 | 118,500,000 | 118,650,000 | 1581 | 1009 | -0.404621272 |                          |
| 4 | 118,575,000 | 118,725,000 | 1582 | 524  | 0.551241988  |                          |
| 4 | 118,650,000 | 118,800,000 | 1583 | 438  | 0.455669817  |                          |
| 4 | 118,725,000 | 118,875,000 | 1584 | 424  | 0.674176403  |                          |
| 4 | 118,800,000 | 118,950,000 | 1585 | 647  | 0.171519794  | LMBR1,RNF32              |
| 4 | 118,875,000 | 119,025,000 | 1586 | 612  | -0.017676325 | LMBR1,RNF32              |
| 4 | 118,950,000 | 119,100,000 | 1587 | 507  | 0.574578802  | LMBR1                    |
| 4 | 119,025,000 | 119,175,000 | 1588 | 489  | -0.362632864 | LMBR1,MNX1,NOM1          |
| 4 | 119,100,000 | 119,250,000 | 1589 | 405  | -1.120843156 | MNX1,NOM1,UBE3C          |
| 4 | 119,175,000 | 119,325,000 | 1590 | 456  | -0.390113333 | UBE3C                    |

|   |             |             |      |      |              |                                       |
|---|-------------|-------------|------|------|--------------|---------------------------------------|
| 4 | 119,250,000 | 119,400,000 | 1591 | 436  | 0.793147493  | UBE3C                                 |
| 4 | 119,325,000 | 119,475,000 | 1592 | 406  | 0.922945187  | DNAJB6,UBE3C                          |
| 4 | 119,400,000 | 119,550,000 | 1593 | 434  | 0.225395315  | DNAJB6,PTPRN2                         |
| 4 | 119,475,000 | 119,625,000 | 1594 | 528  | -0.682235848 | PTPRN2                                |
| 4 | 119,550,000 | 119,700,000 | 1595 | 659  | -1.364125502 | PTPRN2                                |
| 4 | 119,625,000 | 119,775,000 | 1596 | 713  | -2.703002257 |                                       |
| 4 | 119,700,000 | 119,850,000 | 1597 | 568  | -1.853882466 |                                       |
| 4 | 119,775,000 | 119,925,000 | 1598 | 425  | -0.438131199 |                                       |
| 4 | 119,850,000 | 120,000,000 | 1599 | 624  | -0.116536725 |                                       |
| 4 | 119,925,000 | 120,075,000 | 1600 | 657  | 0.197300884  |                                       |
| 4 | 120,000,000 | 120,150,000 | 1601 | 417  | -0.206915796 | NCAPG2                                |
| 4 | 120,075,000 | 120,225,000 | 1602 | 382  | -1.601812778 | NCAPG2                                |
| 4 | 120,150,000 | 120,300,000 | 1603 | 459  | -1.55130256  | ESYT2,NCAPG2                          |
| 4 | 120,225,000 | 120,375,000 | 1604 | 468  | -0.335474175 | ESYT2,WDR60                           |
| 4 | 120,300,000 | 120,450,000 | 1605 | 465  | 0.007414427  | ESYT2,VIPR2,WDR60                     |
| 4 | 120,375,000 | 120,525,000 | 1606 | 486  | 0.248205094  | VIPR2                                 |
| 4 | 120,450,000 | 120,600,000 | 1607 | 471  | 0.159584458  | VIPR2                                 |
| 4 | 120,525,000 | 120,675,000 | 1608 | 403  | -1.003220929 |                                       |
| 4 | 120,600,000 | 120,750,000 | 1609 | 366  | -0.656830322 |                                       |
| 4 | 120,675,000 | 120,825,000 | 1610 | 309  | -0.278615843 |                                       |
| 4 | 120,750,000 | 120,829,699 | 1611 | 109  | -0.468970573 |                                       |
| 5 | 0           | 150,000     | 1    | 454  | -0.098442952 |                                       |
| 5 | 75,000      | 225,000     | 2    | 597  | -0.316384935 |                                       |
| 5 | 150,000     | 300,000     | 3    | 789  | -1.290412985 | ENSBTAG00000027770,ENSBTAG00000037552 |
| 5 | 225,000     | 375,000     | 4    | 940  | -1.274544093 | ENSBTAG00000027770,ENSBTAG00000037552 |
| 5 | 300,000     | 450,000     | 5    | 636  | -0.940070007 | ENSBTAG00000027770,ENSBTAG00000038351 |
| 5 | 375,000     | 525,000     | 6    | 390  | -0.533523112 | ENSBTAG00000038351,ENSBTAG00000045542 |
| 5 | 450,000     | 600,000     | 7    | 456  | 0.092317717  | ENSBTAG00000045542                    |
| 5 | 525,000     | 675,000     | 8    | 837  | 0.569548035  |                                       |
| 5 | 600,000     | 750,000     | 9    | 827  | 0.552144678  |                                       |
| 5 | 675,000     | 825,000     | 10   | 687  | 0.748434416  | TSPAN8                                |
| 5 | 750,000     | 900,000     | 11   | 1007 | 0.291429066  | TSPAN8                                |
| 5 | 825,000     | 975,000     | 12   | 1057 | -0.081378934 | TSPAN8                                |
| 5 | 900,000     | 1,050,000   | 13   | 664  | 0.259558099  |                                       |
| 5 | 975,000     | 1,125,000   | 14   | 411  | -0.159806868 | LGR5                                  |
| 5 | 1,050,000   | 1,200,000   | 15   | 536  | 0.566451416  | LGR5                                  |
| 5 | 1,125,000   | 1,275,000   | 16   | 548  | 1.034643278  | LGR5,ZFC3H1                           |
| 5 | 1,200,000   | 1,350,000   | 17   | 893  | 0.745488868  | LGR5,THAP2,TMEM19,ZFC3H1              |
| 5 | 1,275,000   | 1,425,000   | 18   | 1036 | 0.482705809  | THAP2,TMEM19,ZFC3H1                   |
| 5 | 1,350,000   | 1,500,000   | 19   | 929  | 0.330922792  | TBC1D15                               |
| 5 | 1,425,000   | 1,575,000   | 20   | 859  | 0.596532107  | TBC1D15,TPH2                          |
| 5 | 1,500,000   | 1,650,000   | 21   | 822  | 0.763772202  | TBC1D15,TPH2                          |
| 5 | 1,575,000   | 1,725,000   | 22   | 1195 | 0.592732544  | TPH2                                  |
| 5 | 1,650,000   | 1,800,000   | 23   | 1081 | 0.483796703  |                                       |
| 5 | 1,725,000   | 1,875,000   | 24   | 846  | 0.318531731  |                                       |
| 5 | 1,800,000   | 1,950,000   | 25   | 959  | 0.00882397   | TRHDE                                 |
| 5 | 1,875,000   | 2,025,000   | 26   | 929  | 0.435063886  | TRHDE                                 |
| 5 | 1,950,000   | 2,100,000   | 27   | 1144 | 0.495415284  | TRHDE                                 |
| 5 | 2,025,000   | 2,175,000   | 28   | 1338 | -0.221792072 | TRHDE                                 |
| 5 | 2,100,000   | 2,250,000   | 29   | 1164 | -0.538389045 | TRHDE                                 |
| 5 | 2,175,000   | 2,325,000   | 30   | 1022 | 0.468382437  | TRHDE                                 |
| 5 | 2,250,000   | 2,400,000   | 31   | 789  | 0.361176867  | TRHDE                                 |
| 5 | 2,325,000   | 2,475,000   | 32   | 764  | 0.399926122  | TRHDE                                 |

|   |           |           |    |      |              |                         |
|---|-----------|-----------|----|------|--------------|-------------------------|
| 5 | 2,400,000 | 2,550,000 | 33 | 1092 | 0.549067778  |                         |
| 5 | 2,475,000 | 2,625,000 | 34 | 1000 | 0.354130532  |                         |
| 5 | 2,550,000 | 2,700,000 | 35 | 960  | 0.481806028  |                         |
| 5 | 2,625,000 | 2,775,000 | 36 | 983  | 0.520066427  |                         |
| 5 | 2,700,000 | 2,850,000 | 37 | 941  | 0.159305956  |                         |
| 5 | 2,775,000 | 2,925,000 | 38 | 1094 | -0.037171706 |                         |
| 5 | 2,850,000 | 3,000,000 | 39 | 1044 | -0.262839842 |                         |
| 5 | 2,925,000 | 3,075,000 | 40 | 776  | -0.119133981 |                         |
| 5 | 3,000,000 | 3,150,000 | 41 | 616  | 0.369665129  |                         |
| 5 | 3,075,000 | 3,225,000 | 42 | 849  | 0.158582887  |                         |
| 5 | 3,150,000 | 3,300,000 | 43 | 931  | 0.170116619  |                         |
| 5 | 3,225,000 | 3,375,000 | 44 | 1034 | 0.641257113  |                         |
| 5 | 3,300,000 | 3,450,000 | 45 | 998  | 0.816143679  |                         |
| 5 | 3,375,000 | 3,525,000 | 46 | 991  | 1.040281802  |                         |
| 5 | 3,450,000 | 3,600,000 | 47 | 893  | 1.109431338  |                         |
| 5 | 3,525,000 | 3,675,000 | 48 | 736  | 0.194455509  |                         |
| 5 | 3,600,000 | 3,750,000 | 49 | 790  | -0.021582635 |                         |
| 5 | 3,675,000 | 3,825,000 | 50 | 975  | 0.309815301  |                         |
| 5 | 3,750,000 | 3,900,000 | 51 | 1078 | 0.208787417  |                         |
| 5 | 3,825,000 | 3,975,000 | 52 | 688  | 0.085278458  |                         |
| 5 | 3,900,000 | 4,050,000 | 53 | 913  | -0.710907013 | ATXN7L3B                |
| 5 | 3,975,000 | 4,125,000 | 54 | 1271 | -0.64174687  | ATXN7L3B                |
| 5 | 4,050,000 | 4,200,000 | 55 | 1153 | -0.454402425 | ATXN7L3B                |
| 5 | 4,125,000 | 4,275,000 | 56 | 875  | -1.875570149 |                         |
| 5 | 4,200,000 | 4,350,000 | 57 | 828  | -3.141807646 |                         |
| 5 | 4,275,000 | 4,425,000 | 58 | 969  | -3.493426766 |                         |
| 5 | 4,350,000 | 4,500,000 | 59 | 999  | -2.589461212 |                         |
| 5 | 4,425,000 | 4,575,000 | 60 | 1059 | -1.25521111  |                         |
| 5 | 4,500,000 | 4,650,000 | 61 | 1141 | -0.53331393  |                         |
| 5 | 4,575,000 | 4,725,000 | 62 | 1160 | 0.449510031  |                         |
| 5 | 4,650,000 | 4,800,000 | 63 | 978  | 0.195040096  | CAPS2                   |
| 5 | 4,725,000 | 4,875,000 | 64 | 1029 | 0.648210882  | CAPS2,GLIPR1L1          |
| 5 | 4,800,000 | 4,950,000 | 65 | 1210 | 0.889796442  | CAPS2,GLIPR1L1,GLIPR1L2 |
| 5 | 4,875,000 | 5,025,000 | 66 | 1290 | 0.802670028  | GLIPR1,GLIPR1L2,KRR1    |
| 5 | 4,950,000 | 5,100,000 | 67 | 1220 | 0.711678288  | GLIPR1,KRR1             |
| 5 | 5,025,000 | 5,175,000 | 68 | 1250 | -0.563479189 | KRR1                    |
| 5 | 5,100,000 | 5,250,000 | 69 | 1748 | -0.1023467   |                         |
| 5 | 5,175,000 | 5,325,000 | 70 | 1355 | 0.154285871  |                         |
| 5 | 5,250,000 | 5,400,000 | 71 | 777  | 0.202430436  |                         |
| 5 | 5,325,000 | 5,475,000 | 72 | 716  | 0.3470301    |                         |
| 5 | 5,400,000 | 5,550,000 | 73 | 783  | -0.306718006 |                         |
| 5 | 5,475,000 | 5,625,000 | 74 | 720  | -0.856985264 | NAP1L1,PHLDA1           |
| 5 | 5,550,000 | 5,700,000 | 75 | 497  | -0.676844793 | NAP1L1,PHLDA1           |
| 5 | 5,625,000 | 5,775,000 | 76 | 852  | -0.032179962 |                         |
| 5 | 5,700,000 | 5,850,000 | 77 | 724  | 0.077352162  | BBS10,OSBPL8            |
| 5 | 5,775,000 | 5,925,000 | 78 | 479  | 0.846449237  | BBS10,OSBPL8            |
| 5 | 5,850,000 | 6,000,000 | 79 | 628  | 0.398865708  | OSBPL8                  |
| 5 | 5,925,000 | 6,075,000 | 80 | 628  | -0.208239722 |                         |
| 5 | 6,000,000 | 6,150,000 | 81 | 611  | 0.021430205  |                         |
| 5 | 6,075,000 | 6,225,000 | 82 | 616  | 0.764705741  | ZDHHC17                 |
| 5 | 6,150,000 | 6,300,000 | 83 | 803  | 0.394688235  | CSRP2,ZDHHC17           |
| 5 | 6,225,000 | 6,375,000 | 84 | 948  | 0.296529373  | CSRP2,ZDHHC17           |
| 5 | 6,300,000 | 6,450,000 | 85 | 685  | 0.48248944   | E2F7                    |

|   |            |            |     |      |              |                       |
|---|------------|------------|-----|------|--------------|-----------------------|
| 5 | 6,375,000  | 6,525,000  | 86  | 524  | -0.20037999  | E2F7                  |
| 5 | 6,450,000  | 6,600,000  | 87  | 696  | -0.143068391 | E2F7                  |
| 5 | 6,525,000  | 6,675,000  | 88  | 708  | -0.327805007 |                       |
| 5 | 6,600,000  | 6,750,000  | 89  | 667  | -1.008098228 |                       |
| 5 | 6,675,000  | 6,825,000  | 90  | 586  | -0.541123449 |                       |
| 5 | 6,750,000  | 6,900,000  | 91  | 570  | 0.279476521  |                       |
| 5 | 6,825,000  | 6,975,000  | 92  | 987  | 0.085226182  |                       |
| 5 | 6,900,000  | 7,050,000  | 93  | 1402 | 0.178105667  |                       |
| 5 | 6,975,000  | 7,125,000  | 94  | 1196 | -0.053515811 |                       |
| 5 | 7,050,000  | 7,200,000  | 95  | 772  | -0.630528847 |                       |
| 5 | 7,125,000  | 7,275,000  | 96  | 821  | 0.0473245    |                       |
| 5 | 7,200,000  | 7,350,000  | 97  | 765  | 0.615011459  |                       |
| 5 | 7,275,000  | 7,425,000  | 98  | 505  | -0.589111447 | NAV3                  |
| 5 | 7,350,000  | 7,500,000  | 99  | 421  | -0.595053635 | NAV3                  |
| 5 | 7,425,000  | 7,575,000  | 100 | 592  | 0.698714025  | NAV3                  |
| 5 | 7,500,000  | 7,650,000  | 101 | 710  | 0.683842778  | NAV3                  |
| 5 | 7,575,000  | 7,725,000  | 102 | 785  | 0.549210847  | NAV3                  |
| 5 | 7,650,000  | 7,800,000  | 103 | 1112 | -0.214361937 | NAV3                  |
| 5 | 7,725,000  | 7,875,000  | 104 | 1465 | -0.191005939 |                       |
| 5 | 7,800,000  | 7,950,000  | 105 | 1269 | 0.540117768  |                       |
| 5 | 7,875,000  | 8,025,000  | 106 | 1002 | 0.337475881  |                       |
| 5 | 7,950,000  | 8,100,000  | 107 | 1244 | -0.304973676 |                       |
| 5 | 8,025,000  | 8,175,000  | 108 | 1030 | -0.230003613 |                       |
| 5 | 8,100,000  | 8,250,000  | 109 | 881  | 0.102046681  |                       |
| 5 | 8,175,000  | 8,325,000  | 110 | 975  | 0.618418841  |                       |
| 5 | 8,250,000  | 8,400,000  | 111 | 583  | 0.715295578  |                       |
| 5 | 8,325,000  | 8,475,000  | 112 | 458  | 1.195553775  |                       |
| 5 | 8,400,000  | 8,550,000  | 113 | 645  | 0.587277978  |                       |
| 5 | 8,475,000  | 8,625,000  | 114 | 698  | -0.494681288 |                       |
| 5 | 8,550,000  | 8,700,000  | 115 | 818  | 0.047912956  |                       |
| 5 | 8,625,000  | 8,775,000  | 116 | 958  | 0.557002995  |                       |
| 5 | 8,700,000  | 8,850,000  | 117 | 790  | 0.459798386  | SYT1                  |
| 5 | 8,775,000  | 8,925,000  | 118 | 659  | 0.62411262   | SYT1                  |
| 5 | 8,850,000  | 9,000,000  | 119 | 885  | 0.448491396  | SYT1                  |
| 5 | 8,925,000  | 9,075,000  | 120 | 790  | 0.378776861  | SYT1                  |
| 5 | 9,000,000  | 9,150,000  | 121 | 723  | -0.2924955   | SYT1                  |
| 5 | 9,075,000  | 9,225,000  | 122 | 562  | -1.570257532 | PAWR                  |
| 5 | 9,150,000  | 9,300,000  | 123 | 200  | -3.067859674 | PAWR                  |
| 5 | 9,225,000  | 9,375,000  | 124 | 223  | -3.205040847 | PPP1R12A              |
| 5 | 9,300,000  | 9,450,000  | 125 | 296  | -6.131132787 | PPP1R12A              |
| 5 | 9,375,000  | 9,525,000  | 126 | 396  | -6.925262897 | PPP1R12A              |
| 5 | 9,450,000  | 9,600,000  | 127 | 430  | -3.62974734  | PPP1R12A              |
| 5 | 9,525,000  | 9,675,000  | 128 | 359  | 0.618719628  |                       |
| 5 | 9,600,000  | 9,750,000  | 129 | 447  | 0.743447314  |                       |
| 5 | 9,675,000  | 9,825,000  | 130 | 805  | 0.562371512  | OTOGL                 |
| 5 | 9,750,000  | 9,900,000  | 131 | 770  | 0.582155961  | OTOGL                 |
| 5 | 9,825,000  | 9,975,000  | 132 | 709  | 0.817405369  | OTOGL                 |
| 5 | 9,900,000  | 10,050,000 | 133 | 879  | 0.317646706  | OTOGL                 |
| 5 | 9,975,000  | 10,125,000 | 134 | 888  | -0.448895051 | PTPRQ                 |
| 5 | 10,050,000 | 10,200,000 | 135 | 790  | -0.579584952 | PTPRQ                 |
| 5 | 10,125,000 | 10,275,000 | 136 | 728  | 0.071838146  | PTPRQ                 |
| 5 | 10,200,000 | 10,350,000 | 137 | 605  | 0.364495504  | MYF5,MYF6,PTPRQ       |
| 5 | 10,275,000 | 10,425,000 | 138 | 432  | -0.699301902 | LIN7A,MYF5,MYF6,PTPRQ |

|   |            |            |     |      |              |                |
|---|------------|------------|-----|------|--------------|----------------|
| 5 | 10,350,000 | 10,500,000 | 139 | 449  | -1.470213487 | LIN7A          |
| 5 | 10,425,000 | 10,575,000 | 140 | 574  | -0.899901965 | LIN7A          |
| 5 | 10,500,000 | 10,650,000 | 141 | 907  | -0.240441078 | LIN7A          |
| 5 | 10,575,000 | 10,725,000 | 142 | 1011 | 0.17460188   |                |
| 5 | 10,650,000 | 10,800,000 | 143 | 979  | 0.10415081   | ACSS3          |
| 5 | 10,725,000 | 10,875,000 | 144 | 899  | -1.307518357 | ACSS3          |
| 5 | 10,800,000 | 10,950,000 | 145 | 539  | -2.176292571 | ACSS3,PPFIA2   |
| 5 | 10,875,000 | 11,025,000 | 146 | 501  | 0.021416554  | ACSS3,PPFIA2   |
| 5 | 10,950,000 | 11,100,000 | 147 | 862  | 0.481950783  | PPFIA2         |
| 5 | 11,025,000 | 11,175,000 | 148 | 1188 | -0.027796067 | PPFIA2         |
| 5 | 11,100,000 | 11,250,000 | 149 | 1075 | -0.576565941 | PPFIA2         |
| 5 | 11,175,000 | 11,325,000 | 150 | 1383 | -2.078786983 | TMA7           |
| 5 | 11,250,000 | 11,400,000 | 151 | 1478 | -1.832495947 | TMA7           |
| 5 | 11,325,000 | 11,475,000 | 152 | 1100 | -0.199972803 |                |
| 5 | 11,400,000 | 11,550,000 | 153 | 1121 | 0.43967085   |                |
| 5 | 11,475,000 | 11,625,000 | 154 | 921  | 1.306436829  |                |
| 5 | 11,550,000 | 11,700,000 | 155 | 694  | 0.188604088  |                |
| 5 | 11,625,000 | 11,775,000 | 156 | 664  | -2.746969304 |                |
| 5 | 11,700,000 | 11,850,000 | 157 | 732  | -1.705642714 |                |
| 5 | 11,775,000 | 11,925,000 | 158 | 549  | -1.188712946 |                |
| 5 | 11,850,000 | 12,000,000 | 159 | 354  | -0.657536251 | CCDC59,METTL25 |
| 5 | 11,925,000 | 12,075,000 | 160 | 286  | -0.871927487 | CCDC59,METTL25 |
| 5 | 12,000,000 | 12,150,000 | 161 | 360  | -0.095597667 | METTL25        |
| 5 | 12,075,000 | 12,225,000 | 162 | 868  | 0.514034888  | METTL25        |
| 5 | 12,150,000 | 12,300,000 | 163 | 991  | 0.75164895   |                |
| 5 | 12,225,000 | 12,375,000 | 164 | 672  | 0.597658987  |                |
| 5 | 12,300,000 | 12,450,000 | 165 | 754  | 0.950333934  |                |
| 5 | 12,375,000 | 12,525,000 | 166 | 1049 | 1.321627533  | TMTC2          |
| 5 | 12,450,000 | 12,600,000 | 167 | 1014 | 1.128662694  | TMTC2          |
| 5 | 12,525,000 | 12,675,000 | 168 | 916  | -1.827818346 | TMTC2          |
| 5 | 12,600,000 | 12,750,000 | 169 | 852  | -3.999978152 |                |
| 5 | 12,675,000 | 12,825,000 | 170 | 885  | -1.611867986 |                |
| 5 | 12,750,000 | 12,900,000 | 171 | 915  | -0.04134229  |                |
| 5 | 12,825,000 | 12,975,000 | 172 | 557  | -0.1120698   |                |
| 5 | 12,900,000 | 13,050,000 | 173 | 542  | -1.347929421 |                |
| 5 | 12,975,000 | 13,125,000 | 174 | 1162 | -0.846590099 |                |
| 5 | 13,050,000 | 13,200,000 | 175 | 1329 | 0.084127857  |                |
| 5 | 13,125,000 | 13,275,000 | 176 | 1163 | -0.242072277 |                |
| 5 | 13,200,000 | 13,350,000 | 177 | 1295 | -0.641268737 |                |
| 5 | 13,275,000 | 13,425,000 | 178 | 1075 | -0.182485474 |                |
| 5 | 13,350,000 | 13,500,000 | 179 | 777  | -0.936206853 |                |
| 5 | 13,425,000 | 13,575,000 | 180 | 803  | -0.421683019 |                |
| 5 | 13,500,000 | 13,650,000 | 181 | 920  | 0.530518491  |                |
| 5 | 13,575,000 | 13,725,000 | 182 | 636  | 1.040445792  |                |
| 5 | 13,650,000 | 13,800,000 | 183 | 270  | 0.689492016  |                |
| 5 | 13,725,000 | 13,875,000 | 184 | 233  | 0.41404937   |                |
| 5 | 13,800,000 | 13,950,000 | 185 | 331  | 0.821107416  |                |
| 5 | 13,875,000 | 14,025,000 | 186 | 457  | 0.749667144  |                |
| 5 | 13,950,000 | 14,100,000 | 187 | 459  | -0.019651029 |                |
| 5 | 14,025,000 | 14,175,000 | 188 | 805  | 0.555780563  |                |
| 5 | 14,100,000 | 14,250,000 | 189 | 940  | 0.751262462  |                |
| 5 | 14,175,000 | 14,325,000 | 190 | 558  | 0.440817786  |                |
| 5 | 14,250,000 | 14,400,000 | 191 | 487  | -0.145187079 |                |

|   |            |            |     |      |              |                            |
|---|------------|------------|-----|------|--------------|----------------------------|
| 5 | 14,325,000 | 14,475,000 | 192 | 649  | -0.211546303 |                            |
| 5 | 14,400,000 | 14,550,000 | 193 | 1029 | 0.705067205  |                            |
| 5 | 14,475,000 | 14,625,000 | 194 | 928  | 0.860415078  | SLC6A15                    |
| 5 | 14,550,000 | 14,700,000 | 195 | 464  | -0.161020708 | SLC6A15                    |
| 5 | 14,625,000 | 14,775,000 | 196 | 398  | -0.658346052 | LRRIQ1,TSPAN19             |
| 5 | 14,700,000 | 14,850,000 | 197 | 443  | -0.580811499 | LRRIQ1,TSPAN19             |
| 5 | 14,775,000 | 14,925,000 | 198 | 441  | 0.031157775  | LRRIQ1                     |
| 5 | 14,850,000 | 15,000,000 | 199 | 321  | -1.268607511 | ALX1,LRRIQ1                |
| 5 | 14,925,000 | 15,075,000 | 200 | 636  | -0.07312489  | ALX1,LRRIQ1                |
| 5 | 15,000,000 | 15,150,000 | 201 | 861  | 0.54020071   | ALX1                       |
| 5 | 15,075,000 | 15,225,000 | 202 | 715  | -0.960930469 |                            |
| 5 | 15,150,000 | 15,300,000 | 203 | 636  | -1.642342717 |                            |
| 5 | 15,225,000 | 15,375,000 | 204 | 450  | -0.383682551 |                            |
| 5 | 15,300,000 | 15,450,000 | 205 | 540  | -1.251753027 |                            |
| 5 | 15,375,000 | 15,525,000 | 206 | 923  | 0.224810198  |                            |
| 5 | 15,450,000 | 15,600,000 | 207 | 939  | -1.030951415 | RASSF9                     |
| 5 | 15,525,000 | 15,675,000 | 208 | 904  | -2.019556597 | NTS,RASSF9                 |
| 5 | 15,600,000 | 15,750,000 | 209 | 1151 | -1.082064482 | MGAT4C,NTS                 |
| 5 | 15,675,000 | 15,825,000 | 210 | 832  | -1.419088035 | MGAT4C                     |
| 5 | 15,750,000 | 15,900,000 | 211 | 599  | 0.370462583  | MGAT4C                     |
| 5 | 15,825,000 | 15,975,000 | 212 | 1021 | 0.668089235  |                            |
| 5 | 15,900,000 | 16,050,000 | 213 | 1083 | 0.629381939  |                            |
| 5 | 15,975,000 | 16,125,000 | 214 | 708  | 0.472273595  |                            |
| 5 | 16,050,000 | 16,200,000 | 215 | 691  | 0.970230959  |                            |
| 5 | 16,125,000 | 16,275,000 | 216 | 936  | 1.109501937  |                            |
| 5 | 16,200,000 | 16,350,000 | 217 | 1142 | 0.741851193  |                            |
| 5 | 16,275,000 | 16,425,000 | 218 | 1021 | 0.197817785  |                            |
| 5 | 16,350,000 | 16,500,000 | 219 | 680  | 0.120235482  |                            |
| 5 | 16,425,000 | 16,575,000 | 220 | 865  | 0.692319546  |                            |
| 5 | 16,500,000 | 16,650,000 | 221 | 1045 | 0.968440276  |                            |
| 5 | 16,575,000 | 16,725,000 | 222 | 1045 | 0.621689181  |                            |
| 5 | 16,650,000 | 16,800,000 | 223 | 1278 | 0.57143108   |                            |
| 5 | 16,725,000 | 16,875,000 | 224 | 1505 | 0.686915011  |                            |
| 5 | 16,800,000 | 16,950,000 | 225 | 1729 | 0.310297222  |                            |
| 5 | 16,875,000 | 17,025,000 | 226 | 1585 | 0.557058799  |                            |
| 5 | 16,950,000 | 17,100,000 | 227 | 1517 | 1.126497249  |                            |
| 5 | 17,025,000 | 17,175,000 | 228 | 1103 | 0.830639953  |                            |
| 5 | 17,100,000 | 17,250,000 | 229 | 909  | -1.846663728 |                            |
| 5 | 17,175,000 | 17,325,000 | 230 | 1459 | -1.334004385 |                            |
| 5 | 17,250,000 | 17,400,000 | 231 | 1541 | -0.266581814 |                            |
| 5 | 17,325,000 | 17,475,000 | 232 | 1175 | 0.605818806  |                            |
| 5 | 17,400,000 | 17,550,000 | 233 | 543  | 0.330094214  |                            |
| 5 | 17,475,000 | 17,625,000 | 234 | 854  | 0.349612119  |                            |
| 5 | 17,550,000 | 17,700,000 | 235 | 1229 | 1.140911748  |                            |
| 5 | 17,625,000 | 17,775,000 | 236 | 856  | 1.394509707  |                            |
| 5 | 17,700,000 | 17,850,000 | 237 | 730  | 1.287118184  |                            |
| 5 | 17,775,000 | 17,925,000 | 238 | 530  | 1.221945958  | C12orf50,C5H12orf29,CEP290 |
| 5 | 17,850,000 | 18,000,000 | 239 | 314  | 1.063358554  | C12orf50,C5H12orf29,CEP290 |
| 5 | 17,925,000 | 18,075,000 | 240 | 287  | -0.116114453 | CEP290,TMTC3               |
| 5 | 18,000,000 | 18,150,000 | 241 | 278  | -1.454659773 | TMTC3                      |
| 5 | 18,075,000 | 18,225,000 | 242 | 491  | 0.461251031  |                            |
| 5 | 18,150,000 | 18,300,000 | 243 | 592  | 0.613806283  |                            |
| 5 | 18,225,000 | 18,375,000 | 244 | 409  | -0.234000959 | KITLG                      |

|   |            |            |     |      |              |                    |
|---|------------|------------|-----|------|--------------|--------------------|
| 5 | 18,300,000 | 18,450,000 | 245 | 344  | -0.001027648 | KITLG              |
| 5 | 18,375,000 | 18,525,000 | 246 | 522  | 0.854674258  | KITLG              |
| 5 | 18,450,000 | 18,600,000 | 247 | 628  | 1.130763727  |                    |
| 5 | 18,525,000 | 18,675,000 | 248 | 682  | 1.315533687  |                    |
| 5 | 18,600,000 | 18,750,000 | 249 | 613  | 1.02130385   |                    |
| 5 | 18,675,000 | 18,825,000 | 250 | 390  | 0.724162734  |                    |
| 5 | 18,750,000 | 18,900,000 | 251 | 359  | 1.059435895  |                    |
| 5 | 18,825,000 | 18,975,000 | 252 | 522  | 1.319418402  |                    |
| 5 | 18,900,000 | 19,050,000 | 253 | 830  | 1.195357049  |                    |
| 5 | 18,975,000 | 19,125,000 | 254 | 817  | 1.016570524  |                    |
| 5 | 19,050,000 | 19,200,000 | 255 | 480  | 1.003959824  |                    |
| 5 | 19,125,000 | 19,275,000 | 256 | 360  | -0.745060586 |                    |
| 5 | 19,200,000 | 19,350,000 | 257 | 399  | -1.2342045   | DUSP6              |
| 5 | 19,275,000 | 19,425,000 | 258 | 547  | -0.271358778 | DUSP6,WDR51B       |
| 5 | 19,350,000 | 19,500,000 | 259 | 665  | -1.075847296 | WDR51B             |
| 5 | 19,425,000 | 19,575,000 | 260 | 852  | -0.419343087 | ATP2B1,WDR51B      |
| 5 | 19,500,000 | 19,650,000 | 261 | 1125 | -0.099441826 | ATP2B1             |
| 5 | 19,575,000 | 19,725,000 | 262 | 1004 | -1.415286493 | ATP2B1             |
| 5 | 19,650,000 | 19,800,000 | 263 | 908  | -1.03631293  | ATP2B1             |
| 5 | 19,725,000 | 19,875,000 | 264 | 1039 | 0.286586381  |                    |
| 5 | 19,800,000 | 19,950,000 | 265 | 973  | 0.663710303  |                    |
| 5 | 19,875,000 | 20,025,000 | 266 | 890  | 0.988353007  |                    |
| 5 | 19,950,000 | 20,100,000 | 267 | 848  | 1.165913161  |                    |
| 5 | 20,025,000 | 20,175,000 | 268 | 924  | 0.914231029  |                    |
| 5 | 20,100,000 | 20,250,000 | 269 | 1238 | -0.029441513 |                    |
| 5 | 20,175,000 | 20,325,000 | 270 | 1287 | -0.461889075 |                    |
| 5 | 20,250,000 | 20,400,000 | 271 | 942  | 0.044731637  |                    |
| 5 | 20,325,000 | 20,475,000 | 272 | 838  | 1.145704071  |                    |
| 5 | 20,400,000 | 20,550,000 | 273 | 688  | 0.720387125  |                    |
| 5 | 20,475,000 | 20,625,000 | 274 | 619  | 0.036894852  |                    |
| 5 | 20,550,000 | 20,700,000 | 275 | 703  | -0.109961023 |                    |
| 5 | 20,625,000 | 20,775,000 | 276 | 887  | 0.563721136  |                    |
| 5 | 20,700,000 | 20,850,000 | 277 | 865  | 1.186774384  |                    |
| 5 | 20,775,000 | 20,925,000 | 278 | 743  | 0.684254134  | CCER1,EPYC         |
| 5 | 20,850,000 | 21,000,000 | 279 | 833  | 0.221430961  | CCER1,EPYC,KERA    |
| 5 | 20,925,000 | 21,075,000 | 280 | 903  | -0.70644302  | EPYC,KERA,LUM      |
| 5 | 21,000,000 | 21,150,000 | 281 | 777  | -0.600194236 | DCN,KERA,LUM       |
| 5 | 21,075,000 | 21,225,000 | 282 | 676  | 0.487696628  | DCN                |
| 5 | 21,150,000 | 21,300,000 | 283 | 550  | 0.780017722  |                    |
| 5 | 21,225,000 | 21,375,000 | 284 | 359  | -0.627040812 |                    |
| 5 | 21,300,000 | 21,450,000 | 285 | 423  | -2.008143552 |                    |
| 5 | 21,375,000 | 21,525,000 | 286 | 466  | -0.436257357 |                    |
| 5 | 21,450,000 | 21,600,000 | 287 | 565  | 0.901562861  |                    |
| 5 | 21,525,000 | 21,675,000 | 288 | 762  | 0.427611551  |                    |
| 5 | 21,600,000 | 21,750,000 | 289 | 1044 | 0.215801335  |                    |
| 5 | 21,675,000 | 21,825,000 | 290 | 1039 | 0.90625944   |                    |
| 5 | 21,750,000 | 21,900,000 | 291 | 856  | 0.189417522  |                    |
| 5 | 21,825,000 | 21,975,000 | 292 | 874  | -0.104636766 |                    |
| 5 | 21,900,000 | 22,050,000 | 293 | 938  | 0.480164314  |                    |
| 5 | 21,975,000 | 22,125,000 | 294 | 845  | 0.552905147  | BTG1               |
| 5 | 22,050,000 | 22,200,000 | 295 | 1044 | 0.566170341  | BTG1               |
| 5 | 22,125,000 | 22,275,000 | 296 | 1125 | 0.753218866  |                    |
| 5 | 22,200,000 | 22,350,000 | 297 | 974  | 0.940324786  | ENSBTAG00000033600 |

|   |            |            |     |      |              |                                                    |
|---|------------|------------|-----|------|--------------|----------------------------------------------------|
| 5 | 22,275,000 | 22,425,000 | 298 | 727  | 0.61695926   | ENSBTAG00000033600                                 |
| 5 | 22,350,000 | 22,500,000 | 299 | 562  | 0.284884315  |                                                    |
| 5 | 22,425,000 | 22,575,000 | 300 | 356  | 0.184090755  |                                                    |
| 5 | 22,500,000 | 22,650,000 | 301 | 362  | -0.154832165 |                                                    |
| 5 | 22,575,000 | 22,725,000 | 302 | 1087 | 0.889018098  | C12orf74                                           |
| 5 | 22,650,000 | 22,800,000 | 303 | 1128 | 1.011936746  | C12orf74,PLEKHG7                                   |
| 5 | 22,725,000 | 22,875,000 | 304 | 700  | 0.447990073  | EEA1,PLEKHG7                                       |
| 5 | 22,800,000 | 22,950,000 | 305 | 639  | 0.331020053  | EEA1                                               |
| 5 | 22,875,000 | 23,025,000 | 306 | 494  | 0.188599165  | EEA1                                               |
| 5 | 22,950,000 | 23,100,000 | 307 | 555  | -0.452362873 |                                                    |
| 5 | 23,025,000 | 23,175,000 | 308 | 876  | -0.638792771 |                                                    |
| 5 | 23,100,000 | 23,250,000 | 309 | 957  | -0.548700632 |                                                    |
| 5 | 23,175,000 | 23,325,000 | 310 | 793  | -0.32019096  |                                                    |
| 5 | 23,250,000 | 23,400,000 | 311 | 511  | -0.167365917 | NUDT4,UBE2N,ENSBTAG00000033531                     |
| 5 | 23,325,000 | 23,475,000 | 312 | 460  | 0.76830046   | MRPL42,NUDT4,UBE2N,ENSBTAG00000033531              |
| 5 | 23,400,000 | 23,550,000 | 313 | 551  | 1.041464733  | MRPL42,SOCS2,UBE2N                                 |
| 5 | 23,475,000 | 23,625,000 | 314 | 698  | 1.03970074   | SOCS2                                              |
| 5 | 23,550,000 | 23,700,000 | 315 | 587  | 0.81801492   | CRADD                                              |
| 5 | 23,625,000 | 23,775,000 | 316 | 359  | -0.905516608 | CRADD                                              |
| 5 | 23,700,000 | 23,850,000 | 317 | 574  | 0.211610781  |                                                    |
| 5 | 23,775,000 | 23,925,000 | 318 | 614  | 0.925809781  |                                                    |
| 5 | 23,850,000 | 24,000,000 | 319 | 618  | 0.840382995  |                                                    |
| 5 | 23,925,000 | 24,075,000 | 320 | 657  | -0.105825775 | PLXNC1                                             |
| 5 | 24,000,000 | 24,150,000 | 321 | 553  | -0.559762005 | PLXNC1                                             |
| 5 | 24,075,000 | 24,225,000 | 322 | 477  | 0.471723641  | PLXNC1                                             |
| 5 | 24,150,000 | 24,300,000 | 323 | 386  | 0.329654331  | CEP83,PLXNC1                                       |
| 5 | 24,225,000 | 24,375,000 | 324 | 336  | 0.783784358  | CEP83                                              |
| 5 | 24,300,000 | 24,450,000 | 325 | 581  | 1.203271247  | CEP83                                              |
| 5 | 24,375,000 | 24,525,000 | 326 | 926  | 1.33140629   | TMCC3                                              |
| 5 | 24,450,000 | 24,600,000 | 327 | 1038 | 1.115244299  | TMCC3                                              |
| 5 | 24,525,000 | 24,675,000 | 328 | 1366 | 0.727811609  | TMCC3                                              |
| 5 | 24,600,000 | 24,750,000 | 329 | 1612 | 0.703263628  |                                                    |
| 5 | 24,675,000 | 24,825,000 | 330 | 1360 | 0.681896272  |                                                    |
| 5 | 24,750,000 | 24,900,000 | 331 | 1248 | 0.748900885  | NDUFA12,NR2C1                                      |
| 5 | 24,825,000 | 24,975,000 | 332 | 928  | 0.821162071  | FGD6,NDUFA12,NR2C1                                 |
| 5 | 24,900,000 | 25,050,000 | 333 | 660  | 0.967094328  | FGD6,NR2C1                                         |
| 5 | 24,975,000 | 25,125,000 | 334 | 901  | 1.152779352  | FGD6,VEZT                                          |
| 5 | 25,050,000 | 25,200,000 | 335 | 1126 | 1.114391713  | VEZT                                               |
| 5 | 25,125,000 | 25,275,000 | 336 | 889  | 0.90809229   | METAP2                                             |
| 5 | 25,200,000 | 25,350,000 | 337 | 566  | 0.64780177   | METAP2,USP44,ENSBTAG00000010711                    |
| 5 | 25,275,000 | 25,425,000 | 338 | 493  | 0.033286612  | METAP2,USP44,ENSBTAG00000010711,ENSBTAG00000023670 |
| 5 | 25,350,000 | 25,500,000 | 339 | 313  | -1.328907296 | ENSBTAG00000023670                                 |
| 5 | 25,425,000 | 25,575,000 | 340 | 405  | -1.072974815 |                                                    |
| 5 | 25,500,000 | 25,650,000 | 341 | 493  | -0.063186622 | GLYCAM1,PDE1B,PPP1R1A                              |
| 5 | 25,575,000 | 25,725,000 | 342 | 455  | 0.726255119  | GLYCAM1,NCKAP1L,PDE1B,PPP1R1A                      |
| 5 | 25,650,000 | 25,800,000 | 343 | 458  | -0.758084863 | GTSF1,ITGA5,NCKAP1L,PDE1B                          |
| 5 | 25,725,000 | 25,875,000 | 344 | 407  | -0.781729633 | COPZ1,GPR84,GTSF1,ITGA5,ZNF385A                    |
| 5 | 25,800,000 | 25,950,000 | 345 | 570  | 0.666683425  | CBX5,COPZ1,GPR84,HNRNPA1,NFE2,ZNF385A              |
| 5 | 25,875,000 | 26,025,000 | 346 | 548  | 0.718257358  | CBX5,HNRNPA1,NFE2,SMUG1                            |
| 5 | 25,950,000 | 26,100,000 | 347 | 335  | 0.153778967  | CBX5,SMUG1                                         |
| 5 | 26,025,000 | 26,175,000 | 348 | 302  | 0.101681807  | HOXC4,HOXC5,HOXC6                                  |



|   |            |            |     |      |              |                                                                                 |
|---|------------|------------|-----|------|--------------|---------------------------------------------------------------------------------|
| 5 | 26,100,000 | 26,250,000 | 349 | 191  | 0.604176108  | HOXC10,HOXC11,HOXC12,HOXC13,HOXC4,HOXC5,HOXC6,HOXC8,HOXC9                       |
| 5 | 26,175,000 | 26,325,000 | 350 | 252  | 0.54874953   | HOXC10,HOXC11,HOXC12,HOXC13,HOXC8,HOXC9                                         |
| 5 | 26,250,000 | 26,400,000 | 351 | 379  | 0.717151476  | HOXC13                                                                          |
| 5 | 26,325,000 | 26,475,000 | 352 | 349  | 0.398480267  |                                                                                 |
| 5 | 26,400,000 | 26,550,000 | 353 | 323  | -0.233545887 | ATP5G2,CALCOCO1                                                                 |
| 5 | 26,475,000 | 26,625,000 | 354 | 223  | -0.510446525 | ATP5G2,CALCOCO1,ENSBTAG00000005863                                              |
| 5 | 26,550,000 | 26,700,000 | 355 | 202  | -1.438573934 | MAP3K12,NPFF,TARBP2,ENSBTAG00000005863                                          |
| 5 | 26,625,000 | 26,775,000 | 356 | 254  | -3.873613725 | AMHR2,MAP3K12,NPFF,PCBP2,PRR13,SP1,TARBP2,ENSBTAG00000005863                    |
| 5 | 26,700,000 | 26,850,000 | 357 | 257  | -3.669802498 | AMHR2,MAP3K12,PCBP2,PRR13,SP1,SP7                                               |
| 5 | 26,775,000 | 26,925,000 | 358 | 218  | -1.614201054 | AAAS,C5H12orf10,ESPL1,MFSD5,PFDN5,SP1,SP7                                       |
| 5 | 26,850,000 | 27,000,000 | 359 | 201  | -0.267820623 | AAAS,C5H12orf10,CSAD,ESPL1,ITGB7,MFSD5,PFDN5,RARG,SP7,ZNF740                    |
| 5 | 26,925,000 | 27,075,000 | 360 | 241  | 1.383353524  | CSAD,IGFBP6,ITGB7,RARG,SOAT2,SPRYD3,TENC1,ZNF740                                |
| 5 | 27,000,000 | 27,150,000 | 361 | 264  | 1.177982751  | CSAD,EIF4B,IGFBP6,SOAT2,SPRYD3,TENC1                                            |
| 5 | 27,075,000 | 27,225,000 | 362 | 516  | -0.553516053 | EIF4B,KRT18,KRT8,TENC1                                                          |
| 5 | 27,150,000 | 27,300,000 | 363 | 928  | 0.121215727  | KRT18,KRT4,KRT78,KRT79,KRT8                                                     |
| 5 | 27,225,000 | 27,375,000 | 364 | 1097 | 0.602197508  | KRT3,KRT4,KRT78,KRT79,ENSBTAG00000027974                                        |
| 5 | 27,300,000 | 27,450,000 | 365 | 861  | 0.805678407  | KRT1,KRT2,KRT3,KRT73,KRT77,ENSBTAG00000027974                                   |
| 5 | 27,375,000 | 27,525,000 | 366 | 606  | 0.90419334   | KRT1,KRT2,KRT71,KRT72,KRT73,KRT74,KRT77                                         |
| 5 | 27,450,000 | 27,600,000 | 367 | 508  | 0.911510704  | KRT5,KRT6B,KRT71,KRT72,KRT73,KRT74,ENSBTAG00000039425,ENSBTAG00000040019        |
| 5 | 27,525,000 | 27,675,000 | 368 | 449  | 0.275652618  | KRT5,KRT6B,KRT75,KRT82,ENSBTAG00000037791,ENSBTAG00000039425,ENSBTAG00000040019 |
| 5 | 27,600,000 | 27,750,000 | 369 | 488  | 0.180338459  | KRT75,KRT82,KRT83,KRT84,KRT85,ENSBTAG00000037791                                |
| 5 | 27,675,000 | 27,825,000 | 370 | 408  | 0.092741619  | KRT81,KRT83,KRT84,KRT85,KRT86,ENSBTAG00000013756,ENSBTAG00000016166             |
| 5 | 27,750,000 | 27,900,000 | 371 | 408  | 0.156301852  | KRT7,KRT80,KRT81,KRT83,KRT86,ENSBTAG00000013756,ENSBTAG00000016166              |
| 5 | 27,825,000 | 27,975,000 | 372 | 438  | 0.946929979  | ATG101,KRT7,KRT80,ENSBTAG00000016166                                            |
| 5 | 27,900,000 | 28,050,000 | 373 | 328  | 0.77903029   | ACVR1B,ATG101,GRASP,KRT80,NR4A1                                                 |
| 5 | 27,975,000 | 28,125,000 | 374 | 289  | 0.59456553   | ACVR1B,ACVRL1,GRASP,NR4A1                                                       |
| 5 | 28,050,000 | 28,200,000 | 375 | 273  | 0.215459261  | ACVR1B,ACVRL1,ANKRD33,ENSBTAG00000002673                                        |
| 5 | 28,125,000 | 28,275,000 | 376 | 286  | 0.146544702  | ANKRD33,SCN8A,ENSBTAG00000002673                                                |
| 5 | 28,200,000 | 28,350,000 | 377 | 576  | 0.080782306  | SCN8A                                                                           |
| 5 | 28,275,000 | 28,425,000 | 378 | 691  | 0.176382665  | SCN8A                                                                           |
| 5 | 28,350,000 | 28,500,000 | 379 | 432  | 0.475796256  | SLC4A8                                                                          |
| 5 | 28,425,000 | 28,575,000 | 380 | 321  | -0.385129938 | RPL36,SLC4A8                                                                    |
| 5 | 28,500,000 | 28,650,000 | 381 | 285  | -1.47939239  | BIN2,CELA1,GALNT6,RPL36,SLC4A8                                                  |
| 5 | 28,575,000 | 28,725,000 | 382 | 457  | -0.622109835 | BIN2,CELA1,DAZAP2,GALNT6,SMAGP                                                  |
| 5 | 28,650,000 | 28,800,000 | 383 | 499  | -0.286784292 | BIN2,DAZAP2,POU6F1,SMAGP,TFCP2                                                  |
| 5 | 28,725,000 | 28,875,000 | 384 | 374  | -1.990606071 | CSRNP2,LETMD1,POU6F1,TFCP2                                                      |
| 5 | 28,800,000 | 28,950,000 | 385 | 358  | -1.8089792   | CSRNP2,LETMD1,SLC11A2,TFCP2                                                     |
| 5 | 28,875,000 | 29,025,000 | 386 | 305  | -1.747284364 | SLC11A2                                                                         |
| 5 | 28,950,000 | 29,100,000 | 387 | 424  | -0.156628467 | SLC11A2,ENSBTAG00000032899                                                      |
| 5 | 29,025,000 | 29,175,000 | 388 | 685  | 0.236028276  | HIGD1C,METTL7A,SLC11A2,ENSBTAG00000002355,ENSBTAG00000032899                    |
| 5 | 29,100,000 | 29,250,000 | 389 | 682  | -0.831273515 | HIGD1C,METTL7A,ENSBTAG00000002355,ENSBTAG00000038893                            |
| 5 | 29,175,000 | 29,325,000 | 390 | 502  | -0.632013696 | ATF1,ENSBTAG00000038893                                                         |
| 5 | 29,250,000 | 29,400,000 | 391 | 399  | 0.452420313  | ATF1,DIP2B                                                                      |
| 5 | 29,325,000 | 29,475,000 | 392 | 283  | 0.513210153  | ATF1,DIP2B,HIST1H4I                                                             |

|   |            |            |     |      |              |                                                               |
|---|------------|------------|-----|------|--------------|---------------------------------------------------------------|
| 5 | 29,400,000 | 29,550,000 | 393 | 319  | 0.968861883  | DIP2B,HIST1H4I                                                |
| 5 | 29,475,000 | 29,625,000 | 394 | 312  | 0.939972827  | DIP2B,LARP4,ENSBTAG00000047199                                |
| 5 | 29,550,000 | 29,700,000 | 395 | 224  | -0.010220517 | DIP2B,LARP4,ENSBTAG00000047199                                |
| 5 | 29,625,000 | 29,775,000 | 396 | 216  | -1.13243427  | FAM186A,LARP4                                                 |
| 5 | 29,700,000 | 29,850,000 | 397 | 366  | 0.181275749  | FAM186A,LIMA1                                                 |
| 5 | 29,775,000 | 29,925,000 | 398 | 455  | 0.430936321  | LASS5,LIMA1                                                   |
| 5 | 29,850,000 | 30,000,000 | 399 | 395  | -0.140134307 | ASIC1,COX14,GPD1,LASS5,LIMA1,SMARCD1                          |
| 5 | 29,925,000 | 30,075,000 | 400 | 323  | -0.244678882 | AQP6,ASIC1,COX14,GPD1,LASS5,RACGAP1,SMARCD1                   |
| 5 | 30,000,000 | 30,150,000 | 401 | 447  | 0.566895074  | AQP2,AQP5,AQP6,ASIC1,RACGAP1                                  |
| 5 | 30,075,000 | 30,225,000 | 402 | 698  | 0.650630297  | AQP2,AQP5,BCDIN3D,FAIM2                                       |
| 5 | 30,150,000 | 30,300,000 | 403 | 544  | 0.577919595  | BCDIN3D,FAIM2,NCKAP5L,TMBIM6                                  |
| 5 | 30,225,000 | 30,375,000 | 404 | 363  | 0.831082854  | FMNL3,NCKAP5L,PRPF40B,TMBIM6                                  |
| 5 | 30,300,000 | 30,450,000 | 405 | 342  | 0.891040311  | FAM186B,FMNL3,KCNH3,MCRS1,PRPF40B                             |
| 5 | 30,375,000 | 30,525,000 | 406 | 349  | 0.129632833  | FAM186B,KCNH3,MCRS1,PRPF40B,ENSBTAG00000004660                |
| 5 | 30,450,000 | 30,600,000 | 407 | 476  | 0.165722365  | KCNH3,ENSBTAG00000004660                                      |
| 5 | 30,525,000 | 30,675,000 | 408 | 786  | 0.674576705  | C1QL4,DNAJC22,TROAP,ENSBTAG00000004660                        |
| 5 | 30,600,000 | 30,750,000 | 409 | 868  | 0.918092786  | C1QL4,DNAJC22,PRPH,TROAP,TUBA1C,ENSBTAG00000037775            |
| 5 | 30,675,000 | 30,825,000 | 410 | 494  | 1.079441891  | PRPH,TUBA1A,TUBA1C,ENSBTAG00000037775                         |
| 5 | 30,750,000 | 30,900,000 | 411 | 260  | 0.688167874  | DHH,LMBR1L,TUBA1A,TUBA1B                                      |
| 5 | 30,825,000 | 30,975,000 | 412 | 246  | 0.386902164  | DHH,KMT2D,LMBR1L,PRKAG1,RHEBL1,TUBA1A,TUBA1B                  |
| 5 | 30,900,000 | 31,050,000 | 413 | 231  | -0.163981545 | DDN,FKBP11,KMT2D,PRKAG1,RHEBL1,WNT1,WNT10B                    |
| 5 | 30,975,000 | 31,125,000 | 414 | 215  | -0.029727165 | CACNB3,CCDC65,DDN,DDX23,FKBP11,PRKAG1,RND1,WNT1,WNT10B        |
| 5 | 31,050,000 | 31,200,000 | 415 | 212  | 0.766963186  | ADCY6,CACNB3,CCDC65,DDX23,FKBP11,RND1                         |
| 5 | 31,125,000 | 31,275,000 | 416 | 197  | 1.313274003  | ADCY6,CACNB3,CCNT1,KANSL2                                     |
| 5 | 31,200,000 | 31,350,000 | 417 | 227  | 0.97743563   | CCNT1,KANSL2,LALBA                                            |
| 5 | 31,275,000 | 31,425,000 | 418 | 309  | 0.19966343   | KANSL2,LALBA                                                  |
| 5 | 31,350,000 | 31,500,000 | 419 | 502  | -0.190054672 | ENSBTAG00000038290                                            |
| 5 | 31,425,000 | 31,575,000 | 420 | 546  | -0.187955732 | ENSBTAG0000000280,ENSBTAG00000007706,ENSBTAG00000038290       |
| 5 | 31,500,000 | 31,650,000 | 421 | 981  | -2.652001154 | OR8S1,ENSBTAG0000000280,ENSBTAG00000007706,ENSBTAG00000016905 |
| 5 | 31,575,000 | 31,725,000 | 422 | 1489 | -1.265441325 | C5H12orf54,OR8S1,ENSBTAG00000016317,ENSBTAG00000016905        |
| 5 | 31,650,000 | 31,800,000 | 423 | 1124 | 0.779677581  | C5H12orf54,ENSBTAG00000016317,ENSBTAG00000039152              |
| 5 | 31,725,000 | 31,875,000 | 424 | 1375 | -0.010880899 | C5H12orf54,ENSBTAG00000005054,ENSBTAG00000039152              |
| 5 | 31,800,000 | 31,950,000 | 425 | 1712 | 0.051145582  | ENSBTAG00000005054,ENSBTAG00000014748                         |
| 5 | 31,875,000 | 32,025,000 | 426 | 1153 | 1.003165191  | ENSBTAG00000004181,ENSBTAG00000014748                         |
| 5 | 31,950,000 | 32,100,000 | 427 | 859  | 1.191281102  | ENSBTAG00000004181                                            |
| 5 | 32,025,000 | 32,175,000 | 428 | 763  | 0.638663903  | ZNF641                                                        |
| 5 | 32,100,000 | 32,250,000 | 429 | 805  | 0.525275521  | ZNF641,ENSBTAG00000032428                                     |
| 5 | 32,175,000 | 32,325,000 | 430 | 844  | 0.638520031  | ASB8,CCDC184,PFKM,ENSBTAG00000032428,ENSBTAG00000032429       |
| 5 | 32,250,000 | 32,400,000 | 431 | 437  | 0.379471342  | ASB8,CCDC184,PFKM,SENP1,ENSBTAG00000032429                    |
| 5 | 32,325,000 | 32,475,000 | 432 | 203  | -1.714224584 | COL2A1,PFKM,SENP1                                             |
| 5 | 32,400,000 | 32,550,000 | 433 | 405  | -2.396705535 | COL2A1,SENP1,TMEM106C                                         |
| 5 | 32,475,000 | 32,625,000 | 434 | 422  | -1.803106381 | COL2A1,TMEM106C,VDR                                           |
| 5 | 32,550,000 | 32,700,000 | 435 | 222  | -0.561733584 | HDAC7,RAPGEF3,SLC48A1,VDR                                     |
| 5 | 32,625,000 | 32,775,000 | 436 | 259  | -0.631909315 | ENDOU,HDAC7,RAPGEF3,RPAP3,SLC48A1                             |

|   |            |            |     |      |              |                           |
|---|------------|------------|-----|------|--------------|---------------------------|
| 5 | 32,700,000 | 32,850,000 | 437 | 467  | 0.559885734  | ENDOU,RAPGEF3,RPAP3       |
| 5 | 32,775,000 | 32,925,000 | 438 | 750  | 0.929117833  | RPAP3                     |
| 5 | 32,850,000 | 33,000,000 | 439 | 1034 | 0.353011943  |                           |
| 5 | 32,925,000 | 33,075,000 | 440 | 937  | -0.05117323  |                           |
| 5 | 33,000,000 | 33,150,000 | 441 | 731  | -0.680153401 | ENSBTAG00000038027        |
| 5 | 33,075,000 | 33,225,000 | 442 | 793  | -2.015432969 | PCED1B,ENSBTAG00000038027 |
| 5 | 33,150,000 | 33,300,000 | 443 | 660  | -1.364555689 | PCED1B                    |
| 5 | 33,225,000 | 33,375,000 | 444 | 524  | 0.36954185   | AMIGO2,PCED1B             |
| 5 | 33,300,000 | 33,450,000 | 445 | 498  | 1.03553935   | AMIGO2,PCED1B             |
| 5 | 33,375,000 | 33,525,000 | 446 | 724  | 1.374323053  |                           |
| 5 | 33,450,000 | 33,600,000 | 447 | 865  | 1.354092504  |                           |
| 5 | 33,525,000 | 33,675,000 | 448 | 653  | 0.839479905  | ATA3                      |
| 5 | 33,600,000 | 33,750,000 | 449 | 531  | 0.213127964  | ATA3                      |
| 5 | 33,675,000 | 33,825,000 | 450 | 472  | -0.080359246 |                           |
| 5 | 33,750,000 | 33,900,000 | 451 | 503  | -0.453838766 |                           |
| 5 | 33,825,000 | 33,975,000 | 452 | 634  | -0.597355728 |                           |
| 5 | 33,900,000 | 34,050,000 | 453 | 554  | -0.925186001 | SLC38A2                   |
| 5 | 33,975,000 | 34,125,000 | 454 | 342  | -0.993579493 | SLC38A2                   |
| 5 | 34,050,000 | 34,200,000 | 455 | 416  | -0.805395855 | SLC38A1                   |
| 5 | 34,125,000 | 34,275,000 | 456 | 456  | -0.465467299 | SLC38A1                   |
| 5 | 34,200,000 | 34,350,000 | 457 | 477  | 0.536853717  |                           |
| 5 | 34,275,000 | 34,425,000 | 458 | 493  | 1.038446408  |                           |
| 5 | 34,350,000 | 34,500,000 | 459 | 305  | 0.877031487  | ARID2,SCAF11              |
| 5 | 34,425,000 | 34,575,000 | 460 | 127  | -1.030949509 | ARID2,SCAF11              |
| 5 | 34,500,000 | 34,650,000 | 461 | 102  | -4.35102513  | ARID2                     |
| 5 | 34,575,000 | 34,725,000 | 462 | 102  | -4.054077419 | ARID2                     |
| 5 | 34,650,000 | 34,800,000 | 463 | 96   | -2.014673519 |                           |
| 5 | 34,725,000 | 34,875,000 | 464 | 108  | -2.705146728 |                           |
| 5 | 34,800,000 | 34,950,000 | 465 | 264  | -0.13185047  |                           |
| 5 | 34,875,000 | 35,025,000 | 466 | 373  | 0.692655498  |                           |
| 5 | 34,950,000 | 35,100,000 | 467 | 317  | 0.411515524  | ANO6                      |
| 5 | 35,025,000 | 35,175,000 | 468 | 369  | 0.792590264  | ANO6,ENSBTAG00000026249   |
| 5 | 35,100,000 | 35,250,000 | 469 | 753  | 1.351434404  | ANO6,ENSBTAG00000026249   |
| 5 | 35,175,000 | 35,325,000 | 470 | 787  | 0.727975333  |                           |
| 5 | 35,250,000 | 35,400,000 | 471 | 505  | -1.375697003 |                           |
| 5 | 35,325,000 | 35,475,000 | 472 | 679  | -0.758058324 | DBX2                      |
| 5 | 35,400,000 | 35,550,000 | 473 | 544  | 0.258907804  | DBX2                      |
| 5 | 35,475,000 | 35,625,000 | 474 | 306  | -0.124645277 | DBX2                      |
| 5 | 35,550,000 | 35,700,000 | 475 | 333  | -0.753741588 | NELL2                     |
| 5 | 35,625,000 | 35,775,000 | 476 | 386  | -0.888549376 | NELL2                     |
| 5 | 35,700,000 | 35,850,000 | 477 | 472  | -0.215156421 | NELL2                     |
| 5 | 35,775,000 | 35,925,000 | 478 | 703  | 0.913277677  | NELL2                     |
| 5 | 35,850,000 | 36,000,000 | 479 | 872  | 0.952904545  | NELL2                     |
| 5 | 35,925,000 | 36,075,000 | 480 | 783  | 0.695514196  | NELL2                     |
| 5 | 36,000,000 | 36,150,000 | 481 | 809  | 0.766837686  | NELL2                     |
| 5 | 36,075,000 | 36,225,000 | 482 | 615  | 0.242434833  | TMEM117                   |
| 5 | 36,150,000 | 36,300,000 | 483 | 724  | 0.59622067   | TMEM117                   |
| 5 | 36,225,000 | 36,375,000 | 484 | 976  | 0.791108754  | TMEM117                   |
| 5 | 36,300,000 | 36,450,000 | 485 | 768  | 0.509463334  | TMEM117                   |
| 5 | 36,375,000 | 36,525,000 | 486 | 542  | -1.432350571 | TMEM117                   |
| 5 | 36,450,000 | 36,600,000 | 487 | 572  | -1.446925737 | TMEM117                   |
| 5 | 36,525,000 | 36,675,000 | 488 | 606  | -0.210290888 | TMEM117                   |
| 5 | 36,600,000 | 36,750,000 | 489 | 625  | 0.571012102  | TMEM117                   |

|   |            |            |     |      |              |                                             |
|---|------------|------------|-----|------|--------------|---------------------------------------------|
| 5 | 36,675,000 | 36,825,000 | 490 | 701  | 0.804755207  | TMEM117                                     |
| 5 | 36,750,000 | 36,900,000 | 491 | 443  | 0.781818841  | IRAK4,TMEM117,TWF1                          |
| 5 | 36,825,000 | 36,975,000 | 492 | 659  | -0.636457013 | IRAK4,PUS7L,TWF1                            |
| 5 | 36,900,000 | 37,050,000 | 493 | 704  | -0.607392237 | IRAK4,PUS7L                                 |
| 5 | 36,975,000 | 37,125,000 | 494 | 313  | 0.34002518   | ADAMTS20                                    |
| 5 | 37,050,000 | 37,200,000 | 495 | 295  | -0.618384307 | ADAMTS20                                    |
| 5 | 37,125,000 | 37,275,000 | 496 | 263  | -1.107810567 | ADAMTS20                                    |
| 5 | 37,200,000 | 37,350,000 | 497 | 276  | -0.084583308 | ADAMTS20                                    |
| 5 | 37,275,000 | 37,425,000 | 498 | 606  | -0.475878645 | ADAMTS20                                    |
| 5 | 37,350,000 | 37,500,000 | 499 | 632  | -0.680275901 |                                             |
| 5 | 37,425,000 | 37,575,000 | 500 | 355  | -1.046136149 |                                             |
| 5 | 37,500,000 | 37,650,000 | 501 | 359  | -2.418495485 | ENSBTAG00000046601                          |
| 5 | 37,575,000 | 37,725,000 | 502 | 581  | -4.287316782 | ENSBTAG00000046601                          |
| 5 | 37,650,000 | 37,800,000 | 503 | 1057 | -2.330686794 |                                             |
| 5 | 37,725,000 | 37,875,000 | 504 | 1079 | -0.230366797 |                                             |
| 5 | 37,800,000 | 37,950,000 | 505 | 644  | 0.34644949   |                                             |
| 5 | 37,875,000 | 38,025,000 | 506 | 497  | -0.147607496 |                                             |
| 5 | 37,950,000 | 38,100,000 | 507 | 568  | -1.013054356 |                                             |
| 5 | 38,025,000 | 38,175,000 | 508 | 476  | -1.92205225  |                                             |
| 5 | 38,100,000 | 38,250,000 | 509 | 389  | -1.653712852 |                                             |
| 5 | 38,175,000 | 38,325,000 | 510 | 378  | -0.780784488 | PRICKLE1,ENSBTAG00000045487                 |
| 5 | 38,250,000 | 38,400,000 | 511 | 608  | -2.423590098 | PPHLN1,PRICKLE1,ENSBTAG00000045487          |
| 5 | 38,325,000 | 38,475,000 | 512 | 646  | -2.243085519 | PPHLN1,PRICKLE1                             |
| 5 | 38,400,000 | 38,550,000 | 513 | 536  | -0.262758237 | PPHLN1                                      |
| 5 | 38,475,000 | 38,625,000 | 514 | 709  | -1.841709718 | PPHLN1,ZCRB1                                |
| 5 | 38,550,000 | 38,700,000 | 515 | 450  | -3.47870329  | PPHLN1,YAF2,ZCRB1                           |
| 5 | 38,625,000 | 38,775,000 | 516 | 161  | -1.404758559 | GXYLT1,YAF2                                 |
| 5 | 38,700,000 | 38,850,000 | 517 | 394  | -0.124069855 | GXYLT1,YAF2                                 |
| 5 | 38,775,000 | 38,925,000 | 518 | 812  | -0.548320428 | GXYLT1                                      |
| 5 | 38,850,000 | 39,000,000 | 519 | 1088 | -0.744420883 |                                             |
| 5 | 38,925,000 | 39,075,000 | 520 | 904  | -0.476695036 |                                             |
| 5 | 39,000,000 | 39,150,000 | 521 | 579  | -0.485943336 |                                             |
| 5 | 39,075,000 | 39,225,000 | 522 | 606  | 0.337326629  |                                             |
| 5 | 39,150,000 | 39,300,000 | 523 | 479  | 1.074965482  |                                             |
| 5 | 39,225,000 | 39,375,000 | 524 | 646  | 0.776108354  |                                             |
| 5 | 39,300,000 | 39,450,000 | 525 | 770  | 0.876573787  | PDZRN4                                      |
| 5 | 39,375,000 | 39,525,000 | 526 | 783  | -3.564890338 | PDZRN4                                      |
| 5 | 39,450,000 | 39,600,000 | 527 | 836  | -3.303931682 |                                             |
| 5 | 39,525,000 | 39,675,000 | 528 | 569  | 1.014823108  |                                             |
| 5 | 39,600,000 | 39,750,000 | 529 | 778  | -1.432611994 |                                             |
| 5 | 39,675,000 | 39,825,000 | 530 | 817  | -1.318986435 |                                             |
| 5 | 39,750,000 | 39,900,000 | 531 | 502  | 0.31567978   |                                             |
| 5 | 39,825,000 | 39,975,000 | 532 | 518  | 0.180356892  |                                             |
| 5 | 39,900,000 | 40,050,000 | 533 | 539  | -0.344049252 | CNTN1                                       |
| 5 | 39,975,000 | 40,125,000 | 534 | 378  | -0.965516178 | CNTN1                                       |
| 5 | 40,050,000 | 40,200,000 | 535 | 744  | 0.530725233  | CNTN1                                       |
| 5 | 40,125,000 | 40,275,000 | 536 | 1039 | 0.856259368  | CNTN1                                       |
| 5 | 40,200,000 | 40,350,000 | 537 | 1103 | 1.215426889  | CNTN1                                       |
| 5 | 40,275,000 | 40,425,000 | 538 | 1020 | -1.065788351 |                                             |
| 5 | 40,350,000 | 40,500,000 | 539 | 963  | -5.207271955 |                                             |
| 5 | 40,425,000 | 40,575,000 | 540 | 1151 | -4.482764633 | ENSBTAG00000026792                          |
| 5 | 40,500,000 | 40,650,000 | 541 | 1071 | -5.150634584 | ENSBTAG00000026792,ENSBTAG00000037783       |
| 5 | 40,575,000 | 40,725,000 | 542 | 900  | -5.194592622 | LRRK2,ENSBTAG00000026792,ENSBTAG00000037783 |

|   |            |            |     |      |              |                                                                            |
|---|------------|------------|-----|------|--------------|----------------------------------------------------------------------------|
| 5 | 40,650,000 | 40,800,000 | 543 | 637  | -2.470756395 | LRRK2,ENSBTAG00000037783                                                   |
| 5 | 40,725,000 | 40,875,000 | 544 | 636  | -2.032277286 | LRRK2                                                                      |
| 5 | 40,800,000 | 40,950,000 | 545 | 564  | -2.184574703 | LRRK2                                                                      |
| 5 | 40,875,000 | 41,025,000 | 546 | 380  | 0.119137726  | LRRK2                                                                      |
| 5 | 40,950,000 | 41,100,000 | 547 | 416  | 0.575178798  | SLC2A13                                                                    |
| 5 | 41,025,000 | 41,175,000 | 548 | 390  | 0.527319936  | SLC2A13                                                                    |
| 5 | 41,100,000 | 41,250,000 | 549 | 386  | 0.611200833  | SLC2A13                                                                    |
| 5 | 41,175,000 | 41,325,000 | 550 | 493  | 0.281114027  | SLC2A13                                                                    |
| 5 | 41,250,000 | 41,400,000 | 551 | 643  | 0.140747709  | SLC2A13                                                                    |
| 5 | 41,325,000 | 41,475,000 | 552 | 499  | 0.164834267  | SLC2A13                                                                    |
| 5 | 41,400,000 | 41,550,000 | 553 | 569  | 0.864910878  | SLC2A13                                                                    |
| 5 | 41,475,000 | 41,625,000 | 554 | 747  | 0.930646115  | C12orf40,SLC2A13                                                           |
| 5 | 41,550,000 | 41,700,000 | 555 | 822  | 0.57259329   | ABCD2,C12orf40,SLC2A13                                                     |
| 5 | 41,625,000 | 41,775,000 | 556 | 968  | 0.641851836  | ABCD2,C12orf40                                                             |
| 5 | 41,700,000 | 41,850,000 | 557 | 949  | 0.788166831  | ABCD2                                                                      |
| 5 | 41,775,000 | 41,925,000 | 558 | 1274 | 1.053671693  | ABCD2                                                                      |
| 5 | 41,850,000 | 42,000,000 | 559 | 1397 | 1.139236587  |                                                                            |
| 5 | 41,925,000 | 42,075,000 | 560 | 794  | 0.872137121  |                                                                            |
| 5 | 42,000,000 | 42,150,000 | 561 | 506  | 0.402952928  | KIF21A                                                                     |
| 5 | 42,075,000 | 42,225,000 | 562 | 1071 | -1.605061866 | KIF21A                                                                     |
| 5 | 42,150,000 | 42,300,000 | 563 | 1419 | -2.156114099 |                                                                            |
| 5 | 42,225,000 | 42,375,000 | 564 | 1200 | -1.628268475 |                                                                            |
| 5 | 42,300,000 | 42,450,000 | 565 | 997  | -0.353526767 | CPNE8                                                                      |
| 5 | 42,375,000 | 42,525,000 | 566 | 1120 | 0.520906555  | CPNE8                                                                      |
| 5 | 42,450,000 | 42,600,000 | 567 | 1471 | 0.831526197  | CPNE8                                                                      |
| 5 | 42,525,000 | 42,675,000 | 568 | 1659 | 0.85394632   | CPNE8                                                                      |
| 5 | 42,600,000 | 42,750,000 | 569 | 1159 | 0.572383313  | CPNE8                                                                      |
| 5 | 42,675,000 | 42,825,000 | 570 | 753  | -0.22824767  | CPNE8                                                                      |
| 5 | 42,750,000 | 42,900,000 | 571 | 954  | -0.469517908 | PTPRR                                                                      |
| 5 | 42,825,000 | 42,975,000 | 572 | 879  | 0.093369219  | PTPRR                                                                      |
| 5 | 42,900,000 | 43,050,000 | 573 | 685  | 0.570041693  | PTPRR                                                                      |
| 5 | 42,975,000 | 43,125,000 | 574 | 721  | 0.190918456  | PTPRB,PTPRR                                                                |
| 5 | 43,050,000 | 43,200,000 | 575 | 559  | -0.61389466  | PTPRB,PTPRR                                                                |
| 5 | 43,125,000 | 43,275,000 | 576 | 347  | -1.00700404  | KCNMB4,PTPRB                                                               |
| 5 | 43,200,000 | 43,350,000 | 577 | 557  | 0.04408361   | KCNMB4,PTPRB                                                               |
| 5 | 43,275,000 | 43,425,000 | 578 | 494  | -0.140084104 | CNOT2,KCNMB4                                                               |
| 5 | 43,350,000 | 43,500,000 | 579 | 261  | -0.233439939 | CNOT2                                                                      |
| 5 | 43,425,000 | 43,575,000 | 580 | 426  | -0.414266219 | CNOT2                                                                      |
| 5 | 43,500,000 | 43,650,000 | 581 | 651  | -0.664968254 |                                                                            |
| 5 | 43,575,000 | 43,725,000 | 582 | 623  | 0.125765743  |                                                                            |
| 5 | 43,650,000 | 43,800,000 | 583 | 583  | 0.990957995  | MYRFL                                                                      |
| 5 | 43,725,000 | 43,875,000 | 584 | 692  | 1.017768605  | MYRFL                                                                      |
| 5 | 43,800,000 | 43,950,000 | 585 | 499  | 1.084794885  | MYRFL,RAB3IP                                                               |
| 5 | 43,875,000 | 44,025,000 | 586 | 372  | 0.297905757  | BEST3,RAB3IP                                                               |
| 5 | 43,950,000 | 44,100,000 | 587 | 684  | 0.369129929  | BEST3,LRRRC10                                                              |
| 5 | 44,025,000 | 44,175,000 | 588 | 712  | 0.638243005  | BEST3,CCT2,FRS2,LRRRC10                                                    |
| 5 | 44,100,000 | 44,250,000 | 589 | 521  | 0.749903128  | CCT2,FRS2                                                                  |
| 5 | 44,175,000 | 44,325,000 | 590 | 705  | 0.903450585  | YEATS4                                                                     |
| 5 | 44,250,000 | 44,400,000 | 591 | 851  | 0.123916378  | LYZ1,YEATS4                                                                |
| 5 | 44,325,000 | 44,475,000 | 592 | 1049 | -0.278559816 | LYZ1,YEATS4,ENSBTAG00000000198,ENSBTAG00000022971                          |
| 5 | 44,400,000 | 44,550,000 | 593 | 955  | -1.017551146 | ENSBTAG00000000198,ENSBTAG00000020564,ENSBTAG0000022971,ENSBTAG00000039170 |

|   |            |            |     |      |              |                                                         |
|---|------------|------------|-----|------|--------------|---------------------------------------------------------|
| 5 | 44,475,000 | 44,625,000 | 594 | 579  | -4.275292419 | LYSB,LYZ1,LYZ2,ENSBTAG00000020564,ENSBTAG00000039170    |
| 5 | 44,550,000 | 44,700,000 | 595 | 547  | -0.641061111 | LYSB,LYZ1,LYZ2,LYZ3,ENSBTAG00000020564,ENSBTAG000026322 |
| 5 | 44,625,000 | 44,775,000 | 596 | 459  | 0.301391856  | CPSF6,LYZ,LYZ3,ENSBTAG00000026322                       |
| 5 | 44,700,000 | 44,850,000 | 597 | 472  | 0.232192615  | CPSF6,LYZ                                               |
| 5 | 44,775,000 | 44,925,000 | 598 | 862  | 1.046071081  | CPSF6                                                   |
| 5 | 44,850,000 | 45,000,000 | 599 | 929  | 0.987360701  |                                                         |
| 5 | 44,925,000 | 45,075,000 | 600 | 563  | 0.333012149  |                                                         |
| 5 | 45,000,000 | 45,150,000 | 601 | 579  | -2.715774942 | CPM                                                     |
| 5 | 45,075,000 | 45,225,000 | 602 | 555  | -3.500623032 | CPM,MDM2                                                |
| 5 | 45,150,000 | 45,300,000 | 603 | 506  | -2.518966761 | CPM,MDM2,NUP107,SLC35E3                                 |
| 5 | 45,225,000 | 45,375,000 | 604 | 603  | -1.239089761 | NUP107,RAP1B,SLC35E3                                    |
| 5 | 45,300,000 | 45,450,000 | 605 | 638  | -0.092806238 | NUP107,RAP1B                                            |
| 5 | 45,375,000 | 45,525,000 | 606 | 547  | 0.404018994  | RAP1B                                                   |
| 5 | 45,450,000 | 45,600,000 | 607 | 480  | 1.273909507  |                                                         |
| 5 | 45,525,000 | 45,675,000 | 608 | 577  | 1.137582129  | MDM1                                                    |
| 5 | 45,600,000 | 45,750,000 | 609 | 595  | 0.418865334  | IL-22,MDM1                                              |
| 5 | 45,675,000 | 45,825,000 | 610 | 450  | -0.109947515 | IL-22                                                   |
| 5 | 45,750,000 | 45,900,000 | 611 | 277  | -0.81750093  | IFNG                                                    |
| 5 | 45,825,000 | 45,975,000 | 612 | 264  | -1.252599507 | IFNG                                                    |
| 5 | 45,900,000 | 46,050,000 | 613 | 230  | -1.158268449 |                                                         |
| 5 | 45,975,000 | 46,125,000 | 614 | 239  | 0.115634291  |                                                         |
| 5 | 46,050,000 | 46,200,000 | 615 | 296  | 0.02477658   |                                                         |
| 5 | 46,125,000 | 46,275,000 | 616 | 587  | 1.088625531  |                                                         |
| 5 | 46,200,000 | 46,350,000 | 617 | 813  | 1.196902798  | DYRK2                                                   |
| 5 | 46,275,000 | 46,425,000 | 618 | 613  | 1.014401634  | DYRK2                                                   |
| 5 | 46,350,000 | 46,500,000 | 619 | 705  | 0.407543457  |                                                         |
| 5 | 46,425,000 | 46,575,000 | 620 | 825  | 0.275437382  |                                                         |
| 5 | 46,500,000 | 46,650,000 | 621 | 610  | -0.084798667 |                                                         |
| 5 | 46,575,000 | 46,725,000 | 622 | 710  | -0.023784442 | CAND1                                                   |
| 5 | 46,650,000 | 46,800,000 | 623 | 759  | 0.572731535  | CAND1                                                   |
| 5 | 46,725,000 | 46,875,000 | 624 | 938  | 0.977369633  | CAND1                                                   |
| 5 | 46,800,000 | 46,950,000 | 625 | 1090 | 0.161825934  |                                                         |
| 5 | 46,875,000 | 47,025,000 | 626 | 735  | 0.232024029  |                                                         |
| 5 | 46,950,000 | 47,100,000 | 627 | 605  | 0.440799945  |                                                         |
| 5 | 47,025,000 | 47,175,000 | 628 | 869  | -0.440283875 |                                                         |
| 5 | 47,100,000 | 47,250,000 | 629 | 927  | -0.721614775 |                                                         |
| 5 | 47,175,000 | 47,325,000 | 630 | 729  | -0.485421096 |                                                         |
| 5 | 47,250,000 | 47,400,000 | 631 | 577  | -0.370918788 |                                                         |
| 5 | 47,325,000 | 47,475,000 | 632 | 750  | -0.610273313 |                                                         |
| 5 | 47,400,000 | 47,550,000 | 633 | 954  | -0.120631267 | GRIP1                                                   |
| 5 | 47,475,000 | 47,625,000 | 634 | 584  | 0.563033691  | GRIP1                                                   |
| 5 | 47,550,000 | 47,700,000 | 635 | 437  | 0.408953496  | GRIP1                                                   |
| 5 | 47,625,000 | 47,775,000 | 636 | 574  | -2.6755401   | FAU,GRIP1,HELB                                          |
| 5 | 47,700,000 | 47,850,000 | 637 | 430  | -5.00777342  | FAU,GRIP1,HELB,IRAKM                                    |
| 5 | 47,775,000 | 47,925,000 | 638 | 267  | -3.049397748 | CGI-119,IRAKM,LLPH                                      |
| 5 | 47,850,000 | 48,000,000 | 639 | 318  | 0.422262644  | CGI-119,LLPH                                            |
| 5 | 47,925,000 | 48,075,000 | 640 | 526  | 0.49352656   | HMGA2                                                   |
| 5 | 48,000,000 | 48,150,000 | 641 | 707  | 0.006183148  | HMGA2                                                   |
| 5 | 48,075,000 | 48,225,000 | 642 | 593  | 0.259286551  | HMGA2                                                   |
| 5 | 48,150,000 | 48,300,000 | 643 | 475  | 1.116978418  | HMGA2                                                   |
| 5 | 48,225,000 | 48,375,000 | 644 | 740  | 0.69889181   |                                                         |

|   |            |            |     |      |              |                                       |
|---|------------|------------|-----|------|--------------|---------------------------------------|
| 5 | 48,300,000 | 48,450,000 | 645 | 895  | 0.499140397  |                                       |
| 5 | 48,375,000 | 48,525,000 | 646 | 787  | 0.878988782  |                                       |
| 5 | 48,450,000 | 48,600,000 | 647 | 698  | 0.918435801  | MSRB3                                 |
| 5 | 48,525,000 | 48,675,000 | 648 | 483  | 0.671818938  | MSRB3                                 |
| 5 | 48,600,000 | 48,750,000 | 649 | 281  | 1.366180121  | MSRB3                                 |
| 5 | 48,675,000 | 48,825,000 | 650 | 295  | 1.419675409  | LEMD3,MSRB3                           |
| 5 | 48,750,000 | 48,900,000 | 651 | 422  | 1.241762067  | LEMD3                                 |
| 5 | 48,825,000 | 48,975,000 | 652 | 376  | 1.335736584  | LEMD3,WIF1                            |
| 5 | 48,900,000 | 49,050,000 | 653 | 310  | 1.249543787  | WIF1                                  |
| 5 | 48,975,000 | 49,125,000 | 654 | 415  | 0.247588776  | WIF1                                  |
| 5 | 49,050,000 | 49,200,000 | 655 | 566  | -0.13600364  | TBC1D30                               |
| 5 | 49,125,000 | 49,275,000 | 656 | 692  | 0.496964381  | TBC1D30,ENSBTAG00000000237            |
| 5 | 49,200,000 | 49,350,000 | 657 | 653  | 0.2861991    | GNS,RASSF3,TBC1D30,ENSBTAG00000000237 |
| 5 | 49,275,000 | 49,425,000 | 658 | 572  | 0.642641893  | GNS,RASSF3                            |
| 5 | 49,350,000 | 49,500,000 | 659 | 456  | 1.182662     | RASSF3                                |
| 5 | 49,425,000 | 49,575,000 | 660 | 467  | 1.213847602  | TBK1,XPOT                             |
| 5 | 49,500,000 | 49,650,000 | 661 | 468  | 1.142846423  | C12orf56,TBK1,XPOT                    |
| 5 | 49,575,000 | 49,725,000 | 662 | 754  | 0.918250582  | C12orf56,C5H12orf66,XPOT              |
| 5 | 49,650,000 | 49,800,000 | 663 | 1240 | 0.560376395  | C12orf56,C5H12orf66                   |
| 5 | 49,725,000 | 49,875,000 | 664 | 842  | -0.076778899 | C5H12orf66,SRGAP1                     |
| 5 | 49,800,000 | 49,950,000 | 665 | 453  | -0.200732467 | SRGAP1                                |
| 5 | 49,875,000 | 50,025,000 | 666 | 657  | 0.050524119  | SRGAP1                                |
| 5 | 49,950,000 | 50,100,000 | 667 | 713  | 0.191123523  | SRGAP1                                |
| 5 | 50,025,000 | 50,175,000 | 668 | 490  | 0.436723935  | TMEM5                                 |
| 5 | 50,100,000 | 50,250,000 | 669 | 539  | 0.477860028  | TMEM5                                 |
| 5 | 50,175,000 | 50,325,000 | 670 | 704  | 0.399426516  | TMEM5                                 |
| 5 | 50,250,000 | 50,400,000 | 671 | 753  | 0.260107466  |                                       |
| 5 | 50,325,000 | 50,475,000 | 672 | 745  | 0.33956054   |                                       |
| 5 | 50,400,000 | 50,550,000 | 673 | 588  | 0.609042903  |                                       |
| 5 | 50,475,000 | 50,625,000 | 674 | 594  | 0.912180564  | AVPR1A                                |
| 5 | 50,550,000 | 50,700,000 | 675 | 421  | 0.306282087  | AVPR1A                                |
| 5 | 50,625,000 | 50,775,000 | 676 | 467  | 0.042716209  |                                       |
| 5 | 50,700,000 | 50,850,000 | 677 | 842  | 0.662936474  |                                       |
| 5 | 50,775,000 | 50,925,000 | 678 | 673  | 0.878216504  | PPM1H                                 |
| 5 | 50,850,000 | 51,000,000 | 679 | 387  | -0.550725244 | PPM1H                                 |
| 5 | 50,925,000 | 51,075,000 | 680 | 668  | -0.120295209 | PPM1H                                 |
| 5 | 51,000,000 | 51,150,000 | 681 | 913  | 0.672501737  | PPM1H                                 |
| 5 | 51,075,000 | 51,225,000 | 682 | 712  | 0.761542743  | MON2,PPM1H                            |
| 5 | 51,150,000 | 51,300,000 | 683 | 719  | -0.042881986 | MON2,PPM1H                            |
| 5 | 51,225,000 | 51,375,000 | 684 | 801  | 0.067392277  | MON2                                  |
| 5 | 51,300,000 | 51,450,000 | 685 | 481  | 0.386420263  | MON2,USP15                            |
| 5 | 51,375,000 | 51,525,000 | 686 | 264  | -0.377373325 | USP15                                 |
| 5 | 51,450,000 | 51,600,000 | 687 | 447  | 0.053402437  | USP15                                 |
| 5 | 51,525,000 | 51,675,000 | 688 | 477  | 0.171313654  |                                       |
| 5 | 51,600,000 | 51,750,000 | 689 | 692  | 0.744321796  |                                       |
| 5 | 51,675,000 | 51,825,000 | 690 | 916  | 1.107551154  |                                       |
| 5 | 51,750,000 | 51,900,000 | 691 | 750  | 0.915053948  |                                       |
| 5 | 51,825,000 | 51,975,000 | 692 | 485  | -0.053614168 |                                       |
| 5 | 51,900,000 | 52,050,000 | 693 | 394  | -0.594792901 | FAM19A2                               |
| 5 | 51,975,000 | 52,125,000 | 694 | 400  | 0.431884757  | FAM19A2                               |
| 5 | 52,050,000 | 52,200,000 | 695 | 478  | 0.94724899   | FAM19A2,ENSBTAG00000045842            |
| 5 | 52,125,000 | 52,275,000 | 696 | 816  | 1.085337126  | ENSBTAG00000045842                    |
| 5 | 52,200,000 | 52,350,000 | 697 | 897  | -0.359040291 |                                       |

|   |            |            |     |     |              |                                                                            |
|---|------------|------------|-----|-----|--------------|----------------------------------------------------------------------------|
| 5 | 52,275,000 | 52,425,000 | 698 | 541 | -3.041862916 |                                                                            |
| 5 | 52,350,000 | 52,500,000 | 699 | 223 | -5.784044392 |                                                                            |
| 5 | 52,425,000 | 52,575,000 | 700 | 201 | -7.276801974 |                                                                            |
| 5 | 52,500,000 | 52,650,000 | 701 | 280 | -5.738150755 |                                                                            |
| 5 | 52,575,000 | 52,725,000 | 702 | 513 | -3.857121326 |                                                                            |
| 5 | 52,650,000 | 52,800,000 | 703 | 702 | -2.756244832 |                                                                            |
| 5 | 52,725,000 | 52,875,000 | 704 | 800 | -2.328859703 | ENSBTAG00000040344                                                         |
| 5 | 52,800,000 | 52,950,000 | 705 | 573 | -2.033591519 | ENSBTAG00000040344                                                         |
| 5 | 52,875,000 | 53,025,000 | 706 | 325 | -4.341401438 |                                                                            |
| 5 | 52,950,000 | 53,100,000 | 707 | 301 | -3.312967878 |                                                                            |
| 5 | 53,025,000 | 53,175,000 | 708 | 539 | -0.900118878 |                                                                            |
| 5 | 53,100,000 | 53,250,000 | 709 | 701 | -0.085639108 |                                                                            |
| 5 | 53,175,000 | 53,325,000 | 710 | 523 | 0.291676465  |                                                                            |
| 5 | 53,250,000 | 53,400,000 | 711 | 473 | 1.039672116  |                                                                            |
| 5 | 53,325,000 | 53,475,000 | 712 | 411 | 0.976288265  |                                                                            |
| 5 | 53,400,000 | 53,550,000 | 713 | 417 | 0.470317057  |                                                                            |
| 5 | 53,475,000 | 53,625,000 | 714 | 587 | -1.961121226 |                                                                            |
| 5 | 53,550,000 | 53,700,000 | 715 | 630 | -2.08828981  |                                                                            |
| 5 | 53,625,000 | 53,775,000 | 716 | 563 | -0.635078336 |                                                                            |
| 5 | 53,700,000 | 53,850,000 | 717 | 744 | -0.039907562 |                                                                            |
| 5 | 53,775,000 | 53,925,000 | 718 | 682 | 0.230452461  |                                                                            |
| 5 | 53,850,000 | 54,000,000 | 719 | 530 | -0.083336321 | SLC16A7                                                                    |
| 5 | 53,925,000 | 54,075,000 | 720 | 493 | -0.017203404 | SLC16A7                                                                    |
| 5 | 54,000,000 | 54,150,000 | 721 | 366 | -0.107422473 | SLC16A7                                                                    |
| 5 | 54,075,000 | 54,225,000 | 722 | 495 | -0.10058114  | SLC16A7                                                                    |
| 5 | 54,150,000 | 54,300,000 | 723 | 813 | -0.475489914 | SLC16A7                                                                    |
| 5 | 54,225,000 | 54,375,000 | 724 | 971 | -1.170850773 |                                                                            |
| 5 | 54,300,000 | 54,450,000 | 725 | 979 | -1.095611612 |                                                                            |
| 5 | 54,375,000 | 54,525,000 | 726 | 831 | -1.754230785 |                                                                            |
| 5 | 54,450,000 | 54,600,000 | 727 | 666 | -1.649179026 |                                                                            |
| 5 | 54,525,000 | 54,675,000 | 728 | 847 | -0.796386347 |                                                                            |
| 5 | 54,600,000 | 54,750,000 | 729 | 829 | -0.726348301 |                                                                            |
| 5 | 54,675,000 | 54,825,000 | 730 | 593 | -0.601454322 |                                                                            |
| 5 | 54,750,000 | 54,900,000 | 731 | 405 | -1.062387383 | LRIG3                                                                      |
| 5 | 54,825,000 | 54,975,000 | 732 | 397 | -4.585153696 | LRIG3                                                                      |
| 5 | 54,900,000 | 55,050,000 | 733 | 657 | -4.511769611 | LRIG3                                                                      |
| 5 | 54,975,000 | 55,125,000 | 734 | 538 | -2.323875543 |                                                                            |
| 5 | 55,050,000 | 55,200,000 | 735 | 321 | 1.023917421  |                                                                            |
| 5 | 55,125,000 | 55,275,000 | 736 | 444 | 0.396540642  |                                                                            |
| 5 | 55,200,000 | 55,350,000 | 737 | 766 | -0.083478275 |                                                                            |
| 5 | 55,275,000 | 55,425,000 | 738 | 911 | -0.155194888 |                                                                            |
| 5 | 55,350,000 | 55,500,000 | 739 | 891 | 0.130351056  |                                                                            |
| 5 | 55,425,000 | 55,575,000 | 740 | 840 | 0.744109416  |                                                                            |
| 5 | 55,500,000 | 55,650,000 | 741 | 663 | 0.997437036  |                                                                            |
| 5 | 55,575,000 | 55,725,000 | 742 | 937 | 0.65845768   |                                                                            |
| 5 | 55,650,000 | 55,800,000 | 743 | 890 | 0.634927656  |                                                                            |
| 5 | 55,725,000 | 55,875,000 | 744 | 432 | 0.68276205   | XRCC6BP1                                                                   |
| 5 | 55,800,000 | 55,950,000 | 745 | 254 | 0.677830581  | XRCC6BP1                                                                   |
| 5 | 55,875,000 | 56,025,000 | 746 | 261 | -0.079515528 | AVIL,CTDSP2,CYP27B1,METTL1,METTL21B,TSFM                                   |
| 5 | 55,950,000 | 56,100,000 | 747 | 271 | -0.446854296 | AGAP2,AVIL,CDK4,CTDSP2,CYP27B1,MARCH9,METTL1,ME<br>TTL21B,OS9,TSFM,TSPAN31 |
| 5 | 56,025,000 | 56,175,000 | 748 | 291 | -0.042826572 | AGAP2,CDK4,CYP27B1,MARCH9,OS9,TSPAN31                                      |



|   |            |            |     |      |              |                                                                                              |
|---|------------|------------|-----|------|--------------|----------------------------------------------------------------------------------------------|
| 5 | 56,100,000 | 56,250,000 | 749 | 381  | -0.070547241 | DTX3,GALGT,GEFT,KIF5A,OS9,PIP4K2C,SLC26A10,ENSBTAG00000047374                                |
| 5 | 56,175,000 | 56,325,000 | 750 | 374  | 0.212005186  | ARHGAP9,DCTN2,DDIT3,DTX3,GALGT,GEFT,GLI1,KIF5A,MARS,MBD6,PIP4K2C,SLC26A10,ENSBTAG00000047374 |
| 5 | 56,250,000 | 56,400,000 | 751 | 488  | 0.759555735  | ARHGAP9,DCTN2,DDIT3,GLI1,INHBC,INHBE,KIF5A,MARS,MBD6                                         |
| 5 | 56,325,000 | 56,475,000 | 752 | 556  | 0.820986826  | GLI1,INHBC,INHBE                                                                             |
| 5 | 56,400,000 | 56,550,000 | 753 | 466  | 0.69003048   | NDUFA4L2,NXPH4,R3HDM2,SHMT2,STAC3                                                            |
| 5 | 56,475,000 | 56,625,000 | 754 | 429  | -0.127080212 | LRP1,NDUFA4L2,NXPH4,R3HDM2,SHMT2,STAC3                                                       |
| 5 | 56,550,000 | 56,700,000 | 755 | 404  | -0.192330001 | LRP1,NAB2,NXPH4,STAT6,TMEM194A                                                               |
| 5 | 56,625,000 | 56,775,000 | 756 | 718  | 1.022012589  | GPR182,LRP1,MYO1A,NAB2,STAT6,TAC3,TMEM194A,ZBTB39                                            |
| 5 | 56,700,000 | 56,850,000 | 757 | 902  | 1.23058032   | GPR182,MYO1A,TAC3,TMEM194A,ZBTB39                                                            |
| 5 | 56,775,000 | 56,925,000 | 758 | 616  | 1.22567056   | GPR182,RDH16,SDR9C7                                                                          |
| 5 | 56,850,000 | 57,000,000 | 759 | 543  | 1.065067253  | RDH16,SDR9C7                                                                                 |
| 5 | 56,925,000 | 57,075,000 | 760 | 472  | 0.46862031   | HSD17B6,NACA,PRIM1                                                                           |
| 5 | 57,000,000 | 57,150,000 | 761 | 356  | -0.022185657 | ATP5B,BAZ2A,HSD17B6,NACA,PRIM1,PTGES3                                                        |
| 5 | 57,075,000 | 57,225,000 | 762 | 426  | -0.148672824 | ATP5B,BAZ2A,PTGES3,RBMS2                                                                     |
| 5 | 57,150,000 | 57,300,000 | 763 | 504  | 0.198596349  | BAZ2A,GLS2,MIP,RBMS2,SPRYD4,TIMELESS                                                         |
| 5 | 57,225,000 | 57,375,000 | 764 | 524  | 0.674621877  | APOF,APON,CNPY2,CS,GLS2,IL23A,MIP,PAN2,SPRYD4,STAT2,TIMELESS                                 |
| 5 | 57,300,000 | 57,450,000 | 765 | 438  | 0.698839672  | ANKRD52,APOF,APON,CNPY2,COQ10A,CS,IL23A,NABP2,PAN2,RNF41,SLC39A5,STAT2                       |
| 5 | 57,375,000 | 57,525,000 | 766 | 363  | 0.89418774   | ANKRD52,COQ10A,CS,FAM62A,MYL6,MYL6B,NABP2,RNF41,SLC39A5,SMARCC2,ZC3H10                       |
| 5 | 57,450,000 | 57,600,000 | 767 | 408  | 0.190790863  | ERBB3,FAM62A,MYL6,MYL6B,PA2G4,RNF41,SMARCC2,ZC3H10                                           |
| 5 | 57,525,000 | 57,675,000 | 768 | 462  | 0.2661001    | CDK2,ERBB3,IKZF4,PA2G4,PMEL17,RAB5B,RPS26,SUOX,ZC3H10                                        |
| 5 | 57,600,000 | 57,750,000 | 769 | 609  | 1.046073488  | CDK2,DGKA,IKZF4,PMEL17,RAB5B,RPS26,SUOX,WIBG                                                 |
| 5 | 57,675,000 | 57,825,000 | 770 | 632  | 1.123504854  | CIP29,DGKA,DNAJC14,MMP19,ORMDL2,PMEL17,WIBG,ENSBTAG00000009049                               |
| 5 | 57,750,000 | 57,900,000 | 771 | 502  | 0.800194873  | BLOC1S1,CD63,CIP29,DNAJC14,GDF11,ITGA7,METTL7B,MMP19,ORMDL2,RDH5,ENSBTAG00000009049          |
| 5 | 57,825,000 | 57,975,000 | 772 | 778  | 0.573259262  | BLOC1S1,CD63,GDF11,ITGA7,METTL7B,OR10P1,RDH5,ENSBTAG00000006605,ENSBTAG00000021621           |
| 5 | 57,900,000 | 58,050,000 | 773 | 1649 | 0.48341915   | METTL7B,OR10P1,OR2AP1,ENSBTAG00000006605,ENSBTAG00000018506,ENSBTAG00000021621               |
| 5 | 57,975,000 | 58,125,000 | 774 | 1794 | 0.442477672  | OR2AP1,ENSBTAG00000018506,ENSBTAG00000021122,ENSBTAG00000037758,ENSBTAG00000047733           |
| 5 | 58,050,000 | 58,200,000 | 775 | 1399 | 0.763925158  | ENSBTAG00000021122,ENSBTAG00000037758,ENSBTAG0000047733,ENSBTAG00000047931                   |
| 5 | 58,125,000 | 58,275,000 | 776 | 1835 | 0.947707225  | ENSBTAG00000037842,ENSBTAG00000047931,ENSBTAG0000047980                                      |
| 5 | 58,200,000 | 58,350,000 | 777 | 1993 | 0.776357594  | ENSBTAG00000037842,ENSBTAG00000047980                                                        |
| 5 | 58,275,000 | 58,425,000 | 778 | 1486 | 0.376710635  | ENSBTAG00000047825                                                                           |
| 5 | 58,350,000 | 58,500,000 | 779 | 1386 | 0.900266121  | ENSBTAG00000021460,ENSBTAG00000024798,ENSBTAG0000047825                                      |
| 5 | 58,425,000 | 58,575,000 | 780 | 1182 | 1.10619331   | ENSBTAG00000021460,ENSBTAG00000024798,ENSBTAG0000046778,ENSBTAG00000048295                   |
| 5 | 58,500,000 | 58,650,000 | 781 | 1138 | 0.557540953  | OR6C2,ENSBTAG00000046778,ENSBTAG00000047292,ENSBTAG00000048295                               |
| 5 | 58,575,000 | 58,725,000 | 782 | 1129 | 0.655794439  | OR6C2,ENSBTAG00000047292                                                                     |

|   |            |            |     |      |              |                                                                                                                         |
|---|------------|------------|-----|------|--------------|-------------------------------------------------------------------------------------------------------------------------|
| 5 | 58,650,000 | 58,800,000 | 783 | 1132 | 0.447174773  | ENSBTAG00000026030,ENSBTAG00000031111,ENSBTAG0000038521                                                                 |
| 5 | 58,725,000 | 58,875,000 | 784 | 1523 | 0.573280583  | OR6C76,ENSBTAG00000026030,ENSBTAG00000031111,ENSBTAG00000038521                                                         |
| 5 | 58,800,000 | 58,950,000 | 785 | 1650 | 1.097964457  | OR6C75,OR6C76,ENSBTAG00000048224                                                                                        |
| 5 | 58,875,000 | 59,025,000 | 786 | 1391 | 1.118789226  | OR6C75,ENSBTAG00000045684,ENSBTAG00000048224                                                                            |
| 5 | 58,950,000 | 59,100,000 | 787 | 1734 | 0.932427519  | ENSBTAG00000045684,ENSBTAG00000046994                                                                                   |
| 5 | 59,025,000 | 59,175,000 | 788 | 2207 | 0.914629272  | OR6C1,ENSBTAG00000046994,ENSBTAG00000048233                                                                             |
| 5 | 59,100,000 | 59,250,000 | 789 | 1908 | 1.017794765  | OR6C1,ENSBTAG00000046016,ENSBTAG00000047109,ENSBTAG00000048233                                                          |
| 5 | 59,175,000 | 59,325,000 | 790 | 1366 | 1.110320702  | ENSBTAG00000045816,ENSBTAG00000045922,ENSBTAG0000046016,ENSBTAG00000047056,ENSBTAG00000047109,ENSBTAG00000048277        |
| 5 | 59,250,000 | 59,400,000 | 791 | 762  | 0.860876425  | ENSBTAG00000045752,ENSBTAG00000045816,ENSBTAG0000045922,ENSBTAG00000047056,ENSBTAG00000048277                           |
| 5 | 59,325,000 | 59,475,000 | 792 | 542  | 0.243022205  | ENSBTAG00000002913,ENSBTAG00000045752,ENSBTAG0000047890                                                                 |
| 5 | 59,400,000 | 59,550,000 | 793 | 466  | 0.3027589    | ENSBTAG00000002913,ENSBTAG00000031099,ENSBTAG0000046446,ENSBTAG00000047890                                              |
| 5 | 59,475,000 | 59,625,000 | 794 | 683  | 0.596365168  | ENSBTAG00000026078,ENSBTAG00000031097,ENSBTAG0000031099,ENSBTAG00000046446                                              |
| 5 | 59,550,000 | 59,700,000 | 795 | 1056 | 0.448590953  | OR10A7,ENSBTAG00000026078,ENSBTAG00000031096,ENSBTAG00000031097,ENSBTAG00000047259,ENSBTAG0000047619,ENSBTAG00000047967 |
| 5 | 59,625,000 | 59,775,000 | 796 | 1253 | 0.155594062  | OR10A7,ENSBTAG00000031096,ENSBTAG00000037629,ENSBTAG00000047259,ENSBTAG00000047619,ENSBTAG0000047967                    |
| 5 | 59,700,000 | 59,850,000 | 797 | 1314 | 0.366800692  | ENSBTAG00000037629,ENSBTAG00000038567,ENSBTAG0000046639                                                                 |
| 5 | 59,775,000 | 59,925,000 | 798 | 1102 | 0.224067169  | ENSBTAG00000038567,ENSBTAG00000045722,ENSBTAG0000046599,ENSBTAG00000046639,ENSBTAG00000047886                           |
| 5 | 59,850,000 | 60,000,000 | 799 | 880  | 0.286514071  | ENSBTAG00000045722,ENSBTAG00000046599,ENSBTAG0000046610,ENSBTAG00000047886                                              |
| 5 | 59,925,000 | 60,075,000 | 800 | 725  | 0.664068418  | ENSBTAG00000046317,ENSBTAG00000046610,ENSBTAG0000046884                                                                 |
| 5 | 60,000,000 | 60,150,000 | 801 | 869  | 0.663028297  | ENSBTAG00000045807,ENSBTAG00000045982,ENSBTAG0000046317,ENSBTAG00000046761,ENSBTAG00000046884                           |
| 5 | 60,075,000 | 60,225,000 | 802 | 869  | 0.632345612  | ENSBTAG00000045807,ENSBTAG00000045982,ENSBTAG0000046761,ENSBTAG00000047631                                              |
| 5 | 60,150,000 | 60,300,000 | 803 | 565  | -0.185988866 | NEUROD4,TESPA1,ENSBTAG00000047631                                                                                       |
| 5 | 60,225,000 | 60,375,000 | 804 | 688  | 0.121369417  | NEUROD4,NTN4,TESPA1                                                                                                     |
| 5 | 60,300,000 | 60,450,000 | 805 | 922  | 0.953479547  | NTN4,TESPA1                                                                                                             |
| 5 | 60,375,000 | 60,525,000 | 806 | 755  | 1.033799635  | NTN4                                                                                                                    |
| 5 | 60,450,000 | 60,600,000 | 807 | 859  | 0.368580809  | AMDHD1,CCDC38,NTN4,SNRPF                                                                                                |
| 5 | 60,525,000 | 60,675,000 | 808 | 1067 | -1.204465436 | AMDHD1,CCDC38,HAL,LTA4H,SNRPF                                                                                           |
| 5 | 60,600,000 | 60,750,000 | 809 | 728  | -2.187172182 | AMDHD1,HAL,LTA4H                                                                                                        |
| 5 | 60,675,000 | 60,825,000 | 810 | 460  | -0.016415138 | ELK3,LTA4H                                                                                                              |
| 5 | 60,750,000 | 60,900,000 | 811 | 381  | 0.37278097   | CDK17,ELK3                                                                                                              |
| 5 | 60,825,000 | 60,975,000 | 812 | 319  | -1.209887953 | CDK17,ELK3                                                                                                              |
| 5 | 60,900,000 | 61,050,000 | 813 | 389  | -0.387943192 | CDK17                                                                                                                   |

|   |            |            |     |      |              |                                        |
|---|------------|------------|-----|------|--------------|----------------------------------------|
| 5 | 60,975,000 | 61,125,000 | 814 | 609  | -0.481898426 | C12orf55,CDK17                         |
| 5 | 61,050,000 | 61,200,000 | 815 | 604  | -0.178312846 | C12orf55                               |
| 5 | 61,125,000 | 61,275,000 | 816 | 624  | 1.030516329  | C12orf55,ENSBTAG00000015792            |
| 5 | 61,200,000 | 61,350,000 | 817 | 893  | 0.909196758  | ENSBTAG00000015792                     |
| 5 | 61,275,000 | 61,425,000 | 818 | 998  | 0.81244324   | ENSBTAG00000015792                     |
| 5 | 61,350,000 | 61,500,000 | 819 | 679  | 0.978493853  | NEDD1                                  |
| 5 | 61,425,000 | 61,575,000 | 820 | 413  | 0.312967517  | NEDD1                                  |
| 5 | 61,500,000 | 61,650,000 | 821 | 560  | -0.620134246 |                                        |
| 5 | 61,575,000 | 61,725,000 | 822 | 696  | 0.021317208  |                                        |
| 5 | 61,650,000 | 61,800,000 | 823 | 615  | 0.484743464  |                                        |
| 5 | 61,725,000 | 61,875,000 | 824 | 631  | -0.048301891 |                                        |
| 5 | 61,800,000 | 61,950,000 | 825 | 665  | -0.214017799 |                                        |
| 5 | 61,875,000 | 62,025,000 | 826 | 722  | -0.088783788 |                                        |
| 5 | 61,950,000 | 62,100,000 | 827 | 659  | 0.196820653  |                                        |
| 5 | 62,025,000 | 62,175,000 | 828 | 552  | 0.423363335  |                                        |
| 5 | 62,100,000 | 62,250,000 | 829 | 602  | 0.527652255  |                                        |
| 5 | 62,175,000 | 62,325,000 | 830 | 686  | 0.660476897  |                                        |
| 5 | 62,250,000 | 62,400,000 | 831 | 705  | 0.342656186  | ENSBTAG00000045919                     |
| 5 | 62,325,000 | 62,475,000 | 832 | 585  | -0.006615797 | ENSBTAG00000045919                     |
| 5 | 62,400,000 | 62,550,000 | 833 | 686  | -0.756679712 |                                        |
| 5 | 62,475,000 | 62,625,000 | 834 | 892  | -0.114052052 |                                        |
| 5 | 62,550,000 | 62,700,000 | 835 | 926  | -0.447769661 |                                        |
| 5 | 62,625,000 | 62,775,000 | 836 | 894  | -0.775227651 |                                        |
| 5 | 62,700,000 | 62,850,000 | 837 | 955  | 0.988094714  |                                        |
| 5 | 62,775,000 | 62,925,000 | 838 | 1078 | 1.022688147  |                                        |
| 5 | 62,850,000 | 63,000,000 | 839 | 789  | 0.881293968  |                                        |
| 5 | 62,925,000 | 63,075,000 | 840 | 305  | 0.2471171    | TMPO                                   |
| 5 | 63,000,000 | 63,150,000 | 841 | 211  | 0.331739849  | APAF1,IKBIP,SLC25A3,TMPO               |
| 5 | 63,075,000 | 63,225,000 | 842 | 283  | 0.914075855  | APAF1,IKBIP,SLC25A3,ENSBTAG00000017385 |
| 5 | 63,150,000 | 63,300,000 | 843 | 339  | 0.337425177  | ANKS1B,APAF1,ENSBTAG00000017385        |
| 5 | 63,225,000 | 63,375,000 | 844 | 522  | -0.557868418 | ANKS1B                                 |
| 5 | 63,300,000 | 63,450,000 | 845 | 589  | -0.10670058  | ANKS1B                                 |
| 5 | 63,375,000 | 63,525,000 | 846 | 696  | 0.943307471  | ANKS1B                                 |
| 5 | 63,450,000 | 63,600,000 | 847 | 824  | 1.021933342  | ANKS1B                                 |
| 5 | 63,525,000 | 63,675,000 | 848 | 792  | 0.936414351  | ANKS1B                                 |
| 5 | 63,600,000 | 63,750,000 | 849 | 906  | 0.493623541  | ANKS1B                                 |
| 5 | 63,675,000 | 63,825,000 | 850 | 789  | 0.191114666  |                                        |
| 5 | 63,750,000 | 63,900,000 | 851 | 708  | 0.432329543  |                                        |
| 5 | 63,825,000 | 63,975,000 | 852 | 1022 | 0.581230356  |                                        |
| 5 | 63,900,000 | 64,050,000 | 853 | 1197 | 0.61079693   |                                        |
| 5 | 63,975,000 | 64,125,000 | 854 | 867  | -0.266914487 |                                        |
| 5 | 64,050,000 | 64,200,000 | 855 | 439  | -1.645376705 |                                        |
| 5 | 64,125,000 | 64,275,000 | 856 | 311  | -0.922547945 | ENSBTAG00000013979                     |
| 5 | 64,200,000 | 64,350,000 | 857 | 299  | 0.343946768  | ENSBTAG00000013979                     |
| 5 | 64,275,000 | 64,425,000 | 858 | 322  | 0.469904087  | UHRF1BP1L                              |
| 5 | 64,350,000 | 64,500,000 | 859 | 483  | 0.51148859   | UHRF1BP1L                              |
| 5 | 64,425,000 | 64,575,000 | 860 | 759  | -1.088125689 | ACTR6,SCYL2,UHRF1BP1L                  |
| 5 | 64,500,000 | 64,650,000 | 861 | 722  | -2.151498676 | ACTR6,SCYL2,SLC17A8                    |
| 5 | 64,575,000 | 64,725,000 | 862 | 460  | -1.393569344 | SCYL2,SLC17A8                          |
| 5 | 64,650,000 | 64,800,000 | 863 | 504  | -0.581921813 | NR1H4,SLC17A8                          |
| 5 | 64,725,000 | 64,875,000 | 864 | 685  | 0.339879942  | GAS2L3,NR1H4                           |
| 5 | 64,800,000 | 64,950,000 | 865 | 558  | 1.297027673  | GAS2L3,NR1H4                           |
| 5 | 64,875,000 | 65,025,000 | 866 | 494  | 0.760265282  | ANO4                                   |

|   |            |            |     |      |              |                                                |
|---|------------|------------|-----|------|--------------|------------------------------------------------|
| 5 | 64,950,000 | 65,100,000 | 867 | 830  | 0.59378268   | ANO4                                           |
| 5 | 65,025,000 | 65,175,000 | 868 | 1316 | -0.520743318 | ANO4                                           |
| 5 | 65,100,000 | 65,250,000 | 869 | 1433 | -0.443147772 | ANO4                                           |
| 5 | 65,175,000 | 65,325,000 | 870 | 1309 | 0.886090616  | ANO4                                           |
| 5 | 65,250,000 | 65,400,000 | 871 | 1013 | 1.129020932  | ANO4,SMCT1,ENSBTAG00000047741                  |
| 5 | 65,325,000 | 65,475,000 | 872 | 418  | 1.00632381   | ANO4,SMCT1,ENSBTAG00000047741                  |
| 5 | 65,400,000 | 65,550,000 | 873 | 216  | 0.667280478  | SMCT1,UTP20                                    |
| 5 | 65,475,000 | 65,625,000 | 874 | 370  | 0.534046098  | ARL1,UTP20                                     |
| 5 | 65,550,000 | 65,700,000 | 875 | 646  | 0.275577011  | ARL1,SPIC,UTP20,ENSBTAG00000008020             |
| 5 | 65,625,000 | 65,775,000 | 876 | 632  | 0.098306337  | MYBPC1,SPIC,ENSBTAG00000008020                 |
| 5 | 65,700,000 | 65,850,000 | 877 | 378  | -0.028841264 | MYBPC1                                         |
| 5 | 65,775,000 | 65,925,000 | 878 | 662  | -0.354371245 | CHPT1,GNPTAB,MYBPC1,SYCP3                      |
| 5 | 65,850,000 | 66,000,000 | 879 | 794  | -0.215662927 | CHPT1,GNPTAB,SYCP3                             |
| 5 | 65,925,000 | 66,075,000 | 880 | 789  | 0.099358431  | FLJ11259,GNPTAB                                |
| 5 | 66,000,000 | 66,150,000 | 881 | 752  | 0.133589696  | FLJ11259                                       |
| 5 | 66,075,000 | 66,225,000 | 882 | 402  | 0.605160964  | FLJ11259,ENSBTAG00000000021                    |
| 5 | 66,150,000 | 66,300,000 | 883 | 257  | 0.836055708  | NUP37,PARPBP,ENSBTAG00000000021                |
| 5 | 66,225,000 | 66,375,000 | 884 | 227  | 0.730881059  | NUP37,PARPBP,PMCH,ENSBTAG00000000021           |
| 5 | 66,300,000 | 66,450,000 | 885 | 370  | 0.52712655   | PARPBP,PMCH                                    |
| 5 | 66,375,000 | 66,525,000 | 886 | 428  | 0.041389563  |                                                |
| 5 | 66,450,000 | 66,600,000 | 887 | 284  | -0.679652229 | IGF-I                                          |
| 5 | 66,525,000 | 66,675,000 | 888 | 214  | -2.626070216 | IGF-I                                          |
| 5 | 66,600,000 | 66,750,000 | 889 | 174  | -2.702111683 | IGF-I                                          |
| 5 | 66,675,000 | 66,825,000 | 890 | 198  | 0.221424775  |                                                |
| 5 | 66,750,000 | 66,900,000 | 891 | 304  | 0.743336957  |                                                |
| 5 | 66,825,000 | 66,975,000 | 892 | 573  | 0.333663086  | PAH                                            |
| 5 | 66,900,000 | 67,050,000 | 893 | 622  | -0.178069672 | PAH                                            |
| 5 | 66,975,000 | 67,125,000 | 894 | 437  | -0.116912039 | ASCL1,PAH                                      |
| 5 | 67,050,000 | 67,200,000 | 895 | 503  | 0.540952691  | ASCL1                                          |
| 5 | 67,125,000 | 67,275,000 | 896 | 677  | 0.715968276  |                                                |
| 5 | 67,200,000 | 67,350,000 | 897 | 582  | 0.929027385  |                                                |
| 5 | 67,275,000 | 67,425,000 | 898 | 755  | 1.229783332  |                                                |
| 5 | 67,350,000 | 67,500,000 | 899 | 1084 | 1.214223589  |                                                |
| 5 | 67,425,000 | 67,575,000 | 900 | 1210 | 0.86319849   |                                                |
| 5 | 67,500,000 | 67,650,000 | 901 | 1424 | 1.110437003  | STAB2                                          |
| 5 | 67,575,000 | 67,725,000 | 902 | 1191 | 1.327621897  | STAB2                                          |
| 5 | 67,650,000 | 67,800,000 | 903 | 792  | 1.255738747  | NT5DC3,STAB2                                   |
| 5 | 67,725,000 | 67,875,000 | 904 | 1121 | 0.884191747  | NT5DC3,STAB2,ENSBTAG00000027899                |
| 5 | 67,800,000 | 67,950,000 | 905 | 1616 | 0.671208913  | HSP90B1,NT5DC3,ENSBTAG00000027899              |
| 5 | 67,875,000 | 68,025,000 | 906 | 1252 | 0.705943173  | C12orf73,GLT8D2,HSP90B1,TDG,ENSBTAG00000027899 |
| 5 | 67,950,000 | 68,100,000 | 907 | 705  | 1.008692151  | C12orf73,GLT8D2,HCFC2,HSP90B1,TDG              |
| 5 | 68,025,000 | 68,175,000 | 908 | 640  | 0.846461727  | GLT8D2,HCFC2,NFYB                              |
| 5 | 68,100,000 | 68,250,000 | 909 | 718  | 0.277817339  | NFYB,TXNRD1                                    |
| 5 | 68,175,000 | 68,325,000 | 910 | 1031 | 0.248255395  | TXNRD1                                         |
| 5 | 68,250,000 | 68,400,000 | 911 | 1043 | 0.557908771  | CHST11,TXNRD1                                  |
| 5 | 68,325,000 | 68,475,000 | 912 | 671  | 0.82947227   | CHST11                                         |
| 5 | 68,400,000 | 68,550,000 | 913 | 716  | 0.648419108  | CHST11                                         |
| 5 | 68,475,000 | 68,625,000 | 914 | 1014 | -0.006821177 | CHST11                                         |
| 5 | 68,550,000 | 68,700,000 | 915 | 760  | -0.147580621 | CHST11                                         |
| 5 | 68,625,000 | 68,775,000 | 916 | 408  | 0.892297713  | CHST11,SLC41A2                                 |
| 5 | 68,700,000 | 68,850,000 | 917 | 718  | 1.150428054  | SLC41A2                                        |
| 5 | 68,775,000 | 68,925,000 | 918 | 1081 | 0.884610406  | ALDH1L2,C5H12orf45,SLC41A2                     |
| 5 | 68,850,000 | 69,000,000 | 919 | 1036 | 0.734174854  | ALDH1L2,C5H12orf45,KIAA1033                    |

|   |            |            |     |      |              |                                        |
|---|------------|------------|-----|------|--------------|----------------------------------------|
| 5 | 68,925,000 | 69,075,000 | 920 | 796  | 0.918129465  | ALDH1L2,APPL2,KIAA1033                 |
| 5 | 69,000,000 | 69,150,000 | 921 | 857  | 1.016917156  | APPL2,KIAA1033                         |
| 5 | 69,075,000 | 69,225,000 | 922 | 653  | 0.932450775  | APPL2,C12orf75,ENSBTAG00000047983      |
| 5 | 69,150,000 | 69,300,000 | 923 | 325  | -0.655785758 | C12orf75,ENSBTAG00000047983            |
| 5 | 69,225,000 | 69,375,000 | 924 | 341  | -1.065395855 |                                        |
| 5 | 69,300,000 | 69,450,000 | 925 | 598  | -0.039294814 |                                        |
| 5 | 69,375,000 | 69,525,000 | 926 | 908  | 0.317251651  |                                        |
| 5 | 69,450,000 | 69,600,000 | 927 | 848  | 0.322326411  |                                        |
| 5 | 69,525,000 | 69,675,000 | 928 | 541  | 0.066248466  |                                        |
| 5 | 69,600,000 | 69,750,000 | 929 | 391  | -0.735862532 |                                        |
| 5 | 69,675,000 | 69,825,000 | 930 | 454  | -1.079200316 | NUAK1                                  |
| 5 | 69,750,000 | 69,900,000 | 931 | 530  | -1.010852715 | NUAK1                                  |
| 5 | 69,825,000 | 69,975,000 | 932 | 498  | -2.019412157 | CKAP4,NUAK1                            |
| 5 | 69,900,000 | 70,050,000 | 933 | 451  | -3.488124374 | CKAP4,TCP11L2                          |
| 5 | 69,975,000 | 70,125,000 | 934 | 378  | -4.339999762 | CKAP4,POLR3B,TCP11L2                   |
| 5 | 70,050,000 | 70,200,000 | 935 | 220  | -4.73066414  | POLR3B,TCP11L2                         |
| 5 | 70,125,000 | 70,275,000 | 936 | 285  | -2.5229755   | POLR3B                                 |
| 5 | 70,200,000 | 70,350,000 | 937 | 305  | -1.959791537 | RFX4                                   |
| 5 | 70,275,000 | 70,425,000 | 938 | 177  | -1.056162911 | RFX4,RIC8B                             |
| 5 | 70,350,000 | 70,500,000 | 939 | 139  | -1.179915833 | RFX4,RIC8B                             |
| 5 | 70,425,000 | 70,575,000 | 940 | 196  | -1.503580394 | RIC8B,TMEM263                          |
| 5 | 70,500,000 | 70,650,000 | 941 | 241  | -1.054975959 | CRY1,MTERF2,RIC8B,TMEM263              |
| 5 | 70,575,000 | 70,725,000 | 942 | 333  | -0.942343458 | CRY1,MTERF2,TMEM263                    |
| 5 | 70,650,000 | 70,800,000 | 943 | 491  | 0.320925694  | CRY1                                   |
| 5 | 70,725,000 | 70,875,000 | 944 | 465  | 0.998077371  |                                        |
| 5 | 70,800,000 | 70,950,000 | 945 | 372  | 0.835070989  | BTBD11                                 |
| 5 | 70,875,000 | 71,025,000 | 946 | 359  | -0.849110412 | BTBD11                                 |
| 5 | 70,950,000 | 71,100,000 | 947 | 637  | -1.009322974 | BTBD11                                 |
| 5 | 71,025,000 | 71,175,000 | 948 | 894  | -0.062650984 | BTBD11                                 |
| 5 | 71,100,000 | 71,250,000 | 949 | 868  | 0.654595384  | BTBD11                                 |
| 5 | 71,175,000 | 71,325,000 | 950 | 882  | 1.096916642  | BTBD11,PRDM4,PWP1                      |
| 5 | 71,250,000 | 71,400,000 | 951 | 803  | 0.967228948  | ASCL4,BPIFC,BTBD11,PRDM4,PWP1,RTCB     |
| 5 | 71,325,000 | 71,475,000 | 952 | 710  | 0.799399075  | ASCL4,BPIFC,FBXO7,PRDM4,RTCB           |
| 5 | 71,400,000 | 71,550,000 | 953 | 940  | 1.288849681  | BPIFC,FBXO7,SYN3                       |
| 5 | 71,475,000 | 71,625,000 | 954 | 1425 | 1.207971055  | SYN3                                   |
| 5 | 71,550,000 | 71,700,000 | 955 | 2021 | 0.514364972  | SYN3                                   |
| 5 | 71,625,000 | 71,775,000 | 956 | 1711 | 0.14990456   | SYN3,TIMP3                             |
| 5 | 71,700,000 | 71,850,000 | 957 | 868  | -0.057547816 | SYN3,TIMP3                             |
| 5 | 71,775,000 | 71,925,000 | 958 | 647  | 0.035552977  | SYN3,TIMP3                             |
| 5 | 71,850,000 | 72,000,000 | 959 | 543  | 0.251094063  | SYN3                                   |
| 5 | 71,925,000 | 72,075,000 | 960 | 483  | 0.408730979  | MGC137211,SYN3,ENSBTAG00000030683      |
| 5 | 72,000,000 | 72,150,000 | 961 | 929  | 0.726536069  | MGC137014,MGC137211,ENSBTAG00000030683 |
| 5 | 72,075,000 | 72,225,000 | 962 | 1233 | 0.156797081  | LARGE,MGC137014                        |
| 5 | 72,150,000 | 72,300,000 | 963 | 929  | 0.061692853  | LARGE                                  |
| 5 | 72,225,000 | 72,375,000 | 964 | 986  | 0.90629253   | LARGE                                  |
| 5 | 72,300,000 | 72,450,000 | 965 | 1028 | 1.002008418  | LARGE                                  |
| 5 | 72,375,000 | 72,525,000 | 966 | 865  | 0.683556044  | LARGE                                  |
| 5 | 72,450,000 | 72,600,000 | 967 | 1422 | 0.364558608  | LARGE                                  |
| 5 | 72,525,000 | 72,675,000 | 968 | 1656 | 0.586417996  | LARGE                                  |
| 5 | 72,600,000 | 72,750,000 | 969 | 1097 | 0.961319731  | LARGE                                  |
| 5 | 72,675,000 | 72,825,000 | 970 | 843  | 0.894477915  | LARGE                                  |
| 5 | 72,750,000 | 72,900,000 | 971 | 1175 | 1.020224199  | LARGE                                  |
| 5 | 72,825,000 | 72,975,000 | 972 | 1285 | 1.064698083  |                                        |

|   |            |            |      |      |              |                                                                |
|---|------------|------------|------|------|--------------|----------------------------------------------------------------|
| 5 | 72,900,000 | 73,050,000 | 973  | 1111 | 0.824246206  |                                                                |
| 5 | 72,975,000 | 73,125,000 | 974  | 1151 | 0.705273356  |                                                                |
| 5 | 73,050,000 | 73,200,000 | 975  | 1356 | 0.949725264  |                                                                |
| 5 | 73,125,000 | 73,275,000 | 976  | 1482 | 0.257822051  |                                                                |
| 5 | 73,200,000 | 73,350,000 | 977  | 1434 | -0.763886644 |                                                                |
| 5 | 73,275,000 | 73,425,000 | 978  | 1291 | -0.259346093 |                                                                |
| 5 | 73,350,000 | 73,500,000 | 979  | 1108 | 0.728766182  |                                                                |
| 5 | 73,425,000 | 73,575,000 | 980  | 777  | 0.938804985  |                                                                |
| 5 | 73,500,000 | 73,650,000 | 981  | 666  | 0.952416408  |                                                                |
| 5 | 73,575,000 | 73,725,000 | 982  | 886  | 0.855066093  | ISX                                                            |
| 5 | 73,650,000 | 73,800,000 | 983  | 790  | 0.297949223  | ISX                                                            |
| 5 | 73,725,000 | 73,875,000 | 984  | 617  | 0.508901411  | HMGXB4,ISX                                                     |
| 5 | 73,800,000 | 73,950,000 | 985  | 743  | 1.271079324  | HMGXB4,TOM1                                                    |
| 5 | 73,875,000 | 74,025,000 | 986  | 803  | 1.256018312  | HMGXB4,HMOX1,MCM5,TOM1                                         |
| 5 | 73,950,000 | 74,100,000 | 987  | 868  | 0.143285482  | HMOX1,MCM5                                                     |
| 5 | 74,025,000 | 74,175,000 | 988  | 1063 | -0.023113    | MB,RASD2                                                       |
| 5 | 74,100,000 | 74,250,000 | 989  | 1022 | 0.581277475  | APOL6,MB,RASD2                                                 |
| 5 | 74,175,000 | 74,325,000 | 990  | 736  | 0.851553437  | APOL6,MB,RBFOX2                                                |
| 5 | 74,250,000 | 74,400,000 | 991  | 421  | 0.941328979  | RBFOX2                                                         |
| 5 | 74,325,000 | 74,475,000 | 992  | 384  | 0.161958491  | RBFOX2                                                         |
| 5 | 74,400,000 | 74,550,000 | 993  | 427  | 0.522523349  | RBFOX2                                                         |
| 5 | 74,475,000 | 74,625,000 | 994  | 414  | 0.297800256  |                                                                |
| 5 | 74,550,000 | 74,700,000 | 995  | 1136 | -0.351100204 | ENSBTAG00000037799,ENSBTAG00000046392                          |
| 5 | 74,625,000 | 74,775,000 | 996  | 1399 | -0.06159173  | ENSBTAG00000037799,ENSBTAG00000046392                          |
| 5 | 74,700,000 | 74,850,000 | 997  | 1156 | 0.503079657  |                                                                |
| 5 | 74,775,000 | 74,925,000 | 998  | 1780 | 0.404434708  | ENSBTAG00000039524                                             |
| 5 | 74,850,000 | 75,000,000 | 999  | 1747 | 0.50808314   | APOL3,ENSBTAG00000012192,ENSBTAG00000038652,ENSBTAG00000039524 |
| 5 | 74,925,000 | 75,075,000 | 1000 | 1222 | 0.695851962  | APOL3,ENSBTAG00000012192,ENSBTAG00000038652                    |
| 5 | 75,000,000 | 75,150,000 | 1001 | 1140 | 0.357736083  | APOL3,MYH9,ENSBTAG00000012192                                  |
| 5 | 75,075,000 | 75,225,000 | 1002 | 1029 | 0.145197434  | APOL3,MYH9                                                     |
| 5 | 75,150,000 | 75,300,000 | 1003 | 682  | 0.619800577  | EIF3D,FOXRED2,MYH9,TXN2                                        |
| 5 | 75,225,000 | 75,375,000 | 1004 | 382  | 1.154630221  | CACNG2,EIF3D,FOXRED2,TXN2                                      |
| 5 | 75,300,000 | 75,450,000 | 1005 | 414  | 0.439696963  | CACNG2,EIF3D                                                   |
| 5 | 75,375,000 | 75,525,000 | 1006 | 393  | -0.153275462 | CACNG2,IFT27,ENSBTAG00000008137                                |
| 5 | 75,450,000 | 75,600,000 | 1007 | 420  | -0.093413275 | CACNG2,IFT27,PVALB,ENSBTAG00000008137                          |
| 5 | 75,525,000 | 75,675,000 | 1008 | 890  | 0.347048653  | IFT27,NCF4,PVALB                                               |
| 5 | 75,600,000 | 75,750,000 | 1009 | 1274 | 0.50181782   | CSF2RB,NCF4                                                    |
| 5 | 75,675,000 | 75,825,000 | 1010 | 982  | 0.369211625  | CSF2RB,MGC133880,MPST,TST                                      |
| 5 | 75,750,000 | 75,900,000 | 1011 | 685  | 0.071592687  | KCTD17,MGC133880,MPST,TMPRSS6,TST                              |
| 5 | 75,825,000 | 75,975,000 | 1012 | 810  | 0.558564603  | IL2RB,KCTD17,MPST,TMPRSS6                                      |
| 5 | 75,900,000 | 76,050,000 | 1013 | 866  | 0.726992375  | C1QTNF6,IL2RB,RAC2,SSTR3,TMPRSS6                               |
| 5 | 75,975,000 | 76,125,000 | 1014 | 761  | 0.408267384  | C1QTNF6,CYTH4,RAC2,SSTR3                                       |
| 5 | 76,050,000 | 76,200,000 | 1015 | 477  | 0.073148     | CYTH4,ELFN2,RAC2                                               |
| 5 | 76,125,000 | 76,275,000 | 1016 | 330  | -0.545018348 | ELFN2,MFNG                                                     |
| 5 | 76,200,000 | 76,350,000 | 1017 | 677  | -1.573691153 | CARD10,MFNG                                                    |
| 5 | 76,275,000 | 76,425,000 | 1018 | 878  | -1.066507014 | CARD10,MFNG,USP18                                              |
| 5 | 76,350,000 | 76,500,000 | 1019 | 954  | -0.141741737 | ALG10,USP18                                                    |
| 5 | 76,425,000 | 76,575,000 | 1020 | 810  | -0.203758725 | ALG10                                                          |
| 5 | 76,500,000 | 76,650,000 | 1021 | 446  | -0.040076004 | ALG10                                                          |
| 5 | 76,575,000 | 76,725,000 | 1022 | 423  | 0.120285745  | SYT10                                                          |
| 5 | 76,650,000 | 76,800,000 | 1023 | 439  | 0.061298414  | SYT10                                                          |
| 5 | 76,725,000 | 76,875,000 | 1024 | 478  | 0.286248633  | SYT10                                                          |

|   |            |            |      |      |              |                    |
|---|------------|------------|------|------|--------------|--------------------|
| 5 | 76,800,000 | 76,950,000 | 1025 | 548  | 0.406849205  | SYT10              |
| 5 | 76,875,000 | 77,025,000 | 1026 | 680  | 0.427119622  |                    |
| 5 | 76,950,000 | 77,100,000 | 1027 | 1028 | 0.691150611  |                    |
| 5 | 77,025,000 | 77,175,000 | 1028 | 1346 | 0.669923752  |                    |
| 5 | 77,100,000 | 77,250,000 | 1029 | 1401 | 0.503743932  |                    |
| 5 | 77,175,000 | 77,325,000 | 1030 | 1306 | 0.461832714  |                    |
| 5 | 77,250,000 | 77,400,000 | 1031 | 1083 | 0.397375197  | PKP2               |
| 5 | 77,325,000 | 77,475,000 | 1032 | 627  | 0.425225789  | PKP2               |
| 5 | 77,400,000 | 77,550,000 | 1033 | 517  | 1.13336747   | DNM1L,PKP2,YARS2   |
| 5 | 77,475,000 | 77,625,000 | 1034 | 759  | 1.078912045  | DNM1L,FGD4,YARS2   |
| 5 | 77,550,000 | 77,700,000 | 1035 | 610  | 1.05173171   | DNM1L,FGD4         |
| 5 | 77,625,000 | 77,775,000 | 1036 | 674  | 1.184235917  | FGD4               |
| 5 | 77,700,000 | 77,850,000 | 1037 | 620  | 0.860368345  |                    |
| 5 | 77,775,000 | 77,925,000 | 1038 | 285  | 0.466525823  | BICD1              |
| 5 | 77,850,000 | 78,000,000 | 1039 | 786  | 1.367553941  | BICD1              |
| 5 | 77,925,000 | 78,075,000 | 1040 | 1067 | 1.418613667  |                    |
| 5 | 78,000,000 | 78,150,000 | 1041 | 671  | 0.8461124    |                    |
| 5 | 78,075,000 | 78,225,000 | 1042 | 479  | -0.831615104 |                    |
| 5 | 78,150,000 | 78,300,000 | 1043 | 501  | -1.553746366 | KIAA1551           |
| 5 | 78,225,000 | 78,375,000 | 1044 | 595  | -0.445648682 | KIAA1551           |
| 5 | 78,300,000 | 78,450,000 | 1045 | 1134 | 0.281716929  | KIAA1551           |
| 5 | 78,375,000 | 78,525,000 | 1046 | 1134 | 0.117010429  |                    |
| 5 | 78,450,000 | 78,600,000 | 1047 | 595  | 0.561721379  | AMN1               |
| 5 | 78,525,000 | 78,675,000 | 1048 | 736  | 0.222849463  | AMN1,METTTL20      |
| 5 | 78,600,000 | 78,750,000 | 1049 | 660  | -1.099059043 | AMN1,METTTL20      |
| 5 | 78,675,000 | 78,825,000 | 1050 | 407  | -1.729544558 |                    |
| 5 | 78,750,000 | 78,900,000 | 1051 | 623  | -0.945684537 | DENND5B            |
| 5 | 78,825,000 | 78,975,000 | 1052 | 865  | -1.991821292 | DENND5B            |
| 5 | 78,900,000 | 79,050,000 | 1053 | 594  | -2.353335672 | DENND5B,FAM60A     |
| 5 | 78,975,000 | 79,125,000 | 1054 | 374  | -0.093503239 | FAM60A             |
| 5 | 79,050,000 | 79,200,000 | 1055 | 356  | 1.09187926   | CAPRIN2,FAM60A     |
| 5 | 79,125,000 | 79,275,000 | 1056 | 290  | 1.226029712  | CAPRIN2,IPO8       |
| 5 | 79,200,000 | 79,350,000 | 1057 | 373  | 1.27729124   | CAPRIN2,IPO8       |
| 5 | 79,275,000 | 79,425,000 | 1058 | 380  | 0.91078208   | IPO8               |
| 5 | 79,350,000 | 79,500,000 | 1059 | 299  | 0.251434488  |                    |
| 5 | 79,425,000 | 79,575,000 | 1060 | 238  | 0.154475634  |                    |
| 5 | 79,500,000 | 79,650,000 | 1061 | 445  | -0.353556562 |                    |
| 5 | 79,575,000 | 79,725,000 | 1062 | 841  | -0.400128005 |                    |
| 5 | 79,650,000 | 79,800,000 | 1063 | 1049 | -1.565563048 |                    |
| 5 | 79,725,000 | 79,875,000 | 1064 | 1103 | -0.974234814 |                    |
| 5 | 79,800,000 | 79,950,000 | 1065 | 908  | 0.325820071  |                    |
| 5 | 79,875,000 | 80,025,000 | 1066 | 882  | 0.216754741  |                    |
| 5 | 79,950,000 | 80,100,000 | 1067 | 1099 | 0.238563157  |                    |
| 5 | 80,025,000 | 80,175,000 | 1068 | 928  | 0.219221885  |                    |
| 5 | 80,100,000 | 80,250,000 | 1069 | 679  | 0.712956274  | TMTC1              |
| 5 | 80,175,000 | 80,325,000 | 1070 | 459  | 0.787968813  | TMTC1              |
| 5 | 80,250,000 | 80,400,000 | 1071 | 412  | 0.545529373  | TMTC1              |
| 5 | 80,325,000 | 80,475,000 | 1072 | 591  | 0.533353299  | TMTC1              |
| 5 | 80,400,000 | 80,550,000 | 1073 | 819  | 0.111522669  | OVCH1,TMTC1        |
| 5 | 80,475,000 | 80,625,000 | 1074 | 824  | 0.245576784  | ERGIC2,OVCH1,TMTC1 |
| 5 | 80,550,000 | 80,700,000 | 1075 | 559  | 0.154454983  | ERGIC2,FAR2,OVCH1  |
| 5 | 80,625,000 | 80,775,000 | 1076 | 502  | -0.168046802 | ERGIC2,FAR2        |
| 5 | 80,700,000 | 80,850,000 | 1077 | 385  | 0.679506715  | FAR2               |

|   |            |            |      |      |              |                                    |
|---|------------|------------|------|------|--------------|------------------------------------|
| 5 | 80,775,000 | 80,925,000 | 1078 | 457  | 0.021080856  |                                    |
| 5 | 80,850,000 | 81,000,000 | 1079 | 1105 | 0.251120083  |                                    |
| 5 | 80,925,000 | 81,075,000 | 1080 | 1135 | 0.559764447  |                                    |
| 5 | 81,000,000 | 81,150,000 | 1081 | 658  | 0.816788789  |                                    |
| 5 | 81,075,000 | 81,225,000 | 1082 | 588  | 1.028151018  |                                    |
| 5 | 81,150,000 | 81,300,000 | 1083 | 480  | 0.711708349  |                                    |
| 5 | 81,225,000 | 81,375,000 | 1084 | 607  | -0.045626578 |                                    |
| 5 | 81,300,000 | 81,450,000 | 1085 | 763  | -0.386901653 |                                    |
| 5 | 81,375,000 | 81,525,000 | 1086 | 587  | -0.699235307 |                                    |
| 5 | 81,450,000 | 81,600,000 | 1087 | 349  | -1.280066039 | CCDC91                             |
| 5 | 81,525,000 | 81,675,000 | 1088 | 278  | -2.02041845  | CCDC91                             |
| 5 | 81,600,000 | 81,750,000 | 1089 | 422  | -2.302681951 | CCDC91                             |
| 5 | 81,675,000 | 81,825,000 | 1090 | 460  | -1.409791924 | CCDC91                             |
| 5 | 81,750,000 | 81,900,000 | 1091 | 326  | -0.728849153 | CCDC91                             |
| 5 | 81,825,000 | 81,975,000 | 1092 | 222  | -0.330095414 | CCDC91                             |
| 5 | 81,900,000 | 82,050,000 | 1093 | 240  | -1.453978716 | CCDC91                             |
| 5 | 81,975,000 | 82,125,000 | 1094 | 370  | -3.811685893 | CCDC91                             |
| 5 | 82,050,000 | 82,200,000 | 1095 | 423  | -2.835808611 |                                    |
| 5 | 82,125,000 | 82,275,000 | 1096 | 409  | -0.120611562 | PTHLH                              |
| 5 | 82,200,000 | 82,350,000 | 1097 | 648  | -1.32564873  | PTHLH                              |
| 5 | 82,275,000 | 82,425,000 | 1098 | 715  | -0.962213102 |                                    |
| 5 | 82,350,000 | 82,500,000 | 1099 | 792  | 0.838711809  | KLHL42,MANSC4,MRPS35               |
| 5 | 82,425,000 | 82,575,000 | 1100 | 1007 | 1.013555895  | KLHL42,MANSC4,MRPS35,PPFIBP1,REP15 |
| 5 | 82,500,000 | 82,650,000 | 1101 | 1072 | 0.732938517  | MRPS35,PPFIBP1,REP15               |
| 5 | 82,575,000 | 82,725,000 | 1102 | 909  | 0.638548062  | C12orf71,PPFIBP1                   |
| 5 | 82,650,000 | 82,800,000 | 1103 | 722  | -0.31785569  | C12orf71,SMCO2                     |
| 5 | 82,725,000 | 82,875,000 | 1104 | 1001 | -0.960392432 | SMCO2                              |
| 5 | 82,800,000 | 82,950,000 | 1105 | 1027 | -0.071458621 | ARNTL2,SMCO2                       |
| 5 | 82,875,000 | 83,025,000 | 1106 | 827  | 0.501499598  | ARNTL2,STK38L                      |
| 5 | 82,950,000 | 83,100,000 | 1107 | 696  | -0.163258493 | STK38L                             |
| 5 | 83,025,000 | 83,175,000 | 1108 | 580  | -0.093377724 | STK38L                             |
| 5 | 83,100,000 | 83,250,000 | 1109 | 564  | 0.124270213  | MED21,TM7SF3                       |
| 5 | 83,175,000 | 83,325,000 | 1110 | 466  | 0.320298986  | C5H12ORF11,FGFR1OP2,MED21,TM7SF3   |
| 5 | 83,250,000 | 83,400,000 | 1111 | 340  | 0.964301934  | C5H12ORF11,FGFR1OP2,ITPR2          |
| 5 | 83,325,000 | 83,475,000 | 1112 | 396  | 0.646681937  | ITPR2                              |
| 5 | 83,400,000 | 83,550,000 | 1113 | 604  | -0.054704869 | ITPR2                              |
| 5 | 83,475,000 | 83,625,000 | 1114 | 841  | 0.077972422  | ITPR2                              |
| 5 | 83,550,000 | 83,700,000 | 1115 | 863  | 0.481634028  | ITPR2                              |
| 5 | 83,625,000 | 83,775,000 | 1116 | 586  | 0.236725136  | ITPR2                              |
| 5 | 83,700,000 | 83,850,000 | 1117 | 596  | 0.407490182  | ITPR2                              |
| 5 | 83,775,000 | 83,925,000 | 1118 | 635  | 0.145925592  | ITPR2                              |
| 5 | 83,850,000 | 84,000,000 | 1119 | 533  | -0.500758545 | ITPR2                              |
| 5 | 83,925,000 | 84,075,000 | 1120 | 526  | -0.331067007 | ITPR2                              |
| 5 | 84,000,000 | 84,150,000 | 1121 | 413  | -1.089690209 | SSPN                               |
| 5 | 84,075,000 | 84,225,000 | 1122 | 495  | -0.018323914 | SSPN                               |
| 5 | 84,150,000 | 84,300,000 | 1123 | 594  | 0.634876359  | BHLHE41,C12ORF2                    |
| 5 | 84,225,000 | 84,375,000 | 1124 | 624  | -0.352038564 | BHLHE41,C12ORF2                    |
| 5 | 84,300,000 | 84,450,000 | 1125 | 745  | 0.334405038  | C12ORF2                            |
| 5 | 84,375,000 | 84,525,000 | 1126 | 854  | 0.738008152  |                                    |
| 5 | 84,450,000 | 84,600,000 | 1127 | 601  | 0.764732048  |                                    |
| 5 | 84,525,000 | 84,675,000 | 1128 | 435  | -0.454987796 |                                    |
| 5 | 84,600,000 | 84,750,000 | 1129 | 660  | -1.131000522 |                                    |
| 5 | 84,675,000 | 84,825,000 | 1130 | 1022 | -0.158063238 | ENSBTAG00000046108                 |



|   |            |            |      |      |              |                                 |
|---|------------|------------|------|------|--------------|---------------------------------|
| 5 | 84,750,000 | 84,900,000 | 1131 | 909  | 0.346780673  | LMNTD1,ENSBTAG00000046108       |
| 5 | 84,825,000 | 84,975,000 | 1132 | 767  | 0.780303389  | LMNTD1                          |
| 5 | 84,900,000 | 85,050,000 | 1133 | 705  | 0.887807343  |                                 |
| 5 | 84,975,000 | 85,125,000 | 1134 | 454  | 0.063614899  |                                 |
| 5 | 85,050,000 | 85,200,000 | 1135 | 465  | -0.74876763  | KRAS                            |
| 5 | 85,125,000 | 85,275,000 | 1136 | 452  | -0.584800774 | CASC1,KRAS,LYRM5                |
| 5 | 85,200,000 | 85,350,000 | 1137 | 372  | 0.004260801  | CASC1,KRAS,LRMP,LYRM5           |
| 5 | 85,275,000 | 85,425,000 | 1138 | 438  | -0.27737638  | CASC1,LRMP                      |
| 5 | 85,350,000 | 85,500,000 | 1139 | 841  | -0.061554973 | BCAT1,LRMP                      |
| 5 | 85,425,000 | 85,575,000 | 1140 | 1196 | 0.548588042  | BCAT1                           |
| 5 | 85,500,000 | 85,650,000 | 1141 | 904  | 0.83819844   | BCAT1                           |
| 5 | 85,575,000 | 85,725,000 | 1142 | 510  | 0.212043321  | BCAT1                           |
| 5 | 85,650,000 | 85,800,000 | 1143 | 648  | 0.263792904  |                                 |
| 5 | 85,725,000 | 85,875,000 | 1144 | 634  | 0.527216162  |                                 |
| 5 | 85,800,000 | 85,950,000 | 1145 | 584  | 0.323844481  |                                 |
| 5 | 85,875,000 | 86,025,000 | 1146 | 532  | 0.303362039  |                                 |
| 5 | 85,950,000 | 86,100,000 | 1147 | 481  | -0.268959569 |                                 |
| 5 | 86,025,000 | 86,175,000 | 1148 | 629  | -0.385635617 |                                 |
| 5 | 86,100,000 | 86,250,000 | 1149 | 646  | 0.002675124  |                                 |
| 5 | 86,175,000 | 86,325,000 | 1150 | 647  | 0.550980727  |                                 |
| 5 | 86,250,000 | 86,400,000 | 1151 | 613  | 0.404952397  |                                 |
| 5 | 86,325,000 | 86,475,000 | 1152 | 591  | 0.364347854  |                                 |
| 5 | 86,400,000 | 86,550,000 | 1153 | 671  | -0.075449786 |                                 |
| 5 | 86,475,000 | 86,625,000 | 1154 | 671  | -0.662543919 | SOX5                            |
| 5 | 86,550,000 | 86,700,000 | 1155 | 686  | -0.799473949 | SOX5                            |
| 5 | 86,625,000 | 86,775,000 | 1156 | 568  | -0.028044951 | SOX5                            |
| 5 | 86,700,000 | 86,850,000 | 1157 | 661  | 1.082401428  | SOX5                            |
| 5 | 86,775,000 | 86,925,000 | 1158 | 763  | 0.929368322  | SOX5                            |
| 5 | 86,850,000 | 87,000,000 | 1159 | 678  | -0.248534561 | SOX5                            |
| 5 | 86,925,000 | 87,075,000 | 1160 | 725  | -0.939278315 | SOX5                            |
| 5 | 87,000,000 | 87,150,000 | 1161 | 926  | -2.297713156 | SOX5                            |
| 5 | 87,075,000 | 87,225,000 | 1162 | 976  | -2.778673286 |                                 |
| 5 | 87,150,000 | 87,300,000 | 1163 | 794  | -0.898844389 |                                 |
| 5 | 87,225,000 | 87,375,000 | 1164 | 605  | -0.055623693 |                                 |
| 5 | 87,300,000 | 87,450,000 | 1165 | 770  | -1.209799851 |                                 |
| 5 | 87,375,000 | 87,525,000 | 1166 | 1030 | -0.209232083 |                                 |
| 5 | 87,450,000 | 87,600,000 | 1167 | 922  | 0.794921787  |                                 |
| 5 | 87,525,000 | 87,675,000 | 1168 | 730  | -0.449472265 |                                 |
| 5 | 87,600,000 | 87,750,000 | 1169 | 508  | -0.79263625  |                                 |
| 5 | 87,675,000 | 87,825,000 | 1170 | 559  | 0.623134541  |                                 |
| 5 | 87,750,000 | 87,900,000 | 1171 | 909  | 0.891892913  |                                 |
| 5 | 87,825,000 | 87,975,000 | 1172 | 710  | 0.864463275  | ETNK1                           |
| 5 | 87,900,000 | 88,050,000 | 1173 | 300  | -1.919844855 | ETNK1                           |
| 5 | 87,975,000 | 88,125,000 | 1174 | 397  | -2.641827032 | C2CD5,ETNK1                     |
| 5 | 88,050,000 | 88,200,000 | 1175 | 544  | -1.70661438  | C2CD5                           |
| 5 | 88,125,000 | 88,275,000 | 1176 | 791  | -0.670911478 | C2CD5                           |
| 5 | 88,200,000 | 88,350,000 | 1177 | 725  | -0.478208174 | ST8SIA1                         |
| 5 | 88,275,000 | 88,425,000 | 1178 | 379  | -1.000467329 | ST8SIA1                         |
| 5 | 88,350,000 | 88,500,000 | 1179 | 276  | -0.676070587 | ST8SIA1                         |
| 5 | 88,425,000 | 88,575,000 | 1180 | 256  | 0.437028301  | CMAS,ST8SIA1,ENSBTAG00000026611 |
| 5 | 88,500,000 | 88,650,000 | 1181 | 531  | 0.508505218  | CMAS,ENSBTAG00000026611         |
| 5 | 88,575,000 | 88,725,000 | 1182 | 609  | 0.299021808  | ABCC9,CMAS                      |
| 5 | 88,650,000 | 88,800,000 | 1183 | 645  | -0.374236266 | ABCC9                           |

|   |            |            |      |      |              |                                               |
|---|------------|------------|------|------|--------------|-----------------------------------------------|
| 5 | 88,725,000 | 88,875,000 | 1184 | 768  | 0.129669649  | ABCC9,KCNJ8                                   |
| 5 | 88,800,000 | 88,950,000 | 1185 | 623  | 0.866646655  | ABCC9,KCNJ8                                   |
| 5 | 88,875,000 | 89,025,000 | 1186 | 755  | 0.21047819   | GYS2,LDHB                                     |
| 5 | 88,950,000 | 89,100,000 | 1187 | 1195 | 0.14373705   | C5H12orf39,GYS2,LDHB                          |
| 5 | 89,025,000 | 89,175,000 | 1188 | 975  | -0.086874697 | C5H12orf39,GOLT1B,GYS2,PYROXD1,RECQL          |
| 5 | 89,100,000 | 89,250,000 | 1189 | 588  | -0.852336227 | GOLT1B,IAPP,PYROXD1,RECQL                     |
| 5 | 89,175,000 | 89,325,000 | 1190 | 633  | -0.768150507 | IAPP,PYROXD1,SLCO1A2,ENSBTAG00000022329       |
| 5 | 89,250,000 | 89,400,000 | 1191 | 658  | -1.690666353 | SLCO1A2,ENSBTAG00000016876,ENSBTAG00000022329 |
| 5 | 89,325,000 | 89,475,000 | 1192 | 728  | -1.569070289 | SLCO1C1,ENSBTAG00000016876,ENSBTAG00000022329 |
| 5 | 89,400,000 | 89,550,000 | 1193 | 891  | 0.275807943  | SLCO1C1                                       |
| 5 | 89,475,000 | 89,625,000 | 1194 | 930  | 0.448659072  | PDE3A,SLCO1C1                                 |
| 5 | 89,550,000 | 89,700,000 | 1195 | 807  | -0.656042453 | PDE3A                                         |
| 5 | 89,625,000 | 89,775,000 | 1196 | 699  | -0.449268974 |                                               |
| 5 | 89,700,000 | 89,850,000 | 1197 | 759  | -1.009455168 |                                               |
| 5 | 89,775,000 | 89,925,000 | 1198 | 696  | -1.216178924 |                                               |
| 5 | 89,850,000 | 90,000,000 | 1199 | 406  | -0.180241167 |                                               |
| 5 | 89,925,000 | 90,075,000 | 1200 | 683  | -0.697094307 |                                               |
| 5 | 90,000,000 | 90,150,000 | 1201 | 923  | -0.613581951 |                                               |
| 5 | 90,075,000 | 90,225,000 | 1202 | 774  | -0.30388305  |                                               |
| 5 | 90,150,000 | 90,300,000 | 1203 | 810  | -0.749990453 |                                               |
| 5 | 90,225,000 | 90,375,000 | 1204 | 907  | -0.970915915 |                                               |
| 5 | 90,300,000 | 90,450,000 | 1205 | 802  | -0.605969885 |                                               |
| 5 | 90,375,000 | 90,525,000 | 1206 | 679  | -0.013704138 |                                               |
| 5 | 90,450,000 | 90,600,000 | 1207 | 600  | 0.220311159  |                                               |
| 5 | 90,525,000 | 90,675,000 | 1208 | 427  | 0.132742663  |                                               |
| 5 | 90,600,000 | 90,750,000 | 1209 | 464  | 0.412753851  |                                               |
| 5 | 90,675,000 | 90,825,000 | 1210 | 563  | -0.387390094 |                                               |
| 5 | 90,750,000 | 90,900,000 | 1211 | 557  | -1.89452637  | AEBP2                                         |
| 5 | 90,825,000 | 90,975,000 | 1212 | 652  | -1.974876549 | AEBP2                                         |
| 5 | 90,900,000 | 91,050,000 | 1213 | 712  | -2.185201551 | AEBP2,PLEKHA5                                 |
| 5 | 90,975,000 | 91,125,000 | 1214 | 660  | -1.862204812 | PLEKHA5                                       |
| 5 | 91,050,000 | 91,200,000 | 1215 | 647  | -0.506386565 | PLEKHA5                                       |
| 5 | 91,125,000 | 91,275,000 | 1216 | 558  | -0.398010958 | PLEKHA5                                       |
| 5 | 91,200,000 | 91,350,000 | 1217 | 554  | 0.119076586  |                                               |
| 5 | 91,275,000 | 91,425,000 | 1218 | 618  | 0.758769847  |                                               |
| 5 | 91,350,000 | 91,500,000 | 1219 | 685  | 0.792304293  |                                               |
| 5 | 91,425,000 | 91,575,000 | 1220 | 547  | 0.711684536  |                                               |
| 5 | 91,500,000 | 91,650,000 | 1221 | 333  | 0.701529154  |                                               |
| 5 | 91,575,000 | 91,725,000 | 1222 | 441  | 0.696591429  |                                               |
| 5 | 91,650,000 | 91,800,000 | 1223 | 699  | 0.104388359  | CAPZA3,PLCZ1                                  |
| 5 | 91,725,000 | 91,875,000 | 1224 | 1066 | 0.060036505  | CAPZA3,PIK3C2G,PLCZ1                          |
| 5 | 91,800,000 | 91,950,000 | 1225 | 1336 | 0.431299959  | PIK3C2G,PLCZ1,ENSBTAG00000047048              |
| 5 | 91,875,000 | 92,025,000 | 1226 | 985  | 0.384654158  | PIK3C2G,ENSBTAG00000047048                    |
| 5 | 91,950,000 | 92,100,000 | 1227 | 556  | -0.051434823 | PIK3C2G                                       |
| 5 | 92,025,000 | 92,175,000 | 1228 | 763  | -0.137565254 | PIK3C2G                                       |
| 5 | 92,100,000 | 92,250,000 | 1229 | 901  | -0.474264065 | PIK3C2G                                       |
| 5 | 92,175,000 | 92,325,000 | 1230 | 667  | -2.017579321 | PIK3C2G                                       |
| 5 | 92,250,000 | 92,400,000 | 1231 | 466  | -4.113150371 | PIK3C2G                                       |
| 5 | 92,325,000 | 92,475,000 | 1232 | 542  | -3.807910252 | RERGL                                         |
| 5 | 92,400,000 | 92,550,000 | 1233 | 846  | -2.870307499 | RERGL                                         |
| 5 | 92,475,000 | 92,625,000 | 1234 | 655  | -2.557677622 |                                               |
| 5 | 92,550,000 | 92,700,000 | 1235 | 349  | -4.97354678  |                                               |
| 5 | 92,625,000 | 92,775,000 | 1236 | 551  | -4.649459535 |                                               |

|   |            |            |      |      |              |                                                                        |
|---|------------|------------|------|------|--------------|------------------------------------------------------------------------|
| 5 | 92,700,000 | 92,850,000 | 1237 | 711  | -2.866142409 |                                                                        |
| 5 | 92,775,000 | 92,925,000 | 1238 | 896  | -0.998800428 |                                                                        |
| 5 | 92,850,000 | 93,000,000 | 1239 | 818  | -0.492366715 |                                                                        |
| 5 | 92,925,000 | 93,075,000 | 1240 | 454  | -1.032889715 |                                                                        |
| 5 | 93,000,000 | 93,150,000 | 1241 | 401  | -3.995082582 |                                                                        |
| 5 | 93,075,000 | 93,225,000 | 1242 | 654  | -3.374680703 |                                                                        |
| 5 | 93,150,000 | 93,300,000 | 1243 | 824  | -0.683486234 |                                                                        |
| 5 | 93,225,000 | 93,375,000 | 1244 | 567  | 0.622731316  |                                                                        |
| 5 | 93,300,000 | 93,450,000 | 1245 | 213  | -0.0398161   |                                                                        |
| 5 | 93,375,000 | 93,525,000 | 1246 | 282  | -4.155491402 |                                                                        |
| 5 | 93,450,000 | 93,600,000 | 1247 | 439  | -3.616051698 |                                                                        |
| 5 | 93,525,000 | 93,675,000 | 1248 | 530  | -0.11068879  |                                                                        |
| 5 | 93,600,000 | 93,750,000 | 1249 | 452  | 1.247987959  | LMO3                                                                   |
| 5 | 93,675,000 | 93,825,000 | 1250 | 518  | 1.340552477  | LMO3                                                                   |
| 5 | 93,750,000 | 93,900,000 | 1251 | 794  | 1.283586856  | LMO3                                                                   |
| 5 | 93,825,000 | 93,975,000 | 1252 | 974  | 0.591053958  | MGST1                                                                  |
| 5 | 93,900,000 | 94,050,000 | 1253 | 895  | 0.472412696  | MGST1,SLC15A5                                                          |
| 5 | 93,975,000 | 94,125,000 | 1254 | 901  | 0.726092994  | SLC15A5                                                                |
| 5 | 94,050,000 | 94,200,000 | 1255 | 818  | 0.358043869  | SLC15A5                                                                |
| 5 | 94,125,000 | 94,275,000 | 1256 | 870  | 0.419768405  | SLC15A5                                                                |
| 5 | 94,200,000 | 94,350,000 | 1257 | 1186 | 0.894868224  | DERA                                                                   |
| 5 | 94,275,000 | 94,425,000 | 1258 | 1251 | 1.041336398  | COX6B1,DERA                                                            |
| 5 | 94,350,000 | 94,500,000 | 1259 | 885  | 0.862009821  | COX6B1,DERA,STRAP                                                      |
| 5 | 94,425,000 | 94,575,000 | 1260 | 523  | 0.20234478   | DERA,STRAP                                                             |
| 5 | 94,500,000 | 94,650,000 | 1261 | 639  | 0.010472483  |                                                                        |
| 5 | 94,575,000 | 94,725,000 | 1262 | 576  | 0.378720726  | EPS8                                                                   |
| 5 | 94,650,000 | 94,800,000 | 1263 | 570  | 0.568399273  | EPS8,PTPRO                                                             |
| 5 | 94,725,000 | 94,875,000 | 1264 | 792  | 0.406385615  | EPS8,PTPRO                                                             |
| 5 | 94,800,000 | 94,950,000 | 1265 | 1010 | 0.538521844  | PTPRO                                                                  |
| 5 | 94,875,000 | 95,025,000 | 1266 | 1084 | 0.619436861  | PTPRO                                                                  |
| 5 | 94,950,000 | 95,100,000 | 1267 | 934  | 0.761060372  | RERG                                                                   |
| 5 | 95,025,000 | 95,175,000 | 1268 | 773  | 0.831927705  | RERG                                                                   |
| 5 | 95,100,000 | 95,250,000 | 1269 | 633  | -0.913362526 | RERG                                                                   |
| 5 | 95,175,000 | 95,325,000 | 1270 | 459  | -2.485494589 | RERG                                                                   |
| 5 | 95,250,000 | 95,400,000 | 1271 | 515  | 0.519692221  | ARHGDI,ERP27,PDE6H                                                     |
| 5 | 95,325,000 | 95,475,000 | 1272 | 781  | 1.107421084  | ARHGDI,ERP27,MGP,PDE6H                                                 |
| 5 | 95,400,000 | 95,550,000 | 1273 | 726  | 1.077464315  | ART4,C12orf60,ERP27,MGP,SMCO3,ENSBTAG00000014759                       |
| 5 | 95,475,000 | 95,625,000 | 1274 | 527  | 0.282962721  | ART4,C12orf60,GUCY2C,H2AFJ,SMCO3,ENSBTAG00000014759,ENSBTAG00000030504 |
| 5 | 95,550,000 | 95,700,000 | 1275 | 650  | 0.677938441  | GUCY2C,H2AFJ,ENSBTAG00000030504                                        |
| 5 | 95,625,000 | 95,775,000 | 1276 | 618  | 1.103056506  | GUCY2C,PLBD1                                                           |
| 5 | 95,700,000 | 95,850,000 | 1277 | 367  | 1.040343263  | ATF7IP,PLBD1                                                           |
| 5 | 95,775,000 | 95,925,000 | 1278 | 245  | 0.651341027  | ATF7IP,PLBD1                                                           |
| 5 | 95,850,000 | 96,000,000 | 1279 | 230  | 0.706073405  | ATF7IP                                                                 |
| 5 | 95,925,000 | 96,075,000 | 1280 | 584  | 0.354577199  |                                                                        |
| 5 | 96,000,000 | 96,150,000 | 1281 | 875  | 0.263780343  |                                                                        |
| 5 | 96,075,000 | 96,225,000 | 1282 | 1145 | -0.623614561 |                                                                        |
| 5 | 96,150,000 | 96,300,000 | 1283 | 1108 | -0.544034791 |                                                                        |
| 5 | 96,225,000 | 96,375,000 | 1284 | 646  | 0.705122922  |                                                                        |
| 5 | 96,300,000 | 96,450,000 | 1285 | 735  | 0.057701215  | GRIN2B                                                                 |
| 5 | 96,375,000 | 96,525,000 | 1286 | 743  | 0.176802533  | GRIN2B                                                                 |
| 5 | 96,450,000 | 96,600,000 | 1287 | 603  | 0.98787643   | GRIN2B                                                                 |

|   |             |             |      |      |              |                                                        |
|---|-------------|-------------|------|------|--------------|--------------------------------------------------------|
| 5 | 96,525,000  | 96,675,000  | 1288 | 907  | 0.60278851   | GRIN2B                                                 |
| 5 | 96,600,000  | 96,750,000  | 1289 | 1178 | 0.073485271  | GRIN2B                                                 |
| 5 | 96,675,000  | 96,825,000  | 1290 | 1127 | -0.339790293 | GRIN2B                                                 |
| 5 | 96,750,000  | 96,900,000  | 1291 | 1101 | -0.113348007 | GRIN2B                                                 |
| 5 | 96,825,000  | 96,975,000  | 1292 | 898  | 0.629890273  |                                                        |
| 5 | 96,900,000  | 97,050,000  | 1293 | 530  | 0.032924377  |                                                        |
| 5 | 96,975,000  | 97,125,000  | 1294 | 609  | 0.028718208  | EMP1                                                   |
| 5 | 97,050,000  | 97,200,000  | 1295 | 575  | 0.093707441  | EMP1                                                   |
| 5 | 97,125,000  | 97,275,000  | 1296 | 566  | -0.397629752 | GSG1,KIAA1467                                          |
| 5 | 97,200,000  | 97,350,000  | 1297 | 1036 | -0.192691559 | GSG1,HEBP1,KIAA1467                                    |
| 5 | 97,275,000  | 97,425,000  | 1298 | 1311 | -0.013002164 | GPRC5D,HEBP1,KIAA1467                                  |
| 5 | 97,350,000  | 97,500,000  | 1299 | 1255 | -0.501419938 | DDX47,GPRC5A,GPRC5D,HEBP1                              |
| 5 | 97,425,000  | 97,575,000  | 1300 | 902  | -0.521966102 | APOLD1,DDX47,GPRC5A                                    |
| 5 | 97,500,000  | 97,650,000  | 1301 | 482  | 0.728150502  | APOLD1,CDKN1B,CREBL2,DDX47,GPR19                       |
| 5 | 97,575,000  | 97,725,000  | 1302 | 325  | 0.946461082  | CDKN1B,CREBL2,GPR19                                    |
| 5 | 97,650,000  | 97,800,000  | 1303 | 352  | 0.894034627  | CREBL2,DUSP16                                          |
| 5 | 97,725,000  | 97,875,000  | 1304 | 352  | 0.856007198  | DUSP16,LOH12CR1                                        |
| 5 | 97,800,000  | 97,950,000  | 1305 | 390  | 1.072347086  | DUSP16,LOH12CR1,MANSC1,ENSBTAG00000039496              |
| 5 | 97,875,000  | 98,025,000  | 1306 | 494  | 0.796718484  | LOH12CR1,LRP6,MANSC1,ENSBTAG00000039496                |
| 5 | 97,950,000  | 98,100,000  | 1307 | 395  | 0.257787995  | LRP6                                                   |
| 5 | 98,025,000  | 98,175,000  | 1308 | 322  | 0.766488373  | LRP6                                                   |
| 5 | 98,100,000  | 98,250,000  | 1309 | 549  | 0.013466995  | BCL2L14,LRP6                                           |
| 5 | 98,175,000  | 98,325,000  | 1310 | 647  | 0.355231436  | BCL2L14                                                |
| 5 | 98,250,000  | 98,400,000  | 1311 | 599  | 0.527517085  |                                                        |
| 5 | 98,325,000  | 98,475,000  | 1312 | 651  | 0.54838506   | ETV6                                                   |
| 5 | 98,400,000  | 98,550,000  | 1313 | 709  | 0.752444028  | ETV6                                                   |
| 5 | 98,475,000  | 98,625,000  | 1314 | 611  | 0.159860756  |                                                        |
| 5 | 98,550,000  | 98,700,000  | 1315 | 585  | -0.315697009 |                                                        |
| 5 | 98,625,000  | 98,775,000  | 1316 | 639  | -1.215762111 |                                                        |
| 5 | 98,700,000  | 98,850,000  | 1317 | 1067 | -1.215398032 |                                                        |
| 5 | 98,775,000  | 98,925,000  | 1318 | 982  | -0.858593376 |                                                        |
| 5 | 98,850,000  | 99,000,000  | 1319 | 642  | 0.498837519  | ENSBTAG00000030476                                     |
| 5 | 98,925,000  | 99,075,000  | 1320 | 1261 | 0.665513323  | TAS2R42,TAS2R46,ENSBTAG00000001336,ENSBTAG00000030476  |
| 5 | 99,000,000  | 99,150,000  | 1321 | 1753 | 0.433499628  | T2R12,T2R65A,TAS2R42,TAS2R46,ENSBTAG00000001336        |
| 5 | 99,075,000  | 99,225,000  | 1322 | 1501 | -0.915292274 | BOTA-T2R10B,T2R12,T2R65A                               |
| 5 | 99,150,000  | 99,300,000  | 1323 | 1095 | -2.296381342 | BOTA-T2R10B,T2R10C,TAS2R10                             |
| 5 | 99,225,000  | 99,375,000  | 1324 | 1205 | -1.636402533 | CSDA,T2R10C,TAS2R10                                    |
| 5 | 99,300,000  | 99,450,000  | 1325 | 1589 | -0.569525601 | CSDA,MAGOHB,STYK1                                      |
| 5 | 99,375,000  | 99,525,000  | 1326 | 1837 | 0.055288079  | KLRA1,MAGOHB,STYK1                                     |
| 5 | 99,450,000  | 99,600,000  | 1327 | 2091 | 0.514688201  | KLRA1,MAGOHB,ENSBTAG00000046268                        |
| 5 | 99,525,000  | 99,675,000  | 1328 | 2233 | 0.958601887  | ENSBTAG00000014332,ENSBTAG00000046268                  |
| 5 | 99,600,000  | 99,750,000  | 1329 | 1887 | 0.653664871  | ENSBTAG00000014332,ENSBTAG00000046268                  |
| 5 | 99,675,000  | 99,825,000  | 1330 | 1451 | 0.509115434  | KLRC1,NKG2A,ENSBTAG00000014332,ENSBTAG000000033671     |
| 5 | 99,750,000  | 99,900,000  | 1331 | 1450 | 0.442376048  | KLRC1,KLRJ1,NKG2A,ENSBTAG00000033671                   |
| 5 | 99,825,000  | 99,975,000  | 1332 | 1517 | 0.632887604  | KLRC1,KLRJ1,NKG2A                                      |
| 5 | 99,900,000  | 100,050,000 | 1333 | 1336 | 0.456370905  | NKG2A,NKG2C,ENSBTAG00000004917                         |
| 5 | 99,975,000  | 100,125,000 | 1334 | 1682 | 0.381611757  | KLRD1,NKG2A,NKG2C,ENSBTAG00000000966,ENSBTAG0000004917 |
| 5 | 100,050,000 | 100,200,000 | 1335 | 1901 | 0.645590596  | KLRD1,ENSBTAG00000000966,ENSBTAG00000030426            |
| 5 | 100,125,000 | 100,275,000 | 1336 | 1308 | 0.720501947  | GABARAPL1,OLR1,TMEM52B,ENSBTAG00000030426              |

|   |             |             |      |      |              |                                                                            |
|---|-------------|-------------|------|------|--------------|----------------------------------------------------------------------------|
| 5 | 100,200,000 | 100,350,000 | 1337 | 834  | 0.384968459  | CLEC1A,CLEC1B,CLEC7A,CLEC9A,GABARAPL1,OLR1,TMEM52B                         |
| 5 | 100,275,000 | 100,425,000 | 1338 | 744  | 0.204695334  | CLEC12A,CLEC12B,CLEC1A,CLEC1B,CLEC7A,CLEC9A                                |
| 5 | 100,350,000 | 100,500,000 | 1339 | 890  | -0.109384191 | CLEC12A,CLEC12B,CLEC1B,CLEC2A,KLRF2                                        |
| 5 | 100,425,000 | 100,575,000 | 1340 | 847  | -0.713055338 | CLEC2A,KLRF2,ENSBTAG00000006851                                            |
| 5 | 100,500,000 | 100,650,000 | 1341 | 767  | -0.290961275 | KLRF2,ENSBTAG00000006851,ENSBTAG00000012026                                |
| 5 | 100,575,000 | 100,725,000 | 1342 | 683  | -0.448959843 | KLRF1,ENSBTAG00000006851,ENSBTAG00000012026                                |
| 5 | 100,650,000 | 100,800,000 | 1343 | 771  | -1.542908335 | CD69,CLECL1,KLRF1                                                          |
| 5 | 100,725,000 | 100,875,000 | 1344 | 994  | -0.844728401 | CD69,CLECL1                                                                |
| 5 | 100,800,000 | 100,950,000 | 1345 | 849  | -0.056987383 | KLRB1,ENSBTAG00000046324                                                   |
| 5 | 100,875,000 | 101,025,000 | 1346 | 574  | -0.271019697 | KLRB1,ENSBTAG00000046324                                                   |
| 5 | 100,950,000 | 101,100,000 | 1347 | 521  | -2.412025012 | KLRB1                                                                      |
| 5 | 101,025,000 | 101,175,000 | 1348 | 646  | -1.82152442  | OVOS2                                                                      |
| 5 | 101,100,000 | 101,250,000 | 1349 | 866  | 0.375108593  | OVOS2,ENSBTAG00000038461                                                   |
| 5 | 101,175,000 | 101,325,000 | 1350 | 1022 | 0.76567023   | A2M,OVOS2,ENSBTAG00000038461                                               |
| 5 | 101,250,000 | 101,400,000 | 1351 | 1033 | 0.659213126  | A2M,ENSBTAG00000038461                                                     |
| 5 | 101,325,000 | 101,475,000 | 1352 | 969  | -0.841988022 | A2M,KLRG1,M6PR,PHC1                                                        |
| 5 | 101,400,000 | 101,550,000 | 1353 | 843  | -1.991959991 | A2ML1,KLRG1,M6PR,PHC1                                                      |
| 5 | 101,475,000 | 101,625,000 | 1354 | 579  | -1.941420427 | A2ML1,RIMKLB                                                               |
| 5 | 101,550,000 | 101,700,000 | 1355 | 358  | -1.871506761 | AICDA,MFAP5,RIMKLB                                                         |
| 5 | 101,625,000 | 101,775,000 | 1356 | 373  | -1.407136979 | AICDA,APOBEC1,MFAP5,ENSBTAG00000023192                                     |
| 5 | 101,700,000 | 101,850,000 | 1357 | 420  | -0.46030162  | APOBEC1,DPPA3,ENSBTAG00000023192                                           |
| 5 | 101,775,000 | 101,925,000 | 1358 | 376  | 0.429028029  | DPPA3,NANOG,SLC2A3                                                         |
| 5 | 101,850,000 | 102,000,000 | 1359 | 332  | 0.536402873  | NANOG,SLC2A3                                                               |
| 5 | 101,925,000 | 102,075,000 | 1360 | 434  | 0.658265003  | C3AR1,FOXJ2,NECAP1                                                         |
| 5 | 102,000,000 | 102,150,000 | 1361 | 566  | 0.567076021  | C3AR1,CLEC4A,CLEC4D,CLEC6A,FOXJ2,NECAP1                                    |
| 5 | 102,075,000 | 102,225,000 | 1362 | 716  | 0.688075644  | CLEC4A,CLEC4D,CLEC4E,CLEC6A                                                |
| 5 | 102,150,000 | 102,300,000 | 1363 | 573  | 0.784500272  | CD163,CLEC4D,CLEC4E                                                        |
| 5 | 102,225,000 | 102,375,000 | 1364 | 726  | 0.840315042  | CD163,ENSBTAG00000039847                                                   |
| 5 | 102,300,000 | 102,450,000 | 1365 | 1178 | 0.54207976   | ENSBTAG00000039817,ENSBTAG00000039847                                      |
| 5 | 102,375,000 | 102,525,000 | 1366 | 1439 | 0.588646129  | ENSBTAG00000039380,ENSBTAG00000039817                                      |
| 5 | 102,450,000 | 102,600,000 | 1367 | 2049 | 0.763704858  | ENSBTAG00000039380                                                         |
| 5 | 102,525,000 | 102,675,000 | 1368 | 2083 | 0.589250597  |                                                                            |
| 5 | 102,600,000 | 102,750,000 | 1369 | 1622 | -0.178874451 | ENSBTAG00000039041                                                         |
| 5 | 102,675,000 | 102,825,000 | 1370 | 1802 | -0.083803504 | ENSBTAG00000039041                                                         |
| 5 | 102,750,000 | 102,900,000 | 1371 | 1862 | 1.066859426  | ENSBTAG00000048175                                                         |
| 5 | 102,825,000 | 102,975,000 | 1372 | 1402 | 0.618748507  | ENSBTAG00000024318,ENSBTAG00000030371,ENSBTAG0000048175                    |
| 5 | 102,900,000 | 103,050,000 | 1373 | 1064 | 0.185310071  | ENSBTAG00000024318,ENSBTAG00000030371,ENSBTAG0000045768,ENSBTAG00000048175 |
| 5 | 102,975,000 | 103,125,000 | 1374 | 1058 | 0.088388042  | ENSBTAG00000030371,ENSBTAG00000034678,ENSBTAG0000045768                    |
| 5 | 103,050,000 | 103,200,000 | 1375 | 1366 | 0.514122373  | ENSBTAG00000034678,ENSBTAG00000039470,ENSBTAG0000045768                    |
| 5 | 103,125,000 | 103,275,000 | 1376 | 1452 | 0.55992464   | ENSBTAG00000039470                                                         |
| 5 | 103,200,000 | 103,350,000 | 1377 | 1572 | 0.517981959  | ENSBTAG00000039256,ENSBTAG00000039470                                      |
| 5 | 103,275,000 | 103,425,000 | 1378 | 1926 | 0.583098004  | CD163L1,ENSBTAG00000039256                                                 |
| 5 | 103,350,000 | 103,500,000 | 1379 | 1762 | 0.211065771  | CD163L1,ENSBTAG00000024771                                                 |
| 5 | 103,425,000 | 103,575,000 | 1380 | 1305 | -0.076289163 | CD163L1,PEX5,ENSBTAG00000024771                                            |
| 5 | 103,500,000 | 103,650,000 | 1381 | 1074 | 0.372675806  | C1RL,CLSTN3,PEX5,RBP5                                                      |
| 5 | 103,575,000 | 103,725,000 | 1382 | 1310 | 0.108124135  | C1R,C1RL,CLSTN3,RBP5                                                       |
| 5 | 103,650,000 | 103,800,000 | 1383 | 1227 | -0.217641353 | C1R,C1S                                                                    |
| 5 | 103,725,000 | 103,875,000 | 1384 | 696  | -0.796147028 | C1R,C1S,LPCAT3,PHB2,PTPN6,ENSBTAG00000013126                               |

|   |             |             |      |      |              |                                                                                      |
|---|-------------|-------------|------|------|--------------|--------------------------------------------------------------------------------------|
| 5 | 103,800,000 | 103,950,000 | 1385 | 403  | -0.165157072 | ATN1,C5H12orf57,ENO2,LPCAT3,LRRC23,PHB2,PTPN6,SPS<br>B2,TPI1,USP5,ENSBTAG00000013126 |
| 5 | 103,875,000 | 104,025,000 | 1386 | 356  | -0.234203883 | ATN1,C5H12orf57,CD4,CDCA3,ENO2,GNB3,GPR162,LEPRE<br>L2,LRRC23,SPSB2,TPI1,USP5        |
| 5 | 103,950,000 | 104,100,000 | 1387 | 468  | -0.027205353 | CD4,CDCA3,COPS7A,GNB3,GPR162,LAG3,LEPREL2,MLF2,P<br>TMS,USP5                         |
| 5 | 104,025,000 | 104,175,000 | 1388 | 482  | 0.337640839  | ACRBP,C5H12ORF53,COPS7A,ING4,LAG3,LPAR5,MLF2,PT<br>MS,ZNF384                         |
| 5 | 104,100,000 | 104,250,000 | 1389 | 494  | 0.232431888  | ACRBP,C5H12ORF53,CHD4,GAPDH,IFFO1,ING4,LPAR5,NC<br>APD2,NOP2,ZNF384                  |
| 5 | 104,175,000 | 104,325,000 | 1390 | 522  | 0.154584539  | CD27,CHD4,GAPDH,IFFO1,MRPL51,NCAPD2,NOP2,TAPBP<br>L,VAMP1                            |
| 5 | 104,250,000 | 104,400,000 | 1391 | 405  | 0.426573533  | CD27,LTBR,MRPL51,NCAPD2,SCNN1A,TAPBPL,VAMP1                                          |
| 5 | 104,325,000 | 104,475,000 | 1392 | 533  | 0.491815144  | LTBR,PLEKHG6,SCNN1A,TNFRSF1A                                                         |
| 5 | 104,400,000 | 104,550,000 | 1393 | 789  | 0.534355539  | CD9,PLEKHG6,TNFRSF1A                                                                 |
| 5 | 104,475,000 | 104,625,000 | 1394 | 729  | 0.982256211  | CD9,VWF                                                                              |
| 5 | 104,550,000 | 104,700,000 | 1395 | 775  | -0.196695746 | VWF                                                                                  |
| 5 | 104,625,000 | 104,775,000 | 1396 | 920  | -0.532684637 | ANO2,VWF,ENSBTAG00000011758                                                          |
| 5 | 104,700,000 | 104,850,000 | 1397 | 937  | -0.393686452 | ANO2,VWF,ENSBTAG00000011758                                                          |
| 5 | 104,775,000 | 104,925,000 | 1398 | 808  | -0.303180366 | ANO2                                                                                 |
| 5 | 104,850,000 | 105,000,000 | 1399 | 532  | 0.390749298  | ANO2                                                                                 |
| 5 | 104,925,000 | 105,075,000 | 1400 | 798  | 0.805643724  | ANO2                                                                                 |
| 5 | 105,000,000 | 105,150,000 | 1401 | 1231 | 0.748963387  | ANO2,NTF3                                                                            |
| 5 | 105,075,000 | 105,225,000 | 1402 | 1309 | 0.764562289  | ANO2,NTF3                                                                            |
| 5 | 105,150,000 | 105,300,000 | 1403 | 1405 | 0.915559115  | NTF3                                                                                 |
| 5 | 105,225,000 | 105,375,000 | 1404 | 1535 | 0.356908067  |                                                                                      |
| 5 | 105,300,000 | 105,450,000 | 1405 | 1537 | 0.123005723  |                                                                                      |
| 5 | 105,375,000 | 105,525,000 | 1406 | 1655 | -0.008980948 |                                                                                      |
| 5 | 105,450,000 | 105,600,000 | 1407 | 2143 | 0.346837519  | KCNA5,ENSBTAG00000026522                                                             |
| 5 | 105,525,000 | 105,675,000 | 1408 | 2356 | 0.98741239   | KCNA1,KCNA5,ENSBTAG00000026522                                                       |
| 5 | 105,600,000 | 105,750,000 | 1409 | 2307 | 1.239249885  | KCNA1                                                                                |
| 5 | 105,675,000 | 105,825,000 | 1410 | 2053 | 1.262993439  | GALNT8,KCNA6                                                                         |
| 5 | 105,750,000 | 105,900,000 | 1411 | 1269 | 1.239309359  | AKAP3,GALNT8,KCNA6,NDUFA9                                                            |
| 5 | 105,825,000 | 105,975,000 | 1412 | 834  | 1.103046642  | AKAP3,DYRK4,GALNT8,NDUFA9                                                            |
| 5 | 105,900,000 | 106,050,000 | 1413 | 594  | 1.183061686  | AKAP3,C5H12ORF4,DYRK4,RAD51AP1                                                       |
| 5 | 105,975,000 | 106,125,000 | 1414 | 162  | 1.21862561   | C5H12ORF4,DYRK4,RAD51AP1                                                             |
| 5 | 106,050,000 | 106,200,000 | 1415 | 750  | 0.774754457  | C5H12ORF4,FGF6,RAD51AP1                                                              |
| 5 | 106,125,000 | 106,275,000 | 1416 | 1153 | 0.67237336   | C5H12ORF4,CCND2,FGF23,FGF6,TIGAR                                                     |
| 5 | 106,200,000 | 106,350,000 | 1417 | 740  | 0.700924222  | CCND2,FGF23,TIGAR                                                                    |
| 5 | 106,275,000 | 106,425,000 | 1418 | 705  | 1.1155514    | CCND2                                                                                |
| 5 | 106,350,000 | 106,500,000 | 1419 | 785  | 1.043016115  |                                                                                      |
| 5 | 106,425,000 | 106,575,000 | 1420 | 1035 | 0.472217249  |                                                                                      |
| 5 | 106,500,000 | 106,650,000 | 1421 | 1078 | 0.545950042  | PARP11                                                                               |
| 5 | 106,575,000 | 106,725,000 | 1422 | 1110 | -0.130783627 | CRACR2A,PARP11                                                                       |
| 5 | 106,650,000 | 106,800,000 | 1423 | 975  | -0.842660874 | CRACR2A                                                                              |
| 5 | 106,725,000 | 106,875,000 | 1424 | 557  | 0.001843018  | CRACR2A,PRMT8                                                                        |
| 5 | 106,800,000 | 106,950,000 | 1425 | 581  | -0.929298106 | PRMT8                                                                                |
| 5 | 106,875,000 | 107,025,000 | 1426 | 719  | -1.206488739 | TSPAN11                                                                              |
| 5 | 106,950,000 | 107,100,000 | 1427 | 837  | -0.151853359 | TSPAN11,TSPAN9                                                                       |
| 5 | 107,025,000 | 107,175,000 | 1428 | 956  | 0.109556793  | TSPAN11,TSPAN9                                                                       |
| 5 | 107,100,000 | 107,250,000 | 1429 | 897  | 0.301476715  |                                                                                      |
| 5 | 107,175,000 | 107,325,000 | 1430 | 726  | 0.655023679  | TEAD4                                                                                |
| 5 | 107,250,000 | 107,400,000 | 1431 | 650  | 0.596013196  | FOXM1,RHNO1,TEAD4,TULP3,ENSBTAG00000030325                                           |

|   |             |             |      |      |              |                                                                     |
|---|-------------|-------------|------|------|--------------|---------------------------------------------------------------------|
| 5 | 107,325,000 | 107,475,000 | 1432 | 986  | 0.680403039  | DDX11,FKBP4,FOX M1,ITFG2,NRIP2,RHNO1,TEAD4,TULP3,ENSBTAG00000030325 |
| 5 | 107,400,000 | 107,550,000 | 1433 | 942  | 0.638578768  | DDX11,FKBP4,IQSEC3,ITFG2,NRIP2,WASH1,ENSBTAG00000030325             |
| 5 | 107,475,000 | 107,625,000 | 1434 | 778  | 0.565511109  | DDX11,IQSEC3,WASH1                                                  |
| 5 | 107,550,000 | 107,700,000 | 1435 | 833  | 0.074347108  | IQSEC3,SLC6A12,SLC6A13                                              |
| 5 | 107,625,000 | 107,775,000 | 1436 | 523  | 0.257174421  | IQSEC3,KDM5A,SLC6A12,SLC6A13,ENSBTAG00000023274                     |
| 5 | 107,700,000 | 107,850,000 | 1437 | 378  | 0.970177715  | CCDC77,KDM5A,SLC6A13,ENSBTAG00000023274                             |
| 5 | 107,775,000 | 107,925,000 | 1438 | 449  | 0.226348489  | B4GALNT3,CCDC77,KDM5A                                               |
| 5 | 107,850,000 | 108,000,000 | 1439 | 958  | 0.309445287  | B4GALNT3,NINJ2                                                      |
| 5 | 107,925,000 | 108,075,000 | 1440 | 861  | 0.47663563   | B4GALNT3,NINJ2                                                      |
| 5 | 108,000,000 | 108,150,000 | 1441 | 302  | -0.008112054 | NINJ2,WNK1,ENSBTAG00000024477                                       |
| 5 | 108,075,000 | 108,225,000 | 1442 | 323  | 0.516500824  | RAD52,WNK1,ENSBTAG00000024477                                       |
| 5 | 108,150,000 | 108,300,000 | 1443 | 453  | 1.016979605  | RAD52,WNK1                                                          |
| 5 | 108,225,000 | 108,375,000 | 1444 | 503  | 0.314736692  | ERC1,RAD52                                                          |
| 5 | 108,300,000 | 108,450,000 | 1445 | 445  | -0.237489331 | ERC1                                                                |
| 5 | 108,375,000 | 108,525,000 | 1446 | 440  | -0.723831218 | ERC1                                                                |
| 5 | 108,450,000 | 108,600,000 | 1447 | 603  | -0.564061751 | ERC1                                                                |
| 5 | 108,525,000 | 108,675,000 | 1448 | 627  | 0.605941754  | ERC1,FBXL14,WNT5B                                                   |
| 5 | 108,600,000 | 108,750,000 | 1449 | 512  | 0.304333315  | ADIPOR2,CACNA2D4,FBXL14,WNT5B                                       |
| 5 | 108,675,000 | 108,825,000 | 1450 | 471  | 0.272121868  | ADIPOR2,CACNA2D4,DCP1B,LRTM2                                        |
| 5 | 108,750,000 | 108,900,000 | 1451 | 293  | 1.338595884  | CACNA2D4,DCP1B,LRTM2                                                |
| 5 | 108,825,000 | 108,975,000 | 1452 | 331  | 1.146464574  | DCP1B                                                               |
| 5 | 108,900,000 | 109,050,000 | 1453 | 401  | -0.326548869 |                                                                     |
| 5 | 108,975,000 | 109,125,000 | 1454 | 406  | -3.03950777  |                                                                     |
| 5 | 109,050,000 | 109,200,000 | 1455 | 719  | -2.252993652 | CACNA1C                                                             |
| 5 | 109,125,000 | 109,275,000 | 1456 | 1042 | -0.149113673 | CACNA1C                                                             |
| 5 | 109,200,000 | 109,350,000 | 1457 | 915  | 0.781751328  | CACNA1C                                                             |
| 5 | 109,275,000 | 109,425,000 | 1458 | 644  | -0.009183558 | CACNA1C,CECR5,IL17RA                                                |
| 5 | 109,350,000 | 109,500,000 | 1459 | 488  | -0.336038808 | CACNA1C,CECR1,CECR5,IL17RA                                          |
| 5 | 109,425,000 | 109,575,000 | 1460 | 441  | 1.063108396  | ATP6V1E1,CECR1,CECR2,CECR5                                          |
| 5 | 109,500,000 | 109,650,000 | 1461 | 428  | 0.926946119  | ATP6V1E1,BCL2L13,BID2,CECR2                                         |
| 5 | 109,575,000 | 109,725,000 | 1462 | 347  | -0.223008169 | ATP6V1E1,BCL2L13,BID2,MICAL3                                        |
| 5 | 109,650,000 | 109,800,000 | 1463 | 282  | -2.492887436 | BID2,MICAL3                                                         |
| 5 | 109,725,000 | 109,875,000 | 1464 | 316  | -1.432480841 | MICAL3,PEX26                                                        |
| 5 | 109,800,000 | 109,950,000 | 1465 | 546  | 0.547006518  | CDC42EP1,LGALS3,PEX26,TUBA8                                         |
| 5 | 109,875,000 | 110,025,000 | 1466 | 540  | 0.527841992  | CDC42EP1,GGA1,LGALS1,LGALS3,NOL12,PDXP,SH3BP1,TUBA8                 |
| 5 | 109,950,000 | 110,100,000 | 1467 | 458  | 0.833633353  | GGA1,LGALS1,NOL12,PDXP,SH3BP1,TRIOBP                                |
| 5 | 110,025,000 | 110,175,000 | 1468 | 549  | 0.075569475  | ANKRD54,EIF3L,GALR3,GCAT,H1F0,NOL12,TRIOBP                          |
| 5 | 110,100,000 | 110,250,000 | 1469 | 514  | -0.952943293 | ANKRD54,C22orf23,EIF3L,GALR3,GCAT,H1F0,MICAL1,POLR2F                |
| 5 | 110,175,000 | 110,325,000 | 1470 | 347  | -0.370087697 | C22orf23,EIF3L,MICAL1,POLR2F,SOX10                                  |
| 5 | 110,250,000 | 110,400,000 | 1471 | 334  | 0.669223982  | BAIAP2L2,POLR2F,PRKCABP,SLC16A8,SOX10                               |
| 5 | 110,325,000 | 110,475,000 | 1472 | 342  | 0.906273871  | BAIAP2L2,PLA2G6,PRKCABP,SLC16A8                                     |
| 5 | 110,400,000 | 110,550,000 | 1473 | 225  | 0.608536385  | BAIAP2L2,MAFF,PLA2G6,TMEM184B                                       |
| 5 | 110,475,000 | 110,625,000 | 1474 | 333  | -0.137404108 | CSNK1E,MAFF,TMEM184B                                                |
| 5 | 110,550,000 | 110,700,000 | 1475 | 488  | -2.202309851 | CSNK1E,DDX17,KDELR3                                                 |
| 5 | 110,625,000 | 110,775,000 | 1476 | 474  | -2.563553135 | DDX17,DMC1,FAM227A,KDELR3                                           |
| 5 | 110,700,000 | 110,850,000 | 1477 | 591  | -0.867625129 | CBY1,DMC1,FAM227A,GTPBP1,JOSD1,TOMM22                               |
| 5 | 110,775,000 | 110,925,000 | 1478 | 657  | -0.429264873 | CBY1,DNAL4,FAM227A,GTPBP1,JOSD1,TOMM22,UNC84B                       |

|   |             |             |      |      |              |                                                                                                  |
|---|-------------|-------------|------|------|--------------|--------------------------------------------------------------------------------------------------|
| 5 | 110,850,000 | 111,000,000 | 1479 | 433  | 0.03594692   | CBX6,DNAL4,GTPBP1,NPTXR,UNC84B                                                                   |
| 5 | 110,925,000 | 111,075,000 | 1480 | 628  | 0.529144023  | APOBEC3A,APOBEC3Z3,CBX6,NPTXR                                                                    |
| 5 | 111,000,000 | 111,150,000 | 1481 | 767  | 0.362082967  | APOBEC3A,APOBEC3Z3,CBX7                                                                          |
| 5 | 111,075,000 | 111,225,000 | 1482 | 402  | -0.090860574 | APOBEC3Z3,CBX7,PDGFB                                                                             |
| 5 | 111,150,000 | 111,300,000 | 1483 | 345  | 0.636188705  | PDGFB,RPL3,SYNGR1                                                                                |
| 5 | 111,225,000 | 111,375,000 | 1484 | 640  | 0.948205859  | MAP3K7IP1,RPL3,SYNGR1                                                                            |
| 5 | 111,300,000 | 111,450,000 | 1485 | 620  | 1.22762965   | MAP3K7IP1,MGAT3,MIEF1,SYNGR1                                                                     |
| 5 | 111,375,000 | 111,525,000 | 1486 | 353  | 1.007073715  | ATF4,CACNA1I,MGAT3,MIEF1,RPS19BP1                                                                |
| 5 | 111,450,000 | 111,600,000 | 1487 | 386  | -0.391093091 | ATF4,CACNA1I,MIEF1,RPS19BP1                                                                      |
| 5 | 111,525,000 | 111,675,000 | 1488 | 569  | -0.241686029 | CACNA1I,ENTHD1                                                                                   |
| 5 | 111,600,000 | 111,750,000 | 1489 | 500  | 0.219608306  | CACNA1I,ENTHD1                                                                                   |
| 5 | 111,675,000 | 111,825,000 | 1490 | 310  | 0.564729962  | ENTHD1,GRAP2                                                                                     |
| 5 | 111,750,000 | 111,900,000 | 1491 | 354  | 1.016113611  | ENTHD1,FAM83F,GRAP2                                                                              |
| 5 | 111,825,000 | 111,975,000 | 1492 | 392  | 1.053543976  | FAM83F,GRAP2                                                                                     |
| 5 | 111,900,000 | 112,050,000 | 1493 | 315  | 0.927052876  | TNRC6B                                                                                           |
| 5 | 111,975,000 | 112,125,000 | 1494 | 282  | 0.614764719  | TNRC6B                                                                                           |
| 5 | 112,050,000 | 112,200,000 | 1495 | 279  | 0.561395789  | ADSL,TNRC6B                                                                                      |
| 5 | 112,125,000 | 112,275,000 | 1496 | 319  | 0.339431252  | ADSL,MKL1,SGSM3,TNRC6B                                                                           |
| 5 | 112,200,000 | 112,350,000 | 1497 | 432  | 0.186150259  | ADSL,MKL1,SGSM3                                                                                  |
| 5 | 112,275,000 | 112,425,000 | 1498 | 485  | 0.448975848  | MKL1                                                                                             |
| 5 | 112,350,000 | 112,500,000 | 1499 | 465  | -0.378374832 | MKL1                                                                                             |
| 5 | 112,425,000 | 112,575,000 | 1500 | 403  | -1.068904345 | MCHR1,SLC25A17                                                                                   |
| 5 | 112,500,000 | 112,650,000 | 1501 | 380  | -0.495769227 | DNAJB7,MCHR1,SLC25A17,ST13,XPNPEP3                                                               |
| 5 | 112,575,000 | 112,725,000 | 1502 | 544  | -0.389436905 | DNAJB7,RBX1,SLC25A17,ST13,XPNPEP3                                                                |
| 5 | 112,650,000 | 112,800,000 | 1503 | 613  | 0.158879408  | RBX1,XPNPEP3                                                                                     |
| 5 | 112,725,000 | 112,875,000 | 1504 | 484  | -0.559823175 | EP300                                                                                            |
| 5 | 112,800,000 | 112,950,000 | 1505 | 390  | -1.142667346 | CHADL,EP300,L3MBTL2,RANGAP1                                                                      |
| 5 | 112,875,000 | 113,025,000 | 1506 | 304  | 0.493223094  | CHADL,L3MBTL2,RANGAP1,ZC3H7B                                                                     |
| 5 | 112,950,000 | 113,100,000 | 1507 | 206  | 0.357923395  | ACO2,PHF5A,TEF,TOB2,ZC3H7B                                                                       |
| 5 | 113,025,000 | 113,175,000 | 1508 | 346  | 0.421161392  | ACO2,CSDC2,PHF5A,PMM1,POLR3H,TEF,TOB2                                                            |
| 5 | 113,100,000 | 113,250,000 | 1509 | 420  | 0.605514896  | ACO2,CSDC2,DESI1,PMM1,POLR3H,XRCC6                                                               |
| 5 | 113,175,000 | 113,325,000 | 1510 | 474  | -0.786045904 | C22orf46,DESI1,MEI1,NHP2L1,PMM1,XRCC6,ENSBTAG000046927                                           |
| 5 | 113,250,000 | 113,400,000 | 1511 | 386  | -1.364180582 | C22orf46,CCDC134,MEI1,NHP2L1,SREBF2,XRCC6,ENSBTAG00000046927                                     |
| 5 | 113,325,000 | 113,475,000 | 1512 | 316  | -0.480501915 | CCDC134,CENPM,MEI1,SREBF2,TNFRSF13C                                                              |
| 5 | 113,400,000 | 113,550,000 | 1513 | 507  | 0.178287443  | CENPM,SEPT3,SREBF2,TNFRSF13C,WBP2NL                                                              |
| 5 | 113,475,000 | 113,625,000 | 1514 | 545  | 0.542668335  | FAM109B,MGC127055,MGC152344,NAGA,NDUFA6,SEPT3,SMDT1,WBP2NL,ENSBTAG00000026502,ENSBTAG00000037632 |
| 5 | 113,550,000 | 113,700,000 | 1515 | 696  | 0.110003957  | FAM109B,MGC127055,MGC152344,NAGA,NDUFA6,SMDT1,TCF20,ENSBTAG00000026502,ENSBTAG00000037632        |
| 5 | 113,625,000 | 113,775,000 | 1516 | 621  | -0.37883413  | MGC127055,TCF20                                                                                  |
| 5 | 113,700,000 | 113,850,000 | 1517 | 464  | 0.064458199  | NFAM1,ENSBTAG00000046721                                                                         |
| 5 | 113,775,000 | 113,925,000 | 1518 | 653  | 0.706529591  | NFAM1,ENSBTAG00000046721                                                                         |
| 5 | 113,850,000 | 114,000,000 | 1519 | 822  | 0.731258313  | NFAM1,POLDIP3,RRP7A,SERHL2                                                                       |
| 5 | 113,925,000 | 114,075,000 | 1520 | 692  | -0.575299898 | A4GALT,CYB5R3,POLDIP3,RRP7A,SERHL2                                                               |
| 5 | 114,000,000 | 114,150,000 | 1521 | 445  | -1.393184863 | A4GALT,CYB5R3,POLDIP3,ENSBTAG00000030199                                                         |
| 5 | 114,075,000 | 114,225,000 | 1522 | 173  | 1.146276699  | ENSBTAG00000030199                                                                               |
| 5 | 114,150,000 | 114,300,000 | 1523 | 452  | 1.103101472  | ARFGAP3                                                                                          |
| 5 | 114,225,000 | 114,375,000 | 1524 | 1159 | 1.176198511  | ARFGAP3,PACSIN2                                                                                  |
| 5 | 114,300,000 | 114,450,000 | 1525 | 1329 | 0.98608924   | ARFGAP3,PACSIN2                                                                                  |
| 5 | 114,375,000 | 114,525,000 | 1526 | 1512 | 0.707210082  | PACSIN2,TLL1                                                                                     |



|   |             |             |      |      |              |                                                      |
|---|-------------|-------------|------|------|--------------|------------------------------------------------------|
| 5 | 114,450,000 | 114,600,000 | 1527 | 1272 | 0.489746574  | MCAT,PACSIN2,TSPO,TLL1                               |
| 5 | 114,525,000 | 114,675,000 | 1528 | 742  | -0.518128547 | MCAT,SCUBE1,TSPO,TLL1,TLL12                          |
| 5 | 114,600,000 | 114,750,000 | 1529 | 740  | -0.423793037 | SCUBE1,TSPO,TLL12                                    |
| 5 | 114,675,000 | 114,825,000 | 1530 | 797  | -0.534589281 | SCUBE1                                               |
| 5 | 114,750,000 | 114,900,000 | 1531 | 800  | -2.022426006 | SCUBE1                                               |
| 5 | 114,825,000 | 114,975,000 | 1532 | 1112 | -1.169519387 | SAMM50,ENSBTAG00000003367                            |
| 5 | 114,900,000 | 115,050,000 | 1533 | 1178 | 0.063255596  | SAMM50,ENSBTAG00000003367,ENSBTAG00000045746         |
| 5 | 114,975,000 | 115,125,000 | 1534 | 937  | 0.575335626  | PNPLA5,SULT4A1,ENSBTAG00000003367,ENSBTAG00000045746 |
| 5 | 115,050,000 | 115,200,000 | 1535 | 1009 | 0.674578242  | EFCAB6,PNPLA5,SULT4A1,ENSBTAG00000045746             |
| 5 | 115,125,000 | 115,275,000 | 1536 | 991  | 0.71914173   | EFCAB6                                               |
| 5 | 115,200,000 | 115,350,000 | 1537 | 982  | -0.105230854 | EFCAB6                                               |
| 5 | 115,275,000 | 115,425,000 | 1538 | 722  | -0.59403482  | EFCAB6                                               |
| 5 | 115,350,000 | 115,500,000 | 1539 | 802  | -0.442988196 | EFCAB6                                               |
| 5 | 115,425,000 | 115,575,000 | 1540 | 1539 | -0.51657662  | PARVB                                                |
| 5 | 115,500,000 | 115,650,000 | 1541 | 1622 | -0.022068337 | MGC148449,PARVB                                      |
| 5 | 115,575,000 | 115,725,000 | 1542 | 926  | 0.299455453  | KIAA1644,MGC148449                                   |
| 5 | 115,650,000 | 115,800,000 | 1543 | 833  | 0.52865297   | KIAA1644                                             |
| 5 | 115,725,000 | 115,875,000 | 1544 | 1150 | 0.786745183  | LDOC1L                                               |
| 5 | 115,800,000 | 115,950,000 | 1545 | 1108 | 0.430558576  | LDOC1L                                               |
| 5 | 115,875,000 | 116,025,000 | 1546 | 947  | 0.02961775   | PRR5                                                 |
| 5 | 115,950,000 | 116,100,000 | 1547 | 871  | -0.550510731 | PRR5,ENSBTAG00000008858                              |
| 5 | 116,025,000 | 116,175,000 | 1548 | 1140 | 0.464920723  | PHF21B,PRR5,ENSBTAG00000008858                       |
| 5 | 116,100,000 | 116,250,000 | 1549 | 1385 | 1.085732981  | PHF21B,ENSBTAG00000008858                            |
| 5 | 116,175,000 | 116,325,000 | 1550 | 1299 | 1.06129921   | NUP50                                                |
| 5 | 116,250,000 | 116,400,000 | 1551 | 873  | 0.60111257   | KIAA0930,NUP50                                       |
| 5 | 116,325,000 | 116,475,000 | 1552 | 719  | -0.798949534 | FAM118A,KIAA0930,NUP50,SMC1B,UPK3A                   |
| 5 | 116,400,000 | 116,550,000 | 1553 | 595  | -0.948423031 | FAM118A,RIBC2,SMC1B,UPK3A                            |
| 5 | 116,475,000 | 116,625,000 | 1554 | 803  | 0.444092472  | FBLN1,RIBC2,SMC1B                                    |
| 5 | 116,550,000 | 116,700,000 | 1555 | 1293 | 0.250510523  | FBLN1,RIBC2                                          |
| 5 | 116,625,000 | 116,775,000 | 1556 | 1278 | 0.219804203  | ATXN10,FBLN1                                         |
| 5 | 116,700,000 | 116,850,000 | 1557 | 953  | 0.715661908  | ATXN10                                               |
| 5 | 116,775,000 | 116,925,000 | 1558 | 794  | 0.735122164  | ATXN10                                               |
| 5 | 116,850,000 | 117,000,000 | 1559 | 663  | 0.650945796  | ATXN10,WNT7B                                         |
| 5 | 116,925,000 | 117,075,000 | 1560 | 418  | 0.28713934   | WNT7B                                                |
| 5 | 117,000,000 | 117,150,000 | 1561 | 505  | -0.458664739 |                                                      |
| 5 | 117,075,000 | 117,225,000 | 1562 | 756  | 0.122486116  | PPARA                                                |
| 5 | 117,150,000 | 117,300,000 | 1563 | 1216 | 0.189250012  | CDPF1,PPARA                                          |
| 5 | 117,225,000 | 117,375,000 | 1564 | 2148 | 0.106943659  | CDPF1,PPARA                                          |
| 5 | 117,300,000 | 117,450,000 | 1565 | 3064 | 0.36488218   |                                                      |
| 5 | 117,375,000 | 117,525,000 | 1566 | 2568 | 0.046399177  |                                                      |
| 5 | 117,450,000 | 117,600,000 | 1567 | 1195 | -1.200325984 |                                                      |
| 5 | 117,525,000 | 117,675,000 | 1568 | 816  | -0.664426737 | TTC38                                                |
| 5 | 117,600,000 | 117,750,000 | 1569 | 867  | -0.073831145 | GTSE1,PKDREJ,TRMU,TTC38                              |
| 5 | 117,675,000 | 117,825,000 | 1570 | 793  | 0.031215751  | CELSR1,GTSE1,PKDREJ,TRMU                             |
| 5 | 117,750,000 | 117,900,000 | 1571 | 1225 | 0.720354285  | CELSR1,TRMU                                          |
| 5 | 117,825,000 | 117,975,000 | 1572 | 1110 | 0.881950074  | CELSR1                                               |
| 5 | 117,900,000 | 118,050,000 | 1573 | 672  | 0.429724334  | CERK,GRAMD4                                          |
| 5 | 117,975,000 | 118,125,000 | 1574 | 845  | 0.432581718  | CERK,GRAMD4,TBC1D22A                                 |
| 5 | 118,050,000 | 118,200,000 | 1575 | 1054 | 0.683262034  | TBC1D22A                                             |
| 5 | 118,125,000 | 118,275,000 | 1576 | 977  | 0.621574604  | TBC1D22A                                             |
| 5 | 118,200,000 | 118,350,000 | 1577 | 1141 | 0.454708764  | TBC1D22A                                             |
| 5 | 118,275,000 | 118,425,000 | 1578 | 1420 | -0.187187488 | TBC1D22A                                             |

|   |             |             |      |      |              |                                                                                             |
|---|-------------|-------------|------|------|--------------|---------------------------------------------------------------------------------------------|
| 5 | 118,350,000 | 118,500,000 | 1579 | 1339 | -0.167894836 |                                                                                             |
| 5 | 118,425,000 | 118,575,000 | 1580 | 1094 | 0.321143619  |                                                                                             |
| 5 | 118,500,000 | 118,650,000 | 1581 | 1056 | 0.158828955  |                                                                                             |
| 5 | 118,575,000 | 118,725,000 | 1582 | 1472 | 0.383418118  |                                                                                             |
| 5 | 118,650,000 | 118,800,000 | 1583 | 2046 | 0.581381137  |                                                                                             |
| 5 | 118,725,000 | 118,875,000 | 1584 | 2019 | 0.270617632  |                                                                                             |
| 5 | 118,800,000 | 118,950,000 | 1585 | 1434 | -0.760608053 |                                                                                             |
| 5 | 118,875,000 | 119,025,000 | 1586 | 1127 | -0.300737038 |                                                                                             |
| 5 | 118,950,000 | 119,100,000 | 1587 | 1059 | -1.769602267 |                                                                                             |
| 5 | 119,025,000 | 119,175,000 | 1588 | 1526 | -1.382366073 |                                                                                             |
| 5 | 119,100,000 | 119,250,000 | 1589 | 1681 | 0.360768825  |                                                                                             |
| 5 | 119,175,000 | 119,325,000 | 1590 | 1149 | 0.232570969  |                                                                                             |
| 5 | 119,250,000 | 119,400,000 | 1591 | 855  | -0.484119244 |                                                                                             |
| 5 | 119,325,000 | 119,475,000 | 1592 | 906  | 0.07212655   | FAM19A5                                                                                     |
| 5 | 119,400,000 | 119,550,000 | 1593 | 969  | 0.455769849  | FAM19A5                                                                                     |
| 5 | 119,475,000 | 119,625,000 | 1594 | 784  | 0.094445557  | FAM19A5                                                                                     |
| 5 | 119,550,000 | 119,700,000 | 1595 | 1100 | 0.162890593  | FAM19A5,ENSBTAG00000026385,ENSBTAG00000030185                                               |
| 5 | 119,625,000 | 119,775,000 | 1596 | 1580 | 0.448675865  | SELO,ENSBTAG00000026385,ENSBTAG00000030185                                                  |
| 5 | 119,700,000 | 119,850,000 | 1597 | 1196 | 0.592014895  | HDAC10,MAPK11,MAPK12,PLXNB2,SELO,TUBGCP6                                                    |
| 5 | 119,775,000 | 119,925,000 | 1598 | 747  | 1.01264221   | DENND6B,HDAC10,MAPK11,MAPK12,PLXNB2,SELO,TUBGCP6                                            |
| 5 | 119,850,000 | 120,000,000 | 1599 | 689  | 0.743733597  | ADM2,DENND6B,PLXNB2,PPP6R2,SBF1                                                             |
| 5 | 119,925,000 | 120,075,000 | 1600 | 526  | 0.786686054  | ADM2,KLHDC7B,LMF2,MGC128071,MIOX,NCAPH2,PPP6R2,SBF1,SCO2,SYCE3,ENSBTAG00000046250           |
| 5 | 120,000,000 | 120,150,000 | 1601 | 510  | 0.727504932  | CHKB,CPT1B,KLHDC7B,LMF2,MAPK8IP2,MGC128071,MIOX,NCAPH2,PPP6R2,SCO2,SYCE3,ENSBTAG00000046250 |
| 5 | 120,075,000 | 120,225,000 | 1602 | 506  | 0.660271509  | ACR,ARSA,CHKB,CPT1B,MAPK8IP2,SYCE3,ENSBTAG00000030180                                       |
| 5 | 120,150,000 | 120,300,000 | 1603 | 588  | 0.753619583  | ACR,ARSA,RABL2B,ENSBTAG00000030180                                                          |
| 5 | 120,225,000 | 120,375,000 | 1604 | 1312 | 0.928124304  | ACR,RABL2B                                                                                  |
| 5 | 120,300,000 | 120,450,000 | 1605 | 1519 | 0.618868243  |                                                                                             |
| 5 | 120,375,000 | 120,525,000 | 1606 | 1133 | 0.331089903  |                                                                                             |
| 5 | 120,450,000 | 120,600,000 | 1607 | 1289 | 0.862147034  |                                                                                             |
| 5 | 120,525,000 | 120,675,000 | 1608 | 1350 | 0.767694726  |                                                                                             |
| 5 | 120,600,000 | 120,750,000 | 1609 | 1529 | 0.414908232  |                                                                                             |
| 5 | 120,675,000 | 120,825,000 | 1610 | 1627 | 0.25801377   | ENSBTAG00000014987                                                                          |
| 5 | 120,750,000 | 120,900,000 | 1611 | 1127 | 0.280418424  | BRD1,ENSBTAG00000014987                                                                     |
| 5 | 120,825,000 | 120,975,000 | 1612 | 901  | 0.241883761  | ALG12,BRD1,CRELD2,PIM3                                                                      |
| 5 | 120,900,000 | 121,050,000 | 1613 | 915  | 0.231442216  | ALG12,CRELD2,IL17REL,PIM3,TTLL8                                                             |
| 5 | 120,975,000 | 121,125,000 | 1614 | 1009 | 0.630734104  | IL17REL,MLC1,MOV10L1,TTLL8                                                                  |
| 5 | 121,050,000 | 121,191,424 | 1615 | 827  | 0.708287346  | MLC1,MOV10L1,PANX2,TRABD,TTLL8,ENSBTAG00000047080                                           |
| 6 | 0           | 150,000     | 1    | 262  | -3.225759298 | ENSBTAG00000040324                                                                          |
| 6 | 75,000      | 225,000     | 2    | 472  | -2.573607465 |                                                                                             |
| 6 | 150,000     | 300,000     | 3    | 589  | -2.082380427 |                                                                                             |
| 6 | 225,000     | 375,000     | 4    | 505  | -1.318238683 |                                                                                             |
| 6 | 300,000     | 450,000     | 5    | 637  | -2.785531181 |                                                                                             |
| 6 | 375,000     | 525,000     | 6    | 910  | -2.744834575 |                                                                                             |
| 6 | 450,000     | 600,000     | 7    | 1036 | -2.200051964 |                                                                                             |
| 6 | 525,000     | 675,000     | 8    | 1190 | -2.132229019 |                                                                                             |
| 6 | 600,000     | 750,000     | 9    | 1063 | -1.702411093 |                                                                                             |
| 6 | 675,000     | 825,000     | 10   | 774  | -1.313385804 |                                                                                             |
| 6 | 750,000     | 900,000     | 11   | 1067 | -1.45021111  |                                                                                             |

|   |           |           |    |      |              |                    |        |
|---|-----------|-----------|----|------|--------------|--------------------|--------|
| 6 | 825,000   | 975,000   | 12 | 1201 | -1.164107818 |                    |        |
| 6 | 900,000   | 1,050,000 | 13 | 991  | -0.7190058   |                    |        |
| 6 | 975,000   | 1,125,000 | 14 | 1143 | -1.077175604 |                    |        |
| 6 | 1,050,000 | 1,200,000 | 15 | 1300 | -1.783616088 |                    |        |
| 6 | 1,125,000 | 1,275,000 | 16 | 1131 | -2.242247495 |                    |        |
| 6 | 1,200,000 | 1,350,000 | 17 | 913  | -0.711840023 |                    |        |
| 6 | 1,275,000 | 1,425,000 | 18 | 894  | 0.294508925  |                    |        |
| 6 | 1,350,000 | 1,500,000 | 19 | 817  | -0.570781149 |                    |        |
| 6 | 1,425,000 | 1,575,000 | 20 | 712  | -0.982201341 |                    |        |
| 6 | 1,500,000 | 1,650,000 | 21 | 809  | -0.058724663 |                    |        |
| 6 | 1,575,000 | 1,725,000 | 22 | 879  | -0.407628141 |                    |        |
| 6 | 1,650,000 | 1,800,000 | 23 | 1165 | -1.957146717 |                    |        |
| 6 | 1,725,000 | 1,875,000 | 24 | 882  | -1.898438711 |                    |        |
| 6 | 1,800,000 | 1,950,000 | 25 | 628  | -0.621167621 |                    | 01-Mar |
| 6 | 1,875,000 | 2,025,000 | 26 | 785  | -0.55328742  |                    | 01-Mar |
| 6 | 1,950,000 | 2,100,000 | 27 | 673  | 0.120015171  | MARCH1,TMA16       |        |
| 6 | 2,025,000 | 2,175,000 | 28 | 586  | 0.020326828  | MARCH1,TKTL2,TMA16 |        |
| 6 | 2,100,000 | 2,250,000 | 29 | 795  | 0.620076116  | TKTL2,TMA16        |        |
| 6 | 2,175,000 | 2,325,000 | 30 | 1294 | 0.765895752  |                    |        |
| 6 | 2,250,000 | 2,400,000 | 31 | 1489 | 0.878686088  | NPY5R              |        |
| 6 | 2,325,000 | 2,475,000 | 32 | 1300 | 0.937497656  | NPY1R,NPY5R        |        |
| 6 | 2,400,000 | 2,550,000 | 33 | 1085 | 0.840103148  | NPY1R              |        |
| 6 | 2,475,000 | 2,625,000 | 34 | 1071 | 0.36207624   | NAF1               |        |
| 6 | 2,550,000 | 2,700,000 | 35 | 1160 | 0.068551129  | NAF1               |        |
| 6 | 2,625,000 | 2,775,000 | 36 | 1394 | 0.010380369  | NAF1               |        |
| 6 | 2,700,000 | 2,850,000 | 37 | 1352 | -0.197868658 |                    |        |
| 6 | 2,775,000 | 2,925,000 | 38 | 1133 | 0.147546656  |                    |        |
| 6 | 2,850,000 | 3,000,000 | 39 | 1220 | 0.50102167   |                    |        |
| 6 | 2,925,000 | 3,075,000 | 40 | 1384 | 0.461675486  |                    |        |
| 6 | 3,000,000 | 3,150,000 | 41 | 1518 | 0.791599304  |                    |        |
| 6 | 3,075,000 | 3,225,000 | 42 | 1547 | 0.872761736  |                    |        |
| 6 | 3,150,000 | 3,300,000 | 43 | 1067 | 0.707297702  |                    |        |
| 6 | 3,225,000 | 3,375,000 | 44 | 659  | 0.580786165  |                    |        |
| 6 | 3,300,000 | 3,450,000 | 45 | 705  | 0.212843669  | BBS7,CCNA2,EXOSC9  |        |
| 6 | 3,375,000 | 3,525,000 | 46 | 1138 | -0.00228188  | BBS7,CCNA2,EXOSC9  |        |
| 6 | 3,450,000 | 3,600,000 | 47 | 1542 | -0.416718274 | ANXA5              |        |
| 6 | 3,525,000 | 3,675,000 | 48 | 1496 | -0.449019864 | ANXA5              |        |
| 6 | 3,600,000 | 3,750,000 | 49 | 1290 | 0.415444092  |                    |        |
| 6 | 3,675,000 | 3,825,000 | 50 | 993  | 0.731716829  |                    |        |
| 6 | 3,750,000 | 3,900,000 | 51 | 971  | 0.881036296  |                    |        |
| 6 | 3,825,000 | 3,975,000 | 52 | 1200 | 0.469048839  |                    |        |
| 6 | 3,900,000 | 4,050,000 | 53 | 1345 | 0.208396058  |                    |        |
| 6 | 3,975,000 | 4,125,000 | 54 | 1253 | 0.660664313  | QRFPR              |        |
| 6 | 4,050,000 | 4,200,000 | 55 | 1402 | 0.897641189  | QRFPR              |        |
| 6 | 4,125,000 | 4,275,000 | 56 | 1367 | 0.757205962  | QRFPR              |        |
| 6 | 4,200,000 | 4,350,000 | 57 | 967  | -0.317349222 |                    |        |
| 6 | 4,275,000 | 4,425,000 | 58 | 854  | -0.17274738  | C6H4ORF31          |        |
| 6 | 4,350,000 | 4,500,000 | 59 | 929  | 0.693556983  | C6H4ORF31,PRDM5    |        |
| 6 | 4,425,000 | 4,575,000 | 60 | 761  | 0.88452219   | PRDM5              |        |
| 6 | 4,500,000 | 4,650,000 | 61 | 616  | 0.585570376  | PRDM5              |        |
| 6 | 4,575,000 | 4,725,000 | 62 | 1022 | 0.624099996  | PRDM5              |        |
| 6 | 4,650,000 | 4,800,000 | 63 | 1159 | 0.29830584   | PRDM5              |        |
| 6 | 4,725,000 | 4,875,000 | 64 | 960  | -1.073643276 | PRDM5              |        |

|   |           |           |     |      |              |                                                         |
|---|-----------|-----------|-----|------|--------------|---------------------------------------------------------|
| 6 | 4,800,000 | 4,950,000 | 65  | 798  | -0.919939159 |                                                         |
| 6 | 4,875,000 | 5,025,000 | 66  | 488  | 0.682194383  |                                                         |
| 6 | 4,950,000 | 5,100,000 | 67  | 481  | -0.071982587 |                                                         |
| 6 | 5,025,000 | 5,175,000 | 68  | 703  | -0.589882187 |                                                         |
| 6 | 5,100,000 | 5,250,000 | 69  | 769  | -1.046611203 |                                                         |
| 6 | 5,175,000 | 5,325,000 | 70  | 466  | -0.765658329 |                                                         |
| 6 | 5,250,000 | 5,400,000 | 71  | 73   | -0.398564511 | ENSBTAG00000037426                                      |
| 6 | 5,325,000 | 5,475,000 | 72  | 22   | -2.411570237 | ENSBTAG00000037426,ENSBTAG00000047900                   |
| 6 | 5,475,000 | 5,625,000 | 74  | 1    | -0.394735638 | ENSBTAG00000024874,ENSBTAG00000035129,ENSBTAG0000047900 |
| 6 | 5,550,000 | 5,700,000 | 75  | 1    | -0.394735638 | ENSBTAG00000035129                                      |
| 6 | 5,775,000 | 5,925,000 | 78  | 2    | 1.425589255  |                                                         |
| 6 | 5,850,000 | 6,000,000 | 79  | 26   | -0.144518118 |                                                         |
| 6 | 5,925,000 | 6,075,000 | 80  | 42   | -6.907900423 | ENSBTAG00000035319                                      |
| 6 | 6,000,000 | 6,150,000 | 81  | 18   | -7.131413599 | ENSBTAG00000035319                                      |
| 6 | 6,375,000 | 6,525,000 | 86  | 185  | 0.859975798  |                                                         |
| 6 | 6,450,000 | 6,600,000 | 87  | 197  | 0.982277655  |                                                         |
| 6 | 6,525,000 | 6,675,000 | 88  | 134  | 0.995006589  |                                                         |
| 6 | 6,600,000 | 6,750,000 | 89  | 532  | 1.374524037  |                                                         |
| 6 | 6,675,000 | 6,825,000 | 90  | 790  | 0.129063039  |                                                         |
| 6 | 6,750,000 | 6,900,000 | 91  | 677  | -1.137744267 | PDE5A                                                   |
| 6 | 6,825,000 | 6,975,000 | 92  | 667  | -0.080479836 | PDE5A                                                   |
| 6 | 6,900,000 | 7,050,000 | 93  | 601  | 0.466908735  | PDE5A                                                   |
| 6 | 6,975,000 | 7,125,000 | 94  | 554  | 0.648760981  | FABP2,PDE5A                                             |
| 6 | 7,050,000 | 7,200,000 | 95  | 830  | 0.712978847  | FABP2,PDE5A,USP53,ENSBTAG00000048273                    |
| 6 | 7,125,000 | 7,275,000 | 96  | 839  | 0.699512182  | MYOZ2,USP53,ENSBTAG00000048273                          |
| 6 | 7,200,000 | 7,350,000 | 97  | 703  | -0.092532199 | MYOZ2,USP53                                             |
| 6 | 7,275,000 | 7,425,000 | 98  | 628  | -0.607829492 | MYOZ2,SYNPO2                                            |
| 6 | 7,350,000 | 7,500,000 | 99  | 558  | -0.648684037 | SYNPO2                                                  |
| 6 | 7,425,000 | 7,575,000 | 100 | 716  | -0.413053585 | SYNPO2                                                  |
| 6 | 7,500,000 | 7,650,000 | 101 | 758  | 0.311014804  | SYNPO2                                                  |
| 6 | 7,575,000 | 7,725,000 | 102 | 946  | 0.86794488   | SEC24D,SYNPO2                                           |
| 6 | 7,650,000 | 7,800,000 | 103 | 1006 | 0.286364292  | METTL14,SEC24D                                          |
| 6 | 7,725,000 | 7,875,000 | 104 | 867  | -1.265820629 | METTL14,SEC24D                                          |
| 6 | 7,800,000 | 7,950,000 | 105 | 929  | -0.601499699 | METTL14,PRSS12                                          |
| 6 | 7,875,000 | 8,025,000 | 106 | 897  | 0.362958984  | PRSS12                                                  |
| 6 | 7,950,000 | 8,100,000 | 107 | 727  | 0.71055868   | NDST3,PRSS12                                            |
| 6 | 8,025,000 | 8,175,000 | 108 | 513  | 1.254775042  | NDST3                                                   |
| 6 | 8,100,000 | 8,250,000 | 109 | 396  | 1.006714125  | NDST3                                                   |
| 6 | 8,175,000 | 8,325,000 | 110 | 648  | 0.799307089  | NDST3                                                   |
| 6 | 8,250,000 | 8,400,000 | 111 | 885  | -0.203660014 | NDST3                                                   |
| 6 | 8,325,000 | 8,475,000 | 112 | 1040 | -2.692387842 | RPL39                                                   |
| 6 | 8,400,000 | 8,550,000 | 113 | 1154 | -1.200853839 | RPL39                                                   |
| 6 | 8,475,000 | 8,625,000 | 114 | 1315 | 1.075868239  |                                                         |
| 6 | 8,550,000 | 8,700,000 | 115 | 1471 | 0.738854924  |                                                         |
| 6 | 8,625,000 | 8,775,000 | 116 | 1213 | 0.647523063  |                                                         |
| 6 | 8,700,000 | 8,850,000 | 117 | 1287 | 0.974214272  |                                                         |
| 6 | 8,775,000 | 8,925,000 | 118 | 1189 | -0.689992978 |                                                         |
| 6 | 8,850,000 | 9,000,000 | 119 | 768  | -2.324756965 |                                                         |
| 6 | 8,925,000 | 9,075,000 | 120 | 1266 | 0.655777054  | ENSBTAG00000034849                                      |
| 6 | 9,000,000 | 9,150,000 | 121 | 1465 | 0.795790547  | ENSBTAG00000034849                                      |
| 6 | 9,075,000 | 9,225,000 | 122 | 693  | 0.198768826  |                                                         |
| 6 | 9,150,000 | 9,300,000 | 123 | 470  | 0.159994524  |                                                         |

|   |            |            |     |      |              |         |
|---|------------|------------|-----|------|--------------|---------|
| 6 | 9,225,000  | 9,375,000  | 124 | 769  | -1.031193686 |         |
| 6 | 9,300,000  | 9,450,000  | 125 | 956  | -1.634859318 |         |
| 6 | 9,375,000  | 9,525,000  | 126 | 1099 | -1.143372605 | TRAM1L1 |
| 6 | 9,450,000  | 9,600,000  | 127 | 1731 | -0.398014255 | TRAM1L1 |
| 6 | 9,525,000  | 9,675,000  | 128 | 1851 | -0.057963944 |         |
| 6 | 9,600,000  | 9,750,000  | 129 | 1319 | 0.304944706  |         |
| 6 | 9,675,000  | 9,825,000  | 130 | 847  | 0.380624317  |         |
| 6 | 9,750,000  | 9,900,000  | 131 | 987  | 0.764102184  |         |
| 6 | 9,825,000  | 9,975,000  | 132 | 1818 | -0.441897055 |         |
| 6 | 9,900,000  | 10,050,000 | 133 | 1617 | -0.929183114 |         |
| 6 | 9,975,000  | 10,125,000 | 134 | 1230 | 0.296431626  |         |
| 6 | 10,050,000 | 10,200,000 | 135 | 1318 | 0.344734227  |         |
| 6 | 10,125,000 | 10,275,000 | 136 | 1151 | -0.855972385 |         |
| 6 | 10,200,000 | 10,350,000 | 137 | 1077 | -1.030603995 |         |
| 6 | 10,275,000 | 10,425,000 | 138 | 994  | -0.489741843 |         |
| 6 | 10,350,000 | 10,500,000 | 139 | 1134 | -0.742166291 |         |
| 6 | 10,425,000 | 10,575,000 | 140 | 1362 | -1.835716531 |         |
| 6 | 10,500,000 | 10,650,000 | 141 | 1243 | -1.571949946 |         |
| 6 | 10,575,000 | 10,725,000 | 142 | 1054 | -0.237637162 |         |
| 6 | 10,650,000 | 10,800,000 | 143 | 1412 | 0.769121224  |         |
| 6 | 10,725,000 | 10,875,000 | 144 | 1682 | 0.787226958  |         |
| 6 | 10,800,000 | 10,950,000 | 145 | 1411 | 0.227098895  |         |
| 6 | 10,875,000 | 11,025,000 | 146 | 1244 | -0.395877209 |         |
| 6 | 10,950,000 | 11,100,000 | 147 | 956  | -0.728290501 |         |
| 6 | 11,025,000 | 11,175,000 | 148 | 734  | -0.171049393 |         |
| 6 | 11,100,000 | 11,250,000 | 149 | 821  | -0.117826763 |         |
| 6 | 11,175,000 | 11,325,000 | 150 | 925  | -0.180346283 |         |
| 6 | 11,250,000 | 11,400,000 | 151 | 707  | 0.421471805  |         |
| 6 | 11,325,000 | 11,475,000 | 152 | 601  | 0.386546581  |         |
| 6 | 11,400,000 | 11,550,000 | 153 | 693  | 0.286024021  |         |
| 6 | 11,475,000 | 11,625,000 | 154 | 849  | 0.651033293  |         |
| 6 | 11,550,000 | 11,700,000 | 155 | 1162 | 1.108555632  | NDST4   |
| 6 | 11,625,000 | 11,775,000 | 156 | 929  | 1.2446244    | NDST4   |
| 6 | 11,700,000 | 11,850,000 | 157 | 1029 | 1.080889977  | NDST4   |
| 6 | 11,775,000 | 11,925,000 | 158 | 1203 | 0.799052399  | NDST4   |
| 6 | 11,850,000 | 12,000,000 | 159 | 935  | 0.974614023  | NDST4   |
| 6 | 11,925,000 | 12,075,000 | 160 | 1027 | 1.218044089  | NDST4   |
| 6 | 12,000,000 | 12,150,000 | 161 | 928  | 0.372023398  | UGT8    |
| 6 | 12,075,000 | 12,225,000 | 162 | 859  | -0.62764164  | UGT8    |
| 6 | 12,150,000 | 12,300,000 | 163 | 942  | -1.225560235 | UGT8    |
| 6 | 12,225,000 | 12,375,000 | 164 | 1017 | -0.025453436 |         |
| 6 | 12,300,000 | 12,450,000 | 165 | 1260 | 0.762844241  |         |
| 6 | 12,375,000 | 12,525,000 | 166 | 1230 | 0.492999369  |         |
| 6 | 12,450,000 | 12,600,000 | 167 | 1245 | -1.232691035 |         |
| 6 | 12,525,000 | 12,675,000 | 168 | 1389 | -1.568943095 |         |
| 6 | 12,600,000 | 12,750,000 | 169 | 1119 | -0.607729058 | ARSJ    |
| 6 | 12,675,000 | 12,825,000 | 170 | 1074 | -0.253904783 | ARSJ    |
| 6 | 12,750,000 | 12,900,000 | 171 | 996  | -0.020986826 | ARSJ    |
| 6 | 12,825,000 | 12,975,000 | 172 | 722  | 0.115725786  | CAMK2D  |
| 6 | 12,900,000 | 13,050,000 | 173 | 742  | -0.102733147 | CAMK2D  |
| 6 | 12,975,000 | 13,125,000 | 174 | 902  | -0.522277012 | CAMK2D  |
| 6 | 13,050,000 | 13,200,000 | 175 | 1089 | -0.416502782 | CAMK2D  |
| 6 | 13,125,000 | 13,275,000 | 176 | 897  | 0.168156415  | CAMK2D  |

|   |            |            |     |      |              |                                        |
|---|------------|------------|-----|------|--------------|----------------------------------------|
| 6 | 13,200,000 | 13,350,000 | 177 | 688  | 0.599595375  | CAMK2D                                 |
| 6 | 13,275,000 | 13,425,000 | 178 | 635  | -0.462485632 | ANK2                                   |
| 6 | 13,350,000 | 13,500,000 | 179 | 428  | -1.045193636 | ANK2                                   |
| 6 | 13,425,000 | 13,575,000 | 180 | 574  | 0.161499562  | ANK2                                   |
| 6 | 13,500,000 | 13,650,000 | 181 | 1212 | 0.374553068  | ANK2                                   |
| 6 | 13,575,000 | 13,725,000 | 182 | 1494 | -0.429891725 |                                        |
| 6 | 13,650,000 | 13,800,000 | 183 | 1296 | -0.834067338 |                                        |
| 6 | 13,725,000 | 13,875,000 | 184 | 1266 | -0.2409034   |                                        |
| 6 | 13,800,000 | 13,950,000 | 185 | 1134 | -0.535493072 |                                        |
| 6 | 13,875,000 | 14,025,000 | 186 | 846  | -0.05147865  |                                        |
| 6 | 13,950,000 | 14,100,000 | 187 | 1054 | -0.19463241  |                                        |
| 6 | 14,025,000 | 14,175,000 | 188 | 1105 | -0.317018624 | LARP7,ENSBTAG00000026936               |
| 6 | 14,100,000 | 14,250,000 | 189 | 585  | 0.060184541  | LARP7,NEUROG2,ZGRF1,ENSBTAG00000026936 |
| 6 | 14,175,000 | 14,325,000 | 190 | 517  | -0.027547013 | ALPK1,NEUROG2,ZGRF1,ENSBTAG00000026936 |
| 6 | 14,250,000 | 14,400,000 | 191 | 739  | -0.078073928 | ALPK1,NEUROG2                          |
| 6 | 14,325,000 | 14,475,000 | 192 | 903  | -0.789981086 | ALPK1,MGC155012,TIFA                   |
| 6 | 14,400,000 | 14,550,000 | 193 | 827  | -0.856695222 | C6H4orf32,MGC155012,TIFA               |
| 6 | 14,475,000 | 14,625,000 | 194 | 704  | 0.30552458   | C6H4orf32                              |
| 6 | 14,550,000 | 14,700,000 | 195 | 679  | -0.425615748 | C6H4orf32                              |
| 6 | 14,625,000 | 14,775,000 | 196 | 710  | -0.158228412 |                                        |
| 6 | 14,700,000 | 14,850,000 | 197 | 777  | 0.509693288  |                                        |
| 6 | 14,775,000 | 14,925,000 | 198 | 741  | 0.469470338  |                                        |
| 6 | 14,850,000 | 15,000,000 | 199 | 803  | 0.836871884  |                                        |
| 6 | 14,925,000 | 15,075,000 | 200 | 907  | 1.045230588  |                                        |
| 6 | 15,000,000 | 15,150,000 | 201 | 773  | 0.782186612  |                                        |
| 6 | 15,075,000 | 15,225,000 | 202 | 601  | -0.228063354 |                                        |
| 6 | 15,150,000 | 15,300,000 | 203 | 858  | -0.624164951 |                                        |
| 6 | 15,225,000 | 15,375,000 | 204 | 935  | -0.627885244 |                                        |
| 6 | 15,300,000 | 15,450,000 | 205 | 685  | -0.975271251 |                                        |
| 6 | 15,375,000 | 15,525,000 | 206 | 700  | -0.96400683  |                                        |
| 6 | 15,450,000 | 15,600,000 | 207 | 574  | -0.656995494 |                                        |
| 6 | 15,525,000 | 15,675,000 | 208 | 318  | -1.469528134 |                                        |
| 6 | 15,600,000 | 15,750,000 | 209 | 445  | -2.716429373 |                                        |
| 6 | 15,675,000 | 15,825,000 | 210 | 521  | -1.472328693 |                                        |
| 6 | 15,750,000 | 15,900,000 | 211 | 507  | 0.500528753  |                                        |
| 6 | 15,825,000 | 15,975,000 | 212 | 657  | 0.91561958   |                                        |
| 6 | 15,900,000 | 16,050,000 | 213 | 524  | 0.665134752  | PITX2                                  |
| 6 | 15,975,000 | 16,125,000 | 214 | 378  | -1.408755524 | ENPEP,PITX2                            |
| 6 | 16,050,000 | 16,200,000 | 215 | 628  | -0.429397851 | ENPEP                                  |
| 6 | 16,125,000 | 16,275,000 | 216 | 618  | 0.422084047  | ENPEP                                  |
| 6 | 16,200,000 | 16,350,000 | 217 | 429  | 0.620275347  |                                        |
| 6 | 16,275,000 | 16,425,000 | 218 | 427  | -0.177898002 | MGC139109,ENSBTAG00000038368           |
| 6 | 16,350,000 | 16,500,000 | 219 | 496  | -0.421854474 | MGC139109,ENSBTAG00000038368           |
| 6 | 16,425,000 | 16,575,000 | 220 | 755  | -0.43783985  | MGC139109                              |
| 6 | 16,500,000 | 16,650,000 | 221 | 1024 | 0.257553892  | MGC139109                              |
| 6 | 16,575,000 | 16,725,000 | 222 | 920  | 0.654319104  | LRIT3,RPS26                            |
| 6 | 16,650,000 | 16,800,000 | 223 | 984  | 0.914876408  | CFI,GAR1,LRIT3,RPS26,RRH               |
| 6 | 16,725,000 | 16,875,000 | 224 | 940  | 0.431471929  | CASP6,CCDC109B,CFI,GAR1,PLA2G12A,RRH   |
| 6 | 16,800,000 | 16,950,000 | 225 | 767  | -2.310807473 | CASP6,CCDC109B,CFI,PLA2G12A            |
| 6 | 16,875,000 | 17,025,000 | 226 | 541  | -3.067222809 | CCDC109B,SEC24B                        |
| 6 | 16,950,000 | 17,100,000 | 227 | 315  | -1.941232714 | CCDC109B,SEC24B                        |
| 6 | 17,025,000 | 17,175,000 | 228 | 617  | -1.657662252 | SEC24B                                 |
| 6 | 17,100,000 | 17,250,000 | 229 | 830  | -0.398918311 |                                        |

|   |            |            |     |      |              |                                                     |
|---|------------|------------|-----|------|--------------|-----------------------------------------------------|
| 6 | 17,175,000 | 17,325,000 | 230 | 604  | 0.370448801  |                                                     |
| 6 | 17,250,000 | 17,400,000 | 231 | 496  | 0.18551089   |                                                     |
| 6 | 17,325,000 | 17,475,000 | 232 | 499  | 0.107272963  |                                                     |
| 6 | 17,400,000 | 17,550,000 | 233 | 344  | -0.249834368 | COL25A1                                             |
| 6 | 17,475,000 | 17,625,000 | 234 | 366  | -0.272636926 | COL25A1                                             |
| 6 | 17,550,000 | 17,700,000 | 235 | 467  | 0.504518918  | COL25A1                                             |
| 6 | 17,625,000 | 17,775,000 | 236 | 694  | 0.985821893  | COL25A1,ETNPPL                                      |
| 6 | 17,700,000 | 17,850,000 | 237 | 926  | 0.812875569  | ETNPPL,OSTC,RPL34                                   |
| 6 | 17,775,000 | 17,925,000 | 238 | 653  | 0.622352647  | OSTC,RPL34                                          |
| 6 | 17,850,000 | 18,000,000 | 239 | 168  | 0.877682613  |                                                     |
| 6 | 17,925,000 | 18,075,000 | 240 | 342  | 1.045449515  |                                                     |
| 6 | 18,000,000 | 18,150,000 | 241 | 797  | 0.477851961  |                                                     |
| 6 | 18,075,000 | 18,225,000 | 242 | 664  | -0.166304595 |                                                     |
| 6 | 18,150,000 | 18,300,000 | 243 | 354  | -0.619773732 |                                                     |
| 6 | 18,225,000 | 18,375,000 | 244 | 419  | -0.075074202 | LEF1                                                |
| 6 | 18,300,000 | 18,450,000 | 245 | 528  | 0.585560124  | LEF1                                                |
| 6 | 18,375,000 | 18,525,000 | 246 | 599  | 1.011981464  | CYP2U1,HADH,LEF1                                    |
| 6 | 18,450,000 | 18,600,000 | 247 | 624  | 0.850945049  | CYP2U1,HADH,LEF1,SGMS2                              |
| 6 | 18,525,000 | 18,675,000 | 248 | 959  | 0.390268869  | CYP2U1,SGMS2                                        |
| 6 | 18,600,000 | 18,750,000 | 249 | 1255 | -0.09152647  | PAPSS1                                              |
| 6 | 18,675,000 | 18,825,000 | 250 | 999  | -0.075792294 | PAPSS1                                              |
| 6 | 18,750,000 | 18,900,000 | 251 | 796  | 0.507295137  | PAPSS1                                              |
| 6 | 18,825,000 | 18,975,000 | 252 | 826  | -0.223561383 | PAPSS1                                              |
| 6 | 18,900,000 | 19,050,000 | 253 | 834  | -1.137501827 |                                                     |
| 6 | 18,975,000 | 19,125,000 | 254 | 767  | 0.139523894  |                                                     |
| 6 | 19,050,000 | 19,200,000 | 255 | 1066 | 1.195059991  |                                                     |
| 6 | 19,125,000 | 19,275,000 | 256 | 1020 | 1.2731123    |                                                     |
| 6 | 19,200,000 | 19,350,000 | 257 | 928  | 1.047641457  |                                                     |
| 6 | 19,275,000 | 19,425,000 | 258 | 1078 | 0.896963833  | DKK2                                                |
| 6 | 19,350,000 | 19,500,000 | 259 | 783  | 0.370908006  | DKK2                                                |
| 6 | 19,425,000 | 19,575,000 | 260 | 468  | -0.158765928 | DKK2                                                |
| 6 | 19,500,000 | 19,650,000 | 261 | 350  | 0.645551659  | DKK2                                                |
| 6 | 19,575,000 | 19,725,000 | 262 | 386  | -0.040944883 |                                                     |
| 6 | 19,650,000 | 19,800,000 | 263 | 568  | -1.70996447  |                                                     |
| 6 | 19,725,000 | 19,875,000 | 264 | 686  | -0.345798313 |                                                     |
| 6 | 19,800,000 | 19,950,000 | 265 | 537  | 1.11891116   |                                                     |
| 6 | 19,875,000 | 20,025,000 | 266 | 489  | 0.984779381  |                                                     |
| 6 | 19,950,000 | 20,100,000 | 267 | 554  | 0.601580525  | GIMD1                                               |
| 6 | 20,025,000 | 20,175,000 | 268 | 1004 | 0.726841566  | GIMD1,SCYE1,TBCK                                    |
| 6 | 20,100,000 | 20,250,000 | 269 | 1291 | 0.829120544  | GIMD1,SCYE1,TBCK                                    |
| 6 | 20,175,000 | 20,325,000 | 270 | 1087 | -0.627482429 | TBCK                                                |
| 6 | 20,250,000 | 20,400,000 | 271 | 968  | -1.007768854 | TBCK                                                |
| 6 | 20,325,000 | 20,475,000 | 272 | 735  | 0.420914265  | NPNT,TBCK,ENSBTAG00000038232                        |
| 6 | 20,400,000 | 20,550,000 | 273 | 721  | 0.790857827  | NPNT,ENSBTAG00000038232                             |
| 6 | 20,475,000 | 20,625,000 | 274 | 782  | 0.554012602  | GSTCD,NPNT                                          |
| 6 | 20,550,000 | 20,700,000 | 275 | 552  | 0.111579358  | GSTCD                                               |
| 6 | 20,625,000 | 20,775,000 | 276 | 611  | -0.12886138  | GSTCD,INTS12,ENSBTAG00000008797                     |
| 6 | 20,700,000 | 20,850,000 | 277 | 987  | 0.275845983  | GSTCD,INTS12,ENSBTAG00000008797,ENSBTAG000000033643 |
| 6 | 20,775,000 | 20,925,000 | 278 | 922  | 0.291876184  | ENSBTAG00000008797,ENSBTAG000000033643              |
| 6 | 20,850,000 | 21,000,000 | 279 | 766  | -0.400453266 | PPA2,ENSBTAG000000033643                            |
| 6 | 20,925,000 | 21,075,000 | 280 | 652  | -0.48697326  | PPA2                                                |
| 6 | 21,000,000 | 21,150,000 | 281 | 583  | -0.547280716 | PPA2                                                |

|   |            |            |     |      |              |                     |
|---|------------|------------|-----|------|--------------|---------------------|
| 6 | 21,075,000 | 21,225,000 | 282 | 586  | 0.07530269   | PPA2,TET2           |
| 6 | 21,150,000 | 21,300,000 | 283 | 476  | 1.006566341  | TET2                |
| 6 | 21,225,000 | 21,375,000 | 284 | 594  | 1.010346321  |                     |
| 6 | 21,300,000 | 21,450,000 | 285 | 632  | 1.001350163  |                     |
| 6 | 21,375,000 | 21,525,000 | 286 | 747  | 1.149541852  |                     |
| 6 | 21,450,000 | 21,600,000 | 287 | 793  | 1.041850177  |                     |
| 6 | 21,525,000 | 21,675,000 | 288 | 474  | 0.031178862  |                     |
| 6 | 21,600,000 | 21,750,000 | 289 | 275  | -0.4014087   |                     |
| 6 | 21,675,000 | 21,825,000 | 290 | 497  | 0.191579306  |                     |
| 6 | 21,750,000 | 21,900,000 | 291 | 1030 | 0.354147268  |                     |
| 6 | 21,825,000 | 21,975,000 | 292 | 975  | 0.574970509  |                     |
| 6 | 21,900,000 | 22,050,000 | 293 | 457  | -0.153134423 | CXXC4               |
| 6 | 21,975,000 | 22,125,000 | 294 | 364  | -3.16500711  | CXXC4               |
| 6 | 22,050,000 | 22,200,000 | 295 | 370  | -2.231921353 |                     |
| 6 | 22,125,000 | 22,275,000 | 296 | 525  | 1.076861535  |                     |
| 6 | 22,200,000 | 22,350,000 | 297 | 574  | 0.880384307  |                     |
| 6 | 22,275,000 | 22,425,000 | 298 | 335  | 0.215322711  |                     |
| 6 | 22,350,000 | 22,500,000 | 299 | 706  | 0.778949398  |                     |
| 6 | 22,425,000 | 22,575,000 | 300 | 1189 | 0.438511466  |                     |
| 6 | 22,500,000 | 22,650,000 | 301 | 1048 | 0.199067409  | TACR3               |
| 6 | 22,575,000 | 22,725,000 | 302 | 832  | 0.517177289  | TACR3               |
| 6 | 22,650,000 | 22,800,000 | 303 | 743  | 0.529573087  | TACR3               |
| 6 | 22,725,000 | 22,875,000 | 304 | 471  | 0.571807105  | TACR3               |
| 6 | 22,800,000 | 22,950,000 | 305 | 496  | -0.773481174 |                     |
| 6 | 22,875,000 | 23,025,000 | 306 | 970  | 0.481413347  | CENPE               |
| 6 | 22,950,000 | 23,100,000 | 307 | 1196 | 0.949736613  | BDH2,CENPE,SLC9B2   |
| 6 | 23,025,000 | 23,175,000 | 308 | 1311 | 0.660895549  | BDH2,CENPE,SLC9B2   |
| 6 | 23,100,000 | 23,250,000 | 309 | 1210 | 0.598750452  | NHEDC1,SLC9B2       |
| 6 | 23,175,000 | 23,325,000 | 310 | 803  | 0.246325515  | CISD2,NHEDC1,SLC9B2 |
| 6 | 23,250,000 | 23,400,000 | 311 | 684  | -0.650535878 | CISD2,MANBA,NHEDC1  |
| 6 | 23,325,000 | 23,475,000 | 312 | 1092 | 0.342963832  | MANBA               |
| 6 | 23,400,000 | 23,550,000 | 313 | 1066 | 0.422824146  | MANBA               |
| 6 | 23,475,000 | 23,625,000 | 314 | 633  | -0.02835124  | MANBA,NFKB1         |
| 6 | 23,550,000 | 23,700,000 | 315 | 637  | -0.049455322 | NFKB1               |
| 6 | 23,625,000 | 23,775,000 | 316 | 743  | 0.762711199  | NFKB1               |
| 6 | 23,700,000 | 23,850,000 | 317 | 670  | 0.768502898  | SLC39A8             |
| 6 | 23,775,000 | 23,925,000 | 318 | 583  | -0.035853472 | SLC39A8             |
| 6 | 23,850,000 | 24,000,000 | 319 | 877  | -0.093093991 | SLC39A8             |
| 6 | 23,925,000 | 24,075,000 | 320 | 1086 | 0.340965427  | BANK1               |
| 6 | 24,000,000 | 24,150,000 | 321 | 922  | 0.737672623  | BANK1               |
| 6 | 24,075,000 | 24,225,000 | 322 | 933  | 1.130097754  | BANK1               |
| 6 | 24,150,000 | 24,300,000 | 323 | 1053 | 0.98842232   |                     |
| 6 | 24,225,000 | 24,375,000 | 324 | 828  | 0.738649548  |                     |
| 6 | 24,300,000 | 24,450,000 | 325 | 635  | 0.188293256  |                     |
| 6 | 24,375,000 | 24,525,000 | 326 | 606  | -0.11876091  |                     |
| 6 | 24,450,000 | 24,600,000 | 327 | 534  | 0.199521752  |                     |
| 6 | 24,525,000 | 24,675,000 | 328 | 630  | 0.677706276  |                     |
| 6 | 24,600,000 | 24,750,000 | 329 | 711  | -0.298866797 |                     |
| 6 | 24,675,000 | 24,825,000 | 330 | 593  | -0.736484443 | PPP3CA              |
| 6 | 24,750,000 | 24,900,000 | 331 | 491  | 0.743929391  | PPP3CA              |
| 6 | 24,825,000 | 24,975,000 | 332 | 717  | 0.601882115  | PPP3CA              |
| 6 | 24,900,000 | 25,050,000 | 333 | 850  | 0.461225937  | PPP3CA              |
| 6 | 24,975,000 | 25,125,000 | 334 | 503  | 0.564887555  | PPP3CA              |



|   |            |            |     |      |              |                                                               |
|---|------------|------------|-----|------|--------------|---------------------------------------------------------------|
| 6 | 25,050,000 | 25,200,000 | 335 | 376  | -0.738454465 | PPP3CA                                                        |
| 6 | 25,125,000 | 25,275,000 | 336 | 746  | -0.2581221   | PPP3CA                                                        |
| 6 | 25,200,000 | 25,350,000 | 337 | 707  | 0.281098716  |                                                               |
| 6 | 25,275,000 | 25,425,000 | 338 | 669  | 0.603924111  |                                                               |
| 6 | 25,350,000 | 25,500,000 | 339 | 1064 | 0.847340692  |                                                               |
| 6 | 25,425,000 | 25,575,000 | 340 | 879  | 0.874360122  |                                                               |
| 6 | 25,500,000 | 25,650,000 | 341 | 770  | -0.735855062 | EMCN                                                          |
| 6 | 25,575,000 | 25,725,000 | 342 | 832  | -1.890903404 | EMCN                                                          |
| 6 | 25,650,000 | 25,800,000 | 343 | 778  | -1.056603015 | EMCN                                                          |
| 6 | 25,725,000 | 25,875,000 | 344 | 615  | -0.207258138 |                                                               |
| 6 | 25,800,000 | 25,950,000 | 345 | 607  | 0.70405408   | DDIT4L                                                        |
| 6 | 25,875,000 | 26,025,000 | 346 | 848  | -0.048749946 | DDIT4L                                                        |
| 6 | 25,950,000 | 26,100,000 | 347 | 812  | -0.786039335 | MGC157237                                                     |
| 6 | 26,025,000 | 26,175,000 | 348 | 546  | -0.097852752 | DAPP1,DNAJB14,H2AFZ,LAMTOR3,MGC157237                         |
| 6 | 26,100,000 | 26,250,000 | 349 | 374  | -0.693295038 | DAPP1,DNAJB14,H2AFZ,LAMTOR3                                   |
| 6 | 26,175,000 | 26,325,000 | 350 | 379  | -1.6246743   | DAPP1                                                         |
| 6 | 26,250,000 | 26,400,000 | 351 | 438  | -1.797734243 | MTTP,ENSBTAG00000046333                                       |
| 6 | 26,325,000 | 26,475,000 | 352 | 464  | -0.674381337 | MTTP,TRMT10A,ENSBTAG00000046333                               |
| 6 | 26,400,000 | 26,550,000 | 353 | 597  | 0.191832118  | ADH7,C4orf17,MTTP,TRMT10A                                     |
| 6 | 26,475,000 | 26,625,000 | 354 | 926  | 0.211436839  | ADH7,C4orf17                                                  |
| 6 | 26,550,000 | 26,700,000 | 355 | 1000 | 0.253638609  | ADH7,ENSBTAG00000006986,ENSBTAG00000034189,ENSBTAG00000034514 |
| 6 | 26,625,000 | 26,775,000 | 356 | 1066 | 0.249631184  | ENSBTAG00000006986,ENSBTAG00000034189,ENSBTAG00000034514      |
| 6 | 26,700,000 | 26,850,000 | 357 | 737  | 0.005183523  | ADH6,ENSBTAG00000006986                                       |
| 6 | 26,775,000 | 26,925,000 | 358 | 490  | 0.584681316  | ADH4,ADH5,ADH6                                                |
| 6 | 26,850,000 | 27,000,000 | 359 | 447  | 0.900849766  | ADH4,ADH5,METAP1                                              |
| 6 | 26,925,000 | 27,075,000 | 360 | 406  | 0.774951473  | EIF4E,METAP1,ENSBTAG00000024125                               |
| 6 | 27,000,000 | 27,150,000 | 361 | 690  | 0.682144625  | EIF4E,ENSBTAG00000024125                                      |
| 6 | 27,075,000 | 27,225,000 | 362 | 791  | 0.19013229   | EIF4E                                                         |
| 6 | 27,150,000 | 27,300,000 | 363 | 1011 | -0.231133763 |                                                               |
| 6 | 27,225,000 | 27,375,000 | 364 | 961  | 0.160064367  | TSPAN5                                                        |
| 6 | 27,300,000 | 27,450,000 | 365 | 767  | 0.633742194  | TSPAN5                                                        |
| 6 | 27,375,000 | 27,525,000 | 366 | 768  | 0.239157468  | TSPAN5                                                        |
| 6 | 27,450,000 | 27,600,000 | 367 | 626  | 0.163546877  | RAP1GDS1,TSPAN5                                               |
| 6 | 27,525,000 | 27,675,000 | 368 | 613  | 0.254288767  | RAP1GDS1                                                      |
| 6 | 27,600,000 | 27,750,000 | 369 | 881  | 0.170375218  | RAP1GDS1                                                      |
| 6 | 27,675,000 | 27,825,000 | 370 | 1317 | -0.016763454 |                                                               |
| 6 | 27,750,000 | 27,900,000 | 371 | 1256 | -0.029054419 |                                                               |
| 6 | 27,825,000 | 27,975,000 | 372 | 1170 | -0.24763743  |                                                               |
| 6 | 27,900,000 | 28,050,000 | 373 | 1429 | -0.112657468 |                                                               |
| 6 | 27,975,000 | 28,125,000 | 374 | 1052 | -0.128311138 | ENSBTAG00000023000                                            |
| 6 | 28,050,000 | 28,200,000 | 375 | 839  | -0.970053029 | ENSBTAG00000023000                                            |
| 6 | 28,125,000 | 28,275,000 | 376 | 1025 | -1.034859662 |                                                               |
| 6 | 28,200,000 | 28,350,000 | 377 | 1207 | -0.645457783 |                                                               |
| 6 | 28,275,000 | 28,425,000 | 378 | 1345 | -0.058901406 |                                                               |
| 6 | 28,350,000 | 28,500,000 | 379 | 1343 | 0.568950191  |                                                               |
| 6 | 28,425,000 | 28,575,000 | 380 | 1454 | -0.140126151 |                                                               |
| 6 | 28,500,000 | 28,650,000 | 381 | 1491 | -0.652741401 |                                                               |
| 6 | 28,575,000 | 28,725,000 | 382 | 1258 | -0.280360281 |                                                               |
| 6 | 28,650,000 | 28,800,000 | 383 | 1264 | -0.203731481 |                                                               |
| 6 | 28,725,000 | 28,875,000 | 384 | 1582 | -0.571385278 |                                                               |
| 6 | 28,800,000 | 28,950,000 | 385 | 1608 | -0.075113937 |                                                               |

|   |            |            |     |      |              |                                |
|---|------------|------------|-----|------|--------------|--------------------------------|
| 6 | 28,875,000 | 29,025,000 | 386 | 1536 | 0.040347312  |                                |
| 6 | 28,950,000 | 29,100,000 | 387 | 1337 | -0.093324615 |                                |
| 6 | 29,025,000 | 29,175,000 | 388 | 921  | 0.04845792   |                                |
| 6 | 29,100,000 | 29,250,000 | 389 | 697  | -0.807875932 |                                |
| 6 | 29,175,000 | 29,325,000 | 390 | 575  | -0.938935666 |                                |
| 6 | 29,250,000 | 29,400,000 | 391 | 401  | -0.11639013  | ENSBTAG00000015464             |
| 6 | 29,325,000 | 29,475,000 | 392 | 605  | -0.286377919 | ENSBTAG00000015464             |
| 6 | 29,400,000 | 29,550,000 | 393 | 1199 | 0.727190117  |                                |
| 6 | 29,475,000 | 29,625,000 | 394 | 1642 | 1.022238954  |                                |
| 6 | 29,550,000 | 29,700,000 | 395 | 1654 | 0.979333765  |                                |
| 6 | 29,625,000 | 29,775,000 | 396 | 1598 | 0.794180242  |                                |
| 6 | 29,700,000 | 29,850,000 | 397 | 1353 | 0.327743008  |                                |
| 6 | 29,775,000 | 29,925,000 | 398 | 1206 | 0.220041742  |                                |
| 6 | 29,850,000 | 30,000,000 | 399 | 1489 | 0.573406567  |                                |
| 6 | 29,925,000 | 30,075,000 | 400 | 1751 | 0.328858439  | PDHA2                          |
| 6 | 30,000,000 | 30,150,000 | 401 | 1612 | 0.129762418  | PDHA2                          |
| 6 | 30,075,000 | 30,225,000 | 402 | 1577 | 0.495762072  |                                |
| 6 | 30,150,000 | 30,300,000 | 403 | 1914 | 0.174042856  |                                |
| 6 | 30,225,000 | 30,375,000 | 404 | 1756 | -0.501884709 |                                |
| 6 | 30,300,000 | 30,450,000 | 405 | 1321 | -0.494481594 |                                |
| 6 | 30,375,000 | 30,525,000 | 406 | 1223 | 0.476655199  |                                |
| 6 | 30,450,000 | 30,600,000 | 407 | 981  | 0.716159374  | UNC5C                          |
| 6 | 30,525,000 | 30,675,000 | 408 | 705  | 0.634342829  | UNC5C                          |
| 6 | 30,600,000 | 30,750,000 | 409 | 657  | -1.787170646 | UNC5C                          |
| 6 | 30,675,000 | 30,825,000 | 410 | 859  | -0.3786343   | BMPR1B,UNC5C                   |
| 6 | 30,750,000 | 30,900,000 | 411 | 740  | 0.712295575  | BMPR1B,UNC5C                   |
| 6 | 30,825,000 | 30,975,000 | 412 | 451  | 0.190659897  | BMPR1B                         |
| 6 | 30,900,000 | 31,050,000 | 413 | 588  | -0.198366223 |                                |
| 6 | 30,975,000 | 31,125,000 | 414 | 537  | -0.284697951 |                                |
| 6 | 31,050,000 | 31,200,000 | 415 | 420  | -0.083038686 |                                |
| 6 | 31,125,000 | 31,275,000 | 416 | 486  | 0.207926649  |                                |
| 6 | 31,200,000 | 31,350,000 | 417 | 510  | 0.071519184  | PDLIM5                         |
| 6 | 31,275,000 | 31,425,000 | 418 | 397  | -0.282646299 | PDLIM5                         |
| 6 | 31,350,000 | 31,500,000 | 419 | 466  | -0.344955682 | PDLIM5                         |
| 6 | 31,425,000 | 31,575,000 | 420 | 757  | -0.261257    | PDLIM5                         |
| 6 | 31,500,000 | 31,650,000 | 421 | 681  | -0.144947672 | PDLIM5                         |
| 6 | 31,575,000 | 31,725,000 | 422 | 570  | 0.715256982  | HPGDS                          |
| 6 | 31,650,000 | 31,800,000 | 423 | 588  | 1.000173741  | HPGDS,SMARCAD1                 |
| 6 | 31,725,000 | 31,875,000 | 424 | 415  | 0.855492753  | HPGDS,SMARCAD1                 |
| 6 | 31,800,000 | 31,950,000 | 425 | 404  | 1.087717536  | SMARCAD1                       |
| 6 | 31,875,000 | 32,025,000 | 426 | 833  | 1.182417419  |                                |
| 6 | 31,950,000 | 32,100,000 | 427 | 816  | 0.848266847  |                                |
| 6 | 32,025,000 | 32,175,000 | 428 | 458  | -0.138563335 | ATOH1                          |
| 6 | 32,100,000 | 32,250,000 | 429 | 477  | -1.271294754 | ATOH1,GRID2,ENSBTAG00000046473 |
| 6 | 32,175,000 | 32,325,000 | 430 | 489  | -2.838416725 | GRID2,ENSBTAG00000046473       |
| 6 | 32,250,000 | 32,400,000 | 431 | 615  | -0.830356356 |                                |
| 6 | 32,325,000 | 32,475,000 | 432 | 701  | 0.74641104   |                                |
| 6 | 32,400,000 | 32,550,000 | 433 | 596  | 1.082464472  |                                |
| 6 | 32,475,000 | 32,625,000 | 434 | 641  | 1.175536188  |                                |
| 6 | 32,550,000 | 32,700,000 | 435 | 842  | 0.253135764  |                                |
| 6 | 32,625,000 | 32,775,000 | 436 | 1095 | -0.203415985 |                                |
| 6 | 32,700,000 | 32,850,000 | 437 | 981  | 0.168970951  |                                |
| 6 | 32,775,000 | 32,925,000 | 438 | 668  | -0.096037608 |                                |

|   |            |            |     |      |              |                    |
|---|------------|------------|-----|------|--------------|--------------------|
| 6 | 32,850,000 | 33,000,000 | 439 | 616  | -0.008080637 | ENSBTAG00000047255 |
| 6 | 32,925,000 | 33,075,000 | 440 | 535  | 0.740936187  | ENSBTAG00000047255 |
| 6 | 33,000,000 | 33,150,000 | 441 | 602  | 0.535871541  |                    |
| 6 | 33,075,000 | 33,225,000 | 442 | 1076 | 0.236480831  |                    |
| 6 | 33,150,000 | 33,300,000 | 443 | 1032 | 0.01176775   | ENSBTAG00000019490 |
| 6 | 33,225,000 | 33,375,000 | 444 | 765  | 0.395419454  | ENSBTAG00000019490 |
| 6 | 33,300,000 | 33,450,000 | 445 | 591  | 0.463384584  |                    |
| 6 | 33,375,000 | 33,525,000 | 446 | 364  | -3.282925483 | ENSBTAG00000047821 |
| 6 | 33,450,000 | 33,600,000 | 447 | 438  | -3.674476502 | ENSBTAG00000047821 |
| 6 | 33,525,000 | 33,675,000 | 448 | 420  | -2.89044473  |                    |
| 6 | 33,600,000 | 33,750,000 | 449 | 577  | -4.057559696 |                    |
| 6 | 33,675,000 | 33,825,000 | 450 | 771  | -3.920058349 |                    |
| 6 | 33,750,000 | 33,900,000 | 451 | 674  | -2.521031425 |                    |
| 6 | 33,825,000 | 33,975,000 | 452 | 741  | -1.582553753 |                    |
| 6 | 33,900,000 | 34,050,000 | 453 | 794  | -1.800158252 |                    |
| 6 | 33,975,000 | 34,125,000 | 454 | 434  | -1.342446508 |                    |
| 6 | 34,050,000 | 34,200,000 | 455 | 359  | -1.294006902 |                    |
| 6 | 34,125,000 | 34,275,000 | 456 | 489  | -0.331545429 |                    |
| 6 | 34,200,000 | 34,350,000 | 457 | 886  | 0.616379318  |                    |
| 6 | 34,275,000 | 34,425,000 | 458 | 1021 | -0.164940355 |                    |
| 6 | 34,350,000 | 34,500,000 | 459 | 730  | -0.755995538 |                    |
| 6 | 34,425,000 | 34,575,000 | 460 | 657  | -0.20871712  |                    |
| 6 | 34,500,000 | 34,650,000 | 461 | 683  | -0.187732461 |                    |
| 6 | 34,575,000 | 34,725,000 | 462 | 953  | -0.317383772 |                    |
| 6 | 34,650,000 | 34,800,000 | 463 | 801  | -0.134339979 |                    |
| 6 | 34,725,000 | 34,875,000 | 464 | 403  | 0.874725369  |                    |
| 6 | 34,800,000 | 34,950,000 | 465 | 297  | 0.7228943    |                    |
| 6 | 34,875,000 | 35,025,000 | 466 | 274  | -1.499825967 |                    |
| 6 | 34,950,000 | 35,100,000 | 467 | 543  | -1.112942773 |                    |
| 6 | 35,025,000 | 35,175,000 | 468 | 931  | 0.92684511   | CCSER1             |
| 6 | 35,100,000 | 35,250,000 | 469 | 922  | 1.189213554  | CCSER1             |
| 6 | 35,175,000 | 35,325,000 | 470 | 604  | 0.756943411  | CCSER1             |
| 6 | 35,250,000 | 35,400,000 | 471 | 484  | 0.952741054  | CCSER1             |
| 6 | 35,325,000 | 35,475,000 | 472 | 748  | 0.732472066  | CCSER1             |
| 6 | 35,400,000 | 35,550,000 | 473 | 1019 | -0.081982442 | CCSER1             |
| 6 | 35,475,000 | 35,625,000 | 474 | 797  | -0.444101557 | CCSER1             |
| 6 | 35,550,000 | 35,700,000 | 475 | 670  | 0.339554763  | CCSER1             |
| 6 | 35,625,000 | 35,775,000 | 476 | 707  | 0.293272663  | CCSER1             |
| 6 | 35,700,000 | 35,850,000 | 477 | 864  | 0.245134403  | CCSER1             |
| 6 | 35,775,000 | 35,925,000 | 478 | 1074 | 0.389815388  | CCSER1             |
| 6 | 35,850,000 | 36,000,000 | 479 | 891  | 0.352441188  | CCSER1             |
| 6 | 35,925,000 | 36,075,000 | 480 | 611  | 0.626998393  | CCSER1             |
| 6 | 36,000,000 | 36,150,000 | 481 | 356  | 0.801583362  | MMRN1              |
| 6 | 36,075,000 | 36,225,000 | 482 | 432  | -2.981330766 | MMRN1              |
| 6 | 36,150,000 | 36,300,000 | 483 | 694  | -2.316509835 | MMRN1,SNCA         |
| 6 | 36,225,000 | 36,375,000 | 484 | 554  | -0.57224894  | SNCA               |
| 6 | 36,300,000 | 36,450,000 | 485 | 407  | 0.507134536  | SNCA               |
| 6 | 36,375,000 | 36,525,000 | 486 | 602  | 0.998501925  | SNCA               |
| 6 | 36,450,000 | 36,600,000 | 487 | 907  | 0.711972717  |                    |
| 6 | 36,525,000 | 36,675,000 | 488 | 1061 | 0.430149798  |                    |
| 6 | 36,600,000 | 36,750,000 | 489 | 1150 | 0.18732209   |                    |
| 6 | 36,675,000 | 36,825,000 | 490 | 1190 | 0.076211709  |                    |
| 6 | 36,750,000 | 36,900,000 | 491 | 1127 | 0.440015779  |                    |

|   |            |            |     |      |              |                          |
|---|------------|------------|-----|------|--------------|--------------------------|
| 6 | 36,825,000 | 36,975,000 | 492 | 1327 | 0.37243485   |                          |
| 6 | 36,900,000 | 37,050,000 | 493 | 1529 | 0.492888108  | GPRIN3                   |
| 6 | 36,975,000 | 37,125,000 | 494 | 1446 | 1.057018696  | GPRIN3,TIGD2             |
| 6 | 37,050,000 | 37,200,000 | 495 | 1274 | 1.06178366   | TIGD2,ENSBTAG00000033346 |
| 6 | 37,125,000 | 37,275,000 | 496 | 1255 | 0.693794282  | ENSBTAG00000033346       |
| 6 | 37,200,000 | 37,350,000 | 497 | 1316 | 0.702081909  |                          |
| 6 | 37,275,000 | 37,425,000 | 498 | 1256 | 0.651025791  | FAM13A                   |
| 6 | 37,350,000 | 37,500,000 | 499 | 1148 | 0.363249218  | FAM13A,HERC3             |
| 6 | 37,425,000 | 37,575,000 | 500 | 1151 | 0.244414393  | FAM13A,HERC3,NAP1L5      |
| 6 | 37,500,000 | 37,650,000 | 501 | 1234 | 0.351184639  | HERC3,NAP1L5             |
| 6 | 37,575,000 | 37,725,000 | 502 | 877  | 0.196150689  | HERC3,HERC5,PIGY         |
| 6 | 37,650,000 | 37,800,000 | 503 | 509  | -1.989695956 | HERC5,HERC6,PIGY         |
| 6 | 37,725,000 | 37,875,000 | 504 | 765  | -1.855995781 | HERC5,HERC6              |
| 6 | 37,800,000 | 37,950,000 | 505 | 1012 | -0.61599815  | ABCG2,PPM1K              |
| 6 | 37,875,000 | 38,025,000 | 506 | 991  | 0.055913337  | ABCG2,PPM1K              |
| 6 | 37,950,000 | 38,100,000 | 507 | 626  | 0.154838018  | ABCG2,PKD2               |
| 6 | 38,025,000 | 38,175,000 | 508 | 305  | 0.749032089  | ABCG2,PKD2,SPP1          |
| 6 | 38,100,000 | 38,250,000 | 509 | 581  | 0.959351714  | SPP1                     |
| 6 | 38,175,000 | 38,325,000 | 510 | 663  | 0.449300303  | IBSP,MEPE                |
| 6 | 38,250,000 | 38,400,000 | 511 | 547  | -0.142676137 | IBSP,MEPE                |
| 6 | 38,325,000 | 38,475,000 | 512 | 937  | 0.656091549  |                          |
| 6 | 38,400,000 | 38,550,000 | 513 | 1501 | 0.666895198  |                          |
| 6 | 38,475,000 | 38,625,000 | 514 | 1316 | 0.800302736  | FAM184B,LAP3,MED28       |
| 6 | 38,550,000 | 38,700,000 | 515 | 774  | 1.110246716  | FAM184B,LAP3,MED28       |
| 6 | 38,625,000 | 38,775,000 | 516 | 831  | 1.206679574  | DCAF16,FAM184B,HCAP-G    |
| 6 | 38,700,000 | 38,850,000 | 517 | 775  | 1.165355637  | DCAF16,HCAP-G,LCORL      |
| 6 | 38,775,000 | 38,925,000 | 518 | 492  | 0.966476871  | HCAP-G,LCORL             |
| 6 | 38,850,000 | 39,000,000 | 519 | 408  | 0.863596804  | LCORL                    |
| 6 | 38,925,000 | 39,075,000 | 520 | 349  | 0.866521816  | LCORL                    |
| 6 | 39,000,000 | 39,150,000 | 521 | 271  | 1.018299158  |                          |
| 6 | 39,075,000 | 39,225,000 | 522 | 332  | 0.915387621  |                          |
| 6 | 39,150,000 | 39,300,000 | 523 | 743  | 0.520408981  |                          |
| 6 | 39,225,000 | 39,375,000 | 524 | 1095 | 0.677251314  |                          |
| 6 | 39,300,000 | 39,450,000 | 525 | 1068 | 1.044445024  |                          |
| 6 | 39,375,000 | 39,525,000 | 526 | 910  | 0.699525588  |                          |
| 6 | 39,450,000 | 39,600,000 | 527 | 829  | -0.316319323 |                          |
| 6 | 39,525,000 | 39,675,000 | 528 | 810  | -0.934284142 |                          |
| 6 | 39,600,000 | 39,750,000 | 529 | 743  | -0.85783412  |                          |
| 6 | 39,675,000 | 39,825,000 | 530 | 801  | -0.207994272 |                          |
| 6 | 39,750,000 | 39,900,000 | 531 | 585  | -0.049301908 |                          |
| 6 | 39,825,000 | 39,975,000 | 532 | 242  | -0.281225186 |                          |
| 6 | 39,900,000 | 40,050,000 | 533 | 360  | -0.032242256 |                          |
| 6 | 39,975,000 | 40,125,000 | 534 | 485  | 0.261626568  |                          |
| 6 | 40,050,000 | 40,200,000 | 535 | 403  | 0.203739262  |                          |
| 6 | 40,125,000 | 40,275,000 | 536 | 497  | 0.38308014   |                          |
| 6 | 40,200,000 | 40,350,000 | 537 | 877  | -0.134841295 |                          |
| 6 | 40,275,000 | 40,425,000 | 538 | 787  | -0.545390586 |                          |
| 6 | 40,350,000 | 40,500,000 | 539 | 517  | -0.40929976  |                          |
| 6 | 40,425,000 | 40,575,000 | 540 | 542  | 0.234101088  |                          |
| 6 | 40,500,000 | 40,650,000 | 541 | 847  | 0.945755332  |                          |
| 6 | 40,575,000 | 40,725,000 | 542 | 887  | 0.63196275   |                          |
| 6 | 40,650,000 | 40,800,000 | 543 | 574  | 0.497329637  |                          |
| 6 | 40,725,000 | 40,875,000 | 544 | 543  | 0.978834384  |                          |

|   |            |            |     |      |              |                     |
|---|------------|------------|-----|------|--------------|---------------------|
| 6 | 40,800,000 | 40,950,000 | 545 | 608  | 0.888390389  |                     |
| 6 | 40,875,000 | 41,025,000 | 546 | 495  | 0.893365633  |                     |
| 6 | 40,950,000 | 41,100,000 | 547 | 311  | 0.959485635  |                     |
| 6 | 41,025,000 | 41,175,000 | 548 | 255  | 1.105186422  |                     |
| 6 | 41,100,000 | 41,250,000 | 549 | 312  | 0.981708233  | SLIT2               |
| 6 | 41,175,000 | 41,325,000 | 550 | 520  | 0.784377054  | SLIT2               |
| 6 | 41,250,000 | 41,400,000 | 551 | 778  | 0.978492463  | SLIT2               |
| 6 | 41,325,000 | 41,475,000 | 552 | 936  | 1.145560263  | SLIT2               |
| 6 | 41,400,000 | 41,550,000 | 553 | 640  | 1.019140728  | SLIT2               |
| 6 | 41,475,000 | 41,625,000 | 554 | 452  | 0.575563597  | SLIT2               |
| 6 | 41,550,000 | 41,700,000 | 555 | 747  | 0.786538879  | PACRGL,SLIT2        |
| 6 | 41,625,000 | 41,775,000 | 556 | 1160 | 0.725505186  | KCNIP4,PACRGL,SLIT2 |
| 6 | 41,700,000 | 41,850,000 | 557 | 1370 | 0.85337506   | KCNIP4,PACRGL       |
| 6 | 41,775,000 | 41,925,000 | 558 | 1520 | 0.704102025  | KCNIP4              |
| 6 | 41,850,000 | 42,000,000 | 559 | 1708 | 0.819857619  | KCNIP4              |
| 6 | 41,925,000 | 42,075,000 | 560 | 1710 | 0.985722305  | KCNIP4              |
| 6 | 42,000,000 | 42,150,000 | 561 | 1630 | 1.005793407  | KCNIP4              |
| 6 | 42,075,000 | 42,225,000 | 562 | 1456 | 0.724007501  | KCNIP4              |
| 6 | 42,150,000 | 42,300,000 | 563 | 1483 | 0.037283973  | KCNIP4              |
| 6 | 42,225,000 | 42,375,000 | 564 | 1597 | 0.506759086  | KCNIP4              |
| 6 | 42,300,000 | 42,450,000 | 565 | 1416 | 0.574497198  | KCNIP4              |
| 6 | 42,375,000 | 42,525,000 | 566 | 1226 | -0.362077339 | KCNIP4              |
| 6 | 42,450,000 | 42,600,000 | 567 | 1012 | -0.90579614  | KCNIP4              |
| 6 | 42,525,000 | 42,675,000 | 568 | 583  | -0.833384179 | KCNIP4              |
| 6 | 42,600,000 | 42,750,000 | 569 | 432  | 0.671621041  | KCNIP4              |
| 6 | 42,675,000 | 42,825,000 | 570 | 580  | 1.094556034  | KCNIP4              |
| 6 | 42,750,000 | 42,900,000 | 571 | 682  | 1.203720867  | KCNIP4              |
| 6 | 42,825,000 | 42,975,000 | 572 | 784  | 0.569192349  | KCNIP4              |
| 6 | 42,900,000 | 43,050,000 | 573 | 724  | -0.330167409 | KCNIP4              |
| 6 | 42,975,000 | 43,125,000 | 574 | 502  | 0.245618196  | KCNIP4              |
| 6 | 43,050,000 | 43,200,000 | 575 | 406  | 0.567039425  |                     |
| 6 | 43,125,000 | 43,275,000 | 576 | 431  | 0.397825025  |                     |
| 6 | 43,200,000 | 43,350,000 | 577 | 436  | 0.505065586  |                     |
| 6 | 43,275,000 | 43,425,000 | 578 | 838  | 0.427408547  |                     |
| 6 | 43,350,000 | 43,500,000 | 579 | 1100 | 0.412934866  | GPR125              |
| 6 | 43,425,000 | 43,575,000 | 580 | 824  | 0.448503301  | GPR125              |
| 6 | 43,500,000 | 43,650,000 | 581 | 910  | 0.654279729  | GPR125              |
| 6 | 43,575,000 | 43,725,000 | 582 | 915  | 0.219854505  | GBA3                |
| 6 | 43,650,000 | 43,800,000 | 583 | 606  | -0.425182522 | GBA3                |
| 6 | 43,725,000 | 43,875,000 | 584 | 571  | -0.136314917 | GBA3                |
| 6 | 43,800,000 | 43,950,000 | 585 | 653  | -0.836948971 | GBA3                |
| 6 | 43,875,000 | 44,025,000 | 586 | 528  | -0.99424267  |                     |
| 6 | 43,950,000 | 44,100,000 | 587 | 388  | -0.610228287 |                     |
| 6 | 44,025,000 | 44,175,000 | 588 | 673  | -0.925542376 |                     |
| 6 | 44,100,000 | 44,250,000 | 589 | 660  | -0.783665736 |                     |
| 6 | 44,175,000 | 44,325,000 | 590 | 535  | -0.776322386 |                     |
| 6 | 44,250,000 | 44,400,000 | 591 | 808  | -1.140730501 |                     |
| 6 | 44,325,000 | 44,475,000 | 592 | 981  | -0.31377788  |                     |
| 6 | 44,400,000 | 44,550,000 | 593 | 918  | 0.409935208  |                     |
| 6 | 44,475,000 | 44,625,000 | 594 | 876  | 0.458829841  |                     |
| 6 | 44,550,000 | 44,700,000 | 595 | 925  | 0.813002892  | ENSBTAG00000033327  |
| 6 | 44,625,000 | 44,775,000 | 596 | 754  | 1.08407099   | ENSBTAG00000033327  |
| 6 | 44,700,000 | 44,850,000 | 597 | 730  | 0.469094283  |                     |

|   |            |            |     |      |              |                       |
|---|------------|------------|-----|------|--------------|-----------------------|
| 6 | 44,775,000 | 44,925,000 | 598 | 646  | -0.707411692 | PPARGC1A              |
| 6 | 44,850,000 | 45,000,000 | 599 | 453  | -1.123555261 | PPARGC1A              |
| 6 | 44,925,000 | 45,075,000 | 600 | 405  | -0.620934246 | PPARGC1A              |
| 6 | 45,000,000 | 45,150,000 | 601 | 461  | 0.188550636  |                       |
| 6 | 45,075,000 | 45,225,000 | 602 | 542  | 0.836484249  |                       |
| 6 | 45,150,000 | 45,300,000 | 603 | 458  | 1.093777283  |                       |
| 6 | 45,225,000 | 45,375,000 | 604 | 557  | -0.335148975 |                       |
| 6 | 45,300,000 | 45,450,000 | 605 | 608  | -1.124547461 |                       |
| 6 | 45,375,000 | 45,525,000 | 606 | 435  | -0.801082228 |                       |
| 6 | 45,450,000 | 45,600,000 | 607 | 360  | 0.20113153   |                       |
| 6 | 45,525,000 | 45,675,000 | 608 | 337  | 0.573801998  | DHX15                 |
| 6 | 45,600,000 | 45,750,000 | 609 | 287  | 0.984980205  | DHX15                 |
| 6 | 45,675,000 | 45,825,000 | 610 | 271  | 0.930248755  | DHX15                 |
| 6 | 45,750,000 | 45,900,000 | 611 | 573  | 1.112981177  |                       |
| 6 | 45,825,000 | 45,975,000 | 612 | 855  | 0.513428388  | CCDC149,ECSOD         |
| 6 | 45,900,000 | 46,050,000 | 613 | 594  | -0.035264213 | CCDC149,ECSOD         |
| 6 | 45,975,000 | 46,125,000 | 614 | 487  | 0.64527049   | CCDC149               |
| 6 | 46,050,000 | 46,200,000 | 615 | 438  | 0.630647702  | CCDC149,LGI2          |
| 6 | 46,125,000 | 46,275,000 | 616 | 361  | 0.819526557  | LGI2,SEPSECS          |
| 6 | 46,200,000 | 46,350,000 | 617 | 454  | 0.742028784  | SEPSECS               |
| 6 | 46,275,000 | 46,425,000 | 618 | 407  | 0.908260214  | PI4K2B,SEPSECS,ZCCHC4 |
| 6 | 46,350,000 | 46,500,000 | 619 | 595  | -0.479550476 | ANAPC4,PI4K2B,ZCCHC4  |
| 6 | 46,425,000 | 46,575,000 | 620 | 1030 | -0.533155576 | ANAPC4,ZCCHC4         |
| 6 | 46,500,000 | 46,650,000 | 621 | 1064 | 0.310020303  | ANAPC4                |
| 6 | 46,575,000 | 46,725,000 | 622 | 800  | 0.522131236  | SLC34A2               |
| 6 | 46,650,000 | 46,800,000 | 623 | 941  | 0.922795594  | SEL1L3,SLC34A2        |
| 6 | 46,725,000 | 46,875,000 | 624 | 1032 | 0.411754016  | SEL1L3,SLC34A2        |
| 6 | 46,800,000 | 46,950,000 | 625 | 1037 | -0.783692467 | SEL1L3                |
| 6 | 46,875,000 | 47,025,000 | 626 | 999  | -1.079712362 | SEL1L3,SMIM20         |
| 6 | 46,950,000 | 47,100,000 | 627 | 710  | -0.986209113 | SMIM20                |
| 6 | 47,025,000 | 47,175,000 | 628 | 456  | 0.027761288  |                       |
| 6 | 47,100,000 | 47,250,000 | 629 | 370  | 0.965663366  |                       |
| 6 | 47,175,000 | 47,325,000 | 630 | 283  | 0.759799342  | RBPJ                  |
| 6 | 47,250,000 | 47,400,000 | 631 | 151  | 0.566046836  | RBPJ                  |
| 6 | 47,325,000 | 47,475,000 | 632 | 175  | 1.066808813  | CCKAR,RBPJ            |
| 6 | 47,400,000 | 47,550,000 | 633 | 333  | -0.14660772  | CCKAR,RBPJ            |
| 6 | 47,475,000 | 47,625,000 | 634 | 431  | -0.227830899 | CCKAR,TBC1D19         |
| 6 | 47,550,000 | 47,700,000 | 635 | 623  | -0.145442831 | TBC1D19               |
| 6 | 47,625,000 | 47,775,000 | 636 | 765  | 0.114564131  | TBC1D19               |
| 6 | 47,700,000 | 47,850,000 | 637 | 491  | 0.620496633  | TBC1D19               |
| 6 | 47,775,000 | 47,925,000 | 638 | 568  | 0.759113841  |                       |
| 6 | 47,850,000 | 48,000,000 | 639 | 561  | 0.921133906  | STIM2                 |
| 6 | 47,925,000 | 48,075,000 | 640 | 407  | 0.135312977  | STIM2                 |
| 6 | 48,000,000 | 48,150,000 | 641 | 536  | 0.510637253  | STIM2                 |
| 6 | 48,075,000 | 48,225,000 | 642 | 712  | 1.016882253  |                       |
| 6 | 48,150,000 | 48,300,000 | 643 | 1092 | 0.737626865  |                       |
| 6 | 48,225,000 | 48,375,000 | 644 | 1083 | 0.323025158  |                       |
| 6 | 48,300,000 | 48,450,000 | 645 | 1044 | 0.358772337  |                       |
| 6 | 48,375,000 | 48,525,000 | 646 | 1155 | 0.060476927  | ENSBTAG00000045570    |
| 6 | 48,450,000 | 48,600,000 | 647 | 1271 | -0.033827601 | ENSBTAG00000045570    |
| 6 | 48,525,000 | 48,675,000 | 648 | 1310 | 0.25890417   |                       |
| 6 | 48,600,000 | 48,750,000 | 649 | 1114 | 0.083333633  |                       |
| 6 | 48,675,000 | 48,825,000 | 650 | 1223 | -0.834326329 |                       |

|   |            |            |     |      |              |       |
|---|------------|------------|-----|------|--------------|-------|
| 6 | 48,750,000 | 48,900,000 | 651 | 1223 | -0.925784996 |       |
| 6 | 48,825,000 | 48,975,000 | 652 | 998  | 0.346437765  |       |
| 6 | 48,900,000 | 49,050,000 | 653 | 776  | 0.206745189  |       |
| 6 | 48,975,000 | 49,125,000 | 654 | 628  | 0.071797166  |       |
| 6 | 49,050,000 | 49,200,000 | 655 | 994  | 0.129705679  |       |
| 6 | 49,125,000 | 49,275,000 | 656 | 1173 | -0.281593109 |       |
| 6 | 49,200,000 | 49,350,000 | 657 | 1253 | -0.291672125 |       |
| 6 | 49,275,000 | 49,425,000 | 658 | 1249 | -0.394837754 |       |
| 6 | 49,350,000 | 49,500,000 | 659 | 855  | -0.98922106  |       |
| 6 | 49,425,000 | 49,575,000 | 660 | 782  | -1.488501563 |       |
| 6 | 49,500,000 | 49,650,000 | 661 | 987  | -1.333949091 |       |
| 6 | 49,575,000 | 49,725,000 | 662 | 858  | -0.761610955 |       |
| 6 | 49,650,000 | 49,800,000 | 663 | 585  | -2.222419498 |       |
| 6 | 49,725,000 | 49,875,000 | 664 | 765  | -3.413281292 |       |
| 6 | 49,800,000 | 49,950,000 | 665 | 862  | -1.048406689 |       |
| 6 | 49,875,000 | 50,025,000 | 666 | 705  | 0.650801012  |       |
| 6 | 49,950,000 | 50,100,000 | 667 | 538  | 0.837129178  |       |
| 6 | 50,025,000 | 50,175,000 | 668 | 592  | 1.186726222  |       |
| 6 | 50,100,000 | 50,250,000 | 669 | 673  | 0.812448346  |       |
| 6 | 50,175,000 | 50,325,000 | 670 | 955  | 0.090381015  |       |
| 6 | 50,250,000 | 50,400,000 | 671 | 1342 | 0.689813435  |       |
| 6 | 50,325,000 | 50,475,000 | 672 | 1127 | 1.013241228  |       |
| 6 | 50,400,000 | 50,550,000 | 673 | 963  | 0.475753135  |       |
| 6 | 50,475,000 | 50,625,000 | 674 | 984  | 0.673385903  |       |
| 6 | 50,550,000 | 50,700,000 | 675 | 925  | 0.576003287  |       |
| 6 | 50,625,000 | 50,775,000 | 676 | 1007 | 0.380625723  |       |
| 6 | 50,700,000 | 50,850,000 | 677 | 945  | 0.568230467  |       |
| 6 | 50,775,000 | 50,925,000 | 678 | 1110 | 0.057785841  |       |
| 6 | 50,850,000 | 51,000,000 | 679 | 1428 | -0.779308507 |       |
| 6 | 50,925,000 | 51,075,000 | 680 | 1496 | -0.992001539 |       |
| 6 | 51,000,000 | 51,150,000 | 681 | 1282 | 0.025763894  |       |
| 6 | 51,075,000 | 51,225,000 | 682 | 727  | 0.542860565  |       |
| 6 | 51,150,000 | 51,300,000 | 683 | 845  | 0.712204116  |       |
| 6 | 51,225,000 | 51,375,000 | 684 | 1245 | 0.723312538  |       |
| 6 | 51,300,000 | 51,450,000 | 685 | 1223 | 0.783347133  |       |
| 6 | 51,375,000 | 51,525,000 | 686 | 1094 | 0.59030141   |       |
| 6 | 51,450,000 | 51,600,000 | 687 | 878  | 0.694884943  | PCDH7 |
| 6 | 51,525,000 | 51,675,000 | 688 | 796  | 0.884334298  | PCDH7 |
| 6 | 51,600,000 | 51,750,000 | 689 | 759  | -0.238207047 | PCDH7 |
| 6 | 51,675,000 | 51,825,000 | 690 | 614  | -1.074483431 | PCDH7 |
| 6 | 51,750,000 | 51,900,000 | 691 | 663  | -0.473759902 | PCDH7 |
| 6 | 51,825,000 | 51,975,000 | 692 | 926  | 0.108617298  | PCDH7 |
| 6 | 51,900,000 | 52,050,000 | 693 | 868  | 0.083741631  | PCDH7 |
| 6 | 51,975,000 | 52,125,000 | 694 | 633  | -1.498876397 | PCDH7 |
| 6 | 52,050,000 | 52,200,000 | 695 | 721  | -1.642986598 |       |
| 6 | 52,125,000 | 52,275,000 | 696 | 695  | -0.91432842  |       |
| 6 | 52,200,000 | 52,350,000 | 697 | 696  | -1.564924936 |       |
| 6 | 52,275,000 | 52,425,000 | 698 | 820  | -1.827212985 |       |
| 6 | 52,350,000 | 52,500,000 | 699 | 535  | -1.185197421 |       |
| 6 | 52,425,000 | 52,575,000 | 700 | 367  | -0.392888016 |       |
| 6 | 52,500,000 | 52,650,000 | 701 | 398  | 0.256472054  |       |
| 6 | 52,575,000 | 52,725,000 | 702 | 450  | 1.168089185  |       |
| 6 | 52,650,000 | 52,800,000 | 703 | 523  | 0.772744032  |       |

|   |            |            |     |      |              |
|---|------------|------------|-----|------|--------------|
| 6 | 52,725,000 | 52,875,000 | 704 | 548  | 0.057597286  |
| 6 | 52,800,000 | 52,950,000 | 705 | 815  | -0.794220014 |
| 6 | 52,875,000 | 53,025,000 | 706 | 836  | -0.851336421 |
| 6 | 52,950,000 | 53,100,000 | 707 | 602  | -0.011552653 |
| 6 | 53,025,000 | 53,175,000 | 708 | 1049 | 0.42689697   |
| 6 | 53,100,000 | 53,250,000 | 709 | 1112 | 0.513372     |
| 6 | 53,175,000 | 53,325,000 | 710 | 774  | -0.397590731 |
| 6 | 53,250,000 | 53,400,000 | 711 | 1128 | 0.396151147  |
| 6 | 53,325,000 | 53,475,000 | 712 | 973  | 0.244597647  |
| 6 | 53,400,000 | 53,550,000 | 713 | 747  | -0.562230263 |
| 6 | 53,475,000 | 53,625,000 | 714 | 677  | 0.302650712  |
| 6 | 53,550,000 | 53,700,000 | 715 | 426  | 0.851284534  |
| 6 | 53,625,000 | 53,775,000 | 716 | 354  | 0.355615491  |
| 6 | 53,700,000 | 53,850,000 | 717 | 740  | -0.541922823 |
| 6 | 53,775,000 | 53,925,000 | 718 | 1243 | -1.428011044 |
| 6 | 53,850,000 | 54,000,000 | 719 | 1515 | -0.788782189 |
| 6 | 53,925,000 | 54,075,000 | 720 | 1343 | -0.517745351 |
| 6 | 54,000,000 | 54,150,000 | 721 | 726  | -2.23274457  |
| 6 | 54,075,000 | 54,225,000 | 722 | 731  | -1.14774926  |
| 6 | 54,150,000 | 54,300,000 | 723 | 1089 | -0.266653428 |
| 6 | 54,225,000 | 54,375,000 | 724 | 750  | 0.133889264  |
| 6 | 54,300,000 | 54,450,000 | 725 | 290  | -0.64511772  |
| 6 | 54,375,000 | 54,525,000 | 726 | 785  | -1.040407659 |
| 6 | 54,450,000 | 54,600,000 | 727 | 1288 | -1.155432343 |
| 6 | 54,525,000 | 54,675,000 | 728 | 1019 | -0.316820527 |
| 6 | 54,600,000 | 54,750,000 | 729 | 784  | -0.082378588 |
| 6 | 54,675,000 | 54,825,000 | 730 | 894  | -1.030658373 |
| 6 | 54,750,000 | 54,900,000 | 731 | 740  | -0.518557118 |
| 6 | 54,825,000 | 54,975,000 | 732 | 952  | 0.506238343  |
| 6 | 54,900,000 | 55,050,000 | 733 | 1059 | 0.823432527  |
| 6 | 54,975,000 | 55,125,000 | 734 | 859  | 0.848118796  |
| 6 | 55,050,000 | 55,200,000 | 735 | 870  | 0.805149443  |
| 6 | 55,125,000 | 55,275,000 | 736 | 968  | 0.940970986  |
| 6 | 55,200,000 | 55,350,000 | 737 | 939  | 1.006262013  |
| 6 | 55,275,000 | 55,425,000 | 738 | 928  | 0.873616529  |
| 6 | 55,350,000 | 55,500,000 | 739 | 906  | 0.717616282  |
| 6 | 55,425,000 | 55,575,000 | 740 | 811  | 0.402423772  |
| 6 | 55,500,000 | 55,650,000 | 741 | 814  | 0.461684064  |
| 6 | 55,575,000 | 55,725,000 | 742 | 488  | 0.924042798  |
| 6 | 55,650,000 | 55,800,000 | 743 | 326  | 1.164541356  |
| 6 | 55,725,000 | 55,875,000 | 744 | 588  | 0.943877624  |
| 6 | 55,800,000 | 55,950,000 | 745 | 747  | 1.047518992  |
| 6 | 55,875,000 | 56,025,000 | 746 | 959  | 0.819652704  |
| 6 | 55,950,000 | 56,100,000 | 747 | 1359 | 0.219747609  |
| 6 | 56,025,000 | 56,175,000 | 748 | 1579 | 0.408049085  |
| 6 | 56,100,000 | 56,250,000 | 749 | 1578 | 0.383153486  |
| 6 | 56,175,000 | 56,325,000 | 750 | 1533 | -0.907367623 |
| 6 | 56,250,000 | 56,400,000 | 751 | 1616 | -1.22460378  |
| 6 | 56,325,000 | 56,475,000 | 752 | 1658 | 0.174600052  |
| 6 | 56,400,000 | 56,550,000 | 753 | 1901 | 0.302076557  |
| 6 | 56,475,000 | 56,625,000 | 754 | 1868 | 0.153629313  |
| 6 | 56,550,000 | 56,700,000 | 755 | 1410 | -0.301480825 |
| 6 | 56,625,000 | 56,775,000 | 756 | 1219 | -2.525402645 |



|   |            |            |     |      |              |                           |
|---|------------|------------|-----|------|--------------|---------------------------|
| 6 | 56,700,000 | 56,850,000 | 757 | 963  | -3.056260233 |                           |
| 6 | 56,775,000 | 56,925,000 | 758 | 1137 | -0.89510865  |                           |
| 6 | 56,850,000 | 57,000,000 | 759 | 1425 | 0.752847398  |                           |
| 6 | 56,925,000 | 57,075,000 | 760 | 1051 | 1.325185829  | ARAP2                     |
| 6 | 57,000,000 | 57,150,000 | 761 | 885  | 1.352812237  | ARAP2                     |
| 6 | 57,075,000 | 57,225,000 | 762 | 1153 | 1.146936516  | ARAP2                     |
| 6 | 57,150,000 | 57,300,000 | 763 | 1036 | 0.665732739  | ARAP2                     |
| 6 | 57,225,000 | 57,375,000 | 764 | 895  | 0.651884888  | ARAP2,DTHD1               |
| 6 | 57,300,000 | 57,450,000 | 765 | 804  | 0.985247379  | DTHD1                     |
| 6 | 57,375,000 | 57,525,000 | 766 | 498  | 1.076232068  | DTHD1                     |
| 6 | 57,450,000 | 57,600,000 | 767 | 629  | 0.450413523  |                           |
| 6 | 57,525,000 | 57,675,000 | 768 | 817  | -0.753695164 |                           |
| 6 | 57,600,000 | 57,750,000 | 769 | 601  | -1.135044997 |                           |
| 6 | 57,675,000 | 57,825,000 | 770 | 374  | 0.880833567  |                           |
| 6 | 57,750,000 | 57,900,000 | 771 | 594  | 1.279135342  |                           |
| 6 | 57,825,000 | 57,975,000 | 772 | 960  | 1.167864575  |                           |
| 6 | 57,900,000 | 58,050,000 | 773 | 1046 | 0.559338446  |                           |
| 6 | 57,975,000 | 58,125,000 | 774 | 1041 | -0.02259249  | ENSBTAG00000039222        |
| 6 | 58,050,000 | 58,200,000 | 775 | 1191 | -0.290130819 | ENSBTAG00000039222        |
| 6 | 58,125,000 | 58,275,000 | 776 | 1123 | 0.211861795  |                           |
| 6 | 58,200,000 | 58,350,000 | 777 | 1016 | 1.165157493  |                           |
| 6 | 58,275,000 | 58,425,000 | 778 | 907  | 1.079724254  |                           |
| 6 | 58,350,000 | 58,500,000 | 779 | 619  | 0.452254897  | C4orf19,NWD2              |
| 6 | 58,425,000 | 58,575,000 | 780 | 514  | 0.491464591  | C4orf19,NWD2              |
| 6 | 58,500,000 | 58,650,000 | 781 | 619  | 0.429542548  | C4orf19,RELL1             |
| 6 | 58,575,000 | 58,725,000 | 782 | 658  | 0.628953338  | RELL1                     |
| 6 | 58,650,000 | 58,800,000 | 783 | 645  | 0.834794763  | PGM2,RELL1                |
| 6 | 58,725,000 | 58,875,000 | 784 | 777  | 0.86630132   | PGM2,TBC1D1               |
| 6 | 58,800,000 | 58,950,000 | 785 | 713  | -1.173885754 | PGM2,TBC1D1               |
| 6 | 58,875,000 | 59,025,000 | 786 | 412  | -1.954756896 | TBC1D1                    |
| 6 | 58,950,000 | 59,100,000 | 787 | 251  | 0.234538785  | TBC1D1                    |
| 6 | 59,025,000 | 59,175,000 | 788 | 173  | 0.556631653  | TBC1D1                    |
| 6 | 59,100,000 | 59,250,000 | 789 | 206  | -0.085047904 |                           |
| 6 | 59,175,000 | 59,325,000 | 790 | 284  | 0.084131789  |                           |
| 6 | 59,250,000 | 59,400,000 | 791 | 285  | 0.859655328  |                           |
| 6 | 59,325,000 | 59,475,000 | 792 | 405  | 1.32752708   |                           |
| 6 | 59,400,000 | 59,550,000 | 793 | 372  | 1.28610593   |                           |
| 6 | 59,475,000 | 59,625,000 | 794 | 390  | 0.484404112  | KLF3                      |
| 6 | 59,550,000 | 59,700,000 | 795 | 675  | 0.727493992  | KLF3,TLR10,TLR6           |
| 6 | 59,625,000 | 59,775,000 | 796 | 838  | 0.950582356  | FAM114A1,TLR10,TLR6       |
| 6 | 59,700,000 | 59,850,000 | 797 | 652  | 0.593685244  | FAM114A1,TLR6,TMEM156     |
| 6 | 59,775,000 | 59,925,000 | 798 | 342  | 0.045813721  | FAM114A1,KLHL5,TMEM156    |
| 6 | 59,850,000 | 60,000,000 | 799 | 627  | 0.732841733  | KLHL5,TMEM156,WDR19       |
| 6 | 59,925,000 | 60,075,000 | 800 | 869  | 0.709334459  | KLHL5,RFC1,WDR19          |
| 6 | 60,000,000 | 60,150,000 | 801 | 542  | -0.107276732 | RFC1,WDR19                |
| 6 | 60,075,000 | 60,225,000 | 802 | 389  | -0.116417518 | KLB,LIAS,RFC1,RPL9        |
| 6 | 60,150,000 | 60,300,000 | 803 | 590  | 0.278753015  | KLB,LIAS,RPL9,SMIM14,UGDH |
| 6 | 60,225,000 | 60,375,000 | 804 | 599  | 0.613880507  | LIAS,SMIM14,UGDH          |
| 6 | 60,300,000 | 60,450,000 | 805 | 361  | 0.848903533  | SMIM14,UBE2K              |
| 6 | 60,375,000 | 60,525,000 | 806 | 247  | 0.464517766  | UBE2K                     |
| 6 | 60,450,000 | 60,600,000 | 807 | 197  | 0.568057526  | PDS5A,UBE2K               |
| 6 | 60,525,000 | 60,675,000 | 808 | 162  | 1.082290681  | PDS5A                     |
| 6 | 60,600,000 | 60,750,000 | 809 | 349  | 0.939878105  | PDS5A                     |

|   |            |            |     |      |              |                       |
|---|------------|------------|-----|------|--------------|-----------------------|
| 6 | 60,675,000 | 60,825,000 | 810 | 525  | 0.761057053  | N4BP2                 |
| 6 | 60,750,000 | 60,900,000 | 811 | 567  | 0.141138958  | N4BP2,RHOH            |
| 6 | 60,825,000 | 60,975,000 | 812 | 544  | 0.419617601  | CHRNA9,RHOH           |
| 6 | 60,900,000 | 61,050,000 | 813 | 497  | 0.447634521  | CHRNA9,DKFZP686F02235 |
| 6 | 60,975,000 | 61,125,000 | 814 | 401  | -0.335358828 | CHRNA9,DKFZP686F02235 |
| 6 | 61,050,000 | 61,200,000 | 815 | 404  | -0.1831373   | DKFZP686F02235        |
| 6 | 61,125,000 | 61,275,000 | 816 | 589  | 0.064265056  |                       |
| 6 | 61,200,000 | 61,350,000 | 817 | 570  | 0.284423536  | NSUN7                 |
| 6 | 61,275,000 | 61,425,000 | 818 | 692  | 0.509433269  | APBB2,NSUN7           |
| 6 | 61,350,000 | 61,500,000 | 819 | 917  | 0.274550448  | APBB2,NSUN7           |
| 6 | 61,425,000 | 61,575,000 | 820 | 1005 | 0.51618139   | APBB2                 |
| 6 | 61,500,000 | 61,650,000 | 821 | 675  | 0.928009183  | APBB2                 |
| 6 | 61,575,000 | 61,725,000 | 822 | 265  | 0.662159544  | APBB2                 |
| 6 | 61,650,000 | 61,800,000 | 823 | 362  | 0.392833869  | APBB2,UCHL1           |
| 6 | 61,725,000 | 61,875,000 | 824 | 845  | 0.193070933  | APBB2,LIMCH1,UCHL1    |
| 6 | 61,800,000 | 61,950,000 | 825 | 859  | 0.317293602  | LIMCH1,UCHL1          |
| 6 | 61,875,000 | 62,025,000 | 826 | 508  | 0.833344035  | LIMCH1                |
| 6 | 61,950,000 | 62,100,000 | 827 | 523  | 0.838175536  | LIMCH1                |
| 6 | 62,025,000 | 62,175,000 | 828 | 569  | -0.305498088 | LIMCH1                |
| 6 | 62,100,000 | 62,250,000 | 829 | 789  | 0.60036749   | LIMCH1                |
| 6 | 62,175,000 | 62,325,000 | 830 | 803  | 0.911748012  | LIMCH1,PHOX2B         |
| 6 | 62,250,000 | 62,400,000 | 831 | 502  | -0.778601708 | PHOX2B                |
| 6 | 62,325,000 | 62,475,000 | 832 | 592  | -3.069006114 | TMEM33                |
| 6 | 62,400,000 | 62,550,000 | 833 | 542  | -2.97284299  | SLC30A9,TMEM33        |
| 6 | 62,475,000 | 62,625,000 | 834 | 352  | -3.863467466 | SLC30A9,TMEM33        |
| 6 | 62,550,000 | 62,700,000 | 835 | 354  | -4.175276469 | BEND4,SLC30A9         |
| 6 | 62,625,000 | 62,775,000 | 836 | 343  | -1.712034111 | BEND4                 |
| 6 | 62,700,000 | 62,850,000 | 837 | 446  | -1.136395636 |                       |
| 6 | 62,775,000 | 62,925,000 | 838 | 446  | -0.520117639 | ATP8A1,SHISA3         |
| 6 | 62,850,000 | 63,000,000 | 839 | 368  | 0.846901869  | ATP8A1,SHISA3         |
| 6 | 62,925,000 | 63,075,000 | 840 | 836  | 1.072223041  | ATP8A1                |
| 6 | 63,000,000 | 63,150,000 | 841 | 865  | 1.072936431  | ATP8A1                |
| 6 | 63,075,000 | 63,225,000 | 842 | 537  | 0.993651775  | ATP8A1                |
| 6 | 63,150,000 | 63,300,000 | 843 | 736  | 0.454514348  |                       |
| 6 | 63,225,000 | 63,375,000 | 844 | 609  | -0.411624643 | GRXCR1                |
| 6 | 63,300,000 | 63,450,000 | 845 | 636  | -0.424083328 | GRXCR1                |
| 6 | 63,375,000 | 63,525,000 | 846 | 821  | 0.454977863  | GRXCR1                |
| 6 | 63,450,000 | 63,600,000 | 847 | 691  | 0.875012847  | GRXCR1                |
| 6 | 63,525,000 | 63,675,000 | 848 | 804  | 0.66102803   |                       |
| 6 | 63,600,000 | 63,750,000 | 849 | 788  | 0.638890654  |                       |
| 6 | 63,675,000 | 63,825,000 | 850 | 559  | 1.182715405  |                       |
| 6 | 63,750,000 | 63,900,000 | 851 | 532  | 1.316638147  |                       |
| 6 | 63,825,000 | 63,975,000 | 852 | 847  | 1.119664646  |                       |
| 6 | 63,900,000 | 64,050,000 | 853 | 965  | 0.872626872  |                       |
| 6 | 63,975,000 | 64,125,000 | 854 | 991  | 0.203248339  |                       |
| 6 | 64,050,000 | 64,200,000 | 855 | 935  | 0.127277429  |                       |
| 6 | 64,125,000 | 64,275,000 | 856 | 789  | 0.314608133  |                       |
| 6 | 64,200,000 | 64,350,000 | 857 | 1006 | -0.673806053 |                       |
| 6 | 64,275,000 | 64,425,000 | 858 | 706  | -1.265702999 |                       |
| 6 | 64,350,000 | 64,500,000 | 859 | 544  | -0.384985745 |                       |
| 6 | 64,425,000 | 64,575,000 | 860 | 1008 | -0.212056428 |                       |
| 6 | 64,500,000 | 64,650,000 | 861 | 1429 | 0.751407966  |                       |
| 6 | 64,575,000 | 64,725,000 | 862 | 1430 | 0.870190723  |                       |

|   |            |            |     |      |              |                      |
|---|------------|------------|-----|------|--------------|----------------------|
| 6 | 64,650,000 | 64,800,000 | 863 | 1238 | 0.159362853  | KCTD8                |
| 6 | 64,725,000 | 64,875,000 | 864 | 796  | 0.052611155  | KCTD8                |
| 6 | 64,800,000 | 64,950,000 | 865 | 444  | 0.522137737  | GUF1,YIPF7           |
| 6 | 64,875,000 | 65,025,000 | 866 | 398  | 0.668910787  | GNPDA2,GUF1,YIPF7    |
| 6 | 64,950,000 | 65,100,000 | 867 | 436  | 0.313419857  | GNPDA2,GUF1          |
| 6 | 65,025,000 | 65,175,000 | 868 | 854  | -0.209680667 |                      |
| 6 | 65,100,000 | 65,250,000 | 869 | 1033 | -0.069975204 |                      |
| 6 | 65,175,000 | 65,325,000 | 870 | 619  | 0.030195404  |                      |
| 6 | 65,250,000 | 65,400,000 | 871 | 626  | -0.409764027 |                      |
| 6 | 65,325,000 | 65,475,000 | 872 | 628  | -0.332415746 |                      |
| 6 | 65,400,000 | 65,550,000 | 873 | 782  | -0.206724864 |                      |
| 6 | 65,475,000 | 65,625,000 | 874 | 850  | -0.009698051 |                      |
| 6 | 65,550,000 | 65,700,000 | 875 | 607  | -0.176214415 |                      |
| 6 | 65,625,000 | 65,775,000 | 876 | 946  | -0.241606604 |                      |
| 6 | 65,700,000 | 65,850,000 | 877 | 931  | -0.411250108 |                      |
| 6 | 65,775,000 | 65,925,000 | 878 | 996  | -0.650136437 |                      |
| 6 | 65,850,000 | 66,000,000 | 879 | 934  | -0.317078859 |                      |
| 6 | 65,925,000 | 66,075,000 | 880 | 784  | 0.197780416  |                      |
| 6 | 66,000,000 | 66,150,000 | 881 | 654  | -0.17080865  |                      |
| 6 | 66,075,000 | 66,225,000 | 882 | 441  | -1.582738984 |                      |
| 6 | 66,150,000 | 66,300,000 | 883 | 746  | -0.993831668 | GABRG1               |
| 6 | 66,225,000 | 66,375,000 | 884 | 992  | -0.586916836 | GABRG1               |
| 6 | 66,300,000 | 66,450,000 | 885 | 1032 | -0.098040166 | GABRG1               |
| 6 | 66,375,000 | 66,525,000 | 886 | 864  | -0.140455755 | GABRA2               |
| 6 | 66,450,000 | 66,600,000 | 887 | 723  | -0.441351384 | GABRA2               |
| 6 | 66,525,000 | 66,675,000 | 888 | 648  | 0.437998733  | GABRA2               |
| 6 | 66,600,000 | 66,750,000 | 889 | 445  | 1.157346926  | GABRA2               |
| 6 | 66,675,000 | 66,825,000 | 890 | 560  | -1.298197972 |                      |
| 6 | 66,750,000 | 66,900,000 | 891 | 747  | -2.464967658 |                      |
| 6 | 66,825,000 | 66,975,000 | 892 | 506  | -1.427477697 |                      |
| 6 | 66,900,000 | 67,050,000 | 893 | 435  | -0.045847255 |                      |
| 6 | 66,975,000 | 67,125,000 | 894 | 571  | -0.668799955 | HIST1H4G             |
| 6 | 67,050,000 | 67,200,000 | 895 | 553  | -0.480008775 | GABRA4,HIST1H4G      |
| 6 | 67,125,000 | 67,275,000 | 896 | 556  | -0.268561181 | GABRA4,GABRB1        |
| 6 | 67,200,000 | 67,350,000 | 897 | 643  | -0.069376817 | GABRA4,GABRB1        |
| 6 | 67,275,000 | 67,425,000 | 898 | 511  | 0.396593637  | GABRB1               |
| 6 | 67,350,000 | 67,500,000 | 899 | 305  | -0.125296707 | GABRB1               |
| 6 | 67,425,000 | 67,575,000 | 900 | 560  | 0.346876173  | GABRB1               |
| 6 | 67,500,000 | 67,650,000 | 901 | 772  | 0.854367209  | GABRB1               |
| 6 | 67,575,000 | 67,725,000 | 902 | 622  | 0.906532645  | GABRB1               |
| 6 | 67,650,000 | 67,800,000 | 903 | 609  | 0.009614114  | ATP10D,COMMD8,GABRB1 |
| 6 | 67,725,000 | 67,875,000 | 904 | 604  | -3.474722656 | ATP10D,COMMD8        |
| 6 | 67,800,000 | 67,950,000 | 905 | 416  | -3.178967929 | ATP10D,CORIN         |
| 6 | 67,875,000 | 68,025,000 | 906 | 368  | -1.303568621 | ATP10D,CORIN         |
| 6 | 67,950,000 | 68,100,000 | 907 | 296  | -1.441790537 | CORIN                |
| 6 | 68,025,000 | 68,175,000 | 908 | 331  | 0.471895499  | CORIN                |
| 6 | 68,100,000 | 68,250,000 | 909 | 485  | 0.105371878  | CORIN,NFXL1          |
| 6 | 68,175,000 | 68,325,000 | 910 | 422  | 0.402588557  | CNGA1,CORIN,NFXL1    |
| 6 | 68,250,000 | 68,400,000 | 911 | 587  | 1.326945038  | CNGA1,NFXL1,NIPAL1   |
| 6 | 68,325,000 | 68,475,000 | 912 | 653  | 0.529799349  | CNGA1,NIPAL1,TEC,TXK |
| 6 | 68,400,000 | 68,550,000 | 913 | 677  | -0.414165093 | TEC,TXK              |
| 6 | 68,475,000 | 68,625,000 | 914 | 1053 | 0.660808575  | TEC                  |
| 6 | 68,550,000 | 68,700,000 | 915 | 986  | -0.231586567 | SLAIN2               |

|   |            |            |     |      |              |                                         |
|---|------------|------------|-----|------|--------------|-----------------------------------------|
| 6 | 68,625,000 | 68,775,000 | 916 | 459  | -2.829417563 | SLAIN2                                  |
| 6 | 68,700,000 | 68,850,000 | 917 | 172  | -2.099887519 | FRYL,SLAIN2,SLC10A4,ZAR1                |
| 6 | 68,775,000 | 68,925,000 | 918 | 217  | -1.026689768 | FRYL,SLC10A4,ZAR1                       |
| 6 | 68,850,000 | 69,000,000 | 919 | 288  | -0.072663697 | FRYL                                    |
| 6 | 68,925,000 | 69,075,000 | 920 | 463  | 0.984938673  | FRYL                                    |
| 6 | 69,000,000 | 69,150,000 | 921 | 541  | 0.88399343   | OCIAD1                                  |
| 6 | 69,075,000 | 69,225,000 | 922 | 582  | 0.185571044  | OCIAD1,OCIAD2                           |
| 6 | 69,150,000 | 69,300,000 | 923 | 922  | 0.317662825  | CWH43,OCIAD1,OCIAD2                     |
| 6 | 69,225,000 | 69,375,000 | 924 | 942  | 0.206416533  | CWH43,DCUN1D4                           |
| 6 | 69,300,000 | 69,450,000 | 925 | 608  | -0.059543788 | CWH43,DCUN1D4                           |
| 6 | 69,375,000 | 69,525,000 | 926 | 567  | 0.403550236  | DCUN1D4,LRRC66                          |
| 6 | 69,450,000 | 69,600,000 | 927 | 526  | 0.180871011  | LRRC66,SGCB,SPATA18                     |
| 6 | 69,525,000 | 69,675,000 | 928 | 473  | -1.811033543 | SGCB,SPATA18                            |
| 6 | 69,600,000 | 69,750,000 | 929 | 423  | -2.250438208 | SPATA18                                 |
| 6 | 69,675,000 | 69,825,000 | 930 | 543  | 0.039326165  |                                         |
| 6 | 69,750,000 | 69,900,000 | 931 | 992  | 0.2231768    |                                         |
| 6 | 69,825,000 | 69,975,000 | 932 | 821  | 0.443747119  | USP46                                   |
| 6 | 69,900,000 | 70,050,000 | 933 | 407  | 0.292438988  | USP46                                   |
| 6 | 69,975,000 | 70,125,000 | 934 | 867  | -2.115079382 | USP46                                   |
| 6 | 70,050,000 | 70,200,000 | 935 | 946  | -1.936156182 | RASL11B,SCFD2                           |
| 6 | 70,125,000 | 70,275,000 | 936 | 816  | -0.651992218 | RASL11B,SCFD2                           |
| 6 | 70,200,000 | 70,350,000 | 937 | 1081 | -0.917111543 | SCFD2                                   |
| 6 | 70,275,000 | 70,425,000 | 938 | 920  | -0.797455531 | SCFD2                                   |
| 6 | 70,350,000 | 70,500,000 | 939 | 707  | -0.65519636  | SCFD2                                   |
| 6 | 70,425,000 | 70,575,000 | 940 | 579  | -0.831570314 | SCFD2                                   |
| 6 | 70,500,000 | 70,650,000 | 941 | 631  | -0.306114951 | FIP1L1,SCFD2                            |
| 6 | 70,575,000 | 70,725,000 | 942 | 863  | 0.414208372  | FIP1L1,LNX1,SCFD2                       |
| 6 | 70,650,000 | 70,800,000 | 943 | 1284 | 1.094550138  | FIP1L1,LNX1                             |
| 6 | 70,725,000 | 70,875,000 | 944 | 1386 | 1.253523625  | LNX1                                    |
| 6 | 70,800,000 | 70,950,000 | 945 | 1237 | 0.898171962  |                                         |
| 6 | 70,875,000 | 71,025,000 | 946 | 1378 | 0.848249355  |                                         |
| 6 | 70,950,000 | 71,100,000 | 947 | 1524 | 1.044593668  |                                         |
| 6 | 71,025,000 | 71,175,000 | 948 | 1392 | 1.016246232  |                                         |
| 6 | 71,100,000 | 71,250,000 | 949 | 1030 | 1.045519128  | CHIC2                                   |
| 6 | 71,175,000 | 71,325,000 | 950 | 994  | 1.062973243  | CHIC2,GSX2                              |
| 6 | 71,250,000 | 71,400,000 | 951 | 1129 | 1.131813492  | GSX2,PDGFRA                             |
| 6 | 71,325,000 | 71,475,000 | 952 | 1325 | 0.054994636  | PDGFRA                                  |
| 6 | 71,400,000 | 71,550,000 | 953 | 1486 | 0.136765875  | PDGFRA                                  |
| 6 | 71,475,000 | 71,625,000 | 954 | 1464 | 0.584191182  |                                         |
| 6 | 71,550,000 | 71,700,000 | 955 | 1580 | 0.418935546  |                                         |
| 6 | 71,625,000 | 71,775,000 | 956 | 1657 | 0.403346412  |                                         |
| 6 | 71,700,000 | 71,850,000 | 957 | 1182 | 0.344525782  | KIT                                     |
| 6 | 71,775,000 | 71,925,000 | 958 | 984  | 0.454388012  | KIT                                     |
| 6 | 71,850,000 | 72,000,000 | 959 | 879  | 0.471274075  | KIT                                     |
| 6 | 71,925,000 | 72,075,000 | 960 | 625  | 0.442393024  |                                         |
| 6 | 72,000,000 | 72,150,000 | 961 | 790  | 0.588772651  |                                         |
| 6 | 72,075,000 | 72,225,000 | 962 | 719  | 0.904189703  |                                         |
| 6 | 72,150,000 | 72,300,000 | 963 | 582  | 1.011381655  | KDR                                     |
| 6 | 72,225,000 | 72,375,000 | 964 | 483  | 1.165310367  | KDR                                     |
| 6 | 72,300,000 | 72,450,000 | 965 | 834  | 0.765379856  |                                         |
| 6 | 72,375,000 | 72,525,000 | 966 | 1127 | 0.37956604   | SRD5A3,ENSBTAG00000045602               |
| 6 | 72,450,000 | 72,600,000 | 967 | 822  | 0.379117427  | CLOCK,SRD5A3,TMEM165,ENSBTAG00000045602 |
| 6 | 72,525,000 | 72,675,000 | 968 | 601  | 0.445561682  | CLOCK,TMEM165                           |

|   |            |            |      |      |              |                                         |
|---|------------|------------|------|------|--------------|-----------------------------------------|
| 6 | 72,600,000 | 72,750,000 | 969  | 736  | 0.430861904  | CLOCK,NMU,PDCL2                         |
| 6 | 72,675,000 | 72,825,000 | 970  | 1075 | 0.275260905  | NMU,PDCL2                               |
| 6 | 72,750,000 | 72,900,000 | 971  | 1512 | 0.38788205   | NMU                                     |
| 6 | 72,825,000 | 72,975,000 | 972  | 1688 | 0.738995137  | EXOC1                                   |
| 6 | 72,900,000 | 73,050,000 | 973  | 1424 | 1.071853189  | CEP135,EXOC1                            |
| 6 | 72,975,000 | 73,125,000 | 974  | 1404 | 0.893896199  | CEP135,EXOC1                            |
| 6 | 73,050,000 | 73,200,000 | 975  | 1639 | 0.767991903  | CEP135                                  |
| 6 | 73,125,000 | 73,275,000 | 976  | 1619 | 0.559173371  |                                         |
| 6 | 73,200,000 | 73,350,000 | 977  | 1461 | 0.312164391  |                                         |
| 6 | 73,275,000 | 73,425,000 | 978  | 1105 | 0.324764562  | AASDH,MGC148692                         |
| 6 | 73,350,000 | 73,500,000 | 979  | 815  | 0.618000568  | AASDH,MGC148692,PAICS,PPAT              |
| 6 | 73,425,000 | 73,575,000 | 980  | 977  | 0.536111219  | AASDH,ARL9,PAICS,PPAT,SRP72             |
| 6 | 73,500,000 | 73,650,000 | 981  | 1340 | -0.314262825 | ARL9,HOP,PAICS,SRP72,ENSBTAG00000002330 |
| 6 | 73,575,000 | 73,725,000 | 982  | 1279 | -0.321972745 | HOP,ENSBTAG00000002330                  |
| 6 | 73,650,000 | 73,800,000 | 983  | 1173 | 0.645166178  | SPINK2                                  |
| 6 | 73,725,000 | 73,875,000 | 984  | 910  | 0.378409343  | MGC157163,SPINK2                        |
| 6 | 73,800,000 | 73,950,000 | 985  | 493  | -0.706001833 | MGC157163                               |
| 6 | 73,875,000 | 74,025,000 | 986  | 602  | 0.211516785  | NOA1,ENSBTAG00000019359                 |
| 6 | 73,950,000 | 74,100,000 | 987  | 932  | 0.436437288  | IGFBP7,NOA1,POLR2B,ENSBTAG00000019359   |
| 6 | 74,025,000 | 74,175,000 | 988  | 925  | 0.363940834  | IGFBP7,NOA1,POLR2B                      |
| 6 | 74,100,000 | 74,250,000 | 989  | 779  | -0.07352919  | IGFBP7                                  |
| 6 | 74,175,000 | 74,325,000 | 990  | 965  | -0.057186782 |                                         |
| 6 | 74,250,000 | 74,400,000 | 991  | 1073 | -0.105962217 |                                         |
| 6 | 74,325,000 | 74,475,000 | 992  | 1014 | -0.26285087  |                                         |
| 6 | 74,400,000 | 74,550,000 | 993  | 815  | 0.229314793  |                                         |
| 6 | 74,475,000 | 74,625,000 | 994  | 736  | 0.630909835  |                                         |
| 6 | 74,550,000 | 74,700,000 | 995  | 553  | 0.606564637  |                                         |
| 6 | 74,625,000 | 74,775,000 | 996  | 792  | 0.399191282  |                                         |
| 6 | 74,700,000 | 74,850,000 | 997  | 1367 | 0.874344178  |                                         |
| 6 | 74,775,000 | 74,925,000 | 998  | 1116 | 0.91287036   |                                         |
| 6 | 74,850,000 | 75,000,000 | 999  | 849  | -0.498731819 |                                         |
| 6 | 74,925,000 | 75,075,000 | 1000 | 765  | -0.667311772 |                                         |
| 6 | 75,000,000 | 75,150,000 | 1001 | 900  | -1.172099129 |                                         |
| 6 | 75,075,000 | 75,225,000 | 1002 | 1108 | -1.998305632 |                                         |
| 6 | 75,150,000 | 75,300,000 | 1003 | 812  | -1.872012955 |                                         |
| 6 | 75,225,000 | 75,375,000 | 1004 | 651  | -0.770400285 |                                         |
| 6 | 75,300,000 | 75,450,000 | 1005 | 500  | -1.230002599 |                                         |
| 6 | 75,375,000 | 75,525,000 | 1006 | 470  | -2.18108847  |                                         |
| 6 | 75,450,000 | 75,600,000 | 1007 | 579  | -0.488222414 |                                         |
| 6 | 75,525,000 | 75,675,000 | 1008 | 628  | -1.749486357 |                                         |
| 6 | 75,600,000 | 75,750,000 | 1009 | 552  | -2.425798108 |                                         |
| 6 | 75,675,000 | 75,825,000 | 1010 | 519  | 0.150231163  |                                         |
| 6 | 75,750,000 | 75,900,000 | 1011 | 863  | 0.257988622  |                                         |
| 6 | 75,825,000 | 75,975,000 | 1012 | 1151 | -2.174724148 |                                         |
| 6 | 75,900,000 | 76,050,000 | 1013 | 1043 | -1.261158343 |                                         |
| 6 | 75,975,000 | 76,125,000 | 1014 | 709  | 0.182759808  |                                         |
| 6 | 76,050,000 | 76,200,000 | 1015 | 1144 | 0.398954273  |                                         |
| 6 | 76,125,000 | 76,275,000 | 1016 | 1470 | 0.557014871  |                                         |
| 6 | 76,200,000 | 76,350,000 | 1017 | 1291 | 0.533447667  |                                         |
| 6 | 76,275,000 | 76,425,000 | 1018 | 1041 | 0.360537593  |                                         |
| 6 | 76,350,000 | 76,500,000 | 1019 | 681  | 0.324390228  |                                         |
| 6 | 76,425,000 | 76,575,000 | 1020 | 889  | -1.698830327 |                                         |
| 6 | 76,500,000 | 76,650,000 | 1021 | 896  | -1.56114967  |                                         |

|   |            |            |      |      |              |       |
|---|------------|------------|------|------|--------------|-------|
| 6 | 76,575,000 | 76,725,000 | 1022 | 633  | 0.119158927  |       |
| 6 | 76,650,000 | 76,800,000 | 1023 | 578  | 0.049840116  |       |
| 6 | 76,725,000 | 76,875,000 | 1024 | 567  | 0.081538975  |       |
| 6 | 76,800,000 | 76,950,000 | 1025 | 674  | -1.445625605 |       |
| 6 | 76,875,000 | 77,025,000 | 1026 | 844  | -2.258356377 |       |
| 6 | 76,950,000 | 77,100,000 | 1027 | 787  | -2.433520191 |       |
| 6 | 77,025,000 | 77,175,000 | 1028 | 504  | -3.194601614 |       |
| 6 | 77,100,000 | 77,250,000 | 1029 | 515  | -3.412293282 |       |
| 6 | 77,175,000 | 77,325,000 | 1030 | 446  | -2.534397247 |       |
| 6 | 77,250,000 | 77,400,000 | 1031 | 731  | 0.113004858  |       |
| 6 | 77,325,000 | 77,475,000 | 1032 | 1126 | -1.983766333 |       |
| 6 | 77,400,000 | 77,550,000 | 1033 | 921  | -3.468125045 |       |
| 6 | 77,475,000 | 77,625,000 | 1034 | 835  | -4.000330568 |       |
| 6 | 77,550,000 | 77,700,000 | 1035 | 1047 | -3.606344096 |       |
| 6 | 77,625,000 | 77,775,000 | 1036 | 836  | -2.988838762 |       |
| 6 | 77,700,000 | 77,850,000 | 1037 | 504  | -2.195336935 |       |
| 6 | 77,775,000 | 77,925,000 | 1038 | 528  | -1.218161199 |       |
| 6 | 77,850,000 | 78,000,000 | 1039 | 675  | 0.374327051  |       |
| 6 | 77,925,000 | 78,075,000 | 1040 | 1051 | 1.198744019  |       |
| 6 | 78,000,000 | 78,150,000 | 1041 | 980  | 0.778970343  |       |
| 6 | 78,075,000 | 78,225,000 | 1042 | 769  | -0.342915437 |       |
| 6 | 78,150,000 | 78,300,000 | 1043 | 1099 | -2.263513815 |       |
| 6 | 78,225,000 | 78,375,000 | 1044 | 1159 | -2.497633761 |       |
| 6 | 78,300,000 | 78,450,000 | 1045 | 669  | -1.021630602 |       |
| 6 | 78,375,000 | 78,525,000 | 1046 | 527  | 0.534896946  |       |
| 6 | 78,450,000 | 78,600,000 | 1047 | 705  | 0.820279496  |       |
| 6 | 78,525,000 | 78,675,000 | 1048 | 671  | 0.834432536  |       |
| 6 | 78,600,000 | 78,750,000 | 1049 | 492  | 0.593962804  |       |
| 6 | 78,675,000 | 78,825,000 | 1050 | 539  | 0.792534371  |       |
| 6 | 78,750,000 | 78,900,000 | 1051 | 481  | 0.526648104  |       |
| 6 | 78,825,000 | 78,975,000 | 1052 | 296  | -0.883964261 |       |
| 6 | 78,900,000 | 79,050,000 | 1053 | 661  | -0.226907928 | LPHN3 |
| 6 | 78,975,000 | 79,125,000 | 1054 | 716  | 0.530916077  | LPHN3 |
| 6 | 79,050,000 | 79,200,000 | 1055 | 491  | 0.736510849  | LPHN3 |
| 6 | 79,125,000 | 79,275,000 | 1056 | 754  | 0.298326644  | LPHN3 |
| 6 | 79,200,000 | 79,350,000 | 1057 | 738  | -0.030991493 | LPHN3 |
| 6 | 79,275,000 | 79,425,000 | 1058 | 704  | -0.10495088  | LPHN3 |
| 6 | 79,350,000 | 79,500,000 | 1059 | 886  | -1.016126435 |       |
| 6 | 79,425,000 | 79,575,000 | 1060 | 876  | -1.529404704 |       |
| 6 | 79,500,000 | 79,650,000 | 1061 | 643  | -0.794057769 |       |
| 6 | 79,575,000 | 79,725,000 | 1062 | 845  | 0.252846141  |       |
| 6 | 79,650,000 | 79,800,000 | 1063 | 1154 | 0.766591177  |       |
| 6 | 79,725,000 | 79,875,000 | 1064 | 800  | 0.827993591  |       |
| 6 | 79,800,000 | 79,950,000 | 1065 | 517  | 0.279379121  |       |
| 6 | 79,875,000 | 80,025,000 | 1066 | 530  | -0.33645608  |       |
| 6 | 79,950,000 | 80,100,000 | 1067 | 501  | -0.512110492 |       |
| 6 | 80,025,000 | 80,175,000 | 1068 | 954  | 0.988382922  |       |
| 6 | 80,100,000 | 80,250,000 | 1069 | 1439 | 1.005867938  |       |
| 6 | 80,175,000 | 80,325,000 | 1070 | 1314 | 0.938773562  |       |
| 6 | 80,250,000 | 80,400,000 | 1071 | 811  | 0.716405856  |       |
| 6 | 80,325,000 | 80,475,000 | 1072 | 494  | -0.589213124 |       |
| 6 | 80,400,000 | 80,550,000 | 1073 | 701  | -0.052520372 |       |
| 6 | 80,475,000 | 80,625,000 | 1074 | 757  | -0.232907562 |       |

|   |            |            |      |      |              |       |
|---|------------|------------|------|------|--------------|-------|
| 6 | 80,550,000 | 80,700,000 | 1075 | 948  | -1.072446197 |       |
| 6 | 80,625,000 | 80,775,000 | 1076 | 1372 | -0.608471589 |       |
| 6 | 80,700,000 | 80,850,000 | 1077 | 1443 | -0.191561695 |       |
| 6 | 80,775,000 | 80,925,000 | 1078 | 1416 | -0.007927127 |       |
| 6 | 80,850,000 | 81,000,000 | 1079 | 1361 | -0.413674196 |       |
| 6 | 80,925,000 | 81,075,000 | 1080 | 1452 | -0.80855117  |       |
| 6 | 81,000,000 | 81,150,000 | 1081 | 2063 | 0.459197803  |       |
| 6 | 81,075,000 | 81,225,000 | 1082 | 2012 | 0.666202771  |       |
| 6 | 81,150,000 | 81,300,000 | 1083 | 1538 | 0.631523189  |       |
| 6 | 81,225,000 | 81,375,000 | 1084 | 1787 | 1.099037823  |       |
| 6 | 81,300,000 | 81,450,000 | 1085 | 2039 | 0.45089646   |       |
| 6 | 81,375,000 | 81,525,000 | 1086 | 1905 | -1.495400977 | TECRL |
| 6 | 81,450,000 | 81,600,000 | 1087 | 1642 | -2.297475179 | TECRL |
| 6 | 81,525,000 | 81,675,000 | 1088 | 1393 | -2.140153322 | TECRL |
| 6 | 81,600,000 | 81,750,000 | 1089 | 1413 | -3.285946421 | TECRL |
| 6 | 81,675,000 | 81,825,000 | 1090 | 1375 | -3.976158447 |       |
| 6 | 81,750,000 | 81,900,000 | 1091 | 1426 | -1.598268015 |       |
| 6 | 81,825,000 | 81,975,000 | 1092 | 1500 | -0.452089333 |       |
| 6 | 81,900,000 | 82,050,000 | 1093 | 985  | -0.538627704 |       |
| 6 | 81,975,000 | 82,125,000 | 1094 | 643  | 0.180353066  |       |
| 6 | 82,050,000 | 82,200,000 | 1095 | 566  | 0.607358487  |       |
| 6 | 82,125,000 | 82,275,000 | 1096 | 389  | 0.178190375  |       |
| 6 | 82,200,000 | 82,350,000 | 1097 | 334  | -0.199936998 |       |
| 6 | 82,275,000 | 82,425,000 | 1098 | 356  | -0.219417596 |       |
| 6 | 82,350,000 | 82,500,000 | 1099 | 612  | -0.099702871 |       |
| 6 | 82,425,000 | 82,575,000 | 1100 | 983  | 0.674297656  | EPHA5 |
| 6 | 82,500,000 | 82,650,000 | 1101 | 963  | 0.989442507  | EPHA5 |
| 6 | 82,575,000 | 82,725,000 | 1102 | 790  | 0.364390727  | EPHA5 |
| 6 | 82,650,000 | 82,800,000 | 1103 | 613  | -0.170316084 | EPHA5 |
| 6 | 82,725,000 | 82,875,000 | 1104 | 459  | 0.218775019  | EPHA5 |
| 6 | 82,800,000 | 82,950,000 | 1105 | 477  | 0.948154386  | EPHA5 |
| 6 | 82,875,000 | 83,025,000 | 1106 | 586  | 1.243483018  | EPHA5 |
| 6 | 82,950,000 | 83,100,000 | 1107 | 906  | 0.774012288  | EPHA5 |
| 6 | 83,025,000 | 83,175,000 | 1108 | 1048 | -1.097090352 |       |
| 6 | 83,100,000 | 83,250,000 | 1109 | 896  | -1.05350886  |       |
| 6 | 83,175,000 | 83,325,000 | 1110 | 1167 | 0.581387793  |       |
| 6 | 83,250,000 | 83,400,000 | 1111 | 1106 | 0.761933094  |       |
| 6 | 83,325,000 | 83,475,000 | 1112 | 614  | 0.444326997  |       |
| 6 | 83,400,000 | 83,550,000 | 1113 | 642  | -1.461618866 |       |
| 6 | 83,475,000 | 83,625,000 | 1114 | 668  | -1.181027401 |       |
| 6 | 83,550,000 | 83,700,000 | 1115 | 710  | 0.607631768  |       |
| 6 | 83,625,000 | 83,775,000 | 1116 | 792  | 0.598209365  |       |
| 6 | 83,700,000 | 83,850,000 | 1117 | 1033 | -1.225613536 |       |
| 6 | 83,775,000 | 83,925,000 | 1118 | 1280 | -1.7180384   |       |
| 6 | 83,850,000 | 84,000,000 | 1119 | 996  | -1.351309849 |       |
| 6 | 83,925,000 | 84,075,000 | 1120 | 1103 | -0.492053514 |       |
| 6 | 84,000,000 | 84,150,000 | 1121 | 1227 | 0.304122638  |       |
| 6 | 84,075,000 | 84,225,000 | 1122 | 968  | 0.916796411  |       |
| 6 | 84,150,000 | 84,300,000 | 1123 | 1012 | -0.410746544 |       |
| 6 | 84,225,000 | 84,375,000 | 1124 | 856  | -0.746957449 |       |
| 6 | 84,300,000 | 84,450,000 | 1125 | 608  | 0.712354051  |       |
| 6 | 84,375,000 | 84,525,000 | 1126 | 578  | 0.824599197  |       |
| 6 | 84,450,000 | 84,600,000 | 1127 | 647  | 0.451561051  |       |

|   |            |            |      |      |              |                                                                            |
|---|------------|------------|------|------|--------------|----------------------------------------------------------------------------|
| 6 | 84,525,000 | 84,675,000 | 1128 | 626  | 0.047346865  |                                                                            |
| 6 | 84,600,000 | 84,750,000 | 1129 | 780  | 0.085666393  |                                                                            |
| 6 | 84,675,000 | 84,825,000 | 1130 | 1051 | 0.840450613  |                                                                            |
| 6 | 84,750,000 | 84,900,000 | 1131 | 1044 | -0.394422288 |                                                                            |
| 6 | 84,825,000 | 84,975,000 | 1132 | 755  | -1.945323968 | CENPC1                                                                     |
| 6 | 84,900,000 | 85,050,000 | 1133 | 523  | 0.057136204  | CENPC1,STAP1                                                               |
| 6 | 84,975,000 | 85,125,000 | 1134 | 553  | 0.326143607  | CENPC1,STAP1,UBA6                                                          |
| 6 | 85,050,000 | 85,200,000 | 1135 | 736  | -0.43159908  | GNRHR,UBA6,ENSBTAG00000038648                                              |
| 6 | 85,125,000 | 85,275,000 | 1136 | 718  | -0.754956519 | GNRHR,TMPRSS11D,UBA6,ENSBTAG00000038648                                    |
| 6 | 85,200,000 | 85,350,000 | 1137 | 681  | 0.938530733  | TMPRSS11A,TMPRSS11D,ENSBTAG00000038648                                     |
| 6 | 85,275,000 | 85,425,000 | 1138 | 567  | 1.136973594  | TMPRSS11A,TMPRSS11D,ENSBTAG00000025920                                     |
| 6 | 85,350,000 | 85,500,000 | 1139 | 611  | 0.778937622  | TMPRSS11A,TMPRSS11F,ENSBTAG00000025920                                     |
| 6 | 85,425,000 | 85,575,000 | 1140 | 785  | 0.441140739  | TMPRSS11F,ENSBTAG00000025920                                               |
| 6 | 85,500,000 | 85,650,000 | 1141 | 556  | -0.530332693 | TMPRSS11F,ENSBTAG00000038520                                               |
| 6 | 85,575,000 | 85,725,000 | 1142 | 873  | -0.314754798 | ENSBTAG00000038520                                                         |
| 6 | 85,650,000 | 85,800,000 | 1143 | 799  | -0.193821224 | ENSBTAG00000038520                                                         |
| 6 | 85,725,000 | 85,875,000 | 1144 | 373  | -0.398960963 | YTHDC1                                                                     |
| 6 | 85,800,000 | 85,950,000 | 1145 | 414  | -1.93263944  | YTHDC1,ENSBTAG00000048013                                                  |
| 6 | 85,875,000 | 86,025,000 | 1146 | 534  | -0.642826472 | YTHDC1,ENSBTAG00000039362,ENSBTAG00000048013                               |
| 6 | 85,950,000 | 86,100,000 | 1147 | 745  | 0.744120976  | ENSBTAG00000032350,ENSBTAG00000037613,ENSBTAG0000039362                    |
| 6 | 86,025,000 | 86,175,000 | 1148 | 805  | 0.150784474  | ENSBTAG00000032350,ENSBTAG00000037613,ENSBTAG0000039991,ENSBTAG00000040337 |
| 6 | 86,100,000 | 86,250,000 | 1149 | 1027 | 0.416738259  | ENSBTAG00000022205,ENSBTAG00000039991,ENSBTAG0000040337                    |
| 6 | 86,175,000 | 86,325,000 | 1150 | 1288 | 1.018084007  | ENSBTAG00000022205,ENSBTAG00000039991                                      |
| 6 | 86,250,000 | 86,400,000 | 1151 | 1188 | -0.026718496 | ENSBTAG00000003523                                                         |
| 6 | 86,325,000 | 86,475,000 | 1152 | 868  | -0.262202303 | MGC152010,ENSBTAG00000003523                                               |
| 6 | 86,400,000 | 86,550,000 | 1153 | 739  | 1.039394526  | MGC152010                                                                  |
| 6 | 86,475,000 | 86,625,000 | 1154 | 913  | 0.949187533  |                                                                            |
| 6 | 86,550,000 | 86,700,000 | 1155 | 962  | -0.333715623 | ENSBTAG00000015047                                                         |
| 6 | 86,625,000 | 86,775,000 | 1156 | 1031 | 0.133120373  | ENSBTAG00000015047                                                         |
| 6 | 86,700,000 | 86,850,000 | 1157 | 1327 | 0.910695329  | UGT2A3,ENSBTAG00000015047                                                  |
| 6 | 86,775,000 | 86,925,000 | 1158 | 1109 | 0.991857083  | SULT1B1,UGT2A1,UGT2A3                                                      |
| 6 | 86,850,000 | 87,000,000 | 1159 | 848  | 1.224895304  | SULT1B1,UGT2A1,ENSBTAG00000038214                                          |
| 6 | 86,925,000 | 87,075,000 | 1160 | 985  | 1.241034247  | SULT1B1,SULT1E1,ENSBTAG00000038214                                         |
| 6 | 87,000,000 | 87,150,000 | 1161 | 977  | 0.850189479  | CSN1S1,SULT1E1,ENSBTAG00000038214                                          |
| 6 | 87,075,000 | 87,225,000 | 1162 | 1334 | 0.71557294   | CSN1S1,CSN2,HSTN,SULT1E1                                                   |
| 6 | 87,150,000 | 87,300,000 | 1163 | 1059 | 0.529004807  | CSN1S1,CSN1S2,CSN2,HSTN,STATH                                              |
| 6 | 87,225,000 | 87,375,000 | 1164 | 627  | -0.202937885 | CSN1S2,ODAM,STATH                                                          |
| 6 | 87,300,000 | 87,450,000 | 1165 | 954  | -0.619887127 | CSN3,ODAM                                                                  |
| 6 | 87,375,000 | 87,525,000 | 1166 | 727  | -1.324752887 | CABS1,CSN3,ENSBTAG00000027531                                              |
| 6 | 87,450,000 | 87,600,000 | 1167 | 795  | 0.200032648  | CABS1,ENSBTAG00000027531                                                   |
| 6 | 87,525,000 | 87,675,000 | 1168 | 1113 | -0.317204735 | AMTN                                                                       |
| 6 | 87,600,000 | 87,750,000 | 1169 | 920  | -1.254212577 | AMBN,AMTN,ENAM                                                             |
| 6 | 87,675,000 | 87,825,000 | 1170 | 570  | -0.755416017 | AMBN,ENAM,IGJ,RUFY3,UTP3                                                   |
| 6 | 87,750,000 | 87,900,000 | 1171 | 342  | -0.15282913  | IGJ,RUFY3,UTP3                                                             |
| 6 | 87,825,000 | 87,975,000 | 1172 | 391  | -0.089572016 | GRSF1,RUFY3                                                                |
| 6 | 87,900,000 | 88,050,000 | 1173 | 484  | -0.385412193 | DCK,GRSF1,MOB1B,RUFY3                                                      |
| 6 | 87,975,000 | 88,125,000 | 1174 | 447  | 0.074242119  | DCK,MOB1B                                                                  |
| 6 | 88,050,000 | 88,200,000 | 1175 | 357  | 0.640662825  | DCK,SLC4A4                                                                 |
| 6 | 88,125,000 | 88,275,000 | 1176 | 411  | 0.399925907  | SLC4A4                                                                     |
| 6 | 88,200,000 | 88,350,000 | 1177 | 411  | 0.284407529  | SLC4A4                                                                     |



|   |            |            |      |      |              |                                                      |
|---|------------|------------|------|------|--------------|------------------------------------------------------|
| 6 | 88,275,000 | 88,425,000 | 1178 | 526  | 0.478853203  | SLC4A4                                               |
| 6 | 88,350,000 | 88,500,000 | 1179 | 842  | 0.828617502  | SLC4A4                                               |
| 6 | 88,425,000 | 88,575,000 | 1180 | 755  | 1.047266179  | SLC4A4                                               |
| 6 | 88,500,000 | 88,650,000 | 1181 | 724  | 0.767198901  | SLC4A4                                               |
| 6 | 88,575,000 | 88,725,000 | 1182 | 1138 | 0.528265962  | GC                                                   |
| 6 | 88,650,000 | 88,800,000 | 1183 | 1360 | 0.146333242  | GC                                                   |
| 6 | 88,725,000 | 88,875,000 | 1184 | 1255 | 0.161268305  | GC                                                   |
| 6 | 88,800,000 | 88,950,000 | 1185 | 1399 | 0.605485757  |                                                      |
| 6 | 88,875,000 | 89,025,000 | 1186 | 1450 | 0.534394798  |                                                      |
| 6 | 88,950,000 | 89,100,000 | 1187 | 1112 | 0.496947576  | NPFFR2                                               |
| 6 | 89,025,000 | 89,175,000 | 1188 | 1033 | -0.901479503 | ADAMTS3,NPFFR2                                       |
| 6 | 89,100,000 | 89,250,000 | 1189 | 937  | -0.818748056 | ADAMTS3                                              |
| 6 | 89,175,000 | 89,325,000 | 1190 | 1176 | 0.776914731  | ADAMTS3                                              |
| 6 | 89,250,000 | 89,400,000 | 1191 | 1476 | 0.831792475  | ADAMTS3                                              |
| 6 | 89,325,000 | 89,475,000 | 1192 | 1257 | 1.010608766  | ADAMTS3                                              |
| 6 | 89,400,000 | 89,550,000 | 1193 | 1002 | 0.917561784  | ADAMTS3                                              |
| 6 | 89,475,000 | 89,625,000 | 1194 | 805  | 0.565950668  |                                                      |
| 6 | 89,550,000 | 89,700,000 | 1195 | 722  | -0.220170779 |                                                      |
| 6 | 89,625,000 | 89,775,000 | 1196 | 549  | -0.217243924 |                                                      |
| 6 | 89,700,000 | 89,850,000 | 1197 | 446  | -0.394607082 |                                                      |
| 6 | 89,775,000 | 89,925,000 | 1198 | 451  | -1.012030769 | COX18                                                |
| 6 | 89,850,000 | 90,000,000 | 1199 | 294  | -0.496926102 | ANKRD17,COX18                                        |
| 6 | 89,925,000 | 90,075,000 | 1200 | 224  | 0.899673913  | ANKRD17,COX18                                        |
| 6 | 90,000,000 | 90,150,000 | 1201 | 283  | 1.22066003   | ANKRD17                                              |
| 6 | 90,075,000 | 90,225,000 | 1202 | 328  | 1.25374966   | ANKRD17                                              |
| 6 | 90,150,000 | 90,300,000 | 1203 | 403  | 0.515338362  | AFM,AFP,ALB                                          |
| 6 | 90,225,000 | 90,375,000 | 1204 | 774  | 0.491989191  | AFM,AFP,ALB,RASSF6                                   |
| 6 | 90,300,000 | 90,450,000 | 1205 | 886  | 0.545453791  | AFM,RASSF6                                           |
| 6 | 90,375,000 | 90,525,000 | 1206 | 573  | 0.331013229  | RASSF6                                               |
| 6 | 90,450,000 | 90,600,000 | 1207 | 654  | -0.180835692 | CXCL8                                                |
| 6 | 90,525,000 | 90,675,000 | 1208 | 873  | 0.252201462  | CXCL6,CXCL8,PF4,PPBP,ENSBTAG00000024080              |
| 6 | 90,600,000 | 90,750,000 | 1209 | 853  | 0.804577703  | CXCL6,PF4,PPBP,ENSBTAG00000024080,ENSBTAG00000027513 |
| 6 | 90,675,000 | 90,825,000 | 1210 | 868  | 0.488054437  | CXCL3,GRO1,ENSBTAG00000027513                        |
| 6 | 90,750,000 | 90,900,000 | 1211 | 896  | 0.309047476  | CXCL3,GRO1,MTHFD2L                                   |
| 6 | 90,825,000 | 90,975,000 | 1212 | 830  | -0.56129078  | MTHFD2L                                              |
| 6 | 90,900,000 | 91,050,000 | 1213 | 693  | -0.938034688 | EPGN,MTHFD2L                                         |
| 6 | 90,975,000 | 91,125,000 | 1214 | 530  | -0.126774788 | EPGN,EREG,MTHFD2L                                    |
| 6 | 91,050,000 | 91,200,000 | 1215 | 653  | -1.33523021  | AREG,EREG                                            |
| 6 | 91,125,000 | 91,275,000 | 1216 | 959  | -1.959594399 | AREG                                                 |
| 6 | 91,200,000 | 91,350,000 | 1217 | 1267 | -3.078400919 |                                                      |
| 6 | 91,275,000 | 91,425,000 | 1218 | 1151 | -2.767559657 |                                                      |
| 6 | 91,350,000 | 91,500,000 | 1219 | 801  | -0.504968992 | BTC                                                  |
| 6 | 91,425,000 | 91,575,000 | 1220 | 968  | 0.137782426  | BTC                                                  |
| 6 | 91,500,000 | 91,650,000 | 1221 | 802  | -0.22178637  | DKFZP564O0823                                        |
| 6 | 91,575,000 | 91,725,000 | 1222 | 386  | -1.177600624 | DKFZP564O0823                                        |
| 6 | 91,650,000 | 91,800,000 | 1223 | 604  | -0.047351856 | DKFZP564O0823                                        |
| 6 | 91,725,000 | 91,875,000 | 1224 | 804  | 0.323786965  |                                                      |
| 6 | 91,800,000 | 91,950,000 | 1225 | 683  | 0.956185363  |                                                      |
| 6 | 91,875,000 | 92,025,000 | 1226 | 597  | 0.850095244  |                                                      |
| 6 | 91,950,000 | 92,100,000 | 1227 | 482  | 0.152201075  | RCHY1,THAP6                                          |
| 6 | 92,025,000 | 92,175,000 | 1228 | 674  | -0.182479586 | CDKL2,RCHY1,THAP6                                    |
| 6 | 92,100,000 | 92,250,000 | 1229 | 567  | 0.024025521  | CDKL2,G3BP2,THAP6                                    |

|   |            |            |      |      |              |                                                |
|---|------------|------------|------|------|--------------|------------------------------------------------|
| 6 | 92,175,000 | 92,325,000 | 1230 | 221  | 0.213209134  | CDKL2,G3BP2,USO1                               |
| 6 | 92,250,000 | 92,400,000 | 1231 | 456  | -0.221265956 | USO1                                           |
| 6 | 92,325,000 | 92,475,000 | 1232 | 934  | -0.735967597 | PPEF2,USO1                                     |
| 6 | 92,400,000 | 92,550,000 | 1233 | 1038 | -0.720950621 | NAAA,PPEF2                                     |
| 6 | 92,475,000 | 92,625,000 | 1234 | 839  | -0.480796211 | ART3,CXCL10,CXCL9,NAAA,PPEF2,SDAD1             |
| 6 | 92,550,000 | 92,700,000 | 1235 | 577  | -0.565240855 | ART3,CXCL10,CXCL11,CXCL9,SDAD1                 |
| 6 | 92,625,000 | 92,775,000 | 1236 | 531  | -0.4442917   | ART3,CXCL10,CXCL11,NUP54                       |
| 6 | 92,700,000 | 92,850,000 | 1237 | 992  | 0.205016683  | ART3,NUP54,SCARB2                              |
| 6 | 92,775,000 | 92,925,000 | 1238 | 1310 | 0.368471487  | NUP54,SCARB2,ENSBTAG00000004921                |
| 6 | 92,850,000 | 93,000,000 | 1239 | 998  | -0.103332863 | CCDC158,FAM47E-STBD1,SCARB2,ENSBTAG00000004921 |
| 6 | 92,925,000 | 93,075,000 | 1240 | 777  | -0.744095646 | CCDC158,FAM47E-STBD1,ENSBTAG00000004921        |
| 6 | 93,000,000 | 93,150,000 | 1241 | 1213 | -0.874469984 | CCDC158                                        |
| 6 | 93,075,000 | 93,225,000 | 1242 | 1226 | -0.610599223 |                                                |
| 6 | 93,150,000 | 93,300,000 | 1243 | 897  | -0.262431751 |                                                |
| 6 | 93,225,000 | 93,375,000 | 1244 | 818  | -0.534358597 | SHROOM3                                        |
| 6 | 93,300,000 | 93,450,000 | 1245 | 612  | -0.44166849  | SHROOM3                                        |
| 6 | 93,375,000 | 93,525,000 | 1246 | 462  | 0.026596246  | SHROOM3,SOWAHB                                 |
| 6 | 93,450,000 | 93,600,000 | 1247 | 637  | -1.715678005 | SEPT11,SOWAHB                                  |
| 6 | 93,525,000 | 93,675,000 | 1248 | 890  | -4.401968442 | CCNI,SEPT11                                    |
| 6 | 93,600,000 | 93,750,000 | 1249 | 709  | -5.414306263 | CCNG2,CCNI,SEPT11                              |
| 6 | 93,675,000 | 93,825,000 | 1250 | 531  | -2.344434315 | CCNG2                                          |
| 6 | 93,750,000 | 93,900,000 | 1251 | 693  | -0.053305256 | CCNG2,SLC25A16                                 |
| 6 | 93,825,000 | 93,975,000 | 1252 | 519  | -0.324583249 | SLC25A16                                       |
| 6 | 93,900,000 | 94,050,000 | 1253 | 398  | -1.823904802 | CXCL13                                         |
| 6 | 93,975,000 | 94,125,000 | 1254 | 547  | -1.744041902 | CXCL13,RPL23A                                  |
| 6 | 94,050,000 | 94,200,000 | 1255 | 527  | -1.153230879 | CNOT6L,RPL23A                                  |
| 6 | 94,125,000 | 94,275,000 | 1256 | 387  | -1.171962446 | CNOT6L                                         |
| 6 | 94,200,000 | 94,350,000 | 1257 | 244  | -2.771968229 | CNOT6L,MRPL1                                   |
| 6 | 94,275,000 | 94,425,000 | 1258 | 188  | -3.603934593 | MRPL1                                          |
| 6 | 94,350,000 | 94,500,000 | 1259 | 171  | -1.874260526 | MRPL1                                          |
| 6 | 94,425,000 | 94,575,000 | 1260 | 294  | 0.375824703  |                                                |
| 6 | 94,500,000 | 94,650,000 | 1261 | 542  | -0.152260748 |                                                |
| 6 | 94,575,000 | 94,725,000 | 1262 | 700  | 0.60262891   | FRAS1                                          |
| 6 | 94,650,000 | 94,800,000 | 1263 | 996  | 0.847281911  | FRAS1                                          |
| 6 | 94,725,000 | 94,875,000 | 1264 | 1074 | 0.299777691  | FRAS1                                          |
| 6 | 94,800,000 | 94,950,000 | 1265 | 731  | -0.253668901 | FRAS1                                          |
| 6 | 94,875,000 | 95,025,000 | 1266 | 401  | 0.035934993  | FRAS1                                          |
| 6 | 94,950,000 | 95,100,000 | 1267 | 393  | 0.278554047  | ANXA3,FRAS1                                    |
| 6 | 95,025,000 | 95,175,000 | 1268 | 612  | -0.564599645 | ANXA3,FRAS1                                    |
| 6 | 95,100,000 | 95,250,000 | 1269 | 836  | -0.239510053 | ANXA3                                          |
| 6 | 95,175,000 | 95,325,000 | 1270 | 747  | 0.393941422  |                                                |
| 6 | 95,250,000 | 95,400,000 | 1271 | 487  | -0.4376992   | BMP2K                                          |
| 6 | 95,325,000 | 95,475,000 | 1272 | 551  | -0.501756964 | BMP2K,PAQR3                                    |
| 6 | 95,400,000 | 95,550,000 | 1273 | 656  | -0.11478774  | BMP2K,PAQR3                                    |
| 6 | 95,475,000 | 95,625,000 | 1274 | 865  | 0.020939889  |                                                |
| 6 | 95,550,000 | 95,700,000 | 1275 | 1168 | 0.640963522  |                                                |
| 6 | 95,625,000 | 95,775,000 | 1276 | 1021 | 0.382201793  |                                                |
| 6 | 95,700,000 | 95,850,000 | 1277 | 846  | -0.312031104 | NAA11                                          |
| 6 | 95,775,000 | 95,925,000 | 1278 | 1081 | 0.425541193  | DYNLL1,GK2,NAA11                               |
| 6 | 95,850,000 | 96,000,000 | 1279 | 919  | -1.15821769  | DYNLL1,GK2                                     |
| 6 | 95,925,000 | 96,075,000 | 1280 | 1024 | -0.900971163 |                                                |
| 6 | 96,000,000 | 96,150,000 | 1281 | 954  | -0.861144691 |                                                |

|   |            |             |      |      |              |                                           |
|---|------------|-------------|------|------|--------------|-------------------------------------------|
| 6 | 96,075,000 | 96,225,000  | 1282 | 423  | -0.979529731 |                                           |
| 6 | 96,150,000 | 96,300,000  | 1283 | 644  | 0.861500168  |                                           |
| 6 | 96,225,000 | 96,375,000  | 1284 | 653  | 1.111433655  | ANTXR2                                    |
| 6 | 96,300,000 | 96,450,000  | 1285 | 456  | 0.730102143  | ANTXR2                                    |
| 6 | 96,375,000 | 96,525,000  | 1286 | 413  | 0.435131127  | ANTXR2                                    |
| 6 | 96,450,000 | 96,600,000  | 1287 | 240  | -1.343751826 | ANTXR2                                    |
| 6 | 96,525,000 | 96,675,000  | 1288 | 176  | -1.777789934 | ANTXR2,PRDM8                              |
| 6 | 96,600,000 | 96,750,000  | 1289 | 261  | -0.246266223 | FGF5,PRDM8                                |
| 6 | 96,675,000 | 96,825,000  | 1290 | 348  | -0.034438809 | C4orf22,FGF5                              |
| 6 | 96,750,000 | 96,900,000  | 1291 | 581  | 0.797211597  | C4orf22                                   |
| 6 | 96,825,000 | 96,975,000  | 1292 | 713  | 0.595506994  | C4orf22                                   |
| 6 | 96,900,000 | 97,050,000  | 1293 | 629  | 0.250165287  | C4orf22                                   |
| 6 | 96,975,000 | 97,125,000  | 1294 | 522  | 0.417084227  | C4orf22                                   |
| 6 | 97,050,000 | 97,200,000  | 1295 | 471  | 0.614681229  | C4orf22                                   |
| 6 | 97,125,000 | 97,275,000  | 1296 | 524  | 0.236081989  | C4orf22                                   |
| 6 | 97,200,000 | 97,350,000  | 1297 | 632  | -0.284098417 | C4orf22                                   |
| 6 | 97,275,000 | 97,425,000  | 1298 | 563  | -0.64243692  | C4orf22                                   |
| 6 | 97,350,000 | 97,500,000  | 1299 | 309  | -1.054739885 | C4orf22                                   |
| 6 | 97,425,000 | 97,575,000  | 1300 | 319  | 0.48349463   | C4orf22                                   |
| 6 | 97,500,000 | 97,650,000  | 1301 | 383  | 0.673642045  | BMP3,C4orf22                              |
| 6 | 97,575,000 | 97,725,000  | 1302 | 593  | 0.161326644  | BMP3,PRKG2                                |
| 6 | 97,650,000 | 97,800,000  | 1303 | 629  | 0.111408143  | PRKG2                                     |
| 6 | 97,725,000 | 97,875,000  | 1304 | 635  | -0.682646431 | PRKG2                                     |
| 6 | 97,800,000 | 97,950,000  | 1305 | 950  | 0.243265908  |                                           |
| 6 | 97,875,000 | 98,025,000  | 1306 | 1025 | 0.776558093  | RASGEF1B                                  |
| 6 | 97,950,000 | 98,100,000  | 1307 | 883  | 0.226333428  | RASGEF1B                                  |
| 6 | 98,025,000 | 98,175,000  | 1308 | 635  | -0.063566735 | RASGEF1B                                  |
| 6 | 98,100,000 | 98,250,000  | 1309 | 595  | 0.139688721  |                                           |
| 6 | 98,175,000 | 98,325,000  | 1310 | 716  | 0.116426712  |                                           |
| 6 | 98,250,000 | 98,400,000  | 1311 | 823  | 0.219291897  |                                           |
| 6 | 98,325,000 | 98,475,000  | 1312 | 827  | 0.365696881  |                                           |
| 6 | 98,400,000 | 98,550,000  | 1313 | 663  | 0.572456363  |                                           |
| 6 | 98,475,000 | 98,625,000  | 1314 | 849  | 1.234006638  |                                           |
| 6 | 98,550,000 | 98,700,000  | 1315 | 1024 | 1.271722005  |                                           |
| 6 | 98,625,000 | 98,775,000  | 1316 | 645  | 1.20291592   |                                           |
| 6 | 98,700,000 | 98,850,000  | 1317 | 670  | 0.669204072  |                                           |
| 6 | 98,775,000 | 98,925,000  | 1318 | 956  | 0.679041397  | HNRPD                                     |
| 6 | 98,850,000 | 99,000,000  | 1319 | 1110 | 0.835000055  | ENOPH1,HNRPD,HNRPDL                       |
| 6 | 98,925,000 | 99,075,000  | 1320 | 1443 | 1.140359044  | ENOPH1,HNRPD,HNRPDL,TMEM150C              |
| 6 | 99,000,000 | 99,150,000  | 1321 | 1122 | 0.943178176  | ENOPH1,TMEM150C                           |
| 6 | 99,075,000 | 99,225,000  | 1322 | 858  | -0.039837056 |                                           |
| 6 | 99,150,000 | 99,300,000  | 1323 | 1056 | 0.044328299  | SCD5                                      |
| 6 | 99,225,000 | 99,375,000  | 1324 | 911  | 0.168287613  | SCD5                                      |
| 6 | 99,300,000 | 99,450,000  | 1325 | 569  | 0.008580003  | SCD5,SEC31A                               |
| 6 | 99,375,000 | 99,525,000  | 1326 | 330  | 0.134552906  | SCD5,SEC31A,THAP9                         |
| 6 | 99,450,000 | 99,600,000  | 1327 | 203  | -0.225618629 | LIN54,SEC31A,THAP9                        |
| 6 | 99,525,000 | 99,675,000  | 1328 | 420  | 0.68329522   | COPS4,LIN54,PLAC8                         |
| 6 | 99,600,000 | 99,750,000  | 1329 | 811  | 1.014911297  | COPS4,PLAC8                               |
| 6 | 99,675,000 | 99,825,000  | 1330 | 801  | 0.495697286  | COQ2,PLAC8                                |
| 6 | 99,750,000 | 99,900,000  | 1331 | 1016 | 0.154425085  | COQ2,HPSE,PLAC8                           |
| 6 | 99,825,000 | 99,975,000  | 1332 | 1104 | -0.42306472  | COQ2,HPSE                                 |
| 6 | 99,900,000 | 100,050,000 | 1333 | 914  | -1.638700891 | FAM175A,MRPS18C,ENSBTAG00000018151        |
| 6 | 99,975,000 | 100,125,000 | 1334 | 1026 | -0.060306684 | AGPAT9,FAM175A,MRPS18C,ENSBTAG00000018151 |

|   |             |             |      |      |              |                         |
|---|-------------|-------------|------|------|--------------|-------------------------|
| 6 | 100,050,000 | 100,200,000 | 1335 | 981  | 0.816538648  | AGPAT9                  |
| 6 | 100,125,000 | 100,275,000 | 1336 | 837  | 0.545567848  | AGPAT9                  |
| 6 | 100,200,000 | 100,350,000 | 1337 | 902  | 0.441559662  |                         |
| 6 | 100,275,000 | 100,425,000 | 1338 | 854  | 0.712948221  |                         |
| 6 | 100,350,000 | 100,500,000 | 1339 | 616  | 0.418563016  |                         |
| 6 | 100,425,000 | 100,575,000 | 1340 | 584  | -1.042736576 |                         |
| 6 | 100,500,000 | 100,650,000 | 1341 | 978  | -0.170761666 |                         |
| 6 | 100,575,000 | 100,725,000 | 1342 | 1183 | 0.284928504  |                         |
| 6 | 100,650,000 | 100,800,000 | 1343 | 859  | -0.223733926 |                         |
| 6 | 100,725,000 | 100,875,000 | 1344 | 779  | -3.260973114 |                         |
| 6 | 100,800,000 | 100,950,000 | 1345 | 728  | -3.212340069 |                         |
| 6 | 100,875,000 | 101,025,000 | 1346 | 487  | -1.060548423 |                         |
| 6 | 100,950,000 | 101,100,000 | 1347 | 455  | 0.11040287   | NKX6-1                  |
| 6 | 101,025,000 | 101,175,000 | 1348 | 472  | -0.006112539 | NKX6-1                  |
| 6 | 101,100,000 | 101,250,000 | 1349 | 345  | -0.850095406 | CDS1                    |
| 6 | 101,175,000 | 101,325,000 | 1350 | 186  | -1.752717923 | CDS1,WDFY3              |
| 6 | 101,250,000 | 101,400,000 | 1351 | 257  | -0.175508398 | CDS1,WDFY3              |
| 6 | 101,325,000 | 101,475,000 | 1352 | 369  | 0.657810988  | WDFY3                   |
| 6 | 101,400,000 | 101,550,000 | 1353 | 351  | 0.970362813  | WDFY3                   |
| 6 | 101,475,000 | 101,625,000 | 1354 | 620  | 0.935549525  | WDFY3                   |
| 6 | 101,550,000 | 101,700,000 | 1355 | 604  | 0.51431986   |                         |
| 6 | 101,625,000 | 101,775,000 | 1356 | 427  | -0.659632774 |                         |
| 6 | 101,700,000 | 101,850,000 | 1357 | 515  | -1.434665252 |                         |
| 6 | 101,775,000 | 101,925,000 | 1358 | 509  | -0.082527174 |                         |
| 6 | 101,850,000 | 102,000,000 | 1359 | 823  | 1.059437172  |                         |
| 6 | 101,925,000 | 102,075,000 | 1360 | 960  | 1.202832796  |                         |
| 6 | 102,000,000 | 102,150,000 | 1361 | 851  | 0.061155936  |                         |
| 6 | 102,075,000 | 102,225,000 | 1362 | 734  | -0.729186821 |                         |
| 6 | 102,150,000 | 102,300,000 | 1363 | 468  | -0.312731902 |                         |
| 6 | 102,225,000 | 102,375,000 | 1364 | 390  | -0.194392049 |                         |
| 6 | 102,300,000 | 102,450,000 | 1365 | 367  | 0.392422531  |                         |
| 6 | 102,375,000 | 102,525,000 | 1366 | 608  | 0.85894468   | ARHGAP24                |
| 6 | 102,450,000 | 102,600,000 | 1367 | 614  | 0.954814161  | ARHGAP24                |
| 6 | 102,525,000 | 102,675,000 | 1368 | 568  | 0.173854573  | ARHGAP24                |
| 6 | 102,600,000 | 102,750,000 | 1369 | 1119 | 0.090154987  | ARHGAP24,MAPK10         |
| 6 | 102,675,000 | 102,825,000 | 1370 | 1138 | 0.528205038  | MAPK10                  |
| 6 | 102,750,000 | 102,900,000 | 1371 | 1125 | 1.133048248  | MAPK10                  |
| 6 | 102,825,000 | 102,975,000 | 1372 | 1465 | 1.231490778  | MAPK10                  |
| 6 | 102,900,000 | 103,050,000 | 1373 | 1047 | 1.152604982  | MAPK10                  |
| 6 | 102,975,000 | 103,125,000 | 1374 | 608  | 1.009559048  | MAPK10                  |
| 6 | 103,050,000 | 103,200,000 | 1375 | 555  | 1.076354818  | LAMTOR5,MAPK10          |
| 6 | 103,125,000 | 103,275,000 | 1376 | 757  | 0.117149294  | LAMTOR5                 |
| 6 | 103,200,000 | 103,350,000 | 1377 | 654  | -0.358616866 |                         |
| 6 | 103,275,000 | 103,425,000 | 1378 | 803  | -0.505586233 | PTPN13                  |
| 6 | 103,350,000 | 103,500,000 | 1379 | 857  | -0.373866658 | PTPN13                  |
| 6 | 103,425,000 | 103,575,000 | 1380 | 406  | 0.138136414  | PTPN13,SLC10A6          |
| 6 | 103,500,000 | 103,650,000 | 1381 | 358  | 0.351419561  | PTPN13,SLC10A6          |
| 6 | 103,575,000 | 103,725,000 | 1382 | 498  | 0.92203552   | AFF1                    |
| 6 | 103,650,000 | 103,800,000 | 1383 | 676  | 0.881393916  | AFF1                    |
| 6 | 103,725,000 | 103,875,000 | 1384 | 645  | 0.405856925  | AFF1,KLHL8              |
| 6 | 103,800,000 | 103,950,000 | 1385 | 637  | 0.038089749  | AFF1,KLHL8              |
| 6 | 103,875,000 | 104,025,000 | 1386 | 572  | 0.002686698  | HSD17B11,HSD17B13       |
| 6 | 103,950,000 | 104,100,000 | 1387 | 787  | 0.78959891   | HSD17B11,HSD17B13,NUDT9 |

|   |             |             |      |      |              |                                       |
|---|-------------|-------------|------|------|--------------|---------------------------------------|
| 6 | 104,025,000 | 104,175,000 | 1388 | 669  | 0.9178074    | HSD17B11,NUDT9,SPARCL1                |
| 6 | 104,100,000 | 104,250,000 | 1389 | 328  | 0.281202388  | NUDT9,SPARCL1                         |
| 6 | 104,175,000 | 104,325,000 | 1390 | 432  | -0.032458912 | DMP1,DSPP,SPARCL1                     |
| 6 | 104,250,000 | 104,400,000 | 1391 | 769  | 0.618465942  | DMP1,DSPP,ENSBTAG00000017829          |
| 6 | 104,325,000 | 104,475,000 | 1392 | 1058 | 0.825434254  | ENSBTAG00000006508,ENSBTAG00000017829 |
| 6 | 104,400,000 | 104,550,000 | 1393 | 1119 | 0.60623767   | ENSBTAG00000006508                    |
| 6 | 104,475,000 | 104,625,000 | 1394 | 802  | 0.411036027  | PPP2R2C                               |
| 6 | 104,550,000 | 104,700,000 | 1395 | 567  | 0.533485489  | PPP2R2C,WFS1                          |
| 6 | 104,625,000 | 104,775,000 | 1396 | 783  | 0.704992825  | PPP2R2C,WFS1                          |
| 6 | 104,700,000 | 104,850,000 | 1397 | 634  | 0.035270231  | JAKMIP1                               |
| 6 | 104,775,000 | 104,925,000 | 1398 | 796  | -0.917714204 | JAKMIP1                               |
| 6 | 104,850,000 | 105,000,000 | 1399 | 1230 | -0.273797068 | C4orf50,JAKMIP1                       |
| 6 | 104,925,000 | 105,075,000 | 1400 | 1380 | 0.365847475  | C4orf50,JAKMIP1                       |
| 6 | 105,000,000 | 105,150,000 | 1401 | 1313 | 0.775171853  | C4orf50,CRMP1                         |
| 6 | 105,075,000 | 105,225,000 | 1402 | 767  | 0.332915907  | CRMP1,EVC                             |
| 6 | 105,150,000 | 105,300,000 | 1403 | 743  | 0.618364738  | CRMP1,EVC,EVC2                        |
| 6 | 105,225,000 | 105,375,000 | 1404 | 875  | 0.460293471  | EVC,EVC2                              |
| 6 | 105,300,000 | 105,450,000 | 1405 | 683  | -0.528080148 | EVC2                                  |
| 6 | 105,375,000 | 105,525,000 | 1406 | 523  | -0.225034687 | EVC2,STK32B                           |
| 6 | 105,450,000 | 105,600,000 | 1407 | 493  | -2.612572706 | EVC2,STK32B                           |
| 6 | 105,525,000 | 105,675,000 | 1408 | 616  | -2.52034286  | STK32B                                |
| 6 | 105,600,000 | 105,750,000 | 1409 | 428  | 0.41434702   |                                       |
| 6 | 105,675,000 | 105,825,000 | 1410 | 405  | -0.238727417 |                                       |
| 6 | 105,750,000 | 105,900,000 | 1411 | 510  | 0.044856274  |                                       |
| 6 | 105,825,000 | 105,975,000 | 1412 | 462  | 0.047960716  | CYTL1                                 |
| 6 | 105,900,000 | 106,050,000 | 1413 | 497  | -0.906404005 | CYTL1                                 |
| 6 | 105,975,000 | 106,125,000 | 1414 | 444  | -1.586161614 | MSX1                                  |
| 6 | 106,050,000 | 106,200,000 | 1415 | 418  | -0.638554419 | MSX1                                  |
| 6 | 106,125,000 | 106,275,000 | 1416 | 541  | -0.121111275 |                                       |
| 6 | 106,200,000 | 106,350,000 | 1417 | 573  | 0.116377698  |                                       |
| 6 | 106,275,000 | 106,425,000 | 1418 | 568  | 0.679036975  | STX18                                 |
| 6 | 106,350,000 | 106,500,000 | 1419 | 666  | 0.779439435  | ACOX3,NSG1,STX18                      |
| 6 | 106,425,000 | 106,575,000 | 1420 | 859  | 0.577618264  | ACOX3,NSG1,STX18,TRMT44               |
| 6 | 106,500,000 | 106,650,000 | 1421 | 1057 | 0.419479818  | ACOX3,CPZ,NSG1,TRMT44                 |
| 6 | 106,575,000 | 106,725,000 | 1422 | 1405 | 0.738645791  | CPZ,NSG1,TRMT44                       |
| 6 | 106,650,000 | 106,800,000 | 1423 | 1261 | 0.335820399  | CPZ,NSG1                              |
| 6 | 106,725,000 | 106,875,000 | 1424 | 784  | 0.138509138  | HMX1,NSG1                             |
| 6 | 106,800,000 | 106,950,000 | 1425 | 942  | 0.743476648  | HMX1,NSG1                             |
| 6 | 106,875,000 | 107,025,000 | 1426 | 1151 | 0.529403849  | NSG1                                  |
| 6 | 106,950,000 | 107,100,000 | 1427 | 1029 | 0.198365549  | NSG1                                  |
| 6 | 107,025,000 | 107,175,000 | 1428 | 1080 | 0.307874056  | NSG1                                  |
| 6 | 107,100,000 | 107,250,000 | 1429 | 1292 | 0.800447043  | DOK7,LRPAP1,NSG1                      |
| 6 | 107,175,000 | 107,325,000 | 1430 | 922  | 0.831908861  | DOK7,HGFAC,LRPAP1,NSG1,RGS12          |
| 6 | 107,250,000 | 107,400,000 | 1431 | 608  | -0.056611733 | DOK7,HGFAC,NSG1,RGS12                 |
| 6 | 107,325,000 | 107,475,000 | 1432 | 770  | -0.971957114 | LYAR,NSG1,RGS12,ZBTB49                |
| 6 | 107,400,000 | 107,550,000 | 1433 | 1063 | -0.672313555 | LYAR,OTOP1,TMEM128,ZBTB49             |
| 6 | 107,475,000 | 107,625,000 | 1434 | 1116 | -0.031068874 | DBDR,OTOP1,TMEM128                    |
| 6 | 107,550,000 | 107,700,000 | 1435 | 818  | 0.528404082  | DBDR,HTT,MSANTD1                      |
| 6 | 107,625,000 | 107,775,000 | 1436 | 673  | 0.64421718   | HTT,MSANTD1                           |
| 6 | 107,700,000 | 107,850,000 | 1437 | 639  | -0.227257139 | GRK4,HTT                              |
| 6 | 107,775,000 | 107,925,000 | 1438 | 606  | 0.240224375  | GRK4,HTT,MFSD10,NOP14                 |
| 6 | 107,850,000 | 108,000,000 | 1439 | 868  | 0.448697423  | ADD1,GRK4,MFSD10,NOP14                |
| 6 | 107,925,000 | 108,075,000 | 1440 | 827  | 0.32781901   | ADD1,MFSD10,SH3BP2                    |

|   |             |             |      |      |              |                                                     |
|---|-------------|-------------|------|------|--------------|-----------------------------------------------------|
| 6 | 108,000,000 | 108,150,000 | 1441 | 570  | -1.139187585 | ADD1,FAM193A,SH3BP2,TNIP2                           |
| 6 | 108,075,000 | 108,225,000 | 1442 | 585  | -2.584037818 | FAM193A,TNIP2                                       |
| 6 | 108,150,000 | 108,300,000 | 1443 | 604  | -1.764809597 | FAM193A                                             |
| 6 | 108,225,000 | 108,375,000 | 1444 | 509  | -0.766042785 | RNF4,ENSBTAG00000047977                             |
| 6 | 108,300,000 | 108,450,000 | 1445 | 462  | 0.15004617   | RNF4,ZFYVE28,ENSBTAG00000047977                     |
| 6 | 108,375,000 | 108,525,000 | 1446 | 457  | 0.6826167    | HAUS3,MXD4,ZFYVE28                                  |
| 6 | 108,450,000 | 108,600,000 | 1447 | 756  | 1.357925449  | HAUS3,MXD4,POLN,ZFYVE28                             |
| 6 | 108,525,000 | 108,675,000 | 1448 | 1236 | 1.182944483  | POLN                                                |
| 6 | 108,600,000 | 108,750,000 | 1449 | 839  | 0.658005979  | NAT8L,PIGG,POLN                                     |
| 6 | 108,675,000 | 108,825,000 | 1450 | 344  | -1.103879812 | NAT8L,PDE6B,PIGG,POLN                               |
| 6 | 108,750,000 | 108,900,000 | 1451 | 334  | -2.32892372  | ATP5I,MFSD7,PDE6B,PIGG                              |
| 6 | 108,825,000 | 108,975,000 | 1452 | 517  | -1.15575129  | ATP5I,MFSD7,PCGF3,PDE6B,ENSBTAG00000048119          |
| 6 | 108,900,000 | 109,050,000 | 1453 | 626  | -0.251230323 | GAK,PCGF3,TMEM175,ENSBTAG00000048119                |
| 6 | 108,975,000 | 109,125,000 | 1454 | 499  | -0.186117362 | DGKQ,GAK,IDUA,SLC26A1,TMEM175                       |
| 6 | 109,050,000 | 109,200,000 | 1455 | 364  | 0.155482082  | DGKQ,FGFRL1,IDUA,SLC26A1,TMEM175,ENSBTAG00000002247 |
| 6 | 109,125,000 | 109,275,000 | 1456 | 491  | 0.22537437   | CTBP1,FGFRL1,SPON2,ENSBTAG00000002247               |
| 6 | 109,200,000 | 109,350,000 | 1457 | 599  | 0.137469578  | CTBP1,MAEA,SPON2,ENSBTAG00000002247                 |
| 6 | 109,275,000 | 109,425,000 | 1458 | 448  | -1.092449409 | MAEA,UVSSA                                          |
| 6 | 109,350,000 | 109,500,000 | 1459 | 252  | -2.711216495 | UVSSA                                               |
| 6 | 109,425,000 | 109,575,000 | 1460 | 291  | 0.362814403  |                                                     |
| 6 | 109,500,000 | 109,650,000 | 1461 | 428  | 0.299266228  | SLBP,TACC3,TMEM129                                  |
| 6 | 109,575,000 | 109,725,000 | 1462 | 363  | -0.211088936 | FGFR3,LETM1,SLBP,TACC3,TMEM129                      |
| 6 | 109,650,000 | 109,800,000 | 1463 | 350  | 0.325346108  | FGFR3,LETM1,WHSC1                                   |
| 6 | 109,725,000 | 109,875,000 | 1464 | 429  | 0.605537708  | C4orf48,LETM1,WHSC1,WHSC2                           |
| 6 | 109,800,000 | 109,950,000 | 1465 | 734  | 0.636124241  | C4orf48,SLC2A9,WHSC1,WHSC2                          |
| 6 | 109,875,000 | 110,025,000 | 1466 | 965  | 0.916003199  | SLC2A9                                              |
| 6 | 109,950,000 | 110,100,000 | 1467 | 1152 | 1.147855628  | SLC2A9                                              |
| 6 | 110,025,000 | 110,175,000 | 1468 | 1074 | 1.040990061  | SLC2A9,WDR1                                         |
| 6 | 110,100,000 | 110,250,000 | 1469 | 936  | 0.13542379   | WDR1                                                |
| 6 | 110,175,000 | 110,325,000 | 1470 | 1431 | -0.504804355 | WDR1                                                |
| 6 | 110,250,000 | 110,400,000 | 1471 | 1448 | -0.772154609 | CLNK,ZNF518B                                        |
| 6 | 110,325,000 | 110,475,000 | 1472 | 1513 | -0.334640312 | CLNK,ZNF518B                                        |
| 6 | 110,400,000 | 110,550,000 | 1473 | 1497 | 0.244376742  | CLNK                                                |
| 6 | 110,475,000 | 110,625,000 | 1474 | 896  | -0.464168637 | CLNK                                                |
| 6 | 110,550,000 | 110,700,000 | 1475 | 622  | -1.871969822 | CLNK                                                |
| 6 | 110,625,000 | 110,775,000 | 1476 | 855  | -0.300309943 |                                                     |
| 6 | 110,700,000 | 110,850,000 | 1477 | 955  | 0.013716127  |                                                     |
| 6 | 110,775,000 | 110,925,000 | 1478 | 1063 | -0.286571893 |                                                     |
| 6 | 110,850,000 | 111,000,000 | 1479 | 1351 | -0.21175817  |                                                     |
| 6 | 110,925,000 | 111,075,000 | 1480 | 1357 | 0.396919657  |                                                     |
| 6 | 111,000,000 | 111,150,000 | 1481 | 1530 | 0.994202383  |                                                     |
| 6 | 111,075,000 | 111,225,000 | 1482 | 1668 | 1.007076258  |                                                     |
| 6 | 111,150,000 | 111,300,000 | 1483 | 1386 | 0.857393625  |                                                     |
| 6 | 111,225,000 | 111,375,000 | 1484 | 1072 | 0.832245224  | HS3ST1                                              |
| 6 | 111,300,000 | 111,450,000 | 1485 | 947  | 0.67994335   | HS3ST1                                              |
| 6 | 111,375,000 | 111,525,000 | 1486 | 697  | 0.307320671  | HS3ST1                                              |
| 6 | 111,450,000 | 111,600,000 | 1487 | 646  | 0.015052638  |                                                     |
| 6 | 111,525,000 | 111,675,000 | 1488 | 1097 | 0.264342047  |                                                     |
| 6 | 111,600,000 | 111,750,000 | 1489 | 984  | -0.09671515  |                                                     |
| 6 | 111,675,000 | 111,825,000 | 1490 | 877  | -0.77961788  |                                                     |
| 6 | 111,750,000 | 111,900,000 | 1491 | 1069 | -1.590923261 |                                                     |
| 6 | 111,825,000 | 111,975,000 | 1492 | 726  | -1.993331139 |                                                     |

|   |             |             |      |      |              |                          |
|---|-------------|-------------|------|------|--------------|--------------------------|
| 6 | 111,900,000 | 112,050,000 | 1493 | 644  | 0.40625974   |                          |
| 6 | 111,975,000 | 112,125,000 | 1494 | 875  | 0.456246544  |                          |
| 6 | 112,050,000 | 112,200,000 | 1495 | 1002 | 0.644895546  |                          |
| 6 | 112,125,000 | 112,275,000 | 1496 | 951  | 0.122839017  |                          |
| 6 | 112,200,000 | 112,350,000 | 1497 | 1052 | -0.968722383 |                          |
| 6 | 112,275,000 | 112,425,000 | 1498 | 892  | -1.274796637 |                          |
| 6 | 112,350,000 | 112,500,000 | 1499 | 750  | -2.248789341 |                          |
| 6 | 112,425,000 | 112,575,000 | 1500 | 796  | -1.280914359 |                          |
| 6 | 112,500,000 | 112,650,000 | 1501 | 725  | 0.611581393  |                          |
| 6 | 112,575,000 | 112,725,000 | 1502 | 912  | 1.152177764  |                          |
| 6 | 112,650,000 | 112,800,000 | 1503 | 701  | 0.697321581  |                          |
| 6 | 112,725,000 | 112,875,000 | 1504 | 371  | -0.188842879 |                          |
| 6 | 112,800,000 | 112,950,000 | 1505 | 795  | -0.197656013 |                          |
| 6 | 112,875,000 | 113,025,000 | 1506 | 815  | -0.208585748 |                          |
| 6 | 112,950,000 | 113,100,000 | 1507 | 479  | -1.262031984 |                          |
| 6 | 113,025,000 | 113,175,000 | 1508 | 860  | -0.567983263 |                          |
| 6 | 113,100,000 | 113,250,000 | 1509 | 1149 | 0.435383727  |                          |
| 6 | 113,175,000 | 113,325,000 | 1510 | 1155 | 1.005456037  |                          |
| 6 | 113,250,000 | 113,400,000 | 1511 | 941  | 1.012581779  | ENSBTAG00000000872       |
| 6 | 113,325,000 | 113,475,000 | 1512 | 791  | 0.685577999  | RAB28,ENSBTAG00000000872 |
| 6 | 113,400,000 | 113,550,000 | 1513 | 632  | 0.58680267   | RAB28                    |
| 6 | 113,475,000 | 113,625,000 | 1514 | 376  | 0.373141947  | NKX3-2,RAB28             |
| 6 | 113,550,000 | 113,700,000 | 1515 | 446  | 0.212681523  | BOD1L,NKX3-2,RAB28       |
| 6 | 113,625,000 | 113,775,000 | 1516 | 816  | 0.491287147  | BOD1L,NKX3-2             |
| 6 | 113,700,000 | 113,850,000 | 1517 | 1363 | -0.581438377 | BOD1L                    |
| 6 | 113,775,000 | 113,925,000 | 1518 | 1535 | -1.28498023  |                          |
| 6 | 113,850,000 | 114,000,000 | 1519 | 1190 | -0.225193861 |                          |
| 6 | 113,925,000 | 114,075,000 | 1520 | 979  | 0.504374424  |                          |
| 6 | 114,000,000 | 114,150,000 | 1521 | 977  | 0.830724231  |                          |
| 6 | 114,075,000 | 114,225,000 | 1522 | 835  | 0.572263518  |                          |
| 6 | 114,150,000 | 114,300,000 | 1523 | 652  | -0.251802755 |                          |
| 6 | 114,225,000 | 114,375,000 | 1524 | 552  | 0.50729709   |                          |
| 6 | 114,300,000 | 114,450,000 | 1525 | 507  | -0.05296803  |                          |
| 6 | 114,375,000 | 114,525,000 | 1526 | 605  | -1.659328428 |                          |
| 6 | 114,450,000 | 114,600,000 | 1527 | 972  | -1.671835398 |                          |
| 6 | 114,525,000 | 114,675,000 | 1528 | 1080 | -0.63966348  |                          |
| 6 | 114,600,000 | 114,750,000 | 1529 | 691  | -0.037316346 |                          |
| 6 | 114,675,000 | 114,825,000 | 1530 | 737  | -0.297146136 |                          |
| 6 | 114,750,000 | 114,900,000 | 1531 | 736  | -0.525732282 |                          |
| 6 | 114,825,000 | 114,975,000 | 1532 | 320  | 0.188925427  | CPEB2                    |
| 6 | 114,900,000 | 115,050,000 | 1533 | 182  | 0.300037728  | CPEB2                    |
| 6 | 114,975,000 | 115,125,000 | 1534 | 284  | -0.778432484 | CPEB2                    |
| 6 | 115,050,000 | 115,200,000 | 1535 | 459  | -0.120268016 |                          |
| 6 | 115,125,000 | 115,275,000 | 1536 | 581  | 0.410696427  |                          |
| 6 | 115,200,000 | 115,350,000 | 1537 | 526  | 0.504280948  | C1QTNF7                  |
| 6 | 115,275,000 | 115,425,000 | 1538 | 460  | -0.495533096 | C1QTNF7                  |
| 6 | 115,350,000 | 115,500,000 | 1539 | 478  | -0.362267003 | C1QTNF7,CC2D2A           |
| 6 | 115,425,000 | 115,575,000 | 1540 | 358  | 0.699687742  | CC2D2A,FBXL5             |
| 6 | 115,500,000 | 115,650,000 | 1541 | 299  | 0.407883379  | CC2D2A,FBXL5             |
| 6 | 115,575,000 | 115,725,000 | 1542 | 526  | 0.698807048  | BST1,FBXL5               |
| 6 | 115,650,000 | 115,800,000 | 1543 | 1009 | 0.887933192  | BST1                     |
| 6 | 115,725,000 | 115,875,000 | 1544 | 1310 | 0.481157553  | CD38                     |
| 6 | 115,800,000 | 115,950,000 | 1545 | 920  | -0.339788225 | CD38,FGFBP1              |

|   |             |             |      |      |              |                                             |
|---|-------------|-------------|------|------|--------------|---------------------------------------------|
| 6 | 115,875,000 | 116,025,000 | 1546 | 1011 | 0.130789908  | FGFBP1,PROM1                                |
| 6 | 115,950,000 | 116,100,000 | 1547 | 1246 | 0.787885852  | PROM1                                       |
| 6 | 116,025,000 | 116,175,000 | 1548 | 870  | 0.760453887  | PROM1                                       |
| 6 | 116,100,000 | 116,250,000 | 1549 | 626  | 0.501024083  | PROM1,TAPT1                                 |
| 6 | 116,175,000 | 116,325,000 | 1550 | 450  | 0.454728042  | TAPT1                                       |
| 6 | 116,250,000 | 116,400,000 | 1551 | 400  | 0.474553188  |                                             |
| 6 | 116,325,000 | 116,475,000 | 1552 | 520  | -0.163473914 |                                             |
| 6 | 116,400,000 | 116,550,000 | 1553 | 1120 | 0.100787946  | LDB2                                        |
| 6 | 116,475,000 | 116,625,000 | 1554 | 1330 | 0.213023862  | LDB2                                        |
| 6 | 116,550,000 | 116,700,000 | 1555 | 1109 | -0.433606755 | LDB2                                        |
| 6 | 116,625,000 | 116,775,000 | 1556 | 1123 | -0.781539649 | LDB2                                        |
| 6 | 116,700,000 | 116,850,000 | 1557 | 893  | -1.54886438  | LDB2                                        |
| 6 | 116,775,000 | 116,925,000 | 1558 | 705  | -0.975417051 | LDB2                                        |
| 6 | 116,850,000 | 117,000,000 | 1559 | 655  | 0.382935162  | LDB2,ENSBTAG00000045917                     |
| 6 | 116,925,000 | 117,075,000 | 1560 | 1087 | 0.367965352  | LDB2,ENSBTAG00000045917                     |
| 6 | 117,000,000 | 117,150,000 | 1561 | 1567 | -0.053041668 |                                             |
| 6 | 117,075,000 | 117,225,000 | 1562 | 1025 | -0.45264035  |                                             |
| 6 | 117,150,000 | 117,300,000 | 1563 | 514  | -0.374318311 | ENSBTAG00000039645                          |
| 6 | 117,225,000 | 117,375,000 | 1564 | 561  | -0.022780343 | ENSBTAG00000039645                          |
| 6 | 117,300,000 | 117,450,000 | 1565 | 588  | 0.337652265  |                                             |
| 6 | 117,375,000 | 117,525,000 | 1566 | 593  | 0.189576846  |                                             |
| 6 | 117,450,000 | 117,600,000 | 1567 | 1098 | -0.191817955 |                                             |
| 6 | 117,525,000 | 117,675,000 | 1568 | 1567 | -0.416064622 |                                             |
| 6 | 117,600,000 | 117,750,000 | 1569 | 1337 | -0.004749836 | CLRN2,QDPR                                  |
| 6 | 117,675,000 | 117,825,000 | 1570 | 1253 | 0.812656652  | CLRN2,QDPR,ENSBTAG00000019584               |
| 6 | 117,750,000 | 117,900,000 | 1571 | 1164 | 0.924026907  | CLRN2,ENSBTAG00000019584,ENSBTAG00000027825 |
| 6 | 117,825,000 | 117,975,000 | 1572 | 896  | 0.812028195  | ENSBTAG00000019584,ENSBTAG00000027825       |
| 6 | 117,900,000 | 118,050,000 | 1573 | 762  | 0.861966138  | CNO,MRFAP1,ENSBTAG00000027825               |
| 6 | 117,975,000 | 118,125,000 | 1574 | 561  | 1.073943942  | CNO,MRFAP1                                  |
| 6 | 118,050,000 | 118,200,000 | 1575 | 401  | 0.529646807  | KIAA0232                                    |
| 6 | 118,125,000 | 118,275,000 | 1576 | 516  | -0.830154213 | KIAA0232,TBC1D14                            |
| 6 | 118,200,000 | 118,350,000 | 1577 | 735  | -0.463164129 | CCDC96,GRPEL1,TBC1D14,ENSBTAG00000010185    |
| 6 | 118,275,000 | 118,425,000 | 1578 | 1085 | 0.376530194  | CCDC96,GRPEL1,TBC1D14,ENSBTAG00000010185    |
| 6 | 118,350,000 | 118,500,000 | 1579 | 1422 | 0.426418887  |                                             |
| 6 | 118,425,000 | 118,575,000 | 1580 | 1319 | -0.035802353 |                                             |
| 6 | 118,500,000 | 118,650,000 | 1581 | 1241 | -0.673644518 |                                             |
| 6 | 118,575,000 | 118,725,000 | 1582 | 1611 | -0.181426984 | PSAPL1                                      |
| 6 | 118,650,000 | 118,800,000 | 1583 | 1642 | 0.891511471  | PSAPL1                                      |
| 6 | 118,725,000 | 118,875,000 | 1584 | 1575 | 1.213884548  |                                             |
| 6 | 118,800,000 | 118,950,000 | 1585 | 1569 | 1.244850653  | AFAP1,SORCS2                                |
| 6 | 118,875,000 | 119,025,000 | 1586 | 1003 | 0.572354597  | AFAP1,SORCS2                                |
| 6 | 118,950,000 | 119,100,000 | 1587 | 863  | 0.539030782  | AFAP1                                       |
| 6 | 119,025,000 | 119,175,000 | 1588 | 1004 | 0.667802753  | ABLIM2,AFAP1                                |
| 6 | 119,100,000 | 119,250,000 | 1589 | 1398 | 0.235230888  | ABLIM2                                      |
| 6 | 119,175,000 | 119,325,000 | 1590 | 1851 | -0.493255337 | ABLIM2,SH3TC1                               |
| 6 | 119,250,000 | 119,400,000 | 1591 | 1677 | -1.299803102 | HTRA3,SH3TC1                                |
| 6 | 119,325,000 | 119,458,736 | 1592 | 1226 | -0.895700035 | HTRA3,SH3TC1                                |
| 7 | 0           | 150,000     | 1    | 328  | 0.865711222  |                                             |
| 7 | 75,000      | 225,000     | 2    | 359  | 0.830624046  | ENSBTAG00000040610                          |
| 7 | 150,000     | 300,000     | 3    | 494  | 0.531714014  | ENSBTAG00000037602,ENSBTAG00000040610       |
| 7 | 225,000     | 375,000     | 4    | 989  | 0.624558075  | ENSBTAG00000037602                          |
| 7 | 300,000     | 450,000     | 5    | 827  | 0.639036163  | FLT4                                        |
| 7 | 375,000     | 525,000     | 6    | 301  | 0.813403778  | CNOT6,FLT4                                  |



|   |           |           |    |      |              |                                                                 |
|---|-----------|-----------|----|------|--------------|-----------------------------------------------------------------|
| 7 | 450,000   | 600,000   | 7  | 229  | 0.729746215  | CNOT6                                                           |
| 7 | 525,000   | 675,000   | 8  | 540  | 0.60723696   | CNOT6                                                           |
| 7 | 600,000   | 750,000   | 9  | 903  | 0.580368982  |                                                                 |
| 7 | 675,000   | 825,000   | 10 | 669  | 0.716631815  | GFPT2                                                           |
| 7 | 750,000   | 900,000   | 11 | 454  | 1.058697196  | GFPT2,MAPK9                                                     |
| 7 | 825,000   | 975,000   | 12 | 734  | 0.777100449  | MAPK9,ENSBTAG00000047695                                        |
| 7 | 900,000   | 1,050,000 | 13 | 1000 | 0.903820701  | RASGEF1C,ENSBTAG00000047695                                     |
| 7 | 975,000   | 1,125,000 | 14 | 866  | 0.529616825  | RASGEF1C,RNF130                                                 |
| 7 | 1,050,000 | 1,200,000 | 15 | 606  | -1.14701834  | RNF130                                                          |
| 7 | 1,125,000 | 1,275,000 | 16 | 547  | -1.360331659 | RNF130,TBC1D9B                                                  |
| 7 | 1,200,000 | 1,350,000 | 17 | 872  | -1.533477848 | C7H5orf45,RNF130,SQSTM1,TBC1D9B                                 |
| 7 | 1,275,000 | 1,425,000 | 18 | 897  | -0.563594781 | C7H5orf45,LTC4S,MGAT4B,SQSTM1,TBC1D9B                           |
| 7 | 1,350,000 | 1,500,000 | 19 | 615  | 0.365022593  | LTC4S,MAML1,MGAT4B                                              |
| 7 | 1,425,000 | 1,575,000 | 20 | 478  | 0.24287369   | CANX,CBY3,MAML1                                                 |
| 7 | 1,500,000 | 1,650,000 | 21 | 431  | 0.685346849  | CANX,CBY3,HNRNPH1,RUFY1                                         |
| 7 | 1,575,000 | 1,725,000 | 22 | 607  | 0.004193733  | HNRNPH1,RUFY1                                                   |
| 7 | 1,650,000 | 1,800,000 | 23 | 779  | 0.172429551  | RUFY1                                                           |
| 7 | 1,725,000 | 1,875,000 | 24 | 743  | 0.436370806  |                                                                 |
| 7 | 1,800,000 | 1,950,000 | 25 | 801  | 0.326492654  |                                                                 |
| 7 | 1,875,000 | 2,025,000 | 26 | 899  | 0.379671071  | ADAMTS2                                                         |
| 7 | 1,950,000 | 2,100,000 | 27 | 696  | -0.540006331 | ADAMTS2                                                         |
| 7 | 2,025,000 | 2,175,000 | 28 | 441  | -0.704405042 | ADAMTS2                                                         |
| 7 | 2,100,000 | 2,250,000 | 29 | 320  | 0.602796029  | ADAMTS2,ZNF354C,ZNF879                                          |
| 7 | 2,175,000 | 2,325,000 | 30 | 795  | 0.435700456  | GRM6,ZNF354C,ZNF879,ENSBTAG00000034973                          |
| 7 | 2,250,000 | 2,400,000 | 31 | 845  | 0.403816277  | GRM6,ZFP2,ZNF454,ZNF879,ENSBTAG00000034973                      |
| 7 | 2,325,000 | 2,475,000 | 32 | 485  | 0.14547149   | RNF187,ZFP2,ZNF454                                              |
| 7 | 2,400,000 | 2,550,000 | 33 | 440  | -1.57096287  | HIST3H2A,HIST3H2BB,RNF187,TRIM11,TRIM17                         |
| 7 | 2,475,000 | 2,625,000 | 34 | 797  | -1.311610772 | HIST3H2A,HIST3H2BB,MGC166429,TRIM11,TRIM17,ENSBTAG00000001604   |
| 7 | 2,550,000 | 2,700,000 | 35 | 1177 | -0.595378339 | MGC166429,TRIM11,ENSBTAG00000001604                             |
| 7 | 2,625,000 | 2,775,000 | 36 | 1138 | -0.693696731 |                                                                 |
| 7 | 2,700,000 | 2,850,000 | 37 | 1301 | 0.018407273  |                                                                 |
| 7 | 2,775,000 | 2,925,000 | 38 | 1112 | 0.433100609  | ARF1,GJC2,GUK1,IBA57,MMTAG2,MRPL55                              |
| 7 | 2,850,000 | 3,000,000 | 39 | 667  | 0.283846256  | ARF1,GJC2,GUK1,IBA57,MMTAG2,MRPL55,WNT3A                        |
| 7 | 2,925,000 | 3,075,000 | 40 | 504  | -0.072528575 | ARF1,WNT3A,WNT9A                                                |
| 7 | 3,000,000 | 3,150,000 | 41 | 789  | -0.836012011 | WNT9A,ENSBTAG00000011216                                        |
| 7 | 3,075,000 | 3,225,000 | 42 | 932  | -0.775005472 | PRSS38,ENSBTAG00000011216                                       |
| 7 | 3,150,000 | 3,300,000 | 43 | 661  | -0.150189293 | PRSS38,ENSBTAG00000011216                                       |
| 7 | 3,225,000 | 3,375,000 | 44 | 925  | -0.218441281 | SNAP47                                                          |
| 7 | 3,300,000 | 3,450,000 | 45 | 995  | -0.075596134 | JMJD4,SNAP47,ZNF354B                                            |
| 7 | 3,375,000 | 3,525,000 | 46 | 1147 | 0.430612231  | JMJD4,SNAP47,ZNF354B                                            |
| 7 | 3,450,000 | 3,600,000 | 47 | 1246 | 0.225060939  | ATP13A1                                                         |
| 7 | 3,525,000 | 3,675,000 | 48 | 892  | -0.338995416 | ATP13A1,GMIP,LPAR2,PBX4                                         |
| 7 | 3,600,000 | 3,750,000 | 49 | 712  | -0.298951655 | ATP13A1,CILP2,GATAD2A,GMIP,LPAR2,NDUFA13,PBX4,TSK6,YJEFN3       |
| 7 | 3,675,000 | 3,825,000 | 50 | 474  | 0.845786763  | CILP2,GATAD2A,NDUFA13,PBX4,TSSK6,YJEFN3                         |
| 7 | 3,750,000 | 3,900,000 | 51 | 365  | 0.451559473  | GATAD2A,MAU2,SF4                                                |
| 7 | 3,825,000 | 3,975,000 | 52 | 674  | 0.384808532  | GATAD2A,HAPLN4,MAU2,NCAN,SF4,TM6SF2                             |
| 7 | 3,900,000 | 4,050,000 | 53 | 1018 | 0.264488923  | HAPLN4,MEF2B,MEF2BNB,NCAN,NR2C2AP,RFXANK,SF4,TM6SF2,TMEM161A    |
| 7 | 3,975,000 | 4,125,000 | 54 | 708  | 0.16728442   | ARMC6,MEF2B,MEF2BNB,NCAN,NR2C2AP,RFXANK,SLC25A42,SUGP2,TMEM161A |
| 7 | 4,050,000 | 4,200,000 | 55 | 746  | 0.38126302   | ARMC6,SLC25A42,SUGP2                                            |

|   |           |           |     |      |              |                                                                                                |
|---|-----------|-----------|-----|------|--------------|------------------------------------------------------------------------------------------------|
| 7 | 4,125,000 | 4,275,000 | 56  | 833  | 0.203700439  | COPE,DDX49,HOMER3,LASS1,SUGP2,UPF1,ENSBTAG0000020923                                           |
| 7 | 4,200,000 | 4,350,000 | 57  | 546  | -0.779776148 | COPE,DDX49,HOMER3,LASS1,UPF1,ENSBTAG00000020923                                                |
| 7 | 4,275,000 | 4,425,000 | 58  | 551  | -1.025362454 | COMP,CRTC1,UPF1                                                                                |
| 7 | 4,350,000 | 4,500,000 | 59  | 437  | -0.334545652 | COMP,CRTC1,KLHL26                                                                              |
| 7 | 4,425,000 | 4,575,000 | 60  | 328  | 0.320192016  | C19orf60,CRLF1,CRTC1,FKBP8,KLHL26,KXD1,TMEM59L,UBA52                                           |
| 7 | 4,500,000 | 4,650,000 | 61  | 464  | 0.776480302  | C19orf60,CRLF1,ELL,FKBP8,KXD1,TMEM59L,UBA52                                                    |
| 7 | 4,575,000 | 4,725,000 | 62  | 761  | 0.649219243  | ELL,GDF15,ISYNA1,LRRC25,SSBP4                                                                  |
| 7 | 4,650,000 | 4,800,000 | 63  | 891  | 0.869637605  | ELL,GDF15,ISYNA1,LRRC25,PGPEP1,SSBP4                                                           |
| 7 | 4,725,000 | 4,875,000 | 64  | 684  | 1.194235852  | CIST1,LSM4,PGPEP1                                                                              |
| 7 | 4,800,000 | 4,950,000 | 65  | 678  | 0.935554259  | CIST1,KIAA1683,LSM4,PDE4C,RAB3A                                                                |
| 7 | 4,875,000 | 5,025,000 | 66  | 681  | 0.212013151  | CIST1,IFI30,KIAA1683,MAST3,MPV17L2,PDE4C,PIK3R2,RAB3A                                          |
| 7 | 4,950,000 | 5,100,000 | 67  | 798  | -0.41948684  | IFI30,IL12RB1,MAST3,MPV17L2,PIK3R2,RAB3A                                                       |
| 7 | 5,025,000 | 5,175,000 | 68  | 911  | 0.015746766  | ARRDC2,CCDC124,IL12RB1,KCNN1,MAST3                                                             |
| 7 | 5,100,000 | 5,250,000 | 69  | 730  | 0.776748584  | ARRDC2,CCDC124,JAK3,KCNN1,RPL18A,SLC5A5                                                        |
| 7 | 5,175,000 | 5,325,000 | 70  | 666  | 0.98189664   | B3GNT3,FCHO1,INSL3,JAK3,RPL18A,SLC5A5                                                          |
| 7 | 5,250,000 | 5,400,000 | 71  | 757  | 0.92504357   | B3GNT3,FCHO1,INSL3,MAP1S,UNC13A                                                                |
| 7 | 5,325,000 | 5,475,000 | 72  | 966  | 0.326497784  | COLGALT1,MAP1S,UNC13A                                                                          |
| 7 | 5,400,000 | 5,550,000 | 73  | 1156 | 0.257968637  | COLGALT1,FAM129C,PGLS,SLC27A1,UNC13A                                                           |
| 7 | 5,475,000 | 5,625,000 | 74  | 1007 | -0.009178452 | COLGALT1,FAM129C,MVB12A,NXNL1,PGLS,SLC27A1,ENSBTAG00000025767                                  |
| 7 | 5,550,000 | 5,700,000 | 75  | 969  | -0.12537188  | MVB12A,NXNL1,PLVAP,SLC27A1,ENSBTAG00000008021,ENSBTAG00000025767,ENSBTAG00000045588            |
| 7 | 5,625,000 | 5,775,000 | 76  | 738  | 0.258496726  | ABHD8,ANKLE1,ANO8,BABAM1,DDA1,GTPBP3,MRPL34,PLVAP,USHBP1,ENSBTAG00000008021,ENSBTAG00000045588 |
| 7 | 5,700,000 | 5,850,000 | 77  | 324  | 0.564964417  | ABHD8,ANKLE1,ANO8,BABAM1,DDA1,GTPBP3,MRPL34,MYO9B,NR2F6,PLVAP,USE1,USHBP1,ENSBTAG00000011135   |
| 7 | 5,775,000 | 5,925,000 | 78  | 531  | 0.418473382  | HICE1,MYO9B,NR2F6,USE1,USHBP1,ENSBTAG00000011135                                               |
| 7 | 5,850,000 | 6,000,000 | 79  | 772  | -0.242719693 | CPAMD8,HICE1,MYO9B                                                                             |
| 7 | 5,925,000 | 6,075,000 | 80  | 1185 | 0.223000264  | CPAMD8,HICE1                                                                                   |
| 7 | 6,000,000 | 6,150,000 | 81  | 1624 | 0.447830774  | CPAMD8,F2RL3,SIN3B                                                                             |
| 7 | 6,075,000 | 6,225,000 | 82  | 1409 | 0.144355901  | CPAMD8,F2RL3,NWD1,SIN3B                                                                        |
| 7 | 6,150,000 | 6,300,000 | 83  | 1368 | 0.946367348  | NWD1,TMEM38A                                                                                   |
| 7 | 6,225,000 | 6,375,000 | 84  | 1258 | 1.147221122  | MED26,TMEM38A,ENSBTAG00000013613                                                               |
| 7 | 6,300,000 | 6,450,000 | 85  | 839  | 0.864441982  | C19orf44,CHERP,MED26,SLC35E1,TMEM38A,ENSBTAG000013613,ENSBTAG00000027878                       |
| 7 | 6,375,000 | 6,525,000 | 86  | 982  | 0.35012144   | C19orf44,CALR3,CHERP,EPS15L1,MED26,SLC35E1,ENSBTAG00000027878                                  |
| 7 | 6,450,000 | 6,600,000 | 87  | 1258 | -1.036066826 | CALR3,EPS15L1                                                                                  |
| 7 | 6,525,000 | 6,675,000 | 88  | 1298 | -1.120420184 | EPS15L1                                                                                        |
| 7 | 6,600,000 | 6,750,000 | 89  | 887  | -0.186401037 | ENSBTAG00000047589                                                                             |
| 7 | 6,675,000 | 6,825,000 | 90  | 262  | -0.728604798 | ENSBTAG00000047589                                                                             |
| 7 | 7,650,000 | 7,800,000 | 103 | 25   | -0.241372372 |                                                                                                |
| 7 | 7,725,000 | 7,875,000 | 104 | 639  | 0.176543272  | AP1M1,CIB3,FAM32A                                                                              |
| 7 | 7,800,000 | 7,950,000 | 105 | 934  | 0.514904938  | AP1M1,CIB3,FAM32A,HSH2D,RAB8A,TPM4                                                             |
| 7 | 7,875,000 | 8,025,000 | 106 | 1015 | 0.519985795  | CIB3,HSH2D,RAB8A,TPM4,ENSBTAG00000039983,ENSBTAG00000047796                                    |

|   |            |            |     |      |              |                                                                                                                                                        |
|---|------------|------------|-----|------|--------------|--------------------------------------------------------------------------------------------------------------------------------------------------------|
| 7 | 7,950,000  | 8,100,000  | 107 | 1438 | 0.602186385  | ENSBTAG00000009069,ENSBTAG00000033092,ENSBTAG0000039983,ENSBTAG00000047796                                                                             |
| 7 | 8,025,000  | 8,175,000  | 108 | 1821 | 1.014822892  | ENSBTAG00000009069,ENSBTAG00000018736,ENSBTAG0000033092,ENSBTAG00000033146,ENSBTAG00000045972,ENSBTAG00000047215                                       |
| 7 | 8,100,000  | 8,250,000  | 109 | 1599 | 1.058065193  | ENSBTAG00000008335,ENSBTAG00000018736,ENSBTAG0000033146,ENSBTAG00000037458,ENSBTAG00000038980,ENSBTAG00000039921,ENSBTAG00000045972,ENSBTAG00000047215 |
| 7 | 8,175,000  | 8,325,000  | 110 | 1055 | 1.02483772   | OR10H1,ENSBTAG00000006488,ENSBTAG00000008335,ENSBTAG00000037458,ENSBTAG00000038980,ENSBTAG0000039921                                                   |
| 7 | 8,250,000  | 8,400,000  | 111 | 1151 | 1.063464678  | OR10H1,ENSBTAG00000006216,ENSBTAG00000006488,ENSBTAG00000039337                                                                                        |
| 7 | 8,325,000  | 8,475,000  | 112 | 909  | 1.121144947  | CYP4F2,ENSBTAG00000006216,ENSBTAG00000038549,ENSBTAG00000039337                                                                                        |
| 7 | 8,400,000  | 8,550,000  | 113 | 499  | 0.842898698  | CYP4F2,ENSBTAG00000038549,ENSBTAG00000039319                                                                                                           |
| 7 | 8,475,000  | 8,625,000  | 114 | 454  | 0.275948604  | CYP4F3,ENSBTAG00000025748,ENSBTAG00000038549,ENSBTAG00000039319                                                                                        |
| 7 | 8,550,000  | 8,700,000  | 115 | 475  | 0.398292456  | CYP4F22,CYP4F3,ENSBTAG00000025748                                                                                                                      |
| 7 | 8,625,000  | 8,775,000  | 116 | 405  | 0.928032521  | AKAP8L,CYP4F22,PGLYRP2,RASAL3,WIZ                                                                                                                      |
| 7 | 8,700,000  | 8,850,000  | 117 | 330  | 0.656069769  | AKAP8,AKAP8L,PGLYRP2,RASAL3,WIZ                                                                                                                        |
| 7 | 8,775,000  | 8,925,000  | 118 | 278  | 0.501429444  | AKAP8,AKAP8L,BRD4,EPHX3                                                                                                                                |
| 7 | 8,850,000  | 9,000,000  | 119 | 359  | 1.041763282  | BRD4,EPHX3,NOTCH3,ENSBTAG00000040305                                                                                                                   |
| 7 | 8,925,000  | 9,075,000  | 120 | 505  | 1.015128421  | ILVBL,NOTCH3,SYDE1,ENSBTAG00000002686,ENSBTAG0000040305                                                                                                |
| 7 | 9,000,000  | 9,150,000  | 121 | 817  | 0.922720366  | CASP14,ILVBL,SYDE1,ENSBTAG00000002686,ENSBTAG000011496,ENSBTAG00000040305                                                                              |
| 7 | 9,075,000  | 9,225,000  | 122 | 1111 | 0.875809862  | CASP14,CCDC105,SLC1A6,ENSBTAG00000011496                                                                                                               |
| 7 | 9,150,000  | 9,300,000  | 123 | 1139 | -0.050992671 | CCDC105,OR7C2,SLC1A6,ENSBTAG00000027699,ENSBTAG00000039533                                                                                             |
| 7 | 9,225,000  | 9,375,000  | 124 | 728  | -1.040859997 | OR7C2,ENSBTAG00000027699,ENSBTAG00000039533                                                                                                            |
| 7 | 9,300,000  | 9,450,000  | 125 | 316  | -0.572864606 | ENSBTAG00000045638                                                                                                                                     |
| 7 | 9,375,000  | 9,525,000  | 126 | 956  | 0.014298516  | ENSBTAG00000036175,ENSBTAG00000045638,ENSBTAG0000047429,ENSBTAG00000047888                                                                             |
| 7 | 9,450,000  | 9,600,000  | 127 | 1398 | 0.520202259  | ENSBTAG00000034909,ENSBTAG00000036175,ENSBTAG0000036331,ENSBTAG00000047429,ENSBTAG00000047888,ENSBTAG00000048056                                       |
| 7 | 9,525,000  | 9,675,000  | 128 | 1137 | 0.3165562    | ENSBTAG00000034909,ENSBTAG00000036331,ENSBTAG0000048015,ENSBTAG00000048056                                                                             |
| 7 | 9,600,000  | 9,750,000  | 129 | 1600 | 0.802532788  | ENSBTAG00000038533,ENSBTAG00000046423,ENSBTAG0000048015                                                                                                |
| 7 | 9,675,000  | 9,825,000  | 130 | 1889 | 0.994979447  | ENSBTAG00000038533,ENSBTAG00000046423                                                                                                                  |
| 7 | 9,750,000  | 9,900,000  | 131 | 1452 | 0.984553863  |                                                                                                                                                        |
| 7 | 9,825,000  | 9,975,000  | 132 | 1058 | 0.973508421  | ENSBTAG00000046297                                                                                                                                     |
| 7 | 9,900,000  | 10,050,000 | 133 | 1003 | 0.781292388  | ENSBTAG00000046297,ENSBTAG00000046945,ENSBTAG0000048208                                                                                                |
| 7 | 9,975,000  | 10,125,000 | 134 | 1421 | 0.698672892  | ENSBTAG00000046945,ENSBTAG00000048208                                                                                                                  |
| 7 | 10,050,000 | 10,200,000 | 135 | 1581 | 0.597459187  | ENSBTAG00000022663,ENSBTAG00000024397,ENSBTAG0000039877                                                                                                |
| 7 | 10,125,000 | 10,275,000 | 136 | 1749 | -1.51276217  | ENSBTAG00000022663,ENSBTAG00000024397,ENSBTAG0000039877,ENSBTAG00000047539                                                                             |
| 7 | 10,200,000 | 10,350,000 | 137 | 1651 | -1.922995617 | ENSBTAG00000046233,ENSBTAG00000047539                                                                                                                  |

|   |            |            |     |      |              |                                                                               |
|---|------------|------------|-----|------|--------------|-------------------------------------------------------------------------------|
| 7 | 10,275,000 | 10,425,000 | 138 | 1492 | 0.379870291  | ENSBTAG00000046233,ENSBTAG00000048072                                         |
| 7 | 10,350,000 | 10,500,000 | 139 | 1508 | 0.152812447  | ENSBTAG00000047817,ENSBTAG00000048066,ENSBTAG0000048072                       |
| 7 | 10,425,000 | 10,575,000 | 140 | 1225 | 0.452003931  | ENSBTAG00000046513,ENSBTAG00000047817,ENSBTAG0000048066                       |
| 7 | 10,500,000 | 10,650,000 | 141 | 1265 | 0.480807309  | ENSBTAG00000046513                                                            |
| 7 | 10,575,000 | 10,725,000 | 142 | 1290 | 0.322340797  | ENSBTAG00000047244,ENSBTAG00000048193                                         |
| 7 | 10,650,000 | 10,800,000 | 143 | 1278 | 0.586594459  | ENSBTAG00000047244,ENSBTAG00000048193                                         |
| 7 | 10,725,000 | 10,875,000 | 144 | 1201 | 0.701517688  |                                                                               |
| 7 | 10,800,000 | 10,950,000 | 145 | 1092 | -0.377084327 | ENSBTAG00000046958,ENSBTAG00000047696                                         |
| 7 | 10,875,000 | 11,025,000 | 146 | 1708 | -0.974956739 | ENSBTAG00000034917,ENSBTAG00000035241,ENSBTAG0000046958,ENSBTAG00000047696    |
| 7 | 10,950,000 | 11,100,000 | 147 | 1945 | -0.476552172 | ENSBTAG00000034917,ENSBTAG00000035241                                         |
| 7 | 11,025,000 | 11,175,000 | 148 | 1369 | -0.488582211 | ENSBTAG00000045561,ENSBTAG00000046163                                         |
| 7 | 11,100,000 | 11,250,000 | 149 | 1384 | -0.082879375 | ENSBTAG00000045561,ENSBTAG00000046163,ENSBTAG0000046397                       |
| 7 | 11,175,000 | 11,325,000 | 150 | 1949 | 0.57030902   | ENSBTAG00000045927,ENSBTAG00000046397,ENSBTAG0000046798,ENSBTAG00000047576    |
| 7 | 11,250,000 | 11,400,000 | 151 | 1600 | 0.289448002  | ENSBTAG00000045927,ENSBTAG00000046798,ENSBTAG0000047433,ENSBTAG00000047576    |
| 7 | 11,325,000 | 11,475,000 | 152 | 935  | -0.754485363 | ENSBTAG00000014365,ENSBTAG00000047433,ENSBTAG0000047576                       |
| 7 | 11,400,000 | 11,550,000 | 153 | 1106 | -0.366043627 | ENSBTAG00000014365                                                            |
| 7 | 11,475,000 | 11,625,000 | 154 | 1284 | 0.23983312   | ENSBTAG00000026148,ENSBTAG00000033061                                         |
| 7 | 11,550,000 | 11,700,000 | 155 | 1257 | 0.303602091  | ENSBTAG00000026148,ENSBTAG00000033061                                         |
| 7 | 11,625,000 | 11,775,000 | 156 | 1248 | 0.646856627  | ENSBTAG00000026148,ENSBTAG00000033055                                         |
| 7 | 11,700,000 | 11,850,000 | 157 | 1244 | 0.970078889  | ENSBTAG00000003528,ENSBTAG00000033055                                         |
| 7 | 11,775,000 | 11,925,000 | 158 | 960  | 0.956456649  | ENSBTAG00000003528                                                            |
| 7 | 11,850,000 | 12,000,000 | 159 | 1147 | 0.37860909   |                                                                               |
| 7 | 11,925,000 | 12,075,000 | 160 | 1432 | 0.443240471  | ENSBTAG00000025908                                                            |
| 7 | 12,000,000 | 12,150,000 | 161 | 672  | 0.791773748  | ENSBTAG00000025908                                                            |
| 7 | 12,075,000 | 12,225,000 | 162 | 595  | 0.833780789  | EMR3,ZNF333                                                                   |
| 7 | 12,150,000 | 12,300,000 | 163 | 1057 | 0.728514497  | EMR3,ZNF333                                                                   |
| 7 | 12,225,000 | 12,375,000 | 164 | 732  | 0.271933092  | DNAJB1,EMR3,NDUFB7,TECR                                                       |
| 7 | 12,300,000 | 12,450,000 | 165 | 421  | -0.117711276 | DDX39,DNAJB1,EP1,GIPC1,NDUFB7,PKN1,TECR                                       |
| 7 | 12,375,000 | 12,525,000 | 166 | 544  | 0.041089711  | CD97,DDX39,EP1,GIPC1,PKN1                                                     |
| 7 | 12,450,000 | 12,600,000 | 167 | 653  | 0.363629949  | CD97,DDX39                                                                    |
| 7 | 12,525,000 | 12,675,000 | 168 | 387  | 0.741569218  | LPHN1                                                                         |
| 7 | 12,600,000 | 12,750,000 | 169 | 164  | -0.119103838 | ASF1B,C19orf67,IL27RA,LPHN1,MIR1199,PALM3,PRKACA                              |
| 7 | 12,675,000 | 12,825,000 | 170 | 199  | 0.018851531  | ASF1B,C19orf67,HGNC:9982,IL27RA,MIR1199,PALM3,PRKACA,RLN3,RPL13A              |
| 7 | 12,750,000 | 12,900,000 | 171 | 309  | 0.402740462  | C19orf57,CC2D1A,DCAF15,HGNC:9982,IL27RA,PODNL1,RLN3,RPL13A                    |
| 7 | 12,825,000 | 12,975,000 | 172 | 312  | 0.64386399   | C19orf57,C7H19orf53,CC2D1A,CCDC130,DCAF15,HGNC:9982,MRI1,NANOS3,PODNL1,ZSWIM4 |
| 7 | 12,900,000 | 13,050,000 | 173 | 360  | 0.810276428  | C19orf57,C7H19orf53,CCDC130,MRI1,NANOS3,ZSWIM4                                |
| 7 | 12,975,000 | 13,125,000 | 174 | 695  | 0.773326399  | ZSWIM4                                                                        |
| 7 | 13,050,000 | 13,200,000 | 175 | 850  | 0.521300829  |                                                                               |
| 7 | 13,125,000 | 13,275,000 | 176 | 781  | 0.435743945  | CACNA1A                                                                       |
| 7 | 13,200,000 | 13,350,000 | 177 | 946  | 0.429413489  | CACNA1A                                                                       |
| 7 | 13,275,000 | 13,425,000 | 178 | 1047 | -0.210777476 | CACNA1A                                                                       |
| 7 | 13,350,000 | 13,500,000 | 179 | 762  | -0.956337455 | CACNA1A                                                                       |
| 7 | 13,425,000 | 13,575,000 | 180 | 396  | -1.146630892 | CACNA1A,IER2,NACC1,STX10,TRMT1                                                |

|   |            |            |     |      |              |                                                                                                                           |
|---|------------|------------|-----|------|--------------|---------------------------------------------------------------------------------------------------------------------------|
| 7 | 13,500,000 | 13,650,000 | 181 | 326  | -5.038064562 | CACNA1A,IER2,LYL1,NACC1,NFIX,STX10,TRMT1                                                                                  |
| 7 | 13,575,000 | 13,725,000 | 182 | 279  | -5.086856553 | GADD45GIP1,LYL1,NFIX,RAD23A,TRMT1                                                                                         |
| 7 | 13,650,000 | 13,800,000 | 183 | 218  | -0.220169312 | CALR,DNASE2,FARSA,GADD45GIP1,GCDH,KLF1,MAST1,NF<br>IX,RAD23A,SYCE2                                                        |
| 7 | 13,725,000 | 13,875,000 | 184 | 306  | 0.522948167  | CALR,DNASE2,FARSA,GCDH,HOOK2,JUNB,KLF1,MAST1,PR<br>DX2,RAD23A,RNASEH2A,RTBDN,SYCE2                                        |
| 7 | 13,800,000 | 13,950,000 | 185 | 401  | 1.080883223  | ASNA1,BEST2,C7H19orf43,DHPS,FBXW9,HOOK2,JUNB,MA<br>ST1,MORG1,PRDX2,RNASEH2A,RTBDN,TNPO2,WDR83OS,<br>ENSBTAG00000006251    |
| 7 | 13,875,000 | 14,025,000 | 186 | 416  | 1.063402002  | ASNA1,BEST2,C7H19orf43,DHPS,FBXW9,MAN2B1,MORG1,<br>TNPO2,WDR83OS,ZNF791,ENSBTAG00000006251                                |
| 7 | 13,950,000 | 14,100,000 | 187 | 619  | -0.52438709  | MAN2B1,WDR83OS,ZNF791                                                                                                     |
| 7 | 14,025,000 | 14,175,000 | 188 | 971  | 0.403243328  |                                                                                                                           |
| 7 | 14,100,000 | 14,250,000 | 189 | 996  | 1.201701417  |                                                                                                                           |
| 7 | 14,175,000 | 14,325,000 | 190 | 1111 | 0.674284407  | MUC16,ENSBTAG00000021529                                                                                                  |
| 7 | 14,250,000 | 14,400,000 | 191 | 1462 | 0.265577513  | MUC16,ENSBTAG00000021529                                                                                                  |
| 7 | 14,325,000 | 14,475,000 | 192 | 1501 | 0.265057965  | MUC16                                                                                                                     |
| 7 | 14,400,000 | 14,550,000 | 193 | 1210 | 0.282799918  | OR1M1                                                                                                                     |
| 7 | 14,475,000 | 14,625,000 | 194 | 915  | 0.078305621  | OR1M1,ENSBTAG00000022640,ENSBTAG00000023623,EN<br>SBTAG00000032142                                                        |
| 7 | 14,550,000 | 14,700,000 | 195 | 1250 | -0.411711828 | ENSBTAG00000022640,ENSBTAG00000023623,ENSBTAG0<br>0000032142,ENSBTAG00000038714,ENSBTAG0000003913<br>0,ENSBTAG00000040157 |
| 7 | 14,625,000 | 14,775,000 | 196 | 1407 | -0.703835921 | OR7D2,ZNF317,ENSBTAG00000038510,ENSBTAG0000003<br>8714,ENSBTAG00000039130,ENSBTAG00000040157                              |
| 7 | 14,700,000 | 14,850,000 | 197 | 1374 | 0.202897536  | OR7D2,ZNF317,ENSBTAG00000038510                                                                                           |
| 7 | 14,775,000 | 14,925,000 | 198 | 1574 | 0.028711201  | OR7G2,ENSBTAG00000035395,ENSBTAG00000039809                                                                               |
| 7 | 14,850,000 | 15,000,000 | 199 | 1632 | -1.382884563 | OR7G2,ENSBTAG00000035395,ENSBTAG00000039809,EN<br>SBTAG00000040482,ENSBTAG00000046808,ENSBTAG000<br>00046982              |
| 7 | 14,925,000 | 15,075,000 | 200 | 1957 | -0.319921672 | ENSBTAG00000004369,ENSBTAG00000040482,ENSBTAG0<br>0000046808,ENSBTAG00000046982,ENSBTAG0000004792<br>1                    |
| 7 | 15,000,000 | 15,150,000 | 201 | 1805 | 0.790116671  | ENSBTAG00000004369,ENSBTAG00000046564,ENSBTAG0<br>0000046982,ENSBTAG00000047921                                           |
| 7 | 15,075,000 | 15,225,000 | 202 | 1559 | 0.61974616   | ENSBTAG00000046139,ENSBTAG00000046249,ENSBTAG0<br>0000046564,ENSBTAG00000047799                                           |
| 7 | 15,150,000 | 15,300,000 | 203 | 1729 | 0.883650583  | ENSBTAG00000046139,ENSBTAG00000046249,ENSBTAG0<br>0000047414,ENSBTAG00000047799                                           |
| 7 | 15,225,000 | 15,375,000 | 204 | 1580 | 0.64260969   | ZNF699,ENSBTAG00000039493,ENSBTAG00000046139,EN<br>SBTAG00000047414                                                       |
| 7 | 15,300,000 | 15,450,000 | 205 | 1081 | -0.07404378  | ZNF266,ZNF699,ENSBTAG00000039493,ENSBTAG0000004<br>6265                                                                   |
| 7 | 15,375,000 | 15,525,000 | 206 | 585  | 0.060005992  | FBXL12,ZNF266,ENSBTAG00000035777,ENSBTAG0000004<br>6265                                                                   |
| 7 | 15,450,000 | 15,600,000 | 207 | 455  | -0.300277524 | FBXL12,OLFM2,PIN1,ZNF266,ENSBTAG00000035777                                                                               |
| 7 | 15,525,000 | 15,675,000 | 208 | 609  | -0.050278857 | IGHV6-<br>1,OLFM2,PIN1,ENSBTAG00000045635,ENSBTAG00000047<br>507                                                          |
| 7 | 15,600,000 | 15,750,000 | 209 | 667  | 0.484616403  | IGHV6-<br>1,ENSBTAG00000045635,ENSBTAG00000046813,ENSBTA<br>G00000047177,ENSBTAG00000047507                               |

|   |            |            |     |      |              |                                                                                              |
|---|------------|------------|-----|------|--------------|----------------------------------------------------------------------------------------------|
| 7 | 15,675,000 | 15,825,000 | 210 | 839  | 0.721340433  | COL5A3,RDH8,ENSBTAG00000046813,ENSBTAG00000047177                                            |
| 7 | 15,750,000 | 15,900,000 | 211 | 1075 | 0.644493808  | ANGPTL6,C7H19orf66,COL5A3,EIF3G,P2RY11,PPAN-P2RY11,RDH8,ENSBTAG00000015557                   |
| 7 | 15,825,000 | 15,975,000 | 212 | 1178 | 0.700720927  | ANGPTL6,C7H19orf66,DNMT1,EIF3G,P2RY11,PPAN-P2RY11,S1PR2,ENSBTAG00000015557                   |
| 7 | 15,900,000 | 16,050,000 | 213 | 1109 | 0.764473037  | DNMT1,EIF3G,ICAM1,MRPL4,S1PR2                                                                |
| 7 | 15,975,000 | 16,125,000 | 214 | 909  | 0.610597612  | FDX1L,ICAM1,ICAM3,ICAM4,ICAM5,MRPL4,RAVER1,S1PR2,TYK2,ZGLP1                                  |
| 7 | 16,050,000 | 16,200,000 | 215 | 921  | 0.562396624  | CDC37,FDX1L,ICAM1,ICAM3,ICAM4,ICAM5,PDE4A,RAVER1,TYK2,ZGLP1                                  |
| 7 | 16,125,000 | 16,275,000 | 216 | 958  | 0.778224801  | CDC37,KEAP1,PDE4A,S1PR5,TYK2                                                                 |
| 7 | 16,200,000 | 16,350,000 | 217 | 911  | 0.645887447  | AP1M2,ATG4D,CDKN2D,KEAP1,KRI1,PDE4A,S1PR5,SLC44A2                                            |
| 7 | 16,275,000 | 16,425,000 | 218 | 896  | 0.362321065  | AP1M2,ATG4D,CDKN2D,ILF3,KRI1,QTRT1,SLC44A2                                                   |
| 7 | 16,350,000 | 16,500,000 | 219 | 985  | 0.625746423  | DNM2,ILF3,QTRT1,SLC44A2                                                                      |
| 7 | 16,425,000 | 16,575,000 | 220 | 984  | 0.728271873  | C19orf38,CARM1,DNM2,TMED1                                                                    |
| 7 | 16,500,000 | 16,650,000 | 221 | 834  | 0.584186793  | C19orf38,C7H19orf52,CARM1,DNM2,SMARCA4,TMED1,YIPF2,ENSBTAG00000032364                        |
| 7 | 16,575,000 | 16,725,000 | 222 | 599  | -0.388980727 | C7H19orf52,CARM1,SMARCA4,YIPF2,ENSBTAG00000032364                                            |
| 7 | 16,650,000 | 16,800,000 | 223 | 417  | -1.579370657 | LDLR,SMARCA4                                                                                 |
| 7 | 16,725,000 | 16,875,000 | 224 | 605  | -0.85757581  | DOCK6,KANK2,LDLR,SMARCA4,SPC24                                                               |
| 7 | 16,800,000 | 16,950,000 | 225 | 983  | -0.223516738 | C19orf80,DOCK6,KANK2,LDLR,SPC24,TSPAN16                                                      |
| 7 | 16,875,000 | 17,025,000 | 226 | 1032 | 0.858349181  | C19orf80,CCDC151,CCDC159,DOCK6,EPOR,RAB3D,RGL3,SWSAP1,TMEM205,TSPAN16,ENSBTAG00000008192     |
| 7 | 16,950,000 | 17,100,000 | 227 | 838  | 1.092846753  | CCDC151,CCDC159,ECSIT,ELAVL3,EPOR,PRKCSH,RAB3D,RGL3,SWSAP1,TMEM205,ZNF653,ENSBTAG00000008192 |
| 7 | 17,025,000 | 17,175,000 | 228 | 814  | 1.025001005  | ACP5,CCDC151,CNN1,ECSIT,ELAVL3,ELOF1,PRKCSH,ZNF653,ENSBTAG00000040153                        |
| 7 | 17,100,000 | 17,250,000 | 229 | 920  | 0.946166676  | ACP5,CNN1,ELOF1,ZNF558,ENSBTAG00000040153                                                    |
| 7 | 17,175,000 | 17,325,000 | 230 | 980  | 0.881599844  | IR-A,ZNF558,ENSBTAG00000046336,ENSBTAG00000047612                                            |
| 7 | 17,250,000 | 17,400,000 | 231 | 872  | 0.588923358  | IR-A,ENSBTAG00000046336,ENSBTAG00000047612                                                   |
| 7 | 17,325,000 | 17,475,000 | 232 | 821  | 0.616452191  | IR-A                                                                                         |
| 7 | 17,400,000 | 17,550,000 | 233 | 940  | 0.573639258  | IR-A,ENSBTAG00000032125,ENSBTAG00000040507                                                   |
| 7 | 17,475,000 | 17,625,000 | 234 | 900  | -0.307358549 | C19orf45,MCOLN1,PEX11G,PNPLA6,ZNF358,ENSBTAG00000032125,ENSBTAG00000040507                   |
| 7 | 17,550,000 | 17,700,000 | 235 | 733  | -0.59429574  | C19orf45,CAMSAP3,MCOLN1,PEX11G,PNPLA6,XAB2,ZNF358,ENSBTAG00000040507                         |
| 7 | 17,625,000 | 17,775,000 | 236 | 626  | 0.20556059   | CAMSAP3,FCER2,MCEMP1,PCP2,PNPLA6,RETN,STXBP2,TRAPPC5,XAB2                                    |
| 7 | 17,700,000 | 17,850,000 | 237 | 477  | 0.310791027  | CD209,CLEC4G,EVI5L,FCER2,MCEMP1,PCP2,RETN,STXBP2,TRAPPC5                                     |
| 7 | 17,775,000 | 17,925,000 | 238 | 282  | 0.096713496  | CD209,CLEC4G,CTXN1,EVI5L,LRR8E,MAP2K7,SNAPC2,TIMM44,ENSBTAG00000044018                       |
| 7 | 17,850,000 | 18,000,000 | 239 | 184  | 0.242870207  | CTXN1,ELAVL1,EVI5L,LRR8E,MAP2K7,SNAPC2,TIMM44,ENSBTAG00000044018                             |
| 7 | 17,925,000 | 18,075,000 | 240 | 398  | 0.736711788  | CCL25,ELAVL1,FBN3                                                                            |
| 7 | 18,000,000 | 18,150,000 | 241 | 555  | 0.410271111  | CCL25,CERS4,FBN3                                                                             |
| 7 | 18,075,000 | 18,225,000 | 242 | 702  | -0.67529557  | CD320,CERS4,FBN3,KANK3,NDUFA7,RPS28                                                          |
| 7 | 18,150,000 | 18,300,000 | 243 | 649  | -0.273339524 | ANGPTL4,CD320,CERS4,KANK3,MARCH2,NDUFA7,RAB11B,RPS28,ENSBTAG00000021039                      |

|   |            |            |     |      |              |                                                                                             |
|---|------------|------------|-----|------|--------------|---------------------------------------------------------------------------------------------|
| 7 | 18,225,000 | 18,375,000 | 244 | 397  | 0.840770888  | ANGPTL4,MARCH2,MYO1F,PRAM1,RAB11B,ZNF414,ENSBTAG00000021039                                 |
| 7 | 18,300,000 | 18,450,000 | 245 | 514  | 0.850231781  | ADAMTS10,MYO1F,PRAM1,ZNF414,ENSBTAG00000021039                                              |
| 7 | 18,375,000 | 18,525,000 | 246 | 976  | 0.952307358  | ACTL9,ADAMTS10,MYO1F,OR2Z1,ENSBTAG00000002284                                               |
| 7 | 18,450,000 | 18,600,000 | 247 | 975  | 1.029315558  | ACTL9,OR2Z1,ENSBTAG00000002284,ENSBTAG00000045860                                           |
| 7 | 18,525,000 | 18,675,000 | 248 | 743  | 0.747192898  | ENSBTAG00000045860                                                                          |
| 7 | 18,600,000 | 18,750,000 | 249 | 1009 | 0.655684023  | ENSBTAG00000038981                                                                          |
| 7 | 18,675,000 | 18,825,000 | 250 | 1041 | 0.739951315  | EMR1,ENSBTAG00000038981                                                                     |
| 7 | 18,750,000 | 18,900,000 | 251 | 954  | 0.462308296  | EMR1,VAV1                                                                                   |
| 7 | 18,825,000 | 18,975,000 | 252 | 799  | 0.436779026  | EMR1,GPR108,SH2D3A,TRIP10,VAV1,ENSBTAG00000013834                                           |
| 7 | 18,900,000 | 19,050,000 | 253 | 387  | 0.790822011  | C3,GPR108,SH2D3A,TRIP10,VAV1,ENSBTAG00000013834                                             |
| 7 | 18,975,000 | 19,125,000 | 254 | 382  | -0.503772206 | C3,GPR108,TNFSF14                                                                           |
| 7 | 19,050,000 | 19,200,000 | 255 | 602  | -0.012853933 | CD70,TNFSF14,TNFSF9                                                                         |
| 7 | 19,125,000 | 19,275,000 | 256 | 809  | 0.921785711  | CD70,DENND1C,KHSRP,SLC25A23,SLC25A41,TNFSF9,TUBB4A,ENSBTAG00000046865                       |
| 7 | 19,200,000 | 19,350,000 | 257 | 949  | 1.055720656  | ACER1,ALKBH7,CLPP,DENND1C,GTF2F1,KHSRP,PSPN,SLC25A23,SLC25A41,TUBB4A,ENSBTAG00000046865     |
| 7 | 19,275,000 | 19,425,000 | 258 | 806  | 1.165074431  | ACER1,ALKBH7,CLPP,GTF2F1,MLLT1,PSPN                                                         |
| 7 | 19,350,000 | 19,500,000 | 259 | 833  | 0.883780036  | ACER1,ACSBG2,MLLT1                                                                          |
| 7 | 19,425,000 | 19,575,000 | 260 | 891  | 0.305373353  | ACSBG2,MLLT1,RFX2                                                                           |
| 7 | 19,500,000 | 19,650,000 | 261 | 1065 | 0.52324835   | RANBP3,RFX2                                                                                 |
| 7 | 19,575,000 | 19,725,000 | 262 | 1118 | 0.963098767  | CAPS,NDUFA11,RANBP3,RFX2,VMAC                                                               |
| 7 | 19,650,000 | 19,800,000 | 263 | 941  | 0.640256801  | CAPS,CATSPERD,NDUFA11,NRTN,PRR22,RANBP3,VMAC,ENSBTAG0000000414,ENSBTAG00000011842           |
| 7 | 19,725,000 | 19,875,000 | 264 | 764  | 0.26427897   | C19orf70,CATSPERD,HSD11B1L,LONP1,NRTN,PRR22,RPL36,SAFB,ENSBTAG0000000414,ENSBTAG00000011842 |
| 7 | 19,800,000 | 19,950,000 | 265 | 561  | 0.68578051   | C19orf70,CATSPERD,HSD11B1L,LONP1,RPL36,SAFB,SAFB2,ENSBTAG00000035584                        |
| 7 | 19,875,000 | 20,025,000 | 266 | 739  | 0.720424532  | SAFB,SAFB2,ENSBTAG00000035584                                                               |
| 7 | 19,950,000 | 20,100,000 | 267 | 883  | 0.556628805  | ZNRF4                                                                                       |
| 7 | 20,025,000 | 20,175,000 | 268 | 502  | 0.771281245  | ZNRF4                                                                                       |
| 7 | 20,100,000 | 20,250,000 | 269 | 153  | 1.268938259  | PTPRS                                                                                       |
| 7 | 20,175,000 | 20,325,000 | 270 | 211  | 0.271489907  | KDM4B,PTPRS                                                                                 |
| 7 | 20,250,000 | 20,400,000 | 271 | 388  | -1.71834536  | KDM4B,PTPRS                                                                                 |
| 7 | 20,325,000 | 20,475,000 | 272 | 415  | -1.993240511 | ARRDC5,KDM4B,UHRF1                                                                          |
| 7 | 20,400,000 | 20,550,000 | 273 | 326  | -1.616465119 | ARRDC5,M6PRBP1,TICAM1,UHRF1                                                                 |
| 7 | 20,475,000 | 20,625,000 | 274 | 386  | -1.073053188 | ARRDC5,FEM1A,M6PRBP1,TICAM1                                                                 |
| 7 | 20,550,000 | 20,700,000 | 275 | 441  | 0.158462325  | C7H19orf10,DPP9,FEM1A,TICAM1,TNFAIP8L1                                                      |
| 7 | 20,625,000 | 20,775,000 | 276 | 251  | 1.034325311  | C7H19orf10,DPP9,TNFAIP8L1                                                                   |
| 7 | 20,700,000 | 20,850,000 | 277 | 78   | 0.353363857  | LRG1,PLIN4,PLIN5,SEMA6B,TNFAIP8L1,ENSBTAG00000013251                                        |
| 7 | 20,775,000 | 20,925,000 | 278 | 139  | -0.509044076 | CHAF1A,LRG1,PLIN4,PLIN5,SEMA6B,SH3GL1,UBXN6,ENSBTAG00000013251                              |
| 7 | 20,850,000 | 21,000,000 | 279 | 202  | -1.284155698 | CHAF1A,FSD1,MPND,SH3GL1,STAP2,TMIGD2,UBXN6,ENSBTAG00000013251                               |
| 7 | 20,925,000 | 21,075,000 | 280 | 198  | -0.903411824 | ANKRD24,CCDC94,EBI3,FSD1,MPND,SH3GL1,SHD,STAP2,TMIGD2                                       |
| 7 | 21,000,000 | 21,150,000 | 281 | 183  | 0.375807599  | ANKRD24,CCDC94,CREB3L3,EBI3,MAP2K2,SHD,SIRT6,TMIGD2                                         |
| 7 | 21,075,000 | 21,225,000 | 282 | 199  | 0.57187131   | CREB3L3,MAP2K2,PIAS4,SIRT6,ZBTB7A                                                           |

|   |            |            |     |      |              |                                                                                   |
|---|------------|------------|-----|------|--------------|-----------------------------------------------------------------------------------|
| 7 | 21,150,000 | 21,300,000 | 283 | 187  | 0.08898551   | DAPK3,EEF2,ITGB1BP3,MAP2K2,PIAS4,ZBTB7A,ENSBTAG0000045914                         |
| 7 | 21,225,000 | 21,375,000 | 284 | 636  | 0.591336585  | ATCAY,DAPK3,EEF2,ITGB1BP3,PIAS4,ENSBTAG00000045914                                |
| 7 | 21,300,000 | 21,450,000 | 285 | 869  | 0.697612397  | APBA3,ATCAY,MATK,MRPL54,RAX2,ZFR2,ZO3                                             |
| 7 | 21,375,000 | 21,525,000 | 286 | 616  | 0.921994835  | APBA3,MATK,MRPL54,PIP5K1C,RAX2,ZFR2,ZO3                                           |
| 7 | 21,450,000 | 21,600,000 | 287 | 635  | 0.803545475  | CACTIN,HMG20B,MFSD12,PIP5K1C,TBXA2R,ZO3,ENSBTAG0000008789                         |
| 7 | 21,525,000 | 21,675,000 | 288 | 509  | -1.206927733 | C7H19orf71,CACTIN,DOHH,FZR1,HMG20B,MFSD12,PIP5K1C,SMIM24,TBXA2R,ENSBTAG0000008789 |
| 7 | 21,600,000 | 21,750,000 | 289 | 337  | -1.876053638 | C7H19orf71,DOHH,FZR1,MFSD12,NFIC,SMIM24                                           |
| 7 | 21,675,000 | 21,825,000 | 290 | 269  | 0.252949463  | CELF5,NFIC                                                                        |
| 7 | 21,750,000 | 21,900,000 | 291 | 264  | 0.840954888  | CELF5,NCLN,S1PR4                                                                  |
| 7 | 21,825,000 | 21,975,000 | 292 | 376  | 0.432174671  | CELF5,GNA11,GNA15,NCLN,S1PR4                                                      |
| 7 | 21,900,000 | 22,050,000 | 293 | 549  | 0.317928542  | AES,GNA11,GNA15,TLE2,TLE6                                                         |
| 7 | 21,975,000 | 22,125,000 | 294 | 549  | 0.370276178  | AES,TLE2,TLE6,ZNF554,ZNF555,ZNF77                                                 |
| 7 | 22,050,000 | 22,200,000 | 295 | 417  | 0.594701967  | DIRAS1,SGTA,SLC39A3,THOP1,ZNF554,ZNF555,ZNF77                                     |
| 7 | 22,125,000 | 22,275,000 | 296 | 391  | 1.052608244  | DIRAS1,GNG7,SGTA,SLC39A3,THOP1                                                    |
| 7 | 22,200,000 | 22,350,000 | 297 | 392  | 0.794007416  | GNG7                                                                              |
| 7 | 22,275,000 | 22,425,000 | 298 | 542  | -0.132407764 | GADD45B,GNG7,ENSBTAG00000024041,ENSBTAG00000045755                                |
| 7 | 22,350,000 | 22,500,000 | 299 | 846  | 0.355471468  | GADD45B,LMNB2,TIMM13,TMPRSS9,ENSBTAG00000024041,ENSBTAG00000045755                |
| 7 | 22,425,000 | 22,575,000 | 300 | 698  | 0.731398638  | C19orf35,LINGO3,LMNB2,LSM7,SPPL2B,TIMM13,TMPRSS9                                  |
| 7 | 22,500,000 | 22,650,000 | 301 | 344  | 0.264393186  | C19orf35,DOT1L,LINGO3,LSM7,OAZ1,SPPL2B                                            |
| 7 | 22,575,000 | 22,725,000 | 302 | 294  | 0.455428394  | AMH,AP3D1,DOT1L,JSRP1,OAZ1,PLEKHJ1,SF3A2                                          |
| 7 | 22,650,000 | 22,800,000 | 303 | 330  | 0.679097555  | AMH,AP3D1,DOT1L,IZUMO4,JSRP1,MKNK2,MOB3A,PLEKHJ1,SF3A2                            |
| 7 | 22,725,000 | 22,875,000 | 304 | 465  | 0.685423367  | AP3D1,IZUMO4,MKNK2,MOB3A,SEPT8                                                    |
| 7 | 22,800,000 | 22,950,000 | 305 | 755  | 0.691994537  | CCNI2,KIF3A,SEPT8                                                                 |
| 7 | 22,875,000 | 23,025,000 | 306 | 788  | 0.606639485  | CCNI2,IL13,IL4,KIF3A,SEPT8                                                        |
| 7 | 22,950,000 | 23,100,000 | 307 | 767  | 0.837557867  | IL13,IL4,KIF3A,RAD50                                                              |
| 7 | 23,025,000 | 23,175,000 | 308 | 552  | 0.673762398  | RAD50                                                                             |
| 7 | 23,100,000 | 23,250,000 | 309 | 201  | -0.432120131 | IL5,IRF1,RAD50                                                                    |
| 7 | 23,175,000 | 23,325,000 | 310 | 707  | 0.879304249  | IL5,IRF1                                                                          |
| 7 | 23,250,000 | 23,400,000 | 311 | 1060 | 1.091056676  | SLC22A4,SLC22A5                                                                   |
| 7 | 23,325,000 | 23,475,000 | 312 | 1012 | 0.931896405  | PDLIM4,SLC22A4,SLC22A5                                                            |
| 7 | 23,400,000 | 23,550,000 | 313 | 1049 | 0.81561181   | P4HA2,PDLIM4,SLC22A4                                                              |
| 7 | 23,475,000 | 23,625,000 | 314 | 1004 | 1.031165039  | P4HA2,RPS4X                                                                       |
| 7 | 23,550,000 | 23,700,000 | 315 | 995  | 0.883263562  | CSF2,RPS4X                                                                        |
| 7 | 23,625,000 | 23,775,000 | 316 | 897  | 0.908133807  | CSF2,IL3                                                                          |
| 7 | 23,700,000 | 23,850,000 | 317 | 724  | 0.793885189  | ACSL6,IL3                                                                         |
| 7 | 23,775,000 | 23,925,000 | 318 | 629  | -0.798625755 | ACSL6                                                                             |
| 7 | 23,850,000 | 24,000,000 | 319 | 573  | -4.165892959 | ACSL6,FNIP1                                                                       |
| 7 | 23,925,000 | 24,075,000 | 320 | 348  | -5.710807316 | FNIP1                                                                             |
| 7 | 24,000,000 | 24,150,000 | 321 | 248  | -1.431039637 | FNIP1,ENSBTAG00000000682                                                          |
| 7 | 24,075,000 | 24,225,000 | 322 | 347  | -1.051480284 | ENSBTAG00000000682                                                                |
| 7 | 24,150,000 | 24,300,000 | 323 | 353  | -1.515655365 | ENSBTAG00000000682                                                                |
| 7 | 24,225,000 | 24,375,000 | 324 | 430  | -0.993180482 | CDC42SE2,ENSBTAG00000000682                                                       |
| 7 | 24,300,000 | 24,450,000 | 325 | 590  | 0.270156529  | CDC42SE2                                                                          |
| 7 | 24,375,000 | 24,525,000 | 326 | 789  | 0.169481424  | CDC42SE2,HINT1,LYRM7                                                              |
| 7 | 24,450,000 | 24,600,000 | 327 | 873  | -0.47134619  | HINT1,LYRM7                                                                       |



|   |            |            |     |      |              |                          |
|---|------------|------------|-----|------|--------------|--------------------------|
| 7 | 24,525,000 | 24,675,000 | 328 | 661  | -0.362303631 |                          |
| 7 | 24,600,000 | 24,750,000 | 329 | 773  | 1.110998989  |                          |
| 7 | 24,675,000 | 24,825,000 | 330 | 1174 | 1.204127941  |                          |
| 7 | 24,750,000 | 24,900,000 | 331 | 981  | 0.943471199  |                          |
| 7 | 24,825,000 | 24,975,000 | 332 | 847  | 0.55709406   |                          |
| 7 | 24,900,000 | 25,050,000 | 333 | 1063 | 0.771131715  |                          |
| 7 | 24,975,000 | 25,125,000 | 334 | 922  | 0.767326841  |                          |
| 7 | 25,050,000 | 25,200,000 | 335 | 802  | 0.54473665   | CHSY3                    |
| 7 | 25,125,000 | 25,275,000 | 336 | 691  | 0.521468496  | CHSY3                    |
| 7 | 25,200,000 | 25,350,000 | 337 | 467  | 0.592480118  | CHSY3                    |
| 7 | 25,275,000 | 25,425,000 | 338 | 593  | 0.714110456  | CHSY3                    |
| 7 | 25,350,000 | 25,500,000 | 339 | 693  | 0.597528811  | CHSY3                    |
| 7 | 25,425,000 | 25,575,000 | 340 | 846  | 0.496408986  | CHSY3                    |
| 7 | 25,500,000 | 25,650,000 | 341 | 1045 | 0.591592199  | ADAMTS19,KIAA1024L       |
| 7 | 25,575,000 | 25,725,000 | 342 | 892  | 0.782995309  | ADAMTS19,KIAA1024L       |
| 7 | 25,650,000 | 25,800,000 | 343 | 783  | 0.35825865   | ADAMTS19                 |
| 7 | 25,725,000 | 25,875,000 | 344 | 610  | 0.414414389  | ADAMTS19                 |
| 7 | 25,800,000 | 25,950,000 | 345 | 760  | 1.36411087   | ADAMTS19                 |
| 7 | 25,875,000 | 26,025,000 | 346 | 1039 | 1.175643621  | ADAMTS19                 |
| 7 | 25,950,000 | 26,100,000 | 347 | 933  | -0.491515882 |                          |
| 7 | 26,025,000 | 26,175,000 | 348 | 991  | -1.433851774 | ISOC1                    |
| 7 | 26,100,000 | 26,250,000 | 349 | 831  | -1.119861665 | ISOC1,SLC27A6            |
| 7 | 26,175,000 | 26,325,000 | 350 | 659  | -0.599904702 | ISOC1,SLC27A6            |
| 7 | 26,250,000 | 26,400,000 | 351 | 832  | -0.230963165 | SLC27A6                  |
| 7 | 26,325,000 | 26,475,000 | 352 | 668  | -0.742518727 | SLC27A6                  |
| 7 | 26,400,000 | 26,550,000 | 353 | 607  | -1.029881362 |                          |
| 7 | 26,475,000 | 26,625,000 | 354 | 549  | -0.719477577 |                          |
| 7 | 26,550,000 | 26,700,000 | 355 | 365  | -1.894748064 | FBN2                     |
| 7 | 26,625,000 | 26,775,000 | 356 | 436  | -0.389952262 | FBN2                     |
| 7 | 26,700,000 | 26,850,000 | 357 | 549  | 0.711364333  | FBN2                     |
| 7 | 26,775,000 | 26,925,000 | 358 | 625  | 0.573379083  | FBN2                     |
| 7 | 26,850,000 | 27,000,000 | 359 | 743  | -1.41924278  | FBN2,SLC12A2             |
| 7 | 26,925,000 | 27,075,000 | 360 | 926  | -1.805273256 | SLC12A2                  |
| 7 | 27,000,000 | 27,150,000 | 361 | 1104 | 0.089447428  | SLC12A2                  |
| 7 | 27,075,000 | 27,225,000 | 362 | 1016 | 0.019009098  |                          |
| 7 | 27,150,000 | 27,300,000 | 363 | 849  | -0.167657    |                          |
| 7 | 27,225,000 | 27,375,000 | 364 | 765  | 0.353734243  |                          |
| 7 | 27,300,000 | 27,450,000 | 365 | 701  | 0.279236055  |                          |
| 7 | 27,375,000 | 27,525,000 | 366 | 641  | -0.101725565 | CTXN3                    |
| 7 | 27,450,000 | 27,600,000 | 367 | 579  | -0.349303933 | CTXN3                    |
| 7 | 27,525,000 | 27,675,000 | 368 | 846  | 0.1291471    |                          |
| 7 | 27,600,000 | 27,750,000 | 369 | 1233 | -0.715130367 | PRRC1                    |
| 7 | 27,675,000 | 27,825,000 | 370 | 1244 | -1.893923276 | MEGF10,PRRC1             |
| 7 | 27,750,000 | 27,900,000 | 371 | 1001 | -1.002728949 | MEGF10                   |
| 7 | 27,825,000 | 27,975,000 | 372 | 913  | 0.115525184  | MEGF10                   |
| 7 | 27,900,000 | 28,050,000 | 373 | 974  | -0.386539366 | MEGF10                   |
| 7 | 27,975,000 | 28,125,000 | 374 | 1002 | -0.361202312 | MEGF10                   |
| 7 | 28,050,000 | 28,200,000 | 375 | 968  | -0.299755313 | C5orf63                  |
| 7 | 28,125,000 | 28,275,000 | 376 | 870  | -0.413746983 | C5orf63,MARCH3           |
| 7 | 28,200,000 | 28,350,000 | 377 | 998  | 0.543003498  |                          |
| 7 | 28,275,000 | 28,425,000 | 378 | 984  | 0.272158631  | LMNB1,MARCH3             |
| 7 | 28,350,000 | 28,500,000 | 379 | 758  | 0.183372191  | LMNB1,MARCH3             |
| 7 | 28,425,000 | 28,575,000 | 380 | 663  | 0.853150583  | ALDH7A1,LMNB1,PHAX,TEX43 |

|   |            |            |     |      |              |                    |
|---|------------|------------|-----|------|--------------|--------------------|
| 7 | 28,500,000 | 28,650,000 | 381 | 508  | 0.784019066  | ALDH7A1,PHAX,TEX43 |
| 7 | 28,575,000 | 28,725,000 | 382 | 567  | 0.382149862  | ALDH7A1,GRAMD3     |
| 7 | 28,650,000 | 28,800,000 | 383 | 537  | 0.740366439  | GRAMD3             |
| 7 | 28,725,000 | 28,875,000 | 384 | 577  | 0.251867638  | GRAMD3             |
| 7 | 28,800,000 | 28,950,000 | 385 | 1178 | 0.20734165   |                    |
| 7 | 28,875,000 | 29,025,000 | 386 | 1100 | 0.214169531  |                    |
| 7 | 28,950,000 | 29,100,000 | 387 | 582  | -0.013422055 |                    |
| 7 | 29,025,000 | 29,175,000 | 388 | 569  | -0.411066585 |                    |
| 7 | 29,100,000 | 29,250,000 | 389 | 789  | -0.645527637 |                    |
| 7 | 29,175,000 | 29,325,000 | 390 | 843  | -0.154201735 |                    |
| 7 | 29,250,000 | 29,400,000 | 391 | 701  | -0.397243898 |                    |
| 7 | 29,325,000 | 29,475,000 | 392 | 620  | -3.915264068 |                    |
| 7 | 29,400,000 | 29,550,000 | 393 | 485  | -3.665831643 |                    |
| 7 | 29,475,000 | 29,625,000 | 394 | 679  | -0.016535791 |                    |
| 7 | 29,550,000 | 29,700,000 | 395 | 880  | 0.246340213  | ENSBTAG00000046696 |
| 7 | 29,625,000 | 29,775,000 | 396 | 1045 | -0.238774234 | ENSBTAG00000046696 |
| 7 | 29,700,000 | 29,850,000 | 397 | 900  | 0.229989497  |                    |
| 7 | 29,775,000 | 29,925,000 | 398 | 508  | 0.840476883  |                    |
| 7 | 29,850,000 | 30,000,000 | 399 | 638  | 0.569604904  |                    |
| 7 | 29,925,000 | 30,075,000 | 400 | 845  | 0.765481004  |                    |
| 7 | 30,000,000 | 30,150,000 | 401 | 732  | 0.627331649  |                    |
| 7 | 30,075,000 | 30,225,000 | 402 | 858  | 0.444515137  |                    |
| 7 | 30,150,000 | 30,300,000 | 403 | 959  | 0.418683985  |                    |
| 7 | 30,225,000 | 30,375,000 | 404 | 515  | 0.245303125  | ZNF608             |
| 7 | 30,300,000 | 30,450,000 | 405 | 327  | 0.401621396  | ZNF608             |
| 7 | 30,375,000 | 30,525,000 | 406 | 436  | 0.278153205  | ZNF608             |
| 7 | 30,450,000 | 30,600,000 | 407 | 473  | 0.427376527  | ZNF608             |
| 7 | 30,525,000 | 30,675,000 | 408 | 730  | -0.829560895 |                    |
| 7 | 30,600,000 | 30,750,000 | 409 | 1008 | -0.738636544 |                    |
| 7 | 30,675,000 | 30,825,000 | 410 | 827  | -0.150954228 |                    |
| 7 | 30,750,000 | 30,900,000 | 411 | 445  | -0.233193767 |                    |
| 7 | 30,825,000 | 30,975,000 | 412 | 651  | -0.616675167 |                    |
| 7 | 30,900,000 | 31,050,000 | 413 | 659  | -1.072454278 |                    |
| 7 | 30,975,000 | 31,125,000 | 414 | 345  | -1.292235393 |                    |
| 7 | 31,050,000 | 31,200,000 | 415 | 655  | 0.433868339  | ENSBTAG00000047546 |
| 7 | 31,125,000 | 31,275,000 | 416 | 1225 | 0.378268262  | ENSBTAG00000047546 |
| 7 | 31,200,000 | 31,350,000 | 417 | 1087 | 0.664829611  |                    |
| 7 | 31,275,000 | 31,425,000 | 418 | 633  | 1.083190418  |                    |
| 7 | 31,350,000 | 31,500,000 | 419 | 634  | 0.954190244  | CSNK1G3            |
| 7 | 31,425,000 | 31,575,000 | 420 | 446  | 0.936727397  | CSNK1G3            |
| 7 | 31,500,000 | 31,650,000 | 421 | 521  | -0.990804741 | CSNK1G3            |
| 7 | 31,575,000 | 31,725,000 | 422 | 930  | -0.835280776 | CEP120,CSNK1G3     |
| 7 | 31,650,000 | 31,800,000 | 423 | 826  | 0.005447795  | CEP120             |
| 7 | 31,725,000 | 31,875,000 | 424 | 567  | 0.206109299  | CEP120             |
| 7 | 31,800,000 | 31,950,000 | 425 | 645  | -0.557340315 |                    |
| 7 | 31,875,000 | 32,025,000 | 426 | 742  | -1.979886681 | PRDM6              |
| 7 | 31,950,000 | 32,100,000 | 427 | 773  | -3.253999102 | PRDM6              |
| 7 | 32,025,000 | 32,175,000 | 428 | 612  | -2.020581356 | PPIC,PRDM6,SNX24   |
| 7 | 32,100,000 | 32,250,000 | 429 | 658  | -0.278997758 | PPIC,SNX24         |
| 7 | 32,175,000 | 32,325,000 | 430 | 936  | -1.668252246 | SNX24              |
| 7 | 32,250,000 | 32,400,000 | 431 | 1007 | -2.246377409 | SNX2,SNX24         |
| 7 | 32,325,000 | 32,475,000 | 432 | 873  | -1.518977415 | SNX2               |
| 7 | 32,400,000 | 32,550,000 | 433 | 640  | -0.439633829 |                    |

|   |            |            |     |      |              |                                       |
|---|------------|------------|-----|------|--------------|---------------------------------------|
| 7 | 32,475,000 | 32,625,000 | 434 | 833  | 0.924271734  |                                       |
| 7 | 32,550,000 | 32,700,000 | 435 | 1157 | 0.519167161  |                                       |
| 7 | 32,625,000 | 32,775,000 | 436 | 935  | -0.049666339 | SNCAIP                                |
| 7 | 32,700,000 | 32,850,000 | 437 | 609  | 0.223310612  | SNCAIP                                |
| 7 | 32,775,000 | 32,925,000 | 438 | 488  | 0.013041464  |                                       |
| 7 | 32,850,000 | 33,000,000 | 439 | 654  | 0.41148222   | ZNF474                                |
| 7 | 32,925,000 | 33,075,000 | 440 | 621  | 0.170619023  | ZNF474                                |
| 7 | 33,000,000 | 33,150,000 | 441 | 411  | 0.709383752  | LOX,SRFBP1,ZNF474                     |
| 7 | 33,075,000 | 33,225,000 | 442 | 412  | 1.086697341  | LOX,SRFBP1                            |
| 7 | 33,150,000 | 33,300,000 | 443 | 345  | 0.916693077  | SRFBP1                                |
| 7 | 33,225,000 | 33,375,000 | 444 | 640  | 0.435574961  | FTMT                                  |
| 7 | 33,300,000 | 33,450,000 | 445 | 769  | -0.817901782 | FTMT                                  |
| 7 | 33,375,000 | 33,525,000 | 446 | 469  | -2.106228774 |                                       |
| 7 | 33,450,000 | 33,600,000 | 447 | 564  | 0.116186591  |                                       |
| 7 | 33,525,000 | 33,675,000 | 448 | 923  | 0.21270974   | RPLP2                                 |
| 7 | 33,600,000 | 33,750,000 | 449 | 1133 | -0.722901091 | RPLP2                                 |
| 7 | 33,675,000 | 33,825,000 | 450 | 1583 | 0.164915927  |                                       |
| 7 | 33,750,000 | 33,900,000 | 451 | 1369 | 0.536613529  |                                       |
| 7 | 33,825,000 | 33,975,000 | 452 | 1030 | 0.035319256  |                                       |
| 7 | 33,900,000 | 34,050,000 | 453 | 1465 | -0.42827894  |                                       |
| 7 | 33,975,000 | 34,125,000 | 454 | 1435 | -0.13829153  | ENSBTAG00000046914                    |
| 7 | 34,050,000 | 34,200,000 | 455 | 1152 | -0.04187198  | ENSBTAG00000046914,ENSBTAG00000047190 |
| 7 | 34,125,000 | 34,275,000 | 456 | 1265 | -0.321052769 | ENSBTAG00000047190                    |
| 7 | 34,200,000 | 34,350,000 | 457 | 1402 | -0.961302783 |                                       |
| 7 | 34,275,000 | 34,425,000 | 458 | 1690 | -0.015424966 |                                       |
| 7 | 34,350,000 | 34,500,000 | 459 | 1836 | 1.022649869  |                                       |
| 7 | 34,425,000 | 34,575,000 | 460 | 1704 | 0.601741295  | PRR16                                 |
| 7 | 34,500,000 | 34,650,000 | 461 | 1584 | 0.651864567  | PRR16,ENSBTAG00000046688              |
| 7 | 34,575,000 | 34,725,000 | 462 | 1071 | 0.350054419  | ENSBTAG00000046688                    |
| 7 | 34,650,000 | 34,800,000 | 463 | 980  | -1.124524694 |                                       |
| 7 | 34,725,000 | 34,875,000 | 464 | 1144 | -0.454998118 |                                       |
| 7 | 34,800,000 | 34,950,000 | 465 | 817  | 0.275591649  |                                       |
| 7 | 34,875,000 | 35,025,000 | 466 | 558  | -0.141606905 |                                       |
| 7 | 34,950,000 | 35,100,000 | 467 | 731  | -0.24100472  |                                       |
| 7 | 35,025,000 | 35,175,000 | 468 | 1014 | 0.317334345  |                                       |
| 7 | 35,100,000 | 35,250,000 | 469 | 953  | 0.653679468  |                                       |
| 7 | 35,175,000 | 35,325,000 | 470 | 900  | 0.756994842  |                                       |
| 7 | 35,250,000 | 35,400,000 | 471 | 807  | 0.589691946  |                                       |
| 7 | 35,325,000 | 35,475,000 | 472 | 867  | -0.347324794 |                                       |
| 7 | 35,400,000 | 35,550,000 | 473 | 1166 | -0.432573009 |                                       |
| 7 | 35,475,000 | 35,625,000 | 474 | 787  | -0.597171099 | FAM170A                               |
| 7 | 35,550,000 | 35,700,000 | 475 | 626  | 0.004445212  | FAM170A,HSD17B4                       |
| 7 | 35,625,000 | 35,775,000 | 476 | 1107 | 0.125528627  | HSD17B4                               |
| 7 | 35,700,000 | 35,850,000 | 477 | 1177 | -0.170486743 | HSD17B4,TNFAIP8                       |
| 7 | 35,775,000 | 35,925,000 | 478 | 936  | -2.21891238  | TNFAIP8                               |
| 7 | 35,850,000 | 36,000,000 | 479 | 538  | -4.224370254 | DMXL1,TNFAIP8                         |
| 7 | 35,925,000 | 36,075,000 | 480 | 253  | -1.200911521 | DMXL1                                 |
| 7 | 36,000,000 | 36,150,000 | 481 | 328  | -0.613961714 | DMXL1                                 |
| 7 | 36,075,000 | 36,225,000 | 482 | 511  | 0.210284085  | DMXL1,DTWD2                           |
| 7 | 36,150,000 | 36,300,000 | 483 | 933  | -0.08389084  | DTWD2                                 |
| 7 | 36,225,000 | 36,375,000 | 484 | 930  | -0.474548181 | DTWD2                                 |
| 7 | 36,300,000 | 36,450,000 | 485 | 857  | -0.057192753 |                                       |
| 7 | 36,375,000 | 36,525,000 | 486 | 811  | -0.272833271 |                                       |

|   |            |            |     |      |              |                                                    |
|---|------------|------------|-----|------|--------------|----------------------------------------------------|
| 7 | 36,450,000 | 36,600,000 | 487 | 610  | -1.522810567 |                                                    |
| 7 | 36,525,000 | 36,675,000 | 488 | 1028 | -0.319541117 |                                                    |
| 7 | 36,600,000 | 36,750,000 | 489 | 1114 | 0.796034063  |                                                    |
| 7 | 36,675,000 | 36,825,000 | 490 | 831  | 1.12381296   |                                                    |
| 7 | 36,750,000 | 36,900,000 | 491 | 872  | 0.991317468  |                                                    |
| 7 | 36,825,000 | 36,975,000 | 492 | 728  | 0.182839471  |                                                    |
| 7 | 36,900,000 | 37,050,000 | 493 | 800  | 0.478007987  |                                                    |
| 7 | 36,975,000 | 37,125,000 | 494 | 1412 | 0.702707704  |                                                    |
| 7 | 37,050,000 | 37,200,000 | 495 | 1455 | 0.517693446  |                                                    |
| 7 | 37,125,000 | 37,275,000 | 496 | 905  | 0.622030143  |                                                    |
| 7 | 37,200,000 | 37,350,000 | 497 | 970  | -0.149248141 |                                                    |
| 7 | 37,275,000 | 37,425,000 | 498 | 1105 | -0.185926864 |                                                    |
| 7 | 37,350,000 | 37,500,000 | 499 | 814  | -0.906139243 |                                                    |
| 7 | 37,425,000 | 37,575,000 | 500 | 795  | -3.119146245 |                                                    |
| 7 | 37,500,000 | 37,650,000 | 501 | 900  | -1.030934704 |                                                    |
| 7 | 37,575,000 | 37,725,000 | 502 | 970  | 1.06952007   |                                                    |
| 7 | 37,650,000 | 37,800,000 | 503 | 1042 | 0.702354354  |                                                    |
| 7 | 37,725,000 | 37,875,000 | 504 | 1120 | 0.918934112  |                                                    |
| 7 | 37,800,000 | 37,950,000 | 505 | 1045 | 1.066099542  |                                                    |
| 7 | 37,875,000 | 38,025,000 | 506 | 1021 | 0.53984921   |                                                    |
| 7 | 37,950,000 | 38,100,000 | 507 | 1063 | -0.160982936 |                                                    |
| 7 | 38,025,000 | 38,175,000 | 508 | 1009 | -0.894658607 |                                                    |
| 7 | 38,100,000 | 38,250,000 | 509 | 1004 | -1.45703545  |                                                    |
| 7 | 38,175,000 | 38,325,000 | 510 | 1093 | -1.001694606 |                                                    |
| 7 | 38,250,000 | 38,400,000 | 511 | 958  | -0.932509666 |                                                    |
| 7 | 38,325,000 | 38,475,000 | 512 | 593  | -2.220013902 |                                                    |
| 7 | 38,400,000 | 38,550,000 | 513 | 494  | -1.262794115 |                                                    |
| 7 | 38,475,000 | 38,625,000 | 514 | 692  | -0.012963261 |                                                    |
| 7 | 38,550,000 | 38,700,000 | 515 | 847  | 0.060933112  |                                                    |
| 7 | 38,625,000 | 38,775,000 | 516 | 643  | -0.630439977 | SEMA6A                                             |
| 7 | 38,700,000 | 38,850,000 | 517 | 586  | -2.025071295 | SEMA6A                                             |
| 7 | 38,775,000 | 38,925,000 | 518 | 777  | -1.530512139 | SEMA6A                                             |
| 7 | 38,850,000 | 39,000,000 | 519 | 846  | 0.064391456  | COMMD10                                            |
| 7 | 38,925,000 | 39,075,000 | 520 | 773  | 0.706639867  | COMMD10                                            |
| 7 | 39,000,000 | 39,150,000 | 521 | 636  | 0.39989567   | COMMD10                                            |
| 7 | 39,075,000 | 39,225,000 | 522 | 640  | 0.589215208  | ARL10,CLTB,COMMD10,HIGD2A,NOP16                    |
| 7 | 39,150,000 | 39,300,000 | 523 | 699  | 1.134784807  | ARL10,CLTB,FAF2,HIGD2A,NOP16                       |
| 7 | 39,225,000 | 39,375,000 | 524 | 715  | 0.984504756  | CLTB,FAF2,RNF44                                    |
| 7 | 39,300,000 | 39,450,000 | 525 | 694  | 0.193012006  | CDHR2,FAF2,GPRIN1,RNF44,SNCB                       |
| 7 | 39,375,000 | 39,525,000 | 526 | 602  | -0.445027944 | CDHR2,EIF4E1B,GPRIN1,SNCB,TSPAN17                  |
| 7 | 39,450,000 | 39,600,000 | 527 | 745  | -0.447814354 | EIF4E1B,SNCB,TSPAN17                               |
| 7 | 39,525,000 | 39,675,000 | 528 | 684  | -0.349958345 |                                                    |
| 7 | 39,600,000 | 39,750,000 | 529 | 496  | 0.18135456   | HK3,UIMC1,UNC5A                                    |
| 7 | 39,675,000 | 39,825,000 | 530 | 461  | -0.048833253 | HK3,UIMC1,UNC5A                                    |
| 7 | 39,750,000 | 39,900,000 | 531 | 340  | -0.755989037 | UIMC1,ZNF346                                       |
| 7 | 39,825,000 | 39,975,000 | 532 | 237  | -0.951621883 | FGFR4,UIMC1,ZNF346                                 |
| 7 | 39,900,000 | 40,050,000 | 533 | 174  | 0.812281307  | FGFR4,NSD1,ZNF346                                  |
| 7 | 39,975,000 | 40,125,000 | 534 | 220  | 0.900389708  | NSD1                                               |
| 7 | 40,050,000 | 40,200,000 | 535 | 377  | -0.324122854 | LMAN2,MXD3,NSD1,PRELID1,RAB24                      |
| 7 | 40,125,000 | 40,275,000 | 536 | 553  | 0.169479626  | F12,LMAN2,MXD3,PFN3,PRELID1,RAB24,RGS14,SLC34A1    |
| 7 | 40,200,000 | 40,350,000 | 537 | 390  | 1.005909679  | DBN1,F12,GRK6,LMAN2,PDLIM7,PFN3,PRR7,RGS14,SLC34A1 |
| 7 | 40,275,000 | 40,425,000 | 538 | 158  | 0.332895728  | DBN1,DDX41,DOK3,FAM193B,GRK6,PDLIM7,PRR7           |

|   |            |            |     |      |              |                                                                                                       |
|---|------------|------------|-----|------|--------------|-------------------------------------------------------------------------------------------------------|
| 7 | 40,350,000 | 40,500,000 | 539 | 139  | -0.395687722 | B4GALT7,DDX41,DOK3,EEF1A1,FAM193B,PDLIM7,TMED9,ENSBTAG00000039886                                     |
| 7 | 40,425,000 | 40,575,000 | 540 | 418  | 0.26850245   | B4GALT7,EEF1A1,N4BP3,TMED9,ENSBTAG00000039886                                                         |
| 7 | 40,500,000 | 40,650,000 | 541 | 562  | 0.06441772   | HNRNPAB,N4BP3,NHP2,PHYKPL,RMND5B                                                                      |
| 7 | 40,575,000 | 40,725,000 | 542 | 544  | -1.527095768 | COL23A1,HNRNPAB,N4BP3,NHP2,PHYKPL,RMND5B                                                              |
| 7 | 40,650,000 | 40,800,000 | 543 | 659  | -0.666328817 | COL23A1,PHYKPL                                                                                        |
| 7 | 40,725,000 | 40,875,000 | 544 | 611  | 0.322205105  |                                                                                                       |
| 7 | 40,800,000 | 40,950,000 | 545 | 842  | 0.403799238  |                                                                                                       |
| 7 | 40,875,000 | 41,025,000 | 546 | 843  | 0.418408149  |                                                                                                       |
| 7 | 40,950,000 | 41,100,000 | 547 | 613  | 0.307193651  |                                                                                                       |
| 7 | 41,025,000 | 41,175,000 | 548 | 650  | -0.711246629 | CLK4,ZNF354A                                                                                          |
| 7 | 41,100,000 | 41,250,000 | 549 | 577  | -1.597709194 | CLK4,PROP1,ZNF354A,ENSBTAG00000030704                                                                 |
| 7 | 41,175,000 | 41,325,000 | 550 | 425  | -0.387502579 | OR2Y1,PROP1,ZNF354A,ENSBTAG00000030704,ENSBTAG00000046963                                             |
| 7 | 41,250,000 | 41,400,000 | 551 | 276  | 0.358000305  | MGAT1,OR2Y1,ENSBTAG00000046963                                                                        |
| 7 | 41,325,000 | 41,475,000 | 552 | 813  | 0.496597157  | MGAT1,ZFP62,ENSBTAG00000024713,ENSBTAG00000046424                                                     |
| 7 | 41,400,000 | 41,550,000 | 553 | 1353 | 0.51726828   | ZFP62,ENSBTAG00000024713,ENSBTAG00000046424,ENSBTAG00000047182                                        |
| 7 | 41,475,000 | 41,625,000 | 554 | 1111 | 0.616340501  | OR2V1,ENSBTAG00000039706,ENSBTAG00000047182,ENSBTAG00000047300                                        |
| 7 | 41,550,000 | 41,700,000 | 555 | 1185 | 0.606061918  | BTNL9,OR2V1,ENSBTAG00000039706,ENSBTAG00000047082,ENSBTAG00000047300,ENSBTAG00000047927               |
| 7 | 41,625,000 | 41,775,000 | 556 | 1108 | 0.460974285  | BTNL9,GNB2L1,TRIM41,TRIM7,ENSBTAG00000047082,ENSBTAG00000047927                                       |
| 7 | 41,700,000 | 41,850,000 | 557 | 993  | -0.604601069 | GNB2L1,IFI47,TRIM41,TRIM52,TRIM7,ENSBTAG00000004815                                                   |
| 7 | 41,775,000 | 41,925,000 | 558 | 1233 | -0.564871232 | IFI47,TRIM52,ENSBTAG00000004815                                                                       |
| 7 | 41,850,000 | 42,000,000 | 559 | 1114 | 0.331772908  | ZNF496                                                                                                |
| 7 | 41,925,000 | 42,075,000 | 560 | 876  | 0.176445642  | NLRP3,ZNF496                                                                                          |
| 7 | 42,000,000 | 42,150,000 | 561 | 1164 | 0.841755674  | NLRP3,OR2B11,ENSBTAG00000039986                                                                       |
| 7 | 42,075,000 | 42,225,000 | 562 | 1058 | 0.850609179  | NLRP3,OR2B11,ENSBTAG00000039986,ENSBTAG00000048069,ENSBTAG00000048315                                 |
| 7 | 42,150,000 | 42,300,000 | 563 | 801  | 1.043275854  | OR2G2,ENSBTAG00000039484,ENSBTAG00000048069,ENSBTAG00000048315                                        |
| 7 | 42,225,000 | 42,375,000 | 564 | 1096 | 1.381402739  | COX7B,OR2G2,OR2G3,ENSBTAG00000037611,ENSBTAG00000039484,ENSBTAG00000039804                            |
| 7 | 42,300,000 | 42,450,000 | 565 | 1024 | 1.152247382  | COX7B,OR2G3,ENSBTAG00000037611,ENSBTAG00000039804                                                     |
| 7 | 42,375,000 | 42,525,000 | 566 | 1046 | 0.908372354  | OR6F1,ENSBTAG00000045691                                                                              |
| 7 | 42,450,000 | 42,600,000 | 567 | 936  | 0.989780624  | OR11L1,OR6F1,ENSBTAG00000001761,ENSBTAG00000040109,ENSBTAG00000045691                                 |
| 7 | 42,525,000 | 42,675,000 | 568 | 711  | 0.723227745  | OR11L1,TRIM58,ENSBTAG00000001761,ENSBTAG00000025293,ENSBTAG00000038623,ENSBTAG00000040109             |
| 7 | 42,600,000 | 42,750,000 | 569 | 740  | 0.561729619  | TRIM58,ENSBTAG00000025293,ENSBTAG00000038623,ENSBTAG00000039797,ENSBTAG00000039805,ENSBTAG00000046318 |
| 7 | 42,675,000 | 42,825,000 | 570 | 956  | 0.180069631  | OR2AK2,ENSBTAG00000039797,ENSBTAG00000039805,ENSBTAG00000046318,ENSBTAG00000047016                    |
| 7 | 42,750,000 | 42,900,000 | 571 | 1423 | -0.483058224 | OR2AK2,ENSBTAG00000027241,ENSBTAG00000045733,ENSBTAG00000046417,ENSBTAG00000047016                    |
| 7 | 42,825,000 | 42,975,000 | 572 | 1170 | -0.443645322 | ENSBTAG00000027241,ENSBTAG00000045733,ENSBTAG00000046417,ENSBTAG00000046474                           |

|   |            |            |     |      |              |                                                                                    |
|---|------------|------------|-----|------|--------------|------------------------------------------------------------------------------------|
| 7 | 42,900,000 | 43,050,000 | 573 | 858  | 1.012844501  | OR2AJ1,ENSBTAG00000046474                                                          |
| 7 | 42,975,000 | 43,125,000 | 574 | 1279 | 0.815150964  | OR2AJ1,ENSBTAG00000030725,ENSBTAG00000047180                                       |
| 7 | 43,050,000 | 43,200,000 | 575 | 1245 | 0.698372379  | OR2L13,ENSBTAG00000022690,ENSBTAG00000030725,ENSBTAG00000047180,ENSBTAG00000048025 |
| 7 | 43,125,000 | 43,275,000 | 576 | 1021 | 1.00010679   | OR2L13,ENSBTAG00000009497,ENSBTAG00000022690,ENSBTAG00000048025                    |
| 7 | 43,200,000 | 43,350,000 | 577 | 1291 | 1.138935596  | OR14C36,OR2M4,ENSBTAG00000009497,ENSBTAG00000019925,ENSBTAG00000038564             |
| 7 | 43,275,000 | 43,425,000 | 578 | 997  | 1.039537956  | OR14C36,OR2M4,OR2T1,OR2T6,ENSBTAG00000019925,ENSBTAG00000038564                    |
| 7 | 43,350,000 | 43,500,000 | 579 | 926  | 0.226558783  | OR2T1,OR2T6,ENSBTAG00000003551,ENSBTAG000000034743,ENSBTAG00000038722              |
| 7 | 43,425,000 | 43,575,000 | 580 | 1147 | -0.20697642  | ENSBTAG00000003551,ENSBTAG00000021098,ENSBTAG00000034743,ENSBTAG00000038722        |
| 7 | 43,500,000 | 43,650,000 | 581 | 631  | -0.357271506 | ENSBTAG00000021098,ENSBTAG00000046950                                              |
| 7 | 43,575,000 | 43,725,000 | 582 | 761  | -0.27237345  | ENSBTAG00000030714,ENSBTAG00000046950,ENSBTAG00000047415                           |
| 7 | 43,650,000 | 43,800,000 | 583 | 1534 | -1.335622026 | ENSBTAG00000030714,ENSBTAG00000047415,ENSBTAG00000047519                           |
| 7 | 43,725,000 | 43,875,000 | 584 | 1829 | -0.445772716 | LYPD8,MGC137030,ENSBTAG00000016065,ENSBTAG00000047519                              |
| 7 | 43,800,000 | 43,950,000 | 585 | 1383 | 0.424681346  | LYPD8,MGC137030,SH3BP5L,ENSBTAG00000016065                                         |
| 7 | 43,875,000 | 44,025,000 | 586 | 908  | 0.014415843  | FLJ20531,SH3BP5L,ZNF672,ENSBTAG00000023507                                         |
| 7 | 43,950,000 | 44,100,000 | 587 | 836  | 0.52110039   | FLJ20531,PGBD2,ZNF672,ENSBTAG00000023507,ENSBTAG00000046200                        |
| 7 | 44,025,000 | 44,175,000 | 588 | 786  | 0.877548078  | PGBD2,ENSBTAG00000009273,ENSBTAG00000046200,ENSBTAG00000046953                     |
| 7 | 44,100,000 | 44,250,000 | 589 | 471  | 0.950089057  | ENSBTAG00000009273,ENSBTAG00000046953                                              |
| 7 | 44,175,000 | 44,325,000 | 590 | 143  | 0.93903734   | ENSBTAG00000009273                                                                 |
| 7 | 44,250,000 | 44,400,000 | 591 | 39   | -5.2987098   |                                                                                    |
| 7 | 44,325,000 | 44,475,000 | 592 | 190  | 0.756756392  | ENSBTAG00000045589                                                                 |
| 7 | 44,400,000 | 44,550,000 | 593 | 535  | 0.832128405  | ENSBTAG00000045589,ENSBTAG00000045623,ENSBTAG00000046115                           |
| 7 | 44,475,000 | 44,625,000 | 594 | 711  | 0.618278468  | MIER2,PPAP2C,ENSBTAG00000045623,ENSBTAG00000046115                                 |
| 7 | 44,550,000 | 44,700,000 | 595 | 664  | 0.774611779  | MIER2,PPAP2C,THEG                                                                  |
| 7 | 44,625,000 | 44,775,000 | 596 | 583  | 0.935674802  | C2CD4C,MADCAM1,ODF3L2,SHC2,THEG                                                    |
| 7 | 44,700,000 | 44,850,000 | 597 | 557  | 0.854758222  | BSG,C2CD4C,CDC34,GZMM,HCN2,MADCAM1,ODF3L2,SHC2,TPGS1                               |
| 7 | 44,775,000 | 44,925,000 | 598 | 424  | 1.092179122  | BSG,CDC34,FGF22,FSTL3,GZMM,HCN2,MADCAM1,POLRMT,PRSS57,RNF126,TPGS1                 |
| 7 | 44,850,000 | 45,000,000 | 599 | 227  | 1.004936233  | AZU1,ELA2,FGF22,FSTL3,HCN2,MISP,PALM,POLRMT,PRSS57,PRTN3,RNF126                    |
| 7 | 44,925,000 | 45,075,000 | 600 | 182  | 0.972807668  | AZU1,CFD,ELA2,KISS1R,MED16,MISP,PALM,PRTN3,PTBP1,R3HDM4,ENSBTAG00000046245         |
| 7 | 45,000,000 | 45,150,000 | 601 | 170  | 0.842838519  | ARID3A,CFD,GRIN3B,KISS1R,MED16,PTBP1,R3HDM4,TMEM259,WDR18,ENSBTAG00000046245       |
| 7 | 45,075,000 | 45,225,000 | 602 | 149  | 0.709614018  | ABCA7,ARID3A,CNN2,GRIN3B,HMHA1,POLR2E,SBNO2,TMEM259,WDR18                          |
| 7 | 45,150,000 | 45,300,000 | 603 | 161  | 1.05261312   | ABCA7,C19orf26,CNN2,HMHA1,POLR2E,SBNO2,STK11                                       |
| 7 | 45,225,000 | 45,375,000 | 604 | 206  | 1.199345371  | ATP5D,C19orf26,C7H19orf24,CIRBP,EFNA2,MIDN,SBNO2,STK11                             |

|   |            |            |     |      |              |                                                                                                      |
|---|------------|------------|-----|------|--------------|------------------------------------------------------------------------------------------------------|
| 7 | 45,300,000 | 45,450,000 | 605 | 302  | 0.405972198  | ATP5D,C7H19orf24,CIRBP,EFNA2,GAMT,MIDN,MUM1,NDUFS7                                                   |
| 7 | 45,375,000 | 45,525,000 | 606 | 305  | 0.246218257  | APC2,C7H19orf25,DAZAP1,GAMT,MUM1,NDUFS7,PCSK4,REEP6,RPS15                                            |
| 7 | 45,450,000 | 45,600,000 | 607 | 262  | 0.675353874  | APC2,C7H19orf25,DAZAP1,MBD3,PCSK4,PLK5,REEP6,RPS15,TCF3,UQCR11,ENSBTAG00000006662,ENSBTAG00000046263 |
| 7 | 45,525,000 | 45,675,000 | 608 | 317  | 0.868996546  | MBD3,PLK5,TCF3,UQCR11,ENSBTAG00000006662,ENSBTAG00000046263                                          |
| 7 | 45,600,000 | 45,750,000 | 609 | 291  | 0.976917042  | ATP8B3,ONECUT3,TCF3                                                                                  |
| 7 | 45,675,000 | 45,825,000 | 610 | 321  | 0.963946068  | ABHD17A,ATP8B3,KLF16,ONECUT3,REXO1                                                                   |
| 7 | 45,750,000 | 45,900,000 | 611 | 542  | 1.110967301  | ABHD17A,ATP8B3,CSNK1G2,KLF16,REXO1,SCAMP4                                                            |
| 7 | 45,825,000 | 45,975,000 | 612 | 800  | 1.157662416  | BTBD2,CSNK1G2,SCAMP4                                                                                 |
| 7 | 45,900,000 | 46,050,000 | 613 | 977  | 1.102193354  | BTBD2,SHROOM1,SOWAHA,ENSBTAG00000046234                                                              |
| 7 | 45,975,000 | 46,125,000 | 614 | 619  | 1.006125109  | AFF4,GDF9,LEAP2,SHROOM1,SOWAHA,UQCRQ,ENSBTAG00000046234                                              |
| 7 | 46,050,000 | 46,200,000 | 615 | 343  | 0.234078849  | AFF4,GDF9,LEAP2,UQCRQ,ZCCHC10                                                                        |
| 7 | 46,125,000 | 46,275,000 | 616 | 570  | 0.616780888  | AFF4,HSPA4,ZCCHC10                                                                                   |
| 7 | 46,200,000 | 46,350,000 | 617 | 553  | 0.729499262  | HSPA4,ZCCHC10                                                                                        |
| 7 | 46,275,000 | 46,425,000 | 618 | 934  | -0.006665921 | HSPA4                                                                                                |
| 7 | 46,350,000 | 46,500,000 | 619 | 871  | -0.096218554 | FSTL4                                                                                                |
| 7 | 46,425,000 | 46,575,000 | 620 | 677  | -1.213315822 | FSTL4                                                                                                |
| 7 | 46,500,000 | 46,650,000 | 621 | 1141 | -1.27096089  | FSTL4                                                                                                |
| 7 | 46,575,000 | 46,725,000 | 622 | 1042 | -0.497646905 |                                                                                                      |
| 7 | 46,650,000 | 46,800,000 | 623 | 830  | 0.018799004  |                                                                                                      |
| 7 | 46,725,000 | 46,875,000 | 624 | 804  | 0.416660284  |                                                                                                      |
| 7 | 46,800,000 | 46,950,000 | 625 | 606  | 0.185247209  |                                                                                                      |
| 7 | 46,875,000 | 47,025,000 | 626 | 404  | -3.013012514 |                                                                                                      |
| 7 | 46,950,000 | 47,100,000 | 627 | 671  | -3.801690954 |                                                                                                      |
| 7 | 47,025,000 | 47,175,000 | 628 | 1176 | -2.396562406 |                                                                                                      |
| 7 | 47,100,000 | 47,250,000 | 629 | 1116 | -1.325762223 | C7H5ORF15,VDAC1                                                                                      |
| 7 | 47,175,000 | 47,325,000 | 630 | 604  | -0.174539118 | C7H5ORF15,VDAC1                                                                                      |
| 7 | 47,250,000 | 47,400,000 | 631 | 253  | 0.484245916  | SKP1,TCF7,VDAC1                                                                                      |
| 7 | 47,325,000 | 47,475,000 | 632 | 101  | 0.638705059  | PPP2CA,SKP1,TCF7                                                                                     |
| 7 | 47,400,000 | 47,550,000 | 633 | 86   | 1.485271236  | CDKL3,PPP2CA,SKP1,UBE2B                                                                              |
| 7 | 47,475,000 | 47,625,000 | 634 | 151  | 1.454850347  | CDKL3,CDKN2AIPNL,UBE2B                                                                               |
| 7 | 47,550,000 | 47,700,000 | 635 | 184  | 1.075293996  | CDKN2AIPNL,JADE2                                                                                     |
| 7 | 47,625,000 | 47,775,000 | 636 | 123  | 0.33760936   | JADE2,SAR1B,SEC24A                                                                                   |
| 7 | 47,700,000 | 47,850,000 | 637 | 160  | -1.320128804 | CAMLG,SAR1B,SEC24A                                                                                   |
| 7 | 47,775,000 | 47,925,000 | 638 | 315  | -0.9427798   | C7H5orf24,CAMLG,DDX46,SEC24A                                                                         |
| 7 | 47,850,000 | 48,000,000 | 639 | 278  | -0.452084638 | C7H5orf24,DDX46,TXNDC15                                                                              |
| 7 | 47,925,000 | 48,075,000 | 640 | 188  | -2.144747369 | CATSPER3,PITX1,TXNDC15                                                                               |
| 7 | 48,000,000 | 48,150,000 | 641 | 281  | -1.129547777 | CATSPER3,PITX1                                                                                       |
| 7 | 48,075,000 | 48,225,000 | 642 | 373  | 0.171206933  |                                                                                                      |
| 7 | 48,150,000 | 48,300,000 | 643 | 471  | 0.717148681  |                                                                                                      |
| 7 | 48,225,000 | 48,375,000 | 644 | 584  | 0.799466033  |                                                                                                      |
| 7 | 48,300,000 | 48,450,000 | 645 | 570  | 0.296663233  | H2AFY                                                                                                |
| 7 | 48,375,000 | 48,525,000 | 646 | 500  | -0.263242338 | H2AFY,TIFAB                                                                                          |
| 7 | 48,450,000 | 48,600,000 | 647 | 732  | 0.86434388   | H2AFY,TIFAB                                                                                          |
| 7 | 48,525,000 | 48,675,000 | 648 | 783  | 0.913977863  | CXCL14,NEUROG1,TIFAB                                                                                 |
| 7 | 48,600,000 | 48,750,000 | 649 | 657  | -1.454782653 | CXCL14,NEUROG1                                                                                       |
| 7 | 48,675,000 | 48,825,000 | 650 | 705  | -2.023611078 |                                                                                                      |
| 7 | 48,750,000 | 48,900,000 | 651 | 884  | 0.116851767  | SLC25A48                                                                                             |

|   |            |            |     |      |              |                                                                            |
|---|------------|------------|-----|------|--------------|----------------------------------------------------------------------------|
| 7 | 48,825,000 | 48,975,000 | 652 | 839  | 0.503917577  | FBXL21,IL9,SLC25A48                                                        |
| 7 | 48,900,000 | 49,050,000 | 653 | 605  | 0.611763402  | FBXL21,IL9,LECT2,SLC25A48                                                  |
| 7 | 48,975,000 | 49,125,000 | 654 | 703  | -1.562095806 | FBXL21,LECT2,TGFBI                                                         |
| 7 | 49,050,000 | 49,200,000 | 655 | 588  | -3.31487061  | SMAD5,TGFBI                                                                |
| 7 | 49,125,000 | 49,275,000 | 656 | 576  | -1.527058012 | SMAD5,TRPC7                                                                |
| 7 | 49,200,000 | 49,350,000 | 657 | 591  | -0.050788042 | SMAD5,TRPC7                                                                |
| 7 | 49,275,000 | 49,425,000 | 658 | 460  | 0.038908824  | TRPC7                                                                      |
| 7 | 49,350,000 | 49,500,000 | 659 | 720  | 1.083091615  | TRPC7                                                                      |
| 7 | 49,425,000 | 49,575,000 | 660 | 939  | 1.30863915   |                                                                            |
| 7 | 49,500,000 | 49,650,000 | 661 | 807  | 1.270271014  |                                                                            |
| 7 | 49,575,000 | 49,725,000 | 662 | 617  | 1.290953963  |                                                                            |
| 7 | 49,650,000 | 49,800,000 | 663 | 716  | 1.45622471   |                                                                            |
| 7 | 49,725,000 | 49,875,000 | 664 | 1026 | 1.181265537  |                                                                            |
| 7 | 49,800,000 | 49,950,000 | 665 | 962  | 0.727634489  |                                                                            |
| 7 | 49,875,000 | 50,025,000 | 666 | 754  | 0.964237526  | SPOCK1                                                                     |
| 7 | 49,950,000 | 50,100,000 | 667 | 654  | 0.987140303  | SPOCK1                                                                     |
| 7 | 50,025,000 | 50,175,000 | 668 | 822  | 0.311469611  |                                                                            |
| 7 | 50,100,000 | 50,250,000 | 669 | 1076 | 0.2060311    |                                                                            |
| 7 | 50,175,000 | 50,325,000 | 670 | 1031 | 0.686257466  |                                                                            |
| 7 | 50,250,000 | 50,400,000 | 671 | 1031 | 0.691124147  |                                                                            |
| 7 | 50,325,000 | 50,475,000 | 672 | 812  | 0.521456109  |                                                                            |
| 7 | 50,400,000 | 50,550,000 | 673 | 608  | 1.097853362  |                                                                            |
| 7 | 50,475,000 | 50,625,000 | 674 | 860  | 0.841495972  |                                                                            |
| 7 | 50,550,000 | 50,700,000 | 675 | 726  | 0.576776005  | KLHL3                                                                      |
| 7 | 50,625,000 | 50,775,000 | 676 | 366  | 0.530770824  | KLHL3                                                                      |
| 7 | 50,700,000 | 50,850,000 | 677 | 407  | 0.237921405  | HNRPA0,KLHL3                                                               |
| 7 | 50,775,000 | 50,925,000 | 678 | 354  | 0.231357122  | HNRPA0                                                                     |
| 7 | 50,850,000 | 51,000,000 | 679 | 208  | 0.385788161  | MYOT,PKD2L2                                                                |
| 7 | 50,925,000 | 51,075,000 | 680 | 174  | -1.127302819 | FAM13B,MYOT,PKD2L2                                                         |
| 7 | 51,000,000 | 51,150,000 | 681 | 306  | -0.01833226  | FAM13B,PKD2L2,WNT8A                                                        |
| 7 | 51,075,000 | 51,225,000 | 682 | 302  | 0.410494112  | BRD8,CDC23,KIF20A,NME5,WNT8A                                               |
| 7 | 51,150,000 | 51,300,000 | 683 | 182  | 0.722220803  | BRD8,CDC23,GFRA3,KIF20A,NME5                                               |
| 7 | 51,225,000 | 51,375,000 | 684 | 190  | 1.402389283  | CDC23,CDC25C,FAM53C,GFRA3,KDM3B,SLBP2                                      |
| 7 | 51,300,000 | 51,450,000 | 685 | 161  | 1.382953714  | CDC25C,EGR1,FAM53C,GFRA3,KDM3B,REEP2,SLBP2                                 |
| 7 | 51,375,000 | 51,525,000 | 686 | 245  | 1.173329734  | EGR1,ETF1,HSPA9,KDM3B,REEP2                                                |
| 7 | 51,450,000 | 51,600,000 | 687 | 440  | 1.085314998  | ETF1,HSPA9                                                                 |
| 7 | 51,525,000 | 51,675,000 | 688 | 435  | 0.899487117  |                                                                            |
| 7 | 51,600,000 | 51,750,000 | 689 | 346  | 0.641415033  | CTNNA1                                                                     |
| 7 | 51,675,000 | 51,825,000 | 690 | 365  | 0.877949984  | CTNNA1,LRRTM2                                                              |
| 7 | 51,750,000 | 51,900,000 | 691 | 439  | 0.885223458  | CTNNA1,LRRTM2,SIL1                                                         |
| 7 | 51,825,000 | 51,975,000 | 692 | 338  | 0.817515922  | CTNNA1,GPX4,SIL1                                                           |
| 7 | 51,900,000 | 52,050,000 | 693 | 199  | 0.971927388  | GPX4,SIL1                                                                  |
| 7 | 51,975,000 | 52,125,000 | 694 | 221  | 1.036224775  | SIL1                                                                       |
| 7 | 52,050,000 | 52,200,000 | 695 | 178  | 0.931220178  | SIL1                                                                       |
| 7 | 52,125,000 | 52,275,000 | 696 | 181  | 0.855775095  | PAIP2,SIL1,SLC23A1,ENSBTAG00000006756                                      |
| 7 | 52,200,000 | 52,350,000 | 697 | 203  | 0.433098876  | DNAJC18,ECSCR,MZB1,PAIP2,PROB1,SLC23A1,SPATA24,ENSBTAG00000006756          |
| 7 | 52,275,000 | 52,425,000 | 698 | 170  | -0.007524293 | DNAJC18,ECSCR,MZB1,PROB1,SLC23A1,SPATA24,TMEM173,UBE2D2,ENSBTAG00000030517 |
| 7 | 52,350,000 | 52,500,000 | 699 | 157  | 0.234653376  | ECSCR,TMEM173,UBE2D2,ENSBTAG00000030517                                    |
| 7 | 52,425,000 | 52,575,000 | 700 | 163  | 0.777587482  | CXXC5,UBE2D2                                                               |
| 7 | 52,500,000 | 52,650,000 | 701 | 565  | 0.524436719  | CXXC5                                                                      |
| 7 | 52,575,000 | 52,725,000 | 702 | 605  | 0.338758881  | NRG2,PSD2                                                                  |



|   |            |            |     |      |              |                                                                                                               |
|---|------------|------------|-----|------|--------------|---------------------------------------------------------------------------------------------------------------|
| 7 | 52,650,000 | 52,800,000 | 703 | 293  | 0.169937217  | NRG2,PSD2                                                                                                     |
| 7 | 52,725,000 | 52,875,000 | 704 | 303  | 0.187126629  | NRG2                                                                                                          |
| 7 | 52,800,000 | 52,950,000 | 705 | 280  | 0.49169036   |                                                                                                               |
| 7 | 52,875,000 | 53,025,000 | 706 | 224  | 0.818761629  | IGIP,PURA                                                                                                     |
| 7 | 52,950,000 | 53,100,000 | 707 | 265  | 0.781573566  | CYSTM1,IGIP,PURA                                                                                              |
| 7 | 53,025,000 | 53,175,000 | 708 | 314  | -0.310268441 | CYSTM1,PFDN1                                                                                                  |
| 7 | 53,100,000 | 53,250,000 | 709 | 240  | -1.481457479 | CYSTM1,HBEGF,PFDN1,SLC4A9                                                                                     |
| 7 | 53,175,000 | 53,325,000 | 710 | 211  | -1.64093048  | EIF4EBP3,HBEGF,PFDN1,SLC4A9                                                                                   |
| 7 | 53,250,000 | 53,400,000 | 711 | 189  | -1.991300974 | EIF4EBP3,SLC4A9                                                                                               |
| 7 | 53,325,000 | 53,475,000 | 712 | 207  | -3.293342778 | APBB3,CD14,EIF4EBP3,IK,NDUFA2,SLC35A4,SRA1,TMCO6,ENSBTAG00000003987                                           |
| 7 | 53,400,000 | 53,550,000 | 713 | 525  | -6.483000802 | APBB3,CD14,DND1,EIF4EBP3,HARS,HARS2,IK,NDUFA2,SLC35A4,SRA1,TMCO6,WDR55,ZMAT2,ENSBTAG00000003987               |
| 7 | 53,475,000 | 53,625,000 | 714 | 1113 | -7.948535311 | DND1,HARS,HARS2,IK,PCDHA3,PCDHA5,WDR55,ZMAT2,ENSBTAG00000015439,ENSBTAG00000046717                            |
| 7 | 53,550,000 | 53,700,000 | 715 | 951  | -7.92872379  | PCDHA11,PCDHA13,PCDHA3,PCDHA5,ENSBTAG00000015439,ENSBTAG00000046717                                           |
| 7 | 53,625,000 | 53,775,000 | 716 | 499  | -2.158291006 | PCDHA11,PCDHA13                                                                                               |
| 7 | 53,700,000 | 53,850,000 | 717 | 564  | 0.836659917  | PCDHA13                                                                                                       |
| 7 | 53,775,000 | 53,925,000 | 718 | 833  | 1.006739949  | PCDHA13,PCDHB1,PCDHB4,ENSBTAG00000045858                                                                      |
| 7 | 53,850,000 | 54,000,000 | 719 | 940  | 1.044382516  | PCDHB1,PCDHB16,PCDHB4,PCDHB5,PCDHB6,PCDHB7,ENSBTAG00000045743,ENSBTAG00000045858,ENSBTAG00000045859           |
| 7 | 53,925,000 | 54,075,000 | 720 | 751  | 0.881765435  | PCDHB11,PCDHB14,PCDHB15,PCDHB16,PCDHB5,PCDHB6,PCDHB7,ENSBTAG00000007350,ENSBTAG00000045743,ENSBTAG00000045859 |
| 7 | 54,000,000 | 54,150,000 | 721 | 705  | 0.555162486  | PCDHB11,PCDHB14,PCDHB15,PCDHGA2,PCDHGA3,PCDHGA5,PCDHGA7,PCDHGB1,TAF7,ENSBTAG00000007350,ENSBTAG00000046103    |
| 7 | 54,075,000 | 54,225,000 | 722 | 843  | 0.67738404   | PCDHGA2,PCDHGA3,PCDHGA5,PCDHGA7,PCDHGA8,PCDHGB1,TAF7,ENSBTAG00000046103,ENSBTAG00000047946                    |
| 7 | 54,150,000 | 54,300,000 | 723 | 575  | 0.928950652  | DIAPH1,PCDHGA7,PCDHGA8,ENSBTAG00000047946                                                                     |
| 7 | 54,225,000 | 54,375,000 | 724 | 242  | 1.165569526  | DIAPH1,PCDHGA8,RELL2                                                                                          |
| 7 | 54,300,000 | 54,450,000 | 725 | 267  | 1.253750196  | ARAP3,DIAPH1,HDAC3,RELL2                                                                                      |
| 7 | 54,375,000 | 54,525,000 | 726 | 293  | 1.352421595  | ARAP3,DIAPH1,HDAC3                                                                                            |
| 7 | 54,450,000 | 54,600,000 | 727 | 550  | 1.35438898   | ARAP3                                                                                                         |
| 7 | 54,525,000 | 54,675,000 | 728 | 451  | 1.282514665  | KIAA0141,PCDH1                                                                                                |
| 7 | 54,600,000 | 54,750,000 | 729 | 222  | 1.079595482  | GNPDA1,KIAA0141,PCDH1,PCDH12,RNF14                                                                            |
| 7 | 54,675,000 | 54,825,000 | 730 | 544  | 1.273399378  | GNPDA1,KIAA0141,PCDH12,RNF14                                                                                  |
| 7 | 54,750,000 | 54,900,000 | 731 | 453  | 0.955352246  | GNPDA1,ENSBTAG00000018503                                                                                     |
| 7 | 54,825,000 | 54,975,000 | 732 | 208  | -0.931727751 | ENSBTAG00000018503                                                                                            |
| 7 | 54,900,000 | 55,050,000 | 733 | 192  | -0.753962069 | ENSBTAG00000012339,ENSBTAG00000016789,ENSBTAG00000045651                                                      |
| 7 | 54,975,000 | 55,125,000 | 734 | 166  | -0.501098302 | NDFIP1,ENSBTAG00000012339,ENSBTAG00000016789,ENSBTAG00000045651                                               |
| 7 | 55,050,000 | 55,200,000 | 735 | 219  | -1.808634742 | NDFIP1                                                                                                        |
| 7 | 55,125,000 | 55,275,000 | 736 | 205  | -1.576095693 | SPRY4                                                                                                         |
| 7 | 55,200,000 | 55,350,000 | 737 | 182  | 1.062858723  | SPRY4                                                                                                         |
| 7 | 55,275,000 | 55,425,000 | 738 | 203  | -1.264172064 |                                                                                                               |
| 7 | 55,350,000 | 55,500,000 | 739 | 443  | -0.442176285 |                                                                                                               |
| 7 | 55,425,000 | 55,575,000 | 740 | 563  | 0.321376615  | FGF1                                                                                                          |

|   |            |            |     |      |              |                                 |
|---|------------|------------|-----|------|--------------|---------------------------------|
| 7 | 55,500,000 | 55,650,000 | 741 | 725  | 0.640645603  | FGF1                            |
| 7 | 55,575,000 | 55,725,000 | 742 | 922  | 0.703113469  | FGF1                            |
| 7 | 55,650,000 | 55,800,000 | 743 | 827  | 0.708795436  |                                 |
| 7 | 55,725,000 | 55,875,000 | 744 | 727  | 0.851922453  | ARHGAP26                        |
| 7 | 55,800,000 | 55,950,000 | 745 | 536  | 0.652342007  | ARHGAP26                        |
| 7 | 55,875,000 | 56,025,000 | 746 | 454  | -1.449808682 | ARHGAP26                        |
| 7 | 55,950,000 | 56,100,000 | 747 | 517  | -1.845695331 | ARHGAP26                        |
| 7 | 56,025,000 | 56,175,000 | 748 | 613  | -0.010065021 | ARHGAP26                        |
| 7 | 56,100,000 | 56,250,000 | 749 | 628  | 0.79707549   | ARHGAP26,GR-A                   |
| 7 | 56,175,000 | 56,325,000 | 750 | 524  | 0.608147974  | GR-A                            |
| 7 | 56,250,000 | 56,400,000 | 751 | 557  | 0.355540044  | GR-A                            |
| 7 | 56,325,000 | 56,475,000 | 752 | 627  | 0.513165637  | GR-A                            |
| 7 | 56,400,000 | 56,550,000 | 753 | 627  | 0.747623221  |                                 |
| 7 | 56,475,000 | 56,625,000 | 754 | 344  | 0.620134643  |                                 |
| 7 | 56,550,000 | 56,700,000 | 755 | 272  | -0.016718572 |                                 |
| 7 | 56,625,000 | 56,775,000 | 756 | 397  | -0.17124647  |                                 |
| 7 | 56,700,000 | 56,850,000 | 757 | 362  | -0.393620322 |                                 |
| 7 | 56,775,000 | 56,925,000 | 758 | 369  | 0.206224953  |                                 |
| 7 | 56,850,000 | 57,000,000 | 759 | 440  | 0.882135863  |                                 |
| 7 | 56,925,000 | 57,075,000 | 760 | 466  | 0.701060544  |                                 |
| 7 | 57,000,000 | 57,150,000 | 761 | 519  | 0.593856395  |                                 |
| 7 | 57,075,000 | 57,225,000 | 762 | 602  | 0.65577698   | YIPF5                           |
| 7 | 57,150,000 | 57,300,000 | 763 | 703  | 0.843106426  | KCTD16,YIPF5,ENSBTAG00000010283 |
| 7 | 57,225,000 | 57,375,000 | 764 | 896  | 1.326675386  | KCTD16,ENSBTAG00000010283       |
| 7 | 57,300,000 | 57,450,000 | 765 | 908  | 1.316189513  | KCTD16                          |
| 7 | 57,375,000 | 57,525,000 | 766 | 860  | 0.357010264  | KCTD16                          |
| 7 | 57,450,000 | 57,600,000 | 767 | 615  | -0.051801344 | KCTD16                          |
| 7 | 57,525,000 | 57,675,000 | 768 | 606  | 0.559079183  | KCTD16                          |
| 7 | 57,600,000 | 57,750,000 | 769 | 702  | 0.283832539  |                                 |
| 7 | 57,675,000 | 57,825,000 | 770 | 1040 | -0.213737072 |                                 |
| 7 | 57,750,000 | 57,900,000 | 771 | 896  | -0.295560626 |                                 |
| 7 | 57,825,000 | 57,975,000 | 772 | 600  | -1.218239097 |                                 |
| 7 | 57,900,000 | 58,050,000 | 773 | 729  | -0.566429084 |                                 |
| 7 | 57,975,000 | 58,125,000 | 774 | 592  | 0.521966431  |                                 |
| 7 | 58,050,000 | 58,200,000 | 775 | 520  | 0.776273386  |                                 |
| 7 | 58,125,000 | 58,275,000 | 776 | 726  | 0.980304535  |                                 |
| 7 | 58,200,000 | 58,350,000 | 777 | 819  | 0.968042588  |                                 |
| 7 | 58,275,000 | 58,425,000 | 778 | 533  | 0.15335726   |                                 |
| 7 | 58,350,000 | 58,500,000 | 779 | 366  | -1.123103319 |                                 |
| 7 | 58,425,000 | 58,575,000 | 780 | 522  | 0.342639508  |                                 |
| 7 | 58,500,000 | 58,650,000 | 781 | 772  | 0.817420887  |                                 |
| 7 | 58,575,000 | 58,725,000 | 782 | 867  | 1.070395885  |                                 |
| 7 | 58,650,000 | 58,800,000 | 783 | 637  | 0.914322793  |                                 |
| 7 | 58,725,000 | 58,875,000 | 784 | 517  | -0.335520012 |                                 |
| 7 | 58,800,000 | 58,950,000 | 785 | 733  | -0.662179984 | PRELID2                         |
| 7 | 58,875,000 | 59,025,000 | 786 | 567  | -1.480375995 | PRELID2                         |
| 7 | 58,950,000 | 59,100,000 | 787 | 495  | -2.982542065 | GRXCR2,PRELID2                  |
| 7 | 59,025,000 | 59,175,000 | 788 | 593  | -0.936022778 | GRXCR2,SH3RF2                   |
| 7 | 59,100,000 | 59,250,000 | 789 | 597  | 0.980679442  | SH3RF2                          |
| 7 | 59,175,000 | 59,325,000 | 790 | 714  | 1.120583573  | LARS,PLAC8L1,SH3RF2             |
| 7 | 59,250,000 | 59,400,000 | 791 | 655  | 0.651423139  | LARS,PLAC8L1,SH3RF2             |
| 7 | 59,325,000 | 59,475,000 | 792 | 402  | -0.922428008 | LARS,ENSBTAG00000011642         |
| 7 | 59,400,000 | 59,550,000 | 793 | 277  | -0.202019484 | POU4F3,ENSBTAG00000011642       |

|   |            |            |     |      |              |                                           |
|---|------------|------------|-----|------|--------------|-------------------------------------------|
| 7 | 59,475,000 | 59,625,000 | 794 | 409  | -0.589723996 | POU4F3                                    |
| 7 | 59,550,000 | 59,700,000 | 795 | 552  | -0.45130697  | GPR151,TCERG1                             |
| 7 | 59,625,000 | 59,775,000 | 796 | 868  | -0.561706914 | GPR151,TCERG1                             |
| 7 | 59,700,000 | 59,850,000 | 797 | 906  | -0.337170215 | PPP2R2B                                   |
| 7 | 59,775,000 | 59,925,000 | 798 | 550  | -0.280297196 | PPP2R2B                                   |
| 7 | 59,850,000 | 60,000,000 | 799 | 608  | -0.290507089 | PPP2R2B                                   |
| 7 | 59,925,000 | 60,075,000 | 800 | 471  | -0.351594789 | PPP2R2B                                   |
| 7 | 60,000,000 | 60,150,000 | 801 | 267  | -1.073784408 | PPP2R2B                                   |
| 7 | 60,075,000 | 60,225,000 | 802 | 663  | 0.026390768  | PPP2R2B                                   |
| 7 | 60,150,000 | 60,300,000 | 803 | 1026 | 0.404483587  |                                           |
| 7 | 60,225,000 | 60,375,000 | 804 | 970  | 0.854471001  |                                           |
| 7 | 60,300,000 | 60,450,000 | 805 | 1046 | -0.057536139 |                                           |
| 7 | 60,375,000 | 60,525,000 | 806 | 897  | -0.840363563 | STK32A                                    |
| 7 | 60,450,000 | 60,600,000 | 807 | 721  | -1.609879995 | DPYSL3,STK32A                             |
| 7 | 60,525,000 | 60,675,000 | 808 | 672  | 0.31693865   | DPYSL3,STK32A                             |
| 7 | 60,600,000 | 60,750,000 | 809 | 596  | 1.213157662  | DPYSL3                                    |
| 7 | 60,675,000 | 60,825,000 | 810 | 531  | 1.094659115  | DPYSL3,JAKMIP2                            |
| 7 | 60,750,000 | 60,900,000 | 811 | 498  | 0.291252962  | JAKMIP2                                   |
| 7 | 60,825,000 | 60,975,000 | 812 | 826  | 0.176282697  | JAKMIP2                                   |
| 7 | 60,900,000 | 61,050,000 | 813 | 1014 | -0.086283259 | JAKMIP2,SPINK1,ENSBTAG00000047835         |
| 7 | 60,975,000 | 61,125,000 | 814 | 1131 | -0.583223342 | JAKMIP2,SCGB3A2,SPINK1,ENSBTAG00000047835 |
| 7 | 61,050,000 | 61,200,000 | 815 | 1120 | -0.043290094 | C7H5orf46,SCGB3A2                         |
| 7 | 61,125,000 | 61,275,000 | 816 | 835  | -0.020036125 | C7H5orf46                                 |
| 7 | 61,200,000 | 61,350,000 | 817 | 663  | -0.101811761 | SPINK5                                    |
| 7 | 61,275,000 | 61,425,000 | 818 | 715  | 0.39029193   | SPINK5                                    |
| 7 | 61,350,000 | 61,500,000 | 819 | 801  | 0.497461854  | SPINK5,SPINK6                             |
| 7 | 61,425,000 | 61,575,000 | 820 | 875  | 0.780432122  | SPINK6                                    |
| 7 | 61,500,000 | 61,650,000 | 821 | 1112 | 0.692856597  | ENSBTAG00000033759                        |
| 7 | 61,575,000 | 61,725,000 | 822 | 1237 | 0.091413354  | SPINK7,ENSBTAG00000033759                 |
| 7 | 61,650,000 | 61,800,000 | 823 | 922  | -0.881417047 | SPINK7,ENSBTAG00000033759                 |
| 7 | 61,725,000 | 61,875,000 | 824 | 411  | -1.808435091 | FBXO38,SPINK7,ENSBTAG00000033759          |
| 7 | 61,800,000 | 61,950,000 | 825 | 284  | 3.80E-05     | FBXO38,HTR4,ENSBTAG00000047660            |
| 7 | 61,875,000 | 62,025,000 | 826 | 366  | 0.427202302  | HTR4,ENSBTAG00000047660                   |
| 7 | 61,950,000 | 62,100,000 | 827 | 430  | 0.533549952  | HTR4                                      |
| 7 | 62,025,000 | 62,175,000 | 828 | 734  | 0.751789757  | HTR4                                      |
| 7 | 62,100,000 | 62,250,000 | 829 | 783  | 0.622540815  | ADRB2                                     |
| 7 | 62,175,000 | 62,325,000 | 830 | 489  | 0.619362035  | ADRB2                                     |
| 7 | 62,250,000 | 62,400,000 | 831 | 379  | 1.449822312  | SH3TC2                                    |
| 7 | 62,325,000 | 62,475,000 | 832 | 387  | 1.414316778  | SH3TC2                                    |
| 7 | 62,400,000 | 62,550,000 | 833 | 452  | 0.711269635  | ABLIM3,SH3TC2                             |
| 7 | 62,475,000 | 62,625,000 | 834 | 456  | 0.69058455   | ABLIM3                                    |
| 7 | 62,550,000 | 62,700,000 | 835 | 417  | 1.004748479  | ABLIM3,AFAP1L1                            |
| 7 | 62,625,000 | 62,775,000 | 836 | 329  | 0.447050005  | ABLIM3,AFAP1L1,GRPEL2,IL17B,PCYOX1L       |
| 7 | 62,700,000 | 62,850,000 | 837 | 277  | 0.380294997  | AFAP1L1,GRPEL2,IL17B,PCYOX1L              |
| 7 | 62,775,000 | 62,925,000 | 838 | 287  | 0.94663068   | ARHGEF37,CSNK1A1                          |
| 7 | 62,850,000 | 63,000,000 | 839 | 654  | 1.062156939  | ARHGEF37,CSNK1A1                          |
| 7 | 62,925,000 | 63,075,000 | 840 | 658  | 0.744221469  | ARHGEF37                                  |
| 7 | 63,000,000 | 63,150,000 | 841 | 649  | 0.25369358   |                                           |
| 7 | 63,075,000 | 63,225,000 | 842 | 833  | 0.36774777   | PDE6A,PPARGC1B                            |
| 7 | 63,150,000 | 63,300,000 | 843 | 511  | -0.093423728 | PDE6A,PPARGC1B,SLC26A2                    |
| 7 | 63,225,000 | 63,375,000 | 844 | 455  | 0.699935631  | HMGXB3,PDE6A,SLC26A2                      |
| 7 | 63,300,000 | 63,450,000 | 845 | 453  | 1.1977082    | CSF1R,HMGXB3                              |
| 7 | 63,375,000 | 63,525,000 | 846 | 456  | 0.897376233  | CDX1,CSF1R,HMGXB3,PDGFRB                  |

|   |            |            |     |      |              |                                                |
|---|------------|------------|-----|------|--------------|------------------------------------------------|
| 7 | 63,450,000 | 63,600,000 | 847 | 412  | 0.467208626  | CAMK2A,CDX1,PDGFRB,SLC6A7                      |
| 7 | 63,525,000 | 63,675,000 | 848 | 270  | 0.405895542  | ARSI,CAMK2A,PDGFRB,SLC6A7                      |
| 7 | 63,600,000 | 63,750,000 | 849 | 288  | 0.720537029  | ARSI,CAMK2A,CD74,TCOF1                         |
| 7 | 63,675,000 | 63,825,000 | 850 | 324  | 0.136157976  | CD74,NDST1,RPS14,TCOF1                         |
| 7 | 63,750,000 | 63,900,000 | 851 | 342  | 0.053379824  | CD74,NDST1,RPS14                               |
| 7 | 63,825,000 | 63,975,000 | 852 | 503  | -0.957353189 | NDST1                                          |
| 7 | 63,900,000 | 64,050,000 | 853 | 565  | -1.312514499 | MYOZ3,NDST1,SYNPO                              |
| 7 | 63,975,000 | 64,125,000 | 854 | 437  | -0.313659505 | DCTN4,MYOZ3,RBM22,SYNPO                        |
| 7 | 64,050,000 | 64,200,000 | 855 | 578  | -0.482226327 | DCTN4,MGC128424,RBM22                          |
| 7 | 64,125,000 | 64,275,000 | 856 | 732  | -0.342810288 | MGC128424,ZNF300,ENSBTAG00000046873            |
| 7 | 64,200,000 | 64,350,000 | 857 | 641  | 0.620807907  | GPX3,TNIP1,ZNF300,ENSBTAG00000046873           |
| 7 | 64,275,000 | 64,425,000 | 858 | 721  | 0.79142769   | ANXA6,GPX3,TNIP1                               |
| 7 | 64,350,000 | 64,500,000 | 859 | 702  | 0.895249546  | ANXA6,CCDC69,GM2A,ENSBTAG00000045615           |
| 7 | 64,425,000 | 64,575,000 | 860 | 819  | -0.808022306 | CCDC69,GM2A,SLC36A2,SLC36A3,ENSBTAG00000045615 |
| 7 | 64,500,000 | 64,650,000 | 861 | 927  | -1.523775298 | GM2A,SLC36A2,SLC36A3                           |
| 7 | 64,575,000 | 64,725,000 | 862 | 835  | 0.02904561   | FAT2,SLC36A1,SLC36A2                           |
| 7 | 64,650,000 | 64,800,000 | 863 | 689  | 0.905999654  | FAT2,SLC36A1,ENSBTAG00000047625                |
| 7 | 64,725,000 | 64,875,000 | 864 | 445  | 0.903486025  | FAT2,ENSBTAG00000047625                        |
| 7 | 64,800,000 | 64,950,000 | 865 | 668  | -0.128757434 | ATOX1,SPARC                                    |
| 7 | 64,875,000 | 65,025,000 | 866 | 868  | -0.414543217 | ATOX1,G3BP,SPARC                               |
| 7 | 64,950,000 | 65,100,000 | 867 | 643  | 0.188183533  | ATOX1,G3BP,GLRA1                               |
| 7 | 65,025,000 | 65,175,000 | 868 | 496  | 0.506263024  | GLRA1                                          |
| 7 | 65,100,000 | 65,250,000 | 869 | 746  | 0.146693363  | GLRA1                                          |
| 7 | 65,175,000 | 65,325,000 | 870 | 1010 | -1.196397936 |                                                |
| 7 | 65,250,000 | 65,400,000 | 871 | 975  | -1.979363411 |                                                |
| 7 | 65,325,000 | 65,475,000 | 872 | 755  | -1.105356492 |                                                |
| 7 | 65,400,000 | 65,550,000 | 873 | 577  | 0.172808022  |                                                |
| 7 | 65,475,000 | 65,625,000 | 874 | 549  | 0.661686971  |                                                |
| 7 | 65,550,000 | 65,700,000 | 875 | 658  | 0.157693019  | NMUR2                                          |
| 7 | 65,625,000 | 65,775,000 | 876 | 595  | 0.004263579  | NMUR2                                          |
| 7 | 65,700,000 | 65,850,000 | 877 | 377  | -0.407484719 |                                                |
| 7 | 65,775,000 | 65,925,000 | 878 | 681  | -0.292260385 |                                                |
| 7 | 65,850,000 | 66,000,000 | 879 | 1159 | 0.325343046  |                                                |
| 7 | 65,925,000 | 66,075,000 | 880 | 1128 | 0.317822466  |                                                |
| 7 | 66,000,000 | 66,150,000 | 881 | 866  | -0.150410788 |                                                |
| 7 | 66,075,000 | 66,225,000 | 882 | 868  | 0.544679602  |                                                |
| 7 | 66,150,000 | 66,300,000 | 883 | 1149 | 0.804782805  |                                                |
| 7 | 66,225,000 | 66,375,000 | 884 | 901  | 0.824659829  |                                                |
| 7 | 66,300,000 | 66,450,000 | 885 | 643  | 0.857477861  |                                                |
| 7 | 66,375,000 | 66,525,000 | 886 | 853  | 1.019047163  |                                                |
| 7 | 66,450,000 | 66,600,000 | 887 | 753  | 1.057420314  |                                                |
| 7 | 66,525,000 | 66,675,000 | 888 | 660  | -0.154490551 |                                                |
| 7 | 66,600,000 | 66,750,000 | 889 | 667  | -0.409969929 |                                                |
| 7 | 66,675,000 | 66,825,000 | 890 | 636  | -0.232378387 | GRIA1                                          |
| 7 | 66,750,000 | 66,900,000 | 891 | 555  | -0.072015848 | GRIA1                                          |
| 7 | 66,825,000 | 66,975,000 | 892 | 850  | -0.214809744 | GRIA1                                          |
| 7 | 66,900,000 | 67,050,000 | 893 | 1261 | 0.082416545  | GRIA1                                          |
| 7 | 66,975,000 | 67,125,000 | 894 | 1344 | 0.587087754  | GRIA1                                          |
| 7 | 67,050,000 | 67,200,000 | 895 | 1142 | 0.434908593  | GRIA1                                          |
| 7 | 67,125,000 | 67,275,000 | 896 | 1082 | 0.333692247  |                                                |
| 7 | 67,200,000 | 67,350,000 | 897 | 988  | 0.328252726  | FAM114A2,MFAP3                                 |
| 7 | 67,275,000 | 67,425,000 | 898 | 933  | -0.02190498  | FAM114A2,MFAP3,SMIM15                          |

|   |            |            |     |      |              |                            |
|---|------------|------------|-----|------|--------------|----------------------------|
| 7 | 67,350,000 | 67,500,000 | 899 | 1003 | -0.287364198 | GALNT10,SMIM15             |
| 7 | 67,425,000 | 67,575,000 | 900 | 704  | -0.566222112 | GALNT10                    |
| 7 | 67,500,000 | 67,650,000 | 901 | 507  | -0.596364287 | GALNT10                    |
| 7 | 67,575,000 | 67,725,000 | 902 | 302  | -1.603218689 | GALNT10,HAND1              |
| 7 | 67,650,000 | 67,800,000 | 903 | 228  | -1.071721094 | GALNT10,HAND1,SAP30L       |
| 7 | 67,725,000 | 67,875,000 | 904 | 416  | -0.577460294 | SAP30L                     |
| 7 | 67,800,000 | 67,950,000 | 905 | 546  | -0.044521901 |                            |
| 7 | 67,875,000 | 68,025,000 | 906 | 531  | 0.447955764  | LARP1                      |
| 7 | 67,950,000 | 68,100,000 | 907 | 700  | 0.845643561  | CNOT8,GEMIN5,LARP1         |
| 7 | 68,025,000 | 68,175,000 | 908 | 1029 | 0.260717743  | CNOT8,GEMIN5,MRPL22        |
| 7 | 68,100,000 | 68,250,000 | 909 | 844  | 0.042705743  | GEMIN5,MRPL22              |
| 7 | 68,175,000 | 68,325,000 | 910 | 425  | 0.353572128  |                            |
| 7 | 68,250,000 | 68,400,000 | 911 | 415  | 0.0429886    |                            |
| 7 | 68,325,000 | 68,475,000 | 912 | 441  | 0.406878405  |                            |
| 7 | 68,400,000 | 68,550,000 | 913 | 399  | 0.671222275  |                            |
| 7 | 68,475,000 | 68,625,000 | 914 | 456  | 0.603587758  |                            |
| 7 | 68,550,000 | 68,700,000 | 915 | 673  | -2.097133257 |                            |
| 7 | 68,625,000 | 68,775,000 | 916 | 605  | -2.407841583 |                            |
| 7 | 68,700,000 | 68,850,000 | 917 | 425  | 0.290359702  |                            |
| 7 | 68,775,000 | 68,925,000 | 918 | 462  | 0.681636172  |                            |
| 7 | 68,850,000 | 69,000,000 | 919 | 732  | 0.937673823  |                            |
| 7 | 68,925,000 | 69,075,000 | 920 | 1072 | -0.037711588 |                            |
| 7 | 69,000,000 | 69,150,000 | 921 | 1112 | -0.513014504 |                            |
| 7 | 69,075,000 | 69,225,000 | 922 | 908  | 0.161928056  |                            |
| 7 | 69,150,000 | 69,300,000 | 923 | 1014 | 0.966017342  |                            |
| 7 | 69,225,000 | 69,375,000 | 924 | 1304 | 0.949515752  |                            |
| 7 | 69,300,000 | 69,450,000 | 925 | 1341 | 0.794443356  |                            |
| 7 | 69,375,000 | 69,525,000 | 926 | 1497 | 0.792194022  |                            |
| 7 | 69,450,000 | 69,600,000 | 927 | 1509 | 0.82237811   | SGCD                       |
| 7 | 69,525,000 | 69,675,000 | 928 | 1521 | 0.927009048  | SGCD                       |
| 7 | 69,600,000 | 69,750,000 | 929 | 1279 | 1.030383687  | SGCD                       |
| 7 | 69,675,000 | 69,825,000 | 930 | 1098 | 0.986821577  | SGCD                       |
| 7 | 69,750,000 | 69,900,000 | 931 | 1351 | 0.997726063  | SGCD                       |
| 7 | 69,825,000 | 69,975,000 | 932 | 1500 | 1.010915167  | SGCD                       |
| 7 | 69,900,000 | 70,050,000 | 933 | 1225 | 1.057428855  | SGCD                       |
| 7 | 69,975,000 | 70,125,000 | 934 | 1296 | 0.999002614  | SGCD                       |
| 7 | 70,050,000 | 70,200,000 | 935 | 1393 | 1.011546725  |                            |
| 7 | 70,125,000 | 70,275,000 | 936 | 1203 | 1.046906738  | MGC137099                  |
| 7 | 70,200,000 | 70,350,000 | 937 | 1304 | 0.805975408  | MGC137099,TIMD4            |
| 7 | 70,275,000 | 70,425,000 | 938 | 1407 | 0.069259783  | TIMD4                      |
| 7 | 70,350,000 | 70,500,000 | 939 | 1284 | -0.596752001 |                            |
| 7 | 70,425,000 | 70,575,000 | 940 | 1061 | -1.734568138 |                            |
| 7 | 70,500,000 | 70,650,000 | 941 | 1333 | -0.572458862 |                            |
| 7 | 70,575,000 | 70,725,000 | 942 | 1640 | 0.496262357  | ENSBTAG00000036102         |
| 7 | 70,650,000 | 70,800,000 | 943 | 1493 | 0.627919597  | ENSBTAG00000036102         |
| 7 | 70,725,000 | 70,875,000 | 944 | 1425 | 1.007200933  | HAVCR2,ENSBTAG00000036102  |
| 7 | 70,800,000 | 70,950,000 | 945 | 1390 | 0.974086747  | FAM71B,HAVCR2,ITK          |
| 7 | 70,875,000 | 71,025,000 | 946 | 1401 | 0.244992847  | CYFIP2,FAM71B,ITK          |
| 7 | 70,950,000 | 71,100,000 | 947 | 1486 | 0.251788402  | CYFIP2,FNDC9,ITK           |
| 7 | 71,025,000 | 71,175,000 | 948 | 1073 | 0.534745163  | ADAM19,CYFIP2,FNDC9,NIPAL4 |
| 7 | 71,100,000 | 71,250,000 | 949 | 738  | -0.529418134 | ADAM19,CYFIP2,NIPAL4       |
| 7 | 71,175,000 | 71,325,000 | 950 | 551  | -1.805577698 | ADAM19,SOX30               |
| 7 | 71,250,000 | 71,400,000 | 951 | 315  | -0.690933326 | ADAM19,LSM11,SOX30,THG1L   |

|   |            |            |      |      |              |                           |
|---|------------|------------|------|------|--------------|---------------------------|
| 7 | 71,325,000 | 71,475,000 | 952  | 259  | -2.855060626 | CLINT1,LSM11,SOX30,THG1L  |
| 7 | 71,400,000 | 71,550,000 | 953  | 332  | -1.756788906 | CLINT1                    |
| 7 | 71,475,000 | 71,625,000 | 954  | 333  | -0.398124288 | CLINT1                    |
| 7 | 71,550,000 | 71,700,000 | 955  | 210  | 0.214247225  |                           |
| 7 | 71,625,000 | 71,775,000 | 956  | 187  | 0.49387343   |                           |
| 7 | 71,700,000 | 71,850,000 | 957  | 332  | 0.698715929  |                           |
| 7 | 71,775,000 | 71,925,000 | 958  | 336  | 0.406023194  |                           |
| 7 | 71,850,000 | 72,000,000 | 959  | 198  | 0.040889807  |                           |
| 7 | 71,925,000 | 72,075,000 | 960  | 272  | 0.502405241  |                           |
| 7 | 72,000,000 | 72,150,000 | 961  | 354  | 0.84060822   |                           |
| 7 | 72,075,000 | 72,225,000 | 962  | 363  | -0.539178681 |                           |
| 7 | 72,150,000 | 72,300,000 | 963  | 442  | -1.752181214 |                           |
| 7 | 72,225,000 | 72,375,000 | 964  | 368  | -1.465198303 |                           |
| 7 | 72,300,000 | 72,450,000 | 965  | 246  | -0.491360521 | EBF1                      |
| 7 | 72,375,000 | 72,525,000 | 966  | 315  | 0.334437191  | EBF1                      |
| 7 | 72,450,000 | 72,600,000 | 967  | 313  | 0.147344769  | EBF1                      |
| 7 | 72,525,000 | 72,675,000 | 968  | 229  | 0.433290977  | EBF1                      |
| 7 | 72,600,000 | 72,750,000 | 969  | 250  | -0.979244745 | EBF1                      |
| 7 | 72,675,000 | 72,825,000 | 970  | 216  | -2.483787095 | EBF1                      |
| 7 | 72,750,000 | 72,900,000 | 971  | 152  | -2.895143973 | EBF1,RNF145               |
| 7 | 72,825,000 | 72,975,000 | 972  | 129  | -4.741254296 | RNF145,UBLCP1             |
| 7 | 72,900,000 | 73,050,000 | 973  | 175  | -4.93471503  | IL12B,RNF145,UBLCP1       |
| 7 | 72,975,000 | 73,125,000 | 974  | 243  | -2.846337803 | IL12B,UBLCP1              |
| 7 | 73,050,000 | 73,200,000 | 975  | 510  | 0.118404786  |                           |
| 7 | 73,125,000 | 73,275,000 | 976  | 629  | -0.274271893 |                           |
| 7 | 73,200,000 | 73,350,000 | 977  | 416  | -0.848492328 |                           |
| 7 | 73,275,000 | 73,425,000 | 978  | 498  | -1.237990011 |                           |
| 7 | 73,350,000 | 73,500,000 | 979  | 468  | -3.088651889 |                           |
| 7 | 73,425,000 | 73,575,000 | 980  | 445  | -2.908157012 |                           |
| 7 | 73,500,000 | 73,650,000 | 981  | 554  | -1.145816591 | ADRA1B                    |
| 7 | 73,575,000 | 73,725,000 | 982  | 381  | -0.652020952 | ADRA1B,TTC1               |
| 7 | 73,650,000 | 73,800,000 | 983  | 199  | 0.367679359  | ADRA1B,PWWP2A,TTC1        |
| 7 | 73,725,000 | 73,875,000 | 984  | 227  | -0.465391136 | PWWP2A,TTC1               |
| 7 | 73,800,000 | 73,950,000 | 985  | 504  | 0.016590429  | CCNJL,FABP6               |
| 7 | 73,875,000 | 74,025,000 | 986  | 834  | 0.286945806  | CCNJL,FABP6               |
| 7 | 73,950,000 | 74,100,000 | 987  | 725  | 0.377318303  | C1QTNF2,CCNJL,SLU7,ZBED8  |
| 7 | 74,025,000 | 74,175,000 | 988  | 593  | 0.603497546  | C1QTNF2,PTTG1,SLU7,ZBED8  |
| 7 | 74,100,000 | 74,250,000 | 989  | 1119 | 1.00832427   | PTTG1,SLU7                |
| 7 | 74,175,000 | 74,325,000 | 990  | 1444 | 1.250134883  |                           |
| 7 | 74,250,000 | 74,400,000 | 991  | 1269 | 0.966062482  | ATP10B                    |
| 7 | 74,325,000 | 74,475,000 | 992  | 961  | 0.866935587  | ATP10B                    |
| 7 | 74,400,000 | 74,550,000 | 993  | 1027 | 1.114906547  | ATP10B                    |
| 7 | 74,475,000 | 74,625,000 | 994  | 1374 | 1.043913147  |                           |
| 7 | 74,550,000 | 74,700,000 | 995  | 1140 | 0.931710496  |                           |
| 7 | 74,625,000 | 74,775,000 | 996  | 930  | 0.880959265  |                           |
| 7 | 74,700,000 | 74,850,000 | 997  | 740  | 0.869572155  |                           |
| 7 | 74,775,000 | 74,925,000 | 998  | 542  | 0.835344604  |                           |
| 7 | 74,850,000 | 75,000,000 | 999  | 666  | 0.651152029  |                           |
| 7 | 74,925,000 | 75,075,000 | 1000 | 661  | 0.771599625  | ENSBTAG00000046349        |
| 7 | 75,000,000 | 75,150,000 | 1001 | 598  | 0.850385802  | GABRB2,ENSBTAG00000046349 |
| 7 | 75,075,000 | 75,225,000 | 1002 | 476  | 0.718771018  | GABRB2                    |
| 7 | 75,150,000 | 75,300,000 | 1003 | 331  | 1.103433274  | GABRB2                    |
| 7 | 75,225,000 | 75,375,000 | 1004 | 242  | 1.421901664  | GABRB2                    |

|   |            |            |      |      |              |                         |
|---|------------|------------|------|------|--------------|-------------------------|
| 7 | 75,300,000 | 75,450,000 | 1005 | 361  | 1.428585003  | GABRB2                  |
| 7 | 75,375,000 | 75,525,000 | 1006 | 487  | 1.376872108  | GABRA6,GABRB2           |
| 7 | 75,450,000 | 75,600,000 | 1007 | 291  | 0.797982506  | GABRA6                  |
| 7 | 75,525,000 | 75,675,000 | 1008 | 148  | 0.391392473  | GABRA6                  |
| 7 | 75,600,000 | 75,750,000 | 1009 | 320  | 0.884840911  | GABRA1                  |
| 7 | 75,675,000 | 75,825,000 | 1010 | 456  | 0.728482128  | GABRA1                  |
| 7 | 75,750,000 | 75,900,000 | 1011 | 625  | 0.827926978  | GABRA1,GABRG2           |
| 7 | 75,825,000 | 75,975,000 | 1012 | 727  | 0.717533565  | GABRG2                  |
| 7 | 75,900,000 | 76,050,000 | 1013 | 422  | 0.481774588  | GABRG2                  |
| 7 | 75,975,000 | 76,125,000 | 1014 | 335  | 1.147973786  | GABRG2                  |
| 7 | 76,050,000 | 76,200,000 | 1015 | 562  | -0.017182004 |                         |
| 7 | 76,125,000 | 76,275,000 | 1016 | 550  | -0.586501809 |                         |
| 7 | 76,200,000 | 76,350,000 | 1017 | 332  | -1.078785515 |                         |
| 7 | 76,275,000 | 76,425,000 | 1018 | 551  | -0.080427462 |                         |
| 7 | 76,350,000 | 76,500,000 | 1019 | 653  | 0.227603286  |                         |
| 7 | 76,425,000 | 76,575,000 | 1020 | 263  | -0.411239812 |                         |
| 7 | 76,500,000 | 76,650,000 | 1021 | 314  | -2.167551211 |                         |
| 7 | 76,575,000 | 76,725,000 | 1022 | 956  | -0.216485373 |                         |
| 7 | 76,650,000 | 76,800,000 | 1023 | 1185 | 0.152991413  |                         |
| 7 | 76,725,000 | 76,875,000 | 1024 | 798  | -1.115506001 |                         |
| 7 | 76,800,000 | 76,950,000 | 1025 | 742  | 0.191140008  |                         |
| 7 | 76,875,000 | 77,025,000 | 1026 | 754  | 0.001965468  |                         |
| 7 | 76,950,000 | 77,100,000 | 1027 | 524  | -2.844941714 |                         |
| 7 | 77,025,000 | 77,175,000 | 1028 | 399  | -3.932240702 |                         |
| 7 | 77,100,000 | 77,250,000 | 1029 | 294  | -3.795630318 | CCNG1                   |
| 7 | 77,175,000 | 77,325,000 | 1030 | 318  | -0.666829443 | CCNG1,HMMR,MAT2B,NUDCD2 |
| 7 | 77,250,000 | 77,400,000 | 1031 | 337  | -0.044388077 | CCNG1,HMMR,MAT2B,NUDCD2 |
| 7 | 77,325,000 | 77,475,000 | 1032 | 309  | 0.066633959  | MAT2B                   |
| 7 | 77,400,000 | 77,550,000 | 1033 | 441  | 0.355715469  |                         |
| 7 | 77,475,000 | 77,625,000 | 1034 | 407  | 0.166328568  |                         |
| 7 | 77,550,000 | 77,700,000 | 1035 | 307  | 0.753742835  |                         |
| 7 | 77,625,000 | 77,775,000 | 1036 | 351  | -0.200245332 |                         |
| 7 | 77,700,000 | 77,850,000 | 1037 | 578  | -2.235460751 |                         |
| 7 | 77,775,000 | 77,925,000 | 1038 | 663  | -0.378530957 |                         |
| 7 | 77,850,000 | 78,000,000 | 1039 | 750  | 1.063152529  |                         |
| 7 | 77,925,000 | 78,075,000 | 1040 | 626  | 0.995640307  |                         |
| 7 | 78,000,000 | 78,150,000 | 1041 | 303  | 0.242965356  |                         |
| 7 | 78,075,000 | 78,225,000 | 1042 | 328  | -0.704724464 |                         |
| 7 | 78,150,000 | 78,300,000 | 1043 | 412  | -2.997447552 |                         |
| 7 | 78,225,000 | 78,375,000 | 1044 | 513  | -3.894818724 |                         |
| 7 | 78,300,000 | 78,450,000 | 1045 | 490  | -2.520104207 |                         |
| 7 | 78,375,000 | 78,525,000 | 1046 | 584  | -0.222019907 |                         |
| 7 | 78,450,000 | 78,600,000 | 1047 | 790  | -2.353416283 |                         |
| 7 | 78,525,000 | 78,675,000 | 1048 | 861  | -4.003287601 |                         |
| 7 | 78,600,000 | 78,750,000 | 1049 | 667  | -2.740425436 |                         |
| 7 | 78,675,000 | 78,825,000 | 1050 | 424  | -1.043349061 |                         |
| 7 | 78,750,000 | 78,900,000 | 1051 | 443  | -0.27482533  |                         |
| 7 | 78,825,000 | 78,975,000 | 1052 | 717  | -0.004895752 |                         |
| 7 | 78,900,000 | 79,050,000 | 1053 | 1041 | -0.048274368 |                         |
| 7 | 78,975,000 | 79,125,000 | 1054 | 817  | -0.331839594 |                         |
| 7 | 79,050,000 | 79,200,000 | 1055 | 273  | -0.489749622 |                         |
| 7 | 79,125,000 | 79,275,000 | 1056 | 47   | -5.033976823 |                         |
| 7 | 79,200,000 | 79,350,000 | 1057 | 244  | 0.73495939   |                         |

|   |            |            |      |      |              |                               |
|---|------------|------------|------|------|--------------|-------------------------------|
| 7 | 79,275,000 | 79,425,000 | 1058 | 334  | 1.046520416  |                               |
| 7 | 79,350,000 | 79,500,000 | 1059 | 342  | 0.842976726  |                               |
| 7 | 79,425,000 | 79,575,000 | 1060 | 589  | 0.439607387  |                               |
| 7 | 79,500,000 | 79,650,000 | 1061 | 648  | -0.055179087 |                               |
| 7 | 79,575,000 | 79,725,000 | 1062 | 425  | -0.82722256  |                               |
| 7 | 79,650,000 | 79,800,000 | 1063 | 503  | -1.103553825 |                               |
| 7 | 79,725,000 | 79,875,000 | 1064 | 553  | 0.061196157  |                               |
| 7 | 79,800,000 | 79,950,000 | 1065 | 589  | 0.015881027  |                               |
| 7 | 79,875,000 | 80,025,000 | 1066 | 637  | -1.412799851 |                               |
| 7 | 79,950,000 | 80,100,000 | 1067 | 508  | -1.227709697 |                               |
| 7 | 80,025,000 | 80,175,000 | 1068 | 711  | 0.43069694   |                               |
| 7 | 80,100,000 | 80,250,000 | 1069 | 976  | -0.047776878 | ENSBTAG00000046080            |
| 7 | 80,175,000 | 80,325,000 | 1070 | 934  | -0.693759983 | ENSBTAG00000046080            |
| 7 | 80,250,000 | 80,400,000 | 1071 | 900  | -1.905803466 |                               |
| 7 | 80,325,000 | 80,475,000 | 1072 | 817  | -1.193573343 |                               |
| 7 | 80,400,000 | 80,550,000 | 1073 | 979  | -0.436474908 |                               |
| 7 | 80,475,000 | 80,625,000 | 1074 | 1059 | -0.471093162 |                               |
| 7 | 80,550,000 | 80,700,000 | 1075 | 693  | 0.391011143  |                               |
| 7 | 80,625,000 | 80,775,000 | 1076 | 483  | 0.848994024  |                               |
| 7 | 80,700,000 | 80,850,000 | 1077 | 375  | 1.116111064  |                               |
| 7 | 80,775,000 | 80,925,000 | 1078 | 679  | 1.189370145  |                               |
| 7 | 80,850,000 | 81,000,000 | 1079 | 897  | 1.252924039  |                               |
| 7 | 80,925,000 | 81,075,000 | 1080 | 799  | 1.387775604  |                               |
| 7 | 81,000,000 | 81,150,000 | 1081 | 521  | 1.3302457    |                               |
| 7 | 81,075,000 | 81,225,000 | 1082 | 357  | 0.861788181  |                               |
| 7 | 81,150,000 | 81,300,000 | 1083 | 509  | 0.538163546  |                               |
| 7 | 81,225,000 | 81,375,000 | 1084 | 558  | -0.460105467 |                               |
| 7 | 81,300,000 | 81,450,000 | 1085 | 502  | -0.208269582 | CMC2                          |
| 7 | 81,375,000 | 81,525,000 | 1086 | 350  | 0.939995489  | CMC2                          |
| 7 | 81,450,000 | 81,600,000 | 1087 | 389  | 0.129741549  |                               |
| 7 | 81,525,000 | 81,675,000 | 1088 | 536  | 0.332733722  |                               |
| 7 | 81,600,000 | 81,750,000 | 1089 | 701  | 0.054757429  |                               |
| 7 | 81,675,000 | 81,825,000 | 1090 | 704  | 0.015797115  |                               |
| 7 | 81,750,000 | 81,900,000 | 1091 | 499  | 0.550887396  |                               |
| 7 | 81,825,000 | 81,975,000 | 1092 | 462  | 0.600743971  |                               |
| 7 | 81,900,000 | 82,050,000 | 1093 | 636  | -0.092494474 |                               |
| 7 | 81,975,000 | 82,125,000 | 1094 | 860  | -0.573460353 |                               |
| 7 | 82,050,000 | 82,200,000 | 1095 | 907  | -0.611926265 |                               |
| 7 | 82,125,000 | 82,275,000 | 1096 | 593  | -0.433474993 |                               |
| 7 | 82,200,000 | 82,350,000 | 1097 | 239  | -0.441432104 |                               |
| 7 | 82,275,000 | 82,425,000 | 1098 | 313  | -1.13166017  | TENM2                         |
| 7 | 82,350,000 | 82,500,000 | 1099 | 374  | -0.409438665 | TENM2                         |
| 7 | 82,425,000 | 82,575,000 | 1100 | 348  | 0.687246432  | TENM2                         |
| 7 | 82,500,000 | 82,650,000 | 1101 | 512  | 0.977442317  | TENM2                         |
| 7 | 82,575,000 | 82,725,000 | 1102 | 504  | 0.755109419  | TENM2,WWC1                    |
| 7 | 82,650,000 | 82,800,000 | 1103 | 610  | 0.008078961  | RARS,WWC1                     |
| 7 | 82,725,000 | 82,875,000 | 1104 | 984  | -0.700001861 | FBLL1,RARS,WWC1               |
| 7 | 82,800,000 | 82,950,000 | 1105 | 900  | -1.013750506 | FAM151B,FBLL1,RARS,ZFYVE16    |
| 7 | 82,875,000 | 83,025,000 | 1106 | 705  | -0.900892755 | ANKRD34B,DHFR,FAM151B,ZFYVE16 |
| 7 | 82,950,000 | 83,100,000 | 1107 | 688  | -0.42926572  | ANKRD34B,DHFR,FAM151B,MSH3    |
| 7 | 83,025,000 | 83,175,000 | 1108 | 608  | 0.921284163  | DHFR,MSH3                     |
| 7 | 83,100,000 | 83,250,000 | 1109 | 721  | 0.798523057  | MSH3                          |
| 7 | 83,175,000 | 83,325,000 | 1110 | 575  | 0.495484571  | MSH3                          |



|   |            |            |      |      |              |                             |
|---|------------|------------|------|------|--------------|-----------------------------|
| 7 | 83,250,000 | 83,400,000 | 1111 | 650  | 0.910629853  | RASGRF2                     |
| 7 | 83,325,000 | 83,475,000 | 1112 | 1053 | 1.103326742  | RASGRF2                     |
| 7 | 83,400,000 | 83,550,000 | 1113 | 833  | 0.94805697   | RASGRF2                     |
| 7 | 83,475,000 | 83,625,000 | 1114 | 606  | 0.561101566  | ACOT12,CKMT2,RASGRF2,ZCCHC9 |
| 7 | 83,550,000 | 83,700,000 | 1115 | 823  | 0.281128336  | ACOT12,CKMT2,ZCCHC9         |
| 7 | 83,625,000 | 83,775,000 | 1116 | 683  | 0.193350885  | ACOT12,SSBP2                |
| 7 | 83,700,000 | 83,850,000 | 1117 | 498  | -0.115381981 | SSBP2                       |
| 7 | 83,775,000 | 83,925,000 | 1118 | 684  | -0.341777953 | SSBP2                       |
| 7 | 83,850,000 | 84,000,000 | 1119 | 602  | -1.058329269 | SSBP2                       |
| 7 | 83,925,000 | 84,075,000 | 1120 | 443  | -1.246800999 | SSBP2                       |
| 7 | 84,000,000 | 84,150,000 | 1121 | 368  | 0.472072141  | SSBP2                       |
| 7 | 84,075,000 | 84,225,000 | 1122 | 516  | 0.504619779  |                             |
| 7 | 84,150,000 | 84,300,000 | 1123 | 620  | -0.138191925 | MGC138057                   |
| 7 | 84,225,000 | 84,375,000 | 1124 | 425  | -0.340801669 | MGC138057                   |
| 7 | 84,300,000 | 84,450,000 | 1125 | 356  | -0.165580274 | MGC138057                   |
| 7 | 84,375,000 | 84,525,000 | 1126 | 590  | 0.049527669  | MGC138057,RPS23             |
| 7 | 84,450,000 | 84,600,000 | 1127 | 716  | -0.125567031 | MGC138057,RPS23             |
| 7 | 84,525,000 | 84,675,000 | 1128 | 534  | -0.664894292 | RPS23                       |
| 7 | 84,600,000 | 84,750,000 | 1129 | 511  | -0.669918137 |                             |
| 7 | 84,675,000 | 84,825,000 | 1130 | 600  | -0.424219609 |                             |
| 7 | 84,750,000 | 84,900,000 | 1131 | 650  | 0.093661744  |                             |
| 7 | 84,825,000 | 84,975,000 | 1132 | 746  | 0.432663887  |                             |
| 7 | 84,900,000 | 85,050,000 | 1133 | 559  | 0.448024416  |                             |
| 7 | 84,975,000 | 85,125,000 | 1134 | 418  | 0.153485384  |                             |
| 7 | 85,050,000 | 85,200,000 | 1135 | 383  | 0.366218045  |                             |
| 7 | 85,125,000 | 85,275,000 | 1136 | 294  | 1.084173279  | TMEM167A,XRCC4              |
| 7 | 85,200,000 | 85,350,000 | 1137 | 293  | 1.05504085   | TMEM167A,XRCC4              |
| 7 | 85,275,000 | 85,425,000 | 1138 | 256  | 0.659896807  | XRCC4                       |
| 7 | 85,350,000 | 85,500,000 | 1139 | 383  | -0.009413166 | XRCC4                       |
| 7 | 85,425,000 | 85,575,000 | 1140 | 567  | 0.744968546  | XRCC4                       |
| 7 | 85,500,000 | 85,650,000 | 1141 | 785  | 0.101104119  | XRCC4                       |
| 7 | 85,575,000 | 85,725,000 | 1142 | 793  | -1.033854027 | VCAN                        |
| 7 | 85,650,000 | 85,800,000 | 1143 | 487  | -0.62279125  | VCAN                        |
| 7 | 85,725,000 | 85,875,000 | 1144 | 464  | 0.717293127  | HAPLN1,VCAN                 |
| 7 | 85,800,000 | 85,950,000 | 1145 | 664  | -0.088291764 | HAPLN1                      |
| 7 | 85,875,000 | 86,025,000 | 1146 | 752  | -0.520439837 | HAPLN1                      |
| 7 | 85,950,000 | 86,100,000 | 1147 | 702  | 0.149568372  |                             |
| 7 | 86,025,000 | 86,175,000 | 1148 | 499  | 0.188662835  | EDIL3                       |
| 7 | 86,100,000 | 86,250,000 | 1149 | 347  | 0.73461019   | EDIL3                       |
| 7 | 86,175,000 | 86,325,000 | 1150 | 290  | 1.125481391  | EDIL3                       |
| 7 | 86,250,000 | 86,400,000 | 1151 | 421  | 0.573468118  | EDIL3                       |
| 7 | 86,325,000 | 86,475,000 | 1152 | 716  | 0.897082321  | EDIL3                       |
| 7 | 86,400,000 | 86,550,000 | 1153 | 750  | 1.00258309   | EDIL3                       |
| 7 | 86,475,000 | 86,625,000 | 1154 | 863  | 0.488059224  | EDIL3                       |
| 7 | 86,550,000 | 86,700,000 | 1155 | 899  | 0.170170733  | EDIL3                       |
| 7 | 86,625,000 | 86,775,000 | 1156 | 943  | -0.826027701 | EDIL3                       |
| 7 | 86,700,000 | 86,850,000 | 1157 | 917  | -0.902101944 |                             |
| 7 | 86,775,000 | 86,925,000 | 1158 | 865  | -3.600230829 |                             |
| 7 | 86,850,000 | 87,000,000 | 1159 | 993  | -3.820657463 |                             |
| 7 | 86,925,000 | 87,075,000 | 1160 | 669  | -2.180307018 |                             |
| 7 | 87,000,000 | 87,150,000 | 1161 | 500  | -1.322839783 |                             |
| 7 | 87,075,000 | 87,225,000 | 1162 | 780  | 0.402583198  |                             |
| 7 | 87,150,000 | 87,300,000 | 1163 | 568  | 0.356508992  |                             |

|   |            |            |      |      |              |                          |
|---|------------|------------|------|------|--------------|--------------------------|
| 7 | 87,225,000 | 87,375,000 | 1164 | 218  | -0.854862201 |                          |
| 7 | 87,300,000 | 87,450,000 | 1165 | 409  | -0.081338859 |                          |
| 7 | 87,375,000 | 87,525,000 | 1166 | 626  | 1.084362874  |                          |
| 7 | 87,450,000 | 87,600,000 | 1167 | 601  | 0.912955394  |                          |
| 7 | 87,525,000 | 87,675,000 | 1168 | 934  | 0.177479949  |                          |
| 7 | 87,600,000 | 87,750,000 | 1169 | 1149 | 0.098376297  |                          |
| 7 | 87,675,000 | 87,825,000 | 1170 | 599  | 0.190560377  |                          |
| 7 | 87,750,000 | 87,900,000 | 1171 | 357  | 0.584592893  |                          |
| 7 | 87,825,000 | 87,975,000 | 1172 | 724  | -0.112819159 |                          |
| 7 | 87,900,000 | 88,050,000 | 1173 | 1016 | 0.047675462  |                          |
| 7 | 87,975,000 | 88,125,000 | 1174 | 847  | 0.297450987  |                          |
| 7 | 88,050,000 | 88,200,000 | 1175 | 691  | -1.18910805  |                          |
| 7 | 88,125,000 | 88,275,000 | 1176 | 898  | -0.917507939 |                          |
| 7 | 88,200,000 | 88,350,000 | 1177 | 1201 | -1.982430498 |                          |
| 7 | 88,275,000 | 88,425,000 | 1178 | 1137 | -2.415084898 |                          |
| 7 | 88,350,000 | 88,500,000 | 1179 | 1031 | -1.243448828 |                          |
| 7 | 88,425,000 | 88,575,000 | 1180 | 963  | -1.592791355 |                          |
| 7 | 88,500,000 | 88,650,000 | 1181 | 800  | -0.30639967  | COX7C                    |
| 7 | 88,575,000 | 88,725,000 | 1182 | 922  | 0.363032133  | COX7C                    |
| 7 | 88,650,000 | 88,800,000 | 1183 | 970  | 0.667773223  | COX7C                    |
| 7 | 88,725,000 | 88,875,000 | 1184 | 644  | 0.306444844  |                          |
| 7 | 88,800,000 | 88,950,000 | 1185 | 569  | -1.822926982 |                          |
| 7 | 88,875,000 | 89,025,000 | 1186 | 825  | -2.087201255 |                          |
| 7 | 88,950,000 | 89,100,000 | 1187 | 776  | -1.505354656 |                          |
| 7 | 89,025,000 | 89,175,000 | 1188 | 826  | -2.220499364 |                          |
| 7 | 89,100,000 | 89,250,000 | 1189 | 922  | -1.718826914 |                          |
| 7 | 89,175,000 | 89,325,000 | 1190 | 686  | -0.501869952 | RASA1                    |
| 7 | 89,250,000 | 89,400,000 | 1191 | 462  | -0.809111724 | RASA1,ENSBTAG00000009566 |
| 7 | 89,325,000 | 89,475,000 | 1192 | 680  | -0.818495718 | RASA1,ENSBTAG00000009566 |
| 7 | 89,400,000 | 89,550,000 | 1193 | 794  | -0.227607809 | ENSBTAG00000009566       |
| 7 | 89,475,000 | 89,625,000 | 1194 | 507  | 0.320218229  |                          |
| 7 | 89,550,000 | 89,700,000 | 1195 | 695  | -1.452435473 |                          |
| 7 | 89,625,000 | 89,775,000 | 1196 | 983  | -1.571144329 |                          |
| 7 | 89,700,000 | 89,850,000 | 1197 | 806  | -0.919878146 |                          |
| 7 | 89,775,000 | 89,925,000 | 1198 | 639  | 0.313959778  |                          |
| 7 | 89,850,000 | 90,000,000 | 1199 | 707  | 0.783562353  |                          |
| 7 | 89,925,000 | 90,075,000 | 1200 | 698  | -1.368393346 |                          |
| 7 | 90,000,000 | 90,150,000 | 1201 | 447  | -3.251658519 | TMEM161B                 |
| 7 | 90,075,000 | 90,225,000 | 1202 | 454  | -1.138334793 | TMEM161B                 |
| 7 | 90,150,000 | 90,300,000 | 1203 | 744  | -0.613993799 | TMEM161B                 |
| 7 | 90,225,000 | 90,375,000 | 1204 | 625  | -0.250749358 |                          |
| 7 | 90,300,000 | 90,450,000 | 1205 | 372  | 0.279840984  |                          |
| 7 | 90,375,000 | 90,525,000 | 1206 | 320  | 0.836893975  |                          |
| 7 | 90,450,000 | 90,600,000 | 1207 | 292  | 0.779314619  |                          |
| 7 | 90,525,000 | 90,675,000 | 1208 | 337  | 0.734929396  | MEF2C                    |
| 7 | 90,600,000 | 90,750,000 | 1209 | 466  | 0.472514863  | MEF2C                    |
| 7 | 90,675,000 | 90,825,000 | 1210 | 509  | -0.761684961 | MEF2C                    |
| 7 | 90,750,000 | 90,900,000 | 1211 | 553  | 0.205252349  | MEF2C                    |
| 7 | 90,825,000 | 90,975,000 | 1212 | 607  | 0.366787678  |                          |
| 7 | 90,900,000 | 91,050,000 | 1213 | 543  | 0.113774332  |                          |
| 7 | 90,975,000 | 91,125,000 | 1214 | 451  | 1.019382827  |                          |
| 7 | 91,050,000 | 91,200,000 | 1215 | 436  | 0.308776027  |                          |
| 7 | 91,125,000 | 91,275,000 | 1216 | 607  | 0.758465014  |                          |

|   |            |            |      |      |              |                                 |
|---|------------|------------|------|------|--------------|---------------------------------|
| 7 | 91,200,000 | 91,350,000 | 1217 | 609  | 1.019148847  |                                 |
| 7 | 91,275,000 | 91,425,000 | 1218 | 507  | 0.694071244  |                                 |
| 7 | 91,350,000 | 91,500,000 | 1219 | 505  | 0.400271106  |                                 |
| 7 | 91,425,000 | 91,575,000 | 1220 | 502  | 0.143741459  |                                 |
| 7 | 91,500,000 | 91,650,000 | 1221 | 599  | -0.017031491 |                                 |
| 7 | 91,575,000 | 91,725,000 | 1222 | 661  | 0.431675493  |                                 |
| 7 | 91,650,000 | 91,800,000 | 1223 | 615  | 0.972397118  |                                 |
| 7 | 91,725,000 | 91,875,000 | 1224 | 712  | 0.803350335  |                                 |
| 7 | 91,800,000 | 91,950,000 | 1225 | 691  | 0.797559204  |                                 |
| 7 | 91,875,000 | 92,025,000 | 1226 | 588  | 1.026172327  |                                 |
| 7 | 91,950,000 | 92,100,000 | 1227 | 786  | 1.206194841  |                                 |
| 7 | 92,025,000 | 92,175,000 | 1228 | 740  | 1.23174976   |                                 |
| 7 | 92,100,000 | 92,250,000 | 1229 | 480  | 1.198209488  |                                 |
| 7 | 92,175,000 | 92,325,000 | 1230 | 353  | 0.463988773  | CETN3,ENSBTAG00000045800        |
| 7 | 92,250,000 | 92,400,000 | 1231 | 297  | -0.213041239 | CETN3,MBLAC2,ENSBTAG00000045800 |
| 7 | 92,325,000 | 92,475,000 | 1232 | 332  | 0.069550271  | LYSMD3,MBLAC2,POLR3G            |
| 7 | 92,400,000 | 92,550,000 | 1233 | 408  | 0.073553031  | GPR98,LYSMD3,POLR3G             |
| 7 | 92,475,000 | 92,625,000 | 1234 | 614  | 0.764015614  | GPR98                           |
| 7 | 92,550,000 | 92,700,000 | 1235 | 1104 | 0.62400724   | GPR98                           |
| 7 | 92,625,000 | 92,775,000 | 1236 | 1033 | 0.056297496  | GPR98                           |
| 7 | 92,700,000 | 92,850,000 | 1237 | 898  | 0.290022166  |                                 |
| 7 | 92,775,000 | 92,925,000 | 1238 | 890  | 1.056357022  | ENSBTAG00000046227              |
| 7 | 92,850,000 | 93,000,000 | 1239 | 394  | 1.310410782  | ENSBTAG00000046227              |
| 7 | 92,925,000 | 93,075,000 | 1240 | 261  | 1.020472529  |                                 |
| 7 | 93,000,000 | 93,150,000 | 1241 | 419  | 0.837674265  |                                 |
| 7 | 93,075,000 | 93,225,000 | 1242 | 519  | 0.250107988  |                                 |
| 7 | 93,150,000 | 93,300,000 | 1243 | 563  | 0.134978684  | ARRDC3                          |
| 7 | 93,225,000 | 93,375,000 | 1244 | 553  | 0.264003738  | ARRDC3                          |
| 7 | 93,300,000 | 93,450,000 | 1245 | 589  | 0.497528765  |                                 |
| 7 | 93,375,000 | 93,525,000 | 1246 | 504  | -0.319695683 |                                 |
| 7 | 93,450,000 | 93,600,000 | 1247 | 792  | -1.653258154 |                                 |
| 7 | 93,525,000 | 93,675,000 | 1248 | 817  | -0.972118907 |                                 |
| 7 | 93,600,000 | 93,750,000 | 1249 | 324  | -0.486383392 |                                 |
| 7 | 93,675,000 | 93,825,000 | 1250 | 236  | -1.489963583 |                                 |
| 7 | 93,750,000 | 93,900,000 | 1251 | 247  | -1.172120462 |                                 |
| 7 | 93,825,000 | 93,975,000 | 1252 | 397  | 0.425494188  |                                 |
| 7 | 93,900,000 | 94,050,000 | 1253 | 742  | -0.347438091 |                                 |
| 7 | 93,975,000 | 94,125,000 | 1254 | 924  | -0.705200067 |                                 |
| 7 | 94,050,000 | 94,200,000 | 1255 | 1178 | 0.222949959  |                                 |
| 7 | 94,125,000 | 94,275,000 | 1256 | 1443 | 0.016818397  |                                 |
| 7 | 94,200,000 | 94,350,000 | 1257 | 1616 | -0.048422036 |                                 |
| 7 | 94,275,000 | 94,425,000 | 1258 | 1488 | 0.198708505  |                                 |
| 7 | 94,350,000 | 94,500,000 | 1259 | 952  | 0.042965909  |                                 |
| 7 | 94,425,000 | 94,575,000 | 1260 | 761  | -0.361458892 |                                 |
| 7 | 94,500,000 | 94,650,000 | 1261 | 667  | -0.362941804 |                                 |
| 7 | 94,575,000 | 94,725,000 | 1262 | 732  | 0.212731439  |                                 |
| 7 | 94,650,000 | 94,800,000 | 1263 | 819  | 0.47492605   |                                 |
| 7 | 94,725,000 | 94,875,000 | 1264 | 947  | 0.633766743  |                                 |
| 7 | 94,800,000 | 94,950,000 | 1265 | 819  | 0.675810206  |                                 |
| 7 | 94,875,000 | 95,025,000 | 1266 | 600  | 0.712979371  |                                 |
| 7 | 94,950,000 | 95,100,000 | 1267 | 537  | 0.768327165  |                                 |
| 7 | 95,025,000 | 95,175,000 | 1268 | 458  | 0.418556105  |                                 |
| 7 | 95,100,000 | 95,250,000 | 1269 | 512  | 0.669970623  |                                 |

|   |            |            |      |      |              |                           |
|---|------------|------------|------|------|--------------|---------------------------|
| 7 | 95,175,000 | 95,325,000 | 1270 | 499  | 0.194211109  |                           |
| 7 | 95,250,000 | 95,400,000 | 1271 | 490  | -0.493760498 |                           |
| 7 | 95,325,000 | 95,475,000 | 1272 | 312  | 0.81555951   | NR2F1                     |
| 7 | 95,400,000 | 95,550,000 | 1273 | 229  | -0.082848937 | NR2F1                     |
| 7 | 95,475,000 | 95,625,000 | 1274 | 306  | -1.327375031 |                           |
| 7 | 95,550,000 | 95,700,000 | 1275 | 349  | -2.370881419 |                           |
| 7 | 95,625,000 | 95,775,000 | 1276 | 382  | -2.365594132 |                           |
| 7 | 95,700,000 | 95,850,000 | 1277 | 655  | -0.345098659 |                           |
| 7 | 95,775,000 | 95,925,000 | 1278 | 591  | 0.108055604  |                           |
| 7 | 95,850,000 | 96,000,000 | 1279 | 714  | 1.082694524  |                           |
| 7 | 95,925,000 | 96,075,000 | 1280 | 969  | 1.251938375  |                           |
| 7 | 96,000,000 | 96,150,000 | 1281 | 644  | 0.083648586  | KIAA0825                  |
| 7 | 96,075,000 | 96,225,000 | 1282 | 703  | -0.267380825 | KIAA0825                  |
| 7 | 96,150,000 | 96,300,000 | 1283 | 747  | 0.199704059  | KIAA0825                  |
| 7 | 96,225,000 | 96,375,000 | 1284 | 709  | 0.153673731  | ANKRD32,KIAA0825          |
| 7 | 96,300,000 | 96,450,000 | 1285 | 577  | 0.48874682   | ANKRD32,KIAA0825          |
| 7 | 96,375,000 | 96,525,000 | 1286 | 413  | 0.836066537  | ANKRD32                   |
| 7 | 96,450,000 | 96,600,000 | 1287 | 377  | 0.547710955  |                           |
| 7 | 96,525,000 | 96,675,000 | 1288 | 279  | -0.203605481 |                           |
| 7 | 96,600,000 | 96,750,000 | 1289 | 516  | 0.097013186  | MCTP1                     |
| 7 | 96,675,000 | 96,825,000 | 1290 | 1028 | 0.460037844  | MCTP1                     |
| 7 | 96,750,000 | 96,900,000 | 1291 | 1407 | 0.645461619  |                           |
| 7 | 96,825,000 | 96,975,000 | 1292 | 1233 | 0.517506201  |                           |
| 7 | 96,900,000 | 97,050,000 | 1293 | 1328 | 0.455412667  |                           |
| 7 | 96,975,000 | 97,125,000 | 1294 | 1116 | 0.551164176  | FAM81B                    |
| 7 | 97,050,000 | 97,200,000 | 1295 | 512  | 0.27157692   | FAM81B,TTC37              |
| 7 | 97,125,000 | 97,275,000 | 1296 | 478  | 0.666473189  | FAM81B,TTC37              |
| 7 | 97,200,000 | 97,350,000 | 1297 | 409  | 0.413307384  | ARSK,RHOBTB3,TTC37        |
| 7 | 97,275,000 | 97,425,000 | 1298 | 421  | 0.07762944   | ARSK,RHOBTB3              |
| 7 | 97,350,000 | 97,500,000 | 1299 | 547  | -1.367347585 | RFESD,RHOBTB3,SPATA9      |
| 7 | 97,425,000 | 97,575,000 | 1300 | 453  | -1.747970623 | GLRX,RFESD,RHOBTB3,SPATA9 |
| 7 | 97,500,000 | 97,650,000 | 1301 | 348  | 0.160548704  | ELL2,GLRX,SPATA9          |
| 7 | 97,575,000 | 97,725,000 | 1302 | 387  | 0.469336522  | ELL2                      |
| 7 | 97,650,000 | 97,800,000 | 1303 | 510  | 0.888763743  | ELL2                      |
| 7 | 97,725,000 | 97,875,000 | 1304 | 511  | 0.726501556  |                           |
| 7 | 97,800,000 | 97,950,000 | 1305 | 349  | 0.374546454  |                           |
| 7 | 97,875,000 | 98,025,000 | 1306 | 344  | 0.933700626  |                           |
| 7 | 97,950,000 | 98,100,000 | 1307 | 518  | 1.061116711  |                           |
| 7 | 98,025,000 | 98,175,000 | 1308 | 1095 | 0.620445803  | PCSK1                     |
| 7 | 98,100,000 | 98,250,000 | 1309 | 1013 | 0.310016729  | PCSK1                     |
| 7 | 98,175,000 | 98,325,000 | 1310 | 531  | -0.703331928 | PCSK1                     |
| 7 | 98,250,000 | 98,400,000 | 1311 | 586  | -0.640654578 |                           |
| 7 | 98,325,000 | 98,475,000 | 1312 | 803  | 0.269679203  | CAST                      |
| 7 | 98,400,000 | 98,550,000 | 1313 | 1253 | 0.666779053  | CAST                      |
| 7 | 98,475,000 | 98,625,000 | 1314 | 1544 | 0.140514418  | CAST,ERAP1                |
| 7 | 98,550,000 | 98,700,000 | 1315 | 1517 | 0.214712381  | CAST,ERAP1                |
| 7 | 98,625,000 | 98,775,000 | 1316 | 1438 | 0.071422975  | ERAP2                     |
| 7 | 98,700,000 | 98,850,000 | 1317 | 1162 | -0.23357774  | ERAP2,LNPEP               |
| 7 | 98,775,000 | 98,925,000 | 1318 | 816  | 0.802846761  | LNPEP                     |
| 7 | 98,850,000 | 99,000,000 | 1319 | 714  | 0.593756156  | LIX1,LNPEP                |
| 7 | 98,925,000 | 99,075,000 | 1320 | 643  | 0.300699665  | LIX1,RIOK2                |
| 7 | 99,000,000 | 99,150,000 | 1321 | 588  | 0.211926554  | LIX1,RIOK2                |
| 7 | 99,075,000 | 99,225,000 | 1322 | 903  | -0.063801255 |                           |

|   |             |             |      |      |              |           |
|---|-------------|-------------|------|------|--------------|-----------|
| 7 | 99,150,000  | 99,300,000  | 1323 | 946  | -0.035323677 |           |
| 7 | 99,225,000  | 99,375,000  | 1324 | 760  | 0.907008566  |           |
| 7 | 99,300,000  | 99,450,000  | 1325 | 785  | 1.233589449  |           |
| 7 | 99,375,000  | 99,525,000  | 1326 | 818  | 1.029861145  |           |
| 7 | 99,450,000  | 99,600,000  | 1327 | 855  | 0.322134061  |           |
| 7 | 99,525,000  | 99,675,000  | 1328 | 829  | 0.310899794  |           |
| 7 | 99,600,000  | 99,750,000  | 1329 | 909  | 0.798949772  |           |
| 7 | 99,675,000  | 99,825,000  | 1330 | 917  | 1.115250192  |           |
| 7 | 99,750,000  | 99,900,000  | 1331 | 612  | 0.973174342  |           |
| 7 | 99,825,000  | 99,975,000  | 1332 | 516  | -0.578004159 |           |
| 7 | 99,900,000  | 100,050,000 | 1333 | 483  | -0.495458251 |           |
| 7 | 99,975,000  | 100,125,000 | 1334 | 617  | 1.106373185  |           |
| 7 | 100,050,000 | 100,200,000 | 1335 | 601  | 1.136940217  |           |
| 7 | 100,125,000 | 100,275,000 | 1336 | 335  | 0.896539581  |           |
| 7 | 100,200,000 | 100,350,000 | 1337 | 540  | 0.881755496  |           |
| 7 | 100,275,000 | 100,425,000 | 1338 | 647  | 0.592879423  |           |
| 7 | 100,350,000 | 100,500,000 | 1339 | 470  | 0.558134875  | CHD1,RGMB |
| 7 | 100,425,000 | 100,575,000 | 1340 | 322  | -0.457034047 | CHD1,RGMB |
| 7 | 100,500,000 | 100,650,000 | 1341 | 391  | -0.86914689  | CHD1      |
| 7 | 100,575,000 | 100,725,000 | 1342 | 736  | -3.073577807 |           |
| 7 | 100,650,000 | 100,800,000 | 1343 | 1233 | -3.026508096 |           |
| 7 | 100,725,000 | 100,875,000 | 1344 | 1161 | -1.486871794 |           |
| 7 | 100,800,000 | 100,950,000 | 1345 | 751  | 0.145042266  |           |
| 7 | 100,875,000 | 101,025,000 | 1346 | 731  | 0.426778106  |           |
| 7 | 100,950,000 | 101,100,000 | 1347 | 1158 | 0.752101253  |           |
| 7 | 101,025,000 | 101,175,000 | 1348 | 1259 | 0.226769197  |           |
| 7 | 101,100,000 | 101,250,000 | 1349 | 1340 | -0.444682127 |           |
| 7 | 101,175,000 | 101,325,000 | 1350 | 1520 | 0.017764803  |           |
| 7 | 101,250,000 | 101,400,000 | 1351 | 1498 | -0.105221522 |           |
| 7 | 101,325,000 | 101,475,000 | 1352 | 1537 | 0.046783686  |           |
| 7 | 101,400,000 | 101,550,000 | 1353 | 1757 | 0.211762683  |           |
| 7 | 101,475,000 | 101,625,000 | 1354 | 1538 | 0.242102349  |           |
| 7 | 101,550,000 | 101,700,000 | 1355 | 1145 | 0.876758117  |           |
| 7 | 101,625,000 | 101,775,000 | 1356 | 1048 | 0.911091051  |           |
| 7 | 101,700,000 | 101,850,000 | 1357 | 1180 | 0.976246741  |           |
| 7 | 101,775,000 | 101,925,000 | 1358 | 1530 | 1.05738477   |           |
| 7 | 101,850,000 | 102,000,000 | 1359 | 1458 | 0.73865364   |           |
| 7 | 101,925,000 | 102,075,000 | 1360 | 1465 | 0.895294977  |           |
| 7 | 102,000,000 | 102,150,000 | 1361 | 978  | 1.041309894  |           |
| 7 | 102,075,000 | 102,225,000 | 1362 | 608  | 0.831757034  |           |
| 7 | 102,150,000 | 102,300,000 | 1363 | 1216 | 1.006666345  | FAM174A   |
| 7 | 102,225,000 | 102,375,000 | 1364 | 1560 | 0.629064924  | FAM174A   |
| 7 | 102,300,000 | 102,450,000 | 1365 | 1258 | -0.163847281 |           |
| 7 | 102,375,000 | 102,525,000 | 1366 | 1124 | 0.368648914  | ST8SIA4   |
| 7 | 102,450,000 | 102,600,000 | 1367 | 1480 | 1.008875923  | ST8SIA4   |
| 7 | 102,525,000 | 102,675,000 | 1368 | 1583 | 1.082996554  | ST8SIA4   |
| 7 | 102,600,000 | 102,750,000 | 1369 | 1472 | 1.179190794  |           |
| 7 | 102,675,000 | 102,825,000 | 1370 | 1415 | 1.215382676  |           |
| 7 | 102,750,000 | 102,900,000 | 1371 | 1447 | 1.05176261   |           |
| 7 | 102,825,000 | 102,975,000 | 1372 | 1430 | 0.948117032  |           |
| 7 | 102,900,000 | 103,050,000 | 1373 | 1493 | 0.73226899   |           |
| 7 | 102,975,000 | 103,125,000 | 1374 | 1614 | 0.171676139  |           |
| 7 | 103,050,000 | 103,200,000 | 1375 | 1641 | -0.734751397 |           |

|   |             |             |      |      |              |                                       |
|---|-------------|-------------|------|------|--------------|---------------------------------------|
| 7 | 103,125,000 | 103,275,000 | 1376 | 1900 | -0.770284751 |                                       |
| 7 | 103,200,000 | 103,350,000 | 1377 | 1991 | 0.314725964  |                                       |
| 7 | 103,275,000 | 103,425,000 | 1378 | 1737 | 0.763468791  |                                       |
| 7 | 103,350,000 | 103,500,000 | 1379 | 1552 | -0.455460734 |                                       |
| 7 | 103,425,000 | 103,575,000 | 1380 | 1040 | -1.333433034 |                                       |
| 7 | 103,500,000 | 103,650,000 | 1381 | 713  | 0.214240864  |                                       |
| 7 | 103,575,000 | 103,725,000 | 1382 | 743  | -1.182922562 | SLCO4C1                               |
| 7 | 103,650,000 | 103,800,000 | 1383 | 709  | -1.23345458  | SLCO4C1                               |
| 7 | 103,725,000 | 103,875,000 | 1384 | 953  | 0.257028513  | SLCO4C1,SLCO6A1                       |
| 7 | 103,800,000 | 103,950,000 | 1385 | 918  | 0.519656905  | SLCO6A1                               |
| 7 | 103,875,000 | 104,025,000 | 1386 | 828  | 0.765755115  | SLCO6A1                               |
| 7 | 103,950,000 | 104,100,000 | 1387 | 1099 | 0.346874986  |                                       |
| 7 | 104,025,000 | 104,175,000 | 1388 | 1321 | 0.196073081  |                                       |
| 7 | 104,100,000 | 104,250,000 | 1389 | 1005 | 0.222662658  |                                       |
| 7 | 104,175,000 | 104,325,000 | 1390 | 638  | 0.169876057  | PAM                                   |
| 7 | 104,250,000 | 104,400,000 | 1391 | 664  | 0.372583682  | PAM                                   |
| 7 | 104,325,000 | 104,475,000 | 1392 | 552  | 0.067307359  | PAM                                   |
| 7 | 104,400,000 | 104,550,000 | 1393 | 487  | -0.526052951 | GIN1,PAM                              |
| 7 | 104,475,000 | 104,625,000 | 1394 | 426  | -0.092079624 | GIN1,PAM,PPIP5K2                      |
| 7 | 104,550,000 | 104,700,000 | 1395 | 272  | 0.814396775  | C7H5orf30,GIN1,PPIP5K2                |
| 7 | 104,625,000 | 104,775,000 | 1396 | 394  | 0.703421264  | C7H5orf30,PPIP5K2                     |
| 7 | 104,700,000 | 104,850,000 | 1397 | 902  | -0.225009141 | C7H5orf30                             |
| 7 | 104,775,000 | 104,925,000 | 1398 | 995  | -0.606423962 | ENSBTAG00000027727                    |
| 7 | 104,850,000 | 105,000,000 | 1399 | 615  | -1.152334875 | ENSBTAG00000027727                    |
| 7 | 104,925,000 | 105,075,000 | 1400 | 592  | -0.740540491 | NUDT12,ENSBTAG00000027727             |
| 7 | 105,000,000 | 105,150,000 | 1401 | 1082 | 0.599493858  | NUDT12,ENSBTAG00000027727             |
| 7 | 105,075,000 | 105,225,000 | 1402 | 1174 | 0.745467294  |                                       |
| 7 | 105,150,000 | 105,300,000 | 1403 | 946  | 0.142768857  |                                       |
| 7 | 105,225,000 | 105,375,000 | 1404 | 864  | -1.156009429 | ENSBTAG00000030204                    |
| 7 | 105,300,000 | 105,450,000 | 1405 | 786  | -0.640000075 | ENSBTAG00000030204,ENSBTAG00000046867 |
| 7 | 105,375,000 | 105,525,000 | 1406 | 980  | 0.107547726  | ENSBTAG00000046867                    |
| 7 | 105,450,000 | 105,600,000 | 1407 | 1364 | 0.018263054  |                                       |
| 7 | 105,525,000 | 105,675,000 | 1408 | 1357 | 0.022526692  |                                       |
| 7 | 105,600,000 | 105,750,000 | 1409 | 1200 | 0.280934769  |                                       |
| 7 | 105,675,000 | 105,825,000 | 1410 | 1138 | 0.279692385  |                                       |
| 7 | 105,750,000 | 105,900,000 | 1411 | 484  | 0.296941226  |                                       |
| 7 | 105,825,000 | 105,975,000 | 1412 | 264  | 1.056960368  |                                       |
| 7 | 105,900,000 | 106,050,000 | 1413 | 761  | 0.83139939   |                                       |
| 7 | 105,975,000 | 106,125,000 | 1414 | 1002 | 0.573680904  |                                       |
| 7 | 106,050,000 | 106,200,000 | 1415 | 879  | 0.280624866  |                                       |
| 7 | 106,125,000 | 106,275,000 | 1416 | 864  | -0.336017851 |                                       |
| 7 | 106,200,000 | 106,350,000 | 1417 | 793  | -0.559343099 |                                       |
| 7 | 106,275,000 | 106,425,000 | 1418 | 740  | 0.154767896  |                                       |
| 7 | 106,350,000 | 106,500,000 | 1419 | 767  | 0.359164083  |                                       |
| 7 | 106,425,000 | 106,575,000 | 1420 | 689  | 0.477379573  |                                       |
| 7 | 106,500,000 | 106,650,000 | 1421 | 834  | 0.395419397  |                                       |
| 7 | 106,575,000 | 106,725,000 | 1422 | 848  | 0.263063699  |                                       |
| 7 | 106,650,000 | 106,800,000 | 1423 | 1002 | 0.137177482  |                                       |
| 7 | 106,725,000 | 106,875,000 | 1424 | 1264 | 0.617280174  |                                       |
| 7 | 106,800,000 | 106,950,000 | 1425 | 942  | 0.805463768  |                                       |
| 7 | 106,875,000 | 107,025,000 | 1426 | 662  | 0.017069694  |                                       |
| 7 | 106,950,000 | 107,100,000 | 1427 | 616  | -0.647150929 |                                       |
| 7 | 107,025,000 | 107,175,000 | 1428 | 965  | 0.433292924  |                                       |

|   |             |             |      |      |              |        |
|---|-------------|-------------|------|------|--------------|--------|
| 7 | 107,100,000 | 107,250,000 | 1429 | 1399 | 0.716909899  |        |
| 7 | 107,175,000 | 107,325,000 | 1430 | 1272 | 0.585986172  |        |
| 7 | 107,250,000 | 107,400,000 | 1431 | 914  | 0.715355978  |        |
| 7 | 107,325,000 | 107,475,000 | 1432 | 934  | 0.664648277  |        |
| 7 | 107,400,000 | 107,550,000 | 1433 | 951  | 0.259843783  |        |
| 7 | 107,475,000 | 107,625,000 | 1434 | 603  | 0.148307533  |        |
| 7 | 107,550,000 | 107,700,000 | 1435 | 673  | 0.461863113  |        |
| 7 | 107,625,000 | 107,775,000 | 1436 | 1083 | -0.538602358 |        |
| 7 | 107,700,000 | 107,850,000 | 1437 | 1160 | -1.235657235 |        |
| 7 | 107,775,000 | 107,925,000 | 1438 | 953  | -1.50987455  |        |
| 7 | 107,850,000 | 108,000,000 | 1439 | 941  | -2.37340972  |        |
| 7 | 107,925,000 | 108,075,000 | 1440 | 1289 | -1.23965292  |        |
| 7 | 108,000,000 | 108,150,000 | 1441 | 1366 | -0.160149577 |        |
| 7 | 108,075,000 | 108,225,000 | 1442 | 1243 | 0.282762109  |        |
| 7 | 108,150,000 | 108,300,000 | 1443 | 1168 | 0.132089833  |        |
| 7 | 108,225,000 | 108,375,000 | 1444 | 960  | -0.137682652 |        |
| 7 | 108,300,000 | 108,450,000 | 1445 | 1069 | -0.665351643 |        |
| 7 | 108,375,000 | 108,525,000 | 1446 | 925  | -0.975859553 |        |
| 7 | 108,450,000 | 108,600,000 | 1447 | 770  | -0.53299725  |        |
| 7 | 108,525,000 | 108,675,000 | 1448 | 749  | -0.083138004 |        |
| 7 | 108,600,000 | 108,750,000 | 1449 | 505  | 0.201119198  |        |
| 7 | 108,675,000 | 108,825,000 | 1450 | 538  | -0.380090421 |        |
| 7 | 108,750,000 | 108,900,000 | 1451 | 658  | -1.010602717 |        |
| 7 | 108,825,000 | 108,975,000 | 1452 | 591  | -0.909720543 |        |
| 7 | 108,900,000 | 109,050,000 | 1453 | 595  | 0.126674619  | EFNA5  |
| 7 | 108,975,000 | 109,125,000 | 1454 | 681  | -0.201960717 | EFNA5  |
| 7 | 109,050,000 | 109,200,000 | 1455 | 962  | -0.504111583 | EFNA5  |
| 7 | 109,125,000 | 109,275,000 | 1456 | 1051 | -0.369396018 | EFNA5  |
| 7 | 109,200,000 | 109,350,000 | 1457 | 694  | -0.164860843 | EFNA5  |
| 7 | 109,275,000 | 109,425,000 | 1458 | 918  | 0.729946717  |        |
| 7 | 109,350,000 | 109,500,000 | 1459 | 1450 | 0.869501303  |        |
| 7 | 109,425,000 | 109,575,000 | 1460 | 1542 | 0.94901906   |        |
| 7 | 109,500,000 | 109,650,000 | 1461 | 1400 | 0.671959624  |        |
| 7 | 109,575,000 | 109,725,000 | 1462 | 1336 | 0.104706613  |        |
| 7 | 109,650,000 | 109,800,000 | 1463 | 1127 | 0.188749901  |        |
| 7 | 109,725,000 | 109,875,000 | 1464 | 760  | 0.812809075  |        |
| 7 | 109,800,000 | 109,950,000 | 1465 | 733  | 0.620843662  |        |
| 7 | 109,875,000 | 110,025,000 | 1466 | 747  | 0.194433103  | FBXL17 |
| 7 | 109,950,000 | 110,100,000 | 1467 | 698  | 0.277935743  | FBXL17 |
| 7 | 110,025,000 | 110,175,000 | 1468 | 770  | 0.714150323  | FBXL17 |
| 7 | 110,100,000 | 110,250,000 | 1469 | 851  | 0.939656841  |        |
| 7 | 110,175,000 | 110,325,000 | 1470 | 1142 | 0.258640676  |        |
| 7 | 110,250,000 | 110,400,000 | 1471 | 1199 | -0.677539431 |        |
| 7 | 110,325,000 | 110,475,000 | 1472 | 779  | -0.666858503 | FER    |
| 7 | 110,400,000 | 110,550,000 | 1473 | 556  | 0.068072356  | FER    |
| 7 | 110,475,000 | 110,625,000 | 1474 | 453  | -0.382731314 | FER    |
| 7 | 110,550,000 | 110,700,000 | 1475 | 526  | -2.543916442 | FER    |
| 7 | 110,625,000 | 110,775,000 | 1476 | 523  | -3.711857727 | FER    |
| 7 | 110,700,000 | 110,850,000 | 1477 | 323  | -2.674929536 | FER    |
| 7 | 110,775,000 | 110,925,000 | 1478 | 419  | -1.66251371  | FER    |
| 7 | 110,850,000 | 111,000,000 | 1479 | 890  | -0.004306352 | FER    |
| 7 | 110,925,000 | 111,075,000 | 1480 | 806  | 0.671389556  | PJA2   |
| 7 | 111,000,000 | 111,150,000 | 1481 | 494  | -0.175905157 | PJA2   |

|   |             |             |      |      |              |                                  |
|---|-------------|-------------|------|------|--------------|----------------------------------|
| 7 | 111,075,000 | 111,225,000 | 1482 | 900  | 0.101518946  | PJA2                             |
| 7 | 111,150,000 | 111,300,000 | 1483 | 1202 | 0.598895794  |                                  |
| 7 | 111,225,000 | 111,375,000 | 1484 | 1151 | 0.914220805  |                                  |
| 7 | 111,300,000 | 111,450,000 | 1485 | 906  | 0.602234529  | MAN2A1                           |
| 7 | 111,375,000 | 111,525,000 | 1486 | 592  | -0.057517653 | MAN2A1                           |
| 7 | 111,450,000 | 111,600,000 | 1487 | 565  | 0.604285708  | MAN2A1                           |
| 7 | 111,525,000 | 111,675,000 | 1488 | 994  | 1.083257967  | MAN2A1                           |
| 7 | 111,600,000 | 111,750,000 | 1489 | 1147 | 0.671164096  | MAN2A1                           |
| 7 | 111,675,000 | 111,825,000 | 1490 | 1239 | 0.172471602  |                                  |
| 7 | 111,750,000 | 111,900,000 | 1491 | 1263 | 0.474827997  |                                  |
| 7 | 111,825,000 | 111,975,000 | 1492 | 910  | 0.588828769  |                                  |
| 7 | 111,900,000 | 112,050,000 | 1493 | 663  | 0.371731659  |                                  |
| 7 | 111,975,000 | 112,125,000 | 1494 | 699  | -0.219503584 |                                  |
| 7 | 112,050,000 | 112,200,000 | 1495 | 917  | -1.427415679 | TMEM232                          |
| 7 | 112,125,000 | 112,275,000 | 1496 | 748  | -1.927238606 | TMEM232                          |
| 7 | 112,200,000 | 112,350,000 | 1497 | 498  | -0.683315898 | SLC25A46,TMEM232                 |
| 7 | 112,275,000 | 112,425,000 | 1498 | 413  | -0.497312944 | SLC25A46,TMEM232                 |
| 7 | 112,350,000 | 112,500,000 | 1499 | 349  | -0.584511368 | SLC25A46                         |
| 7 | 112,425,000 | 112,575,000 | 1500 | 399  | -0.6270137   |                                  |
| 7 | 112,500,000 | 112,638,659 | 1501 | 357  | -0.43135823  |                                  |
| 8 | 0           | 150,000     | 1    | 210  | -0.988114991 | HIATL1                           |
| 8 | 75,000      | 225,000     | 2    | 267  | -0.445874814 | HIATL1                           |
| 8 | 150,000     | 300,000     | 3    | 289  | -0.33962194  | HIATL1                           |
| 8 | 225,000     | 375,000     | 4    | 379  | 0.115594089  | ANXA10,HIATL1                    |
| 8 | 300,000     | 450,000     | 5    | 661  | 0.889311166  | ANXA10                           |
| 8 | 375,000     | 525,000     | 6    | 774  | 1.044136473  | ANXA10                           |
| 8 | 450,000     | 600,000     | 7    | 743  | 0.942121576  | ANXA10,PALLD                     |
| 8 | 525,000     | 675,000     | 8    | 675  | 0.947251503  | ANXA10,PALLD                     |
| 8 | 600,000     | 750,000     | 9    | 730  | 0.758757025  | PALLD                            |
| 8 | 675,000     | 825,000     | 10   | 863  | 0.309743995  | PALLD                            |
| 8 | 750,000     | 900,000     | 11   | 787  | -0.034558721 | PALLD                            |
| 8 | 825,000     | 975,000     | 12   | 634  | -0.346903074 | CBR4,PALLD                       |
| 8 | 900,000     | 1,050,000   | 13   | 631  | -0.204551284 | CBR4,PALLD,SH3RF1                |
| 8 | 975,000     | 1,125,000   | 14   | 646  | -0.124990512 | SH3RF1                           |
| 8 | 1,050,000   | 1,200,000   | 15   | 825  | -0.299351964 | SH3RF1                           |
| 8 | 1,125,000   | 1,275,000   | 16   | 942  | 0.07492407   | NEK1                             |
| 8 | 1,200,000   | 1,350,000   | 17   | 979  | 0.934518561  | NEK1                             |
| 8 | 1,275,000   | 1,425,000   | 18   | 1006 | 1.075146087  | NEK1                             |
| 8 | 1,350,000   | 1,500,000   | 19   | 671  | 0.972914484  | CLCN3,NEK1                       |
| 8 | 1,425,000   | 1,575,000   | 20   | 470  | -0.085667137 | C4orf27,CLCN3,ENSBTAG00000035293 |
| 8 | 1,500,000   | 1,650,000   | 21   | 702  | 0.252307197  | C4orf27,CLCN3,ENSBTAG00000035293 |
| 8 | 1,575,000   | 1,725,000   | 22   | 837  | 0.518629988  | MFAP3L                           |
| 8 | 1,650,000   | 1,800,000   | 23   | 957  | 0.429441308  | AADAT,MFAP3L                     |
| 8 | 1,725,000   | 1,875,000   | 24   | 1052 | 0.607844738  | AADAT                            |
| 8 | 1,800,000   | 1,950,000   | 25   | 823  | -0.476798352 | AADAT                            |
| 8 | 1,875,000   | 2,025,000   | 26   | 839  | -0.71370181  |                                  |
| 8 | 1,950,000   | 2,100,000   | 27   | 959  | 0.811664798  |                                  |
| 8 | 2,025,000   | 2,175,000   | 28   | 802  | 0.396472717  |                                  |
| 8 | 2,100,000   | 2,250,000   | 29   | 1087 | -0.977533207 |                                  |
| 8 | 2,175,000   | 2,325,000   | 30   | 1489 | 0.133436332  |                                  |
| 8 | 2,250,000   | 2,400,000   | 31   | 1099 | -0.575785771 |                                  |
| 8 | 2,325,000   | 2,475,000   | 32   | 759  | -3.405401012 |                                  |
| 8 | 2,400,000   | 2,550,000   | 33   | 927  | -0.373153512 |                                  |



|   |           |           |    |      |              |                          |
|---|-----------|-----------|----|------|--------------|--------------------------|
| 8 | 2,475,000 | 2,625,000 | 34 | 870  | 0.260282469  |                          |
| 8 | 2,550,000 | 2,700,000 | 35 | 911  | 1.126689031  |                          |
| 8 | 2,625,000 | 2,775,000 | 36 | 1167 | 1.166143407  |                          |
| 8 | 2,700,000 | 2,850,000 | 37 | 1005 | 1.122264779  |                          |
| 8 | 2,775,000 | 2,925,000 | 38 | 951  | 1.020545478  |                          |
| 8 | 2,850,000 | 3,000,000 | 39 | 802  | 1.126355142  |                          |
| 8 | 2,925,000 | 3,075,000 | 40 | 664  | -1.269183411 |                          |
| 8 | 3,000,000 | 3,150,000 | 41 | 1000 | -0.398880093 |                          |
| 8 | 3,075,000 | 3,225,000 | 42 | 1273 | -0.862747072 |                          |
| 8 | 3,150,000 | 3,300,000 | 43 | 1296 | -2.796006473 |                          |
| 8 | 3,225,000 | 3,375,000 | 44 | 1280 | -2.524156949 |                          |
| 8 | 3,300,000 | 3,450,000 | 45 | 1275 | -2.123560565 |                          |
| 8 | 3,375,000 | 3,525,000 | 46 | 1574 | -2.933078851 |                          |
| 8 | 3,450,000 | 3,600,000 | 47 | 1688 | -1.280739156 |                          |
| 8 | 3,525,000 | 3,675,000 | 48 | 1514 | 0.52011769   |                          |
| 8 | 3,600,000 | 3,750,000 | 49 | 1123 | 0.337712903  |                          |
| 8 | 3,675,000 | 3,825,000 | 50 | 965  | -0.040916772 | GALNTL6                  |
| 8 | 3,750,000 | 3,900,000 | 51 | 1070 | -0.522751997 | GALNTL6                  |
| 8 | 3,825,000 | 3,975,000 | 52 | 688  | -1.26737249  | GALNTL6                  |
| 8 | 3,900,000 | 4,050,000 | 53 | 364  | -1.39625565  | GALNTL6                  |
| 8 | 3,975,000 | 4,125,000 | 54 | 407  | 0.178942482  | GALNTL6                  |
| 8 | 4,050,000 | 4,200,000 | 55 | 501  | 0.825611109  | GALNTL6                  |
| 8 | 4,125,000 | 4,275,000 | 56 | 718  | 0.591952362  | GALNTL6                  |
| 8 | 4,200,000 | 4,350,000 | 57 | 891  | 0.614695423  | GALNTL6                  |
| 8 | 4,275,000 | 4,425,000 | 58 | 887  | 1.067962449  | GALNTL6                  |
| 8 | 4,350,000 | 4,500,000 | 59 | 1019 | 1.174211491  | GALNTL6                  |
| 8 | 4,425,000 | 4,575,000 | 60 | 963  | 0.233443628  | GALNTL6                  |
| 8 | 4,500,000 | 4,650,000 | 61 | 779  | -0.656018139 | GALNTL6                  |
| 8 | 4,575,000 | 4,725,000 | 62 | 1045 | -1.295250988 | GALNTL6                  |
| 8 | 4,650,000 | 4,800,000 | 63 | 1080 | -1.108257819 | GALNTL6                  |
| 8 | 4,725,000 | 4,875,000 | 64 | 569  | 0.328752413  | GALNTL6                  |
| 8 | 4,800,000 | 4,950,000 | 65 | 387  | 0.773886674  | GALNTL6                  |
| 8 | 4,875,000 | 5,025,000 | 66 | 513  | -1.682993439 | GALNTL6                  |
| 8 | 4,950,000 | 5,100,000 | 67 | 692  | -1.251991151 | GALNTL6                  |
| 8 | 5,025,000 | 5,175,000 | 68 | 833  | -1.35211232  | GALNTL6                  |
| 8 | 5,100,000 | 5,250,000 | 69 | 749  | -1.860857305 | GALNTL6                  |
| 8 | 5,175,000 | 5,325,000 | 70 | 793  | 0.545198503  | GALNTL6                  |
| 8 | 5,250,000 | 5,400,000 | 71 | 932  | 0.836092159  | GALNTL6                  |
| 8 | 5,325,000 | 5,475,000 | 72 | 766  | 0.586168925  | GALNTL6                  |
| 8 | 5,400,000 | 5,550,000 | 73 | 761  | 0.849013274  | GALNT7                   |
| 8 | 5,475,000 | 5,625,000 | 74 | 736  | 0.543031109  | GALNT7,HMGB2,SAP30       |
| 8 | 5,550,000 | 5,700,000 | 75 | 697  | 0.500458141  | GALNT7,HMGB2,SAP30,SCRG1 |
| 8 | 5,625,000 | 5,775,000 | 76 | 683  | 0.554087707  | HAND2,SCRG1              |
| 8 | 5,700,000 | 5,850,000 | 77 | 601  | 0.569067956  | HAND2                    |
| 8 | 5,775,000 | 5,925,000 | 78 | 517  | 0.730556773  |                          |
| 8 | 5,850,000 | 6,000,000 | 79 | 788  | 0.571956267  |                          |
| 8 | 5,925,000 | 6,075,000 | 80 | 741  | 0.569757835  |                          |
| 8 | 6,000,000 | 6,150,000 | 81 | 320  | 0.737945377  |                          |
| 8 | 6,075,000 | 6,225,000 | 82 | 295  | 0.113193762  |                          |
| 8 | 6,150,000 | 6,300,000 | 83 | 388  | -0.573706061 |                          |
| 8 | 6,225,000 | 6,375,000 | 84 | 413  | 0.200173485  |                          |
| 8 | 6,300,000 | 6,450,000 | 85 | 426  | 0.818396351  | CEP44,FBXO8              |
| 8 | 6,375,000 | 6,525,000 | 86 | 419  | 0.734677654  | CEP44,FBXO8              |

|   |            |            |     |      |              |                                                                            |
|---|------------|------------|-----|------|--------------|----------------------------------------------------------------------------|
| 8 | 6,450,000  | 6,600,000  | 87  | 307  | 0.716438979  | CEP44                                                                      |
| 8 | 6,525,000  | 6,675,000  | 88  | 447  | 0.806268095  | HPGD                                                                       |
| 8 | 6,600,000  | 6,750,000  | 89  | 752  | 0.763713209  | HPGD                                                                       |
| 8 | 6,675,000  | 6,825,000  | 90  | 656  | 0.534344314  | GLRA3,HPGD                                                                 |
| 8 | 6,750,000  | 6,900,000  | 91  | 519  | 0.565728084  | GLRA3                                                                      |
| 8 | 6,825,000  | 6,975,000  | 92  | 563  | 1.066833328  | GLRA3                                                                      |
| 8 | 6,900,000  | 7,050,000  | 93  | 816  | 0.727065637  | GLRA3                                                                      |
| 8 | 6,975,000  | 7,125,000  | 94  | 817  | 0.606484203  | ENSBTAG00000035768                                                         |
| 8 | 7,050,000  | 7,200,000  | 95  | 497  | 0.705801349  | ENSBTAG00000008678,ENSBTAG00000025954,ENSBTAG0000035768,ENSBTAG00000039873 |
| 8 | 7,125,000  | 7,275,000  | 96  | 651  | 0.865025646  | ENSBTAG00000008678,ENSBTAG00000025954,ENSBTAG0000039873                    |
| 8 | 7,200,000  | 7,350,000  | 97  | 869  | -0.099486037 |                                                                            |
| 8 | 7,275,000  | 7,425,000  | 98  | 787  | -0.94783268  | CTSB                                                                       |
| 8 | 7,350,000  | 7,500,000  | 99  | 797  | -0.091514647 | CTSB,FDFT1,GATA4,NEIL2                                                     |
| 8 | 7,425,000  | 7,575,000  | 100 | 702  | 0.63250585   | FDFT1,GATA4,NEIL2                                                          |
| 8 | 7,500,000  | 7,650,000  | 101 | 764  | 1.195433782  | GATA4                                                                      |
| 8 | 7,575,000  | 7,725,000  | 102 | 1218 | 1.201038217  | BLK                                                                        |
| 8 | 7,650,000  | 7,800,000  | 103 | 1217 | 1.072708111  | BLK,FAM167A,TDH                                                            |
| 8 | 7,725,000  | 7,875,000  | 104 | 891  | 0.557186298  | FAM167A,MTMR9,TDH                                                          |
| 8 | 7,800,000  | 7,950,000  | 105 | 871  | 0.720270877  | MTMR9,TDH                                                                  |
| 8 | 7,875,000  | 8,025,000  | 106 | 766  | 1.106900278  | MTMR9,XKR6                                                                 |
| 8 | 7,950,000  | 8,100,000  | 107 | 612  | 1.10035245   | XKR6                                                                       |
| 8 | 8,025,000  | 8,175,000  | 108 | 838  | 1.105155146  |                                                                            |
| 8 | 8,100,000  | 8,250,000  | 109 | 689  | 0.918372095  |                                                                            |
| 8 | 8,175,000  | 8,325,000  | 110 | 684  | 0.393654083  | FLJ20565,ENSBTAG00000048007                                                |
| 8 | 8,250,000  | 8,400,000  | 111 | 784  | 0.438036992  | FLJ20565,ENSBTAG00000048007                                                |
| 8 | 8,325,000  | 8,475,000  | 112 | 589  | -0.918411411 | C8orf74,FLJ20565,SOX7                                                      |
| 8 | 8,400,000  | 8,550,000  | 113 | 565  | -1.456945909 | C8orf74,RP1L1,SOX7                                                         |
| 8 | 8,475,000  | 8,625,000  | 114 | 473  | 0.393822905  | PRSS55,RP1L1,ENSBTAG00000038291,ENSBTAG00000040038                         |
| 8 | 8,550,000  | 8,700,000  | 115 | 420  | -0.013558942 | MSRA,PRSS55,ENSBTAG00000038291,ENSBTAG00000040038                          |
| 8 | 8,625,000  | 8,775,000  | 116 | 521  | -0.286977445 | MSRA,ENSBTAG00000040038                                                    |
| 8 | 8,700,000  | 8,850,000  | 117 | 460  | 0.745093143  | MSRA                                                                       |
| 8 | 8,775,000  | 8,925,000  | 118 | 764  | 0.247689148  | MSRA                                                                       |
| 8 | 8,850,000  | 9,000,000  | 119 | 922  | 0.192635906  | MSRA                                                                       |
| 8 | 8,925,000  | 9,075,000  | 120 | 740  | 0.504727621  | MSRA                                                                       |
| 8 | 9,000,000  | 9,150,000  | 121 | 759  | 0.634517636  | MSRA                                                                       |
| 8 | 9,075,000  | 9,225,000  | 122 | 949  | 0.364032209  |                                                                            |
| 8 | 9,150,000  | 9,300,000  | 123 | 1152 | -0.731653682 | KIF13B                                                                     |
| 8 | 9,225,000  | 9,375,000  | 124 | 1027 | -0.43330185  | KIF13B                                                                     |
| 8 | 9,300,000  | 9,450,000  | 125 | 1204 | 0.693856731  | KIF13B                                                                     |
| 8 | 9,375,000  | 9,525,000  | 126 | 1256 | 0.756883332  | HMBOX1,KIF13B                                                              |
| 8 | 9,450,000  | 9,600,000  | 127 | 927  | 0.558223304  | HMBOX1,KIF13B                                                              |
| 8 | 9,525,000  | 9,675,000  | 128 | 883  | -1.388763274 | HMBOX1                                                                     |
| 8 | 9,600,000  | 9,750,000  | 129 | 805  | -1.955782213 | HMBOX1,INTS9                                                               |
| 8 | 9,675,000  | 9,825,000  | 130 | 903  | -0.327837704 | HMBOX1,INTS9                                                               |
| 8 | 9,750,000  | 9,900,000  | 131 | 811  | -0.258657027 | EXTL3,INTS9                                                                |
| 8 | 9,825,000  | 9,975,000  | 132 | 521  | 0.041554045  | EXTL3                                                                      |
| 8 | 9,900,000  | 10,050,000 | 133 | 719  | -0.545872865 | FZD3                                                                       |
| 8 | 9,975,000  | 10,125,000 | 134 | 615  | -0.92799308  | FZD3,ENSBTAG00000034626                                                    |
| 8 | 10,050,000 | 10,200,000 | 135 | 412  | -0.698098765 | FZD3,ZNF395,ENSBTAG00000034626                                             |

|   |            |            |     |      |              |                                |
|---|------------|------------|-----|------|--------------|--------------------------------|
| 8 | 10,125,000 | 10,275,000 | 136 | 578  | -0.264884739 | PNOC,ZNF395,ENSBTAG00000034626 |
| 8 | 10,200,000 | 10,350,000 | 137 | 1096 | 0.068403661  | PNOC,ZNF395                    |
| 8 | 10,275,000 | 10,425,000 | 138 | 1404 | 0.68946958   | PNOC                           |
| 8 | 10,350,000 | 10,500,000 | 139 | 1494 | 1.184351867  | ELP3                           |
| 8 | 10,425,000 | 10,575,000 | 140 | 1651 | 0.912971591  | ELP3                           |
| 8 | 10,500,000 | 10,650,000 | 141 | 1546 | -0.0760202   | ELP3,NUGGC                     |
| 8 | 10,575,000 | 10,725,000 | 142 | 1339 | -0.980243047 | ELP3,NUGGC,SCARA5              |
| 8 | 10,650,000 | 10,800,000 | 143 | 1131 | -0.265572365 | SCARA5                         |
| 8 | 10,725,000 | 10,875,000 | 144 | 746  | 0.723169169  | ESCO2,PBK,SCARA5               |
| 8 | 10,800,000 | 10,950,000 | 145 | 522  | 1.053692629  | CCDC25,ESCO2,PBK               |
| 8 | 10,875,000 | 11,025,000 | 146 | 565  | 0.605492925  | CCDC25,ESCO2,SCARA3            |
| 8 | 10,950,000 | 11,100,000 | 147 | 812  | 0.565107618  | CLU,SCARA3                     |
| 8 | 11,025,000 | 11,175,000 | 148 | 1060 | 0.749751971  | CLU                            |
| 8 | 11,100,000 | 11,250,000 | 149 | 1112 | -0.011078531 | TMEM215                        |
| 8 | 11,175,000 | 11,325,000 | 150 | 1562 | -1.230740346 | TMEM215                        |
| 8 | 11,250,000 | 11,400,000 | 151 | 1642 | -0.991960594 | NDUFB6,TOPORS                  |
| 8 | 11,325,000 | 11,475,000 | 152 | 1314 | -0.049328649 | DDX58,NDUFB6,TOPORS            |
| 8 | 11,400,000 | 11,550,000 | 153 | 1293 | 0.55484307   | ACO1,DDX58,TOPORS              |
| 8 | 11,475,000 | 11,625,000 | 154 | 1382 | 0.638453934  | ACO1                           |
| 8 | 11,550,000 | 11,700,000 | 155 | 1514 | 0.33882826   |                                |
| 8 | 11,625,000 | 11,775,000 | 156 | 1649 | -0.230394221 |                                |
| 8 | 11,700,000 | 11,850,000 | 157 | 1489 | -0.18719824  |                                |
| 8 | 11,775,000 | 11,925,000 | 158 | 1324 | 0.651731287  |                                |
| 8 | 11,850,000 | 12,000,000 | 159 | 983  | 0.71909128   |                                |
| 8 | 11,925,000 | 12,075,000 | 160 | 723  | 0.808814813  |                                |
| 8 | 12,000,000 | 12,150,000 | 161 | 1108 | 0.753142945  |                                |
| 8 | 12,075,000 | 12,225,000 | 162 | 1655 | 0.421086833  |                                |
| 8 | 12,150,000 | 12,300,000 | 163 | 1838 | 0.373685862  |                                |
| 8 | 12,225,000 | 12,375,000 | 164 | 1779 | 0.862256577  |                                |
| 8 | 12,300,000 | 12,450,000 | 165 | 1926 | 1.112801456  |                                |
| 8 | 12,375,000 | 12,525,000 | 166 | 1808 | 0.984315125  |                                |
| 8 | 12,450,000 | 12,600,000 | 167 | 1489 | 1.054322932  |                                |
| 8 | 12,525,000 | 12,675,000 | 168 | 1670 | 1.223976708  |                                |
| 8 | 12,600,000 | 12,750,000 | 169 | 2111 | 1.119845866  |                                |
| 8 | 12,675,000 | 12,825,000 | 170 | 2252 | 0.966243886  |                                |
| 8 | 12,750,000 | 12,900,000 | 171 | 2110 | 0.661123765  |                                |
| 8 | 12,825,000 | 12,975,000 | 172 | 1788 | -0.722689791 |                                |
| 8 | 12,900,000 | 13,050,000 | 173 | 1705 | -1.687002362 |                                |
| 8 | 12,975,000 | 13,125,000 | 174 | 1855 | -1.309237778 |                                |
| 8 | 13,050,000 | 13,200,000 | 175 | 2054 | -0.724739383 |                                |
| 8 | 13,125,000 | 13,275,000 | 176 | 1879 | -0.951666865 |                                |
| 8 | 13,200,000 | 13,350,000 | 177 | 1728 | -0.435363289 |                                |
| 8 | 13,275,000 | 13,425,000 | 178 | 1018 | 0.393190187  |                                |
| 8 | 13,350,000 | 13,500,000 | 179 | 812  | 1.052841916  |                                |
| 8 | 13,425,000 | 13,575,000 | 180 | 991  | 0.785140844  |                                |
| 8 | 13,500,000 | 13,650,000 | 181 | 452  | -0.034852232 |                                |
| 8 | 13,575,000 | 13,725,000 | 182 | 673  | 0.081115394  |                                |
| 8 | 13,650,000 | 13,800,000 | 183 | 797  | 0.381320015  |                                |
| 8 | 13,725,000 | 13,875,000 | 184 | 914  | -0.450056187 |                                |
| 8 | 13,800,000 | 13,950,000 | 185 | 1035 | -1.490452152 |                                |
| 8 | 13,875,000 | 14,025,000 | 186 | 968  | -1.57181284  |                                |
| 8 | 13,950,000 | 14,100,000 | 187 | 1108 | -0.779002359 |                                |
| 8 | 14,025,000 | 14,175,000 | 188 | 1176 | -0.220030337 |                                |

|   |            |            |     |      |              |                                   |
|---|------------|------------|-----|------|--------------|-----------------------------------|
| 8 | 14,100,000 | 14,250,000 | 189 | 916  | -0.392966197 |                                   |
| 8 | 14,175,000 | 14,325,000 | 190 | 771  | -1.874863755 |                                   |
| 8 | 14,250,000 | 14,400,000 | 191 | 658  | -1.915808162 |                                   |
| 8 | 14,325,000 | 14,475,000 | 192 | 595  | -1.843879001 |                                   |
| 8 | 14,400,000 | 14,550,000 | 193 | 590  | -1.6816312   |                                   |
| 8 | 14,475,000 | 14,625,000 | 194 | 494  | 0.342296822  |                                   |
| 8 | 14,550,000 | 14,700,000 | 195 | 949  | 0.253743123  |                                   |
| 8 | 14,625,000 | 14,775,000 | 196 | 1032 | 0.317410059  |                                   |
| 8 | 14,700,000 | 14,850,000 | 197 | 669  | 0.883993653  |                                   |
| 8 | 14,775,000 | 14,925,000 | 198 | 711  | 0.798384692  |                                   |
| 8 | 14,850,000 | 15,000,000 | 199 | 726  | 0.833231384  |                                   |
| 8 | 14,925,000 | 15,075,000 | 200 | 872  | 1.191849459  |                                   |
| 8 | 15,000,000 | 15,150,000 | 201 | 1074 | 0.430391582  |                                   |
| 8 | 15,075,000 | 15,225,000 | 202 | 938  | -1.848165269 |                                   |
| 8 | 15,150,000 | 15,300,000 | 203 | 833  | -2.539552201 |                                   |
| 8 | 15,225,000 | 15,375,000 | 204 | 940  | -0.378638742 |                                   |
| 8 | 15,300,000 | 15,450,000 | 205 | 1259 | 0.274114583  |                                   |
| 8 | 15,375,000 | 15,525,000 | 206 | 1166 | 0.17282469   |                                   |
| 8 | 15,450,000 | 15,600,000 | 207 | 928  | -0.010324738 |                                   |
| 8 | 15,525,000 | 15,675,000 | 208 | 993  | -1.267011863 |                                   |
| 8 | 15,600,000 | 15,750,000 | 209 | 1152 | -0.9284488   |                                   |
| 8 | 15,675,000 | 15,825,000 | 210 | 1181 | -0.730281774 |                                   |
| 8 | 15,750,000 | 15,900,000 | 211 | 1063 | -0.21905243  |                                   |
| 8 | 15,825,000 | 15,975,000 | 212 | 902  | 0.873830416  |                                   |
| 8 | 15,900,000 | 16,050,000 | 213 | 682  | 1.053867364  |                                   |
| 8 | 15,975,000 | 16,125,000 | 214 | 532  | 0.436338431  |                                   |
| 8 | 16,050,000 | 16,200,000 | 215 | 567  | 0.327433147  |                                   |
| 8 | 16,125,000 | 16,275,000 | 216 | 497  | 0.566247532  | LINGO2                            |
| 8 | 16,200,000 | 16,350,000 | 217 | 507  | 0.33599605   | LINGO2                            |
| 8 | 16,275,000 | 16,425,000 | 218 | 697  | -0.182226224 |                                   |
| 8 | 16,350,000 | 16,500,000 | 219 | 795  | -0.892634644 |                                   |
| 8 | 16,425,000 | 16,575,000 | 220 | 725  | -0.427065193 |                                   |
| 8 | 16,500,000 | 16,650,000 | 221 | 579  | 0.536942393  |                                   |
| 8 | 16,575,000 | 16,725,000 | 222 | 550  | 0.700394971  | C9orf72                           |
| 8 | 16,650,000 | 16,800,000 | 223 | 512  | 0.672832     | C9orf72,IFNK,MOB3B                |
| 8 | 16,725,000 | 16,875,000 | 224 | 406  | 0.67970874   | IFNK,MOB3B                        |
| 8 | 16,800,000 | 16,950,000 | 225 | 600  | 0.82888848   | MOB3B                             |
| 8 | 16,875,000 | 17,025,000 | 226 | 925  | 0.469417721  | EQTN,MOB3B,ENSBTAG00000020151     |
| 8 | 16,950,000 | 17,100,000 | 227 | 825  | 0.268909296  | EQTN,MOB3B,TEK,ENSBTAG00000020151 |
| 8 | 17,025,000 | 17,175,000 | 228 | 561  | 0.73633745   | TEK,ENSBTAG00000020151            |
| 8 | 17,100,000 | 17,250,000 | 229 | 311  | 0.525191981  | IFT74,LRRRC19,TEK                 |
| 8 | 17,175,000 | 17,325,000 | 230 | 328  | -0.430980606 | CAAP1,IFT74,LRRRC19,PLAA          |
| 8 | 17,250,000 | 17,400,000 | 231 | 451  | 0.219287644  | CAAP1,IFT74,PLAA                  |
| 8 | 17,325,000 | 17,475,000 | 232 | 560  | 0.941995453  | CAAP1                             |
| 8 | 17,400,000 | 17,550,000 | 233 | 674  | 0.780957142  |                                   |
| 8 | 17,475,000 | 17,625,000 | 234 | 575  | 0.242427963  |                                   |
| 8 | 17,550,000 | 17,700,000 | 235 | 892  | -1.636001111 |                                   |
| 8 | 17,625,000 | 17,775,000 | 236 | 884  | -1.206369239 |                                   |
| 8 | 17,700,000 | 17,850,000 | 237 | 559  | -0.56255819  |                                   |
| 8 | 17,775,000 | 17,925,000 | 238 | 709  | -0.599774495 |                                   |
| 8 | 17,850,000 | 18,000,000 | 239 | 590  | -0.162219195 |                                   |
| 8 | 17,925,000 | 18,075,000 | 240 | 467  | -0.125372527 |                                   |
| 8 | 18,000,000 | 18,150,000 | 241 | 548  | -1.231157515 |                                   |

|   |            |            |     |      |              |        |
|---|------------|------------|-----|------|--------------|--------|
| 8 | 18,075,000 | 18,225,000 | 242 | 644  | -1.410954422 |        |
| 8 | 18,150,000 | 18,300,000 | 243 | 1076 | 0.257272109  |        |
| 8 | 18,225,000 | 18,375,000 | 244 | 1258 | 0.692864094  |        |
| 8 | 18,300,000 | 18,450,000 | 245 | 1357 | 0.524267562  |        |
| 8 | 18,375,000 | 18,525,000 | 246 | 1254 | 0.225344995  |        |
| 8 | 18,450,000 | 18,600,000 | 247 | 661  | -0.980989551 | TUSC1  |
| 8 | 18,525,000 | 18,675,000 | 248 | 486  | -1.55526263  | TUSC1  |
| 8 | 18,600,000 | 18,750,000 | 249 | 414  | -0.908652421 |        |
| 8 | 18,675,000 | 18,825,000 | 250 | 581  | 0.972276803  |        |
| 8 | 18,750,000 | 18,900,000 | 251 | 685  | 1.130097806  |        |
| 8 | 18,825,000 | 18,975,000 | 252 | 737  | 0.702888369  |        |
| 8 | 18,900,000 | 19,050,000 | 253 | 863  | -0.172905555 |        |
| 8 | 18,975,000 | 19,125,000 | 254 | 809  | -0.843880268 |        |
| 8 | 19,050,000 | 19,200,000 | 255 | 844  | 0.153104772  |        |
| 8 | 19,125,000 | 19,275,000 | 256 | 617  | 0.191719617  |        |
| 8 | 19,200,000 | 19,350,000 | 257 | 318  | -0.650322961 |        |
| 8 | 19,275,000 | 19,425,000 | 258 | 250  | 0.049664027  |        |
| 8 | 19,350,000 | 19,500,000 | 259 | 611  | 0.645780264  |        |
| 8 | 19,425,000 | 19,575,000 | 260 | 796  | 0.00890688   |        |
| 8 | 19,500,000 | 19,650,000 | 261 | 851  | -1.771210609 | IZUMO3 |
| 8 | 19,575,000 | 19,725,000 | 262 | 840  | -1.776678616 | IZUMO3 |
| 8 | 19,650,000 | 19,800,000 | 263 | 500  | -1.07470506  |        |
| 8 | 19,725,000 | 19,875,000 | 264 | 801  | 0.712146823  |        |
| 8 | 19,800,000 | 19,950,000 | 265 | 1064 | 0.33213046   |        |
| 8 | 19,875,000 | 20,025,000 | 266 | 784  | -1.896401337 |        |
| 8 | 19,950,000 | 20,100,000 | 267 | 447  | -2.14671601  |        |
| 8 | 20,025,000 | 20,175,000 | 268 | 376  | -0.342107426 |        |
| 8 | 20,100,000 | 20,250,000 | 269 | 543  | 0.355148762  |        |
| 8 | 20,175,000 | 20,325,000 | 270 | 550  | 0.48449153   |        |
| 8 | 20,250,000 | 20,400,000 | 271 | 543  | -0.056060296 | ELAVL2 |
| 8 | 20,325,000 | 20,475,000 | 272 | 709  | 0.308216654  | ELAVL2 |
| 8 | 20,400,000 | 20,550,000 | 273 | 1065 | 0.671855306  | ELAVL2 |
| 8 | 20,475,000 | 20,625,000 | 274 | 1095 | 0.738445474  |        |
| 8 | 20,550,000 | 20,700,000 | 275 | 1025 | 0.5848255    |        |
| 8 | 20,625,000 | 20,775,000 | 276 | 1211 | 0.473361182  |        |
| 8 | 20,700,000 | 20,850,000 | 277 | 1159 | 0.808347075  |        |
| 8 | 20,775,000 | 20,925,000 | 278 | 961  | 0.868797455  |        |
| 8 | 20,850,000 | 21,000,000 | 279 | 1146 | 0.726757047  |        |
| 8 | 20,925,000 | 21,075,000 | 280 | 1329 | 0.083873841  |        |
| 8 | 21,000,000 | 21,150,000 | 281 | 922  | -0.434316388 |        |
| 8 | 21,075,000 | 21,225,000 | 282 | 854  | 0.06396594   |        |
| 8 | 21,150,000 | 21,300,000 | 283 | 852  | 0.054379909  |        |
| 8 | 21,225,000 | 21,375,000 | 284 | 737  | 0.450352293  |        |
| 8 | 21,300,000 | 21,450,000 | 285 | 723  | 0.196791001  |        |
| 8 | 21,375,000 | 21,525,000 | 286 | 480  | -0.207376255 |        |
| 8 | 21,450,000 | 21,600,000 | 287 | 377  | 0.468188926  |        |
| 8 | 21,525,000 | 21,675,000 | 288 | 526  | 0.929095112  |        |
| 8 | 21,600,000 | 21,750,000 | 289 | 636  | 1.204620758  |        |
| 8 | 21,675,000 | 21,825,000 | 290 | 545  | 0.478725083  | DMRTA1 |
| 8 | 21,750,000 | 21,900,000 | 291 | 583  | 0.084920543  | DMRTA1 |
| 8 | 21,825,000 | 21,975,000 | 292 | 491  | 0.734131454  |        |
| 8 | 21,900,000 | 22,050,000 | 293 | 232  | 0.47336985   |        |
| 8 | 21,975,000 | 22,125,000 | 294 | 186  | 0.250567186  | CDKN2B |

|   |            |            |     |      |              |                                                                                                                                                                                  |
|---|------------|------------|-----|------|--------------|----------------------------------------------------------------------------------------------------------------------------------------------------------------------------------|
| 8 | 22,050,000 | 22,200,000 | 295 | 259  | -0.750096611 | CDKN2A,CDKN2B                                                                                                                                                                    |
| 8 | 22,125,000 | 22,275,000 | 296 | 237  | -1.340887965 | CDKN2A,ENSBTAG00000025929                                                                                                                                                        |
| 8 | 22,200,000 | 22,350,000 | 297 | 310  | 0.355790507  | ENSBTAG00000025929                                                                                                                                                               |
| 8 | 22,275,000 | 22,425,000 | 298 | 516  | 0.914546934  |                                                                                                                                                                                  |
| 8 | 22,350,000 | 22,500,000 | 299 | 497  | 0.344654605  |                                                                                                                                                                                  |
| 8 | 22,425,000 | 22,575,000 | 300 | 356  | 0.091292958  | IFNE                                                                                                                                                                             |
| 8 | 22,500,000 | 22,650,000 | 301 | 740  | 0.26349225   | IFNE,IFNT                                                                                                                                                                        |
| 8 | 22,575,000 | 22,725,000 | 302 | 833  | 0.204276289  | IFNT,INFAP,ENSBTAG00000025928,ENSBTAG00000047748,ENSBTAG00000048063                                                                                                              |
| 8 | 22,650,000 | 22,800,000 | 303 | 505  | -0.362393258 | IFNW1,INFAP,ENSBTAG00000025928,ENSBTAG00000046119,ENSBTAG00000046427,ENSBTAG00000047195,ENSBTAG00000047748,ENSBTAG00000047782,ENSBTAG00000048063                                 |
| 8 | 22,725,000 | 22,875,000 | 304 | 463  | -0.56304851  | IFN-<br>TAU,IFNAG,IFNW1,ENSBTAG00000046119,ENSBTAG00000046427,ENSBTAG00000047195,ENSBTAG00000047745,ENSBTAG00000047782                                                           |
| 8 | 22,800,000 | 22,950,000 | 305 | 414  | -0.064468894 | IFN-<br>TAU,IFNAG,KLHL9,ENSBTAG00000034326,ENSBTAG00000046598,ENSBTAG00000047745                                                                                                 |
| 8 | 22,875,000 | 23,025,000 | 306 | 795  | -0.370151216 | IFNAG,KLHL9,ENSBTAG00000034326,ENSBTAG0000004552,ENSBTAG00000046443,ENSBTAG00000046598,ENSBTAG00000046629,ENSBTAG00000047134,ENSBTAG00000047413                                  |
| 8 | 22,950,000 | 23,100,000 | 307 | 1207 | -1.267064003 | IFNAH,ENSBTAG00000039963,ENSBTAG00000045552,ENSBTAG00000045845,ENSBTAG00000046097,ENSBTAG00000046443,ENSBTAG00000046629,ENSBTAG00000046815,ENSBTAG00000047134,ENSBTAG00000047413 |
| 8 | 23,025,000 | 23,175,000 | 308 | 1232 | -2.683713849 | IFNAH,ENSBTAG00000022787,ENSBTAG00000039827,ENSBTAG00000039963,ENSBTAG00000045845,ENSBTAG00000046097,ENSBTAG00000046683,ENSBTAG00000046815,ENSBTAG00000047982                    |
| 8 | 23,100,000 | 23,250,000 | 309 | 1361 | -0.570525325 | IFNB1,IFNB3,ENSBTAG00000022787,ENSBTAG00000033708,ENSBTAG00000039827,ENSBTAG00000045674,ENSBTAG00000046683,ENSBTAG00000047982                                                    |
| 8 | 23,175,000 | 23,325,000 | 310 | 1387 | 0.435953489  | IFNB1,IFNB2,IFNB3,IL6,ENSBTAG00000033708,ENSBTAG00000045674,ENSBTAG00000046967                                                                                                   |
| 8 | 23,250,000 | 23,400,000 | 311 | 1223 | 0.905648461  | IFNB2,IL6,KIAA1797,PTPLAD2,ENSBTAG00000046967                                                                                                                                    |
| 8 | 23,325,000 | 23,475,000 | 312 | 1104 | 0.477808607  | KIAA1797,PTPLAD2                                                                                                                                                                 |
| 8 | 23,400,000 | 23,550,000 | 313 | 1017 | 0.105554334  | KIAA1797                                                                                                                                                                         |
| 8 | 23,475,000 | 23,625,000 | 314 | 953  | 0.853956423  | KIAA1797                                                                                                                                                                         |
| 8 | 23,550,000 | 23,700,000 | 315 | 937  | 0.909412533  | KIAA1797                                                                                                                                                                         |
| 8 | 23,625,000 | 23,775,000 | 316 | 715  | 0.309435336  | KIAA1797,MLLT3                                                                                                                                                                   |
| 8 | 23,700,000 | 23,850,000 | 317 | 543  | -0.039137612 | MLLT3                                                                                                                                                                            |
| 8 | 23,775,000 | 23,925,000 | 318 | 463  | -0.282377653 | MLLT3                                                                                                                                                                            |
| 8 | 23,850,000 | 24,000,000 | 319 | 314  | -0.805502478 | MLLT3                                                                                                                                                                            |
| 8 | 23,925,000 | 24,075,000 | 320 | 473  | -0.528004855 | MLLT3                                                                                                                                                                            |
| 8 | 24,000,000 | 24,150,000 | 321 | 710  | 0.255371747  | MLLT3                                                                                                                                                                            |
| 8 | 24,075,000 | 24,225,000 | 322 | 827  | 0.761200672  |                                                                                                                                                                                  |
| 8 | 24,150,000 | 24,300,000 | 323 | 894  | 0.95434043   |                                                                                                                                                                                  |
| 8 | 24,225,000 | 24,375,000 | 324 | 1045 | 1.086686704  |                                                                                                                                                                                  |
| 8 | 24,300,000 | 24,450,000 | 325 | 1103 | 0.946546736  |                                                                                                                                                                                  |
| 8 | 24,375,000 | 24,525,000 | 326 | 962  | 0.224593702  | SLC24A2                                                                                                                                                                          |

|   |            |            |     |      |              |                           |
|---|------------|------------|-----|------|--------------|---------------------------|
| 8 | 24,450,000 | 24,600,000 | 327 | 1015 | 0.147521725  | SLC24A2                   |
| 8 | 24,525,000 | 24,675,000 | 328 | 1242 | 0.543002802  | SLC24A2                   |
| 8 | 24,600,000 | 24,750,000 | 329 | 1330 | 0.738909755  | SLC24A2                   |
| 8 | 24,675,000 | 24,825,000 | 330 | 1312 | 0.716587792  | SLC24A2                   |
| 8 | 24,750,000 | 24,900,000 | 331 | 728  | 0.312901154  | ACER2,SLC24A2             |
| 8 | 24,825,000 | 24,975,000 | 332 | 147  | -1.233696193 | ACER2,DENND4C,RPS6        |
| 8 | 24,900,000 | 25,050,000 | 333 | 148  | 0.359043315  | DENND4C,RPS6              |
| 8 | 24,975,000 | 25,125,000 | 334 | 290  | 0.284191639  | DENND4C                   |
| 8 | 25,050,000 | 25,200,000 | 335 | 355  | 0.027233482  | HAUS6,PLIN2,RRAGA         |
| 8 | 25,125,000 | 25,275,000 | 336 | 396  | 0.077633664  | FAM154A,HAUS6,PLIN2,RRAGA |
| 8 | 25,200,000 | 25,350,000 | 337 | 444  | 0.478335491  | ADAMTSL1,FAM154A          |
| 8 | 25,275,000 | 25,425,000 | 338 | 390  | 0.484795617  | ADAMTSL1,FAM154A          |
| 8 | 25,350,000 | 25,500,000 | 339 | 468  | -0.355930341 | ADAMTSL1                  |
| 8 | 25,425,000 | 25,575,000 | 340 | 538  | -0.464366281 | ADAMTSL1                  |
| 8 | 25,500,000 | 25,650,000 | 341 | 560  | -0.33488225  | ADAMTSL1                  |
| 8 | 25,575,000 | 25,725,000 | 342 | 579  | -0.469139195 | ADAMTSL1                  |
| 8 | 25,650,000 | 25,800,000 | 343 | 608  | 0.042723067  | ADAMTSL1                  |
| 8 | 25,725,000 | 25,875,000 | 344 | 562  | 0.720663423  | ADAMTSL1                  |
| 8 | 25,800,000 | 25,950,000 | 345 | 531  | 0.280462465  | ADAMTSL1                  |
| 8 | 25,875,000 | 26,025,000 | 346 | 782  | -1.54404619  |                           |
| 8 | 25,950,000 | 26,100,000 | 347 | 732  | -2.21220971  |                           |
| 8 | 26,025,000 | 26,175,000 | 348 | 686  | -2.50829953  |                           |
| 8 | 26,100,000 | 26,250,000 | 349 | 725  | -1.471631883 |                           |
| 8 | 26,175,000 | 26,325,000 | 350 | 365  | 0.561486262  |                           |
| 8 | 26,250,000 | 26,400,000 | 351 | 275  | -1.583814699 |                           |
| 8 | 26,325,000 | 26,475,000 | 352 | 508  | -0.747692502 |                           |
| 8 | 26,400,000 | 26,550,000 | 353 | 617  | 1.033156782  |                           |
| 8 | 26,475,000 | 26,625,000 | 354 | 763  | -0.457421567 |                           |
| 8 | 26,550,000 | 26,700,000 | 355 | 953  | -1.034218592 | SH3GL2                    |
| 8 | 26,625,000 | 26,775,000 | 356 | 848  | -0.318963651 | SH3GL2                    |
| 8 | 26,700,000 | 26,850,000 | 357 | 767  | 0.329230722  | SH3GL2                    |
| 8 | 26,775,000 | 26,925,000 | 358 | 998  | -0.890667807 | SH3GL2                    |
| 8 | 26,850,000 | 27,000,000 | 359 | 920  | -1.883744563 | CNTLN,SH3GL2              |
| 8 | 26,925,000 | 27,075,000 | 360 | 425  | -0.672490777 | CNTLN                     |
| 8 | 27,000,000 | 27,150,000 | 361 | 243  | -0.547360127 | CNTLN                     |
| 8 | 27,075,000 | 27,225,000 | 362 | 426  | 0.437403583  | CNTLN                     |
| 8 | 27,150,000 | 27,300,000 | 363 | 631  | 0.702759796  | CNTLN                     |
| 8 | 27,225,000 | 27,375,000 | 364 | 795  | 0.557268021  |                           |
| 8 | 27,300,000 | 27,450,000 | 365 | 657  | 0.526044731  |                           |
| 8 | 27,375,000 | 27,525,000 | 366 | 460  | 0.902683235  |                           |
| 8 | 27,450,000 | 27,600,000 | 367 | 547  | 0.439741543  |                           |
| 8 | 27,525,000 | 27,675,000 | 368 | 510  | -0.850926047 |                           |
| 8 | 27,600,000 | 27,750,000 | 369 | 413  | -0.901234368 |                           |
| 8 | 27,675,000 | 27,825,000 | 370 | 418  | -0.200883323 |                           |
| 8 | 27,750,000 | 27,900,000 | 371 | 396  | -0.135811536 |                           |
| 8 | 27,825,000 | 27,975,000 | 372 | 558  | 0.446009659  | BNC2                      |
| 8 | 27,900,000 | 28,050,000 | 373 | 874  | 0.409449158  | BNC2                      |
| 8 | 27,975,000 | 28,125,000 | 374 | 1140 | 0.285094379  | BNC2                      |
| 8 | 28,050,000 | 28,200,000 | 375 | 1257 | 0.288456411  |                           |
| 8 | 28,125,000 | 28,275,000 | 376 | 1034 | 0.293085337  |                           |
| 8 | 28,200,000 | 28,350,000 | 377 | 716  | 0.302409957  |                           |
| 8 | 28,275,000 | 28,425,000 | 378 | 525  | 0.240825006  |                           |
| 8 | 28,350,000 | 28,500,000 | 379 | 681  | -0.509883548 | CCDC171                   |

|   |            |            |     |      |              |                      |
|---|------------|------------|-----|------|--------------|----------------------|
| 8 | 28,425,000 | 28,575,000 | 380 | 751  | -0.592084057 | CCDC171              |
| 8 | 28,500,000 | 28,650,000 | 381 | 524  | -0.03519779  | CCDC171              |
| 8 | 28,575,000 | 28,725,000 | 382 | 581  | 0.796908563  | CCDC171              |
| 8 | 28,650,000 | 28,800,000 | 383 | 762  | 0.002009112  | CCDC171              |
| 8 | 28,725,000 | 28,875,000 | 384 | 537  | -0.221643927 | CCDC171,PSIP1        |
| 8 | 28,800,000 | 28,950,000 | 385 | 271  | -0.978921386 | CCDC171,PSIP1,SNAPC3 |
| 8 | 28,875,000 | 29,025,000 | 386 | 339  | -0.835528289 | PSIP1,SNAPC3         |
| 8 | 28,950,000 | 29,100,000 | 387 | 527  | -0.105442026 |                      |
| 8 | 29,025,000 | 29,175,000 | 388 | 876  | 0.703333191  | TTC39B               |
| 8 | 29,100,000 | 29,250,000 | 389 | 1358 | 0.847269659  | TTC39B               |
| 8 | 29,175,000 | 29,325,000 | 390 | 1185 | 0.651524699  |                      |
| 8 | 29,250,000 | 29,400,000 | 391 | 806  | 1.213836912  | FREM1                |
| 8 | 29,325,000 | 29,475,000 | 392 | 966  | 1.186851265  | FREM1                |
| 8 | 29,400,000 | 29,550,000 | 393 | 933  | 1.091609193  | CER1,FREM1           |
| 8 | 29,475,000 | 29,625,000 | 394 | 571  | 0.927271878  | CER1,FREM1,ZDHHC21   |
| 8 | 29,550,000 | 29,700,000 | 395 | 539  | 0.658020925  | ZDHHC21              |
| 8 | 29,625,000 | 29,775,000 | 396 | 777  | 0.758886255  |                      |
| 8 | 29,700,000 | 29,850,000 | 397 | 761  | 0.43639564   |                      |
| 8 | 29,775,000 | 29,925,000 | 398 | 510  | -0.829433169 |                      |
| 8 | 29,850,000 | 30,000,000 | 399 | 452  | -1.056449379 |                      |
| 8 | 29,925,000 | 30,075,000 | 400 | 578  | -0.453720834 | NFIB                 |
| 8 | 30,000,000 | 30,150,000 | 401 | 656  | -0.217143113 | NFIB                 |
| 8 | 30,075,000 | 30,225,000 | 402 | 898  | 0.398406702  | NFIB                 |
| 8 | 30,150,000 | 30,300,000 | 403 | 667  | 0.631708769  | NFIB                 |
| 8 | 30,225,000 | 30,375,000 | 404 | 356  | 0.258007774  |                      |
| 8 | 30,300,000 | 30,450,000 | 405 | 488  | -0.085596542 |                      |
| 8 | 30,375,000 | 30,525,000 | 406 | 590  | -0.25049927  |                      |
| 8 | 30,450,000 | 30,600,000 | 407 | 720  | -0.21694644  |                      |
| 8 | 30,525,000 | 30,675,000 | 408 | 727  | 0.252899521  |                      |
| 8 | 30,600,000 | 30,750,000 | 409 | 974  | 0.872264817  |                      |
| 8 | 30,675,000 | 30,825,000 | 410 | 1109 | 0.430173612  |                      |
| 8 | 30,750,000 | 30,900,000 | 411 | 717  | -0.466108946 |                      |
| 8 | 30,825,000 | 30,975,000 | 412 | 491  | -0.206428329 |                      |
| 8 | 30,900,000 | 31,050,000 | 413 | 323  | 0.514235255  |                      |
| 8 | 30,975,000 | 31,125,000 | 414 | 361  | -0.561795772 | MPDZ                 |
| 8 | 31,050,000 | 31,200,000 | 415 | 649  | -0.413164449 | MPDZ                 |
| 8 | 31,125,000 | 31,275,000 | 416 | 547  | 0.052705805  | MPDZ                 |
| 8 | 31,200,000 | 31,350,000 | 417 | 538  | 0.637483255  | MPDZ                 |
| 8 | 31,275,000 | 31,425,000 | 418 | 961  | 0.649617021  | MPDZ                 |
| 8 | 31,350,000 | 31,500,000 | 419 | 1014 | 0.308757875  | ENSBTAG00000048272   |
| 8 | 31,425,000 | 31,575,000 | 420 | 902  | 0.081741006  | ENSBTAG00000048272   |
| 8 | 31,500,000 | 31,650,000 | 421 | 890  | 0.346548955  | LURAP1L              |
| 8 | 31,575,000 | 31,725,000 | 422 | 564  | 0.583615092  | LURAP1L,TYRP1        |
| 8 | 31,650,000 | 31,800,000 | 423 | 647  | 0.063272134  | TYRP1                |
| 8 | 31,725,000 | 31,875,000 | 424 | 1078 | 0.18352067   | TYRP1                |
| 8 | 31,800,000 | 31,950,000 | 425 | 1498 | 0.664503267  |                      |
| 8 | 31,875,000 | 32,025,000 | 426 | 1676 | 0.645711756  |                      |
| 8 | 31,950,000 | 32,100,000 | 427 | 1146 | 0.382761018  |                      |
| 8 | 32,025,000 | 32,175,000 | 428 | 1000 | 0.652872805  |                      |
| 8 | 32,100,000 | 32,250,000 | 429 | 1262 | 0.258881699  |                      |
| 8 | 32,175,000 | 32,325,000 | 430 | 1304 | -0.11986025  |                      |
| 8 | 32,250,000 | 32,400,000 | 431 | 1193 | 0.10187933   |                      |
| 8 | 32,325,000 | 32,475,000 | 432 | 1078 | 0.323614643  |                      |



|   |            |            |     |      |              |
|---|------------|------------|-----|------|--------------|
| 8 | 32,400,000 | 32,550,000 | 433 | 1393 | 0.350086306  |
| 8 | 32,475,000 | 32,625,000 | 434 | 1600 | 0.92140469   |
| 8 | 32,550,000 | 32,700,000 | 435 | 1375 | 0.166463752  |
| 8 | 32,625,000 | 32,775,000 | 436 | 1112 | -1.499718352 |
| 8 | 32,700,000 | 32,850,000 | 437 | 1141 | -1.751507724 |
| 8 | 32,775,000 | 32,925,000 | 438 | 1431 | -1.847011952 |
| 8 | 32,850,000 | 33,000,000 | 439 | 1933 | -1.859566818 |
| 8 | 32,925,000 | 33,075,000 | 440 | 1695 | -1.714959232 |
| 8 | 33,000,000 | 33,150,000 | 441 | 873  | -0.450846772 |
| 8 | 33,075,000 | 33,225,000 | 442 | 993  | -4.376530806 |
| 8 | 33,150,000 | 33,300,000 | 443 | 1102 | -3.538704808 |
| 8 | 33,225,000 | 33,375,000 | 444 | 1128 | 0.114796163  |
| 8 | 33,300,000 | 33,450,000 | 445 | 1233 | 0.12119526   |
| 8 | 33,375,000 | 33,525,000 | 446 | 975  | 0.354794788  |
| 8 | 33,450,000 | 33,600,000 | 447 | 649  | 0.365704513  |
| 8 | 33,525,000 | 33,675,000 | 448 | 599  | 0.38193963   |
| 8 | 33,600,000 | 33,750,000 | 449 | 832  | 0.258993183  |
| 8 | 33,675,000 | 33,825,000 | 450 | 843  | -0.480228506 |
| 8 | 33,750,000 | 33,900,000 | 451 | 746  | -1.583784373 |
| 8 | 33,825,000 | 33,975,000 | 452 | 684  | -0.931137451 |
| 8 | 33,900,000 | 34,050,000 | 453 | 805  | -0.002420579 |
| 8 | 33,975,000 | 34,125,000 | 454 | 695  | 0.223041247  |
| 8 | 34,050,000 | 34,200,000 | 455 | 409  | -0.24748102  |
| 8 | 34,125,000 | 34,275,000 | 456 | 358  | -0.737805117 |
| 8 | 34,200,000 | 34,350,000 | 457 | 289  | -1.272154056 |
| 8 | 34,275,000 | 34,425,000 | 458 | 268  | -1.908711297 |
| 8 | 34,350,000 | 34,500,000 | 459 | 319  | -3.62926359  |
| 8 | 34,425,000 | 34,575,000 | 460 | 719  | -2.398933138 |
| 8 | 34,500,000 | 34,650,000 | 461 | 911  | -1.076267356 |
| 8 | 34,575,000 | 34,725,000 | 462 | 801  | 1.051927409  |
| 8 | 34,650,000 | 34,800,000 | 463 | 590  | 1.19331942   |
| 8 | 34,725,000 | 34,875,000 | 464 | 633  | 0.690218889  |
| 8 | 34,800,000 | 34,950,000 | 465 | 1300 | 0.603731095  |
| 8 | 34,875,000 | 35,025,000 | 466 | 1064 | 0.478956992  |
| 8 | 34,950,000 | 35,100,000 | 467 | 738  | 0.358352034  |
| 8 | 35,025,000 | 35,175,000 | 468 | 864  | 0.209851091  |
| 8 | 35,100,000 | 35,250,000 | 469 | 659  | 0.316720984  |
| 8 | 35,175,000 | 35,325,000 | 470 | 977  | 0.531218396  |
| 8 | 35,250,000 | 35,400,000 | 471 | 1164 | 0.460976956  |
| 8 | 35,325,000 | 35,475,000 | 472 | 951  | 0.66002336   |
| 8 | 35,400,000 | 35,550,000 | 473 | 956  | 0.740407793  |
| 8 | 35,475,000 | 35,625,000 | 474 | 1086 | 0.42322155   |
| 8 | 35,550,000 | 35,700,000 | 475 | 1067 | -0.399488783 |
| 8 | 35,625,000 | 35,775,000 | 476 | 731  | -0.445152686 |
| 8 | 35,700,000 | 35,850,000 | 477 | 584  | 0.404743267  |
| 8 | 35,775,000 | 35,925,000 | 478 | 922  | 0.940036704  |
| 8 | 35,850,000 | 36,000,000 | 479 | 1327 | 1.101520228  |
| 8 | 35,925,000 | 36,075,000 | 480 | 1161 | 1.04150748   |
| 8 | 36,000,000 | 36,150,000 | 481 | 443  | 1.064431788  |
| 8 | 36,075,000 | 36,225,000 | 482 | 267  | -0.934989227 |
| 8 | 36,150,000 | 36,300,000 | 483 | 518  | -1.744529292 |
| 8 | 36,225,000 | 36,375,000 | 484 | 769  | -0.830995641 |
| 8 | 36,300,000 | 36,450,000 | 485 | 1219 | 0.212134026  |

|   |            |            |     |      |              |                                                       |
|---|------------|------------|-----|------|--------------|-------------------------------------------------------|
| 8 | 36,375,000 | 36,525,000 | 486 | 1221 | 0.469819172  |                                                       |
| 8 | 36,450,000 | 36,600,000 | 487 | 905  | 0.171119151  | PTPRD                                                 |
| 8 | 36,525,000 | 36,675,000 | 488 | 757  | 0.337039007  | PTPRD                                                 |
| 8 | 36,600,000 | 36,750,000 | 489 | 701  | 1.239266265  | PTPRD                                                 |
| 8 | 36,675,000 | 36,825,000 | 490 | 613  | 1.040136138  | PTPRD                                                 |
| 8 | 36,750,000 | 36,900,000 | 491 | 565  | -0.389770332 | PTPRD                                                 |
| 8 | 36,825,000 | 36,975,000 | 492 | 543  | -0.205475497 |                                                       |
| 8 | 36,900,000 | 37,050,000 | 493 | 846  | -0.871877275 |                                                       |
| 8 | 36,975,000 | 37,125,000 | 494 | 1045 | -0.603337464 |                                                       |
| 8 | 37,050,000 | 37,200,000 | 495 | 913  | 0.272105973  |                                                       |
| 8 | 37,125,000 | 37,275,000 | 496 | 674  | 0.62221164   |                                                       |
| 8 | 37,200,000 | 37,350,000 | 497 | 393  | 0.814785614  | MGC127919                                             |
| 8 | 37,275,000 | 37,425,000 | 498 | 339  | 0.570575177  | MGC127919                                             |
| 8 | 37,350,000 | 37,500,000 | 499 | 455  | 0.904304203  |                                                       |
| 8 | 37,425,000 | 37,575,000 | 500 | 538  | 1.08291844   |                                                       |
| 8 | 37,500,000 | 37,650,000 | 501 | 677  | 0.638363343  |                                                       |
| 8 | 37,575,000 | 37,725,000 | 502 | 1059 | 0.255692173  | ENSBTAG00000038698                                    |
| 8 | 37,650,000 | 37,800,000 | 503 | 913  | -0.032803095 | ENSBTAG00000038698                                    |
| 8 | 37,725,000 | 37,875,000 | 504 | 640  | -0.195182586 |                                                       |
| 8 | 37,800,000 | 37,950,000 | 505 | 562  | 0.599152753  |                                                       |
| 8 | 37,875,000 | 38,025,000 | 506 | 340  | 1.304763558  | ENSBTAG00000043987                                    |
| 8 | 37,950,000 | 38,100,000 | 507 | 245  | 1.178320233  | ENSBTAG00000043987                                    |
| 8 | 38,025,000 | 38,175,000 | 508 | 483  | 1.277274751  | ENSBTAG00000043987                                    |
| 8 | 38,100,000 | 38,250,000 | 509 | 493  | 0.989192546  | ENSBTAG00000043987                                    |
| 8 | 38,175,000 | 38,325,000 | 510 | 310  | -1.450951224 | ENSBTAG00000043987                                    |
| 8 | 38,250,000 | 38,400,000 | 511 | 286  | -1.87820264  |                                                       |
| 8 | 38,325,000 | 38,475,000 | 512 | 181  | 0.555615971  | GLDC                                                  |
| 8 | 38,400,000 | 38,550,000 | 513 | 213  | 0.33136809   | GLDC                                                  |
| 8 | 38,475,000 | 38,625,000 | 514 | 335  | 0.418961979  | GLDC,UHRF2                                            |
| 8 | 38,550,000 | 38,700,000 | 515 | 358  | 0.469674102  | GLDC,TPD52L3,UHRF2                                    |
| 8 | 38,625,000 | 38,775,000 | 516 | 386  | 0.70858225   | IL33,TPD52L3,UHRF2                                    |
| 8 | 38,700,000 | 38,850,000 | 517 | 361  | 0.830599063  | IL33                                                  |
| 8 | 38,775,000 | 38,925,000 | 518 | 343  | 0.38416174   | IL33,RANBP6                                           |
| 8 | 38,850,000 | 39,000,000 | 519 | 425  | 0.427344643  | RANBP6                                                |
| 8 | 38,925,000 | 39,075,000 | 520 | 482  | 1.056496347  | KIAA2026,MLANA,RANBP6                                 |
| 8 | 39,000,000 | 39,150,000 | 521 | 548  | 1.165638137  | ERMP1,KIAA2026,MLANA                                  |
| 8 | 39,075,000 | 39,225,000 | 522 | 426  | 1.248208434  | ERMP1,RIC1                                            |
| 8 | 39,150,000 | 39,300,000 | 523 | 311  | 1.441455848  | ERMP1,RIC1                                            |
| 8 | 39,225,000 | 39,375,000 | 524 | 386  | 1.459611768  | RIC1                                                  |
| 8 | 39,300,000 | 39,450,000 | 525 | 457  | 1.307887132  | PDCD1LG2,RIC1                                         |
| 8 | 39,375,000 | 39,525,000 | 526 | 436  | 0.786520147  | PD-L1,PDCD1LG2                                        |
| 8 | 39,450,000 | 39,600,000 | 527 | 482  | 0.5941741    | C8H9ORF46,PD-L1,PDCD1LG2                              |
| 8 | 39,525,000 | 39,675,000 | 528 | 540  | 0.526017949  | C8H9ORF46,INSL6,JAK2                                  |
| 8 | 39,600,000 | 39,750,000 | 529 | 567  | -0.873316936 | INSL6,JAK2                                            |
| 8 | 39,675,000 | 39,825,000 | 530 | 732  | -2.234055916 | JAK2                                                  |
| 8 | 39,750,000 | 39,900,000 | 531 | 974  | -0.638339277 |                                                       |
| 8 | 39,825,000 | 39,975,000 | 532 | 1149 | 0.313569234  | RCL1                                                  |
| 8 | 39,900,000 | 40,050,000 | 533 | 1031 | -0.253019763 | AK3,RCL1,ENSBTAG00000046486                           |
| 8 | 39,975,000 | 40,125,000 | 534 | 746  | -0.959905081 | AK3,CDC37L1,PPAPDC2,RCL1,SPATA6L,ENSBTAG00000046486   |
| 8 | 40,050,000 | 40,200,000 | 535 | 906  | -0.478560215 | AK3,CDC37L1,PPAPDC2,SLC1A1,SPATA6L,ENSBTAG00000046486 |
| 8 | 40,125,000 | 40,275,000 | 536 | 932  | -0.39984144  | SLC1A1,SPATA6L,ENSBTAG00000046687                     |

|   |            |            |     |      |              |                           |
|---|------------|------------|-----|------|--------------|---------------------------|
| 8 | 40,200,000 | 40,350,000 | 537 | 471  | -0.705489461 | SLC1A1,ENSBTAG00000046687 |
| 8 | 40,275,000 | 40,425,000 | 538 | 385  | -1.111981056 |                           |
| 8 | 40,350,000 | 40,500,000 | 539 | 579  | -2.092819283 |                           |
| 8 | 40,425,000 | 40,575,000 | 540 | 778  | -0.638560436 |                           |
| 8 | 40,500,000 | 40,650,000 | 541 | 862  | 0.573579895  |                           |
| 8 | 40,575,000 | 40,725,000 | 542 | 735  | 0.451769035  |                           |
| 8 | 40,650,000 | 40,800,000 | 543 | 679  | 0.004251631  |                           |
| 8 | 40,725,000 | 40,875,000 | 544 | 540  | -0.33139649  | GLIS3                     |
| 8 | 40,800,000 | 40,950,000 | 545 | 345  | -0.394168928 | GLIS3                     |
| 8 | 40,875,000 | 41,025,000 | 546 | 527  | 0.443737902  | GLIS3                     |
| 8 | 40,950,000 | 41,100,000 | 547 | 828  | -0.311705414 | GLIS3                     |
| 8 | 41,025,000 | 41,175,000 | 548 | 838  | -0.629434261 |                           |
| 8 | 41,100,000 | 41,250,000 | 549 | 700  | 0.071728041  |                           |
| 8 | 41,175,000 | 41,325,000 | 550 | 684  | -0.777814175 |                           |
| 8 | 41,250,000 | 41,400,000 | 551 | 552  | -0.891634885 |                           |
| 8 | 41,325,000 | 41,475,000 | 552 | 380  | 0.447337099  | RFX3                      |
| 8 | 41,400,000 | 41,550,000 | 553 | 381  | 0.160228226  | RFX3                      |
| 8 | 41,475,000 | 41,625,000 | 554 | 575  | 0.543061638  | RFX3                      |
| 8 | 41,550,000 | 41,700,000 | 555 | 609  | 0.918900044  | RFX3                      |
| 8 | 41,625,000 | 41,775,000 | 556 | 567  | 0.921412525  |                           |
| 8 | 41,700,000 | 41,850,000 | 557 | 716  | 0.805141887  |                           |
| 8 | 41,775,000 | 41,925,000 | 558 | 764  | 0.528428008  |                           |
| 8 | 41,850,000 | 42,000,000 | 559 | 622  | 0.268608587  | KIAA0020                  |
| 8 | 41,925,000 | 42,075,000 | 560 | 650  | -0.028364305 | KCNV2,KIAA0020            |
| 8 | 42,000,000 | 42,150,000 | 561 | 919  | 0.331248071  | KCNV2,VLDLR               |
| 8 | 42,075,000 | 42,225,000 | 562 | 956  | 0.742378811  | VLDLR                     |
| 8 | 42,150,000 | 42,300,000 | 563 | 628  | 0.867993091  |                           |
| 8 | 42,225,000 | 42,375,000 | 564 | 390  | 0.554622788  |                           |
| 8 | 42,300,000 | 42,450,000 | 565 | 518  | 0.232202301  |                           |
| 8 | 42,375,000 | 42,525,000 | 566 | 966  | -0.142398959 |                           |
| 8 | 42,450,000 | 42,600,000 | 567 | 1327 | -0.216627773 |                           |
| 8 | 42,525,000 | 42,675,000 | 568 | 895  | -0.138663829 | SMARCA2                   |
| 8 | 42,600,000 | 42,750,000 | 569 | 416  | -0.051332092 | SMARCA2                   |
| 8 | 42,675,000 | 42,825,000 | 570 | 438  | -2.236370154 | SMARCA2                   |
| 8 | 42,750,000 | 42,900,000 | 571 | 481  | -3.18567477  | SMARCA2                   |
| 8 | 42,825,000 | 42,975,000 | 572 | 701  | 0.653968039  | SMARCA2                   |
| 8 | 42,900,000 | 43,050,000 | 573 | 822  | 0.856189907  |                           |
| 8 | 42,975,000 | 43,125,000 | 574 | 676  | 0.261480239  |                           |
| 8 | 43,050,000 | 43,200,000 | 575 | 786  | 0.23611442   |                           |
| 8 | 43,125,000 | 43,275,000 | 576 | 1308 | 0.294113201  |                           |
| 8 | 43,200,000 | 43,350,000 | 577 | 1552 | 0.328198728  |                           |
| 8 | 43,275,000 | 43,425,000 | 578 | 1089 | 0.483950434  |                           |
| 8 | 43,350,000 | 43,500,000 | 579 | 868  | 0.857922865  |                           |
| 8 | 43,425,000 | 43,575,000 | 580 | 812  | 0.595672052  |                           |
| 8 | 43,500,000 | 43,650,000 | 581 | 740  | 0.149001828  |                           |
| 8 | 43,575,000 | 43,725,000 | 582 | 948  | 0.552450852  |                           |
| 8 | 43,650,000 | 43,800,000 | 583 | 805  | 0.82060095   | DMRT2                     |
| 8 | 43,725,000 | 43,875,000 | 584 | 468  | 0.240480253  | DMRT2,DMRT3               |
| 8 | 43,800,000 | 43,950,000 | 585 | 288  | -0.24200861  | DMRT1,DMRT3               |
| 8 | 43,875,000 | 44,025,000 | 586 | 201  | -0.151711436 | DMRT1                     |
| 8 | 43,950,000 | 44,100,000 | 587 | 274  | -0.382055782 | DMRT1,KANK1               |
| 8 | 44,025,000 | 44,175,000 | 588 | 409  | 0.179594799  | KANK1                     |
| 8 | 44,100,000 | 44,250,000 | 589 | 744  | 0.370898274  |                           |

|   |            |            |     |      |              |                                            |
|---|------------|------------|-----|------|--------------|--------------------------------------------|
| 8 | 44,175,000 | 44,325,000 | 590 | 847  | 0.397466747  | DOCK8                                      |
| 8 | 44,250,000 | 44,400,000 | 591 | 564  | -0.825041009 | DOCK8                                      |
| 8 | 44,325,000 | 44,475,000 | 592 | 439  | -2.798776964 | DOCK8                                      |
| 8 | 44,400,000 | 44,550,000 | 593 | 455  | -1.910043325 | DOCK8                                      |
| 8 | 44,475,000 | 44,625,000 | 594 | 345  | -2.195578501 | DOCK8,ENSBTAG00000000269                   |
| 8 | 44,550,000 | 44,700,000 | 595 | 222  | -1.983775525 | PGM5,ENSBTAG00000000269,ENSBTAG00000033122 |
| 8 | 44,625,000 | 44,775,000 | 596 | 227  | -0.880774366 | PGM5,ENSBTAG00000033122                    |
| 8 | 44,700,000 | 44,850,000 | 597 | 304  | -0.770784937 | PGM5                                       |
| 8 | 44,775,000 | 44,925,000 | 598 | 336  | -0.853808867 | PGM5,TMEM252                               |
| 8 | 44,850,000 | 45,000,000 | 599 | 441  | -1.939707743 | PGM5,TMEM252                               |
| 8 | 44,925,000 | 45,075,000 | 600 | 564  | -1.90563306  |                                            |
| 8 | 45,000,000 | 45,150,000 | 601 | 416  | -0.812959286 |                                            |
| 8 | 45,075,000 | 45,225,000 | 602 | 299  | 0.256186183  | FAM122A,PIP5K1B                            |
| 8 | 45,150,000 | 45,300,000 | 603 | 338  | 0.519718433  | FAM122A,PIP5K1B                            |
| 8 | 45,225,000 | 45,375,000 | 604 | 304  | 0.327891955  | PIP5K1B                                    |
| 8 | 45,300,000 | 45,450,000 | 605 | 263  | 0.059337136  | PIP5K1B                                    |
| 8 | 45,375,000 | 45,525,000 | 606 | 483  | -1.543991668 | FXN                                        |
| 8 | 45,450,000 | 45,600,000 | 607 | 978  | -0.42111649  | FXN,ZO2                                    |
| 8 | 45,525,000 | 45,675,000 | 608 | 1170 | 0.337878718  | FXN,ZO2                                    |
| 8 | 45,600,000 | 45,750,000 | 609 | 1115 | 0.379734658  | ZO2                                        |
| 8 | 45,675,000 | 45,825,000 | 610 | 970  | -0.297946287 | FAM189A2,ZO2                               |
| 8 | 45,750,000 | 45,900,000 | 611 | 723  | -2.756941652 | APBA1,FAM189A2                             |
| 8 | 45,825,000 | 45,975,000 | 612 | 529  | -2.606334359 | APBA1                                      |
| 8 | 45,900,000 | 46,050,000 | 613 | 562  | 0.219234889  | APBA1                                      |
| 8 | 45,975,000 | 46,125,000 | 614 | 543  | 0.102664133  |                                            |
| 8 | 46,050,000 | 46,200,000 | 615 | 373  | -0.978913913 | PTAR1                                      |
| 8 | 46,125,000 | 46,275,000 | 616 | 532  | -1.174871342 | C8H9orf135,PTAR1                           |
| 8 | 46,200,000 | 46,350,000 | 617 | 860  | -1.155792716 | C8H9orf135                                 |
| 8 | 46,275,000 | 46,425,000 | 618 | 816  | -1.078273501 | C8H9orf135                                 |
| 8 | 46,350,000 | 46,500,000 | 619 | 708  | -0.052567851 |                                            |
| 8 | 46,425,000 | 46,575,000 | 620 | 625  | -0.309402136 |                                            |
| 8 | 46,500,000 | 46,650,000 | 621 | 485  | -2.318375761 | MAMDC2                                     |
| 8 | 46,575,000 | 46,725,000 | 622 | 463  | -1.565376492 | MAMDC2,SMC5                                |
| 8 | 46,650,000 | 46,800,000 | 623 | 426  | 0.843413728  | MAMDC2,SMC5                                |
| 8 | 46,725,000 | 46,875,000 | 624 | 626  | 0.296391878  | SMC5                                       |
| 8 | 46,800,000 | 46,950,000 | 625 | 549  | -0.028663637 | KLF9,SMC5                                  |
| 8 | 46,875,000 | 47,025,000 | 626 | 343  | 0.172914791  | KLF9,TRPM3                                 |
| 8 | 46,950,000 | 47,100,000 | 627 | 320  | 0.062924661  | TRPM3                                      |
| 8 | 47,025,000 | 47,175,000 | 628 | 456  | -1.138950665 | TRPM3                                      |
| 8 | 47,100,000 | 47,250,000 | 629 | 712  | -0.521714094 | TRPM3                                      |
| 8 | 47,175,000 | 47,325,000 | 630 | 716  | -0.383775942 | TRPM3                                      |
| 8 | 47,250,000 | 47,400,000 | 631 | 489  | -1.391772879 | TRPM3                                      |
| 8 | 47,325,000 | 47,475,000 | 632 | 295  | -1.24379582  |                                            |
| 8 | 47,400,000 | 47,550,000 | 633 | 373  | 0.182808436  |                                            |
| 8 | 47,475,000 | 47,625,000 | 634 | 639  | 0.651395532  |                                            |
| 8 | 47,550,000 | 47,700,000 | 635 | 823  | 0.604992617  |                                            |
| 8 | 47,625,000 | 47,775,000 | 636 | 765  | 0.502055811  |                                            |
| 8 | 47,700,000 | 47,850,000 | 637 | 1224 | 0.583611904  |                                            |
| 8 | 47,775,000 | 47,925,000 | 638 | 1562 | 0.729349439  |                                            |
| 8 | 47,850,000 | 48,000,000 | 639 | 1134 | 0.914288186  |                                            |
| 8 | 47,925,000 | 48,075,000 | 640 | 835  | 1.145098602  |                                            |
| 8 | 48,000,000 | 48,150,000 | 641 | 625  | 1.256622028  |                                            |
| 8 | 48,075,000 | 48,225,000 | 642 | 375  | 1.005890735  | TMEM2                                      |

|   |            |            |     |      |              |                             |
|---|------------|------------|-----|------|--------------|-----------------------------|
| 8 | 48,150,000 | 48,300,000 | 643 | 607  | 0.528926604  | TMEM2                       |
| 8 | 48,225,000 | 48,375,000 | 644 | 808  | -1.018017031 | TMEM2                       |
| 8 | 48,300,000 | 48,450,000 | 645 | 480  | -1.430907539 | FAM108B1,TMEM2              |
| 8 | 48,375,000 | 48,525,000 | 646 | 263  | 0.443922318  | C8H9ORF85,FAM108B1          |
| 8 | 48,450,000 | 48,600,000 | 647 | 179  | 0.640494216  | C8H9ORF85,FAM108B1          |
| 8 | 48,525,000 | 48,675,000 | 648 | 111  | 0.270796674  | GDA                         |
| 8 | 48,600,000 | 48,750,000 | 649 | 166  | -0.032318437 | GDA                         |
| 8 | 48,675,000 | 48,825,000 | 650 | 354  | 0.040561061  | GDA                         |
| 8 | 48,750,000 | 48,900,000 | 651 | 399  | -0.232533689 | GDA,ZFAND5                  |
| 8 | 48,825,000 | 48,975,000 | 652 | 203  | -1.104949188 | ZFAND5                      |
| 8 | 48,900,000 | 49,050,000 | 653 | 202  | -2.462822363 | ZFAND5                      |
| 8 | 48,975,000 | 49,125,000 | 654 | 325  | -2.409653411 |                             |
| 8 | 49,050,000 | 49,200,000 | 655 | 477  | -4.584661553 |                             |
| 8 | 49,125,000 | 49,275,000 | 656 | 804  | -1.653783963 | TMC1                        |
| 8 | 49,200,000 | 49,350,000 | 657 | 816  | 0.183562292  | TMC1                        |
| 8 | 49,275,000 | 49,425,000 | 658 | 846  | -0.925483082 | ALDH1A1,TMC1                |
| 8 | 49,350,000 | 49,500,000 | 659 | 858  | -0.476069065 | ALDH1A1,ENSBTAG00000047442  |
| 8 | 49,425,000 | 49,575,000 | 660 | 1082 | 0.477041168  | ENSBTAG00000047442          |
| 8 | 49,500,000 | 49,650,000 | 661 | 1139 | 0.369389119  | ANXA1,ENSBTAG00000047442    |
| 8 | 49,575,000 | 49,725,000 | 662 | 945  | 0.156169804  | ANXA1                       |
| 8 | 49,650,000 | 49,800,000 | 663 | 842  | 0.186472099  |                             |
| 8 | 49,725,000 | 49,875,000 | 664 | 613  | 0.29087664   |                             |
| 8 | 49,800,000 | 49,950,000 | 665 | 447  | 0.649629668  |                             |
| 8 | 49,875,000 | 50,025,000 | 666 | 361  | -1.134136469 |                             |
| 8 | 49,950,000 | 50,100,000 | 667 | 521  | -1.108403168 |                             |
| 8 | 50,025,000 | 50,175,000 | 668 | 689  | 0.648957103  |                             |
| 8 | 50,100,000 | 50,250,000 | 669 | 766  | 0.9930994    |                             |
| 8 | 50,175,000 | 50,325,000 | 670 | 774  | -0.045879446 |                             |
| 8 | 50,250,000 | 50,400,000 | 671 | 885  | 0.052527614  |                             |
| 8 | 50,325,000 | 50,475,000 | 672 | 970  | 0.394780574  |                             |
| 8 | 50,400,000 | 50,550,000 | 673 | 772  | -0.211902604 |                             |
| 8 | 50,475,000 | 50,625,000 | 674 | 565  | 0.330320226  |                             |
| 8 | 50,550,000 | 50,700,000 | 675 | 839  | -1.452479649 |                             |
| 8 | 50,625,000 | 50,775,000 | 676 | 1089 | -1.699003705 |                             |
| 8 | 50,700,000 | 50,850,000 | 677 | 1072 | -0.811386709 |                             |
| 8 | 50,775,000 | 50,925,000 | 678 | 805  | 0.121453717  | RORB                        |
| 8 | 50,850,000 | 51,000,000 | 679 | 499  | 0.600776301  | RORB                        |
| 8 | 50,925,000 | 51,075,000 | 680 | 537  | -0.466904679 | RORB                        |
| 8 | 51,000,000 | 51,150,000 | 681 | 827  | -1.451811608 | RORB,TRPM6                  |
| 8 | 51,075,000 | 51,225,000 | 682 | 992  | -2.179120737 | RORB,TRPM6                  |
| 8 | 51,150,000 | 51,300,000 | 683 | 643  | -2.164296097 | TRPM6                       |
| 8 | 51,225,000 | 51,375,000 | 684 | 329  | -0.207459167 | C9orf40,C9orf41             |
| 8 | 51,300,000 | 51,450,000 | 685 | 309  | 0.033941566  | C9orf40,C9orf41,NMRK1,OSTF1 |
| 8 | 51,375,000 | 51,525,000 | 686 | 390  | 0.876074508  | C9orf41,NMRK1,OSTF1         |
| 8 | 51,450,000 | 51,600,000 | 687 | 708  | 0.861902343  | OSTF1                       |
| 8 | 51,525,000 | 51,675,000 | 688 | 1026 | 0.818086484  |                             |
| 8 | 51,600,000 | 51,750,000 | 689 | 990  | 0.480389291  |                             |
| 8 | 51,675,000 | 51,825,000 | 690 | 629  | -0.651816576 |                             |
| 8 | 51,750,000 | 51,900,000 | 691 | 775  | -0.670450808 |                             |
| 8 | 51,825,000 | 51,975,000 | 692 | 1054 | -0.722565074 |                             |
| 8 | 51,900,000 | 52,050,000 | 693 | 702  | -0.715423456 |                             |
| 8 | 51,975,000 | 52,125,000 | 694 | 428  | -0.60684763  |                             |
| 8 | 52,050,000 | 52,200,000 | 695 | 466  | -1.266273143 |                             |

|   |            |            |     |      |              |                                             |
|---|------------|------------|-----|------|--------------|---------------------------------------------|
| 8 | 52,125,000 | 52,275,000 | 696 | 577  | -1.677414592 |                                             |
| 8 | 52,200,000 | 52,350,000 | 697 | 617  | -0.472300662 | PCSK5                                       |
| 8 | 52,275,000 | 52,425,000 | 698 | 454  | 1.050671674  | PCSK5                                       |
| 8 | 52,350,000 | 52,500,000 | 699 | 552  | 0.517140075  | PCSK5                                       |
| 8 | 52,425,000 | 52,575,000 | 700 | 626  | 0.42644379   | PCSK5                                       |
| 8 | 52,500,000 | 52,650,000 | 701 | 375  | 0.631692023  | PCSK5                                       |
| 8 | 52,575,000 | 52,725,000 | 702 | 444  | 0.433381069  | PCSK5                                       |
| 8 | 52,650,000 | 52,800,000 | 703 | 564  | 0.688366407  | PCSK5,RFK                                   |
| 8 | 52,725,000 | 52,875,000 | 704 | 508  | 0.686701193  | GCNT1,RFK                                   |
| 8 | 52,800,000 | 52,950,000 | 705 | 545  | 0.297160496  | GCNT1                                       |
| 8 | 52,875,000 | 53,025,000 | 706 | 787  | 0.233950756  | PRUNE2                                      |
| 8 | 52,950,000 | 53,100,000 | 707 | 1056 | 0.65173909   | PRUNE2                                      |
| 8 | 53,025,000 | 53,175,000 | 708 | 976  | 0.226186349  | PRUNE2                                      |
| 8 | 53,100,000 | 53,250,000 | 709 | 595  | -0.898140979 | PRUNE2                                      |
| 8 | 53,175,000 | 53,325,000 | 710 | 333  | -0.475285685 | PRUNE2                                      |
| 8 | 53,250,000 | 53,400,000 | 711 | 488  | -0.100352051 | FOXB2                                       |
| 8 | 53,325,000 | 53,475,000 | 712 | 752  | 0.549077843  | FOXB2                                       |
| 8 | 53,400,000 | 53,550,000 | 713 | 821  | 0.754050607  |                                             |
| 8 | 53,475,000 | 53,625,000 | 714 | 613  | 0.570796151  | ENSBTAG00000047788                          |
| 8 | 53,550,000 | 53,700,000 | 715 | 368  | 0.827943124  | GNA14,ENSBTAG00000047788                    |
| 8 | 53,625,000 | 53,775,000 | 716 | 331  | 0.785557544  | GNA14,ENSBTAG00000017734,ENSBTAG00000047788 |
| 8 | 53,700,000 | 53,850,000 | 717 | 454  | 0.304233075  | GNA14,ENSBTAG00000017734                    |
| 8 | 53,775,000 | 53,925,000 | 718 | 510  | 0.159761723  | GNA14,ENSBTAG00000017734                    |
| 8 | 53,850,000 | 54,000,000 | 719 | 543  | 0.40704967   | GNA14,GNAQ                                  |
| 8 | 53,925,000 | 54,075,000 | 720 | 764  | 0.535104202  | GNA14,GNAQ                                  |
| 8 | 54,000,000 | 54,150,000 | 721 | 665  | 0.249613318  | GNAQ                                        |
| 8 | 54,075,000 | 54,225,000 | 722 | 434  | -0.846271873 | GNAQ                                        |
| 8 | 54,150,000 | 54,300,000 | 723 | 444  | -2.147657656 | GNAQ                                        |
| 8 | 54,225,000 | 54,375,000 | 724 | 301  | -2.23817542  | GNAQ                                        |
| 8 | 54,300,000 | 54,450,000 | 725 | 108  | -1.986285408 | CEP78                                       |
| 8 | 54,375,000 | 54,525,000 | 726 | 213  | -2.993613366 | CEP78,PSAT1                                 |
| 8 | 54,450,000 | 54,600,000 | 727 | 322  | -2.939939972 | CEP78,PSAT1                                 |
| 8 | 54,525,000 | 54,675,000 | 728 | 466  | -0.282632842 | PSAT1                                       |
| 8 | 54,600,000 | 54,750,000 | 729 | 411  | 0.85850847   |                                             |
| 8 | 54,675,000 | 54,825,000 | 730 | 405  | -1.496028807 |                                             |
| 8 | 54,750,000 | 54,900,000 | 731 | 482  | -2.235000309 |                                             |
| 8 | 54,825,000 | 54,975,000 | 732 | 501  | -1.717668113 | RAN                                         |
| 8 | 54,900,000 | 55,050,000 | 733 | 798  | -0.434934699 | RAN                                         |
| 8 | 54,975,000 | 55,125,000 | 734 | 1082 | -1.008976942 |                                             |
| 8 | 55,050,000 | 55,200,000 | 735 | 1080 | -1.758743674 |                                             |
| 8 | 55,125,000 | 55,275,000 | 736 | 951  | -1.034290928 |                                             |
| 8 | 55,200,000 | 55,350,000 | 737 | 750  | -0.627025953 |                                             |
| 8 | 55,275,000 | 55,425,000 | 738 | 476  | 0.223193247  |                                             |
| 8 | 55,350,000 | 55,500,000 | 739 | 466  | 1.172934559  |                                             |
| 8 | 55,425,000 | 55,575,000 | 740 | 554  | 1.259875658  |                                             |
| 8 | 55,500,000 | 55,650,000 | 741 | 554  | 0.964374514  |                                             |
| 8 | 55,575,000 | 55,725,000 | 742 | 431  | 0.640703775  |                                             |
| 8 | 55,650,000 | 55,800,000 | 743 | 377  | -0.013984946 |                                             |
| 8 | 55,725,000 | 55,875,000 | 744 | 497  | -1.377423697 | TLE4                                        |
| 8 | 55,800,000 | 55,950,000 | 745 | 656  | -2.193142799 | TLE4                                        |
| 8 | 55,875,000 | 56,025,000 | 746 | 597  | -0.850471069 | TLE4                                        |
| 8 | 55,950,000 | 56,100,000 | 747 | 460  | 0.166421448  | TLE4                                        |
| 8 | 56,025,000 | 56,175,000 | 748 | 543  | -1.012960209 |                                             |

|   |            |            |     |      |              |                                                   |
|---|------------|------------|-----|------|--------------|---------------------------------------------------|
| 8 | 56,100,000 | 56,250,000 | 749 | 468  | -0.600755657 |                                                   |
| 8 | 56,175,000 | 56,325,000 | 750 | 423  | -0.888094249 |                                                   |
| 8 | 56,250,000 | 56,400,000 | 751 | 420  | -0.931488727 |                                                   |
| 8 | 56,325,000 | 56,475,000 | 752 | 248  | 0.150574069  |                                                   |
| 8 | 56,400,000 | 56,550,000 | 753 | 439  | -0.611747006 | ENSBTAG00000046462                                |
| 8 | 56,475,000 | 56,625,000 | 754 | 582  | -0.067087859 | ENSBTAG00000046462                                |
| 8 | 56,550,000 | 56,700,000 | 755 | 608  | 0.442143985  | ENSBTAG00000046462                                |
| 8 | 56,625,000 | 56,775,000 | 756 | 429  | 0.366618927  |                                                   |
| 8 | 56,700,000 | 56,850,000 | 757 | 59   | 0.687599821  |                                                   |
| 8 | 56,775,000 | 56,925,000 | 758 | 101  | -0.844752992 |                                                   |
| 8 | 56,850,000 | 57,000,000 | 759 | 270  | -0.281490464 |                                                   |
| 8 | 56,925,000 | 57,075,000 | 760 | 461  | -0.15084759  |                                                   |
| 8 | 57,000,000 | 57,150,000 | 761 | 963  | 0.846791037  |                                                   |
| 8 | 57,075,000 | 57,225,000 | 762 | 1079 | 0.898755657  |                                                   |
| 8 | 57,150,000 | 57,300,000 | 763 | 671  | 0.334322566  |                                                   |
| 8 | 57,225,000 | 57,375,000 | 764 | 468  | -0.029991459 |                                                   |
| 8 | 57,300,000 | 57,450,000 | 765 | 782  | 0.535517257  |                                                   |
| 8 | 57,375,000 | 57,525,000 | 766 | 1063 | 0.718427302  |                                                   |
| 8 | 57,450,000 | 57,600,000 | 767 | 827  | 0.442414148  |                                                   |
| 8 | 57,525,000 | 57,675,000 | 768 | 600  | 0.924258229  |                                                   |
| 8 | 57,600,000 | 57,750,000 | 769 | 644  | 0.895541016  |                                                   |
| 8 | 57,675,000 | 57,825,000 | 770 | 643  | 0.318260363  |                                                   |
| 8 | 57,750,000 | 57,900,000 | 771 | 643  | -0.045764564 |                                                   |
| 8 | 57,825,000 | 57,975,000 | 772 | 621  | -1.364422832 | TLE1                                              |
| 8 | 57,900,000 | 58,050,000 | 773 | 375  | -4.803806114 | TLE1                                              |
| 8 | 57,975,000 | 58,125,000 | 774 | 475  | -0.831595435 | TLE1                                              |
| 8 | 58,050,000 | 58,200,000 | 775 | 757  | 0.990772838  |                                                   |
| 8 | 58,125,000 | 58,275,000 | 776 | 778  | 0.635766371  | SPATA31D1,ENSBTAG00000046782                      |
| 8 | 58,200,000 | 58,350,000 | 777 | 919  | 0.714281872  | SPATA31D1,ENSBTAG00000046782                      |
| 8 | 58,275,000 | 58,425,000 | 778 | 854  | 0.973191446  |                                                   |
| 8 | 58,350,000 | 58,500,000 | 779 | 665  | -0.319256775 |                                                   |
| 8 | 58,425,000 | 58,575,000 | 780 | 702  | -1.097790447 |                                                   |
| 8 | 58,500,000 | 58,650,000 | 781 | 612  | -1.573802393 | FKBP8                                             |
| 8 | 58,575,000 | 58,725,000 | 782 | 537  | -1.850257024 | FKBP8                                             |
| 8 | 58,650,000 | 58,800,000 | 783 | 509  | -2.047852357 |                                                   |
| 8 | 58,725,000 | 58,875,000 | 784 | 435  | -1.414727443 |                                                   |
| 8 | 58,800,000 | 58,950,000 | 785 | 679  | 0.774602265  |                                                   |
| 8 | 58,875,000 | 59,025,000 | 786 | 697  | 0.979445711  |                                                   |
| 8 | 58,950,000 | 59,100,000 | 787 | 493  | -0.215341953 |                                                   |
| 8 | 59,025,000 | 59,175,000 | 788 | 472  | -0.623973878 |                                                   |
| 8 | 59,100,000 | 59,250,000 | 789 | 536  | -0.326536264 |                                                   |
| 8 | 59,175,000 | 59,325,000 | 790 | 430  | -0.181784113 |                                                   |
| 8 | 59,250,000 | 59,400,000 | 791 | 278  | -0.795739734 |                                                   |
| 8 | 59,325,000 | 59,475,000 | 792 | 411  | -0.398678132 |                                                   |
| 8 | 59,400,000 | 59,550,000 | 793 | 335  | -0.165635023 | ENSBTAG00000038982                                |
| 8 | 59,475,000 | 59,625,000 | 794 | 466  | -0.016794507 | ENSBTAG00000017338,ENSBTAG00000038982             |
| 8 | 59,550,000 | 59,700,000 | 795 | 508  | 0.329805168  | DNAJB5,KIAA1045,ENSBTAG00000017338                |
| 8 | 59,625,000 | 59,775,000 | 796 | 308  | 0.606075504  | DNAJB5,FAM214B,KIAA1045,MGC159566,PIGO,STOML2,VCP |
| 8 | 59,700,000 | 59,850,000 | 797 | 584  | 0.844684193  | FAM214B,MGC159566,PIGO,STOML2,UNC13B,VCP          |
| 8 | 59,775,000 | 59,925,000 | 798 | 820  | 0.963887276  | FAM214B,UNC13B                                    |
| 8 | 59,850,000 | 60,000,000 | 799 | 564  | 0.792217913  | UNC13B                                            |
| 8 | 59,925,000 | 60,075,000 | 800 | 450  | -1.446139386 | UNC13B,ENSBTAG00000011402                         |

|   |            |            |     |      |              |                                                                                                                                              |
|---|------------|------------|-----|------|--------------|----------------------------------------------------------------------------------------------------------------------------------------------|
| 8 | 60,000,000 | 60,150,000 | 801 | 425  | -2.012719165 | RUSC2,UNC13B,ENSBTAG00000011402                                                                                                              |
| 8 | 60,075,000 | 60,225,000 | 802 | 288  | -0.187435643 | CD72,FAM166B,RUSC2,TESK1,ENSBTAG00000011402                                                                                                  |
| 8 | 60,150,000 | 60,300,000 | 803 | 317  | 0.963547825  | ARHGEF39,CA9,CCDC107,CD72,FAM166B,RUSC2,SIT1,TESK1,TLN1,TPM2                                                                                 |
| 8 | 60,225,000 | 60,375,000 | 804 | 421  | 0.619464874  | ARHGEF39,CA9,CCDC107,CREB3,GBA2,MSMP,NPR2,RGP1,SIT1,TLN1,TPM2                                                                                |
| 8 | 60,300,000 | 60,450,000 | 805 | 312  | 0.073229549  | CREB3,FAM221B,GBA2,HINT2,MSMP,NPR2,RGP1,SPAG8,TLN1,TMEM8B,ENSBTAG00000047598                                                                 |
| 8 | 60,375,000 | 60,525,000 | 806 | 485  | 0.34721892   | FAM221B,HINT2,NPR2,SPAG8,TMEM8B,ENSBTAG00000026123,ENSBTAG00000045900,ENSBTAG00000047237,ENSBTAG00000047598                                  |
| 8 | 60,450,000 | 60,600,000 | 807 | 859  | 0.322378577  | ENSBTAG00000026123,ENSBTAG00000032668,ENSBTAG00000032669,ENSBTAG00000045900,ENSBTAG00000045958,ENSBTAG00000047237                            |
| 8 | 60,525,000 | 60,675,000 | 808 | 646  | 0.300966558  | OR13C7P,ENSBTAG00000032668,ENSBTAG00000032669,ENSBTAG00000032670,ENSBTAG00000038308,ENSBTAG00000039443,ENSBTAG00000045958,ENSBTAG00000047099 |
| 8 | 60,600,000 | 60,750,000 | 809 | 397  | 0.236231247  | OR13C7P,RECK,ENSBTAG00000032670,ENSBTAG00000038086,ENSBTAG00000038308,ENSBTAG00000039443,ENSBTAG00000047099                                  |
| 8 | 60,675,000 | 60,825,000 | 810 | 843  | -0.009998412 | CCIN,GLIPR2,RECK,ENSBTAG00000038086                                                                                                          |
| 8 | 60,750,000 | 60,900,000 | 811 | 955  | -0.07433274  | CCIN,CLTA,GLIPR2,GNE,RECK                                                                                                                    |
| 8 | 60,825,000 | 60,975,000 | 812 | 494  | -0.545976674 | CLTA,GNE,RNF38                                                                                                                               |
| 8 | 60,900,000 | 61,050,000 | 813 | 235  | -1.023427793 | GNE,RNF38                                                                                                                                    |
| 8 | 60,975,000 | 61,125,000 | 814 | 169  | -0.428565065 | RNF38                                                                                                                                        |
| 8 | 61,050,000 | 61,200,000 | 815 | 261  | -0.492982855 | MELK                                                                                                                                         |
| 8 | 61,125,000 | 61,275,000 | 816 | 398  | -2.139545274 | MELK                                                                                                                                         |
| 8 | 61,200,000 | 61,350,000 | 817 | 577  | -1.077885707 | MELK                                                                                                                                         |
| 8 | 61,275,000 | 61,425,000 | 818 | 509  | -0.087138308 | PAX5                                                                                                                                         |
| 8 | 61,350,000 | 61,500,000 | 819 | 416  | -0.520303309 | PAX5                                                                                                                                         |
| 8 | 61,425,000 | 61,575,000 | 820 | 375  | -0.274853201 | PAX5                                                                                                                                         |
| 8 | 61,500,000 | 61,650,000 | 821 | 210  | 0.106468976  | PAX5,ZCCHC7                                                                                                                                  |
| 8 | 61,575,000 | 61,725,000 | 822 | 204  | -0.050141601 | ZCCHC7                                                                                                                                       |
| 8 | 61,650,000 | 61,800,000 | 823 | 270  | 0.197181183  | ZCCHC7                                                                                                                                       |
| 8 | 61,725,000 | 61,875,000 | 824 | 279  | 0.040341674  | ZCCHC7                                                                                                                                       |
| 8 | 61,800,000 | 61,950,000 | 825 | 278  | 0.734285602  | GRHPR,ZCCHC7                                                                                                                                 |
| 8 | 61,875,000 | 62,025,000 | 826 | 310  | 1.236459387  | FBXO10,GRHPR,POLR1E,ZBTB5,ZCCHC7                                                                                                             |
| 8 | 61,950,000 | 62,100,000 | 827 | 557  | 1.168792689  | FBXO10,GRHPR,POLR1E,TOMM5,ZBTB5                                                                                                              |
| 8 | 62,025,000 | 62,175,000 | 828 | 588  | 1.08287767   | FBXO10,TOMM5                                                                                                                                 |
| 8 | 62,100,000 | 62,250,000 | 829 | 590  | 0.904206342  |                                                                                                                                              |
| 8 | 62,175,000 | 62,325,000 | 830 | 663  | 0.953415714  | FRMPD1                                                                                                                                       |
| 8 | 62,250,000 | 62,400,000 | 831 | 414  | 1.115778075  | DCAF10,EXOSC3,FRMPD1,TRMT10B                                                                                                                 |
| 8 | 62,325,000 | 62,475,000 | 832 | 298  | 0.652276838  | DCAF10,EXOSC3,MCART1,SHB,TRMT10B                                                                                                             |
| 8 | 62,400,000 | 62,550,000 | 833 | 482  | 0.359619776  | DCAF10,MCART1,SHB                                                                                                                            |
| 8 | 62,475,000 | 62,625,000 | 834 | 544  | 0.744729067  | SHB                                                                                                                                          |
| 8 | 62,550,000 | 62,700,000 | 835 | 588  | 0.638467287  | SHB                                                                                                                                          |
| 8 | 62,625,000 | 62,775,000 | 836 | 700  | 0.282647329  |                                                                                                                                              |
| 8 | 62,700,000 | 62,850,000 | 837 | 1232 | 0.8781032    |                                                                                                                                              |
| 8 | 62,775,000 | 62,925,000 | 838 | 1451 | 0.964904177  | ALDH1B1,IGFBPL1                                                                                                                              |
| 8 | 62,850,000 | 63,000,000 | 839 | 1243 | 0.379348096  | ALDH1B1,CCDC180,IGFBPL1,ENSBTAG00000040034                                                                                                   |
| 8 | 62,925,000 | 63,075,000 | 840 | 1187 | 0.3143527    | CCDC180,TDRD7,ENSBTAG00000040034                                                                                                             |
| 8 | 63,000,000 | 63,150,000 | 841 | 843  | 0.710708875  | CCDC180,TDRD7                                                                                                                                |



|   |            |            |     |      |              |                                                          |
|---|------------|------------|-----|------|--------------|----------------------------------------------------------|
| 8 | 63,075,000 | 63,225,000 | 842 | 924  | 0.689990472  | TDRD7,TMOD1                                              |
| 8 | 63,150,000 | 63,300,000 | 843 | 1189 | 0.961243921  | NCBP1,TDRD7,TMOD1,TSTD2                                  |
| 8 | 63,225,000 | 63,375,000 | 844 | 1093 | 0.928229746  | NCBP1,TMOD1,TSTD2,XPA                                    |
| 8 | 63,300,000 | 63,450,000 | 845 | 1136 | 0.920446246  | NCBP1,XPA                                                |
| 8 | 63,375,000 | 63,525,000 | 846 | 964  | 1.052735595  | FOX1                                                     |
| 8 | 63,450,000 | 63,600,000 | 847 | 675  | 0.608561478  | C8H9ORF156,FOX1,HEMGN                                    |
| 8 | 63,525,000 | 63,675,000 | 848 | 643  | 0.418833109  | ANP32B,C8H9ORF156,HEMGN,NANS                             |
| 8 | 63,600,000 | 63,750,000 | 849 | 453  | 0.742994606  | ANP32B,CORO2A,NANS,TRIM14                                |
| 8 | 63,675,000 | 63,825,000 | 850 | 360  | 0.727710644  | CORO2A,TBC1D2,TRIM14                                     |
| 8 | 63,750,000 | 63,900,000 | 851 | 499  | 0.188221989  | CORO2A,GABBR2,TBC1D2                                     |
| 8 | 63,825,000 | 63,975,000 | 852 | 669  | 0.126783963  | GABBR2                                                   |
| 8 | 63,900,000 | 64,050,000 | 853 | 567  | 0.350452547  | GABBR2                                                   |
| 8 | 63,975,000 | 64,125,000 | 854 | 617  | -0.707167993 | GABBR2                                                   |
| 8 | 64,050,000 | 64,200,000 | 855 | 734  | -0.516315112 | GABBR2                                                   |
| 8 | 64,125,000 | 64,275,000 | 856 | 760  | 0.548634246  | ANKS6                                                    |
| 8 | 64,200,000 | 64,350,000 | 857 | 775  | 0.514102084  | ANKS6,GALNT12                                            |
| 8 | 64,275,000 | 64,425,000 | 858 | 735  | 0.323181247  | ANKS6,GALNT12                                            |
| 8 | 64,350,000 | 64,500,000 | 859 | 811  | 0.241219855  | COL15A1                                                  |
| 8 | 64,425,000 | 64,575,000 | 860 | 736  | 0.419732061  | COL15A1,TGFBR1                                           |
| 8 | 64,500,000 | 64,650,000 | 861 | 458  | 0.305875768  | COL15A1,TGFBR1,ENSBTAG00000047836                        |
| 8 | 64,575,000 | 64,725,000 | 862 | 317  | -0.532128551 | ALG2,SEC61B,TGFBR1,ENSBTAG00000047836                    |
| 8 | 64,650,000 | 64,800,000 | 863 | 410  | 0.094709211  | ALG2,SEC61B                                              |
| 8 | 64,725,000 | 64,875,000 | 864 | 459  | 0.159366105  | SEC61B                                                   |
| 8 | 64,800,000 | 64,950,000 | 865 | 388  | 0.495756498  |                                                          |
| 8 | 64,875,000 | 65,025,000 | 866 | 447  | 0.526254711  | ENSBTAG00000019143                                       |
| 8 | 64,950,000 | 65,100,000 | 867 | 575  | 1.033046385  | ENSBTAG00000019143                                       |
| 8 | 65,025,000 | 65,175,000 | 868 | 459  | 1.338865833  |                                                          |
| 8 | 65,100,000 | 65,250,000 | 869 | 326  | 1.202905654  |                                                          |
| 8 | 65,175,000 | 65,325,000 | 870 | 332  | 1.254538656  |                                                          |
| 8 | 65,250,000 | 65,400,000 | 871 | 386  | 0.588943147  | NR4A3                                                    |
| 8 | 65,325,000 | 65,475,000 | 872 | 545  | 0.603936823  | NR4A3,STX17                                              |
| 8 | 65,400,000 | 65,550,000 | 873 | 520  | 1.042568854  | ERP44,STX17                                              |
| 8 | 65,475,000 | 65,625,000 | 874 | 418  | 0.929699483  | ERP44,INVS,STX17                                         |
| 8 | 65,550,000 | 65,700,000 | 875 | 444  | -0.000635147 | ERP44,INVS                                               |
| 8 | 65,625,000 | 65,775,000 | 876 | 538  | -1.114208962 | INVS,TEX10                                               |
| 8 | 65,700,000 | 65,850,000 | 877 | 761  | -0.582523566 | INVS,TEX10,ENSBTAG00000035708                            |
| 8 | 65,775,000 | 65,925,000 | 878 | 1141 | 0.395182063  | TEX10,ENSBTAG00000035707,ENSBTAG00000035708              |
| 8 | 65,850,000 | 66,000,000 | 879 | 1441 | 0.498476619  | ENSBTAG00000018095,ENSBTAG00000035707,ENSBTAG00000035708 |
| 8 | 65,925,000 | 66,075,000 | 880 | 1353 | -0.326827987 | ENSBTAG00000018095,ENSBTAG00000035709                    |
| 8 | 66,000,000 | 66,150,000 | 881 | 1142 | -1.03196111  | ENSBTAG00000035709,ENSBTAG00000037971                    |
| 8 | 66,075,000 | 66,225,000 | 882 | 1123 | 0.021390956  | ENSBTAG00000037971,ENSBTAG00000047647                    |
| 8 | 66,150,000 | 66,300,000 | 883 | 936  | 0.118709042  | ENSBTAG00000047647                                       |
| 8 | 66,225,000 | 66,375,000 | 884 | 1001 | 0.595432345  |                                                          |
| 8 | 66,300,000 | 66,450,000 | 885 | 1007 | 0.322934376  | ENSBTAG00000006446                                       |
| 8 | 66,375,000 | 66,525,000 | 886 | 970  | 0.566218866  | ENSBTAG00000006446                                       |
| 8 | 66,450,000 | 66,600,000 | 887 | 1220 | 1.042446741  | ENSBTAG00000006446                                       |
| 8 | 66,525,000 | 66,675,000 | 888 | 1085 | 1.019921586  | ENSBTAG00000006446                                       |
| 8 | 66,600,000 | 66,750,000 | 889 | 1058 | 0.70976493   | ENSBTAG00000006446                                       |
| 8 | 66,675,000 | 66,825,000 | 890 | 963  | -0.216290505 |                                                          |
| 8 | 66,750,000 | 66,900,000 | 891 | 913  | -0.563623225 |                                                          |
| 8 | 66,825,000 | 66,975,000 | 892 | 1094 | 0.415153365  |                                                          |
| 8 | 66,900,000 | 67,050,000 | 893 | 810  | 0.684456183  |                                                          |

|   |            |            |     |      |              |                                                    |
|---|------------|------------|-----|------|--------------|----------------------------------------------------|
| 8 | 66,975,000 | 67,125,000 | 894 | 540  | 0.636848183  |                                                    |
| 8 | 67,050,000 | 67,200,000 | 895 | 1312 | 1.163780845  |                                                    |
| 8 | 67,125,000 | 67,275,000 | 896 | 1400 | 1.385989605  | ENSBTAG00000005966                                 |
| 8 | 67,200,000 | 67,350,000 | 897 | 816  | 1.354445338  | ENSBTAG00000005966                                 |
| 8 | 67,275,000 | 67,425,000 | 898 | 962  | 1.138799201  |                                                    |
| 8 | 67,350,000 | 67,500,000 | 899 | 1112 | 0.716317562  | LPL                                                |
| 8 | 67,425,000 | 67,575,000 | 900 | 1204 | 0.5644292    | LPL                                                |
| 8 | 67,500,000 | 67,650,000 | 901 | 969  | 0.684565178  | LPL                                                |
| 8 | 67,575,000 | 67,725,000 | 902 | 803  | 1.056320553  | SLC18A1                                            |
| 8 | 67,650,000 | 67,800,000 | 903 | 1017 | 0.958120164  | ATP6V1B2,SLC18A1                                   |
| 8 | 67,725,000 | 67,875,000 | 904 | 1117 | 0.033627181  | ATP6V1B2,LZTS1,SLC18A1                             |
| 8 | 67,800,000 | 67,950,000 | 905 | 774  | -0.130732357 | ATP6V1B2,LZTS1                                     |
| 8 | 67,875,000 | 68,025,000 | 906 | 757  | 1.115074172  |                                                    |
| 8 | 67,950,000 | 68,100,000 | 907 | 939  | 0.729706686  |                                                    |
| 8 | 68,025,000 | 68,175,000 | 908 | 646  | 0.407279889  |                                                    |
| 8 | 68,100,000 | 68,250,000 | 909 | 765  | 0.012184629  |                                                    |
| 8 | 68,175,000 | 68,325,000 | 910 | 975  | -0.734963701 |                                                    |
| 8 | 68,250,000 | 68,400,000 | 911 | 672  | -1.289700326 |                                                    |
| 8 | 68,325,000 | 68,475,000 | 912 | 446  | 0.060994075  |                                                    |
| 8 | 68,400,000 | 68,550,000 | 913 | 582  | 1.157308293  |                                                    |
| 8 | 68,475,000 | 68,625,000 | 914 | 693  | 1.001097093  |                                                    |
| 8 | 68,550,000 | 68,700,000 | 915 | 1029 | 0.572489483  |                                                    |
| 8 | 68,625,000 | 68,775,000 | 916 | 840  | 0.563861101  |                                                    |
| 8 | 68,700,000 | 68,850,000 | 917 | 528  | -0.368429888 |                                                    |
| 8 | 68,775,000 | 68,925,000 | 918 | 808  | -1.664866874 |                                                    |
| 8 | 68,850,000 | 69,000,000 | 919 | 1027 | -0.299815727 |                                                    |
| 8 | 68,925,000 | 69,075,000 | 920 | 885  | 0.596640227  |                                                    |
| 8 | 69,000,000 | 69,150,000 | 921 | 635  | 0.570896746  |                                                    |
| 8 | 69,075,000 | 69,225,000 | 922 | 905  | -0.912772794 |                                                    |
| 8 | 69,150,000 | 69,300,000 | 923 | 1039 | -1.062167113 |                                                    |
| 8 | 69,225,000 | 69,375,000 | 924 | 1149 | 0.297956856  |                                                    |
| 8 | 69,300,000 | 69,450,000 | 925 | 1264 | 0.779835933  |                                                    |
| 8 | 69,375,000 | 69,525,000 | 926 | 923  | 0.383376697  | GFRA2                                              |
| 8 | 69,450,000 | 69,600,000 | 927 | 571  | -0.629436289 | GFRA2                                              |
| 8 | 69,525,000 | 69,675,000 | 928 | 480  | -0.09972034  | GFRA2                                              |
| 8 | 69,600,000 | 69,750,000 | 929 | 377  | 0.650891071  | DOK2,GFRA2,XPO7                                    |
| 8 | 69,675,000 | 69,825,000 | 930 | 228  | 0.165651736  | DOK2,XPO7                                          |
| 8 | 69,750,000 | 69,900,000 | 931 | 248  | 0.132620425  | DMTN,FGF17,NPM2,XPO7                               |
| 8 | 69,825,000 | 69,975,000 | 932 | 280  | -0.204784013 | DMTN,FAM160B2,FGF17,HR,LGI3,NPM2,NUDT18,REEP4,XPO7 |
| 8 | 69,900,000 | 70,050,000 | 933 | 227  | -0.889396908 | BMP1,FAM160B2,HR,LGI3,NUDT18,PHYHIP,REEP4,SFTPC    |
| 8 | 69,975,000 | 70,125,000 | 934 | 322  | -1.106611382 | BMP1,PHYHIP,PIWIL2,POLR3D,SFTPC                    |
| 8 | 70,050,000 | 70,200,000 | 935 | 410  | -0.55744063  | PIWIL2,POLR3D,SLC39A14                             |
| 8 | 70,125,000 | 70,275,000 | 936 | 324  | -0.669710208 | PIWIL2,PPP3CC,SLC39A14                             |
| 8 | 70,200,000 | 70,350,000 | 937 | 260  | -0.589909181 | PPP3CC,SLC39A14                                    |
| 8 | 70,275,000 | 70,425,000 | 938 | 415  | 0.70153604   | CCAR2,PDLIM2,PPP3CC,SORBS3,ENSBTAG00000005466      |
| 8 | 70,350,000 | 70,500,000 | 939 | 484  | 0.704523202  | BIN3,CCAR2,PDLIM2,SORBS3,ENSBTAG00000005466        |
| 8 | 70,425,000 | 70,575,000 | 940 | 369  | 0.204202974  | BIN3,CCAR2,EGR3,PEBP4                              |
| 8 | 70,500,000 | 70,650,000 | 941 | 286  | -1.270436397 | EGR3,PEBP4                                         |
| 8 | 70,575,000 | 70,725,000 | 942 | 434  | -0.830290579 | PEBP4                                              |
| 8 | 70,650,000 | 70,800,000 | 943 | 550  | -0.04338025  | PEBP4                                              |
| 8 | 70,725,000 | 70,875,000 | 944 | 583  | 0.112174974  | PEBP4,RHOBTB2,ENSBTAG000000035958                  |
| 8 | 70,800,000 | 70,950,000 | 945 | 792  | -0.17363997  | RHOBTB2,TNFRSF10D,ENSBTAG000000035958              |

|   |            |            |     |      |              |                                                                 |
|---|------------|------------|-----|------|--------------|-----------------------------------------------------------------|
| 8 | 70,875,000 | 71,025,000 | 946 | 894  | -0.319033805 | RHOBTB2,TNFRSF10D                                               |
| 8 | 70,950,000 | 71,100,000 | 947 | 586  | -0.201854418 |                                                                 |
| 8 | 71,025,000 | 71,175,000 | 948 | 281  | 0.239937068  | ENSBTAG00000048226                                              |
| 8 | 71,100,000 | 71,250,000 | 949 | 678  | 0.19432792   | CHMP7,ENSBTAG00000046431,ENSBTAG00000048226                     |
| 8 | 71,175,000 | 71,325,000 | 950 | 1049 | -0.477253232 | CHMP7,LOXL2,R3HCC1,ENSBTAG00000046431,ENSBTAGO000048226         |
| 8 | 71,250,000 | 71,400,000 | 951 | 852  | -1.680483049 | CHMP7,LOXL2,R3HCC1                                              |
| 8 | 71,325,000 | 71,475,000 | 952 | 708  | -0.698871857 | ENTPD4,LOXL2                                                    |
| 8 | 71,400,000 | 71,550,000 | 953 | 754  | 0.227356954  | ENTPD4,SLC25A37                                                 |
| 8 | 71,475,000 | 71,625,000 | 954 | 667  | 0.549407784  | SLC25A37                                                        |
| 8 | 71,550,000 | 71,700,000 | 955 | 576  | 0.619969315  | NKX2-6,NKX3-1,SLC25A37                                          |
| 8 | 71,625,000 | 71,775,000 | 956 | 467  | 0.518471527  | NKX2-6,NKX3-1                                                   |
| 8 | 71,700,000 | 71,850,000 | 957 | 425  | 0.552887641  | NKX2-6                                                          |
| 8 | 71,775,000 | 71,925,000 | 958 | 574  | 0.882434516  | STC1                                                            |
| 8 | 71,850,000 | 72,000,000 | 959 | 490  | 1.095686167  | STC1                                                            |
| 8 | 71,925,000 | 72,075,000 | 960 | 292  | 1.237344959  |                                                                 |
| 8 | 72,000,000 | 72,150,000 | 961 | 338  | 0.968040037  |                                                                 |
| 8 | 72,075,000 | 72,225,000 | 962 | 434  | 0.266273281  |                                                                 |
| 8 | 72,150,000 | 72,300,000 | 963 | 458  | 0.351354708  | ENSBTAG00000047207                                              |
| 8 | 72,225,000 | 72,375,000 | 964 | 512  | 0.635530327  | ENSBTAG00000047207                                              |
| 8 | 72,300,000 | 72,450,000 | 965 | 667  | 0.276544615  | ADAM28                                                          |
| 8 | 72,375,000 | 72,525,000 | 966 | 728  | -0.03789874  | ADAM28,ADAMDEC1                                                 |
| 8 | 72,450,000 | 72,600,000 | 967 | 721  | -0.986131261 | ADAM28,ADAM7,ADAMDEC1                                           |
| 8 | 72,525,000 | 72,675,000 | 968 | 877  | -1.162918396 | ADAM7                                                           |
| 8 | 72,600,000 | 72,750,000 | 969 | 731  | -1.404579754 |                                                                 |
| 8 | 72,675,000 | 72,825,000 | 970 | 838  | -0.108485615 |                                                                 |
| 8 | 72,750,000 | 72,900,000 | 971 | 935  | 0.787527822  |                                                                 |
| 8 | 72,825,000 | 72,975,000 | 972 | 922  | 1.206075059  |                                                                 |
| 8 | 72,900,000 | 73,050,000 | 973 | 990  | 0.750494813  |                                                                 |
| 8 | 72,975,000 | 73,125,000 | 974 | 967  | 0.369562031  | ENSBTAG00000001219                                              |
| 8 | 73,050,000 | 73,200,000 | 975 | 801  | 0.252147948  | NEFL,NF-M,ENSBTAG00000001219                                    |
| 8 | 73,125,000 | 73,275,000 | 976 | 361  | -0.561061694 | NEFL,NF-M                                                       |
| 8 | 73,200,000 | 73,350,000 | 977 | 704  | 0.919226466  |                                                                 |
| 8 | 73,275,000 | 73,425,000 | 978 | 979  | 1.137180497  |                                                                 |
| 8 | 73,350,000 | 73,500,000 | 979 | 811  | 1.117851966  |                                                                 |
| 8 | 73,425,000 | 73,575,000 | 980 | 738  | 1.116719989  | DOCK5                                                           |
| 8 | 73,500,000 | 73,650,000 | 981 | 511  | 1.008751602  | DOCK5                                                           |
| 8 | 73,575,000 | 73,725,000 | 982 | 400  | 0.686208685  | DOCK5,GNRH1,KCTD9                                               |
| 8 | 73,650,000 | 73,800,000 | 983 | 447  | 1.172995588  | DOCK5,GNRH1,KCTD9,ENSBTAG00000002756                            |
| 8 | 73,725,000 | 73,875,000 | 984 | 504  | 0.418652834  | KCTD9,ENSBTAG00000002756,ENSBTAG00000010829,ENSBTAG000000046594 |
| 8 | 73,800,000 | 73,950,000 | 985 | 529  | -0.20114397  | ENSBTAG00000002756,ENSBTAG00000010829,ENSBTAGO000046594         |
| 8 | 73,875,000 | 74,025,000 | 986 | 511  | 0.726046546  | ENSBTAG00000010829                                              |
| 8 | 73,950,000 | 74,100,000 | 987 | 544  | 0.581879965  |                                                                 |
| 8 | 74,025,000 | 74,175,000 | 988 | 536  | -0.145272273 | EBF2                                                            |
| 8 | 74,100,000 | 74,250,000 | 989 | 396  | -0.556806995 | EBF2                                                            |
| 8 | 74,175,000 | 74,325,000 | 990 | 356  | -1.493552703 | EBF2                                                            |
| 8 | 74,250,000 | 74,400,000 | 991 | 564  | -2.294174969 | EBF2                                                            |
| 8 | 74,325,000 | 74,475,000 | 992 | 632  | -2.067060593 | EBF2                                                            |
| 8 | 74,400,000 | 74,550,000 | 993 | 303  | -1.938864854 |                                                                 |
| 8 | 74,475,000 | 74,625,000 | 994 | 21   | -1.123927959 |                                                                 |
| 8 | 74,550,000 | 74,700,000 | 995 | 3    | -1.686181535 |                                                                 |

|   |            |            |      |      |              |                                                                       |
|---|------------|------------|------|------|--------------|-----------------------------------------------------------------------|
| 8 | 74,625,000 | 74,775,000 | 996  | 9    | 0.096326733  |                                                                       |
| 8 | 74,700,000 | 74,850,000 | 997  | 142  | -0.070226862 | PPP2R2A                                                               |
| 8 | 74,775,000 | 74,925,000 | 998  | 317  | -0.097448939 | BNIP3L,PPP2R2A                                                        |
| 8 | 74,850,000 | 75,000,000 | 999  | 339  | -0.033456578 | BNIP3L,PPP2R2A                                                        |
| 8 | 74,925,000 | 75,075,000 | 1000 | 330  | 0.627654787  | BNIP3L,PNMA2                                                          |
| 8 | 75,000,000 | 75,150,000 | 1001 | 435  | -0.886880265 | DPYSL2,PNMA2                                                          |
| 8 | 75,075,000 | 75,225,000 | 1002 | 735  | -0.50993664  | DPYSL2                                                                |
| 8 | 75,150,000 | 75,300,000 | 1003 | 950  | -0.024224917 | ADRA1A,DPYSL2                                                         |
| 8 | 75,225,000 | 75,375,000 | 1004 | 825  | 0.102498032  | ADRA1A                                                                |
| 8 | 75,300,000 | 75,450,000 | 1005 | 823  | 0.766898648  | ADRA1A                                                                |
| 8 | 75,375,000 | 75,525,000 | 1006 | 713  | 0.32129125   |                                                                       |
| 8 | 75,450,000 | 75,600,000 | 1007 | 398  | -0.503745381 |                                                                       |
| 8 | 75,525,000 | 75,675,000 | 1008 | 443  | 0.746822917  | STMN4                                                                 |
| 8 | 75,600,000 | 75,750,000 | 1009 | 467  | 0.1572659    | PTK2B,STMN4,TRIM35                                                    |
| 8 | 75,675,000 | 75,825,000 | 1010 | 471  | 0.394845872  | PTK2B,TRIM35                                                          |
| 8 | 75,750,000 | 75,900,000 | 1011 | 619  | 0.499713581  | CHRNA2,PTK2B                                                          |
| 8 | 75,825,000 | 75,975,000 | 1012 | 907  | -1.08603095  | CHRNA2,EPHX2,PTK2B                                                    |
| 8 | 75,900,000 | 76,050,000 | 1013 | 1055 | -0.912065975 | EPHX2,GULO,ENSBTAG00000015027                                         |
| 8 | 75,975,000 | 76,125,000 | 1014 | 696  | 0.241711191  | APTX,DNAJA1,EPHX2,GULO,SMU1,ENSBTAG00000015027                        |
| 8 | 76,050,000 | 76,200,000 | 1015 | 417  | 0.039995806  | APTX,B4GALT1,DNAJA1,SMU1                                              |
| 8 | 76,125,000 | 76,275,000 | 1016 | 354  | -0.740364508 | B4GALT1,SMU1                                                          |
| 8 | 76,200,000 | 76,350,000 | 1017 | 307  | -0.504914875 | B4GALT1,SPINK4                                                        |
| 8 | 76,275,000 | 76,425,000 | 1018 | 320  | -0.179283112 | BAG1,CHMP5,NFX1,SPINK4                                                |
| 8 | 76,350,000 | 76,500,000 | 1019 | 336  | 0.592185878  | BAG1,CHMP5,NFX1,ENSBTAG00000020105                                    |
| 8 | 76,425,000 | 76,575,000 | 1020 | 356  | 0.790595426  | AQP3,NFX1,NOL6,UBE2R2,ENSBTAG00000020105                              |
| 8 | 76,500,000 | 76,650,000 | 1021 | 351  | 0.678353141  | AQP3,NOL6,UBE2R2                                                      |
| 8 | 76,575,000 | 76,725,000 | 1022 | 335  | 0.314451726  | UBAP2,UBE2R2                                                          |
| 8 | 76,650,000 | 76,800,000 | 1023 | 354  | 0.387350515  | UBAP2,UBE2R2                                                          |
| 8 | 76,725,000 | 76,875,000 | 1024 | 453  | 0.59941633   | DCAF12,UBAP2                                                          |
| 8 | 76,800,000 | 76,950,000 | 1025 | 433  | 0.613513609  | DCAF12                                                                |
| 8 | 76,875,000 | 77,025,000 | 1026 | 334  | 0.654359829  | KIF24,UBAP1                                                           |
| 8 | 76,950,000 | 77,100,000 | 1027 | 375  | 0.18150091   | KIF24,NUDT2,SMRP1,UBAP1,ENSBTAG00000005495                            |
| 8 | 77,025,000 | 77,175,000 | 1028 | 413  | -0.386547179 | DNAI1,FAM219A,KIF24,NUDT2,SMRP1,ENSBTAG00000005495                    |
| 8 | 77,100,000 | 77,250,000 | 1029 | 596  | -0.056939703 | DNAI1,ENHO,FAM219A,SMRP1,ENSBTAG00000005495                           |
| 8 | 77,175,000 | 77,325,000 | 1030 | 528  | 0.180369019  | CNTFR,DCTN3,DNAI1,ENHO,RPP25L,ENSBTAG00000005495                      |
| 8 | 77,250,000 | 77,400,000 | 1031 | 205  | 0.052796668  | ARID3C,CCL19,CCL27,CNTFR,DCTN3,GALT,IL11RA,RPP25L,SIGMAR1             |
| 8 | 77,325,000 | 77,475,000 | 1032 | 425  | -2.942860098 | ARID3C,CCL19,CCL21,CCL27,DCTN3,GALT,IL11RA,SIGMAR1,ENSBTAG00000039021 |
| 8 | 77,400,000 | 77,550,000 | 1033 | 708  | -0.018149409 | CCL21,RASEF,ENSBTAG00000039021                                        |
| 8 | 77,475,000 | 77,625,000 | 1034 | 595  | 0.793779276  | RASEF                                                                 |
| 8 | 77,550,000 | 77,700,000 | 1035 | 693  | -0.292814753 | RASEF                                                                 |
| 8 | 77,625,000 | 77,775,000 | 1036 | 795  | -0.281435881 |                                                                       |
| 8 | 77,700,000 | 77,850,000 | 1037 | 952  | -0.861484295 | FRMD3                                                                 |
| 8 | 77,775,000 | 77,925,000 | 1038 | 1126 | -2.101337194 | FRMD3                                                                 |
| 8 | 77,850,000 | 78,000,000 | 1039 | 1170 | -2.529021203 | FRMD3                                                                 |
| 8 | 77,925,000 | 78,075,000 | 1040 | 1301 | 0.094472158  |                                                                       |
| 8 | 78,000,000 | 78,150,000 | 1041 | 1013 | 0.808905358  |                                                                       |
| 8 | 78,075,000 | 78,225,000 | 1042 | 803  | 1.055538941  | IDNK,UBQLN1                                                           |
| 8 | 78,150,000 | 78,300,000 | 1043 | 881  | 1.13046799   | IDNK,UBQLN1                                                           |

|   |            |            |      |     |              |                        |
|---|------------|------------|------|-----|--------------|------------------------|
| 8 | 78,225,000 | 78,375,000 | 1044 | 573 | 0.802800728  | GKAP1,UBQLN1           |
| 8 | 78,300,000 | 78,450,000 | 1045 | 294 | -0.282289236 | GKAP1,KIF27            |
| 8 | 78,375,000 | 78,525,000 | 1046 | 295 | 0.033474791  | GKAP1,KIF27            |
| 8 | 78,450,000 | 78,600,000 | 1047 | 293 | 0.365421475  | C8H9orf64,HNRNPK,KIF27 |
| 8 | 78,525,000 | 78,675,000 | 1048 | 263 | -1.216186791 | C8H9orf64,HNRNPK       |
| 8 | 78,600,000 | 78,750,000 | 1049 | 274 | -1.202075684 |                        |
| 8 | 78,675,000 | 78,825,000 | 1050 | 647 | -1.046313325 |                        |
| 8 | 78,750,000 | 78,900,000 | 1051 | 698 | -0.608089707 | SLC28A3                |
| 8 | 78,825,000 | 78,975,000 | 1052 | 560 | -0.682725761 | SLC28A3                |
| 8 | 78,900,000 | 79,050,000 | 1053 | 554 | -0.860256215 | SLC28A3                |
| 8 | 78,975,000 | 79,125,000 | 1054 | 381 | 0.384874149  |                        |
| 8 | 79,050,000 | 79,200,000 | 1055 | 367 | 1.052020079  |                        |
| 8 | 79,125,000 | 79,275,000 | 1056 | 401 | 1.332749109  |                        |
| 8 | 79,200,000 | 79,350,000 | 1057 | 328 | 1.421545742  | NTRK2                  |
| 8 | 79,275,000 | 79,425,000 | 1058 | 317 | 1.416837545  | NTRK2                  |
| 8 | 79,350,000 | 79,500,000 | 1059 | 522 | 1.207432703  | NTRK2                  |
| 8 | 79,425,000 | 79,575,000 | 1060 | 433 | 1.011472106  | NTRK2                  |
| 8 | 79,500,000 | 79,650,000 | 1061 | 223 | -0.818423608 | NTRK2                  |
| 8 | 79,575,000 | 79,725,000 | 1062 | 322 | -2.042806015 | NTRK2                  |
| 8 | 79,650,000 | 79,800,000 | 1063 | 453 | -1.758070116 | NTRK2                  |
| 8 | 79,725,000 | 79,875,000 | 1064 | 468 | -1.343661783 | NTRK2                  |
| 8 | 79,800,000 | 79,950,000 | 1065 | 373 | -1.884049711 |                        |
| 8 | 79,875,000 | 80,025,000 | 1066 | 412 | -2.297032723 |                        |
| 8 | 79,950,000 | 80,100,000 | 1067 | 405 | -1.105819713 |                        |
| 8 | 80,025,000 | 80,175,000 | 1068 | 491 | -0.153452335 |                        |
| 8 | 80,100,000 | 80,250,000 | 1069 | 676 | -0.111344072 | AGTPBP1                |
| 8 | 80,175,000 | 80,325,000 | 1070 | 838 | 0.789143603  | AGTPBP1                |
| 8 | 80,250,000 | 80,400,000 | 1071 | 690 | 1.02359561   | AGTPBP1                |
| 8 | 80,325,000 | 80,475,000 | 1072 | 489 | 1.304644187  | AGTPBP1                |
| 8 | 80,400,000 | 80,550,000 | 1073 | 462 | 1.420186023  | NAA35                  |
| 8 | 80,475,000 | 80,625,000 | 1074 | 258 | 1.293084991  | NAA35                  |
| 8 | 80,550,000 | 80,700,000 | 1075 | 308 | 0.848144439  | GOLM1,NAA35            |
| 8 | 80,625,000 | 80,775,000 | 1076 | 376 | 0.982297814  | GOLM1,NAA35            |
| 8 | 80,700,000 | 80,850,000 | 1077 | 430 | 1.254075873  | C9orf153,ISCA1,ZCCHC6  |
| 8 | 80,775,000 | 80,925,000 | 1078 | 381 | 1.267520579  | C9orf153,ISCA1,ZCCHC6  |
| 8 | 80,850,000 | 81,000,000 | 1079 | 295 | 1.255783525  | ZCCHC6                 |
| 8 | 80,925,000 | 81,075,000 | 1080 | 310 | 1.235457977  |                        |
| 8 | 81,000,000 | 81,150,000 | 1081 | 215 | 0.62050631   |                        |
| 8 | 81,075,000 | 81,225,000 | 1082 | 465 | -0.339651357 |                        |
| 8 | 81,150,000 | 81,300,000 | 1083 | 528 | -0.328772694 |                        |
| 8 | 81,225,000 | 81,375,000 | 1084 | 341 | 0.213475292  |                        |
| 8 | 81,300,000 | 81,450,000 | 1085 | 420 | 1.099931854  |                        |
| 8 | 81,375,000 | 81,525,000 | 1086 | 392 | 1.209171196  | GAS1                   |
| 8 | 81,450,000 | 81,600,000 | 1087 | 397 | 0.03540141   | GAS1                   |
| 8 | 81,525,000 | 81,675,000 | 1088 | 598 | -0.031662669 |                        |
| 8 | 81,600,000 | 81,750,000 | 1089 | 550 | 0.17418127   |                        |
| 8 | 81,675,000 | 81,825,000 | 1090 | 508 | 0.880918506  |                        |
| 8 | 81,750,000 | 81,900,000 | 1091 | 470 | 0.521275366  |                        |
| 8 | 81,825,000 | 81,975,000 | 1092 | 532 | -1.56030806  |                        |
| 8 | 81,900,000 | 82,050,000 | 1093 | 835 | -0.5100157   |                        |
| 8 | 81,975,000 | 82,125,000 | 1094 | 600 | -0.070404521 |                        |
| 8 | 82,050,000 | 82,200,000 | 1095 | 474 | -0.648514853 |                        |
| 8 | 82,125,000 | 82,275,000 | 1096 | 852 | 0.301486399  | DAPK1                  |

|   |            |            |      |      |              |                                |
|---|------------|------------|------|------|--------------|--------------------------------|
| 8 | 82,200,000 | 82,350,000 | 1097 | 1058 | 0.598674107  | DAPK1                          |
| 8 | 82,275,000 | 82,425,000 | 1098 | 1012 | -0.295499305 | CTSL1,DAPK1,FBP2               |
| 8 | 82,350,000 | 82,500,000 | 1099 | 911  | -0.501355056 | CTSL1,FBP1,FBP2                |
| 8 | 82,425,000 | 82,575,000 | 1100 | 1011 | -0.044039586 | FBP1,FBP2                      |
| 8 | 82,500,000 | 82,650,000 | 1101 | 777  | -0.051610913 |                                |
| 8 | 82,575,000 | 82,725,000 | 1102 | 445  | 0.61279116   | ENSBTAG00000000699             |
| 8 | 82,650,000 | 82,800,000 | 1103 | 572  | 0.897698968  | ENSBTAG00000000699             |
| 8 | 82,725,000 | 82,875,000 | 1104 | 578  | 1.155622591  |                                |
| 8 | 82,800,000 | 82,950,000 | 1105 | 489  | 0.948027666  |                                |
| 8 | 82,875,000 | 83,025,000 | 1106 | 355  | -0.042382503 | FANCC,ENSBTAG00000045622       |
| 8 | 82,950,000 | 83,100,000 | 1107 | 469  | 0.64443989   | FANCC,ENSBTAG00000045622       |
| 8 | 83,025,000 | 83,175,000 | 1108 | 669  | 1.28217333   | FANCC                          |
| 8 | 83,100,000 | 83,250,000 | 1109 | 610  | 0.821818088  | FANCC,TSPY-M2                  |
| 8 | 83,175,000 | 83,325,000 | 1110 | 501  | -0.996357921 | FANCC,TSPY-M2                  |
| 8 | 83,250,000 | 83,400,000 | 1111 | 411  | -0.812133228 | FANCC,TSPY-M2                  |
| 8 | 83,325,000 | 83,475,000 | 1112 | 531  | 0.071175746  |                                |
| 8 | 83,400,000 | 83,550,000 | 1113 | 485  | 0.168150982  | ENSBTAG00000009903             |
| 8 | 83,475,000 | 83,625,000 | 1114 | 274  | 0.089867186  | PTCH1,ENSBTAG00000009903       |
| 8 | 83,550,000 | 83,700,000 | 1115 | 258  | 0.253795204  | PTCH1                          |
| 8 | 83,625,000 | 83,775,000 | 1116 | 274  | -0.053873713 |                                |
| 8 | 83,700,000 | 83,850,000 | 1117 | 324  | 0.202400617  |                                |
| 8 | 83,775,000 | 83,925,000 | 1118 | 500  | 0.149519988  |                                |
| 8 | 83,850,000 | 84,000,000 | 1119 | 596  | -0.204200099 | ERCC6L2                        |
| 8 | 83,925,000 | 84,075,000 | 1120 | 573  | 0.026392086  | ERCC6L2                        |
| 8 | 84,000,000 | 84,150,000 | 1121 | 644  | 0.043891279  | ERCC6L2                        |
| 8 | 84,075,000 | 84,225,000 | 1122 | 745  | 0.59241155   | ERCC6L2                        |
| 8 | 84,150,000 | 84,300,000 | 1123 | 837  | 0.801393467  |                                |
| 8 | 84,225,000 | 84,375,000 | 1124 | 859  | 0.653537114  |                                |
| 8 | 84,300,000 | 84,450,000 | 1125 | 670  | 0.373834373  | HSD17B3                        |
| 8 | 84,375,000 | 84,525,000 | 1126 | 514  | -0.85601426  | HSD17B3,SLC35D2,ZNF367         |
| 8 | 84,450,000 | 84,600,000 | 1127 | 367  | -1.746655201 | HABP4,SLC35D2,ZNF367           |
| 8 | 84,525,000 | 84,675,000 | 1128 | 198  | -2.366687062 | CDC14B,HABP4,ZNF367            |
| 8 | 84,600,000 | 84,750,000 | 1129 | 540  | -1.326019583 | CDC14B,HABP4                   |
| 8 | 84,675,000 | 84,825,000 | 1130 | 603  | -1.392701171 | AAED1,CDC14B                   |
| 8 | 84,750,000 | 84,900,000 | 1131 | 488  | -1.20613899  | AAED1,RPS15A,ZNF782            |
| 8 | 84,825,000 | 84,975,000 | 1132 | 854  | -0.65243141  | RPS15A,ZNF782                  |
| 8 | 84,900,000 | 85,050,000 | 1133 | 640  | -0.062292179 | CTSL,ZNF782                    |
| 8 | 84,975,000 | 85,125,000 | 1134 | 263  | 0.669360867  | CTSL                           |
| 8 | 85,050,000 | 85,200,000 | 1135 | 449  | -1.201844114 | ENSBTAG00000009764             |
| 8 | 85,125,000 | 85,275,000 | 1136 | 534  | -0.633834269 | IARS,ZNF484,ENSBTAG00000009764 |
| 8 | 85,200,000 | 85,350,000 | 1137 | 416  | 0.376477474  | IARS,ZNF484                    |
| 8 | 85,275,000 | 85,425,000 | 1138 | 376  | 0.28673693   | CENPP,IARS,NOL8                |
| 8 | 85,350,000 | 85,500,000 | 1139 | 501  | 0.610815381  | ASPN,CENPP,IARS,NOL8,OGN,OMD   |
| 8 | 85,425,000 | 85,575,000 | 1140 | 607  | -0.245810824 | ASPN,ECM2,OGN,OMD              |
| 8 | 85,500,000 | 85,650,000 | 1141 | 469  | -0.54281831  | ASPN,ECM2,IPPK                 |
| 8 | 85,575,000 | 85,725,000 | 1142 | 560  | 0.98313391   | BICD2,ECM2,IPPK                |
| 8 | 85,650,000 | 85,800,000 | 1143 | 865  | 1.353953908  | BICD2,IPPK                     |
| 8 | 85,725,000 | 85,875,000 | 1144 | 1023 | 0.880549602  | BICD2,FGD3                     |
| 8 | 85,800,000 | 85,950,000 | 1145 | 987  | 0.175136071  | C9orf89,FGD3,NINJ1,SUSD3       |
| 8 | 85,875,000 | 86,025,000 | 1146 | 818  | 0.47325754   | C9orf89,NINJ1,SUSD3,WNK2       |
| 8 | 85,950,000 | 86,100,000 | 1147 | 918  | 0.582655442  | WNK2                           |
| 8 | 86,025,000 | 86,175,000 | 1148 | 950  | 0.772241824  | WNK2                           |
| 8 | 86,100,000 | 86,250,000 | 1149 | 616  | 0.972892391  | FAM120A,WNK2                   |

|   |            |            |      |      |              |                             |
|---|------------|------------|------|------|--------------|-----------------------------|
| 8 | 86,175,000 | 86,325,000 | 1150 | 429  | -0.775962508 | FAM120A                     |
| 8 | 86,250,000 | 86,400,000 | 1151 | 519  | -0.881987931 | FAM120A,PHF2                |
| 8 | 86,325,000 | 86,475,000 | 1152 | 587  | 0.097803446  | PHF2                        |
| 8 | 86,400,000 | 86,550,000 | 1153 | 935  | 0.141188724  | PHF2                        |
| 8 | 86,475,000 | 86,625,000 | 1154 | 1386 | -0.663675453 | ENSBTAG00000009073          |
| 8 | 86,550,000 | 86,700,000 | 1155 | 945  | -0.932004704 | BARX1,ENSBTAG00000009073    |
| 8 | 86,625,000 | 86,775,000 | 1156 | 824  | -1.630399424 | BARX1                       |
| 8 | 86,700,000 | 86,850,000 | 1157 | 1225 | -1.624609645 | PTPDC1                      |
| 8 | 86,775,000 | 86,925,000 | 1158 | 1088 | -0.981985012 | PTPDC1                      |
| 8 | 86,850,000 | 87,000,000 | 1159 | 938  | -0.177777459 | ZNF169                      |
| 8 | 86,925,000 | 87,075,000 | 1160 | 1590 | 0.35943466   | ZNF169,ENSBTAG00000031359   |
| 8 | 87,000,000 | 87,150,000 | 1161 | 1589 | 0.387186504  | CDC42BPA,ENSBTAG00000031359 |
| 8 | 87,075,000 | 87,225,000 | 1162 | 938  | 0.478937391  | CDC42BPA,SPTLC1             |
| 8 | 87,150,000 | 87,300,000 | 1163 | 1185 | -0.21442261  | CDC42BPA,SPTLC1             |
| 8 | 87,225,000 | 87,375,000 | 1164 | 1347 | 0.430781641  | ROR2,SPTLC1                 |
| 8 | 87,300,000 | 87,450,000 | 1165 | 1482 | 1.209605876  | ROR2                        |
| 8 | 87,375,000 | 87,525,000 | 1166 | 1413 | 1.248320924  | ROR2                        |
| 8 | 87,450,000 | 87,600,000 | 1167 | 1329 | 1.152898547  | ROR2                        |
| 8 | 87,525,000 | 87,675,000 | 1168 | 1548 | 0.9875874    | ROR2                        |
| 8 | 87,600,000 | 87,750,000 | 1169 | 1580 | 0.850892258  |                             |
| 8 | 87,675,000 | 87,825,000 | 1170 | 1251 | 0.766988143  |                             |
| 8 | 87,750,000 | 87,900,000 | 1171 | 827  | 0.888201045  | NFIL3                       |
| 8 | 87,825,000 | 87,975,000 | 1172 | 811  | 1.191012168  | AUH,NFIL3                   |
| 8 | 87,900,000 | 88,050,000 | 1173 | 910  | 1.316282869  | AUH                         |
| 8 | 87,975,000 | 88,125,000 | 1174 | 601  | 0.902951731  | AUH                         |
| 8 | 88,050,000 | 88,200,000 | 1175 | 442  | 0.188835782  |                             |
| 8 | 88,125,000 | 88,275,000 | 1176 | 643  | 0.443787646  |                             |
| 8 | 88,200,000 | 88,350,000 | 1177 | 631  | 0.377129437  |                             |
| 8 | 88,275,000 | 88,425,000 | 1178 | 535  | -0.010663243 | SYK                         |
| 8 | 88,350,000 | 88,500,000 | 1179 | 620  | -0.09460093  | SYK                         |
| 8 | 88,425,000 | 88,575,000 | 1180 | 738  | 0.181937637  | SYK                         |
| 8 | 88,500,000 | 88,650,000 | 1181 | 907  | 0.800253376  | SYK,ENSBTAG00000046969      |
| 8 | 88,575,000 | 88,725,000 | 1182 | 1482 | 0.926422101  | DIRAS2,ENSBTAG00000046969   |
| 8 | 88,650,000 | 88,800,000 | 1183 | 1272 | 0.579522435  | DIRAS2                      |
| 8 | 88,725,000 | 88,875,000 | 1184 | 785  | 0.134310139  |                             |
| 8 | 88,800,000 | 88,950,000 | 1185 | 1267 | 0.965954213  |                             |
| 8 | 88,875,000 | 89,025,000 | 1186 | 1466 | 0.67032568   |                             |
| 8 | 88,950,000 | 89,100,000 | 1187 | 1212 | -0.294405851 |                             |
| 8 | 89,025,000 | 89,175,000 | 1188 | 1202 | -0.264621446 |                             |
| 8 | 89,100,000 | 89,250,000 | 1189 | 1502 | 0.152764685  |                             |
| 8 | 89,175,000 | 89,325,000 | 1190 | 1281 | 0.343767895  |                             |
| 8 | 89,250,000 | 89,400,000 | 1191 | 873  | -0.293275613 |                             |
| 8 | 89,325,000 | 89,475,000 | 1192 | 670  | -0.449091223 |                             |
| 8 | 89,400,000 | 89,550,000 | 1193 | 531  | -2.35424565  |                             |
| 8 | 89,475,000 | 89,625,000 | 1194 | 626  | -3.07969704  |                             |
| 8 | 89,550,000 | 89,700,000 | 1195 | 1082 | -3.016054672 |                             |
| 8 | 89,625,000 | 89,775,000 | 1196 | 1428 | -2.724943146 |                             |
| 8 | 89,700,000 | 89,850,000 | 1197 | 1185 | -1.330730039 |                             |
| 8 | 89,775,000 | 89,925,000 | 1198 | 981  | -0.078709248 |                             |
| 8 | 89,850,000 | 90,000,000 | 1199 | 882  | 0.005222449  |                             |
| 8 | 89,925,000 | 90,075,000 | 1200 | 1004 | 0.187880344  | GADD45G                     |
| 8 | 90,000,000 | 90,150,000 | 1201 | 912  | 0.626961827  | GADD45G,SEMA4D              |
| 8 | 90,075,000 | 90,225,000 | 1202 | 622  | 0.58583932   | SEMA4D                      |

|   |            |            |      |      |              |                                       |
|---|------------|------------|------|------|--------------|---------------------------------------|
| 8 | 90,150,000 | 90,300,000 | 1203 | 614  | 0.301347111  | SECISBP2,SEMA4D                       |
| 8 | 90,225,000 | 90,375,000 | 1204 | 781  | -0.347243629 | CKS2,SECISBP2,SEMA4D                  |
| 8 | 90,300,000 | 90,450,000 | 1205 | 954  | -0.526540796 | CKS2                                  |
| 8 | 90,375,000 | 90,525,000 | 1206 | 1016 | 0.329027506  |                                       |
| 8 | 90,450,000 | 90,600,000 | 1207 | 1181 | 1.140521139  | SHC3                                  |
| 8 | 90,525,000 | 90,675,000 | 1208 | 1169 | 1.085275118  | S1PR3,SHC3                            |
| 8 | 90,600,000 | 90,750,000 | 1209 | 1087 | 0.797877506  | S1PR3,SHC3                            |
| 8 | 90,675,000 | 90,825,000 | 1210 | 1364 | 0.585171367  |                                       |
| 8 | 90,750,000 | 90,900,000 | 1211 | 1298 | 0.341735912  |                                       |
| 8 | 90,825,000 | 90,975,000 | 1212 | 913  | -0.34370309  |                                       |
| 8 | 90,900,000 | 91,050,000 | 1213 | 691  | -0.143130133 |                                       |
| 8 | 90,975,000 | 91,125,000 | 1214 | 582  | 0.716040785  | NXNL2                                 |
| 8 | 91,050,000 | 91,200,000 | 1215 | 729  | 1.187145756  | NXNL2,SPIN1                           |
| 8 | 91,125,000 | 91,275,000 | 1216 | 749  | 0.8408442    | NXNL2,SPIN1                           |
| 8 | 91,200,000 | 91,350,000 | 1217 | 520  | -0.189546748 | SPIN1                                 |
| 8 | 91,275,000 | 91,425,000 | 1218 | 717  | -0.290169307 |                                       |
| 8 | 91,350,000 | 91,500,000 | 1219 | 759  | -1.37299197  |                                       |
| 8 | 91,425,000 | 91,575,000 | 1220 | 861  | -0.599395159 |                                       |
| 8 | 91,500,000 | 91,650,000 | 1221 | 867  | 0.475379641  | CCRK,FBXW12                           |
| 8 | 91,575,000 | 91,725,000 | 1222 | 493  | 0.531036764  | CCRK,FBXW12,ENSBTAG00000021235        |
| 8 | 91,650,000 | 91,800,000 | 1223 | 383  | 0.60565627   | FBXW12,ENSBTAG00000021235             |
| 8 | 91,725,000 | 91,875,000 | 1224 | 678  | -0.771370315 | ENSBTAG00000021235,ENSBTAG00000021991 |
| 8 | 91,800,000 | 91,950,000 | 1225 | 947  | -0.683663937 | MURC,ENSBTAG00000021991               |
| 8 | 91,875,000 | 92,025,000 | 1226 | 749  | -0.049625468 | MURC,ENSBTAG00000021991               |
| 8 | 91,950,000 | 92,100,000 | 1227 | 648  | -0.027811224 |                                       |
| 8 | 92,025,000 | 92,175,000 | 1228 | 744  | 0.801242335  |                                       |
| 8 | 92,100,000 | 92,250,000 | 1229 | 945  | 1.104652298  |                                       |
| 8 | 92,175,000 | 92,325,000 | 1230 | 883  | -0.032476472 |                                       |
| 8 | 92,250,000 | 92,400,000 | 1231 | 1101 | -0.200454326 | LPPR1                                 |
| 8 | 92,325,000 | 92,475,000 | 1232 | 1171 | 0.283671533  | LPPR1                                 |
| 8 | 92,400,000 | 92,550,000 | 1233 | 958  | -1.100819968 | LPPR1                                 |
| 8 | 92,475,000 | 92,625,000 | 1234 | 971  | -1.308584939 | LPPR1                                 |
| 8 | 92,550,000 | 92,700,000 | 1235 | 828  | -0.73208292  | BAAT,LPPR1                            |
| 8 | 92,625,000 | 92,775,000 | 1236 | 551  | -0.818055117 | ALDOB,BAAT,LPPR1,MRPL50,ZNF189        |
| 8 | 92,700,000 | 92,850,000 | 1237 | 366  | 0.776023472  | ALDOB,MRPL50,TMEM246,ZNF189           |
| 8 | 92,775,000 | 92,925,000 | 1238 | 339  | -1.637808033 | ALDOB,RNF20,TMEM246                   |
| 8 | 92,850,000 | 93,000,000 | 1239 | 513  | -0.193461905 | ALDOB,GRIN3A,RNF20,TMEM246            |
| 8 | 92,925,000 | 93,075,000 | 1240 | 705  | 0.17111594   | GRIN3A,RNF20                          |
| 8 | 93,000,000 | 93,150,000 | 1241 | 527  | -1.933682316 | GRIN3A                                |
| 8 | 93,075,000 | 93,225,000 | 1242 | 441  | -0.160140124 | GRIN3A                                |
| 8 | 93,150,000 | 93,300,000 | 1243 | 668  | -0.038084327 | ENSBTAG00000030953                    |
| 8 | 93,225,000 | 93,375,000 | 1244 | 903  | 0.164889171  | ENSBTAG00000030953                    |
| 8 | 93,300,000 | 93,450,000 | 1245 | 939  | 0.720078765  |                                       |
| 8 | 93,375,000 | 93,525,000 | 1246 | 762  | 0.60782641   |                                       |
| 8 | 93,450,000 | 93,600,000 | 1247 | 965  | 0.098444129  |                                       |
| 8 | 93,525,000 | 93,675,000 | 1248 | 1372 | -0.146853463 |                                       |
| 8 | 93,600,000 | 93,750,000 | 1249 | 1158 | 0.453063051  |                                       |
| 8 | 93,675,000 | 93,825,000 | 1250 | 1257 | 1.174329952  |                                       |
| 8 | 93,750,000 | 93,900,000 | 1251 | 1511 | 1.31329595   |                                       |
| 8 | 93,825,000 | 93,975,000 | 1252 | 1528 | 0.627017917  |                                       |
| 8 | 93,900,000 | 94,050,000 | 1253 | 1571 | -0.5282069   |                                       |
| 8 | 93,975,000 | 94,125,000 | 1254 | 1414 | -0.434507063 |                                       |
| 8 | 94,050,000 | 94,200,000 | 1255 | 951  | -0.270977247 |                                       |



|   |            |            |      |      |              |                                                                                               |
|---|------------|------------|------|------|--------------|-----------------------------------------------------------------------------------------------|
| 8 | 94,125,000 | 94,275,000 | 1256 | 573  | 0.183625698  | CYLC2                                                                                         |
| 8 | 94,200,000 | 94,350,000 | 1257 | 508  | -0.110098532 | CYLC2                                                                                         |
| 8 | 94,275,000 | 94,425,000 | 1258 | 583  | -0.706989053 |                                                                                               |
| 8 | 94,350,000 | 94,500,000 | 1259 | 1032 | -0.081736338 |                                                                                               |
| 8 | 94,425,000 | 94,575,000 | 1260 | 1374 | -0.057170008 |                                                                                               |
| 8 | 94,500,000 | 94,650,000 | 1261 | 1350 | -0.920790914 |                                                                                               |
| 8 | 94,575,000 | 94,725,000 | 1262 | 1382 | -0.730457736 |                                                                                               |
| 8 | 94,650,000 | 94,800,000 | 1263 | 1103 | -0.048267301 |                                                                                               |
| 8 | 94,725,000 | 94,875,000 | 1264 | 835  | 0.183600391  |                                                                                               |
| 8 | 94,800,000 | 94,950,000 | 1265 | 1182 | 0.686155451  |                                                                                               |
| 8 | 94,875,000 | 95,025,000 | 1266 | 1159 | 0.639074742  |                                                                                               |
| 8 | 94,950,000 | 95,100,000 | 1267 | 838  | 0.442920139  |                                                                                               |
| 8 | 95,025,000 | 95,175,000 | 1268 | 617  | 1.072632658  |                                                                                               |
| 8 | 95,100,000 | 95,250,000 | 1269 | 772  | -0.416094923 |                                                                                               |
| 8 | 95,175,000 | 95,325,000 | 1270 | 864  | -0.707328349 |                                                                                               |
| 8 | 95,250,000 | 95,400,000 | 1271 | 716  | 0.447161829  | SMC2                                                                                          |
| 8 | 95,325,000 | 95,475,000 | 1272 | 987  | 0.938203061  | SMC2                                                                                          |
| 8 | 95,400,000 | 95,550,000 | 1273 | 1065 | 0.979213421  | SMC2                                                                                          |
| 8 | 95,475,000 | 95,625,000 | 1274 | 1073 | 1.187970906  | ENSBTAG00000047350                                                                            |
| 8 | 95,550,000 | 95,700,000 | 1275 | 1054 | 1.274162647  | ENSBTAG00000047350                                                                            |
| 8 | 95,625,000 | 95,775,000 | 1276 | 853  | 1.196089225  | OR13F1                                                                                        |
| 8 | 95,700,000 | 95,850,000 | 1277 | 620  | 0.921328719  | OR13F1,ENSBTAG00000046292                                                                     |
| 8 | 95,775,000 | 95,925,000 | 1278 | 358  | 0.464522419  | ENSBTAG00000016173,ENSBTAG00000036005,ENSBTAG0000036008,ENSBTAG00000046292                    |
| 8 | 95,850,000 | 96,000,000 | 1279 | 293  | 0.994281557  | ENSBTAG00000000145,ENSBTAG00000016173,ENSBTAG0000036005,ENSBTAG00000036008,ENSBTAG00000048106 |
| 8 | 95,925,000 | 96,075,000 | 1280 | 303  | 1.051311365  | OR13C3,ENSBTAG00000000145,ENSBTAG00000048106                                                  |
| 8 | 96,000,000 | 96,150,000 | 1281 | 545  | 1.19521626   | OR13C3,OR13C8                                                                                 |
| 8 | 96,075,000 | 96,225,000 | 1282 | 803  | 1.299268272  | OR13C8,ENSBTAG00000039868                                                                     |
| 8 | 96,150,000 | 96,300,000 | 1283 | 720  | 0.941050994  | ABCA1,NIPSNAP3A,ENSBTAG00000039868                                                            |
| 8 | 96,225,000 | 96,375,000 | 1284 | 515  | 0.583543262  | ABCA1,NIPSNAP3A                                                                               |
| 8 | 96,300,000 | 96,450,000 | 1285 | 539  | -0.057595931 | ABCA1                                                                                         |
| 8 | 96,375,000 | 96,525,000 | 1286 | 578  | -0.820454296 | ABCA1                                                                                         |
| 8 | 96,450,000 | 96,600,000 | 1287 | 407  | -0.864162024 |                                                                                               |
| 8 | 96,525,000 | 96,675,000 | 1288 | 360  | -0.261678332 |                                                                                               |
| 8 | 96,600,000 | 96,750,000 | 1289 | 332  | -0.092165134 |                                                                                               |
| 8 | 96,675,000 | 96,825,000 | 1290 | 505  | 0.049373929  | SLC44A1                                                                                       |
| 8 | 96,750,000 | 96,900,000 | 1291 | 630  | -0.000405545 | SLC44A1                                                                                       |
| 8 | 96,825,000 | 96,975,000 | 1292 | 555  | 0.295112527  | FSD1L,SLC44A1                                                                                 |
| 8 | 96,900,000 | 97,050,000 | 1293 | 515  | 0.228459675  | FKTN,FSD1L                                                                                    |
| 8 | 96,975,000 | 97,125,000 | 1294 | 659  | 0.095947905  | FKTN,FSD1L,TAL2                                                                               |
| 8 | 97,050,000 | 97,200,000 | 1295 | 695  | 0.352767251  | FKTN,TAL2,TMEM38B                                                                             |
| 8 | 97,125,000 | 97,275,000 | 1296 | 660  | 0.582274956  | TMEM38B                                                                                       |
| 8 | 97,200,000 | 97,350,000 | 1297 | 671  | 0.747675641  | TMEM38B                                                                                       |
| 8 | 97,275,000 | 97,425,000 | 1298 | 527  | 0.102955804  |                                                                                               |
| 8 | 97,350,000 | 97,500,000 | 1299 | 813  | 0.055917154  |                                                                                               |
| 8 | 97,425,000 | 97,575,000 | 1300 | 811  | 0.448559056  |                                                                                               |
| 8 | 97,500,000 | 97,650,000 | 1301 | 371  | 0.679129765  |                                                                                               |
| 8 | 97,575,000 | 97,725,000 | 1302 | 438  | 0.322752152  |                                                                                               |
| 8 | 97,650,000 | 97,800,000 | 1303 | 823  | 1.052956084  |                                                                                               |
| 8 | 97,725,000 | 97,875,000 | 1304 | 1092 | 0.925990828  |                                                                                               |
| 8 | 97,800,000 | 97,950,000 | 1305 | 995  | 0.47310125   |                                                                                               |

|   |             |             |      |      |              |                                          |
|---|-------------|-------------|------|------|--------------|------------------------------------------|
| 8 | 97,875,000  | 98,025,000  | 1306 | 845  | 0.333162376  |                                          |
| 8 | 97,950,000  | 98,100,000  | 1307 | 787  | 0.396552321  |                                          |
| 8 | 98,025,000  | 98,175,000  | 1308 | 527  | 0.478729539  |                                          |
| 8 | 98,100,000  | 98,250,000  | 1309 | 467  | 0.364710574  |                                          |
| 8 | 98,175,000  | 98,325,000  | 1310 | 444  | 0.69161379   |                                          |
| 8 | 98,250,000  | 98,400,000  | 1311 | 297  | 0.657123747  | ZNF462                                   |
| 8 | 98,325,000  | 98,475,000  | 1312 | 397  | 0.470124274  | ZNF462                                   |
| 8 | 98,400,000  | 98,550,000  | 1313 | 1018 | 0.871446178  | ZNF462                                   |
| 8 | 98,475,000  | 98,625,000  | 1314 | 1085 | 0.745408685  |                                          |
| 8 | 98,550,000  | 98,700,000  | 1315 | 569  | -1.437780701 | RAD23B                                   |
| 8 | 98,625,000  | 98,775,000  | 1316 | 430  | -2.535742196 | RAD23B                                   |
| 8 | 98,700,000  | 98,850,000  | 1317 | 402  | -0.617621156 | KLF4,RAD23B                              |
| 8 | 98,775,000  | 98,925,000  | 1318 | 577  | 0.385590248  | KLF4                                     |
| 8 | 98,850,000  | 99,000,000  | 1319 | 931  | 0.71214331   |                                          |
| 8 | 98,925,000  | 99,075,000  | 1320 | 1146 | 0.582945014  |                                          |
| 8 | 99,000,000  | 99,150,000  | 1321 | 954  | 0.259910635  |                                          |
| 8 | 99,075,000  | 99,225,000  | 1322 | 614  | -0.321146844 |                                          |
| 8 | 99,150,000  | 99,300,000  | 1323 | 470  | -0.372243882 |                                          |
| 8 | 99,225,000  | 99,375,000  | 1324 | 415  | 0.505001518  |                                          |
| 8 | 99,300,000  | 99,450,000  | 1325 | 322  | 0.846407484  |                                          |
| 8 | 99,375,000  | 99,525,000  | 1326 | 423  | 0.239031582  |                                          |
| 8 | 99,450,000  | 99,600,000  | 1327 | 620  | 0.565252263  |                                          |
| 8 | 99,525,000  | 99,675,000  | 1328 | 718  | 0.696417128  |                                          |
| 8 | 99,600,000  | 99,750,000  | 1329 | 718  | -0.5231479   |                                          |
| 8 | 99,675,000  | 99,825,000  | 1330 | 689  | -1.521156643 |                                          |
| 8 | 99,750,000  | 99,900,000  | 1331 | 586  | -0.340544472 | ENSBTAG00000000885                       |
| 8 | 99,825,000  | 99,975,000  | 1332 | 430  | 1.109679842  | ENSBTAG00000000885                       |
| 8 | 99,900,000  | 100,050,000 | 1333 | 333  | 0.856828127  |                                          |
| 8 | 99,975,000  | 100,125,000 | 1334 | 273  | 0.593582866  |                                          |
| 8 | 100,050,000 | 100,200,000 | 1335 | 216  | 0.976830195  | ACTL7A,ACTL7B,IKBKAP                     |
| 8 | 100,125,000 | 100,275,000 | 1336 | 242  | 0.773186628  | ACTL7A,ACTL7B,CTNNAL1,FAM206A,IKBKAP     |
| 8 | 100,200,000 | 100,350,000 | 1337 | 367  | 0.638717864  | CTNNAL1,FAM206A,IKBKAP,TMEM245           |
| 8 | 100,275,000 | 100,425,000 | 1338 | 358  | 0.766244809  | CTNNAL1,EPB41L4B,FRRS1L,TMEM245          |
| 8 | 100,350,000 | 100,500,000 | 1339 | 306  | 0.854944595  | EPB41L4B,FRRS1L,TMEM245                  |
| 8 | 100,425,000 | 100,575,000 | 1340 | 420  | 0.909143046  | EPB41L4B                                 |
| 8 | 100,500,000 | 100,650,000 | 1341 | 557  | 0.890356579  | EPB41L4B,PTPN3                           |
| 8 | 100,575,000 | 100,725,000 | 1342 | 480  | 0.752874695  | PTPN3                                    |
| 8 | 100,650,000 | 100,800,000 | 1343 | 647  | 0.846162586  | PTPN3                                    |
| 8 | 100,725,000 | 100,875,000 | 1344 | 963  | 0.622938274  |                                          |
| 8 | 100,800,000 | 100,950,000 | 1345 | 911  | 0.38169122   |                                          |
| 8 | 100,875,000 | 101,025,000 | 1346 | 1048 | -0.359585257 | PALM2                                    |
| 8 | 100,950,000 | 101,100,000 | 1347 | 1320 | -0.462199511 | PALM2                                    |
| 8 | 101,025,000 | 101,175,000 | 1348 | 1398 | 0.118866657  | PALM2                                    |
| 8 | 101,100,000 | 101,250,000 | 1349 | 1403 | 0.495392778  | PALM2                                    |
| 8 | 101,175,000 | 101,325,000 | 1350 | 1294 | 0.729912133  | PALM2                                    |
| 8 | 101,250,000 | 101,400,000 | 1351 | 1251 | 0.055690659  | ENSBTAG00000014471                       |
| 8 | 101,325,000 | 101,475,000 | 1352 | 1014 | -0.553421244 | C8H9orf152,ENSBTAG00000014471            |
| 8 | 101,400,000 | 101,550,000 | 1353 | 655  | -1.85129569  | C8H9orf152,TXN,TXNDC8,ENSBTAG00000014471 |
| 8 | 101,475,000 | 101,625,000 | 1354 | 444  | -2.4138446   | SVEP1,TXN,TXNDC8                         |
| 8 | 101,550,000 | 101,700,000 | 1355 | 676  | 1.087590038  | SVEP1,TXNDC8                             |
| 8 | 101,625,000 | 101,775,000 | 1356 | 748  | 1.171288621  | SVEP1                                    |
| 8 | 101,700,000 | 101,850,000 | 1357 | 321  | 0.567359242  | SVEP1                                    |
| 8 | 101,775,000 | 101,925,000 | 1358 | 262  | 0.409794835  | MUSK,SVEP1                               |

|   |             |             |      |      |              |                                                         |
|---|-------------|-------------|------|------|--------------|---------------------------------------------------------|
| 8 | 101,850,000 | 102,000,000 | 1359 | 381  | 0.635606206  | MUSK                                                    |
| 8 | 101,925,000 | 102,075,000 | 1360 | 794  | 0.962162331  | LPAR1,MUSK                                              |
| 8 | 102,000,000 | 102,150,000 | 1361 | 898  | 0.936979282  | LPAR1                                                   |
| 8 | 102,075,000 | 102,225,000 | 1362 | 735  | 0.655522235  | LPAR1                                                   |
| 8 | 102,150,000 | 102,300,000 | 1363 | 761  | -0.178833078 |                                                         |
| 8 | 102,225,000 | 102,375,000 | 1364 | 530  | -0.481127996 |                                                         |
| 8 | 102,300,000 | 102,450,000 | 1365 | 785  | -0.043511776 |                                                         |
| 8 | 102,375,000 | 102,525,000 | 1366 | 802  | -0.038543101 | KIAA0368,OR2K2                                          |
| 8 | 102,450,000 | 102,600,000 | 1367 | 491  | 0.216596622  | KIAA0368,OR2K2                                          |
| 8 | 102,525,000 | 102,675,000 | 1368 | 531  | -0.078284802 | KIAA0368,PTGR1,ZNF483                                   |
| 8 | 102,600,000 | 102,750,000 | 1369 | 696  | -0.045055624 | PTGR1,ZNF483                                            |
| 8 | 102,675,000 | 102,825,000 | 1370 | 703  | -0.119222539 | C9orf84,DNAJC25,GNG10,PTGR1                             |
| 8 | 102,750,000 | 102,900,000 | 1371 | 411  | -0.523001265 | C9orf84,DNAJC25,GNG10                                   |
| 8 | 102,825,000 | 102,975,000 | 1372 | 349  | -0.324480827 | C9orf84                                                 |
| 8 | 102,900,000 | 103,050,000 | 1373 | 453  | -0.843547431 | UGCG                                                    |
| 8 | 102,975,000 | 103,125,000 | 1374 | 448  | -0.180441834 | UGCG                                                    |
| 8 | 103,050,000 | 103,200,000 | 1375 | 620  | 1.054126081  | SUSD1                                                   |
| 8 | 103,125,000 | 103,275,000 | 1376 | 790  | 0.831877599  | SUSD1                                                   |
| 8 | 103,200,000 | 103,350,000 | 1377 | 512  | 0.598171117  | PTBP3,SUSD1                                             |
| 8 | 103,275,000 | 103,425,000 | 1378 | 351  | 1.042620485  | IGBP1,PTBP3,SUSD1                                       |
| 8 | 103,350,000 | 103,500,000 | 1379 | 453  | 1.266699629  | HSDL2,IGBP1,PTBP3                                       |
| 8 | 103,425,000 | 103,575,000 | 1380 | 614  | 0.895607643  | HSDL2,IGBP1                                             |
| 8 | 103,500,000 | 103,650,000 | 1381 | 494  | 0.692790524  | HSDL2,KIAA1958                                          |
| 8 | 103,575,000 | 103,725,000 | 1382 | 644  | -0.533744924 | INIP,KIAA1958                                           |
| 8 | 103,650,000 | 103,800,000 | 1383 | 980  | 0.327398694  | INIP,SNX30                                              |
| 8 | 103,725,000 | 103,875,000 | 1384 | 693  | 1.027667986  | SNX30,TSCOT                                             |
| 8 | 103,800,000 | 103,950,000 | 1385 | 691  | 1.164333128  | SNX30,TSCOT,ENSBTAG00000018481,ENSBTAG00000047990       |
| 8 | 103,875,000 | 104,025,000 | 1386 | 954  | 1.25815127   | ENSBTAG00000018481,ENSBTAG00000045868,ENSBTAG0000047990 |
| 8 | 103,950,000 | 104,100,000 | 1387 | 932  | 1.265580513  | ENSBTAG00000045868                                      |
| 8 | 104,025,000 | 104,175,000 | 1388 | 886  | -0.272250992 | FKBP15,SLC31A1,SLC31A2                                  |
| 8 | 104,100,000 | 104,250,000 | 1389 | 674  | -1.457621491 | CDC26,FKBP15,PRPF4,RNF183,SLC31A1,SLC31A2               |
| 8 | 104,175,000 | 104,325,000 | 1390 | 572  | -0.057679697 | BSPRY,CDC26,PRPF4,RNF183,SLC31A1,WDR31                  |
| 8 | 104,250,000 | 104,400,000 | 1391 | 787  | 0.705759033  | ALAD,BSPRY,C9orf43,HDHD3,POLE3,WDR31,ENSBTAG0000045506  |
| 8 | 104,325,000 | 104,475,000 | 1392 | 716  | 0.285542684  | ALAD,BSPRY,C9orf43,HDHD3,POLE3,RGS3,ENSBTAG0000045506   |
| 8 | 104,400,000 | 104,550,000 | 1393 | 470  | -0.49034259  | RGS3                                                    |
| 8 | 104,475,000 | 104,625,000 | 1394 | 433  | -0.118258239 | RGS3                                                    |
| 8 | 104,550,000 | 104,700,000 | 1395 | 627  | 0.661418478  |                                                         |
| 8 | 104,625,000 | 104,775,000 | 1396 | 698  | 0.198618595  |                                                         |
| 8 | 104,700,000 | 104,850,000 | 1397 | 568  | -0.816216599 | ZNF618                                                  |
| 8 | 104,775,000 | 104,925,000 | 1398 | 730  | 0.693102334  | ZNF618                                                  |
| 8 | 104,850,000 | 105,000,000 | 1399 | 922  | 0.212845132  | ZNF618                                                  |
| 8 | 104,925,000 | 105,075,000 | 1400 | 1068 | -0.267760164 | AMBP,KIF12,ZNF618                                       |
| 8 | 105,000,000 | 105,150,000 | 1401 | 797  | 0.275327972  | AMBP,COL27A1,KIF12                                      |
| 8 | 105,075,000 | 105,225,000 | 1402 | 468  | 0.605999884  | AGP,AKNA,COL27A1                                        |
| 8 | 105,150,000 | 105,300,000 | 1403 | 523  | 0.589714935  | AGP,AKNA,COL27A1                                        |
| 8 | 105,225,000 | 105,375,000 | 1404 | 486  | 0.982613377  | AKNA,DFNB31                                             |
| 8 | 105,300,000 | 105,450,000 | 1405 | 433  | 0.866566299  | AKNA,DFNB31                                             |
| 8 | 105,375,000 | 105,525,000 | 1406 | 452  | 0.617971604  | ATP6V1G1,C9orf91,DFNB31                                 |
| 8 | 105,450,000 | 105,600,000 | 1407 | 492  | 0.372843177  | ATP6V1G1,C9orf91                                        |

|   |             |             |      |      |              |                           |
|---|-------------|-------------|------|------|--------------|---------------------------|
| 8 | 105,525,000 | 105,675,000 | 1408 | 418  | -0.166862931 | C9orf91                   |
| 8 | 105,600,000 | 105,750,000 | 1409 | 364  | 0.046661202  | TNFSF15                   |
| 8 | 105,675,000 | 105,825,000 | 1410 | 407  | -0.447569884 | TNFSF15                   |
| 8 | 105,750,000 | 105,900,000 | 1411 | 485  | -2.127120359 | TNFSF8                    |
| 8 | 105,825,000 | 105,975,000 | 1412 | 573  | -0.903670514 | TNC,TNFSF8                |
| 8 | 105,900,000 | 106,050,000 | 1413 | 545  | 0.131929242  | TNC                       |
| 8 | 105,975,000 | 106,125,000 | 1414 | 494  | -0.178138776 | TNC                       |
| 8 | 106,050,000 | 106,200,000 | 1415 | 720  | -0.699587503 | TNC                       |
| 8 | 106,125,000 | 106,275,000 | 1416 | 816  | -0.302302699 |                           |
| 8 | 106,200,000 | 106,350,000 | 1417 | 862  | 0.554507916  |                           |
| 8 | 106,275,000 | 106,425,000 | 1418 | 793  | 0.765590093  |                           |
| 8 | 106,350,000 | 106,500,000 | 1419 | 612  | 0.662054139  |                           |
| 8 | 106,425,000 | 106,575,000 | 1420 | 524  | -0.005188843 |                           |
| 8 | 106,500,000 | 106,650,000 | 1421 | 594  | 0.290613512  |                           |
| 8 | 106,575,000 | 106,725,000 | 1422 | 892  | 0.962718617  |                           |
| 8 | 106,650,000 | 106,800,000 | 1423 | 863  | 0.807927825  |                           |
| 8 | 106,725,000 | 106,875,000 | 1424 | 824  | 0.156029542  |                           |
| 8 | 106,800,000 | 106,950,000 | 1425 | 734  | -0.426060609 |                           |
| 8 | 106,875,000 | 107,025,000 | 1426 | 669  | -0.889962142 |                           |
| 8 | 106,950,000 | 107,100,000 | 1427 | 739  | -0.184390776 |                           |
| 8 | 107,025,000 | 107,175,000 | 1428 | 524  | 0.797372096  | PAPPA                     |
| 8 | 107,100,000 | 107,250,000 | 1429 | 389  | 0.9390786    | PAPPA                     |
| 8 | 107,175,000 | 107,325,000 | 1430 | 383  | 0.575268331  | PAPPA                     |
| 8 | 107,250,000 | 107,400,000 | 1431 | 470  | -0.130235763 | PAPPA                     |
| 8 | 107,325,000 | 107,475,000 | 1432 | 556  | -0.073000847 | PAPPA,ENSBTAG00000047511  |
| 8 | 107,400,000 | 107,550,000 | 1433 | 435  | 0.458428435  | ENSBTAG00000047511        |
| 8 | 107,475,000 | 107,625,000 | 1434 | 454  | 0.742175837  | ENSBTAG00000025667        |
| 8 | 107,550,000 | 107,700,000 | 1435 | 499  | -0.668397606 | TRIM32,ENSBTAG00000025667 |
| 8 | 107,625,000 | 107,775,000 | 1436 | 523  | -2.372454949 | TRIM32,ENSBTAG00000025667 |
| 8 | 107,700,000 | 107,850,000 | 1437 | 594  | -2.078550001 | ENSBTAG00000025667        |
| 8 | 107,775,000 | 107,925,000 | 1438 | 1001 | -1.68071458  | ENSBTAG00000025667        |
| 8 | 107,850,000 | 108,000,000 | 1439 | 1310 | -0.38723846  |                           |
| 8 | 107,925,000 | 108,075,000 | 1440 | 1006 | 0.527446504  |                           |
| 8 | 108,000,000 | 108,150,000 | 1441 | 821  | -0.86448632  |                           |
| 8 | 108,075,000 | 108,225,000 | 1442 | 771  | -2.874734321 |                           |
| 8 | 108,150,000 | 108,300,000 | 1443 | 833  | -3.482277265 |                           |
| 8 | 108,225,000 | 108,375,000 | 1444 | 854  | -1.483621308 |                           |
| 8 | 108,300,000 | 108,450,000 | 1445 | 704  | 0.91815775   |                           |
| 8 | 108,375,000 | 108,525,000 | 1446 | 577  | 0.98399417   |                           |
| 8 | 108,450,000 | 108,600,000 | 1447 | 754  | 0.652944477  |                           |
| 8 | 108,525,000 | 108,675,000 | 1448 | 1066 | 0.812582417  |                           |
| 8 | 108,600,000 | 108,750,000 | 1449 | 781  | 0.730533201  |                           |
| 8 | 108,675,000 | 108,825,000 | 1450 | 817  | 0.817746962  |                           |
| 8 | 108,750,000 | 108,900,000 | 1451 | 1413 | 0.995738461  | TLR4                      |
| 8 | 108,825,000 | 108,975,000 | 1452 | 1267 | 0.986632682  | TLR4                      |
| 8 | 108,900,000 | 109,050,000 | 1453 | 803  | 0.647519377  |                           |
| 8 | 108,975,000 | 109,125,000 | 1454 | 722  | 0.573917914  |                           |
| 8 | 109,050,000 | 109,200,000 | 1455 | 558  | 0.767391711  |                           |
| 8 | 109,125,000 | 109,275,000 | 1456 | 565  | -1.506110373 |                           |
| 8 | 109,200,000 | 109,350,000 | 1457 | 822  | -1.756424984 |                           |
| 8 | 109,275,000 | 109,425,000 | 1458 | 1114 | -0.494558241 |                           |
| 8 | 109,350,000 | 109,500,000 | 1459 | 1032 | 0.24746771   |                           |
| 8 | 109,425,000 | 109,575,000 | 1460 | 586  | 1.068297958  |                           |

|   |             |             |      |      |              |                                                               |
|---|-------------|-------------|------|------|--------------|---------------------------------------------------------------|
| 8 | 109,500,000 | 109,650,000 | 1461 | 593  | 0.935750006  |                                                               |
| 8 | 109,575,000 | 109,725,000 | 1462 | 626  | 0.263325719  |                                                               |
| 8 | 109,650,000 | 109,800,000 | 1463 | 472  | -0.369795093 |                                                               |
| 8 | 109,725,000 | 109,875,000 | 1464 | 388  | -1.196828695 | ENSBTAG00000046729                                            |
| 8 | 109,800,000 | 109,950,000 | 1465 | 437  | -1.930142226 | ENSBTAG00000046729                                            |
| 8 | 109,875,000 | 110,025,000 | 1466 | 862  | -1.60755963  |                                                               |
| 8 | 109,950,000 | 110,100,000 | 1467 | 1055 | -1.624834106 |                                                               |
| 8 | 110,025,000 | 110,175,000 | 1468 | 811  | -0.576329639 |                                                               |
| 8 | 110,100,000 | 110,250,000 | 1469 | 516  | -0.031168628 |                                                               |
| 8 | 110,175,000 | 110,325,000 | 1470 | 318  | -0.247139826 |                                                               |
| 8 | 110,250,000 | 110,400,000 | 1471 | 367  | -0.112028124 |                                                               |
| 8 | 110,325,000 | 110,475,000 | 1472 | 612  | -0.136311433 | BRINP1                                                        |
| 8 | 110,400,000 | 110,550,000 | 1473 | 664  | 0.543512856  | BRINP1                                                        |
| 8 | 110,475,000 | 110,625,000 | 1474 | 756  | 0.394227809  | BRINP1                                                        |
| 8 | 110,550,000 | 110,700,000 | 1475 | 706  | 0.376275443  | BRINP1                                                        |
| 8 | 110,625,000 | 110,775,000 | 1476 | 236  | 0.701243783  |                                                               |
| 8 | 110,700,000 | 110,850,000 | 1477 | 382  | -0.216701988 |                                                               |
| 8 | 110,775,000 | 110,925,000 | 1478 | 701  | -0.74053036  |                                                               |
| 8 | 110,850,000 | 111,000,000 | 1479 | 472  | -0.518946408 |                                                               |
| 8 | 110,925,000 | 111,075,000 | 1480 | 424  | 0.046274627  |                                                               |
| 8 | 111,000,000 | 111,150,000 | 1481 | 766  | 0.554138194  |                                                               |
| 8 | 111,075,000 | 111,225,000 | 1482 | 835  | 1.053334175  |                                                               |
| 8 | 111,150,000 | 111,300,000 | 1483 | 682  | 0.67525366   |                                                               |
| 8 | 111,225,000 | 111,375,000 | 1484 | 628  | 0.111010692  |                                                               |
| 8 | 111,300,000 | 111,450,000 | 1485 | 1078 | -0.88418564  |                                                               |
| 8 | 111,375,000 | 111,525,000 | 1486 | 1389 | -0.614628713 |                                                               |
| 8 | 111,450,000 | 111,600,000 | 1487 | 1343 | 0.648882114  |                                                               |
| 8 | 111,525,000 | 111,675,000 | 1488 | 1474 | 1.026368593  |                                                               |
| 8 | 111,600,000 | 111,750,000 | 1489 | 1433 | 0.69068753   | CDK5RAP2                                                      |
| 8 | 111,675,000 | 111,825,000 | 1490 | 1207 | -1.026825216 | CDK5RAP2                                                      |
| 8 | 111,750,000 | 111,900,000 | 1491 | 813  | -1.712410891 | CDK5RAP2                                                      |
| 8 | 111,825,000 | 111,975,000 | 1492 | 538  | -0.188469922 | CDK5RAP2,MEGF9                                                |
| 8 | 111,900,000 | 112,050,000 | 1493 | 764  | 0.459438443  | MEGF9                                                         |
| 8 | 111,975,000 | 112,125,000 | 1494 | 877  | 0.001033665  | FBXW2,MEGF9,PSMD5,ENSBTAG00000016957,ENSBTAG0000038486        |
| 8 | 112,050,000 | 112,200,000 | 1495 | 787  | -0.035174248 | FBXW2,PHF19,PSMD5,TRAF1,ENSBTAG00000016957,ENSBTAG00000038486 |
| 8 | 112,125,000 | 112,275,000 | 1496 | 766  | 1.13579508   | C5,PHF19,TRAF1,ENSBTAG00000016957                             |
| 8 | 112,200,000 | 112,350,000 | 1497 | 986  | -0.135648951 | C5,TRAF1                                                      |
| 8 | 112,275,000 | 112,425,000 | 1498 | 1138 | -0.417281974 | C5,CNTRL                                                      |
| 8 | 112,350,000 | 112,500,000 | 1499 | 830  | 0.747690153  | CNTRL                                                         |
| 8 | 112,425,000 | 112,575,000 | 1500 | 643  | 0.493754017  | CNTRL,RAB14                                                   |
| 8 | 112,500,000 | 112,650,000 | 1501 | 752  | 0.370038555  | GSN,RAB14,STOM                                                |
| 8 | 112,575,000 | 112,725,000 | 1502 | 854  | 0.705563926  | GSN,STOM                                                      |
| 8 | 112,650,000 | 112,800,000 | 1503 | 659  | 0.705113566  | DCDC2C,STOM                                                   |
| 8 | 112,725,000 | 112,875,000 | 1504 | 657  | 0.515042544  | ALLC,COLEC11,DCDC2C                                           |
| 8 | 112,800,000 | 112,950,000 | 1505 | 745  | 0.344117107  | ADI1,ALLC,COLEC11,DCDC2C,RNASEH1,RPS7                         |
| 8 | 112,875,000 | 113,025,000 | 1506 | 1019 | 0.274344702  | ADI1,COLEC11,RNASEH1,RPS7,TSSC1,TTC15                         |
| 8 | 112,950,000 | 113,100,000 | 1507 | 1097 | 0.588378465  | ADI1,TSSC1,TTC15                                              |
| 8 | 113,025,000 | 113,175,000 | 1508 | 786  | 0.598554322  | TSSC1                                                         |
| 8 | 113,100,000 | 113,250,000 | 1509 | 921  | -0.582880979 |                                                               |
| 8 | 113,175,000 | 113,325,000 | 1510 | 1166 | -0.840587019 |                                                               |
| 8 | 113,250,000 | 113,384,836 | 1511 | 948  | -0.461335568 |                                                               |

|   |           |           |    |      |              |                                       |
|---|-----------|-----------|----|------|--------------|---------------------------------------|
| 9 | 0         | 150,000   | 1  | 393  | -0.393401174 |                                       |
| 9 | 75,000    | 225,000   | 2  | 371  | -0.796770966 |                                       |
| 9 | 150,000   | 300,000   | 3  | 339  | -1.6494384   | ENSBTAG00000036273                    |
| 9 | 225,000   | 375,000   | 4  | 343  | -2.458128957 | ENSBTAG00000036273,ENSBTAG00000047687 |
| 9 | 300,000   | 450,000   | 5  | 381  | -2.830082012 | ENSBTAG00000047032,ENSBTAG00000047687 |
| 9 | 375,000   | 525,000   | 6  | 340  | -1.903159583 | PTP4A1,ENSBTAG00000047032             |
| 9 | 450,000   | 600,000   | 7  | 269  | -1.192468812 | PTP4A1                                |
| 9 | 525,000   | 675,000   | 8  | 266  | -1.305260081 | PHF3                                  |
| 9 | 600,000   | 750,000   | 9  | 258  | -1.877055102 | PHF3                                  |
| 9 | 675,000   | 825,000   | 10 | 398  | -2.016925588 | PHF3                                  |
| 9 | 750,000   | 900,000   | 11 | 475  | -1.544119288 |                                       |
| 9 | 825,000   | 975,000   | 12 | 363  | -0.706596508 |                                       |
| 9 | 900,000   | 1,050,000 | 13 | 498  | -0.051654749 |                                       |
| 9 | 975,000   | 1,125,000 | 14 | 640  | -0.493153274 |                                       |
| 9 | 1,050,000 | 1,200,000 | 15 | 619  | -2.344175238 |                                       |
| 9 | 1,125,000 | 1,275,000 | 16 | 771  | -1.891016822 |                                       |
| 9 | 1,200,000 | 1,350,000 | 17 | 885  | -1.308882641 |                                       |
| 9 | 1,275,000 | 1,425,000 | 18 | 792  | -1.194430128 |                                       |
| 9 | 1,350,000 | 1,500,000 | 19 | 466  | -0.686050891 |                                       |
| 9 | 1,425,000 | 1,575,000 | 20 | 231  | -2.219835324 |                                       |
| 9 | 1,500,000 | 1,650,000 | 21 | 228  | -3.000352244 |                                       |
| 9 | 1,575,000 | 1,725,000 | 22 | 406  | -4.456079302 |                                       |
| 9 | 1,650,000 | 1,800,000 | 23 | 580  | -4.427070154 |                                       |
| 9 | 1,725,000 | 1,875,000 | 24 | 624  | -2.598183713 |                                       |
| 9 | 1,800,000 | 1,950,000 | 25 | 725  | -0.265259485 |                                       |
| 9 | 1,875,000 | 2,025,000 | 26 | 613  | 0.740763759  |                                       |
| 9 | 1,950,000 | 2,100,000 | 27 | 745  | 0.576836961  |                                       |
| 9 | 2,025,000 | 2,175,000 | 28 | 832  | 0.391662028  |                                       |
| 9 | 2,100,000 | 2,250,000 | 29 | 726  | 0.249961981  |                                       |
| 9 | 2,175,000 | 2,325,000 | 30 | 983  | 0.73664881   |                                       |
| 9 | 2,250,000 | 2,400,000 | 31 | 816  | 0.81159878   |                                       |
| 9 | 2,325,000 | 2,475,000 | 32 | 472  | -0.361166293 |                                       |
| 9 | 2,400,000 | 2,550,000 | 33 | 558  | -0.121800952 |                                       |
| 9 | 2,475,000 | 2,625,000 | 34 | 643  | 0.54636232   |                                       |
| 9 | 2,550,000 | 2,700,000 | 35 | 616  | 0.1919916    |                                       |
| 9 | 2,625,000 | 2,775,000 | 36 | 675  | -0.518870826 |                                       |
| 9 | 2,700,000 | 2,850,000 | 37 | 1150 | -0.38391788  |                                       |
| 9 | 2,775,000 | 2,925,000 | 38 | 1773 | 0.444843067  |                                       |
| 9 | 2,850,000 | 3,000,000 | 39 | 1245 | 0.34629605   |                                       |
| 9 | 2,925,000 | 3,075,000 | 40 | 409  | -0.581610667 |                                       |
| 9 | 3,000,000 | 3,150,000 | 41 | 855  | 0.963195482  |                                       |
| 9 | 3,075,000 | 3,225,000 | 42 | 990  | 0.811975814  |                                       |
| 9 | 3,150,000 | 3,300,000 | 43 | 666  | 0.331474154  |                                       |
| 9 | 3,225,000 | 3,375,000 | 44 | 629  | -0.458955938 |                                       |
| 9 | 3,300,000 | 3,450,000 | 45 | 624  | -0.685886774 |                                       |
| 9 | 3,375,000 | 3,525,000 | 46 | 851  | -1.821144659 |                                       |
| 9 | 3,450,000 | 3,600,000 | 47 | 1057 | -2.514055723 |                                       |
| 9 | 3,525,000 | 3,675,000 | 48 | 1033 | -3.058221162 |                                       |
| 9 | 3,600,000 | 3,750,000 | 49 | 1023 | -1.677388612 |                                       |
| 9 | 3,675,000 | 3,825,000 | 50 | 852  | 0.196353036  |                                       |
| 9 | 3,750,000 | 3,900,000 | 51 | 697  | 0.677376391  |                                       |
| 9 | 3,825,000 | 3,975,000 | 52 | 676  | 0.81646416   |                                       |
| 9 | 3,900,000 | 4,050,000 | 53 | 587  | -0.890281979 |                                       |

|   |           |           |     |      |              |
|---|-----------|-----------|-----|------|--------------|
| 9 | 3,975,000 | 4,125,000 | 54  | 538  | -2.348810846 |
| 9 | 4,050,000 | 4,200,000 | 55  | 939  | -4.338257744 |
| 9 | 4,125,000 | 4,275,000 | 56  | 996  | -4.069770046 |
| 9 | 4,200,000 | 4,350,000 | 57  | 521  | -1.703242881 |
| 9 | 4,275,000 | 4,425,000 | 58  | 679  | -3.342449991 |
| 9 | 4,350,000 | 4,500,000 | 59  | 916  | -2.648674272 |
| 9 | 4,425,000 | 4,575,000 | 60  | 870  | -0.844082657 |
| 9 | 4,500,000 | 4,650,000 | 61  | 1183 | -0.612141119 |
| 9 | 4,575,000 | 4,725,000 | 62  | 1466 | -0.155402856 |
| 9 | 4,650,000 | 4,800,000 | 63  | 1283 | 0.449466011  |
| 9 | 4,725,000 | 4,875,000 | 64  | 1582 | -0.026501205 |
| 9 | 4,800,000 | 4,950,000 | 65  | 1730 | -0.19016387  |
| 9 | 4,875,000 | 5,025,000 | 66  | 989  | -0.411068464 |
| 9 | 4,950,000 | 5,100,000 | 67  | 1051 | 0.069891757  |
| 9 | 5,025,000 | 5,175,000 | 68  | 1868 | -0.133985509 |
| 9 | 5,100,000 | 5,250,000 | 69  | 1577 | -0.733021324 |
| 9 | 5,175,000 | 5,325,000 | 70  | 764  | -0.56952042  |
| 9 | 5,250,000 | 5,400,000 | 71  | 705  | -0.356498949 |
| 9 | 5,325,000 | 5,475,000 | 72  | 786  | -0.240079161 |
| 9 | 5,400,000 | 5,550,000 | 73  | 673  | 0.264614981  |
| 9 | 5,475,000 | 5,625,000 | 74  | 978  | 0.806699065  |
| 9 | 5,550,000 | 5,700,000 | 75  | 1060 | 0.895942931  |
| 9 | 5,625,000 | 5,775,000 | 76  | 1227 | 0.174968424  |
| 9 | 5,700,000 | 5,850,000 | 77  | 1522 | 0.429413892  |
| 9 | 5,775,000 | 5,925,000 | 78  | 1180 | -0.023399993 |
| 9 | 5,850,000 | 6,000,000 | 79  | 892  | -0.97434573  |
| 9 | 5,925,000 | 6,075,000 | 80  | 854  | -0.067114194 |
| 9 | 6,000,000 | 6,150,000 | 81  | 1055 | 0.66762617   |
| 9 | 6,075,000 | 6,225,000 | 82  | 1042 | 0.834492173  |
| 9 | 6,150,000 | 6,300,000 | 83  | 717  | -0.297769975 |
| 9 | 6,225,000 | 6,375,000 | 84  | 784  | -0.40357995  |
| 9 | 6,300,000 | 6,450,000 | 85  | 1173 | 0.688273506  |
| 9 | 6,375,000 | 6,525,000 | 86  | 1367 | 1.223910213  |
| 9 | 6,450,000 | 6,600,000 | 87  | 1013 | 1.017249385  |
| 9 | 6,525,000 | 6,675,000 | 88  | 1010 | 0.075395783  |
| 9 | 6,600,000 | 6,750,000 | 89  | 1638 | 0.396431116  |
| 9 | 6,675,000 | 6,825,000 | 90  | 1553 | 0.900112947  |
| 9 | 6,750,000 | 6,900,000 | 91  | 1076 | 0.63949198   |
| 9 | 6,825,000 | 6,975,000 | 92  | 1014 | 0.151937088  |
| 9 | 6,900,000 | 7,050,000 | 93  | 1195 | -0.281226962 |
| 9 | 6,975,000 | 7,125,000 | 94  | 849  | -0.480610773 |
| 9 | 7,050,000 | 7,200,000 | 95  | 675  | 0.054666166  |
| 9 | 7,125,000 | 7,275,000 | 96  | 1425 | -1.79343014  |
| 9 | 7,200,000 | 7,350,000 | 97  | 1623 | -1.701159318 |
| 9 | 7,275,000 | 7,425,000 | 98  | 1166 | -1.325764846 |
| 9 | 7,350,000 | 7,500,000 | 99  | 975  | -0.801744533 |
| 9 | 7,425,000 | 7,575,000 | 100 | 801  | 0.913421573  |
| 9 | 7,500,000 | 7,650,000 | 101 | 581  | 1.137254066  |
| 9 | 7,575,000 | 7,725,000 | 102 | 788  | 0.904990988  |
| 9 | 7,650,000 | 7,800,000 | 103 | 673  | 0.72124627   |
| 9 | 7,725,000 | 7,875,000 | 104 | 490  | -0.575047339 |
| 9 | 7,800,000 | 7,950,000 | 105 | 811  | -1.84426289  |
| 9 | 7,875,000 | 8,025,000 | 106 | 1209 | -0.789777331 |

BAI3

BAI3

|   |            |            |     |      |              |                                      |
|---|------------|------------|-----|------|--------------|--------------------------------------|
| 9 | 7,950,000  | 8,100,000  | 107 | 1367 | -0.370886581 | BAI3                                 |
| 9 | 8,025,000  | 8,175,000  | 108 | 1113 | -1.399679896 | BAI3                                 |
| 9 | 8,100,000  | 8,250,000  | 109 | 917  | -0.066496194 | BAI3                                 |
| 9 | 8,175,000  | 8,325,000  | 110 | 672  | 0.781613939  | BAI3                                 |
| 9 | 8,250,000  | 8,400,000  | 111 | 749  | 0.281537526  | BAI3                                 |
| 9 | 8,325,000  | 8,475,000  | 112 | 986  | 0.553251814  | BAI3                                 |
| 9 | 8,400,000  | 8,550,000  | 113 | 715  | 0.299066972  | BAI3                                 |
| 9 | 8,475,000  | 8,625,000  | 114 | 1133 | -0.536464029 |                                      |
| 9 | 8,550,000  | 8,700,000  | 115 | 1775 | -0.071899892 |                                      |
| 9 | 8,625,000  | 8,775,000  | 116 | 1638 | 0.408699873  |                                      |
| 9 | 8,700,000  | 8,850,000  | 117 | 1319 | 0.56075394   | LMBRD1                               |
| 9 | 8,775,000  | 8,925,000  | 118 | 1299 | 0.81031085   | LMBRD1                               |
| 9 | 8,850,000  | 9,000,000  | 119 | 1587 | 0.984860969  | LMBRD1                               |
| 9 | 8,925,000  | 9,075,000  | 120 | 1393 | 0.757329444  | LMBRD1                               |
| 9 | 9,000,000  | 9,150,000  | 121 | 821  | 0.52626967   |                                      |
| 9 | 9,075,000  | 9,225,000  | 122 | 672  | 0.92456689   |                                      |
| 9 | 9,150,000  | 9,300,000  | 123 | 925  | 0.913627662  |                                      |
| 9 | 9,225,000  | 9,375,000  | 124 | 1035 | 1.062534956  |                                      |
| 9 | 9,300,000  | 9,450,000  | 125 | 816  | 1.103524534  | COL19A1                              |
| 9 | 9,375,000  | 9,525,000  | 126 | 819  | 0.97192231   | COL19A1,COL9A1                       |
| 9 | 9,450,000  | 9,600,000  | 127 | 1064 | 0.564776602  | COL19A1,COL9A1                       |
| 9 | 9,525,000  | 9,675,000  | 128 | 787  | -0.808448224 | COL9A1                               |
| 9 | 9,600,000  | 9,750,000  | 129 | 515  | -0.467275586 | COL9A1,ENSBTAG00000045999            |
| 9 | 9,675,000  | 9,825,000  | 130 | 539  | -0.327295239 | FAM135A,ENSBTAG00000045999           |
| 9 | 9,750,000  | 9,900,000  | 131 | 437  | -0.762184137 | FAM135A                              |
| 9 | 9,825,000  | 9,975,000  | 132 | 526  | -0.621289289 | FAM135A,MGC137021,ENSBTAG00000035076 |
| 9 | 9,900,000  | 10,050,000 | 133 | 488  | 0.195562886  | MGC137021,SMAP1,ENSBTAG00000035076   |
| 9 | 9,975,000  | 10,125,000 | 134 | 484  | 0.967051858  | SMAP1                                |
| 9 | 10,050,000 | 10,200,000 | 135 | 489  | 0.876101339  | SMAP1                                |
| 9 | 10,125,000 | 10,275,000 | 136 | 470  | 0.864737496  | B3GAT2,SMAP1                         |
| 9 | 10,200,000 | 10,350,000 | 137 | 759  | 0.955418855  | B3GAT2,SMAP1                         |
| 9 | 10,275,000 | 10,425,000 | 138 | 1064 | 0.897439088  | B3GAT2                               |
| 9 | 10,350,000 | 10,500,000 | 139 | 1128 | 0.256554134  |                                      |
| 9 | 10,425,000 | 10,575,000 | 140 | 1103 | -0.610926542 |                                      |
| 9 | 10,500,000 | 10,650,000 | 141 | 997  | 0.165638118  | OGFRL1                               |
| 9 | 10,575,000 | 10,725,000 | 142 | 626  | 0.55685774   | OGFRL1                               |
| 9 | 10,650,000 | 10,800,000 | 143 | 361  | -0.315176742 |                                      |
| 9 | 10,725,000 | 10,875,000 | 144 | 654  | 0.237185426  |                                      |
| 9 | 10,800,000 | 10,950,000 | 145 | 1129 | 0.96136866   |                                      |
| 9 | 10,875,000 | 11,025,000 | 146 | 1186 | -0.381076072 |                                      |
| 9 | 10,950,000 | 11,100,000 | 147 | 1096 | -1.175902346 |                                      |
| 9 | 11,025,000 | 11,175,000 | 148 | 1254 | 0.326173462  |                                      |
| 9 | 11,100,000 | 11,250,000 | 149 | 1124 | 0.639602014  |                                      |
| 9 | 11,175,000 | 11,325,000 | 150 | 703  | -1.007088805 |                                      |
| 9 | 11,250,000 | 11,400,000 | 151 | 521  | -1.048098628 |                                      |
| 9 | 11,325,000 | 11,475,000 | 152 | 521  | -0.302751631 |                                      |
| 9 | 11,400,000 | 11,550,000 | 153 | 466  | -0.098078198 |                                      |
| 9 | 11,475,000 | 11,625,000 | 154 | 546  | 0.373208643  |                                      |
| 9 | 11,550,000 | 11,700,000 | 155 | 941  | 0.48696346   | RIMS1                                |
| 9 | 11,625,000 | 11,775,000 | 156 | 1146 | -0.137979941 | RIMS1                                |
| 9 | 11,700,000 | 11,850,000 | 157 | 1046 | -0.127331759 | RIMS1                                |
| 9 | 11,775,000 | 11,925,000 | 158 | 745  | 0.348480559  | RIMS1                                |
| 9 | 11,850,000 | 12,000,000 | 159 | 581  | -0.213813122 | RIMS1                                |



|   |            |            |     |      |              |                               |
|---|------------|------------|-----|------|--------------|-------------------------------|
| 9 | 11,925,000 | 12,075,000 | 160 | 580  | -0.71119519  | RIMS1                         |
| 9 | 12,000,000 | 12,150,000 | 161 | 479  | -1.34346884  |                               |
| 9 | 12,075,000 | 12,225,000 | 162 | 790  | -0.230102966 |                               |
| 9 | 12,150,000 | 12,300,000 | 163 | 820  | 0.138732939  |                               |
| 9 | 12,225,000 | 12,375,000 | 164 | 396  | -0.679933312 |                               |
| 9 | 12,300,000 | 12,450,000 | 165 | 394  | -0.131358239 |                               |
| 9 | 12,375,000 | 12,525,000 | 166 | 587  | 0.422258557  |                               |
| 9 | 12,450,000 | 12,600,000 | 167 | 777  | 0.574947514  |                               |
| 9 | 12,525,000 | 12,675,000 | 168 | 1137 | 0.220795652  |                               |
| 9 | 12,600,000 | 12,750,000 | 169 | 1347 | 0.281728146  | KCNQ5                         |
| 9 | 12,675,000 | 12,825,000 | 170 | 987  | 0.233529016  | KCNQ5                         |
| 9 | 12,750,000 | 12,900,000 | 171 | 1006 | 0.259076134  | KCNQ5                         |
| 9 | 12,825,000 | 12,975,000 | 172 | 1083 | 0.632504912  | KCNQ5,KHDC3L                  |
| 9 | 12,900,000 | 13,050,000 | 173 | 615  | 0.749316269  | DDX43,KHDC3L,OOEP             |
| 9 | 12,975,000 | 13,125,000 | 174 | 738  | -0.590262966 | DDX43,OOEP                    |
| 9 | 13,050,000 | 13,200,000 | 175 | 766  | -1.003944257 | MB21D1,MTO1                   |
| 9 | 13,125,000 | 13,275,000 | 176 | 432  | -0.335597218 | EEF1A1,MB21D1,MTO1            |
| 9 | 13,200,000 | 13,350,000 | 177 | 574  | -0.456974324 | EEF1A1,MTO1,SLC17A5           |
| 9 | 13,275,000 | 13,425,000 | 178 | 509  | -0.451375488 | CD109,SLC17A5                 |
| 9 | 13,350,000 | 13,500,000 | 179 | 533  | -1.053576174 | CD109,SLC17A5                 |
| 9 | 13,425,000 | 13,575,000 | 180 | 827  | -0.528462965 | CD109                         |
| 9 | 13,500,000 | 13,650,000 | 181 | 931  | 0.618788632  | CD109                         |
| 9 | 13,575,000 | 13,725,000 | 182 | 843  | 0.47440898   |                               |
| 9 | 13,650,000 | 13,800,000 | 183 | 958  | -0.739547947 |                               |
| 9 | 13,725,000 | 13,875,000 | 184 | 892  | -0.69624039  |                               |
| 9 | 13,800,000 | 13,950,000 | 185 | 970  | 0.664326045  |                               |
| 9 | 13,875,000 | 14,025,000 | 186 | 978  | 0.510762924  |                               |
| 9 | 13,950,000 | 14,100,000 | 187 | 587  | -0.782922821 |                               |
| 9 | 14,025,000 | 14,175,000 | 188 | 701  | -2.467219026 |                               |
| 9 | 14,100,000 | 14,250,000 | 189 | 965  | -2.228788589 |                               |
| 9 | 14,175,000 | 14,325,000 | 190 | 1245 | -0.125346612 |                               |
| 9 | 14,250,000 | 14,400,000 | 191 | 1009 | 0.862853426  |                               |
| 9 | 14,325,000 | 14,475,000 | 192 | 768  | 0.892621058  |                               |
| 9 | 14,400,000 | 14,550,000 | 193 | 767  | 0.998814136  |                               |
| 9 | 14,475,000 | 14,625,000 | 194 | 486  | 0.724914064  |                               |
| 9 | 14,550,000 | 14,700,000 | 195 | 521  | -0.204512983 |                               |
| 9 | 14,625,000 | 14,775,000 | 196 | 608  | -0.466038999 |                               |
| 9 | 14,700,000 | 14,850,000 | 197 | 513  | -0.841774951 |                               |
| 9 | 14,775,000 | 14,925,000 | 198 | 525  | -0.121210043 | COL12A1                       |
| 9 | 14,850,000 | 15,000,000 | 199 | 662  | 1.107834735  | COL12A1                       |
| 9 | 14,925,000 | 15,075,000 | 200 | 987  | 1.253929603  | COL12A1,COX7A2,TMEM30A        |
| 9 | 15,000,000 | 15,150,000 | 201 | 815  | 1.154403273  | COX7A2,FILIP1,TMEM30A         |
| 9 | 15,075,000 | 15,225,000 | 202 | 647  | 0.794682629  | FILIP1,TMEM30A                |
| 9 | 15,150,000 | 15,300,000 | 203 | 797  | 0.436385147  | FILIP1                        |
| 9 | 15,225,000 | 15,375,000 | 204 | 1020 | 0.198409367  | FILIP1                        |
| 9 | 15,300,000 | 15,450,000 | 205 | 1333 | -0.239385401 | ENSBTAG00000032382            |
| 9 | 15,375,000 | 15,525,000 | 206 | 887  | -0.91447221  | SENPA6,ENSBTAG00000032382     |
| 9 | 15,450,000 | 15,600,000 | 207 | 409  | -1.817482242 | SENPA6                        |
| 9 | 15,525,000 | 15,675,000 | 208 | 818  | -1.66504934  | MYO6,SENPA6                   |
| 9 | 15,600,000 | 15,750,000 | 209 | 1528 | -0.544400462 | MYO6                          |
| 9 | 15,675,000 | 15,825,000 | 210 | 1617 | -0.209028588 | MYO6,ENSBTAG00000045726       |
| 9 | 15,750,000 | 15,900,000 | 211 | 1537 | -0.714747892 | IMPG1,MYO6,ENSBTAG00000045726 |
| 9 | 15,825,000 | 15,975,000 | 212 | 1428 | 0.086373324  | IMPG1                         |

|   |            |            |     |      |              |                    |
|---|------------|------------|-----|------|--------------|--------------------|
| 9 | 15,900,000 | 16,050,000 | 213 | 1194 | 0.3978117    |                    |
| 9 | 15,975,000 | 16,125,000 | 214 | 1368 | -0.055567079 |                    |
| 9 | 16,050,000 | 16,200,000 | 215 | 1719 | -0.2046366   |                    |
| 9 | 16,125,000 | 16,275,000 | 216 | 1698 | -0.373255047 |                    |
| 9 | 16,200,000 | 16,350,000 | 217 | 1513 | -0.304874703 | ENSBTAG00000016391 |
| 9 | 16,275,000 | 16,425,000 | 218 | 1431 | -0.042598116 | ENSBTAG00000016391 |
| 9 | 16,350,000 | 16,500,000 | 219 | 1091 | -0.649358736 |                    |
| 9 | 16,425,000 | 16,575,000 | 220 | 754  | -1.148762607 |                    |
| 9 | 16,500,000 | 16,650,000 | 221 | 821  | 0.617358754  |                    |
| 9 | 16,575,000 | 16,725,000 | 222 | 853  | 0.838127092  |                    |
| 9 | 16,650,000 | 16,800,000 | 223 | 1023 | -0.166391894 |                    |
| 9 | 16,725,000 | 16,875,000 | 224 | 1160 | -0.655588146 |                    |
| 9 | 16,800,000 | 16,950,000 | 225 | 1375 | 0.412896124  |                    |
| 9 | 16,875,000 | 17,025,000 | 226 | 1494 | 0.054031893  |                    |
| 9 | 16,950,000 | 17,100,000 | 227 | 1021 | -0.536410822 |                    |
| 9 | 17,025,000 | 17,175,000 | 228 | 886  | -0.217516452 |                    |
| 9 | 17,100,000 | 17,250,000 | 229 | 1078 | 0.595754861  |                    |
| 9 | 17,175,000 | 17,325,000 | 230 | 844  | 1.073793006  | HTR1B              |
| 9 | 17,250,000 | 17,400,000 | 231 | 454  | 0.715072913  | HTR1B              |
| 9 | 17,325,000 | 17,475,000 | 232 | 631  | 0.366379195  |                    |
| 9 | 17,400,000 | 17,550,000 | 233 | 687  | 0.278019924  |                    |
| 9 | 17,475,000 | 17,625,000 | 234 | 795  | 1.008804843  |                    |
| 9 | 17,550,000 | 17,700,000 | 235 | 1207 | 1.138552921  |                    |
| 9 | 17,625,000 | 17,775,000 | 236 | 1094 | 0.78701464   |                    |
| 9 | 17,700,000 | 17,850,000 | 237 | 1366 | 0.832811831  |                    |
| 9 | 17,775,000 | 17,925,000 | 238 | 1733 | 0.985796929  |                    |
| 9 | 17,850,000 | 18,000,000 | 239 | 1598 | 0.830585914  |                    |
| 9 | 17,925,000 | 18,075,000 | 240 | 1466 | 0.938636464  |                    |
| 9 | 18,000,000 | 18,150,000 | 241 | 1464 | 1.238343297  |                    |
| 9 | 18,075,000 | 18,225,000 | 242 | 1049 | 1.243633654  |                    |
| 9 | 18,150,000 | 18,300,000 | 243 | 869  | 0.709433228  |                    |
| 9 | 18,225,000 | 18,375,000 | 244 | 1020 | 0.152028236  |                    |
| 9 | 18,300,000 | 18,450,000 | 245 | 1031 | -0.156456615 |                    |
| 9 | 18,375,000 | 18,525,000 | 246 | 1076 | 0.199776775  |                    |
| 9 | 18,450,000 | 18,600,000 | 247 | 601  | 0.098400903  |                    |
| 9 | 18,525,000 | 18,675,000 | 248 | 506  | -0.171151814 |                    |
| 9 | 18,600,000 | 18,750,000 | 249 | 611  | -0.263731985 | IRAK1BP1,PHIP      |
| 9 | 18,675,000 | 18,825,000 | 250 | 518  | -0.086858414 | IRAK1BP1,PHIP      |
| 9 | 18,750,000 | 18,900,000 | 251 | 539  | -0.083532128 | PHIP               |
| 9 | 18,825,000 | 18,975,000 | 252 | 610  | 0.057995406  | PHIP               |
| 9 | 18,900,000 | 19,050,000 | 253 | 724  | 0.099450306  | HMG3               |
| 9 | 18,975,000 | 19,125,000 | 254 | 1093 | 0.144164879  | HMG3               |
| 9 | 19,050,000 | 19,200,000 | 255 | 1168 | 0.303421616  |                    |
| 9 | 19,125,000 | 19,275,000 | 256 | 695  | -0.448154307 |                    |
| 9 | 19,200,000 | 19,350,000 | 257 | 588  | -0.30723369  | LCA5               |
| 9 | 19,275,000 | 19,425,000 | 258 | 899  | 0.487593227  | LCA5               |
| 9 | 19,350,000 | 19,500,000 | 259 | 724  | 0.281075094  | LCA5               |
| 9 | 19,425,000 | 19,575,000 | 260 | 548  | -1.137896669 | SH3BGRL2           |
| 9 | 19,500,000 | 19,650,000 | 261 | 547  | -1.532668024 | SH3BGRL2           |
| 9 | 19,575,000 | 19,725,000 | 262 | 689  | 0.636094775  |                    |
| 9 | 19,650,000 | 19,800,000 | 263 | 693  | 0.994038233  |                    |
| 9 | 19,725,000 | 19,875,000 | 264 | 360  | 1.161928059  | ELOVL4             |
| 9 | 19,800,000 | 19,950,000 | 265 | 478  | 0.691793303  | ELOVL4,TTK         |

|   |            |            |     |      |              |                                                     |
|---|------------|------------|-----|------|--------------|-----------------------------------------------------|
| 9 | 19,875,000 | 20,025,000 | 266 | 410  | -0.179869244 | ELOVL4,TTK                                          |
| 9 | 19,950,000 | 20,100,000 | 267 | 195  | -0.936650975 | BCKDHB,RPA3OS,TTK                                   |
| 9 | 20,025,000 | 20,175,000 | 268 | 395  | -1.248965157 | BCKDHB,RPA3OS                                       |
| 9 | 20,100,000 | 20,250,000 | 269 | 425  | -2.91685338  | BCKDHB                                              |
| 9 | 20,175,000 | 20,325,000 | 270 | 353  | -4.389555371 | BCKDHB                                              |
| 9 | 20,250,000 | 20,400,000 | 271 | 484  | -3.488842698 | BCKDHB                                              |
| 9 | 20,325,000 | 20,475,000 | 272 | 614  | -2.968541571 | BCKDHB                                              |
| 9 | 20,400,000 | 20,550,000 | 273 | 446  | -3.146669399 |                                                     |
| 9 | 20,475,000 | 20,625,000 | 274 | 232  | -3.442627752 |                                                     |
| 9 | 20,550,000 | 20,700,000 | 275 | 318  | -3.809028867 |                                                     |
| 9 | 20,625,000 | 20,775,000 | 276 | 678  | -2.928026381 |                                                     |
| 9 | 20,700,000 | 20,850,000 | 277 | 618  | -1.972015466 |                                                     |
| 9 | 20,775,000 | 20,925,000 | 278 | 307  | -3.050292459 |                                                     |
| 9 | 20,850,000 | 21,000,000 | 279 | 481  | -2.27591455  |                                                     |
| 9 | 20,925,000 | 21,075,000 | 280 | 887  | 0.355740296  |                                                     |
| 9 | 21,000,000 | 21,150,000 | 281 | 726  | 0.537461462  |                                                     |
| 9 | 21,075,000 | 21,225,000 | 282 | 361  | 0.108017992  |                                                     |
| 9 | 21,150,000 | 21,300,000 | 283 | 400  | -0.379638797 |                                                     |
| 9 | 21,225,000 | 21,375,000 | 284 | 438  | -0.330600202 |                                                     |
| 9 | 21,300,000 | 21,450,000 | 285 | 397  | 0.310524447  |                                                     |
| 9 | 21,375,000 | 21,525,000 | 286 | 335  | -0.147624009 |                                                     |
| 9 | 21,450,000 | 21,600,000 | 287 | 381  | 0.297962258  |                                                     |
| 9 | 21,525,000 | 21,675,000 | 288 | 671  | 0.685761376  |                                                     |
| 9 | 21,600,000 | 21,750,000 | 289 | 786  | -1.666735937 |                                                     |
| 9 | 21,675,000 | 21,825,000 | 290 | 453  | -4.875529523 | FAM46A                                              |
| 9 | 21,750,000 | 21,900,000 | 291 | 333  | -4.399138547 | FAM46A                                              |
| 9 | 21,825,000 | 21,975,000 | 292 | 355  | -2.479508052 |                                                     |
| 9 | 21,900,000 | 22,050,000 | 293 | 417  | -0.326813643 |                                                     |
| 9 | 21,975,000 | 22,125,000 | 294 | 381  | -0.448864122 |                                                     |
| 9 | 22,050,000 | 22,200,000 | 295 | 525  | 0.462588071  |                                                     |
| 9 | 22,125,000 | 22,275,000 | 296 | 767  | -0.109696936 | IBTK                                                |
| 9 | 22,200,000 | 22,350,000 | 297 | 698  | -0.828768741 | IBTK                                                |
| 9 | 22,275,000 | 22,425,000 | 298 | 1020 | -0.09732997  | IBTK                                                |
| 9 | 22,350,000 | 22,500,000 | 299 | 933  | -0.034289974 | TPBG                                                |
| 9 | 22,425,000 | 22,575,000 | 300 | 336  | 0.361765439  | TPBG                                                |
| 9 | 22,500,000 | 22,650,000 | 301 | 615  | 1.158877739  |                                                     |
| 9 | 22,575,000 | 22,725,000 | 302 | 775  | 1.118000417  |                                                     |
| 9 | 22,650,000 | 22,800,000 | 303 | 678  | -0.351016419 |                                                     |
| 9 | 22,725,000 | 22,875,000 | 304 | 915  | -0.198092255 |                                                     |
| 9 | 22,800,000 | 22,950,000 | 305 | 979  | 0.36724741   |                                                     |
| 9 | 22,875,000 | 23,025,000 | 306 | 772  | 0.46094119   |                                                     |
| 9 | 22,950,000 | 23,100,000 | 307 | 421  | 0.327469828  | UBE3D                                               |
| 9 | 23,025,000 | 23,175,000 | 308 | 225  | 0.335493855  | UBE3D                                               |
| 9 | 23,100,000 | 23,250,000 | 309 | 281  | 0.946033727  | UBE3D                                               |
| 9 | 23,175,000 | 23,325,000 | 310 | 327  | 0.591038377  | DOPEY1,UBE3D                                        |
| 9 | 23,250,000 | 23,400,000 | 311 | 486  | 0.373349693  | DOPEY1,PGM3,RWDD2A                                  |
| 9 | 23,325,000 | 23,475,000 | 312 | 788  | -0.362281099 | DOPEY1,ME1,PGM3,RWDD2A                              |
| 9 | 23,400,000 | 23,550,000 | 313 | 797  | -1.006592659 | ME1                                                 |
| 9 | 23,475,000 | 23,625,000 | 314 | 764  | 0.001562989  | ME1                                                 |
| 9 | 23,550,000 | 23,700,000 | 315 | 692  | 0.948408173  | ME1                                                 |
| 9 | 23,625,000 | 23,775,000 | 316 | 955  | 0.763884764  | PRSS35,SNAP91                                       |
| 9 | 23,700,000 | 23,850,000 | 317 | 951  | 0.451315322  | PRSS35,SNAP91,ENSBTAG00000046593,ENSBTAG00000047118 |

|   |            |            |     |      |              |                                              |
|---|------------|------------|-----|------|--------------|----------------------------------------------|
| 9 | 23,775,000 | 23,925,000 | 318 | 626  | -0.213864619 | SNAP91,ENSBTAG00000046593,ENSBTAG00000047118 |
| 9 | 23,850,000 | 24,000,000 | 319 | 797  | 0.256476567  | SNAP91                                       |
| 9 | 23,925,000 | 24,075,000 | 320 | 705  | 0.694424911  | C6orf58,ENSBTAG00000003921                   |
| 9 | 24,000,000 | 24,150,000 | 321 | 715  | 0.949503813  | C6orf58,KIAA0408,ENSBTAG00000003921          |
| 9 | 24,075,000 | 24,225,000 | 322 | 888  | 0.823211986  | KIAA0408,ENSBTAG00000003921                  |
| 9 | 24,150,000 | 24,300,000 | 323 | 657  | 0.533457036  | ECHDC1,RNF146B                               |
| 9 | 24,225,000 | 24,375,000 | 324 | 616  | -0.486019105 | ECHDC1,RNF146B,RSPO3                         |
| 9 | 24,300,000 | 24,450,000 | 325 | 552  | -1.042616802 | RNF146B,RSPO3                                |
| 9 | 24,375,000 | 24,525,000 | 326 | 411  | -1.881037191 | RSPO3                                        |
| 9 | 24,450,000 | 24,600,000 | 327 | 692  | -0.516242952 | LAPTM4B,RSPO3                                |
| 9 | 24,525,000 | 24,675,000 | 328 | 716  | 0.52147391   | LAPTM4B                                      |
| 9 | 24,600,000 | 24,750,000 | 329 | 535  | 0.382209576  |                                              |
| 9 | 24,675,000 | 24,825,000 | 330 | 481  | 0.151027981  |                                              |
| 9 | 24,750,000 | 24,900,000 | 331 | 388  | -0.035018367 |                                              |
| 9 | 24,825,000 | 24,975,000 | 332 | 540  | 0.344542486  |                                              |
| 9 | 24,900,000 | 25,050,000 | 333 | 874  | 0.223505057  |                                              |
| 9 | 24,975,000 | 25,125,000 | 334 | 756  | 0.092641903  |                                              |
| 9 | 25,050,000 | 25,200,000 | 335 | 440  | 0.078172719  |                                              |
| 9 | 25,125,000 | 25,275,000 | 336 | 362  | -0.073137236 | C6ORF173                                     |
| 9 | 25,200,000 | 25,350,000 | 337 | 456  | -1.696813048 | C6ORF173                                     |
| 9 | 25,275,000 | 25,425,000 | 338 | 433  | -2.167602011 | C6ORF173                                     |
| 9 | 25,350,000 | 25,500,000 | 339 | 470  | -1.195952648 |                                              |
| 9 | 25,425,000 | 25,575,000 | 340 | 456  | -0.862739404 |                                              |
| 9 | 25,500,000 | 25,650,000 | 341 | 258  | -0.044337503 | HINT3,TRMT11                                 |
| 9 | 25,575,000 | 25,725,000 | 342 | 405  | 0.108438739  | HINT3,NCOA7,TRMT11,ENSBTAG00000046503        |
| 9 | 25,650,000 | 25,800,000 | 343 | 813  | -0.559670798 | HINT3,NCOA7,ENSBTAG00000046503               |
| 9 | 25,725,000 | 25,875,000 | 344 | 1165 | -0.233901755 | HEY2,ENSBTAG00000046503                      |
| 9 | 25,800,000 | 25,950,000 | 345 | 922  | 0.531441003  | HEY2                                         |
| 9 | 25,875,000 | 26,025,000 | 346 | 537  | 0.624423055  | HEY2                                         |
| 9 | 25,950,000 | 26,100,000 | 347 | 479  | 0.75005956   |                                              |
| 9 | 26,025,000 | 26,175,000 | 348 | 598  | 0.330792231  |                                              |
| 9 | 26,100,000 | 26,250,000 | 349 | 591  | 0.413279265  |                                              |
| 9 | 26,175,000 | 26,325,000 | 350 | 562  | 1.12005306   | HDCC2,TPD52L1                                |
| 9 | 26,250,000 | 26,400,000 | 351 | 1186 | 1.146613257  | HDCC2,TPD52L1                                |
| 9 | 26,325,000 | 26,475,000 | 352 | 1348 | 0.960318483  | RNF217,TPD52L1                               |
| 9 | 26,400,000 | 26,550,000 | 353 | 1063 | 1.019968006  | RNF217,TPD52L1                               |
| 9 | 26,475,000 | 26,625,000 | 354 | 862  | 0.99187837   | RNF217                                       |
| 9 | 26,550,000 | 26,700,000 | 355 | 619  | 0.436194952  | ENSBTAG00000021667                           |
| 9 | 26,625,000 | 26,775,000 | 356 | 944  | 0.688502831  | ENSBTAG00000021667                           |
| 9 | 26,700,000 | 26,850,000 | 357 | 1028 | 0.860970875  | ENSBTAG00000021667                           |
| 9 | 26,775,000 | 26,925,000 | 358 | 830  | 0.911836397  | ENSBTAG00000021667                           |
| 9 | 26,850,000 | 27,000,000 | 359 | 905  | 1.005575924  | ENSBTAG00000021667                           |
| 9 | 26,925,000 | 27,075,000 | 360 | 863  | 0.959851814  |                                              |
| 9 | 27,000,000 | 27,150,000 | 361 | 766  | 0.861218546  |                                              |
| 9 | 27,075,000 | 27,225,000 | 362 | 701  | 0.932727718  |                                              |
| 9 | 27,150,000 | 27,300,000 | 363 | 576  | 0.817620581  | ENSBTAG00000033195                           |
| 9 | 27,225,000 | 27,375,000 | 364 | 442  | 0.222052787  | ENSBTAG00000033195                           |
| 9 | 27,300,000 | 27,450,000 | 365 | 480  | 0.413587182  | ENSBTAG00000033195                           |
| 9 | 27,375,000 | 27,525,000 | 366 | 817  | 0.724088972  |                                              |
| 9 | 27,450,000 | 27,600,000 | 367 | 1185 | 0.732379336  |                                              |
| 9 | 27,525,000 | 27,675,000 | 368 | 1105 | 0.765836625  | ENSBTAG00000047309                           |
| 9 | 27,600,000 | 27,750,000 | 369 | 993  | 0.597213074  | ENSBTAG00000047309                           |
| 9 | 27,675,000 | 27,825,000 | 370 | 926  | 0.632968801  |                                              |

|   |            |            |     |      |              |                          |
|---|------------|------------|-----|------|--------------|--------------------------|
| 9 | 27,750,000 | 27,900,000 | 371 | 933  | 0.957161589  |                          |
| 9 | 27,825,000 | 27,975,000 | 372 | 942  | 0.47277932   |                          |
| 9 | 27,900,000 | 28,050,000 | 373 | 822  | -0.016239102 |                          |
| 9 | 27,975,000 | 28,125,000 | 374 | 833  | 0.45312481   | TRDN                     |
| 9 | 28,050,000 | 28,200,000 | 375 | 888  | 0.237978788  | TRDN                     |
| 9 | 28,125,000 | 28,275,000 | 376 | 1154 | -0.837790509 | TRDN                     |
| 9 | 28,200,000 | 28,350,000 | 377 | 1083 | -0.393451085 | TRDN                     |
| 9 | 28,275,000 | 28,425,000 | 378 | 779  | -0.076920115 |                          |
| 9 | 28,350,000 | 28,500,000 | 379 | 452  | -1.500833183 |                          |
| 9 | 28,425,000 | 28,575,000 | 380 | 289  | -3.51019788  | ENSBTAG00000046232       |
| 9 | 28,500,000 | 28,650,000 | 381 | 309  | -3.577782139 | CLVS2,ENSBTAG00000046232 |
| 9 | 28,575,000 | 28,725,000 | 382 | 521  | -0.383995286 | CLVS2                    |
| 9 | 28,650,000 | 28,800,000 | 383 | 739  | 0.188892216  | CLVS2                    |
| 9 | 28,725,000 | 28,875,000 | 384 | 498  | 0.332261952  | FABP7,SMPDL3A            |
| 9 | 28,800,000 | 28,950,000 | 385 | 557  | -1.17692086  | FABP7,PKIB,SMPDL3A       |
| 9 | 28,875,000 | 29,025,000 | 386 | 797  | -0.509833398 | PKIB                     |
| 9 | 28,950,000 | 29,100,000 | 387 | 799  | 0.081185294  | PKIB,SERINC1             |
| 9 | 29,025,000 | 29,175,000 | 388 | 586  | -0.679771576 | HSF2,SERINC1             |
| 9 | 29,100,000 | 29,250,000 | 389 | 407  | -0.591291879 | HSF2,SERINC1             |
| 9 | 29,175,000 | 29,325,000 | 390 | 676  | 0.499684015  |                          |
| 9 | 29,250,000 | 29,400,000 | 391 | 864  | 1.102124814  |                          |
| 9 | 29,325,000 | 29,475,000 | 392 | 667  | 1.01031399   |                          |
| 9 | 29,400,000 | 29,550,000 | 393 | 550  | 0.717724008  |                          |
| 9 | 29,475,000 | 29,625,000 | 394 | 933  | 1.092368043  |                          |
| 9 | 29,550,000 | 29,700,000 | 395 | 1155 | 1.081383359  |                          |
| 9 | 29,625,000 | 29,775,000 | 396 | 784  | 0.349638507  | ENSBTAG00000011735       |
| 9 | 29,700,000 | 29,850,000 | 397 | 607  | -0.518998824 | ENSBTAG00000011735       |
| 9 | 29,775,000 | 29,925,000 | 398 | 760  | 0.289746627  |                          |
| 9 | 29,850,000 | 30,000,000 | 399 | 812  | 0.450018433  |                          |
| 9 | 29,925,000 | 30,075,000 | 400 | 683  | 0.177939456  |                          |
| 9 | 30,000,000 | 30,150,000 | 401 | 510  | -0.254901912 | GJA1                     |
| 9 | 30,075,000 | 30,225,000 | 402 | 612  | -0.662780194 | GJA1,TBC1D32             |
| 9 | 30,150,000 | 30,300,000 | 403 | 1013 | -1.044205851 | TBC1D32                  |
| 9 | 30,225,000 | 30,375,000 | 404 | 798  | -0.937738401 | TBC1D32                  |
| 9 | 30,300,000 | 30,450,000 | 405 | 575  | 0.951448321  | TBC1D32                  |
| 9 | 30,375,000 | 30,525,000 | 406 | 1073 | 0.813343814  | TBC1D32                  |
| 9 | 30,450,000 | 30,600,000 | 407 | 1315 | 0.554626004  |                          |
| 9 | 30,525,000 | 30,675,000 | 408 | 1167 | -0.604625114 |                          |
| 9 | 30,600,000 | 30,750,000 | 409 | 852  | -0.981340241 |                          |
| 9 | 30,675,000 | 30,825,000 | 410 | 505  | -0.622646578 |                          |
| 9 | 30,750,000 | 30,900,000 | 411 | 603  | -1.796144821 |                          |
| 9 | 30,825,000 | 30,975,000 | 412 | 888  | -0.915585391 |                          |
| 9 | 30,900,000 | 31,050,000 | 413 | 982  | 0.258229778  |                          |
| 9 | 30,975,000 | 31,125,000 | 414 | 1015 | -1.716333252 |                          |
| 9 | 31,050,000 | 31,200,000 | 415 | 1089 | -1.269048789 |                          |
| 9 | 31,125,000 | 31,275,000 | 416 | 1131 | 0.197194306  |                          |
| 9 | 31,200,000 | 31,350,000 | 417 | 756  | -0.607064234 |                          |
| 9 | 31,275,000 | 31,425,000 | 418 | 622  | -2.659571815 |                          |
| 9 | 31,350,000 | 31,500,000 | 419 | 557  | -2.595975151 |                          |
| 9 | 31,425,000 | 31,575,000 | 420 | 290  | -0.743491931 |                          |
| 9 | 31,500,000 | 31,650,000 | 421 | 294  | -0.443657425 |                          |
| 9 | 31,575,000 | 31,725,000 | 422 | 301  | -0.048370891 |                          |
| 9 | 31,650,000 | 31,800,000 | 423 | 468  | 0.647396922  |                          |

|   |            |            |     |      |              |                                         |
|---|------------|------------|-----|------|--------------|-----------------------------------------|
| 9 | 31,725,000 | 31,875,000 | 424 | 679  | 0.887345612  |                                         |
| 9 | 31,800,000 | 31,950,000 | 425 | 1154 | 0.652486583  |                                         |
| 9 | 31,875,000 | 32,025,000 | 426 | 1608 | 0.775132291  |                                         |
| 9 | 31,950,000 | 32,100,000 | 427 | 1467 | 0.884284108  | MAN1A1                                  |
| 9 | 32,025,000 | 32,175,000 | 428 | 1135 | 0.89842567   | MAN1A1                                  |
| 9 | 32,100,000 | 32,250,000 | 429 | 1139 | 0.858832901  | MAN1A1                                  |
| 9 | 32,175,000 | 32,325,000 | 430 | 1480 | 0.817651257  | MAN1A1                                  |
| 9 | 32,250,000 | 32,400,000 | 431 | 1748 | 0.472889744  | MAN1A1                                  |
| 9 | 32,325,000 | 32,475,000 | 432 | 1709 | -0.338334828 | FAM184A                                 |
| 9 | 32,400,000 | 32,550,000 | 433 | 1026 | -0.783333414 | ASF1A,FAM184A,MCM9                      |
| 9 | 32,475,000 | 32,625,000 | 434 | 396  | -0.080711411 | ASF1A,FAM184A,MCM9                      |
| 9 | 32,550,000 | 32,700,000 | 435 | 620  | 0.352933179  | ASF1A,MCM9                              |
| 9 | 32,625,000 | 32,775,000 | 436 | 580  | 0.304457072  |                                         |
| 9 | 32,700,000 | 32,850,000 | 437 | 308  | -1.615315054 | CEP85L,PLN,ENSBTAG00000047280           |
| 9 | 32,775,000 | 32,925,000 | 438 | 290  | -2.050086424 | CEP85L,PLN,ENSBTAG00000047280           |
| 9 | 32,850,000 | 33,000,000 | 439 | 371  | 0.671418539  | CEP85L                                  |
| 9 | 32,925,000 | 33,075,000 | 440 | 669  | -0.074806939 | SLC35F1                                 |
| 9 | 33,000,000 | 33,150,000 | 441 | 798  | -0.688177837 | SLC35F1                                 |
| 9 | 33,075,000 | 33,225,000 | 442 | 974  | -0.135478518 | SLC35F1                                 |
| 9 | 33,150,000 | 33,300,000 | 443 | 1011 | 0.485742821  |                                         |
| 9 | 33,225,000 | 33,375,000 | 444 | 874  | 0.792964836  |                                         |
| 9 | 33,300,000 | 33,450,000 | 445 | 808  | 0.935168541  |                                         |
| 9 | 33,375,000 | 33,525,000 | 446 | 704  | 0.852990619  |                                         |
| 9 | 33,450,000 | 33,600,000 | 447 | 634  | 0.930496948  | NEPN,NUS1                               |
| 9 | 33,525,000 | 33,675,000 | 448 | 484  | 0.72874924   | GOPC,NEPN,NUS1                          |
| 9 | 33,600,000 | 33,750,000 | 449 | 615  | 0.58981358   | DCBLD1,GOPC,NEPN                        |
| 9 | 33,675,000 | 33,825,000 | 450 | 691  | 0.679889787  | DCBLD1,ROS1                             |
| 9 | 33,750,000 | 33,900,000 | 451 | 580  | 0.755346451  | ROS1                                    |
| 9 | 33,825,000 | 33,975,000 | 452 | 477  | 0.744871162  | ROS1,VGLL2                              |
| 9 | 33,900,000 | 34,050,000 | 453 | 308  | 0.73239242   | ROS1,VGLL2                              |
| 9 | 33,975,000 | 34,125,000 | 454 | 360  | 0.805736053  |                                         |
| 9 | 34,050,000 | 34,200,000 | 455 | 451  | -0.008423334 | RFX6                                    |
| 9 | 34,125,000 | 34,275,000 | 456 | 554  | -0.280861043 | RFX6                                    |
| 9 | 34,200,000 | 34,350,000 | 457 | 732  | 0.448875439  | FAM162B,KPNA5,RFX6                      |
| 9 | 34,275,000 | 34,425,000 | 458 | 870  | 0.5700646    | FAM162B,KPNA5,RSPH4A,TMEM230,ZUFSP      |
| 9 | 34,350,000 | 34,500,000 | 459 | 896  | -0.262750661 | KPNA5,RSPH4A,TMEM230,ZUFSP              |
| 9 | 34,425,000 | 34,575,000 | 460 | 892  | -0.635942618 | SULT1C4                                 |
| 9 | 34,500,000 | 34,650,000 | 461 | 886  | -1.298147578 | FAM26D,RWDD1,SULT1C4,TRAPPC3L           |
| 9 | 34,575,000 | 34,725,000 | 462 | 711  | -1.518573859 | DSE,FAM26D,FAM26E,FAM26F,RWDD1,TRAPPC3L |
| 9 | 34,650,000 | 34,800,000 | 463 | 519  | -0.04250512  | DSE,FAM26E,FAM26F,TRAPPC3L              |
| 9 | 34,725,000 | 34,875,000 | 464 | 393  | 0.624712737  | DSE,TSPYL1                              |
| 9 | 34,800,000 | 34,950,000 | 465 | 323  | -0.037733634 | NT5DC1,TSPYL1,TSPYL4                    |
| 9 | 34,875,000 | 35,025,000 | 466 | 408  | 0.226827655  | COL10A1,NT5DC1,TSPYL1,TSPYL4            |
| 9 | 34,950,000 | 35,100,000 | 467 | 410  | 0.313919629  | COL10A1,FRK,NT5DC1                      |
| 9 | 35,025,000 | 35,175,000 | 468 | 371  | 0.021117585  | FRK                                     |
| 9 | 35,100,000 | 35,250,000 | 469 | 350  | 0.169453315  | FRK                                     |
| 9 | 35,175,000 | 35,325,000 | 470 | 479  | -0.461763832 |                                         |
| 9 | 35,250,000 | 35,400,000 | 471 | 935  | -0.144560462 |                                         |
| 9 | 35,325,000 | 35,475,000 | 472 | 928  | 0.39839425   |                                         |
| 9 | 35,400,000 | 35,550,000 | 473 | 883  | 0.892045958  |                                         |
| 9 | 35,475,000 | 35,625,000 | 474 | 1239 | 0.823555517  |                                         |
| 9 | 35,550,000 | 35,700,000 | 475 | 939  | 0.923658635  |                                         |
| 9 | 35,625,000 | 35,775,000 | 476 | 723  | 1.049952096  |                                         |

|   |            |            |     |      |              |                                   |
|---|------------|------------|-----|------|--------------|-----------------------------------|
| 9 | 35,700,000 | 35,850,000 | 477 | 879  | 0.327082913  |                                   |
| 9 | 35,775,000 | 35,925,000 | 478 | 640  | -0.125036619 |                                   |
| 9 | 35,850,000 | 36,000,000 | 479 | 570  | 0.092236988  |                                   |
| 9 | 35,925,000 | 36,075,000 | 480 | 670  | 0.345071624  |                                   |
| 9 | 36,000,000 | 36,150,000 | 481 | 743  | 0.835687762  |                                   |
| 9 | 36,075,000 | 36,225,000 | 482 | 819  | 0.570347663  |                                   |
| 9 | 36,150,000 | 36,300,000 | 483 | 808  | 0.543812331  |                                   |
| 9 | 36,225,000 | 36,375,000 | 484 | 1006 | 0.610676898  |                                   |
| 9 | 36,300,000 | 36,450,000 | 485 | 898  | 0.412598938  |                                   |
| 9 | 36,375,000 | 36,525,000 | 486 | 542  | 0.38407513   |                                   |
| 9 | 36,450,000 | 36,600,000 | 487 | 678  | 0.943279215  | HS3ST5                            |
| 9 | 36,525,000 | 36,675,000 | 488 | 945  | 0.856636584  | HS3ST5                            |
| 9 | 36,600,000 | 36,750,000 | 489 | 1413 | -0.603038312 | HS3ST5                            |
| 9 | 36,675,000 | 36,825,000 | 490 | 1382 | -1.224857047 | HS3ST5                            |
| 9 | 36,750,000 | 36,900,000 | 491 | 948  | -0.60355635  | HS3ST5                            |
| 9 | 36,825,000 | 36,975,000 | 492 | 736  | -0.786614474 | HDAC2,HS3ST5                      |
| 9 | 36,900,000 | 37,050,000 | 493 | 506  | -2.189115142 | HDAC2,MARCKS                      |
| 9 | 36,975,000 | 37,125,000 | 494 | 395  | -0.752433863 | MARCKS                            |
| 9 | 37,050,000 | 37,200,000 | 495 | 280  | 0.416398082  |                                   |
| 9 | 37,125,000 | 37,275,000 | 496 | 383  | 0.302201529  |                                   |
| 9 | 37,200,000 | 37,350,000 | 497 | 532  | 0.56647139   |                                   |
| 9 | 37,275,000 | 37,425,000 | 498 | 860  | 0.666798363  |                                   |
| 9 | 37,350,000 | 37,500,000 | 499 | 780  | 0.562793913  |                                   |
| 9 | 37,425,000 | 37,575,000 | 500 | 470  | 0.380616815  |                                   |
| 9 | 37,500,000 | 37,650,000 | 501 | 523  | 0.617963333  |                                   |
| 9 | 37,575,000 | 37,725,000 | 502 | 712  | 0.608236968  |                                   |
| 9 | 37,650,000 | 37,800,000 | 503 | 888  | 0.436390919  |                                   |
| 9 | 37,725,000 | 37,875,000 | 504 | 878  | 0.424432672  |                                   |
| 9 | 37,800,000 | 37,950,000 | 505 | 779  | 0.348407219  |                                   |
| 9 | 37,875,000 | 38,025,000 | 506 | 938  | 0.42307665   |                                   |
| 9 | 37,950,000 | 38,100,000 | 507 | 884  | 0.573644786  |                                   |
| 9 | 38,025,000 | 38,175,000 | 508 | 577  | -1.990897145 |                                   |
| 9 | 38,100,000 | 38,250,000 | 509 | 742  | -0.493917234 |                                   |
| 9 | 38,175,000 | 38,325,000 | 510 | 613  | 0.960906348  |                                   |
| 9 | 38,250,000 | 38,400,000 | 511 | 548  | 0.070442509  |                                   |
| 9 | 38,325,000 | 38,475,000 | 512 | 814  | 0.551497202  |                                   |
| 9 | 38,400,000 | 38,550,000 | 513 | 546  | 0.817630293  |                                   |
| 9 | 38,475,000 | 38,625,000 | 514 | 394  | 0.669364017  |                                   |
| 9 | 38,550,000 | 38,700,000 | 515 | 557  | 0.723778442  | LAMA4                             |
| 9 | 38,625,000 | 38,775,000 | 516 | 587  | 1.03712358   | LAMA4                             |
| 9 | 38,700,000 | 38,850,000 | 517 | 869  | 1.016632155  | FAM229B,LAMA4,TUBE1,WISP3         |
| 9 | 38,775,000 | 38,925,000 | 518 | 1146 | 1.05288441   | FAM229B,LAMA4,TUBE1,WISP3         |
| 9 | 38,850,000 | 39,000,000 | 519 | 733  | 0.61626511   | WISP3                             |
| 9 | 38,925,000 | 39,075,000 | 520 | 420  | -2.066009224 |                                   |
| 9 | 39,000,000 | 39,150,000 | 521 | 472  | -1.705760986 | FYN                               |
| 9 | 39,075,000 | 39,225,000 | 522 | 710  | -1.757315971 | FYN                               |
| 9 | 39,150,000 | 39,300,000 | 523 | 728  | -2.035855888 | FYN                               |
| 9 | 39,225,000 | 39,375,000 | 524 | 363  | -2.802002396 | FYN,TRAF3IP2                      |
| 9 | 39,300,000 | 39,450,000 | 525 | 315  | -2.628343091 | REV3L,TRAF3IP2,ENSBTAG00000039456 |
| 9 | 39,375,000 | 39,525,000 | 526 | 257  | -0.923544556 | REV3L,ENSBTAG00000039456          |
| 9 | 39,450,000 | 39,600,000 | 527 | 196  | -1.340668396 | REV3L                             |
| 9 | 39,525,000 | 39,675,000 | 528 | 450  | -0.987815137 | KIAA1919,REV3L,SLC16A10           |
| 9 | 39,600,000 | 39,750,000 | 529 | 565  | -0.867988182 | KIAA1919,SLC16A10                 |

|   |            |            |     |      |              |                                                    |
|---|------------|------------|-----|------|--------------|----------------------------------------------------|
| 9 | 39,675,000 | 39,825,000 | 530 | 445  | 0.462412244  | RPF2,SLC16A10                                      |
| 9 | 39,750,000 | 39,900,000 | 531 | 292  | 1.211108856  | GTF3C6,RPF2,SLC16A10                               |
| 9 | 39,825,000 | 39,975,000 | 532 | 198  | 1.10028272   | AMD1,GTF3C6,RPF2                                   |
| 9 | 39,900,000 | 40,050,000 | 533 | 261  | 1.207615016  | AMD1                                               |
| 9 | 39,975,000 | 40,125,000 | 534 | 356  | 0.322517472  | CDK19                                              |
| 9 | 40,050,000 | 40,200,000 | 535 | 464  | -0.055049257 | CDK19                                              |
| 9 | 40,125,000 | 40,275,000 | 536 | 691  | -0.165694613 | SLC22A16                                           |
| 9 | 40,200,000 | 40,350,000 | 537 | 643  | -0.400113221 | C9H6orf186,DDO,SLC22A16                            |
| 9 | 40,275,000 | 40,425,000 | 538 | 426  | -2.299986931 | C9H6orf186,DDO                                     |
| 9 | 40,350,000 | 40,500,000 | 539 | 629  | -1.529932    | C9H6orf186,CDC40                                   |
| 9 | 40,425,000 | 40,575,000 | 540 | 541  | -0.591634418 | C9H6orf186,CDC40,WASF1                             |
| 9 | 40,500,000 | 40,650,000 | 541 | 403  | -2.296127236 | CDC40,WASF1                                        |
| 9 | 40,575,000 | 40,725,000 | 542 | 855  | -0.931253327 | GPR6,WASF1                                         |
| 9 | 40,650,000 | 40,800,000 | 543 | 848  | -0.089393951 | GPR6                                               |
| 9 | 40,725,000 | 40,875,000 | 544 | 551  | -4.089913991 | FIG4                                               |
| 9 | 40,800,000 | 40,950,000 | 545 | 472  | -5.930013997 | FIG4                                               |
| 9 | 40,875,000 | 41,025,000 | 546 | 494  | -3.494752536 | FIG4                                               |
| 9 | 40,950,000 | 41,100,000 | 547 | 1000 | -3.467204779 | AK9,FIG4                                           |
| 9 | 41,025,000 | 41,175,000 | 548 | 903  | -3.975494322 | AK9,FIG4,ZBTB24                                    |
| 9 | 41,100,000 | 41,250,000 | 549 | 359  | -3.323496818 | AK9,CD164,MICAL1,PPIL6,SMPD2,ZBTB24                |
| 9 | 41,175,000 | 41,325,000 | 550 | 170  | -2.890274769 | CD164,MICAL1,PPIL6,SMPD2,ZBTB24,ENSBTAG00000026637 |
| 9 | 41,250,000 | 41,400,000 | 551 | 114  | -3.680873078 | CD164,ENSBTAG00000026637,ENSBTAG00000047024        |
| 9 | 41,325,000 | 41,475,000 | 552 | 171  | -2.331895862 | CEP57L1,ENSBTAG00000026637,ENSBTAG00000047024      |
| 9 | 41,400,000 | 41,550,000 | 553 | 204  | -1.61675381  | CEP57L1                                            |
| 9 | 41,475,000 | 41,625,000 | 554 | 298  | -0.850413048 | CEP57L1,SESN1                                      |
| 9 | 41,550,000 | 41,700,000 | 555 | 350  | -0.907585517 | CEP57L1,SESN1                                      |
| 9 | 41,625,000 | 41,775,000 | 556 | 499  | -0.828186256 | ARMC2,SESN1                                        |
| 9 | 41,700,000 | 41,850,000 | 557 | 614  | -0.291052355 | ARMC2                                              |
| 9 | 41,775,000 | 41,925,000 | 558 | 595  | 0.294196772  | ARMC2                                              |
| 9 | 41,850,000 | 42,000,000 | 559 | 532  | 0.330519894  |                                                    |
| 9 | 41,925,000 | 42,075,000 | 560 | 389  | 0.776383887  | FOXO3                                              |
| 9 | 42,000,000 | 42,150,000 | 561 | 366  | 0.023865922  | FOXO3                                              |
| 9 | 42,075,000 | 42,225,000 | 562 | 385  | -1.376369813 | FOXO3,LACE1                                        |
| 9 | 42,150,000 | 42,300,000 | 563 | 293  | -0.955329951 | LACE1                                              |
| 9 | 42,225,000 | 42,375,000 | 564 | 169  | 0.183327656  | LACE1,SNX3,ENSBTAG00000045504                      |
| 9 | 42,300,000 | 42,450,000 | 565 | 191  | 0.785014579  | LACE1,NR2E1,SNX3,ENSBTAG00000045504                |
| 9 | 42,375,000 | 42,525,000 | 566 | 219  | 0.881244081  | NR2E1,SNX3                                         |
| 9 | 42,450,000 | 42,600,000 | 567 | 264  | 0.946875798  | NR2E1,OSTM1,ENSBTAG00000023792                     |
| 9 | 42,525,000 | 42,675,000 | 568 | 324  | 1.246196735  | OSTM1,SEC63,ENSBTAG00000023792                     |
| 9 | 42,600,000 | 42,750,000 | 569 | 272  | 1.349645941  | SEC63                                              |
| 9 | 42,675,000 | 42,825,000 | 570 | 583  | 1.303377577  | SCML4,SEC63                                        |
| 9 | 42,750,000 | 42,900,000 | 571 | 769  | 0.860476765  | SCML4                                              |
| 9 | 42,825,000 | 42,975,000 | 572 | 456  | -0.461738734 | SCML4,SOBP                                         |
| 9 | 42,900,000 | 43,050,000 | 573 | 404  | -1.116803355 | SOBP                                               |
| 9 | 42,975,000 | 43,125,000 | 574 | 359  | 0.141522758  | PDSS2,SOBP                                         |
| 9 | 43,050,000 | 43,200,000 | 575 | 338  | 0.165462031  | PDSS2,SOBP                                         |
| 9 | 43,125,000 | 43,275,000 | 576 | 346  | -0.436433668 | PDSS2                                              |
| 9 | 43,200,000 | 43,350,000 | 577 | 399  | 0.016621046  | PDSS2                                              |
| 9 | 43,275,000 | 43,425,000 | 578 | 594  | 0.815940634  | BEND3,PDSS2                                        |
| 9 | 43,350,000 | 43,500,000 | 579 | 514  | 0.857556916  | BEND3,C9H6ORF203,PDSS2,ENSBTAG00000045655          |
| 9 | 43,425,000 | 43,575,000 | 580 | 553  | 0.938980254  | C9H6ORF203,ENSBTAG00000045655                      |
| 9 | 43,500,000 | 43,650,000 | 581 | 711  | 1.015582856  |                                                    |



|   |            |            |     |      |              |                                |
|---|------------|------------|-----|------|--------------|--------------------------------|
| 9 | 43,575,000 | 43,725,000 | 582 | 689  | 1.103838296  |                                |
| 9 | 43,650,000 | 43,800,000 | 583 | 599  | 0.956365921  | QRSL1                          |
| 9 | 43,725,000 | 43,875,000 | 584 | 590  | 0.799904951  | QRSL1,RTN4IP1                  |
| 9 | 43,800,000 | 43,950,000 | 585 | 783  | 0.768128846  | AIM1,QRSL1,RTN4IP1             |
| 9 | 43,875,000 | 44,025,000 | 586 | 885  | -1.100167013 | AIM1,RTN4IP1                   |
| 9 | 43,950,000 | 44,100,000 | 587 | 1008 | -3.592203612 |                                |
| 9 | 44,025,000 | 44,175,000 | 588 | 972  | -3.006240422 | ATG5                           |
| 9 | 44,100,000 | 44,250,000 | 589 | 550  | -1.057847009 | ATG5                           |
| 9 | 44,175,000 | 44,325,000 | 590 | 316  | -0.122665511 | ATG5                           |
| 9 | 44,250,000 | 44,400,000 | 591 | 398  | -0.899310713 | PRDM1                          |
| 9 | 44,325,000 | 44,475,000 | 592 | 359  | -1.131148259 | PRDM1                          |
| 9 | 44,400,000 | 44,550,000 | 593 | 210  | -0.432036406 |                                |
| 9 | 44,475,000 | 44,625,000 | 594 | 296  | 0.221540582  |                                |
| 9 | 44,550,000 | 44,700,000 | 595 | 427  | 0.288235496  | ENSBTAG00000020368             |
| 9 | 44,625,000 | 44,775,000 | 596 | 387  | -0.104220353 | ENSBTAG00000020368             |
| 9 | 44,700,000 | 44,850,000 | 597 | 631  | 0.519894813  |                                |
| 9 | 44,775,000 | 44,925,000 | 598 | 904  | 0.148708774  |                                |
| 9 | 44,850,000 | 45,000,000 | 599 | 717  | -0.735007077 |                                |
| 9 | 44,925,000 | 45,075,000 | 600 | 327  | -0.786083302 |                                |
| 9 | 45,000,000 | 45,150,000 | 601 | 278  | 0.571167861  |                                |
| 9 | 45,075,000 | 45,225,000 | 602 | 530  | 0.942589967  | PREP                           |
| 9 | 45,150,000 | 45,300,000 | 603 | 512  | 1.127566963  | PREP                           |
| 9 | 45,225,000 | 45,375,000 | 604 | 419  | 1.174653659  | PREP                           |
| 9 | 45,300,000 | 45,450,000 | 605 | 534  | 0.958574665  | PREP,ENSBTAG00000033218        |
| 9 | 45,375,000 | 45,525,000 | 606 | 624  | 0.457158189  | BVES,POPDC3,ENSBTAG00000033218 |
| 9 | 45,450,000 | 45,600,000 | 607 | 484  | -0.108263786 | BVES,LIN28B,POPDC3             |
| 9 | 45,525,000 | 45,675,000 | 608 | 348  | -1.123324704 | LIN28B                         |
| 9 | 45,600,000 | 45,750,000 | 609 | 367  | -0.552167663 | HACE1                          |
| 9 | 45,675,000 | 45,825,000 | 610 | 370  | 0.326809375  | HACE1                          |
| 9 | 45,750,000 | 45,900,000 | 611 | 331  | 0.140436581  | HACE1                          |
| 9 | 45,825,000 | 45,975,000 | 612 | 255  | 0.602608491  | HACE1                          |
| 9 | 45,900,000 | 46,050,000 | 613 | 179  | 0.959839746  |                                |
| 9 | 45,975,000 | 46,125,000 | 614 | 218  | -0.070035281 |                                |
| 9 | 46,050,000 | 46,200,000 | 615 | 298  | -0.37985747  |                                |
| 9 | 46,125,000 | 46,275,000 | 616 | 249  | -0.088808499 |                                |
| 9 | 46,200,000 | 46,350,000 | 617 | 187  | 0.985011773  |                                |
| 9 | 46,275,000 | 46,425,000 | 618 | 483  | -0.541113938 |                                |
| 9 | 46,350,000 | 46,500,000 | 619 | 729  | -0.611725933 |                                |
| 9 | 46,425,000 | 46,575,000 | 620 | 667  | 0.388298081  |                                |
| 9 | 46,500,000 | 46,650,000 | 621 | 594  | 0.700088832  |                                |
| 9 | 46,575,000 | 46,725,000 | 622 | 740  | 0.582389416  |                                |
| 9 | 46,650,000 | 46,800,000 | 623 | 1026 | 0.442630802  |                                |
| 9 | 46,725,000 | 46,875,000 | 624 | 714  | 0.291839342  |                                |
| 9 | 46,800,000 | 46,950,000 | 625 | 322  | 0.441484393  |                                |
| 9 | 46,875,000 | 47,025,000 | 626 | 363  | 0.633266204  |                                |
| 9 | 46,950,000 | 47,100,000 | 627 | 429  | 0.717494891  |                                |
| 9 | 47,025,000 | 47,175,000 | 628 | 423  | 0.344079324  |                                |
| 9 | 47,100,000 | 47,250,000 | 629 | 359  | 0.410408803  |                                |
| 9 | 47,175,000 | 47,325,000 | 630 | 457  | 0.939013132  |                                |
| 9 | 47,250,000 | 47,400,000 | 631 | 924  | 0.914684039  |                                |
| 9 | 47,325,000 | 47,475,000 | 632 | 1386 | -0.151555007 |                                |
| 9 | 47,400,000 | 47,550,000 | 633 | 1304 | -0.106777189 |                                |
| 9 | 47,475,000 | 47,625,000 | 634 | 1102 | 0.614688581  |                                |

|   |            |            |     |      |              |                                           |
|---|------------|------------|-----|------|--------------|-------------------------------------------|
| 9 | 47,550,000 | 47,700,000 | 635 | 838  | -0.212270022 |                                           |
| 9 | 47,625,000 | 47,775,000 | 636 | 537  | -0.264492841 |                                           |
| 9 | 47,700,000 | 47,850,000 | 637 | 456  | 0.724341527  |                                           |
| 9 | 47,775,000 | 47,925,000 | 638 | 644  | 1.221303164  |                                           |
| 9 | 47,850,000 | 48,000,000 | 639 | 1214 | 1.340140292  |                                           |
| 9 | 47,925,000 | 48,075,000 | 640 | 1344 | 1.188307006  |                                           |
| 9 | 48,000,000 | 48,150,000 | 641 | 1078 | 0.543574937  |                                           |
| 9 | 48,075,000 | 48,225,000 | 642 | 1208 | -0.618888076 |                                           |
| 9 | 48,150,000 | 48,300,000 | 643 | 1032 | -1.278092222 |                                           |
| 9 | 48,225,000 | 48,375,000 | 644 | 856  | -0.447187778 |                                           |
| 9 | 48,300,000 | 48,450,000 | 645 | 764  | 0.042553599  |                                           |
| 9 | 48,375,000 | 48,525,000 | 646 | 559  | -0.684218344 | GRIK2                                     |
| 9 | 48,450,000 | 48,600,000 | 647 | 569  | -0.350490996 | GRIK2                                     |
| 9 | 48,525,000 | 48,675,000 | 648 | 752  | -0.324599514 | GRIK2                                     |
| 9 | 48,600,000 | 48,750,000 | 649 | 841  | -0.869268012 | GRIK2                                     |
| 9 | 48,675,000 | 48,825,000 | 650 | 551  | -0.776985108 | GRIK2                                     |
| 9 | 48,750,000 | 48,900,000 | 651 | 345  | -0.257732163 | GRIK2                                     |
| 9 | 48,825,000 | 48,975,000 | 652 | 362  | -0.084135727 | GRIK2                                     |
| 9 | 48,900,000 | 49,050,000 | 653 | 364  | -0.017733031 | GRIK2                                     |
| 9 | 48,975,000 | 49,125,000 | 654 | 382  | 0.176775548  | GRIK2,ENSBTAG00000030490                  |
| 9 | 49,050,000 | 49,200,000 | 655 | 383  | 0.933964858  | GRIK2,ENSBTAG00000030490                  |
| 9 | 49,125,000 | 49,275,000 | 656 | 361  | 0.85383418   | GRIK2                                     |
| 9 | 49,200,000 | 49,350,000 | 657 | 525  | -1.326236478 | GRIK2                                     |
| 9 | 49,275,000 | 49,425,000 | 658 | 796  | -1.539825869 |                                           |
| 9 | 49,350,000 | 49,500,000 | 659 | 889  | -0.706075657 |                                           |
| 9 | 49,425,000 | 49,575,000 | 660 | 836  | -1.578991683 |                                           |
| 9 | 49,500,000 | 49,650,000 | 661 | 734  | -2.670587356 |                                           |
| 9 | 49,575,000 | 49,725,000 | 662 | 425  | -2.327176982 | ASCC3                                     |
| 9 | 49,650,000 | 49,800,000 | 663 | 287  | -0.77296007  | ASCC3                                     |
| 9 | 49,725,000 | 49,875,000 | 664 | 570  | -3.586889868 | ASCC3,ENSBTAG00000045624                  |
| 9 | 49,800,000 | 49,950,000 | 665 | 696  | -4.834119596 | ASCC3,ENSBTAG00000045624                  |
| 9 | 49,875,000 | 50,025,000 | 666 | 569  | -3.999841757 | ASCC3                                     |
| 9 | 49,950,000 | 50,100,000 | 667 | 776  | -0.90067287  | ASCC3                                     |
| 9 | 50,025,000 | 50,175,000 | 668 | 788  | 0.441513005  | ASCC3,SIM1                                |
| 9 | 50,100,000 | 50,250,000 | 669 | 455  | 0.411972068  | ASCC3,SIM1                                |
| 9 | 50,175,000 | 50,325,000 | 670 | 285  | -0.180331586 | SIM1                                      |
| 9 | 50,250,000 | 50,400,000 | 671 | 405  | 0.507517587  |                                           |
| 9 | 50,325,000 | 50,475,000 | 672 | 832  | 0.515818774  |                                           |
| 9 | 50,400,000 | 50,550,000 | 673 | 999  | 0.161339673  | ENSBTAG00000014104                        |
| 9 | 50,475,000 | 50,625,000 | 674 | 942  | -0.736223747 | MCHR2,ENSBTAG00000014104                  |
| 9 | 50,550,000 | 50,700,000 | 675 | 1107 | -0.060496474 | MCHR2                                     |
| 9 | 50,625,000 | 50,775,000 | 676 | 1079 | 0.619947347  |                                           |
| 9 | 50,700,000 | 50,850,000 | 677 | 679  | 0.49650509   |                                           |
| 9 | 50,775,000 | 50,925,000 | 678 | 346  | 0.766463286  | CCNC,PRDM13                               |
| 9 | 50,850,000 | 51,000,000 | 679 | 284  | 1.060830748  | CCNC,PRDM13,USP45,ENSBTAG00000038931      |
| 9 | 50,925,000 | 51,075,000 | 680 | 303  | 0.960917395  | CCNC,COQ3,SFRS18,USP45,ENSBTAG00000038931 |
| 9 | 51,000,000 | 51,150,000 | 681 | 310  | 0.432951253  | COQ3,FAXC,SFRS18,USP45                    |
| 9 | 51,075,000 | 51,225,000 | 682 | 370  | -0.511586698 | COQ3,FAXC                                 |
| 9 | 51,150,000 | 51,300,000 | 683 | 945  | -1.899663233 | FAXC                                      |
| 9 | 51,225,000 | 51,375,000 | 684 | 1144 | -1.953545715 |                                           |
| 9 | 51,300,000 | 51,450,000 | 685 | 597  | -0.557452042 |                                           |
| 9 | 51,375,000 | 51,525,000 | 686 | 339  | 0.621460363  | FBXL4                                     |
| 9 | 51,450,000 | 51,600,000 | 687 | 361  | 0.244978049  | FBXL4,POU3F2                              |

|   |            |            |     |      |              |                    |
|---|------------|------------|-----|------|--------------|--------------------|
| 9 | 51,525,000 | 51,675,000 | 688 | 565  | 0.454631258  | FBXL4,POU3F2       |
| 9 | 51,600,000 | 51,750,000 | 689 | 709  | 0.081728719  | POU3F2             |
| 9 | 51,675,000 | 51,825,000 | 690 | 937  | 0.768060767  |                    |
| 9 | 51,750,000 | 51,900,000 | 691 | 892  | 0.843940665  |                    |
| 9 | 51,825,000 | 51,975,000 | 692 | 580  | -0.564010748 |                    |
| 9 | 51,900,000 | 52,050,000 | 693 | 490  | -0.8020802   |                    |
| 9 | 51,975,000 | 52,125,000 | 694 | 511  | 0.867353928  |                    |
| 9 | 52,050,000 | 52,200,000 | 695 | 596  | 0.738496245  |                    |
| 9 | 52,125,000 | 52,275,000 | 696 | 601  | 0.392957026  |                    |
| 9 | 52,200,000 | 52,350,000 | 697 | 698  | 0.336351069  |                    |
| 9 | 52,275,000 | 52,425,000 | 698 | 630  | 0.372721671  |                    |
| 9 | 52,350,000 | 52,500,000 | 699 | 538  | 0.392185211  |                    |
| 9 | 52,425,000 | 52,575,000 | 700 | 715  | 0.430181481  |                    |
| 9 | 52,500,000 | 52,650,000 | 701 | 662  | 0.42576163   |                    |
| 9 | 52,575,000 | 52,725,000 | 702 | 688  | -1.675631703 |                    |
| 9 | 52,650,000 | 52,800,000 | 703 | 771  | -2.729371018 |                    |
| 9 | 52,725,000 | 52,875,000 | 704 | 526  | -2.165625299 |                    |
| 9 | 52,800,000 | 52,950,000 | 705 | 410  | -0.791729649 | ENSBTAG00000017170 |
| 9 | 52,875,000 | 53,025,000 | 706 | 595  | 0.449724609  | ENSBTAG00000017170 |
| 9 | 52,950,000 | 53,100,000 | 707 | 615  | 0.761196301  |                    |
| 9 | 53,025,000 | 53,175,000 | 708 | 523  | 0.811926103  |                    |
| 9 | 53,100,000 | 53,250,000 | 709 | 607  | 0.080172599  | MMS22L             |
| 9 | 53,175,000 | 53,325,000 | 710 | 660  | -0.024464888 | MMS22L             |
| 9 | 53,250,000 | 53,400,000 | 711 | 878  | 0.368791581  | KLHL32,MMS22L      |
| 9 | 53,325,000 | 53,475,000 | 712 | 1073 | 0.072710013  | KLHL32,MMS22L      |
| 9 | 53,400,000 | 53,550,000 | 713 | 900  | -0.141142413 | KLHL32             |
| 9 | 53,475,000 | 53,625,000 | 714 | 435  | 0.000526302  |                    |
| 9 | 53,550,000 | 53,700,000 | 715 | 612  | 0.827924695  | NDUF4F4            |
| 9 | 53,625,000 | 53,775,000 | 716 | 987  | 0.803303523  | NDUF4F4            |
| 9 | 53,700,000 | 53,850,000 | 717 | 746  | 0.273410155  | GPR63              |
| 9 | 53,775,000 | 53,925,000 | 718 | 845  | -2.060804665 | GPR63              |
| 9 | 53,850,000 | 54,000,000 | 719 | 916  | -1.580445469 | FHL5               |
| 9 | 53,925,000 | 54,075,000 | 720 | 655  | 0.830351356  | FHL5,UFL1          |
| 9 | 54,000,000 | 54,150,000 | 721 | 461  | 0.793282719  | FHL5,UFL1          |
| 9 | 54,075,000 | 54,225,000 | 722 | 450  | 0.504953907  | UFL1               |
| 9 | 54,150,000 | 54,300,000 | 723 | 555  | 0.705491943  |                    |
| 9 | 54,225,000 | 54,375,000 | 724 | 468  | 0.900710108  |                    |
| 9 | 54,300,000 | 54,450,000 | 725 | 470  | -0.477137895 | FUT9               |
| 9 | 54,375,000 | 54,525,000 | 726 | 610  | -0.250822647 | FUT9               |
| 9 | 54,450,000 | 54,600,000 | 727 | 864  | 0.743885312  |                    |
| 9 | 54,525,000 | 54,675,000 | 728 | 815  | 0.687396369  |                    |
| 9 | 54,600,000 | 54,750,000 | 729 | 776  | 0.101428729  |                    |
| 9 | 54,675,000 | 54,825,000 | 730 | 825  | -0.055929949 | ENSBTAG00000045583 |
| 9 | 54,750,000 | 54,900,000 | 731 | 535  | -0.070184112 | ENSBTAG00000045583 |
| 9 | 54,825,000 | 54,975,000 | 732 | 449  | 0.345966186  |                    |
| 9 | 54,900,000 | 55,050,000 | 733 | 464  | 0.725146571  |                    |
| 9 | 54,975,000 | 55,125,000 | 734 | 644  | -0.175239865 | MANEA              |
| 9 | 55,050,000 | 55,200,000 | 735 | 533  | -0.551163078 | MANEA              |
| 9 | 55,125,000 | 55,275,000 | 736 | 288  | 0.096917301  | MANEA              |
| 9 | 55,200,000 | 55,350,000 | 737 | 465  | 0.590132797  |                    |
| 9 | 55,275,000 | 55,425,000 | 738 | 576  | 0.120645066  |                    |
| 9 | 55,350,000 | 55,500,000 | 739 | 548  | 0.067492288  |                    |
| 9 | 55,425,000 | 55,575,000 | 740 | 695  | 0.287240291  |                    |

|   |            |            |     |      |              |                    |
|---|------------|------------|-----|------|--------------|--------------------|
| 9 | 55,500,000 | 55,650,000 | 741 | 981  | 0.808078677  |                    |
| 9 | 55,575,000 | 55,725,000 | 742 | 972  | 0.99729484   |                    |
| 9 | 55,650,000 | 55,800,000 | 743 | 1114 | 0.08174554   |                    |
| 9 | 55,725,000 | 55,875,000 | 744 | 929  | -0.209459584 |                    |
| 9 | 55,800,000 | 55,950,000 | 745 | 683  | -0.328634656 |                    |
| 9 | 55,875,000 | 56,025,000 | 746 | 1147 | -0.553530161 |                    |
| 9 | 55,950,000 | 56,100,000 | 747 | 1372 | -0.890935176 |                    |
| 9 | 56,025,000 | 56,175,000 | 748 | 1115 | -0.392131123 |                    |
| 9 | 56,100,000 | 56,250,000 | 749 | 656  | 0.625469444  |                    |
| 9 | 56,175,000 | 56,325,000 | 750 | 746  | 0.808062009  |                    |
| 9 | 56,250,000 | 56,400,000 | 751 | 1325 | 0.624917323  | ENSBTAG00000033083 |
| 9 | 56,325,000 | 56,475,000 | 752 | 1378 | 0.264901822  | ENSBTAG00000033083 |
| 9 | 56,400,000 | 56,550,000 | 753 | 1352 | -0.110245252 |                    |
| 9 | 56,475,000 | 56,625,000 | 754 | 1272 | 0.025357024  |                    |
| 9 | 56,550,000 | 56,700,000 | 755 | 1033 | -0.016100543 |                    |
| 9 | 56,625,000 | 56,775,000 | 756 | 1040 | 0.135663618  |                    |
| 9 | 56,700,000 | 56,850,000 | 757 | 784  | 0.419017415  |                    |
| 9 | 56,775,000 | 56,925,000 | 758 | 629  | 0.440294343  |                    |
| 9 | 56,850,000 | 57,000,000 | 759 | 1030 | 0.325303666  |                    |
| 9 | 56,925,000 | 57,075,000 | 760 | 977  | 0.390073229  |                    |
| 9 | 57,000,000 | 57,150,000 | 761 | 730  | 0.45268725   |                    |
| 9 | 57,075,000 | 57,225,000 | 762 | 1094 | -1.18031698  |                    |
| 9 | 57,150,000 | 57,300,000 | 763 | 1117 | -0.952822376 |                    |
| 9 | 57,225,000 | 57,375,000 | 764 | 723  | 0.258497959  |                    |
| 9 | 57,300,000 | 57,450,000 | 765 | 564  | -0.914981235 |                    |
| 9 | 57,375,000 | 57,525,000 | 766 | 833  | 0.241541936  | ENSBTAG00000003743 |
| 9 | 57,450,000 | 57,600,000 | 767 | 689  | 0.707067949  | ENSBTAG00000003743 |
| 9 | 57,525,000 | 57,675,000 | 768 | 506  | -0.130143571 | EPHA7              |
| 9 | 57,600,000 | 57,750,000 | 769 | 637  | -0.051578764 | EPHA7              |
| 9 | 57,675,000 | 57,825,000 | 770 | 534  | -0.572476949 | EPHA7              |
| 9 | 57,750,000 | 57,900,000 | 771 | 692  | -0.140174908 | EPHA7              |
| 9 | 57,825,000 | 57,975,000 | 772 | 1000 | 0.687212677  | EPHA7              |
| 9 | 57,900,000 | 58,050,000 | 773 | 1029 | 0.214291631  |                    |
| 9 | 57,975,000 | 58,125,000 | 774 | 1032 | 0.152038282  |                    |
| 9 | 58,050,000 | 58,200,000 | 775 | 1311 | 0.494411623  |                    |
| 9 | 58,125,000 | 58,275,000 | 776 | 1117 | 0.467022605  |                    |
| 9 | 58,200,000 | 58,350,000 | 777 | 843  | 0.93770859   |                    |
| 9 | 58,275,000 | 58,425,000 | 778 | 1060 | 0.784008217  |                    |
| 9 | 58,350,000 | 58,500,000 | 779 | 1274 | 0.767905734  |                    |
| 9 | 58,425,000 | 58,575,000 | 780 | 1263 | 0.253591797  |                    |
| 9 | 58,500,000 | 58,650,000 | 781 | 1134 | 0.143097869  |                    |
| 9 | 58,575,000 | 58,725,000 | 782 | 1169 | 0.305338757  |                    |
| 9 | 58,650,000 | 58,800,000 | 783 | 1006 | -0.599155561 |                    |
| 9 | 58,725,000 | 58,875,000 | 784 | 715  | -0.99146169  |                    |
| 9 | 58,800,000 | 58,950,000 | 785 | 807  | 0.362418891  |                    |
| 9 | 58,875,000 | 59,025,000 | 786 | 1010 | -0.03468367  |                    |
| 9 | 58,950,000 | 59,100,000 | 787 | 1084 | -0.388121218 |                    |
| 9 | 59,025,000 | 59,175,000 | 788 | 1212 | 0.250640095  |                    |
| 9 | 59,100,000 | 59,250,000 | 789 | 1246 | -0.817999612 |                    |
| 9 | 59,175,000 | 59,325,000 | 790 | 1289 | -1.649748444 |                    |
| 9 | 59,250,000 | 59,400,000 | 791 | 1213 | 0.268203631  |                    |
| 9 | 59,325,000 | 59,475,000 | 792 | 812  | 0.382795365  |                    |
| 9 | 59,400,000 | 59,550,000 | 793 | 724  | -0.539582919 |                    |

|   |            |            |     |      |              |                                            |
|---|------------|------------|-----|------|--------------|--------------------------------------------|
| 9 | 59,475,000 | 59,625,000 | 794 | 905  | -0.454633889 |                                            |
| 9 | 59,550,000 | 59,700,000 | 795 | 1066 | 0.588664631  |                                            |
| 9 | 59,625,000 | 59,775,000 | 796 | 942  | 0.892311638  |                                            |
| 9 | 59,700,000 | 59,850,000 | 797 | 662  | 0.331740609  |                                            |
| 9 | 59,775,000 | 59,925,000 | 798 | 875  | 0.580499235  |                                            |
| 9 | 59,850,000 | 60,000,000 | 799 | 1111 | 0.703694352  |                                            |
| 9 | 59,925,000 | 60,075,000 | 800 | 1001 | 0.700028049  |                                            |
| 9 | 60,000,000 | 60,150,000 | 801 | 690  | 0.785057489  |                                            |
| 9 | 60,075,000 | 60,225,000 | 802 | 579  | -1.059126561 |                                            |
| 9 | 60,150,000 | 60,300,000 | 803 | 698  | -0.427323256 |                                            |
| 9 | 60,225,000 | 60,375,000 | 804 | 607  | 0.442923799  |                                            |
| 9 | 60,300,000 | 60,450,000 | 805 | 861  | -0.832293563 |                                            |
| 9 | 60,375,000 | 60,525,000 | 806 | 792  | -0.7815872   |                                            |
| 9 | 60,450,000 | 60,600,000 | 807 | 359  | -0.4877519   | MAP3K7                                     |
| 9 | 60,525,000 | 60,675,000 | 808 | 448  | 0.110499012  | MAP3K7                                     |
| 9 | 60,600,000 | 60,750,000 | 809 | 571  | 0.544467269  | MAP3K7                                     |
| 9 | 60,675,000 | 60,825,000 | 810 | 649  | 0.374459658  |                                            |
| 9 | 60,750,000 | 60,900,000 | 811 | 477  | 0.785702068  |                                            |
| 9 | 60,825,000 | 60,975,000 | 812 | 285  | 1.084483394  |                                            |
| 9 | 60,900,000 | 61,050,000 | 813 | 285  | 1.232976313  |                                            |
| 9 | 60,975,000 | 61,125,000 | 814 | 343  | 1.122876846  | BACH2,ENSBTAG00000047479                   |
| 9 | 61,050,000 | 61,200,000 | 815 | 592  | 0.158740364  | BACH2,ENSBTAG00000047479                   |
| 9 | 61,125,000 | 61,275,000 | 816 | 552  | -0.919268498 | BACH2,CASP8AP2,GJA10                       |
| 9 | 61,200,000 | 61,350,000 | 817 | 331  | -1.348225268 | BACH2,CASP8AP2,GJA10,MDN1                  |
| 9 | 61,275,000 | 61,425,000 | 818 | 352  | 0.329495954  | MDN1                                       |
| 9 | 61,350,000 | 61,500,000 | 819 | 493  | 0.982463249  | ANKRD6,LYRM2,MDN1                          |
| 9 | 61,425,000 | 61,575,000 | 820 | 462  | 0.932843836  | ANKRD6,LYRM2,MDN1                          |
| 9 | 61,500,000 | 61,650,000 | 821 | 553  | -0.576289513 | ANKRD6,RRAGD                               |
| 9 | 61,575,000 | 61,725,000 | 822 | 477  | -0.910955021 | ANKRD6,GABRR2,RRAGD                        |
| 9 | 61,650,000 | 61,800,000 | 823 | 267  | 0.183113542  | GABRR2,RRAGD,UBE2J1                        |
| 9 | 61,725,000 | 61,875,000 | 824 | 393  | 1.03181351   | GABRR1,PM20D2,RRAGD,UBE2J1                 |
| 9 | 61,800,000 | 61,950,000 | 825 | 316  | 1.197374776  | GABRR1,PM20D2,PNRC1,SRSF12                 |
| 9 | 61,875,000 | 62,025,000 | 826 | 204  | 1.131567812  | PNRC1,RNGTT,SRSF12                         |
| 9 | 61,950,000 | 62,100,000 | 827 | 233  | 0.262111491  | RNGTT                                      |
| 9 | 62,025,000 | 62,175,000 | 828 | 279  | -1.726799168 | RNGTT                                      |
| 9 | 62,100,000 | 62,250,000 | 829 | 307  | -1.842516745 | RNGTT                                      |
| 9 | 62,175,000 | 62,325,000 | 830 | 375  | -1.065320987 | RNGTT                                      |
| 9 | 62,250,000 | 62,400,000 | 831 | 618  | 0.105543668  |                                            |
| 9 | 62,325,000 | 62,475,000 | 832 | 609  | 0.208879291  |                                            |
| 9 | 62,400,000 | 62,550,000 | 833 | 443  | -0.235484061 |                                            |
| 9 | 62,475,000 | 62,625,000 | 834 | 421  | 0.22180158   |                                            |
| 9 | 62,550,000 | 62,700,000 | 835 | 323  | 0.356634521  | CNR1                                       |
| 9 | 62,625,000 | 62,775,000 | 836 | 350  | 0.44984881   | CNR1,SPACA1                                |
| 9 | 62,700,000 | 62,850,000 | 837 | 571  | 0.499275413  | SPACA1                                     |
| 9 | 62,775,000 | 62,925,000 | 838 | 706  | 0.405461885  | SPACA1                                     |
| 9 | 62,850,000 | 63,000,000 | 839 | 802  | 0.436667956  |                                            |
| 9 | 62,925,000 | 63,075,000 | 840 | 873  | 0.689620983  |                                            |
| 9 | 63,000,000 | 63,150,000 | 841 | 597  | 0.676006224  | AKIRIN2                                    |
| 9 | 63,075,000 | 63,225,000 | 842 | 287  | 0.71060976   | AKIRIN2,ORC3                               |
| 9 | 63,150,000 | 63,300,000 | 843 | 216  | 0.78897925   | AKIRIN2,ORC3,RARS2                         |
| 9 | 63,225,000 | 63,375,000 | 844 | 242  | 0.817426505  | ORC3,RARS2,SLC35A1,ENSBTAG00000014054      |
| 9 | 63,300,000 | 63,450,000 | 845 | 351  | 1.170936894  | C9H6orf163,SLC35A1,ENSBTAG00000014054      |
| 9 | 63,375,000 | 63,525,000 | 846 | 313  | 1.206742165  | C9H6orf163,SMIM8,ZNF292,ENSBTAG00000014054 |

|   |            |            |     |      |              |                                             |
|---|------------|------------|-----|------|--------------|---------------------------------------------|
| 9 | 63,450,000 | 63,600,000 | 847 | 186  | 1.117362414  | C9H6orf163,SMIM8,ZNF292                     |
| 9 | 63,525,000 | 63,675,000 | 848 | 175  | 1.174177239  | ZNF292                                      |
| 9 | 63,600,000 | 63,750,000 | 849 | 188  | 0.438932087  | CGA,ZNF292                                  |
| 9 | 63,675,000 | 63,825,000 | 850 | 307  | -0.052174379 | CGA,HTR1E,ENSBTAG00000047011                |
| 9 | 63,750,000 | 63,900,000 | 851 | 782  | 0.12070636   | HTR1E,ENSBTAG00000047011                    |
| 9 | 63,825,000 | 63,975,000 | 852 | 1128 | 0.434811427  |                                             |
| 9 | 63,900,000 | 64,050,000 | 853 | 1147 | 0.797587379  |                                             |
| 9 | 63,975,000 | 64,125,000 | 854 | 779  | 0.843160047  |                                             |
| 9 | 64,050,000 | 64,200,000 | 855 | 406  | 0.374229699  |                                             |
| 9 | 64,125,000 | 64,275,000 | 856 | 747  | -0.84369829  |                                             |
| 9 | 64,200,000 | 64,350,000 | 857 | 904  | -1.30744904  |                                             |
| 9 | 64,275,000 | 64,425,000 | 858 | 629  | -0.548063014 |                                             |
| 9 | 64,350,000 | 64,500,000 | 859 | 423  | -0.860622811 |                                             |
| 9 | 64,425,000 | 64,575,000 | 860 | 686  | -1.540216346 |                                             |
| 9 | 64,500,000 | 64,650,000 | 861 | 963  | -1.437484449 |                                             |
| 9 | 64,575,000 | 64,725,000 | 862 | 751  | -0.702256113 | SYNCRIP                                     |
| 9 | 64,650,000 | 64,800,000 | 863 | 539  | 1.004820548  | SNX14,SYNCRIP                               |
| 9 | 64,725,000 | 64,875,000 | 864 | 698  | 1.127635307  | SNX14,SYNCRIP,ENSBTAG00000045976            |
| 9 | 64,800,000 | 64,950,000 | 865 | 814  | -1.315614193 | SNX14,ENSBTAG00000011330,ENSBTAG00000045976 |
| 9 | 64,875,000 | 65,025,000 | 866 | 864  | -2.428704994 | ENSBTAG00000011330                          |
| 9 | 64,950,000 | 65,100,000 | 867 | 859  | -1.308660386 |                                             |
| 9 | 65,025,000 | 65,175,000 | 868 | 582  | -0.676599897 |                                             |
| 9 | 65,100,000 | 65,250,000 | 869 | 488  | 0.027027303  |                                             |
| 9 | 65,175,000 | 65,325,000 | 870 | 451  | 0.557914635  |                                             |
| 9 | 65,250,000 | 65,400,000 | 871 | 451  | 0.137271239  |                                             |
| 9 | 65,325,000 | 65,475,000 | 872 | 636  | -0.398316219 |                                             |
| 9 | 65,400,000 | 65,550,000 | 873 | 816  | 0.000469688  |                                             |
| 9 | 65,475,000 | 65,625,000 | 874 | 825  | 0.200284711  | TBX18                                       |
| 9 | 65,550,000 | 65,700,000 | 875 | 707  | -0.446328749 | TBX18                                       |
| 9 | 65,625,000 | 65,775,000 | 876 | 600  | -1.500586741 |                                             |
| 9 | 65,700,000 | 65,850,000 | 877 | 701  | -0.302807531 |                                             |
| 9 | 65,775,000 | 65,925,000 | 878 | 823  | 0.610080986  |                                             |
| 9 | 65,850,000 | 66,000,000 | 879 | 774  | -0.483643078 |                                             |
| 9 | 65,925,000 | 66,075,000 | 880 | 622  | -1.871651311 |                                             |
| 9 | 66,000,000 | 66,150,000 | 881 | 1023 | -2.174772832 | KIAA1009                                    |
| 9 | 66,075,000 | 66,225,000 | 882 | 1393 | -1.290333267 | KIAA1009,MRAP2                              |
| 9 | 66,150,000 | 66,300,000 | 883 | 1115 | 0.340559188  | KIAA1009,MRAP2                              |
| 9 | 66,225,000 | 66,375,000 | 884 | 1010 | 0.975174247  | MRAP2                                       |
| 9 | 66,300,000 | 66,450,000 | 885 | 1196 | 0.432380121  | CYB5R4                                      |
| 9 | 66,375,000 | 66,525,000 | 886 | 1210 | -0.406565923 | CYB5R4,RIPPLY2                              |
| 9 | 66,450,000 | 66,600,000 | 887 | 938  | 0.025342936  | CYB5R4,RIPPLY2                              |
| 9 | 66,525,000 | 66,675,000 | 888 | 810  | 0.293523527  | ENSBTAG00000026578                          |
| 9 | 66,600,000 | 66,750,000 | 889 | 814  | 0.298771843  | THEMIS,ENSBTAG00000026578                   |
| 9 | 66,675,000 | 66,825,000 | 890 | 600  | 0.096047833  | THEMIS                                      |
| 9 | 66,750,000 | 66,900,000 | 891 | 306  | -0.36350515  | THEMIS                                      |
| 9 | 66,825,000 | 66,975,000 | 892 | 632  | 0.669432711  | PTPRK,THEMIS                                |
| 9 | 66,900,000 | 67,050,000 | 893 | 959  | 0.654169077  | PTPRK                                       |
| 9 | 66,975,000 | 67,125,000 | 894 | 973  | -0.245977707 | PTPRK                                       |
| 9 | 67,050,000 | 67,200,000 | 895 | 858  | -1.124940185 | PTPRK                                       |
| 9 | 67,125,000 | 67,275,000 | 896 | 855  | 0.405683868  | PTPRK                                       |
| 9 | 67,200,000 | 67,350,000 | 897 | 923  | 0.805610104  | PTPRK                                       |
| 9 | 67,275,000 | 67,425,000 | 898 | 728  | 0.265406609  | PTPRK                                       |
| 9 | 67,350,000 | 67,500,000 | 899 | 636  | 0.724591807  | PTPRK                                       |

|   |            |            |     |      |              |                    |
|---|------------|------------|-----|------|--------------|--------------------|
| 9 | 67,425,000 | 67,575,000 | 900 | 531  | 1.07676127   | PTPRK              |
| 9 | 67,500,000 | 67,650,000 | 901 | 554  | 1.086971879  | PTPRK              |
| 9 | 67,575,000 | 67,725,000 | 902 | 774  | 0.830083666  | PTPRK              |
| 9 | 67,650,000 | 67,800,000 | 903 | 726  | 0.282130596  |                    |
| 9 | 67,725,000 | 67,875,000 | 904 | 472  | 0.272558067  |                    |
| 9 | 67,800,000 | 67,950,000 | 905 | 364  | 0.726479387  |                    |
| 9 | 67,875,000 | 68,025,000 | 906 | 552  | 0.707235307  |                    |
| 9 | 67,950,000 | 68,100,000 | 907 | 810  | 0.955062983  |                    |
| 9 | 68,025,000 | 68,175,000 | 908 | 955  | -0.241288287 | LAMA2              |
| 9 | 68,100,000 | 68,250,000 | 909 | 788  | -0.716840019 | LAMA2              |
| 9 | 68,175,000 | 68,325,000 | 910 | 528  | 0.634381351  | LAMA2              |
| 9 | 68,250,000 | 68,400,000 | 911 | 818  | 0.960905478  | LAMA2              |
| 9 | 68,325,000 | 68,475,000 | 912 | 892  | 1.218470021  | LAMA2              |
| 9 | 68,400,000 | 68,550,000 | 913 | 833  | 1.03981669   | LAMA2              |
| 9 | 68,475,000 | 68,625,000 | 914 | 894  | 0.738356354  | LAMA2              |
| 9 | 68,550,000 | 68,700,000 | 915 | 653  | 0.391104289  | LAMA2              |
| 9 | 68,625,000 | 68,775,000 | 916 | 430  | 0.514266569  | ARHGAP18,LAMA2     |
| 9 | 68,700,000 | 68,850,000 | 917 | 335  | 0.844816992  | ARHGAP18           |
| 9 | 68,775,000 | 68,925,000 | 918 | 367  | 0.631739101  | ARHGAP18           |
| 9 | 68,850,000 | 69,000,000 | 919 | 430  | -0.848110341 |                    |
| 9 | 68,925,000 | 69,075,000 | 920 | 470  | -0.411250183 | ENSBTAG00000021446 |
| 9 | 69,000,000 | 69,150,000 | 921 | 469  | 0.818505811  | ENSBTAG00000021446 |
| 9 | 69,075,000 | 69,225,000 | 922 | 438  | 0.378736699  | L3MBTL3            |
| 9 | 69,150,000 | 69,300,000 | 923 | 808  | -0.246821587 | L3MBTL3,SAMD3      |
| 9 | 69,225,000 | 69,375,000 | 924 | 1053 | 0.296309612  | L3MBTL3,SAMD3      |
| 9 | 69,300,000 | 69,450,000 | 925 | 860  | 1.073870425  | SAMD3              |
| 9 | 69,375,000 | 69,525,000 | 926 | 848  | 0.800652155  | TMEM200A           |
| 9 | 69,450,000 | 69,600,000 | 927 | 865  | 0.531296958  | TMEM200A           |
| 9 | 69,525,000 | 69,675,000 | 928 | 746  | 0.88554201   |                    |
| 9 | 69,600,000 | 69,750,000 | 929 | 597  | 1.185442834  |                    |
| 9 | 69,675,000 | 69,825,000 | 930 | 414  | 0.777833189  |                    |
| 9 | 69,750,000 | 69,900,000 | 931 | 437  | -0.076264012 |                    |
| 9 | 69,825,000 | 69,975,000 | 932 | 672  | -0.201774812 | EPB41L2            |
| 9 | 69,900,000 | 70,050,000 | 933 | 652  | -0.520308076 | EPB41L2            |
| 9 | 69,975,000 | 70,125,000 | 934 | 586  | -0.886464725 | EPB41L2            |
| 9 | 70,050,000 | 70,200,000 | 935 | 595  | -0.353346612 | AKAP7              |
| 9 | 70,125,000 | 70,275,000 | 936 | 471  | 0.787025149  | AKAP7              |
| 9 | 70,200,000 | 70,350,000 | 937 | 468  | 0.799302903  | AKAP7              |
| 9 | 70,275,000 | 70,425,000 | 938 | 862  | 0.949725387  | AKAP7              |
| 9 | 70,350,000 | 70,500,000 | 939 | 888  | 0.900691012  | ARG1               |
| 9 | 70,425,000 | 70,575,000 | 940 | 697  | 0.144175114  | ARG1,MED23         |
| 9 | 70,500,000 | 70,650,000 | 941 | 921  | -0.180924531 | ARG1,ENPP3,MED23   |
| 9 | 70,575,000 | 70,725,000 | 942 | 949  | -0.013301912 | ENPP3              |
| 9 | 70,650,000 | 70,800,000 | 943 | 754  | 0.290449136  | ENPP1,ENPP3        |
| 9 | 70,725,000 | 70,875,000 | 944 | 512  | 0.25770072   | CTGF,ENPP1         |
| 9 | 70,800,000 | 70,950,000 | 945 | 416  | -0.152524903 | CTGF,ENPP1         |
| 9 | 70,875,000 | 71,025,000 | 946 | 446  | 0.273028418  | CTGF               |
| 9 | 70,950,000 | 71,100,000 | 947 | 378  | 0.307645298  |                    |
| 9 | 71,025,000 | 71,175,000 | 948 | 391  | 0.81574726   |                    |
| 9 | 71,100,000 | 71,250,000 | 949 | 685  | 0.769364078  | MOXD1              |
| 9 | 71,175,000 | 71,325,000 | 950 | 842  | 0.129469639  | MOXD1              |
| 9 | 71,250,000 | 71,400,000 | 951 | 898  | -1.042814624 | MOXD1,STX7         |
| 9 | 71,325,000 | 71,475,000 | 952 | 913  | -2.100792628 | MOXD1,STX7,TAAR9   |

|   |            |            |     |      |              |                                                                                                                                     |
|---|------------|------------|-----|------|--------------|-------------------------------------------------------------------------------------------------------------------------------------|
| 9 | 71,400,000 | 71,550,000 | 953 | 858  | -1.636004319 | STX7,TAAR9,ENSBTAG00000040354,ENSBTAG00000046954,ENSBTAG00000047327                                                                 |
| 9 | 71,475,000 | 71,625,000 | 954 | 1033 | -1.194192949 | ENSBTAG00000027223,ENSBTAG00000038447,ENSBTAG0000039058,ENSBTAG00000040354,ENSBTAG00000046954,ENSBTAG00000047327,ENSBTAG00000047912 |
| 9 | 71,550,000 | 71,700,000 | 955 | 940  | -1.161517388 | TAAR6,ENSBTAG00000026548,ENSBTAG00000027223,ENSBTAG00000038447,ENSBTAG00000039058,ENSBTAG0000040489,ENSBTAG00000047912              |
| 9 | 71,625,000 | 71,775,000 | 956 | 1251 | -0.637999393 | TAAR5,TAAR6,ENSBTAG00000026548,ENSBTAG00000038483,ENSBTAG00000038761,ENSBTAG00000039615,ENSBTAG00000040489,ENSBTAG00000040533       |
| 9 | 71,700,000 | 71,850,000 | 957 | 1478 | -1.239414792 | TAAR1,TAAR2,TAAR5,VNN1,ENSBTAG00000038483,ENSBTAG00000038761,ENSBTAG00000039615,ENSBTAG00000040533                                  |
| 9 | 71,775,000 | 71,925,000 | 958 | 1073 | -2.295635168 | TAAR1,TAAR2,VNN1,VNN2                                                                                                               |
| 9 | 71,850,000 | 72,000,000 | 959 | 1041 | -3.240283418 | RPS12,SLC18B1,VNN1,VNN2                                                                                                             |
| 9 | 71,925,000 | 72,075,000 | 960 | 902  | -2.264311188 | RPS12,SLC18B1                                                                                                                       |
| 9 | 72,000,000 | 72,150,000 | 961 | 592  | -0.273224469 |                                                                                                                                     |
| 9 | 72,075,000 | 72,225,000 | 962 | 405  | 0.065406738  |                                                                                                                                     |
| 9 | 72,150,000 | 72,300,000 | 963 | 346  | 0.073651217  |                                                                                                                                     |
| 9 | 72,225,000 | 72,375,000 | 964 | 538  | 0.612519145  |                                                                                                                                     |
| 9 | 72,300,000 | 72,450,000 | 965 | 488  | 0.856290813  |                                                                                                                                     |
| 9 | 72,375,000 | 72,525,000 | 966 | 567  | 0.707796045  |                                                                                                                                     |
| 9 | 72,450,000 | 72,600,000 | 967 | 764  | 0.808487947  |                                                                                                                                     |
| 9 | 72,525,000 | 72,675,000 | 968 | 636  | 0.889829077  | EYA4                                                                                                                                |
| 9 | 72,600,000 | 72,750,000 | 969 | 495  | -0.403531899 | EYA4                                                                                                                                |
| 9 | 72,675,000 | 72,825,000 | 970 | 388  | -1.842450004 | EYA4                                                                                                                                |
| 9 | 72,750,000 | 72,900,000 | 971 | 514  | -0.960413522 |                                                                                                                                     |
| 9 | 72,825,000 | 72,975,000 | 972 | 754  | -0.553338248 |                                                                                                                                     |
| 9 | 72,900,000 | 73,050,000 | 973 | 733  | 0.508456763  |                                                                                                                                     |
| 9 | 72,975,000 | 73,125,000 | 974 | 403  | 0.745745853  | TBPL1,TCF21                                                                                                                         |
| 9 | 73,050,000 | 73,200,000 | 975 | 365  | 0.435953603  | SLC2A12,TBPL1,TCF21                                                                                                                 |
| 9 | 73,125,000 | 73,275,000 | 976 | 545  | 0.958412601  | SLC2A12,TBPL1                                                                                                                       |
| 9 | 73,200,000 | 73,350,000 | 977 | 436  | 1.126486897  | SGK1,SLC2A12                                                                                                                        |
| 9 | 73,275,000 | 73,425,000 | 978 | 361  | 0.381758062  | SGK1                                                                                                                                |
| 9 | 73,350,000 | 73,500,000 | 979 | 643  | 0.158659126  |                                                                                                                                     |
| 9 | 73,425,000 | 73,575,000 | 980 | 851  | -0.111938358 |                                                                                                                                     |
| 9 | 73,500,000 | 73,650,000 | 981 | 666  | 0.331434648  |                                                                                                                                     |
| 9 | 73,575,000 | 73,725,000 | 982 | 524  | 0.99110632   | ENSBTAG00000026543                                                                                                                  |
| 9 | 73,650,000 | 73,800,000 | 983 | 715  | -0.878319151 | ENSBTAG00000026543                                                                                                                  |
| 9 | 73,725,000 | 73,875,000 | 984 | 1012 | -1.534842955 |                                                                                                                                     |
| 9 | 73,800,000 | 73,950,000 | 985 | 855  | -3.234199761 |                                                                                                                                     |
| 9 | 73,875,000 | 74,025,000 | 986 | 437  | -4.293378378 | ALDH8A1,HBS1L                                                                                                                       |
| 9 | 73,950,000 | 74,100,000 | 987 | 285  | -0.663687094 | ALDH8A1,HBS1L                                                                                                                       |
| 9 | 74,025,000 | 74,175,000 | 988 | 301  | -2.20612696  | HBS1L                                                                                                                               |
| 9 | 74,100,000 | 74,250,000 | 989 | 374  | -3.278287035 | MYB                                                                                                                                 |
| 9 | 74,175,000 | 74,325,000 | 990 | 445  | -1.447758979 | MYB                                                                                                                                 |
| 9 | 74,250,000 | 74,400,000 | 991 | 480  | -0.482570053 | AHI1,MYB                                                                                                                            |
| 9 | 74,325,000 | 74,475,000 | 992 | 400  | -0.873136162 | AHI1                                                                                                                                |
| 9 | 74,400,000 | 74,550,000 | 993 | 318  | -1.650631638 | AHI1                                                                                                                                |
| 9 | 74,475,000 | 74,625,000 | 994 | 345  | -2.425153122 | AHI1                                                                                                                                |
| 9 | 74,550,000 | 74,700,000 | 995 | 397  | -0.93692267  |                                                                                                                                     |
| 9 | 74,625,000 | 74,775,000 | 996 | 777  | 0.648932806  |                                                                                                                                     |



|   |            |            |      |      |              |                                           |
|---|------------|------------|------|------|--------------|-------------------------------------------|
| 9 | 74,700,000 | 74,850,000 | 997  | 757  | 0.669185163  |                                           |
| 9 | 74,775,000 | 74,925,000 | 998  | 319  | 0.135051612  |                                           |
| 9 | 74,850,000 | 75,000,000 | 999  | 317  | 0.774334587  |                                           |
| 9 | 74,925,000 | 75,075,000 | 1000 | 393  | 1.032746376  | PDE7B                                     |
| 9 | 75,000,000 | 75,150,000 | 1001 | 313  | -0.30256866  | PDE7B                                     |
| 9 | 75,075,000 | 75,225,000 | 1002 | 276  | -0.278345367 | PDE7B                                     |
| 9 | 75,150,000 | 75,300,000 | 1003 | 282  | 0.69054702   | BCLAF1,MTFR2,PDE7B                        |
| 9 | 75,225,000 | 75,375,000 | 1004 | 248  | 0.632347033  | BCLAF1,MGC151537,MTFR2,ENSBTAG00000046168 |
| 9 | 75,300,000 | 75,450,000 | 1005 | 252  | 0.692333392  | MGC151537,ENSBTAG00000046168              |
| 9 | 75,375,000 | 75,525,000 | 1006 | 480  | 0.579090968  | MGC151537                                 |
| 9 | 75,450,000 | 75,600,000 | 1007 | 539  | 0.514771358  | MAP3K5,MGC151537                          |
| 9 | 75,525,000 | 75,675,000 | 1008 | 687  | -2.333225018 | MAP3K5                                    |
| 9 | 75,600,000 | 75,750,000 | 1009 | 605  | -2.857808166 | MAP3K5                                    |
| 9 | 75,675,000 | 75,825,000 | 1010 | 486  | 0.34170268   | MAP3K5,PEX7                               |
| 9 | 75,750,000 | 75,900,000 | 1011 | 892  | 0.417017669  | MAP3K5,PEX7,SLC35D3                       |
| 9 | 75,825,000 | 75,975,000 | 1012 | 948  | 0.485479806  | PEX7,SLC35D3                              |
| 9 | 75,900,000 | 76,050,000 | 1013 | 1056 | 0.782903626  | IL20RA,SLC35D3                            |
| 9 | 75,975,000 | 76,125,000 | 1014 | 988  | 0.947351325  | IFNGR1,IL20RA,IL22RA2                     |
| 9 | 76,050,000 | 76,200,000 | 1015 | 564  | 0.869193913  | IFNGR1,IL22RA2                            |
| 9 | 76,125,000 | 76,275,000 | 1016 | 521  | 0.88114657   |                                           |
| 9 | 76,200,000 | 76,350,000 | 1017 | 737  | 0.975313065  |                                           |
| 9 | 76,275,000 | 76,425,000 | 1018 | 588  | 0.996799014  | OLIG3                                     |
| 9 | 76,350,000 | 76,500,000 | 1019 | 405  | 0.371477626  | OLIG3                                     |
| 9 | 76,425,000 | 76,575,000 | 1020 | 634  | 1.002992452  |                                           |
| 9 | 76,500,000 | 76,650,000 | 1021 | 907  | 1.153723798  |                                           |
| 9 | 76,575,000 | 76,725,000 | 1022 | 1009 | 0.549982312  |                                           |
| 9 | 76,650,000 | 76,800,000 | 1023 | 750  | 0.189519216  | TNFAIP3                                   |
| 9 | 76,725,000 | 76,875,000 | 1024 | 442  | 0.133178056  | TNFAIP3                                   |
| 9 | 76,800,000 | 76,950,000 | 1025 | 395  | -0.251459778 | PERP                                      |
| 9 | 76,875,000 | 77,025,000 | 1026 | 365  | -0.403375928 | PERP                                      |
| 9 | 76,950,000 | 77,100,000 | 1027 | 351  | -0.321819655 | KIAA1244,PERP                             |
| 9 | 77,025,000 | 77,175,000 | 1028 | 652  | 0.512391273  | KIAA1244                                  |
| 9 | 77,100,000 | 77,250,000 | 1029 | 845  | 0.46640162   | HEBP2,KIAA1244,NHSL1                      |
| 9 | 77,175,000 | 77,325,000 | 1030 | 590  | 0.196031405  | HEBP2,NHSL1                               |
| 9 | 77,250,000 | 77,400,000 | 1031 | 394  | 0.56974588   | NHSL1                                     |
| 9 | 77,325,000 | 77,475,000 | 1032 | 360  | 0.682509399  |                                           |
| 9 | 77,400,000 | 77,550,000 | 1033 | 351  | 0.796889238  |                                           |
| 9 | 77,475,000 | 77,625,000 | 1034 | 312  | 0.834467854  | CCDC28A,ECT2L                             |
| 9 | 77,550,000 | 77,700,000 | 1035 | 404  | 0.779392033  | CCDC28A,ECT2L,REPS1                       |
| 9 | 77,625,000 | 77,775,000 | 1036 | 609  | 1.051097606  | ECT2L,REPS1                               |
| 9 | 77,700,000 | 77,850,000 | 1037 | 597  | 1.041204544  | ABRACL,REPS1                              |
| 9 | 77,775,000 | 77,925,000 | 1038 | 463  | 0.086016507  | ABRACL,HECA                               |
| 9 | 77,850,000 | 78,000,000 | 1039 | 375  | -0.435735443 | HECA,TXLNB                                |
| 9 | 77,925,000 | 78,075,000 | 1040 | 366  | -0.497875535 | CITED2,TXLNB                              |
| 9 | 78,000,000 | 78,150,000 | 1041 | 525  | 0.427179362  | CITED2                                    |
| 9 | 78,075,000 | 78,225,000 | 1042 | 406  | 0.949124882  |                                           |
| 9 | 78,150,000 | 78,300,000 | 1043 | 197  | 0.59992928   |                                           |
| 9 | 78,225,000 | 78,375,000 | 1044 | 505  | -0.976948492 |                                           |
| 9 | 78,300,000 | 78,450,000 | 1045 | 694  | -1.434800867 |                                           |
| 9 | 78,375,000 | 78,525,000 | 1046 | 511  | -0.841094439 |                                           |
| 9 | 78,450,000 | 78,600,000 | 1047 | 637  | 0.16978718   |                                           |
| 9 | 78,525,000 | 78,675,000 | 1048 | 777  | 0.500841721  |                                           |
| 9 | 78,600,000 | 78,750,000 | 1049 | 708  | 0.810536431  |                                           |

|   |            |            |      |      |              |                             |
|---|------------|------------|------|------|--------------|-----------------------------|
| 9 | 78,675,000 | 78,825,000 | 1050 | 740  | 0.757992955  |                             |
| 9 | 78,750,000 | 78,900,000 | 1051 | 563  | 0.103841728  |                             |
| 9 | 78,825,000 | 78,975,000 | 1052 | 382  | -0.120094829 |                             |
| 9 | 78,900,000 | 79,050,000 | 1053 | 553  | 0.050311851  |                             |
| 9 | 78,975,000 | 79,125,000 | 1054 | 561  | 0.024155766  |                             |
| 9 | 79,050,000 | 79,200,000 | 1055 | 336  | 0.318718715  |                             |
| 9 | 79,125,000 | 79,275,000 | 1056 | 319  | 0.49986611   |                             |
| 9 | 79,200,000 | 79,350,000 | 1057 | 461  | 0.760618619  |                             |
| 9 | 79,275,000 | 79,425,000 | 1058 | 650  | 1.068870873  |                             |
| 9 | 79,350,000 | 79,500,000 | 1059 | 632  | 1.189317334  |                             |
| 9 | 79,425,000 | 79,575,000 | 1060 | 647  | 0.155060826  |                             |
| 9 | 79,500,000 | 79,650,000 | 1061 | 628  | -0.758253105 |                             |
| 9 | 79,575,000 | 79,725,000 | 1062 | 576  | -0.735552278 |                             |
| 9 | 79,650,000 | 79,800,000 | 1063 | 648  | -0.326190367 |                             |
| 9 | 79,725,000 | 79,875,000 | 1064 | 836  | 0.100170985  |                             |
| 9 | 79,800,000 | 79,950,000 | 1065 | 728  | 0.17080943   |                             |
| 9 | 79,875,000 | 80,025,000 | 1066 | 613  | -0.092649155 |                             |
| 9 | 79,950,000 | 80,100,000 | 1067 | 802  | 0.103678342  |                             |
| 9 | 80,025,000 | 80,175,000 | 1068 | 548  | 0.256512016  |                             |
| 9 | 80,100,000 | 80,250,000 | 1069 | 503  | -0.277436564 |                             |
| 9 | 80,175,000 | 80,325,000 | 1070 | 716  | -0.042213248 |                             |
| 9 | 80,250,000 | 80,400,000 | 1071 | 569  | 0.006817998  |                             |
| 9 | 80,325,000 | 80,475,000 | 1072 | 630  | 0.257848328  |                             |
| 9 | 80,400,000 | 80,550,000 | 1073 | 1112 | 0.648197035  |                             |
| 9 | 80,475,000 | 80,625,000 | 1074 | 1121 | 0.704380912  | NMBR                        |
| 9 | 80,550,000 | 80,700,000 | 1075 | 777  | 0.390646487  | NMBR,VTA1                   |
| 9 | 80,625,000 | 80,775,000 | 1076 | 692  | 0.614159946  | VTA1                        |
| 9 | 80,700,000 | 80,850,000 | 1077 | 640  | 0.645902811  | VTA1                        |
| 9 | 80,775,000 | 80,925,000 | 1078 | 601  | 0.219450138  | GPR126                      |
| 9 | 80,850,000 | 81,000,000 | 1079 | 689  | -1.079263016 | GPR126                      |
| 9 | 80,925,000 | 81,075,000 | 1080 | 684  | -1.137247646 | GPR126                      |
| 9 | 81,000,000 | 81,150,000 | 1081 | 708  | -0.579168257 |                             |
| 9 | 81,075,000 | 81,225,000 | 1082 | 672  | -0.23393995  |                             |
| 9 | 81,150,000 | 81,300,000 | 1083 | 472  | 0.490924187  | HIVEP2                      |
| 9 | 81,225,000 | 81,375,000 | 1084 | 523  | 0.317666846  | HIVEP2                      |
| 9 | 81,300,000 | 81,450,000 | 1085 | 632  | 0.602915454  |                             |
| 9 | 81,375,000 | 81,525,000 | 1086 | 444  | 1.100950096  |                             |
| 9 | 81,450,000 | 81,600,000 | 1087 | 475  | 0.426230486  | AIG1                        |
| 9 | 81,525,000 | 81,675,000 | 1088 | 443  | 0.006231787  | AIG1                        |
| 9 | 81,600,000 | 81,750,000 | 1089 | 269  | 0.154454983  | AIG1                        |
| 9 | 81,675,000 | 81,825,000 | 1090 | 317  | -0.118792035 | AIG1                        |
| 9 | 81,750,000 | 81,900,000 | 1091 | 299  | -0.730520079 | AIG1                        |
| 9 | 81,825,000 | 81,975,000 | 1092 | 276  | 0.047056204  | AIG1,DEADC1,PEX3            |
| 9 | 81,900,000 | 82,050,000 | 1093 | 660  | 1.129035634  | DEADC1,FUCA2,PEX3           |
| 9 | 81,975,000 | 82,125,000 | 1094 | 775  | 1.171313026  | FUCA2,PEX3                  |
| 9 | 82,050,000 | 82,200,000 | 1095 | 740  | 0.31283554   |                             |
| 9 | 82,125,000 | 82,275,000 | 1096 | 859  | -0.130840152 | PHACTR2                     |
| 9 | 82,200,000 | 82,350,000 | 1097 | 532  | -0.063572485 | PHACTR2                     |
| 9 | 82,275,000 | 82,425,000 | 1098 | 292  | -0.298305386 | LTV1,PHACTR2,PLAGL1,ZC2HC1B |
| 9 | 82,350,000 | 82,500,000 | 1099 | 276  | -1.664385358 | LTV1,PLAGL1,ZC2HC1B         |
| 9 | 82,425,000 | 82,575,000 | 1100 | 316  | -2.569214159 | SF3B5                       |
| 9 | 82,500,000 | 82,650,000 | 1101 | 621  | -2.123198908 | SF3B5,STX11                 |
| 9 | 82,575,000 | 82,725,000 | 1102 | 585  | -2.15876312  | STX11                       |

|   |            |            |      |      |              |                                                   |
|---|------------|------------|------|------|--------------|---------------------------------------------------|
| 9 | 82,650,000 | 82,800,000 | 1103 | 271  | -1.369626889 | UTRN                                              |
| 9 | 82,725,000 | 82,875,000 | 1104 | 646  | 0.874478577  | UTRN                                              |
| 9 | 82,800,000 | 82,950,000 | 1105 | 894  | 0.835297183  | UTRN                                              |
| 9 | 82,875,000 | 83,025,000 | 1106 | 612  | 0.85857144   | UTRN                                              |
| 9 | 82,950,000 | 83,100,000 | 1107 | 390  | 1.229711708  | UTRN                                              |
| 9 | 83,025,000 | 83,175,000 | 1108 | 633  | 0.590681553  | UTRN                                              |
| 9 | 83,100,000 | 83,250,000 | 1109 | 834  | 0.548235546  | UTRN                                              |
| 9 | 83,175,000 | 83,325,000 | 1110 | 556  | 0.715101095  | UTRN                                              |
| 9 | 83,250,000 | 83,400,000 | 1111 | 820  | 0.85987696   | UTRN                                              |
| 9 | 83,325,000 | 83,475,000 | 1112 | 1359 | 0.997924078  |                                                   |
| 9 | 83,400,000 | 83,550,000 | 1113 | 1383 | 0.599092842  |                                                   |
| 9 | 83,475,000 | 83,625,000 | 1114 | 1099 | 0.260046223  |                                                   |
| 9 | 83,550,000 | 83,700,000 | 1115 | 1037 | 0.341415902  |                                                   |
| 9 | 83,625,000 | 83,775,000 | 1116 | 1275 | -0.303949021 |                                                   |
| 9 | 83,700,000 | 83,850,000 | 1117 | 1656 | -0.49452     |                                                   |
| 9 | 83,775,000 | 83,925,000 | 1118 | 1676 | -0.230368408 |                                                   |
| 9 | 83,850,000 | 84,000,000 | 1119 | 1362 | 0.287005751  |                                                   |
| 9 | 83,925,000 | 84,075,000 | 1120 | 973  | 0.580311486  | EPM2A                                             |
| 9 | 84,000,000 | 84,150,000 | 1121 | 685  | 0.418654179  | EPM2A                                             |
| 9 | 84,075,000 | 84,225,000 | 1122 | 612  | 0.333239164  | EPM2A,FBXO30                                      |
| 9 | 84,150,000 | 84,300,000 | 1123 | 419  | 0.146059353  | FBXO30,SHPRH                                      |
| 9 | 84,225,000 | 84,375,000 | 1124 | 396  | 0.134478563  | SHPRH                                             |
| 9 | 84,300,000 | 84,450,000 | 1125 | 602  | -0.90358587  | SHPRH                                             |
| 9 | 84,375,000 | 84,525,000 | 1126 | 747  | -1.279906738 |                                                   |
| 9 | 84,450,000 | 84,600,000 | 1127 | 776  | -0.059344706 |                                                   |
| 9 | 84,525,000 | 84,675,000 | 1128 | 697  | 0.572019237  |                                                   |
| 9 | 84,600,000 | 84,750,000 | 1129 | 951  | 1.045264616  | GRM1                                              |
| 9 | 84,675,000 | 84,825,000 | 1130 | 940  | 1.102328239  | GRM1                                              |
| 9 | 84,750,000 | 84,900,000 | 1131 | 562  | -1.755064898 | GRM1                                              |
| 9 | 84,825,000 | 84,975,000 | 1132 | 627  | -2.546929501 | RAB32                                             |
| 9 | 84,900,000 | 85,050,000 | 1133 | 774  | -0.98617074  | ADGB,RAB32                                        |
| 9 | 84,975,000 | 85,125,000 | 1134 | 739  | -0.316070236 | ADGB                                              |
| 9 | 85,050,000 | 85,200,000 | 1135 | 610  | -0.934140107 | ADGB                                              |
| 9 | 85,125,000 | 85,275,000 | 1136 | 767  | -0.8110036   | ADGB                                              |
| 9 | 85,200,000 | 85,350,000 | 1137 | 823  | 0.149582277  | ADGB                                              |
| 9 | 85,275,000 | 85,425,000 | 1138 | 498  | 0.731367839  |                                                   |
| 9 | 85,350,000 | 85,500,000 | 1139 | 537  | 1.081240792  |                                                   |
| 9 | 85,425,000 | 85,575,000 | 1140 | 562  | 1.232785204  |                                                   |
| 9 | 85,500,000 | 85,650,000 | 1141 | 324  | 1.04299638   | STXBP5                                            |
| 9 | 85,575,000 | 85,725,000 | 1142 | 344  | 0.604371686  | STXBP5                                            |
| 9 | 85,650,000 | 85,800,000 | 1143 | 340  | 0.3552759    | STXBP5                                            |
| 9 | 85,725,000 | 85,875,000 | 1144 | 581  | 0.223318105  | STXBP5,ENSBTAG00000039444,ENSBTAG00000047224      |
| 9 | 85,800,000 | 85,950,000 | 1145 | 751  | 0.413378203  | SAMD5,ULBP3,ENSBTAG00000039444,ENSBTAG00000047224 |
| 9 | 85,875,000 | 86,025,000 | 1146 | 703  | 0.552181938  | SAMD5,ULBP3                                       |
| 9 | 85,950,000 | 86,100,000 | 1147 | 755  | -0.066319707 | SAMD5,ULBP3                                       |
| 9 | 86,025,000 | 86,175,000 | 1148 | 684  | 0.037225036  |                                                   |
| 9 | 86,100,000 | 86,250,000 | 1149 | 660  | 0.83499864   |                                                   |
| 9 | 86,175,000 | 86,325,000 | 1150 | 709  | -0.246777884 |                                                   |
| 9 | 86,250,000 | 86,400,000 | 1151 | 777  | -1.178003761 |                                                   |
| 9 | 86,325,000 | 86,475,000 | 1152 | 692  | -0.002389071 |                                                   |
| 9 | 86,400,000 | 86,550,000 | 1153 | 549  | 1.246759825  |                                                   |
| 9 | 86,475,000 | 86,625,000 | 1154 | 636  | 0.607617494  |                                                   |

|   |            |            |      |      |              |                                                                                                          |
|---|------------|------------|------|------|--------------|----------------------------------------------------------------------------------------------------------|
| 9 | 86,550,000 | 86,700,000 | 1155 | 570  | -0.171514136 |                                                                                                          |
| 9 | 86,625,000 | 86,775,000 | 1156 | 620  | -2.096180727 |                                                                                                          |
| 9 | 86,700,000 | 86,850,000 | 1157 | 751  | -1.703310949 |                                                                                                          |
| 9 | 86,775,000 | 86,925,000 | 1158 | 783  | -0.05684809  | SASH1                                                                                                    |
| 9 | 86,850,000 | 87,000,000 | 1159 | 780  | -0.403022308 | SASH1                                                                                                    |
| 9 | 86,925,000 | 87,075,000 | 1160 | 941  | -2.240959769 | SASH1                                                                                                    |
| 9 | 87,000,000 | 87,150,000 | 1161 | 1197 | -2.180528601 |                                                                                                          |
| 9 | 87,075,000 | 87,225,000 | 1162 | 1034 | -1.171216166 |                                                                                                          |
| 9 | 87,150,000 | 87,300,000 | 1163 | 933  | -0.521968536 |                                                                                                          |
| 9 | 87,225,000 | 87,375,000 | 1164 | 919  | 0.332370564  |                                                                                                          |
| 9 | 87,300,000 | 87,450,000 | 1165 | 1040 | 1.015456602  |                                                                                                          |
| 9 | 87,375,000 | 87,525,000 | 1166 | 1142 | 1.012681838  |                                                                                                          |
| 9 | 87,450,000 | 87,600,000 | 1167 | 1113 | 0.194532873  |                                                                                                          |
| 9 | 87,525,000 | 87,675,000 | 1168 | 1083 | 0.204418129  |                                                                                                          |
| 9 | 87,600,000 | 87,750,000 | 1169 | 848  | 0.896656124  |                                                                                                          |
| 9 | 87,675,000 | 87,825,000 | 1170 | 672  | 1.02139051   | TAB2                                                                                                     |
| 9 | 87,750,000 | 87,900,000 | 1171 | 938  | 0.893747116  | PPIL4,TAB2,ZC3H12D                                                                                       |
| 9 | 87,825,000 | 87,975,000 | 1172 | 1040 | -0.121737577 | KATNA1,MGC133692,PPIL4,ZC3H12D                                                                           |
| 9 | 87,900,000 | 88,050,000 | 1173 | 862  | -0.436452884 | KATNA1,LATS1,MGC133692,PPIL4                                                                             |
| 9 | 87,975,000 | 88,125,000 | 1174 | 769  | 1.000077288  | KATNA1,LATS1,LRP11,NUP43,PCMT1                                                                           |
| 9 | 88,050,000 | 88,200,000 | 1175 | 1080 | 0.187464883  | LRP11,NUP43,PCMT1                                                                                        |
| 9 | 88,125,000 | 88,275,000 | 1176 | 1286 | -0.176494253 | LRP11,RAET1G,ENSBTAG00000024751,ENSBTAG00000036061,ENSBTAG00000038891,ENSBTAG00000047902                 |
| 9 | 88,200,000 | 88,350,000 | 1177 | 1129 | -0.480425133 | RAET1G,ENSBTAG00000024751,ENSBTAG00000036061,E<br>NSBTAG00000038891,ENSBTAG00000039875,ENSBTAG0000047902 |
| 9 | 88,275,000 | 88,425,000 | 1178 | 1329 | -0.464024402 | PPP1R14C,RAET1G,ENSBTAG00000039875,ENSBTAG0000047902                                                     |
| 9 | 88,350,000 | 88,500,000 | 1179 | 1346 | 0.107944077  | PPP1R14C,RAET1G                                                                                          |
| 9 | 88,425,000 | 88,575,000 | 1180 | 1020 | -0.330116816 | IYD,PPP1R14C                                                                                             |
| 9 | 88,500,000 | 88,650,000 | 1181 | 594  | -0.573756401 | IYD,PPP1R14C,ENSBTAG00000048114                                                                          |
| 9 | 88,575,000 | 88,725,000 | 1182 | 439  | -0.497955832 | IYD,ENSBTAG00000048114                                                                                   |
| 9 | 88,650,000 | 88,800,000 | 1183 | 602  | -0.688952462 |                                                                                                          |
| 9 | 88,725,000 | 88,875,000 | 1184 | 539  | -0.196988083 |                                                                                                          |
| 9 | 88,800,000 | 88,950,000 | 1185 | 645  | 0.506486008  |                                                                                                          |
| 9 | 88,875,000 | 89,025,000 | 1186 | 910  | 0.542217381  | PLEKHG1                                                                                                  |
| 9 | 88,950,000 | 89,100,000 | 1187 | 734  | 0.317764682  | PLEKHG1                                                                                                  |
| 9 | 89,025,000 | 89,175,000 | 1188 | 648  | 0.026116825  | MTHFD1L,PLEKHG1                                                                                          |
| 9 | 89,100,000 | 89,250,000 | 1189 | 1088 | 0.309148623  | MTHFD1L,PLEKHG1                                                                                          |
| 9 | 89,175,000 | 89,325,000 | 1190 | 1385 | 0.345267425  | MTHFD1L                                                                                                  |
| 9 | 89,250,000 | 89,400,000 | 1191 | 1077 | -0.306714389 | MTHFD1L                                                                                                  |
| 9 | 89,325,000 | 89,475,000 | 1192 | 897  | -0.078438446 |                                                                                                          |
| 9 | 89,400,000 | 89,550,000 | 1193 | 1009 | -1.11144256  |                                                                                                          |
| 9 | 89,475,000 | 89,625,000 | 1194 | 745  | -2.377184718 | AKAP12,RMND1,ZBTB2                                                                                       |
| 9 | 89,550,000 | 89,700,000 | 1195 | 491  | -0.884735732 | AKAP12,C9H6orf211,RMND1,TOMM7,ZBTB2                                                                      |
| 9 | 89,625,000 | 89,775,000 | 1196 | 622  | 0.318226665  | C9H6orf211,CCDC170,RMND1,TOMM7                                                                           |
| 9 | 89,700,000 | 89,850,000 | 1197 | 681  | 0.078187785  | CCDC170                                                                                                  |
| 9 | 89,775,000 | 89,925,000 | 1198 | 477  | -0.127714229 | CCDC170                                                                                                  |
| 9 | 89,850,000 | 90,000,000 | 1199 | 293  | 0.610466023  | ESR1                                                                                                     |
| 9 | 89,925,000 | 90,075,000 | 1200 | 388  | -0.22802867  | ESR1                                                                                                     |
| 9 | 90,000,000 | 90,150,000 | 1201 | 730  | 0.629740682  | ESR1                                                                                                     |
| 9 | 90,075,000 | 90,225,000 | 1202 | 682  | 0.909129345  | ESR1                                                                                                     |
| 9 | 90,150,000 | 90,300,000 | 1203 | 607  | 0.35838716   | ESR1,SYNE1                                                                                               |

|   |            |            |      |      |              |                                       |
|---|------------|------------|------|------|--------------|---------------------------------------|
| 9 | 90,225,000 | 90,375,000 | 1204 | 836  | 0.579426515  | ESR1,SYNE1                            |
| 9 | 90,300,000 | 90,450,000 | 1205 | 895  | 0.858757709  | SYNE1                                 |
| 9 | 90,375,000 | 90,525,000 | 1206 | 824  | 1.233142007  | SYNE1                                 |
| 9 | 90,450,000 | 90,600,000 | 1207 | 1003 | 1.224623358  | SYNE1                                 |
| 9 | 90,525,000 | 90,675,000 | 1208 | 1533 | 1.035720102  | SYNE1                                 |
| 9 | 90,600,000 | 90,750,000 | 1209 | 1491 | 0.770234118  | SYNE1                                 |
| 9 | 90,675,000 | 90,825,000 | 1210 | 1027 | 0.076735263  |                                       |
| 9 | 90,750,000 | 90,900,000 | 1211 | 819  | -0.035399032 | MYCT1,VIP                             |
| 9 | 90,825,000 | 90,975,000 | 1212 | 607  | 0.142872243  | MYCT1,VIP                             |
| 9 | 90,900,000 | 91,050,000 | 1213 | 620  | 0.122659836  |                                       |
| 9 | 90,975,000 | 91,125,000 | 1214 | 670  | 0.705667033  | FBXO5,MTRF1L,RGS17                    |
| 9 | 91,050,000 | 91,200,000 | 1215 | 602  | 0.645059185  | FBXO5,MTRF1L,RGS17                    |
| 9 | 91,125,000 | 91,275,000 | 1216 | 455  | 0.304719645  | RGS17,ENSBTAG00000046219              |
| 9 | 91,200,000 | 91,350,000 | 1217 | 297  | -1.063355404 | ENSBTAG00000016405,ENSBTAG00000046219 |
| 9 | 91,275,000 | 91,425,000 | 1218 | 379  | 0.105135979  | ENSBTAG00000016405                    |
| 9 | 91,350,000 | 91,500,000 | 1219 | 752  | -0.009901983 |                                       |
| 9 | 91,425,000 | 91,575,000 | 1220 | 1161 | -0.570970906 |                                       |
| 9 | 91,500,000 | 91,650,000 | 1221 | 1158 | -1.348090796 |                                       |
| 9 | 91,575,000 | 91,725,000 | 1222 | 925  | -0.347963586 |                                       |
| 9 | 91,650,000 | 91,800,000 | 1223 | 900  | 0.651415588  |                                       |
| 9 | 91,725,000 | 91,875,000 | 1224 | 1348 | 0.915252243  |                                       |
| 9 | 91,800,000 | 91,950,000 | 1225 | 1434 | 1.094245348  |                                       |
| 9 | 91,875,000 | 92,025,000 | 1226 | 970  | 0.97359287   |                                       |
| 9 | 91,950,000 | 92,100,000 | 1227 | 601  | 0.676486411  |                                       |
| 9 | 92,025,000 | 92,175,000 | 1228 | 683  | 0.037461597  | OPRM1                                 |
| 9 | 92,100,000 | 92,250,000 | 1229 | 742  | -0.298459755 | OPRM1,ENSBTAG00000003489              |
| 9 | 92,175,000 | 92,325,000 | 1230 | 691  | -0.287745494 | OPRM1,ENSBTAG00000003489              |
| 9 | 92,250,000 | 92,400,000 | 1231 | 773  | -1.071351732 | ENSBTAG00000003489                    |
| 9 | 92,325,000 | 92,475,000 | 1232 | 977  | -0.752835093 | ENSBTAG00000012674                    |
| 9 | 92,400,000 | 92,550,000 | 1233 | 926  | 0.530739785  | ENSBTAG00000012674                    |
| 9 | 92,475,000 | 92,625,000 | 1234 | 651  | 0.913709573  | ENSBTAG00000012674                    |
| 9 | 92,550,000 | 92,700,000 | 1235 | 768  | 0.630684738  |                                       |
| 9 | 92,625,000 | 92,775,000 | 1236 | 709  | 0.806431155  |                                       |
| 9 | 92,700,000 | 92,850,000 | 1237 | 504  | 0.759890214  | SCAF8                                 |
| 9 | 92,775,000 | 92,925,000 | 1238 | 623  | 0.795932505  | SCAF8                                 |
| 9 | 92,850,000 | 93,000,000 | 1239 | 553  | 0.817099145  | SCAF8                                 |
| 9 | 92,925,000 | 93,075,000 | 1240 | 382  | 0.122725608  |                                       |
| 9 | 93,000,000 | 93,150,000 | 1241 | 703  | 0.858970105  | TIAM2                                 |
| 9 | 93,075,000 | 93,225,000 | 1242 | 821  | 1.032714162  | TIAM2                                 |
| 9 | 93,150,000 | 93,300,000 | 1243 | 448  | 0.72165247   | CLDN20,TFB1M,TIAM2                    |
| 9 | 93,225,000 | 93,375,000 | 1244 | 635  | 0.632752764  | CLDN20,NOX3,TFB1M,TIAM2               |
| 9 | 93,300,000 | 93,450,000 | 1245 | 1043 | 0.688610488  | NOX3,TFB1M                            |
| 9 | 93,375,000 | 93,525,000 | 1246 | 1023 | 0.675817518  | NOX3                                  |
| 9 | 93,450,000 | 93,600,000 | 1247 | 1160 | 0.446752187  |                                       |
| 9 | 93,525,000 | 93,675,000 | 1248 | 1130 | 0.460893833  | ENSBTAG00000035623                    |
| 9 | 93,600,000 | 93,750,000 | 1249 | 1054 | 0.544253092  | ENSBTAG00000035623                    |
| 9 | 93,675,000 | 93,825,000 | 1250 | 932  | 0.321050439  |                                       |
| 9 | 93,750,000 | 93,900,000 | 1251 | 841  | -1.035589218 |                                       |
| 9 | 93,825,000 | 93,975,000 | 1252 | 872  | -2.039084287 |                                       |
| 9 | 93,900,000 | 94,050,000 | 1253 | 667  | -1.920664318 |                                       |
| 9 | 93,975,000 | 94,125,000 | 1254 | 685  | -2.308644986 |                                       |
| 9 | 94,050,000 | 94,200,000 | 1255 | 1003 | -0.555585465 |                                       |
| 9 | 94,125,000 | 94,275,000 | 1256 | 1074 | 0.455970633  |                                       |

|   |            |            |      |      |              |                                    |
|---|------------|------------|------|------|--------------|------------------------------------|
| 9 | 94,200,000 | 94,350,000 | 1257 | 853  | 0.495177337  |                                    |
| 9 | 94,275,000 | 94,425,000 | 1258 | 1007 | 0.880305099  |                                    |
| 9 | 94,350,000 | 94,500,000 | 1259 | 987  | 1.038051792  |                                    |
| 9 | 94,425,000 | 94,575,000 | 1260 | 713  | 0.869236896  |                                    |
| 9 | 94,500,000 | 94,650,000 | 1261 | 818  | 0.906951578  |                                    |
| 9 | 94,575,000 | 94,725,000 | 1262 | 1028 | 0.909194982  |                                    |
| 9 | 94,650,000 | 94,800,000 | 1263 | 769  | 0.862604138  |                                    |
| 9 | 94,725,000 | 94,875,000 | 1264 | 366  | 0.721304409  |                                    |
| 9 | 94,800,000 | 94,950,000 | 1265 | 342  | 0.74898609   | ARID1B                             |
| 9 | 94,875,000 | 95,025,000 | 1266 | 350  | 0.70727678   | ARID1B                             |
| 9 | 94,950,000 | 95,100,000 | 1267 | 378  | 0.427491986  | ARID1B                             |
| 9 | 95,025,000 | 95,175,000 | 1268 | 665  | 0.309553388  | ARID1B,ENSBTAG00000045772          |
| 9 | 95,100,000 | 95,250,000 | 1269 | 634  | 0.334688614  | ARID1B,ENSBTAG00000045772          |
| 9 | 95,175,000 | 95,325,000 | 1270 | 630  | -0.03344928  | ARID1B                             |
| 9 | 95,250,000 | 95,400,000 | 1271 | 723  | 0.132650237  | ARID1B,C9H6ORF35                   |
| 9 | 95,325,000 | 95,475,000 | 1272 | 638  | 1.005505867  | C9H6ORF35,ZDHHC14                  |
| 9 | 95,400,000 | 95,550,000 | 1273 | 649  | 0.757659826  | ZDHHC14                            |
| 9 | 95,475,000 | 95,625,000 | 1274 | 753  | 0.583902381  | ZDHHC14                            |
| 9 | 95,550,000 | 95,700,000 | 1275 | 1215 | 0.661246433  | ZDHHC14                            |
| 9 | 95,625,000 | 95,775,000 | 1276 | 1467 | 0.13569862   | ZDHHC14                            |
| 9 | 95,700,000 | 95,850,000 | 1277 | 1116 | -0.206870618 | ZDHHC14                            |
| 9 | 95,775,000 | 95,925,000 | 1278 | 543  | 0.577981366  | SNX9                               |
| 9 | 95,850,000 | 96,000,000 | 1279 | 602  | 0.270389483  | SNX9                               |
| 9 | 95,925,000 | 96,075,000 | 1280 | 768  | -0.064281785 | SNX9,SYNJ2                         |
| 9 | 96,000,000 | 96,150,000 | 1281 | 546  | 0.257407821  | SERAC1,SYNJ2                       |
| 9 | 96,075,000 | 96,225,000 | 1282 | 498  | 0.754373202  | GTF2H5,SERAC1,SYNJ2                |
| 9 | 96,150,000 | 96,300,000 | 1283 | 541  | 0.823582205  | GTF2H5,TULP4                       |
| 9 | 96,225,000 | 96,375,000 | 1284 | 679  | 1.08911296   | TULP4                              |
| 9 | 96,300,000 | 96,450,000 | 1285 | 776  | 1.082395349  | TMEM181,TULP4                      |
| 9 | 96,375,000 | 96,525,000 | 1286 | 976  | 0.912411813  | DYNLT1,SYTL3,TMEM181,TULP4         |
| 9 | 96,450,000 | 96,600,000 | 1287 | 1386 | -0.383181352 | DYNLT1,EZR,SYTL3,TMEM181           |
| 9 | 96,525,000 | 96,675,000 | 1288 | 1316 | -0.868473744 | EZR,SYTL3                          |
| 9 | 96,600,000 | 96,750,000 | 1289 | 1147 | -0.15887644  | EZR                                |
| 9 | 96,675,000 | 96,825,000 | 1290 | 1266 | 0.119870556  | RSPH3,TAGAP                        |
| 9 | 96,750,000 | 96,900,000 | 1291 | 1053 | -0.431312258 | RSPH3,TAGAP                        |
| 9 | 96,825,000 | 96,975,000 | 1292 | 814  | 0.082301593  | FNDC1                              |
| 9 | 96,900,000 | 97,050,000 | 1293 | 879  | 0.861458215  | FNDC1                              |
| 9 | 96,975,000 | 97,125,000 | 1294 | 835  | 0.535862358  | FNDC1                              |
| 9 | 97,050,000 | 97,200,000 | 1295 | 816  | -0.197637202 |                                    |
| 9 | 97,125,000 | 97,275,000 | 1296 | 904  | -1.348587946 |                                    |
| 9 | 97,200,000 | 97,350,000 | 1297 | 925  | -2.208093869 |                                    |
| 9 | 97,275,000 | 97,425,000 | 1298 | 1076 | -1.725075731 | SOD2                               |
| 9 | 97,350,000 | 97,500,000 | 1299 | 945  | -0.703573834 | ACAT2,MRPL18,SOD2,TCP1,WTAP        |
| 9 | 97,425,000 | 97,575,000 | 1300 | 920  | 0.485674885  | ACAT2,MAS1,MRPL18,PNLDC1,TCP1,WTAP |
| 9 | 97,500,000 | 97,650,000 | 1301 | 827  | 0.698772604  | IGF2R,MAS1,PNLDC1                  |
| 9 | 97,575,000 | 97,725,000 | 1302 | 454  | 0.452635763  | IGF2R                              |
| 9 | 97,650,000 | 97,800,000 | 1303 | 533  | -0.273239279 | IGF2R,SLC22A1                      |
| 9 | 97,725,000 | 97,875,000 | 1304 | 648  | 0.338662079  | IGF2R,SLC22A1,SLC22A2              |
| 9 | 97,800,000 | 97,950,000 | 1305 | 744  | 1.039215677  | SLC22A2,SLC22A3                    |
| 9 | 97,875,000 | 98,025,000 | 1306 | 633  | 1.005280598  | PLG,SLC22A3                        |
| 9 | 97,950,000 | 98,100,000 | 1307 | 719  | 0.59160391   | PLG,SLC22A3                        |
| 9 | 98,025,000 | 98,175,000 | 1308 | 1302 | 0.563351471  | MAP3K4,PLG                         |
| 9 | 98,100,000 | 98,250,000 | 1309 | 1326 | 0.637584983  | AGPAT4,MAP3K4                      |

|   |             |             |      |      |              |                           |
|---|-------------|-------------|------|------|--------------|---------------------------|
| 9 | 98,175,000  | 98,325,000  | 1310 | 1175 | 0.505095565  | AGPAT4,MAP3K4             |
| 9 | 98,250,000  | 98,400,000  | 1311 | 1035 | 0.948156126  | AGPAT4                    |
| 9 | 98,325,000  | 98,475,000  | 1312 | 1241 | 1.071784083  | AGPAT4,PARK2              |
| 9 | 98,400,000  | 98,550,000  | 1313 | 1850 | 0.866610433  | PARK2                     |
| 9 | 98,475,000  | 98,625,000  | 1314 | 1887 | 0.8592596    | PARK2                     |
| 9 | 98,550,000  | 98,700,000  | 1315 | 1525 | 0.88911755   | PARK2                     |
| 9 | 98,625,000  | 98,775,000  | 1316 | 1489 | 0.648389207  | PARK2                     |
| 9 | 98,700,000  | 98,850,000  | 1317 | 1388 | 0.144963159  | PARK2                     |
| 9 | 98,775,000  | 98,925,000  | 1318 | 1066 | 0.519059101  | PARK2                     |
| 9 | 98,850,000  | 99,000,000  | 1319 | 1101 | 1.078397409  | PARK2                     |
| 9 | 98,925,000  | 99,075,000  | 1320 | 1568 | -0.153090156 | PARK2                     |
| 9 | 99,000,000  | 99,150,000  | 1321 | 1681 | -0.166876833 | PARK2                     |
| 9 | 99,075,000  | 99,225,000  | 1322 | 1523 | 0.563800362  | PARK2                     |
| 9 | 99,150,000  | 99,300,000  | 1323 | 1854 | 0.842012739  | PARK2                     |
| 9 | 99,225,000  | 99,375,000  | 1324 | 1562 | 1.137742233  | PARK2                     |
| 9 | 99,300,000  | 99,450,000  | 1325 | 1003 | 0.937618817  | PARK2                     |
| 9 | 99,375,000  | 99,525,000  | 1326 | 850  | 0.898331932  | PARK2                     |
| 9 | 99,450,000  | 99,600,000  | 1327 | 582  | 1.051748703  | PARK2                     |
| 9 | 99,525,000  | 99,675,000  | 1328 | 535  | 0.607184723  | PACRG,PARK2               |
| 9 | 99,600,000  | 99,750,000  | 1329 | 715  | 0.5877393    | PACRG                     |
| 9 | 99,675,000  | 99,825,000  | 1330 | 838  | 0.889254263  | PACRG                     |
| 9 | 99,750,000  | 99,900,000  | 1331 | 672  | 1.018145245  | PACRG                     |
| 9 | 99,825,000  | 99,975,000  | 1332 | 870  | 0.60413962   | PACRG                     |
| 9 | 99,900,000  | 100,050,000 | 1333 | 1104 | 0.39352229   | PACRG                     |
| 9 | 99,975,000  | 100,125,000 | 1334 | 825  | 0.407159999  | PACRG                     |
| 9 | 100,050,000 | 100,200,000 | 1335 | 763  | 0.452923143  | PACRG                     |
| 9 | 100,125,000 | 100,275,000 | 1336 | 665  | 0.01161895   | PACRG                     |
| 9 | 100,200,000 | 100,350,000 | 1337 | 428  | -0.656730763 | ENSBTAG00000037598        |
| 9 | 100,275,000 | 100,425,000 | 1338 | 322  | -0.556080808 | QKI,ENSBTAG00000037598    |
| 9 | 100,350,000 | 100,500,000 | 1339 | 407  | 0.116840428  | QKI                       |
| 9 | 100,425,000 | 100,575,000 | 1340 | 851  | 0.563185839  | QKI                       |
| 9 | 100,500,000 | 100,650,000 | 1341 | 1070 | 0.568642005  |                           |
| 9 | 100,575,000 | 100,725,000 | 1342 | 852  | 0.367986605  |                           |
| 9 | 100,650,000 | 100,800,000 | 1343 | 842  | 0.512900453  |                           |
| 9 | 100,725,000 | 100,875,000 | 1344 | 808  | 0.479359346  |                           |
| 9 | 100,800,000 | 100,950,000 | 1345 | 887  | -0.555158306 |                           |
| 9 | 100,875,000 | 101,025,000 | 1346 | 1025 | -0.495921669 |                           |
| 9 | 100,950,000 | 101,100,000 | 1347 | 1040 | 0.035486349  |                           |
| 9 | 101,025,000 | 101,175,000 | 1348 | 964  | -0.004592655 |                           |
| 9 | 101,100,000 | 101,250,000 | 1349 | 753  | -0.018020902 |                           |
| 9 | 101,175,000 | 101,325,000 | 1350 | 652  | -0.189623335 |                           |
| 9 | 101,250,000 | 101,400,000 | 1351 | 859  | -0.036929185 |                           |
| 9 | 101,325,000 | 101,475,000 | 1352 | 1045 | 0.628466016  |                           |
| 9 | 101,400,000 | 101,550,000 | 1353 | 1168 | -0.19350575  |                           |
| 9 | 101,475,000 | 101,625,000 | 1354 | 1175 | -0.778359713 |                           |
| 9 | 101,550,000 | 101,700,000 | 1355 | 1214 | 0.391090753  |                           |
| 9 | 101,625,000 | 101,775,000 | 1356 | 1407 | 0.753477198  |                           |
| 9 | 101,700,000 | 101,850,000 | 1357 | 1326 | -0.170295208 |                           |
| 9 | 101,775,000 | 101,925,000 | 1358 | 1196 | -1.607276343 |                           |
| 9 | 101,850,000 | 102,000,000 | 1359 | 991  | -0.740902448 | MGC134132,PDE10A          |
| 9 | 101,925,000 | 102,075,000 | 1360 | 1221 | 0.18968512   | MGC134132,PDE10A          |
| 9 | 102,000,000 | 102,150,000 | 1361 | 1866 | 0.28049654   | PDE10A,ENSBTAG00000046733 |
| 9 | 102,075,000 | 102,225,000 | 1362 | 1722 | 0.082593805  | ENSBTAG00000046733        |

|    |             |             |      |      |              |                                                         |
|----|-------------|-------------|------|------|--------------|---------------------------------------------------------|
| 9  | 102,150,000 | 102,300,000 | 1363 | 1285 | 0.229410397  |                                                         |
| 9  | 102,225,000 | 102,375,000 | 1364 | 1383 | 0.369355146  |                                                         |
| 9  | 102,300,000 | 102,450,000 | 1365 | 1396 | 0.309042966  |                                                         |
| 9  | 102,375,000 | 102,525,000 | 1366 | 1311 | 0.472049558  |                                                         |
| 9  | 102,450,000 | 102,600,000 | 1367 | 1357 | 0.655805007  |                                                         |
| 9  | 102,525,000 | 102,675,000 | 1368 | 1189 | 0.666153803  | T                                                       |
| 9  | 102,600,000 | 102,750,000 | 1369 | 742  | -0.259086791 | T                                                       |
| 9  | 102,675,000 | 102,825,000 | 1370 | 486  | -1.542320123 | T                                                       |
| 9  | 102,750,000 | 102,900,000 | 1371 | 680  | -0.563508579 | MPC1,SFT2D1                                             |
| 9  | 102,825,000 | 102,975,000 | 1372 | 811  | -0.950960658 | MPC1,RPS6KA2,SFT2D1                                     |
| 9  | 102,900,000 | 103,050,000 | 1373 | 795  | -0.449588628 | RPS6KA2                                                 |
| 9  | 102,975,000 | 103,125,000 | 1374 | 826  | 0.061818021  | RPS6KA2                                                 |
| 9  | 103,050,000 | 103,200,000 | 1375 | 755  | 0.480279699  | RPS6KA2                                                 |
| 9  | 103,125,000 | 103,275,000 | 1376 | 753  | 1.030955641  |                                                         |
| 9  | 103,200,000 | 103,350,000 | 1377 | 794  | -0.024598682 | RNASET2                                                 |
| 9  | 103,275,000 | 103,425,000 | 1378 | 654  | -0.727077777 | FGFR1OP,RNASET2                                         |
| 9  | 103,350,000 | 103,500,000 | 1379 | 625  | -0.833761645 | FGFR1OP,GPR31,ENSBTAG00000014496,ENSBTAG00000026133     |
| 9  | 103,425,000 | 103,575,000 | 1380 | 1034 | -1.902249178 | GPR31,TTLL2,UNC93A,ENSBTAG00000014496,ENSBTAG0000026133 |
| 9  | 103,500,000 | 103,650,000 | 1381 | 1928 | -0.908631935 | TTLL2,UNC93A,ENSBTAG00000026133                         |
| 9  | 103,575,000 | 103,725,000 | 1382 | 2119 | -0.279376657 |                                                         |
| 9  | 103,650,000 | 103,800,000 | 1383 | 1749 | 0.049855087  |                                                         |
| 9  | 103,725,000 | 103,875,000 | 1384 | 1429 | 0.504603261  | MLLT4                                                   |
| 9  | 103,800,000 | 103,950,000 | 1385 | 1032 | 0.617593818  | KIF25,MLLT4                                             |
| 9  | 103,875,000 | 104,025,000 | 1386 | 1140 | 0.642365326  | FRMD1,KIF25,MLLT4                                       |
| 9  | 103,950,000 | 104,100,000 | 1387 | 1033 | 0.164717437  | FRMD1,KIF25,ENSBTAG00000047235                          |
| 9  | 104,025,000 | 104,175,000 | 1388 | 868  | -0.001719717 | DACT2,ENSBTAG00000047235                                |
| 9  | 104,100,000 | 104,250,000 | 1389 | 1201 | 0.458473322  | DACT2                                                   |
| 9  | 104,175,000 | 104,325,000 | 1390 | 1322 | -0.569489255 | SMOC2                                                   |
| 9  | 104,250,000 | 104,400,000 | 1391 | 1001 | -0.475725406 | SMOC2                                                   |
| 9  | 104,325,000 | 104,475,000 | 1392 | 985  | 0.396005543  | SMOC2                                                   |
| 9  | 104,400,000 | 104,550,000 | 1393 | 919  | 0.174016551  |                                                         |
| 9  | 104,475,000 | 104,625,000 | 1394 | 610  | 0.217081048  |                                                         |
| 9  | 104,550,000 | 104,700,000 | 1395 | 501  | 0.426539693  |                                                         |
| 9  | 104,625,000 | 104,775,000 | 1396 | 351  | 0.299548389  | THBS2                                                   |
| 9  | 104,700,000 | 104,850,000 | 1397 | 501  | 0.750442266  | THBS2                                                   |
| 9  | 104,775,000 | 104,925,000 | 1398 | 630  | 0.922618479  |                                                         |
| 9  | 104,850,000 | 105,000,000 | 1399 | 488  | 0.757081171  | WDR27                                                   |
| 9  | 104,925,000 | 105,075,000 | 1400 | 369  | 0.900814293  | C9H6orf120,PHF10,WDR27                                  |
| 9  | 105,000,000 | 105,150,000 | 1401 | 287  | 1.047716619  | C9H6orf120,ERMARD,PHF10,TCTE3,WDR27                     |
| 9  | 105,075,000 | 105,225,000 | 1402 | 291  | 0.786922788  | C9H6orf120,ERMARD,PHF10,TCTE3                           |
| 9  | 105,150,000 | 105,300,000 | 1403 | 519  | 0.634705538  | ERMARD                                                  |
| 9  | 105,225,000 | 105,375,000 | 1404 | 575  | 0.655996081  |                                                         |
| 9  | 105,300,000 | 105,450,000 | 1405 | 443  | 0.825050782  |                                                         |
| 9  | 105,375,000 | 105,525,000 | 1406 | 359  | 0.626669379  | DLL1                                                    |
| 9  | 105,450,000 | 105,600,000 | 1407 | 253  | 0.602360943  | DLL1,FAM120B                                            |
| 9  | 105,525,000 | 105,675,000 | 1408 | 290  | 0.89559661   | FAM120B,PSMB1                                           |
| 9  | 105,600,000 | 105,708,250 | 1409 | 251  | 0.784105489  | PDCD2,PSMB1,TBP                                         |
| 10 | 0           | 150,000     | 1    | 430  | -0.096323802 |                                                         |
| 10 | 75,000      | 225,000     | 2    | 411  | 0.218218449  | ENSBTAG00000047105                                      |
| 10 | 150,000     | 300,000     | 3    | 734  | 0.540271463  | ENSBTAG00000017396,ENSBTAG00000047105                   |
| 10 | 225,000     | 375,000     | 4    | 992  | 0.983868764  | ENSBTAG00000003493,ENSBTAG00000017396                   |



|    |           |           |    |      |              |                        |
|----|-----------|-----------|----|------|--------------|------------------------|
| 10 | 300,000   | 450,000   | 5  | 1064 | 0.631783701  | ENSBTAG00000003493     |
| 10 | 375,000   | 525,000   | 6  | 1140 | 0.447284348  |                        |
| 10 | 450,000   | 600,000   | 7  | 858  | 0.63259263   | ENSBTAG00000046432     |
| 10 | 525,000   | 675,000   | 8  | 759  | 0.164571279  | MCC,ENSBTAG00000046432 |
| 10 | 600,000   | 750,000   | 9  | 1013 | 0.438958671  | MCC                    |
| 10 | 675,000   | 825,000   | 10 | 669  | 0.684391114  | MCC                    |
| 10 | 750,000   | 900,000   | 11 | 603  | -0.118877939 | MCC                    |
| 10 | 825,000   | 975,000   | 12 | 779  | -1.574126382 | DCP2,MCC               |
| 10 | 900,000   | 1,050,000 | 13 | 538  | -2.800433149 | DCP2,MCC,REEP5         |
| 10 | 975,000   | 1,125,000 | 14 | 452  | -1.097668562 | APC,DCP2,REEP5,SRP19   |
| 10 | 1,050,000 | 1,200,000 | 15 | 492  | 0.029712525  | APC,REEP5,SRP19        |
| 10 | 1,125,000 | 1,275,000 | 16 | 541  | 0.242857425  | APC                    |
| 10 | 1,200,000 | 1,350,000 | 17 | 602  | 0.608886339  | APC                    |
| 10 | 1,275,000 | 1,425,000 | 18 | 783  | 1.160496263  |                        |
| 10 | 1,350,000 | 1,500,000 | 19 | 756  | 0.63666863   | EPB41L4A               |
| 10 | 1,425,000 | 1,575,000 | 20 | 700  | 0.299964187  | EPB41L4A               |
| 10 | 1,500,000 | 1,650,000 | 21 | 650  | 0.191153959  | EPB41L4A               |
| 10 | 1,575,000 | 1,725,000 | 22 | 395  | -0.822188134 | EPB41L4A               |
| 10 | 1,650,000 | 1,800,000 | 23 | 595  | -0.882593029 | EPB41L4A               |
| 10 | 1,725,000 | 1,875,000 | 24 | 1122 | -1.392132003 | EPB41L4A               |
| 10 | 1,800,000 | 1,950,000 | 25 | 1147 | -1.414800558 |                        |
| 10 | 1,875,000 | 2,025,000 | 26 | 1030 | -0.636491645 |                        |
| 10 | 1,950,000 | 2,100,000 | 27 | 901  | 0.215575461  |                        |
| 10 | 2,025,000 | 2,175,000 | 28 | 927  | 0.944004509  | NREP                   |
| 10 | 2,100,000 | 2,250,000 | 29 | 1059 | 0.791979831  | NREP                   |
| 10 | 2,175,000 | 2,325,000 | 30 | 1085 | 0.537284594  | NREP                   |
| 10 | 2,250,000 | 2,400,000 | 31 | 1245 | 0.427258906  | YTHDC2                 |
| 10 | 2,325,000 | 2,475,000 | 32 | 1018 | 0.42600745   | YTHDC2                 |
| 10 | 2,400,000 | 2,550,000 | 33 | 617  | -0.681417932 | YTHDC2                 |
| 10 | 2,475,000 | 2,625,000 | 34 | 718  | -3.15169572  |                        |
| 10 | 2,550,000 | 2,700,000 | 35 | 885  | -1.2773679   |                        |
| 10 | 2,625,000 | 2,775,000 | 36 | 1031 | 1.192817852  |                        |
| 10 | 2,700,000 | 2,850,000 | 37 | 1385 | 1.253797369  |                        |
| 10 | 2,775,000 | 2,925,000 | 38 | 1239 | 1.175495752  |                        |
| 10 | 2,850,000 | 3,000,000 | 39 | 992  | 0.597078816  |                        |
| 10 | 2,925,000 | 3,075,000 | 40 | 588  | 0.145126023  |                        |
| 10 | 3,000,000 | 3,150,000 | 41 | 277  | -0.052452755 |                        |
| 10 | 3,075,000 | 3,225,000 | 42 | 556  | 0.417052039  | KCNN2                  |
| 10 | 3,150,000 | 3,300,000 | 43 | 955  | -1.283781186 | KCNN2                  |
| 10 | 3,225,000 | 3,375,000 | 44 | 1144 | -1.90610163  | KCNN2                  |
| 10 | 3,300,000 | 3,450,000 | 45 | 941  | -1.101981472 | KCNN2                  |
| 10 | 3,375,000 | 3,525,000 | 46 | 1103 | -0.512437585 |                        |
| 10 | 3,450,000 | 3,600,000 | 47 | 1491 | -0.210011887 | ENSBTAG00000023186     |
| 10 | 3,525,000 | 3,675,000 | 48 | 1401 | 0.203642337  | ENSBTAG00000023186     |
| 10 | 3,600,000 | 3,750,000 | 49 | 1150 | 0.784313279  |                        |
| 10 | 3,675,000 | 3,825,000 | 50 | 959  | -0.245445583 |                        |
| 10 | 3,750,000 | 3,900,000 | 51 | 945  | -0.156974983 |                        |
| 10 | 3,825,000 | 3,975,000 | 52 | 869  | 0.658471347  | TRIM36                 |
| 10 | 3,900,000 | 4,050,000 | 53 | 793  | 0.905623219  | PGGT1B,TRIM36          |
| 10 | 3,975,000 | 4,125,000 | 54 | 722  | 1.169709955  | CCDC112,PGGT1B         |
| 10 | 4,050,000 | 4,200,000 | 55 | 777  | 0.77061695   | CCDC112,PGGT1B         |
| 10 | 4,125,000 | 4,275,000 | 56 | 1115 | 0.386258854  |                        |
| 10 | 4,200,000 | 4,350,000 | 57 | 964  | 0.476892021  | FEM1C                  |

|    |           |           |     |      |              |                               |
|----|-----------|-----------|-----|------|--------------|-------------------------------|
| 10 | 4,275,000 | 4,425,000 | 58  | 677  | 0.412402405  | FEM1C,TICAM2,TMED7            |
| 10 | 4,350,000 | 4,500,000 | 59  | 1187 | 0.277039256  | TICAM2,TMED7                  |
| 10 | 4,425,000 | 4,575,000 | 60  | 1286 | 0.693154529  |                               |
| 10 | 4,500,000 | 4,650,000 | 61  | 726  | -0.34696435  | ATG12,CDO1,ENSBTAG00000048058 |
| 10 | 4,575,000 | 4,725,000 | 62  | 670  | -1.795774828 | ATG12,CDO1,ENSBTAG00000048058 |
| 10 | 4,650,000 | 4,800,000 | 63  | 817  | -0.675978215 | AQPEP,ATG12                   |
| 10 | 4,725,000 | 4,875,000 | 64  | 798  | 0.132271149  | AQPEP,ATG12,C10H11ORF46       |
| 10 | 4,800,000 | 4,950,000 | 65  | 709  | 0.818185079  | AQPEP,C10H11ORF46             |
| 10 | 4,875,000 | 5,025,000 | 66  | 508  | 0.585845792  | C10H11ORF46,P33MONOX,SIMC1    |
| 10 | 4,950,000 | 5,100,000 | 67  | 462  | -0.252344752 | P33MONOX,SIMC1                |
| 10 | 5,025,000 | 5,175,000 | 68  | 585  | 0.029511797  | THOC3                         |
| 10 | 5,100,000 | 5,250,000 | 69  | 460  | 0.699766583  | CPLX2,THOC3                   |
| 10 | 5,175,000 | 5,325,000 | 70  | 347  | 0.952718297  | CPLX2                         |
| 10 | 5,250,000 | 5,400,000 | 71  | 655  | 0.273286155  |                               |
| 10 | 5,325,000 | 5,475,000 | 72  | 890  | -0.395617301 | HRH2                          |
| 10 | 5,400,000 | 5,550,000 | 73  | 848  | -1.188664794 | HRH2                          |
| 10 | 5,475,000 | 5,625,000 | 74  | 930  | 0.312288138  | SFXN1                         |
| 10 | 5,550,000 | 5,700,000 | 75  | 889  | 1.054465277  | DRD1,SFXN1                    |
| 10 | 5,625,000 | 5,775,000 | 76  | 792  | 0.973466921  | DRD1                          |
| 10 | 5,700,000 | 5,850,000 | 77  | 712  | 1.303318794  |                               |
| 10 | 5,775,000 | 5,925,000 | 78  | 682  | 0.888024982  |                               |
| 10 | 5,850,000 | 6,000,000 | 79  | 918  | -0.958139584 |                               |
| 10 | 5,925,000 | 6,075,000 | 80  | 1440 | -0.56586692  |                               |
| 10 | 6,000,000 | 6,150,000 | 81  | 1562 | 0.598254599  |                               |
| 10 | 6,075,000 | 6,225,000 | 82  | 973  | 0.694875714  |                               |
| 10 | 6,150,000 | 6,300,000 | 83  | 1012 | -0.055251957 |                               |
| 10 | 6,225,000 | 6,375,000 | 84  | 1466 | 0.254676782  |                               |
| 10 | 6,300,000 | 6,450,000 | 85  | 1380 | 0.744005536  | GCNT4                         |
| 10 | 6,375,000 | 6,525,000 | 86  | 1261 | 0.544485095  | ANKRD31,GCNT4                 |
| 10 | 6,450,000 | 6,600,000 | 87  | 1073 | 0.629413123  | ANKRD31                       |
| 10 | 6,525,000 | 6,675,000 | 88  | 1202 | 0.653398644  | ANKRD31                       |
| 10 | 6,600,000 | 6,750,000 | 89  | 1088 | 0.512404787  | COL4A3BP,HMGCR                |
| 10 | 6,675,000 | 6,825,000 | 90  | 715  | 0.012470153  | COL4A3BP,HMGCR                |
| 10 | 6,750,000 | 6,900,000 | 91  | 774  | 0.60329583   | COL4A3BP,POLK                 |
| 10 | 6,825,000 | 6,975,000 | 92  | 850  | 0.899118104  | ANKDD1B,COL4A3BP,POLK         |
| 10 | 6,900,000 | 7,050,000 | 93  | 925  | 0.072462846  | ANKDD1B,MGC157319,POLK        |
| 10 | 6,975,000 | 7,125,000 | 94  | 931  | -0.334990696 | ANKDD1B,MGC157319             |
| 10 | 7,050,000 | 7,200,000 | 95  | 936  | 0.863671313  |                               |
| 10 | 7,125,000 | 7,275,000 | 96  | 1194 | 1.302767691  |                               |
| 10 | 7,200,000 | 7,350,000 | 97  | 1566 | 0.27428704   | SV2C                          |
| 10 | 7,275,000 | 7,425,000 | 98  | 1868 | -0.121697422 | SV2C                          |
| 10 | 7,350,000 | 7,500,000 | 99  | 1754 | 0.511358339  | SV2C                          |
| 10 | 7,425,000 | 7,575,000 | 100 | 1291 | -0.20023961  | IQGAP2,SV2C                   |
| 10 | 7,500,000 | 7,650,000 | 101 | 1037 | -0.681302526 | IQGAP2,SV2C                   |
| 10 | 7,575,000 | 7,725,000 | 102 | 1208 | 0.104819269  | IQGAP2                        |
| 10 | 7,650,000 | 7,800,000 | 103 | 1293 | -0.184715335 | F2RL2,IQGAP2                  |
| 10 | 7,725,000 | 7,875,000 | 104 | 1168 | 0.11215809   | F2RL2,IQGAP2                  |
| 10 | 7,800,000 | 7,950,000 | 105 | 1237 | 0.656055539  | F2R,IQGAP2                    |
| 10 | 7,875,000 | 8,025,000 | 106 | 1047 | 0.81591968   | F2R,F2RL1,S100Z               |
| 10 | 7,950,000 | 8,100,000 | 107 | 836  | 0.611878678  | CRHBP,F2RL1,S100Z             |
| 10 | 8,025,000 | 8,175,000 | 108 | 761  | 0.604096057  | AGGF1,CRHBP                   |
| 10 | 8,100,000 | 8,250,000 | 109 | 730  | 0.898389354  | AGGF1                         |
| 10 | 8,175,000 | 8,325,000 | 110 | 833  | 0.496478736  |                               |

|    |            |            |     |      |              |                                   |
|----|------------|------------|-----|------|--------------|-----------------------------------|
| 10 | 8,250,000  | 8,400,000  | 111 | 801  | 0.379202667  |                                   |
| 10 | 8,325,000  | 8,475,000  | 112 | 908  | 0.292169926  | PDE8B                             |
| 10 | 8,400,000  | 8,550,000  | 113 | 1192 | 0.360238366  | PDE8B,WDR41                       |
| 10 | 8,475,000  | 8,625,000  | 114 | 1079 | 0.664104243  | PDE8B,WDR41                       |
| 10 | 8,550,000  | 8,700,000  | 115 | 915  | 0.970781194  | OTP,WDR41                         |
| 10 | 8,625,000  | 8,775,000  | 116 | 682  | 1.07158814   | OTP,TBCA                          |
| 10 | 8,700,000  | 8,850,000  | 117 | 468  | 0.005816006  | TBCA                              |
| 10 | 8,775,000  | 8,925,000  | 118 | 683  | 0.270066377  | TBCA                              |
| 10 | 8,850,000  | 9,000,000  | 119 | 545  | 0.540361775  |                                   |
| 10 | 8,925,000  | 9,075,000  | 120 | 330  | 0.689069683  | AP3B1                             |
| 10 | 9,000,000  | 9,150,000  | 121 | 290  | 1.286287123  | AP3B1                             |
| 10 | 9,075,000  | 9,225,000  | 122 | 527  | 0.619096096  | AP3B1                             |
| 10 | 9,150,000  | 9,300,000  | 123 | 992  | 0.122085726  | AP3B1                             |
| 10 | 9,225,000  | 9,375,000  | 124 | 1085 | -0.886264534 | AP3B1,SCAMP1                      |
| 10 | 9,300,000  | 9,450,000  | 125 | 1085 | -1.617022224 | AP3B1,SCAMP1                      |
| 10 | 9,375,000  | 9,525,000  | 126 | 1160 | -0.92818313  | LHFPL2,SCAMP1                     |
| 10 | 9,450,000  | 9,600,000  | 127 | 1014 | -0.267416741 | LHFPL2,SCAMP1                     |
| 10 | 9,525,000  | 9,675,000  | 128 | 903  | -0.775617091 | LHFPL2                            |
| 10 | 9,600,000  | 9,750,000  | 129 | 835  | -0.331548838 |                                   |
| 10 | 9,675,000  | 9,825,000  | 130 | 661  | 0.395757504  | ARSB                              |
| 10 | 9,750,000  | 9,900,000  | 131 | 686  | 0.504740439  | ARSB                              |
| 10 | 9,825,000  | 9,975,000  | 132 | 782  | 0.539604337  | ARSB                              |
| 10 | 9,900,000  | 10,050,000 | 133 | 623  | 0.116529174  | ARSB,DMGDH                        |
| 10 | 9,975,000  | 10,125,000 | 134 | 584  | 0.230377872  | BHMT2,DMGDH                       |
| 10 | 10,050,000 | 10,200,000 | 135 | 748  | -0.950626191 | BHMT,BHMT2,DMGDH                  |
| 10 | 10,125,000 | 10,275,000 | 136 | 565  | -1.858624657 | BHMT,JMY                          |
| 10 | 10,200,000 | 10,350,000 | 137 | 391  | -1.29082143  | JMY                               |
| 10 | 10,275,000 | 10,425,000 | 138 | 641  | -0.313032476 | HOMER1,JMY                        |
| 10 | 10,350,000 | 10,500,000 | 139 | 766  | -0.455296858 | HOMER1                            |
| 10 | 10,425,000 | 10,575,000 | 140 | 638  | -2.120476955 | HOMER1,PAPD4                      |
| 10 | 10,500,000 | 10,650,000 | 141 | 744  | -1.198590335 | PAPD4                             |
| 10 | 10,575,000 | 10,725,000 | 142 | 893  | -0.628251181 | CMYA5,PAPD4                       |
| 10 | 10,650,000 | 10,800,000 | 143 | 1069 | 0.027455762  | CMYA5                             |
| 10 | 10,725,000 | 10,875,000 | 144 | 1012 | 0.138476037  |                                   |
| 10 | 10,800,000 | 10,950,000 | 145 | 805  | -0.084484787 | MTX3,THBS4                        |
| 10 | 10,875,000 | 11,025,000 | 146 | 1148 | 0.361779315  | MTX3,THBS4                        |
| 10 | 10,950,000 | 11,100,000 | 147 | 1459 | 0.245884813  | SERINC5,THBS4                     |
| 10 | 11,025,000 | 11,175,000 | 148 | 1365 | -0.106941141 | SERINC5                           |
| 10 | 11,100,000 | 11,250,000 | 149 | 1341 | -0.103562932 | SERINC5                           |
| 10 | 11,175,000 | 11,325,000 | 150 | 881  | 0.026904855  |                                   |
| 10 | 11,250,000 | 11,400,000 | 151 | 312  | -0.404081783 | GNPNAT1,STYX                      |
| 10 | 11,325,000 | 11,475,000 | 152 | 436  | 1.202486851  | ERO1L,GNPNAT1,PSMC6,STYX          |
| 10 | 11,400,000 | 11,550,000 | 153 | 711  | 1.026691616  | ERO1L,GPR137C,PSMC6               |
| 10 | 11,475,000 | 11,625,000 | 154 | 813  | 0.749843007  | ERO1L,GPR137C,TXNDC16             |
| 10 | 11,550,000 | 11,700,000 | 155 | 1061 | 0.652454843  | GPR137C,TXNDC16                   |
| 10 | 11,625,000 | 11,775,000 | 156 | 1044 | 0.200438132  | PTGER2,TXNDC16                    |
| 10 | 11,700,000 | 11,850,000 | 157 | 616  | -0.312988491 | ANKDD1A,PTGER2                    |
| 10 | 11,775,000 | 11,925,000 | 158 | 582  | 0.74195679   | ANKDD1A,MTFMT,PTGER2,SPG21        |
| 10 | 11,850,000 | 12,000,000 | 159 | 819  | 0.954985965  | KBTBD13,MTFMT,RASL12,SLC51B,SPG21 |
| 10 | 11,925,000 | 12,075,000 | 160 | 661  | 0.462433419  | CLPX,KBTBD13,PDCD7,RASL12,SLC51B  |
| 10 | 12,000,000 | 12,150,000 | 161 | 662  | -0.90315639  | CILP,CLPX,PDCD7                   |
| 10 | 12,075,000 | 12,225,000 | 162 | 594  | -0.609276493 | CILP,IGDCC3,PARP16                |
| 10 | 12,150,000 | 12,300,000 | 163 | 361  | 0.044456894  | IGDCC3,IGDCC4,PARP16              |

|    |            |            |     |      |              |                                  |
|----|------------|------------|-----|------|--------------|----------------------------------|
| 10 | 12,225,000 | 12,375,000 | 164 | 388  | 0.42818103   | DPP8,IGDCC3,IGDCC4               |
| 10 | 12,300,000 | 12,450,000 | 165 | 398  | 0.77145046   | DPP8,PTPLAD1,VWA9                |
| 10 | 12,375,000 | 12,525,000 | 166 | 352  | 0.732017568  | DENND4A,PTPLAD1,SLC24A1,VWA9     |
| 10 | 12,450,000 | 12,600,000 | 167 | 225  | 0.289703981  | DENND4A,SLC24A1                  |
| 10 | 12,525,000 | 12,675,000 | 168 | 235  | -0.307361713 | DENND4A                          |
| 10 | 12,600,000 | 12,750,000 | 169 | 304  | -0.72143726  | MEGF11,RAB11A                    |
| 10 | 12,675,000 | 12,825,000 | 170 | 751  | -2.546763841 | MEGF11,RAB11A                    |
| 10 | 12,750,000 | 12,900,000 | 171 | 1078 | -1.222731547 | MEGF11                           |
| 10 | 12,825,000 | 12,975,000 | 172 | 975  | 0.720084788  |                                  |
| 10 | 12,900,000 | 13,050,000 | 173 | 1022 | 0.625127866  |                                  |
| 10 | 12,975,000 | 13,125,000 | 174 | 1031 | -0.230657738 |                                  |
| 10 | 13,050,000 | 13,200,000 | 175 | 1035 | 0.004155908  | DIS3L,TIPIN                      |
| 10 | 13,125,000 | 13,275,000 | 176 | 798  | 0.844943955  | DIS3L,MAP2K1,TIPIN               |
| 10 | 13,200,000 | 13,350,000 | 177 | 423  | 0.702427547  | MAP2K1,RPL4,SNAPC5,TIPIN,ZWILCH  |
| 10 | 13,275,000 | 13,425,000 | 178 | 327  | 0.468838956  | LCTL,MAP2K1,RPL4,SNAPC5,ZWILCH   |
| 10 | 13,350,000 | 13,500,000 | 179 | 515  | 0.268203543  | LCTL,ZWILCH                      |
| 10 | 13,425,000 | 13,575,000 | 180 | 548  | -0.171955717 | SMAD6                            |
| 10 | 13,500,000 | 13,650,000 | 181 | 622  | 0.215875493  | SMAD6                            |
| 10 | 13,575,000 | 13,725,000 | 182 | 1167 | 0.818424477  | SMAD6                            |
| 10 | 13,650,000 | 13,800,000 | 183 | 1276 | 0.653525441  |                                  |
| 10 | 13,725,000 | 13,875,000 | 184 | 1021 | 0.570563865  |                                  |
| 10 | 13,800,000 | 13,950,000 | 185 | 1131 | 0.695087167  |                                  |
| 10 | 13,875,000 | 14,025,000 | 186 | 895  | 0.646911941  | MGC152585,SMAD3                  |
| 10 | 13,950,000 | 14,100,000 | 187 | 735  | 0.677083843  | IQCH,MGC152585,SMAD3             |
| 10 | 14,025,000 | 14,175,000 | 188 | 685  | 0.602994637  | IQCH,MGC152585                   |
| 10 | 14,100,000 | 14,250,000 | 189 | 726  | 0.614852925  | IQCH                             |
| 10 | 14,175,000 | 14,325,000 | 190 | 897  | 0.443007882  | IQCH                             |
| 10 | 14,250,000 | 14,400,000 | 191 | 675  | -0.334945539 | C15orf61,IQCH,MAP2K5             |
| 10 | 14,325,000 | 14,475,000 | 192 | 772  | -0.568754151 | C15orf61,MAP2K5                  |
| 10 | 14,400,000 | 14,550,000 | 193 | 710  | -0.513274195 | MAP2K5                           |
| 10 | 14,475,000 | 14,625,000 | 194 | 651  | 0.383823121  | MAP2K5                           |
| 10 | 14,550,000 | 14,700,000 | 195 | 811  | 0.719514167  | MAP2K5,SKOR1                     |
| 10 | 14,625,000 | 14,775,000 | 196 | 726  | 0.710620968  | MAP2K5,SKOR1                     |
| 10 | 14,700,000 | 14,850,000 | 197 | 528  | 0.543115648  |                                  |
| 10 | 14,775,000 | 14,925,000 | 198 | 370  | 0.174533588  | PIAS1                            |
| 10 | 14,850,000 | 15,000,000 | 199 | 274  | 0.155752435  | PIAS1                            |
| 10 | 14,925,000 | 15,075,000 | 200 | 512  | 0.545702526  | CALML4,CLN6,PIAS1                |
| 10 | 15,000,000 | 15,150,000 | 201 | 778  | 0.19445084   | CALML4,CLN6,FEM1B,ITGA11,PIAS1   |
| 10 | 15,075,000 | 15,225,000 | 202 | 957  | -0.859131423 | FEM1B,ITGA11                     |
| 10 | 15,150,000 | 15,300,000 | 203 | 1157 | -0.929319585 | ITGA11                           |
| 10 | 15,225,000 | 15,375,000 | 204 | 1046 | -0.841538897 |                                  |
| 10 | 15,300,000 | 15,450,000 | 205 | 796  | -0.398052634 |                                  |
| 10 | 15,375,000 | 15,525,000 | 206 | 818  | 0.368130113  | CORO2B                           |
| 10 | 15,450,000 | 15,600,000 | 207 | 973  | -0.257201312 | ANP32A,CORO2B,ENSBTAG00000045866 |
| 10 | 15,525,000 | 15,675,000 | 208 | 898  | -0.516077203 | ANP32A,CORO2B,ENSBTAG00000045866 |
| 10 | 15,600,000 | 15,750,000 | 209 | 877  | -0.026169507 | ANP32A,SPESP1                    |
| 10 | 15,675,000 | 15,825,000 | 210 | 971  | -0.246275817 | SPESP1                           |
| 10 | 15,750,000 | 15,900,000 | 211 | 1293 | -0.830917187 | NOX5,SPESP1                      |
| 10 | 15,825,000 | 15,975,000 | 212 | 1308 | -0.850104355 | NOX5                             |
| 10 | 15,900,000 | 16,050,000 | 213 | 702  | -0.350884427 |                                  |
| 10 | 15,975,000 | 16,125,000 | 214 | 334  | 0.131854572  | GLCE                             |
| 10 | 16,050,000 | 16,200,000 | 215 | 848  | 0.790841254  | GLCE,PAQR5                       |
| 10 | 16,125,000 | 16,275,000 | 216 | 1142 | 0.938759619  | KIF23,PAQR5                      |

|    |            |            |     |      |              |                                                         |
|----|------------|------------|-----|------|--------------|---------------------------------------------------------|
| 10 | 16,200,000 | 16,350,000 | 217 | 960  | 1.089171344  | KIF23,PAQR5,RPLP1                                       |
| 10 | 16,275,000 | 16,425,000 | 218 | 1109 | 0.980154602  | KIF23,RPLP1                                             |
| 10 | 16,350,000 | 16,500,000 | 219 | 1073 | 0.864116279  |                                                         |
| 10 | 16,425,000 | 16,575,000 | 220 | 786  | 0.776445291  |                                                         |
| 10 | 16,500,000 | 16,650,000 | 221 | 736  | 0.325919469  |                                                         |
| 10 | 16,575,000 | 16,725,000 | 222 | 829  | 0.506070821  |                                                         |
| 10 | 16,650,000 | 16,800,000 | 223 | 978  | -0.006962397 |                                                         |
| 10 | 16,725,000 | 16,875,000 | 224 | 1073 | -0.16572094  |                                                         |
| 10 | 16,800,000 | 16,950,000 | 225 | 849  | 0.393264234  | TLE3                                                    |
| 10 | 16,875,000 | 17,025,000 | 226 | 692  | 0.089546972  | TLE3                                                    |
| 10 | 16,950,000 | 17,100,000 | 227 | 815  | -0.317717538 |                                                         |
| 10 | 17,025,000 | 17,175,000 | 228 | 1159 | 0.316908827  |                                                         |
| 10 | 17,100,000 | 17,250,000 | 229 | 879  | 0.705921918  | ENSBTAG00000030439                                      |
| 10 | 17,175,000 | 17,325,000 | 230 | 542  | -0.002955165 | ENSBTAG00000030439                                      |
| 10 | 17,250,000 | 17,400,000 | 231 | 745  | 0.782381462  |                                                         |
| 10 | 17,325,000 | 17,475,000 | 232 | 790  | -0.0583124   |                                                         |
| 10 | 17,400,000 | 17,550,000 | 233 | 841  | -0.886190943 | UACA                                                    |
| 10 | 17,475,000 | 17,625,000 | 234 | 895  | 0.857654696  | UACA                                                    |
| 10 | 17,550,000 | 17,700,000 | 235 | 1247 | 0.523490661  | LARP6,UACA                                              |
| 10 | 17,625,000 | 17,775,000 | 236 | 1097 | 0.264436771  | LARP6,LRRC49,THAP10                                     |
| 10 | 17,700,000 | 17,850,000 | 237 | 858  | 0.163463752  | LRRC49,THAP10                                           |
| 10 | 17,775,000 | 17,925,000 | 238 | 1150 | 0.267995694  | LRRC49                                                  |
| 10 | 17,850,000 | 18,000,000 | 239 | 1058 | 0.073021792  | LRRC49                                                  |
| 10 | 17,925,000 | 18,075,000 | 240 | 981  | 0.545433362  |                                                         |
| 10 | 18,000,000 | 18,150,000 | 241 | 656  | 0.791032794  |                                                         |
| 10 | 18,075,000 | 18,225,000 | 242 | 669  | 0.633389743  |                                                         |
| 10 | 18,150,000 | 18,300,000 | 243 | 914  | 0.673902597  |                                                         |
| 10 | 18,225,000 | 18,375,000 | 244 | 1148 | 0.719697276  |                                                         |
| 10 | 18,300,000 | 18,450,000 | 245 | 1322 | 0.672018098  |                                                         |
| 10 | 18,375,000 | 18,525,000 | 246 | 868  | -0.090300215 | THSD4                                                   |
| 10 | 18,450,000 | 18,600,000 | 247 | 805  | -0.146551329 | THSD4                                                   |
| 10 | 18,525,000 | 18,675,000 | 248 | 680  | 0.306085148  | NR2E3,THSD4,ENSBTAG00000007433                          |
| 10 | 18,600,000 | 18,750,000 | 249 | 531  | 0.734792589  | NR2E3,THSD4,ENSBTAG00000007433                          |
| 10 | 18,675,000 | 18,825,000 | 250 | 497  | 1.184613335  | ENSBTAG00000007433                                      |
| 10 | 18,750,000 | 18,900,000 | 251 | 313  | 1.182363157  | ENSBTAG00000007433,ENSBTAG00000033344                   |
| 10 | 18,825,000 | 18,975,000 | 252 | 557  | 0.755839261  | GRAMD2,PKM2,ENSBTAG00000007433,ENSBTAG00000033344       |
| 10 | 18,900,000 | 19,050,000 | 253 | 620  | 0.640754608  | GRAMD2,PARP6,PKM2,ENSBTAG00000014092,ENSBTAG00000033344 |
| 10 | 18,975,000 | 19,125,000 | 254 | 671  | 0.770041008  | HEXA,PARP6,PKM2,ENSBTAG00000014092                      |
| 10 | 19,050,000 | 19,200,000 | 255 | 928  | 0.758847209  | ARIH1,HEXA,TMEM202,ENSBTAG00000014092                   |
| 10 | 19,125,000 | 19,275,000 | 256 | 755  | 0.679840449  | ARIH1,HEXA,TMEM202                                      |
| 10 | 19,200,000 | 19,350,000 | 257 | 616  | 0.597027469  | ARIH1,BBS4                                              |
| 10 | 19,275,000 | 19,425,000 | 258 | 770  | 0.657941274  | ADPGK,ARIH1,BBS4                                        |
| 10 | 19,350,000 | 19,500,000 | 259 | 987  | 0.456846492  | ADPGK,BBS4                                              |
| 10 | 19,425,000 | 19,575,000 | 260 | 1150 | -0.063723995 |                                                         |
| 10 | 19,500,000 | 19,650,000 | 261 | 1053 | -0.123653176 |                                                         |
| 10 | 19,575,000 | 19,725,000 | 262 | 843  | 0.620404513  |                                                         |
| 10 | 19,650,000 | 19,800,000 | 263 | 991  | 0.830479704  | NEO1                                                    |
| 10 | 19,725,000 | 19,875,000 | 264 | 873  | 1.046958012  | NEO1                                                    |
| 10 | 19,800,000 | 19,950,000 | 265 | 728  | 1.166254847  | NEO1                                                    |
| 10 | 19,875,000 | 20,025,000 | 266 | 894  | 0.756807616  | HCN4,NEO1                                               |
| 10 | 19,950,000 | 20,100,000 | 267 | 813  | 0.576423147  | HCN4,NEO1                                               |

|    |            |            |     |      |              |                                                                                                                                            |
|----|------------|------------|-----|------|--------------|--------------------------------------------------------------------------------------------------------------------------------------------|
| 10 | 20,025,000 | 20,175,000 | 268 | 920  | 0.533988367  |                                                                                                                                            |
| 10 | 20,100,000 | 20,250,000 | 269 | 906  | -0.097891666 | NPTN                                                                                                                                       |
| 10 | 20,175,000 | 20,325,000 | 270 | 734  | -0.835272513 | NPTN                                                                                                                                       |
| 10 | 20,250,000 | 20,400,000 | 271 | 801  | 0.181890709  | C15orf59,CD276,NPTN                                                                                                                        |
| 10 | 20,325,000 | 20,475,000 | 272 | 950  | -0.093958935 | C15orf59,CD276                                                                                                                             |
| 10 | 20,400,000 | 20,550,000 | 273 | 1106 | -0.220831679 | TBC1D21                                                                                                                                    |
| 10 | 20,475,000 | 20,625,000 | 274 | 1076 | 0.323811524  | CBLN3,KHNYN,NYNRIN,SDR39U1,TBC1D21                                                                                                         |
| 10 | 20,550,000 | 20,700,000 | 275 | 779  | -0.005447047 | ADCY4,C10H14orf21,CBLN3,CIDEB,KHNYN,LTB4R,LTB4R2,NFATC4,NYNRIN,RIPK3,SDR39U1                                                               |
| 10 | 20,625,000 | 20,775,000 | 276 | 732  | -0.542508403 | ADCY4,C10H14orf21,CIDEB,DHRS1,GMMPR2,LTB4R,LTB4R2,NFATC4,RABGGTA,RIPK3,TGM1,TINF2                                                          |
| 10 | 20,700,000 | 20,850,000 | 277 | 694  | -0.811831276 | C10H14orf21,CHMP4A,DHRS1,EMC9,GMMPR2,IPO4,ISGF3G,MDP-1,NEDD8,PSME1,PSME2,RABGGTA,REC8,TGM1,TINF2,TSSK4,ENSBTAG0000002709,ENSBTAG0000005815 |
| 10 | 20,775,000 | 20,925,000 | 278 | 567  | -0.790157924 | CHMP4A,CPNE6,DHRS4,EMC9,FITM1,IPO4,ISGF3G,LRR16B,MDP-1,NEDD8,NRL,PCK2,PSME1,PSME2,REC8,TSSK4,WDR23,ENSBTAG0000002709,ENSBTAG0000005815     |
| 10 | 20,850,000 | 21,000,000 | 279 | 1017 | 0.236829599  | CPNE6,DHRS4,FITM1,LRR16B,NRL,PCK2,WDR23,ENSBTAG00000045993                                                                                 |
| 10 | 20,925,000 | 21,075,000 | 280 | 1361 | 0.329189627  | DHRS4,ENSBTAG00000030841,ENSBTAG00000045993                                                                                                |
| 10 | 21,000,000 | 21,150,000 | 281 | 1227 | 0.202372948  | ENSBTAG00000030841                                                                                                                         |
| 10 | 21,075,000 | 21,225,000 | 282 | 1066 | -0.766887841 | AP1G2,JPH4,THTPA                                                                                                                           |
| 10 | 21,150,000 | 21,300,000 | 283 | 663  | -1.171988046 | AP1G2,JPH4,NGDN,THTPA,ZFH2                                                                                                                 |
| 10 | 21,225,000 | 21,375,000 | 284 | 575  | 1.00936337   | MYH7,NGDN,THTPA,ZFH2                                                                                                                       |
| 10 | 21,300,000 | 21,450,000 | 285 | 531  | 1.183554084  | BCL2L2,CMTM5,EFS,IL25,MYH7,NGDN,PABPN1,PPP1R3E,SLC22A17                                                                                    |
| 10 | 21,375,000 | 21,525,000 | 286 | 312  | 1.100283238  | BCL2L2,CMTM5,EFS,IL25,KIAA1443,MYH7,PABPN1,PPP1R3E,RNF212B,SLC22A17,SLC7A8                                                                 |
| 10 | 21,450,000 | 21,600,000 | 287 | 357  | 0.050831937  | ACIN1,C14orf119,CEBPE,KIAA1443,RNF212B,SLC7A8                                                                                              |
| 10 | 21,525,000 | 21,675,000 | 288 | 454  | 0.108951346  | ACIN1,C14orf119,CDH24,CEBPE,PSMB11,PSMB5,SLC7A8                                                                                            |
| 10 | 21,600,000 | 21,750,000 | 289 | 483  | 0.342501747  | ACIN1,AJUBA,C10H14ORF93,CDH24,PSMB11,PSMB5,ENSBTAG00000012723                                                                              |
| 10 | 21,675,000 | 21,825,000 | 290 | 342  | -1.146470206 | AJUBA,C10H14ORF93,LRP10,MMP14,MRPL52,PRMT5,RBM23,REM2,ENSBTAG00000012723                                                                   |
| 10 | 21,750,000 | 21,900,000 | 291 | 202  | -1.759039746 | LRP10,MMP14,MRPL52,OXA1L,PRMT5,RBM23,REM2,SLC7A7                                                                                           |
| 10 | 21,825,000 | 21,975,000 | 292 | 203  | -5.618699047 | OXA1L,SLC7A7,ENSBTAG00000046906,ENSBTAG00000047305,ENSBTAG00000047672,ENSBTAG00000047893                                                   |
| 10 | 21,900,000 | 22,050,000 | 293 | 590  | -5.807220175 | ABHD4,OR6J1,ENSBTAG0000009274,ENSBTAG00000045760,ENSBTAG00000046906,ENSBTAG00000047305,ENSBTAG00000047672,ENSBTAG00000047893               |
| 10 | 21,975,000 | 22,125,000 | 294 | 773  | -2.932584345 | ABHD4,DAD1,OR6J1,TRAC,ENSBTAG0000009274,ENSBTAG00000045760                                                                                 |
| 10 | 22,050,000 | 22,200,000 | 295 | 824  | -0.020393375 | ABHD4,DAD1,TRAC,TRD@                                                                                                                       |
| 10 | 22,125,000 | 22,275,000 | 296 | 1241 | -0.102031309 | TRAC,TRD@                                                                                                                                  |
| 10 | 22,200,000 | 22,350,000 | 297 | 1366 | 0.570796637  | TRAC,TRD@,TRDV2,ENSBTAG00000039402                                                                                                         |
| 10 | 22,275,000 | 22,425,000 | 298 | 1518 | 0.946148767  | TRAC,TRDV2,ENSBTAG00000039402                                                                                                              |
| 10 | 22,350,000 | 22,500,000 | 299 | 2088 | 0.956799023  | TRAC,TRDV2,ENSBTAG00000039402                                                                                                              |
| 10 | 22,425,000 | 22,575,000 | 300 | 2177 | 0.898870102  | TRAC,ENSBTAG00000039402,ENSBTAG00000046962                                                                                                 |
| 10 | 22,500,000 | 22,650,000 | 301 | 1801 | 0.785940533  | TRAC,ENSBTAG00000045595,ENSBTAG00000046962,ENSBTAG00000047258                                                                              |

|    |            |            |     |      |              |                                                                                                                                                                                    |
|----|------------|------------|-----|------|--------------|------------------------------------------------------------------------------------------------------------------------------------------------------------------------------------|
| 10 | 22,575,000 | 22,725,000 | 302 | 1750 | 0.732419353  | TRAC,ENSBTAG00000045595,ENSBTAG00000045758,ENSBTAG00000047258,ENSBTAG00000048302                                                                                                   |
| 10 | 22,650,000 | 22,800,000 | 303 | 1753 | 0.823313187  | TRAC,ENSBTAG00000045758,ENSBTAG00000046464,ENSBTAG00000048302                                                                                                                      |
| 10 | 22,725,000 | 22,875,000 | 304 | 1550 | 0.842223158  | TRAC,ENSBTAG00000039077,ENSBTAG00000046464,ENSBTAG00000046530,ENSBTAG00000047041,ENSBTAG0000047444                                                                                 |
| 10 | 22,800,000 | 22,950,000 | 305 | 2319 | 0.774910876  | TRAC,ENSBTAG00000039077,ENSBTAG00000046530,ENSBTAG00000046682,ENSBTAG00000047041,ENSBTAG0000047444                                                                                 |
| 10 | 22,875,000 | 23,025,000 | 306 | 2396 | 0.68472999   | TRAC,ENSBTAG00000046682                                                                                                                                                            |
| 10 | 22,950,000 | 23,100,000 | 307 | 1648 | 0.709923146  | TRAC,TRAV29DV5                                                                                                                                                                     |
| 10 | 23,025,000 | 23,175,000 | 308 | 1864 | 0.442207568  | TRAC,TRAV29DV5,ENSBTAG00000047276                                                                                                                                                  |
| 10 | 23,100,000 | 23,250,000 | 309 | 1363 | -0.432848144 | TRAC,ENSBTAG00000036202,ENSBTAG00000047276,ENSBTAG00000048064                                                                                                                      |
| 10 | 23,175,000 | 23,325,000 | 310 | 617  | -0.810540007 | TRAC,ENSBTAG00000036202,ENSBTAG00000048064                                                                                                                                         |
| 10 | 23,250,000 | 23,400,000 | 311 | 1259 | -0.091756832 | TRAC,ENSBTAG00000038565,ENSBTAG00000047312                                                                                                                                         |
| 10 | 23,325,000 | 23,475,000 | 312 | 1473 | -0.322166065 | ENSBTAG00000038565,ENSBTAG00000046477,ENSBTAG0000047091,ENSBTAG00000047312,ENSBTAG00000047683                                                                                      |
| 10 | 23,400,000 | 23,550,000 | 313 | 1440 | -0.353036019 | ENSBTAG00000046477,ENSBTAG00000046897,ENSBTAG0000047001,ENSBTAG00000047091,ENSBTAG00000047683                                                                                      |
| 10 | 23,475,000 | 23,625,000 | 314 | 2297 | 0.046407677  | TRA@,ENSBTAG00000046897,ENSBTAG00000047001,ENSBTAG00000047981                                                                                                                      |
| 10 | 23,550,000 | 23,700,000 | 315 | 1775 | 0.033866206  | TRA@,ENSBTAG00000045953,ENSBTAG00000047097,ENSBTAG00000047981                                                                                                                      |
| 10 | 23,625,000 | 23,775,000 | 316 | 945  | -0.320302556 | ENSBTAG00000045953,ENSBTAG00000047097,ENSBTAG0000047522,ENSBTAG00000047909                                                                                                         |
| 10 | 23,700,000 | 23,850,000 | 317 | 1231 | -0.425768985 | ENSBTAG00000047398,ENSBTAG00000047522,ENSBTAG0000047909                                                                                                                            |
| 10 | 23,775,000 | 23,925,000 | 318 | 1595 | 0.146688635  | ENSBTAG00000047398,ENSBTAG00000048236                                                                                                                                              |
| 10 | 23,850,000 | 24,000,000 | 319 | 1552 | 0.664589886  | ENSBTAG00000037924,ENSBTAG00000039807,ENSBTAG0000048236                                                                                                                            |
| 10 | 23,925,000 | 24,075,000 | 320 | 1803 | 0.668544467  | TRAV8-1,ENSBTAG00000037924,ENSBTAG00000039038,ENSBTAG00000039807,ENSBTAG00000048074                                                                                                |
| 10 | 24,000,000 | 24,150,000 | 321 | 2260 | 0.449186947  | TRAV8-1,ENSBTAG00000039038,ENSBTAG00000046102,ENSBTAG00000046157,ENSBTAG00000046305,ENSBTAG00000047096,ENSBTAG00000047624,ENSBTAG00000047639,ENSBTAG00000047952,ENSBTAG00000048074 |
| 10 | 24,075,000 | 24,225,000 | 322 | 2183 | 0.078754289  | ENSBTAG00000046102,ENSBTAG00000046157,ENSBTAG0000046305,ENSBTAG00000047096,ENSBTAG00000047624,ENSBTAG00000047639,ENSBTAG00000047952                                                |
| 10 | 24,150,000 | 24,300,000 | 323 | 1932 | -0.153542001 | ENSBTAG00000046546,ENSBTAG00000047690                                                                                                                                              |
| 10 | 24,225,000 | 24,375,000 | 324 | 1519 | 0.075719628  | ENSBTAG00000046546,ENSBTAG00000047690                                                                                                                                              |
| 10 | 24,300,000 | 24,450,000 | 325 | 741  | 0.28514486   |                                                                                                                                                                                    |
| 10 | 24,375,000 | 24,525,000 | 326 | 852  | 0.34790433   |                                                                                                                                                                                    |
| 10 | 24,450,000 | 24,600,000 | 327 | 1939 | 0.605653266  |                                                                                                                                                                                    |
| 10 | 24,525,000 | 24,675,000 | 328 | 2154 | 0.781473245  | ENSBTAG00000046802                                                                                                                                                                 |
| 10 | 24,600,000 | 24,750,000 | 329 | 1563 | 0.619324462  | ENSBTAG00000027170,ENSBTAG00000046802,ENSBTAG0000047058                                                                                                                            |

|    |            |            |     |      |              |                                                                                                                                             |
|----|------------|------------|-----|------|--------------|---------------------------------------------------------------------------------------------------------------------------------------------|
| 10 | 24,675,000 | 24,825,000 | 330 | 1596 | 0.129408769  | ENSBTAG00000027170,ENSBTAG00000035785,ENSBTAG0000047058                                                                                     |
| 10 | 24,750,000 | 24,900,000 | 331 | 1385 | -0.104282123 | TRAV14DV4,ENSBTAG00000035785,ENSBTAG00000046819                                                                                             |
| 10 | 24,825,000 | 24,975,000 | 332 | 962  | 0.309600784  | TRAV14DV4,ENSBTAG00000024659,ENSBTAG00000038060,ENSBTAG00000046819                                                                          |
| 10 | 24,900,000 | 25,050,000 | 333 | 1256 | -0.06491412  | TRAV16,TRAV17,ENSBTAG00000024659,ENSBTAG00000038060                                                                                         |
| 10 | 24,975,000 | 25,125,000 | 334 | 1101 | -0.54780103  | TRAV16,TRAV17,TRAV18,ENSBTAG00000045883,ENSBTAG00000046993,ENSBTAG00000047015                                                               |
| 10 | 25,050,000 | 25,200,000 | 335 | 1159 | 0.026743687  | TRAV18,ENSBTAG00000033045,ENSBTAG00000038544,ENSBTAG00000045883,ENSBTAG00000046426,ENSBTAG00000046993,ENSBTAG00000046995,ENSBTAG00000047015 |
| 10 | 25,125,000 | 25,275,000 | 336 | 1412 | 0.488975429  | ENSBTAG00000033045,ENSBTAG00000038544,ENSBTAG0000046361,ENSBTAG00000046426,ENSBTAG00000046995                                               |
| 10 | 25,200,000 | 25,350,000 | 337 | 1584 | 0.490967663  | ENSBTAG00000033036,ENSBTAG00000046361,ENSBTAG0000046643                                                                                     |
| 10 | 25,275,000 | 25,425,000 | 338 | 1931 | 0.559659488  | ENSBTAG00000033034,ENSBTAG00000033036,ENSBTAG0000035530,ENSBTAG00000039546,ENSBTAG00000046478,ENSBTAG00000046643                            |
| 10 | 25,350,000 | 25,500,000 | 339 | 2273 | 0.578730585  | ENSBTAG00000033034,ENSBTAG00000035530,ENSBTAG0000039546,ENSBTAG00000046478                                                                  |
| 10 | 25,425,000 | 25,575,000 | 340 | 2271 | 0.768268401  | TRAV3                                                                                                                                       |
| 10 | 25,500,000 | 25,650,000 | 341 | 1759 | 1.089149146  | OR4E2,TRAV3,ENSBTAG00000011925,ENSBTAG00000047253,ENSBTAG00000047746                                                                        |
| 10 | 25,575,000 | 25,725,000 | 342 | 1275 | 1.005940728  | METTL3,OR10G3,OR4E2,SALL2,ENSBTAG00000011925,ENSBTAG00000047253,ENSBTAG00000047746                                                          |
| 10 | 25,650,000 | 25,800,000 | 343 | 773  | 1.127051159  | CHD8,METTL3,OR10G3,RAB2B,SALL2,TOX4                                                                                                         |
| 10 | 25,725,000 | 25,875,000 | 344 | 484  | 0.486234646  | CHD8,METTL3,RAB2B,RPGRIP1,SUPT16H,TOX4                                                                                                      |
| 10 | 25,800,000 | 25,950,000 | 345 | 981  | 0.482374476  | CHD8,HNRPC,RPGRIP1,SUPT16H                                                                                                                  |
| 10 | 25,875,000 | 26,025,000 | 346 | 1477 | 0.08768431   | HNRPC,OR5AU1,RPGRIP1                                                                                                                        |
| 10 | 25,950,000 | 26,100,000 | 347 | 1153 | 0.04726998   | ARHGEF40,HNRPC,OR5AU1,TMEM253,ZNF219                                                                                                        |
| 10 | 26,025,000 | 26,175,000 | 348 | 859  | 0.747667943  | ARHGEF40,NDRG2,RNASE13,SLC39A2,TMEM253,TPPP2,ZNF219,ENSBTAG00000046482                                                                      |
| 10 | 26,100,000 | 26,250,000 | 349 | 1243 | 0.87168195   | METTL17,NDRG2,RNASE13,SLC39A2,TPPP2,ENSBTAG0000025664,ENSBTAG00000046482                                                                    |
| 10 | 26,175,000 | 26,325,000 | 350 | 1658 | 0.821625958  | BRN,METTL17,RAC1,ENSBTAG00000025664,ENSBTAG0000032873                                                                                       |
| 10 | 26,250,000 | 26,400,000 | 351 | 1312 | 0.569171259  | BRN,RAC1,RNASE1,ENSBTAG00000032873                                                                                                          |
| 10 | 26,325,000 | 26,475,000 | 352 | 895  | 0.706102621  | ANG,ANG2,RNASE1,RNASE4,RNASE6                                                                                                               |
| 10 | 26,400,000 | 26,550,000 | 353 | 851  | 0.941361657  | ANG,ANG2,OR6S1,RNASE4,RNASE6,ENSBTAG00000046058                                                                                             |
| 10 | 26,475,000 | 26,625,000 | 354 | 1039 | 0.853810926  | OR6S1,RAK1,ENSBTAG00000046058                                                                                                               |
| 10 | 26,550,000 | 26,700,000 | 355 | 1267 | 0.631274056  | PNP,RAK1,RNASE10,ENSBTAG00000037452                                                                                                         |
| 10 | 26,625,000 | 26,775,000 | 356 | 1371 | 0.519547629  | APEX1,KLHL33,OSGEP,PNP,RNASE10,TEP1,TMEM55B,ENSBTAG00000037452                                                                              |
| 10 | 26,700,000 | 26,850,000 | 357 | 1191 | 0.283355472  | APEX1,CCNB1IP1,KLHL33,OSGEP,PARP2,RPS29,TEP1,TMEM55B,TTC5                                                                                   |
| 10 | 26,775,000 | 26,925,000 | 358 | 1377 | 0.396024684  | CCNB1IP1,OR11H4,OR11H6,OR11H7,PARP2,RPS29,TEP1,TTC5,ENSBTAG00000015983                                                                      |



|    |            |            |     |      |              |                                                                                                                                                                          |
|----|------------|------------|-----|------|--------------|--------------------------------------------------------------------------------------------------------------------------------------------------------------------------|
| 10 | 26,850,000 | 27,000,000 | 359 | 1969 | 0.68546686   | OR11H4,OR11H6,OR11H7,TTC5,ENSBTAG00000006198,ENSBTAG00000015983,ENSBTAG00000032798,ENSBTAG0000032799,ENSBTAG00000037959,ENSBTAG00000038868                               |
| 10 | 26,925,000 | 27,075,000 | 360 | 1600 | 0.570847242  | OR11H6,ENSBTAG00000006198,ENSBTAG00000032798,ENSBTAG00000032799,ENSBTAG00000037959,ENSBTAG0000038227,ENSBTAG00000038868,ENSBTAG00000039315,ENSBTAG00000048109            |
| 10 | 27,000,000 | 27,150,000 | 361 | 1172 | 0.389965477  | ENSBTAG00000025068,ENSBTAG00000038227,ENSBTAG0000038485,ENSBTAG00000039315,ENSBTAG00000046970,ENSBTAG00000047483,ENSBTAG00000048109                                      |
| 10 | 27,075,000 | 27,225,000 | 362 | 1305 | 0.549475257  | OR4Q3,ENSBTAG00000025068,ENSBTAG00000037411,ENSBTAG00000038485,ENSBTAG00000038672,ENSBTAG0000039120,ENSBTAG00000039416,ENSBTAG00000046970,ENSBTAG00000047483             |
| 10 | 27,150,000 | 27,300,000 | 363 | 1330 | 0.740106193  | OR4K2,OR4N2,OR4Q3,ENSBTAG00000037411,ENSBTAG0000037511,ENSBTAG00000038672,ENSBTAG00000039120,ENSBTAG00000039416,ENSBTAG00000046390,ENSBTAG00000046651,ENSBTAG00000047311 |
| 10 | 27,225,000 | 27,375,000 | 364 | 1315 | 0.74731901   | OR4K1,OR4K2,OR4K5,OR4N2,ENSBTAG00000037511,ENSBTAG00000046390,ENSBTAG00000046651,ENSBTAG00000047311                                                                      |
| 10 | 27,300,000 | 27,450,000 | 365 | 1000 | 0.050547881  | OR4K1,OR4K15,OR4K5                                                                                                                                                       |
| 10 | 27,375,000 | 27,525,000 | 366 | 1076 | -2.174480267 | OR4K14,OR4K15,OR4L1,OR4N5,OR4Q2                                                                                                                                          |
| 10 | 27,450,000 | 27,600,000 | 367 | 1445 | -2.972966529 | OR4K14,OR4L1,OR4N5,OR4Q2                                                                                                                                                 |
| 10 | 27,525,000 | 27,675,000 | 368 | 1293 | -2.318889266 | ENSBTAG00000047348,ENSBTAG00000047984                                                                                                                                    |
| 10 | 27,600,000 | 27,750,000 | 369 | 1666 | -0.194183234 | ENSBTAG00000046009,ENSBTAG00000046061,ENSBTAG0000046370,ENSBTAG00000047348,ENSBTAG00000047984                                                                            |
| 10 | 27,675,000 | 27,825,000 | 370 | 1569 | 0.254180346  | ENSBTAG00000046009,ENSBTAG00000046061,ENSBTAG0000046370                                                                                                                  |
| 10 | 27,750,000 | 27,900,000 | 371 | 969  | -0.85388711  | ENSBTAG00000013255,ENSBTAG00000038188,ENSBTAG0000046207,ENSBTAG00000047465,ENSBTAG00000047566                                                                            |
| 10 | 27,825,000 | 27,975,000 | 372 | 1431 | -2.73247099  | ENSBTAG00000013255,ENSBTAG00000038188,ENSBTAG0000039354,ENSBTAG00000045618,ENSBTAG00000046207,ENSBTAG00000047465,ENSBTAG00000047566                                      |
| 10 | 27,900,000 | 28,050,000 | 373 | 1614 | -2.902843609 | OR4F15,ENSBTAG00000003549,ENSBTAG00000039354,ENSBTAG00000039554,ENSBTAG00000045618                                                                                       |
| 10 | 27,975,000 | 28,125,000 | 374 | 881  | -2.066533723 | OR4F15,ENSBTAG00000003549,ENSBTAG00000039554,ENSBTAG00000039707,ENSBTAG00000040459                                                                                       |
| 10 | 28,050,000 | 28,200,000 | 375 | 923  | 0.509897581  | ENSBTAG00000037647,ENSBTAG00000038083,ENSBTAG0000039707,ENSBTAG00000040459                                                                                               |
| 10 | 28,125,000 | 28,275,000 | 376 | 1251 | -0.135215851 | ENSBTAG00000037647,ENSBTAG00000038083,ENSBTAG0000038963,ENSBTAG00000039884,ENSBTAG00000040609                                                                            |
| 10 | 28,200,000 | 28,350,000 | 377 | 883  | -0.156230144 | LPCAT4,NUTM1,ENSBTAG00000038531,ENSBTAG00000038963,ENSBTAG00000039884,ENSBTAG00000040609                                                                                 |
| 10 | 28,275,000 | 28,425,000 | 378 | 457  | 0.429970986  | LPCAT4,NOP10,NUTM1,SLC12A6,ENSBTAG00000038531                                                                                                                            |
| 10 | 28,350,000 | 28,500,000 | 379 | 415  | 0.456426964  | EMC4,KATNBL1,NOP10,NUTM1,SLC12A6                                                                                                                                         |
| 10 | 28,425,000 | 28,575,000 | 380 | 775  | 1.058065231  | C10H15ORF24,EMC4,KATNBL1,SLC12A6                                                                                                                                         |
| 10 | 28,500,000 | 28,650,000 | 381 | 1054 | 0.79938005   | AVEN,C10H15ORF24,CHRM5,KATNBL1                                                                                                                                           |
| 10 | 28,575,000 | 28,725,000 | 382 | 1085 | -0.186909546 | AVEN,CHRM5                                                                                                                                                               |

|    |            |            |     |      |              |                                |
|----|------------|------------|-----|------|--------------|--------------------------------|
| 10 | 28,650,000 | 28,800,000 | 383 | 983  | -0.202629723 | AVEN,RYR3                      |
| 10 | 28,725,000 | 28,875,000 | 384 | 855  | 0.321319812  | AVEN,RYR3                      |
| 10 | 28,800,000 | 28,950,000 | 385 | 795  | -0.622088741 | RYR3                           |
| 10 | 28,875,000 | 29,025,000 | 386 | 805  | -0.724499125 | RYR3                           |
| 10 | 28,950,000 | 29,100,000 | 387 | 965  | 0.230657908  | RYR3                           |
| 10 | 29,025,000 | 29,175,000 | 388 | 976  | 0.736008157  | RYR3                           |
| 10 | 29,100,000 | 29,250,000 | 389 | 821  | 0.126506473  | RYR3                           |
| 10 | 29,175,000 | 29,325,000 | 390 | 768  | 0.315925122  |                                |
| 10 | 29,250,000 | 29,400,000 | 391 | 845  | 0.639664483  |                                |
| 10 | 29,325,000 | 29,475,000 | 392 | 795  | 0.723981195  | ENSBTAG00000021414             |
| 10 | 29,400,000 | 29,550,000 | 393 | 581  | -1.340689166 | ENSBTAG00000021414             |
| 10 | 29,475,000 | 29,625,000 | 394 | 655  | -2.99864894  |                                |
| 10 | 29,550,000 | 29,700,000 | 395 | 759  | -0.546819559 | ENSBTAG00000025634             |
| 10 | 29,625,000 | 29,775,000 | 396 | 630  | -0.100868639 | ENSBTAG00000025634             |
| 10 | 29,700,000 | 29,850,000 | 397 | 581  | -1.155303821 | ENSBTAG00000025634             |
| 10 | 29,775,000 | 29,925,000 | 398 | 400  | -1.189184583 | ENSBTAG00000025634             |
| 10 | 29,850,000 | 30,000,000 | 399 | 142  | -2.236939549 | ENSBTAG00000047645             |
| 10 | 29,925,000 | 30,075,000 | 400 | 190  | -1.060779482 | GREM1,ENSBTAG00000047645       |
| 10 | 30,000,000 | 30,150,000 | 401 | 363  | -0.025752383 | ARHGAP11A,GREM1,SCG5           |
| 10 | 30,075,000 | 30,225,000 | 402 | 890  | 0.562977271  | ARHGAP11A,SCG5                 |
| 10 | 30,150,000 | 30,300,000 | 403 | 854  | 0.54362613   | ARHGAP11A                      |
| 10 | 30,225,000 | 30,375,000 | 404 | 625  | -2.886472839 | ACTC1,GJD2                     |
| 10 | 30,300,000 | 30,450,000 | 405 | 894  | -2.746036455 | ACTC1,AQR,GJD2                 |
| 10 | 30,375,000 | 30,525,000 | 406 | 1088 | -1.306213268 | AQR                            |
| 10 | 30,450,000 | 30,600,000 | 407 | 1153 | -0.997947015 | AQR,ZNF770                     |
| 10 | 30,525,000 | 30,675,000 | 408 | 1141 | 0.460458354  | ZNF770                         |
| 10 | 30,600,000 | 30,750,000 | 409 | 1118 | 0.279174549  |                                |
| 10 | 30,675,000 | 30,825,000 | 410 | 1074 | 0.308649743  |                                |
| 10 | 30,750,000 | 30,900,000 | 411 | 1143 | 0.65757976   |                                |
| 10 | 30,825,000 | 30,975,000 | 412 | 974  | 0.47956569   | DPH6                           |
| 10 | 30,900,000 | 31,050,000 | 413 | 595  | 0.079999474  | DPH6                           |
| 10 | 30,975,000 | 31,125,000 | 414 | 442  | -0.2021561   | DPH6                           |
| 10 | 31,050,000 | 31,200,000 | 415 | 721  | 0.866099866  | DPH6                           |
| 10 | 31,125,000 | 31,275,000 | 416 | 653  | 0.499406521  |                                |
| 10 | 31,200,000 | 31,350,000 | 417 | 374  | -1.356337674 |                                |
| 10 | 31,275,000 | 31,425,000 | 418 | 424  | -0.55694008  |                                |
| 10 | 31,350,000 | 31,500,000 | 419 | 530  | -0.814459703 |                                |
| 10 | 31,425,000 | 31,575,000 | 420 | 576  | -0.612528534 |                                |
| 10 | 31,500,000 | 31,650,000 | 421 | 400  | -0.129348748 |                                |
| 10 | 31,575,000 | 31,725,000 | 422 | 536  | -1.370732249 |                                |
| 10 | 31,650,000 | 31,800,000 | 423 | 687  | -0.560251399 |                                |
| 10 | 31,725,000 | 31,875,000 | 424 | 619  | 0.448217127  |                                |
| 10 | 31,800,000 | 31,950,000 | 425 | 535  | -0.293530493 |                                |
| 10 | 31,875,000 | 32,025,000 | 426 | 655  | 0.379218559  |                                |
| 10 | 31,950,000 | 32,100,000 | 427 | 889  | 0.648823906  |                                |
| 10 | 32,025,000 | 32,175,000 | 428 | 842  | 0.786043145  |                                |
| 10 | 32,100,000 | 32,250,000 | 429 | 788  | 0.75100888   |                                |
| 10 | 32,175,000 | 32,325,000 | 430 | 765  | 0.424538333  |                                |
| 10 | 32,250,000 | 32,400,000 | 431 | 698  | 0.34745921   | C10H15ORF41                    |
| 10 | 32,325,000 | 32,475,000 | 432 | 661  | -0.981518776 | C10H15ORF41                    |
| 10 | 32,400,000 | 32,550,000 | 433 | 755  | -1.797575755 | C10H15ORF41,ENSBTAG00000047974 |
| 10 | 32,475,000 | 32,625,000 | 434 | 692  | -2.157759936 | C10H15ORF41,ENSBTAG00000047974 |
| 10 | 32,550,000 | 32,700,000 | 435 | 535  | -2.907723982 | C10H15ORF41,MEIS2              |

|    |            |            |     |      |              |                                                                 |
|----|------------|------------|-----|------|--------------|-----------------------------------------------------------------|
| 10 | 32,625,000 | 32,775,000 | 436 | 431  | -2.025353482 | MEIS2                                                           |
| 10 | 32,700,000 | 32,850,000 | 437 | 473  | -0.723818765 | MEIS2                                                           |
| 10 | 32,775,000 | 32,925,000 | 438 | 497  | 0.202926241  | MEIS2                                                           |
| 10 | 32,850,000 | 33,000,000 | 439 | 372  | 0.456078596  | MEIS2                                                           |
| 10 | 32,925,000 | 33,075,000 | 440 | 392  | 0.581310105  |                                                                 |
| 10 | 33,000,000 | 33,150,000 | 441 | 560  | 1.003640274  |                                                                 |
| 10 | 33,075,000 | 33,225,000 | 442 | 815  | 0.537096024  |                                                                 |
| 10 | 33,150,000 | 33,300,000 | 443 | 727  | 0.129128857  |                                                                 |
| 10 | 33,225,000 | 33,375,000 | 444 | 649  | 0.454072028  |                                                                 |
| 10 | 33,300,000 | 33,450,000 | 445 | 917  | 0.717039872  |                                                                 |
| 10 | 33,375,000 | 33,525,000 | 446 | 903  | 0.793685405  |                                                                 |
| 10 | 33,450,000 | 33,600,000 | 447 | 561  | 0.557769813  |                                                                 |
| 10 | 33,525,000 | 33,675,000 | 448 | 396  | -0.932212942 | TMCO5A                                                          |
| 10 | 33,600,000 | 33,750,000 | 449 | 351  | -1.088274002 | TMCO5A                                                          |
| 10 | 33,675,000 | 33,825,000 | 450 | 379  | -0.426356462 | TMCO5A                                                          |
| 10 | 33,750,000 | 33,900,000 | 451 | 844  | 0.313953577  |                                                                 |
| 10 | 33,825,000 | 33,975,000 | 452 | 877  | 0.512008448  | SPRED1                                                          |
| 10 | 33,900,000 | 34,050,000 | 453 | 471  | 0.210316305  | SPRED1                                                          |
| 10 | 33,975,000 | 34,125,000 | 454 | 421  | 0.539818807  | SPRED1                                                          |
| 10 | 34,050,000 | 34,200,000 | 455 | 528  | 0.661183883  | FAM98B,SPRED1                                                   |
| 10 | 34,125,000 | 34,275,000 | 456 | 476  | 0.355199342  | FAM98B,RASGRP1                                                  |
| 10 | 34,200,000 | 34,350,000 | 457 | 321  | -0.319021433 | RASGRP1                                                         |
| 10 | 34,275,000 | 34,425,000 | 458 | 591  | -1.350164867 | RASGRP1                                                         |
| 10 | 34,350,000 | 34,500,000 | 459 | 840  | -0.712801116 |                                                                 |
| 10 | 34,425,000 | 34,575,000 | 460 | 754  | -0.892873479 |                                                                 |
| 10 | 34,500,000 | 34,650,000 | 461 | 741  | -1.131326012 |                                                                 |
| 10 | 34,575,000 | 34,725,000 | 462 | 916  | -0.308175604 |                                                                 |
| 10 | 34,650,000 | 34,800,000 | 463 | 771  | -0.157422555 |                                                                 |
| 10 | 34,725,000 | 34,875,000 | 464 | 655  | 0.402372312  |                                                                 |
| 10 | 34,800,000 | 34,950,000 | 465 | 804  | -1.190062551 |                                                                 |
| 10 | 34,875,000 | 35,025,000 | 466 | 848  | -1.605380881 |                                                                 |
| 10 | 34,950,000 | 35,100,000 | 467 | 739  | -0.502503516 |                                                                 |
| 10 | 35,025,000 | 35,175,000 | 468 | 657  | -0.229196809 |                                                                 |
| 10 | 35,100,000 | 35,250,000 | 469 | 858  | -0.149284236 |                                                                 |
| 10 | 35,175,000 | 35,325,000 | 470 | 1093 | 0.524258646  | THBS1                                                           |
| 10 | 35,250,000 | 35,400,000 | 471 | 706  | 0.653908934  | FSIP1,THBS1                                                     |
| 10 | 35,325,000 | 35,475,000 | 472 | 179  | 0.886400416  | FSIP1,THBS1                                                     |
| 10 | 35,400,000 | 35,550,000 | 473 | 245  | 0.578860619  | FSIP1                                                           |
| 10 | 35,475,000 | 35,625,000 | 474 | 257  | 0.161079875  | FSIP1,GPR176                                                    |
| 10 | 35,550,000 | 35,700,000 | 475 | 255  | -0.421863383 | GPR176                                                          |
| 10 | 35,625,000 | 35,775,000 | 476 | 275  | -0.267586374 | EIF2AK4,GPR176                                                  |
| 10 | 35,700,000 | 35,850,000 | 477 | 268  | 0.361650668  | EIF2AK4,SRP14                                                   |
| 10 | 35,775,000 | 35,925,000 | 478 | 268  | 0.606760222  | BMF,BUB1B,EIF2AK4,SRP14                                         |
| 10 | 35,850,000 | 36,000,000 | 479 | 277  | 0.331208059  | BMF,BUB1B,ENSBTAG00000019076                                    |
| 10 | 35,925,000 | 36,075,000 | 480 | 314  | 0.352621733  | ANKRD63,BUB1B,C15orf52,PLCB2,ENSBTAG00000019076                 |
| 10 | 36,000,000 | 36,150,000 | 481 | 403  | 0.57757933   | ANKRD63,C10H15ORF23,C15orf52,DISP2,IVD,PLCB2,ENSBTAG00000019076 |
| 10 | 36,075,000 | 36,225,000 | 482 | 405  | 0.55580674   | BAHD1,C10H15ORF23,CHST14,DISP2,IVD                              |
| 10 | 36,150,000 | 36,300,000 | 483 | 354  | 1.027460948  | BAHD1,CCDC32,CHST14,IVD,RPUSD2                                  |
| 10 | 36,225,000 | 36,375,000 | 484 | 279  | 1.216740843  | CCDC32,RAD51,RPUSD2                                             |
| 10 | 36,300,000 | 36,450,000 | 485 | 174  | 1.104944952  | C15orf62,DNAJC17,GCHFR,RAD51,RMDN3                              |
| 10 | 36,375,000 | 36,525,000 | 486 | 223  | 0.12170301   | C15orf62,DNAJC17,GCHFR,PPP1R14D,RAD51,RHOV,RMDN3,SPINT1,ZFYVE19 |

|    |            |            |     |      |              |                                                       |
|----|------------|------------|-----|------|--------------|-------------------------------------------------------|
| 10 | 36,450,000 | 36,600,000 | 487 | 258  | -0.470937213 | CHAC1,DLL4,DNAJC17,PPP1R14D,RHOV,SPINT1,VPS18,ZFYVE19 |
| 10 | 36,525,000 | 36,675,000 | 488 | 378  | -0.185141713 | CHAC1,DLL4,INO80,RHOV,VPS18                           |
| 10 | 36,600,000 | 36,750,000 | 489 | 513  | 0.330953997  | CHAC1,INO80                                           |
| 10 | 36,675,000 | 36,825,000 | 490 | 510  | 0.583878122  | EXD1,INO80,SUMO1                                      |
| 10 | 36,750,000 | 36,900,000 | 491 | 419  | 0.574981253  | CHP1,EXD1,OIP5,SUMO1                                  |
| 10 | 36,825,000 | 36,975,000 | 492 | 491  | 0.386604197  | CHP1,EXD1,NDUFAF1,NUSAP1,OIP5                         |
| 10 | 36,900,000 | 37,050,000 | 493 | 585  | 0.092698362  | ITPKA,NDUFAF1,NUSAP1,OIP5,RTF1                        |
| 10 | 36,975,000 | 37,125,000 | 494 | 557  | -0.08307784  | ITPKA,RPAP1,RTF1,TYRO3                                |
| 10 | 37,050,000 | 37,200,000 | 495 | 482  | -0.248966222 | MGA,RPAP1,TYRO3                                       |
| 10 | 37,125,000 | 37,275,000 | 496 | 350  | -1.091153087 | MGA,ENSBTAG00000014662                                |
| 10 | 37,200,000 | 37,350,000 | 497 | 458  | -0.720629471 | JMJD7,MAPKBP1,MGA,PLA2G4B,ENSBTAG00000014662          |
| 10 | 37,275,000 | 37,425,000 | 498 | 791  | -0.349797272 | EHD4,JMJD7,MAPKBP1,MGA,PLA2G4B,SPTBN5                 |
| 10 | 37,350,000 | 37,500,000 | 499 | 1067 | 0.103270415  | EHD4,PLA2G4B,SPTBN5                                   |
| 10 | 37,425,000 | 37,575,000 | 500 | 1155 | 0.280499489  | EHD4,PLA2G4E                                          |
| 10 | 37,500,000 | 37,650,000 | 501 | 1217 | 0.48559246   | PLA2G4D,PLA2G4E                                       |
| 10 | 37,575,000 | 37,725,000 | 502 | 864  | 0.026479989  | PLA2G4D,PLA2G4F,TMEM87A,VPS39                         |
| 10 | 37,650,000 | 37,800,000 | 503 | 459  | -0.997328825 | GANC,PLA2G4F,TMEM87A,VPS39                            |
| 10 | 37,725,000 | 37,875,000 | 504 | 464  | -0.552037018 | CAPN3,GANC,TMEM87A                                    |
| 10 | 37,800,000 | 37,950,000 | 505 | 515  | -0.710913224 | CAPN3,GANC,SNAP23,ZNF106                              |
| 10 | 37,875,000 | 38,025,000 | 506 | 507  | -0.654694377 | CAPN3,CEP27,LRRC57,SNAP23,ZNF106                      |
| 10 | 37,950,000 | 38,100,000 | 507 | 517  | -0.505961842 | CEP27,LRRC57,SNAP23                                   |
| 10 | 38,025,000 | 38,175,000 | 508 | 574  | -0.478264274 | CDAN1,TTBK2,ENSBTAG00000003754,ENSBTAG000000039789    |
| 10 | 38,100,000 | 38,250,000 | 509 | 516  | -0.505613279 | CDAN1,TTBK2,ENSBTAG00000003754,ENSBTAG000000039789    |
| 10 | 38,175,000 | 38,325,000 | 510 | 536  | -0.058122508 | TTBK2,UBR1                                            |
| 10 | 38,250,000 | 38,400,000 | 511 | 532  | 0.423121297  | UBR1                                                  |
| 10 | 38,325,000 | 38,475,000 | 512 | 437  | 0.978961836  | TMEM62,UBR1                                           |
| 10 | 38,400,000 | 38,550,000 | 513 | 562  | 0.748826399  | CCNDBP1,EPB42,TMEM62,UBR1                             |
| 10 | 38,475,000 | 38,625,000 | 514 | 852  | 0.896511721  | CCNDBP1,EPB42,TMEM62                                  |
| 10 | 38,550,000 | 38,700,000 | 515 | 1073 | 0.696837809  |                                                       |
| 10 | 38,625,000 | 38,775,000 | 516 | 870  | -0.30654882  |                                                       |
| 10 | 38,700,000 | 38,850,000 | 517 | 701  | 0.046623423  |                                                       |
| 10 | 38,775,000 | 38,925,000 | 518 | 724  | 0.32921448   |                                                       |
| 10 | 38,850,000 | 39,000,000 | 519 | 878  | -1.224650273 |                                                       |
| 10 | 38,925,000 | 39,075,000 | 520 | 1281 | -0.119149561 |                                                       |
| 10 | 39,000,000 | 39,150,000 | 521 | 1320 | 0.764101183  |                                                       |
| 10 | 39,075,000 | 39,225,000 | 522 | 1409 | 0.098116096  |                                                       |
| 10 | 39,150,000 | 39,300,000 | 523 | 999  | -0.299247175 |                                                       |
| 10 | 39,225,000 | 39,375,000 | 524 | 644  | 0.629164266  |                                                       |
| 10 | 39,300,000 | 39,450,000 | 525 | 790  | 0.581070497  |                                                       |
| 10 | 39,375,000 | 39,525,000 | 526 | 937  | 0.290719386  |                                                       |
| 10 | 39,450,000 | 39,600,000 | 527 | 1244 | 0.543293244  |                                                       |
| 10 | 39,525,000 | 39,675,000 | 528 | 1232 | 0.664613982  |                                                       |
| 10 | 39,600,000 | 39,750,000 | 529 | 1208 | 0.348303463  | RPL10L                                                |
| 10 | 39,675,000 | 39,825,000 | 530 | 1481 | 0.392915388  | RPL10L                                                |
| 10 | 39,750,000 | 39,900,000 | 531 | 1488 | 0.72500125   |                                                       |
| 10 | 39,825,000 | 39,975,000 | 532 | 1020 | 0.939403963  | MDGA2                                                 |
| 10 | 39,900,000 | 40,050,000 | 533 | 843  | 0.315192718  | MDGA2                                                 |
| 10 | 39,975,000 | 40,125,000 | 534 | 691  | -0.175949779 | MDGA2                                                 |
| 10 | 40,050,000 | 40,200,000 | 535 | 460  | 0.160494322  | MDGA2,ENSBTAG000000032894                             |
| 10 | 40,125,000 | 40,275,000 | 536 | 489  | 0.438652518  | MDGA2,ENSBTAG000000032894                             |

|    |            |            |     |      |              |                                                    |
|----|------------|------------|-----|------|--------------|----------------------------------------------------|
| 10 | 40,200,000 | 40,350,000 | 537 | 589  | -0.674068778 | MDGA2                                              |
| 10 | 40,275,000 | 40,425,000 | 538 | 825  | 0.254588626  | MDGA2                                              |
| 10 | 40,350,000 | 40,500,000 | 539 | 799  | 0.976746662  | MDGA2                                              |
| 10 | 40,425,000 | 40,575,000 | 540 | 524  | -0.383657722 | MDGA2                                              |
| 10 | 40,500,000 | 40,650,000 | 541 | 751  | 0.29304749   |                                                    |
| 10 | 40,575,000 | 40,725,000 | 542 | 734  | 0.917433824  |                                                    |
| 10 | 40,650,000 | 40,800,000 | 543 | 511  | 0.897973485  |                                                    |
| 10 | 40,725,000 | 40,875,000 | 544 | 598  | 1.046446357  |                                                    |
| 10 | 40,800,000 | 40,950,000 | 545 | 733  | 0.99317506   |                                                    |
| 10 | 40,875,000 | 41,025,000 | 546 | 873  | -0.244632825 |                                                    |
| 10 | 40,950,000 | 41,100,000 | 547 | 814  | -0.384610006 |                                                    |
| 10 | 41,025,000 | 41,175,000 | 548 | 759  | 0.771819064  |                                                    |
| 10 | 41,100,000 | 41,250,000 | 549 | 1121 | -0.058513801 |                                                    |
| 10 | 41,175,000 | 41,325,000 | 550 | 1298 | -0.330516783 |                                                    |
| 10 | 41,250,000 | 41,400,000 | 551 | 843  | -0.34022573  |                                                    |
| 10 | 41,325,000 | 41,475,000 | 552 | 769  | 0.417056001  |                                                    |
| 10 | 41,400,000 | 41,550,000 | 553 | 831  | 0.633989989  |                                                    |
| 10 | 41,475,000 | 41,625,000 | 554 | 959  | 0.823293394  |                                                    |
| 10 | 41,550,000 | 41,700,000 | 555 | 1333 | 1.14193226   |                                                    |
| 10 | 41,625,000 | 41,775,000 | 556 | 1534 | 1.145339069  |                                                    |
| 10 | 41,700,000 | 41,850,000 | 557 | 1564 | 0.649623446  |                                                    |
| 10 | 41,775,000 | 41,925,000 | 558 | 1335 | 0.325111267  |                                                    |
| 10 | 41,850,000 | 42,000,000 | 559 | 989  | 0.676079149  | ENSBTAG00000047222                                 |
| 10 | 41,925,000 | 42,075,000 | 560 | 890  | 0.352036121  | ENSBTAG00000047222                                 |
| 10 | 42,000,000 | 42,150,000 | 561 | 788  | 0.59680213   |                                                    |
| 10 | 42,075,000 | 42,225,000 | 562 | 521  | 0.991116854  |                                                    |
| 10 | 42,150,000 | 42,300,000 | 563 | 516  | -0.218912854 |                                                    |
| 10 | 42,225,000 | 42,375,000 | 564 | 785  | -1.0181959   |                                                    |
| 10 | 42,300,000 | 42,450,000 | 565 | 878  | -0.24770005  |                                                    |
| 10 | 42,375,000 | 42,525,000 | 566 | 876  | 0.356613204  |                                                    |
| 10 | 42,450,000 | 42,600,000 | 567 | 780  | 0.233561035  |                                                    |
| 10 | 42,525,000 | 42,675,000 | 568 | 530  | 0.615293338  |                                                    |
| 10 | 42,600,000 | 42,750,000 | 569 | 369  | 0.73428251   | DNAAF2,KLHDC1,MGAT2,POLE2,PPIL5,RPL36A             |
| 10 | 42,675,000 | 42,825,000 | 570 | 225  | -0.023640281 | DNAAF2,KLHDC1,KLHDC2,MGAT2,NEMF,POLE2,PPIL5,RPL36A |
| 10 | 42,750,000 | 42,900,000 | 571 | 233  | -0.016302613 | KLHDC1,KLHDC2,NEMF                                 |
| 10 | 42,825,000 | 42,975,000 | 572 | 339  | 0.067180959  | ARF6,NEMF                                          |
| 10 | 42,900,000 | 43,050,000 | 573 | 412  | -0.33065506  | ARF6                                               |
| 10 | 42,975,000 | 43,125,000 | 574 | 456  | -1.455187855 | SOS2,VCPKMT                                        |
| 10 | 43,050,000 | 43,200,000 | 575 | 630  | -0.888741588 | SOS2,VCPKMT                                        |
| 10 | 43,125,000 | 43,275,000 | 576 | 568  | -0.919121064 | ATP5S,L2HGDH,SOS2                                  |
| 10 | 43,200,000 | 43,350,000 | 577 | 531  | -0.314655665 | ATP5S,CDKL1,L2HGDH                                 |
| 10 | 43,275,000 | 43,425,000 | 578 | 537  | 0.589263788  | ATP5S,CDKL1,MAP4K5                                 |
| 10 | 43,350,000 | 43,500,000 | 579 | 363  | 1.183779627  | ATL1,MAP4K5                                        |
| 10 | 43,425,000 | 43,575,000 | 580 | 242  | 1.338469943  | ATL1,MAP4K5,SAV1                                   |
| 10 | 43,500,000 | 43,650,000 | 581 | 176  | 1.297985996  | ATL1,NIN,SAV1                                      |
| 10 | 43,575,000 | 43,725,000 | 582 | 613  | 1.334961138  | NIN,SAV1                                           |
| 10 | 43,650,000 | 43,800,000 | 583 | 958  | 1.31896239   | ABHD12B,NIN                                        |
| 10 | 43,725,000 | 43,875,000 | 584 | 701  | 1.100995775  | ABHD12B,PYGL,TRIM9                                 |
| 10 | 43,800,000 | 43,950,000 | 585 | 573  | 0.661250223  | PYGL,TRIM9                                         |
| 10 | 43,875,000 | 44,025,000 | 586 | 589  | 0.458259156  | TRIM9                                              |
| 10 | 43,950,000 | 44,100,000 | 587 | 752  | 0.444891406  | TRIM9                                              |
| 10 | 44,025,000 | 44,175,000 | 588 | 779  | 0.200505042  | TMX1                                               |

|    |            |            |     |      |              |                                  |
|----|------------|------------|-----|------|--------------|----------------------------------|
| 10 | 44,100,000 | 44,250,000 | 589 | 475  | -0.366078163 | TMX1                             |
| 10 | 44,175,000 | 44,325,000 | 590 | 388  | -0.31227505  |                                  |
| 10 | 44,250,000 | 44,400,000 | 591 | 525  | 0.013266662  | FRMD6                            |
| 10 | 44,325,000 | 44,475,000 | 592 | 639  | 0.576848095  | FRMD6                            |
| 10 | 44,400,000 | 44,550,000 | 593 | 570  | 0.810871081  | FRMD6                            |
| 10 | 44,475,000 | 44,625,000 | 594 | 537  | 0.975322774  | FRMD6                            |
| 10 | 44,550,000 | 44,700,000 | 595 | 829  | 0.966104308  | FRMD6                            |
| 10 | 44,625,000 | 44,775,000 | 596 | 866  | 0.316049115  | GNG2                             |
| 10 | 44,700,000 | 44,850,000 | 597 | 791  | -0.348313618 | GNG2                             |
| 10 | 44,775,000 | 44,925,000 | 598 | 913  | 0.560614309  | C10H14ORF166,GNG2,NID2           |
| 10 | 44,850,000 | 45,000,000 | 599 | 958  | 0.704645577  | C10H14ORF166,NID2                |
| 10 | 44,925,000 | 45,075,000 | 600 | 1079 | 0.754306555  | NID2                             |
| 10 | 45,000,000 | 45,150,000 | 601 | 941  | 1.074679465  |                                  |
| 10 | 45,075,000 | 45,225,000 | 602 | 658  | 0.776128481  | PTGDR,ENSBTAG00000001423         |
| 10 | 45,150,000 | 45,300,000 | 603 | 698  | 0.235603569  | PLEKHO2,PTGDR,ENSBTAG00000001423 |
| 10 | 45,225,000 | 45,375,000 | 604 | 818  | 0.545627772  | PIF1,PLEKHO2                     |
| 10 | 45,300,000 | 45,450,000 | 605 | 790  | 0.571967728  | OAZ2,PIF1,PLEKHO2,RBPMS2,ZNF609  |
| 10 | 45,375,000 | 45,525,000 | 606 | 721  | 0.859397731  | OAZ2,RBPMS2,ZNF609               |
| 10 | 45,450,000 | 45,600,000 | 607 | 798  | 1.355913243  | ZNF609,ENSBTAG00000017641        |
| 10 | 45,525,000 | 45,675,000 | 608 | 647  | 1.325191525  | TRIP4,ZNF609,ENSBTAG00000017641  |
| 10 | 45,600,000 | 45,750,000 | 609 | 415  | 0.909746877  | CSNK1G1,PAF,TRIP4,ZNF609         |
| 10 | 45,675,000 | 45,825,000 | 610 | 411  | 0.847846518  | CSNK1G1,PAF,TRIP4                |
| 10 | 45,750,000 | 45,900,000 | 611 | 479  | 1.168792911  | CSNK1G1,PPIB,SNX1,SNX22          |
| 10 | 45,825,000 | 45,975,000 | 612 | 710  | 1.13109952   | CSNK1G1,FAM96A,PPIB,SNX1,SNX22   |
| 10 | 45,900,000 | 46,050,000 | 613 | 896  | 0.669392863  | DAPK2,FAM96A,SNX1                |
| 10 | 45,975,000 | 46,125,000 | 614 | 1048 | 0.788362498  | DAPK2                            |
| 10 | 46,050,000 | 46,200,000 | 615 | 850  | 0.921469863  | DAPK2                            |
| 10 | 46,125,000 | 46,275,000 | 616 | 424  | 0.369874976  | DAPK2,HERC1                      |
| 10 | 46,200,000 | 46,350,000 | 617 | 305  | 0.287087429  | HERC1                            |
| 10 | 46,275,000 | 46,425,000 | 618 | 317  | 0.97257737   | HERC1                            |
| 10 | 46,350,000 | 46,500,000 | 619 | 481  | 1.049890007  | FBXL22,HERC1,USP3                |
| 10 | 46,425,000 | 46,575,000 | 620 | 527  | 0.818547842  | FBXL22,HERC1,USP3                |
| 10 | 46,500,000 | 46,650,000 | 621 | 673  | 0.479606506  | USP3                             |
| 10 | 46,575,000 | 46,725,000 | 622 | 921  | 0.31501809   |                                  |
| 10 | 46,650,000 | 46,800,000 | 623 | 804  | -0.00655744  | APH1B,CA12                       |
| 10 | 46,725,000 | 46,875,000 | 624 | 602  | -0.153488503 | APH1B,CA12,RAB8B                 |
| 10 | 46,800,000 | 46,950,000 | 625 | 510  | -0.094714095 | APH1B,RAB8B,RPS27L               |
| 10 | 46,875,000 | 47,025,000 | 626 | 568  | -1.306005023 | LACTB,RAB8B,RPS27L               |
| 10 | 46,950,000 | 47,100,000 | 627 | 829  | -1.363622207 | LACTB,TPM1                       |
| 10 | 47,025,000 | 47,175,000 | 628 | 1138 | -0.137062621 | TPM1                             |
| 10 | 47,100,000 | 47,250,000 | 629 | 1534 | 0.117074215  |                                  |
| 10 | 47,175,000 | 47,325,000 | 630 | 1502 | 0.332013278  | TLN2                             |
| 10 | 47,250,000 | 47,400,000 | 631 | 1377 | 0.778626428  | TLN2                             |
| 10 | 47,325,000 | 47,475,000 | 632 | 1286 | 0.889634252  | TLN2                             |
| 10 | 47,400,000 | 47,550,000 | 633 | 1187 | 1.058193559  | TLN2                             |
| 10 | 47,475,000 | 47,625,000 | 634 | 1383 | 0.919789616  | TLN2                             |
| 10 | 47,550,000 | 47,700,000 | 635 | 1536 | 0.300386648  | TLN2                             |
| 10 | 47,625,000 | 47,775,000 | 636 | 1385 | 0.065379139  | TLN2                             |
| 10 | 47,700,000 | 47,850,000 | 637 | 1174 | 0.990091315  | TLN2                             |
| 10 | 47,775,000 | 47,925,000 | 638 | 1065 | 1.046996518  | TLN2                             |
| 10 | 47,850,000 | 48,000,000 | 639 | 1113 | 1.088929765  | C2CD4A                           |
| 10 | 47,925,000 | 48,075,000 | 640 | 1387 | 1.262359857  | C2CD4A,ENSBTAG00000010952        |
| 10 | 48,000,000 | 48,150,000 | 641 | 1359 | 1.164067105  | VPS13C,ENSBTAG00000010952        |

|    |            |            |     |      |              |                    |
|----|------------|------------|-----|------|--------------|--------------------|
| 10 | 48,075,000 | 48,225,000 | 642 | 1199 | 0.617621589  | VPS13C             |
| 10 | 48,150,000 | 48,300,000 | 643 | 921  | 0.431870522  | VPS13C             |
| 10 | 48,225,000 | 48,375,000 | 644 | 826  | 0.970107181  | VPS13C             |
| 10 | 48,300,000 | 48,450,000 | 645 | 1021 | 0.942386845  |                    |
| 10 | 48,375,000 | 48,525,000 | 646 | 933  | 0.828594432  |                    |
| 10 | 48,450,000 | 48,600,000 | 647 | 998  | 0.576790552  |                    |
| 10 | 48,525,000 | 48,675,000 | 648 | 1374 | 0.623223619  |                    |
| 10 | 48,600,000 | 48,750,000 | 649 | 1320 | 0.497524954  |                    |
| 10 | 48,675,000 | 48,825,000 | 650 | 1223 | 0.919868608  |                    |
| 10 | 48,750,000 | 48,900,000 | 651 | 1175 | 1.274885837  |                    |
| 10 | 48,825,000 | 48,975,000 | 652 | 869  | 1.031607188  | RORA               |
| 10 | 48,900,000 | 49,050,000 | 653 | 704  | 0.475216001  | RORA               |
| 10 | 48,975,000 | 49,125,000 | 654 | 630  | 0.837852751  | RORA               |
| 10 | 49,050,000 | 49,200,000 | 655 | 544  | 0.278794505  | RORA               |
| 10 | 49,125,000 | 49,275,000 | 656 | 546  | -0.212864947 | RORA               |
| 10 | 49,200,000 | 49,350,000 | 657 | 506  | -0.422369506 | RORA               |
| 10 | 49,275,000 | 49,425,000 | 658 | 441  | -1.059296222 | RORA               |
| 10 | 49,350,000 | 49,500,000 | 659 | 513  | -1.345959477 | RORA               |
| 10 | 49,425,000 | 49,575,000 | 660 | 447  | -0.723135732 | RORA               |
| 10 | 49,500,000 | 49,650,000 | 661 | 279  | 0.054328633  | RORA               |
| 10 | 49,575,000 | 49,725,000 | 662 | 284  | -1.095393464 | RORA               |
| 10 | 49,650,000 | 49,800,000 | 663 | 373  | -0.507269524 | ICE2,RORA          |
| 10 | 49,725,000 | 49,875,000 | 664 | 689  | 0.215682429  | ANXA2,ICE2,RORA    |
| 10 | 49,800,000 | 49,950,000 | 665 | 1112 | 1.004364355  | ANXA2,ICE2         |
| 10 | 49,875,000 | 50,025,000 | 666 | 1372 | 1.009085282  | ANXA2              |
| 10 | 49,950,000 | 50,100,000 | 667 | 1273 | 0.597019924  |                    |
| 10 | 50,025,000 | 50,175,000 | 668 | 1017 | 0.007700187  |                    |
| 10 | 50,100,000 | 50,250,000 | 669 | 1039 | -0.80205796  |                    |
| 10 | 50,175,000 | 50,325,000 | 670 | 960  | -0.488109598 | FOXB1              |
| 10 | 50,250,000 | 50,400,000 | 671 | 950  | 0.370461536  | FOXB1              |
| 10 | 50,325,000 | 50,475,000 | 672 | 1050 | 0.450166797  |                    |
| 10 | 50,400,000 | 50,550,000 | 673 | 1189 | 0.910613343  |                    |
| 10 | 50,475,000 | 50,625,000 | 674 | 979  | 1.05424545   |                    |
| 10 | 50,550,000 | 50,700,000 | 675 | 515  | 0.726915262  | BNIP2,GTF2A2       |
| 10 | 50,625,000 | 50,775,000 | 676 | 510  | 0.993054718  | BNIP2,GCNT3,GTF2A2 |
| 10 | 50,700,000 | 50,850,000 | 677 | 1154 | 0.980922231  | GCNT3              |
| 10 | 50,775,000 | 50,925,000 | 678 | 1265 | 0.933442659  | FAM81A             |
| 10 | 50,850,000 | 51,000,000 | 679 | 710  | 0.440432847  | FAM81A             |
| 10 | 50,925,000 | 51,075,000 | 680 | 660  | 0.387903687  | FAM81A,MYO1E       |
| 10 | 51,000,000 | 51,150,000 | 681 | 845  | -0.405260208 | MYO1E              |
| 10 | 51,075,000 | 51,225,000 | 682 | 939  | -1.411102195 | MYO1E              |
| 10 | 51,150,000 | 51,300,000 | 683 | 698  | -1.158309265 | CCNB2,MYO1E,RNF111 |
| 10 | 51,225,000 | 51,375,000 | 684 | 519  | 0.310522946  | CCNB2,MYO1E,RNF111 |
| 10 | 51,300,000 | 51,450,000 | 685 | 442  | 0.917379084  | RNF111,SLTM        |
| 10 | 51,375,000 | 51,525,000 | 686 | 361  | 0.948640591  | FAM63B,RNF111,SLTM |
| 10 | 51,450,000 | 51,600,000 | 687 | 326  | 0.990555101  | ADAM10,FAM63B,SLTM |
| 10 | 51,525,000 | 51,675,000 | 688 | 387  | 0.860899446  | ADAM10,FAM63B      |
| 10 | 51,600,000 | 51,750,000 | 689 | 388  | 0.545154271  | ADAM10             |
| 10 | 51,675,000 | 51,825,000 | 690 | 442  | -0.161695704 | ADAM10,LIPC        |
| 10 | 51,750,000 | 51,900,000 | 691 | 720  | 0.34498081   | LIPC               |
| 10 | 51,825,000 | 51,975,000 | 692 | 718  | 0.716671462  | LIPC               |
| 10 | 51,900,000 | 52,050,000 | 693 | 616  | 0.380362904  | LIPC               |
| 10 | 51,975,000 | 52,125,000 | 694 | 631  | 0.557637861  |                    |

|    |            |            |     |      |              |                          |
|----|------------|------------|-----|------|--------------|--------------------------|
| 10 | 52,050,000 | 52,200,000 | 695 | 943  | 0.985348046  | AQP9                     |
| 10 | 52,125,000 | 52,275,000 | 696 | 980  | 1.024644958  | AQP9                     |
| 10 | 52,200,000 | 52,350,000 | 697 | 535  | 0.934013602  | ALDH1A2                  |
| 10 | 52,275,000 | 52,425,000 | 698 | 612  | 0.149991162  | ALDH1A2                  |
| 10 | 52,350,000 | 52,500,000 | 699 | 640  | -0.18570015  | ALDH1A2                  |
| 10 | 52,425,000 | 52,575,000 | 700 | 651  | 0.344627616  |                          |
| 10 | 52,500,000 | 52,650,000 | 701 | 784  | 0.890474306  | POLR2M                   |
| 10 | 52,575,000 | 52,725,000 | 702 | 730  | 1.181477997  | MYZAP,POLR2M             |
| 10 | 52,650,000 | 52,800,000 | 703 | 675  | 0.689729314  | MYZAP,POLR2M             |
| 10 | 52,725,000 | 52,875,000 | 704 | 924  | 0.300451228  | CGNL1,MYZAP              |
| 10 | 52,800,000 | 52,950,000 | 705 | 1021 | 0.290255928  | CGNL1                    |
| 10 | 52,875,000 | 53,025,000 | 706 | 627  | 0.200055747  | CGNL1                    |
| 10 | 52,950,000 | 53,100,000 | 707 | 530  | -1.457565183 | TCF12                    |
| 10 | 53,025,000 | 53,175,000 | 708 | 488  | -2.57445433  | TCF12                    |
| 10 | 53,100,000 | 53,250,000 | 709 | 316  | -0.852276134 | TCF12                    |
| 10 | 53,175,000 | 53,325,000 | 710 | 321  | -0.628805192 | TCF12                    |
| 10 | 53,250,000 | 53,400,000 | 711 | 323  | -0.263953834 | TCF12                    |
| 10 | 53,325,000 | 53,475,000 | 712 | 281  | -0.002866078 | TCF12                    |
| 10 | 53,400,000 | 53,550,000 | 713 | 265  | 0.049083714  | TCF12                    |
| 10 | 53,475,000 | 53,625,000 | 714 | 260  | -0.086398618 | TCF12                    |
| 10 | 53,550,000 | 53,700,000 | 715 | 248  | -0.016076662 |                          |
| 10 | 53,625,000 | 53,775,000 | 716 | 239  | 0.239541899  | ZNF280D                  |
| 10 | 53,700,000 | 53,850,000 | 717 | 335  | 0.766306875  | ZNF280D                  |
| 10 | 53,775,000 | 53,925,000 | 718 | 521  | 0.344561831  | ZNF280D                  |
| 10 | 53,850,000 | 54,000,000 | 719 | 527  | -0.113423064 | MNS1                     |
| 10 | 53,925,000 | 54,075,000 | 720 | 451  | -0.212564279 | MNS1                     |
| 10 | 54,000,000 | 54,150,000 | 721 | 631  | 0.412721058  | MNS1,TEX9                |
| 10 | 54,075,000 | 54,225,000 | 722 | 901  | 0.718048172  | TEX9                     |
| 10 | 54,150,000 | 54,300,000 | 723 | 1027 | 0.823029865  | RFX7,TEX9                |
| 10 | 54,225,000 | 54,375,000 | 724 | 730  | 0.741853359  | RFX7                     |
| 10 | 54,300,000 | 54,450,000 | 725 | 626  | -1.15187455  | RFX7                     |
| 10 | 54,375,000 | 54,525,000 | 726 | 910  | -0.743533283 | RFX7,ENSBTAG00000031396  |
| 10 | 54,450,000 | 54,600,000 | 727 | 743  | -0.070294001 | NEDD4,ENSBTAG00000031396 |
| 10 | 54,525,000 | 54,675,000 | 728 | 612  | 0.262146341  | NEDD4                    |
| 10 | 54,600,000 | 54,750,000 | 729 | 531  | -0.649154968 | NEDD4                    |
| 10 | 54,675,000 | 54,825,000 | 730 | 363  | -4.252321354 | PRTG                     |
| 10 | 54,750,000 | 54,900,000 | 731 | 461  | -4.049546842 | PRTG,PYGO1               |
| 10 | 54,825,000 | 54,975,000 | 732 | 330  | -2.325026404 | DYX1C1,PRTG,PYGO1        |
| 10 | 54,900,000 | 55,050,000 | 733 | 148  | 0.957986754  | CCPG1,DYX1C1,PIGB        |
| 10 | 54,975,000 | 55,125,000 | 734 | 227  | 1.063499622  | CCPG1,PIGB,RAB27A        |
| 10 | 55,050,000 | 55,200,000 | 735 | 542  | 1.340984183  | PIGB,RAB27A,RSL24D1      |
| 10 | 55,125,000 | 55,275,000 | 736 | 767  | 1.404676983  | RAB27A,RSL24D1           |
| 10 | 55,200,000 | 55,350,000 | 737 | 787  | 0.794401718  |                          |
| 10 | 55,275,000 | 55,425,000 | 738 | 985  | 0.282737912  |                          |
| 10 | 55,350,000 | 55,500,000 | 739 | 1082 | 0.622256168  |                          |
| 10 | 55,425,000 | 55,575,000 | 740 | 1160 | -1.059460239 |                          |
| 10 | 55,500,000 | 55,650,000 | 741 | 1430 | -1.367870962 |                          |
| 10 | 55,575,000 | 55,725,000 | 742 | 1440 | -0.17289081  | UNC13C                   |
| 10 | 55,650,000 | 55,800,000 | 743 | 1551 | 0.617716508  | UNC13C                   |
| 10 | 55,725,000 | 55,875,000 | 744 | 1106 | 0.558537114  | UNC13C                   |
| 10 | 55,800,000 | 55,950,000 | 745 | 896  | -0.253490424 | UNC13C                   |
| 10 | 55,875,000 | 56,025,000 | 746 | 1237 | -0.343699061 | UNC13C                   |
| 10 | 55,950,000 | 56,100,000 | 747 | 1026 | 0.302826639  | UNC13C                   |



|    |            |            |     |      |              |                                |
|----|------------|------------|-----|------|--------------|--------------------------------|
| 10 | 56,025,000 | 56,175,000 | 748 | 1201 | 1.063010925  | UNC13C                         |
| 10 | 56,100,000 | 56,250,000 | 749 | 1042 | 0.847566895  | UNC13C                         |
| 10 | 56,175,000 | 56,325,000 | 750 | 831  | -0.120312294 | UNC13C                         |
| 10 | 56,250,000 | 56,400,000 | 751 | 1240 | 0.556424672  | UNC13C                         |
| 10 | 56,325,000 | 56,475,000 | 752 | 1638 | 0.582894211  | UNC13C                         |
| 10 | 56,400,000 | 56,550,000 | 753 | 1734 | 0.535158045  |                                |
| 10 | 56,475,000 | 56,625,000 | 754 | 1317 | 0.149368456  |                                |
| 10 | 56,550,000 | 56,700,000 | 755 | 678  | -1.168649633 | WDR72                          |
| 10 | 56,625,000 | 56,775,000 | 756 | 641  | -0.53395474  | WDR72                          |
| 10 | 56,700,000 | 56,850,000 | 757 | 752  | -0.157522959 | WDR72                          |
| 10 | 56,775,000 | 56,925,000 | 758 | 813  | 0.790567361  | WDR72                          |
| 10 | 56,850,000 | 57,000,000 | 759 | 824  | 0.786733056  |                                |
| 10 | 56,925,000 | 57,075,000 | 760 | 899  | 0.020063372  |                                |
| 10 | 57,000,000 | 57,150,000 | 761 | 778  | 0.248297283  |                                |
| 10 | 57,075,000 | 57,225,000 | 762 | 383  | 0.228230815  |                                |
| 10 | 57,150,000 | 57,300,000 | 763 | 370  | 0.270503773  |                                |
| 10 | 57,225,000 | 57,375,000 | 764 | 721  | 1.055686385  |                                |
| 10 | 57,300,000 | 57,450,000 | 765 | 948  | 0.917818726  |                                |
| 10 | 57,375,000 | 57,525,000 | 766 | 680  | 0.676204368  |                                |
| 10 | 57,450,000 | 57,600,000 | 767 | 497  | 0.487231266  |                                |
| 10 | 57,525,000 | 57,675,000 | 768 | 679  | 0.798847576  |                                |
| 10 | 57,600,000 | 57,750,000 | 769 | 708  | 0.675524499  | ONECUT1                        |
| 10 | 57,675,000 | 57,825,000 | 770 | 637  | 0.783696363  | ONECUT1                        |
| 10 | 57,750,000 | 57,900,000 | 771 | 573  | -0.096920076 | FAM214A                        |
| 10 | 57,825,000 | 57,975,000 | 772 | 387  | -0.741692222 | ARPP19,FAM214A                 |
| 10 | 57,900,000 | 58,050,000 | 773 | 645  | 0.67579017   | ARPP19,FAM214A,MYO5A           |
| 10 | 57,975,000 | 58,125,000 | 774 | 829  | 0.679872477  | MYO5A                          |
| 10 | 58,050,000 | 58,200,000 | 775 | 754  | 0.261848897  | MYO5A,MYO5C                    |
| 10 | 58,125,000 | 58,275,000 | 776 | 1023 | 0.605462237  | MYO5A,MYO5C                    |
| 10 | 58,200,000 | 58,350,000 | 777 | 1105 | 0.903112824  | GNB5,MYO5C,ENSBTAG00000005429  |
| 10 | 58,275,000 | 58,425,000 | 778 | 614  | 0.492703723  | GNB5,MYO5C,ENSBTAG00000005429  |
| 10 | 58,350,000 | 58,500,000 | 779 | 270  | -0.062477481 | MAPK6                          |
| 10 | 58,425,000 | 58,575,000 | 780 | 322  | -0.060331176 | LEO1,MAPK6,ENSBTAG00000019601  |
| 10 | 58,500,000 | 58,650,000 | 781 | 285  | 0.535188904  | LEO1,TMOD3,ENSBTAG00000019601  |
| 10 | 58,575,000 | 58,725,000 | 782 | 235  | 0.042744691  | TMOD2,TMOD3,ENSBTAG00000019601 |
| 10 | 58,650,000 | 58,800,000 | 783 | 259  | 0.22982111   | LYSMD2,SCG3,TMOD2              |
| 10 | 58,725,000 | 58,875,000 | 784 | 301  | 0.566766084  | LYSMD2,SCG3                    |
| 10 | 58,800,000 | 58,950,000 | 785 | 316  | 0.147411124  | DMXL2                          |
| 10 | 58,875,000 | 59,025,000 | 786 | 241  | 0.123709051  | DMXL2                          |
| 10 | 58,950,000 | 59,100,000 | 787 | 274  | 0.694810739  | DMXL2,GLDN                     |
| 10 | 59,025,000 | 59,175,000 | 788 | 404  | -0.341958851 | GLDN                           |
| 10 | 59,100,000 | 59,250,000 | 789 | 402  | -0.198344393 | CYP19A1,GLDN                   |
| 10 | 59,175,000 | 59,325,000 | 790 | 418  | 1.24196853   | CYP19A1                        |
| 10 | 59,250,000 | 59,400,000 | 791 | 619  | 0.291032891  | CYP19A1                        |
| 10 | 59,325,000 | 59,475,000 | 792 | 630  | 0.056196842  |                                |
| 10 | 59,400,000 | 59,550,000 | 793 | 334  | -0.020141469 | TNFAIP8L3                      |
| 10 | 59,475,000 | 59,625,000 | 794 | 134  | -1.091558726 | AP4E1,TNFAIP8L3                |
| 10 | 59,550,000 | 59,700,000 | 795 | 184  | -2.146396233 | AP4E1                          |
| 10 | 59,625,000 | 59,775,000 | 796 | 247  | -1.521159088 | AP4E1                          |
| 10 | 59,700,000 | 59,850,000 | 797 | 332  | -1.605917213 | SPPL2A                         |
| 10 | 59,775,000 | 59,925,000 | 798 | 349  | -1.442403173 | SPPL2A,TRPM7                   |
| 10 | 59,850,000 | 60,000,000 | 799 | 403  | 0.148676454  | TRPM7,USP50,USP8               |
| 10 | 59,925,000 | 60,075,000 | 800 | 431  | 0.443563428  | TRPM7,USP50,USP8               |

|    |            |            |     |     |              |                                                         |
|----|------------|------------|-----|-----|--------------|---------------------------------------------------------|
| 10 | 60,000,000 | 60,150,000 | 801 | 284 | 0.28180826   | GABPB1,HDC,USP8                                         |
| 10 | 60,075,000 | 60,225,000 | 802 | 327 | -0.894877012 | GABPB1,HDC,SLC27A2,ENSBTAG00000045591,ENSBTAG0000045634 |
| 10 | 60,150,000 | 60,300,000 | 803 | 550 | 0.03826035   | HDC,SLC27A2,ENSBTAG00000045591,ENSBTAG00000045634       |
| 10 | 60,225,000 | 60,375,000 | 804 | 787 | 0.972306465  | SLC27A2                                                 |
| 10 | 60,300,000 | 60,450,000 | 805 | 820 | 1.025088477  | ATP8B4                                                  |
| 10 | 60,375,000 | 60,525,000 | 806 | 706 | 0.884023581  | ATP8B4                                                  |
| 10 | 60,450,000 | 60,600,000 | 807 | 673 | 0.701377239  | ATP8B4                                                  |
| 10 | 60,525,000 | 60,675,000 | 808 | 693 | -0.722994421 | ATP8B4                                                  |
| 10 | 60,600,000 | 60,750,000 | 809 | 741 | -1.390900971 | ATP8B4                                                  |
| 10 | 60,675,000 | 60,825,000 | 810 | 572 | -0.429086718 |                                                         |
| 10 | 60,750,000 | 60,900,000 | 811 | 586 | 0.792934203  |                                                         |
| 10 | 60,825,000 | 60,975,000 | 812 | 537 | 1.060260438  | DTWD1                                                   |
| 10 | 60,900,000 | 61,050,000 | 813 | 481 | 1.080664132  | DTWD1,FGF7                                              |
| 10 | 60,975,000 | 61,125,000 | 814 | 519 | 1.155530133  | FGF7                                                    |
| 10 | 61,050,000 | 61,200,000 | 815 | 486 | 1.285826588  | FGF7,GALK2                                              |
| 10 | 61,125,000 | 61,275,000 | 816 | 617 | 1.218629907  | GALK2                                                   |
| 10 | 61,200,000 | 61,350,000 | 817 | 731 | 1.08712863   | COPS2,GALK2                                             |
| 10 | 61,275,000 | 61,425,000 | 818 | 743 | 0.986364107  | COPS2,GALK2,SECISBP2L                                   |
| 10 | 61,350,000 | 61,500,000 | 819 | 672 | 0.983224016  | SECISBP2L                                               |
| 10 | 61,425,000 | 61,575,000 | 820 | 808 | 0.992013997  | SECISBP2L,ENSBTAG00000005217,ENSBTAG00000046376         |
| 10 | 61,500,000 | 61,650,000 | 821 | 857 | 0.50164939   | EID1,SHC4,ENSBTAG00000005217,ENSBTAG00000046376         |
| 10 | 61,575,000 | 61,725,000 | 822 | 948 | -0.286552608 | CEP152,EID1,SHC4                                        |
| 10 | 61,650,000 | 61,800,000 | 823 | 945 | -0.222627628 | CEP152                                                  |
| 10 | 61,725,000 | 61,875,000 | 824 | 574 | 0.399479945  | CEP152                                                  |
| 10 | 61,800,000 | 61,950,000 | 825 | 531 | 0.552955464  | FBN1                                                    |
| 10 | 61,875,000 | 62,025,000 | 826 | 512 | 0.753776974  | FBN1                                                    |
| 10 | 61,950,000 | 62,100,000 | 827 | 457 | 1.020104598  | FBN1                                                    |
| 10 | 62,025,000 | 62,175,000 | 828 | 403 | 0.871607541  | FBN1                                                    |
| 10 | 62,100,000 | 62,250,000 | 829 | 237 | 0.225721624  | FBN1                                                    |
| 10 | 62,175,000 | 62,325,000 | 830 | 444 | 0.044572028  | DUT,SLC12A1                                             |
| 10 | 62,250,000 | 62,400,000 | 831 | 557 | -0.513579054 | DUT,SLC12A1                                             |
| 10 | 62,325,000 | 62,475,000 | 832 | 353 | -0.790390655 | CTXN2,MYEF2,SLC12A1,SLC24A5                             |
| 10 | 62,400,000 | 62,550,000 | 833 | 364 | 0.173730957  | CTXN2,MYEF2,SLC12A1,SLC24A5                             |
| 10 | 62,475,000 | 62,625,000 | 834 | 777 | 0.38806869   | SLC24A5                                                 |
| 10 | 62,550,000 | 62,700,000 | 835 | 932 | 0.81594561   |                                                         |
| 10 | 62,625,000 | 62,775,000 | 836 | 928 | 0.895854627  |                                                         |
| 10 | 62,700,000 | 62,850,000 | 837 | 870 | 0.717837891  |                                                         |
| 10 | 62,775,000 | 62,925,000 | 838 | 484 | 0.543370877  | SEMA6D                                                  |
| 10 | 62,850,000 | 63,000,000 | 839 | 535 | -0.382889191 | SEMA6D                                                  |
| 10 | 62,925,000 | 63,075,000 | 840 | 813 | -0.776448077 |                                                         |
| 10 | 63,000,000 | 63,150,000 | 841 | 760 | -1.847210935 |                                                         |
| 10 | 63,075,000 | 63,225,000 | 842 | 833 | -3.332925328 |                                                         |
| 10 | 63,150,000 | 63,300,000 | 843 | 773 | -2.013864478 |                                                         |
| 10 | 63,225,000 | 63,375,000 | 844 | 450 | 0.133746679  |                                                         |
| 10 | 63,300,000 | 63,450,000 | 845 | 362 | -0.716711513 |                                                         |
| 10 | 63,375,000 | 63,525,000 | 846 | 400 | 0.423495383  |                                                         |
| 10 | 63,450,000 | 63,600,000 | 847 | 679 | -0.043647436 |                                                         |
| 10 | 63,525,000 | 63,675,000 | 848 | 856 | 0.392130844  | ENSBTAG00000006267                                      |
| 10 | 63,600,000 | 63,750,000 | 849 | 724 | 1.150616438  | ENSBTAG00000006267                                      |

|    |            |            |     |      |              |                                              |
|----|------------|------------|-----|------|--------------|----------------------------------------------|
| 10 | 63,675,000 | 63,825,000 | 850 | 593  | 0.800858192  |                                              |
| 10 | 63,750,000 | 63,900,000 | 851 | 1110 | 1.045865759  |                                              |
| 10 | 63,825,000 | 63,975,000 | 852 | 1437 | 0.888194545  |                                              |
| 10 | 63,900,000 | 64,050,000 | 853 | 768  | 0.588262528  |                                              |
| 10 | 63,975,000 | 64,125,000 | 854 | 475  | -0.539950412 |                                              |
| 10 | 64,050,000 | 64,200,000 | 855 | 538  | -0.413245795 |                                              |
| 10 | 64,125,000 | 64,275,000 | 856 | 527  | 0.371213156  |                                              |
| 10 | 64,200,000 | 64,350,000 | 857 | 718  | 0.605508065  |                                              |
| 10 | 64,275,000 | 64,425,000 | 858 | 761  | -0.151976331 |                                              |
| 10 | 64,350,000 | 64,500,000 | 859 | 567  | -2.098558738 |                                              |
| 10 | 64,425,000 | 64,575,000 | 860 | 442  | -2.277307614 |                                              |
| 10 | 64,500,000 | 64,650,000 | 861 | 595  | 0.02739282   |                                              |
| 10 | 64,575,000 | 64,725,000 | 862 | 1097 | 0.449230986  |                                              |
| 10 | 64,650,000 | 64,800,000 | 863 | 988  | 0.51591888   |                                              |
| 10 | 64,725,000 | 64,875,000 | 864 | 593  | 0.541264634  |                                              |
| 10 | 64,800,000 | 64,950,000 | 865 | 808  | 0.6972648    |                                              |
| 10 | 64,875,000 | 65,025,000 | 866 | 794  | -0.63475862  |                                              |
| 10 | 64,950,000 | 65,100,000 | 867 | 588  | -4.037532302 | SQRDL                                        |
| 10 | 65,025,000 | 65,175,000 | 868 | 552  | -2.462995165 | BLOC1S6,SQRDL                                |
| 10 | 65,100,000 | 65,250,000 | 869 | 617  | -2.012899927 | BLOC1S6,MGC165862,SLC30A4                    |
| 10 | 65,175,000 | 65,325,000 | 870 | 512  | -3.944850014 | MGC165862,SLC30A4,SPATA5L1                   |
| 10 | 65,250,000 | 65,400,000 | 871 | 388  | -2.527639492 | GATM,SLC28A2,SPATA5L1,ENSBTAG00000027251     |
| 10 | 65,325,000 | 65,475,000 | 872 | 593  | -1.784667731 | GATM,SHF,SLC28A2,ENSBTAG00000027251          |
| 10 | 65,400,000 | 65,550,000 | 873 | 690  | -1.218751278 | DUOX1,DUOX2,DUOXA1,DUOXA2,SHF,SLC28A2        |
| 10 | 65,475,000 | 65,625,000 | 874 | 644  | 0.526157636  | DUOX1,DUOX2,DUOXA1,DUOXA2,SHF,SORD           |
| 10 | 65,550,000 | 65,700,000 | 875 | 813  | 1.210487641  | DUOX2,SORD,ENSBTAG00000038327                |
| 10 | 65,625,000 | 65,775,000 | 876 | 807  | 0.825173047  | FERMT2,ENSBTAG00000038327,ENSBTAG00000047170 |
| 10 | 65,700,000 | 65,850,000 | 877 | 399  | -0.55219143  | FERMT2,ENSBTAG00000047170                    |
| 10 | 65,775,000 | 65,925,000 | 878 | 523  | -1.592470391 | DDHD1,FERMT2                                 |
| 10 | 65,850,000 | 66,000,000 | 879 | 750  | -0.999591943 | DDHD1                                        |
| 10 | 65,925,000 | 66,075,000 | 880 | 635  | -0.981688583 | DDHD1                                        |
| 10 | 66,000,000 | 66,150,000 | 881 | 530  | -3.076958716 |                                              |
| 10 | 66,075,000 | 66,225,000 | 882 | 435  | -1.721082602 |                                              |
| 10 | 66,150,000 | 66,300,000 | 883 | 665  | 0.167544119  |                                              |
| 10 | 66,225,000 | 66,375,000 | 884 | 738  | -0.003224036 |                                              |
| 10 | 66,300,000 | 66,450,000 | 885 | 645  | -0.363314486 |                                              |
| 10 | 66,375,000 | 66,525,000 | 886 | 657  | -0.144184044 |                                              |
| 10 | 66,450,000 | 66,600,000 | 887 | 520  | 0.127565175  |                                              |
| 10 | 66,525,000 | 66,675,000 | 888 | 407  | 0.571288165  |                                              |
| 10 | 66,600,000 | 66,750,000 | 889 | 412  | -0.706470717 | ENSBTAG00000047239                           |
| 10 | 66,675,000 | 66,825,000 | 890 | 389  | -1.163004184 | BMP4,ENSBTAG00000047239                      |
| 10 | 66,750,000 | 66,900,000 | 891 | 337  | -0.170022788 | BMP4                                         |
| 10 | 66,825,000 | 66,975,000 | 892 | 377  | -1.708930666 |                                              |
| 10 | 66,900,000 | 67,050,000 | 893 | 402  | -1.076664233 |                                              |
| 10 | 66,975,000 | 67,125,000 | 894 | 311  | 0.264275737  |                                              |
| 10 | 67,050,000 | 67,200,000 | 895 | 358  | 0.341991925  | CDKN3,CNIH1                                  |
| 10 | 67,125,000 | 67,275,000 | 896 | 712  | 0.970604281  | CDKN3,CGRRF1,CNIH1,GMFB                      |
| 10 | 67,200,000 | 67,350,000 | 897 | 799  | 1.193732812  | CGRRF1,GMFB                                  |
| 10 | 67,275,000 | 67,425,000 | 898 | 502  | 0.970233367  |                                              |
| 10 | 67,350,000 | 67,500,000 | 899 | 312  | 0.69883803   | SAMD4A                                       |
| 10 | 67,425,000 | 67,575,000 | 900 | 371  | 0.370127309  | SAMD4A                                       |
| 10 | 67,500,000 | 67,650,000 | 901 | 638  | 0.531803227  | GCH1,SAMD4A                                  |
| 10 | 67,575,000 | 67,725,000 | 902 | 584  | 1.051943866  | GCH1,WDHD1                                   |

|    |            |            |     |      |              |                                     |
|----|------------|------------|-----|------|--------------|-------------------------------------|
| 10 | 67,650,000 | 67,800,000 | 903 | 299  | 0.78764843   | MAPK1IP1L,SOCS4,WDHD1               |
| 10 | 67,725,000 | 67,875,000 | 904 | 345  | 0.014149899  | DLGAP5,LGALS3,MAPK1IP1L,SOCS4,WDHD1 |
| 10 | 67,800,000 | 67,950,000 | 905 | 584  | 0.113895988  | DLGAP5,LGALS3                       |
| 10 | 67,875,000 | 68,025,000 | 906 | 659  | 0.542879036  | DLGAP5                              |
| 10 | 67,950,000 | 68,100,000 | 907 | 449  | 0.891275991  | ATG14,FBXO34                        |
| 10 | 68,025,000 | 68,175,000 | 908 | 511  | 0.284501978  | ATG14,FBXO34,TBPL2                  |
| 10 | 68,100,000 | 68,250,000 | 909 | 715  | 0.427973815  | ATG14,KTN1,TBPL2                    |
| 10 | 68,175,000 | 68,325,000 | 910 | 705  | 0.294682166  | KTN1                                |
| 10 | 68,250,000 | 68,400,000 | 911 | 655  | 0.28174712   | KTN1                                |
| 10 | 68,325,000 | 68,475,000 | 912 | 644  | -1.96828611  | KTN1                                |
| 10 | 68,400,000 | 68,550,000 | 913 | 682  | -3.204400206 |                                     |
| 10 | 68,475,000 | 68,625,000 | 914 | 519  | -1.975708751 |                                     |
| 10 | 68,550,000 | 68,700,000 | 915 | 538  | -1.586869597 |                                     |
| 10 | 68,625,000 | 68,775,000 | 916 | 572  | -0.991020743 |                                     |
| 10 | 68,700,000 | 68,850,000 | 917 | 719  | 0.752384247  | PELI2                               |
| 10 | 68,775,000 | 68,925,000 | 918 | 680  | 1.087073653  | PELI2                               |
| 10 | 68,850,000 | 69,000,000 | 919 | 390  | 0.388029151  | PELI2                               |
| 10 | 68,925,000 | 69,075,000 | 920 | 652  | -1.990839072 | PELI2                               |
| 10 | 69,000,000 | 69,150,000 | 921 | 790  | -1.89053176  |                                     |
| 10 | 69,075,000 | 69,225,000 | 922 | 663  | 0.809003849  |                                     |
| 10 | 69,150,000 | 69,300,000 | 923 | 614  | -0.437937265 | TMEM260                             |
| 10 | 69,225,000 | 69,375,000 | 924 | 557  | -3.131535467 | TMEM260                             |
| 10 | 69,300,000 | 69,450,000 | 925 | 390  | -2.650690723 | TMEM260                             |
| 10 | 69,375,000 | 69,525,000 | 926 | 484  | -0.254015319 | OTX2                                |
| 10 | 69,450,000 | 69,600,000 | 927 | 644  | -0.434511533 | OTX2                                |
| 10 | 69,525,000 | 69,675,000 | 928 | 721  | -0.167933647 |                                     |
| 10 | 69,600,000 | 69,750,000 | 929 | 875  | -0.133607346 |                                     |
| 10 | 69,675,000 | 69,825,000 | 930 | 903  | -1.011766339 |                                     |
| 10 | 69,750,000 | 69,900,000 | 931 | 704  | -0.900237625 | EXOC5                               |
| 10 | 69,825,000 | 69,975,000 | 932 | 604  | 0.639369009  | AP5M1,EXOC5                         |
| 10 | 69,900,000 | 70,050,000 | 933 | 558  | 0.316508814  | AP5M1,EXOC5,NAA30                   |
| 10 | 69,975,000 | 70,125,000 | 934 | 806  | 0.05317759   | C14orf105,NAA30                     |
| 10 | 70,050,000 | 70,200,000 | 935 | 1109 | 0.177979412  | C14orf105,SLC35F4                   |
| 10 | 70,125,000 | 70,275,000 | 936 | 1278 | 0.164691792  | SLC35F4                             |
| 10 | 70,200,000 | 70,350,000 | 937 | 1340 | -0.293569913 |                                     |
| 10 | 70,275,000 | 70,425,000 | 938 | 822  | -0.552175673 |                                     |
| 10 | 70,350,000 | 70,500,000 | 939 | 631  | 0.773730607  |                                     |
| 10 | 70,425,000 | 70,575,000 | 940 | 642  | 0.878735001  |                                     |
| 10 | 70,500,000 | 70,650,000 | 941 | 745  | 0.933242941  | C14orf37                            |
| 10 | 70,575,000 | 70,725,000 | 942 | 708  | 0.742591036  | C14orf37                            |
| 10 | 70,650,000 | 70,800,000 | 943 | 450  | -0.829317515 | ACTR10,C14orf37,PSMA3               |
| 10 | 70,725,000 | 70,875,000 | 944 | 362  | -0.920029274 | ACTR10,ARID4A,PSMA3                 |
| 10 | 70,800,000 | 70,950,000 | 945 | 340  | -1.121991531 | ARID4A,KIAA0586,PSMA3,TIMM9         |
| 10 | 70,875,000 | 71,025,000 | 946 | 319  | -2.627942083 | ARID4A,KIAA0586,TIMM9               |
| 10 | 70,950,000 | 71,100,000 | 947 | 505  | -1.145576141 | KIAA0586                            |
| 10 | 71,025,000 | 71,175,000 | 948 | 721  | 0.353154417  | DACT1,KIAA0586                      |
| 10 | 71,100,000 | 71,250,000 | 949 | 660  | 1.214298663  | DACT1                               |
| 10 | 71,175,000 | 71,325,000 | 950 | 556  | 0.879137644  |                                     |
| 10 | 71,250,000 | 71,400,000 | 951 | 584  | 0.31690067   |                                     |
| 10 | 71,325,000 | 71,475,000 | 952 | 637  | 0.549144219  |                                     |
| 10 | 71,400,000 | 71,550,000 | 953 | 567  | 1.104035271  |                                     |
| 10 | 71,475,000 | 71,625,000 | 954 | 603  | -0.093050846 | ENSBTAG00000045799                  |
| 10 | 71,550,000 | 71,700,000 | 955 | 523  | -1.048891654 | ENSBTAG00000045799                  |

|    |            |            |      |      |              |                                  |
|----|------------|------------|------|------|--------------|----------------------------------|
| 10 | 71,625,000 | 71,775,000 | 956  | 427  | -1.000070058 | DAAM1                            |
| 10 | 71,700,000 | 71,850,000 | 957  | 331  | -1.147294236 | DAAM1                            |
| 10 | 71,775,000 | 71,925,000 | 958  | 191  | -0.893278258 | DAAM1                            |
| 10 | 71,850,000 | 72,000,000 | 959  | 401  | -1.364030322 | DAAM1,GPR135,L3HYPDH             |
| 10 | 71,925,000 | 72,075,000 | 960  | 672  | -0.475657425 | CCDC175,GPR135,JAMP,L3HYPDH      |
| 10 | 72,000,000 | 72,150,000 | 961  | 498  | 0.654789186  | CCDC175,JAMP,L3HYPDH,RTN1        |
| 10 | 72,075,000 | 72,225,000 | 962  | 347  | 0.885654573  | CCDC175,RTN1                     |
| 10 | 72,150,000 | 72,300,000 | 963  | 709  | 0.565787018  | COX7C,RTN1                       |
| 10 | 72,225,000 | 72,375,000 | 964  | 940  | 0.197669119  | COX7C,RTN1                       |
| 10 | 72,300,000 | 72,450,000 | 965  | 705  | 0.306935984  | LRR9                             |
| 10 | 72,375,000 | 72,525,000 | 966  | 555  | 0.899780134  | LRR9                             |
| 10 | 72,450,000 | 72,600,000 | 967  | 711  | 0.36809537   | LRR9,PCNX4                       |
| 10 | 72,525,000 | 72,675,000 | 968  | 822  | 0.507664059  | DHRS7,PCNX4                      |
| 10 | 72,600,000 | 72,750,000 | 969  | 790  | 0.938549197  | DHRS7,PCNX4                      |
| 10 | 72,675,000 | 72,825,000 | 970  | 646  | 0.999324209  | PPM1A                            |
| 10 | 72,750,000 | 72,900,000 | 971  | 410  | 0.976156201  | C14orf39,PPM1A                   |
| 10 | 72,825,000 | 72,975,000 | 972  | 290  | 1.00128569   | C14orf39,SIX6                    |
| 10 | 72,900,000 | 73,050,000 | 973  | 376  | 0.716261577  | C14orf39,SIX6                    |
| 10 | 72,975,000 | 73,125,000 | 974  | 401  | 0.010313515  | SIX1                             |
| 10 | 73,050,000 | 73,200,000 | 975  | 415  | -0.478536581 | MNAT1,SIX1,ENSBTAG00000046309    |
| 10 | 73,125,000 | 73,275,000 | 976  | 492  | -0.165874852 | MNAT1,ENSBTAG00000046309         |
| 10 | 73,200,000 | 73,350,000 | 977  | 496  | 0.086288133  | MNAT1                            |
| 10 | 73,275,000 | 73,425,000 | 978  | 533  | 0.19318549   | MNAT1,SLC38A6,TRMT5              |
| 10 | 73,350,000 | 73,500,000 | 979  | 578  | 0.284940956  | MNAT1,SLC38A6,TRMT5              |
| 10 | 73,425,000 | 73,575,000 | 980  | 509  | 0.486345133  | SLC38A6                          |
| 10 | 73,500,000 | 73,650,000 | 981  | 467  | 0.475803251  | TMEM30B,ENSBTAG00000047000       |
| 10 | 73,575,000 | 73,725,000 | 982  | 457  | 0.173481076  | PRKCH,TMEM30B,ENSBTAG00000047000 |
| 10 | 73,650,000 | 73,800,000 | 983  | 699  | -0.215442911 | PRKCH                            |
| 10 | 73,725,000 | 73,875,000 | 984  | 920  | -0.538814422 | PRKCH                            |
| 10 | 73,800,000 | 73,950,000 | 985  | 850  | -0.802254329 | PRKCH                            |
| 10 | 73,875,000 | 74,025,000 | 986  | 658  | -0.611320907 | PRKCH                            |
| 10 | 73,950,000 | 74,100,000 | 987  | 623  | 0.444627038  | HIF1A                            |
| 10 | 74,025,000 | 74,175,000 | 988  | 761  | 1.079484939  | HIF1A,SNAPC1                     |
| 10 | 74,100,000 | 74,250,000 | 989  | 1015 | 0.864908635  | HIF1A,SNAPC1                     |
| 10 | 74,175,000 | 74,325,000 | 990  | 1442 | 1.011333666  | SNAPC1                           |
| 10 | 74,250,000 | 74,400,000 | 991  | 1052 | 1.144157081  | SYT16                            |
| 10 | 74,325,000 | 74,475,000 | 992  | 595  | -0.156111708 | SYT16                            |
| 10 | 74,400,000 | 74,550,000 | 993  | 742  | -0.459096501 | SYT16,ENSBTAG00000030792         |
| 10 | 74,475,000 | 74,625,000 | 994  | 679  | 0.326341276  | SYT16,ENSBTAG00000030792         |
| 10 | 74,550,000 | 74,700,000 | 995  | 951  | 0.658737464  |                                  |
| 10 | 74,625,000 | 74,775,000 | 996  | 1354 | 0.978396314  |                                  |
| 10 | 74,700,000 | 74,850,000 | 997  | 1165 | 1.217692112  |                                  |
| 10 | 74,775,000 | 74,925,000 | 998  | 698  | 0.883797074  |                                  |
| 10 | 74,850,000 | 75,000,000 | 999  | 326  | 0.069770378  |                                  |
| 10 | 74,925,000 | 75,075,000 | 1000 | 352  | -2.101707179 |                                  |
| 10 | 75,000,000 | 75,150,000 | 1001 | 423  | -1.868036933 |                                  |
| 10 | 75,075,000 | 75,225,000 | 1002 | 368  | -0.063097402 |                                  |
| 10 | 75,150,000 | 75,300,000 | 1003 | 352  | 0.019062092  | KCNH5                            |
| 10 | 75,225,000 | 75,375,000 | 1004 | 398  | -0.386691074 | KCNH5                            |
| 10 | 75,300,000 | 75,450,000 | 1005 | 746  | 0.254428838  | KCNH5                            |
| 10 | 75,375,000 | 75,525,000 | 1006 | 1302 | 0.276184733  | KCNH5                            |
| 10 | 75,450,000 | 75,600,000 | 1007 | 1116 | 0.323828471  | KCNH5                            |
| 10 | 75,525,000 | 75,675,000 | 1008 | 840  | 0.644326045  | KCNH5                            |

|    |            |            |      |      |              |                                        |
|----|------------|------------|------|------|--------------|----------------------------------------|
| 10 | 75,600,000 | 75,750,000 | 1009 | 941  | 0.20032027   | KCNH5                                  |
| 10 | 75,675,000 | 75,825,000 | 1010 | 718  | -0.389696238 | RHOJ                                   |
| 10 | 75,750,000 | 75,900,000 | 1011 | 412  | -0.441015351 | RHOJ                                   |
| 10 | 75,825,000 | 75,975,000 | 1012 | 530  | 0.15549773   | PPP2R5E,RHOJ                           |
| 10 | 75,900,000 | 76,050,000 | 1013 | 634  | -1.507404705 | PPP2R5E                                |
| 10 | 75,975,000 | 76,125,000 | 1014 | 487  | -2.50106316  | PPP2R5E                                |
| 10 | 76,050,000 | 76,200,000 | 1015 | 378  | -1.165388631 | PPP2R5E,WDR89                          |
| 10 | 76,125,000 | 76,275,000 | 1016 | 288  | -0.297681138 | SGPP1,WDR89                            |
| 10 | 76,200,000 | 76,350,000 | 1017 | 628  | -0.277401648 | SGPP1                                  |
| 10 | 76,275,000 | 76,425,000 | 1018 | 875  | -0.032548171 | SGPP1,SYNE2                            |
| 10 | 76,350,000 | 76,500,000 | 1019 | 965  | -0.843846034 | SYNE2                                  |
| 10 | 76,425,000 | 76,575,000 | 1020 | 907  | -1.3902159   | SYNE2                                  |
| 10 | 76,500,000 | 76,650,000 | 1021 | 494  | -0.313970375 | SYNE2                                  |
| 10 | 76,575,000 | 76,725,000 | 1022 | 314  | 0.172307262  | ESR2,SYNE2                             |
| 10 | 76,650,000 | 76,800,000 | 1023 | 281  | -1.313967364 | ESR2,SYNE2                             |
| 10 | 76,725,000 | 76,875,000 | 1024 | 435  | -4.478652366 | ESR2,MTHFD1,ENSBTAG00000013836         |
| 10 | 76,800,000 | 76,950,000 | 1025 | 550  | -4.218852549 | AKAP5,MTHFD1,ZBTB25,ENSBTAG00000013836 |
| 10 | 76,875,000 | 77,025,000 | 1026 | 465  | -3.085109199 | AKAP5,MTHFD1,PPP1R36,ZBTB1,ZBTB25      |
| 10 | 76,950,000 | 77,100,000 | 1027 | 815  | -1.129239755 | PPP1R36,ZBTB1,ZBTB25                   |
| 10 | 77,025,000 | 77,175,000 | 1028 | 983  | -0.193781989 |                                        |
| 10 | 77,100,000 | 77,250,000 | 1029 | 608  | 0.611409116  | PLEKHG3,SPTB                           |
| 10 | 77,175,000 | 77,325,000 | 1030 | 439  | 0.096240793  | PLEKHG3,SPTB                           |
| 10 | 77,250,000 | 77,400,000 | 1031 | 673  | 0.475888313  | CHURC1,GPX2,RAB15,SPTB                 |
| 10 | 77,325,000 | 77,475,000 | 1032 | 844  | 0.520276378  | CHURC1,FNTB,GPX2,RAB15                 |
| 10 | 77,400,000 | 77,550,000 | 1033 | 715  | 0.122562973  | FNTB,MAX,RAB15                         |
| 10 | 77,475,000 | 77,625,000 | 1034 | 632  | 0.223147764  | FNTB,MAX                               |
| 10 | 77,550,000 | 77,700,000 | 1035 | 629  | 0.667440942  |                                        |
| 10 | 77,625,000 | 77,775,000 | 1036 | 586  | -0.67251254  |                                        |
| 10 | 77,700,000 | 77,850,000 | 1037 | 757  | -1.686162398 |                                        |
| 10 | 77,775,000 | 77,925,000 | 1038 | 1088 | -0.860819074 |                                        |
| 10 | 77,850,000 | 78,000,000 | 1039 | 1129 | 0.046605375  | FUT8                                   |
| 10 | 77,925,000 | 78,075,000 | 1040 | 1029 | 0.324400539  | FUT8                                   |
| 10 | 78,000,000 | 78,150,000 | 1041 | 1039 | 0.147962033  | FUT8                                   |
| 10 | 78,075,000 | 78,225,000 | 1042 | 974  | 0.844344908  | FUT8                                   |
| 10 | 78,150,000 | 78,300,000 | 1043 | 708  | 1.358412103  | FUT8                                   |
| 10 | 78,225,000 | 78,375,000 | 1044 | 440  | 1.185074672  |                                        |
| 10 | 78,300,000 | 78,450,000 | 1045 | 720  | 0.24224153   |                                        |
| 10 | 78,375,000 | 78,525,000 | 1046 | 837  | 0.025742149  | ENSBTAG00000037625                     |
| 10 | 78,450,000 | 78,600,000 | 1047 | 659  | -0.646859949 | ENSBTAG00000037625                     |
| 10 | 78,525,000 | 78,675,000 | 1048 | 825  | -0.419651535 |                                        |
| 10 | 78,600,000 | 78,750,000 | 1049 | 623  | -0.095859889 |                                        |
| 10 | 78,675,000 | 78,825,000 | 1050 | 429  | -1.581212467 |                                        |
| 10 | 78,750,000 | 78,900,000 | 1051 | 415  | -1.158719195 | C10H14orf53                            |
| 10 | 78,825,000 | 78,975,000 | 1052 | 312  | -1.348210288 | C10H14orf53,GPHN                       |
| 10 | 78,900,000 | 79,050,000 | 1053 | 302  | -1.874222902 | GPHN                                   |
| 10 | 78,975,000 | 79,125,000 | 1054 | 253  | -2.241998427 | GPHN                                   |
| 10 | 79,050,000 | 79,200,000 | 1055 | 517  | -2.048195625 | GPHN                                   |
| 10 | 79,125,000 | 79,275,000 | 1056 | 519  | -2.004024332 | GPHN                                   |
| 10 | 79,200,000 | 79,350,000 | 1057 | 220  | -1.228961557 | GPHN                                   |
| 10 | 79,275,000 | 79,425,000 | 1058 | 197  | 0.181825792  | GPHN                                   |
| 10 | 79,350,000 | 79,500,000 | 1059 | 194  | 0.216691975  | FAM71D,GPHN                            |
| 10 | 79,425,000 | 79,575,000 | 1060 | 173  | -0.399224087 | FAM71D,GPHN,MPP5                       |
| 10 | 79,500,000 | 79,650,000 | 1061 | 163  | -0.415830759 | ATP6V1D,EIF2S1,MPP5,PLEK2              |

|    |            |            |      |     |              |                                                                                   |
|----|------------|------------|------|-----|--------------|-----------------------------------------------------------------------------------|
| 10 | 79,575,000 | 79,725,000 | 1062 | 232 | -0.2447119   | ATP6V1D,EIF2S1,MPP5,PLEK2,TMEM229B                                                |
| 10 | 79,650,000 | 79,800,000 | 1063 | 325 | 1.068828638  | PLEKHH1,TMEM229B                                                                  |
| 10 | 79,725,000 | 79,875,000 | 1064 | 321 | 1.43563023   | PIGH,PLEKHH1,RPL39,ENSBTAG00000046048                                             |
| 10 | 79,800,000 | 79,950,000 | 1065 | 289 | 0.484522751  | PIGH,PLEKHH1,RPL39,ENSBTAG00000046048                                             |
| 10 | 79,875,000 | 80,025,000 | 1066 | 316 | -0.098032245 |                                                                                   |
| 10 | 79,950,000 | 80,100,000 | 1067 | 285 | 0.683948794  | ARG2                                                                              |
| 10 | 80,025,000 | 80,175,000 | 1068 | 208 | 1.458613074  | ARG2,RDH11,RDH12,VTI1B                                                            |
| 10 | 80,100,000 | 80,250,000 | 1069 | 232 | 1.539749148  | ARG2,RAD51B,RDH11,RDH12,VTI1B,ZFYVE26                                             |
| 10 | 80,175,000 | 80,325,000 | 1070 | 393 | 1.448481974  | RAD51B,ZFYVE26                                                                    |
| 10 | 80,250,000 | 80,400,000 | 1071 | 406 | 0.232501633  | RAD51B                                                                            |
| 10 | 80,325,000 | 80,475,000 | 1072 | 323 | -0.512965597 | RAD51B                                                                            |
| 10 | 80,400,000 | 80,550,000 | 1073 | 261 | 0.941199336  | RAD51B                                                                            |
| 10 | 80,475,000 | 80,625,000 | 1074 | 244 | 0.123906964  | RAD51B                                                                            |
| 10 | 80,550,000 | 80,700,000 | 1075 | 259 | 0.263591614  | RAD51B                                                                            |
| 10 | 80,625,000 | 80,775,000 | 1076 | 268 | 0.379268363  | RAD51B                                                                            |
| 10 | 80,700,000 | 80,850,000 | 1077 | 376 | 0.176369328  |                                                                                   |
| 10 | 80,775,000 | 80,925,000 | 1078 | 559 | 0.271140593  |                                                                                   |
| 10 | 80,850,000 | 81,000,000 | 1079 | 571 | -0.168199948 | ZFP36L1                                                                           |
| 10 | 80,925,000 | 81,075,000 | 1080 | 466 | -0.967764344 | ACTN1,ZFP36L1                                                                     |
| 10 | 81,000,000 | 81,150,000 | 1081 | 796 | -0.184693382 | ACTN1                                                                             |
| 10 | 81,075,000 | 81,225,000 | 1082 | 837 | 0.39616828   | ACTN1,DCAF5                                                                       |
| 10 | 81,150,000 | 81,300,000 | 1083 | 455 | 1.031332213  | DCAF5                                                                             |
| 10 | 81,225,000 | 81,375,000 | 1084 | 531 | 1.312609072  | DCAF5,EXD2                                                                        |
| 10 | 81,300,000 | 81,450,000 | 1085 | 716 | 0.810439888  | EXD2,GALNTL1                                                                      |
| 10 | 81,375,000 | 81,525,000 | 1086 | 867 | 0.255466589  | ERH,EXD2,GALNTL1                                                                  |
| 10 | 81,450,000 | 81,600,000 | 1087 | 832 | 0.465093419  | ERH,GALNTL1,PLEKHD1,SLC39A9                                                       |
| 10 | 81,525,000 | 81,675,000 | 1088 | 554 | 0.444245118  | ERH,PLEKHD1,SLC39A9                                                               |
| 10 | 81,600,000 | 81,750,000 | 1089 | 448 | 0.371047408  | CCDC177,PLEKHD1                                                                   |
| 10 | 81,675,000 | 81,825,000 | 1090 | 367 | 0.250416992  | CCDC177,KIAA0247                                                                  |
| 10 | 81,750,000 | 81,900,000 | 1091 | 351 | -0.172319018 | KIAA0247,SFRS5,SLC10A1                                                            |
| 10 | 81,825,000 | 81,975,000 | 1092 | 453 | 0.301581534  | SFRS5,SLC10A1,SMOC1                                                               |
| 10 | 81,900,000 | 82,050,000 | 1093 | 473 | 0.878553701  | SMOC1                                                                             |
| 10 | 81,975,000 | 82,125,000 | 1094 | 412 | 0.916056713  | SMOC1                                                                             |
| 10 | 82,050,000 | 82,200,000 | 1095 | 536 | 0.773696104  | SLC8A3,SMOC1                                                                      |
| 10 | 82,125,000 | 82,275,000 | 1096 | 880 | 0.543579114  | SLC8A3                                                                            |
| 10 | 82,200,000 | 82,350,000 | 1097 | 973 | 0.42511683   | SLC8A3,SYNJ2BP                                                                    |
| 10 | 82,275,000 | 82,425,000 | 1098 | 978 | 0.446531977  | COX16,SYNJ2BP                                                                     |
| 10 | 82,350,000 | 82,500,000 | 1099 | 811 | 0.443091231  | COX16,SYNJ2BP,ENSBTAG00000037932                                                  |
| 10 | 82,425,000 | 82,575,000 | 1100 | 600 | 0.289330824  | ADAM20,ADAM21,COX16,MED6,ENSBTAG00000037932,ENSBTAG00000039950,ENSBTAG00000045679 |
| 10 | 82,500,000 | 82,650,000 | 1101 | 810 | -0.209957143 | ADAM20,ADAM21,MED6,TTC9,ENSBTAG00000039950,ENSBTAG00000045679                     |
| 10 | 82,575,000 | 82,725,000 | 1102 | 647 | -0.184916733 | MED6,TTC9,ENSBTAG00000039950,ENSBTAG00000045679                                   |
| 10 | 82,650,000 | 82,800,000 | 1103 | 351 | 0.126050163  | MAP3K9,TTC9                                                                       |
| 10 | 82,725,000 | 82,875,000 | 1104 | 591 | 0.228050286  | MAP3K9                                                                            |
| 10 | 82,800,000 | 82,950,000 | 1105 | 558 | 0.223391186  | MAP3K9,PCNX                                                                       |
| 10 | 82,875,000 | 83,025,000 | 1106 | 289 | -0.496182377 | PCNX                                                                              |
| 10 | 82,950,000 | 83,100,000 | 1107 | 363 | -0.486256139 | PCNX                                                                              |
| 10 | 83,025,000 | 83,175,000 | 1108 | 683 | 0.555839907  | PCNX                                                                              |
| 10 | 83,100,000 | 83,250,000 | 1109 | 786 | 1.014491226  | ENSBTAG00000005395                                                                |
| 10 | 83,175,000 | 83,325,000 | 1110 | 640 | 0.638871504  | ENSBTAG00000005395                                                                |
| 10 | 83,250,000 | 83,400,000 | 1111 | 797 | 0.01379559   |                                                                                   |

|    |            |            |      |      |              |                                                                         |
|----|------------|------------|------|------|--------------|-------------------------------------------------------------------------|
| 10 | 83,325,000 | 83,475,000 | 1112 | 753  | -0.336248149 |                                                                         |
| 10 | 83,400,000 | 83,550,000 | 1113 | 457  | -1.12423983  | RPL12,SIPA1L1                                                           |
| 10 | 83,475,000 | 83,625,000 | 1114 | 621  | -0.131669439 | RPL12,SIPA1L1                                                           |
| 10 | 83,550,000 | 83,700,000 | 1115 | 704  | 0.015409331  | SIPA1L1                                                                 |
| 10 | 83,625,000 | 83,775,000 | 1116 | 609  | 0.291546311  |                                                                         |
| 10 | 83,700,000 | 83,850,000 | 1117 | 635  | 0.547312513  |                                                                         |
| 10 | 83,775,000 | 83,925,000 | 1118 | 1002 | 0.467741779  |                                                                         |
| 10 | 83,850,000 | 84,000,000 | 1119 | 1302 | 0.468154913  |                                                                         |
| 10 | 83,925,000 | 84,075,000 | 1120 | 952  | 0.480599247  |                                                                         |
| 10 | 84,000,000 | 84,150,000 | 1121 | 590  | 0.462288203  |                                                                         |
| 10 | 84,075,000 | 84,225,000 | 1122 | 648  | 0.692560171  |                                                                         |
| 10 | 84,150,000 | 84,300,000 | 1123 | 1063 | 0.932606557  |                                                                         |
| 10 | 84,225,000 | 84,375,000 | 1124 | 1072 | 0.511634446  | RGS6                                                                    |
| 10 | 84,300,000 | 84,450,000 | 1125 | 744  | 0.29799835   | RGS6                                                                    |
| 10 | 84,375,000 | 84,525,000 | 1126 | 850  | 0.515584035  | DPF3,RGS6                                                               |
| 10 | 84,450,000 | 84,600,000 | 1127 | 676  | 0.394027017  | DPF3                                                                    |
| 10 | 84,525,000 | 84,675,000 | 1128 | 322  | -0.05248899  | DPF3                                                                    |
| 10 | 84,600,000 | 84,750,000 | 1129 | 632  | 0.598636418  | DPF3,ENSBTAG00000046952                                                 |
| 10 | 84,675,000 | 84,825,000 | 1130 | 1019 | 0.771562688  | ENSBTAG00000046952                                                      |
| 10 | 84,750,000 | 84,900,000 | 1131 | 703  | 0.300134127  | WDR21A,ZFYVE1                                                           |
| 10 | 84,825,000 | 84,975,000 | 1132 | 201  | -0.269585406 | RBM25,WDR21A,ZFYVE1                                                     |
| 10 | 84,900,000 | 85,050,000 | 1133 | 161  | -1.283433675 | PSEN1,RBM25,ZFYVE1                                                      |
| 10 | 84,975,000 | 85,125,000 | 1134 | 275  | -1.35318198  | PAPLN,PSEN1,RBM25                                                       |
| 10 | 85,050,000 | 85,200,000 | 1135 | 281  | -0.696877492 | NUMB,PAPLN,PSEN1                                                        |
| 10 | 85,125,000 | 85,275,000 | 1136 | 237  | 0.00896353   | NUMB                                                                    |
| 10 | 85,200,000 | 85,350,000 | 1137 | 279  | -0.341356406 | C14orf169,HEATR4                                                        |
| 10 | 85,275,000 | 85,425,000 | 1138 | 519  | -1.893207887 | ACOT2,C14orf169,HEATR4,MGC160092                                        |
| 10 | 85,350,000 | 85,500,000 | 1139 | 943  | -0.935353293 | ACOT2,ACOT6,DNAL1,HEATR4,MGC160092,ENSBTAG0000009783,ENSBTAG00000010270 |
| 10 | 85,425,000 | 85,575,000 | 1140 | 732  | -0.283729374 | ACOT6,DNAL1,ELMSAN1,PNMA1,ENSBTAG0000009783,ENSBTAG00000010270          |
| 10 | 85,500,000 | 85,650,000 | 1141 | 370  | -2.144809626 | DNAL1,ELMSAN1,PNMA1,PTGR2                                               |
| 10 | 85,575,000 | 85,725,000 | 1142 | 377  | -1.272301707 | FAM161B,PTGR2,ZNF410                                                    |
| 10 | 85,650,000 | 85,800,000 | 1143 | 439  | 0.421307507  | CCDC176,COQ6,ENTPD5,FAM161B,PTGR2,ZNF410                                |
| 10 | 85,725,000 | 85,875,000 | 1144 | 428  | 0.438713701  | ALDH6A1,CCDC176,COQ6,ENTPD5,LIN52                                       |
| 10 | 85,800,000 | 85,950,000 | 1145 | 242  | 0.646348577  | ALDH6A1,CCDC176,LIN52                                                   |
| 10 | 85,875,000 | 86,025,000 | 1146 | 348  | 0.375226579  | ABCD4,LIN52,VSX2                                                        |
| 10 | 85,950,000 | 86,100,000 | 1147 | 533  | 0.732635006  | ABCD4,LIN52,VRTN,VSX2                                                   |
| 10 | 86,025,000 | 86,175,000 | 1148 | 693  | 0.981253736  | ABCD4,NPC2,SYNDIG1L,VRTN                                                |
| 10 | 86,100,000 | 86,250,000 | 1149 | 753  | 1.097850465  | ISCA2,LTBP2,NPC2,SYNDIG1L                                               |
| 10 | 86,175,000 | 86,325,000 | 1150 | 545  | 1.376372723  | ISCA2,LTBP2,NPC2                                                        |
| 10 | 86,250,000 | 86,400,000 | 1151 | 353  | 1.435686633  | AREL1,FCF1,LTBP2                                                        |
| 10 | 86,325,000 | 86,475,000 | 1152 | 236  | 1.253931951  | AREL1,FCF1,YLPM1                                                        |
| 10 | 86,400,000 | 86,550,000 | 1153 | 300  | -1.686635124 | DLST,PROX2,YLPM1                                                        |
| 10 | 86,475,000 | 86,625,000 | 1154 | 406  | -2.025487114 | DLST,PGF,PROX2,RPS6KL1,YLPM1                                            |
| 10 | 86,550,000 | 86,700,000 | 1155 | 348  | -2.042156219 | DLST,EIF2B2,MLH3,PGF,RPS6KL1                                            |
| 10 | 86,625,000 | 86,775,000 | 1156 | 276  | -2.493091306 | ACYP1,EIF2B2,MLH3,NEK9,TMED10,ZC2HC1C                                   |
| 10 | 86,700,000 | 86,850,000 | 1157 | 388  | -1.302414005 | ACYP1,NEK9,TMED10,ZC2HC1C                                               |
| 10 | 86,775,000 | 86,925,000 | 1158 | 491  | -0.693818203 | FOS,TMED10                                                              |
| 10 | 86,850,000 | 87,000,000 | 1159 | 691  | 0.278814449  | FOS                                                                     |
| 10 | 86,925,000 | 87,075,000 | 1160 | 631  | 0.702236655  | JDP2                                                                    |
| 10 | 87,000,000 | 87,150,000 | 1161 | 323  | 0.018572316  | BATF,JDP2                                                               |
| 10 | 87,075,000 | 87,225,000 | 1162 | 390  | -1.0076544   | BATF,ENSBTAG00000040078                                                 |



|    |            |            |      |      |              |                                                |
|----|------------|------------|------|------|--------------|------------------------------------------------|
| 10 | 87,150,000 | 87,300,000 | 1163 | 438  | -0.986782648 | CAMK4,STARD4,ENSBTAG00000040078                |
| 10 | 87,225,000 | 87,375,000 | 1164 | 408  | -0.43654012  | CAMK4,NCL,STARD4                               |
| 10 | 87,300,000 | 87,450,000 | 1165 | 712  | 0.011339237  | CAMK4,NCL                                      |
| 10 | 87,375,000 | 87,525,000 | 1166 | 898  | 0.248280072  |                                                |
| 10 | 87,450,000 | 87,600,000 | 1167 | 743  | -1.236584964 |                                                |
| 10 | 87,525,000 | 87,675,000 | 1168 | 552  | -1.723419478 | WDR36                                          |
| 10 | 87,600,000 | 87,750,000 | 1169 | 376  | -0.650360945 | WDR36                                          |
| 10 | 87,675,000 | 87,825,000 | 1170 | 467  | -2.115988632 | WDR36                                          |
| 10 | 87,750,000 | 87,900,000 | 1171 | 544  | -1.569061988 | ENSBTAG00000011985                             |
| 10 | 87,825,000 | 87,975,000 | 1172 | 448  | -0.320702623 | C10H14ORF1,TTLL5,ENSBTAG00000011985            |
| 10 | 87,900,000 | 88,050,000 | 1173 | 369  | -0.757847542 | C10H14ORF1,TTLL5,ENSBTAG00000011985            |
| 10 | 87,975,000 | 88,125,000 | 1174 | 329  | -0.45489545  | TTLL5                                          |
| 10 | 88,050,000 | 88,200,000 | 1175 | 446  | -0.138643159 | TTLL5                                          |
| 10 | 88,125,000 | 88,275,000 | 1176 | 394  | -0.517428923 | IFT43,TGFB3,TTLL5                              |
| 10 | 88,200,000 | 88,350,000 | 1177 | 318  | -0.611755035 | IFT43,TGFB3,TTLL5                              |
| 10 | 88,275,000 | 88,425,000 | 1178 | 954  | -1.435617672 | IFT43                                          |
| 10 | 88,350,000 | 88,500,000 | 1179 | 1234 | -1.207733362 | IFT43,MGC166084                                |
| 10 | 88,425,000 | 88,575,000 | 1180 | 721  | -0.013392333 | MGC166084                                      |
| 10 | 88,500,000 | 88,650,000 | 1181 | 795  | -0.988877562 | MGC166084                                      |
| 10 | 88,575,000 | 88,725,000 | 1182 | 889  | -1.392529679 |                                                |
| 10 | 88,650,000 | 88,800,000 | 1183 | 566  | -1.861688522 | ESRRB                                          |
| 10 | 88,725,000 | 88,875,000 | 1184 | 627  | -0.552972503 | ESRRB                                          |
| 10 | 88,800,000 | 88,950,000 | 1185 | 543  | 0.527273056  | ESRRB                                          |
| 10 | 88,875,000 | 89,025,000 | 1186 | 300  | -0.277230344 |                                                |
| 10 | 88,950,000 | 89,100,000 | 1187 | 345  | -1.011808191 | ANGEL1,LRRC74A,VASH1                           |
| 10 | 89,025,000 | 89,175,000 | 1188 | 517  | -1.687298865 | ANGEL1,LRRC74A,VASH1                           |
| 10 | 89,100,000 | 89,250,000 | 1189 | 556  | -3.010477459 | IRF2BPL,LRRC74A                                |
| 10 | 89,175,000 | 89,325,000 | 1190 | 307  | -3.121674365 | IRF2BPL                                        |
| 10 | 89,250,000 | 89,400,000 | 1191 | 154  | -1.807399124 | KIAA1737,ZDHHC2                                |
| 10 | 89,325,000 | 89,475,000 | 1192 | 377  | -1.037989381 | KIAA1737,ZDHHC2                                |
| 10 | 89,400,000 | 89,550,000 | 1193 | 530  | -0.900958551 | NGB,POMT2,TMEM63C,ZDHHC2                       |
| 10 | 89,475,000 | 89,625,000 | 1194 | 395  | -1.338152081 | GSTZ1,NGB,POMT2,TMED8,TMEM63C                  |
| 10 | 89,550,000 | 89,700,000 | 1195 | 321  | -0.343088506 | GSTZ1,NOXRED1,POMT2,SAMD15,TMED8,VIPAS39       |
| 10 | 89,625,000 | 89,775,000 | 1196 | 314  | 0.192710502  | AHSA1,ISM2,NOXRED1,SAMD15,SPTLC2,TMED8,VIPAS39 |
| 10 | 89,700,000 | 89,850,000 | 1197 | 387  | 0.293373693  | AHSA1,ISM2,SPTLC2,VIPAS39                      |
| 10 | 89,775,000 | 89,925,000 | 1198 | 720  | -0.123190395 | ALKBH1,SLIRP,SNW1,SPTLC2                       |
| 10 | 89,850,000 | 90,000,000 | 1199 | 835  | -0.198102045 | ALKBH1,SLIRP,SNW1,SPTLC2                       |
| 10 | 89,925,000 | 90,075,000 | 1200 | 994  | 0.053079223  | ADCK1,SNW1                                     |
| 10 | 90,000,000 | 90,150,000 | 1201 | 1041 | 0.561537658  | ADCK1                                          |
| 10 | 90,075,000 | 90,225,000 | 1202 | 821  | 0.624460873  | ADCK1                                          |
| 10 | 90,150,000 | 90,300,000 | 1203 | 852  | -0.018863786 |                                                |
| 10 | 90,225,000 | 90,375,000 | 1204 | 835  | 0.066401017  |                                                |
| 10 | 90,300,000 | 90,450,000 | 1205 | 635  | -0.001244713 |                                                |
| 10 | 90,375,000 | 90,525,000 | 1206 | 495  | 0.485538546  |                                                |
| 10 | 90,450,000 | 90,600,000 | 1207 | 543  | 0.808233799  |                                                |
| 10 | 90,525,000 | 90,675,000 | 1208 | 866  | 0.970358581  |                                                |
| 10 | 90,600,000 | 90,750,000 | 1209 | 1168 | 0.582310557  |                                                |
| 10 | 90,675,000 | 90,825,000 | 1210 | 1097 | 0.160425105  |                                                |
| 10 | 90,750,000 | 90,900,000 | 1211 | 763  | 0.444243085  |                                                |
| 10 | 90,825,000 | 90,975,000 | 1212 | 641  | 0.228011778  |                                                |
| 10 | 90,900,000 | 91,050,000 | 1213 | 776  | -1.437985523 |                                                |
| 10 | 90,975,000 | 91,125,000 | 1214 | 1045 | -1.143087558 |                                                |
| 10 | 91,050,000 | 91,200,000 | 1215 | 1131 | 0.34866741   |                                                |

|    |            |            |      |      |              |                                            |
|----|------------|------------|------|------|--------------|--------------------------------------------|
| 10 | 91,125,000 | 91,275,000 | 1216 | 703  | -0.137627879 |                                            |
| 10 | 91,200,000 | 91,350,000 | 1217 | 860  | -0.312355735 |                                            |
| 10 | 91,275,000 | 91,425,000 | 1218 | 1148 | -0.511296459 |                                            |
| 10 | 91,350,000 | 91,500,000 | 1219 | 1487 | -0.466306054 |                                            |
| 10 | 91,425,000 | 91,575,000 | 1220 | 1641 | -0.382149487 |                                            |
| 10 | 91,500,000 | 91,650,000 | 1221 | 1057 | -0.30087288  | ENSBTAG00000025324                         |
| 10 | 91,575,000 | 91,725,000 | 1222 | 1007 | 0.449055853  | ENSBTAG00000025324                         |
| 10 | 91,650,000 | 91,800,000 | 1223 | 1090 | 0.517965179  | ENSBTAG00000025324                         |
| 10 | 91,725,000 | 91,875,000 | 1224 | 940  | 0.777441933  | ENSBTAG00000025324                         |
| 10 | 91,800,000 | 91,950,000 | 1225 | 927  | 0.923415695  | ENSBTAG00000025324                         |
| 10 | 91,875,000 | 92,025,000 | 1226 | 1137 | -0.38346868  | ENSBTAG00000025324                         |
| 10 | 91,950,000 | 92,100,000 | 1227 | 902  | -1.041870686 | ENSBTAG00000025324                         |
| 10 | 92,025,000 | 92,175,000 | 1228 | 694  | -0.710592414 | ENSBTAG00000025324                         |
| 10 | 92,100,000 | 92,250,000 | 1229 | 663  | -0.753794819 | ENSBTAG00000025324                         |
| 10 | 92,175,000 | 92,325,000 | 1230 | 517  | -0.8135988   | ENSBTAG00000025324                         |
| 10 | 92,250,000 | 92,400,000 | 1231 | 918  | 0.775743895  |                                            |
| 10 | 92,325,000 | 92,475,000 | 1232 | 900  | 1.077841247  |                                            |
| 10 | 92,400,000 | 92,550,000 | 1233 | 613  | 0.982293108  |                                            |
| 10 | 92,475,000 | 92,625,000 | 1234 | 606  | 0.981329805  | DIO2                                       |
| 10 | 92,550,000 | 92,700,000 | 1235 | 689  | 0.646839687  | DIO2                                       |
| 10 | 92,625,000 | 92,775,000 | 1236 | 562  | 0.462594882  | DIO2                                       |
| 10 | 92,700,000 | 92,850,000 | 1237 | 465  | -0.040645542 |                                            |
| 10 | 92,775,000 | 92,925,000 | 1238 | 710  | 0.242387362  | ENSBTAG00000040167,ENSBTAG00000047260      |
| 10 | 92,850,000 | 93,000,000 | 1239 | 742  | -2.117402461 | ENSBTAG00000040167,ENSBTAG00000047260      |
| 10 | 92,925,000 | 93,075,000 | 1240 | 620  | -3.627451352 | ENSBTAG00000047260                         |
| 10 | 93,000,000 | 93,150,000 | 1241 | 469  | -1.076888414 |                                            |
| 10 | 93,075,000 | 93,225,000 | 1242 | 466  | -1.168978218 | ENSBTAG00000021708                         |
| 10 | 93,150,000 | 93,300,000 | 1243 | 429  | -1.927536347 | ENSBTAG00000021708                         |
| 10 | 93,225,000 | 93,375,000 | 1244 | 265  | -3.011227685 | ENSBTAG00000021708,ENSBTAG00000047322      |
| 10 | 93,300,000 | 93,450,000 | 1245 | 450  | -2.079714245 | TSHR,ENSBTAG00000021708,ENSBTAG00000047322 |
| 10 | 93,375,000 | 93,525,000 | 1246 | 779  | -0.665665839 | TSHR                                       |
| 10 | 93,450,000 | 93,600,000 | 1247 | 610  | -0.07030353  | TSHR                                       |
| 10 | 93,525,000 | 93,675,000 | 1248 | 283  | -1.218599024 | GTF2A1,TSHR                                |
| 10 | 93,600,000 | 93,750,000 | 1249 | 422  | -1.245842902 | GTF2A1,STON2                               |
| 10 | 93,675,000 | 93,825,000 | 1250 | 1003 | 0.214428736  | GTF2A1,STON2                               |
| 10 | 93,750,000 | 93,900,000 | 1251 | 1076 | -0.046570755 | STON2                                      |
| 10 | 93,825,000 | 93,975,000 | 1252 | 732  | -0.365191947 | SEL1L                                      |
| 10 | 93,900,000 | 94,050,000 | 1253 | 913  | 0.441409356  | SEL1L                                      |
| 10 | 93,975,000 | 94,125,000 | 1254 | 823  | 0.101001384  |                                            |
| 10 | 94,050,000 | 94,200,000 | 1255 | 837  | -2.17322045  |                                            |
| 10 | 94,125,000 | 94,275,000 | 1256 | 965  | -1.790679246 |                                            |
| 10 | 94,200,000 | 94,350,000 | 1257 | 700  | 0.504142245  |                                            |
| 10 | 94,275,000 | 94,425,000 | 1258 | 749  | 1.083769306  |                                            |
| 10 | 94,350,000 | 94,500,000 | 1259 | 760  | 1.015158595  |                                            |
| 10 | 94,425,000 | 94,575,000 | 1260 | 492  | -0.464501923 |                                            |
| 10 | 94,500,000 | 94,650,000 | 1261 | 777  | -2.992966689 |                                            |
| 10 | 94,575,000 | 94,725,000 | 1262 | 1027 | -1.849088415 |                                            |
| 10 | 94,650,000 | 94,800,000 | 1263 | 837  | 0.096357369  |                                            |
| 10 | 94,725,000 | 94,875,000 | 1264 | 599  | 0.514380838  |                                            |
| 10 | 94,800,000 | 94,950,000 | 1265 | 684  | 1.233222675  |                                            |
| 10 | 94,875,000 | 95,025,000 | 1266 | 834  | 1.297365589  |                                            |
| 10 | 94,950,000 | 95,100,000 | 1267 | 1044 | -0.020311502 |                                            |
| 10 | 95,025,000 | 95,175,000 | 1268 | 1293 | -0.50061838  |                                            |

|    |            |            |      |      |              |                    |
|----|------------|------------|------|------|--------------|--------------------|
| 10 | 95,100,000 | 95,250,000 | 1269 | 1257 | -1.159864254 |                    |
| 10 | 95,175,000 | 95,325,000 | 1270 | 1108 | -0.956314822 |                    |
| 10 | 95,250,000 | 95,400,000 | 1271 | 1144 | 0.407084744  |                    |
| 10 | 95,325,000 | 95,475,000 | 1272 | 1350 | 0.384836149  | ENSBTAG00000018039 |
| 10 | 95,400,000 | 95,550,000 | 1273 | 1499 | 0.556348476  | ENSBTAG00000018039 |
| 10 | 95,475,000 | 95,625,000 | 1274 | 1335 | 0.472554445  |                    |
| 10 | 95,550,000 | 95,700,000 | 1275 | 766  | 0.722484073  |                    |
| 10 | 95,625,000 | 95,775,000 | 1276 | 632  | 0.791207306  |                    |
| 10 | 95,700,000 | 95,850,000 | 1277 | 1211 | -0.286911923 |                    |
| 10 | 95,775,000 | 95,925,000 | 1278 | 1531 | -0.091580188 |                    |
| 10 | 95,850,000 | 96,000,000 | 1279 | 1238 | 0.476813474  |                    |
| 10 | 95,925,000 | 96,075,000 | 1280 | 1012 | 0.941662927  |                    |
| 10 | 96,000,000 | 96,150,000 | 1281 | 1047 | 0.419217649  |                    |
| 10 | 96,075,000 | 96,225,000 | 1282 | 1243 | -0.522554606 |                    |
| 10 | 96,150,000 | 96,300,000 | 1283 | 1132 | -0.654106446 |                    |
| 10 | 96,225,000 | 96,375,000 | 1284 | 660  | 0.053093381  |                    |
| 10 | 96,300,000 | 96,450,000 | 1285 | 466  | 1.231508968  |                    |
| 10 | 96,375,000 | 96,525,000 | 1286 | 554  | 0.87006884   |                    |
| 10 | 96,450,000 | 96,600,000 | 1287 | 884  | 0.874858852  |                    |
| 10 | 96,525,000 | 96,675,000 | 1288 | 1051 | 1.039354346  |                    |
| 10 | 96,600,000 | 96,750,000 | 1289 | 660  | 0.749631323  |                    |
| 10 | 96,675,000 | 96,825,000 | 1290 | 1129 | -2.333990057 |                    |
| 10 | 96,750,000 | 96,900,000 | 1291 | 1433 | -1.400859779 |                    |
| 10 | 96,825,000 | 96,975,000 | 1292 | 1349 | 0.659955965  |                    |
| 10 | 96,900,000 | 97,050,000 | 1293 | 1043 | -0.123708509 |                    |
| 10 | 96,975,000 | 97,125,000 | 1294 | 1037 | -2.247274172 |                    |
| 10 | 97,050,000 | 97,200,000 | 1295 | 1335 | -1.609643319 |                    |
| 10 | 97,125,000 | 97,275,000 | 1296 | 1185 | -0.47714474  |                    |
| 10 | 97,200,000 | 97,350,000 | 1297 | 1337 | 0.325669337  |                    |
| 10 | 97,275,000 | 97,425,000 | 1298 | 1271 | 1.122491775  |                    |
| 10 | 97,350,000 | 97,500,000 | 1299 | 782  | 1.162381772  |                    |
| 10 | 97,425,000 | 97,575,000 | 1300 | 390  | 0.811713453  |                    |
| 10 | 97,500,000 | 97,650,000 | 1301 | 687  | 1.290715229  |                    |
| 10 | 97,575,000 | 97,725,000 | 1302 | 1035 | 0.643265048  |                    |
| 10 | 97,650,000 | 97,800,000 | 1303 | 861  | 0.201075911  |                    |
| 10 | 97,725,000 | 97,875,000 | 1304 | 681  | 0.179734339  |                    |
| 10 | 97,800,000 | 97,950,000 | 1305 | 883  | -1.390948622 |                    |
| 10 | 97,875,000 | 98,025,000 | 1306 | 963  | -1.955541535 |                    |
| 10 | 97,950,000 | 98,100,000 | 1307 | 857  | 0.773225483  |                    |
| 10 | 98,025,000 | 98,175,000 | 1308 | 988  | 0.200799277  |                    |
| 10 | 98,100,000 | 98,250,000 | 1309 | 933  | -0.962696346 |                    |
| 10 | 98,175,000 | 98,325,000 | 1310 | 955  | -1.056427912 |                    |
| 10 | 98,250,000 | 98,400,000 | 1311 | 840  | -0.75012603  | FLRT2              |
| 10 | 98,325,000 | 98,475,000 | 1312 | 680  | 0.080777915  | FLRT2              |
| 10 | 98,400,000 | 98,550,000 | 1313 | 830  | 0.459285584  |                    |
| 10 | 98,475,000 | 98,625,000 | 1314 | 956  | 0.740582947  |                    |
| 10 | 98,550,000 | 98,700,000 | 1315 | 1302 | 1.005800442  |                    |
| 10 | 98,625,000 | 98,775,000 | 1316 | 1470 | 0.295358935  |                    |
| 10 | 98,700,000 | 98,850,000 | 1317 | 1471 | -0.215600409 |                    |
| 10 | 98,775,000 | 98,925,000 | 1318 | 1583 | 0.847631707  |                    |
| 10 | 98,850,000 | 99,000,000 | 1319 | 1460 | 0.841348175  |                    |
| 10 | 98,925,000 | 99,075,000 | 1320 | 1435 | 0.523578863  |                    |
| 10 | 99,000,000 | 99,150,000 | 1321 | 1597 | 0.550508711  |                    |

|    |             |             |      |      |              |                    |
|----|-------------|-------------|------|------|--------------|--------------------|
| 10 | 99,075,000  | 99,225,000  | 1322 | 1656 | 0.157929702  |                    |
| 10 | 99,150,000  | 99,300,000  | 1323 | 1310 | -0.651106046 |                    |
| 10 | 99,225,000  | 99,375,000  | 1324 | 786  | -0.458333797 |                    |
| 10 | 99,300,000  | 99,450,000  | 1325 | 673  | 0.071636953  |                    |
| 10 | 99,375,000  | 99,525,000  | 1326 | 619  | 0.044988547  |                    |
| 10 | 99,450,000  | 99,600,000  | 1327 | 857  | -0.10107945  |                    |
| 10 | 99,525,000  | 99,675,000  | 1328 | 1089 | -0.384326874 |                    |
| 10 | 99,600,000  | 99,750,000  | 1329 | 895  | -0.00036762  |                    |
| 10 | 99,675,000  | 99,825,000  | 1330 | 875  | 0.890525974  |                    |
| 10 | 99,750,000  | 99,900,000  | 1331 | 859  | 0.831088796  |                    |
| 10 | 99,825,000  | 99,975,000  | 1332 | 1023 | 0.272212539  |                    |
| 10 | 99,900,000  | 100,050,000 | 1333 | 1239 | -0.117110633 |                    |
| 10 | 99,975,000  | 100,125,000 | 1334 | 965  | -0.009394271 |                    |
| 10 | 100,050,000 | 100,200,000 | 1335 | 1107 | 0.328785154  |                    |
| 10 | 100,125,000 | 100,275,000 | 1336 | 1074 | 0.408301672  |                    |
| 10 | 100,200,000 | 100,350,000 | 1337 | 876  | -0.094013572 |                    |
| 10 | 100,275,000 | 100,425,000 | 1338 | 921  | -0.409888464 |                    |
| 10 | 100,350,000 | 100,500,000 | 1339 | 641  | 0.09617507   |                    |
| 10 | 100,425,000 | 100,575,000 | 1340 | 670  | 0.783543339  |                    |
| 10 | 100,500,000 | 100,650,000 | 1341 | 1158 | 1.072252266  |                    |
| 10 | 100,575,000 | 100,725,000 | 1342 | 1275 | 0.646411655  |                    |
| 10 | 100,650,000 | 100,800,000 | 1343 | 1021 | 0.465996513  | GALC               |
| 10 | 100,725,000 | 100,875,000 | 1344 | 1040 | 1.041230972  | GALC,GPR65         |
| 10 | 100,800,000 | 100,950,000 | 1345 | 1082 | 0.956117879  | GPR65              |
| 10 | 100,875,000 | 101,025,000 | 1346 | 1097 | 0.724901233  | KCNK10             |
| 10 | 100,950,000 | 101,100,000 | 1347 | 1172 | 0.453940077  | KCNK10             |
| 10 | 101,025,000 | 101,175,000 | 1348 | 1082 | 0.479880256  | KCNK10             |
| 10 | 101,100,000 | 101,250,000 | 1349 | 747  | 0.248423835  | PTPN21,SPATA7      |
| 10 | 101,175,000 | 101,325,000 | 1350 | 781  | -0.766484065 | PTPN21,SPATA7      |
| 10 | 101,250,000 | 101,400,000 | 1351 | 734  | -0.926128759 | EML5,PTPN21,ZC3H14 |
| 10 | 101,325,000 | 101,475,000 | 1352 | 380  | -0.911834931 | EML5,ZC3H14        |
| 10 | 101,400,000 | 101,550,000 | 1353 | 400  | -1.186037303 | EML5               |
| 10 | 101,475,000 | 101,625,000 | 1354 | 421  | -1.089784615 | EML5,TTC8          |
| 10 | 101,550,000 | 101,700,000 | 1355 | 762  | 0.094187271  | TTC8               |
| 10 | 101,625,000 | 101,775,000 | 1356 | 778  | 0.19910606   | TTC8               |
| 10 | 101,700,000 | 101,850,000 | 1357 | 817  | -0.995364862 |                    |
| 10 | 101,775,000 | 101,925,000 | 1358 | 925  | -0.683308937 |                    |
| 10 | 101,850,000 | 102,000,000 | 1359 | 722  | 0.296885418  |                    |
| 10 | 101,925,000 | 102,075,000 | 1360 | 1135 | 0.719811479  | FOXN3              |
| 10 | 102,000,000 | 102,150,000 | 1361 | 1072 | 0.522331636  | FOXN3              |
| 10 | 102,075,000 | 102,225,000 | 1362 | 761  | -0.105046581 | FOXN3              |
| 10 | 102,150,000 | 102,300,000 | 1363 | 818  | 0.467535154  | FOXN3              |
| 10 | 102,225,000 | 102,375,000 | 1364 | 779  | 0.30271853   | FOXN3              |
| 10 | 102,300,000 | 102,450,000 | 1365 | 800  | 0.451750988  | FOXN3              |
| 10 | 102,375,000 | 102,525,000 | 1366 | 1126 | 0.59815129   |                    |
| 10 | 102,450,000 | 102,600,000 | 1367 | 1305 | 0.54141826   |                    |
| 10 | 102,525,000 | 102,675,000 | 1368 | 1078 | 0.710132637  | EFCAB11            |
| 10 | 102,600,000 | 102,750,000 | 1369 | 935  | 0.97065294   | EFCAB11,TDP1       |
| 10 | 102,675,000 | 102,825,000 | 1370 | 962  | 1.150310173  | EFCAB11,TDP1       |
| 10 | 102,750,000 | 102,900,000 | 1371 | 1076 | 0.999532035  | KCNK13,TDP1        |
| 10 | 102,825,000 | 102,975,000 | 1372 | 1327 | 0.251155835  | KCNK13,NRDE2,PSMC1 |
| 10 | 102,900,000 | 103,050,000 | 1373 | 1169 | -0.542048434 | NRDE2,PSMC1        |
| 10 | 102,975,000 | 103,125,000 | 1374 | 721  | 0.542674469  | CALM               |

|    |             |             |      |      |              |                                                               |
|----|-------------|-------------|------|------|--------------|---------------------------------------------------------------|
| 10 | 103,050,000 | 103,200,000 | 1375 | 919  | 1.211848609  | CALM,TTC7B                                                    |
| 10 | 103,125,000 | 103,275,000 | 1376 | 1012 | 0.984078471  | TTC7B                                                         |
| 10 | 103,200,000 | 103,350,000 | 1377 | 1015 | -0.023246644 | TTC7B                                                         |
| 10 | 103,275,000 | 103,425,000 | 1378 | 1150 | -0.923667615 | TTC7B                                                         |
| 10 | 103,350,000 | 103,500,000 | 1379 | 853  | -1.135917954 | TTC7B                                                         |
| 10 | 103,425,000 | 103,575,000 | 1380 | 489  | -0.058089204 | RPS6KA5                                                       |
| 10 | 103,500,000 | 103,650,000 | 1381 | 697  | 0.803859621  | RPS6KA5                                                       |
| 10 | 103,575,000 | 103,725,000 | 1382 | 972  | 0.656434306  | RPS6KA5                                                       |
| 10 | 103,650,000 | 103,800,000 | 1383 | 1015 | 0.327966509  | RPS6KA5                                                       |
| 10 | 103,725,000 | 103,875,000 | 1384 | 873  | 0.299503233  | CASC4                                                         |
| 10 | 103,800,000 | 103,950,000 | 1385 | 512  | 0.138822639  | CASC4,CTDSPL2                                                 |
| 10 | 103,875,000 | 104,025,000 | 1386 | 399  | -0.956429571 | CASC4,CTDSPL2,EIF3J,SPG11                                     |
| 10 | 103,950,000 | 104,100,000 | 1387 | 530  | -3.056190722 | CTDSPL2,EIF3J,PATL2,SPG11                                     |
| 10 | 104,025,000 | 104,175,000 | 1388 | 576  | -3.684963644 | B2M,PATL2,SPG11                                               |
| 10 | 104,100,000 | 104,250,000 | 1389 | 461  | -2.462385659 | B2M,C10H15orf43,TRIM69                                        |
| 10 | 104,175,000 | 104,305,016 | 1390 | 377  | -0.408831184 | C10H15orf43,TRIM69                                            |
| 11 | 0           | 150,000     | 1    | 367  | -0.458904006 | ZC3H6,ENSBTAG00000038257                                      |
| 11 | 75,000      | 225,000     | 2    | 955  | 0.259992384  | FBLN7,ZC3H6,ZC3H8                                             |
| 11 | 150,000     | 300,000     | 3    | 1116 | 0.514116338  | FBLN7,TMEM87B,ZC3H8                                           |
| 11 | 225,000     | 375,000     | 4    | 939  | 0.646959448  | FBLN7,MERTK,TMEM87B                                           |
| 11 | 300,000     | 450,000     | 5    | 1129 | 0.608764836  | MERTK,TMEM87B                                                 |
| 11 | 375,000     | 525,000     | 6    | 1054 | 0.748118076  | ANAPC1,MERTK                                                  |
| 11 | 450,000     | 600,000     | 7    | 794  | 0.987669288  | ANAPC1,ENSBTAG00000023163                                     |
| 11 | 525,000     | 675,000     | 8    | 784  | 0.118087919  | ANAPC1,ENSBTAG00000023163                                     |
| 11 | 600,000     | 750,000     | 9    | 962  | -0.743829753 |                                                               |
| 11 | 675,000     | 825,000     | 10   | 988  | -0.415607235 |                                                               |
| 11 | 750,000     | 900,000     | 11   | 724  | -0.913827101 |                                                               |
| 11 | 825,000     | 975,000     | 12   | 627  | -0.877776725 |                                                               |
| 11 | 900,000     | 1,050,000   | 13   | 774  | -0.38449216  |                                                               |
| 11 | 975,000     | 1,125,000   | 14   | 763  | -0.193582113 |                                                               |
| 11 | 1,050,000   | 1,200,000   | 15   | 841  | 0.768130887  | BCL2L11                                                       |
| 11 | 1,125,000   | 1,275,000   | 16   | 805  | 0.564801532  | ACOXL,BCL2L11                                                 |
| 11 | 1,200,000   | 1,350,000   | 17   | 736  | -0.267125328 | ACOXL                                                         |
| 11 | 1,275,000   | 1,425,000   | 18   | 745  | -0.341021327 | ACOXL                                                         |
| 11 | 1,350,000   | 1,500,000   | 19   | 654  | 0.174782183  | ACOXL                                                         |
| 11 | 1,425,000   | 1,575,000   | 20   | 785  | -0.809115789 | ACOXL,BUB1                                                    |
| 11 | 1,500,000   | 1,650,000   | 21   | 950  | -2.444624476 | ACOXL,BUB1,TPC3                                               |
| 11 | 1,575,000   | 1,725,000   | 22   | 719  | -3.296314102 | BUB1,LINC00116,NPHP1,TPC3                                     |
| 11 | 1,650,000   | 1,800,000   | 23   | 531  | -1.512031703 | LINC00116,MALL,NPHP1                                          |
| 11 | 1,725,000   | 1,875,000   | 24   | 688  | -1.060352017 | MALL,NPHP1,ENSBTAG00000034586                                 |
| 11 | 1,800,000   | 1,950,000   | 25   | 1152 | -0.373612474 | MRPS5,ZNF514,ENSBTAG00000034586,ENSBTAG00000034657            |
| 11 | 1,875,000   | 2,025,000   | 26   | 1175 | -0.030257125 | MRPS5,PROM2,ZNF2,ZNF514,ENSBTAG00000034657,ENSBTAG00000047503 |
| 11 | 1,950,000   | 2,100,000   | 27   | 1052 | -0.095875143 | PROM2,ZNF2,ENSBTAG00000017955,ENSBTAG00000047503              |
| 11 | 2,025,000   | 2,175,000   | 28   | 1219 | 0.302886715  | GPAT2,ENSBTAG00000011553,ENSBTAG00000017955                   |
| 11 | 2,100,000   | 2,250,000   | 29   | 1032 | 0.367099713  | ADRA2B,ASTL,GPAT2,ENSBTAG00000011553                          |
| 11 | 2,175,000   | 2,325,000   | 30   | 727  | 0.537243619  | ADRA2B,ASTL,DUSP2,STARD7,TMEM127                              |
| 11 | 2,250,000   | 2,400,000   | 31   | 872  | 0.571398731  | CIAO1,DUSP2,ITPRIPL1,SNRNP200,STARD7,TMEM127                  |
| 11 | 2,325,000   | 2,475,000   | 32   | 1445 | -0.079882498 | CIAO1,ITPRIPL1,NCAPH,SNRNP200,TMEM127                         |
| 11 | 2,400,000   | 2,550,000   | 33   | 1085 | -0.261802728 | ARID5A,NCAPH,NEURL3                                           |
| 11 | 2,475,000   | 2,625,000   | 34   | 485  | 0.314377416  | ARID5A,FER1L5,KANSL3,NEURL3                                   |

|    |           |           |    |      |              |                                            |
|----|-----------|-----------|----|------|--------------|--------------------------------------------|
| 11 | 2,550,000 | 2,700,000 | 35 | 815  | 0.741233843  | CNNM4,FER1L5,KANSL3,LMAN2L                 |
| 11 | 2,625,000 | 2,775,000 | 36 | 1171 | 0.320214184  | ANKRD23,CNNM3,CNNM4,FER1L5,LMAN2L          |
| 11 | 2,700,000 | 2,850,000 | 37 | 1215 | -0.823151199 | ANKRD23,ANKRD39,CNNM3,CNNM4,FAM178B,SEMA4C |
| 11 | 2,775,000 | 2,925,000 | 38 | 1222 | -1.325458944 | ANKRD39,COX5B,FAM178B,SEMA4C               |
| 11 | 2,850,000 | 3,000,000 | 39 | 1481 | -2.357185709 | ACTR1B,COX5B,FAM178B                       |
| 11 | 2,925,000 | 3,075,000 | 40 | 1650 | -1.479021254 | ACTR1B,ZAP70                               |
| 11 | 3,000,000 | 3,150,000 | 41 | 1113 | 0.221485024  | TMEM131,ZAP70                              |
| 11 | 3,075,000 | 3,225,000 | 42 | 600  | -0.088699838 | TMEM131                                    |
| 11 | 3,150,000 | 3,300,000 | 43 | 798  | -0.494090105 | TMEM131                                    |
| 11 | 3,225,000 | 3,375,000 | 44 | 1392 | -0.360071009 | VWA3B                                      |
| 11 | 3,300,000 | 3,450,000 | 45 | 1363 | -0.258212893 | VWA3B                                      |
| 11 | 3,375,000 | 3,525,000 | 46 | 1410 | -0.961632683 | VWA3B                                      |
| 11 | 3,450,000 | 3,600,000 | 47 | 1804 | -0.704792774 | CNGA3,VWA3B                                |
| 11 | 3,525,000 | 3,675,000 | 48 | 1667 | 0.328402634  | CNGA3,VWA3B                                |
| 11 | 3,600,000 | 3,750,000 | 49 | 1451 | 0.842024236  | INPP4A                                     |
| 11 | 3,675,000 | 3,825,000 | 50 | 1325 | 0.982661482  | COA5,INPP4A,MGAT4A,UNC50                   |
| 11 | 3,750,000 | 3,900,000 | 51 | 1330 | 1.074495341  | COA5,MGAT4A,UNC50                          |
| 11 | 3,825,000 | 3,975,000 | 52 | 1178 | 0.875378804  | MGAT4A                                     |
| 11 | 3,900,000 | 4,050,000 | 53 | 1171 | 0.653146157  | MGAT4A                                     |
| 11 | 3,975,000 | 4,125,000 | 54 | 1049 | 0.738559859  |                                            |
| 11 | 4,050,000 | 4,200,000 | 55 | 622  | 0.416776107  | TSGA10                                     |
| 11 | 4,125,000 | 4,275,000 | 56 | 401  | -0.91748012  | C2orf15,TSGA10                             |
| 11 | 4,200,000 | 4,350,000 | 57 | 679  | -3.56847948  | C2orf15,LIPT1,LYG2,MITD1,MRPL30,TSGA10     |
| 11 | 4,275,000 | 4,425,000 | 58 | 1341 | -2.475661607 | LIPT1,LYG2,MITD1,MRPL30,TXNDC9             |
| 11 | 4,350,000 | 4,500,000 | 59 | 1266 | -1.342950079 | EIF5B,TXNDC9                               |
| 11 | 4,425,000 | 4,575,000 | 60 | 890  | -0.471217116 | EIF5B,REV1                                 |
| 11 | 4,500,000 | 4,650,000 | 61 | 872  | -0.009994762 | AFF3,EIF5B,REV1                            |
| 11 | 4,575,000 | 4,725,000 | 62 | 1029 | -0.444427872 | AFF3,REV1                                  |
| 11 | 4,650,000 | 4,800,000 | 63 | 1611 | -0.239681203 | AFF3                                       |
| 11 | 4,725,000 | 4,875,000 | 64 | 1520 | 0.345688179  |                                            |
| 11 | 4,800,000 | 4,950,000 | 65 | 1067 | 0.03762525   |                                            |
| 11 | 4,875,000 | 5,025,000 | 66 | 1118 | -0.122507232 |                                            |
| 11 | 4,950,000 | 5,100,000 | 67 | 1290 | 0.184833467  |                                            |
| 11 | 5,025,000 | 5,175,000 | 68 | 1239 | -0.278336757 |                                            |
| 11 | 5,100,000 | 5,250,000 | 69 | 1318 | -0.229345894 |                                            |
| 11 | 5,175,000 | 5,325,000 | 70 | 1477 | -0.367871664 |                                            |
| 11 | 5,250,000 | 5,400,000 | 71 | 1467 | -0.030846325 |                                            |
| 11 | 5,325,000 | 5,475,000 | 72 | 1598 | 0.134214905  | CHST10,LONRF2                              |
| 11 | 5,400,000 | 5,550,000 | 73 | 1491 | 0.419219281  | CHST10,LONRF2,NMS                          |
| 11 | 5,475,000 | 5,625,000 | 74 | 950  | 0.61190003   | CHST10,NMS,PDCL3                           |
| 11 | 5,550,000 | 5,700,000 | 75 | 774  | -0.235764595 | PDCL3                                      |
| 11 | 5,625,000 | 5,775,000 | 76 | 1043 | -0.584751659 | PTPN13                                     |
| 11 | 5,700,000 | 5,850,000 | 77 | 993  | -0.493401079 | PTPN13,SLC10A6                             |
| 11 | 5,775,000 | 5,925,000 | 78 | 994  | -0.396934322 | NPAS2,PTPN13,SLC10A6                       |
| 11 | 5,850,000 | 6,000,000 | 79 | 1099 | 0.029554519  | NPAS2                                      |
| 11 | 5,925,000 | 6,075,000 | 80 | 960  | 0.646253806  | NPAS2,RPL31,TBC1D8                         |
| 11 | 6,000,000 | 6,150,000 | 81 | 994  | 1.101238157  | NPAS2,RPL31,TBC1D8                         |
| 11 | 6,075,000 | 6,225,000 | 82 | 1127 | 1.038004069  | CNOT11,RNF149                              |
| 11 | 6,150,000 | 6,300,000 | 83 | 1177 | -0.204636637 | CNOT11,CREG2,RNF149                        |
| 11 | 6,225,000 | 6,375,000 | 84 | 1248 | -0.134713691 | CREG2,RFX8,RNF149                          |
| 11 | 6,300,000 | 6,450,000 | 85 | 1043 | 0.192277531  | RFX8                                       |
| 11 | 6,375,000 | 6,525,000 | 86 | 822  | -0.505958732 |                                            |
| 11 | 6,450,000 | 6,600,000 | 87 | 949  | -1.237311397 |                                            |

|    |            |            |     |      |              |                                                                                                                 |
|----|------------|------------|-----|------|--------------|-----------------------------------------------------------------------------------------------------------------|
| 11 | 6,525,000  | 6,675,000  | 88  | 1033 | -1.555129344 | MAP4K4                                                                                                          |
| 11 | 6,600,000  | 6,750,000  | 89  | 929  | -1.555242542 | IL1R2,MAP4K4                                                                                                    |
| 11 | 6,675,000  | 6,825,000  | 90  | 722  | -1.027250301 | IL1R2                                                                                                           |
| 11 | 6,750,000  | 6,900,000  | 91  | 538  | -0.130333225 | IL1R1,IL1R2                                                                                                     |
| 11 | 6,825,000  | 6,975,000  | 92  | 689  | -0.238904281 | IL1R1                                                                                                           |
| 11 | 6,900,000  | 7,050,000  | 93  | 697  | -0.097607672 | IL1R1,IL1RL2                                                                                                    |
| 11 | 6,975,000  | 7,125,000  | 94  | 639  | 0.61404117   | IL1RL1,IL1RL2                                                                                                   |
| 11 | 7,050,000  | 7,200,000  | 95  | 600  | 0.754968727  | IL18R1,IL18RAP,IL1RL1                                                                                           |
| 11 | 7,125,000  | 7,275,000  | 96  | 919  | 0.836082854  | IL18R1,IL18RAP,IL1RL1,SLC9A4                                                                                    |
| 11 | 7,200,000  | 7,350,000  | 97  | 1122 | 0.830312617  | IL18RAP,SLC9A2,SLC9A4                                                                                           |
| 11 | 7,275,000  | 7,425,000  | 98  | 1354 | 0.619347188  | MFSD9,SLC9A2,SLC9A4                                                                                             |
| 11 | 7,350,000  | 7,500,000  | 99  | 1571 | 0.968437055  | MFSD9,SLC9A2,TMEM182                                                                                            |
| 11 | 7,425,000  | 7,575,000  | 100 | 1263 | 0.972832417  | MFSD9,TMEM182                                                                                                   |
| 11 | 7,500,000  | 7,650,000  | 101 | 1187 | 0.559537733  |                                                                                                                 |
| 11 | 7,575,000  | 7,725,000  | 102 | 898  | 0.498988153  |                                                                                                                 |
| 11 | 7,650,000  | 7,800,000  | 103 | 675  | 0.905623615  |                                                                                                                 |
| 11 | 7,725,000  | 7,875,000  | 104 | 609  | 0.599064229  |                                                                                                                 |
| 11 | 7,800,000  | 7,950,000  | 105 | 530  | 0.123132548  |                                                                                                                 |
| 11 | 7,875,000  | 8,025,000  | 106 | 630  | 0.641885416  |                                                                                                                 |
| 11 | 7,950,000  | 8,100,000  | 107 | 593  | 0.872096937  |                                                                                                                 |
| 11 | 8,025,000  | 8,175,000  | 108 | 439  | 0.318843319  |                                                                                                                 |
| 11 | 8,100,000  | 8,250,000  | 109 | 402  | 0.04561477   |                                                                                                                 |
| 11 | 8,175,000  | 8,325,000  | 110 | 321  | 0.170599988  |                                                                                                                 |
| 11 | 8,250,000  | 8,400,000  | 111 | 274  | -0.419777441 |                                                                                                                 |
| 11 | 8,325,000  | 8,475,000  | 112 | 418  | -1.490086466 |                                                                                                                 |
| 11 | 8,400,000  | 8,550,000  | 113 | 404  | -1.398634411 |                                                                                                                 |
| 11 | 8,475,000  | 8,625,000  | 114 | 286  | -0.432227912 |                                                                                                                 |
| 11 | 8,550,000  | 8,700,000  | 115 | 351  | 0.14573766   |                                                                                                                 |
| 11 | 8,625,000  | 8,775,000  | 116 | 584  | -0.00444137  |                                                                                                                 |
| 11 | 8,700,000  | 8,850,000  | 117 | 591  | -0.611082377 |                                                                                                                 |
| 11 | 8,775,000  | 8,925,000  | 118 | 395  | -0.553432487 |                                                                                                                 |
| 11 | 8,850,000  | 9,000,000  | 119 | 329  | 0.455468491  |                                                                                                                 |
| 11 | 8,925,000  | 9,075,000  | 120 | 416  | 0.980569342  |                                                                                                                 |
| 11 | 9,000,000  | 9,150,000  | 121 | 983  | 0.737487176  | MRPS9                                                                                                           |
| 11 | 9,075,000  | 9,225,000  | 122 | 1444 | 0.443499865  | GPR45,MRPS9,TGFBRAP1                                                                                            |
| 11 | 9,150,000  | 9,300,000  | 123 | 1275 | 0.176126442  | C2orf49,FHL2,GPR45,MRPS9,TGFBRAP1                                                                               |
| 11 | 9,225,000  | 9,375,000  | 124 | 1114 | 0.364188439  | C2orf49,FHL2,TGFBRAP1                                                                                           |
| 11 | 9,300,000  | 9,450,000  | 125 | 1160 | 0.218060043  | FHL2                                                                                                            |
| 11 | 9,375,000  | 9,525,000  | 126 | 1118 | -0.22620411  | NK1R                                                                                                            |
| 11 | 9,450,000  | 9,600,000  | 127 | 766  | 0.535923542  | NK1R                                                                                                            |
| 11 | 9,525,000  | 9,675,000  | 128 | 614  | 1.305476028  | NK1R                                                                                                            |
| 11 | 9,600,000  | 9,750,000  | 129 | 911  | -0.768576758 | HK2,NK1R,POLE4                                                                                                  |
| 11 | 9,675,000  | 9,825,000  | 130 | 905  | -0.892456508 | HK2,POLE4                                                                                                       |
| 11 | 9,750,000  | 9,900,000  | 131 | 678  | 0.318366697  | HK2                                                                                                             |
| 11 | 9,825,000  | 9,975,000  | 132 | 531  | -0.008772708 | M1AP,SEMA4F                                                                                                     |
| 11 | 9,900,000  | 10,050,000 | 133 | 322  | -0.430534646 | M1AP,SEMA4F                                                                                                     |
| 11 | 9,975,000  | 10,125,000 | 134 | 246  | -0.366034735 | AUP1,DOK1,DQX1,HTRA2,LBX2,LOXL3,M1AP,PCGF1,TLX2                                                                 |
| 11 | 10,050,000 | 10,200,000 | 135 | 240  | -0.279753281 | AUP1,C11H2orf81,CCDC142,DOK1,DQX1,HTRA2,INO80B,LBX2,LOXL3,M1AP,MGC152281,MOGS,MRPL53,PCGF1,RTKN,TLX2,WBP1,WDR54 |
| 11 | 10,125,000 | 10,275,000 | 136 | 281  | 0.223306102  | C11H2orf81,CCDC142,DCTN1,INO80B,MGC152281,MOGS,MRPL53,RTKN,WBP1,WDR54                                           |
| 11 | 10,200,000 | 10,350,000 | 137 | 773  | 0.80834609   | DCTN1,MGC152281,SLC4A5                                                                                          |

|    |            |            |     |      |              |                                               |
|----|------------|------------|-----|------|--------------|-----------------------------------------------|
| 11 | 10,275,000 | 10,425,000 | 138 | 879  | 0.739097311  | MTHFD2,SLC4A5                                 |
| 11 | 10,350,000 | 10,500,000 | 139 | 477  | 0.547096287  | BOLA3,MOBK1B,MTHFD2,SLC4A5                    |
| 11 | 10,425,000 | 10,575,000 | 140 | 617  | 0.569849369  | BOLA3,MOBK1B,MTHFD2,TET3                      |
| 11 | 10,500,000 | 10,650,000 | 141 | 805  | 0.43843794   | TET3                                          |
| 11 | 10,575,000 | 10,725,000 | 142 | 890  | 0.157303881  | ACTB,DGUOK,TET3                               |
| 11 | 10,650,000 | 10,800,000 | 143 | 1238 | -0.429044908 | ACTB,DGUOK,STAMBP                             |
| 11 | 10,725,000 | 10,875,000 | 144 | 1167 | -0.25786806  | ACTB,C2orf78,DUSP11,STAMBP,TPRKB              |
| 11 | 10,800,000 | 10,950,000 | 145 | 1237 | -0.591488811 | ALMS1,C2orf78,DUSP11,TPRKB,ENSBTAG00000047969 |
| 11 | 10,875,000 | 11,025,000 | 146 | 1306 | -0.961623675 | ALMS1,ENSBTAG00000047969                      |
| 11 | 10,950,000 | 11,100,000 | 147 | 1322 | 0.577491869  | ALMS1                                         |
| 11 | 11,025,000 | 11,175,000 | 148 | 1212 | 0.593586802  | ALMS1,EGR4,FBXO41                             |
| 11 | 11,100,000 | 11,250,000 | 149 | 966  | 0.77704399   | C11H2ORF7,CCT7,EGR4,FBXO41,NOTO,SMYD5         |
| 11 | 11,175,000 | 11,325,000 | 150 | 1148 | 0.468521379  | C11H2ORF7,CCT7,FBXO41,NOTO,RAB11FIP5,SMYD5    |
| 11 | 11,250,000 | 11,400,000 | 151 | 1098 | -0.864179865 | RAB11FIP5,SFXN5                               |
| 11 | 11,325,000 | 11,475,000 | 152 | 1173 | -1.4972104   | RAB11FIP5,SFXN5                               |
| 11 | 11,400,000 | 11,550,000 | 153 | 1055 | -0.121049205 | EMX1,SFXN5,SPR                                |
| 11 | 11,475,000 | 11,625,000 | 154 | 787  | 1.06399378   | EMX1,EXOC6B,SFXN5,SPR                         |
| 11 | 11,550,000 | 11,700,000 | 155 | 655  | 0.927594724  | EXOC6B                                        |
| 11 | 11,625,000 | 11,775,000 | 156 | 610  | 0.747933405  | EXOC6B                                        |
| 11 | 11,700,000 | 11,850,000 | 157 | 711  | 0.896767147  | EXOC6B                                        |
| 11 | 11,775,000 | 11,925,000 | 158 | 805  | 0.52419788   | EXOC6B,ENSBTAG00000039263                     |
| 11 | 11,850,000 | 12,000,000 | 159 | 681  | 0.442432143  | EXOC6B,ENSBTAG00000039263                     |
| 11 | 11,925,000 | 12,075,000 | 160 | 696  | 0.424211581  | EXOC6B                                        |
| 11 | 12,000,000 | 12,150,000 | 161 | 806  | -0.7550722   | EXOC6B                                        |
| 11 | 12,075,000 | 12,225,000 | 162 | 807  | 0.521025335  | EXOC6B                                        |
| 11 | 12,150,000 | 12,300,000 | 163 | 760  | 1.115509036  | EXOC6B                                        |
| 11 | 12,225,000 | 12,375,000 | 164 | 784  | 1.107732012  | CYP26B1,EXOC6B                                |
| 11 | 12,300,000 | 12,450,000 | 165 | 857  | 0.739637074  | CYP26B1,EXOC6B                                |
| 11 | 12,375,000 | 12,525,000 | 166 | 710  | 0.115457417  | CYP26B1                                       |
| 11 | 12,450,000 | 12,600,000 | 167 | 632  | 0.076849102  |                                               |
| 11 | 12,525,000 | 12,675,000 | 168 | 462  | 0.288931263  |                                               |
| 11 | 12,600,000 | 12,750,000 | 169 | 408  | -0.211979361 |                                               |
| 11 | 12,675,000 | 12,825,000 | 170 | 385  | -0.447077311 |                                               |
| 11 | 12,750,000 | 12,900,000 | 171 | 403  | -0.389549831 | DYSF                                          |
| 11 | 12,825,000 | 12,975,000 | 172 | 460  | -0.799353087 | DYSF                                          |
| 11 | 12,900,000 | 13,050,000 | 173 | 426  | -0.437689232 | DYSF                                          |
| 11 | 12,975,000 | 13,125,000 | 174 | 525  | 0.270306892  | DYSF                                          |
| 11 | 13,050,000 | 13,200,000 | 175 | 423  | -0.790036578 | DYSF,ZNF638                                   |
| 11 | 13,125,000 | 13,275,000 | 176 | 276  | -3.113644315 | ZNF638                                        |
| 11 | 13,200,000 | 13,350,000 | 177 | 359  | -0.471655778 | ZNF638                                        |
| 11 | 13,275,000 | 13,425,000 | 178 | 519  | 0.386296243  | NAGK,PAIP2B                                   |
| 11 | 13,350,000 | 13,500,000 | 179 | 650  | 0.511393398  | ANKRD53,ATP6V1B1,NAGK,PAIP2B,TEX261,VAX2      |
| 11 | 13,425,000 | 13,575,000 | 180 | 692  | 0.852991223  | ANKRD53,ATP6V1B1,CD207,TEX261,VAX2            |
| 11 | 13,500,000 | 13,650,000 | 181 | 882  | 0.381986045  | CD207,CLEC4F,FIGLA,VAX2                       |
| 11 | 13,575,000 | 13,725,000 | 182 | 899  | 0.123455877  | ADD2,CD207,CLEC4F,FIGLA                       |
| 11 | 13,650,000 | 13,800,000 | 183 | 809  | 0.33739768   | ADD2                                          |
| 11 | 13,725,000 | 13,875,000 | 184 | 802  | 0.558709525  | ADD2                                          |
| 11 | 13,800,000 | 13,950,000 | 185 | 419  | 0.953279003  |                                               |
| 11 | 13,875,000 | 14,025,000 | 186 | 256  | 0.959233288  | TGFA                                          |
| 11 | 13,950,000 | 14,100,000 | 187 | 698  | 0.138850946  | TGFA                                          |
| 11 | 14,025,000 | 14,175,000 | 188 | 769  | -0.45553371  | FAM136A                                       |
| 11 | 14,100,000 | 14,250,000 | 189 | 446  | -0.264810444 | FAM136A,XDH                                   |
| 11 | 14,175,000 | 14,325,000 | 190 | 420  | 0.363270135  | XDH                                           |



|    |            |            |     |      |              |                            |
|----|------------|------------|-----|------|--------------|----------------------------|
| 11 | 14,250,000 | 14,400,000 | 191 | 524  | 1.109295645  | SRD5A2,XDH                 |
| 11 | 14,325,000 | 14,475,000 | 192 | 373  | 1.339048811  | SRD5A2                     |
| 11 | 14,400,000 | 14,550,000 | 193 | 310  | 0.954457596  |                            |
| 11 | 14,475,000 | 14,625,000 | 194 | 344  | 0.976591123  | MEMO1,RPL36A-HNRNPH2       |
| 11 | 14,550,000 | 14,700,000 | 195 | 236  | 0.859673437  | DPY30,MEMO1,RPL36A-HNRNPH2 |
| 11 | 14,625,000 | 14,775,000 | 196 | 188  | 0.806712267  | DPY30,MEMO1,SPAST          |
| 11 | 14,700,000 | 14,850,000 | 197 | 408  | -0.295613363 | NLRC4,SLC30A6,SPAST        |
| 11 | 14,775,000 | 14,925,000 | 198 | 712  | -0.121598344 | NLRC4,SLC30A6,YIPF4        |
| 11 | 14,850,000 | 15,000,000 | 199 | 703  | 0.438658927  | BIRC6,NLRC4,YIPF4          |
| 11 | 14,925,000 | 15,075,000 | 200 | 474  | 0.396945025  | BIRC6,YIPF4                |
| 11 | 15,000,000 | 15,150,000 | 201 | 274  | -0.658063553 | BIRC6                      |
| 11 | 15,075,000 | 15,225,000 | 202 | 386  | -0.943134028 | BIRC6,TTC27                |
| 11 | 15,150,000 | 15,300,000 | 203 | 453  | -0.168169031 | BIRC6,TTC27                |
| 11 | 15,225,000 | 15,375,000 | 204 | 486  | 0.281703771  | TTC27                      |
| 11 | 15,300,000 | 15,450,000 | 205 | 559  | -0.484253172 | TTC27                      |
| 11 | 15,375,000 | 15,525,000 | 206 | 496  | -0.183602347 | LTBP1,TTC27                |
| 11 | 15,450,000 | 15,600,000 | 207 | 357  | 0.872843514  | LTBP1                      |
| 11 | 15,525,000 | 15,675,000 | 208 | 439  | 0.739762623  | LTBP1                      |
| 11 | 15,600,000 | 15,750,000 | 209 | 577  | -0.796845728 | LTBP1                      |
| 11 | 15,675,000 | 15,825,000 | 210 | 446  | -2.120580272 | LTBP1                      |
| 11 | 15,750,000 | 15,900,000 | 211 | 471  | -1.335430027 | LTBP1                      |
| 11 | 15,825,000 | 15,975,000 | 212 | 620  | -0.359656485 | LTBP1                      |
| 11 | 15,900,000 | 16,050,000 | 213 | 650  | 0.451946367  | LTBP1                      |
| 11 | 15,975,000 | 16,125,000 | 214 | 668  | 0.792245016  | RASGRP3                    |
| 11 | 16,050,000 | 16,200,000 | 215 | 623  | 0.788913422  | FAM98A,RASGRP3             |
| 11 | 16,125,000 | 16,275,000 | 216 | 472  | 0.233472831  | FAM98A,RASGRP3             |
| 11 | 16,200,000 | 16,350,000 | 217 | 520  | 0.091910415  |                            |
| 11 | 16,275,000 | 16,425,000 | 218 | 800  | -0.531743877 |                            |
| 11 | 16,350,000 | 16,500,000 | 219 | 921  | -0.078496369 |                            |
| 11 | 16,425,000 | 16,575,000 | 220 | 897  | 0.150612505  |                            |
| 11 | 16,500,000 | 16,650,000 | 221 | 669  | -0.562809003 |                            |
| 11 | 16,575,000 | 16,725,000 | 222 | 412  | -1.195865839 |                            |
| 11 | 16,650,000 | 16,800,000 | 223 | 520  | 0.093446053  |                            |
| 11 | 16,725,000 | 16,875,000 | 224 | 712  | -1.436971672 |                            |
| 11 | 16,800,000 | 16,950,000 | 225 | 918  | -3.578261479 |                            |
| 11 | 16,875,000 | 17,025,000 | 226 | 1023 | -2.499611584 |                            |
| 11 | 16,950,000 | 17,100,000 | 227 | 1001 | -0.30555312  |                            |
| 11 | 17,025,000 | 17,175,000 | 228 | 790  | 0.030437902  |                            |
| 11 | 17,100,000 | 17,250,000 | 229 | 633  | 0.394793433  |                            |
| 11 | 17,175,000 | 17,325,000 | 230 | 735  | 0.71410366   |                            |
| 11 | 17,250,000 | 17,400,000 | 231 | 1015 | 1.009889305  |                            |
| 11 | 17,325,000 | 17,475,000 | 232 | 932  | 1.063721454  |                            |
| 11 | 17,400,000 | 17,550,000 | 233 | 637  | 0.895042074  |                            |
| 11 | 17,475,000 | 17,625,000 | 234 | 705  | 0.478799661  |                            |
| 11 | 17,550,000 | 17,700,000 | 235 | 953  | 0.174344574  |                            |
| 11 | 17,625,000 | 17,775,000 | 236 | 1125 | -0.706155208 |                            |
| 11 | 17,700,000 | 17,850,000 | 237 | 1235 | -1.188995678 |                            |
| 11 | 17,775,000 | 17,925,000 | 238 | 1275 | -0.425761296 |                            |
| 11 | 17,850,000 | 18,000,000 | 239 | 1204 | 0.240555439  |                            |
| 11 | 17,925,000 | 18,075,000 | 240 | 1000 | 0.458822003  |                            |
| 11 | 18,000,000 | 18,150,000 | 241 | 695  | 0.096811369  |                            |
| 11 | 18,075,000 | 18,225,000 | 242 | 728  | 0.090507236  |                            |
| 11 | 18,150,000 | 18,300,000 | 243 | 724  | 0.13960877   |                            |

|    |            |            |     |      |              |                                              |
|----|------------|------------|-----|------|--------------|----------------------------------------------|
| 11 | 18,225,000 | 18,375,000 | 244 | 791  | 0.683652665  |                                              |
| 11 | 18,300,000 | 18,450,000 | 245 | 1104 | 0.137535522  |                                              |
| 11 | 18,375,000 | 18,525,000 | 246 | 1050 | -0.280064366 |                                              |
| 11 | 18,450,000 | 18,600,000 | 247 | 808  | 0.463550008  |                                              |
| 11 | 18,525,000 | 18,675,000 | 248 | 739  | 0.352935079  |                                              |
| 11 | 18,600,000 | 18,750,000 | 249 | 953  | 0.21920623   |                                              |
| 11 | 18,675,000 | 18,825,000 | 250 | 797  | 0.512058637  |                                              |
| 11 | 18,750,000 | 18,900,000 | 251 | 523  | 0.492109326  | CRIM1                                        |
| 11 | 18,825,000 | 18,975,000 | 252 | 530  | -0.181974028 | CRIM1                                        |
| 11 | 18,900,000 | 19,050,000 | 253 | 453  | -0.945188037 | CRIM1,FEZ2                                   |
| 11 | 18,975,000 | 19,125,000 | 254 | 707  | 0.037290187  | CRIM1,FEZ2                                   |
| 11 | 19,050,000 | 19,200,000 | 255 | 657  | 0.123029806  | FEZ2,VIT                                     |
| 11 | 19,125,000 | 19,275,000 | 256 | 719  | -0.317232856 | VIT                                          |
| 11 | 19,200,000 | 19,350,000 | 257 | 671  | -0.52886789  | STRN,VIT                                     |
| 11 | 19,275,000 | 19,425,000 | 258 | 315  | -0.95759346  | STRN,VIT                                     |
| 11 | 19,350,000 | 19,500,000 | 259 | 473  | 0.120047699  | HEATR5B,STRN                                 |
| 11 | 19,425,000 | 19,575,000 | 260 | 659  | 0.138216307  | GPATCH11,HEATR5B,STRN                        |
| 11 | 19,500,000 | 19,650,000 | 261 | 602  | -0.387138037 | EIF2AK2,GPATCH11,HEATR5B,SULT6B1             |
| 11 | 19,575,000 | 19,725,000 | 262 | 411  | -0.338700777 | CEBPZ,EIF2AK2,GPATCH11,NDUFAF7,PRKD3,SULT6B1 |
| 11 | 19,650,000 | 19,800,000 | 263 | 341  | -0.091009761 | CEBPZ,NDUFAF7,PRKD3                          |
| 11 | 19,725,000 | 19,875,000 | 264 | 364  | 0.396995089  | PRKD3,QPCT                                   |
| 11 | 19,800,000 | 19,950,000 | 265 | 439  | 0.996913966  | QPCT                                         |
| 11 | 19,875,000 | 20,025,000 | 266 | 628  | 1.202681832  |                                              |
| 11 | 19,950,000 | 20,100,000 | 267 | 648  | 1.169390291  |                                              |
| 11 | 20,025,000 | 20,175,000 | 268 | 420  | 1.042207875  | CDC42EP3                                     |
| 11 | 20,100,000 | 20,250,000 | 269 | 282  | 0.891913501  | CDC42EP3                                     |
| 11 | 20,175,000 | 20,325,000 | 270 | 488  | 0.59520674   |                                              |
| 11 | 20,250,000 | 20,400,000 | 271 | 769  | 0.377996115  | RMDN2                                        |
| 11 | 20,325,000 | 20,475,000 | 272 | 819  | -0.428516803 | RMDN2                                        |
| 11 | 20,400,000 | 20,550,000 | 273 | 569  | -0.620903455 | CYP1B1,RMDN2                                 |
| 11 | 20,475,000 | 20,625,000 | 274 | 549  | 0.393526962  | CYP1B1                                       |
| 11 | 20,550,000 | 20,700,000 | 275 | 706  | -0.722864815 | ATL2                                         |
| 11 | 20,625,000 | 20,775,000 | 276 | 606  | -1.37648579  | ATL2                                         |
| 11 | 20,700,000 | 20,850,000 | 277 | 784  | -0.229359903 | ATL2                                         |
| 11 | 20,775,000 | 20,925,000 | 278 | 802  | 0.217377924  |                                              |
| 11 | 20,850,000 | 21,000,000 | 279 | 400  | 0.395773763  | HNRNPLL                                      |
| 11 | 20,925,000 | 21,075,000 | 280 | 327  | 0.422277234  | GALM,HNRNPLL                                 |
| 11 | 21,000,000 | 21,150,000 | 281 | 536  | 0.767926823  | GALM,GEMIN6,SRSF7,ENSBTAG00000012984         |
| 11 | 21,075,000 | 21,225,000 | 282 | 506  | 0.479663092  | DHX57,GALM,GEMIN6,SRSF7,ENSBTAG00000012984   |
| 11 | 21,150,000 | 21,300,000 | 283 | 440  | -1.653825186 | ARHGEF33,DHX57,GEMIN6,MORN2                  |
| 11 | 21,225,000 | 21,375,000 | 284 | 435  | -2.351032944 | ARHGEF33,MORN2,SOS1                          |
| 11 | 21,300,000 | 21,450,000 | 285 | 554  | -2.054334496 | ARHGEF33,SOS1                                |
| 11 | 21,375,000 | 21,525,000 | 286 | 745  | -1.273837774 | SOS1                                         |
| 11 | 21,450,000 | 21,600,000 | 287 | 829  | -0.145088083 | CDKL4,MAP4K3,ENSBTAG00000032775              |
| 11 | 21,525,000 | 21,675,000 | 288 | 973  | 0.160359606  | CDKL4,MAP4K3,ENSBTAG00000032775              |
| 11 | 21,600,000 | 21,750,000 | 289 | 874  | 0.478376668  | MAP4K3                                       |
| 11 | 21,675,000 | 21,825,000 | 290 | 753  | 0.362623332  | MAP4K3                                       |
| 11 | 21,750,000 | 21,900,000 | 291 | 828  | 0.518241017  | MAP4K3                                       |
| 11 | 21,825,000 | 21,975,000 | 292 | 814  | 0.610727105  |                                              |
| 11 | 21,900,000 | 22,050,000 | 293 | 598  | 0.488676518  | TMEM178                                      |
| 11 | 21,975,000 | 22,125,000 | 294 | 1048 | 0.091111857  | THUMPD2,TMEM178                              |
| 11 | 22,050,000 | 22,200,000 | 295 | 1252 | -0.038817364 | THUMPD2                                      |
| 11 | 22,125,000 | 22,275,000 | 296 | 1188 | -0.489650851 |                                              |

|    |            |            |     |      |              |                              |
|----|------------|------------|-----|------|--------------|------------------------------|
| 11 | 22,200,000 | 22,350,000 | 297 | 1187 | -0.480889128 |                              |
| 11 | 22,275,000 | 22,425,000 | 298 | 718  | -0.606256997 |                              |
| 11 | 22,350,000 | 22,500,000 | 299 | 774  | -1.610805513 | SLC8A1                       |
| 11 | 22,425,000 | 22,575,000 | 300 | 784  | -2.020406215 | SLC8A1                       |
| 11 | 22,500,000 | 22,650,000 | 301 | 749  | -0.889150193 | SLC8A1                       |
| 11 | 22,575,000 | 22,725,000 | 302 | 895  | -2.11359971  | SLC8A1                       |
| 11 | 22,650,000 | 22,800,000 | 303 | 627  | -3.578972579 | SLC8A1                       |
| 11 | 22,725,000 | 22,875,000 | 304 | 340  | -0.042551387 | SLC8A1                       |
| 11 | 22,800,000 | 22,950,000 | 305 | 401  | 0.168548731  |                              |
| 11 | 22,875,000 | 23,025,000 | 306 | 576  | 0.178393474  |                              |
| 11 | 22,950,000 | 23,100,000 | 307 | 744  | -0.478342247 |                              |
| 11 | 23,025,000 | 23,175,000 | 308 | 712  | -0.169992886 |                              |
| 11 | 23,100,000 | 23,250,000 | 309 | 835  | 0.65384894   |                              |
| 11 | 23,175,000 | 23,325,000 | 310 | 878  | 0.811077472  |                              |
| 11 | 23,250,000 | 23,400,000 | 311 | 716  | 1.033944849  |                              |
| 11 | 23,325,000 | 23,475,000 | 312 | 820  | 0.708386782  |                              |
| 11 | 23,400,000 | 23,550,000 | 313 | 1228 | 0.309415946  |                              |
| 11 | 23,475,000 | 23,625,000 | 314 | 1243 | -0.187694184 |                              |
| 11 | 23,550,000 | 23,700,000 | 315 | 898  | -0.392206124 |                              |
| 11 | 23,625,000 | 23,775,000 | 316 | 881  | -0.129346596 |                              |
| 11 | 23,700,000 | 23,850,000 | 317 | 730  | -0.169038658 |                              |
| 11 | 23,775,000 | 23,925,000 | 318 | 651  | 0.427403413  |                              |
| 11 | 23,850,000 | 24,000,000 | 319 | 972  | 1.051954958  |                              |
| 11 | 23,925,000 | 24,075,000 | 320 | 1084 | -0.328702116 |                              |
| 11 | 24,000,000 | 24,150,000 | 321 | 1277 | -1.127302235 |                              |
| 11 | 24,075,000 | 24,225,000 | 322 | 1099 | 0.302769648  |                              |
| 11 | 24,150,000 | 24,300,000 | 323 | 676  | 1.021163314  |                              |
| 11 | 24,225,000 | 24,375,000 | 324 | 763  | 0.77107841   |                              |
| 11 | 24,300,000 | 24,450,000 | 325 | 827  | -0.438165919 |                              |
| 11 | 24,375,000 | 24,525,000 | 326 | 730  | -0.990325277 |                              |
| 11 | 24,450,000 | 24,600,000 | 327 | 695  | -0.382326165 | PKDCC                        |
| 11 | 24,525,000 | 24,675,000 | 328 | 597  | 0.131070399  | PKDCC                        |
| 11 | 24,600,000 | 24,750,000 | 329 | 412  | 0.885204994  | EML4                         |
| 11 | 24,675,000 | 24,825,000 | 330 | 481  | 0.741974279  | COX7A2L,EML4                 |
| 11 | 24,750,000 | 24,900,000 | 331 | 541  | 0.131335662  | COX7A2L,EML4                 |
| 11 | 24,825,000 | 24,975,000 | 332 | 552  | -1.361484186 | COX7A2L,KCNG3                |
| 11 | 24,900,000 | 25,050,000 | 333 | 412  | -2.799453907 | KCNG3,MTA3                   |
| 11 | 24,975,000 | 25,125,000 | 334 | 498  | -2.001088783 | MTA3                         |
| 11 | 25,050,000 | 25,200,000 | 335 | 553  | -0.673290614 | HAAO,MTA3,OXER1              |
| 11 | 25,125,000 | 25,275,000 | 336 | 359  | -0.76764237  | HAAO,MTA3,OXER1              |
| 11 | 25,200,000 | 25,350,000 | 337 | 418  | -0.772272677 | HAAO,ENSBTAG00000014836      |
| 11 | 25,275,000 | 25,425,000 | 338 | 559  | -1.197178729 | ENSBTAG00000014836           |
| 11 | 25,350,000 | 25,500,000 | 339 | 514  | -1.755795729 |                              |
| 11 | 25,425,000 | 25,575,000 | 340 | 429  | -3.398480823 |                              |
| 11 | 25,500,000 | 25,650,000 | 341 | 403  | -2.081183946 | THADA,ZFP36L2                |
| 11 | 25,575,000 | 25,725,000 | 342 | 335  | 0.809388505  | THADA,ZFP36L2                |
| 11 | 25,650,000 | 25,800,000 | 343 | 369  | -0.395042352 | THADA                        |
| 11 | 25,725,000 | 25,875,000 | 344 | 307  | -1.760001029 | THADA                        |
| 11 | 25,800,000 | 25,950,000 | 345 | 232  | -3.048612663 | THADA                        |
| 11 | 25,875,000 | 26,025,000 | 346 | 430  | -2.679420318 | PLEKHH2,THADA                |
| 11 | 25,950,000 | 26,100,000 | 347 | 442  | -2.009576062 | DYNC2LI1,PLEKHH2             |
| 11 | 26,025,000 | 26,175,000 | 348 | 576  | 0.394224785  | ABCG5,ABCG8,DYNC2LI1,PLEKHH2 |
| 11 | 26,100,000 | 26,250,000 | 349 | 637  | 0.637331648  | ABCG5,ABCG8,DYNC2LI1,LRPPRC  |

|    |            |            |     |      |              |                            |
|----|------------|------------|-----|------|--------------|----------------------------|
| 11 | 26,175,000 | 26,325,000 | 350 | 399  | 0.290183587  | LRPPRC                     |
| 11 | 26,250,000 | 26,400,000 | 351 | 510  | 0.442107549  | LRPPRC                     |
| 11 | 26,325,000 | 26,475,000 | 352 | 558  | 0.547540732  | PPM1B                      |
| 11 | 26,400,000 | 26,550,000 | 353 | 495  | 0.05894278   | PPM1B,SLC3A1               |
| 11 | 26,475,000 | 26,625,000 | 354 | 364  | 0.10605207   | CAMKMT,PREPL,SLC3A1        |
| 11 | 26,550,000 | 26,700,000 | 355 | 265  | 0.674430321  | CAMKMT,PREPL,SLC3A1        |
| 11 | 26,625,000 | 26,775,000 | 356 | 660  | 1.140730458  | CAMKMT                     |
| 11 | 26,700,000 | 26,850,000 | 357 | 1187 | -0.626998828 | CAMKMT                     |
| 11 | 26,775,000 | 26,925,000 | 358 | 1095 | -1.385628365 | CAMKMT                     |
| 11 | 26,850,000 | 27,000,000 | 359 | 656  | -0.730405691 | CAMKMT                     |
| 11 | 26,925,000 | 27,075,000 | 360 | 467  | -0.847682136 | CAMKMT                     |
| 11 | 27,000,000 | 27,150,000 | 361 | 428  | -0.457245203 | CAMKMT                     |
| 11 | 27,075,000 | 27,225,000 | 362 | 530  | -0.005986146 | SIX3                       |
| 11 | 27,150,000 | 27,300,000 | 363 | 654  | 0.531733406  | SIX2,SIX3                  |
| 11 | 27,225,000 | 27,375,000 | 364 | 643  | 0.352361717  | SIX2                       |
| 11 | 27,300,000 | 27,450,000 | 365 | 673  | 0.351636165  |                            |
| 11 | 27,375,000 | 27,525,000 | 366 | 746  | 0.272494068  |                            |
| 11 | 27,450,000 | 27,600,000 | 367 | 765  | -0.073871535 |                            |
| 11 | 27,525,000 | 27,675,000 | 368 | 809  | -0.258020668 | SRBD1                      |
| 11 | 27,600,000 | 27,750,000 | 369 | 835  | 0.211698653  | SRBD1                      |
| 11 | 27,675,000 | 27,825,000 | 370 | 727  | 0.398501109  | SRBD1,ENSBTAG00000032651   |
| 11 | 27,750,000 | 27,900,000 | 371 | 516  | -0.136897789 | SRBD1,ENSBTAG00000032651   |
| 11 | 27,825,000 | 27,975,000 | 372 | 387  | 0.066841002  | PRKCE,SRBD1                |
| 11 | 27,900,000 | 28,050,000 | 373 | 494  | 0.597980852  | PRKCE                      |
| 11 | 27,975,000 | 28,125,000 | 374 | 839  | -0.176321351 | PRKCE                      |
| 11 | 28,050,000 | 28,200,000 | 375 | 836  | -0.345204519 | PRKCE                      |
| 11 | 28,125,000 | 28,275,000 | 376 | 523  | -0.975674431 | PRKCE                      |
| 11 | 28,200,000 | 28,350,000 | 377 | 382  | -0.997601662 | PRKCE                      |
| 11 | 28,275,000 | 28,425,000 | 378 | 338  | 0.991079005  | PRKCE                      |
| 11 | 28,350,000 | 28,500,000 | 379 | 424  | 1.047969337  | PRKCE                      |
| 11 | 28,425,000 | 28,575,000 | 380 | 402  | -0.532297217 | PRKCE                      |
| 11 | 28,500,000 | 28,650,000 | 381 | 473  | -0.719094298 | EPAS1                      |
| 11 | 28,575,000 | 28,725,000 | 382 | 683  | 0.394585594  | EPAS1                      |
| 11 | 28,650,000 | 28,800,000 | 383 | 860  | 0.616308424  | EPAS1,TMEM247              |
| 11 | 28,725,000 | 28,875,000 | 384 | 935  | 0.794926151  | ATP6V1E2,PIGF,RHOQ,TMEM247 |
| 11 | 28,800,000 | 28,950,000 | 385 | 929  | 0.854316227  | ATP6V1E2,CRIPT,PIGF,RHOQ   |
| 11 | 28,875,000 | 29,025,000 | 386 | 723  | 0.686652583  | CRIPT,PIGF,SOCS5           |
| 11 | 28,950,000 | 29,100,000 | 387 | 459  | 0.674167175  | SOCS5                      |
| 11 | 29,025,000 | 29,175,000 | 388 | 444  | 0.668270995  | SOCS5                      |
| 11 | 29,100,000 | 29,250,000 | 389 | 787  | -0.158216138 | MCFD2,TTC7A                |
| 11 | 29,175,000 | 29,325,000 | 390 | 806  | -0.299752548 | MCFD2,TTC7A                |
| 11 | 29,250,000 | 29,400,000 | 391 | 675  | 0.353683596  | TTC7A                      |
| 11 | 29,325,000 | 29,475,000 | 392 | 842  | -0.571520868 | TTC7A,ENSBTAG00000001575   |
| 11 | 29,400,000 | 29,550,000 | 393 | 685  | -2.60307384  | ENSBTAG00000001575         |
| 11 | 29,475,000 | 29,625,000 | 394 | 661  | -3.008914018 |                            |
| 11 | 29,550,000 | 29,700,000 | 395 | 915  | -2.101569105 | EPCAM,MSH2                 |
| 11 | 29,625,000 | 29,775,000 | 396 | 1095 | -0.884325143 | EPCAM,KCNK12,MSH2          |
| 11 | 29,700,000 | 29,850,000 | 397 | 792  | 0.376506595  | KCNK12,MSH2                |
| 11 | 29,775,000 | 29,925,000 | 398 | 544  | 1.000419222  | KCNK12                     |
| 11 | 29,850,000 | 30,000,000 | 399 | 439  | 0.734972697  | FBXO11,MSH6                |
| 11 | 29,925,000 | 30,075,000 | 400 | 238  | 0.868518816  | FBXO11,MSH6                |
| 11 | 30,000,000 | 30,150,000 | 401 | 309  | 0.079434868  | FBXO11                     |
| 11 | 30,075,000 | 30,225,000 | 402 | 658  | -0.821648496 | FBXO11                     |

|    |            |            |     |      |              |                                             |
|----|------------|------------|-----|------|--------------|---------------------------------------------|
| 11 | 30,150,000 | 30,300,000 | 403 | 951  | -0.49901781  |                                             |
| 11 | 30,225,000 | 30,375,000 | 404 | 686  | 0.369323151  |                                             |
| 11 | 30,300,000 | 30,450,000 | 405 | 489  | 0.843812266  |                                             |
| 11 | 30,375,000 | 30,525,000 | 406 | 397  | 0.642440952  |                                             |
| 11 | 30,450,000 | 30,600,000 | 407 | 233  | -0.362882188 | FOXN2,KLRAQ1                                |
| 11 | 30,525,000 | 30,675,000 | 408 | 413  | -0.663391829 | FOXN2,KLRAQ1                                |
| 11 | 30,600,000 | 30,750,000 | 409 | 704  | -0.625437022 | KLRAQ1,ENSBTAG00000004168                   |
| 11 | 30,675,000 | 30,825,000 | 410 | 633  | 0.069866672  | LHCGR,ENSBTAG00000004168,ENSBTAG00000023999 |
| 11 | 30,750,000 | 30,900,000 | 411 | 415  | 0.298090404  | LHCGR,ENSBTAG00000023999                    |
| 11 | 30,825,000 | 30,975,000 | 412 | 580  | 0.031232402  | LHCGR,ENSBTAG00000027015                    |
| 11 | 30,900,000 | 31,050,000 | 413 | 827  | 0.460358885  | ENSBTAG00000027015                          |
| 11 | 30,975,000 | 31,125,000 | 414 | 808  | 0.983574764  | FSHR                                        |
| 11 | 31,050,000 | 31,200,000 | 415 | 1083 | 0.636561824  | FSHR                                        |
| 11 | 31,125,000 | 31,275,000 | 416 | 1030 | 0.201325807  | FSHR                                        |
| 11 | 31,200,000 | 31,350,000 | 417 | 635  | -0.431214595 | FSHR                                        |
| 11 | 31,275,000 | 31,425,000 | 418 | 477  | -0.855323823 | FSHR                                        |
| 11 | 31,350,000 | 31,500,000 | 419 | 525  | -2.380882821 |                                             |
| 11 | 31,425,000 | 31,575,000 | 420 | 857  | -1.183286221 |                                             |
| 11 | 31,500,000 | 31,650,000 | 421 | 774  | -0.03130562  |                                             |
| 11 | 31,575,000 | 31,725,000 | 422 | 674  | 0.002769858  |                                             |
| 11 | 31,650,000 | 31,800,000 | 423 | 575  | 0.00435249   |                                             |
| 11 | 31,725,000 | 31,875,000 | 424 | 492  | -0.302751357 |                                             |
| 11 | 31,800,000 | 31,950,000 | 425 | 581  | -0.87256032  |                                             |
| 11 | 31,875,000 | 32,025,000 | 426 | 889  | 0.395688009  |                                             |
| 11 | 31,950,000 | 32,100,000 | 427 | 1279 | 0.750585235  |                                             |
| 11 | 32,025,000 | 32,175,000 | 428 | 1142 | 0.422792204  | ENSBTAG00000046199                          |
| 11 | 32,100,000 | 32,250,000 | 429 | 1157 | 0.504415399  | ENSBTAG00000046199                          |
| 11 | 32,175,000 | 32,325,000 | 430 | 1103 | 1.181968418  | ENSBTAG00000046199                          |
| 11 | 32,250,000 | 32,400,000 | 431 | 796  | 0.953879409  | ENSBTAG00000046199                          |
| 11 | 32,325,000 | 32,475,000 | 432 | 699  | 0.022044995  | ENSBTAG00000046199                          |
| 11 | 32,400,000 | 32,550,000 | 433 | 740  | 0.067884875  | ENSBTAG00000046199                          |
| 11 | 32,475,000 | 32,625,000 | 434 | 825  | 0.634562776  | ENSBTAG00000046199                          |
| 11 | 32,550,000 | 32,700,000 | 435 | 890  | 0.803597304  |                                             |
| 11 | 32,625,000 | 32,775,000 | 436 | 864  | 0.993735292  | ENSBTAG00000024021                          |
| 11 | 32,700,000 | 32,850,000 | 437 | 843  | 0.25307848   | ENSBTAG00000024021                          |
| 11 | 32,775,000 | 32,925,000 | 438 | 715  | -0.446811519 | ENSBTAG00000024021                          |
| 11 | 32,850,000 | 33,000,000 | 439 | 578  | 0.093898054  | ENSBTAG00000024021                          |
| 11 | 32,925,000 | 33,075,000 | 440 | 610  | 0.82808321   |                                             |
| 11 | 33,000,000 | 33,150,000 | 441 | 586  | 1.20038911   |                                             |
| 11 | 33,075,000 | 33,225,000 | 442 | 489  | 1.119096867  |                                             |
| 11 | 33,150,000 | 33,300,000 | 443 | 411  | 0.373968769  |                                             |
| 11 | 33,225,000 | 33,375,000 | 444 | 454  | 0.004093333  | ENSBTAG00000014072                          |
| 11 | 33,300,000 | 33,450,000 | 445 | 426  | 0.502863841  | ENSBTAG00000014072                          |
| 11 | 33,375,000 | 33,525,000 | 446 | 680  | 1.075814656  |                                             |
| 11 | 33,450,000 | 33,600,000 | 447 | 1038 | 0.975455217  |                                             |
| 11 | 33,525,000 | 33,675,000 | 448 | 1233 | 0.958435207  |                                             |
| 11 | 33,600,000 | 33,750,000 | 449 | 919  | 0.80822785   |                                             |
| 11 | 33,675,000 | 33,825,000 | 450 | 771  | 0.361417479  |                                             |
| 11 | 33,750,000 | 33,900,000 | 451 | 1369 | 0.301764973  |                                             |
| 11 | 33,825,000 | 33,975,000 | 452 | 1223 | -0.364747612 |                                             |
| 11 | 33,900,000 | 34,050,000 | 453 | 769  | -1.783422137 |                                             |
| 11 | 33,975,000 | 34,125,000 | 454 | 861  | -1.166480849 |                                             |
| 11 | 34,050,000 | 34,200,000 | 455 | 754  | 0.293010673  |                                             |

|    |            |            |     |      |              |                                             |
|----|------------|------------|-----|------|--------------|---------------------------------------------|
| 11 | 34,125,000 | 34,275,000 | 456 | 795  | 0.927330859  |                                             |
| 11 | 34,200,000 | 34,350,000 | 457 | 925  | 0.736174004  |                                             |
| 11 | 34,275,000 | 34,425,000 | 458 | 556  | 0.418034288  |                                             |
| 11 | 34,350,000 | 34,500,000 | 459 | 438  | 0.85196229   |                                             |
| 11 | 34,425,000 | 34,575,000 | 460 | 996  | 1.165371499  |                                             |
| 11 | 34,500,000 | 34,650,000 | 461 | 1144 | 0.63906556   |                                             |
| 11 | 34,575,000 | 34,725,000 | 462 | 731  | -0.378560486 |                                             |
| 11 | 34,650,000 | 34,800,000 | 463 | 868  | -0.910639038 |                                             |
| 11 | 34,725,000 | 34,875,000 | 464 | 1408 | -2.865045284 |                                             |
| 11 | 34,800,000 | 34,950,000 | 465 | 1502 | -2.585225806 |                                             |
| 11 | 34,875,000 | 35,025,000 | 466 | 1486 | 0.152726775  |                                             |
| 11 | 34,950,000 | 35,100,000 | 467 | 1688 | 0.099264349  |                                             |
| 11 | 35,025,000 | 35,175,000 | 468 | 1733 | -0.217403628 |                                             |
| 11 | 35,100,000 | 35,250,000 | 469 | 1321 | -0.136761763 |                                             |
| 11 | 35,175,000 | 35,325,000 | 470 | 1034 | 0.22219222   |                                             |
| 11 | 35,250,000 | 35,400,000 | 471 | 1000 | 0.640209185  |                                             |
| 11 | 35,325,000 | 35,475,000 | 472 | 757  | -0.306389977 |                                             |
| 11 | 35,400,000 | 35,550,000 | 473 | 823  | -0.387352315 |                                             |
| 11 | 35,475,000 | 35,625,000 | 474 | 992  | 0.95075698   |                                             |
| 11 | 35,550,000 | 35,700,000 | 475 | 1251 | 0.778883408  |                                             |
| 11 | 35,625,000 | 35,775,000 | 476 | 1335 | 0.546603173  |                                             |
| 11 | 35,700,000 | 35,850,000 | 477 | 1163 | -1.125311831 |                                             |
| 11 | 35,775,000 | 35,925,000 | 478 | 1300 | -3.701874714 |                                             |
| 11 | 35,850,000 | 36,000,000 | 479 | 1033 | -3.014557897 |                                             |
| 11 | 35,925,000 | 36,075,000 | 480 | 659  | -0.457540369 | ENSBTAG00000002943                          |
| 11 | 36,000,000 | 36,150,000 | 481 | 670  | -0.816678169 | ENSBTAG00000002943                          |
| 11 | 36,075,000 | 36,225,000 | 482 | 498  | -0.192311219 |                                             |
| 11 | 36,150,000 | 36,300,000 | 483 | 634  | -0.268356413 | ENSBTAG00000019458                          |
| 11 | 36,225,000 | 36,375,000 | 484 | 739  | -0.740944084 | CHAC2,ERLEC1,ENSBTAG00000019458             |
| 11 | 36,300,000 | 36,450,000 | 485 | 633  | -0.138892698 | CHAC2,ERLEC1,GPR75,PSME4,ENSBTAG00000019458 |
| 11 | 36,375,000 | 36,525,000 | 486 | 498  | 0.499774995  | ERLEC1,GPR75,PSME4                          |
| 11 | 36,450,000 | 36,600,000 | 487 | 512  | 0.825948567  | PSME4,ENSBTAG00000024019                    |
| 11 | 36,525,000 | 36,675,000 | 488 | 590  | 0.478167999  | ENSBTAG00000024019                          |
| 11 | 36,600,000 | 36,750,000 | 489 | 478  | -0.096588514 | ACYP2                                       |
| 11 | 36,675,000 | 36,825,000 | 490 | 624  | 0.434260588  | ACYP2,TSPYL6                                |
| 11 | 36,750,000 | 36,900,000 | 491 | 719  | 0.939477208  | ACYP2,C2orf73,TSPYL6                        |
| 11 | 36,825,000 | 36,975,000 | 492 | 686  | 1.159901913  | ACYP2,C2orf73                               |
| 11 | 36,900,000 | 37,050,000 | 493 | 657  | 0.678377627  | C2orf73,SPTBN1                              |
| 11 | 36,975,000 | 37,125,000 | 494 | 610  | 0.199951524  | SPTBN1                                      |
| 11 | 37,050,000 | 37,200,000 | 495 | 621  | 0.312191517  | SPTBN1                                      |
| 11 | 37,125,000 | 37,275,000 | 496 | 609  | -0.401373772 | SPTBN1                                      |
| 11 | 37,200,000 | 37,350,000 | 497 | 538  | -1.103295549 | EML6,SPTBN1                                 |
| 11 | 37,275,000 | 37,425,000 | 498 | 609  | -1.901685231 | EML6                                        |
| 11 | 37,350,000 | 37,500,000 | 499 | 722  | -1.297569693 | EML6                                        |
| 11 | 37,425,000 | 37,575,000 | 500 | 923  | 0.307486951  | EML6                                        |
| 11 | 37,500,000 | 37,650,000 | 501 | 1072 | 0.283779402  | EML6,RTN4                                   |
| 11 | 37,575,000 | 37,725,000 | 502 | 1069 | 0.229844403  | RTN4                                        |
| 11 | 37,650,000 | 37,800,000 | 503 | 1147 | 0.666749327  | MGC139228                                   |
| 11 | 37,725,000 | 37,875,000 | 504 | 923  | 0.756885289  | CCDC88A,MGC139228,MTIF2,PRORS1,RPS27A       |
| 11 | 37,800,000 | 37,950,000 | 505 | 549  | 1.122627065  | CCDC88A,MGC139228,MTIF2,PRORS1,RPS27A       |
| 11 | 37,875,000 | 38,025,000 | 506 | 463  | 0.653416847  | CCDC88A                                     |
| 11 | 37,950,000 | 38,100,000 | 507 | 411  | 0.044321046  | CCDC104,CCDC88A,SMEK2                       |
| 11 | 38,025,000 | 38,175,000 | 508 | 275  | -0.15394685  | CCDC104,PNPT1,SMEK2                         |

|    |            |            |     |      |              |             |
|----|------------|------------|-----|------|--------------|-------------|
| 11 | 38,100,000 | 38,250,000 | 509 | 262  | 0.081573823  | PNPT1,SMEK2 |
| 11 | 38,175,000 | 38,325,000 | 510 | 291  | 0.390437209  | PNPT1       |
| 11 | 38,250,000 | 38,400,000 | 511 | 309  | 0.739751423  | EFEMP1      |
| 11 | 38,325,000 | 38,475,000 | 512 | 480  | 0.533745845  | EFEMP1      |
| 11 | 38,400,000 | 38,550,000 | 513 | 823  | 0.340034289  | EFEMP1      |
| 11 | 38,475,000 | 38,625,000 | 514 | 1214 | 0.745377408  |             |
| 11 | 38,550,000 | 38,700,000 | 515 | 1212 | 0.312518532  |             |
| 11 | 38,625,000 | 38,775,000 | 516 | 1073 | -0.164553146 | CCDC85A     |
| 11 | 38,700,000 | 38,850,000 | 517 | 1137 | -1.102993346 | CCDC85A     |
| 11 | 38,775,000 | 38,925,000 | 518 | 1194 | -0.672236654 | CCDC85A     |
| 11 | 38,850,000 | 39,000,000 | 519 | 1135 | 0.768764322  | CCDC85A     |
| 11 | 38,925,000 | 39,075,000 | 520 | 838  | 0.806105824  | CCDC85A     |
| 11 | 39,000,000 | 39,150,000 | 521 | 722  | 0.822963031  |             |
| 11 | 39,075,000 | 39,225,000 | 522 | 1180 | 1.090084973  |             |
| 11 | 39,150,000 | 39,300,000 | 523 | 1113 | 0.102627307  |             |
| 11 | 39,225,000 | 39,375,000 | 524 | 631  | -1.589249203 |             |
| 11 | 39,300,000 | 39,450,000 | 525 | 817  | 0.222556955  |             |
| 11 | 39,375,000 | 39,525,000 | 526 | 881  | 0.906176975  |             |
| 11 | 39,450,000 | 39,600,000 | 527 | 687  | 1.193747391  |             |
| 11 | 39,525,000 | 39,675,000 | 528 | 639  | 0.058298519  |             |
| 11 | 39,600,000 | 39,750,000 | 529 | 478  | -1.646503929 |             |
| 11 | 39,675,000 | 39,825,000 | 530 | 419  | -0.893215382 |             |
| 11 | 39,750,000 | 39,900,000 | 531 | 750  | 0.726702922  |             |
| 11 | 39,825,000 | 39,975,000 | 532 | 856  | 0.741832304  |             |
| 11 | 39,900,000 | 40,050,000 | 533 | 623  | 0.772928015  |             |
| 11 | 39,975,000 | 40,125,000 | 534 | 623  | 0.309478571  |             |
| 11 | 40,050,000 | 40,200,000 | 535 | 1020 | 0.238308904  |             |
| 11 | 40,125,000 | 40,275,000 | 536 | 1156 | 0.281252612  |             |
| 11 | 40,200,000 | 40,350,000 | 537 | 1028 | 0.268167626  |             |
| 11 | 40,275,000 | 40,425,000 | 538 | 1019 | 0.860003409  |             |
| 11 | 40,350,000 | 40,500,000 | 539 | 996  | 0.551998136  |             |
| 11 | 40,425,000 | 40,575,000 | 540 | 1137 | -0.429258937 | VRK2        |
| 11 | 40,500,000 | 40,650,000 | 541 | 839  | -0.012119275 | VRK2        |
| 11 | 40,575,000 | 40,725,000 | 542 | 417  | 0.865507924  | FANCL,VRK2  |
| 11 | 40,650,000 | 40,800,000 | 543 | 844  | 1.122739106  | FANCL,VRK2  |
| 11 | 40,725,000 | 40,875,000 | 544 | 999  | 0.838665281  | FANCL       |
| 11 | 40,800,000 | 40,950,000 | 545 | 689  | 0.031074366  |             |
| 11 | 40,875,000 | 41,025,000 | 546 | 500  | 0.549411107  |             |
| 11 | 40,950,000 | 41,100,000 | 547 | 321  | 0.094158918  |             |
| 11 | 41,025,000 | 41,175,000 | 548 | 305  | 0.561596218  |             |
| 11 | 41,100,000 | 41,250,000 | 549 | 470  | 0.544052486  |             |
| 11 | 41,175,000 | 41,325,000 | 550 | 679  | 0.301541079  |             |
| 11 | 41,250,000 | 41,400,000 | 551 | 707  | -0.130115563 |             |
| 11 | 41,325,000 | 41,475,000 | 552 | 543  | -0.658910424 |             |
| 11 | 41,400,000 | 41,550,000 | 553 | 509  | -0.331057189 |             |
| 11 | 41,475,000 | 41,625,000 | 554 | 596  | 0.464950611  |             |
| 11 | 41,550,000 | 41,700,000 | 555 | 768  | 0.328531437  |             |
| 11 | 41,625,000 | 41,775,000 | 556 | 1162 | -0.138957649 |             |
| 11 | 41,700,000 | 41,850,000 | 557 | 1288 | -0.569974852 |             |
| 11 | 41,775,000 | 41,925,000 | 558 | 1305 | -0.12659646  |             |
| 11 | 41,850,000 | 42,000,000 | 559 | 1569 | 0.435133843  |             |
| 11 | 41,925,000 | 42,075,000 | 560 | 1646 | 0.235589382  |             |
| 11 | 42,000,000 | 42,150,000 | 561 | 1006 | -0.174108705 |             |

|    |            |            |     |      |              |                                                                      |
|----|------------|------------|-----|------|--------------|----------------------------------------------------------------------|
| 11 | 42,075,000 | 42,225,000 | 562 | 777  | 0.141936084  |                                                                      |
| 11 | 42,150,000 | 42,300,000 | 563 | 961  | 0.474009028  |                                                                      |
| 11 | 42,225,000 | 42,375,000 | 564 | 707  | 0.049187164  |                                                                      |
| 11 | 42,300,000 | 42,450,000 | 565 | 557  | -0.198525413 |                                                                      |
| 11 | 42,375,000 | 42,525,000 | 566 | 533  | -0.2893161   |                                                                      |
| 11 | 42,450,000 | 42,600,000 | 567 | 673  | -0.408553729 |                                                                      |
| 11 | 42,525,000 | 42,675,000 | 568 | 829  | 0.44171847   |                                                                      |
| 11 | 42,600,000 | 42,750,000 | 569 | 646  | 0.582752827  |                                                                      |
| 11 | 42,675,000 | 42,825,000 | 570 | 626  | -0.42059989  |                                                                      |
| 11 | 42,750,000 | 42,900,000 | 571 | 807  | 0.343267393  |                                                                      |
| 11 | 42,825,000 | 42,975,000 | 572 | 626  | 0.681639562  |                                                                      |
| 11 | 42,900,000 | 43,050,000 | 573 | 662  | -0.570086651 |                                                                      |
| 11 | 42,975,000 | 43,125,000 | 574 | 736  | -0.237630634 | BCL11A                                                               |
| 11 | 43,050,000 | 43,200,000 | 575 | 409  | 0.53470058   | BCL11A                                                               |
| 11 | 43,125,000 | 43,275,000 | 576 | 414  | 0.686660737  | BCL11A                                                               |
| 11 | 43,200,000 | 43,350,000 | 577 | 730  | -0.039427906 |                                                                      |
| 11 | 43,275,000 | 43,425,000 | 578 | 631  | -0.75782085  | PAPOLG                                                               |
| 11 | 43,350,000 | 43,500,000 | 579 | 406  | -0.913992079 | PAPOLG                                                               |
| 11 | 43,425,000 | 43,575,000 | 580 | 304  | -0.121696655 | PUS10,REL                                                            |
| 11 | 43,500,000 | 43,650,000 | 581 | 240  | 0.565841544  | PEX13,PUS10,REL                                                      |
| 11 | 43,575,000 | 43,725,000 | 582 | 362  | 0.8411579    | PEX13,PUS10                                                          |
| 11 | 43,650,000 | 43,800,000 | 583 | 878  | 1.135387726  | GCFC2                                                                |
| 11 | 43,725,000 | 43,875,000 | 584 | 1064 | 1.088099048  | GCFC2                                                                |
| 11 | 43,800,000 | 43,950,000 | 585 | 1200 | 0.96095601   | GCFC2,MRPL19,ENSBTAG00000018554                                      |
| 11 | 43,875,000 | 44,025,000 | 586 | 1337 | 0.623547835  | MRPL19,ENSBTAG00000018554                                            |
| 11 | 43,950,000 | 44,100,000 | 587 | 1260 | 0.023157657  |                                                                      |
| 11 | 44,025,000 | 44,175,000 | 588 | 1171 | 0.271734753  |                                                                      |
| 11 | 44,100,000 | 44,250,000 | 589 | 807  | 0.731553085  | SEPT10,SH3RF3                                                        |
| 11 | 44,175,000 | 44,325,000 | 590 | 934  | 0.927039158  | SEPT10,SH3RF3                                                        |
| 11 | 44,250,000 | 44,400,000 | 591 | 694  | 0.626507812  | SH3RF3                                                               |
| 11 | 44,325,000 | 44,475,000 | 592 | 320  | -0.618926703 | EDAR,SH3RF3                                                          |
| 11 | 44,400,000 | 44,550,000 | 593 | 359  | 0.056359417  | CCDC138,EDAR,RANBP2                                                  |
| 11 | 44,475,000 | 44,625,000 | 594 | 339  | -0.367705208 | CCDC138,MGC142792,RANBP2                                             |
| 11 | 44,550,000 | 44,700,000 | 595 | 341  | 0.25114946   | GCC2,MGC142792,RANBP2                                                |
| 11 | 44,625,000 | 44,775,000 | 596 | 573  | -0.813780775 | GCC2,MGC142792,SULT1C2,SULT1C3,ENSBTAG00000016032,ENSBTAG00000032051 |
| 11 | 44,700,000 | 44,850,000 | 597 | 811  | -2.256816895 | GCC2,SULT1C2,SULT1C3,ENSBTAG00000016032,ENSBTAG00000032051           |
| 11 | 44,775,000 | 44,925,000 | 598 | 706  | -2.261173728 | SLC5A7,SULT1C3                                                       |
| 11 | 44,850,000 | 45,000,000 | 599 | 849  | -0.710941167 | SLC5A7                                                               |
| 11 | 44,925,000 | 45,075,000 | 600 | 996  | -1.833477316 |                                                                      |
| 11 | 45,000,000 | 45,150,000 | 601 | 1300 | -1.510151399 |                                                                      |
| 11 | 45,075,000 | 45,225,000 | 602 | 1475 | -0.716543718 |                                                                      |
| 11 | 45,150,000 | 45,300,000 | 603 | 1322 | 0.171621841  |                                                                      |
| 11 | 45,225,000 | 45,375,000 | 604 | 1207 | 0.883820912  |                                                                      |
| 11 | 45,300,000 | 45,450,000 | 605 | 1114 | 1.177931982  | ST6GAL2                                                              |
| 11 | 45,375,000 | 45,525,000 | 606 | 1012 | 1.150417326  | ST6GAL2                                                              |
| 11 | 45,450,000 | 45,600,000 | 607 | 556  | 1.062448532  | ST6GAL2,UXS1                                                         |
| 11 | 45,525,000 | 45,675,000 | 608 | 333  | 0.989830009  | UXS1                                                                 |
| 11 | 45,600,000 | 45,750,000 | 609 | 701  | 0.623318494  | C11H2orf40,UXS1                                                      |
| 11 | 45,675,000 | 45,825,000 | 610 | 1041 | 0.485004922  | C11H2orf40,NCK2                                                      |
| 11 | 45,750,000 | 45,900,000 | 611 | 958  | 0.089465565  | NCK2                                                                 |
| 11 | 45,825,000 | 45,975,000 | 612 | 807  | -0.959187078 | NCK2                                                                 |

10-Sep



|    |            |            |     |      |              |                                                                            |
|----|------------|------------|-----|------|--------------|----------------------------------------------------------------------------|
| 11 | 45,900,000 | 46,050,000 | 613 | 974  | -0.624145637 |                                                                            |
| 11 | 45,975,000 | 46,125,000 | 614 | 1017 | -0.238703895 | POLR1B,TTL                                                                 |
| 11 | 46,050,000 | 46,200,000 | 615 | 993  | 0.178106441  | POLR1B,TTL                                                                 |
| 11 | 46,125,000 | 46,275,000 | 616 | 754  | 0.390578988  | POLR1B,SLC20A1                                                             |
| 11 | 46,200,000 | 46,350,000 | 617 | 685  | 0.530390924  | CKAP2L,IL1A,NT5DC4,SLC20A1                                                 |
| 11 | 46,275,000 | 46,425,000 | 618 | 760  | 0.797300896  | CKAP2L,IL1A,IL1B,NT5DC4                                                    |
| 11 | 46,350,000 | 46,500,000 | 619 | 716  | 0.487245184  | IL1A,IL1B,IL37                                                             |
| 11 | 46,425,000 | 46,575,000 | 620 | 1145 | -0.165971568 | IL36A,IL36G,IL37,ENSBTAG00000039476                                        |
| 11 | 46,500,000 | 46,650,000 | 621 | 1144 | -0.323524775 | IL1F10,IL36A,IL36B,IL36G,IL36RN,ENSBTAG00000039476                         |
| 11 | 46,575,000 | 46,725,000 | 622 | 908  | -0.357294581 | IL1F10,IL1RN,IL36B,IL36RN                                                  |
| 11 | 46,650,000 | 46,800,000 | 623 | 1134 | 0.324391908  | IL1RN,PAX8,PSD4                                                            |
| 11 | 46,725,000 | 46,875,000 | 624 | 1027 | 0.286772766  | PAX8,PSD4                                                                  |
| 11 | 46,800,000 | 46,950,000 | 625 | 720  | -1.324538633 | PAX8                                                                       |
| 11 | 46,875,000 | 47,025,000 | 626 | 859  | -0.420604708 | ENSBTAG00000047185                                                         |
| 11 | 46,950,000 | 47,100,000 | 627 | 1508 | 0.7625318    | ENSBTAG00000047029,ENSBTAG00000047185                                      |
| 11 | 47,025,000 | 47,175,000 | 628 | 1694 | 0.667474721  | ENSBTAG00000003408,ENSBTAG00000045514,ENSBTAG0000045659,ENSBTAG00000047029 |
| 11 | 47,100,000 | 47,250,000 | 629 | 1013 | 0.590087384  | RPIA,ENSBTAG00000003408,ENSBTAG00000045514,ENSBTAG00000045659              |
| 11 | 47,175,000 | 47,325,000 | 630 | 808  | 0.524717096  | EIF2AK3,RPIA                                                               |
| 11 | 47,250,000 | 47,400,000 | 631 | 1121 | -0.570902863 | EIF2AK3,RPIA                                                               |
| 11 | 47,325,000 | 47,475,000 | 632 | 1258 | -2.926407294 | EIF2AK3,TEX37                                                              |
| 11 | 47,400,000 | 47,550,000 | 633 | 1118 | -2.107926916 | FOXI3,TEX37                                                                |
| 11 | 47,475,000 | 47,625,000 | 634 | 833  | 0.687218209  | FOXI3                                                                      |
| 11 | 47,550,000 | 47,700,000 | 635 | 839  | 0.600333811  |                                                                            |
| 11 | 47,625,000 | 47,775,000 | 636 | 1291 | -0.049719136 | THNSL2                                                                     |
| 11 | 47,700,000 | 47,850,000 | 637 | 1420 | -0.888933054 | FABP1,SMYD1,THNSL2                                                         |
| 11 | 47,775,000 | 47,925,000 | 638 | 994  | -0.855042577 | CD8B,FABP1,KRCC1,SMYD1,ENSBTAG00000002545                                  |
| 11 | 47,850,000 | 48,000,000 | 639 | 804  | -0.06839789  | CD8A,CD8B,KRCC1,ENSBTAG00000002545                                         |
| 11 | 47,925,000 | 48,075,000 | 640 | 906  | -0.05849401  | CD8A,CD8B,RMND5A                                                           |
| 11 | 48,000,000 | 48,150,000 | 641 | 882  | 0.411179776  | RMND5A,RNF103                                                              |
| 11 | 48,075,000 | 48,225,000 | 642 | 723  | 0.688917912  | CHMP3,RNF103                                                               |
| 11 | 48,150,000 | 48,300,000 | 643 | 606  | 0.859578175  | CHMP3,KDM3A,RNF103                                                         |
| 11 | 48,225,000 | 48,375,000 | 644 | 795  | 0.284727849  | CHMP3,KDM3A                                                                |
| 11 | 48,300,000 | 48,450,000 | 645 | 1240 | -0.167717084 | KDM3A,REEP1                                                                |
| 11 | 48,375,000 | 48,525,000 | 646 | 1466 | -0.179115226 | REEP1                                                                      |
| 11 | 48,450,000 | 48,600,000 | 647 | 1116 | 0.310779576  | IMMT,MRPL35,PTCD3,REEP1                                                    |
| 11 | 48,525,000 | 48,675,000 | 648 | 784  | 0.836266894  | IMMT,MRPL35,POLR1A,PTCD3,REEP1                                             |
| 11 | 48,600,000 | 48,750,000 | 649 | 991  | -0.326373858 | POLR1A,PTCD3                                                               |
| 11 | 48,675,000 | 48,825,000 | 650 | 1183 | -0.69797553  | POLR1A                                                                     |
| 11 | 48,750,000 | 48,900,000 | 651 | 908  | -0.187865849 | ST3GAL5                                                                    |
| 11 | 48,825,000 | 48,975,000 | 652 | 617  | -0.050308121 | ATOH8,ST3GAL5                                                              |
| 11 | 48,900,000 | 49,050,000 | 653 | 517  | -1.438255317 | ATOH8,ST3GAL5                                                              |
| 11 | 48,975,000 | 49,125,000 | 654 | 1305 | 0.151398276  | ATOH8,ENSBTAG00000047449,ENSBTAG00000047816                                |
| 11 | 49,050,000 | 49,200,000 | 655 | 1578 | 0.558903598  | SFTPB,USP39,ENSBTAG00000031828,ENSBTAG00000047449,ENSBTAG00000047816       |
| 11 | 49,125,000 | 49,275,000 | 656 | 971  | 1.209768594  | C2orf68,RNF181,SFTPB,TMEM150A,USP39,VAMP5,VAMP8,ENSBTAG00000031828         |
| 11 | 49,200,000 | 49,350,000 | 657 | 675  | 1.019689834  | C2orf68,GGCX,MAT2A,RNF181,TMEM150A,USP39,VAMP5,VAMP8                       |
| 11 | 49,275,000 | 49,425,000 | 658 | 426  | 0.235849469  | CAPG,GGCX,MAT2A,SH2D6                                                      |
| 11 | 49,350,000 | 49,500,000 | 659 | 518  | 0.540446804  | CAPG,ELMOD3,RETSAT,SH2D6,TGOLN2                                            |
| 11 | 49,425,000 | 49,575,000 | 660 | 458  | 0.038219958  | CAPG,ELMOD3,RETSAT,TGOLN2,ENSBTAG00000010111                               |

|    |            |            |     |      |              |                                 |
|----|------------|------------|-----|------|--------------|---------------------------------|
| 11 | 49,500,000 | 49,650,000 | 661 | 347  | -1.503102471 | ENSBTAG00000010111              |
| 11 | 49,575,000 | 49,725,000 | 662 | 669  | -1.069417905 | ENSBTAG00000047475              |
| 11 | 49,650,000 | 49,800,000 | 663 | 896  | -0.322371922 | HIGD1D,KCMF1,ENSBTAG00000047475 |
| 11 | 49,725,000 | 49,875,000 | 664 | 645  | -0.000306187 | HIGD1D,KCMF1                    |
| 11 | 49,800,000 | 49,950,000 | 665 | 580  | -0.216578617 | KCMF1,TMSB10                    |
| 11 | 49,875,000 | 50,025,000 | 666 | 782  | 0.095435131  | TMSB10                          |
| 11 | 49,950,000 | 50,100,000 | 667 | 1042 | -3.046423544 |                                 |
| 11 | 50,025,000 | 50,175,000 | 668 | 1050 | -4.223336264 |                                 |
| 11 | 50,100,000 | 50,250,000 | 669 | 1151 | -1.764920708 |                                 |
| 11 | 50,175,000 | 50,325,000 | 670 | 1130 | -0.376268778 |                                 |
| 11 | 50,250,000 | 50,400,000 | 671 | 783  | 0.89495898   |                                 |
| 11 | 50,325,000 | 50,475,000 | 672 | 720  | 0.918615189  | SUCLG1                          |
| 11 | 50,400,000 | 50,550,000 | 673 | 682  | 0.965761408  | SUCLG1                          |
| 11 | 50,475,000 | 50,625,000 | 674 | 746  | 0.867934014  |                                 |
| 11 | 50,550,000 | 50,700,000 | 675 | 583  | 0.549580244  |                                 |
| 11 | 50,625,000 | 50,775,000 | 676 | 311  | 0.729260812  |                                 |
| 11 | 50,700,000 | 50,850,000 | 677 | 346  | 0.567649957  |                                 |
| 11 | 50,775,000 | 50,925,000 | 678 | 753  | 0.235133214  |                                 |
| 11 | 50,850,000 | 51,000,000 | 679 | 1126 | -0.13231405  |                                 |
| 11 | 50,925,000 | 51,075,000 | 680 | 940  | -0.24797273  |                                 |
| 11 | 51,000,000 | 51,150,000 | 681 | 1006 | 0.36033058   |                                 |
| 11 | 51,075,000 | 51,225,000 | 682 | 1348 | -0.237367739 |                                 |
| 11 | 51,150,000 | 51,300,000 | 683 | 1062 | -0.921245394 |                                 |
| 11 | 51,225,000 | 51,375,000 | 684 | 1026 | -1.971255266 |                                 |
| 11 | 51,300,000 | 51,450,000 | 685 | 1279 | -0.937711802 |                                 |
| 11 | 51,375,000 | 51,525,000 | 686 | 1273 | -0.083826982 |                                 |
| 11 | 51,450,000 | 51,600,000 | 687 | 1172 | -0.884083635 |                                 |
| 11 | 51,525,000 | 51,675,000 | 688 | 1013 | -0.419295023 |                                 |
| 11 | 51,600,000 | 51,750,000 | 689 | 1259 | -0.454909269 |                                 |
| 11 | 51,675,000 | 51,825,000 | 690 | 1370 | -0.240104396 |                                 |
| 11 | 51,750,000 | 51,900,000 | 691 | 1074 | 0.188134554  |                                 |
| 11 | 51,825,000 | 51,975,000 | 692 | 1055 | -0.829904793 |                                 |
| 11 | 51,900,000 | 52,050,000 | 693 | 899  | -1.538795954 |                                 |
| 11 | 51,975,000 | 52,125,000 | 694 | 572  | -1.428971709 |                                 |
| 11 | 52,050,000 | 52,200,000 | 695 | 649  | 0.154305649  |                                 |
| 11 | 52,125,000 | 52,275,000 | 696 | 949  | 0.989127336  |                                 |
| 11 | 52,200,000 | 52,350,000 | 697 | 1001 | 1.100259793  |                                 |
| 11 | 52,275,000 | 52,425,000 | 698 | 624  | 0.858827009  |                                 |
| 11 | 52,350,000 | 52,500,000 | 699 | 426  | 0.253441618  |                                 |
| 11 | 52,425,000 | 52,575,000 | 700 | 527  | 0.334342603  |                                 |
| 11 | 52,500,000 | 52,650,000 | 701 | 786  | -0.056243354 |                                 |
| 11 | 52,575,000 | 52,725,000 | 702 | 1019 | -1.717407263 |                                 |
| 11 | 52,650,000 | 52,800,000 | 703 | 925  | -2.384704277 |                                 |
| 11 | 52,725,000 | 52,875,000 | 704 | 762  | -0.492300026 |                                 |
| 11 | 52,800,000 | 52,950,000 | 705 | 803  | -0.335438898 |                                 |
| 11 | 52,875,000 | 53,025,000 | 706 | 1016 | 0.463577366  |                                 |
| 11 | 52,950,000 | 53,100,000 | 707 | 1452 | 1.084789886  |                                 |
| 11 | 53,025,000 | 53,175,000 | 708 | 1712 | 1.031559611  |                                 |
| 11 | 53,100,000 | 53,250,000 | 709 | 1625 | 0.431154685  |                                 |
| 11 | 53,175,000 | 53,325,000 | 710 | 1277 | -0.381648598 |                                 |
| 11 | 53,250,000 | 53,400,000 | 711 | 1058 | 0.262493878  |                                 |
| 11 | 53,325,000 | 53,475,000 | 712 | 1073 | 0.788484749  |                                 |
| 11 | 53,400,000 | 53,550,000 | 713 | 1245 | 0.887458493  |                                 |

|    |            |            |     |      |              |                           |
|----|------------|------------|-----|------|--------------|---------------------------|
| 11 | 53,475,000 | 53,625,000 | 714 | 1076 | 0.503856198  |                           |
| 11 | 53,550,000 | 53,700,000 | 715 | 746  | 0.256787451  |                           |
| 11 | 53,625,000 | 53,775,000 | 716 | 859  | 0.300192823  |                           |
| 11 | 53,700,000 | 53,850,000 | 717 | 993  | 0.48126194   |                           |
| 11 | 53,775,000 | 53,925,000 | 718 | 872  | 0.64089911   |                           |
| 11 | 53,850,000 | 54,000,000 | 719 | 952  | 0.618299162  |                           |
| 11 | 53,925,000 | 54,075,000 | 720 | 1216 | 0.745326965  |                           |
| 11 | 54,000,000 | 54,150,000 | 721 | 927  | 0.815074414  |                           |
| 11 | 54,075,000 | 54,225,000 | 722 | 687  | 0.87520508   |                           |
| 11 | 54,150,000 | 54,300,000 | 723 | 875  | -0.169110377 |                           |
| 11 | 54,225,000 | 54,375,000 | 724 | 1074 | -0.107418151 |                           |
| 11 | 54,300,000 | 54,450,000 | 725 | 1125 | 0.946500188  |                           |
| 11 | 54,375,000 | 54,525,000 | 726 | 1092 | 0.724195108  |                           |
| 11 | 54,450,000 | 54,600,000 | 727 | 757  | 0.578782721  |                           |
| 11 | 54,525,000 | 54,675,000 | 728 | 452  | 0.959911593  |                           |
| 11 | 54,600,000 | 54,750,000 | 729 | 466  | 1.293586492  | CTNNA2                    |
| 11 | 54,675,000 | 54,825,000 | 730 | 614  | 0.867352941  | CTNNA2,ENSBTAG00000047167 |
| 11 | 54,750,000 | 54,900,000 | 731 | 1124 | -1.570368368 | CTNNA2,ENSBTAG00000047167 |
| 11 | 54,825,000 | 54,975,000 | 732 | 1467 | -1.985390784 | CTNNA2,ENSBTAG00000047167 |
| 11 | 54,900,000 | 55,050,000 | 733 | 1076 | -1.023531339 | CTNNA2,ENSBTAG00000047167 |
| 11 | 54,975,000 | 55,125,000 | 734 | 770  | 0.012321879  | CTNNA2,ENSBTAG00000047167 |
| 11 | 55,050,000 | 55,200,000 | 735 | 665  | -0.242585857 | CTNNA2                    |
| 11 | 55,125,000 | 55,275,000 | 736 | 537  | -1.791796805 | CTNNA2                    |
| 11 | 55,200,000 | 55,350,000 | 737 | 860  | -0.648810067 | CTNNA2                    |
| 11 | 55,275,000 | 55,425,000 | 738 | 1195 | -0.59449779  | CTNNA2                    |
| 11 | 55,350,000 | 55,500,000 | 739 | 1378 | -1.187536995 | CTNNA2                    |
| 11 | 55,425,000 | 55,575,000 | 740 | 1156 | -0.753650556 | CTNNA2                    |
| 11 | 55,500,000 | 55,650,000 | 741 | 1117 | 0.603576773  | CTNNA2                    |
| 11 | 55,575,000 | 55,725,000 | 742 | 1065 | 0.635308525  | CTNNA2                    |
| 11 | 55,650,000 | 55,800,000 | 743 | 608  | -0.251557363 | CTNNA2                    |
| 11 | 55,725,000 | 55,875,000 | 744 | 594  | -0.202415982 | CTNNA2                    |
| 11 | 55,800,000 | 55,950,000 | 745 | 872  | -1.090241893 | CTNNA2                    |
| 11 | 55,875,000 | 56,025,000 | 746 | 979  | -1.331488135 | CTNNA2                    |
| 11 | 55,950,000 | 56,100,000 | 747 | 621  | 0.426930306  |                           |
| 11 | 56,025,000 | 56,175,000 | 748 | 513  | 0.792318045  |                           |
| 11 | 56,100,000 | 56,250,000 | 749 | 820  | 1.176140003  |                           |
| 11 | 56,175,000 | 56,325,000 | 750 | 1231 | 1.298893944  |                           |
| 11 | 56,250,000 | 56,400,000 | 751 | 1731 | 1.311494228  |                           |
| 11 | 56,325,000 | 56,475,000 | 752 | 1891 | 1.342559365  |                           |
| 11 | 56,400,000 | 56,550,000 | 753 | 1409 | 1.268487602  | REG3G                     |
| 11 | 56,475,000 | 56,625,000 | 754 | 1367 | 1.329921967  | REG3G                     |
| 11 | 56,550,000 | 56,700,000 | 755 | 2151 | 1.36452795   | PTP                       |
| 11 | 56,625,000 | 56,775,000 | 756 | 2081 | 1.333318553  | PTP                       |
| 11 | 56,700,000 | 56,850,000 | 757 | 1360 | 0.993656346  |                           |
| 11 | 56,775,000 | 56,925,000 | 758 | 1284 | 0.621029085  |                           |
| 11 | 56,850,000 | 57,000,000 | 759 | 1768 | 1.018040888  | ENSBTAG0000000168         |
| 11 | 56,925,000 | 57,075,000 | 760 | 1822 | 0.879869307  | ENSBTAG0000000168         |
| 11 | 57,000,000 | 57,150,000 | 761 | 1645 | 0.574761039  |                           |
| 11 | 57,075,000 | 57,225,000 | 762 | 1729 | 0.652173852  |                           |
| 11 | 57,150,000 | 57,300,000 | 763 | 1511 | 0.705095533  |                           |
| 11 | 57,225,000 | 57,375,000 | 764 | 1688 | 0.545401471  |                           |
| 11 | 57,300,000 | 57,450,000 | 765 | 1684 | 0.319899669  |                           |
| 11 | 57,375,000 | 57,525,000 | 766 | 1484 | 0.041778544  |                           |

|    |            |            |     |      |              |                     |
|----|------------|------------|-----|------|--------------|---------------------|
| 11 | 57,450,000 | 57,600,000 | 767 | 1485 | 0.380133953  |                     |
| 11 | 57,525,000 | 57,675,000 | 768 | 1481 | 0.834775925  |                     |
| 11 | 57,600,000 | 57,750,000 | 769 | 1736 | 0.845505642  |                     |
| 11 | 57,675,000 | 57,825,000 | 770 | 1591 | 0.897265974  |                     |
| 11 | 57,750,000 | 57,900,000 | 771 | 1379 | 1.152825543  |                     |
| 11 | 57,825,000 | 57,975,000 | 772 | 1589 | 1.12076277   |                     |
| 11 | 57,900,000 | 58,050,000 | 773 | 1592 | 0.818202879  |                     |
| 11 | 57,975,000 | 58,125,000 | 774 | 1383 | 0.658969548  |                     |
| 11 | 58,050,000 | 58,200,000 | 775 | 1253 | 0.723706673  |                     |
| 11 | 58,125,000 | 58,275,000 | 776 | 1378 | 0.821431644  |                     |
| 11 | 58,200,000 | 58,350,000 | 777 | 1396 | 0.21807236   |                     |
| 11 | 58,275,000 | 58,425,000 | 778 | 1295 | 0.259364718  |                     |
| 11 | 58,350,000 | 58,500,000 | 779 | 1092 | 0.74365807   | LRRTM4              |
| 11 | 58,425,000 | 58,575,000 | 780 | 1006 | 0.027815571  | LRRTM4              |
| 11 | 58,500,000 | 58,650,000 | 781 | 1151 | -0.141935116 |                     |
| 11 | 58,575,000 | 58,725,000 | 782 | 808  | 0.317909168  |                     |
| 11 | 58,650,000 | 58,800,000 | 783 | 644  | 0.758250545  |                     |
| 11 | 58,725,000 | 58,875,000 | 784 | 871  | 0.828972734  |                     |
| 11 | 58,800,000 | 58,950,000 | 785 | 966  | 0.375282351  |                     |
| 11 | 58,875,000 | 59,025,000 | 786 | 867  | -0.465629333 |                     |
| 11 | 58,950,000 | 59,100,000 | 787 | 976  | -1.353861065 |                     |
| 11 | 59,025,000 | 59,175,000 | 788 | 1011 | -1.157864474 |                     |
| 11 | 59,100,000 | 59,250,000 | 789 | 651  | -0.803071158 |                     |
| 11 | 59,175,000 | 59,325,000 | 790 | 481  | -0.708319693 |                     |
| 11 | 59,250,000 | 59,400,000 | 791 | 494  | -0.635580217 |                     |
| 11 | 59,325,000 | 59,475,000 | 792 | 443  | -0.5748624   |                     |
| 11 | 59,400,000 | 59,550,000 | 793 | 496  | -0.022589032 |                     |
| 11 | 59,475,000 | 59,625,000 | 794 | 836  | -1.211769004 |                     |
| 11 | 59,550,000 | 59,700,000 | 795 | 854  | -1.816919248 |                     |
| 11 | 59,625,000 | 59,775,000 | 796 | 461  | -1.548187791 | AHSA2,C2orf74       |
| 11 | 59,700,000 | 59,850,000 | 797 | 362  | 0.140907996  | AHSA2,C2orf74,USP34 |
| 11 | 59,775,000 | 59,925,000 | 798 | 421  | 0.545403102  | AHSA2,USP34         |
| 11 | 59,850,000 | 60,000,000 | 799 | 401  | 0.356285701  | USP34               |
| 11 | 59,925,000 | 60,075,000 | 800 | 329  | 0.602506452  | USP34,XPO1          |
| 11 | 60,000,000 | 60,150,000 | 801 | 315  | 1.072081147  | XPO1                |
| 11 | 60,075,000 | 60,225,000 | 802 | 473  | 1.125455376  | XPO1                |
| 11 | 60,150,000 | 60,300,000 | 803 | 568  | 0.678842555  |                     |
| 11 | 60,225,000 | 60,375,000 | 804 | 644  | 0.787408944  | FAM161A             |
| 11 | 60,300,000 | 60,450,000 | 805 | 889  | 0.399083795  | CCT4,COMMD1,FAM161A |
| 11 | 60,375,000 | 60,525,000 | 806 | 931  | 0.189305882  | CCT4,COMMD1,FAM161A |
| 11 | 60,450,000 | 60,600,000 | 807 | 972  | 0.479183213  | COMMD1              |
| 11 | 60,525,000 | 60,675,000 | 808 | 741  | 0.342662279  | B3GNT2,COMMD1       |
| 11 | 60,600,000 | 60,750,000 | 809 | 357  | 0.233848973  | B3GNT2              |
| 11 | 60,675,000 | 60,825,000 | 810 | 583  | -0.540350515 | B3GNT2              |
| 11 | 60,750,000 | 60,900,000 | 811 | 916  | -0.702553983 |                     |
| 11 | 60,825,000 | 60,975,000 | 812 | 889  | 0.29229484   | TMEM17              |
| 11 | 60,900,000 | 61,050,000 | 813 | 640  | 0.888527767  | TMEM17              |
| 11 | 60,975,000 | 61,125,000 | 814 | 681  | -1.179937044 | EHBP1               |
| 11 | 61,050,000 | 61,200,000 | 815 | 542  | -1.794787465 | EHBP1               |
| 11 | 61,125,000 | 61,275,000 | 816 | 256  | -0.205861846 | EHBP1               |
| 11 | 61,200,000 | 61,350,000 | 817 | 279  | 0.215628305  | EHBP1               |
| 11 | 61,275,000 | 61,425,000 | 818 | 318  | -1.152676954 | EHBP1               |
| 11 | 61,350,000 | 61,500,000 | 819 | 289  | -0.815025262 | EHBP1,OTX1          |

|    |            |            |     |      |              |                           |
|----|------------|------------|-----|------|--------------|---------------------------|
| 11 | 61,425,000 | 61,575,000 | 820 | 229  | 0.836704683  | EHBP1,OTX1                |
| 11 | 61,500,000 | 61,650,000 | 821 | 280  | 0.860234544  |                           |
| 11 | 61,575,000 | 61,725,000 | 822 | 328  | 0.720751781  |                           |
| 11 | 61,650,000 | 61,800,000 | 823 | 350  | 0.5328063    | WDPCP                     |
| 11 | 61,725,000 | 61,875,000 | 824 | 353  | 0.044657024  | WDPCP                     |
| 11 | 61,800,000 | 61,950,000 | 825 | 366  | -0.170385998 | WDPCP                     |
| 11 | 61,875,000 | 62,025,000 | 826 | 581  | 0.496170687  | MDH1,WDPCP                |
| 11 | 61,950,000 | 62,100,000 | 827 | 742  | 0.205132407  | MDH1,WDPCP                |
| 11 | 62,025,000 | 62,175,000 | 828 | 515  | -0.90652671  |                           |
| 11 | 62,100,000 | 62,250,000 | 829 | 307  | -3.258728774 | UGP2                      |
| 11 | 62,175,000 | 62,325,000 | 830 | 303  | -3.183385158 | UGP2,VPS54                |
| 11 | 62,250,000 | 62,400,000 | 831 | 317  | -1.222338156 | UGP2,VPS54                |
| 11 | 62,325,000 | 62,475,000 | 832 | 303  | 0.189891762  | PELI1,VPS54               |
| 11 | 62,400,000 | 62,550,000 | 833 | 487  | -0.854709214 | PELI1                     |
| 11 | 62,475,000 | 62,625,000 | 834 | 737  | -0.412016946 | PELI1                     |
| 11 | 62,550,000 | 62,700,000 | 835 | 646  | 0.081527164  |                           |
| 11 | 62,625,000 | 62,775,000 | 836 | 665  | 0.40438447   |                           |
| 11 | 62,700,000 | 62,850,000 | 837 | 703  | 0.088804945  | LGALSL                    |
| 11 | 62,775,000 | 62,925,000 | 838 | 445  | -0.495506316 | AFTPH,LGALSL              |
| 11 | 62,850,000 | 63,000,000 | 839 | 302  | 0.200170688  | AFTPH,SERTAD2             |
| 11 | 62,925,000 | 63,075,000 | 840 | 304  | 0.564789847  | AFTPH,SERTAD2             |
| 11 | 63,000,000 | 63,150,000 | 841 | 350  | 0.163384205  |                           |
| 11 | 63,075,000 | 63,225,000 | 842 | 466  | 0.294303602  |                           |
| 11 | 63,150,000 | 63,300,000 | 843 | 610  | 0.91485954   | TMSB4X                    |
| 11 | 63,225,000 | 63,375,000 | 844 | 605  | 0.993511122  | SLC1A4,TMSB4X             |
| 11 | 63,300,000 | 63,450,000 | 845 | 610  | 1.253103042  | CEP68,RAB1A,SLC1A4,TMSB4X |
| 11 | 63,375,000 | 63,525,000 | 846 | 880  | 0.564404721  | CEP68,RAB1A,TMSB4X        |
| 11 | 63,450,000 | 63,600,000 | 847 | 745  | -0.401649225 | ACTR2,RAB1A               |
| 11 | 63,525,000 | 63,675,000 | 848 | 415  | 0.042053158  | ACTR2,SPRED2              |
| 11 | 63,600,000 | 63,750,000 | 849 | 332  | -0.711066689 | SPRED2                    |
| 11 | 63,675,000 | 63,825,000 | 850 | 410  | -1.367349933 |                           |
| 11 | 63,750,000 | 63,900,000 | 851 | 1105 | 0.457173065  |                           |
| 11 | 63,825,000 | 63,975,000 | 852 | 1307 | 0.884549579  |                           |
| 11 | 63,900,000 | 64,050,000 | 853 | 612  | 1.011859921  |                           |
| 11 | 63,975,000 | 64,125,000 | 854 | 354  | 0.549306336  |                           |
| 11 | 64,050,000 | 64,200,000 | 855 | 759  | 0.967631112  |                           |
| 11 | 64,125,000 | 64,275,000 | 856 | 1154 | 1.16069864   |                           |
| 11 | 64,200,000 | 64,350,000 | 857 | 988  | 1.183250244  |                           |
| 11 | 64,275,000 | 64,425,000 | 858 | 705  | 1.035468266  |                           |
| 11 | 64,350,000 | 64,500,000 | 859 | 604  | 0.800494253  |                           |
| 11 | 64,425,000 | 64,575,000 | 860 | 505  | 0.056139835  |                           |
| 11 | 64,500,000 | 64,650,000 | 861 | 594  | 0.619082818  |                           |
| 11 | 64,575,000 | 64,725,000 | 862 | 545  | 0.90408622   |                           |
| 11 | 64,650,000 | 64,800,000 | 863 | 286  | 0.227867437  | MEIS1                     |
| 11 | 64,725,000 | 64,875,000 | 864 | 285  | 0.860133475  | MEIS1                     |
| 11 | 64,800,000 | 64,950,000 | 865 | 380  | 1.099537091  | MEIS1                     |
| 11 | 64,875,000 | 65,025,000 | 866 | 348  | 0.969959858  | MEIS1                     |
| 11 | 64,950,000 | 65,100,000 | 867 | 303  | -0.329666243 |                           |
| 11 | 65,025,000 | 65,175,000 | 868 | 325  | -0.551414843 |                           |
| 11 | 65,100,000 | 65,250,000 | 869 | 416  | 0.4256679    |                           |
| 11 | 65,175,000 | 65,325,000 | 870 | 523  | 0.348886297  |                           |
| 11 | 65,250,000 | 65,400,000 | 871 | 512  | 0.459054009  |                           |
| 11 | 65,325,000 | 65,475,000 | 872 | 537  | 0.069437043  |                           |

|    |            |            |     |     |              |                                        |
|----|------------|------------|-----|-----|--------------|----------------------------------------|
| 11 | 65,400,000 | 65,550,000 | 873 | 728 | 0.502429193  | ENSBTAG00000046310                     |
| 11 | 65,475,000 | 65,625,000 | 874 | 747 | 1.081166686  | ENSBTAG00000046310                     |
| 11 | 65,550,000 | 65,700,000 | 875 | 547 | 0.67694187   |                                        |
| 11 | 65,625,000 | 65,775,000 | 876 | 727 | -0.571609873 |                                        |
| 11 | 65,700,000 | 65,850,000 | 877 | 816 | -1.084187417 | ETAA1                                  |
| 11 | 65,775,000 | 65,925,000 | 878 | 459 | -0.93347818  | ETAA1                                  |
| 11 | 65,850,000 | 66,000,000 | 879 | 322 | -0.737441652 |                                        |
| 11 | 65,925,000 | 66,075,000 | 880 | 530 | -0.224241999 |                                        |
| 11 | 66,000,000 | 66,150,000 | 881 | 729 | -0.250142705 |                                        |
| 11 | 66,075,000 | 66,225,000 | 882 | 628 | -0.870550439 |                                        |
| 11 | 66,150,000 | 66,300,000 | 883 | 503 | 0.431524003  |                                        |
| 11 | 66,225,000 | 66,375,000 | 884 | 526 | 1.350697092  |                                        |
| 11 | 66,300,000 | 66,450,000 | 885 | 447 | 1.313959041  |                                        |
| 11 | 66,375,000 | 66,525,000 | 886 | 296 | 0.665431281  | C1D                                    |
| 11 | 66,450,000 | 66,600,000 | 887 | 259 | 0.061460014  | C1D,PNO1,PPP3R1,WDR92                  |
| 11 | 66,525,000 | 66,675,000 | 888 | 445 | 0.551144934  | PNO1,PPP3R1,WDR92                      |
| 11 | 66,600,000 | 66,750,000 | 889 | 483 | 0.286414119  | CNRIP1,PPP3R1                          |
| 11 | 66,675,000 | 66,825,000 | 890 | 451 | -0.086142651 | CNRIP1,PLEK                            |
| 11 | 66,750,000 | 66,900,000 | 891 | 669 | 0.42660829   | APLF,FBXO48,PLEK                       |
| 11 | 66,825,000 | 66,975,000 | 892 | 893 | 0.516112371  | APLF,FBXO48                            |
| 11 | 66,900,000 | 67,050,000 | 893 | 832 | 0.141600275  | APLF,PROKR1                            |
| 11 | 66,975,000 | 67,125,000 | 894 | 491 | -0.659565642 | ARHGAP25,PROKR1                        |
| 11 | 67,050,000 | 67,200,000 | 895 | 454 | 0.223326009  | ARHGAP25,BMP10                         |
| 11 | 67,125,000 | 67,275,000 | 896 | 540 | -1.574740934 | ARHGAP25,BMP10,GKN2,ENSBTAG00000038835 |
| 11 | 67,200,000 | 67,350,000 | 897 | 376 | -3.09671459  | ANTXR1,FOV,GKN2,ENSBTAG00000038835     |
| 11 | 67,275,000 | 67,425,000 | 898 | 572 | -1.528376954 | ANTXR1,FOV                             |
| 11 | 67,350,000 | 67,500,000 | 899 | 890 | 0.0014472    | ANTXR1                                 |
| 11 | 67,425,000 | 67,575,000 | 900 | 859 | 0.477958624  | ANTXR1                                 |
| 11 | 67,500,000 | 67,650,000 | 901 | 716 | 0.383197601  | ANTXR1                                 |
| 11 | 67,575,000 | 67,725,000 | 902 | 584 | 1.171783462  | ANTXR1,GFPT1                           |
| 11 | 67,650,000 | 67,800,000 | 903 | 827 | 1.410956564  | GFPT1,NFU1                             |
| 11 | 67,725,000 | 67,875,000 | 904 | 759 | 1.394975742  | AAK1,GFPT1,NFU1,ENSBTAG00000047822     |
| 11 | 67,800,000 | 67,950,000 | 905 | 486 | 1.097916042  | AAK1,ENSBTAG00000047822                |
| 11 | 67,875,000 | 68,025,000 | 906 | 444 | 0.823081876  | AAK1                                   |
| 11 | 67,950,000 | 68,100,000 | 907 | 483 | -1.113595711 | AAK1,ANXA4                             |
| 11 | 68,025,000 | 68,175,000 | 908 | 479 | -1.315823713 | ANXA4,GMCL1                            |
| 11 | 68,100,000 | 68,250,000 | 909 | 277 | -0.417563041 | ANXA4,GMCL1,MXD1,SNRNP27               |
| 11 | 68,175,000 | 68,325,000 | 910 | 280 | -0.977906662 | GMCL1,MXD1,SNRNP27                     |
| 11 | 68,250,000 | 68,400,000 | 911 | 337 | -0.17518212  | MXD1,PCBP1                             |
| 11 | 68,325,000 | 68,475,000 | 912 | 351 | -0.226052238 | C2orf42,PCBP1                          |
| 11 | 68,400,000 | 68,550,000 | 913 | 406 | -0.095890756 | C2orf42,TIA1                           |
| 11 | 68,475,000 | 68,625,000 | 914 | 441 | 0.58177886   | C2orf42,PCYOX1,TIA1                    |
| 11 | 68,550,000 | 68,700,000 | 915 | 640 | 0.720545228  | CAPN14,MGC139254,PCYOX1                |
| 11 | 68,625,000 | 68,775,000 | 916 | 909 | 0.343400303  | CAPN14,GALNT14,MGC139254               |
| 11 | 68,700,000 | 68,850,000 | 917 | 669 | 0.070113717  | CAPN14,GALNT14                         |
| 11 | 68,775,000 | 68,925,000 | 918 | 280 | -0.488971951 | GALNT14                                |
| 11 | 68,850,000 | 69,000,000 | 919 | 361 | -2.049429558 | GALNT14                                |
| 11 | 68,925,000 | 69,075,000 | 920 | 515 | -2.460012367 | CAPN13,GALNT14                         |
| 11 | 69,000,000 | 69,150,000 | 921 | 598 | -0.925003867 | CAPN13                                 |
| 11 | 69,075,000 | 69,225,000 | 922 | 753 | -1.200123228 | CAPN13,LCLAT1                          |
| 11 | 69,150,000 | 69,300,000 | 923 | 825 | -2.210272329 | LCLAT1                                 |
| 11 | 69,225,000 | 69,375,000 | 924 | 626 | -1.988678053 | LCLAT1                                 |
| 11 | 69,300,000 | 69,450,000 | 925 | 387 | -0.708001397 | LCLAT1                                 |

|    |            |            |     |      |              |                                                                         |
|----|------------|------------|-----|------|--------------|-------------------------------------------------------------------------|
| 11 | 69,375,000 | 69,525,000 | 926 | 496  | -0.81183408  |                                                                         |
| 11 | 69,450,000 | 69,600,000 | 927 | 756  | -2.943633202 | LBH                                                                     |
| 11 | 69,525,000 | 69,675,000 | 928 | 662  | -2.43410788  | LBH                                                                     |
| 11 | 69,600,000 | 69,750,000 | 929 | 343  | 0.154840677  | LBH,YPEL5                                                               |
| 11 | 69,675,000 | 69,825,000 | 930 | 244  | -0.713541875 | YPEL5                                                                   |
| 11 | 69,750,000 | 69,900,000 | 931 | 255  | -1.772099275 |                                                                         |
| 11 | 69,825,000 | 69,975,000 | 932 | 265  | -2.324303134 |                                                                         |
| 11 | 69,900,000 | 70,050,000 | 933 | 290  | -3.069844508 |                                                                         |
| 11 | 69,975,000 | 70,125,000 | 934 | 497  | -3.660043884 |                                                                         |
| 11 | 70,050,000 | 70,200,000 | 935 | 773  | -2.145378514 |                                                                         |
| 11 | 70,125,000 | 70,275,000 | 936 | 794  | -2.090367587 |                                                                         |
| 11 | 70,200,000 | 70,350,000 | 937 | 666  | -3.576862785 |                                                                         |
| 11 | 70,275,000 | 70,425,000 | 938 | 625  | -2.462331353 |                                                                         |
| 11 | 70,350,000 | 70,500,000 | 939 | 711  | -0.89544526  |                                                                         |
| 11 | 70,425,000 | 70,575,000 | 940 | 719  | -1.973067622 | ALK                                                                     |
| 11 | 70,500,000 | 70,650,000 | 941 | 664  | -1.912501379 | ALK                                                                     |
| 11 | 70,575,000 | 70,725,000 | 942 | 851  | 0.112261808  | ALK,CLIP4                                                               |
| 11 | 70,650,000 | 70,800,000 | 943 | 820  | 0.130346777  | C2orf71,CLIP4,FAM179A                                                   |
| 11 | 70,725,000 | 70,875,000 | 944 | 468  | -0.095587262 | C2orf71,CLIP4,FAM179A,WDR43                                             |
| 11 | 70,800,000 | 70,950,000 | 945 | 274  | -0.172509727 | FAM179A,SPDYA,WDR43                                                     |
| 11 | 70,875,000 | 71,025,000 | 946 | 200  | -2.711570353 | PPP1CB,SPDYA,WDR43                                                      |
| 11 | 70,950,000 | 71,100,000 | 947 | 200  | -2.902529586 | PPP1CB,SPDYA                                                            |
| 11 | 71,025,000 | 71,175,000 | 948 | 270  | -1.434192606 | PLB1                                                                    |
| 11 | 71,100,000 | 71,250,000 | 949 | 512  | -0.509376529 | PLB1                                                                    |
| 11 | 71,175,000 | 71,325,000 | 950 | 780  | -1.314325292 | PLB1                                                                    |
| 11 | 71,250,000 | 71,400,000 | 951 | 546  | -1.257679291 | FOSL2                                                                   |
| 11 | 71,325,000 | 71,475,000 | 952 | 312  | 0.640050166  | BRE,FOSL2                                                               |
| 11 | 71,400,000 | 71,550,000 | 953 | 379  | 0.119507845  | BRE                                                                     |
| 11 | 71,475,000 | 71,625,000 | 954 | 298  | -0.200329478 | BRE                                                                     |
| 11 | 71,550,000 | 71,700,000 | 955 | 322  | 1.022468776  | BRE                                                                     |
| 11 | 71,625,000 | 71,775,000 | 956 | 405  | 1.210251033  | BRE                                                                     |
| 11 | 71,700,000 | 71,850,000 | 957 | 446  | 1.332962032  | BRE,RBKS                                                                |
| 11 | 71,775,000 | 71,925,000 | 958 | 386  | 1.183489634  | BRE,RBKS                                                                |
| 11 | 71,850,000 | 72,000,000 | 959 | 483  | -0.173039953 | RBKS,ENSBTAG00000018680                                                 |
| 11 | 71,925,000 | 72,075,000 | 960 | 689  | -0.235203361 | GPN1,SUPT7L,ZNF512,ENSBTAG00000018680                                   |
| 11 | 72,000,000 | 72,150,000 | 961 | 595  | 0.365950858  | C2orf16,GPN1,SUPT7L,ZNF512,ENSBTAG00000018680                           |
| 11 | 72,075,000 | 72,225,000 | 962 | 458  | 0.199340105  | C2orf16,FNDC4,GCKR,IFT172,KRTCAP3,NRBP1,ZNF512                          |
| 11 | 72,150,000 | 72,300,000 | 963 | 360  | -0.066449795 | EIF2B4,FNDC4,GCKR,GTF3C2,IFT172,KRTCAP3,NRBP1,PPM1G,SNX17,ZNF513        |
| 11 | 72,225,000 | 72,375,000 | 964 | 293  | 0.462839645  | DNAJC5G,EIF2B4,GTF3C2,MPV17,NRBP1,PPM1G,SLC30A3,SNX17,TRIM54,UCN,ZNF513 |
| 11 | 72,300,000 | 72,450,000 | 965 | 348  | 0.582323209  | ATRAID,CAD,DNAJC5G,GTF3C2,MPV17,SLC30A3,SLC5A6,TRIM54,UCN               |
| 11 | 72,375,000 | 72,525,000 | 966 | 379  | 0.628534272  | ABHD1,ATRAID,CAD,CGREF1,PRES,PRR30,SLC5A6,TCF23                         |
| 11 | 72,450,000 | 72,600,000 | 967 | 367  | 0.474915631  | ABHD1,AGBL5,CGREF1,EMILIN1,KHK,MAPRE3,PRES,PRR30,TCF23,TMEM214          |
| 11 | 72,525,000 | 72,675,000 | 968 | 627  | 0.497668633  | AGBL5,DPYSL5,EMILIN1,KHK,MAPRE3,TMEM214                                 |
| 11 | 72,600,000 | 72,750,000 | 969 | 981  | 0.337255383  | DPYSL5,MAPRE3                                                           |
| 11 | 72,675,000 | 72,825,000 | 970 | 1033 | 0.621938153  | DPYSL5,MGC139367,ENSBTAG00000023938                                     |
| 11 | 72,750,000 | 72,900,000 | 971 | 728  | 0.854523665  | DPYSL5,KCNK3,MGC139367,ENSBTAG00000023938                               |
| 11 | 72,825,000 | 72,975,000 | 972 | 520  | 0.921677065  | C11H2orf70,CIB4,KCNK3                                                   |
| 11 | 72,900,000 | 73,050,000 | 973 | 749  | 1.007169162  | C11H2orf70,CIB4,OTOF                                                    |
| 11 | 72,975,000 | 73,125,000 | 974 | 833  | 0.781020601  | C11H2orf70,DRC1,OTOF                                                    |

|    |            |            |      |      |              |                                                                |
|----|------------|------------|------|------|--------------|----------------------------------------------------------------|
| 11 | 73,050,000 | 73,200,000 | 975  | 657  | -0.014068073 | DRC1,EPT1,GPR113,IER3IP1,OTOF                                  |
| 11 | 73,125,000 | 73,275,000 | 976  | 475  | -0.970717502 | EPT1,GPR113,HADHA,HADHB,IER3IP1                                |
| 11 | 73,200,000 | 73,350,000 | 977  | 427  | -1.640875475 | GAREML,GPR113,HADHA,HADHB,RAB10                                |
| 11 | 73,275,000 | 73,425,000 | 978  | 392  | -0.671603836 | GAREML,HADHA,RAB10                                             |
| 11 | 73,350,000 | 73,500,000 | 979  | 297  | 0.696461633  | KIF3C,RAB10                                                    |
| 11 | 73,425,000 | 73,575,000 | 980  | 354  | 0.612113759  | KIF3C                                                          |
| 11 | 73,500,000 | 73,650,000 | 981  | 415  | 0.171268986  | ASXL2                                                          |
| 11 | 73,575,000 | 73,725,000 | 982  | 392  | 0.239548135  | ASXL2,DTNB                                                     |
| 11 | 73,650,000 | 73,800,000 | 983  | 362  | 0.957781313  | DTNB                                                           |
| 11 | 73,725,000 | 73,875,000 | 984  | 336  | 0.765641169  | DTNB                                                           |
| 11 | 73,800,000 | 73,950,000 | 985  | 299  | 0.629450761  | DTNB                                                           |
| 11 | 73,875,000 | 74,025,000 | 986  | 381  | 0.68197259   | DTNB                                                           |
| 11 | 73,950,000 | 74,100,000 | 987  | 464  | 0.757826454  | DNMT3A                                                         |
| 11 | 74,025,000 | 74,175,000 | 988  | 889  | 1.153680888  | DNMT3A,EFR3B,POMC                                              |
| 11 | 74,100,000 | 74,250,000 | 989  | 1103 | 1.127349202  | EFR3B,POMC                                                     |
| 11 | 74,175,000 | 74,325,000 | 990  | 568  | 0.630700663  | DNAJC27                                                        |
| 11 | 74,250,000 | 74,400,000 | 991  | 436  | -0.336433093 | ADCY3,DNAJC27                                                  |
| 11 | 74,325,000 | 74,475,000 | 992  | 478  | -0.506317208 | ADCY3,CENPO,DNAJC27                                            |
| 11 | 74,400,000 | 74,550,000 | 993  | 264  | -0.913764246 | ADCY3,CENPO,NCOA1,PTRHD1,ENSBTAG00000047575                    |
| 11 | 74,475,000 | 74,625,000 | 994  | 210  | -0.605480751 | CENPO,NCOA1,PTRHD1,ENSBTAG00000047575                          |
| 11 | 74,550,000 | 74,700,000 | 995  | 205  | 0.053847749  | NCOA1                                                          |
| 11 | 74,625,000 | 74,775,000 | 996  | 210  | 0.486277606  |                                                                |
| 11 | 74,700,000 | 74,850,000 | 997  | 256  | 0.004940367  |                                                                |
| 11 | 74,775,000 | 74,925,000 | 998  | 229  | -0.15681075  | ITSN2                                                          |
| 11 | 74,850,000 | 75,000,000 | 999  | 163  | -0.293582027 | FAM228A,FAM228B,ITSN2                                          |
| 11 | 74,925,000 | 75,075,000 | 1000 | 242  | -0.090379967 | C2orf44,FAM228A,FAM228B,FKBP1B,ITSN2,PFN4,SF3B14,TP53I3        |
| 11 | 75,000,000 | 75,150,000 | 1001 | 488  | 0.509687453  | ATAD2B,C2orf44,FAM228B,FKBP1B,MFSD2B,PFN4,SF3B14,TP53I3,UBXN2A |
| 11 | 75,075,000 | 75,225,000 | 1002 | 658  | 0.789325292  | ATAD2B,C2orf44,MFSD2B,UBXN2A                                   |
| 11 | 75,150,000 | 75,300,000 | 1003 | 644  | 0.605343456  | ATAD2B,KLHL29                                                  |
| 11 | 75,225,000 | 75,375,000 | 1004 | 822  | -0.057050943 | ATAD2B,KLHL29                                                  |
| 11 | 75,300,000 | 75,450,000 | 1005 | 803  | 0.233613518  | KLHL29                                                         |
| 11 | 75,375,000 | 75,525,000 | 1006 | 672  | 0.584810229  | KLHL29                                                         |
| 11 | 75,450,000 | 75,600,000 | 1007 | 683  | -0.084256955 | KLHL29                                                         |
| 11 | 75,525,000 | 75,675,000 | 1008 | 452  | -0.384631946 | KLHL29                                                         |
| 11 | 75,600,000 | 75,750,000 | 1009 | 677  | 0.517407572  | KLHL29                                                         |
| 11 | 75,675,000 | 75,825,000 | 1010 | 831  | -0.003137551 |                                                                |
| 11 | 75,750,000 | 75,900,000 | 1011 | 486  | -1.583441201 |                                                                |
| 11 | 75,825,000 | 75,975,000 | 1012 | 564  | -0.355255381 |                                                                |
| 11 | 75,900,000 | 76,050,000 | 1013 | 990  | 0.718665704  |                                                                |
| 11 | 75,975,000 | 76,125,000 | 1014 | 1005 | 0.648269469  |                                                                |
| 11 | 76,050,000 | 76,200,000 | 1015 | 731  | -0.108754902 |                                                                |
| 11 | 76,125,000 | 76,275,000 | 1016 | 583  | 0.044880982  |                                                                |
| 11 | 76,200,000 | 76,350,000 | 1017 | 613  | 0.865021758  |                                                                |
| 11 | 76,275,000 | 76,425,000 | 1018 | 658  | 0.932003628  |                                                                |
| 11 | 76,350,000 | 76,500,000 | 1019 | 659  | 0.54331534   |                                                                |
| 11 | 76,425,000 | 76,575,000 | 1020 | 913  | 0.31019145   |                                                                |
| 11 | 76,500,000 | 76,650,000 | 1021 | 888  | 0.276694038  |                                                                |
| 11 | 76,575,000 | 76,725,000 | 1022 | 876  | 0.227938429  |                                                                |
| 11 | 76,650,000 | 76,800,000 | 1023 | 1023 | -0.14244746  |                                                                |
| 11 | 76,725,000 | 76,875,000 | 1024 | 883  | -0.392155327 |                                                                |
| 11 | 76,800,000 | 76,950,000 | 1025 | 1179 | 0.262669135  |                                                                |



|    |            |            |      |      |              |                              |
|----|------------|------------|------|------|--------------|------------------------------|
| 11 | 76,875,000 | 77,025,000 | 1026 | 1392 | 0.011041276  |                              |
| 11 | 76,950,000 | 77,100,000 | 1027 | 1089 | -1.01019797  |                              |
| 11 | 77,025,000 | 77,175,000 | 1028 | 913  | -1.078941426 |                              |
| 11 | 77,100,000 | 77,250,000 | 1029 | 904  | 0.681184013  |                              |
| 11 | 77,175,000 | 77,325,000 | 1030 | 824  | 0.933387445  |                              |
| 11 | 77,250,000 | 77,400,000 | 1031 | 816  | 0.470832301  |                              |
| 11 | 77,325,000 | 77,475,000 | 1032 | 684  | -0.058465521 |                              |
| 11 | 77,400,000 | 77,550,000 | 1033 | 546  | 0.059319806  |                              |
| 11 | 77,475,000 | 77,625,000 | 1034 | 742  | 0.868236474  |                              |
| 11 | 77,550,000 | 77,700,000 | 1035 | 910  | 0.735355718  | ENSBTAG00000030834           |
| 11 | 77,625,000 | 77,775,000 | 1036 | 872  | 0.096467952  | ENSBTAG00000030834           |
| 11 | 77,700,000 | 77,850,000 | 1037 | 854  | 0.183470802  |                              |
| 11 | 77,775,000 | 77,925,000 | 1038 | 801  | 0.820881107  |                              |
| 11 | 77,850,000 | 78,000,000 | 1039 | 633  | 0.877831791  | APOB                         |
| 11 | 77,925,000 | 78,075,000 | 1040 | 680  | 0.958929843  | APOB                         |
| 11 | 78,000,000 | 78,150,000 | 1041 | 598  | 0.066552952  | APOB                         |
| 11 | 78,075,000 | 78,225,000 | 1042 | 335  | -1.043755437 | C2ORF43                      |
| 11 | 78,150,000 | 78,300,000 | 1043 | 329  | -0.654895537 | C2ORF43,GDF7,HS1BP3          |
| 11 | 78,225,000 | 78,375,000 | 1044 | 600  | -0.867102316 | C2ORF43,GDF7,HS1BP3          |
| 11 | 78,300,000 | 78,450,000 | 1045 | 806  | -0.366041667 | HS1BP3                       |
| 11 | 78,375,000 | 78,525,000 | 1046 | 569  | 0.381723085  | RHOB,ENSBTAG00000016270      |
| 11 | 78,450,000 | 78,600,000 | 1047 | 344  | 0.509305533  | PUM2,RHOB,ENSBTAG00000016270 |
| 11 | 78,525,000 | 78,675,000 | 1048 | 356  | 0.2685167    | PUM2                         |
| 11 | 78,600,000 | 78,750,000 | 1049 | 413  | -0.214809002 | PUM2,SDC1                    |
| 11 | 78,675,000 | 78,825,000 | 1050 | 493  | -0.181020184 | SDC1                         |
| 11 | 78,750,000 | 78,900,000 | 1051 | 522  | 0.54916192   | LAPTM4A,MATN3                |
| 11 | 78,825,000 | 78,975,000 | 1052 | 534  | 0.642564573  | LAPTM4A,MATN3,TTC32          |
| 11 | 78,900,000 | 79,050,000 | 1053 | 456  | 0.547611194  | MATN3,TTC32                  |
| 11 | 78,975,000 | 79,125,000 | 1054 | 464  | 0.640361692  | TTC32                        |
| 11 | 79,050,000 | 79,200,000 | 1055 | 586  | 0.46699084   |                              |
| 11 | 79,125,000 | 79,275,000 | 1056 | 553  | 0.55817244   |                              |
| 11 | 79,200,000 | 79,350,000 | 1057 | 534  | 0.441275794  |                              |
| 11 | 79,275,000 | 79,425,000 | 1058 | 613  | 0.205777511  |                              |
| 11 | 79,350,000 | 79,500,000 | 1059 | 661  | 0.376848318  | OSR1                         |
| 11 | 79,425,000 | 79,575,000 | 1060 | 531  | 0.218274364  | OSR1                         |
| 11 | 79,500,000 | 79,650,000 | 1061 | 444  | -0.155321711 |                              |
| 11 | 79,575,000 | 79,725,000 | 1062 | 479  | -0.27887724  |                              |
| 11 | 79,650,000 | 79,800,000 | 1063 | 475  | -0.081177595 |                              |
| 11 | 79,725,000 | 79,875,000 | 1064 | 413  | 0.225074398  |                              |
| 11 | 79,800,000 | 79,950,000 | 1065 | 573  | -0.024587649 |                              |
| 11 | 79,875,000 | 80,025,000 | 1066 | 708  | 0.169973147  |                              |
| 11 | 79,950,000 | 80,100,000 | 1067 | 518  | 0.580960134  |                              |
| 11 | 80,025,000 | 80,175,000 | 1068 | 505  | 0.871002753  |                              |
| 11 | 80,100,000 | 80,250,000 | 1069 | 488  | 0.827815726  | ENSBTAG00000005270           |
| 11 | 80,175,000 | 80,325,000 | 1070 | 553  | 0.220551664  | RDH14,ENSBTAG00000005270     |
| 11 | 80,250,000 | 80,400,000 | 1071 | 524  | -0.991255198 | RDH14,ENSBTAG00000005270     |
| 11 | 80,325,000 | 80,475,000 | 1072 | 631  | -0.242602186 |                              |
| 11 | 80,400,000 | 80,550,000 | 1073 | 672  | 0.718395312  |                              |
| 11 | 80,475,000 | 80,625,000 | 1074 | 664  | -0.00316197  |                              |
| 11 | 80,550,000 | 80,700,000 | 1075 | 862  | -0.932899724 |                              |
| 11 | 80,625,000 | 80,775,000 | 1076 | 990  | -2.794572611 |                              |
| 11 | 80,700,000 | 80,850,000 | 1077 | 996  | -2.969610134 | KCNS3                        |
| 11 | 80,775,000 | 80,925,000 | 1078 | 714  | -0.246729622 | KCNS3                        |

|    |            |            |      |      |              |                 |
|----|------------|------------|------|------|--------------|-----------------|
| 11 | 80,850,000 | 81,000,000 | 1079 | 390  | 0.236897041  | GEN1,MSGN1      |
| 11 | 80,925,000 | 81,075,000 | 1080 | 233  | 0.556412631  | GEN1,MSGN1,SMC6 |
| 11 | 81,000,000 | 81,150,000 | 1081 | 411  | 1.271001317  | SMC6,VSNL1      |
| 11 | 81,075,000 | 81,225,000 | 1082 | 696  | 1.217022982  | VSNL1           |
| 11 | 81,150,000 | 81,300,000 | 1083 | 552  | 1.163392765  | RAD51AP2,VSNL1  |
| 11 | 81,225,000 | 81,375,000 | 1084 | 429  | 1.014995732  | RAD51AP2        |
| 11 | 81,300,000 | 81,450,000 | 1085 | 624  | 1.090839988  |                 |
| 11 | 81,375,000 | 81,525,000 | 1086 | 926  | 1.13219725   |                 |
| 11 | 81,450,000 | 81,600,000 | 1087 | 1248 | 1.110459728  |                 |
| 11 | 81,525,000 | 81,675,000 | 1088 | 1558 | 0.780606992  |                 |
| 11 | 81,600,000 | 81,750,000 | 1089 | 1533 | 0.568022025  |                 |
| 11 | 81,675,000 | 81,825,000 | 1090 | 1226 | 0.291187639  |                 |
| 11 | 81,750,000 | 81,900,000 | 1091 | 1226 | -0.486060964 |                 |
| 11 | 81,825,000 | 81,975,000 | 1092 | 1163 | -0.129838579 |                 |
| 11 | 81,900,000 | 82,050,000 | 1093 | 1174 | 0.816171925  | FAM49A          |
| 11 | 81,975,000 | 82,125,000 | 1094 | 1256 | 0.909501981  | FAM49A          |
| 11 | 82,050,000 | 82,200,000 | 1095 | 863  | 0.740508136  |                 |
| 11 | 82,125,000 | 82,275,000 | 1096 | 433  | 0.478203202  |                 |
| 11 | 82,200,000 | 82,350,000 | 1097 | 792  | 0.994555163  |                 |
| 11 | 82,275,000 | 82,425,000 | 1098 | 1004 | 0.726869969  |                 |
| 11 | 82,350,000 | 82,500,000 | 1099 | 664  | 0.207978858  |                 |
| 11 | 82,425,000 | 82,575,000 | 1100 | 455  | 0.139335643  |                 |
| 11 | 82,500,000 | 82,650,000 | 1101 | 468  | 0.033604806  |                 |
| 11 | 82,575,000 | 82,725,000 | 1102 | 412  | -0.162917724 | MYCN            |
| 11 | 82,650,000 | 82,800,000 | 1103 | 441  | 0.490759136  | MYCN            |
| 11 | 82,725,000 | 82,875,000 | 1104 | 1033 | 0.982293831  | DDX1            |
| 11 | 82,800,000 | 82,950,000 | 1105 | 1275 | 1.079452001  | DDX1,NBAS       |
| 11 | 82,875,000 | 83,025,000 | 1106 | 1372 | 1.331702034  | NBAS            |
| 11 | 82,950,000 | 83,100,000 | 1107 | 1165 | 1.408159045  | NBAS            |
| 11 | 83,025,000 | 83,175,000 | 1108 | 1192 | 1.306088298  | NBAS            |
| 11 | 83,100,000 | 83,250,000 | 1109 | 1276 | 0.864808895  | NBAS            |
| 11 | 83,175,000 | 83,325,000 | 1110 | 684  | -0.973962062 | NBAS            |
| 11 | 83,250,000 | 83,400,000 | 1111 | 627  | -0.508108287 |                 |
| 11 | 83,325,000 | 83,475,000 | 1112 | 1103 | 0.105059161  |                 |
| 11 | 83,400,000 | 83,550,000 | 1113 | 1509 | 0.607539094  |                 |
| 11 | 83,475,000 | 83,625,000 | 1114 | 1134 | 0.550061742  |                 |
| 11 | 83,550,000 | 83,700,000 | 1115 | 827  | -0.62000706  | FAM84A          |
| 11 | 83,625,000 | 83,775,000 | 1116 | 1288 | 0.153594014  | FAM84A          |
| 11 | 83,700,000 | 83,850,000 | 1117 | 1356 | 0.240758696  |                 |
| 11 | 83,775,000 | 83,925,000 | 1118 | 922  | 0.210517677  |                 |
| 11 | 83,850,000 | 84,000,000 | 1119 | 1001 | 0.779722014  |                 |
| 11 | 83,925,000 | 84,075,000 | 1120 | 944  | 0.622180332  |                 |
| 11 | 84,000,000 | 84,150,000 | 1121 | 404  | -0.14294677  |                 |
| 11 | 84,075,000 | 84,225,000 | 1122 | 314  | 0.442497865  |                 |
| 11 | 84,150,000 | 84,300,000 | 1123 | 467  | 0.503861818  |                 |
| 11 | 84,225,000 | 84,375,000 | 1124 | 628  | 0.591281773  |                 |
| 11 | 84,300,000 | 84,450,000 | 1125 | 874  | 0.367955446  |                 |
| 11 | 84,375,000 | 84,525,000 | 1126 | 777  | 0.238369691  |                 |
| 11 | 84,450,000 | 84,600,000 | 1127 | 579  | 0.153401313  |                 |
| 11 | 84,525,000 | 84,675,000 | 1128 | 528  | -0.895243044 |                 |
| 11 | 84,600,000 | 84,750,000 | 1129 | 681  | -0.206671845 |                 |
| 11 | 84,675,000 | 84,825,000 | 1130 | 798  | 0.60629889   |                 |
| 11 | 84,750,000 | 84,900,000 | 1131 | 870  | 1.187301169  |                 |

|    |            |            |      |      |              |                                           |
|----|------------|------------|------|------|--------------|-------------------------------------------|
| 11 | 84,825,000 | 84,975,000 | 1132 | 1009 | 1.198819826  |                                           |
| 11 | 84,900,000 | 85,050,000 | 1133 | 1023 | 0.941082289  |                                           |
| 11 | 84,975,000 | 85,125,000 | 1134 | 842  | 0.75064011   |                                           |
| 11 | 85,050,000 | 85,200,000 | 1135 | 565  | 0.582533808  |                                           |
| 11 | 85,125,000 | 85,275,000 | 1136 | 549  | -0.460836241 | TRIB2                                     |
| 11 | 85,200,000 | 85,350,000 | 1137 | 720  | -0.066740059 | TRIB2                                     |
| 11 | 85,275,000 | 85,425,000 | 1138 | 828  | 0.783392117  |                                           |
| 11 | 85,350,000 | 85,500,000 | 1139 | 638  | 1.064635228  |                                           |
| 11 | 85,425,000 | 85,575,000 | 1140 | 440  | 0.747277811  |                                           |
| 11 | 85,500,000 | 85,650,000 | 1141 | 394  | 1.151081359  |                                           |
| 11 | 85,575,000 | 85,725,000 | 1142 | 589  | 0.855663944  |                                           |
| 11 | 85,650,000 | 85,800,000 | 1143 | 1013 | 0.146358786  |                                           |
| 11 | 85,725,000 | 85,875,000 | 1144 | 921  | -0.015900878 |                                           |
| 11 | 85,800,000 | 85,950,000 | 1145 | 644  | 0.881632542  |                                           |
| 11 | 85,875,000 | 86,025,000 | 1146 | 633  | 0.723292531  |                                           |
| 11 | 85,950,000 | 86,100,000 | 1147 | 589  | 0.146218209  | LPIN1                                     |
| 11 | 86,025,000 | 86,175,000 | 1148 | 565  | 0.05567322   | LPIN1                                     |
| 11 | 86,100,000 | 86,250,000 | 1149 | 557  | -0.208544429 | GREB1,LPIN1,NTSR2                         |
| 11 | 86,175,000 | 86,325,000 | 1150 | 489  | -1.736066372 | GREB1,NTSR2                               |
| 11 | 86,250,000 | 86,400,000 | 1151 | 430  | -1.175636041 | E2F6,GREB1                                |
| 11 | 86,325,000 | 86,475,000 | 1152 | 408  | 0.507997861  | E2F6                                      |
| 11 | 86,400,000 | 86,550,000 | 1153 | 378  | 0.171728966  | ROCK2,ENSBTAG00000048065                  |
| 11 | 86,475,000 | 86,625,000 | 1154 | 369  | -0.012989783 | C11H2orf50,PQLC3,ROCK2,ENSBTAG00000048065 |
| 11 | 86,550,000 | 86,700,000 | 1155 | 479  | -0.605793202 | C11H2orf50,PQLC3,ROCK2                    |
| 11 | 86,625,000 | 86,775,000 | 1156 | 506  | -0.071488927 | KCNF1                                     |
| 11 | 86,700,000 | 86,850,000 | 1157 | 460  | 0.795947893  | KCNF1,PDIA6                               |
| 11 | 86,775,000 | 86,925,000 | 1158 | 652  | 0.303435302  | ATP6V1C2,PDIA6                            |
| 11 | 86,850,000 | 87,000,000 | 1159 | 888  | -1.30605735  | ATP6V1C2,NOL10,PDIA6                      |
| 11 | 86,925,000 | 87,075,000 | 1160 | 808  | -2.086763356 | NOL10                                     |
| 11 | 87,000,000 | 87,150,000 | 1161 | 520  | -1.648257571 | NOL10                                     |
| 11 | 87,075,000 | 87,225,000 | 1162 | 639  | -0.820669992 | HPCAL1,ODC1                               |
| 11 | 87,150,000 | 87,300,000 | 1163 | 1100 | -3.426183013 | HPCAL1,ODC1                               |
| 11 | 87,225,000 | 87,375,000 | 1164 | 1426 | -1.993747799 | HPCAL1                                    |
| 11 | 87,300,000 | 87,450,000 | 1165 | 1112 | -0.044002072 | HPCAL1                                    |
| 11 | 87,375,000 | 87,525,000 | 1166 | 628  | -0.378522947 | RRM2                                      |
| 11 | 87,450,000 | 87,600,000 | 1167 | 419  | 0.403228709  | GRHL1,RRM2,TIEG2                          |
| 11 | 87,525,000 | 87,675,000 | 1168 | 272  | -0.324678151 | GRHL1,TAF1B,TIEG2                         |
| 11 | 87,600,000 | 87,750,000 | 1169 | 367  | -0.296085954 | GRHL1,TAF1B                               |
| 11 | 87,675,000 | 87,825,000 | 1170 | 436  | 0.381143016  | TAF1B                                     |
| 11 | 87,750,000 | 87,900,000 | 1171 | 416  | 0.886035172  | ADAM17,YWHAQ                              |
| 11 | 87,825,000 | 87,975,000 | 1172 | 762  | -2.521240093 | ADAM17,CPSF3,IAH1,YWHAQ                   |
| 11 | 87,900,000 | 88,050,000 | 1173 | 1010 | -2.956940976 | ADAM17,ASAP2,CPSF3,IAH1,ITGB1BP1          |
| 11 | 87,975,000 | 88,125,000 | 1174 | 1113 | -2.846636833 | ASAP2,CPSF3,ITGB1BP1                      |
| 11 | 88,050,000 | 88,200,000 | 1175 | 1260 | -2.282890975 | ASAP2                                     |
| 11 | 88,125,000 | 88,275,000 | 1176 | 754  | -0.92775763  |                                           |
| 11 | 88,200,000 | 88,350,000 | 1177 | 257  | 0.828642598  |                                           |
| 11 | 88,275,000 | 88,425,000 | 1178 | 253  | 1.2251626    | MBOAT2                                    |
| 11 | 88,350,000 | 88,500,000 | 1179 | 352  | 0.974714837  | KIDINS220,MBOAT2                          |
| 11 | 88,425,000 | 88,575,000 | 1180 | 253  | 0.942795117  | KIDINS220,MBOAT2                          |
| 11 | 88,500,000 | 88,650,000 | 1181 | 140  | 0.662464525  | ID2,KIDINS220                             |
| 11 | 88,575,000 | 88,725,000 | 1182 | 413  | 1.173340453  | ID2                                       |
| 11 | 88,650,000 | 88,800,000 | 1183 | 514  | 1.256399924  |                                           |
| 11 | 88,725,000 | 88,875,000 | 1184 | 813  | 0.825808421  |                                           |

|    |            |            |      |      |              |                                    |
|----|------------|------------|------|------|--------------|------------------------------------|
| 11 | 88,800,000 | 88,950,000 | 1185 | 1295 | 0.199983238  |                                    |
| 11 | 88,875,000 | 89,025,000 | 1186 | 1169 | 0.252827115  |                                    |
| 11 | 88,950,000 | 89,100,000 | 1187 | 1063 | 0.775166928  |                                    |
| 11 | 89,025,000 | 89,175,000 | 1188 | 1112 | 0.933287535  | ENSBTAG00000037793                 |
| 11 | 89,100,000 | 89,250,000 | 1189 | 1019 | 1.058943629  | ENSBTAG00000037793                 |
| 11 | 89,175,000 | 89,325,000 | 1190 | 1099 | 0.807214854  |                                    |
| 11 | 89,250,000 | 89,400,000 | 1191 | 992  | -0.277240645 |                                    |
| 11 | 89,325,000 | 89,475,000 | 1192 | 752  | -0.680207012 |                                    |
| 11 | 89,400,000 | 89,550,000 | 1193 | 730  | -0.074683411 |                                    |
| 11 | 89,475,000 | 89,625,000 | 1194 | 760  | -1.060437515 |                                    |
| 11 | 89,550,000 | 89,700,000 | 1195 | 874  | -1.004095663 |                                    |
| 11 | 89,625,000 | 89,775,000 | 1196 | 751  | 0.352637213  |                                    |
| 11 | 89,700,000 | 89,850,000 | 1197 | 710  | -0.465822693 |                                    |
| 11 | 89,775,000 | 89,925,000 | 1198 | 659  | -0.968500258 | RNF144A                            |
| 11 | 89,850,000 | 90,000,000 | 1199 | 604  | 0.196206672  | RNF144A                            |
| 11 | 89,925,000 | 90,075,000 | 1200 | 578  | 0.828181804  | CMPK2,RNF144A,RSAD2                |
| 11 | 90,000,000 | 90,150,000 | 1201 | 592  | 0.829761552  | CMPK2,RSAD2                        |
| 11 | 90,075,000 | 90,225,000 | 1202 | 864  | 0.208172091  |                                    |
| 11 | 90,150,000 | 90,300,000 | 1203 | 890  | 0.264404411  |                                    |
| 11 | 90,225,000 | 90,375,000 | 1204 | 1075 | 0.220106043  |                                    |
| 11 | 90,300,000 | 90,450,000 | 1205 | 1423 | 0.259476148  |                                    |
| 11 | 90,375,000 | 90,525,000 | 1206 | 1368 | 0.115623006  |                                    |
| 11 | 90,450,000 | 90,600,000 | 1207 | 1167 | 0.310392696  |                                    |
| 11 | 90,525,000 | 90,675,000 | 1208 | 803  | 1.063150696  |                                    |
| 11 | 90,600,000 | 90,750,000 | 1209 | 518  | 0.786740259  |                                    |
| 11 | 90,675,000 | 90,825,000 | 1210 | 801  | -1.655680474 |                                    |
| 11 | 90,750,000 | 90,900,000 | 1211 | 733  | -2.990476165 |                                    |
| 11 | 90,825,000 | 90,975,000 | 1212 | 392  | -2.741937863 |                                    |
| 11 | 90,900,000 | 91,050,000 | 1213 | 552  | 0.008088139  |                                    |
| 11 | 90,975,000 | 91,125,000 | 1214 | 900  | 0.199485885  |                                    |
| 11 | 91,050,000 | 91,200,000 | 1215 | 878  | 0.152217265  |                                    |
| 11 | 91,125,000 | 91,275,000 | 1216 | 938  | 0.575772367  |                                    |
| 11 | 91,200,000 | 91,350,000 | 1217 | 924  | 0.568483065  |                                    |
| 11 | 91,275,000 | 91,425,000 | 1218 | 626  | 0.523193216  |                                    |
| 11 | 91,350,000 | 91,500,000 | 1219 | 813  | 0.333961784  |                                    |
| 11 | 91,425,000 | 91,575,000 | 1220 | 1076 | 0.826098625  |                                    |
| 11 | 91,500,000 | 91,650,000 | 1221 | 843  | 1.066959321  |                                    |
| 11 | 91,575,000 | 91,725,000 | 1222 | 837  | 0.32276957   |                                    |
| 11 | 91,650,000 | 91,800,000 | 1223 | 1171 | 0.345670853  |                                    |
| 11 | 91,725,000 | 91,875,000 | 1224 | 1021 | 0.516846413  |                                    |
| 11 | 91,800,000 | 91,950,000 | 1225 | 962  | 0.720916774  |                                    |
| 11 | 91,875,000 | 92,025,000 | 1226 | 1034 | 0.432951078  |                                    |
| 11 | 91,950,000 | 92,100,000 | 1227 | 1053 | -0.201657973 |                                    |
| 11 | 92,025,000 | 92,175,000 | 1228 | 1143 | 0.081386712  |                                    |
| 11 | 92,100,000 | 92,250,000 | 1229 | 885  | 0.783858668  | ENSBTAG00000039201                 |
| 11 | 92,175,000 | 92,325,000 | 1230 | 579  | -0.287855403 | GGTA1,MGC151949,ENSBTAG00000039201 |
| 11 | 92,250,000 | 92,400,000 | 1231 | 426  | -1.973747087 | GGTA1,MGC151949                    |
| 11 | 92,325,000 | 92,475,000 | 1232 | 417  | -0.145524748 | GGTA1                              |
| 11 | 92,400,000 | 92,550,000 | 1233 | 515  | -0.124127765 |                                    |
| 11 | 92,475,000 | 92,625,000 | 1234 | 567  | -3.41587249  | DAB2IP                             |
| 11 | 92,550,000 | 92,700,000 | 1235 | 544  | -3.144771239 | DAB2IP                             |
| 11 | 92,625,000 | 92,775,000 | 1236 | 717  | 0.111372752  | DAB2IP,TTLL11                      |
| 11 | 92,700,000 | 92,850,000 | 1237 | 1017 | 1.159673478  | TTLL11                             |

|    |            |            |      |      |              |                                                                                                                                                                                         |
|----|------------|------------|------|------|--------------|-----------------------------------------------------------------------------------------------------------------------------------------------------------------------------------------|
| 11 | 92,775,000 | 92,925,000 | 1238 | 753  | 1.35513295   | TTL11                                                                                                                                                                                   |
| 11 | 92,850,000 | 93,000,000 | 1239 | 703  | -0.388596804 | TTL11                                                                                                                                                                                   |
| 11 | 92,925,000 | 93,075,000 | 1240 | 783  | -0.787397052 | LHX6,MORN5,NDUFA8                                                                                                                                                                       |
| 11 | 93,000,000 | 93,150,000 | 1241 | 493  | -0.958868816 | LHX6,MORN5,MRRF,NDUFA8,RBM18                                                                                                                                                            |
| 11 | 93,075,000 | 93,225,000 | 1242 | 607  | 0.67402655   | LHX6,MRRF,PTGS1,RBM18                                                                                                                                                                   |
| 11 | 93,150,000 | 93,300,000 | 1243 | 729  | 1.330492153  | MRRF,PTGS1,ENSBTAG00000047610,ENSBTAG000000476<br>93<br>PTGS1,ENSBTAG00000038309,ENSBTAG00000038796,ENS<br>BTAG00000046018,ENSBTAG00000046137,ENSBTAG0000<br>0047610,ENSBTAG00000047693 |
| 11 | 93,225,000 | 93,375,000 | 1244 | 481  | 1.052675001  | ENSBTAG00000037739,ENSBTAG00000038278,ENSBTAG0<br>0000038309,ENSBTAG00000038796,ENSBTAG0000004601<br>8,ENSBTAG00000046137                                                               |
| 11 | 93,300,000 | 93,450,000 | 1245 | 495  | -1.378267613 | ENSBTAG00000037739,ENSBTAG00000038278,ENSBTAG0<br>0000039225                                                                                                                            |
| 11 | 93,375,000 | 93,525,000 | 1246 | 902  | -3.597954796 | OR1J1,ENSBTAG00000037542,ENSBTAG00000038726,ENS<br>BTAG00000039225                                                                                                                      |
| 11 | 93,450,000 | 93,600,000 | 1247 | 874  | -2.39763007  | OR1J1,OR1J2,OR1N1,ENSBTAG00000037542,ENSBTAG000<br>00038726,ENSBTAG00000046536,ENSBTAG00000047112,<br>ENSBTAG00000047728                                                                |
| 11 | 93,525,000 | 93,675,000 | 1248 | 1070 | 0.763823126  | OR1J2,OR1N1,OR1Q1,ENSBTAG00000020660,ENSBTAG00<br>000038551,ENSBTAG00000045527,ENSBTAG00000045545<br>,ENSBTAG00000046536,ENSBTAG00000047112,ENSBTAG<br>00000047728                      |
| 11 | 93,600,000 | 93,750,000 | 1249 | 1618 | 0.900749088  | OR1L1,OR1L3,OR1Q1,ENSBTAG00000020660,ENSBTAG00<br>000038551,ENSBTAG00000045527,ENSBTAG00000045528<br>,ENSBTAG00000045545                                                                |
| 11 | 93,675,000 | 93,825,000 | 1250 | 2094 | 0.933630806  | OR1L1,OR1L3,ENSBTAG00000037822,ENSBTAG00000038<br>665,ENSBTAG00000038941,ENSBTAG00000045528                                                                                             |
| 11 | 93,750,000 | 93,900,000 | 1251 | 2027 | 0.959605642  | OR1K1,OR5C1,ENSBTAG0000004667,ENSBTAG00000030<br>677,ENSBTAG00000037822,ENSBTAG00000038665,ENSBT<br>AG00000038941                                                                       |
| 11 | 93,825,000 | 93,975,000 | 1252 | 1300 | 0.918955434  | OR1K1,OR5C1,PDCL,RC3H2,ENSBTAG0000004667,ENSBT<br>AG00000030677                                                                                                                         |
| 11 | 93,900,000 | 94,050,000 | 1253 | 629  | 0.358829837  | PDCL,RABGAP1,RC3H2,ZBTB26,ZBTB6                                                                                                                                                         |
| 11 | 93,975,000 | 94,125,000 | 1254 | 294  | 0.609603455  | GPR21,RABGAP1,RC3H2,ZBTB26,ZBTB6                                                                                                                                                        |
| 11 | 94,050,000 | 94,200,000 | 1255 | 444  | 0.822865434  | GPR21,RABGAP1,ENSBTAG00000024604                                                                                                                                                        |
| 11 | 94,125,000 | 94,275,000 | 1256 | 504  | 0.775240198  | RABGAP1,STRBP,ENSBTAG00000024604                                                                                                                                                        |
| 11 | 94,200,000 | 94,350,000 | 1257 | 374  | 0.697022316  | STRBP,ENSBTAG00000024604                                                                                                                                                                |
| 11 | 94,275,000 | 94,425,000 | 1258 | 285  | 0.703349725  | STRBP,ENSBTAG00000024604                                                                                                                                                                |
| 11 | 94,350,000 | 94,500,000 | 1259 | 475  | 0.648295144  | STRBP                                                                                                                                                                                   |
| 11 | 94,425,000 | 94,575,000 | 1260 | 580  | 0.500151281  | CRB2,DENND1A                                                                                                                                                                            |
| 11 | 94,500,000 | 94,650,000 | 1261 | 404  | 0.444451768  | CRB2,DENND1A                                                                                                                                                                            |
| 11 | 94,575,000 | 94,725,000 | 1262 | 488  | -0.470545442 | DENND1A                                                                                                                                                                                 |
| 11 | 94,650,000 | 94,800,000 | 1263 | 547  | -0.083935423 | DENND1A                                                                                                                                                                                 |
| 11 | 94,725,000 | 94,875,000 | 1264 | 382  | 1.069150116  | DENND1A                                                                                                                                                                                 |
| 11 | 94,800,000 | 94,950,000 | 1265 | 305  | 0.625069349  | DENND1A,ENSBTAG00000023860                                                                                                                                                              |
| 11 | 94,875,000 | 95,025,000 | 1266 | 233  | 0.728073864  | DENND1A,ENSBTAG00000023860                                                                                                                                                              |
| 11 | 94,950,000 | 95,100,000 | 1267 | 231  | 0.675465954  | DENND1A                                                                                                                                                                                 |
| 11 | 95,025,000 | 95,175,000 | 1268 | 222  | 0.401204251  | DENND1A,LHX2                                                                                                                                                                            |
| 11 | 95,100,000 | 95,250,000 | 1269 | 493  | -0.525823284 | LHX2                                                                                                                                                                                    |
| 11 | 95,175,000 | 95,325,000 | 1270 | 640  | -0.566450992 | NEK6                                                                                                                                                                                    |
| 11 | 95,250,000 | 95,400,000 | 1271 | 463  | 0.312333261  | NEK6                                                                                                                                                                                    |
| 11 | 95,325,000 | 95,475,000 | 1272 | 515  | 0.042703051  | NEK6,PSMB7                                                                                                                                                                              |

|    |            |            |      |      |              |                                                                             |
|----|------------|------------|------|------|--------------|-----------------------------------------------------------------------------|
| 11 | 95,400,000 | 95,550,000 | 1273 | 734  | -1.493313079 | GPR144,NEK6,NR5A1,PSMB7                                                     |
| 11 | 95,475,000 | 95,625,000 | 1274 | 591  | -1.622898397 | GPR144,NR5A1,NR6A1                                                          |
| 11 | 95,550,000 | 95,700,000 | 1275 | 273  | 0.462606731  | NR6A1                                                                       |
| 11 | 95,625,000 | 95,775,000 | 1276 | 287  | 1.284074269  |                                                                             |
| 11 | 95,700,000 | 95,850,000 | 1277 | 382  | 1.118510142  | OLFML2A,WDR38                                                               |
| 11 | 95,775,000 | 95,925,000 | 1278 | 335  | 0.19577092   | ARPC5L,GOLGA1,OLFML2A,RPL35,WDR38                                           |
| 11 | 95,850,000 | 96,000,000 | 1279 | 191  | -1.496749668 | ARPC5L,GOLGA1,RPL35,SCAI,WDR38                                              |
| 11 | 95,925,000 | 96,075,000 | 1280 | 278  | -2.791494179 | PPP6C,SCAI                                                                  |
| 11 | 96,000,000 | 96,150,000 | 1281 | 423  | -1.320328329 | GAPVD1,GRP78,PPP6C,RABEPK                                                   |
| 11 | 96,075,000 | 96,225,000 | 1282 | 381  | -0.055104587 | GAPVD1,GRP78,PPP6C,RABEPK                                                   |
| 11 | 96,150,000 | 96,300,000 | 1283 | 403  | 0.39709376   | GAPVD1,MAPKAP1                                                              |
| 11 | 96,225,000 | 96,375,000 | 1284 | 385  | 0.179111934  | MAPKAP1                                                                     |
| 11 | 96,300,000 | 96,450,000 | 1285 | 286  | -0.403215803 | MAPKAP1                                                                     |
| 11 | 96,375,000 | 96,525,000 | 1286 | 261  | -0.742709821 | MAPKAP1                                                                     |
| 11 | 96,450,000 | 96,600,000 | 1287 | 197  | -1.300348835 | MAPKAP1                                                                     |
| 11 | 96,525,000 | 96,675,000 | 1288 | 151  | -1.338246668 |                                                                             |
| 11 | 96,600,000 | 96,750,000 | 1289 | 248  | -0.013009099 | PBX3                                                                        |
| 11 | 96,675,000 | 96,825,000 | 1290 | 469  | 0.181646954  | PBX3                                                                        |
| 11 | 96,750,000 | 96,900,000 | 1291 | 619  | 0.407353026  | PBX3                                                                        |
| 11 | 96,825,000 | 96,975,000 | 1292 | 422  | 0.3733171    |                                                                             |
| 11 | 96,900,000 | 97,050,000 | 1293 | 364  | -2.823021195 |                                                                             |
| 11 | 96,975,000 | 97,125,000 | 1294 | 953  | -0.186525563 |                                                                             |
| 11 | 97,050,000 | 97,200,000 | 1295 | 1160 | 0.763347432  |                                                                             |
| 11 | 97,125,000 | 97,275,000 | 1296 | 800  | 0.657112896  |                                                                             |
| 11 | 97,200,000 | 97,350,000 | 1297 | 603  | 0.669535036  |                                                                             |
| 11 | 97,275,000 | 97,425,000 | 1298 | 444  | 0.197281239  |                                                                             |
| 11 | 97,350,000 | 97,500,000 | 1299 | 363  | 0.06084133   | LMX1B                                                                       |
| 11 | 97,425,000 | 97,575,000 | 1300 | 465  | 0.397643162  | LMX1B                                                                       |
| 11 | 97,500,000 | 97,650,000 | 1301 | 456  | -0.846315551 | ZNF297B                                                                     |
| 11 | 97,575,000 | 97,725,000 | 1302 | 401  | -1.671249416 | RALGPS1,ZBTB34,ZNF297B                                                      |
| 11 | 97,650,000 | 97,800,000 | 1303 | 357  | -0.847809378 | RALGPS1,ZBTB34                                                              |
| 11 | 97,725,000 | 97,875,000 | 1304 | 497  | -0.131676747 | ANGPTL2,RALGPS1                                                             |
| 11 | 97,800,000 | 97,950,000 | 1305 | 633  | -0.778960677 | ANGPTL2,RALGPS1                                                             |
| 11 | 97,875,000 | 98,025,000 | 1306 | 657  | -1.100226535 | GARNL3,RALGPS1                                                              |
| 11 | 97,950,000 | 98,100,000 | 1307 | 623  | -0.619493918 | GARNL3,RALGPS1                                                              |
| 11 | 98,025,000 | 98,175,000 | 1308 | 485  | 0.320676321  | GARNL3,SLC2A8,ZNF79                                                         |
| 11 | 98,100,000 | 98,250,000 | 1309 | 414  | 0.727144387  | FAM129B,GARNL3,LRSAM1,RPL12,SLC2A8,ZNF79                                    |
| 11 | 98,175,000 | 98,325,000 | 1310 | 399  | 0.316943786  | FAM129B,LRSAM1,RPL12,ZNF79                                                  |
| 11 | 98,250,000 | 98,400,000 | 1311 | 452  | -0.373509955 | CYCS,FAM129B,STXBP1                                                         |
| 11 | 98,325,000 | 98,475,000 | 1312 | 416  | -0.440323178 | C9orf117,CDK9,CYCS,PTRH1,SH2D3C,STXBP1,TOR2A,TTC16                          |
| 11 | 98,400,000 | 98,550,000 | 1313 | 350  | 0.990294295  | C9orf117,CDK9,ENG,FPGS,PTRH1,SH2D3C,TOR2A,TTC16,ENSBTAG00000046303          |
| 11 | 98,475,000 | 98,625,000 | 1314 | 407  | 1.02137425   | AK1,CDK9,DPM2,ENG,FAM102A,FPGS,PIP5KL1,SIAT7B,ST6GALNAC6,ENSBTAG00000046303 |
| 11 | 98,550,000 | 98,700,000 | 1315 | 504  | 1.174273226  | AK1,DPM2,FAM102A,PIP5KL1,SIAT7B,ST6GALNAC6                                  |
| 11 | 98,625,000 | 98,775,000 | 1316 | 586  | 1.021036894  | FAM102A,NAIF1,PTGES2,SLC25A25                                               |
| 11 | 98,700,000 | 98,850,000 | 1317 | 686  | 0.57800198   | C11H9orf16,CIZ1,DNM1,LCN2,NAIF1,PTGES2,SLC25A25                             |
| 11 | 98,775,000 | 98,925,000 | 1318 | 492  | 0.510034643  | C11H9orf16,CIZ1,DNM1,LCN2,PTGES2,SWI5,TRUB2,ENSBTAG00000011317              |
| 11 | 98,850,000 | 99,000,000 | 1319 | 432  | 0.814204207  | COQ4,DNM1,SLC27A4,SWI5,TRUB2,URM1,ENSBTAG00000011317                        |
| 11 | 98,925,000 | 99,075,000 | 1320 | 494  | 0.902004088  | CERCAM,COQ4,ODF2,SLC27A4,TRUB2,URM1                                         |

|    |             |             |      |     |              |                                                                       |
|----|-------------|-------------|------|-----|--------------|-----------------------------------------------------------------------|
| 11 | 99,000,000  | 99,150,000  | 1321 | 410 | 1.131867963  | CERCAM,GLE1,ODF2,SPTAN1                                               |
| 11 | 99,075,000  | 99,225,000  | 1322 | 396 | 0.514253556  | GLE1,SET,SPTAN1,WDR34                                                 |
| 11 | 99,150,000  | 99,300,000  | 1323 | 321 | 0.125404128  | PKN3,SET,SPTAN1,TBC1D13,WDR34,ZDHHC12,ZER1                            |
| 11 | 99,225,000  | 99,375,000  | 1324 | 314 | 0.733189599  | C9orf114,CCBL1,ENDOG,PKN3,SET,TBC1D13,ZDHHC12,ZER1,ENSBTAG00000036099 |
| 11 | 99,300,000  | 99,450,000  | 1325 | 453 | -0.497519768 | C9orf114,CCBL1,ENDOG,LLRC8A,PHYHD1,TBC1D13,ENSBTAG00000036099         |
| 11 | 99,375,000  | 99,525,000  | 1326 | 469 | -1.57440713  | CCBL1,DOLK,LLRC8A,NUP188,PHYHD1,SH3GLB2                               |
| 11 | 99,450,000  | 99,600,000  | 1327 | 348 | -0.637016798 | DOLK,DOLPP1,FAM73B,MGC142781,NUP188,PHYHD1,PPP2R4,SH3GLB2             |
| 11 | 99,525,000  | 99,675,000  | 1328 | 291 | 0.156822712  | DOLPP1,FAM73B,IER5L,MGC142781,PPP2R4                                  |
| 11 | 99,600,000  | 99,750,000  | 1329 | 371 | -0.274279585 | IER5L,PPP2R4                                                          |
| 11 | 99,675,000  | 99,825,000  | 1330 | 432 | -2.759816715 |                                                                       |
| 11 | 99,750,000  | 99,900,000  | 1331 | 399 | -2.328362222 |                                                                       |
| 11 | 99,825,000  | 99,975,000  | 1332 | 568 | 0.743545792  |                                                                       |
| 11 | 99,900,000  | 100,050,000 | 1333 | 627 | 0.194894105  | C9orf50,NTMT1                                                         |
| 11 | 99,975,000  | 100,125,000 | 1334 | 394 | -0.915890046 | ASB6,C9orf50,NTMT1,PRRX2,ENSBTAG00000038183                           |
| 11 | 100,050,000 | 100,200,000 | 1335 | 447 | 0.073930964  | ASB6,PRRX2,PTGES,ENSBTAG00000038183                                   |
| 11 | 100,125,000 | 100,275,000 | 1336 | 598 | 0.497968339  | C11H9ORF78,PRRX2,PTGES,TOR1A,TOR1B,USP20,ENSBTAG00000047907           |
| 11 | 100,200,000 | 100,350,000 | 1337 | 749 | 0.744514654  | C11H9ORF78,FNBP1,TOR1A,TOR1B,USP20,ENSBTAG00000047907                 |
| 11 | 100,275,000 | 100,425,000 | 1338 | 857 | 0.76632888   | FNBP1,USP20                                                           |
| 11 | 100,350,000 | 100,500,000 | 1339 | 855 | 0.279671832  | FNBP1,GPR107                                                          |
| 11 | 100,425,000 | 100,575,000 | 1340 | 736 | -0.365547726 | GPR107,NCS1                                                           |
| 11 | 100,500,000 | 100,650,000 | 1341 | 459 | 0.048836998  | HMCN2,NCS1                                                            |
| 11 | 100,575,000 | 100,725,000 | 1342 | 570 | 0.690680141  | HMCN2                                                                 |
| 11 | 100,650,000 | 100,800,000 | 1343 | 556 | 0.847716543  | ASS1,HMCN2                                                            |
| 11 | 100,725,000 | 100,875,000 | 1344 | 398 | 0.226787535  | ASS1,HMCN2                                                            |
| 11 | 100,800,000 | 100,950,000 | 1345 | 782 | 0.329223634  | ASS1,FUBP3                                                            |
| 11 | 100,875,000 | 101,025,000 | 1346 | 715 | 0.421347125  | EXOSC2,FUBP3,PRDM12                                                   |
| 11 | 100,950,000 | 101,100,000 | 1347 | 530 | 0.960127957  | EXOSC2,FUBP3,PRDM12                                                   |
| 11 | 101,025,000 | 101,175,000 | 1348 | 653 | -0.406648529 | ABL1,FIBCD1,QRFP                                                      |
| 11 | 101,100,000 | 101,250,000 | 1349 | 593 | -3.071612232 | ABL1,FIBCD1,LAMC3,QRFP                                                |
| 11 | 101,175,000 | 101,325,000 | 1350 | 707 | -0.48886302  | FIBCD1,LAMC3                                                          |
| 11 | 101,250,000 | 101,400,000 | 1351 | 517 | 0.806633657  | AIF1L,LAMC3,NUP214                                                    |
| 11 | 101,325,000 | 101,475,000 | 1352 | 379 | 0.890339554  | AIF1L,NUP214                                                          |
| 11 | 101,400,000 | 101,550,000 | 1353 | 502 | 0.313370522  | C9ORF59,NUP214,PPAPDC3                                                |
| 11 | 101,475,000 | 101,625,000 | 1354 | 461 | 0.176241749  | C9ORF59,PPAPDC3,PRRC2B                                                |
| 11 | 101,550,000 | 101,700,000 | 1355 | 509 | 0.561649779  | POMT1,PRRC2B,UCK1                                                     |
| 11 | 101,625,000 | 101,775,000 | 1356 | 820 | 0.835149146  | POMT1,PRRC2B,RAPGEF1,UCK1                                             |
| 11 | 101,700,000 | 101,850,000 | 1357 | 971 | -0.35414209  | RAPGEF1                                                               |
| 11 | 101,775,000 | 101,925,000 | 1358 | 852 | -1.191818013 | RAPGEF1                                                               |
| 11 | 101,850,000 | 102,000,000 | 1359 | 690 | -0.28237672  | MED27                                                                 |
| 11 | 101,925,000 | 102,075,000 | 1360 | 640 | 0.326509677  | MED27                                                                 |
| 11 | 102,000,000 | 102,150,000 | 1361 | 508 | -0.456640546 | MED27                                                                 |
| 11 | 102,075,000 | 102,225,000 | 1362 | 561 | -1.417042325 | MED27                                                                 |
| 11 | 102,150,000 | 102,300,000 | 1363 | 694 | -0.942828608 | MED27,NTNG2                                                           |
| 11 | 102,225,000 | 102,375,000 | 1364 | 669 | -0.099367956 | NTNG2,SETX                                                            |
| 11 | 102,300,000 | 102,450,000 | 1365 | 646 | 0.479515007  | NTNG2,SETX                                                            |
| 11 | 102,375,000 | 102,525,000 | 1366 | 775 | 0.913927485  | C9orf171,SETX,TTF1,ENSBTAG00000023697                                 |
| 11 | 102,450,000 | 102,600,000 | 1367 | 811 | 1.239960434  | C9orf171,SETX,TTF1,ENSBTAG00000023697                                 |
| 11 | 102,525,000 | 102,675,000 | 1368 | 741 | 0.871919853  | C9orf171                                                              |

|    |             |             |      |      |              |                                                                                        |
|----|-------------|-------------|------|------|--------------|----------------------------------------------------------------------------------------|
| 11 | 102,600,000 | 102,750,000 | 1369 | 602  | 0.133115546  | BARHL1,C9orf171,DDX31                                                                  |
| 11 | 102,675,000 | 102,825,000 | 1370 | 293  | -0.236055968 | AK8,BARHL1,DDX31,GTF3C4                                                                |
| 11 | 102,750,000 | 102,900,000 | 1371 | 483  | -0.922622922 | AK8,DDX31,GTF3C4                                                                       |
| 11 | 102,825,000 | 102,975,000 | 1372 | 701  | -0.019732813 | AK8,C11H9ORF9,TSC1                                                                     |
| 11 | 102,900,000 | 103,050,000 | 1373 | 557  | 0.715965601  | AK8,C11H9ORF9,GFI1B,TSC1                                                               |
| 11 | 102,975,000 | 103,125,000 | 1374 | 494  | 0.714590271  | CEL,GFI1B,GTF3C5,TSC1                                                                  |
| 11 | 103,050,000 | 103,200,000 | 1375 | 717  | -1.511158259 | CEL,GBGT1,GFI1B,GTF3C5,RALGDS,TSC1                                                     |
| 11 | 103,125,000 | 103,275,000 | 1376 | 977  | -1.492522596 | GBGT1,RALGDS,ENSBTAG00000000893                                                        |
| 11 | 103,200,000 | 103,350,000 | 1377 | 1096 | -0.123341128 | GLT6D1,LCN9,LGB,SOHLH1,ENSBTAG00000000893,ENSBTAG000000048091                          |
| 11 | 103,275,000 | 103,425,000 | 1378 | 842  | 0.016223968  | GLT6D1,KCNT1,LCN9,LGB,SOHLH1,ENSBTAG000000048091                                       |
| 11 | 103,350,000 | 103,500,000 | 1379 | 490  | 0.582850683  | CAMSAP1,KCNT1,SOHLH1                                                                   |
| 11 | 103,425,000 | 103,575,000 | 1380 | 327  | 0.851879243  | CAMSAP1,KCNT1,NACC2,UBAC1                                                              |
| 11 | 103,500,000 | 103,650,000 | 1381 | 475  | 0.24877759   | NACC2,UBAC1                                                                            |
| 11 | 103,575,000 | 103,725,000 | 1382 | 499  | 0.002027689  | C9orf69,NACC2                                                                          |
| 11 | 103,650,000 | 103,800,000 | 1383 | 499  | 0.812446653  | C9orf69,LHX3,QSOX2                                                                     |
| 11 | 103,725,000 | 103,875,000 | 1384 | 532  | 0.93240125   | DNLZ,GPSM1,LHX3,QSOX2,ENSBTAG00000023064                                               |
| 11 | 103,800,000 | 103,950,000 | 1385 | 354  | -1.091808842 | CARD9,DNLZ,GPSM1,INPP5E,PMPCA,SDCCAG3,SEC16A,SNAPC4,ENSBTAG00000023064                 |
| 11 | 103,875,000 | 104,025,000 | 1386 | 350  | -1.487320442 | CARD9,DNLZ,INPP5E,NOTCH1,PMPCA,SDCCAG3,SEC16A,SNAPC4                                   |
| 11 | 103,950,000 | 104,100,000 | 1387 | 324  | 0.364638041  | NOTCH1,SEC16A                                                                          |
| 11 | 104,025,000 | 104,175,000 | 1388 | 384  | 0.216591079  | AGPAT2,EGFL7,NOTCH1                                                                    |
| 11 | 104,100,000 | 104,250,000 | 1389 | 1136 | 0.585877397  | ABO,AGPAT2,EGFL7,FAM69B                                                                |
| 11 | 104,175,000 | 104,325,000 | 1390 | 1453 | 0.726292863  | ABO,FAM69B,MED22,RPL7A,SURF1,SURF2,SURF6                                               |
| 11 | 104,250,000 | 104,400,000 | 1391 | 888  | 0.553846949  | ABO,ADAMTS13,MED22,REXO4,RPL7A,STKLD1,SURF1,SURF2,SURF6                                |
| 11 | 104,325,000 | 104,475,000 | 1392 | 604  | 0.236905321  | ADAMTS13,ADAMTSL2,MGC139698,REXO4,SLC2A6,STKLD1,SURF1,TMEM8C                           |
| 11 | 104,400,000 | 104,550,000 | 1393 | 736  | 0.620993428  | ADAMTS13,ADAMTSL2,FAM163B,MGC139698,SLC2A6,TMEM8C                                      |
| 11 | 104,475,000 | 104,625,000 | 1394 | 1190 | 0.75529871   | ADAMTSL2,DBH,FAM163B,SARDH                                                             |
| 11 | 104,550,000 | 104,700,000 | 1395 | 1357 | 0.484662951  | DBH,SARDH,VAV2                                                                         |
| 11 | 104,625,000 | 104,775,000 | 1396 | 1369 | -1.109438622 | SARDH,VAV2                                                                             |
| 11 | 104,700,000 | 104,850,000 | 1397 | 1100 | -1.409995351 |                                                                                        |
| 11 | 104,775,000 | 104,925,000 | 1398 | 499  | -0.388663327 | BRD3                                                                                   |
| 11 | 104,850,000 | 105,000,000 | 1399 | 442  | 0.331583393  | BRD3,WDR5                                                                              |
| 11 | 104,925,000 | 105,075,000 | 1400 | 639  | 0.441102728  | WDR5                                                                                   |
| 11 | 105,000,000 | 105,150,000 | 1401 | 761  | 0.405019144  | ENSBTAG00000008308                                                                     |
| 11 | 105,075,000 | 105,225,000 | 1402 | 732  | 0.46769137   | CACNA1B,ENSBTAG00000008308                                                             |
| 11 | 105,150,000 | 105,300,000 | 1403 | 478  | 0.371146216  | CACNA1B                                                                                |
| 11 | 105,225,000 | 105,375,000 | 1404 | 523  | 0.353281776  | CACNA1B                                                                                |
| 11 | 105,300,000 | 105,450,000 | 1405 | 799  | 0.086278718  | CACNA1B,EHMT1                                                                          |
| 11 | 105,375,000 | 105,525,000 | 1406 | 695  | -0.774226706 | CACNA1B,EHMT1                                                                          |
| 11 | 105,450,000 | 105,600,000 | 1407 | 519  | -0.594520286 | ARRDC1,DPH7,EHMT1,MRPL41,PNPLA7,ZMYND19                                                |
| 11 | 105,525,000 | 105,675,000 | 1408 | 464  | 0.274948964  | ARRDC1,DPH7,MRPL41,NSMF,PNPLA7,ZMYND19                                                 |
| 11 | 105,600,000 | 105,750,000 | 1409 | 537  | 0.724712444  | ENTPD8,EXD3,NOXA1,NSMF,PNPLA7                                                          |
| 11 | 105,675,000 | 105,825,000 | 1410 | 557  | 0.387238759  | ENTPD8,EXD3,NOXA1,NRARP,NSMF                                                           |
| 11 | 105,750,000 | 105,900,000 | 1411 | 343  | -0.371465319 | COBRA1,CYSRT1,EXD3,FAM166A,NDOR1,NRARP,RNF208,RNF224,SLC34A3,TMEM203,TOR4A,TPRN,TUBB4B |



|    |             |             |      |      |              |                                                                                                                                                                                                                              |
|----|-------------|-------------|------|------|--------------|------------------------------------------------------------------------------------------------------------------------------------------------------------------------------------------------------------------------------|
| 11 | 105,825,000 | 105,975,000 | 1412 | 289  | -0.540076311 | COBRA1,CYSRT1,FAM166A,GRIN1,LRRC26,NDOR1,RNF208,RNF224,SLC34A3,SSNA1,TMEM203,TMEM210,TOR4A,TPRN,TUBB4B,ENSBTAG00000046223,ENSBTAG00000046416                                                                                 |
| 11 | 105,900,000 | 106,050,000 | 1413 | 394  | 0.465324204  | GRIN1,LRRC26,RXRA,SSNA1,TMEM210,TPRN,ENSBTAG0000046223,ENSBTAG00000046416                                                                                                                                                    |
| 11 | 105,975,000 | 106,125,000 | 1414 | 751  | 0.459885988  | RXRA                                                                                                                                                                                                                         |
| 11 | 106,050,000 | 106,200,000 | 1415 | 811  | 0.166914681  | ENTPD2,MAN1B1,NPDC1,SAPCD2,UAP1L1                                                                                                                                                                                            |
| 11 | 106,125,000 | 106,275,000 | 1416 | 608  | -0.15278839  | ABCA2,C11H9ORF142,CLIC3,ENTPD2,FUT7,LCNL1,MAN1B1,NPDC1,PTGDS,SAPCD2,UAP1L1                                                                                                                                                   |
| 11 | 106,200,000 | 106,350,000 | 1417 | 662  | -0.282184401 | ABCA2,C11H9ORF142,C8G,C9orf172,CLIC3,EDF1,FBXW5,FUT7,LCNL1,LCNL1,MAMDC4,PHPT1,PTGDS,RABL6,TRAF2C8G,C9orf172,EDF1,FBXW5,KIAA1984,LCN10,LCN12,LCN15,LCN8,MAMDC4,PHPT1,RABL6,TMEM141,TRAF2,ENSBTAG0000016148,ENSBTAG00000047297 |
| 11 | 106,275,000 | 106,425,000 | 1418 | 1142 | 0.470704931  | C9orf116,KIAA1984,LCN1,LCN10,LCN15,LCN8,MRPS2,PPP1R26,RABL6,TMEM141,ENSBTAG00000016148,ENSBTAG0000038440,ENSBTAG00000047297                                                                                                  |
| 11 | 106,350,000 | 106,500,000 | 1419 | 1798 | 0.461952006  | C9orf116,LCN1,MRPS2,PPP1R26,ENSBTAG00000038440                                                                                                                                                                               |
| 11 | 106,425,000 | 106,575,000 | 1420 | 1925 | -0.685809369 |                                                                                                                                                                                                                              |
| 11 | 106,500,000 | 106,650,000 | 1421 | 1652 | -0.976092759 |                                                                                                                                                                                                                              |
| 11 | 106,575,000 | 106,725,000 | 1422 | 1324 | -0.060700246 | OLFM1                                                                                                                                                                                                                        |
| 11 | 106,650,000 | 106,800,000 | 1423 | 1516 | -1.311408436 | OLFM1                                                                                                                                                                                                                        |
| 11 | 106,725,000 | 106,875,000 | 1424 | 1495 | -1.037362057 | COL5A1,FCN2                                                                                                                                                                                                                  |
| 11 | 106,800,000 | 106,950,000 | 1425 | 1005 | 0.016612058  | COL5A1,FCN2                                                                                                                                                                                                                  |
| 11 | 106,875,000 | 107,025,000 | 1426 | 889  | 0.409365946  | COL5A1                                                                                                                                                                                                                       |
| 11 | 106,950,000 | 107,100,000 | 1427 | 916  | 0.731495929  | COL5A1                                                                                                                                                                                                                       |
| 11 | 107,025,000 | 107,175,000 | 1428 | 858  | 0.573577663  | BET1L,ODF3,RIC8A,SIRT3,ENSBTAG00000022142                                                                                                                                                                                    |
| 11 | 107,100,000 | 107,250,000 | 1429 | 953  | 0.513354608  | ATHL1,BET1L,COX8B,IFITM2,IFITM5,NLRP6,ODF3,PSMD13,RIC8A,SIRT3,ENSBTAG00000022142                                                                                                                                             |
| 11 | 107,175,000 | 107,310,763 | 1430 | 838  | -0.962405007 | ATHL1,COX8B,IFITM2,IFITM5,NLRP6,PSMD13,SIRT3,ENSBTAG00000019018                                                                                                                                                              |
| 12 | 0           | 150,000     | 1    | 400  | -2.940155594 |                                                                                                                                                                                                                              |
| 12 | 75,000      | 225,000     | 2    | 270  | -3.351452788 |                                                                                                                                                                                                                              |
| 12 | 150,000     | 300,000     | 3    | 233  | -2.797652892 |                                                                                                                                                                                                                              |
| 12 | 225,000     | 375,000     | 4    | 221  | -1.315831791 |                                                                                                                                                                                                                              |
| 12 | 300,000     | 450,000     | 5    | 483  | 0.720312774  | PCDH20                                                                                                                                                                                                                       |
| 12 | 375,000     | 525,000     | 6    | 777  | 0.758143172  | PCDH20                                                                                                                                                                                                                       |
| 12 | 450,000     | 600,000     | 7    | 774  | -0.397972563 |                                                                                                                                                                                                                              |
| 12 | 525,000     | 675,000     | 8    | 1030 | -1.408807927 |                                                                                                                                                                                                                              |
| 12 | 600,000     | 750,000     | 9    | 1658 | -0.4843534   | ENSBTAG00000035926                                                                                                                                                                                                           |
| 12 | 675,000     | 825,000     | 10   | 1769 | -0.812673944 | ENSBTAG00000035926                                                                                                                                                                                                           |
| 12 | 750,000     | 900,000     | 11   | 1355 | -1.763822407 |                                                                                                                                                                                                                              |
| 12 | 825,000     | 975,000     | 12   | 1253 | -1.525458015 |                                                                                                                                                                                                                              |
| 12 | 900,000     | 1,050,000   | 13   | 1126 | -0.576467341 |                                                                                                                                                                                                                              |
| 12 | 975,000     | 1,125,000   | 14   | 677  | 0.581903972  |                                                                                                                                                                                                                              |
| 12 | 1,050,000   | 1,200,000   | 15   | 471  | 0.71260721   |                                                                                                                                                                                                                              |
| 12 | 1,125,000   | 1,275,000   | 16   | 1060 | 0.758555403  |                                                                                                                                                                                                                              |
| 12 | 1,200,000   | 1,350,000   | 17   | 1264 | 0.482607903  |                                                                                                                                                                                                                              |
| 12 | 1,275,000   | 1,425,000   | 18   | 1192 | -1.484394525 |                                                                                                                                                                                                                              |
| 12 | 1,350,000   | 1,500,000   | 19   | 1377 | -1.643858418 |                                                                                                                                                                                                                              |
| 12 | 1,425,000   | 1,575,000   | 20   | 1276 | -0.265406726 | TDRD3                                                                                                                                                                                                                        |
| 12 | 1,500,000   | 1,650,000   | 21   | 1185 | 0.076590526  | TDRD3                                                                                                                                                                                                                        |
| 12 | 1,575,000   | 1,725,000   | 22   | 1062 | -0.125447652 | TDRD3                                                                                                                                                                                                                        |

|    |           |           |    |      |              |                           |
|----|-----------|-----------|----|------|--------------|---------------------------|
| 12 | 1,650,000 | 1,800,000 | 23 | 1105 | 0.724974093  | TDRD3                     |
| 12 | 1,725,000 | 1,875,000 | 24 | 1411 | 0.989518979  | TDRD3                     |
| 12 | 1,800,000 | 1,950,000 | 25 | 1257 | 0.793082341  |                           |
| 12 | 1,875,000 | 2,025,000 | 26 | 747  | 0.608354982  |                           |
| 12 | 1,950,000 | 2,100,000 | 27 | 542  | 0.779466187  | ENSBTAG00000026861        |
| 12 | 2,025,000 | 2,175,000 | 28 | 568  | -1.287043863 | DIAPH3,ENSBTAG00000026861 |
| 12 | 2,100,000 | 2,250,000 | 29 | 1040 | -0.244134367 | DIAPH3                    |
| 12 | 2,175,000 | 2,325,000 | 30 | 1149 | -0.387802466 | DIAPH3                    |
| 12 | 2,250,000 | 2,400,000 | 31 | 752  | -0.855264556 | DIAPH3                    |
| 12 | 2,325,000 | 2,475,000 | 32 | 745  | -0.464969485 | DIAPH3                    |
| 12 | 2,400,000 | 2,550,000 | 33 | 632  | -1.228280454 | DIAPH3                    |
| 12 | 2,475,000 | 2,625,000 | 34 | 791  | 0.538491154  | DIAPH3                    |
| 12 | 2,550,000 | 2,700,000 | 35 | 1111 | 0.929497226  | DIAPH3                    |
| 12 | 2,625,000 | 2,775,000 | 36 | 956  | 0.867906728  | DIAPH3                    |
| 12 | 2,700,000 | 2,850,000 | 37 | 625  | 0.051608036  |                           |
| 12 | 2,775,000 | 2,925,000 | 38 | 879  | -0.31026414  |                           |
| 12 | 2,850,000 | 3,000,000 | 39 | 1033 | 0.316765689  |                           |
| 12 | 2,925,000 | 3,075,000 | 40 | 837  | 0.468234421  |                           |
| 12 | 3,000,000 | 3,150,000 | 41 | 1245 | -0.170673453 |                           |
| 12 | 3,075,000 | 3,225,000 | 42 | 1234 | -0.216770342 |                           |
| 12 | 3,150,000 | 3,300,000 | 43 | 988  | -0.053270333 |                           |
| 12 | 3,225,000 | 3,375,000 | 44 | 1012 | 0.439551555  |                           |
| 12 | 3,300,000 | 3,450,000 | 45 | 994  | 0.82262994   |                           |
| 12 | 3,375,000 | 3,525,000 | 46 | 952  | 0.249782243  |                           |
| 12 | 3,450,000 | 3,600,000 | 47 | 951  | 0.24441352   |                           |
| 12 | 3,525,000 | 3,675,000 | 48 | 832  | 0.177238224  |                           |
| 12 | 3,600,000 | 3,750,000 | 49 | 715  | -1.502080734 |                           |
| 12 | 3,675,000 | 3,825,000 | 50 | 794  | -0.91585703  |                           |
| 12 | 3,750,000 | 3,900,000 | 51 | 882  | 0.195544565  |                           |
| 12 | 3,825,000 | 3,975,000 | 52 | 694  | 0.063637255  |                           |
| 12 | 3,900,000 | 4,050,000 | 53 | 899  | 0.994170825  |                           |
| 12 | 3,975,000 | 4,125,000 | 54 | 988  | 1.063116347  |                           |
| 12 | 4,050,000 | 4,200,000 | 55 | 782  | 0.689407845  |                           |
| 12 | 4,125,000 | 4,275,000 | 56 | 816  | 0.271997346  |                           |
| 12 | 4,200,000 | 4,350,000 | 57 | 708  | 0.085497869  |                           |
| 12 | 4,275,000 | 4,425,000 | 58 | 699  | 0.43881154   |                           |
| 12 | 4,350,000 | 4,500,000 | 59 | 1335 | 0.453586504  |                           |
| 12 | 4,425,000 | 4,575,000 | 60 | 1322 | 0.15741576   |                           |
| 12 | 4,500,000 | 4,650,000 | 61 | 749  | -0.36894657  |                           |
| 12 | 4,575,000 | 4,725,000 | 62 | 790  | 0.253491438  |                           |
| 12 | 4,650,000 | 4,800,000 | 63 | 985  | 1.026342064  |                           |
| 12 | 4,725,000 | 4,875,000 | 64 | 1443 | 0.660820137  |                           |
| 12 | 4,800,000 | 4,950,000 | 65 | 1501 | 0.221905203  |                           |
| 12 | 4,875,000 | 5,025,000 | 66 | 1229 | 0.510665881  |                           |
| 12 | 4,950,000 | 5,100,000 | 67 | 995  | -0.262737493 | PCDH17                    |
| 12 | 5,025,000 | 5,175,000 | 68 | 940  | -0.256775559 | PCDH17                    |
| 12 | 5,100,000 | 5,250,000 | 69 | 1035 | -0.225950633 | PCDH17                    |
| 12 | 5,175,000 | 5,325,000 | 70 | 1101 | 0.240040363  | PCDH17                    |
| 12 | 5,250,000 | 5,400,000 | 71 | 1272 | 0.239463296  |                           |
| 12 | 5,325,000 | 5,475,000 | 72 | 1387 | 0.062226699  |                           |
| 12 | 5,400,000 | 5,550,000 | 73 | 1539 | 0.992562165  |                           |
| 12 | 5,475,000 | 5,625,000 | 74 | 1507 | 1.20078363   |                           |
| 12 | 5,550,000 | 5,700,000 | 75 | 1475 | 1.145606351  |                           |

|    |           |           |     |      |              |
|----|-----------|-----------|-----|------|--------------|
| 12 | 5,625,000 | 5,775,000 | 76  | 1557 | 1.008971479  |
| 12 | 5,700,000 | 5,850,000 | 77  | 1771 | -1.851370623 |
| 12 | 5,775,000 | 5,925,000 | 78  | 1550 | -3.532152468 |
| 12 | 5,850,000 | 6,000,000 | 79  | 1134 | -1.639446567 |
| 12 | 5,925,000 | 6,075,000 | 80  | 927  | 1.233932773  |
| 12 | 6,000,000 | 6,150,000 | 81  | 1087 | 1.033837906  |
| 12 | 6,075,000 | 6,225,000 | 82  | 1480 | 0.487415692  |
| 12 | 6,150,000 | 6,300,000 | 83  | 1135 | 0.237871947  |
| 12 | 6,225,000 | 6,375,000 | 84  | 1052 | 0.847400016  |
| 12 | 6,300,000 | 6,450,000 | 85  | 1035 | 1.107771139  |
| 12 | 6,375,000 | 6,525,000 | 86  | 1626 | 1.089222991  |
| 12 | 6,450,000 | 6,600,000 | 87  | 1619 | 0.832508396  |
| 12 | 6,525,000 | 6,675,000 | 88  | 1108 | -1.24181663  |
| 12 | 6,600,000 | 6,750,000 | 89  | 1301 | -1.275496649 |
| 12 | 6,675,000 | 6,825,000 | 90  | 1769 | 0.262894106  |
| 12 | 6,750,000 | 6,900,000 | 91  | 2344 | 0.473576146  |
| 12 | 6,825,000 | 6,975,000 | 92  | 1988 | 0.670049808  |
| 12 | 6,900,000 | 7,050,000 | 93  | 1188 | 0.992232702  |
| 12 | 6,975,000 | 7,125,000 | 94  | 918  | 0.720995973  |
| 12 | 7,050,000 | 7,200,000 | 95  | 922  | -0.113040768 |
| 12 | 7,125,000 | 7,275,000 | 96  | 854  | -1.449894586 |
| 12 | 7,200,000 | 7,350,000 | 97  | 1183 | -0.718333522 |
| 12 | 7,275,000 | 7,425,000 | 98  | 1008 | 0.305606297  |
| 12 | 7,350,000 | 7,500,000 | 99  | 633  | 1.046996665  |
| 12 | 7,425,000 | 7,575,000 | 100 | 1155 | 1.131266226  |
| 12 | 7,500,000 | 7,650,000 | 101 | 1533 | 1.116642955  |
| 12 | 7,575,000 | 7,725,000 | 102 | 1328 | 0.692713224  |
| 12 | 7,650,000 | 7,800,000 | 103 | 1439 | 0.399364753  |
| 12 | 7,725,000 | 7,875,000 | 104 | 1746 | 0.643076448  |
| 12 | 7,800,000 | 7,950,000 | 105 | 1777 | 0.697376218  |
| 12 | 7,875,000 | 8,025,000 | 106 | 1878 | -0.237356619 |
| 12 | 7,950,000 | 8,100,000 | 107 | 2088 | -0.023443466 |
| 12 | 8,025,000 | 8,175,000 | 108 | 1953 | 0.647437506  |
| 12 | 8,100,000 | 8,250,000 | 109 | 1795 | 0.451541789  |
| 12 | 8,175,000 | 8,325,000 | 110 | 1667 | 0.124035743  |
| 12 | 8,250,000 | 8,400,000 | 111 | 2020 | 0.862795779  |
| 12 | 8,325,000 | 8,475,000 | 112 | 2241 | 1.003961177  |
| 12 | 8,400,000 | 8,550,000 | 113 | 1595 | 0.657152047  |
| 12 | 8,475,000 | 8,625,000 | 114 | 1815 | 0.690023643  |
| 12 | 8,550,000 | 8,700,000 | 115 | 2276 | 0.667983772  |
| 12 | 8,625,000 | 8,775,000 | 116 | 2166 | 0.702492011  |
| 12 | 8,700,000 | 8,850,000 | 117 | 1954 | 0.753700894  |
| 12 | 8,775,000 | 8,925,000 | 118 | 1749 | 0.473819885  |
| 12 | 8,850,000 | 9,000,000 | 119 | 1777 | 0.39428344   |
| 12 | 8,925,000 | 9,075,000 | 120 | 1601 | 0.532962333  |
| 12 | 9,000,000 | 9,150,000 | 121 | 1478 | 0.636223306  |
| 12 | 9,075,000 | 9,225,000 | 122 | 1541 | 0.293545354  |
| 12 | 9,150,000 | 9,300,000 | 123 | 993  | 0.164658135  |
| 12 | 9,225,000 | 9,375,000 | 124 | 848  | 0.427079909  |
| 12 | 9,300,000 | 9,450,000 | 125 | 1122 | 0.560358866  |
| 12 | 9,375,000 | 9,525,000 | 126 | 1334 | 0.353364452  |
| 12 | 9,450,000 | 9,600,000 | 127 | 1318 | -0.394380693 |
| 12 | 9,525,000 | 9,675,000 | 128 | 1064 | -0.275351486 |

|    |            |            |     |      |              |                                      |
|----|------------|------------|-----|------|--------------|--------------------------------------|
| 12 | 9,600,000  | 9,750,000  | 129 | 1199 | 0.545506016  |                                      |
| 12 | 9,675,000  | 9,825,000  | 130 | 1207 | 0.05154891   |                                      |
| 12 | 9,750,000  | 9,900,000  | 131 | 1291 | 0.224445381  |                                      |
| 12 | 9,825,000  | 9,975,000  | 132 | 1390 | -0.14102164  |                                      |
| 12 | 9,900,000  | 10,050,000 | 133 | 1590 | -0.684939735 |                                      |
| 12 | 9,975,000  | 10,125,000 | 134 | 1734 | -0.388032384 |                                      |
| 12 | 10,050,000 | 10,200,000 | 135 | 1394 | -0.085818114 |                                      |
| 12 | 10,125,000 | 10,275,000 | 136 | 1170 | 0.458842589  |                                      |
| 12 | 10,200,000 | 10,350,000 | 137 | 1462 | -0.300162617 |                                      |
| 12 | 10,275,000 | 10,425,000 | 138 | 1617 | -0.345440409 |                                      |
| 12 | 10,350,000 | 10,500,000 | 139 | 1541 | 0.211124746  | ENSBTAG00000048161                   |
| 12 | 10,425,000 | 10,575,000 | 140 | 1489 | 0.561887335  | ENSBTAG00000048161                   |
| 12 | 10,500,000 | 10,650,000 | 141 | 1730 | 0.340876014  | ENSBTAG00000048161                   |
| 12 | 10,575,000 | 10,725,000 | 142 | 1767 | -0.016946192 | OLFM4                                |
| 12 | 10,650,000 | 10,800,000 | 143 | 1661 | -0.013378217 | OLFM4                                |
| 12 | 10,725,000 | 10,875,000 | 144 | 1738 | 0.160850161  |                                      |
| 12 | 10,800,000 | 10,950,000 | 145 | 1405 | 0.144618748  | PCDH8                                |
| 12 | 10,875,000 | 11,025,000 | 146 | 1243 | -1.019852708 | PCDH8                                |
| 12 | 10,950,000 | 11,100,000 | 147 | 1106 | -1.016069584 | LECT1                                |
| 12 | 11,025,000 | 11,175,000 | 148 | 836  | -0.519707682 | LECT1,SUGT1                          |
| 12 | 11,100,000 | 11,250,000 | 149 | 752  | -0.439087633 | ELF1,LECT1,SUGT1                     |
| 12 | 11,175,000 | 11,325,000 | 150 | 547  | -0.949468256 | ELF1,WBP4                            |
| 12 | 11,250,000 | 11,400,000 | 151 | 397  | -1.948130033 | ELF1,KBTBD6,WBP4                     |
| 12 | 11,325,000 | 11,475,000 | 152 | 507  | -0.593102152 | KBTBD6,MTRF1,WBP4,ENSBTAG00000039823 |
| 12 | 11,400,000 | 11,550,000 | 153 | 435  | -0.32665662  | MTRF1,NAA16,ENSBTAG00000039823       |
| 12 | 11,475,000 | 11,625,000 | 154 | 493  | -2.051491274 | MTRF1,NAA16                          |
| 12 | 11,550,000 | 11,700,000 | 155 | 624  | -1.424239319 | MGC148992,NAA16                      |
| 12 | 11,625,000 | 11,775,000 | 156 | 678  | 0.727674782  | MGC148992,VWA8                       |
| 12 | 11,700,000 | 11,850,000 | 157 | 685  | 0.383923208  | VWA8                                 |
| 12 | 11,775,000 | 11,925,000 | 158 | 831  | -0.763840458 | VWA8                                 |
| 12 | 11,850,000 | 12,000,000 | 159 | 1015 | -1.343734311 | VWA8                                 |
| 12 | 11,925,000 | 12,075,000 | 160 | 710  | -1.215772678 | VWA8                                 |
| 12 | 12,000,000 | 12,150,000 | 161 | 823  | -0.137258204 | VWA8                                 |
| 12 | 12,075,000 | 12,225,000 | 162 | 928  | -0.185639674 |                                      |
| 12 | 12,150,000 | 12,300,000 | 163 | 1192 | -0.055153662 | DGKH                                 |
| 12 | 12,225,000 | 12,375,000 | 164 | 1073 | 0.265590359  | DGKH                                 |
| 12 | 12,300,000 | 12,450,000 | 165 | 504  | 0.363132171  | DGKH                                 |
| 12 | 12,375,000 | 12,525,000 | 166 | 524  | -1.408951971 | AKAP11,DGKH                          |
| 12 | 12,450,000 | 12,600,000 | 167 | 704  | -1.806053947 | AKAP11                               |
| 12 | 12,525,000 | 12,675,000 | 168 | 741  | -1.491902932 |                                      |
| 12 | 12,600,000 | 12,750,000 | 169 | 921  | -0.777191411 | TNFSF11                              |
| 12 | 12,675,000 | 12,825,000 | 170 | 1668 | -0.237154746 | TNFSF11                              |
| 12 | 12,750,000 | 12,900,000 | 171 | 1881 | -0.116603498 | TNFSF11                              |
| 12 | 12,825,000 | 12,975,000 | 172 | 1581 | 0.091014464  | FAM216B                              |
| 12 | 12,900,000 | 13,050,000 | 173 | 1606 | -0.05209968  | FAM216B                              |
| 12 | 12,975,000 | 13,125,000 | 174 | 1455 | 0.179893077  | EPSTI1,FAM216B                       |
| 12 | 13,050,000 | 13,200,000 | 175 | 918  | -0.38548857  | DNAJC15,EPSTI1                       |
| 12 | 13,125,000 | 13,275,000 | 176 | 752  | -2.323885338 | DNAJC15,EPSTI1                       |
| 12 | 13,200,000 | 13,350,000 | 177 | 623  | -1.575184933 | DNAJC15                              |
| 12 | 13,275,000 | 13,425,000 | 178 | 567  | -0.305256635 | ENOX1                                |
| 12 | 13,350,000 | 13,500,000 | 179 | 897  | -2.736264565 | ENOX1                                |
| 12 | 13,425,000 | 13,575,000 | 180 | 1243 | -2.071847659 | ENOX1                                |
| 12 | 13,500,000 | 13,650,000 | 181 | 1446 | 0.092472801  | ENOX1                                |

|    |            |            |     |      |              |                       |
|----|------------|------------|-----|------|--------------|-----------------------|
| 12 | 13,575,000 | 13,725,000 | 182 | 1303 | 0.379222643  | ENOX1                 |
| 12 | 13,650,000 | 13,800,000 | 183 | 1163 | 0.294339043  |                       |
| 12 | 13,725,000 | 13,875,000 | 184 | 1124 | 0.445085945  |                       |
| 12 | 13,800,000 | 13,950,000 | 185 | 943  | -0.131289568 |                       |
| 12 | 13,875,000 | 14,025,000 | 186 | 882  | -0.456379954 |                       |
| 12 | 13,950,000 | 14,100,000 | 187 | 784  | -0.541179051 |                       |
| 12 | 14,025,000 | 14,175,000 | 188 | 544  | -0.627100743 | CCDC122,LACC1         |
| 12 | 14,100,000 | 14,250,000 | 189 | 727  | -0.535062156 | CCDC122,LACC1         |
| 12 | 14,175,000 | 14,325,000 | 190 | 772  | -1.721024526 |                       |
| 12 | 14,250,000 | 14,400,000 | 191 | 520  | -3.418556248 |                       |
| 12 | 14,325,000 | 14,475,000 | 192 | 437  | -2.048168971 |                       |
| 12 | 14,400,000 | 14,550,000 | 193 | 508  | 0.350394335  |                       |
| 12 | 14,475,000 | 14,625,000 | 194 | 967  | 0.195844535  |                       |
| 12 | 14,550,000 | 14,700,000 | 195 | 913  | -0.090362369 |                       |
| 12 | 14,625,000 | 14,775,000 | 196 | 444  | -0.267306892 | TSC22D1               |
| 12 | 14,700,000 | 14,850,000 | 197 | 324  | -0.502685919 | TSC22D1               |
| 12 | 14,775,000 | 14,925,000 | 198 | 281  | -0.824659208 | TSC22D1               |
| 12 | 14,850,000 | 15,000,000 | 199 | 722  | 0.897293907  |                       |
| 12 | 14,925,000 | 15,075,000 | 200 | 1247 | 1.06048955   |                       |
| 12 | 15,000,000 | 15,150,000 | 201 | 1249 | 0.975004536  |                       |
| 12 | 15,075,000 | 15,225,000 | 202 | 1055 | 0.842917219  | GPALPP1,NUFIP1        |
| 12 | 15,150,000 | 15,300,000 | 203 | 1039 | -0.030286586 | GPALPP1,NUFIP1        |
| 12 | 15,225,000 | 15,375,000 | 204 | 1074 | 0.059444973  | GTF2F2                |
| 12 | 15,300,000 | 15,450,000 | 205 | 691  | 0.184726476  | GTF2F2,KCTD4          |
| 12 | 15,375,000 | 15,525,000 | 206 | 569  | -0.974888528 | GTF2F2,KCTD4,TPT1     |
| 12 | 15,450,000 | 15,600,000 | 207 | 870  | -0.082919082 | GTF2F2,SLC25A30,TPT1  |
| 12 | 15,525,000 | 15,675,000 | 208 | 627  | 0.531528538  | COG3,SLC25A30         |
| 12 | 15,600,000 | 15,750,000 | 209 | 466  | 0.141760649  | COG3,SLC25A30         |
| 12 | 15,675,000 | 15,825,000 | 210 | 1051 | 0.492858684  | COG3,SPERT            |
| 12 | 15,750,000 | 15,900,000 | 211 | 1115 | 0.638104528  | SPERT                 |
| 12 | 15,825,000 | 15,975,000 | 212 | 633  | 0.74208971   | SPERT                 |
| 12 | 15,900,000 | 16,050,000 | 213 | 818  | 0.604889984  |                       |
| 12 | 15,975,000 | 16,125,000 | 214 | 838  | 0.624343441  | ZC3H13                |
| 12 | 16,050,000 | 16,200,000 | 215 | 554  | 0.807846769  | CPB2,ZC3H13           |
| 12 | 16,125,000 | 16,275,000 | 216 | 818  | 1.072336691  | CPB2,LCP1,ZC3H13      |
| 12 | 16,200,000 | 16,350,000 | 217 | 1066 | 1.078797045  | CPB2,LCP1             |
| 12 | 16,275,000 | 16,425,000 | 218 | 1000 | 0.155530714  | KIAA0226L,LCP1,LRRC63 |
| 12 | 16,350,000 | 16,500,000 | 219 | 783  | -0.527558385 | KIAA0226L,LRRC63      |
| 12 | 16,425,000 | 16,575,000 | 220 | 768  | -0.816749178 | KIAA0226L,LRCH1       |
| 12 | 16,500,000 | 16,650,000 | 221 | 772  | -1.119066746 | LRCH1                 |
| 12 | 16,575,000 | 16,725,000 | 222 | 551  | -0.800771377 | LRCH1                 |
| 12 | 16,650,000 | 16,800,000 | 223 | 505  | 0.236887376  | ESD,LRCH1             |
| 12 | 16,725,000 | 16,875,000 | 224 | 648  | 0.446226562  | ESD,HTR2A,LRCH1       |
| 12 | 16,800,000 | 16,950,000 | 225 | 726  | 0.283665735  | HTR2A                 |
| 12 | 16,875,000 | 17,025,000 | 226 | 731  | 0.380713918  | HTR2A                 |
| 12 | 16,950,000 | 17,100,000 | 227 | 733  | 0.383307734  |                       |
| 12 | 17,025,000 | 17,175,000 | 228 | 807  | 0.417797652  |                       |
| 12 | 17,100,000 | 17,250,000 | 229 | 957  | 0.287822696  |                       |
| 12 | 17,175,000 | 17,325,000 | 230 | 950  | 0.541304135  |                       |
| 12 | 17,250,000 | 17,400,000 | 231 | 1007 | 0.738226976  |                       |
| 12 | 17,325,000 | 17,475,000 | 232 | 868  | 0.357041215  |                       |
| 12 | 17,400,000 | 17,550,000 | 233 | 480  | 0.066088062  |                       |
| 12 | 17,475,000 | 17,625,000 | 234 | 533  | 0.267283763  |                       |

|    |            |            |     |      |              |                              |
|----|------------|------------|-----|------|--------------|------------------------------|
| 12 | 17,550,000 | 17,700,000 | 235 | 650  | 0.370804087  |                              |
| 12 | 17,625,000 | 17,775,000 | 236 | 1004 | -1.721139517 |                              |
| 12 | 17,700,000 | 17,850,000 | 237 | 1275 | -2.498779195 |                              |
| 12 | 17,775,000 | 17,925,000 | 238 | 741  | -2.23187214  | SUCLA2                       |
| 12 | 17,850,000 | 18,000,000 | 239 | 435  | 0.257243133  | MED4,NUDT15,SUCLA2           |
| 12 | 17,925,000 | 18,075,000 | 240 | 597  | 0.050263183  | MED4,NUDT15,SUCLA2           |
| 12 | 18,000,000 | 18,150,000 | 241 | 867  | 0.098921943  | ITM2B                        |
| 12 | 18,075,000 | 18,225,000 | 242 | 971  | 0.739250181  | ITM2B,RB1,ENSBTAG00000003560 |
| 12 | 18,150,000 | 18,300,000 | 243 | 886  | 0.92203552   | P2RY5,RB1,ENSBTAG00000003560 |
| 12 | 18,225,000 | 18,375,000 | 244 | 875  | 0.894352544  | P2RY5,RB1,RCBTB2             |
| 12 | 18,300,000 | 18,450,000 | 245 | 1031 | 1.076723254  | RB1,RCBTB2                   |
| 12 | 18,375,000 | 18,525,000 | 246 | 1202 | 1.206705418  |                              |
| 12 | 18,450,000 | 18,600,000 | 247 | 1344 | 1.095218776  | CYSLTR2                      |
| 12 | 18,525,000 | 18,675,000 | 248 | 1175 | 0.467223584  | CYSLTR2                      |
| 12 | 18,600,000 | 18,750,000 | 249 | 695  | -1.369822999 |                              |
| 12 | 18,675,000 | 18,825,000 | 250 | 530  | -1.701300177 |                              |
| 12 | 18,750,000 | 18,900,000 | 251 | 396  | -0.274827369 | FNDC3A                       |
| 12 | 18,825,000 | 18,975,000 | 252 | 250  | -0.152140149 | CDADC1,FNDC3A,MLNR           |
| 12 | 18,900,000 | 19,050,000 | 253 | 697  | -0.166415486 | CAB39L,CDADC1,FNDC3A,MLNR    |
| 12 | 18,975,000 | 19,125,000 | 254 | 1130 | -0.645022258 | CAB39L,CDADC1,SETDB2         |
| 12 | 19,050,000 | 19,200,000 | 255 | 1108 | -0.758891757 | CAB39L,PHF11,RCBTB1,SETDB2   |
| 12 | 19,125,000 | 19,275,000 | 256 | 982  | -0.052375704 | PHF11,RCBTB1,SETDB2          |
| 12 | 19,200,000 | 19,350,000 | 257 | 1039 | -0.029531982 | ARL11,EBPL,KPNA3,RCBTB1      |
| 12 | 19,275,000 | 19,425,000 | 258 | 891  | 0.122498919  | ARL11,EBPL,KPNA3             |
| 12 | 19,350,000 | 19,500,000 | 259 | 659  | 0.25074615   | KPNA3,SPRYD7                 |
| 12 | 19,425,000 | 19,575,000 | 260 | 524  | -0.008484994 | KCNRG,SPRYD7,TRIM13          |
| 12 | 19,500,000 | 19,650,000 | 261 | 317  | 0.293234423  | KCNRG,SPRYD7,TRIM13          |
| 12 | 19,575,000 | 19,725,000 | 262 | 359  | 0.670247968  |                              |
| 12 | 19,650,000 | 19,800,000 | 263 | 489  | 0.494355774  |                              |
| 12 | 19,725,000 | 19,875,000 | 264 | 682  | 0.406339159  |                              |
| 12 | 19,800,000 | 19,950,000 | 265 | 679  | 0.522332858  |                              |
| 12 | 19,875,000 | 20,025,000 | 266 | 534  | 0.420168117  |                              |
| 12 | 19,950,000 | 20,100,000 | 267 | 507  | -0.045187137 |                              |
| 12 | 20,025,000 | 20,175,000 | 268 | 442  | 0.028095194  |                              |
| 12 | 20,100,000 | 20,250,000 | 269 | 717  | 0.818239297  |                              |
| 12 | 20,175,000 | 20,325,000 | 270 | 884  | 0.578684454  |                              |
| 12 | 20,250,000 | 20,400,000 | 271 | 630  | -0.02400868  |                              |
| 12 | 20,325,000 | 20,475,000 | 272 | 609  | -1.434871803 | RNASEH2B                     |
| 12 | 20,400,000 | 20,550,000 | 273 | 580  | -1.913744813 | RNASEH2B,ENSBTAG00000007457  |
| 12 | 20,475,000 | 20,625,000 | 274 | 514  | -0.245920769 | RNASEH2B,ENSBTAG00000007457  |
| 12 | 20,550,000 | 20,700,000 | 275 | 495  | 0.661710818  | ENSBTAG00000007457           |
| 12 | 20,625,000 | 20,775,000 | 276 | 690  | 0.401293978  | FAM124A                      |
| 12 | 20,700,000 | 20,850,000 | 277 | 1258 | 0.117624174  | FAM124A                      |
| 12 | 20,775,000 | 20,925,000 | 278 | 1147 | -0.066708219 | FAM124A,INTS6,SERPINE3       |
| 12 | 20,850,000 | 21,000,000 | 279 | 650  | -0.062289806 | INTS6,SERPINE3               |
| 12 | 20,925,000 | 21,075,000 | 280 | 539  | -0.811137073 | INTS6                        |
| 12 | 21,000,000 | 21,150,000 | 281 | 424  | -1.566904926 | WDFY2                        |
| 12 | 21,075,000 | 21,225,000 | 282 | 779  | 0.003132111  | WDFY2                        |
| 12 | 21,150,000 | 21,300,000 | 283 | 1332 | 0.660613401  | DHRS12,WDFY2                 |
| 12 | 21,225,000 | 21,375,000 | 284 | 1715 | 0.107438142  | CCDC70,DHRS12,WDFY2          |
| 12 | 21,300,000 | 21,450,000 | 285 | 1989 | 0.321800693  | ATP7B,CCDC70,DHRS12          |
| 12 | 21,375,000 | 21,525,000 | 286 | 1454 | 0.799523501  | ALG11,ATP7B,CCDC70,NEK5      |
| 12 | 21,450,000 | 21,600,000 | 287 | 931  | 0.98408464   | ALG11,ATP7B,NEK3,NEK5        |

|    |            |            |     |      |              |                                    |
|----|------------|------------|-----|------|--------------|------------------------------------|
| 12 | 21,525,000 | 21,675,000 | 288 | 740  | 0.831444535  | CKAP2,NEK3,NEK5,THSD1,VPS36        |
| 12 | 21,600,000 | 21,750,000 | 289 | 363  | -0.170943592 | CKAP2,THSD1,VPS36                  |
| 12 | 21,675,000 | 21,825,000 | 290 | 480  | 0.406834982  | SLC25A15,THSD1,ENSBTAG00000011654  |
| 12 | 21,750,000 | 21,900,000 | 291 | 569  | 0.474353017  | MRPS31,SLC25A15,ENSBTAG00000011654 |
| 12 | 21,825,000 | 21,975,000 | 292 | 341  | 0.086202225  | FOXO1,MRPS31,SLC25A15              |
| 12 | 21,900,000 | 22,050,000 | 293 | 243  | -0.352548641 | FOXO1                              |
| 12 | 21,975,000 | 22,125,000 | 294 | 260  | -0.242836667 | FOXO1                              |
| 12 | 22,050,000 | 22,200,000 | 295 | 244  | -0.162166852 |                                    |
| 12 | 22,125,000 | 22,275,000 | 296 | 233  | 0.564026553  |                                    |
| 12 | 22,200,000 | 22,350,000 | 297 | 837  | 1.211117772  |                                    |
| 12 | 22,275,000 | 22,425,000 | 298 | 1322 | 1.039463888  |                                    |
| 12 | 22,350,000 | 22,500,000 | 299 | 1171 | 0.701664845  |                                    |
| 12 | 22,425,000 | 22,575,000 | 300 | 904  | 0.359212849  |                                    |
| 12 | 22,500,000 | 22,650,000 | 301 | 592  | -0.317176257 |                                    |
| 12 | 22,575,000 | 22,725,000 | 302 | 469  | -0.309880394 | COG6                               |
| 12 | 22,650,000 | 22,800,000 | 303 | 468  | 0.52899417   | COG6                               |
| 12 | 22,725,000 | 22,875,000 | 304 | 788  | 0.733626058  | COG6,LHFP                          |
| 12 | 22,800,000 | 22,950,000 | 305 | 809  | 0.414382631  | LHFP                               |
| 12 | 22,875,000 | 23,025,000 | 306 | 507  | -0.118828235 | LHFP                               |
| 12 | 22,950,000 | 23,100,000 | 307 | 656  | -0.337306756 | LHFP                               |
| 12 | 23,025,000 | 23,175,000 | 308 | 770  | -0.167270695 | LHFP                               |
| 12 | 23,100,000 | 23,250,000 | 309 | 823  | 0.066836567  | NHLRC3,PROSER1                     |
| 12 | 23,175,000 | 23,325,000 | 310 | 905  | 0.225279116  | FREM2,NHLRC3,PROSER1,STOML3        |
| 12 | 23,250,000 | 23,400,000 | 311 | 1021 | 0.640332512  | FREM2,PROSER1,STOML3               |
| 12 | 23,325,000 | 23,475,000 | 312 | 882  | 0.569877107  | FREM2                              |
| 12 | 23,400,000 | 23,550,000 | 313 | 746  | -1.966799772 | FREM2                              |
| 12 | 23,475,000 | 23,625,000 | 314 | 912  | -1.433022243 |                                    |
| 12 | 23,550,000 | 23,700,000 | 315 | 651  | 0.242293469  |                                    |
| 12 | 23,625,000 | 23,775,000 | 316 | 365  | -0.125526198 |                                    |
| 12 | 23,700,000 | 23,850,000 | 317 | 513  | -1.292141942 |                                    |
| 12 | 23,775,000 | 23,925,000 | 318 | 585  | -1.597151897 |                                    |
| 12 | 23,850,000 | 24,000,000 | 319 | 699  | -0.131408991 |                                    |
| 12 | 23,925,000 | 24,075,000 | 320 | 777  | 0.575787034  | TRPC4                              |
| 12 | 24,000,000 | 24,150,000 | 321 | 892  | 0.677715922  | TRPC4                              |
| 12 | 24,075,000 | 24,225,000 | 322 | 860  | 0.234745112  | TRPC4                              |
| 12 | 24,150,000 | 24,300,000 | 323 | 522  | -0.071755068 | POSTN,TRPC4                        |
| 12 | 24,225,000 | 24,375,000 | 324 | 565  | 1.039007873  | POSTN                              |
| 12 | 24,300,000 | 24,450,000 | 325 | 971  | 1.11811628   |                                    |
| 12 | 24,375,000 | 24,525,000 | 326 | 1336 | 1.017592017  |                                    |
| 12 | 24,450,000 | 24,600,000 | 327 | 1546 | 0.76223059   |                                    |
| 12 | 24,525,000 | 24,675,000 | 328 | 1304 | 0.25797748   | FAM48A                             |
| 12 | 24,600,000 | 24,750,000 | 329 | 752  | -0.413349727 | ALG5,EXOSC8,FAM48A                 |
| 12 | 24,675,000 | 24,825,000 | 330 | 661  | -0.707642513 | ALG5,EXOSC8,FAM48A,SMAD9           |
| 12 | 24,750,000 | 24,900,000 | 331 | 816  | -1.027265635 | RFXAP,SMAD9                        |
| 12 | 24,825,000 | 24,975,000 | 332 | 713  | -0.596434141 | RFXAP,SERTM1                       |
| 12 | 24,900,000 | 25,050,000 | 333 | 768  | 0.668204541  | SERTM1                             |
| 12 | 24,975,000 | 25,125,000 | 334 | 903  | 0.879781242  |                                    |
| 12 | 25,050,000 | 25,200,000 | 335 | 1006 | 0.674654339  | CCNA1,SPG20                        |
| 12 | 25,125,000 | 25,275,000 | 336 | 970  | 0.698727524  | CCNA1,SPG20,ENSBTAG00000018955     |
| 12 | 25,200,000 | 25,350,000 | 337 | 839  | 1.114504024  | SPG20,ENSBTAG00000018955           |
| 12 | 25,275,000 | 25,425,000 | 338 | 1049 | 0.809236567  | DCLK1,ENSBTAG00000018955           |
| 12 | 25,350,000 | 25,500,000 | 339 | 1282 | 0.565643547  | DCLK1                              |
| 12 | 25,425,000 | 25,575,000 | 340 | 1223 | 0.450973352  | DCLK1                              |

|    |            |            |     |      |              |                                  |
|----|------------|------------|-----|------|--------------|----------------------------------|
| 12 | 25,500,000 | 25,650,000 | 341 | 985  | 0.474500104  | DCLK1                            |
| 12 | 25,575,000 | 25,725,000 | 342 | 884  | 0.746152936  | DCLK1                            |
| 12 | 25,650,000 | 25,800,000 | 343 | 1003 | 0.85823588   | DCLK1,NBEA                       |
| 12 | 25,725,000 | 25,875,000 | 344 | 962  | 0.796868997  | NBEA                             |
| 12 | 25,800,000 | 25,950,000 | 345 | 848  | 0.043598831  | NBEA                             |
| 12 | 25,875,000 | 26,025,000 | 346 | 658  | -0.497160568 | MAB21L1,NBEA                     |
| 12 | 25,950,000 | 26,100,000 | 347 | 587  | -0.149215857 | MAB21L1,NBEA                     |
| 12 | 26,025,000 | 26,175,000 | 348 | 894  | 0.185495044  | NBEA,ENSBTAG00000019268          |
| 12 | 26,100,000 | 26,250,000 | 349 | 710  | -0.086768695 | NBEA,ENSBTAG00000019268          |
| 12 | 26,175,000 | 26,325,000 | 350 | 450  | -1.193940734 | NBEA                             |
| 12 | 26,250,000 | 26,400,000 | 351 | 610  | -1.085949403 | NBEA                             |
| 12 | 26,325,000 | 26,475,000 | 352 | 744  | -1.105225495 | NBEA                             |
| 12 | 26,400,000 | 26,550,000 | 353 | 751  | -1.713146749 |                                  |
| 12 | 26,475,000 | 26,625,000 | 354 | 736  | -1.339422515 |                                  |
| 12 | 26,550,000 | 26,700,000 | 355 | 573  | -1.438415366 |                                  |
| 12 | 26,625,000 | 26,775,000 | 356 | 502  | -2.865730955 |                                  |
| 12 | 26,700,000 | 26,850,000 | 357 | 630  | -1.944754015 |                                  |
| 12 | 26,775,000 | 26,925,000 | 358 | 869  | -0.004908536 |                                  |
| 12 | 26,850,000 | 27,000,000 | 359 | 874  | 0.617576763  |                                  |
| 12 | 26,925,000 | 27,075,000 | 360 | 675  | -0.003492486 |                                  |
| 12 | 27,000,000 | 27,150,000 | 361 | 641  | 0.170267873  |                                  |
| 12 | 27,075,000 | 27,225,000 | 362 | 733  | 0.446346938  |                                  |
| 12 | 27,150,000 | 27,300,000 | 363 | 730  | 0.489019273  |                                  |
| 12 | 27,225,000 | 27,375,000 | 364 | 640  | 0.222471915  |                                  |
| 12 | 27,300,000 | 27,450,000 | 365 | 629  | -0.570395543 | RFC3                             |
| 12 | 27,375,000 | 27,525,000 | 366 | 567  | -0.132654891 | RFC3                             |
| 12 | 27,450,000 | 27,600,000 | 367 | 407  | 0.543684385  |                                  |
| 12 | 27,525,000 | 27,675,000 | 368 | 295  | 0.405298229  |                                  |
| 12 | 27,600,000 | 27,750,000 | 369 | 402  | 0.16181768   |                                  |
| 12 | 27,675,000 | 27,825,000 | 370 | 425  | 0.081959465  |                                  |
| 12 | 27,750,000 | 27,900,000 | 371 | 334  | 0.191722237  | STARD13                          |
| 12 | 27,825,000 | 27,975,000 | 372 | 394  | -0.243400308 | STARD13                          |
| 12 | 27,900,000 | 28,050,000 | 373 | 417  | -1.602446527 | STARD13                          |
| 12 | 27,975,000 | 28,125,000 | 374 | 477  | -2.100936951 | KL,STARD13                       |
| 12 | 28,050,000 | 28,200,000 | 375 | 687  | -0.630338093 | KL                               |
| 12 | 28,125,000 | 28,275,000 | 376 | 559  | -0.403979162 |                                  |
| 12 | 28,200,000 | 28,350,000 | 377 | 342  | -0.043331297 | PDS5B                            |
| 12 | 28,275,000 | 28,425,000 | 378 | 246  | 1.157028039  | PDS5B                            |
| 12 | 28,350,000 | 28,500,000 | 379 | 183  | 1.154651221  | PDS5B                            |
| 12 | 28,425,000 | 28,575,000 | 380 | 215  | 1.202173907  | PDS5B,ENSBTAG00000023279         |
| 12 | 28,500,000 | 28,650,000 | 381 | 228  | 1.103154296  | BRCA2,N4BP2L1,ENSBTAG00000023279 |
| 12 | 28,575,000 | 28,725,000 | 382 | 215  | 0.191272398  | BRCA2,N4BP2L1,ZAR1L              |
| 12 | 28,650,000 | 28,800,000 | 383 | 201  | -0.432975224 | BRCA2,FRY,ZAR1L                  |
| 12 | 28,725,000 | 28,875,000 | 384 | 292  | 0.477407425  | FRY                              |
| 12 | 28,800,000 | 28,950,000 | 385 | 436  | 0.624761648  | FRY                              |
| 12 | 28,875,000 | 29,025,000 | 386 | 716  | 0.434409765  | FRY                              |
| 12 | 28,950,000 | 29,100,000 | 387 | 846  | 0.573076159  | FRY                              |
| 12 | 29,025,000 | 29,175,000 | 388 | 552  | 0.531590802  |                                  |
| 12 | 29,100,000 | 29,250,000 | 389 | 322  | -1.47290051  | RXFP2                            |
| 12 | 29,175,000 | 29,325,000 | 390 | 193  | -3.544230418 | RXFP2                            |
| 12 | 29,250,000 | 29,400,000 | 391 | 161  | -2.619522041 | RXFP2                            |
| 12 | 29,325,000 | 29,475,000 | 392 | 196  | -2.765844295 |                                  |
| 12 | 29,400,000 | 29,550,000 | 393 | 180  | -1.036139386 |                                  |



|    |            |            |     |      |              |                                |
|----|------------|------------|-----|------|--------------|--------------------------------|
| 12 | 29,475,000 | 29,625,000 | 394 | 324  | 0.793443729  |                                |
| 12 | 29,550,000 | 29,700,000 | 395 | 636  | -1.177624916 | B3GALTL                        |
| 12 | 29,625,000 | 29,775,000 | 396 | 674  | -2.148677423 | B3GALTL                        |
| 12 | 29,700,000 | 29,850,000 | 397 | 606  | -0.894573685 | B3GALTL,HSPH1                  |
| 12 | 29,775,000 | 29,925,000 | 398 | 770  | -0.19323675  | HSPH1,ENSBTAG00000016052       |
| 12 | 29,850,000 | 30,000,000 | 399 | 764  | 0.003013214  | C12H13ORF26,ENSBTAG00000016052 |
| 12 | 29,925,000 | 30,075,000 | 400 | 790  | 0.620583952  | C12H13ORF26,MEDAG              |
| 12 | 30,000,000 | 30,150,000 | 401 | 850  | 0.816628658  | ALOX5AP,C12H13ORF26,MEDAG      |
| 12 | 30,075,000 | 30,225,000 | 402 | 797  | 0.721380455  | ALOX5AP,USPL1                  |
| 12 | 30,150,000 | 30,300,000 | 403 | 655  | 0.7925357    | ALOX5AP,USPL1                  |
| 12 | 30,225,000 | 30,375,000 | 404 | 590  | 0.291432724  | HMGB1,USPL1                    |
| 12 | 30,300,000 | 30,450,000 | 405 | 847  | 0.77396752   | HMGB1                          |
| 12 | 30,375,000 | 30,525,000 | 406 | 838  | 0.717840454  | KATNAL1                        |
| 12 | 30,450,000 | 30,600,000 | 407 | 653  | 0.443778837  | KATNAL1                        |
| 12 | 30,525,000 | 30,675,000 | 408 | 781  | 0.622645537  | KATNAL1                        |
| 12 | 30,600,000 | 30,750,000 | 409 | 928  | -0.934900745 |                                |
| 12 | 30,675,000 | 30,825,000 | 410 | 1070 | -0.415139919 |                                |
| 12 | 30,750,000 | 30,900,000 | 411 | 1013 | 0.664748158  | UBL3                           |
| 12 | 30,825,000 | 30,975,000 | 412 | 739  | 0.99141909   | UBL3                           |
| 12 | 30,900,000 | 31,050,000 | 413 | 881  | 0.866655337  | MTUS2,SLC7A1                   |
| 12 | 30,975,000 | 31,125,000 | 414 | 1198 | 0.509058887  | MTUS2,SLC7A1                   |
| 12 | 31,050,000 | 31,200,000 | 415 | 1362 | 0.591761796  | MTUS2                          |
| 12 | 31,125,000 | 31,275,000 | 416 | 1538 | 0.804473038  | MTUS2                          |
| 12 | 31,200,000 | 31,350,000 | 417 | 1302 | 0.858725171  | MTUS2                          |
| 12 | 31,275,000 | 31,425,000 | 418 | 1154 | 0.737056515  | MTUS2                          |
| 12 | 31,350,000 | 31,500,000 | 419 | 919  | 0.72885219   | POMP,SLC46A3                   |
| 12 | 31,425,000 | 31,575,000 | 420 | 474  | 0.832421393  | POMP,SLC46A3                   |
| 12 | 31,500,000 | 31,650,000 | 421 | 493  | -1.034613113 | POMP                           |
| 12 | 31,575,000 | 31,725,000 | 422 | 735  | -0.33915441  | FLT1                           |
| 12 | 31,650,000 | 31,800,000 | 423 | 1002 | 0.785162735  | FLT1                           |
| 12 | 31,725,000 | 31,875,000 | 424 | 830  | 0.805035023  | FLT1,PAN3                      |
| 12 | 31,800,000 | 31,950,000 | 425 | 449  | 0.938213577  | FLT1,PAN3                      |
| 12 | 31,875,000 | 32,025,000 | 426 | 342  | -0.266265959 | PAN3                           |
| 12 | 31,950,000 | 32,100,000 | 427 | 749  | -1.89558235  |                                |
| 12 | 32,025,000 | 32,175,000 | 428 | 1314 | -1.253323509 |                                |
| 12 | 32,100,000 | 32,250,000 | 429 | 1579 | -0.218043045 | FLT3                           |
| 12 | 32,175,000 | 32,325,000 | 430 | 1069 | -0.847713987 | CDX2,FLT3,URAD                 |
| 12 | 32,250,000 | 32,400,000 | 431 | 387  | -2.521949676 | CDX2,FLT3,PDX1,URAD            |
| 12 | 32,325,000 | 32,475,000 | 432 | 332  | -0.564668037 | GSX1,PDX1                      |
| 12 | 32,400,000 | 32,550,000 | 433 | 469  | -0.184635822 | GSX1,POLR1D                    |
| 12 | 32,475,000 | 32,625,000 | 434 | 518  | -0.036577571 | LNX2,POLR1D                    |
| 12 | 32,550,000 | 32,700,000 | 435 | 488  | 0.034169613  | LNX2,POLR1D                    |
| 12 | 32,625,000 | 32,775,000 | 436 | 384  | -0.194338201 | GTF3A,LNX2,MTIF3               |
| 12 | 32,700,000 | 32,850,000 | 437 | 355  | -0.661244718 | GTF3A,MTIF3,RASL11A            |
| 12 | 32,775,000 | 32,925,000 | 438 | 383  | 0.03576702   | RASL11A,RPL21,USP12            |
| 12 | 32,850,000 | 33,000,000 | 439 | 618  | -0.070493445 | RPL21,USP12                    |
| 12 | 32,925,000 | 33,075,000 | 440 | 891  | -0.635394983 | USP12                          |
| 12 | 33,000,000 | 33,150,000 | 441 | 741  | -0.197267429 | GPR12                          |
| 12 | 33,075,000 | 33,225,000 | 442 | 698  | 0.905701853  | GPR12,WASF3                    |
| 12 | 33,150,000 | 33,300,000 | 443 | 603  | 0.530985094  | WASF3                          |
| 12 | 33,225,000 | 33,375,000 | 444 | 384  | -0.998891185 | CDK8                           |
| 12 | 33,300,000 | 33,450,000 | 445 | 411  | 0.377110288  | CDK8,RNF6                      |
| 12 | 33,375,000 | 33,525,000 | 446 | 724  | 0.327390424  | RNF6,ENSBTAG00000025428        |

|    |            |            |     |      |              |                                  |
|----|------------|------------|-----|------|--------------|----------------------------------|
| 12 | 33,450,000 | 33,600,000 | 447 | 896  | 0.13307889   | SHISA2,ENSBTAG00000025428        |
| 12 | 33,525,000 | 33,675,000 | 448 | 655  | -1.047116432 | SHISA2,ENSBTAG00000025428        |
| 12 | 33,600,000 | 33,750,000 | 449 | 652  | -0.561664531 |                                  |
| 12 | 33,675,000 | 33,825,000 | 450 | 946  | -0.972875072 | ATP8A2                           |
| 12 | 33,750,000 | 33,900,000 | 451 | 767  | -1.114442587 | ATP8A2                           |
| 12 | 33,825,000 | 33,975,000 | 452 | 384  | 0.528015912  | ATP8A2                           |
| 12 | 33,900,000 | 34,050,000 | 453 | 277  | 0.057079884  | ATP8A2                           |
| 12 | 33,975,000 | 34,125,000 | 454 | 323  | -0.271644441 | ATP8A2                           |
| 12 | 34,050,000 | 34,200,000 | 455 | 318  | 0.313937539  | ATP8A2,MTMR6,NUPL1               |
| 12 | 34,125,000 | 34,275,000 | 456 | 293  | 1.014213494  | MTMR6,NUPL1                      |
| 12 | 34,200,000 | 34,350,000 | 457 | 292  | 1.043914048  |                                  |
| 12 | 34,275,000 | 34,425,000 | 458 | 421  | 0.675900063  |                                  |
| 12 | 34,350,000 | 34,500,000 | 459 | 606  | 0.931668823  | ENSBTAG00000019545               |
| 12 | 34,425,000 | 34,575,000 | 460 | 597  | 0.371769973  | C1QTNF9,MIPEP,ENSBTAG00000019545 |
| 12 | 34,500,000 | 34,650,000 | 461 | 776  | -0.947286983 | C1QTNF9,MIPEP,ENSBTAG00000019545 |
| 12 | 34,575,000 | 34,725,000 | 462 | 740  | -1.092588864 | MIPEP,TNFRSF19                   |
| 12 | 34,650,000 | 34,800,000 | 463 | 552  | -0.10733616  | TNFRSF19                         |
| 12 | 34,725,000 | 34,875,000 | 464 | 532  | 0.581073519  | TNFRSF19                         |
| 12 | 34,800,000 | 34,950,000 | 465 | 420  | 0.219532166  | SACS,SGCG                        |
| 12 | 34,875,000 | 35,025,000 | 466 | 342  | 0.386985812  | SACS,SGCG                        |
| 12 | 34,950,000 | 35,100,000 | 467 | 408  | -0.270203073 | SGCG                             |
| 12 | 35,025,000 | 35,175,000 | 468 | 362  | -0.707241919 |                                  |
| 12 | 35,100,000 | 35,250,000 | 469 | 255  | 0.510484488  |                                  |
| 12 | 35,175,000 | 35,325,000 | 470 | 368  | 0.550332142  |                                  |
| 12 | 35,250,000 | 35,400,000 | 471 | 487  | 0.280356483  |                                  |
| 12 | 35,325,000 | 35,475,000 | 472 | 605  | 0.343668888  |                                  |
| 12 | 35,400,000 | 35,550,000 | 473 | 463  | -0.415167699 |                                  |
| 12 | 35,475,000 | 35,625,000 | 474 | 250  | -4.353265919 |                                  |
| 12 | 35,550,000 | 35,700,000 | 475 | 303  | -2.883794214 | FGF9                             |
| 12 | 35,625,000 | 35,775,000 | 476 | 296  | -0.430973765 | EFHA1,FGF9                       |
| 12 | 35,700,000 | 35,850,000 | 477 | 287  | 0.286391386  | EFHA1,MRPL57,SKA3,ZDHHC20        |
| 12 | 35,775,000 | 35,925,000 | 478 | 273  | 0.124594642  | LATS2,MRPL57,SAP18,SKA3,ZDHHC20  |
| 12 | 35,850,000 | 36,000,000 | 479 | 151  | 0.128468537  | LATS2,SAP18,SKA3,XPO4            |
| 12 | 35,925,000 | 36,075,000 | 480 | 81   | 0.315136252  | LATS2,N6AMT2,XPO4                |
| 12 | 36,000,000 | 36,150,000 | 481 | 82   | 0.483613853  | IFT88,IL17D,N6AMT2,XPO4          |
| 12 | 36,075,000 | 36,225,000 | 482 | 101  | 0.469804963  | CRYL1,IFT88,IL17D,N6AMT2         |
| 12 | 36,150,000 | 36,300,000 | 483 | 332  | 1.137462341  | CRYL1,IFT88                      |
| 12 | 36,225,000 | 36,375,000 | 484 | 351  | 0.736657184  | CRYL1,GJA3,GJB2,GJB6             |
| 12 | 36,300,000 | 36,450,000 | 485 | 141  | -1.481494085 | GJA3,GJB2,GJB6,ZMYM2             |
| 12 | 36,375,000 | 36,525,000 | 486 | 166  | -2.689034704 | ZMYM2,ZMYM5                      |
| 12 | 36,450,000 | 36,600,000 | 487 | 262  | -3.411501917 | PSPC1,ZMYM2,ZMYM5                |
| 12 | 36,525,000 | 36,675,000 | 488 | 284  | -3.417370914 | MPHOSPH8,PARP4,PSPC1             |
| 12 | 36,600,000 | 36,750,000 | 489 | 247  | -2.787500825 | CENPJ,MPHOSPH8,PARP4             |
| 12 | 36,675,000 | 36,825,000 | 490 | 203  | -2.443574137 | CENPJ,PARP4,RNF17                |
| 12 | 36,750,000 | 36,900,000 | 491 | 171  | -3.166014542 | CENPJ,RNF17                      |
| 12 | 36,825,000 | 36,975,000 | 492 | 128  | -3.504245542 | ATP12A,RNF17                     |
| 12 | 36,900,000 | 37,050,000 | 493 | 121  | -3.157012465 | ATP12A                           |
| 12 | 36,975,000 | 37,125,000 | 494 | 259  | -2.226602688 |                                  |
| 12 | 37,050,000 | 37,200,000 | 495 | 298  | -1.837831393 |                                  |
| 12 | 37,125,000 | 37,275,000 | 496 | 352  | -0.38802804  |                                  |
| 12 | 37,200,000 | 37,350,000 | 497 | 681  | 1.208279636  |                                  |
| 12 | 37,275,000 | 37,425,000 | 498 | 1276 | 1.252423807  |                                  |
| 12 | 37,350,000 | 37,500,000 | 499 | 1342 | 1.032373929  |                                  |

|    |            |            |     |      |              |                    |
|----|------------|------------|-----|------|--------------|--------------------|
| 12 | 37,425,000 | 37,575,000 | 500 | 930  | -0.016425719 |                    |
| 12 | 37,500,000 | 37,650,000 | 501 | 799  | -0.687654044 |                    |
| 12 | 37,575,000 | 37,725,000 | 502 | 1129 | 0.413273177  |                    |
| 12 | 37,650,000 | 37,800,000 | 503 | 1042 | 0.630401841  | ENSBTAG00000014274 |
| 12 | 37,725,000 | 37,875,000 | 504 | 398  | 0.180181034  | ENSBTAG00000014274 |
| 12 | 37,800,000 | 37,950,000 | 505 | 205  | -0.787599802 |                    |
| 12 | 37,875,000 | 38,025,000 | 506 | 206  | -0.8090393   |                    |
| 12 | 37,950,000 | 38,100,000 | 507 | 199  | -0.656708189 |                    |
| 12 | 38,025,000 | 38,175,000 | 508 | 423  | -0.569583066 |                    |
| 12 | 38,100,000 | 38,250,000 | 509 | 494  | -0.405402252 |                    |
| 12 | 38,175,000 | 38,325,000 | 510 | 329  | -0.16441293  |                    |
| 12 | 38,250,000 | 38,400,000 | 511 | 311  | -0.391965143 |                    |
| 12 | 38,325,000 | 38,475,000 | 512 | 243  | -0.295147596 |                    |
| 12 | 38,400,000 | 38,550,000 | 513 | 211  | 0.326850591  |                    |
| 12 | 38,475,000 | 38,625,000 | 514 | 224  | 0.020110605  |                    |
| 12 | 38,550,000 | 38,700,000 | 515 | 225  | -0.421773785 |                    |
| 12 | 38,625,000 | 38,775,000 | 516 | 228  | -0.376018041 |                    |
| 12 | 38,700,000 | 38,850,000 | 517 | 452  | -0.334826016 |                    |
| 12 | 38,775,000 | 38,925,000 | 518 | 936  | -0.087679715 |                    |
| 12 | 38,850,000 | 39,000,000 | 519 | 1005 | -0.111975521 |                    |
| 12 | 38,925,000 | 39,075,000 | 520 | 742  | -0.154163129 |                    |
| 12 | 39,000,000 | 39,150,000 | 521 | 657  | 0.372265593  |                    |
| 12 | 39,075,000 | 39,225,000 | 522 | 500  | -0.361251036 |                    |
| 12 | 39,150,000 | 39,300,000 | 523 | 361  | -1.552756758 |                    |
| 12 | 39,225,000 | 39,375,000 | 524 | 606  | 0.356468652  |                    |
| 12 | 39,300,000 | 39,450,000 | 525 | 633  | 0.663966253  |                    |
| 12 | 39,375,000 | 39,525,000 | 526 | 463  | -0.187194029 |                    |
| 12 | 39,450,000 | 39,600,000 | 527 | 887  | -0.20038227  |                    |
| 12 | 39,525,000 | 39,675,000 | 528 | 1082 | -1.358362362 |                    |
| 12 | 39,600,000 | 39,750,000 | 529 | 689  | -2.288826692 |                    |
| 12 | 39,675,000 | 39,825,000 | 530 | 493  | -0.83540719  |                    |
| 12 | 39,750,000 | 39,900,000 | 531 | 666  | -0.923523931 |                    |
| 12 | 39,825,000 | 39,975,000 | 532 | 602  | -0.748623069 | ENSBTAG00000032984 |
| 12 | 39,900,000 | 40,050,000 | 533 | 481  | 0.225679872  | ENSBTAG00000032984 |
| 12 | 39,975,000 | 40,125,000 | 534 | 681  | 0.273623473  |                    |
| 12 | 40,050,000 | 40,200,000 | 535 | 582  | 0.216112594  |                    |
| 12 | 40,125,000 | 40,275,000 | 536 | 557  | -0.201063357 |                    |
| 12 | 40,200,000 | 40,350,000 | 537 | 533  | -0.488117893 |                    |
| 12 | 40,275,000 | 40,425,000 | 538 | 310  | 0.18323759   |                    |
| 12 | 40,350,000 | 40,500,000 | 539 | 525  | 0.731464415  |                    |
| 12 | 40,425,000 | 40,575,000 | 540 | 704  | 0.402457159  |                    |
| 12 | 40,500,000 | 40,650,000 | 541 | 618  | 0.495013386  |                    |
| 12 | 40,575,000 | 40,725,000 | 542 | 626  | 0.92296011   | ENSBTAG00000047831 |
| 12 | 40,650,000 | 40,800,000 | 543 | 430  | 0.416586473  | ENSBTAG00000047831 |
| 12 | 40,725,000 | 40,875,000 | 544 | 307  | -5.207506817 |                    |
| 12 | 40,800,000 | 40,950,000 | 545 | 386  | -3.971164667 | PCDH9              |
| 12 | 40,875,000 | 41,025,000 | 546 | 664  | 0.86114825   | PCDH9              |
| 12 | 40,950,000 | 41,100,000 | 547 | 940  | 0.873054498  |                    |
| 12 | 41,025,000 | 41,175,000 | 548 | 669  | 0.707734012  |                    |
| 12 | 41,100,000 | 41,250,000 | 549 | 670  | 0.452263474  |                    |
| 12 | 41,175,000 | 41,325,000 | 550 | 675  | -0.050699348 |                    |
| 12 | 41,250,000 | 41,400,000 | 551 | 426  | -1.314452173 |                    |
| 12 | 41,325,000 | 41,475,000 | 552 | 387  | -1.29829415  |                    |

|    |            |            |     |      |              |                    |
|----|------------|------------|-----|------|--------------|--------------------|
| 12 | 41,400,000 | 41,550,000 | 553 | 311  | -0.547815227 |                    |
| 12 | 41,475,000 | 41,625,000 | 554 | 368  | -1.50435224  |                    |
| 12 | 41,550,000 | 41,700,000 | 555 | 584  | -4.114809524 |                    |
| 12 | 41,625,000 | 41,775,000 | 556 | 892  | -5.312225577 |                    |
| 12 | 41,700,000 | 41,850,000 | 557 | 991  | -5.355799851 |                    |
| 12 | 41,775,000 | 41,925,000 | 558 | 722  | -4.31919534  | ENSBTAG00000032979 |
| 12 | 41,850,000 | 42,000,000 | 559 | 434  | -1.611485583 | ENSBTAG00000032979 |
| 12 | 41,925,000 | 42,075,000 | 560 | 368  | -2.229192613 |                    |
| 12 | 42,000,000 | 42,150,000 | 561 | 735  | -2.793654812 |                    |
| 12 | 42,075,000 | 42,225,000 | 562 | 675  | -2.980387807 |                    |
| 12 | 42,150,000 | 42,300,000 | 563 | 259  | -2.343007991 |                    |
| 12 | 42,225,000 | 42,375,000 | 564 | 349  | -0.148051119 |                    |
| 12 | 42,300,000 | 42,450,000 | 565 | 633  | -0.003629084 |                    |
| 12 | 42,375,000 | 42,525,000 | 566 | 710  | 0.079138155  |                    |
| 12 | 42,450,000 | 42,600,000 | 567 | 556  | -0.306281025 |                    |
| 12 | 42,525,000 | 42,675,000 | 568 | 450  | -0.894940743 |                    |
| 12 | 42,600,000 | 42,750,000 | 569 | 383  | -0.731321731 |                    |
| 12 | 42,675,000 | 42,825,000 | 570 | 328  | -2.702275678 |                    |
| 12 | 42,750,000 | 42,900,000 | 571 | 250  | -4.429533371 |                    |
| 12 | 42,825,000 | 42,975,000 | 572 | 323  | -1.466404344 |                    |
| 12 | 42,900,000 | 43,050,000 | 573 | 669  | 0.387069538  |                    |
| 12 | 42,975,000 | 43,125,000 | 574 | 748  | 0.967493433  |                    |
| 12 | 43,050,000 | 43,200,000 | 575 | 586  | 1.037454792  |                    |
| 12 | 43,125,000 | 43,275,000 | 576 | 518  | 0.876812675  |                    |
| 12 | 43,200,000 | 43,350,000 | 577 | 367  | 0.731560643  |                    |
| 12 | 43,275,000 | 43,425,000 | 578 | 410  | 0.568783231  |                    |
| 12 | 43,350,000 | 43,500,000 | 579 | 853  | -0.217282229 |                    |
| 12 | 43,425,000 | 43,575,000 | 580 | 893  | -0.24555088  |                    |
| 12 | 43,500,000 | 43,650,000 | 581 | 747  | -1.117040726 |                    |
| 12 | 43,575,000 | 43,725,000 | 582 | 944  | -1.732332441 |                    |
| 12 | 43,650,000 | 43,800,000 | 583 | 923  | -0.610453739 |                    |
| 12 | 43,725,000 | 43,875,000 | 584 | 596  | 0.362020879  |                    |
| 12 | 43,800,000 | 43,950,000 | 585 | 305  | 0.754053281  |                    |
| 12 | 43,875,000 | 44,025,000 | 586 | 296  | 0.631267943  |                    |
| 12 | 43,950,000 | 44,100,000 | 587 | 313  | 0.270091528  |                    |
| 12 | 44,025,000 | 44,175,000 | 588 | 318  | -2.315905721 |                    |
| 12 | 44,100,000 | 44,250,000 | 589 | 684  | -0.362680887 |                    |
| 12 | 44,175,000 | 44,325,000 | 590 | 785  | 0.310588864  | KLHL1              |
| 12 | 44,250,000 | 44,400,000 | 591 | 1210 | 0.564875938  | KLHL1              |
| 12 | 44,325,000 | 44,475,000 | 592 | 1703 | 0.643134583  | KLHL1              |
| 12 | 44,400,000 | 44,550,000 | 593 | 1136 | 0.328472238  | KLHL1              |
| 12 | 44,475,000 | 44,625,000 | 594 | 847  | -0.672431056 | KLHL1              |
| 12 | 44,550,000 | 44,700,000 | 595 | 919  | -1.356532095 | KLHL1              |
| 12 | 44,625,000 | 44,775,000 | 596 | 872  | -1.061928354 |                    |
| 12 | 44,700,000 | 44,850,000 | 597 | 806  | -0.499155914 | ENSBTAG00000046942 |
| 12 | 44,775,000 | 44,925,000 | 598 | 1002 | 0.445032537  | ENSBTAG00000046942 |
| 12 | 44,850,000 | 45,000,000 | 599 | 1144 | 1.011577331  |                    |
| 12 | 44,925,000 | 45,075,000 | 600 | 795  | 0.927563276  |                    |
| 12 | 45,000,000 | 45,150,000 | 601 | 556  | 0.511497303  |                    |
| 12 | 45,075,000 | 45,225,000 | 602 | 644  | 0.96235149   |                    |
| 12 | 45,150,000 | 45,300,000 | 603 | 710  | 0.626279476  |                    |
| 12 | 45,225,000 | 45,375,000 | 604 | 575  | -0.079072568 |                    |
| 12 | 45,300,000 | 45,450,000 | 605 | 695  | 0.176879541  |                    |

|    |            |            |     |      |              |                      |
|----|------------|------------|-----|------|--------------|----------------------|
| 12 | 45,375,000 | 45,525,000 | 606 | 688  | 0.027024277  |                      |
| 12 | 45,450,000 | 45,600,000 | 607 | 948  | -2.74864691  |                      |
| 12 | 45,525,000 | 45,675,000 | 608 | 1296 | -2.146310344 |                      |
| 12 | 45,600,000 | 45,750,000 | 609 | 1039 | -0.962452825 |                      |
| 12 | 45,675,000 | 45,825,000 | 610 | 766  | -1.21260573  |                      |
| 12 | 45,750,000 | 45,900,000 | 611 | 574  | -0.504175021 |                      |
| 12 | 45,825,000 | 45,975,000 | 612 | 762  | 0.567409339  |                      |
| 12 | 45,900,000 | 46,050,000 | 613 | 735  | 0.526181036  |                      |
| 12 | 45,975,000 | 46,125,000 | 614 | 480  | -0.237700259 |                      |
| 12 | 46,050,000 | 46,200,000 | 615 | 763  | -0.420109294 |                      |
| 12 | 46,125,000 | 46,275,000 | 616 | 1054 | -0.095205505 |                      |
| 12 | 46,200,000 | 46,350,000 | 617 | 1079 | 0.903881588  |                      |
| 12 | 46,275,000 | 46,425,000 | 618 | 919  | 1.113721718  | DACH1                |
| 12 | 46,350,000 | 46,500,000 | 619 | 566  | 0.958692724  | DACH1                |
| 12 | 46,425,000 | 46,575,000 | 620 | 281  | 0.999969558  | DACH1                |
| 12 | 46,500,000 | 46,650,000 | 621 | 332  | 0.810570241  |                      |
| 12 | 46,575,000 | 46,725,000 | 622 | 833  | 0.866734295  |                      |
| 12 | 46,650,000 | 46,800,000 | 623 | 971  | 0.763645768  |                      |
| 12 | 46,725,000 | 46,875,000 | 624 | 645  | 0.57960998   |                      |
| 12 | 46,800,000 | 46,950,000 | 625 | 768  | 0.80169317   |                      |
| 12 | 46,875,000 | 47,025,000 | 626 | 871  | 0.691071066  |                      |
| 12 | 46,950,000 | 47,100,000 | 627 | 644  | 0.78686557   |                      |
| 12 | 47,025,000 | 47,175,000 | 628 | 555  | 1.113373685  |                      |
| 12 | 47,100,000 | 47,250,000 | 629 | 520  | 1.005884195  |                      |
| 12 | 47,175,000 | 47,325,000 | 630 | 748  | -0.717802128 |                      |
| 12 | 47,250,000 | 47,400,000 | 631 | 1364 | 0.208661566  |                      |
| 12 | 47,325,000 | 47,475,000 | 632 | 1141 | 0.632394462  |                      |
| 12 | 47,400,000 | 47,550,000 | 633 | 593  | -0.258268455 |                      |
| 12 | 47,475,000 | 47,625,000 | 634 | 745  | -0.128388813 |                      |
| 12 | 47,550,000 | 47,700,000 | 635 | 872  | 0.091947231  |                      |
| 12 | 47,625,000 | 47,775,000 | 636 | 1050 | 0.766212088  | MZT1                 |
| 12 | 47,700,000 | 47,850,000 | 637 | 964  | 0.917450795  | BORA,DIS3,MZT1,PIBF1 |
| 12 | 47,775,000 | 47,925,000 | 638 | 539  | 1.06434381   | BORA,DIS3,MZT1,PIBF1 |
| 12 | 47,850,000 | 48,000,000 | 639 | 391  | 1.083955486  | PIBF1                |
| 12 | 47,925,000 | 48,075,000 | 640 | 371  | 0.926548625  | PIBF1                |
| 12 | 48,000,000 | 48,150,000 | 641 | 525  | 0.582952908  | KLF5,PIBF1           |
| 12 | 48,075,000 | 48,225,000 | 642 | 461  | 0.11670358   | KLF5                 |
| 12 | 48,150,000 | 48,300,000 | 643 | 340  | 0.326163843  |                      |
| 12 | 48,225,000 | 48,375,000 | 644 | 435  | 0.184795194  |                      |
| 12 | 48,300,000 | 48,450,000 | 645 | 341  | -0.022283266 |                      |
| 12 | 48,375,000 | 48,525,000 | 646 | 272  | 0.523578122  |                      |
| 12 | 48,450,000 | 48,600,000 | 647 | 537  | -0.195386942 |                      |
| 12 | 48,525,000 | 48,675,000 | 648 | 803  | 0.09562715   |                      |
| 12 | 48,600,000 | 48,750,000 | 649 | 930  | 0.801337074  |                      |
| 12 | 48,675,000 | 48,825,000 | 650 | 971  | 1.020665225  |                      |
| 12 | 48,750,000 | 48,900,000 | 651 | 658  | 0.856755385  | KLF12                |
| 12 | 48,825,000 | 48,975,000 | 652 | 757  | -0.104069032 | KLF12                |
| 12 | 48,900,000 | 49,050,000 | 653 | 700  | -0.972006773 | KLF12                |
| 12 | 48,975,000 | 49,125,000 | 654 | 301  | -1.663766345 | KLF12                |
| 12 | 49,050,000 | 49,200,000 | 655 | 277  | -2.716755649 | KLF12                |
| 12 | 49,125,000 | 49,275,000 | 656 | 383  | -2.438097734 |                      |
| 12 | 49,200,000 | 49,350,000 | 657 | 390  | 0.004899462  |                      |
| 12 | 49,275,000 | 49,425,000 | 658 | 632  | 0.862762571  |                      |

|    |            |            |     |      |              |                               |
|----|------------|------------|-----|------|--------------|-------------------------------|
| 12 | 49,350,000 | 49,500,000 | 659 | 1133 | 0.82923935   |                               |
| 12 | 49,425,000 | 49,575,000 | 660 | 1104 | 0.810961201  |                               |
| 12 | 49,500,000 | 49,650,000 | 661 | 920  | 0.921747148  |                               |
| 12 | 49,575,000 | 49,725,000 | 662 | 1361 | 1.12830593   |                               |
| 12 | 49,650,000 | 49,800,000 | 663 | 1137 | 0.922990522  |                               |
| 12 | 49,725,000 | 49,875,000 | 664 | 507  | 0.251236338  |                               |
| 12 | 49,800,000 | 49,950,000 | 665 | 596  | -0.63693968  |                               |
| 12 | 49,875,000 | 50,025,000 | 666 | 608  | -0.371338423 |                               |
| 12 | 49,950,000 | 50,100,000 | 667 | 656  | 0.368454966  |                               |
| 12 | 50,025,000 | 50,175,000 | 668 | 697  | 0.413226507  |                               |
| 12 | 50,100,000 | 50,250,000 | 669 | 646  | 0.416278648  |                               |
| 12 | 50,175,000 | 50,325,000 | 670 | 577  | 0.290407289  |                               |
| 12 | 50,250,000 | 50,400,000 | 671 | 562  | 0.085165188  |                               |
| 12 | 50,325,000 | 50,475,000 | 672 | 676  | -0.174020455 |                               |
| 12 | 50,400,000 | 50,550,000 | 673 | 724  | -0.038521925 |                               |
| 12 | 50,475,000 | 50,625,000 | 674 | 764  | -1.423068533 |                               |
| 12 | 50,550,000 | 50,700,000 | 675 | 759  | -0.923477938 | TBC1D4                        |
| 12 | 50,625,000 | 50,775,000 | 676 | 899  | -0.07026624  | TBC1D4                        |
| 12 | 50,700,000 | 50,850,000 | 677 | 759  | -0.89339213  | TBC1D4                        |
| 12 | 50,775,000 | 50,925,000 | 678 | 799  | -0.010212943 | TBC1D4                        |
| 12 | 50,850,000 | 51,000,000 | 679 | 979  | -0.111004073 | TBC1D4,UCHL3                  |
| 12 | 50,925,000 | 51,075,000 | 680 | 721  | -0.455084348 | UCHL3,ENSBTAG00000010680      |
| 12 | 51,000,000 | 51,150,000 | 681 | 908  | 0.219487724  | LMO7,ENSBTAG00000010680       |
| 12 | 51,075,000 | 51,225,000 | 682 | 1002 | 0.670279501  | LMO7                          |
| 12 | 51,150,000 | 51,300,000 | 683 | 1064 | 1.081201126  | LMO7                          |
| 12 | 51,225,000 | 51,375,000 | 684 | 1308 | 0.946345984  | LMO7,ENSBTAG00000032878       |
| 12 | 51,300,000 | 51,450,000 | 685 | 1336 | 0.819565028  | ENSBTAG00000032878            |
| 12 | 51,375,000 | 51,525,000 | 686 | 1032 | 0.686223677  |                               |
| 12 | 51,450,000 | 51,600,000 | 687 | 473  | 0.52183457   |                               |
| 12 | 51,525,000 | 51,675,000 | 688 | 409  | 0.069946591  |                               |
| 12 | 51,600,000 | 51,750,000 | 689 | 615  | 0.187888389  |                               |
| 12 | 51,675,000 | 51,825,000 | 690 | 699  | 0.878861305  |                               |
| 12 | 51,750,000 | 51,900,000 | 691 | 710  | 1.095857014  |                               |
| 12 | 51,825,000 | 51,975,000 | 692 | 584  | 1.039360187  |                               |
| 12 | 51,900,000 | 52,050,000 | 693 | 737  | 0.749228181  |                               |
| 12 | 51,975,000 | 52,125,000 | 694 | 1196 | 0.02650481   |                               |
| 12 | 52,050,000 | 52,200,000 | 695 | 1048 | -0.271247084 |                               |
| 12 | 52,125,000 | 52,275,000 | 696 | 518  | 0.463412834  |                               |
| 12 | 52,200,000 | 52,350,000 | 697 | 315  | 0.945622107  |                               |
| 12 | 52,275,000 | 52,425,000 | 698 | 311  | 0.157273155  | IRG1,KCTD12                   |
| 12 | 52,350,000 | 52,500,000 | 699 | 477  | 0.270680154  | CLN5,FBXL3,IRG1,KCTD12,MYCBP2 |
| 12 | 52,425,000 | 52,575,000 | 700 | 436  | 0.655960142  | CLN5,FBXL3,MYCBP2             |
| 12 | 52,500,000 | 52,650,000 | 701 | 262  | -0.052997333 | MYCBP2                        |
| 12 | 52,575,000 | 52,725,000 | 702 | 243  | -0.199878001 | MYCBP2                        |
| 12 | 52,650,000 | 52,800,000 | 703 | 254  | 0.444360413  | MYCBP2                        |
| 12 | 52,725,000 | 52,875,000 | 704 | 461  | 0.595369691  | MYCBP2                        |
| 12 | 52,800,000 | 52,950,000 | 705 | 632  | 0.674810429  |                               |
| 12 | 52,875,000 | 53,025,000 | 706 | 725  | 0.379339705  |                               |
| 12 | 52,950,000 | 53,100,000 | 707 | 757  | 0.26910232   | SCEL                          |
| 12 | 53,025,000 | 53,175,000 | 708 | 559  | 0.367531743  | SCEL                          |
| 12 | 53,100,000 | 53,250,000 | 709 | 515  | 0.082258141  | SCEL,SLAIN1                   |
| 12 | 53,175,000 | 53,325,000 | 710 | 758  | -0.187443533 | EDNRB,SLAIN1                  |
| 12 | 53,250,000 | 53,400,000 | 711 | 703  | -0.437518712 | EDNRB                         |

|    |            |            |     |      |              |                           |
|----|------------|------------|-----|------|--------------|---------------------------|
| 12 | 53,325,000 | 53,475,000 | 712 | 566  | 0.031544997  | EDNRB                     |
| 12 | 53,400,000 | 53,550,000 | 713 | 766  | 0.577165397  | EDNRB                     |
| 12 | 53,475,000 | 53,625,000 | 714 | 941  | 0.635673378  |                           |
| 12 | 53,550,000 | 53,700,000 | 715 | 1215 | 0.502554225  |                           |
| 12 | 53,625,000 | 53,775,000 | 716 | 1413 | 0.802898366  |                           |
| 12 | 53,700,000 | 53,850,000 | 717 | 1353 | 0.762938829  |                           |
| 12 | 53,775,000 | 53,925,000 | 718 | 1196 | 0.899231595  |                           |
| 12 | 53,850,000 | 54,000,000 | 719 | 975  | 1.2553417    |                           |
| 12 | 53,925,000 | 54,075,000 | 720 | 773  | 1.267092964  |                           |
| 12 | 54,000,000 | 54,150,000 | 721 | 564  | 1.133355427  | RNF219                    |
| 12 | 54,075,000 | 54,225,000 | 722 | 675  | 0.508698009  | RNF219                    |
| 12 | 54,150,000 | 54,300,000 | 723 | 916  | 0.347331814  |                           |
| 12 | 54,225,000 | 54,375,000 | 724 | 1346 | 0.546689066  |                           |
| 12 | 54,300,000 | 54,450,000 | 725 | 1626 | 0.502121415  |                           |
| 12 | 54,375,000 | 54,525,000 | 726 | 1234 | 0.010330784  |                           |
| 12 | 54,450,000 | 54,600,000 | 727 | 911  | 0.10035934   |                           |
| 12 | 54,525,000 | 54,675,000 | 728 | 735  | 0.995324474  |                           |
| 12 | 54,600,000 | 54,750,000 | 729 | 746  | 0.91831876   |                           |
| 12 | 54,675,000 | 54,825,000 | 730 | 558  | -0.309579669 | RBM26                     |
| 12 | 54,750,000 | 54,900,000 | 731 | 361  | -1.602410281 | RBM26                     |
| 12 | 54,825,000 | 54,975,000 | 732 | 401  | -0.884148667 | NDFIP2,RBM26              |
| 12 | 54,900,000 | 55,050,000 | 733 | 546  | 0.456764722  | NDFIP2,ENSBTAG00000032727 |
| 12 | 54,975,000 | 55,125,000 | 734 | 890  | 0.484363183  | NDFIP2,ENSBTAG00000032727 |
| 12 | 55,050,000 | 55,200,000 | 735 | 674  | -0.12380884  |                           |
| 12 | 55,125,000 | 55,275,000 | 736 | 356  | -0.551336178 |                           |
| 12 | 55,200,000 | 55,350,000 | 737 | 566  | 0.738404105  |                           |
| 12 | 55,275,000 | 55,425,000 | 738 | 689  | -0.581287441 |                           |
| 12 | 55,350,000 | 55,500,000 | 739 | 606  | -2.38351884  |                           |
| 12 | 55,425,000 | 55,575,000 | 740 | 530  | -1.536024508 |                           |
| 12 | 55,500,000 | 55,650,000 | 741 | 477  | -3.187005181 |                           |
| 12 | 55,575,000 | 55,725,000 | 742 | 560  | -4.886154999 | SPRY2                     |
| 12 | 55,650,000 | 55,800,000 | 743 | 514  | -3.615938653 | SPRY2                     |
| 12 | 55,725,000 | 55,875,000 | 744 | 627  | -1.154911196 |                           |
| 12 | 55,800,000 | 55,950,000 | 745 | 973  | -1.288860195 |                           |
| 12 | 55,875,000 | 56,025,000 | 746 | 923  | -0.66531344  |                           |
| 12 | 55,950,000 | 56,100,000 | 747 | 525  | 0.279573713  |                           |
| 12 | 56,025,000 | 56,175,000 | 748 | 217  | -0.011265806 |                           |
| 12 | 56,100,000 | 56,250,000 | 749 | 354  | 0.250053399  |                           |
| 12 | 56,175,000 | 56,325,000 | 750 | 446  | 0.166865539  |                           |
| 12 | 56,250,000 | 56,400,000 | 751 | 542  | 0.981244126  |                           |
| 12 | 56,325,000 | 56,475,000 | 752 | 559  | 0.922163852  |                           |
| 12 | 56,400,000 | 56,550,000 | 753 | 474  | 0.527636136  |                           |
| 12 | 56,475,000 | 56,625,000 | 754 | 498  | 0.898959143  |                           |
| 12 | 56,550,000 | 56,700,000 | 755 | 550  | 0.503423121  |                           |
| 12 | 56,625,000 | 56,775,000 | 756 | 636  | 0.205512403  |                           |
| 12 | 56,700,000 | 56,850,000 | 757 | 569  | 0.149984115  |                           |
| 12 | 56,775,000 | 56,925,000 | 758 | 459  | 0.475990801  |                           |
| 12 | 56,850,000 | 57,000,000 | 759 | 310  | 0.384656155  |                           |
| 12 | 56,925,000 | 57,075,000 | 760 | 303  | -1.279290234 |                           |
| 12 | 57,000,000 | 57,150,000 | 761 | 780  | 0.527401058  |                           |
| 12 | 57,075,000 | 57,225,000 | 762 | 1226 | 1.043757534  |                           |
| 12 | 57,150,000 | 57,300,000 | 763 | 1086 | 1.103034821  |                           |
| 12 | 57,225,000 | 57,375,000 | 764 | 850  | 0.928117038  |                           |

|    |            |            |     |      |              |         |
|----|------------|------------|-----|------|--------------|---------|
| 12 | 57,300,000 | 57,450,000 | 765 | 840  | 0.580666355  |         |
| 12 | 57,375,000 | 57,525,000 | 766 | 722  | 0.398352397  |         |
| 12 | 57,450,000 | 57,600,000 | 767 | 573  | -0.402951032 |         |
| 12 | 57,525,000 | 57,675,000 | 768 | 667  | -1.024348029 |         |
| 12 | 57,600,000 | 57,750,000 | 769 | 1099 | -1.15731444  |         |
| 12 | 57,675,000 | 57,825,000 | 770 | 1188 | -0.427161544 |         |
| 12 | 57,750,000 | 57,900,000 | 771 | 841  | 0.559995601  |         |
| 12 | 57,825,000 | 57,975,000 | 772 | 887  | 0.923055642  |         |
| 12 | 57,900,000 | 58,050,000 | 773 | 1204 | 1.224690411  |         |
| 12 | 57,975,000 | 58,125,000 | 774 | 1354 | 1.158679356  |         |
| 12 | 58,050,000 | 58,200,000 | 775 | 1222 | 0.906298464  |         |
| 12 | 58,125,000 | 58,275,000 | 776 | 793  | 0.900689488  |         |
| 12 | 58,200,000 | 58,350,000 | 777 | 484  | 0.861598786  |         |
| 12 | 58,275,000 | 58,425,000 | 778 | 653  | 0.3857418    |         |
| 12 | 58,350,000 | 58,500,000 | 779 | 948  | 0.661726116  |         |
| 12 | 58,425,000 | 58,575,000 | 780 | 973  | 0.298671648  |         |
| 12 | 58,500,000 | 58,650,000 | 781 | 1122 | -0.42791077  |         |
| 12 | 58,575,000 | 58,725,000 | 782 | 1316 | 0.26272251   |         |
| 12 | 58,650,000 | 58,800,000 | 783 | 1076 | 0.667865135  |         |
| 12 | 58,725,000 | 58,875,000 | 784 | 805  | 0.428276651  |         |
| 12 | 58,800,000 | 58,950,000 | 785 | 735  | 0.541990941  |         |
| 12 | 58,875,000 | 59,025,000 | 786 | 651  | 0.676245604  |         |
| 12 | 58,950,000 | 59,100,000 | 787 | 461  | 0.118809373  |         |
| 12 | 59,025,000 | 59,175,000 | 788 | 714  | -0.03192087  | SLITRK1 |
| 12 | 59,100,000 | 59,250,000 | 789 | 859  | 0.053279777  | SLITRK1 |
| 12 | 59,175,000 | 59,325,000 | 790 | 613  | -0.076321431 |         |
| 12 | 59,250,000 | 59,400,000 | 791 | 396  | -1.139934881 |         |
| 12 | 59,325,000 | 59,475,000 | 792 | 813  | -1.797524673 |         |
| 12 | 59,400,000 | 59,550,000 | 793 | 991  | -0.596549557 |         |
| 12 | 59,475,000 | 59,625,000 | 794 | 523  | 0.927915103  |         |
| 12 | 59,550,000 | 59,700,000 | 795 | 337  | 0.321221675  |         |
| 12 | 59,625,000 | 59,775,000 | 796 | 600  | -0.235909644 |         |
| 12 | 59,700,000 | 59,850,000 | 797 | 746  | 0.395790388  |         |
| 12 | 59,775,000 | 59,925,000 | 798 | 956  | 0.538360689  |         |
| 12 | 59,850,000 | 60,000,000 | 799 | 1353 | 0.352366863  |         |
| 12 | 59,925,000 | 60,075,000 | 800 | 1320 | 0.425005605  |         |
| 12 | 60,000,000 | 60,150,000 | 801 | 1176 | 0.76689553   |         |
| 12 | 60,075,000 | 60,225,000 | 802 | 1051 | -2.34079115  |         |
| 12 | 60,150,000 | 60,300,000 | 803 | 1032 | -5.070997492 |         |
| 12 | 60,225,000 | 60,375,000 | 804 | 720  | -3.362784625 |         |
| 12 | 60,300,000 | 60,450,000 | 805 | 845  | -0.954848643 |         |
| 12 | 60,375,000 | 60,525,000 | 806 | 1099 | -0.604899796 |         |
| 12 | 60,450,000 | 60,600,000 | 807 | 770  | 0.249243872  |         |
| 12 | 60,525,000 | 60,675,000 | 808 | 763  | 0.651470752  |         |
| 12 | 60,600,000 | 60,750,000 | 809 | 883  | -0.238613359 |         |
| 12 | 60,675,000 | 60,825,000 | 810 | 865  | 0.335201705  |         |
| 12 | 60,750,000 | 60,900,000 | 811 | 669  | 1.117879516  |         |
| 12 | 60,825,000 | 60,975,000 | 812 | 615  | 1.009762115  |         |
| 12 | 60,900,000 | 61,050,000 | 813 | 744  | 0.450190378  |         |
| 12 | 60,975,000 | 61,125,000 | 814 | 759  | 0.482833269  | SLITRK6 |
| 12 | 61,050,000 | 61,200,000 | 815 | 973  | 1.094456114  | SLITRK6 |
| 12 | 61,125,000 | 61,275,000 | 816 | 1092 | -0.129033716 |         |
| 12 | 61,200,000 | 61,350,000 | 817 | 1110 | -0.641345064 |         |



|    |            |            |     |      |              |         |
|----|------------|------------|-----|------|--------------|---------|
| 12 | 61,275,000 | 61,425,000 | 818 | 1168 | -0.071760371 |         |
| 12 | 61,350,000 | 61,500,000 | 819 | 999  | 0.30173257   |         |
| 12 | 61,425,000 | 61,575,000 | 820 | 592  | 0.967124897  | HTATSF1 |
| 12 | 61,500,000 | 61,650,000 | 821 | 397  | -0.202575862 | HTATSF1 |
| 12 | 61,575,000 | 61,725,000 | 822 | 494  | 0.402532719  |         |
| 12 | 61,650,000 | 61,800,000 | 823 | 877  | 1.021445225  |         |
| 12 | 61,725,000 | 61,875,000 | 824 | 1146 | 0.835348866  |         |
| 12 | 61,800,000 | 61,950,000 | 825 | 872  | 0.16525815   |         |
| 12 | 61,875,000 | 62,025,000 | 826 | 778  | -1.202386436 |         |
| 12 | 61,950,000 | 62,100,000 | 827 | 1106 | -0.334369259 |         |
| 12 | 62,025,000 | 62,175,000 | 828 | 1357 | 0.679351138  |         |
| 12 | 62,100,000 | 62,250,000 | 829 | 1421 | 1.099214137  |         |
| 12 | 62,175,000 | 62,325,000 | 830 | 1447 | 1.00319623   |         |
| 12 | 62,250,000 | 62,400,000 | 831 | 1220 | 0.690598274  |         |
| 12 | 62,325,000 | 62,475,000 | 832 | 1415 | -1.072825657 |         |
| 12 | 62,400,000 | 62,550,000 | 833 | 1378 | -0.947635821 |         |
| 12 | 62,475,000 | 62,625,000 | 834 | 753  | 0.328975766  |         |
| 12 | 62,550,000 | 62,700,000 | 835 | 744  | 0.166182433  | SLITRK5 |
| 12 | 62,625,000 | 62,775,000 | 836 | 930  | 0.143745013  | SLITRK5 |
| 12 | 62,700,000 | 62,850,000 | 837 | 744  | -0.489978706 |         |
| 12 | 62,775,000 | 62,925,000 | 838 | 441  | -0.502751463 |         |
| 12 | 62,850,000 | 63,000,000 | 839 | 465  | -1.543611426 |         |
| 12 | 62,925,000 | 63,075,000 | 840 | 716  | -1.430507125 |         |
| 12 | 63,000,000 | 63,150,000 | 841 | 858  | -0.515623351 |         |
| 12 | 63,075,000 | 63,225,000 | 842 | 1154 | 0.090838347  |         |
| 12 | 63,150,000 | 63,300,000 | 843 | 1456 | -0.01716177  |         |
| 12 | 63,225,000 | 63,375,000 | 844 | 1096 | -0.065097124 |         |
| 12 | 63,300,000 | 63,450,000 | 845 | 1278 | 0.167004398  |         |
| 12 | 63,375,000 | 63,525,000 | 846 | 1246 | 0.316505601  |         |
| 12 | 63,450,000 | 63,600,000 | 847 | 810  | 0.664344719  |         |
| 12 | 63,525,000 | 63,675,000 | 848 | 1267 | -0.031574507 |         |
| 12 | 63,600,000 | 63,750,000 | 849 | 1084 | -0.231497105 |         |
| 12 | 63,675,000 | 63,825,000 | 850 | 621  | -0.229107064 |         |
| 12 | 63,750,000 | 63,900,000 | 851 | 607  | -0.07148391  |         |
| 12 | 63,825,000 | 63,975,000 | 852 | 569  | 0.625482994  |         |
| 12 | 63,900,000 | 64,050,000 | 853 | 677  | -0.716197417 |         |
| 12 | 63,975,000 | 64,125,000 | 854 | 1005 | -1.174782836 |         |
| 12 | 64,050,000 | 64,200,000 | 855 | 1424 | -0.246871246 |         |
| 12 | 64,125,000 | 64,275,000 | 856 | 1323 | 0.206991169  |         |
| 12 | 64,200,000 | 64,350,000 | 857 | 700  | 0.827669519  |         |
| 12 | 64,275,000 | 64,425,000 | 858 | 760  | -0.392207189 |         |
| 12 | 64,350,000 | 64,500,000 | 859 | 1175 | 0.497119679  |         |
| 12 | 64,425,000 | 64,575,000 | 860 | 990  | 0.924663908  |         |
| 12 | 64,500,000 | 64,650,000 | 861 | 1085 | 0.447966722  |         |
| 12 | 64,575,000 | 64,725,000 | 862 | 1190 | -0.127219463 |         |
| 12 | 64,650,000 | 64,800,000 | 863 | 1296 | 0.361751378  |         |
| 12 | 64,725,000 | 64,875,000 | 864 | 1150 | 1.095308008  |         |
| 12 | 64,800,000 | 64,950,000 | 865 | 540  | 0.688497539  |         |
| 12 | 64,875,000 | 65,025,000 | 866 | 398  | 0.177373503  |         |
| 12 | 64,950,000 | 65,100,000 | 867 | 631  | -0.252499368 |         |
| 12 | 65,025,000 | 65,175,000 | 868 | 730  | -0.507170973 |         |
| 12 | 65,100,000 | 65,250,000 | 869 | 812  | -0.022142283 |         |
| 12 | 65,175,000 | 65,325,000 | 870 | 815  | 0.878664288  |         |

|    |            |            |     |      |              |      |
|----|------------|------------|-----|------|--------------|------|
| 12 | 65,250,000 | 65,400,000 | 871 | 499  | 0.642730613  |      |
| 12 | 65,325,000 | 65,475,000 | 872 | 557  | -2.234555781 |      |
| 12 | 65,400,000 | 65,550,000 | 873 | 593  | -1.41963011  |      |
| 12 | 65,475,000 | 65,625,000 | 874 | 563  | 0.1654746    |      |
| 12 | 65,550,000 | 65,700,000 | 875 | 663  | -0.518703083 |      |
| 12 | 65,625,000 | 65,775,000 | 876 | 733  | -0.003404045 |      |
| 12 | 65,700,000 | 65,850,000 | 877 | 820  | 0.981778478  |      |
| 12 | 65,775,000 | 65,925,000 | 878 | 922  | 0.877193722  |      |
| 12 | 65,850,000 | 66,000,000 | 879 | 849  | 0.393109897  |      |
| 12 | 65,925,000 | 66,075,000 | 880 | 522  | 0.380846637  |      |
| 12 | 66,000,000 | 66,150,000 | 881 | 344  | 0.850465619  |      |
| 12 | 66,075,000 | 66,225,000 | 882 | 436  | 0.265599195  |      |
| 12 | 66,150,000 | 66,300,000 | 883 | 540  | -0.304685417 | GPC5 |
| 12 | 66,225,000 | 66,375,000 | 884 | 593  | 0.400978926  | GPC5 |
| 12 | 66,300,000 | 66,450,000 | 885 | 541  | 1.126738697  | GPC5 |
| 12 | 66,375,000 | 66,525,000 | 886 | 375  | 1.252754117  | GPC5 |
| 12 | 66,450,000 | 66,600,000 | 887 | 317  | 1.328044703  | GPC5 |
| 12 | 66,525,000 | 66,675,000 | 888 | 611  | 0.463495498  | GPC5 |
| 12 | 66,600,000 | 66,750,000 | 889 | 912  | -0.161507718 | GPC5 |
| 12 | 66,675,000 | 66,825,000 | 890 | 628  | 0.028562912  | GPC5 |
| 12 | 66,750,000 | 66,900,000 | 891 | 538  | 0.928438877  | GPC5 |
| 12 | 66,825,000 | 66,975,000 | 892 | 523  | 0.842041306  | GPC5 |
| 12 | 66,900,000 | 67,050,000 | 893 | 363  | 0.152584739  | GPC5 |
| 12 | 66,975,000 | 67,125,000 | 894 | 424  | -0.018973942 | GPC5 |
| 12 | 67,050,000 | 67,200,000 | 895 | 537  | 0.815755407  | GPC5 |
| 12 | 67,125,000 | 67,275,000 | 896 | 611  | 1.129720863  | GPC5 |
| 12 | 67,200,000 | 67,350,000 | 897 | 539  | 0.558015456  | GPC5 |
| 12 | 67,275,000 | 67,425,000 | 898 | 510  | -1.031561761 | GPC5 |
| 12 | 67,350,000 | 67,500,000 | 899 | 568  | -1.680443765 |      |
| 12 | 67,425,000 | 67,575,000 | 900 | 467  | -1.376680348 |      |
| 12 | 67,500,000 | 67,650,000 | 901 | 408  | 0.456370098  |      |
| 12 | 67,575,000 | 67,725,000 | 902 | 702  | 1.130767656  |      |
| 12 | 67,650,000 | 67,800,000 | 903 | 678  | 1.222959223  |      |
| 12 | 67,725,000 | 67,875,000 | 904 | 572  | 0.216747434  |      |
| 12 | 67,800,000 | 67,950,000 | 905 | 739  | 0.28870383   |      |
| 12 | 67,875,000 | 68,025,000 | 906 | 972  | 0.332330651  |      |
| 12 | 67,950,000 | 68,100,000 | 907 | 804  | -0.20304297  |      |
| 12 | 68,025,000 | 68,175,000 | 908 | 839  | -0.298070858 |      |
| 12 | 68,100,000 | 68,250,000 | 909 | 1012 | -0.115925067 | GPC6 |
| 12 | 68,175,000 | 68,325,000 | 910 | 854  | 0.167918315  | GPC6 |
| 12 | 68,250,000 | 68,400,000 | 911 | 843  | 0.58231822   | GPC6 |
| 12 | 68,325,000 | 68,475,000 | 912 | 952  | -0.30612607  | GPC6 |
| 12 | 68,400,000 | 68,550,000 | 913 | 933  | -0.424771748 | GPC6 |
| 12 | 68,475,000 | 68,625,000 | 914 | 873  | 0.27672402   | GPC6 |
| 12 | 68,550,000 | 68,700,000 | 915 | 968  | -1.090471802 | GPC6 |
| 12 | 68,625,000 | 68,775,000 | 916 | 952  | -0.753650356 | GPC6 |
| 12 | 68,700,000 | 68,850,000 | 917 | 666  | 0.85441084   | GPC6 |
| 12 | 68,775,000 | 68,925,000 | 918 | 484  | 1.165064249  |      |
| 12 | 68,850,000 | 69,000,000 | 919 | 895  | 1.218796126  |      |
| 12 | 68,925,000 | 69,075,000 | 920 | 961  | 1.172196278  |      |
| 12 | 69,000,000 | 69,150,000 | 921 | 658  | 1.061833483  |      |
| 12 | 69,075,000 | 69,225,000 | 922 | 661  | 0.740927056  |      |
| 12 | 69,150,000 | 69,300,000 | 923 | 740  | 0.402522394  |      |

|    |            |            |     |      |              |                                       |
|----|------------|------------|-----|------|--------------|---------------------------------------|
| 12 | 69,225,000 | 69,375,000 | 924 | 907  | 0.55192142   |                                       |
| 12 | 69,300,000 | 69,450,000 | 925 | 1133 | 0.996885021  |                                       |
| 12 | 69,375,000 | 69,525,000 | 926 | 1440 | 1.018981736  | DCT                                   |
| 12 | 69,450,000 | 69,600,000 | 927 | 1345 | 0.95866933   | DCT                                   |
| 12 | 69,525,000 | 69,675,000 | 928 | 714  | 0.995355773  | DCT,GPR180,TGDS                       |
| 12 | 69,600,000 | 69,750,000 | 929 | 626  | 0.857393625  | GPR180,SOX21,TGDS                     |
| 12 | 69,675,000 | 69,825,000 | 930 | 1021 | 0.75205685   | SOX21                                 |
| 12 | 69,750,000 | 69,900,000 | 931 | 1207 | 0.631687299  |                                       |
| 12 | 69,825,000 | 69,975,000 | 932 | 1086 | 0.617205315  |                                       |
| 12 | 69,900,000 | 70,050,000 | 933 | 1126 | 0.658005348  | ENSBTAG00000032603                    |
| 12 | 69,975,000 | 70,125,000 | 934 | 1252 | 0.353890385  | ENSBTAG00000032603                    |
| 12 | 70,050,000 | 70,200,000 | 935 | 1156 | 0.326967149  | ENSBTAG00000032603                    |
| 12 | 70,125,000 | 70,275,000 | 936 | 1056 | 0.784959829  | ENSBTAG00000032603                    |
| 12 | 70,200,000 | 70,350,000 | 937 | 1376 | 0.871265791  |                                       |
| 12 | 70,275,000 | 70,425,000 | 938 | 1445 | 0.395210254  |                                       |
| 12 | 70,350,000 | 70,500,000 | 939 | 1281 | -1.131200932 |                                       |
| 12 | 70,425,000 | 70,575,000 | 940 | 1618 | 0.419839927  |                                       |
| 12 | 70,500,000 | 70,650,000 | 941 | 1865 | 0.314247971  |                                       |
| 12 | 70,575,000 | 70,725,000 | 942 | 1933 | -0.126282995 |                                       |
| 12 | 70,650,000 | 70,800,000 | 943 | 2183 | -0.649203797 |                                       |
| 12 | 70,725,000 | 70,875,000 | 944 | 2353 | -2.281768336 |                                       |
| 12 | 70,800,000 | 70,950,000 | 945 | 2128 | -3.590316466 |                                       |
| 12 | 70,875,000 | 71,025,000 | 946 | 1717 | -3.524758871 |                                       |
| 12 | 70,950,000 | 71,100,000 | 947 | 1596 | -4.320275652 |                                       |
| 12 | 71,025,000 | 71,175,000 | 948 | 1439 | -6.037866797 |                                       |
| 12 | 71,100,000 | 71,250,000 | 949 | 1124 | -4.275253927 |                                       |
| 12 | 71,175,000 | 71,325,000 | 950 | 1770 | -0.245566907 |                                       |
| 12 | 71,250,000 | 71,400,000 | 951 | 2926 | 0.154314859  |                                       |
| 12 | 71,325,000 | 71,475,000 | 952 | 3002 | 0.024179605  |                                       |
| 12 | 71,400,000 | 71,550,000 | 953 | 2096 | 0.03538886   |                                       |
| 12 | 71,475,000 | 71,625,000 | 954 | 1862 | 0.247317252  |                                       |
| 12 | 71,550,000 | 71,700,000 | 955 | 1724 | 0.125299368  |                                       |
| 12 | 71,625,000 | 71,775,000 | 956 | 1553 | 0.255793875  |                                       |
| 12 | 71,700,000 | 71,850,000 | 957 | 1486 | 0.341824533  | ENSBTAG00000047383                    |
| 12 | 71,775,000 | 71,925,000 | 958 | 1570 | 0.548731147  | ENSBTAG00000047383                    |
| 12 | 71,850,000 | 72,000,000 | 959 | 2447 | 0.496318538  | ENSBTAG00000047383                    |
| 12 | 71,925,000 | 72,075,000 | 960 | 2299 | -0.009577716 | ENSBTAG00000045751,ENSBTAG00000047383 |
| 12 | 72,000,000 | 72,150,000 | 961 | 2129 | -0.030172408 | ENSBTAG00000045751                    |
| 12 | 72,075,000 | 72,225,000 | 962 | 2602 | 0.221916967  | ENSBTAG00000045751                    |
| 12 | 72,150,000 | 72,300,000 | 963 | 2398 | 0.375870072  | ENSBTAG00000045751                    |
| 12 | 72,225,000 | 72,375,000 | 964 | 2246 | 0.077241405  |                                       |
| 12 | 72,300,000 | 72,450,000 | 965 | 2420 | 0.420000714  |                                       |
| 12 | 72,375,000 | 72,525,000 | 966 | 2249 | 0.554802815  |                                       |
| 12 | 72,450,000 | 72,600,000 | 967 | 1677 | -0.718214611 | ENSBTAG00000047181                    |
| 12 | 72,525,000 | 72,675,000 | 968 | 1394 | -2.83041382  | ENSBTAG00000047181                    |
| 12 | 72,600,000 | 72,750,000 | 969 | 1862 | -0.510053877 | ENSBTAG00000047181                    |
| 12 | 72,675,000 | 72,825,000 | 970 | 1593 | -0.96870404  | ENSBTAG00000047181                    |
| 12 | 72,750,000 | 72,900,000 | 971 | 1324 | -1.954418762 |                                       |
| 12 | 72,825,000 | 72,975,000 | 972 | 1669 | 0.512115965  |                                       |
| 12 | 72,900,000 | 73,050,000 | 973 | 1645 | 0.390934215  |                                       |
| 12 | 72,975,000 | 73,125,000 | 974 | 1632 | 0.176904233  |                                       |
| 12 | 73,050,000 | 73,200,000 | 975 | 1891 | -0.071879538 |                                       |
| 12 | 73,125,000 | 73,275,000 | 976 | 2323 | -0.286908608 |                                       |

|    |            |            |      |      |              |                                       |
|----|------------|------------|------|------|--------------|---------------------------------------|
| 12 | 73,200,000 | 73,350,000 | 977  | 2261 | -0.367897392 |                                       |
| 12 | 73,275,000 | 73,425,000 | 978  | 2069 | -0.066470661 |                                       |
| 12 | 73,350,000 | 73,500,000 | 979  | 1704 | 0.173991689  |                                       |
| 12 | 73,425,000 | 73,575,000 | 980  | 1477 | -0.207644788 | ENSBTAG00000046041                    |
| 12 | 73,500,000 | 73,650,000 | 981  | 1316 | -1.122873501 | ENSBTAG00000046041                    |
| 12 | 73,575,000 | 73,725,000 | 982  | 1543 | -0.534644664 | ENSBTAG00000046041                    |
| 12 | 73,650,000 | 73,800,000 | 983  | 1580 | -0.250404078 | ENSBTAG00000046041                    |
| 12 | 73,725,000 | 73,875,000 | 984  | 1821 | -0.218450725 |                                       |
| 12 | 73,800,000 | 73,950,000 | 985  | 1997 | -0.527336609 | ENSBTAG00000047764                    |
| 12 | 73,875,000 | 74,025,000 | 986  | 1289 | -0.427826431 | ENSBTAG00000047764                    |
| 12 | 73,950,000 | 74,100,000 | 987  | 1665 | 0.236092726  | ENSBTAG00000047764                    |
| 12 | 74,025,000 | 74,175,000 | 988  | 1765 | -0.099506657 |                                       |
| 12 | 74,100,000 | 74,250,000 | 989  | 1948 | -0.261681426 |                                       |
| 12 | 74,175,000 | 74,325,000 | 990  | 2376 | -0.133788025 |                                       |
| 12 | 74,250,000 | 74,400,000 | 991  | 2217 | -0.169520344 |                                       |
| 12 | 74,325,000 | 74,475,000 | 992  | 1889 | -0.543969324 |                                       |
| 12 | 74,400,000 | 74,550,000 | 993  | 2412 | -0.863305172 |                                       |
| 12 | 74,475,000 | 74,625,000 | 994  | 2802 | -0.583994472 |                                       |
| 12 | 74,550,000 | 74,700,000 | 995  | 2016 | -0.500127895 |                                       |
| 12 | 74,625,000 | 74,775,000 | 996  | 1636 | -1.209506491 |                                       |
| 12 | 74,700,000 | 74,850,000 | 997  | 1940 | -1.786062472 | ENSBTAG00000023309                    |
| 12 | 74,775,000 | 74,925,000 | 998  | 2419 | -6.140531655 | ENSBTAG00000023309                    |
| 12 | 74,850,000 | 75,000,000 | 999  | 2042 | -3.849663423 | ENSBTAG00000023309                    |
| 12 | 74,925,000 | 75,075,000 | 1000 | 1480 | -1.505708244 | ENSBTAG00000023309                    |
| 12 | 75,000,000 | 75,150,000 | 1001 | 1265 | -1.674014263 |                                       |
| 12 | 75,075,000 | 75,225,000 | 1002 | 1650 | 0.120433515  |                                       |
| 12 | 75,150,000 | 75,300,000 | 1003 | 2242 | 0.32738553   |                                       |
| 12 | 75,225,000 | 75,375,000 | 1004 | 2514 | 0.231155047  |                                       |
| 12 | 75,300,000 | 75,450,000 | 1005 | 2276 | 0.169267328  |                                       |
| 12 | 75,375,000 | 75,525,000 | 1006 | 3061 | -0.119792644 | ENSBTAG00000026070                    |
| 12 | 75,450,000 | 75,600,000 | 1007 | 3304 | -0.120940584 | ENSBTAG00000026070                    |
| 12 | 75,525,000 | 75,675,000 | 1008 | 2482 | 0.298164534  | ENSBTAG00000026070,ENSBTAG00000039714 |
| 12 | 75,600,000 | 75,750,000 | 1009 | 2897 | 0.257074503  | ENSBTAG00000039714                    |
| 12 | 75,675,000 | 75,825,000 | 1010 | 3203 | 0.170111493  | ENSBTAG00000039714                    |
| 12 | 75,750,000 | 75,900,000 | 1011 | 3161 | -0.058558529 | ENSBTAG00000039714                    |
| 12 | 75,825,000 | 75,975,000 | 1012 | 2498 | -0.592967059 | ENSBTAG00000039714                    |
| 12 | 75,900,000 | 76,050,000 | 1013 | 1541 | -0.368968776 |                                       |
| 12 | 75,975,000 | 76,125,000 | 1014 | 1831 | 0.187967905  |                                       |
| 12 | 76,050,000 | 76,200,000 | 1015 | 2421 | 0.005383407  |                                       |
| 12 | 76,125,000 | 76,275,000 | 1016 | 2132 | -0.123216312 |                                       |
| 12 | 76,200,000 | 76,350,000 | 1017 | 1945 | -0.129429277 |                                       |
| 12 | 76,275,000 | 76,425,000 | 1018 | 2215 | -0.171950067 |                                       |
| 12 | 76,350,000 | 76,500,000 | 1019 | 2538 | -0.174212255 |                                       |
| 12 | 76,425,000 | 76,575,000 | 1020 | 2387 | -0.179476154 |                                       |
| 12 | 76,500,000 | 76,650,000 | 1021 | 2363 | -0.175378485 |                                       |
| 12 | 76,575,000 | 76,725,000 | 1022 | 2474 | -0.249691484 |                                       |
| 12 | 76,650,000 | 76,800,000 | 1023 | 2614 | 0.067068521  | CLDN10                                |
| 12 | 76,725,000 | 76,875,000 | 1024 | 3020 | 0.492259802  | CLDN10,DZIP1                          |
| 12 | 76,800,000 | 76,950,000 | 1025 | 2779 | 0.731367931  | CLDN10,DZIP1                          |
| 12 | 76,875,000 | 77,025,000 | 1026 | 2325 | 0.551681004  | DNAJC3,DZIP1                          |
| 12 | 76,950,000 | 77,100,000 | 1027 | 2167 | 0.429994877  | DNAJC3,UGGT2                          |
| 12 | 77,025,000 | 77,175,000 | 1028 | 1920 | 0.694032296  | UGGT2                                 |
| 12 | 77,100,000 | 77,250,000 | 1029 | 1796 | 0.309011936  | HS6ST3,UGGT2                          |

|    |            |            |      |      |              |                                 |
|----|------------|------------|------|------|--------------|---------------------------------|
| 12 | 77,175,000 | 77,325,000 | 1030 | 2040 | 0.639886178  | HS6ST3,UGGT2                    |
| 12 | 77,250,000 | 77,400,000 | 1031 | 2020 | 0.769423089  |                                 |
| 12 | 77,325,000 | 77,475,000 | 1032 | 1485 | 0.542965604  |                                 |
| 12 | 77,400,000 | 77,550,000 | 1033 | 1503 | 0.69405683   |                                 |
| 12 | 77,475,000 | 77,625,000 | 1034 | 1770 | 0.758018701  |                                 |
| 12 | 77,550,000 | 77,700,000 | 1035 | 1664 | 0.285355289  |                                 |
| 12 | 77,625,000 | 77,775,000 | 1036 | 1701 | -0.019733684 |                                 |
| 12 | 77,700,000 | 77,850,000 | 1037 | 1357 | 0.317135595  |                                 |
| 12 | 77,775,000 | 77,925,000 | 1038 | 843  | 0.690079284  |                                 |
| 12 | 77,850,000 | 78,000,000 | 1039 | 1061 | 1.016542037  | HS6ST3,ENSBTAG00000045566       |
| 12 | 77,925,000 | 78,075,000 | 1040 | 1052 | 0.336576219  | HS6ST3,OXGR1,ENSBTAG00000045566 |
| 12 | 78,000,000 | 78,150,000 | 1041 | 784  | -0.103599204 | OXGR1                           |
| 12 | 78,075,000 | 78,225,000 | 1042 | 709  | 0.778328806  |                                 |
| 12 | 78,150,000 | 78,300,000 | 1043 | 635  | 0.655353869  | MBNL2                           |
| 12 | 78,225,000 | 78,375,000 | 1044 | 536  | 0.431456499  | MBNL2                           |
| 12 | 78,300,000 | 78,450,000 | 1045 | 501  | -0.003739199 | MBNL2                           |
| 12 | 78,375,000 | 78,525,000 | 1046 | 825  | -0.060216438 | MBNL2,RAP2A                     |
| 12 | 78,450,000 | 78,600,000 | 1047 | 949  | -0.584956101 | RAP2A                           |
| 12 | 78,525,000 | 78,675,000 | 1048 | 528  | -0.857478117 | RAP2A                           |
| 12 | 78,600,000 | 78,750,000 | 1049 | 172  | -0.758005031 |                                 |
| 12 | 78,675,000 | 78,825,000 | 1050 | 408  | -0.167759912 |                                 |
| 12 | 78,750,000 | 78,900,000 | 1051 | 797  | -0.247711056 |                                 |
| 12 | 78,825,000 | 78,975,000 | 1052 | 624  | 0.100548204  |                                 |
| 12 | 78,900,000 | 79,050,000 | 1053 | 234  | 0.826356577  | RANBP6                          |
| 12 | 78,975,000 | 79,125,000 | 1054 | 358  | -0.242824925 | RANBP6                          |
| 12 | 79,050,000 | 79,200,000 | 1055 | 673  | 0.203858027  | FARP1                           |
| 12 | 79,125,000 | 79,275,000 | 1056 | 799  | -0.048865183 | FARP1                           |
| 12 | 79,200,000 | 79,350,000 | 1057 | 1036 | -0.212709305 | FARP1                           |
| 12 | 79,275,000 | 79,425,000 | 1058 | 1121 | 0.286438728  | FARP1                           |
| 12 | 79,350,000 | 79,500,000 | 1059 | 1027 | 0.533569566  | FARP1,STK24                     |
| 12 | 79,425,000 | 79,575,000 | 1060 | 1076 | 0.665710802  | FARP1,STK24                     |
| 12 | 79,500,000 | 79,650,000 | 1061 | 1290 | -0.23053689  | PEPT-1                          |
| 12 | 79,575,000 | 79,725,000 | 1062 | 1246 | -0.504634273 | DOCK9,PEPT-1                    |
| 12 | 79,650,000 | 79,800,000 | 1063 | 797  | 0.275968982  | DOCK9,PEPT-1                    |
| 12 | 79,725,000 | 79,875,000 | 1064 | 801  | 0.180490049  | DOCK9                           |
| 12 | 79,800,000 | 79,950,000 | 1065 | 936  | 0.281099418  | DOCK9                           |
| 12 | 79,875,000 | 80,025,000 | 1066 | 780  | 0.599958866  |                                 |
| 12 | 79,950,000 | 80,100,000 | 1067 | 585  | 0.561734262  | GPR18,UBAC2                     |
| 12 | 80,025,000 | 80,175,000 | 1068 | 412  | 0.507267216  | GPR18,GPR183,UBAC2              |
| 12 | 80,100,000 | 80,250,000 | 1069 | 474  | 0.978449623  | GPR183,UBAC2,ENSBTAG00000038268 |
| 12 | 80,175,000 | 80,325,000 | 1070 | 678  | 1.010314068  | TM9SF2,UBAC2,ENSBTAG00000038268 |
| 12 | 80,250,000 | 80,400,000 | 1071 | 865  | 0.751689795  | TM9SF2                          |
| 12 | 80,325,000 | 80,475,000 | 1072 | 781  | 0.841805839  | CLYBL,TM9SF2                    |
| 12 | 80,400,000 | 80,550,000 | 1073 | 473  | 1.196337118  | CLYBL                           |
| 12 | 80,475,000 | 80,625,000 | 1074 | 467  | 1.141476959  | CLYBL                           |
| 12 | 80,550,000 | 80,700,000 | 1075 | 570  | 0.428886577  | CLYBL                           |
| 12 | 80,625,000 | 80,775,000 | 1076 | 444  | -0.817707064 | CLYBL,ZIC2,ZIC5                 |
| 12 | 80,700,000 | 80,850,000 | 1077 | 512  | -1.368007191 | PCCA,ZIC2,ZIC5                  |
| 12 | 80,775,000 | 80,925,000 | 1078 | 632  | -0.662645077 | PCCA                            |
| 12 | 80,850,000 | 81,000,000 | 1079 | 656  | -0.069908775 | PCCA                            |
| 12 | 80,925,000 | 81,075,000 | 1080 | 969  | 0.151116541  | PCCA                            |
| 12 | 81,000,000 | 81,150,000 | 1081 | 1087 | 0.338870491  | PCCA                            |
| 12 | 81,075,000 | 81,225,000 | 1082 | 953  | 0.606236002  | GGACT,PCCA                      |

|    |            |            |      |      |              |                                     |
|----|------------|------------|------|------|--------------|-------------------------------------|
| 12 | 81,150,000 | 81,300,000 | 1083 | 1004 | 0.667372175  | GGACT,PCCA,TMTC4                    |
| 12 | 81,225,000 | 81,375,000 | 1084 | 1272 | 0.575536621  | TMTC4                               |
| 12 | 81,300,000 | 81,450,000 | 1085 | 1449 | 0.234437891  | TMTC4                               |
| 12 | 81,375,000 | 81,525,000 | 1086 | 1322 | 0.137208071  |                                     |
| 12 | 81,450,000 | 81,600,000 | 1087 | 1014 | 0.245229274  | NALCN                               |
| 12 | 81,525,000 | 81,675,000 | 1088 | 1180 | 0.912203788  | NALCN                               |
| 12 | 81,600,000 | 81,750,000 | 1089 | 1161 | 1.120448835  | NALCN                               |
| 12 | 81,675,000 | 81,825,000 | 1090 | 793  | 0.399399751  | NALCN                               |
| 12 | 81,750,000 | 81,900,000 | 1091 | 693  | 0.602361806  | NALCN                               |
| 12 | 81,825,000 | 81,975,000 | 1092 | 621  | 1.011875015  | NALCN                               |
| 12 | 81,900,000 | 82,050,000 | 1093 | 866  | 0.082742924  | ITGBL1                              |
| 12 | 81,975,000 | 82,125,000 | 1094 | 980  | -0.139930616 | ITGBL1                              |
| 12 | 82,050,000 | 82,200,000 | 1095 | 988  | -0.179134537 | ITGBL1                              |
| 12 | 82,125,000 | 82,275,000 | 1096 | 828  | -0.550044875 |                                     |
| 12 | 82,200,000 | 82,350,000 | 1097 | 447  | -0.00477854  |                                     |
| 12 | 82,275,000 | 82,425,000 | 1098 | 536  | -0.446275426 |                                     |
| 12 | 82,350,000 | 82,500,000 | 1099 | 632  | -0.445770397 |                                     |
| 12 | 82,425,000 | 82,575,000 | 1100 | 630  | 0.18424576   |                                     |
| 12 | 82,500,000 | 82,650,000 | 1101 | 852  | -0.336183626 |                                     |
| 12 | 82,575,000 | 82,725,000 | 1102 | 820  | -0.976890993 |                                     |
| 12 | 82,650,000 | 82,800,000 | 1103 | 622  | -0.946989595 |                                     |
| 12 | 82,725,000 | 82,875,000 | 1104 | 617  | -0.395004284 | TPP2                                |
| 12 | 82,800,000 | 82,950,000 | 1105 | 877  | -0.140723035 | METTL21C,TPP2                       |
| 12 | 82,875,000 | 83,025,000 | 1106 | 924  | 0.292057585  | CCDC168,KDELC1,METTL21C,TEX30,TPP2  |
| 12 | 82,950,000 | 83,100,000 | 1107 | 751  | 0.378954573  | CCDC168,ERCC5,KDELC1,METTL21E,TEX30 |
| 12 | 83,025,000 | 83,175,000 | 1108 | 990  | 0.408405929  | ERCC5,METTL21E                      |
| 12 | 83,100,000 | 83,250,000 | 1109 | 1157 | 0.738859793  | METTL21E                            |
| 12 | 83,175,000 | 83,325,000 | 1110 | 1451 | 0.578280527  | SLC10A2                             |
| 12 | 83,250,000 | 83,400,000 | 1111 | 1506 | 0.283055854  | SLC10A2                             |
| 12 | 83,325,000 | 83,475,000 | 1112 | 1084 | 0.082487335  |                                     |
| 12 | 83,400,000 | 83,550,000 | 1113 | 713  | 0.134323073  |                                     |
| 12 | 83,475,000 | 83,625,000 | 1114 | 646  | 0.095319843  |                                     |
| 12 | 83,550,000 | 83,700,000 | 1115 | 975  | 0.940561442  |                                     |
| 12 | 83,625,000 | 83,775,000 | 1116 | 1190 | 0.967536169  |                                     |
| 12 | 83,700,000 | 83,850,000 | 1117 | 1371 | 0.89497608   |                                     |
| 12 | 83,775,000 | 83,925,000 | 1118 | 1084 | 0.896121217  |                                     |
| 12 | 83,850,000 | 84,000,000 | 1119 | 716  | 0.653473576  |                                     |
| 12 | 83,925,000 | 84,075,000 | 1120 | 923  | 0.661241196  |                                     |
| 12 | 84,000,000 | 84,150,000 | 1121 | 1094 | 0.116655998  |                                     |
| 12 | 84,075,000 | 84,225,000 | 1122 | 927  | -0.139164813 |                                     |
| 12 | 84,150,000 | 84,300,000 | 1123 | 1040 | 0.748217766  |                                     |
| 12 | 84,225,000 | 84,375,000 | 1124 | 1278 | 0.932286842  |                                     |
| 12 | 84,300,000 | 84,450,000 | 1125 | 1303 | 0.54733735   |                                     |
| 12 | 84,375,000 | 84,525,000 | 1126 | 1562 | 0.471706688  |                                     |
| 12 | 84,450,000 | 84,600,000 | 1127 | 1734 | 0.806848211  |                                     |
| 12 | 84,525,000 | 84,675,000 | 1128 | 1807 | 0.743899323  |                                     |
| 12 | 84,600,000 | 84,750,000 | 1129 | 1849 | 0.255819945  |                                     |
| 12 | 84,675,000 | 84,825,000 | 1130 | 1601 | -0.247639117 |                                     |
| 12 | 84,750,000 | 84,900,000 | 1131 | 1210 | -0.497824865 |                                     |
| 12 | 84,825,000 | 84,975,000 | 1132 | 1242 | 0.118628383  |                                     |
| 12 | 84,900,000 | 85,050,000 | 1133 | 1232 | 0.503078338  |                                     |
| 12 | 84,975,000 | 85,125,000 | 1134 | 836  | 0.624198033  |                                     |
| 12 | 85,050,000 | 85,200,000 | 1135 | 825  | 0.627399122  |                                     |

|    |            |            |      |      |              |                      |
|----|------------|------------|------|------|--------------|----------------------|
| 12 | 85,125,000 | 85,275,000 | 1136 | 1084 | 0.966426239  |                      |
| 12 | 85,200,000 | 85,350,000 | 1137 | 888  | 0.912976092  |                      |
| 12 | 85,275,000 | 85,425,000 | 1138 | 503  | -0.341000211 |                      |
| 12 | 85,350,000 | 85,500,000 | 1139 | 825  | 0.239539827  |                      |
| 12 | 85,425,000 | 85,575,000 | 1140 | 1040 | 0.550641211  |                      |
| 12 | 85,500,000 | 85,650,000 | 1141 | 842  | 0.682702026  | ENSBTAG00000046889   |
| 12 | 85,575,000 | 85,725,000 | 1142 | 796  | 0.620938418  | ENSBTAG00000046889   |
| 12 | 85,650,000 | 85,800,000 | 1143 | 852  | 0.98640321   |                      |
| 12 | 85,725,000 | 85,875,000 | 1144 | 784  | 0.856466808  |                      |
| 12 | 85,800,000 | 85,950,000 | 1145 | 785  | -0.048864173 |                      |
| 12 | 85,875,000 | 86,025,000 | 1146 | 802  | -0.129849626 |                      |
| 12 | 85,950,000 | 86,100,000 | 1147 | 794  | -1.210029704 |                      |
| 12 | 86,025,000 | 86,175,000 | 1148 | 891  | -1.261247772 |                      |
| 12 | 86,100,000 | 86,250,000 | 1149 | 659  | -0.410082127 | EFNB2                |
| 12 | 86,175,000 | 86,325,000 | 1150 | 435  | 0.384710452  | ARGLU1,EFNB2         |
| 12 | 86,250,000 | 86,400,000 | 1151 | 619  | 1.159385648  | ARGLU1,EFNB2         |
| 12 | 86,325,000 | 86,475,000 | 1152 | 872  | 0.969825161  |                      |
| 12 | 86,400,000 | 86,550,000 | 1153 | 853  | 0.730303102  |                      |
| 12 | 86,475,000 | 86,625,000 | 1154 | 1215 | 0.268606411  |                      |
| 12 | 86,550,000 | 86,700,000 | 1155 | 1151 | 0.25008143   |                      |
| 12 | 86,625,000 | 86,775,000 | 1156 | 945  | -0.198399394 |                      |
| 12 | 86,700,000 | 86,850,000 | 1157 | 1096 | -1.353708685 | FAM155A              |
| 12 | 86,775,000 | 86,925,000 | 1158 | 701  | -1.559951213 | FAM155A              |
| 12 | 86,850,000 | 87,000,000 | 1159 | 572  | 0.494822496  | FAM155A              |
| 12 | 86,925,000 | 87,075,000 | 1160 | 677  | -0.674300483 | FAM155A              |
| 12 | 87,000,000 | 87,150,000 | 1161 | 698  | -1.267777449 | FAM155A              |
| 12 | 87,075,000 | 87,225,000 | 1162 | 677  | -1.314837352 | FAM155A              |
| 12 | 87,150,000 | 87,300,000 | 1163 | 756  | -1.277100215 | FAM155A              |
| 12 | 87,225,000 | 87,375,000 | 1164 | 840  | -0.303600714 | FAM155A              |
| 12 | 87,300,000 | 87,450,000 | 1165 | 595  | 0.105063026  | FAM155A              |
| 12 | 87,375,000 | 87,525,000 | 1166 | 607  | 0.113713279  | FAM155A              |
| 12 | 87,450,000 | 87,600,000 | 1167 | 846  | 0.180263486  |                      |
| 12 | 87,525,000 | 87,675,000 | 1168 | 773  | 0.629022575  | ABHD13,LIG4,TNFSF13B |
| 12 | 87,600,000 | 87,750,000 | 1169 | 581  | 0.865352072  | ABHD13,LIG4,TNFSF13B |
| 12 | 87,675,000 | 87,825,000 | 1170 | 459  | 0.565864307  | TNFSF13B             |
| 12 | 87,750,000 | 87,900,000 | 1171 | 763  | -0.066906916 |                      |
| 12 | 87,825,000 | 87,975,000 | 1172 | 1071 | 0.194332753  | MYO16                |
| 12 | 87,900,000 | 88,050,000 | 1173 | 821  | 0.326265074  | MYO16                |
| 12 | 87,975,000 | 88,125,000 | 1174 | 706  | -1.571609665 | MYO16                |
| 12 | 88,050,000 | 88,200,000 | 1175 | 570  | -2.23864203  | MYO16                |
| 12 | 88,125,000 | 88,275,000 | 1176 | 352  | -1.335815442 | MYO16                |
| 12 | 88,200,000 | 88,350,000 | 1177 | 435  | -0.927689486 | MYO16                |
| 12 | 88,275,000 | 88,425,000 | 1178 | 435  | -0.19551657  | MYO16                |
| 12 | 88,350,000 | 88,500,000 | 1179 | 464  | 0.33136944   |                      |
| 12 | 88,425,000 | 88,575,000 | 1180 | 773  | 0.662279949  |                      |
| 12 | 88,500,000 | 88,650,000 | 1181 | 637  | 0.821038133  |                      |
| 12 | 88,575,000 | 88,725,000 | 1182 | 518  | -2.777438379 | IRS2                 |
| 12 | 88,650,000 | 88,800,000 | 1183 | 825  | -1.747492886 | IRS2                 |
| 12 | 88,725,000 | 88,875,000 | 1184 | 663  | -0.001821778 |                      |
| 12 | 88,800,000 | 88,950,000 | 1185 | 696  | 0.226212957  | COL4A1               |
| 12 | 88,875,000 | 89,025,000 | 1186 | 678  | 0.512363204  | COL4A1               |
| 12 | 88,950,000 | 89,100,000 | 1187 | 391  | 0.514701009  | COL4A1               |
| 12 | 89,025,000 | 89,175,000 | 1188 | 622  | -1.060731247 | COL4A2               |

|    |            |            |      |      |              |                                                          |
|----|------------|------------|------|------|--------------|----------------------------------------------------------|
| 12 | 89,100,000 | 89,250,000 | 1189 | 729  | -0.739722761 | CARKD,COL4A2,RAB20                                       |
| 12 | 89,175,000 | 89,325,000 | 1190 | 744  | 0.183979422  | ANKRD10,CARKD,CARS2,RAB20                                |
| 12 | 89,250,000 | 89,400,000 | 1191 | 637  | 0.249904967  | ANKRD10,CARS2,ING1                                       |
| 12 | 89,325,000 | 89,475,000 | 1192 | 320  | 0.113999056  | ANKRD10,ARHGEF7,ING1                                     |
| 12 | 89,400,000 | 89,550,000 | 1193 | 432  | -1.525032782 | ARHGEF7                                                  |
| 12 | 89,475,000 | 89,625,000 | 1194 | 760  | 0.100758139  | ARHGEF7,TEX29                                            |
| 12 | 89,550,000 | 89,700,000 | 1195 | 918  | 0.588930716  | ARHGEF7,TEX29                                            |
| 12 | 89,625,000 | 89,775,000 | 1196 | 802  | 0.420144606  |                                                          |
| 12 | 89,700,000 | 89,850,000 | 1197 | 582  | 0.612286535  |                                                          |
| 12 | 89,775,000 | 89,925,000 | 1198 | 467  | 0.386558144  |                                                          |
| 12 | 89,850,000 | 90,000,000 | 1199 | 433  | 0.416895498  |                                                          |
| 12 | 89,925,000 | 90,075,000 | 1200 | 405  | 0.49692093   | SOX1                                                     |
| 12 | 90,000,000 | 90,150,000 | 1201 | 581  | -0.279501378 | SOX1                                                     |
| 12 | 90,075,000 | 90,225,000 | 1202 | 748  | -0.177327742 | TUBGCP3                                                  |
| 12 | 90,150,000 | 90,300,000 | 1203 | 856  | 0.302889257  | TUBGCP3                                                  |
| 12 | 90,225,000 | 90,375,000 | 1204 | 1011 | -0.004340797 | ATP11A,TUBGCP3                                           |
| 12 | 90,300,000 | 90,450,000 | 1205 | 745  | -0.476002003 | ATP11A,MCF2L                                             |
| 12 | 90,375,000 | 90,525,000 | 1206 | 448  | -0.884728615 | ATP11A,F10,F7,MCF2L                                      |
| 12 | 90,450,000 | 90,600,000 | 1207 | 544  | -1.508171535 | CUL4A,F10,F7,MCF2L,PCID2,PROZ                            |
| 12 | 90,525,000 | 90,675,000 | 1208 | 609  | -0.978796325 | ADPRHL1,CUL4A,F10,GRTP1,LAMP1,PCID2,PROZ                 |
| 12 | 90,600,000 | 90,750,000 | 1209 | 539  | 0.443127835  | ADPRHL1,DCUN1D2,GRTP1,LAMP1,TFDP1,TMCO3                  |
| 12 | 90,675,000 | 90,825,000 | 1210 | 681  | 0.660685115  | ADPRHL1,ATP4B,DCUN1D2,GAS6,GRK1,TFDP1,TMCO3,TEM255B      |
| 12 | 90,750,000 | 90,900,000 | 1211 | 895  | 1.096366589  | ATP4B,GAS6,GRK1,TFDP1,TMEM255B                           |
| 12 | 90,825,000 | 90,975,000 | 1212 | 1186 | 0.953579792  | GAS6,MGC134473,RASA3                                     |
| 12 | 90,900,000 | 91,050,000 | 1213 | 1066 | 0.573172621  | CDC16,MGC134473,RASA3,RPL22                              |
| 12 | 90,975,000 | 91,125,000 | 1214 | 871  | 0.228531347  | CDC16,CHAMP1,RASA3,RPL22,UPF3A                           |
| 12 | 91,050,000 | 91,163,125 | 1215 | 624  | 0.230643407  | CDC16,CHAMP1,UPF3A,ENSBTAG00000023187,ENSBTAG00000038732 |
| 13 | 0          | 150,000    | 1    | 496  | 0.72220067   |                                                          |
| 13 | 75,000     | 225,000    | 2    | 762  | 0.910421365  | OR4S2                                                    |
| 13 | 150,000    | 300,000    | 3    | 675  | 0.850986507  | OR4S2                                                    |
| 13 | 225,000    | 375,000    | 4    | 649  | -0.363394718 | ENSBTAG00000024891                                       |
| 13 | 300,000    | 450,000    | 5    | 870  | -2.263858229 | ENSBTAG00000024891,ENSBTAG00000025720                    |
| 13 | 375,000    | 525,000    | 6    | 1058 | -2.960072671 | ENSBTAG00000025720                                       |
| 13 | 450,000    | 600,000    | 7    | 894  | -1.512030054 | TMX4                                                     |
| 13 | 525,000    | 675,000    | 8    | 532  | 0.807653322  | TMX4                                                     |
| 13 | 600,000    | 750,000    | 9    | 798  | 1.010490438  |                                                          |
| 13 | 675,000    | 825,000    | 10   | 942  | 0.632950789  | PLCB1                                                    |
| 13 | 750,000    | 900,000    | 11   | 910  | 0.346965743  | PLCB1                                                    |
| 13 | 825,000    | 975,000    | 12   | 1108 | 0.830393414  | PLCB1                                                    |
| 13 | 900,000    | 1,050,000  | 13   | 1286 | -0.006110146 | PLCB1                                                    |
| 13 | 975,000    | 1,125,000  | 14   | 1389 | 0.156042238  | PLCB1                                                    |
| 13 | 1,050,000  | 1,200,000  | 15   | 1148 | 0.626572583  | PLCB1                                                    |
| 13 | 1,125,000  | 1,275,000  | 16   | 899  | 0.053601831  | PLCB1                                                    |
| 13 | 1,200,000  | 1,350,000  | 17   | 1286 | -0.323728365 | PLCB1                                                    |
| 13 | 1,275,000  | 1,425,000  | 18   | 1227 | -0.837418025 | PLCB1                                                    |
| 13 | 1,350,000  | 1,500,000  | 19   | 1220 | -1.611993647 | PLCB1                                                    |
| 13 | 1,425,000  | 1,575,000  | 20   | 1391 | -0.96209516  | PLCB1                                                    |
| 13 | 1,500,000  | 1,650,000  | 21   | 939  | -0.317337078 | PLCB1                                                    |
| 13 | 1,575,000  | 1,725,000  | 22   | 883  | -0.258673923 | PLCB1                                                    |
| 13 | 1,650,000  | 1,800,000  | 23   | 721  | 0.09170412   | PLCB1                                                    |
| 13 | 1,725,000  | 1,875,000  | 24   | 648  | 0.376618276  |                                                          |



|    |           |           |    |      |              |                           |
|----|-----------|-----------|----|------|--------------|---------------------------|
| 13 | 1,800,000 | 1,950,000 | 25 | 748  | 0.491692628  |                           |
| 13 | 1,875,000 | 2,025,000 | 26 | 901  | 0.593074615  |                           |
| 13 | 1,950,000 | 2,100,000 | 27 | 996  | 0.520862798  |                           |
| 13 | 2,025,000 | 2,175,000 | 28 | 1104 | 0.091855431  |                           |
| 13 | 2,100,000 | 2,250,000 | 29 | 907  | -0.402874739 | PLCB4                     |
| 13 | 2,175,000 | 2,325,000 | 30 | 827  | -1.485234175 | PLCB4                     |
| 13 | 2,250,000 | 2,400,000 | 31 | 1305 | -0.399269905 | PLCB4                     |
| 13 | 2,325,000 | 2,475,000 | 32 | 1288 | 0.502383229  | LAMP5,PAK7,PLCB4          |
| 13 | 2,400,000 | 2,550,000 | 33 | 1515 | 0.94940417   | LAMP5,PAK7,PLCB4          |
| 13 | 2,475,000 | 2,625,000 | 34 | 1669 | 0.760250424  | PAK7                      |
| 13 | 2,550,000 | 2,700,000 | 35 | 1593 | 0.343850474  |                           |
| 13 | 2,625,000 | 2,775,000 | 36 | 1457 | 0.084111792  |                           |
| 13 | 2,700,000 | 2,850,000 | 37 | 1065 | -1.554575544 | ENSBTAG00000046074        |
| 13 | 2,775,000 | 2,925,000 | 38 | 771  | -1.448445161 | MRPL33,ENSBTAG00000046074 |
| 13 | 2,850,000 | 3,000,000 | 39 | 678  | 0.176793896  | MRPL33                    |
| 13 | 2,925,000 | 3,075,000 | 40 | 557  | 0.29347019   |                           |
| 13 | 3,000,000 | 3,150,000 | 41 | 683  | 0.968063906  | ANKEF1                    |
| 13 | 3,075,000 | 3,225,000 | 42 | 994  | 0.068363298  | ANKEF1                    |
| 13 | 3,150,000 | 3,300,000 | 43 | 858  | -1.78997514  | ANKEF1                    |
| 13 | 3,225,000 | 3,375,000 | 44 | 665  | -0.079726558 | SNAP25                    |
| 13 | 3,300,000 | 3,450,000 | 45 | 801  | 0.439546064  | SNAP25                    |
| 13 | 3,375,000 | 3,525,000 | 46 | 1091 | 0.218454753  | SNAP25                    |
| 13 | 3,450,000 | 3,600,000 | 47 | 1115 | 0.419570344  | MKKS,SNAP25               |
| 13 | 3,525,000 | 3,675,000 | 48 | 701  | 0.529513926  | MKKS                      |
| 13 | 3,600,000 | 3,750,000 | 49 | 497  | 0.875381673  | SLX4IP                    |
| 13 | 3,675,000 | 3,825,000 | 50 | 585  | 0.992694115  | SLX4IP                    |
| 13 | 3,750,000 | 3,900,000 | 51 | 496  | 0.049748513  | JAG1,SLX4IP               |
| 13 | 3,825,000 | 3,975,000 | 52 | 539  | -1.540593548 | JAG1                      |
| 13 | 3,900,000 | 4,050,000 | 53 | 674  | -1.444004002 |                           |
| 13 | 3,975,000 | 4,125,000 | 54 | 521  | -1.39543029  |                           |
| 13 | 4,050,000 | 4,200,000 | 55 | 521  | -0.663612878 |                           |
| 13 | 4,125,000 | 4,275,000 | 56 | 636  | 0.183147635  |                           |
| 13 | 4,200,000 | 4,350,000 | 57 | 567  | 0.588853662  |                           |
| 13 | 4,275,000 | 4,425,000 | 58 | 685  | 0.343013624  |                           |
| 13 | 4,350,000 | 4,500,000 | 59 | 785  | 0.289910051  |                           |
| 13 | 4,425,000 | 4,575,000 | 60 | 778  | -0.66808206  |                           |
| 13 | 4,500,000 | 4,650,000 | 61 | 652  | -0.1361293   |                           |
| 13 | 4,575,000 | 4,725,000 | 62 | 768  | 0.767721966  |                           |
| 13 | 4,650,000 | 4,800,000 | 63 | 824  | 0.497662723  |                           |
| 13 | 4,725,000 | 4,875,000 | 64 | 618  | 0.666577075  |                           |
| 13 | 4,800,000 | 4,950,000 | 65 | 743  | -1.78864668  |                           |
| 13 | 4,875,000 | 5,025,000 | 66 | 953  | -1.22208598  |                           |
| 13 | 4,950,000 | 5,100,000 | 67 | 884  | -0.085607919 |                           |
| 13 | 5,025,000 | 5,175,000 | 68 | 903  | -1.190908013 |                           |
| 13 | 5,100,000 | 5,250,000 | 69 | 1279 | -0.901939817 |                           |
| 13 | 5,175,000 | 5,325,000 | 70 | 1198 | -0.350739209 |                           |
| 13 | 5,250,000 | 5,400,000 | 71 | 687  | -0.187666751 |                           |
| 13 | 5,325,000 | 5,475,000 | 72 | 220  | -0.621663397 | SRY                       |
| 13 | 5,400,000 | 5,550,000 | 73 | 33   | -7.261397289 | SRY                       |
| 13 | 5,475,000 | 5,625,000 | 74 | 373  | 0.172925984  | BTBD3                     |
| 13 | 5,550,000 | 5,700,000 | 75 | 1193 | -0.049897137 | BTBD3                     |
| 13 | 5,625,000 | 5,775,000 | 76 | 1511 | -0.152866723 | ENSBTAG00000045631        |
| 13 | 5,700,000 | 5,850,000 | 77 | 1290 | -0.18165989  | ENSBTAG00000045631        |

|    |           |           |     |      |              |                        |
|----|-----------|-----------|-----|------|--------------|------------------------|
| 13 | 5,775,000 | 5,925,000 | 78  | 1194 | -0.650893982 |                        |
| 13 | 5,850,000 | 6,000,000 | 79  | 1464 | -0.13894167  |                        |
| 13 | 5,925,000 | 6,075,000 | 80  | 1723 | -0.48052099  |                        |
| 13 | 6,000,000 | 6,150,000 | 81  | 1663 | -0.409753904 |                        |
| 13 | 6,075,000 | 6,225,000 | 82  | 1690 | 0.434312838  |                        |
| 13 | 6,150,000 | 6,300,000 | 83  | 1673 | 0.520148589  |                        |
| 13 | 6,225,000 | 6,375,000 | 84  | 1710 | 0.487419226  |                        |
| 13 | 6,300,000 | 6,450,000 | 85  | 1382 | 0.07223833   |                        |
| 13 | 6,375,000 | 6,525,000 | 86  | 949  | -0.728265048 |                        |
| 13 | 6,450,000 | 6,600,000 | 87  | 1200 | -0.195307085 |                        |
| 13 | 6,525,000 | 6,675,000 | 88  | 1397 | 0.811772013  |                        |
| 13 | 6,600,000 | 6,750,000 | 89  | 1262 | 0.704003539  | SPTLC3                 |
| 13 | 6,675,000 | 6,825,000 | 90  | 1143 | 0.216061959  | SPTLC3                 |
| 13 | 6,750,000 | 6,900,000 | 91  | 969  | 0.036339294  | SPTLC3                 |
| 13 | 6,825,000 | 6,975,000 | 92  | 651  | 0.406842691  | SPTLC3                 |
| 13 | 6,900,000 | 7,050,000 | 93  | 583  | 0.792144857  | C20ORF82               |
| 13 | 6,975,000 | 7,125,000 | 94  | 650  | 0.71343624   | C20ORF82               |
| 13 | 7,050,000 | 7,200,000 | 95  | 823  | 0.727970522  | C20ORF82,TASP1         |
| 13 | 7,125,000 | 7,275,000 | 96  | 1040 | 0.397765606  | TASP1                  |
| 13 | 7,200,000 | 7,350,000 | 97  | 1074 | 0.320061332  | TASP1                  |
| 13 | 7,275,000 | 7,425,000 | 98  | 1222 | 0.737117789  | TASP1                  |
| 13 | 7,350,000 | 7,500,000 | 99  | 882  | 0.934172853  | ESF1,TASP1             |
| 13 | 7,425,000 | 7,575,000 | 100 | 545  | -0.874756918 | C13H20orf7,ESF1,SEL1L2 |
| 13 | 7,500,000 | 7,650,000 | 101 | 949  | -0.733701173 | C13H20orf7,ESF1,SEL1L2 |
| 13 | 7,575,000 | 7,725,000 | 102 | 904  | 0.350873982  | SEL1L2                 |
| 13 | 7,650,000 | 7,800,000 | 103 | 459  | 1.305327583  |                        |
| 13 | 7,725,000 | 7,875,000 | 104 | 507  | 1.424887994  |                        |
| 13 | 7,800,000 | 7,950,000 | 105 | 756  | 1.339715989  |                        |
| 13 | 7,875,000 | 8,025,000 | 106 | 663  | 0.592696944  |                        |
| 13 | 7,950,000 | 8,100,000 | 107 | 416  | -0.286915    | FLRT3                  |
| 13 | 8,025,000 | 8,175,000 | 108 | 390  | 0.465692421  | FLRT3                  |
| 13 | 8,100,000 | 8,250,000 | 109 | 994  | 1.113775922  |                        |
| 13 | 8,175,000 | 8,325,000 | 110 | 949  | 1.116923357  |                        |
| 13 | 8,250,000 | 8,400,000 | 111 | 666  | 1.067423583  |                        |
| 13 | 8,325,000 | 8,475,000 | 112 | 957  | 1.01852627   |                        |
| 13 | 8,400,000 | 8,550,000 | 113 | 681  | 0.646297849  |                        |
| 13 | 8,475,000 | 8,625,000 | 114 | 545  | -1.943876461 |                        |
| 13 | 8,550,000 | 8,700,000 | 115 | 532  | -2.051907824 |                        |
| 13 | 8,625,000 | 8,775,000 | 116 | 573  | 0.421798626  |                        |
| 13 | 8,700,000 | 8,850,000 | 117 | 936  | 0.442855114  |                        |
| 13 | 8,775,000 | 8,925,000 | 118 | 1286 | 0.505374266  |                        |
| 13 | 8,850,000 | 9,000,000 | 119 | 1535 | 0.55379383   |                        |
| 13 | 8,925,000 | 9,075,000 | 120 | 1395 | 0.473865492  |                        |
| 13 | 9,000,000 | 9,150,000 | 121 | 1359 | 0.359185346  |                        |
| 13 | 9,075,000 | 9,225,000 | 122 | 1444 | 0.117839133  |                        |
| 13 | 9,150,000 | 9,300,000 | 123 | 1225 | 0.204696587  |                        |
| 13 | 9,225,000 | 9,375,000 | 124 | 1073 | 0.305579874  |                        |
| 13 | 9,300,000 | 9,450,000 | 125 | 1214 | 0.485500891  |                        |
| 13 | 9,375,000 | 9,525,000 | 126 | 1322 | 0.725855413  |                        |
| 13 | 9,450,000 | 9,600,000 | 127 | 1251 | 0.481102509  |                        |
| 13 | 9,525,000 | 9,675,000 | 128 | 1142 | 0.55536709   |                        |
| 13 | 9,600,000 | 9,750,000 | 129 | 1057 | 0.596691201  |                        |
| 13 | 9,675,000 | 9,825,000 | 130 | 942  | 0.479072694  |                        |

|    |            |            |     |      |              |                                  |
|----|------------|------------|-----|------|--------------|----------------------------------|
| 13 | 9,750,000  | 9,900,000  | 131 | 1065 | -0.546581017 | MACROD2                          |
| 13 | 9,825,000  | 9,975,000  | 132 | 1156 | -0.565345775 | MACROD2                          |
| 13 | 9,900,000  | 10,050,000 | 133 | 1093 | 0.768158256  | MACROD2                          |
| 13 | 9,975,000  | 10,125,000 | 134 | 1139 | 1.088233037  | MACROD2                          |
| 13 | 10,050,000 | 10,200,000 | 135 | 1280 | 0.412278012  |                                  |
| 13 | 10,125,000 | 10,275,000 | 136 | 1458 | 0.04382975   | KIF16B                           |
| 13 | 10,200,000 | 10,350,000 | 137 | 945  | 0.211435687  | KIF16B                           |
| 13 | 10,275,000 | 10,425,000 | 138 | 456  | 0.006030086  | KIF16B                           |
| 13 | 10,350,000 | 10,500,000 | 139 | 797  | -0.398644494 | KIF16B                           |
| 13 | 10,425,000 | 10,575,000 | 140 | 1020 | -1.563840094 | KIF16B                           |
| 13 | 10,500,000 | 10,650,000 | 141 | 1178 | -0.427417283 | KIF16B                           |
| 13 | 10,575,000 | 10,725,000 | 142 | 1723 | 0.840646155  |                                  |
| 13 | 10,650,000 | 10,800,000 | 143 | 1649 | 0.785028234  | OTOR,SNRPB2                      |
| 13 | 10,725,000 | 10,875,000 | 144 | 1047 | 0.800526909  | NANP,OTOR,SNRPB2                 |
| 13 | 10,800,000 | 10,950,000 | 145 | 1016 | 0.694576996  | NANP,ENSBTAG00000023169          |
| 13 | 10,875,000 | 11,025,000 | 146 | 1274 | 0.750453742  | NANP,ENSBTAG00000023169          |
| 13 | 10,950,000 | 11,100,000 | 147 | 1062 | 0.714431276  | ENSBTAG00000023169               |
| 13 | 11,025,000 | 11,175,000 | 148 | 946  | 0.536940791  | ENSBTAG00000004354               |
| 13 | 11,100,000 | 11,250,000 | 149 | 1591 | 0.751393095  | ENSBTAG00000004354               |
| 13 | 11,175,000 | 11,325,000 | 150 | 1584 | 0.740141362  | ANKRD26,ENSBTAG00000004354       |
| 13 | 11,250,000 | 11,400,000 | 151 | 1008 | 0.108398013  | ANKRD26,ENSBTAG00000040046       |
| 13 | 11,325,000 | 11,475,000 | 152 | 977  | 0.139708044  | ANKRD26,ENSBTAG00000040046       |
| 13 | 11,400,000 | 11,550,000 | 153 | 881  | 0.505030982  | CCDC3,ENSBTAG00000040046         |
| 13 | 11,475,000 | 11,625,000 | 154 | 756  | 0.876407404  | CCDC3                            |
| 13 | 11,550,000 | 11,700,000 | 155 | 651  | 0.512891884  | CCDC3                            |
| 13 | 11,625,000 | 11,775,000 | 156 | 670  | -1.044559341 | CAMK1D,CCDC3                     |
| 13 | 11,700,000 | 11,850,000 | 157 | 973  | -1.019609701 | CAMK1D                           |
| 13 | 11,775,000 | 11,925,000 | 158 | 1107 | -0.522785516 | CAMK1D                           |
| 13 | 11,850,000 | 12,000,000 | 159 | 959  | -1.068668612 |                                  |
| 13 | 11,925,000 | 12,075,000 | 160 | 795  | -2.369200558 |                                  |
| 13 | 12,000,000 | 12,150,000 | 161 | 661  | -1.286692285 |                                  |
| 13 | 12,075,000 | 12,225,000 | 162 | 831  | 0.928439012  | CDC123                           |
| 13 | 12,150,000 | 12,300,000 | 163 | 748  | 1.01894764   | CDC123,DHTKD1,NUDT5,SEC61A2      |
| 13 | 12,225,000 | 12,375,000 | 164 | 573  | 0.986926936  | CDC123,DHTKD1,NUDT5,SEC61A2,UPF2 |
| 13 | 12,300,000 | 12,450,000 | 165 | 518  | 0.710350315  | DHTKD1,UPF2                      |
| 13 | 12,375,000 | 12,525,000 | 166 | 449  | 0.837419363  | PROSER2,UPF2                     |
| 13 | 12,450,000 | 12,600,000 | 167 | 558  | 0.922485776  | ECHDC3,PROSER2,UPF2              |
| 13 | 12,525,000 | 12,675,000 | 168 | 685  | 0.852997989  | ECHDC3,PROSER2                   |
| 13 | 12,600,000 | 12,750,000 | 169 | 655  | 0.911448129  |                                  |
| 13 | 12,675,000 | 12,825,000 | 170 | 595  | 0.817187044  | USP6NL                           |
| 13 | 12,750,000 | 12,900,000 | 171 | 992  | 0.907824435  | USP6NL                           |
| 13 | 12,825,000 | 12,975,000 | 172 | 960  | 1.067309669  | CELF2,USP6NL                     |
| 13 | 12,900,000 | 13,050,000 | 173 | 608  | 1.242584052  | CELF2                            |
| 13 | 12,975,000 | 13,125,000 | 174 | 491  | 1.092690192  | CELF2                            |
| 13 | 13,050,000 | 13,200,000 | 175 | 434  | 0.357348627  |                                  |
| 13 | 13,125,000 | 13,275,000 | 176 | 691  | -0.173724484 |                                  |
| 13 | 13,200,000 | 13,350,000 | 177 | 1107 | 0.31065137   |                                  |
| 13 | 13,275,000 | 13,425,000 | 178 | 980  | 0.624809751  |                                  |
| 13 | 13,350,000 | 13,500,000 | 179 | 689  | -0.041405329 |                                  |
| 13 | 13,425,000 | 13,575,000 | 180 | 949  | 0.410399822  |                                  |
| 13 | 13,500,000 | 13,650,000 | 181 | 757  | 0.924704691  |                                  |
| 13 | 13,575,000 | 13,725,000 | 182 | 647  | -0.555194749 |                                  |
| 13 | 13,650,000 | 13,800,000 | 183 | 826  | -0.499996646 |                                  |

|    |            |            |     |      |              |                                  |
|----|------------|------------|-----|------|--------------|----------------------------------|
| 13 | 13,725,000 | 13,875,000 | 184 | 646  | 0.703939698  |                                  |
| 13 | 13,800,000 | 13,950,000 | 185 | 865  | 1.003599535  |                                  |
| 13 | 13,875,000 | 14,025,000 | 186 | 1070 | 0.951957496  |                                  |
| 13 | 13,950,000 | 14,100,000 | 187 | 1230 | 0.85085542   |                                  |
| 13 | 14,025,000 | 14,175,000 | 188 | 1234 | 0.897013702  |                                  |
| 13 | 14,100,000 | 14,250,000 | 189 | 929  | 0.679032489  |                                  |
| 13 | 14,175,000 | 14,325,000 | 190 | 892  | 0.81320559   |                                  |
| 13 | 14,250,000 | 14,400,000 | 191 | 889  | 0.025461627  |                                  |
| 13 | 14,325,000 | 14,475,000 | 192 | 913  | -1.070628585 |                                  |
| 13 | 14,400,000 | 14,550,000 | 193 | 1278 | 0.32547458   |                                  |
| 13 | 14,475,000 | 14,625,000 | 194 | 1468 | 0.712381946  |                                  |
| 13 | 14,550,000 | 14,700,000 | 195 | 1472 | 0.246888083  |                                  |
| 13 | 14,625,000 | 14,775,000 | 196 | 1633 | -0.201231351 |                                  |
| 13 | 14,700,000 | 14,850,000 | 197 | 1898 | -0.317277966 |                                  |
| 13 | 14,775,000 | 14,925,000 | 198 | 1954 | 0.262239708  |                                  |
| 13 | 14,850,000 | 15,000,000 | 199 | 1783 | 0.703036163  |                                  |
| 13 | 14,925,000 | 15,075,000 | 200 | 1309 | 0.668653624  |                                  |
| 13 | 15,000,000 | 15,150,000 | 201 | 973  | 0.692267012  |                                  |
| 13 | 15,075,000 | 15,225,000 | 202 | 1264 | 0.128808421  | ENSBTAG00000048047               |
| 13 | 15,150,000 | 15,300,000 | 203 | 1283 | 0.470372621  | ENSBTAG00000048047               |
| 13 | 15,225,000 | 15,375,000 | 204 | 806  | 1.122539225  |                                  |
| 13 | 15,300,000 | 15,450,000 | 205 | 349  | 0.495192878  |                                  |
| 13 | 15,375,000 | 15,525,000 | 206 | 346  | 0.104923289  |                                  |
| 13 | 15,450,000 | 15,600,000 | 207 | 455  | 0.270252368  |                                  |
| 13 | 15,525,000 | 15,675,000 | 208 | 409  | 1.001989857  |                                  |
| 13 | 15,600,000 | 15,750,000 | 209 | 277  | 1.158281208  |                                  |
| 13 | 15,675,000 | 15,825,000 | 210 | 317  | 0.47770058   |                                  |
| 13 | 15,750,000 | 15,900,000 | 211 | 562  | 0.261303291  |                                  |
| 13 | 15,825,000 | 15,975,000 | 212 | 748  | -0.100366961 |                                  |
| 13 | 15,900,000 | 16,050,000 | 213 | 771  | -0.497061024 | GATA3,TAF3                       |
| 13 | 15,975,000 | 16,125,000 | 214 | 841  | -0.167442493 | GATA3,TAF3                       |
| 13 | 16,050,000 | 16,200,000 | 215 | 1066 | 0.446713741  | ATP5C1,KIN,TAF3                  |
| 13 | 16,125,000 | 16,275,000 | 216 | 1302 | 0.785899626  | ATP5C1,ITIH2,KIN,TAF3            |
| 13 | 16,200,000 | 16,350,000 | 217 | 1628 | 0.731706792  | ITIH2,ITIH5,KIN                  |
| 13 | 16,275,000 | 16,425,000 | 218 | 1980 | 0.297825167  | ITIH5,SFMBT2                     |
| 13 | 16,350,000 | 16,500,000 | 219 | 2080 | 0.277973991  | ITIH5,SFMBT2                     |
| 13 | 16,425,000 | 16,575,000 | 220 | 1777 | 0.433550297  | SFMBT2                           |
| 13 | 16,500,000 | 16,650,000 | 221 | 1250 | 0.260384577  | SFMBT2                           |
| 13 | 16,575,000 | 16,725,000 | 222 | 916  | -1.037150367 | SFMBT2                           |
| 13 | 16,650,000 | 16,800,000 | 223 | 775  | -1.46814677  |                                  |
| 13 | 16,725,000 | 16,875,000 | 224 | 790  | -0.423170626 |                                  |
| 13 | 16,800,000 | 16,950,000 | 225 | 808  | -2.361634151 |                                  |
| 13 | 16,875,000 | 17,025,000 | 226 | 506  | -2.419963541 |                                  |
| 13 | 16,950,000 | 17,100,000 | 227 | 456  | 0.51073521   | PRKCQ                            |
| 13 | 17,025,000 | 17,175,000 | 228 | 673  | 0.419120508  | PRKCQ                            |
| 13 | 17,100,000 | 17,250,000 | 229 | 543  | 0.259270313  | PRKCQ                            |
| 13 | 17,175,000 | 17,325,000 | 230 | 686  | 0.84802745   | PRKCQ                            |
| 13 | 17,250,000 | 17,400,000 | 231 | 1058 | 0.896993393  | PFKFB3                           |
| 13 | 17,325,000 | 17,475,000 | 232 | 936  | 0.547075487  | PFKFB3                           |
| 13 | 17,400,000 | 17,550,000 | 233 | 673  | -0.05426539  | IL2RA,PFKFB3,RBM17               |
| 13 | 17,475,000 | 17,625,000 | 234 | 599  | -0.403823796 | IL15RA,IL2RA,RBM17               |
| 13 | 17,550,000 | 17,700,000 | 235 | 619  | -0.152682709 | FBXO18,IL15RA,IL2RA              |
| 13 | 17,625,000 | 17,775,000 | 236 | 913  | 0.221575982  | FBXO18,IL15RA,ENSBTAG00000036222 |

|    |            |            |     |      |              |                                                                                     |
|----|------------|------------|-----|------|--------------|-------------------------------------------------------------------------------------|
| 13 | 17,700,000 | 17,850,000 | 237 | 1266 | 0.62615589   | ENSBTAG00000017012,ENSBTAG00000022931,ENSBTAG0000036222                             |
| 13 | 17,775,000 | 17,925,000 | 238 | 1013 | 0.767092466  | ANKRD26,ENSBTAG00000017012,ENSBTAG00000022931,ENSBTAG00000034145,ENSBTAG00000036222 |
| 13 | 17,850,000 | 18,000,000 | 239 | 791  | 0.261332843  | ANKRD26,YME1L1,ENSBTAG00000022931,ENSBTAG00000034145                                |
| 13 | 17,925,000 | 18,075,000 | 240 | 932  | 0.490311542  | ACBD5,ANKRD26,MASTL,YME1L1                                                          |
| 13 | 18,000,000 | 18,150,000 | 241 | 863  | 0.871485618  | ABI1,ACBD5,MASTL,YME1L1                                                             |
| 13 | 18,075,000 | 18,225,000 | 242 | 688  | 0.245845511  | ABI1,ACBD5,PDSS1                                                                    |
| 13 | 18,150,000 | 18,300,000 | 243 | 981  | 0.328665985  | ABI1,APBB1IP,PDSS1                                                                  |
| 13 | 18,225,000 | 18,375,000 | 244 | 1021 | 0.632951166  | APBB1IP,CCNY                                                                        |
| 13 | 18,300,000 | 18,450,000 | 245 | 721  | 0.656307531  | APBB1IP,CCNY                                                                        |
| 13 | 18,375,000 | 18,525,000 | 246 | 630  | 0.519058366  | CCNY,CREM                                                                           |
| 13 | 18,450,000 | 18,600,000 | 247 | 479  | 0.786988461  | CREM,CUL2                                                                           |
| 13 | 18,525,000 | 18,675,000 | 248 | 446  | 0.892610615  | CREM,CUL2                                                                           |
| 13 | 18,600,000 | 18,750,000 | 249 | 449  | 0.24842524   | CUL2                                                                                |
| 13 | 18,675,000 | 18,825,000 | 250 | 454  | 0.187812504  |                                                                                     |
| 13 | 18,750,000 | 18,900,000 | 251 | 400  | 0.839140997  |                                                                                     |
| 13 | 18,825,000 | 18,975,000 | 252 | 381  | 1.253603517  |                                                                                     |
| 13 | 18,900,000 | 19,050,000 | 253 | 682  | 1.279392157  | PAR3                                                                                |
| 13 | 18,975,000 | 19,125,000 | 254 | 706  | 1.130011582  | PAR3                                                                                |
| 13 | 19,050,000 | 19,200,000 | 255 | 610  | 0.329054754  | PAR3                                                                                |
| 13 | 19,125,000 | 19,275,000 | 256 | 710  | 0.173380058  | PAR3                                                                                |
| 13 | 19,200,000 | 19,350,000 | 257 | 803  | -0.53389709  | PAR3                                                                                |
| 13 | 19,275,000 | 19,425,000 | 258 | 899  | -0.20191542  | PAR3                                                                                |
| 13 | 19,350,000 | 19,500,000 | 259 | 750  | 0.51583663   |                                                                                     |
| 13 | 19,425,000 | 19,575,000 | 260 | 637  | -0.395298683 |                                                                                     |
| 13 | 19,500,000 | 19,650,000 | 261 | 579  | -1.176507687 |                                                                                     |
| 13 | 19,575,000 | 19,725,000 | 262 | 425  | -1.025000607 |                                                                                     |
| 13 | 19,650,000 | 19,800,000 | 263 | 788  | 0.78382014   |                                                                                     |
| 13 | 19,725,000 | 19,875,000 | 264 | 915  | 0.724476762  |                                                                                     |
| 13 | 19,800,000 | 19,950,000 | 265 | 545  | 0.460016069  | NRP1                                                                                |
| 13 | 19,875,000 | 20,025,000 | 266 | 484  | 0.17168939   | NRP1                                                                                |
| 13 | 19,950,000 | 20,100,000 | 267 | 655  | -0.799555178 | NRP1                                                                                |
| 13 | 20,025,000 | 20,175,000 | 268 | 778  | -0.28185422  | NRP1                                                                                |
| 13 | 20,100,000 | 20,250,000 | 269 | 729  | 0.638706441  | ITGB1                                                                               |
| 13 | 20,175,000 | 20,325,000 | 270 | 582  | 0.955797773  | ITGB1                                                                               |
| 13 | 20,250,000 | 20,400,000 | 271 | 326  | 1.032204051  | ITGB1                                                                               |
| 13 | 20,325,000 | 20,475,000 | 272 | 263  | 1.288333352  |                                                                                     |
| 13 | 20,400,000 | 20,550,000 | 273 | 283  | 1.151891222  | CCDC7                                                                               |
| 13 | 20,475,000 | 20,625,000 | 274 | 285  | 0.566267216  | ARL5B,CCDC7                                                                         |
| 13 | 20,550,000 | 20,700,000 | 275 | 723  | 1.121722883  | ARL5B,CCDC7                                                                         |
| 13 | 20,625,000 | 20,775,000 | 276 | 1063 | 0.880183378  |                                                                                     |
| 13 | 20,700,000 | 20,850,000 | 277 | 1194 | 0.073379374  |                                                                                     |
| 13 | 20,775,000 | 20,925,000 | 278 | 1434 | 0.56681601   |                                                                                     |
| 13 | 20,850,000 | 21,000,000 | 279 | 1521 | 0.876775557  | MGC152301                                                                           |
| 13 | 20,925,000 | 21,075,000 | 280 | 1316 | 0.319525845  | MGC152301,ENSBTAG00000023216                                                        |
| 13 | 21,000,000 | 21,150,000 | 281 | 834  | -0.100013137 | ENSBTAG00000023216                                                                  |
| 13 | 21,075,000 | 21,225,000 | 282 | 553  | 0.040670802  | ENSBTAG00000023216                                                                  |
| 13 | 21,150,000 | 21,300,000 | 283 | 461  | 0.480118734  | ENSBTAG00000023216                                                                  |
| 13 | 21,225,000 | 21,375,000 | 284 | 947  | -0.001228392 | ENSBTAG00000023216                                                                  |
| 13 | 21,300,000 | 21,450,000 | 285 | 1455 | 0.375689659  | ENSBTAG00000023216                                                                  |
| 13 | 21,375,000 | 21,525,000 | 286 | 1125 | 1.108161771  | ENSBTAG00000023216                                                                  |

|    |            |            |     |      |              |                      |
|----|------------|------------|-----|------|--------------|----------------------|
| 13 | 21,450,000 | 21,600,000 | 287 | 792  | 1.063493497  | PLXDC2               |
| 13 | 21,525,000 | 21,675,000 | 288 | 840  | 0.963260146  | PLXDC2               |
| 13 | 21,600,000 | 21,750,000 | 289 | 910  | 1.057378105  | PLXDC2               |
| 13 | 21,675,000 | 21,825,000 | 290 | 916  | 0.855156908  | PLXDC2               |
| 13 | 21,750,000 | 21,900,000 | 291 | 1275 | 0.383309933  | PLXDC2               |
| 13 | 21,825,000 | 21,975,000 | 292 | 1583 | 0.286591871  | PLXDC2               |
| 13 | 21,900,000 | 22,050,000 | 293 | 1161 | 0.451128145  | PLXDC2               |
| 13 | 21,975,000 | 22,125,000 | 294 | 846  | 1.049822509  | PLXDC2               |
| 13 | 22,050,000 | 22,200,000 | 295 | 915  | 0.191335148  |                      |
| 13 | 22,125,000 | 22,275,000 | 296 | 848  | -0.569456547 |                      |
| 13 | 22,200,000 | 22,350,000 | 297 | 869  | -0.255736224 |                      |
| 13 | 22,275,000 | 22,425,000 | 298 | 800  | -0.005802973 | NEBL                 |
| 13 | 22,350,000 | 22,500,000 | 299 | 590  | 0.58322732   | NEBL                 |
| 13 | 22,425,000 | 22,575,000 | 300 | 523  | 0.006593777  | NEBL                 |
| 13 | 22,500,000 | 22,650,000 | 301 | 440  | -0.550901347 |                      |
| 13 | 22,575,000 | 22,725,000 | 302 | 439  | 1.016713063  |                      |
| 13 | 22,650,000 | 22,800,000 | 303 | 477  | 0.542870439  |                      |
| 13 | 22,725,000 | 22,875,000 | 304 | 801  | 0.247264961  | ENSBTAG00000003937   |
| 13 | 22,800,000 | 22,950,000 | 305 | 719  | 0.293383321  | ENSBTAG00000003937   |
| 13 | 22,875,000 | 23,025,000 | 306 | 239  | -1.064165262 | SKIDA1               |
| 13 | 22,950,000 | 23,100,000 | 307 | 173  | -2.758936673 | MLLT10,SKIDA1        |
| 13 | 23,025,000 | 23,175,000 | 308 | 202  | -1.876890451 | MLLT10               |
| 13 | 23,100,000 | 23,250,000 | 309 | 213  | -1.235376086 | MLLT10               |
| 13 | 23,175,000 | 23,325,000 | 310 | 203  | -0.99680113  | DNAJC1,MLLT10        |
| 13 | 23,250,000 | 23,400,000 | 311 | 206  | -1.112120191 | DNAJC1               |
| 13 | 23,325,000 | 23,475,000 | 312 | 291  | -0.590046054 | DNAJC1               |
| 13 | 23,400,000 | 23,550,000 | 313 | 309  | -0.446063493 | DNAJC1               |
| 13 | 23,475,000 | 23,625,000 | 314 | 476  | -0.61852155  |                      |
| 13 | 23,550,000 | 23,700,000 | 315 | 579  | -0.640279734 |                      |
| 13 | 23,625,000 | 23,775,000 | 316 | 423  | -0.499851532 | BMI1,COMMD3,SPAG6    |
| 13 | 23,700,000 | 23,850,000 | 317 | 507  | -1.054987073 | BMI1,COMMD3,SPAG6    |
| 13 | 23,775,000 | 23,925,000 | 318 | 637  | -1.030927086 | PIP4K2A,SPAG6        |
| 13 | 23,850,000 | 24,000,000 | 319 | 804  | 0.100417656  | PIP4K2A              |
| 13 | 23,925,000 | 24,075,000 | 320 | 905  | 0.083808178  | PIP4K2A              |
| 13 | 24,000,000 | 24,150,000 | 321 | 832  | -1.246709373 | PIP4K2A              |
| 13 | 24,075,000 | 24,225,000 | 322 | 865  | -1.680832466 | PIP4K2A              |
| 13 | 24,150,000 | 24,300,000 | 323 | 995  | -1.12585711  | ARMC3                |
| 13 | 24,225,000 | 24,375,000 | 324 | 1045 | -0.602607307 | ARMC3                |
| 13 | 24,300,000 | 24,450,000 | 325 | 1166 | -0.152388568 | ARMC3,MSRB2          |
| 13 | 24,375,000 | 24,525,000 | 326 | 1138 | -1.274697914 | C10orf67,MSRB2,PTF1A |
| 13 | 24,450,000 | 24,600,000 | 327 | 952  | -2.999818717 | C10orf67,PTF1A       |
| 13 | 24,525,000 | 24,675,000 | 328 | 1103 | -1.010506448 | C10orf67,OTUD1       |
| 13 | 24,600,000 | 24,750,000 | 329 | 1051 | 0.52038143   | OTUD1                |
| 13 | 24,675,000 | 24,825,000 | 330 | 820  | 0.842110765  |                      |
| 13 | 24,750,000 | 24,900,000 | 331 | 841  | 0.852935968  |                      |
| 13 | 24,825,000 | 24,975,000 | 332 | 937  | 0.59228556   |                      |
| 13 | 24,900,000 | 25,050,000 | 333 | 896  | 0.753907905  |                      |
| 13 | 24,975,000 | 25,125,000 | 334 | 698  | 0.81620869   |                      |
| 13 | 25,050,000 | 25,200,000 | 335 | 559  | 1.00535642   |                      |
| 13 | 25,125,000 | 25,275,000 | 336 | 521  | 0.655807128  |                      |
| 13 | 25,200,000 | 25,350,000 | 337 | 682  | -0.164827881 | KIAA1217             |
| 13 | 25,275,000 | 25,425,000 | 338 | 942  | 0.225927828  | KIAA1217             |
| 13 | 25,350,000 | 25,500,000 | 339 | 1281 | 0.571305892  | KIAA1217             |

|    |            |            |     |      |              |                                |
|----|------------|------------|-----|------|--------------|--------------------------------|
| 13 | 25,425,000 | 25,575,000 | 340 | 1296 | 0.075008396  | KIAA1217                       |
| 13 | 25,500,000 | 25,650,000 | 341 | 1088 | -1.123020786 | KIAA1217                       |
| 13 | 25,575,000 | 25,725,000 | 342 | 977  | -1.844693115 | KIAA1217                       |
| 13 | 25,650,000 | 25,800,000 | 343 | 989  | -0.572211169 | ARHGAP21,KIAA1217              |
| 13 | 25,725,000 | 25,875,000 | 344 | 1081 | -0.105461038 | ARHGAP21                       |
| 13 | 25,800,000 | 25,950,000 | 345 | 1052 | 0.2333045    | ARHGAP21                       |
| 13 | 25,875,000 | 26,025,000 | 346 | 928  | 0.219437178  |                                |
| 13 | 25,950,000 | 26,100,000 | 347 | 623  | -0.684623595 | ENKUR,PRTFDC1                  |
| 13 | 26,025,000 | 26,175,000 | 348 | 416  | -0.301320738 | ENKUR,PRTFDC1,THNSL1           |
| 13 | 26,100,000 | 26,250,000 | 349 | 377  | 0.446677424  | ENKUR,GPR158,THNSL1            |
| 13 | 26,175,000 | 26,325,000 | 350 | 367  | -0.294686768 | GPR158                         |
| 13 | 26,250,000 | 26,400,000 | 351 | 367  | -0.90142734  | GPR158                         |
| 13 | 26,325,000 | 26,475,000 | 352 | 430  | 0.149725042  | GPR158                         |
| 13 | 26,400,000 | 26,550,000 | 353 | 550  | 0.876675245  | GPR158                         |
| 13 | 26,475,000 | 26,625,000 | 354 | 715  | -0.357391749 | GPR158                         |
| 13 | 26,550,000 | 26,700,000 | 355 | 1206 | 0.323298586  |                                |
| 13 | 26,625,000 | 26,775,000 | 356 | 1330 | 0.841104871  | MYO3A                          |
| 13 | 26,700,000 | 26,850,000 | 357 | 664  | 0.493564631  | MYO3A                          |
| 13 | 26,775,000 | 26,925,000 | 358 | 282  | -0.30156873  | MYO3A                          |
| 13 | 26,850,000 | 27,000,000 | 359 | 414  | -0.855794762 | GAD2,MYO3A                     |
| 13 | 26,925,000 | 27,075,000 | 360 | 407  | -1.133627289 | FZD8,GAD2,GJD4,MYO3A           |
| 13 | 27,000,000 | 27,150,000 | 361 | 271  | -2.343905252 | FZD8,GJD4                      |
| 13 | 27,075,000 | 27,225,000 | 362 | 452  | 0.046528925  |                                |
| 13 | 27,150,000 | 27,300,000 | 363 | 746  | 0.62920191   |                                |
| 13 | 27,225,000 | 27,375,000 | 364 | 1018 | 0.641031801  |                                |
| 13 | 27,300,000 | 27,450,000 | 365 | 899  | 0.468072621  |                                |
| 13 | 27,375,000 | 27,525,000 | 366 | 716  | 0.118676091  |                                |
| 13 | 27,450,000 | 27,600,000 | 367 | 818  | 0.16011202   |                                |
| 13 | 27,525,000 | 27,675,000 | 368 | 792  | 0.232093543  |                                |
| 13 | 27,600,000 | 27,750,000 | 369 | 885  | 0.463564745  |                                |
| 13 | 27,675,000 | 27,825,000 | 370 | 981  | 0.795345932  |                                |
| 13 | 27,750,000 | 27,900,000 | 371 | 920  | 0.892971412  |                                |
| 13 | 27,825,000 | 27,975,000 | 372 | 901  | 0.677807329  |                                |
| 13 | 27,900,000 | 28,050,000 | 373 | 852  | 0.331117304  |                                |
| 13 | 27,975,000 | 28,125,000 | 374 | 824  | 0.301853699  | OPTN                           |
| 13 | 28,050,000 | 28,200,000 | 375 | 972  | 0.743245101  | MCM10,OPTN                     |
| 13 | 28,125,000 | 28,275,000 | 376 | 711  | 0.554506992  | MCM10,PHYH,ENSBTAG00000047869  |
| 13 | 28,200,000 | 28,350,000 | 377 | 485  | 0.855108748  | PHYH,SEPHS1,ENSBTAG00000047869 |
| 13 | 28,275,000 | 28,425,000 | 378 | 596  | 1.19924286   | BEND7,PHYH,SEPHS1              |
| 13 | 28,350,000 | 28,500,000 | 379 | 556  | 1.190718172  | BEND7                          |
| 13 | 28,425,000 | 28,575,000 | 380 | 458  | 1.183105286  | BEND7,PRPF18                   |
| 13 | 28,500,000 | 28,650,000 | 381 | 357  | 1.085493145  | FRMD4A,PRPF18                  |
| 13 | 28,575,000 | 28,725,000 | 382 | 411  | -0.129592567 | FRMD4A,PRPF18                  |
| 13 | 28,650,000 | 28,800,000 | 383 | 558  | 0.276529269  | FRMD4A                         |
| 13 | 28,725,000 | 28,875,000 | 384 | 522  | 0.93515995   | FRMD4A                         |
| 13 | 28,800,000 | 28,950,000 | 385 | 464  | 0.740068443  | FRMD4A                         |
| 13 | 28,875,000 | 29,025,000 | 386 | 500  | 0.754024909  | FRMD4A                         |
| 13 | 28,950,000 | 29,100,000 | 387 | 782  | -0.916291935 | FRMD4A                         |
| 13 | 29,025,000 | 29,175,000 | 388 | 969  | -0.786274713 |                                |
| 13 | 29,100,000 | 29,250,000 | 389 | 1354 | 1.109105632  |                                |
| 13 | 29,175,000 | 29,325,000 | 390 | 1233 | 0.791196866  |                                |
| 13 | 29,250,000 | 29,400,000 | 391 | 956  | 0.758594453  |                                |
| 13 | 29,325,000 | 29,475,000 | 392 | 1306 | -0.951858538 |                                |

|    |            |            |     |      |              |                                                           |
|----|------------|------------|-----|------|--------------|-----------------------------------------------------------|
| 13 | 29,400,000 | 29,550,000 | 393 | 1269 | -1.205660679 | FAM107B                                                   |
| 13 | 29,475,000 | 29,625,000 | 394 | 1238 | 0.595743273  | FAM107B                                                   |
| 13 | 29,550,000 | 29,700,000 | 395 | 1268 | 0.715578033  | FAM107B                                                   |
| 13 | 29,625,000 | 29,775,000 | 396 | 834  | 0.772247989  | CDNF                                                      |
| 13 | 29,700,000 | 29,850,000 | 397 | 346  | 0.571942768  | CDNF,DCLRE1C,HSPA14,SUV39H2,ENSBTAG00000045609            |
| 13 | 29,775,000 | 29,925,000 | 398 | 500  | 0.771225095  | CDNF,DCLRE1C,HSPA14,MEIG1,OLAH,SUV39H2,ENSBTAG00000045609 |
| 13 | 29,850,000 | 30,000,000 | 399 | 633  | 0.619450069  | ACBD7,DCLRE1C,MEIG1,NMT2,OLAH,RPP38                       |
| 13 | 29,925,000 | 30,075,000 | 400 | 672  | -1.254619101 | ACBD7,C13H10ORF38,NMT2,OLAH,RPP38                         |
| 13 | 30,000,000 | 30,150,000 | 401 | 844  | -0.306788507 | C13H10ORF38,NMT2                                          |
| 13 | 30,075,000 | 30,225,000 | 402 | 1109 | 0.703967493  | C13H10ORF38                                               |
| 13 | 30,150,000 | 30,300,000 | 403 | 1061 | 0.131524918  |                                                           |
| 13 | 30,225,000 | 30,375,000 | 404 | 703  | -0.398727876 | ITGA8                                                     |
| 13 | 30,300,000 | 30,450,000 | 405 | 547  | 0.565714175  | ITGA8                                                     |
| 13 | 30,375,000 | 30,525,000 | 406 | 657  | 0.770951565  | ITGA8                                                     |
| 13 | 30,450,000 | 30,600,000 | 407 | 919  | 0.398714989  | ITGA8                                                     |
| 13 | 30,525,000 | 30,675,000 | 408 | 923  | 0.493465604  | FAM188A,ITGA8                                             |
| 13 | 30,600,000 | 30,750,000 | 409 | 925  | 0.896731652  | FAM188A                                                   |
| 13 | 30,675,000 | 30,825,000 | 410 | 1338 | 0.201756857  | FAM188A                                                   |
| 13 | 30,750,000 | 30,900,000 | 411 | 1375 | 0.291132035  |                                                           |
| 13 | 30,825,000 | 30,975,000 | 412 | 965  | 0.812493864  |                                                           |
| 13 | 30,900,000 | 31,050,000 | 413 | 724  | 0.630609646  |                                                           |
| 13 | 30,975,000 | 31,125,000 | 414 | 661  | -0.125216836 |                                                           |
| 13 | 31,050,000 | 31,200,000 | 415 | 739  | 0.35642317   |                                                           |
| 13 | 31,125,000 | 31,275,000 | 416 | 1006 | 1.029933702  | PTER                                                      |
| 13 | 31,200,000 | 31,350,000 | 417 | 997  | 1.042419343  | C1QL3,PTER,RSU1                                           |
| 13 | 31,275,000 | 31,425,000 | 418 | 1154 | 1.226839445  | C1QL3,PTER,RSU1                                           |
| 13 | 31,350,000 | 31,500,000 | 419 | 1145 | 0.885909096  | RSU1                                                      |
| 13 | 31,425,000 | 31,575,000 | 420 | 948  | -0.79942163  | CUBN,RSU1                                                 |
| 13 | 31,500,000 | 31,650,000 | 421 | 1173 | -0.595081375 | CUBN,RSU1                                                 |
| 13 | 31,575,000 | 31,725,000 | 422 | 894  | -0.167373152 | CUBN                                                      |
| 13 | 31,650,000 | 31,800,000 | 423 | 748  | 0.258873869  | CUBN                                                      |
| 13 | 31,725,000 | 31,875,000 | 424 | 857  | 0.661569102  | CUBN,TRDMT1                                               |
| 13 | 31,800,000 | 31,950,000 | 425 | 959  | 0.870289347  | CUBN,TRDMT1,VIM                                           |
| 13 | 31,875,000 | 32,025,000 | 426 | 1006 | 0.871220652  | TRDMT1,VIM                                                |
| 13 | 31,950,000 | 32,100,000 | 427 | 885  | 0.88851446   | ST8SIA6,VIM                                               |
| 13 | 32,025,000 | 32,175,000 | 428 | 666  | 1.091659064  | ST8SIA6                                                   |
| 13 | 32,100,000 | 32,250,000 | 429 | 505  | 1.251661534  | ST8SIA6                                                   |
| 13 | 32,175,000 | 32,325,000 | 430 | 486  | 1.286526438  | ST8SIA6                                                   |
| 13 | 32,250,000 | 32,400,000 | 431 | 474  | 1.118259633  | PTPLA,STAM                                                |
| 13 | 32,325,000 | 32,475,000 | 432 | 540  | 0.696947497  | PTPLA,STAM                                                |
| 13 | 32,400,000 | 32,550,000 | 433 | 488  | 0.350276877  | MRC1,STAM,TMEM236                                         |
| 13 | 32,475,000 | 32,625,000 | 434 | 537  | -0.000642473 | MRC1,TMEM236                                              |
| 13 | 32,550,000 | 32,700,000 | 435 | 590  | -0.257342954 | MRC1,SLC39A12                                             |
| 13 | 32,625,000 | 32,775,000 | 436 | 427  | -0.913217689 | MRC1,SLC39A12                                             |
| 13 | 32,700,000 | 32,850,000 | 437 | 376  | -1.861874219 | SLC39A12                                                  |
| 13 | 32,775,000 | 32,925,000 | 438 | 610  | -1.42999332  |                                                           |
| 13 | 32,850,000 | 33,000,000 | 439 | 818  | -0.699815861 |                                                           |
| 13 | 32,925,000 | 33,075,000 | 440 | 610  | 0.542042255  | CACNB2                                                    |
| 13 | 33,000,000 | 33,150,000 | 441 | 580  | 1.040692549  | CACNB2                                                    |
| 13 | 33,075,000 | 33,225,000 | 442 | 806  | 0.632056863  | CACNB2                                                    |
| 13 | 33,150,000 | 33,300,000 | 443 | 691  | 0.454340022  | CACNB2,ENSBTAG00000022003                                 |



|    |            |            |     |      |              |                           |
|----|------------|------------|-----|------|--------------|---------------------------|
| 13 | 33,225,000 | 33,375,000 | 444 | 513  | -0.513408984 | CACNB2,ENSBTAG00000022003 |
| 13 | 33,300,000 | 33,450,000 | 445 | 526  | -2.383877814 | ENSBTAG00000022003        |
| 13 | 33,375,000 | 33,525,000 | 446 | 413  | -2.342907584 | EPC1                      |
| 13 | 33,450,000 | 33,600,000 | 447 | 581  | -0.372048543 | EPC1                      |
| 13 | 33,525,000 | 33,675,000 | 448 | 834  | -0.199108054 | KIF5B                     |
| 13 | 33,600,000 | 33,750,000 | 449 | 419  | -0.052329352 | ARHGAP12,KIF5B            |
| 13 | 33,675,000 | 33,825,000 | 450 | 123  | 1.124894512  | ARHGAP12                  |
| 13 | 33,750,000 | 33,900,000 | 451 | 284  | 1.133484463  | ARHGAP12                  |
| 13 | 33,825,000 | 33,975,000 | 452 | 392  | 0.343427049  | ARHGAP12                  |
| 13 | 33,900,000 | 34,050,000 | 453 | 384  | -0.490301854 |                           |
| 13 | 33,975,000 | 34,125,000 | 454 | 409  | 0.140624228  | ZEB1                      |
| 13 | 34,050,000 | 34,200,000 | 455 | 345  | 0.671986873  | ZEB1                      |
| 13 | 34,125,000 | 34,275,000 | 456 | 240  | 0.750660409  | ZEB1                      |
| 13 | 34,200,000 | 34,350,000 | 457 | 247  | 1.11329286   | ZEB1                      |
| 13 | 34,275,000 | 34,425,000 | 458 | 340  | 1.396088098  |                           |
| 13 | 34,350,000 | 34,500,000 | 459 | 265  | 1.380715665  |                           |
| 13 | 34,425,000 | 34,575,000 | 460 | 209  | 0.996986612  | ZNF438                    |
| 13 | 34,500,000 | 34,650,000 | 461 | 287  | 1.171279056  | ZNF438                    |
| 13 | 34,575,000 | 34,725,000 | 462 | 260  | 1.295369796  | ZNF438                    |
| 13 | 34,650,000 | 34,800,000 | 463 | 417  | 0.452813498  | ZNF438                    |
| 13 | 34,725,000 | 34,875,000 | 464 | 480  | 0.294548101  | SVIL,ZNF438               |
| 13 | 34,800,000 | 34,950,000 | 465 | 376  | 0.339397585  | SVIL,ZNF438               |
| 13 | 34,875,000 | 35,025,000 | 466 | 507  | -0.098988975 | SVIL                      |
| 13 | 34,950,000 | 35,100,000 | 467 | 961  | 0.032830901  | SVIL                      |
| 13 | 35,025,000 | 35,175,000 | 468 | 933  | 0.394203861  |                           |
| 13 | 35,100,000 | 35,250,000 | 469 | 533  | 0.941608434  |                           |
| 13 | 35,175,000 | 35,325,000 | 470 | 470  | 0.917306018  |                           |
| 13 | 35,250,000 | 35,400,000 | 471 | 383  | 1.08117934   | JCAD                      |
| 13 | 35,325,000 | 35,475,000 | 472 | 523  | -0.004658486 | JCAD                      |
| 13 | 35,400,000 | 35,550,000 | 473 | 771  | -0.231404021 | MTPAP                     |
| 13 | 35,475,000 | 35,625,000 | 474 | 679  | -0.189514913 | MAP3K8,MTPAP              |
| 13 | 35,550,000 | 35,700,000 | 475 | 618  | -1.003389614 | MAP3K8,MTPAP              |
| 13 | 35,625,000 | 35,775,000 | 476 | 659  | -1.056529277 | MAP3K8                    |
| 13 | 35,700,000 | 35,850,000 | 477 | 633  | -0.359363306 | LYZL1                     |
| 13 | 35,775,000 | 35,925,000 | 478 | 615  | -1.144643571 | LYZL1                     |
| 13 | 35,850,000 | 36,000,000 | 479 | 507  | -2.107428979 |                           |
| 13 | 35,925,000 | 36,075,000 | 480 | 399  | -1.301443178 |                           |
| 13 | 36,000,000 | 36,150,000 | 481 | 363  | -0.127982583 |                           |
| 13 | 36,075,000 | 36,225,000 | 482 | 424  | -0.730005685 |                           |
| 13 | 36,150,000 | 36,300,000 | 483 | 680  | 0.196209712  |                           |
| 13 | 36,225,000 | 36,375,000 | 484 | 738  | 1.133819112  | BAMBI,WAC                 |
| 13 | 36,300,000 | 36,450,000 | 485 | 552  | 1.144538343  | BAMBI,WAC                 |
| 13 | 36,375,000 | 36,525,000 | 486 | 426  | 0.884727153  | WAC                       |
| 13 | 36,450,000 | 36,600,000 | 487 | 628  | 0.677553958  |                           |
| 13 | 36,525,000 | 36,675,000 | 488 | 808  | 0.578820196  | MPP7                      |
| 13 | 36,600,000 | 36,750,000 | 489 | 586  | 0.249501728  | MPP7                      |
| 13 | 36,675,000 | 36,825,000 | 490 | 514  | 0.616988326  | MPP7                      |
| 13 | 36,750,000 | 36,900,000 | 491 | 757  | 0.446413499  | ARMC4,MPP7                |
| 13 | 36,825,000 | 36,975,000 | 492 | 1021 | 0.852041268  | ARMC4,MPP7                |
| 13 | 36,900,000 | 37,050,000 | 493 | 917  | 1.081454444  | ARMC4                     |
| 13 | 36,975,000 | 37,125,000 | 494 | 688  | 0.614588949  | ARMC4                     |
| 13 | 37,050,000 | 37,200,000 | 495 | 618  | 0.616690077  | MKX                       |
| 13 | 37,125,000 | 37,275,000 | 496 | 497  | 0.697687069  | MKX                       |

|    |            |            |     |      |              |                                      |
|----|------------|------------|-----|------|--------------|--------------------------------------|
| 13 | 37,200,000 | 37,350,000 | 497 | 932  | 0.454988167  | RAB18                                |
| 13 | 37,275,000 | 37,425,000 | 498 | 984  | 0.621720934  | RAB18,ENSBTAG00000048079             |
| 13 | 37,350,000 | 37,500,000 | 499 | 599  | 0.374769525  | ENSBTAG00000048079                   |
| 13 | 37,425,000 | 37,575,000 | 500 | 698  | 0.318938302  |                                      |
| 13 | 37,500,000 | 37,650,000 | 501 | 754  | 0.592646742  |                                      |
| 13 | 37,575,000 | 37,725,000 | 502 | 722  | 0.426341811  |                                      |
| 13 | 37,650,000 | 37,800,000 | 503 | 657  | 0.722427388  |                                      |
| 13 | 37,725,000 | 37,875,000 | 504 | 589  | -0.02472858  | PCSK2                                |
| 13 | 37,800,000 | 37,950,000 | 505 | 394  | -2.809380468 | PCSK2                                |
| 13 | 37,875,000 | 38,025,000 | 506 | 236  | -0.929125702 | PCSK2                                |
| 13 | 37,950,000 | 38,100,000 | 507 | 303  | 0.614141642  | PCSK2,SLC6A9                         |
| 13 | 38,025,000 | 38,175,000 | 508 | 476  | 0.983232381  | PCSK2,SLC6A9                         |
| 13 | 38,100,000 | 38,250,000 | 509 | 557  | 0.670478764  | BFSP1,SLC6A9                         |
| 13 | 38,175,000 | 38,325,000 | 510 | 538  | 0.252011205  | BFSP1,DSTN,RRBP1                     |
| 13 | 38,250,000 | 38,400,000 | 511 | 421  | -0.673905186 | BANF2,DSTN,RRBP1                     |
| 13 | 38,325,000 | 38,475,000 | 512 | 352  | -0.887363523 | BANF2                                |
| 13 | 38,400,000 | 38,550,000 | 513 | 407  | 0.084126237  | MGME1,SNX5                           |
| 13 | 38,475,000 | 38,625,000 | 514 | 489  | 0.216957615  | MGME1,OVOL2,SNX5                     |
| 13 | 38,550,000 | 38,700,000 | 515 | 611  | 0.492745173  | CSRP2BP,MGME1,OVOL2                  |
| 13 | 38,625,000 | 38,775,000 | 516 | 557  | 0.498105246  | CSRP2BP,ZNF133                       |
| 13 | 38,700,000 | 38,850,000 | 517 | 384  | 0.158866504  | C13H20ORF12,POLR3F,ZNF133            |
| 13 | 38,775,000 | 38,925,000 | 518 | 363  | -2.00819122  | C13H20ORF12,DTD1,POLR3F,RBBP9,SEC23B |
| 13 | 38,850,000 | 39,000,000 | 519 | 375  | -2.565477906 | DTD1,POLR3F,RBBP9,RPL5,SEC23B        |
| 13 | 38,925,000 | 39,075,000 | 520 | 715  | -1.693487595 | DTD1,RPL5,SCP2D1                     |
| 13 | 39,000,000 | 39,150,000 | 521 | 1211 | -0.066164755 | SCP2D1                               |
| 13 | 39,075,000 | 39,225,000 | 522 | 820  | 0.835893024  | SLC24A3                              |
| 13 | 39,150,000 | 39,300,000 | 523 | 517  | 0.892854005  | SLC24A3                              |
| 13 | 39,225,000 | 39,375,000 | 524 | 664  | 0.926483522  | SLC24A3                              |
| 13 | 39,300,000 | 39,450,000 | 525 | 738  | 0.628798662  | SLC24A3                              |
| 13 | 39,375,000 | 39,525,000 | 526 | 686  | 0.72422476   | SLC24A3                              |
| 13 | 39,450,000 | 39,600,000 | 527 | 815  | 0.839057979  | SLC24A3                              |
| 13 | 39,525,000 | 39,675,000 | 528 | 1222 | 0.71576604   | SLC24A3,ENSBTAG00000032893           |
| 13 | 39,600,000 | 39,750,000 | 529 | 1167 | 0.716721307  | SLC24A3,ENSBTAG00000032893           |
| 13 | 39,675,000 | 39,825,000 | 530 | 1034 | 0.907803521  | RIN2                                 |
| 13 | 39,750,000 | 39,900,000 | 531 | 889  | 1.045034093  | NAA20,RIN2                           |
| 13 | 39,825,000 | 39,975,000 | 532 | 698  | 1.22925784   | CFAP61,CRNKL1,NAA20,RIN2             |
| 13 | 39,900,000 | 40,050,000 | 533 | 946  | 1.236633915  | CFAP61,CRNKL1,NAA20                  |
| 13 | 39,975,000 | 40,125,000 | 534 | 1070 | 1.183037248  | CFAP61                               |
| 13 | 40,050,000 | 40,200,000 | 535 | 761  | 1.188558789  | CFAP61                               |
| 13 | 40,125,000 | 40,275,000 | 536 | 585  | 1.306375157  | CFAP61,INSM1                         |
| 13 | 40,200,000 | 40,350,000 | 537 | 673  | 1.214378037  | CFAP61,INSM1,RALGAPA2                |
| 13 | 40,275,000 | 40,425,000 | 538 | 968  | 1.305261443  | RALGAPA2                             |
| 13 | 40,350,000 | 40,500,000 | 539 | 1184 | 1.331665877  | RALGAPA2                             |
| 13 | 40,425,000 | 40,575,000 | 540 | 1201 | 1.13624673   | RALGAPA2                             |
| 13 | 40,500,000 | 40,650,000 | 541 | 842  | 0.332743623  | RALGAPA2                             |
| 13 | 40,575,000 | 40,725,000 | 542 | 406  | -0.919521659 |                                      |
| 13 | 40,650,000 | 40,800,000 | 543 | 465  | -2.85899302  |                                      |
| 13 | 40,725,000 | 40,875,000 | 544 | 533  | -3.043412388 | KIZ                                  |
| 13 | 40,800,000 | 40,950,000 | 545 | 321  | -0.229599237 | KIZ                                  |
| 13 | 40,875,000 | 41,025,000 | 546 | 244  | -0.375176291 | KIZ,XRN2                             |
| 13 | 40,950,000 | 41,100,000 | 547 | 313  | -0.659497926 | NKX2-4,XRN2                          |
| 13 | 41,025,000 | 41,175,000 | 548 | 377  | 0.080637136  | NAP1L1,NKX2-2,NKX2-4,XRN2            |
| 13 | 41,100,000 | 41,250,000 | 549 | 346  | 0.396687419  | NAP1L1,NKX2-2,PAX1                   |

|    |            |            |     |      |              |                                                                                                                  |
|----|------------|------------|-----|------|--------------|------------------------------------------------------------------------------------------------------------------|
| 13 | 41,175,000 | 41,325,000 | 550 | 326  | 0.734656849  | PAX1                                                                                                             |
| 13 | 41,250,000 | 41,400,000 | 551 | 541  | 0.99958188   | PAX1                                                                                                             |
| 13 | 41,325,000 | 41,475,000 | 552 | 651  | 0.442393939  |                                                                                                                  |
| 13 | 41,400,000 | 41,550,000 | 553 | 847  | 0.791286623  |                                                                                                                  |
| 13 | 41,475,000 | 41,625,000 | 554 | 915  | 1.125624918  |                                                                                                                  |
| 13 | 41,550,000 | 41,700,000 | 555 | 1017 | -0.181021585 |                                                                                                                  |
| 13 | 41,625,000 | 41,775,000 | 556 | 1318 | 0.677683305  |                                                                                                                  |
| 13 | 41,700,000 | 41,850,000 | 557 | 1049 | 1.426464317  |                                                                                                                  |
| 13 | 41,775,000 | 41,925,000 | 558 | 511  | 1.033999362  | FOXA2                                                                                                            |
| 13 | 41,850,000 | 42,000,000 | 559 | 417  | 0.752114598  | FOXA2                                                                                                            |
| 13 | 41,925,000 | 42,075,000 | 560 | 697  | 0.060004557  |                                                                                                                  |
| 13 | 42,000,000 | 42,150,000 | 561 | 667  | -0.516561151 |                                                                                                                  |
| 13 | 42,075,000 | 42,225,000 | 562 | 455  | 0.023464659  | THBD                                                                                                             |
| 13 | 42,150,000 | 42,300,000 | 563 | 417  | -0.183532989 | CD93,THBD                                                                                                        |
| 13 | 42,225,000 | 42,375,000 | 564 | 762  | 0.296596667  | CD93                                                                                                             |
| 13 | 42,300,000 | 42,450,000 | 565 | 1025 | -0.433537451 | GZF1,NAPB,NXT1                                                                                                   |
| 13 | 42,375,000 | 42,525,000 | 566 | 836  | -0.544168695 | CST11,CST8,CSTL1,GZF1,MGC133636,NAPB,NXT1,ENSBTAG00000015949,ENSBTAG00000027420                                  |
| 13 | 42,450,000 | 42,600,000 | 567 | 483  | 0.420587825  | CST11,CST3,CST8,CSTL1,MGC133636,NAPB,ENSBTAG00000015949,ENSBTAG00000027420,ENSBTAG00000032687,ENSBTAG00000047137 |
| 13 | 42,525,000 | 42,675,000 | 568 | 272  | -0.162233965 | CST3,ENSBTAG00000015949,ENSBTAG00000032687,ENSBTAG00000047137                                                    |
| 13 | 42,600,000 | 42,750,000 | 569 | 327  | -0.534336968 |                                                                                                                  |
| 13 | 42,675,000 | 42,825,000 | 570 | 389  | -0.284122283 | SYNDIG1                                                                                                          |
| 13 | 42,750,000 | 42,900,000 | 571 | 356  | -0.179356988 | SYNDIG1                                                                                                          |
| 13 | 42,825,000 | 42,975,000 | 572 | 669  | -2.320629062 | APMAP,CST7,SYNDIG1                                                                                               |
| 13 | 42,900,000 | 43,050,000 | 573 | 869  | -2.380771895 | ACSS1,APMAP,CST7,ENTPD6                                                                                          |
| 13 | 42,975,000 | 43,125,000 | 574 | 619  | -1.346644678 | ACSS1,APMAP,ENTPD6,VSX1                                                                                          |
| 13 | 43,050,000 | 43,200,000 | 575 | 573  | -0.016546707 | ABHD12,ACSS1,ENTPD6,PYGB,VSX1                                                                                    |
| 13 | 43,125,000 | 43,275,000 | 576 | 465  | 0.164745515  | ABHD12,ANKRD16,PYGB                                                                                              |
| 13 | 43,200,000 | 43,350,000 | 577 | 294  | 0.232546394  | ABHD12,ANKRD16,FAM208B,GDI2                                                                                      |
| 13 | 43,275,000 | 43,425,000 | 578 | 348  | 0.651642447  | ASB13,FAM208B,GDI2                                                                                               |
| 13 | 43,350,000 | 43,500,000 | 579 | 540  | 0.208428419  | ASB13,CALML3,FAM208B                                                                                             |
| 13 | 43,425,000 | 43,575,000 | 580 | 572  | -0.152061564 | CALML3,CALML5,NET1                                                                                               |
| 13 | 43,500,000 | 43,650,000 | 581 | 715  | 0.051177896  | CALML5,NET1,TUBAL3,UCN3                                                                                          |
| 13 | 43,575,000 | 43,725,000 | 582 | 671  | -0.107676487 | AKR1C4,TUBAL3,UCN3                                                                                               |
| 13 | 43,650,000 | 43,800,000 | 583 | 506  | -0.526345746 | AKR1C4,ENSBTAG00000039643,ENSBTAG00000039722                                                                     |
| 13 | 43,725,000 | 43,875,000 | 584 | 750  | -0.005883174 | ENSBTAG00000017938,ENSBTAG00000027419,ENSBTAG00000039643,ENSBTAG00000039722                                      |
| 13 | 43,800,000 | 43,950,000 | 585 | 850  | 0.466591895  | ENSBTAG00000017938,ENSBTAG00000022564,ENSBTAG00000022571,ENSBTAG00000027419,ENSBTAG00000039643                   |
| 13 | 43,875,000 | 44,025,000 | 586 | 697  | 0.227419149  | ENSBTAG00000021368,ENSBTAG00000022564,ENSBTAG00000022571,ENSBTAG00000039289                                      |
| 13 | 43,950,000 | 44,100,000 | 587 | 747  | -0.193878814 | ENSBTAG00000021368,ENSBTAG00000022564,ENSBTAG00000022570,ENSBTAG00000039289                                      |
| 13 | 44,025,000 | 44,175,000 | 588 | 823  | -0.330830371 | 20ALPHA-HSD,ENSBTAG00000021368,ENSBTAG00000022564,ENSBTAG00000022570                                             |
| 13 | 44,100,000 | 44,250,000 | 589 | 839  | -0.116182345 | 20ALPHA-HSD,AKR1E2,ENSBTAG00000017191,ENSBTAG00000022564                                                         |

|    |            |            |     |      |              |                                 |
|----|------------|------------|-----|------|--------------|---------------------------------|
| 13 | 44,175,000 | 44,325,000 | 590 | 702  | 0.367900006  | AKR1E2,ENSBTAG00000017191       |
| 13 | 44,250,000 | 44,400,000 | 591 | 650  | -0.224114558 |                                 |
| 13 | 44,325,000 | 44,475,000 | 592 | 891  | -0.642300127 |                                 |
| 13 | 44,400,000 | 44,550,000 | 593 | 701  | -0.196627803 |                                 |
| 13 | 44,475,000 | 44,625,000 | 594 | 832  | 0.803050936  |                                 |
| 13 | 44,550,000 | 44,700,000 | 595 | 1045 | 0.774290004  |                                 |
| 13 | 44,625,000 | 44,775,000 | 596 | 678  | 0.425353599  |                                 |
| 13 | 44,700,000 | 44,850,000 | 597 | 551  | 0.649871465  |                                 |
| 13 | 44,775,000 | 44,925,000 | 598 | 685  | 0.735893167  |                                 |
| 13 | 44,850,000 | 45,000,000 | 599 | 652  | 0.374690077  | KLF6                            |
| 13 | 44,925,000 | 45,075,000 | 600 | 843  | 0.504644523  | KLF6                            |
| 13 | 45,000,000 | 45,150,000 | 601 | 1139 | 0.630640561  |                                 |
| 13 | 45,075,000 | 45,225,000 | 602 | 1106 | -0.072983981 |                                 |
| 13 | 45,150,000 | 45,300,000 | 603 | 963  | 0.194104072  |                                 |
| 13 | 45,225,000 | 45,375,000 | 604 | 1097 | 0.947985932  |                                 |
| 13 | 45,300,000 | 45,450,000 | 605 | 1320 | 0.689200149  |                                 |
| 13 | 45,375,000 | 45,525,000 | 606 | 1200 | 0.683150405  | PFKP,PITRM1                     |
| 13 | 45,450,000 | 45,600,000 | 607 | 1037 | 1.109326867  | PFKP,PITRM1                     |
| 13 | 45,525,000 | 45,675,000 | 608 | 1106 | 0.822440842  | PFKP                            |
| 13 | 45,600,000 | 45,750,000 | 609 | 1189 | 0.533572467  |                                 |
| 13 | 45,675,000 | 45,825,000 | 610 | 1160 | 0.968451719  |                                 |
| 13 | 45,750,000 | 45,900,000 | 611 | 997  | 0.560976027  |                                 |
| 13 | 45,825,000 | 45,975,000 | 612 | 699  | 0.066526021  |                                 |
| 13 | 45,900,000 | 46,050,000 | 613 | 498  | 0.171344795  |                                 |
| 13 | 45,975,000 | 46,125,000 | 614 | 454  | 0.43372639   |                                 |
| 13 | 46,050,000 | 46,200,000 | 615 | 752  | 0.32667982   |                                 |
| 13 | 46,125,000 | 46,275,000 | 616 | 1052 | 0.583947285  |                                 |
| 13 | 46,200,000 | 46,350,000 | 617 | 1037 | 0.507123529  |                                 |
| 13 | 46,275,000 | 46,425,000 | 618 | 845  | 0.203866379  | ADARB2                          |
| 13 | 46,350,000 | 46,500,000 | 619 | 487  | -0.625644102 | ADARB2,ENSBTAG00000039356       |
| 13 | 46,425,000 | 46,575,000 | 620 | 300  | -1.573696808 | ADARB2,ENSBTAG00000039356       |
| 13 | 46,500,000 | 46,650,000 | 621 | 340  | -1.774554692 | ADARB2,WDR37,ENSBTAG00000039356 |
| 13 | 46,575,000 | 46,725,000 | 622 | 418  | -0.942241266 | ADARB2,GTPBP4,IDI1,WDR37        |
| 13 | 46,650,000 | 46,800,000 | 623 | 379  | -0.823092715 | GTPBP4,IDI1,LARP4B,WDR37        |
| 13 | 46,725,000 | 46,875,000 | 624 | 333  | -1.926650105 | LARP4B                          |
| 13 | 46,800,000 | 46,950,000 | 625 | 417  | -1.731863338 | LARP4B                          |
| 13 | 46,875,000 | 47,025,000 | 626 | 390  | -1.505478954 |                                 |
| 13 | 46,950,000 | 47,100,000 | 627 | 306  | -1.316633287 | DIP2C                           |
| 13 | 47,025,000 | 47,175,000 | 628 | 397  | -0.028185681 | DIP2C                           |
| 13 | 47,100,000 | 47,250,000 | 629 | 394  | 0.396901363  | DIP2C,ZMYND11                   |
| 13 | 47,175,000 | 47,325,000 | 630 | 297  | 0.358091835  | DIP2C,ZMYND11                   |
| 13 | 47,250,000 | 47,400,000 | 631 | 380  | 0.299829784  | ZMYND11                         |
| 13 | 47,325,000 | 47,475,000 | 632 | 487  | -0.760717023 | PRND,PRNP                       |
| 13 | 47,400,000 | 47,550,000 | 633 | 530  | -0.970478118 | PRND,PRNP,RASSF2                |
| 13 | 47,475,000 | 47,625,000 | 634 | 594  | 0.121565     | RASSF2,SLC23A2                  |
| 13 | 47,550,000 | 47,700,000 | 635 | 620  | 0.900235944  | SLC23A2                         |
| 13 | 47,625,000 | 47,775,000 | 636 | 513  | 0.829535736  | SLC23A2                         |
| 13 | 47,700,000 | 47,850,000 | 637 | 402  | 0.246760059  | CDS2,PCNA,SLC23A2,TMEM230       |
| 13 | 47,775,000 | 47,925,000 | 638 | 624  | -0.084021871 | CDS2,PCNA,PROKR2,TMEM230        |
| 13 | 47,850,000 | 48,000,000 | 639 | 778  | 0.325564822  | CDS2,PROKR2                     |
| 13 | 47,925,000 | 48,075,000 | 640 | 1000 | 0.460862077  |                                 |
| 13 | 48,000,000 | 48,150,000 | 641 | 886  | 0.490836064  | GPCPD1                          |
| 13 | 48,075,000 | 48,225,000 | 642 | 624  | 0.849521064  | GPCPD1                          |

|    |            |            |     |      |              |                                                                                                                                                                         |
|----|------------|------------|-----|------|--------------|-------------------------------------------------------------------------------------------------------------------------------------------------------------------------|
| 13 | 48,150,000 | 48,300,000 | 643 | 878  | 0.931519348  | C20orf196,GPCPD1                                                                                                                                                        |
| 13 | 48,225,000 | 48,375,000 | 644 | 960  | 0.832111027  | C20orf196                                                                                                                                                               |
| 13 | 48,300,000 | 48,450,000 | 645 | 980  | 0.807539332  | C20orf196,CHGB                                                                                                                                                          |
| 13 | 48,375,000 | 48,525,000 | 646 | 676  | 0.889979648  | C20orf196,CHGB,MCM8,TRMT6                                                                                                                                               |
| 13 | 48,450,000 | 48,600,000 | 647 | 362  | 0.815193932  | CRLS1,LRRN4,MCM8,TRMT6                                                                                                                                                  |
| 13 | 48,525,000 | 48,675,000 | 648 | 556  | 0.793253385  | CRLS1,FERMT1,LRRN4,MCM8                                                                                                                                                 |
| 13 | 48,600,000 | 48,750,000 | 649 | 910  | 0.10373748   | FERMT1                                                                                                                                                                  |
| 13 | 48,675,000 | 48,825,000 | 650 | 921  | -0.285389846 |                                                                                                                                                                         |
| 13 | 48,750,000 | 48,900,000 | 651 | 536  | -0.04222229  |                                                                                                                                                                         |
| 13 | 48,825,000 | 48,975,000 | 652 | 364  | -0.443163197 |                                                                                                                                                                         |
| 13 | 48,900,000 | 49,050,000 | 653 | 542  | 0.401307243  |                                                                                                                                                                         |
| 13 | 48,975,000 | 49,125,000 | 654 | 661  | 0.622127208  |                                                                                                                                                                         |
| 13 | 49,050,000 | 49,200,000 | 655 | 502  | 0.132603773  |                                                                                                                                                                         |
| 13 | 49,125,000 | 49,275,000 | 656 | 370  | 0.510580148  |                                                                                                                                                                         |
| 13 | 49,200,000 | 49,350,000 | 657 | 442  | 1.173686361  |                                                                                                                                                                         |
| 13 | 49,275,000 | 49,425,000 | 658 | 415  | 1.247424483  |                                                                                                                                                                         |
| 13 | 49,350,000 | 49,500,000 | 659 | 432  | 1.311362903  |                                                                                                                                                                         |
| 13 | 49,425,000 | 49,575,000 | 660 | 354  | 1.23612714   | BMP2                                                                                                                                                                    |
| 13 | 49,500,000 | 49,650,000 | 661 | 203  | 0.763754001  | BMP2                                                                                                                                                                    |
| 13 | 49,575,000 | 49,725,000 | 662 | 375  | 1.031477543  |                                                                                                                                                                         |
| 13 | 49,650,000 | 49,800,000 | 663 | 706  | 0.976398554  |                                                                                                                                                                         |
| 13 | 49,725,000 | 49,875,000 | 664 | 790  | 0.914070912  |                                                                                                                                                                         |
| 13 | 49,800,000 | 49,950,000 | 665 | 720  | 1.085955958  |                                                                                                                                                                         |
| 13 | 49,875,000 | 50,025,000 | 666 | 764  | -0.025677693 |                                                                                                                                                                         |
| 13 | 49,950,000 | 50,100,000 | 667 | 682  | -0.306481269 |                                                                                                                                                                         |
| 13 | 50,025,000 | 50,175,000 | 668 | 688  | 0.596249119  |                                                                                                                                                                         |
| 13 | 50,100,000 | 50,250,000 | 669 | 712  | 0.398592777  |                                                                                                                                                                         |
| 13 | 50,175,000 | 50,325,000 | 670 | 878  | 0.948642344  |                                                                                                                                                                         |
|    |            |            |     |      |              | UBE2D3,ENSBTAG00000045555,ENSBTAG00000045753,E                                                                                                                          |
| 13 | 50,250,000 | 50,400,000 | 671 | 689  | 1.029254871  | NSBTAG00000046276,ENSBTAG00000046631,ENSBTAG0000046776,ENSBTAG00000047102,ENSBTAG00000047638,ENSBTAG00000047653,ENSBTAG00000047962,ENSBTAG0000048089,ENSBTAG00000048291 |
|    |            |            |     |      |              | UBE2D3,ENSBTAG00000045555,ENSBTAG00000045753,E                                                                                                                          |
| 13 | 50,325,000 | 50,475,000 | 672 | 463  | -0.023588351 | NSBTAG00000046276,ENSBTAG00000046631,ENSBTAG0000046776,ENSBTAG00000047102,ENSBTAG00000047638,ENSBTAG00000047653,ENSBTAG00000047962,ENSBTAG0000048089,ENSBTAG00000048291 |
|    |            |            |     |      |              | ENSBTAG00000046631                                                                                                                                                      |
| 13 | 50,400,000 | 50,550,000 | 673 | 950  | -0.143435585 |                                                                                                                                                                         |
| 13 | 50,475,000 | 50,625,000 | 674 | 1237 | 0.120411227  |                                                                                                                                                                         |
| 13 | 50,550,000 | 50,700,000 | 675 | 1042 | 0.566667165  |                                                                                                                                                                         |
| 13 | 50,625,000 | 50,775,000 | 676 | 712  | 0.493210974  |                                                                                                                                                                         |
| 13 | 50,700,000 | 50,850,000 | 677 | 760  | 0.511805916  |                                                                                                                                                                         |
| 13 | 50,775,000 | 50,925,000 | 678 | 820  | 0.746914     |                                                                                                                                                                         |
| 13 | 50,850,000 | 51,000,000 | 679 | 801  | 0.582727259  |                                                                                                                                                                         |
| 13 | 50,925,000 | 51,075,000 | 680 | 909  | 0.586290978  |                                                                                                                                                                         |
| 13 | 51,000,000 | 51,150,000 | 681 | 837  | 0.838686856  | HAO1                                                                                                                                                                    |
| 13 | 51,075,000 | 51,225,000 | 682 | 732  | 0.804500209  | HAO1,ENSBTAG00000032156                                                                                                                                                 |
| 13 | 51,150,000 | 51,300,000 | 683 | 1320 | 0.414207201  | HAO1,ENSBTAG00000032156                                                                                                                                                 |
| 13 | 51,225,000 | 51,375,000 | 684 | 1312 | 0.00177502   | ADRA1D                                                                                                                                                                  |
| 13 | 51,300,000 | 51,450,000 | 685 | 922  | 0.0371533    | ADRA1D,SMOX                                                                                                                                                             |
| 13 | 51,375,000 | 51,525,000 | 686 | 1142 | 0.526047442  | ADRA1D,SMOX                                                                                                                                                             |
| 13 | 51,450,000 | 51,600,000 | 687 | 1131 | 0.564197268  |                                                                                                                                                                         |

|    |            |            |     |      |              |                                                                                                    |
|----|------------|------------|-----|------|--------------|----------------------------------------------------------------------------------------------------|
| 13 | 51,525,000 | 51,675,000 | 688 | 999  | 0.234217083  | RNF24                                                                                              |
| 13 | 51,600,000 | 51,750,000 | 689 | 963  | -0.08675879  | PANK2,RNF24                                                                                        |
| 13 | 51,675,000 | 51,825,000 | 690 | 1013 | 0.244319825  | MAVS,PANK2,RNF24                                                                                   |
| 13 | 51,750,000 | 51,900,000 | 691 | 761  | 0.366450579  | C20ORF29,C20orf27,CDC25B,CENPB,MAVS,PANK2,SPEF1                                                    |
| 13 | 51,825,000 | 51,975,000 | 692 | 453  | -0.342205004 | ADAM33,C20ORF29,C20orf27,CDC25B,CENPB,HSPA12B,SIGLEC1,SPEF1,ENSBTAG00000027412                     |
| 13 | 51,900,000 | 52,050,000 | 693 | 350  | 0.345982221  | ADAM33,ATRN,C20orf27,GFRA4,HSPA12B,SIGLEC1,ENSBTAG00000027412                                      |
| 13 | 51,975,000 | 52,125,000 | 694 | 366  | 0.26537306   | ADAM33,ATRN,GFRA4                                                                                  |
| 13 | 52,050,000 | 52,200,000 | 695 | 348  | 0.091195554  | ATRN                                                                                               |
| 13 | 52,125,000 | 52,275,000 | 696 | 334  | 0.18434382   | ATRN,C13H20orf194                                                                                  |
| 13 | 52,200,000 | 52,350,000 | 697 | 391  | 0.039105625  | C13H20orf194                                                                                       |
| 13 | 52,275,000 | 52,425,000 | 698 | 456  | 0.756636371  | C13H20orf194                                                                                       |
| 13 | 52,350,000 | 52,500,000 | 699 | 547  | 1.108324322  | C13H20orf194,DDRJK1,ITPA,SLC4A11,ENSBTAG00000020454                                                |
| 13 | 52,425,000 | 52,575,000 | 700 | 498  | 0.782051116  | AVP,DDRJK1,ITPA,SLC4A11,UBOX5,ENSBTAG00000020454                                                   |
| 13 | 52,500,000 | 52,650,000 | 701 | 449  | 0.52868092   | AVP,MRPS26,OXT,PTPRA,UBOX5,ENSBTAG00000020454                                                      |
| 13 | 52,575,000 | 52,725,000 | 702 | 384  | 0.67940945   | MRPS26,OXT,PTPRA                                                                                   |
| 13 | 52,650,000 | 52,800,000 | 703 | 305  | 0.717015914  | PTPRA,VPS16                                                                                        |
| 13 | 52,725,000 | 52,875,000 | 704 | 495  | -0.286850669 | CPXM,PCED1A,PTPRA,TMEM239,VPS16,ENSBTAG00000021817                                                 |
| 13 | 52,800,000 | 52,950,000 | 705 | 919  | -0.119387558 | CPXM,EBF4,PCED1A,TMEM239,VPS16,ENSBTAG00000021817                                                  |
| 13 | 52,875,000 | 53,025,000 | 706 | 789  | 0.341673432  | EBF4,IDH3B,NOP56,TMC2                                                                              |
| 13 | 52,950,000 | 53,100,000 | 707 | 342  | 0.175200643  | IDH3B,NOP56,TMC2                                                                                   |
| 13 | 53,025,000 | 53,175,000 | 708 | 588  | 0.810740851  | SNRPB,TGM6,TMC2                                                                                    |
| 13 | 53,100,000 | 53,250,000 | 709 | 971  | 1.012845007  | SNRPB,TGM6,TMC2                                                                                    |
| 13 | 53,175,000 | 53,325,000 | 710 | 903  | 0.731094626  | TGM3,TGM6,ENSBTAG00000022534                                                                       |
| 13 | 53,250,000 | 53,400,000 | 711 | 639  | 0.451999665  | TGM3,ENSBTAG00000022534                                                                            |
| 13 | 53,325,000 | 53,475,000 | 712 | 504  | 0.29826016   |                                                                                                    |
| 13 | 53,400,000 | 53,550,000 | 713 | 487  | -0.463658612 | STK35                                                                                              |
| 13 | 53,475,000 | 53,625,000 | 714 | 822  | 0.245346463  | PDYN,STK35                                                                                         |
| 13 | 53,550,000 | 53,700,000 | 715 | 1625 | 0.623877387  | PDYN,SIRPA                                                                                         |
| 13 | 53,625,000 | 53,775,000 | 716 | 1595 | 0.77577675   | SIRPA                                                                                              |
| 13 | 53,700,000 | 53,850,000 | 717 | 1239 | 1.320914231  | SIRPA,ENSBTAG00000039016,ENSBTAG00000048087                                                        |
| 13 | 53,775,000 | 53,925,000 | 718 | 1759 | 0.608703752  | SIRPB1,ENSBTAG00000039016,ENSBTAG00000048087                                                       |
| 13 | 53,850,000 | 54,000,000 | 719 | 2067 | 0.168489632  | SIRPB1,ENSBTAG00000039016                                                                          |
| 13 | 53,925,000 | 54,075,000 | 720 | 2097 | 0.342403524  | GINS1,SIRPB1,ENSBTAG00000011638,ENSBTAG00000027221                                                 |
| 13 | 54,000,000 | 54,150,000 | 721 | 2119 | 0.438828905  | GINS1,PCMTD2,ENSBTAG00000011638,ENSBTAG00000027221                                                 |
| 13 | 54,075,000 | 54,225,000 | 722 | 1498 | 0.558611938  | GINS1,MYT1,PCMTD2                                                                                  |
| 13 | 54,150,000 | 54,300,000 | 723 | 749  | 0.931676604  | LKAAEAR1,MYT1,NPBWR2,OPRL1,RGS19,SOX18,TCEA2                                                       |
| 13 | 54,225,000 | 54,375,000 | 724 | 477  | 1.132946093  | LKAAEAR1,NPBWR2,OPRL1,PRPF6,RGS19,SAMD10,SOX18,TCEA2,UCKL1,ZNF512B                                 |
| 13 | 54,300,000 | 54,450,000 | 725 | 410  | 1.044879634  | C13H20ORF135,DNAJC5,PRPF6,SAMD10,TPD52L2,UCKL1,ZNF512B                                             |
| 13 | 54,375,000 | 54,525,000 | 726 | 487  | 1.092763425  | ARFRP1,C13H20ORF135,DNAJC5,SLC2A4RG,TPD52L2,ZBTB46,ZGPAT,ENSBTAG0000007501                         |
| 13 | 54,450,000 | 54,600,000 | 727 | 485  | 1.010908825  | ARFRP1,C20orf195,GMEB2,PTK6,RTEL,RTEL1,SLC2A4RG,SRMS,STMN3,TNFRSF6B,ZBTB46,ZGPAT,ENSBTAG0000007501 |

|    |            |            |     |      |              |                                                                                   |
|----|------------|------------|-----|------|--------------|-----------------------------------------------------------------------------------|
| 13 | 54,525,000 | 54,675,000 | 728 | 636  | 1.036013154  | ARFRP1,C20orf195,EEF1A2,GMEB2,KCNQ2,PPDPF,PTK6,RT<br>EL,RTKL1,SRMS,STMN3,TNFRSF6B |
| 13 | 54,600,000 | 54,750,000 | 729 | 994  | 1.134464705  | CHRNA4,COL20A1,EEF1A2,KCNQ2,PPDPF,PTK6                                            |
| 13 | 54,675,000 | 54,825,000 | 730 | 1226 | 0.834642377  | ARFGAP3,BIRC7,CHRNA4,COL20A1,KCNQ2,YTHDF1                                         |
| 13 | 54,750,000 | 54,900,000 | 731 | 1276 | 0.695249002  | ARFGAP3,BHLHE23,BIRC7,COL20A1,YTHDF1                                              |
| 13 | 54,825,000 | 54,975,000 | 732 | 1030 | 0.9797332    | BHLHE23,DIDO1,GID8,SLC17A9                                                        |
| 13 | 54,900,000 | 55,050,000 | 733 | 555  | 1.05907419   | COL9A3,DIDO1,GID8,OGFR,SLC17A9,TCFL5                                              |
| 13 | 54,975,000 | 55,125,000 | 734 | 482  | 1.087669493  | C13H20orf20,COL9A3,DIDO1,NTSR1,OGFR,TCFL5                                         |
| 13 | 55,050,000 | 55,200,000 | 735 | 486  | 0.912089715  | C13H20orf20,NTSR1,OGFR,SLCO4A1                                                    |
| 13 | 55,125,000 | 55,275,000 | 736 | 345  | 0.528163899  | NTSR1,SLCO4A1                                                                     |
| 13 | 55,200,000 | 55,350,000 | 737 | 370  | 0.273988022  | CABLES2,GATA5,RBBP8NL                                                             |
| 13 | 55,275,000 | 55,425,000 | 738 | 295  | 0.21265637   | CABLES2,GATA5,LAMA5,RBBP8NL,RPS21                                                 |
| 13 | 55,350,000 | 55,500,000 | 739 | 258  | 0.58912262   | ADRM1,CABLES2,LAMA5,OSBPL2,RPS21                                                  |
| 13 | 55,425,000 | 55,575,000 | 740 | 306  | 0.510398265  | ADRM1,GTPBP5,HRH3,LAMA5,OSBPL2,PSMA7,SS18L1,EN<br>SBTAG00000021558                |
| 13 | 55,500,000 | 55,650,000 | 741 | 381  | 0.166449364  | GTPBP5,HRH3,PSMA7,SS18L1,TAF4,ENSBTAG0000002155<br>8                              |
| 13 | 55,575,000 | 55,725,000 | 742 | 357  | 0.287342974  | CDH4,TAF4                                                                         |
| 13 | 55,650,000 | 55,800,000 | 743 | 431  | 0.69196588   | CDH4,TAF4                                                                         |
| 13 | 55,725,000 | 55,875,000 | 744 | 605  | 0.979318057  | CDH4                                                                              |
| 13 | 55,800,000 | 55,950,000 | 745 | 651  | 1.156056117  | CDH4                                                                              |
| 13 | 55,875,000 | 56,025,000 | 746 | 645  | 0.664772497  |                                                                                   |
| 13 | 55,950,000 | 56,100,000 | 747 | 624  | -0.577723476 |                                                                                   |
| 13 | 56,025,000 | 56,175,000 | 748 | 896  | 0.192913268  |                                                                                   |
| 13 | 56,100,000 | 56,250,000 | 749 | 840  | 0.326196974  |                                                                                   |
| 13 | 56,175,000 | 56,325,000 | 750 | 719  | -0.688579817 |                                                                                   |
| 13 | 56,250,000 | 56,400,000 | 751 | 851  | -0.443017141 |                                                                                   |
| 13 | 56,325,000 | 56,475,000 | 752 | 802  | -0.611720377 |                                                                                   |
| 13 | 56,400,000 | 56,550,000 | 753 | 931  | -0.549299006 |                                                                                   |
| 13 | 56,475,000 | 56,625,000 | 754 | 957  | 0.198171514  |                                                                                   |
| 13 | 56,550,000 | 56,700,000 | 755 | 645  | -0.725211721 |                                                                                   |
| 13 | 56,625,000 | 56,775,000 | 756 | 428  | -1.971415906 |                                                                                   |
| 13 | 56,700,000 | 56,850,000 | 757 | 592  | -0.910763672 |                                                                                   |
| 13 | 56,775,000 | 56,925,000 | 758 | 859  | -0.618233342 |                                                                                   |
| 13 | 56,850,000 | 57,000,000 | 759 | 838  | -0.271419006 |                                                                                   |
| 13 | 56,925,000 | 57,075,000 | 760 | 927  | 0.232012025  | CDH26                                                                             |
| 13 | 57,000,000 | 57,150,000 | 761 | 781  | -0.148909477 | CDH26,FAM217B,PPP1R3D,SYCP2                                                       |
| 13 | 57,075,000 | 57,225,000 | 762 | 401  | -1.416339016 | CDH26,FAM217B,PHACTR3,PPP1R3D,SYCP2                                               |
| 13 | 57,150,000 | 57,300,000 | 763 | 547  | -0.337755371 | PHACTR3,SYCP2                                                                     |
| 13 | 57,225,000 | 57,375,000 | 764 | 628  | 0.274430744  | PHACTR3                                                                           |
| 13 | 57,300,000 | 57,450,000 | 765 | 746  | 0.621349105  |                                                                                   |
| 13 | 57,375,000 | 57,525,000 | 766 | 667  | -0.152146349 |                                                                                   |
| 13 | 57,450,000 | 57,600,000 | 767 | 573  | -0.158764368 | EDN3                                                                              |
| 13 | 57,525,000 | 57,675,000 | 768 | 790  | 0.42836505   | EDN3,ZNF831                                                                       |
| 13 | 57,600,000 | 57,750,000 | 769 | 771  | 0.837893025  | ZNF831                                                                            |
| 13 | 57,675,000 | 57,825,000 | 770 | 570  | 0.923030986  | ZNF831                                                                            |
| 13 | 57,750,000 | 57,900,000 | 771 | 414  | 0.979920993  | ATP5E,CTSZ,NELFCD,SLMO2,TUBB1                                                     |
| 13 | 57,825,000 | 57,975,000 | 772 | 384  | 0.864592445  | ATP5E,CTSZ,NELFCD,SLMO2,TUBB1                                                     |
| 13 | 57,900,000 | 58,050,000 | 773 | 355  | 0.454691167  | GNAS,NELFCD                                                                       |
| 13 | 57,975,000 | 58,125,000 | 774 | 295  | 0.119502138  | GNAS                                                                              |
| 13 | 58,050,000 | 58,200,000 | 775 | 286  | -0.418420838 |                                                                                   |
| 13 | 58,125,000 | 58,275,000 | 776 | 253  | 0.012321879  | NPEPL1,ENSBTAG00000003872                                                         |
| 13 | 58,200,000 | 58,350,000 | 777 | 222  | 0.940143764  | NPEPL1,ENSBTAG00000003872                                                         |

|    |            |            |     |      |              |                                                                       |
|----|------------|------------|-----|------|--------------|-----------------------------------------------------------------------|
| 13 | 58,275,000 | 58,425,000 | 778 | 248  | 0.143941198  |                                                                       |
| 13 | 58,350,000 | 58,500,000 | 779 | 280  | 0.007845593  | APCDD1L,VAPB                                                          |
| 13 | 58,425,000 | 58,575,000 | 780 | 351  | -0.177566456 | APCDD1L,RAB22A,VAPB                                                   |
| 13 | 58,500,000 | 58,650,000 | 781 | 441  | -0.79734595  | RAB22A,VAPB                                                           |
| 13 | 58,575,000 | 58,725,000 | 782 | 485  | 0.086196711  | ANKRD60,C13H20ORF85,RAB22A                                            |
| 13 | 58,650,000 | 58,800,000 | 783 | 461  | 0.658576274  | ANKRD60,C13H20ORF85                                                   |
| 13 | 58,725,000 | 58,875,000 | 784 | 514  | 0.445541814  | C13H20ORF85                                                           |
| 13 | 58,800,000 | 58,950,000 | 785 | 692  | 0.554272526  |                                                                       |
| 13 | 58,875,000 | 59,025,000 | 786 | 824  | 0.924145378  | PMEPA1                                                                |
| 13 | 58,950,000 | 59,100,000 | 787 | 731  | 1.072238948  | PMEPA1,ZBP1                                                           |
| 13 | 59,025,000 | 59,175,000 | 788 | 705  | 0.88441716   | PCK1,PMEPA1,ZBP1                                                      |
| 13 | 59,100,000 | 59,250,000 | 789 | 621  | 0.831005529  | BORIS,PCK1,ZBP1                                                       |
| 13 | 59,175,000 | 59,325,000 | 790 | 360  | 0.421101298  | BORIS,RAE1,RBM38                                                      |
| 13 | 59,250,000 | 59,400,000 | 791 | 229  | -0.344503388 | RAE1,RBM38,SPO11                                                      |
| 13 | 59,325,000 | 59,475,000 | 792 | 312  | -2.161303925 | BMP7,RAE1,SPO11                                                       |
| 13 | 59,400,000 | 59,550,000 | 793 | 425  | -2.650966474 | BMP7                                                                  |
| 13 | 59,475,000 | 59,625,000 | 794 | 762  | -2.730555114 | BMP7                                                                  |
| 13 | 59,550,000 | 59,700,000 | 795 | 894  | -2.196196079 |                                                                       |
| 13 | 59,625,000 | 59,775,000 | 796 | 643  | -0.735747492 |                                                                       |
| 13 | 59,700,000 | 59,850,000 | 797 | 623  | -1.473931772 |                                                                       |
| 13 | 59,775,000 | 59,925,000 | 798 | 634  | -2.83126697  | TFAP2C                                                                |
| 13 | 59,850,000 | 60,000,000 | 799 | 498  | -2.264654674 | FAM209B,GCNT7,RTFDC1,TFAP2C,ENSBTAG00000024608                        |
| 13 | 59,925,000 | 60,075,000 | 800 | 400  | -1.474739094 | CASS4,FAM209B,GCNT7,RTFDC1,ENSBTAG00000024608                         |
| 13 | 60,000,000 | 60,150,000 | 801 | 371  | -1.124606254 | AURKA,C13H20ORF108,CASS4,CSTF1,GCNT7,RTFDC1                           |
| 13 | 60,075,000 | 60,225,000 | 802 | 284  | -0.276546342 | AURKA,C13H20ORF108,CSTF1,MC3R,SIRPD                                   |
| 13 | 60,150,000 | 60,300,000 | 803 | 319  | -0.355881333 | FKBP1A,MC3R,NSFL1C,SIRPB2,SIRPD                                       |
| 13 | 60,225,000 | 60,375,000 | 804 | 527  | -0.089364886 | FKBP1A,NSFL1C,SDCBP2,SIRPB2,SNPH                                      |
| 13 | 60,300,000 | 60,450,000 | 805 | 628  | -0.769988049 | FKBP1A,RAD21L1,SDCBP2,SNPH                                            |
| 13 | 60,375,000 | 60,525,000 | 806 | 958  | -0.320384671 | PSMF1,RAD21L1,TMEM74B                                                 |
| 13 | 60,450,000 | 60,600,000 | 807 | 1158 | -0.081364385 | PSMF1,TMEM74B                                                         |
| 13 | 60,525,000 | 60,675,000 | 808 | 1071 | -0.060926007 | PSMF1                                                                 |
| 13 | 60,600,000 | 60,750,000 | 809 | 954  | 0.606190889  | ANGPTL4,RSPO4                                                         |
| 13 | 60,675,000 | 60,825,000 | 810 | 642  | 0.641121383  | ANGPTL4,FAM110A,RSPO4                                                 |
| 13 | 60,750,000 | 60,900,000 | 811 | 435  | 0.364096168  | ANGPTL4,FAM110A,SLC52A3                                               |
| 13 | 60,825,000 | 60,975,000 | 812 | 516  | 0.523540198  | SLC52A3,SRXN1                                                         |
| 13 | 60,900,000 | 61,050,000 | 813 | 504  | 0.593338985  | SRXN1,TCF15                                                           |
| 13 | 60,975,000 | 61,125,000 | 814 | 283  | 0.268313069  | CSNK2A1,TBC1D20,TCF15                                                 |
| 13 | 61,050,000 | 61,200,000 | 815 | 218  | 0.316350187  | C20ORF18,CSNK2A1,TBC1D20,TRIB3                                        |
| 13 | 61,125,000 | 61,275,000 | 816 | 221  | 0.893029675  | C20ORF18,C20orf96,NRSN2,TBC1D20,TRIB3,ZCCHC3                          |
| 13 | 61,200,000 | 61,350,000 | 817 | 420  | 0.951446115  | C20orf96,DEFB129,NRSN2,ZCCHC3                                         |
| 13 | 61,275,000 | 61,425,000 | 818 | 708  | 0.941031858  | C20orf96,DEFB129                                                      |
| 13 | 61,350,000 | 61,500,000 | 819 | 793  | 0.864822166  |                                                                       |
| 13 | 61,425,000 | 61,575,000 | 820 | 1233 | 0.581855322  | DEFB119,DEFB122,DEFB122A,ENSBTAG00000048009                           |
| 13 | 61,500,000 | 61,650,000 | 821 | 1235 | 0.78247996   | DEFB119,DEFB122,DEFB122A,DEFB123,DEFB124,HM13,REM1,ENSBTAG00000048009 |
| 13 | 61,575,000 | 61,725,000 | 822 | 839  | 1.082545407  | DEFB122,DEFB123,DEFB124,HM13,REM1                                     |
| 13 | 61,650,000 | 61,800,000 | 823 | 683  | 1.127715466  | BCL2L1,COX4I2,HM13,ID1                                                |
| 13 | 61,725,000 | 61,875,000 | 824 | 379  | 1.288987159  | BCL2L1,COX4I2,ID1,TPX2                                                |
| 13 | 61,800,000 | 61,950,000 | 825 | 336  | 1.320820319  | BCL2L1,DUSP15,FOXS1,MYLK2,TPX2,ENSBTAG00000031214                     |
| 13 | 61,875,000 | 62,025,000 | 826 | 480  | 1.254536371  | DUSP15,FOXS1,MYLK2,PDRG1,TPX2,TLL9,ENSBTAG0000031214                  |
| 13 | 61,950,000 | 62,100,000 | 827 | 489  | 0.873562953  | CCM2L,DUSP15,PDRG1,TLL9,XKR7                                          |



|    |            |            |     |      |              |                                                                          |
|----|------------|------------|-----|------|--------------|--------------------------------------------------------------------------|
| 13 | 62,025,000 | 62,175,000 | 828 | 402  | 0.300362192  | CCM2L,HCK,TM9SF4,XKR7                                                    |
| 13 | 62,100,000 | 62,250,000 | 829 | 459  | 0.480515963  | HCK,PLAGL2,POFUT1,TM9SF4                                                 |
| 13 | 62,175,000 | 62,325,000 | 830 | 512  | 0.639679327  | KIF3B,PLAGL2,POFUT1,TM9SF4                                               |
| 13 | 62,250,000 | 62,400,000 | 831 | 448  | 0.410656443  | ASXL1,KIF3B,POFUT1                                                       |
| 13 | 62,325,000 | 62,475,000 | 832 | 337  | 0.245709153  | ASXL1,KIF3B,NOL4L                                                        |
| 13 | 62,400,000 | 62,550,000 | 833 | 320  | 0.071062759  | ASXL1,NOL4L                                                              |
| 13 | 62,475,000 | 62,625,000 | 834 | 502  | 0.339359834  | NOL4L                                                                    |
| 13 | 62,550,000 | 62,700,000 | 835 | 568  | 0.271832592  | COMMD7                                                                   |
| 13 | 62,625,000 | 62,775,000 | 836 | 382  | 0.355823739  | COMMD7,DNMT3B,MAPRE1                                                     |
| 13 | 62,700,000 | 62,850,000 | 837 | 634  | 1.14079188   | DNMT3B,MAPRE1,SPAG4L                                                     |
| 13 | 62,775,000 | 62,925,000 | 838 | 1126 | 0.876716613  | BPIFB2,BPIFB3,BPIFB6,SPAG4L                                              |
| 13 | 62,850,000 | 63,000,000 | 839 | 1464 | 0.601844555  | BPIFB2,BPIFB3,BPIFB4,BPIFB6,ENSBTAG00000038453                           |
| 13 | 62,925,000 | 63,075,000 | 840 | 1424 | 0.452153657  | BPIFB4,ENSBTAG00000009144,ENSBTAG00000038453                             |
| 13 | 63,000,000 | 63,150,000 | 841 | 956  | 0.533522939  | BSP30C,BSP30D,ENSBTAG00000009144                                         |
| 13 | 63,075,000 | 63,225,000 | 842 | 927  | 0.158133597  | BASE,BPIFA2B,BSP30C,BSP30D,ENSBTAG00000011704                            |
| 13 | 63,150,000 | 63,300,000 | 843 | 923  | -0.187822081 | BASE,BPIFA1,BPIFA2B,BPIFB1,C13H20ORF71,ENSBTAG00000011704                |
| 13 | 63,225,000 | 63,375,000 | 844 | 959  | -0.207054806 | BPIFA1,BPIFB1,C13H20ORF71,CDK5RAP1,ENSBTAG00000031354,ENSBTAG00000031361 |
| 13 | 63,300,000 | 63,450,000 | 845 | 1065 | -0.122395613 | BPIFB1,CDK5RAP1,SNTA1,ENSBTAG00000031354,ENSBTAG00000031361              |
| 13 | 63,375,000 | 63,525,000 | 846 | 559  | 0.251093874  | CDK5RAP1,SNTA1                                                           |
| 13 | 63,450,000 | 63,600,000 | 847 | 189  | -0.074424906 | SNTA1                                                                    |
| 13 | 63,525,000 | 63,675,000 | 848 | 152  | -1.177675004 | CBFA2T2                                                                  |
| 13 | 63,600,000 | 63,750,000 | 849 | 174  | -0.752528362 | ACTL10,C2orf144,CBFA2T2,E2F1,NECAB3,PXMP4                                |
| 13 | 63,675,000 | 63,825,000 | 850 | 289  | 0.502576691  | ACTL10,C2orf144,CHMP4B,E2F1,NECAB3,PXMP4,ZNF341                          |
| 13 | 63,750,000 | 63,900,000 | 851 | 568  | 0.098462528  | CHMP4B,ZNF341                                                            |
| 13 | 63,825,000 | 63,975,000 | 852 | 580  | -0.322495961 | CHMP4B,RALY                                                              |
| 13 | 63,900,000 | 64,050,000 | 853 | 334  | -0.682578852 | RALY                                                                     |
| 13 | 63,975,000 | 64,125,000 | 854 | 233  | -0.345961937 | EIF2S2,RALY                                                              |
| 13 | 64,050,000 | 64,200,000 | 855 | 397  | 0.711859092  | EIF2S2                                                                   |
| 13 | 64,125,000 | 64,275,000 | 856 | 466  | 0.968001935  | AHCY,ASIP                                                                |
| 13 | 64,200,000 | 64,350,000 | 857 | 305  | 1.433288416  | AHCY,ASIP                                                                |
| 13 | 64,275,000 | 64,425,000 | 858 | 347  | 1.438853258  | ITCH,ENSBTAG00000046623                                                  |
| 13 | 64,350,000 | 64,500,000 | 859 | 433  | 1.400436126  | DYNLRB1,ITCH,MAP1LC3A,PIGU,ENSBTAG00000046623                            |
| 13 | 64,425,000 | 64,575,000 | 860 | 585  | 0.723205902  | DYNLRB1,ITCH,MAP1LC3A,PIGU                                               |
| 13 | 64,500,000 | 64,650,000 | 861 | 646  | 0.150764219  | NCOA6,PIGU,TP53INP2                                                      |
| 13 | 64,575,000 | 64,725,000 | 862 | 471  | 0.439033863  | NCOA6,PIGU,TP53INP2                                                      |
| 13 | 64,650,000 | 64,800,000 | 863 | 496  | 0.675314822  | ACSS2,GGT7,NCOA6                                                         |
| 13 | 64,725,000 | 64,875,000 | 864 | 523  | 0.664578388  | ACSS2,GGT7,GSS,NCOA6                                                     |
| 13 | 64,800,000 | 64,950,000 | 865 | 354  | 0.689925426  | ACSS2,GSS,MYH7B,TRPC4AP                                                  |
| 13 | 64,875,000 | 65,025,000 | 866 | 463  | 0.018556497  | EDEM2,MYH7B,TRPC4AP                                                      |
| 13 | 64,950,000 | 65,100,000 | 867 | 693  | 0.428761575  | EDEM2,PROCR,TRPC4AP                                                      |
| 13 | 65,025,000 | 65,175,000 | 868 | 708  | 0.55394092   | EDEM2,MMP24,PROCR                                                        |
| 13 | 65,100,000 | 65,250,000 | 869 | 793  | 0.693615399  | EIF6,FAM83C,MMP24,PROCR,UQCC                                             |
| 13 | 65,175,000 | 65,325,000 | 870 | 637  | 1.142589926  | EIF6,FAM83C,MMP24,UQCC                                                   |
| 13 | 65,250,000 | 65,400,000 | 871 | 397  | 1.063272105  | CEP250,GDF5,UQCC                                                         |
| 13 | 65,325,000 | 65,475,000 | 872 | 508  | 0.859737382  | C2orf173,CEP250,ERGIC3,GDF5,UQCC                                         |
| 13 | 65,400,000 | 65,550,000 | 873 | 482  | 0.70438513   | C2orf173,CEP250,CPNE1,ERGIC3,NFS1,RBM12,SPAG4                            |
| 13 | 65,475,000 | 65,625,000 | 874 | 321  | 0.382469143  | CPNE1,NFS1,PHF20,RBM12,RBM39,ROMO1,SPAG4                                 |
| 13 | 65,550,000 | 65,700,000 | 875 | 200  | -0.232645466 | NFS1,PHF20,RBM39,ROMO1                                                   |
| 13 | 65,625,000 | 65,775,000 | 876 | 321  | -0.372209266 | CNBD2,PHF20,SCAND1                                                       |

|    |            |            |     |      |              |                                   |
|----|------------|------------|-----|------|--------------|-----------------------------------|
| 13 | 65,700,000 | 65,850,000 | 877 | 599  | 0.397694528  | CNBD2,PHF20,SCAND1                |
| 13 | 65,775,000 | 65,925,000 | 878 | 811  | 1.107888227  | CNBD2                             |
| 13 | 65,850,000 | 66,000,000 | 879 | 794  | 0.923406693  | EPB41L1                           |
| 13 | 65,925,000 | 66,075,000 | 880 | 572  | 0.578676443  | AAR2,EPB41L1                      |
| 13 | 66,000,000 | 66,150,000 | 881 | 635  | -0.014004599 | AAR2,EPB41L1                      |
| 13 | 66,075,000 | 66,225,000 | 882 | 601  | -0.43990578  | DLGAP4                            |
| 13 | 66,150,000 | 66,300,000 | 883 | 489  | 0.335486135  | DLGAP4                            |
| 13 | 66,225,000 | 66,375,000 | 884 | 490  | 0.286829496  | DLGAP4,MYL9,RIP5,SLA2,TGIF2       |
| 13 | 66,300,000 | 66,450,000 | 885 | 422  | -0.316249803 | MYL9,NDRG3,RIP5,SLA2,TGIF2,TLDC2  |
| 13 | 66,375,000 | 66,525,000 | 886 | 398  | -0.721929045 | NDRG3,SAMHD1,SLA2,TLDC2           |
| 13 | 66,450,000 | 66,600,000 | 887 | 316  | -0.685527613 | NDRG3,RBL1,SAMHD1                 |
| 13 | 66,525,000 | 66,675,000 | 888 | 334  | 0.574627518  | DSN1,NDRG3,RBL1,SAMHD1,SOGA1      |
| 13 | 66,600,000 | 66,750,000 | 889 | 372  | 0.534385518  | DSN1,MROH8,RBL1,SOGA1             |
| 13 | 66,675,000 | 66,825,000 | 890 | 439  | 0.538738568  | MROH8,RBL1,RPN2                   |
| 13 | 66,750,000 | 66,900,000 | 891 | 550  | 0.357352344  | GHRH,MANBAL,MROH8,RPN2            |
| 13 | 66,825,000 | 66,975,000 | 892 | 534  | -0.017111775 | GHRH,MANBAL,RPN2                  |
| 13 | 66,900,000 | 67,050,000 | 893 | 517  | 0.298291868  | MANBAL,SRC                        |
| 13 | 66,975,000 | 67,125,000 | 894 | 474  | 0.917504226  | BLCAP,NNAT,SRC,ENSBTAG00000045928 |
| 13 | 67,050,000 | 67,200,000 | 895 | 494  | 0.24786193   | BLCAP,NNAT,ENSBTAG00000045928     |
| 13 | 67,125,000 | 67,275,000 | 896 | 789  | -0.485725395 | BLCAP,CTNNBL1                     |
| 13 | 67,200,000 | 67,350,000 | 897 | 1004 | -0.136152444 | CTNNBL1                           |
| 13 | 67,275,000 | 67,425,000 | 898 | 1007 | -0.079659532 | CTNNBL1                           |
| 13 | 67,350,000 | 67,500,000 | 899 | 944  | -0.843485292 | CTNNBL1,VSTM2L                    |
| 13 | 67,425,000 | 67,575,000 | 900 | 915  | 0.099133712  | CTNNBL1,RPRD1B,TTI1,VSTM2L        |
| 13 | 67,500,000 | 67,650,000 | 901 | 943  | 1.01346779   | RPRD1B,TTI1                       |
| 13 | 67,575,000 | 67,725,000 | 902 | 978  | 0.199870829  | RPRD1B,TGM2                       |
| 13 | 67,650,000 | 67,800,000 | 903 | 738  | -0.364155957 | KIAA1755,TGM2                     |
| 13 | 67,725,000 | 67,875,000 | 904 | 955  | -0.852103643 | BPI,KIAA1755,LBP                  |
| 13 | 67,800,000 | 67,950,000 | 905 | 1301 | -0.970641134 | BPI,LBP                           |
| 13 | 67,875,000 | 68,025,000 | 906 | 994  | -0.805867594 | LBP,ENSBTAG00000047302            |
| 13 | 67,950,000 | 68,100,000 | 907 | 646  | 0.141266611  | RALGAPB,ENSBTAG00000047302        |
| 13 | 68,025,000 | 68,175,000 | 908 | 770  | -1.794860325 | ADIG,RALGAPB                      |
| 13 | 68,100,000 | 68,250,000 | 909 | 1152 | -2.601317566 | ACTR5,ADIG,RALGAPB,SLC32A1        |
| 13 | 68,175,000 | 68,325,000 | 910 | 1210 | -1.678931868 | ACTR5,PPP1R16B,SLC32A1            |
| 13 | 68,250,000 | 68,400,000 | 911 | 1279 | -1.891127356 | DHX35,FAM83D,PPP1R16B             |
| 13 | 68,325,000 | 68,475,000 | 912 | 1394 | -2.121307881 | DHX35,FAM83D,PPP1R16B             |
| 13 | 68,400,000 | 68,550,000 | 913 | 1651 | -1.616238977 | DHX35                             |
| 13 | 68,475,000 | 68,625,000 | 914 | 1340 | -0.748781645 |                                   |
| 13 | 68,550,000 | 68,700,000 | 915 | 1067 | 1.123537601  |                                   |
| 13 | 68,625,000 | 68,775,000 | 916 | 1065 | -0.261720905 |                                   |
| 13 | 68,700,000 | 68,850,000 | 917 | 956  | -1.876854167 |                                   |
| 13 | 68,775,000 | 68,925,000 | 918 | 778  | -1.063430775 |                                   |
| 13 | 68,850,000 | 69,000,000 | 919 | 593  | 1.076684043  |                                   |
| 13 | 68,925,000 | 69,075,000 | 920 | 680  | 0.686252466  |                                   |
| 13 | 69,000,000 | 69,150,000 | 921 | 782  | -0.424028098 |                                   |
| 13 | 69,075,000 | 69,225,000 | 922 | 741  | -1.17569812  |                                   |
| 13 | 69,150,000 | 69,300,000 | 923 | 774  | 0.005123418  |                                   |
| 13 | 69,225,000 | 69,375,000 | 924 | 934  | 0.722155853  |                                   |
| 13 | 69,300,000 | 69,450,000 | 925 | 697  | 0.608596498  |                                   |
| 13 | 69,375,000 | 69,525,000 | 926 | 685  | 0.522818356  |                                   |
| 13 | 69,450,000 | 69,600,000 | 927 | 778  | -0.027401989 |                                   |
| 13 | 69,525,000 | 69,675,000 | 928 | 786  | -0.125842816 |                                   |
| 13 | 69,600,000 | 69,750,000 | 929 | 755  | 0.031324274  |                                   |

|    |            |            |     |      |              |                                          |
|----|------------|------------|-----|------|--------------|------------------------------------------|
| 13 | 69,675,000 | 69,825,000 | 930 | 516  | 0.031601085  |                                          |
| 13 | 69,750,000 | 69,900,000 | 931 | 673  | -0.199101268 |                                          |
| 13 | 69,825,000 | 69,975,000 | 932 | 680  | -0.322059973 |                                          |
| 13 | 69,900,000 | 70,050,000 | 933 | 303  | -0.673373188 |                                          |
| 13 | 69,975,000 | 70,125,000 | 934 | 198  | -1.366351545 | MAFB                                     |
| 13 | 70,050,000 | 70,200,000 | 935 | 512  | 0.253287642  | MAFB                                     |
| 13 | 70,125,000 | 70,275,000 | 936 | 1164 | 0.449658732  |                                          |
| 13 | 70,200,000 | 70,350,000 | 937 | 932  | 0.155710682  |                                          |
| 13 | 70,275,000 | 70,425,000 | 938 | 284  | -0.576953291 | TOP1                                     |
| 13 | 70,350,000 | 70,500,000 | 939 | 196  | 0.199501661  | TOP1                                     |
| 13 | 70,425,000 | 70,575,000 | 940 | 414  | 0.120602768  | PLCG1, TOP1, ZHX3                        |
| 13 | 70,500,000 | 70,650,000 | 941 | 695  | 0.545575638  | PLCG1, ZHX3                              |
| 13 | 70,575,000 | 70,725,000 | 942 | 641  | 0.851886975  | EMILIN3, LPIN3, ENSBTAG00000045671       |
| 13 | 70,650,000 | 70,800,000 | 943 | 916  | 1.101795951  | CHD6, EMILIN3, LPIN3, ENSBTAG00000045671 |
| 13 | 70,725,000 | 70,875,000 | 944 | 951  | 1.037950204  | CHD6                                     |
| 13 | 70,800,000 | 70,950,000 | 945 | 632  | 0.262276518  | CHD6                                     |
| 13 | 70,875,000 | 71,025,000 | 946 | 894  | -0.106317389 |                                          |
| 13 | 70,950,000 | 71,100,000 | 947 | 815  | 0.43770777   |                                          |
| 13 | 71,025,000 | 71,175,000 | 948 | 857  | 0.870409668  |                                          |
| 13 | 71,100,000 | 71,250,000 | 949 | 1115 | 0.981340987  |                                          |
| 13 | 71,175,000 | 71,325,000 | 950 | 879  | 0.783122946  |                                          |
| 13 | 71,250,000 | 71,400,000 | 951 | 669  | 0.197181183  | PTPRT, ENSBTAG00000046673                |
| 13 | 71,325,000 | 71,475,000 | 952 | 760  | 0.551954803  | PTPRT, ENSBTAG00000046673                |
| 13 | 71,400,000 | 71,550,000 | 953 | 1130 | 1.085928094  | PTPRT                                    |
| 13 | 71,475,000 | 71,625,000 | 954 | 1292 | 0.627988232  | PTPRT                                    |
| 13 | 71,550,000 | 71,700,000 | 955 | 892  | 0.007652102  | PTPRT                                    |
| 13 | 71,625,000 | 71,775,000 | 956 | 822  | -0.421756136 | PTPRT                                    |
| 13 | 71,700,000 | 71,850,000 | 957 | 1155 | -0.970920593 |                                          |
| 13 | 71,775,000 | 71,925,000 | 958 | 1010 | -0.588459639 |                                          |
| 13 | 71,850,000 | 72,000,000 | 959 | 868  | -1.132968376 |                                          |
| 13 | 71,925,000 | 72,075,000 | 960 | 1148 | -1.42473723  |                                          |
| 13 | 72,000,000 | 72,150,000 | 961 | 1106 | -0.672670068 |                                          |
| 13 | 72,075,000 | 72,225,000 | 962 | 1023 | -0.32159503  |                                          |
| 13 | 72,150,000 | 72,300,000 | 963 | 1320 | 0.087876792  |                                          |
| 13 | 72,225,000 | 72,375,000 | 964 | 1012 | -0.116749006 |                                          |
| 13 | 72,300,000 | 72,450,000 | 965 | 641  | -0.939068315 |                                          |
| 13 | 72,375,000 | 72,525,000 | 966 | 802  | -1.758429786 |                                          |
| 13 | 72,450,000 | 72,600,000 | 967 | 1142 | -0.335459122 |                                          |
| 13 | 72,525,000 | 72,675,000 | 968 | 1110 | 0.82021679   |                                          |
| 13 | 72,600,000 | 72,750,000 | 969 | 872  | 0.573984777  |                                          |
| 13 | 72,675,000 | 72,825,000 | 970 | 911  | 0.002703879  | SRSF6                                    |
| 13 | 72,750,000 | 72,900,000 | 971 | 922  | 0.436281443  | IFT52, SGK2, SRSF6                       |
| 13 | 72,825,000 | 72,975,000 | 972 | 634  | 0.94712144   | IFT52, MYBL2, SGK2                       |
| 13 | 72,900,000 | 73,050,000 | 973 | 410  | 0.189884935  | GTSF1L, IFT52, MYBL2                     |
| 13 | 72,975,000 | 73,125,000 | 974 | 628  | 0.79907311   | GTSF1L                                   |
| 13 | 73,050,000 | 73,200,000 | 975 | 646  | 0.595445102  | TOX2                                     |
| 13 | 73,125,000 | 73,275,000 | 976 | 865  | 0.499011246  | TOX2                                     |
| 13 | 73,200,000 | 73,350,000 | 977 | 1206 | 0.734544105  | JPH2                                     |
| 13 | 73,275,000 | 73,425,000 | 978 | 887  | 0.388890631  | JPH2, OSER1                              |
| 13 | 73,350,000 | 73,500,000 | 979 | 610  | -0.970048696 | FITM2, GDAP1L1, JPH2, OSER1, R3HDML      |
| 13 | 73,425,000 | 73,575,000 | 980 | 666  | -0.866124678 | FITM2, GDAP1L1, HNF4A, R3HDML            |
| 13 | 73,500,000 | 73,650,000 | 981 | 735  | -0.824472554 | HNF4A, R3HDML, SERINC3, TTPAL            |
| 13 | 73,575,000 | 73,725,000 | 982 | 630  | -0.735011811 | PKIG, SERINC3, TTPAL                     |

|    |            |            |      |      |              |                                                                                                           |
|----|------------|------------|------|------|--------------|-----------------------------------------------------------------------------------------------------------|
| 13 | 73,650,000 | 73,800,000 | 983  | 668  | 0.368813733  | ADA,PKIG,SERINC3                                                                                          |
| 13 | 73,725,000 | 73,875,000 | 984  | 652  | 0.366864956  | ADA,KCNK15,PKIG,WISP2                                                                                     |
| 13 | 73,800,000 | 73,950,000 | 985  | 804  | -0.074813513 | KCNK15,RIMS4,WISP2                                                                                        |
| 13 | 73,875,000 | 74,025,000 | 986  | 1015 | 0.268926491  | RIMS4,YWHAB                                                                                               |
| 13 | 73,950,000 | 74,100,000 | 987  | 720  | 0.331707682  | PABPC1L,STK4,TOMM34,YWHAB                                                                                 |
| 13 | 74,025,000 | 74,175,000 | 988  | 898  | 0.490753058  | PABPC1L,STK4,TOMM34,YWHAB                                                                                 |
| 13 | 74,100,000 | 74,250,000 | 989  | 1272 | 0.622441137  | KCNS1,STK4,WFDC5,ENSBTAG00000020813,ENSBTAG000046375                                                      |
| 13 | 74,175,000 | 74,325,000 | 990  | 1453 | 0.399787698  | KCNS1,PI3,STK4,WFDC5,ENSBTAG00000014329,ENSBTAG00000020813,ENSBTAG00000039446,ENSBTAG00000046375          |
| 13 | 74,250,000 | 74,400,000 | 991  | 976  | 0.446630951  | MATN4,PI3,RBPJL,SDC4,ENSBTAG00000014329,ENSBTAG00000039446                                                |
| 13 | 74,325,000 | 74,475,000 | 992  | 311  | 0.384952293  | DBNDD2,MATN4,PIGT,RBPJL,SDC4,SYS1,TP53TG5                                                                 |
| 13 | 74,400,000 | 74,550,000 | 993  | 966  | 0.325429723  | DBNDD2,PIGT,SDC4,SYS1,TP53TG5,ENSBTAG00000014345,ENSBTAG00000016127,ENSBTAG00000037942,ENSBTAG00000046614 |
| 13 | 74,475,000 | 74,625,000 | 994  | 1604 | 0.848448089  | PIGT,ENSBTAG00000014345,ENSBTAG00000016127,ENSBTAG00000037942,ENSBTAG00000046614                          |
| 13 | 74,550,000 | 74,700,000 | 995  | 1403 | 1.09600341   | ENSBTAG00000039693                                                                                        |
| 13 | 74,625,000 | 74,775,000 | 996  | 1009 | 0.534156079  | ENSBTAG00000018122,ENSBTAG00000039693,ENSBTAG0000046704                                                   |
| 13 | 74,700,000 | 74,850,000 | 997  | 652  | -0.586297774 | TKDP4,ENSBTAG00000018122,ENSBTAG00000038966,ENSBTAG00000046704                                            |
| 13 | 74,775,000 | 74,925,000 | 998  | 486  | -0.353630904 | TKDP1,TKDP4,ENSBTAG00000038966                                                                            |
| 13 | 74,850,000 | 75,000,000 | 999  | 757  | 0.792650279  | PTI,TKDP1,ENSBTAG00000045630                                                                              |
| 13 | 74,925,000 | 75,075,000 | 1000 | 1011 | 0.819669298  | PTI,ENSBTAG00000045630                                                                                    |
| 13 | 75,000,000 | 75,150,000 | 1001 | 797  | 0.635571466  | PTI,SPINLW1,WFDC2,WFDC8,ENSBTAG00000045630                                                                |
| 13 | 75,075,000 | 75,225,000 | 1002 | 748  | 0.842400024  | SPINLW1,WFDC10A,WFDC11,WFDC13,WFDC2,WFDC8,WFDC9,ENSBTAG00000030800,ENSBTAG00000030802                     |
| 13 | 75,150,000 | 75,300,000 | 1003 | 949  | -0.483008892 | DNTTIP1,SPINT4,WFDC10A,WFDC11,WFDC13,WFDC3,WFDC9,ENSBTAG00000030800,ENSBTAG00000030802                    |
| 13 | 75,225,000 | 75,375,000 | 1004 | 917  | -0.534066176 | ACOT8,CTSA,DNTTIP1,NEURL2,PLTP,SPATA25,SPINT4,TNNC2,UBE2C,WFDC3,ZSWIM1,ZSWIM3                             |
| 13 | 75,300,000 | 75,450,000 | 1005 | 858  | 0.341994498  | ACOT8,CTSA,DNTTIP1,NEURL2,PCIF1,PLTP,SPATA25,TNNC2,UBE2C,ZNF335,ZSWIM1,ZSWIM3                             |
| 13 | 75,375,000 | 75,525,000 | 1006 | 575  | 0.283591416  | MMP9,NCOA5,PCIF1,PLTP,SLC12A5,ZNF335                                                                      |
| 13 | 75,450,000 | 75,600,000 | 1007 | 348  | -1.081496679 | CD40,MMP9,NCOA5,SLC12A5                                                                                   |
| 13 | 75,525,000 | 75,675,000 | 1008 | 481  | -0.761681983 | CD40,CDH22,NCOA5                                                                                          |
| 13 | 75,600,000 | 75,750,000 | 1009 | 596  | 0.240020361  | CDH22                                                                                                     |
| 13 | 75,675,000 | 75,825,000 | 1010 | 557  | -0.029931227 | CDH22,ELMO2,SLC35C2                                                                                       |
| 13 | 75,750,000 | 75,900,000 | 1011 | 557  | -0.053873187 | ELMO2,SLC35C2,ENSBTAG00000027328                                                                          |
| 13 | 75,825,000 | 75,975,000 | 1012 | 823  | 0.705097547  | ELMO2,OCSTAMP,ENSBTAG00000009675,ENSBTAG00000027328,ENSBTAG00000047336                                    |
| 13 | 75,900,000 | 76,050,000 | 1013 | 871  | 0.163811255  | OCSTAMP,SLC13A3,ENSBTAG00000009675,ENSBTAG00000047336                                                     |
| 13 | 75,975,000 | 76,125,000 | 1014 | 912  | -0.862897418 | SLC13A3,SLC2A10,TP53RK                                                                                    |
| 13 | 76,050,000 | 76,200,000 | 1015 | 768  | -0.739393512 | SLC13A3,SLC2A10,TP53RK                                                                                    |
| 13 | 76,125,000 | 76,275,000 | 1016 | 704  | -0.020060874 |                                                                                                           |
| 13 | 76,200,000 | 76,350,000 | 1017 | 759  | -0.38168245  | EYA2                                                                                                      |
| 13 | 76,275,000 | 76,425,000 | 1018 | 736  | -0.137361846 | EYA2                                                                                                      |
| 13 | 76,350,000 | 76,500,000 | 1019 | 688  | 0.740687479  | EYA2                                                                                                      |
| 13 | 76,425,000 | 76,575,000 | 1020 | 626  | 0.602350261  | EYA2,ZMYND8                                                                                               |

|    |            |            |      |      |              |                             |
|----|------------|------------|------|------|--------------|-----------------------------|
| 13 | 76,500,000 | 76,650,000 | 1021 | 738  | 0.342100273  | ZMYND8                      |
| 13 | 76,575,000 | 76,725,000 | 1022 | 864  | 0.396808955  | ZMYND8                      |
| 13 | 76,650,000 | 76,800,000 | 1023 | 733  | 0.521796935  |                             |
| 13 | 76,725,000 | 76,875,000 | 1024 | 663  | -0.399683564 | NCOA3                       |
| 13 | 76,800,000 | 76,950,000 | 1025 | 1147 | 0.21832271   | NCOA3,SULF2                 |
| 13 | 76,875,000 | 77,025,000 | 1026 | 1289 | 0.817430962  | NCOA3,SULF2                 |
| 13 | 76,950,000 | 77,100,000 | 1027 | 1085 | -0.036136748 | SULF2                       |
| 13 | 77,025,000 | 77,175,000 | 1028 | 1035 | -0.000142033 |                             |
| 13 | 77,100,000 | 77,250,000 | 1029 | 993  | 0.559414112  |                             |
| 13 | 77,175,000 | 77,325,000 | 1030 | 926  | 0.009820299  |                             |
| 13 | 77,250,000 | 77,400,000 | 1031 | 849  | -0.252651093 |                             |
| 13 | 77,325,000 | 77,475,000 | 1032 | 1129 | 0.419297296  |                             |
| 13 | 77,400,000 | 77,550,000 | 1033 | 995  | 0.426105348  |                             |
| 13 | 77,475,000 | 77,625,000 | 1034 | 554  | -0.41116444  | PREX1                       |
| 13 | 77,550,000 | 77,700,000 | 1035 | 572  | -0.576798553 | PREX1                       |
| 13 | 77,625,000 | 77,775,000 | 1036 | 519  | -0.272584081 | PREX1                       |
| 13 | 77,700,000 | 77,850,000 | 1037 | 462  | -1.031559854 | ARFGEF2                     |
| 13 | 77,775,000 | 77,925,000 | 1038 | 671  | -1.009559593 | ARFGEF2,CSE1L               |
| 13 | 77,850,000 | 78,000,000 | 1039 | 698  | -0.724464408 | ARFGEF2,CSE1L,STAU1         |
| 13 | 77,925,000 | 78,075,000 | 1040 | 846  | -0.914559252 | CSE1L,DDX27,STAU1           |
| 13 | 78,000,000 | 78,150,000 | 1041 | 1070 | 0.10149659   | DDX27,STAU1,ZNFX1           |
| 13 | 78,075,000 | 78,225,000 | 1042 | 862  | 0.854908789  | KCNB1,ZNFX1                 |
| 13 | 78,150,000 | 78,300,000 | 1043 | 785  | -0.002504143 | KCNB1                       |
| 13 | 78,225,000 | 78,375,000 | 1044 | 853  | 0.107221717  | KCNB1,PTGIS                 |
| 13 | 78,300,000 | 78,450,000 | 1045 | 967  | 0.979245089  | KCNB1,PTGIS                 |
| 13 | 78,375,000 | 78,525,000 | 1046 | 791  | 0.84240979   | B4GALT5                     |
| 13 | 78,450,000 | 78,600,000 | 1047 | 561  | -0.148732869 | B4GALT5                     |
| 13 | 78,525,000 | 78,675,000 | 1048 | 632  | -0.380518731 | SLC9A8                      |
| 13 | 78,600,000 | 78,750,000 | 1049 | 655  | 0.917519783  | RNF114,SLC9A8,SPATA2        |
| 13 | 78,675,000 | 78,825,000 | 1050 | 529  | 1.100639178  | RNF114,SLC9A8,SNAI1,SPATA2  |
| 13 | 78,750,000 | 78,900,000 | 1051 | 637  | -0.44142162  | SNAI1,TMEM189,UBE2V1        |
| 13 | 78,825,000 | 78,975,000 | 1052 | 716  | -0.619247621 | TMEM189,UBE2V1              |
| 13 | 78,900,000 | 79,050,000 | 1053 | 646  | 0.898094234  | TMEM189                     |
| 13 | 78,975,000 | 79,125,000 | 1054 | 696  | 1.216317722  |                             |
| 13 | 79,050,000 | 79,200,000 | 1055 | 497  | 1.053732542  |                             |
| 13 | 79,125,000 | 79,275,000 | 1056 | 443  | 0.803168551  | PTPN1                       |
| 13 | 79,200,000 | 79,350,000 | 1057 | 392  | 0.779334306  | FAM65C,PTPN1                |
| 13 | 79,275,000 | 79,425,000 | 1058 | 438  | 0.432984325  | FAM65C,PTPN1                |
| 13 | 79,350,000 | 79,500,000 | 1059 | 657  | 0.303848335  | BCAS4,FAM65C,PAR6B          |
| 13 | 79,425,000 | 79,575,000 | 1060 | 553  | 0.241396781  | ADNP,BCAS4,PAR6B            |
| 13 | 79,500,000 | 79,650,000 | 1061 | 647  | -0.131736555 | ADNP,BCAS4,DPM1,KCNG1,MOCS3 |
| 13 | 79,575,000 | 79,725,000 | 1062 | 627  | -0.184023237 | DPM1,KCNG1,MOCS3            |
| 13 | 79,650,000 | 79,800,000 | 1063 | 704  | 0.465990021  | KCNG1                       |
| 13 | 79,725,000 | 79,875,000 | 1064 | 1142 | -0.173886408 |                             |
| 13 | 79,800,000 | 79,950,000 | 1065 | 1009 | -0.453250702 |                             |
| 13 | 79,875,000 | 80,025,000 | 1066 | 669  | 0.459200091  | NFATC2                      |
| 13 | 79,950,000 | 80,100,000 | 1067 | 573  | 0.68869027   | NFATC2                      |
| 13 | 80,025,000 | 80,175,000 | 1068 | 600  | -1.157986091 | ATP9A,NFATC2                |
| 13 | 80,100,000 | 80,250,000 | 1069 | 1037 | -1.337510777 | ATP9A,NFATC2                |
| 13 | 80,175,000 | 80,325,000 | 1070 | 1066 | -0.351029374 | ATP9A,SALL4                 |
| 13 | 80,250,000 | 80,400,000 | 1071 | 764  | 0.007920107  | ATP9A,SALL4                 |
| 13 | 80,325,000 | 80,475,000 | 1072 | 736  | 0.455913654  | ENSBTAG00000030564          |
| 13 | 80,400,000 | 80,550,000 | 1073 | 907  | 0.732319115  | ENSBTAG00000030564          |

|    |            |            |      |      |              |                    |
|----|------------|------------|------|------|--------------|--------------------|
| 13 | 80,475,000 | 80,625,000 | 1074 | 1107 | 0.812154067  | ZFP64              |
| 13 | 80,550,000 | 80,700,000 | 1075 | 1221 | 0.843660182  | ZFP64              |
| 13 | 80,625,000 | 80,775,000 | 1076 | 1375 | 0.507153355  |                    |
| 13 | 80,700,000 | 80,850,000 | 1077 | 1124 | 0.056463882  |                    |
| 13 | 80,775,000 | 80,925,000 | 1078 | 937  | -0.010550123 |                    |
| 13 | 80,850,000 | 81,000,000 | 1079 | 1345 | 0.468376826  |                    |
| 13 | 80,925,000 | 81,075,000 | 1080 | 1600 | 0.530068439  |                    |
| 13 | 81,000,000 | 81,150,000 | 1081 | 1503 | 0.1317559    |                    |
| 13 | 81,075,000 | 81,225,000 | 1082 | 1341 | -0.791760253 |                    |
| 13 | 81,150,000 | 81,300,000 | 1083 | 908  | -0.493951507 |                    |
| 13 | 81,225,000 | 81,375,000 | 1084 | 564  | 0.052775936  |                    |
| 13 | 81,300,000 | 81,450,000 | 1085 | 573  | -0.437616159 |                    |
| 13 | 81,375,000 | 81,525,000 | 1086 | 666  | -0.635769536 |                    |
| 13 | 81,450,000 | 81,600,000 | 1087 | 742  | -0.118280247 |                    |
| 13 | 81,525,000 | 81,675,000 | 1088 | 619  | 0.266883839  | TSHZ2              |
| 13 | 81,600,000 | 81,750,000 | 1089 | 448  | 0.441111747  | TSHZ2              |
| 13 | 81,675,000 | 81,825,000 | 1090 | 570  | -0.881158403 |                    |
| 13 | 81,750,000 | 81,900,000 | 1091 | 564  | -0.874753963 | ZNF217             |
| 13 | 81,825,000 | 81,975,000 | 1092 | 488  | 0.418151336  | ZNF217             |
| 13 | 81,900,000 | 82,050,000 | 1093 | 525  | 0.721194314  |                    |
| 13 | 81,975,000 | 82,125,000 | 1094 | 572  | 0.426099754  |                    |
| 13 | 82,050,000 | 82,200,000 | 1095 | 687  | -0.930190397 | BCAS1              |
| 13 | 82,125,000 | 82,275,000 | 1096 | 640  | -1.139958988 | BCAS1              |
| 13 | 82,200,000 | 82,350,000 | 1097 | 496  | -0.399045511 | BCAS1              |
| 13 | 82,275,000 | 82,425,000 | 1098 | 561  | -0.307396135 | CYP24A1,PFDN4      |
| 13 | 82,350,000 | 82,500,000 | 1099 | 847  | -0.567922691 | CYP24A1,PFDN4      |
| 13 | 82,425,000 | 82,575,000 | 1100 | 997  | -0.275410282 |                    |
| 13 | 82,500,000 | 82,650,000 | 1101 | 766  | 0.094377986  |                    |
| 13 | 82,575,000 | 82,725,000 | 1102 | 629  | -0.299260138 | DOK5               |
| 13 | 82,650,000 | 82,800,000 | 1103 | 1016 | 0.030944507  | DOK5               |
| 13 | 82,725,000 | 82,875,000 | 1104 | 1427 | 0.491901959  | DOK5               |
| 13 | 82,800,000 | 82,950,000 | 1105 | 1227 | 0.573626632  | DOK5               |
| 13 | 82,875,000 | 83,025,000 | 1106 | 952  | 0.245907874  |                    |
| 13 | 82,950,000 | 83,100,000 | 1107 | 910  | 0.205275848  |                    |
| 13 | 83,025,000 | 83,175,000 | 1108 | 1382 | 0.423556174  |                    |
| 13 | 83,100,000 | 83,250,000 | 1109 | 1553 | 0.7587888    |                    |
| 13 | 83,175,000 | 83,325,000 | 1110 | 1505 | 0.682312353  |                    |
| 13 | 83,250,000 | 83,400,000 | 1111 | 1744 | 0.461752322  |                    |
| 13 | 83,325,000 | 83,475,000 | 1112 | 1262 | 0.479469658  |                    |
| 13 | 83,400,000 | 83,550,000 | 1113 | 898  | 0.91687716   |                    |
| 13 | 83,475,000 | 83,625,000 | 1114 | 1302 | 0.667333297  |                    |
| 13 | 83,550,000 | 83,700,000 | 1115 | 1252 | 0.266003587  |                    |
| 13 | 83,625,000 | 83,775,000 | 1116 | 998  | 0.121045374  |                    |
| 13 | 83,700,000 | 83,850,000 | 1117 | 1030 | 0.183818269  |                    |
| 13 | 83,775,000 | 83,925,000 | 1118 | 1187 | 0.059277162  |                    |
| 13 | 83,850,000 | 84,000,000 | 1119 | 1178 | -0.252461967 |                    |
| 13 | 83,925,000 | 84,075,000 | 1120 | 935  | -0.040244202 | CBLN4              |
| 13 | 84,000,000 | 84,150,000 | 1121 | 778  | 0.455318298  | CBLN4              |
| 13 | 84,075,000 | 84,225,000 | 1122 | 635  | 0.48648011   |                    |
| 13 | 84,150,000 | 84,240,350 | 1123 | 438  | 0.644070105  | ENSBTAG00000038057 |
| 14 | 0          | 150,000    | 1    | 131  | -0.999905257 |                    |
| 14 | 75,000     | 225,000    | 2    | 143  | -2.231901151 |                    |
| 14 | 150,000    | 300,000    | 3    | 89   | -2.700162703 |                    |

|    |           |           |    |      |              |                                                                                                                    |
|----|-----------|-----------|----|------|--------------|--------------------------------------------------------------------------------------------------------------------|
| 14 | 225,000   | 375,000   | 4  | 146  | -0.011487379 | ENSBTAG00000034261                                                                                                 |
| 14 | 300,000   | 450,000   | 5  | 113  | -1.438866885 | ENSBTAG00000034261                                                                                                 |
| 14 | 375,000   | 525,000   | 6  | 62   | -1.376736797 |                                                                                                                    |
| 14 | 450,000   | 600,000   | 7  | 184  | -1.269173504 |                                                                                                                    |
| 14 | 525,000   | 675,000   | 8  | 217  | -2.048500547 |                                                                                                                    |
| 14 | 600,000   | 750,000   | 9  | 165  | -2.357994441 | ENSBTAG00000034176                                                                                                 |
| 14 | 675,000   | 825,000   | 10 | 88   | -2.618527865 | ENSBTAG00000034176                                                                                                 |
| 14 | 750,000   | 900,000   | 11 | 51   | -2.79895101  |                                                                                                                    |
| 14 | 825,000   | 975,000   | 12 | 90   | -1.881424482 |                                                                                                                    |
| 14 | 900,000   | 1,050,000 | 13 | 55   | -0.53843912  |                                                                                                                    |
| 14 | 975,000   | 1,125,000 | 14 | 103  | -0.568057429 |                                                                                                                    |
| 14 | 1,050,000 | 1,200,000 | 15 | 289  | 0.052428619  | ENSBTAG00000036098,ENSBTAG00000048001                                                                              |
| 14 | 1,125,000 | 1,275,000 | 16 | 544  | 0.009820119  | TMEM60,ENSBTAG00000036098,ENSBTAG00000048001                                                                       |
| 14 | 1,200,000 | 1,350,000 | 17 | 998  | -0.375621249 | TMEM60,ENSBTAG00000046435,ENSBTAG00000046932                                                                       |
| 14 | 1,275,000 | 1,425,000 | 18 | 1139 | 0.135072911  | ENSBTAG00000046435,ENSBTAG00000046932                                                                              |
| 14 | 1,350,000 | 1,500,000 | 19 | 1235 | 0.154718086  | C8orf33,ZNF34,ENSBTAG00000016203                                                                                   |
| 14 | 1,425,000 | 1,575,000 | 20 | 1051 | 0.020435983  | ARHGAP39,C8orf33,COMMD5,RPL8,ZNF34,ZNF7,ENSBTAG00000016203                                                         |
| 14 | 1,500,000 | 1,650,000 | 21 | 434  | 0.923755958  | ARHGAP39,C14H8orf82,COMMD5,GPT,LRRC14,LRRC24,MFSD3,PPP1R16A,RECQL4,RPL8,ZNF34,ZNF7                                 |
| 14 | 1,575,000 | 1,725,000 | 22 | 285  | 0.570505659  | ARHGAP39,C14H8orf82,CYHR1,FOXH1,GPT,KIFC2,LRRC14,LRRC24,MFSD3,PPP1R16A,RECQL4,SLC39A4,TONSL,VPS28                  |
| 14 | 1,650,000 | 1,800,000 | 23 | 315  | 0.791496045  | ADCK5,CPSF1,CYHR1,DGAT1,FBXL6,FOXH1,GPR172B,KIFC2,SCRT1,SLC39A4,TMEM249,TONSL,VPS28                                |
| 14 | 1,725,000 | 1,875,000 | 24 | 434  | 1.067058672  | ADCK5,BOP1,CPSF1,DGAT1,FBXL6,GPR172B,HSF1,MROH1,SCRT1,SCX,TMEM249                                                  |
| 14 | 1,800,000 | 1,950,000 | 25 | 513  | 1.186156173  | BOP1,CYC1,DGAT1,EXOSC4,GPAA1,HGH1,HSF1,KIAA1875,MAF1,MROH1,SCX,SHARPIN,ENSBTAG00000039978                          |
| 14 | 1,875,000 | 2,025,000 | 26 | 540  | 1.101459512  | CYC1,EXOSC4,GPAA1,GRINA,HGH1,KIAA1875,MAF1,MROH1,OPLAH,PARP10,SHARPIN,SPATC1,ENSBTAG00000015040,ENSBTAG00000039978 |
| 14 | 1,950,000 | 2,100,000 | 27 | 474  | 0.845866041  | GRINA,OPLAH,PARP10,PLEC,SPATC1,ENSBTAG00000015040                                                                  |
| 14 | 2,025,000 | 2,175,000 | 28 | 522  | 0.694247663  | NRBP2,PARP10,PLEC,PUF60                                                                                            |
| 14 | 2,100,000 | 2,250,000 | 29 | 613  | 0.197373748  | FAM83H,MAPK15,NRBP2,PUF60,SCRIB                                                                                    |
| 14 | 2,175,000 | 2,325,000 | 30 | 543  | -0.333157163 | CCDC166,EEF1D,FAM83H,MAPK15,PUF60,PYCRL,SCRIB,TIGD5,TSTA3,ZNF623,ENSBTAG00000046866                                |
| 14 | 2,250,000 | 2,400,000 | 31 | 642  | -0.864099746 | CCDC166,EEF1D,GSDMD,MROH6,NAPRT,PYCRL,TIGD5,TSTA3,ZC3H3,ZNF623,ENSBTAG00000046866                                  |
| 14 | 2,325,000 | 2,475,000 | 32 | 772  | 0.191031931  | EEF1D,GSDMD,MAFA,MROH6,NAPRT,RHPN1,ZC3H3                                                                           |
| 14 | 2,400,000 | 2,550,000 | 33 | 1031 | 0.72258817   | MAFA,RHPN1,ZC3H3,ZNF16                                                                                             |
| 14 | 2,475,000 | 2,625,000 | 34 | 1138 | 0.193284659  | LY6E,LY6H,ZNF16                                                                                                    |
| 14 | 2,550,000 | 2,700,000 | 35 | 1154 | -0.056299868 | LY6E,LY6H                                                                                                          |
| 14 | 2,625,000 | 2,775,000 | 36 | 1404 | 0.405873456  | GML,LY6E,LY6K,ENSBTAG0000004596,ENSBTAG00000037824                                                                 |
| 14 | 2,700,000 | 2,850,000 | 37 | 1369 | 0.773721997  | GML,LY6D,LY6K,LYNX1,LYPD2,SLURP1,THEM6,ENSBTAG0000004596,ENSBTAG00000037824                                        |
| 14 | 2,775,000 | 2,925,000 | 38 | 1038 | 0.880758779  | ARC,LY6D,LYNX1,LYPD2,PSCA,SLURP1,THEM6,ENSBTAG000026340,ENSBTAG00000037824                                         |
| 14 | 2,850,000 | 3,000,000 | 39 | 733  | 0.363923257  | ARC,BAI1,PSCA,ENSBTAG00000026340                                                                                   |
| 14 | 2,925,000 | 3,075,000 | 40 | 697  | -0.634926836 | BAI1,TSNARE1,ENSBTAG00000026340                                                                                    |
| 14 | 3,000,000 | 3,150,000 | 41 | 902  | -0.021486962 | BAI1,TSNARE1                                                                                                       |

|    |           |           |    |      |              |                                       |
|----|-----------|-----------|----|------|--------------|---------------------------------------|
| 14 | 3,075,000 | 3,225,000 | 42 | 1058 | -0.306345333 | TSNARE1                               |
| 14 | 3,150,000 | 3,300,000 | 43 | 1286 | -0.29429699  | TSNARE1                               |
| 14 | 3,225,000 | 3,375,000 | 44 | 1299 | 0.123653536  |                                       |
| 14 | 3,300,000 | 3,450,000 | 45 | 1317 | -1.100918251 |                                       |
| 14 | 3,375,000 | 3,525,000 | 46 | 1209 | -3.419092514 |                                       |
| 14 | 3,450,000 | 3,600,000 | 47 | 749  | -3.969332911 | MROH5,PTP4A3                          |
| 14 | 3,525,000 | 3,675,000 | 48 | 650  | 0.137964207  | GPR20,MROH5,PTP4A3                    |
| 14 | 3,600,000 | 3,750,000 | 49 | 524  | -0.059325394 | GPR20,SLC45A4                         |
| 14 | 3,675,000 | 3,825,000 | 50 | 376  | -0.437411586 | DENND3,SLC45A4                        |
| 14 | 3,750,000 | 3,900,000 | 51 | 483  | -0.452325609 | DENND3,PTK2                           |
| 14 | 3,825,000 | 3,975,000 | 52 | 512  | -2.338835389 | PTK2                                  |
| 14 | 3,900,000 | 4,050,000 | 53 | 490  | -2.512519472 | PTK2                                  |
| 14 | 3,975,000 | 4,125,000 | 54 | 577  | -1.467318531 | EIF2C2,PTK2                           |
| 14 | 4,050,000 | 4,200,000 | 55 | 546  | -1.300733005 | CHRAC1,EIF2C2,PTK2                    |
| 14 | 4,125,000 | 4,275,000 | 56 | 780  | -0.131413512 | CHRAC1,EIF2C2,TRAPPC9                 |
| 14 | 4,200,000 | 4,350,000 | 57 | 1200 | -0.171146398 | TRAPPC9                               |
| 14 | 4,275,000 | 4,425,000 | 58 | 1304 | -0.017481463 | TRAPPC9                               |
| 14 | 4,350,000 | 4,500,000 | 59 | 1337 | 0.368391911  | TRAPPC9                               |
| 14 | 4,425,000 | 4,575,000 | 60 | 1122 | -0.094363181 | TRAPPC9                               |
| 14 | 4,500,000 | 4,650,000 | 61 | 672  | -1.791016216 | KCNK9,TRAPPC9                         |
| 14 | 4,575,000 | 4,725,000 | 62 | 606  | -2.435440721 | KCNK9,TRAPPC9                         |
| 14 | 4,650,000 | 4,800,000 | 63 | 766  | -1.127540475 | KCNK9                                 |
| 14 | 4,725,000 | 4,875,000 | 64 | 843  | -0.113730315 | KCNK9                                 |
| 14 | 4,800,000 | 4,950,000 | 65 | 761  | -1.293223877 |                                       |
| 14 | 4,875,000 | 5,025,000 | 66 | 999  | -4.005316259 |                                       |
| 14 | 4,950,000 | 5,100,000 | 67 | 1421 | -3.791210391 |                                       |
| 14 | 5,025,000 | 5,175,000 | 68 | 1195 | -1.688389994 | COL22A1                               |
| 14 | 5,100,000 | 5,250,000 | 69 | 1187 | 0.029831023  | COL22A1                               |
| 14 | 5,175,000 | 5,325,000 | 70 | 1818 | 0.498009322  | COL22A1                               |
| 14 | 5,250,000 | 5,400,000 | 71 | 1668 | 0.271456116  | COL22A1                               |
| 14 | 5,325,000 | 5,475,000 | 72 | 1261 | -0.494947285 | COL22A1,ENSBTAG00000018218            |
| 14 | 5,400,000 | 5,550,000 | 73 | 1306 | -0.689098637 | ENSBTAG00000018218                    |
| 14 | 5,475,000 | 5,625,000 | 74 | 1261 | -1.762723639 | ENSBTAG00000018218                    |
| 14 | 5,550,000 | 5,700,000 | 75 | 1241 | -1.249703502 | ENSBTAG00000018218,ENSBTAG00000048078 |
| 14 | 5,625,000 | 5,775,000 | 76 | 1253 | -0.097775006 | ENSBTAG00000018218,ENSBTAG00000048078 |
| 14 | 5,700,000 | 5,850,000 | 77 | 1103 | 0.47287279   |                                       |
| 14 | 5,775,000 | 5,925,000 | 78 | 753  | 0.266623793  |                                       |
| 14 | 5,850,000 | 6,000,000 | 79 | 880  | -0.516349806 |                                       |
| 14 | 5,925,000 | 6,075,000 | 80 | 1119 | -0.476148586 |                                       |
| 14 | 6,000,000 | 6,150,000 | 81 | 1403 | 0.031834054  |                                       |
| 14 | 6,075,000 | 6,225,000 | 82 | 1205 | 0.057071621  |                                       |
| 14 | 6,150,000 | 6,300,000 | 83 | 913  | 0.124926218  |                                       |
| 14 | 6,225,000 | 6,375,000 | 84 | 933  | 0.286365803  |                                       |
| 14 | 6,300,000 | 6,450,000 | 85 | 896  | 0.274710693  |                                       |
| 14 | 6,375,000 | 6,525,000 | 86 | 1166 | 0.351377191  |                                       |
| 14 | 6,450,000 | 6,600,000 | 87 | 1172 | 0.594724471  |                                       |
| 14 | 6,525,000 | 6,675,000 | 88 | 1156 | 0.342164347  |                                       |
| 14 | 6,600,000 | 6,750,000 | 89 | 1103 | 0.56191191   |                                       |
| 14 | 6,675,000 | 6,825,000 | 90 | 1108 | -0.342461596 |                                       |
| 14 | 6,750,000 | 6,900,000 | 91 | 1156 | -0.876563852 |                                       |
| 14 | 6,825,000 | 6,975,000 | 92 | 924  | -0.560921391 |                                       |
| 14 | 6,900,000 | 7,050,000 | 93 | 701  | -0.234661229 |                                       |
| 14 | 6,975,000 | 7,125,000 | 94 | 962  | 0.665063825  |                                       |



|    |            |            |     |      |              |                                                       |
|----|------------|------------|-----|------|--------------|-------------------------------------------------------|
| 14 | 7,050,000  | 7,200,000  | 95  | 1320 | 0.796231693  |                                                       |
| 14 | 7,125,000  | 7,275,000  | 96  | 1122 | 0.734026023  |                                                       |
| 14 | 7,200,000  | 7,350,000  | 97  | 904  | 0.233517509  |                                                       |
| 14 | 7,275,000  | 7,425,000  | 98  | 926  | 0.359355272  |                                                       |
| 14 | 7,350,000  | 7,500,000  | 99  | 760  | 0.691427958  | KHDRBS3                                               |
| 14 | 7,425,000  | 7,575,000  | 100 | 523  | 0.558552652  | KHDRBS3                                               |
| 14 | 7,500,000  | 7,650,000  | 101 | 613  | 0.377883646  | KHDRBS3                                               |
| 14 | 7,575,000  | 7,725,000  | 102 | 816  | 0.429504159  | KHDRBS3                                               |
| 14 | 7,650,000  | 7,800,000  | 103 | 771  | 0.298437979  |                                                       |
| 14 | 7,725,000  | 7,875,000  | 104 | 1035 | -0.397896968 |                                                       |
| 14 | 7,800,000  | 7,950,000  | 105 | 1409 | -0.817149414 |                                                       |
| 14 | 7,875,000  | 8,025,000  | 106 | 1215 | -1.210927092 |                                                       |
| 14 | 7,950,000  | 8,100,000  | 107 | 689  | -0.758945299 |                                                       |
| 14 | 8,025,000  | 8,175,000  | 108 | 535  | 0.093103615  | ZFAT                                                  |
| 14 | 8,100,000  | 8,250,000  | 109 | 698  | 0.015304964  | ZFAT                                                  |
| 14 | 8,175,000  | 8,325,000  | 110 | 819  | 0.388601543  | ZFAT                                                  |
| 14 | 8,250,000  | 8,400,000  | 111 | 805  | 0.671717175  | ZFAT                                                  |
| 14 | 8,325,000  | 8,475,000  | 112 | 785  | -0.420163129 |                                                       |
| 14 | 8,400,000  | 8,550,000  | 113 | 716  | -0.978164993 |                                                       |
| 14 | 8,475,000  | 8,625,000  | 114 | 628  | 0.117853749  |                                                       |
| 14 | 8,550,000  | 8,700,000  | 115 | 573  | 0.262743177  |                                                       |
| 14 | 8,625,000  | 8,775,000  | 116 | 304  | 0.675474904  |                                                       |
| 14 | 8,700,000  | 8,850,000  | 117 | 631  | 0.328001428  |                                                       |
| 14 | 8,775,000  | 8,925,000  | 118 | 811  | 0.399862195  |                                                       |
| 14 | 8,850,000  | 9,000,000  | 119 | 969  | 0.868823909  | ST3GAL1                                               |
| 14 | 8,925,000  | 9,075,000  | 120 | 1110 | -0.146345177 | ST3GAL1                                               |
| 14 | 9,000,000  | 9,150,000  | 121 | 910  | -0.751515836 | NDRG1                                                 |
| 14 | 9,075,000  | 9,225,000  | 122 | 728  | 0.200234298  | NDRG1,WISP1                                           |
| 14 | 9,150,000  | 9,300,000  | 123 | 692  | -0.082849103 | NDRG1,TG,WISP1                                        |
| 14 | 9,225,000  | 9,375,000  | 124 | 1000 | 0.410199946  | SLA,TG                                                |
| 14 | 9,300,000  | 9,450,000  | 125 | 719  | 0.76260904   | SLA,TG                                                |
| 14 | 9,375,000  | 9,525,000  | 126 | 502  | 0.691597215  | TG                                                    |
| 14 | 9,450,000  | 9,600,000  | 127 | 576  | 0.772855591  | PHF20L1,TG                                            |
| 14 | 9,525,000  | 9,675,000  | 128 | 795  | 0.625426332  | LRRC6,PHF20L1,TMEM71                                  |
| 14 | 9,600,000  | 9,750,000  | 129 | 1179 | -0.965322355 | LRRC6,TMEM71                                          |
| 14 | 9,675,000  | 9,825,000  | 130 | 1285 | -0.573735935 | KCNQ3,LRRC6                                           |
| 14 | 9,750,000  | 9,900,000  | 131 | 1327 | 1.095103087  | KCNQ3                                                 |
| 14 | 9,825,000  | 9,975,000  | 132 | 1221 | 0.972824014  | KCNQ3                                                 |
| 14 | 9,900,000  | 10,050,000 | 133 | 820  | 0.861499149  | KCNQ3                                                 |
| 14 | 9,975,000  | 10,125,000 | 134 | 411  | 1.033580007  | HHLA1,KCNQ3                                           |
| 14 | 10,050,000 | 10,200,000 | 135 | 531  | 0.354521107  | EFR3A,HHLA1,KCNQ3,ENSBTAG00000007731,ENSBTAG000007736 |
| 14 | 10,125,000 | 10,275,000 | 136 | 694  | -0.128159921 | EFR3A,HHLA1,ENSBTAG00000007731,ENSBTAG0000000736      |
| 14 | 10,200,000 | 10,350,000 | 137 | 713  | 0.475889159  | EFR3A,ENSBTAG00000007731                              |
| 14 | 10,275,000 | 10,425,000 | 138 | 896  | 0.700234891  |                                                       |
| 14 | 10,350,000 | 10,500,000 | 139 | 942  | 0.454721183  |                                                       |
| 14 | 10,425,000 | 10,575,000 | 140 | 913  | 0.333027744  |                                                       |
| 14 | 10,500,000 | 10,650,000 | 141 | 756  | -0.046977187 |                                                       |
| 14 | 10,575,000 | 10,725,000 | 142 | 611  | -0.17728259  |                                                       |
| 14 | 10,650,000 | 10,800,000 | 143 | 770  | 0.863629252  |                                                       |
| 14 | 10,725,000 | 10,875,000 | 144 | 944  | 1.05340338   | ADCY8                                                 |
| 14 | 10,800,000 | 10,950,000 | 145 | 973  | 0.635342801  | ADCY8                                                 |

|    |            |            |     |      |              |              |
|----|------------|------------|-----|------|--------------|--------------|
| 14 | 10,875,000 | 11,025,000 | 146 | 1001 | 0.667351874  | ADCY8        |
| 14 | 10,950,000 | 11,100,000 | 147 | 827  | 0.799298091  | ADCY8        |
| 14 | 11,025,000 | 11,175,000 | 148 | 624  | 0.329100323  | ADCY8        |
| 14 | 11,100,000 | 11,250,000 | 149 | 719  | 0.641360811  |              |
| 14 | 11,175,000 | 11,325,000 | 150 | 755  | 0.454805826  |              |
| 14 | 11,250,000 | 11,400,000 | 151 | 968  | -0.125917191 | ASAP1        |
| 14 | 11,325,000 | 11,475,000 | 152 | 986  | -0.511711489 | ASAP1        |
| 14 | 11,400,000 | 11,550,000 | 153 | 962  | -1.325410136 | ASAP1        |
| 14 | 11,475,000 | 11,625,000 | 154 | 1306 | -2.774073569 | ASAP1        |
| 14 | 11,550,000 | 11,700,000 | 155 | 1403 | -2.177443444 | ASAP1        |
| 14 | 11,625,000 | 11,775,000 | 156 | 981  | -2.62132106  | ASAP1        |
| 14 | 11,700,000 | 11,850,000 | 157 | 476  | -4.120790852 | FAM49B       |
| 14 | 11,775,000 | 11,925,000 | 158 | 614  | -4.925640521 | FAM49B,GSDMC |
| 14 | 11,850,000 | 12,000,000 | 159 | 962  | -4.258602977 | FAM49B,GSDMC |
| 14 | 11,925,000 | 12,075,000 | 160 | 1070 | -5.122224365 |              |
| 14 | 12,000,000 | 12,150,000 | 161 | 744  | -6.183944471 |              |
| 14 | 12,075,000 | 12,225,000 | 162 | 584  | -2.524765573 |              |
| 14 | 12,150,000 | 12,300,000 | 163 | 806  | -0.289158196 |              |
| 14 | 12,225,000 | 12,375,000 | 164 | 872  | -0.710829091 |              |
| 14 | 12,300,000 | 12,450,000 | 165 | 839  | -0.011131883 |              |
| 14 | 12,375,000 | 12,525,000 | 166 | 796  | 1.106564719  |              |
| 14 | 12,450,000 | 12,600,000 | 167 | 666  | 0.990937017  |              |
| 14 | 12,525,000 | 12,675,000 | 168 | 614  | 0.212780066  |              |
| 14 | 12,600,000 | 12,750,000 | 169 | 748  | -0.97277491  |              |
| 14 | 12,675,000 | 12,825,000 | 170 | 888  | 0.059700833  |              |
| 14 | 12,750,000 | 12,900,000 | 171 | 729  | 0.716357423  |              |
| 14 | 12,825,000 | 12,975,000 | 172 | 424  | 0.636010586  |              |
| 14 | 12,900,000 | 13,050,000 | 173 | 438  | 0.752378887  |              |
| 14 | 12,975,000 | 13,125,000 | 174 | 530  | 0.892265887  |              |
| 14 | 13,050,000 | 13,200,000 | 175 | 643  | -0.521228302 |              |
| 14 | 13,125,000 | 13,275,000 | 176 | 759  | -0.981433553 |              |
| 14 | 13,200,000 | 13,350,000 | 177 | 648  | -0.356473316 |              |
| 14 | 13,275,000 | 13,425,000 | 178 | 405  | -0.629608305 |              |
| 14 | 13,350,000 | 13,500,000 | 179 | 445  | 0.727791125  |              |
| 14 | 13,425,000 | 13,575,000 | 180 | 660  | 1.251211517  |              |
| 14 | 13,500,000 | 13,650,000 | 181 | 726  | 1.227289893  |              |
| 14 | 13,575,000 | 13,725,000 | 182 | 517  | 1.054011686  |              |
| 14 | 13,650,000 | 13,800,000 | 183 | 336  | 0.308069039  | MYC          |
| 14 | 13,725,000 | 13,875,000 | 184 | 469  | 0.300706582  | MYC          |
| 14 | 13,800,000 | 13,950,000 | 185 | 685  | 0.347903331  |              |
| 14 | 13,875,000 | 14,025,000 | 186 | 729  | 0.379186288  |              |
| 14 | 13,950,000 | 14,100,000 | 187 | 725  | 0.792827332  |              |
| 14 | 14,025,000 | 14,175,000 | 188 | 801  | 0.710169701  |              |
| 14 | 14,100,000 | 14,250,000 | 189 | 878  | -0.359950832 |              |
| 14 | 14,175,000 | 14,325,000 | 190 | 718  | -0.801284746 |              |
| 14 | 14,250,000 | 14,400,000 | 191 | 750  | 0.064604608  |              |
| 14 | 14,325,000 | 14,475,000 | 192 | 1089 | 0.240964924  |              |
| 14 | 14,400,000 | 14,550,000 | 193 | 823  | -0.0698657   |              |
| 14 | 14,475,000 | 14,625,000 | 194 | 343  | -0.000215802 |              |
| 14 | 14,550,000 | 14,700,000 | 195 | 255  | -0.23148442  |              |
| 14 | 14,625,000 | 14,775,000 | 196 | 421  | 0.195620496  |              |
| 14 | 14,700,000 | 14,850,000 | 197 | 337  | 0.574070772  |              |
| 14 | 14,775,000 | 14,925,000 | 198 | 281  | 0.376316033  |              |

|    |            |            |     |      |              |                                                      |
|----|------------|------------|-----|------|--------------|------------------------------------------------------|
| 14 | 14,850,000 | 15,000,000 | 199 | 693  | -0.578484262 |                                                      |
| 14 | 14,925,000 | 15,075,000 | 200 | 809  | 0.033134121  |                                                      |
| 14 | 15,000,000 | 15,150,000 | 201 | 568  | 0.226480757  |                                                      |
| 14 | 15,075,000 | 15,225,000 | 202 | 334  | -0.487455274 |                                                      |
| 14 | 15,150,000 | 15,300,000 | 203 | 402  | 0.061168004  |                                                      |
| 14 | 15,225,000 | 15,375,000 | 204 | 587  | -0.089684105 |                                                      |
| 14 | 15,300,000 | 15,450,000 | 205 | 566  | -0.132602415 |                                                      |
| 14 | 15,375,000 | 15,525,000 | 206 | 779  | 0.500104503  | FAM84B                                               |
| 14 | 15,450,000 | 15,600,000 | 207 | 1086 | 0.382499363  | FAM84B                                               |
| 14 | 15,525,000 | 15,675,000 | 208 | 1213 | -0.088571307 |                                                      |
| 14 | 15,600,000 | 15,750,000 | 209 | 1203 | -0.122218804 |                                                      |
| 14 | 15,675,000 | 15,825,000 | 210 | 959  | 0.348793674  |                                                      |
| 14 | 15,750,000 | 15,900,000 | 211 | 963  | 0.696638046  |                                                      |
| 14 | 15,825,000 | 15,975,000 | 212 | 1271 | -0.61867879  |                                                      |
| 14 | 15,900,000 | 16,050,000 | 213 | 1195 | -0.967169435 |                                                      |
| 14 | 15,975,000 | 16,125,000 | 214 | 1154 | 0.046000679  |                                                      |
| 14 | 16,050,000 | 16,200,000 | 215 | 1053 | 0.015898562  |                                                      |
| 14 | 16,125,000 | 16,275,000 | 216 | 713  | 0.21343173   |                                                      |
| 14 | 16,200,000 | 16,350,000 | 217 | 488  | 0.720966851  |                                                      |
| 14 | 16,275,000 | 16,425,000 | 218 | 392  | 0.487621687  | NSMCE2,TRIB1                                         |
| 14 | 16,350,000 | 16,500,000 | 219 | 399  | 0.480856415  | NSMCE2,TRIB1                                         |
| 14 | 16,425,000 | 16,575,000 | 220 | 348  | -0.221733661 | NSMCE2                                               |
| 14 | 16,500,000 | 16,650,000 | 221 | 357  | -0.025690781 | NSMCE2                                               |
| 14 | 16,575,000 | 16,725,000 | 222 | 429  | 0.829751109  | KIAA0196,NSMCE2,SQL                                  |
| 14 | 16,650,000 | 16,800,000 | 223 | 472  | 1.012526405  | KIAA0196,SQL,ZNF572                                  |
| 14 | 16,725,000 | 16,875,000 | 224 | 724  | 1.155987038  | SQL,ZNF572                                           |
| 14 | 16,800,000 | 16,950,000 | 225 | 947  | 0.791540145  |                                                      |
| 14 | 16,875,000 | 17,025,000 | 226 | 647  | 0.610421148  | MTSS1                                                |
| 14 | 16,950,000 | 17,100,000 | 227 | 649  | 1.036847102  | MTSS1                                                |
| 14 | 17,025,000 | 17,175,000 | 228 | 710  | 0.620339011  | MTSS1,NDUFB9,RNF139,TATDN1                           |
| 14 | 17,100,000 | 17,250,000 | 229 | 756  | 0.396627832  | MTSS1,NDUFB9,RNF139,TATDN1,TRMT12,ENSBTAG00000010813 |
| 14 | 17,175,000 | 17,325,000 | 230 | 907  | 0.406735741  | RNF139,TMEM65,TRMT12,ENSBTAG00000010813              |
| 14 | 17,250,000 | 17,400,000 | 231 | 721  | 0.662016647  | TMEM65                                               |
| 14 | 17,325,000 | 17,475,000 | 232 | 778  | 1.135159687  | FER1L6                                               |
| 14 | 17,400,000 | 17,550,000 | 233 | 1109 | 0.877150142  | FER1L6                                               |
| 14 | 17,475,000 | 17,625,000 | 234 | 1137 | 0.606393588  | FER1L6                                               |
| 14 | 17,550,000 | 17,700,000 | 235 | 1107 | 0.655646587  | FAM91A1,FER1L6                                       |
| 14 | 17,625,000 | 17,775,000 | 236 | 957  | 0.166388326  | ANXA13,FAM91A1,FER1L6                                |
| 14 | 17,700,000 | 17,850,000 | 237 | 887  | -0.620085467 | ANXA13,FAM91A1,KLHL38                                |
| 14 | 17,775,000 | 17,925,000 | 238 | 1007 | 0.028474291  | ANXA13,FBXO32,KLHL38                                 |
| 14 | 17,850,000 | 18,000,000 | 239 | 829  | 0.692500884  | FBXO32                                               |
| 14 | 17,925,000 | 18,075,000 | 240 | 709  | 1.237846009  | ATAD2,FBXO32,WDYHV1                                  |
| 14 | 18,000,000 | 18,150,000 | 241 | 567  | 1.221301415  | ATAD2,WDYHV1,ZHX1                                    |
| 14 | 18,075,000 | 18,225,000 | 242 | 712  | 0.699467816  | ATAD2,FAM83A,TBC1D31,ZHX1,ENSBTAG00000015319         |
| 14 | 18,150,000 | 18,300,000 | 243 | 1133 | 0.493631085  | FAM83A,TBC1D31,ENSBTAG00000015319                    |
| 14 | 18,225,000 | 18,375,000 | 244 | 1037 | 0.359019254  | DERL1,TBC1D31                                        |
| 14 | 18,300,000 | 18,450,000 | 245 | 975  | 0.834227117  | DERL1,ZHX2                                           |
| 14 | 18,375,000 | 18,525,000 | 246 | 1091 | 1.230239521  | ZHX2                                                 |
| 14 | 18,450,000 | 18,600,000 | 247 | 829  | 1.20881423   |                                                      |
| 14 | 18,525,000 | 18,675,000 | 248 | 685  | 1.134264932  |                                                      |
| 14 | 18,600,000 | 18,750,000 | 249 | 631  | 0.915009603  |                                                      |
| 14 | 18,675,000 | 18,825,000 | 250 | 473  | 0.097758209  |                                                      |

|    |            |            |     |      |              |                                 |
|----|------------|------------|-----|------|--------------|---------------------------------|
| 14 | 18,750,000 | 18,900,000 | 251 | 819  | 0.010126015  |                                 |
| 14 | 18,825,000 | 18,975,000 | 252 | 810  | -0.226511957 |                                 |
| 14 | 18,900,000 | 19,050,000 | 253 | 640  | -1.738991778 |                                 |
| 14 | 18,975,000 | 19,125,000 | 254 | 1061 | -0.734390366 |                                 |
| 14 | 19,050,000 | 19,200,000 | 255 | 872  | 0.14480046   |                                 |
| 14 | 19,125,000 | 19,275,000 | 256 | 613  | -0.005277026 |                                 |
| 14 | 19,200,000 | 19,350,000 | 257 | 891  | -0.190070154 |                                 |
| 14 | 19,275,000 | 19,425,000 | 258 | 1169 | 0.22374075   |                                 |
| 14 | 19,350,000 | 19,500,000 | 259 | 1115 | 0.61358689   |                                 |
| 14 | 19,425,000 | 19,575,000 | 260 | 990  | 0.040558585  |                                 |
| 14 | 19,500,000 | 19,650,000 | 261 | 920  | -0.026765128 |                                 |
| 14 | 19,575,000 | 19,725,000 | 262 | 594  | 0.498865656  | HAS2                            |
| 14 | 19,650,000 | 19,800,000 | 263 | 1190 | 0.8549101    | HAS2                            |
| 14 | 19,725,000 | 19,875,000 | 264 | 1426 | 0.746314971  | HAS2                            |
| 14 | 19,800,000 | 19,950,000 | 265 | 717  | -0.004862372 |                                 |
| 14 | 19,875,000 | 20,025,000 | 266 | 594  | -1.061357487 |                                 |
| 14 | 19,950,000 | 20,100,000 | 267 | 596  | -0.571758463 |                                 |
| 14 | 20,025,000 | 20,175,000 | 268 | 501  | -1.359547127 |                                 |
| 14 | 20,100,000 | 20,250,000 | 269 | 458  | -0.219230496 |                                 |
| 14 | 20,175,000 | 20,325,000 | 270 | 771  | -0.817664252 |                                 |
| 14 | 20,250,000 | 20,400,000 | 271 | 1177 | -0.882604157 |                                 |
| 14 | 20,325,000 | 20,475,000 | 272 | 1147 | 0.175401985  |                                 |
| 14 | 20,400,000 | 20,550,000 | 273 | 1109 | 0.900003087  |                                 |
| 14 | 20,475,000 | 20,625,000 | 274 | 1247 | -0.3681261   | ENSBTAG00000009474              |
| 14 | 20,550,000 | 20,700,000 | 275 | 1015 | -2.246858433 | ENSBTAG00000009474              |
| 14 | 20,625,000 | 20,775,000 | 276 | 591  | -2.153371743 | SPIDR,ENSBTAG00000040351        |
| 14 | 20,700,000 | 20,850,000 | 277 | 352  | 0.077492346  | SPIDR,ENSBTAG00000040351        |
| 14 | 20,775,000 | 20,925,000 | 278 | 419  | 0.484046519  | SPIDR                           |
| 14 | 20,850,000 | 21,000,000 | 279 | 674  | 0.572878119  | SPIDR                           |
| 14 | 20,925,000 | 21,075,000 | 280 | 1117 | 0.546216435  | H3F3C,PRKDC,SPIDR               |
| 14 | 21,000,000 | 21,150,000 | 281 | 1229 | 0.659335388  | H3F3C,PRKDC                     |
| 14 | 21,075,000 | 21,225,000 | 282 | 863  | 0.570214381  | PRKDC,ENSBTAG00000046325        |
| 14 | 21,150,000 | 21,300,000 | 283 | 587  | -0.319998331 | PRKDC,UBE2V2,ENSBTAG00000046325 |
| 14 | 21,225,000 | 21,375,000 | 284 | 431  | -0.747647932 | UBE2V2                          |
| 14 | 21,300,000 | 21,450,000 | 285 | 360  | 0.980360706  |                                 |
| 14 | 21,375,000 | 21,525,000 | 286 | 354  | 0.87378528   | EFCAB1                          |
| 14 | 21,450,000 | 21,600,000 | 287 | 277  | 1.130826124  | EFCAB1,SNAI2                    |
| 14 | 21,525,000 | 21,675,000 | 288 | 397  | 1.134186384  | C14H8orf22,SNAI2                |
| 14 | 21,600,000 | 21,750,000 | 289 | 496  | 1.056616331  | C14H8orf22                      |
| 14 | 21,675,000 | 21,825,000 | 290 | 699  | 0.877061353  |                                 |
| 14 | 21,750,000 | 21,900,000 | 291 | 875  | 0.315211295  |                                 |
| 14 | 21,825,000 | 21,975,000 | 292 | 698  | 0.277140474  |                                 |
| 14 | 21,900,000 | 22,050,000 | 293 | 530  | 0.71635706   |                                 |
| 14 | 21,975,000 | 22,125,000 | 294 | 545  | -0.129604841 |                                 |
| 14 | 22,050,000 | 22,200,000 | 295 | 1016 | -1.329383911 |                                 |
| 14 | 22,125,000 | 22,275,000 | 296 | 1178 | -0.983294927 | SNTG1                           |
| 14 | 22,200,000 | 22,350,000 | 297 | 1294 | 0.657019699  | SNTG1                           |
| 14 | 22,275,000 | 22,425,000 | 298 | 1229 | 0.843193476  | SNTG1                           |
| 14 | 22,350,000 | 22,500,000 | 299 | 908  | 1.067031144  | SNTG1                           |
| 14 | 22,425,000 | 22,575,000 | 300 | 800  | 0.434096733  |                                 |
| 14 | 22,500,000 | 22,650,000 | 301 | 816  | -0.82257573  |                                 |
| 14 | 22,575,000 | 22,725,000 | 302 | 715  | -0.521158814 | PCMTD1                          |
| 14 | 22,650,000 | 22,800,000 | 303 | 812  | -0.670708983 | PCMTD1                          |

|    |            |            |     |      |              |                                               |
|----|------------|------------|-----|------|--------------|-----------------------------------------------|
| 14 | 22,725,000 | 22,875,000 | 304 | 1060 | -0.43196127  | ST18                                          |
| 14 | 22,800,000 | 22,950,000 | 305 | 816  | 0.559871006  | ST18                                          |
| 14 | 22,875,000 | 23,025,000 | 306 | 1017 | 0.391735758  |                                               |
| 14 | 22,950,000 | 23,100,000 | 307 | 1266 | 0.319257111  | ENSBTAG00000026306                            |
| 14 | 23,025,000 | 23,175,000 | 308 | 1167 | 0.048837178  | RB1CC1,ENSBTAG00000026306                     |
| 14 | 23,100,000 | 23,250,000 | 309 | 937  | 0.167482346  | RB1CC1                                        |
| 14 | 23,175,000 | 23,325,000 | 310 | 895  | 1.077748238  | NPBWR1,RB1CC1                                 |
| 14 | 23,250,000 | 23,400,000 | 311 | 954  | -0.482466684 | NPBWR1,OPRK1                                  |
| 14 | 23,325,000 | 23,475,000 | 312 | 1002 | -1.139939028 | OPRK1                                         |
| 14 | 23,400,000 | 23,550,000 | 313 | 951  | 0.67950295   | ATP6V1H                                       |
| 14 | 23,475,000 | 23,625,000 | 314 | 677  | 0.688995541  | ATP6V1H,RGS20,TCEA1                           |
| 14 | 23,550,000 | 23,700,000 | 315 | 529  | 0.905589541  | ATP6V1H,LYPLA1,MRPL15,RGS20,TCEA1             |
| 14 | 23,625,000 | 23,775,000 | 316 | 591  | 0.086626504  | LYPLA1,MRPL15,POLR2K,TCEA1,ENSBTAG00000033627 |
| 14 | 23,700,000 | 23,850,000 | 317 | 822  | -0.3806698   | POLR2K,ENSBTAG00000033627                     |
| 14 | 23,775,000 | 23,925,000 | 318 | 790  | 0.375453226  | SOX17                                         |
| 14 | 23,850,000 | 24,000,000 | 319 | 923  | 1.0204136    | RP1,SOX17                                     |
| 14 | 23,925,000 | 24,075,000 | 320 | 969  | -1.339789587 | RP1,ENSBTAG00000047303                        |
| 14 | 24,000,000 | 24,150,000 | 321 | 776  | -3.217279639 | ENSBTAG00000047303                            |
| 14 | 24,075,000 | 24,225,000 | 322 | 844  | 0.228477071  | ENSBTAG00000047303                            |
| 14 | 24,150,000 | 24,300,000 | 323 | 825  | 1.015604199  | XKR4                                          |
| 14 | 24,225,000 | 24,375,000 | 324 | 811  | 1.03559217   | XKR4                                          |
| 14 | 24,300,000 | 24,450,000 | 325 | 1039 | 0.801255173  | XKR4                                          |
| 14 | 24,375,000 | 24,525,000 | 326 | 1142 | 0.694701688  | XKR4                                          |
| 14 | 24,450,000 | 24,600,000 | 327 | 780  | 0.875134637  | XKR4                                          |
| 14 | 24,525,000 | 24,675,000 | 328 | 449  | 0.839020469  | XKR4                                          |
| 14 | 24,600,000 | 24,750,000 | 329 | 581  | 1.083701455  | TGS1,TMEM68,XKR4                              |
| 14 | 24,675,000 | 24,825,000 | 330 | 607  | 1.097291598  | TGS1,TMEM68                                   |
| 14 | 24,750,000 | 24,900,000 | 331 | 700  | 0.254748447  | LYN,TGS1                                      |
| 14 | 24,825,000 | 24,975,000 | 332 | 1001 | 0.359327117  | LYN,RPS20                                     |
| 14 | 24,900,000 | 25,050,000 | 333 | 737  | 0.663954173  | C-MOS,LYN,PLAG1,RPS20                         |
| 14 | 24,975,000 | 25,125,000 | 334 | 355  | 0.560871005  | C-MOS,CHCHD7,PLAG1,SDR16C5,ENSBTAG00000039031 |
| 14 | 25,050,000 | 25,200,000 | 335 | 289  | -0.018814747 | CHCHD7,SDR16C5,SDR16C6,ENSBTAG00000039031     |
| 14 | 25,125,000 | 25,275,000 | 336 | 466  | 0.628365273  | PENK,SDR16C6                                  |
| 14 | 25,200,000 | 25,350,000 | 337 | 770  | 0.677619464  | PENK                                          |
| 14 | 25,275,000 | 25,425,000 | 338 | 927  | 0.78039649   |                                               |
| 14 | 25,350,000 | 25,500,000 | 339 | 1151 | 1.014931042  |                                               |
| 14 | 25,425,000 | 25,575,000 | 340 | 1236 | 0.518678604  | IMPAD1                                        |
| 14 | 25,500,000 | 25,650,000 | 341 | 898  | -0.35628205  | IMPAD1                                        |
| 14 | 25,575,000 | 25,725,000 | 342 | 557  | -0.890125164 |                                               |
| 14 | 25,650,000 | 25,800,000 | 343 | 436  | 0.241534096  |                                               |
| 14 | 25,725,000 | 25,875,000 | 344 | 570  | 0.993557296  |                                               |
| 14 | 25,800,000 | 25,950,000 | 345 | 940  | 1.085855548  |                                               |
| 14 | 25,875,000 | 26,025,000 | 346 | 1271 | 1.03658241   |                                               |
| 14 | 25,950,000 | 26,100,000 | 347 | 1285 | 0.757166065  |                                               |
| 14 | 26,025,000 | 26,175,000 | 348 | 923  | 0.313102287  | FAM110B                                       |
| 14 | 26,100,000 | 26,250,000 | 349 | 614  | 0.344417128  | FAM110B,RPL39                                 |
| 14 | 26,175,000 | 26,325,000 | 350 | 476  | 0.38777862   | RPL39,UBXN2B                                  |
| 14 | 26,250,000 | 26,400,000 | 351 | 583  | 0.285362532  | CYP7A1,UBXN2B                                 |
| 14 | 26,325,000 | 26,475,000 | 352 | 765  | 0.675763194  | CYP7A1,NSMAF,SDCBP                            |
| 14 | 26,400,000 | 26,550,000 | 353 | 848  | 0.975510064  | NSMAF,SDCBP                                   |
| 14 | 26,475,000 | 26,625,000 | 354 | 939  | 0.291042173  | NSMAF                                         |
| 14 | 26,550,000 | 26,700,000 | 355 | 721  | -0.487492543 | TOX                                           |

|    |            |            |     |      |              |                 |
|----|------------|------------|-----|------|--------------|-----------------|
| 14 | 26,625,000 | 26,775,000 | 356 | 454  | 0.270716476  | TOX             |
| 14 | 26,700,000 | 26,850,000 | 357 | 336  | 0.936440815  | TOX             |
| 14 | 26,775,000 | 26,925,000 | 358 | 285  | 0.041057257  | TOX             |
| 14 | 26,850,000 | 27,000,000 | 359 | 445  | 0.043133017  | TOX             |
| 14 | 26,925,000 | 27,075,000 | 360 | 441  | 0.500467917  | TOX             |
| 14 | 27,000,000 | 27,150,000 | 361 | 321  | 0.514239551  |                 |
| 14 | 27,075,000 | 27,225,000 | 362 | 505  | 0.430100031  |                 |
| 14 | 27,150,000 | 27,300,000 | 363 | 616  | 0.257626389  |                 |
| 14 | 27,225,000 | 27,375,000 | 364 | 590  | 0.45913218   |                 |
| 14 | 27,300,000 | 27,450,000 | 365 | 612  | 0.64513673   |                 |
| 14 | 27,375,000 | 27,525,000 | 366 | 590  | 0.008788445  |                 |
| 14 | 27,450,000 | 27,600,000 | 367 | 627  | 0.236998091  |                 |
| 14 | 27,525,000 | 27,675,000 | 368 | 741  | 0.359812194  | CA8             |
| 14 | 27,600,000 | 27,750,000 | 369 | 683  | 0.169283193  | CA8             |
| 14 | 27,675,000 | 27,825,000 | 370 | 699  | 0.26580602   | CA8             |
| 14 | 27,750,000 | 27,900,000 | 371 | 779  | -1.487290844 | RAB2A           |
| 14 | 27,825,000 | 27,975,000 | 372 | 655  | -2.890335969 | RAB2A           |
| 14 | 27,900,000 | 28,050,000 | 373 | 649  | -0.542294476 | CHD7,RAB2A      |
| 14 | 27,975,000 | 28,125,000 | 374 | 803  | -0.019552875 | CHD7            |
| 14 | 28,050,000 | 28,200,000 | 375 | 757  | -0.175521592 | CHD7            |
| 14 | 28,125,000 | 28,275,000 | 376 | 504  | 0.213682516  | CHD7            |
| 14 | 28,200,000 | 28,350,000 | 377 | 391  | 0.237337578  |                 |
| 14 | 28,275,000 | 28,425,000 | 378 | 617  | 0.473725389  |                 |
| 14 | 28,350,000 | 28,500,000 | 379 | 879  | 0.569073832  |                 |
| 14 | 28,425,000 | 28,575,000 | 380 | 990  | 0.60171983   | CLVS1           |
| 14 | 28,500,000 | 28,650,000 | 381 | 1130 | -0.045678404 | CLVS1           |
| 14 | 28,575,000 | 28,725,000 | 382 | 865  | -0.59358927  | ASPH            |
| 14 | 28,650,000 | 28,800,000 | 383 | 501  | 0.330102354  | ASPH            |
| 14 | 28,725,000 | 28,875,000 | 384 | 374  | 1.043904463  | ASPH            |
| 14 | 28,800,000 | 28,950,000 | 385 | 537  | 0.393102899  | ASPH            |
| 14 | 28,875,000 | 29,025,000 | 386 | 923  | -0.771433692 | ASPH            |
| 14 | 28,950,000 | 29,100,000 | 387 | 1149 | -0.737204048 |                 |
| 14 | 29,025,000 | 29,175,000 | 388 | 956  | 0.090336005  |                 |
| 14 | 29,100,000 | 29,250,000 | 389 | 830  | -0.597398727 |                 |
| 14 | 29,175,000 | 29,325,000 | 390 | 1025 | -1.039570605 |                 |
| 14 | 29,250,000 | 29,400,000 | 391 | 868  | -0.746995275 |                 |
| 14 | 29,325,000 | 29,475,000 | 392 | 722  | -1.261032288 |                 |
| 14 | 29,400,000 | 29,550,000 | 393 | 1070 | 0.405425914  |                 |
| 14 | 29,475,000 | 29,625,000 | 394 | 1133 | 1.22985763   |                 |
| 14 | 29,550,000 | 29,700,000 | 395 | 1035 | 0.043108347  |                 |
| 14 | 29,625,000 | 29,775,000 | 396 | 930  | -0.255367107 | GGH,TTPA        |
| 14 | 29,700,000 | 29,850,000 | 397 | 464  | -0.012552227 | GGH,TTPA,YTHDF3 |
| 14 | 29,775,000 | 29,925,000 | 398 | 381  | -0.795687986 | TTPA,YTHDF3     |
| 14 | 29,850,000 | 30,000,000 | 399 | 748  | -1.744577444 | YTHDF3          |
| 14 | 29,925,000 | 30,075,000 | 400 | 859  | -1.555726672 |                 |
| 14 | 30,000,000 | 30,150,000 | 401 | 678  | -0.535243125 |                 |
| 14 | 30,075,000 | 30,225,000 | 402 | 631  | -0.411413667 |                 |
| 14 | 30,150,000 | 30,300,000 | 403 | 559  | -0.400751282 |                 |
| 14 | 30,225,000 | 30,375,000 | 404 | 709  | -0.038447347 |                 |
| 14 | 30,300,000 | 30,450,000 | 405 | 784  | -0.076907442 |                 |
| 14 | 30,375,000 | 30,525,000 | 406 | 714  | -0.317860734 |                 |
| 14 | 30,450,000 | 30,600,000 | 407 | 773  | 0.020253489  |                 |
| 14 | 30,525,000 | 30,675,000 | 408 | 537  | 0.433977715  |                 |

|    |            |            |     |      |              |                                   |
|----|------------|------------|-----|------|--------------|-----------------------------------|
| 14 | 30,600,000 | 30,750,000 | 409 | 379  | 0.611733566  |                                   |
| 14 | 30,675,000 | 30,825,000 | 410 | 340  | 0.700011091  |                                   |
| 14 | 30,750,000 | 30,900,000 | 411 | 446  | -0.1143242   |                                   |
| 14 | 30,825,000 | 30,975,000 | 412 | 636  | -0.440004748 | BHLHE22                           |
| 14 | 30,900,000 | 31,050,000 | 413 | 520  | -0.746302373 | BHLHE22,CYP7B1                    |
| 14 | 30,975,000 | 31,125,000 | 414 | 429  | -0.572006322 | CYP7B1                            |
| 14 | 31,050,000 | 31,200,000 | 415 | 581  | 0.203812388  | CYP7B1                            |
| 14 | 31,125,000 | 31,275,000 | 416 | 717  | 0.04102466   | CYP7B1                            |
| 14 | 31,200,000 | 31,350,000 | 417 | 715  | 0.14983049   |                                   |
| 14 | 31,275,000 | 31,425,000 | 418 | 632  | 0.720263887  |                                   |
| 14 | 31,350,000 | 31,500,000 | 419 | 504  | 0.709877885  |                                   |
| 14 | 31,425,000 | 31,575,000 | 420 | 383  | 0.34910871   |                                   |
| 14 | 31,500,000 | 31,650,000 | 421 | 265  | 0.017782452  |                                   |
| 14 | 31,575,000 | 31,725,000 | 422 | 389  | 0.647348681  | ARMC1                             |
| 14 | 31,650,000 | 31,800,000 | 423 | 615  | 1.056454416  | ARMC1,MTFR1                       |
| 14 | 31,725,000 | 31,875,000 | 424 | 609  | 0.56316681   | MTFR1,PDE7A                       |
| 14 | 31,800,000 | 31,950,000 | 425 | 656  | 0.258644825  | PDE7A                             |
| 14 | 31,875,000 | 32,025,000 | 426 | 874  | 0.430149496  |                                   |
| 14 | 31,950,000 | 32,100,000 | 427 | 1080 | 0.09648158   | DNAJC5B                           |
| 14 | 32,025,000 | 32,175,000 | 428 | 940  | -1.065604001 | DNAJC5B,TRIM55                    |
| 14 | 32,100,000 | 32,250,000 | 429 | 695  | -1.755873762 | CRH,DNAJC5B,TRIM55                |
| 14 | 32,175,000 | 32,325,000 | 430 | 613  | -0.630642794 | CRH,TRIM55                        |
| 14 | 32,250,000 | 32,400,000 | 431 | 324  | 0.483757723  |                                   |
| 14 | 32,325,000 | 32,475,000 | 432 | 73   | 0.184738616  |                                   |
| 14 | 32,400,000 | 32,550,000 | 433 | 99   | -0.768977294 | ENSBTAG00000040021                |
| 14 | 32,475,000 | 32,625,000 | 434 | 341  | 0.64682123   | ENSBTAG00000040021                |
| 14 | 32,550,000 | 32,700,000 | 435 | 553  | 0.721863819  | RRS1                              |
| 14 | 32,625,000 | 32,775,000 | 436 | 428  | 0.166436561  | ADHFE1,C14H8orf46,RRS1            |
| 14 | 32,700,000 | 32,850,000 | 437 | 275  | -1.429549915 | ADHFE1,C14H8orf46,MYBL1,RRS1      |
| 14 | 32,775,000 | 32,925,000 | 438 | 213  | -1.56189406  | C14H8orf46,MYBL1,VCPIP1           |
| 14 | 32,850,000 | 33,000,000 | 439 | 191  | -0.905437035 | MYBL1,VCPIP1                      |
| 14 | 32,925,000 | 33,075,000 | 440 | 211  | -0.959074245 | MCMDC2,ENSBTAG00000013284         |
| 14 | 33,000,000 | 33,150,000 | 441 | 195  | -0.57301948  | MCMDC2,PPP1R42,ENSBTAG00000013284 |
| 14 | 33,075,000 | 33,225,000 | 442 | 398  | -4.150622673 | COPS5,MCMDC2,PPP1R42              |
| 14 | 33,150,000 | 33,300,000 | 443 | 722  | -5.340242414 | COPS5,CSPP1,PPP1R42               |
| 14 | 33,225,000 | 33,375,000 | 444 | 977  | -2.523664619 | ARFGF1,COPS5,CSPP1                |
| 14 | 33,300,000 | 33,450,000 | 445 | 1111 | -2.26826718  | ARFGF1,CSPP1                      |
| 14 | 33,375,000 | 33,525,000 | 446 | 821  | -3.211337082 | ARFGF1                            |
| 14 | 33,450,000 | 33,600,000 | 447 | 909  | -0.418570562 | ARFGF1,CPA6                       |
| 14 | 33,525,000 | 33,675,000 | 448 | 907  | 0.092952179  | CPA6                              |
| 14 | 33,600,000 | 33,750,000 | 449 | 513  | 0.854144579  | CPA6                              |
| 14 | 33,675,000 | 33,825,000 | 450 | 470  | 0.883156138  |                                   |
| 14 | 33,750,000 | 33,900,000 | 451 | 410  | -0.710451323 |                                   |
| 14 | 33,825,000 | 33,975,000 | 452 | 506  | -0.513000874 |                                   |
| 14 | 33,900,000 | 34,050,000 | 453 | 764  | -0.09316649  | PREX2                             |
| 14 | 33,975,000 | 34,125,000 | 454 | 744  | 0.478272327  | PREX2                             |
| 14 | 34,050,000 | 34,200,000 | 455 | 531  | 0.986768985  | PREX2                             |
| 14 | 34,125,000 | 34,275,000 | 456 | 616  | 0.436715999  | PREX2                             |
| 14 | 34,200,000 | 34,350,000 | 457 | 892  | 0.360305687  | PREX2                             |
| 14 | 34,275,000 | 34,425,000 | 458 | 1041 | 0.609802057  | PREX2                             |
| 14 | 34,350,000 | 34,500,000 | 459 | 1036 | 0.746803433  | C14H8orf34                        |
| 14 | 34,425,000 | 34,575,000 | 460 | 857  | 0.750603112  | C14H8orf34                        |
| 14 | 34,500,000 | 34,650,000 | 461 | 590  | 0.696389329  | C14H8orf34                        |

|    |            |            |     |      |              |                                  |
|----|------------|------------|-----|------|--------------|----------------------------------|
| 14 | 34,575,000 | 34,725,000 | 462 | 790  | -1.853859928 | C14H8orf34                       |
| 14 | 34,650,000 | 34,800,000 | 463 | 921  | -1.616440369 | C14H8orf34                       |
| 14 | 34,725,000 | 34,875,000 | 464 | 743  | 0.45212715   | C14H8orf34                       |
| 14 | 34,800,000 | 34,950,000 | 465 | 547  | 1.090898361  | C14H8orf34                       |
| 14 | 34,875,000 | 35,025,000 | 466 | 424  | 0.823131199  |                                  |
| 14 | 34,950,000 | 35,100,000 | 467 | 608  | 0.555547559  |                                  |
| 14 | 35,025,000 | 35,175,000 | 468 | 579  | 0.138145688  |                                  |
| 14 | 35,100,000 | 35,250,000 | 469 | 583  | 0.167159375  |                                  |
| 14 | 35,175,000 | 35,325,000 | 470 | 574  | 0.340481809  |                                  |
| 14 | 35,250,000 | 35,400,000 | 471 | 412  | 0.192437954  |                                  |
| 14 | 35,325,000 | 35,475,000 | 472 | 468  | -0.064301324 |                                  |
| 14 | 35,400,000 | 35,550,000 | 473 | 437  | -0.508637444 | SULF1                            |
| 14 | 35,475,000 | 35,625,000 | 474 | 332  | -0.252935235 | SLCO5A1,SULF1,ENSBTAG00000037399 |
| 14 | 35,550,000 | 35,700,000 | 475 | 468  | 0.212541077  | SLCO5A1,SULF1,ENSBTAG00000037399 |
| 14 | 35,625,000 | 35,775,000 | 476 | 582  | 0.745985563  | SLCO5A1                          |
| 14 | 35,700,000 | 35,850,000 | 477 | 423  | 0.838542113  | SLCO5A1                          |
| 14 | 35,775,000 | 35,925,000 | 478 | 585  | 0.529058335  | PRDM14                           |
| 14 | 35,850,000 | 36,000,000 | 479 | 534  | 0.647831258  | NCOA2,PRDM14                     |
| 14 | 35,925,000 | 36,075,000 | 480 | 292  | -1.463414011 | NCOA2                            |
| 14 | 36,000,000 | 36,150,000 | 481 | 257  | -1.921065713 | NCOA2                            |
| 14 | 36,075,000 | 36,225,000 | 482 | 139  | 1.352351394  | NCOA2                            |
| 14 | 36,150,000 | 36,300,000 | 483 | 363  | 1.078587392  |                                  |
| 14 | 36,225,000 | 36,375,000 | 484 | 652  | -1.544349753 |                                  |
| 14 | 36,300,000 | 36,450,000 | 485 | 525  | -2.495558321 | LACTB2,TRAM1                     |
| 14 | 36,375,000 | 36,525,000 | 486 | 298  | -0.562945101 | LACTB2,TRAM1,XKR9                |
| 14 | 36,450,000 | 36,600,000 | 487 | 308  | -2.125349514 | LACTB2,XKR9                      |
| 14 | 36,525,000 | 36,675,000 | 488 | 335  | -2.595514274 |                                  |
| 14 | 36,600,000 | 36,750,000 | 489 | 318  | -0.835065167 |                                  |
| 14 | 36,675,000 | 36,825,000 | 490 | 432  | 0.772445628  |                                  |
| 14 | 36,750,000 | 36,900,000 | 491 | 614  | 0.959797821  | EYA1                             |
| 14 | 36,825,000 | 36,975,000 | 492 | 435  | 1.107319476  | EYA1                             |
| 14 | 36,900,000 | 37,050,000 | 493 | 199  | 1.335027308  | EYA1                             |
| 14 | 36,975,000 | 37,125,000 | 494 | 209  | 0.700841707  | EYA1                             |
| 14 | 37,050,000 | 37,200,000 | 495 | 302  | 1.204611431  | EYA1                             |
| 14 | 37,125,000 | 37,275,000 | 496 | 273  | 1.490789705  | EYA1                             |
| 14 | 37,200,000 | 37,350,000 | 497 | 226  | 1.489500502  | EYA1                             |
| 14 | 37,275,000 | 37,425,000 | 498 | 275  | 1.430811206  |                                  |
| 14 | 37,350,000 | 37,500,000 | 499 | 379  | 0.224625698  |                                  |
| 14 | 37,425,000 | 37,575,000 | 500 | 446  | -0.16457365  | MSC                              |
| 14 | 37,500,000 | 37,650,000 | 501 | 570  | 0.873887378  | MSC                              |
| 14 | 37,575,000 | 37,725,000 | 502 | 601  | 1.009533597  | TRPA1                            |
| 14 | 37,650,000 | 37,800,000 | 503 | 494  | 0.680346838  | TRPA1                            |
| 14 | 37,725,000 | 37,875,000 | 504 | 552  | -0.343005607 | TRPA1                            |
| 14 | 37,800,000 | 37,950,000 | 505 | 854  | -1.452570855 |                                  |
| 14 | 37,875,000 | 38,025,000 | 506 | 814  | -1.708537438 | KCNB2,ENSBTAG00000048040         |
| 14 | 37,950,000 | 38,100,000 | 507 | 345  | -1.279134224 | KCNB2,ENSBTAG00000048040         |
| 14 | 38,025,000 | 38,175,000 | 508 | 373  | -0.195752688 | KCNB2                            |
| 14 | 38,100,000 | 38,250,000 | 509 | 975  | 0.817116662  | KCNB2                            |
| 14 | 38,175,000 | 38,325,000 | 510 | 1100 | 1.220955463  | KCNB2                            |
| 14 | 38,250,000 | 38,400,000 | 511 | 932  | 1.164047586  | KCNB2                            |
| 14 | 38,325,000 | 38,475,000 | 512 | 1042 | 0.904825595  | KCNB2                            |
| 14 | 38,400,000 | 38,550,000 | 513 | 825  | 0.642675642  | KCNB2,TERF1                      |
| 14 | 38,475,000 | 38,625,000 | 514 | 740  | -0.257311602 | SBSPON,TERF1,ENSBTAG00000037470  |



|    |            |            |     |      |              |                               |
|----|------------|------------|-----|------|--------------|-------------------------------|
| 14 | 38,550,000 | 38,700,000 | 515 | 743  | -0.2948276   | SBSPON,ENSBTAG00000037470     |
| 14 | 38,625,000 | 38,775,000 | 516 | 624  | -0.122888881 | RDH10,RPL7,ENSBTAG00000047607 |
| 14 | 38,700,000 | 38,850,000 | 517 | 527  | 0.077542595  | RDH10,RPL7,ENSBTAG00000047607 |
| 14 | 38,775,000 | 38,925,000 | 518 | 422  | 0.797480986  |                               |
| 14 | 38,850,000 | 39,000,000 | 519 | 352  | 0.922880939  | STAU2                         |
| 14 | 38,925,000 | 39,075,000 | 520 | 361  | 0.71341777   | STAU2                         |
| 14 | 39,000,000 | 39,150,000 | 521 | 359  | 0.392174567  | STAU2                         |
| 14 | 39,075,000 | 39,225,000 | 522 | 320  | 0.419324671  |                               |
| 14 | 39,150,000 | 39,300,000 | 523 | 397  | 0.692402191  | UBE2W                         |
| 14 | 39,225,000 | 39,375,000 | 524 | 642  | 0.891279499  | MD2,TCEB1,TMEM70,UBE2W        |
| 14 | 39,300,000 | 39,450,000 | 525 | 813  | 0.662963458  | MD2,TCEB1,TMEM70              |
| 14 | 39,375,000 | 39,525,000 | 526 | 998  | -0.265087298 | MD2                           |
| 14 | 39,450,000 | 39,600,000 | 527 | 993  | -0.739019912 |                               |
| 14 | 39,525,000 | 39,675,000 | 528 | 744  | 0.021986995  | JPH1                          |
| 14 | 39,600,000 | 39,750,000 | 529 | 732  | 0.847831912  | JPH1                          |
| 14 | 39,675,000 | 39,825,000 | 530 | 576  | 0.773979806  | GDAP1,JPH1                    |
| 14 | 39,750,000 | 39,900,000 | 531 | 516  | -0.157797927 | GDAP1                         |
| 14 | 39,825,000 | 39,975,000 | 532 | 723  | 0.032335702  |                               |
| 14 | 39,900,000 | 40,050,000 | 533 | 995  | 0.516641279  |                               |
| 14 | 39,975,000 | 40,125,000 | 534 | 963  | 0.635442343  |                               |
| 14 | 40,050,000 | 40,200,000 | 535 | 620  | 0.591331858  |                               |
| 14 | 40,125,000 | 40,275,000 | 536 | 392  | 0.018211354  |                               |
| 14 | 40,200,000 | 40,350,000 | 537 | 439  | 0.236663369  | PI15                          |
| 14 | 40,275,000 | 40,425,000 | 538 | 654  | 0.569496737  | CRISPLD1,PI15                 |
| 14 | 40,350,000 | 40,500,000 | 539 | 679  | -0.977441739 | CRISPLD1                      |
| 14 | 40,425,000 | 40,575,000 | 540 | 484  | -1.711686257 | CRISPLD1                      |
| 14 | 40,500,000 | 40,650,000 | 541 | 406  | 1.116947348  |                               |
| 14 | 40,575,000 | 40,725,000 | 542 | 648  | 1.047631434  |                               |
| 14 | 40,650,000 | 40,800,000 | 543 | 603  | 0.36745976   |                               |
| 14 | 40,725,000 | 40,875,000 | 544 | 639  | -1.582745392 | HNF4G                         |
| 14 | 40,800,000 | 40,950,000 | 545 | 608  | -1.439194087 | HNF4G                         |
| 14 | 40,875,000 | 41,025,000 | 546 | 669  | 0.240501645  | HNF4G                         |
| 14 | 40,950,000 | 41,100,000 | 547 | 685  | 0.144116551  | HNF4G                         |
| 14 | 41,025,000 | 41,175,000 | 548 | 396  | -0.029049109 |                               |
| 14 | 41,100,000 | 41,250,000 | 549 | 416  | -0.041735142 |                               |
| 14 | 41,175,000 | 41,325,000 | 550 | 328  | -0.612904615 |                               |
| 14 | 41,250,000 | 41,400,000 | 551 | 705  | 0.691729167  |                               |
| 14 | 41,325,000 | 41,475,000 | 552 | 1088 | 1.219519485  |                               |
| 14 | 41,400,000 | 41,550,000 | 553 | 1121 | 1.081430327  |                               |
| 14 | 41,475,000 | 41,625,000 | 554 | 975  | 0.718104039  |                               |
| 14 | 41,550,000 | 41,700,000 | 555 | 724  | 0.163684401  |                               |
| 14 | 41,625,000 | 41,775,000 | 556 | 768  | -0.259305227 |                               |
| 14 | 41,700,000 | 41,850,000 | 557 | 636  | -1.613918193 |                               |
| 14 | 41,775,000 | 41,925,000 | 558 | 583  | -1.495707432 |                               |
| 14 | 41,850,000 | 42,000,000 | 559 | 584  | 0.133985929  | ZFHX4                         |
| 14 | 41,925,000 | 42,075,000 | 560 | 456  | 1.108316811  | ZFHX4                         |
| 14 | 42,000,000 | 42,150,000 | 561 | 339  | 0.697460108  | ZFHX4                         |
| 14 | 42,075,000 | 42,225,000 | 562 | 268  | 0.725327174  | ZFHX4                         |
| 14 | 42,150,000 | 42,300,000 | 563 | 729  | 1.119624623  | ZFHX4,ENSBTAG00000047355      |
| 14 | 42,225,000 | 42,375,000 | 564 | 1008 | 1.103007108  | PEX2,ENSBTAG00000047355       |
| 14 | 42,300,000 | 42,450,000 | 565 | 956  | 1.103721116  | PEX2                          |
| 14 | 42,375,000 | 42,525,000 | 566 | 1101 | 1.155015928  |                               |
| 14 | 42,450,000 | 42,600,000 | 567 | 758  | 0.875757188  |                               |

|    |            |            |     |      |              |                               |
|----|------------|------------|-----|------|--------------|-------------------------------|
| 14 | 42,525,000 | 42,675,000 | 568 | 624  | 0.117091199  | MRPL33                        |
| 14 | 42,600,000 | 42,750,000 | 569 | 783  | -0.304051713 | MRPL33                        |
| 14 | 42,675,000 | 42,825,000 | 570 | 858  | -1.195825125 |                               |
| 14 | 42,750,000 | 42,900,000 | 571 | 1044 | -0.705438161 |                               |
| 14 | 42,825,000 | 42,975,000 | 572 | 961  | 0.378814203  |                               |
| 14 | 42,900,000 | 43,050,000 | 573 | 664  | 0.579403709  | ENSBTAG00000039499            |
| 14 | 42,975,000 | 43,125,000 | 574 | 398  | -0.899165313 | ENSBTAG00000039499            |
| 14 | 43,050,000 | 43,200,000 | 575 | 312  | -2.921736656 |                               |
| 14 | 43,125,000 | 43,275,000 | 576 | 594  | -2.194206171 |                               |
| 14 | 43,200,000 | 43,350,000 | 577 | 639  | -1.745594506 |                               |
| 14 | 43,275,000 | 43,425,000 | 578 | 612  | -1.605205747 |                               |
| 14 | 43,350,000 | 43,500,000 | 579 | 716  | -1.635910997 |                               |
| 14 | 43,425,000 | 43,575,000 | 580 | 538  | -0.151729448 |                               |
| 14 | 43,500,000 | 43,650,000 | 581 | 542  | 0.292778946  |                               |
| 14 | 43,575,000 | 43,725,000 | 582 | 618  | -0.505653034 | ENSBTAG00000017169            |
| 14 | 43,650,000 | 43,800,000 | 583 | 653  | -1.189250785 | ENSBTAG00000017169            |
| 14 | 43,725,000 | 43,875,000 | 584 | 466  | -2.502029586 |                               |
| 14 | 43,800,000 | 43,950,000 | 585 | 498  | -5.709621879 | PKIA                          |
| 14 | 43,875,000 | 44,025,000 | 586 | 530  | -3.700572195 | PKIA                          |
| 14 | 43,950,000 | 44,100,000 | 587 | 328  | 0.829686581  | IL7,PKIA,ZC2HC1A              |
| 14 | 44,025,000 | 44,175,000 | 588 | 620  | -0.233225386 | IL7,ZC2HC1A                   |
| 14 | 44,100,000 | 44,250,000 | 589 | 856  | -0.221743859 | IL7                           |
| 14 | 44,175,000 | 44,325,000 | 590 | 571  | 0.181792636  | IL7                           |
| 14 | 44,250,000 | 44,400,000 | 591 | 304  | -0.099578651 |                               |
| 14 | 44,325,000 | 44,475,000 | 592 | 346  | -0.20728027  |                               |
| 14 | 44,400,000 | 44,550,000 | 593 | 389  | 0.18712475   |                               |
| 14 | 44,475,000 | 44,625,000 | 594 | 309  | 0.263845737  |                               |
| 14 | 44,550,000 | 44,700,000 | 595 | 299  | -0.584983808 |                               |
| 14 | 44,625,000 | 44,775,000 | 596 | 495  | 0.154188206  |                               |
| 14 | 44,700,000 | 44,850,000 | 597 | 653  | 0.64151041   |                               |
| 14 | 44,775,000 | 44,925,000 | 598 | 719  | 0.154857336  |                               |
| 14 | 44,850,000 | 45,000,000 | 599 | 639  | 0.143131594  | STMN2                         |
| 14 | 44,925,000 | 45,075,000 | 600 | 695  | 0.781498294  | STMN2,ENSBTAG00000032812      |
| 14 | 45,000,000 | 45,150,000 | 601 | 780  | 0.799535686  | HEY1,STMN2,ENSBTAG00000032812 |
| 14 | 45,075,000 | 45,225,000 | 602 | 467  | 0.649938345  | HEY1                          |
| 14 | 45,150,000 | 45,300,000 | 603 | 375  | 0.844312909  | MRPS28                        |
| 14 | 45,225,000 | 45,375,000 | 604 | 641  | 1.092949245  | MRPS28                        |
| 14 | 45,300,000 | 45,450,000 | 605 | 559  | 1.058717142  | MRPS28                        |
| 14 | 45,375,000 | 45,525,000 | 606 | 424  | 1.251486564  | MRPS28,TPD52                  |
| 14 | 45,450,000 | 45,600,000 | 607 | 521  | 1.282204786  | MRPS28,TPD52                  |
| 14 | 45,525,000 | 45,675,000 | 608 | 366  | 1.235894934  | TPD52                         |
| 14 | 45,600,000 | 45,750,000 | 609 | 282  | 0.485811751  |                               |
| 14 | 45,675,000 | 45,825,000 | 610 | 367  | -0.88874721  |                               |
| 14 | 45,750,000 | 45,900,000 | 611 | 322  | -0.862907826 | ZBTB10                        |
| 14 | 45,825,000 | 45,975,000 | 612 | 388  | 0.99012083   | ZBTB10                        |
| 14 | 45,900,000 | 46,050,000 | 613 | 445  | 0.914151973  | ZNF704                        |
| 14 | 45,975,000 | 46,125,000 | 614 | 434  | -0.283517454 | ZNF704                        |
| 14 | 46,050,000 | 46,200,000 | 615 | 642  | -0.297262722 |                               |
| 14 | 46,125,000 | 46,275,000 | 616 | 721  | 0.16111384   |                               |
| 14 | 46,200,000 | 46,350,000 | 617 | 498  | 0.28021495   | PAG1                          |
| 14 | 46,275,000 | 46,425,000 | 618 | 381  | 1.079850245  | PAG1                          |
| 14 | 46,350,000 | 46,500,000 | 619 | 471  | 0.713804818  | PAG1                          |
| 14 | 46,425,000 | 46,575,000 | 620 | 467  | -0.042530937 |                               |

|    |            |            |     |      |              |                         |
|----|------------|------------|-----|------|--------------|-------------------------|
| 14 | 46,500,000 | 46,650,000 | 621 | 452  | -0.159240768 | FABP5                   |
| 14 | 46,575,000 | 46,725,000 | 622 | 428  | 0.05721415   | FABP5                   |
| 14 | 46,650,000 | 46,800,000 | 623 | 657  | -1.292545255 |                         |
| 14 | 46,725,000 | 46,875,000 | 624 | 900  | -1.308341825 | FABP4,FABP9,PMP2        |
| 14 | 46,800,000 | 46,950,000 | 625 | 590  | -1.092188537 | FABP12,FABP4,FABP9,PMP2 |
| 14 | 46,875,000 | 47,025,000 | 626 | 408  | -1.51762187  | FABP12,NOV              |
| 14 | 46,950,000 | 47,100,000 | 627 | 557  | -0.045465821 | NOV                     |
| 14 | 47,025,000 | 47,175,000 | 628 | 575  | -0.468159924 | MAL2                    |
| 14 | 47,100,000 | 47,250,000 | 629 | 410  | -1.572130214 | MAL2                    |
| 14 | 47,175,000 | 47,325,000 | 630 | 585  | 1.02771697   | COLEC10                 |
| 14 | 47,250,000 | 47,400,000 | 631 | 633  | 1.098920403  | COLEC10                 |
| 14 | 47,325,000 | 47,475,000 | 632 | 423  | 0.830640292  | TNFRSF11B               |
| 14 | 47,400,000 | 47,550,000 | 633 | 397  | 1.015799576  | TNFRSF11B               |
| 14 | 47,475,000 | 47,625,000 | 634 | 535  | 0.921467569  |                         |
| 14 | 47,550,000 | 47,700,000 | 635 | 893  | 0.495868325  |                         |
| 14 | 47,625,000 | 47,775,000 | 636 | 820  | 0.334415838  |                         |
| 14 | 47,700,000 | 47,850,000 | 637 | 504  | 0.390751253  | SAMD12                  |
| 14 | 47,775,000 | 47,925,000 | 638 | 405  | -0.089786059 | SAMD12                  |
| 14 | 47,850,000 | 48,000,000 | 639 | 482  | -0.333461299 | SAMD12                  |
| 14 | 47,925,000 | 48,075,000 | 640 | 462  | -0.462628241 | SAMD12                  |
| 14 | 48,000,000 | 48,150,000 | 641 | 611  | -0.920460397 | SAMD12                  |
| 14 | 48,075,000 | 48,225,000 | 642 | 905  | -0.298762418 | SAMD12                  |
| 14 | 48,150,000 | 48,300,000 | 643 | 708  | 0.225389563  | SAMD12                  |
| 14 | 48,225,000 | 48,375,000 | 644 | 469  | 0.191215659  | EXT1                    |
| 14 | 48,300,000 | 48,450,000 | 645 | 897  | 0.393121472  | EXT1                    |
| 14 | 48,375,000 | 48,525,000 | 646 | 1043 | 0.159799333  | EXT1                    |
| 14 | 48,450,000 | 48,600,000 | 647 | 718  | 0.257808251  | EXT1                    |
| 14 | 48,525,000 | 48,675,000 | 648 | 618  | 1.026782185  | EXT1                    |
| 14 | 48,600,000 | 48,750,000 | 649 | 574  | 1.099432405  | EXT1                    |
| 14 | 48,675,000 | 48,825,000 | 650 | 707  | 1.099542503  |                         |
| 14 | 48,750,000 | 48,900,000 | 651 | 881  | 1.078948471  |                         |
| 14 | 48,825,000 | 48,975,000 | 652 | 800  | 1.006841088  | MED30                   |
| 14 | 48,900,000 | 49,050,000 | 653 | 702  | 1.219334241  | MED30                   |
| 14 | 48,975,000 | 49,125,000 | 654 | 648  | 1.18513716   |                         |
| 14 | 49,050,000 | 49,200,000 | 655 | 784  | 0.857041645  |                         |
| 14 | 49,125,000 | 49,275,000 | 656 | 958  | 0.912447563  |                         |
| 14 | 49,200,000 | 49,350,000 | 657 | 1007 | 0.451038146  |                         |
| 14 | 49,275,000 | 49,425,000 | 658 | 761  | -0.68328811  |                         |
| 14 | 49,350,000 | 49,500,000 | 659 | 521  | -0.954652354 | AARD                    |
| 14 | 49,425,000 | 49,575,000 | 660 | 690  | 0.962363025  | AARD,RAD21              |
| 14 | 49,500,000 | 49,650,000 | 661 | 564  | 1.275189849  | AARD,RAD21              |
| 14 | 49,575,000 | 49,725,000 | 662 | 400  | 0.600400279  | RAD21,UTP23             |
| 14 | 49,650,000 | 49,800,000 | 663 | 435  | 0.581502099  | EIF3H,UTP23             |
| 14 | 49,725,000 | 49,875,000 | 664 | 471  | 0.698165254  | EIF3H                   |
| 14 | 49,800,000 | 49,950,000 | 665 | 512  | 0.36235206   | EIF3H                   |
| 14 | 49,875,000 | 50,025,000 | 666 | 472  | 0.442643123  |                         |
| 14 | 49,950,000 | 50,100,000 | 667 | 290  | 0.926241853  |                         |
| 14 | 50,025,000 | 50,175,000 | 668 | 189  | 0.908878706  |                         |
| 14 | 50,100,000 | 50,250,000 | 669 | 521  | -0.623254218 |                         |
| 14 | 50,175,000 | 50,325,000 | 670 | 573  | -0.895917547 |                         |
| 14 | 50,250,000 | 50,400,000 | 671 | 563  | -0.556649831 |                         |
| 14 | 50,325,000 | 50,475,000 | 672 | 685  | 0.036127005  |                         |
| 14 | 50,400,000 | 50,550,000 | 673 | 500  | 1.076940444  |                         |

|    |            |            |     |      |              |       |
|----|------------|------------|-----|------|--------------|-------|
| 14 | 50,475,000 | 50,625,000 | 674 | 504  | 1.211510361  |       |
| 14 | 50,550,000 | 50,700,000 | 675 | 668  | 1.300434949  |       |
| 14 | 50,625,000 | 50,775,000 | 676 | 472  | 1.259170588  |       |
| 14 | 50,700,000 | 50,850,000 | 677 | 223  | 0.923215981  | TRPS1 |
| 14 | 50,775,000 | 50,925,000 | 678 | 319  | 0.818371862  | TRPS1 |
| 14 | 50,850,000 | 51,000,000 | 679 | 423  | 0.760234118  | TRPS1 |
| 14 | 50,925,000 | 51,075,000 | 680 | 414  | 0.878088621  | TRPS1 |
| 14 | 51,000,000 | 51,150,000 | 681 | 267  | 0.698253731  | TRPS1 |
| 14 | 51,075,000 | 51,225,000 | 682 | 536  | 0.847124297  |       |
| 14 | 51,150,000 | 51,300,000 | 683 | 776  | 0.552686184  |       |
| 14 | 51,225,000 | 51,375,000 | 684 | 607  | -0.400296168 |       |
| 14 | 51,300,000 | 51,450,000 | 685 | 596  | -2.298033531 |       |
| 14 | 51,375,000 | 51,525,000 | 686 | 779  | -1.624644911 |       |
| 14 | 51,450,000 | 51,600,000 | 687 | 759  | -1.443675218 |       |
| 14 | 51,525,000 | 51,675,000 | 688 | 835  | -1.188856583 |       |
| 14 | 51,600,000 | 51,750,000 | 689 | 768  | -0.184364217 |       |
| 14 | 51,675,000 | 51,825,000 | 690 | 653  | 0.739714143  |       |
| 14 | 51,750,000 | 51,900,000 | 691 | 924  | 0.779940194  |       |
| 14 | 51,825,000 | 51,975,000 | 692 | 978  | 0.318430436  |       |
| 14 | 51,900,000 | 52,050,000 | 693 | 988  | -0.092354404 |       |
| 14 | 51,975,000 | 52,125,000 | 694 | 1235 | 0.105338303  |       |
| 14 | 52,050,000 | 52,200,000 | 695 | 1467 | 0.539545559  |       |
| 14 | 52,125,000 | 52,275,000 | 696 | 1334 | 0.691619913  |       |
| 14 | 52,200,000 | 52,350,000 | 697 | 1044 | 0.443188595  |       |
| 14 | 52,275,000 | 52,425,000 | 698 | 881  | -0.07912898  |       |
| 14 | 52,350,000 | 52,500,000 | 699 | 643  | -0.087682703 |       |
| 14 | 52,425,000 | 52,575,000 | 700 | 434  | 0.341719601  |       |
| 14 | 52,500,000 | 52,650,000 | 701 | 453  | 0.01063728   |       |
| 14 | 52,575,000 | 52,725,000 | 702 | 598  | 0.804217617  |       |
| 14 | 52,650,000 | 52,800,000 | 703 | 1024 | 1.062019133  |       |
| 14 | 52,725,000 | 52,875,000 | 704 | 1161 | 0.980168482  |       |
| 14 | 52,800,000 | 52,950,000 | 705 | 867  | 1.045748008  | CSMD3 |
| 14 | 52,875,000 | 53,025,000 | 706 | 548  | 1.055729159  | CSMD3 |
| 14 | 52,950,000 | 53,100,000 | 707 | 463  | 0.723052902  | CSMD3 |
| 14 | 53,025,000 | 53,175,000 | 708 | 719  | -0.104721704 |       |
| 14 | 53,100,000 | 53,250,000 | 709 | 974  | -0.54437563  |       |
| 14 | 53,175,000 | 53,325,000 | 710 | 785  | -0.556517371 |       |
| 14 | 53,250,000 | 53,400,000 | 711 | 629  | -0.634743815 |       |
| 14 | 53,325,000 | 53,475,000 | 712 | 809  | -0.739539779 |       |
| 14 | 53,400,000 | 53,550,000 | 713 | 925  | -0.612478559 |       |
| 14 | 53,475,000 | 53,625,000 | 714 | 692  | -0.480869307 |       |
| 14 | 53,550,000 | 53,700,000 | 715 | 424  | -0.476043917 |       |
| 14 | 53,625,000 | 53,775,000 | 716 | 562  | -1.680383517 |       |
| 14 | 53,700,000 | 53,850,000 | 717 | 824  | -1.222373765 |       |
| 14 | 53,775,000 | 53,925,000 | 718 | 1000 | -0.365527591 | CSMD3 |
| 14 | 53,850,000 | 54,000,000 | 719 | 1180 | -0.130181177 | CSMD3 |
| 14 | 53,925,000 | 54,075,000 | 720 | 1242 | 0.631222881  | CSMD3 |
| 14 | 54,000,000 | 54,150,000 | 721 | 968  | 0.950709024  | CSMD3 |
| 14 | 54,075,000 | 54,225,000 | 722 | 907  | 0.965082287  | CSMD3 |
| 14 | 54,150,000 | 54,300,000 | 723 | 1284 | 1.018559421  | CSMD3 |
| 14 | 54,225,000 | 54,375,000 | 724 | 1691 | 0.771029882  | CSMD3 |
| 14 | 54,300,000 | 54,450,000 | 725 | 1621 | -0.073481849 | CSMD3 |
| 14 | 54,375,000 | 54,525,000 | 726 | 1291 | -0.489163043 | CSMD3 |

|    |            |            |     |      |              |                         |
|----|------------|------------|-----|------|--------------|-------------------------|
| 14 | 54,450,000 | 54,600,000 | 727 | 1193 | 0.172627215  |                         |
| 14 | 54,525,000 | 54,675,000 | 728 | 1220 | 0.311167276  |                         |
| 14 | 54,600,000 | 54,750,000 | 729 | 1395 | 0.584850067  |                         |
| 14 | 54,675,000 | 54,825,000 | 730 | 1416 | 0.302246939  |                         |
| 14 | 54,750,000 | 54,900,000 | 731 | 1242 | 0.095588744  |                         |
| 14 | 54,825,000 | 54,975,000 | 732 | 1363 | 0.497893027  |                         |
| 14 | 54,900,000 | 55,050,000 | 733 | 1116 | 0.168149916  |                         |
| 14 | 54,975,000 | 55,125,000 | 734 | 1018 | -0.333370907 |                         |
| 14 | 55,050,000 | 55,200,000 | 735 | 1241 | -0.065795067 |                         |
| 14 | 55,125,000 | 55,275,000 | 736 | 1576 | 0.501256347  |                         |
| 14 | 55,200,000 | 55,350,000 | 737 | 1779 | 0.809772262  |                         |
| 14 | 55,275,000 | 55,425,000 | 738 | 1700 | 0.492134967  |                         |
| 14 | 55,350,000 | 55,500,000 | 739 | 1877 | 0.476513763  |                         |
| 14 | 55,425,000 | 55,575,000 | 740 | 1596 | 0.216445702  |                         |
| 14 | 55,500,000 | 55,650,000 | 741 | 1318 | -0.741538893 |                         |
| 14 | 55,575,000 | 55,725,000 | 742 | 1399 | -0.471654469 |                         |
| 14 | 55,650,000 | 55,800,000 | 743 | 1369 | 0.225295251  |                         |
| 14 | 55,725,000 | 55,875,000 | 744 | 1248 | 0.831655736  |                         |
| 14 | 55,800,000 | 55,950,000 | 745 | 1276 | 0.452874825  |                         |
| 14 | 55,875,000 | 56,025,000 | 746 | 1442 | 0.472938796  |                         |
| 14 | 55,950,000 | 56,100,000 | 747 | 1499 | 0.756778233  |                         |
| 14 | 56,025,000 | 56,175,000 | 748 | 1559 | 0.411230851  |                         |
| 14 | 56,100,000 | 56,250,000 | 749 | 1774 | 0.563998104  |                         |
| 14 | 56,175,000 | 56,325,000 | 750 | 1643 | 0.694405367  |                         |
| 14 | 56,250,000 | 56,400,000 | 751 | 1503 | 0.150086312  |                         |
| 14 | 56,325,000 | 56,475,000 | 752 | 1879 | -0.036267441 |                         |
| 14 | 56,400,000 | 56,550,000 | 753 | 2005 | -0.329874036 |                         |
| 14 | 56,475,000 | 56,625,000 | 754 | 1840 | -0.912217412 |                         |
| 14 | 56,550,000 | 56,700,000 | 755 | 1533 | -1.445404073 | KCNV1                   |
| 14 | 56,625,000 | 56,775,000 | 756 | 1211 | -0.839777435 | KCNV1                   |
| 14 | 56,700,000 | 56,850,000 | 757 | 1097 | 0.432104534  | ENSBTAG00000021747      |
| 14 | 56,775,000 | 56,925,000 | 758 | 724  | 0.582420493  | SYBU,ENSBTAG00000021747 |
| 14 | 56,850,000 | 57,000,000 | 759 | 698  | -1.644281664 | SYBU                    |
| 14 | 56,925,000 | 57,075,000 | 760 | 684  | -2.082778355 | EBAG9,SYBU              |
| 14 | 57,000,000 | 57,150,000 | 761 | 338  | -0.455226694 | EBAG9                   |
| 14 | 57,075,000 | 57,225,000 | 762 | 625  | -0.420287726 | PKHD1L1                 |
| 14 | 57,150,000 | 57,300,000 | 763 | 707  | -0.32027135  | ENY2,NUDCD1,PKHD1L1     |
| 14 | 57,225,000 | 57,375,000 | 764 | 851  | 0.986882269  | ENY2,NUDCD1             |
| 14 | 57,300,000 | 57,450,000 | 765 | 1436 | 0.788564983  | NUDCD1                  |
| 14 | 57,375,000 | 57,525,000 | 766 | 1288 | -0.757031634 | TRHR                    |
| 14 | 57,450,000 | 57,600,000 | 767 | 955  | -0.97133251  | TRHR                    |
| 14 | 57,525,000 | 57,675,000 | 768 | 820  | 0.127807354  |                         |
| 14 | 57,600,000 | 57,750,000 | 769 | 681  | 0.090357308  |                         |
| 14 | 57,675,000 | 57,825,000 | 770 | 659  | 0.323841049  | TMEM74                  |
| 14 | 57,750,000 | 57,900,000 | 771 | 813  | 0.602290467  | TMEM74                  |
| 14 | 57,825,000 | 57,975,000 | 772 | 715  | 0.706502437  |                         |
| 14 | 57,900,000 | 58,050,000 | 773 | 482  | 0.07242301   |                         |
| 14 | 57,975,000 | 58,125,000 | 774 | 450  | -0.283540378 |                         |
| 14 | 58,050,000 | 58,200,000 | 775 | 410  | 0.847416058  | EMC2                    |
| 14 | 58,125,000 | 58,275,000 | 776 | 436  | 0.893919218  | EMC2                    |
| 14 | 58,200,000 | 58,350,000 | 777 | 309  | 0.730358136  |                         |
| 14 | 58,275,000 | 58,425,000 | 778 | 301  | 0.898733042  | EIF3E                   |
| 14 | 58,350,000 | 58,500,000 | 779 | 508  | 0.944476373  | EIF3E                   |

|    |            |            |     |      |              |                           |
|----|------------|------------|-----|------|--------------|---------------------------|
| 14 | 58,425,000 | 58,575,000 | 780 | 617  | 0.343795039  | EIF3E,RSPO2               |
| 14 | 58,500,000 | 58,650,000 | 781 | 553  | 0.115092997  | RSPO2                     |
| 14 | 58,575,000 | 58,725,000 | 782 | 546  | 0.140237582  | RSPO2                     |
| 14 | 58,650,000 | 58,800,000 | 783 | 480  | 0.137638879  | RSPO2                     |
| 14 | 58,725,000 | 58,875,000 | 784 | 273  | 0.306907032  | IFT27                     |
| 14 | 58,800,000 | 58,950,000 | 785 | 273  | 0.542522284  | IFT27                     |
| 14 | 58,875,000 | 59,025,000 | 786 | 352  | 0.498229485  |                           |
| 14 | 58,950,000 | 59,100,000 | 787 | 350  | 0.75372147   |                           |
| 14 | 59,025,000 | 59,175,000 | 788 | 279  | 0.755960733  | ANGPT1,ENSBTAG00000008257 |
| 14 | 59,100,000 | 59,250,000 | 789 | 206  | -0.084950632 | ANGPT1,ENSBTAG00000008257 |
| 14 | 59,175,000 | 59,325,000 | 790 | 391  | -2.342894322 | ANGPT1                    |
| 14 | 59,250,000 | 59,400,000 | 791 | 732  | -0.820483847 | ANGPT1                    |
| 14 | 59,325,000 | 59,475,000 | 792 | 829  | 0.093968259  | ANGPT1                    |
| 14 | 59,400,000 | 59,550,000 | 793 | 823  | -0.552726337 | ANGPT1                    |
| 14 | 59,475,000 | 59,625,000 | 794 | 763  | 0.069039512  |                           |
| 14 | 59,550,000 | 59,700,000 | 795 | 568  | -0.614288114 |                           |
| 14 | 59,625,000 | 59,775,000 | 796 | 660  | -0.222232562 |                           |
| 14 | 59,700,000 | 59,850,000 | 797 | 627  | 0.434527975  |                           |
| 14 | 59,775,000 | 59,925,000 | 798 | 658  | -0.77920346  |                           |
| 14 | 59,850,000 | 60,000,000 | 799 | 778  | -0.709019735 | ABRA                      |
| 14 | 59,925,000 | 60,075,000 | 800 | 485  | -0.546695695 | ABRA,OXR1                 |
| 14 | 60,000,000 | 60,150,000 | 801 | 470  | 0.013630226  | OXR1                      |
| 14 | 60,075,000 | 60,225,000 | 802 | 899  | -0.96377621  | OXR1                      |
| 14 | 60,150,000 | 60,300,000 | 803 | 801  | -1.040159673 |                           |
| 14 | 60,225,000 | 60,375,000 | 804 | 474  | 0.495241045  |                           |
| 14 | 60,300,000 | 60,450,000 | 805 | 505  | 0.575876561  |                           |
| 14 | 60,375,000 | 60,525,000 | 806 | 562  | 0.345543015  |                           |
| 14 | 60,450,000 | 60,600,000 | 807 | 807  | 0.486587073  |                           |
| 14 | 60,525,000 | 60,675,000 | 808 | 1198 | 0.762616575  |                           |
| 14 | 60,600,000 | 60,750,000 | 809 | 885  | 0.926160779  |                           |
| 14 | 60,675,000 | 60,825,000 | 810 | 555  | 0.406703569  |                           |
| 14 | 60,750,000 | 60,900,000 | 811 | 950  | 0.614024763  |                           |
| 14 | 60,825,000 | 60,975,000 | 812 | 1094 | 0.741540014  |                           |
| 14 | 60,900,000 | 61,050,000 | 813 | 933  | 0.800166465  | ZFPM2                     |
| 14 | 60,975,000 | 61,125,000 | 814 | 714  | 0.393688202  | ZFPM2                     |
| 14 | 61,050,000 | 61,200,000 | 815 | 534  | -1.154256285 | ZFPM2                     |
| 14 | 61,125,000 | 61,275,000 | 816 | 560  | -0.546505338 | ZFPM2                     |
| 14 | 61,200,000 | 61,350,000 | 817 | 904  | 0.682845698  | ZFPM2                     |
| 14 | 61,275,000 | 61,425,000 | 818 | 1017 | -0.087289919 | ZFPM2                     |
| 14 | 61,350,000 | 61,500,000 | 819 | 650  | -0.72271243  | ZFPM2                     |
| 14 | 61,425,000 | 61,575,000 | 820 | 344  | -0.884391919 | ZFPM2                     |
| 14 | 61,500,000 | 61,650,000 | 821 | 705  | -0.452438534 | ZFPM2                     |
| 14 | 61,575,000 | 61,725,000 | 822 | 783  | -1.152652006 |                           |
| 14 | 61,650,000 | 61,800,000 | 823 | 714  | -1.356843894 |                           |
| 14 | 61,725,000 | 61,875,000 | 824 | 762  | -1.552648627 |                           |
| 14 | 61,800,000 | 61,950,000 | 825 | 492  | -2.797547562 |                           |
| 14 | 61,875,000 | 62,025,000 | 826 | 514  | -0.940919484 |                           |
| 14 | 61,950,000 | 62,100,000 | 827 | 505  | -0.58909865  |                           |
| 14 | 62,025,000 | 62,175,000 | 828 | 376  | -1.347493482 |                           |
| 14 | 62,100,000 | 62,250,000 | 829 | 230  | -1.486011325 | DCSTAMP,LRP12             |
| 14 | 62,175,000 | 62,325,000 | 830 | 422  | -0.532608437 | DCSTAMP,LRP12             |
| 14 | 62,250,000 | 62,400,000 | 831 | 805  | -1.075166905 | DCSTAMP,DPYS,LRP12        |
| 14 | 62,325,000 | 62,475,000 | 832 | 1022 | -1.210348119 | DCSTAMP,DPYS              |

|    |            |            |     |      |              |                             |
|----|------------|------------|-----|------|--------------|-----------------------------|
| 14 | 62,400,000 | 62,550,000 | 833 | 1204 | -0.803795286 | DCSTAMP,DPYS,RIMS2          |
| 14 | 62,475,000 | 62,625,000 | 834 | 915  | -0.458176697 | RIMS2                       |
| 14 | 62,550,000 | 62,700,000 | 835 | 564  | 0.323205666  | RIMS2                       |
| 14 | 62,625,000 | 62,775,000 | 836 | 459  | -0.564316055 | RIMS2                       |
| 14 | 62,700,000 | 62,850,000 | 837 | 320  | -0.030311115 | RIMS2                       |
| 14 | 62,775,000 | 62,925,000 | 838 | 335  | 0.784155921  | RIMS2                       |
| 14 | 62,850,000 | 63,000,000 | 839 | 515  | 0.597008676  | RIMS2                       |
| 14 | 62,925,000 | 63,075,000 | 840 | 582  | 0.41031472   |                             |
| 14 | 63,000,000 | 63,150,000 | 841 | 596  | 0.515825987  |                             |
| 14 | 63,075,000 | 63,225,000 | 842 | 573  | 0.287040459  |                             |
| 14 | 63,150,000 | 63,300,000 | 843 | 537  | -0.332560632 | DCAF13,SLC25A32             |
| 14 | 63,225,000 | 63,375,000 | 844 | 482  | -0.886138998 | CTHRC1,DCAF13,FZD6,SLC25A32 |
| 14 | 63,300,000 | 63,450,000 | 845 | 530  | -0.479666234 | BAALC,CTHRC1,FZD6           |
| 14 | 63,375,000 | 63,525,000 | 846 | 823  | -0.199015993 | BAALC,FZD6                  |
| 14 | 63,450,000 | 63,600,000 | 847 | 1118 | 0.699915632  | ATP6V1C1,BAALC              |
| 14 | 63,525,000 | 63,675,000 | 848 | 931  | 0.77178215   | ATP6V1C1,BAALC              |
| 14 | 63,600,000 | 63,750,000 | 849 | 630  | 0.187737275  | ATP6V1C1                    |
| 14 | 63,675,000 | 63,825,000 | 850 | 579  | 0.541057478  | AZIN1                       |
| 14 | 63,750,000 | 63,900,000 | 851 | 500  | 0.52006717   | AZIN1                       |
| 14 | 63,825,000 | 63,975,000 | 852 | 547  | 0.02793232   | TIEG1                       |
| 14 | 63,900,000 | 64,050,000 | 853 | 775  | 0.544385117  | ODF1,TIEG1                  |
| 14 | 63,975,000 | 64,125,000 | 854 | 726  | 0.606150502  | ODF1                        |
| 14 | 64,050,000 | 64,200,000 | 855 | 386  | -0.395145793 | UBR5                        |
| 14 | 64,125,000 | 64,275,000 | 856 | 304  | 0.201197915  | UBR5                        |
| 14 | 64,200,000 | 64,350,000 | 857 | 425  | 0.252847698  | RRM2B,UBR5                  |
| 14 | 64,275,000 | 64,425,000 | 858 | 608  | -1.749087394 | RRM2B,UBR5                  |
| 14 | 64,350,000 | 64,500,000 | 859 | 702  | -2.359697385 | RRM2B                       |
| 14 | 64,425,000 | 64,575,000 | 860 | 889  | -0.390804312 |                             |
| 14 | 64,500,000 | 64,650,000 | 861 | 806  | -0.858982354 |                             |
| 14 | 64,575,000 | 64,725,000 | 862 | 613  | -5.019619825 |                             |
| 14 | 64,650,000 | 64,800,000 | 863 | 532  | -3.657947744 |                             |
| 14 | 64,725,000 | 64,875,000 | 864 | 572  | 0.388209886  |                             |
| 14 | 64,800,000 | 64,950,000 | 865 | 905  | 0.020535602  | GRHL2,NCALD                 |
| 14 | 64,875,000 | 65,025,000 | 866 | 1182 | 0.288319328  | GRHL2,NCALD                 |
| 14 | 64,950,000 | 65,100,000 | 867 | 936  | 0.373274939  | GRHL2                       |
| 14 | 65,025,000 | 65,175,000 | 868 | 623  | 0.228342717  | GRHL2                       |
| 14 | 65,100,000 | 65,250,000 | 869 | 634  | -0.021674274 |                             |
| 14 | 65,175,000 | 65,325,000 | 870 | 965  | 0.283238137  |                             |
| 14 | 65,250,000 | 65,400,000 | 871 | 858  | 0.634738502  | MGC133632                   |
| 14 | 65,325,000 | 65,475,000 | 872 | 536  | 0.158843141  | MGC133632                   |
| 14 | 65,400,000 | 65,550,000 | 873 | 910  | 0.225880449  |                             |
| 14 | 65,475,000 | 65,625,000 | 874 | 889  | 0.22164366   | YWHAZ                       |
| 14 | 65,550,000 | 65,700,000 | 875 | 832  | 0.816307949  | YWHAZ                       |
| 14 | 65,625,000 | 65,775,000 | 876 | 893  | 0.929556852  |                             |
| 14 | 65,700,000 | 65,850,000 | 877 | 834  | 0.296502955  | PABPC1                      |
| 14 | 65,775,000 | 65,925,000 | 878 | 801  | 0.591547991  | PABPC1,SNX31                |
| 14 | 65,850,000 | 66,000,000 | 879 | 454  | 0.854032922  | ANKRD46,SNX31               |
| 14 | 65,925,000 | 66,075,000 | 880 | 282  | 0.313202641  | ANKRD46,SNX31               |
| 14 | 66,000,000 | 66,150,000 | 881 | 443  | 0.700692375  | ANKRD46                     |
| 14 | 66,075,000 | 66,225,000 | 882 | 533  | 0.901144318  |                             |
| 14 | 66,150,000 | 66,300,000 | 883 | 364  | 0.813863192  | RNF19A                      |
| 14 | 66,225,000 | 66,375,000 | 884 | 315  | 0.191332792  | RNF19A,SPAG1                |
| 14 | 66,300,000 | 66,450,000 | 885 | 463  | 0.900503562  | FBXO43,SPAG1                |

|    |            |            |     |      |              |                                       |
|----|------------|------------|-----|------|--------------|---------------------------------------|
| 14 | 66,375,000 | 66,525,000 | 886 | 564  | 0.69153074   | FBXO43,RGS22,SPAG1                    |
| 14 | 66,450,000 | 66,600,000 | 887 | 505  | 0.266081181  | RGS22                                 |
| 14 | 66,525,000 | 66,675,000 | 888 | 427  | 0.833826499  | COX6C,RGS22                           |
| 14 | 66,600,000 | 66,750,000 | 889 | 413  | -0.173160415 | COX6C                                 |
| 14 | 66,675,000 | 66,825,000 | 890 | 257  | -0.894512395 |                                       |
| 14 | 66,750,000 | 66,900,000 | 891 | 154  | 0.771883372  |                                       |
| 14 | 66,825,000 | 66,975,000 | 892 | 199  | 0.623217607  |                                       |
| 14 | 66,900,000 | 67,050,000 | 893 | 261  | 0.230764303  | ENSBTAG00000012357                    |
| 14 | 66,975,000 | 67,125,000 | 894 | 303  | 0.025828631  | ENSBTAG00000012357                    |
| 14 | 67,050,000 | 67,200,000 | 895 | 318  | 0.585615184  | ENSBTAG00000012357                    |
| 14 | 67,125,000 | 67,275,000 | 896 | 298  | 0.823071432  | ENSBTAG00000012357                    |
| 14 | 67,200,000 | 67,350,000 | 897 | 237  | -0.250401593 | ENSBTAG00000012357,ENSBTAG00000047534 |
| 14 | 67,275,000 | 67,425,000 | 898 | 194  | -1.212835746 | ENSBTAG00000026233,ENSBTAG00000047534 |
| 14 | 67,350,000 | 67,500,000 | 899 | 200  | -0.472419227 | ENSBTAG00000026233,ENSBTAG00000047534 |
| 14 | 67,425,000 | 67,575,000 | 900 | 290  | 0.725792386  | OSR2,ENSBTAG00000026233               |
| 14 | 67,500,000 | 67,650,000 | 901 | 377  | 0.768002519  | OSR2                                  |
| 14 | 67,575,000 | 67,725,000 | 902 | 596  | 0.928895176  | STK3                                  |
| 14 | 67,650,000 | 67,800,000 | 903 | 575  | 1.074733483  | STK3                                  |
| 14 | 67,725,000 | 67,875,000 | 904 | 376  | 0.722598646  | STK3                                  |
| 14 | 67,800,000 | 67,950,000 | 905 | 638  | 0.578163348  | STK3                                  |
| 14 | 67,875,000 | 68,025,000 | 906 | 960  | 0.046722791  | STK3                                  |
| 14 | 67,950,000 | 68,100,000 | 907 | 942  | 0.032996775  | KCNS2,STK3                            |
| 14 | 68,025,000 | 68,175,000 | 908 | 827  | 0.506594568  | KCNS2,ENSBTAG00000046739              |
| 14 | 68,100,000 | 68,250,000 | 909 | 748  | 0.573205794  | ENSBTAG00000046739                    |
| 14 | 68,175,000 | 68,325,000 | 910 | 545  | 0.809529658  | NIPAL2                                |
| 14 | 68,250,000 | 68,400,000 | 911 | 526  | 0.94200797   | NIPAL2,POP1                           |
| 14 | 68,325,000 | 68,475,000 | 912 | 790  | 1.199581759  | ERICH5,HRSP12,NIPAL2,POP1,RPL30       |
| 14 | 68,400,000 | 68,550,000 | 913 | 1145 | 1.129890054  | ERICH5,HRSP12,MATN2,POP1,RPL30        |
| 14 | 68,475,000 | 68,625,000 | 914 | 1096 | 0.149659325  | MATN2                                 |
| 14 | 68,550,000 | 68,700,000 | 915 | 970  | -0.160447365 | LAPTM4B,MATN2                         |
| 14 | 68,625,000 | 68,775,000 | 916 | 823  | -0.070819298 | LAPTM4B,MATN2                         |
| 14 | 68,700,000 | 68,850,000 | 917 | 490  | -0.815148247 | LAPTM4B,MTDH                          |
| 14 | 68,775,000 | 68,925,000 | 918 | 792  | -0.822772307 | MTDH                                  |
| 14 | 68,850,000 | 69,000,000 | 919 | 1003 | -0.824293251 | MTDH,ENSBTAG00000032432               |
| 14 | 68,925,000 | 69,075,000 | 920 | 762  | -0.448041887 | ENSBTAG00000032432                    |
| 14 | 69,000,000 | 69,150,000 | 921 | 496  | -0.702211613 | TSPYL5                                |
| 14 | 69,075,000 | 69,225,000 | 922 | 491  | -0.463011831 | HNRNPH3,TSPYL5                        |
| 14 | 69,150,000 | 69,300,000 | 923 | 592  | 0.873948438  | CPQ,HNRNPH3                           |
| 14 | 69,225,000 | 69,375,000 | 924 | 565  | 0.565269039  | CPQ,ENSBTAG00000047205                |
| 14 | 69,300,000 | 69,450,000 | 925 | 690  | -0.22774337  | CPQ,ENSBTAG00000047205                |
| 14 | 69,375,000 | 69,525,000 | 926 | 660  | -1.147111175 | CPQ                                   |
| 14 | 69,450,000 | 69,600,000 | 927 | 788  | -0.529249373 | CPQ                                   |
| 14 | 69,525,000 | 69,675,000 | 928 | 850  | -0.26741654  | CPQ                                   |
| 14 | 69,600,000 | 69,750,000 | 929 | 826  | -0.246395643 | CPQ                                   |
| 14 | 69,675,000 | 69,825,000 | 930 | 1123 | 0.028494825  | CPQ                                   |
| 14 | 69,750,000 | 69,900,000 | 931 | 1089 | -2.24466106  | CPQ                                   |
| 14 | 69,825,000 | 69,975,000 | 932 | 1073 | -3.440814071 | CPQ,SDC2                              |
| 14 | 69,900,000 | 70,050,000 | 933 | 896  | -0.595324518 | SDC2                                  |
| 14 | 69,975,000 | 70,125,000 | 934 | 876  | 0.420459217  | SDC2                                  |
| 14 | 70,050,000 | 70,200,000 | 935 | 851  | 1.146249903  | SDC2                                  |
| 14 | 70,125,000 | 70,275,000 | 936 | 404  | 1.196444731  | PTDSS1                                |
| 14 | 70,200,000 | 70,350,000 | 937 | 364  | 1.004187333  | MTERFD1,PTDSS1,UQCRB                  |
| 14 | 70,275,000 | 70,425,000 | 938 | 392  | 0.777929649  | GDF6,MTERFD1,PTDSS1,UQCRB             |



|    |            |            |     |      |              |                                |
|----|------------|------------|-----|------|--------------|--------------------------------|
| 14 | 70,350,000 | 70,500,000 | 939 | 363  | 0.266599431  | GDF6                           |
| 14 | 70,425,000 | 70,575,000 | 940 | 336  | 0.096858327  |                                |
| 14 | 70,500,000 | 70,650,000 | 941 | 401  | -0.46540459  |                                |
| 14 | 70,575,000 | 70,725,000 | 942 | 415  | -0.467616872 |                                |
| 14 | 70,650,000 | 70,800,000 | 943 | 270  | -0.665570804 |                                |
| 14 | 70,725,000 | 70,875,000 | 944 | 342  | -0.255228516 |                                |
| 14 | 70,800,000 | 70,950,000 | 945 | 528  | 0.720745295  |                                |
| 14 | 70,875,000 | 71,025,000 | 946 | 537  | 0.810636597  |                                |
| 14 | 70,950,000 | 71,100,000 | 947 | 610  | -1.659395234 |                                |
| 14 | 71,025,000 | 71,175,000 | 948 | 777  | -0.972595085 |                                |
| 14 | 71,100,000 | 71,250,000 | 949 | 750  | 1.038189031  |                                |
| 14 | 71,175,000 | 71,325,000 | 950 | 541  | 0.559042214  |                                |
| 14 | 71,250,000 | 71,400,000 | 951 | 590  | 0.349733788  | C8orf37                        |
| 14 | 71,325,000 | 71,475,000 | 952 | 744  | -0.585202076 | C8orf37                        |
| 14 | 71,400,000 | 71,550,000 | 953 | 890  | -1.029562513 | C8orf37,PLEKHF2                |
| 14 | 71,475,000 | 71,625,000 | 954 | 827  | -0.213365498 | NDUFAF6,PLEKHF2                |
| 14 | 71,550,000 | 71,700,000 | 955 | 566  | -0.561312801 | NDUFAF6                        |
| 14 | 71,625,000 | 71,775,000 | 956 | 589  | -0.299114984 | NDUFAF6,TP53INP1               |
| 14 | 71,700,000 | 71,850,000 | 957 | 562  | 0.015615336  | CCNE2,INTS8,TP53INP1           |
| 14 | 71,775,000 | 71,925,000 | 958 | 419  | -0.90893174  | CCNE2,DPY19L4,INTS8            |
| 14 | 71,850,000 | 72,000,000 | 959 | 329  | -0.765110485 | DPY19L4,ESRP1                  |
| 14 | 71,925,000 | 72,075,000 | 960 | 366  | -0.807822906 | DPY19L4,ESRP1                  |
| 14 | 72,000,000 | 72,150,000 | 961 | 459  | -0.908772737 | ESRP1,KIAA1429                 |
| 14 | 72,075,000 | 72,225,000 | 962 | 461  | -0.663316034 | FSBP,KIAA1429,RAD54B           |
| 14 | 72,150,000 | 72,300,000 | 963 | 668  | -1.00964973  | FSBP,KIAA1429,RAD54B           |
| 14 | 72,225,000 | 72,375,000 | 964 | 588  | -0.709949877 | FSBP,RAD54B                    |
| 14 | 72,300,000 | 72,450,000 | 965 | 438  | 1.164356988  | CDH17,GEM                      |
| 14 | 72,375,000 | 72,525,000 | 966 | 599  | 1.276425427  | CDH17,GEM                      |
| 14 | 72,450,000 | 72,600,000 | 967 | 704  | 0.79828787   | CDH17                          |
| 14 | 72,525,000 | 72,675,000 | 968 | 567  | 0.508008403  | CDH17                          |
| 14 | 72,600,000 | 72,750,000 | 969 | 322  | 0.958925048  | PDP1,ENSBTAG00000045865        |
| 14 | 72,675,000 | 72,825,000 | 970 | 441  | 1.20390893   | PDP1,TMEM67,ENSBTAG00000045865 |
| 14 | 72,750,000 | 72,900,000 | 971 | 429  | 0.795948347  | FAM92A1,RBM12B,TMEM67          |
| 14 | 72,825,000 | 72,975,000 | 972 | 496  | -0.311053514 | FAM92A1,RBM12B                 |
| 14 | 72,900,000 | 73,050,000 | 973 | 676  | 0.216993982  | FAM92A1                        |
| 14 | 72,975,000 | 73,125,000 | 974 | 477  | 1.014145217  |                                |
| 14 | 73,050,000 | 73,200,000 | 975 | 332  | 0.925181638  |                                |
| 14 | 73,125,000 | 73,275,000 | 976 | 529  | -0.456270181 |                                |
| 14 | 73,200,000 | 73,350,000 | 977 | 914  | -0.158446006 |                                |
| 14 | 73,275,000 | 73,425,000 | 978 | 951  | 0.189110352  |                                |
| 14 | 73,350,000 | 73,500,000 | 979 | 737  | -1.510679244 |                                |
| 14 | 73,425,000 | 73,575,000 | 980 | 550  | -2.556126354 |                                |
| 14 | 73,500,000 | 73,650,000 | 981 | 479  | 0.56147963   | TRIQQ                          |
| 14 | 73,575,000 | 73,725,000 | 982 | 546  | 1.022214844  | TRIQQ                          |
| 14 | 73,650,000 | 73,800,000 | 983 | 615  | 0.922564039  | TRIQQ                          |
| 14 | 73,725,000 | 73,875,000 | 984 | 637  | 0.787205514  | TRIQQ                          |
| 14 | 73,800,000 | 73,950,000 | 985 | 834  | 0.345299045  |                                |
| 14 | 73,875,000 | 74,025,000 | 986 | 1277 | 0.343194503  |                                |
| 14 | 73,950,000 | 74,100,000 | 987 | 1180 | 0.559723963  |                                |
| 14 | 74,025,000 | 74,175,000 | 988 | 915  | 0.732230035  |                                |
| 14 | 74,100,000 | 74,250,000 | 989 | 737  | 0.299227087  |                                |
| 14 | 74,175,000 | 74,325,000 | 990 | 531  | -0.511100538 |                                |
| 14 | 74,250,000 | 74,400,000 | 991 | 776  | -0.032404664 |                                |

|    |            |            |      |      |              |                                       |
|----|------------|------------|------|------|--------------|---------------------------------------|
| 14 | 74,325,000 | 74,475,000 | 992  | 893  | 0.581020448  |                                       |
| 14 | 74,400,000 | 74,550,000 | 993  | 956  | 0.697717108  |                                       |
| 14 | 74,475,000 | 74,625,000 | 994  | 1220 | 0.639382945  |                                       |
| 14 | 74,550,000 | 74,700,000 | 995  | 906  | 0.778800533  | RUNX1T1                               |
| 14 | 74,625,000 | 74,775,000 | 996  | 766  | 0.234886194  | RUNX1T1                               |
| 14 | 74,700,000 | 74,850,000 | 997  | 928  | -0.644365292 | RUNX1T1                               |
| 14 | 74,775,000 | 74,925,000 | 998  | 688  | -0.800436396 | RUNX1T1                               |
| 14 | 74,850,000 | 75,000,000 | 999  | 863  | 0.800173682  |                                       |
| 14 | 74,925,000 | 75,075,000 | 1000 | 1083 | 1.046056461  |                                       |
| 14 | 75,000,000 | 75,150,000 | 1001 | 723  | 1.075138856  |                                       |
| 14 | 75,075,000 | 75,225,000 | 1002 | 630  | 0.759404518  |                                       |
| 14 | 75,150,000 | 75,300,000 | 1003 | 792  | 0.180848795  |                                       |
| 14 | 75,225,000 | 75,375,000 | 1004 | 807  | 0.047836885  |                                       |
| 14 | 75,300,000 | 75,450,000 | 1005 | 811  | 0.386323804  | SLC26A7                               |
| 14 | 75,375,000 | 75,525,000 | 1006 | 994  | -4.236293435 | SLC26A7                               |
| 14 | 75,450,000 | 75,600,000 | 1007 | 1284 | -3.408706604 | LRRRC69,SLC26A7                       |
| 14 | 75,525,000 | 75,675,000 | 1008 | 1472 | 0.749924502  | LRRRC69,OTUD6B,SLC26A7                |
| 14 | 75,600,000 | 75,750,000 | 1009 | 1362 | 0.936960678  | LRRRC69,OTUD6B,TMEM55A                |
| 14 | 75,675,000 | 75,825,000 | 1010 | 957  | 0.460020934  | TMEM55A                               |
| 14 | 75,750,000 | 75,900,000 | 1011 | 506  | 0.157911057  | TMEM55A,TMEM64                        |
| 14 | 75,825,000 | 75,975,000 | 1012 | 479  | 0.617488702  | TMEM64                                |
| 14 | 75,900,000 | 76,050,000 | 1013 | 739  | -0.830332384 | CALB1,DECR1,TMEM64                    |
| 14 | 75,975,000 | 76,125,000 | 1014 | 703  | -1.083804596 | CALB1,DECR1,NBN                       |
| 14 | 76,050,000 | 76,200,000 | 1015 | 561  | 0.674918531  | DECR1,NBN,OSGIN2                      |
| 14 | 76,125,000 | 76,275,000 | 1016 | 522  | 1.192842301  | NBN,OSGIN2,RIPK2                      |
| 14 | 76,200,000 | 76,350,000 | 1017 | 791  | 1.071252985  | RIPK2                                 |
| 14 | 76,275,000 | 76,425,000 | 1018 | 1119 | 1.20879351   |                                       |
| 14 | 76,350,000 | 76,500,000 | 1019 | 1117 | 1.024805304  |                                       |
| 14 | 76,425,000 | 76,575,000 | 1020 | 1145 | -0.319279654 |                                       |
| 14 | 76,500,000 | 76,650,000 | 1021 | 1053 | -0.336829306 |                                       |
| 14 | 76,575,000 | 76,725,000 | 1022 | 767  | 0.736031876  |                                       |
| 14 | 76,650,000 | 76,800,000 | 1023 | 871  | 0.252887494  | MMP-16                                |
| 14 | 76,725,000 | 76,875,000 | 1024 | 1003 | 0.515281792  | MMP-16,ENSBTAG00000046836             |
| 14 | 76,800,000 | 76,950,000 | 1025 | 686  | 0.815634014  | MMP-16,ENSBTAG00000046836             |
| 14 | 76,875,000 | 77,025,000 | 1026 | 440  | 0.400710459  | MMP-16                                |
| 14 | 76,950,000 | 77,100,000 | 1027 | 729  | 0.354574723  | MMP-16                                |
| 14 | 77,025,000 | 77,175,000 | 1028 | 783  | 0.289715088  | MMP-16                                |
| 14 | 77,100,000 | 77,250,000 | 1029 | 715  | 0.51367288   | MMP-16                                |
| 14 | 77,175,000 | 77,325,000 | 1030 | 891  | 0.593186522  | ENSBTAG00000007302                    |
| 14 | 77,250,000 | 77,400,000 | 1031 | 920  | -0.12875094  | ENSBTAG00000007302,ENSBTAG00000048317 |
| 14 | 77,325,000 | 77,475,000 | 1032 | 977  | -0.553035179 | ENSBTAG00000048317                    |
| 14 | 77,400,000 | 77,550,000 | 1033 | 1054 | -0.124233246 |                                       |
| 14 | 77,475,000 | 77,625,000 | 1034 | 1216 | 0.586491742  |                                       |
| 14 | 77,550,000 | 77,700,000 | 1035 | 1211 | 0.784530692  |                                       |
| 14 | 77,625,000 | 77,775,000 | 1036 | 1049 | 0.234860879  |                                       |
| 14 | 77,700,000 | 77,850,000 | 1037 | 1176 | -0.79948624  |                                       |
| 14 | 77,775,000 | 77,925,000 | 1038 | 1124 | -0.244374441 |                                       |
| 14 | 77,850,000 | 78,000,000 | 1039 | 1046 | 0.864901338  |                                       |
| 14 | 77,925,000 | 78,075,000 | 1040 | 1078 | 0.795539852  |                                       |
| 14 | 78,000,000 | 78,150,000 | 1041 | 839  | 0.549519308  |                                       |
| 14 | 78,075,000 | 78,225,000 | 1042 | 737  | 0.563254943  |                                       |
| 14 | 78,150,000 | 78,300,000 | 1043 | 1226 | 0.658335485  |                                       |
| 14 | 78,225,000 | 78,375,000 | 1044 | 1587 | -0.587420066 |                                       |

|    |            |            |      |      |              |                                                        |
|----|------------|------------|------|------|--------------|--------------------------------------------------------|
| 14 | 78,300,000 | 78,450,000 | 1045 | 1238 | -0.959303783 | CNGB3                                                  |
| 14 | 78,375,000 | 78,525,000 | 1046 | 1147 | 0.443676938  | CNGB3,CPNE3                                            |
| 14 | 78,450,000 | 78,600,000 | 1047 | 1217 | 0.601109115  | CNGB3,CPNE3,RMDN1,WWP1                                 |
| 14 | 78,525,000 | 78,675,000 | 1048 | 1165 | 0.899861126  | CPNE3,RMDN1,WWP1,ENSBTAG00000032233                    |
| 14 | 78,600,000 | 78,750,000 | 1049 | 1075 | 0.986058695  | WWP1,ENSBTAG00000032233                                |
| 14 | 78,675,000 | 78,825,000 | 1050 | 1164 | 0.901890063  | WWP1                                                   |
| 14 | 78,750,000 | 78,900,000 | 1051 | 1279 | 0.900602638  |                                                        |
| 14 | 78,825,000 | 78,975,000 | 1052 | 1211 | 0.948446103  | ATP6V0D2                                               |
| 14 | 78,900,000 | 79,050,000 | 1053 | 1375 | 0.761780955  | ATP6V0D2                                               |
| 14 | 78,975,000 | 79,125,000 | 1054 | 1380 | 0.421780514  |                                                        |
| 14 | 79,050,000 | 79,200,000 | 1055 | 1524 | 0.399074859  |                                                        |
| 14 | 79,125,000 | 79,275,000 | 1056 | 1480 | 0.630284094  |                                                        |
| 14 | 79,200,000 | 79,350,000 | 1057 | 1076 | 0.772887587  | ENSBTAG00000002851,ENSBTAG00000046121                  |
| 14 | 79,275,000 | 79,425,000 | 1058 | 810  | 0.776739007  | CA2,CA3,ENSBTAG00000002851,ENSBTAG00000046121          |
| 14 | 79,350,000 | 79,500,000 | 1059 | 947  | 0.83465961   | CA2,CA3                                                |
| 14 | 79,425,000 | 79,575,000 | 1060 | 1168 | 0.661233215  | CA1,ENSBTAG00000036116                                 |
| 14 | 79,500,000 | 79,650,000 | 1061 | 1027 | 0.482336326  | CA1,ENSBTAG00000036116                                 |
| 14 | 79,575,000 | 79,725,000 | 1062 | 833  | 0.509639469  | CA13,ENSBTAG00000036116                                |
| 14 | 79,650,000 | 79,800,000 | 1063 | 749  | 0.677245053  | CA13,E2F5,ENSBTAG00000032227                           |
| 14 | 79,725,000 | 79,875,000 | 1064 | 1023 | 1.071742752  | CA13,E2F5,LRRCC1,ENSBTAG00000032227,ENSBTAG00000040461 |
| 14 | 79,800,000 | 79,950,000 | 1065 | 1295 | 0.853468884  | LRRCC1,ENSBTAG00000038798,ENSBTAG00000040461           |
| 14 | 79,875,000 | 80,025,000 | 1066 | 1285 | -0.176191664 | ENSBTAG00000038798,ENSBTAG00000040461                  |
| 14 | 79,950,000 | 80,100,000 | 1067 | 1080 | 0.157639562  | RALYL                                                  |
| 14 | 80,025,000 | 80,175,000 | 1068 | 892  | 0.506840844  | RALYL                                                  |
| 14 | 80,100,000 | 80,250,000 | 1069 | 1304 | 0.171773056  | RALYL                                                  |
| 14 | 80,175,000 | 80,325,000 | 1070 | 1578 | 0.363240684  | RALYL                                                  |
| 14 | 80,250,000 | 80,400,000 | 1071 | 1658 | 0.511881669  | RALYL                                                  |
| 14 | 80,325,000 | 80,475,000 | 1072 | 1568 | 0.06561743   |                                                        |
| 14 | 80,400,000 | 80,550,000 | 1073 | 1287 | -0.540112355 |                                                        |
| 14 | 80,475,000 | 80,625,000 | 1074 | 1520 | 0.114928433  |                                                        |
| 14 | 80,550,000 | 80,700,000 | 1075 | 1464 | 0.563971001  |                                                        |
| 14 | 80,625,000 | 80,775,000 | 1076 | 1045 | 0.749219808  |                                                        |
| 14 | 80,700,000 | 80,850,000 | 1077 | 1195 | -0.061180408 |                                                        |
| 14 | 80,775,000 | 80,925,000 | 1078 | 1363 | 0.017962431  |                                                        |
| 14 | 80,850,000 | 81,000,000 | 1079 | 1068 | 0.200684671  |                                                        |
| 14 | 80,925,000 | 81,075,000 | 1080 | 1065 | 0.221644692  |                                                        |
| 14 | 81,000,000 | 81,150,000 | 1081 | 1295 | 0.724093286  |                                                        |
| 14 | 81,075,000 | 81,225,000 | 1082 | 1136 | 0.892773869  |                                                        |
| 14 | 81,150,000 | 81,300,000 | 1083 | 709  | 1.214893953  |                                                        |
| 14 | 81,225,000 | 81,375,000 | 1084 | 580  | 0.876764555  |                                                        |
| 14 | 81,300,000 | 81,450,000 | 1085 | 1026 | 1.11377487   |                                                        |
| 14 | 81,375,000 | 81,525,000 | 1086 | 1324 | 1.118321607  |                                                        |
| 14 | 81,450,000 | 81,600,000 | 1087 | 1284 | 1.024642747  |                                                        |
| 14 | 81,525,000 | 81,675,000 | 1088 | 1250 | 1.058361349  |                                                        |
| 14 | 81,600,000 | 81,750,000 | 1089 | 1216 | 1.0555106    |                                                        |
| 14 | 81,675,000 | 81,825,000 | 1090 | 1000 | 0.777638026  |                                                        |
| 14 | 81,750,000 | 81,900,000 | 1091 | 723  | 0.687297337  |                                                        |
| 14 | 81,825,000 | 81,975,000 | 1092 | 958  | 0.798005627  |                                                        |
| 14 | 81,900,000 | 82,050,000 | 1093 | 1335 | 0.968064442  |                                                        |
| 14 | 81,975,000 | 82,125,000 | 1094 | 1527 | 1.05143942   |                                                        |
| 14 | 82,050,000 | 82,200,000 | 1095 | 1438 | 0.048035138  |                                                        |
| 14 | 82,125,000 | 82,275,000 | 1096 | 1175 | -0.091027723 |                                                        |

|    |            |            |      |      |              |                                                         |
|----|------------|------------|------|------|--------------|---------------------------------------------------------|
| 14 | 82,200,000 | 82,350,000 | 1097 | 1256 | -0.647402262 |                                                         |
| 14 | 82,275,000 | 82,425,000 | 1098 | 1305 | -0.718786306 |                                                         |
| 14 | 82,350,000 | 82,500,000 | 1099 | 1463 | 0.134080358  |                                                         |
| 14 | 82,425,000 | 82,575,000 | 1100 | 1578 | 0.593870161  |                                                         |
| 14 | 82,500,000 | 82,650,000 | 1101 | 1370 | -0.250340491 |                                                         |
| 14 | 82,575,000 | 82,725,000 | 1102 | 1125 | -1.817789996 |                                                         |
| 14 | 82,650,000 | 82,800,000 | 1103 | 705  | -1.046007389 |                                                         |
| 14 | 82,725,000 | 82,875,000 | 1104 | 857  | -0.34134544  |                                                         |
| 14 | 82,800,000 | 82,950,000 | 1105 | 976  | -0.158331778 |                                                         |
| 14 | 82,875,000 | 83,025,000 | 1106 | 528  | 0.564275636  |                                                         |
| 14 | 82,950,000 | 83,100,000 | 1107 | 625  | 0.686050937  |                                                         |
| 14 | 83,025,000 | 83,175,000 | 1108 | 848  | 0.961463946  | SNX16                                                   |
| 14 | 83,100,000 | 83,250,000 | 1109 | 831  | 0.977692884  | CHMP4C,SNX16,ZFAND1                                     |
| 14 | 83,175,000 | 83,325,000 | 1110 | 722  | 0.608412653  | CHMP4C,IMPA1,SLC10A5,SNX16,ZFAND1                       |
| 14 | 83,250,000 | 83,400,000 | 1111 | 464  | -0.037031749 | ENPP2,IMPA1,SLC10A5,ZFAND1                              |
| 14 | 83,325,000 | 83,475,000 | 1112 | 361  | -0.306125366 | ENPP2                                                   |
| 14 | 83,400,000 | 83,550,000 | 1113 | 313  | -0.24543236  | ENPP2                                                   |
| 14 | 83,475,000 | 83,625,000 | 1114 | 383  | -3.421024607 | TAF2                                                    |
| 14 | 83,550,000 | 83,700,000 | 1115 | 589  | -2.041068487 | DEPTOR,DSCC1,TAF2                                       |
| 14 | 83,625,000 | 83,775,000 | 1116 | 971  | -0.771780936 | DEPTOR,DSCC1,TAF2                                       |
| 14 | 83,700,000 | 83,850,000 | 1117 | 1527 | -0.893108258 | DEPTOR                                                  |
| 14 | 83,775,000 | 83,925,000 | 1118 | 1287 | -0.728030895 | COL14A1,DEPTOR                                          |
| 14 | 83,850,000 | 84,000,000 | 1119 | 1008 | 0.633602928  | COL14A1                                                 |
| 14 | 83,925,000 | 84,075,000 | 1120 | 1268 | 1.016593815  | COL14A1                                                 |
| 14 | 84,000,000 | 84,150,000 | 1121 | 1522 | 1.066485302  | COL14A1,MRPL13                                          |
| 14 | 84,075,000 | 84,225,000 | 1122 | 1298 | 1.071733218  | COL14A1,MRPL13,MTBP                                     |
| 14 | 84,150,000 | 84,300,000 | 1123 | 1079 | 0.721019611  | MRPL13,MTBP,SNTB1                                       |
| 14 | 84,225,000 | 84,375,000 | 1124 | 1560 | 0.535359691  | MTBP,SNTB1                                              |
| 14 | 84,300,000 | 84,450,000 | 1125 | 1512 | 0.473171075  | SNTB1                                                   |
| 14 | 84,375,000 | 84,525,000 | 1126 | 1071 | 0.385831077  | SNTB1                                                   |
| 14 | 84,450,000 | 84,600,000 | 1127 | 796  | 0.438202171  | SNTB1                                                   |
| 14 | 84,525,000 | 84,648,390 | 1128 | 556  | 0.705277114  |                                                         |
| 15 | 0          | 150,000    | 1    | 412  | -1.535383355 |                                                         |
| 15 | 75,000     | 225,000    | 2    | 644  | -0.92717059  | ENSBTAG00000038319,ENSBTAG00000046228                   |
| 15 | 150,000    | 300,000    | 3    | 611  | -0.751579999 | ENSBTAG00000038319,ENSBTAG00000045558,ENSBTAG0000046228 |
| 15 | 225,000    | 375,000    | 4    | 337  | -0.946937033 | ENSBTAG00000040008,ENSBTAG00000045558                   |
| 15 | 300,000    | 450,000    | 5    | 362  | -1.373443017 | ENSBTAG00000040008,ENSBTAG00000048221                   |
| 15 | 375,000    | 525,000    | 6    | 363  | -1.606559789 | ENSBTAG00000048221                                      |
| 15 | 450,000    | 600,000    | 7    | 447  | -3.204503008 | OR9G1                                                   |
| 15 | 525,000    | 675,000    | 8    | 771  | -5.230290813 | OR9G1                                                   |
| 15 | 600,000    | 750,000    | 9    | 717  | -5.532223061 |                                                         |
| 15 | 675,000    | 825,000    | 10   | 393  | -4.473160126 | ENSBTAG00000045790,ENSBTAG00000046028                   |
| 15 | 750,000    | 900,000    | 11   | 326  | -2.600734977 | ENSBTAG00000045790,ENSBTAG00000046028                   |
| 15 | 825,000    | 975,000    | 12   | 542  | -0.960948251 | ENSBTAG00000003930,ENSBTAG00000016807                   |
| 15 | 900,000    | 1,050,000  | 13   | 585  | -1.156007469 | ENSBTAG00000003930,ENSBTAG00000016807                   |
| 15 | 975,000    | 1,125,000  | 14   | 665  | -0.492687602 | ENSBTAG00000013156                                      |
| 15 | 1,050,000  | 1,200,000  | 15   | 1049 | 0.144571981  | ENSBTAG00000003023,ENSBTAG00000013156,ENSBTAG0000047007 |
| 15 | 1,125,000  | 1,275,000  | 16   | 1269 | 0.085013972  | ENSBTAG00000003023,ENSBTAG00000036025,ENSBTAG0000047007 |
| 15 | 1,200,000  | 1,350,000  | 17   | 1387 | -2.219561478 | ENSBTAG00000036025,ENSBTAG00000046387                   |
| 15 | 1,275,000  | 1,425,000  | 18   | 1106 | -2.139188672 | ENSBTAG00000046387                                      |

|    |           |           |    |      |              |                         |
|----|-----------|-----------|----|------|--------------|-------------------------|
| 15 | 1,350,000 | 1,500,000 | 19 | 880  | -0.068370513 |                         |
| 15 | 1,425,000 | 1,575,000 | 20 | 591  | -0.207796171 |                         |
| 15 | 1,500,000 | 1,650,000 | 21 | 430  | -0.321692215 | GPR83,MRE11A            |
| 15 | 1,575,000 | 1,725,000 | 22 | 529  | -0.942380968 | GPR83,MRE11A            |
| 15 | 1,650,000 | 1,800,000 | 23 | 502  | -0.567700514 | AASDHPPT,ANKRD49,MRE11A |
| 15 | 1,725,000 | 1,875,000 | 24 | 537  | -0.518671281 | AASDHPPT,ANKRD49,KBTBD3 |
| 15 | 1,800,000 | 1,950,000 | 25 | 486  | -0.160839329 | AASDHPPT,KBTBD3         |
| 15 | 1,875,000 | 2,025,000 | 26 | 404  | 0.885890307  | KBTBD3,MSANTD4          |
| 15 | 1,950,000 | 2,100,000 | 27 | 360  | 0.831884406  | GRIA4,MSANTD4           |
| 15 | 2,025,000 | 2,175,000 | 28 | 412  | 0.472905487  | GRIA4                   |
| 15 | 2,100,000 | 2,250,000 | 29 | 451  | 0.747340559  | GRIA4                   |
| 15 | 2,175,000 | 2,325,000 | 30 | 508  | 1.12532397   |                         |
| 15 | 2,250,000 | 2,400,000 | 31 | 814  | 0.559277166  |                         |
| 15 | 2,325,000 | 2,475,000 | 32 | 1084 | 0.636314748  | ENSBTAG00000024639      |
| 15 | 2,400,000 | 2,550,000 | 33 | 1302 | 1.209765956  | ENSBTAG00000024639      |
| 15 | 2,475,000 | 2,625,000 | 34 | 1648 | 1.143151706  |                         |
| 15 | 2,550,000 | 2,700,000 | 35 | 1709 | 0.957445719  |                         |
| 15 | 2,625,000 | 2,775,000 | 36 | 1496 | 1.083346889  |                         |
| 15 | 2,700,000 | 2,850,000 | 37 | 1432 | 1.289152104  |                         |
| 15 | 2,775,000 | 2,925,000 | 38 | 1046 | 1.102982519  |                         |
| 15 | 2,850,000 | 3,000,000 | 39 | 940  | -0.221811098 |                         |
| 15 | 2,925,000 | 3,075,000 | 40 | 1430 | 0.249342269  |                         |
| 15 | 3,000,000 | 3,150,000 | 41 | 1055 | 1.016408448  |                         |
| 15 | 3,075,000 | 3,225,000 | 42 | 532  | 0.611476931  |                         |
| 15 | 3,150,000 | 3,300,000 | 43 | 1193 | -1.340879476 |                         |
| 15 | 3,225,000 | 3,375,000 | 44 | 1112 | -1.283324985 |                         |
| 15 | 3,300,000 | 3,450,000 | 45 | 536  | 1.022311675  |                         |
| 15 | 3,375,000 | 3,525,000 | 46 | 575  | 0.922001488  | CASP13                  |
| 15 | 3,450,000 | 3,600,000 | 47 | 908  | 0.581024286  | CASP13                  |
| 15 | 3,525,000 | 3,675,000 | 48 | 1626 | 0.299074403  |                         |
| 15 | 3,600,000 | 3,750,000 | 49 | 1529 | 0.463139291  | ENSBTAG00000006093      |
| 15 | 3,675,000 | 3,825,000 | 50 | 1295 | 0.778076772  | ENSBTAG00000006093      |
| 15 | 3,750,000 | 3,900,000 | 51 | 1240 | 0.391768894  |                         |
| 15 | 3,825,000 | 3,975,000 | 52 | 1065 | -0.213178202 |                         |
| 15 | 3,900,000 | 4,050,000 | 53 | 820  | -0.240876815 |                         |
| 15 | 3,975,000 | 4,125,000 | 54 | 508  | -0.192821171 |                         |
| 15 | 4,050,000 | 4,200,000 | 55 | 480  | -0.682993396 |                         |
| 15 | 4,125,000 | 4,275,000 | 56 | 833  | -0.332799223 |                         |
| 15 | 4,200,000 | 4,350,000 | 57 | 1209 | 0.057773361  |                         |
| 15 | 4,275,000 | 4,425,000 | 58 | 1399 | 0.352432216  |                         |
| 15 | 4,350,000 | 4,500,000 | 59 | 1432 | 0.587291808  |                         |
| 15 | 4,425,000 | 4,575,000 | 60 | 1063 | 0.307223086  | PDGFD                   |
| 15 | 4,500,000 | 4,650,000 | 61 | 811  | -0.178466649 | DDI1,PDGFD              |
| 15 | 4,575,000 | 4,725,000 | 62 | 1144 | 0.689320574  | DDI1,PDGFD              |
| 15 | 4,650,000 | 4,800,000 | 63 | 1366 | 0.633698484  | PDGFD                   |
| 15 | 4,725,000 | 4,875,000 | 64 | 1248 | 0.146469777  | PDGFD                   |
| 15 | 4,800,000 | 4,950,000 | 65 | 1396 | -0.888066146 |                         |
| 15 | 4,875,000 | 5,025,000 | 66 | 1471 | -0.249251265 |                         |
| 15 | 4,950,000 | 5,100,000 | 67 | 1477 | 0.516551353  |                         |
| 15 | 5,025,000 | 5,175,000 | 68 | 1371 | 0.595774025  |                         |
| 15 | 5,100,000 | 5,250,000 | 69 | 1065 | 0.65006069   |                         |
| 15 | 5,175,000 | 5,325,000 | 70 | 1188 | 0.653162609  | ENSBTAG00000047461      |
| 15 | 5,250,000 | 5,400,000 | 71 | 1407 | 0.791464229  | ENSBTAG00000047461      |

|    |           |           |     |      |              |                                            |
|----|-----------|-----------|-----|------|--------------|--------------------------------------------|
| 15 | 5,325,000 | 5,475,000 | 72  | 1204 | 0.498691316  | ENSBTAG00000047461                         |
| 15 | 5,400,000 | 5,550,000 | 73  | 993  | -1.847600903 | ENSBTAG00000047461                         |
| 15 | 5,475,000 | 5,625,000 | 74  | 1020 | -1.462902823 |                                            |
| 15 | 5,550,000 | 5,700,000 | 75  | 667  | -0.303278242 | ENSBTAG00000019309                         |
| 15 | 5,625,000 | 5,775,000 | 76  | 401  | 0.657418031  | DCUN1D5,ENSBTAG00000019309                 |
| 15 | 5,700,000 | 5,850,000 | 77  | 511  | 0.489839742  | DCUN1D5                                    |
| 15 | 5,775,000 | 5,925,000 | 78  | 689  | -1.006109776 | MMP13                                      |
| 15 | 5,850,000 | 6,000,000 | 79  | 1044 | -0.08780982  | MMP13                                      |
| 15 | 5,925,000 | 6,075,000 | 80  | 1416 | 0.756734974  | ENSBTAG00000037768                         |
| 15 | 6,000,000 | 6,150,000 | 81  | 1512 | 0.740875959  | MMP1,ENSBTAG00000020007,ENSBTAG00000037768 |
| 15 | 6,075,000 | 6,225,000 | 82  | 1406 | 0.650528043  | MMP1,MMP27,MMP8,ENSBTAG00000020007         |
| 15 | 6,150,000 | 6,300,000 | 83  | 1177 | 0.535823411  | MMP20,MMP27,MMP8,ENSBTAG00000020007        |
| 15 | 6,225,000 | 6,375,000 | 84  | 977  | 0.567487293  | MMP20                                      |
| 15 | 6,300,000 | 6,450,000 | 85  | 778  | 0.788405614  | MMP20,MMP7                                 |
| 15 | 6,375,000 | 6,525,000 | 86  | 605  | 0.649253262  | MMP7                                       |
| 15 | 6,450,000 | 6,600,000 | 87  | 616  | 0.303199904  | BIRC2                                      |
| 15 | 6,525,000 | 6,675,000 | 88  | 431  | 0.279399784  | BIRC2,BIRC3                                |
| 15 | 6,600,000 | 6,750,000 | 89  | 326  | 0.106861975  | BIRC2,BIRC3,ENSBTAG00000047406             |
| 15 | 6,675,000 | 6,825,000 | 90  | 422  | -2.051958333 | ENSBTAG00000039307,ENSBTAG00000047406      |
| 15 | 6,750,000 | 6,900,000 | 91  | 453  | -2.576657936 | ENSBTAG00000039307,ENSBTAG00000047406      |
| 15 | 6,825,000 | 6,975,000 | 92  | 355  | -1.467420818 | ENSBTAG00000015309,ENSBTAG00000047406      |
| 15 | 6,900,000 | 7,050,000 | 93  | 365  | -0.119942989 | KIAA1377,ENSBTAG00000015309                |
| 15 | 6,975,000 | 7,125,000 | 94  | 403  | 0.170146816  | KIAA1377                                   |
| 15 | 7,050,000 | 7,200,000 | 95  | 589  | -0.526615341 | ANGPTL5,KIAA1377                           |
| 15 | 7,125,000 | 7,275,000 | 96  | 991  | -0.447599701 | ANGPTL5                                    |
| 15 | 7,200,000 | 7,350,000 | 97  | 1129 | -0.580483152 |                                            |
| 15 | 7,275,000 | 7,425,000 | 98  | 908  | -0.898809956 |                                            |
| 15 | 7,350,000 | 7,500,000 | 99  | 1072 | -0.962073939 |                                            |
| 15 | 7,425,000 | 7,575,000 | 100 | 1618 | -0.789129415 |                                            |
| 15 | 7,500,000 | 7,650,000 | 101 | 1750 | -0.456043712 |                                            |
| 15 | 7,575,000 | 7,725,000 | 102 | 1458 | -0.618711532 | TRPC6                                      |
| 15 | 7,650,000 | 7,800,000 | 103 | 854  | -0.476375729 | TRPC6                                      |
| 15 | 7,725,000 | 7,875,000 | 104 | 429  | 0.104193291  |                                            |
| 15 | 7,800,000 | 7,950,000 | 105 | 375  | 0.501859765  |                                            |
| 15 | 7,875,000 | 8,025,000 | 106 | 546  | 0.917165431  |                                            |
| 15 | 7,950,000 | 8,100,000 | 107 | 713  | 0.679163381  |                                            |
| 15 | 8,025,000 | 8,175,000 | 108 | 677  | 0.270558981  | PGR                                        |
| 15 | 8,100,000 | 8,250,000 | 109 | 873  | 0.849000817  | PGR                                        |
| 15 | 8,175,000 | 8,325,000 | 110 | 922  | 0.545787619  | FLJ32810,PGR                               |
| 15 | 8,250,000 | 8,400,000 | 111 | 920  | -1.582289377 | FLJ32810                                   |
| 15 | 8,325,000 | 8,475,000 | 112 | 794  | -1.331572168 | FLJ32810                                   |
| 15 | 8,400,000 | 8,550,000 | 113 | 391  | -0.136495105 |                                            |
| 15 | 8,475,000 | 8,625,000 | 114 | 445  | -0.869545762 |                                            |
| 15 | 8,550,000 | 8,700,000 | 115 | 474  | -0.848254436 |                                            |
| 15 | 8,625,000 | 8,775,000 | 116 | 368  | -0.669040578 |                                            |
| 15 | 8,700,000 | 8,850,000 | 117 | 465  | -0.692394886 |                                            |
| 15 | 8,775,000 | 8,925,000 | 118 | 709  | 0.03700848   | ENSBTAG00000047425                         |
| 15 | 8,850,000 | 9,000,000 | 119 | 1002 | 0.288227353  | ENSBTAG00000047425                         |
| 15 | 8,925,000 | 9,075,000 | 120 | 1024 | -0.314042617 |                                            |
| 15 | 9,000,000 | 9,150,000 | 121 | 1169 | -1.132363164 |                                            |
| 15 | 9,075,000 | 9,225,000 | 122 | 1399 | -0.899238843 |                                            |
| 15 | 9,150,000 | 9,300,000 | 123 | 1119 | -0.020387527 |                                            |
| 15 | 9,225,000 | 9,375,000 | 124 | 973  | -0.727355552 |                                            |

|    |            |            |     |      |              |       |
|----|------------|------------|-----|------|--------------|-------|
| 15 | 9,300,000  | 9,450,000  | 125 | 1306 | -1.06110081  |       |
| 15 | 9,375,000  | 9,525,000  | 126 | 1184 | 0.105379669  |       |
| 15 | 9,450,000  | 9,600,000  | 127 | 886  | 1.080815722  |       |
| 15 | 9,525,000  | 9,675,000  | 128 | 988  | -0.090627403 | CNTN5 |
| 15 | 9,600,000  | 9,750,000  | 129 | 932  | -0.044698154 | CNTN5 |
| 15 | 9,675,000  | 9,825,000  | 130 | 825  | -1.036794597 | CNTN5 |
| 15 | 9,750,000  | 9,900,000  | 131 | 1002 | -4.018045662 |       |
| 15 | 9,825,000  | 9,975,000  | 132 | 888  | -1.630586795 |       |
| 15 | 9,900,000  | 10,050,000 | 133 | 710  | 1.223327898  |       |
| 15 | 9,975,000  | 10,125,000 | 134 | 625  | 1.228124805  |       |
| 15 | 10,050,000 | 10,200,000 | 135 | 642  | 1.119434176  |       |
| 15 | 10,125,000 | 10,275,000 | 136 | 1097 | 1.024313916  |       |
| 15 | 10,200,000 | 10,350,000 | 137 | 1198 | 1.030773702  |       |
| 15 | 10,275,000 | 10,425,000 | 138 | 643  | 1.112077694  |       |
| 15 | 10,350,000 | 10,500,000 | 139 | 255  | 0.90176755   |       |
| 15 | 10,425,000 | 10,575,000 | 140 | 319  | 0.953292625  |       |
| 15 | 10,500,000 | 10,650,000 | 141 | 444  | 1.057215587  |       |
| 15 | 10,575,000 | 10,725,000 | 142 | 498  | 1.204404643  |       |
| 15 | 10,650,000 | 10,800,000 | 143 | 496  | 1.085464464  |       |
| 15 | 10,725,000 | 10,875,000 | 144 | 459  | 0.875622201  |       |
| 15 | 10,800,000 | 10,950,000 | 145 | 526  | 0.299393045  |       |
| 15 | 10,875,000 | 11,025,000 | 146 | 660  | 0.138295203  |       |
| 15 | 10,950,000 | 11,100,000 | 147 | 653  | 0.543651446  |       |
| 15 | 11,025,000 | 11,175,000 | 148 | 893  | 0.159482546  |       |
| 15 | 11,100,000 | 11,250,000 | 149 | 1020 | -0.110302708 |       |
| 15 | 11,175,000 | 11,325,000 | 150 | 883  | -0.026357154 |       |
| 15 | 11,250,000 | 11,400,000 | 151 | 649  | 0.290564233  |       |
| 15 | 11,325,000 | 11,475,000 | 152 | 697  | 0.821323203  |       |
| 15 | 11,400,000 | 11,550,000 | 153 | 1532 | 0.514380325  |       |
| 15 | 11,475,000 | 11,625,000 | 154 | 1818 | 0.133952759  |       |
| 15 | 11,550,000 | 11,700,000 | 155 | 1377 | 0.009611724  |       |
| 15 | 11,625,000 | 11,775,000 | 156 | 821  | 0.259120912  |       |
| 15 | 11,700,000 | 11,850,000 | 157 | 543  | 0.240792467  |       |
| 15 | 11,775,000 | 11,925,000 | 158 | 729  | 0.7262833    |       |
| 15 | 11,850,000 | 12,000,000 | 159 | 780  | 0.973249391  |       |
| 15 | 11,925,000 | 12,075,000 | 160 | 939  | -0.319795377 |       |
| 15 | 12,000,000 | 12,150,000 | 161 | 1417 | -0.724499099 |       |
| 15 | 12,075,000 | 12,225,000 | 162 | 1210 | -0.866066099 |       |
| 15 | 12,150,000 | 12,300,000 | 163 | 695  | -0.363335687 |       |
| 15 | 12,225,000 | 12,375,000 | 164 | 826  | -0.307862375 |       |
| 15 | 12,300,000 | 12,450,000 | 165 | 723  | -0.767475743 |       |
| 15 | 12,375,000 | 12,525,000 | 166 | 574  | 0.276214513  |       |
| 15 | 12,450,000 | 12,600,000 | 167 | 1023 | 0.447188493  |       |
| 15 | 12,525,000 | 12,675,000 | 168 | 994  | 0.670942326  |       |
| 15 | 12,600,000 | 12,750,000 | 169 | 622  | 0.543884904  |       |
| 15 | 12,675,000 | 12,825,000 | 170 | 978  | -0.064749645 |       |
| 15 | 12,750,000 | 12,900,000 | 171 | 1034 | 0.189130225  |       |
| 15 | 12,825,000 | 12,975,000 | 172 | 708  | 1.027322443  |       |
| 15 | 12,900,000 | 13,050,000 | 173 | 764  | 0.878598386  |       |
| 15 | 12,975,000 | 13,125,000 | 174 | 738  | 0.437573783  |       |
| 15 | 13,050,000 | 13,200,000 | 175 | 568  | 0.454792631  |       |
| 15 | 13,125,000 | 13,275,000 | 176 | 516  | 0.960088076  |       |
| 15 | 13,200,000 | 13,350,000 | 177 | 598  | 1.101692235  |       |

|    |            |            |     |      |              |                                 |
|----|------------|------------|-----|------|--------------|---------------------------------|
| 15 | 13,275,000 | 13,425,000 | 178 | 902  | -4.770301508 |                                 |
| 15 | 13,350,000 | 13,500,000 | 179 | 863  | -4.675770575 |                                 |
| 15 | 13,425,000 | 13,575,000 | 180 | 586  | 1.123084161  |                                 |
| 15 | 13,500,000 | 13,650,000 | 181 | 636  | 0.772872852  | ENSBTAG00000034724              |
| 15 | 13,575,000 | 13,725,000 | 182 | 544  | 0.14235696   | ENSBTAG00000034724              |
| 15 | 13,650,000 | 13,800,000 | 183 | 355  | -0.410503425 |                                 |
| 15 | 13,725,000 | 13,875,000 | 184 | 309  | -0.788983682 |                                 |
| 15 | 13,800,000 | 13,950,000 | 185 | 356  | 0.222345759  |                                 |
| 15 | 13,875,000 | 14,025,000 | 186 | 497  | 0.88367204   |                                 |
| 15 | 13,950,000 | 14,100,000 | 187 | 630  | 0.092469787  |                                 |
| 15 | 14,025,000 | 14,175,000 | 188 | 672  | -1.240590148 | CCDC82,JRKL                     |
| 15 | 14,100,000 | 14,250,000 | 189 | 542  | -1.109983474 | CCDC82,JRKL                     |
| 15 | 14,175,000 | 14,325,000 | 190 | 375  | -1.20857236  |                                 |
| 15 | 14,250,000 | 14,400,000 | 191 | 322  | -0.172487615 |                                 |
| 15 | 14,325,000 | 14,475,000 | 192 | 497  | 0.282011186  | MAML2                           |
| 15 | 14,400,000 | 14,550,000 | 193 | 644  | -0.48764924  | MAML2                           |
| 15 | 14,475,000 | 14,625,000 | 194 | 639  | -0.983834453 | MAML2                           |
| 15 | 14,550,000 | 14,700,000 | 195 | 408  | -0.273018868 | MAML2,MTMR2                     |
| 15 | 14,625,000 | 14,775,000 | 196 | 397  | -0.011810971 | CEP57,FAM76B,MTMR2              |
| 15 | 14,700,000 | 14,850,000 | 197 | 428  | 0.103372712  | CEP57,FAM76B,MTMR2              |
| 15 | 14,775,000 | 14,925,000 | 198 | 318  | 0.020752418  | FAM76B                          |
| 15 | 14,850,000 | 15,000,000 | 199 | 478  | -0.229534496 |                                 |
| 15 | 14,925,000 | 15,075,000 | 200 | 527  | 0.096340367  |                                 |
| 15 | 15,000,000 | 15,150,000 | 201 | 721  | -0.135157072 |                                 |
| 15 | 15,075,000 | 15,225,000 | 202 | 879  | -0.798643008 |                                 |
| 15 | 15,150,000 | 15,300,000 | 203 | 793  | -0.728874056 |                                 |
| 15 | 15,225,000 | 15,375,000 | 204 | 760  | 0.501585189  |                                 |
| 15 | 15,300,000 | 15,450,000 | 205 | 677  | 0.73764683   |                                 |
| 15 | 15,375,000 | 15,525,000 | 206 | 447  | 0.75411032   | SESN3                           |
| 15 | 15,450,000 | 15,600,000 | 207 | 833  | 0.79293194   | ENDOD1,SESN3                    |
| 15 | 15,525,000 | 15,675,000 | 208 | 1332 | 0.763551322  | ENDOD1,ENSBTAG00000001704       |
| 15 | 15,600,000 | 15,750,000 | 209 | 985  | 0.784412319  | CWC15,ENDOD1,ENSBTAG00000001704 |
| 15 | 15,675,000 | 15,825,000 | 210 | 841  | 0.83806555   | AMOTL1,CWC15,ENSBTAG00000001704 |
| 15 | 15,750,000 | 15,900,000 | 211 | 679  | 0.965431065  | AMOTL1                          |
| 15 | 15,825,000 | 15,975,000 | 212 | 611  | -0.691260911 | AMOTL1                          |
| 15 | 15,900,000 | 16,050,000 | 213 | 940  | -0.678583347 |                                 |
| 15 | 15,975,000 | 16,125,000 | 214 | 1171 | 0.552514594  | PIWIL4                          |
| 15 | 16,050,000 | 16,200,000 | 215 | 1372 | 0.734805911  | PIWIL4                          |
| 15 | 16,125,000 | 16,275,000 | 216 | 1205 | 0.708326709  | FUT4,MGC137061,PIWIL4           |
| 15 | 16,200,000 | 16,350,000 | 217 | 1106 | -0.073139357 | CWF19L2,FUT4,MGC137061          |
| 15 | 16,275,000 | 16,425,000 | 218 | 1149 | -1.497642245 | CWF19L2,MGC137061               |
| 15 | 16,350,000 | 16,500,000 | 219 | 874  | -2.586886653 | CWF19L2                         |
| 15 | 16,425,000 | 16,575,000 | 220 | 788  | -1.129184898 | CWF19L2                         |
| 15 | 16,500,000 | 16,650,000 | 221 | 696  | 0.316850867  | GUCY1A2                         |
| 15 | 16,575,000 | 16,725,000 | 222 | 666  | 0.251541191  | GUCY1A2                         |
| 15 | 16,650,000 | 16,800,000 | 223 | 722  | 0.52924873   | GUCY1A2                         |
| 15 | 16,725,000 | 16,875,000 | 224 | 580  | 0.810705118  | GUCY1A2                         |
| 15 | 16,800,000 | 16,950,000 | 225 | 1416 | 1.199549116  | GUCY1A2                         |
| 15 | 16,875,000 | 17,025,000 | 226 | 1882 | 1.24051625   | GUCY1A2                         |
| 15 | 16,950,000 | 17,100,000 | 227 | 960  | 1.185596853  | GUCY1A2                         |
| 15 | 17,025,000 | 17,175,000 | 228 | 438  | 0.947689848  | GUCY1A2                         |
| 15 | 17,100,000 | 17,250,000 | 229 | 446  | 0.785432851  | ALKBH8,GUCY1A2                  |
| 15 | 17,175,000 | 17,325,000 | 230 | 420  | 0.364316345  | ALKBH8                          |



|    |            |            |     |      |              |                                |
|----|------------|------------|-----|------|--------------|--------------------------------|
| 15 | 17,250,000 | 17,400,000 | 231 | 377  | 0.430565353  | ALKBH8,ELMOD1                  |
| 15 | 17,325,000 | 17,475,000 | 232 | 599  | 0.826273934  | ELMOD1                         |
| 15 | 17,400,000 | 17,550,000 | 233 | 1370 | 0.50168139   | ELMOD1                         |
| 15 | 17,475,000 | 17,625,000 | 234 | 1539 | 0.35016819   |                                |
| 15 | 17,550,000 | 17,700,000 | 235 | 1145 | 0.338045864  | ENSBTAG00000003661             |
| 15 | 17,625,000 | 17,775,000 | 236 | 1160 | 0.312452419  | RAB39,ENSBTAG00000003661       |
| 15 | 17,700,000 | 17,850,000 | 237 | 786  | -0.129397019 | RAB39                          |
| 15 | 17,775,000 | 17,925,000 | 238 | 366  | -0.439275016 | CUL5,RAB39                     |
| 15 | 17,850,000 | 18,000,000 | 239 | 406  | 0.665242311  | ACAT1,CUL5                     |
| 15 | 17,925,000 | 18,075,000 | 240 | 460  | -1.973023298 | ACAT1,CUL5,NPAT                |
| 15 | 18,000,000 | 18,150,000 | 241 | 463  | -3.021039525 | ACAT1,ATM,NPAT                 |
| 15 | 18,075,000 | 18,225,000 | 242 | 403  | -1.766044099 | ATM,NPAT                       |
| 15 | 18,150,000 | 18,300,000 | 243 | 365  | -0.942561396 | ATM                            |
| 15 | 18,225,000 | 18,375,000 | 244 | 777  | 0.458534807  | ATM                            |
| 15 | 18,300,000 | 18,450,000 | 245 | 942  | 0.755629378  | KDELC2                         |
| 15 | 18,375,000 | 18,525,000 | 246 | 792  | 0.4835752    | EXPH5,KDELC2                   |
| 15 | 18,450,000 | 18,600,000 | 247 | 638  | 0.006497369  | EXPH5,KDELC2                   |
| 15 | 18,525,000 | 18,675,000 | 248 | 860  | -2.136286699 | DDX10                          |
| 15 | 18,600,000 | 18,750,000 | 249 | 1085 | -2.073387915 | DDX10                          |
| 15 | 18,675,000 | 18,825,000 | 250 | 1136 | -0.383131848 | DDX10                          |
| 15 | 18,750,000 | 18,900,000 | 251 | 971  | -0.980400793 | DDX10                          |
| 15 | 18,825,000 | 18,975,000 | 252 | 715  | -1.444720319 | DDX10                          |
| 15 | 18,900,000 | 19,050,000 | 253 | 1156 | -1.238497305 | DDX10                          |
| 15 | 18,975,000 | 19,125,000 | 254 | 1190 | 0.13026591   |                                |
| 15 | 19,050,000 | 19,200,000 | 255 | 1107 | 0.830480711  |                                |
| 15 | 19,125,000 | 19,275,000 | 256 | 1416 | 0.148052347  |                                |
| 15 | 19,200,000 | 19,350,000 | 257 | 1709 | 0.348435049  |                                |
| 15 | 19,275,000 | 19,425,000 | 258 | 1286 | 0.782978711  |                                |
| 15 | 19,350,000 | 19,500,000 | 259 | 704  | 0.893013086  |                                |
| 15 | 19,425,000 | 19,575,000 | 260 | 715  | 0.936318206  |                                |
| 15 | 19,500,000 | 19,650,000 | 261 | 726  | 1.236047635  | C11orf87                       |
| 15 | 19,575,000 | 19,725,000 | 262 | 1024 | 1.262943253  | C11orf87                       |
| 15 | 19,650,000 | 19,800,000 | 263 | 1197 | 1.259920725  |                                |
| 15 | 19,725,000 | 19,875,000 | 264 | 1059 | 1.213113252  |                                |
| 15 | 19,800,000 | 19,950,000 | 265 | 1082 | -0.155265545 |                                |
| 15 | 19,875,000 | 20,025,000 | 266 | 771  | -0.915345272 |                                |
| 15 | 19,950,000 | 20,100,000 | 267 | 587  | 0.252721731  |                                |
| 15 | 20,025,000 | 20,175,000 | 268 | 626  | 0.716484515  |                                |
| 15 | 20,100,000 | 20,250,000 | 269 | 543  | 0.785852885  |                                |
| 15 | 20,175,000 | 20,325,000 | 270 | 596  | 0.151768952  |                                |
| 15 | 20,250,000 | 20,400,000 | 271 | 1085 | 0.257604971  |                                |
| 15 | 20,325,000 | 20,475,000 | 272 | 920  | 0.409601184  |                                |
| 15 | 20,400,000 | 20,550,000 | 273 | 452  | -0.066195662 | ZC3H12C                        |
| 15 | 20,475,000 | 20,625,000 | 274 | 750  | 0.317404661  | RDX,ZC3H12C,ENSBTAG00000047384 |
| 15 | 20,550,000 | 20,700,000 | 275 | 1069 | 0.228224609  | RDX,ENSBTAG00000047384         |
| 15 | 20,625,000 | 20,775,000 | 276 | 1172 | 0.248897299  | FDX1,RDX                       |
| 15 | 20,700,000 | 20,850,000 | 277 | 988  | 0.603678685  | FDX1                           |
| 15 | 20,775,000 | 20,925,000 | 278 | 870  | 0.191844977  | ARHGAP20,FDX1                  |
| 15 | 20,850,000 | 21,000,000 | 279 | 687  | -0.206361277 | ARHGAP20                       |
| 15 | 20,925,000 | 21,075,000 | 280 | 758  | 1.011602355  | ARHGAP20                       |
| 15 | 21,000,000 | 21,150,000 | 281 | 911  | 0.762357555  | ARHGAP20                       |
| 15 | 21,075,000 | 21,225,000 | 282 | 871  | 0.249631586  |                                |
| 15 | 21,150,000 | 21,300,000 | 283 | 992  | 0.366695502  |                                |

|    |            |            |     |      |              |                                                                       |
|----|------------|------------|-----|------|--------------|-----------------------------------------------------------------------|
| 15 | 21,225,000 | 21,375,000 | 284 | 838  | 0.573561973  |                                                                       |
| 15 | 21,300,000 | 21,450,000 | 285 | 621  | 0.065596819  |                                                                       |
| 15 | 21,375,000 | 21,525,000 | 286 | 534  | -0.442802441 |                                                                       |
| 15 | 21,450,000 | 21,600,000 | 287 | 661  | 0.158331867  |                                                                       |
| 15 | 21,525,000 | 21,675,000 | 288 | 804  | 0.182042893  |                                                                       |
| 15 | 21,600,000 | 21,750,000 | 289 | 1086 | -0.108250674 |                                                                       |
| 15 | 21,675,000 | 21,825,000 | 290 | 1261 | 0.407316084  |                                                                       |
| 15 | 21,750,000 | 21,900,000 | 291 | 1158 | 0.953267586  | C11orf53                                                              |
| 15 | 21,825,000 | 21,975,000 | 292 | 1160 | 0.968893602  | C11orf53,POU2AF1                                                      |
| 15 | 21,900,000 | 22,050,000 | 293 | 1156 | 1.130405057  | POU2AF1                                                               |
| 15 | 21,975,000 | 22,125,000 | 294 | 1416 | 0.945098256  | BTG4,POU2AF1                                                          |
| 15 | 22,050,000 | 22,200,000 | 295 | 1106 | 0.822928814  | BTG4,LAYN,MGC133619                                                   |
| 15 | 22,125,000 | 22,275,000 | 296 | 575  | 0.790476353  | LAYN,MGC133619,SIK2                                                   |
| 15 | 22,200,000 | 22,350,000 | 297 | 477  | 0.05106436   | SIK2                                                                  |
| 15 | 22,275,000 | 22,425,000 | 298 | 427  | -2.754876048 | PPP2R1B,SIK2                                                          |
| 15 | 22,350,000 | 22,500,000 | 299 | 573  | -1.434166312 | ALG9,PPP2R1B,SIK2                                                     |
| 15 | 22,425,000 | 22,575,000 | 300 | 746  | 0.180356483  | ALG9,CRYAB,FDXACB1,HSPB2,MGC134087,ENSBTAG0000045821                  |
| 15 | 22,500,000 | 22,650,000 | 301 | 1078 | 0.414392407  | ALG9,C11ORF52,CRYAB,DIXDC1,FDXACB1,HSPB2,MGC134087,ENSBTAG00000045821 |
| 15 | 22,575,000 | 22,725,000 | 302 | 1096 | 0.66060572   | C11ORF52,DIXDC1,MGC143285,PIH1D2,SDHD,TIMM8B,ENSBTAG00000010709       |
| 15 | 22,650,000 | 22,800,000 | 303 | 913  | 0.76501063   | DIXDC1,MGC143285,PIH1D2,SDHD,TIMM8B,ENSBTAG00000010709                |
| 15 | 22,725,000 | 22,875,000 | 304 | 889  | 0.748513873  | BCO2,IL18,SDHD,TEX12                                                  |
| 15 | 22,800,000 | 22,950,000 | 305 | 869  | 0.278351376  | BCO2,IL18,PTS,TEX12                                                   |
| 15 | 22,875,000 | 23,025,000 | 306 | 1093 | 0.032126646  | BCO2,PLET1,PTS                                                        |
| 15 | 22,950,000 | 23,100,000 | 307 | 1455 | -0.077297319 | PLET1                                                                 |
| 15 | 23,025,000 | 23,175,000 | 308 | 1466 | 0.067626842  |                                                                       |
| 15 | 23,100,000 | 23,250,000 | 309 | 1361 | 0.592447475  |                                                                       |
| 15 | 23,175,000 | 23,325,000 | 310 | 1480 | 0.772645461  |                                                                       |
| 15 | 23,250,000 | 23,400,000 | 311 | 1022 | 0.300077336  |                                                                       |
| 15 | 23,325,000 | 23,475,000 | 312 | 596  | 0.272323046  |                                                                       |
| 15 | 23,400,000 | 23,550,000 | 313 | 905  | 0.964242812  |                                                                       |
| 15 | 23,475,000 | 23,625,000 | 314 | 1082 | 0.782456974  |                                                                       |
| 15 | 23,550,000 | 23,700,000 | 315 | 758  | 0.309018854  |                                                                       |
| 15 | 23,625,000 | 23,775,000 | 316 | 796  | 0.492641316  |                                                                       |
| 15 | 23,700,000 | 23,850,000 | 317 | 879  | 0.629010092  |                                                                       |
| 15 | 23,775,000 | 23,925,000 | 318 | 597  | 0.64177362   |                                                                       |
| 15 | 23,850,000 | 24,000,000 | 319 | 714  | 0.270596786  |                                                                       |
| 15 | 23,925,000 | 24,075,000 | 320 | 1017 | 0.301488415  |                                                                       |
| 15 | 24,000,000 | 24,150,000 | 321 | 900  | 0.2909669    | NCAM1                                                                 |
| 15 | 24,075,000 | 24,225,000 | 322 | 790  | 0.504090699  | NCAM1,TTC12                                                           |
| 15 | 24,150,000 | 24,300,000 | 323 | 668  | 0.607923765  | ANKK1,NCAM1,TTC12                                                     |
| 15 | 24,225,000 | 24,375,000 | 324 | 390  | 0.211484256  | ANKK1,DRD2,TTC12                                                      |
| 15 | 24,300,000 | 24,450,000 | 325 | 635  | -0.201166794 | DRD2                                                                  |
| 15 | 24,375,000 | 24,525,000 | 326 | 944  | -0.602268405 |                                                                       |
| 15 | 24,450,000 | 24,600,000 | 327 | 889  | -0.187525413 | TMPRSS5                                                               |
| 15 | 24,525,000 | 24,675,000 | 328 | 707  | 0.586374021  | CLDN25,TMPRSS5,USP28,ZW10                                             |
| 15 | 24,600,000 | 24,750,000 | 329 | 509  | 0.215561132  | CLDN25,USP28,ZW10                                                     |
| 15 | 24,675,000 | 24,825,000 | 330 | 554  | -0.744932925 | HTR3B,USP28                                                           |
| 15 | 24,750,000 | 24,900,000 | 331 | 623  | -0.37664347  | HTR3A,HTR3B                                                           |
| 15 | 24,825,000 | 24,975,000 | 332 | 416  | 0.44518475   | HTR3A,ZBTB16,ENSBTAG00000046254                                       |

|    |            |            |     |      |              |                                                              |
|----|------------|------------|-----|------|--------------|--------------------------------------------------------------|
| 15 | 24,900,000 | 25,050,000 | 333 | 478  | 0.608594415  | ZBTB16,ENSBTAG00000046254                                    |
| 15 | 24,975,000 | 25,125,000 | 334 | 663  | 0.90172337   | ZBTB16                                                       |
| 15 | 25,050,000 | 25,200,000 | 335 | 955  | 0.676853234  | ZBTB16,ENSBTAG00000008564                                    |
| 15 | 25,125,000 | 25,275,000 | 336 | 915  | 0.190459337  | C15H11ORF71,RBM7,ENSBTAG00000008564                          |
| 15 | 25,200,000 | 25,350,000 | 337 | 576  | -0.802213221 | C15H11ORF71,RBM7,REXO2                                       |
| 15 | 25,275,000 | 25,425,000 | 338 | 488  | -0.652502537 | NXPE4,REXO2                                                  |
| 15 | 25,350,000 | 25,500,000 | 339 | 316  | -0.217623596 | NXPE4                                                        |
| 15 | 25,425,000 | 25,575,000 | 340 | 437  | -0.829131916 | NXPE2,NXPE4                                                  |
| 15 | 25,500,000 | 25,650,000 | 341 | 962  | -1.693516258 | NXPE2                                                        |
| 15 | 25,575,000 | 25,725,000 | 342 | 1076 | -2.068905363 |                                                              |
| 15 | 25,650,000 | 25,800,000 | 343 | 636  | -2.134529711 |                                                              |
| 15 | 25,725,000 | 25,875,000 | 344 | 719  | -1.361495345 |                                                              |
| 15 | 25,800,000 | 25,950,000 | 345 | 1083 | -0.959481747 |                                                              |
| 15 | 25,875,000 | 26,025,000 | 346 | 974  | -0.406128589 |                                                              |
| 15 | 25,950,000 | 26,100,000 | 347 | 889  | -0.668949269 |                                                              |
| 15 | 26,025,000 | 26,175,000 | 348 | 667  | -0.709555586 | CADM1                                                        |
| 15 | 26,100,000 | 26,250,000 | 349 | 575  | -0.088887271 | CADM1                                                        |
| 15 | 26,175,000 | 26,325,000 | 350 | 751  | -0.679163694 | CADM1                                                        |
| 15 | 26,250,000 | 26,400,000 | 351 | 746  | -0.819075807 | CADM1                                                        |
| 15 | 26,325,000 | 26,475,000 | 352 | 552  | -0.613012117 | CADM1                                                        |
| 15 | 26,400,000 | 26,550,000 | 353 | 643  | 0.222328326  | CADM1                                                        |
| 15 | 26,475,000 | 26,625,000 | 354 | 789  | 0.58023638   |                                                              |
| 15 | 26,550,000 | 26,700,000 | 355 | 929  | 0.129779995  |                                                              |
| 15 | 26,625,000 | 26,775,000 | 356 | 881  | 0.089579798  |                                                              |
| 15 | 26,700,000 | 26,850,000 | 357 | 604  | 0.757041743  |                                                              |
| 15 | 26,775,000 | 26,925,000 | 358 | 561  | 0.91677747   |                                                              |
| 15 | 26,850,000 | 27,000,000 | 359 | 706  | 0.718065734  |                                                              |
| 15 | 26,925,000 | 27,075,000 | 360 | 772  | 0.697758695  |                                                              |
| 15 | 27,000,000 | 27,150,000 | 361 | 518  | 0.669516862  |                                                              |
| 15 | 27,075,000 | 27,225,000 | 362 | 815  | 0.906866659  |                                                              |
| 15 | 27,150,000 | 27,300,000 | 363 | 1245 | 0.839724102  |                                                              |
| 15 | 27,225,000 | 27,375,000 | 364 | 1106 | 0.696424326  |                                                              |
| 15 | 27,300,000 | 27,450,000 | 365 | 751  | 0.741969328  |                                                              |
| 15 | 27,375,000 | 27,525,000 | 366 | 516  | 0.167667007  |                                                              |
| 15 | 27,450,000 | 27,600,000 | 367 | 743  | 0.159650015  |                                                              |
| 15 | 27,525,000 | 27,675,000 | 368 | 665  | 0.470838692  |                                                              |
| 15 | 27,600,000 | 27,750,000 | 369 | 288  | 0.526812325  |                                                              |
| 15 | 27,675,000 | 27,825,000 | 370 | 412  | 0.637008826  | ENSBTAG00000037657                                           |
| 15 | 27,750,000 | 27,900,000 | 371 | 604  | 0.584364478  | APOA5,BUD13,ZNF259,ENSBTAG00000037657                        |
| 15 | 27,825,000 | 27,975,000 | 372 | 665  | 0.677865103  | APOA1,APOA4,APOA5,APOC3,BUD13,SIK3,ZNF259,ENSBTAG00000037657 |
| 15 | 27,900,000 | 28,050,000 | 373 | 499  | 1.094496269  | APOA1,APOA4,APOC3,SIK3                                       |
| 15 | 27,975,000 | 28,125,000 | 374 | 371  | 0.859122676  | SIK3                                                         |
| 15 | 28,050,000 | 28,200,000 | 375 | 387  | 0.661503023  | SIK3                                                         |
| 15 | 28,125,000 | 28,275,000 | 376 | 321  | 0.554246071  | PAFAH1B2                                                     |
| 15 | 28,200,000 | 28,350,000 | 377 | 346  | 0.665893164  | PAFAH1B2,PCSK7,SIDT2,TAGLN                                   |
| 15 | 28,275,000 | 28,425,000 | 378 | 477  | 0.909798379  | BACE1,PAFAH1B2,PCSK7,RNF214,SIDT2,TAGLN                      |
| 15 | 28,350,000 | 28,500,000 | 379 | 484  | 0.682653385  | BACE1,CEP164,PCSK7,RNF214                                    |
| 15 | 28,425,000 | 28,575,000 | 380 | 455  | 0.77512365   | CEP164,DSCAML1                                               |
| 15 | 28,500,000 | 28,650,000 | 381 | 453  | 0.955180766  | CEP164,DSCAML1                                               |
| 15 | 28,575,000 | 28,725,000 | 382 | 864  | 0.859491176  | DSCAML1                                                      |
| 15 | 28,650,000 | 28,800,000 | 383 | 1017 | 0.762600944  |                                                              |
| 15 | 28,725,000 | 28,875,000 | 384 | 577  | -0.075989977 |                                                              |

|    |            |            |     |     |              |                                                                         |
|----|------------|------------|-----|-----|--------------|-------------------------------------------------------------------------|
| 15 | 28,800,000 | 28,950,000 | 385 | 397 | -0.330126033 | FXYD2,FXYD6,ENSBTAG00000047932                                          |
| 15 | 28,875,000 | 29,025,000 | 386 | 651 | 0.457889416  | FXYD2,FXYD6,TMPRSS13,ENSBTAG00000047932                                 |
| 15 | 28,950,000 | 29,100,000 | 387 | 753 | 0.19368063   | FXYD6,IL10RA,TMPRSS13                                                   |
| 15 | 29,025,000 | 29,175,000 | 388 | 608 | -1.539649655 | IL10RA                                                                  |
| 15 | 29,100,000 | 29,250,000 | 389 | 714 | -1.11640023  | IL10RA,TMPRSS4                                                          |
| 15 | 29,175,000 | 29,325,000 | 390 | 643 | 0.415779986  | AMICA1,SCN2B,SCN4B,TMPRSS4                                              |
| 15 | 29,250,000 | 29,400,000 | 391 | 543 | 0.779188885  | AMICA1,MPZL2,MPZL3,SCN2B,SCN4B                                          |
| 15 | 29,325,000 | 29,475,000 | 392 | 497 | -0.14010086  | AMICA1,CD3D,CD3E,CD3G,MPZL2,MPZL3                                       |
| 15 | 29,400,000 | 29,550,000 | 393 | 318 | -0.344354837 | ATP5L,CD3D,CD3E,CD3G,UBE4A                                              |
| 15 | 29,475,000 | 29,625,000 | 394 | 129 | 0.506276355  | ATP5L,UBE4A                                                             |
| 15 | 29,550,000 | 29,700,000 | 395 | 107 | 0.886870013  | KMT2A                                                                   |
| 15 | 29,625,000 | 29,775,000 | 396 | 187 | 0.513093745  | ARCN1,IFT46,KMT2A,TMEM25,TTC36                                          |
| 15 | 29,700,000 | 29,850,000 | 397 | 216 | 0.113854865  | ARCN1,IFT46,KMT2A,PHLDB1,TMEM25,TREH,TTC36                              |
| 15 | 29,775,000 | 29,925,000 | 398 | 295 | 0.421880604  | ARCN1,DDX6,PHLDB1,TREH                                                  |
| 15 | 29,850,000 | 30,000,000 | 399 | 363 | 0.761227742  | DDX6                                                                    |
| 15 | 29,925,000 | 30,075,000 | 400 | 393 | 0.900440885  | BCL9L,BLR1,UPK2                                                         |
| 15 | 30,000,000 | 30,150,000 | 401 | 365 | -0.318936535 | BCL9L,BLR1,CCDC84,FOXR1,RPS25,SLC37A4,TRAPPC4,UPK2                      |
| 15 | 30,075,000 | 30,225,000 | 402 | 312 | -1.210377404 | C2CD2L,CCDC84,DPAGT1,FOXR1,H2AFX,HMBS,HYOU1,RPS25,SLC37A4,TRAPPC4,VPS11 |
| 15 | 30,150,000 | 30,300,000 | 403 | 282 | 0.219490039  | ABCG4,C2CD2L,DPAGT1,H2AFX,HINFP,HMBS,HYOU1,NLRX1,PDZD3,VPS11            |
| 15 | 30,225,000 | 30,375,000 | 404 | 208 | 0.633012066  | ABCG4,CBL,CCDC153,HINFP,NLRX1,PDZD3                                     |
| 15 | 30,300,000 | 30,450,000 | 405 | 196 | 0.285888539  | C1QTNF5,CBL,CCDC153,MCAM,PDZD3,RNF26                                    |
| 15 | 30,375,000 | 30,525,000 | 406 | 269 | -0.234093831 | C1QTNF5,CBL,MCAM,MFRP,RNF26,THY1,USP2                                   |
| 15 | 30,450,000 | 30,600,000 | 407 | 642 | -1.171686637 | C1QTNF5,MFRP,THY1,USP2                                                  |
| 15 | 30,525,000 | 30,675,000 | 408 | 886 | -0.766491128 |                                                                         |
| 15 | 30,600,000 | 30,750,000 | 409 | 748 | 0.18339968   | HVEC,ENSBTAG00000027759                                                 |
| 15 | 30,675,000 | 30,825,000 | 410 | 671 | -0.468141261 | HVEC,ENSBTAG00000027759                                                 |
| 15 | 30,750,000 | 30,900,000 | 411 | 844 | -0.260108414 | HVEC                                                                    |
| 15 | 30,825,000 | 30,975,000 | 412 | 717 | 0.079341119  |                                                                         |
| 15 | 30,900,000 | 31,050,000 | 413 | 516 | -0.615499385 |                                                                         |
| 15 | 30,975,000 | 31,125,000 | 414 | 785 | -0.412584606 |                                                                         |
| 15 | 31,050,000 | 31,200,000 | 415 | 768 | -0.878968388 |                                                                         |
| 15 | 31,125,000 | 31,275,000 | 416 | 863 | -0.405444877 | TRIM29                                                                  |
| 15 | 31,200,000 | 31,350,000 | 417 | 783 | -0.060864377 | OAF,TRIM29                                                              |
| 15 | 31,275,000 | 31,425,000 | 418 | 376 | -0.006683313 | OAF,POU2F3                                                              |
| 15 | 31,350,000 | 31,500,000 | 419 | 308 | -0.110928472 | ARHGEF12,POU2F3,TMEM136                                                 |
| 15 | 31,425,000 | 31,575,000 | 420 | 407 | 0.628095435  | ARHGEF12,POU2F3,TMEM136                                                 |
| 15 | 31,500,000 | 31,650,000 | 421 | 577 | 0.91072204   | ARHGEF12                                                                |
| 15 | 31,575,000 | 31,725,000 | 422 | 618 | 0.889691745  | ARHGEF12                                                                |
| 15 | 31,650,000 | 31,800,000 | 423 | 505 | 0.970126406  |                                                                         |
| 15 | 31,725,000 | 31,875,000 | 424 | 433 | 1.175152957  |                                                                         |
| 15 | 31,800,000 | 31,950,000 | 425 | 667 | 1.114407335  |                                                                         |
| 15 | 31,875,000 | 32,025,000 | 426 | 957 | 0.850069651  |                                                                         |
| 15 | 31,950,000 | 32,100,000 | 427 | 994 | 0.885252945  | GRIK4                                                                   |
| 15 | 32,025,000 | 32,175,000 | 428 | 780 | 0.69457756   | GRIK4,ENSBTAG00000040051                                                |
| 15 | 32,100,000 | 32,250,000 | 429 | 378 | -0.12366113  | GRIK4,LRRC35,ENSBTAG00000040051                                         |
| 15 | 32,175,000 | 32,325,000 | 430 | 485 | -1.479677666 | LRRC35,TECTA                                                            |
| 15 | 32,250,000 | 32,400,000 | 431 | 626 | -1.353021055 | TECTA                                                                   |
| 15 | 32,325,000 | 32,475,000 | 432 | 603 | 0.383927484  | SC5DL,TECTA                                                             |
| 15 | 32,400,000 | 32,550,000 | 433 | 747 | 0.969230402  | SC5DL                                                                   |
| 15 | 32,475,000 | 32,625,000 | 434 | 688 | 1.018101081  | SORL1                                                                   |

|    |            |            |     |      |              |                                               |
|----|------------|------------|-----|------|--------------|-----------------------------------------------|
| 15 | 32,550,000 | 32,700,000 | 435 | 566  | 0.144187319  | SORL1                                         |
| 15 | 32,625,000 | 32,775,000 | 436 | 377  | -0.925397533 | SORL1                                         |
| 15 | 32,700,000 | 32,850,000 | 437 | 284  | 0.179716711  | SORL1                                         |
| 15 | 32,775,000 | 32,925,000 | 438 | 319  | 1.028859645  |                                               |
| 15 | 32,850,000 | 33,000,000 | 439 | 301  | 1.091814929  |                                               |
| 15 | 32,925,000 | 33,075,000 | 440 | 296  | 1.140334548  |                                               |
| 15 | 33,000,000 | 33,150,000 | 441 | 399  | 1.192631202  |                                               |
| 15 | 33,075,000 | 33,225,000 | 442 | 421  | 1.135372112  |                                               |
| 15 | 33,150,000 | 33,300,000 | 443 | 383  | 1.154859132  |                                               |
| 15 | 33,225,000 | 33,375,000 | 444 | 399  | 0.782095625  |                                               |
| 15 | 33,300,000 | 33,450,000 | 445 | 559  | 0.640075815  |                                               |
| 15 | 33,375,000 | 33,525,000 | 446 | 660  | 0.572978377  |                                               |
| 15 | 33,450,000 | 33,600,000 | 447 | 723  | 0.603095468  |                                               |
| 15 | 33,525,000 | 33,675,000 | 448 | 851  | 0.837972386  |                                               |
| 15 | 33,600,000 | 33,750,000 | 449 | 973  | 0.297964246  |                                               |
| 15 | 33,675,000 | 33,825,000 | 450 | 1163 | 0.510346199  |                                               |
| 15 | 33,750,000 | 33,900,000 | 451 | 1162 | 1.118911171  |                                               |
| 15 | 33,825,000 | 33,975,000 | 452 | 1039 | 1.257121465  | UBASH3B                                       |
| 15 | 33,900,000 | 34,050,000 | 453 | 970  | 1.09076337   | C11orf63,CRTAM,UBASH3B                        |
| 15 | 33,975,000 | 34,125,000 | 454 | 606  | 0.803015505  | C11orf63,CRTAM,UBASH3B                        |
| 15 | 34,050,000 | 34,200,000 | 455 | 485  | 0.527076095  | BSX,C11orf63                                  |
| 15 | 34,125,000 | 34,275,000 | 456 | 438  | 0.468333669  | ASAM,BSX,HSPA8                                |
| 15 | 34,200,000 | 34,350,000 | 457 | 659  | 0.902276314  | ASAM,HSPA8                                    |
| 15 | 34,275,000 | 34,425,000 | 458 | 1016 | 0.691066113  | ASAM                                          |
| 15 | 34,350,000 | 34,500,000 | 459 | 998  | -0.444689169 |                                               |
| 15 | 34,425,000 | 34,575,000 | 460 | 1075 | -0.344844797 |                                               |
| 15 | 34,500,000 | 34,650,000 | 461 | 993  | 0.351043224  | GRAMD1B                                       |
| 15 | 34,575,000 | 34,725,000 | 462 | 892  | 0.495503692  | GRAMD1B                                       |
| 15 | 34,650,000 | 34,800,000 | 463 | 1042 | 0.906974349  | GRAMD1B,SCN3B                                 |
| 15 | 34,725,000 | 34,875,000 | 464 | 1258 | 0.798479528  | GRAMD1B,SCN3B,ZNF202                          |
| 15 | 34,800,000 | 34,950,000 | 465 | 1173 | 0.832891776  | SAAL1,ZNF202                                  |
| 15 | 34,875,000 | 35,025,000 | 466 | 715  | 0.999448169  | SAAL1,SERGEF,TPH1                             |
| 15 | 34,950,000 | 35,100,000 | 467 | 612  | 1.203099766  | SAAL1,SERGEF,TPH1                             |
| 15 | 35,025,000 | 35,175,000 | 468 | 854  | -0.261595471 | SERGEF                                        |
| 15 | 35,100,000 | 35,250,000 | 469 | 827  | -0.783753467 | SERGEF                                        |
| 15 | 35,175,000 | 35,325,000 | 470 | 809  | -0.610218191 | KCNC1,SERGEF                                  |
| 15 | 35,250,000 | 35,400,000 | 471 | 693  | -1.190935467 | KCNC1,MYOD1,SERGEF                            |
| 15 | 35,325,000 | 35,475,000 | 472 | 545  | -0.482211755 | MYOD1,OTOG                                    |
| 15 | 35,400,000 | 35,550,000 | 473 | 821  | 0.106289212  | OTOG,USH1C                                    |
| 15 | 35,475,000 | 35,625,000 | 474 | 1092 | -0.026493441 | ABCC8,OTOG,USH1C                              |
| 15 | 35,550,000 | 35,700,000 | 475 | 1062 | -0.298892408 | ABCC8,KCNJ11,NUCB2                            |
| 15 | 35,625,000 | 35,775,000 | 476 | 1134 | -0.272393693 | ABCC8,KCNJ11,NUCB2                            |
| 15 | 35,700,000 | 35,850,000 | 477 | 1033 | 0.242359733  | NUCB2,ENSBTAG00000015244,ENSBTAG00000032859   |
| 15 | 35,775,000 | 35,925,000 | 478 | 915  | 0.582196879  | PIK3C2A,ENSBTAG00000015244,ENSBTAG00000032859 |
| 15 | 35,850,000 | 36,000,000 | 479 | 1070 | 0.354454717  | PIK3C2A,RPS13                                 |
| 15 | 35,925,000 | 36,075,000 | 480 | 957  | -0.007945778 | RPS13                                         |
| 15 | 36,000,000 | 36,150,000 | 481 | 832  | -0.247379406 | PLEKHA7                                       |
| 15 | 36,075,000 | 36,225,000 | 482 | 855  | -0.765939707 | PLEKHA7,SMAP                                  |
| 15 | 36,150,000 | 36,300,000 | 483 | 883  | -0.960803525 | PLEKHA7,SMAP                                  |
| 15 | 36,225,000 | 36,375,000 | 484 | 745  | -0.520798393 | SMAP                                          |
| 15 | 36,300,000 | 36,450,000 | 485 | 678  | 0.701184498  |                                               |
| 15 | 36,375,000 | 36,525,000 | 486 | 642  | 0.525556216  |                                               |
| 15 | 36,450,000 | 36,600,000 | 487 | 603  | -0.338542584 |                                               |

|    |            |            |     |      |              |                    |
|----|------------|------------|-----|------|--------------|--------------------|
| 15 | 36,525,000 | 36,675,000 | 488 | 853  | 0.377482375  | SOX6               |
| 15 | 36,600,000 | 36,750,000 | 489 | 853  | 0.630411788  | SOX6               |
| 15 | 36,675,000 | 36,825,000 | 490 | 844  | 0.461862738  | SOX6               |
| 15 | 36,750,000 | 36,900,000 | 491 | 938  | -0.407041406 | SOX6               |
| 15 | 36,825,000 | 36,975,000 | 492 | 867  | -1.185964244 | SOX6               |
| 15 | 36,900,000 | 37,050,000 | 493 | 757  | -0.037056125 | SOX6               |
| 15 | 36,975,000 | 37,125,000 | 494 | 715  | -0.830480429 | SOX6               |
| 15 | 37,050,000 | 37,200,000 | 495 | 812  | -0.477134494 | SOX6               |
| 15 | 37,125,000 | 37,275,000 | 496 | 818  | 0.266169624  |                    |
| 15 | 37,200,000 | 37,350,000 | 497 | 844  | 0.100251707  |                    |
| 15 | 37,275,000 | 37,425,000 | 498 | 852  | 0.374047709  |                    |
| 15 | 37,350,000 | 37,500,000 | 499 | 794  | 0.748921149  |                    |
| 15 | 37,425,000 | 37,575,000 | 500 | 933  | 0.175421045  |                    |
| 15 | 37,500,000 | 37,650,000 | 501 | 712  | -0.442498089 |                    |
| 15 | 37,575,000 | 37,725,000 | 502 | 579  | 0.48264049   |                    |
| 15 | 37,650,000 | 37,800,000 | 503 | 668  | 0.759546055  |                    |
| 15 | 37,725,000 | 37,875,000 | 504 | 482  | 0.582600625  | INSC               |
| 15 | 37,800,000 | 37,950,000 | 505 | 533  | 0.088220385  | INSC               |
| 15 | 37,875,000 | 38,025,000 | 506 | 606  | 0.174646485  | INSC               |
| 15 | 37,950,000 | 38,100,000 | 507 | 500  | -0.139480614 | CT,INSC            |
| 15 | 38,025,000 | 38,175,000 | 508 | 441  | -0.816473123 | CALC3,CT           |
| 15 | 38,100,000 | 38,250,000 | 509 | 414  | 0.632155616  | CALC3              |
| 15 | 38,175,000 | 38,325,000 | 510 | 533  | 0.913539694  |                    |
| 15 | 38,250,000 | 38,400,000 | 511 | 451  | 0.504216627  | CRSP1              |
| 15 | 38,325,000 | 38,475,000 | 512 | 311  | 1.083884656  | CRSP1,CYP2R1,PDE3B |
| 15 | 38,400,000 | 38,550,000 | 513 | 318  | -1.664262708 | CYP2R1,PDE3B       |
| 15 | 38,475,000 | 38,625,000 | 514 | 284  | -2.861900405 | PDE3B              |
| 15 | 38,550,000 | 38,700,000 | 515 | 418  | -0.067964069 | PDE3B              |
| 15 | 38,625,000 | 38,775,000 | 516 | 668  | 1.024834379  | COPB1,PDE3B,PSMA1  |
| 15 | 38,700,000 | 38,850,000 | 517 | 764  | 1.193571888  | COPB1,PSMA1        |
| 15 | 38,775,000 | 38,925,000 | 518 | 527  | 0.987107731  | COPB1,RRAS2        |
| 15 | 38,850,000 | 39,000,000 | 519 | 288  | 0.728572643  | RRAS2,SPON1        |
| 15 | 38,925,000 | 39,075,000 | 520 | 466  | 0.869034544  | RRAS2,SPON1        |
| 15 | 39,000,000 | 39,150,000 | 521 | 707  | 0.218047089  | SPON1              |
| 15 | 39,075,000 | 39,225,000 | 522 | 755  | -1.157107641 | SPON1              |
| 15 | 39,150,000 | 39,300,000 | 523 | 791  | -1.374121373 | SPON1              |
| 15 | 39,225,000 | 39,375,000 | 524 | 913  | -0.446866059 | SPON1              |
| 15 | 39,300,000 | 39,450,000 | 525 | 1068 | 0.169330961  | SPON1              |
| 15 | 39,375,000 | 39,525,000 | 526 | 727  | 0.016930341  |                    |
| 15 | 39,450,000 | 39,600,000 | 527 | 256  | -0.808237572 | FAR1               |
| 15 | 39,525,000 | 39,675,000 | 528 | 301  | -0.284640355 | FAR1               |
| 15 | 39,600,000 | 39,750,000 | 529 | 458  | 0.303313163  | FAR1,PTH           |
| 15 | 39,675,000 | 39,825,000 | 530 | 356  | 0.877248147  | BTBD10,PTH         |
| 15 | 39,750,000 | 39,900,000 | 531 | 324  | 1.329455069  | ARNTL,BTBD10       |
| 15 | 39,825,000 | 39,975,000 | 532 | 458  | 1.2716264    | ARNTL,BTBD10       |
| 15 | 39,900,000 | 40,050,000 | 533 | 314  | 1.305597591  | ARNTL              |
| 15 | 39,975,000 | 40,125,000 | 534 | 374  | 1.236217098  |                    |
| 15 | 40,050,000 | 40,200,000 | 535 | 662  | 0.917244413  |                    |
| 15 | 40,125,000 | 40,275,000 | 536 | 847  | 0.953574462  | RASSF10            |
| 15 | 40,200,000 | 40,350,000 | 537 | 994  | 1.176960922  | RASSF10,TEAD1      |
| 15 | 40,275,000 | 40,425,000 | 538 | 908  | 0.900509013  | TEAD1              |
| 15 | 40,350,000 | 40,500,000 | 539 | 827  | 0.481001221  | TEAD1              |
| 15 | 40,425,000 | 40,575,000 | 540 | 832  | 0.770078793  | TEAD1              |

|    |            |            |     |      |              |                                             |
|----|------------|------------|-----|------|--------------|---------------------------------------------|
| 15 | 40,500,000 | 40,650,000 | 541 | 905  | 0.958885822  |                                             |
| 15 | 40,575,000 | 40,725,000 | 542 | 764  | 0.69492707   |                                             |
| 15 | 40,650,000 | 40,800,000 | 543 | 712  | 0.092644215  | PARVA                                       |
| 15 | 40,725,000 | 40,875,000 | 544 | 859  | 0.157116884  | PARVA,ENSBTAG00000047961                    |
| 15 | 40,800,000 | 40,950,000 | 545 | 736  | 0.315332551  | PARVA,ENSBTAG00000008193,ENSBTAG00000047961 |
| 15 | 40,875,000 | 41,025,000 | 546 | 762  | 0.228812535  | MICAL2,PARVA,ENSBTAG00000008193             |
| 15 | 40,950,000 | 41,100,000 | 547 | 852  | 0.20493981   | MICAL2,ENSBTAG00000008193                   |
| 15 | 41,025,000 | 41,175,000 | 548 | 878  | 0.592609011  | MICAL2                                      |
| 15 | 41,100,000 | 41,250,000 | 549 | 815  | 1.054488013  | DKK3,MICAL2                                 |
| 15 | 41,175,000 | 41,325,000 | 550 | 661  | 0.804316781  | DKK3,USP47                                  |
| 15 | 41,250,000 | 41,400,000 | 551 | 771  | -0.071250657 | DKK3,USP47                                  |
| 15 | 41,325,000 | 41,475,000 | 552 | 712  | -0.305627431 | USP47                                       |
| 15 | 41,400,000 | 41,550,000 | 553 | 508  | 0.054080009  |                                             |
| 15 | 41,475,000 | 41,625,000 | 554 | 531  | 0.714909568  | GALNTL4                                     |
| 15 | 41,550,000 | 41,700,000 | 555 | 602  | 0.715304381  | GALNTL4                                     |
| 15 | 41,625,000 | 41,775,000 | 556 | 684  | -1.208324469 | GALNTL4                                     |
| 15 | 41,700,000 | 41,850,000 | 557 | 958  | 0.292867431  | GALNTL4                                     |
| 15 | 41,775,000 | 41,925,000 | 558 | 1069 | 0.218784369  | GALNTL4                                     |
| 15 | 41,850,000 | 42,000,000 | 559 | 1159 | -1.570842639 | GALNTL4                                     |
| 15 | 41,925,000 | 42,075,000 | 560 | 1062 | -0.392759545 | GALNTL4                                     |
| 15 | 42,000,000 | 42,150,000 | 561 | 853  | 0.936558693  |                                             |
| 15 | 42,075,000 | 42,225,000 | 562 | 991  | 0.365810338  |                                             |
| 15 | 42,150,000 | 42,300,000 | 563 | 978  | -0.578098811 |                                             |
| 15 | 42,225,000 | 42,375,000 | 564 | 823  | 0.040484652  | C7H19orf53,ENSBTAG00000046636               |
| 15 | 42,300,000 | 42,450,000 | 565 | 601  | 0.853111109  | C7H19orf53,EIF4G2,ZBED5,ENSBTAG00000046636  |
| 15 | 42,375,000 | 42,525,000 | 566 | 438  | 1.030753384  | CTR9,EIF4G2,ZBED5                           |
| 15 | 42,450,000 | 42,600,000 | 567 | 611  | 0.264449782  | CTR9,MRVI1                                  |
| 15 | 42,525,000 | 42,675,000 | 568 | 848  | 0.377941886  | MRVI1                                       |
| 15 | 42,600,000 | 42,750,000 | 569 | 922  | 1.083112997  | LYVE1,MRVI1,RNF141                          |
| 15 | 42,675,000 | 42,825,000 | 570 | 981  | 1.137110686  | AMPD3,LYVE1,RNF141                          |
| 15 | 42,750,000 | 42,900,000 | 571 | 841  | 0.749662548  | AMPD3,RNF141                                |
| 15 | 42,825,000 | 42,975,000 | 572 | 577  | 0.225369072  | ADM,SBF2                                    |
| 15 | 42,900,000 | 43,050,000 | 573 | 468  | 0.293284408  | ADM,SBF2                                    |
| 15 | 42,975,000 | 43,125,000 | 574 | 429  | 0.090357279  | SBF2                                        |
| 15 | 43,050,000 | 43,200,000 | 575 | 425  | -0.478802385 | SBF2                                        |
| 15 | 43,125,000 | 43,275,000 | 576 | 496  | -0.048943524 | SBF2                                        |
| 15 | 43,200,000 | 43,350,000 | 577 | 441  | 0.398397318  | SBF2                                        |
| 15 | 43,275,000 | 43,425,000 | 578 | 303  | 0.408290961  | SBF2                                        |
| 15 | 43,350,000 | 43,500,000 | 579 | 413  | 0.239403798  | SBF2                                        |
| 15 | 43,425,000 | 43,575,000 | 580 | 707  | 0.045453308  | HSPC321,SBF2                                |
| 15 | 43,500,000 | 43,650,000 | 581 | 697  | 0.373500908  | HSPC321                                     |
| 15 | 43,575,000 | 43,725,000 | 582 | 503  | 1.012224637  | FAM92A1,HSPC321,WEE1,ENSBTAG00000016074     |
| 15 | 43,650,000 | 43,800,000 | 583 | 321  | 1.080575749  | FAM92A1,IPO7,WEE1,ZNF143,ENSBTAG00000016074 |
| 15 | 43,725,000 | 43,875,000 | 584 | 493  | -0.467162459 | IPO7,ZNF143,ENSBTAG00000016074              |
| 15 | 43,800,000 | 43,950,000 | 585 | 942  | -0.150657962 | IPO7,TMEM41B,ENSBTAG00000027723             |
| 15 | 43,875,000 | 44,025,000 | 586 | 857  | -0.406236946 | DENND5A,TMEM41B,ENSBTAG00000027723          |
| 15 | 43,950,000 | 44,100,000 | 587 | 670  | -0.407025505 | DENND5A,SCUBE2                              |
| 15 | 44,025,000 | 44,175,000 | 588 | 585  | 0.13256433   | DENND5A,SCUBE2                              |
| 15 | 44,100,000 | 44,250,000 | 589 | 325  | 0.036394132  | ASCL3,NRIP3,SCUBE2,TMEM9B                   |
| 15 | 44,175,000 | 44,325,000 | 590 | 409  | 0.279059767  | AKIP1,ASCL3,C11ORF16,NRIP3,TMEM9B           |
| 15 | 44,250,000 | 44,400,000 | 591 | 543  | 0.238060393  | AKIP1,C11ORF16,ST5                          |
| 15 | 44,325,000 | 44,475,000 | 592 | 401  | 0.089725909  | RPL27A,ST5                                  |
| 15 | 44,400,000 | 44,550,000 | 593 | 525  | -0.52038039  | RPL27A,ST5,TRIM66                           |

|    |            |            |     |      |              |                                                                                                                                      |
|----|------------|------------|-----|------|--------------|--------------------------------------------------------------------------------------------------------------------------------------|
| 15 | 44,475,000 | 44,625,000 | 594 | 497  | -0.492792059 | STK33,TRIM66                                                                                                                         |
| 15 | 44,550,000 | 44,700,000 | 595 | 380  | -0.109702992 | STK33                                                                                                                                |
| 15 | 44,625,000 | 44,775,000 | 596 | 673  | -0.462842591 | STK33                                                                                                                                |
| 15 | 44,700,000 | 44,850,000 | 597 | 672  | -0.391056255 | STK33                                                                                                                                |
| 15 | 44,775,000 | 44,925,000 | 598 | 627  | 0.22546946   | LMO1                                                                                                                                 |
| 15 | 44,850,000 | 45,000,000 | 599 | 862  | 0.498258033  | LMO1,RIC3                                                                                                                            |
| 15 | 44,925,000 | 45,075,000 | 600 | 868  | 0.411788477  | RIC3,TUB                                                                                                                             |
| 15 | 45,000,000 | 45,150,000 | 601 | 997  | -0.555289402 | EIF3F,RIC3,TUB                                                                                                                       |
| 15 | 45,075,000 | 45,225,000 | 602 | 1199 | -0.50655744  | EIF3F,ENSBTAG00000038641,ENSBTAG00000039405,ENSBTAG00000040252                                                                       |
| 15 | 45,150,000 | 45,300,000 | 603 | 1296 | 0.280331658  | ENSBTAG00000038641,ENSBTAG00000039405,ENSBTAG00000040252,ENSBTAG00000046894                                                          |
| 15 | 45,225,000 | 45,375,000 | 604 | 1508 | 0.253712961  | OR5P3,ENSBTAG00000021150,ENSBTAG00000040285,ENSBTAG00000046894                                                                       |
| 15 | 45,300,000 | 45,450,000 | 605 | 1652 | 0.250816931  | OR5P3,ENSBTAG00000021150,ENSBTAG00000040285,ENSBTAG00000045639,ENSBTAG00000048176                                                    |
| 15 | 45,375,000 | 45,525,000 | 606 | 1901 | -0.529070301 | ENSBTAG00000026826,ENSBTAG00000037384,ENSBTAG00000045639,ENSBTAG00000048176                                                          |
| 15 | 45,450,000 | 45,600,000 | 607 | 2023 | -0.539410872 | ENSBTAG00000026826,ENSBTAG00000037384,ENSBTAG00000038245,ENSBTAG00000038317,ENSBTAG00000038598,ENSBTAG00000047850                    |
| 15 | 45,525,000 | 45,675,000 | 608 | 1829 | 0.170925867  | CYB5R2,OVCH2,PPFIBP2,ENSBTAG00000038245,ENSBTAG00000038317,ENSBTAG00000038598,ENSBTAG00000047850                                     |
| 15 | 45,600,000 | 45,750,000 | 609 | 1375 | -0.49609775  | CYB5R2,OVCH2,PPFIBP2                                                                                                                 |
| 15 | 45,675,000 | 45,825,000 | 610 | 856  | -1.768645705 | PPFIBP2                                                                                                                              |
| 15 | 45,750,000 | 45,900,000 | 611 | 969  | -3.466517765 | OLFML1,PPFIBP2                                                                                                                       |
| 15 | 45,825,000 | 45,975,000 | 612 | 1198 | -2.46337229  | OLFML1,SYT9                                                                                                                          |
| 15 | 45,900,000 | 46,050,000 | 613 | 1186 | -0.240262601 | SYT9                                                                                                                                 |
| 15 | 45,975,000 | 46,125,000 | 614 | 1227 | 0.188118764  | SYT9                                                                                                                                 |
| 15 | 46,050,000 | 46,200,000 | 615 | 1213 | 0.560301867  |                                                                                                                                      |
| 15 | 46,125,000 | 46,275,000 | 616 | 1172 | 1.105814507  |                                                                                                                                      |
| 15 | 46,200,000 | 46,350,000 | 617 | 1334 | 0.621858254  | NLRP14,RBMX                                                                                                                          |
| 15 | 46,275,000 | 46,425,000 | 618 | 1618 | -0.201544537 | NLRP14,OR2D3,RBMX,ZNF214,ZNF215                                                                                                      |
| 15 | 46,350,000 | 46,500,000 | 619 | 1731 | -0.934983557 | OR10A4,OR2D2,OR2D3,ZNF214,ZNF215,ENSBTAG00000026441,ENSBTAG00000045599,ENSBTAG00000047104                                            |
| 15 | 46,425,000 | 46,575,000 | 620 | 2224 | 0.066946275  | OR10A4,OR2D2,OR6A2,ENSBTAG00000026441,ENSBTAG00000032050,ENSBTAG00000032052,ENSBTAG00000045599,ENSBTAG00000047104                    |
| 15 | 46,500,000 | 46,650,000 | 621 | 2754 | 0.010375233  | OR6A2,ENSBTAG00000032050,ENSBTAG00000032052,ENSBTAG00000036031,ENSBTAG00000037603,ENSBTAG00000038031                                 |
| 15 | 46,575,000 | 46,725,000 | 622 | 3049 | 0.062120143  | ENSBTAG00000015791,ENSBTAG00000021147,ENSBTAG00000035675,ENSBTAG00000036031,ENSBTAG00000037603,ENSBTAG00000038031,ENSBTAG00000047025 |
| 15 | 46,650,000 | 46,800,000 | 623 | 3024 | 0.566439016  | ENSBTAG00000015791,ENSBTAG00000021147,ENSBTAG00000035675,ENSBTAG00000046196,ENSBTAG00000047025                                       |
| 15 | 46,725,000 | 46,875,000 | 624 | 3012 | 0.747445786  | ENSBTAG00000004443,ENSBTAG00000037937,ENSBTAG00000046196                                                                             |
| 15 | 46,800,000 | 46,950,000 | 625 | 2792 | 0.665388033  | ENSBTAG00000004443,ENSBTAG00000037937,ENSBTAG00000037991                                                                             |
| 15 | 46,875,000 | 47,025,000 | 626 | 2389 | 0.307369209  | MRPL17,ENSBTAG00000037991                                                                                                            |



|    |            |            |     |      |              |                                                                                                                                                              |
|----|------------|------------|-----|------|--------------|--------------------------------------------------------------------------------------------------------------------------------------------------------------|
| 15 | 46,950,000 | 47,100,000 | 627 | 1720 | 0.090642809  | DCHS1,ILK,MRPL17,RRP8,TAF10,TPP1                                                                                                                             |
| 15 | 47,025,000 | 47,175,000 | 628 | 1044 | 0.235871201  | APBB1,DCHS1,DNHD1,ILK,RRP8,TAF10,TPP1                                                                                                                        |
| 15 | 47,100,000 | 47,250,000 | 629 | 679  | 0.238120742  | APBB1,ARFIP2,DNHD1,FXC1,HPX,TRIM3                                                                                                                            |
| 15 | 47,175,000 | 47,325,000 | 630 | 665  | -2.075593054 | APBB1,ARFIP2,FXC1,HPX,SMPD1,TRIM3,ENSBTAG00000009440                                                                                                         |
| 15 | 47,250,000 | 47,400,000 | 631 | 708  | -2.559910656 | APBB1,CCKBR,PRKCDBP,SMPD1,ENSBTAG00000009440                                                                                                                 |
| 15 | 47,325,000 | 47,475,000 | 632 | 424  | -0.690033541 | C11orf42,CCKBR,CNGA4,FAM160A2,OR52W1,OR56B4,PRKCDBP                                                                                                          |
| 15 | 47,400,000 | 47,550,000 | 633 | 576  | 0.268075476  | C11orf42,CNGA4,FAM160A2,OR52B2,OR52W1,OR56B4                                                                                                                 |
| 15 | 47,475,000 | 47,625,000 | 634 | 503  | 0.140740515  | OR52B2,OR56A1,ENSBTAG00000027443,ENSBTAG00000038977                                                                                                          |
| 15 | 47,550,000 | 47,700,000 | 635 | 291  | 0.415082493  | OR56A1,ENSBTAG00000027443,ENSBTAG00000032276,ENSBTAG000000038977,ENSBTAG00000047246,ENSBTAG0000048223                                                        |
| 15 | 47,625,000 | 47,775,000 | 636 | 828  | 0.99118998   | OR52E4,OR52E5,OR56A3,ENSBTAG00000023125,ENSBTAG00000032276,ENSBTAG00000047246,ENSBTAG00000048223                                                             |
| 15 | 47,700,000 | 47,850,000 | 637 | 1288 | 0.449874175  | OR52E4,OR52E5,OR56A3,ENSBTAG0000000118,ENSBTAG00000020952,ENSBTAG00000023125,ENSBTAG00000027949,ENSBTAG00000037505,ENSBTAG00000038452                        |
| 15 | 47,775,000 | 47,925,000 | 638 | 1229 | 0.016261771  | ENSBTAG0000000118,ENSBTAG00000020952,ENSBTAG0000027949,ENSBTAG00000036326,ENSBTAG00000037505,ENSBTAG00000038452,ENSBTAG00000040480                           |
| 15 | 47,850,000 | 48,000,000 | 639 | 1314 | 0.230570895  | OR52N1,ENSBTAG00000027430,ENSBTAG00000036326,ENSBTAG00000036328,ENSBTAG00000040480                                                                           |
| 15 | 47,925,000 | 48,075,000 | 640 | 1292 | 0.078624001  | OR52N1,ENSBTAG00000023912,ENSBTAG00000027430,ENSBTAG00000032255,ENSBTAG00000032256,ENSBTAG00000032259,ENSBTAG00000032262,ENSBTAG00000036328                  |
| 15 | 48,000,000 | 48,150,000 | 641 | 1337 | -0.298340646 | ENSBTAG00000023912,ENSBTAG00000026929,ENSBTAG0000027889,ENSBTAG00000032255,ENSBTAG00000032256,ENSBTAG00000032259,ENSBTAG00000032262                          |
| 15 | 48,075,000 | 48,225,000 | 642 | 1372 | -1.846593308 | ENSBTAG00000026924,ENSBTAG00000026929,ENSBTAG0000027889,ENSBTAG00000046618                                                                                   |
| 15 | 48,150,000 | 48,300,000 | 643 | 1136 | -1.375595932 | ENSBTAG00000016119,ENSBTAG00000026922,ENSBTAG0000026924,ENSBTAG00000046618,ENSBTAG00000047088                                                                |
| 15 | 48,225,000 | 48,375,000 | 644 | 1034 | -0.487941885 | ENSBTAG00000005609,ENSBTAG00000016119,ENSBTAG0000026922,ENSBTAG00000047088                                                                                   |
| 15 | 48,300,000 | 48,450,000 | 645 | 1217 | 0.212347349  | ENSBTAG00000002043,ENSBTAG00000005609,ENSBTAG0000038536                                                                                                      |
| 15 | 48,375,000 | 48,525,000 | 646 | 1306 | 0.901454318  | ENSBTAG00000002043,ENSBTAG00000005251,ENSBTAG0000038536                                                                                                      |
| 15 | 48,450,000 | 48,600,000 | 647 | 1227 | 0.774561834  | OR52B6,ENSBTAG00000005251,ENSBTAG00000037465                                                                                                                 |
| 15 | 48,525,000 | 48,675,000 | 648 | 1240 | 0.701136244  | OR52B6,ENSBTAG00000037465,ENSBTAG00000046489,ENSBTAG00000046741,ENSBTAG00000048166,ENSBTAG0000048214                                                         |
| 15 | 48,600,000 | 48,750,000 | 649 | 1293 | 0.021439678  | MGC137098,UBQLN3,UBQLNL,ENSBTAG00000017647,ENSBTAG00000032224,ENSBTAG00000046441,ENSBTAG00000046489,ENSBTAG00000046741,ENSBTAG00000048166,ENSBTAG00000048214 |

|    |            |            |     |      |              |                                                                                                                                                                                        |
|----|------------|------------|-----|------|--------------|----------------------------------------------------------------------------------------------------------------------------------------------------------------------------------------|
| 15 | 48,675,000 | 48,825,000 | 650 | 1460 | -0.082763677 | MGC137098,OR51I2,UBQLN3,UBQLNL,ENSBTAG00000017647,ENSBTAG00000018182,ENSBTAG00000032224,ENSBTAG00000038637,ENSBTAG00000039214,ENSBTAG00000046441,ENSBTAG00000046825,ENSBTAG00000047232 |
| 15 | 48,750,000 | 48,900,000 | 651 | 1306 | 0.476179823  | OR51I1,OR51I2,OR51Q1,ENSBTAG00000018182,ENSBTAG00000019544,ENSBTAG00000038637,ENSBTAG00000039088,ENSBTAG00000039214,ENSBTAG00000046825,ENSBTAG00000047232                              |
| 15 | 48,825,000 | 48,975,000 | 652 | 1497 | 0.263728587  | OR51I1,OR51M1,OR51Q1,ENSBTAG00000019544,ENSBTAG00000039088                                                                                                                             |
| 15 | 48,900,000 | 49,050,000 | 653 | 2041 | 0.462395805  | HBB,HBE2,HBE4,OR51M1,ENSBTAG00000037815,ENSBTAG00000039056                                                                                                                             |
| 15 | 48,975,000 | 49,125,000 | 654 | 1899 | 0.911468096  | HBB,HBE2,HBE4,OR51V1,ENSBTAG00000020673,ENSBTAG00000037644,ENSBTAG00000037815,ENSBTAG00000039056,ENSBTAG00000047477                                                                    |
| 15 | 49,050,000 | 49,200,000 | 655 | 1724 | 1.031053054  | HBE2,OR51V1,ENSBTAG00000020673,ENSBTAG00000037644,ENSBTAG00000046378,ENSBTAG00000047477,ENSBTAG00000048301                                                                             |
| 15 | 49,125,000 | 49,275,000 | 656 | 1667 | 1.05865914   | ENSBTAG00000038679,ENSBTAG00000046378,ENSBTAG00000046983,ENSBTAG00000048003,ENSBTAG00000048300,ENSBTAG00000048301                                                                      |
| 15 | 49,200,000 | 49,350,000 | 657 | 1581 | 0.893704972  | ENSBTAG00000038679,ENSBTAG00000039773,ENSBTAG00000046983,ENSBTAG00000047356,ENSBTAG00000047847,ENSBTAG00000048003,ENSBTAG00000048300                                                   |
| 15 | 49,275,000 | 49,425,000 | 658 | 1357 | 0.912129026  | ENSBTAG00000039773,ENSBTAG00000040017,ENSBTAG00000045959,ENSBTAG00000046829,ENSBTAG00000046921,ENSBTAG00000047356,ENSBTAG00000047847                                                   |
| 15 | 49,350,000 | 49,500,000 | 659 | 1237 | 0.927636901  | ENSBTAG00000039054,ENSBTAG00000040017,ENSBTAG00000045959,ENSBTAG00000046829,ENSBTAG00000046921                                                                                         |
| 15 | 49,425,000 | 49,575,000 | 660 | 1447 | 1.035146548  | ENSBTAG00000038899,ENSBTAG00000039054,ENSBTAG00000040236,ENSBTAG00000047178,ENSBTAG00000047662                                                                                         |
| 15 | 49,500,000 | 49,650,000 | 661 | 1370 | 0.764372155  | OR51F2,OR51T1,ENSBTAG00000038899,ENSBTAG00000039651,ENSBTAG00000040236,ENSBTAG00000047178,ENSBTAG00000047662                                                                           |
| 15 | 49,575,000 | 49,725,000 | 662 | 1186 | 0.117875224  | OR51F2,OR51T1,ENSBTAG00000014853,ENSBTAG00000038727,ENSBTAG00000039651                                                                                                                 |
| 15 | 49,650,000 | 49,800,000 | 663 | 1065 | 0.163200906  | ENSBTAG00000000763,ENSBTAG00000014853,ENSBTAG00000038161,ENSBTAG00000038727,ENSBTAG00000045612                                                                                         |
| 15 | 49,725,000 | 49,875,000 | 664 | 922  | 0.031367531  | OR52E2,ENSBTAG00000000763,ENSBTAG00000038161,ENSBTAG00000040408,ENSBTAG00000045612,ENSBTAG00000046913                                                                                  |
| 15 | 49,800,000 | 49,950,000 | 665 | 1241 | -0.740162477 | OR52E2,ENSBTAG00000035006,ENSBTAG00000035008,ENSBTAG00000040408,ENSBTAG00000046913                                                                                                     |
| 15 | 49,875,000 | 50,025,000 | 666 | 1605 | -0.34991239  | ENSBTAG00000008312,ENSBTAG00000035006,ENSBTAG00000035008,ENSBTAG00000045488                                                                                                            |
| 15 | 49,950,000 | 50,100,000 | 667 | 1308 | -0.165481222 | ENSBTAG00000008312,ENSBTAG00000035027,ENSBTAG00000045488,ENSBTAG00000046624,ENSBTAG00000047960                                                                                         |
| 15 | 50,025,000 | 50,175,000 | 668 | 989  | -0.390784383 | ENSBTAG00000035027,ENSBTAG00000039298,ENSBTAG00000046624,ENSBTAG00000047960                                                                                                            |

|    |            |            |     |      |              |                                                                                                                                                        |
|----|------------|------------|-----|------|--------------|--------------------------------------------------------------------------------------------------------------------------------------------------------|
| 15 | 50,100,000 | 50,250,000 | 669 | 1237 | -0.760413276 | ENSBTAG00000037875,ENSBTAG00000039298,ENSBTAG0000039735,ENSBTAG00000047945                                                                             |
| 15 | 50,175,000 | 50,325,000 | 670 | 1393 | -0.515874162 | ENSBTAG00000004765,ENSBTAG00000037875,ENSBTAG0000039330,ENSBTAG00000039735,ENSBTAG00000040339,ENSBTAG00000047945                                       |
| 15 | 50,250,000 | 50,400,000 | 671 | 1327 | -0.61125719  | ENSBTAG00000004765,ENSBTAG00000037886,ENSBTAG0000038636,ENSBTAG00000039330,ENSBTAG00000040339                                                          |
| 15 | 50,325,000 | 50,475,000 | 672 | 1546 | 0.048805744  | ENSBTAG00000017934,ENSBTAG00000037886,ENSBTAG0000038636,ENSBTAG00000040478,ENSBTAG00000047021                                                          |
| 15 | 50,400,000 | 50,550,000 | 673 | 1435 | 0.764595418  | ENSBTAG00000017934,ENSBTAG00000020033,ENSBTAG0000022368,ENSBTAG00000038075,ENSBTAG00000040478,ENSBTAG00000045850,ENSBTAG00000047021,ENSBTAG00000047489 |
| 15 | 50,475,000 | 50,625,000 | 674 | 1245 | -1.14252606  | ENSBTAG00000020033,ENSBTAG00000022368,ENSBTAG0000038075,ENSBTAG00000038579,ENSBTAG00000038787,ENSBTAG00000040119,ENSBTAG00000045850,ENSBTAG00000047489 |
| 15 | 50,550,000 | 50,700,000 | 675 | 1263 | -1.375659734 | OR51L1,ENSBTAG00000038579,ENSBTAG00000038787,ENSBTAG00000039503,ENSBTAG00000040119                                                                     |
| 15 | 50,625,000 | 50,775,000 | 676 | 775  | -0.231214737 | OR51A7,OR51L1,ENSBTAG00000037474,ENSBTAG00000038170,ENSBTAG00000039134,ENSBTAG00000039503,ENSBTAG00000046816                                           |
| 15 | 50,700,000 | 50,850,000 | 677 | 430  | -0.059638911 | OR51A7,ENSBTAG00000037474,ENSBTAG00000038170,ENSBTAG00000039134,ENSBTAG00000046816,ENSBTAG0000046853,ENSBTAG00000047498                                |
| 15 | 50,775,000 | 50,925,000 | 678 | 946  | 0.588532604  | ENSBTAG00000031937,ENSBTAG00000031943,ENSBTAG0000046853,ENSBTAG00000047498                                                                             |
| 15 | 50,850,000 | 51,000,000 | 679 | 1238 | 0.516028492  | OR51E2,ENSBTAG00000027637,ENSBTAG00000031937,ENSBTAG00000031943,ENSBTAG00000034711                                                                     |
| 15 | 50,925,000 | 51,075,000 | 680 | 1202 | 0.583396912  | OR51D1,OR51E1,OR51E2,TRIM68,ENSBTAG00000027637,ENSBTAG00000034711,ENSBTAG00000047556,ENSBTAG0000047803,ENSBTAG00000048052                              |
| 15 | 51,000,000 | 51,150,000 | 681 | 788  | 0.609114657  | OR51D1,OR51E1,TRIM68,ENSBTAG00000047556,ENSBTAG00000047803,ENSBTAG00000048052                                                                          |
| 15 | 51,075,000 | 51,225,000 | 682 | 91   | -0.977343343 |                                                                                                                                                        |
| 15 | 51,150,000 | 51,300,000 | 683 | 43   | -0.008329713 |                                                                                                                                                        |
| 15 | 51,225,000 | 51,375,000 | 684 | 830  | -1.228202343 | OR52K2,ENSBTAG00000039467                                                                                                                              |
| 15 | 51,300,000 | 51,450,000 | 685 | 1334 | -0.631497651 | OR52K1,OR52K2,OR52M1,ENSBTAG00000013683,ENSBTAG00000039467                                                                                             |
| 15 | 51,375,000 | 51,525,000 | 686 | 1096 | 0.036382267  | OR52K1,OR52M1,TRIM21,ENSBTAG00000012325,ENSBTAG00000013683,ENSBTAG00000015357,ENSBTAG00000040075                                                       |
| 15 | 51,450,000 | 51,600,000 | 687 | 1320 | -2.550156408 | TRIM21,ENSBTAG00000012325,ENSBTAG00000015357,ENSBTAG00000031915,ENSBTAG00000040075,ENSBTAG0000047860                                                   |
| 15 | 51,525,000 | 51,675,000 | 688 | 1380 | -2.177788694 | ENSBTAG00000031907,ENSBTAG00000031915,ENSBTAG0000045696,ENSBTAG00000047860                                                                             |
| 15 | 51,600,000 | 51,750,000 | 689 | 1665 | 0.088462789  | ENSBTAG00000031903,ENSBTAG00000031907,ENSBTAG0000045556,ENSBTAG00000045696                                                                             |
| 15 | 51,675,000 | 51,825,000 | 690 | 1996 | 0.353165476  | RRM1,ENSBTAG00000005070,ENSBTAG00000031903,ENSBTAG00000035686,ENSBTAG00000045556                                                                       |

|    |            |            |     |      |              |                                                                                                            |
|----|------------|------------|-----|------|--------------|------------------------------------------------------------------------------------------------------------|
| 15 | 51,750,000 | 51,900,000 | 691 | 1695 | 0.107465766  | RRM1,STIM1,ENSBTAG00000005070,ENSBTAG000000035686                                                          |
| 15 | 51,825,000 | 51,975,000 | 692 | 1542 | -0.021622727 | RRM1,STIM1                                                                                                 |
| 15 | 51,900,000 | 52,050,000 | 693 | 1505 | 0.37998123   | STIM1                                                                                                      |
| 15 | 51,975,000 | 52,125,000 | 694 | 1201 | 0.386803938  | NUP98,PGAP2,RHOG,STIM1                                                                                     |
| 15 | 52,050,000 | 52,200,000 | 695 | 1112 | -0.264207901 | CHRNA10,NUP98,PGAP2,RHOG,ENSBTAG00000006345                                                                |
| 15 | 52,125,000 | 52,275,000 | 696 | 1416 | -0.382420031 | ART1,CHRNA10,NUP98,ENSBTAG00000006345,ENSBTAG0000023648,ENSBTAG00000037826                                 |
| 15 | 52,200,000 | 52,350,000 | 697 | 1861 | -0.347452243 | ART1,RNF121,ENSBTAG00000006345,ENSBTAG00000011549,ENSBTAG00000023648,ENSBTAG00000026796,ENSBTAG00000037826 |
| 15 | 52,275,000 | 52,425,000 | 698 | 1728 | -0.073187782 | IL18BP,NUMA1,RNF121,ENSBTAG00000011549,ENSBTAG00000026796                                                  |
| 15 | 52,350,000 | 52,500,000 | 699 | 1281 | 0.443768362  | IL18BP,LRRC51,NUMA1,RNF121                                                                                 |
| 15 | 52,425,000 | 52,575,000 | 700 | 1429 | 0.487483727  | ANAPC15,FOLR1,LAMTOR1,LRRC51,LRTOMT,NUMA1                                                                  |
| 15 | 52,500,000 | 52,650,000 | 701 | 1494 | 0.622933014  | ANAPC15,FOLR1,FOLR2,INPPL1,LAMTOR1,LRRC51,LRTOMT,PHOX2A                                                    |
| 15 | 52,575,000 | 52,725,000 | 702 | 1526 | 0.97172985   | CLPB,FOLR1,FOLR2,INPPL1,PHOX2A                                                                             |
| 15 | 52,650,000 | 52,800,000 | 703 | 1431 | 1.180007704  | CLPB                                                                                                       |
| 15 | 52,725,000 | 52,875,000 | 704 | 1316 | 0.874283414  | CLPB                                                                                                       |
| 15 | 52,800,000 | 52,950,000 | 705 | 1376 | 0.42171786   | CLPB,PDE2A                                                                                                 |
| 15 | 52,875,000 | 53,025,000 | 706 | 1104 | 0.385900528  | PDE2A,ENSBTAG00000002051                                                                                   |
| 15 | 52,950,000 | 53,100,000 | 707 | 755  | 0.484845298  | PDE2A,STARD10,ENSBTAG00000002051                                                                           |
| 15 | 53,025,000 | 53,175,000 | 708 | 636  | 0.440651908  | ATG16L2,FCHSD2,STARD10,ENSBTAG00000002051                                                                  |
| 15 | 53,100,000 | 53,250,000 | 709 | 738  | 0.31628417   | ATG16L2,FCHSD2,STARD10                                                                                     |
| 15 | 53,175,000 | 53,325,000 | 710 | 742  | -0.946193548 | FCHSD2                                                                                                     |
| 15 | 53,250,000 | 53,400,000 | 711 | 663  | -1.908035187 | FCHSD2                                                                                                     |
| 15 | 53,325,000 | 53,475,000 | 712 | 562  | -0.602127382 | FCHSD2                                                                                                     |
| 15 | 53,400,000 | 53,550,000 | 713 | 1026 | 0.681925745  | FCHSD2,P2RY2                                                                                               |
| 15 | 53,475,000 | 53,625,000 | 714 | 1155 | 0.196627288  | ARHGEF17,P2RY2,P2RY6                                                                                       |
| 15 | 53,550,000 | 53,700,000 | 715 | 714  | -1.320648889 | ARHGEF17,FAM168A,P2RY6,RELT                                                                                |
| 15 | 53,625,000 | 53,775,000 | 716 | 629  | -1.856224516 | ARHGEF17,FAM168A,RELT                                                                                      |
| 15 | 53,700,000 | 53,850,000 | 717 | 535  | -1.744054187 |                                                                                                            |
| 15 | 53,775,000 | 53,925,000 | 718 | 523  | -0.448731596 | PLEKHB1                                                                                                    |
| 15 | 53,850,000 | 54,000,000 | 719 | 640  | 0.125135001  | PLEKHB1,ENSBTAG00000000025                                                                                 |
| 15 | 53,925,000 | 54,075,000 | 720 | 921  | 0.207939394  | MRPL48,ENSBTAG00000000025                                                                                  |
| 15 | 54,000,000 | 54,150,000 | 721 | 906  | -2.205007274 | MRPL48,PAAF1,ENSBTAG00000000025                                                                            |
| 15 | 54,075,000 | 54,225,000 | 722 | 925  | -2.929995835 | DNAJB13,MRPL48,PAAF1,UCP2,UCP3                                                                             |
| 15 | 54,150,000 | 54,300,000 | 723 | 1159 | -1.864766231 | C2CD3,DNAJB13,PAAF1,UCP2,UCP3                                                                              |
| 15 | 54,225,000 | 54,375,000 | 724 | 1205 | -0.652046863 | C2CD3,PPME1                                                                                                |
| 15 | 54,300,000 | 54,450,000 | 725 | 1231 | -0.844702269 | C2CD3,P4HA3,PPME1                                                                                          |
| 15 | 54,375,000 | 54,525,000 | 726 | 1308 | -2.581924144 | P4HA3,PGM2L1,PPME1,RPL36A                                                                                  |
| 15 | 54,450,000 | 54,600,000 | 727 | 1360 | -1.689976207 | KCNE3,P4HA3,PGM2L1,RPL36A                                                                                  |
| 15 | 54,525,000 | 54,675,000 | 728 | 1559 | -1.80293008  | KCNE3,LIPT2,PGM2L1                                                                                         |
| 15 | 54,600,000 | 54,750,000 | 729 | 1665 | -2.911165124 | LIPT2,POLD3                                                                                                |
| 15 | 54,675,000 | 54,825,000 | 730 | 1446 | -2.419990973 | CHRDL2,POLD3                                                                                               |
| 15 | 54,750,000 | 54,900,000 | 731 | 993  | -1.571506426 | CHRDL2,RNF169                                                                                              |
| 15 | 54,825,000 | 54,975,000 | 732 | 766  | -1.419083856 | RNF169,XRRA1                                                                                               |
| 15 | 54,900,000 | 55,050,000 | 733 | 1129 | 0.151693732  | NEU3,RNF169,SPCS2,XRRA1                                                                                    |
| 15 | 54,975,000 | 55,125,000 | 734 | 1324 | 0.568572907  | NEU3,OR2AT4,SPCS2,XRRA1,ENSBTAG00000047344                                                                 |
| 15 | 55,050,000 | 55,200,000 | 735 | 1025 | -0.262998419 | OR2AT4,SLCO2B1,ENSBTAG00000047344                                                                          |
| 15 | 55,125,000 | 55,275,000 | 736 | 767  | -0.499625431 | ARRB1,SLCO2B1,TPBGL                                                                                        |
| 15 | 55,200,000 | 55,350,000 | 737 | 710  | -0.6592145   | ARRB1,SLCO2B1,TPBGL                                                                                        |

|    |            |            |     |      |              |                                                                      |
|----|------------|------------|-----|------|--------------|----------------------------------------------------------------------|
| 15 | 55,275,000 | 55,425,000 | 738 | 810  | -2.268053341 | ARRB1,GDPD5,KLHL35,RPS3                                              |
| 15 | 55,350,000 | 55,500,000 | 739 | 1018 | -0.837600724 | GDPD5,KLHL35,RPS3                                                    |
| 15 | 55,425,000 | 55,575,000 | 740 | 837  | 0.068299435  | GDPD5,MAP6,SERPINH1                                                  |
| 15 | 55,500,000 | 55,650,000 | 741 | 647  | -0.030522412 | MAP6,SERPINH1                                                        |
| 15 | 55,575,000 | 55,725,000 | 742 | 825  | -0.503543933 | MAP6,MOGAT2,ENSBTAG00000047111                                       |
| 15 | 55,650,000 | 55,800,000 | 743 | 935  | -1.100923316 | MOGAT2,ENSBTAG00000047111                                            |
| 15 | 55,725,000 | 55,875,000 | 744 | 1246 | -0.697073643 | ENSBTAG00000000628,ENSBTAG00000015091,ENSBTAG0000046149              |
| 15 | 55,800,000 | 55,950,000 | 745 | 1205 | -0.355014275 | DGAT2,MOGAT2,ENSBTAG00000000628,ENSBTAG00000015091,ENSBTAG0000046149 |
| 15 | 55,875,000 | 56,025,000 | 746 | 1043 | -0.192756591 | DGAT2,MOGAT2,UVRAG                                                   |
| 15 | 55,950,000 | 56,100,000 | 747 | 1133 | -1.013619088 | DGAT2,UVRAG                                                          |
| 15 | 56,025,000 | 56,175,000 | 748 | 940  | -2.423281158 | UVRAG                                                                |
| 15 | 56,100,000 | 56,250,000 | 749 | 741  | -2.536550034 | UVRAG                                                                |
| 15 | 56,175,000 | 56,325,000 | 750 | 724  | -1.417327525 | UVRAG                                                                |
| 15 | 56,250,000 | 56,400,000 | 751 | 826  | -1.292429237 | UVRAG,WNT11                                                          |
| 15 | 56,325,000 | 56,475,000 | 752 | 939  | -1.4379112   | WNT11                                                                |
| 15 | 56,400,000 | 56,550,000 | 753 | 933  | -0.35929455  | PRKRIR,WNT11                                                         |
| 15 | 56,475,000 | 56,625,000 | 754 | 969  | 0.612192266  | PRKRIR                                                               |
| 15 | 56,550,000 | 56,700,000 | 755 | 773  | 0.315470266  | C11orf30,PRKRIR                                                      |
| 15 | 56,625,000 | 56,775,000 | 756 | 503  | -2.606997977 | C11orf30                                                             |
| 15 | 56,700,000 | 56,850,000 | 757 | 563  | -2.891809932 | C11orf30,LRRC32                                                      |
| 15 | 56,775,000 | 56,925,000 | 758 | 786  | -0.565539601 | LRRC32,ENSBTAG00000027438                                            |
| 15 | 56,850,000 | 57,000,000 | 759 | 715  | 0.115322757  | TSKU,ENSBTAG00000027438                                              |
| 15 | 56,925,000 | 57,075,000 | 760 | 383  | -0.070399527 | ACER3,TSKU                                                           |
| 15 | 57,000,000 | 57,150,000 | 761 | 265  | -0.141503266 | ACER3                                                                |
| 15 | 57,075,000 | 57,225,000 | 762 | 353  | -0.691717626 | ACER3                                                                |
| 15 | 57,150,000 | 57,300,000 | 763 | 1273 | -1.623862643 | ACER3,B3GNT6,CAPN5                                                   |
| 15 | 57,225,000 | 57,375,000 | 764 | 1433 | -1.397894696 | B3GNT6,CAPN5,MYO7A                                                   |
| 15 | 57,300,000 | 57,450,000 | 765 | 1020 | 0.093152261  | CAPN5,MYO7A,ENSBTAG00000000886                                       |
| 15 | 57,375,000 | 57,525,000 | 766 | 1161 | 0.932374767  | MYO7A,ENSBTAG00000000886                                             |
| 15 | 57,450,000 | 57,600,000 | 767 | 1078 | 1.135465194  | ENSBTAG00000000886                                                   |
| 15 | 57,525,000 | 57,675,000 | 768 | 1027 | 0.562783481  |                                                                      |
| 15 | 57,600,000 | 57,750,000 | 769 | 1195 | 0.20689718   |                                                                      |
| 15 | 57,675,000 | 57,825,000 | 770 | 1296 | 0.403494114  |                                                                      |
| 15 | 57,750,000 | 57,900,000 | 771 | 842  | 0.240433956  |                                                                      |
| 15 | 57,825,000 | 57,975,000 | 772 | 712  | -1.201838802 | ANO3                                                                 |
| 15 | 57,900,000 | 58,050,000 | 773 | 805  | -1.004045986 | ANO3                                                                 |
| 15 | 57,975,000 | 58,125,000 | 774 | 683  | 0.189133654  | ANO3,MUC15                                                           |
| 15 | 58,050,000 | 58,200,000 | 775 | 583  | 0.425670921  | ANO3,MUC15,SLC5A12                                                   |
| 15 | 58,125,000 | 58,275,000 | 776 | 452  | 0.0248858    | ANO3,SLC5A12                                                         |
| 15 | 58,200,000 | 58,350,000 | 777 | 672  | -0.756349592 |                                                                      |
| 15 | 58,275,000 | 58,425,000 | 778 | 773  | -1.056180906 |                                                                      |
| 15 | 58,350,000 | 58,500,000 | 779 | 697  | -0.613166043 | FIBIN                                                                |
| 15 | 58,425,000 | 58,575,000 | 780 | 663  | -0.407787471 | BBOX1,FIBIN                                                          |
| 15 | 58,500,000 | 58,650,000 | 781 | 708  | -0.793368043 | BBOX1                                                                |
| 15 | 58,575,000 | 58,725,000 | 782 | 765  | -0.364691078 | BBOX1                                                                |
| 15 | 58,650,000 | 58,800,000 | 783 | 929  | 0.23057339   |                                                                      |
| 15 | 58,725,000 | 58,875,000 | 784 | 836  | -0.583577961 | CCDC34,LGR4                                                          |
| 15 | 58,800,000 | 58,950,000 | 785 | 404  | -1.599794627 | CCDC34,LGR4                                                          |
| 15 | 58,875,000 | 59,025,000 | 786 | 320  | -1.588350904 | LGR4,LIN7C                                                           |
| 15 | 58,950,000 | 59,100,000 | 787 | 542  | 0.115319295  | LGR4,LIN7C                                                           |
| 15 | 59,025,000 | 59,175,000 | 788 | 556  | 0.55769718   | BDNF                                                                 |

|    |            |            |     |      |              |                          |
|----|------------|------------|-----|------|--------------|--------------------------|
| 15 | 59,100,000 | 59,250,000 | 789 | 437  | 0.469945364  | BDNF                     |
| 15 | 59,175,000 | 59,325,000 | 790 | 583  | -0.2947162   | BDNF                     |
| 15 | 59,250,000 | 59,400,000 | 791 | 793  | -0.828569524 |                          |
| 15 | 59,325,000 | 59,475,000 | 792 | 694  | -0.295359667 |                          |
| 15 | 59,400,000 | 59,550,000 | 793 | 414  | -0.302239119 | KIF18A                   |
| 15 | 59,475,000 | 59,625,000 | 794 | 222  | -0.950961583 | KIF18A,METTL15           |
| 15 | 59,550,000 | 59,700,000 | 795 | 108  | -1.354711868 | KIF18A,METTL15           |
| 15 | 59,625,000 | 59,775,000 | 796 | 124  | -0.999265688 | METTL15                  |
| 15 | 59,700,000 | 59,850,000 | 797 | 291  | -1.261029197 | METTL15                  |
| 15 | 59,775,000 | 59,925,000 | 798 | 355  | -1.261607089 | METTL15                  |
| 15 | 59,850,000 | 60,000,000 | 799 | 314  | -0.923088873 |                          |
| 15 | 59,925,000 | 60,075,000 | 800 | 380  | -0.222524292 |                          |
| 15 | 60,000,000 | 60,150,000 | 801 | 335  | -0.194782307 |                          |
| 15 | 60,075,000 | 60,225,000 | 802 | 435  | -0.499075    |                          |
| 15 | 60,150,000 | 60,300,000 | 803 | 619  | -0.089667999 |                          |
| 15 | 60,225,000 | 60,375,000 | 804 | 427  | -0.529198845 |                          |
| 15 | 60,300,000 | 60,450,000 | 805 | 244  | -3.835572591 |                          |
| 15 | 60,375,000 | 60,525,000 | 806 | 207  | -1.480311295 |                          |
| 15 | 60,450,000 | 60,600,000 | 807 | 195  | 0.490006091  |                          |
| 15 | 60,525,000 | 60,675,000 | 808 | 457  | 0.99532982   |                          |
| 15 | 60,600,000 | 60,750,000 | 809 | 458  | 0.759226299  |                          |
| 15 | 60,675,000 | 60,825,000 | 810 | 241  | -1.852046482 |                          |
| 15 | 60,750,000 | 60,900,000 | 811 | 356  | -2.473712819 |                          |
| 15 | 60,825,000 | 60,975,000 | 812 | 488  | -1.862975277 |                          |
| 15 | 60,900,000 | 61,050,000 | 813 | 875  | -0.309605046 |                          |
| 15 | 60,975,000 | 61,125,000 | 814 | 925  | -0.112485491 |                          |
| 15 | 61,050,000 | 61,200,000 | 815 | 826  | 0.339881858  |                          |
| 15 | 61,125,000 | 61,275,000 | 816 | 1091 | 0.388376877  |                          |
| 15 | 61,200,000 | 61,350,000 | 817 | 1054 | -0.247006203 |                          |
| 15 | 61,275,000 | 61,425,000 | 818 | 997  | -1.710481862 |                          |
| 15 | 61,350,000 | 61,500,000 | 819 | 983  | -1.787128146 |                          |
| 15 | 61,425,000 | 61,575,000 | 820 | 618  | -0.79402023  | KCNA4                    |
| 15 | 61,500,000 | 61,650,000 | 821 | 556  | -0.869933677 | KCNA4                    |
| 15 | 61,575,000 | 61,725,000 | 822 | 659  | -1.152645213 | ENSBTAG00000039236       |
| 15 | 61,650,000 | 61,800,000 | 823 | 465  | -1.131489441 | FSHB,ENSBTAG00000039236  |
| 15 | 61,725,000 | 61,875,000 | 824 | 410  | -0.780932204 | ARL14EP,FSHB             |
| 15 | 61,800,000 | 61,950,000 | 825 | 452  | -0.294099432 | ARL14EP,MPPED2           |
| 15 | 61,875,000 | 62,025,000 | 826 | 437  | 0.156006799  | MPPED2                   |
| 15 | 61,950,000 | 62,100,000 | 827 | 371  | -1.003695955 | MPPED2                   |
| 15 | 62,025,000 | 62,175,000 | 828 | 399  | -0.883051418 | MPPED2                   |
| 15 | 62,100,000 | 62,250,000 | 829 | 407  | 0.300345635  | MPPED2                   |
| 15 | 62,175,000 | 62,325,000 | 830 | 351  | 0.33312763   |                          |
| 15 | 62,250,000 | 62,400,000 | 831 | 457  | 0.846540887  |                          |
| 15 | 62,325,000 | 62,475,000 | 832 | 451  | 0.753415386  | ENSBTAG00000048290       |
| 15 | 62,400,000 | 62,550,000 | 833 | 481  | -0.332802054 | DCDC1,ENSBTAG00000048290 |
| 15 | 62,475,000 | 62,625,000 | 834 | 726  | -0.160569437 | DCDC1,ENSBTAG00000048290 |
| 15 | 62,550,000 | 62,700,000 | 835 | 990  | 0.558926461  |                          |
| 15 | 62,625,000 | 62,775,000 | 836 | 845  | 0.826490088  |                          |
| 15 | 62,700,000 | 62,850,000 | 837 | 619  | 0.745107905  | ENSBTAG00000045878       |
| 15 | 62,775,000 | 62,925,000 | 838 | 607  | 0.492002151  | DCDC1,ENSBTAG00000045878 |
| 15 | 62,850,000 | 63,000,000 | 839 | 377  | 0.052226651  | DCDC1,DNAJC24            |
| 15 | 62,925,000 | 63,075,000 | 840 | 429  | 0.42280583   | DCDC1,DNAJC24,IMMP1L     |
| 15 | 63,000,000 | 63,150,000 | 841 | 467  | 0.591540793  | DNAJC24,ELP4,IMMP1L      |

|    |            |            |     |      |              |                               |
|----|------------|------------|-----|------|--------------|-------------------------------|
| 15 | 63,075,000 | 63,225,000 | 842 | 285  | 0.106904045  | ELP4,IMMP1L                   |
| 15 | 63,150,000 | 63,300,000 | 843 | 444  | 0.781003193  | ELP4                          |
| 15 | 63,225,000 | 63,375,000 | 844 | 470  | 0.675825668  | ELP4,PAX6                     |
| 15 | 63,300,000 | 63,450,000 | 845 | 452  | -2.245127792 | ELP4,PAX6                     |
| 15 | 63,375,000 | 63,525,000 | 846 | 678  | -1.814713581 | PAX6                          |
| 15 | 63,450,000 | 63,600,000 | 847 | 557  | -0.388214761 |                               |
| 15 | 63,525,000 | 63,675,000 | 848 | 464  | -0.807185702 | RCN1                          |
| 15 | 63,600,000 | 63,750,000 | 849 | 812  | -0.024350112 | RCN1                          |
| 15 | 63,675,000 | 63,825,000 | 850 | 1297 | 0.102784922  |                               |
| 15 | 63,750,000 | 63,900,000 | 851 | 1078 | -0.171727692 |                               |
| 15 | 63,825,000 | 63,975,000 | 852 | 668  | 0.262038101  | WT1                           |
| 15 | 63,900,000 | 64,050,000 | 853 | 731  | 0.858501612  | WT1                           |
| 15 | 63,975,000 | 64,125,000 | 854 | 776  | 0.87943604   | CCDC73,EIF3M                  |
| 15 | 64,050,000 | 64,200,000 | 855 | 558  | 0.804920898  | CCDC73,EIF3M                  |
| 15 | 64,125,000 | 64,275,000 | 856 | 869  | 0.601088817  | CCDC73                        |
| 15 | 64,200,000 | 64,350,000 | 857 | 1045 | 0.582661329  | CCDC73,PRRG4                  |
| 15 | 64,275,000 | 64,425,000 | 858 | 690  | 0.631995403  | PRRG4,QSER1                   |
| 15 | 64,350,000 | 64,500,000 | 859 | 621  | 0.762121691  | DEPDC7,QSER1,TCP11L1          |
| 15 | 64,425,000 | 64,575,000 | 860 | 549  | 0.342023963  | CSTF3,DEPDC7,QSER1,TCP11L1    |
| 15 | 64,500,000 | 64,650,000 | 861 | 611  | -0.462952568 | CSTF3,TCP11L1                 |
| 15 | 64,575,000 | 64,725,000 | 862 | 553  | -0.07025899  | CSTF3,HIPK3                   |
| 15 | 64,650,000 | 64,800,000 | 863 | 410  | 0.306801181  | HIPK3                         |
| 15 | 64,725,000 | 64,875,000 | 864 | 500  | 0.201557288  | HIPK3,ENSBTAG00000027578      |
| 15 | 64,800,000 | 64,950,000 | 865 | 758  | 0.623819146  | ENSBTAG00000027578            |
| 15 | 64,875,000 | 65,025,000 | 866 | 769  | 0.464369218  | KIAA1549L                     |
| 15 | 64,950,000 | 65,100,000 | 867 | 930  | -0.035174051 | KIAA1549L                     |
| 15 | 65,025,000 | 65,175,000 | 868 | 1150 | 0.157045866  | C11orf91,CD59,KIAA1549L       |
| 15 | 65,100,000 | 65,250,000 | 869 | 1016 | 0.038088295  | C11orf91,CD59,FBXO3,KIAA1549L |
| 15 | 65,175,000 | 65,325,000 | 870 | 774  | -1.745281484 | FBXO3                         |
| 15 | 65,250,000 | 65,400,000 | 871 | 793  | -1.430538067 | LMO2                          |
| 15 | 65,325,000 | 65,475,000 | 872 | 765  | -1.522918368 | CAPRIN1,LMO2                  |
| 15 | 65,400,000 | 65,550,000 | 873 | 725  | -0.099633526 | ABTB2,CAPRIN1,LMO2,NAT10      |
| 15 | 65,475,000 | 65,625,000 | 874 | 924  | 0.564154841  | ABTB2,CAPRIN1,NAT10           |
| 15 | 65,550,000 | 65,700,000 | 875 | 893  | -0.511295821 | ABTB2                         |
| 15 | 65,625,000 | 65,775,000 | 876 | 689  | -0.562111485 | ABTB2                         |
| 15 | 65,700,000 | 65,850,000 | 877 | 544  | 0.227001092  | ABTB2,CAT,ELF5                |
| 15 | 65,775,000 | 65,925,000 | 878 | 517  | 0.461090938  | CAT,ELF5                      |
| 15 | 65,850,000 | 66,000,000 | 879 | 609  | -0.221520994 | EHF,ELF5                      |
| 15 | 65,925,000 | 66,075,000 | 880 | 769  | -0.649723767 | EHF                           |
| 15 | 66,000,000 | 66,150,000 | 881 | 801  | 0.1974082    | EHF                           |
| 15 | 66,075,000 | 66,225,000 | 882 | 839  | 0.0760848    | APIP                          |
| 15 | 66,150,000 | 66,300,000 | 883 | 1213 | 0.281948513  | APIP,PDHX                     |
| 15 | 66,225,000 | 66,375,000 | 884 | 1304 | 0.611253514  | APIP,PDHX                     |
| 15 | 66,300,000 | 66,450,000 | 885 | 1009 | 0.743179733  | PDHX                          |
| 15 | 66,375,000 | 66,525,000 | 886 | 701  | -0.047537109 | CD44                          |
| 15 | 66,450,000 | 66,600,000 | 887 | 535  | -2.27537546  | CD44,SLC1A2                   |
| 15 | 66,525,000 | 66,675,000 | 888 | 480  | -1.857483821 | CD44,SLC1A2                   |
| 15 | 66,600,000 | 66,750,000 | 889 | 340  | 0.428384197  | SLC1A2                        |
| 15 | 66,675,000 | 66,825,000 | 890 | 347  | 0.351700829  | PAMR1                         |
| 15 | 66,750,000 | 66,900,000 | 891 | 523  | 0.168471394  | PAMR1                         |
| 15 | 66,825,000 | 66,975,000 | 892 | 995  | 0.769583923  | FJX1,PAMR1                    |
| 15 | 66,900,000 | 67,050,000 | 893 | 1161 | 0.973245002  | FJX1,TRIM44                   |
| 15 | 66,975,000 | 67,125,000 | 894 | 1085 | 0.913536115  | TRIM44                        |

|    |            |            |     |      |              |                                   |
|----|------------|------------|-----|------|--------------|-----------------------------------|
| 15 | 67,050,000 | 67,200,000 | 895 | 1197 | 0.509652511  | TRIM44                            |
| 15 | 67,125,000 | 67,275,000 | 896 | 1062 | 0.36190995   | LDLRAD3                           |
| 15 | 67,200,000 | 67,350,000 | 897 | 930  | 0.538928041  | LDLRAD3                           |
| 15 | 67,275,000 | 67,425,000 | 898 | 949  | 0.418996841  | LDLRAD3                           |
| 15 | 67,350,000 | 67,500,000 | 899 | 633  | 0.040512463  | LDLRAD3                           |
| 15 | 67,425,000 | 67,575,000 | 900 | 522  | -0.105568239 | COMMD9,LDLRAD3                    |
| 15 | 67,500,000 | 67,650,000 | 901 | 556  | -0.712531931 | COMMD9,LDLRAD3                    |
| 15 | 67,575,000 | 67,725,000 | 902 | 652  | -2.14328896  | COMMD9,PRR5L                      |
| 15 | 67,650,000 | 67,800,000 | 903 | 872  | -1.09954759  | PRR5L,TRAF6                       |
| 15 | 67,725,000 | 67,875,000 | 904 | 964  | -0.143264737 | C15H11ORF74,PRR5L,RAG1,RAG2,TRAF6 |
| 15 | 67,800,000 | 67,950,000 | 905 | 1070 | -0.238606659 | C15H11ORF74,RAG1,RAG2             |
| 15 | 67,875,000 | 68,025,000 | 906 | 1231 | 1.036010902  | C15H11ORF74                       |
| 15 | 67,950,000 | 68,100,000 | 907 | 1300 | 1.093266449  |                                   |
| 15 | 68,025,000 | 68,175,000 | 908 | 988  | 0.617887225  |                                   |
| 15 | 68,100,000 | 68,250,000 | 909 | 803  | 0.337389623  |                                   |
| 15 | 68,175,000 | 68,325,000 | 910 | 1239 | 0.34483486   |                                   |
| 15 | 68,250,000 | 68,400,000 | 911 | 1196 | 0.411969142  |                                   |
| 15 | 68,325,000 | 68,475,000 | 912 | 976  | 0.398350558  |                                   |
| 15 | 68,400,000 | 68,550,000 | 913 | 1229 | 0.58883846   |                                   |
| 15 | 68,475,000 | 68,625,000 | 914 | 1243 | 0.430132219  |                                   |
| 15 | 68,550,000 | 68,700,000 | 915 | 1036 | -0.161431738 |                                   |
| 15 | 68,625,000 | 68,775,000 | 916 | 708  | -0.145991217 |                                   |
| 15 | 68,700,000 | 68,850,000 | 917 | 566  | -0.587585079 |                                   |
| 15 | 68,775,000 | 68,925,000 | 918 | 555  | -0.203210576 |                                   |
| 15 | 68,850,000 | 69,000,000 | 919 | 669  | 0.370342954  |                                   |
| 15 | 68,925,000 | 69,075,000 | 920 | 986  | 0.33725261   |                                   |
| 15 | 69,000,000 | 69,150,000 | 921 | 1310 | 0.007082794  |                                   |
| 15 | 69,075,000 | 69,225,000 | 922 | 1162 | -0.362478086 |                                   |
| 15 | 69,150,000 | 69,300,000 | 923 | 963  | -0.518305201 |                                   |
| 15 | 69,225,000 | 69,375,000 | 924 | 938  | -0.707848915 |                                   |
| 15 | 69,300,000 | 69,450,000 | 925 | 821  | -0.382290945 |                                   |
| 15 | 69,375,000 | 69,525,000 | 926 | 821  | -0.093186999 |                                   |
| 15 | 69,450,000 | 69,600,000 | 927 | 881  | 0.114765764  |                                   |
| 15 | 69,525,000 | 69,675,000 | 928 | 794  | 0.361938074  |                                   |
| 15 | 69,600,000 | 69,750,000 | 929 | 879  | 0.484016878  |                                   |
| 15 | 69,675,000 | 69,825,000 | 930 | 1086 | 0.683900378  |                                   |
| 15 | 69,750,000 | 69,900,000 | 931 | 1115 | 1.043668045  |                                   |
| 15 | 69,825,000 | 69,975,000 | 932 | 1086 | 0.065274175  |                                   |
| 15 | 69,900,000 | 70,050,000 | 933 | 1465 | 0.103320783  |                                   |
| 15 | 69,975,000 | 70,125,000 | 934 | 1738 | 0.447121815  |                                   |
| 15 | 70,050,000 | 70,200,000 | 935 | 1506 | 0.356593052  |                                   |
| 15 | 70,125,000 | 70,275,000 | 936 | 1391 | 0.212579688  |                                   |
| 15 | 70,200,000 | 70,350,000 | 937 | 1428 | 0.477782228  |                                   |
| 15 | 70,275,000 | 70,425,000 | 938 | 1124 | 0.297412834  |                                   |
| 15 | 70,350,000 | 70,500,000 | 939 | 783  | 0.823277059  |                                   |
| 15 | 70,425,000 | 70,575,000 | 940 | 892  | 0.977685149  |                                   |
| 15 | 70,500,000 | 70,650,000 | 941 | 1072 | 0.464488528  |                                   |
| 15 | 70,575,000 | 70,725,000 | 942 | 928  | 0.17272868   |                                   |
| 15 | 70,650,000 | 70,800,000 | 943 | 664  | 0.016397174  |                                   |
| 15 | 70,725,000 | 70,875,000 | 944 | 496  | 0.293121618  |                                   |
| 15 | 70,800,000 | 70,950,000 | 945 | 540  | -0.462836487 |                                   |
| 15 | 70,875,000 | 71,025,000 | 946 | 887  | -1.252338183 |                                   |
| 15 | 70,950,000 | 71,100,000 | 947 | 908  | -0.833251909 |                                   |



|    |            |            |      |      |              |                    |
|----|------------|------------|------|------|--------------|--------------------|
| 15 | 71,025,000 | 71,175,000 | 948  | 1118 | 0.447208886  |                    |
| 15 | 71,100,000 | 71,250,000 | 949  | 1004 | 0.66934672   | LRR4C              |
| 15 | 71,175,000 | 71,325,000 | 950  | 640  | -0.409909023 | LRR4C              |
| 15 | 71,250,000 | 71,400,000 | 951  | 698  | -0.32424974  |                    |
| 15 | 71,325,000 | 71,475,000 | 952  | 736  | 0.21519523   |                    |
| 15 | 71,400,000 | 71,550,000 | 953  | 860  | -0.973386267 |                    |
| 15 | 71,475,000 | 71,625,000 | 954  | 916  | -1.181828411 |                    |
| 15 | 71,550,000 | 71,700,000 | 955  | 1008 | -0.195549648 |                    |
| 15 | 71,625,000 | 71,775,000 | 956  | 1348 | -0.135154459 |                    |
| 15 | 71,700,000 | 71,850,000 | 957  | 1562 | -0.421691791 |                    |
| 15 | 71,775,000 | 71,925,000 | 958  | 1337 | -0.107584557 |                    |
| 15 | 71,850,000 | 72,000,000 | 959  | 729  | 0.440021323  |                    |
| 15 | 71,925,000 | 72,075,000 | 960  | 614  | 0.655785114  |                    |
| 15 | 72,000,000 | 72,150,000 | 961  | 1027 | 0.093385429  |                    |
| 15 | 72,075,000 | 72,225,000 | 962  | 889  | -0.263882678 |                    |
| 15 | 72,150,000 | 72,300,000 | 963  | 627  | 0.177251923  |                    |
| 15 | 72,225,000 | 72,375,000 | 964  | 751  | 0.486761266  |                    |
| 15 | 72,300,000 | 72,450,000 | 965  | 635  | 0.540714261  |                    |
| 15 | 72,375,000 | 72,525,000 | 966  | 604  | -0.004699608 | MSANTD3            |
| 15 | 72,450,000 | 72,600,000 | 967  | 605  | -0.240190837 | MSANTD3            |
| 15 | 72,525,000 | 72,675,000 | 968  | 771  | 0.175665772  |                    |
| 15 | 72,600,000 | 72,750,000 | 969  | 1273 | 0.493176249  |                    |
| 15 | 72,675,000 | 72,825,000 | 970  | 1400 | 0.25461143   |                    |
| 15 | 72,750,000 | 72,900,000 | 971  | 983  | -0.038765175 |                    |
| 15 | 72,825,000 | 72,975,000 | 972  | 478  | 0.340398322  |                    |
| 15 | 72,900,000 | 73,050,000 | 973  | 369  | -0.279117783 |                    |
| 15 | 72,975,000 | 73,125,000 | 974  | 357  | -0.845278342 |                    |
| 15 | 73,050,000 | 73,200,000 | 975  | 549  | -1.282069208 |                    |
| 15 | 73,125,000 | 73,275,000 | 976  | 817  | -0.406321935 |                    |
| 15 | 73,200,000 | 73,350,000 | 977  | 1083 | 0.945977917  |                    |
| 15 | 73,275,000 | 73,425,000 | 978  | 1460 | 0.409591717  | ENSBTAG00000000487 |
| 15 | 73,350,000 | 73,500,000 | 979  | 1402 | 0.15482771   | ENSBTAG00000000487 |
| 15 | 73,425,000 | 73,575,000 | 980  | 998  | -0.370032831 |                    |
| 15 | 73,500,000 | 73,650,000 | 981  | 892  | -0.27128238  |                    |
| 15 | 73,575,000 | 73,725,000 | 982  | 1219 | 0.493875304  |                    |
| 15 | 73,650,000 | 73,800,000 | 983  | 1429 | 0.401947329  |                    |
| 15 | 73,725,000 | 73,875,000 | 984  | 1430 | 0.539656112  |                    |
| 15 | 73,800,000 | 73,950,000 | 985  | 1522 | 0.761569874  |                    |
| 15 | 73,875,000 | 74,025,000 | 986  | 1371 | -0.056936386 |                    |
| 15 | 73,950,000 | 74,100,000 | 987  | 1047 | -0.825570099 |                    |
| 15 | 74,025,000 | 74,175,000 | 988  | 1178 | 0.324119622  |                    |
| 15 | 74,100,000 | 74,250,000 | 989  | 1171 | -0.260311638 |                    |
| 15 | 74,175,000 | 74,325,000 | 990  | 878  | -1.172294015 | API5               |
| 15 | 74,250,000 | 74,400,000 | 991  | 874  | -0.05344612  | API5,TTC17         |
| 15 | 74,325,000 | 74,475,000 | 992  | 952  | 0.476126774  | TTC17              |
| 15 | 74,400,000 | 74,550,000 | 993  | 836  | 0.36319376   | TTC17              |
| 15 | 74,475,000 | 74,625,000 | 994  | 627  | 0.803062871  |                    |
| 15 | 74,550,000 | 74,700,000 | 995  | 478  | 0.810838473  | HSD17B12           |
| 15 | 74,625,000 | 74,775,000 | 996  | 326  | -0.453250956 | HSD17B12           |
| 15 | 74,700,000 | 74,850,000 | 997  | 395  | -1.418905833 | ALKBH3,HSD17B12    |
| 15 | 74,775,000 | 74,925,000 | 998  | 532  | -0.665946675 | ALKBH3,HSD17B12    |
| 15 | 74,850,000 | 75,000,000 | 999  | 1018 | -0.07115878  | ALKBH3             |
| 15 | 74,925,000 | 75,075,000 | 1000 | 1163 | 0.193857259  | ACCSL,ACS,EXT2     |

|    |            |            |      |      |              |                                                               |
|----|------------|------------|------|------|--------------|---------------------------------------------------------------|
| 15 | 75,000,000 | 75,150,000 | 1001 | 672  | 0.904730366  | ACCSL,ACS,EXT2                                                |
| 15 | 75,075,000 | 75,225,000 | 1002 | 523  | 0.852611133  | ALX4,EXT2                                                     |
| 15 | 75,150,000 | 75,300,000 | 1003 | 435  | 0.395454127  | ALX4,EXT2                                                     |
| 15 | 75,225,000 | 75,375,000 | 1004 | 425  | 0.193056386  | EXT2                                                          |
| 15 | 75,300,000 | 75,450,000 | 1005 | 438  | -0.675247324 |                                                               |
| 15 | 75,375,000 | 75,525,000 | 1006 | 532  | -0.549806526 | CD82                                                          |
| 15 | 75,450,000 | 75,600,000 | 1007 | 606  | -0.531609827 | CD82                                                          |
| 15 | 75,525,000 | 75,675,000 | 1008 | 714  | -1.155461207 | CD82                                                          |
| 15 | 75,600,000 | 75,750,000 | 1009 | 1043 | -0.257935918 | TSPAN18                                                       |
| 15 | 75,675,000 | 75,825,000 | 1010 | 1020 | -0.190303254 | TSPAN18                                                       |
| 15 | 75,750,000 | 75,900,000 | 1011 | 652  | -0.455650045 | TP53I11,TSPAN18                                               |
| 15 | 75,825,000 | 75,975,000 | 1012 | 670  | -0.034638828 | TP53I11,TSPAN18                                               |
| 15 | 75,900,000 | 76,050,000 | 1013 | 898  | 0.219828556  |                                                               |
| 15 | 75,975,000 | 76,125,000 | 1014 | 731  | 0.808942138  | PRDM11                                                        |
| 15 | 76,050,000 | 76,200,000 | 1015 | 986  | 0.679269641  | PRDM11,SYT13,ENSBTAG00000031210                               |
| 15 | 76,125,000 | 76,275,000 | 1016 | 1290 | 0.460965074  | PRDM11,SYT13,ENSBTAG00000031210                               |
| 15 | 76,200,000 | 76,350,000 | 1017 | 1213 | 0.309285616  | SYT13                                                         |
| 15 | 76,275,000 | 76,425,000 | 1018 | 1455 | -0.07767545  |                                                               |
| 15 | 76,350,000 | 76,500,000 | 1019 | 1794 | -0.852139206 |                                                               |
| 15 | 76,425,000 | 76,575,000 | 1020 | 1613 | -0.573179047 | CHST1                                                         |
| 15 | 76,500,000 | 76,650,000 | 1021 | 993  | 0.418860756  | CHST1                                                         |
| 15 | 76,575,000 | 76,725,000 | 1022 | 828  | -1.055844896 | CHST1                                                         |
| 15 | 76,650,000 | 76,800,000 | 1023 | 1137 | -1.004387685 | CRY2,MAPK8IP1,SLC35C1                                         |
| 15 | 76,725,000 | 76,875,000 | 1024 | 983  | 0.413878618  | C15H11orf94,CRY2,GYLTL1B,MAPK8IP1,PEX16,PHF21A,SLC35C1        |
| 15 | 76,800,000 | 76,950,000 | 1025 | 728  | 0.855069123  | C15H11orf94,GYLTL1B,MAPK8IP1,PEX16,PHF21A                     |
| 15 | 76,875,000 | 77,025,000 | 1026 | 615  | 0.755470944  | PHF21A                                                        |
| 15 | 76,950,000 | 77,100,000 | 1027 | 714  | -1.097772198 |                                                               |
| 15 | 77,025,000 | 77,175,000 | 1028 | 766  | -1.089839736 | CREB3L1                                                       |
| 15 | 77,100,000 | 77,250,000 | 1029 | 538  | -0.472522023 | BMK,CREB3L1,DGKZ                                              |
| 15 | 77,175,000 | 77,325,000 | 1030 | 618  | -0.30276316  | AMBRA1,BMK,CHRM4,CREB3L1,DGKZ                                 |
| 15 | 77,250,000 | 77,400,000 | 1031 | 734  | -0.38694357  | AMBRA1,BMK,CHRM4                                              |
| 15 | 77,325,000 | 77,475,000 | 1032 | 584  | -0.745583826 | AMBRA1,ATG13,HARBI1                                           |
| 15 | 77,400,000 | 77,550,000 | 1033 | 531  | -0.079139717 | AMBRA1,ARHGAP1,ATG13,CKAP5,F2,HARBI1,ZNF408                   |
| 15 | 77,475,000 | 77,625,000 | 1034 | 533  | -0.503310823 | ARHGAP1,ATG13,CKAP5,F2,ZNF408                                 |
| 15 | 77,550,000 | 77,700,000 | 1035 | 452  | -0.321776396 | CKAP5,LRP4                                                    |
| 15 | 77,625,000 | 77,775,000 | 1036 | 327  | 0.443080112  | CKAP5,LRP4,ENSBTAG00000047298                                 |
| 15 | 77,700,000 | 77,850,000 | 1037 | 132  | -0.651085921 | LRP4,ENSBTAG00000012546,ENSBTAG00000038160,ENSBTAG00000047298 |
| 15 | 77,775,000 | 77,925,000 | 1038 | 104  | -1.762260106 | ENSBTAG00000012546,ENSBTAG00000016082,ENSBTAG00000038160      |
| 15 | 77,850,000 | 78,000,000 | 1039 | 124  | -3.34774698  | ENSBTAG00000016082,ENSBTAG00000046354                         |
| 15 | 77,925,000 | 78,075,000 | 1040 | 211  | -1.792908255 | C11orf49,ENSBTAG00000046354                                   |
| 15 | 78,000,000 | 78,150,000 | 1041 | 249  | 0.00759887   | C11orf49                                                      |
| 15 | 78,075,000 | 78,225,000 | 1042 | 477  | 0.528069044  | C11orf49                                                      |
| 15 | 78,150,000 | 78,300,000 | 1043 | 587  | -0.147090702 | ARFGAP2,C11orf49,DDB2,PACSIN3                                 |
| 15 | 78,225,000 | 78,375,000 | 1044 | 369  | -0.138754097 | ACP2,ARFGAP2,C11orf49,DDB2,MADD,NR1H3,PACSIN3                 |
| 15 | 78,300,000 | 78,450,000 | 1045 | 296  | 0.877516795  | ACP2,DDB2,MADD,MYBPC3,NR1H3,SLC39A13,SPI1                     |
| 15 | 78,375,000 | 78,525,000 | 1046 | 322  | 0.905687447  | CUGBP1,MADD,MYBPC3,PSMC3,RAPSN,SLC39A13,SPI1                  |
| 15 | 78,450,000 | 78,600,000 | 1047 | 358  | 0.527085328  | CUGBP1,KBTBD4,NDUFS3,PSMC3,PTPMT1,RAPSN,SLC39A13              |
| 15 | 78,525,000 | 78,675,000 | 1048 | 636  | 0.069928282  | CUGBP1,KBTBD4,MTCH2,NDUFS3,PTPMT1                             |
| 15 | 78,600,000 | 78,750,000 | 1049 | 770  | 0.035852799  | FNBP4,MTCH2,NUP160                                            |

|    |            |            |      |      |              |                                                                                                                                                        |
|----|------------|------------|------|------|--------------|--------------------------------------------------------------------------------------------------------------------------------------------------------|
| 15 | 78,675,000 | 78,825,000 | 1050 | 810  | 0.145860711  | FNBP4,NUP160                                                                                                                                           |
| 15 | 78,750,000 | 78,900,000 | 1051 | 1052 | 0.001156929  | NUP160                                                                                                                                                 |
| 15 | 78,825,000 | 78,975,000 | 1052 | 975  | -0.037693355 |                                                                                                                                                        |
| 15 | 78,900,000 | 79,050,000 | 1053 | 980  | 0.690273029  | PTPRJ                                                                                                                                                  |
| 15 | 78,975,000 | 79,125,000 | 1054 | 924  | 0.608703381  | PTPRJ                                                                                                                                                  |
| 15 | 79,050,000 | 79,200,000 | 1055 | 970  | 0.372264937  | OR4X1,PTPRJ,ENSBTAG00000000926,ENSBTAG00000005914,ENSBTAG00000031025                                                                                   |
| 15 | 79,125,000 | 79,275,000 | 1056 | 1266 | 0.100896722  | OR4C5,OR4S1,OR4X1,ENSBTAG00000000926,ENSBTAG000005914,ENSBTAG00000024788,ENSBTAG00000031025,ENSBTAG00000031027,ENSBTAG00000031028,ENSBTAG00000031029   |
| 15 | 79,200,000 | 79,350,000 | 1057 | 1386 | -0.378626001 | OR4C3,OR4C5,OR4S1,ENSBTAG00000016090,ENSBTAG000024788,ENSBTAG00000030909,ENSBTAG00000031027,ENSBTAG00000031028,ENSBTAG00000031029,ENSBTAG00000031032   |
| 15 | 79,275,000 | 79,425,000 | 1058 | 1379 | -0.344919831 | OR4C3,ENSBTAG00000016090,ENSBTAG00000030909,ENSBTAG00000031032,ENSBTAG00000039821                                                                      |
| 15 | 79,350,000 | 79,500,000 | 1059 | 1604 | -0.079206471 | ENSBTAG00000039821,ENSBTAG00000047026,ENSBTAG0000048037                                                                                                |
| 15 | 79,425,000 | 79,575,000 | 1060 | 2033 | 0.110864903  | ENSBTAG00000027275,ENSBTAG00000035487,ENSBTAG0000035489,ENSBTAG00000047026,ENSBTAG00000048037                                                          |
| 15 | 79,500,000 | 79,650,000 | 1061 | 1704 | 0.076954701  | ENSBTAG00000010005,ENSBTAG00000027275,ENSBTAG0000035487,ENSBTAG00000035489,ENSBTAG00000037666,ENSBTAG00000046923                                       |
| 15 | 79,575,000 | 79,725,000 | 1062 | 1103 | -0.280387388 | ENSBTAG00000010005,ENSBTAG00000011521,ENSBTAG0000035485,ENSBTAG00000037666,ENSBTAG00000039272,ENSBTAG00000040425,ENSBTAG00000046923                    |
| 15 | 79,650,000 | 79,800,000 | 1063 | 1069 | -0.346885261 | ENSBTAG00000005624,ENSBTAG00000007944,ENSBTAG0000011521,ENSBTAG00000035485,ENSBTAG00000039272,ENSBTAG00000040341,ENSBTAG00000040425                    |
| 15 | 79,725,000 | 79,875,000 | 1064 | 911  | 0.370439785  | ENSBTAG00000003056,ENSBTAG00000005087,ENSBTAG0000005624,ENSBTAG00000007944,ENSBTAG00000014594,ENSBTAG00000015876,ENSBTAG00000020746,ENSBTAG00000040341 |
| 15 | 79,800,000 | 79,950,000 | 1065 | 824  | 0.661061224  | ENSBTAG00000003056,ENSBTAG00000005087,ENSBTAG0000014594,ENSBTAG00000015876,ENSBTAG00000020746,ENSBTAG00000023511,ENSBTAG00000046471,ENSBTAG00000048141 |
| 15 | 79,875,000 | 80,025,000 | 1066 | 1302 | 0.565819233  | ENSBTAG00000005874,ENSBTAG00000023511,ENSBTAG0000030920,ENSBTAG00000039331,ENSBTAG00000046471,ENSBTAG00000048141                                       |
| 15 | 79,950,000 | 80,100,000 | 1067 | 1372 | 0.460893833  | ENSBTAG00000005874,ENSBTAG00000030920,ENSBTAG0000039331                                                                                                |
| 15 | 80,025,000 | 80,175,000 | 1068 | 1037 | 0.458352685  | ENSBTAG00000030920                                                                                                                                     |
| 15 | 80,100,000 | 80,250,000 | 1069 | 1023 | 0.74148104   | ENSBTAG00000046527                                                                                                                                     |
| 15 | 80,175,000 | 80,325,000 | 1070 | 1329 | 0.575344028  | OR8I2,ENSBTAG00000001291,ENSBTAG00000014309,ENSBTAG00000046527                                                                                         |
| 15 | 80,250,000 | 80,400,000 | 1071 | 1347 | 0.728566567  | OR8I2,ENSBTAG00000001291,ENSBTAG00000014309,ENSBTAG00000037878,ENSBTAG00000045709,ENSBTAG0000046278                                                    |
| 15 | 80,325,000 | 80,475,000 | 1072 | 890  | 1.109351723  | ENSBTAG00000035988,ENSBTAG00000037878,ENSBTAG0000045709,ENSBTAG00000046278                                                                             |

|    |            |            |      |      |              |                                                                                                                                                        |
|----|------------|------------|------|------|--------------|--------------------------------------------------------------------------------------------------------------------------------------------------------|
| 15 | 80,400,000 | 80,550,000 | 1073 | 611  | 1.023283261  | ENSBTAG00000035059,ENSBTAG00000035985,ENSBTAG0000035986,ENSBTAG00000035988,ENSBTAG00000046274,ENSBTAG00000046710                                       |
| 15 | 80,475,000 | 80,625,000 | 1074 | 555  | 1.126599159  | ENSBTAG00000022858,ENSBTAG00000023310,ENSBTAG0000024423,ENSBTAG00000035059,ENSBTAG00000035985,ENSBTAG00000035986,ENSBTAG00000046274,ENSBTAG00000046710 |
| 15 | 80,550,000 | 80,700,000 | 1075 | 641  | 0.835407605  | ENSBTAG00000022858,ENSBTAG00000023310,ENSBTAG0000024423,ENSBTAG00000035990,ENSBTAG00000038049,ENSBTAG00000039348,ENSBTAG00000046845                    |
| 15 | 80,625,000 | 80,775,000 | 1076 | 607  | 0.594291321  | ENSBTAG00000035989,ENSBTAG00000035990,ENSBTAG0000038049,ENSBTAG00000039348,ENSBTAG00000046845                                                          |
| 15 | 80,700,000 | 80,850,000 | 1077 | 500  | 0.739853152  | OR5J2,ENSBTAG00000035031,ENSBTAG00000035989,ENSBTAG00000045723                                                                                         |
| 15 | 80,775,000 | 80,925,000 | 1078 | 887  | 0.940170421  | OR5J2,ENSBTAG00000035029,ENSBTAG00000035031,ENSBTAG00000045723,ENSBTAG00000046801,ENSBTAG0000047721                                                    |
| 15 | 80,850,000 | 81,000,000 | 1079 | 1080 | 0.695725938  | ENSBTAG00000035029,ENSBTAG00000038479,ENSBTAG0000039110,ENSBTAG00000045739,ENSBTAG00000046801,ENSBTAG00000047721                                       |
| 15 | 80,925,000 | 81,075,000 | 1080 | 936  | -0.461098093 | OR5M11,OR5M3,ENSBTAG00000038479,ENSBTAG00000039110,ENSBTAG00000045739                                                                                  |
| 15 | 81,000,000 | 81,150,000 | 1081 | 950  | -1.330132445 | OR5M11,OR5M3,ENSBTAG00000006421,ENSBTAG00000016146,ENSBTAG00000023542,ENSBTAG00000036130                                                               |
| 15 | 81,075,000 | 81,225,000 | 1082 | 1284 | -0.095683334 | ENSBTAG00000006421,ENSBTAG00000016146,ENSBTAG0000023542,ENSBTAG00000036130,ENSBTAG00000036131,ENSBTAG00000039801,ENSBTAG00000040463                    |
| 15 | 81,150,000 | 81,300,000 | 1083 | 1295 | 0.085799602  | ENSBTAG00000036131,ENSBTAG00000037928,ENSBTAG0000038539,ENSBTAG00000039801,ENSBTAG00000040463                                                          |
| 15 | 81,225,000 | 81,375,000 | 1084 | 739  | -0.724214517 | ENSBTAG00000031017,ENSBTAG00000037928,ENSBTAG0000038539                                                                                                |
| 15 | 81,300,000 | 81,450,000 | 1085 | 448  | -2.028196294 | ENSBTAG00000023202,ENSBTAG00000031017,ENSBTAG0000038539                                                                                                |
| 15 | 81,375,000 | 81,525,000 | 1086 | 645  | -0.762219798 | OR5AK2,ENSBTAG00000023202,ENSBTAG00000031017,ENSBTAG00000039448                                                                                        |
| 15 | 81,450,000 | 81,600,000 | 1087 | 1298 | 0.575857187  | OR5AK2,ENSBTAG00000023202,ENSBTAG00000039448                                                                                                           |
| 15 | 81,525,000 | 81,675,000 | 1088 | 1701 | 0.672635337  | LRRC55                                                                                                                                                 |
| 15 | 81,600,000 | 81,750,000 | 1089 | 1588 | 0.753303694  | APLNR,LRRC55                                                                                                                                           |
| 15 | 81,675,000 | 81,825,000 | 1090 | 1338 | 0.977433202  | APLNR,LRRC55,SSRP1,TNKS1BP1                                                                                                                            |
| 15 | 81,750,000 | 81,900,000 | 1091 | 996  | 0.114580507  | P2RX3,PRG3,SSRP1,TNKS1BP1                                                                                                                              |
| 15 | 81,825,000 | 81,975,000 | 1092 | 1173 | -2.03967489  | P2RX3,PRG3,SSRP1,ENSBTAG00000040320                                                                                                                    |
| 15 | 81,900,000 | 82,050,000 | 1093 | 1348 | -2.039968361 | PRG3,RTN4RL2,SLC43A3,ENSBTAG00000040320                                                                                                                |
| 15 | 81,975,000 | 82,125,000 | 1094 | 1065 | -0.950487743 | RTN4RL2,SLC43A3,SMTNL1,TIMM10,UBE2L6                                                                                                                   |
| 15 | 82,050,000 | 82,200,000 | 1095 | 1123 | 0.308632776  | SERPING1,SMTNL1,TIMM10,UBE2L6                                                                                                                          |
| 15 | 82,125,000 | 82,275,000 | 1096 | 1117 | 0.93640565   | CLP1,SERPING1,UBE2L6                                                                                                                                   |
| 15 | 82,200,000 | 82,350,000 | 1097 | 773  | 0.750029215  | CLP1,CTNND1,ZDHHC5                                                                                                                                     |
| 15 | 82,275,000 | 82,425,000 | 1098 | 608  | -0.296033786 | BTBD18,CTNND1,MED19,TMX2,ZDHHC5                                                                                                                        |
| 15 | 82,350,000 | 82,500,000 | 1099 | 783  | -1.908892444 | BTBD18,MED19,TMX2,ZDHHC5                                                                                                                               |
| 15 | 82,425,000 | 82,575,000 | 1100 | 1511 | -1.381035931 | ENSBTAG00000007971,ENSBTAG00000047396                                                                                                                  |
| 15 | 82,500,000 | 82,650,000 | 1101 | 1705 | -0.190492098 | OR9I1,ENSBTAG00000007971,ENSBTAG00000047396                                                                                                            |
| 15 | 82,575,000 | 82,725,000 | 1102 | 1789 | 0.203166567  | OR9I1,ENSBTAG000000038267                                                                                                                              |

|    |            |            |      |      |              |                                                                                                                                   |
|----|------------|------------|------|------|--------------|-----------------------------------------------------------------------------------------------------------------------------------|
| 15 | 82,650,000 | 82,800,000 | 1103 | 1887 | 0.219171415  | OR10Q1,OR9Q2,ENSBTAG00000038267,ENSBTAG00000040150                                                                                |
| 15 | 82,725,000 | 82,875,000 | 1104 | 1705 | 0.744362058  | OR10Q1,OR10W1,OR5B3,OR9Q2,ENSBTAG00000039306,ENSBTAG00000040150                                                                   |
| 15 | 82,800,000 | 82,950,000 | 1105 | 1689 | 0.68653151   | OR10W1,OR5B17,OR5B3,ENSBTAG00000014572,ENSBTAG00000037853,ENSBTAG00000039306                                                      |
| 15 | 82,875,000 | 83,025,000 | 1106 | 1359 | 0.129319383  | OR5B17,OR5B2,OR5B3,ENSBTAG00000013503,ENSBTAG0000014572,ENSBTAG00000037853,ENSBTAG00000039592                                     |
| 15 | 82,950,000 | 83,100,000 | 1107 | 1506 | 0.830707958  | OR5B2,ENSBTAG00000013503,ENSBTAG00000027942,ENSBTAG00000036042,ENSBTAG00000039592,ENSBTAG000047464                                |
| 15 | 83,025,000 | 83,175,000 | 1108 | 1770 | 0.821050713  | ENSBTAG00000027942,ENSBTAG00000036042,ENSBTAG0000046380,ENSBTAG00000046460,ENSBTAG00000047464                                     |
| 15 | 83,100,000 | 83,250,000 | 1109 | 1662 | -0.138269286 | LPXN,ENSBTAG00000024657,ENSBTAG00000046380,ENSBTAG00000046460                                                                     |
| 15 | 83,175,000 | 83,325,000 | 1110 | 1321 | -0.167722543 | CNTF,LPXN,ENSBTAG00000024657                                                                                                      |
| 15 | 83,250,000 | 83,400,000 | 1111 | 1049 | -0.432183428 | CNTF,MPEG1,ENSBTAG00000024657,ENSBTAG00000038058                                                                                  |
| 15 | 83,325,000 | 83,475,000 | 1112 | 979  | 0.340035921  | GLYAT,MPEG1,ENSBTAG00000012540,ENSBTAG00000038058                                                                                 |
| 15 | 83,400,000 | 83,550,000 | 1113 | 782  | 0.880431535  | GLYAT,GLYATL2,ENSBTAG00000012540,ENSBTAG00000038058                                                                               |
| 15 | 83,475,000 | 83,625,000 | 1114 | 740  | 0.835690885  | FAM111A,FAM111B,GLYATL2,ENSBTAG00000012540                                                                                        |
| 15 | 83,550,000 | 83,700,000 | 1115 | 933  | 0.975176135  | DTX4,FAM111A,FAM111B                                                                                                              |
| 15 | 83,625,000 | 83,775,000 | 1116 | 832  | 1.011675848  | DTX4,ENSBTAG00000039760                                                                                                           |
| 15 | 83,700,000 | 83,850,000 | 1117 | 534  | 0.286792658  | ENSBTAG00000005255,ENSBTAG00000039760                                                                                             |
| 15 | 83,775,000 | 83,925,000 | 1118 | 402  | -1.954303533 | ENSBTAG00000005255,ENSBTAG00000040023,ENSBTAG0000046811                                                                           |
| 15 | 83,850,000 | 84,000,000 | 1119 | 785  | 0.760124117  | OR4D6,OR5A1,ENSBTAG00000037538,ENSBTAG00000040023,ENSBTAG00000046811                                                              |
| 15 | 83,925,000 | 84,075,000 | 1120 | 1311 | 0.582441289  | OR4D6,OR4D9,OR5A1,ENSBTAG00000001432,ENSBTAG0000002071,ENSBTAG0000002679,ENSBTAG00000018259,ENSBTAG00000033519,ENSBTAG00000037538 |
| 15 | 84,000,000 | 84,150,000 | 1121 | 960  | -0.039575676 | OR4D9,OSBP,ENSBTAG00000001432,ENSBTAG00000002071,ENSBTAG0000002679,ENSBTAG00000018259,ENSBTAG00000033506,ENSBTAG00000033519       |
| 15 | 84,075,000 | 84,225,000 | 1122 | 403  | -0.14027373  | OR4D9,OSBP,PATL1,ENSBTAG00000033506                                                                                               |
| 15 | 84,150,000 | 84,300,000 | 1123 | 389  | 0.760233773  | OR10V1,PATL1,ENSBTAG00000048032                                                                                                   |
| 15 | 84,225,000 | 84,375,000 | 1124 | 426  | 0.821200312  | GIF,MRPL16,OR10V1,STX3,ENSBTAG00000048032                                                                                         |
| 15 | 84,300,000 | 84,450,000 | 1125 | 618  | -0.33085578  | GIF,MRPL16,OOSP1,STX3,TCN1                                                                                                        |
| 15 | 84,375,000 | 84,525,000 | 1126 | 730  | -0.397571699 | GIF,MS4A2,MS4A3,OOSP1,TCN1                                                                                                        |
| 15 | 84,450,000 | 84,600,000 | 1127 | 756  | -0.27688521  | MS4A14,MS4A2,MS4A3,MS4A5,MS4A7                                                                                                    |
| 15 | 84,525,000 | 84,675,000 | 1128 | 635  | -0.051730123 | MS4A1,MS4A13,MS4A14,MS4A5,MS4A7                                                                                                   |
| 15 | 84,600,000 | 84,750,000 | 1129 | 344  | 0.275784659  | MS4A1,MS4A13,MS4A5                                                                                                                |
| 15 | 84,675,000 | 84,825,000 | 1130 | 290  | 0.194578469  | MS4A13,NCAPD3                                                                                                                     |
| 15 | 84,750,000 | 84,900,000 | 1131 | 316  | -0.984448414 | ACAD8,NCAPD3,THYN1,VPS26B,ENSBTAG00000012229                                                                                      |
| 15 | 84,825,000 | 84,975,000 | 1132 | 444  | -0.519015098 | ACAD8,GLB1L2,GLB1L3,NCAPD3,THYN1,VPS26B,ENSBTAG00000012229                                                                        |
| 15 | 84,900,000 | 85,050,000 | 1133 | 569  | 0.357120607  | B3GAT1,GLB1L2,GLB1L3,ENSBTAG00000012229                                                                                           |
| 15 | 84,975,000 | 85,125,000 | 1134 | 525  | 0.504772477  | B3GAT1,GLB1L2                                                                                                                     |
| 15 | 85,050,000 | 85,200,000 | 1135 | 593  | 0.847896408  |                                                                                                                                   |

|    |            |            |      |      |              |                                                         |
|----|------------|------------|------|------|--------------|---------------------------------------------------------|
| 15 | 85,125,000 | 85,275,000 | 1136 | 536  | 0.92083446   | ENSBTAG00000048316                                      |
| 15 | 85,200,000 | 85,296,676 | 1137 | 244  | -0.761260868 | ENSBTAG00000048316                                      |
| 16 | 0          | 150,000    | 1    | 402  | 0.767286107  |                                                         |
| 16 | 75,000     | 225,000    | 2    | 405  | 0.940748987  |                                                         |
| 16 | 150,000    | 300,000    | 3    | 351  | 0.832861528  | ENSBTAG00000035659                                      |
| 16 | 225,000    | 375,000    | 4    | 492  | 0.404959146  | ENSBTAG00000015517,ENSBTAG00000035659                   |
| 16 | 300,000    | 450,000    | 5    | 831  | 0.437250194  | ENSBTAG00000015517,ENSBTAG00000039944,ENSBTAG0000047603 |
| 16 | 375,000    | 525,000    | 6    | 917  | 0.496863394  | TMEM183,ENSBTAG00000039944,ENSBTAG00000047603           |
| 16 | 450,000    | 600,000    | 7    | 847  | 0.744261103  | MYOG,PPFIA4,TMEM183                                     |
| 16 | 525,000    | 675,000    | 8    | 702  | 0.607005253  | MYOG,PPFIA4,TMEM183                                     |
| 16 | 600,000    | 750,000    | 9    | 488  | -0.224509017 | ADORA1                                                  |
| 16 | 675,000    | 825,000    | 10   | 559  | 0.07968206   | ADORA1,CHI3L1,MYBPH                                     |
| 16 | 750,000    | 900,000    | 11   | 867  | 0.147661206  | ADORA1,BTG2,CHI3L1,MYBPH                                |
| 16 | 825,000    | 975,000    | 12   | 1040 | 0.267907554  | BTG2,FMOD                                               |
| 16 | 900,000    | 1,050,000  | 13   | 1092 | 0.564787746  | FMOD,PRELP                                              |
| 16 | 975,000    | 1,125,000  | 14   | 786  | 0.469598016  | OPTC,PRELP                                              |
| 16 | 1,050,000  | 1,200,000  | 15   | 628  | -0.333211434 | OPTC,PRELP                                              |
| 16 | 1,125,000  | 1,275,000  | 16   | 675  | -0.212424906 | ATP2B4                                                  |
| 16 | 1,200,000  | 1,350,000  | 17   | 498  | -0.64356709  | ATP2B4,LAX1                                             |
| 16 | 1,275,000  | 1,425,000  | 18   | 431  | -0.760468366 | ATP2B4,LAX1,ZBED6,ZC3H11A                               |
| 16 | 1,350,000  | 1,500,000  | 19   | 795  | -0.284322444 | ZBED6,ZC3H11A                                           |
| 16 | 1,425,000  | 1,575,000  | 20   | 1153 | -0.084060856 | ZC3H11A                                                 |
| 16 | 1,500,000  | 1,650,000  | 21   | 895  | 0.341025175  |                                                         |
| 16 | 1,575,000  | 1,725,000  | 22   | 601  | -0.048237333 | SOX13                                                   |
| 16 | 1,650,000  | 1,800,000  | 23   | 471  | -0.724401389 | ETNK2,GOLT1A,KISS1,REN,SOX13                            |
| 16 | 1,725,000  | 1,875,000  | 24   | 380  | -0.207569911 | ETNK2,GOLT1A,KISS1,PLEKHA6,REN,SOX13                    |
| 16 | 1,800,000  | 1,950,000  | 25   | 646  | 0.013113882  | PLEKHA6                                                 |
| 16 | 1,875,000  | 2,025,000  | 26   | 960  | 0.256053506  | PIK3C2B,PLEKHA6,PPP1R15B                                |
| 16 | 1,950,000  | 2,100,000  | 27   | 798  | 0.585151253  | MDM4,PIK3C2B,PPP1R15B                                   |
| 16 | 2,025,000  | 2,175,000  | 28   | 883  | 0.892188233  | MDM4,PIK3C2B,ENSBTAG00000026068,ENSBTAG00000034611      |
| 16 | 2,100,000  | 2,250,000  | 29   | 1378 | 1.169286413  | LRRN5,MDM4,ENSBTAG00000026068,ENSBTAG00000034611        |
| 16 | 2,175,000  | 2,325,000  | 30   | 1419 | 1.078582679  | LRRN5                                                   |
| 16 | 2,250,000  | 2,400,000  | 31   | 1654 | 0.759068046  |                                                         |
| 16 | 2,325,000  | 2,475,000  | 32   | 2129 | 0.817599495  |                                                         |
| 16 | 2,400,000  | 2,550,000  | 33   | 1898 | 0.455532714  |                                                         |
| 16 | 2,475,000  | 2,625,000  | 34   | 1449 | 0.0615062    | NFASC                                                   |
| 16 | 2,550,000  | 2,700,000  | 35   | 1136 | 0.556008487  | CNTN2,NFASC,RBBP5,TMEM81                                |
| 16 | 2,625,000  | 2,775,000  | 36   | 891  | 0.814542141  | CNTN2,DSTYK,NFASC,RBBP5,TMEM81                          |
| 16 | 2,700,000  | 2,850,000  | 37   | 884  | 0.95246887   | DSTYK,RBBP5,TMCC2                                       |
| 16 | 2,775,000  | 2,925,000  | 38   | 968  | 1.036782024  | DSTYK,NUAK2,TMCC2                                       |
| 16 | 2,850,000  | 3,000,000  | 39   | 1211 | 0.911407962  | KLHDC8A,LEMD1,NUAK2,TMCC2                               |
| 16 | 2,925,000  | 3,075,000  | 40   | 1251 | 0.505700957  | KLHDC8A,LEMD1                                           |
| 16 | 3,000,000  | 3,150,000  | 41   | 933  | -0.063101872 | LEMD1,PCTK3                                             |
| 16 | 3,075,000  | 3,225,000  | 42   | 812  | 0.334235386  | ELK4,MFSD4,PCTK3                                        |
| 16 | 3,150,000  | 3,300,000  | 43   | 700  | 0.732325674  | ELK4,MFSD4,SLC45A3                                      |
| 16 | 3,225,000  | 3,375,000  | 44   | 694  | 0.871533018  | NUCKS1,RAB7L1,SLC41A1,SLC45A3                           |
| 16 | 3,300,000  | 3,450,000  | 45   | 732  | 0.60410318   | NUCKS1,PM20D1,RAB7L1,SLC41A1                            |
| 16 | 3,375,000  | 3,525,000  | 46   | 788  | 0.241350785  | PM20D1,SLC26A9,SLC41A1                                  |
| 16 | 3,450,000  | 3,600,000  | 47   | 939  | 0.478796275  | PM20D1,RAB7B,SLC26A9                                    |
| 16 | 3,525,000  | 3,675,000  | 48   | 1298 | 0.216812477  | RAB7B                                                   |

|    |           |           |     |      |              |                                         |
|----|-----------|-----------|-----|------|--------------|-----------------------------------------|
| 16 | 3,600,000 | 3,750,000 | 49  | 987  | -0.034357273 | AVPR1B,C1orf186,RAB7B                   |
| 16 | 3,675,000 | 3,825,000 | 50  | 625  | 0.184207363  | AVPR1B,C1orf186                         |
| 16 | 3,750,000 | 3,900,000 | 51  | 912  | 0.677652578  | FAM72A                                  |
| 16 | 3,825,000 | 3,975,000 | 52  | 835  | 1.003706692  | FAM72A                                  |
| 16 | 3,900,000 | 4,050,000 | 53  | 794  | 0.858072761  | ENSBTAG00000001483                      |
| 16 | 3,975,000 | 4,125,000 | 54  | 1008 | 0.179739048  | IKBKE,ENSBTAG00000001483                |
| 16 | 4,050,000 | 4,200,000 | 55  | 1146 | -1.688580138 | IKBKE,RASSF5,ENSBTAG00000001483         |
| 16 | 4,125,000 | 4,275,000 | 56  | 1113 | -1.227138289 | DYRK3,EIF2D,IKBKE,RASSF5                |
| 16 | 4,200,000 | 4,350,000 | 57  | 1081 | 0.83242188   | DYRK3,EIF2D,MAPKAPK2,RASSF5             |
| 16 | 4,275,000 | 4,425,000 | 58  | 1106 | 0.83864812   | DYRK3,IL10,MAPKAPK2                     |
| 16 | 4,350,000 | 4,500,000 | 59  | 850  | 0.407111503  | IL10,IL19,MAPKAPK2                      |
| 16 | 4,425,000 | 4,575,000 | 60  | 771  | -0.109568402 | FCAMR,IL19,IL20,PIGR                    |
| 16 | 4,500,000 | 4,650,000 | 61  | 818  | -0.194477335 | FAIM3,FCAMR,IL20,IL24,PIGR              |
| 16 | 4,575,000 | 4,725,000 | 62  | 386  | 0.032466081  | FAIM3,IL24,SARG,YOD1                    |
| 16 | 4,650,000 | 4,800,000 | 63  | 385  | 0.385051789  | C4BPA,C4BPB,PFKFB2,SARG,YOD1            |
| 16 | 4,725,000 | 4,875,000 | 64  | 661  | 0.755511514  | C4BPA,C4BPB,PFKFB2                      |
| 16 | 4,800,000 | 4,950,000 | 65  | 870  | 1.026199976  | C4BPA,ENSBTAG000000039196               |
| 16 | 4,875,000 | 5,025,000 | 66  | 1253 | 0.72834672   | ENSBTAG000000039196,ENSBTAG000000047621 |
| 16 | 4,950,000 | 5,100,000 | 67  | 1196 | 0.618537401  | ENSBTAG000000039196,ENSBTAG000000047621 |
| 16 | 5,025,000 | 5,175,000 | 68  | 982  | 0.673909637  | CD55                                    |
| 16 | 5,100,000 | 5,250,000 | 69  | 865  | 0.442222415  | CD55                                    |
| 16 | 5,175,000 | 5,325,000 | 70  | 818  | 0.067996652  | CR2                                     |
| 16 | 5,250,000 | 5,400,000 | 71  | 1185 | 0.325795135  | CR2                                     |
| 16 | 5,325,000 | 5,475,000 | 72  | 1519 | 0.621153214  |                                         |
| 16 | 5,400,000 | 5,550,000 | 73  | 1627 | 0.775777249  | ENSBTAG000000023177                     |
| 16 | 5,475,000 | 5,625,000 | 74  | 1891 | -0.062399083 | ENSBTAG000000023177,ENSBTAG000000024647 |
| 16 | 5,550,000 | 5,700,000 | 75  | 2205 | -1.200262677 | ENSBTAG000000023177,ENSBTAG000000024647 |
| 16 | 5,625,000 | 5,775,000 | 76  | 2704 | -0.76623885  | ENSBTAG000000024647                     |
| 16 | 5,700,000 | 5,850,000 | 77  | 2544 | 0.318617165  | ENSBTAG000000024647,ENSBTAG000000040409 |
| 16 | 5,775,000 | 5,925,000 | 78  | 2286 | 0.590565258  | ENSBTAG000000024647,ENSBTAG000000040409 |
| 16 | 5,850,000 | 6,000,000 | 79  | 2279 | 0.509571744  | ENSBTAG000000024647,ENSBTAG000000040409 |
| 16 | 5,925,000 | 6,075,000 | 80  | 2235 | 0.622991777  | CFH,ENSBTAG000000024647                 |
| 16 | 6,000,000 | 6,150,000 | 81  | 2510 | 0.568497685  | CFH                                     |
| 16 | 6,075,000 | 6,225,000 | 82  | 2061 | 0.581776982  | CFH                                     |
| 16 | 6,150,000 | 6,300,000 | 83  | 1372 | 0.85150485   |                                         |
| 16 | 6,225,000 | 6,375,000 | 84  | 1161 | 1.092049948  | KCNT2                                   |
| 16 | 6,300,000 | 6,450,000 | 85  | 1037 | 0.868701665  | KCNT2                                   |
| 16 | 6,375,000 | 6,525,000 | 86  | 1027 | 0.959152293  | KCNT2                                   |
| 16 | 6,450,000 | 6,600,000 | 87  | 1046 | 0.651965983  | KCNT2                                   |
| 16 | 6,525,000 | 6,675,000 | 88  | 728  | -0.898270096 | KCNT2                                   |
| 16 | 6,600,000 | 6,750,000 | 89  | 642  | -1.268733507 | KCNT2                                   |
| 16 | 6,675,000 | 6,825,000 | 90  | 673  | 0.177002232  |                                         |
| 16 | 6,750,000 | 6,900,000 | 91  | 824  | -0.125441285 |                                         |
| 16 | 6,825,000 | 6,975,000 | 92  | 748  | -0.128899103 |                                         |
| 16 | 6,900,000 | 7,050,000 | 93  | 410  | 0.222135672  |                                         |
| 16 | 6,975,000 | 7,125,000 | 94  | 780  | -0.104358765 |                                         |
| 16 | 7,050,000 | 7,200,000 | 95  | 838  | -0.049441234 |                                         |
| 16 | 7,125,000 | 7,275,000 | 96  | 473  | 0.231435695  |                                         |
| 16 | 7,200,000 | 7,350,000 | 97  | 482  | 0.22326257   |                                         |
| 16 | 7,275,000 | 7,425,000 | 98  | 708  | 0.312611804  |                                         |
| 16 | 7,350,000 | 7,500,000 | 99  | 845  | 0.046455956  |                                         |
| 16 | 7,425,000 | 7,575,000 | 100 | 821  | -0.192684677 |                                         |
| 16 | 7,500,000 | 7,650,000 | 101 | 711  | -0.188840134 |                                         |

|    |            |            |     |      |              |                    |
|----|------------|------------|-----|------|--------------|--------------------|
| 16 | 7,575,000  | 7,725,000  | 102 | 530  | 0.116297321  |                    |
| 16 | 7,650,000  | 7,800,000  | 103 | 1026 | 0.552288918  |                    |
| 16 | 7,725,000  | 7,875,000  | 104 | 1393 | 0.500941946  |                    |
| 16 | 7,800,000  | 7,950,000  | 105 | 1247 | 0.534449948  |                    |
| 16 | 7,875,000  | 8,025,000  | 106 | 1170 | 0.954915032  |                    |
| 16 | 7,950,000  | 8,100,000  | 107 | 1199 | 0.975079698  |                    |
| 16 | 8,025,000  | 8,175,000  | 108 | 1437 | 1.045033566  |                    |
| 16 | 8,100,000  | 8,250,000  | 109 | 1479 | 1.294640431  | ENSBTAG00000025113 |
| 16 | 8,175,000  | 8,325,000  | 110 | 978  | 1.134702534  | ENSBTAG00000025113 |
| 16 | 8,250,000  | 8,400,000  | 111 | 974  | 0.340594131  |                    |
| 16 | 8,325,000  | 8,475,000  | 112 | 1550 | 0.488308152  |                    |
| 16 | 8,400,000  | 8,550,000  | 113 | 1483 | 0.715225228  |                    |
| 16 | 8,475,000  | 8,625,000  | 114 | 1116 | 0.548011889  |                    |
| 16 | 8,550,000  | 8,700,000  | 115 | 1223 | 0.851313674  |                    |
| 16 | 8,625,000  | 8,775,000  | 116 | 1632 | 1.012289538  |                    |
| 16 | 8,700,000  | 8,850,000  | 117 | 1226 | 0.756320389  |                    |
| 16 | 8,775,000  | 8,925,000  | 118 | 1024 | 0.413615371  |                    |
| 16 | 8,850,000  | 9,000,000  | 119 | 1630 | 0.370244855  |                    |
| 16 | 8,925,000  | 9,075,000  | 120 | 1669 | 0.663817326  |                    |
| 16 | 9,000,000  | 9,150,000  | 121 | 1579 | 0.424768265  |                    |
| 16 | 9,075,000  | 9,225,000  | 122 | 1480 | -0.086112343 |                    |
| 16 | 9,150,000  | 9,300,000  | 123 | 1365 | 0.14220495   |                    |
| 16 | 9,225,000  | 9,375,000  | 124 | 1435 | 0.330871853  |                    |
| 16 | 9,300,000  | 9,450,000  | 125 | 1496 | 0.347348034  |                    |
| 16 | 9,375,000  | 9,525,000  | 126 | 1115 | 0.303929027  |                    |
| 16 | 9,450,000  | 9,600,000  | 127 | 848  | 0.379967155  |                    |
| 16 | 9,525,000  | 9,675,000  | 128 | 1352 | 1.008876365  |                    |
| 16 | 9,600,000  | 9,750,000  | 129 | 1470 | 0.917983053  |                    |
| 16 | 9,675,000  | 9,825,000  | 130 | 1709 | -0.691150959 |                    |
| 16 | 9,750,000  | 9,900,000  | 131 | 1777 | -0.159867389 |                    |
| 16 | 9,825,000  | 9,975,000  | 132 | 1136 | 0.569617402  |                    |
| 16 | 9,900,000  | 10,050,000 | 133 | 1219 | -2.245049417 |                    |
| 16 | 9,975,000  | 10,125,000 | 134 | 1518 | -2.045258982 |                    |
| 16 | 10,050,000 | 10,200,000 | 135 | 1520 | 0.157869971  |                    |
| 16 | 10,125,000 | 10,275,000 | 136 | 1627 | 0.613567208  |                    |
| 16 | 10,200,000 | 10,350,000 | 137 | 1377 | 0.479862375  |                    |
| 16 | 10,275,000 | 10,425,000 | 138 | 1524 | -0.103159505 |                    |
| 16 | 10,350,000 | 10,500,000 | 139 | 1698 | -1.999643614 |                    |
| 16 | 10,425,000 | 10,575,000 | 140 | 1545 | -3.595461393 |                    |
| 16 | 10,500,000 | 10,650,000 | 141 | 1307 | -2.574584192 |                    |
| 16 | 10,575,000 | 10,725,000 | 142 | 1165 | 0.575961009  |                    |
| 16 | 10,650,000 | 10,800,000 | 143 | 1070 | 0.577650069  |                    |
| 16 | 10,725,000 | 10,875,000 | 144 | 978  | 0.550224012  |                    |
| 16 | 10,800,000 | 10,950,000 | 145 | 1219 | 0.346136352  |                    |
| 16 | 10,875,000 | 11,025,000 | 146 | 1201 | 0.495958245  |                    |
| 16 | 10,950,000 | 11,100,000 | 147 | 1058 | -1.11052781  | ENSBTAG00000014862 |
| 16 | 11,025,000 | 11,175,000 | 148 | 1222 | -0.975473072 | ENSBTAG00000014862 |
| 16 | 11,100,000 | 11,250,000 | 149 | 1406 | -0.104499894 |                    |
| 16 | 11,175,000 | 11,325,000 | 150 | 1317 | 0.483136098  |                    |
| 16 | 11,250,000 | 11,400,000 | 151 | 1578 | 0.742882975  |                    |
| 16 | 11,325,000 | 11,475,000 | 152 | 1677 | 0.350724116  |                    |
| 16 | 11,400,000 | 11,550,000 | 153 | 1540 | 0.295928459  |                    |
| 16 | 11,475,000 | 11,625,000 | 154 | 1580 | 0.72520215   |                    |



|    |            |            |     |      |              |                                             |
|----|------------|------------|-----|------|--------------|---------------------------------------------|
| 16 | 11,550,000 | 11,700,000 | 155 | 1468 | 0.652171081  |                                             |
| 16 | 11,625,000 | 11,775,000 | 156 | 1485 | 0.071375734  |                                             |
| 16 | 11,700,000 | 11,850,000 | 157 | 1431 | -0.047632893 |                                             |
| 16 | 11,775,000 | 11,925,000 | 158 | 1159 | 0.381707828  |                                             |
| 16 | 11,850,000 | 12,000,000 | 159 | 1019 | 0.759246581  |                                             |
| 16 | 11,925,000 | 12,075,000 | 160 | 965  | 1.051140297  |                                             |
| 16 | 12,000,000 | 12,150,000 | 161 | 935  | 0.216168481  |                                             |
| 16 | 12,075,000 | 12,225,000 | 162 | 688  | -0.640716854 |                                             |
| 16 | 12,150,000 | 12,300,000 | 163 | 660  | 0.373645961  |                                             |
| 16 | 12,225,000 | 12,375,000 | 164 | 796  | 0.585562843  |                                             |
| 16 | 12,300,000 | 12,450,000 | 165 | 564  | 0.902964857  |                                             |
| 16 | 12,375,000 | 12,525,000 | 166 | 980  | 0.748234003  |                                             |
| 16 | 12,450,000 | 12,600,000 | 167 | 1482 | 0.031848948  | ENSBTAG00000012765                          |
| 16 | 12,525,000 | 12,675,000 | 168 | 889  | -1.277991092 | CDC73,ENSBTAG00000012765,ENSBTAG00000046060 |
| 16 | 12,600,000 | 12,750,000 | 169 | 289  | -1.610309453 | B3GALT2,CDC73,ENSBTAG00000046060            |
| 16 | 12,675,000 | 12,825,000 | 170 | 249  | -0.462361384 | B3GALT2,CDC73,GLRX2,TROVE2,UCHL5            |
| 16 | 12,750,000 | 12,900,000 | 171 | 313  | 0.408973322  | GLRX2,TROVE2,UCHL5                          |
| 16 | 12,825,000 | 12,975,000 | 172 | 418  | 0.862082614  | UCHL5                                       |
| 16 | 12,900,000 | 13,050,000 | 173 | 720  | 0.819792971  | RGS2                                        |
| 16 | 12,975,000 | 13,125,000 | 174 | 631  | 0.582342847  | RGS2                                        |
| 16 | 13,050,000 | 13,200,000 | 175 | 386  | -0.696183591 |                                             |
| 16 | 13,125,000 | 13,275,000 | 176 | 590  | -0.167246548 | RGS13                                       |
| 16 | 13,200,000 | 13,350,000 | 177 | 897  | 0.478951336  | RGS1,RGS13                                  |
| 16 | 13,275,000 | 13,425,000 | 178 | 896  | 0.333370571  | RGS1                                        |
| 16 | 13,350,000 | 13,500,000 | 179 | 854  | 0.31192165   |                                             |
| 16 | 13,425,000 | 13,575,000 | 180 | 919  | 0.224682793  | RGS21                                       |
| 16 | 13,500,000 | 13,650,000 | 181 | 741  | -0.453526042 | RGS21                                       |
| 16 | 13,575,000 | 13,725,000 | 182 | 1076 | -0.778076377 |                                             |
| 16 | 13,650,000 | 13,800,000 | 183 | 1425 | -0.387163763 | RGS18                                       |
| 16 | 13,725,000 | 13,875,000 | 184 | 1147 | -0.112040579 | RGS18                                       |
| 16 | 13,800,000 | 13,950,000 | 185 | 923  | 0.71245612   |                                             |
| 16 | 13,875,000 | 14,025,000 | 186 | 1618 | 1.393820661  |                                             |
| 16 | 13,950,000 | 14,100,000 | 187 | 1906 | 1.230996607  |                                             |
| 16 | 14,025,000 | 14,175,000 | 188 | 1488 | 0.702760739  |                                             |
| 16 | 14,100,000 | 14,250,000 | 189 | 1666 | 0.282942443  |                                             |
| 16 | 14,175,000 | 14,325,000 | 190 | 1453 | 0.233389103  |                                             |
| 16 | 14,250,000 | 14,400,000 | 191 | 1023 | -0.484570437 |                                             |
| 16 | 14,325,000 | 14,475,000 | 192 | 1345 | -0.981665831 |                                             |
| 16 | 14,400,000 | 14,550,000 | 193 | 1559 | -0.197745348 |                                             |
| 16 | 14,475,000 | 14,625,000 | 194 | 1119 | 0.391219353  |                                             |
| 16 | 14,550,000 | 14,700,000 | 195 | 676  | 0.680197377  |                                             |
| 16 | 14,625,000 | 14,775,000 | 196 | 717  | 0.399336176  |                                             |
| 16 | 14,700,000 | 14,850,000 | 197 | 1138 | 0.856371373  |                                             |
| 16 | 14,775,000 | 14,925,000 | 198 | 1149 | 0.543103701  |                                             |
| 16 | 14,850,000 | 15,000,000 | 199 | 1128 | -0.679971258 |                                             |
| 16 | 14,925,000 | 15,075,000 | 200 | 946  | -0.505600902 |                                             |
| 16 | 15,000,000 | 15,150,000 | 201 | 1058 | 0.618412886  |                                             |
| 16 | 15,075,000 | 15,225,000 | 202 | 1145 | 0.236213026  |                                             |
| 16 | 15,150,000 | 15,300,000 | 203 | 883  | 0.232200283  |                                             |
| 16 | 15,225,000 | 15,375,000 | 204 | 1073 | 0.29849028   |                                             |
| 16 | 15,300,000 | 15,450,000 | 205 | 1054 | -0.16058559  |                                             |
| 16 | 15,375,000 | 15,525,000 | 206 | 716  | 0.18211161   |                                             |
| 16 | 15,450,000 | 15,600,000 | 207 | 691  | 0.682069982  |                                             |

|    |            |            |     |      |              |                    |
|----|------------|------------|-----|------|--------------|--------------------|
| 16 | 15,525,000 | 15,675,000 | 208 | 1157 | 0.847710386  |                    |
| 16 | 15,600,000 | 15,750,000 | 209 | 1329 | 0.301995446  |                    |
| 16 | 15,675,000 | 15,825,000 | 210 | 966  | -0.270932348 | BRINP3             |
| 16 | 15,750,000 | 15,900,000 | 211 | 615  | 0.398597718  | BRINP3             |
| 16 | 15,825,000 | 15,975,000 | 212 | 498  | 0.52009025   | BRINP3             |
| 16 | 15,900,000 | 16,050,000 | 213 | 720  | -0.970415385 | BRINP3             |
| 16 | 15,975,000 | 16,125,000 | 214 | 794  | -1.09575576  | BRINP3             |
| 16 | 16,050,000 | 16,200,000 | 215 | 719  | -0.192353874 | BRINP3             |
| 16 | 16,125,000 | 16,275,000 | 216 | 1142 | -1.029452441 | BRINP3             |
| 16 | 16,200,000 | 16,350,000 | 217 | 1342 | -1.460090155 | BRINP3             |
| 16 | 16,275,000 | 16,425,000 | 218 | 1218 | -0.939666121 |                    |
| 16 | 16,350,000 | 16,500,000 | 219 | 1167 | 0.074071559  |                    |
| 16 | 16,425,000 | 16,575,000 | 220 | 1091 | 0.692937937  |                    |
| 16 | 16,500,000 | 16,650,000 | 221 | 943  | -0.020609825 |                    |
| 16 | 16,575,000 | 16,725,000 | 222 | 783  | -1.20069514  |                    |
| 16 | 16,650,000 | 16,800,000 | 223 | 593  | -1.393274297 |                    |
| 16 | 16,725,000 | 16,875,000 | 224 | 573  | -2.084782756 |                    |
| 16 | 16,800,000 | 16,950,000 | 225 | 777  | -1.000147963 |                    |
| 16 | 16,875,000 | 17,025,000 | 226 | 938  | 0.546220696  |                    |
| 16 | 16,950,000 | 17,100,000 | 227 | 1165 | 0.661902291  |                    |
| 16 | 17,025,000 | 17,175,000 | 228 | 1020 | 0.83345208   |                    |
| 16 | 17,100,000 | 17,250,000 | 229 | 1064 | -0.323554126 |                    |
| 16 | 17,175,000 | 17,325,000 | 230 | 1352 | -0.259031279 |                    |
| 16 | 17,250,000 | 17,400,000 | 231 | 1475 | 0.269096924  |                    |
| 16 | 17,325,000 | 17,475,000 | 232 | 1470 | 0.50273448   |                    |
| 16 | 17,400,000 | 17,550,000 | 233 | 1262 | 0.591876328  |                    |
| 16 | 17,475,000 | 17,625,000 | 234 | 1209 | 0.925543783  |                    |
| 16 | 17,550,000 | 17,700,000 | 235 | 1190 | 1.012960749  |                    |
| 16 | 17,625,000 | 17,775,000 | 236 | 1245 | 1.023200362  |                    |
| 16 | 17,700,000 | 17,850,000 | 237 | 1491 | 0.180451509  |                    |
| 16 | 17,775,000 | 17,925,000 | 238 | 1262 | -1.022865723 |                    |
| 16 | 17,850,000 | 18,000,000 | 239 | 896  | -2.72307578  |                    |
| 16 | 17,925,000 | 18,075,000 | 240 | 1033 | -2.284055494 |                    |
| 16 | 18,000,000 | 18,150,000 | 241 | 1352 | -0.939890127 |                    |
| 16 | 18,075,000 | 18,225,000 | 242 | 1441 | 0.270806542  |                    |
| 16 | 18,150,000 | 18,300,000 | 243 | 1563 | 0.357938004  |                    |
| 16 | 18,225,000 | 18,375,000 | 244 | 1826 | 0.155124334  |                    |
| 16 | 18,300,000 | 18,450,000 | 245 | 1579 | 0.473264474  | ENSBTAG00000046655 |
| 16 | 18,375,000 | 18,525,000 | 246 | 1234 | 0.129192067  | ENSBTAG00000046655 |
| 16 | 18,450,000 | 18,600,000 | 247 | 908  | -0.366049348 |                    |
| 16 | 18,525,000 | 18,675,000 | 248 | 1248 | 0.309455153  |                    |
| 16 | 18,600,000 | 18,750,000 | 249 | 1570 | 0.108773201  |                    |
| 16 | 18,675,000 | 18,825,000 | 250 | 1294 | 0.210156476  |                    |
| 16 | 18,750,000 | 18,900,000 | 251 | 1017 | 0.859231714  |                    |
| 16 | 18,825,000 | 18,975,000 | 252 | 699  | 0.785041635  |                    |
| 16 | 18,900,000 | 19,050,000 | 253 | 879  | 0.960516504  |                    |
| 16 | 18,975,000 | 19,125,000 | 254 | 1161 | 0.031503613  |                    |
| 16 | 19,050,000 | 19,200,000 | 255 | 1353 | -2.628509147 |                    |
| 16 | 19,125,000 | 19,275,000 | 256 | 1276 | -1.893024545 |                    |
| 16 | 19,200,000 | 19,350,000 | 257 | 871  | -0.507665761 |                    |
| 16 | 19,275,000 | 19,425,000 | 258 | 678  | -0.245847314 |                    |
| 16 | 19,350,000 | 19,500,000 | 259 | 795  | 0.919613819  |                    |
| 16 | 19,425,000 | 19,575,000 | 260 | 803  | 1.081086998  | KCTD3,USH2A        |

|    |            |            |     |      |              |                          |
|----|------------|------------|-----|------|--------------|--------------------------|
| 16 | 19,500,000 | 19,650,000 | 261 | 589  | 1.300527326  | KCTD3,USH2A              |
| 16 | 19,575,000 | 19,725,000 | 262 | 917  | 1.15662284   | USH2A                    |
| 16 | 19,650,000 | 19,800,000 | 263 | 1156 | 0.756164442  | USH2A                    |
| 16 | 19,725,000 | 19,875,000 | 264 | 1151 | 0.404074676  | USH2A                    |
| 16 | 19,800,000 | 19,950,000 | 265 | 972  | -0.11092284  | USH2A,ENSBTAG00000007997 |
| 16 | 19,875,000 | 20,025,000 | 266 | 810  | -1.579315961 | USH2A,ENSBTAG00000007997 |
| 16 | 19,950,000 | 20,100,000 | 267 | 996  | -3.155492303 | USH2A                    |
| 16 | 20,025,000 | 20,175,000 | 268 | 1145 | -3.50326826  | USH2A                    |
| 16 | 20,100,000 | 20,250,000 | 269 | 1119 | -2.375955912 | USH2A                    |
| 16 | 20,175,000 | 20,325,000 | 270 | 1206 | -0.84567615  | USH2A                    |
| 16 | 20,250,000 | 20,400,000 | 271 | 1111 | 0.075744777  | USH2A                    |
| 16 | 20,325,000 | 20,475,000 | 272 | 819  | 0.591063195  | USH2A                    |
| 16 | 20,400,000 | 20,550,000 | 273 | 1161 | 1.098353307  | USH2A                    |
| 16 | 20,475,000 | 20,625,000 | 274 | 1128 | 0.827636846  | ESRRG,USH2A              |
| 16 | 20,550,000 | 20,700,000 | 275 | 847  | -0.330093309 | ESRRG                    |
| 16 | 20,625,000 | 20,775,000 | 276 | 887  | -0.191015891 | ESRRG                    |
| 16 | 20,700,000 | 20,850,000 | 277 | 835  | 0.153038218  | ESRRG                    |
| 16 | 20,775,000 | 20,925,000 | 278 | 895  | 0.535230472  | ESRRG                    |
| 16 | 20,850,000 | 21,000,000 | 279 | 1056 | 1.008154835  |                          |
| 16 | 20,925,000 | 21,075,000 | 280 | 1122 | 0.475843983  |                          |
| 16 | 21,000,000 | 21,150,000 | 281 | 1122 | 0.217452961  |                          |
| 16 | 21,075,000 | 21,225,000 | 282 | 910  | 0.113057564  |                          |
| 16 | 21,150,000 | 21,300,000 | 283 | 716  | -1.787945515 |                          |
| 16 | 21,225,000 | 21,375,000 | 284 | 515  | -1.946502788 |                          |
| 16 | 21,300,000 | 21,450,000 | 285 | 772  | 0.228925895  |                          |
| 16 | 21,375,000 | 21,525,000 | 286 | 1277 | 0.591349781  |                          |
| 16 | 21,450,000 | 21,600,000 | 287 | 1218 | 0.74360437   |                          |
| 16 | 21,525,000 | 21,675,000 | 288 | 1232 | 0.779487754  |                          |
| 16 | 21,600,000 | 21,750,000 | 289 | 1034 | 0.649558265  |                          |
| 16 | 21,675,000 | 21,825,000 | 290 | 1007 | -0.412800437 | GPATCH2                  |
| 16 | 21,750,000 | 21,900,000 | 291 | 1205 | -0.338341498 | GPATCH2                  |
| 16 | 21,825,000 | 21,975,000 | 292 | 967  | 0.479898637  |                          |
| 16 | 21,900,000 | 22,050,000 | 293 | 1043 | 0.79961498   |                          |
| 16 | 21,975,000 | 22,125,000 | 294 | 1170 | -0.147715278 |                          |
| 16 | 22,050,000 | 22,200,000 | 295 | 1083 | -0.910854995 |                          |
| 16 | 22,125,000 | 22,275,000 | 296 | 1418 | -0.059416683 |                          |
| 16 | 22,200,000 | 22,350,000 | 297 | 1189 | 0.722103055  |                          |
| 16 | 22,275,000 | 22,425,000 | 298 | 603  | 0.625278286  |                          |
| 16 | 22,350,000 | 22,500,000 | 299 | 444  | 0.074472799  | RRP15,TGFB2              |
| 16 | 22,425,000 | 22,575,000 | 300 | 568  | 0.08888867   | RRP15,TGFB2              |
| 16 | 22,500,000 | 22,650,000 | 301 | 593  | 0.327978902  | TGFB2                    |
| 16 | 22,575,000 | 22,725,000 | 302 | 443  | 0.911444988  | TGFB2                    |
| 16 | 22,650,000 | 22,800,000 | 303 | 580  | 0.958849827  |                          |
| 16 | 22,725,000 | 22,875,000 | 304 | 488  | 0.83389194   |                          |
| 16 | 22,800,000 | 22,950,000 | 305 | 288  | 0.964785091  |                          |
| 16 | 22,875,000 | 23,025,000 | 306 | 367  | 1.128011226  |                          |
| 16 | 22,950,000 | 23,100,000 | 307 | 440  | 0.934666468  |                          |
| 16 | 23,025,000 | 23,175,000 | 308 | 484  | 0.289665178  |                          |
| 16 | 23,100,000 | 23,250,000 | 309 | 994  | 0.148814092  |                          |
| 16 | 23,175,000 | 23,325,000 | 310 | 1157 | 0.393321841  |                          |
| 16 | 23,250,000 | 23,400,000 | 311 | 693  | 0.422975626  | LYPLAL1                  |
| 16 | 23,325,000 | 23,475,000 | 312 | 455  | -0.185083141 | LYPLAL1                  |
| 16 | 23,400,000 | 23,550,000 | 313 | 557  | 0.314815138  |                          |

|    |            |            |     |     |              |                           |
|----|------------|------------|-----|-----|--------------|---------------------------|
| 16 | 23,475,000 | 23,625,000 | 314 | 579 | 0.432031479  |                           |
| 16 | 23,550,000 | 23,700,000 | 315 | 683 | 0.328048999  |                           |
| 16 | 23,625,000 | 23,775,000 | 316 | 789 | 0.783421286  |                           |
| 16 | 23,700,000 | 23,850,000 | 317 | 749 | 0.98067345   |                           |
| 16 | 23,775,000 | 23,925,000 | 318 | 718 | 0.344345079  |                           |
| 16 | 23,850,000 | 24,000,000 | 319 | 972 | -1.047017346 |                           |
| 16 | 23,925,000 | 24,075,000 | 320 | 800 | -1.277966944 |                           |
| 16 | 24,000,000 | 24,150,000 | 321 | 393 | -2.516152975 | SLC30A10                  |
| 16 | 24,075,000 | 24,225,000 | 322 | 401 | -2.752671168 | EPRS,SLC30A10             |
| 16 | 24,150,000 | 24,300,000 | 323 | 545 | -1.825625893 | BPNT1,EPRS,IARS2          |
| 16 | 24,225,000 | 24,375,000 | 324 | 732 | -1.799733368 | BPNT1,EPRS,IARS2,RAB3GAP2 |
| 16 | 24,300,000 | 24,450,000 | 325 | 511 | -1.468079246 | IARS2,RAB3GAP2            |
| 16 | 24,375,000 | 24,525,000 | 326 | 548 | 0.56750123   | RAB3GAP2                  |
| 16 | 24,450,000 | 24,600,000 | 327 | 707 | 0.953161709  |                           |
| 16 | 24,525,000 | 24,675,000 | 328 | 739 | -0.27001553  |                           |
| 16 | 24,600,000 | 24,750,000 | 329 | 588 | -1.311561752 |                           |
| 16 | 24,675,000 | 24,825,000 | 330 | 352 | -0.440982183 | MARK1                     |
| 16 | 24,750,000 | 24,900,000 | 331 | 400 | -0.587786672 | C16H1orf115,MARK1         |
| 16 | 24,825,000 | 24,975,000 | 332 | 540 | -0.209579284 | C16H1orf115,MARC2,MARK1   |
| 16 | 24,900,000 | 25,050,000 | 333 | 750 | 0.551273622  | MARC1,MARC2               |
| 16 | 24,975,000 | 25,125,000 | 334 | 620 | 0.297721325  | HLX,MARC1                 |
| 16 | 25,050,000 | 25,200,000 | 335 | 482 | 0.198681666  | HLX                       |
| 16 | 25,125,000 | 25,275,000 | 336 | 468 | 0.462290429  |                           |
| 16 | 25,200,000 | 25,350,000 | 337 | 326 | 0.329391505  |                           |
| 16 | 25,275,000 | 25,425,000 | 338 | 318 | 0.152534502  |                           |
| 16 | 25,350,000 | 25,500,000 | 339 | 266 | 0.307749152  |                           |
| 16 | 25,425,000 | 25,575,000 | 340 | 294 | 0.764573354  |                           |
| 16 | 25,500,000 | 25,650,000 | 341 | 443 | 0.498423205  |                           |
| 16 | 25,575,000 | 25,725,000 | 342 | 676 | 0.139388064  |                           |
| 16 | 25,650,000 | 25,800,000 | 343 | 630 | -0.501826144 |                           |
| 16 | 25,725,000 | 25,875,000 | 344 | 368 | -1.019269376 |                           |
| 16 | 25,800,000 | 25,950,000 | 345 | 367 | 0.337716     | DUSP10                    |
| 16 | 25,875,000 | 26,025,000 | 346 | 432 | 0.642946159  | DUSP10                    |
| 16 | 25,950,000 | 26,100,000 | 347 | 391 | -0.173452747 |                           |
| 16 | 26,025,000 | 26,175,000 | 348 | 271 | -0.857474962 |                           |
| 16 | 26,100,000 | 26,250,000 | 349 | 252 | -1.018358806 |                           |
| 16 | 26,175,000 | 26,325,000 | 350 | 290 | -0.557997094 |                           |
| 16 | 26,250,000 | 26,400,000 | 351 | 433 | 1.446341613  |                           |
| 16 | 26,325,000 | 26,475,000 | 352 | 654 | 1.478373054  |                           |
| 16 | 26,400,000 | 26,550,000 | 353 | 834 | 1.426728439  |                           |
| 16 | 26,475,000 | 26,625,000 | 354 | 952 | 1.404256862  |                           |
| 16 | 26,550,000 | 26,700,000 | 355 | 742 | 1.335715074  |                           |
| 16 | 26,625,000 | 26,775,000 | 356 | 799 | 0.864546578  | HHIPL2,TAF1A              |
| 16 | 26,700,000 | 26,850,000 | 357 | 662 | 0.629838545  | HHIPL2,MIA3,TAF1A         |
| 16 | 26,775,000 | 26,925,000 | 358 | 408 | 0.620216091  | AIDA,BROX,MIA3,TAF1A      |
| 16 | 26,850,000 | 27,000,000 | 359 | 658 | 1.16250861   | AIDA,BROX,MIA3            |
| 16 | 26,925,000 | 27,075,000 | 360 | 737 | 0.651708569  | AUH,BROX                  |
| 16 | 27,000,000 | 27,150,000 | 361 | 471 | -0.309310317 | AUH                       |
| 16 | 27,075,000 | 27,225,000 | 362 | 331 | -0.643299096 | DISP1                     |
| 16 | 27,150,000 | 27,300,000 | 363 | 407 | -0.306106944 | DISP1                     |
| 16 | 27,225,000 | 27,375,000 | 364 | 555 | -0.922116993 | TLR5                      |
| 16 | 27,300,000 | 27,450,000 | 365 | 666 | -1.31842576  | SUSD4,TLR5                |
| 16 | 27,375,000 | 27,525,000 | 366 | 471 | -1.088522281 | SUSD4                     |

|    |            |            |     |      |              |                                                        |
|----|------------|------------|-----|------|--------------|--------------------------------------------------------|
| 16 | 27,450,000 | 27,600,000 | 367 | 490  | -1.918907568 | CCDC185,SUSD4                                          |
| 16 | 27,525,000 | 27,675,000 | 368 | 798  | -0.981315678 | CCDC185                                                |
| 16 | 27,600,000 | 27,750,000 | 369 | 979  | 0.577627488  | MGC151839                                              |
| 16 | 27,675,000 | 27,825,000 | 370 | 1049 | 0.921415534  | CAPN2,MGC151839                                        |
| 16 | 27,750,000 | 27,900,000 | 371 | 1019 | 0.332655279  | CAPN2,TP53BP2                                          |
| 16 | 27,825,000 | 27,975,000 | 372 | 694  | -0.536430683 | CAPN2,TP53BP2                                          |
| 16 | 27,900,000 | 28,050,000 | 373 | 481  | -0.005101614 | FBXO28,ENSBTAG00000022942                              |
| 16 | 27,975,000 | 28,125,000 | 374 | 462  | 0.485015481  | DEGS1,FBXO28,NVL,ENSBTAG00000022942                    |
| 16 | 28,050,000 | 28,200,000 | 375 | 339  | 0.583556106  | DEGS1,NVL                                              |
| 16 | 28,125,000 | 28,275,000 | 376 | 290  | 0.077445896  | CNIH4,NVL,WDR26                                        |
| 16 | 28,200,000 | 28,350,000 | 377 | 364  | -0.407904284 | CNIH4,NVL,WDR26                                        |
| 16 | 28,275,000 | 28,425,000 | 378 | 707  | -0.411149886 | WDR26                                                  |
| 16 | 28,350,000 | 28,500,000 | 379 | 1258 | 0.376649843  | CNIH3                                                  |
| 16 | 28,425,000 | 28,575,000 | 380 | 957  | 0.681613108  | CNIH3                                                  |
| 16 | 28,500,000 | 28,650,000 | 381 | 730  | 0.644273852  | CNIH3                                                  |
| 16 | 28,575,000 | 28,725,000 | 382 | 921  | -0.458973465 | CNIH3                                                  |
| 16 | 28,650,000 | 28,800,000 | 383 | 895  | -3.949298322 |                                                        |
| 16 | 28,725,000 | 28,875,000 | 384 | 690  | -3.587920607 |                                                        |
| 16 | 28,800,000 | 28,950,000 | 385 | 334  | -0.419014049 |                                                        |
| 16 | 28,875,000 | 29,025,000 | 386 | 772  | 0.923208013  |                                                        |
| 16 | 28,950,000 | 29,100,000 | 387 | 804  | 0.893154329  | ENSBTAG00000008449                                     |
| 16 | 29,025,000 | 29,175,000 | 388 | 628  | 0.80544697   | LBR,ENSBTAG00000008449                                 |
| 16 | 29,100,000 | 29,250,000 | 389 | 725  | -6.82E-05    | ENAH,LBR,ENSBTAG00000008449                            |
| 16 | 29,175,000 | 29,325,000 | 390 | 436  | -2.099365392 | ENAH,LBR                                               |
| 16 | 29,250,000 | 29,400,000 | 391 | 738  | -2.425500926 | ENAH                                                   |
| 16 | 29,325,000 | 29,475,000 | 392 | 876  | -2.269091489 | ENAH                                                   |
| 16 | 29,400,000 | 29,550,000 | 393 | 539  | -2.354946082 | ENAH                                                   |
| 16 | 29,475,000 | 29,625,000 | 394 | 521  | -2.151892558 | EPHX1,SRP9,TMEM63A                                     |
| 16 | 29,550,000 | 29,700,000 | 395 | 595  | -1.179663493 | EPHX1,PYCR2,SRP9,TMEM63A,ENSBTAG0000002855             |
| 16 | 29,625,000 | 29,775,000 | 396 | 441  | -0.896383482 | PYCR2,SDE2,TMEM63A,ENSBTAG0000002855,ENSBTAGO000037896 |
| 16 | 29,700,000 | 29,850,000 | 397 | 240  | -1.667926419 | H3F3A,SDE2,ENSBTAG00000037896                          |
| 16 | 29,775,000 | 29,925,000 | 398 | 535  | -1.319351606 | ACBD3,H3F3A                                            |
| 16 | 29,850,000 | 30,000,000 | 399 | 771  | -0.945219907 | ACBD3,LIN9,MIXL1                                       |
| 16 | 29,925,000 | 30,075,000 | 400 | 454  | -0.894567625 | ACBD3,LIN9,MIXL1                                       |
| 16 | 30,000,000 | 30,150,000 | 401 | 343  | -2.834902748 | LIN9,PARP1                                             |
| 16 | 30,075,000 | 30,225,000 | 402 | 618  | -2.847833021 | PARP1,ENSBTAG00000047233                               |
| 16 | 30,150,000 | 30,300,000 | 403 | 895  | -0.521032368 | PARP1,ENSBTAG00000047233                               |
| 16 | 30,225,000 | 30,375,000 | 404 | 909  | -0.632686628 | MGC151592                                              |
| 16 | 30,300,000 | 30,450,000 | 405 | 646  | -1.310203894 | ITPKB,MGC151592,ENSBTAG00000033252                     |
| 16 | 30,375,000 | 30,525,000 | 406 | 520  | 0.019380179  | ITPKB,ENSBTAG00000033252                               |
| 16 | 30,450,000 | 30,600,000 | 407 | 437  | -0.745806162 | ITPKB,PSEN2                                            |
| 16 | 30,525,000 | 30,675,000 | 408 | 664  | -2.454574043 | ADCK3,PSEN2                                            |
| 16 | 30,600,000 | 30,750,000 | 409 | 719  | -1.879130766 | ADCK3,CDC42BPA,PSEN2                                   |
| 16 | 30,675,000 | 30,825,000 | 410 | 357  | 0.661761662  | ADCK3,CDC42BPA                                         |
| 16 | 30,750,000 | 30,900,000 | 411 | 344  | -0.437981921 | CDC42BPA                                               |
| 16 | 30,825,000 | 30,975,000 | 412 | 738  | -0.148918729 | CDC42BPA                                               |
| 16 | 30,900,000 | 31,050,000 | 413 | 720  | 0.088515815  | CDC42BPA                                               |
| 16 | 30,975,000 | 31,125,000 | 414 | 288  | -0.271998738 | CDC42BPA                                               |
| 16 | 31,050,000 | 31,200,000 | 415 | 162  | -0.969131872 | AHCTF1                                                 |
| 16 | 31,125,000 | 31,275,000 | 416 | 247  | 0.012529986  | AHCTF1                                                 |
| 16 | 31,200,000 | 31,350,000 | 417 | 781  | 0.684409942  | AHCTF1,SCCPDH                                          |
| 16 | 31,275,000 | 31,425,000 | 418 | 1239 | 0.666331356  | H3F3C,SCCPDH                                           |

|    |            |            |     |      |              |                        |
|----|------------|------------|-----|------|--------------|------------------------|
| 16 | 31,350,000 | 31,500,000 | 419 | 1027 | 0.419837487  | CNST,H3F3C,SCCPDH      |
| 16 | 31,425,000 | 31,575,000 | 420 | 679  | 0.152092535  | CNST,TFB2M             |
| 16 | 31,500,000 | 31,650,000 | 421 | 663  | -0.848389006 | CNST,SMYD3,TFB2M       |
| 16 | 31,575,000 | 31,725,000 | 422 | 624  | -1.558584659 | SMYD3                  |
| 16 | 31,650,000 | 31,800,000 | 423 | 569  | -2.04327226  | SMYD3                  |
| 16 | 31,725,000 | 31,875,000 | 424 | 615  | -0.720711658 | SMYD3                  |
| 16 | 31,800,000 | 31,950,000 | 425 | 481  | 0.782649389  | SMYD3                  |
| 16 | 31,875,000 | 32,025,000 | 426 | 318  | -0.133279464 | SMYD3                  |
| 16 | 31,950,000 | 32,100,000 | 427 | 438  | -0.663480437 | SMYD3                  |
| 16 | 32,025,000 | 32,175,000 | 428 | 530  | -0.099090654 | SMYD3                  |
| 16 | 32,100,000 | 32,250,000 | 429 | 513  | 0.673305372  | SMYD3                  |
| 16 | 32,175,000 | 32,325,000 | 430 | 595  | 0.440845787  | SMYD3                  |
| 16 | 32,250,000 | 32,400,000 | 431 | 563  | 0.121452826  | KIF26B,SMYD3           |
| 16 | 32,325,000 | 32,475,000 | 432 | 762  | 0.369677401  | KIF26B,SMYD3           |
| 16 | 32,400,000 | 32,550,000 | 433 | 1088 | 0.150761282  | KIF26B                 |
| 16 | 32,475,000 | 32,625,000 | 434 | 1226 | -0.008766115 |                        |
| 16 | 32,550,000 | 32,700,000 | 435 | 873  | 0.399244452  |                        |
| 16 | 32,625,000 | 32,775,000 | 436 | 430  | -0.566763023 |                        |
| 16 | 32,700,000 | 32,850,000 | 437 | 774  | -0.313203971 |                        |
| 16 | 32,775,000 | 32,925,000 | 438 | 861  | 0.171879115  |                        |
| 16 | 32,850,000 | 33,000,000 | 439 | 793  | 0.533286118  | EFCAB2                 |
| 16 | 32,925,000 | 33,075,000 | 440 | 666  | 0.629216399  | EFCAB2                 |
| 16 | 33,000,000 | 33,150,000 | 441 | 335  | 0.354105008  | EFCAB2                 |
| 16 | 33,075,000 | 33,225,000 | 442 | 398  | 0.489677209  | FAM36A,HNRNPU          |
| 16 | 33,150,000 | 33,300,000 | 443 | 565  | 0.269074035  | FAM36A,HNRNPU,PPPDE1   |
| 16 | 33,225,000 | 33,375,000 | 444 | 635  | 0.369589424  | C1orf101,PPPDE1        |
| 16 | 33,300,000 | 33,450,000 | 445 | 884  | 0.784890343  | C1orf101,PPPDE1        |
| 16 | 33,375,000 | 33,525,000 | 446 | 868  | 0.686258765  | C1orf101               |
| 16 | 33,450,000 | 33,600,000 | 447 | 757  | -0.699184412 | ADSS,C1orf100,C1orf101 |
| 16 | 33,525,000 | 33,675,000 | 448 | 1187 | -0.192120858 | ADSS,C1orf100          |
| 16 | 33,600,000 | 33,750,000 | 449 | 1114 | 0.540023061  |                        |
| 16 | 33,675,000 | 33,825,000 | 450 | 630  | 0.827698585  |                        |
| 16 | 33,750,000 | 33,900,000 | 451 | 584  | 0.984976819  |                        |
| 16 | 33,825,000 | 33,975,000 | 452 | 533  | 1.120844746  | ZBTB18                 |
| 16 | 33,900,000 | 34,050,000 | 453 | 655  | 0.855487634  | ZBTB18                 |
| 16 | 33,975,000 | 34,125,000 | 454 | 948  | 0.129232646  |                        |
| 16 | 34,050,000 | 34,200,000 | 455 | 900  | -0.168114575 | AKT3                   |
| 16 | 34,125,000 | 34,275,000 | 456 | 1068 | 0.44757318   | AKT3                   |
| 16 | 34,200,000 | 34,350,000 | 457 | 1055 | 0.326251095  | AKT3                   |
| 16 | 34,275,000 | 34,425,000 | 458 | 755  | 0.373969245  | AKT3,SDCCAG8           |
| 16 | 34,350,000 | 34,500,000 | 459 | 934  | 0.806889572  | AKT3,SDCCAG8           |
| 16 | 34,425,000 | 34,575,000 | 460 | 1053 | 0.715691026  | SDCCAG8                |
| 16 | 34,500,000 | 34,650,000 | 461 | 596  | 0.687483724  | SDCCAG8                |
| 16 | 34,575,000 | 34,725,000 | 462 | 336  | -0.046413652 | CEP170,SDCCAG8         |
| 16 | 34,650,000 | 34,800,000 | 463 | 389  | -1.194590474 | CEP170,SDCCAG8         |
| 16 | 34,725,000 | 34,875,000 | 464 | 749  | -1.725414411 | CEP170                 |
| 16 | 34,800,000 | 34,950,000 | 465 | 1069 | -1.396155218 |                        |
| 16 | 34,875,000 | 35,025,000 | 466 | 1138 | -0.070455444 |                        |
| 16 | 34,950,000 | 35,100,000 | 467 | 1158 | 0.3965515    |                        |
| 16 | 35,025,000 | 35,175,000 | 468 | 1019 | -2.223149183 |                        |
| 16 | 35,100,000 | 35,250,000 | 469 | 803  | -3.817834147 |                        |
| 16 | 35,175,000 | 35,325,000 | 470 | 558  | -2.134716289 |                        |
| 16 | 35,250,000 | 35,400,000 | 471 | 586  | -0.386740153 |                        |

|    |            |            |     |      |              |                                        |
|----|------------|------------|-----|------|--------------|----------------------------------------|
| 16 | 35,325,000 | 35,475,000 | 472 | 1010 | 0.280773358  | PLD5                                   |
| 16 | 35,400,000 | 35,550,000 | 473 | 1472 | 0.606855574  | PLD5                                   |
| 16 | 35,475,000 | 35,625,000 | 474 | 1121 | 0.633972031  | PLD5                                   |
| 16 | 35,550,000 | 35,700,000 | 475 | 736  | 0.869891614  | PLD5,ENSBTAG00000013700                |
| 16 | 35,625,000 | 35,775,000 | 476 | 797  | 1.131832721  | EXO1,MAP1LC3C,PLD5,ENSBTAG00000013700  |
| 16 | 35,700,000 | 35,850,000 | 477 | 826  | 0.926362303  | EXO1,MAP1LC3C,WDR64,ENSBTAG00000013700 |
| 16 | 35,775,000 | 35,925,000 | 478 | 924  | 0.173465699  | EXO1,WDR64                             |
| 16 | 35,850,000 | 36,000,000 | 479 | 853  | 0.201371096  | CHML,KMO,WDR64                         |
| 16 | 35,925,000 | 36,075,000 | 480 | 866  | 1.185958054  | CHML,FH,KMO,WDR64                      |
| 16 | 36,000,000 | 36,150,000 | 481 | 959  | 1.247551332  | FH,KMO                                 |
| 16 | 36,075,000 | 36,225,000 | 482 | 801  | 0.907330211  | FH,RGS7                                |
| 16 | 36,150,000 | 36,300,000 | 483 | 529  | 0.446226871  | RGS7                                   |
| 16 | 36,225,000 | 36,375,000 | 484 | 622  | 1.062937834  | RGS7                                   |
| 16 | 36,300,000 | 36,450,000 | 485 | 1008 | 0.885858768  | RGS7                                   |
| 16 | 36,375,000 | 36,525,000 | 486 | 1117 | 0.228672839  | RGS7                                   |
| 16 | 36,450,000 | 36,600,000 | 487 | 810  | -0.12984025  | RGS7                                   |
| 16 | 36,525,000 | 36,675,000 | 488 | 454  | 0.43915986   | RGS7                                   |
| 16 | 36,600,000 | 36,750,000 | 489 | 436  | 0.584894843  | RGS7                                   |
| 16 | 36,675,000 | 36,825,000 | 490 | 637  | 0.528423982  | RGS7                                   |
| 16 | 36,750,000 | 36,900,000 | 491 | 603  | 0.414853942  |                                        |
| 16 | 36,825,000 | 36,975,000 | 492 | 410  | 0.259532182  | ENSBTAG00000009943                     |
| 16 | 36,900,000 | 37,050,000 | 493 | 420  | -0.208336389 | XCL1,ENSBTAG00000009943                |
| 16 | 36,975,000 | 37,125,000 | 494 | 511  | 0.093005165  | DPT,XCL1                               |
| 16 | 37,050,000 | 37,200,000 | 495 | 695  | -1.573421142 | DPT                                    |
| 16 | 37,125,000 | 37,275,000 | 496 | 641  | -2.184796159 | DPT                                    |
| 16 | 37,200,000 | 37,350,000 | 497 | 704  | 0.420165656  |                                        |
| 16 | 37,275,000 | 37,425,000 | 498 | 843  | 0.766446493  |                                        |
| 16 | 37,350,000 | 37,500,000 | 499 | 522  | 0.399547343  |                                        |
| 16 | 37,425,000 | 37,575,000 | 500 | 347  | -0.149173258 | ATP1B1                                 |
| 16 | 37,500,000 | 37,650,000 | 501 | 380  | 0.949229729  | ATP1B1,NME7                            |
| 16 | 37,575,000 | 37,725,000 | 502 | 591  | 1.193316182  | ATP1B1,NME7                            |
| 16 | 37,650,000 | 37,800,000 | 503 | 732  | 1.130205826  | NME7                                   |
| 16 | 37,725,000 | 37,875,000 | 504 | 732  | 0.462271192  | BLZF1,NME7                             |
| 16 | 37,800,000 | 37,950,000 | 505 | 644  | 0.387780209  | BLZF1,CCDC181,NME7,SLC19A2             |
| 16 | 37,875,000 | 38,025,000 | 506 | 776  | 0.481932932  | CCDC181,F5,SLC19A2                     |
| 16 | 37,950,000 | 38,100,000 | 507 | 1194 | -0.79641113  | F5,SELP                                |
| 16 | 38,025,000 | 38,175,000 | 508 | 1048 | -1.710592711 | F5,SELL,SELP                           |
| 16 | 38,100,000 | 38,250,000 | 509 | 549  | -1.353846065 | METTTL18,SELE,SELL                     |
| 16 | 38,175,000 | 38,325,000 | 510 | 488  | -0.509617844 | C1orf112,METTTL18,SCYL3,SELE           |
| 16 | 38,250,000 | 38,400,000 | 511 | 584  | -1.405451769 | C1orf112,KIFAP3,SCYL3                  |
| 16 | 38,325,000 | 38,475,000 | 512 | 326  | -2.440653122 | KIFAP3,SCYL3                           |
| 16 | 38,400,000 | 38,550,000 | 513 | 188  | -0.791577474 | KIFAP3                                 |
| 16 | 38,475,000 | 38,625,000 | 514 | 364  | -0.465027248 | KIFAP3,METTTL11B                       |
| 16 | 38,550,000 | 38,700,000 | 515 | 618  | 0.302181105  | METTTL11B                              |
| 16 | 38,625,000 | 38,775,000 | 516 | 823  | 0.801140446  |                                        |
| 16 | 38,700,000 | 38,850,000 | 517 | 816  | 0.64218644   |                                        |
| 16 | 38,775,000 | 38,925,000 | 518 | 735  | -0.72882198  | GORAB                                  |
| 16 | 38,850,000 | 39,000,000 | 519 | 511  | -2.273884615 | GORAB                                  |
| 16 | 38,925,000 | 39,075,000 | 520 | 352  | -0.874252285 | PRRX1                                  |
| 16 | 39,000,000 | 39,150,000 | 521 | 295  | 0.514283956  | PRRX1                                  |
| 16 | 39,075,000 | 39,225,000 | 522 | 201  | 0.658325327  | PRRX1                                  |
| 16 | 39,150,000 | 39,300,000 | 523 | 236  | 1.043968889  |                                        |
| 16 | 39,225,000 | 39,375,000 | 524 | 552  | 0.930242192  | MROH9                                  |

|    |            |            |     |     |              |                                                 |
|----|------------|------------|-----|-----|--------------|-------------------------------------------------|
| 16 | 39,300,000 | 39,450,000 | 525 | 598 | 0.84999889   | MROH9                                           |
| 16 | 39,375,000 | 39,525,000 | 526 | 408 | 0.854296467  | FMO3,MROH9                                      |
| 16 | 39,450,000 | 39,600,000 | 527 | 334 | 0.738228014  | FMO3,FMO6P                                      |
| 16 | 39,525,000 | 39,675,000 | 528 | 478 | 0.78824742   | FMO1,FMO2,FMO3,FMO6P                            |
| 16 | 39,600,000 | 39,750,000 | 529 | 631 | 0.788333006  | FMO1,FMO2,FMO4                                  |
| 16 | 39,675,000 | 39,825,000 | 530 | 447 | 0.785712286  | FMO1,FMO4                                       |
| 16 | 39,750,000 | 39,900,000 | 531 | 277 | 1.063369057  | FMO4,PRRC2C                                     |
| 16 | 39,825,000 | 39,975,000 | 532 | 233 | 1.017340306  | MYOC,PRRC2C                                     |
| 16 | 39,900,000 | 40,050,000 | 533 | 379 | 0.57237064   | METTTL13,MYOC,PRRC2C,VAMP4                      |
| 16 | 39,975,000 | 40,125,000 | 534 | 411 | 0.627187803  | DNM3,METTTL13,VAMP4                             |
| 16 | 40,050,000 | 40,200,000 | 535 | 354 | -0.449900377 | DNM3,METTTL13                                   |
| 16 | 40,125,000 | 40,275,000 | 536 | 332 | -2.163474302 | DNM3                                            |
| 16 | 40,200,000 | 40,350,000 | 537 | 261 | -2.357981535 | DNM3                                            |
| 16 | 40,275,000 | 40,425,000 | 538 | 184 | -0.086351308 | DNM3                                            |
| 16 | 40,350,000 | 40,500,000 | 539 | 122 | 0.885500613  | DNM3                                            |
| 16 | 40,425,000 | 40,575,000 | 540 | 132 | 1.074274898  | DNM3                                            |
| 16 | 40,500,000 | 40,650,000 | 541 | 185 | 1.134431302  |                                                 |
| 16 | 40,575,000 | 40,725,000 | 542 | 178 | 1.026623247  |                                                 |
| 16 | 40,650,000 | 40,800,000 | 543 | 267 | 1.21503729   | PIGC                                            |
| 16 | 40,725,000 | 40,875,000 | 544 | 590 | 0.972791801  | PIGC                                            |
| 16 | 40,800,000 | 40,950,000 | 545 | 514 | 0.755575121  | SUCO                                            |
| 16 | 40,875,000 | 41,025,000 | 546 | 289 | 0.51143413   | SUCO                                            |
| 16 | 40,950,000 | 41,100,000 | 547 | 323 | 0.424612848  | FASLG,SUCO                                      |
| 16 | 41,025,000 | 41,175,000 | 548 | 248 | 0.062118614  | FASLG,ENSBTAG00000016347                        |
| 16 | 41,100,000 | 41,250,000 | 549 | 228 | -0.117497597 | ENSBTAG00000016347                              |
| 16 | 41,175,000 | 41,325,000 | 550 | 255 | -1.894465738 |                                                 |
| 16 | 41,250,000 | 41,400,000 | 551 | 253 | -3.072058337 |                                                 |
| 16 | 41,325,000 | 41,475,000 | 552 | 334 | -3.021537774 |                                                 |
| 16 | 41,400,000 | 41,550,000 | 553 | 408 | -1.886248071 | TNFSF18                                         |
| 16 | 41,475,000 | 41,625,000 | 554 | 483 | 1.010446108  | TNFSF18                                         |
| 16 | 41,550,000 | 41,700,000 | 555 | 345 | 1.475108855  | TNFSF18,TNFSF4                                  |
| 16 | 41,625,000 | 41,775,000 | 556 | 160 | 1.049502183  | TNFSF4                                          |
| 16 | 41,700,000 | 41,850,000 | 557 | 203 | 0.888223685  | TNFSF4                                          |
| 16 | 41,775,000 | 41,925,000 | 558 | 258 | 1.009202219  |                                                 |
| 16 | 41,850,000 | 42,000,000 | 559 | 331 | 0.447742045  | DHRS3                                           |
| 16 | 41,925,000 | 42,075,000 | 560 | 316 | 0.320012754  | DHRS3                                           |
| 16 | 42,000,000 | 42,150,000 | 561 | 194 | 0.269877967  | DHRS3,VPS13D                                    |
| 16 | 42,075,000 | 42,225,000 | 562 | 98  | -0.248958484 | VPS13D                                          |
| 16 | 42,150,000 | 42,300,000 | 563 | 94  | -0.78180059  | VPS13D                                          |
| 16 | 42,225,000 | 42,375,000 | 564 | 230 | 0.813493286  | VPS13D                                          |
| 16 | 42,300,000 | 42,450,000 | 565 | 263 | 1.14588169   | TNFRSF1B,TNFRSF8,VPS13D                         |
| 16 | 42,375,000 | 42,525,000 | 566 | 290 | 0.329863216  | TNFRSF1B,TNFRSF8                                |
| 16 | 42,450,000 | 42,600,000 | 567 | 477 | -1.552090986 | MFN2,MIIP,PLOD1,TNFRSF8                         |
| 16 | 42,525,000 | 42,675,000 | 568 | 417 | -1.707134395 | KIAA2013,MFN2,MIIP,PLOD1                        |
| 16 | 42,600,000 | 42,750,000 | 569 | 268 | -0.02220782  | CLCN6,KIAA2013,NPPA,NPPB,PLOD1                  |
| 16 | 42,675,000 | 42,825,000 | 570 | 414 | -1.014791954 | AGTRAP,C1orf167,CLCN6,MTHFR,NPPA,NPPB           |
| 16 | 42,750,000 | 42,900,000 | 571 | 558 | -0.948329308 | AGTRAP,C1orf167,CLCN6,DRAXIN,FBXO6,MAD2L2,MTHFR |
| 16 | 42,825,000 | 42,975,000 | 572 | 410 | -0.222023311 | AGTRAP,DRAXIN,FBXO2,FBXO44,FBXO6,MAD2L2         |
| 16 | 42,900,000 | 43,050,000 | 573 | 283 | 0.480039782  | FBXO2,FBXO44,PTCHD2                             |
| 16 | 42,975,000 | 43,125,000 | 574 | 318 | 1.127982393  | PTCHD2                                          |
| 16 | 43,050,000 | 43,200,000 | 575 | 424 | 1.294318675  | PTCHD2                                          |
| 16 | 43,125,000 | 43,275,000 | 576 | 386 | 1.373990272  | UBIAD1                                          |



|    |            |            |     |      |              |                                  |
|----|------------|------------|-----|------|--------------|----------------------------------|
| 16 | 43,200,000 | 43,350,000 | 577 | 194  | 1.357120123  | ANGPTL7,MTOR,UBIAD1              |
| 16 | 43,275,000 | 43,425,000 | 578 | 179  | 1.219334241  | ANGPTL7,EXOSC10,MTOR             |
| 16 | 43,350,000 | 43,500,000 | 579 | 427  | 1.160820964  | EXOSC10,MASP2,MTOR,SRM,TARDBP    |
| 16 | 43,425,000 | 43,575,000 | 580 | 434  | 1.138688258  | EXOSC10,MASP2,SRM,TARDBP         |
| 16 | 43,500,000 | 43,650,000 | 581 | 470  | 1.332710529  |                                  |
| 16 | 43,575,000 | 43,725,000 | 582 | 460  | 1.295993062  |                                  |
| 16 | 43,650,000 | 43,800,000 | 583 | 278  | 0.837954329  | CASZ1                            |
| 16 | 43,725,000 | 43,875,000 | 584 | 274  | 0.755586614  | CASZ1,PEX14                      |
| 16 | 43,800,000 | 43,950,000 | 585 | 259  | 1.224032715  | CASZ1,PEX14                      |
| 16 | 43,875,000 | 44,025,000 | 586 | 218  | 1.315557764  | APITD1,CORT,DFFA,PEX14           |
| 16 | 43,950,000 | 44,100,000 | 587 | 394  | -0.908206194 | APITD1,CORT,DFFA,KIF1B,PEX14,PGD |
| 16 | 44,025,000 | 44,175,000 | 588 | 538  | -1.631851536 | APITD1,KIF1B,PGD                 |
| 16 | 44,100,000 | 44,250,000 | 589 | 396  | -1.806283353 | KIF1B                            |
| 16 | 44,175,000 | 44,325,000 | 590 | 345  | -1.693732869 | KIF1B,UBE4B                      |
| 16 | 44,250,000 | 44,400,000 | 591 | 245  | -1.144426554 | UBE4B                            |
| 16 | 44,325,000 | 44,475,000 | 592 | 212  | 0.986467434  | NMNAT1,RBP7,UBE4B                |
| 16 | 44,400,000 | 44,550,000 | 593 | 345  | 1.245829393  | CTNNBIP1,NMNAT1,RBP7             |
| 16 | 44,475,000 | 44,625,000 | 594 | 285  | 1.340448799  | CTNNBIP1                         |
| 16 | 44,550,000 | 44,700,000 | 595 | 190  | 1.132995021  | CLSTN1,CTNNBIP1,PIK3CD           |
| 16 | 44,625,000 | 44,775,000 | 596 | 273  | 0.488977272  | CLSTN1,PIK3CD                    |
| 16 | 44,700,000 | 44,850,000 | 597 | 323  | -0.396127994 | SLC25A33,TMEM201                 |
| 16 | 44,775,000 | 44,925,000 | 598 | 318  | -0.965017985 | SLC25A33,TMEM201                 |
| 16 | 44,850,000 | 45,000,000 | 599 | 325  | -0.414868107 | SPSB1                            |
| 16 | 44,925,000 | 45,075,000 | 600 | 326  | 0.300683651  | SPSB1                            |
| 16 | 45,000,000 | 45,150,000 | 601 | 360  | 0.400662769  | H6PD,SPSB1                       |
| 16 | 45,075,000 | 45,225,000 | 602 | 379  | 0.600262499  | GPR157,H6PD                      |
| 16 | 45,150,000 | 45,300,000 | 603 | 485  | 0.940300741  | CA6,GPR157,SLC2A5                |
| 16 | 45,225,000 | 45,375,000 | 604 | 406  | 1.006233764  | CA6,GPR157,SLC2A5                |
| 16 | 45,300,000 | 45,450,000 | 605 | 341  | 1.049740205  | CA6,ENSBTAG00000013411           |
| 16 | 45,375,000 | 45,525,000 | 606 | 378  | 1.221966883  | ENSBTAG00000013411               |
| 16 | 45,450,000 | 45,600,000 | 607 | 396  | 1.314452467  |                                  |
| 16 | 45,525,000 | 45,675,000 | 608 | 443  | 1.256965263  | RERE                             |
| 16 | 45,600,000 | 45,750,000 | 609 | 292  | 1.176065549  | RERE                             |
| 16 | 45,675,000 | 45,825,000 | 610 | 231  | 1.276544136  | RERE                             |
| 16 | 45,750,000 | 45,900,000 | 611 | 248  | 1.268421456  | RERE,SLC45A1                     |
| 16 | 45,825,000 | 45,975,000 | 612 | 218  | 1.154844035  | RERE,SLC45A1                     |
| 16 | 45,900,000 | 46,050,000 | 613 | 416  | 1.304132949  | SLC45A1                          |
| 16 | 45,975,000 | 46,125,000 | 614 | 677  | 0.838507938  | ENSBTAG00000011650               |
| 16 | 46,050,000 | 46,200,000 | 615 | 672  | 0.488148078  | ENSBTAG00000011650               |
| 16 | 46,125,000 | 46,275,000 | 616 | 504  | 0.90459916   | ERRFI1,PARK7,ENSBTAG00000011650  |
| 16 | 46,200,000 | 46,350,000 | 617 | 507  | 0.739980993  | ERRFI1,PARK7,TNFRSF9             |
| 16 | 46,275,000 | 46,425,000 | 618 | 878  | 0.820931811  | TNFRSF9                          |
| 16 | 46,350,000 | 46,500,000 | 619 | 909  | 1.028357787  | CAMTA1,VAMP3                     |
| 16 | 46,425,000 | 46,575,000 | 620 | 751  | 1.055844405  | CAMTA1,VAMP3                     |
| 16 | 46,500,000 | 46,650,000 | 621 | 968  | -0.202507662 | CAMTA1                           |
| 16 | 46,575,000 | 46,725,000 | 622 | 1156 | 0.024251429  |                                  |
| 16 | 46,650,000 | 46,800,000 | 623 | 1165 | -0.024000693 |                                  |
| 16 | 46,725,000 | 46,875,000 | 624 | 1044 | -0.384738358 |                                  |
| 16 | 46,800,000 | 46,950,000 | 625 | 929  | 0.528125467  |                                  |
| 16 | 46,875,000 | 47,025,000 | 626 | 814  | 1.05947604   |                                  |
| 16 | 46,950,000 | 47,100,000 | 627 | 907  | 0.465463926  |                                  |
| 16 | 47,025,000 | 47,175,000 | 628 | 1079 | -0.311818829 |                                  |
| 16 | 47,100,000 | 47,250,000 | 629 | 986  | -0.537180402 |                                  |

|    |            |            |     |      |              |                                                              |
|----|------------|------------|-----|------|--------------|--------------------------------------------------------------|
| 16 | 47,175,000 | 47,325,000 | 630 | 690  | 0.067230854  |                                                              |
| 16 | 47,250,000 | 47,400,000 | 631 | 303  | 0.919290279  |                                                              |
| 16 | 47,325,000 | 47,475,000 | 632 | 156  | 0.993902248  |                                                              |
| 16 | 47,400,000 | 47,550,000 | 633 | 200  | 0.137407973  |                                                              |
| 16 | 47,475,000 | 47,625,000 | 634 | 258  | -0.042985448 | DNAJC11,THAP3                                                |
| 16 | 47,550,000 | 47,700,000 | 635 | 256  | 0.220486135  | DNAJC11,KLHL21,NOL9,PHF13,TAS1R1,THAP3,ZBTB48                |
| 16 | 47,625,000 | 47,775,000 | 636 | 247  | -0.600549222 | ESPN,KLHL21,NOL9,PHF13,PLEKHG5,TAS1R1,THAP3,TNFRSF25,ZBTB48  |
| 16 | 47,700,000 | 47,850,000 | 637 | 374  | -3.873968667 | ACOT7,ESPN,HES2,PLEKHG5,TNFRSF25                             |
| 16 | 47,775,000 | 47,925,000 | 638 | 448  | -3.590083199 | ACOT7,ESPN,HES2                                              |
| 16 | 47,850,000 | 48,000,000 | 639 | 323  | -2.229921641 | ACOT7,GPR153,HES3,ICMT,RNF207,ENSBTAG00000014423             |
| 16 | 47,925,000 | 48,075,000 | 640 | 232  | -0.552505927 | ACOT7,CHD5,GPR153,HES3,ICMT,RNF207,ENSBTAG00000014423        |
| 16 | 48,000,000 | 48,150,000 | 641 | 251  | 0.47764245   | CHD5,KCNAB2,ENSBTAG00000014423                               |
| 16 | 48,075,000 | 48,225,000 | 642 | 413  | 0.643578173  | CHD5,KCNAB2,NPHP4                                            |
| 16 | 48,150,000 | 48,300,000 | 643 | 977  | 0.901791887  | NPHP4                                                        |
| 16 | 48,225,000 | 48,375,000 | 644 | 1686 | 0.93896976   | NPHP4                                                        |
| 16 | 48,300,000 | 48,450,000 | 645 | 1268 | 1.005741408  | NPHP4                                                        |
| 16 | 48,375,000 | 48,525,000 | 646 | 868  | -0.21565192  |                                                              |
| 16 | 48,450,000 | 48,600,000 | 647 | 1263 | -1.084465381 |                                                              |
| 16 | 48,525,000 | 48,675,000 | 648 | 1366 | -0.628948008 |                                                              |
| 16 | 48,600,000 | 48,750,000 | 649 | 1073 | -3.438975457 |                                                              |
| 16 | 48,675,000 | 48,825,000 | 650 | 626  | -7.811043695 |                                                              |
| 16 | 48,750,000 | 48,900,000 | 651 | 733  | -7.259808842 |                                                              |
| 16 | 48,825,000 | 48,975,000 | 652 | 743  | -6.154316071 |                                                              |
| 16 | 48,900,000 | 49,050,000 | 653 | 551  | -1.136596034 |                                                              |
| 16 | 48,975,000 | 49,125,000 | 654 | 862  | -0.143173988 |                                                              |
| 16 | 49,050,000 | 49,200,000 | 655 | 979  | -1.063711375 |                                                              |
| 16 | 49,125,000 | 49,275,000 | 656 | 655  | -0.655610204 | LAD1,TNNT2,ENSBTAG00000047285,ENSBTAG00000048267             |
| 16 | 49,200,000 | 49,350,000 | 657 | 459  | 0.817504308  | CSRP1,LAD1,TNNI1,TNNT2,ENSBTAG00000047285,ENSBTAG00000048267 |
| 16 | 49,275,000 | 49,425,000 | 658 | 520  | 0.497782754  | CSRP1,LAD1,TNNI1                                             |
| 16 | 49,350,000 | 49,500,000 | 659 | 569  | 0.547344826  | CSRP1,NAV1,ENSBTAG00000046062                                |
| 16 | 49,425,000 | 49,575,000 | 660 | 579  | 0.703143128  | NAV1,ENSBTAG00000046062                                      |
| 16 | 49,500,000 | 49,650,000 | 661 | 653  | 0.725913093  | IPO9,LMOD1,NAV1,SHISA4                                       |
| 16 | 49,575,000 | 49,725,000 | 662 | 751  | 0.901663828  | IPO9,LMOD1,SHISA4,TIMM17A                                    |
| 16 | 49,650,000 | 49,800,000 | 663 | 965  | 0.844775817  | LMOD1,TIMM17A                                                |
| 16 | 49,725,000 | 49,875,000 | 664 | 954  | 0.53396704   | AJAP1                                                        |
| 16 | 49,800,000 | 49,950,000 | 665 | 617  | 0.645000266  | AJAP1                                                        |
| 16 | 49,875,000 | 50,025,000 | 666 | 478  | 1.260400812  |                                                              |
| 16 | 49,950,000 | 50,100,000 | 667 | 762  | 1.172423585  |                                                              |
| 16 | 50,025,000 | 50,175,000 | 668 | 890  | 0.454437997  |                                                              |
| 16 | 50,100,000 | 50,250,000 | 669 | 764  | -2.475133092 |                                                              |
| 16 | 50,175,000 | 50,325,000 | 670 | 762  | -1.668635482 |                                                              |
| 16 | 50,250,000 | 50,400,000 | 671 | 830  | 1.110042635  |                                                              |
| 16 | 50,325,000 | 50,475,000 | 672 | 748  | 1.216076196  | C16H1orf174                                                  |
| 16 | 50,400,000 | 50,550,000 | 673 | 573  | 0.663955213  | C16H1orf174,CEP104,DFFB,LRR47                                |
| 16 | 50,475,000 | 50,625,000 | 674 | 546  | 0.310201317  | C16H1orf174,CCDC27,CEP104,DFFB,LRR47,SMIM1,TP73              |
| 16 | 50,550,000 | 50,700,000 | 675 | 481  | 0.583220097  | CCDC27,LRR47,SMIM1,TP73,TPRG1L,WRAP73                        |
| 16 | 50,625,000 | 50,775,000 | 676 | 412  | 0.439919188  | MEGF6,TP73,TPRG1L,WRAP73                                     |
| 16 | 50,700,000 | 50,850,000 | 677 | 410  | 0.349564822  | ARHGEF16,MEGF6,PRDM16                                        |

|    |            |            |     |      |              |                                                                                                                      |
|----|------------|------------|-----|------|--------------|----------------------------------------------------------------------------------------------------------------------|
| 16 | 50,775,000 | 50,925,000 | 678 | 411  | 0.471509563  | ARHGEF16,MEGF6,PRDM16                                                                                                |
| 16 | 50,850,000 | 51,000,000 | 679 | 458  | 0.207068821  | PRDM16                                                                                                               |
| 16 | 50,925,000 | 51,075,000 | 680 | 722  | 0.611066351  |                                                                                                                      |
| 16 | 51,000,000 | 51,150,000 | 681 | 637  | 0.717902504  |                                                                                                                      |
| 16 | 51,075,000 | 51,225,000 | 682 | 394  | -0.690903843 |                                                                                                                      |
| 16 | 51,150,000 | 51,300,000 | 683 | 397  | -0.283786081 | ACTRT2                                                                                                               |
| 16 | 51,225,000 | 51,375,000 | 684 | 358  | 0.658076236  | ACTRT2                                                                                                               |
| 16 | 51,300,000 | 51,450,000 | 685 | 407  | 0.479011195  |                                                                                                                      |
| 16 | 51,375,000 | 51,525,000 | 686 | 534  | 0.544249529  | MMEL1,TTC34                                                                                                          |
| 16 | 51,450,000 | 51,600,000 | 687 | 495  | 0.406680988  | FAM213B,HES5,MMEL1,PANK4,TTC34                                                                                       |
| 16 | 51,525,000 | 51,675,000 | 688 | 536  | 0.612298797  | FAM213B,HES5,MMEL1,PANK4,PLCH2                                                                                       |
| 16 | 51,600,000 | 51,750,000 | 689 | 505  | 0.793079114  | MORN1,PANK4,PEX10,PLCH2,RER1                                                                                         |
| 16 | 51,675,000 | 51,825,000 | 690 | 315  | -1.472342603 | MORN1,PEX10,RER1,SKI                                                                                                 |
| 16 | 51,750,000 | 51,900,000 | 691 | 345  | -1.180235956 | FAAP20,PRKCZ,SKI                                                                                                     |
| 16 | 51,825,000 | 51,975,000 | 692 | 434  | 0.275624605  | FAAP20,GABRD,PRKCZ                                                                                                   |
| 16 | 51,900,000 | 52,050,000 | 693 | 384  | 0.65914181   | GABRD,KIAA1751,PRKCZ                                                                                                 |
| 16 | 51,975,000 | 52,125,000 | 694 | 320  | 0.903534364  | CALML6,GNB1,KIAA1751,TMEM52,ENSBTAG00000024510                                                                       |
| 16 | 52,050,000 | 52,200,000 | 695 | 286  | 0.547818331  | CALML6,GNB1,KIAA1751,TMEM52,ENSBTAG00000024510                                                                       |
| 16 | 52,125,000 | 52,275,000 | 696 | 167  | -0.023927135 | CDC2L1,GNB1,MIB2,MMP23B,NADK,RPLP1,SLC35E2B                                                                          |
| 16 | 52,200,000 | 52,350,000 | 697 | 126  | -0.147369796 | ATAD3,C16H1orf70,C1orf233,CDC2L1,MIB2,MMP23B,NADK,RPLP1,SLC35E2B,SSU72                                               |
| 16 | 52,275,000 | 52,425,000 | 698 | 122  | -0.059027498 | ANKRD65,ATAD3,AURKAIP1,C16H1orf70,C1orf233,CCNL2,MIB2,MRPL20,MXRA8,RPLP1,SSU72,TMEM88B,VWA1                          |
| 16 | 52,350,000 | 52,500,000 | 699 | 172  | 1.111205735  | ANKRD65,ATAD3,AURKAIP1,B3GALT6,CCNL2,DVL1,FAM132A,MRPL20,MXRA8,RPLP1,SDF4,TMEM88B,TNFRSF18,TNFRSF4,TLL10,UBE2J2,VWA1 |
| 16 | 52,425,000 | 52,575,000 | 700 | 235  | 1.089068939  | B3GALT6,DVL1,FAM132A,GLTPD1,MXRA8,SDF4,TNFRSF18,TNFRSF4,TLL10,UBE2J2                                                 |
| 16 | 52,500,000 | 52,650,000 | 701 | 209  | 1.075750663  | ACAP3,CPSF3L,FLJ20584,GLTPD1,PUSL1,SCNN1D,TLL10                                                                      |
| 16 | 52,575,000 | 52,725,000 | 702 | 169  | 0.691561726  | ACAP3,AGRN,CPSF3L,FLJ20584,GLTPD1,HES4,ISG15,PUSL1,RNF223,SCNN1D,ENSBTAG00000024492                                  |
| 16 | 52,650,000 | 52,800,000 | 703 | 130  | 0.400983605  | AGRN,FLJ20584,HES4,ISG15,KLHL17,NOC2L,PERM1,PLEKHN1,RNF223,SAMD11,ENSBTAG00000024492                                 |
| 16 | 52,725,000 | 52,875,000 | 704 | 140  | 0.546929001  | HES4,KLHL17,NOC2L,PERM1,PLEKHN1,SAMD11,ZBTB17                                                                        |
| 16 | 52,800,000 | 52,950,000 | 705 | 214  | 0.650252177  | SPEN,ZBTB17                                                                                                          |
| 16 | 52,875,000 | 53,025,000 | 706 | 274  | -0.265629168 | SPEN,ZBTB17                                                                                                          |
| 16 | 52,950,000 | 53,100,000 | 707 | 391  | 0.220407925  | FBLIM1,PLEKHM2,SLC25A34,SPEN,TMEM82                                                                                  |
| 16 | 53,025,000 | 53,175,000 | 708 | 394  | 0.934503192  | DDI2,FBLIM1,PLEKHM2,RSC1A1,SLC25A34,TMEM82                                                                           |
| 16 | 53,100,000 | 53,250,000 | 709 | 275  | 1.226019431  | AGMAT,DDI2,DNAJC16,PLEKHM2,RSC1A1                                                                                    |
| 16 | 53,175,000 | 53,325,000 | 710 | 398  | 0.288689776  | AGMAT,CASP9,CTRC,DNAJC16,EFHD2,ELA2A                                                                                 |
| 16 | 53,250,000 | 53,400,000 | 711 | 691  | 0.28800146   | CASP9,CTRC,EFHD2,ELA2A,FHAD1                                                                                         |
| 16 | 53,325,000 | 53,475,000 | 712 | 631  | 0.383120993  | FHAD1                                                                                                                |
| 16 | 53,400,000 | 53,550,000 | 713 | 406  | 0.41604377   | FHAD1,TMEM51                                                                                                         |
| 16 | 53,475,000 | 53,625,000 | 714 | 814  | 0.686603711  | TMEM51                                                                                                               |
| 16 | 53,550,000 | 53,700,000 | 715 | 890  | 0.37628772   | KAZN                                                                                                                 |
| 16 | 53,625,000 | 53,775,000 | 716 | 773  | 0.719042777  | KAZN                                                                                                                 |
| 16 | 53,700,000 | 53,850,000 | 717 | 1110 | 0.890097726  | KAZN                                                                                                                 |
| 16 | 53,775,000 | 53,925,000 | 718 | 858  | 0.340466824  |                                                                                                                      |
| 16 | 53,850,000 | 54,000,000 | 719 | 741  | -0.461730539 |                                                                                                                      |
| 16 | 53,925,000 | 54,075,000 | 720 | 883  | -0.169597755 |                                                                                                                      |
| 16 | 54,000,000 | 54,150,000 | 721 | 586  | -0.111313082 |                                                                                                                      |

|    |            |            |     |      |              |                                                                                               |
|----|------------|------------|-----|------|--------------|-----------------------------------------------------------------------------------------------|
| 16 | 54,075,000 | 54,225,000 | 722 | 385  | 0.292622473  |                                                                                               |
| 16 | 54,150,000 | 54,300,000 | 723 | 540  | 0.488733338  |                                                                                               |
| 16 | 54,225,000 | 54,375,000 | 724 | 843  | 0.432883236  |                                                                                               |
| 16 | 54,300,000 | 54,450,000 | 725 | 1171 | 0.146835218  |                                                                                               |
| 16 | 54,375,000 | 54,525,000 | 726 | 1008 | -0.067013195 |                                                                                               |
| 16 | 54,450,000 | 54,600,000 | 727 | 709  | 0.052960506  |                                                                                               |
| 16 | 54,525,000 | 54,675,000 | 728 | 581  | 0.3745633    |                                                                                               |
| 16 | 54,600,000 | 54,750,000 | 729 | 1058 | 0.591271266  |                                                                                               |
| 16 | 54,675,000 | 54,825,000 | 730 | 1457 | 0.605238965  |                                                                                               |
| 16 | 54,750,000 | 54,900,000 | 731 | 1071 | 0.279499705  |                                                                                               |
| 16 | 54,825,000 | 54,975,000 | 732 | 1179 | 0.443909374  |                                                                                               |
| 16 | 54,900,000 | 55,050,000 | 733 | 1296 | 0.688718429  |                                                                                               |
| 16 | 54,975,000 | 55,125,000 | 734 | 822  | 0.373481059  | PRDM2                                                                                         |
| 16 | 55,050,000 | 55,200,000 | 735 | 477  | 0.417792419  | PRDM2                                                                                         |
| 16 | 55,125,000 | 55,275,000 | 736 | 544  | 0.958904659  | KDM5B,PRDM2                                                                                   |
| 16 | 55,200,000 | 55,350,000 | 737 | 626  | 0.905301822  | KDM5B                                                                                         |
| 16 | 55,275,000 | 55,425,000 | 738 | 574  | 0.131790125  | BOVAGGRUS,KDM5B                                                                               |
| 16 | 55,350,000 | 55,500,000 | 739 | 583  | 0.397633004  | BOVAGGRUS,KLHL12,RABIF                                                                        |
| 16 | 55,425,000 | 55,575,000 | 740 | 511  | 0.413542396  | ADIPOR1,BOVAGGRUS,CYB5R1,KLHL12,RABIF,ENSBTAG0000019931                                       |
| 16 | 55,500,000 | 55,650,000 | 741 | 701  | 0.82904637   | ADIPOR1,CYB5R1,KLHL12,LRRC38,ENSBTAG00000019931                                               |
| 16 | 55,575,000 | 55,725,000 | 742 | 995  | 0.946896775  | LRRC38,ENSBTAG00000024791                                                                     |
| 16 | 55,650,000 | 55,800,000 | 743 | 796  | 0.490969069  | ENSBTAG00000012389,ENSBTAG00000024791,ENSBTAG0000038000,ENSBTAG00000038222,ENSBTAG00000040570 |
| 16 | 55,725,000 | 55,875,000 | 744 | 635  | -0.435952067 | ENSBTAG00000012389,ENSBTAG00000038000,ENSBTAG0000038222,ENSBTAG00000038264,ENSBTAG00000040570 |
| 16 | 55,800,000 | 55,950,000 | 745 | 544  | -0.943314889 | ENSBTAG00000031507,ENSBTAG00000038261,ENSBTAG0000038264                                       |
| 16 | 55,875,000 | 56,025,000 | 746 | 510  | -0.440804746 | ENSBTAG00000031507,ENSBTAG00000038261,ENSBTAG0000040419                                       |
| 16 | 55,950,000 | 56,100,000 | 747 | 524  | 0.174773402  | ENSBTAG00000001210,ENSBTAG00000015600,ENSBTAG0000040419                                       |
| 16 | 56,025,000 | 56,175,000 | 748 | 460  | 0.214292294  | ENSBTAG00000001210,ENSBTAG00000015600,ENSBTAG0000040419,ENSBTAG00000046630                    |
| 16 | 56,100,000 | 56,250,000 | 749 | 375  | 0.35111722   | AADAACL3,C16H1orf158,ENSBTAG00000046630                                                       |
| 16 | 56,175,000 | 56,325,000 | 750 | 608  | -0.374033883 | AADAACL3,C16H1orf158                                                                          |
| 16 | 56,250,000 | 56,400,000 | 751 | 1090 | -0.965277007 | PRDX6                                                                                         |
| 16 | 56,325,000 | 56,475,000 | 752 | 1087 | -0.941122727 | PRDX6,SLC9C2                                                                                  |
| 16 | 56,400,000 | 56,550,000 | 753 | 705  | -0.888955651 | ANKRD45,SLC9C2,ENSBTAG00000046799                                                             |
| 16 | 56,475,000 | 56,625,000 | 754 | 540  | -2.126127765 | ANKRD45,KLHL20,SLC9C2,ENSBTAG00000046799                                                      |
| 16 | 56,550,000 | 56,700,000 | 755 | 547  | -1.505887036 | CENPL,DARS2,KLHL20,ZBTB37                                                                     |
| 16 | 56,625,000 | 56,775,000 | 756 | 436  | -0.33746623  | CENPL,DARS2,SERPINC1,ZBTB37                                                                   |
| 16 | 56,700,000 | 56,850,000 | 757 | 334  | 0.178291228  | SERPINC1,ZBTB37                                                                               |
| 16 | 56,775,000 | 56,925,000 | 758 | 489  | 0.575625701  |                                                                                               |
| 16 | 56,850,000 | 57,000,000 | 759 | 449  | 0.111307571  | RABGAP1L                                                                                      |
| 16 | 56,925,000 | 57,075,000 | 760 | 267  | 0.374607829  | RABGAP1L                                                                                      |
| 16 | 57,000,000 | 57,150,000 | 761 | 262  | 0.85764622   | RABGAP1L                                                                                      |
| 16 | 57,075,000 | 57,225,000 | 762 | 342  | 0.451425764  | GPR52                                                                                         |
| 16 | 57,150,000 | 57,300,000 | 763 | 420  | 0.773896673  | GPR52                                                                                         |
| 16 | 57,225,000 | 57,375,000 | 764 | 351  | 0.596431899  |                                                                                               |
| 16 | 57,300,000 | 57,450,000 | 765 | 518  | -2.695044751 |                                                                                               |

|    |            |            |     |      |              |                             |
|----|------------|------------|-----|------|--------------|-----------------------------|
| 16 | 57,375,000 | 57,525,000 | 766 | 849  | -1.0336358   |                             |
| 16 | 57,450,000 | 57,600,000 | 767 | 1009 | -1.920128798 | MGC157043                   |
| 16 | 57,525,000 | 57,675,000 | 768 | 1001 | -1.41470634  | MGC157043                   |
| 16 | 57,600,000 | 57,750,000 | 769 | 841  | 0.636235479  | CACYBP,MGC157043,MRPS14     |
| 16 | 57,675,000 | 57,825,000 | 770 | 788  | 0.356947147  | CACYBP,MGC157043,MRPS14,TNN |
| 16 | 57,750,000 | 57,900,000 | 771 | 696  | 0.608480584  | TNN                         |
| 16 | 57,825,000 | 57,975,000 | 772 | 609  | 0.690962401  | TNN                         |
| 16 | 57,900,000 | 58,050,000 | 773 | 559  | -0.161521269 | TNR                         |
| 16 | 57,975,000 | 58,125,000 | 774 | 384  | -0.535674476 | TNR                         |
| 16 | 58,050,000 | 58,200,000 | 775 | 731  | 0.662100841  | TNR                         |
| 16 | 58,125,000 | 58,275,000 | 776 | 881  | 0.641149233  | TNR                         |
| 16 | 58,200,000 | 58,350,000 | 777 | 961  | -0.369287118 |                             |
| 16 | 58,275,000 | 58,425,000 | 778 | 1203 | -0.110901044 |                             |
| 16 | 58,350,000 | 58,500,000 | 779 | 1003 | 0.438616107  |                             |
| 16 | 58,425,000 | 58,575,000 | 780 | 813  | 0.143783949  |                             |
| 16 | 58,500,000 | 58,650,000 | 781 | 585  | 0.326590443  | RFWD2                       |
| 16 | 58,575,000 | 58,725,000 | 782 | 450  | 0.191557346  | RFWD2                       |
| 16 | 58,650,000 | 58,800,000 | 783 | 382  | -0.060118054 | RFWD2                       |
| 16 | 58,725,000 | 58,875,000 | 784 | 290  | 0.491511098  | RFWD2                       |
| 16 | 58,800,000 | 58,950,000 | 785 | 695  | 0.87833509   | RFWD2                       |
| 16 | 58,875,000 | 59,025,000 | 786 | 873  | 0.816798684  |                             |
| 16 | 58,950,000 | 59,100,000 | 787 | 792  | 0.577413766  |                             |
| 16 | 59,025,000 | 59,175,000 | 788 | 700  | 0.343542492  | PAPPA2                      |
| 16 | 59,100,000 | 59,250,000 | 789 | 426  | -0.353960769 | PAPPA2                      |
| 16 | 59,175,000 | 59,325,000 | 790 | 617  | 0.178026955  | PAPPA2                      |
| 16 | 59,250,000 | 59,400,000 | 791 | 663  | 0.512637089  | PAPPA2                      |
| 16 | 59,325,000 | 59,475,000 | 792 | 625  | 0.807846819  | PAPPA2                      |
| 16 | 59,400,000 | 59,550,000 | 793 | 977  | 0.544362691  | ASTN1,PAPPA2                |
| 16 | 59,475,000 | 59,625,000 | 794 | 1092 | 0.342614943  | ASTN1                       |
| 16 | 59,550,000 | 59,700,000 | 795 | 1047 | 0.705953809  | ASTN1                       |
| 16 | 59,625,000 | 59,775,000 | 796 | 911  | 0.775640176  | ASTN1                       |
| 16 | 59,700,000 | 59,850,000 | 797 | 758  | 0.528409031  | ASTN1                       |
| 16 | 59,775,000 | 59,925,000 | 798 | 537  | 0.552749891  |                             |
| 16 | 59,850,000 | 60,000,000 | 799 | 586  | 0.203236183  | BRINP2                      |
| 16 | 59,925,000 | 60,075,000 | 800 | 784  | -0.501087263 | BRINP2                      |
| 16 | 60,000,000 | 60,150,000 | 801 | 806  | 0.138785053  |                             |
| 16 | 60,075,000 | 60,225,000 | 802 | 761  | 1.096207391  |                             |
| 16 | 60,150,000 | 60,300,000 | 803 | 1118 | 1.38332804   |                             |
| 16 | 60,225,000 | 60,375,000 | 804 | 1405 | 1.245640127  |                             |
| 16 | 60,300,000 | 60,450,000 | 805 | 1360 | 0.769259222  |                             |
| 16 | 60,375,000 | 60,525,000 | 806 | 1735 | 0.631184724  |                             |
| 16 | 60,450,000 | 60,600,000 | 807 | 1840 | 0.684880504  |                             |
| 16 | 60,525,000 | 60,675,000 | 808 | 1698 | 0.903027811  | ENSBTAG00000038238          |
| 16 | 60,600,000 | 60,750,000 | 809 | 1401 | 0.818102191  | SEC16B,ENSBTAG00000038238   |
| 16 | 60,675,000 | 60,825,000 | 810 | 1092 | 0.78652497   | SEC16B                      |
| 16 | 60,750,000 | 60,900,000 | 811 | 667  | 0.944995608  | SEC16B,ENSBTAG00000046172   |
| 16 | 60,825,000 | 60,975,000 | 812 | 392  | 1.046856475  | ENSBTAG00000046172          |
| 16 | 60,900,000 | 61,050,000 | 813 | 445  | 1.263628598  |                             |
| 16 | 60,975,000 | 61,125,000 | 814 | 589  | 0.197723401  | RASAL2                      |
| 16 | 61,050,000 | 61,200,000 | 815 | 533  | -0.309975498 | RASAL2                      |
| 16 | 61,125,000 | 61,275,000 | 816 | 579  | -0.66528652  | RASAL2                      |
| 16 | 61,200,000 | 61,350,000 | 817 | 739  | 0.013108812  | RASAL2                      |
| 16 | 61,275,000 | 61,425,000 | 818 | 658  | 0.482215676  | RASAL2,TEX35                |

|    |            |            |     |      |              |                                             |
|----|------------|------------|-----|------|--------------|---------------------------------------------|
| 16 | 61,350,000 | 61,500,000 | 819 | 549  | -0.166664561 | TEX35                                       |
| 16 | 61,425,000 | 61,575,000 | 820 | 649  | -0.83277438  | RALGPS2                                     |
| 16 | 61,500,000 | 61,650,000 | 821 | 916  | -0.477678661 | RALGPS2                                     |
| 16 | 61,575,000 | 61,725,000 | 822 | 803  | -0.331705942 | ANGPTL1,RALGPS2                             |
| 16 | 61,650,000 | 61,800,000 | 823 | 748  | -0.550748482 | ANGPTL1,RALGPS2                             |
| 16 | 61,725,000 | 61,875,000 | 824 | 494  | -0.519723445 | FAM20B,TOR3A                                |
| 16 | 61,800,000 | 61,950,000 | 825 | 163  | -1.986078335 | ABL2,FAM20B,TOR3A                           |
| 16 | 61,875,000 | 62,025,000 | 826 | 185  | -1.999997582 | ABL2,TOR3A                                  |
| 16 | 61,950,000 | 62,100,000 | 827 | 384  | -0.214198649 | ABL2,SOAT1                                  |
| 16 | 62,025,000 | 62,175,000 | 828 | 681  | 0.83584135   | AXDND1,SOAT1                                |
| 16 | 62,100,000 | 62,250,000 | 829 | 811  | 0.794039722  | AXDND1,NPHS2,SOAT1                          |
| 16 | 62,175,000 | 62,325,000 | 830 | 734  | 0.631945118  | AXDND1,NPHS2,TDRD5                          |
| 16 | 62,250,000 | 62,400,000 | 831 | 698  | 0.874366992  | TDRD5                                       |
| 16 | 62,325,000 | 62,475,000 | 832 | 608  | 0.786826252  | FAM163A,TDRD5                               |
| 16 | 62,400,000 | 62,550,000 | 833 | 481  | -0.176818331 | FAM163A,IFRG15,TOR1AIP1,TOR1AIP2            |
| 16 | 62,475,000 | 62,625,000 | 834 | 558  | -0.469334885 | IFRG15,TOR1AIP1,TOR1AIP2                    |
| 16 | 62,550,000 | 62,700,000 | 835 | 497  | 0.176450579  | CEP350,TOR1AIP1                             |
| 16 | 62,625,000 | 62,775,000 | 836 | 351  | 0.531561722  | CEP350                                      |
| 16 | 62,700,000 | 62,850,000 | 837 | 473  | -0.10525919  | CEP350,QSOX1                                |
| 16 | 62,775,000 | 62,925,000 | 838 | 471  | -0.319483972 | LHX4,QSOX1                                  |
| 16 | 62,850,000 | 63,000,000 | 839 | 797  | -0.859254464 | LHX4                                        |
| 16 | 62,925,000 | 63,075,000 | 840 | 1297 | -0.36614938  | ACBD6                                       |
| 16 | 63,000,000 | 63,150,000 | 841 | 1207 | 0.09066011   | ACBD6                                       |
| 16 | 63,075,000 | 63,225,000 | 842 | 747  | -0.06987813  | ACBD6                                       |
| 16 | 63,150,000 | 63,300,000 | 843 | 640  | 0.152931322  | XPR1                                        |
| 16 | 63,225,000 | 63,375,000 | 844 | 701  | 0.334538532  | XPR1                                        |
| 16 | 63,300,000 | 63,450,000 | 845 | 591  | 0.81023469   | XPR1                                        |
| 16 | 63,375,000 | 63,525,000 | 846 | 595  | 0.980800647  | XPR1                                        |
| 16 | 63,450,000 | 63,600,000 | 847 | 895  | 0.75828496   | KIAA1614,STX6,XPR1                          |
| 16 | 63,525,000 | 63,675,000 | 848 | 915  | 0.549222046  | KIAA1614,MR1,STX6                           |
| 16 | 63,600,000 | 63,750,000 | 849 | 593  | 0.427464429  | IER5,MR1,STX6                               |
| 16 | 63,675,000 | 63,825,000 | 850 | 931  | -0.202179436 | IER5                                        |
| 16 | 63,750,000 | 63,900,000 | 851 | 1085 | 0.082753456  |                                             |
| 16 | 63,825,000 | 63,975,000 | 852 | 823  | 1.206797119  |                                             |
| 16 | 63,900,000 | 64,050,000 | 853 | 797  | 0.99623118   |                                             |
| 16 | 63,975,000 | 64,125,000 | 854 | 710  | 0.725509822  | CAV2.3                                      |
| 16 | 64,050,000 | 64,200,000 | 855 | 830  | 0.834293617  | CAV2.3                                      |
| 16 | 64,125,000 | 64,275,000 | 856 | 1113 | 0.929314402  | CAV2.3                                      |
| 16 | 64,200,000 | 64,350,000 | 857 | 954  | 0.638420044  | CAV2.3                                      |
| 16 | 64,275,000 | 64,425,000 | 858 | 761  | 0.454863713  | CAV2.3                                      |
| 16 | 64,350,000 | 64,500,000 | 859 | 893  | 0.448834385  | CAV2.3                                      |
| 16 | 64,425,000 | 64,575,000 | 860 | 739  | -0.135398345 | CAV2.3                                      |
| 16 | 64,500,000 | 64,650,000 | 861 | 467  | -0.4742099   | ZNF648                                      |
| 16 | 64,575,000 | 64,725,000 | 862 | 598  | -0.640265395 | ZNF648                                      |
| 16 | 64,650,000 | 64,800,000 | 863 | 737  | 0.519812193  | ZNF648                                      |
| 16 | 64,725,000 | 64,875,000 | 864 | 824  | 1.050801738  |                                             |
| 16 | 64,800,000 | 64,950,000 | 865 | 930  | 0.31672644   | GLUL                                        |
| 16 | 64,875,000 | 65,025,000 | 866 | 1094 | 0.451850733  | GLUL,TEDDM1,ENSBTAG00000000772              |
| 16 | 64,950,000 | 65,100,000 | 867 | 914  | 0.12095153   | GLUL,RGSL1,RNASEL,TEDDM1,ENSBTAG00000000772 |
| 16 | 65,025,000 | 65,175,000 | 868 | 625  | -0.272554232 | RGS16,RGSL1,RNASEL                          |
| 16 | 65,100,000 | 65,250,000 | 869 | 675  | 0.590532615  | RGS16,RGS8,RNASEL                           |
| 16 | 65,175,000 | 65,325,000 | 870 | 463  | 0.826810455  | RGS8                                        |
| 16 | 65,250,000 | 65,400,000 | 871 | 478  | 0.442510998  | DHX9,NPL                                    |

|    |            |            |     |      |              |                                     |
|----|------------|------------|-----|------|--------------|-------------------------------------|
| 16 | 65,325,000 | 65,475,000 | 872 | 760  | 0.985236516  | C16H1ORF14,DHX9,NPL                 |
| 16 | 65,400,000 | 65,550,000 | 873 | 901  | 0.805327832  | C16H1ORF14,DHX9,LAMC1               |
| 16 | 65,475,000 | 65,625,000 | 874 | 849  | 0.077653089  | LAMC1                               |
| 16 | 65,550,000 | 65,700,000 | 875 | 646  | 0.269132253  | LAMC1                               |
| 16 | 65,625,000 | 65,775,000 | 876 | 839  | 0.626059982  | LAMC1,LAMC2                         |
| 16 | 65,700,000 | 65,850,000 | 877 | 964  | 0.639402018  | LAMC2,NMNAT2                        |
| 16 | 65,775,000 | 65,925,000 | 878 | 1271 | 0.412654141  | NMNAT2                              |
| 16 | 65,850,000 | 66,000,000 | 879 | 1138 | 0.263092888  | NMNAT2                              |
| 16 | 65,925,000 | 66,075,000 | 880 | 612  | 0.467141777  | NMNAT2,SMG7                         |
| 16 | 66,000,000 | 66,150,000 | 881 | 897  | 0.502870969  | NCF2,SMG7                           |
| 16 | 66,075,000 | 66,225,000 | 882 | 1083 | 0.031917796  | APOBEC4,ARPC5,NCF2,SMG7             |
| 16 | 66,150,000 | 66,300,000 | 883 | 1143 | 0.515741477  | APOBEC4,ARPC5                       |
| 16 | 66,225,000 | 66,375,000 | 884 | 1158 | 0.921526971  | RGL1                                |
| 16 | 66,300,000 | 66,450,000 | 885 | 1136 | 0.596588695  | RGL1                                |
| 16 | 66,375,000 | 66,525,000 | 886 | 1294 | 0.206159049  | GLT25D2,RGL1                        |
| 16 | 66,450,000 | 66,600,000 | 887 | 1265 | -1.304932791 | GLT25D2,TSEN15                      |
| 16 | 66,525,000 | 66,675,000 | 888 | 1100 | -0.982227168 | GLT25D2,TSEN15                      |
| 16 | 66,600,000 | 66,750,000 | 889 | 1113 | 0.668612749  | TSEN15                              |
| 16 | 66,675,000 | 66,825,000 | 890 | 1172 | 0.74457667   |                                     |
| 16 | 66,750,000 | 66,900,000 | 891 | 1234 | 0.403046732  | ENSBTAG00000046091                  |
| 16 | 66,825,000 | 66,975,000 | 892 | 1302 | 0.2357586    | C16H1ORF21,ENSBTAG00000046091       |
| 16 | 66,900,000 | 67,050,000 | 893 | 1077 | 0.643351451  | C16H1ORF21                          |
| 16 | 66,975,000 | 67,125,000 | 894 | 809  | 0.56995192   | C16H1ORF21                          |
| 16 | 67,050,000 | 67,200,000 | 895 | 592  | 0.182755296  | C16H1ORF21                          |
| 16 | 67,125,000 | 67,275,000 | 896 | 527  | 0.486256053  | C16H1ORF21,EDEM3                    |
| 16 | 67,200,000 | 67,350,000 | 897 | 501  | 0.308264684  | EDEM3,FAM129A                       |
| 16 | 67,275,000 | 67,425,000 | 898 | 711  | 0.256708688  | EDEM3,FAM129A                       |
| 16 | 67,350,000 | 67,500,000 | 899 | 682  | 0.279883685  | FAM129A                             |
| 16 | 67,425,000 | 67,575,000 | 900 | 636  | -0.880018099 | FAM129A                             |
| 16 | 67,500,000 | 67,650,000 | 901 | 791  | -0.292795092 | RNF2,TRMT1L                         |
| 16 | 67,575,000 | 67,725,000 | 902 | 656  | 0.570950995  | C16H1ORF26,RNF2,TRMT1L              |
| 16 | 67,650,000 | 67,800,000 | 903 | 664  | 0.141473149  | C16H1ORF26,IVNS1ABP,TRMT1L          |
| 16 | 67,725,000 | 67,875,000 | 904 | 614  | 0.184147919  | C16H1ORF26,IVNS1ABP                 |
| 16 | 67,800,000 | 67,950,000 | 905 | 550  | 1.031196599  |                                     |
| 16 | 67,875,000 | 68,025,000 | 906 | 624  | 0.586589441  |                                     |
| 16 | 67,950,000 | 68,100,000 | 907 | 1026 | -0.588083118 | SMIM20                              |
| 16 | 68,025,000 | 68,175,000 | 908 | 988  | -0.155313484 | SMIM20                              |
| 16 | 68,100,000 | 68,250,000 | 909 | 510  | 0.82393811   | HMCN1                               |
| 16 | 68,175,000 | 68,325,000 | 910 | 607  | -0.173184732 | HMCN1                               |
| 16 | 68,250,000 | 68,400,000 | 911 | 782  | -0.586061292 | HMCN1                               |
| 16 | 68,325,000 | 68,475,000 | 912 | 749  | 0.688625192  | HMCN1                               |
| 16 | 68,400,000 | 68,550,000 | 913 | 866  | 0.692109771  | HMCN1                               |
| 16 | 68,475,000 | 68,625,000 | 914 | 826  | 0.658124393  | HMCN1                               |
| 16 | 68,550,000 | 68,700,000 | 915 | 631  | 0.493944352  | HMCN1                               |
| 16 | 68,625,000 | 68,775,000 | 916 | 531  | -0.745263647 | HMCN1                               |
| 16 | 68,700,000 | 68,850,000 | 917 | 810  | -1.339510333 | HMCN1                               |
| 16 | 68,775,000 | 68,925,000 | 918 | 1129 | -3.915717641 | PRG4,TPR                            |
| 16 | 68,850,000 | 69,000,000 | 919 | 948  | -5.412023961 | C1orf27,PRG4,TPR,ENSBTAG00000047559 |
| 16 | 68,925,000 | 69,075,000 | 920 | 734  | -2.910996229 | C1orf27,PDC,TPR,ENSBTAG00000047559  |
| 16 | 69,000,000 | 69,150,000 | 921 | 811  | 0.435442459  | PDC                                 |
| 16 | 69,075,000 | 69,225,000 | 922 | 873  | 0.599331897  |                                     |
| 16 | 69,150,000 | 69,300,000 | 923 | 593  | -0.845317824 | PGHS-2                              |
| 16 | 69,225,000 | 69,375,000 | 924 | 428  | -2.478361858 | PGHS-2                              |

|    |            |            |     |      |              |                                                                  |
|----|------------|------------|-----|------|--------------|------------------------------------------------------------------|
| 16 | 69,300,000 | 69,450,000 | 925 | 643  | -1.090811249 | PLA2G4A                                                          |
| 16 | 69,375,000 | 69,525,000 | 926 | 842  | -0.583782598 | PLA2G4A                                                          |
| 16 | 69,450,000 | 69,600,000 | 927 | 616  | -2.722186918 | PLA2G4A                                                          |
| 16 | 69,525,000 | 69,675,000 | 928 | 522  | -3.696754612 | PLA2G4A                                                          |
| 16 | 69,600,000 | 69,750,000 | 929 | 545  | -1.738795416 | PLA2G4A                                                          |
| 16 | 69,675,000 | 69,825,000 | 930 | 736  | 0.25096938   |                                                                  |
| 16 | 69,750,000 | 69,900,000 | 931 | 927  | 0.572291613  | KCNK2                                                            |
| 16 | 69,825,000 | 69,975,000 | 932 | 819  | 0.283864747  | KCNK2                                                            |
| 16 | 69,900,000 | 70,050,000 | 933 | 857  | -0.426347087 | KCNK2                                                            |
| 16 | 69,975,000 | 70,125,000 | 934 | 852  | -0.516067735 | KCNK2                                                            |
| 16 | 70,050,000 | 70,200,000 | 935 | 847  | -0.246983279 | KCNK2                                                            |
| 16 | 70,125,000 | 70,275,000 | 936 | 712  | 0.012548739  |                                                                  |
| 16 | 70,200,000 | 70,350,000 | 937 | 545  | 0.20136581   |                                                                  |
| 16 | 70,275,000 | 70,425,000 | 938 | 958  | 0.311058224  |                                                                  |
| 16 | 70,350,000 | 70,500,000 | 939 | 867  | 0.362402166  | CENPF                                                            |
| 16 | 70,425,000 | 70,575,000 | 940 | 392  | 0.298507928  | CENPF                                                            |
| 16 | 70,500,000 | 70,650,000 | 941 | 552  | -0.189622172 | CENPF,PTPN14                                                     |
| 16 | 70,575,000 | 70,725,000 | 942 | 559  | 0.140670602  | PTPN14                                                           |
| 16 | 70,650,000 | 70,800,000 | 943 | 858  | 0.756990039  | PTPN14,SMYD2                                                     |
| 16 | 70,725,000 | 70,875,000 | 944 | 1087 | 0.664998586  | ELF3,PTPN14,RNPEP,SMYD2                                          |
| 16 | 70,800,000 | 70,950,000 | 945 | 667  | 0.54227249   | ARL8A,ELF3,GPR37L1,LGR6,PTPN7,RNPEP,SMYD2,ENSBTA<br>G00000047073 |
| 16 | 70,875,000 | 71,025,000 | 946 | 600  | 0.353610305  | ARL8A,GPR37L1,LGR6,PTPN7,UBE2T,ENSBTAG0000004707<br>3            |
| 16 | 70,950,000 | 71,100,000 | 947 | 934  | 0.539360464  | LGR6,PPP1R12B,UBE2T                                              |
| 16 | 71,025,000 | 71,175,000 | 948 | 970  | 0.836469472  | PPP1R12B,SYT2                                                    |
| 16 | 71,100,000 | 71,250,000 | 949 | 733  | 0.360598784  | PPP1R12B,SYT2                                                    |
| 16 | 71,175,000 | 71,325,000 | 950 | 857  | -0.058517597 |                                                                  |
| 16 | 71,250,000 | 71,400,000 | 951 | 831  | -0.296851266 |                                                                  |
| 16 | 71,325,000 | 71,475,000 | 952 | 451  | -0.667192353 | PROX1                                                            |
| 16 | 71,400,000 | 71,550,000 | 953 | 433  | 0.065271728  | PROX1                                                            |
| 16 | 71,475,000 | 71,625,000 | 954 | 562  | 0.38933791   |                                                                  |
| 16 | 71,550,000 | 71,700,000 | 955 | 679  | 0.696272185  |                                                                  |
| 16 | 71,625,000 | 71,775,000 | 956 | 860  | 0.304892999  |                                                                  |
| 16 | 71,700,000 | 71,850,000 | 957 | 1064 | -0.023384196 |                                                                  |
| 16 | 71,775,000 | 71,925,000 | 958 | 1048 | 0.255086827  |                                                                  |
| 16 | 71,850,000 | 72,000,000 | 959 | 743  | -0.033364644 |                                                                  |
| 16 | 71,925,000 | 72,075,000 | 960 | 624  | -1.454418243 |                                                                  |
| 16 | 72,000,000 | 72,150,000 | 961 | 618  | -1.209377773 |                                                                  |
| 16 | 72,075,000 | 72,225,000 | 962 | 880  | 0.902930462  |                                                                  |
| 16 | 72,150,000 | 72,300,000 | 963 | 971  | 1.066414856  | RPS6KC1                                                          |
| 16 | 72,225,000 | 72,375,000 | 964 | 741  | 0.508631049  | RPS6KC1                                                          |
| 16 | 72,300,000 | 72,450,000 | 965 | 629  | 0.299446609  | RPS6KC1                                                          |
| 16 | 72,375,000 | 72,525,000 | 966 | 440  | -0.322646311 | ANGEL2,RPS6KC1,VASH2                                             |
| 16 | 72,450,000 | 72,600,000 | 967 | 350  | -1.428331908 | ANGEL2,FLVCR1,VASH2                                              |
| 16 | 72,525,000 | 72,675,000 | 968 | 421  | -1.335296742 | FLVCR1,NSL1,SPATA45,TATDN3,VASH2                                 |
| 16 | 72,600,000 | 72,750,000 | 969 | 494  | -2.083950141 | BATF3,NSL1,SPATA45,TATDN3                                        |
| 16 | 72,675,000 | 72,825,000 | 970 | 411  | -2.904754394 | ATF3,BATF3,FAM71A,NSL1                                           |
| 16 | 72,750,000 | 72,900,000 | 971 | 391  | -3.862036832 | ATF3,BATF3,FAM71A                                                |
| 16 | 72,825,000 | 72,975,000 | 972 | 590  | -2.025648999 | ATF3                                                             |
| 16 | 72,900,000 | 73,050,000 | 973 | 718  | -0.708955617 | NENF,TMEM206                                                     |
| 16 | 72,975,000 | 73,125,000 | 974 | 522  | -1.628368181 | NENF,PPP2R5A,TMEM206                                             |
| 16 | 73,050,000 | 73,200,000 | 975 | 381  | -2.251360665 | PPP2R5A,TMEM206                                                  |



|    |            |            |      |      |              |                               |
|----|------------|------------|------|------|--------------|-------------------------------|
| 16 | 73,125,000 | 73,275,000 | 976  | 628  | -1.194607883 | PPP2R5A                       |
| 16 | 73,200,000 | 73,350,000 | 977  | 679  | -1.145873632 | DTL                           |
| 16 | 73,275,000 | 73,425,000 | 978  | 564  | -0.559606121 | DTL,INTS7                     |
| 16 | 73,350,000 | 73,500,000 | 979  | 602  | -0.095051838 | DTL,INTS7                     |
| 16 | 73,425,000 | 73,575,000 | 980  | 576  | 0.19302908   | INTS7,LPGAT1                  |
| 16 | 73,500,000 | 73,650,000 | 981  | 448  | 0.059997341  | LPGAT1                        |
| 16 | 73,575,000 | 73,725,000 | 982  | 577  | -1.891043349 | LPGAT1,NEK2                   |
| 16 | 73,650,000 | 73,800,000 | 983  | 659  | -0.560255861 | NEK2,SLC30A1                  |
| 16 | 73,725,000 | 73,875,000 | 984  | 834  | 1.125742896  | RD3,SLC30A1                   |
| 16 | 73,800,000 | 73,950,000 | 985  | 793  | 0.768491786  | RD3,TRAF5                     |
| 16 | 73,875,000 | 74,025,000 | 986  | 363  | 0.166564505  | RCOR3,TRAF5                   |
| 16 | 73,950,000 | 74,100,000 | 987  | 266  | 0.625771552  | RCOR3                         |
| 16 | 74,025,000 | 74,175,000 | 988  | 461  | 0.888918186  | KCNH1                         |
| 16 | 74,100,000 | 74,250,000 | 989  | 717  | 0.584583461  | KCNH1                         |
| 16 | 74,175,000 | 74,325,000 | 990  | 844  | -0.422403006 | KCNH1                         |
| 16 | 74,250,000 | 74,400,000 | 991  | 865  | -0.829363948 | KCNH1                         |
| 16 | 74,325,000 | 74,475,000 | 992  | 686  | -1.144907472 | KCNH1                         |
| 16 | 74,400,000 | 74,550,000 | 993  | 934  | 0.280115664  | KCNH1                         |
| 16 | 74,475,000 | 74,625,000 | 994  | 1136 | 0.417124441  | KCNH1                         |
| 16 | 74,550,000 | 74,700,000 | 995  | 814  | -0.464497118 |                               |
| 16 | 74,625,000 | 74,775,000 | 996  | 736  | -0.800303535 |                               |
| 16 | 74,700,000 | 74,850,000 | 997  | 791  | -0.753642522 |                               |
| 16 | 74,775,000 | 74,925,000 | 998  | 606  | -0.577875843 |                               |
| 16 | 74,850,000 | 75,000,000 | 999  | 377  | -0.418188179 | SERTAD4                       |
| 16 | 74,925,000 | 75,075,000 | 1000 | 260  | -0.888364274 | SERTAD4,SYT14                 |
| 16 | 75,000,000 | 75,150,000 | 1001 | 557  | -1.933618389 | SERTAD4,SYT14                 |
| 16 | 75,075,000 | 75,225,000 | 1002 | 761  | -2.66589165  | SYT14                         |
| 16 | 75,150,000 | 75,300,000 | 1003 | 835  | -2.978634381 | SYT14                         |
| 16 | 75,225,000 | 75,375,000 | 1004 | 1054 | -2.237335683 | DIEXF                         |
| 16 | 75,300,000 | 75,450,000 | 1005 | 981  | -1.382011917 | C1orf74,DIEXF,IRF6,TRAF3IP3   |
| 16 | 75,375,000 | 75,525,000 | 1006 | 754  | -1.775494398 | C1orf74,HSD11B1,IRF6,TRAF3IP3 |
| 16 | 75,450,000 | 75,600,000 | 1007 | 684  | -1.369525129 | G0S2,HSD11B1,LAMB3            |
| 16 | 75,525,000 | 75,675,000 | 1008 | 715  | -0.474125791 | CAMK1G,G0S2,LAMB3             |
| 16 | 75,600,000 | 75,750,000 | 1009 | 1306 | -0.684214561 | CAMK1G,LAMB3                  |
| 16 | 75,675,000 | 75,825,000 | 1010 | 1338 | -0.713140952 |                               |
| 16 | 75,750,000 | 75,900,000 | 1011 | 683  | -0.915929117 |                               |
| 16 | 75,825,000 | 75,975,000 | 1012 | 727  | -0.548766638 |                               |
| 16 | 75,900,000 | 76,050,000 | 1013 | 957  | -2.139794091 |                               |
| 16 | 75,975,000 | 76,125,000 | 1014 | 888  | -3.407489903 |                               |
| 16 | 76,050,000 | 76,200,000 | 1015 | 925  | -0.77295324  |                               |
| 16 | 76,125,000 | 76,275,000 | 1016 | 1187 | -0.051454088 |                               |
| 16 | 76,200,000 | 76,350,000 | 1017 | 1375 | -1.301581253 |                               |
| 16 | 76,275,000 | 76,425,000 | 1018 | 1040 | -0.706334793 |                               |
| 16 | 76,350,000 | 76,500,000 | 1019 | 620  | 1.194005357  |                               |
| 16 | 76,425,000 | 76,575,000 | 1020 | 760  | 0.860207505  |                               |
| 16 | 76,500,000 | 76,650,000 | 1021 | 916  | -0.010222938 |                               |
| 16 | 76,575,000 | 76,725,000 | 1022 | 1220 | -0.596174919 |                               |
| 16 | 76,650,000 | 76,800,000 | 1023 | 1145 | -0.39701105  |                               |
| 16 | 76,725,000 | 76,875,000 | 1024 | 765  | -0.100918032 |                               |
| 16 | 76,800,000 | 76,950,000 | 1025 | 790  | 0.486348378  |                               |
| 16 | 76,875,000 | 77,025,000 | 1026 | 888  | 0.639820823  |                               |
| 16 | 76,950,000 | 77,100,000 | 1027 | 762  | 0.655772291  | PLXNA2                        |
| 16 | 77,025,000 | 77,175,000 | 1028 | 857  | 0.913940698  | PLXNA2                        |

|    |            |            |      |      |              |                                    |
|----|------------|------------|------|------|--------------|------------------------------------|
| 16 | 77,100,000 | 77,250,000 | 1029 | 1312 | 0.953692644  | PLXNA2                             |
| 16 | 77,175,000 | 77,325,000 | 1030 | 1211 | 0.823098497  | PLXNA2                             |
| 16 | 77,250,000 | 77,400,000 | 1031 | 659  | -0.104508982 | CD34,PLXNA2                        |
| 16 | 77,325,000 | 77,475,000 | 1032 | 568  | -0.434935013 | CD34                               |
| 16 | 77,400,000 | 77,550,000 | 1033 | 571  | -0.110550971 | CD46                               |
| 16 | 77,475,000 | 77,625,000 | 1034 | 1080 | 0.319904565  | CD46                               |
| 16 | 77,550,000 | 77,700,000 | 1035 | 1473 | 0.454126793  |                                    |
| 16 | 77,625,000 | 77,775,000 | 1036 | 984  | 0.513139361  | ENSBTAG00000030910                 |
| 16 | 77,700,000 | 77,850,000 | 1037 | 854  | 0.710181897  | F13B,ENSBTAG00000030910            |
| 16 | 77,775,000 | 77,925,000 | 1038 | 1023 | 0.332916464  | ASPM,CFHR5,F13B,ENSBTAG00000030910 |
| 16 | 77,850,000 | 78,000,000 | 1039 | 855  | -1.380678142 | ASPM,CFHR5,F13B                    |
| 16 | 77,925,000 | 78,075,000 | 1040 | 582  | -3.266731414 | ASPM,ZBTB41                        |
| 16 | 78,000,000 | 78,150,000 | 1041 | 960  | -1.741559133 | CRB1,ZBTB41                        |
| 16 | 78,075,000 | 78,225,000 | 1042 | 1235 | -0.518458343 | CRB1                               |
| 16 | 78,150,000 | 78,300,000 | 1043 | 981  | 0.745558256  | CRB1                               |
| 16 | 78,225,000 | 78,375,000 | 1044 | 816  | 0.921503872  | CRB1                               |
| 16 | 78,300,000 | 78,450,000 | 1045 | 706  | 1.070171044  | CRB1,DENND1B                       |
| 16 | 78,375,000 | 78,525,000 | 1046 | 732  | 1.146902931  | DENND1B                            |
| 16 | 78,450,000 | 78,600,000 | 1047 | 860  | 0.765699052  | DENND1B                            |
| 16 | 78,525,000 | 78,675,000 | 1048 | 742  | -0.156506454 | DENND1B                            |
| 16 | 78,600,000 | 78,750,000 | 1049 | 707  | -0.133719959 |                                    |
| 16 | 78,675,000 | 78,825,000 | 1050 | 643  | -0.035274964 | LHX9                               |
| 16 | 78,750,000 | 78,900,000 | 1051 | 345  | -0.500006832 | LHX9                               |
| 16 | 78,825,000 | 78,975,000 | 1052 | 578  | -4.896989727 |                                    |
| 16 | 78,900,000 | 79,050,000 | 1053 | 684  | -5.283419985 |                                    |
| 16 | 78,975,000 | 79,125,000 | 1054 | 489  | -1.545508341 | NEK7                               |
| 16 | 79,050,000 | 79,200,000 | 1055 | 374  | -1.173393662 | NEK7                               |
| 16 | 79,125,000 | 79,275,000 | 1056 | 414  | -0.267788632 | NEK7                               |
| 16 | 79,200,000 | 79,350,000 | 1057 | 1004 | 0.38681225   | ATP6V1G3                           |
| 16 | 79,275,000 | 79,425,000 | 1058 | 1323 | 0.937988905  | ATP6V1G3                           |
| 16 | 79,350,000 | 79,500,000 | 1059 | 1055 | 1.233507829  | ATP6V1G3                           |
| 16 | 79,425,000 | 79,575,000 | 1060 | 1272 | 1.170354055  | PTPRC,ENSBTAG00000046345           |
| 16 | 79,500,000 | 79,650,000 | 1061 | 1337 | 0.442513899  | PTPRC,ENSBTAG00000046345           |
| 16 | 79,575,000 | 79,725,000 | 1062 | 1115 | 0.264044208  | PTPRC                              |
| 16 | 79,650,000 | 79,800,000 | 1063 | 1005 | 0.770337597  |                                    |
| 16 | 79,725,000 | 79,875,000 | 1064 | 979  | 0.892444292  |                                    |
| 16 | 79,800,000 | 79,950,000 | 1065 | 1193 | 0.522561721  |                                    |
| 16 | 79,875,000 | 80,025,000 | 1066 | 953  | 0.184298733  |                                    |
| 16 | 79,950,000 | 80,100,000 | 1067 | 763  | 0.209604089  |                                    |
| 16 | 80,025,000 | 80,175,000 | 1068 | 805  | -0.120160396 |                                    |
| 16 | 80,100,000 | 80,250,000 | 1069 | 1071 | 0.63993547   |                                    |
| 16 | 80,175,000 | 80,325,000 | 1070 | 1017 | 1.1941133    |                                    |
| 16 | 80,250,000 | 80,400,000 | 1071 | 630  | 0.84770622   |                                    |
| 16 | 80,325,000 | 80,475,000 | 1072 | 790  | 0.308509514  |                                    |
| 16 | 80,400,000 | 80,550,000 | 1073 | 907  | 0.154652283  |                                    |
| 16 | 80,475,000 | 80,625,000 | 1074 | 781  | 0.208659024  |                                    |
| 16 | 80,550,000 | 80,700,000 | 1075 | 582  | 0.570915239  |                                    |
| 16 | 80,625,000 | 80,775,000 | 1076 | 431  | 0.650453385  | NR5A2                              |
| 16 | 80,700,000 | 80,850,000 | 1077 | 598  | 0.606062665  | NR5A2                              |
| 16 | 80,775,000 | 80,925,000 | 1078 | 712  | -0.047677258 | NR5A2                              |
| 16 | 80,850,000 | 81,000,000 | 1079 | 887  | -0.525313607 | NR5A2                              |
| 16 | 80,925,000 | 81,075,000 | 1080 | 930  | -0.046184137 | ZNF281                             |
| 16 | 81,000,000 | 81,150,000 | 1081 | 761  | 0.583921557  | KIF14,ZNF281                       |

|    |            |            |      |      |              |                         |
|----|------------|------------|------|------|--------------|-------------------------|
| 16 | 81,075,000 | 81,225,000 | 1082 | 848  | 0.621750339  | DDX59,KIF14             |
| 16 | 81,150,000 | 81,300,000 | 1083 | 745  | 0.272462022  | CAMSAP2,DDX59,KIF14     |
| 16 | 81,225,000 | 81,375,000 | 1084 | 632  | -0.990451396 | C1orf106,CAMSAP2        |
| 16 | 81,300,000 | 81,450,000 | 1085 | 519  | -1.510670646 | C1orf106,CAMSAP2,KIF21B |
| 16 | 81,375,000 | 81,525,000 | 1086 | 542  | -0.225897205 | C1orf106,CACNA1S,KIF21B |
| 16 | 81,450,000 | 81,600,000 | 1087 | 594  | 0.222917601  | CACNA1S,TMEM9           |
| 16 | 81,525,000 | 81,675,000 | 1088 | 491  | 0.381989578  | CACNA1S,IGFN1,TMEM9     |
| 16 | 81,600,000 | 81,724,687 | 1089 | 379  | 0.225749979  | IGFN1,PKP1              |
| 17 | 0          | 150,000    | 1    | 644  | 0.29614493   | ENSBTAG00000048129      |
| 17 | 75,000     | 225,000    | 2    | 617  | 0.42375332   | TMEM192                 |
| 17 | 150,000    | 300,000    | 3    | 911  | 0.180948654  | TMEM192                 |
| 17 | 225,000    | 375,000    | 4    | 769  | 0.017852436  | KLHL2                   |
| 17 | 300,000    | 450,000    | 5    | 714  | 0.821127852  | KLHL2                   |
| 17 | 375,000    | 525,000    | 6    | 989  | 1.21288239   | KLHL2,SC4MOL            |
| 17 | 450,000    | 600,000    | 7    | 1383 | 1.357581746  | CPE,KLHL2,SC4MOL        |
| 17 | 525,000    | 675,000    | 8    | 1313 | 1.241899581  | CPE                     |
| 17 | 600,000    | 750,000    | 9    | 629  | 0.926388374  | CPE                     |
| 17 | 675,000    | 825,000    | 10   | 418  | 0.45537797   | CPE                     |
| 17 | 750,000    | 900,000    | 11   | 400  | -0.009852272 |                         |
| 17 | 825,000    | 975,000    | 12   | 431  | 0.170624952  |                         |
| 17 | 900,000    | 1,050,000  | 13   | 811  | 0.29014587   |                         |
| 17 | 975,000    | 1,125,000  | 14   | 1030 | 0.786302322  |                         |
| 17 | 1,050,000  | 1,200,000  | 15   | 945  | 0.737277     |                         |
| 17 | 1,125,000  | 1,275,000  | 16   | 789  | 0.242631168  |                         |
| 17 | 1,200,000  | 1,350,000  | 17   | 593  | -0.737002199 |                         |
| 17 | 1,275,000  | 1,425,000  | 18   | 764  | -0.865865877 |                         |
| 17 | 1,350,000  | 1,500,000  | 19   | 683  | -0.650455213 | TLL1                    |
| 17 | 1,425,000  | 1,575,000  | 20   | 588  | 0.0294549    | TLL1                    |
| 17 | 1,500,000  | 1,650,000  | 21   | 921  | -0.126421    | TLL1                    |
| 17 | 1,575,000  | 1,725,000  | 22   | 1197 | -0.509835995 | TLL1                    |
| 17 | 1,650,000  | 1,800,000  | 23   | 1232 | 0.080765266  | TLL1                    |
| 17 | 1,725,000  | 1,875,000  | 24   | 1299 | 0.955723513  | TLL1                    |
| 17 | 1,800,000  | 1,950,000  | 25   | 1703 | 1.120600329  | MAP9,TLL1               |
| 17 | 1,875,000  | 2,025,000  | 26   | 2107 | 1.248602598  | MAP9                    |
| 17 | 1,950,000  | 2,100,000  | 27   | 1531 | 1.316953834  | NPY2R                   |
| 17 | 2,025,000  | 2,175,000  | 28   | 974  | 0.985004898  | NPY2R                   |
| 17 | 2,100,000  | 2,250,000  | 29   | 1238 | 0.857959746  |                         |
| 17 | 2,175,000  | 2,325,000  | 30   | 1324 | 0.865278508  |                         |
| 17 | 2,250,000  | 2,400,000  | 31   | 1637 | 0.832565157  |                         |
| 17 | 2,325,000  | 2,475,000  | 32   | 1643 | 0.723374808  |                         |
| 17 | 2,400,000  | 2,550,000  | 33   | 1032 | 0.518462575  | RBM46                   |
| 17 | 2,475,000  | 2,625,000  | 34   | 1033 | 0.502201554  | RBM46                   |
| 17 | 2,550,000  | 2,700,000  | 35   | 1164 | 0.588362438  | LRAT,RBM46              |
| 17 | 2,625,000  | 2,775,000  | 36   | 773  | 0.026969132  | LRAT                    |
| 17 | 2,700,000  | 2,850,000  | 37   | 645  | -0.080566811 | FGA,FGG                 |
| 17 | 2,775,000  | 2,925,000  | 38   | 1063 | 0.384839384  | FGA,FGB,FGG,PLRG1       |
| 17 | 2,850,000  | 3,000,000  | 39   | 1309 | 0.398481828  | FGB,PLRG1               |
| 17 | 2,925,000  | 3,075,000  | 40   | 1138 | -0.11044517  |                         |
| 17 | 3,000,000  | 3,150,000  | 41   | 752  | -0.382092192 | DCHS2                   |
| 17 | 3,075,000  | 3,225,000  | 42   | 653  | -0.873493153 | DCHS2                   |
| 17 | 3,150,000  | 3,300,000  | 43   | 632  | -1.5425137   | DCHS2                   |
| 17 | 3,225,000  | 3,375,000  | 44   | 754  | -0.011563913 | DCHS2                   |
| 17 | 3,300,000  | 3,450,000  | 45   | 805  | 0.459217954  | DCHS2                   |

|    |           |           |    |      |              |                      |
|----|-----------|-----------|----|------|--------------|----------------------|
| 17 | 3,375,000 | 3,525,000 | 46 | 691  | 0.697998967  |                      |
| 17 | 3,450,000 | 3,600,000 | 47 | 963  | 0.752871584  |                      |
| 17 | 3,525,000 | 3,675,000 | 48 | 1136 | 0.53781652   |                      |
| 17 | 3,600,000 | 3,750,000 | 49 | 913  | 0.515017846  |                      |
| 17 | 3,675,000 | 3,825,000 | 50 | 569  | 0.361629699  |                      |
| 17 | 3,750,000 | 3,900,000 | 51 | 1041 | 0.88119734   | RNF175,SFRP2         |
| 17 | 3,825,000 | 3,975,000 | 52 | 1554 | 1.152168199  | RNF175,SFRP2,TLR2    |
| 17 | 3,900,000 | 4,050,000 | 53 | 1367 | 1.251034477  | KIAA0922,RNF175,TLR2 |
| 17 | 3,975,000 | 4,125,000 | 54 | 956  | 1.109027166  | KIAA0922             |
| 17 | 4,050,000 | 4,200,000 | 55 | 760  | 0.278857668  | KIAA0922             |
| 17 | 4,125,000 | 4,275,000 | 56 | 938  | -1.109341769 | MND1                 |
| 17 | 4,200,000 | 4,350,000 | 57 | 1287 | -0.731658392 | MND1,TRIM2           |
| 17 | 4,275,000 | 4,425,000 | 58 | 1698 | 0.543901935  | MND1,TRIM2           |
| 17 | 4,350,000 | 4,500,000 | 59 | 1600 | 0.765686033  | TRIM2                |
| 17 | 4,425,000 | 4,575,000 | 60 | 1436 | 1.007554534  | TRIM2                |
| 17 | 4,500,000 | 4,650,000 | 61 | 1408 | 0.594867109  |                      |
| 17 | 4,575,000 | 4,725,000 | 62 | 1338 | 0.707294921  | FHDC1                |
| 17 | 4,650,000 | 4,800,000 | 63 | 1269 | 0.499473057  | ARFIP1,FHDC1         |
| 17 | 4,725,000 | 4,875,000 | 64 | 1556 | -1.971511965 | ARFIP1               |
| 17 | 4,800,000 | 4,950,000 | 65 | 1704 | -1.211061105 | ARFIP1,TIGD4         |
| 17 | 4,875,000 | 5,025,000 | 66 | 1481 | -0.059972124 | TIGD4                |
| 17 | 4,950,000 | 5,100,000 | 67 | 1751 | 0.293835845  |                      |
| 17 | 5,025,000 | 5,175,000 | 68 | 1859 | 0.537721402  |                      |
| 17 | 5,100,000 | 5,250,000 | 69 | 1715 | 1.142035978  |                      |
| 17 | 5,175,000 | 5,325,000 | 70 | 1407 | 1.084101446  | FBXW7                |
| 17 | 5,250,000 | 5,400,000 | 71 | 1329 | 0.728146563  | FBXW7                |
| 17 | 5,325,000 | 5,475,000 | 72 | 1410 | 0.664134089  | FBXW7                |
| 17 | 5,400,000 | 5,550,000 | 73 | 1311 | 0.512509439  |                      |
| 17 | 5,475,000 | 5,625,000 | 74 | 890  | 0.214719085  |                      |
| 17 | 5,550,000 | 5,700,000 | 75 | 474  | -0.139007441 |                      |
| 17 | 5,625,000 | 5,775,000 | 76 | 660  | 0.180199568  |                      |
| 17 | 5,700,000 | 5,850,000 | 77 | 1227 | 0.422222875  |                      |
| 17 | 5,775,000 | 5,925,000 | 78 | 1222 | 0.395118914  |                      |
| 17 | 5,850,000 | 6,000,000 | 79 | 864  | 0.690668285  | PET112L              |
| 17 | 5,925,000 | 6,075,000 | 80 | 772  | 1.205189119  | PET112L              |
| 17 | 6,000,000 | 6,150,000 | 81 | 989  | 1.152230134  | FAM160A1,PET112L     |
| 17 | 6,075,000 | 6,225,000 | 82 | 1005 | 1.160382765  | FAM160A1,PET112L     |
| 17 | 6,150,000 | 6,300,000 | 83 | 702  | 1.094128269  | FAM160A1             |
| 17 | 6,225,000 | 6,375,000 | 84 | 770  | 0.841205946  |                      |
| 17 | 6,300,000 | 6,450,000 | 85 | 1043 | -0.016272373 |                      |
| 17 | 6,375,000 | 6,525,000 | 86 | 982  | -0.354111576 | PRSS48               |
| 17 | 6,450,000 | 6,600,000 | 87 | 773  | 0.53113554   | PRSS48               |
| 17 | 6,525,000 | 6,675,000 | 88 | 722  | 0.664067047  | PRSS48,SH3D19        |
| 17 | 6,600,000 | 6,750,000 | 89 | 880  | 0.447361315  | RPS3A,SH3D19         |
| 17 | 6,675,000 | 6,825,000 | 90 | 1094 | 0.732682334  | RPS3A,SH3D19         |
| 17 | 6,750,000 | 6,900,000 | 91 | 1007 | 1.169976948  | LRBA                 |
| 17 | 6,825,000 | 6,975,000 | 92 | 726  | 1.158082446  | LRBA                 |
| 17 | 6,900,000 | 7,050,000 | 93 | 593  | 1.019843976  | LRBA                 |
| 17 | 6,975,000 | 7,125,000 | 94 | 923  | 1.054985451  | LRBA                 |
| 17 | 7,050,000 | 7,200,000 | 95 | 1139 | 0.222353995  | LRBA                 |
| 17 | 7,125,000 | 7,275,000 | 96 | 795  | -0.851100431 | LRBA,MAB21L2         |
| 17 | 7,200,000 | 7,350,000 | 97 | 548  | -0.168235508 | LRBA,MAB21L2         |
| 17 | 7,275,000 | 7,425,000 | 98 | 532  | 0.140180031  | LRBA                 |

|    |            |            |     |      |              |                           |
|----|------------|------------|-----|------|--------------|---------------------------|
| 17 | 7,350,000  | 7,500,000  | 99  | 484  | -0.398010188 | LRBA                      |
| 17 | 7,425,000  | 7,575,000  | 100 | 764  | 0.218997854  | DCLK2,LRBA                |
| 17 | 7,500,000  | 7,650,000  | 101 | 648  | 0.631611866  | DCLK2,LRBA                |
| 17 | 7,575,000  | 7,725,000  | 102 | 496  | 0.81454984   | DCLK2                     |
| 17 | 7,650,000  | 7,800,000  | 103 | 789  | -0.143042795 | DCLK2                     |
| 17 | 7,725,000  | 7,875,000  | 104 | 988  | 0.641735019  | DCLK2                     |
| 17 | 7,800,000  | 7,950,000  | 105 | 1053 | 1.220861848  |                           |
| 17 | 7,875,000  | 8,025,000  | 106 | 838  | 0.927425702  |                           |
| 17 | 7,950,000  | 8,100,000  | 107 | 740  | 0.642868149  |                           |
| 17 | 8,025,000  | 8,175,000  | 108 | 656  | 0.954700172  |                           |
| 17 | 8,100,000  | 8,250,000  | 109 | 604  | 1.175940273  |                           |
| 17 | 8,175,000  | 8,325,000  | 110 | 935  | 0.444220213  |                           |
| 17 | 8,250,000  | 8,400,000  | 111 | 1007 | -0.555251424 |                           |
| 17 | 8,325,000  | 8,475,000  | 112 | 913  | 0.062546792  |                           |
| 17 | 8,400,000  | 8,550,000  | 113 | 1020 | 0.760139226  |                           |
| 17 | 8,475,000  | 8,625,000  | 114 | 1124 | 0.905005451  |                           |
| 17 | 8,550,000  | 8,700,000  | 115 | 887  | 0.930316531  |                           |
| 17 | 8,625,000  | 8,775,000  | 116 | 922  | 0.528937116  |                           |
| 17 | 8,700,000  | 8,850,000  | 117 | 1558 | 0.15063322   |                           |
| 17 | 8,775,000  | 8,925,000  | 118 | 2117 | -0.665740997 | ENSBTAG00000045580        |
| 17 | 8,850,000  | 9,000,000  | 119 | 2082 | -1.696457031 | ENSBTAG00000045580        |
| 17 | 8,925,000  | 9,075,000  | 120 | 1210 | -0.68399778  |                           |
| 17 | 9,000,000  | 9,150,000  | 121 | 763  | 0.93513668   |                           |
| 17 | 9,075,000  | 9,225,000  | 122 | 808  | 0.553328789  |                           |
| 17 | 9,150,000  | 9,300,000  | 123 | 1021 | -0.029984672 |                           |
| 17 | 9,225,000  | 9,375,000  | 124 | 1237 | 0.614668145  |                           |
| 17 | 9,300,000  | 9,450,000  | 125 | 1167 | 1.005402294  |                           |
| 17 | 9,375,000  | 9,525,000  | 126 | 1058 | 0.073326722  |                           |
| 17 | 9,450,000  | 9,600,000  | 127 | 671  | -1.150472234 |                           |
| 17 | 9,525,000  | 9,675,000  | 128 | 625  | 0.859559752  |                           |
| 17 | 9,600,000  | 9,750,000  | 129 | 734  | 0.924670767  | NR3C2                     |
| 17 | 9,675,000  | 9,825,000  | 130 | 844  | 0.851019183  | NR3C2                     |
| 17 | 9,750,000  | 9,900,000  | 131 | 861  | 1.048931179  | NR3C2                     |
| 17 | 9,825,000  | 9,975,000  | 132 | 715  | 1.196510124  | NR3C2                     |
| 17 | 9,900,000  | 10,050,000 | 133 | 605  | 1.138928253  | NR3C2                     |
| 17 | 9,975,000  | 10,125,000 | 134 | 471  | 0.846290523  | NR3C2                     |
| 17 | 10,050,000 | 10,200,000 | 135 | 505  | 0.366671174  | ARHGAP10,NR3C2            |
| 17 | 10,125,000 | 10,275,000 | 136 | 783  | -0.405500503 | ARHGAP10,NR3C2            |
| 17 | 10,200,000 | 10,350,000 | 137 | 1157 | -0.318025612 | ARHGAP10                  |
| 17 | 10,275,000 | 10,425,000 | 138 | 1141 | -0.027332946 | ARHGAP10                  |
| 17 | 10,350,000 | 10,500,000 | 139 | 1022 | 0.305926063  | ARHGAP10                  |
| 17 | 10,425,000 | 10,575,000 | 140 | 786  | -0.445951255 | ARHGAP10                  |
| 17 | 10,500,000 | 10,650,000 | 141 | 646  | -2.624238199 | ARHGAP10,MGC151858,TMEM34 |
| 17 | 10,575,000 | 10,725,000 | 142 | 634  | -0.684950424 | MGC151858,TMEM34          |
| 17 | 10,650,000 | 10,800,000 | 143 | 832  | 0.106437852  | EDNRA,TMEM34              |
| 17 | 10,725,000 | 10,875,000 | 144 | 1199 | -0.940228888 | EDNRA                     |
| 17 | 10,800,000 | 10,950,000 | 145 | 1194 | -0.006985574 | EDNRA                     |
| 17 | 10,875,000 | 11,025,000 | 146 | 1122 | 0.473587674  |                           |
| 17 | 10,950,000 | 11,100,000 | 147 | 1018 | 0.28661262   |                           |
| 17 | 11,025,000 | 11,175,000 | 148 | 704  | 0.600780969  |                           |
| 17 | 11,100,000 | 11,250,000 | 149 | 611  | 0.383625843  |                           |
| 17 | 11,175,000 | 11,325,000 | 150 | 1041 | 0.571284429  |                           |
| 17 | 11,250,000 | 11,400,000 | 151 | 1131 | 0.652090609  |                           |

|    |            |            |     |      |              |                                |
|----|------------|------------|-----|------|--------------|--------------------------------|
| 17 | 11,325,000 | 11,475,000 | 152 | 750  | 0.104564776  |                                |
| 17 | 11,400,000 | 11,550,000 | 153 | 733  | -0.642286422 | TTC29                          |
| 17 | 11,475,000 | 11,625,000 | 154 | 714  | -0.152970512 | TTC29                          |
| 17 | 11,550,000 | 11,700,000 | 155 | 524  | 0.507585326  | TTC29                          |
| 17 | 11,625,000 | 11,775,000 | 156 | 724  | 0.060689174  | RNF146A,TTC29                  |
| 17 | 11,700,000 | 11,850,000 | 157 | 869  | -0.2102803   | POU4F2,RNF146A,TTC29           |
| 17 | 11,775,000 | 11,925,000 | 158 | 870  | -0.34715433  | POU4F2,SLC10A7                 |
| 17 | 11,850,000 | 12,000,000 | 159 | 1267 | -0.596983057 | SLC10A7                        |
| 17 | 11,925,000 | 12,075,000 | 160 | 1447 | 0.001114325  | SLC10A7                        |
| 17 | 12,000,000 | 12,150,000 | 161 | 1180 | 0.145652003  | SLC10A7                        |
| 17 | 12,075,000 | 12,225,000 | 162 | 842  | -2.095707291 | ENSBTAG00000048020             |
| 17 | 12,150,000 | 12,300,000 | 163 | 724  | -4.771607368 | ENSBTAG00000048020             |
| 17 | 12,225,000 | 12,375,000 | 164 | 828  | -2.045233572 | LSM6,ENSBTAG00000048020        |
| 17 | 12,300,000 | 12,450,000 | 165 | 695  | 0.833109027  | LSM6                           |
| 17 | 12,375,000 | 12,525,000 | 166 | 842  | 0.973906999  |                                |
| 17 | 12,450,000 | 12,600,000 | 167 | 1039 | 0.082783507  | ZNF827                         |
| 17 | 12,525,000 | 12,675,000 | 168 | 765  | -0.278242114 | ZNF827                         |
| 17 | 12,600,000 | 12,750,000 | 169 | 590  | 0.465076421  | ZNF827,ENSBTAG00000019880      |
| 17 | 12,675,000 | 12,825,000 | 170 | 663  | 0.863107138  | MMAA,ZNF827,ENSBTAG00000019880 |
| 17 | 12,750,000 | 12,900,000 | 171 | 592  | 0.722172925  | MMAA                           |
| 17 | 12,825,000 | 12,975,000 | 172 | 466  | -0.276694079 | MMAA,SMAD1                     |
| 17 | 12,900,000 | 13,050,000 | 173 | 569  | 0.213270494  | SMAD1                          |
| 17 | 12,975,000 | 13,125,000 | 174 | 501  | 0.520509953  |                                |
| 17 | 13,050,000 | 13,200,000 | 175 | 239  | 0.644503503  |                                |
| 17 | 13,125,000 | 13,275,000 | 176 | 833  | 1.241578363  |                                |
| 17 | 13,200,000 | 13,350,000 | 177 | 1410 | 1.273215424  | ABCE1,OTUD4                    |
| 17 | 13,275,000 | 13,425,000 | 178 | 1352 | 1.272976579  | ABCE1,ANAPC10,OTUD4            |
| 17 | 13,350,000 | 13,500,000 | 179 | 1271 | 1.32314159   | ABCE1,ANAPC10                  |
| 17 | 13,425,000 | 13,575,000 | 180 | 1318 | 1.387221634  | ANAPC10                        |
| 17 | 13,500,000 | 13,650,000 | 181 | 1372 | 1.267873653  | HHIP                           |
| 17 | 13,575,000 | 13,725,000 | 182 | 1294 | 0.811693417  | HHIP                           |
| 17 | 13,650,000 | 13,800,000 | 183 | 1237 | 0.47940678   | HHIP                           |
| 17 | 13,725,000 | 13,875,000 | 184 | 1382 | 0.66744362   | HHIP                           |
| 17 | 13,800,000 | 13,950,000 | 185 | 1906 | 0.764299402  |                                |
| 17 | 13,875,000 | 14,025,000 | 186 | 1953 | 0.280981091  |                                |
| 17 | 13,950,000 | 14,100,000 | 187 | 1924 | 0.059600102  |                                |
| 17 | 14,025,000 | 14,175,000 | 188 | 2134 | 0.218068034  |                                |
| 17 | 14,100,000 | 14,250,000 | 189 | 1806 | -0.325792515 | GPA                            |
| 17 | 14,175,000 | 14,325,000 | 190 | 2231 | -0.191164179 | GPA,GYPB                       |
| 17 | 14,250,000 | 14,400,000 | 191 | 2596 | -0.106496126 | GPA,GYPB                       |
| 17 | 14,325,000 | 14,475,000 | 192 | 2454 | -0.444020178 | GYPB                           |
| 17 | 14,400,000 | 14,550,000 | 193 | 2446 | -0.585335424 | SMARCA5                        |
| 17 | 14,475,000 | 14,625,000 | 194 | 1860 | -1.269746484 | SMARCA5                        |
| 17 | 14,550,000 | 14,700,000 | 195 | 1472 | -1.509797175 | GAB1,SMARCA5                   |
| 17 | 14,625,000 | 14,775,000 | 196 | 1057 | -1.67477803  | GAB1                           |
| 17 | 14,700,000 | 14,850,000 | 197 | 1161 | -0.337875157 | GAB1                           |
| 17 | 14,775,000 | 14,925,000 | 198 | 1250 | 0.304873543  | USP38                          |
| 17 | 14,850,000 | 15,000,000 | 199 | 1009 | 1.000196819  | USP38                          |
| 17 | 14,925,000 | 15,075,000 | 200 | 1603 | 0.989059015  |                                |
| 17 | 15,000,000 | 15,150,000 | 201 | 1930 | 0.876702928  |                                |
| 17 | 15,075,000 | 15,225,000 | 202 | 1587 | 1.070520977  |                                |
| 17 | 15,150,000 | 15,300,000 | 203 | 1587 | 0.635877373  | ENSBTAG00000045665             |
| 17 | 15,225,000 | 15,375,000 | 204 | 1690 | 0.362691389  | ENSBTAG00000045665             |

|    |            |            |     |      |              |                                                  |
|----|------------|------------|-----|------|--------------|--------------------------------------------------|
| 17 | 15,300,000 | 15,450,000 | 205 | 1176 | 0.62675702   |                                                  |
| 17 | 15,375,000 | 15,525,000 | 206 | 886  | 0.121981222  |                                                  |
| 17 | 15,450,000 | 15,600,000 | 207 | 1269 | -0.716483326 |                                                  |
| 17 | 15,525,000 | 15,675,000 | 208 | 1823 | 0.37778903   |                                                  |
| 17 | 15,600,000 | 15,750,000 | 209 | 1811 | 0.829216611  | INPP4B                                           |
| 17 | 15,675,000 | 15,825,000 | 210 | 1448 | 0.101563652  | INPP4B                                           |
| 17 | 15,750,000 | 15,900,000 | 211 | 1078 | -0.071977847 | INPP4B                                           |
| 17 | 15,825,000 | 15,975,000 | 212 | 806  | 0.488962283  | INPP4B                                           |
| 17 | 15,900,000 | 16,050,000 | 213 | 816  | -0.257641448 | INPP4B                                           |
| 17 | 15,975,000 | 16,125,000 | 214 | 651  | -0.116597333 | INPP4B                                           |
| 17 | 16,050,000 | 16,200,000 | 215 | 685  | 0.855280569  | INPP4B                                           |
| 17 | 16,125,000 | 16,275,000 | 216 | 649  | 0.937094677  |                                                  |
| 17 | 16,200,000 | 16,350,000 | 217 | 525  | 0.32172164   | IL15                                             |
| 17 | 16,275,000 | 16,425,000 | 218 | 717  | 0.456600167  | IL15                                             |
| 17 | 16,350,000 | 16,500,000 | 219 | 653  | 0.537847972  | IL15                                             |
| 17 | 16,425,000 | 16,575,000 | 220 | 603  | 0.176561548  |                                                  |
| 17 | 16,500,000 | 16,650,000 | 221 | 760  | 0.470704931  |                                                  |
| 17 | 16,575,000 | 16,725,000 | 222 | 808  | -0.263651363 |                                                  |
| 17 | 16,650,000 | 16,800,000 | 223 | 863  | -1.78197096  |                                                  |
| 17 | 16,725,000 | 16,875,000 | 224 | 959  | -0.541898234 | ZNF330                                           |
| 17 | 16,800,000 | 16,950,000 | 225 | 877  | 0.602593171  | ZNF330                                           |
| 17 | 16,875,000 | 17,025,000 | 226 | 742  | 0.409076711  |                                                  |
| 17 | 16,950,000 | 17,100,000 | 227 | 839  | 0.58985145   |                                                  |
| 17 | 17,025,000 | 17,175,000 | 228 | 992  | 0.751115761  |                                                  |
| 17 | 17,100,000 | 17,250,000 | 229 | 1295 | 0.395838061  |                                                  |
| 17 | 17,175,000 | 17,325,000 | 230 | 1516 | 0.429502284  |                                                  |
| 17 | 17,250,000 | 17,400,000 | 231 | 1327 | 0.576654588  | TBC1D9                                           |
| 17 | 17,325,000 | 17,475,000 | 232 | 1291 | -0.435271    | TBC1D9,UCP1                                      |
| 17 | 17,400,000 | 17,550,000 | 233 | 1015 | -0.80404724  | ELMOD2,MGAT4D,TBC1D9,UCP1                        |
| 17 | 17,475,000 | 17,625,000 | 234 | 509  | 0.650177427  | CLGN,ELMOD2,MGAT4D                               |
| 17 | 17,550,000 | 17,700,000 | 235 | 420  | 0.901106816  | CLGN,MGAT4D,SCOC                                 |
| 17 | 17,625,000 | 17,775,000 | 236 | 557  | 0.628324564  | SCOC                                             |
| 17 | 17,700,000 | 17,850,000 | 237 | 789  | 0.652677784  |                                                  |
| 17 | 17,775,000 | 17,925,000 | 238 | 676  | 0.718124403  |                                                  |
| 17 | 17,850,000 | 18,000,000 | 239 | 460  | -0.165711851 |                                                  |
| 17 | 17,925,000 | 18,075,000 | 240 | 814  | 0.619028608  |                                                  |
| 17 | 18,000,000 | 18,150,000 | 241 | 805  | 1.056751354  | MAML3                                            |
| 17 | 18,075,000 | 18,225,000 | 242 | 490  | 1.246398826  | MAML3                                            |
| 17 | 18,150,000 | 18,300,000 | 243 | 727  | 1.196874189  | MAML3                                            |
| 17 | 18,225,000 | 18,375,000 | 244 | 850  | 0.888278104  | MAML3,MGST2                                      |
| 17 | 18,300,000 | 18,450,000 | 245 | 1001 | 0.416017904  | MAML3,MGST2                                      |
| 17 | 18,375,000 | 18,525,000 | 246 | 790  | 0.179783277  | SETD7                                            |
| 17 | 18,450,000 | 18,600,000 | 247 | 434  | -1.446836417 | RAB33B,SETD7                                     |
| 17 | 18,525,000 | 18,675,000 | 248 | 360  | -1.535709751 | NAA15,RAB33B                                     |
| 17 | 18,600,000 | 18,750,000 | 249 | 246  | 0.852041741  | MGARP,NAA15,NDUFC1,THOC7                         |
| 17 | 18,675,000 | 18,825,000 | 250 | 274  | 0.534233956  | ELF2,MGARP,NAA15,NDUFC1,THOC7,ENSBTAG00000015811 |
| 17 | 18,750,000 | 18,900,000 | 251 | 249  | -0.953934555 | CCRN4L,ELF2,ENSBTAG00000015811                   |
| 17 | 18,825,000 | 18,975,000 | 252 | 245  | -2.691771542 | CCRN4L,ELF2                                      |
| 17 | 18,900,000 | 19,050,000 | 253 | 452  | -0.504572147 | CCRN4L                                           |
| 17 | 18,975,000 | 19,125,000 | 254 | 682  | 0.463666515  |                                                  |
| 17 | 19,050,000 | 19,200,000 | 255 | 1052 | -0.565419871 |                                                  |
| 17 | 19,125,000 | 19,275,000 | 256 | 1289 | -1.81952441  |                                                  |

|    |            |            |     |      |              |                    |
|----|------------|------------|-----|------|--------------|--------------------|
| 17 | 19,200,000 | 19,350,000 | 257 | 1041 | -2.007217961 |                    |
| 17 | 19,275,000 | 19,425,000 | 258 | 903  | -0.549331276 |                    |
| 17 | 19,350,000 | 19,500,000 | 259 | 973  | -1.893666181 | ENSBTAG00000034089 |
| 17 | 19,425,000 | 19,575,000 | 260 | 1157 | -1.414958824 | ENSBTAG00000034089 |
| 17 | 19,500,000 | 19,650,000 | 261 | 1209 | 0.011499558  |                    |
| 17 | 19,575,000 | 19,725,000 | 262 | 945  | -0.356780433 |                    |
| 17 | 19,650,000 | 19,800,000 | 263 | 812  | -0.693524153 | SLC7A11            |
| 17 | 19,725,000 | 19,875,000 | 264 | 1012 | -0.632079844 | SLC7A11            |
| 17 | 19,800,000 | 19,950,000 | 265 | 755  | -0.481640999 | SLC7A11            |
| 17 | 19,875,000 | 20,025,000 | 266 | 626  | 0.212817391  |                    |
| 17 | 19,950,000 | 20,100,000 | 267 | 724  | 0.339610032  |                    |
| 17 | 20,025,000 | 20,175,000 | 268 | 906  | 0.610567352  |                    |
| 17 | 20,100,000 | 20,250,000 | 269 | 1418 | 0.96363774   |                    |
| 17 | 20,175,000 | 20,325,000 | 270 | 1413 | 0.836994617  |                    |
| 17 | 20,250,000 | 20,400,000 | 271 | 1268 | -0.194658094 |                    |
| 17 | 20,325,000 | 20,475,000 | 272 | 1197 | -0.518221698 |                    |
| 17 | 20,400,000 | 20,550,000 | 273 | 1047 | -0.065234273 |                    |
| 17 | 20,475,000 | 20,625,000 | 274 | 853  | -1.144834943 | PCDH18             |
| 17 | 20,550,000 | 20,700,000 | 275 | 542  | -1.997770754 | PCDH18             |
| 17 | 20,625,000 | 20,775,000 | 276 | 469  | 0.309662665  |                    |
| 17 | 20,700,000 | 20,850,000 | 277 | 701  | 0.77327007   |                    |
| 17 | 20,775,000 | 20,925,000 | 278 | 1040 | 0.407723111  |                    |
| 17 | 20,850,000 | 21,000,000 | 279 | 1053 | -1.00868623  |                    |
| 17 | 20,925,000 | 21,075,000 | 280 | 1021 | -1.38791705  |                    |
| 17 | 21,000,000 | 21,150,000 | 281 | 1176 | -0.912300066 |                    |
| 17 | 21,075,000 | 21,225,000 | 282 | 1136 | -0.352253698 |                    |
| 17 | 21,150,000 | 21,300,000 | 283 | 796  | 0.334420926  |                    |
| 17 | 21,225,000 | 21,375,000 | 284 | 470  | -0.488289969 |                    |
| 17 | 21,300,000 | 21,450,000 | 285 | 479  | 0.388825446  |                    |
| 17 | 21,375,000 | 21,525,000 | 286 | 757  | 0.952415506  |                    |
| 17 | 21,450,000 | 21,600,000 | 287 | 1117 | 0.88534144   |                    |
| 17 | 21,525,000 | 21,675,000 | 288 | 1078 | 0.910303833  |                    |
| 17 | 21,600,000 | 21,750,000 | 289 | 1109 | 1.103085314  |                    |
| 17 | 21,675,000 | 21,825,000 | 290 | 1489 | 1.134953374  |                    |
| 17 | 21,750,000 | 21,900,000 | 291 | 1376 | 0.531431367  |                    |
| 17 | 21,825,000 | 21,975,000 | 292 | 1401 | -0.305711539 |                    |
| 17 | 21,900,000 | 22,050,000 | 293 | 1564 | -0.696404486 |                    |
| 17 | 21,975,000 | 22,125,000 | 294 | 1207 | -2.109398378 |                    |
| 17 | 22,050,000 | 22,200,000 | 295 | 671  | -2.860279878 |                    |
| 17 | 22,125,000 | 22,275,000 | 296 | 285  | -1.598072104 |                    |
| 17 | 22,200,000 | 22,350,000 | 297 | 481  | -1.987180966 |                    |
| 17 | 22,275,000 | 22,425,000 | 298 | 951  | -2.02204782  |                    |
| 17 | 22,350,000 | 22,500,000 | 299 | 754  | -1.85049678  |                    |
| 17 | 22,425,000 | 22,575,000 | 300 | 485  | -0.402562849 |                    |
| 17 | 22,500,000 | 22,650,000 | 301 | 670  | 0.193840263  |                    |
| 17 | 22,575,000 | 22,725,000 | 302 | 662  | 0.130852142  |                    |
| 17 | 22,650,000 | 22,800,000 | 303 | 706  | 0.284024355  |                    |
| 17 | 22,725,000 | 22,875,000 | 304 | 624  | 0.448339181  |                    |
| 17 | 22,800,000 | 22,950,000 | 305 | 599  | 0.3851841    |                    |
| 17 | 22,875,000 | 23,025,000 | 306 | 775  | -0.186958486 |                    |
| 17 | 22,950,000 | 23,100,000 | 307 | 835  | -1.154709306 |                    |
| 17 | 23,025,000 | 23,175,000 | 308 | 980  | -1.06374921  |                    |
| 17 | 23,100,000 | 23,250,000 | 309 | 901  | -0.154726146 |                    |



|    |            |            |     |      |              |                                             |
|----|------------|------------|-----|------|--------------|---------------------------------------------|
| 17 | 23,175,000 | 23,325,000 | 310 | 776  | 0.949764391  |                                             |
| 17 | 23,250,000 | 23,400,000 | 311 | 905  | 1.272685597  |                                             |
| 17 | 23,325,000 | 23,475,000 | 312 | 1116 | 0.104373403  |                                             |
| 17 | 23,400,000 | 23,550,000 | 313 | 966  | -0.138717935 | ENSBTAG00000033967                          |
| 17 | 23,475,000 | 23,625,000 | 314 | 849  | 0.553567657  | ENSBTAG00000033967                          |
| 17 | 23,550,000 | 23,700,000 | 315 | 783  | 0.007128244  |                                             |
| 17 | 23,625,000 | 23,775,000 | 316 | 358  | 0.75832467   |                                             |
| 17 | 23,700,000 | 23,850,000 | 317 | 485  | 1.109266317  |                                             |
| 17 | 23,775,000 | 23,925,000 | 318 | 576  | 0.135891447  |                                             |
| 17 | 23,850,000 | 24,000,000 | 319 | 452  | 0.672638861  |                                             |
| 17 | 23,925,000 | 24,075,000 | 320 | 514  | 1.102019541  |                                             |
| 17 | 24,000,000 | 24,150,000 | 321 | 427  | 1.025366154  |                                             |
| 17 | 24,075,000 | 24,225,000 | 322 | 303  | 1.041880823  |                                             |
| 17 | 24,150,000 | 24,300,000 | 323 | 898  | 0.701210069  |                                             |
| 17 | 24,225,000 | 24,375,000 | 324 | 1163 | 0.737619396  |                                             |
| 17 | 24,300,000 | 24,450,000 | 325 | 644  | 0.881152407  |                                             |
| 17 | 24,375,000 | 24,525,000 | 326 | 691  | 1.020052915  | ENSBTAG00000009722                          |
| 17 | 24,450,000 | 24,600,000 | 327 | 628  | 1.027460385  | ENSBTAG00000009722                          |
| 17 | 24,525,000 | 24,675,000 | 328 | 575  | 1.073043852  |                                             |
| 17 | 24,600,000 | 24,750,000 | 329 | 756  | 1.208050847  |                                             |
| 17 | 24,675,000 | 24,825,000 | 330 | 753  | 0.270950548  |                                             |
| 17 | 24,750,000 | 24,900,000 | 331 | 820  | -0.503528115 |                                             |
| 17 | 24,825,000 | 24,975,000 | 332 | 1003 | 0.178179783  |                                             |
| 17 | 24,900,000 | 25,050,000 | 333 | 851  | -0.244703622 | ENSBTAG00000035012                          |
| 17 | 24,975,000 | 25,125,000 | 334 | 529  | -0.903430875 | PRAME,ENSBTAG00000035012,ENSBTAG00000040370 |
| 17 | 25,050,000 | 25,200,000 | 335 | 723  | -1.081904886 | PRAME,ENSBTAG00000040370                    |
| 17 | 25,125,000 | 25,275,000 | 336 | 1313 | 0.251370461  |                                             |
| 17 | 25,200,000 | 25,350,000 | 337 | 1408 | 0.496146983  |                                             |
| 17 | 25,275,000 | 25,425,000 | 338 | 947  | 0.941722537  |                                             |
| 17 | 25,350,000 | 25,500,000 | 339 | 687  | 0.804272202  | PCDH10                                      |
| 17 | 25,425,000 | 25,575,000 | 340 | 787  | 1.042910811  | PCDH10                                      |
| 17 | 25,500,000 | 25,650,000 | 341 | 864  | 0.28016074   |                                             |
| 17 | 25,575,000 | 25,725,000 | 342 | 1170 | -1.381931112 |                                             |
| 17 | 25,650,000 | 25,800,000 | 343 | 1305 | -1.343130533 |                                             |
| 17 | 25,725,000 | 25,875,000 | 344 | 970  | 0.178313261  |                                             |
| 17 | 25,800,000 | 25,950,000 | 345 | 680  | 1.035772391  |                                             |
| 17 | 25,875,000 | 26,025,000 | 346 | 502  | -0.550847719 |                                             |
| 17 | 25,950,000 | 26,100,000 | 347 | 820  | -0.801494856 |                                             |
| 17 | 26,025,000 | 26,175,000 | 348 | 1385 | 0.038546367  |                                             |
| 17 | 26,100,000 | 26,250,000 | 349 | 1470 | 0.192985465  |                                             |
| 17 | 26,175,000 | 26,325,000 | 350 | 1239 | 0.779757952  |                                             |
| 17 | 26,250,000 | 26,400,000 | 351 | 999  | 0.470814827  |                                             |
| 17 | 26,325,000 | 26,475,000 | 352 | 1058 | -2.131769596 |                                             |
| 17 | 26,400,000 | 26,550,000 | 353 | 1130 | -1.522613516 |                                             |
| 17 | 26,475,000 | 26,625,000 | 354 | 1056 | 0.401353796  |                                             |
| 17 | 26,550,000 | 26,700,000 | 355 | 1198 | -0.624321025 |                                             |
| 17 | 26,625,000 | 26,775,000 | 356 | 1262 | -0.781499635 |                                             |
| 17 | 26,700,000 | 26,850,000 | 357 | 1100 | 0.262576381  |                                             |
| 17 | 26,775,000 | 26,925,000 | 358 | 991  | 0.282803677  |                                             |
| 17 | 26,850,000 | 27,000,000 | 359 | 1226 | -0.679600929 |                                             |
| 17 | 26,925,000 | 27,075,000 | 360 | 1359 | -1.119311562 |                                             |
| 17 | 27,000,000 | 27,150,000 | 361 | 1310 | -1.110315033 |                                             |
| 17 | 27,075,000 | 27,225,000 | 362 | 1055 | -0.795632149 |                                             |

|    |            |            |     |      |              |                            |
|----|------------|------------|-----|------|--------------|----------------------------|
| 17 | 27,150,000 | 27,300,000 | 363 | 937  | 0.368496397  |                            |
| 17 | 27,225,000 | 27,375,000 | 364 | 1013 | 0.621975297  |                            |
| 17 | 27,300,000 | 27,450,000 | 365 | 1310 | 0.646864878  |                            |
| 17 | 27,375,000 | 27,525,000 | 366 | 1777 | 0.712707079  |                            |
| 17 | 27,450,000 | 27,600,000 | 367 | 1590 | 0.950399199  |                            |
| 17 | 27,525,000 | 27,675,000 | 368 | 1045 | 1.284879956  |                            |
| 17 | 27,600,000 | 27,750,000 | 369 | 1028 | 0.293956264  |                            |
| 17 | 27,675,000 | 27,825,000 | 370 | 1265 | -1.604011472 |                            |
| 17 | 27,750,000 | 27,900,000 | 371 | 1191 | -3.03573981  |                            |
| 17 | 27,825,000 | 27,975,000 | 372 | 917  | -1.738211155 |                            |
| 17 | 27,900,000 | 28,050,000 | 373 | 911  | 0.498999894  |                            |
| 17 | 27,975,000 | 28,125,000 | 374 | 823  | 0.495478976  |                            |
| 17 | 28,050,000 | 28,200,000 | 375 | 535  | 0.156496726  |                            |
| 17 | 28,125,000 | 28,275,000 | 376 | 790  | -0.441369303 |                            |
| 17 | 28,200,000 | 28,350,000 | 377 | 1139 | -1.067029398 |                            |
| 17 | 28,275,000 | 28,425,000 | 378 | 1154 | -1.09986464  |                            |
| 17 | 28,350,000 | 28,500,000 | 379 | 1076 | -0.353825814 |                            |
| 17 | 28,425,000 | 28,575,000 | 380 | 860  | 0.02251998   |                            |
| 17 | 28,500,000 | 28,650,000 | 381 | 556  | -0.620127718 |                            |
| 17 | 28,575,000 | 28,725,000 | 382 | 524  | -3.481135586 |                            |
| 17 | 28,650,000 | 28,800,000 | 383 | 593  | -2.596116554 |                            |
| 17 | 28,725,000 | 28,875,000 | 384 | 494  | -0.531257527 |                            |
| 17 | 28,800,000 | 28,950,000 | 385 | 693  | -2.080927237 |                            |
| 17 | 28,875,000 | 29,025,000 | 386 | 1101 | -1.88227321  |                            |
| 17 | 28,950,000 | 29,100,000 | 387 | 908  | -1.090092514 |                            |
| 17 | 29,025,000 | 29,175,000 | 388 | 828  | 0.767749018  | C4orf33                    |
| 17 | 29,100,000 | 29,250,000 | 389 | 971  | 1.216487137  | C4orf33,SCLT1              |
| 17 | 29,175,000 | 29,325,000 | 390 | 569  | 0.58450131   | SCLT1                      |
| 17 | 29,250,000 | 29,400,000 | 391 | 335  | -1.834933761 | JADE1,SCLT1                |
| 17 | 29,325,000 | 29,475,000 | 392 | 319  | -2.346540194 | JADE1,SCLT1                |
| 17 | 29,400,000 | 29,550,000 | 393 | 376  | -1.8821928   | JADE1,ENSBTAG00000004743   |
| 17 | 29,475,000 | 29,625,000 | 394 | 539  | -1.002582255 | ENSBTAG00000004743         |
| 17 | 29,550,000 | 29,700,000 | 395 | 414  | -2.293577875 |                            |
| 17 | 29,625,000 | 29,775,000 | 396 | 243  | -4.419899254 |                            |
| 17 | 29,700,000 | 29,850,000 | 397 | 215  | -1.638605168 | COMMD6                     |
| 17 | 29,775,000 | 29,925,000 | 398 | 237  | -0.220555149 | COMMD6,PGRMC2              |
| 17 | 29,850,000 | 30,000,000 | 399 | 269  | 0.248777887  | LARP1B,PGRMC2              |
| 17 | 29,925,000 | 30,075,000 | 400 | 272  | -0.441394756 | LARP1B                     |
| 17 | 30,000,000 | 30,150,000 | 401 | 262  | -1.33733229  | LARP1B,MFSD8,MGC165715     |
| 17 | 30,075,000 | 30,225,000 | 402 | 211  | -1.562058757 | MFSD8,MGC165715,PLK4       |
| 17 | 30,150,000 | 30,300,000 | 403 | 194  | -1.066091134 | HSPA4L,MFSD8,PLK4,SLC25A31 |
| 17 | 30,225,000 | 30,375,000 | 404 | 231  | 0.077655768  | HSPA4L,INTU,SLC25A31       |
| 17 | 30,300,000 | 30,450,000 | 405 | 402  | 0.552187288  | INTU,SLC25A31              |
| 17 | 30,375,000 | 30,525,000 | 406 | 540  | -0.830083394 | INTU                       |
| 17 | 30,450,000 | 30,600,000 | 407 | 492  | -1.584096449 |                            |
| 17 | 30,525,000 | 30,675,000 | 408 | 743  | 0.186314548  | ENSBTAG00000005435         |
| 17 | 30,600,000 | 30,750,000 | 409 | 826  | 0.629853852  | ENSBTAG00000005435         |
| 17 | 30,675,000 | 30,825,000 | 410 | 489  | 0.909504689  |                            |
| 17 | 30,750,000 | 30,900,000 | 411 | 347  | 0.846287335  |                            |
| 17 | 30,825,000 | 30,975,000 | 412 | 341  | 0.92667215   |                            |
| 17 | 30,900,000 | 31,050,000 | 413 | 623  | 0.702122404  |                            |
| 17 | 30,975,000 | 31,125,000 | 414 | 1105 | 0.222179405  |                            |
| 17 | 31,050,000 | 31,200,000 | 415 | 1163 | -0.269626715 |                            |

|    |            |            |     |      |              |              |
|----|------------|------------|-----|------|--------------|--------------|
| 17 | 31,125,000 | 31,275,000 | 416 | 912  | 0.014143124  |              |
| 17 | 31,200,000 | 31,350,000 | 417 | 999  | 0.21865127   |              |
| 17 | 31,275,000 | 31,425,000 | 418 | 1102 | 0.005031856  |              |
| 17 | 31,350,000 | 31,500,000 | 419 | 1050 | 0.321155303  |              |
| 17 | 31,425,000 | 31,575,000 | 420 | 990  | 0.167221666  |              |
| 17 | 31,500,000 | 31,650,000 | 421 | 661  | -0.193439086 |              |
| 17 | 31,575,000 | 31,725,000 | 422 | 501  | -1.147766221 |              |
| 17 | 31,650,000 | 31,800,000 | 423 | 721  | 0.46791892   |              |
| 17 | 31,725,000 | 31,875,000 | 424 | 641  | 0.379016848  |              |
| 17 | 31,800,000 | 31,950,000 | 425 | 514  | -0.803107595 |              |
| 17 | 31,875,000 | 32,025,000 | 426 | 882  | 0.016836682  |              |
| 17 | 31,950,000 | 32,100,000 | 427 | 843  | 0.033428486  |              |
| 17 | 32,025,000 | 32,175,000 | 428 | 583  | 0.267565942  |              |
| 17 | 32,100,000 | 32,250,000 | 429 | 578  | -0.044636788 |              |
| 17 | 32,175,000 | 32,325,000 | 430 | 485  | -0.263161117 |              |
| 17 | 32,250,000 | 32,400,000 | 431 | 422  | 0.327225487  |              |
| 17 | 32,325,000 | 32,475,000 | 432 | 370  | 0.552076027  |              |
| 17 | 32,400,000 | 32,550,000 | 433 | 438  | -0.058150425 |              |
| 17 | 32,475,000 | 32,625,000 | 434 | 585  | -0.803748771 |              |
| 17 | 32,550,000 | 32,700,000 | 435 | 669  | -0.868260432 |              |
| 17 | 32,625,000 | 32,775,000 | 436 | 693  | -0.404504541 | FAT4         |
| 17 | 32,700,000 | 32,850,000 | 437 | 889  | -0.181880695 | FAT4         |
| 17 | 32,775,000 | 32,925,000 | 438 | 1083 | 0.224613975  | FAT4         |
| 17 | 32,850,000 | 33,000,000 | 439 | 962  | 0.98724709   | FAT4         |
| 17 | 32,925,000 | 33,075,000 | 440 | 819  | 1.106669294  |              |
| 17 | 33,000,000 | 33,150,000 | 441 | 788  | 0.590594494  |              |
| 17 | 33,075,000 | 33,225,000 | 442 | 986  | -0.198803045 |              |
| 17 | 33,150,000 | 33,300,000 | 443 | 1073 | -0.680501273 |              |
| 17 | 33,225,000 | 33,375,000 | 444 | 1181 | -0.258353753 |              |
| 17 | 33,300,000 | 33,450,000 | 445 | 1258 | -0.573129536 |              |
| 17 | 33,375,000 | 33,525,000 | 446 | 1042 | -0.55168516  | ANKRD50      |
| 17 | 33,450,000 | 33,600,000 | 447 | 1091 | 1.063797874  | ANKRD50      |
| 17 | 33,525,000 | 33,675,000 | 448 | 1118 | 1.016478034  | ANKRD50      |
| 17 | 33,600,000 | 33,750,000 | 449 | 1185 | 0.995848906  |              |
| 17 | 33,675,000 | 33,825,000 | 450 | 1212 | 0.604620305  |              |
| 17 | 33,750,000 | 33,900,000 | 451 | 1305 | -0.987998484 |              |
| 17 | 33,825,000 | 33,975,000 | 452 | 1240 | -0.305531031 |              |
| 17 | 33,900,000 | 34,050,000 | 453 | 1136 | 0.470831856  |              |
| 17 | 33,975,000 | 34,125,000 | 454 | 1063 | -0.167993837 |              |
| 17 | 34,050,000 | 34,200,000 | 455 | 882  | -2.886288937 |              |
| 17 | 34,125,000 | 34,275,000 | 456 | 844  | -3.662898267 |              |
| 17 | 34,200,000 | 34,350,000 | 457 | 994  | -2.94008886  |              |
| 17 | 34,275,000 | 34,425,000 | 458 | 1063 | -2.480562689 |              |
| 17 | 34,350,000 | 34,500,000 | 459 | 842  | -1.587919589 |              |
| 17 | 34,425,000 | 34,575,000 | 460 | 872  | -1.111896283 |              |
| 17 | 34,500,000 | 34,650,000 | 461 | 770  | -0.477344981 |              |
| 17 | 34,575,000 | 34,725,000 | 462 | 527  | -0.982009196 |              |
| 17 | 34,650,000 | 34,800,000 | 463 | 630  | -0.808682845 | SPRY1        |
| 17 | 34,725,000 | 34,875,000 | 464 | 751  | -0.144340815 | SPRY1        |
| 17 | 34,800,000 | 34,950,000 | 465 | 639  | -0.245714473 | SPATA5       |
| 17 | 34,875,000 | 35,025,000 | 466 | 474  | -0.063384938 | SPATA5       |
| 17 | 34,950,000 | 35,100,000 | 467 | 395  | 0.511382378  | SPATA5       |
| 17 | 35,025,000 | 35,175,000 | 468 | 393  | 0.510531039  | NUDT6,SPATA5 |

|    |            |            |     |      |              |                                       |
|----|------------|------------|-----|------|--------------|---------------------------------------|
| 17 | 35,100,000 | 35,250,000 | 469 | 340  | -0.120799932 | FGF2,NUDT6,SPATA5                     |
| 17 | 35,175,000 | 35,325,000 | 470 | 403  | -0.693492551 | FGF2,NUDT6                            |
| 17 | 35,250,000 | 35,400,000 | 471 | 505  | -1.065431261 | BBS12,CETN4,FGF2                      |
| 17 | 35,325,000 | 35,475,000 | 472 | 405  | -1.29351601  | BBS12,CETN4,IL21                      |
| 17 | 35,400,000 | 35,550,000 | 473 | 265  | -2.348592738 | IL21                                  |
| 17 | 35,475,000 | 35,625,000 | 474 | 227  | -4.37323374  | IL2                                   |
| 17 | 35,550,000 | 35,700,000 | 475 | 242  | -0.934714416 | IL2                                   |
| 17 | 35,625,000 | 35,775,000 | 476 | 431  | 0.029523412  | ENSBTAG00000046302                    |
| 17 | 35,700,000 | 35,850,000 | 477 | 345  | 0.425703644  | ENSBTAG00000046302                    |
| 17 | 35,775,000 | 35,925,000 | 478 | 84   | -0.460734719 | ENSBTAG00000045738,ENSBTAG00000045938 |
| 17 | 35,850,000 | 36,000,000 | 479 | 649  | 0.569683679  | ENSBTAG00000045738,ENSBTAG00000045938 |
| 17 | 35,925,000 | 36,075,000 | 480 | 1019 | 0.692625389  | ADAD1,ENSBTAG00000035606              |
| 17 | 36,000,000 | 36,150,000 | 481 | 464  | 0.565858634  | ADAD1,ENSBTAG00000035606              |
| 17 | 36,075,000 | 36,225,000 | 482 | 157  | 0.117029896  | ADAD1                                 |
| 17 | 36,150,000 | 36,300,000 | 483 | 202  | 1.124756053  |                                       |
| 17 | 36,225,000 | 36,375,000 | 484 | 350  | 0.733360891  |                                       |
| 17 | 36,300,000 | 36,450,000 | 485 | 524  | 0.295464538  |                                       |
| 17 | 36,375,000 | 36,525,000 | 486 | 786  | 0.072072655  |                                       |
| 17 | 36,450,000 | 36,600,000 | 487 | 840  | -0.622777849 | TRPC3                                 |
| 17 | 36,525,000 | 36,675,000 | 488 | 976  | -0.764101583 | TRPC3                                 |
| 17 | 36,600,000 | 36,750,000 | 489 | 1425 | -0.380738716 | TRPC3                                 |
| 17 | 36,675,000 | 36,825,000 | 490 | 1219 | -0.793166342 |                                       |
| 17 | 36,750,000 | 36,900,000 | 491 | 1001 | -0.872160077 |                                       |
| 17 | 36,825,000 | 36,975,000 | 492 | 1488 | -0.602300429 |                                       |
| 17 | 36,900,000 | 37,050,000 | 493 | 1527 | -1.133046767 |                                       |
| 17 | 36,975,000 | 37,125,000 | 494 | 1521 | -0.411083448 |                                       |
| 17 | 37,050,000 | 37,200,000 | 495 | 1474 | 0.408028935  |                                       |
| 17 | 37,125,000 | 37,275,000 | 496 | 1074 | 0.31790715   |                                       |
| 17 | 37,200,000 | 37,350,000 | 497 | 1007 | 0.53928866   |                                       |
| 17 | 37,275,000 | 37,425,000 | 498 | 1225 | -0.755749414 | ENSBTAG00000046833                    |
| 17 | 37,350,000 | 37,500,000 | 499 | 1163 | -0.400513395 | ENSBTAG00000046833                    |
| 17 | 37,425,000 | 37,575,000 | 500 | 645  | -0.012228786 |                                       |
| 17 | 37,500,000 | 37,650,000 | 501 | 695  | -0.89580074  |                                       |
| 17 | 37,575,000 | 37,725,000 | 502 | 1039 | 0.209013095  |                                       |
| 17 | 37,650,000 | 37,800,000 | 503 | 859  | 0.379485652  |                                       |
| 17 | 37,725,000 | 37,875,000 | 504 | 551  | -0.501289586 | ENSBTAG00000047595                    |
| 17 | 37,800,000 | 37,950,000 | 505 | 622  | 0.042596408  | ENSBTAG00000047595                    |
| 17 | 37,875,000 | 38,025,000 | 506 | 784  | 0.53724447   | ENSBTAG00000047595                    |
| 17 | 37,950,000 | 38,100,000 | 507 | 876  | 0.202672543  | ENSBTAG00000047595                    |
| 17 | 38,025,000 | 38,175,000 | 508 | 851  | -2.239840165 | ENSBTAG00000047595                    |
| 17 | 38,100,000 | 38,250,000 | 509 | 1066 | -2.208492683 |                                       |
| 17 | 38,175,000 | 38,325,000 | 510 | 1187 | 0.131586632  |                                       |
| 17 | 38,250,000 | 38,400,000 | 511 | 1180 | -2.741779744 |                                       |
| 17 | 38,325,000 | 38,475,000 | 512 | 1056 | -4.295461269 |                                       |
| 17 | 38,400,000 | 38,550,000 | 513 | 721  | -3.41860509  |                                       |
| 17 | 38,475,000 | 38,625,000 | 514 | 1359 | 0.427012534  |                                       |
| 17 | 38,550,000 | 38,700,000 | 515 | 1839 | -0.625529808 |                                       |
| 17 | 38,625,000 | 38,775,000 | 516 | 1300 | -1.776406865 |                                       |
| 17 | 38,700,000 | 38,850,000 | 517 | 967  | -1.718560011 |                                       |
| 17 | 38,775,000 | 38,925,000 | 518 | 698  | -2.028857129 |                                       |
| 17 | 38,850,000 | 39,000,000 | 519 | 673  | -1.476525775 |                                       |
| 17 | 38,925,000 | 39,075,000 | 520 | 1075 | -0.494195643 |                                       |
| 17 | 39,000,000 | 39,150,000 | 521 | 787  | 0.072082396  |                                       |

|    |            |            |     |      |              |                             |
|----|------------|------------|-----|------|--------------|-----------------------------|
| 17 | 39,075,000 | 39,225,000 | 522 | 341  | 0.029327297  |                             |
| 17 | 39,150,000 | 39,300,000 | 523 | 345  | -0.260848431 |                             |
| 17 | 39,225,000 | 39,375,000 | 524 | 332  | -0.190907514 |                             |
| 17 | 39,300,000 | 39,450,000 | 525 | 345  | -0.914720133 |                             |
| 17 | 39,375,000 | 39,525,000 | 526 | 380  | -1.235363489 |                             |
| 17 | 39,450,000 | 39,600,000 | 527 | 583  | 0.507996652  |                             |
| 17 | 39,525,000 | 39,675,000 | 528 | 754  | 0.505654746  |                             |
| 17 | 39,600,000 | 39,750,000 | 529 | 824  | -1.077913986 |                             |
| 17 | 39,675,000 | 39,825,000 | 530 | 845  | -1.464078509 |                             |
| 17 | 39,750,000 | 39,900,000 | 531 | 815  | -1.579285049 | ULBP3                       |
| 17 | 39,825,000 | 39,975,000 | 532 | 1156 | 0.445279157  | ULBP3                       |
| 17 | 39,900,000 | 40,050,000 | 533 | 1231 | 0.66589728   |                             |
| 17 | 39,975,000 | 40,125,000 | 534 | 1066 | 0.346233011  |                             |
| 17 | 40,050,000 | 40,200,000 | 535 | 1110 | 0.6771574    |                             |
| 17 | 40,125,000 | 40,275,000 | 536 | 1172 | -0.381980377 |                             |
| 17 | 40,200,000 | 40,350,000 | 537 | 1117 | -0.505340225 |                             |
| 17 | 40,275,000 | 40,425,000 | 538 | 1083 | 0.339661584  |                             |
| 17 | 40,350,000 | 40,500,000 | 539 | 970  | 0.779222728  | RAPGEF2                     |
| 17 | 40,425,000 | 40,575,000 | 540 | 671  | 0.476439847  | RAPGEF2                     |
| 17 | 40,500,000 | 40,650,000 | 541 | 613  | 0.287291581  | RAPGEF2                     |
| 17 | 40,575,000 | 40,725,000 | 542 | 921  | 0.140398514  | RAPGEF2                     |
| 17 | 40,650,000 | 40,800,000 | 543 | 1132 | 0.224710966  |                             |
| 17 | 40,725,000 | 40,875,000 | 544 | 1004 | 0.961391054  | TNIP3                       |
| 17 | 40,800,000 | 40,950,000 | 545 | 1066 | 0.959523488  | C17H4orf45,TNIP3            |
| 17 | 40,875,000 | 41,025,000 | 546 | 1045 | 0.990130841  | C17H4orf45                  |
| 17 | 40,950,000 | 41,100,000 | 547 | 626  | 0.562502246  | C17H4orf45, FNIP2           |
| 17 | 41,025,000 | 41,175,000 | 548 | 356  | -1.092681645 | C17H4orf45, FNIP2           |
| 17 | 41,100,000 | 41,250,000 | 549 | 552  | -2.017619912 | FNIP2,PPID                  |
| 17 | 41,175,000 | 41,325,000 | 550 | 600  | -1.98606388  | C17H4orf46,ETFDH,PPID,RXFP1 |
| 17 | 41,250,000 | 41,400,000 | 551 | 868  | -0.007905041 | C17H4orf46,ETFDH,PPID,RXFP1 |
| 17 | 41,325,000 | 41,475,000 | 552 | 1408 | -0.082707587 | RXFP1                       |
| 17 | 41,400,000 | 41,550,000 | 553 | 1573 | -0.802951543 | RXFP1                       |
| 17 | 41,475,000 | 41,625,000 | 554 | 1201 | -0.683774778 |                             |
| 17 | 41,550,000 | 41,700,000 | 555 | 862  | 0.241752203  | TMEM144                     |
| 17 | 41,625,000 | 41,775,000 | 556 | 959  | 1.052505153  | FAM198B, TMEM144            |
| 17 | 41,700,000 | 41,850,000 | 557 | 876  | 1.129284943  | FAM198B, TMEM144            |
| 17 | 41,775,000 | 41,925,000 | 558 | 592  | 0.810245825  | FAM198B                     |
| 17 | 41,850,000 | 42,000,000 | 559 | 480  | 0.554498336  |                             |
| 17 | 41,925,000 | 42,075,000 | 560 | 588  | 0.784100616  |                             |
| 17 | 42,000,000 | 42,150,000 | 561 | 904  | 1.245222753  |                             |
| 17 | 42,075,000 | 42,225,000 | 562 | 1186 | 0.269075634  |                             |
| 17 | 42,150,000 | 42,300,000 | 563 | 1180 | -0.453900755 |                             |
| 17 | 42,225,000 | 42,375,000 | 564 | 1008 | 0.809868666  |                             |
| 17 | 42,300,000 | 42,450,000 | 565 | 683  | 0.898417502  |                             |
| 17 | 42,375,000 | 42,525,000 | 566 | 592  | 0.073401067  |                             |
| 17 | 42,450,000 | 42,600,000 | 567 | 726  | 0.164905806  |                             |
| 17 | 42,525,000 | 42,675,000 | 568 | 726  | 0.788707699  |                             |
| 17 | 42,600,000 | 42,750,000 | 569 | 559  | 0.897246202  |                             |
| 17 | 42,675,000 | 42,825,000 | 570 | 442  | 0.553422809  | GRIA2                       |
| 17 | 42,750,000 | 42,900,000 | 571 | 438  | -1.348815958 | GRIA2                       |
| 17 | 42,825,000 | 42,975,000 | 572 | 741  | -1.241796436 | GRIA2                       |
| 17 | 42,900,000 | 43,050,000 | 573 | 867  | -0.653248246 | GLRB,GRIA2                  |
| 17 | 42,975,000 | 43,125,000 | 574 | 952  | -0.009155092 | GLRB                        |

|    |            |            |     |      |              |                                              |
|----|------------|------------|-----|------|--------------|----------------------------------------------|
| 17 | 43,050,000 | 43,200,000 | 575 | 872  | 0.491537577  | GLRB                                         |
| 17 | 43,125,000 | 43,275,000 | 576 | 490  | 0.891666795  | GLRB                                         |
| 17 | 43,200,000 | 43,350,000 | 577 | 480  | 0.789729474  | GLRB,PDGFC                                   |
| 17 | 43,275,000 | 43,425,000 | 578 | 827  | 0.688464106  | PDGFC                                        |
| 17 | 43,350,000 | 43,500,000 | 579 | 810  | 0.641137323  | PDGFC                                        |
| 17 | 43,425,000 | 43,575,000 | 580 | 417  | 0.441980863  | PDGFC                                        |
| 17 | 43,500,000 | 43,650,000 | 581 | 317  | -0.099473717 |                                              |
| 17 | 43,575,000 | 43,725,000 | 582 | 338  | -0.112028124 |                                              |
| 17 | 43,650,000 | 43,800,000 | 583 | 645  | 0.83202878   |                                              |
| 17 | 43,725,000 | 43,875,000 | 584 | 1023 | 0.988080238  |                                              |
| 17 | 43,800,000 | 43,950,000 | 585 | 831  | 0.97682057   |                                              |
| 17 | 43,875,000 | 44,025,000 | 586 | 400  | 0.673574617  |                                              |
| 17 | 43,950,000 | 44,100,000 | 587 | 325  | -0.095995213 |                                              |
| 17 | 44,025,000 | 44,175,000 | 588 | 347  | -0.85537748  |                                              |
| 17 | 44,100,000 | 44,250,000 | 589 | 398  | -2.664110799 |                                              |
| 17 | 44,175,000 | 44,325,000 | 590 | 751  | -2.224002984 |                                              |
| 17 | 44,250,000 | 44,400,000 | 591 | 655  | -2.348873332 | CTSO,TDO2                                    |
| 17 | 44,325,000 | 44,475,000 | 592 | 296  | -5.191012792 | ASIC5,CTSO,TDO2                              |
| 17 | 44,400,000 | 44,550,000 | 593 | 499  | -4.613866925 | ASIC5,GUCY1B1                                |
| 17 | 44,475,000 | 44,625,000 | 594 | 604  | -2.586888458 | ASIC5,GUCY1A1,GUCY1B1                        |
| 17 | 44,550,000 | 44,700,000 | 595 | 460  | -0.584029068 | GUCY1A1,GUCY1B1                              |
| 17 | 44,625,000 | 44,775,000 | 596 | 740  | 0.935632352  | GUCY1A1                                      |
| 17 | 44,700,000 | 44,850,000 | 597 | 970  | 0.782887622  |                                              |
| 17 | 44,775,000 | 44,925,000 | 598 | 768  | -0.157540723 |                                              |
| 17 | 44,850,000 | 45,000,000 | 599 | 548  | -0.094706748 | ZNF605                                       |
| 17 | 44,925,000 | 45,075,000 | 600 | 381  | -0.570236196 | ZNF605,ENSBTAG00000013001                    |
| 17 | 45,000,000 | 45,150,000 | 601 | 511  | -4.057102141 | ZNF140,ZNF891,ENSBTAG00000013001             |
| 17 | 45,075,000 | 45,225,000 | 602 | 755  | -2.625445591 | ZNF10,ZNF140,ZNF268,ZNF891                   |
| 17 | 45,150,000 | 45,300,000 | 603 | 851  | 0.258423292  | ANHX,MBD3L1,ZNF10,ZNF268,ZNF891              |
| 17 | 45,225,000 | 45,375,000 | 604 | 690  | 0.33897032   | ANHX,MBD3L1                                  |
| 17 | 45,300,000 | 45,450,000 | 605 | 520  | 0.4025824    | CHFR,GOLGA3                                  |
| 17 | 45,375,000 | 45,525,000 | 606 | 476  | 0.673336511  | ANKLE2,CHFR,GOLGA3,PGAM5,POLE,PXMP2          |
| 17 | 45,450,000 | 45,600,000 | 607 | 457  | 0.699060286  | ANKLE2,GOLGA3,P2RX2,PGAM5,POLE,PXMP2         |
| 17 | 45,525,000 | 45,675,000 | 608 | 435  | 0.444551067  | FBRSL1,P2RX2,POLE                            |
| 17 | 45,600,000 | 45,750,000 | 609 | 417  | 0.603908801  | FBRSL1                                       |
| 17 | 45,675,000 | 45,825,000 | 610 | 709  | 1.038817114  | FBRSL1                                       |
| 17 | 45,750,000 | 45,900,000 | 611 | 793  | 0.762617452  | WBSCR17                                      |
| 17 | 45,825,000 | 45,975,000 | 612 | 532  | -1.025278014 | WBSCR17                                      |
| 17 | 45,900,000 | 46,050,000 | 613 | 346  | -1.944686458 | DDX51,EP400,NOC4L,WBSCR17,ENSBTAG00000022084 |
| 17 | 45,975,000 | 46,125,000 | 614 | 275  | -0.772766775 | DDX51,EP400,NOC4L,ENSBTAG00000022084         |
| 17 | 46,050,000 | 46,200,000 | 615 | 511  | -0.672158011 | EP400,PUS1,ULK1                              |
| 17 | 46,125,000 | 46,275,000 | 616 | 528  | -0.383124148 | EP400,MMP17,PUS1,SFSWAP,ULK1                 |
| 17 | 46,200,000 | 46,350,000 | 617 | 349  | -0.113587765 | MMP17,SFSWAP                                 |
| 17 | 46,275,000 | 46,425,000 | 618 | 441  | 0.375690525  | SFSWAP                                       |
| 17 | 46,350,000 | 46,500,000 | 619 | 483  | 0.718899111  | SFSWAP                                       |
| 17 | 46,425,000 | 46,575,000 | 620 | 535  | 0.794983523  |                                              |
| 17 | 46,500,000 | 46,650,000 | 621 | 590  | 0.614689897  |                                              |
| 17 | 46,575,000 | 46,725,000 | 622 | 491  | -0.271879965 |                                              |
| 17 | 46,650,000 | 46,800,000 | 623 | 530  | -0.936015068 |                                              |
| 17 | 46,725,000 | 46,875,000 | 624 | 648  | -3.728400129 |                                              |
| 17 | 46,800,000 | 46,950,000 | 625 | 447  | -6.388795061 |                                              |
| 17 | 46,875,000 | 47,025,000 | 626 | 224  | -6.64260174  |                                              |
| 17 | 46,950,000 | 47,100,000 | 627 | 490  | -3.05977419  | GPR133                                       |

|    |            |            |     |      |              |                                   |
|----|------------|------------|-----|------|--------------|-----------------------------------|
| 17 | 47,025,000 | 47,175,000 | 628 | 884  | -2.370155252 | GPR133                            |
| 17 | 47,100,000 | 47,250,000 | 629 | 821  | -1.597745973 | GPR133                            |
| 17 | 47,175,000 | 47,325,000 | 630 | 670  | 0.548593659  | GPR133,STX2                       |
| 17 | 47,250,000 | 47,400,000 | 631 | 537  | 1.202950888  | STX2                              |
| 17 | 47,325,000 | 47,475,000 | 632 | 401  | 0.599600753  | STX2                              |
| 17 | 47,400,000 | 47,550,000 | 633 | 701  | 0.549593518  |                                   |
| 17 | 47,475,000 | 47,625,000 | 634 | 1023 | -0.926697316 |                                   |
| 17 | 47,550,000 | 47,700,000 | 635 | 794  | -1.813382556 | RIMBP2                            |
| 17 | 47,625,000 | 47,775,000 | 636 | 621  | -0.977210157 | PIWIL1,RIMBP2                     |
| 17 | 47,700,000 | 47,850,000 | 637 | 609  | -1.952837943 | PIWIL1,RIMBP2                     |
| 17 | 47,775,000 | 47,925,000 | 638 | 536  | -0.707128599 |                                   |
| 17 | 47,850,000 | 48,000,000 | 639 | 641  | 0.267107261  | FZD10                             |
| 17 | 47,925,000 | 48,075,000 | 640 | 971  | -0.270293716 | FZD10                             |
| 17 | 48,000,000 | 48,150,000 | 641 | 1335 | -1.046091005 |                                   |
| 17 | 48,075,000 | 48,225,000 | 642 | 850  | -1.270150291 |                                   |
| 17 | 48,150,000 | 48,300,000 | 643 | 350  | -0.319994373 |                                   |
| 17 | 48,225,000 | 48,375,000 | 644 | 443  | -0.128795048 |                                   |
| 17 | 48,300,000 | 48,450,000 | 645 | 781  | 1.113795286  |                                   |
| 17 | 48,375,000 | 48,525,000 | 646 | 977  | -0.217007481 |                                   |
| 17 | 48,450,000 | 48,600,000 | 647 | 944  | -3.127870843 |                                   |
| 17 | 48,525,000 | 48,675,000 | 648 | 864  | -2.071136434 |                                   |
| 17 | 48,600,000 | 48,750,000 | 649 | 1115 | -0.236615897 |                                   |
| 17 | 48,675,000 | 48,825,000 | 650 | 1489 | 0.047238729  |                                   |
| 17 | 48,750,000 | 48,900,000 | 651 | 1074 | 0.50804694   |                                   |
| 17 | 48,825,000 | 48,975,000 | 652 | 672  | 0.252535651  |                                   |
| 17 | 48,900,000 | 49,050,000 | 653 | 611  | 0.183843892  |                                   |
| 17 | 48,975,000 | 49,125,000 | 654 | 659  | 0.628390201  | TMEM132D                          |
| 17 | 49,050,000 | 49,200,000 | 655 | 799  | 0.771996737  | GLT1D1,TMEM132D                   |
| 17 | 49,125,000 | 49,275,000 | 656 | 811  | 0.422526529  | GLT1D1,ENSBTAG00000046676         |
| 17 | 49,200,000 | 49,350,000 | 657 | 558  | -0.722275127 | GLT1D1,SLC15A4,ENSBTAG00000046676 |
| 17 | 49,275,000 | 49,425,000 | 658 | 374  | -1.652838692 | GLT1D1,SLC15A4                    |
| 17 | 49,350,000 | 49,500,000 | 659 | 659  | 0.188120691  | SLC15A4,TMEM132C                  |
| 17 | 49,425,000 | 49,575,000 | 660 | 834  | 0.362222884  | TMEM132C                          |
| 17 | 49,500,000 | 49,650,000 | 661 | 775  | 0.102062375  | TMEM132C                          |
| 17 | 49,575,000 | 49,725,000 | 662 | 639  | 0.612933988  | TMEM132C                          |
| 17 | 49,650,000 | 49,800,000 | 663 | 690  | 0.928651296  | TMEM132C                          |
| 17 | 49,725,000 | 49,875,000 | 664 | 673  | 0.553022623  | TMEM132C                          |
| 17 | 49,800,000 | 49,950,000 | 665 | 723  | 0.500022853  |                                   |
| 17 | 49,875,000 | 50,025,000 | 666 | 1190 | -0.832228423 |                                   |
| 17 | 49,950,000 | 50,100,000 | 667 | 1022 | -1.50046019  |                                   |
| 17 | 50,025,000 | 50,175,000 | 668 | 697  | 1.196081343  |                                   |
| 17 | 50,100,000 | 50,250,000 | 669 | 700  | 1.059255624  |                                   |
| 17 | 50,175,000 | 50,325,000 | 670 | 688  | 0.654875224  |                                   |
| 17 | 50,250,000 | 50,400,000 | 671 | 642  | 0.5675879    |                                   |
| 17 | 50,325,000 | 50,475,000 | 672 | 659  | 0.650408459  |                                   |
| 17 | 50,400,000 | 50,550,000 | 673 | 825  | 0.649013909  |                                   |
| 17 | 50,475,000 | 50,625,000 | 674 | 650  | 0.65183075   |                                   |
| 17 | 50,550,000 | 50,700,000 | 675 | 459  | 0.930454536  |                                   |
| 17 | 50,625,000 | 50,775,000 | 676 | 442  | 0.680542525  | ENSBTAG00000046439                |
| 17 | 50,700,000 | 50,850,000 | 677 | 284  | -3.746000807 | ENSBTAG00000046439                |
| 17 | 50,775,000 | 50,925,000 | 678 | 175  | -3.868721245 |                                   |
| 17 | 50,850,000 | 51,000,000 | 679 | 307  | 0.141711053  | ENSBTAG00000046657                |
| 17 | 50,925,000 | 51,075,000 | 680 | 692  | 0.450400224  | ENSBTAG00000046657                |

|    |            |            |     |      |              |                                                 |
|----|------------|------------|-----|------|--------------|-------------------------------------------------|
| 17 | 51,000,000 | 51,150,000 | 681 | 689  | 0.556918121  |                                                 |
| 17 | 51,075,000 | 51,225,000 | 682 | 359  | 0.836094052  | ENSBTAG00000047597                              |
| 17 | 51,150,000 | 51,300,000 | 683 | 413  | 1.372762051  | ENSBTAG00000033558,ENSBTAG00000047597           |
| 17 | 51,225,000 | 51,375,000 | 684 | 455  | 1.404216762  | HSFY2,PRAME,ENSBTAG00000033558                  |
| 17 | 51,300,000 | 51,450,000 | 685 | 289  | -0.698794684 | HSFY2,PRAME                                     |
| 17 | 51,375,000 | 51,525,000 | 686 | 388  | -1.686106843 | PRAME                                           |
| 17 | 51,450,000 | 51,600,000 | 687 | 325  | -2.052467668 | ENSBTAG00000039769                              |
| 17 | 51,525,000 | 51,675,000 | 688 | 279  | -0.804522755 | ENSBTAG00000034761,ENSBTAG00000039769           |
| 17 | 51,600,000 | 51,750,000 | 689 | 701  | 0.095618252  | ENSBTAG00000020532,ENSBTAG00000034761           |
| 17 | 51,675,000 | 51,825,000 | 690 | 1008 | -0.018943636 | ENSBTAG00000020532,ENSBTAG00000046986           |
| 17 | 51,750,000 | 51,900,000 | 691 | 594  | 0.306821568  | ENSBTAG00000033620,ENSBTAG00000046986           |
| 17 | 51,825,000 | 51,975,000 | 692 | 416  | 0.762272326  | ENSBTAG00000033620                              |
| 17 | 51,900,000 | 52,050,000 | 693 | 465  | 0.509319172  |                                                 |
| 17 | 51,975,000 | 52,125,000 | 694 | 569  | -0.49588609  |                                                 |
| 17 | 52,050,000 | 52,200,000 | 695 | 848  | -0.019626872 |                                                 |
| 17 | 52,125,000 | 52,275,000 | 696 | 637  | 0.33572129   |                                                 |
| 17 | 52,200,000 | 52,350,000 | 697 | 620  | -0.254511083 |                                                 |
| 17 | 52,275,000 | 52,425,000 | 698 | 838  | 0.198248589  |                                                 |
| 17 | 52,350,000 | 52,500,000 | 699 | 914  | 0.617095504  |                                                 |
| 17 | 52,425,000 | 52,575,000 | 700 | 963  | 0.850615579  | TMEM132B                                        |
| 17 | 52,500,000 | 52,650,000 | 701 | 944  | 0.539487556  | TMEM132B                                        |
| 17 | 52,575,000 | 52,725,000 | 702 | 925  | 0.208968291  | TMEM132B                                        |
| 17 | 52,650,000 | 52,800,000 | 703 | 1287 | 0.319108815  | TMEM132B                                        |
| 17 | 52,725,000 | 52,875,000 | 704 | 1133 | 0.275137974  | TMEM132B                                        |
| 17 | 52,800,000 | 52,950,000 | 705 | 550  | 0.334070107  |                                                 |
| 17 | 52,875,000 | 53,025,000 | 706 | 609  | -0.779412421 | AACS                                            |
| 17 | 52,950,000 | 53,100,000 | 707 | 824  | -0.718976736 | AACS,BRI3BP,DHX37                               |
| 17 | 53,025,000 | 53,175,000 | 708 | 620  | -0.613178199 | AACS,BRI3BP,DHX37,UBC                           |
| 17 | 53,100,000 | 53,250,000 | 709 | 526  | -0.211812628 | DHX37,SCARB1,UBC                                |
| 17 | 53,175,000 | 53,325,000 | 710 | 513  | 0.880086884  | SCARB1                                          |
| 17 | 53,250,000 | 53,400,000 | 711 | 461  | 0.062311479  | SCARB1                                          |
| 17 | 53,325,000 | 53,475,000 | 712 | 585  | -0.344661465 |                                                 |
| 17 | 53,400,000 | 53,550,000 | 713 | 476  | -0.177864835 |                                                 |
| 17 | 53,475,000 | 53,625,000 | 714 | 289  | 0.401232425  | NCOR2                                           |
| 17 | 53,550,000 | 53,700,000 | 715 | 260  | 0.129006598  | NCOR2                                           |
| 17 | 53,625,000 | 53,775,000 | 716 | 383  | -1.199841808 | FAM101A,NCOR2                                   |
| 17 | 53,700,000 | 53,850,000 | 717 | 478  | -1.553810199 | FAM101A,NCOR2                                   |
| 17 | 53,775,000 | 53,925,000 | 718 | 877  | 0.355670079  |                                                 |
| 17 | 53,850,000 | 54,000,000 | 719 | 1172 | 0.928293581  | ZNF664                                          |
| 17 | 53,925,000 | 54,075,000 | 720 | 872  | 0.541120921  | CCDC92,DNAH10,ZNF664                            |
| 17 | 54,000,000 | 54,150,000 | 721 | 794  | -0.256350808 | CCDC92,DNAH10                                   |
| 17 | 54,075,000 | 54,225,000 | 722 | 881  | -1.224703191 | ATP6V0A2,DNAH10                                 |
| 17 | 54,150,000 | 54,300,000 | 723 | 790  | -1.420562949 | ATP6V0A2,DNAH10,EIF2B1,GTF2H3,TCTN2             |
| 17 | 54,225,000 | 54,375,000 | 724 | 784  | 0.078801448  | ATP6V0A2,DDX55,EIF2B1,GTF2H3,RILPL1,TCTN2,TMED2 |
| 17 | 54,300,000 | 54,450,000 | 725 | 738  | -0.396211495 | DDX55,EIF2B1,RILPL1,RILPL2,SNRNP35,TMED2        |
| 17 | 54,375,000 | 54,525,000 | 726 | 476  | -1.434611265 | RILPL1,RILPL2,SBNO1,SETD8,SNRNP35               |
| 17 | 54,450,000 | 54,600,000 | 727 | 297  | -0.129979048 | C12orf65,CDK2AP1,MPHOSPH9,RILPL2,SBNO1,SETD8    |
| 17 | 54,525,000 | 54,675,000 | 728 | 290  | -0.164637409 | C12orf65,CDK2AP1,MPHOSPH9,SBNO1                 |
| 17 | 54,600,000 | 54,750,000 | 729 | 373  | -0.675910524 | MPHOSPH9,PITPNM2                                |
| 17 | 54,675,000 | 54,825,000 | 730 | 380  | -1.607332781 | ARL6IP4,OGFOD2,PITPNM2                          |
| 17 | 54,750,000 | 54,900,000 | 731 | 508  | -0.50164783  | ABCB9,ARL6IP4,OGFOD2,PITPNM2                    |
| 17 | 54,825,000 | 54,975,000 | 732 | 564  | 0.157687722  | ABCB9,CCDC62,HIP1R                              |
| 17 | 54,900,000 | 55,050,000 | 733 | 529  | 0.115391441  | CCDC62,GPR81,HIP1R,ENSBTAG00000032433           |



|    |            |            |     |      |              |                                                         |
|----|------------|------------|-----|------|--------------|---------------------------------------------------------|
| 17 | 54,975,000 | 55,125,000 | 734 | 619  | -0.030123774 | CCDC62,GPR81,KNTC1,ENSBTAG00000032433,ENSBTAG0000047904 |
| 17 | 55,050,000 | 55,200,000 | 735 | 399  | -0.67659722  | KNTC1,RSRC2,ZCCHC8,ENSBTAG00000047904                   |
| 17 | 55,125,000 | 55,275,000 | 736 | 312  | -0.782935527 | CLIP1,KNTC1,RSRC2,ZCCHC8                                |
| 17 | 55,200,000 | 55,350,000 | 737 | 580  | -2.353799455 | CLIP1,ZCCHC8                                            |
| 17 | 55,275,000 | 55,425,000 | 738 | 503  | -2.730806088 | B3GNT4,CLIP1,DIABLO,LRRC43,VPS33A                       |
| 17 | 55,350,000 | 55,500,000 | 739 | 288  | -0.578396829 | B3GNT4,CLIP1,DIABLO,LRRC43,MLXIP,VPS33A                 |
| 17 | 55,425,000 | 55,575,000 | 740 | 455  | 0.031201921  | BCL7A,LRRC43,MLXIP                                      |
| 17 | 55,500,000 | 55,650,000 | 741 | 701  | 0.210427789  | BCL7A,MLXIP,WDR66                                       |
| 17 | 55,575,000 | 55,725,000 | 742 | 669  | 0.215408456  | HPD,PSMD9,WDR66                                         |
| 17 | 55,650,000 | 55,800,000 | 743 | 386  | 0.211484256  | HPD,PSMD9,RHOF,SETD1B,TMEM120B,WDR66                    |
| 17 | 55,725,000 | 55,875,000 | 744 | 221  | -0.653064889 | MORN3,ORAI1,RHOF,SETD1B,TMEM120B                        |
| 17 | 55,800,000 | 55,950,000 | 745 | 391  | -0.446570524 | KDM2B,MORN3,ORAI1,TMEM120B                              |
| 17 | 55,875,000 | 56,025,000 | 746 | 546  | 0.595243114  | KDM2B,RNF34                                             |
| 17 | 55,950,000 | 56,100,000 | 747 | 440  | 0.371831828  | ANAPC5,KDM2B,RNF34                                      |
| 17 | 56,025,000 | 56,175,000 | 748 | 395  | -0.005524043 | ANAPC5,CAMKK2,P2RX4,RNF34                               |
| 17 | 56,100,000 | 56,250,000 | 749 | 361  | 0.429213247  | ANAPC5,CAMKK2,P2RX4,P2RX7                               |
| 17 | 56,175,000 | 56,325,000 | 750 | 332  | 0.355868675  | IFT81,P2RX4,P2RX7                                       |
| 17 | 56,250,000 | 56,400,000 | 751 | 280  | 0.259481968  | IFT81,P2RX7                                             |
| 17 | 56,325,000 | 56,475,000 | 752 | 283  | 0.862551052  | ATP2A2,IFT81                                            |
| 17 | 56,400,000 | 56,550,000 | 753 | 320  | 1.093079512  | ANAPC7,ATP2A2,IFT81                                     |
| 17 | 56,475,000 | 56,625,000 | 754 | 297  | 0.898006978  | ANAPC7,ARPC3,ATP2A2,FAM216A,GPN3,VPS29                  |
| 17 | 56,550,000 | 56,700,000 | 755 | 313  | 0.634475681  | ANAPC7,ARPC3,FAM216A,GPN3,PPTC7,RAD9B,VPS29             |
| 17 | 56,625,000 | 56,775,000 | 756 | 408  | 0.366288011  | HVCN1,PPTC7,RAD9B,TCTN1                                 |
| 17 | 56,700,000 | 56,850,000 | 757 | 492  | -0.34597938  | HVCN1,PPP1CC,PPTC7,TCTN1                                |
| 17 | 56,775,000 | 56,925,000 | 758 | 674  | -3.798769661 | CCDC63,PPP1CC                                           |
| 17 | 56,850,000 | 57,000,000 | 759 | 772  | -3.343382714 | CCDC63,MYL2                                             |
| 17 | 56,925,000 | 57,075,000 | 760 | 716  | -0.346259047 | CCDC63,CUX2,MYL2                                        |
| 17 | 57,000,000 | 57,150,000 | 761 | 737  | 0.490147674  | CUX2                                                    |
| 17 | 57,075,000 | 57,225,000 | 762 | 597  | 0.557550189  | CUX2                                                    |
| 17 | 57,150,000 | 57,300,000 | 763 | 552  | 0.640529793  | CUX2                                                    |
| 17 | 57,225,000 | 57,375,000 | 764 | 646  | 0.487154153  | CUX2,FAM109A                                            |
| 17 | 57,300,000 | 57,450,000 | 765 | 416  | -0.119656112 | ATXN2,CUX2,FAM109A,SH2B3                                |
| 17 | 57,375,000 | 57,525,000 | 766 | 140  | -0.179890017 | ATXN2,SH2B3                                             |
| 17 | 57,450,000 | 57,600,000 | 767 | 228  | 0.590594494  | ATXN2,BRAP                                              |
| 17 | 57,525,000 | 57,675,000 | 768 | 442  | 0.489543075  | ACAD10,ATXN2,BRAP                                       |
| 17 | 57,600,000 | 57,750,000 | 769 | 396  | 0.327764823  | ACAD10                                                  |
| 17 | 57,675,000 | 57,825,000 | 770 | 544  | 0.62861157   | ACAD10,CIT                                              |
| 17 | 57,750,000 | 57,900,000 | 771 | 816  | 0.873878313  | CIT                                                     |
| 17 | 57,825,000 | 57,975,000 | 772 | 683  | 1.101592716  | CIT                                                     |
| 17 | 57,900,000 | 58,050,000 | 773 | 843  | 1.051020484  | CIT,PRKAB1                                              |
| 17 | 57,975,000 | 58,125,000 | 774 | 1033 | 1.03644712   | CCDC60,CIT,PRKAB1                                       |
| 17 | 58,050,000 | 58,200,000 | 775 | 939  | 1.232492925  | CCDC60                                                  |
| 17 | 58,125,000 | 58,275,000 | 776 | 1053 | 0.991693553  | CCDC60                                                  |
| 17 | 58,200,000 | 58,350,000 | 777 | 834  | 0.664162868  |                                                         |
| 17 | 58,275,000 | 58,425,000 | 778 | 710  | -1.186164296 | HSPB8                                                   |
| 17 | 58,350,000 | 58,500,000 | 779 | 809  | -0.676816121 | HSPB8,SRRM4                                             |
| 17 | 58,425,000 | 58,575,000 | 780 | 848  | 0.862425137  | SRRM4                                                   |
| 17 | 58,500,000 | 58,650,000 | 781 | 978  | 1.173741472  |                                                         |
| 17 | 58,575,000 | 58,725,000 | 782 | 899  | 1.17051756   |                                                         |
| 17 | 58,650,000 | 58,800,000 | 783 | 825  | 1.134162641  |                                                         |
| 17 | 58,725,000 | 58,875,000 | 784 | 671  | 0.089100187  |                                                         |
| 17 | 58,800,000 | 58,950,000 | 785 | 633  | -0.534887743 |                                                         |

|    |            |            |     |      |              |                                      |
|----|------------|------------|-----|------|--------------|--------------------------------------|
| 17 | 58,875,000 | 59,025,000 | 786 | 984  | 0.618363031  |                                      |
| 17 | 58,950,000 | 59,100,000 | 787 | 913  | 1.000177673  | SUDS3                                |
| 17 | 59,025,000 | 59,175,000 | 788 | 479  | 0.778149414  | SUDS3                                |
| 17 | 59,100,000 | 59,250,000 | 789 | 269  | 0.764466335  | SUDS3,TAOK3                          |
| 17 | 59,175,000 | 59,325,000 | 790 | 184  | 1.031392649  | TAOK3                                |
| 17 | 59,250,000 | 59,400,000 | 791 | 323  | 0.530943786  | PEBP1,TAOK3,VSIG10                   |
| 17 | 59,325,000 | 59,475,000 | 792 | 311  | 0.285705954  | PEBP1,RFC5,VSIG10,WSB2               |
| 17 | 59,400,000 | 59,550,000 | 793 | 298  | -0.384809184 | KSR2,RFC5,VSIG10,WSB2                |
| 17 | 59,475,000 | 59,625,000 | 794 | 554  | 0.019091604  | KSR2                                 |
| 17 | 59,550,000 | 59,700,000 | 795 | 583  | 0.261961888  | KSR2                                 |
| 17 | 59,625,000 | 59,775,000 | 796 | 542  | 0.807955292  | KSR2                                 |
| 17 | 59,700,000 | 59,850,000 | 797 | 683  | 1.277216984  | KSR2                                 |
| 17 | 59,775,000 | 59,925,000 | 798 | 665  | 0.576945477  | KSR2                                 |
| 17 | 59,850,000 | 60,000,000 | 799 | 953  | -0.280166068 | KSR2                                 |
| 17 | 59,925,000 | 60,075,000 | 800 | 1233 | -0.19233989  | NOS1                                 |
| 17 | 60,000,000 | 60,150,000 | 801 | 1022 | 0.014107731  | COX7B,NOS1,ENSBTAG00000046747        |
| 17 | 60,075,000 | 60,225,000 | 802 | 669  | 0.565109254  | COX7B,FBXO21,NOS1,ENSBTAG00000046747 |
| 17 | 60,150,000 | 60,300,000 | 803 | 392  | 0.231330598  | FBXO21,TESC                          |
| 17 | 60,225,000 | 60,375,000 | 804 | 551  | 0.752367964  | FBXO21,FBXW8,TESC                    |
| 17 | 60,300,000 | 60,450,000 | 805 | 699  | 0.79817993   | FBXW8,HRK,RNFT2,TESC                 |
| 17 | 60,375,000 | 60,525,000 | 806 | 434  | 0.736756444  | C12orf49,FBXW8,HRK,RNFT2             |
| 17 | 60,450,000 | 60,600,000 | 807 | 308  | 0.227648813  | C12orf49,RNFT2                       |
| 17 | 60,525,000 | 60,675,000 | 808 | 383  | 0.017575023  |                                      |
| 17 | 60,600,000 | 60,750,000 | 809 | 474  | 0.597081346  |                                      |
| 17 | 60,675,000 | 60,825,000 | 810 | 475  | 0.911326278  |                                      |
| 17 | 60,750,000 | 60,900,000 | 811 | 319  | 0.082262723  |                                      |
| 17 | 60,825,000 | 60,975,000 | 812 | 256  | -2.705749419 | MED13L                               |
| 17 | 60,900,000 | 61,050,000 | 813 | 301  | -0.771540471 | MED13L                               |
| 17 | 60,975,000 | 61,125,000 | 814 | 293  | 0.438776072  | MED13L                               |
| 17 | 61,050,000 | 61,200,000 | 815 | 259  | 0.359548318  | MED13L                               |
| 17 | 61,125,000 | 61,275,000 | 816 | 352  | 0.65803374   | MED13L                               |
| 17 | 61,200,000 | 61,350,000 | 817 | 469  | 0.930408509  |                                      |
| 17 | 61,275,000 | 61,425,000 | 818 | 493  | 1.241066563  |                                      |
| 17 | 61,350,000 | 61,500,000 | 819 | 407  | 0.202963409  |                                      |
| 17 | 61,425,000 | 61,575,000 | 820 | 674  | -0.290730237 |                                      |
| 17 | 61,500,000 | 61,650,000 | 821 | 914  | 0.339857324  |                                      |
| 17 | 61,575,000 | 61,725,000 | 822 | 792  | -0.81690625  |                                      |
| 17 | 61,650,000 | 61,800,000 | 823 | 766  | -0.30884562  |                                      |
| 17 | 61,725,000 | 61,875,000 | 824 | 878  | 0.878294856  |                                      |
| 17 | 61,800,000 | 61,950,000 | 825 | 646  | 0.341755548  |                                      |
| 17 | 61,875,000 | 62,025,000 | 826 | 338  | 0.251062436  |                                      |
| 17 | 61,950,000 | 62,100,000 | 827 | 523  | 0.457450884  |                                      |
| 17 | 62,025,000 | 62,175,000 | 828 | 797  | 0.029863479  |                                      |
| 17 | 62,100,000 | 62,250,000 | 829 | 836  | -0.54811233  |                                      |
| 17 | 62,175,000 | 62,325,000 | 830 | 602  | -0.083790135 |                                      |
| 17 | 62,250,000 | 62,400,000 | 831 | 411  | 0.744184669  | TBX3                                 |
| 17 | 62,325,000 | 62,475,000 | 832 | 465  | 0.157485873  | TBX3                                 |
| 17 | 62,400,000 | 62,550,000 | 833 | 535  | 0.120311905  | TBX5                                 |
| 17 | 62,475,000 | 62,625,000 | 834 | 501  | -0.081597588 | TBX5                                 |
| 17 | 62,550,000 | 62,700,000 | 835 | 542  | 0.257096299  | TBX5                                 |
| 17 | 62,625,000 | 62,775,000 | 836 | 756  | 0.876138152  |                                      |
| 17 | 62,700,000 | 62,850,000 | 837 | 715  | 0.427427594  |                                      |
| 17 | 62,775,000 | 62,925,000 | 838 | 591  | -0.145664563 | RBM19                                |

|    |            |            |     |      |              |                                                                    |
|----|------------|------------|-----|------|--------------|--------------------------------------------------------------------|
| 17 | 62,850,000 | 63,000,000 | 839 | 875  | -0.018122527 | RBM19                                                              |
| 17 | 62,925,000 | 63,075,000 | 840 | 1288 | -0.119790346 | RBM19                                                              |
| 17 | 63,000,000 | 63,150,000 | 841 | 1113 | -0.118375613 | RBM19                                                              |
| 17 | 63,075,000 | 63,225,000 | 842 | 729  | 0.157320941  |                                                                    |
| 17 | 63,150,000 | 63,300,000 | 843 | 718  | 0.224277149  | LHX5,SDSL                                                          |
| 17 | 63,225,000 | 63,375,000 | 844 | 687  | -0.399366828 | DTX1,LHX5,PLBD2,SDS,SDSL                                           |
| 17 | 63,300,000 | 63,450,000 | 845 | 734  | -0.390516486 | CCDC42B,DDX54,DTX1,PLBD2,RASAL1,SDS                                |
| 17 | 63,375,000 | 63,525,000 | 846 | 801  | 0.54606372   | CCDC42B,DDX54,DTX1,IQCD,RASAL1,RITA1                               |
| 17 | 63,450,000 | 63,600,000 | 847 | 816  | 0.742903144  | DDX54,IQCD,RITA1,SLC8B1,TPCN1                                      |
| 17 | 63,525,000 | 63,675,000 | 848 | 1139 | 0.711451862  | OAS1Y,OAS1Z,OAS2,SLC8B1,TPCN1                                      |
| 17 | 63,600,000 | 63,750,000 | 849 | 1318 | 0.858091332  | OAS1Y,OAS1Z,OAS2,RPH3A                                             |
| 17 | 63,675,000 | 63,825,000 | 850 | 1081 | 1.100491087  | OAS1Z,RPH3A                                                        |
| 17 | 63,750,000 | 63,900,000 | 851 | 717  | 0.989430049  |                                                                    |
| 17 | 63,825,000 | 63,975,000 | 852 | 613  | -1.808185343 |                                                                    |
| 17 | 63,900,000 | 64,050,000 | 853 | 675  | -1.548320175 | PTPN11                                                             |
| 17 | 63,975,000 | 64,125,000 | 854 | 404  | 0.235188649  | PTPN11,RPL6                                                        |
| 17 | 64,050,000 | 64,200,000 | 855 | 291  | 0.813491958  | PTPN11,RPL6                                                        |
| 17 | 64,125,000 | 64,275,000 | 856 | 279  | 0.996281552  | ENSBTAG00000010958,ENSBTAG00000046730                              |
| 17 | 64,200,000 | 64,350,000 | 857 | 220  | 1.021955937  | TRAFD1,ENSBTAG00000008762,ENSBTAG00000010958,ENSBTAG00000046730    |
| 17 | 64,275,000 | 64,425,000 | 858 | 258  | 0.204199948  | ERP29,NAA25,TRAFD1,ENSBTAG00000008762,ENSBTAG00000046730           |
| 17 | 64,350,000 | 64,500,000 | 859 | 292  | -0.541831291 | ADAM1B,ERP29,NAA25,TMEM116                                         |
| 17 | 64,425,000 | 64,575,000 | 860 | 396  | -1.064151533 | ADAM1B,ALDH2,ERP29,MAPKAPK5,TMEM116                                |
| 17 | 64,500,000 | 64,650,000 | 861 | 465  | -1.784386456 | ALDH2,CCDC64,MAPKAPK5                                              |
| 17 | 64,575,000 | 64,725,000 | 862 | 315  | -1.459697651 | ALDH2,CCDC64,RAB35                                                 |
| 17 | 64,650,000 | 64,800,000 | 863 | 243  | -1.05116813  | CCDC64,GCN1L1,RAB35                                                |
| 17 | 64,725,000 | 64,875,000 | 864 | 302  | -1.041730571 | GCN1L1,PXN,RAB35,RPLP0                                             |
| 17 | 64,800,000 | 64,950,000 | 865 | 422  | -1.386655014 | GCN1L1,MSI1,PLA2G1B,PXN,RPLP0,SIRT4,ENSBTAG00000047084             |
| 17 | 64,875,000 | 65,025,000 | 866 | 381  | -1.705666165 | COX6A1,GATC,MSI1,PLA2G1B,SFRS9,SIRT4,TRIAP1,ENSBTAG00000047084     |
| 17 | 64,950,000 | 65,100,000 | 867 | 182  | -1.939530909 | COQ5,COX6A1,DYNLL1,GATC,RNF10,SFRS9,TRIAP1                         |
| 17 | 65,025,000 | 65,175,000 | 868 | 224  | -0.05007749  | CABP1,COQ5,DYNLL1,POP5,RNF10                                       |
| 17 | 65,100,000 | 65,250,000 | 869 | 407  | 0.392026618  | ACADS,CABP1,MLEC,POP5,RNF10,UNC119B                                |
| 17 | 65,175,000 | 65,325,000 | 870 | 430  | 0.049485115  | ACADS,MLEC,SPPL3,UNC119B                                           |
| 17 | 65,250,000 | 65,400,000 | 871 | 394  | -0.124409226 | SPPL3                                                              |
| 17 | 65,325,000 | 65,475,000 | 872 | 543  | -0.884569602 | C12orf43,HNF1A,OASL,ENSBTAG00000046887                             |
| 17 | 65,400,000 | 65,550,000 | 873 | 555  | -0.272237507 | ANKRD13A,C12orf43,HNF1A,OASL,ENSBTAG00000032047,ENSBTAG00000046887 |
| 17 | 65,475,000 | 65,625,000 | 874 | 486  | 0.737724313  | ANKRD13A,GIT2,TCHP,ENSBTAG00000032047                              |
| 17 | 65,550,000 | 65,700,000 | 875 | 533  | 0.117928086  | ANKRD13A,GIT2,GLTP,TCHP,TRPV4                                      |
| 17 | 65,625,000 | 65,775,000 | 876 | 560  | -0.105338011 | FAM222A,GLTP,TRPV4                                                 |
| 17 | 65,700,000 | 65,850,000 | 877 | 713  | -0.758046289 | FAM222A                                                            |
| 17 | 65,775,000 | 65,925,000 | 878 | 884  | -1.886807439 | MMAB,MVK,UBE3B                                                     |
| 17 | 65,850,000 | 66,000,000 | 879 | 912  | -1.96294614  | KCTD10,MMAB,MVK,MYO1H,UBE3B                                        |
| 17 | 65,925,000 | 66,075,000 | 880 | 957  | -0.632256031 | FOXN4,KCTD10,MYO1H,UBE3B                                           |
| 17 | 66,000,000 | 66,150,000 | 881 | 779  | -0.161232475 | ACACB,FOXN4,MYO1H                                                  |
| 17 | 66,075,000 | 66,225,000 | 882 | 631  | 0.084855399  | ACACB,FOXN4,UNG                                                    |
| 17 | 66,150,000 | 66,300,000 | 883 | 710  | 0.509165211  | ACACB,ALKBH2,SVOP,UNG,USP30                                        |
| 17 | 66,225,000 | 66,375,000 | 884 | 874  | 0.901934026  | ALKBH2,DAO,SVOP,UNG,USP30                                          |
| 17 | 66,300,000 | 66,450,000 | 885 | 668  | 0.854891436  | DAO,SSH1,SVOP                                                      |
| 17 | 66,375,000 | 66,525,000 | 886 | 347  | 0.890141677  | CORO1C,SSH1,ENSBTAG00000023431                                     |

|    |            |            |     |      |              |                                          |
|----|------------|------------|-----|------|--------------|------------------------------------------|
| 17 | 66,450,000 | 66,600,000 | 887 | 513  | 0.386335084  | CORO1C,SELPLG,TMEM119,ENSBTAG00000023431 |
| 17 | 66,525,000 | 66,675,000 | 888 | 856  | -0.350408698 | CORO1C,FICD,SART3,SELPLG,TMEM119         |
| 17 | 66,600,000 | 66,750,000 | 889 | 1174 | -1.429781087 | FICD,ISCU,SART3                          |
| 17 | 66,675,000 | 66,825,000 | 890 | 1116 | -0.618778187 | ISCU                                     |
| 17 | 66,750,000 | 66,900,000 | 891 | 1136 | -0.313350537 | CMLKR1,WSCD2                             |
| 17 | 66,825,000 | 66,975,000 | 892 | 1209 | -0.756431517 | CMLKR1,WSCD2                             |
| 17 | 66,900,000 | 67,050,000 | 893 | 1225 | -0.463295348 | WSCD2                                    |
| 17 | 66,975,000 | 67,125,000 | 894 | 1078 | -0.117995258 |                                          |
| 17 | 67,050,000 | 67,200,000 | 895 | 542  | 0.236065489  |                                          |
| 17 | 67,125,000 | 67,275,000 | 896 | 651  | -0.840045076 | PIWIL3                                   |
| 17 | 67,200,000 | 67,350,000 | 897 | 1061 | 0.058963746  | PIWIL3,SGSM1,TMEM211                     |
| 17 | 67,275,000 | 67,425,000 | 898 | 878  | 0.415571503  | KIAA1671,SGSM1,TMEM211                   |
| 17 | 67,350,000 | 67,500,000 | 899 | 832  | 0.309746596  | KIAA1671                                 |
| 17 | 67,425,000 | 67,575,000 | 900 | 923  | -0.456145985 | CRYBB2,CRYBB3,KIAA1671                   |
| 17 | 67,500,000 | 67,650,000 | 901 | 866  | -0.517503889 | CRYBB2,CRYBB3,KIAA1671                   |
| 17 | 67,575,000 | 67,725,000 | 902 | 663  | 0.282996767  | ADRBK2                                   |
| 17 | 67,650,000 | 67,800,000 | 903 | 630  | 0.934704502  | ADRBK2,MYO18B                            |
| 17 | 67,725,000 | 67,875,000 | 904 | 781  | 0.713940881  | ADRBK2,MYO18B                            |
| 17 | 67,800,000 | 67,950,000 | 905 | 600  | 0.040909486  | MYO18B                                   |
| 17 | 67,875,000 | 68,025,000 | 906 | 399  | -1.255805405 | MYO18B                                   |
| 17 | 67,950,000 | 68,100,000 | 907 | 632  | -1.151693301 | MYO18B                                   |
| 17 | 68,025,000 | 68,175,000 | 908 | 954  | -0.32350862  |                                          |
| 17 | 68,100,000 | 68,250,000 | 909 | 977  | 0.372694141  | SEZ6L                                    |
| 17 | 68,175,000 | 68,325,000 | 910 | 868  | 0.560775293  | SEZ6L                                    |
| 17 | 68,250,000 | 68,400,000 | 911 | 907  | 0.509322654  | ASPHD2,HPS4,SEZ6L,SRRD                   |
| 17 | 68,325,000 | 68,475,000 | 912 | 836  | 0.390830505  | ASPHD2,HPS4,SRRD,TFIP11,TPST2            |
| 17 | 68,400,000 | 68,550,000 | 913 | 657  | -0.99625677  | CRYBA4,CRYBB1,SRRD,TFIP11,TPST2          |
| 17 | 68,475,000 | 68,625,000 | 914 | 889  | -1.958742803 | CRYBA4,CRYBB1,TPST2,ENSBTAG00000031468   |
| 17 | 68,550,000 | 68,700,000 | 915 | 1091 | -0.354202311 | ENSBTAG00000031468                       |
| 17 | 68,625,000 | 68,775,000 | 916 | 871  | -0.302215687 |                                          |
| 17 | 68,700,000 | 68,850,000 | 917 | 455  | -0.849931142 |                                          |
| 17 | 68,775,000 | 68,925,000 | 918 | 399  | 0.200511712  |                                          |
| 17 | 68,850,000 | 69,000,000 | 919 | 560  | 0.449704552  |                                          |
| 17 | 68,925,000 | 69,075,000 | 920 | 690  | 0.86197739   |                                          |
| 17 | 69,000,000 | 69,150,000 | 921 | 721  | 0.431841918  |                                          |
| 17 | 69,075,000 | 69,225,000 | 922 | 629  | -0.223870153 |                                          |
| 17 | 69,150,000 | 69,300,000 | 923 | 588  | -0.066909874 |                                          |
| 17 | 69,225,000 | 69,375,000 | 924 | 500  | -0.315208657 |                                          |
| 17 | 69,300,000 | 69,450,000 | 925 | 363  | 0.231223608  | MN1                                      |
| 17 | 69,375,000 | 69,525,000 | 926 | 303  | 0.438453826  | MN1                                      |
| 17 | 69,450,000 | 69,600,000 | 927 | 185  | -0.031400734 | MN1,PITPNB                               |
| 17 | 69,525,000 | 69,675,000 | 928 | 54   | -3.785382991 | PITPNB,TTC28                             |
| 17 | 69,600,000 | 69,750,000 | 929 | 145  | -1.015804707 | TTC28                                    |
| 17 | 69,675,000 | 69,825,000 | 930 | 240  | 0.301664062  | TTC28                                    |
| 17 | 69,750,000 | 69,900,000 | 931 | 367  | -1.400882103 | TTC28                                    |
| 17 | 69,825,000 | 69,975,000 | 932 | 402  | -1.652659976 | TTC28                                    |
| 17 | 69,900,000 | 70,050,000 | 933 | 287  | -1.156250256 | TTC28                                    |
| 17 | 69,975,000 | 70,125,000 | 934 | 227  | -1.904815571 |                                          |
| 17 | 70,050,000 | 70,200,000 | 935 | 253  | 0.521517667  |                                          |
| 17 | 70,125,000 | 70,275,000 | 936 | 240  | 1.299420208  | CHEK2                                    |
| 17 | 70,200,000 | 70,350,000 | 937 | 586  | 1.006351335  | CCDC117,CHEK2,HSCB,XBP1                  |
| 17 | 70,275,000 | 70,425,000 | 938 | 888  | 0.786227984  | CCDC117,CHEK2,HSCB,XBP1                  |
| 17 | 70,350,000 | 70,500,000 | 939 | 673  | 0.567346168  |                                          |

|    |            |            |     |      |              |                                                                                                              |
|----|------------|------------|-----|------|--------------|--------------------------------------------------------------------------------------------------------------|
| 17 | 70,425,000 | 70,575,000 | 940 | 462  | 0.550560823  | C17H22orf31,KREMEN1,ZNRF3                                                                                    |
| 17 | 70,500,000 | 70,650,000 | 941 | 377  | -0.935045323 | C17H22orf31,EMID1,KREMEN1,ZNRF3                                                                              |
| 17 | 70,575,000 | 70,725,000 | 942 | 335  | -1.137324918 | EMID1,EWSR1,GAS2L1,KREMEN1,RASL10A,RHBDD3                                                                    |
| 17 | 70,650,000 | 70,800,000 | 943 | 338  | 0.135323929  | AP1B1,EMID1,EWSR1,GAS2L1,RASL10A,RHBDD3                                                                      |
| 17 | 70,725,000 | 70,875,000 | 944 | 586  | -0.137023339 | AP1B1,NEFH,NIPSNAP1,RASL10A,THOC5                                                                            |
| 17 | 70,800,000 | 70,950,000 | 945 | 684  | 0.073331889  | NEFH,NF2,NIPSNAP1,THOC5                                                                                      |
| 17 | 70,875,000 | 71,025,000 | 946 | 501  | 0.561540361  | CABP7,NF2,NIPSNAP1,ZMAT5                                                                                     |
| 17 | 70,950,000 | 71,100,000 | 947 | 425  | 0.637987106  | ASCC2,CABP7,NF2,UQCR10,ZMAT5                                                                                 |
| 17 | 71,025,000 | 71,175,000 | 948 | 588  | 0.115511421  | ASCC2,MTMR3,UQCR10,ZMAT5                                                                                     |
| 17 | 71,100,000 | 71,250,000 | 949 | 622  | 0.153477551  | MTMR3                                                                                                        |
| 17 | 71,175,000 | 71,325,000 | 950 | 627  | 0.598932419  | HORMAD2,MTMR3                                                                                                |
| 17 | 71,250,000 | 71,400,000 | 951 | 637  | 0.309879478  | HORMAD2,MTMR3                                                                                                |
| 17 | 71,325,000 | 71,475,000 | 952 | 453  | -0.104817813 | GATSL3,HORMAD2,LIF,OSM,TBC1D10A                                                                              |
| 17 | 71,400,000 | 71,550,000 | 953 | 360  | -0.09770109  | CCDC157,GATSL3,LIF,OSM,RNF215,SF3A1,TBC1D10A                                                                 |
| 17 | 71,475,000 | 71,625,000 | 954 | 474  | -0.367870701 | CCDC157,MTP18,RNF215,SEC14L2,SEC14L3,SEC14L4,SF3A1,ENSBTAG00000037993                                        |
| 17 | 71,550,000 | 71,700,000 | 955 | 663  | 0.63892978   | GAL3ST1,MTP18,PES1,SEC14L2,SEC14L3,SEC14L4,ENSBTAG00000037993                                                |
| 17 | 71,625,000 | 71,775,000 | 956 | 637  | 0.770339664  | C5orf52,DUSP18,GAL3ST1,OSBP2,PES1,SLC35E4,TCN2                                                               |
| 17 | 71,700,000 | 71,850,000 | 957 | 1047 | -0.457218673 | C5orf52,DUSP18,OSBP2,PES1,SLC35E4,TCN2                                                                       |
| 17 | 71,775,000 | 71,925,000 | 958 | 1353 | -0.356561491 | MORC2,OSBP2                                                                                                  |
| 17 | 71,850,000 | 72,000,000 | 959 | 717  | 0.5488159    | MORC2,OSBP2                                                                                                  |
| 17 | 71,925,000 | 72,075,000 | 960 | 406  | 0.278285007  | MORC2,SELM,SMTN                                                                                              |
| 17 | 72,000,000 | 72,150,000 | 961 | 397  | -0.108358965 | INPP5J,LIMK2,PLA2G3,RNF185,SELM,SMTN                                                                         |
| 17 | 72,075,000 | 72,225,000 | 962 | 554  | -1.355072646 | INPP5J,LIMK2,PIK3IP1,PLA2G3,RNF185                                                                           |
| 17 | 72,150,000 | 72,300,000 | 963 | 718  | -0.787340888 | DRG1,EIF4ENIF1,LIMK2,PATZ1,PIK3IP1                                                                           |
| 17 | 72,225,000 | 72,375,000 | 964 | 825  | 0.819557318  | DRG1,EIF4ENIF1,PATZ1,SFI1                                                                                    |
| 17 | 72,300,000 | 72,450,000 | 965 | 1036 | 0.983474558  | EIF4ENIF1,PISD,SFI1                                                                                          |
| 17 | 72,375,000 | 72,525,000 | 966 | 772  | 0.546104006  | DEPDC5,PISD,PRR14L,SFI1                                                                                      |
| 17 | 72,450,000 | 72,600,000 | 967 | 782  | -0.146144347 | DEPDC5,PISD,PRR14L                                                                                           |
| 17 | 72,525,000 | 72,675,000 | 968 | 1053 | -0.948794938 | DEPDC5,YWHAH                                                                                                 |
| 17 | 72,600,000 | 72,750,000 | 969 | 1190 | -1.948163409 | SGLT1,SLC5A4,YWHAH                                                                                           |
| 17 | 72,675,000 | 72,825,000 | 970 | 1243 | -0.924313148 | SGLT1,SLC5A4,ENSBTAG00000046584,ENSBTAG00000048030                                                           |
| 17 | 72,750,000 | 72,900,000 | 971 | 1170 | -0.1695693   | IGLL1,SLC5A4,ENSBTAG00000039237,ENSBTAG00000046584,ENSBTAG00000047529,ENSBTAG00000047986,ENSBTAG00000048030  |
| 17 | 72,825,000 | 72,975,000 | 972 | 1257 | -0.072329486 | IGLL1,ENSBTAG00000039237,ENSBTAG00000047529,ENSBTAG00000047986                                               |
| 17 | 72,900,000 | 73,050,000 | 973 | 1344 | -0.138232323 | IGLL1,ZNF280A,ZNF280B,ENSBTAG00000033890                                                                     |
| 17 | 72,975,000 | 73,125,000 | 974 | 1559 | -0.692708244 | IGLL1,ZNF280A,ZNF280B,ENSBTAG00000033890,ENSBTAG00000047121                                                  |
| 17 | 73,050,000 | 73,200,000 | 975 | 1257 | -1.039961029 | IGLL1,ZNF70,ENSBTAG00000047121                                                                               |
| 17 | 73,125,000 | 73,275,000 | 976 | 683  | -1.610730083 | C22orf15,CHCHD10,DERL3,IGLL1,MIF,MMP11,SMARCB1,VPREB3,ZNF70,ENSBTAG00000018647,ENSBTAG00000047121            |
| 17 | 73,200,000 | 73,350,000 | 977 | 527  | -0.735811929 | C22orf15,CABIN1,CHCHD10,DDT,DERL3,GSTT1,GSTT3,MIF,MMP11,SMARCB1,VPREB3,ENSBTAG00000000170,ENSBTAG00000018647 |
| 17 | 73,275,000 | 73,425,000 | 978 | 459  | -0.043533077 | CABIN1,DDT,GSTT1,GSTT3,SUSD2,ENSBTAG00000000170                                                              |
| 17 | 73,350,000 | 73,500,000 | 979 | 661  | -0.376279269 | C17H22orf13,CABIN1,GGT5,SNRPD3,SUSD2,ENSBTAG00000046900                                                      |

|    |            |            |      |      |              |                                                                                                                 |
|----|------------|------------|------|------|--------------|-----------------------------------------------------------------------------------------------------------------|
| 17 | 73,425,000 | 73,575,000 | 980  | 1018 | -0.212056184 | C17H22orf13,GGT5,SNRPD3,UPB1,ENSBTAG00000046900                                                                 |
| 17 | 73,500,000 | 73,650,000 | 981  | 913  | 0.24566852   | SPECC1L,UPB1,ENSBTAG00000016944                                                                                 |
| 17 | 73,575,000 | 73,725,000 | 982  | 676  | 0.68882129   | BCR,SPECC1L,ENSBTAG00000016944                                                                                  |
| 17 | 73,650,000 | 73,800,000 | 983  | 798  | 0.348695049  | BCR,RAB36,RTDR1,SPECC1L                                                                                         |
| 17 | 73,725,000 | 73,875,000 | 984  | 638  | -1.019038711 | BCR,GNAZ,RAB36,RTDR1,ENSBTAG00000023007                                                                         |
| 17 | 73,800,000 | 73,950,000 | 985  | 754  | -0.960784086 | GNAZ,RTDR1,VPREB,ENSBTAG00000023007                                                                             |
| 17 | 73,875,000 | 74,025,000 | 986  | 845  | -0.133075857 | MAPK1,PPM1F,VPREB,ENSBTAG00000023007,ENSBTAG0000047805                                                          |
| 17 | 73,950,000 | 74,100,000 | 987  | 546  | 0.213587354  | DGCR6L,MAPK1,PPIL2,PPM1F,YPEL1,ENSBTAG00000022019,ENSBTAG00000047805                                            |
| 17 | 74,025,000 | 74,175,000 | 988  | 454  | -0.866843436 | CCDC116,DGCR6L,MAPK1,PPIL2,SDF2L1,UBE2L3,YDJC,YPEL1,ENSBTAG00000022019,ENSBTAG00000047538                       |
| 17 | 74,100,000 | 74,250,000 | 989  | 412  | -0.087054578 | CCDC116,HIC2,PI4KA,SDF2L1,SERPIND1,TMEM191B,UBE2L3,YDJC,ENSBTAG00000047538                                      |
| 17 | 74,175,000 | 74,325,000 | 990  | 452  | -0.055673948 | AIFM3,CRKL,HIC2,LZTR1,PI4KA,SERPIND1,SNAP29,TMEM191B                                                            |
| 17 | 74,250,000 | 74,400,000 | 991  | 485  | 0.397164856  | AIFM3,CRKL,LZTR1,MZT2,P2RX6,PI4KA,SLC7A4,SMPD4,SNAP29,THAP7,TUBA3E,ENSBTAG00000038258                           |
| 17 | 74,325,000 | 74,475,000 | 992  | 432  | 0.64172128   | LZTR1,MED15,MZT2,P2RX6,PRODH,SLC7A4,SMPD4,THAP7,TUBA3E,ENSBTAG00000031018,ENSBTAG00000038258,ENSBTAG00000046165 |
| 17 | 74,400,000 | 74,550,000 | 993  | 415  | -0.050952641 | KLHL22,MED15,PRODH,SCARF2,SMPD4,ENSBTAG00000031018,ENSBTAG00000046165                                           |
| 17 | 74,475,000 | 74,625,000 | 994  | 392  | 0.054887116  | DGCR14,DGCR2,GSC2,KLHL22,MED15,SCARF2,TSSK1B,TSSK2,ZNF74                                                        |
| 17 | 74,550,000 | 74,700,000 | 995  | 407  | -2.289061935 | DGCR14,DGCR2,GSC2,HIRA,SLC25A1,TSSK1B,TSSK2,ZNF74                                                               |
| 17 | 74,625,000 | 74,775,000 | 996  | 550  | -4.025630423 | C22orf39,CDC45L,CLDN5,HIRA,MRPL40,SLC25A1,UFD1L                                                                 |
| 17 | 74,700,000 | 74,850,000 | 997  | 498  | -3.635945858 | C22orf39,CDC45L,CLDN5,GP1BB,MRPL40,SEPT5,UFD1L                                                                  |
| 17 | 74,775,000 | 74,925,000 | 998  | 325  | -2.325314707 | GNB1L,GP1BB,SEPT5,TXNRD2,ENSBTAG00000047896                                                                     |
| 17 | 74,850,000 | 75,000,000 | 999  | 274  | -0.496423523 | ARVCF,COMT,DGCR8,GNB1L,TANGO2,TXNRD2,ENSBTAG00000047896                                                         |
| 17 | 74,925,000 | 75,075,000 | 1000 | 208  | 0.20105397   | ARVCF,COMT,DGCR8,RANBP1,TANGO2,TRMT2A,ZDHHC8,ENSBTAG00000046005,ENSBTAG00000047626                              |
| 17 | 75,000,000 | 75,150,000 | 1001 | 233  | -0.020362582 | DGCR8,RANBP1,RTN4R,TRMT2A,ZDHHC8,ENSBTAG00000046005,ENSBTAG00000046322,ENSBTAG00000047626                       |
| 17 | 75,075,000 | 75,158,596 | 1002 | 163  | -0.164880105 | RTN4R,ENSBTAG00000046322                                                                                        |
| 18 | 0          | 150,000    | 1    | 501  | -0.421973892 |                                                                                                                 |
| 18 | 75,000     | 225,000    | 2    | 495  | -0.640996679 |                                                                                                                 |
| 18 | 150,000    | 300,000    | 3    | 282  | -0.183705528 |                                                                                                                 |
| 18 | 225,000    | 375,000    | 4    | 221  | 0.447321011  |                                                                                                                 |
| 18 | 300,000    | 450,000    | 5    | 411  | 1.008749974  |                                                                                                                 |
| 18 | 375,000    | 525,000    | 6    | 416  | 1.059727389  |                                                                                                                 |
| 18 | 450,000    | 600,000    | 7    | 336  | -1.029254992 |                                                                                                                 |
| 18 | 525,000    | 675,000    | 8    | 560  | -1.06348564  |                                                                                                                 |
| 18 | 600,000    | 750,000    | 9    | 353  | -0.116176048 |                                                                                                                 |
| 18 | 675,000    | 825,000    | 10   | 233  | -2.006675933 |                                                                                                                 |
| 18 | 750,000    | 900,000    | 11   | 937  | -0.710493337 |                                                                                                                 |
| 18 | 825,000    | 975,000    | 12   | 1242 | -0.50423079  |                                                                                                                 |
| 18 | 900,000    | 1,050,000  | 13   | 1188 | -0.446319152 | UQCRFS1                                                                                                         |
| 18 | 975,000    | 1,125,000  | 14   | 1134 | 0.062658259  | UQCRFS1                                                                                                         |
| 18 | 1,050,000  | 1,200,000  | 15   | 868  | 0.083788737  |                                                                                                                 |

|    |           |           |    |      |              |                                                                         |
|----|-----------|-----------|----|------|--------------|-------------------------------------------------------------------------|
| 18 | 1,125,000 | 1,275,000 | 16 | 763  | -0.1525821   |                                                                         |
| 18 | 1,200,000 | 1,350,000 | 17 | 684  | -0.558436343 | VSTM2B                                                                  |
| 18 | 1,275,000 | 1,425,000 | 18 | 1111 | 0.130795639  | VSTM2B                                                                  |
| 18 | 1,350,000 | 1,500,000 | 19 | 967  | 0.452681276  | VAC14                                                                   |
| 18 | 1,425,000 | 1,575,000 | 20 | 421  | -0.683764633 | IL34,MTSS1L,VAC14                                                       |
| 18 | 1,500,000 | 1,650,000 | 21 | 461  | -1.11054816  | IL34,MTSS1L,SF3B3,VAC14                                                 |
| 18 | 1,575,000 | 1,725,000 | 22 | 782  | -0.428827279 | COG4,FUK,IL34,SF3B3                                                     |
| 18 | 1,650,000 | 1,800,000 | 23 | 1160 | 0.163282888  | COG4,DDX19A,FUK,SF3B3,SIAT4B,ENSBTAG00000020714                         |
| 18 | 1,725,000 | 1,875,000 | 24 | 1208 | 0.766027229  | AARS,DDX19A,MRCL,SIAT4B,ENSBTAG00000020714                              |
| 18 | 1,800,000 | 1,950,000 | 25 | 810  | 0.559838825  | AARS,MRCL,PDPR,ENSBTAG00000020714,ENSBTAG00000047937                    |
| 18 | 1,875,000 | 2,025,000 | 26 | 574  | 0.136121095  | GLG1,MRCL,PDPR,ENSBTAG00000047937                                       |
| 18 | 1,950,000 | 2,100,000 | 27 | 683  | 0.442397417  | GLG1,PDPR,ENSBTAG00000004526                                            |
| 18 | 2,025,000 | 2,175,000 | 28 | 630  | -0.7140539   | GLG1,MLKL,RFWD3,ENSBTAG00000004526                                      |
| 18 | 2,100,000 | 2,250,000 | 29 | 789  | -1.892664614 | FA2H,MLKL,RFWD3,ENSBTAG00000004526                                      |
| 18 | 2,175,000 | 2,325,000 | 30 | 878  | -0.603295627 | FA2H,MLKL,WDR59                                                         |
| 18 | 2,250,000 | 2,400,000 | 31 | 573  | -0.10424195  | WDR59,ZNRF1                                                             |
| 18 | 2,325,000 | 2,475,000 | 32 | 509  | 0.076725053  | WDR59,ZNRF1                                                             |
| 18 | 2,400,000 | 2,550,000 | 33 | 585  | 1.037022804  | LDHD,ZFP1,ZNRF1                                                         |
| 18 | 2,475,000 | 2,625,000 | 34 | 361  | 1.080801919  | BCAR1,CTRB1,LDHD,ZFP1,ZNRF1,ENSBTAG00000011995,ENSBTAG000000039914      |
| 18 | 2,550,000 | 2,700,000 | 35 | 404  | 1.112768385  | BCAR1,CFDP1,CTRB1,ENSBTAG00000011995,ENSBTAG000000039914                |
| 18 | 2,625,000 | 2,775,000 | 36 | 597  | 0.981966132  | BCAR1,BCNT,CFDP1                                                        |
| 18 | 2,700,000 | 2,850,000 | 37 | 749  | 0.432539967  | BCNT,CFDP1,P97BCNT2,TMEM170A                                            |
| 18 | 2,775,000 | 2,925,000 | 38 | 822  | -0.175614413 | BCNT,GABARAPL2,P97BCNT2,TMEM170A,TMEM231,ENSBTAG00000040000             |
| 18 | 2,850,000 | 3,000,000 | 39 | 760  | 0.043680676  | ADAT1,EEF1A1,GABARAPL2,KARS,TERF2IP,TMEM170A,TMEM231,ENSBTAG00000040000 |
| 18 | 2,925,000 | 3,075,000 | 40 | 724  | -0.141369214 | ADAT1,EEF1A1,KARS,TERF2IP                                               |
| 18 | 3,000,000 | 3,150,000 | 41 | 867  | -0.689320451 |                                                                         |
| 18 | 3,075,000 | 3,225,000 | 42 | 927  | -1.512829354 |                                                                         |
| 18 | 3,150,000 | 3,300,000 | 43 | 786  | -1.267838155 |                                                                         |
| 18 | 3,225,000 | 3,375,000 | 44 | 869  | 0.241883114  |                                                                         |
| 18 | 3,300,000 | 3,450,000 | 45 | 1172 | 0.595252066  |                                                                         |
| 18 | 3,375,000 | 3,525,000 | 46 | 1205 | 0.347885461  | CNTNAP4                                                                 |
| 18 | 3,450,000 | 3,600,000 | 47 | 1113 | 0.249413953  | CNTNAP4                                                                 |
| 18 | 3,525,000 | 3,675,000 | 48 | 1207 | 0.093008101  | CNTNAP4                                                                 |
| 18 | 3,600,000 | 3,750,000 | 49 | 1312 | 0.402994465  | CNTNAP4                                                                 |
| 18 | 3,675,000 | 3,825,000 | 50 | 1321 | 0.51453861   | CNTNAP4                                                                 |
| 18 | 3,750,000 | 3,900,000 | 51 | 1357 | 0.464231069  |                                                                         |
| 18 | 3,825,000 | 3,975,000 | 52 | 1119 | -0.139480204 |                                                                         |
| 18 | 3,900,000 | 4,050,000 | 53 | 674  | -1.306312652 |                                                                         |
| 18 | 3,975,000 | 4,125,000 | 54 | 910  | 0.428846501  |                                                                         |
| 18 | 4,050,000 | 4,200,000 | 55 | 1303 | 0.631111023  |                                                                         |
| 18 | 4,125,000 | 4,275,000 | 56 | 1221 | 0.287467132  |                                                                         |
| 18 | 4,200,000 | 4,350,000 | 57 | 987  | -0.11216569  |                                                                         |
| 18 | 4,275,000 | 4,425,000 | 58 | 710  | -0.310392316 | ENSBTAG00000012131                                                      |
| 18 | 4,350,000 | 4,500,000 | 59 | 576  | 0.151833273  | MON1B,SYCE1L,ENSBTAG00000012131                                         |
| 18 | 4,425,000 | 4,575,000 | 60 | 869  | 0.830545464  | ADAMTS18,MON1B,SYCE1L                                                   |
| 18 | 4,500,000 | 4,650,000 | 61 | 903  | 0.947831198  | ADAMTS18                                                                |
| 18 | 4,575,000 | 4,725,000 | 62 | 792  | 0.585399903  | ADAMTS18                                                                |
| 18 | 4,650,000 | 4,800,000 | 63 | 705  | 0.259984657  | ADAMTS18                                                                |

|    |           |           |     |      |              |                                       |
|----|-----------|-----------|-----|------|--------------|---------------------------------------|
| 18 | 4,725,000 | 4,875,000 | 64  | 577  | 0.459815435  |                                       |
| 18 | 4,800,000 | 4,950,000 | 65  | 739  | 0.708253688  |                                       |
| 18 | 4,875,000 | 5,025,000 | 66  | 1060 | 0.796255567  | NUDT7                                 |
| 18 | 4,950,000 | 5,100,000 | 67  | 1324 | 0.127734357  | NUDT7,VAT1L                           |
| 18 | 5,025,000 | 5,175,000 | 68  | 1433 | -1.325846109 | VAT1L                                 |
| 18 | 5,100,000 | 5,250,000 | 69  | 1560 | -1.543586861 | CLEC3A,VAT1L                          |
| 18 | 5,175,000 | 5,325,000 | 70  | 1230 | -0.704769878 | CLEC3A,VAT1L,WWOX                     |
| 18 | 5,250,000 | 5,400,000 | 71  | 869  | -0.638814444 | CLEC3A,WWOX                           |
| 18 | 5,325,000 | 5,475,000 | 72  | 1046 | -0.321008837 | WWOX                                  |
| 18 | 5,400,000 | 5,550,000 | 73  | 1212 | 0.100692222  | WWOX                                  |
| 18 | 5,475,000 | 5,625,000 | 74  | 1307 | 0.882423146  | WWOX                                  |
| 18 | 5,550,000 | 5,700,000 | 75  | 1192 | 1.045218063  | WWOX                                  |
| 18 | 5,625,000 | 5,775,000 | 76  | 998  | 1.095494912  | WWOX                                  |
| 18 | 5,700,000 | 5,850,000 | 77  | 980  | 0.846615787  | WWOX                                  |
| 18 | 5,775,000 | 5,925,000 | 78  | 841  | 0.706348849  | WWOX                                  |
| 18 | 5,850,000 | 6,000,000 | 79  | 870  | 0.620615108  | WWOX                                  |
| 18 | 5,925,000 | 6,075,000 | 80  | 761  | 0.501777618  | WWOX                                  |
| 18 | 6,000,000 | 6,150,000 | 81  | 640  | -0.75354508  | WWOX                                  |
| 18 | 6,075,000 | 6,225,000 | 82  | 1049 | -1.932187489 | WWOX                                  |
| 18 | 6,150,000 | 6,300,000 | 83  | 1092 | -1.267129894 | WWOX                                  |
| 18 | 6,225,000 | 6,375,000 | 84  | 946  | -0.753255754 |                                       |
| 18 | 6,300,000 | 6,450,000 | 85  | 1111 | -0.272165258 |                                       |
| 18 | 6,375,000 | 6,525,000 | 86  | 1100 | 0.612369467  |                                       |
| 18 | 6,450,000 | 6,600,000 | 87  | 897  | 0.841782307  | MAF                                   |
| 18 | 6,525,000 | 6,675,000 | 88  | 963  | 0.599111412  | MAF                                   |
| 18 | 6,600,000 | 6,750,000 | 89  | 786  | 0.691163304  |                                       |
| 18 | 6,675,000 | 6,825,000 | 90  | 825  | 0.861101997  |                                       |
| 18 | 6,750,000 | 6,900,000 | 91  | 1242 | 0.864445495  |                                       |
| 18 | 6,825,000 | 6,975,000 | 92  | 1188 | 0.437860306  |                                       |
| 18 | 6,900,000 | 7,050,000 | 93  | 878  | -0.623858233 |                                       |
| 18 | 6,975,000 | 7,125,000 | 94  | 649  | -0.093523812 |                                       |
| 18 | 7,050,000 | 7,200,000 | 95  | 848  | 0.676424618  |                                       |
| 18 | 7,125,000 | 7,275,000 | 96  | 831  | 0.911812512  |                                       |
| 18 | 7,200,000 | 7,350,000 | 97  | 498  | 0.901813741  |                                       |
| 18 | 7,275,000 | 7,425,000 | 98  | 517  | -0.472019163 | CDYL2,DYNLRB2                         |
| 18 | 7,350,000 | 7,500,000 | 99  | 828  | -0.104084989 | CDYL2,DYNLRB2                         |
| 18 | 7,425,000 | 7,575,000 | 100 | 1046 | 0.636831413  | CDYL2                                 |
| 18 | 7,500,000 | 7,650,000 | 101 | 1101 | 0.661933957  |                                       |
| 18 | 7,575,000 | 7,725,000 | 102 | 1009 | 0.574587396  | CMC2                                  |
| 18 | 7,650,000 | 7,800,000 | 103 | 644  | 0.401392199  | ATMIN,C16orf46,CENPN,CMC2,GCSH        |
| 18 | 7,725,000 | 7,875,000 | 104 | 472  | -0.259302248 | ATMIN,C16orf46,CENPN,CMC2,GCSH,PKD1L2 |
| 18 | 7,800,000 | 7,950,000 | 105 | 731  | 0.286620572  | BCMO1,GCSH,PKD1L2                     |
| 18 | 7,875,000 | 8,025,000 | 106 | 1077 | 0.728967098  | BCMO1,GAN,PKD1L2                      |
| 18 | 7,950,000 | 8,100,000 | 107 | 963  | 0.711661857  | BCMO1,GAN                             |
| 18 | 8,025,000 | 8,175,000 | 108 | 628  | 0.363327682  | GAN                                   |
| 18 | 8,100,000 | 8,250,000 | 109 | 860  | 0.659909694  | CMIP                                  |
| 18 | 8,175,000 | 8,325,000 | 110 | 1024 | 0.828954179  | CMIP                                  |
| 18 | 8,250,000 | 8,400,000 | 111 | 1125 | 0.817475159  | CMIP                                  |
| 18 | 8,325,000 | 8,475,000 | 112 | 1144 | 0.304615834  | PLCG2,ENSBTAG00000048177              |
| 18 | 8,400,000 | 8,550,000 | 113 | 865  | 0.266819121  | PLCG2,ENSBTAG00000048177              |
| 18 | 8,475,000 | 8,625,000 | 114 | 816  | -0.690781363 | PLCG2,SDR42E1                         |
| 18 | 8,550,000 | 8,700,000 | 115 | 631  | -2.802610122 | HSD17B2,SDR42E1                       |
| 18 | 8,625,000 | 8,775,000 | 116 | 413  | -2.286107467 | HSD17B2,MPHOSPH6                      |



|    |            |            |     |      |              |                                                |
|----|------------|------------|-----|------|--------------|------------------------------------------------|
| 18 | 8,700,000  | 8,850,000  | 117 | 426  | 0.087183418  | HSD17B2,MPHOSPH6                               |
| 18 | 8,775,000  | 8,925,000  | 118 | 552  | 0.549345904  | MPHOSPH6                                       |
| 18 | 8,850,000  | 9,000,000  | 119 | 704  | 1.090285341  |                                                |
| 18 | 8,925,000  | 9,075,000  | 120 | 810  | 0.493167133  |                                                |
| 18 | 9,000,000  | 9,150,000  | 121 | 993  | 0.249633019  |                                                |
| 18 | 9,075,000  | 9,225,000  | 122 | 1008 | 0.659862286  |                                                |
| 18 | 9,150,000  | 9,300,000  | 123 | 762  | 0.266140679  |                                                |
| 18 | 9,225,000  | 9,375,000  | 124 | 647  | 0.171108467  |                                                |
| 18 | 9,300,000  | 9,450,000  | 125 | 857  | 0.841666898  |                                                |
| 18 | 9,375,000  | 9,525,000  | 126 | 841  | 0.529089228  | CDH13                                          |
| 18 | 9,450,000  | 9,600,000  | 127 | 980  | 0.030867121  | CDH13                                          |
| 18 | 9,525,000  | 9,675,000  | 128 | 1396 | 0.37559703   | CDH13                                          |
| 18 | 9,600,000  | 9,750,000  | 129 | 1243 | 0.384793851  | CDH13                                          |
| 18 | 9,675,000  | 9,825,000  | 130 | 785  | -0.170806872 | CDH13                                          |
| 18 | 9,750,000  | 9,900,000  | 131 | 820  | 0.31179528   | CDH13                                          |
| 18 | 9,825,000  | 9,975,000  | 132 | 773  | 0.134782671  | CDH13                                          |
| 18 | 9,900,000  | 10,050,000 | 133 | 923  | -0.231908277 | CDH13                                          |
| 18 | 9,975,000  | 10,125,000 | 134 | 1145 | -0.793926377 | CDH13                                          |
| 18 | 10,050,000 | 10,200,000 | 135 | 727  | -1.525238033 | CDH13,HSBP1                                    |
| 18 | 10,125,000 | 10,275,000 | 136 | 655  | 0.576064376  | CDH13,HSBP1,MLYCD                              |
| 18 | 10,200,000 | 10,350,000 | 137 | 825  | 1.068734448  | MLYCD,NECAB2,OSGIN1                            |
| 18 | 10,275,000 | 10,425,000 | 138 | 643  | 0.974987757  | MBTPS1,NECAB2,OSGIN1,SLC38A8                   |
| 18 | 10,350,000 | 10,500,000 | 139 | 598  | 0.817604371  | ADAD2,DNAAF1,HSDL1,MBTPS1,NECAB2,SLC38A8,TAF1C |
| 18 | 10,425,000 | 10,575,000 | 140 | 690  | 0.480073923  | ADAD2,DNAAF1,HSDL1,KCNG4,MBTPS1,TAF1C          |
| 18 | 10,500,000 | 10,650,000 | 141 | 489  | -0.336299622 | ATP2C2,KCNG4                                   |
| 18 | 10,575,000 | 10,725,000 | 142 | 762  | -0.409895842 | ATP2C2,TLDC1                                   |
| 18 | 10,650,000 | 10,800,000 | 143 | 903  | -1.350243977 | ATP2C2,COTL1,TLDC1                             |
| 18 | 10,725,000 | 10,875,000 | 144 | 578  | -1.597450151 | COTL1,KLHL36                                   |
| 18 | 10,800,000 | 10,950,000 | 145 | 515  | 0.970781041  | COTL1,KLHL36,USP10                             |
| 18 | 10,875,000 | 11,025,000 | 146 | 383  | 1.159419528  | CRISPLD2,USP10                                 |
| 18 | 10,950,000 | 11,100,000 | 147 | 290  | 0.958808962  | CRISPLD2                                       |
| 18 | 11,025,000 | 11,175,000 | 148 | 443  | -1.772907785 | CRISPLD2,KIAA0513,ZDHHC7                       |
| 18 | 11,100,000 | 11,250,000 | 149 | 486  | -1.88018939  | FAM92B,KIAA0513,ZDHHC7                         |
| 18 | 11,175,000 | 11,325,000 | 150 | 503  | 0.481075746  | FAM92B,KIAA0513                                |
| 18 | 11,250,000 | 11,400,000 | 151 | 795  | 0.690785151  |                                                |
| 18 | 11,325,000 | 11,475,000 | 152 | 842  | 0.416147363  |                                                |
| 18 | 11,400,000 | 11,550,000 | 153 | 734  | 0.271602869  |                                                |
| 18 | 11,475,000 | 11,625,000 | 154 | 574  | 0.688814161  |                                                |
| 18 | 11,550,000 | 11,700,000 | 155 | 256  | 1.109221616  | GINS2,GSE1                                     |
| 18 | 11,625,000 | 11,775,000 | 156 | 293  | -0.908762699 | GINS2,GSE1                                     |
| 18 | 11,700,000 | 11,850,000 | 157 | 308  | -1.014744593 | COX4I1,EMC8,GINS2                              |
| 18 | 11,775,000 | 11,925,000 | 158 | 308  | -1.180596906 | COX4I1,EMC8,IRF8                               |
| 18 | 11,850,000 | 12,000,000 | 159 | 441  | -0.235168929 | IRF8                                           |
| 18 | 11,925,000 | 12,075,000 | 160 | 572  | 0.8223827    |                                                |
| 18 | 12,000,000 | 12,150,000 | 161 | 628  | 0.536367898  |                                                |
| 18 | 12,075,000 | 12,225,000 | 162 | 412  | -1.057176085 |                                                |
| 18 | 12,150,000 | 12,300,000 | 163 | 363  | -0.589367433 |                                                |
| 18 | 12,225,000 | 12,375,000 | 164 | 460  | 0.872722966  |                                                |
| 18 | 12,300,000 | 12,450,000 | 165 | 367  | 0.307474824  | FOXC2,FOXF1,FOXL1,MTHFSD                       |
| 18 | 12,375,000 | 12,525,000 | 166 | 288  | 0.198785188  | FOXC2,FOXF1,FOXL1,MTHFSD                       |
| 18 | 12,450,000 | 12,600,000 | 167 | 278  | 0.440138895  |                                                |
| 18 | 12,525,000 | 12,675,000 | 168 | 407  | 0.006605602  |                                                |

|    |            |            |     |      |              |                                                                   |
|----|------------|------------|-----|------|--------------|-------------------------------------------------------------------|
| 18 | 12,600,000 | 12,750,000 | 169 | 516  | 0.097063876  |                                                                   |
| 18 | 12,675,000 | 12,825,000 | 170 | 406  | 0.359123528  |                                                                   |
| 18 | 12,750,000 | 12,900,000 | 171 | 293  | 0.703225267  |                                                                   |
| 18 | 12,825,000 | 12,975,000 | 172 | 260  | 1.026057724  | C16orf95,FBXO31                                                   |
| 18 | 12,900,000 | 13,050,000 | 173 | 196  | 1.180861811  | C16orf95,FBXO31,MAP1LC3B,ZCCHC14                                  |
| 18 | 12,975,000 | 13,125,000 | 174 | 132  | 1.268179535  | FBXO31,MAP1LC3B,ZCCHC14                                           |
| 18 | 13,050,000 | 13,200,000 | 175 | 260  | 0.892772763  | JPH3,ZCCHC14                                                      |
| 18 | 13,125,000 | 13,275,000 | 176 | 762  | -0.076332313 | JPH3,KLHDC4                                                       |
| 18 | 13,200,000 | 13,350,000 | 177 | 1049 | -0.541098966 | JPH3,KLHDC4,LAT                                                   |
| 18 | 13,275,000 | 13,425,000 | 178 | 763  | -0.000241292 | CA5A,KLHDC4,LAT                                                   |
| 18 | 13,350,000 | 13,500,000 | 179 | 503  | 0.509305349  | BANP,CA5A,LAT                                                     |
| 18 | 13,425,000 | 13,575,000 | 180 | 402  | -0.22960751  | BANP                                                              |
| 18 | 13,500,000 | 13,650,000 | 181 | 644  | -1.703763256 |                                                                   |
| 18 | 13,575,000 | 13,725,000 | 182 | 623  | -1.780673559 |                                                                   |
| 18 | 13,650,000 | 13,800,000 | 183 | 333  | -1.190077964 | ZNF469                                                            |
| 18 | 13,725,000 | 13,875,000 | 184 | 318  | -0.656947073 | ZFPM1,ZNF469,ENSBTAG00000018507                                   |
| 18 | 13,800,000 | 13,950,000 | 185 | 305  | -0.131975046 | CYBA,IL17C,MVD,ZC3H18,ZFPM1,ENSBTAG00000018507                    |
| 18 | 13,875,000 | 14,025,000 | 186 | 556  | 0.399477527  | CTU2,CYBA,IL17C,MVD,PIEZO1,RNF166,SNAI3,ZC3H18                    |
| 18 | 13,950,000 | 14,100,000 | 187 | 694  | 0.313035684  | APRT,CBFA2T3,CDT1,CTU2,GALNS,PABPN1L,PIEZO1,RNF166,SNAI3,TRAPPC2L |
| 18 | 14,025,000 | 14,175,000 | 188 | 414  | -0.310114656 | APRT,CBFA2T3,CDT1,GALNS,PABPN1L,TRAPPC2L                          |
| 18 | 14,100,000 | 14,250,000 | 189 | 297  | -0.280819334 | CBFA2T3                                                           |
| 18 | 14,175,000 | 14,325,000 | 190 | 333  | 0.240675966  | ACSF3,CDH15,MGC157263                                             |
| 18 | 14,250,000 | 14,400,000 | 191 | 279  | -2.45808652  | ACSF3,ANKRD11,CDH15,MGC157263                                     |
| 18 | 14,325,000 | 14,475,000 | 192 | 251  | -4.169723495 | ANKRD11,MGC157263                                                 |
| 18 | 14,400,000 | 14,550,000 | 193 | 265  | -4.098142994 | ANKRD11,CPNE7,RPL13,SPG7                                          |
| 18 | 14,475,000 | 14,625,000 | 194 | 189  | -4.456206139 | CDK10,CHMP1A,CPNE7,DPEP1,RPL13,SPATA2L,SPG7                       |
| 18 | 14,550,000 | 14,700,000 | 195 | 77   | -4.98248442  | CDK10,CHMP1A,CPNE7,DPEP1,FANCA,SPATA2L,SPIRE2,VPS9D1,ZNF276       |
| 18 | 14,625,000 | 14,775,000 | 196 | 69   | -0.938049309 | FANCA,MC1R,SPIRE2,TCF25,TUBB3,VPS9D1,ZNF276                       |
| 18 | 14,700,000 | 14,850,000 | 197 | 63   | -0.309391249 | DBNDD1,DEF8,GAS8,MC1R,SPIRE2,TCF25,TUBB3,ENSBTAG00000038051       |
| 18 | 14,775,000 | 14,925,000 | 198 | 73   | -4.105383604 | DBNDD1,DEF8,GAS8,ENSBTAG00000038051                               |
| 18 | 14,850,000 | 15,000,000 | 199 | 225  | -1.855584568 | SHCBP1                                                            |
| 18 | 14,925,000 | 15,075,000 | 200 | 426  | 0.279231322  | ORC6,SHCBP1,VPS35                                                 |
| 18 | 15,000,000 | 15,150,000 | 201 | 553  | -0.302298741 | MYLK3,ORC6,VPS35,ENSBTAG00000023726                               |
| 18 | 15,075,000 | 15,225,000 | 202 | 457  | -0.687200177 | C18H16orf87,MYLK3,ORC6,ENSBTAG00000023726                         |
| 18 | 15,150,000 | 15,300,000 | 203 | 676  | 0.661224808  | C18H16orf87                                                       |
| 18 | 15,225,000 | 15,375,000 | 204 | 1109 | 0.607529983  | GPT2                                                              |
| 18 | 15,300,000 | 15,450,000 | 205 | 1007 | -0.528736462 | DNAJA2,GPT2                                                       |
| 18 | 15,375,000 | 15,525,000 | 206 | 737  | -0.966517623 | DNAJA2,GPT2                                                       |
| 18 | 15,450,000 | 15,600,000 | 207 | 667  | -1.126411193 | NETO2                                                             |
| 18 | 15,525,000 | 15,675,000 | 208 | 533  | -1.60687948  | ITFG1,NETO2                                                       |
| 18 | 15,600,000 | 15,750,000 | 209 | 526  | 0.456733278  | ITFG1                                                             |
| 18 | 15,675,000 | 15,825,000 | 210 | 843  | 0.323643038  | ITFG1                                                             |
| 18 | 15,750,000 | 15,900,000 | 211 | 608  | -0.514053221 | ITFG1                                                             |
| 18 | 15,825,000 | 15,975,000 | 212 | 214  | -2.639925541 | ITFG1,PHKB                                                        |
| 18 | 15,900,000 | 16,050,000 | 213 | 238  | -1.261734212 | ITFG1,PHKB                                                        |
| 18 | 15,975,000 | 16,125,000 | 214 | 293  | 0.618893659  | PHKB                                                              |
| 18 | 16,050,000 | 16,200,000 | 215 | 702  | -0.134663639 | PHKB                                                              |
| 18 | 16,125,000 | 16,275,000 | 216 | 1080 | -0.50025405  | PHKB                                                              |
| 18 | 16,200,000 | 16,350,000 | 217 | 1044 | 0.172006504  |                                                                   |
| 18 | 16,275,000 | 16,425,000 | 218 | 819  | 0.936569165  |                                                                   |

|    |            |            |     |      |              |                                       |
|----|------------|------------|-----|------|--------------|---------------------------------------|
| 18 | 16,350,000 | 16,500,000 | 219 | 521  | 1.169045456  |                                       |
| 18 | 16,425,000 | 16,575,000 | 220 | 512  | 1.007838575  | ENSBTAG00000044191                    |
| 18 | 16,500,000 | 16,650,000 | 221 | 757  | 0.669624003  | ENSBTAG00000044191                    |
| 18 | 16,575,000 | 16,725,000 | 222 | 835  | 0.143792291  | ENSBTAG00000010858,ENSBTAG00000044191 |
| 18 | 16,650,000 | 16,800,000 | 223 | 594  | 0.167633572  | LONP2,ENSBTAG00000010858              |
| 18 | 16,725,000 | 16,875,000 | 224 | 592  | 0.728741276  | LONP2,SIAH1,ENSBTAG00000010858        |
| 18 | 16,800,000 | 16,950,000 | 225 | 650  | 0.517009549  | LONP2,SIAH1                           |
| 18 | 16,875,000 | 17,025,000 | 226 | 648  | 0.793733355  |                                       |
| 18 | 16,950,000 | 17,100,000 | 227 | 550  | 0.985235238  | N4BP1                                 |
| 18 | 17,025,000 | 17,175,000 | 228 | 623  | 0.344779422  | N4BP1                                 |
| 18 | 17,100,000 | 17,250,000 | 229 | 802  | 0.468192789  |                                       |
| 18 | 17,175,000 | 17,325,000 | 230 | 752  | 0.893447501  |                                       |
| 18 | 17,250,000 | 17,400,000 | 231 | 921  | 0.930944784  |                                       |
| 18 | 17,325,000 | 17,475,000 | 232 | 1171 | 0.010219389  |                                       |
| 18 | 17,400,000 | 17,550,000 | 233 | 1059 | -0.632835014 |                                       |
| 18 | 17,475,000 | 17,625,000 | 234 | 784  | -0.365565807 |                                       |
| 18 | 17,550,000 | 17,700,000 | 235 | 1123 | -0.032474078 |                                       |
| 18 | 17,625,000 | 17,775,000 | 236 | 981  | 0.139186421  |                                       |
| 18 | 17,700,000 | 17,850,000 | 237 | 508  | -0.430376958 | CBLN1                                 |
| 18 | 17,775,000 | 17,925,000 | 238 | 541  | -0.834205219 | C18H16orf78,CBLN1                     |
| 18 | 17,850,000 | 18,000,000 | 239 | 808  | 0.292011759  | C18H16orf78                           |
| 18 | 17,925,000 | 18,075,000 | 240 | 827  | 0.626429605  | C18H16orf78,ZNF423                    |
| 18 | 18,000,000 | 18,150,000 | 241 | 854  | -0.966824496 | ZNF423                                |
| 18 | 18,075,000 | 18,225,000 | 242 | 1013 | -0.800642385 | ZNF423                                |
| 18 | 18,150,000 | 18,300,000 | 243 | 827  | 0.271457903  | ZNF423                                |
| 18 | 18,225,000 | 18,375,000 | 244 | 710  | 0.351937573  | ZNF423                                |
| 18 | 18,300,000 | 18,450,000 | 245 | 596  | 0.354406778  | ZNF423                                |
| 18 | 18,375,000 | 18,525,000 | 246 | 463  | 0.748349124  | ZNF423                                |
| 18 | 18,450,000 | 18,600,000 | 247 | 419  | 0.54228183   | CNEP1R1,HEATR3                        |
| 18 | 18,525,000 | 18,675,000 | 248 | 645  | 0.554836612  | CNEP1R1,HEATR3                        |
| 18 | 18,600,000 | 18,750,000 | 249 | 647  | 0.428606301  | ADCY7,HEATR3,PAPD5                    |
| 18 | 18,675,000 | 18,825,000 | 250 | 494  | 0.357328621  | ADCY7,BRD7,PAPD5                      |
| 18 | 18,750,000 | 18,900,000 | 251 | 460  | 0.578839244  | ADCY7,BRD7                            |
| 18 | 18,825,000 | 18,975,000 | 252 | 360  | -0.054869856 | BRD7                                  |
| 18 | 18,900,000 | 19,050,000 | 253 | 424  | -0.918173211 | NKD1                                  |
| 18 | 18,975,000 | 19,125,000 | 254 | 479  | -1.080034025 | NKD1                                  |
| 18 | 19,050,000 | 19,200,000 | 255 | 502  | -2.902626526 | NKD1,NOD2,SNX20                       |
| 18 | 19,125,000 | 19,275,000 | 256 | 453  | -3.301254164 | CYLD,NOD2,SNX20                       |
| 18 | 19,200,000 | 19,350,000 | 257 | 546  | 0.590030143  | CYLD,NOD2                             |
| 18 | 19,275,000 | 19,425,000 | 258 | 895  | 0.483004287  | CYLD                                  |
| 18 | 19,350,000 | 19,500,000 | 259 | 872  | 0.634883797  |                                       |
| 18 | 19,425,000 | 19,575,000 | 260 | 904  | 0.831989985  |                                       |
| 18 | 19,500,000 | 19,650,000 | 261 | 986  | 0.391652859  | SALL1                                 |
| 18 | 19,575,000 | 19,725,000 | 262 | 888  | -0.47665735  | SALL1                                 |
| 18 | 19,650,000 | 19,800,000 | 263 | 1061 | -0.121926426 | SALL1                                 |
| 18 | 19,725,000 | 19,875,000 | 264 | 1040 | 0.938286564  |                                       |
| 18 | 19,800,000 | 19,950,000 | 265 | 1214 | 0.991881783  |                                       |
| 18 | 19,875,000 | 20,025,000 | 266 | 1265 | 0.466096311  |                                       |
| 18 | 19,950,000 | 20,100,000 | 267 | 962  | -0.702266175 |                                       |
| 18 | 20,025,000 | 20,175,000 | 268 | 756  | -0.347037364 |                                       |
| 18 | 20,100,000 | 20,250,000 | 269 | 775  | 0.104421668  |                                       |
| 18 | 20,175,000 | 20,325,000 | 270 | 710  | 0.42534333   | NKX6-2                                |
| 18 | 20,250,000 | 20,400,000 | 271 | 463  | 0.053740224  | NKX6-2                                |

|    |            |            |     |     |              |                                                  |
|----|------------|------------|-----|-----|--------------|--------------------------------------------------|
| 18 | 20,325,000 | 20,475,000 | 272 | 601 | 0.08791602   |                                                  |
| 18 | 20,400,000 | 20,550,000 | 273 | 919 | -0.768662163 |                                                  |
| 18 | 20,475,000 | 20,625,000 | 274 | 677 | -1.287230262 |                                                  |
| 18 | 20,550,000 | 20,700,000 | 275 | 292 | 0.333833187  |                                                  |
| 18 | 20,625,000 | 20,775,000 | 276 | 656 | 0.529483736  |                                                  |
| 18 | 20,700,000 | 20,850,000 | 277 | 773 | 0.548274388  |                                                  |
| 18 | 20,775,000 | 20,925,000 | 278 | 540 | 0.4070215    |                                                  |
| 18 | 20,850,000 | 21,000,000 | 279 | 464 | 0.022546065  |                                                  |
| 18 | 20,925,000 | 21,075,000 | 280 | 411 | -0.008205922 | TOX3                                             |
| 18 | 21,000,000 | 21,150,000 | 281 | 480 | 0.950811302  | TOX3                                             |
| 18 | 21,075,000 | 21,225,000 | 282 | 721 | 0.993381141  | TOX3                                             |
| 18 | 21,150,000 | 21,300,000 | 283 | 926 | -0.528704582 |                                                  |
| 18 | 21,225,000 | 21,375,000 | 284 | 724 | -1.981305999 |                                                  |
| 18 | 21,300,000 | 21,450,000 | 285 | 452 | -0.081958272 |                                                  |
| 18 | 21,375,000 | 21,525,000 | 286 | 647 | 0.418732553  |                                                  |
| 18 | 21,450,000 | 21,600,000 | 287 | 643 | 0.17502182   |                                                  |
| 18 | 21,525,000 | 21,675,000 | 288 | 455 | -0.239062531 |                                                  |
| 18 | 21,600,000 | 21,750,000 | 289 | 375 | 0.041259278  | CHD9                                             |
| 18 | 21,675,000 | 21,825,000 | 290 | 230 | 0.195201558  | CHD9                                             |
| 18 | 21,750,000 | 21,900,000 | 291 | 285 | -0.505850654 | CHD9,RBL2                                        |
| 18 | 21,825,000 | 21,975,000 | 292 | 537 | 0.066590155  | AKTIP,CHD9,RBL2                                  |
| 18 | 21,900,000 | 22,050,000 | 293 | 668 | 0.366506279  | AKTIP,RBL2,RPGRIP1L                              |
| 18 | 21,975,000 | 22,125,000 | 294 | 505 | 0.145510584  | FTO,RPGRIP1L                                     |
| 18 | 22,050,000 | 22,200,000 | 295 | 529 | -0.36546404  | FTO,RPGRIP1L                                     |
| 18 | 22,125,000 | 22,275,000 | 296 | 725 | -0.388571576 | FTO                                              |
| 18 | 22,200,000 | 22,350,000 | 297 | 677 | -0.631011167 | FTO                                              |
| 18 | 22,275,000 | 22,425,000 | 298 | 596 | -0.924064178 | FTO                                              |
| 18 | 22,350,000 | 22,500,000 | 299 | 467 | -0.42098322  | FTO                                              |
| 18 | 22,425,000 | 22,575,000 | 300 | 375 | -0.338522854 | FTO                                              |
| 18 | 22,500,000 | 22,650,000 | 301 | 534 | -0.058224984 | FTO                                              |
| 18 | 22,575,000 | 22,725,000 | 302 | 469 | -0.196090279 | IRX3                                             |
| 18 | 22,650,000 | 22,800,000 | 303 | 363 | -1.046040017 | IRX3                                             |
| 18 | 22,725,000 | 22,875,000 | 304 | 628 | 0.108683105  |                                                  |
| 18 | 22,800,000 | 22,950,000 | 305 | 585 | 0.862793034  |                                                  |
| 18 | 22,875,000 | 23,025,000 | 306 | 368 | 0.664427434  |                                                  |
| 18 | 22,950,000 | 23,100,000 | 307 | 397 | 0.761171117  |                                                  |
| 18 | 23,025,000 | 23,175,000 | 308 | 758 | -0.275284875 |                                                  |
| 18 | 23,100,000 | 23,250,000 | 309 | 918 | -0.541463535 |                                                  |
| 18 | 23,175,000 | 23,325,000 | 310 | 548 | 0.372023398  | IRX5                                             |
| 18 | 23,250,000 | 23,400,000 | 311 | 637 | 0.292462543  | IRX5                                             |
| 18 | 23,325,000 | 23,475,000 | 312 | 824 | 0.467758565  |                                                  |
| 18 | 23,400,000 | 23,550,000 | 313 | 708 | 0.683145442  |                                                  |
| 18 | 23,475,000 | 23,625,000 | 314 | 831 | 0.117489276  |                                                  |
| 18 | 23,550,000 | 23,700,000 | 315 | 892 | 0.161643374  | IRX6                                             |
| 18 | 23,625,000 | 23,775,000 | 316 | 879 | -0.667961153 | IRX6                                             |
| 18 | 23,700,000 | 23,850,000 | 317 | 898 | -1.608608945 | MMP2                                             |
| 18 | 23,775,000 | 23,925,000 | 318 | 697 | -0.851269083 | LPCAT2,MMP2                                      |
| 18 | 23,850,000 | 24,000,000 | 319 | 671 | -0.625807769 | LPCAT2,MMP2,SLC6A2                               |
| 18 | 23,925,000 | 24,075,000 | 320 | 560 | -1.027500051 | CES1,LPCAT2,SLC6A2,ENSBTAG00000001851            |
| 18 | 24,000,000 | 24,150,000 | 321 | 450 | 0.067091909  | CES1,MT1A,MT1E,MT2,MT3,SLC6A2,ENSBTAG00000001851 |
| 18 | 24,075,000 | 24,225,000 | 322 | 527 | -0.275917103 | BBS2,MT1A,MT1E,MT2,MT3,MT4,ENSBTAG00000001851    |
| 18 | 24,150,000 | 24,300,000 | 323 | 594 | -1.128755443 | AMFR,BBS2,MT4,NUDT21,OGFOD1                      |

|    |            |            |     |      |              |                                                            |
|----|------------|------------|-----|------|--------------|------------------------------------------------------------|
| 18 | 24,225,000 | 24,375,000 | 324 | 755  | -0.515771975 | AMFR,BBS2,GNAO1,NUDT21,OGFOD1                              |
| 18 | 24,300,000 | 24,450,000 | 325 | 615  | 0.384273221  | AMFR,GNAO1                                                 |
| 18 | 24,375,000 | 24,525,000 | 326 | 406  | 0.732467617  | GNAO1                                                      |
| 18 | 24,450,000 | 24,600,000 | 327 | 323  | 1.129830825  | GNAO1                                                      |
| 18 | 24,525,000 | 24,675,000 | 328 | 330  | 0.991004326  |                                                            |
| 18 | 24,600,000 | 24,750,000 | 329 | 570  | 0.194910605  |                                                            |
| 18 | 24,675,000 | 24,825,000 | 330 | 857  | -0.680829159 | CES5A                                                      |
| 18 | 24,750,000 | 24,900,000 | 331 | 751  | -0.064146235 | BREH1,CES5A,NUP93                                          |
| 18 | 24,825,000 | 24,975,000 | 332 | 416  | 1.07045089   | BREH1,NUP93                                                |
| 18 | 24,900,000 | 25,050,000 | 333 | 323  | 1.112901283  | HERPUD1,NUP93,SLC12A3                                      |
| 18 | 24,975,000 | 25,125,000 | 334 | 582  | 0.762311333  | HERPUD1,NUP93,SLC12A3                                      |
| 18 | 25,050,000 | 25,200,000 | 335 | 688  | 0.518825532  | HERPUD1,NLRC5                                              |
| 18 | 25,125,000 | 25,275,000 | 336 | 507  | 0.308986566  | CPNE2,NIP30,NLRC5                                          |
| 18 | 25,200,000 | 25,350,000 | 337 | 352  | 0.515855374  | ARL2BP,CPNE2,NIP30,PLLP,RSPRY1                             |
| 18 | 25,275,000 | 25,425,000 | 338 | 354  | 0.690259433  | ARL2BP,NIP30,PLLP,RSPRY1                                   |
| 18 | 25,350,000 | 25,500,000 | 339 | 321  | 0.227353206  | CCL22,CX3CL1                                               |
| 18 | 25,425,000 | 25,575,000 | 340 | 172  | -0.016166407 | CCL17,CCL22,CIAPIN1,COQ9,CX3CL1,DOK4,POLR2C                |
| 18 | 25,500,000 | 25,650,000 | 341 | 415  | 1.073897471  | CCDC102A,CCL17,CIAPIN1,COQ9,DOK4,GPR114,POLR2C             |
| 18 | 25,575,000 | 25,725,000 | 342 | 610  | 0.88107869   | CCDC102A,GPR114,ENSBTAG00000038141,ENSBTAG0000046323       |
| 18 | 25,650,000 | 25,800,000 | 343 | 660  | 0.491780775  | CCDC135,GPR97,KATNB1,ENSBTAG00000038141,ENSBTAG00000046323 |
| 18 | 25,725,000 | 25,875,000 | 344 | 675  | 0.247139438  | CCDC135,GPR97,KATNB1,KIFC3                                 |
| 18 | 25,800,000 | 25,950,000 | 345 | 623  | 0.624260336  | CNGB1,KATNB1,KIFC3                                         |
| 18 | 25,875,000 | 26,025,000 | 346 | 466  | 0.720456665  | CNGB1,MMP15,TEPP,USB1,ZNF319                               |
| 18 | 25,950,000 | 26,100,000 | 347 | 395  | -0.192425907 | C18H16orf80,CNGB1,CSNK2A2,MMP15,TEPP,USB1,ZNF319           |
| 18 | 26,025,000 | 26,175,000 | 348 | 457  | -0.482021275 | C18H16orf80,CCDC113,CSNK2A2,MMP15                          |
| 18 | 26,100,000 | 26,250,000 | 349 | 566  | -0.822340214 | CCDC113,CSNK2A2,KLKBL4                                     |
| 18 | 26,175,000 | 26,325,000 | 350 | 897  | -0.921007376 | CCDC113,GINS3,KLKBL4                                       |
| 18 | 26,250,000 | 26,400,000 | 351 | 836  | -0.546345842 | CNOT1,GINS3,NDRG4,SETD6                                    |
| 18 | 26,325,000 | 26,475,000 | 352 | 474  | 0.550513768  | CNOT1,NDRG4,SETD6                                          |
| 18 | 26,400,000 | 26,550,000 | 353 | 299  | 1.38346028   | CNOT1,GOT2,SLC38A7                                         |
| 18 | 26,475,000 | 26,625,000 | 354 | 655  | 0.542551333  | GOT2,SLC38A7                                               |
| 18 | 26,550,000 | 26,700,000 | 355 | 1133 | 0.354315807  | GOT2                                                       |
| 18 | 26,625,000 | 26,775,000 | 356 | 914  | 0.138916509  |                                                            |
| 18 | 26,700,000 | 26,850,000 | 357 | 648  | 0.141214338  |                                                            |
| 18 | 26,775,000 | 26,925,000 | 358 | 780  | 0.749101299  |                                                            |
| 18 | 26,850,000 | 27,000,000 | 359 | 988  | 0.816687115  |                                                            |
| 18 | 26,925,000 | 27,075,000 | 360 | 1236 | -0.42566532  |                                                            |
| 18 | 27,000,000 | 27,150,000 | 361 | 1154 | -0.294152341 |                                                            |
| 18 | 27,075,000 | 27,225,000 | 362 | 1158 | 0.446943198  |                                                            |
| 18 | 27,150,000 | 27,300,000 | 363 | 992  | 0.525817158  |                                                            |
| 18 | 27,225,000 | 27,375,000 | 364 | 860  | 0.058521486  |                                                            |
| 18 | 27,300,000 | 27,450,000 | 365 | 1237 | 0.596409859  |                                                            |
| 18 | 27,375,000 | 27,525,000 | 366 | 1460 | 0.736323546  |                                                            |
| 18 | 27,450,000 | 27,600,000 | 367 | 1405 | 0.534714904  |                                                            |
| 18 | 27,525,000 | 27,675,000 | 368 | 1241 | -0.321426468 |                                                            |
| 18 | 27,600,000 | 27,750,000 | 369 | 1452 | -0.818677286 |                                                            |
| 18 | 27,675,000 | 27,825,000 | 370 | 1302 | -0.327732424 |                                                            |
| 18 | 27,750,000 | 27,900,000 | 371 | 1003 | -0.520171718 |                                                            |
| 18 | 27,825,000 | 27,975,000 | 372 | 1000 | 0.656822257  |                                                            |
| 18 | 27,900,000 | 28,050,000 | 373 | 1027 | -0.181302025 |                                                            |

|    |            |            |     |      |              |                         |
|----|------------|------------|-----|------|--------------|-------------------------|
| 18 | 27,975,000 | 28,125,000 | 374 | 740  | -1.372844417 |                         |
| 18 | 28,050,000 | 28,200,000 | 375 | 559  | 0.382814679  |                         |
| 18 | 28,125,000 | 28,275,000 | 376 | 1069 | -0.9131726   |                         |
| 18 | 28,200,000 | 28,350,000 | 377 | 1238 | -1.401215459 |                         |
| 18 | 28,275,000 | 28,425,000 | 378 | 1115 | -1.157824694 |                         |
| 18 | 28,350,000 | 28,500,000 | 379 | 906  | -1.118193812 | ENSBTAG00000046851      |
| 18 | 28,425,000 | 28,575,000 | 380 | 933  | 0.467257888  | ENSBTAG00000046851      |
| 18 | 28,500,000 | 28,650,000 | 381 | 1243 | 0.621463932  |                         |
| 18 | 28,575,000 | 28,725,000 | 382 | 1116 | 0.63406249   |                         |
| 18 | 28,650,000 | 28,800,000 | 383 | 991  | 0.061398503  |                         |
| 18 | 28,725,000 | 28,875,000 | 384 | 856  | -0.394909331 |                         |
| 18 | 28,800,000 | 28,950,000 | 385 | 996  | 0.560568316  |                         |
| 18 | 28,875,000 | 29,025,000 | 386 | 991  | 0.829111046  |                         |
| 18 | 28,950,000 | 29,100,000 | 387 | 731  | 0.585902232  |                         |
| 18 | 29,025,000 | 29,175,000 | 388 | 1021 | 0.677465763  |                         |
| 18 | 29,100,000 | 29,250,000 | 389 | 955  | 0.810977331  |                         |
| 18 | 29,175,000 | 29,325,000 | 390 | 521  | 0.659441626  |                         |
| 18 | 29,250,000 | 29,400,000 | 391 | 988  | 0.947365025  |                         |
| 18 | 29,325,000 | 29,475,000 | 392 | 1579 | 0.866697206  | ENSBTAG00000046749      |
| 18 | 29,400,000 | 29,550,000 | 393 | 963  | 0.748532125  | CDH8,ENSBTAG00000046749 |
| 18 | 29,475,000 | 29,625,000 | 394 | 487  | 0.669287027  | CDH8,ENSBTAG00000046749 |
| 18 | 29,550,000 | 29,700,000 | 395 | 563  | 0.555732832  | CDH8                    |
| 18 | 29,625,000 | 29,775,000 | 396 | 463  | 0.64619896   | CDH8                    |
| 18 | 29,700,000 | 29,850,000 | 397 | 423  | 1.030688994  | CDH8                    |
| 18 | 29,775,000 | 29,925,000 | 398 | 441  | 1.21322746   | CDH8                    |
| 18 | 29,850,000 | 30,000,000 | 399 | 782  | 0.963353052  |                         |
| 18 | 29,925,000 | 30,075,000 | 400 | 1121 | 0.910531986  |                         |
| 18 | 30,000,000 | 30,150,000 | 401 | 1192 | 0.859560437  |                         |
| 18 | 30,075,000 | 30,225,000 | 402 | 1137 | 0.282023733  |                         |
| 18 | 30,150,000 | 30,300,000 | 403 | 1164 | 0.348500175  |                         |
| 18 | 30,225,000 | 30,375,000 | 404 | 1161 | 0.612734965  |                         |
| 18 | 30,300,000 | 30,450,000 | 405 | 1234 | 0.637312166  |                         |
| 18 | 30,375,000 | 30,525,000 | 406 | 1371 | 0.848204131  |                         |
| 18 | 30,450,000 | 30,600,000 | 407 | 1023 | 0.800038518  |                         |
| 18 | 30,525,000 | 30,675,000 | 408 | 856  | 0.717299723  |                         |
| 18 | 30,600,000 | 30,750,000 | 409 | 1095 | 1.073905537  |                         |
| 18 | 30,675,000 | 30,825,000 | 410 | 1021 | 0.992433831  |                         |
| 18 | 30,750,000 | 30,900,000 | 411 | 643  | 0.596947542  |                         |
| 18 | 30,825,000 | 30,975,000 | 412 | 604  | 0.542869563  |                         |
| 18 | 30,900,000 | 31,050,000 | 413 | 512  | 0.524204052  |                         |
| 18 | 30,975,000 | 31,125,000 | 414 | 359  | 1.327756566  |                         |
| 18 | 31,050,000 | 31,200,000 | 415 | 353  | 1.416219587  |                         |
| 18 | 31,125,000 | 31,275,000 | 416 | 476  | 1.268928063  |                         |
| 18 | 31,200,000 | 31,350,000 | 417 | 729  | 1.281220407  |                         |
| 18 | 31,275,000 | 31,425,000 | 418 | 912  | 1.094631797  |                         |
| 18 | 31,350,000 | 31,500,000 | 419 | 1096 | 0.854133225  |                         |
| 18 | 31,425,000 | 31,575,000 | 420 | 972  | 0.527498893  |                         |
| 18 | 31,500,000 | 31,650,000 | 421 | 690  | -0.465214021 |                         |
| 18 | 31,575,000 | 31,725,000 | 422 | 507  | -0.950185668 |                         |
| 18 | 31,650,000 | 31,800,000 | 423 | 663  | -1.960517678 |                         |
| 18 | 31,725,000 | 31,875,000 | 424 | 932  | -2.183231572 |                         |
| 18 | 31,800,000 | 31,950,000 | 425 | 968  | -0.912971442 |                         |
| 18 | 31,875,000 | 32,025,000 | 426 | 731  | -0.139071091 |                         |

|    |            |            |     |      |              |                                                                                                |
|----|------------|------------|-----|------|--------------|------------------------------------------------------------------------------------------------|
| 18 | 31,950,000 | 32,100,000 | 427 | 525  | -0.119955231 |                                                                                                |
| 18 | 32,025,000 | 32,175,000 | 428 | 450  | -0.931453667 |                                                                                                |
| 18 | 32,100,000 | 32,250,000 | 429 | 748  | -2.876319327 |                                                                                                |
| 18 | 32,175,000 | 32,325,000 | 430 | 1142 | -1.945045134 |                                                                                                |
| 18 | 32,250,000 | 32,400,000 | 431 | 1063 | -0.295423776 |                                                                                                |
| 18 | 32,325,000 | 32,475,000 | 432 | 995  | 0.176672468  |                                                                                                |
| 18 | 32,400,000 | 32,550,000 | 433 | 795  | 0.299088427  |                                                                                                |
| 18 | 32,475,000 | 32,625,000 | 434 | 670  | 0.664486028  |                                                                                                |
| 18 | 32,550,000 | 32,700,000 | 435 | 711  | 0.769362555  |                                                                                                |
| 18 | 32,625,000 | 32,775,000 | 436 | 783  | 0.753791819  |                                                                                                |
| 18 | 32,700,000 | 32,850,000 | 437 | 662  | 0.390694285  | CDH11                                                                                          |
| 18 | 32,775,000 | 32,925,000 | 438 | 448  | 0.382286734  | CDH11                                                                                          |
| 18 | 32,850,000 | 33,000,000 | 439 | 454  | 0.458170813  | CDH11                                                                                          |
| 18 | 32,925,000 | 33,075,000 | 440 | 658  | 0.413286048  |                                                                                                |
| 18 | 33,000,000 | 33,150,000 | 441 | 988  | 0.41088716   |                                                                                                |
| 18 | 33,075,000 | 33,225,000 | 442 | 996  | 0.374165146  |                                                                                                |
| 18 | 33,150,000 | 33,300,000 | 443 | 713  | 0.301327242  |                                                                                                |
| 18 | 33,225,000 | 33,375,000 | 444 | 528  | 0.17021319   |                                                                                                |
| 18 | 33,300,000 | 33,450,000 | 445 | 561  | 0.609858673  |                                                                                                |
| 18 | 33,375,000 | 33,525,000 | 446 | 636  | 1.072635812  |                                                                                                |
| 18 | 33,450,000 | 33,600,000 | 447 | 1069 | 1.022567784  |                                                                                                |
| 18 | 33,525,000 | 33,675,000 | 448 | 1354 | 0.869404286  |                                                                                                |
| 18 | 33,600,000 | 33,750,000 | 449 | 1266 | -0.59409492  |                                                                                                |
| 18 | 33,675,000 | 33,825,000 | 450 | 1051 | -1.470537843 |                                                                                                |
| 18 | 33,750,000 | 33,900,000 | 451 | 739  | -0.027736524 |                                                                                                |
| 18 | 33,825,000 | 33,975,000 | 452 | 1025 | 0.516267309  |                                                                                                |
| 18 | 33,900,000 | 34,050,000 | 453 | 1267 | 0.19289855   |                                                                                                |
| 18 | 33,975,000 | 34,125,000 | 454 | 901  | 0.000725164  |                                                                                                |
| 18 | 34,050,000 | 34,200,000 | 455 | 648  | 0.329479547  | ENSBTAG00000045692                                                                             |
| 18 | 34,125,000 | 34,275,000 | 456 | 963  | 0.58108503   | CDH5,ENSBTAG00000045692                                                                        |
| 18 | 34,200,000 | 34,350,000 | 457 | 777  | 0.605333207  | BEAN1,CDH5,ENSBTAG00000045692                                                                  |
| 18 | 34,275,000 | 34,425,000 | 458 | 338  | 0.499668632  | BEAN1,CKLF,TK2                                                                                 |
| 18 | 34,350,000 | 34,500,000 | 459 | 486  | 0.65965217   | BEAN1,CKLF,CMTM2,CMTM3,CMTM4,TK2                                                               |
| 18 | 34,425,000 | 34,575,000 | 460 | 543  | 0.12771465   | CMTM2,CMTM3,CMTM4                                                                              |
| 18 | 34,500,000 | 34,650,000 | 461 | 302  | -0.859378365 | CCDC79,CMTM4,DYNC1LI2,NAE1                                                                     |
| 18 | 34,575,000 | 34,725,000 | 462 | 177  | 0.512263932  | CA7,CCDC79,DYNC1LI2,NAE1,PDP2                                                                  |
| 18 | 34,650,000 | 34,800,000 | 463 | 308  | 0.601893846  | CA7,CDH16,CES2,CES3,CES4A,FAM96B,NAE1,PDP2,RRAD                                                |
| 18 | 34,725,000 | 34,875,000 | 464 | 450  | 0.655335007  | CBFB,CDH16,CES2,CES3,CES4A,FAM96B,RRAD                                                         |
| 18 | 34,800,000 | 34,950,000 | 465 | 438  | 1.001159246  | C16orf70,CBFB,CES4A,E2F4,EXOC3L1,FBXL8,HSF4,KIAA0895L,NOL3,TRADD                               |
| 18 | 34,875,000 | 35,025,000 | 466 | 272  | 1.251103921  | C16orf70,E2F4,ELMO3,EXOC3L1,FBXL8,FHOD1,HSF4,KIAA0895L,LRR36,NOL3,PLEKHG4,SLC9A5,TMEM208,TRADD |
| 18 | 34,950,000 | 35,100,000 | 467 | 207  | 1.037461433  | E2F4,ELMO3,FHOD1,KCTD19,LRR36,NOL3,PLEKHG4,SLC9A5,TMEM208                                      |
| 18 | 35,025,000 | 35,175,000 | 468 | 241  | 0.84207642   | ATP6V0D1,HSD11B2,KCTD19,LRR36,PLEKHG4,TPPP3,ZDHHC1,ENSBTAG00000046690                          |
| 18 | 35,100,000 | 35,250,000 | 469 | 252  | 0.566973765  | AGRP,ATP6V0D1,FAM65A,HSD11B2,LRR36,TPPP3,ZDHHC1,ENSBTAG00000046690                             |
| 18 | 35,175,000 | 35,325,000 | 470 | 253  | 0.250959842  | AGRP,ATP6V0D1,CTCF,FAM65A,RLTPR                                                                |
| 18 | 35,250,000 | 35,400,000 | 471 | 257  | 0.080720204  | ACD,C16orf86,CTCF,ENKD1,FAM65A,GFOD2,PARD6A,RANBP10,RLTPR                                      |
| 18 | 35,325,000 | 35,475,000 | 472 | 205  | -0.130782452 | ACD,C16orf86,CENPT,ENKD1,GFOD2,PARD6A,RANBP10,RLTPR,THAP11,TSNAXIP1                            |

|    |            |            |     |     |              |                                                                    |
|----|------------|------------|-----|-----|--------------|--------------------------------------------------------------------|
| 18 | 35,400,000 | 35,550,000 | 473 | 188 | -0.324495271 | CENPT,EDC4,LCAT,NUTF2,PSKH1,PSMB10,RANBP10,SLC12A4,THAP11,TSNAXIP1 |
| 18 | 35,475,000 | 35,625,000 | 474 | 210 | -0.088473386 | DDX28,DPEP2,DPEP3,DUS2L,EDC4,LCAT,NUTF2,PSKH1,PSMB10,SLC12A4       |
| 18 | 35,550,000 | 35,700,000 | 475 | 206 | -0.397037126 | DDX28,DPEP2,DPEP3,DUS2L,NFATC3,SLC12A4                             |
| 18 | 35,625,000 | 35,775,000 | 476 | 188 | -0.725745779 | DUS2L,ESRP2,NFATC3,PLA2G15,SLC7A6                                  |
| 18 | 35,700,000 | 35,850,000 | 477 | 180 | -1.59505692  | ESRP2,NFATC3,PLA2G15,PRMT7,SLC7A6,SLC7A6OS,SMPD3                   |
| 18 | 35,775,000 | 35,925,000 | 478 | 255 | -1.350898712 | PRMT7,SLC7A6,SLC7A6OS,SMPD3                                        |
| 18 | 35,850,000 | 36,000,000 | 479 | 331 | -0.800775048 | SMPD3                                                              |
| 18 | 35,925,000 | 36,075,000 | 480 | 411 | -0.948653707 | ZFP90                                                              |
| 18 | 36,000,000 | 36,150,000 | 481 | 430 | -0.518975728 | CDH3,ZFP90                                                         |
| 18 | 36,075,000 | 36,225,000 | 482 | 674 | -0.185082671 | CDH3,E-CADHERIN                                                    |
| 18 | 36,150,000 | 36,300,000 | 483 | 737 | -0.254976965 | E-CADHERIN,TANGO6                                                  |
| 18 | 36,225,000 | 36,375,000 | 484 | 381 | -0.388936383 | E-CADHERIN,TANGO6,ENSBTAG00000047471                               |
| 18 | 36,300,000 | 36,450,000 | 485 | 245 | -0.631547918 | HAS3,TANGO6,ENSBTAG00000047471                                     |
| 18 | 36,375,000 | 36,525,000 | 486 | 230 | -0.897824444 | CHTF8,CIRH1A,HAS3,SNTB2,TANGO6                                     |
| 18 | 36,450,000 | 36,600,000 | 487 | 214 | -0.203527476 | CHTF8,CIRH1A,HAS3,PDF,SNTB2,VPS4A                                  |
| 18 | 36,525,000 | 36,675,000 | 488 | 213 | 0.906947644  | COG8,CYB5B,NIP7,PDF,SNTB2,TERF2,TMED6,VPS4A                        |
| 18 | 36,600,000 | 36,750,000 | 489 | 237 | 0.989434281  | COG8,CYB5B,NIP7,PDF,TERF2,TMED6                                    |
| 18 | 36,675,000 | 36,825,000 | 490 | 267 | -0.06720187  | CYB5B                                                              |
| 18 | 36,750,000 | 36,900,000 | 491 | 272 | -1.462998844 | NFAT5                                                              |
| 18 | 36,825,000 | 36,975,000 | 492 | 466 | -1.152739861 | NFAT5,NOB1,NQO1,WWP2                                               |
| 18 | 36,900,000 | 37,050,000 | 493 | 520 | -0.534265905 | NOB1,NQO1,WWP2                                                     |
| 18 | 36,975,000 | 37,125,000 | 494 | 369 | 0.205697217  | PSMD7,WWP2                                                         |
| 18 | 37,050,000 | 37,200,000 | 495 | 314 | 0.338082662  | PSMD7,WWP2                                                         |
| 18 | 37,125,000 | 37,275,000 | 496 | 285 | 0.459071127  |                                                                    |
| 18 | 37,200,000 | 37,350,000 | 497 | 559 | 0.365401432  |                                                                    |
| 18 | 37,275,000 | 37,425,000 | 498 | 542 | 0.105670805  |                                                                    |
| 18 | 37,350,000 | 37,500,000 | 499 | 323 | 0.17002206   |                                                                    |
| 18 | 37,425,000 | 37,575,000 | 500 | 420 | 0.230869698  |                                                                    |
| 18 | 37,500,000 | 37,650,000 | 501 | 503 | -0.160076609 |                                                                    |
| 18 | 37,575,000 | 37,725,000 | 502 | 493 | -1.033271207 |                                                                    |
| 18 | 37,650,000 | 37,800,000 | 503 | 533 | -1.132002566 |                                                                    |
| 18 | 37,725,000 | 37,875,000 | 504 | 740 | 0.168325422  |                                                                    |
| 18 | 37,800,000 | 37,950,000 | 505 | 839 | 0.658717283  |                                                                    |
| 18 | 37,875,000 | 38,025,000 | 506 | 844 | -0.068491976 |                                                                    |
| 18 | 37,950,000 | 38,100,000 | 507 | 849 | -0.599615728 |                                                                    |
| 18 | 38,025,000 | 38,175,000 | 508 | 717 | -0.06798863  |                                                                    |
| 18 | 38,100,000 | 38,250,000 | 509 | 465 | 0.245866991  |                                                                    |
| 18 | 38,175,000 | 38,325,000 | 510 | 334 | -0.075397884 |                                                                    |
| 18 | 38,250,000 | 38,400,000 | 511 | 500 | 0.255943671  | ZFHX3                                                              |
| 18 | 38,325,000 | 38,475,000 | 512 | 720 | -0.145062912 | ZFHX3                                                              |
| 18 | 38,400,000 | 38,550,000 | 513 | 658 | -1.267936082 | ZFHX3                                                              |
| 18 | 38,475,000 | 38,625,000 | 514 | 604 | -1.660863568 | ZFHX3                                                              |
| 18 | 38,550,000 | 38,700,000 | 515 | 654 | -1.983180713 |                                                                    |
| 18 | 38,625,000 | 38,775,000 | 516 | 600 | -1.618576647 |                                                                    |
| 18 | 38,700,000 | 38,850,000 | 517 | 471 | -0.03370976  |                                                                    |
| 18 | 38,775,000 | 38,925,000 | 518 | 374 | 0.420534353  |                                                                    |
| 18 | 38,850,000 | 39,000,000 | 519 | 641 | 0.8268611    |                                                                    |
| 18 | 38,925,000 | 39,075,000 | 520 | 731 | 0.77047501   |                                                                    |
| 18 | 39,000,000 | 39,150,000 | 521 | 708 | 0.232393624  | DHX38,PMFBP1                                                       |



|    |            |            |     |      |              |                                                       |
|----|------------|------------|-----|------|--------------|-------------------------------------------------------|
| 18 | 39,075,000 | 39,225,000 | 522 | 682  | 0.764399979  | DHODH,DHX38,HP,PKD1L3,PMFBP1,TXNL4B,ENSBTAG0000019887 |
| 18 | 39,150,000 | 39,300,000 | 523 | 880  | -0.477894291 | DHODH,DHX38,HP,PKD1L3,TXNL4B,ENSBTAG00000019887       |
| 18 | 39,225,000 | 39,375,000 | 524 | 822  | -1.241925894 | IST1,PKD1L3,ZNF821                                    |
| 18 | 39,300,000 | 39,450,000 | 525 | 328  | -0.598004484 | AP1G1,ATXN1L,IST1,PKD1L3,ZNF821,ENSBTAG00000047787    |
| 18 | 39,375,000 | 39,525,000 | 526 | 270  | -0.398897613 | AP1G1,ATXN1L,PHLPP2,ENSBTAG00000047787                |
| 18 | 39,450,000 | 39,600,000 | 527 | 313  | -0.406301116 | AP1G1,MARVELD3,PHLPP2,TAT                             |
| 18 | 39,525,000 | 39,675,000 | 528 | 469  | 0.141183719  | CHST4,MARVELD3,PHLPP2,TAT                             |
| 18 | 39,600,000 | 39,750,000 | 529 | 476  | 0.088381534  | CHST4,TAT,ZNF19                                       |
| 18 | 39,675,000 | 39,825,000 | 530 | 307  | -0.72245704  | CALB2,ZNF19,ENSBTAG00000023617                        |
| 18 | 39,750,000 | 39,900,000 | 531 | 533  | -0.333506619 | CALB2,ZNF19,ENSBTAG00000023617                        |
| 18 | 39,825,000 | 39,975,000 | 532 | 1130 | 1.098366792  | CALB2,CMTR2                                           |
| 18 | 39,900,000 | 40,050,000 | 533 | 1057 | 1.356055779  | CMTR2,HYDIN                                           |
| 18 | 39,975,000 | 40,125,000 | 534 | 675  | -0.215255511 | HYDIN                                                 |
| 18 | 40,050,000 | 40,200,000 | 535 | 634  | -0.625978771 | HYDIN                                                 |
| 18 | 40,125,000 | 40,275,000 | 536 | 493  | 0.402789125  | HYDIN                                                 |
| 18 | 40,200,000 | 40,350,000 | 537 | 742  | 0.973952615  | HYDIN                                                 |
| 18 | 40,275,000 | 40,425,000 | 538 | 874  | 0.719108022  | HYDIN,PLEKHF1,POP4                                    |
| 18 | 40,350,000 | 40,500,000 | 539 | 652  | -0.985941188 | PLEKHF1,POP4,ENSBTAG00000020434                       |
| 18 | 40,425,000 | 40,575,000 | 540 | 675  | -2.845549535 | CCNE1,PLEKHF1,ENSBTAG00000020434                      |
| 18 | 40,500,000 | 40,650,000 | 541 | 545  | -1.836089366 | CCNE1                                                 |
| 18 | 40,575,000 | 40,725,000 | 542 | 550  | -0.04291427  | URI1                                                  |
| 18 | 40,650,000 | 40,800,000 | 543 | 510  | -0.029654255 | URI1                                                  |
| 18 | 40,725,000 | 40,875,000 | 544 | 427  | 0.6239704    | URI1                                                  |
| 18 | 40,800,000 | 40,950,000 | 545 | 659  | 0.748628141  |                                                       |
| 18 | 40,875,000 | 41,025,000 | 546 | 628  | 0.334724145  |                                                       |
| 18 | 40,950,000 | 41,100,000 | 547 | 498  | -1.389598035 |                                                       |
| 18 | 41,025,000 | 41,175,000 | 548 | 637  | -1.551897735 | ZNF536                                                |
| 18 | 41,100,000 | 41,250,000 | 549 | 747  | -0.728651171 | ZNF536                                                |
| 18 | 41,175,000 | 41,325,000 | 550 | 806  | -0.050672775 | ZNF536                                                |
| 18 | 41,250,000 | 41,400,000 | 551 | 845  | 0.625588641  |                                                       |
| 18 | 41,325,000 | 41,475,000 | 552 | 910  | 0.758247636  |                                                       |
| 18 | 41,400,000 | 41,550,000 | 553 | 1144 | 0.804907639  |                                                       |
| 18 | 41,475,000 | 41,625,000 | 554 | 1101 | 0.832718206  |                                                       |
| 18 | 41,550,000 | 41,700,000 | 555 | 865  | 0.420675588  |                                                       |
| 18 | 41,625,000 | 41,775,000 | 556 | 953  | -0.687485531 |                                                       |
| 18 | 41,700,000 | 41,850,000 | 557 | 821  | -1.152616494 |                                                       |
| 18 | 41,775,000 | 41,925,000 | 558 | 411  | -0.443746313 |                                                       |
| 18 | 41,850,000 | 42,000,000 | 559 | 415  | 0.616509637  | TSHZ3                                                 |
| 18 | 41,925,000 | 42,075,000 | 560 | 524  | 0.203100751  | TSHZ3                                                 |
| 18 | 42,000,000 | 42,150,000 | 561 | 517  | 0.198047821  |                                                       |
| 18 | 42,075,000 | 42,225,000 | 562 | 498  | -1.270306466 |                                                       |
| 18 | 42,150,000 | 42,300,000 | 563 | 554  | -0.580011323 |                                                       |
| 18 | 42,225,000 | 42,375,000 | 564 | 841  | 0.715603198  |                                                       |
| 18 | 42,300,000 | 42,450,000 | 565 | 695  | 0.333825419  |                                                       |
| 18 | 42,375,000 | 42,525,000 | 566 | 367  | -1.278143759 |                                                       |
| 18 | 42,450,000 | 42,600,000 | 567 | 529  | 0.597425979  |                                                       |
| 18 | 42,525,000 | 42,675,000 | 568 | 797  | 0.741723509  |                                                       |
| 18 | 42,600,000 | 42,750,000 | 569 | 827  | 0.21459884   |                                                       |
| 18 | 42,675,000 | 42,825,000 | 570 | 835  | 0.159742545  |                                                       |
| 18 | 42,750,000 | 42,900,000 | 571 | 847  | 0.032186156  |                                                       |

|    |            |            |     |      |              |                                                                                   |
|----|------------|------------|-----|------|--------------|-----------------------------------------------------------------------------------|
| 18 | 42,825,000 | 42,975,000 | 572 | 541  | -0.270148895 |                                                                                   |
| 18 | 42,900,000 | 43,050,000 | 573 | 371  | 0.148832674  | ZNF507                                                                            |
| 18 | 42,975,000 | 43,125,000 | 574 | 542  | 0.355216424  | DPY19L3,ZNF507                                                                    |
| 18 | 43,050,000 | 43,200,000 | 575 | 711  | 0.887496217  | DPY19L3,ZNF507                                                                    |
| 18 | 43,125,000 | 43,275,000 | 576 | 802  | 1.116952914  | ANKRD27,DPY19L3,PDCD5                                                             |
| 18 | 43,200,000 | 43,350,000 | 577 | 746  | 1.03512286   | ANKRD27,NUDT19,PDCD5,RGS9BP                                                       |
| 18 | 43,275,000 | 43,425,000 | 578 | 842  | 1.089571594  | ANKRD27,NUDT19,RGS9BP,TDRD12                                                      |
| 18 | 43,350,000 | 43,500,000 | 579 | 1312 | 1.124582616  | CEP89,SLC7A9,TDRD12                                                               |
| 18 | 43,425,000 | 43,575,000 | 580 | 1358 | 0.432278066  | CEP89,FAAP24,RHPN2,SLC7A9,TDRD12                                                  |
| 18 | 43,500,000 | 43,650,000 | 581 | 856  | -0.921237992 | CEP89,FAAP24,RHPN2                                                                |
| 18 | 43,575,000 | 43,725,000 | 582 | 1060 | -0.365132782 | GPATCH1,RHPN2,WDR88                                                               |
| 18 | 43,650,000 | 43,800,000 | 583 | 1322 | 0.247363114  | GPATCH1,WDR88                                                                     |
| 18 | 43,725,000 | 43,875,000 | 584 | 959  | 0.676886044  | LRP3,SLC7A10,WDR88                                                                |
| 18 | 43,800,000 | 43,950,000 | 585 | 1086 | 0.707724338  | LRP3,SLC7A10                                                                      |
| 18 | 43,875,000 | 44,025,000 | 586 | 1555 | 0.608029196  | CEBPG,PEPD                                                                        |
| 18 | 43,950,000 | 44,100,000 | 587 | 2070 | 0.177676982  | CEBPG,PEPD                                                                        |
| 18 | 44,025,000 | 44,175,000 | 588 | 2201 | 0.416348933  | PEPD                                                                              |
| 18 | 44,100,000 | 44,250,000 | 589 | 1716 | 0.690300382  | PEPD                                                                              |
| 18 | 44,175,000 | 44,325,000 | 590 | 1361 | 0.651339078  | CHST8                                                                             |
| 18 | 44,250,000 | 44,400,000 | 591 | 1019 | 0.681643617  | CHST8                                                                             |
| 18 | 44,325,000 | 44,475,000 | 592 | 550  | 0.539801007  | CHST8,KCTD15                                                                      |
| 18 | 44,400,000 | 44,550,000 | 593 | 670  | 0.735649972  | KCTD15                                                                            |
| 18 | 44,475,000 | 44,625,000 | 594 | 902  | 0.931144711  |                                                                                   |
| 18 | 44,550,000 | 44,700,000 | 595 | 820  | 0.289670077  |                                                                                   |
| 18 | 44,625,000 | 44,775,000 | 596 | 944  | -1.143077956 |                                                                                   |
| 18 | 44,700,000 | 44,850,000 | 597 | 802  | -0.966596415 | LSM14A                                                                            |
| 18 | 44,775,000 | 44,925,000 | 598 | 503  | 0.417271642  | KIAA0355,LSM14A                                                                   |
| 18 | 44,850,000 | 45,000,000 | 599 | 451  | 0.175728749  | GPI,KIAA0355,LSM14A                                                               |
| 18 | 44,925,000 | 45,075,000 | 600 | 415  | -0.225224106 | GPI,KIAA0355,PDCD2L,UBA2                                                          |
| 18 | 45,000,000 | 45,150,000 | 601 | 630  | -1.103671129 | GPI,PDCD2L,UBA2,WTIP                                                              |
| 18 | 45,075,000 | 45,225,000 | 602 | 1018 | -0.09998141  | WTIP                                                                              |
| 18 | 45,150,000 | 45,300,000 | 603 | 1014 | 1.016094059  |                                                                                   |
| 18 | 45,225,000 | 45,375,000 | 604 | 707  | 0.983944402  | ENSBTAG00000045737                                                                |
| 18 | 45,300,000 | 45,450,000 | 605 | 948  | 0.556520263  | ENSBTAG00000045737,ENSBTAG00000047571                                             |
| 18 | 45,375,000 | 45,525,000 | 606 | 1089 | 0.618656641  | ENSBTAG00000047571                                                                |
| 18 | 45,450,000 | 45,600,000 | 607 | 768  | 0.878018762  | ENSBTAG00000047724                                                                |
| 18 | 45,525,000 | 45,675,000 | 608 | 612  | 1.050501393  | ENSBTAG00000047724                                                                |
| 18 | 45,600,000 | 45,750,000 | 609 | 504  | 0.823877149  | ZNF181,ZNF599,ENSBTAG00000023998                                                  |
| 18 | 45,675,000 | 45,825,000 | 610 | 979  | 0.299266584  | ZNF181,ZNF599,ENSBTAG00000023998                                                  |
| 18 | 45,750,000 | 45,900,000 | 611 | 1117 | 0.143114024  | ZNF792                                                                            |
| 18 | 45,825,000 | 45,975,000 | 612 | 867  | 0.188623426  | GRAMD1A,HPN,SCN1B,ZNF792                                                          |
| 18 | 45,900,000 | 46,050,000 | 613 | 961  | 0.386286778  | FXYD3,GRAMD1A,HPN,LGI4,SCN1B                                                      |
| 18 | 45,975,000 | 46,125,000 | 614 | 1078 | 0.502301639  | FXYD1,FXYD3,FXYD5,FXYD7,HPN,LGI4                                                  |
| 18 | 46,050,000 | 46,200,000 | 615 | 1004 | 0.500294824  | FAM187B,FXYD1,FXYD5,FXYD7,HAMP,LSR,MAG,USF2,ENSBTAG00000031420                    |
| 18 | 46,125,000 | 46,275,000 | 616 | 724  | 0.406246392  | CD22,FAM187B,FFAR1,GPR41,HAMP,LSR,MAG,USF2,ENSBTAG00000031420                     |
| 18 | 46,200,000 | 46,350,000 | 617 | 647  | 0.397856619  | CD22,FFAR1,GPR41,GPR43,KRTDAP,MAG,ENSBTAG00000045656                              |
| 18 | 46,275,000 | 46,425,000 | 618 | 872  | 0.718202057  | ATP4A,DMKN,GAPDHS,GPR43,KRTDAP,SBSN,TMEM147,ENSBTAG00000045598,ENSBTAG00000045656 |
| 18 | 46,350,000 | 46,500,000 | 619 | 951  | 1.110625076  | ATP4A,DMKN,GAPDHS,SBSN,TMEM147,ENSBTAG00000045598                                 |

|    |            |            |     |      |              |                                                                                               |
|----|------------|------------|-----|------|--------------|-----------------------------------------------------------------------------------------------|
| 18 | 46,425,000 | 46,575,000 | 620 | 682  | 0.989391764  | ETV2,HAUS5,PNKD,RBM42                                                                         |
| 18 | 46,500,000 | 46,650,000 | 621 | 528  | -0.008593421 | ETV2,HAUS5,IGFLR1,KMT2B,LIN37,PNKD,PSENEEN,RBM42,U2AF1L4,UPK1A,ZBTB32                         |
| 18 | 46,575,000 | 46,725,000 | 622 | 676  | -0.571054132 | ARHGAP33,HSPB6,IGFLR1,KMT2B,LIN37,NPHS1,PRODH2,PROSER3,PSENEEN,U2AF1L4,UPK1A,ZBTB32           |
| 18 | 46,650,000 | 46,800,000 | 623 | 648  | -0.446812191 | APLP1,ARHGAP33,HCST,HSPB6,KIRREL2,LIN37,NFKBID,NPHS1,PRODH2,PROSER3,TYROBP                    |
| 18 | 46,725,000 | 46,875,000 | 624 | 596  | -0.268189266 | ALKBH6,APLP1,HCST,KIRREL2,LRFN3,NFKBID,NPHS1,SDHAF1,SYNE4,TYROBP                              |
| 18 | 46,800,000 | 46,950,000 | 625 | 931  | -2.979254809 | ALKBH6,CLIP3,LRFN3,SDHAF1,SYNE4,THAP8,WDR62                                                   |
| 18 | 46,875,000 | 47,025,000 | 626 | 814  | -5.58776526  | ALKBH6,CAPNS1,CLIP3,COX7A1,OVOL3,POLR2I,TBCB,THAP8,WDR62,ZNF565                               |
| 18 | 46,950,000 | 47,100,000 | 627 | 497  | -4.505054538 | CAPNS1,COX7A1,OVOL3,POLR2I,TBCB,WDR62,ZNF565,ZNF567,ENSBTAG00000031687                        |
| 18 | 47,025,000 | 47,175,000 | 628 | 848  | 0.339327873  | ZNF382,ZNF461,ZNF565,ZNF567,ENSBTAG00000031687                                                |
| 18 | 47,100,000 | 47,250,000 | 629 | 798  | 0.229262794  | ZNF382,ZNF461,ZNF566,ZNF567,ENSBTAG00000033563                                                |
| 18 | 47,175,000 | 47,325,000 | 630 | 382  | 0.443449924  | ZNF382,ZNF546,ZNF566,ENSBTAG00000033563                                                       |
| 18 | 47,250,000 | 47,400,000 | 631 | 381  | -0.217287898 | ZNF546,ZNF566,ZNF568                                                                          |
| 18 | 47,325,000 | 47,475,000 | 632 | 677  | 0.081186572  | ZNF546,ZNF568,ZNF585A,ZNF793,ZNF829                                                           |
| 18 | 47,400,000 | 47,550,000 | 633 | 707  | 0.895358048  | ZNF383,ZNF568,ZNF585A,ZNF793,ZNF829                                                           |
| 18 | 47,475,000 | 47,625,000 | 634 | 802  | 0.511853941  | ZNF383,ZNF527,ZNF569                                                                          |
| 18 | 47,550,000 | 47,700,000 | 635 | 871  | 0.103209763  | ZNF527,ZNF569,ZNF570                                                                          |
| 18 | 47,625,000 | 47,775,000 | 636 | 540  | 0.352522371  | ZNF345,ZNF420,ZNF569,ZNF570                                                                   |
| 18 | 47,700,000 | 47,850,000 | 637 | 636  | 0.546264809  | ZNF345,ZNF420                                                                                 |
| 18 | 47,775,000 | 47,925,000 | 638 | 746  | 0.801291354  | ZNF345,ENSBTAG00000046367                                                                     |
| 18 | 47,850,000 | 48,000,000 | 639 | 784  | 1.186924279  | WDR87,ENSBTAG00000040318,ENSBTAG00000046367                                                   |
| 18 | 47,925,000 | 48,075,000 | 640 | 1041 | 1.014133168  | WDR87,ENSBTAG00000040318                                                                      |
| 18 | 48,000,000 | 48,150,000 | 641 | 1297 | 0.40436702   | SIPA1L3                                                                                       |
| 18 | 48,075,000 | 48,225,000 | 642 | 1337 | 0.449836916  | SIPA1L3                                                                                       |
| 18 | 48,150,000 | 48,300,000 | 643 | 985  | 0.741076205  | DPF1,PPP1R14A,SIPA1L3,SPINT2                                                                  |
| 18 | 48,225,000 | 48,375,000 | 644 | 602  | -0.575537016 | C18H19orf33,DPF1,PPP1R14A,SIPA1L3,SPINT2,YIF1B                                                |
| 18 | 48,300,000 | 48,450,000 | 645 | 645  | -1.116160024 | C18H19orf33,CATSPERG,KCNK6,SPINT2,YIF1B                                                       |
| 18 | 48,375,000 | 48,525,000 | 646 | 779  | 0.309938294  | CATSPERG,FAM98C,GGN,KCNK6,PSMD8,RASGRP4,RYR1,SPRED3                                           |
| 18 | 48,450,000 | 48,600,000 | 647 | 968  | 0.632989685  | FAM98C,GGN,PSMD8,RASGRP4,RYR1,SPRED3                                                          |
| 18 | 48,525,000 | 48,675,000 | 648 | 822  | 0.673089243  | ACTN4,EIF3K,MAP4K1,RYR1                                                                       |
| 18 | 48,600,000 | 48,750,000 | 649 | 674  | 0.732958652  | ACTN4,CAPN12,EIF3K,MAP4K1,RYR1                                                                |
| 18 | 48,675,000 | 48,825,000 | 650 | 848  | 0.026826499  | ACTN4,CAPN12,ECH1,HNRNPL,LGALS4,ENSBTAG00000031538,ENSBTAG00000046365                         |
| 18 | 48,750,000 | 48,900,000 | 651 | 742  | -0.244287475 | CAPN12,CCER2,ECH1,HNRNPL,LGALS4,NFKBIB,RINL,SARS2,SIRT2,ENSBTAG00000031538,ENSBTAG00000046365 |
| 18 | 48,825,000 | 48,975,000 | 652 | 848  | -1.164457243 | CCER2,FBXO17,HNRNPL,MRPS12,NFKBIB,RINL,SARS2,SIRT2                                            |
| 18 | 48,900,000 | 49,050,000 | 653 | 879  | -1.46301808  | FBXO17,MRPS12,SARS2                                                                           |
| 18 | 48,975,000 | 49,125,000 | 654 | 808  | -2.679832515 | ENSBTAG00000012590                                                                            |
| 18 | 49,050,000 | 49,200,000 | 655 | 795  | -3.260298938 | NCCRP1,PAK4,SYCN,ENSBTAG00000012590                                                           |
| 18 | 49,125,000 | 49,275,000 | 656 | 606  | -0.005251379 | NCCRP1,PAK4,SYCN,ENSBTAG00000047307                                                           |
| 18 | 49,200,000 | 49,350,000 | 657 | 403  | 0.304708847  | GMFG,IFNL1,LRFN1,PAF1,SAMD4B,ENSBTAG00000047307                                               |
| 18 | 49,275,000 | 49,425,000 | 658 | 315  | 0.732839812  | GMFG,IFNL1,LRFN1,MED29,PAF1,PLEKHG2,RPS16,SAMD4B,SUPT5H,ZFP36                                 |
| 18 | 49,350,000 | 49,500,000 | 659 | 578  | 0.664254799  | DLL3,EID2,MED29,PAF1,PLEKHG2,RPS16,SAMD4B,SELV,SUPT5H,TIMM50,ZFP36                            |

|    |            |            |     |      |              |                                                                                         |
|----|------------|------------|-----|------|--------------|-----------------------------------------------------------------------------------------|
| 18 | 49,425,000 | 49,575,000 | 660 | 1044 | 0.050906067  | DLL3,EID2,SELV,SUPT5H,TIMM50,ENSBTAG00000047030                                         |
| 18 | 49,500,000 | 49,650,000 | 661 | 1472 | 0.385402002  | LEUTX,ENSBTAG00000015260,ENSBTAG00000047030                                             |
| 18 | 49,575,000 | 49,725,000 | 662 | 993  | 0.694280054  | DYRK1B,FBL,LEUTX,PSMC4,ENSBTAG00000008502,ENSBTAG00000015260                            |
| 18 | 49,650,000 | 49,800,000 | 663 | 515  | 0.197469282  | DYRK1B,FBL,FCGBP,PSMC4,ENSBTAG00000008502,ENSBTAG00000018242                            |
| 18 | 49,725,000 | 49,875,000 | 664 | 789  | 0.293902375  | FCGBP,MAP3K10,ENSBTAG00000018242                                                        |
| 18 | 49,800,000 | 49,950,000 | 665 | 580  | 0.162682574  | AKT2,CNTD2,MAP3K10,TTC9B                                                                |
| 18 | 49,875,000 | 50,025,000 | 666 | 295  | 0.021430205  | AKT2,C19orf47,CNTD2,HIPK4,MAP3K10,PLD3,PRX,TTC9B                                        |
| 18 | 49,950,000 | 50,100,000 | 667 | 424  | 0.648319713  | AKT2,BLVRB,C19orf47,HIPK4,PLD3,PRX,SERTAD1,SERTAD3,SPTBN4                               |
| 18 | 50,025,000 | 50,175,000 | 668 | 403  | -0.236422413 | BLVRB,LTBP4,PRX,SERTAD1,SERTAD3,SHKBP1,SPTBN4                                           |
| 18 | 50,100,000 | 50,250,000 | 669 | 319  | -1.763314216 | LTBP4,NUMBL,SHKBP1,SPTBN4                                                               |
| 18 | 50,175,000 | 50,325,000 | 670 | 398  | -1.444812612 | ADCK4,C19orf54,ITPKC,LTBP4,MIA,NUMBL,SNRPA,ENSBTAG00000009079                           |
| 18 | 50,250,000 | 50,400,000 | 671 | 434  | -0.740901854 | ADCK4,C19orf54,CYP2F1,EGLN2,ITPKC,MIA,NUMBL,SNRPA,ENSBTAG00000001350,ENSBTAG00000009079 |
| 18 | 50,325,000 | 50,475,000 | 672 | 383  | -0.230813046 | CYP2F1,EGLN2,ENSBTAG00000001350,ENSBTAG00000003272,ENSBTAG00000047815                   |
| 18 | 50,400,000 | 50,550,000 | 673 | 386  | -0.552775717 | ENSBTAG00000003272,ENSBTAG00000047815                                                   |
| 18 | 50,475,000 | 50,625,000 | 674 | 383  | -0.124164272 | C9orf3,CYP2B6                                                                           |
| 18 | 50,550,000 | 50,700,000 | 675 | 442  | -0.007168473 | AXL,C9orf3,CYP2B6,CYP2S1                                                                |
| 18 | 50,625,000 | 50,775,000 | 676 | 531  | 0.232411558  | AXL,CCDC97,CYP2S1,HNRNPUL1,TGFB1                                                        |
| 18 | 50,700,000 | 50,850,000 | 677 | 554  | 0.846868814  | ATP5SL,AXL,B3GNT8,B9D2,BCKDHA,CCDC97,EXOSC5,HNRNPUL1,TGFB1,TMEM91                       |
| 18 | 50,775,000 | 50,925,000 | 678 | 577  | 0.300482481  | ATP5SL,B3GNT8,B9D2,BCKDHA,ERICH4,EXOSC5,TGFB1,TMEM91                                    |
| 18 | 50,850,000 | 51,000,000 | 679 | 605  | 0.180507225  | ATP5SL,ERICH4                                                                           |
| 18 | 50,925,000 | 51,075,000 | 680 | 513  | 0.176895993  |                                                                                         |
| 18 | 51,000,000 | 51,150,000 | 681 | 525  | 0.256278284  | CEACAM1                                                                                 |
| 18 | 51,075,000 | 51,225,000 | 682 | 530  | 0.155933402  | CEACAM1,HSL                                                                             |
| 18 | 51,150,000 | 51,300,000 | 683 | 359  | -0.60513747  | CEACAM1,CNFN,HSL,MEGF8,TMEM145                                                          |
| 18 | 51,225,000 | 51,375,000 | 684 | 228  | -0.92713362  | CIC,CNFN,ERF,GSK3A,HSL,MEGF8,PAFAH1B3,PRR19,TMEM145,ZNF526                              |
| 18 | 51,300,000 | 51,450,000 | 685 | 195  | -3.439577749 | CIC,DEDD2,ERF,GSK3A,PAFAH1B3,PRR19,TMEM145,ZNF526                                       |
| 18 | 51,375,000 | 51,525,000 | 686 | 253  | -2.71674462  | DEDD2,GRIK5,POU2F2,ZNF526,ZNF574                                                        |
| 18 | 51,450,000 | 51,600,000 | 687 | 428  | -0.790525785 | ATP1A3,GRIK5,POU2F2,ZNF574                                                              |
| 18 | 51,525,000 | 51,675,000 | 688 | 634  | 0.285221341  | ARHGEF1,ATP1A3,GRIK5,RABAC1                                                             |
| 18 | 51,600,000 | 51,750,000 | 689 | 748  | 0.086903687  | ARHGEF1,ATP1A3,CD79A,DMRTC2,LYPD4,RABAC1,RPS19,ENSBTAG00000006859                       |
| 18 | 51,675,000 | 51,825,000 | 690 | 1542 | -0.105355213 | ARHGEF1,CD79A,DMRTC2,LYPD4,RPS19,ENSBTAG00000006859                                     |
| 18 | 51,750,000 | 51,900,000 | 691 | 1720 | -0.069202478 | CD177,CXCL17,TEX101,ENSBTAG00000006859                                                  |
| 18 | 51,825,000 | 51,975,000 | 692 | 1043 | 0.002834056  | BSP1,BSP3,BSP5,CD177,CXCL17,TEX101                                                      |
| 18 | 51,900,000 | 52,050,000 | 693 | 1053 | 0.105479479  | BSP1,BSP3,BSP5,ETHE1,LYPD3,PHLDB3,TEX101                                                |
| 18 | 51,975,000 | 52,125,000 | 694 | 1152 | -1.434327842 | ETHE1,LYPD3,PHLDB3,PINLYP,XRCC1,ZNF575                                                  |
| 18 | 52,050,000 | 52,200,000 | 695 | 1127 | -1.245791526 | CADM4,ETHE1,IRGQ,PINLYP,XRCC1,ZNF428,ZNF575,ZNF576                                      |
| 18 | 52,125,000 | 52,275,000 | 696 | 1207 | 0.253826875  | CADM4,IRGC,IRGQ,PLAUR,SMG9,ZNF428,ZNF576,ENSBTAG00000023439,ENSBTAG00000030922          |
| 18 | 52,200,000 | 52,350,000 | 697 | 1360 | -0.407752713 | IRGC,KCNN4,LYPD5,PLAUR,SMG9,ENSBTAG00000023439,ENSBTAG00000030922                       |

|    |            |            |     |      |              |                                                                                      |
|----|------------|------------|-----|------|--------------|--------------------------------------------------------------------------------------|
| 18 | 52,275,000 | 52,425,000 | 698 | 1074 | -0.07401997  | KCNN4,LYPD5,SMG9,ZNF283,ZNF404                                                       |
| 18 | 52,350,000 | 52,500,000 | 699 | 999  | 1.18393296   | ZNF226,ZNF283,ZNF404,ZNF45                                                           |
| 18 | 52,425,000 | 52,575,000 | 700 | 1220 | 1.250044139  | ZNF226,ZNF235,ZNF45                                                                  |
| 18 | 52,500,000 | 52,650,000 | 701 | 860  | 0.945181506  | ZNF180,ZNF226,ZNF235,ENSBTAG00000040209                                              |
| 18 | 52,575,000 | 52,725,000 | 702 | 749  | 0.388497219  | CEACAM20,ZNF180,ENSBTAG00000040209                                                   |
| 18 | 52,650,000 | 52,800,000 | 703 | 786  | 0.608668978  | CEACAM20,IGSF23,ZNF180                                                               |
| 18 | 52,725,000 | 52,875,000 | 704 | 497  | 0.784242761  | CEACAM19,IGSF23                                                                      |
| 18 | 52,800,000 | 52,950,000 | 705 | 545  | 1.045137462  | BCL3,CBLC,CEACAM16,CEACAM19                                                          |
| 18 | 52,875,000 | 53,025,000 | 706 | 863  | 0.927226087  | BCAM,BCL3,CBLC,CEACAM16,PVRL2,TOMM40,ENSBTAG0000047345                               |
| 18 | 52,950,000 | 53,100,000 | 707 | 872  | 0.806337904  | APOC2,APOC4,APOE,BCAM,CBLC,CLPTM1,PVRL2,RELB,TOMM40,ENSBTAG00000047345               |
| 18 | 53,025,000 | 53,175,000 | 708 | 775  | 1.208928716  | APOC2,APOC4,APOE,CLASRP,CLPTM1,GEMIN7,PPP1R37,RELB,TOMM40,ZNF296                     |
| 18 | 53,100,000 | 53,250,000 | 709 | 730  | 1.070568728  | BLOC1S3,CLASRP,GEMIN7,NKPD1,PPP1R37,RELB,TRAPPC6A,ZNF296                             |
| 18 | 53,175,000 | 53,325,000 | 710 | 777  | 0.299341195  | BLOC1S3,EXOC3L2,NKPD1,PPP1R37,TRAPPC6A,ENSBTAG0000030882                             |
| 18 | 53,250,000 | 53,400,000 | 711 | 730  | 0.286844193  | CKM,EXOC3L2,MARK4,ENSBTAG00000030882                                                 |
| 18 | 53,325,000 | 53,475,000 | 712 | 606  | 0.318471602  | CD3EAP,CKM,ERCC1,ERCC2,KLC3,MARK4,PPP1R13L                                           |
| 18 | 53,400,000 | 53,550,000 | 713 | 482  | 0.263947604  | CD3EAP,ERCC1,ERCC2,FOSB,KLC3,MGC148938,OPA3,PPP1R13L,RTN2,VASP                       |
| 18 | 53,475,000 | 53,625,000 | 714 | 324  | 0.120279825  | FOSB,GPR4,MGC148938,OPA3,RTN2,VASP                                                   |
| 18 | 53,550,000 | 53,700,000 | 715 | 429  | 0.380475205  | EML2,GIPR,GPR4,OPA3,QPCTL,SNRPD2                                                     |
| 18 | 53,625,000 | 53,775,000 | 716 | 491  | 0.223903245  | DMPK,DMWD,EML2,GIPR,MYPOP,QPCTL,SIX5,SNRPD2                                          |
| 18 | 53,700,000 | 53,850,000 | 717 | 680  | -0.039387726 | DMPK,DMWD,FOXA3,MYPOP,RSPH6A,SIX5,SYMPK                                              |
| 18 | 53,775,000 | 53,925,000 | 718 | 656  | -0.107278738 | DMWD,FOXA3,NANOS2,NOVA2,RSPH6A,SYMPK                                                 |
| 18 | 53,850,000 | 54,000,000 | 719 | 517  | -0.023943708 | CCDC61,HIF3A,IGFL1,NANOS2,NOVA2,PGLYRP1                                              |
| 18 | 53,925,000 | 54,075,000 | 720 | 915  | 0.186487557  | CCDC61,HIF3A,IGFL1,PGLYRP1,PPP5C                                                     |
| 18 | 54,000,000 | 54,150,000 | 721 | 1202 | 0.71162607   | CCDC8,HIF3A,PNMAL1,PNMAL2,PPP5C,ENSBTAG00000046451                                   |
| 18 | 54,075,000 | 54,225,000 | 722 | 980  | 0.925222228  | CALM,CCDC8,DACT3,GNG8,PNMAL1,PNMAL2,PRKD2,PTGIR,ENSBTAG00000046451                   |
| 18 | 54,150,000 | 54,300,000 | 723 | 709  | -0.931079879 | CALM,DACT3,FKRP,GNG8,PRKD2,PTGIR,STRN4                                               |
| 18 | 54,225,000 | 54,375,000 | 724 | 706  | -1.226626107 | AP2S1,FKRP,PRKD2,SLC1A5,STRN4                                                        |
| 18 | 54,300,000 | 54,450,000 | 725 | 614  | 0.52837993   | AP2S1,ARHGAP35,SLC1A5                                                                |
| 18 | 54,375,000 | 54,525,000 | 726 | 668  | 1.047732339  | ARHGAP35,NPAS1                                                                       |
| 18 | 54,450,000 | 54,600,000 | 727 | 854  | 0.972997585  | ARHGAP35,NPAS1,TMEM160,ZC3H4                                                         |
| 18 | 54,525,000 | 54,675,000 | 728 | 757  | 0.628484875  | NPAS1,SAE1,TMEM160,ZC3H4                                                             |
| 18 | 54,600,000 | 54,750,000 | 729 | 951  | 0.355727195  | CCDC9,SAE1                                                                           |
| 18 | 54,675,000 | 54,825,000 | 730 | 1005 | -0.074601705 | C5AR1,CCDC9,DHX34,GPR77                                                              |
| 18 | 54,750,000 | 54,900,000 | 731 | 521  | -0.586967774 | C5AR1,DHX34,GPR77,KPTN,MEIS3,SLC8A2                                                  |
| 18 | 54,825,000 | 54,975,000 | 732 | 331  | -0.022138596 | KPTN,MEIS3,NAPA,SLC8A2,ZNF541                                                        |
| 18 | 54,900,000 | 55,050,000 | 733 | 552  | 0.893931568  | GLTSCR1,NAPA,ZNF541                                                                  |
| 18 | 54,975,000 | 55,125,000 | 734 | 604  | 0.762032889  | EHD2,GLTSCR1,GLTSCR2,SEPW1                                                           |
| 18 | 55,050,000 | 55,200,000 | 735 | 578  | -0.05592724  | CRX,EHD2,GLTSCR1,GLTSCR2,SEPW1,SULT2A1,ENSBTAG0000039971                             |
| 18 | 55,125,000 | 55,275,000 | 736 | 1017 | -0.895147443 | CRX,SULT2A1,ENSBTAG00000039971,ENSBTAG00000040054                                    |
| 18 | 55,200,000 | 55,350,000 | 737 | 1682 | -0.076932027 | C19orf68,CABP5,ELSPBP1,LIG1,ENSBTAG00000039971,ENSBTAG00000040054                    |
| 18 | 55,275,000 | 55,425,000 | 738 | 1546 | 0.859895022  | C19orf68,CABP5,ELSPBP1,LIG1,ENSBTAG00000011119,ENSBTAG00000038322,ENSBTAG00000038986 |

|    |            |            |     |      |              |                                                                                             |
|----|------------|------------|-----|------|--------------|---------------------------------------------------------------------------------------------|
| 18 | 55,350,000 | 55,500,000 | 739 | 972  | 0.375510424  | C19orf68,CCDC114,EMP3,TMEM143,ZNF114,ENSBTAG000001119,ENSBTAG00000038322,ENSBTAG00000038986 |
| 18 | 55,425,000 | 55,575,000 | 740 | 694  | -0.506975213 | CCDC114,EMP3,GRIN2D,GRWD1,KDEL1R1,SYNGR4,TMEM143,ZNF114                                     |
| 18 | 55,500,000 | 55,650,000 | 741 | 726  | -0.320125953 | CYTH2,GRIN2D,GRWD1,KCNJ14,KDEL1R1,LMTK3,SYNGR4,TMEM143                                      |
| 18 | 55,575,000 | 55,725,000 | 742 | 845  | 0.30638361   | CYTH2,DBP,FAM83E,GRWD1,KCNJ14,LMTK3,RPL18,SPACA4,SPHK2,SULT2B1                              |
| 18 | 55,650,000 | 55,800,000 | 743 | 524  | 0.333194627  | CA11,DBP,FAM83E,FUT2,NTN5,RPL18,SPACA4,SPHK2,SULT2B1,ENSBTAG00000014514                     |
| 18 | 55,725,000 | 55,875,000 | 744 | 295  | -0.429392046 | BCAT2,CA11,DBP,FGF21,FUT1,FUT2,IZUMO1,MAMSTR,NTN5,RASIP1,ENSBTAG00000014514                 |
| 18 | 55,800,000 | 55,950,000 | 745 | 314  | -1.256442221 | BCAT2,FGF21,FUT1,HSD17B14,IZUMO1,MAMSTR,NUCB1,PLEKHA4,PPP1R15A,RASIP1,TULP2                 |
| 18 | 55,875,000 | 56,025,000 | 746 | 459  | 0.323437017  | BAX,BCAT2,DHDH,FTL,GYS1,HSD17B14,NUCB1,PLEKHA4,PPP1R15A,RUVBL2,TULP2                        |
| 18 | 55,950,000 | 56,100,000 | 747 | 423  | 0.992730581  | BAX,DHDH,FTL,GYS1,KCNA7,LHB,LIN7B,NTF4,NUCB1,PPFIA3,RUVBL2,SNRNP70                          |
| 18 | 56,025,000 | 56,175,000 | 748 | 208  | 0.573919925  | HRC,KCNA7,LHB,LIN7B,NTF4,PPFIA3,RUVBL2,SNRNP70,TRPM4                                        |
| 18 | 56,100,000 | 56,250,000 | 749 | 347  | 1.107252437  | HRC,PPFIA3,SLC6A16,TRPM4,ENSBTAG00000030502,ENSBTAG00000030505                              |
| 18 | 56,175,000 | 56,325,000 | 750 | 566  | 1.018971283  | CCDC155,CD37,DKKL1,SLC6A16,TEAD2,ENSBTAG00000030502,ENSBTAG00000030505                      |
| 18 | 56,250,000 | 56,400,000 | 751 | 613  | 0.476579289  | ALDH16A1,CCDC155,CD37,DKKL1,FLT3LG,PIH1D1,PTH2,RPL13A,SLC17A7,SLC6A16,TEAD2                 |
| 18 | 56,325,000 | 56,475,000 | 752 | 440  | 0.437601703  | ALDH16A1,CCDC155,FCGRT,FLT3LG,NOSIP,PIH1D1,PRR12,PRRG2,PTH2,RCN3,RPL13A,RPS11,SLC17A7       |
| 18 | 56,400,000 | 56,550,000 | 753 | 285  | 0.995795079  | BCL2L12,CPT1C,FCGRT,HRMT1L2,IRF3,NOSIP,PRR12,PRRG2,RCN3,RPS11,RRAS,SCAF1                    |
| 18 | 56,475,000 | 56,625,000 | 754 | 277  | 0.570704221  | AP2A1,BCL2L12,CPT1C,FUZ,HRMT1L2,IRF3,PRR12,RRAS,SCAF1,TSKS                                  |
| 18 | 56,550,000 | 56,700,000 | 755 | 270  | 0.104342978  | AKT1S1,AP2A1,CPT1C,FUZ,IL4I1,MED25,PNKP,PTOV1,TBC1D17,TSKS                                  |
| 18 | 56,625,000 | 56,775,000 | 756 | 464  | 0.823428509  | AKT1S1,ATF5,FUZ,IL4I1,MED25,PNKP,PTOV1,TBC1D17,VRK3,ENSBTAG00000016997                      |
| 18 | 56,700,000 | 56,850,000 | 757 | 806  | 1.105826363  | ATF5,C18H19ORF41,IL4I1,VRK3,ZNF473,ENSBTAG00000016997                                       |
| 18 | 56,775,000 | 56,925,000 | 758 | 1208 | 1.048977306  | C18H19ORF41,MYH14,VRK3,ZNF473                                                               |
| 18 | 56,850,000 | 57,000,000 | 759 | 968  | 0.805920108  | KCNC3,MYH14,NAPSA,NR1H2,ENSBTAG00000048283                                                  |
| 18 | 56,925,000 | 57,075,000 | 760 | 662  | 0.296628556  | EMC10,FAM71E1,KCNC3,MYBPC2,MYH14,NAPSA,NR1H2,POLD1,ENSBTAG00000043953,ENSBTAG00000048283    |
| 18 | 57,000,000 | 57,150,000 | 761 | 836  | 0.304138994  | ASPDH,EMC10,FAM71E1,JOSD2,LRRC4B,MYBPC2,NR1H2,POLD1,ENSBTAG00000043953                      |
| 18 | 57,075,000 | 57,225,000 | 762 | 838  | 0.372498775  | ASPDH,C19orf81,EMC10,JOSD2,LRRC4B,SHANK1,SYT3                                               |
| 18 | 57,150,000 | 57,300,000 | 763 | 1004 | 0.111256311  | C19orf81,CLEC11A,SHANK1,SYT3                                                                |
| 18 | 57,225,000 | 57,375,000 | 764 | 1150 | 0.130367687  | ACPT,CLEC11A,KLK1,KLK15,KLK4,MGC137708,SHANK1                                               |
| 18 | 57,300,000 | 57,450,000 | 765 | 1195 | 0.755113773  | ACPT,KLK1,KLK10,KLK15,KLK4,KLK5,KLK6,KLK7,KLK8,KLK9,MGC137708                               |
| 18 | 57,375,000 | 57,525,000 | 766 | 1142 | 1.087340164  | CTU1,KLK10,KLK11,KLK12,KLK13,KLK14,KLK5,KLK6,KLK7,KLK8,KLK9                                 |

|    |            |            |     |      |              |                                                                                                                                   |
|----|------------|------------|-----|------|--------------|-----------------------------------------------------------------------------------------------------------------------------------|
| 18 | 57,450,000 | 57,600,000 | 767 | 1287 | 0.763880159  | CEACAM18,CTU1,KLK10,KLK11,KLK12,KLK13,KLK14,ENSBTAG00000004608,ENSBTAG000000037537                                                |
| 18 | 57,525,000 | 57,675,000 | 768 | 1776 | -0.146710897 | CEACAM18,ENSBTAG00000004608,ENSBTAG000000030440,ENSBTAG000000037537,ENSBTAG000000037699,ENSBTAG000000037710,ENSBTAG000000047301   |
| 18 | 57,600,000 | 57,750,000 | 769 | 2096 | -0.186540247 | SIGLECL1,ENSBTAG000000030440,ENSBTAG000000037699,ENSBTAG000000037710,ENSBTAG000000038526,ENSBTAG000000047301                      |
| 18 | 57,675,000 | 57,825,000 | 770 | 1481 | -0.123307383 | CLDND2,ETFB,IGLON5,LIM2,NKG7,SIGLECL1,VSIG10L,ENSBTAG000000037699,ENSBTAG000000038526                                             |
| 18 | 57,750,000 | 57,900,000 | 771 | 1131 | 0.189918048  | CLDND2,ETFB,IGLON5,LIM2,NKG7,VSIG10L,ENSBTAG00000008851,ENSBTAG00000008852,ENSBTAG000000038526,ENSBTAG000000047675                |
| 18 | 57,825,000 | 57,975,000 | 772 | 1407 | 0.079232759  | LIM2,ZNF175,ENSBTAG00000008851,ENSBTAG00000008852,ENSBTAG000000023365,ENSBTAG000000035868,ENSBTAG000000045880,ENSBTAG000000047675 |
| 18 | 57,900,000 | 58,050,000 | 773 | 1309 | -0.0211125   | HAS1,ZNF175,ENSBTAG000000019227,ENSBTAG000000023365,ENSBTAG000000035868,ENSBTAG000000045880,ENSBTAG000000048204                   |
| 18 | 57,975,000 | 58,125,000 | 774 | 1130 | 0.384086664  | HAS1,ENSBTAG000000014593,ENSBTAG000000019227,ENSBTAG000000035868,ENSBTAG000000039111,ENSBTAG000000039491,ENSBTAG000000048204      |
| 18 | 58,050,000 | 58,200,000 | 775 | 999  | 0.961365224  | ZNF432,ZNF613,ZNF614,ENSBTAG000000014593,ENSBTAG000000037906,ENSBTAG000000039111,ENSBTAG000000039491                              |
| 18 | 58,125,000 | 58,275,000 | 776 | 1160 | 0.589439822  | ZNF350,ZNF432,ZNF613,ZNF614,ENSBTAG000000037906                                                                                   |
| 18 | 58,200,000 | 58,350,000 | 777 | 1098 | 0.08679262   | ZNF350,ENSBTAG000000037906                                                                                                        |
| 18 | 58,275,000 | 58,425,000 | 778 | 1338 | 0.101717767  |                                                                                                                                   |
| 18 | 58,350,000 | 58,500,000 | 779 | 2006 | 0.450114655  | PPP2R1A,VN1R4                                                                                                                     |
| 18 | 58,425,000 | 58,575,000 | 780 | 1744 | 0.621868895  | PPP2R1A,VN1R4,ENSBTAG000000046472,ENSBTAG000000047617                                                                             |
| 18 | 58,500,000 | 58,650,000 | 781 | 1127 | 0.658046543  | ENSBTAG000000046472,ENSBTAG000000046510,ENSBTAG000000047617,ENSBTAG000000047761,ENSBTAG000000047791                               |
| 18 | 58,575,000 | 58,725,000 | 782 | 1018 | 0.045803381  | ENSBTAG000000030470,ENSBTAG000000038903,ENSBTAG000000046510,ENSBTAG000000047761,ENSBTAG000000047791                               |
| 18 | 58,650,000 | 58,800,000 | 783 | 1334 | 0.168657086  | ENSBTAG000000030470,ENSBTAG000000038125,ENSBTAG000000038903,ENSBTAG000000047761                                                   |
| 18 | 58,725,000 | 58,875,000 | 784 | 1417 | 0.456412566  | ENSBTAG000000017651,ENSBTAG000000030470,ENSBTAG000000038125                                                                       |
| 18 | 58,800,000 | 58,950,000 | 785 | 891  | 0.591372921  | ENSBTAG000000017651                                                                                                               |
| 18 | 58,875,000 | 59,025,000 | 786 | 586  | 0.916311809  | ZNF493,ENSBTAG000000017651                                                                                                        |
| 18 | 58,950,000 | 59,100,000 | 787 | 634  | 0.731796897  | ZNF493,ENSBTAG000000033604                                                                                                        |
| 18 | 59,025,000 | 59,175,000 | 788 | 892  | 0.917400406  | ENSBTAG000000033604,ENSBTAG000000045571                                                                                           |
| 18 | 59,100,000 | 59,250,000 | 789 | 1035 | 0.86602737   | ENSBTAG000000037440,ENSBTAG000000045571                                                                                           |
| 18 | 59,175,000 | 59,325,000 | 790 | 769  | 0.461406905  | ENSBTAG000000037440                                                                                                               |
| 18 | 59,250,000 | 59,400,000 | 791 | 736  | 0.434324245  | ENSBTAG000000011052,ENSBTAG000000030454                                                                                           |
| 18 | 59,325,000 | 59,475,000 | 792 | 920  | 0.157221404  | ENSBTAG000000011052,ENSBTAG000000030454                                                                                           |
| 18 | 59,400,000 | 59,550,000 | 793 | 617  | -0.005064606 | ENSBTAG000000011052                                                                                                               |
| 18 | 59,475,000 | 59,625,000 | 794 | 516  | 0.702486229  |                                                                                                                                   |
| 18 | 59,550,000 | 59,700,000 | 795 | 762  | 0.716336034  | ENSBTAG000000040411                                                                                                               |
| 18 | 59,625,000 | 59,775,000 | 796 | 769  | 0.854925157  | ENSBTAG000000040411                                                                                                               |

|    |            |            |     |      |              |                                                                                    |
|----|------------|------------|-----|------|--------------|------------------------------------------------------------------------------------|
| 18 | 59,700,000 | 59,850,000 | 797 | 763  | 0.886694136  | ENSBTAG00000040411                                                                 |
| 18 | 59,775,000 | 59,925,000 | 798 | 766  | 0.629958914  | ENSBTAG00000015899,ENSBTAG00000021433                                              |
| 18 | 59,850,000 | 60,000,000 | 799 | 603  | 0.752264184  | ENSBTAG00000015899,ENSBTAG00000021433                                              |
| 18 | 59,925,000 | 60,075,000 | 800 | 508  | 1.153680311  | ENSBTAG00000011844,ENSBTAG00000021433                                              |
| 18 | 60,000,000 | 60,150,000 | 801 | 610  | 1.237879158  | ENSBTAG00000011844,ENSBTAG00000047053                                              |
| 18 | 60,075,000 | 60,225,000 | 802 | 458  | 1.14087629   | ENSBTAG00000011844,ENSBTAG00000047053                                              |
| 18 | 60,150,000 | 60,300,000 | 803 | 710  | -0.19947787  | ENSBTAG00000004925,ENSBTAG00000045985                                              |
| 18 | 60,225,000 | 60,375,000 | 804 | 1007 | 0.180190192  | ZNF677,ENSBTAG00000004925,ENSBTAG00000039969,ENSBTAG00000045985                    |
| 18 | 60,300,000 | 60,450,000 | 805 | 1076 | -0.25887159  | ZNF677,ENSBTAG00000004925,ENSBTAG00000017993,ENSBTAG00000039969                    |
| 18 | 60,375,000 | 60,525,000 | 806 | 1172 | -0.428533029 | ZNF519,ENSBTAG00000017993                                                          |
| 18 | 60,450,000 | 60,600,000 | 807 | 969  | 0.31972002   | ZNF519,ENSBTAG00000034090,ENSBTAG00000038702,ENSBTAG00000039849                    |
| 18 | 60,525,000 | 60,675,000 | 808 | 930  | 0.341122869  | ENSBTAG00000034090,ENSBTAG00000038702,ENSBTAG00000039849                           |
| 18 | 60,600,000 | 60,750,000 | 809 | 960  | -0.170031184 | ENSBTAG00000034090,ENSBTAG00000038702,ENSBTAG00000045581                           |
| 18 | 60,675,000 | 60,825,000 | 810 | 959  | 0.162340212  | ENSBTAG00000033642,ENSBTAG00000045581                                              |
| 18 | 60,750,000 | 60,900,000 | 811 | 1220 | 0.729906623  | ENSBTAG00000033642,ENSBTAG00000045581                                              |
| 18 | 60,825,000 | 60,975,000 | 812 | 1456 | 0.511651166  | ENSBTAG00000038755,ENSBTAG00000045581                                              |
| 18 | 60,900,000 | 61,050,000 | 813 | 992  | 0.460375616  | ZNF331,ENSBTAG00000015061,ENSBTAG00000038755,ENSBTAG00000045581                    |
| 18 | 60,975,000 | 61,125,000 | 814 | 1025 | 0.769931759  | NLRP12,ZNF331,ENSBTAG00000015061,ENSBTAG00000038755                                |
| 18 | 61,050,000 | 61,200,000 | 815 | 1719 | 0.173509341  | NLRP12                                                                             |
| 18 | 61,125,000 | 61,275,000 | 816 | 2290 | -0.096468312 | NLRP12,ENSBTAG00000000336,ENSBTAG00000040392,ENSBTAG00000046961                    |
| 18 | 61,200,000 | 61,350,000 | 817 | 2100 | -0.565132516 | MGC157082,ENSBTAG00000000336,ENSBTAG00000040392,ENSBTAG00000046961                 |
| 18 | 61,275,000 | 61,425,000 | 818 | 2301 | 0.080114112  | MGC157082,ENSBTAG00000009171,ENSBTAG00000014953                                    |
| 18 | 61,350,000 | 61,500,000 | 819 | 2279 | 0.36261353   | MGC157082,ENSBTAG00000009171,ENSBTAG00000014953                                    |
| 18 | 61,425,000 | 61,575,000 | 820 | 1712 | 0.035056865  |                                                                                    |
| 18 | 61,500,000 | 61,650,000 | 821 | 1859 | 0.733319376  | ENSBTAG00000014328,ENSBTAG00000047602                                              |
| 18 | 61,575,000 | 61,725,000 | 822 | 1366 | 0.661299835  | ENSBTAG00000002290,ENSBTAG00000009364,ENSBTAG00000014328,ENSBTAG00000047602        |
| 18 | 61,650,000 | 61,800,000 | 823 | 1253 | -1.525596177 | ENSBTAG00000002290,ENSBTAG00000009364                                              |
| 18 | 61,725,000 | 61,875,000 | 824 | 1832 | -2.443770757 | ENSBTAG00000013345,ENSBTAG00000015987                                              |
| 18 | 61,800,000 | 61,950,000 | 825 | 1703 | -2.143263906 | ENSBTAG00000013345,ENSBTAG00000015139,ENSBTAG00000015987                           |
| 18 | 61,875,000 | 62,025,000 | 826 | 1694 | -0.115456504 | MYADM,ENSBTAG00000015139                                                           |
| 18 | 61,950,000 | 62,100,000 | 827 | 1456 | 0.613328208  | CACNG7,CACNG8,MYADM,PRKCG,ENSBTAG00000015139                                       |
| 18 | 62,025,000 | 62,175,000 | 828 | 1414 | 0.526206452  | CACNG6,CACNG7,CACNG8,PRKCG,VSTM1                                                   |
| 18 | 62,100,000 | 62,250,000 | 829 | 2129 | 0.719413983  | CACNG6,NLRP9,VSTM1,ENSBTAG00000023349                                              |
| 18 | 62,175,000 | 62,325,000 | 830 | 2080 | 0.90630892   | EPN1,NLRP9,ENSBTAG00000023349,ENSBTAG00000040294                                   |
| 18 | 62,250,000 | 62,400,000 | 831 | 1288 | 0.73342878   | CCDC106,EPN1,FIZ1,U2AF2,ZNF580,ZNF581,ZNF784,ENSBTAG00000037582,ENSBTAG00000040294 |
| 18 | 62,325,000 | 62,475,000 | 832 | 502  | -0.685986353 | CCDC106,FIZ1,NAT14,SBK2,SSC5D,U2AF2,ZNF580,ZNF581,ZNF784,ENSBTAG00000037582        |



|    |            |            |     |      |              |                                                                                                                                                                                               |
|----|------------|------------|-----|------|--------------|-----------------------------------------------------------------------------------------------------------------------------------------------------------------------------------------------|
| 18 | 62,400,000 | 62,550,000 | 833 | 290  | -0.676227707 | FIZ1,ISOC2,NAT14,RPL28,SBK2,SHISA7,SSC5D,UBE2S,ZNF628                                                                                                                                         |
| 18 | 62,475,000 | 62,625,000 | 834 | 364  | 0.574277978  | BRSK1,COX6B2,FAM71E2,IL11,ISOC2,RPL28,SHISA7,SUV420H2,TMEM150B,TMEM190,UBE2S,ZNF628                                                                                                           |
| 18 | 62,550,000 | 62,700,000 | 835 | 694  | 0.924543128  | BRSK1,COX6B2,FAM71E2,HSPBP1,IL11,PPP6R1,PTPRH,SUV420H2,TMEM150B,TMEM190,TMEM86B,ENSBTAG00000044492                                                                                            |
| 18 | 62,625,000 | 62,775,000 | 836 | 872  | 0.949248732  | BRSK1,DNAAF3,EPS8L1,HSPBP1,PPP1R12C,PPP6R1,PTPRH,SYT5,TMEM86B,TNNI3,TNNT1,ENSBTAG00000044492                                                                                                  |
| 18 | 62,700,000 | 62,850,000 | 837 | 1381 | 0.820089806  | DNAAF3,EPS8L1,FCAR,KIR2DL5A,PPP1R12C,RDH13,SYT5,TNNI3,TNNT1                                                                                                                                   |
| 18 | 62,775,000 | 62,925,000 | 838 | 1552 | 0.439412338  | FCAR,KIR2DL5A,NCR1,RDH13,ENSBTAG00000045854,ENSBTAG00000047473,ENSBTAG00000047953,ENSBTAG00000048184                                                                                          |
| 18 | 62,850,000 | 63,000,000 | 839 | 1382 | 0.144493962  | GP6,KIR2DS1,NCR1,ENSBTAG00000045854,ENSBTAG00000047473,ENSBTAG00000047953,ENSBTAG00000048184                                                                                                  |
| 18 | 62,925,000 | 63,075,000 | 840 | 1932 | 0.094836209  | GP6,KIR2DS1,ENSBTAG00000026080,ENSBTAG00000038797,ENSBTAG00000039413,ENSBTAG00000047953                                                                                                       |
| 18 | 63,000,000 | 63,150,000 | 841 | 1776 | -0.236187487 | CDC42EP5,LENG8,LENG9,TTYH1,ENSBTAG00000019547,ENSBTAG00000026080,ENSBTAG00000038797,ENSBTAG00000039413                                                                                        |
| 18 | 63,075,000 | 63,225,000 | 842 | 1158 | -0.481486116 | CDC42EP5,LENG8,LENG9,LILRA4,TTYH1,ENSBTAG0000004043,ENSBTAG00000019547,ENSBTAG00000037830,ENSBTAG00000039892,ENSBTAG00000039932                                                               |
| 18 | 63,150,000 | 63,300,000 | 843 | 699  | -0.501830679 | LILRA4,ENSBTAG0000000930,ENSBTAG0000004043,ENSBTAG00000019348,ENSBTAG00000019547,ENSBTAG00000037830,ENSBTAG00000039086,ENSBTAG00000039892,ENSBTAG00000039932,ENSBTAG00000048145               |
| 18 | 63,225,000 | 63,375,000 | 844 | 543  | -0.364197525 | ENSBTAG0000000930,ENSBTAG0000005841,ENSBTAG00000019348,ENSBTAG00000039086,ENSBTAG00000039691,ENSBTAG00000048145                                                                               |
| 18 | 63,300,000 | 63,450,000 | 845 | 1015 | -0.713997757 | CNOT3,LENG1,MBOAT7,PRPF31,RPS9,TMC4,TSEN34,ENSBTAG0000005841,ENSBTAG00000039691                                                                                                               |
| 18 | 63,375,000 | 63,525,000 | 846 | 1176 | -0.501477965 | CNOT3,LENG1,MBOAT7,NDUFA3,OSCAR,PRPF31,RPS9,TARM1,TFPT,TMC4,TSEN34,ENSBTAG00000038890                                                                                                         |
| 18 | 63,450,000 | 63,600,000 | 847 | 1172 | 0.366454281  | NDUFA3,OSCAR,PRPF31,TARM1,TFPT,ENSBTAG00000030360,ENSBTAG00000038416,ENSBTAG00000038890                                                                                                       |
| 18 | 63,525,000 | 63,675,000 | 848 | 1346 | 0.185789915  | NLRP13,NLRP5,NLRP8,ENSBTAG00000030360,ENSBTAG00000036215,ENSBTAG00000038416                                                                                                                   |
| 18 | 63,600,000 | 63,750,000 | 849 | 1027 | 0.032711495  | NLRP13,NLRP5,NLRP8,ZNF444,ZNF787,ENSBTAG00000034302,ENSBTAG00000036215                                                                                                                        |
| 18 | 63,675,000 | 63,825,000 | 850 | 1095 | 0.131973707  | NLRP5,ZNF444,ZNF787,ENSBTAG0000000688,ENSBTAG00000024895,ENSBTAG00000030344,ENSBTAG00000034302,ENSBTAG00000039081,ENSBTAG00000039628,ENSBTAG00000045803,ENSBTAG00000046087,ENSBTAG00000047236 |
| 18 | 63,750,000 | 63,900,000 | 851 | 1203 | -0.163801541 | ZNF667,ENSBTAG0000000688,ENSBTAG00000024895,ENSBTAG00000030344,ENSBTAG00000038022,ENSBTAG00000039081,ENSBTAG00000039628,ENSBTAG00000045803,ENSBTAG00000046087,ENSBTAG00000047236              |
| 18 | 63,825,000 | 63,975,000 | 852 | 826  | -0.791090609 | ZNF583,ZNF667,ENSBTAG00000030348,ENSBTAG00000037881,ENSBTAG00000038022,ENSBTAG00000046947                                                                                                     |

|    |            |            |     |      |              |                                                                                                          |
|----|------------|------------|-----|------|--------------|----------------------------------------------------------------------------------------------------------|
| 18 | 63,900,000 | 64,050,000 | 853 | 960  | 0.036859353  | ZFP28,ZNF583,ENSBTAG00000030348,ENSBTAG00000037881,ENSBTAG00000046101,ENSBTAG00000046947                 |
| 18 | 63,975,000 | 64,125,000 | 854 | 1361 | 0.554015337  | ZFP28,ENSBTAG00000025288,ENSBTAG00000030348,ENSBTAG00000046101                                           |
| 18 | 64,050,000 | 64,200,000 | 855 | 1350 | 0.724283975  | ZFP28,ZIM2,ENSBTAG00000025288,ENSBTAG00000038911,ENSBTAG00000045731                                      |
| 18 | 64,125,000 | 64,275,000 | 856 | 977  | 0.649447138  | MGC157368,PEG3,ZIM2,ENSBTAG00000038326,ENSBTAG00000038911,ENSBTAG00000045731                             |
| 18 | 64,200,000 | 64,350,000 | 857 | 580  | 0.22699652   | MGC157368,PEG3,ENSBTAG00000038326                                                                        |
| 18 | 64,275,000 | 64,425,000 | 858 | 581  | 0.622943674  | PEG3                                                                                                     |
| 18 | 64,350,000 | 64,500,000 | 859 | 646  | 0.113482035  |                                                                                                          |
| 18 | 64,425,000 | 64,575,000 | 860 | 904  | 0.035173375  |                                                                                                          |
| 18 | 64,500,000 | 64,650,000 | 861 | 1437 | 0.60610332   | ENSBTAG00000003261,ENSBTAG00000038926                                                                    |
| 18 | 64,575,000 | 64,725,000 | 862 | 1653 | 1.029157303  | ZNF304,ENSBTAG00000003261,ENSBTAG00000037721,ENSBTAG00000038926                                          |
| 18 | 64,650,000 | 64,800,000 | 863 | 1704 | 1.104321626  | ZNF304,ENSBTAG00000011262,ENSBTAG00000037375,ENSBTAG00000037721,ENSBTAG00000039341                       |
| 18 | 64,725,000 | 64,875,000 | 864 | 1675 | 0.778204521  | ZNF772,ENSBTAG00000000195,ENSBTAG00000011262,ENSBTAG00000017613,ENSBTAG00000037375,ENSBTAG00000039341    |
| 18 | 64,800,000 | 64,950,000 | 865 | 1660 | 0.353508537  | ZNF550,ZNF772,ENSBTAG00000000195,ENSBTAG00000017613                                                      |
| 18 | 64,875,000 | 65,025,000 | 866 | 1704 | 0.315474686  | ZNF550,ZNF772,ENSBTAG00000017613,ENSBTAG00000037981,ENSBTAG00000048261                                   |
| 18 | 64,950,000 | 65,100,000 | 867 | 1658 | 0.621554262  | VN1R1,ZNF134,ENSBTAG00000037981,ENSBTAG00000048261                                                       |
| 18 | 65,025,000 | 65,175,000 | 868 | 1708 | 0.476000574  | VN1R1,ZNF134,ENSBTAG00000038635                                                                          |
| 18 | 65,100,000 | 65,250,000 | 869 | 1720 | -0.021721448 | ZNF211,ENSBTAG00000038635,ENSBTAG00000040169                                                             |
| 18 | 65,175,000 | 65,325,000 | 870 | 1533 | -0.471577333 | ZNF211,ZNF551,ZSCAN4,ENSBTAG00000040169                                                                  |
| 18 | 65,250,000 | 65,400,000 | 871 | 1366 | -0.58228791  | ZNF551,ZSCAN4                                                                                            |
| 18 | 65,325,000 | 65,475,000 | 872 | 832  | -0.319989989 | ZNF814                                                                                                   |
| 18 | 65,400,000 | 65,550,000 | 873 | 667  | -1.076412035 | ZNF814,ENSBTAG00000038715,ENSBTAG00000040442                                                             |
| 18 | 65,475,000 | 65,625,000 | 874 | 994  | -0.226730207 | ZNF154,ENSBTAG00000027787,ENSBTAG00000038715,ENSBTAG00000040442                                          |
| 18 | 65,550,000 | 65,700,000 | 875 | 1164 | 0.24269715   | ZNF135,ZNF154,ZNF606,ENSBTAG00000027787,ENSBTAG00000040442                                               |
| 18 | 65,625,000 | 65,775,000 | 876 | 945  | -0.34869296  | ZNF135,ZNF274,ZNF329,ZNF606                                                                              |
| 18 | 65,700,000 | 65,850,000 | 877 | 796  | -0.407451444 | A1BG,RPS5,ZNF274,ZNF329,ZNF8                                                                             |
| 18 | 65,775,000 | 65,925,000 | 878 | 617  | 0.089329419  | A1BG,RPS5,SLC27A5,ZNF132,ZNF446,ZNF584,ZNF8,ENSBTAG00000039453                                           |
| 18 | 65,850,000 | 66,000,000 | 879 | 283  | 0.632055087  | CENPBD1,CHMP2A,MZF1,RPS5,SLC27A5,TRIM28,UBE2M,ZNF132,ZNF446,ZNF584,ENSBTAG00000037595,ENSBTAG00000039453 |
| 18 | 65,925,000 | 66,004,023 | 880 | 149  | 0.271136877  | CENPBD1,CHMP2A,MZF1,SLC27A5,TRIM28,UBE2M,ENSBTAG00000037595                                              |
| 19 | 0          | 150,000    | 1   | 115  | 0.472795607  | ENSBTAG00000045560,ENSBTAG00000048260                                                                    |
| 19 | 75,000     | 225,000    | 2   | 145  | 0.550013892  | ENSBTAG00000045560,ENSBTAG00000048260                                                                    |
| 19 | 150,000    | 300,000    | 3   | 126  | 0.16142249   | ENSBTAG00000045560                                                                                       |
| 19 | 225,000    | 375,000    | 4   | 188  | 0.76003576   |                                                                                                          |
| 19 | 300,000    | 450,000    | 5   | 780  | 1.111386832  |                                                                                                          |
| 19 | 375,000    | 525,000    | 6   | 1000 | 1.158298072  |                                                                                                          |
| 19 | 450,000    | 600,000    | 7   | 712  | 0.939749994  |                                                                                                          |
| 19 | 525,000    | 675,000    | 8   | 513  | 0.613534823  | CA10                                                                                                     |

|    |           |           |    |      |              |                          |
|----|-----------|-----------|----|------|--------------|--------------------------|
| 19 | 600,000   | 750,000   | 9  | 313  | 0.538324028  | CA10                     |
| 19 | 675,000   | 825,000   | 10 | 436  | 1.0440603    | CA10                     |
| 19 | 750,000   | 900,000   | 11 | 423  | 1.05953294   | CA10                     |
| 19 | 825,000   | 975,000   | 12 | 745  | 0.819895068  | CA10                     |
| 19 | 900,000   | 1,050,000 | 13 | 1195 | 1.043825009  | CA10                     |
| 19 | 975,000   | 1,125,000 | 14 | 1022 | 0.721085222  | CA10                     |
| 19 | 1,050,000 | 1,200,000 | 15 | 980  | 0.658312033  | CA10                     |
| 19 | 1,125,000 | 1,275,000 | 16 | 1346 | 1.111012572  | CA10                     |
| 19 | 1,200,000 | 1,350,000 | 17 | 1430 | 1.168348953  | CA10                     |
| 19 | 1,275,000 | 1,425,000 | 18 | 940  | 0.379396071  | CA10                     |
| 19 | 1,350,000 | 1,500,000 | 19 | 672  | -2.06985694  | CA10                     |
| 19 | 1,425,000 | 1,575,000 | 20 | 1058 | -3.239884733 | CA10                     |
| 19 | 1,500,000 | 1,650,000 | 21 | 1303 | -3.191217624 |                          |
| 19 | 1,575,000 | 1,725,000 | 22 | 1433 | -1.252394502 |                          |
| 19 | 1,650,000 | 1,800,000 | 23 | 1851 | -0.33098002  |                          |
| 19 | 1,725,000 | 1,875,000 | 24 | 2110 | -0.674149417 |                          |
| 19 | 1,800,000 | 1,950,000 | 25 | 1794 | -0.751037739 |                          |
| 19 | 1,875,000 | 2,025,000 | 26 | 1898 | 0.07391875   |                          |
| 19 | 1,950,000 | 2,100,000 | 27 | 2195 | 0.334605706  |                          |
| 19 | 2,025,000 | 2,175,000 | 28 | 1546 | 0.585663301  |                          |
| 19 | 2,100,000 | 2,250,000 | 29 | 955  | 0.256420646  |                          |
| 19 | 2,175,000 | 2,325,000 | 30 | 1053 | 0.675885708  |                          |
| 19 | 2,250,000 | 2,400,000 | 31 | 1184 | 0.303860719  |                          |
| 19 | 2,325,000 | 2,475,000 | 32 | 1354 | -0.083196507 |                          |
| 19 | 2,400,000 | 2,550,000 | 33 | 1963 | -2.383489074 |                          |
| 19 | 2,475,000 | 2,625,000 | 34 | 2166 | -2.699367595 |                          |
| 19 | 2,550,000 | 2,700,000 | 35 | 1832 | -1.771237534 |                          |
| 19 | 2,625,000 | 2,775,000 | 36 | 1671 | -2.393650444 |                          |
| 19 | 2,700,000 | 2,850,000 | 37 | 1780 | -1.91033893  |                          |
| 19 | 2,775,000 | 2,925,000 | 38 | 2063 | -1.550036175 |                          |
| 19 | 2,850,000 | 3,000,000 | 39 | 2357 | -1.391612228 |                          |
| 19 | 2,925,000 | 3,075,000 | 40 | 2274 | -0.826618967 |                          |
| 19 | 3,000,000 | 3,150,000 | 41 | 1976 | -0.405488858 |                          |
| 19 | 3,075,000 | 3,225,000 | 42 | 1988 | 0.421027974  |                          |
| 19 | 3,150,000 | 3,300,000 | 43 | 2020 | 0.914463133  |                          |
| 19 | 3,225,000 | 3,375,000 | 44 | 1915 | 1.155109523  |                          |
| 19 | 3,300,000 | 3,450,000 | 45 | 1855 | 0.463062555  | IGLV5-52                 |
| 19 | 3,375,000 | 3,525,000 | 46 | 1801 | 0.417247508  | IGLV5-52                 |
| 19 | 3,450,000 | 3,600,000 | 47 | 1599 | 0.565968628  |                          |
| 19 | 3,525,000 | 3,675,000 | 48 | 1472 | 0.732939262  |                          |
| 19 | 3,600,000 | 3,750,000 | 49 | 1344 | 0.711526642  |                          |
| 19 | 3,675,000 | 3,825,000 | 50 | 1218 | 0.268312113  |                          |
| 19 | 3,750,000 | 3,900,000 | 51 | 1096 | 0.144760496  | KIF2B                    |
| 19 | 3,825,000 | 3,975,000 | 52 | 743  | -1.78215878  | KIF2B,ENSBTAG00000036115 |
| 19 | 3,900,000 | 4,050,000 | 53 | 519  | -3.736629594 | ENSBTAG00000036115       |
| 19 | 3,975,000 | 4,125,000 | 54 | 692  | -1.828833585 | ENSBTAG00000036115       |
| 19 | 4,050,000 | 4,200,000 | 55 | 1027 | -0.649821268 |                          |
| 19 | 4,125,000 | 4,275,000 | 56 | 1276 | -0.666531556 |                          |
| 19 | 4,200,000 | 4,350,000 | 57 | 1059 | -0.112137872 |                          |
| 19 | 4,275,000 | 4,425,000 | 58 | 690  | 0.614855778  |                          |
| 19 | 4,350,000 | 4,500,000 | 59 | 1001 | 0.704962865  |                          |
| 19 | 4,425,000 | 4,575,000 | 60 | 1412 | 0.244698753  |                          |
| 19 | 4,500,000 | 4,650,000 | 61 | 1081 | -0.211637523 |                          |

|    |           |           |     |      |              |                                                                  |
|----|-----------|-----------|-----|------|--------------|------------------------------------------------------------------|
| 19 | 4,575,000 | 4,725,000 | 62  | 967  | -0.287742537 |                                                                  |
| 19 | 4,650,000 | 4,800,000 | 63  | 1035 | -0.183190137 |                                                                  |
| 19 | 4,725,000 | 4,875,000 | 64  | 707  | 0.286089623  |                                                                  |
| 19 | 4,800,000 | 4,950,000 | 65  | 812  | 0.292549524  |                                                                  |
| 19 | 4,875,000 | 5,025,000 | 66  | 802  | -0.202449943 |                                                                  |
| 19 | 4,950,000 | 5,100,000 | 67  | 828  | -0.733940176 | ENSBTAG00000017221                                               |
| 19 | 5,025,000 | 5,175,000 | 68  | 1146 | -1.316895587 | ENSBTAG00000017221                                               |
| 19 | 5,100,000 | 5,250,000 | 69  | 851  | -1.993051439 | TOM1L1                                                           |
| 19 | 5,175,000 | 5,325,000 | 70  | 766  | 0.553073927  | COX11,STXBP4,TOM1L1                                              |
| 19 | 5,250,000 | 5,400,000 | 71  | 1140 | 0.103707316  | COX11,STXBP4,TOM1L1                                              |
| 19 | 5,325,000 | 5,475,000 | 72  | 1116 | -0.71113419  | STXBP4                                                           |
| 19 | 5,400,000 | 5,550,000 | 73  | 959  | -0.828040933 | STXBP4                                                           |
| 19 | 5,475,000 | 5,625,000 | 74  | 749  | -0.935904301 | STXBP4                                                           |
| 19 | 5,550,000 | 5,700,000 | 75  | 602  | -1.224171024 | HLF                                                              |
| 19 | 5,625,000 | 5,775,000 | 76  | 821  | -1.300996253 | HLF                                                              |
| 19 | 5,700,000 | 5,850,000 | 77  | 933  | -0.045559352 | HLF,MMD                                                          |
| 19 | 5,775,000 | 5,925,000 | 78  | 792  | 0.787772584  | MMD                                                              |
| 19 | 5,850,000 | 6,000,000 | 79  | 1233 | 0.771424603  |                                                                  |
| 19 | 5,925,000 | 6,075,000 | 80  | 1624 | 0.556503702  |                                                                  |
| 19 | 6,000,000 | 6,150,000 | 81  | 1221 | -0.863714192 |                                                                  |
| 19 | 6,075,000 | 6,225,000 | 82  | 1384 | -0.577117922 |                                                                  |
| 19 | 6,150,000 | 6,300,000 | 83  | 1244 | 0.123354362  | TMEM100                                                          |
| 19 | 6,225,000 | 6,375,000 | 84  | 756  | -0.299896217 | TMEM100,ENSBTAG00000038770,ENSBTAG00000039563,ENSBTAG00000040237 |
| 19 | 6,300,000 | 6,450,000 | 85  | 683  | 0.509545381  | PCTP,ENSBTAG00000038770,ENSBTAG00000039563,ENSBTAG00000040237    |
| 19 | 6,375,000 | 6,525,000 | 86  | 945  | 0.97037647   | PCTP,ENSBTAG00000039563                                          |
| 19 | 6,450,000 | 6,600,000 | 87  | 1639 | 0.666046798  | PCTP                                                             |
| 19 | 6,525,000 | 6,675,000 | 88  | 1926 | 0.483806051  |                                                                  |
| 19 | 6,600,000 | 6,750,000 | 89  | 1681 | 0.693205114  |                                                                  |
| 19 | 6,675,000 | 6,825,000 | 90  | 1107 | 0.745089149  |                                                                  |
| 19 | 6,750,000 | 6,900,000 | 91  | 694  | 0.029030578  |                                                                  |
| 19 | 6,825,000 | 6,975,000 | 92  | 777  | -0.981251553 |                                                                  |
| 19 | 6,900,000 | 7,050,000 | 93  | 1067 | -0.632527158 |                                                                  |
| 19 | 6,975,000 | 7,125,000 | 94  | 909  | -0.859646196 |                                                                  |
| 19 | 7,050,000 | 7,200,000 | 95  | 672  | -2.173476476 |                                                                  |
| 19 | 7,125,000 | 7,275,000 | 96  | 697  | -3.59153978  |                                                                  |
| 19 | 7,200,000 | 7,350,000 | 97  | 732  | -2.753186883 | ANKFN1                                                           |
| 19 | 7,275,000 | 7,425,000 | 98  | 743  | -0.693340227 | ANKFN1                                                           |
| 19 | 7,350,000 | 7,500,000 | 99  | 585  | 0.037465382  | ANKFN1,ENSBTAG00000038823                                        |
| 19 | 7,425,000 | 7,575,000 | 100 | 513  | 0.069395356  | ANKFN1,ENSBTAG00000038823                                        |
| 19 | 7,500,000 | 7,650,000 | 101 | 643  | 0.800344483  | NOG,ENSBTAG00000038823                                           |
| 19 | 7,575,000 | 7,725,000 | 102 | 833  | 0.791616506  | NOG                                                              |
| 19 | 7,650,000 | 7,800,000 | 103 | 803  | 0.252535541  |                                                                  |
| 19 | 7,725,000 | 7,875,000 | 104 | 1024 | -1.32184809  | C17orf67                                                         |
| 19 | 7,800,000 | 7,950,000 | 105 | 1032 | -1.759832353 | C17orf67,DGKE,TRIM25                                             |
| 19 | 7,875,000 | 8,025,000 | 106 | 859  | -0.317731258 | COIL,DGKE,SCPEP1,TRIM25                                          |
| 19 | 7,950,000 | 8,100,000 | 107 | 1453 | 0.711344118  | COIL,SCPEP1,TRIM25,ENSBTAG00000046559                            |
| 19 | 8,025,000 | 8,175,000 | 108 | 1598 | 0.589318414  | SCPEP1,ENSBTAG00000046559                                        |
| 19 | 8,100,000 | 8,250,000 | 109 | 1233 | 0.445071508  | AKAP1                                                            |
| 19 | 8,175,000 | 8,325,000 | 110 | 1003 | 0.438795147  | AKAP1                                                            |
| 19 | 8,250,000 | 8,400,000 | 111 | 748  | -0.142267538 |                                                                  |
| 19 | 8,325,000 | 8,475,000 | 112 | 489  | -0.01229502  |                                                                  |

|    |            |            |     |      |              |                                                                                                                                                                                                                       |
|----|------------|------------|-----|------|--------------|-----------------------------------------------------------------------------------------------------------------------------------------------------------------------------------------------------------------------|
| 19 | 8,400,000  | 8,550,000  | 113 | 762  | 0.04332164   |                                                                                                                                                                                                                       |
| 19 | 8,475,000  | 8,625,000  | 114 | 1151 | 0.300709652  |                                                                                                                                                                                                                       |
| 19 | 8,550,000  | 8,700,000  | 115 | 984  | 0.694882853  | KLF5,MSI2                                                                                                                                                                                                             |
| 19 | 8,625,000  | 8,775,000  | 116 | 780  | 0.244162434  | KLF5,MSI2                                                                                                                                                                                                             |
| 19 | 8,700,000  | 8,850,000  | 117 | 869  | -0.336860707 | CCDC182,MSI2                                                                                                                                                                                                          |
| 19 | 8,775,000  | 8,925,000  | 118 | 848  | -1.095897657 | CCDC182,CUEDC1,MRPS23                                                                                                                                                                                                 |
| 19 | 8,850,000  | 9,000,000  | 119 | 629  | -1.537727022 | CUEDC1,MRPS23                                                                                                                                                                                                         |
| 19 | 8,925,000  | 9,075,000  | 120 | 656  | -0.283132811 | CUEDC1,SRSF1,VEZF1                                                                                                                                                                                                    |
| 19 | 9,000,000  | 9,150,000  | 121 | 894  | -0.433186784 | DYNLL2,SRSF1,VEZF1                                                                                                                                                                                                    |
| 19 | 9,075,000  | 9,225,000  | 122 | 1066 | -0.443060421 | DYNLL2,ENSBTAG00000035001,ENSBTAG00000037424<br>ENSBTAG00000035001,ENSBTAG00000037424,ENSBTAG0<br>0000045606,ENSBTAG00000047689,ENSBTAG0000004787<br>0                                                                |
| 19 | 9,150,000  | 9,300,000  | 123 | 1333 | -0.325772651 | ENSBTAG00000037424,ENSBTAG00000045606,ENSBTAG0<br>0000045769,ENSBTAG00000045921,ENSBTAG0000004768<br>9,ENSBTAG00000047770,ENSBTAG00000047870<br>LPO,MKS1,ENSBTAG00000045769,ENSBTAG00000045921,<br>ENSBTAG00000047770 |
| 19 | 9,225,000  | 9,375,000  | 124 | 1740 | -0.131371231 | BZRAP1,LPO,MKS1,MPO                                                                                                                                                                                                   |
| 19 | 9,300,000  | 9,450,000  | 125 | 1707 | 0.166633109  | BZRAP1,LPO,MPO,RNF43,SUPT4H1                                                                                                                                                                                          |
| 19 | 9,375,000  | 9,525,000  | 126 | 1352 | 0.041688242  | HSF5,MTMR4,RNF43,SUPT4H1                                                                                                                                                                                              |
| 19 | 9,450,000  | 9,600,000  | 127 | 1159 | 0.16451905   | C17orf47,HSF5,MTMR4,RNF43,SEPT4,TEX14                                                                                                                                                                                 |
| 19 | 9,525,000  | 9,675,000  | 128 | 923  | 0.409096827  | C17orf47,MTMR4,SEPT4,TEX14                                                                                                                                                                                            |
| 19 | 9,600,000  | 9,750,000  | 129 | 822  | 0.76311327   | MGC137055,RAD51C,TEX14,ENSBTAG00000046283                                                                                                                                                                             |
| 19 | 9,675,000  | 9,825,000  | 130 | 949  | 0.902764247  | MGC137055,RAD51C,TEX14,ENSBTAG00000046283                                                                                                                                                                             |
| 19 | 9,750,000  | 9,900,000  | 131 | 777  | 0.37391081   | RAD51C                                                                                                                                                                                                                |
| 19 | 9,825,000  | 9,975,000  | 132 | 502  | -0.846763878 |                                                                                                                                                                                                                       |
| 19 | 9,900,000  | 10,050,000 | 133 | 335  | -0.292172791 | PPM1E,TRIM37                                                                                                                                                                                                          |
| 19 | 9,975,000  | 10,125,000 | 134 | 305  | -0.588573351 | PPM1E,TRIM37,ENSBTAG00000025310                                                                                                                                                                                       |
| 19 | 10,050,000 | 10,200,000 | 135 | 420  | -1.010710238 | SKA2,TRIM37,ENSBTAG00000025310                                                                                                                                                                                        |
| 19 | 10,125,000 | 10,275,000 | 136 | 469  | 0.208816874  | GDPD1,PRR11,SKA2,SMG8,TRIM37                                                                                                                                                                                          |
| 19 | 10,200,000 | 10,350,000 | 137 | 390  | 1.149696235  | GDPD1,PRR11,SKA2,SMG8                                                                                                                                                                                                 |
| 19 | 10,275,000 | 10,425,000 | 138 | 552  | 0.32164645   | GDPD1,YPEL2                                                                                                                                                                                                           |
| 19 | 10,350,000 | 10,500,000 | 139 | 614  | -0.048265776 | YPEL2                                                                                                                                                                                                                 |
| 19 | 10,425,000 | 10,575,000 | 140 | 456  | 0.364136698  | YPEL2                                                                                                                                                                                                                 |
| 19 | 10,500,000 | 10,650,000 | 141 | 551  | -0.131762503 | DHX40                                                                                                                                                                                                                 |
| 19 | 10,575,000 | 10,725,000 | 142 | 825  | -0.48764912  | CLTC,DHX40                                                                                                                                                                                                            |
| 19 | 10,650,000 | 10,800,000 | 143 | 918  | 0.023274159  | CLTC,DHX40,PTRH2,VMP1                                                                                                                                                                                                 |
| 19 | 10,725,000 | 10,875,000 | 144 | 720  | 0.617934604  | CLTC,PTRH2,VMP1                                                                                                                                                                                                       |
| 19 | 10,800,000 | 10,950,000 | 145 | 565  | -0.237349431 | RPS6KB1,TUBD1,VMP1                                                                                                                                                                                                    |
| 19 | 10,875,000 | 11,025,000 | 146 | 488  | -0.98870705  | RNFT1,RPS6KB1,TUBD1,VMP1                                                                                                                                                                                              |
| 19 | 10,950,000 | 11,100,000 | 147 | 545  | -1.104700862 | RNFT1,RPS6KB1                                                                                                                                                                                                         |
| 19 | 11,025,000 | 11,175,000 | 148 | 525  | -1.02172414  | MED13                                                                                                                                                                                                                 |
| 19 | 11,100,000 | 11,250,000 | 149 | 588  | 0.14733059   | MED13                                                                                                                                                                                                                 |
| 19 | 11,175,000 | 11,325,000 | 150 | 695  | -0.075518646 | INTS2,MED13                                                                                                                                                                                                           |
| 19 | 11,250,000 | 11,400,000 | 151 | 563  | -0.302219652 | BRIP1,INTS2,TSPY-M2                                                                                                                                                                                                   |
| 19 | 11,325,000 | 11,475,000 | 152 | 655  | 0.011499391  | BRIP1,TSPY-M2,ENSBTAG00000047777                                                                                                                                                                                      |
| 19 | 11,400,000 | 11,550,000 | 153 | 655  | 0.242405735  | BRIP1,ENSBTAG00000047777                                                                                                                                                                                              |
| 19 | 11,475,000 | 11,625,000 | 154 | 539  | 0.386722118  | BRIP1                                                                                                                                                                                                                 |
| 19 | 11,550,000 | 11,700,000 | 155 | 777  | 0.416467805  |                                                                                                                                                                                                                       |
| 19 | 11,625,000 | 11,775,000 | 156 | 980  | 0.883391395  | TBX4                                                                                                                                                                                                                  |
| 19 | 11,700,000 | 11,850,000 | 157 | 827  | 1.151142469  | TBX2,TBX4                                                                                                                                                                                                             |
| 19 | 11,775,000 | 11,925,000 | 158 | 765  | 0.677836844  |                                                                                                                                                                                                                       |
| 19 | 11,850,000 | 12,000,000 | 159 | 881  | -0.178390834 | TBX2                                                                                                                                                                                                                  |
| 19 | 11,925,000 | 12,075,000 | 160 | 763  | -0.550444328 |                                                                                                                                                                                                                       |

|    |            |            |     |      |              |                                                                         |
|----|------------|------------|-----|------|--------------|-------------------------------------------------------------------------|
| 19 | 12,000,000 | 12,150,000 | 161 | 505  | -0.280915723 |                                                                         |
| 19 | 12,075,000 | 12,225,000 | 162 | 403  | 0.629810395  |                                                                         |
| 19 | 12,150,000 | 12,300,000 | 163 | 411  | -0.337147506 | BCAS3,SNRPG                                                             |
| 19 | 12,225,000 | 12,375,000 | 164 | 566  | -0.662910187 | BCAS3,SNRPG                                                             |
| 19 | 12,300,000 | 12,450,000 | 165 | 1021 | 0.673861263  | BCAS3                                                                   |
| 19 | 12,375,000 | 12,525,000 | 166 | 1236 | 1.005461231  | BCAS3                                                                   |
| 19 | 12,450,000 | 12,600,000 | 167 | 728  | 0.868417815  | BCAS3,ENSBTAG00000033841,ENSBTAG00000045964                             |
| 19 | 12,525,000 | 12,675,000 | 168 | 298  | 0.354366068  | BCAS3,PPM1D,ENSBTAG00000033841,ENSBTAG00000045964                       |
| 19 | 12,600,000 | 12,750,000 | 169 | 669  | -0.368671786 | PPM1D                                                                   |
| 19 | 12,675,000 | 12,825,000 | 170 | 801  | -0.896489218 | APPBP2,C17orf64                                                         |
| 19 | 12,750,000 | 12,900,000 | 171 | 515  | -1.323277595 | APPBP2,C17orf64,ENSBTAG00000034433                                      |
| 19 | 12,825,000 | 12,975,000 | 172 | 487  | -0.830410331 | C17orf64,ENSBTAG00000034433                                             |
| 19 | 12,900,000 | 13,050,000 | 173 | 539  | -0.314630376 | ENSBTAG00000020089                                                      |
| 19 | 12,975,000 | 13,125,000 | 174 | 601  | -0.357876253 | CA4,ENSBTAG00000020089                                                  |
| 19 | 13,050,000 | 13,200,000 | 175 | 983  | 0.009431284  | CA4,MYO19,PIGW,ZNHIT3,ENSBTAG00000020089                                |
| 19 | 13,125,000 | 13,275,000 | 176 | 1098 | 0.227466931  | DHRS11,GGNBP2,MRM1,MYO19,PIGW,ZNHIT3                                    |
| 19 | 13,200,000 | 13,350,000 | 177 | 1068 | 0.319759379  | DHRS11,GGNBP2,MRM1                                                      |
| 19 | 13,275,000 | 13,425,000 | 178 | 1192 | 0.693923993  |                                                                         |
| 19 | 13,350,000 | 13,500,000 | 179 | 1097 | 0.561558916  |                                                                         |
| 19 | 13,425,000 | 13,575,000 | 180 | 1059 | 0.460466824  | ENSBTAG00000000560                                                      |
| 19 | 13,500,000 | 13,650,000 | 181 | 714  | 0.649045161  | AATF,LHX1,ENSBTAG00000000560                                            |
| 19 | 13,575,000 | 13,725,000 | 182 | 439  | -0.336698784 | AATF,LHX1                                                               |
| 19 | 13,650,000 | 13,800,000 | 183 | 625  | -0.299999151 | AATF,ACACA                                                              |
| 19 | 13,725,000 | 13,875,000 | 184 | 885  | 0.398287169  | AATF,ACACA                                                              |
| 19 | 13,800,000 | 13,950,000 | 185 | 750  | 0.835327969  | ACACA                                                                   |
| 19 | 13,875,000 | 14,025,000 | 186 | 559  | 1.248897055  | ACACA,C17orf78                                                          |
| 19 | 13,950,000 | 14,100,000 | 187 | 439  | 1.05291654   | ACACA,C17orf78,DUSP14,TADA2A                                            |
| 19 | 14,025,000 | 14,175,000 | 188 | 404  | -2.163666812 | DUSP14,SYNRG,TADA2A                                                     |
| 19 | 14,100,000 | 14,250,000 | 189 | 525  | -1.469565542 | DDX52,DUSP14,SYNRG                                                      |
| 19 | 14,175,000 | 14,325,000 | 190 | 418  | 0.440345048  | DDX52,HNF1B,SYNRG                                                       |
| 19 | 14,250,000 | 14,400,000 | 191 | 382  | 0.61590327   | HNF1B                                                                   |
| 19 | 14,325,000 | 14,475,000 | 192 | 802  | -0.033984122 | HEATR6,HNF1B                                                            |
| 19 | 14,400,000 | 14,550,000 | 193 | 1344 | 0.365823988  | HEATR6,ENSBTAG00000025258                                               |
| 19 | 14,475,000 | 14,625,000 | 194 | 1393 | 0.556841338  | HEATR6,WFDC18,ENSBTAG00000025258,ENSBTAG00000046944,ENSBTAG00000046975  |
| 19 | 14,550,000 | 14,700,000 | 195 | 1112 | -0.199535131 | CCL3,CCL4,WFDC18,ENSBTAG00000039504,ENSBTAG000046944,ENSBTAG00000046975 |
| 19 | 14,625,000 | 14,775,000 | 196 | 1274 | -0.069523148 | CCL3,CCL4,ENSBTAG00000003289,ENSBTAG00000010155,ENSBTAG00000039504      |
| 19 | 14,700,000 | 14,850,000 | 197 | 1411 | 0.193519429  | CCL14,CCL16,CCL5,HEATR9,ENSBTAG0000003289,ENSBTAG00000010155            |
| 19 | 14,775,000 | 14,925,000 | 198 | 830  | 0.653048475  | CCL14,CCL16,CCL5,HEATR9,MMP28,TAF15                                     |
| 19 | 14,850,000 | 15,000,000 | 199 | 362  | 1.235881421  | C17orf50,GAS2L2,HEATR9,MMP28,RASL10B,TAF15                              |
| 19 | 14,925,000 | 15,075,000 | 200 | 373  | 0.947388325  | AP2B1,C17orf50,GAS2L2,MMP28,RASL10B                                     |
| 19 | 15,000,000 | 15,150,000 | 201 | 577  | 0.537485531  | AP2B1,PEX12,SLFN14,ENSBTAG00000019437                                   |
| 19 | 15,075,000 | 15,225,000 | 202 | 729  | 0.131732259  | AP2B1,PEX12,SLFN14,ENSBTAG00000019437,ENSBTAG000025219                  |
| 19 | 15,150,000 | 15,300,000 | 203 | 1215 | 0.736461472  | FNDC8,NLE1,RAD51D,UNC45B,ENSBTAG00000025219                             |
| 19 | 15,225,000 | 15,375,000 | 204 | 1272 | 0.935192718  | FNDC8,NLE1,RAD51D,UNC45B                                                |
| 19 | 15,300,000 | 15,450,000 | 205 | 919  | 0.303053088  | CCT6B,LIG3,RAD51D,RFFL,ZNF830                                           |
| 19 | 15,375,000 | 15,525,000 | 206 | 746  | 0.005461812  | CCT6B,LIG3,RFFL,ZNF830                                                  |
| 19 | 15,450,000 | 15,600,000 | 207 | 633  | 0.180057861  | CCT6B                                                                   |

|    |            |            |     |      |              |                                      |
|----|------------|------------|-----|------|--------------|--------------------------------------|
| 19 | 15,525,000 | 15,675,000 | 208 | 867  | 0.658924577  |                                      |
| 19 | 15,600,000 | 15,750,000 | 209 | 1192 | 0.9480407    |                                      |
| 19 | 15,675,000 | 15,825,000 | 210 | 1145 | -0.1064977   | TMEM132E                             |
| 19 | 15,750,000 | 15,900,000 | 211 | 781  | -0.65653923  | TMEM132E                             |
| 19 | 15,825,000 | 15,975,000 | 212 | 881  | 0.369193131  |                                      |
| 19 | 15,900,000 | 16,050,000 | 213 | 1439 | 0.411857008  |                                      |
| 19 | 15,975,000 | 16,125,000 | 214 | 1526 | 0.633485665  | CCL1                                 |
| 19 | 16,050,000 | 16,200,000 | 215 | 1295 | 0.719441673  | CCL1,CCL11,CCL8                      |
| 19 | 16,125,000 | 16,275,000 | 216 | 1001 | 0.69911285   | CCL11,CCL2,CCL8                      |
| 19 | 16,200,000 | 16,350,000 | 217 | 868  | 0.937614443  | CCL2                                 |
| 19 | 16,275,000 | 16,425,000 | 218 | 797  | 0.803897393  | ACCN1                                |
| 19 | 16,350,000 | 16,500,000 | 219 | 860  | 0.275038027  | ACCN1                                |
| 19 | 16,425,000 | 16,575,000 | 220 | 1257 | -0.588670649 | ACCN1                                |
| 19 | 16,500,000 | 16,650,000 | 221 | 1180 | -0.361864455 | ACCN1                                |
| 19 | 16,575,000 | 16,725,000 | 222 | 815  | -0.394947893 | ACCN1                                |
| 19 | 16,650,000 | 16,800,000 | 223 | 998  | -0.895836263 | ACCN1                                |
| 19 | 16,725,000 | 16,875,000 | 224 | 1551 | -0.326996542 | ACCN1                                |
| 19 | 16,800,000 | 16,950,000 | 225 | 1274 | -0.290235684 | ACCN1                                |
| 19 | 16,875,000 | 17,025,000 | 226 | 930  | 0.986123611  | ACCN1                                |
| 19 | 16,950,000 | 17,100,000 | 227 | 1050 | 1.334886084  | ACCN1                                |
| 19 | 17,025,000 | 17,175,000 | 228 | 861  | 1.244490995  | ACCN1                                |
| 19 | 17,100,000 | 17,250,000 | 229 | 596  | 0.641810241  | ACCN1                                |
| 19 | 17,175,000 | 17,325,000 | 230 | 836  | -1.18821601  | ACCN1                                |
| 19 | 17,250,000 | 17,400,000 | 231 | 1236 | -0.537283326 | ACCN1                                |
| 19 | 17,325,000 | 17,475,000 | 232 | 1215 | 0.532923825  | ACCN1                                |
| 19 | 17,400,000 | 17,550,000 | 233 | 1120 | 0.364103419  | ACCN1                                |
| 19 | 17,475,000 | 17,625,000 | 234 | 1014 | 0.042798262  | ACCN1,SPACA3,TMEM98                  |
| 19 | 17,550,000 | 17,700,000 | 235 | 835  | 0.401633292  | ACCN1,MYO1D,SPACA3,TMEM98            |
| 19 | 17,625,000 | 17,775,000 | 236 | 961  | 0.588633603  | MYO1D,TMEM98                         |
| 19 | 17,700,000 | 17,850,000 | 237 | 1130 | 0.628221765  | MYO1D                                |
| 19 | 17,775,000 | 17,925,000 | 238 | 1161 | 0.800189394  | MYO1D                                |
| 19 | 17,850,000 | 18,000,000 | 239 | 802  | 0.525292565  | MYO1D                                |
| 19 | 17,925,000 | 18,075,000 | 240 | 404  | -0.267238408 | CDK5R1,MYO1D,PSMD11                  |
| 19 | 18,000,000 | 18,150,000 | 241 | 477  | 0.571891079  | C17orf75,CDK5R1,MYO1D,PSMD11,ZNF207  |
| 19 | 18,075,000 | 18,225,000 | 242 | 683  | 0.636194646  | C17orf75,RHBDL3,ZNF207               |
| 19 | 18,150,000 | 18,300,000 | 243 | 819  | 0.422772794  | C17orf75,RHBDL3,RHOT1                |
| 19 | 18,225,000 | 18,375,000 | 244 | 765  | 0.113434493  | ADAP2,RHOT1,RNF135                   |
| 19 | 18,300,000 | 18,450,000 | 245 | 630  | 0.315459256  | ADAP2,ATAD5,C19H17orf42,RHOT1,RNF135 |
| 19 | 18,375,000 | 18,525,000 | 246 | 540  | 0.211091023  | ADAP2,ATAD5,C19H17orf42,CRLF3,SUZ12  |
| 19 | 18,450,000 | 18,600,000 | 247 | 439  | -0.882074236 | CRLF3,SUZ12,UTP6                     |
| 19 | 18,525,000 | 18,675,000 | 248 | 380  | -0.716510352 | COPRS,SUZ12,UTP6                     |
| 19 | 18,600,000 | 18,750,000 | 249 | 394  | -0.319522628 | COPRS                                |
| 19 | 18,675,000 | 18,825,000 | 250 | 384  | -1.470151872 |                                      |
| 19 | 18,750,000 | 18,900,000 | 251 | 624  | -2.566182737 | RAB11FIP4                            |
| 19 | 18,825,000 | 18,975,000 | 252 | 693  | -1.345021526 | NF1,RAB11FIP4                        |
| 19 | 18,900,000 | 19,050,000 | 253 | 519  | -0.520878958 | EVI2A,EVI2B,NF1,OMG                  |
| 19 | 18,975,000 | 19,125,000 | 254 | 377  | -1.000626212 | EVI2A,EVI2B,NF1,OMG                  |
| 19 | 19,050,000 | 19,200,000 | 255 | 332  | -1.577608984 | NF1                                  |
| 19 | 19,125,000 | 19,275,000 | 256 | 468  | -0.384089722 | NF1                                  |
| 19 | 19,200,000 | 19,350,000 | 257 | 716  | -0.07910492  | NF1                                  |
| 19 | 19,275,000 | 19,425,000 | 258 | 1062 | -0.138820439 | WSB1                                 |
| 19 | 19,350,000 | 19,500,000 | 259 | 1039 | 0.679380162  | WSB1                                 |
| 19 | 19,425,000 | 19,575,000 | 260 | 821  | 0.945110777  | KSR1                                 |

|    |            |            |     |      |              |                                                                                            |
|----|------------|------------|-----|------|--------------|--------------------------------------------------------------------------------------------|
| 19 | 19,500,000 | 19,650,000 | 261 | 726  | 0.716362602  | KSR1,ENSBTAG00000046372                                                                    |
| 19 | 19,575,000 | 19,725,000 | 262 | 840  | 0.611292503  | KSR1,ENSBTAG00000046372                                                                    |
| 19 | 19,650,000 | 19,800,000 | 263 | 997  | 0.332064146  | INOS,LGALS9,ENSBTAG00000046372                                                             |
| 19 | 19,725,000 | 19,875,000 | 264 | 1065 | -0.89022824  | INOS,LGALS9,ULBP27                                                                         |
| 19 | 19,800,000 | 19,950,000 | 265 | 1060 | -1.307046734 | INOS,ULBP27,ENSBTAG0000001836,ENSBTAG00000023970,ENSBTAG00000046595                        |
| 19 | 19,875,000 | 20,025,000 | 266 | 913  | -0.857697056 | INOS,LYRM9,ULBP27,ENSBTAG0000001836,ENSBTAG000007238,ENSBTAG00000023970,ENSBTAG00000046595 |
| 19 | 19,950,000 | 20,100,000 | 267 | 1031 | -1.442023858 | INOS,LYRM9,ENSBTAG00000007238                                                              |
| 19 | 20,025,000 | 20,175,000 | 268 | 1212 | -1.601384885 | LYRM9                                                                                      |
| 19 | 20,100,000 | 20,250,000 | 269 | 865  | -0.465452258 | NLK                                                                                        |
| 19 | 20,175,000 | 20,325,000 | 270 | 580  | 0.030834503  | NLK                                                                                        |
| 19 | 20,250,000 | 20,400,000 | 271 | 657  | 0.372414582  | IFT20,NLK,POLDIP2,TMEM199,TMEM97,TNFAIP1                                                   |
| 19 | 20,325,000 | 20,475,000 | 272 | 736  | -0.23578451  | IFT20,POLDIP2,SARM1,SEBOX,SLC46A1,TMEM199,TMEM97,TNFAIP1,VTN                               |
| 19 | 20,400,000 | 20,550,000 | 273 | 651  | -0.557880032 | FOXN1,SARM1,SEBOX,SLC13A2,SLC46A1,TMEM199,VTN                                              |
| 19 | 20,475,000 | 20,625,000 | 274 | 525  | 0.739914148  | ALDOC,FOXN1,KIAA0100,PIGS,SLC13A2,SPAG5,UNC119,ENSBTAG00000011984                          |
| 19 | 20,550,000 | 20,700,000 | 275 | 404  | 1.179645056  | ALDOC,FOXN1,KIAA0100,PIGS,PROCA1,RAB34,SDF2,SPAG5,SUPT6H,UNC119,ENSBTAG00000011984         |
| 19 | 20,625,000 | 20,775,000 | 276 | 274  | 0.190102484  | FAM222B,KIAA0100,NEK8,PROCA1,RAB34,RPL23A,SDF2,SUPT6H,TLCD1,TRAF4                          |
| 19 | 20,700,000 | 20,850,000 | 277 | 395  | 0.384437801  | DHRS13,ERAL1,FAM222B,FLOT2,NEK8,PHF12,RAB34,RPL23A,TLCD1,TRAF4                             |
| 19 | 20,775,000 | 20,925,000 | 278 | 540  | 0.233630013  | DHRS13,ERAL1,FAM222B,FLOT2,PHF12,SEZ6                                                      |
| 19 | 20,850,000 | 21,000,000 | 279 | 733  | 0.19648455   | MYO18A,PHF12,PIPOX,SEZ6                                                                    |
| 19 | 20,925,000 | 21,075,000 | 280 | 755  | -0.778619285 | MYO18A,PIPOX,SEZ6                                                                          |
| 19 | 21,000,000 | 21,150,000 | 281 | 545  | -1.318326301 | COX7C,CRYBA1,MYO18A                                                                        |
| 19 | 21,075,000 | 21,225,000 | 282 | 445  | 0.263246988  | COX7C,CRYBA1,MYO18A,NUFIP2                                                                 |
| 19 | 21,150,000 | 21,300,000 | 283 | 350  | 0.17616337   | CRYBA1,NUFIP2                                                                              |
| 19 | 21,225,000 | 21,375,000 | 284 | 259  | -0.012866192 | TAOK1                                                                                      |
| 19 | 21,300,000 | 21,450,000 | 285 | 276  | 0.095786934  | ABHD15,ANKRD13B,CORO6,GIT1,SSH2,TAOK1,TP53I13                                              |
| 19 | 21,375,000 | 21,525,000 | 286 | 308  | 0.057438306  | ABHD15,ANKRD13B,CORO6,GIT1,SSH2,TP53I13                                                    |
| 19 | 21,450,000 | 21,600,000 | 287 | 324  | 0.17878553   | SSH2                                                                                       |
| 19 | 21,525,000 | 21,675,000 | 288 | 375  | 0.653919868  |                                                                                            |
| 19 | 21,600,000 | 21,750,000 | 289 | 544  | 0.362794478  | EFCAB5                                                                                     |
| 19 | 21,675,000 | 21,825,000 | 290 | 709  | 0.287530887  | EFCAB5,NSRP1                                                                               |
| 19 | 21,750,000 | 21,900,000 | 291 | 585  | 0.426980333  | BLMH,EFCAB5,NSRP1,SLC6A4                                                                   |
| 19 | 21,825,000 | 21,975,000 | 292 | 334  | 0.195448784  | BLMH,NSRP1,SLC6A4,TMIGD1                                                                   |
| 19 | 21,900,000 | 22,050,000 | 293 | 378  | 0.177975112  | BLMH,CPD,TMIGD1                                                                            |
| 19 | 21,975,000 | 22,125,000 | 294 | 449  | 0.255226581  | CPD,GOSR1                                                                                  |
| 19 | 22,050,000 | 22,200,000 | 295 | 453  | 0.094494965  | BHLHA9,CPD,GOSR1,TUSC5                                                                     |
| 19 | 22,125,000 | 22,275,000 | 296 | 511  | -0.799152544 | BHLHA9,GOSR1,TUSC5                                                                         |
| 19 | 22,200,000 | 22,350,000 | 297 | 511  | -1.354174709 | ABR                                                                                        |
| 19 | 22,275,000 | 22,425,000 | 298 | 671  | -0.314257755 | ABR                                                                                        |
| 19 | 22,350,000 | 22,500,000 | 299 | 510  | -0.901119402 | ABR,NXN,TIMM22                                                                             |
| 19 | 22,425,000 | 22,575,000 | 300 | 258  | -1.974316146 | ABR,NXN,TIMM22                                                                             |
| 19 | 22,500,000 | 22,650,000 | 301 | 646  | -0.485894621 | GLOD4,NXN,RNMTL1                                                                           |
| 19 | 22,575,000 | 22,725,000 | 302 | 746  | -0.448582407 | DBIL5,GEMIN4,GLOD4,MGC155170,NXN,RNMTL1,VPS53                                              |
| 19 | 22,650,000 | 22,800,000 | 303 | 518  | -0.318954077 | DBIL5,GEMIN4,GLOD4,MGC155170,VPS53                                                         |
| 19 | 22,725,000 | 22,875,000 | 304 | 527  | 0.123260022  | C17orf97,FAM101B,RPH3AL,VPS53                                                              |
| 19 | 22,800,000 | 22,950,000 | 305 | 991  | 0.144689095  | C17orf97,FAM101B,RPH3AL,VPS53                                                              |



|    |            |            |     |      |              |                                                                                                                                                                                                       |
|----|------------|------------|-----|------|--------------|-------------------------------------------------------------------------------------------------------------------------------------------------------------------------------------------------------|
| 19 | 22,875,000 | 23,025,000 | 306 | 1112 | -0.159533051 | RPH3AL                                                                                                                                                                                                |
| 19 | 22,950,000 | 23,100,000 | 307 | 735  | -0.156126211 | DOC2B,RPH3AL,YWHAE                                                                                                                                                                                    |
| 19 | 23,025,000 | 23,175,000 | 308 | 570  | 0.770312824  | CRK,DOC2B,MYO1C,YWHAE                                                                                                                                                                                 |
| 19 | 23,100,000 | 23,250,000 | 309 | 485  | 0.795390972  | CRK,INPP5K,MYO1C,PITPNA,YWHAE                                                                                                                                                                         |
| 19 | 23,175,000 | 23,325,000 | 310 | 517  | -2.407910419 | INPP5K,MYO1C,PITPNA,PRPF8,RILP,SCARF1,SLC43A2                                                                                                                                                         |
| 19 | 23,250,000 | 23,400,000 | 311 | 534  | -5.549494177 | PRPF8,RILP,SCARF1,SLC43A2,TLCD2,WDR81                                                                                                                                                                 |
| 19 | 23,325,000 | 23,475,000 | 312 | 492  | -6.337387511 | PRPF8,SERPINF1,SERPINF2,SMYD4,TLCD2,WDR81                                                                                                                                                             |
| 19 | 23,400,000 | 23,550,000 | 313 | 540  | -6.802606947 | RPA1,SERPINF1,SERPINF2,SMYD4,WDR81                                                                                                                                                                    |
| 19 | 23,475,000 | 23,625,000 | 314 | 729  | -3.944946697 | RPA1,RTN4RL1,SMYD4                                                                                                                                                                                    |
| 19 | 23,550,000 | 23,700,000 | 315 | 620  | -0.155707654 | DPH1,HIC1,OVCA2,RTN4RL1,SMG6                                                                                                                                                                          |
| 19 | 23,625,000 | 23,775,000 | 316 | 449  | -0.745136217 | DPH1,HIC1,OVCA2,SMG6                                                                                                                                                                                  |
| 19 | 23,700,000 | 23,850,000 | 317 | 477  | -1.657873685 | SMG6                                                                                                                                                                                                  |
| 19 | 23,775,000 | 23,925,000 | 318 | 412  | -1.848311756 | SGSM2,SMG6,SRR,TSR1                                                                                                                                                                                   |
| 19 | 23,850,000 | 24,000,000 | 319 | 275  | 0.041764934  | METTL16,MNT,SGSM2,SMG6,SRR,TSR1                                                                                                                                                                       |
| 19 | 23,925,000 | 24,075,000 | 320 | 250  | 0.833726101  | METTL16,MNT                                                                                                                                                                                           |
| 19 | 24,000,000 | 24,150,000 | 321 | 262  | 0.323775616  | METTL16,PAFAH1B1                                                                                                                                                                                      |
| 19 | 24,075,000 | 24,225,000 | 322 | 331  | 0.223056708  | CLUH,PAFAH1B1                                                                                                                                                                                         |
| 19 | 24,150,000 | 24,300,000 | 323 | 509  | -2.574784573 | CLUH,PAFAH1B1                                                                                                                                                                                         |
| 19 | 24,225,000 | 24,375,000 | 324 | 763  | -1.8649705   |                                                                                                                                                                                                       |
| 19 | 24,300,000 | 24,450,000 | 325 | 1240 | -0.475552592 | RAP1GAP2                                                                                                                                                                                              |
| 19 | 24,375,000 | 24,525,000 | 326 | 1788 | -1.598945204 | OR1G1,RAP1GAP2,ENSBTAG00000008324,ENSBTAG00000008481,ENSBTAG000000040362                                                                                                                              |
| 19 | 24,450,000 | 24,600,000 | 327 | 2439 | -0.278445405 | OR1G1,RAP1GAP2,ENSBTAG00000008324,ENSBTAG00000008481,ENSBTAG00000019391,ENSBTAG00000039411,ENSBTAG000000039633,ENSBTAG000000040362,ENSBTAG00000048282                                                 |
| 19 | 24,525,000 | 24,675,000 | 328 | 2120 | 0.433332525  | OR3A1,ENSBTAG00000018221,ENSBTAG00000019391,ENSBTAG000000039411,ENSBTAG000000039633,ENSBTAG00000047049,ENSBTAG00000048099,ENSBTAG00000048282                                                          |
| 19 | 24,600,000 | 24,750,000 | 329 | 1071 | 0.390782774  | OR3A1,ENSBTAG00000018221,ENSBTAG00000032467,ENSBTAG000000037529,ENSBTAG00000038059,ENSBTAG00000045667,ENSBTAG00000046217,ENSBTAG00000046652,ENSBTAG00000046960,ENSBTAG00000047049,ENSBTAG00000048099  |
| 19 | 24,675,000 | 24,825,000 | 330 | 1342 | -0.426038023 | SPATA22,ENSBTAG00000032457,ENSBTAG00000032467,ENSBTAG00000037529,ENSBTAG00000038059,ENSBTAG00000045667,ENSBTAG00000045899,ENSBTAG00000046217,ENSBTAG00000046652,ENSBTAG00000046960,ENSBTAG00000047458 |
| 19 | 24,750,000 | 24,900,000 | 331 | 1330 | -0.707964602 | ASPA,SPATA22,TRPV3,ENSBTAG00000018880,ENSBTAG00000032457,ENSBTAG00000045899,ENSBTAG00000046217,ENSBTAG00000047458                                                                                     |
| 19 | 24,825,000 | 24,975,000 | 332 | 674  | -0.270517305 | ASPA,CARKL,CTNS,TAX1BP3,TRPV3,ENSBTAG00000018880                                                                                                                                                      |
| 19 | 24,900,000 | 25,050,000 | 333 | 774  | 0.006750627  | CARKL,CTNS,EMC6,GSG2,ITGAE,TAX1BP3,ENSBTAG00000015258,ENSBTAG00000018880                                                                                                                              |
| 19 | 24,975,000 | 25,125,000 | 334 | 886  | -0.31411003  | C17orf85,CAMKK1,EMC6,GSG2,ITGAE,TAX1BP3,ENSBTAG00000015258                                                                                                                                            |
| 19 | 25,050,000 | 25,200,000 | 335 | 842  | -0.023599895 | ATP2A3,C17orf85,CAMKK1,P2RX1                                                                                                                                                                          |
| 19 | 25,125,000 | 25,275,000 | 336 | 855  | 0.013017918  | ATP2A3,CAMKK1,P2RX1,ZZEF1                                                                                                                                                                             |
| 19 | 25,200,000 | 25,350,000 | 337 | 822  | 0.154181942  | ANKFY1,CYB5D2,ZZEF1                                                                                                                                                                                   |
| 19 | 25,275,000 | 25,425,000 | 338 | 612  | 0.988014691  | ANKFY1,CYB5D2,UBE2G1,ZZEF1                                                                                                                                                                            |
| 19 | 25,350,000 | 25,500,000 | 339 | 470  | 1.255965299  | ANKFY1,UBE2G1                                                                                                                                                                                         |

|    |            |            |     |      |              |                                                                                                                             |
|----|------------|------------|-----|------|--------------|-----------------------------------------------------------------------------------------------------------------------------|
| 19 | 25,425,000 | 25,575,000 | 340 | 744  | 1.148927602  | SPNS3,UBE2G1                                                                                                                |
| 19 | 25,500,000 | 25,650,000 | 341 | 1059 | 0.87350244   | MYBBP1A,SPNS2,SPNS3                                                                                                         |
| 19 | 25,575,000 | 25,725,000 | 342 | 892  | 0.393788643  | GGT6,MYBBP1A,SMTNL2,SPNS2,SPNS3,TEKT1                                                                                       |
| 19 | 25,650,000 | 25,800,000 | 343 | 722  | 0.248750049  | FBXO39,GGT6,MYBBP1A,SLC13A5,SMTNL2,TEKT1,XAF1                                                                               |
| 19 | 25,725,000 | 25,875,000 | 344 | 647  | 0.460520612  | FBXO39,KIAA0753,MED31,SLC13A5,TXNDC17,XAF1                                                                                  |
| 19 | 25,800,000 | 25,950,000 | 345 | 599  | 0.749540142  | KIAA0753,MED31,PITPNM3,SLC13A5,TXNDC17,ENSBTAG0000047858                                                                    |
| 19 | 25,875,000 | 26,025,000 | 346 | 873  | 0.887177061  | FAM64A,KIAA0753,PITPNM3,ENSBTAG0000047858                                                                                   |
| 19 | 25,950,000 | 26,100,000 | 347 | 956  | -0.460934151 | AIPL1,FAM64A,PITPNM3                                                                                                        |
| 19 | 26,025,000 | 26,175,000 | 348 | 916  | -1.264309949 | AIPL1,FAM64A                                                                                                                |
| 19 | 26,100,000 | 26,250,000 | 349 | 913  | 0.117330962  |                                                                                                                             |
| 19 | 26,175,000 | 26,325,000 | 350 | 1068 | 0.656476248  | WSCD1                                                                                                                       |
| 19 | 26,250,000 | 26,400,000 | 351 | 1484 | 0.329237328  | WSCD1                                                                                                                       |
| 19 | 26,325,000 | 26,475,000 | 352 | 1374 | -0.10495503  |                                                                                                                             |
| 19 | 26,400,000 | 26,550,000 | 353 | 1129 | 0.054046476  |                                                                                                                             |
| 19 | 26,475,000 | 26,625,000 | 354 | 1405 | 1.015115585  |                                                                                                                             |
| 19 | 26,550,000 | 26,700,000 | 355 | 1359 | 1.174545708  | DERL2,MIS12,NLRP1,ENSBTAG00000025126                                                                                        |
| 19 | 26,625,000 | 26,775,000 | 356 | 922  | 0.545172336  | C1QBP,DERL2,DHX33,MIS12,NLRP1,NUP88,RABEP1,RPAIN,ENSBTAG00000025126                                                         |
| 19 | 26,700,000 | 26,850,000 | 357 | 539  | -0.898855286 | C1QBP,DHX33,NUP88,RABEP1,RPAIN                                                                                              |
| 19 | 26,775,000 | 26,925,000 | 358 | 553  | -1.226922954 | RABEP1,SCIMP                                                                                                                |
| 19 | 26,850,000 | 27,000,000 | 359 | 526  | -0.040731205 | RABEP1,SCIMP,ZFP3,ENSBTAG00000013906                                                                                        |
| 19 | 26,925,000 | 27,075,000 | 360 | 392  | 0.223598703  | CAMTA2,ENO3,INCA1,KIF1C,SPAG7,ZFP3,ENSBTAG00000013906                                                                       |
| 19 | 27,000,000 | 27,150,000 | 361 | 597  | 0.059604705  | C17orf107,CAMTA2,CHRNE,ENO3,GP1BA,INCA1,KIF1C,MINK1,PFN1,RNF167,SLC25A11,SPAG7                                              |
| 19 | 27,075,000 | 27,225,000 | 362 | 505  | -0.086199579 | C17orf107,CHRNE,ENO3,GLTPD2,GP1BA,MINK1,PFN1,PLD2,PSMB6,RNF167,SLC25A11,TM4SF5,VMO1                                         |
| 19 | 27,150,000 | 27,300,000 | 363 | 431  | 0.170802946  | ARRB2,CXCL16,GLTPD2,MED11,MINK1,PELP1,PLD2,PSMB6,TM4SF5,VMO1,ZMYND15                                                        |
| 19 | 27,225,000 | 27,375,000 | 364 | 772  | 0.43396794   | ALOX12E,ALOX15,ARRB2,CXCL16,MED11,PELP1,ZMYND15                                                                             |
| 19 | 27,300,000 | 27,450,000 | 365 | 628  | 0.260677875  | ALOX12,ALOX12E,ALOX15,BAP18,BCL6B,PELP1,RNASEK                                                                              |
| 19 | 27,375,000 | 27,525,000 | 366 | 367  | 0.086582377  | ALOX12,ASGR2,BAP18,BCL6B,CLEC10A,RNASEK,SLC16A11,SLC16A13                                                                   |
| 19 | 27,450,000 | 27,600,000 | 367 | 415  | -1.177561881 | ACADVL,ASGR1,ASGR2,BCL6B,CLEC10A,CTDNEP1,DLG4,DVL2,ELP5,GABARAP,PHF23,SLC16A11,SLC16A13                                     |
| 19 | 27,525,000 | 27,675,000 | 368 | 321  | -2.81940566  | ACADVL,ACAP1,ASGR1,CLDN7,CTDNEP1,DLG4,DVL2,EIF5A,ELP5,GABARAP,GPS2,PHF23,SLC2A4,YBX2,ENSBTAG0000010519,ENSBTAG00000045892   |
| 19 | 27,600,000 | 27,750,000 | 369 | 240  | -3.853960788 | ACAP1,CLDN7,EIF5A,ELP5,GPS2,KCTD11,NLGN2,PLSCR3,SLC2A4,SPEM1,TMEM102,TMEM256,TNK1,YBX2,ENSBTAG0000010519,ENSBTAG00000045892 |
| 19 | 27,675,000 | 27,825,000 | 370 | 279  | -1.75177583  | ACAP1,CHRN1,FGF11,KCTD11,NLGN2,PLSCR3,POLR2A,SPEM1,TMEM102,TMEM256,TNK1,ZBTB4                                               |
| 19 | 27,750,000 | 27,900,000 | 371 | 472  | 0.332103151  | CHRN1,FGF11,POLR2A,TNFSF12,ZBTB4                                                                                            |
| 19 | 27,825,000 | 27,975,000 | 372 | 424  | 0.626452083  | ATP1B2,CD68,EIF4A1,FXR2,MPDU1,SAT2,SHBG,SOX15,TNFSF12,TNFSF13,ENSBTAG00000000131                                            |
| 19 | 27,900,000 | 28,050,000 | 373 | 299  | -0.486029387 | ATP1B2,CD68,DNAH2,EFNB3,EIF4A1,FXR2,MPDU1,SAT2,SHBG,SOX15,TNFSF12,TNFSF13,TP53,WRAP53,ENSBTAG0000000131                     |
| 19 | 27,975,000 | 28,125,000 | 374 | 428  | -0.369753603 | ATP1B2,DNAH2,EFNB3,TP53,WRAP53                                                                                              |
| 19 | 28,050,000 | 28,200,000 | 375 | 395  | -0.856649465 | CHD3,CYB5D1,DNAH2,KDM6B,NAA38,TMEM88                                                                                        |

|    |            |            |     |      |              |                                                                   |
|----|------------|------------|-----|------|--------------|-------------------------------------------------------------------|
| 19 | 28,125,000 | 28,275,000 | 376 | 388  | -1.844499566 | CHD3,CNTROB,CYB5D1,DNAH2,GUCY2D,KCNAB3,KDM6B,NAA38,TMEM88,TRAPPC1 |
| 19 | 28,200,000 | 28,350,000 | 377 | 506  | -1.821363669 | ALOX12B,ALOX15B,CHD3,CNTROB,GUCY2D,KCNAB3,TRAPPC1                 |
| 19 | 28,275,000 | 28,425,000 | 378 | 478  | -2.03400379  | ALOX12B,ALOX15B,ALOXE3,GUCY2D,HES7,PER1,VAMP2                     |
| 19 | 28,350,000 | 28,500,000 | 379 | 542  | -1.588631748 | ALOXE3,AURKB,C19H17orf59,CTC1,HES7,PER1,PFAS,TMEM107,VAMP2        |
| 19 | 28,425,000 | 28,575,000 | 380 | 617  | -0.608655778 | ARHGEF15,AURKB,C19H17orf59,CTC1,ODF4,PFAS,RANGRF,SLC25A35,TMEM107 |
| 19 | 28,500,000 | 28,650,000 | 381 | 653  | -0.4621646   | ARHGEF15,NDEL1,ODF4,PFAS,RANGRF,RNF222,RPL26,SLC25A35             |
| 19 | 28,575,000 | 28,725,000 | 382 | 721  | -0.856708626 | MYH10,NDEL1,RNF222,RPL26                                          |
| 19 | 28,650,000 | 28,800,000 | 383 | 661  | -0.376956485 | MYH10,NDEL1                                                       |
| 19 | 28,725,000 | 28,875,000 | 384 | 542  | -0.127511434 | CCDC42,MYH10                                                      |
| 19 | 28,800,000 | 28,950,000 | 385 | 474  | 0.358717855  | CCDC42,MFSD6L,MYH10,PIK3R6                                        |
| 19 | 28,875,000 | 29,025,000 | 386 | 541  | 0.728420378  | CCDC42,MFSD6L,PIK3R5,PIK3R6                                       |
| 19 | 28,950,000 | 29,100,000 | 387 | 458  | 0.479608673  | NTN1,PIK3R5,PIK3R6                                                |
| 19 | 29,025,000 | 29,175,000 | 388 | 308  | 0.035984934  | NTN1                                                              |
| 19 | 29,100,000 | 29,250,000 | 389 | 431  | 0.403779683  | NTN1                                                              |
| 19 | 29,175,000 | 29,325,000 | 390 | 485  | 0.590484587  | NTN1,STX8                                                         |
| 19 | 29,250,000 | 29,400,000 | 391 | 410  | 0.067685445  | NTN1,STX8                                                         |
| 19 | 29,325,000 | 29,475,000 | 392 | 559  | -0.538653865 | STX8                                                              |
| 19 | 29,400,000 | 29,550,000 | 393 | 979  | 0.166474495  | STX8,USP43,WDR16                                                  |
| 19 | 29,475,000 | 29,625,000 | 394 | 1293 | 0.485264356  | DHRS7C,GLP2R,STX8,USP43,WDR16,ENSBTAG00000005051                  |
| 19 | 29,550,000 | 29,700,000 | 395 | 1311 | 0.493100081  | DHRS7C,GAS7,GLP2R,RCVRN,USP43,ENSBTAG00000005051                  |
| 19 | 29,625,000 | 29,775,000 | 396 | 971  | 0.437980595  | GAS7,GLP2R,RCVRN                                                  |
| 19 | 29,700,000 | 29,850,000 | 397 | 700  | -0.066237206 | GAS7                                                              |
| 19 | 29,775,000 | 29,925,000 | 398 | 595  | -0.067957944 | GAS7                                                              |
| 19 | 29,850,000 | 30,000,000 | 399 | 737  | 0.803668216  | GAS7,MYH13                                                        |
| 19 | 29,925,000 | 30,075,000 | 400 | 907  | 0.40813598   | MYH13,MYHC-FETAL                                                  |
| 19 | 30,000,000 | 30,150,000 | 401 | 847  | 0.109662777  | MYH1,MYH13,MYH2,MYH4,MYHC-FETAL                                   |
| 19 | 30,075,000 | 30,225,000 | 402 | 748  | 0.743630946  | MYH1,MYH2,MYH4                                                    |
| 19 | 30,150,000 | 30,300,000 | 403 | 502  | 0.782437997  | ADPRM,MYH2,MYHC-EMBRYONIC,SCO1                                    |
| 19 | 30,225,000 | 30,375,000 | 404 | 386  | 0.488750133  | ADPRM,MYHC-EMBRYONIC,SCO1,TMEM220                                 |
| 19 | 30,300,000 | 30,450,000 | 405 | 439  | 0.843870485  | ADPRM,PIRT,TMEM220                                                |
| 19 | 30,375,000 | 30,525,000 | 406 | 507  | 0.617176437  | PIRT                                                              |
| 19 | 30,450,000 | 30,600,000 | 407 | 687  | 0.309564901  |                                                                   |
| 19 | 30,525,000 | 30,675,000 | 408 | 712  | 0.203894619  |                                                                   |
| 19 | 30,600,000 | 30,750,000 | 409 | 677  | 0.512093644  |                                                                   |
| 19 | 30,675,000 | 30,825,000 | 410 | 803  | 0.994157273  |                                                                   |
| 19 | 30,750,000 | 30,900,000 | 411 | 802  | 0.903708941  |                                                                   |
| 19 | 30,825,000 | 30,975,000 | 412 | 616  | 0.220253801  | DNAH9                                                             |
| 19 | 30,900,000 | 31,050,000 | 413 | 463  | -0.208442875 | DNAH9                                                             |
| 19 | 30,975,000 | 31,125,000 | 414 | 911  | 1.132045502  | DNAH9                                                             |
| 19 | 31,050,000 | 31,200,000 | 415 | 1499 | 1.320429333  | DNAH9                                                             |
| 19 | 31,125,000 | 31,275,000 | 416 | 1643 | 1.28027485   | DNAH9,ZNF18                                                       |
| 19 | 31,200,000 | 31,350,000 | 417 | 1313 | 1.278500178  | DNAH9,MAP2K4,ZNF18                                                |
| 19 | 31,275,000 | 31,425,000 | 418 | 1165 | 1.234662521  | MAP2K4                                                            |
| 19 | 31,350,000 | 31,500,000 | 419 | 1457 | 1.19927118   | MAP2K4                                                            |
| 19 | 31,425,000 | 31,575,000 | 420 | 1240 | 1.202564121  |                                                                   |
| 19 | 31,500,000 | 31,650,000 | 421 | 565  | 1.08666455   |                                                                   |

|    |            |            |     |      |              |                                                    |
|----|------------|------------|-----|------|--------------|----------------------------------------------------|
| 19 | 31,575,000 | 31,725,000 | 422 | 557  | 1.103772217  |                                                    |
| 19 | 31,650,000 | 31,800,000 | 423 | 1134 | 0.84427607   | MYOCD                                              |
| 19 | 31,725,000 | 31,875,000 | 424 | 1185 | 0.586067839  | MYOCD                                              |
| 19 | 31,800,000 | 31,950,000 | 425 | 740  | 0.462913474  | ARHGAP44,MYOCD                                     |
| 19 | 31,875,000 | 32,025,000 | 426 | 880  | -0.879296607 | ARHGAP44,ELAC2                                     |
| 19 | 31,950,000 | 32,100,000 | 427 | 1132 | -0.06657661  | ARHGAP44,ELAC2                                     |
| 19 | 32,025,000 | 32,175,000 | 428 | 1088 | 1.148251831  |                                                    |
| 19 | 32,100,000 | 32,250,000 | 429 | 1271 | 1.039993998  |                                                    |
| 19 | 32,175,000 | 32,325,000 | 430 | 1103 | 0.402940732  |                                                    |
| 19 | 32,250,000 | 32,400,000 | 431 | 752  | 0.052912929  | ENSBTAG00000031107                                 |
| 19 | 32,325,000 | 32,475,000 | 432 | 865  | 0.757462751  | ENSBTAG00000031107                                 |
| 19 | 32,400,000 | 32,550,000 | 433 | 1106 | 0.17885481   | ENSBTAG00000031107                                 |
| 19 | 32,475,000 | 32,625,000 | 434 | 873  | 0.002120895  |                                                    |
| 19 | 32,550,000 | 32,700,000 | 435 | 629  | 0.042547876  | COX10                                              |
| 19 | 32,625,000 | 32,775,000 | 436 | 726  | -0.061690364 | COX10                                              |
| 19 | 32,700,000 | 32,850,000 | 437 | 818  | 0.840981633  | COX10,HS3ST3B1                                     |
| 19 | 32,775,000 | 32,925,000 | 438 | 684  | 1.326992623  | COX10,HS3ST3B1                                     |
| 19 | 32,850,000 | 33,000,000 | 439 | 650  | 1.242155677  | HS3ST3B1                                           |
| 19 | 32,925,000 | 33,075,000 | 440 | 891  | 0.950706493  |                                                    |
| 19 | 33,000,000 | 33,150,000 | 441 | 916  | 0.617732615  |                                                    |
| 19 | 33,075,000 | 33,225,000 | 442 | 700  | 0.517707671  |                                                    |
| 19 | 33,150,000 | 33,300,000 | 443 | 985  | 1.14381893   |                                                    |
| 19 | 33,225,000 | 33,375,000 | 444 | 1283 | 0.848924411  | PMP22                                              |
| 19 | 33,300,000 | 33,450,000 | 445 | 773  | 0.36465963   | PMP22,TEKT3                                        |
| 19 | 33,375,000 | 33,525,000 | 446 | 575  | 0.451123326  | CDRT4,PMP22,TEKT3                                  |
| 19 | 33,450,000 | 33,600,000 | 447 | 666  | 0.288717477  | CDRT4,TEKT3,TVP23B                                 |
| 19 | 33,525,000 | 33,675,000 | 448 | 888  | 0.852385512  | CDRT4,TVP23B,ZNF286A,ENSBTAG00000002605            |
| 19 | 33,600,000 | 33,750,000 | 449 | 818  | 1.228019363  | ZNF286A,ENSBTAG00000002605,ENSBTAG00000031071      |
| 19 | 33,675,000 | 33,825,000 | 450 | 594  | 0.959746679  | LRR75A,TRPV2,ZNF286A,ENSBTAG00000031071            |
| 19 | 33,750,000 | 33,900,000 | 451 | 801  | 0.75209254   | CENPV,LRR75A,PIGL,TRPV2,UBB                        |
| 19 | 33,825,000 | 33,975,000 | 452 | 617  | 0.766357531  | CENPV,NCOR1,PIGL,TRPV2,UBB                         |
| 19 | 33,900,000 | 34,050,000 | 453 | 353  | 0.624612306  | NCOR1,PIGL,TTC19                                   |
| 19 | 33,975,000 | 34,125,000 | 454 | 350  | -0.756908707 | ADORA2B,NCOR1,SPECC1,TTC19,ZSWIM7                  |
| 19 | 34,050,000 | 34,200,000 | 455 | 385  | -1.108574769 | ADORA2B,SPECC1,TTC19,ZSWIM7                        |
| 19 | 34,125,000 | 34,275,000 | 456 | 385  | -0.841387479 | SPECC1                                             |
| 19 | 34,200,000 | 34,350,000 | 457 | 628  | -0.696481253 | AKAP10                                             |
| 19 | 34,275,000 | 34,425,000 | 458 | 618  | -0.891304439 | AKAP10,ULK2                                        |
| 19 | 34,350,000 | 34,500,000 | 459 | 562  | -0.766620218 | AKAP10,ALDH3A1,ULK2                                |
| 19 | 34,425,000 | 34,575,000 | 460 | 635  | -0.030475015 | ALDH3A1,ALDH3A2,SLC47A2,ULK2                       |
| 19 | 34,500,000 | 34,650,000 | 461 | 564  | -0.121586754 | ALDH3A2,SLC47A1,SLC47A2                            |
| 19 | 34,575,000 | 34,725,000 | 462 | 407  | -1.057438481 | B9D1,EPN2,MAPK7,MFAP4,RNF112,SLC47A1               |
| 19 | 34,650,000 | 34,800,000 | 463 | 386  | -0.865000397 | B9D1,EPN2,GRAP,MAPK7,MFAP4,RNF112                  |
| 19 | 34,725,000 | 34,875,000 | 464 | 497  | -0.086517985 | EPN2,FAM83G,GRAP,SLC5A10                           |
| 19 | 34,800,000 | 34,950,000 | 465 | 328  | 0.380117602  | FAM83G,GRAP,PRPSAP2,SHMT1,SLC5A10,SMCR8            |
| 19 | 34,875,000 | 35,025,000 | 466 | 221  | 0.419814964  | FLII,LLGL1,MIEF2,PRPSAP2,SHMT1,SMCR8,TOP3A         |
| 19 | 34,950,000 | 35,100,000 | 467 | 269  | -0.386615704 | ALKBH5,DRG2,FLII,LLGL1,MIEF2,MYO15A,SMCR8,TOP3A    |
| 19 | 35,025,000 | 35,175,000 | 468 | 341  | -0.520853187 | ALKBH5,ATPAF2,C19H17ORF39,DRG2,LRR48,MYO15A,TOM1L2 |
| 19 | 35,100,000 | 35,250,000 | 469 | 332  | -0.279748815 | ATPAF2,C19H17ORF39,DRG2,LRR48,SREBF1,TOM1L2        |
| 19 | 35,175,000 | 35,325,000 | 470 | 272  | -0.388647414 | RAI1,SREBF1,TOM1L2                                 |
| 19 | 35,250,000 | 35,400,000 | 471 | 273  | -0.732305785 | PEMT,RAI1,SREBF1                                   |
| 19 | 35,325,000 | 35,475,000 | 472 | 554  | -0.005732944 | MED9,NT5M,PEMT,RASD1                               |
| 19 | 35,400,000 | 35,550,000 | 473 | 568  | 0.390324048  | COPS3,FLCN,MED9,NT5M,PEMT,PLD6,RASD1               |

|    |            |            |     |      |              |                                                       |
|----|------------|------------|-----|------|--------------|-------------------------------------------------------|
| 19 | 35,475,000 | 35,625,000 | 474 | 354  | 0.134911815  | COPS3,FLCN,M-RIP,NT5M,PLD6                            |
| 19 | 35,550,000 | 35,700,000 | 475 | 356  | -0.891721331 | M-RIP                                                 |
| 19 | 35,625,000 | 35,775,000 | 476 | 253  | -1.085788359 | DHRS7B,M-RIP,TFNRSF13B,USP22                          |
| 19 | 35,700,000 | 35,850,000 | 477 | 170  | -1.06001289  | DHRS7B,GTLF3B,TMEM11,TFNRSF13B,USP22                  |
| 19 | 35,775,000 | 35,925,000 | 478 | 175  | -0.733082098 | DHRS7B,GTLF3B,MAP2K3,TMEM11                           |
| 19 | 35,850,000 | 36,000,000 | 479 | 207  | 0.212863222  | KCNJ12,MAP2K3                                         |
| 19 | 35,925,000 | 36,075,000 | 480 | 397  | 0.390203456  | KCNJ12,ENSBTAG00000018840                             |
| 19 | 36,000,000 | 36,150,000 | 481 | 606  | 0.626995577  | UTP18,ENSBTAG00000018840                              |
| 19 | 36,075,000 | 36,225,000 | 482 | 519  | 1.022325503  | MBTD1,NME1,NME2,UTP18                                 |
| 19 | 36,150,000 | 36,300,000 | 483 | 583  | 1.131316168  | MBTD1,NME1,NME2                                       |
| 19 | 36,225,000 | 36,375,000 | 484 | 590  | 0.988016133  | NME1,SPAG9                                            |
| 19 | 36,300,000 | 36,450,000 | 485 | 439  | 0.660808258  | SPAG9,ENSBTAG00000037660                              |
| 19 | 36,375,000 | 36,525,000 | 486 | 458  | 0.040069027  | SPAG9,TOB1,ENSBTAG00000037660                         |
| 19 | 36,450,000 | 36,600,000 | 487 | 467  | -0.250014644 | TOB1,WFIKKN2                                          |
| 19 | 36,525,000 | 36,675,000 | 488 | 583  | 0.467077432  | ANKRD40,LUC7L3,WFIKKN2                                |
| 19 | 36,600,000 | 36,750,000 | 489 | 807  | 0.436317716  | ABCC3,ANKRD40,CACNA1G,LUC7L3                          |
| 19 | 36,675,000 | 36,825,000 | 490 | 908  | 0.113267567  | ABCC3,ANKRD40,CACNA1G,EPN3,MYCBPAP,SPATA20            |
| 19 | 36,750,000 | 36,900,000 | 491 | 859  | -0.192808827 | ACSF2,CACNA1G,CHAD,EPN3,MYCBPAP,RSAD1,SPATA20         |
| 19 | 36,825,000 | 36,975,000 | 492 | 771  | 0.310878971  | ACSF2,CHAD,EME1,LRRC59,MRPL27,MYCBPAP,RSAD1,XYL<br>T2 |
| 19 | 36,900,000 | 37,050,000 | 493 | 976  | 1.04352334   | ACSF2,EME1,LRRC59,MRPL27,TMEM92,XYL<br>T2             |
| 19 | 36,975,000 | 37,125,000 | 494 | 1052 | 0.871617188  | COL1A1,SGCA,TMEM92,ENSBTAG00000043979                 |
| 19 | 37,050,000 | 37,200,000 | 495 | 644  | 0.21895091   | COL1A1,ITGA3,PKK2,SAMD14,SGCA,ENSBTAG000000439<br>79  |
| 19 | 37,125,000 | 37,275,000 | 496 | 728  | -0.282971642 | ITGA3,PKK2,SAMD14                                     |
| 19 | 37,200,000 | 37,350,000 | 497 | 804  | -0.243841529 | DLX3,DLX4,ITGA3,ENSBTAG00000045805                    |
| 19 | 37,275,000 | 37,425,000 | 498 | 427  | -0.922834714 | DLX3,DLX4,ENSBTAG00000045805                          |
| 19 | 37,350,000 | 37,500,000 | 499 | 556  | 0.281599855  | MYST2                                                 |
| 19 | 37,425,000 | 37,575,000 | 500 | 536  | 0.603038044  | FAM117A,MYST2,SLC35B1,SPOP                            |
| 19 | 37,500,000 | 37,650,000 | 501 | 256  | 0.698223092  | FAM117A,SLC35B1,SPOP                                  |
| 19 | 37,575,000 | 37,725,000 | 502 | 431  | 0.958686965  | NXPH3,SPOP                                            |
| 19 | 37,650,000 | 37,800,000 | 503 | 557  | 0.139298266  | NGFR,NXPH3,SPOP                                       |
| 19 | 37,725,000 | 37,875,000 | 504 | 459  | 0.124690723  | NGFR,PHB                                              |
| 19 | 37,800,000 | 37,950,000 | 505 | 339  | 1.213684487  | PHB,ZNF652                                            |
| 19 | 37,875,000 | 38,025,000 | 506 | 531  | 1.394037237  | ABI3,GNGT2,PHOSPHO1,ZNF652                            |
| 19 | 37,950,000 | 38,100,000 | 507 | 905  | 1.325849934  | ABI3,B4GALNT2,GNGT2,PHOSPHO1                          |
| 19 | 38,025,000 | 38,175,000 | 508 | 883  | 1.19727954   | B4GALNT2,IGF2BP1                                      |
| 19 | 38,100,000 | 38,250,000 | 509 | 657  | 1.228237382  | GIP,IGF2BP1,SNF8,UBE2Z                                |
| 19 | 38,175,000 | 38,325,000 | 510 | 561  | 0.4050514    | ATP5G1,CALCOCO2,GIP,IGF2BP1,SNF8,UBE2Z                |
| 19 | 38,250,000 | 38,400,000 | 511 | 511  | 0.46907691   | ATP5G1,CALCOCO2,TTLL6                                 |
| 19 | 38,325,000 | 38,475,000 | 512 | 431  | 0.822730787  | CALCOCO2,HOXB13,TTLL6                                 |
| 19 | 38,400,000 | 38,550,000 | 513 | 327  | 0.058011015  | HOXB13,HOXB5,HOXB7,HOXB9                              |
| 19 | 38,475,000 | 38,625,000 | 514 | 228  | -1.041597814 | HOXB1,HOXB2,HOXB3,HOXB4,HOXB5,HOXB7,HOXB9             |
| 19 | 38,550,000 | 38,700,000 | 515 | 225  | 0.512403281  | HOXB1,HOXB2,HOXB3,HOXB4,SKAP1                         |
| 19 | 38,625,000 | 38,775,000 | 516 | 295  | 0.769864662  | SKAP1                                                 |
| 19 | 38,700,000 | 38,850,000 | 517 | 276  | 0.267147999  | SKAP1                                                 |
| 19 | 38,775,000 | 38,925,000 | 518 | 266  | 0.264076676  | SKAP1                                                 |
| 19 | 38,850,000 | 39,000,000 | 519 | 298  | 0.580038776  | SKAP1                                                 |
| 19 | 38,925,000 | 39,075,000 | 520 | 205  | 0.799676531  | CBX1,NFE2L1,SKAP1,SNX11                               |
| 19 | 39,000,000 | 39,150,000 | 521 | 240  | 1.127722085  | CBX1,CDK5RAP3,COPZ2,NFE2L1,SKAP1,SNX11                |
| 19 | 39,075,000 | 39,225,000 | 522 | 470  | 0.473567976  | CDK5RAP3,COPZ2,PNPO,PRR15L,SP2                        |
| 19 | 39,150,000 | 39,300,000 | 523 | 442  | -0.430294532 | LRRC46,MRPL10,OSBPL7,PNPO,PRR15L,SCRN2,SP2,SP6        |

|    |            |            |     |      |              |                                                                                                                                                                                                                              |
|----|------------|------------|-----|------|--------------|------------------------------------------------------------------------------------------------------------------------------------------------------------------------------------------------------------------------------|
| 19 | 39,225,000 | 39,375,000 | 524 | 267  | -0.749138632 | LRRC46,MRPL10,OSBPL7,SCRN2,SP2,SP6,TBX21                                                                                                                                                                                     |
| 19 | 39,300,000 | 39,450,000 | 525 | 185  | -1.639990925 | KPNB1,TBKBP1,TBX21                                                                                                                                                                                                           |
| 19 | 39,375,000 | 39,525,000 | 526 | 187  | -2.001976544 | KPNB1,NPEPPS,TBKBP1                                                                                                                                                                                                          |
| 19 | 39,450,000 | 39,600,000 | 527 | 271  | -1.812949231 | NPEPPS                                                                                                                                                                                                                       |
| 19 | 39,525,000 | 39,675,000 | 528 | 322  | -0.173208525 | GPR179,MRPL45,NPEPPS,SOCS7                                                                                                                                                                                                   |
| 19 | 39,600,000 | 39,750,000 | 529 | 293  | 0.998423901  | ARHGAP23,GPR179,MRPL45,SOCS7,ENSBTAG00000046615                                                                                                                                                                              |
| 19 | 39,675,000 | 39,825,000 | 530 | 268  | 0.14780582   | ARHGAP23,SRCIN1,ENSBTAG00000046615                                                                                                                                                                                           |
| 19 | 39,750,000 | 39,900,000 | 531 | 368  | 0.300422223  | ARHGAP23,SRCIN1                                                                                                                                                                                                              |
| 19 | 39,825,000 | 39,975,000 | 532 | 466  | 0.575215248  | C17orf96,CISD3,MLLT6,PCGF2,SRCIN1                                                                                                                                                                                            |
| 19 | 39,900,000 | 40,050,000 | 533 | 531  | 0.957257806  | C17orf96,CCDC49,CISD3,MLLT6,PCGF2,PIP4K2B,PSMB3                                                                                                                                                                              |
| 19 | 39,975,000 | 40,125,000 | 534 | 657  | 1.189710028  | C19H17orf98,CCDC49,LASP1,PIP4K2B,PSMB3,RPL23                                                                                                                                                                                 |
| 19 | 40,050,000 | 40,200,000 | 535 | 633  | 0.768338235  | C19H17orf98,FBXO47,LASP1,RPL23                                                                                                                                                                                               |
| 19 | 40,125,000 | 40,275,000 | 536 | 602  | -0.027341614 | FBXO47,LASP1,PLXDC1                                                                                                                                                                                                          |
| 19 | 40,200,000 | 40,350,000 | 537 | 492  | 0.10691719   | ARL5C,CACNB1,PLXDC1,RPL19,STAC2                                                                                                                                                                                              |
| 19 | 40,275,000 | 40,425,000 | 538 | 373  | -0.06697369  | ARL5C,CACNB1,FBXL20,PLXDC1,RPL19,STAC2,ENSBTAG000008368                                                                                                                                                                      |
| 19 | 40,350,000 | 40,500,000 | 539 | 312  | 0.106280033  | FBXL20,MED1,STAC2,ENSBTAG0000008368                                                                                                                                                                                          |
| 19 | 40,425,000 | 40,575,000 | 540 | 269  | 0.985050586  | CDK12,FBXL20,MED1                                                                                                                                                                                                            |
| 19 | 40,500,000 | 40,650,000 | 541 | 275  | 0.912781147  | CDK12,MED1,NEUROD2                                                                                                                                                                                                           |
| 19 | 40,575,000 | 40,725,000 | 542 | 480  | 1.065191967  | ERBB2,NEUROD2,PGAP3,PNMT,PPP1R1B,STARD3,TCAP                                                                                                                                                                                 |
| 19 | 40,650,000 | 40,800,000 | 543 | 482  | 0.824690821  | ERBB2,GRB7,IKZF3,MIEN1,PGAP3,PNMT,PPP1R1B,STARD3,TCAP                                                                                                                                                                        |
| 19 | 40,725,000 | 40,875,000 | 544 | 282  | 0.247584587  | ERBB2,GRB7,IKZF3,MIEN1,ZPBP2                                                                                                                                                                                                 |
| 19 | 40,800,000 | 40,950,000 | 545 | 506  | -0.253891575 | GSDMA,GSDMB,IKZF3,LRRC3C,ORMDL3,ZPBP2                                                                                                                                                                                        |
| 19 | 40,875,000 | 41,025,000 | 546 | 518  | -0.323767091 | CSF3,GSDMA,GSDMB,LRRC3C,MED24,ORMDL3,PSMD3,THRA,ZPBP2                                                                                                                                                                        |
| 19 | 40,950,000 | 41,100,000 | 547 | 472  | 0.621883745  | CASC3,CSF3,GSDMA,MED24,MSL1,NR1D1,PSMD3,THRA                                                                                                                                                                                 |
| 19 | 41,025,000 | 41,175,000 | 548 | 642  | 0.873421823  | CASC3,MSL1,NR1D1,RAPGEFL1,THRA,WIPF2                                                                                                                                                                                         |
| 19 | 41,100,000 | 41,250,000 | 549 | 589  | 0.683092038  | CASC3,CDC6,RAPGEFL1,RARA,WIPF2                                                                                                                                                                                               |
| 19 | 41,175,000 | 41,325,000 | 550 | 640  | 0.947755823  | CDC6,RARA,TOP2A,WIPF2                                                                                                                                                                                                        |
| 19 | 41,250,000 | 41,400,000 | 551 | 915  | 1.190006131  | IGFBP4,TNS4,TOP2A                                                                                                                                                                                                            |
| 19 | 41,325,000 | 41,475,000 | 552 | 937  | 1.020565425  | CCR7,IGFBP4,TNS4                                                                                                                                                                                                             |
| 19 | 41,400,000 | 41,550,000 | 553 | 891  | 0.588801559  | CCR7,KRT222,SMARCE1                                                                                                                                                                                                          |
| 19 | 41,475,000 | 41,625,000 | 554 | 1292 | -0.566756082 | KRT222,KRT24,KRT25,KRT26,SMARCE1                                                                                                                                                                                             |
| 19 | 41,550,000 | 41,700,000 | 555 | 1585 | -0.949498684 | KRT10,KRT24,KRT25,KRT26,KRT27,KRT28                                                                                                                                                                                          |
| 19 | 41,625,000 | 41,775,000 | 556 | 1162 | 0.085662446  | KRT10,KRT12,KRT20,KRT23,KRT27,KRT28                                                                                                                                                                                          |
| 19 | 41,700,000 | 41,850,000 | 557 | 1039 | 0.140052865  | KRT12,KRT20,KRT23,KRT39,KRT40,KRTAP3-3,KRT23,KRT39,KRT40,KRTAP1-1,KRTAP3-1,KRTAP3-3,ENSBTAG00000024995,ENSBTAG00000038759,ENSBTAG00000046225                                                                                 |
| 19 | 41,775,000 | 41,925,000 | 558 | 897  | -0.00358594  | KRTAP1-1,KRTAP3-1,KRTAP4-7,RPL17,ENSBTAG00000024995,ENSBTAG00000037665,ENSBTAG00000037943,ENSBTAG00000038759,ENSBTAG0000039587,ENSBTAG00000039644,ENSBTAG00000040118,ENSBTAG00000046075,ENSBTAG00000046225,ENSBTAG0000046907 |
| 19 | 41,850,000 | 42,000,000 | 559 | 681  | 0.813664995  | KRTAP4-7,RPL17,ENSBTAG00000037665,ENSBTAG00000037943,ENSBTAG00000039587,ENSBTAG00000039644,ENSBTAG00000040118,ENSBTAG00000046075,ENSBTAG00000046907                                                                          |
| 19 | 41,925,000 | 42,075,000 | 560 | 875  | 0.8678027    | KRTAP9-1,ENSBTAG00000001672,ENSBTAG00000039880                                                                                                                                                                               |
| 19 | 42,000,000 | 42,150,000 | 561 | 905  | 0.306632623  |                                                                                                                                                                                                                              |

|    |            |            |     |      |              |                                                                                                                    |
|----|------------|------------|-----|------|--------------|--------------------------------------------------------------------------------------------------------------------|
| 19 | 42,075,000 | 42,225,000 | 562 | 885  | 0.110798216  | KRT33A,KRTAP9-1,ENSBTAG00000001672,ENSBTAG000000030519                                                             |
| 19 | 42,150,000 | 42,300,000 | 563 | 948  | 0.263309294  | HKA1,KRT31,KRT33A,ENSBTAG00000000573,ENSBTAG000000030519                                                           |
| 19 | 42,225,000 | 42,375,000 | 564 | 1036 | 0.458725024  | HKA1,KRT15,KRT19,KRT31,KRT32,KRT35,KRT36,ENSBTAG0000000573                                                         |
| 19 | 42,300,000 | 42,450,000 | 565 | 1015 | 0.45337451   | KRT14,KRT15,KRT19,KRT32,KRT35,KRT36,KRT9                                                                           |
| 19 | 42,375,000 | 42,525,000 | 566 | 1190 | 0.527090042  | KRT14,KRT16,KRT17,KRT9,ENSBTAG000000047262                                                                         |
| 19 | 42,450,000 | 42,600,000 | 567 | 1294 | 0.539004353  | EIF1,GAST,KRT16,KRT17,ENSBTAG000000047262                                                                          |
| 19 | 42,525,000 | 42,675,000 | 568 | 1061 | 0.747896541  | EIF1,FKBP10,GAST,JUP,KLHL10,LEPREL4,NT5C3L                                                                         |
| 19 | 42,600,000 | 42,750,000 | 569 | 870  | 0.952643008  | ACLY,FKBP10,JUP,KLHL10,KLHL11,LEPREL4,NT5C3L,TTC25                                                                 |
| 19 | 42,675,000 | 42,825,000 | 570 | 717  | 0.877975573  | ACLY,CNP,DNAJC7,KLHL10,KLHL11,NKIRAS2,TTC25,ZNF385C                                                                |
| 19 | 42,750,000 | 42,900,000 | 571 | 599  | 0.518854212  | CNP,DNAJC7,HSPB9,KAT2A,LGP2,NKIRAS2,RAB5C,TTC25,ZNF385C                                                            |
| 19 | 42,825,000 | 42,975,000 | 572 | 654  | 0.400390847  | BORX,GHDC,HSPB9,KAT2A,KCNH4,LGP2,RAB5C,STAT5B,ZNF385C                                                              |
| 19 | 42,900,000 | 43,050,000 | 573 | 647  | 0.16482039   | BORX,GHDC,KCNH4,RAB5C,STAT5A,STAT5B                                                                                |
| 19 | 42,975,000 | 43,125,000 | 574 | 774  | -0.358348412 | STAT3,STAT5A,STAT5B                                                                                                |
| 19 | 43,050,000 | 43,200,000 | 575 | 617  | -0.216850037 | PTRF,STAT3,STAT5A                                                                                                  |
| 19 | 43,125,000 | 43,275,000 | 576 | 223  | 0.389853457  | ATP6V0A1,HSD17B1,NAGLU,PTRF,STAT3                                                                                  |
| 19 | 43,200,000 | 43,350,000 | 577 | 391  | 0.098111172  | ATP6V0A1,COASY,FAM134C,HSD17B1,MLX,NAGLU,PSMC3IP,TUBG1                                                             |
| 19 | 43,275,000 | 43,425,000 | 578 | 409  | -0.022329083 | CCR10,CNTNAP1,COASY,EZH1,FAM134C,MLX,PLEKHH3,PSMC3IP,TUBG1,TUBG2                                                   |
| 19 | 43,350,000 | 43,500,000 | 579 | 261  | 0.798337784  | BECN1,CCR10,CNTD1,CNTNAP1,COA3,EZH1,PLEKHH3,RAMP2,TUBG2,VPS25,WNK4                                                 |
| 19 | 43,425,000 | 43,575,000 | 580 | 486  | 0.410829922  | AOC2,AOC3,BECN1,CNTD1,COA3,EZH1,PSME3,RAMP2,VP S25,WNK4,ENSBTAG00000001041,ENSBTAG000000030333,ENSBTAG000000039321 |
| 19 | 43,500,000 | 43,650,000 | 581 | 500  | 0.13741379   | AARSD1,AOC2,AOC3,G6PC,PSME3,ENSBTAG00000001041,ENSBTAG000000030333,ENSBTAG000000039321                             |
| 19 | 43,575,000 | 43,725,000 | 582 | 298  | -0.06644183  | AARSD1,BRCA1,G6PC,IFI35,RND2,RPL27,RUNDC1,VAT1                                                                     |
| 19 | 43,650,000 | 43,800,000 | 583 | 284  | -0.649814844 | AARSD1,BRCA1,IFI35,NBR1,RND2,RPL27,RUNDC1,VAT1                                                                     |
| 19 | 43,725,000 | 43,875,000 | 584 | 297  | 0.282925697  | BRCA1,NBR1,SNRPE,TMEM106A                                                                                          |
| 19 | 43,800,000 | 43,950,000 | 585 | 456  | 1.129765633  | ARL4D,NBR1,SNRPE,TMEM106A                                                                                          |
| 19 | 43,875,000 | 44,025,000 | 586 | 503  | 1.000906912  | ARL4D                                                                                                              |
| 19 | 43,950,000 | 44,100,000 | 587 | 438  | 0.624542319  | DHX8,ETV4                                                                                                          |
| 19 | 44,025,000 | 44,175,000 | 588 | 361  | 1.027958628  | DHX8,ETV4,MEOX1                                                                                                    |
| 19 | 44,100,000 | 44,250,000 | 589 | 246  | 1.29702151   | MEOX1                                                                                                              |
| 19 | 44,175,000 | 44,325,000 | 590 | 347  | 1.179765896  | C17orf105,DUSP3,MEOX1,MPP3,SOST                                                                                    |
| 19 | 44,250,000 | 44,400,000 | 591 | 528  | 1.14798869   | C17orf105,CD300LG,DUSP3,MPP2,MPP3,SOST                                                                             |
| 19 | 44,325,000 | 44,475,000 | 592 | 705  | 1.2557002    | CD300LG,MPP2,MPP3,PPY,PYY,PYY2                                                                                     |
| 19 | 44,400,000 | 44,550,000 | 593 | 597  | 1.260430088  | G6PC3,HDAC5,LSM12,MPP2,NAGS,PPY,PYY,PYY2,TMEM101                                                                   |
| 19 | 44,475,000 | 44,625,000 | 594 | 359  | 1.01338146   | ASB16,C17orf53,G6PC3,HDAC5,LSM12,NAGS,TMEM101                                                                      |
| 19 | 44,550,000 | 44,700,000 | 595 | 272  | 0.792176384  | ASB16,ATXN7L3,BEB3,C17orf53,HDAC5,TMUB2,UBF                                                                        |
| 19 | 44,625,000 | 44,775,000 | 596 | 237  | -0.71947723  | ATXN7L3,BEB3,RUNDC3A,SLC25A39,TMUB2,UBF                                                                            |
| 19 | 44,700,000 | 44,850,000 | 597 | 233  | -1.822881015 | BEB3,FAM171A2,GPATCH8,GRN,ITGA2B,RUNDC3A,SLC25A39                                                                  |
| 19 | 44,775,000 | 44,925,000 | 598 | 230  | -0.579001918 | FAM171A2,GPATCH8,GRN,ITGA2B                                                                                        |
| 19 | 44,850,000 | 45,000,000 | 599 | 326  | -3.112255005 | FZD2,GPATCH8                                                                                                       |
| 19 | 44,925,000 | 45,075,000 | 600 | 500  | -3.77591481  | C17orf104,CCDC43,DBF4B,FZD2                                                                                        |

|    |            |            |     |      |              |                                                                    |        |
|----|------------|------------|-----|------|--------------|--------------------------------------------------------------------|--------|
| 19 | 45,000,000 | 45,150,000 | 601 | 481  | -2.726780302 | ADAM11,C17orf104,CCDC43,DBF4B                                      |        |
| 19 | 45,075,000 | 45,225,000 | 602 | 511  | -3.73756603  | ADAM11,DBF4B,EFTUD2,GJC1,HIGD1B                                    |        |
| 19 | 45,150,000 | 45,300,000 | 603 | 595  | -3.040545204 | C1QL1,EFTUD2,FAM187A,GFAP,GJC1,HIGD1B,KIF18B,ENSBTAG00000013529    |        |
| 19 | 45,225,000 | 45,375,000 | 604 | 553  | 0.501926872  | C1QL1,DCAKD,EFTUD2,FAM187A,GFAP,KIF18B,ENSBTAG0000013529           |        |
| 19 | 45,300,000 | 45,450,000 | 605 | 467  | 0.828606107  | ACBD4,DCAKD,HEXIM1,NMT1,PLCD3                                      |        |
| 19 | 45,375,000 | 45,525,000 | 606 | 308  | 0.939617409  | ACBD4,FMNL1,HEXIM1,HEXIM2,NMT1,PLCD3,ENSBTAG000024975              |        |
| 19 | 45,450,000 | 45,600,000 | 607 | 222  | 1.061821283  | FMNL1,HEXIM2,MAP3K14,SPATA32,ENSBTAG00000024975                    |        |
| 19 | 45,525,000 | 45,675,000 | 608 | 374  | 0.751689795  | MAP3K14,SPATA32,ENSBTAG00000024975                                 |        |
| 19 | 45,600,000 | 45,750,000 | 609 | 825  | 0.555721184  | ARHGAP27,PLEKHM1                                                   |        |
| 19 | 45,675,000 | 45,825,000 | 610 | 773  | 0.43085097   | ARHGAP27,PLEKHM1,ENSBTAG00000027274                                |        |
| 19 | 45,750,000 | 45,900,000 | 611 | 502  | 0.176509568  | LYZL6,PLEKHM1,RDM1,RPRML,ENSBTAG00000027274                        |        |
| 19 | 45,825,000 | 45,975,000 | 612 | 600  | -0.124193789 | GOSR2,LYZL6,RDM1,RPRML,WNT9B,ENSBTAG00000027274                    |        |
| 19 | 45,900,000 | 46,050,000 | 613 | 498  | -0.017471223 | GOSR2,WNT9B                                                        |        |
| 19 | 45,975,000 | 46,125,000 | 614 | 424  | 0.807861285  | NSF,WNT3,WNT9B                                                     |        |
| 19 | 46,050,000 | 46,200,000 | 615 | 407  | 1.059789465  | NSF,WNT3                                                           |        |
| 19 | 46,125,000 | 46,275,000 | 616 | 418  | 0.894637668  | ARF2,NSF                                                           |        |
| 19 | 46,200,000 | 46,350,000 | 617 | 636  | 0.953575568  | ARF2,NSF                                                           |        |
| 19 | 46,275,000 | 46,425,000 | 618 | 765  | 0.827577503  |                                                                    |        |
| 19 | 46,350,000 | 46,500,000 | 619 | 640  | 0.716049952  | CRHR1,SPPL2C                                                       |        |
| 19 | 46,425,000 | 46,575,000 | 620 | 436  | 0.754485108  | CRHR1,MAPT,SPPL2C                                                  |        |
| 19 | 46,500,000 | 46,650,000 | 621 | 576  | 0.985163861  | MAPT                                                               |        |
| 19 | 46,575,000 | 46,725,000 | 622 | 689  | 1.149178036  | KANSL1,MAPT                                                        |        |
| 19 | 46,650,000 | 46,800,000 | 623 | 797  | 1.259422145  | KANSL1,ENSBTAG00000046260                                          |        |
| 19 | 46,725,000 | 46,875,000 | 624 | 753  | 1.203725456  | CDC27,KANSL1,ENSBTAG00000046260                                    |        |
| 19 | 46,800,000 | 46,950,000 | 625 | 558  | 1.293933304  | CDC27,MYL4                                                         |        |
| 19 | 46,875,000 | 47,025,000 | 626 | 845  | 0.59813022   | CDC27,INTB3,MYL4                                                   |        |
| 19 | 46,950,000 | 47,100,000 | 627 | 1145 | -0.357978239 | EFCAB13,INTB3                                                      |        |
| 19 | 47,025,000 | 47,175,000 | 628 | 1065 | -0.882935513 | EFCAB13,INTB3,ENSBTAG00000045837                                   |        |
| 19 | 47,100,000 | 47,250,000 | 629 | 663  | -0.811095741 | ENSBTAG00000045837                                                 |        |
| 19 | 47,175,000 | 47,325,000 | 630 | 837  | 0.178908262  |                                                                    |        |
| 19 | 47,250,000 | 47,400,000 | 631 | 1179 | -0.722707008 |                                                                    |        |
| 19 | 47,325,000 | 47,475,000 | 632 | 1069 | -1.582692061 | EFCAB3                                                             |        |
| 19 | 47,400,000 | 47,550,000 | 633 | 1002 | -0.807132423 | EFCAB3,METTL2                                                      |        |
| 19 | 47,475,000 | 47,625,000 | 634 | 729  | 0.429048637  | EFCAB3,METTL2,TLK2                                                 |        |
| 19 | 47,550,000 | 47,700,000 | 635 | 438  | 1.067408218  | TLK2                                                               |        |
| 19 | 47,625,000 | 47,775,000 | 636 | 310  | 0.349780176  | MARCH10,MRC2,TLK2                                                  |        |
| 19 | 47,700,000 | 47,850,000 | 637 | 534  | 0.43412061   | MARCH10,MRC2                                                       |        |
| 19 | 47,775,000 | 47,925,000 | 638 | 626  | 0.383751413  |                                                                    | 10-Mar |
| 19 | 47,850,000 | 48,000,000 | 639 | 519  | 0.138160107  |                                                                    | 10-Mar |
| 19 | 47,925,000 | 48,075,000 | 640 | 764  | 0.555912721  |                                                                    |        |
| 19 | 48,000,000 | 48,150,000 | 641 | 776  | 0.914068489  | TANC2                                                              |        |
| 19 | 48,075,000 | 48,225,000 | 642 | 618  | 0.633097045  | TANC2                                                              |        |
| 19 | 48,150,000 | 48,300,000 | 643 | 525  | -0.04810572  | TANC2                                                              |        |
| 19 | 48,225,000 | 48,375,000 | 644 | 523  | 0.211446618  | TANC2                                                              |        |
| 19 | 48,300,000 | 48,450,000 | 645 | 550  | 0.32738526   | ACE,CYB561,TANC2,ENSBTAG00000047866                                |        |
| 19 | 48,375,000 | 48,525,000 | 646 | 434  | 0.677753944  | ACE,CYB561,KCNH6,TANC2,WDR68,ENSBTAG00000038138,ENSBTAG00000047866 |        |



|    |            |            |     |      |              |                                                                                                       |
|----|------------|------------|-----|------|--------------|-------------------------------------------------------------------------------------------------------|
| 19 | 48,450,000 | 48,600,000 | 647 | 572  | 1.242116328  | ACE,KCNH6,MAP3K3,TACO1,WDR68,ENSBTAG00000038138                                                       |
| 19 | 48,525,000 | 48,675,000 | 648 | 577  | 1.145105908  | CCDC47,LIMD2,MAP3K3,STRADA,TACO1,WDR68                                                                |
| 19 | 48,600,000 | 48,750,000 | 649 | 426  | -0.444036141 | CCDC47,DDX42,FTSJ3,LIMD2,MAP3K3,PSMC5,SMARCD2,STRADA                                                  |
| 19 | 48,675,000 | 48,825,000 | 650 | 779  | -0.047380168 | CCDC47,CD79B,DDX42,FTSJ3,GH1,PSMC5,SCN4A,SMARCD2,ENSBTAG00000024947                                   |
| 19 | 48,750,000 | 48,900,000 | 651 | 1366 | 0.483487573  | CD79B,GH1,ICAM2,SCN4A,ENSBTAG00000024947                                                              |
| 19 | 48,825,000 | 48,975,000 | 652 | 1256 | 0.118257103  | ERN1,ICAM2,SCN4A                                                                                      |
| 19 | 48,900,000 | 49,050,000 | 653 | 942  | -1.252143986 | ERN1,TEX2                                                                                             |
| 19 | 48,975,000 | 49,125,000 | 654 | 939  | -2.851375742 | TEX2                                                                                                  |
| 19 | 49,050,000 | 49,200,000 | 655 | 875  | -2.878377223 | PECAM1,TEX2                                                                                           |
| 19 | 49,125,000 | 49,275,000 | 656 | 660  | -2.26431596  | MILR1,PECAM1                                                                                          |
| 19 | 49,200,000 | 49,350,000 | 657 | 475  | -2.00444188  | CEP95,DDX5,MILR1,PECAM1,POLG2                                                                         |
| 19 | 49,275,000 | 49,425,000 | 658 | 394  | 0.397280621  | CEP95,DDX5,MILR1,POLG2,SMURF2                                                                         |
| 19 | 49,350,000 | 49,500,000 | 659 | 245  | 0.577100032  | CEP95,SMURF2                                                                                          |
| 19 | 49,425,000 | 49,575,000 | 660 | 370  | 0.950665512  | KPNA2,SMURF2                                                                                          |
| 19 | 49,500,000 | 49,650,000 | 661 | 638  | 0.975936602  | BPTF,KPNA2                                                                                            |
| 19 | 49,575,000 | 49,725,000 | 662 | 611  | 0.853003237  | BPTF,KPNA2                                                                                            |
| 19 | 49,650,000 | 49,800,000 | 663 | 508  | 0.498098419  | BPTF,NOL11                                                                                            |
| 19 | 49,725,000 | 49,875,000 | 664 | 436  | 0.239711659  | NOL11,ENSBTAG00000044065                                                                              |
| 19 | 49,800,000 | 49,950,000 | 665 | 474  | -0.05045039  | NOL11,ENSBTAG00000044065                                                                              |
| 19 | 49,875,000 | 50,025,000 | 666 | 477  | 0.278152336  | ENSBTAG00000044065                                                                                    |
| 19 | 49,950,000 | 50,100,000 | 667 | 393  | 0.700021636  |                                                                                                       |
| 19 | 50,025,000 | 50,175,000 | 668 | 635  | 0.514358241  | PSMD12                                                                                                |
| 19 | 50,100,000 | 50,250,000 | 669 | 636  | 0.746515298  | METRNL,PSMD12                                                                                         |
| 19 | 50,175,000 | 50,325,000 | 670 | 437  | 0.719611974  | METRNL                                                                                                |
| 19 | 50,250,000 | 50,400,000 | 671 | 892  | -1.778693742 | METRNL,TBCD                                                                                           |
| 19 | 50,325,000 | 50,475,000 | 672 | 1025 | -1.67644559  | TBCD                                                                                                  |
| 19 | 50,400,000 | 50,550,000 | 673 | 763  | -0.07236932  | FN3K,TBCD,ZNF750                                                                                      |
| 19 | 50,475,000 | 50,625,000 | 674 | 685  | 0.331844496  | FN3K,FN3KRP,RAB40B,TBCD,WDR45L,ZNF750                                                                 |
| 19 | 50,550,000 | 50,700,000 | 675 | 722  | 0.484624555  | FN3KRP,FOXK2,RAB40B,WDR45L                                                                            |
| 19 | 50,625,000 | 50,775,000 | 676 | 689  | 0.681513881  | C17orf62,FOXK2,HEXDC,NARF,WDR45L                                                                      |
| 19 | 50,700,000 | 50,850,000 | 677 | 467  | 0.751280822  | C17orf62,HEXDC,NARF,OGFOD3,UTS2R,ENSBTAG00000015299,ENSBTAG00000047667                                |
| 19 | 50,775,000 | 50,925,000 | 678 | 1007 | 0.784808663  | HEXDC,OGFOD3,UTS2R,ENSBTAG00000015299,ENSBTAG00000024934,ENSBTAG00000039765,ENSBTAG00000047667        |
| 19 | 50,850,000 | 51,000,000 | 679 | 1219 | 0.527632245  | SECTM1,ENSBTAG00000024915,ENSBTAG00000024934,ENSBTAG00000039765                                       |
| 19 | 50,925,000 | 51,075,000 | 680 | 975  | -0.684197432 | SECTM1,ENSBTAG00000024915                                                                             |
| 19 | 51,000,000 | 51,150,000 | 681 | 1175 | -1.818707591 | SECTM1                                                                                                |
| 19 | 51,075,000 | 51,225,000 | 682 | 853  | -1.599644194 | CD7,CSNK1D,SECTM1                                                                                     |
| 19 | 51,150,000 | 51,300,000 | 683 | 389  | -0.130626687 | CCDC57,CD7,CSNK1D,SLC16A3                                                                             |
| 19 | 51,225,000 | 51,375,000 | 684 | 357  | -1.557422507 | CCDC57,CSNK1D,SLC16A3                                                                                 |
| 19 | 51,300,000 | 51,450,000 | 685 | 349  | -1.670286737 | CCDC57,DUS1L,FASN,GPS1,RFNG                                                                           |
| 19 | 51,375,000 | 51,525,000 | 686 | 341  | 0.319535756  | DCXR,DUS1L,FASN,GPS1,LRR45,RAC3,RFNG,STRA13,ENSBTAG0000004632,ENSBTAG00000047973                      |
| 19 | 51,450,000 | 51,600,000 | 687 | 282  | 0.697590967  | DCXR,LRR45,MAFG,MYADML2,PCYT2,PCYR1,RAC3,SIRT7,STRA13,ENSBTAG0000004632,ENSBTAG00000047973            |
| 19 | 51,525,000 | 51,675,000 | 688 | 278  | -0.07605976  | ALYREF,ANAPC11,ARHGDI1,FAM195B,GCGR,MAFG,MYADML2,NPB,P4HB,PCYT2,PPP1R27,PCYR1,SIRT7,ENSBTAG0000004632 |

|    |            |            |     |      |              |                                                                       |        |
|----|------------|------------|-----|------|--------------|-----------------------------------------------------------------------|--------|
| 19 | 51,600,000 | 51,750,000 | 689 | 536  | -0.307389458 | ALYREF,ANAPC11,ARHGDI1,ARL16,FAM195B,GCGR,HGS,MRPL12,NPB,P4HB,PPP1R27 |        |
| 19 | 51,675,000 | 51,825,000 | 690 | 728  | -1.031025267 | ARL16,CCDC137,GCGR,HGS,MRPL12,NPLOC4,OXLD1,PDE6G,TSPAN10              |        |
| 19 | 51,750,000 | 51,900,000 | 691 | 528  | -1.415335236 | ACTG1,C17orf70,CCDC137,FSCN2,NPLOC4,OXLD1,PDE6G,TSPAN10               |        |
| 19 | 51,825,000 | 51,975,000 | 692 | 338  | 0.048013553  | ACTG1,BAHCC1,C17orf70,FSCN2,NPLOC4                                    |        |
| 19 | 51,900,000 | 52,050,000 | 693 | 334  | -0.106886586 | BAHCC1,SLC38A10                                                       |        |
| 19 | 51,975,000 | 52,125,000 | 694 | 620  | -0.609413799 | CEP131,ENTHD2,SLC38A10                                                |        |
| 19 | 52,050,000 | 52,200,000 | 695 | 990  | -0.440291074 | AATK,BAIAP2,CEP131,ENTHD2,SLC38A10                                    |        |
| 19 | 52,125,000 | 52,275,000 | 696 | 969  | -0.162915479 | AATK,BAIAP2                                                           |        |
| 19 | 52,200,000 | 52,350,000 | 697 | 873  | 0.26689063   | BAIAP2,CHMP6,RPTOR                                                    |        |
| 19 | 52,275,000 | 52,425,000 | 698 | 819  | 0.411460936  | CHMP6,RPTOR                                                           |        |
| 19 | 52,350,000 | 52,500,000 | 699 | 692  | 0.323182125  | RPTOR                                                                 |        |
| 19 | 52,425,000 | 52,575,000 | 700 | 470  | 0.182271346  | RPTOR                                                                 |        |
| 19 | 52,500,000 | 52,650,000 | 701 | 496  | 0.541237096  | RPTOR                                                                 |        |
| 19 | 52,575,000 | 52,725,000 | 702 | 522  | 0.664652738  | ENDOV,NPTX1,RPTOR                                                     |        |
| 19 | 52,650,000 | 52,800,000 | 703 | 397  | 0.918417753  | ENDOV,NPTX1,RNF213                                                    |        |
| 19 | 52,725,000 | 52,875,000 | 704 | 597  | 0.899178481  | ENDOV,RNF213                                                          |        |
| 19 | 52,800,000 | 52,950,000 | 705 | 806  | 0.861751779  | ENSBTAG00000017233                                                    |        |
| 19 | 52,875,000 | 53,025,000 | 706 | 811  | 0.585405191  | SLC26A11,ENSBTAG00000017233                                           |        |
| 19 | 52,950,000 | 53,100,000 | 707 | 886  | 0.47374585   | CARD14,EIF4A3,SGSH,SLC26A11,ENSBTAG00000017233                        |        |
| 19 | 53,025,000 | 53,175,000 | 708 | 891  | 0.465036228  | CARD14,CCDC40,EIF4A3,GAA,SGSH,SLC26A11,USMG5                          |        |
| 19 | 53,100,000 | 53,250,000 | 709 | 639  | -0.653112571 | CCDC40,GAA,TBC1D16,USMG5                                              |        |
| 19 | 53,175,000 | 53,325,000 | 710 | 407  | -1.115913542 | CBX4,TBC1D16                                                          |        |
| 19 | 53,250,000 | 53,400,000 | 711 | 294  | 0.312318312  | CBX2,CBX4,CBX8                                                        |        |
| 19 | 53,325,000 | 53,475,000 | 712 | 562  | -0.97823233  | CBX2,CBX4,CBX8,ENPP7                                                  |        |
| 19 | 53,400,000 | 53,550,000 | 713 | 715  | -1.243608972 | ENPP7                                                                 |        |
| 19 | 53,475,000 | 53,625,000 | 714 | 878  | -0.777420661 | RBFOX3                                                                |        |
| 19 | 53,550,000 | 53,700,000 | 715 | 1286 | -0.663480844 | RBFOX3                                                                |        |
| 19 | 53,625,000 | 53,775,000 | 716 | 981  | -1.011536621 | RBFOX3                                                                |        |
| 19 | 53,700,000 | 53,850,000 | 717 | 660  | -0.636205538 | RBFOX3                                                                |        |
| 19 | 53,775,000 | 53,925,000 | 718 | 623  | 0.043366459  | RBFOX3                                                                |        |
| 19 | 53,850,000 | 54,000,000 | 719 | 431  | -0.00362807  | C1QTNF1,ENGASE,RBFOX3                                                 |        |
| 19 | 53,925,000 | 54,075,000 | 720 | 414  | -0.372742651 | C1QTNF1,CANT1,ENGASE,LGALS3BP,RBFOX3                                  |        |
| 19 | 54,000,000 | 54,150,000 | 721 | 601  | -0.45920667  | CANT1,LGALS3BP,TIMP2,USP36                                            |        |
| 19 | 54,075,000 | 54,225,000 | 722 | 601  | -0.415113996 | TIMP2,USP36                                                           |        |
| 19 | 54,150,000 | 54,300,000 | 723 | 474  | -0.790398284 | CYTH1,USP36                                                           |        |
| 19 | 54,225,000 | 54,375,000 | 724 | 720  | -0.067111852 | CYTH1,DNAH17                                                          |        |
| 19 | 54,300,000 | 54,450,000 | 725 | 939  | 0.416092164  | DNAH17,PGS1                                                           |        |
| 19 | 54,375,000 | 54,525,000 | 726 | 784  | 0.469092396  | DNAH17,PGS1,SOCS3                                                     |        |
| 19 | 54,450,000 | 54,600,000 | 727 | 761  | 0.138827349  | AFMID,BIRC5,SOCS3,TK1,TMEM235,ENSBTAG00000009029                      |        |
| 19 | 54,525,000 | 54,675,000 | 728 | 1032 | -0.360980177 | AFMID,BIRC5,SYNGR2,TK1,TMC6,TMC8,TMEM235,TNRC6C,ENSBTAG00000009029    |        |
| 19 | 54,600,000 | 54,750,000 | 729 | 1004 | -0.581249936 | SYNGR2,TK1,TMC6,TMC8,TNRC6C                                           |        |
| 19 | 54,675,000 | 54,825,000 | 730 | 654  | -0.36408951  | TNRC6C                                                                |        |
| 19 | 54,750,000 | 54,900,000 | 731 | 689  | -0.815803268 |                                                                       |        |
| 19 | 54,825,000 | 54,975,000 | 732 | 908  | -0.808222654 |                                                                       |        |
| 19 | 54,900,000 | 55,050,000 | 733 | 982  | -0.306211062 |                                                                       |        |
| 19 | 54,975,000 | 55,125,000 | 734 | 1191 | 0.285943592  |                                                                       | 09-Sep |
| 19 | 55,050,000 | 55,200,000 | 735 | 1145 | 0.132695195  |                                                                       | 09-Sep |
| 19 | 55,125,000 | 55,275,000 | 736 | 963  | 0.07258154   |                                                                       | 09-Sep |

|    |            |            |     |      |              |                                                                                  |
|----|------------|------------|-----|------|--------------|----------------------------------------------------------------------------------|
| 19 | 55,200,000 | 55,350,000 | 737 | 1132 | 0.072123427  | SEC14L1                                                                          |
| 19 | 55,275,000 | 55,425,000 | 738 | 1195 | -0.880823586 | SEC14L1                                                                          |
| 19 | 55,350,000 | 55,500,000 | 739 | 1298 | -1.004796453 | SEC14L1                                                                          |
| 19 | 55,425,000 | 55,575,000 | 740 | 1179 | -1.113215014 | MGAT5B                                                                           |
| 19 | 55,500,000 | 55,650,000 | 741 | 943  | -0.885509236 | MFSD11,MGAT5B                                                                    |
| 19 | 55,575,000 | 55,725,000 | 742 | 953  | -0.019610183 | JMJD6,MFSD11,MGAT5B,SRSF2,ENSBTAG00000044138                                     |
| 19 | 55,650,000 | 55,800,000 | 743 | 1016 | 0.049805286  | JMJD6,MFSD11,SRSF2,ST6GALNAC1,ENSBTAG00000044138                                 |
| 19 | 55,725,000 | 55,875,000 | 744 | 795  | 0.103056666  | CYGB,PRCD,ST6GALNAC1,ST6GALNAC2                                                  |
| 19 | 55,800,000 | 55,950,000 | 745 | 395  | 0.353996925  | AANAT,CYGB,PRCD,RHBDF2,ST6GALNAC2,UBE2O,ENSBTAG00000039119                       |
| 19 | 55,875,000 | 56,025,000 | 746 | 591  | 0.150194151  | AANAT,PRPSAP1,RHBDF2,SPHK1,UBE2O,ENSBTAG00000039119                              |
| 19 | 55,950,000 | 56,100,000 | 747 | 777  | 0.193252771  | PRPSAP1,QRICH2,SPHK1,UBALD2,UBE2O                                                |
| 19 | 56,025,000 | 56,175,000 | 748 | 663  | -0.015760379 | FOXJ1,PRPSAP1,QRICH2,RNF157,UBALD2                                               |
| 19 | 56,100,000 | 56,250,000 | 749 | 685  | -0.343299464 | EXOC7,FOXJ1,GALR2,RNF157,SRP68,ZACN                                              |
| 19 | 56,175,000 | 56,325,000 | 750 | 637  | -0.02571482  | ACOX1,CDK3,EVPL,EXOC7,FOXJ1,GALR2,SRP68,TEN1,ZACN                                |
| 19 | 56,250,000 | 56,400,000 | 751 | 567  | 0.297197323  | ACOX1,CDK3,EVPL,FBF1,MRPL38,TEN1,TRIM47,TRIM65,WBP2                              |
| 19 | 56,325,000 | 56,475,000 | 752 | 560  | 0.00591387   | FBF1,GALK1,H3F3A,ITGB4,MRPL38,TRIM47,TRIM65,UNC13D,UNK,WBP2                      |
| 19 | 56,400,000 | 56,550,000 | 753 | 774  | 0.006830226  | GALK1,H3F3A,ITGB4,SAP30BP,UNC13D,UNK,WBP2                                        |
| 19 | 56,475,000 | 56,625,000 | 754 | 894  | 0.275667778  | ITGB4,LLGL2,RECQL5,SAP30BP,SMIM5,SMIM6,ENSBTAG0000011713                         |
| 19 | 56,550,000 | 56,700,000 | 755 | 740  | 0.537364322  | CASKIN2,KIAA0195,LLGL2,RECQL5,SMIM5,SMIM6,TSEN54,ENSBTAG00000011713              |
| 19 | 56,625,000 | 56,775,000 | 756 | 782  | 0.189612466  | CASKIN2,GRB2,KIAA0195,LLGL2,TSEN54                                               |
| 19 | 56,700,000 | 56,850,000 | 757 | 629  | -0.513107831 | GRB2,SLC25A19                                                                    |
| 19 | 56,775,000 | 56,925,000 | 758 | 410  | -0.370590031 | GGA3,GRB2,MIF4GD,MRPS7,NUP85,SLC25A19,SUMO2                                      |
| 19 | 56,850,000 | 57,000,000 | 759 | 364  | 0.167888105  | ARMC7,GGA3,HN1,MIF4GD,MRPS7,NT5C,NUP85,SLC16A5,SLC25A19,SUMO2,ENSBTAG00000026645 |
| 19 | 56,925,000 | 57,075,000 | 760 | 378  | 0.105819422  | ARMC7,ATP5H,CDR2L,HN1,ICT1,KCTD2,NT5C,SLC16A5,SUMO2,ENSBTAG00000026645           |
| 19 | 57,000,000 | 57,150,000 | 761 | 925  | 0.102155466  | ATP5H,CDR2L,FADS6,HID1,ICT1,KCTD2,OTOP2,OTOP3,USH1G,ENSBTAG00000017248           |
| 19 | 57,075,000 | 57,225,000 | 762 | 1115 | 0.117070063  | FADS6,FDXR,GRIN2C,HID1,OTOP2,OTOP3,USH1G,ENSBTAG00000017248                      |
| 19 | 57,150,000 | 57,300,000 | 763 | 726  | 0.091191048  | FADS6,FDXR,GRIN2C,NAT9,RAB37,SLC9A3R1,TMEM104                                    |
| 19 | 57,225,000 | 57,375,000 | 764 | 500  | -0.499318392 | NAT9,RAB37,SLC9A3R1,TMEM104,ENSBTAG00000002773                                   |
| 19 | 57,300,000 | 57,450,000 | 765 | 541  | -0.791000255 | CD300E,RAB37,ENSBTAG00000002773                                                  |
| 19 | 57,375,000 | 57,525,000 | 766 | 1407 | -0.140059863 | CD300E,RAB37,ENSBTAG00000024901,ENSBTAG00000046693                               |
| 19 | 57,450,000 | 57,600,000 | 767 | 1952 | 0.27192006   | CD300LB,ENSBTAG00000008328,ENSBTAG00000024901,ENSBTAG00000046693                 |
| 19 | 57,525,000 | 57,675,000 | 768 | 1586 | 0.434277549  | CD300LB,GPRC5C,ENSBTAG0000000812,ENSBTAG00000008328                              |
| 19 | 57,600,000 | 57,750,000 | 769 | 1071 | -0.287757926 | BTBD17,GPR142,GPRC5C,KIF19,ENSBTAG0000000812                                     |
| 19 | 57,675,000 | 57,825,000 | 770 | 1128 | -0.646647649 | BTBD17,DNAI2,GPR142,KIF19,TTYH2                                                  |
| 19 | 57,750,000 | 57,900,000 | 771 | 1262 | -0.276042347 | DNAI2,KIF19,RPL38,TTYH2                                                          |
| 19 | 57,825,000 | 57,975,000 | 772 | 1120 | -0.354032314 | RPL38,TTYH2                                                                      |
| 19 | 57,900,000 | 58,050,000 | 773 | 1199 | -0.260608685 |                                                                                  |
| 19 | 57,975,000 | 58,125,000 | 774 | 962  | -0.611113882 |                                                                                  |

|    |            |            |     |      |              |                                             |
|----|------------|------------|-----|------|--------------|---------------------------------------------|
| 19 | 58,050,000 | 58,200,000 | 775 | 898  | -0.816809918 |                                             |
| 19 | 58,125,000 | 58,275,000 | 776 | 1012 | -0.348914416 |                                             |
| 19 | 58,200,000 | 58,350,000 | 777 | 866  | -0.758488078 |                                             |
| 19 | 58,275,000 | 58,425,000 | 778 | 1153 | 0.28223214   |                                             |
| 19 | 58,350,000 | 58,500,000 | 779 | 1369 | 0.132105669  | SDK2                                        |
| 19 | 58,425,000 | 58,575,000 | 780 | 1395 | -0.193664785 | SDK2                                        |
| 19 | 58,500,000 | 58,650,000 | 781 | 1170 | 0.340642152  | C17orf80,CDC42EP4,SDK2                      |
| 19 | 58,575,000 | 58,725,000 | 782 | 827  | -0.350733451 | C17orf80,CDC42EP4,COG1,MGC128049,SDK2,SSTR2 |
| 19 | 58,650,000 | 58,800,000 | 783 | 1078 | -0.627307347 | C17orf80,COG1,MGC128049,SLC39A11,SSTR2      |
| 19 | 58,725,000 | 58,875,000 | 784 | 1127 | -0.362007627 | SLC39A11                                    |
| 19 | 58,800,000 | 58,950,000 | 785 | 1417 | 0.10434799   | SLC39A11                                    |
| 19 | 58,875,000 | 59,025,000 | 786 | 1551 | -0.551253386 | SLC39A11                                    |
| 19 | 58,950,000 | 59,100,000 | 787 | 1141 | -1.413024166 | SLC39A11                                    |
| 19 | 59,025,000 | 59,175,000 | 788 | 796  | -0.55694414  | SLC39A11                                    |
| 19 | 59,100,000 | 59,250,000 | 789 | 489  | -0.064290244 |                                             |
| 19 | 59,175,000 | 59,325,000 | 790 | 937  | 0.043027459  |                                             |
| 19 | 59,250,000 | 59,400,000 | 791 | 1502 | 0.180325632  |                                             |
| 19 | 59,325,000 | 59,475,000 | 792 | 1337 | 0.185188045  |                                             |
| 19 | 59,400,000 | 59,550,000 | 793 | 984  | -0.462953872 | SOX9                                        |
| 19 | 59,475,000 | 59,625,000 | 794 | 1027 | -0.929849216 | SOX9                                        |
| 19 | 59,550,000 | 59,700,000 | 795 | 1040 | -0.518449253 |                                             |
| 19 | 59,625,000 | 59,775,000 | 796 | 835  | 0.146238155  |                                             |
| 19 | 59,700,000 | 59,850,000 | 797 | 1135 | 0.177301165  |                                             |
| 19 | 59,775,000 | 59,925,000 | 798 | 1609 | 0.329186284  |                                             |
| 19 | 59,850,000 | 60,000,000 | 799 | 1411 | -0.129929362 |                                             |
| 19 | 59,925,000 | 60,075,000 | 800 | 1093 | 0.217146635  |                                             |
| 19 | 60,000,000 | 60,150,000 | 801 | 891  | 0.714307765  |                                             |
| 19 | 60,075,000 | 60,225,000 | 802 | 881  | -0.713891904 |                                             |
| 19 | 60,150,000 | 60,300,000 | 803 | 913  | -1.034541141 |                                             |
| 19 | 60,225,000 | 60,375,000 | 804 | 766  | -0.657780655 |                                             |
| 19 | 60,300,000 | 60,450,000 | 805 | 774  | -0.253199587 |                                             |
| 19 | 60,375,000 | 60,525,000 | 806 | 755  | 0.369276224  |                                             |
| 19 | 60,450,000 | 60,600,000 | 807 | 1029 | -1.08971484  |                                             |
| 19 | 60,525,000 | 60,675,000 | 808 | 945  | -1.698304368 |                                             |
| 19 | 60,600,000 | 60,750,000 | 809 | 772  | 0.890264617  |                                             |
| 19 | 60,675,000 | 60,825,000 | 810 | 842  | 0.865027269  |                                             |
| 19 | 60,750,000 | 60,900,000 | 811 | 752  | 0.167124002  |                                             |
| 19 | 60,825,000 | 60,975,000 | 812 | 1017 | -0.008228941 |                                             |
| 19 | 60,900,000 | 61,050,000 | 813 | 1117 | -0.596894169 |                                             |
| 19 | 60,975,000 | 61,125,000 | 814 | 991  | -0.898291206 |                                             |
| 19 | 61,050,000 | 61,200,000 | 815 | 862  | 0.229946421  | KCNJ2                                       |
| 19 | 61,125,000 | 61,275,000 | 816 | 997  | -0.214989901 | KCNJ16,KCNJ2                                |
| 19 | 61,200,000 | 61,350,000 | 817 | 1031 | -0.335988299 | KCNJ16                                      |
| 19 | 61,275,000 | 61,425,000 | 818 | 925  | -0.45670216  |                                             |
| 19 | 61,350,000 | 61,500,000 | 819 | 946  | -0.446269991 |                                             |
| 19 | 61,425,000 | 61,575,000 | 820 | 663  | -0.088186932 |                                             |
| 19 | 61,500,000 | 61,650,000 | 821 | 595  | -0.429150227 |                                             |
| 19 | 61,575,000 | 61,725,000 | 822 | 635  | -0.346452263 | MAP2K6                                      |
| 19 | 61,650,000 | 61,800,000 | 823 | 979  | -0.197102624 | MAP2K6                                      |
| 19 | 61,725,000 | 61,875,000 | 824 | 1080 | -0.290048263 | ABCA5,MAP2K6                                |
| 19 | 61,800,000 | 61,950,000 | 825 | 671  | -0.108424006 | ABCA5,MAP2K6                                |
| 19 | 61,875,000 | 62,025,000 | 826 | 787  | -0.550873813 | ABCA10,ABCA5                                |
| 19 | 61,950,000 | 62,100,000 | 827 | 793  | -1.277576681 | ABCA10,ABCA6,ABCA9                          |

|    |            |            |     |      |              |                                                                           |
|----|------------|------------|-----|------|--------------|---------------------------------------------------------------------------|
| 19 | 62,025,000 | 62,175,000 | 828 | 830  | -0.932452482 | ABCA6,ABCA9                                                               |
| 19 | 62,100,000 | 62,250,000 | 829 | 1131 | 0.179217235  | ABCA9,ENSBTAG00000024899                                                  |
| 19 | 62,175,000 | 62,325,000 | 830 | 1062 | 0.675982709  | FAM20A,PRKAR1A,ENSBTAG00000024899                                         |
| 19 | 62,250,000 | 62,400,000 | 831 | 951  | -0.033510558 | ARSG,FAM20A,PRKAR1A                                                       |
| 19 | 62,325,000 | 62,475,000 | 832 | 902  | 0.078036104  | ARSG,MGC159964,PRKAR1A                                                    |
| 19 | 62,400,000 | 62,550,000 | 833 | 814  | -0.57186985  | AMZ2,ARSG,MGC159964,SLC16A6                                               |
| 19 | 62,475,000 | 62,625,000 | 834 | 745  | -1.026315028 | AMZ2,GNA13,RGS9,SLC16A6,ENSBTAG00000047055                                |
| 19 | 62,550,000 | 62,700,000 | 835 | 818  | -1.778854836 | GNA13,RGS9,ENSBTAG00000047055                                             |
| 19 | 62,625,000 | 62,775,000 | 836 | 873  | -0.964916346 | RGS9                                                                      |
| 19 | 62,700,000 | 62,850,000 | 837 | 859  | 0.204321469  | AXIN2                                                                     |
| 19 | 62,775,000 | 62,925,000 | 838 | 939  | -0.215650656 | AXIN2                                                                     |
| 19 | 62,850,000 | 63,000,000 | 839 | 1000 | -0.053645921 | AXIN2                                                                     |
| 19 | 62,925,000 | 63,075,000 | 840 | 1081 | 0.402401638  | CEP112                                                                    |
| 19 | 63,000,000 | 63,150,000 | 841 | 1114 | 0.416125259  | CEP112                                                                    |
| 19 | 63,075,000 | 63,225,000 | 842 | 1182 | 0.387603253  | CEP112                                                                    |
| 19 | 63,150,000 | 63,300,000 | 843 | 1288 | 0.437026817  | APOH,CEP112                                                               |
| 19 | 63,225,000 | 63,375,000 | 844 | 1352 | -0.047654263 | APOH                                                                      |
| 19 | 63,300,000 | 63,450,000 | 845 | 1420 | -0.101861261 |                                                                           |
| 19 | 63,375,000 | 63,525,000 | 846 | 1419 | 0.384548506  | PRKCA                                                                     |
| 19 | 63,450,000 | 63,600,000 | 847 | 1269 | 0.004147788  | PRKCA                                                                     |
| 19 | 63,525,000 | 63,675,000 | 848 | 1058 | -0.846884064 | CACNG5,PRKCA                                                              |
| 19 | 63,600,000 | 63,750,000 | 849 | 966  | -1.729742367 | CACNG1,CACNG4,CACNG5                                                      |
| 19 | 63,675,000 | 63,825,000 | 850 | 798  | -3.393436398 | CACNG1,CACNG4,HELZ                                                        |
| 19 | 63,750,000 | 63,900,000 | 851 | 510  | -4.188188894 | HELZ                                                                      |
| 19 | 63,825,000 | 63,975,000 | 852 | 480  | -3.269017647 | HELZ                                                                      |
| 19 | 63,900,000 | 64,050,000 | 853 | 707  | -2.173288629 | HELZ                                                                      |
| 19 | 63,975,000 | 64,057,457 | 854 | 456  | -1.691420884 |                                                                           |
| 20 | 0          | 150,000    | 1   | 367  | 0.942613309  | ENSBTAG0000000617,ENSBTAG00000038364,ENSBTAG0000038537,ENSBTAG00000047333 |
| 20 | 75,000     | 225,000    | 2   | 683  | 0.530394832  | PANK3,SPZ1,ENSBTAG00000047333                                             |
| 20 | 150,000    | 300,000    | 3   | 1035 | 0.398690945  | PANK3,SPZ1                                                                |
| 20 | 225,000    | 375,000    | 4   | 850  | 0.75603617   | SLIT3                                                                     |
| 20 | 300,000    | 450,000    | 5   | 1051 | 0.933616105  | SLIT3                                                                     |
| 20 | 375,000    | 525,000    | 6   | 1541 | 0.971138402  | SLIT3                                                                     |
| 20 | 450,000    | 600,000    | 7   | 1368 | 1.140505078  | SLIT3                                                                     |
| 20 | 525,000    | 675,000    | 8   | 1100 | 0.965586505  |                                                                           |
| 20 | 600,000    | 750,000    | 9   | 1422 | 0.550342817  |                                                                           |
| 20 | 675,000    | 825,000    | 10  | 1941 | 0.397277245  |                                                                           |
| 20 | 750,000    | 900,000    | 11  | 1630 | 0.330407198  |                                                                           |
| 20 | 825,000    | 975,000    | 12  | 1149 | 0.720279032  |                                                                           |
| 20 | 900,000    | 1,050,000  | 13  | 909  | 0.993879749  |                                                                           |
| 20 | 975,000    | 1,125,000  | 14  | 865  | 0.727052455  |                                                                           |
| 20 | 1,050,000  | 1,200,000  | 15  | 740  | 0.526333312  |                                                                           |
| 20 | 1,125,000  | 1,275,000  | 16  | 440  | 0.276551505  |                                                                           |
| 20 | 1,200,000  | 1,350,000  | 17  | 614  | 0.98055418   |                                                                           |
| 20 | 1,275,000  | 1,425,000  | 18  | 767  | 1.375558313  | SPDL1                                                                     |
| 20 | 1,350,000  | 1,500,000  | 19  | 860  | 1.040985014  | DOCK2,SPDL1                                                               |
| 20 | 1,425,000  | 1,575,000  | 20  | 1102 | -0.510378446 | DOCK2                                                                     |
| 20 | 1,500,000  | 1,650,000  | 21  | 1182 | -1.186080447 | DOCK2                                                                     |
| 20 | 1,575,000  | 1,725,000  | 22  | 1268 | -1.135657634 | DOCK2,FAM196B                                                             |
| 20 | 1,650,000  | 1,800,000  | 23  | 1179 | -0.979498688 | DOCK2,FAM196B                                                             |
| 20 | 1,725,000  | 1,875,000  | 24  | 903  | 0.220144716  | DOCK2                                                                     |
| 20 | 1,800,000  | 1,950,000  | 25  | 989  | 0.125514159  | DOCK2,FOX11,ENSBTAG00000046449                                            |

|    |           |           |    |      |              |                                            |
|----|-----------|-----------|----|------|--------------|--------------------------------------------|
| 20 | 1,875,000 | 2,025,000 | 26 | 947  | 0.028604642  | DOCK2,FOXI1,ENSBTAG00000046449             |
| 20 | 1,950,000 | 2,100,000 | 27 | 797  | 0.920897469  | LCP2                                       |
| 20 | 2,025,000 | 2,175,000 | 28 | 640  | 0.661360669  | KCNMB1,LCP2                                |
| 20 | 2,100,000 | 2,250,000 | 29 | 579  | 0.497699542  | KCNMB1                                     |
| 20 | 2,175,000 | 2,325,000 | 30 | 1007 | 0.557256065  | KCNIP1                                     |
| 20 | 2,250,000 | 2,400,000 | 31 | 1109 | -0.209443525 | KCNIP1                                     |
| 20 | 2,325,000 | 2,475,000 | 32 | 1161 | -0.660877417 | KCNIP1                                     |
| 20 | 2,400,000 | 2,550,000 | 33 | 1181 | 0.073665651  | KCNIP1                                     |
| 20 | 2,475,000 | 2,625,000 | 34 | 1081 | 0.293946314  | GABRP,KCNIP1                               |
| 20 | 2,550,000 | 2,700,000 | 35 | 928  | 0.072694947  | GABRP,RANBP17                              |
| 20 | 2,625,000 | 2,775,000 | 36 | 582  | -0.087224543 | RANBP17                                    |
| 20 | 2,700,000 | 2,850,000 | 37 | 434  | -0.377583091 | RANBP17                                    |
| 20 | 2,775,000 | 2,925,000 | 38 | 504  | 0.138042721  | RANBP17                                    |
| 20 | 2,850,000 | 3,000,000 | 39 | 560  | 0.668448267  | RANBP17                                    |
| 20 | 2,925,000 | 3,075,000 | 40 | 798  | 0.75716488   | RANBP17,TLX3,ENSBTAG00000022684            |
| 20 | 3,000,000 | 3,150,000 | 41 | 1012 | 0.554683001  | FGF18,NPM1,RANBP17,TLX3,ENSBTAG00000022684 |
| 20 | 3,075,000 | 3,225,000 | 42 | 855  | 0.292561542  | FGF18,NPM1                                 |
| 20 | 3,150,000 | 3,300,000 | 43 | 956  | 0.428826599  | FGF18                                      |
| 20 | 3,225,000 | 3,375,000 | 44 | 801  | 0.124382525  |                                            |
| 20 | 3,300,000 | 3,450,000 | 45 | 443  | -0.716096733 |                                            |
| 20 | 3,375,000 | 3,525,000 | 46 | 344  | -1.248613881 | SMIM23                                     |
| 20 | 3,450,000 | 3,600,000 | 47 | 328  | -0.928514657 | FBXW11,SMIM23                              |
| 20 | 3,525,000 | 3,675,000 | 48 | 374  | -0.281077956 | FBXW11                                     |
| 20 | 3,600,000 | 3,750,000 | 49 | 275  | -0.316749512 | FBXW11                                     |
| 20 | 3,675,000 | 3,825,000 | 50 | 429  | -0.985477747 | STK10                                      |
| 20 | 3,750,000 | 3,900,000 | 51 | 569  | -1.329975523 | EFCAB9,STK10                               |
| 20 | 3,825,000 | 3,975,000 | 52 | 383  | -1.828232197 | EFCAB9,STK10,UBTD2                         |
| 20 | 3,900,000 | 4,050,000 | 53 | 275  | -1.922549715 | SH3PXD2B,UBTD2                             |
| 20 | 3,975,000 | 4,125,000 | 54 | 510  | -1.809256877 | SH3PXD2B                                   |
| 20 | 4,050,000 | 4,200,000 | 55 | 632  | -1.795282065 | SH3PXD2B                                   |
| 20 | 4,125,000 | 4,275,000 | 56 | 535  | -1.557890452 |                                            |
| 20 | 4,200,000 | 4,350,000 | 57 | 478  | -1.864556694 | NEURL1B                                    |
| 20 | 4,275,000 | 4,425,000 | 58 | 412  | -0.576026228 | NEURL1B                                    |
| 20 | 4,350,000 | 4,500,000 | 59 | 345  | 0.849613123  | DUSP1,NEURL1B                              |
| 20 | 4,425,000 | 4,575,000 | 60 | 485  | -0.576885166 | DUSP1,ERGIC1                               |
| 20 | 4,500,000 | 4,650,000 | 61 | 584  | -1.03317032  | ATP6V0E1,ERGIC1,RPL26L1                    |
| 20 | 4,575,000 | 4,725,000 | 62 | 285  | -1.577288578 | ATP6V0E1,CREBRF,ERGIC1,RPL26L1             |
| 20 | 4,650,000 | 4,800,000 | 63 | 164  | -2.440462981 | ATP6V0E1,BNIP1,CREBRF                      |
| 20 | 4,725,000 | 4,875,000 | 64 | 276  | -1.520070288 | BNIP1,CREBRF,NKX2-5                        |
| 20 | 4,800,000 | 4,950,000 | 65 | 541  | -0.422985837 | NKX2-5,STC2                                |
| 20 | 4,875,000 | 5,025,000 | 66 | 598  | 0.551090362  | STC2                                       |
| 20 | 4,950,000 | 5,100,000 | 67 | 401  | 0.670547028  |                                            |
| 20 | 5,025,000 | 5,175,000 | 68 | 295  | -0.275032578 |                                            |
| 20 | 5,100,000 | 5,250,000 | 69 | 621  | 0.275907916  | BOD1                                       |
| 20 | 5,175,000 | 5,325,000 | 70 | 761  | 0.10769574   | BOD1                                       |
| 20 | 5,250,000 | 5,400,000 | 71 | 645  | -0.334437009 |                                            |
| 20 | 5,325,000 | 5,475,000 | 72 | 663  | 0.049849549  |                                            |
| 20 | 5,400,000 | 5,550,000 | 73 | 524  | 0.670409817  | CPEB4                                      |
| 20 | 5,475,000 | 5,625,000 | 74 | 577  | 0.604266351  | CPEB4                                      |
| 20 | 5,550,000 | 5,700,000 | 75 | 715  | 0.178165702  | CPEB4,NSG2                                 |
| 20 | 5,625,000 | 5,775,000 | 76 | 901  | -0.266495389 | NSG2                                       |
| 20 | 5,700,000 | 5,850,000 | 77 | 1210 | 0.131536707  | NSG2                                       |
| 20 | 5,775,000 | 5,925,000 | 78 | 1550 | 0.185498858  |                                            |

|    |           |           |     |      |              |                                            |
|----|-----------|-----------|-----|------|--------------|--------------------------------------------|
| 20 | 5,850,000 | 6,000,000 | 79  | 1561 | 0.491969033  |                                            |
| 20 | 5,925,000 | 6,075,000 | 80  | 1138 | 0.146264451  |                                            |
| 20 | 6,000,000 | 6,150,000 | 81  | 851  | -0.159528181 |                                            |
| 20 | 6,075,000 | 6,225,000 | 82  | 767  | 0.811199122  |                                            |
| 20 | 6,150,000 | 6,300,000 | 83  | 750  | -0.079306944 |                                            |
| 20 | 6,225,000 | 6,375,000 | 84  | 656  | -0.105541567 | MSX2                                       |
| 20 | 6,300,000 | 6,450,000 | 85  | 444  | 0.229234646  | MSX2                                       |
| 20 | 6,375,000 | 6,525,000 | 86  | 855  | 0.22330644   |                                            |
| 20 | 6,450,000 | 6,600,000 | 87  | 947  | 0.111298794  | FAM169A                                    |
| 20 | 6,525,000 | 6,675,000 | 88  | 653  | -0.403286932 | FAM169A,GFM2,NSA2                          |
| 20 | 6,600,000 | 6,750,000 | 89  | 870  | 0.400595088  | FAM169A,GFM2,NSA2,ENSBTAG00000015512       |
| 20 | 6,675,000 | 6,825,000 | 90  | 977  | 0.058462397  | GFM2,ENSBTAG00000015512,ENSBTAG00000034138 |
| 20 | 6,750,000 | 6,900,000 | 91  | 1027 | 0.108608557  | ENC1,ENSBTAG00000015512,ENSBTAG00000034138 |
| 20 | 6,825,000 | 6,975,000 | 92  | 1433 | 0.984516538  | ENC1                                       |
| 20 | 6,900,000 | 7,050,000 | 93  | 1260 | -0.067203473 |                                            |
| 20 | 6,975,000 | 7,125,000 | 94  | 1087 | -0.832262584 |                                            |
| 20 | 7,050,000 | 7,200,000 | 95  | 1236 | 0.381595863  |                                            |
| 20 | 7,125,000 | 7,275,000 | 96  | 639  | 0.163230839  |                                            |
| 20 | 7,200,000 | 7,350,000 | 97  | 328  | 0.870277067  |                                            |
| 20 | 7,275,000 | 7,425,000 | 98  | 555  | 0.776951828  |                                            |
| 20 | 7,350,000 | 7,500,000 | 99  | 626  | 0.864528805  |                                            |
| 20 | 7,425,000 | 7,575,000 | 100 | 506  | 0.862530873  |                                            |
| 20 | 7,500,000 | 7,650,000 | 101 | 454  | 0.560688324  | RGNEF                                      |
| 20 | 7,575,000 | 7,725,000 | 102 | 681  | 0.438267727  | RGNEF                                      |
| 20 | 7,650,000 | 7,800,000 | 103 | 698  | 0.24356854   | RGNEF                                      |
| 20 | 7,725,000 | 7,875,000 | 104 | 812  | -0.126212559 |                                            |
| 20 | 7,800,000 | 7,950,000 | 105 | 989  | -0.590697432 |                                            |
| 20 | 7,875,000 | 8,025,000 | 106 | 803  | -0.770042553 | ANKRA2,UTP15                               |
| 20 | 7,950,000 | 8,100,000 | 107 | 830  | -0.349451426 | ANKRA2,BTF3,CALM,UTP15                     |
| 20 | 8,025,000 | 8,175,000 | 108 | 617  | -0.332028677 | BTF3,CALM                                  |
| 20 | 8,100,000 | 8,250,000 | 109 | 412  | -0.91766516  |                                            |
| 20 | 8,175,000 | 8,325,000 | 110 | 686  | -1.396256553 |                                            |
| 20 | 8,250,000 | 8,400,000 | 111 | 892  | -0.681482024 | TMEM174                                    |
| 20 | 8,325,000 | 8,475,000 | 112 | 950  | 0.343304473  | FCHO2,TMEM171,TMEM174                      |
| 20 | 8,400,000 | 8,550,000 | 113 | 842  | 0.581682557  | FCHO2,TMEM171                              |
| 20 | 8,475,000 | 8,625,000 | 114 | 888  | 0.427430476  | FCHO2                                      |
| 20 | 8,550,000 | 8,700,000 | 115 | 902  | 0.138954691  | FCHO2,TNPO1                                |
| 20 | 8,625,000 | 8,775,000 | 116 | 668  | -0.259244372 | TNPO1                                      |
| 20 | 8,700,000 | 8,850,000 | 117 | 854  | 0.028742708  | SUBH2BV                                    |
| 20 | 8,775,000 | 8,925,000 | 118 | 1016 | 0.136796124  | SUBH2BV                                    |
| 20 | 8,850,000 | 9,000,000 | 119 | 1093 | 0.299185442  |                                            |
| 20 | 8,925,000 | 9,075,000 | 120 | 948  | 0.391905595  |                                            |
| 20 | 9,000,000 | 9,150,000 | 121 | 735  | 0.780137932  | ZNF366                                     |
| 20 | 9,075,000 | 9,225,000 | 122 | 985  | 1.049892132  | MRPS27,PTCD2,ZNF366                        |
| 20 | 9,150,000 | 9,300,000 | 123 | 823  | 0.882111142  | MRPS27,PTCD2                               |
| 20 | 9,225,000 | 9,375,000 | 124 | 510  | 0.528705452  | MAP1B,MRPS27                               |
| 20 | 9,300,000 | 9,450,000 | 125 | 546  | 0.499618303  | MAP1B,MRPS27                               |
| 20 | 9,375,000 | 9,525,000 | 126 | 601  | -0.856797234 | MAP1B                                      |
| 20 | 9,450,000 | 9,600,000 | 127 | 748  | -1.305881627 |                                            |
| 20 | 9,525,000 | 9,675,000 | 128 | 1059 | -0.077535258 |                                            |
| 20 | 9,600,000 | 9,750,000 | 129 | 978  | -0.154036599 |                                            |
| 20 | 9,675,000 | 9,825,000 | 130 | 683  | -0.027130914 | CARTPT                                     |
| 20 | 9,750,000 | 9,900,000 | 131 | 596  | 0.141677337  | CARTPT,MCCC2                               |

|    |            |            |     |      |              |                                          |
|----|------------|------------|-----|------|--------------|------------------------------------------|
| 20 | 9,825,000  | 9,975,000  | 132 | 841  | -1.086255327 | BDP1,MCCC2                               |
| 20 | 9,900,000  | 10,050,000 | 133 | 954  | -1.149136512 | BDP1,MCCC2,SERF1,SMN1                    |
| 20 | 9,975,000  | 10,125,000 | 134 | 529  | 0.054890448  | BDP1,NAIP,SERF1,SMN1                     |
| 20 | 10,050,000 | 10,200,000 | 135 | 484  | -0.009014417 | GTF2H2,NAIP,OCLN,SMN1                    |
| 20 | 10,125,000 | 10,275,000 | 136 | 718  | 0.455046025  | GTF2H2,MARVELD2,OCLN,RAD17               |
| 20 | 10,200,000 | 10,350,000 | 137 | 615  | 0.511927174  | AK6,CCDC125,MARVELD2,OCLN,RAD17,TAF9     |
| 20 | 10,275,000 | 10,425,000 | 138 | 365  | -0.186860959 | AK6,CCDC125,CDK7,CENPH,MRPS36,RAD17,TAF9 |
| 20 | 10,350,000 | 10,500,000 | 139 | 308  | -0.069693622 | CCDC125,CCNB1,CDK7,CENPH,MRPS36,SLC30A5  |
| 20 | 10,425,000 | 10,575,000 | 140 | 655  | 0.126826216  | CCNB1,CENPH,SLC30A5                      |
| 20 | 10,500,000 | 10,650,000 | 141 | 899  | 0.314822734  |                                          |
| 20 | 10,575,000 | 10,725,000 | 142 | 994  | 0.65984732   |                                          |
| 20 | 10,650,000 | 10,800,000 | 143 | 829  | 0.428458653  |                                          |
| 20 | 10,725,000 | 10,875,000 | 144 | 596  | 0.203261728  |                                          |
| 20 | 10,800,000 | 10,950,000 | 145 | 635  | 0.162754556  |                                          |
| 20 | 10,875,000 | 11,025,000 | 146 | 896  | 0.203933132  |                                          |
| 20 | 10,950,000 | 11,100,000 | 147 | 1284 | 0.669997623  |                                          |
| 20 | 11,025,000 | 11,175,000 | 148 | 1140 | 0.583489249  |                                          |
| 20 | 11,100,000 | 11,250,000 | 149 | 979  | 0.243716539  |                                          |
| 20 | 11,175,000 | 11,325,000 | 150 | 1164 | 0.787896913  |                                          |
| 20 | 11,250,000 | 11,400,000 | 151 | 1061 | 1.027759968  | PIK3R1                                   |
| 20 | 11,325,000 | 11,475,000 | 152 | 811  | 0.586364357  | PIK3R1                                   |
| 20 | 11,400,000 | 11,550,000 | 153 | 872  | 0.442763849  | PIK3R1                                   |
| 20 | 11,475,000 | 11,625,000 | 154 | 892  | 0.474921362  |                                          |
| 20 | 11,550,000 | 11,700,000 | 155 | 1015 | 0.626165702  |                                          |
| 20 | 11,625,000 | 11,775,000 | 156 | 1035 | 0.391707246  | DYNLL1                                   |
| 20 | 11,700,000 | 11,850,000 | 157 | 611  | 0.193995724  | DYNLL1                                   |
| 20 | 11,775,000 | 11,925,000 | 158 | 577  | 1.068594184  |                                          |
| 20 | 11,850,000 | 12,000,000 | 159 | 592  | 1.166117972  |                                          |
| 20 | 11,925,000 | 12,075,000 | 160 | 668  | 1.12468279   |                                          |
| 20 | 12,000,000 | 12,150,000 | 161 | 1028 | 0.506257431  |                                          |
| 20 | 12,075,000 | 12,225,000 | 162 | 966  | -0.170216482 |                                          |
| 20 | 12,150,000 | 12,300,000 | 163 | 701  | -0.348067834 |                                          |
| 20 | 12,225,000 | 12,375,000 | 164 | 827  | -0.200231423 | CD180                                    |
| 20 | 12,300,000 | 12,450,000 | 165 | 1056 | -0.21829377  | CD180,MAST4                              |
| 20 | 12,375,000 | 12,525,000 | 166 | 772  | -0.163759483 | MAST4                                    |
| 20 | 12,450,000 | 12,600,000 | 167 | 594  | 0.402826522  | MAST4                                    |
| 20 | 12,525,000 | 12,675,000 | 168 | 759  | 0.768162871  |                                          |
| 20 | 12,600,000 | 12,750,000 | 169 | 807  | 0.34962391   |                                          |
| 20 | 12,675,000 | 12,825,000 | 170 | 732  | 0.218637957  |                                          |
| 20 | 12,750,000 | 12,900,000 | 171 | 726  | -0.11316229  |                                          |
| 20 | 12,825,000 | 12,975,000 | 172 | 791  | -0.492251926 |                                          |
| 20 | 12,900,000 | 13,050,000 | 173 | 852  | -0.080051485 |                                          |
| 20 | 12,975,000 | 13,125,000 | 174 | 791  | 0.625866253  |                                          |
| 20 | 13,050,000 | 13,200,000 | 175 | 602  | 1.039436735  |                                          |
| 20 | 13,125,000 | 13,275,000 | 176 | 551  | 0.829188125  |                                          |
| 20 | 13,200,000 | 13,350,000 | 177 | 740  | -0.258627687 |                                          |
| 20 | 13,275,000 | 13,425,000 | 178 | 791  | -0.269927813 | SREK1                                    |
| 20 | 13,350,000 | 13,500,000 | 179 | 504  | 0.692527799  | ERBB2IP,SREK1                            |
| 20 | 13,425,000 | 13,575,000 | 180 | 426  | 0.978743932  | ERBB2IP,SREK1                            |
| 20 | 13,500,000 | 13,650,000 | 181 | 467  | 1.02493188   | ERBB2IP                                  |
| 20 | 13,575,000 | 13,725,000 | 182 | 498  | 0.776478762  | NLN                                      |
| 20 | 13,650,000 | 13,800,000 | 183 | 439  | 0.562996193  | NLN                                      |
| 20 | 13,725,000 | 13,875,000 | 184 | 565  | 0.416647635  | NLN,SGTB,TRAPPC13                        |



|    |            |            |     |      |              |                                                                         |
|----|------------|------------|-----|------|--------------|-------------------------------------------------------------------------|
| 20 | 13,800,000 | 13,950,000 | 185 | 539  | 0.328257497  | PPWD1,SGTB,TRAPPC13,TRIM23,ENSBTAG00000047828                           |
| 20 | 13,875,000 | 14,025,000 | 186 | 189  | -0.615722326 | ADAMTS6,CENPK,PPWD1,TRAPPC13,TRIM23,ENSBTAG000046810,ENSBTAG00000047828 |
| 20 | 13,950,000 | 14,100,000 | 187 | 153  | -0.70852305  | ADAMTS6,CENPK,PPWD1,ENSBTAG00000046810                                  |
| 20 | 14,025,000 | 14,175,000 | 188 | 141  | -0.579123392 | ADAMTS6                                                                 |
| 20 | 14,100,000 | 14,250,000 | 189 | 138  | -0.810027129 | ADAMTS6                                                                 |
| 20 | 14,175,000 | 14,325,000 | 190 | 194  | -0.807310785 | ADAMTS6                                                                 |
| 20 | 14,250,000 | 14,400,000 | 191 | 288  | -0.280037353 | ADAMTS6                                                                 |
| 20 | 14,325,000 | 14,475,000 | 192 | 278  | -0.18998884  | CWC27                                                                   |
| 20 | 14,400,000 | 14,550,000 | 193 | 197  | 0.4339903    | CWC27                                                                   |
| 20 | 14,475,000 | 14,625,000 | 194 | 245  | 0.94484986   | CWC27                                                                   |
| 20 | 14,550,000 | 14,700,000 | 195 | 315  | 0.713491025  | CWC27,SREK1IP1                                                          |
| 20 | 14,625,000 | 14,775,000 | 196 | 276  | 0.931381149  | CWC27,FAM159B,SREK1IP1                                                  |
| 20 | 14,700,000 | 14,850,000 | 197 | 230  | 1.116710076  | FAM159B,RGS7BP,SREK1IP1                                                 |
| 20 | 14,775,000 | 14,925,000 | 198 | 281  | 1.028646378  | RGS7BP                                                                  |
| 20 | 14,850,000 | 15,000,000 | 199 | 335  | 0.407990566  | RGS7BP                                                                  |
| 20 | 14,925,000 | 15,075,000 | 200 | 350  | 0.600569199  | RGS7BP                                                                  |
| 20 | 15,000,000 | 15,150,000 | 201 | 551  | 0.933520335  | RNF180                                                                  |
| 20 | 15,075,000 | 15,225,000 | 202 | 608  | 0.720998231  | RNF180                                                                  |
| 20 | 15,150,000 | 15,300,000 | 203 | 468  | -0.127387456 | RNF180                                                                  |
| 20 | 15,225,000 | 15,375,000 | 204 | 402  | -1.106174358 | RNF180                                                                  |
| 20 | 15,300,000 | 15,450,000 | 205 | 571  | -0.305528054 | RNF180                                                                  |
| 20 | 15,375,000 | 15,525,000 | 206 | 826  | 0.34699041   |                                                                         |
| 20 | 15,450,000 | 15,600,000 | 207 | 858  | 0.699136845  | 5HTR1A                                                                  |
| 20 | 15,525,000 | 15,675,000 | 208 | 1053 | 0.68736028   | 5HTR1A                                                                  |
| 20 | 15,600,000 | 15,750,000 | 209 | 1216 | 0.501910526  |                                                                         |
| 20 | 15,675,000 | 15,825,000 | 210 | 974  | 0.607457928  |                                                                         |
| 20 | 15,750,000 | 15,900,000 | 211 | 799  | 0.784100253  |                                                                         |
| 20 | 15,825,000 | 15,975,000 | 212 | 671  | 0.556905972  |                                                                         |
| 20 | 15,900,000 | 16,050,000 | 213 | 676  | 0.505608707  |                                                                         |
| 20 | 15,975,000 | 16,125,000 | 214 | 775  | 0.555663125  |                                                                         |
| 20 | 16,050,000 | 16,200,000 | 215 | 799  | 0.814967636  |                                                                         |
| 20 | 16,125,000 | 16,275,000 | 216 | 1043 | 0.694121818  |                                                                         |
| 20 | 16,200,000 | 16,350,000 | 217 | 1292 | 0.3278208    |                                                                         |
| 20 | 16,275,000 | 16,425,000 | 218 | 1418 | 0.554356734  |                                                                         |
| 20 | 16,350,000 | 16,500,000 | 219 | 1370 | 0.029055001  |                                                                         |
| 20 | 16,425,000 | 16,575,000 | 220 | 1108 | -1.066507167 |                                                                         |
| 20 | 16,500,000 | 16,650,000 | 221 | 893  | 0.074644721  |                                                                         |
| 20 | 16,575,000 | 16,725,000 | 222 | 695  | 0.115561974  |                                                                         |
| 20 | 16,650,000 | 16,800,000 | 223 | 971  | 0.114270772  | IPO11                                                                   |
| 20 | 16,725,000 | 16,875,000 | 224 | 872  | 0.671884391  | IPO11                                                                   |
| 20 | 16,800,000 | 16,950,000 | 225 | 463  | -0.604510087 | IPO11                                                                   |
| 20 | 16,875,000 | 17,025,000 | 226 | 493  | -0.167709536 | DIMT1,IPO11,KIF2A                                                       |
| 20 | 16,950,000 | 17,100,000 | 227 | 357  | 0.689410323  | DIMT1,IPO11,KIF2A                                                       |
| 20 | 17,025,000 | 17,175,000 | 228 | 439  | 0.380041893  | KIF2A                                                                   |
| 20 | 17,100,000 | 17,250,000 | 229 | 882  | -0.081379674 |                                                                         |
| 20 | 17,175,000 | 17,325,000 | 230 | 846  | -0.084635394 |                                                                         |
| 20 | 17,250,000 | 17,400,000 | 231 | 734  | 0.893401198  |                                                                         |
| 20 | 17,325,000 | 17,475,000 | 232 | 740  | 1.144923718  |                                                                         |
| 20 | 17,400,000 | 17,550,000 | 233 | 453  | 0.87462072   |                                                                         |
| 20 | 17,475,000 | 17,625,000 | 234 | 430  | 0.50217236   |                                                                         |
| 20 | 17,550,000 | 17,700,000 | 235 | 530  | 0.207002438  |                                                                         |
| 20 | 17,625,000 | 17,775,000 | 236 | 731  | -0.593031314 |                                                                         |

|    |            |            |     |      |              |                          |
|----|------------|------------|-----|------|--------------|--------------------------|
| 20 | 17,700,000 | 17,850,000 | 237 | 896  | -0.257813928 | ZSWIM6                   |
| 20 | 17,775,000 | 17,925,000 | 238 | 617  | 0.66367057   | ZSWIM6                   |
| 20 | 17,850,000 | 18,000,000 | 239 | 285  | 0.714521911  | ZSWIM6                   |
| 20 | 17,925,000 | 18,075,000 | 240 | 280  | -0.62848088  |                          |
| 20 | 18,000,000 | 18,150,000 | 241 | 283  | -1.550188886 |                          |
| 20 | 18,075,000 | 18,225,000 | 242 | 441  | -1.580041317 | NDUFAF2                  |
| 20 | 18,150,000 | 18,300,000 | 243 | 801  | -1.593863465 | NDUFAF2                  |
| 20 | 18,225,000 | 18,375,000 | 244 | 866  | -0.658549514 | ERCC8,NDUFAF2            |
| 20 | 18,300,000 | 18,450,000 | 245 | 872  | 0.501058838  | ERCC8,NDUFAF2            |
| 20 | 18,375,000 | 18,525,000 | 246 | 753  | 0.445785876  | ELOVL7,ERCC8             |
| 20 | 18,450,000 | 18,600,000 | 247 | 802  | 0.901158057  | DEPDC1B,ELOVL7           |
| 20 | 18,525,000 | 18,675,000 | 248 | 851  | 1.145734218  | DEPDC1B,ELOVL7           |
| 20 | 18,600,000 | 18,750,000 | 249 | 713  | 0.865047468  | DEPDC1B                  |
| 20 | 18,675,000 | 18,825,000 | 250 | 793  | 0.707232967  |                          |
| 20 | 18,750,000 | 18,900,000 | 251 | 864  | 0.735856244  |                          |
| 20 | 18,825,000 | 18,975,000 | 252 | 1352 | -0.774336703 |                          |
| 20 | 18,900,000 | 19,050,000 | 253 | 1398 | -0.941839389 |                          |
| 20 | 18,975,000 | 19,125,000 | 254 | 922  | 0.001251339  |                          |
| 20 | 19,050,000 | 19,200,000 | 255 | 980  | 0.619656664  |                          |
| 20 | 19,125,000 | 19,275,000 | 256 | 1062 | 0.885806319  |                          |
| 20 | 19,200,000 | 19,350,000 | 257 | 909  | 0.544592977  |                          |
| 20 | 19,275,000 | 19,425,000 | 258 | 664  | 0.098925251  |                          |
| 20 | 19,350,000 | 19,500,000 | 259 | 702  | 0.688823235  |                          |
| 20 | 19,425,000 | 19,575,000 | 260 | 796  | 0.584595399  |                          |
| 20 | 19,500,000 | 19,650,000 | 261 | 576  | -0.112819112 |                          |
| 20 | 19,575,000 | 19,725,000 | 262 | 843  | 0.020428392  |                          |
| 20 | 19,650,000 | 19,800,000 | 263 | 1024 | 0.249654737  |                          |
| 20 | 19,725,000 | 19,875,000 | 264 | 743  | 0.598680246  |                          |
| 20 | 19,800,000 | 19,950,000 | 265 | 619  | 0.918561691  |                          |
| 20 | 19,875,000 | 20,025,000 | 266 | 790  | 0.533187704  |                          |
| 20 | 19,950,000 | 20,100,000 | 267 | 860  | 0.167675733  | ENSBTAG00000039486       |
| 20 | 20,025,000 | 20,175,000 | 268 | 721  | 0.154646835  | ENSBTAG00000039486       |
| 20 | 20,100,000 | 20,250,000 | 269 | 590  | -0.277906737 | ENSBTAG00000039486       |
| 20 | 20,175,000 | 20,325,000 | 270 | 390  | -0.646691117 | PDE4D,ENSBTAG00000039486 |
| 20 | 20,250,000 | 20,400,000 | 271 | 591  | -0.70985183  | PDE4D                    |
| 20 | 20,325,000 | 20,475,000 | 272 | 979  | -0.095142695 | RAB3C                    |
| 20 | 20,400,000 | 20,550,000 | 273 | 1077 | 0.859261081  | RAB3C                    |
| 20 | 20,475,000 | 20,625,000 | 274 | 879  | 0.462813514  | RAB3C,ENSBTAG0000005229  |
| 20 | 20,550,000 | 20,700,000 | 275 | 839  | 0.066535239  | RAB3C,ENSBTAG0000005229  |
| 20 | 20,625,000 | 20,775,000 | 276 | 937  | 0.456491235  | RAB3C                    |
| 20 | 20,700,000 | 20,850,000 | 277 | 1042 | -0.068534542 | GAPT,RAB3C               |
| 20 | 20,775,000 | 20,925,000 | 278 | 908  | 0.156904268  | GAPT,PLK2                |
| 20 | 20,850,000 | 21,000,000 | 279 | 680  | 0.375145886  | PLK2                     |
| 20 | 20,925,000 | 21,075,000 | 280 | 962  | 0.719587585  |                          |
| 20 | 21,000,000 | 21,150,000 | 281 | 985  | 0.141807571  |                          |
| 20 | 21,075,000 | 21,225,000 | 282 | 990  | -0.433919068 |                          |
| 20 | 21,150,000 | 21,300,000 | 283 | 977  | 0.460238793  |                          |
| 20 | 21,225,000 | 21,375,000 | 284 | 1092 | 0.926662642  |                          |
| 20 | 21,300,000 | 21,450,000 | 285 | 1069 | 0.978815394  |                          |
| 20 | 21,375,000 | 21,525,000 | 286 | 850  | 0.557304616  |                          |
| 20 | 21,450,000 | 21,600,000 | 287 | 1200 | 0.364047547  |                          |
| 20 | 21,525,000 | 21,675,000 | 288 | 1556 | 0.10431578   |                          |
| 20 | 21,600,000 | 21,750,000 | 289 | 1642 | 0.018257027  |                          |

|    |            |            |     |      |              |                                       |
|----|------------|------------|-----|------|--------------|---------------------------------------|
| 20 | 21,675,000 | 21,825,000 | 290 | 1365 | 0.275075344  |                                       |
| 20 | 21,750,000 | 21,900,000 | 291 | 1196 | -1.762382527 |                                       |
| 20 | 21,825,000 | 21,975,000 | 292 | 1098 | -1.943178648 | ENSBTAG00000026505                    |
| 20 | 21,900,000 | 22,050,000 | 293 | 809  | 0.657135698  | GPBP1,ENSBTAG00000026505              |
| 20 | 21,975,000 | 22,125,000 | 294 | 804  | 0.660964863  | GPBP1                                 |
| 20 | 22,050,000 | 22,200,000 | 295 | 881  | -0.087589332 | GPBP1,ENSBTAG00000047548              |
| 20 | 22,125,000 | 22,275,000 | 296 | 877  | -0.692440891 | ENSBTAG00000047548                    |
| 20 | 22,200,000 | 22,350,000 | 297 | 909  | -0.554208131 | MIER3,SETD9                           |
| 20 | 22,275,000 | 22,425,000 | 298 | 793  | -0.031739944 | MAP3K1,MIER3,SETD9                    |
| 20 | 22,350,000 | 22,500,000 | 299 | 743  | 0.763367244  | MAP3K1                                |
| 20 | 22,425,000 | 22,575,000 | 300 | 762  | 0.968784666  | MAP3K1                                |
| 20 | 22,500,000 | 22,650,000 | 301 | 595  | 0.100773744  |                                       |
| 20 | 22,575,000 | 22,725,000 | 302 | 698  | -2.493240066 |                                       |
| 20 | 22,650,000 | 22,800,000 | 303 | 976  | -0.473128949 |                                       |
| 20 | 22,725,000 | 22,875,000 | 304 | 941  | 0.812079215  |                                       |
| 20 | 22,800,000 | 22,950,000 | 305 | 727  | 0.067560662  |                                       |
| 20 | 22,875,000 | 23,025,000 | 306 | 721  | -0.606426138 | ANKRD55                               |
| 20 | 22,950,000 | 23,100,000 | 307 | 797  | -0.436341321 | ANKRD55                               |
| 20 | 23,025,000 | 23,175,000 | 308 | 639  | -0.496967096 | ANKRD55                               |
| 20 | 23,100,000 | 23,250,000 | 309 | 518  | 0.598740632  | ANKRD55,IL6ST                         |
| 20 | 23,175,000 | 23,325,000 | 310 | 551  | 0.955824846  | IL31RA,IL6ST                          |
| 20 | 23,250,000 | 23,400,000 | 311 | 733  | 0.989995488  | DDX4,IL31RA,IL6ST                     |
| 20 | 23,325,000 | 23,475,000 | 312 | 970  | 1.069795411  | DDX4,IL31RA,SLC38A9                   |
| 20 | 23,400,000 | 23,550,000 | 313 | 763  | 1.010507669  | DDX4,SLC38A9                          |
| 20 | 23,475,000 | 23,625,000 | 314 | 446  | -0.328685977 | SLC38A9                               |
| 20 | 23,550,000 | 23,700,000 | 315 | 345  | -0.17244571  | PPAP2A,SLC38A9                        |
| 20 | 23,625,000 | 23,775,000 | 316 | 282  | 1.070828833  | PPAP2A,SKIV2L2                        |
| 20 | 23,700,000 | 23,850,000 | 317 | 281  | 0.967257705  | PPAP2A,SKIV2L2                        |
| 20 | 23,775,000 | 23,925,000 | 318 | 535  | 0.385413767  | CCNO,DHX29,PPAP2A,SKIV2L2             |
| 20 | 23,850,000 | 24,000,000 | 319 | 744  | 0.775345767  | CCNO,CDC20B,DHX29,GPX8,MCIDAS,SKIV2L2 |
| 20 | 23,925,000 | 24,075,000 | 320 | 715  | 1.183159277  | CCNO,CDC20B,GPX8,GZMA,MCIDAS          |
| 20 | 24,000,000 | 24,150,000 | 321 | 674  | 0.979678366  | CDC20B,ESM1,GZMA,GZMK                 |
| 20 | 24,075,000 | 24,225,000 | 322 | 703  | 1.124103414  | ESM1,GZMK                             |
| 20 | 24,150,000 | 24,300,000 | 323 | 558  | 1.102376546  | ENSBTAG00000003200                    |
| 20 | 24,225,000 | 24,375,000 | 324 | 293  | 0.524607145  | ENSBTAG00000003200                    |
| 20 | 24,300,000 | 24,450,000 | 325 | 386  | 0.191739367  | COX8A                                 |
| 20 | 24,375,000 | 24,525,000 | 326 | 592  | -0.102293695 | COX8A                                 |
| 20 | 24,450,000 | 24,600,000 | 327 | 591  | -0.191195116 | SNX18                                 |
| 20 | 24,525,000 | 24,675,000 | 328 | 634  | -2.200482766 | HSPB3,SNX18                           |
| 20 | 24,600,000 | 24,750,000 | 329 | 581  | -2.532212082 | HSPB3                                 |
| 20 | 24,675,000 | 24,825,000 | 330 | 696  | -1.317191268 |                                       |
| 20 | 24,750,000 | 24,900,000 | 331 | 884  | -0.575785147 |                                       |
| 20 | 24,825,000 | 24,975,000 | 332 | 565  | -0.121118901 | ARL15                                 |
| 20 | 24,900,000 | 25,050,000 | 333 | 450  | 0.259074544  | ARL15                                 |
| 20 | 24,975,000 | 25,125,000 | 334 | 348  | 0.743636452  | ARL15                                 |
| 20 | 25,050,000 | 25,200,000 | 335 | 105  | 0.725362333  |                                       |
| 20 | 25,125,000 | 25,275,000 | 336 | 125  | 0.572534451  |                                       |
| 20 | 25,200,000 | 25,350,000 | 337 | 490  | -0.791026633 |                                       |
| 20 | 25,275,000 | 25,425,000 | 338 | 876  | -0.736251893 | NDUFS4                                |
| 20 | 25,350,000 | 25,500,000 | 339 | 637  | -0.242244312 | NDUFS4                                |
| 20 | 25,425,000 | 25,575,000 | 340 | 406  | -0.059359223 | NDUFS4                                |
| 20 | 25,500,000 | 25,650,000 | 341 | 533  | -0.909049121 | FST,NDUFS4,ENSBTAG00000046997         |
| 20 | 25,575,000 | 25,725,000 | 342 | 679  | 0.45509845   | FST,ENSBTAG00000046997                |

|    |            |            |     |      |              |                                |
|----|------------|------------|-----|------|--------------|--------------------------------|
| 20 | 25,650,000 | 25,800,000 | 343 | 864  | 0.443030573  |                                |
| 20 | 25,725,000 | 25,875,000 | 344 | 772  | 0.28520477   |                                |
| 20 | 25,800,000 | 25,950,000 | 345 | 553  | 0.588338067  |                                |
| 20 | 25,875,000 | 26,025,000 | 346 | 475  | 0.495652981  | ITGA2,MOCS2                    |
| 20 | 25,950,000 | 26,100,000 | 347 | 513  | 0.102152349  | ITGA2,MOCS2                    |
| 20 | 26,025,000 | 26,175,000 | 348 | 501  | -0.353820385 | ITGA1,ITGA2,ENSBTAG00000046575 |
| 20 | 26,100,000 | 26,250,000 | 349 | 323  | 0.927401471  | ITGA1,ENSBTAG00000046575       |
| 20 | 26,175,000 | 26,325,000 | 350 | 393  | 0.576616898  | ITGA1,PELO                     |
| 20 | 26,250,000 | 26,400,000 | 351 | 915  | 0.12947558   | PELO                           |
| 20 | 26,325,000 | 26,475,000 | 352 | 1066 | 0.137145972  |                                |
| 20 | 26,400,000 | 26,550,000 | 353 | 781  | 0.265538512  |                                |
| 20 | 26,475,000 | 26,625,000 | 354 | 673  | 0.281605084  |                                |
| 20 | 26,550,000 | 26,700,000 | 355 | 700  | -0.814635483 |                                |
| 20 | 26,625,000 | 26,775,000 | 356 | 748  | -0.266376402 |                                |
| 20 | 26,700,000 | 26,850,000 | 357 | 828  | 0.30221441   |                                |
| 20 | 26,775,000 | 26,925,000 | 358 | 632  | -0.243710533 |                                |
| 20 | 26,850,000 | 27,000,000 | 359 | 660  | 0.855449826  |                                |
| 20 | 26,925,000 | 27,075,000 | 360 | 998  | 0.115001887  |                                |
| 20 | 27,000,000 | 27,150,000 | 361 | 721  | -0.563378538 |                                |
| 20 | 27,075,000 | 27,225,000 | 362 | 674  | 0.503027603  |                                |
| 20 | 27,150,000 | 27,300,000 | 363 | 687  | 1.039772475  |                                |
| 20 | 27,225,000 | 27,375,000 | 364 | 491  | 1.03335538   |                                |
| 20 | 27,300,000 | 27,450,000 | 365 | 695  | 0.847774741  |                                |
| 20 | 27,375,000 | 27,525,000 | 366 | 672  | 0.398467665  |                                |
| 20 | 27,450,000 | 27,600,000 | 367 | 1003 | -0.17743262  |                                |
| 20 | 27,525,000 | 27,675,000 | 368 | 1222 | 0.121129185  |                                |
| 20 | 27,600,000 | 27,750,000 | 369 | 605  | 0.526763235  | ISL1                           |
| 20 | 27,675,000 | 27,825,000 | 370 | 429  | 0.095445566  | ISL1                           |
| 20 | 27,750,000 | 27,900,000 | 371 | 489  | 0.309625338  | ISL1                           |
| 20 | 27,825,000 | 27,975,000 | 372 | 445  | 0.779463291  |                                |
| 20 | 27,900,000 | 28,050,000 | 373 | 734  | -2.500671324 |                                |
| 20 | 27,975,000 | 28,125,000 | 374 | 685  | -3.001032097 |                                |
| 20 | 28,050,000 | 28,200,000 | 375 | 389  | -1.134212873 |                                |
| 20 | 28,125,000 | 28,275,000 | 376 | 534  | -3.005064931 |                                |
| 20 | 28,200,000 | 28,350,000 | 377 | 726  | -2.665560566 | PARP8                          |
| 20 | 28,275,000 | 28,425,000 | 378 | 802  | -2.242626808 | PARP8                          |
| 20 | 28,350,000 | 28,500,000 | 379 | 659  | -1.109987994 | PARP8                          |
| 20 | 28,425,000 | 28,575,000 | 380 | 418  | -1.173564549 | PARP8                          |
| 20 | 28,500,000 | 28,650,000 | 381 | 488  | -4.111170955 | PARP8                          |
| 20 | 28,575,000 | 28,725,000 | 382 | 410  | -2.403814284 | EMB                            |
| 20 | 28,650,000 | 28,800,000 | 383 | 340  | 1.162159746  | EMB                            |
| 20 | 28,725,000 | 28,875,000 | 384 | 552  | 0.944071979  | EMB                            |
| 20 | 28,800,000 | 28,950,000 | 385 | 705  | 0.487487872  |                                |
| 20 | 28,875,000 | 29,025,000 | 386 | 675  | 0.419159411  |                                |
| 20 | 28,950,000 | 29,100,000 | 387 | 544  | 0.261607964  |                                |
| 20 | 29,025,000 | 29,175,000 | 388 | 777  | -0.690627809 | HCN1                           |
| 20 | 29,100,000 | 29,250,000 | 389 | 897  | -1.450114662 | HCN1                           |
| 20 | 29,175,000 | 29,325,000 | 390 | 1011 | -2.173645283 | HCN1                           |
| 20 | 29,250,000 | 29,400,000 | 391 | 953  | -1.892237819 | HCN1                           |
| 20 | 29,325,000 | 29,475,000 | 392 | 497  | -0.766177262 | HCN1                           |
| 20 | 29,400,000 | 29,550,000 | 393 | 346  | -0.213599075 | HCN1                           |
| 20 | 29,475,000 | 29,625,000 | 394 | 344  | 0.152230458  | HCN1                           |
| 20 | 29,550,000 | 29,700,000 | 395 | 519  | 0.455319873  | HCN1                           |

|    |            |            |     |      |              |                                       |
|----|------------|------------|-----|------|--------------|---------------------------------------|
| 20 | 29,625,000 | 29,775,000 | 396 | 1090 | -0.305614101 |                                       |
| 20 | 29,700,000 | 29,850,000 | 397 | 1125 | -0.465045155 |                                       |
| 20 | 29,775,000 | 29,925,000 | 398 | 799  | -2.744206921 |                                       |
| 20 | 29,850,000 | 30,000,000 | 399 | 1131 | -4.233823142 |                                       |
| 20 | 29,925,000 | 30,075,000 | 400 | 857  | -3.016691143 | MRPS30                                |
| 20 | 30,000,000 | 30,150,000 | 401 | 298  | -0.335894921 | MRPS30                                |
| 20 | 30,075,000 | 30,225,000 | 402 | 311  | -0.437148112 | MRPS30                                |
| 20 | 30,150,000 | 30,300,000 | 403 | 311  | -0.186840782 |                                       |
| 20 | 30,225,000 | 30,375,000 | 404 | 409  | -0.657210111 |                                       |
| 20 | 30,300,000 | 30,450,000 | 405 | 425  | -0.014927447 | ENSBTAG00000011657                    |
| 20 | 30,375,000 | 30,525,000 | 406 | 239  | 0.968812911  | ENSBTAG00000011657                    |
| 20 | 30,450,000 | 30,600,000 | 407 | 168  | -1.566237549 |                                       |
| 20 | 30,525,000 | 30,675,000 | 408 | 337  | 0.11193598   |                                       |
| 20 | 30,600,000 | 30,750,000 | 409 | 482  | 1.22498418   |                                       |
| 20 | 30,675,000 | 30,825,000 | 410 | 348  | 1.072622781  |                                       |
| 20 | 30,750,000 | 30,900,000 | 411 | 170  | -0.081073448 |                                       |
| 20 | 30,825,000 | 30,975,000 | 412 | 257  | 0.941941481  |                                       |
| 20 | 30,900,000 | 31,050,000 | 413 | 299  | 1.107366428  |                                       |
| 20 | 30,975,000 | 31,125,000 | 414 | 189  | 1.037542633  |                                       |
| 20 | 31,050,000 | 31,200,000 | 415 | 213  | 1.123475751  | NNT,ENSBTAG00000033187                |
| 20 | 31,125,000 | 31,275,000 | 416 | 267  | 0.990372058  | NNT,ENSBTAG00000033187                |
| 20 | 31,200,000 | 31,350,000 | 417 | 268  | -0.063745013 | C20H5orf34,NNT,PAIP1                  |
| 20 | 31,275,000 | 31,425,000 | 418 | 404  | 0.728019804  | C20H5orf34,C5orf28,CCL28,PAIP1        |
| 20 | 31,350,000 | 31,500,000 | 419 | 511  | 1.002124327  | C20H5orf34,C5orf28,CCL28,HMGCS1,NIM1K |
| 20 | 31,425,000 | 31,575,000 | 420 | 451  | 0.307650347  | HMGCS1,NIM1K,ZNF131                   |
| 20 | 31,500,000 | 31,650,000 | 421 | 493  | 0.027360535  | NIM1K,ZNF131                          |
| 20 | 31,575,000 | 31,725,000 | 422 | 959  | 0.965661485  | ZNF131                                |
| 20 | 31,650,000 | 31,800,000 | 423 | 1216 | 1.094182588  | CCDC152                               |
| 20 | 31,725,000 | 31,875,000 | 424 | 1220 | 0.71203119   | CCDC152                               |
| 20 | 31,800,000 | 31,950,000 | 425 | 971  | 0.465286281  | CCDC152,GHR                           |
| 20 | 31,875,000 | 32,025,000 | 426 | 725  | 0.022910693  | GHR                                   |
| 20 | 31,950,000 | 32,100,000 | 427 | 980  | 0.069427599  | GHR                                   |
| 20 | 32,025,000 | 32,175,000 | 428 | 1027 | 0.914730677  | GHR                                   |
| 20 | 32,100,000 | 32,250,000 | 429 | 638  | 1.269552723  | GHR                                   |
| 20 | 32,175,000 | 32,325,000 | 430 | 284  | 1.019973501  | GHR                                   |
| 20 | 32,250,000 | 32,400,000 | 431 | 221  | 0.84497813   |                                       |
| 20 | 32,325,000 | 32,475,000 | 432 | 248  | 0.198684387  |                                       |
| 20 | 32,400,000 | 32,550,000 | 433 | 288  | -0.429894338 |                                       |
| 20 | 32,475,000 | 32,625,000 | 434 | 285  | -0.29824776  | FBXO4                                 |
| 20 | 32,550,000 | 32,700,000 | 435 | 441  | 0.236513291  | C5orf51,FBXO4,OXCT1                   |
| 20 | 32,625,000 | 32,775,000 | 436 | 545  | -0.366961763 | C5orf51,OXCT1                         |
| 20 | 32,700,000 | 32,850,000 | 437 | 474  | -0.327183159 | OXCT1                                 |
| 20 | 32,775,000 | 32,925,000 | 438 | 665  | 0.133386125  | OXCT1                                 |
| 20 | 32,850,000 | 33,000,000 | 439 | 967  | 0.092980276  |                                       |
| 20 | 32,925,000 | 33,075,000 | 440 | 591  | -0.20583171  | PLCXD3                                |
| 20 | 33,000,000 | 33,150,000 | 441 | 433  | -1.96791466  | PLCXD3                                |
| 20 | 33,075,000 | 33,225,000 | 442 | 614  | -1.806688433 | PLCXD3                                |
| 20 | 33,150,000 | 33,300,000 | 443 | 518  | -1.673335385 | PLCXD3                                |
| 20 | 33,225,000 | 33,375,000 | 444 | 545  | -2.465667772 | C6,PLCXD3                             |
| 20 | 33,300,000 | 33,450,000 | 445 | 986  | -1.100796236 | C6                                    |
| 20 | 33,375,000 | 33,525,000 | 446 | 1376 | 0.201181587  | C6,MROH2B                             |
| 20 | 33,450,000 | 33,600,000 | 447 | 1311 | -1.355459586 | C7,MROH2B                             |
| 20 | 33,525,000 | 33,675,000 | 448 | 976  | -2.879668281 | C7,CARD6,MROH2B,RPL37                 |

|    |            |            |     |      |              |                             |
|----|------------|------------|-----|------|--------------|-----------------------------|
| 20 | 33,600,000 | 33,750,000 | 449 | 660  | -2.164307607 | C7,CARD6,PRKAA1,RPL37,TTC33 |
| 20 | 33,675,000 | 33,825,000 | 450 | 587  | -0.058341479 | PRKAA1,PTGER4,TTC33         |
| 20 | 33,750,000 | 33,900,000 | 451 | 485  | -0.045753874 | PTGER4                      |
| 20 | 33,825,000 | 33,975,000 | 452 | 579  | -0.285388955 |                             |
| 20 | 33,900,000 | 34,050,000 | 453 | 690  | -0.028329234 |                             |
| 20 | 33,975,000 | 34,125,000 | 454 | 570  | -1.297155561 |                             |
| 20 | 34,050,000 | 34,200,000 | 455 | 568  | -2.481756194 |                             |
| 20 | 34,125,000 | 34,275,000 | 456 | 604  | -1.618359716 |                             |
| 20 | 34,200,000 | 34,350,000 | 457 | 530  | -0.693393227 |                             |
| 20 | 34,275,000 | 34,425,000 | 458 | 750  | -1.562420464 |                             |
| 20 | 34,350,000 | 34,500,000 | 459 | 916  | -0.599217807 |                             |
| 20 | 34,425,000 | 34,575,000 | 460 | 1091 | 0.585885856  |                             |
| 20 | 34,500,000 | 34,650,000 | 461 | 1218 | 0.647060119  |                             |
| 20 | 34,575,000 | 34,725,000 | 462 | 1126 | 0.682980014  |                             |
| 20 | 34,650,000 | 34,800,000 | 463 | 1110 | 0.930958813  |                             |
| 20 | 34,725,000 | 34,875,000 | 464 | 924  | 0.640976419  |                             |
| 20 | 34,800,000 | 34,950,000 | 465 | 853  | -0.587773967 |                             |
| 20 | 34,875,000 | 35,025,000 | 466 | 731  | -1.424368175 | DAB2                        |
| 20 | 34,950,000 | 35,100,000 | 467 | 612  | -1.306385529 | C9,DAB2                     |
| 20 | 35,025,000 | 35,175,000 | 468 | 744  | 0.293340598  | C9,DAB2                     |
| 20 | 35,100,000 | 35,250,000 | 469 | 512  | 0.078213495  | C9,FYB                      |
| 20 | 35,175,000 | 35,325,000 | 470 | 301  | -0.665684321 | FYB                         |
| 20 | 35,250,000 | 35,400,000 | 471 | 436  | -0.309630373 | FYB,RICTOR                  |
| 20 | 35,325,000 | 35,475,000 | 472 | 423  | 0.361467631  | FYB,RICTOR                  |
| 20 | 35,400,000 | 35,550,000 | 473 | 329  | -1.338531701 | OSMR,RICTOR                 |
| 20 | 35,475,000 | 35,625,000 | 474 | 529  | -1.168909829 | OSMR,RICTOR                 |
| 20 | 35,550,000 | 35,700,000 | 475 | 615  | -0.434499602 | OSMR                        |
| 20 | 35,625,000 | 35,775,000 | 476 | 528  | 0.244277018  |                             |
| 20 | 35,700,000 | 35,850,000 | 477 | 585  | 0.122022031  |                             |
| 20 | 35,775,000 | 35,925,000 | 478 | 559  | -0.042406509 | LIFR                        |
| 20 | 35,850,000 | 36,000,000 | 479 | 415  | -0.812342106 | EGFLAM,LIFR                 |
| 20 | 35,925,000 | 36,075,000 | 480 | 674  | 0.245046808  | EGFLAM,LIFR                 |
| 20 | 36,000,000 | 36,150,000 | 481 | 1297 | 0.09732584   | EGFLAM                      |
| 20 | 36,075,000 | 36,225,000 | 482 | 1264 | -0.158274008 | EGFLAM                      |
| 20 | 36,150,000 | 36,300,000 | 483 | 1129 | 0.500682655  | EGFLAM                      |
| 20 | 36,225,000 | 36,375,000 | 484 | 1218 | -0.024316792 |                             |
| 20 | 36,300,000 | 36,450,000 | 485 | 903  | -0.738460001 |                             |
| 20 | 36,375,000 | 36,525,000 | 486 | 557  | -0.164681778 |                             |
| 20 | 36,450,000 | 36,600,000 | 487 | 581  | 0.347204297  |                             |
| 20 | 36,525,000 | 36,675,000 | 488 | 561  | -0.094914352 | GDNF                        |
| 20 | 36,600,000 | 36,750,000 | 489 | 518  | -1.524221934 | GDNF,WDR70                  |
| 20 | 36,675,000 | 36,825,000 | 490 | 524  | -3.013853427 | WDR70                       |
| 20 | 36,750,000 | 36,900,000 | 491 | 615  | -2.520831776 | WDR70                       |
| 20 | 36,825,000 | 36,975,000 | 492 | 568  | -1.641974746 | WDR70                       |
| 20 | 36,900,000 | 37,050,000 | 493 | 318  | -1.069910809 | NUP155,WDR70                |
| 20 | 36,975,000 | 37,125,000 | 494 | 329  | -0.039553034 | C5orf42,NUP155,WDR70        |
| 20 | 37,050,000 | 37,200,000 | 495 | 647  | -2.524999238 | C5orf42,NIPBL               |
| 20 | 37,125,000 | 37,275,000 | 496 | 609  | -3.598397079 | C5orf42,NIPBL               |
| 20 | 37,200,000 | 37,350,000 | 497 | 220  | -4.192585687 | NIPBL                       |
| 20 | 37,275,000 | 37,425,000 | 498 | 344  | -2.536003789 | NIPBL                       |
| 20 | 37,350,000 | 37,500,000 | 499 | 660  | -3.481961237 | ENSBTAG00000047208          |
| 20 | 37,425,000 | 37,575,000 | 500 | 532  | -2.984492284 | ENSBTAG00000047208          |
| 20 | 37,500,000 | 37,650,000 | 501 | 441  | 0.065624496  | SLC1A3                      |

|    |            |            |     |      |              |                                 |
|----|------------|------------|-----|------|--------------|---------------------------------|
| 20 | 37,575,000 | 37,725,000 | 502 | 576  | 0.330039687  | SLC1A3                          |
| 20 | 37,650,000 | 37,800,000 | 503 | 433  | 0.198250461  | SLC1A3                          |
| 20 | 37,725,000 | 37,875,000 | 504 | 434  | 0.248959305  |                                 |
| 20 | 37,800,000 | 37,950,000 | 505 | 601  | 0.519331715  |                                 |
| 20 | 37,875,000 | 38,025,000 | 506 | 503  | 0.336644012  | RANBP3L                         |
| 20 | 37,950,000 | 38,100,000 | 507 | 334  | -0.258711597 | NADK2,RANBP3L,SKP2              |
| 20 | 38,025,000 | 38,175,000 | 508 | 323  | 0.054727338  | LMBRD2,NADK2,SKP2               |
| 20 | 38,100,000 | 38,250,000 | 509 | 480  | 0.315813245  | LMBRD2,SKP2,UGT3A1              |
| 20 | 38,175,000 | 38,325,000 | 510 | 533  | 0.187662985  | CAPSL,UGT3A1                    |
| 20 | 38,250,000 | 38,400,000 | 511 | 402  | -0.035194823 | CAPSL,IL7R                      |
| 20 | 38,325,000 | 38,475,000 | 512 | 308  | -0.461166937 | IL7R,SPEF2                      |
| 20 | 38,400,000 | 38,550,000 | 513 | 230  | -1.23703222  | SPEF2                           |
| 20 | 38,475,000 | 38,625,000 | 514 | 269  | -1.860741836 | SPEF2                           |
| 20 | 38,550,000 | 38,700,000 | 515 | 359  | -0.472653251 | SPEF2                           |
| 20 | 38,625,000 | 38,775,000 | 516 | 453  | 0.194524184  |                                 |
| 20 | 38,700,000 | 38,850,000 | 517 | 427  | 0.010272562  |                                 |
| 20 | 38,775,000 | 38,925,000 | 518 | 639  | 0.247629796  |                                 |
| 20 | 38,850,000 | 39,000,000 | 519 | 861  | 0.319062038  |                                 |
| 20 | 38,925,000 | 39,075,000 | 520 | 581  | 0.563940882  | PRLR                            |
| 20 | 39,000,000 | 39,150,000 | 521 | 388  | 0.644389737  | PRLR                            |
| 20 | 39,075,000 | 39,225,000 | 522 | 449  | 0.349389867  | AGXT2,PRLR                      |
| 20 | 39,150,000 | 39,300,000 | 523 | 529  | 0.34446398   | AGXT2,BRIX1,DNAJC21,RAD1,TTC23L |
| 20 | 39,225,000 | 39,375,000 | 524 | 380  | -0.112553855 | BRIX1,DNAJC21,RAD1,RAI14,TTC23L |
| 20 | 39,300,000 | 39,450,000 | 525 | 411  | 0.699816467  | RAI14,TTC23L                    |
| 20 | 39,375,000 | 39,525,000 | 526 | 508  | 0.761766024  | RAI14                           |
| 20 | 39,450,000 | 39,600,000 | 527 | 399  | -0.024298545 |                                 |
| 20 | 39,525,000 | 39,675,000 | 528 | 622  | 0.538873326  |                                 |
| 20 | 39,600,000 | 39,750,000 | 529 | 634  | 0.571848273  |                                 |
| 20 | 39,675,000 | 39,825,000 | 530 | 565  | -0.251616148 | AMACR,C1QTNF3                   |
| 20 | 39,750,000 | 39,900,000 | 531 | 743  | -0.251707773 | AMACR,C1QTNF3,RXFP3,SLC45A2     |
| 20 | 39,825,000 | 39,975,000 | 532 | 738  | 0.403774838  | ADAMTS12,RXFP3,SLC45A2          |
| 20 | 39,900,000 | 40,050,000 | 533 | 616  | 0.561159996  | ADAMTS12                        |
| 20 | 39,975,000 | 40,125,000 | 534 | 659  | 0.62787871   | ADAMTS12                        |
| 20 | 40,050,000 | 40,200,000 | 535 | 927  | 0.549181876  | ADAMTS12                        |
| 20 | 40,125,000 | 40,275,000 | 536 | 1015 | 0.4744725    | ADAMTS12                        |
| 20 | 40,200,000 | 40,350,000 | 537 | 666  | 0.6603034    | ADAMTS12,TARS                   |
| 20 | 40,275,000 | 40,425,000 | 538 | 445  | 0.875778025  | ADAMTS12,TARS                   |
| 20 | 40,350,000 | 40,500,000 | 539 | 671  | 0.803885427  | TARS                            |
| 20 | 40,425,000 | 40,575,000 | 540 | 634  | 0.404410561  |                                 |
| 20 | 40,500,000 | 40,650,000 | 541 | 459  | -0.784240773 |                                 |
| 20 | 40,575,000 | 40,725,000 | 542 | 645  | -2.187339736 |                                 |
| 20 | 40,650,000 | 40,800,000 | 543 | 814  | -0.904497641 |                                 |
| 20 | 40,725,000 | 40,875,000 | 544 | 785  | -0.787147758 |                                 |
| 20 | 40,800,000 | 40,950,000 | 545 | 688  | -5.260420725 |                                 |
| 20 | 40,875,000 | 41,025,000 | 546 | 685  | -6.765934941 | NPR3                            |
| 20 | 40,950,000 | 41,100,000 | 547 | 675  | -4.12201554  | NPR3                            |
| 20 | 41,025,000 | 41,175,000 | 548 | 529  | 0.395587247  | NPR3,SUB1                       |
| 20 | 41,100,000 | 41,250,000 | 549 | 360  | 0.639798999  | SUB1                            |
| 20 | 41,175,000 | 41,325,000 | 550 | 257  | -0.12914613  | ZFR                             |
| 20 | 41,250,000 | 41,400,000 | 551 | 242  | -0.041863973 | MTMR12,ZFR                      |
| 20 | 41,325,000 | 41,475,000 | 552 | 303  | 0.214802581  | MTMR12,ZFR                      |
| 20 | 41,400,000 | 41,550,000 | 553 | 283  | -0.291783082 | GOLPH3,MTMR12                   |
| 20 | 41,475,000 | 41,625,000 | 554 | 289  | 0.003961481  | GOLPH3,ENSBTAG00000014455       |

|    |            |            |     |      |              |                           |
|----|------------|------------|-----|------|--------------|---------------------------|
| 20 | 41,550,000 | 41,700,000 | 555 | 401  | 0.309692227  | GOLPH3,ENSBTAG00000014455 |
| 20 | 41,625,000 | 41,775,000 | 556 | 503  | -2.003444562 | ENSBTAG00000014455        |
| 20 | 41,700,000 | 41,850,000 | 557 | 422  | -1.639962072 | ENSBTAG00000038985        |
| 20 | 41,775,000 | 41,925,000 | 558 | 394  | 0.615842724  | ENSBTAG00000038985        |
| 20 | 41,850,000 | 42,000,000 | 559 | 428  | 0.27891471   |                           |
| 20 | 41,925,000 | 42,075,000 | 560 | 537  | 0.150420584  | C20H5ORF22,DROSHA         |
| 20 | 42,000,000 | 42,150,000 | 561 | 876  | -1.045140839 | C20H5ORF22,DROSHA         |
| 20 | 42,075,000 | 42,225,000 | 562 | 927  | -2.275884884 | DROSHA                    |
| 20 | 42,150,000 | 42,300,000 | 563 | 808  | -1.646356312 | CDH6,DROSHA               |
| 20 | 42,225,000 | 42,375,000 | 564 | 570  | -0.834969128 | CDH6                      |
| 20 | 42,300,000 | 42,450,000 | 565 | 415  | -2.440715869 | CDH6                      |
| 20 | 42,375,000 | 42,525,000 | 566 | 384  | -3.306655306 | CDH6                      |
| 20 | 42,450,000 | 42,600,000 | 567 | 336  | -0.606211615 |                           |
| 20 | 42,525,000 | 42,675,000 | 568 | 463  | -0.089350413 |                           |
| 20 | 42,600,000 | 42,750,000 | 569 | 521  | -0.367207957 |                           |
| 20 | 42,675,000 | 42,825,000 | 570 | 482  | 0.206073146  |                           |
| 20 | 42,750,000 | 42,900,000 | 571 | 532  | 0.278048969  |                           |
| 20 | 42,825,000 | 42,975,000 | 572 | 852  | 0.389948234  |                           |
| 20 | 42,900,000 | 43,050,000 | 573 | 905  | 0.707286404  |                           |
| 20 | 42,975,000 | 43,125,000 | 574 | 575  | -0.206875328 |                           |
| 20 | 43,050,000 | 43,200,000 | 575 | 653  | -0.628893368 |                           |
| 20 | 43,125,000 | 43,275,000 | 576 | 783  | -0.307867805 |                           |
| 20 | 43,200,000 | 43,350,000 | 577 | 950  | -0.134051452 |                           |
| 20 | 43,275,000 | 43,425,000 | 578 | 1000 | 0.384361197  |                           |
| 20 | 43,350,000 | 43,500,000 | 579 | 875  | -0.653486041 |                           |
| 20 | 43,425,000 | 43,575,000 | 580 | 1127 | -0.935361331 |                           |
| 20 | 43,500,000 | 43,650,000 | 581 | 1229 | 0.024096641  |                           |
| 20 | 43,575,000 | 43,725,000 | 582 | 1033 | 0.002319335  |                           |
| 20 | 43,650,000 | 43,800,000 | 583 | 1267 | -0.080519511 |                           |
| 20 | 43,725,000 | 43,875,000 | 584 | 1088 | 0.30268207   |                           |
| 20 | 43,800,000 | 43,950,000 | 585 | 649  | -0.070722956 |                           |
| 20 | 43,875,000 | 44,025,000 | 586 | 1148 | 0.29207096   |                           |
| 20 | 43,950,000 | 44,100,000 | 587 | 1471 | -0.441686892 |                           |
| 20 | 44,025,000 | 44,175,000 | 588 | 1195 | -1.251910418 |                           |
| 20 | 44,100,000 | 44,250,000 | 589 | 928  | -0.222850638 |                           |
| 20 | 44,175,000 | 44,325,000 | 590 | 996  | 0.594572948  |                           |
| 20 | 44,250,000 | 44,400,000 | 591 | 1172 | 0.363234354  |                           |
| 20 | 44,325,000 | 44,475,000 | 592 | 1214 | -0.695265521 |                           |
| 20 | 44,400,000 | 44,550,000 | 593 | 1090 | -1.533113182 |                           |
| 20 | 44,475,000 | 44,625,000 | 594 | 1082 | -1.472126351 |                           |
| 20 | 44,550,000 | 44,700,000 | 595 | 1209 | -1.490858703 |                           |
| 20 | 44,625,000 | 44,775,000 | 596 | 1223 | -1.120495765 |                           |
| 20 | 44,700,000 | 44,850,000 | 597 | 1080 | 0.20443291   |                           |
| 20 | 44,775,000 | 44,925,000 | 598 | 957  | -0.8889048   |                           |
| 20 | 44,850,000 | 45,000,000 | 599 | 980  | -1.710942163 |                           |
| 20 | 44,925,000 | 45,075,000 | 600 | 833  | -1.194085578 |                           |
| 20 | 45,000,000 | 45,150,000 | 601 | 1037 | 0.438155703  |                           |
| 20 | 45,075,000 | 45,225,000 | 602 | 884  | 0.500548748  |                           |
| 20 | 45,150,000 | 45,300,000 | 603 | 452  | 0.25799029   |                           |
| 20 | 45,225,000 | 45,375,000 | 604 | 852  | -1.82358519  |                           |
| 20 | 45,300,000 | 45,450,000 | 605 | 790  | -2.080374704 |                           |
| 20 | 45,375,000 | 45,525,000 | 606 | 964  | -0.415638691 |                           |
| 20 | 45,450,000 | 45,600,000 | 607 | 1299 | -0.332697072 |                           |



|    |            |            |     |      |              |                    |
|----|------------|------------|-----|------|--------------|--------------------|
| 20 | 45,525,000 | 45,675,000 | 608 | 986  | -0.464297137 |                    |
| 20 | 45,600,000 | 45,750,000 | 609 | 1155 | 0.619827629  |                    |
| 20 | 45,675,000 | 45,825,000 | 610 | 958  | 0.878620972  |                    |
| 20 | 45,750,000 | 45,900,000 | 611 | 736  | 0.527630043  |                    |
| 20 | 45,825,000 | 45,975,000 | 612 | 1102 | -0.203099134 |                    |
| 20 | 45,900,000 | 46,050,000 | 613 | 1154 | -0.948186229 |                    |
| 20 | 45,975,000 | 46,125,000 | 614 | 1086 | -0.876130512 |                    |
| 20 | 46,050,000 | 46,200,000 | 615 | 1075 | 0.02728212   |                    |
| 20 | 46,125,000 | 46,275,000 | 616 | 940  | 0.694165546  |                    |
| 20 | 46,200,000 | 46,350,000 | 617 | 1121 | 0.646207423  |                    |
| 20 | 46,275,000 | 46,425,000 | 618 | 1143 | 0.548734926  |                    |
| 20 | 46,350,000 | 46,500,000 | 619 | 829  | 0.196469029  |                    |
| 20 | 46,425,000 | 46,575,000 | 620 | 892  | 0.34602836   |                    |
| 20 | 46,500,000 | 46,650,000 | 621 | 765  | 0.627839854  |                    |
| 20 | 46,575,000 | 46,725,000 | 622 | 521  | 0.848294199  |                    |
| 20 | 46,650,000 | 46,800,000 | 623 | 807  | 0.472523405  | CDH9               |
| 20 | 46,725,000 | 46,875,000 | 624 | 824  | 0.204276895  | CDH9               |
| 20 | 46,800,000 | 46,950,000 | 625 | 487  | -0.192858892 |                    |
| 20 | 46,875,000 | 47,025,000 | 626 | 443  | -0.235606959 |                    |
| 20 | 46,950,000 | 47,100,000 | 627 | 538  | -0.750874318 |                    |
| 20 | 47,025,000 | 47,175,000 | 628 | 613  | -0.087090434 |                    |
| 20 | 47,100,000 | 47,250,000 | 629 | 737  | 0.435093142  | ENSBTAG00000048105 |
| 20 | 47,175,000 | 47,325,000 | 630 | 895  | 0.629608982  | ENSBTAG00000048105 |
| 20 | 47,250,000 | 47,400,000 | 631 | 1162 | 0.771801382  |                    |
| 20 | 47,325,000 | 47,475,000 | 632 | 1450 | 0.865547937  |                    |
| 20 | 47,400,000 | 47,550,000 | 633 | 1195 | 0.94173821   |                    |
| 20 | 47,475,000 | 47,625,000 | 634 | 827  | -0.87565836  |                    |
| 20 | 47,550,000 | 47,700,000 | 635 | 730  | -2.254102817 |                    |
| 20 | 47,625,000 | 47,775,000 | 636 | 863  | 0.04480745   |                    |
| 20 | 47,700,000 | 47,850,000 | 637 | 994  | 0.344999435  |                    |
| 20 | 47,775,000 | 47,925,000 | 638 | 1159 | 0.131435938  |                    |
| 20 | 47,850,000 | 48,000,000 | 639 | 1395 | -0.404390178 | ENSBTAG00000045813 |
| 20 | 47,925,000 | 48,075,000 | 640 | 1360 | -0.481592713 | ENSBTAG00000045813 |
| 20 | 48,000,000 | 48,150,000 | 641 | 1042 | -0.50027419  |                    |
| 20 | 48,075,000 | 48,225,000 | 642 | 630  | -1.042711491 |                    |
| 20 | 48,150,000 | 48,300,000 | 643 | 459  | -0.262850679 |                    |
| 20 | 48,225,000 | 48,375,000 | 644 | 469  | -0.434166177 |                    |
| 20 | 48,300,000 | 48,450,000 | 645 | 521  | -0.198072775 |                    |
| 20 | 48,375,000 | 48,525,000 | 646 | 581  | 0.368048207  |                    |
| 20 | 48,450,000 | 48,600,000 | 647 | 640  | -1.301638057 |                    |
| 20 | 48,525,000 | 48,675,000 | 648 | 757  | -0.904037167 |                    |
| 20 | 48,600,000 | 48,750,000 | 649 | 623  | 0.371485109  |                    |
| 20 | 48,675,000 | 48,825,000 | 650 | 503  | -0.33802475  |                    |
| 20 | 48,750,000 | 48,900,000 | 651 | 845  | -0.885139106 | CDH10              |
| 20 | 48,825,000 | 48,975,000 | 652 | 1243 | -3.921641924 | CDH10              |
| 20 | 48,900,000 | 49,050,000 | 653 | 923  | -5.117836569 | CDH10              |
| 20 | 48,975,000 | 49,125,000 | 654 | 407  | -2.062536809 | CDH10              |
| 20 | 49,050,000 | 49,200,000 | 655 | 574  | -0.691922033 | CDH10              |
| 20 | 49,125,000 | 49,275,000 | 656 | 688  | 0.216353947  |                    |
| 20 | 49,200,000 | 49,350,000 | 657 | 984  | 0.708288277  |                    |
| 20 | 49,275,000 | 49,425,000 | 658 | 1088 | -1.074612978 |                    |
| 20 | 49,350,000 | 49,500,000 | 659 | 926  | -5.240137953 |                    |
| 20 | 49,425,000 | 49,575,000 | 660 | 745  | -5.806912243 |                    |

|    |            |            |     |      |              |       |
|----|------------|------------|-----|------|--------------|-------|
| 20 | 49,500,000 | 49,650,000 | 661 | 837  | -1.225363419 |       |
| 20 | 49,575,000 | 49,725,000 | 662 | 1414 | -0.042995467 |       |
| 20 | 49,650,000 | 49,800,000 | 663 | 1321 | 0.275123368  |       |
| 20 | 49,725,000 | 49,875,000 | 664 | 1229 | 0.995019858  |       |
| 20 | 49,800,000 | 49,950,000 | 665 | 1181 | 0.894944695  |       |
| 20 | 49,875,000 | 50,025,000 | 666 | 838  | 0.807556934  |       |
| 20 | 49,950,000 | 50,100,000 | 667 | 598  | 0.751851996  |       |
| 20 | 50,025,000 | 50,175,000 | 668 | 648  | -0.242734923 |       |
| 20 | 50,100,000 | 50,250,000 | 669 | 873  | -1.803868466 |       |
| 20 | 50,175,000 | 50,325,000 | 670 | 662  | -2.356082143 |       |
| 20 | 50,250,000 | 50,400,000 | 671 | 702  | -0.068930696 |       |
| 20 | 50,325,000 | 50,475,000 | 672 | 785  | -0.547767116 |       |
| 20 | 50,400,000 | 50,550,000 | 673 | 783  | -1.088928815 |       |
| 20 | 50,475,000 | 50,625,000 | 674 | 799  | -0.119966053 |       |
| 20 | 50,550,000 | 50,700,000 | 675 | 457  | -0.200053539 |       |
| 20 | 50,625,000 | 50,775,000 | 676 | 581  | -0.797141856 |       |
| 20 | 50,700,000 | 50,850,000 | 677 | 751  | -0.813856329 |       |
| 20 | 50,775,000 | 50,925,000 | 678 | 901  | -0.255069246 |       |
| 20 | 50,850,000 | 51,000,000 | 679 | 839  | 0.207874343  |       |
| 20 | 50,925,000 | 51,075,000 | 680 | 572  | 0.060005542  |       |
| 20 | 51,000,000 | 51,150,000 | 681 | 798  | 0.726592434  |       |
| 20 | 51,075,000 | 51,225,000 | 682 | 706  | 0.797056126  |       |
| 20 | 51,150,000 | 51,300,000 | 683 | 326  | -0.283930163 |       |
| 20 | 51,225,000 | 51,375,000 | 684 | 267  | -3.258245732 |       |
| 20 | 51,300,000 | 51,450,000 | 685 | 414  | -2.64900277  |       |
| 20 | 51,375,000 | 51,525,000 | 686 | 459  | -1.408470749 | CDH12 |
| 20 | 51,450,000 | 51,600,000 | 687 | 706  | -1.378489973 | CDH12 |
| 20 | 51,525,000 | 51,675,000 | 688 | 824  | -1.163136589 | CDH12 |
| 20 | 51,600,000 | 51,750,000 | 689 | 745  | 0.726700321  | CDH12 |
| 20 | 51,675,000 | 51,825,000 | 690 | 982  | 0.970406103  |       |
| 20 | 51,750,000 | 51,900,000 | 691 | 931  | 0.430983942  |       |
| 20 | 51,825,000 | 51,975,000 | 692 | 821  | -0.604300543 |       |
| 20 | 51,900,000 | 52,050,000 | 693 | 894  | -0.012695173 |       |
| 20 | 51,975,000 | 52,125,000 | 694 | 812  | 0.077596032  |       |
| 20 | 52,050,000 | 52,200,000 | 695 | 741  | -0.174411093 |       |
| 20 | 52,125,000 | 52,275,000 | 696 | 1086 | -0.037729278 |       |
| 20 | 52,200,000 | 52,350,000 | 697 | 1053 | -0.379551073 |       |
| 20 | 52,275,000 | 52,425,000 | 698 | 555  | -0.983492278 |       |
| 20 | 52,350,000 | 52,500,000 | 699 | 498  | 0.647305207  |       |
| 20 | 52,425,000 | 52,575,000 | 700 | 831  | 0.840775228  |       |
| 20 | 52,500,000 | 52,650,000 | 701 | 1148 | 0.986240949  |       |
| 20 | 52,575,000 | 52,725,000 | 702 | 991  | 1.009432227  |       |
| 20 | 52,650,000 | 52,800,000 | 703 | 947  | 0.83425455   |       |
| 20 | 52,725,000 | 52,875,000 | 704 | 988  | 0.834853747  |       |
| 20 | 52,800,000 | 52,950,000 | 705 | 801  | 1.001703223  |       |
| 20 | 52,875,000 | 53,025,000 | 706 | 726  | -0.035589139 |       |
| 20 | 52,950,000 | 53,100,000 | 707 | 943  | -2.256220673 |       |
| 20 | 53,025,000 | 53,175,000 | 708 | 882  | -3.856194671 |       |
| 20 | 53,100,000 | 53,250,000 | 709 | 445  | -4.279896496 |       |
| 20 | 53,175,000 | 53,325,000 | 710 | 437  | -2.402684955 |       |
| 20 | 53,250,000 | 53,400,000 | 711 | 678  | -3.724345778 |       |
| 20 | 53,325,000 | 53,475,000 | 712 | 1077 | -1.334157798 | CDH18 |
| 20 | 53,400,000 | 53,550,000 | 713 | 1202 | 0.165704638  | CDH18 |

|    |            |            |     |      |              |                                       |        |
|----|------------|------------|-----|------|--------------|---------------------------------------|--------|
| 20 | 53,475,000 | 53,625,000 | 714 | 901  | 0.533721406  | CDH18                                 |        |
| 20 | 53,550,000 | 53,700,000 | 715 | 970  | 0.595704068  | CDH18                                 |        |
| 20 | 53,625,000 | 53,775,000 | 716 | 1093 | -0.46657461  | CDH18                                 |        |
| 20 | 53,700,000 | 53,850,000 | 717 | 792  | -1.061544636 | CDH18                                 |        |
| 20 | 53,775,000 | 53,925,000 | 718 | 555  | 0.81452091   | CDH18                                 |        |
| 20 | 53,850,000 | 54,000,000 | 719 | 693  | 0.466345951  | CDH18                                 |        |
| 20 | 53,925,000 | 54,075,000 | 720 | 927  | 0.085155243  | CDH18                                 |        |
| 20 | 54,000,000 | 54,150,000 | 721 | 1038 | -0.231514742 | CDH18                                 |        |
| 20 | 54,075,000 | 54,225,000 | 722 | 685  | -1.540301198 |                                       |        |
| 20 | 54,150,000 | 54,300,000 | 723 | 357  | -3.175216848 |                                       |        |
| 20 | 54,225,000 | 54,375,000 | 724 | 398  | -0.720223187 |                                       |        |
| 20 | 54,300,000 | 54,450,000 | 725 | 518  | 0.032899999  |                                       |        |
| 20 | 54,375,000 | 54,525,000 | 726 | 1262 | 0.198739501  |                                       |        |
| 20 | 54,450,000 | 54,600,000 | 727 | 1544 | 0.175665349  |                                       |        |
| 20 | 54,525,000 | 54,675,000 | 728 | 778  | 0.149112611  |                                       |        |
| 20 | 54,600,000 | 54,750,000 | 729 | 357  | 0.635684689  |                                       |        |
| 20 | 54,675,000 | 54,825,000 | 730 | 487  | 0.459731488  |                                       |        |
| 20 | 54,750,000 | 54,900,000 | 731 | 882  | -0.153753285 |                                       |        |
| 20 | 54,825,000 | 54,975,000 | 732 | 838  | -2.450998076 |                                       |        |
| 20 | 54,900,000 | 55,050,000 | 733 | 727  | -3.521710803 |                                       |        |
| 20 | 54,975,000 | 55,125,000 | 734 | 720  | -2.163850976 |                                       |        |
| 20 | 55,050,000 | 55,200,000 | 735 | 687  | -1.466056605 |                                       |        |
| 20 | 55,125,000 | 55,275,000 | 736 | 850  | 0.524099535  |                                       |        |
| 20 | 55,200,000 | 55,350,000 | 737 | 737  | 0.342911139  |                                       |        |
| 20 | 55,275,000 | 55,425,000 | 738 | 969  | -0.404558395 |                                       |        |
| 20 | 55,350,000 | 55,500,000 | 739 | 1338 | -1.059419997 |                                       |        |
| 20 | 55,425,000 | 55,575,000 | 740 | 1226 | -1.044635378 |                                       |        |
| 20 | 55,500,000 | 55,650,000 | 741 | 1085 | 0.466275608  |                                       |        |
| 20 | 55,575,000 | 55,725,000 | 742 | 1203 | 0.583058171  | ENSBTAG00000012971                    |        |
| 20 | 55,650,000 | 55,800,000 | 743 | 884  | 0.322613438  | ENSBTAG00000005491,ENSBTAG00000012971 |        |
| 20 | 55,725,000 | 55,875,000 | 744 | 428  | 0.446547735  | ENSBTAG00000005491                    |        |
| 20 | 55,800,000 | 55,950,000 | 745 | 909  | 0.641525638  |                                       |        |
| 20 | 55,875,000 | 56,025,000 | 746 | 1142 | 0.812145464  |                                       |        |
| 20 | 55,950,000 | 56,100,000 | 747 | 763  | 0.048110182  |                                       |        |
| 20 | 56,025,000 | 56,175,000 | 748 | 624  | -1.792508338 |                                       |        |
| 20 | 56,100,000 | 56,250,000 | 749 | 397  | -0.674331085 |                                       |        |
| 20 | 56,175,000 | 56,325,000 | 750 | 486  | 0.367771753  | MYO10                                 |        |
| 20 | 56,250,000 | 56,400,000 | 751 | 732  | 0.274956037  | MYO10                                 |        |
| 20 | 56,325,000 | 56,475,000 | 752 | 739  | 0.407875186  | MYO10                                 |        |
| 20 | 56,400,000 | 56,550,000 | 753 | 725  | 0.532777535  | MYO10                                 |        |
| 20 | 56,475,000 | 56,625,000 | 754 | 771  | -1.276093002 | MYO10                                 |        |
| 20 | 56,550,000 | 56,700,000 | 755 | 1105 | -0.388997718 | MYO10                                 |        |
| 20 | 56,625,000 | 56,775,000 | 756 | 1123 | 0.263874093  | FAM134B,ZNF622                        |        |
| 20 | 56,700,000 | 56,850,000 | 757 | 784  | -1.133927315 | FAM134B,ZNF622                        |        |
| 20 | 56,775,000 | 56,925,000 | 758 | 703  | -2.021882194 | ZNF622                                |        |
| 20 | 56,850,000 | 57,000,000 | 759 | 894  | -0.865005314 |                                       |        |
| 20 | 56,925,000 | 57,075,000 | 760 | 867  | -0.357682052 |                                       | 11-Mar |
| 20 | 57,000,000 | 57,150,000 | 761 | 697  | -0.485308895 |                                       | 11-Mar |
| 20 | 57,075,000 | 57,225,000 | 762 | 491  | -0.514164212 |                                       | 11-Mar |
| 20 | 57,150,000 | 57,300,000 | 763 | 333  | -0.302393369 |                                       |        |
| 20 | 57,225,000 | 57,375,000 | 764 | 310  | 0.133038575  | FBXL7                                 |        |
| 20 | 57,300,000 | 57,450,000 | 765 | 471  | -1.827134446 | FBXL7                                 |        |
| 20 | 57,375,000 | 57,525,000 | 766 | 783  | -2.715934877 |                                       |        |

|    |            |            |     |      |              |                       |
|----|------------|------------|-----|------|--------------|-----------------------|
| 20 | 57,450,000 | 57,600,000 | 767 | 897  | -1.92651063  |                       |
| 20 | 57,525,000 | 57,675,000 | 768 | 967  | -0.204086579 |                       |
| 20 | 57,600,000 | 57,750,000 | 769 | 1076 | -1.178341979 |                       |
| 20 | 57,675,000 | 57,825,000 | 770 | 1197 | -0.890991566 |                       |
| 20 | 57,750,000 | 57,900,000 | 771 | 1243 | 0.512445476  |                       |
| 20 | 57,825,000 | 57,975,000 | 772 | 824  | -0.525122931 |                       |
| 20 | 57,900,000 | 58,050,000 | 773 | 691  | 0.19737245   |                       |
| 20 | 57,975,000 | 58,125,000 | 774 | 1062 | 0.229984488  |                       |
| 20 | 58,050,000 | 58,200,000 | 775 | 1057 | -1.189658849 |                       |
| 20 | 58,125,000 | 58,275,000 | 776 | 680  | -0.731003688 |                       |
| 20 | 58,200,000 | 58,350,000 | 777 | 541  | -0.355466124 |                       |
| 20 | 58,275,000 | 58,425,000 | 778 | 780  | -0.181188803 | ANKH                  |
| 20 | 58,350,000 | 58,500,000 | 779 | 837  | 0.291937864  | ANKH                  |
| 20 | 58,425,000 | 58,575,000 | 780 | 879  | -0.833218375 | ANKH,OTULIN           |
| 20 | 58,500,000 | 58,650,000 | 781 | 767  | -2.360987107 | ANKH,MGC143209,OTULIN |
| 20 | 58,575,000 | 58,725,000 | 782 | 706  | -0.988959051 | MGC143209,OTULIN,TRIO |
| 20 | 58,650,000 | 58,800,000 | 783 | 779  | 0.114896205  | MGC143209,TRIO        |
| 20 | 58,725,000 | 58,875,000 | 784 | 861  | -0.083288795 | TRIO                  |
| 20 | 58,800,000 | 58,950,000 | 785 | 1076 | -1.675779164 | TRIO                  |
| 20 | 58,875,000 | 59,025,000 | 786 | 791  | -2.740572125 | TRIO                  |
| 20 | 58,950,000 | 59,100,000 | 787 | 396  | -1.09901237  |                       |
| 20 | 59,025,000 | 59,175,000 | 788 | 815  | -0.701148527 |                       |
| 20 | 59,100,000 | 59,250,000 | 789 | 1008 | -0.57578192  |                       |
| 20 | 59,175,000 | 59,325,000 | 790 | 626  | -1.118449123 | DNAH5                 |
| 20 | 59,250,000 | 59,400,000 | 791 | 918  | -0.276317662 | DNAH5                 |
| 20 | 59,325,000 | 59,475,000 | 792 | 1464 | -0.042828372 | DNAH5                 |
| 20 | 59,400,000 | 59,550,000 | 793 | 1429 | -0.425616562 | DNAH5                 |
| 20 | 59,475,000 | 59,625,000 | 794 | 920  | -0.183149178 | DNAH5                 |
| 20 | 59,550,000 | 59,700,000 | 795 | 774  | -2.566423866 | DNAH5                 |
| 20 | 59,625,000 | 59,775,000 | 796 | 742  | -3.640847102 |                       |
| 20 | 59,700,000 | 59,850,000 | 797 | 520  | -1.005022337 |                       |
| 20 | 59,775,000 | 59,925,000 | 798 | 688  | -1.696453325 |                       |
| 20 | 59,850,000 | 60,000,000 | 799 | 966  | -1.276832289 |                       |
| 20 | 59,925,000 | 60,075,000 | 800 | 1093 | -0.135935828 |                       |
| 20 | 60,000,000 | 60,150,000 | 801 | 1052 | 0.351713479  |                       |
| 20 | 60,075,000 | 60,225,000 | 802 | 1210 | 0.801996246  |                       |
| 20 | 60,150,000 | 60,300,000 | 803 | 1128 | 0.94028694   |                       |
| 20 | 60,225,000 | 60,375,000 | 804 | 971  | 0.545289385  |                       |
| 20 | 60,300,000 | 60,450,000 | 805 | 1240 | 0.205460102  |                       |
| 20 | 60,375,000 | 60,525,000 | 806 | 1389 | -0.05152368  |                       |
| 20 | 60,450,000 | 60,600,000 | 807 | 997  | 0.240592141  |                       |
| 20 | 60,525,000 | 60,675,000 | 808 | 831  | -0.579125638 |                       |
| 20 | 60,600,000 | 60,750,000 | 809 | 842  | -0.785032336 |                       |
| 20 | 60,675,000 | 60,825,000 | 810 | 771  | 0.029046697  |                       |
| 20 | 60,750,000 | 60,900,000 | 811 | 1276 | 0.254750906  |                       |
| 20 | 60,825,000 | 60,975,000 | 812 | 1511 | 0.280508821  |                       |
| 20 | 60,900,000 | 61,050,000 | 813 | 1283 | -0.379844931 |                       |
| 20 | 60,975,000 | 61,125,000 | 814 | 794  | -0.475043945 |                       |
| 20 | 61,050,000 | 61,200,000 | 815 | 516  | 0.54546008   |                       |
| 20 | 61,125,000 | 61,275,000 | 816 | 933  | 0.944625365  |                       |
| 20 | 61,200,000 | 61,350,000 | 817 | 994  | 0.969489184  |                       |
| 20 | 61,275,000 | 61,425,000 | 818 | 717  | 0.57693577   |                       |
| 20 | 61,350,000 | 61,500,000 | 819 | 679  | -0.36197331  |                       |

|    |            |            |     |      |              |                                       |
|----|------------|------------|-----|------|--------------|---------------------------------------|
| 20 | 61,425,000 | 61,575,000 | 820 | 713  | -1.17894075  |                                       |
| 20 | 61,500,000 | 61,650,000 | 821 | 826  | -0.855520004 |                                       |
| 20 | 61,575,000 | 61,725,000 | 822 | 942  | 0.15111697   |                                       |
| 20 | 61,650,000 | 61,800,000 | 823 | 1050 | 0.65984794   |                                       |
| 20 | 61,725,000 | 61,875,000 | 824 | 701  | 0.715206131  |                                       |
| 20 | 61,800,000 | 61,950,000 | 825 | 647  | -0.452074718 | CTNND2                                |
| 20 | 61,875,000 | 62,025,000 | 826 | 1012 | -1.465341134 | CTNND2                                |
| 20 | 61,950,000 | 62,100,000 | 827 | 769  | -3.776837855 | CTNND2                                |
| 20 | 62,025,000 | 62,175,000 | 828 | 826  | -3.46031687  | CTNND2                                |
| 20 | 62,100,000 | 62,250,000 | 829 | 1121 | -3.314909309 | CTNND2                                |
| 20 | 62,175,000 | 62,325,000 | 830 | 942  | -2.46199746  | CTNND2                                |
| 20 | 62,250,000 | 62,400,000 | 831 | 868  | 0.338779504  | CTNND2                                |
| 20 | 62,325,000 | 62,475,000 | 832 | 945  | -1.038776343 | CTNND2                                |
| 20 | 62,400,000 | 62,550,000 | 833 | 698  | -1.670106033 | CTNND2                                |
| 20 | 62,475,000 | 62,625,000 | 834 | 656  | 0.902468101  |                                       |
| 20 | 62,550,000 | 62,700,000 | 835 | 1118 | 0.052553528  | DAP                                   |
| 20 | 62,625,000 | 62,775,000 | 836 | 932  | -0.875440528 | ANKRD33B,DAP                          |
| 20 | 62,700,000 | 62,850,000 | 837 | 707  | -1.141751204 | ANKRD33B                              |
| 20 | 62,775,000 | 62,925,000 | 838 | 920  | -1.656012489 | ANKRD33B,ROPN1L                       |
| 20 | 62,850,000 | 63,000,000 | 839 | 579  | -2.856822097 | MARCH6,ROPN1L                         |
| 20 | 62,925,000 | 63,075,000 | 840 | 377  | -0.672102981 | CMBL,MARCH6,ROPN1L,ENSBTAG00000022809 |
| 20 | 63,000,000 | 63,150,000 | 841 | 523  | 0.400728721  | CCT5,CMBL,FAM173B,ENSBTAG00000022809  |
| 20 | 63,075,000 | 63,225,000 | 842 | 718  | 0.378716431  | CCT5,CMBL,FAM173B                     |
| 20 | 63,150,000 | 63,300,000 | 843 | 714  | -0.311634155 |                                       |
| 20 | 63,225,000 | 63,375,000 | 844 | 641  | -0.114877746 |                                       |
| 20 | 63,300,000 | 63,450,000 | 845 | 739  | -1.711651192 |                                       |
| 20 | 63,375,000 | 63,525,000 | 846 | 815  | -4.702740779 |                                       |
| 20 | 63,450,000 | 63,600,000 | 847 | 679  | -4.889029348 |                                       |
| 20 | 63,525,000 | 63,675,000 | 848 | 442  | -3.808355931 |                                       |
| 20 | 63,600,000 | 63,750,000 | 849 | 373  | -2.034497927 | TAS2R1                                |
| 20 | 63,675,000 | 63,825,000 | 850 | 361  | -0.316375113 | TAS2R1                                |
| 20 | 63,750,000 | 63,900,000 | 851 | 384  | -0.485093917 |                                       |
| 20 | 63,825,000 | 63,975,000 | 852 | 685  | -0.674795641 |                                       |
| 20 | 63,900,000 | 64,050,000 | 853 | 1152 | -0.161095242 |                                       |
| 20 | 63,975,000 | 64,125,000 | 854 | 1199 | -0.351500351 |                                       |
| 20 | 64,050,000 | 64,200,000 | 855 | 1024 | -0.360005376 | SEMA5A                                |
| 20 | 64,125,000 | 64,275,000 | 856 | 861  | -1.81874006  | SEMA5A                                |
| 20 | 64,200,000 | 64,350,000 | 857 | 909  | -2.954886436 | SEMA5A                                |
| 20 | 64,275,000 | 64,425,000 | 858 | 1487 | 0.364868626  | SEMA5A                                |
| 20 | 64,350,000 | 64,500,000 | 859 | 1805 | 1.001869805  | SEMA5A                                |
| 20 | 64,425,000 | 64,575,000 | 860 | 1487 | 0.917128216  |                                       |
| 20 | 64,500,000 | 64,650,000 | 861 | 1397 | -0.066106194 |                                       |
| 20 | 64,575,000 | 64,725,000 | 862 | 1357 | -0.012893433 |                                       |
| 20 | 64,650,000 | 64,800,000 | 863 | 1208 | -0.002493529 |                                       |
| 20 | 64,725,000 | 64,875,000 | 864 | 798  | -0.267065242 |                                       |
| 20 | 64,800,000 | 64,950,000 | 865 | 411  | -0.447708232 |                                       |
| 20 | 64,875,000 | 65,025,000 | 866 | 690  | 0.298999945  |                                       |
| 20 | 64,950,000 | 65,100,000 | 867 | 914  | -0.154381302 |                                       |
| 20 | 65,025,000 | 65,175,000 | 868 | 972  | 0.331863436  |                                       |
| 20 | 65,100,000 | 65,250,000 | 869 | 1162 | 0.50078431   |                                       |
| 20 | 65,175,000 | 65,325,000 | 870 | 1401 | -0.020069147 |                                       |
| 20 | 65,250,000 | 65,400,000 | 871 | 1486 | -0.317431057 |                                       |
| 20 | 65,325,000 | 65,475,000 | 872 | 1346 | 0.107467585  | FASTKD3,MTRR                          |

|    |            |            |     |      |              |                    |
|----|------------|------------|-----|------|--------------|--------------------|
| 20 | 65,400,000 | 65,550,000 | 873 | 1092 | 0.963593433  | ADCY2,FASTKD3,MTRR |
| 20 | 65,475,000 | 65,625,000 | 874 | 1034 | 0.290434711  | ADCY2              |
| 20 | 65,550,000 | 65,700,000 | 875 | 1439 | 0.24923599   | ADCY2              |
| 20 | 65,625,000 | 65,775,000 | 876 | 1643 | 0.147820329  | ADCY2              |
| 20 | 65,700,000 | 65,850,000 | 877 | 1456 | -1.063719106 |                    |
| 20 | 65,775,000 | 65,925,000 | 878 | 1414 | -1.011876527 |                    |
| 20 | 65,850,000 | 66,000,000 | 879 | 1220 | -0.002174391 |                    |
| 20 | 65,925,000 | 66,075,000 | 880 | 1010 | -0.12437715  |                    |
| 20 | 66,000,000 | 66,150,000 | 881 | 1324 | -0.093874074 |                    |
| 20 | 66,075,000 | 66,225,000 | 882 | 1508 | -1.424781344 |                    |
| 20 | 66,150,000 | 66,300,000 | 883 | 963  | -2.568654034 |                    |
| 20 | 66,225,000 | 66,375,000 | 884 | 859  | -2.328799207 | ENSBTAG00000032442 |
| 20 | 66,300,000 | 66,450,000 | 885 | 1339 | -1.814822844 | ENSBTAG00000032442 |
| 20 | 66,375,000 | 66,525,000 | 886 | 1422 | -0.011097922 |                    |
| 20 | 66,450,000 | 66,600,000 | 887 | 1000 | 0.150046667  | PAPD7              |
| 20 | 66,525,000 | 66,675,000 | 888 | 495  | -1.436264406 | PAPD7              |
| 20 | 66,600,000 | 66,750,000 | 889 | 388  | -0.484391414 | NSUN2,PAPD7,SRD5A1 |
| 20 | 66,675,000 | 66,825,000 | 890 | 518  | 0.55838501   | NSUN2,SRD5A1       |
| 20 | 66,750,000 | 66,900,000 | 891 | 530  | 0.547448001  | NSUN2              |
| 20 | 66,825,000 | 66,975,000 | 892 | 418  | 0.062726384  | MED10              |
| 20 | 66,900,000 | 67,050,000 | 893 | 749  | 0.254363936  | MED10              |
| 20 | 66,975,000 | 67,125,000 | 894 | 1226 | -1.326721539 |                    |
| 20 | 67,050,000 | 67,200,000 | 895 | 1924 | -0.804018562 |                    |
| 20 | 67,125,000 | 67,275,000 | 896 | 2310 | -0.483139385 |                    |
| 20 | 67,200,000 | 67,350,000 | 897 | 2091 | -2.092088264 |                    |
| 20 | 67,275,000 | 67,425,000 | 898 | 1860 | -1.494467393 |                    |
| 20 | 67,350,000 | 67,500,000 | 899 | 1418 | -0.743295918 |                    |
| 20 | 67,425,000 | 67,575,000 | 900 | 921  | -1.24337768  |                    |
| 20 | 67,500,000 | 67,650,000 | 901 | 904  | 0.648455444  |                    |
| 20 | 67,575,000 | 67,725,000 | 902 | 1394 | 0.956821752  |                    |
| 20 | 67,650,000 | 67,800,000 | 903 | 1542 | 0.686218236  | ICE1               |
| 20 | 67,725,000 | 67,875,000 | 904 | 1178 | 0.171526873  | ICE1               |
| 20 | 67,800,000 | 67,950,000 | 905 | 759  | -0.529644106 | ADAMTS16,ICE1      |
| 20 | 67,875,000 | 68,025,000 | 906 | 504  | -0.335073208 | ADAMTS16           |
| 20 | 67,950,000 | 68,100,000 | 907 | 369  | 0.29139901   | ADAMTS16           |
| 20 | 68,025,000 | 68,175,000 | 908 | 427  | 0.767076674  | ADAMTS16           |
| 20 | 68,100,000 | 68,250,000 | 909 | 602  | 0.887714241  |                    |
| 20 | 68,175,000 | 68,325,000 | 910 | 510  | 0.851026498  |                    |
| 20 | 68,250,000 | 68,400,000 | 911 | 422  | -0.082684538 |                    |
| 20 | 68,325,000 | 68,475,000 | 912 | 749  | -0.333281462 |                    |
| 20 | 68,400,000 | 68,550,000 | 913 | 842  | 0.338501081  |                    |
| 20 | 68,475,000 | 68,625,000 | 914 | 731  | 0.674819293  |                    |
| 20 | 68,550,000 | 68,700,000 | 915 | 737  | 0.556472971  |                    |
| 20 | 68,625,000 | 68,775,000 | 916 | 811  | 0.290591127  |                    |
| 20 | 68,700,000 | 68,850,000 | 917 | 846  | 0.164630061  |                    |
| 20 | 68,775,000 | 68,925,000 | 918 | 753  | 0.273378336  |                    |
| 20 | 68,850,000 | 69,000,000 | 919 | 690  | -0.111698893 |                    |
| 20 | 68,925,000 | 69,075,000 | 920 | 770  | -1.226402023 |                    |
| 20 | 69,000,000 | 69,150,000 | 921 | 1252 | -0.490187856 |                    |
| 20 | 69,075,000 | 69,225,000 | 922 | 1259 | -0.165699116 |                    |
| 20 | 69,150,000 | 69,300,000 | 923 | 806  | -0.80501162  |                    |
| 20 | 69,225,000 | 69,375,000 | 924 | 517  | -1.5614041   |                    |
| 20 | 69,300,000 | 69,450,000 | 925 | 459  | -1.557474722 |                    |

|    |            |            |     |      |              |                                                                |
|----|------------|------------|-----|------|--------------|----------------------------------------------------------------|
| 20 | 69,375,000 | 69,525,000 | 926 | 594  | -0.739146861 | IRX1                                                           |
| 20 | 69,450,000 | 69,600,000 | 927 | 708  | 0.019293012  | IRX1                                                           |
| 20 | 69,525,000 | 69,675,000 | 928 | 732  | -0.391057182 |                                                                |
| 20 | 69,600,000 | 69,750,000 | 929 | 602  | -1.272526488 |                                                                |
| 20 | 69,675,000 | 69,825,000 | 930 | 615  | -1.058269215 |                                                                |
| 20 | 69,750,000 | 69,900,000 | 931 | 578  | -1.646744632 |                                                                |
| 20 | 69,825,000 | 69,975,000 | 932 | 693  | -1.174767897 |                                                                |
| 20 | 69,900,000 | 70,050,000 | 933 | 1287 | -0.657886345 |                                                                |
| 20 | 69,975,000 | 70,125,000 | 934 | 1010 | -0.694005185 |                                                                |
| 20 | 70,050,000 | 70,200,000 | 935 | 272  | -0.350424431 | IRX2                                                           |
| 20 | 70,125,000 | 70,275,000 | 936 | 631  | -1.694019033 | IRX2                                                           |
| 20 | 70,200,000 | 70,350,000 | 937 | 1053 | -1.170617869 |                                                                |
| 20 | 70,275,000 | 70,425,000 | 938 | 1034 | -0.867984032 |                                                                |
| 20 | 70,350,000 | 70,500,000 | 939 | 1020 | -1.753336262 |                                                                |
| 20 | 70,425,000 | 70,575,000 | 940 | 1113 | -1.206317661 |                                                                |
| 20 | 70,500,000 | 70,650,000 | 941 | 1032 | -0.415179816 |                                                                |
| 20 | 70,575,000 | 70,725,000 | 942 | 1009 | 0.357999441  |                                                                |
| 20 | 70,650,000 | 70,800,000 | 943 | 979  | 0.59753281   |                                                                |
| 20 | 70,725,000 | 70,875,000 | 944 | 581  | 0.746535558  |                                                                |
| 20 | 70,800,000 | 70,950,000 | 945 | 380  | 0.641499188  | IRX4                                                           |
| 20 | 70,875,000 | 71,025,000 | 946 | 422  | 0.491629971  | IRX4,MRPL36,NDUFS6                                             |
| 20 | 70,950,000 | 71,100,000 | 947 | 788  | 0.295186277  | MRPL36,NDUFS6                                                  |
| 20 | 71,025,000 | 71,175,000 | 948 | 1154 | 0.586000577  | LPCAT1                                                         |
| 20 | 71,100,000 | 71,250,000 | 949 | 1083 | 0.263165998  | CLPTM1L,LPCAT1,SLC6A3                                          |
| 20 | 71,175,000 | 71,325,000 | 950 | 824  | -1.125166077 | CLPTM1L,SLC6A18,SLC6A19,SLC6A3,TERT                            |
| 20 | 71,250,000 | 71,400,000 | 951 | 690  | -1.068128673 | SLC12A7,SLC6A18,SLC6A19,TERT                                   |
| 20 | 71,325,000 | 71,475,000 | 952 | 750  | -0.80268638  | NKD2,SLC12A7,ENSBTAG00000046181                                |
| 20 | 71,400,000 | 71,550,000 | 953 | 724  | -0.249529985 | BRD9,NKD2,SLC12A7,TRIP13,ENSBTAG00000034431,ENSBTAG00000046181 |
| 20 | 71,475,000 | 71,625,000 | 954 | 591  | 0.48213822   | BRD9,CEP72,TPPP,TRIP13,ENSBTAG00000034431                      |
| 20 | 71,550,000 | 71,700,000 | 955 | 609  | 0.648145783  | CEP72,TPPP                                                     |
| 20 | 71,625,000 | 71,775,000 | 956 | 498  | 0.688967788  | CEP72,EXOC3,SLC9A3,ENSBTAG00000039409                          |
| 20 | 71,700,000 | 71,850,000 | 957 | 267  | 0.53765484   | AHRR,EXOC3,SLC9A3,ENSBTAG00000039409                           |
| 20 | 71,775,000 | 71,925,000 | 958 | 394  | 0.329617714  | AHRR,EXOC3,PDCD6,ENSBTAG00000048135                            |
| 20 | 71,850,000 | 72,000,000 | 959 | 366  | 0.343171198  | AHRR,CCDC127,LRRC14B,PDCD6,SDHA,ENSBTAG00000048135             |
| 20 | 71,925,000 | 72,042,655 | 960 | 122  | 0.504276736  | CCDC127,LRRC14B,PDCD6,SDHA,ENSBTAG00000034577                  |
| 21 | 0          | 150,000    | 1   | 913  | -0.087342105 | SNRPN                                                          |
| 21 | 75,000     | 225,000    | 2   | 1081 | 0.007528233  |                                                                |
| 21 | 150,000    | 300,000    | 3   | 708  | 0.316138567  |                                                                |
| 21 | 225,000    | 375,000    | 4   | 537  | 0.551290688  |                                                                |
| 21 | 300,000    | 450,000    | 5   | 403  | 0.311540631  |                                                                |
| 21 | 375,000    | 525,000    | 6   | 439  | -0.281905034 |                                                                |
| 21 | 450,000    | 600,000    | 7   | 437  | -1.319690569 |                                                                |
| 21 | 525,000    | 675,000    | 8   | 336  | -2.144921819 |                                                                |
| 21 | 600,000    | 750,000    | 9   | 294  | -3.1987255   | NDN                                                            |
| 21 | 675,000    | 825,000    | 10  | 365  | -2.603809291 | MAGEL2,NDN                                                     |
| 21 | 750,000    | 900,000    | 11  | 323  | -2.712535425 | MAGEL2                                                         |
| 21 | 825,000    | 975,000    | 12  | 218  | -4.281336588 |                                                                |
| 21 | 900,000    | 1,050,000  | 13  | 251  | -4.289941984 |                                                                |
| 21 | 975,000    | 1,125,000  | 14  | 372  | -3.344579765 |                                                                |
| 21 | 1,050,000  | 1,200,000  | 15  | 413  | -2.31026388  |                                                                |
| 21 | 1,125,000  | 1,275,000  | 16  | 455  | -2.743284295 |                                                                |

|    |           |           |    |      |              |                                       |
|----|-----------|-----------|----|------|--------------|---------------------------------------|
| 21 | 1,200,000 | 1,350,000 | 17 | 705  | -2.672308179 |                                       |
| 21 | 1,275,000 | 1,425,000 | 18 | 623  | -1.568265229 |                                       |
| 21 | 1,350,000 | 1,500,000 | 19 | 386  | -0.66363635  | FZD3                                  |
| 21 | 1,425,000 | 1,575,000 | 20 | 397  | -1.008391741 | FZD3                                  |
| 21 | 1,500,000 | 1,650,000 | 21 | 722  | -2.865950402 | FZD3,ENSBTAG00000023079               |
| 21 | 1,575,000 | 1,725,000 | 22 | 978  | -4.06654314  | ENSBTAG00000023079                    |
| 21 | 1,650,000 | 1,800,000 | 23 | 1001 | -4.257626264 | ENSBTAG00000006648                    |
| 21 | 1,725,000 | 1,875,000 | 24 | 875  | -3.116392378 | ENSBTAG00000006648,ENSBTAG00000013567 |
| 21 | 1,800,000 | 1,950,000 | 25 | 484  | -0.81409295  | ENSBTAG00000013567,ENSBTAG00000035333 |
| 21 | 1,875,000 | 2,025,000 | 26 | 309  | 0.53537482   | ENSBTAG00000035333                    |
| 21 | 1,950,000 | 2,100,000 | 27 | 220  | 0.764546722  |                                       |
| 21 | 2,025,000 | 2,175,000 | 28 | 143  | 0.653985752  |                                       |
| 21 | 2,100,000 | 2,250,000 | 29 | 198  | 0.156636368  |                                       |
| 21 | 2,175,000 | 2,325,000 | 30 | 201  | -1.284420144 |                                       |
| 21 | 2,250,000 | 2,400,000 | 31 | 191  | -2.63913365  | UBE3A                                 |
| 21 | 2,325,000 | 2,475,000 | 32 | 261  | -1.870373855 | UBE3A                                 |
| 21 | 2,400,000 | 2,550,000 | 33 | 282  | -1.087862717 | UBE3A                                 |
| 21 | 2,475,000 | 2,625,000 | 34 | 296  | 0.448914766  |                                       |
| 21 | 2,550,000 | 2,700,000 | 35 | 662  | 0.818482263  |                                       |
| 21 | 2,625,000 | 2,775,000 | 36 | 1047 | 0.378040516  |                                       |
| 21 | 2,700,000 | 2,850,000 | 37 | 1349 | 0.042659132  | ATP10A                                |
| 21 | 2,775,000 | 2,925,000 | 38 | 1532 | 0.527408808  | ATP10A                                |
| 21 | 2,850,000 | 3,000,000 | 39 | 1098 | 0.595528595  | ATP10A                                |
| 21 | 2,925,000 | 3,075,000 | 40 | 520  | -0.284465528 | ATP10A                                |
| 21 | 3,000,000 | 3,150,000 | 41 | 626  | 0.629410775  |                                       |
| 21 | 3,075,000 | 3,225,000 | 42 | 1317 | 1.200414497  |                                       |
| 21 | 3,150,000 | 3,300,000 | 43 | 1302 | 1.373132834  |                                       |
| 21 | 3,225,000 | 3,375,000 | 44 | 1231 | 0.956474679  |                                       |
| 21 | 3,300,000 | 3,450,000 | 45 | 1240 | 1.052180371  |                                       |
| 21 | 3,375,000 | 3,525,000 | 46 | 845  | -0.43316639  |                                       |
| 21 | 3,450,000 | 3,600,000 | 47 | 988  | -0.605828355 |                                       |
| 21 | 3,525,000 | 3,675,000 | 48 | 773  | 1.161524854  |                                       |
| 21 | 3,600,000 | 3,750,000 | 49 | 471  | 1.006299053  |                                       |
| 21 | 3,675,000 | 3,825,000 | 50 | 457  | 0.6142231    |                                       |
| 21 | 3,750,000 | 3,900,000 | 51 | 253  | -2.509260999 |                                       |
| 21 | 3,825,000 | 3,975,000 | 52 | 189  | -4.199488576 |                                       |
| 21 | 3,900,000 | 4,050,000 | 53 | 210  | -3.217709853 | GABRB3                                |
| 21 | 3,975,000 | 4,125,000 | 54 | 288  | -3.789786258 | GABRB3                                |
| 21 | 4,050,000 | 4,200,000 | 55 | 537  | -1.879236811 | GABRB3                                |
| 21 | 4,125,000 | 4,275,000 | 56 | 879  | -0.096704116 |                                       |
| 21 | 4,200,000 | 4,350,000 | 57 | 879  | 0.366364389  |                                       |
| 21 | 4,275,000 | 4,425,000 | 58 | 616  | 0.322013144  | GABRA5                                |
| 21 | 4,350,000 | 4,500,000 | 59 | 445  | -0.130727327 | GABRA5                                |
| 21 | 4,425,000 | 4,575,000 | 60 | 413  | -0.133757628 | GABRA5                                |
| 21 | 4,500,000 | 4,650,000 | 61 | 373  | 0.636434013  |                                       |
| 21 | 4,575,000 | 4,725,000 | 62 | 376  | 1.162849478  |                                       |
| 21 | 4,650,000 | 4,800,000 | 63 | 811  | 0.988153903  |                                       |
| 21 | 4,725,000 | 4,875,000 | 64 | 932  | 0.870496932  |                                       |
| 21 | 4,800,000 | 4,950,000 | 65 | 606  | 1.090414794  |                                       |
| 21 | 4,875,000 | 5,025,000 | 66 | 493  | 1.117653754  | ENSBTAG00000035184                    |
| 21 | 4,950,000 | 5,100,000 | 67 | 841  | 0.700021852  | ENSBTAG00000035184                    |
| 21 | 5,025,000 | 5,175,000 | 68 | 824  | 0.671285147  |                                       |
| 21 | 5,100,000 | 5,250,000 | 69 | 621  | 0.688109961  |                                       |



|    |           |           |     |      |              |                          |
|----|-----------|-----------|-----|------|--------------|--------------------------|
| 21 | 5,175,000 | 5,325,000 | 70  | 833  | 0.785771067  |                          |
| 21 | 5,250,000 | 5,400,000 | 71  | 1034 | 0.760229929  | VIMP                     |
| 21 | 5,325,000 | 5,475,000 | 72  | 1096 | 0.312813729  | CHSY,VIMP                |
| 21 | 5,400,000 | 5,550,000 | 73  | 1164 | 0.204602989  | CHSY                     |
| 21 | 5,475,000 | 5,625,000 | 74  | 1367 | 0.166725856  | CHSY                     |
| 21 | 5,550,000 | 5,700,000 | 75  | 1191 | -0.926904052 | LRRK1                    |
| 21 | 5,625,000 | 5,775,000 | 76  | 1276 | -1.245871593 | LRRK1                    |
| 21 | 5,700,000 | 5,850,000 | 77  | 1188 | -0.389712182 | ALDH1A3,LRRK1            |
| 21 | 5,775,000 | 5,925,000 | 78  | 971  | -0.015340174 | ALDH1A3                  |
| 21 | 5,850,000 | 6,000,000 | 79  | 1306 | -1.549575636 |                          |
| 21 | 5,925,000 | 6,075,000 | 80  | 1655 | -0.419622457 |                          |
| 21 | 6,000,000 | 6,150,000 | 81  | 1447 | 0.639759685  | ENSBTAG00000048048       |
| 21 | 6,075,000 | 6,225,000 | 82  | 897  | 0.415283762  | ASB7,ENSBTAG00000048048  |
| 21 | 6,150,000 | 6,300,000 | 83  | 628  | -0.772539761 | ASB7,LASS3,LINS          |
| 21 | 6,225,000 | 6,375,000 | 84  | 500  | -0.316318414 | LASS3,LINS               |
| 21 | 6,300,000 | 6,450,000 | 85  | 533  | 1.095463471  | LASS3                    |
| 21 | 6,375,000 | 6,525,000 | 86  | 557  | 0.779402112  | ADAMTS17,LASS3           |
| 21 | 6,450,000 | 6,600,000 | 87  | 683  | 0.192122692  | ADAMTS17                 |
| 21 | 6,525,000 | 6,675,000 | 88  | 1105 | -0.726318979 | ADAMTS17                 |
| 21 | 6,600,000 | 6,750,000 | 89  | 1091 | -0.677908089 | ADAMTS17                 |
| 21 | 6,675,000 | 6,825,000 | 90  | 738  | 0.885042532  | ADAMTS17                 |
| 21 | 6,750,000 | 6,900,000 | 91  | 556  | 0.999142158  | ADAMTS17                 |
| 21 | 6,825,000 | 6,975,000 | 92  | 524  | -0.191965507 | ADAMTS17                 |
| 21 | 6,900,000 | 7,050,000 | 93  | 805  | -0.534212755 | ADAMTS17,MEF2A,MGC155141 |
| 21 | 6,975,000 | 7,125,000 | 94  | 832  | -0.793481829 | MEF2A,MGC155141          |
| 21 | 7,050,000 | 7,200,000 | 95  | 661  | -0.593158613 | MEF2A                    |
| 21 | 7,125,000 | 7,275,000 | 96  | 857  | 0.94735179   | MEF2A                    |
| 21 | 7,200,000 | 7,350,000 | 97  | 1060 | 1.08397234   | MEF2A                    |
| 21 | 7,275,000 | 7,425,000 | 98  | 746  | 0.950556158  | LRRC28                   |
| 21 | 7,350,000 | 7,500,000 | 99  | 313  | 1.150688301  | LRRC28                   |
| 21 | 7,425,000 | 7,575,000 | 100 | 265  | 1.316912341  | LRRC28                   |
| 21 | 7,500,000 | 7,650,000 | 101 | 228  | 1.369932819  | LRRC28,TTC23             |
| 21 | 7,575,000 | 7,725,000 | 102 | 201  | 1.221269665  | LRRC28,TTC23             |
| 21 | 7,650,000 | 7,800,000 | 103 | 217  | 1.183580762  | SYNM,TTC23               |
| 21 | 7,725,000 | 7,875,000 | 104 | 250  | 1.292677377  | SYNM,TTC23               |
| 21 | 7,800,000 | 7,950,000 | 105 | 269  | 1.241874606  |                          |
| 21 | 7,875,000 | 8,025,000 | 106 | 321  | 0.70141774   |                          |
| 21 | 7,950,000 | 8,100,000 | 107 | 573  | 0.172402221  |                          |
| 21 | 8,025,000 | 8,175,000 | 108 | 480  | -0.131881576 |                          |
| 21 | 8,100,000 | 8,250,000 | 109 | 284  | -0.335460575 | IGF1R                    |
| 21 | 8,175,000 | 8,325,000 | 110 | 391  | 0.229130671  | IGF1R,PGPEP1L            |
| 21 | 8,250,000 | 8,400,000 | 111 | 501  | 0.480255684  | FAM169B,IGF1R,PGPEP1L    |
| 21 | 8,325,000 | 8,475,000 | 112 | 542  | 0.1300211    | FAM169B                  |
| 21 | 8,400,000 | 8,550,000 | 113 | 626  | -0.85685646  | FAM169B                  |
| 21 | 8,475,000 | 8,625,000 | 114 | 770  | -0.220772474 |                          |
| 21 | 8,550,000 | 8,700,000 | 115 | 1045 | 0.712833406  |                          |
| 21 | 8,625,000 | 8,775,000 | 116 | 1292 | 0.793093384  |                          |
| 21 | 8,700,000 | 8,850,000 | 117 | 1141 | 0.310059538  |                          |
| 21 | 8,775,000 | 8,925,000 | 118 | 975  | 0.115467014  | ARRDC4                   |
| 21 | 8,850,000 | 9,000,000 | 119 | 878  | -0.237637006 | ARRDC4                   |
| 21 | 8,925,000 | 9,075,000 | 120 | 1050 | -1.311467257 | ARRDC4                   |
| 21 | 9,000,000 | 9,150,000 | 121 | 1382 | -0.813666332 |                          |
| 21 | 9,075,000 | 9,225,000 | 122 | 1451 | 0.164028273  |                          |

|    |            |            |     |      |              |                    |
|----|------------|------------|-----|------|--------------|--------------------|
| 21 | 9,150,000  | 9,300,000  | 123 | 1363 | 0.571671927  |                    |
| 21 | 9,225,000  | 9,375,000  | 124 | 1405 | 0.637926595  |                    |
| 21 | 9,300,000  | 9,450,000  | 125 | 1618 | 1.019499402  |                    |
| 21 | 9,375,000  | 9,525,000  | 126 | 1291 | 1.147654949  |                    |
| 21 | 9,450,000  | 9,600,000  | 127 | 862  | 1.084005098  |                    |
| 21 | 9,525,000  | 9,675,000  | 128 | 1207 | 0.315928111  | ENSBTAG00000046611 |
| 21 | 9,600,000  | 9,750,000  | 129 | 988  | -0.028502504 | ENSBTAG00000046611 |
| 21 | 9,675,000  | 9,825,000  | 130 | 602  | -1.392156258 |                    |
| 21 | 9,750,000  | 9,900,000  | 131 | 898  | -0.465799778 |                    |
| 21 | 9,825,000  | 9,975,000  | 132 | 755  | 0.596566162  |                    |
| 21 | 9,900,000  | 10,050,000 | 133 | 536  | 0.369207742  |                    |
| 21 | 9,975,000  | 10,125,000 | 134 | 628  | 0.790893586  |                    |
| 21 | 10,050,000 | 10,200,000 | 135 | 535  | 0.312231009  |                    |
| 21 | 10,125,000 | 10,275,000 | 136 | 423  | -0.4855126   |                    |
| 21 | 10,200,000 | 10,350,000 | 137 | 484  | 0.435185821  |                    |
| 21 | 10,275,000 | 10,425,000 | 138 | 719  | 0.380032556  |                    |
| 21 | 10,350,000 | 10,500,000 | 139 | 1068 | 0.442856718  |                    |
| 21 | 10,425,000 | 10,575,000 | 140 | 831  | 0.21214676   |                    |
| 21 | 10,500,000 | 10,650,000 | 141 | 639  | -0.79602851  |                    |
| 21 | 10,575,000 | 10,725,000 | 142 | 732  | -1.509082516 |                    |
| 21 | 10,650,000 | 10,800,000 | 143 | 466  | -1.444052651 | NR2F2              |
| 21 | 10,725,000 | 10,875,000 | 144 | 348  | 0.830581442  | NR2F2              |
| 21 | 10,800,000 | 10,950,000 | 145 | 451  | 0.585799948  | NR2F2              |
| 21 | 10,875,000 | 11,025,000 | 146 | 688  | 0.639829493  |                    |
| 21 | 10,950,000 | 11,100,000 | 147 | 830  | 0.620052205  |                    |
| 21 | 11,025,000 | 11,175,000 | 148 | 900  | -0.849588386 |                    |
| 21 | 11,100,000 | 11,250,000 | 149 | 1023 | -0.464392964 |                    |
| 21 | 11,175,000 | 11,325,000 | 150 | 743  | 0.106177025  |                    |
| 21 | 11,250,000 | 11,400,000 | 151 | 738  | -0.445501617 |                    |
| 21 | 11,325,000 | 11,475,000 | 152 | 1022 | -0.407444605 |                    |
| 21 | 11,400,000 | 11,550,000 | 153 | 957  | -0.843610816 |                    |
| 21 | 11,475,000 | 11,625,000 | 154 | 774  | -1.359113053 |                    |
| 21 | 11,550,000 | 11,700,000 | 155 | 796  | -0.238978738 |                    |
| 21 | 11,625,000 | 11,775,000 | 156 | 985  | -0.42534361  |                    |
| 21 | 11,700,000 | 11,850,000 | 157 | 870  | -1.394580417 |                    |
| 21 | 11,775,000 | 11,925,000 | 158 | 840  | -1.462679443 |                    |
| 21 | 11,850,000 | 12,000,000 | 159 | 979  | -0.726403141 |                    |
| 21 | 11,925,000 | 12,075,000 | 160 | 1021 | 0.223957608  |                    |
| 21 | 12,000,000 | 12,150,000 | 161 | 968  | 0.582524508  |                    |
| 21 | 12,075,000 | 12,225,000 | 162 | 693  | -0.179180504 |                    |
| 21 | 12,150,000 | 12,300,000 | 163 | 815  | -0.561430347 |                    |
| 21 | 12,225,000 | 12,375,000 | 164 | 1052 | 0.085211244  |                    |
| 21 | 12,300,000 | 12,450,000 | 165 | 899  | 0.828607337  |                    |
| 21 | 12,375,000 | 12,525,000 | 166 | 854  | 0.592788925  |                    |
| 21 | 12,450,000 | 12,600,000 | 167 | 971  | 0.553794668  |                    |
| 21 | 12,525,000 | 12,675,000 | 168 | 935  | 0.654082266  |                    |
| 21 | 12,600,000 | 12,750,000 | 169 | 830  | 0.669109052  |                    |
| 21 | 12,675,000 | 12,825,000 | 170 | 899  | 0.692688156  |                    |
| 21 | 12,750,000 | 12,900,000 | 171 | 727  | 0.536604487  | MCTP2              |
| 21 | 12,825,000 | 12,975,000 | 172 | 654  | 0.819736648  | MCTP2              |
| 21 | 12,900,000 | 13,050,000 | 173 | 1170 | 0.854949853  | MCTP2              |
| 21 | 12,975,000 | 13,125,000 | 174 | 1443 | 0.597053475  | MCTP2              |
| 21 | 13,050,000 | 13,200,000 | 175 | 1498 | -0.188049839 | MCTP2              |

|    |            |            |     |      |              |                              |
|----|------------|------------|-----|------|--------------|------------------------------|
| 21 | 13,125,000 | 13,275,000 | 176 | 1251 | 0.021973981  |                              |
| 21 | 13,200,000 | 13,350,000 | 177 | 660  | 0.701733607  |                              |
| 21 | 13,275,000 | 13,425,000 | 178 | 795  | -0.144077589 | ENSBTAG00000033335           |
| 21 | 13,350,000 | 13,500,000 | 179 | 1060 | 0.50333831   | ENSBTAG00000033335           |
| 21 | 13,425,000 | 13,575,000 | 180 | 942  | 0.259388758  |                              |
| 21 | 13,500,000 | 13,650,000 | 181 | 819  | -0.355005975 |                              |
| 21 | 13,575,000 | 13,725,000 | 182 | 913  | 0.151360898  |                              |
| 21 | 13,650,000 | 13,800,000 | 183 | 1164 | -0.93615433  |                              |
| 21 | 13,725,000 | 13,875,000 | 184 | 1144 | -0.775185321 |                              |
| 21 | 13,800,000 | 13,950,000 | 185 | 1027 | 0.287410154  |                              |
| 21 | 13,875,000 | 14,025,000 | 186 | 775  | -0.127403795 |                              |
| 21 | 13,950,000 | 14,100,000 | 187 | 625  | -0.403055476 |                              |
| 21 | 14,025,000 | 14,175,000 | 188 | 615  | 0.302876066  |                              |
| 21 | 14,100,000 | 14,250,000 | 189 | 815  | 0.375707375  |                              |
| 21 | 14,175,000 | 14,325,000 | 190 | 964  | 0.380429135  | ENSBTAG00000027075           |
| 21 | 14,250,000 | 14,400,000 | 191 | 623  | 0.431821916  | CHD2,RGMA,ENSBTAG00000027075 |
| 21 | 14,325,000 | 14,475,000 | 192 | 327  | 0.543420041  | CHD2,RGMA                    |
| 21 | 14,400,000 | 14,550,000 | 193 | 238  | -0.038100146 | CHD2                         |
| 21 | 14,475,000 | 14,625,000 | 194 | 541  | 0.935967851  | CHD2                         |
| 21 | 14,550,000 | 14,700,000 | 195 | 1210 | 0.103588677  | FAM174B                      |
| 21 | 14,625,000 | 14,775,000 | 196 | 1007 | -0.42543813  | FAM174B                      |
| 21 | 14,700,000 | 14,850,000 | 197 | 431  | -0.089602024 | FAM174B                      |
| 21 | 14,775,000 | 14,925,000 | 198 | 885  | 0.784708894  | ST8SIA2                      |
| 21 | 14,850,000 | 15,000,000 | 199 | 1161 | 0.652654677  | ST8SIA2                      |
| 21 | 14,925,000 | 15,075,000 | 200 | 1280 | -0.649173701 | ST8SIA2                      |
| 21 | 15,000,000 | 15,150,000 | 201 | 1420 | -0.308071045 |                              |
| 21 | 15,075,000 | 15,225,000 | 202 | 1241 | 0.223123791  | SLCO3A1                      |
| 21 | 15,150,000 | 15,300,000 | 203 | 918  | 0.064085786  | SLCO3A1                      |
| 21 | 15,225,000 | 15,375,000 | 204 | 956  | 0.709337057  | SLCO3A1                      |
| 21 | 15,300,000 | 15,450,000 | 205 | 1460 | 0.501046654  | SLCO3A1                      |
| 21 | 15,375,000 | 15,525,000 | 206 | 1282 | -0.18293879  | SLCO3A1                      |
| 21 | 15,450,000 | 15,600,000 | 207 | 934  | -0.678395903 | SLCO3A1                      |
| 21 | 15,525,000 | 15,675,000 | 208 | 1072 | 0.398315405  | SLCO3A1                      |
| 21 | 15,600,000 | 15,750,000 | 209 | 960  | 0.765709347  |                              |
| 21 | 15,675,000 | 15,825,000 | 210 | 623  | 0.382209262  |                              |
| 21 | 15,750,000 | 15,900,000 | 211 | 597  | 0.817723483  |                              |
| 21 | 15,825,000 | 15,975,000 | 212 | 570  | 0.821017242  |                              |
| 21 | 15,900,000 | 16,050,000 | 213 | 1078 | 0.259202707  | ENSBTAG00000021064           |
| 21 | 15,975,000 | 16,125,000 | 214 | 1348 | -0.198684021 | ENSBTAG00000021064           |
| 21 | 16,050,000 | 16,200,000 | 215 | 1221 | -0.726652447 | ENSBTAG00000021064           |
| 21 | 16,125,000 | 16,275,000 | 216 | 1512 | -0.789405629 | SV2B                         |
| 21 | 16,200,000 | 16,350,000 | 217 | 1043 | -0.764668041 | SV2B                         |
| 21 | 16,275,000 | 16,425,000 | 218 | 742  | 0.27926282   | SV2B                         |
| 21 | 16,350,000 | 16,500,000 | 219 | 712  | 0.876331903  | SV2B                         |
| 21 | 16,425,000 | 16,575,000 | 220 | 417  | 0.527155851  | SV2B                         |
| 21 | 16,500,000 | 16,650,000 | 221 | 493  | -0.059062288 |                              |
| 21 | 16,575,000 | 16,725,000 | 222 | 581  | -0.971313248 | AKAP13                       |
| 21 | 16,650,000 | 16,800,000 | 223 | 757  | 0.028823997  | AKAP13                       |
| 21 | 16,725,000 | 16,875,000 | 224 | 1090 | 0.563050013  | AKAP13                       |
| 21 | 16,800,000 | 16,950,000 | 225 | 1129 | 0.198861745  | AKAP13,KLHL25                |
| 21 | 16,875,000 | 17,025,000 | 226 | 1291 | 0.155778874  | AKAP13,KLHL25                |
| 21 | 16,950,000 | 17,100,000 | 227 | 1782 | 0.144900263  | KLHL25                       |
| 21 | 17,025,000 | 17,175,000 | 228 | 1864 | 0.361394225  |                              |

|    |            |            |     |      |              |                                                                                             |
|----|------------|------------|-----|------|--------------|---------------------------------------------------------------------------------------------|
| 21 | 17,100,000 | 17,250,000 | 229 | 1476 | 0.818497373  |                                                                                             |
| 21 | 17,175,000 | 17,325,000 | 230 | 1689 | 1.0456218    |                                                                                             |
| 21 | 17,250,000 | 17,400,000 | 231 | 1637 | 0.651894965  |                                                                                             |
| 21 | 17,325,000 | 17,475,000 | 232 | 826  | -0.479526423 |                                                                                             |
| 21 | 17,400,000 | 17,550,000 | 233 | 548  | -1.08754737  |                                                                                             |
| 21 | 17,475,000 | 17,625,000 | 234 | 598  | -0.537130233 |                                                                                             |
| 21 | 17,550,000 | 17,700,000 | 235 | 615  | 0.653157596  |                                                                                             |
| 21 | 17,625,000 | 17,775,000 | 236 | 644  | 0.514659388  |                                                                                             |
| 21 | 17,700,000 | 17,850,000 | 237 | 989  | 0.163871292  |                                                                                             |
| 21 | 17,775,000 | 17,925,000 | 238 | 1218 | 0.523117648  |                                                                                             |
| 21 | 17,850,000 | 18,000,000 | 239 | 1067 | 0.95256714   |                                                                                             |
| 21 | 17,925,000 | 18,075,000 | 240 | 950  | 0.392737693  |                                                                                             |
| 21 | 18,000,000 | 18,150,000 | 241 | 1112 | -0.698862192 |                                                                                             |
| 21 | 18,075,000 | 18,225,000 | 242 | 1098 | -0.383315022 |                                                                                             |
| 21 | 18,150,000 | 18,300,000 | 243 | 673  | 0.722854447  |                                                                                             |
| 21 | 18,225,000 | 18,375,000 | 244 | 511  | 0.698243051  |                                                                                             |
| 21 | 18,300,000 | 18,450,000 | 245 | 666  | 0.905830775  |                                                                                             |
| 21 | 18,375,000 | 18,525,000 | 246 | 738  | 0.872237735  |                                                                                             |
| 21 | 18,450,000 | 18,600,000 | 247 | 864  | 0.841805669  |                                                                                             |
| 21 | 18,525,000 | 18,675,000 | 248 | 1085 | 0.864726371  |                                                                                             |
| 21 | 18,600,000 | 18,750,000 | 249 | 1215 | 0.099917312  |                                                                                             |
| 21 | 18,675,000 | 18,825,000 | 250 | 1402 | -0.594800515 |                                                                                             |
| 21 | 18,750,000 | 18,900,000 | 251 | 1294 | -0.513075568 |                                                                                             |
| 21 | 18,825,000 | 18,975,000 | 252 | 845  | -0.346106295 |                                                                                             |
| 21 | 18,900,000 | 19,050,000 | 253 | 1025 | -0.900479202 |                                                                                             |
| 21 | 18,975,000 | 19,125,000 | 254 | 1122 | -0.466273173 |                                                                                             |
| 21 | 19,050,000 | 19,200,000 | 255 | 846  | 0.360724627  |                                                                                             |
| 21 | 19,125,000 | 19,275,000 | 256 | 898  | 0.308183753  | ENSBTAG00000011213                                                                          |
| 21 | 19,200,000 | 19,350,000 | 257 | 843  | 0.106441522  | ENSBTAG00000011213                                                                          |
| 21 | 19,275,000 | 19,425,000 | 258 | 857  | -1.264943176 | ENSBTAG00000011213                                                                          |
| 21 | 19,350,000 | 19,500,000 | 259 | 1610 | -0.326729228 | NTRK3                                                                                       |
| 21 | 19,425,000 | 19,575,000 | 260 | 1936 | 0.908958349  | NTRK3                                                                                       |
| 21 | 19,500,000 | 19,650,000 | 261 | 1869 | -0.598019591 | NTRK3                                                                                       |
| 21 | 19,575,000 | 19,725,000 | 262 | 2000 | -0.379364724 |                                                                                             |
| 21 | 19,650,000 | 19,800,000 | 263 | 1679 | 0.500379022  |                                                                                             |
| 21 | 19,725,000 | 19,875,000 | 264 | 1508 | 0.100783202  | MRPL46,MRPS11                                                                               |
| 21 | 19,800,000 | 19,950,000 | 265 | 1341 | 0.091250375  | DET1,MRPL46,MRPS11                                                                          |
| 21 | 19,875,000 | 20,025,000 | 266 | 1251 | 0.468835228  | AEN,DET1,ISG20,MRPS11                                                                       |
| 21 | 19,950,000 | 20,100,000 | 267 | 2019 | 0.070297577  | AEN,DET1,ISG20,ENSBTAG0000001308,ENSBTAG00000047729                                         |
| 21 | 20,025,000 | 20,175,000 | 268 | 2225 | -0.483809492 | ISG20,ENSBTAG0000001308,ENSBTAG00000040580,ENSBTAG00000045929,ENSBTAG00000047729            |
| 21 | 20,100,000 | 20,250,000 | 269 | 2205 | -0.409662577 | ENSBTAG0000001308,ENSBTAG0000002786,ENSBTAG0000040580,ENSBTAG00000045929,ENSBTAG00000047729 |
| 21 | 20,175,000 | 20,325,000 | 270 | 2445 | -0.150770468 | ENSBTAG0000001308,ENSBTAG0000002786                                                         |
| 21 | 20,250,000 | 20,400,000 | 271 | 2275 | 0.025015417  | ENSBTAG00000012326,ENSBTAG00000038494                                                       |
| 21 | 20,325,000 | 20,475,000 | 272 | 2570 | 0.641230779  | ENSBTAG0000004339,ENSBTAG00000012326,ENSBTAG0000038494                                      |
| 21 | 20,400,000 | 20,550,000 | 273 | 3108 | 0.615245802  | ENSBTAG0000001526,ENSBTAG0000004339                                                         |
| 21 | 20,475,000 | 20,625,000 | 274 | 2820 | 0.314143322  | ENSBTAG0000001526,ENSBTAG00000036082,ENSBTAG0000046377,ENSBTAG00000046412                   |

|    |            |            |     |      |              |                                                                                               |
|----|------------|------------|-----|------|--------------|-----------------------------------------------------------------------------------------------|
| 21 | 20,550,000 | 20,700,000 | 275 | 2332 | 0.277953146  | ENSBTAG00000017054,ENSBTAG00000036082,ENSBTAG0000046377,ENSBTAG00000046412,ENSBTAG00000048096 |
|    |            |            |     |      |              | 6                                                                                             |
| 21 | 20,625,000 | 20,775,000 | 276 | 2082 | 0.547822129  | ENSBTAG00000017054,ENSBTAG00000048096                                                         |
| 21 | 20,700,000 | 20,850,000 | 277 | 1480 | 0.95991767   | ACAN                                                                                          |
| 21 | 20,775,000 | 20,925,000 | 278 | 1279 | 1.002657024  | ACAN,HAPLN3,MFGE8                                                                             |
| 21 | 20,850,000 | 21,000,000 | 279 | 1468 | 0.577047034  | ABHD2,ACAN,HAPLN3,MFGE8                                                                       |
| 21 | 20,925,000 | 21,075,000 | 280 | 1478 | 0.134509987  | ABHD2                                                                                         |
| 21 | 21,000,000 | 21,150,000 | 281 | 1406 | 0.105755378  | ABHD2,FANCI,RLBP1                                                                             |
| 21 | 21,075,000 | 21,225,000 | 282 | 1231 | 0.266657862  | ABHD2,FANCI,POLG,RLBP1                                                                        |
| 21 | 21,150,000 | 21,300,000 | 283 | 862  | -1.19630377  | FANCI,POLG,RLBP1                                                                              |
| 21 | 21,225,000 | 21,375,000 | 284 | 728  | -1.288723192 | RHCG,RLBP1                                                                                    |
| 21 | 21,300,000 | 21,450,000 | 285 | 849  | -0.317357186 | RHCG,TICRR                                                                                    |
| 21 | 21,375,000 | 21,525,000 | 286 | 775  | -2.33544512  | KIF7,PEX11A,PLIN,RHCG,TICRR                                                                   |
| 21 | 21,450,000 | 21,600,000 | 287 | 470  | -3.389919332 | KIF7,PEX11A,PLIN,TICRR,WDR93                                                                  |
| 21 | 21,525,000 | 21,675,000 | 288 | 450  | -4.476218925 | ANPEP,MESP2,PEX11A,WDR93                                                                      |
| 21 | 21,600,000 | 21,750,000 | 289 | 536  | -3.275712985 | ANPEP,AP3S2,ARPIN,MESP2                                                                       |
| 21 | 21,675,000 | 21,825,000 | 290 | 884  | -0.759187853 | AP3S2,ARPIN                                                                                   |
| 21 | 21,750,000 | 21,900,000 | 291 | 1155 | 0.022287179  | ZNF710                                                                                        |
| 21 | 21,825,000 | 21,975,000 | 292 | 866  | 0.874301994  | IDH2,ZNF710                                                                                   |
| 21 | 21,900,000 | 22,050,000 | 293 | 533  | 0.694599909  | CIB1,GDPGP1,IDH2,SEMA4B                                                                       |
| 21 | 21,975,000 | 22,125,000 | 294 | 326  | 0.063159158  | CIB1,GDPGP1,NGRN,PRC1,SEMA4B,VPS33B                                                           |
| 21 | 22,050,000 | 22,200,000 | 295 | 310  | -0.164603884 | FES,GDPGP1,HDDC3,MAN2A2,NGRN,PRC1,RCCD1,UNC45A,VPS33B                                         |
| 21 | 22,125,000 | 22,275,000 | 296 | 365  | -0.066125172 | BLM,FES,FURIN,HDDC3,MAN2A2,RCCD1,UNC45A                                                       |
| 21 | 22,200,000 | 22,350,000 | 297 | 503  | -1.552956384 | BLM,FES,FURIN                                                                                 |
| 21 | 22,275,000 | 22,425,000 | 298 | 624  | -2.157807258 | BLM,CRTC3                                                                                     |
| 21 | 22,350,000 | 22,500,000 | 299 | 481  | -1.342878541 | CRTC3                                                                                         |
| 21 | 22,425,000 | 22,575,000 | 300 | 722  | -0.318462828 | CRTC3,IQGAP1                                                                                  |
| 21 | 22,500,000 | 22,650,000 | 301 | 962  | -0.208640774 | IQGAP1                                                                                        |
| 21 | 22,575,000 | 22,725,000 | 302 | 824  | 0.398548909  | IQGAP1,ZNF774,ZSCAN2                                                                          |
| 21 | 22,650,000 | 22,800,000 | 303 | 641  | 0.787057205  | NMB,SEC11A,WDR73,ZNF774,ZSCAN2                                                                |
| 21 | 22,725,000 | 22,875,000 | 304 | 452  | 0.996137258  | NMB,SEC11A,WDR73,ZNF592                                                                       |
| 21 | 22,800,000 | 22,950,000 | 305 | 547  | 0.972295584  | ALPK3,SLC28A1,ZNF592                                                                          |
| 21 | 22,875,000 | 23,025,000 | 306 | 803  | 0.858035774  | ALPK3,SLC28A1                                                                                 |
| 21 | 22,950,000 | 23,100,000 | 307 | 949  | 0.071514043  | SLC28A1                                                                                       |
| 21 | 23,025,000 | 23,175,000 | 308 | 696  | -0.722811377 | PDE8A,SLC28A1                                                                                 |
| 21 | 23,100,000 | 23,250,000 | 309 | 461  | -0.038067994 | PDE8A                                                                                         |
| 21 | 23,175,000 | 23,325,000 | 310 | 612  | 0.1313654    | PDE8A,RPS17,ENSBTAG00000000623                                                                |
| 21 | 23,250,000 | 23,400,000 | 311 | 724  | 0.007305537  | PDE8A,RPS17,ENSBTAG00000000623                                                                |
| 21 | 23,325,000 | 23,475,000 | 312 | 775  | 0.483200978  | ENSBTAG00000000623,ENSBTAG00000008495                                                         |
| 21 | 23,400,000 | 23,550,000 | 313 | 1137 | 0.757106552  | FSD2,WHAMM,ENSBTAG00000008495                                                                 |
| 21 | 23,475,000 | 23,625,000 | 314 | 1297 | 0.855101718  | FSD2,HOMER2,WHAMM                                                                             |
| 21 | 23,550,000 | 23,700,000 | 315 | 1087 | 0.875040427  | HOMER2,WHAMM                                                                                  |
| 21 | 23,625,000 | 23,775,000 | 316 | 1104 | 0.693637543  | C21H15ORF40,HOMER2,MGC127733                                                                  |
| 21 | 23,700,000 | 23,850,000 | 317 | 1319 | 0.853953984  | C21H15ORF40,MGC127733                                                                         |
| 21 | 23,775,000 | 23,925,000 | 318 | 1666 | 0.907442918  | ENSBTAG00000047366                                                                            |
| 21 | 23,850,000 | 24,000,000 | 319 | 1272 | 0.874982139  | ENSBTAG00000047366                                                                            |
| 21 | 23,925,000 | 24,075,000 | 320 | 434  | 0.913503892  |                                                                                               |
| 21 | 24,000,000 | 24,150,000 | 321 | 295  | 0.761630347  |                                                                                               |
| 21 | 24,075,000 | 24,225,000 | 322 | 277  | 1.125654964  |                                                                                               |
| 21 | 24,150,000 | 24,300,000 | 323 | 254  | 1.24843901   |                                                                                               |
| 21 | 24,225,000 | 24,375,000 | 324 | 440  | 1.12506113   | MEX3B                                                                                         |

|    |            |            |     |      |              |                                      |
|----|------------|------------|-----|------|--------------|--------------------------------------|
| 21 | 24,300,000 | 24,450,000 | 325 | 642  | 0.788901047  | EFTUD1,MEX3B                         |
| 21 | 24,375,000 | 24,525,000 | 326 | 848  | 0.663714278  | EFTUD1,FAM154B                       |
| 21 | 24,450,000 | 24,600,000 | 327 | 693  | 0.642800662  | ADAMTSL3,EFTUD1,FAM154B              |
| 21 | 24,525,000 | 24,675,000 | 328 | 352  | 0.586528266  | ADAMTSL3,FAM154B                     |
| 21 | 24,600,000 | 24,750,000 | 329 | 325  | 0.331994711  | ADAMTSL3                             |
| 21 | 24,675,000 | 24,825,000 | 330 | 350  | -0.824821988 | ADAMTSL3                             |
| 21 | 24,750,000 | 24,900,000 | 331 | 376  | -1.311386808 | ADAMTSL3                             |
| 21 | 24,825,000 | 24,975,000 | 332 | 347  | -1.73525708  | ADAMTSL3                             |
| 21 | 24,900,000 | 25,050,000 | 333 | 559  | -1.399729159 | SH3GL3                               |
| 21 | 24,975,000 | 25,125,000 | 334 | 682  | -0.113257478 | SH3GL3                               |
| 21 | 25,050,000 | 25,200,000 | 335 | 446  | 0.307113693  |                                      |
| 21 | 25,125,000 | 25,275,000 | 336 | 330  | -0.213258464 | BNC1                                 |
| 21 | 25,200,000 | 25,350,000 | 337 | 322  | -0.502373606 | BNC1,HDGFRP3                         |
| 21 | 25,275,000 | 25,425,000 | 338 | 486  | -0.145843465 | HDGFRP3,TM6SF1                       |
| 21 | 25,350,000 | 25,500,000 | 339 | 495  | -0.007653354 | BTBD1,HDGFRP3,TM6SF1                 |
| 21 | 25,425,000 | 25,575,000 | 340 | 349  | 0.006371589  | BTBD1                                |
| 21 | 25,500,000 | 25,650,000 | 341 | 360  | -0.267816012 | BTBD1                                |
| 21 | 25,575,000 | 25,725,000 | 342 | 464  | -0.805223355 | CTSH,RASGRF1,ENSBTAG00000010988      |
| 21 | 25,650,000 | 25,800,000 | 343 | 486  | -1.076495305 | CTSH,RASGRF1,ENSBTAG00000010988      |
| 21 | 25,725,000 | 25,875,000 | 344 | 416  | -0.681380981 | RASGRF1                              |
| 21 | 25,800,000 | 25,950,000 | 345 | 391  | 0.359890551  | RASGRF1                              |
| 21 | 25,875,000 | 26,025,000 | 346 | 530  | 0.549357801  | ANKRD34C,TMED3                       |
| 21 | 25,950,000 | 26,100,000 | 347 | 481  | 0.34414375   | ANKRD34C,TMED3                       |
| 21 | 26,025,000 | 26,175,000 | 348 | 457  | -0.087534799 | KIAA1024                             |
| 21 | 26,100,000 | 26,250,000 | 349 | 723  | -0.04916538  | KIAA1024,ENSBTAG00000047935          |
| 21 | 26,175,000 | 26,325,000 | 350 | 807  | 0.31341484   | ENSBTAG00000047935                   |
| 21 | 26,250,000 | 26,400,000 | 351 | 1336 | -0.606430263 |                                      |
| 21 | 26,325,000 | 26,475,000 | 352 | 1322 | -0.83897174  | MTHFS                                |
| 21 | 26,400,000 | 26,550,000 | 353 | 582  | 0.211809649  | BCL2A1,MTHFS,ZFAND6                  |
| 21 | 26,475,000 | 26,625,000 | 354 | 358  | 1.001574333  | BCL2A1,FAH,ZFAND6,ENSBTAG00000048314 |
| 21 | 26,550,000 | 26,700,000 | 355 | 429  | 0.20009596   | FAH,ZFAND6,ENSBTAG00000048314        |
| 21 | 26,625,000 | 26,775,000 | 356 | 611  | 0.232906645  | FAH                                  |
| 21 | 26,700,000 | 26,850,000 | 357 | 876  | 0.858868224  | ENSBTAG00000047587                   |
| 21 | 26,775,000 | 26,925,000 | 358 | 1056 | 0.345533368  | ARNT2,ENSBTAG00000047587             |
| 21 | 26,850,000 | 27,000,000 | 359 | 792  | -1.070698386 | ARNT2                                |
| 21 | 26,925,000 | 27,075,000 | 360 | 661  | -0.061782596 | ABHD17C,ARNT2                        |
| 21 | 27,000,000 | 27,150,000 | 361 | 637  | 0.934934605  | ABHD17C                              |
| 21 | 27,075,000 | 27,225,000 | 362 | 434  | 0.443563428  | ABHD17C                              |
| 21 | 27,150,000 | 27,300,000 | 363 | 391  | 0.175418717  | CEMIP                                |
| 21 | 27,225,000 | 27,375,000 | 364 | 359  | -0.64402753  | CEMIP,MESDC1,MESDC2                  |
| 21 | 27,300,000 | 27,450,000 | 365 | 352  | -1.449133138 | C21H15ORF26,MESDC1,MESDC2            |
| 21 | 27,375,000 | 27,525,000 | 366 | 489  | -1.138545008 | C21H15ORF26                          |
| 21 | 27,450,000 | 27,600,000 | 367 | 403  | -1.106223427 | C21H15ORF26,IL16                     |
| 21 | 27,525,000 | 27,675,000 | 368 | 421  | -2.439980514 | IL16,STARD5,TMC3                     |
| 21 | 27,600,000 | 27,750,000 | 369 | 726  | -1.694738832 | IL16,STARD5,TMC3                     |
| 21 | 27,675,000 | 27,825,000 | 370 | 703  | -0.777402495 | TMC3                                 |
| 21 | 27,750,000 | 27,900,000 | 371 | 456  | -0.719911042 | MCEE                                 |
| 21 | 27,825,000 | 27,975,000 | 372 | 322  | -0.046061544 | FAN1,MCEE,MPHOSPH10,MTMR10           |
| 21 | 27,900,000 | 28,050,000 | 373 | 377  | 0.907720162  | FAN1,MCEE,MPHOSPH10,MTMR10,TRPM1     |
| 21 | 27,975,000 | 28,125,000 | 374 | 702  | 1.161897541  | MTMR10,TRPM1                         |
| 21 | 28,050,000 | 28,200,000 | 375 | 842  | 1.146339731  | TRPM1                                |
| 21 | 28,125,000 | 28,275,000 | 376 | 579  | 1.095271599  |                                      |
| 21 | 28,200,000 | 28,350,000 | 377 | 601  | -0.371372795 |                                      |

|    |            |            |     |      |              |                                 |
|----|------------|------------|-----|------|--------------|---------------------------------|
| 21 | 28,275,000 | 28,425,000 | 378 | 1224 | 0.078973594  |                                 |
| 21 | 28,350,000 | 28,500,000 | 379 | 1524 | 0.550597512  |                                 |
| 21 | 28,425,000 | 28,575,000 | 380 | 1082 | 0.326550231  | APBA2                           |
| 21 | 28,500,000 | 28,650,000 | 381 | 550  | 0.582408829  | APBA2,FAM189A1                  |
| 21 | 28,575,000 | 28,725,000 | 382 | 287  | 0.078564581  | APBA2,FAM189A1,NDNL2            |
| 21 | 28,650,000 | 28,800,000 | 383 | 314  | 0.062064279  | FAM189A1,NDNL2                  |
| 21 | 28,725,000 | 28,875,000 | 384 | 367  | 0.653415296  |                                 |
| 21 | 28,800,000 | 28,950,000 | 385 | 431  | 0.89483499   | ZO1                             |
| 21 | 28,875,000 | 29,025,000 | 386 | 322  | 0.839620131  | ZO1                             |
| 21 | 28,950,000 | 29,100,000 | 387 | 202  | 0.627053647  | ZO1                             |
| 21 | 29,025,000 | 29,175,000 | 388 | 207  | 0.594482751  |                                 |
| 21 | 29,100,000 | 29,250,000 | 389 | 220  | 1.024942809  |                                 |
| 21 | 29,175,000 | 29,325,000 | 390 | 418  | 0.610066261  | TARSL2                          |
| 21 | 29,250,000 | 29,400,000 | 391 | 454  | 0.356840249  | TARSL2,TM2D3                    |
| 21 | 29,325,000 | 29,475,000 | 392 | 267  | 0.229177138  | TARSL2,TM2D3                    |
| 21 | 29,400,000 | 29,550,000 | 393 | 259  | -0.455304195 |                                 |
| 21 | 29,475,000 | 29,625,000 | 394 | 517  | 0.021250669  | PCSK6                           |
| 21 | 29,550,000 | 29,700,000 | 395 | 847  | 0.685372509  | PCSK6,SNRPA1                    |
| 21 | 29,625,000 | 29,775,000 | 396 | 990  | 0.786412243  | PCSK6,SNRPA1,ENSBTAG00000003957 |
| 21 | 29,700,000 | 29,850,000 | 397 | 896  | 0.807639726  | ENSBTAG00000003957              |
| 21 | 29,775,000 | 29,925,000 | 398 | 613  | 0.791237097  |                                 |
| 21 | 29,850,000 | 30,000,000 | 399 | 611  | -0.053571915 | ENSBTAG00000047130              |
| 21 | 29,925,000 | 30,075,000 | 400 | 542  | 0.112865298  | ENSBTAG00000047130              |
| 21 | 30,000,000 | 30,150,000 | 401 | 439  | 0.286531729  | CHRNA7                          |
| 21 | 30,075,000 | 30,225,000 | 402 | 518  | 0.252314103  | CHRNA7                          |
| 21 | 30,150,000 | 30,300,000 | 403 | 615  | 0.604652501  |                                 |
| 21 | 30,225,000 | 30,375,000 | 404 | 618  | 0.548958026  |                                 |
| 21 | 30,300,000 | 30,450,000 | 405 | 819  | 0.506816306  |                                 |
| 21 | 30,375,000 | 30,525,000 | 406 | 985  | 0.871319021  |                                 |
| 21 | 30,450,000 | 30,600,000 | 407 | 529  | 1.126767633  |                                 |
| 21 | 30,525,000 | 30,675,000 | 408 | 286  | -1.063311226 | OTUD7A                          |
| 21 | 30,600,000 | 30,750,000 | 409 | 445  | -4.976478904 | OTUD7A                          |
| 21 | 30,675,000 | 30,825,000 | 410 | 533  | -4.918983072 | OTUD7A                          |
| 21 | 30,750,000 | 30,900,000 | 411 | 509  | -0.996998218 | ADAMTS7,OTUD7A                  |
| 21 | 30,825,000 | 30,975,000 | 412 | 583  | -0.687747304 | ADAMTS7,TBC1D2B                 |
| 21 | 30,900,000 | 31,050,000 | 413 | 569  | -1.516100676 | CIB2,SH2D7,TBC1D2B              |
| 21 | 30,975,000 | 31,125,000 | 414 | 535  | -0.863194314 | ACSBG1,CIB2,IDH3A,SH2D7         |
| 21 | 31,050,000 | 31,200,000 | 415 | 403  | 0.100918983  | ACSBG1,DNAJA4,IDH3A,WDR61       |
| 21 | 31,125,000 | 31,275,000 | 416 | 218  | -0.891724679 | ACSBG1,CRABP1,DNAJA4,WDR61      |
| 21 | 31,200,000 | 31,350,000 | 417 | 386  | -1.871187487 | CRABP1,WDR61                    |
| 21 | 31,275,000 | 31,425,000 | 418 | 464  | -1.84887896  | HYKK,IREB2                      |
| 21 | 31,350,000 | 31,500,000 | 419 | 455  | -0.328249843 | CHRNA5,HYKK,IREB2,PSMA4         |
| 21 | 31,425,000 | 31,575,000 | 420 | 576  | 0.24661077   | CHRNA3,CHRNA5,CHRN4,HYKK,PSMA4  |
| 21 | 31,500,000 | 31,650,000 | 421 | 574  | 0.011734376  | CHRNA3,CHRN4,UBE2Q2             |
| 21 | 31,575,000 | 31,725,000 | 422 | 339  | 0.128839074  | FBXO22,UBE2Q2                   |
| 21 | 31,650,000 | 31,800,000 | 423 | 122  | 8.37E-05     | FBXO22,UBE2Q2                   |
| 21 | 31,725,000 | 31,875,000 | 424 | 128  | -1.336569825 | C15orf27,FBXO22                 |
| 21 | 31,800,000 | 31,950,000 | 425 | 274  | -0.571215385 | C15orf27                        |
| 21 | 31,875,000 | 32,025,000 | 426 | 245  | 0.07147691   | C15orf27,ETFA                   |
| 21 | 31,950,000 | 32,100,000 | 427 | 101  | 1.23376071   | C15orf27,ETFA                   |
| 21 | 32,025,000 | 32,175,000 | 428 | 136  | 1.365760609  | ETFA,ISL2,SCAPER                |
| 21 | 32,100,000 | 32,250,000 | 429 | 167  | 1.367751255  | ISL2,SCAPER                     |
| 21 | 32,175,000 | 32,325,000 | 430 | 166  | 1.412897766  | SCAPER                          |

|    |            |            |     |      |              |                                                                                                                                                              |
|----|------------|------------|-----|------|--------------|--------------------------------------------------------------------------------------------------------------------------------------------------------------|
| 21 | 32,250,000 | 32,400,000 | 431 | 141  | 1.411606291  | SCAPER                                                                                                                                                       |
| 21 | 32,325,000 | 32,475,000 | 432 | 260  | 0.966053252  | SCAPER                                                                                                                                                       |
| 21 | 32,400,000 | 32,550,000 | 433 | 526  | 0.744044709  | SCAPER                                                                                                                                                       |
| 21 | 32,475,000 | 32,625,000 | 434 | 431  | -0.516335526 | RCN2,SCAPER                                                                                                                                                  |
| 21 | 32,550,000 | 32,700,000 | 435 | 285  | -5.066379756 | PSTPIP1,RCN2                                                                                                                                                 |
| 21 | 32,625,000 | 32,775,000 | 436 | 239  | -5.26056939  | PEAK1,PSTPIP1,TSPAN3                                                                                                                                         |
| 21 | 32,700,000 | 32,850,000 | 437 | 161  | -1.797357984 | PEAK1,TSPAN3                                                                                                                                                 |
| 21 | 32,775,000 | 32,925,000 | 438 | 207  | 0.268796373  | PEAK1                                                                                                                                                        |
| 21 | 32,850,000 | 33,000,000 | 439 | 157  | 0.798484601  |                                                                                                                                                              |
| 21 | 32,925,000 | 33,075,000 | 440 | 108  | -0.032296838 |                                                                                                                                                              |
| 21 | 33,000,000 | 33,150,000 | 441 | 214  | -2.680025203 | HMG20A                                                                                                                                                       |
| 21 | 33,075,000 | 33,225,000 | 442 | 565  | -0.353302016 | HMG20A                                                                                                                                                       |
| 21 | 33,150,000 | 33,300,000 | 443 | 717  | 0.872944175  | HMG20A,LINGO1                                                                                                                                                |
| 21 | 33,225,000 | 33,375,000 | 444 | 461  | 1.088578581  | LINGO1                                                                                                                                                       |
| 21 | 33,300,000 | 33,450,000 | 445 | 420  | 1.267720577  |                                                                                                                                                              |
| 21 | 33,375,000 | 33,525,000 | 446 | 496  | 0.717534204  |                                                                                                                                                              |
| 21 | 33,450,000 | 33,600,000 | 447 | 408  | -2.370962778 | CSPG4,ODF3L1                                                                                                                                                 |
| 21 | 33,525,000 | 33,675,000 | 448 | 438  | -2.081887841 | CSPG4,IMP3,ODF3L1,SNUPN,SNX33                                                                                                                                |
| 21 | 33,600,000 | 33,750,000 | 449 | 406  | -2.079539524 | CSPG4,IMP3,PTPN9,SNUPN,SNX33                                                                                                                                 |
| 21 | 33,675,000 | 33,825,000 | 450 | 268  | -2.46816062  | PTPN9,SIN3A,SNUPN                                                                                                                                            |
| 21 | 33,750,000 | 33,900,000 | 451 | 366  | -2.298188915 | COMMD4,MAN2C1,NEIL1,PTPN9,SIN3A                                                                                                                              |
| 21 | 33,825,000 | 33,975,000 | 452 | 534  | -0.727237553 | C15orf39,COMMD4,MAN2C1,NEIL1,SIN3A,ENSBTAG000000032631                                                                                                       |
| 21 | 33,900,000 | 34,050,000 | 453 | 676  | -0.14272894  | C15orf39,ENSBTAG000000032631                                                                                                                                 |
| 21 | 33,975,000 | 34,125,000 | 454 | 531  | -0.635495462 | MDS018,SCAMP5                                                                                                                                                |
| 21 | 34,050,000 | 34,200,000 | 455 | 340  | -0.565071078 | COX5A,FAM219B,MDS018,MPI,RPP25,SCAMP5                                                                                                                        |
| 21 | 34,125,000 | 34,275,000 | 456 | 339  | 0.124970399  | COX5A,CPLX3,CSK,FAM219B,LMAN1L,MPI,RPP25,SCAMP2,ULK3                                                                                                         |
| 21 | 34,200,000 | 34,350,000 | 457 | 304  | 0.451313591  | CPLX3,CSK,CYP1A1,CYP1A2,LMAN1L,SCAMP2,ULK3                                                                                                                   |
| 21 | 34,275,000 | 34,425,000 | 458 | 389  | -1.417135855 | CSK,CYP1A1,CYP1A2,FLJ21128                                                                                                                                   |
| 21 | 34,350,000 | 34,500,000 | 459 | 379  | -3.354675018 | ARID3B,CLK3,FLJ21128                                                                                                                                         |
| 21 | 34,425,000 | 34,575,000 | 460 | 405  | -2.549510539 | ARID3B,CLK3,FLJ21128                                                                                                                                         |
| 21 | 34,500,000 | 34,650,000 | 461 | 352  | -1.97400176  | ARID3B,BMSC-UBP,SEMA7A                                                                                                                                       |
| 21 | 34,575,000 | 34,725,000 | 462 | 460  | -0.316593131 | BMSC-UBP,CYP11A1,SEMA7A                                                                                                                                      |
| 21 | 34,650,000 | 34,800,000 | 463 | 540  | 0.239650899  | CCDC33,CYP11A1,SEMA7A                                                                                                                                        |
| 21 | 34,725,000 | 34,875,000 | 464 | 409  | 0.895907356  | CCDC33,CYP11A1                                                                                                                                               |
| 21 | 34,800,000 | 34,950,000 | 465 | 428  | 0.987205395  | CCDC33,ISLR,STRA6                                                                                                                                            |
| 21 | 34,875,000 | 35,025,000 | 466 | 381  | 0.908230201  | ISLR,ISLR2,PML,STRA6                                                                                                                                         |
| 21 | 34,950,000 | 35,100,000 | 467 | 399  | -0.908994449 | ISLR2,LOXL1,PML,STOML1                                                                                                                                       |
| 21 | 35,025,000 | 35,175,000 | 468 | 551  | -2.540873698 | GZMB,LOXL1,PML,STOML1,ENSBTAG00000013234,ENSBTAG00000027033,ENSBTAG00000037578,ENSBTAG00000038159                                                            |
| 21 | 35,100,000 | 35,250,000 | 469 | 620  | -2.011734318 | GZMB,ENSBTAG00000010828,ENSBTAG00000013055,ENSBTAG00000013234,ENSBTAG00000027033,ENSBTAG00000037578,ENSBTAG00000038080,ENSBTAG00000038159,ENSBTAG00000040134 |
| 21 | 35,175,000 | 35,325,000 | 470 | 565  | -2.374676455 | GZMB,ENSBTAG00000010828,ENSBTAG00000013055,ENSBTAG00000038080,ENSBTAG00000040134                                                                             |
| 21 | 35,250,000 | 35,400,000 | 471 | 1087 | -1.232117602 | GZMB                                                                                                                                                         |
| 21 | 35,325,000 | 35,475,000 | 472 | 1498 | -1.437684356 | STXBP6                                                                                                                                                       |
| 21 | 35,400,000 | 35,550,000 | 473 | 1388 | -1.727207303 | STXBP6                                                                                                                                                       |
| 21 | 35,475,000 | 35,625,000 | 474 | 974  | -1.029594042 | STXBP6                                                                                                                                                       |
| 21 | 35,550,000 | 35,700,000 | 475 | 1040 | 0.181974909  | STXBP6                                                                                                                                                       |



|    |            |            |     |      |              |                    |
|----|------------|------------|-----|------|--------------|--------------------|
| 21 | 35,625,000 | 35,775,000 | 476 | 1413 | -0.015750276 | STXBP6             |
| 21 | 35,700,000 | 35,850,000 | 477 | 1633 | -0.302003461 |                    |
| 21 | 35,775,000 | 35,925,000 | 478 | 1777 | 0.415634551  |                    |
| 21 | 35,850,000 | 36,000,000 | 479 | 1516 | 0.651632499  |                    |
| 21 | 35,925,000 | 36,075,000 | 480 | 1061 | 0.433406638  |                    |
| 21 | 36,000,000 | 36,150,000 | 481 | 730  | 0.553775213  |                    |
| 21 | 36,075,000 | 36,225,000 | 482 | 1164 | 0.071295334  |                    |
| 21 | 36,150,000 | 36,300,000 | 483 | 1086 | -0.37464869  |                    |
| 21 | 36,225,000 | 36,375,000 | 484 | 539  | -0.639003357 |                    |
| 21 | 36,300,000 | 36,450,000 | 485 | 556  | 0.28064711   |                    |
| 21 | 36,375,000 | 36,525,000 | 486 | 766  | -0.009545725 |                    |
| 21 | 36,450,000 | 36,600,000 | 487 | 1012 | -0.161311732 |                    |
| 21 | 36,525,000 | 36,675,000 | 488 | 818  | -0.115346221 |                    |
| 21 | 36,600,000 | 36,750,000 | 489 | 496  | -0.068701534 |                    |
| 21 | 36,675,000 | 36,825,000 | 490 | 573  | 0.196015268  |                    |
| 21 | 36,750,000 | 36,900,000 | 491 | 801  | -0.841934328 |                    |
| 21 | 36,825,000 | 36,975,000 | 492 | 1144 | -0.972520022 |                    |
| 21 | 36,900,000 | 37,050,000 | 493 | 1102 | -0.07708411  |                    |
| 21 | 36,975,000 | 37,125,000 | 494 | 855  | 0.469146326  | NOVA1              |
| 21 | 37,050,000 | 37,200,000 | 495 | 708  | 0.601275921  | NOVA1              |
| 21 | 37,125,000 | 37,275,000 | 496 | 475  | 0.056626487  | NOVA1              |
| 21 | 37,200,000 | 37,350,000 | 497 | 426  | -0.917762196 | NOVA1              |
| 21 | 37,275,000 | 37,425,000 | 498 | 604  | -0.070441218 |                    |
| 21 | 37,350,000 | 37,500,000 | 499 | 925  | 0.515095386  |                    |
| 21 | 37,425,000 | 37,575,000 | 500 | 1153 | 0.096787551  |                    |
| 21 | 37,500,000 | 37,650,000 | 501 | 959  | 0.409276297  |                    |
| 21 | 37,575,000 | 37,725,000 | 502 | 553  | 1.062671744  |                    |
| 21 | 37,650,000 | 37,800,000 | 503 | 358  | 0.620815225  |                    |
| 21 | 37,725,000 | 37,875,000 | 504 | 629  | 0.551515176  |                    |
| 21 | 37,800,000 | 37,950,000 | 505 | 920  | 0.459848996  |                    |
| 21 | 37,875,000 | 38,025,000 | 506 | 1129 | 0.834253804  |                    |
| 21 | 37,950,000 | 38,100,000 | 507 | 1007 | 1.089159011  |                    |
| 21 | 38,025,000 | 38,175,000 | 508 | 786  | 1.144475997  |                    |
| 21 | 38,100,000 | 38,250,000 | 509 | 1180 | 1.082703938  |                    |
| 21 | 38,175,000 | 38,325,000 | 510 | 1360 | 0.795716093  | ENSBTAG00000031558 |
| 21 | 38,250,000 | 38,400,000 | 511 | 937  | 0.21866277   | ENSBTAG00000031558 |
| 21 | 38,325,000 | 38,475,000 | 512 | 596  | 0.161176927  |                    |
| 21 | 38,400,000 | 38,550,000 | 513 | 818  | 0.127190764  |                    |
| 21 | 38,475,000 | 38,625,000 | 514 | 887  | -0.501629481 |                    |
| 21 | 38,550,000 | 38,700,000 | 515 | 919  | 0.728093877  |                    |
| 21 | 38,625,000 | 38,775,000 | 516 | 1153 | 0.965499891  |                    |
| 21 | 38,700,000 | 38,850,000 | 517 | 1205 | 0.700203079  |                    |
| 21 | 38,775,000 | 38,925,000 | 518 | 1149 | -0.295408999 |                    |
| 21 | 38,850,000 | 39,000,000 | 519 | 718  | -0.701286322 |                    |
| 21 | 38,925,000 | 39,075,000 | 520 | 331  | -0.101757965 |                    |
| 21 | 39,000,000 | 39,150,000 | 521 | 300  | -0.022435853 |                    |
| 21 | 39,075,000 | 39,225,000 | 522 | 444  | -0.633836793 |                    |
| 21 | 39,150,000 | 39,300,000 | 523 | 531  | -0.153665731 |                    |
| 21 | 39,225,000 | 39,375,000 | 524 | 522  | 0.664089483  |                    |
| 21 | 39,300,000 | 39,450,000 | 525 | 503  | 0.075528793  |                    |
| 21 | 39,375,000 | 39,525,000 | 526 | 618  | 0.489711791  |                    |
| 21 | 39,450,000 | 39,600,000 | 527 | 625  | 0.460660114  |                    |
| 21 | 39,525,000 | 39,675,000 | 528 | 599  | 0.088982153  |                    |

|    |            |            |     |      |              |                                  |
|----|------------|------------|-----|------|--------------|----------------------------------|
| 21 | 39,600,000 | 39,750,000 | 529 | 643  | -0.983211335 |                                  |
| 21 | 39,675,000 | 39,825,000 | 530 | 580  | -1.418272405 |                                  |
| 21 | 39,750,000 | 39,900,000 | 531 | 422  | 0.554093758  |                                  |
| 21 | 39,825,000 | 39,975,000 | 532 | 393  | -0.060437794 |                                  |
| 21 | 39,900,000 | 40,050,000 | 533 | 522  | 0.202798223  |                                  |
| 21 | 39,975,000 | 40,125,000 | 534 | 482  | 0.583097303  |                                  |
| 21 | 40,050,000 | 40,200,000 | 535 | 369  | 0.717923257  |                                  |
| 21 | 40,125,000 | 40,275,000 | 536 | 337  | 0.361827396  |                                  |
| 21 | 40,200,000 | 40,350,000 | 537 | 427  | -0.54257604  |                                  |
| 21 | 40,275,000 | 40,425,000 | 538 | 698  | -0.17431408  |                                  |
| 21 | 40,350,000 | 40,500,000 | 539 | 696  | -0.694206273 |                                  |
| 21 | 40,425,000 | 40,575,000 | 540 | 477  | -1.20989493  | PRKD1                            |
| 21 | 40,500,000 | 40,650,000 | 541 | 401  | -0.55163868  | PRKD1                            |
| 21 | 40,575,000 | 40,725,000 | 542 | 642  | 0.289997237  | PRKD1                            |
| 21 | 40,650,000 | 40,800,000 | 543 | 940  | 0.91767338   | PRKD1                            |
| 21 | 40,725,000 | 40,875,000 | 544 | 812  | 0.600027275  |                                  |
| 21 | 40,800,000 | 40,950,000 | 545 | 745  | 0.390391935  |                                  |
| 21 | 40,875,000 | 41,025,000 | 546 | 530  | 0.132810432  |                                  |
| 21 | 40,950,000 | 41,100,000 | 547 | 277  | -1.027049016 |                                  |
| 21 | 41,025,000 | 41,175,000 | 548 | 301  | -0.452921457 |                                  |
| 21 | 41,100,000 | 41,250,000 | 549 | 366  | 0.020086389  |                                  |
| 21 | 41,175,000 | 41,325,000 | 550 | 493  | 0.72697962   |                                  |
| 21 | 41,250,000 | 41,400,000 | 551 | 436  | 0.879354945  |                                  |
| 21 | 41,325,000 | 41,475,000 | 552 | 252  | 0.573491758  |                                  |
| 21 | 41,400,000 | 41,550,000 | 553 | 324  | 0.835057498  |                                  |
| 21 | 41,475,000 | 41,625,000 | 554 | 404  | 0.415272458  |                                  |
| 21 | 41,550,000 | 41,700,000 | 555 | 378  | 0.518415992  | G2E3,SCFD1                       |
| 21 | 41,625,000 | 41,775,000 | 556 | 450  | 1.163693949  | G2E3,SCFD1                       |
| 21 | 41,700,000 | 41,850,000 | 557 | 839  | 0.284582392  | SCFD1                            |
| 21 | 41,775,000 | 41,925,000 | 558 | 1080 | 0.236739944  | SCFD1                            |
| 21 | 41,850,000 | 42,000,000 | 559 | 730  | 0.554763416  | COCH,STRN3                       |
| 21 | 41,925,000 | 42,075,000 | 560 | 349  | -0.358807504 | AP4S1,COCH,STRN3                 |
| 21 | 42,000,000 | 42,150,000 | 561 | 288  | -0.767255138 | AP4S1,HECTD1,STRN3               |
| 21 | 42,075,000 | 42,225,000 | 562 | 300  | -0.822935419 | AP4S1,HECTD1                     |
| 21 | 42,150,000 | 42,300,000 | 563 | 279  | -2.070359886 | HEATR5A,HECTD1                   |
| 21 | 42,225,000 | 42,375,000 | 564 | 587  | -0.959053615 | HEATR5A                          |
| 21 | 42,300,000 | 42,450,000 | 565 | 701  | 0.078866857  | GPR33,HEATR5A,ENSBTAG00000038020 |
| 21 | 42,375,000 | 42,525,000 | 566 | 784  | 1.093532782  | GPR33,NUBPL,ENSBTAG00000038020   |
| 21 | 42,450,000 | 42,600,000 | 567 | 1186 | 1.17164052   | NUBPL                            |
| 21 | 42,525,000 | 42,675,000 | 568 | 1080 | 0.914339564  | NUBPL                            |
| 21 | 42,600,000 | 42,750,000 | 569 | 563  | 0.613192746  | NUBPL                            |
| 21 | 42,675,000 | 42,825,000 | 570 | 231  | 0.509085235  | NUBPL                            |
| 21 | 42,750,000 | 42,900,000 | 571 | 166  | -0.915451496 |                                  |
| 21 | 42,825,000 | 42,975,000 | 572 | 180  | -0.609443332 | ARHGAP5                          |
| 21 | 42,900,000 | 43,050,000 | 573 | 347  | 0.066155866  | ARHGAP5                          |
| 21 | 42,975,000 | 43,125,000 | 574 | 675  | 0.239472362  | ARHGAP5                          |
| 21 | 43,050,000 | 43,200,000 | 575 | 853  | 0.097201286  | AKAP6                            |
| 21 | 43,125,000 | 43,275,000 | 576 | 810  | -0.30098719  | AKAP6                            |
| 21 | 43,200,000 | 43,350,000 | 577 | 782  | -0.864914625 | AKAP6                            |
| 21 | 43,275,000 | 43,425,000 | 578 | 836  | -0.853354223 | AKAP6                            |
| 21 | 43,350,000 | 43,500,000 | 579 | 557  | -0.202712394 | AKAP6                            |
| 21 | 43,425,000 | 43,575,000 | 580 | 264  | -0.44265469  | AKAP6                            |
| 21 | 43,500,000 | 43,650,000 | 581 | 546  | 0.114454335  | AKAP6                            |

|    |            |            |     |      |              |                                           |
|----|------------|------------|-----|------|--------------|-------------------------------------------|
| 21 | 43,575,000 | 43,725,000 | 582 | 710  | 0.209699237  | AKAP6                                     |
| 21 | 43,650,000 | 43,800,000 | 583 | 557  | 0.449183959  |                                           |
| 21 | 43,725,000 | 43,875,000 | 584 | 638  | 0.222888988  |                                           |
| 21 | 43,800,000 | 43,950,000 | 585 | 734  | 0.066683429  |                                           |
| 21 | 43,875,000 | 44,025,000 | 586 | 641  | -0.071797856 |                                           |
| 21 | 43,950,000 | 44,100,000 | 587 | 531  | -0.842266535 |                                           |
| 21 | 44,025,000 | 44,175,000 | 588 | 669  | -1.234861436 |                                           |
| 21 | 44,100,000 | 44,250,000 | 589 | 615  | -0.595977615 |                                           |
| 21 | 44,175,000 | 44,325,000 | 590 | 431  | -0.020090665 |                                           |
| 21 | 44,250,000 | 44,400,000 | 591 | 522  | 0.084912207  |                                           |
| 21 | 44,325,000 | 44,475,000 | 592 | 682  | 0.027522097  |                                           |
| 21 | 44,400,000 | 44,550,000 | 593 | 634  | -0.180474096 |                                           |
| 21 | 44,475,000 | 44,625,000 | 594 | 382  | -0.11962204  |                                           |
| 21 | 44,550,000 | 44,700,000 | 595 | 368  | -3.566458009 | NPAS3                                     |
| 21 | 44,625,000 | 44,775,000 | 596 | 499  | -1.609859426 | NPAS3                                     |
| 21 | 44,700,000 | 44,850,000 | 597 | 657  | 0.555568635  | EGLN3,NPAS3                               |
| 21 | 44,775,000 | 44,925,000 | 598 | 955  | 0.778670471  | EGLN3                                     |
| 21 | 44,850,000 | 45,000,000 | 599 | 837  | 0.372171196  |                                           |
| 21 | 44,925,000 | 45,075,000 | 600 | 651  | -1.396489451 |                                           |
| 21 | 45,000,000 | 45,150,000 | 601 | 862  | -0.35760446  |                                           |
| 21 | 45,075,000 | 45,225,000 | 602 | 1270 | 0.28336559   |                                           |
| 21 | 45,150,000 | 45,300,000 | 603 | 1344 | -0.640263743 | ENSBTAG00000047905                        |
| 21 | 45,225,000 | 45,375,000 | 604 | 749  | -1.90308931  | EAPP,SPTSSA,ENSBTAG00000047905            |
| 21 | 45,300,000 | 45,450,000 | 605 | 461  | -2.970897269 | EAPP,SNX6,SPTSSA,ENSBTAG00000047905       |
| 21 | 45,375,000 | 45,525,000 | 606 | 406  | -2.735709947 | CFL2,SNX6                                 |
| 21 | 45,450,000 | 45,600,000 | 607 | 315  | 1.034941127  | BAZ1A,CFL2,SNX6                           |
| 21 | 45,525,000 | 45,675,000 | 608 | 327  | 1.181881181  | BAZ1A                                     |
| 21 | 45,600,000 | 45,750,000 | 609 | 549  | 1.253425752  | MGC142695,SRP54                           |
| 21 | 45,675,000 | 45,825,000 | 610 | 610  | 0.90765565   | FAM177A1,KIAA0391,MGC142695,PPP2R3C,SRP54 |
| 21 | 45,750,000 | 45,900,000 | 611 | 372  | 0.400689355  | FAM177A1,KIAA0391,PPP2R3C,SRP54           |
| 21 | 45,825,000 | 45,975,000 | 612 | 499  | 0.012863168  | KIAA0391,PSMA6                            |
| 21 | 45,900,000 | 46,050,000 | 613 | 753  | 0.24054677   | KIAA0391,PSMA6                            |
| 21 | 45,975,000 | 46,125,000 | 614 | 597  | 0.666646218  | BIKBA,PSMA6                               |
| 21 | 46,050,000 | 46,200,000 | 615 | 629  | 0.49841919   | BIKBA                                     |
| 21 | 46,125,000 | 46,275,000 | 616 | 574  | 0.226432299  | GARNL1                                    |
| 21 | 46,200,000 | 46,350,000 | 617 | 380  | 0.788141394  | GARNL1                                    |
| 21 | 46,275,000 | 46,425,000 | 618 | 494  | 0.823621777  | GARNL1                                    |
| 21 | 46,350,000 | 46,500,000 | 619 | 458  | 0.613195918  | BRMS1L,GARNL1                             |
| 21 | 46,425,000 | 46,575,000 | 620 | 388  | -0.342153522 | BRMS1L                                    |
| 21 | 46,500,000 | 46,650,000 | 621 | 356  | -0.446119609 |                                           |
| 21 | 46,575,000 | 46,725,000 | 622 | 459  | 0.589036801  |                                           |
| 21 | 46,650,000 | 46,800,000 | 623 | 570  | 0.50252078   |                                           |
| 21 | 46,725,000 | 46,875,000 | 624 | 631  | -0.390547949 |                                           |
| 21 | 46,800,000 | 46,950,000 | 625 | 675  | -1.120614296 | MBIP                                      |
| 21 | 46,875,000 | 47,025,000 | 626 | 735  | -0.187071616 | MBIP                                      |
| 21 | 46,950,000 | 47,100,000 | 627 | 692  | 0.632980927  |                                           |
| 21 | 47,025,000 | 47,175,000 | 628 | 440  | 0.906039656  | NKX2-1                                    |
| 21 | 47,100,000 | 47,250,000 | 629 | 342  | 0.724026794  | NKX2-1,NKX2-8                             |
| 21 | 47,175,000 | 47,325,000 | 630 | 294  | 0.669445259  | NKX2-8,PAX9,SLC25A21                      |
| 21 | 47,250,000 | 47,400,000 | 631 | 399  | 1.11341071   | PAX9,SLC25A21                             |
| 21 | 47,325,000 | 47,475,000 | 632 | 537  | 0.877260651  | SLC25A21                                  |
| 21 | 47,400,000 | 47,550,000 | 633 | 333  | 0.151861691  | SLC25A21                                  |
| 21 | 47,475,000 | 47,625,000 | 634 | 248  | -0.408893391 | SLC25A21                                  |

|    |            |            |     |      |              |                                                                      |
|----|------------|------------|-----|------|--------------|----------------------------------------------------------------------|
| 21 | 47,550,000 | 47,700,000 | 635 | 460  | -0.005622819 | SLC25A21                                                             |
| 21 | 47,625,000 | 47,775,000 | 636 | 743  | -1.472137225 | SLC25A21                                                             |
| 21 | 47,700,000 | 47,850,000 | 637 | 956  | -2.17614689  | SLC25A21                                                             |
| 21 | 47,775,000 | 47,925,000 | 638 | 1127 | -1.368364741 | MIPOL1,SLC25A21                                                      |
| 21 | 47,850,000 | 48,000,000 | 639 | 910  | -0.408899289 | MIPOL1                                                               |
| 21 | 47,925,000 | 48,075,000 | 640 | 828  | -1.056536035 | MIPOL1                                                               |
| 21 | 48,000,000 | 48,150,000 | 641 | 873  | -1.170521752 | MIPOL1                                                               |
| 21 | 48,075,000 | 48,225,000 | 642 | 622  | -0.294190693 | FOXA1,MIPOL1                                                         |
| 21 | 48,150,000 | 48,300,000 | 643 | 492  | -0.310758472 | FOXA1,MIPOL1                                                         |
| 21 | 48,225,000 | 48,375,000 | 644 | 615  | 0.054890733  |                                                                      |
| 21 | 48,300,000 | 48,450,000 | 645 | 707  | 0.565980002  | TTC6                                                                 |
| 21 | 48,375,000 | 48,525,000 | 646 | 641  | 0.236786024  | TTC6                                                                 |
| 21 | 48,450,000 | 48,600,000 | 647 | 995  | 0.624496262  |                                                                      |
| 21 | 48,525,000 | 48,675,000 | 648 | 1026 | 0.977901056  |                                                                      |
| 21 | 48,600,000 | 48,750,000 | 649 | 864  | 0.033693446  |                                                                      |
| 21 | 48,675,000 | 48,825,000 | 650 | 833  | -0.190791365 | SSTR1                                                                |
| 21 | 48,750,000 | 48,900,000 | 651 | 662  | 0.268945272  | CLEC14A,SSTR1                                                        |
| 21 | 48,825,000 | 48,975,000 | 652 | 601  | 0.353657806  | CLEC14A                                                              |
| 21 | 48,900,000 | 49,050,000 | 653 | 858  | 1.071035604  |                                                                      |
| 21 | 48,975,000 | 49,125,000 | 654 | 1121 | 0.962971198  |                                                                      |
| 21 | 49,050,000 | 49,200,000 | 655 | 1290 | 0.004966053  |                                                                      |
| 21 | 49,125,000 | 49,275,000 | 656 | 994  | -0.397489266 |                                                                      |
| 21 | 49,200,000 | 49,350,000 | 657 | 878  | 0.93986456   |                                                                      |
| 21 | 49,275,000 | 49,425,000 | 658 | 1197 | 0.498242597  |                                                                      |
| 21 | 49,350,000 | 49,500,000 | 659 | 1001 | -0.129127135 | SEC23A                                                               |
| 21 | 49,425,000 | 49,575,000 | 660 | 635  | 0.481308338  | GEMIN2,SEC23A,ENSBTAG00000048042                                     |
| 21 | 49,500,000 | 49,650,000 | 661 | 758  | -0.220332414 | GEMIN2,PNN,SEC23A,TRAPPC6B,ENSBTAG00000045986,E<br>NSBTAG00000048042 |
| 21 | 49,575,000 | 49,725,000 | 662 | 791  | -1.068531321 | GEMIN2,PNN,TRAPPC6B,ENSBTAG0000006819,ENSBTAG<br>00000045986         |
| 21 | 49,650,000 | 49,800,000 | 663 | 643  | -0.993160877 | FBXO33,ENSBTAG0000006819                                             |
| 21 | 49,725,000 | 49,875,000 | 664 | 570  | 0.746859113  | FBXO33,ENSBTAG0000006819                                             |
| 21 | 49,800,000 | 49,950,000 | 665 | 869  | 1.158405618  |                                                                      |
| 21 | 49,875,000 | 50,025,000 | 666 | 1532 | 0.941490822  |                                                                      |
| 21 | 49,950,000 | 50,100,000 | 667 | 1590 | 0.436019555  |                                                                      |
| 21 | 50,025,000 | 50,175,000 | 668 | 1188 | -0.021808337 |                                                                      |
| 21 | 50,100,000 | 50,250,000 | 669 | 896  | -0.066386692 |                                                                      |
| 21 | 50,175,000 | 50,325,000 | 670 | 897  | 0.502252081  | ODC1                                                                 |
| 21 | 50,250,000 | 50,400,000 | 671 | 1218 | 0.35159313   | ODC1,ENSBTAG0000009980                                               |
| 21 | 50,325,000 | 50,475,000 | 672 | 1058 | -0.283043908 | ENSBTAG0000009980                                                    |
| 21 | 50,400,000 | 50,550,000 | 673 | 844  | -0.484267832 |                                                                      |
| 21 | 50,475,000 | 50,625,000 | 674 | 1147 | -0.080465472 |                                                                      |
| 21 | 50,550,000 | 50,700,000 | 675 | 963  | 0.659243511  |                                                                      |
| 21 | 50,625,000 | 50,775,000 | 676 | 670  | 1.059324017  |                                                                      |
| 21 | 50,700,000 | 50,850,000 | 677 | 591  | 1.012005703  |                                                                      |
| 21 | 50,775,000 | 50,925,000 | 678 | 571  | 0.747983497  |                                                                      |
| 21 | 50,850,000 | 51,000,000 | 679 | 613  | 0.337786951  |                                                                      |
| 21 | 50,925,000 | 51,075,000 | 680 | 787  | -1.089246205 |                                                                      |
| 21 | 51,000,000 | 51,150,000 | 681 | 1103 | -0.004334549 |                                                                      |
| 21 | 51,075,000 | 51,225,000 | 682 | 1403 | 0.658621931  |                                                                      |
| 21 | 51,150,000 | 51,300,000 | 683 | 1494 | 0.331693859  |                                                                      |
| 21 | 51,225,000 | 51,375,000 | 684 | 1054 | 0.066273872  |                                                                      |
| 21 | 51,300,000 | 51,450,000 | 685 | 797  | 0.306378348  |                                                                      |

|    |            |            |     |      |              |                                                |
|----|------------|------------|-----|------|--------------|------------------------------------------------|
| 21 | 51,375,000 | 51,525,000 | 686 | 792  | 0.255051638  |                                                |
| 21 | 51,450,000 | 51,600,000 | 687 | 787  | 0.532106872  |                                                |
| 21 | 51,525,000 | 51,675,000 | 688 | 697  | 0.770859103  |                                                |
| 21 | 51,600,000 | 51,750,000 | 689 | 1030 | 0.747382465  |                                                |
| 21 | 51,675,000 | 51,825,000 | 690 | 1110 | 0.77444223   | LRFN5                                          |
| 21 | 51,750,000 | 51,900,000 | 691 | 529  | 0.442936328  | LRFN5                                          |
| 21 | 51,825,000 | 51,975,000 | 692 | 418  | 0.138984042  | LRFN5                                          |
| 21 | 51,900,000 | 52,050,000 | 693 | 509  | 0.781102003  | LRFN5                                          |
| 21 | 51,975,000 | 52,125,000 | 694 | 1112 | 1.099806978  | LRFN5                                          |
| 21 | 52,050,000 | 52,200,000 | 695 | 1744 | 0.926653648  | LRFN5                                          |
| 21 | 52,125,000 | 52,275,000 | 696 | 1533 | 0.790625832  |                                                |
| 21 | 52,200,000 | 52,350,000 | 697 | 1099 | 0.423791578  |                                                |
| 21 | 52,275,000 | 52,425,000 | 698 | 1093 | -0.305299516 |                                                |
| 21 | 52,350,000 | 52,500,000 | 699 | 982  | -0.085438715 |                                                |
| 21 | 52,425,000 | 52,575,000 | 700 | 770  | 0.174032372  |                                                |
| 21 | 52,500,000 | 52,650,000 | 701 | 681  | 0.144202622  |                                                |
| 21 | 52,575,000 | 52,725,000 | 702 | 510  | 0.302461564  |                                                |
| 21 | 52,650,000 | 52,800,000 | 703 | 495  | -0.789584198 |                                                |
| 21 | 52,725,000 | 52,875,000 | 704 | 899  | 0.285968856  |                                                |
| 21 | 52,800,000 | 52,950,000 | 705 | 1036 | 0.482665316  |                                                |
| 21 | 52,875,000 | 53,025,000 | 706 | 1398 | 0.655969823  |                                                |
| 21 | 52,950,000 | 53,100,000 | 707 | 1599 | 0.98309024   |                                                |
| 21 | 53,025,000 | 53,175,000 | 708 | 1055 | 0.7124706    |                                                |
| 21 | 53,100,000 | 53,250,000 | 709 | 596  | 0.096497007  |                                                |
| 21 | 53,175,000 | 53,325,000 | 710 | 614  | -0.364305186 | ENSBTAG00000047710                             |
| 21 | 53,250,000 | 53,400,000 | 711 | 633  | -0.358997916 | ENSBTAG00000047710                             |
| 21 | 53,325,000 | 53,475,000 | 712 | 385  | 0.298003593  |                                                |
| 21 | 53,400,000 | 53,550,000 | 713 | 283  | 0.704990454  |                                                |
| 21 | 53,475,000 | 53,625,000 | 714 | 511  | 0.686697901  |                                                |
| 21 | 53,550,000 | 53,700,000 | 715 | 1342 | 0.337650973  |                                                |
| 21 | 53,625,000 | 53,775,000 | 716 | 1986 | 0.459101169  |                                                |
| 21 | 53,700,000 | 53,850,000 | 717 | 1781 | 0.461145107  |                                                |
| 21 | 53,775,000 | 53,925,000 | 718 | 923  | -0.38429391  |                                                |
| 21 | 53,850,000 | 54,000,000 | 719 | 420  | -0.68129578  |                                                |
| 21 | 53,925,000 | 54,075,000 | 720 | 588  | 0.995703323  |                                                |
| 21 | 54,000,000 | 54,150,000 | 721 | 499  | 0.855188011  |                                                |
| 21 | 54,075,000 | 54,225,000 | 722 | 720  | 1.033635063  | ENSBTAG00000047240                             |
| 21 | 54,150,000 | 54,300,000 | 723 | 1293 | 1.042360588  | ENSBTAG00000047240                             |
| 21 | 54,225,000 | 54,375,000 | 724 | 1251 | 0.714532854  |                                                |
| 21 | 54,300,000 | 54,450,000 | 725 | 1209 | -0.247538822 |                                                |
| 21 | 54,375,000 | 54,525,000 | 726 | 1145 | -0.421061733 |                                                |
| 21 | 54,450,000 | 54,600,000 | 727 | 915  | 0.415641834  |                                                |
| 21 | 54,525,000 | 54,675,000 | 728 | 808  | 0.438222343  |                                                |
| 21 | 54,600,000 | 54,750,000 | 729 | 630  | 0.593542104  | FSCB                                           |
| 21 | 54,675,000 | 54,825,000 | 730 | 607  | 0.670129519  | FSCB                                           |
| 21 | 54,750,000 | 54,900,000 | 731 | 536  | 0.77670994   | FSCB                                           |
| 21 | 54,825,000 | 54,975,000 | 732 | 469  | 0.850249866  |                                                |
| 21 | 54,900,000 | 55,050,000 | 733 | 668  | 0.566870529  |                                                |
| 21 | 54,975,000 | 55,125,000 | 734 | 930  | -0.062625353 |                                                |
| 21 | 55,050,000 | 55,200,000 | 735 | 931  | -0.017698807 | C14orf28,KLHL28                                |
| 21 | 55,125,000 | 55,275,000 | 736 | 726  | 0.588414094  | C14orf28,FAM179B,KLHL28                        |
| 21 | 55,200,000 | 55,350,000 | 737 | 711  | -0.001739834 | FAM179B,FKBP3,KLHL28,PRPF39,ENSBTAG00000047002 |

|    |            |            |     |      |              |                                                                                   |
|----|------------|------------|-----|------|--------------|-----------------------------------------------------------------------------------|
| 21 | 55,275,000 | 55,425,000 | 738 | 867  | -0.492085641 | FAM179B,FANCM,FKBP3,MIS18BP1,PRPF39,ENSBTAG00000047002                            |
| 21 | 55,350,000 | 55,500,000 | 739 | 913  | 0.014163461  | FANCM,MIS18BP1,ENSBTAG00000047002                                                 |
| 21 | 55,425,000 | 55,575,000 | 740 | 994  | 0.555368122  | MIS18BP1,TGM5,TGM7                                                                |
| 21 | 55,500,000 | 55,650,000 | 741 | 1016 | 0.851300505  | ADAL,LCMT2,RPL17,TGM5,TGM7,TUBGCP4,ZSCAN29                                        |
| 21 | 55,575,000 | 55,725,000 | 742 | 790  | 0.751580015  | ADAL,LCMT2,RPL17,TGM7,TP53BP1,TUBGCP4,ZSCAN29                                     |
| 21 | 55,650,000 | 55,800,000 | 743 | 661  | 0.094437222  | TP53BP1,TUBGCP4                                                                   |
| 21 | 55,725,000 | 55,875,000 | 744 | 577  | 0.317454681  | MAP1A,PPIP5K1,TP53BP1                                                             |
| 21 | 55,800,000 | 55,950,000 | 745 | 436  | 0.889946277  | CATSPER2,CKMT1,ELL3,MAP1A,PDIA3,PPIP5K1,STRC                                      |
| 21 | 55,875,000 | 56,025,000 | 746 | 586  | 0.105245435  | C21H15orf63,CATSPER2,CKMT1,ELL3,MFAP1,PDIA3,SERINC4,STRC,WDR76,ENSBTAG00000047694 |
| 21 | 55,950,000 | 56,100,000 | 747 | 910  | -0.382955718 | C21H15orf63,ELL3,FRMD5,MFAP1,SERINC4,WDR76,ENSBTAG00000047694                     |
| 21 | 56,025,000 | 56,175,000 | 748 | 1024 | -0.076176533 | FRMD5,WDR76                                                                       |
| 21 | 56,100,000 | 56,250,000 | 749 | 873  | 0.808555828  |                                                                                   |
| 21 | 56,175,000 | 56,325,000 | 750 | 687  | 0.997436369  |                                                                                   |
| 21 | 56,250,000 | 56,400,000 | 751 | 831  | 0.321615906  |                                                                                   |
| 21 | 56,325,000 | 56,475,000 | 752 | 1111 | 0.425880866  |                                                                                   |
| 21 | 56,400,000 | 56,550,000 | 753 | 1134 | 0.433326595  | C14orf159                                                                         |
| 21 | 56,475,000 | 56,625,000 | 754 | 836  | -0.343424501 | C14orf159,GPR68                                                                   |
| 21 | 56,550,000 | 56,700,000 | 755 | 903  | -1.055337475 | C14orf159,CCDC88C,GPR68                                                           |
| 21 | 56,625,000 | 56,775,000 | 756 | 953  | -0.446284222 | CCDC88C                                                                           |
| 21 | 56,700,000 | 56,850,000 | 757 | 601  | 0.532378582  | CCDC88C,SMEK1                                                                     |
| 21 | 56,775,000 | 56,925,000 | 758 | 564  | 0.754902119  | CATSPERB,SMEK1,UTP14A                                                             |
| 21 | 56,850,000 | 57,000,000 | 759 | 687  | 0.890138325  | CATSPERB,UTP14A                                                                   |
| 21 | 56,925,000 | 57,075,000 | 760 | 592  | 0.488455556  | CATSPERB                                                                          |
| 21 | 57,000,000 | 57,150,000 | 761 | 448  | 0.033906554  | CATSPERB,TC2N                                                                     |
| 21 | 57,075,000 | 57,225,000 | 762 | 457  | 0.464376868  | FBLN5,TC2N                                                                        |
| 21 | 57,150,000 | 57,300,000 | 763 | 679  | 0.831711173  | FBLN5                                                                             |
| 21 | 57,225,000 | 57,375,000 | 764 | 731  | 0.99057797   | ATXN3,FBLN5,TRIP11                                                                |
| 21 | 57,300,000 | 57,450,000 | 765 | 656  | 0.81965724   | ATXN3,CPSF2,NDUFB1,TRIP11                                                         |
| 21 | 57,375,000 | 57,525,000 | 766 | 1174 | 0.841442218  | ATXN3,CPSF2,NDUFB1                                                                |
| 21 | 57,450,000 | 57,600,000 | 767 | 1494 | 0.668306499  | SLC24A4                                                                           |
| 21 | 57,525,000 | 57,675,000 | 768 | 1434 | 0.57940544   | SLC24A4                                                                           |
| 21 | 57,600,000 | 57,750,000 | 769 | 1225 | 0.885498477  | SLC24A4                                                                           |
| 21 | 57,675,000 | 57,825,000 | 770 | 881  | 0.832308002  | SLC24A4                                                                           |
| 21 | 57,750,000 | 57,900,000 | 771 | 668  | 0.85969121   | RIN3,SLC24A4                                                                      |
| 21 | 57,825,000 | 57,975,000 | 772 | 459  | 0.853068017  | LGMN,RIN3                                                                         |
| 21 | 57,900,000 | 58,050,000 | 773 | 598  | 0.275129916  | LGMN,RIN3                                                                         |
| 21 | 57,975,000 | 58,125,000 | 774 | 1103 | 1.211481181  | GOLGA5,LGMN                                                                       |
| 21 | 58,050,000 | 58,200,000 | 775 | 1116 | 1.362599856  | CHGA,GOLGA5,ITPK1                                                                 |
| 21 | 58,125,000 | 58,275,000 | 776 | 827  | 0.075206643  | CHGA,ITPK1                                                                        |
| 21 | 58,200,000 | 58,350,000 | 777 | 502  | -1.405053717 | ITPK1                                                                             |
| 21 | 58,275,000 | 58,425,000 | 778 | 254  | -0.352584908 | C21H14orf142,ITPK1,TMEM251,UBR7                                                   |
| 21 | 58,350,000 | 58,500,000 | 779 | 324  | 0.188130285  | BTBD7,C21H14orf142,TMEM251,UBR7                                                   |
| 21 | 58,425,000 | 58,575,000 | 780 | 381  | 0.77100667   | BTBD7,UBR7                                                                        |
| 21 | 58,500,000 | 58,650,000 | 781 | 699  | 0.496427713  | BTBD7                                                                             |
| 21 | 58,575,000 | 58,725,000 | 782 | 987  | -0.103144495 | UNC79                                                                             |
| 21 | 58,650,000 | 58,800,000 | 783 | 726  | 0.065000949  | UNC79                                                                             |
| 21 | 58,725,000 | 58,875,000 | 784 | 422  | 1.009935798  | UNC79                                                                             |
| 21 | 58,800,000 | 58,950,000 | 785 | 445  | 0.83372848   | PRIMA1,UNC79                                                                      |
| 21 | 58,875,000 | 59,025,000 | 786 | 801  | 0.487648992  | PRIMA1,UNC79                                                                      |
| 21 | 58,950,000 | 59,100,000 | 787 | 1122 | 0.239967389  | PRIMA1                                                                            |

|    |            |            |     |      |              |                                                                                            |
|----|------------|------------|-----|------|--------------|--------------------------------------------------------------------------------------------|
| 21 | 59,025,000 | 59,175,000 | 788 | 1106 | -0.46820818  | ASB2,FAM181A                                                                               |
| 21 | 59,100,000 | 59,250,000 | 789 | 1581 | -0.700034231 | ASB2,FAM181A,OTUB2,ENSBTAG00000016112                                                      |
| 21 | 59,175,000 | 59,325,000 | 790 | 1889 | -0.523633442 | DDX24,ISG12(B),OTUB2,ENSBTAG00000016112,ENSBTAG00000031834                                 |
| 21 | 59,250,000 | 59,400,000 | 791 | 1231 | -0.830798496 | DDX24,IFI27,IFI27L2,ISG12(B),OTUB2,PPP4R4,ENSBTAG000031834                                 |
| 21 | 59,325,000 | 59,475,000 | 792 | 610  | -1.302963058 | IFI27,IFI27L2,PPP4R4                                                                       |
| 21 | 59,400,000 | 59,550,000 | 793 | 566  | -0.910928059 | PPP4R4,SERPINA10,SERPINA6                                                                  |
| 21 | 59,475,000 | 59,625,000 | 794 | 624  | -0.144194189 | PPP4R4,SERPINA1,SERPINA10,SERPINA6                                                         |
| 21 | 59,550,000 | 59,700,000 | 795 | 916  | -0.063649904 | SERPINA1,SERPINA11,ENSBTAG00000007392                                                      |
| 21 | 59,625,000 | 59,775,000 | 796 | 938  | -0.097920038 | SERPINA11,SERPINA12,SERPINA4,ENSBTAG00000007392                                            |
| 21 | 59,700,000 | 59,850,000 | 797 | 684  | -0.010579531 | SERPINA12,SERPINA3-1,SERPINA4,SERPINA5                                                     |
| 21 | 59,775,000 | 59,925,000 | 798 | 615  | -0.017304568 | SERPINA3-1,SERPINA5                                                                        |
| 21 | 59,850,000 | 60,000,000 | 799 | 507  | 0.850924796  |                                                                                            |
| 21 | 59,925,000 | 60,075,000 | 800 | 383  | 0.997844187  |                                                                                            |
| 21 | 60,000,000 | 60,150,000 | 801 | 304  | 0.297563364  |                                                                                            |
| 21 | 60,075,000 | 60,225,000 | 802 | 474  | 0.446693437  |                                                                                            |
| 21 | 60,150,000 | 60,300,000 | 803 | 641  | 0.321156384  |                                                                                            |
| 21 | 60,225,000 | 60,375,000 | 804 | 798  | 0.304810673  |                                                                                            |
| 21 | 60,300,000 | 60,450,000 | 805 | 663  | 0.126477143  |                                                                                            |
| 21 | 60,375,000 | 60,525,000 | 806 | 358  | 0.124503358  | ERICH1                                                                                     |
| 21 | 60,450,000 | 60,600,000 | 807 | 262  | 0.840388864  | ERICH1                                                                                     |
| 21 | 60,525,000 | 60,675,000 | 808 | 176  | 0.759485462  |                                                                                            |
| 21 | 60,600,000 | 60,750,000 | 809 | 121  | 0.513012295  |                                                                                            |
| 21 | 60,675,000 | 60,825,000 | 810 | 119  | 0.282362958  |                                                                                            |
| 21 | 60,750,000 | 60,900,000 | 811 | 106  | -0.02306278  | ENSBTAG00000024311                                                                         |
| 21 | 60,825,000 | 60,975,000 | 812 | 408  | 0.668109092  | SERPINA3-<br>6,ENSBTAG00000007043,ENSBTAG00000024311,ENSBTAG00000026917                    |
| 21 | 60,900,000 | 61,050,000 | 813 | 753  | 0.910905393  | SERPINA3-<br>6,ENSBTAG00000003492,ENSBTAG00000007041,ENSBTAG00000007043,ENSBTAG00000026917 |
| 21 | 60,975,000 | 61,125,000 | 814 | 1169 | 0.457238144  | ENSBTAG00000003492,ENSBTAG00000007041,ENSBTAG0000007043                                    |
| 21 | 61,050,000 | 61,200,000 | 815 | 993  | 0.305531874  | GSC                                                                                        |
| 21 | 61,125,000 | 61,275,000 | 816 | 771  | 0.558877209  | GSC                                                                                        |
| 21 | 61,200,000 | 61,350,000 | 817 | 1315 | -0.977901288 |                                                                                            |
| 21 | 61,275,000 | 61,425,000 | 818 | 1492 | -0.625801622 |                                                                                            |
| 21 | 61,350,000 | 61,500,000 | 819 | 1397 | 0.84062309   |                                                                                            |
| 21 | 61,425,000 | 61,575,000 | 820 | 1132 | 1.049573824  | DICER1                                                                                     |
| 21 | 61,500,000 | 61,650,000 | 821 | 1220 | 1.0777274    | CLMN,DICER1                                                                                |
| 21 | 61,575,000 | 61,725,000 | 822 | 1282 | 0.951748138  | CLMN,ENSBTAG00000048094                                                                    |
| 21 | 61,650,000 | 61,800,000 | 823 | 856  | 0.937431261  | CLMN,ENSBTAG00000048094                                                                    |
| 21 | 61,725,000 | 61,875,000 | 824 | 947  | 0.775351142  | SYNE3                                                                                      |
| 21 | 61,800,000 | 61,950,000 | 825 | 1551 | 0.864282779  | SYNE3                                                                                      |
| 21 | 61,875,000 | 62,025,000 | 826 | 1426 | 0.603307258  | GLRX5,SYNE3                                                                                |
| 21 | 61,950,000 | 62,100,000 | 827 | 1213 | 0.440305938  | GLRX5,SYNE3,TCL1B                                                                          |
| 21 | 62,025,000 | 62,175,000 | 828 | 1207 | 0.705259114  | TCL1A,TCL1B                                                                                |
| 21 | 62,100,000 | 62,250,000 | 829 | 924  | 0.741983819  | TCL1A,TCL1B                                                                                |
| 21 | 62,175,000 | 62,325,000 | 830 | 799  | 0.844920941  |                                                                                            |
| 21 | 62,250,000 | 62,400,000 | 831 | 851  | -1.271219168 |                                                                                            |
| 21 | 62,325,000 | 62,475,000 | 832 | 1015 | -0.95530165  |                                                                                            |
| 21 | 62,400,000 | 62,550,000 | 833 | 1229 | -0.679117266 |                                                                                            |

|    |            |            |     |      |              |                              |
|----|------------|------------|-----|------|--------------|------------------------------|
| 21 | 62,475,000 | 62,625,000 | 834 | 1258 | -0.779152861 |                              |
| 21 | 62,550,000 | 62,700,000 | 835 | 1434 | 0.025802347  |                              |
| 21 | 62,625,000 | 62,775,000 | 836 | 1431 | -0.013662506 | BDKRB1,BDKRB2                |
| 21 | 62,700,000 | 62,850,000 | 837 | 955  | 0.735464995  | ATG2B,BDKRB1,BDKRB2          |
| 21 | 62,775,000 | 62,925,000 | 838 | 925  | 0.810072314  | AK7,ATG2B,GSKIP              |
| 21 | 62,850,000 | 63,000,000 | 839 | 797  | 0.50133041   | AK7,ATG2B,GSKIP,PAPOLA       |
| 21 | 62,925,000 | 63,075,000 | 840 | 494  | 0.596694942  | AK7,PAPOLA                   |
| 21 | 63,000,000 | 63,150,000 | 841 | 385  | 1.066251302  | PAPOLA                       |
| 21 | 63,075,000 | 63,225,000 | 842 | 368  | 0.37683346   |                              |
| 21 | 63,150,000 | 63,300,000 | 843 | 380  | -0.303747049 | VRK1                         |
| 21 | 63,225,000 | 63,375,000 | 844 | 441  | -0.710335765 | VRK1                         |
| 21 | 63,300,000 | 63,450,000 | 845 | 706  | 0.094701318  | VRK1                         |
| 21 | 63,375,000 | 63,525,000 | 846 | 688  | 0.194662611  |                              |
| 21 | 63,450,000 | 63,600,000 | 847 | 709  | 0.223834708  |                              |
| 21 | 63,525,000 | 63,675,000 | 848 | 939  | 0.409263854  |                              |
| 21 | 63,600,000 | 63,750,000 | 849 | 845  | 0.138389591  |                              |
| 21 | 63,675,000 | 63,825,000 | 850 | 731  | -0.094501273 |                              |
| 21 | 63,750,000 | 63,900,000 | 851 | 542  | 0.175386336  |                              |
| 21 | 63,825,000 | 63,975,000 | 852 | 498  | 0.542752084  |                              |
| 21 | 63,900,000 | 64,050,000 | 853 | 858  | -0.166129524 |                              |
| 21 | 63,975,000 | 64,125,000 | 854 | 993  | 0.381429907  |                              |
| 21 | 64,050,000 | 64,200,000 | 855 | 1079 | 0.895165041  |                              |
| 21 | 64,125,000 | 64,275,000 | 856 | 1102 | 0.472518724  |                              |
| 21 | 64,200,000 | 64,350,000 | 857 | 1010 | 0.522224662  |                              |
| 21 | 64,275,000 | 64,425,000 | 858 | 1000 | 0.286714728  |                              |
| 21 | 64,350,000 | 64,500,000 | 859 | 838  | -0.086040348 |                              |
| 21 | 64,425,000 | 64,575,000 | 860 | 904  | 0.098068253  |                              |
| 21 | 64,500,000 | 64,650,000 | 861 | 741  | -0.485794474 |                              |
| 21 | 64,575,000 | 64,725,000 | 862 | 337  | -0.73571735  |                              |
| 21 | 64,650,000 | 64,800,000 | 863 | 540  | 1.085665816  |                              |
| 21 | 64,725,000 | 64,875,000 | 864 | 772  | 1.183774185  |                              |
| 21 | 64,800,000 | 64,950,000 | 865 | 575  | 0.939883248  |                              |
| 21 | 64,875,000 | 65,025,000 | 866 | 343  | 0.821212747  |                              |
| 21 | 64,950,000 | 65,100,000 | 867 | 388  | 0.004300302  |                              |
| 21 | 65,025,000 | 65,175,000 | 868 | 652  | 0.70785497   |                              |
| 21 | 65,100,000 | 65,250,000 | 869 | 863  | 0.917662252  |                              |
| 21 | 65,175,000 | 65,325,000 | 870 | 882  | 0.723214392  |                              |
| 21 | 65,250,000 | 65,400,000 | 871 | 865  | 0.674405411  |                              |
| 21 | 65,325,000 | 65,475,000 | 872 | 691  | 0.513034261  |                              |
| 21 | 65,400,000 | 65,550,000 | 873 | 604  | 0.630707813  |                              |
| 21 | 65,475,000 | 65,625,000 | 874 | 636  | 0.714498629  |                              |
| 21 | 65,550,000 | 65,700,000 | 875 | 669  | 0.47351487   |                              |
| 21 | 65,625,000 | 65,775,000 | 876 | 665  | 0.502426395  |                              |
| 21 | 65,700,000 | 65,850,000 | 877 | 514  | 0.904940751  | BCL11B                       |
| 21 | 65,775,000 | 65,925,000 | 878 | 435  | 1.100024808  | BCL11B                       |
| 21 | 65,850,000 | 66,000,000 | 879 | 632  | 0.301254518  | BCL11B                       |
| 21 | 65,925,000 | 66,075,000 | 880 | 840  | 0.38155201   | BCL11B,SETD3                 |
| 21 | 66,000,000 | 66,150,000 | 881 | 773  | 0.942549266  | SETD3                        |
| 21 | 66,075,000 | 66,225,000 | 882 | 923  | 1.287299683  | CCDC85C,CCNK,SETD3           |
| 21 | 66,150,000 | 66,300,000 | 883 | 990  | 0.766310881  | CCDC85C,CCNK,HHIPL1          |
| 21 | 66,225,000 | 66,375,000 | 884 | 1175 | 0.601454314  | CCDC85C,CYP46A1,EMAPL,HHIPL1 |
| 21 | 66,300,000 | 66,450,000 | 885 | 1213 | 0.864987653  | CYP46A1,EMAPL,HHIPL1         |
| 21 | 66,375,000 | 66,525,000 | 886 | 988  | 0.787531033  | EMAPL                        |



|    |            |            |     |      |              |                                                     |
|----|------------|------------|-----|------|--------------|-----------------------------------------------------|
| 21 | 66,450,000 | 66,600,000 | 887 | 838  | -0.415414119 | EMAPL                                               |
| 21 | 66,525,000 | 66,675,000 | 888 | 495  | -2.152625818 | EMAPL                                               |
| 21 | 66,600,000 | 66,750,000 | 889 | 454  | -1.89269855  | DEGS2,EVL                                           |
| 21 | 66,675,000 | 66,825,000 | 890 | 899  | -0.158128757 | DEGS2,EVL,YY1,ENSBTAG00000045497                    |
| 21 | 66,750,000 | 66,900,000 | 891 | 1054 | 0.439016161  | DEGS2,SLC25A29,SLC25A47,WARS,YY1,ENSBTAG00000045497 |
| 21 | 66,825,000 | 66,975,000 | 892 | 1098 | 0.226674952  | SLC25A29,SLC25A47,WARS,WDR25,YY1                    |
| 21 | 66,900,000 | 67,050,000 | 893 | 1254 | 0.247647636  | WARS,WDR25                                          |
| 21 | 66,975,000 | 67,125,000 | 894 | 784  | 0.059615413  | BEGAIN,WDR25                                        |
| 21 | 67,050,000 | 67,200,000 | 895 | 716  | -0.384106152 | BEGAIN,WDR25                                        |
| 21 | 67,125,000 | 67,275,000 | 896 | 690  | -0.324178681 | DLK                                                 |
| 21 | 67,200,000 | 67,350,000 | 897 | 326  | 0.136769623  | DLK                                                 |
| 21 | 67,275,000 | 67,425,000 | 898 | 396  | 0.681454311  | DLK                                                 |
| 21 | 67,350,000 | 67,500,000 | 899 | 419  | 0.737465396  | RTL1                                                |
| 21 | 67,425,000 | 67,575,000 | 900 | 499  | 0.434889584  | RTL1                                                |
| 21 | 67,500,000 | 67,650,000 | 901 | 497  | 0.01722001   |                                                     |
| 21 | 67,575,000 | 67,725,000 | 902 | 837  | 0.541517996  |                                                     |
| 21 | 67,650,000 | 67,800,000 | 903 | 1184 | 0.83805783   |                                                     |
| 21 | 67,725,000 | 67,875,000 | 904 | 1125 | 0.738080073  |                                                     |
| 21 | 67,800,000 | 67,950,000 | 905 | 1065 | 0.761035547  |                                                     |
| 21 | 67,875,000 | 68,025,000 | 906 | 680  | 0.867129863  |                                                     |
| 21 | 67,950,000 | 68,100,000 | 907 | 457  | 1.050414711  |                                                     |
| 21 | 68,025,000 | 68,175,000 | 908 | 617  | 1.248316875  | DIO3                                                |
| 21 | 68,100,000 | 68,250,000 | 909 | 557  | 1.03324311   | DIO3                                                |
| 21 | 68,175,000 | 68,325,000 | 910 | 533  | 0.484228387  |                                                     |
| 21 | 68,250,000 | 68,400,000 | 911 | 696  | -0.64414098  | PPP2R5C                                             |
| 21 | 68,325,000 | 68,475,000 | 912 | 472  | -1.228336982 | PPP2R5C                                             |
| 21 | 68,400,000 | 68,550,000 | 913 | 173  | 0.298256781  | DYNC1H1,PPP2R5C                                     |
| 21 | 68,475,000 | 68,625,000 | 914 | 369  | 1.300475377  | DYNC1H1,HSP90AA1,MGC152337                          |
| 21 | 68,550,000 | 68,700,000 | 915 | 680  | 1.066532611  | DYNC1H1,HSP90AA1,MGC152337,WDR20                    |
| 21 | 68,625,000 | 68,775,000 | 916 | 833  | -0.129021067 | MOK,RPL9,WDR20                                      |
| 21 | 68,700,000 | 68,850,000 | 917 | 606  | -0.565842609 | CINP,MOK,RPL9,TECPR2,ZNF839                         |
| 21 | 68,775,000 | 68,925,000 | 918 | 342  | 0.216395623  | ANKRD9,CINP,TECPR2,ZNF839                           |
| 21 | 68,850,000 | 69,000,000 | 919 | 388  | 0.360667099  | ANKRD9,RCOR1,TECPR2                                 |
| 21 | 68,925,000 | 69,075,000 | 920 | 526  | 0.852821404  | RCOR1                                               |
| 21 | 69,000,000 | 69,150,000 | 921 | 772  | 1.227341548  | RCOR1                                               |
| 21 | 69,075,000 | 69,225,000 | 922 | 940  | 1.148688265  | RCOR1                                               |
| 21 | 69,150,000 | 69,300,000 | 923 | 801  | 0.966025336  | AMN,CDC42BPB,TRAF3                                  |
| 21 | 69,225,000 | 69,375,000 | 924 | 507  | 0.089237419  | AMN,CDC42BPB,TRAF3                                  |
| 21 | 69,300,000 | 69,450,000 | 925 | 801  | 0.388072272  | CDC42BPB,EXOC3L4                                    |
| 21 | 69,375,000 | 69,525,000 | 926 | 1296 | 0.235370557  | EXOC3L4,TNFAIP2                                     |
| 21 | 69,450,000 | 69,600,000 | 927 | 972  | -0.213485762 | TNFAIP2,ENSBTAG00000047319                          |
| 21 | 69,525,000 | 69,675,000 | 928 | 536  | -0.879319241 | EIF5,ENSBTAG00000047319                             |
| 21 | 69,600,000 | 69,750,000 | 929 | 403  | -0.322770475 | EIF5,MARK3                                          |
| 21 | 69,675,000 | 69,825,000 | 930 | 304  | 0.838764899  | CKB,MARK3,TRMT61A                                   |
| 21 | 69,750,000 | 69,900,000 | 931 | 656  | 0.825459609  | APOPT1,BAG5,CKB,KLC1,MARK3,TRMT61A                  |
| 21 | 69,825,000 | 69,975,000 | 932 | 779  | 0.981822728  | APOPT1,BAG5,KLC1,XRCC3                              |
| 21 | 69,900,000 | 70,050,000 | 933 | 512  | -0.256463088 | KLC1,PPP1R13B,XRCC3,ZFYVE21                         |
| 21 | 69,975,000 | 70,125,000 | 934 | 609  | -0.735668244 | MP68,PPP1R13B,TDRD9,ZFYVE21,ENSBTAG00000046186      |
| 21 | 70,050,000 | 70,200,000 | 935 | 1022 | -0.523443529 | MP68,PPP1R13B,RD3L,TDRD9,ENSBTAG00000046186         |
| 21 | 70,125,000 | 70,275,000 | 936 | 1084 | -0.54135463  | ASPG,RD3L,TDRD9                                     |
| 21 | 70,200,000 | 70,350,000 | 937 | 937  | 0.067408107  | ASPG,KIF26A,TDRD9                                   |
| 21 | 70,275,000 | 70,425,000 | 938 | 1248 | 0.363411981  | ASPG,KIF26A                                         |

|    |            |            |     |      |              |                                                                                               |
|----|------------|------------|-----|------|--------------|-----------------------------------------------------------------------------------------------|
| 21 | 70,350,000 | 70,500,000 | 939 | 1615 | -0.287604626 | KIF26A                                                                                        |
| 21 | 70,425,000 | 70,575,000 | 940 | 1485 | -2.278984654 |                                                                                               |
| 21 | 70,500,000 | 70,650,000 | 941 | 876  | -3.093743181 |                                                                                               |
| 21 | 70,575,000 | 70,725,000 | 942 | 815  | -0.464793434 | C14orf180,TMEM179                                                                             |
| 21 | 70,650,000 | 70,800,000 | 943 | 928  | -1.022087301 | C14orf180,TMEM179                                                                             |
| 21 | 70,725,000 | 70,875,000 | 944 | 644  | -1.616112329 | ADSSL1,INF2,SIVA1,TMEM179                                                                     |
| 21 | 70,800,000 | 70,950,000 | 945 | 452  | -1.486254967 | ADSSL1,AKT1,CEP170B,INF2,SIVA1,ZBTB42                                                         |
| 21 | 70,875,000 | 71,025,000 | 946 | 343  | -1.780421778 | AHNAK2,AKT1,CEP170B,PLD4,ZBTB42                                                               |
| 21 | 70,950,000 | 71,100,000 | 947 | 337  | -0.582575306 | AHNAK2,C14orf79,CDCA4,CEP170B,GPR132,PLD4                                                     |
| 21 | 71,025,000 | 71,175,000 | 948 | 288  | 0.114742185  | C14orf79,CDCA4,GPR132,JAG2,NUDT14                                                             |
| 21 | 71,100,000 | 71,250,000 | 949 | 405  | -0.200268239 | BRF1,BTBD6,JAG2,NUDT14,ENSBTAG00000046364                                                     |
| 21 | 71,175,000 | 71,325,000 | 950 | 520  | 0.092578724  | BRF1,BTBD6,PACS2,ENSBTAG00000046364                                                           |
| 21 | 71,250,000 | 71,400,000 | 951 | 575  | -0.270757672 | C14orf80,CRIP1,MTA1,PACS2,ENSBTAG00000046364                                                  |
| 21 | 71,325,000 | 71,475,000 | 952 | 1003 | -0.803997364 | C14orf80,CRIP1,IGHE,MTA1,TMEM121,ENSBTAG00000046364,ENSBTAG00000047700,ENSBTAG00000047970     |
| 21 | 71,400,000 | 71,550,000 | 953 | 1318 | -0.035228575 | IGHE,IGHM,TMEM121,ENSBTAG00000046161,ENSBTAG00000047700,ENSBTAG00000047970,ENSBTAG00000048268 |
| 21 | 71,475,000 | 71,599,096 | 954 | 947  | 0.400849831  | IGHM,ENSBTAG00000046076,ENSBTAG00000046161,ENSBTAG00000048268                                 |
| 22 | 0          | 150,000    | 1   | 465  | 0.409753851  | ENSBTAG00000023954,ENSBTAG00000045666,ENSBTAG00000046011,ENSBTAG00000046634                   |
| 22 | 75,000     | 225,000    | 2   | 716  | -3.424612    | MRPS24,URGCP,ENSBTAG00000023954                                                               |
| 22 | 150,000    | 300,000    | 3   | 908  | -2.94171461  | MRPS24,URGCP                                                                                  |
| 22 | 225,000    | 375,000    | 4   | 749  | -0.338241091 | DBNL,PGAM2,UBE2D4,URGCP                                                                       |
| 22 | 300,000    | 450,000    | 5   | 843  | -0.07580422  | DBNL,PGAM2,UBE2D4                                                                             |
| 22 | 375,000    | 525,000    | 6   | 971  | 0.361273884  | VOPP1                                                                                         |
| 22 | 450,000    | 600,000    | 7   | 942  | -0.279590988 | VOPP1                                                                                         |
| 22 | 525,000    | 675,000    | 8   | 1002 | -0.385080949 | VOPP1                                                                                         |
| 22 | 600,000    | 750,000    | 9   | 1126 | 0.100962492  | LANCL2,VOPP1                                                                                  |
| 22 | 675,000    | 825,000    | 10  | 1230 | -0.057075215 | LANCL2,VOPP1                                                                                  |
| 22 | 750,000    | 900,000    | 11  | 1231 | -0.307451091 | EGFR,LANCL2                                                                                   |
| 22 | 825,000    | 975,000    | 12  | 1044 | -0.155460462 | EGFR                                                                                          |
| 22 | 900,000    | 1,050,000  | 13  | 713  | 0.373618216  | EGFR                                                                                          |
| 22 | 975,000    | 1,125,000  | 14  | 431  | 0.600749513  | EGFR                                                                                          |
| 22 | 1,050,000  | 1,200,000  | 15  | 348  | 0.29638694   | EGFR                                                                                          |
| 22 | 1,125,000  | 1,275,000  | 16  | 799  | -0.202307391 |                                                                                               |
| 22 | 1,200,000  | 1,350,000  | 17  | 1016 | -0.086986201 |                                                                                               |
| 22 | 1,275,000  | 1,425,000  | 18  | 1104 | 0.403109149  |                                                                                               |
| 22 | 1,350,000  | 1,500,000  | 19  | 1349 | 0.212774508  | NEK10,SEC61G                                                                                  |
| 22 | 1,425,000  | 1,575,000  | 20  | 1091 | 0.114021973  | NEK10,SEC61G                                                                                  |
| 22 | 1,500,000  | 1,650,000  | 21  | 954  | 0.794997007  | NEK10                                                                                         |
| 22 | 1,575,000  | 1,725,000  | 22  | 953  | -0.002284967 | NEK10                                                                                         |
| 22 | 1,650,000  | 1,800,000  | 23  | 704  | -2.222241943 | NEK10,SLC4A7                                                                                  |
| 22 | 1,725,000  | 1,875,000  | 24  | 412  | -2.613161999 | SLC4A7                                                                                        |
| 22 | 1,800,000  | 1,950,000  | 25  | 548  | 0.78646444   | SLC4A7,ENSBTAG00000030494                                                                     |
| 22 | 1,875,000  | 2,025,000  | 26  | 600  | 0.670640365  | SLC4A7,ENSBTAG00000030494                                                                     |
| 22 | 1,950,000  | 2,100,000  | 27  | 543  | -1.812532096 |                                                                                               |
| 22 | 2,025,000  | 2,175,000  | 28  | 526  | -1.591054278 | EOMES                                                                                         |
| 22 | 2,100,000  | 2,250,000  | 29  | 468  | 0.104624655  | EOMES                                                                                         |
| 22 | 2,175,000  | 2,325,000  | 30  | 468  | -0.321557299 |                                                                                               |
| 22 | 2,250,000  | 2,400,000  | 31  | 316  | -0.205193285 |                                                                                               |
| 22 | 2,325,000  | 2,475,000  | 32  | 436  | 0.137564481  |                                                                                               |

|    |           |           |    |      |              |                  |
|----|-----------|-----------|----|------|--------------|------------------|
| 22 | 2,400,000 | 2,550,000 | 33 | 630  | -0.151866522 |                  |
| 22 | 2,475,000 | 2,625,000 | 34 | 1059 | -0.962181422 |                  |
| 22 | 2,550,000 | 2,700,000 | 35 | 1225 | -1.341366896 | CMC1             |
| 22 | 2,625,000 | 2,775,000 | 36 | 765  | -1.271099116 | AZI2,CMC1        |
| 22 | 2,700,000 | 2,850,000 | 37 | 504  | -0.464756205 | AZI2,CMC1,ZCWPW2 |
| 22 | 2,775,000 | 2,925,000 | 38 | 510  | -0.055124373 | AZI2,ZCWPW2      |
| 22 | 2,850,000 | 3,000,000 | 39 | 649  | 0.060375775  | ZCWPW2           |
| 22 | 2,925,000 | 3,075,000 | 40 | 791  | 0.132403127  | ZCWPW2           |
| 22 | 3,000,000 | 3,150,000 | 41 | 715  | 0.566763428  |                  |
| 22 | 3,075,000 | 3,225,000 | 42 | 723  | 0.907290729  |                  |
| 22 | 3,150,000 | 3,300,000 | 43 | 1021 | 0.870755562  |                  |
| 22 | 3,225,000 | 3,375,000 | 44 | 939  | 0.660775586  |                  |
| 22 | 3,300,000 | 3,450,000 | 45 | 642  | 0.602441544  |                  |
| 22 | 3,375,000 | 3,525,000 | 46 | 808  | 1.079332993  |                  |
| 22 | 3,450,000 | 3,600,000 | 47 | 1105 | 0.862148268  |                  |
| 22 | 3,525,000 | 3,675,000 | 48 | 1045 | 0.600724105  |                  |
| 22 | 3,600,000 | 3,750,000 | 49 | 838  | 0.136574422  |                  |
| 22 | 3,675,000 | 3,825,000 | 50 | 747  | 0.049269252  |                  |
| 22 | 3,750,000 | 3,900,000 | 51 | 737  | 0.154851695  | RBMS3            |
| 22 | 3,825,000 | 3,975,000 | 52 | 667  | -0.643589133 | RBMS3            |
| 22 | 3,900,000 | 4,050,000 | 53 | 631  | -1.045986463 | RBMS3            |
| 22 | 3,975,000 | 4,125,000 | 54 | 586  | -0.21298352  | RBMS3            |
| 22 | 4,050,000 | 4,200,000 | 55 | 680  | 1.08040344   | RBMS3            |
| 22 | 4,125,000 | 4,275,000 | 56 | 676  | 0.896983919  | RBMS3            |
| 22 | 4,200,000 | 4,350,000 | 57 | 548  | 0.586295116  | RBMS3            |
| 22 | 4,275,000 | 4,425,000 | 58 | 791  | 1.067830306  | RBMS3            |
| 22 | 4,350,000 | 4,500,000 | 59 | 1031 | 1.186376426  | RBMS3            |
| 22 | 4,425,000 | 4,575,000 | 60 | 700  | 0.981649122  | RBMS3            |
| 22 | 4,500,000 | 4,650,000 | 61 | 489  | 0.376773859  | RBMS3            |
| 22 | 4,575,000 | 4,725,000 | 62 | 748  | 0.252732641  | RBMS3            |
| 22 | 4,650,000 | 4,800,000 | 63 | 1142 | 0.881992828  | RBMS3            |
| 22 | 4,725,000 | 4,875,000 | 64 | 1307 | 1.119876017  |                  |
| 22 | 4,800,000 | 4,950,000 | 65 | 1055 | -0.160649388 |                  |
| 22 | 4,875,000 | 5,025,000 | 66 | 1112 | -0.755748495 |                  |
| 22 | 4,950,000 | 5,100,000 | 67 | 894  | -0.181111715 |                  |
| 22 | 5,025,000 | 5,175,000 | 68 | 518  | -0.250895087 | TGFBR2           |
| 22 | 5,100,000 | 5,250,000 | 69 | 619  | -0.282711335 | TGFBR2           |
| 22 | 5,175,000 | 5,325,000 | 70 | 855  | -0.066287621 | GADL1,TGFBR2     |
| 22 | 5,250,000 | 5,400,000 | 71 | 961  | -0.049958871 | GADL1            |
| 22 | 5,325,000 | 5,475,000 | 72 | 672  | -0.638446275 | GADL1            |
| 22 | 5,400,000 | 5,550,000 | 73 | 565  | -0.36239912  | GADL1            |
| 22 | 5,475,000 | 5,625,000 | 74 | 1047 | 0.280811096  |                  |
| 22 | 5,550,000 | 5,700,000 | 75 | 1220 | 0.451001253  |                  |
| 22 | 5,625,000 | 5,775,000 | 76 | 1271 | 0.450326344  |                  |
| 22 | 5,700,000 | 5,850,000 | 77 | 1129 | 0.128327188  |                  |
| 22 | 5,775,000 | 5,925,000 | 78 | 816  | 0.139895461  |                  |
| 22 | 5,850,000 | 6,000,000 | 79 | 1017 | 0.9695023    |                  |
| 22 | 5,925,000 | 6,075,000 | 80 | 1271 | 0.815610595  |                  |
| 22 | 6,000,000 | 6,150,000 | 81 | 935  | 0.633190859  | STT3B            |
| 22 | 6,075,000 | 6,225,000 | 82 | 663  | 1.079233724  | OSBPL10,STT3B    |
| 22 | 6,150,000 | 6,300,000 | 83 | 969  | 0.82447562   | OSBPL10,STT3B    |
| 22 | 6,225,000 | 6,375,000 | 84 | 1027 | 0.28201552   | OSBPL10          |
| 22 | 6,300,000 | 6,450,000 | 85 | 964  | 0.051102107  |                  |

|    |            |            |     |      |              |                                           |
|----|------------|------------|-----|------|--------------|-------------------------------------------|
| 22 | 6,375,000  | 6,525,000  | 86  | 1102 | 0.051064991  |                                           |
| 22 | 6,450,000  | 6,600,000  | 87  | 1048 | -0.246094259 |                                           |
| 22 | 6,525,000  | 6,675,000  | 88  | 1085 | -0.512328582 | GPD1L                                     |
| 22 | 6,600,000  | 6,750,000  | 89  | 1227 | 0.330336731  | GPD1L                                     |
| 22 | 6,675,000  | 6,825,000  | 90  | 1382 | 1.286459264  | CMTM8,GPD1L                               |
| 22 | 6,750,000  | 6,900,000  | 91  | 1415 | 0.953959345  | CMTM7,CMTM8                               |
| 22 | 6,825,000  | 6,975,000  | 92  | 1135 | 0.524677594  | CMTM7,CMTM8                               |
| 22 | 6,900,000  | 7,050,000  | 93  | 1225 | 0.758015424  | CMTM6,CMTM7,DYNC1LI1                      |
| 22 | 6,975,000  | 7,125,000  | 94  | 1343 | 0.980474509  | CMTM6,DYNC1LI1,ENSBTAG00000025595         |
| 22 | 7,050,000  | 7,200,000  | 95  | 1214 | 1.218077276  | CNOT10,DYNC1LI1,ENSBTAG00000025595        |
| 22 | 7,125,000  | 7,275,000  | 96  | 1202 | 1.133634075  | CNOT10                                    |
| 22 | 7,200,000  | 7,350,000  | 97  | 1112 | 0.980487223  | CNOT10,TRIM71                             |
| 22 | 7,275,000  | 7,425,000  | 98  | 1100 | 0.481460374  | CCR4,GLB1,TRIM71                          |
| 22 | 7,350,000  | 7,500,000  | 99  | 994  | 0.249924183  | CCR4,GLB1                                 |
| 22 | 7,425,000  | 7,575,000  | 100 | 1110 | 0.567183203  | CRTAP,GLB1,SUSD5,ENSBTAG00000034871       |
| 22 | 7,500,000  | 7,650,000  | 101 | 1285 | -0.789433596 | CRTAP,FBXL2,GLB1,SUSD5,ENSBTAG00000034871 |
| 22 | 7,575,000  | 7,725,000  | 102 | 1117 | -0.906155228 | FBXL2,SUSD5,UBP1                          |
| 22 | 7,650,000  | 7,800,000  | 103 | 861  | 0.950521346  | FBXL2,UBP1                                |
| 22 | 7,725,000  | 7,875,000  | 104 | 445  | 1.176665256  | CLASP2,UBP1                               |
| 22 | 7,800,000  | 7,950,000  | 105 | 311  | 0.552887311  | CLASP2                                    |
| 22 | 7,875,000  | 8,025,000  | 106 | 462  | -1.367065397 | CLASP2                                    |
| 22 | 7,950,000  | 8,100,000  | 107 | 893  | -0.77187651  | CLASP2,PDCD6IP                            |
| 22 | 8,025,000  | 8,175,000  | 108 | 951  | 0.026292756  | PDCD6IP                                   |
| 22 | 8,100,000  | 8,250,000  | 109 | 1062 | 0.457772655  | PDCD6IP                                   |
| 22 | 8,175,000  | 8,325,000  | 110 | 1372 | 0.401310715  |                                           |
| 22 | 8,250,000  | 8,400,000  | 111 | 1137 | 0.64168555   |                                           |
| 22 | 8,325,000  | 8,475,000  | 112 | 1134 | 0.958025633  |                                           |
| 22 | 8,400,000  | 8,550,000  | 113 | 1016 | 0.578247404  |                                           |
| 22 | 8,475,000  | 8,625,000  | 114 | 715  | -0.834823305 |                                           |
| 22 | 8,550,000  | 8,700,000  | 115 | 689  | -0.540463027 |                                           |
| 22 | 8,625,000  | 8,775,000  | 116 | 598  | 0.220565012  |                                           |
| 22 | 8,700,000  | 8,850,000  | 117 | 765  | 0.348994348  |                                           |
| 22 | 8,775,000  | 8,925,000  | 118 | 1357 | 0.49883042   |                                           |
| 22 | 8,850,000  | 9,000,000  | 119 | 1270 | 0.554062081  |                                           |
| 22 | 8,925,000  | 9,075,000  | 120 | 890  | 0.441275187  |                                           |
| 22 | 9,000,000  | 9,150,000  | 121 | 899  | 0.289579147  |                                           |
| 22 | 9,075,000  | 9,225,000  | 122 | 860  | 0.362455613  |                                           |
| 22 | 9,150,000  | 9,300,000  | 123 | 634  | 0.154657143  |                                           |
| 22 | 9,225,000  | 9,375,000  | 124 | 506  | 0.122368797  |                                           |
| 22 | 9,300,000  | 9,450,000  | 125 | 628  | 0.681391547  |                                           |
| 22 | 9,375,000  | 9,525,000  | 126 | 622  | 0.12365307   |                                           |
| 22 | 9,450,000  | 9,600,000  | 127 | 776  | -0.298257517 |                                           |
| 22 | 9,525,000  | 9,675,000  | 128 | 664  | -0.077476208 | ARPP21                                    |
| 22 | 9,600,000  | 9,750,000  | 129 | 532  | -0.025207174 | ARPP21                                    |
| 22 | 9,675,000  | 9,825,000  | 130 | 801  | 0.219788349  | ARPP21                                    |
| 22 | 9,750,000  | 9,900,000  | 131 | 867  | 0.268844369  | ARPP21                                    |
| 22 | 9,825,000  | 9,975,000  | 132 | 676  | 0.634334637  |                                           |
| 22 | 9,900,000  | 10,050,000 | 133 | 452  | 0.79152068   |                                           |
| 22 | 9,975,000  | 10,125,000 | 134 | 849  | 0.399383831  |                                           |
| 22 | 10,050,000 | 10,200,000 | 135 | 1059 | 0.492383325  | STAC                                      |
| 22 | 10,125,000 | 10,275,000 | 136 | 989  | 0.651280767  | STAC                                      |
| 22 | 10,200,000 | 10,350,000 | 137 | 1091 | -0.512696962 | STAC                                      |
| 22 | 10,275,000 | 10,425,000 | 138 | 590  | -2.758026759 | LRRFIP2                                   |

|    |            |            |     |      |              |                                                                |
|----|------------|------------|-----|------|--------------|----------------------------------------------------------------|
| 22 | 10,350,000 | 10,500,000 | 139 | 243  | 0.350778831  | LRRFIP2,MLH1                                                   |
| 22 | 10,425,000 | 10,575,000 | 140 | 317  | 0.419708756  | LRRFIP2,MLH1                                                   |
| 22 | 10,500,000 | 10,650,000 | 141 | 514  | -1.122807606 | EPM2AIP1,MLH1                                                  |
| 22 | 10,575,000 | 10,725,000 | 142 | 608  | -1.101147339 | EPM2AIP1,MLH1,TRANK1                                           |
| 22 | 10,650,000 | 10,800,000 | 143 | 394  | -0.530659529 | DCLK3,TRANK1                                                   |
| 22 | 10,725,000 | 10,875,000 | 144 | 150  | -1.207677911 | DCLK3,GOLGA4                                                   |
| 22 | 10,800,000 | 10,950,000 | 145 | 75   | 0.960355883  | GOLGA4,ITGA9                                                   |
| 22 | 10,875,000 | 11,025,000 | 146 | 405  | 0.964348588  | GOLGA4,ITGA9                                                   |
| 22 | 10,950,000 | 11,100,000 | 147 | 691  | 1.003747395  | ITGA9                                                          |
| 22 | 11,025,000 | 11,175,000 | 148 | 694  | 0.843219056  | ITGA9,ENSBTAG00000047965                                       |
| 22 | 11,100,000 | 11,250,000 | 149 | 851  | 0.879891513  | ITGA9,ENSBTAG00000047965                                       |
| 22 | 11,175,000 | 11,325,000 | 150 | 886  | 0.740141045  | ITGA9                                                          |
| 22 | 11,250,000 | 11,400,000 | 151 | 645  | 0.478312933  | CTDSPL,ITGA9                                                   |
| 22 | 11,325,000 | 11,475,000 | 152 | 535  | 0.74657895   | CTDSPL                                                         |
| 22 | 11,400,000 | 11,550,000 | 153 | 820  | 0.973676598  | CTDSPL,DLEC1,PLCD1,VILL                                        |
| 22 | 11,475,000 | 11,625,000 | 154 | 752  | 1.024096347  | ACAA1,DLEC1,PLCD1,VILL                                         |
| 22 | 11,550,000 | 11,700,000 | 155 | 403  | 0.423130759  | ACAA1,DLEC1,MYD88,OXSR1                                        |
| 22 | 11,625,000 | 11,775,000 | 156 | 368  | 0.252448459  | ACAA1,MYD88,OXSR1,SLC22A13                                     |
| 22 | 11,700,000 | 11,850,000 | 157 | 460  | 0.603467227  | OXSR1,SLC22A13,SLC22A14,XVLB                                   |
| 22 | 11,775,000 | 11,925,000 | 158 | 548  | 0.776029578  | ACVR2B,EXO,SLC22A14,XVLB                                       |
| 22 | 11,850,000 | 12,000,000 | 159 | 642  | -0.96207733  | ACVR2B,EXO                                                     |
| 22 | 11,925,000 | 12,075,000 | 160 | 874  | -0.872270767 | EXO,SCN5A                                                      |
| 22 | 12,000,000 | 12,150,000 | 161 | 817  | 0.08509163   | SCN10A,SCN5A                                                   |
| 22 | 12,075,000 | 12,225,000 | 162 | 687  | 0.360504611  | SCN10A,SCN5A                                                   |
| 22 | 12,150,000 | 12,300,000 | 163 | 697  | 0.031094887  | SCN10A,SCN11A                                                  |
| 22 | 12,225,000 | 12,375,000 | 164 | 828  | 0.043921465  | SCN10A,SCN11A                                                  |
| 22 | 12,300,000 | 12,450,000 | 165 | 799  | 0.30195505   | SCN11A,WDR48                                                   |
| 22 | 12,375,000 | 12,525,000 | 166 | 448  | 0.519293382  | CSRNP1,GORASP1,TTC21A,WDR48                                    |
| 22 | 12,450,000 | 12,600,000 | 167 | 357  | 1.097209642  | CMYA1,CSRNP1,GORASP1,TTC21A,WDR48                              |
| 22 | 12,525,000 | 12,675,000 | 168 | 448  | 1.199928466  | CMYA1,CSRNP1,CX3CR1                                            |
| 22 | 12,600,000 | 12,750,000 | 169 | 522  | 1.091998709  | CCR8,CX3CR1,RPSA,SLC25A38,ENSBTAG0000009760,ENSBTAG00000015493 |
| 22 | 12,675,000 | 12,825,000 | 170 | 441  | -0.059308733 | CCR8,MOBP,RPSA,SLC25A38,ENSBTAG0000009760,ENSBTAG00000015493   |
| 22 | 12,750,000 | 12,900,000 | 171 | 610  | -0.483623025 | MOBP                                                           |
| 22 | 12,825,000 | 12,975,000 | 172 | 828  | -0.027899155 |                                                                |
| 22 | 12,900,000 | 13,050,000 | 173 | 642  | -0.202527561 |                                                                |
| 22 | 12,975,000 | 13,125,000 | 174 | 659  | 0.339573543  | MYRIP                                                          |
| 22 | 13,050,000 | 13,200,000 | 175 | 549  | 0.049089169  | MYRIP                                                          |
| 22 | 13,125,000 | 13,275,000 | 176 | 298  | 0.065040524  | EIF1B,ENTPD3,MYRIP                                             |
| 22 | 13,200,000 | 13,350,000 | 177 | 288  | 0.692587087  | EIF1B,ENTPD3,RPL14,ENSBTAG00000018057                          |
| 22 | 13,275,000 | 13,425,000 | 178 | 298  | 0.681445921  | ENTPD3,RPL14,ENSBTAG00000018057                                |
| 22 | 13,350,000 | 13,500,000 | 179 | 321  | 0.621226046  | ENSBTAG00000018057                                             |
| 22 | 13,425,000 | 13,575,000 | 180 | 640  | 0.523357243  |                                                                |
| 22 | 13,500,000 | 13,650,000 | 181 | 843  | 0.441437967  |                                                                |
| 22 | 13,575,000 | 13,725,000 | 182 | 637  | 0.043350999  |                                                                |
| 22 | 13,650,000 | 13,800,000 | 183 | 581  | -1.059105238 |                                                                |
| 22 | 13,725,000 | 13,875,000 | 184 | 466  | -1.293303397 | CTNNB1                                                         |
| 22 | 13,800,000 | 13,950,000 | 185 | 287  | -0.885690678 | CTNNB1                                                         |
| 22 | 13,875,000 | 14,025,000 | 186 | 698  | -1.601928161 | CTNNB1                                                         |
| 22 | 13,950,000 | 14,100,000 | 187 | 1110 | -0.494312183 |                                                                |
| 22 | 14,025,000 | 14,175,000 | 188 | 1026 | 0.134036085  |                                                                |
| 22 | 14,100,000 | 14,250,000 | 189 | 824  | 0.161472574  |                                                                |

|    |            |            |     |      |              |                                                                                  |
|----|------------|------------|-----|------|--------------|----------------------------------------------------------------------------------|
| 22 | 14,175,000 | 14,325,000 | 190 | 800  | 0.625276021  |                                                                                  |
| 22 | 14,250,000 | 14,400,000 | 191 | 723  | 1.017518118  |                                                                                  |
| 22 | 14,325,000 | 14,475,000 | 192 | 451  | 0.70568475   | ABHD5                                                                            |
| 22 | 14,400,000 | 14,550,000 | 193 | 492  | -0.420787349 | ABHD5                                                                            |
| 22 | 14,475,000 | 14,625,000 | 194 | 526  | 0.21389269   | ABHD5                                                                            |
| 22 | 14,550,000 | 14,700,000 | 195 | 531  | 0.72918492   |                                                                                  |
| 22 | 14,625,000 | 14,775,000 | 196 | 626  | 0.847649382  |                                                                                  |
| 22 | 14,700,000 | 14,850,000 | 197 | 612  | 1.067959006  |                                                                                  |
| 22 | 14,775,000 | 14,925,000 | 198 | 494  | 0.985775636  |                                                                                  |
| 22 | 14,850,000 | 15,000,000 | 199 | 428  | 0.98032723   |                                                                                  |
| 22 | 14,925,000 | 15,075,000 | 200 | 856  | 0.572227512  |                                                                                  |
| 22 | 15,000,000 | 15,150,000 | 201 | 872  | 0.22274471   | TRAK1                                                                            |
| 22 | 15,075,000 | 15,225,000 | 202 | 483  | 0.174861892  | CCK,TRAK1,ENSBTAG00000047883                                                     |
| 22 | 15,150,000 | 15,300,000 | 203 | 398  | 0.283103659  | CCK,LYZL4,TRAK1,VIPR1,ENSBTAG00000047883                                         |
| 22 | 15,225,000 | 15,375,000 | 204 | 354  | 0.405071729  | LYZL4,NKTR,SEC22C,VIPR1                                                          |
| 22 | 15,300,000 | 15,450,000 | 205 | 313  | 0.125831563  | KBTBD5,NKTR,SEC22C,VIPR1,ZBTB47                                                  |
| 22 | 15,375,000 | 15,525,000 | 206 | 303  | 0.589570885  | CCDC13,HHATL,HIGD1D,KBTBD5,NKTR,ZBTB47                                           |
| 22 | 15,450,000 | 15,600,000 | 207 | 477  | 0.794853918  | CCBP2,CCDC13,CYP8B1,HHATL,HIGD1D,KBTBD5                                          |
| 22 | 15,525,000 | 15,675,000 | 208 | 611  | 0.624244965  | CCBP2,CYP8B1                                                                     |
| 22 | 15,600,000 | 15,750,000 | 209 | 607  | 0.518354993  | POMGNT2                                                                          |
| 22 | 15,675,000 | 15,825,000 | 210 | 393  | 0.47294098   | POMGNT2                                                                          |
| 22 | 15,750,000 | 15,900,000 | 211 | 431  | 0.425879135  | SNRK,ENSBTAG00000008244                                                          |
| 22 | 15,825,000 | 15,975,000 | 212 | 519  | 0.644384223  | ANO10,SNRK,ENSBTAG00000008244                                                    |
| 22 | 15,900,000 | 16,050,000 | 213 | 414  | 1.1314995    | ANO10,SNRK                                                                       |
| 22 | 15,975,000 | 16,125,000 | 214 | 431  | 0.738678461  | ANO10                                                                            |
| 22 | 16,050,000 | 16,200,000 | 215 | 311  | 0.196723606  | ANO10                                                                            |
| 22 | 16,125,000 | 16,275,000 | 216 | 371  | 0.795366913  | ANO10,TOPAZ1                                                                     |
| 22 | 16,200,000 | 16,350,000 | 217 | 501  | -0.290840243 | TCAIM,TOPAZ1                                                                     |
| 22 | 16,275,000 | 16,425,000 | 218 | 777  | -0.279397761 | TCAIM,TOPAZ1,ZNF445,ZNF852,ENSBTAG00000030533                                    |
| 22 | 16,350,000 | 16,500,000 | 219 | 666  | -0.232727351 | ZNF197,ZNF35,ZNF445,ZNF852,ENSBTAG00000030533                                    |
| 22 | 16,425,000 | 16,575,000 | 220 | 511  | -0.336769429 | KIAA1143,KIF15,ZNF197,ZNF35,ZNF502,ZNF852                                        |
| 22 | 16,500,000 | 16,650,000 | 221 | 1072 | -0.37842635  | KIAA1143,KIF15,ZNF35,ZNF502,ENSBTAG00000047611                                   |
| 22 | 16,575,000 | 16,725,000 | 222 | 1275 | -0.058946043 | IRAK2,KIF15,ENSBTAG00000019479,ENSBTAG00000047611                                |
| 22 | 16,650,000 | 16,800,000 | 223 | 731  | 0.201668232  | C22H3ORF10,FANCD2,FANCD2OS,IRAK2,VHL,ENSBTAG0000019479                           |
| 22 | 16,725,000 | 16,875,000 | 224 | 283  | -0.517956435 | C22H3ORF10,CRELD1,EMC3,FANCD2,FANCD2OS,IL17RC,IRAK2,PRRT3,VHL                    |
| 22 | 16,800,000 | 16,950,000 | 225 | 264  | -0.514753522 | CIDEC,CRELD1,EMC3,FANCD2,IL17RC,IL17RE,JAGN1,PRRT3,RPUSD3,ENSBTAG00000007966     |
| 22 | 16,875,000 | 17,025,000 | 226 | 241  | 0.262634287  | ARPC4,BRPF1,CAMK1,CIDEC,IL17RC,IL17RE,JAGN1,OGG1,RPUSD3,TADA3,ENSBTAG00000007966 |
| 22 | 16,950,000 | 17,100,000 | 227 | 241  | 1.204647426  | ARPC4,BRPF1,CAMK1,CPNE9,MTMR14,OGG1,TADA3,ENSBTAG00000007966                     |
| 22 | 17,025,000 | 17,175,000 | 228 | 228  | 0.324078375  | CPNE9,LHFPL4,MTMR14                                                              |
| 22 | 17,100,000 | 17,250,000 | 229 | 166  | -1.06606462  | LHFPL4,SETD5                                                                     |
| 22 | 17,175,000 | 17,325,000 | 230 | 133  | -1.163677906 | SETD5,THUMPD3                                                                    |
| 22 | 17,250,000 | 17,400,000 | 231 | 162  | -0.982582641 | SRGAP3,THUMPD3                                                                   |
| 22 | 17,325,000 | 17,475,000 | 232 | 183  | -0.301877003 | SRGAP3                                                                           |
| 22 | 17,400,000 | 17,550,000 | 233 | 327  | 0.023844464  | SRGAP3                                                                           |
| 22 | 17,475,000 | 17,625,000 | 234 | 454  | 0.017928271  | SRGAP3                                                                           |
| 22 | 17,550,000 | 17,700,000 | 235 | 383  | 0.074868973  | RAD18,SRGAP3                                                                     |
| 22 | 17,625,000 | 17,775,000 | 236 | 354  | 0.348360406  | RAD18                                                                            |

|    |            |            |     |      |              |                 |
|----|------------|------------|-----|------|--------------|-----------------|
| 22 | 17,700,000 | 17,850,000 | 237 | 418  | 0.003967223  | CAV3,OXTR,RAD18 |
| 22 | 17,775,000 | 17,925,000 | 238 | 550  | -0.02086088  | CAV3,OXTR,SSUH2 |
| 22 | 17,850,000 | 18,000,000 | 239 | 671  | -0.727531241 | LMCD1,SSUH2     |
| 22 | 17,925,000 | 18,075,000 | 240 | 630  | -0.67387775  | LMCD1           |
| 22 | 18,000,000 | 18,150,000 | 241 | 738  | 0.308765368  | LMCD1           |
| 22 | 18,075,000 | 18,225,000 | 242 | 917  | 0.503459794  |                 |
| 22 | 18,150,000 | 18,300,000 | 243 | 898  | 0.508888064  |                 |
| 22 | 18,225,000 | 18,375,000 | 244 | 831  | -1.644392496 |                 |
| 22 | 18,300,000 | 18,450,000 | 245 | 886  | -2.258612601 |                 |
| 22 | 18,375,000 | 18,525,000 | 246 | 931  | -1.397481397 |                 |
| 22 | 18,450,000 | 18,600,000 | 247 | 1021 | -0.152921022 |                 |
| 22 | 18,525,000 | 18,675,000 | 248 | 867  | 0.619638328  |                 |
| 22 | 18,600,000 | 18,750,000 | 249 | 529  | 0.009695799  | GRM7            |
| 22 | 18,675,000 | 18,825,000 | 250 | 940  | -0.25179718  | GRM7            |
| 22 | 18,750,000 | 18,900,000 | 251 | 1442 | -0.417547662 | GRM7            |
| 22 | 18,825,000 | 18,975,000 | 252 | 1518 | -0.386033513 | GRM7            |
| 22 | 18,900,000 | 19,050,000 | 253 | 1305 | 0.262636028  | GRM7            |
| 22 | 18,975,000 | 19,125,000 | 254 | 911  | 0.953066192  | GRM7            |
| 22 | 19,050,000 | 19,200,000 | 255 | 632  | 0.847469018  | GRM7            |
| 22 | 19,125,000 | 19,275,000 | 256 | 587  | 0.785267213  | GRM7            |
| 22 | 19,200,000 | 19,350,000 | 257 | 1020 | 0.910923276  | GRM7            |
| 22 | 19,275,000 | 19,425,000 | 258 | 1066 | 0.149604586  | GRM7            |
| 22 | 19,350,000 | 19,500,000 | 259 | 997  | -0.162843413 | GRM7            |
| 22 | 19,425,000 | 19,575,000 | 260 | 1149 | 0.146885144  | GRM7            |
| 22 | 19,500,000 | 19,650,000 | 261 | 876  | -2.632333001 | GRM7            |
| 22 | 19,575,000 | 19,725,000 | 262 | 644  | -3.617456282 | GRM7            |
| 22 | 19,650,000 | 19,800,000 | 263 | 745  | 0.04311774   |                 |
| 22 | 19,725,000 | 19,875,000 | 264 | 1151 | 0.242025835  |                 |
| 22 | 19,800,000 | 19,950,000 | 265 | 1587 | -0.096462559 |                 |
| 22 | 19,875,000 | 20,025,000 | 266 | 1573 | 0.367955952  |                 |
| 22 | 19,950,000 | 20,100,000 | 267 | 1069 | 0.747891966  |                 |
| 22 | 20,025,000 | 20,175,000 | 268 | 728  | 0.186695639  |                 |
| 22 | 20,100,000 | 20,250,000 | 269 | 654  | 0.611877949  |                 |
| 22 | 20,175,000 | 20,325,000 | 270 | 518  | 0.777292854  |                 |
| 22 | 20,250,000 | 20,400,000 | 271 | 434  | 0.355123469  |                 |
| 22 | 20,325,000 | 20,475,000 | 272 | 628  | 0.686995036  |                 |
| 22 | 20,400,000 | 20,550,000 | 273 | 1050 | 0.983015602  |                 |
| 22 | 20,475,000 | 20,625,000 | 274 | 998  | 0.522579584  |                 |
| 22 | 20,550,000 | 20,700,000 | 275 | 547  | -0.573145202 |                 |
| 22 | 20,625,000 | 20,775,000 | 276 | 660  | -0.307398169 |                 |
| 22 | 20,700,000 | 20,850,000 | 277 | 693  | -1.024264122 |                 |
| 22 | 20,775,000 | 20,925,000 | 278 | 517  | -1.001842997 |                 |
| 22 | 20,850,000 | 21,000,000 | 279 | 527  | 0.536928847  |                 |
| 22 | 20,925,000 | 21,075,000 | 280 | 673  | 0.999124365  |                 |
| 22 | 21,000,000 | 21,150,000 | 281 | 1111 | 0.683035789  |                 |
| 22 | 21,075,000 | 21,225,000 | 282 | 1074 | -0.025113602 |                 |
| 22 | 21,150,000 | 21,300,000 | 283 | 653  | -1.89254854  | EDEM1           |
| 22 | 21,225,000 | 21,375,000 | 284 | 391  | -3.042939446 | ARL8B,EDEM1     |
| 22 | 21,300,000 | 21,450,000 | 285 | 411  | -2.396245089 | ARL8B           |
| 22 | 21,375,000 | 21,525,000 | 286 | 423  | -1.688794712 | BHLHE40         |
| 22 | 21,450,000 | 21,600,000 | 287 | 281  | -0.13610148  | BHLHE40         |
| 22 | 21,525,000 | 21,675,000 | 288 | 543  | -0.07440919  | ITPR1           |
| 22 | 21,600,000 | 21,750,000 | 289 | 937  | -0.030374442 | ITPR1           |

|    |            |            |     |      |              |                        |
|----|------------|------------|-----|------|--------------|------------------------|
| 22 | 21,675,000 | 21,825,000 | 290 | 963  | 0.766265707  | ITPR1                  |
| 22 | 21,750,000 | 21,900,000 | 291 | 774  | 1.151224284  | ITPR1                  |
| 22 | 21,825,000 | 21,975,000 | 292 | 617  | 0.856373504  | ITPR1                  |
| 22 | 21,900,000 | 22,050,000 | 293 | 659  | 1.134633248  | SUMF1                  |
| 22 | 21,975,000 | 22,125,000 | 294 | 823  | 1.114576725  | SETMAR,SHFM1,SUMF1     |
| 22 | 22,050,000 | 22,200,000 | 295 | 1007 | 1.092444939  | SETMAR,SHFM1,SUMF1     |
| 22 | 22,125,000 | 22,275,000 | 296 | 782  | 0.915548343  |                        |
| 22 | 22,200,000 | 22,350,000 | 297 | 462  | 0.235858096  |                        |
| 22 | 22,275,000 | 22,425,000 | 298 | 740  | 0.58855975   |                        |
| 22 | 22,350,000 | 22,500,000 | 299 | 874  | 0.944436152  |                        |
| 22 | 22,425,000 | 22,575,000 | 300 | 787  | 1.222596733  |                        |
| 22 | 22,500,000 | 22,650,000 | 301 | 788  | 1.237724201  | LRRN1                  |
| 22 | 22,575,000 | 22,725,000 | 302 | 725  | 0.328530414  | LRRN1                  |
| 22 | 22,650,000 | 22,800,000 | 303 | 582  | -0.268363219 |                        |
| 22 | 22,725,000 | 22,875,000 | 304 | 719  | 0.028248994  |                        |
| 22 | 22,800,000 | 22,950,000 | 305 | 942  | -0.655956328 |                        |
| 22 | 22,875,000 | 23,025,000 | 306 | 1210 | -1.193350253 |                        |
| 22 | 22,950,000 | 23,100,000 | 307 | 1329 | -1.696111646 |                        |
| 22 | 23,025,000 | 23,175,000 | 308 | 930  | -1.58236873  |                        |
| 22 | 23,100,000 | 23,250,000 | 309 | 866  | -0.544892681 | CRBN                   |
| 22 | 23,175,000 | 23,325,000 | 310 | 859  | -1.340151771 | CRBN,IL5RA,TRNT1       |
| 22 | 23,250,000 | 23,400,000 | 311 | 840  | -0.203356381 | CNTN4,CRBN,IL5RA,TRNT1 |
| 22 | 23,325,000 | 23,475,000 | 312 | 1015 | 0.822451681  | CNTN4,IL5RA            |
| 22 | 23,400,000 | 23,550,000 | 313 | 832  | 0.365622775  | CNTN4                  |
| 22 | 23,475,000 | 23,625,000 | 314 | 832  | 0.84777128   | CNTN4                  |
| 22 | 23,550,000 | 23,700,000 | 315 | 923  | 1.009187403  | CNTN4                  |
| 22 | 23,625,000 | 23,775,000 | 316 | 971  | 0.893797352  |                        |
| 22 | 23,700,000 | 23,850,000 | 317 | 951  | 1.103228564  |                        |
| 22 | 23,775,000 | 23,925,000 | 318 | 793  | 0.525094696  |                        |
| 22 | 23,850,000 | 24,000,000 | 319 | 667  | 0.673741536  |                        |
| 22 | 23,925,000 | 24,075,000 | 320 | 757  | 1.00077838   |                        |
| 22 | 24,000,000 | 24,150,000 | 321 | 920  | 1.061212852  |                        |
| 22 | 24,075,000 | 24,225,000 | 322 | 764  | 0.536171026  |                        |
| 22 | 24,150,000 | 24,300,000 | 323 | 648  | -0.391638374 |                        |
| 22 | 24,225,000 | 24,375,000 | 324 | 569  | 0.195861801  |                        |
| 22 | 24,300,000 | 24,450,000 | 325 | 425  | 0.576756938  |                        |
| 22 | 24,375,000 | 24,525,000 | 326 | 588  | -0.622592912 |                        |
| 22 | 24,450,000 | 24,600,000 | 327 | 1005 | -1.425516341 |                        |
| 22 | 24,525,000 | 24,675,000 | 328 | 900  | -2.088070214 |                        |
| 22 | 24,600,000 | 24,750,000 | 329 | 649  | -0.645931086 |                        |
| 22 | 24,675,000 | 24,825,000 | 330 | 748  | 0.958573152  |                        |
| 22 | 24,750,000 | 24,900,000 | 331 | 744  | 0.797315158  |                        |
| 22 | 24,825,000 | 24,975,000 | 332 | 841  | -0.888726306 |                        |
| 22 | 24,900,000 | 25,050,000 | 333 | 873  | -0.758911732 |                        |
| 22 | 24,975,000 | 25,125,000 | 334 | 551  | 0.233153275  | CNTN6                  |
| 22 | 25,050,000 | 25,200,000 | 335 | 550  | -0.691310585 | CNTN6                  |
| 22 | 25,125,000 | 25,275,000 | 336 | 630  | -0.655748681 | CNTN6                  |
| 22 | 25,200,000 | 25,350,000 | 337 | 891  | -2.196661007 | CNTN6                  |
| 22 | 25,275,000 | 25,425,000 | 338 | 1054 | -1.47191785  |                        |
| 22 | 25,350,000 | 25,500,000 | 339 | 1126 | -0.63744038  |                        |
| 22 | 25,425,000 | 25,575,000 | 340 | 945  | -1.388235018 |                        |
| 22 | 25,500,000 | 25,650,000 | 341 | 645  | 0.100129756  |                        |
| 22 | 25,575,000 | 25,725,000 | 342 | 871  | 1.193255837  |                        |



|    |            |            |     |      |              |               |
|----|------------|------------|-----|------|--------------|---------------|
| 22 | 25,650,000 | 25,800,000 | 343 | 777  | 1.164360301  |               |
| 22 | 25,725,000 | 25,875,000 | 344 | 519  | 0.812421378  |               |
| 22 | 25,800,000 | 25,950,000 | 345 | 645  | 1.088120002  |               |
| 22 | 25,875,000 | 26,025,000 | 346 | 672  | 0.762484609  |               |
| 22 | 25,950,000 | 26,100,000 | 347 | 601  | 0.21313634   |               |
| 22 | 26,025,000 | 26,175,000 | 348 | 644  | 0.347250485  | CHL1          |
| 22 | 26,100,000 | 26,250,000 | 349 | 537  | 0.276571156  | CHL1          |
| 22 | 26,175,000 | 26,325,000 | 350 | 664  | 0.536765828  | CHL1          |
| 22 | 26,250,000 | 26,400,000 | 351 | 786  | 0.796758013  | CHL1          |
| 22 | 26,325,000 | 26,475,000 | 352 | 686  | 0.303546973  |               |
| 22 | 26,400,000 | 26,550,000 | 353 | 449  | -0.101022418 |               |
| 22 | 26,475,000 | 26,625,000 | 354 | 232  | 0.671207107  |               |
| 22 | 26,550,000 | 26,700,000 | 355 | 413  | 0.597980218  |               |
| 22 | 26,625,000 | 26,775,000 | 356 | 863  | 0.904656085  |               |
| 22 | 26,700,000 | 26,850,000 | 357 | 1090 | 1.069351845  |               |
| 22 | 26,775,000 | 26,925,000 | 358 | 829  | 0.797065927  |               |
| 22 | 26,850,000 | 27,000,000 | 359 | 524  | 0.124986732  |               |
| 22 | 26,925,000 | 27,075,000 | 360 | 570  | -2.112011892 |               |
| 22 | 27,000,000 | 27,150,000 | 361 | 641  | -3.459469526 |               |
| 22 | 27,075,000 | 27,225,000 | 362 | 795  | -1.28352497  |               |
| 22 | 27,150,000 | 27,300,000 | 363 | 948  | 0.240726863  | CNTN3         |
| 22 | 27,225,000 | 27,375,000 | 364 | 1194 | 0.712746896  | CNTN3         |
| 22 | 27,300,000 | 27,450,000 | 365 | 1410 | 0.668990532  | CNTN3         |
| 22 | 27,375,000 | 27,525,000 | 366 | 1176 | -0.039083809 | CNTN3         |
| 22 | 27,450,000 | 27,600,000 | 367 | 1298 | -0.552189831 | CNTN3         |
| 22 | 27,525,000 | 27,675,000 | 368 | 1622 | 0.572206804  | CNTN3         |
| 22 | 27,600,000 | 27,750,000 | 369 | 1241 | 0.680659482  |               |
| 22 | 27,675,000 | 27,825,000 | 370 | 838  | -0.453001504 |               |
| 22 | 27,750,000 | 27,900,000 | 371 | 1048 | -1.003565146 |               |
| 22 | 27,825,000 | 27,975,000 | 372 | 1164 | -0.814088641 |               |
| 22 | 27,900,000 | 28,050,000 | 373 | 1179 | 0.308573508  |               |
| 22 | 27,975,000 | 28,125,000 | 374 | 1041 | 0.990965158  |               |
| 22 | 28,050,000 | 28,200,000 | 375 | 965  | 0.951352823  |               |
| 22 | 28,125,000 | 28,275,000 | 376 | 1037 | 1.174301531  | PDZRN3        |
| 22 | 28,200,000 | 28,350,000 | 377 | 1071 | 0.560898223  | PDZRN3        |
| 22 | 28,275,000 | 28,425,000 | 378 | 965  | 0.359180496  | PDZRN3        |
| 22 | 28,350,000 | 28,500,000 | 379 | 634  | 0.734906298  | PDZRN3        |
| 22 | 28,425,000 | 28,575,000 | 380 | 614  | 0.633746261  | PDZRN3        |
| 22 | 28,500,000 | 28,650,000 | 381 | 757  | 0.209481966  | PDZRN3        |
| 22 | 28,575,000 | 28,725,000 | 382 | 772  | 0.55113136   |               |
| 22 | 28,650,000 | 28,800,000 | 383 | 563  | 1.223513908  | PPP4R2        |
| 22 | 28,725,000 | 28,875,000 | 384 | 371  | 1.15534199   | GXYLT2,PPP4R2 |
| 22 | 28,800,000 | 28,950,000 | 385 | 451  | 0.973217812  | GXYLT2,PPP4R2 |
| 22 | 28,875,000 | 29,025,000 | 386 | 490  | 0.960980461  | GXYLT2,SHQ1   |
| 22 | 28,950,000 | 29,100,000 | 387 | 316  | 1.092444558  | SHQ1          |
| 22 | 29,025,000 | 29,175,000 | 388 | 258  | 0.658445905  | SHQ1          |
| 22 | 29,100,000 | 29,250,000 | 389 | 344  | 0.629870502  |               |
| 22 | 29,175,000 | 29,325,000 | 390 | 345  | 0.587469223  | RYBP          |
| 22 | 29,250,000 | 29,400,000 | 391 | 319  | 0.369576742  | RYBP          |
| 22 | 29,325,000 | 29,475,000 | 392 | 447  | -0.636356265 | RYBP          |
| 22 | 29,400,000 | 29,550,000 | 393 | 725  | -0.11888908  |               |
| 22 | 29,475,000 | 29,625,000 | 394 | 825  | 0.315071063  |               |
| 22 | 29,550,000 | 29,700,000 | 395 | 703  | -0.397859903 |               |

|    |            |            |     |      |              |                                |
|----|------------|------------|-----|------|--------------|--------------------------------|
| 22 | 29,625,000 | 29,775,000 | 396 | 558  | -0.334529674 |                                |
| 22 | 29,700,000 | 29,850,000 | 397 | 765  | -1.431482853 |                                |
| 22 | 29,775,000 | 29,925,000 | 398 | 977  | -0.978403756 |                                |
| 22 | 29,850,000 | 30,000,000 | 399 | 661  | -0.134570476 |                                |
| 22 | 29,925,000 | 30,075,000 | 400 | 381  | -0.599058528 | EIF4E3,PROK2                   |
| 22 | 30,000,000 | 30,150,000 | 401 | 456  | -0.09080486  | EIF4E3,PROK2                   |
| 22 | 30,075,000 | 30,225,000 | 402 | 474  | 0.375456257  | EIF4E3                         |
| 22 | 30,150,000 | 30,300,000 | 403 | 380  | 0.639801006  |                                |
| 22 | 30,225,000 | 30,375,000 | 404 | 395  | 0.628670983  |                                |
| 22 | 30,300,000 | 30,450,000 | 405 | 320  | 0.318050502  | FOXP1                          |
| 22 | 30,375,000 | 30,525,000 | 406 | 230  | -0.100144299 | FOXP1                          |
| 22 | 30,450,000 | 30,600,000 | 407 | 309  | 0.617223656  | FOXP1                          |
| 22 | 30,525,000 | 30,675,000 | 408 | 347  | 0.555825577  | FOXP1                          |
| 22 | 30,600,000 | 30,750,000 | 409 | 354  | -3.119622557 | FOXP1                          |
| 22 | 30,675,000 | 30,825,000 | 410 | 374  | -3.077077916 | FOXP1                          |
| 22 | 30,750,000 | 30,900,000 | 411 | 316  | -0.095928121 | FOXP1                          |
| 22 | 30,825,000 | 30,975,000 | 412 | 341  | -0.14354856  |                                |
| 22 | 30,900,000 | 31,050,000 | 413 | 383  | -1.301082722 |                                |
| 22 | 30,975,000 | 31,125,000 | 414 | 521  | -0.505817578 |                                |
| 22 | 31,050,000 | 31,200,000 | 415 | 637  | 0.697584916  |                                |
| 22 | 31,125,000 | 31,275,000 | 416 | 636  | 0.048478059  |                                |
| 22 | 31,200,000 | 31,350,000 | 417 | 921  | 0.351247166  |                                |
| 22 | 31,275,000 | 31,425,000 | 418 | 845  | 0.223309982  |                                |
| 22 | 31,350,000 | 31,500,000 | 419 | 526  | -1.075107886 |                                |
| 22 | 31,425,000 | 31,575,000 | 420 | 516  | 0.053813023  | ENSBTAG00000048050             |
| 22 | 31,500,000 | 31,650,000 | 421 | 459  | 0.433597658  | ENSBTAG00000048050             |
| 22 | 31,575,000 | 31,725,000 | 422 | 635  | -0.168274395 |                                |
| 22 | 31,650,000 | 31,800,000 | 423 | 666  | -0.227801737 | MITF                           |
| 22 | 31,725,000 | 31,875,000 | 424 | 458  | -0.255651895 | MITF                           |
| 22 | 31,800,000 | 31,950,000 | 425 | 429  | -1.539693524 |                                |
| 22 | 31,875,000 | 32,025,000 | 426 | 569  | -1.9451981   |                                |
| 22 | 31,950,000 | 32,100,000 | 427 | 607  | -0.366497694 |                                |
| 22 | 32,025,000 | 32,175,000 | 428 | 448  | 0.784085027  |                                |
| 22 | 32,100,000 | 32,250,000 | 429 | 717  | -0.197579236 |                                |
| 22 | 32,175,000 | 32,325,000 | 430 | 1140 | -0.540536475 |                                |
| 22 | 32,250,000 | 32,400,000 | 431 | 780  | -0.224036687 | FRMD4B                         |
| 22 | 32,325,000 | 32,475,000 | 432 | 297  | 1.150588589  | FRMD4B                         |
| 22 | 32,400,000 | 32,550,000 | 433 | 382  | 0.76188787   | FRMD4B,LMOD3                   |
| 22 | 32,475,000 | 32,625,000 | 434 | 343  | 0.10632841   | ARL6IP5,FRMD4B,LMOD3,TMF1,UBA3 |
| 22 | 32,550,000 | 32,700,000 | 435 | 273  | -2.580806045 | ARL6IP5,EOGT,LMOD3,TMF1,UBA3   |
| 22 | 32,625,000 | 32,775,000 | 436 | 390  | -2.298662567 | EOGT,FAM19A4,TMF1              |
| 22 | 32,700,000 | 32,850,000 | 437 | 738  | -1.615035661 | FAM19A4                        |
| 22 | 32,775,000 | 32,925,000 | 438 | 888  | -0.692220403 | FAM19A4                        |
| 22 | 32,850,000 | 33,000,000 | 439 | 665  | 0.287548409  | FAM19A4                        |
| 22 | 32,925,000 | 33,075,000 | 440 | 577  | -1.241272767 | FAM19A1                        |
| 22 | 33,000,000 | 33,150,000 | 441 | 644  | -3.264497303 | FAM19A1                        |
| 22 | 33,075,000 | 33,225,000 | 442 | 744  | -2.1037669   | FAM19A1                        |
| 22 | 33,150,000 | 33,300,000 | 443 | 875  | 0.482200205  | FAM19A1                        |
| 22 | 33,225,000 | 33,375,000 | 444 | 1111 | 0.323754561  | FAM19A1                        |
| 22 | 33,300,000 | 33,450,000 | 445 | 1037 | -0.712239451 | FAM19A1                        |
| 22 | 33,375,000 | 33,525,000 | 446 | 831  | -1.754968554 | FAM19A1                        |
| 22 | 33,450,000 | 33,600,000 | 447 | 640  | -1.143288343 | FAM19A1                        |
| 22 | 33,525,000 | 33,675,000 | 448 | 685  | -0.24916737  | FAM19A1                        |

|    |            |            |     |      |              |                                             |
|----|------------|------------|-----|------|--------------|---------------------------------------------|
| 22 | 33,600,000 | 33,750,000 | 449 | 642  | -0.012080521 |                                             |
| 22 | 33,675,000 | 33,825,000 | 450 | 780  | 0.764449317  |                                             |
| 22 | 33,750,000 | 33,900,000 | 451 | 1021 | 0.898105959  |                                             |
| 22 | 33,825,000 | 33,975,000 | 452 | 762  | 1.21876224   |                                             |
| 22 | 33,900,000 | 34,050,000 | 453 | 539  | 1.141012654  | SUCLG2                                      |
| 22 | 33,975,000 | 34,125,000 | 454 | 433  | 1.104657191  | SUCLG2                                      |
| 22 | 34,050,000 | 34,200,000 | 455 | 351  | 0.957909519  | SUCLG2                                      |
| 22 | 34,125,000 | 34,275,000 | 456 | 288  | 0.51771566   | SUCLG2                                      |
| 22 | 34,200,000 | 34,350,000 | 457 | 296  | 0.668138998  | SUCLG2                                      |
| 22 | 34,275,000 | 34,425,000 | 458 | 386  | -1.255894241 |                                             |
| 22 | 34,350,000 | 34,500,000 | 459 | 458  | -1.925893482 |                                             |
| 22 | 34,425,000 | 34,575,000 | 460 | 464  | -1.22227506  |                                             |
| 22 | 34,500,000 | 34,650,000 | 461 | 593  | -1.301743239 | KBTD8                                       |
| 22 | 34,575,000 | 34,725,000 | 462 | 599  | -0.653843678 | KBTD8                                       |
| 22 | 34,650,000 | 34,800,000 | 463 | 404  | 0.127802348  |                                             |
| 22 | 34,725,000 | 34,875,000 | 464 | 371  | -0.186864653 |                                             |
| 22 | 34,800,000 | 34,950,000 | 465 | 551  | -1.093770894 |                                             |
| 22 | 34,875,000 | 35,025,000 | 466 | 519  | -2.233810552 |                                             |
| 22 | 34,950,000 | 35,100,000 | 467 | 408  | -1.151238152 | LRIG1,ENSBTAG00000046330,ENSBTAG00000047851 |
| 22 | 35,025,000 | 35,175,000 | 468 | 505  | 0.698985799  | LRIG1,ENSBTAG00000046330,ENSBTAG00000047851 |
| 22 | 35,100,000 | 35,250,000 | 469 | 485  | -0.124578425 | LRIG1,SLC25A26                              |
| 22 | 35,175,000 | 35,325,000 | 470 | 322  | -2.17187774  | LRIG1,SLC25A26                              |
| 22 | 35,250,000 | 35,400,000 | 471 | 525  | -0.325116392 | ATP5E,SLC25A26                              |
| 22 | 35,325,000 | 35,475,000 | 472 | 716  | -0.61064443  | ATP5E,SLC25A26                              |
| 22 | 35,400,000 | 35,550,000 | 473 | 731  | -0.815326681 |                                             |
| 22 | 35,475,000 | 35,625,000 | 474 | 1055 | 0.497282722  |                                             |
| 22 | 35,550,000 | 35,700,000 | 475 | 984  | 0.776038726  |                                             |
| 22 | 35,625,000 | 35,775,000 | 476 | 577  | 0.40701264   |                                             |
| 22 | 35,700,000 | 35,850,000 | 477 | 498  | 0.264019324  |                                             |
| 22 | 35,775,000 | 35,925,000 | 478 | 415  | 0.284622317  |                                             |
| 22 | 35,850,000 | 36,000,000 | 479 | 386  | 0.094101688  |                                             |
| 22 | 35,925,000 | 36,075,000 | 480 | 472  | 0.22945585   | MAGI1                                       |
| 22 | 36,000,000 | 36,150,000 | 481 | 674  | 0.816405018  | MAGI1                                       |
| 22 | 36,075,000 | 36,225,000 | 482 | 1016 | 0.804483002  | MAGI1                                       |
| 22 | 36,150,000 | 36,300,000 | 483 | 1038 | 0.752121471  |                                             |
| 22 | 36,225,000 | 36,375,000 | 484 | 978  | 0.914639919  |                                             |
| 22 | 36,300,000 | 36,450,000 | 485 | 996  | 0.905012042  |                                             |
| 22 | 36,375,000 | 36,525,000 | 486 | 825  | 0.620511037  |                                             |
| 22 | 36,450,000 | 36,600,000 | 487 | 595  | 0.23998116   |                                             |
| 22 | 36,525,000 | 36,675,000 | 488 | 414  | 0.347236452  |                                             |
| 22 | 36,600,000 | 36,750,000 | 489 | 352  | 0.476273552  | ENSBTAG00000008534                          |
| 22 | 36,675,000 | 36,825,000 | 490 | 392  | -0.558480182 | ENSBTAG00000008534                          |
| 22 | 36,750,000 | 36,900,000 | 491 | 391  | -0.99434123  | ADAMTS9                                     |
| 22 | 36,825,000 | 36,975,000 | 492 | 316  | 0.059380756  | ADAMTS9                                     |
| 22 | 36,900,000 | 37,050,000 | 493 | 457  | -0.100523661 | ADAMTS9                                     |
| 22 | 36,975,000 | 37,125,000 | 494 | 645  | 0.089265866  | ADAMTS9                                     |
| 22 | 37,050,000 | 37,200,000 | 495 | 514  | 0.595654734  |                                             |
| 22 | 37,125,000 | 37,275,000 | 496 | 586  | 0.479807374  |                                             |
| 22 | 37,200,000 | 37,350,000 | 497 | 687  | -0.001821222 | PRICKLE2                                    |
| 22 | 37,275,000 | 37,425,000 | 498 | 743  | 0.173247727  | PRICKLE2                                    |
| 22 | 37,350,000 | 37,500,000 | 499 | 650  | 0.628149412  | PRICKLE2                                    |
| 22 | 37,425,000 | 37,575,000 | 500 | 589  | -0.569855304 | PRICKLE2,PSMD6                              |
| 22 | 37,500,000 | 37,650,000 | 501 | 568  | -2.241479126 | ATXN7,PSMD6                                 |

|    |            |            |     |      |              |                                  |
|----|------------|------------|-----|------|--------------|----------------------------------|
| 22 | 37,575,000 | 37,725,000 | 502 | 275  | -3.079512119 | ATXN7                            |
| 22 | 37,650,000 | 37,800,000 | 503 | 659  | 0.387407156  | ATXN7,C3orf49,ENSBTAG00000032872 |
| 22 | 37,725,000 | 37,875,000 | 504 | 1100 | 0.107068455  | C3orf49,SNTN,ENSBTAG00000032872  |
| 22 | 37,800,000 | 37,950,000 | 505 | 877  | -0.179697529 | SNTN,SYNPR                       |
| 22 | 37,875,000 | 38,025,000 | 506 | 567  | 0.133887815  | SNTN,SYNPR                       |
| 22 | 37,950,000 | 38,100,000 | 507 | 479  | -0.368487204 | SYNPR                            |
| 22 | 38,025,000 | 38,175,000 | 508 | 502  | 0.085601985  | SYNPR                            |
| 22 | 38,100,000 | 38,250,000 | 509 | 546  | 0.24764258   |                                  |
| 22 | 38,175,000 | 38,325,000 | 510 | 580  | 0.082485034  |                                  |
| 22 | 38,250,000 | 38,400,000 | 511 | 439  | -0.167907184 |                                  |
| 22 | 38,325,000 | 38,475,000 | 512 | 498  | -2.368005917 |                                  |
| 22 | 38,400,000 | 38,550,000 | 513 | 707  | -1.095816698 |                                  |
| 22 | 38,475,000 | 38,625,000 | 514 | 771  | 0.86941651   |                                  |
| 22 | 38,550,000 | 38,700,000 | 515 | 870  | 0.537436594  | CADPS                            |
| 22 | 38,625,000 | 38,775,000 | 516 | 692  | 0.262879679  | CADPS                            |
| 22 | 38,700,000 | 38,850,000 | 517 | 793  | 0.713905051  | CADPS                            |
| 22 | 38,775,000 | 38,925,000 | 518 | 840  | 0.304813497  | CADPS                            |
| 22 | 38,850,000 | 39,000,000 | 519 | 483  | -0.470144366 | CADPS                            |
| 22 | 38,925,000 | 39,075,000 | 520 | 400  | 0.434551318  | CADPS,FEZF2                      |
| 22 | 39,000,000 | 39,150,000 | 521 | 496  | 0.402008761  | C3orf14,CADPS,FEZF2              |
| 22 | 39,075,000 | 39,225,000 | 522 | 720  | 0.538388442  | C3orf14,PTPRG                    |
| 22 | 39,150,000 | 39,300,000 | 523 | 1096 | 0.402237521  | PTPRG                            |
| 22 | 39,225,000 | 39,375,000 | 524 | 981  | 0.541800724  | PTPRG                            |
| 22 | 39,300,000 | 39,450,000 | 525 | 880  | 0.145564455  | PTPRG                            |
| 22 | 39,375,000 | 39,525,000 | 526 | 892  | -0.340040212 | PTPRG                            |
| 22 | 39,450,000 | 39,600,000 | 527 | 578  | -0.254941397 | PTPRG                            |
| 22 | 39,525,000 | 39,675,000 | 528 | 712  | 0.194193393  | PTPRG                            |
| 22 | 39,600,000 | 39,750,000 | 529 | 895  | 0.566038032  | PTPRG                            |
| 22 | 39,675,000 | 39,825,000 | 530 | 474  | 0.577518373  | PTPRG                            |
| 22 | 39,750,000 | 39,900,000 | 531 | 42   | -6.473081823 | PTPRG                            |
| 22 | 39,825,000 | 39,975,000 | 532 | 177  | -0.120258035 | PTPRG                            |
| 22 | 39,900,000 | 40,050,000 | 533 | 273  | 0.005537108  | PTPRG                            |
| 22 | 39,975,000 | 40,125,000 | 534 | 374  | 0.376002255  | PTPRG                            |
| 22 | 40,050,000 | 40,200,000 | 535 | 687  | 1.072220676  | PTPRG                            |
| 22 | 40,125,000 | 40,275,000 | 536 | 965  | 0.784629356  | PTPRG                            |
| 22 | 40,200,000 | 40,350,000 | 537 | 1022 | 0.455090154  | PTPRG                            |
| 22 | 40,275,000 | 40,425,000 | 538 | 1082 | -0.419564297 | PTPRG                            |
| 22 | 40,350,000 | 40,500,000 | 539 | 1021 | -0.992678669 | PTPRG                            |
| 22 | 40,425,000 | 40,575,000 | 540 | 933  | 0.278878031  |                                  |
| 22 | 40,500,000 | 40,650,000 | 541 | 1146 | -0.056565049 |                                  |
| 22 | 40,575,000 | 40,725,000 | 542 | 1322 | -0.5731541   |                                  |
| 22 | 40,650,000 | 40,800,000 | 543 | 1193 | -0.294399479 |                                  |
| 22 | 40,725,000 | 40,875,000 | 544 | 992  | 0.514429387  |                                  |
| 22 | 40,800,000 | 40,950,000 | 545 | 763  | 1.096750651  |                                  |
| 22 | 40,875,000 | 41,025,000 | 546 | 450  | 1.10690372   |                                  |
| 22 | 40,950,000 | 41,100,000 | 547 | 572  | 1.219761588  |                                  |
| 22 | 41,025,000 | 41,175,000 | 548 | 703  | 1.206239067  |                                  |
| 22 | 41,100,000 | 41,250,000 | 549 | 749  | 0.886676683  |                                  |
| 22 | 41,175,000 | 41,325,000 | 550 | 1006 | -0.397743351 | FHIT                             |
| 22 | 41,250,000 | 41,400,000 | 551 | 1149 | -1.006284809 | FHIT                             |
| 22 | 41,325,000 | 41,475,000 | 552 | 1134 | -0.74085551  | FHIT,ENSBTAG00000047771          |
| 22 | 41,400,000 | 41,550,000 | 553 | 1154 | -1.234975076 | FHIT,ENSBTAG00000047771          |
| 22 | 41,475,000 | 41,625,000 | 554 | 1002 | -1.114666056 | FHIT                             |

|    |            |            |     |      |              |                                       |
|----|------------|------------|-----|------|--------------|---------------------------------------|
| 22 | 41,550,000 | 41,700,000 | 555 | 829  | -0.798495874 | FHIT                                  |
| 22 | 41,625,000 | 41,775,000 | 556 | 1053 | -0.659189475 | FHIT                                  |
| 22 | 41,700,000 | 41,850,000 | 557 | 1372 | -0.904207742 | FHIT                                  |
| 22 | 41,775,000 | 41,925,000 | 558 | 1434 | -0.675264847 | FHIT                                  |
| 22 | 41,850,000 | 42,000,000 | 559 | 1346 | 0.431433891  | FHIT                                  |
| 22 | 41,925,000 | 42,075,000 | 560 | 1026 | 0.443766735  | FHIT                                  |
| 22 | 42,000,000 | 42,150,000 | 561 | 711  | 0.293277897  | FHIT                                  |
| 22 | 42,075,000 | 42,225,000 | 562 | 706  | -0.739513973 | FHIT                                  |
| 22 | 42,150,000 | 42,300,000 | 563 | 908  | 0.223403087  |                                       |
| 22 | 42,225,000 | 42,375,000 | 564 | 1210 | 1.029975675  |                                       |
| 22 | 42,300,000 | 42,450,000 | 565 | 952  | 0.659026967  |                                       |
| 22 | 42,375,000 | 42,525,000 | 566 | 987  | 0.928790528  |                                       |
| 22 | 42,450,000 | 42,600,000 | 567 | 1189 | 1.170524246  |                                       |
| 22 | 42,525,000 | 42,675,000 | 568 | 1068 | 1.138326435  |                                       |
| 22 | 42,600,000 | 42,750,000 | 569 | 1262 | 1.016914657  |                                       |
| 22 | 42,675,000 | 42,825,000 | 570 | 1194 | 0.833855505  |                                       |
| 22 | 42,750,000 | 42,900,000 | 571 | 1115 | 1.085247345  |                                       |
| 22 | 42,825,000 | 42,975,000 | 572 | 862  | 1.037945188  |                                       |
| 22 | 42,900,000 | 43,050,000 | 573 | 556  | 0.061039784  | C3orf67                               |
| 22 | 42,975,000 | 43,125,000 | 574 | 714  | -0.376720988 | C3orf67                               |
| 22 | 43,050,000 | 43,200,000 | 575 | 1127 | -0.25669692  | C3orf67                               |
| 22 | 43,125,000 | 43,275,000 | 576 | 1413 | 0.359943911  | C3orf67,FAM3D                         |
| 22 | 43,200,000 | 43,350,000 | 577 | 1423 | 1.053380197  | FAM3D,MGC143103                       |
| 22 | 43,275,000 | 43,425,000 | 578 | 1055 | 1.013643925  | ACOX2,KCTD6,MGC143103                 |
| 22 | 43,350,000 | 43,500,000 | 579 | 682  | -0.165306934 | ACOX2,KCTD6,MGC143103,PDHB,PXK        |
| 22 | 43,425,000 | 43,575,000 | 580 | 632  | -0.226777035 | ABHD6,PDHB,PXK,RPP14                  |
| 22 | 43,500,000 | 43,650,000 | 581 | 462  | 0.631889142  | ABHD6,DNASE1L3,PXK,RPP14              |
| 22 | 43,575,000 | 43,725,000 | 582 | 591  | 0.803892208  | ABHD6,DNASE1L3,FLNB                   |
| 22 | 43,650,000 | 43,800,000 | 583 | 745  | 0.718496215  | DNASE1L3,FLNB                         |
| 22 | 43,725,000 | 43,875,000 | 584 | 884  | 0.782547683  | FLNB,SLMAP                            |
| 22 | 43,800,000 | 43,950,000 | 585 | 969  | 0.496675916  | FLNB,SLMAP                            |
| 22 | 43,875,000 | 44,025,000 | 586 | 717  | 0.149854529  | SLMAP                                 |
| 22 | 43,950,000 | 44,100,000 | 587 | 612  | 0.869750587  | DENND6A,SLMAP                         |
| 22 | 44,025,000 | 44,175,000 | 588 | 860  | 0.95427048   | ARF4,DENND6A                          |
| 22 | 44,100,000 | 44,250,000 | 589 | 817  | 0.97691291   | ARF4,DENND6A,PDE12,ENSBTAG00000020802 |
| 22 | 44,175,000 | 44,325,000 | 590 | 857  | 0.785370464  | PDE12,ENSBTAG00000020802              |
| 22 | 44,250,000 | 44,400,000 | 591 | 1041 | 0.778887598  | APPL1,DNAH12,ENSBTAG00000020802       |
| 22 | 44,325,000 | 44,475,000 | 592 | 726  | 1.000432074  | APPL1,DNAH12,HESX1,ENSBTAG00000020802 |
| 22 | 44,400,000 | 44,550,000 | 593 | 695  | 0.755795541  | APPL1,HESX1,IL17RD                    |
| 22 | 44,475,000 | 44,625,000 | 594 | 1003 | 0.345740874  | IL17RD                                |
| 22 | 44,550,000 | 44,700,000 | 595 | 1084 | 0.059152922  |                                       |
| 22 | 44,625,000 | 44,775,000 | 596 | 1244 | 0.659518655  |                                       |
| 22 | 44,700,000 | 44,850,000 | 597 | 1234 | 0.975590037  | ARHGEF3                               |
| 22 | 44,775,000 | 44,925,000 | 598 | 959  | 0.805997349  | ARHGEF3,FAM208A                       |
| 22 | 44,850,000 | 45,000,000 | 599 | 710  | 0.86172193   | ARHGEF3,CCDC66,FAM208A                |
| 22 | 44,925,000 | 45,075,000 | 600 | 739  | 0.951688028  | CCDC66,FAM208A                        |
| 22 | 45,000,000 | 45,150,000 | 601 | 1019 | 0.754355673  | ERC2                                  |
| 22 | 45,075,000 | 45,225,000 | 602 | 997  | 0.757161499  | ERC2                                  |
| 22 | 45,150,000 | 45,300,000 | 603 | 936  | 0.993085772  | ERC2                                  |
| 22 | 45,225,000 | 45,375,000 | 604 | 849  | 0.937336348  | ERC2                                  |
| 22 | 45,300,000 | 45,450,000 | 605 | 757  | 0.914177614  | ERC2                                  |
| 22 | 45,375,000 | 45,525,000 | 606 | 671  | 0.838579493  | ERC2                                  |
| 22 | 45,450,000 | 45,600,000 | 607 | 675  | 0.769806075  | ERC2                                  |

|    |            |            |     |      |              |                                                               |
|----|------------|------------|-----|------|--------------|---------------------------------------------------------------|
| 22 | 45,525,000 | 45,675,000 | 608 | 709  | 0.816139596  | ERC2                                                          |
| 22 | 45,600,000 | 45,750,000 | 609 | 674  | 0.828378163  |                                                               |
| 22 | 45,675,000 | 45,825,000 | 610 | 748  | 1.03406607   |                                                               |
| 22 | 45,750,000 | 45,900,000 | 611 | 732  | 0.966285036  |                                                               |
| 22 | 45,825,000 | 45,975,000 | 612 | 641  | 0.448117751  |                                                               |
| 22 | 45,900,000 | 46,050,000 | 613 | 664  | 0.661975123  |                                                               |
| 22 | 45,975,000 | 46,125,000 | 614 | 663  | 1.128575725  | WNT5A                                                         |
| 22 | 46,050,000 | 46,200,000 | 615 | 1248 | 0.698273168  | WNT5A                                                         |
| 22 | 46,125,000 | 46,275,000 | 616 | 1395 | 0.559517458  |                                                               |
| 22 | 46,200,000 | 46,350,000 | 617 | 939  | 0.765576803  |                                                               |
| 22 | 46,275,000 | 46,425,000 | 618 | 962  | 0.909938113  |                                                               |
| 22 | 46,350,000 | 46,500,000 | 619 | 1061 | 0.983109114  | CACNA2D3                                                      |
| 22 | 46,425,000 | 46,575,000 | 620 | 992  | 1.111130274  | CACNA2D3                                                      |
| 22 | 46,500,000 | 46,650,000 | 621 | 874  | 1.201173774  | CACNA2D3,LRTM1                                                |
| 22 | 46,575,000 | 46,725,000 | 622 | 1116 | 0.737508616  | CACNA2D3,LRTM1                                                |
| 22 | 46,650,000 | 46,800,000 | 623 | 1016 | 0.402046199  | CACNA2D3                                                      |
| 22 | 46,725,000 | 46,875,000 | 624 | 646  | 0.541038456  | CACNA2D3                                                      |
| 22 | 46,800,000 | 46,950,000 | 625 | 599  | 0.688296901  | CACNA2D3                                                      |
| 22 | 46,875,000 | 47,025,000 | 626 | 815  | 0.624807865  | CACNA2D3                                                      |
| 22 | 46,950,000 | 47,100,000 | 627 | 1050 | 0.261833003  |                                                               |
| 22 | 47,025,000 | 47,175,000 | 628 | 956  | 0.140424236  |                                                               |
| 22 | 47,100,000 | 47,250,000 | 629 | 944  | -0.999296178 |                                                               |
| 22 | 47,175,000 | 47,325,000 | 630 | 1157 | -0.529965074 |                                                               |
| 22 | 47,250,000 | 47,400,000 | 631 | 902  | 0.62855457   |                                                               |
| 22 | 47,325,000 | 47,475,000 | 632 | 798  | -0.292629158 |                                                               |
| 22 | 47,400,000 | 47,550,000 | 633 | 959  | -0.255666517 |                                                               |
| 22 | 47,475,000 | 47,625,000 | 634 | 988  | 0.625572349  | ACTR8,IL17RB,SELK                                             |
| 22 | 47,550,000 | 47,700,000 | 635 | 1098 | 0.804183207  | ACTR8,CHDH,IL17RB,SELK                                        |
| 22 | 47,625,000 | 47,775,000 | 636 | 711  | 0.890837443  | CACNA1D,CHDH,IL17RB                                           |
| 22 | 47,700,000 | 47,850,000 | 637 | 360  | 0.798064292  | CACNA1D,CHDH                                                  |
| 22 | 47,775,000 | 47,925,000 | 638 | 516  | 0.789838407  | CACNA1D                                                       |
| 22 | 47,850,000 | 48,000,000 | 639 | 1043 | 0.92369956   | CACNA1D                                                       |
| 22 | 47,925,000 | 48,075,000 | 640 | 1069 | 0.919451247  | CACNA1D                                                       |
| 22 | 48,000,000 | 48,150,000 | 641 | 855  | 0.532530726  | CACNA1D,CHCHD5                                                |
| 22 | 48,075,000 | 48,225,000 | 642 | 1051 | 0.51031206   | CHCHD5,DCP1A                                                  |
| 22 | 48,150,000 | 48,300,000 | 643 | 932  | 0.64339892   | DCP1A,TKT                                                     |
| 22 | 48,225,000 | 48,375,000 | 644 | 925  | 0.604968969  | DCP1A,PRKCD,TKT,ENSBTAG00000020973                            |
| 22 | 48,300,000 | 48,450,000 | 645 | 1128 | 0.607647266  | PRKCD,ENSBTAG00000020973                                      |
| 22 | 48,375,000 | 48,525,000 | 646 | 1017 | 0.825130309  | SFMBT1,ENSBTAG00000020973                                     |
| 22 | 48,450,000 | 48,600,000 | 647 | 829  | 0.983165436  | SFMBT1,TMEM110                                                |
| 22 | 48,525,000 | 48,675,000 | 648 | 682  | 0.913170083  | ITIH1,ITIH3,ITIH4,MUSTN1,SFMBT1,TMEM110                       |
| 22 | 48,600,000 | 48,750,000 | 649 | 368  | 0.816491363  | GLT8D1,GNL3,ITIH1,ITIH3,ITIH4,MUSTN1,NEK4,PBRM1,SPCS1,TMEM110 |
| 22 | 48,675,000 | 48,825,000 | 650 | 201  | 0.650531121  | GLT8D1,GNL3,NEK4,PBRM1,SPCS1                                  |
| 22 | 48,750,000 | 48,900,000 | 651 | 270  | -0.797590367 | NT5DC2,PBRM1,SMIM4,STAB1                                      |
| 22 | 48,825,000 | 48,975,000 | 652 | 320  | -2.17642592  | NISCH,NT5DC2,PBRM1,SMIM4,STAB1                                |
| 22 | 48,900,000 | 49,050,000 | 653 | 267  | -1.597573149 | BAP1,DNAH1,NISCH,PHF7,SEMA3G,STAB1,TNNC1                      |
| 22 | 48,975,000 | 49,125,000 | 654 | 197  | -0.473230613 | BAP1,DNAH1,NISCH,PHF7,SEMA3G,TNNC1                            |
| 22 | 49,050,000 | 49,200,000 | 655 | 158  | -0.785400122 | DNAH1,GLYCTK,WDR82P1                                          |
| 22 | 49,125,000 | 49,275,000 | 656 | 347  | -0.45964191  | ALAS1,GLYCTK,PPM1M,TLR9,WDR82P1                               |
| 22 | 49,200,000 | 49,350,000 | 657 | 403  | -2.520582414 | ALAS1,POC1A,PPM1M,TLR9,WDR82P1                                |
| 22 | 49,275,000 | 49,425,000 | 658 | 358  | -7.302848494 | DUSP7,POC1A                                                   |
| 22 | 49,350,000 | 49,500,000 | 659 | 484  | -4.838330032 | DUSP7,POC1A,RPL29                                             |

|    |            |            |     |      |              |                                                                                                                    |
|----|------------|------------|-----|------|--------------|--------------------------------------------------------------------------------------------------------------------|
| 22 | 49,425,000 | 49,575,000 | 660 | 416  | -1.521632022 | ABHD14B,ACY1,GPR62,IQCF1,IQCF5,PARP3,PCBP4,RPL29,RRP9                                                              |
| 22 | 49,500,000 | 49,650,000 | 661 | 298  | 0.041555815  | ABHD14B,ACY1,GPR62,IQCF1,IQCF2,IQCF3,IQCF5,IQCF6,PARP3,PCBP4,RPL29,RRP9,ENSBTAG00000037410                         |
| 22 | 49,575,000 | 49,725,000 | 662 | 337  | 0.545270178  | GRM2,IQCF2,IQCF3,IQCF6,TEX264,ENSBTAG00000037410                                                                   |
| 22 | 49,650,000 | 49,800,000 | 663 | 305  | 1.069076653  | GRM2,RAD54L2,TEX264                                                                                                |
| 22 | 49,725,000 | 49,875,000 | 664 | 194  | 1.224101699  | RAD54L2,VPRBP                                                                                                      |
| 22 | 49,800,000 | 49,950,000 | 665 | 166  | 1.36275589   | MANF,RBM15B,VPRBP                                                                                                  |
| 22 | 49,875,000 | 50,025,000 | 666 | 261  | 1.352206954  | DOCK3,MANF,RBM15B,VPRBP                                                                                            |
| 22 | 49,950,000 | 50,100,000 | 667 | 270  | 1.347120752  | DOCK3,MANF                                                                                                         |
| 22 | 50,025,000 | 50,175,000 | 668 | 205  | 1.344866323  | DOCK3                                                                                                              |
| 22 | 50,100,000 | 50,250,000 | 669 | 212  | 1.25707551   | DOCK3                                                                                                              |
| 22 | 50,175,000 | 50,325,000 | 670 | 199  | 1.26896699   | CISH,MAPKAPK3                                                                                                      |
| 22 | 50,250,000 | 50,400,000 | 671 | 249  | 1.067183035  | C22H3ORF18,CISH,HEMK1,MAPKAPK3                                                                                     |
| 22 | 50,325,000 | 50,475,000 | 672 | 389  | 1.084010509  | C22H3ORF18,CISH,HEMK1                                                                                              |
| 22 | 50,400,000 | 50,550,000 | 673 | 555  | 1.262828302  | CACNA2D2                                                                                                           |
| 22 | 50,475,000 | 50,625,000 | 674 | 493  | 1.170924605  | CACNA2D2,CYB561D2,HYAL1,HYAL2,IFRD2,NAT6,NPRL2,RASSF1,TMEM115,TUSC2,ZMYND10,ENSBTAG00000047200                     |
| 22 | 50,550,000 | 50,700,000 | 675 | 368  | 0.462928117  | CACNA2D2,CYB561D2,GNAI2,HYAL1,HYAL2,IFRD2,LSMEM2,NAT6,NPRL2,RASSF1,SEMA3B,TMEM115,TUSC2,ZMYND10,ENSBTAG00000047200 |
| 22 | 50,625,000 | 50,775,000 | 676 | 409  | -1.413112685 | GNAI2,GNAT1,IFRD2,LSMEM2,SEMA3B,SEMA3F,SLC38A3                                                                     |
| 22 | 50,700,000 | 50,850,000 | 677 | 335  | -1.793817827 | GNAT1,RBM5,RBM6,SEMA3F,SLC38A3                                                                                     |
| 22 | 50,775,000 | 50,925,000 | 678 | 220  | -0.59520123  | MON1A,RBM5,RBM6                                                                                                    |
| 22 | 50,850,000 | 51,000,000 | 679 | 333  | 0.685170738  | CAMKV,MON1A,MST1R,RBM6,TRAI,UBA7,ENSBTAG00000040083                                                                |
| 22 | 50,925,000 | 51,075,000 | 680 | 310  | 0.9934299    | AMIGO3,CAMKV,CDHR4,FAM212A,GMPPB,IP6K1,MST1R,RNF123,TRAI,UBA7,ENSBTAG00000040083                                   |
| 22 | 51,000,000 | 51,150,000 | 681 | 274  | -2.117495926 | AMIGO3,APEH,BSN,CDHR4,FAM212A,GMPPB,IP6K1,MST1,RNF123,UBA7                                                         |
| 22 | 51,075,000 | 51,225,000 | 682 | 670  | -2.501585663 | APEH,BSN,DAG1,MST1,RNF123                                                                                          |
| 22 | 51,150,000 | 51,300,000 | 683 | 704  | -1.349032494 | AMT,BSN,DAG1,NICN1,RHOA,TCTA                                                                                       |
| 22 | 51,225,000 | 51,375,000 | 684 | 367  | -0.002831314 | AMT,NICN1,RHOA,TCTA,USP4                                                                                           |
| 22 | 51,300,000 | 51,450,000 | 685 | 284  | 0.32963721   | C3orf62,CCDC36,CCDC71,KLHDC8B,MGC137053,RHOA,USP4                                                                  |
| 22 | 51,375,000 | 51,525,000 | 686 | 262  | 0.09561475   | C3orf62,CCDC36,CCDC71,KLHDC8B,LAMC1,MGC137053,QARS,QRIC1,USP19                                                     |
| 22 | 51,450,000 | 51,600,000 | 687 | 258  | 0.229912271  | ARIH2,DALRD3,IMPDH2,LAMC1,NDUFAF3,P4HTM,QARS,QRIC1,USP19,WDR6                                                      |
| 22 | 51,525,000 | 51,675,000 | 688 | 286  | 0.421819866  | ARIH2,DALRD3,IMPDH2,NDUFAF3,P4HTM,PRKAR2A,QRIC1,SLC25A20,WDR6                                                      |
| 22 | 51,600,000 | 51,750,000 | 689 | 312  | 0.554528858  | ARIH2,IP6K2,PRKAR2A,SLC25A20                                                                                       |
| 22 | 51,675,000 | 51,825,000 | 690 | 342  | 0.585211867  | CELSR3,IP6K2,NCKIPSD,PRKAR2A,SLC26A6                                                                               |
| 22 | 51,750,000 | 51,900,000 | 691 | 350  | -0.366242737 | CELSR3,COL7A1,IP6K2,NCKIPSD,PFKFB4,SLC26A6,TMEM89,UCN2,UQCRC1                                                      |
| 22 | 51,825,000 | 51,975,000 | 692 | 356  | -0.412317004 | ATRIP,COL7A1,PFKFB4,SHISA5,SLC26A6,TMEM89,TREX1,UCN2,UQCRC1                                                        |
| 22 | 51,900,000 | 52,050,000 | 693 | 535  | 0.104647763  | ATRIP,CCDC51,PFKFB4,PLXNB1,SHISA5,TREX1                                                                            |
| 22 | 51,975,000 | 52,125,000 | 694 | 1106 | -1.18850446  | ATRIP,CCDC51,PLXNB1,SPINK8                                                                                         |
| 22 | 52,050,000 | 52,200,000 | 695 | 1137 | -1.756014136 | CATHL1,CATHL2,CATHL3,CATHL7,NME6,SPINK8,ENSBTAG0000016153,ENSBTAG00000039879                                       |

|    |            |            |     |      |              |                                                                     |
|----|------------|------------|-----|------|--------------|---------------------------------------------------------------------|
|    |            |            |     |      |              | CATHL1,CATHL2,CATHL3,CATHL5,CATHL6,CATHL7,CDC25                     |
| 22 | 52,125,000 | 52,275,000 | 696 | 658  | -1.380846478 | A,NME6,ENSBTAG00000016153,ENSBTAG00000031594,E<br>NSBTAG00000039879 |
| 22 | 52,200,000 | 52,350,000 | 697 | 587  | -0.594812552 | CATHL5,CATHL6,CDC25A,ENSBTAG00000031594                             |
| 22 | 52,275,000 | 52,425,000 | 698 | 637  | -0.19512024  | MAP4                                                                |
| 22 | 52,350,000 | 52,500,000 | 699 | 520  | -0.751585114 | DHX30,MAP4,ENSBTAG00000047174                                       |
| 22 | 52,425,000 | 52,575,000 | 700 | 411  | -0.989819916 | DHX30,MAP4,SMARCC1,ENSBTAG00000047174                               |
| 22 | 52,500,000 | 52,650,000 | 701 | 493  | 0.069789118  | CSPG5,SMARCC1                                                       |
| 22 | 52,575,000 | 52,725,000 | 702 | 603  | -0.009264965 | C22H3orf75,CSPG5,SMARCC1                                            |
| 22 | 52,650,000 | 52,800,000 | 703 | 581  | -1.525712182 | C22H3orf75,CSPG5,SCAP                                               |
| 22 | 52,725,000 | 52,875,000 | 704 | 451  | -2.549677255 | KLHL18,NGP,PTPN23,SCAP                                              |
| 22 | 52,800,000 | 52,950,000 | 705 | 458  | -2.19614258  | KIF9,KLHL18,NGP,PTPN23,SCAP                                         |
| 22 | 52,875,000 | 53,025,000 | 706 | 437  | -1.604921429 | KIF9,KLHL18,SETD2                                                   |
| 22 | 52,950,000 | 53,100,000 | 707 | 364  | -0.220891268 | KIF9,SETD2,ENSBTAG00000022598                                       |
| 22 | 53,025,000 | 53,175,000 | 708 | 466  | 0.467001463  | CCDC12,PTH1R,SETD2,ENSBTAG00000022598                               |
| 22 | 53,100,000 | 53,250,000 | 709 | 424  | 0.702139539  | CCDC12,MYL3,PRSS42,PTH1R                                            |
| 22 | 53,175,000 | 53,325,000 | 710 | 383  | -0.387072451 | MYL3,PRSS42,PRSS45,PRSS46,PTH1R,ENSBTAG000000378<br>21              |
| 22 | 53,250,000 | 53,400,000 | 711 | 633  | 0.466718391  | ALS2CL,PRSS45,PRSS46,PRSS50,TMIE,ENSBTAG000000378<br>21             |
| 22 | 53,325,000 | 53,475,000 | 712 | 987  | 0.745037268  | ALS2CL,LRRC2,PRSS46,PRSS50,TDGF1,TMIE                               |
| 22 | 53,400,000 | 53,550,000 | 713 | 1127 | -0.593106921 | LRRC2,LTF,RTP3,TDGF1                                                |
| 22 | 53,475,000 | 53,625,000 | 714 | 861  | -1.483867428 | CCR2,CCR5,CCRL2,LRRC2,LTF,RTP3                                      |
| 22 | 53,550,000 | 53,700,000 | 715 | 379  | -1.269259771 | CCR2,CCR5,CCRL2,LTF                                                 |
| 22 | 53,625,000 | 53,775,000 | 716 | 247  | -2.395926136 | CCR3                                                                |
| 22 | 53,700,000 | 53,850,000 | 717 | 475  | -0.011288786 | CCR3,ENSBTAG00000031355                                             |
| 22 | 53,775,000 | 53,925,000 | 718 | 626  | 0.897381582  | CCR1,ENSBTAG00000031355                                             |
| 22 | 53,850,000 | 54,000,000 | 719 | 729  | 0.017427852  | CCR1,CXCR6,FYCO1,XCR1                                               |
| 22 | 53,925,000 | 54,075,000 | 720 | 950  | -0.438509484 | CCR9,CXCR6,FYCO1,XCR1                                               |
| 22 | 54,000,000 | 54,150,000 | 721 | 993  | -0.13005533  | CCR9,CXCR6,FYCO1,LZTFL1,SLC6A20                                     |
| 22 | 54,075,000 | 54,225,000 | 722 | 1127 | -1.631714527 | LZTFL1,SACM1L,SLC6A20                                               |
| 22 | 54,150,000 | 54,300,000 | 723 | 1424 | -2.435909982 | LIMD1,SACM1L,SLC6A20                                                |
| 22 | 54,225,000 | 54,375,000 | 724 | 1178 | -1.241528367 | LARS2,LIMD1,SACM1L                                                  |
| 22 | 54,300,000 | 54,450,000 | 725 | 901  | -0.490333359 | LARS2,LIMD1                                                         |
| 22 | 54,375,000 | 54,525,000 | 726 | 863  | -0.429663421 | LARS2                                                               |
| 22 | 54,450,000 | 54,600,000 | 727 | 819  | 0.415783917  | LARS2                                                               |
| 22 | 54,525,000 | 54,675,000 | 728 | 776  | 0.699502333  | TMEM158                                                             |
| 22 | 54,600,000 | 54,750,000 | 729 | 775  | 0.609029248  | CDCP1,TMEM158,ENSBTAG00000026650                                    |
| 22 | 54,675,000 | 54,825,000 | 730 | 728  | 0.427499217  | CDCP1,CLEC3B,EXOSC7,ENSBTAG00000026650                              |
| 22 | 54,750,000 | 54,900,000 | 731 | 580  | 0.667287861  | CDCP1,CLEC3B,EXOSC7,ZDHHC3                                          |
| 22 | 54,825,000 | 54,975,000 | 732 | 825  | 0.486291786  | EXOSC7,GHRL,SEC13,TMEM42,ZDHHC3                                     |
| 22 | 54,900,000 | 55,050,000 | 733 | 786  | 0.423383612  | ATP2B2,GHRL,SEC13,TMEM42                                            |
| 22 | 54,975,000 | 55,125,000 | 734 | 734  | 0.442777735  | ATP2B2,SEC13                                                        |
| 22 | 55,050,000 | 55,200,000 | 735 | 713  | 0.387619219  | ATP2B2                                                              |
| 22 | 55,125,000 | 55,275,000 | 736 | 624  | -0.016925181 | ATP2B2                                                              |
| 22 | 55,200,000 | 55,350,000 | 737 | 768  | 0.255834812  | ATP2B2                                                              |
| 22 | 55,275,000 | 55,425,000 | 738 | 644  | 0.733134082  | ATP2B2                                                              |
| 22 | 55,350,000 | 55,500,000 | 739 | 525  | 0.930357088  | SLC6A11                                                             |
| 22 | 55,425,000 | 55,575,000 | 740 | 627  | 1.303225176  | SLC6A11                                                             |
| 22 | 55,500,000 | 55,650,000 | 741 | 719  | 1.135511748  | SLC6A11                                                             |
| 22 | 55,575,000 | 55,725,000 | 742 | 1119 | 0.458923348  | SLC6A1,SLC6A11                                                      |
| 22 | 55,650,000 | 55,800,000 | 743 | 1323 | -0.65298901  | SLC6A1                                                              |
| 22 | 55,725,000 | 55,875,000 | 744 | 971  | -0.634171931 |                                                                     |



|    |            |            |     |      |              |                                                              |
|----|------------|------------|-----|------|--------------|--------------------------------------------------------------|
| 22 | 55,800,000 | 55,950,000 | 745 | 918  | 0.591123585  | ATG7,HRH1                                                    |
| 22 | 55,875,000 | 56,025,000 | 746 | 749  | 0.559453328  | ATG7,HRH1                                                    |
| 22 | 55,950,000 | 56,100,000 | 747 | 795  | 0.378086489  | ATG7,ENSBTAG00000031065                                      |
| 22 | 56,025,000 | 56,175,000 | 748 | 949  | 0.283034567  | ATG7,ENSBTAG00000031065                                      |
| 22 | 56,100,000 | 56,250,000 | 749 | 730  | -0.243585083 | ATG7,VGLL4                                                   |
| 22 | 56,175,000 | 56,325,000 | 750 | 718  | -0.117353616 | ATG7,VGLL4                                                   |
| 22 | 56,250,000 | 56,400,000 | 751 | 864  | 0.802423796  | VGLL4                                                        |
| 22 | 56,325,000 | 56,475,000 | 752 | 884  | 0.860417028  | TAMM41                                                       |
| 22 | 56,400,000 | 56,550,000 | 753 | 1170 | 0.349796837  | TAMM41,TRH                                                   |
| 22 | 56,475,000 | 56,625,000 | 754 | 1006 | 0.064388778  | TAMM41,TRH                                                   |
| 22 | 56,550,000 | 56,700,000 | 755 | 542  | 0.261023452  |                                                              |
| 22 | 56,625,000 | 56,775,000 | 756 | 516  | 0.509511408  | PLXND1,TMCC1                                                 |
| 22 | 56,700,000 | 56,850,000 | 757 | 499  | 0.469215909  | H1FOO,PLXND1,TMCC1                                           |
| 22 | 56,775,000 | 56,925,000 | 758 | 746  | 0.519406937  | H1FOO,IFT122,PLXND1,RHO                                      |
| 22 | 56,850,000 | 57,000,000 | 759 | 1175 | 0.566727149  | CAND2,EFCAB12,H1FOO,IFT122,MBD4,RHO,RPL32                    |
| 22 | 56,925,000 | 57,075,000 | 760 | 1266 | 0.60268211   | CAND2,EFCAB12,IFT122,MBD4,RPL32,TMEM40                       |
| 22 | 57,000,000 | 57,150,000 | 761 | 1046 | 0.692088877  | CAND2,RAF1,TMEM40                                            |
| 22 | 57,075,000 | 57,225,000 | 762 | 741  | -0.336702647 | MKRN2,RAF1,ENSBTAG00000045748                                |
| 22 | 57,150,000 | 57,300,000 | 763 | 785  | -0.792347968 | MKRN2,MKRN2OS,RAF1,TSEN2,ENSBTAG00000045748                  |
| 22 | 57,225,000 | 57,375,000 | 764 | 763  | 0.275097114  | MKRN2OS,PPARG,TSEN2                                          |
| 22 | 57,300,000 | 57,450,000 | 765 | 448  | 0.231151928  | PPARG,TSEN2                                                  |
| 22 | 57,375,000 | 57,525,000 | 766 | 411  | 0.297064644  | PPARG                                                        |
| 22 | 57,450,000 | 57,600,000 | 767 | 406  | 0.261120434  | PPARG,SYN2                                                   |
| 22 | 57,525,000 | 57,675,000 | 768 | 440  | -0.168983403 | SYN2,TIMP4                                                   |
| 22 | 57,600,000 | 57,750,000 | 769 | 618  | -0.223032588 | SYN2,TIMP4                                                   |
| 22 | 57,675,000 | 57,825,000 | 770 | 915  | 0.340651723  | ENSBTAG00000031115                                           |
| 22 | 57,750,000 | 57,900,000 | 771 | 877  | 0.734140495  | MRPS25,ZFYVE20,ENSBTAG00000031115                            |
| 22 | 57,825,000 | 57,975,000 | 772 | 485  | 0.581291686  | MRPS25,NR2C2,ZFYVE20                                         |
| 22 | 57,900,000 | 58,050,000 | 773 | 411  | -0.105843507 | FGD5,MRPS25,NR2C2                                            |
| 22 | 57,975,000 | 58,125,000 | 774 | 596  | -0.190810235 | FGD5                                                         |
| 22 | 58,050,000 | 58,200,000 | 775 | 707  | -1.892849407 | FGD5                                                         |
| 22 | 58,125,000 | 58,275,000 | 776 | 736  | -0.803626549 | C22H3ORF19,C3orf20,FGD5                                      |
| 22 | 58,200,000 | 58,350,000 | 777 | 774  | 0.412620476  | C22H3ORF19,C3orf20                                           |
| 22 | 58,275,000 | 58,425,000 | 778 | 680  | -0.753457828 | C22H3ORF19,GRIP2                                             |
| 22 | 58,350,000 | 58,500,000 | 779 | 466  | -4.467390903 | GRIP2,SLC6A6                                                 |
| 22 | 58,425,000 | 58,575,000 | 780 | 223  | -5.902774393 | SLC6A6                                                       |
| 22 | 58,500,000 | 58,650,000 | 781 | 500  | 0.190403313  |                                                              |
| 22 | 58,575,000 | 58,725,000 | 782 | 971  | 0.774170694  | LSM3,XPC                                                     |
| 22 | 58,650,000 | 58,800,000 | 783 | 977  | 0.927656707  | CHCHD4,LSM3,TMEM43,XPC,ENSBTAG00000017173,ENSBTAG00000023918 |
| 22 | 58,725,000 | 58,875,000 | 784 | 827  | 0.55069202   | CHCHD4,TMEM43,WNT7A,ENSBTAG00000017173,ENSBTAG00000023918    |
| 22 | 58,800,000 | 58,950,000 | 785 | 946  | 0.278231247  | WNT7A                                                        |
| 22 | 58,875,000 | 59,025,000 | 786 | 1106 | 0.55532736   | FBLN2                                                        |
| 22 | 58,950,000 | 59,100,000 | 787 | 1348 | 0.599818109  | FBLN2,HDAC11                                                 |
| 22 | 59,025,000 | 59,175,000 | 788 | 1475 | 0.079192873  | FBLN2,HDAC11,NUP210                                          |
| 22 | 59,100,000 | 59,250,000 | 789 | 1149 | -0.046044152 | HDAC11,NUP210                                                |
| 22 | 59,175,000 | 59,325,000 | 790 | 922  | 0.797833109  | NUP210                                                       |
| 22 | 59,250,000 | 59,400,000 | 791 | 1209 | 0.874229181  |                                                              |
| 22 | 59,325,000 | 59,475,000 | 792 | 1085 | 0.55217937   | IQSEC1                                                       |
| 22 | 59,400,000 | 59,550,000 | 793 | 477  | -0.612256527 | IQSEC1                                                       |
| 22 | 59,475,000 | 59,625,000 | 794 | 417  | -2.225778562 | ACAD9,IQSEC1,ENSBTAG0000003244                               |
| 22 | 59,550,000 | 59,700,000 | 795 | 616  | -2.73746649  | ACAD9,EFCC1,GP9,KIAA1257,ENSBTAG0000003244                   |

|    |            |            |     |      |              |                                                      |
|----|------------|------------|-----|------|--------------|------------------------------------------------------|
| 22 | 59,625,000 | 59,775,000 | 796 | 711  | -1.471007478 | CNBP,EFCC1,GP9,ISY1,KIAA1257                         |
| 22 | 59,700,000 | 59,850,000 | 797 | 615  | 0.267942984  | CNBP,COPG1,H1FX,HMCES,ISY1                           |
| 22 | 59,775,000 | 59,925,000 | 798 | 534  | 0.544290038  | COPG1,H1FX,HMCES,RAB7A,ENSBTAG00000030941            |
| 22 | 59,850,000 | 60,000,000 | 799 | 736  | 0.656800045  | RAB7A,RPN1,ENSBTAG00000030941                        |
| 22 | 59,925,000 | 60,075,000 | 800 | 731  | 0.735696939  | DNAJB8,EEFSEC,GATA2,RPN1                             |
| 22 | 60,000,000 | 60,150,000 | 801 | 743  | -1.545394149 | DNAJB8,EEFSEC,GATA2                                  |
| 22 | 60,075,000 | 60,225,000 | 802 | 939  | -1.676324037 | EEFSEC,RUVBL1,SEC61A1                                |
| 22 | 60,150,000 | 60,300,000 | 803 | 1025 | -0.352309093 | EEFSEC,KBTD12,RUVBL1,SEC61A1                         |
| 22 | 60,225,000 | 60,375,000 | 804 | 1233 | -0.325440598 | KBTD12,SEC61A1                                       |
| 22 | 60,300,000 | 60,450,000 | 805 | 1389 | -0.686212572 | MGLL                                                 |
| 22 | 60,375,000 | 60,525,000 | 806 | 1139 | -0.569633958 | ABTB1,MGLL,PODXL2                                    |
| 22 | 60,450,000 | 60,600,000 | 807 | 615  | -0.096894225 | ABTB1,MCM2,MGLL,PODXL2,TPRA1                         |
| 22 | 60,525,000 | 60,675,000 | 808 | 630  | -0.396841357 | MCM2,PODXL2,TPRA1                                    |
| 22 | 60,600,000 | 60,750,000 | 809 | 1034 | -0.523776076 |                                                      |
| 22 | 60,675,000 | 60,825,000 | 810 | 1228 | 0.071886244  |                                                      |
| 22 | 60,750,000 | 60,900,000 | 811 | 1165 | 0.348348925  |                                                      |
| 22 | 60,825,000 | 60,975,000 | 812 | 747  | -0.026750835 | CHCHD6,PLXNA1                                        |
| 22 | 60,900,000 | 61,050,000 | 813 | 457  | -1.067188439 | CHCHD6,PLXNA1                                        |
| 22 | 60,975,000 | 61,125,000 | 814 | 661  | -0.615451027 | C3H3orf22,CHCHD6,CHST13,TRXR3                        |
| 22 | 61,050,000 | 61,200,000 | 815 | 664  | -0.181082708 | C3H3orf22,CHCHD6,CHST13,SLC41A3,TRXR3,UROC1,ZXD<br>C |
| 22 | 61,125,000 | 61,275,000 | 816 | 785  | 0.328814097  | ALDH1L1,CHST13,SLC41A3,UROC1,ZXDC                    |
| 22 | 61,200,000 | 61,350,000 | 817 | 1581 | 1.00795802   | ALDH1L1,CCDC37,KLF15,SLC41A3                         |
| 22 | 61,275,000 | 61,425,000 | 818 | 1765 | 1.109976867  | CCDC37,KLF15                                         |
| 22 | 61,350,000 | 61,435,874 | 819 | 714  | 1.078805883  |                                                      |
| 23 | 0          | 150,000    | 1   | 493  | -0.924866435 |                                                      |
| 23 | 75,000     | 225,000    | 2   | 274  | -0.721818687 | KHDRBS2                                              |
| 23 | 150,000    | 300,000    | 3   | 157  | -0.502919893 | KHDRBS2                                              |
| 23 | 225,000    | 375,000    | 4   | 195  | -0.779586091 | KHDRBS2                                              |
| 23 | 300,000    | 450,000    | 5   | 445  | -1.9656647   | KHDRBS2                                              |
| 23 | 375,000    | 525,000    | 6   | 629  | -2.24729492  | KHDRBS2                                              |
| 23 | 450,000    | 600,000    | 7   | 528  | -2.013721333 | KHDRBS2                                              |
| 23 | 525,000    | 675,000    | 8   | 449  | -1.412223425 | KHDRBS2                                              |
| 23 | 600,000    | 750,000    | 9   | 423  | -0.929980309 | KHDRBS2                                              |
| 23 | 675,000    | 825,000    | 10  | 471  | -0.816706233 | KHDRBS2                                              |
| 23 | 750,000    | 900,000    | 11  | 650  | -0.590258467 | KHDRBS2                                              |
| 23 | 825,000    | 975,000    | 12  | 541  | -0.14807448  | KHDRBS2                                              |
| 23 | 900,000    | 1,050,000  | 13  | 279  | 0.710501303  |                                                      |
| 23 | 975,000    | 1,125,000  | 14  | 487  | 0.903425997  |                                                      |
| 23 | 1,050,000  | 1,200,000  | 15  | 824  | 0.860230335  |                                                      |
| 23 | 1,125,000  | 1,275,000  | 16  | 773  | 0.772385979  |                                                      |
| 23 | 1,200,000  | 1,350,000  | 17  | 652  | 0.94200358   |                                                      |
| 23 | 1,275,000  | 1,425,000  | 18  | 548  | 1.243578943  |                                                      |
| 23 | 1,350,000  | 1,500,000  | 19  | 386  | 1.384846164  |                                                      |
| 23 | 1,425,000  | 1,575,000  | 20  | 370  | 0.494988533  |                                                      |
| 23 | 1,500,000  | 1,650,000  | 21  | 793  | 0.712110872  |                                                      |
| 23 | 1,575,000  | 1,725,000  | 22  | 1195 | 0.11378016   |                                                      |
| 23 | 1,650,000  | 1,800,000  | 23  | 1085 | -2.604982333 |                                                      |
| 23 | 1,725,000  | 1,875,000  | 24  | 788  | -2.438589008 |                                                      |
| 23 | 1,800,000  | 1,950,000  | 25  | 971  | 0.931340117  |                                                      |
| 23 | 1,875,000  | 2,025,000  | 26  | 1451 | 0.952758561  |                                                      |
| 23 | 1,950,000  | 2,100,000  | 27  | 1589 | 0.806636577  |                                                      |
| 23 | 2,025,000  | 2,175,000  | 28  | 1409 | 0.85854083   |                                                      |

|    |           |           |    |      |              |                            |
|----|-----------|-----------|----|------|--------------|----------------------------|
| 23 | 2,100,000 | 2,250,000 | 29 | 1505 | 0.684063343  |                            |
| 23 | 2,175,000 | 2,325,000 | 30 | 1665 | 0.703156296  |                            |
| 23 | 2,250,000 | 2,400,000 | 31 | 1323 | 0.840732211  |                            |
| 23 | 2,325,000 | 2,475,000 | 32 | 1158 | 0.619491416  |                            |
| 23 | 2,400,000 | 2,550,000 | 33 | 1099 | 0.692643166  | PRIM2                      |
| 23 | 2,475,000 | 2,625,000 | 34 | 1157 | 0.807174771  | PRIM2                      |
| 23 | 2,550,000 | 2,700,000 | 35 | 1066 | 0.727759497  | PRIM2                      |
| 23 | 2,625,000 | 2,775,000 | 36 | 798  | 0.988233781  | PRIM2                      |
| 23 | 2,700,000 | 2,850,000 | 37 | 935  | 0.970952917  | PRIM2                      |
| 23 | 2,775,000 | 2,925,000 | 38 | 1313 | 0.913456829  | PRIM2                      |
| 23 | 2,850,000 | 3,000,000 | 39 | 937  | 0.936003828  | BAG2,RAB23,ZNF451          |
| 23 | 2,925,000 | 3,075,000 | 40 | 285  | 1.094538981  | BAG2,RAB23,ZNF451          |
| 23 | 3,000,000 | 3,150,000 | 41 | 522  | 1.034924156  | BEND6,ZNF451               |
| 23 | 3,075,000 | 3,225,000 | 42 | 810  | 0.016901538  | BEND6                      |
| 23 | 3,150,000 | 3,300,000 | 43 | 630  | -0.688073852 |                            |
| 23 | 3,225,000 | 3,375,000 | 44 | 547  | -0.565465946 |                            |
| 23 | 3,300,000 | 3,450,000 | 45 | 1293 | -0.906987428 | DST                        |
| 23 | 3,375,000 | 3,525,000 | 46 | 1726 | -0.066872481 | DST                        |
| 23 | 3,450,000 | 3,600,000 | 47 | 1434 | 0.172142091  | DST                        |
| 23 | 3,525,000 | 3,675,000 | 48 | 1527 | -0.824466023 | DST                        |
| 23 | 3,600,000 | 3,750,000 | 49 | 1403 | -1.749771591 | DST                        |
| 23 | 3,675,000 | 3,825,000 | 50 | 1026 | -1.020369507 | DST                        |
| 23 | 3,750,000 | 3,900,000 | 51 | 1144 | -0.076669909 |                            |
| 23 | 3,825,000 | 3,975,000 | 52 | 1120 | 0.113441467  | COL21A1                    |
| 23 | 3,900,000 | 4,050,000 | 53 | 1189 | 0.480524831  | COL21A1                    |
| 23 | 3,975,000 | 4,125,000 | 54 | 1459 | 0.702034307  | COL21A1                    |
| 23 | 4,050,000 | 4,200,000 | 55 | 1546 | 0.313980047  | COL21A1,ENSBTAG00000046193 |
| 23 | 4,125,000 | 4,275,000 | 56 | 1245 | 0.34492107   | ENSBTAG00000046193         |
| 23 | 4,200,000 | 4,350,000 | 57 | 1019 | -0.010401509 |                            |
| 23 | 4,275,000 | 4,425,000 | 58 | 1077 | 0.257168638  | BMP5                       |
| 23 | 4,350,000 | 4,500,000 | 59 | 787  | 0.489154495  | BMP5                       |
| 23 | 4,425,000 | 4,575,000 | 60 | 711  | -0.411945806 | BMP5                       |
| 23 | 4,500,000 | 4,650,000 | 61 | 910  | 0.614255364  | BMP5                       |
| 23 | 4,575,000 | 4,725,000 | 62 | 1024 | 1.063386856  | HMGCLL1                    |
| 23 | 4,650,000 | 4,800,000 | 63 | 986  | 1.138869258  | HMGCLL1                    |
| 23 | 4,725,000 | 4,875,000 | 64 | 704  | 0.956716653  | HMGCLL1                    |
| 23 | 4,800,000 | 4,950,000 | 65 | 566  | 0.212638774  | HMGCLL1                    |
| 23 | 4,875,000 | 5,025,000 | 66 | 1073 | -0.41775557  | GFRAL,HMGCLL1              |
| 23 | 4,950,000 | 5,100,000 | 67 | 1272 | -0.056407254 | GFRAL,HCRTR2               |
| 23 | 5,025,000 | 5,175,000 | 68 | 1170 | 0.570790767  | HCRTR2                     |
| 23 | 5,100,000 | 5,250,000 | 69 | 1222 | 0.229179162  | HCRTR2                     |
| 23 | 5,175,000 | 5,325,000 | 70 | 1207 | 0.03946961   | HCRTR2                     |
| 23 | 5,250,000 | 5,400,000 | 71 | 913  | 0.160502648  | FAM83B                     |
| 23 | 5,325,000 | 5,475,000 | 72 | 737  | -0.126200339 | FAM83B                     |
| 23 | 5,400,000 | 5,550,000 | 73 | 1152 | -0.934299806 | FAM83B                     |
| 23 | 5,475,000 | 5,625,000 | 74 | 1483 | -1.015975611 | FAM83B                     |
| 23 | 5,550,000 | 5,700,000 | 75 | 1090 | -0.298597924 |                            |
| 23 | 5,625,000 | 5,775,000 | 76 | 804  | 0.850512878  |                            |
| 23 | 5,700,000 | 5,850,000 | 77 | 723  | 0.756454281  |                            |
| 23 | 5,775,000 | 5,925,000 | 78 | 937  | 0.646598997  |                            |
| 23 | 5,850,000 | 6,000,000 | 79 | 1011 | 0.864872086  | TINAG                      |
| 23 | 5,925,000 | 6,075,000 | 80 | 688  | 0.974709303  | TINAG                      |
| 23 | 6,000,000 | 6,150,000 | 81 | 852  | 1.123425423  | MLIP,TINAG                 |

|    |           |           |     |      |              |                                                                                 |
|----|-----------|-----------|-----|------|--------------|---------------------------------------------------------------------------------|
| 23 | 6,075,000 | 6,225,000 | 82  | 904  | 1.315050794  | MLIP                                                                            |
| 23 | 6,150,000 | 6,300,000 | 83  | 1053 | 0.799860929  | MLIP                                                                            |
| 23 | 6,225,000 | 6,375,000 | 84  | 1333 | -0.186520392 | MLIP                                                                            |
| 23 | 6,300,000 | 6,450,000 | 85  | 1276 | -0.064763124 | MLIP                                                                            |
| 23 | 6,375,000 | 6,525,000 | 86  | 1327 | 0.79517747   | MLIP                                                                            |
| 23 | 6,450,000 | 6,600,000 | 87  | 1320 | 0.787606976  | LRRRC1                                                                          |
| 23 | 6,525,000 | 6,675,000 | 88  | 1316 | -0.358660818 | LRRRC1                                                                          |
| 23 | 6,600,000 | 6,750,000 | 89  | 1200 | -0.843399053 |                                                                                 |
| 23 | 6,675,000 | 6,825,000 | 90  | 725  | -0.252596153 | KLHL31                                                                          |
| 23 | 6,750,000 | 6,900,000 | 91  | 562  | -0.034951339 | KLHL31                                                                          |
| 23 | 6,825,000 | 6,975,000 | 92  | 489  | 0.025899751  | GCLC                                                                            |
| 23 | 6,900,000 | 7,050,000 | 93  | 636  | 0.979485766  | BOLA-DIB,BOLA-DYA,DSB,GCLC                                                      |
| 23 | 6,975,000 | 7,125,000 | 94  | 864  | 1.147000592  | BOLA-DIB,BOLA-DOB,BOLA-DYA,DSB,PSMB8,TAP1,TAP2,ENSBTAG00000003037               |
| 23 | 7,050,000 | 7,200,000 | 95  | 1094 | 0.658551868  | BOLA-DOB,H2B,HLA-DMB,PSMB8,PSMB9,TAP1,TAP2,ENSBTAG00000003037                   |
| 23 | 7,125,000 | 7,275,000 | 96  | 1142 | 0.117998204  | BOLA-DMA,BOLA-DNA,BRD2,H2B,HLA-DMB,PSMB9,TAP1                                   |
| 23 | 7,200,000 | 7,350,000 | 97  | 687  | 0.241104591  | BOLA-DMA,BOLA-DNA,BRD2,COL11A2,HSD17B8,RING1,RXRB,SLC39A7                       |
| 23 | 7,275,000 | 7,425,000 | 98  | 671  | 0.515515024  | B3GALT4,C6ORF11,COL11A2,HSD17B8,PFDN6,RGL2,RING1,RPS18,RXRB,SLC39A7,TAPBP,VPS52 |
| 23 | 7,350,000 | 7,500,000 | 99  | 934  | -0.666510148 | B3GALT4,C6ORF11,DAXX,PFDN6,RGL2,RPS18,TAPBP,VPS52,ZBTB22                        |
| 23 | 7,425,000 | 7,575,000 | 100 | 583  | -1.29555774  | CUTA,DAXX,KIFC1,PHF1,SYNGAP1,TAPBP,ZBTB22,ZBTB9                                 |
| 23 | 7,500,000 | 7,650,000 | 101 | 300  | -0.166408306 | CUTA,KIFC1,PHF1,SYNGAP1,ZBTB9                                                   |
| 23 | 7,575,000 | 7,725,000 | 102 | 550  | 0.445949357  | BAK1,GGNBP1,ITPR3                                                               |
| 23 | 7,650,000 | 7,800,000 | 103 | 788  | 0.012235447  | BAK1,GGNBP1,ITPR3,UQCC2                                                         |
| 23 | 7,725,000 | 7,875,000 | 104 | 725  | -0.192454699 | ITPR3,LEMD2,MLN,UQCC2                                                           |
| 23 | 7,800,000 | 7,950,000 | 105 | 472  | 0.071095795  | LEMD2,MLN,UQCC2                                                                 |
| 23 | 7,875,000 | 8,025,000 | 106 | 521  | 0.546300533  |                                                                                 |
| 23 | 7,950,000 | 8,100,000 | 107 | 574  | -0.574113096 | GRM4                                                                            |
| 23 | 8,025,000 | 8,175,000 | 108 | 637  | -2.66652054  | GRM4                                                                            |
| 23 | 8,100,000 | 8,250,000 | 109 | 591  | -1.55569194  | GRM4                                                                            |
| 23 | 8,175,000 | 8,325,000 | 110 | 350  | -0.019611368 | GRM4,HMGA1,NUDT3,ENSBTAG000000034519                                            |
| 23 | 8,250,000 | 8,400,000 | 111 | 301  | -1.201019559 | HMGA1,NUDT3,ENSBTAG000000034519                                                 |
| 23 | 8,325,000 | 8,475,000 | 112 | 358  | -0.188383975 | NUDT3,PACSIN1,RPS10                                                             |
| 23 | 8,400,000 | 8,550,000 | 113 | 551  | -1.399852222 | NUDT3,PACSIN1,RPS10,SPDEF                                                       |
| 23 | 8,475,000 | 8,625,000 | 114 | 475  | -1.519483018 | C6ORF106,PACSIN1,SPDEF                                                          |
| 23 | 8,550,000 | 8,700,000 | 115 | 289  | 0.624106384  | C6ORF106,SPDEF                                                                  |
| 23 | 8,625,000 | 8,775,000 | 116 | 303  | -0.485214873 | C6ORF106,SNRPC                                                                  |
| 23 | 8,700,000 | 8,850,000 | 117 | 370  | -0.930541241 | ANKS1A,SNRPC,TAF11,UHRF1BP1                                                     |
| 23 | 8,775,000 | 8,925,000 | 118 | 417  | -0.237390671 | ANKS1A,TAF11,UHRF1BP1                                                           |
| 23 | 8,850,000 | 9,000,000 | 119 | 579  | 0.252331636  | ANKS1A                                                                          |
| 23 | 8,925,000 | 9,075,000 | 120 | 707  | 0.532423368  | ANKS1A,TCP11                                                                    |
| 23 | 9,000,000 | 9,150,000 | 121 | 610  | 0.442220037  | ANKS1A,SCUBE3,TCP11                                                             |
| 23 | 9,075,000 | 9,225,000 | 122 | 396  | -0.20193753  | SCUBE3,ZNF76                                                                    |
| 23 | 9,150,000 | 9,300,000 | 123 | 325  | 0.835705874  | DEF6,SCUBE3,ZNF76                                                               |
| 23 | 9,225,000 | 9,375,000 | 124 | 503  | 1.225276168  | DEF6,PPARD,ZNF76                                                                |
| 23 | 9,300,000 | 9,450,000 | 125 | 664  | 0.640194699  | FANCE,PPARD,RPL10A,TEAD3,TULP1                                                  |
| 23 | 9,375,000 | 9,525,000 | 126 | 857  | -0.23965402  | FANCE,FKBP5,RPL10A,TEAD3,TULP1                                                  |
| 23 | 9,450,000 | 9,600,000 | 127 | 628  | -0.696825257 | FKBP5                                                                           |
| 23 | 9,525,000 | 9,675,000 | 128 | 258  | -0.925304626 | FKBP5                                                                           |

|    |            |            |     |      |              |                                                                  |
|----|------------|------------|-----|------|--------------|------------------------------------------------------------------|
| 23 | 9,600,000  | 9,750,000  | 129 | 400  | -1.117575137 | ARMC12,CLPS,FKBP5,LHFPL5                                         |
| 23 | 9,675,000  | 9,825,000  | 130 | 456  | -1.083123306 | ARMC12,CLPS,LHFPL5,SRPK1                                         |
| 23 | 9,750,000  | 9,900,000  | 131 | 393  | -0.057872954 | SLC26A8,SRPK1                                                    |
| 23 | 9,825,000  | 9,975,000  | 132 | 377  | 0.56853224   | MAPK14,SLC26A8                                                   |
| 23 | 9,900,000  | 10,050,000 | 133 | 351  | 0.60722142   | MAPK13,MAPK14,SLC26A8                                            |
| 23 | 9,975,000  | 10,125,000 | 134 | 255  | -1.329297099 | BRPF3,MAPK13,MAPK14                                              |
| 23 | 10,050,000 | 10,200,000 | 135 | 201  | -1.705110113 | BRPF3,PNPLA1                                                     |
| 23 | 10,125,000 | 10,275,000 | 136 | 305  | -1.07955848  | BRPF3,C6orf222,PNPLA1                                            |
| 23 | 10,200,000 | 10,350,000 | 137 | 602  | -0.053541453 | C6orf222,PNPLA1                                                  |
| 23 | 10,275,000 | 10,425,000 | 138 | 594  | 0.543597414  | KCTD20,STK38                                                     |
| 23 | 10,350,000 | 10,500,000 | 139 | 518  | 0.835816656  | KCTD20,SRSF3,STK38,ENSBTAG00000004219                            |
| 23 | 10,425,000 | 10,575,000 | 140 | 553  | 0.405157176  | CDKN1A,RPS4Y1,SRSF3,STK38,ENSBTAG00000004219,ENSBTAG000000045551 |
| 23 | 10,500,000 | 10,650,000 | 141 | 634  | 0.152795088  | CDKN1A,CPNE5,RAB44,RPS4Y1,ENSBTAG00000010730,ENSBTAG000000045551 |
| 23 | 10,575,000 | 10,725,000 | 142 | 898  | 0.269138686  | CPNE5,RAB44,ENSBTAG00000010730,ENSBTAG00000004551                |
| 23 | 10,650,000 | 10,800,000 | 143 | 629  | 0.254821788  | C6orf89,CPNE5,PPIL1                                              |
| 23 | 10,725,000 | 10,875,000 | 144 | 454  | 0.466429333  | C6orf89,CPNE5,MTCH1,PI16,PPIL1                                   |
| 23 | 10,800,000 | 10,950,000 | 145 | 756  | 0.774655335  | C6orf89,FGD2,MTCH1,PI16                                          |
| 23 | 10,875,000 | 11,025,000 | 146 | 763  | 0.664508144  | FGD2                                                             |
| 23 | 10,950,000 | 11,100,000 | 147 | 725  | 0.65467654   | PIM1,ENSBTAG000000045936                                         |
| 23 | 11,025,000 | 11,175,000 | 148 | 1077 | 0.552395387  | PIM1,TBC1D22B,TMEM217,ENSBTAG000000045936                        |
| 23 | 11,100,000 | 11,250,000 | 149 | 1075 | -0.029992607 | RNF8,TBC1D22B,TMEM217,ENSBTAG000000045936                        |
| 23 | 11,175,000 | 11,325,000 | 150 | 895  | 0.001564493  | CMTR1,RNF8,TBC1D22B                                              |
| 23 | 11,250,000 | 11,400,000 | 151 | 817  | 0.477260801  | CCDC167,CMTR1,RNF8                                               |
| 23 | 11,325,000 | 11,475,000 | 152 | 932  | -0.029369411 | CCDC167,CMTR1                                                    |
| 23 | 11,400,000 | 11,550,000 | 153 | 825  | -0.291981069 | MDGA1                                                            |
| 23 | 11,475,000 | 11,625,000 | 154 | 867  | 1.12580625   | MDGA1                                                            |
| 23 | 11,550,000 | 11,700,000 | 155 | 1017 | 0.816424345  | MDGA1                                                            |
| 23 | 11,625,000 | 11,775,000 | 156 | 897  | 0.084160071  | ZFAND3                                                           |
| 23 | 11,700,000 | 11,850,000 | 157 | 866  | -0.382973576 | ZFAND3                                                           |
| 23 | 11,775,000 | 11,925,000 | 158 | 603  | -1.731697278 | ZFAND3                                                           |
| 23 | 11,850,000 | 12,000,000 | 159 | 726  | -3.657609649 | ZFAND3                                                           |
| 23 | 11,925,000 | 12,075,000 | 160 | 868  | -2.171484836 | ZFAND3                                                           |
| 23 | 12,000,000 | 12,150,000 | 161 | 742  | 0.514069542  | ZFAND3                                                           |
| 23 | 12,075,000 | 12,225,000 | 162 | 693  | 1.20423157   |                                                                  |
| 23 | 12,150,000 | 12,300,000 | 163 | 602  | 0.84545944   |                                                                  |
| 23 | 12,225,000 | 12,375,000 | 164 | 434  | -0.170321802 |                                                                  |
| 23 | 12,300,000 | 12,450,000 | 165 | 333  | 0.206659972  | BTBD9                                                            |
| 23 | 12,375,000 | 12,525,000 | 166 | 422  | -0.254983631 | BTBD9,GLO1                                                       |
| 23 | 12,450,000 | 12,600,000 | 167 | 895  | -0.279111843 | BTBD9,DNAH8,GLO1                                                 |
| 23 | 12,525,000 | 12,675,000 | 168 | 1125 | 0.190160803  | DNAH8                                                            |
| 23 | 12,600,000 | 12,750,000 | 169 | 905  | 0.789272582  | DNAH8                                                            |
| 23 | 12,675,000 | 12,825,000 | 170 | 899  | 0.960924972  | DNAH8                                                            |
| 23 | 12,750,000 | 12,900,000 | 171 | 1344 | 1.026300872  | DNAH8                                                            |
| 23 | 12,825,000 | 12,975,000 | 172 | 1308 | 0.111032918  | DNAH8,GLP1R,SAYSD1                                               |
| 23 | 12,900,000 | 13,050,000 | 173 | 1112 | -0.596869041 | GLP1R,SAYSD1                                                     |
| 23 | 12,975,000 | 13,125,000 | 174 | 1280 | 0.209195705  | KCNK5,ENSBTAG00000007140                                         |
| 23 | 13,050,000 | 13,200,000 | 175 | 975  | 0.472800399  | KCNK16,KCNK17,KCNK5,ENSBTAG00000007140                           |
| 23 | 13,125,000 | 13,275,000 | 176 | 809  | 0.518171135  | KCNK16,KCNK17                                                    |
| 23 | 13,200,000 | 13,350,000 | 177 | 876  | 0.714589409  |                                                                  |
| 23 | 13,275,000 | 13,425,000 | 178 | 1075 | 0.348749189  | KIF6                                                             |

|    |            |            |     |      |              |                                                                         |
|----|------------|------------|-----|------|--------------|-------------------------------------------------------------------------|
| 23 | 13,350,000 | 13,500,000 | 179 | 1419 | 0.894531371  | KIF6                                                                    |
| 23 | 13,425,000 | 13,575,000 | 180 | 1322 | 1.131927139  | KIF6                                                                    |
| 23 | 13,500,000 | 13,650,000 | 181 | 1233 | 0.945588839  | KIF6                                                                    |
| 23 | 13,575,000 | 13,725,000 | 182 | 1324 | 0.98468551   |                                                                         |
| 23 | 13,650,000 | 13,800,000 | 183 | 911  | 0.761821662  | DAAM2                                                                   |
| 23 | 13,725,000 | 13,875,000 | 184 | 363  | 0.055667585  | DAAM2,MOCS1                                                             |
| 23 | 13,800,000 | 13,950,000 | 185 | 418  | 0.566989385  | DAAM2,MOCS1                                                             |
| 23 | 13,875,000 | 14,025,000 | 186 | 1037 | 0.987484304  |                                                                         |
| 23 | 13,950,000 | 14,100,000 | 187 | 1455 | 1.003847831  |                                                                         |
| 23 | 14,025,000 | 14,175,000 | 188 | 1167 | 1.008698832  |                                                                         |
| 23 | 14,100,000 | 14,250,000 | 189 | 810  | 1.23405934   |                                                                         |
| 23 | 14,175,000 | 14,325,000 | 190 | 613  | 1.269731449  | LRFN2                                                                   |
| 23 | 14,250,000 | 14,400,000 | 191 | 771  | 0.735508863  | LRFN2                                                                   |
| 23 | 14,325,000 | 14,475,000 | 192 | 951  | 0.500196574  | LRFN2                                                                   |
| 23 | 14,400,000 | 14,550,000 | 193 | 761  | 0.327561225  |                                                                         |
| 23 | 14,475,000 | 14,625,000 | 194 | 1091 | 0.965583728  |                                                                         |
| 23 | 14,550,000 | 14,700,000 | 195 | 1708 | 0.973336432  |                                                                         |
| 23 | 14,625,000 | 14,775,000 | 196 | 1772 | 0.442526526  |                                                                         |
| 23 | 14,700,000 | 14,850,000 | 197 | 1557 | 0.087784063  |                                                                         |
| 23 | 14,775,000 | 14,925,000 | 198 | 1604 | -0.169416191 |                                                                         |
| 23 | 14,850,000 | 15,000,000 | 199 | 1311 | 0.035166431  | APOBEC2,TSPO2,UNC5CL                                                    |
| 23 | 14,925,000 | 15,075,000 | 200 | 719  | 0.813880949  | APOBEC2,NFYA,OARD1,TSPO2,UNC5CL,ENSBTAG00000021359                      |
| 23 | 15,000,000 | 15,150,000 | 201 | 603  | -1.268661527 | NFYA,OARD1,TREM1,TREM2,TREML1,TREML2,ENSBTAG000021359                   |
| 23 | 15,075,000 | 15,225,000 | 202 | 569  | -2.261284011 | TREM1,TREM2,TREML1,TREML2                                               |
| 23 | 15,150,000 | 15,300,000 | 203 | 431  | -0.975601514 | TREM1                                                                   |
| 23 | 15,225,000 | 15,375,000 | 204 | 530  | -0.158871271 |                                                                         |
| 23 | 15,300,000 | 15,450,000 | 205 | 594  | -0.077412815 | FOXP4                                                                   |
| 23 | 15,375,000 | 15,525,000 | 206 | 397  | 0.313759261  | FOXP4,MDFI,TFEB                                                         |
| 23 | 15,450,000 | 15,600,000 | 207 | 401  | 0.40556713   | FRS3,MDFI,PGC,TFEB                                                      |
| 23 | 15,525,000 | 15,675,000 | 208 | 561  | 0.522059013  | FRS3,PGC,TOMM6,USP49,ENSBTAG00000038916                                 |
| 23 | 15,600,000 | 15,750,000 | 209 | 541  | 0.474218207  | BYSL,CCND3,FRS3,MED20,TOMM6,USP49,ENSBTAG00000038916                    |
| 23 | 15,675,000 | 15,825,000 | 210 | 498  | 0.327958456  | BYSL,CCND3,MED20,TAF8                                                   |
| 23 | 15,750,000 | 15,900,000 | 211 | 520  | 0.681124973  | C6orf132,MGC137036,TAF8                                                 |
| 23 | 15,825,000 | 15,975,000 | 212 | 646  | 0.451968678  | C6orf132,GUCA1A,GUCA1B,MGC137036,MRPS10,TRERF1                          |
| 23 | 15,900,000 | 16,050,000 | 213 | 923  | -1.200213775 | GUCA1A,GUCA1B,MRPS10,TRERF1                                             |
| 23 | 15,975,000 | 16,125,000 | 214 | 854  | -2.205335533 | TRERF1                                                                  |
| 23 | 16,050,000 | 16,200,000 | 215 | 431  | -1.398569785 |                                                                         |
| 23 | 16,125,000 | 16,275,000 | 216 | 286  | 0.558748602  | UBR2                                                                    |
| 23 | 16,200,000 | 16,350,000 | 217 | 296  | -0.33814291  | UBR2                                                                    |
| 23 | 16,275,000 | 16,425,000 | 218 | 336  | -0.642658802 | PRPH2,TBCC,UBR2                                                         |
| 23 | 16,350,000 | 16,500,000 | 219 | 434  | -0.271299622 | GLTSCR1L,PRPH2,TBCC,UBR2                                                |
| 23 | 16,425,000 | 16,575,000 | 220 | 388  | -0.098033714 | CNPY3,GLTSCR1L,PTCRA,RPL7L1                                             |
| 23 | 16,500,000 | 16,650,000 | 221 | 337  | 0.406001441  | CNPY3,CUL7,GLTSCR1L,GNMT,KLHDC3,MEA1,PEX6,PPP2R5D,PTCRA,RPL7L1          |
| 23 | 16,575,000 | 16,725,000 | 222 | 382  | 0.194082289  | CUL7,GNMT,KLC4,KLHDC3,MEA1,MRPL2,PEX6,PPP2R5D,PTK7                      |
| 23 | 16,650,000 | 16,800,000 | 223 | 301  | 0.257128867  | CUL7,CUL9,DNPH1,KLC4,MRPL2,PTK7,SRF                                     |
| 23 | 16,725,000 | 16,875,000 | 224 | 239  | 0.520850154  | CRIP3,CUL9,DNPH1,PTK7,SLC22A7,SRF,ENSBTAG00000045499,ENSBTAG00000046107 |

|    |            |            |     |      |              |                                                                   |
|----|------------|------------|-----|------|--------------|-------------------------------------------------------------------|
| 23 | 16,800,000 | 16,950,000 | 225 | 292  | 0.637467343  | CRIP3,SLC22A7,ZNF318,ENSBTAG00000045499,ENSBTAG00000046107        |
| 23 | 16,875,000 | 17,025,000 | 226 | 415  | 0.504382594  | ABCC10,CRIP3,DLK2,TJAP1,ZNF318                                    |
| 23 | 16,950,000 | 17,100,000 | 227 | 612  | 0.297816182  | ABCC10,DLK2,LRRC73,POLH,POLR1C,TJAP1,XPO5,YIPF3                   |
| 23 | 17,025,000 | 17,175,000 | 228 | 834  | 0.10707089   | GTPBP2,LRRC73,MAD2L1BP,MRPS18A,POLH,POLR1C,RSPH9,TJAP1,XPO5,YIPF3 |
| 23 | 17,100,000 | 17,250,000 | 229 | 687  | 0.061714595  | GTPBP2,MAD2L1BP,MRPS18A,POLH,RSPH9                                |
| 23 | 17,175,000 | 17,325,000 | 230 | 344  | 0.253657472  | VEGFA,ENSBTAG00000005339                                          |
| 23 | 17,250,000 | 17,400,000 | 231 | 514  | 1.161481357  | VEGFA,ENSBTAG00000005339                                          |
| 23 | 17,325,000 | 17,475,000 | 232 | 585  | 1.170087971  |                                                                   |
| 23 | 17,400,000 | 17,550,000 | 233 | 504  | 0.421684053  |                                                                   |
| 23 | 17,475,000 | 17,625,000 | 234 | 455  | 0.344506386  | AARS2                                                             |
| 23 | 17,550,000 | 17,700,000 | 235 | 380  | 0.17693139   | AARS2,MRPL14,TMEM63B                                              |
| 23 | 17,625,000 | 17,775,000 | 236 | 664  | -0.016380911 | AARS2,CDC5L,MRPL14,TMEM63B                                        |
| 23 | 17,700,000 | 17,850,000 | 237 | 646  | -0.085752683 | CAPN11,CDC5L,SLC29A1,TMEM63B                                      |
| 23 | 17,775,000 | 17,925,000 | 238 | 354  | -1.22518883  | CAPN11,NFKBIE,SLC29A1,SLC35B2,TMEM151B,TMEM63B,ENSBTAG00000000778 |
| 23 | 17,850,000 | 18,000,000 | 239 | 322  | -1.109577238 | NFKBIE,SLC29A1,SLC35B2,TMEM151B,ENSBTAG00000000778                |
| 23 | 17,925,000 | 18,075,000 | 240 | 425  | 0.036132623  |                                                                   |
| 23 | 18,000,000 | 18,150,000 | 241 | 459  | -0.858137551 |                                                                   |
| 23 | 18,075,000 | 18,225,000 | 242 | 358  | -1.182222775 |                                                                   |
| 23 | 18,150,000 | 18,300,000 | 243 | 285  | -0.139717487 | SUPT3H                                                            |
| 23 | 18,225,000 | 18,375,000 | 244 | 233  | -0.943368948 | SUPT3H                                                            |
| 23 | 18,300,000 | 18,450,000 | 245 | 222  | -1.05743243  | SUPT3H                                                            |
| 23 | 18,375,000 | 18,525,000 | 246 | 253  | 0.393604922  | SUPT3H                                                            |
| 23 | 18,450,000 | 18,600,000 | 247 | 241  | -0.101359715 | SUPT3H                                                            |
| 23 | 18,525,000 | 18,675,000 | 248 | 200  | 0.27856418   | RUNX2,SUPT3H                                                      |
| 23 | 18,600,000 | 18,750,000 | 249 | 201  | 1.132624024  | RUNX2,SUPT3H                                                      |
| 23 | 18,675,000 | 18,825,000 | 250 | 317  | 0.790901806  | RUNX2                                                             |
| 23 | 18,750,000 | 18,900,000 | 251 | 728  | 1.087228987  | RUNX2                                                             |
| 23 | 18,825,000 | 18,975,000 | 252 | 1103 | 1.038554365  |                                                                   |
| 23 | 18,900,000 | 19,050,000 | 253 | 1241 | 0.92617754   |                                                                   |
| 23 | 18,975,000 | 19,125,000 | 254 | 1095 | 0.784911916  |                                                                   |
| 23 | 19,050,000 | 19,200,000 | 255 | 951  | 0.664304175  | CLIC5                                                             |
| 23 | 19,125,000 | 19,275,000 | 256 | 1358 | 0.325879994  | CLIC5                                                             |
| 23 | 19,200,000 | 19,350,000 | 257 | 1504 | -0.48657133  | CLIC5                                                             |
| 23 | 19,275,000 | 19,425,000 | 258 | 1212 | -0.387043529 | CLIC5,ENPP4,ENPP5                                                 |
| 23 | 19,350,000 | 19,500,000 | 259 | 914  | 0.170401316  | ENPP4,ENPP5,RCAN2                                                 |
| 23 | 19,425,000 | 19,575,000 | 260 | 660  | -1.291646973 | RCAN2                                                             |
| 23 | 19,500,000 | 19,650,000 | 261 | 824  | -1.715359209 | RCAN2                                                             |
| 23 | 19,575,000 | 19,725,000 | 262 | 1355 | 0.331004897  | RCAN2                                                             |
| 23 | 19,650,000 | 19,800,000 | 263 | 1333 | 0.912869037  | CYP39A1,RCAN2                                                     |
| 23 | 19,725,000 | 19,875,000 | 264 | 939  | 0.99805594   | CYP39A1,SLC25A27                                                  |
| 23 | 19,800,000 | 19,950,000 | 265 | 1026 | 0.39082988   | CYP39A1,PLA2G7,SLC25A27,TDRD6                                     |
| 23 | 19,875,000 | 20,025,000 | 266 | 1073 | -2.241010227 | ANKRD66,MEP1A,PLA2G7,SLC25A27,TDRD6                               |
| 23 | 19,950,000 | 20,100,000 | 267 | 829  | -2.926474796 | ANKRD66,GPR116,MEP1A                                              |
| 23 | 20,025,000 | 20,175,000 | 268 | 824  | 0.194370368  | GPR116,MEP1A                                                      |
| 23 | 20,100,000 | 20,250,000 | 269 | 1058 | 0.304108615  | GPR110,GPR116                                                     |
| 23 | 20,175,000 | 20,325,000 | 270 | 982  | -1.190689137 | GPR110                                                            |
| 23 | 20,250,000 | 20,400,000 | 271 | 975  | -1.894224609 | GPR110                                                            |
| 23 | 20,325,000 | 20,475,000 | 272 | 1061 | -0.100525325 | TNFRSF21                                                          |
| 23 | 20,400,000 | 20,550,000 | 273 | 1082 | -0.372544856 | TNFRSF21                                                          |

|    |            |            |     |      |              |                                    |
|----|------------|------------|-----|------|--------------|------------------------------------|
| 23 | 20,475,000 | 20,625,000 | 274 | 1136 | -0.519354626 | CD2AP                              |
| 23 | 20,550,000 | 20,700,000 | 275 | 1104 | 0.473104589  | CD2AP                              |
| 23 | 20,625,000 | 20,775,000 | 276 | 855  | 1.185602698  | CD2AP,GPR111,GPR115                |
| 23 | 20,700,000 | 20,850,000 | 277 | 897  | 0.48553275   | GPR111,GPR115,OPN5                 |
| 23 | 20,775,000 | 20,925,000 | 278 | 795  | 0.408270386  | C23H6orf138,OPN5                   |
| 23 | 20,850,000 | 21,000,000 | 279 | 730  | 0.868606879  | C23H6orf138                        |
| 23 | 20,925,000 | 21,075,000 | 280 | 1039 | 0.382844819  | C23H6orf138                        |
| 23 | 21,000,000 | 21,150,000 | 281 | 845  | 0.265615556  | C23H6orf138                        |
| 23 | 21,075,000 | 21,225,000 | 282 | 1012 | -0.574644842 | C23H6orf138                        |
| 23 | 21,150,000 | 21,300,000 | 283 | 1524 | -0.321144056 |                                    |
| 23 | 21,225,000 | 21,375,000 | 284 | 1421 | 0.334028411  |                                    |
| 23 | 21,300,000 | 21,450,000 | 285 | 1427 | 0.110521496  |                                    |
| 23 | 21,375,000 | 21,525,000 | 286 | 1710 | -0.116529511 |                                    |
| 23 | 21,450,000 | 21,600,000 | 287 | 1367 | -0.36135819  |                                    |
| 23 | 21,525,000 | 21,675,000 | 288 | 1008 | -0.399328582 |                                    |
| 23 | 21,600,000 | 21,750,000 | 289 | 1422 | -0.346122756 |                                    |
| 23 | 21,675,000 | 21,825,000 | 290 | 1583 | -0.320805185 |                                    |
| 23 | 21,750,000 | 21,900,000 | 291 | 1533 | 0.270510078  |                                    |
| 23 | 21,825,000 | 21,975,000 | 292 | 1591 | 0.385400384  | MUT                                |
| 23 | 21,900,000 | 22,050,000 | 293 | 1144 | 0.45413401   | C23H6orf141,CENPQ,GLYATL3,MUT      |
| 23 | 21,975,000 | 22,125,000 | 294 | 1079 | 0.098550374  | C23H6orf141,CENPQ,GLYATL3,MUT,RHAG |
| 23 | 22,050,000 | 22,200,000 | 295 | 1215 | 0.539340215  | CRISP2,CRISP3,RHAG                 |
| 23 | 22,125,000 | 22,275,000 | 296 | 1043 | 0.816254976  | CRISP1,CRISP2,CRISP3               |
| 23 | 22,200,000 | 22,350,000 | 297 | 1284 | 0.224787132  | CRISP1                             |
| 23 | 22,275,000 | 22,425,000 | 298 | 1387 | 0.355661023  | DEFB112                            |
| 23 | 22,350,000 | 22,500,000 | 299 | 1218 | 0.948740425  | DEFB112                            |
| 23 | 22,425,000 | 22,575,000 | 300 | 1097 | 0.899537932  |                                    |
| 23 | 22,500,000 | 22,650,000 | 301 | 902  | 0.570054736  |                                    |
| 23 | 22,575,000 | 22,725,000 | 302 | 924  | 0.497789318  |                                    |
| 23 | 22,650,000 | 22,800,000 | 303 | 973  | -0.037457031 |                                    |
| 23 | 22,725,000 | 22,875,000 | 304 | 962  | 0.021993235  |                                    |
| 23 | 22,800,000 | 22,950,000 | 305 | 1095 | 0.548456892  |                                    |
| 23 | 22,875,000 | 23,025,000 | 306 | 1008 | 0.552567661  | TFAP2D                             |
| 23 | 22,950,000 | 23,100,000 | 307 | 1081 | -0.241785378 | TFAP2B,TFAP2D                      |
| 23 | 23,025,000 | 23,175,000 | 308 | 1135 | 0.014616131  | TFAP2B,TFAP2D                      |
| 23 | 23,100,000 | 23,250,000 | 309 | 966  | 0.522084139  | TFAP2B                             |
| 23 | 23,175,000 | 23,325,000 | 310 | 1422 | 0.334562282  |                                    |
| 23 | 23,250,000 | 23,400,000 | 311 | 1804 | 0.563525708  |                                    |
| 23 | 23,325,000 | 23,475,000 | 312 | 1874 | 0.703669172  |                                    |
| 23 | 23,400,000 | 23,550,000 | 313 | 1929 | 0.940480631  |                                    |
| 23 | 23,475,000 | 23,625,000 | 314 | 2005 | 0.717932258  |                                    |
| 23 | 23,550,000 | 23,700,000 | 315 | 1854 | 0.024738332  |                                    |
| 23 | 23,625,000 | 23,775,000 | 316 | 1882 | 0.044641712  |                                    |
| 23 | 23,700,000 | 23,850,000 | 317 | 1900 | 0.136405805  | PKHD1                              |
| 23 | 23,775,000 | 23,925,000 | 318 | 1835 | -0.174777585 | PKHD1                              |
| 23 | 23,850,000 | 24,000,000 | 319 | 1983 | -0.453849364 | PKHD1                              |
| 23 | 23,925,000 | 24,075,000 | 320 | 1782 | -0.357904538 | PKHD1                              |
| 23 | 24,000,000 | 24,150,000 | 321 | 1643 | 0.129346783  | PKHD1                              |
| 23 | 24,075,000 | 24,225,000 | 322 | 1904 | 0.350399229  | PKHD1                              |
| 23 | 24,150,000 | 24,300,000 | 323 | 2394 | 0.718224476  | PKHD1                              |
| 23 | 24,225,000 | 24,375,000 | 324 | 2476 | 0.870595255  | IL17,PKHD1                         |
| 23 | 24,300,000 | 24,450,000 | 325 | 2472 | 0.509002542  | IL17,IL17F,MCM3                    |
| 23 | 24,375,000 | 24,525,000 | 326 | 2194 | 0.296783402  | IL17F,MCM3                         |



|    |            |            |     |      |              |                                                                                                              |
|----|------------|------------|-----|------|--------------|--------------------------------------------------------------------------------------------------------------|
| 23 | 24,450,000 | 24,600,000 | 327 | 2131 | -0.110493712 | EFHC1,MCM3,PAQR8                                                                                             |
| 23 | 24,525,000 | 24,675,000 | 328 | 2572 | -0.155298027 | EFHC1,PAQR8,TRAM2                                                                                            |
| 23 | 24,600,000 | 24,750,000 | 329 | 2268 | 0.102767943  | EFHC1,TRAM2                                                                                                  |
| 23 | 24,675,000 | 24,825,000 | 330 | 2201 | 0.228943012  | GSTA2,TMEM14A,TRAM2                                                                                          |
| 23 | 24,750,000 | 24,900,000 | 331 | 2401 | -0.578988991 | GSTA1,GSTA2,GSTA5,TMEM14A,ENSBTAG00000025485                                                                 |
| 23 | 24,825,000 | 24,975,000 | 332 | 2372 | -0.91585483  | GSTA1,GSTA2,GSTA4,GSTA5,ENSBTAG00000025485,ENSBTAG00000032642                                                |
| 23 | 24,900,000 | 25,050,000 | 333 | 2502 | -0.018284252 | FBXO9,GSTA4,GSTA5,ICK,ENSBTAG00000032642                                                                     |
| 23 | 24,975,000 | 25,125,000 | 334 | 2881 | 0.193381445  | FBXO9,GCM-1,GSTA4,ICK                                                                                        |
| 23 | 25,050,000 | 25,200,000 | 335 | 2652 | 0.021244432  | ELOVL5,FBXO9,GCM-1                                                                                           |
| 23 | 25,125,000 | 25,275,000 | 336 | 2306 | -0.021559752 | ELOVL5                                                                                                       |
| 23 | 25,200,000 | 25,350,000 | 337 | 3157 | 0.076852862  | ELOVL5                                                                                                       |
| 23 | 25,275,000 | 25,425,000 | 338 | 2684 | -0.167667712 | BOLA-DQA2,BOLA-DQA5,BOLA-DQB,ENSBTAG00000003352                                                              |
| 23 | 25,350,000 | 25,500,000 | 339 | 2596 | -0.581515139 | BOLA-DQA1,BOLA-DQA2,BOLA-DQA5,BOLA-DQB,BOLA-DRB3,ENSBTAG00000003352                                          |
| 23 | 25,425,000 | 25,575,000 | 340 | 3551 | 0.043453916  | BOLA-DQA1,BOLA-DRB3,ENSBTAG00000038397                                                                       |
| 23 | 25,500,000 | 25,650,000 | 341 | 3083 | 0.419796514  | BOLA-DRA,BTNL2,ENSBTAG00000007618,ENSBTAG00000034945,ENSBTAG00000038397                                      |
| 23 | 25,575,000 | 25,725,000 | 342 | 2489 | 0.496854922  | BOLA-DRA,BTNL2,ENSBTAG00000007618,ENSBTAG00000034945,ENSBTAG00000038397                                      |
| 23 | 25,650,000 | 25,800,000 | 343 | 2194 | 0.189480737  | ENSBTAG00000007618                                                                                           |
| 23 | 25,725,000 | 25,875,000 | 344 | 2771 | -0.85958776  | BOLA-DQB                                                                                                     |
| 23 | 25,800,000 | 25,950,000 | 345 | 2993 | -0.40871273  | BOLA-DQB                                                                                                     |
| 23 | 25,875,000 | 26,025,000 | 346 | 2363 | -0.361047785 | ENSBTAG00000033979                                                                                           |
| 23 | 25,950,000 | 26,100,000 | 347 | 2031 | -1.453258147 | ENSBTAG00000033979                                                                                           |
| 23 | 26,025,000 | 26,175,000 | 348 | 1290 | -2.526942951 |                                                                                                              |
| 23 | 26,100,000 | 26,250,000 | 349 | 823  | -1.613077622 |                                                                                                              |
| 23 | 26,175,000 | 26,325,000 | 350 | 1558 | -0.525508262 |                                                                                                              |
| 23 | 26,250,000 | 26,400,000 | 351 | 1781 | -1.194558084 | ENSBTAG00000026163                                                                                           |
| 23 | 26,325,000 | 26,475,000 | 352 | 1982 | -1.645027591 | ENSBTAG00000026163                                                                                           |
| 23 | 26,400,000 | 26,550,000 | 353 | 2287 | 0.062332926  |                                                                                                              |
| 23 | 26,475,000 | 26,625,000 | 354 | 2054 | 0.058724554  |                                                                                                              |
| 23 | 26,550,000 | 26,700,000 | 355 | 1990 | -0.092204311 | ENSBTAG00000046116                                                                                           |
| 23 | 26,625,000 | 26,775,000 | 356 | 2240 | 0.048261538  | C6orf10,ENSBTAG00000046116                                                                                   |
| 23 | 26,700,000 | 26,850,000 | 357 | 2555 | -0.065991408 | C6orf10                                                                                                      |
| 23 | 26,775,000 | 26,925,000 | 358 | 2736 | -0.40988518  | C6orf10,ENSBTAG00000023563                                                                                   |
| 23 | 26,850,000 | 27,000,000 | 359 | 3174 | -0.275672899 | NOTCH4,ENSBTAG00000023563,ENSBTAG00000048304                                                                 |
| 23 | 26,925,000 | 27,075,000 | 360 | 2600 | -0.004374259 | AGER,AGPAT1,ATF6B,EGFL8,FKBPL,NOTCH4,PBX2,PPT2,PRRT1,RNF5,ENSBTAG00000023563,ENSBTAG00000048304              |
| 23 | 27,000,000 | 27,150,000 | 361 | 1859 | -0.115208888 | AGER,AGPAT1,ATF6B,EGFL8,FKBPL,PBX2,PPT2,PRRT1,RNF5,TNXB,ENSBTAG00000047039                                   |
| 23 | 27,075,000 | 27,225,000 | 362 | 1854 | -0.224856555 | DOM3Z,NELFE,SKIV2L,STK19,TNXB,ENSBTAG00000001443,ENSBTAG00000006864,ENSBTAG00000037533,ENSBTAG00000047039    |
| 23 | 27,150,000 | 27,300,000 | 363 | 1833 | 0.202860822  | BAT8,C2,CFB,DOM3Z,NELFE,SKIV2L,SLC44A4,STK19,ZBTB12,ENSBTAG00000001443,ENSBTAG00000006864,ENSBTAG00000037533 |
| 23 | 27,225,000 | 27,375,000 | 364 | 1912 | 0.184442668  | BAT8,C2,CFB,HSPA1A,HSPA1L,LSM2,MGC151586,NELFE,NEU1,SLC44A4,VAR5,VWA7,ZBTB12                                 |

|    |            |            |     |      |              |                                                                                                                                                                                                                                                        |
|----|------------|------------|-----|------|--------------|--------------------------------------------------------------------------------------------------------------------------------------------------------------------------------------------------------------------------------------------------------|
| 23 | 27,300,000 | 27,450,000 | 365 | 1827 | 0.080406906  | ABHD16A,C6ORF25,CLIC1,CSNK2B,DDAH2,HSPA1A,HSPA1L,LSM2,LY6G5B,LY6G5C,LY6G6C,LY6G6E,MGC151586,MSH5,NEU1,SLC44A4,VAR5,VWA7,ENSBTAG00000000580,ENSBTAG00000038955                                                                                          |
| 23 | 27,375,000 | 27,525,000 | 366 | 1787 | 0.313266838  | ABHD16A,AIF1,APOM,BAG6,BAT4,C23H6ORF47,C6ORF25,CLIC1,CSNK2B,DDAH2,LY6G5B,LY6G5C,LY6G6C,LY6G6E,MGC151586,MSH5,NCR3,PRRC2A,ENSBTAG00000000580,ENSBTAG00000038955                                                                                         |
| 23 | 27,450,000 | 27,600,000 | 367 | 2078 | 0.484776485  | AIF1,APOM,ATP6V1G2,BAG6,BAT4,C23H6ORF47,CSNK2B,DDX39B,LTA,LTB,MCCD1,NCR3,NFKBIL1,PRRC2A,TNF                                                                                                                                                            |
| 23 | 27,525,000 | 27,675,000 | 368 | 2305 | 0.207553886  | ATP6V1G2,BOLA,DDX39B,LTA,LTB,MCCD1,NFKBIL1,TNF,ENSBTAG00000008959,ENSBTAG00000010166,ENSBTAG00000031905                                                                                                                                                |
| 23 | 27,600,000 | 27,750,000 | 369 | 2795 | 0.104417387  | BOLA,ENSBTAG00000001476,ENSBTAG00000008959,ENSBTAG00000010166,ENSBTAG00000012208,ENSBTAG00000031905                                                                                                                                                    |
| 23 | 27,675,000 | 27,825,000 | 370 | 2760 | 0.296551266  | C6orf15,CCHCR1,CDSN,POU5F1,PSORS1C2,TCF19,ENSBTAG00000001476,ENSBTAG00000010166,ENSBTAG00000012208                                                                                                                                                     |
| 23 | 27,750,000 | 27,900,000 | 371 | 2505 | 0.577312194  | BOLA,C6orf15,CCHCR1,CDSN,POU5F1,PSORS1C2,TCF19,ENSBTAG00000007075                                                                                                                                                                                      |
| 23 | 27,825,000 | 27,975,000 | 372 | 2263 | 0.580429126  | BOLA,GTF2H4,SFTA2,VAR5,ENSBTAG00000007075                                                                                                                                                                                                              |
| 23 | 27,900,000 | 28,050,000 | 373 | 2152 | 0.32133447   | DDR1,GTF2H4,SFTA2,VAR5                                                                                                                                                                                                                                 |
| 23 | 27,975,000 | 28,125,000 | 374 | 2135 | 0.338831459  | DDR1,FLOT1,IER3,MDC1,NRM,TUBB5                                                                                                                                                                                                                         |
| 23 | 28,050,000 | 28,200,000 | 375 | 1572 | 0.592104847  | ABCF1,ATAT1,C6orf136,DHX16,FLOT1,IER3,KIAA1949,MDC1,MRPS18B,NRM,PPP1R10,TUBB5                                                                                                                                                                          |
| 23 | 28,125,000 | 28,275,000 | 376 | 1596 | 0.509109926  | ABCF1,ATAT1,C6orf136,DHX16,GNL1,KIAA1949,MDC1,MRPS18B,PPP1R10,PRR3,TRIM39-RPP21                                                                                                                                                                        |
| 23 | 28,200,000 | 28,350,000 | 377 | 2234 | 0.441826747  | ABCF1,GNL1,PRR3,TRIM39-RPP21,ENSBTAG00000005146,ENSBTAG00000038619                                                                                                                                                                                     |
| 23 | 28,275,000 | 28,425,000 | 378 | 3301 | -0.009292144 | BOLA-NC,ENSBTAG00000005146,ENSBTAG00000038619                                                                                                                                                                                                          |
| 23 | 28,350,000 | 28,500,000 | 379 | 3815 | 0.013499777  | BOLA-NC,JSP.1                                                                                                                                                                                                                                          |
| 23 | 28,425,000 | 28,575,000 | 380 | 3648 | 0.34372129   | BOLA,JSP.1,TRIM26,ENSBTAG00000037421                                                                                                                                                                                                                   |
| 23 | 28,500,000 | 28,650,000 | 381 | 3701 | 0.173982765  | BOLA,TRIM10,TRIM15,TRIM26,TRIM40,ENSBTAG00000037421                                                                                                                                                                                                    |
| 23 | 28,575,000 | 28,725,000 | 382 | 3148 | 0.277240802  | PPP1R11,TRIM10,TRIM15,TRIM26,TRIM31,TRIM40,ZNRD1                                                                                                                                                                                                       |
| 23 | 28,650,000 | 28,800,000 | 383 | 2386 | 0.597902672  | GABBR1,MOG,PPP1R11,TRIM31,ZFP57,ZNRD1                                                                                                                                                                                                                  |
| 23 | 28,725,000 | 28,875,000 | 384 | 2295 | 0.569739634  | GABBR1,MOG,ZFP57,ENSBTAG00000025398,ENSBTAG00000031825                                                                                                                                                                                                 |
| 23 | 28,800,000 | 28,950,000 | 385 | 2086 | 0.620261603  | GABBR1,UBD,ENSBTAG00000003250,ENSBTAG00000017227,ENSBTAG00000025398,ENSBTAG00000027245,ENSBTAG00000031825                                                                                                                                              |
| 23 | 28,875,000 | 29,025,000 | 386 | 2406 | 0.398484349  | UBD,ENSBTAG00000003250,ENSBTAG00000012956,ENSBTAG00000017227,ENSBTAG00000027245,ENSBTAG00000031832,ENSBTAG00000045586,ENSBTAG00000046934,ENSBTAG00000047014,ENSBTAG00000047644,ENSBTAG00000048194                                                      |
| 23 | 28,950,000 | 29,100,000 | 387 | 3220 | 0.410998781  | ENSBTAG00000012956,ENSBTAG00000031832,ENSBTAG00000031835,ENSBTAG00000039390,ENSBTAG00000045586,ENSBTAG00000046892,ENSBTAG00000046934,ENSBTAG00000047014,ENSBTAG00000047644,ENSBTAG00000047763,ENSBTAG00000047829,ENSBTAG00000048019,ENSBTAG00000048194 |

|    |            |            |     |      |              |                                                                                                                                                                            |
|----|------------|------------|-----|------|--------------|----------------------------------------------------------------------------------------------------------------------------------------------------------------------------|
| 23 | 29,025,000 | 29,175,000 | 388 | 3111 | 0.629103729  | OR12D2,OR12D3,ENSBTAG00000031835,ENSBTAG00000039116,ENSBTAG00000039390,ENSBTAG00000039683,ENSBTAG00000046892,ENSBTAG00000047763,ENSBTAG00000047829,ENSBTAG00000048019      |
| 23 | 29,100,000 | 29,250,000 | 389 | 2588 | 0.621611237  | OR12D2,OR12D3,OR14J1,OR5V1,ENSBTAG00000031843,ENSBTAG00000039116,ENSBTAG00000039534,ENSBTAG00000039683,ENSBTAG00000039901                                                  |
| 23 | 29,175,000 | 29,325,000 | 390 | 2810 | 0.122189846  | OR14J1,OR5V1,ENSBTAG00000031843,ENSBTAG00000038608,ENSBTAG00000039534,ENSBTAG00000039901,ENSBTAG00000046023,ENSBTAG00000046777,ENSBTAG00000047086                          |
| 23 | 29,250,000 | 29,400,000 | 391 | 2801 | 0.382690013  | ENSBTAG0000000228,ENSBTAG00000031850,ENSBTAG00000037628,ENSBTAG00000038608,ENSBTAG00000046023,ENSBTAG00000046777,ENSBTAG00000047086                                        |
| 23 | 29,325,000 | 29,475,000 | 392 | 2162 | 0.133830308  | ENSBTAG0000000228,ENSBTAG00000006339,ENSBTAG00000027955,ENSBTAG00000031850,ENSBTAG00000037628,ENSBTAG00000040582                                                           |
| 23 | 29,400,000 | 29,550,000 | 393 | 1710 | -1.711248325 | ENSBTAG00000006339,ENSBTAG00000027955,ENSBTAG00000038562,ENSBTAG00000038928,ENSBTAG00000040280,ENSBTAG00000040582,ENSBTAG00000047558                                       |
| 23 | 29,475,000 | 29,625,000 | 394 | 1656 | -1.677671698 | ENSBTAG00000037577,ENSBTAG00000038444,ENSBTAG00000038562,ENSBTAG00000038928,ENSBTAG00000039052,ENSBTAG00000040064,ENSBTAG00000040280,ENSBTAG00000047558,ENSBTAG00000047736 |
| 23 | 29,550,000 | 29,700,000 | 395 | 1315 | -0.701696147 | ENSBTAG00000015175,ENSBTAG00000037577,ENSBTAG00000038444,ENSBTAG00000039052,ENSBTAG00000040026,ENSBTAG00000040064,ENSBTAG00000040187,ENSBTAG00000040457,ENSBTAG00000047736 |
| 23 | 29,625,000 | 29,775,000 | 396 | 844  | 0.345795922  | ENSBTAG00000000214,ENSBTAG00000015175,ENSBTAG00000040026,ENSBTAG00000040187,ENSBTAG00000040457                                                                             |
| 23 | 29,700,000 | 29,850,000 | 397 | 1292 | 0.213751474  | ENSBTAG00000000214,ENSBTAG00000047585                                                                                                                                      |
| 23 | 29,775,000 | 29,925,000 | 398 | 1736 | 0.239160291  | TRIM27,ZNF311,ENSBTAG00000047585                                                                                                                                           |
| 23 | 29,850,000 | 30,000,000 | 399 | 1696 | 0.147318671  | TRIM27,ZNF311                                                                                                                                                              |
| 23 | 29,925,000 | 30,075,000 | 400 | 1752 | 0.083985028  | ENSBTAG00000038782                                                                                                                                                         |
| 23 | 30,000,000 | 30,150,000 | 401 | 2035 | 0.375211032  | PGBD1,ZNF323,ZSCAN12,ENSBTAG00000038782                                                                                                                                    |
| 23 | 30,075,000 | 30,225,000 | 402 | 2115 | -0.063171003 | NKAPL,PGBD1,ZNF323,ZSCAN12,ZSCAN26,ZSCAN9,ENSBTAG00000003575                                                                                                               |
| 23 | 30,150,000 | 30,300,000 | 403 | 1991 | 0.078032983  | NKAPL,PGBD1,ZNF192,ZSCAN26,ZSCAN9,ENSBTAG00000002641,ENSBTAG00000003575                                                                                                    |
| 23 | 30,225,000 | 30,375,000 | 404 | 2156 | 0.134436988  | ZNF165,ZNF192,ZSCAN16,ENSBTAG00000002641,ENSBTAG00000013384                                                                                                                |
| 23 | 30,300,000 | 30,450,000 | 405 | 1959 | 0.059783479  | ZNF165,ZSCAN16,ENSBTAG00000013384,ENSBTAG00000038908,ENSBTAG00000039079                                                                                                    |
| 23 | 30,375,000 | 30,525,000 | 406 | 2052 | 0.582561841  | ENSBTAG000000031881,ENSBTAG00000038908,ENSBTAG00000038983,ENSBTAG00000039079,ENSBTAG00000040454,ENSBTAG00000040583                                                         |
| 23 | 30,450,000 | 30,600,000 | 407 | 2580 | 0.129420471  | ENSBTAG00000005885,ENSBTAG00000031881,ENSBTAG00000038983,ENSBTAG00000040171,ENSBTAG00000040307,ENSBTAG00000040454,ENSBTAG00000040583                                       |
| 23 | 30,525,000 | 30,675,000 | 408 | 2552 | -0.304594838 | OR2B6,ENSBTAG00000005885,ENSBTAG00000038597,ENSBTAG00000039145,ENSBTAG00000040171,ENSBTAG00000040307                                                                       |

|    |            |            |     |      |             |                                                                                                                                                                     |
|----|------------|------------|-----|------|-------------|---------------------------------------------------------------------------------------------------------------------------------------------------------------------|
| 23 | 30,600,000 | 30,750,000 | 409 | 2078 | 0.133643618 | H2B,HIST1H2AD,HIST1H2AG,HIST1H3B,HIST1H3F,HIST1H4D,OR2B6,ENSBTAG00000024179,ENSBTAG00000038597,ENSBTAG00000039145,ENSBTAG00000039274                                |
| 23 | 30,675,000 | 30,825,000 | 410 | 1705 | 0.035610433 | H2B,HIST1H2AD,HIST1H2AG,HIST1H2AJ,HIST1H3B,HIST1H3F,HIST1H4D,ENSBTAG00000024175,ENSBTAG00000024178,ENSBTAG00000024179,ENSBTAG00000039274                            |
| 23 | 30,750,000 | 30,900,000 | 411 | 1700 | 0.243840241 | H2B,HIST1H2AG,HIST1H2AJ,ENSBTAG00000024175,ENSBTAG00000024178                                                                                                       |
| 23 | 30,825,000 | 30,975,000 | 412 | 1375 | 1.058155798 | ZNF184                                                                                                                                                              |
| 23 | 30,900,000 | 31,050,000 | 413 | 1150 | 1.292324466 | POM121L2,ZNF184,ZNF391                                                                                                                                              |
| 23 | 30,975,000 | 31,125,000 | 414 | 1329 | 1.150067579 | HIST1H2AG,HIST1H2BJ,POM121L2,PRSS16,ZNF184,ZNF391,ENSBTAG00000038173,ENSBTAG00000046096                                                                             |
| 23 | 31,050,000 | 31,200,000 | 415 | 1515 | 1.017132904 | HIST1H2AG,HIST1H2BJ,PRSS16,ENSBTAG00000038173,ENSBTAG00000046096                                                                                                    |
| 23 | 31,125,000 | 31,275,000 | 416 | 1461 | 0.959217463 | HIST1H2BJ,MGC157324,ENSBTAG00000027547,ENSBTAG00000037597                                                                                                           |
| 23 | 31,200,000 | 31,350,000 | 417 | 1382 | 1.073060328 | ABT1,HMGN4,MGC157324,ENSBTAG00000010852,ENSBTAG00000027547,ENSBTAG00000037597                                                                                       |
| 23 | 31,275,000 | 31,425,000 | 418 | 1384 | 0.9630345   | ABT1,BTN1A1,HMGN4,ENSBTAG00000010852                                                                                                                                |
| 23 | 31,350,000 | 31,500,000 | 419 | 1304 | 0.387480074 | BTN1A1,H2B,HIST1H1D,HIST1H2AG,HIST1H3A,HIST1H3G,HIST2H4B,ENSBTAG00000010852,ENSBTAG00000031762,ENSBTAG00000031763,ENSBTAG00000031766                                |
| 23 | 31,425,000 | 31,575,000 | 420 | 1357 | 0.739227835 | H2B,HIST1H1D,HIST1H1E,HIST1H2AG,HIST1H2BI,HIST1H3A,HIST1H3G,HIST2H4B,ENSBTAG00000031762,ENSBTAG00000031763,ENSBTAG00000031766,ENSBTAG00000031768,ENSBTAG00000040277 |
| 23 | 31,500,000 | 31,650,000 | 421 | 1308 | 1.162944893 | H2B,HFE,HIST1H1C,HIST1H1E,HIST1H2AC,HIST1H2AG,HIST1H2BB,HIST1H2BI,ENSBTAG00000025391,ENSBTAG00000031717,ENSBTAG00000031768,ENSBTAG00000040277                       |
| 23 | 31,575,000 | 31,725,000 | 422 | 1294 | 1.002251541 | H2B,HFE,HIST1H1A,HIST1H1C,HIST1H2AC,HIST1H2BB,HIST1H3D,HIST1H3I,HIST2H4A,SLC17A2,TRIM38,ENSBTAG00000025391,ENSBTAG00000031717,ENSBTAG00000031719,ENSBTAG00000031738 |
| 23 | 31,650,000 | 31,800,000 | 423 | 1239 | 0.868660307 | HIST1H1A,HIST1H3D,HIST1H3I,HIST2H4A,SLC17A1,SLC17A2,SLC17A3,TRIM38,ENSBTAG00000031719,ENSBTAG00000031738                                                            |
| 23 | 31,725,000 | 31,875,000 | 424 | 874  | 0.144291209 | SLC17A1,SLC17A2,SLC17A3,SLC17A4                                                                                                                                     |
| 23 | 31,800,000 | 31,950,000 | 425 | 931  | 0.053079982 | HIST1H2BA,SLC17A1,SLC17A4,ENSBTAG00000046992,ENSBTAG00000048235                                                                                                     |
| 23 | 31,875,000 | 32,025,000 | 426 | 1348 | 0.309375166 | HIST1H2BA,SCGN,ENSBTAG00000046992,ENSBTAG00000048235                                                                                                                |
| 23 | 31,950,000 | 32,100,000 | 427 | 1829 | 0.383564187 | LRRC16A,SCGN                                                                                                                                                        |
| 23 | 32,025,000 | 32,175,000 | 428 | 2118 | 0.498993215 | LRRC16A                                                                                                                                                             |
| 23 | 32,100,000 | 32,250,000 | 429 | 2194 | 0.763327276 | LRRC16A                                                                                                                                                             |
| 23 | 32,175,000 | 32,325,000 | 430 | 2004 | 0.989065625 | LRRC16A,ENSBTAG00000038783                                                                                                                                          |
| 23 | 32,250,000 | 32,400,000 | 431 | 1520 | 1.004095727 | LRRC16A,ENSBTAG00000038783                                                                                                                                          |
| 23 | 32,325,000 | 32,475,000 | 432 | 1439 | 0.067073727 | LRRC16A,ENSBTAG00000003892                                                                                                                                          |
| 23 | 32,400,000 | 32,550,000 | 433 | 1478 | 0.14857867  | ENSBTAG00000003892                                                                                                                                                  |
| 23 | 32,475,000 | 32,625,000 | 434 | 1519 | 0.920247642 | ENSBTAG00000003892                                                                                                                                                  |
| 23 | 32,550,000 | 32,700,000 | 435 | 1405 | 0.955159101 | FAM65B                                                                                                                                                              |
| 23 | 32,625,000 | 32,775,000 | 436 | 1342 | 0.730968707 | FAM65B                                                                                                                                                              |
| 23 | 32,700,000 | 32,850,000 | 437 | 1121 | 0.405074499 | C23H6ORF62,FAM65B,GMNN,TDP2,THEM2                                                                                                                                   |

|    |            |            |     |      |              |                                                                     |
|----|------------|------------|-----|------|--------------|---------------------------------------------------------------------|
| 23 | 32,775,000 | 32,925,000 | 438 | 739  | 0.052632524  | C23H6ORF62,GMNN,KIAA0319,TDP2,THEM2                                 |
| 23 | 32,850,000 | 33,000,000 | 439 | 1178 | 0.428705347  | ALDH5A1,GPLD1,KIAA0319,TDP2                                         |
| 23 | 32,925,000 | 33,075,000 | 440 | 1446 | 0.619368159  | ALDH5A1,GPLD1,KIAA0319,MRS2                                         |
| 23 | 33,000,000 | 33,150,000 | 441 | 1167 | 0.33372215   | DCDC2,GPLD1,MRS2                                                    |
| 23 | 33,075,000 | 33,225,000 | 442 | 1184 | 0.235735296  | DCDC2,MRS2                                                          |
| 23 | 33,150,000 | 33,300,000 | 443 | 1246 | -0.228332746 | DCDC2,NRSN1                                                         |
| 23 | 33,225,000 | 33,375,000 | 444 | 1088 | -0.945649419 | DCDC2,NRSN1                                                         |
| 23 | 33,300,000 | 33,450,000 | 445 | 962  | -0.613435193 |                                                                     |
| 23 | 33,375,000 | 33,525,000 | 446 | 1082 | 0.087754796  |                                                                     |
| 23 | 33,450,000 | 33,600,000 | 447 | 1078 | 0.368953375  |                                                                     |
| 23 | 33,525,000 | 33,675,000 | 448 | 1097 | 0.34436681   |                                                                     |
| 23 | 33,600,000 | 33,750,000 | 449 | 1004 | 0.512972282  |                                                                     |
| 23 | 33,675,000 | 33,825,000 | 450 | 765  | 0.643705119  |                                                                     |
| 23 | 33,750,000 | 33,900,000 | 451 | 612  | 0.739344781  |                                                                     |
| 23 | 33,825,000 | 33,975,000 | 452 | 471  | 1.059287444  |                                                                     |
| 23 | 33,900,000 | 34,050,000 | 453 | 720  | 0.840893121  |                                                                     |
| 23 | 33,975,000 | 34,125,000 | 454 | 1114 | 0.421495784  |                                                                     |
| 23 | 34,050,000 | 34,200,000 | 455 | 1008 | 0.284316113  |                                                                     |
| 23 | 34,125,000 | 34,275,000 | 456 | 1018 | -0.717030232 |                                                                     |
| 23 | 34,200,000 | 34,350,000 | 457 | 1222 | -0.242598336 |                                                                     |
| 23 | 34,275,000 | 34,425,000 | 458 | 1114 | 0.167386339  | PRP5                                                                |
| 23 | 34,350,000 | 34,500,000 | 459 | 959  | 0.283795746  | PRP5,PRP6,PRP8                                                      |
| 23 | 34,425,000 | 34,575,000 | 460 | 911  | 0.822727527  | PRP1,PRP6,PRP8                                                      |
| 23 | 34,500,000 | 34,650,000 | 461 | 748  | 0.606648667  | PRP1,ENSBTAG00000038718,ENSBTAG00000047671                          |
| 23 | 34,575,000 | 34,725,000 | 462 | 619  | -0.481734878 | PRP14,PRP9,ENSBTAG00000036106,ENSBTAG00000038718,ENSBTAG00000047671 |
| 23 | 34,650,000 | 34,800,000 | 463 | 625  | -0.541300756 | PRP14,PRP9,ENSBTAG00000036106,ENSBTAG00000047671                    |
| 23 | 34,725,000 | 34,875,000 | 464 | 604  | 0.701455452  | PRP7,PRP9,ENSBTAG00000031640                                        |
| 23 | 34,800,000 | 34,950,000 | 465 | 885  | 0.782522199  | PRP7,ENSBTAG00000031640                                             |
| 23 | 34,875,000 | 35,025,000 | 466 | 911  | 0.642044927  | ENSBTAG00000040136                                                  |
| 23 | 34,950,000 | 35,100,000 | 467 | 836  | 0.778180071  | CSH1,ENSBTAG00000040136                                             |
| 23 | 35,025,000 | 35,175,000 | 468 | 757  | 0.711129065  | CSH1,PRL                                                            |
| 23 | 35,100,000 | 35,250,000 | 469 | 764  | 0.780894371  | PRL                                                                 |
| 23 | 35,175,000 | 35,325,000 | 470 | 809  | 0.286557399  |                                                                     |
| 23 | 35,250,000 | 35,400,000 | 471 | 612  | -0.459571542 |                                                                     |
| 23 | 35,325,000 | 35,475,000 | 472 | 512  | -1.110831056 | HDGFL1                                                              |
| 23 | 35,400,000 | 35,550,000 | 473 | 559  | -1.035729033 | HDGFL1                                                              |
| 23 | 35,475,000 | 35,625,000 | 474 | 827  | 0.675805575  |                                                                     |
| 23 | 35,550,000 | 35,700,000 | 475 | 713  | 0.911779099  |                                                                     |
| 23 | 35,625,000 | 35,775,000 | 476 | 369  | 0.543678134  |                                                                     |
| 23 | 35,700,000 | 35,850,000 | 477 | 468  | 0.068135189  |                                                                     |
| 23 | 35,775,000 | 35,925,000 | 478 | 685  | 0.314867319  |                                                                     |
| 23 | 35,850,000 | 36,000,000 | 479 | 701  | 0.522772282  |                                                                     |
| 23 | 35,925,000 | 36,075,000 | 480 | 506  | 0.040179097  |                                                                     |
| 23 | 36,000,000 | 36,150,000 | 481 | 295  | -0.221346733 |                                                                     |
| 23 | 36,075,000 | 36,225,000 | 482 | 227  | 0.303430415  |                                                                     |
| 23 | 36,150,000 | 36,300,000 | 483 | 462  | 0.506239051  | SOX4                                                                |
| 23 | 36,225,000 | 36,375,000 | 484 | 751  | 0.842252915  | SOX4                                                                |
| 23 | 36,300,000 | 36,450,000 | 485 | 790  | 1.048624705  |                                                                     |
| 23 | 36,375,000 | 36,525,000 | 486 | 824  | 0.790182649  |                                                                     |
| 23 | 36,450,000 | 36,600,000 | 487 | 889  | -0.063603839 |                                                                     |
| 23 | 36,525,000 | 36,675,000 | 488 | 1033 | 0.059696173  | CDKAL1                                                              |

|    |            |            |     |      |              |                               |
|----|------------|------------|-----|------|--------------|-------------------------------|
| 23 | 36,600,000 | 36,750,000 | 489 | 1152 | 0.793175543  | CDKAL1                        |
| 23 | 36,675,000 | 36,825,000 | 490 | 929  | 0.812050054  | CDKAL1                        |
| 23 | 36,750,000 | 36,900,000 | 491 | 606  | 0.317995452  | CDKAL1                        |
| 23 | 36,825,000 | 36,975,000 | 492 | 596  | -0.123496711 | CDKAL1                        |
| 23 | 36,900,000 | 37,050,000 | 493 | 835  | -0.2760725   | CDKAL1                        |
| 23 | 36,975,000 | 37,125,000 | 494 | 977  | -1.20054967  | CDKAL1                        |
| 23 | 37,050,000 | 37,200,000 | 495 | 996  | -0.694645745 | CDKAL1                        |
| 23 | 37,125,000 | 37,275,000 | 496 | 926  | 0.415907789  | CDKAL1,E2F3                   |
| 23 | 37,200,000 | 37,350,000 | 497 | 1062 | -0.985155593 | CDKAL1,E2F3                   |
| 23 | 37,275,000 | 37,425,000 | 498 | 1266 | -0.40560209  | E2F3                          |
| 23 | 37,350,000 | 37,500,000 | 499 | 908  | 0.147451201  | MBOAT1                        |
| 23 | 37,425,000 | 37,575,000 | 500 | 806  | 0.152054982  | MBOAT1                        |
| 23 | 37,500,000 | 37,650,000 | 501 | 1186 | 0.83893361   | MBOAT1                        |
| 23 | 37,575,000 | 37,725,000 | 502 | 1129 | 1.169690018  | MBOAT1                        |
| 23 | 37,650,000 | 37,800,000 | 503 | 622  | 1.336465906  |                               |
| 23 | 37,725,000 | 37,875,000 | 504 | 461  | 1.101046126  |                               |
| 23 | 37,800,000 | 37,950,000 | 505 | 522  | 0.653702777  |                               |
| 23 | 37,875,000 | 38,025,000 | 506 | 665  | -0.148929242 |                               |
| 23 | 37,950,000 | 38,100,000 | 507 | 1030 | 0.338875584  |                               |
| 23 | 38,025,000 | 38,175,000 | 508 | 1392 | 0.808021873  |                               |
| 23 | 38,100,000 | 38,250,000 | 509 | 1608 | 1.072841178  |                               |
| 23 | 38,175,000 | 38,325,000 | 510 | 1113 | 1.330275049  |                               |
| 23 | 38,250,000 | 38,400,000 | 511 | 792  | 1.235022024  |                               |
| 23 | 38,325,000 | 38,475,000 | 512 | 1064 | 1.073327922  |                               |
| 23 | 38,400,000 | 38,550,000 | 513 | 917  | 0.745043689  |                               |
| 23 | 38,475,000 | 38,625,000 | 514 | 767  | -0.019559669 |                               |
| 23 | 38,550,000 | 38,700,000 | 515 | 1112 | 0.003265597  |                               |
| 23 | 38,625,000 | 38,775,000 | 516 | 1186 | 0.451702426  |                               |
| 23 | 38,700,000 | 38,850,000 | 517 | 694  | 0.535307509  |                               |
| 23 | 38,775,000 | 38,925,000 | 518 | 776  | -0.338663523 |                               |
| 23 | 38,850,000 | 39,000,000 | 519 | 1032 | 0.234174544  | RNF144B                       |
| 23 | 38,925,000 | 39,075,000 | 520 | 840  | 0.875076794  | RNF144B                       |
| 23 | 39,000,000 | 39,150,000 | 521 | 607  | 0.724444271  | DEK,RNF144B                   |
| 23 | 39,075,000 | 39,225,000 | 522 | 368  | 0.763694655  | DEK,KDM1B,TPMT                |
| 23 | 39,150,000 | 39,300,000 | 523 | 497  | 0.776953963  | DEK,KDM1B,NHLRC1,TPMT         |
| 23 | 39,225,000 | 39,375,000 | 524 | 821  | 0.398837612  | NHLRC1,TPMT                   |
| 23 | 39,300,000 | 39,450,000 | 525 | 1043 | 0.607190575  | KIF13A                        |
| 23 | 39,375,000 | 39,525,000 | 526 | 897  | 0.809539453  | KIF13A                        |
| 23 | 39,450,000 | 39,600,000 | 527 | 585  | 0.323497094  | KIF13A,NUP153                 |
| 23 | 39,525,000 | 39,675,000 | 528 | 529  | 0.10517147   | CAP2,FAM8A1,NUP153            |
| 23 | 39,600,000 | 39,750,000 | 529 | 607  | 0.169291923  | CAP2,FAM8A1,NUP153            |
| 23 | 39,675,000 | 39,825,000 | 530 | 497  | -0.104585454 | CAP2                          |
| 23 | 39,750,000 | 39,900,000 | 531 | 642  | -0.575847962 | CAP2,RBM24                    |
| 23 | 39,825,000 | 39,975,000 | 532 | 767  | -0.50775985  | RBM24,STMND1                  |
| 23 | 39,900,000 | 40,050,000 | 533 | 496  | -0.018106802 | STMND1                        |
| 23 | 39,975,000 | 40,125,000 | 534 | 479  | 0.073424889  |                               |
| 23 | 40,050,000 | 40,200,000 | 535 | 584  | 0.448251156  |                               |
| 23 | 40,125,000 | 40,275,000 | 536 | 489  | 0.928464511  |                               |
| 23 | 40,200,000 | 40,350,000 | 537 | 451  | 0.227794197  |                               |
| 23 | 40,275,000 | 40,425,000 | 538 | 687  | 0.100583061  |                               |
| 23 | 40,350,000 | 40,500,000 | 539 | 683  | 0.233587728  |                               |
| 23 | 40,425,000 | 40,575,000 | 540 | 515  | 0.390521712  |                               |
| 23 | 40,500,000 | 40,650,000 | 541 | 659  | -0.207662902 | ATXN1,GMPR,ENSBTAG00000019672 |

|    |            |            |     |      |              |                               |
|----|------------|------------|-----|------|--------------|-------------------------------|
| 23 | 40,575,000 | 40,725,000 | 542 | 1136 | -0.149615684 | ATXN1,GMPR,ENSBTAG00000019672 |
| 23 | 40,650,000 | 40,800,000 | 543 | 1143 | -0.323576802 | GMPR,MYLIP                    |
| 23 | 40,725,000 | 40,875,000 | 544 | 967  | -0.250002901 | MYLIP                         |
| 23 | 40,800,000 | 40,950,000 | 545 | 1185 | 0.628656094  |                               |
| 23 | 40,875,000 | 41,025,000 | 546 | 1500 | -0.558939385 |                               |
| 23 | 40,950,000 | 41,100,000 | 547 | 1515 | -1.305224815 | DTNBP1                        |
| 23 | 41,025,000 | 41,175,000 | 548 | 1213 | -0.572501838 | DTNBP1,JARID2                 |
| 23 | 41,100,000 | 41,250,000 | 549 | 859  | 0.374258382  | DTNBP1,JARID2                 |
| 23 | 41,175,000 | 41,325,000 | 550 | 537  | 1.003869459  | JARID2                        |
| 23 | 41,250,000 | 41,400,000 | 551 | 406  | 0.706033897  | JARID2                        |
| 23 | 41,325,000 | 41,475,000 | 552 | 509  | 0.979978824  |                               |
| 23 | 41,400,000 | 41,550,000 | 553 | 884  | 0.662459024  |                               |
| 23 | 41,475,000 | 41,625,000 | 554 | 853  | 0.45362562   |                               |
| 23 | 41,550,000 | 41,700,000 | 555 | 477  | 0.511214839  |                               |
| 23 | 41,625,000 | 41,775,000 | 556 | 330  | 0.631493875  |                               |
| 23 | 41,700,000 | 41,850,000 | 557 | 367  | 0.755768978  |                               |
| 23 | 41,775,000 | 41,925,000 | 558 | 485  | 0.54318621   |                               |
| 23 | 41,850,000 | 42,000,000 | 559 | 778  | 0.421333485  |                               |
| 23 | 41,925,000 | 42,075,000 | 560 | 823  | -0.006464356 |                               |
| 23 | 42,000,000 | 42,150,000 | 561 | 972  | 0.303560644  |                               |
| 23 | 42,075,000 | 42,225,000 | 562 | 1172 | 0.438543633  |                               |
| 23 | 42,150,000 | 42,300,000 | 563 | 696  | 0.192945589  |                               |
| 23 | 42,225,000 | 42,375,000 | 564 | 607  | -0.06457883  | CD83                          |
| 23 | 42,300,000 | 42,450,000 | 565 | 942  | 0.566448626  | CD83                          |
| 23 | 42,375,000 | 42,525,000 | 566 | 1075 | 0.548417075  | RNF182                        |
| 23 | 42,450,000 | 42,600,000 | 567 | 1008 | -0.763245868 | CCDC90A,RNF182                |
| 23 | 42,525,000 | 42,675,000 | 568 | 1154 | -0.728987854 | CCDC90A                       |
| 23 | 42,600,000 | 42,750,000 | 569 | 1243 | -0.471717231 | RANBP9                        |
| 23 | 42,675,000 | 42,825,000 | 570 | 912  | -0.804987186 | NOL7,RANBP9,SIRT5             |
| 23 | 42,750,000 | 42,900,000 | 571 | 717  | -0.923794001 | NOL7,RANBP9,SIRT5             |
| 23 | 42,825,000 | 42,975,000 | 572 | 512  | -0.654430926 | SIRT5                         |
| 23 | 42,900,000 | 43,050,000 | 573 | 439  | -0.271100902 | TBC1D7                        |
| 23 | 42,975,000 | 43,125,000 | 574 | 649  | -0.814289916 | PHACTR1,TBC1D7                |
| 23 | 43,050,000 | 43,200,000 | 575 | 1204 | -0.196905044 | PHACTR1                       |
| 23 | 43,125,000 | 43,275,000 | 576 | 1543 | 0.260190922  | PHACTR1                       |
| 23 | 43,200,000 | 43,350,000 | 577 | 1512 | 0.767022309  | PHACTR1                       |
| 23 | 43,275,000 | 43,425,000 | 578 | 1366 | 0.628697707  | PHACTR1                       |
| 23 | 43,350,000 | 43,500,000 | 579 | 1531 | -0.646961183 | PHACTR1                       |
| 23 | 43,425,000 | 43,575,000 | 580 | 1845 | -0.533380874 | PHACTR1                       |
| 23 | 43,500,000 | 43,650,000 | 581 | 1492 | 0.090344854  | PHACTR1                       |
| 23 | 43,575,000 | 43,725,000 | 582 | 1344 | 0.655027801  | PHACTR1                       |
| 23 | 43,650,000 | 43,800,000 | 583 | 1551 | 0.576479897  |                               |
| 23 | 43,725,000 | 43,875,000 | 584 | 1500 | 0.287229741  |                               |
| 23 | 43,800,000 | 43,950,000 | 585 | 1493 | 0.611883591  |                               |
| 23 | 43,875,000 | 44,025,000 | 586 | 1455 | 0.852634605  | EDN1                          |
| 23 | 43,950,000 | 44,100,000 | 587 | 1248 | 0.647246418  | EDN1                          |
| 23 | 44,025,000 | 44,175,000 | 588 | 1214 | 0.495436701  | HIVEP1                        |
| 23 | 44,100,000 | 44,250,000 | 589 | 1179 | 0.408733486  | HIVEP1                        |
| 23 | 44,175,000 | 44,325,000 | 590 | 993  | 0.054761216  | HIVEP1                        |
| 23 | 44,250,000 | 44,400,000 | 591 | 955  | -0.002757158 |                               |
| 23 | 44,325,000 | 44,475,000 | 592 | 1158 | 0.004926914  | C23H6ORF105                   |
| 23 | 44,400,000 | 44,550,000 | 593 | 1015 | -0.267959115 | C23H6ORF105                   |
| 23 | 44,475,000 | 44,625,000 | 594 | 726  | -0.575809064 | C23H6ORF105                   |

|    |            |            |     |      |              |                                        |
|----|------------|------------|-----|------|--------------|----------------------------------------|
| 23 | 44,550,000 | 44,700,000 | 595 | 621  | -0.268006171 | TMEM170B                               |
| 23 | 44,625,000 | 44,775,000 | 596 | 514  | -0.338320845 | TMEM170B                               |
| 23 | 44,700,000 | 44,850,000 | 597 | 534  | -0.782250813 |                                        |
| 23 | 44,775,000 | 44,925,000 | 598 | 534  | -0.146931647 | NEDD9                                  |
| 23 | 44,850,000 | 45,000,000 | 599 | 594  | 0.457293055  | NEDD9                                  |
| 23 | 44,925,000 | 45,075,000 | 600 | 606  | 0.460536434  | NEDD9,SMIM13                           |
| 23 | 45,000,000 | 45,150,000 | 601 | 693  | 0.03475036   | ELOVL2,SMIM13,SYCP2L                   |
| 23 | 45,075,000 | 45,225,000 | 602 | 656  | -0.139135897 | ELOVL2,GCM2,MAK,SYCP2L                 |
| 23 | 45,150,000 | 45,300,000 | 603 | 590  | -0.136584253 | GCM2,MAK,PAK1IP1,SYCP2L,TMEM14C        |
| 23 | 45,225,000 | 45,375,000 | 604 | 881  | 0.067593057  | GCNT2,MAK,PAK1IP1,TMEM14C              |
| 23 | 45,300,000 | 45,450,000 | 605 | 1011 | -0.508650643 | GCNT2                                  |
| 23 | 45,375,000 | 45,525,000 | 606 | 726  | -1.319499426 | TFAP2A                                 |
| 23 | 45,450,000 | 45,600,000 | 607 | 569  | -1.546677424 | TFAP2A                                 |
| 23 | 45,525,000 | 45,675,000 | 608 | 690  | -0.54869304  |                                        |
| 23 | 45,600,000 | 45,750,000 | 609 | 805  | -0.592209118 |                                        |
| 23 | 45,675,000 | 45,825,000 | 610 | 1177 | -0.144349864 |                                        |
| 23 | 45,750,000 | 45,900,000 | 611 | 1154 | 0.58431157   | OFCC1                                  |
| 23 | 45,825,000 | 45,975,000 | 612 | 702  | 0.631059632  | OFCC1                                  |
| 23 | 45,900,000 | 46,050,000 | 613 | 788  | -0.197628792 |                                        |
| 23 | 45,975,000 | 46,125,000 | 614 | 907  | 0.216670447  |                                        |
| 23 | 46,050,000 | 46,200,000 | 615 | 884  | -0.089158719 |                                        |
| 23 | 46,125,000 | 46,275,000 | 616 | 885  | -0.637349341 |                                        |
| 23 | 46,200,000 | 46,350,000 | 617 | 705  | -0.283974936 |                                        |
| 23 | 46,275,000 | 46,425,000 | 618 | 769  | 0.219732141  |                                        |
| 23 | 46,350,000 | 46,500,000 | 619 | 896  | 0.318281039  |                                        |
| 23 | 46,425,000 | 46,575,000 | 620 | 1047 | 0.209305659  |                                        |
| 23 | 46,500,000 | 46,650,000 | 621 | 1194 | 0.380321288  |                                        |
| 23 | 46,575,000 | 46,725,000 | 622 | 1156 | 0.699945563  |                                        |
| 23 | 46,650,000 | 46,800,000 | 623 | 991  | 0.443913823  |                                        |
| 23 | 46,725,000 | 46,875,000 | 624 | 845  | 0.360911305  |                                        |
| 23 | 46,800,000 | 46,950,000 | 625 | 762  | 0.658583796  |                                        |
| 23 | 46,875,000 | 47,025,000 | 626 | 939  | 0.88941995   | SLC35B3                                |
| 23 | 46,950,000 | 47,100,000 | 627 | 889  | 0.692238465  | SLC35B3                                |
| 23 | 47,025,000 | 47,175,000 | 628 | 574  | 0.074570972  | SLC35B3                                |
| 23 | 47,100,000 | 47,250,000 | 629 | 677  | -0.299163435 | BLOC1S5,EEF1E1                         |
| 23 | 47,175,000 | 47,325,000 | 630 | 746  | -0.075290586 | BLOC1S5,EEF1E1                         |
| 23 | 47,250,000 | 47,400,000 | 631 | 604  | 0.186989427  | BLOC1S5,BMP6,TXNDC5,ENSBTAG00000046839 |
| 23 | 47,325,000 | 47,475,000 | 632 | 592  | 0.997849097  | BMP6,TXNDC5,ENSBTAG00000046839         |
| 23 | 47,400,000 | 47,550,000 | 633 | 446  | 1.229143106  | BMP6                                   |
| 23 | 47,475,000 | 47,625,000 | 634 | 480  | 0.926489683  | BMP6,ENSBTAG00000008517                |
| 23 | 47,550,000 | 47,700,000 | 635 | 851  | 0.745262282  | DSP,SNRNP48,ENSBTAG00000008517         |
| 23 | 47,625,000 | 47,775,000 | 636 | 1460 | 0.287088807  | DSP,SNRNP48                            |
| 23 | 47,700,000 | 47,850,000 | 637 | 1481 | -0.330306252 | CAGE1,DSP,RIOK1                        |
| 23 | 47,775,000 | 47,925,000 | 638 | 818  | -1.182308347 | CAGE1,RIOK1,RREB1,SSR1                 |
| 23 | 47,850,000 | 48,000,000 | 639 | 557  | -0.422743223 | RREB1,SSR1                             |
| 23 | 47,925,000 | 48,075,000 | 640 | 524  | 0.385837154  | RREB1                                  |
| 23 | 48,000,000 | 48,150,000 | 641 | 820  | -0.262419017 |                                        |
| 23 | 48,075,000 | 48,225,000 | 642 | 958  | -0.060193375 |                                        |
| 23 | 48,150,000 | 48,300,000 | 643 | 784  | 0.965810748  |                                        |
| 23 | 48,225,000 | 48,375,000 | 644 | 649  | 1.15891674   |                                        |
| 23 | 48,300,000 | 48,450,000 | 645 | 779  | 0.739547459  | LY86                                   |
| 23 | 48,375,000 | 48,525,000 | 646 | 878  | 0.285041795  | LY86                                   |
| 23 | 48,450,000 | 48,600,000 | 647 | 886  | -0.93434617  |                                        |



|    |            |            |     |      |              |                                                               |
|----|------------|------------|-----|------|--------------|---------------------------------------------------------------|
| 23 | 48,525,000 | 48,675,000 | 648 | 1130 | -0.533429403 | F13A1                                                         |
| 23 | 48,600,000 | 48,750,000 | 649 | 1403 | 0.315952268  | F13A1                                                         |
| 23 | 48,675,000 | 48,825,000 | 650 | 1324 | 0.438728827  | F13A1                                                         |
| 23 | 48,750,000 | 48,900,000 | 651 | 964  | 0.289160858  | F13A1,NRN1                                                    |
| 23 | 48,825,000 | 48,975,000 | 652 | 1250 | 0.678032721  | FARS2,NRN1,ENSBTAG00000010640                                 |
| 23 | 48,900,000 | 49,050,000 | 653 | 1056 | 0.880909731  | FARS2,ENSBTAG00000010640                                      |
| 23 | 48,975,000 | 49,125,000 | 654 | 822  | 0.728661735  | FARS2                                                         |
| 23 | 49,050,000 | 49,200,000 | 655 | 1222 | 0.656189333  | FARS2                                                         |
| 23 | 49,125,000 | 49,275,000 | 656 | 1174 | 0.489271832  | FARS2                                                         |
| 23 | 49,200,000 | 49,350,000 | 657 | 1407 | 0.865240855  | FARS2,LYRM4                                                   |
| 23 | 49,275,000 | 49,425,000 | 658 | 1354 | 0.612877954  | LYRM4,PPP1R3G,RPP40                                           |
| 23 | 49,350,000 | 49,500,000 | 659 | 899  | -0.377659812 | CDYL,LYRM4,PPP1R3G,RPP40                                      |
| 23 | 49,425,000 | 49,575,000 | 660 | 976  | 0.375157879  | CDYL                                                          |
| 23 | 49,500,000 | 49,650,000 | 661 | 1031 | 0.701832865  | CDYL                                                          |
| 23 | 49,575,000 | 49,725,000 | 662 | 912  | 0.501466632  | CDYL                                                          |
| 23 | 49,650,000 | 49,800,000 | 663 | 903  | 0.200594631  |                                                               |
| 23 | 49,725,000 | 49,875,000 | 664 | 928  | 0.166533097  |                                                               |
| 23 | 49,800,000 | 49,950,000 | 665 | 836  | -0.006312738 | C6orf201,FAM217A,PECI                                         |
| 23 | 49,875,000 | 50,025,000 | 666 | 573  | -0.044445819 | C6orf201,FAM217A,PECI,PRPF4B                                  |
| 23 | 49,950,000 | 50,100,000 | 667 | 819  | 0.457016315  | PRPF4B,PXDC1                                                  |
| 23 | 50,025,000 | 50,175,000 | 668 | 805  | -0.010793701 | PXDC1                                                         |
| 23 | 50,100,000 | 50,250,000 | 669 | 753  | -1.19575214  | SLC22A23                                                      |
| 23 | 50,175,000 | 50,325,000 | 670 | 1155 | -0.366321727 | SLC22A23                                                      |
| 23 | 50,250,000 | 50,400,000 | 671 | 910  | -0.161371498 | BPHL,PSMG4,SLC22A23,TUBB2B                                    |
| 23 | 50,325,000 | 50,475,000 | 672 | 475  | -0.455944543 | BPHL,PSMG4,RIPK1,TUBB2B                                       |
| 23 | 50,400,000 | 50,550,000 | 673 | 487  | 0.362140808  | BPHL,NQO2,RIPK1,ENSBTAG00000017483                            |
| 23 | 50,475,000 | 50,625,000 | 674 | 714  | 0.592798397  | NQO2,ENSBTAG00000017483,ENSBTAG00000017949,ENSBTAG00000025280 |
| 23 | 50,550,000 | 50,700,000 | 675 | 622  | 0.24990147   | SERPINB1,SERPINB9,ENSBTAG00000017949,ENSBTAG00000025280       |
| 23 | 50,625,000 | 50,775,000 | 676 | 432  | -0.345358433 | MYLK4,SERPINB1,SERPINB9,WRNIP1                                |
| 23 | 50,700,000 | 50,850,000 | 677 | 630  | -0.120726519 | MYLK4,WRNIP1                                                  |
| 23 | 50,775,000 | 50,925,000 | 678 | 781  | -0.020637682 | MYLK4                                                         |
| 23 | 50,850,000 | 51,000,000 | 679 | 676  | -0.676647837 |                                                               |
| 23 | 50,925,000 | 51,075,000 | 680 | 713  | -0.77493486  |                                                               |
| 23 | 51,000,000 | 51,150,000 | 681 | 656  | -0.187122922 | GMDS                                                          |
| 23 | 51,075,000 | 51,225,000 | 682 | 536  | -0.040658256 | GMDS                                                          |
| 23 | 51,150,000 | 51,300,000 | 683 | 560  | 0.329118369  | GMDS                                                          |
| 23 | 51,225,000 | 51,375,000 | 684 | 562  | -0.012114002 | GMDS                                                          |
| 23 | 51,300,000 | 51,450,000 | 685 | 696  | -0.35333623  | GMDS                                                          |
| 23 | 51,375,000 | 51,525,000 | 686 | 690  | -0.019837141 | GMDS                                                          |
| 23 | 51,450,000 | 51,600,000 | 687 | 569  | 0.14327555   | FOXF2,GMDS                                                    |
| 23 | 51,525,000 | 51,675,000 | 688 | 588  | -0.482281019 | FOXF2                                                         |
| 23 | 51,600,000 | 51,750,000 | 689 | 931  | -0.804833326 |                                                               |
| 23 | 51,675,000 | 51,825,000 | 690 | 871  | -0.55349737  |                                                               |
| 23 | 51,750,000 | 51,900,000 | 691 | 492  | -0.586894062 |                                                               |
| 23 | 51,825,000 | 51,975,000 | 692 | 443  | -0.785009156 | EXOC2                                                         |
| 23 | 51,900,000 | 52,050,000 | 693 | 396  | -0.390634325 | EXOC2                                                         |
| 23 | 51,975,000 | 52,125,000 | 694 | 531  | -1.907121972 | DUSP22,EXOC2,IRF4                                             |
| 23 | 52,050,000 | 52,200,000 | 695 | 587  | -1.653724884 | DUSP22,IRF4                                                   |
| 23 | 52,125,000 | 52,275,000 | 696 | 597  | -0.330976882 | DUSP22                                                        |
| 23 | 52,200,000 | 52,350,000 | 697 | 569  | -0.330732071 |                                                               |
| 23 | 52,275,000 | 52,425,000 | 698 | 513  | -1.77983219  | ENSBTAG00000047812                                            |

|    |            |            |     |      |              |                                                         |
|----|------------|------------|-----|------|--------------|---------------------------------------------------------|
| 23 | 52,350,000 | 52,500,000 | 699 | 521  | -4.762283892 | ENSBTAG00000047485,ENSBTAG00000047516,ENSBTAG0000047812 |
| 23 | 52,425,000 | 52,530,062 | 700 | 296  | -4.079135223 | ENSBTAG00000047485,ENSBTAG00000047516                   |
| 24 | 0          | 150,000    | 1   | 424  | -2.205748253 |                                                         |
| 24 | 75,000     | 225,000    | 2   | 748  | -1.736858364 | ENSBTAG00000013809                                      |
| 24 | 150,000    | 300,000    | 3   | 662  | -0.959915161 | ENSBTAG00000013809                                      |
| 24 | 225,000    | 375,000    | 4   | 746  | 0.01225354   | ENSBTAG00000045511                                      |
| 24 | 300,000    | 450,000    | 5   | 1318 | 1.151686997  | ENSBTAG00000045511                                      |
| 24 | 375,000    | 525,000    | 6   | 1368 | 1.103741499  | ENSBTAG00000046170,ENSBTAG00000047013                   |
| 24 | 450,000    | 600,000    | 7   | 1074 | 0.639787768  | PARD6G,ENSBTAG00000046170,ENSBTAG00000047013            |
| 24 | 525,000    | 675,000    | 8   | 937  | 0.441971057  | PARD6G                                                  |
| 24 | 600,000    | 750,000    | 9   | 718  | 0.347661611  | ADNP2,PARD6G,RBFA,ENSBTAG00000036298                    |
| 24 | 675,000    | 825,000    | 10  | 675  | 0.2655682    | ADNP2,PQLC1,RBFA,TXNL4A,ENSBTAG00000036298              |
| 24 | 750,000    | 900,000    | 11  | 719  | 0.593165532  | KCNG2,PQLC1,TXNL4A,ENSBTAG00000036298                   |
| 24 | 825,000    | 975,000    | 12  | 668  | 0.90380441   | KCNG2,PQLC1                                             |
| 24 | 900,000    | 1,050,000  | 13  | 573  | 0.912909742  | NFATC1                                                  |
| 24 | 975,000    | 1,125,000  | 14  | 489  | 0.955981833  | ATP9B,NFATC1                                            |
| 24 | 1,050,000  | 1,200,000  | 15  | 432  | 0.723610369  | ATP9B,NFATC1                                            |
| 24 | 1,125,000  | 1,275,000  | 16  | 539  | 0.575831121  | ATP9B                                                   |
| 24 | 1,200,000  | 1,350,000  | 17  | 723  | 0.990377161  | ATP9B                                                   |
| 24 | 1,275,000  | 1,425,000  | 18  | 790  | 0.984135711  |                                                         |
| 24 | 1,350,000  | 1,500,000  | 19  | 694  | 0.295610611  |                                                         |
| 24 | 1,425,000  | 1,575,000  | 20  | 644  | -0.278953103 |                                                         |
| 24 | 1,500,000  | 1,650,000  | 21  | 807  | 0.240893067  |                                                         |
| 24 | 1,575,000  | 1,725,000  | 22  | 1023 | 1.033425795  |                                                         |
| 24 | 1,650,000  | 1,800,000  | 23  | 1285 | 0.718763217  |                                                         |
| 24 | 1,725,000  | 1,875,000  | 24  | 1589 | 0.656510251  |                                                         |
| 24 | 1,800,000  | 1,950,000  | 25  | 1351 | 0.844687529  |                                                         |
| 24 | 1,875,000  | 2,025,000  | 26  | 1019 | 0.607102987  |                                                         |
| 24 | 1,950,000  | 2,100,000  | 27  | 1055 | 0.279210605  |                                                         |
| 24 | 2,025,000  | 2,175,000  | 28  | 1189 | -0.033503416 |                                                         |
| 24 | 2,100,000  | 2,250,000  | 29  | 1353 | -0.371963885 |                                                         |
| 24 | 2,175,000  | 2,325,000  | 30  | 1335 | 0.166436404  |                                                         |
| 24 | 2,250,000  | 2,400,000  | 31  | 1355 | 0.807077983  |                                                         |
| 24 | 2,325,000  | 2,475,000  | 32  | 1310 | 0.798547078  | GALR1                                                   |
| 24 | 2,400,000  | 2,550,000  | 33  | 1650 | 0.252483866  | GALR1                                                   |
| 24 | 2,475,000  | 2,625,000  | 34  | 1802 | 0.300013768  | MBP,ZNF236                                              |
| 24 | 2,550,000  | 2,700,000  | 35  | 1113 | 0.900889708  | MBP,ZNF236                                              |
| 24 | 2,625,000  | 2,775,000  | 36  | 902  | 1.181421415  | ZNF236                                                  |
| 24 | 2,700,000  | 2,850,000  | 37  | 962  | 1.058832681  |                                                         |
| 24 | 2,775,000  | 2,925,000  | 38  | 1231 | 0.886625119  | ZNF516                                                  |
| 24 | 2,850,000  | 3,000,000  | 39  | 1615 | 0.433809702  | ZNF516                                                  |
| 24 | 2,925,000  | 3,075,000  | 40  | 1549 | 0.264893455  |                                                         |
| 24 | 3,000,000  | 3,150,000  | 41  | 1471 | 0.2458135    |                                                         |
| 24 | 3,075,000  | 3,225,000  | 42  | 1219 | 0.318970453  |                                                         |
| 24 | 3,150,000  | 3,300,000  | 43  | 1097 | 0.668886985  |                                                         |
| 24 | 3,225,000  | 3,375,000  | 44  | 1089 | 0.53699366   |                                                         |
| 24 | 3,300,000  | 3,450,000  | 45  | 1061 | 0.316789189  |                                                         |
| 24 | 3,375,000  | 3,525,000  | 46  | 1315 | 0.620088556  |                                                         |
| 24 | 3,450,000  | 3,600,000  | 47  | 1433 | 0.29048879   |                                                         |
| 24 | 3,525,000  | 3,675,000  | 48  | 1035 | 0.097855141  | TSHZ1                                                   |
| 24 | 3,600,000  | 3,750,000  | 49  | 621  | -0.073744069 | TSHZ1                                                   |
| 24 | 3,675,000  | 3,825,000  | 50  | 665  | -0.142226458 | TSHZ1,ZADH2                                             |

|    |           |           |     |      |              |                             |
|----|-----------|-----------|-----|------|--------------|-----------------------------|
| 24 | 3,750,000 | 3,900,000 | 51  | 770  | 0.425653299  | ZADH2,ZNF407                |
| 24 | 3,825,000 | 3,975,000 | 52  | 749  | 0.310922166  | ZNF407                      |
| 24 | 3,900,000 | 4,050,000 | 53  | 474  | 0.441326764  | ZNF407                      |
| 24 | 3,975,000 | 4,125,000 | 54  | 258  | 0.966092427  | ZNF407                      |
| 24 | 4,050,000 | 4,200,000 | 55  | 423  | 0.71806441   | ZNF407                      |
| 24 | 4,125,000 | 4,275,000 | 56  | 588  | 0.513883521  | CNDP1,CNDP2,ZNF407          |
| 24 | 4,200,000 | 4,350,000 | 57  | 716  | 1.119103146  | CNDP1,CNDP2,FAM69C          |
| 24 | 4,275,000 | 4,425,000 | 58  | 569  | 1.106616329  | C18orf63,CNDP2,CYB5A,FAM69C |
| 24 | 4,350,000 | 4,500,000 | 59  | 377  | 0.38994727   | C18orf63,CYB5A              |
| 24 | 4,425,000 | 4,575,000 | 60  | 375  | 0.465773255  | CYB5A,FBXO15,TIMM21         |
| 24 | 4,500,000 | 4,650,000 | 61  | 692  | 0.446290845  | FBXO15,TIMM21               |
| 24 | 4,575,000 | 4,725,000 | 62  | 995  | 0.882432592  |                             |
| 24 | 4,650,000 | 4,800,000 | 63  | 1024 | 1.162746281  |                             |
| 24 | 4,725,000 | 4,875,000 | 64  | 988  | 1.152849196  |                             |
| 24 | 4,800,000 | 4,950,000 | 65  | 737  | -1.437013142 |                             |
| 24 | 4,875,000 | 5,025,000 | 66  | 495  | -3.380272191 |                             |
| 24 | 4,950,000 | 5,100,000 | 67  | 454  | -0.300380386 |                             |
| 24 | 5,025,000 | 5,175,000 | 68  | 827  | 0.243473664  |                             |
| 24 | 5,100,000 | 5,250,000 | 69  | 1056 | 0.446766157  |                             |
| 24 | 5,175,000 | 5,325,000 | 70  | 955  | 0.190676463  |                             |
| 24 | 5,250,000 | 5,400,000 | 71  | 760  | -0.282087992 | NETO1                       |
| 24 | 5,325,000 | 5,475,000 | 72  | 857  | 0.091215826  | NETO1                       |
| 24 | 5,400,000 | 5,550,000 | 73  | 814  | 0.28399765   | NETO1                       |
| 24 | 5,475,000 | 5,625,000 | 74  | 859  | 0.064792632  | CBLN2                       |
| 24 | 5,550,000 | 5,700,000 | 75  | 1136 | 0.459279963  | CBLN2                       |
| 24 | 5,625,000 | 5,775,000 | 76  | 1097 | 0.674561192  |                             |
| 24 | 5,700,000 | 5,850,000 | 77  | 1303 | 0.656910832  |                             |
| 24 | 5,775,000 | 5,925,000 | 78  | 1244 | 0.486683898  |                             |
| 24 | 5,850,000 | 6,000,000 | 79  | 1149 | 0.055980389  |                             |
| 24 | 5,925,000 | 6,075,000 | 80  | 1397 | -0.228527578 |                             |
| 24 | 6,000,000 | 6,150,000 | 81  | 1377 | -0.052453506 |                             |
| 24 | 6,075,000 | 6,225,000 | 82  | 1287 | -0.070866082 |                             |
| 24 | 6,150,000 | 6,300,000 | 83  | 1369 | -0.254620411 |                             |
| 24 | 6,225,000 | 6,375,000 | 84  | 1316 | -0.233713799 |                             |
| 24 | 6,300,000 | 6,450,000 | 85  | 1468 | -1.65641958  |                             |
| 24 | 6,375,000 | 6,525,000 | 86  | 1266 | -3.039797213 |                             |
| 24 | 6,450,000 | 6,600,000 | 87  | 860  | -2.407334329 |                             |
| 24 | 6,525,000 | 6,675,000 | 88  | 1063 | 0.772816659  |                             |
| 24 | 6,600,000 | 6,750,000 | 89  | 1415 | 1.097409663  |                             |
| 24 | 6,675,000 | 6,825,000 | 90  | 1313 | 0.868566178  |                             |
| 24 | 6,750,000 | 6,900,000 | 91  | 1231 | -0.329085972 |                             |
| 24 | 6,825,000 | 6,975,000 | 92  | 1229 | -1.107209119 |                             |
| 24 | 6,900,000 | 7,050,000 | 93  | 1300 | -0.553985919 |                             |
| 24 | 6,975,000 | 7,125,000 | 94  | 1550 | 0.593163433  |                             |
| 24 | 7,050,000 | 7,200,000 | 95  | 1173 | 0.668438429  |                             |
| 24 | 7,125,000 | 7,275,000 | 96  | 1017 | 0.474375858  |                             |
| 24 | 7,200,000 | 7,350,000 | 97  | 1251 | 0.603878957  | SOCS6                       |
| 24 | 7,275,000 | 7,425,000 | 98  | 1317 | 0.59656763   | RTTN,SOCS6                  |
| 24 | 7,350,000 | 7,500,000 | 99  | 860  | 0.655790022  | RTTN                        |
| 24 | 7,425,000 | 7,575,000 | 100 | 717  | 0.564053532  | RTTN                        |
| 24 | 7,500,000 | 7,650,000 | 101 | 886  | 0.611341112  | CD226,RTTN                  |
| 24 | 7,575,000 | 7,725,000 | 102 | 981  | 0.719811366  | CD226,DOK6                  |
| 24 | 7,650,000 | 7,800,000 | 103 | 1034 | -0.065683401 | CD226,DOK6                  |

|    |            |            |     |      |              |               |
|----|------------|------------|-----|------|--------------|---------------|
| 24 | 7,725,000  | 7,875,000  | 104 | 830  | -1.393571916 | DOK6          |
| 24 | 7,800,000  | 7,950,000  | 105 | 815  | -0.916077931 | DOK6          |
| 24 | 7,875,000  | 8,025,000  | 106 | 1008 | 0.302418759  | DOK6          |
| 24 | 7,950,000  | 8,100,000  | 107 | 1168 | 0.575887977  | DOK6          |
| 24 | 8,025,000  | 8,175,000  | 108 | 1094 | 0.431419013  | DOK6          |
| 24 | 8,100,000  | 8,250,000  | 109 | 938  | 0.211774965  | DOK6          |
| 24 | 8,175,000  | 8,325,000  | 110 | 792  | -1.371679465 |               |
| 24 | 8,250,000  | 8,400,000  | 111 | 1063 | -1.007359346 |               |
| 24 | 8,325,000  | 8,475,000  | 112 | 1046 | -0.653122015 |               |
| 24 | 8,400,000  | 8,550,000  | 113 | 872  | -0.686954539 |               |
| 24 | 8,475,000  | 8,625,000  | 114 | 1073 | -0.361699243 | CCDC102B      |
| 24 | 8,550,000  | 8,700,000  | 115 | 919  | 0.099402071  | CCDC102B      |
| 24 | 8,625,000  | 8,775,000  | 116 | 911  | 1.034932115  | CCDC102B,TMX3 |
| 24 | 8,700,000  | 8,850,000  | 117 | 889  | 1.044007655  | HIGD1D,TMX3   |
| 24 | 8,775,000  | 8,925,000  | 118 | 475  | 0.670925956  | HIGD1D,TMX3   |
| 24 | 8,850,000  | 9,000,000  | 119 | 515  | 0.319723317  |               |
| 24 | 8,925,000  | 9,075,000  | 120 | 765  | 0.470533598  |               |
| 24 | 9,000,000  | 9,150,000  | 121 | 707  | -0.33212647  |               |
| 24 | 9,075,000  | 9,225,000  | 122 | 868  | -2.178029065 |               |
| 24 | 9,150,000  | 9,300,000  | 123 | 1157 | -2.077496898 |               |
| 24 | 9,225,000  | 9,375,000  | 124 | 1361 | -0.664745424 |               |
| 24 | 9,300,000  | 9,450,000  | 125 | 1351 | 0.278477573  |               |
| 24 | 9,375,000  | 9,525,000  | 126 | 1123 | 0.791430441  |               |
| 24 | 9,450,000  | 9,600,000  | 127 | 932  | 0.641039704  |               |
| 24 | 9,525,000  | 9,675,000  | 128 | 903  | 0.978976075  |               |
| 24 | 9,600,000  | 9,750,000  | 129 | 892  | 0.42639083   | DSEL          |
| 24 | 9,675,000  | 9,825,000  | 130 | 1125 | -0.434046259 | DSEL          |
| 24 | 9,750,000  | 9,900,000  | 131 | 1350 | 0.292035601  |               |
| 24 | 9,825,000  | 9,975,000  | 132 | 1334 | 0.085736071  |               |
| 24 | 9,900,000  | 10,050,000 | 133 | 1409 | -0.271287113 |               |
| 24 | 9,975,000  | 10,125,000 | 134 | 1334 | 0.549383611  |               |
| 24 | 10,050,000 | 10,200,000 | 135 | 1322 | 1.108329027  |               |
| 24 | 10,125,000 | 10,275,000 | 136 | 1164 | 0.695135262  |               |
| 24 | 10,200,000 | 10,350,000 | 137 | 1225 | -0.00831096  |               |
| 24 | 10,275,000 | 10,425,000 | 138 | 1483 | 0.11221807   |               |
| 24 | 10,350,000 | 10,500,000 | 139 | 1390 | 0.16424851   | CDH19         |
| 24 | 10,425,000 | 10,575,000 | 140 | 1155 | 0.426311781  | CDH19         |
| 24 | 10,500,000 | 10,650,000 | 141 | 1335 | 0.688953935  | CDH19         |
| 24 | 10,575,000 | 10,725,000 | 142 | 1441 | 0.827907891  |               |
| 24 | 10,650,000 | 10,800,000 | 143 | 1128 | 1.178094183  |               |
| 24 | 10,725,000 | 10,875,000 | 144 | 1076 | 0.833305231  |               |
| 24 | 10,800,000 | 10,950,000 | 145 | 1071 | -0.677142338 |               |
| 24 | 10,875,000 | 11,025,000 | 146 | 980  | -0.718944907 |               |
| 24 | 10,950,000 | 11,100,000 | 147 | 1380 | -0.372317379 | CDH7          |
| 24 | 11,025,000 | 11,175,000 | 148 | 1391 | 0.147374444  | CDH7          |
| 24 | 11,100,000 | 11,250,000 | 149 | 715  | 0.98801376   | CDH7          |
| 24 | 11,175,000 | 11,325,000 | 150 | 915  | 0.719800586  | CDH7          |
| 24 | 11,250,000 | 11,400,000 | 151 | 977  | 0.567821564  |               |
| 24 | 11,325,000 | 11,475,000 | 152 | 607  | 0.265286045  |               |
| 24 | 11,400,000 | 11,550,000 | 153 | 654  | -0.47674761  |               |
| 24 | 11,475,000 | 11,625,000 | 154 | 853  | -0.504156321 |               |
| 24 | 11,550,000 | 11,700,000 | 155 | 950  | 0.318177696  |               |
| 24 | 11,625,000 | 11,775,000 | 156 | 1166 | 0.671216465  |               |

|    |            |            |     |      |              |                                      |
|----|------------|------------|-----|------|--------------|--------------------------------------|
| 24 | 11,700,000 | 11,850,000 | 157 | 1418 | 0.930019555  |                                      |
| 24 | 11,775,000 | 11,925,000 | 158 | 1433 | 0.161935885  |                                      |
| 24 | 11,850,000 | 12,000,000 | 159 | 1042 | -1.457840647 |                                      |
| 24 | 11,925,000 | 12,075,000 | 160 | 875  | 0.340692987  |                                      |
| 24 | 12,000,000 | 12,150,000 | 161 | 949  | 0.555056613  |                                      |
| 24 | 12,075,000 | 12,225,000 | 162 | 1275 | 0.388026062  |                                      |
| 24 | 12,150,000 | 12,300,000 | 163 | 1218 | 0.764765546  |                                      |
| 24 | 12,225,000 | 12,375,000 | 164 | 896  | 0.279482778  |                                      |
| 24 | 12,300,000 | 12,450,000 | 165 | 1179 | 0.077882085  |                                      |
| 24 | 12,375,000 | 12,525,000 | 166 | 1308 | -0.002659234 |                                      |
| 24 | 12,450,000 | 12,600,000 | 167 | 1479 | -0.032397824 |                                      |
| 24 | 12,525,000 | 12,675,000 | 168 | 1353 | -0.019977395 |                                      |
| 24 | 12,600,000 | 12,750,000 | 169 | 1326 | -0.304333139 | SERPINB2,SERPINB8                    |
| 24 | 12,675,000 | 12,825,000 | 170 | 1135 | -0.633062592 | SERPINB2,SERPINB8,ENSBTAG00000034656 |
| 24 | 12,750,000 | 12,900,000 | 171 | 1536 | -0.361296436 | SERPINB2,ENSBTAG00000034656          |
| 24 | 12,825,000 | 12,975,000 | 172 | 1440 | -0.06471642  | SYT4                                 |
| 24 | 12,900,000 | 13,050,000 | 173 | 979  | -0.674352085 | SYT4                                 |
| 24 | 12,975,000 | 13,125,000 | 174 | 1242 | -0.235670664 |                                      |
| 24 | 13,050,000 | 13,200,000 | 175 | 1250 | 0.805633337  |                                      |
| 24 | 13,125,000 | 13,275,000 | 176 | 1735 | 0.710561338  |                                      |
| 24 | 13,200,000 | 13,350,000 | 177 | 2025 | 0.394264161  |                                      |
| 24 | 13,275,000 | 13,425,000 | 178 | 2303 | 0.98572105   |                                      |
| 24 | 13,350,000 | 13,500,000 | 179 | 2096 | 1.172452484  |                                      |
| 24 | 13,425,000 | 13,575,000 | 180 | 1872 | 0.791765354  |                                      |
| 24 | 13,500,000 | 13,650,000 | 181 | 2000 | 0.820876018  |                                      |
| 24 | 13,575,000 | 13,725,000 | 182 | 1556 | 0.952006302  |                                      |
| 24 | 13,650,000 | 13,800,000 | 183 | 1121 | 0.910296259  |                                      |
| 24 | 13,725,000 | 13,875,000 | 184 | 1240 | 0.013754672  |                                      |
| 24 | 13,800,000 | 13,950,000 | 185 | 1181 | 0.013645484  |                                      |
| 24 | 13,875,000 | 14,025,000 | 186 | 805  | 0.324260924  |                                      |
| 24 | 13,950,000 | 14,100,000 | 187 | 834  | 0.235297258  |                                      |
| 24 | 14,025,000 | 14,175,000 | 188 | 1319 | 0.77516292   |                                      |
| 24 | 14,100,000 | 14,250,000 | 189 | 1434 | 1.092064569  | PIK3C3                               |
| 24 | 14,175,000 | 14,325,000 | 190 | 938  | 1.072342617  | PIK3C3                               |
| 24 | 14,250,000 | 14,400,000 | 191 | 1106 | 1.008088745  | PIK3C3                               |
| 24 | 14,325,000 | 14,475,000 | 192 | 1260 | 0.612785174  | PIK3C3                               |
| 24 | 14,400,000 | 14,550,000 | 193 | 810  | -0.117746383 |                                      |
| 24 | 14,475,000 | 14,625,000 | 194 | 570  | -0.306082487 |                                      |
| 24 | 14,550,000 | 14,700,000 | 195 | 927  | 0.312317986  |                                      |
| 24 | 14,625,000 | 14,775,000 | 196 | 1010 | 0.1126411    |                                      |
| 24 | 14,700,000 | 14,850,000 | 197 | 927  | 0.626424099  |                                      |
| 24 | 14,775,000 | 14,925,000 | 198 | 1092 | 1.083294881  |                                      |
| 24 | 14,850,000 | 15,000,000 | 199 | 1297 | 0.954897904  |                                      |
| 24 | 14,925,000 | 15,075,000 | 200 | 1282 | 0.051908219  |                                      |
| 24 | 15,000,000 | 15,150,000 | 201 | 1115 | -0.008499355 |                                      |
| 24 | 15,075,000 | 15,225,000 | 202 | 797  | 0.825946581  |                                      |
| 24 | 15,150,000 | 15,300,000 | 203 | 622  | -0.016027232 |                                      |
| 24 | 15,225,000 | 15,375,000 | 204 | 580  | 0.106207156  |                                      |
| 24 | 15,300,000 | 15,450,000 | 205 | 361  | 0.418899007  |                                      |
| 24 | 15,375,000 | 15,525,000 | 206 | 385  | 0.541461384  |                                      |
| 24 | 15,450,000 | 15,600,000 | 207 | 618  | 0.850133196  |                                      |
| 24 | 15,525,000 | 15,675,000 | 208 | 721  | 0.81205122   |                                      |
| 24 | 15,600,000 | 15,750,000 | 209 | 587  | 0.747917186  |                                      |

|    |            |            |     |      |              |
|----|------------|------------|-----|------|--------------|
| 24 | 15,675,000 | 15,825,000 | 210 | 866  | 0.96730845   |
| 24 | 15,750,000 | 15,900,000 | 211 | 1096 | 0.961658843  |
| 24 | 15,825,000 | 15,975,000 | 212 | 956  | 0.914805599  |
| 24 | 15,900,000 | 16,050,000 | 213 | 607  | 0.608145339  |
| 24 | 15,975,000 | 16,125,000 | 214 | 605  | -1.487065825 |
| 24 | 16,050,000 | 16,200,000 | 215 | 608  | -1.380561628 |
| 24 | 16,125,000 | 16,275,000 | 216 | 497  | -0.417268908 |
| 24 | 16,200,000 | 16,350,000 | 217 | 573  | 0.125107955  |
| 24 | 16,275,000 | 16,425,000 | 218 | 464  | 0.735271794  |
| 24 | 16,350,000 | 16,500,000 | 219 | 517  | 0.202289984  |
| 24 | 16,425,000 | 16,575,000 | 220 | 803  | 0.000608089  |
| 24 | 16,500,000 | 16,650,000 | 221 | 1348 | -0.196788393 |
| 24 | 16,575,000 | 16,725,000 | 222 | 1503 | 0.109160566  |
| 24 | 16,650,000 | 16,800,000 | 223 | 1164 | 0.816947048  |
| 24 | 16,725,000 | 16,875,000 | 224 | 823  | 0.436485814  |
| 24 | 16,800,000 | 16,950,000 | 225 | 608  | -0.002523208 |
| 24 | 16,875,000 | 17,025,000 | 226 | 869  | -0.203124281 |
| 24 | 16,950,000 | 17,100,000 | 227 | 1592 | 0.203003084  |
| 24 | 17,025,000 | 17,175,000 | 228 | 1693 | 0.758785021  |
| 24 | 17,100,000 | 17,250,000 | 229 | 1354 | 0.38586518   |
| 24 | 17,175,000 | 17,325,000 | 230 | 1276 | -0.004618043 |
| 24 | 17,250,000 | 17,400,000 | 231 | 1113 | -0.107173753 |
| 24 | 17,325,000 | 17,475,000 | 232 | 756  | -0.0016342   |
| 24 | 17,400,000 | 17,550,000 | 233 | 405  | 0.338579541  |
| 24 | 17,475,000 | 17,625,000 | 234 | 505  | 0.967528745  |
| 24 | 17,550,000 | 17,700,000 | 235 | 728  | 0.562322002  |
| 24 | 17,625,000 | 17,775,000 | 236 | 775  | 0.614707448  |
| 24 | 17,700,000 | 17,850,000 | 237 | 1030 | 1.13492942   |
| 24 | 17,775,000 | 17,925,000 | 238 | 1172 | 1.189463688  |
| 24 | 17,850,000 | 18,000,000 | 239 | 893  | 0.833570096  |
| 24 | 17,925,000 | 18,075,000 | 240 | 854  | 0.180861589  |
| 24 | 18,000,000 | 18,150,000 | 241 | 739  | -0.313837888 |
| 24 | 18,075,000 | 18,225,000 | 242 | 532  | 0.05152175   |
| 24 | 18,150,000 | 18,300,000 | 243 | 755  | -0.328003787 |
| 24 | 18,225,000 | 18,375,000 | 244 | 859  | -0.185276177 |
| 24 | 18,300,000 | 18,450,000 | 245 | 1083 | 0.937131559  |
| 24 | 18,375,000 | 18,525,000 | 246 | 995  | 0.638275222  |
| 24 | 18,450,000 | 18,600,000 | 247 | 644  | -0.641799802 |
| 24 | 18,525,000 | 18,675,000 | 248 | 907  | 0.294379568  |
| 24 | 18,600,000 | 18,750,000 | 249 | 964  | 0.545819642  |
| 24 | 18,675,000 | 18,825,000 | 250 | 617  | 0.086926031  |
| 24 | 18,750,000 | 18,900,000 | 251 | 550  | 0.559464583  |
| 24 | 18,825,000 | 18,975,000 | 252 | 709  | 0.970364888  |
| 24 | 18,900,000 | 19,050,000 | 253 | 507  | 1.097118965  |
| 24 | 18,975,000 | 19,125,000 | 254 | 476  | 0.510080255  |
| 24 | 19,050,000 | 19,200,000 | 255 | 1105 | 0.514393748  |
| 24 | 19,125,000 | 19,275,000 | 256 | 1296 | 0.418271385  |
| 24 | 19,200,000 | 19,350,000 | 257 | 1080 | 0.117047778  |
| 24 | 19,275,000 | 19,425,000 | 258 | 1205 | 0.325559505  |
| 24 | 19,350,000 | 19,500,000 | 259 | 1031 | 0.295344925  |
| 24 | 19,425,000 | 19,575,000 | 260 | 667  | -1.835475218 |
| 24 | 19,500,000 | 19,650,000 | 261 | 660  | -3.633034001 |
| 24 | 19,575,000 | 19,725,000 | 262 | 736  | -0.070854392 |

|    |            |            |     |      |              |                                        |
|----|------------|------------|-----|------|--------------|----------------------------------------|
| 24 | 19,650,000 | 19,800,000 | 263 | 717  | 0.968136716  |                                        |
| 24 | 19,725,000 | 19,875,000 | 264 | 574  | 0.017861072  | BRUNOL4                                |
| 24 | 19,800,000 | 19,950,000 | 265 | 610  | -1.058699828 | BRUNOL4                                |
| 24 | 19,875,000 | 20,025,000 | 266 | 745  | -1.491100477 | BRUNOL4                                |
| 24 | 19,950,000 | 20,100,000 | 267 | 699  | -1.069218925 | BRUNOL4                                |
| 24 | 20,025,000 | 20,175,000 | 268 | 703  | 0.483967443  | BRUNOL4                                |
| 24 | 20,100,000 | 20,250,000 | 269 | 889  | 0.875349785  | BRUNOL4                                |
| 24 | 20,175,000 | 20,325,000 | 270 | 820  | 1.177089609  | KIAA1328                               |
| 24 | 20,250,000 | 20,400,000 | 271 | 554  | 1.163789565  | KIAA1328                               |
| 24 | 20,325,000 | 20,475,000 | 272 | 481  | 1.01515693   |                                        |
| 24 | 20,400,000 | 20,550,000 | 273 | 344  | 0.913981534  |                                        |
| 24 | 20,475,000 | 20,625,000 | 274 | 290  | 1.046651104  | C24H18ORF10                            |
| 24 | 20,550,000 | 20,700,000 | 275 | 441  | 0.770089746  | C24H18ORF10,FHOD3                      |
| 24 | 20,625,000 | 20,775,000 | 276 | 558  | 0.435087027  | C24H18ORF10,FHOD3                      |
| 24 | 20,700,000 | 20,850,000 | 277 | 677  | 0.582168772  | FHOD3                                  |
| 24 | 20,775,000 | 20,925,000 | 278 | 960  | 0.919477613  | FHOD3                                  |
| 24 | 20,850,000 | 21,000,000 | 279 | 883  | 0.969521321  | FHOD3                                  |
| 24 | 20,925,000 | 21,075,000 | 280 | 769  | 0.493051235  | FHOD3                                  |
| 24 | 21,000,000 | 21,150,000 | 281 | 936  | 0.451338905  | FHOD3                                  |
| 24 | 21,075,000 | 21,225,000 | 282 | 1261 | 0.725127755  | FHOD3,MOCOS                            |
| 24 | 21,150,000 | 21,300,000 | 283 | 1136 | 0.6878277    | ELP2,FHOD3,MOCOS                       |
| 24 | 21,225,000 | 21,375,000 | 284 | 640  | 0.597758092  | ELP2,MOCOS,RPRD1A,SLC39A6              |
| 24 | 21,300,000 | 21,450,000 | 285 | 665  | -0.279813415 | C18orf21,ELP2,RPRD1A,SLC39A6           |
| 24 | 21,375,000 | 21,525,000 | 286 | 878  | -1.064908279 | C18orf21,RPRD1A                        |
| 24 | 21,450,000 | 21,600,000 | 287 | 970  | -1.120496623 | C18orf21                               |
| 24 | 21,525,000 | 21,675,000 | 288 | 958  | -0.667706232 |                                        |
| 24 | 21,600,000 | 21,750,000 | 289 | 970  | 0.235405884  | GALNT1                                 |
| 24 | 21,675,000 | 21,825,000 | 290 | 921  | 0.147536357  | GALNT1                                 |
| 24 | 21,750,000 | 21,900,000 | 291 | 908  | -0.001546084 | GALNT1,INO80C                          |
| 24 | 21,825,000 | 21,975,000 | 292 | 705  | 0.034026441  | INO80C                                 |
| 24 | 21,900,000 | 22,050,000 | 293 | 762  | 0.676344348  | INO80C,ZNF24                           |
| 24 | 21,975,000 | 22,125,000 | 294 | 754  | 0.773741891  | ZNF24,ZNF397                           |
| 24 | 22,050,000 | 22,200,000 | 295 | 545  | 0.520387899  | MAPRE2,ZNF24,ZNF397,ENSBTAG00000015315 |
| 24 | 22,125,000 | 22,275,000 | 296 | 854  | 0.870387961  | MAPRE2,ENSBTAG00000015315              |
| 24 | 22,200,000 | 22,350,000 | 297 | 791  | 1.004555676  | MAPRE2                                 |
| 24 | 22,275,000 | 22,425,000 | 298 | 603  | 0.798838236  | MAPRE2                                 |
| 24 | 22,350,000 | 22,500,000 | 299 | 696  | 0.739920067  | DTNA                                   |
| 24 | 22,425,000 | 22,575,000 | 300 | 822  | -0.122360254 | DTNA                                   |
| 24 | 22,500,000 | 22,650,000 | 301 | 899  | -0.642121243 | DTNA                                   |
| 24 | 22,575,000 | 22,725,000 | 302 | 1022 | -0.065798972 | DTNA                                   |
| 24 | 22,650,000 | 22,800,000 | 303 | 1113 | 0.590255745  | DTNA                                   |
| 24 | 22,725,000 | 22,875,000 | 304 | 855  | 0.762847466  | DTNA                                   |
| 24 | 22,800,000 | 22,950,000 | 305 | 620  | 0.918364057  |                                        |
| 24 | 22,875,000 | 23,025,000 | 306 | 832  | 0.898288622  |                                        |
| 24 | 22,950,000 | 23,100,000 | 307 | 1229 | 0.894888643  |                                        |
| 24 | 23,025,000 | 23,175,000 | 308 | 1085 | 0.804148799  | NOL4                                   |
| 24 | 23,100,000 | 23,250,000 | 309 | 790  | -1.429221076 | NOL4                                   |
| 24 | 23,175,000 | 23,325,000 | 310 | 744  | -3.695469641 | NOL4                                   |
| 24 | 23,250,000 | 23,400,000 | 311 | 772  | -3.288124704 | NOL4                                   |
| 24 | 23,325,000 | 23,475,000 | 312 | 658  | -1.046851336 | NOL4                                   |
| 24 | 23,400,000 | 23,550,000 | 313 | 607  | 0.491198276  | NOL4                                   |
| 24 | 23,475,000 | 23,625,000 | 314 | 1162 | 0.866049959  | NOL4                                   |
| 24 | 23,550,000 | 23,700,000 | 315 | 1331 | 0.881681446  | NOL4                                   |

|    |            |            |     |      |              |                                       |
|----|------------|------------|-----|------|--------------|---------------------------------------|
| 24 | 23,625,000 | 23,775,000 | 316 | 669  | 0.23507142   | ASXL3,NOL4                            |
| 24 | 23,700,000 | 23,850,000 | 317 | 346  | -1.202455973 | ASXL3                                 |
| 24 | 23,775,000 | 23,925,000 | 318 | 519  | -0.589848523 | ASXL3                                 |
| 24 | 23,850,000 | 24,000,000 | 319 | 700  | 0.482092995  | ASXL3                                 |
| 24 | 23,925,000 | 24,075,000 | 320 | 549  | 0.889229988  | ASXL3                                 |
| 24 | 24,000,000 | 24,150,000 | 321 | 279  | 0.906566542  | CCDC178                               |
| 24 | 24,075,000 | 24,225,000 | 322 | 334  | -0.318624899 | CCDC178                               |
| 24 | 24,150,000 | 24,300,000 | 323 | 376  | -0.399889155 | CCDC178                               |
| 24 | 24,225,000 | 24,375,000 | 324 | 554  | -0.745596618 | CCDC178                               |
| 24 | 24,300,000 | 24,450,000 | 325 | 617  | -0.433256383 | ENSBTAG00000048303                    |
| 24 | 24,375,000 | 24,525,000 | 326 | 566  | 0.953196842  | ENSBTAG00000048303                    |
| 24 | 24,450,000 | 24,600,000 | 327 | 649  | 0.949739189  |                                       |
| 24 | 24,525,000 | 24,675,000 | 328 | 741  | 0.967018278  | KLHL14                                |
| 24 | 24,600,000 | 24,750,000 | 329 | 1032 | 0.917983459  | KLHL14                                |
| 24 | 24,675,000 | 24,825,000 | 330 | 1146 | 0.428154414  | KLHL14                                |
| 24 | 24,750,000 | 24,900,000 | 331 | 1119 | 0.307249482  | KLHL14                                |
| 24 | 24,825,000 | 24,975,000 | 332 | 1267 | 0.388439948  |                                       |
| 24 | 24,900,000 | 25,050,000 | 333 | 1267 | 0.479187891  | GAREM                                 |
| 24 | 24,975,000 | 25,125,000 | 334 | 1150 | 0.814317581  | GAREM                                 |
| 24 | 25,050,000 | 25,200,000 | 335 | 1182 | 0.825991633  | GAREM                                 |
| 24 | 25,125,000 | 25,275,000 | 336 | 1148 | 0.914989421  | GAREM                                 |
| 24 | 25,200,000 | 25,350,000 | 337 | 1189 | 0.86275266   | GAREM,MEP1B                           |
| 24 | 25,275,000 | 25,425,000 | 338 | 1254 | 0.816051754  | MEP1B,RNF138                          |
| 24 | 25,350,000 | 25,500,000 | 339 | 1166 | 0.399936791  | RNF125,RNF138                         |
| 24 | 25,425,000 | 25,575,000 | 340 | 999  | -0.178485063 | RNF125,RNF138,ENSBTAG00000039296      |
| 24 | 25,500,000 | 25,650,000 | 341 | 864  | 0.306848918  | ENSBTAG00000007696,ENSBTAG00000039296 |
| 24 | 25,575,000 | 25,725,000 | 342 | 1015 | 0.803018805  | ENSBTAG00000007696,ENSBTAG00000039296 |
| 24 | 25,650,000 | 25,800,000 | 343 | 1047 | 0.764042212  | B4GALT6,ENSBTAG00000007696            |
| 24 | 25,725,000 | 25,875,000 | 344 | 1247 | 1.004749999  | B4GALT6,TTR                           |
| 24 | 25,800,000 | 25,950,000 | 345 | 1798 | 0.993299849  | B4GALT6,DSG2,TTR                      |
| 24 | 25,875,000 | 26,025,000 | 346 | 1736 | 0.909125204  | DSG2,DSG3                             |
| 24 | 25,950,000 | 26,100,000 | 347 | 1472 | 0.335785955  | DSG1,DSG2,DSG3,DSG4                   |
| 24 | 26,025,000 | 26,175,000 | 348 | 1559 | -0.623728375 | DSG1,DSG4                             |
| 24 | 26,100,000 | 26,250,000 | 349 | 1569 | -0.90982332  | DSG1                                  |
| 24 | 26,175,000 | 26,325,000 | 350 | 1459 | -0.905274137 | DSC1                                  |
| 24 | 26,250,000 | 26,400,000 | 351 | 1405 | 0.030468865  | DSC1,DSC2,DSC3                        |
| 24 | 26,325,000 | 26,475,000 | 352 | 1118 | 0.826628989  | DSC2,DSC3                             |
| 24 | 26,400,000 | 26,550,000 | 353 | 615  | 0.683930776  | DSC3                                  |
| 24 | 26,475,000 | 26,625,000 | 354 | 488  | 0.428029127  |                                       |
| 24 | 26,550,000 | 26,700,000 | 355 | 785  | 0.091475517  |                                       |
| 24 | 26,625,000 | 26,775,000 | 356 | 1065 | 0.260890985  |                                       |
| 24 | 26,700,000 | 26,850,000 | 357 | 1178 | -0.669264253 |                                       |
| 24 | 26,775,000 | 26,925,000 | 358 | 1248 | -0.492159727 |                                       |
| 24 | 26,850,000 | 27,000,000 | 359 | 1293 | 0.24834778   |                                       |
| 24 | 26,925,000 | 27,075,000 | 360 | 1287 | -0.616093147 |                                       |
| 24 | 27,000,000 | 27,150,000 | 361 | 1120 | -0.707138112 |                                       |
| 24 | 27,075,000 | 27,225,000 | 362 | 862  | -0.745749104 |                                       |
| 24 | 27,150,000 | 27,300,000 | 363 | 804  | -0.536722145 |                                       |
| 24 | 27,225,000 | 27,375,000 | 364 | 693  | 0.300647209  |                                       |
| 24 | 27,300,000 | 27,450,000 | 365 | 543  | 0.522545806  |                                       |
| 24 | 27,375,000 | 27,525,000 | 366 | 1111 | 0.505821612  |                                       |
| 24 | 27,450,000 | 27,600,000 | 367 | 1080 | 0.536232449  |                                       |
| 24 | 27,525,000 | 27,675,000 | 368 | 1082 | -2.214610722 |                                       |



|    |            |            |     |      |              |                    |
|----|------------|------------|-----|------|--------------|--------------------|
| 24 | 27,600,000 | 27,750,000 | 369 | 1305 | -2.423181711 |                    |
| 24 | 27,675,000 | 27,825,000 | 370 | 837  | -0.244297933 |                    |
| 24 | 27,750,000 | 27,900,000 | 371 | 1049 | 0.515826494  |                    |
| 24 | 27,825,000 | 27,975,000 | 372 | 1277 | -0.138329774 |                    |
| 24 | 27,900,000 | 28,050,000 | 373 | 1150 | -0.567892429 |                    |
| 24 | 27,975,000 | 28,125,000 | 374 | 958  | -0.240302793 |                    |
| 24 | 28,050,000 | 28,200,000 | 375 | 904  | -0.095699376 |                    |
| 24 | 28,125,000 | 28,275,000 | 376 | 1034 | -0.088734644 |                    |
| 24 | 28,200,000 | 28,350,000 | 377 | 1247 | 0.231873051  |                    |
| 24 | 28,275,000 | 28,425,000 | 378 | 1405 | 0.786774269  |                    |
| 24 | 28,350,000 | 28,500,000 | 379 | 1088 | 1.044614675  |                    |
| 24 | 28,425,000 | 28,575,000 | 380 | 1074 | 1.112429804  |                    |
| 24 | 28,500,000 | 28,650,000 | 381 | 1429 | 1.105506388  |                    |
| 24 | 28,575,000 | 28,725,000 | 382 | 1089 | 1.180880287  |                    |
| 24 | 28,650,000 | 28,800,000 | 383 | 882  | -1.995448732 |                    |
| 24 | 28,725,000 | 28,875,000 | 384 | 1232 | -2.759709486 |                    |
| 24 | 28,800,000 | 28,950,000 | 385 | 970  | -1.618022774 |                    |
| 24 | 28,875,000 | 29,025,000 | 386 | 646  | 0.63702919   | CDH2               |
| 24 | 28,950,000 | 29,100,000 | 387 | 817  | 1.055874794  | CDH2               |
| 24 | 29,025,000 | 29,175,000 | 388 | 957  | 0.992721208  | CDH2               |
| 24 | 29,100,000 | 29,250,000 | 389 | 900  | 1.0123205    | CDH2               |
| 24 | 29,175,000 | 29,325,000 | 390 | 893  | -0.981837111 | CDH2               |
| 24 | 29,250,000 | 29,400,000 | 391 | 684  | -2.09421492  |                    |
| 24 | 29,325,000 | 29,475,000 | 392 | 346  | -1.082777272 |                    |
| 24 | 29,400,000 | 29,550,000 | 393 | 367  | -0.984496231 | ENSBTAG00000044212 |
| 24 | 29,475,000 | 29,625,000 | 394 | 528  | -0.007116237 | ENSBTAG00000044212 |
| 24 | 29,550,000 | 29,700,000 | 395 | 581  | -0.135646946 |                    |
| 24 | 29,625,000 | 29,775,000 | 396 | 559  | -1.065453208 |                    |
| 24 | 29,700,000 | 29,850,000 | 397 | 718  | -1.672623271 |                    |
| 24 | 29,775,000 | 29,925,000 | 398 | 855  | -1.63884963  |                    |
| 24 | 29,850,000 | 30,000,000 | 399 | 789  | -1.877039351 |                    |
| 24 | 29,925,000 | 30,075,000 | 400 | 632  | -1.464810615 | CHST9              |
| 24 | 30,000,000 | 30,150,000 | 401 | 619  | -1.512406134 | CHST9              |
| 24 | 30,075,000 | 30,225,000 | 402 | 1068 | -1.369826371 | CHST9              |
| 24 | 30,150,000 | 30,300,000 | 403 | 1075 | -0.712938919 | CHST9              |
| 24 | 30,225,000 | 30,375,000 | 404 | 509  | -0.361586788 | AQP4,CHST9         |
| 24 | 30,300,000 | 30,450,000 | 405 | 649  | 0.436516328  | AQP4,CHST9         |
| 24 | 30,375,000 | 30,525,000 | 406 | 978  | 0.104672065  | AQP4               |
| 24 | 30,450,000 | 30,600,000 | 407 | 762  | -0.280061473 |                    |
| 24 | 30,525,000 | 30,675,000 | 408 | 751  | 0.832510743  |                    |
| 24 | 30,600,000 | 30,750,000 | 409 | 718  | 1.174717074  | KCTD1              |
| 24 | 30,675,000 | 30,825,000 | 410 | 551  | 1.219031343  | KCTD1              |
| 24 | 30,750,000 | 30,900,000 | 411 | 657  | 1.077646259  | KCTD1,TAF4B        |
| 24 | 30,825,000 | 30,975,000 | 412 | 917  | 1.175119653  | TAF4B              |
| 24 | 30,900,000 | 31,050,000 | 413 | 885  | 1.124093887  | PSMA8,SS18,TAF4B   |
| 24 | 30,975,000 | 31,125,000 | 414 | 534  | 1.038251315  | PSMA8,SS18         |
| 24 | 31,050,000 | 31,200,000 | 415 | 666  | 1.307562689  | SS18               |
| 24 | 31,125,000 | 31,275,000 | 416 | 707  | 1.428539406  |                    |
| 24 | 31,200,000 | 31,350,000 | 417 | 535  | 1.471531344  |                    |
| 24 | 31,275,000 | 31,425,000 | 418 | 445  | 1.33241116   |                    |
| 24 | 31,350,000 | 31,500,000 | 419 | 386  | 0.094308244  |                    |
| 24 | 31,425,000 | 31,575,000 | 420 | 567  | -3.480798182 |                    |
| 24 | 31,500,000 | 31,650,000 | 421 | 758  | -3.245023965 |                    |

|    |            |            |     |      |              |                                       |
|----|------------|------------|-----|------|--------------|---------------------------------------|
| 24 | 31,575,000 | 31,725,000 | 422 | 605  | -0.981234267 | ZNF521                                |
| 24 | 31,650,000 | 31,800,000 | 423 | 487  | -1.799183686 | ZNF521                                |
| 24 | 31,725,000 | 31,875,000 | 424 | 537  | -2.212958384 | ZNF521                                |
| 24 | 31,800,000 | 31,950,000 | 425 | 552  | -0.125980946 | ZNF521                                |
| 24 | 31,875,000 | 32,025,000 | 426 | 487  | 0.438094286  | ZNF521                                |
| 24 | 31,950,000 | 32,100,000 | 427 | 549  | -1.656568283 | ZNF521                                |
| 24 | 32,025,000 | 32,175,000 | 428 | 666  | -2.39132463  | ZNF521                                |
| 24 | 32,100,000 | 32,250,000 | 429 | 932  | -1.88303952  |                                       |
| 24 | 32,175,000 | 32,325,000 | 430 | 1054 | -0.937308933 |                                       |
| 24 | 32,250,000 | 32,400,000 | 431 | 1186 | -0.109378257 |                                       |
| 24 | 32,325,000 | 32,475,000 | 432 | 1393 | -0.373947055 |                                       |
| 24 | 32,400,000 | 32,550,000 | 433 | 1049 | -0.131779452 |                                       |
| 24 | 32,475,000 | 32,625,000 | 434 | 805  | -0.021613851 | HRH4,IMPACT                           |
| 24 | 32,550,000 | 32,700,000 | 435 | 696  | -2.199621865 | HRH4,IMPACT,OSBPL1A                   |
| 24 | 32,625,000 | 32,775,000 | 436 | 709  | -3.273622854 | IMPACT,OSBPL1A                        |
| 24 | 32,700,000 | 32,850,000 | 437 | 688  | -1.523771813 | OSBPL1A                               |
| 24 | 32,775,000 | 32,925,000 | 438 | 583  | -0.323840451 | CABYR,OSBPL1A,TTC39C                  |
| 24 | 32,850,000 | 33,000,000 | 439 | 586  | -1.361124529 | CABYR,OSBPL1A,TTC39C                  |
| 24 | 32,925,000 | 33,075,000 | 440 | 691  | -1.508729808 | LAMA3,TTC39C                          |
| 24 | 33,000,000 | 33,150,000 | 441 | 739  | -0.133133573 | LAMA3                                 |
| 24 | 33,075,000 | 33,225,000 | 442 | 748  | 0.535646399  | LAMA3                                 |
| 24 | 33,150,000 | 33,300,000 | 443 | 924  | 0.647613787  | LAMA3                                 |
| 24 | 33,225,000 | 33,375,000 | 444 | 1077 | 0.437135814  | LAMA3,ENSBTAG00000039850              |
| 24 | 33,300,000 | 33,450,000 | 445 | 1173 | 0.448796656  | ANKRD29,LAMA3,NPC1,ENSBTAG00000039850 |
| 24 | 33,375,000 | 33,525,000 | 446 | 987  | 0.347588263  | ANKRD29,C18orf8,NPC1,RIOK3            |
| 24 | 33,450,000 | 33,600,000 | 447 | 715  | 0.372721552  | C18orf8,NPC1,RIOK3,TMEM241            |
| 24 | 33,525,000 | 33,675,000 | 448 | 841  | 0.388761885  | RIOK3,TMEM241                         |
| 24 | 33,600,000 | 33,750,000 | 449 | 817  | -0.596214311 | CABLES1,TMEM241                       |
| 24 | 33,675,000 | 33,825,000 | 450 | 525  | -1.229663827 | CABLES1                               |
| 24 | 33,750,000 | 33,900,000 | 451 | 444  | -1.206426461 | CABLES1,RBBP8                         |
| 24 | 33,825,000 | 33,975,000 | 452 | 323  | -1.216524596 | RBBP8                                 |
| 24 | 33,900,000 | 34,050,000 | 453 | 279  | 0.581361925  | RBBP8                                 |
| 24 | 33,975,000 | 34,125,000 | 454 | 359  | 0.481682335  |                                       |
| 24 | 34,050,000 | 34,200,000 | 455 | 454  | 0.386101679  |                                       |
| 24 | 34,125,000 | 34,275,000 | 456 | 608  | 0.753335626  |                                       |
| 24 | 34,200,000 | 34,350,000 | 457 | 560  | 0.611246934  |                                       |
| 24 | 34,275,000 | 34,425,000 | 458 | 396  | 0.242966124  |                                       |
| 24 | 34,350,000 | 34,500,000 | 459 | 320  | 0.857270238  |                                       |
| 24 | 34,425,000 | 34,575,000 | 460 | 308  | 0.428249806  | GATA6                                 |
| 24 | 34,500,000 | 34,650,000 | 461 | 318  | 0.103521614  | GATA6,ENSBTAG00000047113              |
| 24 | 34,575,000 | 34,725,000 | 462 | 322  | 0.610300256  | GATA6,ENSBTAG00000047113              |
| 24 | 34,650,000 | 34,800,000 | 463 | 301  | 1.198987086  |                                       |
| 24 | 34,725,000 | 34,875,000 | 464 | 272  | 0.981231034  | MIB1                                  |
| 24 | 34,800,000 | 34,950,000 | 465 | 421  | 0.752685094  | ABHD3,MIB1                            |
| 24 | 34,875,000 | 35,025,000 | 466 | 498  | 0.827371422  | ABHD3,ESCO1,MIB1,SNRPD1               |
| 24 | 34,950,000 | 35,100,000 | 467 | 360  | 1.001485949  | ABHD3,ESCO1,GREB1L,SNRPD1             |
| 24 | 35,025,000 | 35,175,000 | 468 | 554  | -1.669652188 | ESCO1,GREB1L                          |
| 24 | 35,100,000 | 35,250,000 | 469 | 608  | -2.584294158 | GREB1L                                |
| 24 | 35,175,000 | 35,325,000 | 470 | 375  | -1.270399161 |                                       |
| 24 | 35,250,000 | 35,400,000 | 471 | 312  | -0.072042279 | MGC133647                             |
| 24 | 35,325,000 | 35,475,000 | 472 | 350  | 0.264784825  | MGC133647,ROCK1                       |
| 24 | 35,400,000 | 35,550,000 | 473 | 506  | 0.375421447  | ROCK1,USP14                           |
| 24 | 35,475,000 | 35,625,000 | 474 | 840  | 1.049937309  | ROCK1,THOC1,USP14                     |

|    |            |            |     |      |              |                                 |
|----|------------|------------|-----|------|--------------|---------------------------------|
| 24 | 35,550,000 | 35,700,000 | 475 | 966  | 0.982048972  | COLEC12,THOC1,USP14             |
| 24 | 35,625,000 | 35,775,000 | 476 | 736  | 0.787342173  | COLEC12                         |
| 24 | 35,700,000 | 35,850,000 | 477 | 610  | 0.352054336  | COLEC12                         |
| 24 | 35,775,000 | 35,925,000 | 478 | 813  | -0.35091998  | CETN1,CLUL1,COLEC12             |
| 24 | 35,850,000 | 36,000,000 | 479 | 998  | -0.365160389 | CETN1,CLUL1,ENOSF1,TYMS,YES1    |
| 24 | 35,925,000 | 36,075,000 | 480 | 929  | -0.36263086  | CLUL1,ENOSF1,TYMS,YES1          |
| 24 | 36,000,000 | 36,150,000 | 481 | 965  | 0.059186661  | ADCYAP1,YES1                    |
| 24 | 36,075,000 | 36,225,000 | 482 | 1112 | 0.618525401  | ADCYAP1                         |
| 24 | 36,150,000 | 36,300,000 | 483 | 950  | 0.537551151  |                                 |
| 24 | 36,225,000 | 36,375,000 | 484 | 706  | 0.237748418  |                                 |
| 24 | 36,300,000 | 36,450,000 | 485 | 625  | 0.239685493  |                                 |
| 24 | 36,375,000 | 36,525,000 | 486 | 643  | -0.170106283 |                                 |
| 24 | 36,450,000 | 36,600,000 | 487 | 977  | 0.182113343  |                                 |
| 24 | 36,525,000 | 36,675,000 | 488 | 1143 | 0.31678093   |                                 |
| 24 | 36,600,000 | 36,750,000 | 489 | 924  | -0.430196463 |                                 |
| 24 | 36,675,000 | 36,825,000 | 490 | 772  | 0.131483594  |                                 |
| 24 | 36,750,000 | 36,900,000 | 491 | 772  | 0.077644877  |                                 |
| 24 | 36,825,000 | 36,975,000 | 492 | 915  | 0.229296724  |                                 |
| 24 | 36,900,000 | 37,050,000 | 493 | 790  | 0.668369821  |                                 |
| 24 | 36,975,000 | 37,125,000 | 494 | 591  | 0.266762164  |                                 |
| 24 | 37,050,000 | 37,200,000 | 495 | 675  | -0.227595101 |                                 |
| 24 | 37,125,000 | 37,275,000 | 496 | 869  | -0.564080009 | METTL4                          |
| 24 | 37,200,000 | 37,350,000 | 497 | 886  | 0.106370933  | METTL4,NDC80,SMCHD1             |
| 24 | 37,275,000 | 37,425,000 | 498 | 871  | 1.006995261  | METTL4,NDC80,SMCHD1             |
| 24 | 37,350,000 | 37,500,000 | 499 | 873  | 0.885461429  | EMILIN2,SMCHD1                  |
| 24 | 37,425,000 | 37,575,000 | 500 | 620  | 0.080866885  | EMILIN2,LPIN2,SMCHD1            |
| 24 | 37,500,000 | 37,650,000 | 501 | 728  | 0.136327637  | EMILIN2,LPIN2                   |
| 24 | 37,575,000 | 37,725,000 | 502 | 869  | 1.04252977   | LPIN2,MYOM1                     |
| 24 | 37,650,000 | 37,800,000 | 503 | 569  | 1.265321958  | MYOM1                           |
| 24 | 37,725,000 | 37,875,000 | 504 | 468  | 1.033178656  | MYL12B,MYL9,MYOM1               |
| 24 | 37,800,000 | 37,950,000 | 505 | 553  | 0.991243498  | MYL12B,MYL9,TGIF1               |
| 24 | 37,875,000 | 38,025,000 | 506 | 665  | 0.855403256  | MYL12B,TGIF1,ENSBTAG00000005372 |
| 24 | 37,950,000 | 38,100,000 | 507 | 625  | 0.950182251  | ENSBTAG00000005372              |
| 24 | 38,025,000 | 38,175,000 | 508 | 536  | 0.416499805  | ENSBTAG00000005372              |
| 24 | 38,100,000 | 38,250,000 | 509 | 724  | 0.184585236  | ENSBTAG00000005372              |
| 24 | 38,175,000 | 38,325,000 | 510 | 802  | 0.310247868  | ENSBTAG00000005372              |
| 24 | 38,250,000 | 38,400,000 | 511 | 595  | 0.143181634  | ENSBTAG00000005372              |
| 24 | 38,325,000 | 38,475,000 | 512 | 530  | -0.349738951 |                                 |
| 24 | 38,400,000 | 38,550,000 | 513 | 926  | 0.118829055  |                                 |
| 24 | 38,475,000 | 38,625,000 | 514 | 1144 | 0.693362251  |                                 |
| 24 | 38,550,000 | 38,700,000 | 515 | 1110 | 1.3561548    |                                 |
| 24 | 38,625,000 | 38,775,000 | 516 | 969  | 1.005306624  |                                 |
| 24 | 38,700,000 | 38,850,000 | 517 | 634  | -0.025327246 |                                 |
| 24 | 38,775,000 | 38,925,000 | 518 | 622  | -0.138339038 |                                 |
| 24 | 38,850,000 | 39,000,000 | 519 | 613  | -0.210558671 |                                 |
| 24 | 38,925,000 | 39,075,000 | 520 | 535  | -0.565818398 |                                 |
| 24 | 39,000,000 | 39,150,000 | 521 | 554  | 0.188540927  | ENSBTAG00000046269              |
| 24 | 39,075,000 | 39,225,000 | 522 | 518  | 0.893131407  | ENSBTAG00000046269              |
| 24 | 39,150,000 | 39,300,000 | 523 | 623  | -0.298367833 | ZBTB14                          |
| 24 | 39,225,000 | 39,375,000 | 524 | 767  | -0.220677749 | EPB41L3,ZBTB14                  |
| 24 | 39,300,000 | 39,450,000 | 525 | 920  | 0.487646403  | EPB41L3                         |
| 24 | 39,375,000 | 39,525,000 | 526 | 994  | -0.418305717 | EPB41L3                         |
| 24 | 39,450,000 | 39,600,000 | 527 | 824  | -2.280425622 |                                 |

|    |            |            |     |      |              |                                                         |
|----|------------|------------|-----|------|--------------|---------------------------------------------------------|
| 24 | 39,525,000 | 39,675,000 | 528 | 678  | -3.357382367 |                                                         |
| 24 | 39,600,000 | 39,750,000 | 529 | 745  | -2.007908683 | TMEM200C                                                |
| 24 | 39,675,000 | 39,825,000 | 530 | 617  | -1.172575793 | TMEM200C                                                |
| 24 | 39,750,000 | 39,900,000 | 531 | 504  | -1.027149663 |                                                         |
| 24 | 39,825,000 | 39,975,000 | 532 | 736  | -1.249430196 |                                                         |
| 24 | 39,900,000 | 40,050,000 | 533 | 870  | -0.963329536 |                                                         |
| 24 | 39,975,000 | 40,125,000 | 534 | 917  | -0.060417554 |                                                         |
| 24 | 40,050,000 | 40,200,000 | 535 | 829  | -1.081063752 |                                                         |
| 24 | 40,125,000 | 40,275,000 | 536 | 733  | -1.089527245 |                                                         |
| 24 | 40,200,000 | 40,350,000 | 537 | 886  | -0.249775914 | ARHGAP28                                                |
| 24 | 40,275,000 | 40,425,000 | 538 | 833  | -0.943002204 | ARHGAP28,LAMA1                                          |
| 24 | 40,350,000 | 40,500,000 | 539 | 884  | -0.366945175 | ARHGAP28,LAMA1                                          |
| 24 | 40,425,000 | 40,575,000 | 540 | 1161 | -0.006857618 | LAMA1,MGC160046                                         |
| 24 | 40,500,000 | 40,650,000 | 541 | 1106 | 0.485507997  | LAMA1,MGC160046                                         |
| 24 | 40,575,000 | 40,725,000 | 542 | 992  | 0.205293526  |                                                         |
| 24 | 40,650,000 | 40,800,000 | 543 | 1093 | -0.415425996 | PTPRM                                                   |
| 24 | 40,725,000 | 40,875,000 | 544 | 888  | -0.178257975 | PTPRM                                                   |
| 24 | 40,800,000 | 40,950,000 | 545 | 620  | 0.229824442  | PTPRM                                                   |
| 24 | 40,875,000 | 41,025,000 | 546 | 828  | 0.770093732  | PTPRM                                                   |
| 24 | 40,950,000 | 41,100,000 | 547 | 955  | 1.308955724  | PTPRM                                                   |
| 24 | 41,025,000 | 41,175,000 | 548 | 796  | 1.217752666  | PTPRM                                                   |
| 24 | 41,100,000 | 41,250,000 | 549 | 563  | 0.964380334  | PTPRM                                                   |
| 24 | 41,175,000 | 41,325,000 | 550 | 600  | 1.124408906  | PTPRM                                                   |
| 24 | 41,250,000 | 41,400,000 | 551 | 708  | 0.918219599  | PTPRM                                                   |
| 24 | 41,325,000 | 41,475,000 | 552 | 617  | 0.369442856  | PTPRM                                                   |
| 24 | 41,400,000 | 41,550,000 | 553 | 586  | 0.067907     | PTPRM,RAB12                                             |
| 24 | 41,475,000 | 41,625,000 | 554 | 789  | -0.285926224 | MTCL1,RAB12                                             |
| 24 | 41,550,000 | 41,700,000 | 555 | 842  | -0.020072845 | MTCL1                                                   |
| 24 | 41,625,000 | 41,775,000 | 556 | 626  | 1.067084734  | MTCL1                                                   |
| 24 | 41,700,000 | 41,850,000 | 557 | 598  | 1.402841513  |                                                         |
| 24 | 41,775,000 | 41,925,000 | 558 | 513  | 1.429835663  | ANKRD12,NDUFV2                                          |
| 24 | 41,850,000 | 42,000,000 | 559 | 383  | 1.401246531  | ANKRD12,NDUFV2,TWSG1                                    |
| 24 | 41,925,000 | 42,075,000 | 560 | 413  | 1.420236924  | ANKRD12,RALBP1,TWSG1                                    |
| 24 | 42,000,000 | 42,150,000 | 561 | 470  | 1.364943879  | PPP4R1,RALBP1,TWSG1                                     |
| 24 | 42,075,000 | 42,225,000 | 562 | 523  | 1.065570513  | PPP4R1,RALBP1                                           |
| 24 | 42,150,000 | 42,300,000 | 563 | 562  | -0.872052163 | RAB31                                                   |
| 24 | 42,225,000 | 42,375,000 | 564 | 667  | -3.96934254  | RAB31,TXNDC2,VAPA                                       |
| 24 | 42,300,000 | 42,450,000 | 565 | 560  | -3.59413773  | RAB31,TXNDC2,VAPA                                       |
| 24 | 42,375,000 | 42,525,000 | 566 | 418  | -0.441523636 |                                                         |
| 24 | 42,450,000 | 42,600,000 | 567 | 611  | -0.016854585 | APCDD1                                                  |
| 24 | 42,525,000 | 42,675,000 | 568 | 814  | -0.087228264 | APCDD1,NAPG,PIEZO2                                      |
| 24 | 42,600,000 | 42,750,000 | 569 | 812  | 0.521017061  | NAPG,PIEZO2                                             |
| 24 | 42,675,000 | 42,825,000 | 570 | 711  | 1.078997727  | PIEZO2                                                  |
| 24 | 42,750,000 | 42,900,000 | 571 | 691  | 1.00525825   | PIEZO2                                                  |
| 24 | 42,825,000 | 42,975,000 | 572 | 564  | 0.395648009  |                                                         |
| 24 | 42,900,000 | 43,050,000 | 573 | 387  | 0.287578727  |                                                         |
| 24 | 42,975,000 | 43,125,000 | 574 | 498  | 0.704498977  | GNAL                                                    |
| 24 | 43,050,000 | 43,200,000 | 575 | 653  | 1.029154638  | GNAL,IMPA2,MPPE1                                        |
| 24 | 43,125,000 | 43,275,000 | 576 | 413  | 1.084832656  | AFG3L2,CIDEA,GNAL,IMPA2,MPPE1,TUBB6,ENSBTAG0000046547   |
| 24 | 43,200,000 | 43,350,000 | 577 | 193  | 0.361396676  | AFG3L2,CIDEA,IMPA2,SLMO1,SPIRE1,TUBB6,ENSBTAG0000046547 |
| 24 | 43,275,000 | 43,425,000 | 578 | 176  | 0.424406696  | SLMO1,SPIRE1                                            |

|    |            |            |     |      |              |                                          |
|----|------------|------------|-----|------|--------------|------------------------------------------|
| 24 | 43,350,000 | 43,500,000 | 579 | 131  | 0.825613806  | SPIRE1                                   |
| 24 | 43,425,000 | 43,575,000 | 580 | 144  | 0.834823556  | CEP76,PSMG2,PTPN2,SPIRE1                 |
| 24 | 43,500,000 | 43,650,000 | 581 | 177  | 0.773031854  | CEP76,PSMG2,PTPN2,SEH1L                  |
| 24 | 43,575,000 | 43,725,000 | 582 | 190  | 0.915510712  | CEP192,PTPN2,SEH1L                       |
| 24 | 43,650,000 | 43,800,000 | 583 | 231  | 0.871744535  | CEP192,SEH1L                             |
| 24 | 43,725,000 | 43,875,000 | 584 | 249  | 0.62382375   | CEP192,LDLRAD4                           |
| 24 | 43,800,000 | 43,950,000 | 585 | 210  | 0.164630403  | FAM210A,LDLRAD4,RNMT                     |
| 24 | 43,875,000 | 44,025,000 | 586 | 206  | -0.190025733 | FAM210A,LDLRAD4,MC2R,MC5R,RNMT           |
| 24 | 43,950,000 | 44,100,000 | 587 | 402  | -2.018904867 | MC2R,MC5R,RNMT                           |
| 24 | 44,025,000 | 44,175,000 | 588 | 436  | -2.238663372 |                                          |
| 24 | 44,100,000 | 44,250,000 | 589 | 233  | -1.905168944 |                                          |
| 24 | 44,175,000 | 44,325,000 | 590 | 174  | -1.883066734 |                                          |
| 24 | 44,250,000 | 44,400,000 | 591 | 158  | -0.938355822 |                                          |
| 24 | 44,325,000 | 44,475,000 | 592 | 195  | -1.83321417  |                                          |
| 24 | 44,400,000 | 44,550,000 | 593 | 366  | -0.504174987 |                                          |
| 24 | 44,475,000 | 44,625,000 | 594 | 557  | -0.748511142 |                                          |
| 24 | 44,550,000 | 44,700,000 | 595 | 588  | -1.670953803 |                                          |
| 24 | 44,625,000 | 44,775,000 | 596 | 511  | -0.330904357 |                                          |
| 24 | 44,700,000 | 44,850,000 | 597 | 460  | 1.249390178  |                                          |
| 24 | 44,775,000 | 44,925,000 | 598 | 504  | 0.42134488   |                                          |
| 24 | 44,850,000 | 45,000,000 | 599 | 577  | 0.138165929  |                                          |
| 24 | 44,925,000 | 45,075,000 | 600 | 455  | 0.504088028  | SETBP1                                   |
| 24 | 45,000,000 | 45,150,000 | 601 | 315  | 0.642604469  | SETBP1                                   |
| 24 | 45,075,000 | 45,225,000 | 602 | 333  | 1.000535684  | SETBP1                                   |
| 24 | 45,150,000 | 45,300,000 | 603 | 381  | 0.911098076  |                                          |
| 24 | 45,225,000 | 45,375,000 | 604 | 463  | 0.677353531  |                                          |
| 24 | 45,300,000 | 45,450,000 | 605 | 484  | 0.408555876  |                                          |
| 24 | 45,375,000 | 45,525,000 | 606 | 641  | 0.705100434  |                                          |
| 24 | 45,450,000 | 45,600,000 | 607 | 696  | 0.730858341  |                                          |
| 24 | 45,525,000 | 45,675,000 | 608 | 818  | -0.274018608 |                                          |
| 24 | 45,600,000 | 45,750,000 | 609 | 868  | -0.019101873 |                                          |
| 24 | 45,675,000 | 45,825,000 | 610 | 773  | 0.485507596  | SLC14A2                                  |
| 24 | 45,750,000 | 45,900,000 | 611 | 777  | 0.228933868  | SLC14A2                                  |
| 24 | 45,825,000 | 45,975,000 | 612 | 948  | 0.100372081  | SLC14A1,SLC14A2                          |
| 24 | 45,900,000 | 46,050,000 | 613 | 1177 | 0.130214067  | EPG5,SIGLEC15,SLC14A1                    |
| 24 | 45,975,000 | 46,125,000 | 614 | 1116 | 0.731014436  | EPG5,SIGLEC15                            |
| 24 | 46,050,000 | 46,200,000 | 615 | 710  | 1.224870209  | EPG5,PSTPIP2                             |
| 24 | 46,125,000 | 46,275,000 | 616 | 325  | 0.754973036  | EPG5,PSTPIP2                             |
| 24 | 46,200,000 | 46,350,000 | 617 | 658  | 0.675330107  | ATP5A1,HAUS1,PSTPIP2                     |
| 24 | 46,275,000 | 46,425,000 | 618 | 708  | 0.268089212  | ATP5A1,C24H18orf25,HAUS1,PSTPIP2         |
| 24 | 46,350,000 | 46,500,000 | 619 | 450  | -0.154901408 | C24H18orf25                              |
| 24 | 46,425,000 | 46,575,000 | 620 | 629  | 0.042340537  | C24H18orf25                              |
| 24 | 46,500,000 | 46,650,000 | 621 | 860  | -0.029260408 | RNF165                                   |
| 24 | 46,575,000 | 46,725,000 | 622 | 844  | -0.542295635 | RNF165                                   |
| 24 | 46,650,000 | 46,800,000 | 623 | 642  | -1.758671965 | LOXHD1                                   |
| 24 | 46,725,000 | 46,875,000 | 624 | 590  | -2.308899632 | LOXHD1                                   |
| 24 | 46,800,000 | 46,950,000 | 625 | 972  | -1.478209076 | LOXHD1,ST8SIA5                           |
| 24 | 46,875,000 | 47,025,000 | 626 | 862  | -0.166492206 | PIAS2,ST8SIA5                            |
| 24 | 46,950,000 | 47,100,000 | 627 | 372  | 1.252181387  | PIAS2                                    |
| 24 | 47,025,000 | 47,175,000 | 628 | 456  | 1.305682942  | PIAS2                                    |
| 24 | 47,100,000 | 47,250,000 | 629 | 586  | 0.672613876  | HDHD2,KATNAL2                            |
| 24 | 47,175,000 | 47,325,000 | 630 | 651  | 0.022107409  | HDHD2,IER3IP1,KATNAL2,ENSBTAG00000047809 |
| 24 | 47,250,000 | 47,400,000 | 631 | 722  | 0.119889172  | HDHD2,IER3IP1,SKOR2,ENSBTAG00000047809   |

|    |            |            |     |      |              |                          |
|----|------------|------------|-----|------|--------------|--------------------------|
| 24 | 47,325,000 | 47,475,000 | 632 | 795  | -0.707382387 | SKOR2                    |
| 24 | 47,400,000 | 47,550,000 | 633 | 810  | -0.453723203 |                          |
| 24 | 47,475,000 | 47,625,000 | 634 | 824  | 0.839803244  |                          |
| 24 | 47,550,000 | 47,700,000 | 635 | 736  | 0.747483223  |                          |
| 24 | 47,625,000 | 47,775,000 | 636 | 591  | -0.065073029 |                          |
| 24 | 47,700,000 | 47,850,000 | 637 | 459  | -0.676183596 |                          |
| 24 | 47,775,000 | 47,925,000 | 638 | 430  | -0.900251935 |                          |
| 24 | 47,850,000 | 48,000,000 | 639 | 421  | -0.504383443 | SMAD2                    |
| 24 | 47,925,000 | 48,075,000 | 640 | 278  | 0.833796614  | SMAD2                    |
| 24 | 48,000,000 | 48,150,000 | 641 | 339  | 0.036033849  | SMAD2                    |
| 24 | 48,075,000 | 48,225,000 | 642 | 452  | -0.978184895 | ZBTB7C                   |
| 24 | 48,150,000 | 48,300,000 | 643 | 470  | -3.369226484 | ZBTB7C                   |
| 24 | 48,225,000 | 48,375,000 | 644 | 482  | -5.29851707  |                          |
| 24 | 48,300,000 | 48,450,000 | 645 | 604  | -1.648462156 |                          |
| 24 | 48,375,000 | 48,525,000 | 646 | 525  | 0.841206093  |                          |
| 24 | 48,450,000 | 48,600,000 | 647 | 478  | -0.217802792 |                          |
| 24 | 48,525,000 | 48,675,000 | 648 | 833  | -2.346523645 |                          |
| 24 | 48,600,000 | 48,750,000 | 649 | 801  | -1.516489964 |                          |
| 24 | 48,675,000 | 48,825,000 | 650 | 594  | 0.661853156  | CTIF                     |
| 24 | 48,750,000 | 48,900,000 | 651 | 662  | -0.151491078 | CTIF                     |
| 24 | 48,825,000 | 48,975,000 | 652 | 466  | -0.757193907 | CTIF                     |
| 24 | 48,900,000 | 49,050,000 | 653 | 459  | 0.317434157  | CTIF                     |
| 24 | 48,975,000 | 49,125,000 | 654 | 449  | 0.660095048  | CTIF,SMAD7               |
| 24 | 49,050,000 | 49,200,000 | 655 | 359  | 0.928361673  | DYM,SMAD7                |
| 24 | 49,125,000 | 49,275,000 | 656 | 394  | 0.761231224  | DYM                      |
| 24 | 49,200,000 | 49,350,000 | 657 | 286  | 0.812089333  | DYM                      |
| 24 | 49,275,000 | 49,425,000 | 658 | 250  | 1.184361739  | DYM                      |
| 24 | 49,350,000 | 49,500,000 | 659 | 291  | 1.270671458  | DYM                      |
| 24 | 49,425,000 | 49,575,000 | 660 | 313  | 0.832821855  | DYM                      |
| 24 | 49,500,000 | 49,650,000 | 661 | 334  | 0.888413778  | C24H18orf32,DYM,RPL17    |
| 24 | 49,575,000 | 49,725,000 | 662 | 332  | 1.142821713  | C24H18orf32,DYM,RPL17    |
| 24 | 49,650,000 | 49,800,000 | 663 | 358  | 0.785668829  |                          |
| 24 | 49,725,000 | 49,875,000 | 664 | 484  | 0.480431137  | ENSBTAG00000039248       |
| 24 | 49,800,000 | 49,950,000 | 665 | 373  | 0.573261532  | ACAA2,ENSBTAG00000039248 |
| 24 | 49,875,000 | 50,025,000 | 666 | 559  | 1.4592432    | ACAA2,MYO5B              |
| 24 | 49,950,000 | 50,100,000 | 667 | 643  | 1.442891074  | MYO5B                    |
| 24 | 50,025,000 | 50,175,000 | 668 | 521  | -0.653408329 | MYO5B                    |
| 24 | 50,100,000 | 50,250,000 | 669 | 548  | -1.916410826 | MYO5B                    |
| 24 | 50,175,000 | 50,325,000 | 670 | 755  | -1.667433036 | CCDC11                   |
| 24 | 50,250,000 | 50,400,000 | 671 | 772  | -0.61994015  | CCDC11,MBD1              |
| 24 | 50,325,000 | 50,475,000 | 672 | 438  | 1.101518235  | CCDC11,CXXC1,MBD1,SKA1   |
| 24 | 50,400,000 | 50,550,000 | 673 | 290  | 0.877845399  | CXXC1,SKA1               |
| 24 | 50,475,000 | 50,625,000 | 674 | 376  | -0.466826398 |                          |
| 24 | 50,550,000 | 50,700,000 | 675 | 687  | -1.400230797 | MAPK4                    |
| 24 | 50,625,000 | 50,775,000 | 676 | 874  | 0.108666186  | MAPK4                    |
| 24 | 50,700,000 | 50,850,000 | 677 | 879  | 1.068283669  | MAPK4,MRO                |
| 24 | 50,775,000 | 50,925,000 | 678 | 736  | 0.91176825   | ME2,MRO                  |
| 24 | 50,850,000 | 51,000,000 | 679 | 702  | 1.099751385  | ELAC1,ME2,SMAD4          |
| 24 | 50,925,000 | 51,075,000 | 680 | 621  | 0.476483073  | ELAC1,ME2,SMAD4          |
| 24 | 51,000,000 | 51,150,000 | 681 | 487  | -0.237643375 | MEX3C,SMAD4              |
| 24 | 51,075,000 | 51,225,000 | 682 | 637  | 0.807258519  | AP3S1,MEX3C              |
| 24 | 51,150,000 | 51,300,000 | 683 | 1047 | 1.039435854  | AP3S1                    |
| 24 | 51,225,000 | 51,375,000 | 684 | 1091 | 1.030733653  |                          |

|    |            |            |     |      |              |                                         |
|----|------------|------------|-----|------|--------------|-----------------------------------------|
| 24 | 51,300,000 | 51,450,000 | 685 | 835  | 0.842656612  |                                         |
| 24 | 51,375,000 | 51,525,000 | 686 | 879  | 0.488136259  |                                         |
| 24 | 51,450,000 | 51,600,000 | 687 | 1115 | 0.7485029    |                                         |
| 24 | 51,525,000 | 51,675,000 | 688 | 1254 | 0.947157217  |                                         |
| 24 | 51,600,000 | 51,750,000 | 689 | 1083 | 0.856915283  |                                         |
| 24 | 51,675,000 | 51,825,000 | 690 | 669  | 0.302419184  |                                         |
| 24 | 51,750,000 | 51,900,000 | 691 | 884  | 0.458792123  |                                         |
| 24 | 51,825,000 | 51,975,000 | 692 | 1360 | 0.899841198  |                                         |
| 24 | 51,900,000 | 52,050,000 | 693 | 1410 | 1.097328822  |                                         |
| 24 | 51,975,000 | 52,125,000 | 694 | 1390 | 1.21120654   |                                         |
| 24 | 52,050,000 | 52,200,000 | 695 | 1265 | 0.927305883  |                                         |
| 24 | 52,125,000 | 52,275,000 | 696 | 1086 | -0.613314137 |                                         |
| 24 | 52,200,000 | 52,350,000 | 697 | 989  | -1.053411393 |                                         |
| 24 | 52,275,000 | 52,425,000 | 698 | 1027 | 0.130619643  |                                         |
| 24 | 52,350,000 | 52,500,000 | 699 | 942  | 0.552265573  |                                         |
| 24 | 52,425,000 | 52,575,000 | 700 | 781  | -0.188516814 |                                         |
| 24 | 52,500,000 | 52,650,000 | 701 | 739  | -0.292930873 |                                         |
| 24 | 52,575,000 | 52,725,000 | 702 | 715  | 1.19222459   |                                         |
| 24 | 52,650,000 | 52,800,000 | 703 | 728  | 0.352325457  |                                         |
| 24 | 52,725,000 | 52,875,000 | 704 | 1000 | 0.080883474  |                                         |
| 24 | 52,800,000 | 52,950,000 | 705 | 1075 | 0.634006794  |                                         |
| 24 | 52,875,000 | 53,025,000 | 706 | 688  | 1.060522802  |                                         |
| 24 | 52,950,000 | 53,100,000 | 707 | 399  | 1.103555776  |                                         |
| 24 | 53,025,000 | 53,175,000 | 708 | 595  | 1.399478258  |                                         |
| 24 | 53,100,000 | 53,250,000 | 709 | 1084 | 0.536570726  |                                         |
| 24 | 53,175,000 | 53,325,000 | 710 | 1119 | -0.645494893 |                                         |
| 24 | 53,250,000 | 53,400,000 | 711 | 958  | -1.665551189 |                                         |
| 24 | 53,325,000 | 53,475,000 | 712 | 762  | -2.454260884 |                                         |
| 24 | 53,400,000 | 53,550,000 | 713 | 914  | -0.552117306 |                                         |
| 24 | 53,475,000 | 53,625,000 | 714 | 1397 | 0.827140107  |                                         |
| 24 | 53,550,000 | 53,700,000 | 715 | 1249 | 1.06936964   |                                         |
| 24 | 53,625,000 | 53,775,000 | 716 | 952  | 0.303824149  |                                         |
| 24 | 53,700,000 | 53,850,000 | 717 | 1057 | 0.452581556  |                                         |
| 24 | 53,775,000 | 53,925,000 | 718 | 1308 | 0.662604041  |                                         |
| 24 | 53,850,000 | 54,000,000 | 719 | 1522 | 0.32447882   |                                         |
| 24 | 53,925,000 | 54,075,000 | 720 | 1269 | 0.466390719  | MBD2                                    |
| 24 | 54,000,000 | 54,150,000 | 721 | 814  | -1.365423873 | MBD2                                    |
| 24 | 54,075,000 | 54,225,000 | 722 | 907  | -1.137076209 | C18orf54,MBD2,POLI,STARD6               |
| 24 | 54,150,000 | 54,300,000 | 723 | 1069 | 0.96144179   | C18orf54,POLI,STARD6,ENSBTAG00000046901 |
| 24 | 54,225,000 | 54,375,000 | 724 | 990  | 1.292339982  | C18orf54,ENSBTAG00000046901             |
| 24 | 54,300,000 | 54,450,000 | 725 | 1159 | 0.589790705  |                                         |
| 24 | 54,375,000 | 54,525,000 | 726 | 1449 | -0.191183128 | ENSBTAG00000013871                      |
| 24 | 54,450,000 | 54,600,000 | 727 | 1616 | 0.343042733  | RAB27B,ENSBTAG00000013871               |
| 24 | 54,525,000 | 54,675,000 | 728 | 1637 | 1.177988246  | RAB27B                                  |
| 24 | 54,600,000 | 54,750,000 | 729 | 1098 | 1.116596413  | CCDC68,RAB27B                           |
| 24 | 54,675,000 | 54,825,000 | 730 | 955  | -0.179386599 | CCDC68,RAB27B                           |
| 24 | 54,750,000 | 54,900,000 | 731 | 986  | -0.127937415 | CCDC68                                  |
| 24 | 54,825,000 | 54,975,000 | 732 | 578  | 0.345925404  |                                         |
| 24 | 54,900,000 | 55,050,000 | 733 | 623  | 0.245257773  |                                         |
| 24 | 54,975,000 | 55,125,000 | 734 | 529  | -0.713972    | TCF7L2                                  |
| 24 | 55,050,000 | 55,200,000 | 735 | 249  | -3.058506204 | TCF7L2                                  |
| 24 | 55,125,000 | 55,275,000 | 736 | 240  | -2.505705962 | TCF7L2                                  |
| 24 | 55,200,000 | 55,350,000 | 737 | 254  | -0.764307211 | TCF7L2                                  |

|    |            |            |     |      |              |                                 |
|----|------------|------------|-----|------|--------------|---------------------------------|
| 24 | 55,275,000 | 55,425,000 | 738 | 264  | -0.724435523 | TCF7L2                          |
| 24 | 55,350,000 | 55,500,000 | 739 | 440  | -0.558376505 | TCF7L2                          |
| 24 | 55,425,000 | 55,575,000 | 740 | 642  | -0.664075013 | TCF7L2                          |
| 24 | 55,500,000 | 55,650,000 | 741 | 663  | 0.263813641  |                                 |
| 24 | 55,575,000 | 55,725,000 | 742 | 600  | 1.07529468   |                                 |
| 24 | 55,650,000 | 55,800,000 | 743 | 505  | 0.7312435    |                                 |
| 24 | 55,725,000 | 55,875,000 | 744 | 486  | 0.512356828  |                                 |
| 24 | 55,800,000 | 55,950,000 | 745 | 663  | 0.671951531  |                                 |
| 24 | 55,875,000 | 56,025,000 | 746 | 1098 | 0.647951383  |                                 |
| 24 | 55,950,000 | 56,100,000 | 747 | 1220 | 0.41527063   |                                 |
| 24 | 56,025,000 | 56,175,000 | 748 | 1091 | 0.060214177  |                                 |
| 24 | 56,100,000 | 56,250,000 | 749 | 801  | -0.715504681 |                                 |
| 24 | 56,175,000 | 56,325,000 | 750 | 481  | -1.769238616 |                                 |
| 24 | 56,250,000 | 56,400,000 | 751 | 380  | -0.507187847 |                                 |
| 24 | 56,325,000 | 56,475,000 | 752 | 444  | -2.285481206 | TXNL1,WDR7                      |
| 24 | 56,400,000 | 56,550,000 | 753 | 507  | -2.003618979 | TXNL1,WDR7                      |
| 24 | 56,475,000 | 56,625,000 | 754 | 504  | 0.165766957  | WDR7                            |
| 24 | 56,550,000 | 56,700,000 | 755 | 619  | 0.317020677  | WDR7                            |
| 24 | 56,625,000 | 56,775,000 | 756 | 652  | -0.048205492 | WDR7                            |
| 24 | 56,700,000 | 56,850,000 | 757 | 669  | -0.203324717 | WDR7                            |
| 24 | 56,775,000 | 56,925,000 | 758 | 678  | -0.334826749 | WDR7                            |
| 24 | 56,850,000 | 57,000,000 | 759 | 597  | -0.275585188 |                                 |
| 24 | 56,925,000 | 57,075,000 | 760 | 622  | 0.57985018   |                                 |
| 24 | 57,000,000 | 57,150,000 | 761 | 694  | 0.946078297  | ST8SIA3                         |
| 24 | 57,075,000 | 57,225,000 | 762 | 580  | 1.066116384  | ONECUT2,ST8SIA3                 |
| 24 | 57,150,000 | 57,300,000 | 763 | 462  | 0.712434089  | FECH,ONECUT2                    |
| 24 | 57,225,000 | 57,375,000 | 764 | 446  | 0.795354496  | FECH,ONECUT2,ENSBTAG00000019271 |
| 24 | 57,300,000 | 57,450,000 | 765 | 566  | 0.989886183  | ATP8B1,FECH,ENSBTAG00000019271  |
| 24 | 57,375,000 | 57,525,000 | 766 | 608  | 0.81743004   | ATP8B1                          |
| 24 | 57,450,000 | 57,600,000 | 767 | 554  | 0.725845392  | ATP8B1                          |
| 24 | 57,525,000 | 57,675,000 | 768 | 525  | 0.362653596  |                                 |
| 24 | 57,600,000 | 57,750,000 | 769 | 639  | -0.570395333 |                                 |
| 24 | 57,675,000 | 57,825,000 | 770 | 829  | -0.54004859  |                                 |
| 24 | 57,750,000 | 57,900,000 | 771 | 758  | -0.051626847 |                                 |
| 24 | 57,825,000 | 57,975,000 | 772 | 576  | 0.556009967  | NEDD4L                          |
| 24 | 57,900,000 | 58,050,000 | 773 | 522  | -0.696022534 | NEDD4L                          |
| 24 | 57,975,000 | 58,125,000 | 774 | 920  | -0.443084758 | ALPK2,NEDD4L                    |
| 24 | 58,050,000 | 58,200,000 | 775 | 1166 | 0.345524708  | ALPK2,NEDD4L                    |
| 24 | 58,125,000 | 58,275,000 | 776 | 784  | 0.935170881  | ALPK2                           |
| 24 | 58,200,000 | 58,350,000 | 777 | 495  | 1.080231711  | ALPK2,MALT1                     |
| 24 | 58,275,000 | 58,425,000 | 778 | 580  | 0.063530946  | MALT1                           |
| 24 | 58,350,000 | 58,500,000 | 779 | 691  | -0.083167307 | ZNF532                          |
| 24 | 58,425,000 | 58,575,000 | 780 | 987  | -0.869293267 | ZNF532,ENSBTAG00000022829       |
| 24 | 58,500,000 | 58,650,000 | 781 | 1251 | -0.316703227 | ZNF532,ENSBTAG00000022829       |
| 24 | 58,575,000 | 58,725,000 | 782 | 1268 | 0.855528419  | GRP,SEC11C,ENSBTAG00000022829   |
| 24 | 58,650,000 | 58,800,000 | 783 | 1028 | 0.850108972  | CPLX4,GRP,LMAN1,RAX,SEC11C      |
| 24 | 58,725,000 | 58,875,000 | 784 | 740  | 0.364777029  | CPLX4,LMAN1,RAX                 |
| 24 | 58,800,000 | 58,950,000 | 785 | 843  | 0.346068886  | CCBE1,LMAN1                     |
| 24 | 58,875,000 | 59,025,000 | 786 | 1027 | -0.260579972 | CCBE1                           |
| 24 | 58,950,000 | 59,100,000 | 787 | 1318 | -1.407067124 |                                 |
| 24 | 59,025,000 | 59,175,000 | 788 | 1362 | -1.086394969 |                                 |
| 24 | 59,100,000 | 59,250,000 | 789 | 1097 | -0.33828577  |                                 |
| 24 | 59,175,000 | 59,325,000 | 790 | 877  | -0.358412146 |                                 |



|    |            |            |     |      |              |                                                                                                             |
|----|------------|------------|-----|------|--------------|-------------------------------------------------------------------------------------------------------------|
| 24 | 59,250,000 | 59,400,000 | 791 | 884  | -1.09453045  |                                                                                                             |
| 24 | 59,325,000 | 59,475,000 | 792 | 1319 | -0.093192125 |                                                                                                             |
| 24 | 59,400,000 | 59,550,000 | 793 | 1508 | 0.598008684  |                                                                                                             |
| 24 | 59,475,000 | 59,625,000 | 794 | 942  | 0.628443522  |                                                                                                             |
| 24 | 59,550,000 | 59,700,000 | 795 | 553  | 0.705903297  | MC4R                                                                                                        |
| 24 | 59,625,000 | 59,775,000 | 796 | 626  | 0.952660373  | MC4R                                                                                                        |
| 24 | 59,700,000 | 59,850,000 | 797 | 838  | 0.462150328  | ENSBTAG00000000531                                                                                          |
| 24 | 59,775,000 | 59,925,000 | 798 | 1050 | 0.236512656  | ENSBTAG00000000531                                                                                          |
| 24 | 59,850,000 | 60,000,000 | 799 | 745  | 0.611792923  |                                                                                                             |
| 24 | 59,925,000 | 60,075,000 | 800 | 595  | -0.488166251 |                                                                                                             |
| 24 | 60,000,000 | 60,150,000 | 801 | 884  | 0.413610911  |                                                                                                             |
| 24 | 60,075,000 | 60,225,000 | 802 | 868  | 1.051100018  |                                                                                                             |
| 24 | 60,150,000 | 60,300,000 | 803 | 582  | 0.834774316  |                                                                                                             |
| 24 | 60,225,000 | 60,375,000 | 804 | 437  | 0.131043242  | ENSBTAG00000047569                                                                                          |
| 24 | 60,300,000 | 60,450,000 | 805 | 671  | 0.562217203  | ENSBTAG00000047569                                                                                          |
| 24 | 60,375,000 | 60,525,000 | 806 | 700  | 0.880659645  |                                                                                                             |
| 24 | 60,450,000 | 60,600,000 | 807 | 957  | 0.438701185  | CDH20                                                                                                       |
| 24 | 60,525,000 | 60,675,000 | 808 | 1131 | 0.021027528  | CDH20                                                                                                       |
| 24 | 60,600,000 | 60,750,000 | 809 | 794  | -0.544300245 |                                                                                                             |
| 24 | 60,675,000 | 60,825,000 | 810 | 962  | 0.213255035  |                                                                                                             |
| 24 | 60,750,000 | 60,900,000 | 811 | 1072 | 0.398022227  |                                                                                                             |
| 24 | 60,825,000 | 60,975,000 | 812 | 984  | 0.499102185  |                                                                                                             |
| 24 | 60,900,000 | 61,050,000 | 813 | 909  | 0.334638397  | PIGN                                                                                                        |
| 24 | 60,975,000 | 61,125,000 | 814 | 681  | -0.587148602 | KIAA1468,PIGN                                                                                               |
| 24 | 61,050,000 | 61,200,000 | 815 | 444  | -1.43625636  | KIAA1468,PIGN                                                                                               |
| 24 | 61,125,000 | 61,275,000 | 816 | 512  | -0.938866109 | KIAA1468,TNFRSF11A                                                                                          |
| 24 | 61,200,000 | 61,350,000 | 817 | 944  | -1.206815179 | KIAA1468,TNFRSF11A                                                                                          |
| 24 | 61,275,000 | 61,425,000 | 818 | 854  | -1.074383186 | TNFRSF11A                                                                                                   |
| 24 | 61,350,000 | 61,500,000 | 819 | 712  | -0.0684266   |                                                                                                             |
| 24 | 61,425,000 | 61,575,000 | 820 | 790  | 0.326052452  |                                                                                                             |
| 24 | 61,500,000 | 61,650,000 | 821 | 814  | 0.631283862  |                                                                                                             |
| 24 | 61,575,000 | 61,725,000 | 822 | 653  | 0.522537884  | PHLPP1                                                                                                      |
| 24 | 61,650,000 | 61,800,000 | 823 | 457  | 0.106724208  | PHLPP1                                                                                                      |
| 24 | 61,725,000 | 61,875,000 | 824 | 671  | 0.07581522   | PHLPP1                                                                                                      |
| 24 | 61,800,000 | 61,950,000 | 825 | 737  | 0.083588772  | BCL2                                                                                                        |
| 24 | 61,875,000 | 62,025,000 | 826 | 689  | 0.026509693  | BCL2                                                                                                        |
| 24 | 61,950,000 | 62,100,000 | 827 | 576  | 0.444729906  | BCL2                                                                                                        |
| 24 | 62,025,000 | 62,175,000 | 828 | 407  | 1.018325892  | BCL2,KDSR                                                                                                   |
| 24 | 62,100,000 | 62,250,000 | 829 | 708  | 1.078690175  | BCL2,KDSR,SERPINB5,VPS4B                                                                                    |
| 24 | 62,175,000 | 62,325,000 | 830 | 1195 | 0.700850169  | SERPINB12,SERPINB5,VPS4B                                                                                    |
| 24 | 62,250,000 | 62,400,000 | 831 | 1114 | 0.107948074  | HMSD,SERPINB12,SERPINB13,SERPINB4,SERPINB5,ENSBTAG00000037554                                               |
| 24 | 62,325,000 | 62,475,000 | 832 | 1331 | 0.307562844  | HMSD,SERPINB12,SERPINB13,SERPINB4,ENSBTAG00000035224,ENSBTAG00000037554,ENSBTAG00000040586                  |
| 24 | 62,400,000 | 62,550,000 | 833 | 1350 | 0.051313781  | SERPINB7,ENSBTAG0000005324,ENSBTAG00000035224,ENSBTAG00000037554,ENSBTAG00000040586                         |
| 24 | 62,475,000 | 62,625,000 | 834 | 866  | -0.954635983 | SERPINB10,SERPINB2,SERPINB7,ENSBTAG0000005324                                                               |
| 24 | 62,550,000 | 62,700,000 | 835 | 1046 | -0.215708849 | SERPINB10,SERPINB2                                                                                          |
| 24 | 62,625,000 | 62,714,930 | 836 | 684  | -0.548723005 | SERPINB10                                                                                                   |
| 25 | 0          | 150,000    | 1   | 317  | -1.535199031 | IL9R,MPG,NPRL3,POLR3K,RHBDF1,SNRNP25                                                                        |
| 25 | 75,000     | 225,000    | 2   | 312  | -2.242253494 | HBA,HBM,HBQ1,IL9R,MPG,NPRL3,POLR3K,RHBDF1,SNRN P25,ENSBTAG00000032198,ENSBTAG00000034024,ENSBTAG00000038921 |

|    |           |           |    |      |              |                                                                                                                                                              |
|----|-----------|-----------|----|------|--------------|--------------------------------------------------------------------------------------------------------------------------------------------------------------|
| 25 | 150,000   | 300,000   | 3  | 295  | -0.28975295  | HBA,HBM,HBQ1,ITFG3,LUC7L,NPRL3,RGS11,ENSBTAG0000032198,ENSBTAG00000034024,ENSBTAG00000038921                                                                 |
| 25 | 225,000   | 375,000   | 4  | 364  | 0.859543421  | ARHGDIG,AXIN1,ITFG3,LUC7L,MRPL28,PDIA2,RGS11,TMEM8                                                                                                           |
| 25 | 300,000   | 450,000   | 5  | 353  | 1.045147651  | ARHGDIG,AXIN1,DECR2,MRPL28,NME4,PDIA2,RAB11FIP3,TMEM8                                                                                                        |
| 25 | 375,000   | 525,000   | 6  | 321  | 1.076834974  | CAPN15,DECR2,NHLRC4,NME4,PIGQ,PRR35,RAB11FIP3,RAB40C                                                                                                         |
| 25 | 450,000   | 600,000   | 7  | 252  | 1.057875879  | C25H16ORF13,CAPN15,FAM195A,FBXL16,JMJD8,NHLRC4,PIGQ,PRR35,RAB11FIP3,RAB40C,RHBDL1,RHOT2,STUB1,WDR24,WDR90,WFIKKN1,ENSBTAG00000038330                         |
| 25 | 525,000   | 675,000   | 8  | 486  | 1.410545655  | C25H16ORF13,CCDC78,CHTF18,FAM173A,FAM195A,FBXL16,HAGHL,JMJD8,METRNL,MSLN,MSLNL,NARFL,RAB40C,RHBDL1,RHOT2,RPUSD1,STUB1,WDR24,WDR90,WFIKKN1,ENSBTAG00000038330 |
| 25 | 600,000   | 750,000   | 9  | 714  | 1.335173898  | CCDC78,CHTF18,FAM173A,FBXL16,GNG13,HAGHL,LMF1,METRNL,MSLN,MSLNL,NARFL,RPUSD1                                                                                 |
| 25 | 675,000   | 825,000   | 10 | 523  | 0.980220322  | CHTF18,GNG13,LMF1,SOX8                                                                                                                                       |
| 25 | 750,000   | 900,000   | 11 | 502  | 0.776310469  | C1QTNF8,LMF1,SOX8,SSTR5,TEKT4                                                                                                                                |
| 25 | 825,000   | 975,000   | 12 | 632  | 0.792473604  | C1QTNF8,CACNA1H,SSTR5,TEKT4                                                                                                                                  |
| 25 | 900,000   | 1,050,000 | 13 | 700  | 0.259764993  | CACNA1H,TPSB1,UBE2I,ENSBTAG00000046722,ENSBTAG00000046965                                                                                                    |
| 25 | 975,000   | 1,125,000 | 14 | 1011 | -0.529379178 | BAIAP3,C25H16ORF42,CACNA1H,CCSMST1,GNPTG,TPSB1,UBE2I,UNKL,ENSBTAG00000046722,ENSBTAG00000046965                                                              |
| 25 | 1,050,000 | 1,200,000 | 15 | 1012 | -0.141663725 | BAIAP3,C25H16ORF42,CCDC154,CCSMST1,CLCN7,GNPTG,IFT140,PTX4,TELO2,TMEM204,UNKL                                                                                |
| 25 | 1,125,000 | 1,275,000 | 16 | 695  | 0.806464119  | CCDC154,CLCN7,CRAMP1L,IFT140,PTX4,TELO2,TMEM204                                                                                                              |
| 25 | 1,200,000 | 1,350,000 | 17 | 695  | 0.145938902  | CRAMP1L,HN1L,IFT140,MAPK8IP3,MRPS34,NME3,TMEM204                                                                                                             |
| 25 | 1,275,000 | 1,425,000 | 18 | 691  | -0.260585934 | CRAMP1L,EME2,FAHD1,HAGH,HN1L,IGFALS,MAPK8IP3,MEIOB,MRPS34,NME3,NUBP2,SPSB3,TPT1                                                                              |
| 25 | 1,350,000 | 1,500,000 | 19 | 831  | -0.738636596 | EME2,FAHD1,HAGH,HS3ST6,IGFALS,MEIOB,MRPS34,NUBP2,SPSB3,TPT1                                                                                                  |
| 25 | 1,425,000 | 1,575,000 | 20 | 765  | -0.334251696 | GFER,HS3ST6,MEIOB,NDUFB10,NOXO1,NPW,RNF151,RPL3L,RPS2,SYNGR3,TBL3,ZNF598                                                                                     |
| 25 | 1,500,000 | 1,650,000 | 21 | 407  | 0.929479281  | GFER,NDUFB10,NOXO1,NPW,NTHL1,PKD1,RNF151,RPL3L,RPS2,SLC9A3R2,SYNGR3,TBL3,TSC2,ZNF598                                                                         |
| 25 | 1,575,000 | 1,725,000 | 22 | 400  | 0.44383894   | CASKIN1,NTHL1,PKD1,RAB26,SLC9A3R2,TRAF7,TSC2                                                                                                                 |
| 25 | 1,650,000 | 1,800,000 | 23 | 587  | 0.855678485  | ABCA3,BRICD5,CASKIN1,DNASE1L2,E4F1,ECI1,MLST8,PGP,PKD1,RAB26,RNPS1,TRAF7                                                                                     |
| 25 | 1,725,000 | 1,875,000 | 24 | 703  | 0.876852606  | ABCA3,BRICD5,CASKIN1,DNASE1L2,E4F1,ECI1,MLST8,PGP,RNPS1,ENSBTAG00000034643                                                                                   |
| 25 | 1,800,000 | 1,950,000 | 25 | 674  | 0.469466332  | ABCA3,CCNF,ENSBTAG00000034643                                                                                                                                |
| 25 | 1,875,000 | 2,025,000 | 26 | 452  | 0.634750009  | AMDHD2,ATP6V0C,C16orf59,CCNF,NTN3,ENSBTAG00000005458,ENSBTAG00000034643                                                                                      |
| 25 | 1,950,000 | 2,100,000 | 27 | 460  | 0.862589914  | AMDHD2,ATP6V0C,C16orf59,CCNF,NTN3,PDPK1,ENSBTAG00000005458                                                                                                   |
| 25 | 2,025,000 | 2,175,000 | 28 | 654  | 0.517635773  | AMDHD2,KCTD5,PDPK1,PRSS27                                                                                                                                    |
| 25 | 2,100,000 | 2,250,000 | 29 | 1123 | 0.490412009  | KCTD5,PRSS21,PRSS22,PRSS27,ENSBTAG00000019103,ENSBTAG00000034372,ENSBTAG00000047368                                                                          |

|    |           |           |    |      |              |                                                                                                                                 |
|----|-----------|-----------|----|------|--------------|---------------------------------------------------------------------------------------------------------------------------------|
| 25 | 2,175,000 | 2,325,000 | 30 | 1030 | 0.360289651  | FLYWCH2,PRSS21,PRSS22,PRSS33,SRRM2,TCEB2,ENSBTA<br>G00000019103,ENSBTAG000000034372,ENSBTAG00000003<br>8568,ENSBTAG000000047368 |
| 25 | 2,250,000 | 2,400,000 | 31 | 350  | 0.070124667  | FLYWCH1,FLYWCH2,KREMEN2,PAQR4,PKMYT1,PRSS33,SR<br>RM2,TCEB2,ENSBTAG000000038568                                                 |
| 25 | 2,325,000 | 2,475,000 | 32 | 274  | 1.107212801  | CCDC64B,CLDN6,CLDN9,FLYWCH1,FLYWCH2,HCFC1R1,K<br>REMEN2,PAQR4,PKMYT1,THOC6,TNFRSF12A                                            |
| 25 | 2,400,000 | 2,550,000 | 33 | 733  | 0.353662673  | CCDC64B,CLDN6,CLDN9,HCFC1R1,MMP25,THOC6,TNFRS<br>F12A,ZSCAN10                                                                   |
| 25 | 2,475,000 | 2,625,000 | 34 | 763  | -0.249183336 | CASP16,MMP25,ZNF205,ZNF213,ZSCAN10                                                                                              |
| 25 | 2,550,000 | 2,700,000 | 35 | 632  | -0.929380613 | CASP16,MEFV,ZNF200,ZNF205,ZNF213,ENSBTAG0000004<br>0438,ENSBTAG000000046326,ENSBTAG000000047634                                 |
| 25 | 2,625,000 | 2,775,000 | 36 | 845  | -0.605202327 | MEFV,TIGD7,ZNF200,ZNF263,ZNF75A,ENSBTAG00000040<br>438,ENSBTAG000000046326,ENSBTAG000000047634                                  |
| 25 | 2,700,000 | 2,850,000 | 37 | 1019 | 0.062613678  | MEFV,OR2C1,TIGD7,ZNF174,ZNF263,ZNF75A                                                                                           |
| 25 | 2,775,000 | 2,925,000 | 38 | 875  | 0.903098409  | C16orf90,CLUAP1,NAT15,OR2C1,ZNF174,ZNF597                                                                                       |
| 25 | 2,850,000 | 3,000,000 | 39 | 381  | 1.209479386  | C16orf90,CLUAP1,DNASE1,NAT15,NLRC3,SLX4,TRAP1,ZNF<br>597                                                                        |
| 25 | 2,925,000 | 3,075,000 | 40 | 262  | 0.700457894  | CREBBP,DNASE1,NLRC3,SLX4,TRAP1                                                                                                  |
| 25 | 3,000,000 | 3,150,000 | 41 | 338  | -0.610828638 | CREBBP,TRAP1                                                                                                                    |
| 25 | 3,075,000 | 3,225,000 | 42 | 329  | -0.685347595 | CREBBP                                                                                                                          |
| 25 | 3,150,000 | 3,300,000 | 43 | 265  | -0.017408378 | ADCY9,CREBBP                                                                                                                    |
| 25 | 3,225,000 | 3,375,000 | 44 | 284  | -0.279974631 | ADCY9                                                                                                                           |
| 25 | 3,300,000 | 3,450,000 | 45 | 474  | -0.353378808 | ADCY9,SRL,TFAP4                                                                                                                 |
| 25 | 3,375,000 | 3,525,000 | 46 | 479  | -0.523817913 | CORO7,GLIS2,PAM16,SRL,TFAP4,VASN                                                                                                |
| 25 | 3,450,000 | 3,600,000 | 47 | 421  | 0.456753234  | CORO7,DNAJA3,GLIS2,PAM16,TFAP4,VASN                                                                                             |
| 25 | 3,525,000 | 3,675,000 | 48 | 496  | 0.948340959  | CDIP1,CORO7,DNAJA3,HMOX2,NMRAL1,VASN                                                                                            |
| 25 | 3,600,000 | 3,750,000 | 49 | 645  | 0.800285551  | CDIP1,DNAJA3,HMOX2,MGC142811,NMRAL1,ENSBTAG00<br>000047316                                                                      |
| 25 | 3,675,000 | 3,825,000 | 50 | 638  | 0.864886029  | ANKS3,C25H16ORF71,MGC142811,MGRN1,NUDT16L1,EN<br>SBTAG000000047316                                                              |
| 25 | 3,750,000 | 3,900,000 | 51 | 428  | 0.425267491  | ANKS3,C25H16ORF71,MGRN1,NUDT16L1,ROGDI,SEPT12,<br>ZNF500                                                                        |
| 25 | 3,825,000 | 3,975,000 | 52 | 314  | -0.080693455 | C25H16ORF71,GLYR1,PPL,ROGDI,SEPT12,UBN1,ZNF500                                                                                  |
| 25 | 3,900,000 | 4,050,000 | 53 | 559  | 0.529706572  | GLYR1,PPL,ROGDI,SEC14L5,UBN1                                                                                                    |
| 25 | 3,975,000 | 4,125,000 | 54 | 733  | 0.162652098  | ALG1,C16orf89,FAM86A,NAGPA,PPL,SEC14L5                                                                                          |
| 25 | 4,050,000 | 4,200,000 | 55 | 569  | -0.841231838 | ALG1,C16orf89,FAM86A,NAGPA,SEC14L5,ENSBTAG00000<br>026383                                                                       |
| 25 | 4,125,000 | 4,275,000 | 56 | 805  | -1.758662467 | FAM86A,ENSBTAG000000026383                                                                                                      |
| 25 | 4,200,000 | 4,350,000 | 57 | 1235 | -0.963477978 |                                                                                                                                 |
| 25 | 4,275,000 | 4,425,000 | 58 | 1515 | 0.217866503  |                                                                                                                                 |
| 25 | 4,350,000 | 4,500,000 | 59 | 1485 | 0.597420261  |                                                                                                                                 |
| 25 | 4,425,000 | 4,575,000 | 60 | 1055 | 0.252734795  |                                                                                                                                 |
| 25 | 4,500,000 | 4,650,000 | 61 | 844  | -0.313149376 |                                                                                                                                 |
| 25 | 4,575,000 | 4,725,000 | 62 | 954  | 0.011479712  |                                                                                                                                 |
| 25 | 4,650,000 | 4,800,000 | 63 | 1023 | 0.377286919  |                                                                                                                                 |
| 25 | 4,725,000 | 4,875,000 | 64 | 891  | 0.744926835  |                                                                                                                                 |
| 25 | 4,800,000 | 4,950,000 | 65 | 631  | 1.112461533  |                                                                                                                                 |
| 25 | 4,875,000 | 5,025,000 | 66 | 564  | 1.209945568  |                                                                                                                                 |
| 25 | 4,950,000 | 5,100,000 | 67 | 480  | 0.890686929  |                                                                                                                                 |
| 25 | 5,025,000 | 5,175,000 | 68 | 831  | 1.077251351  |                                                                                                                                 |
| 25 | 5,100,000 | 5,250,000 | 69 | 1188 | 0.557229114  |                                                                                                                                 |
| 25 | 5,175,000 | 5,325,000 | 70 | 791  | -0.263464539 |                                                                                                                                 |

|    |           |           |     |      |              |                                |
|----|-----------|-----------|-----|------|--------------|--------------------------------|
| 25 | 5,250,000 | 5,400,000 | 71  | 817  | 0.590011135  |                                |
| 25 | 5,325,000 | 5,475,000 | 72  | 840  | 0.737070657  |                                |
| 25 | 5,400,000 | 5,550,000 | 73  | 804  | -0.095234931 |                                |
| 25 | 5,475,000 | 5,625,000 | 74  | 851  | -0.728599819 |                                |
| 25 | 5,550,000 | 5,700,000 | 75  | 861  | 0.78234199   |                                |
| 25 | 5,625,000 | 5,775,000 | 76  | 1116 | 0.619373772  |                                |
| 25 | 5,700,000 | 5,850,000 | 77  | 901  | -0.164069094 |                                |
| 25 | 5,775,000 | 5,925,000 | 78  | 862  | -0.221825997 |                                |
| 25 | 5,850,000 | 6,000,000 | 79  | 944  | -0.303192504 |                                |
| 25 | 5,925,000 | 6,075,000 | 80  | 695  | -0.14871265  |                                |
| 25 | 6,000,000 | 6,150,000 | 81  | 1051 | 0.306538415  |                                |
| 25 | 6,075,000 | 6,225,000 | 82  | 1107 | 0.330955747  |                                |
| 25 | 6,150,000 | 6,300,000 | 83  | 786  | 0.330101787  |                                |
| 25 | 6,225,000 | 6,375,000 | 84  | 892  | 0.225346769  |                                |
| 25 | 6,300,000 | 6,450,000 | 85  | 966  | -0.698593936 |                                |
| 25 | 6,375,000 | 6,525,000 | 86  | 1046 | -0.159809148 | RBFOX1                         |
| 25 | 6,450,000 | 6,600,000 | 87  | 827  | 0.795192749  | RBFOX1                         |
| 25 | 6,525,000 | 6,675,000 | 88  | 695  | 0.253849608  | RBFOX1                         |
| 25 | 6,600,000 | 6,750,000 | 89  | 1288 | -0.958057865 | RBFOX1                         |
| 25 | 6,675,000 | 6,825,000 | 90  | 1501 | -0.216500015 | RBFOX1                         |
| 25 | 6,750,000 | 6,900,000 | 91  | 1188 | 1.116345099  |                                |
| 25 | 6,825,000 | 6,975,000 | 92  | 1073 | 0.531070006  |                                |
| 25 | 6,900,000 | 7,050,000 | 93  | 898  | 0.405218568  |                                |
| 25 | 6,975,000 | 7,125,000 | 94  | 708  | 0.956202476  |                                |
| 25 | 7,050,000 | 7,200,000 | 95  | 652  | -1.006461215 |                                |
| 25 | 7,125,000 | 7,275,000 | 96  | 821  | -0.902746833 |                                |
| 25 | 7,200,000 | 7,350,000 | 97  | 839  | 0.746483582  |                                |
| 25 | 7,275,000 | 7,425,000 | 98  | 913  | -0.277880604 |                                |
| 25 | 7,350,000 | 7,500,000 | 99  | 1054 | -0.372644464 |                                |
| 25 | 7,425,000 | 7,575,000 | 100 | 881  | 0.407858772  | METTTL22,TMEM114               |
| 25 | 7,500,000 | 7,650,000 | 101 | 872  | 0.328765029  | ABAT,METTTL22,TMEM114          |
| 25 | 7,575,000 | 7,725,000 | 102 | 726  | -0.009017944 | ABAT,METTTL22,PMM2,TMEM186     |
| 25 | 7,650,000 | 7,800,000 | 103 | 526  | 0.301592252  | ABAT,CARHSP1,PMM2,TMEM186,USP7 |
| 25 | 7,725,000 | 7,875,000 | 104 | 662  | 0.884210392  | CARHSP1,PMM2,USP7              |
| 25 | 7,800,000 | 7,950,000 | 105 | 784  | 0.452367808  | C25H16ORF72                    |
| 25 | 7,875,000 | 8,025,000 | 106 | 846  | 0.48478037   | C25H16ORF72                    |
| 25 | 7,950,000 | 8,100,000 | 107 | 858  | 0.409027206  | C25H16ORF72                    |
| 25 | 8,025,000 | 8,175,000 | 108 | 900  | -0.537690614 |                                |
| 25 | 8,100,000 | 8,250,000 | 109 | 992  | -1.082900221 |                                |
| 25 | 8,175,000 | 8,325,000 | 110 | 1007 | -1.343627511 |                                |
| 25 | 8,250,000 | 8,400,000 | 111 | 867  | -0.484599688 |                                |
| 25 | 8,325,000 | 8,475,000 | 112 | 714  | 0.097112411  |                                |
| 25 | 8,400,000 | 8,550,000 | 113 | 840  | -0.975132636 |                                |
| 25 | 8,475,000 | 8,625,000 | 114 | 716  | -0.789275339 | GRIN2A                         |
| 25 | 8,550,000 | 8,700,000 | 115 | 612  | -0.183194329 | GRIN2A                         |
| 25 | 8,625,000 | 8,775,000 | 116 | 1163 | 0.068559265  | GRIN2A                         |
| 25 | 8,700,000 | 8,850,000 | 117 | 1730 | 0.433621889  |                                |
| 25 | 8,775,000 | 8,925,000 | 118 | 1854 | 0.668922958  |                                |
| 25 | 8,850,000 | 9,000,000 | 119 | 1522 | 0.428038604  | ENSBTAG00000045680             |
| 25 | 8,925,000 | 9,075,000 | 120 | 1421 | -0.067154846 | ENSBTAG00000045680             |
| 25 | 9,000,000 | 9,150,000 | 121 | 1422 | -0.474159262 |                                |
| 25 | 9,075,000 | 9,225,000 | 122 | 1165 | -0.715105713 |                                |
| 25 | 9,150,000 | 9,300,000 | 123 | 783  | -0.070420456 | ATF7IP2                        |

|    |            |            |     |      |              |                                       |
|----|------------|------------|-----|------|--------------|---------------------------------------|
| 25 | 9,225,000  | 9,375,000  | 124 | 1052 | 0.862759677  | ATF7IP2,EMP2                          |
| 25 | 9,300,000  | 9,450,000  | 125 | 1656 | 0.668156056  | EMP2,TEKT5                            |
| 25 | 9,375,000  | 9,525,000  | 126 | 1450 | 0.426980333  | NUBP1,TEKT5,TVP23A                    |
| 25 | 9,450,000  | 9,600,000  | 127 | 1224 | 0.802989621  | NUBP1,TEKT5,TVP23A                    |
| 25 | 9,525,000  | 9,675,000  | 128 | 1428 | 0.979480472  | CIITA,DEXI                            |
| 25 | 9,600,000  | 9,750,000  | 129 | 1134 | 0.695818667  | CIITA,CLEC16A,DEXI                    |
| 25 | 9,675,000  | 9,825,000  | 130 | 581  | 0.309847692  | CLEC16A,DEXI                          |
| 25 | 9,750,000  | 9,900,000  | 131 | 498  | 0.663792185  | CLEC16A                               |
| 25 | 9,825,000  | 9,975,000  | 132 | 612  | 0.604369198  | CLEC16A                               |
| 25 | 9,900,000  | 10,050,000 | 133 | 700  | 0.388817194  | CLEC16A,PRM1,PRM2,PRM3,SOCS1,TNP2     |
| 25 | 9,975,000  | 10,125,000 | 134 | 858  | 0.60567629   | PRM1,PRM2,PRM3,RMI2,SOCS1,TNP2        |
| 25 | 10,050,000 | 10,200,000 | 135 | 1135 | 0.756235286  | RMI2,ENSBTAG00000013305               |
| 25 | 10,125,000 | 10,275,000 | 136 | 1131 | 0.592543385  | ENSBTAG00000013305                    |
| 25 | 10,200,000 | 10,350,000 | 137 | 898  | 0.296493312  | LITAF,ENSBTAG00000013305              |
| 25 | 10,275,000 | 10,425,000 | 138 | 690  | -0.31803673  | LITAF,SNN                             |
| 25 | 10,350,000 | 10,500,000 | 139 | 929  | 0.276305845  | SNN,TXNDC11,ZC3H7A                    |
| 25 | 10,425,000 | 10,575,000 | 140 | 1033 | 0.582791994  | SNN,TXNDC11,ZC3H7A                    |
| 25 | 10,500,000 | 10,650,000 | 141 | 807  | 0.884422478  | BCAR4,GSPT1,RSL1D1,ZC3H7A             |
| 25 | 10,575,000 | 10,725,000 | 142 | 710  | 1.09060955   | BCAR4,GSPT1,RSL1D1,ENSBTAG00000007295 |
| 25 | 10,650,000 | 10,800,000 | 143 | 845  | 0.740282088  | GSPT1,SNX29,ENSBTAG00000007295        |
| 25 | 10,725,000 | 10,875,000 | 144 | 1070 | 0.261275895  | SNX29                                 |
| 25 | 10,800,000 | 10,950,000 | 145 | 1463 | -0.273670853 | SNX29                                 |
| 25 | 10,875,000 | 11,025,000 | 146 | 1592 | -0.214138631 | SNX29                                 |
| 25 | 10,950,000 | 11,100,000 | 147 | 1305 | 0.439355463  | SNX29                                 |
| 25 | 11,025,000 | 11,175,000 | 148 | 1252 | 0.121848076  | SNX29                                 |
| 25 | 11,100,000 | 11,250,000 | 149 | 1292 | -0.285300492 | SNX29                                 |
| 25 | 11,175,000 | 11,325,000 | 150 | 1336 | -0.497486576 | SNX29                                 |
| 25 | 11,250,000 | 11,400,000 | 151 | 1198 | -0.343152046 | SNX29                                 |
| 25 | 11,325,000 | 11,475,000 | 152 | 1161 | 0.435804715  | ENSBTAG00000046216                    |
| 25 | 11,400,000 | 11,550,000 | 153 | 1335 | 0.297063881  | CPPED1,ENSBTAG00000046216             |
| 25 | 11,475,000 | 11,625,000 | 154 | 1486 | -0.036429743 | CPPED1                                |
| 25 | 11,550,000 | 11,700,000 | 155 | 1225 | -0.700401696 | CPPED1                                |
| 25 | 11,625,000 | 11,775,000 | 156 | 819  | -0.115547445 | SHISA9                                |
| 25 | 11,700,000 | 11,850,000 | 157 | 1016 | -0.276989304 | SHISA9                                |
| 25 | 11,775,000 | 11,925,000 | 158 | 1208 | -0.225310356 |                                       |
| 25 | 11,850,000 | 12,000,000 | 159 | 1307 | 0.43084138   |                                       |
| 25 | 11,925,000 | 12,075,000 | 160 | 1244 | 0.70227852   |                                       |
| 25 | 12,000,000 | 12,150,000 | 161 | 725  | 0.90852981   |                                       |
| 25 | 12,075,000 | 12,225,000 | 162 | 692  | 1.028004824  |                                       |
| 25 | 12,150,000 | 12,300,000 | 163 | 746  | 1.106562145  |                                       |
| 25 | 12,225,000 | 12,375,000 | 164 | 583  | 0.397782412  |                                       |
| 25 | 12,300,000 | 12,450,000 | 165 | 967  | -0.246624841 |                                       |
| 25 | 12,375,000 | 12,525,000 | 166 | 1381 | -0.022395801 |                                       |
| 25 | 12,450,000 | 12,600,000 | 167 | 1174 | 0.313936333  |                                       |
| 25 | 12,525,000 | 12,675,000 | 168 | 882  | 1.133861969  |                                       |
| 25 | 12,600,000 | 12,750,000 | 169 | 875  | 0.52415025   |                                       |
| 25 | 12,675,000 | 12,825,000 | 170 | 653  | 0.023443094  |                                       |
| 25 | 12,750,000 | 12,900,000 | 171 | 501  | 0.608145437  |                                       |
| 25 | 12,825,000 | 12,975,000 | 172 | 639  | 0.835902945  | ERCC4,ENSBTAG00000032643              |
| 25 | 12,900,000 | 13,050,000 | 173 | 710  | 0.805251678  | ERCC4,ENSBTAG00000032643              |
| 25 | 12,975,000 | 13,125,000 | 174 | 567  | 0.575084273  | MKL2,ENSBTAG00000026365               |
| 25 | 13,050,000 | 13,200,000 | 175 | 319  | -1.120499567 | MKL2,ENSBTAG00000026365               |
| 25 | 13,125,000 | 13,275,000 | 176 | 268  | -0.684709876 | MKL2                                  |

|    |            |            |     |      |              |                                      |
|----|------------|------------|-----|------|--------------|--------------------------------------|
| 25 | 13,200,000 | 13,350,000 | 177 | 430  | -0.108797275 | MKL2                                 |
| 25 | 13,275,000 | 13,425,000 | 178 | 731  | 0.002840167  | MKL2                                 |
| 25 | 13,350,000 | 13,500,000 | 179 | 835  | -0.152054192 | PARN                                 |
| 25 | 13,425,000 | 13,575,000 | 180 | 866  | -0.576249291 | PARN                                 |
| 25 | 13,500,000 | 13,650,000 | 181 | 898  | -0.313843295 | BFAR,PARN                            |
| 25 | 13,575,000 | 13,725,000 | 182 | 1013 | 0.19461469   | BFAR,PARN,PLA2G10                    |
| 25 | 13,650,000 | 13,800,000 | 183 | 920  | 0.212892027  | BFAR,PLA2G10,RRN3                    |
| 25 | 13,725,000 | 13,875,000 | 184 | 541  | 0.570954362  | NTAN1,PDXDC1,RRN3                    |
| 25 | 13,800,000 | 13,950,000 | 185 | 595  | 0.737390566  | NTAN1,PDXDC1,RRN3,ENSBTAG00000047520 |
| 25 | 13,875,000 | 14,025,000 | 186 | 956  | 0.476148542  | MGC140681,PDXDC1,ENSBTAG00000047520  |
| 25 | 13,950,000 | 14,100,000 | 187 | 785  | 0.59884413   | MGC140681                            |
| 25 | 14,025,000 | 14,175,000 | 188 | 478  | -0.348938482 | MARF1,MGC140681                      |
| 25 | 14,100,000 | 14,250,000 | 189 | 674  | -0.856017342 | MARF1,MGC140681,MYH11,NDE1           |
| 25 | 14,175,000 | 14,325,000 | 190 | 989  | -0.162315557 | MYH11,NDE1                           |
| 25 | 14,250,000 | 14,400,000 | 191 | 791  | -0.000300658 | FOPNL,MYH11                          |
| 25 | 14,325,000 | 14,475,000 | 192 | 452  | 0.049229028  | ABCC1,FOPNL,MYH11                    |
| 25 | 14,400,000 | 14,550,000 | 193 | 559  | 0.124956434  | ABCC1                                |
| 25 | 14,475,000 | 14,625,000 | 194 | 715  | -0.026748059 | ABCC1,ABCC6                          |
| 25 | 14,550,000 | 14,700,000 | 195 | 851  | 0.197874773  | ABCC1,ABCC6,ENSBTAG00000017759       |
| 25 | 14,625,000 | 14,775,000 | 196 | 784  | 0.664594935  | ABCC6,ENSBTAG00000017759             |
| 25 | 14,700,000 | 14,850,000 | 197 | 616  | 1.060231357  | ENSBTAG00000017759                   |
| 25 | 14,775,000 | 14,925,000 | 198 | 730  | 1.347233719  |                                      |
| 25 | 14,850,000 | 15,000,000 | 199 | 690  | 1.116643748  |                                      |
| 25 | 14,925,000 | 15,075,000 | 200 | 478  | -1.557676661 |                                      |
| 25 | 15,000,000 | 15,150,000 | 201 | 725  | -1.845959715 |                                      |
| 25 | 15,075,000 | 15,225,000 | 202 | 1014 | -0.111988688 |                                      |
| 25 | 15,150,000 | 15,300,000 | 203 | 1034 | 0.384685987  |                                      |
| 25 | 15,225,000 | 15,375,000 | 204 | 1037 | 0.415162235  |                                      |
| 25 | 15,300,000 | 15,450,000 | 205 | 983  | 0.807726551  |                                      |
| 25 | 15,375,000 | 15,525,000 | 206 | 1065 | 0.160119691  |                                      |
| 25 | 15,450,000 | 15,600,000 | 207 | 1216 | 0.108163116  |                                      |
| 25 | 15,525,000 | 15,675,000 | 208 | 1053 | 0.654199294  |                                      |
| 25 | 15,600,000 | 15,750,000 | 209 | 805  | -0.282255666 |                                      |
| 25 | 15,675,000 | 15,825,000 | 210 | 989  | -0.445415845 | XYLT1                                |
| 25 | 15,750,000 | 15,900,000 | 211 | 838  | -0.101617216 | XYLT1                                |
| 25 | 15,825,000 | 15,975,000 | 212 | 510  | 0.196851774  | XYLT1                                |
| 25 | 15,900,000 | 16,050,000 | 213 | 678  | 0.92601251   | XYLT1                                |
| 25 | 15,975,000 | 16,125,000 | 214 | 1036 | 0.787596333  | XYLT1                                |
| 25 | 16,050,000 | 16,200,000 | 215 | 1384 | 0.717122149  |                                      |
| 25 | 16,125,000 | 16,275,000 | 216 | 1584 | 1.324987169  |                                      |
| 25 | 16,200,000 | 16,350,000 | 217 | 1348 | 1.34701414   |                                      |
| 25 | 16,275,000 | 16,425,000 | 218 | 1424 | 1.112255394  |                                      |
| 25 | 16,350,000 | 16,500,000 | 219 | 1496 | 0.545283133  |                                      |
| 25 | 16,425,000 | 16,575,000 | 220 | 937  | 0.083722792  | ARL6IP1,RPS15A,ENSBTAG00000020735    |
| 25 | 16,500,000 | 16,650,000 | 221 | 629  | 0.758196232  | ARL6IP1,RPS15A,ENSBTAG00000020735    |
| 25 | 16,575,000 | 16,725,000 | 222 | 519  | 0.779646235  | ENSBTAG00000020735                   |
| 25 | 16,650,000 | 16,800,000 | 223 | 710  | -0.781839946 | CLEC19A                              |
| 25 | 16,725,000 | 16,875,000 | 224 | 858  | -0.417364477 | CLEC19A,SYT17                        |
| 25 | 16,800,000 | 16,950,000 | 225 | 791  | 0.773053008  | CLEC19A,SYT17                        |
| 25 | 16,875,000 | 17,025,000 | 226 | 946  | 0.90690595   | COQ7,ITPRIPL2,SYT17                  |
| 25 | 16,950,000 | 17,100,000 | 227 | 995  | 0.845967091  | COQ7,ITPRIPL2,TMC7                   |
| 25 | 17,025,000 | 17,175,000 | 228 | 764  | 0.592892835  | COQ7,TMC5,TMC7                       |
| 25 | 17,100,000 | 17,250,000 | 229 | 716  | 0.360743717  | CCP110,GDE1,TMC5                     |

|    |            |            |     |      |              |                                             |
|----|------------|------------|-----|------|--------------|---------------------------------------------|
| 25 | 17,175,000 | 17,325,000 | 230 | 767  | -0.428782619 | C16orf62,CCP110,GDE1,TMC5                   |
| 25 | 17,250,000 | 17,400,000 | 231 | 1089 | -0.281619699 | C16orf62,CCP110                             |
| 25 | 17,325,000 | 17,475,000 | 232 | 1285 | 0.008871627  | C16orf62,IQCK,KNOP1                         |
| 25 | 17,400,000 | 17,550,000 | 233 | 716  | -0.392511246 | C16orf62,IQCK,KNOP1                         |
| 25 | 17,475,000 | 17,625,000 | 234 | 708  | 0.874650624  | GPRC5B,IQCK                                 |
| 25 | 17,550,000 | 17,700,000 | 235 | 904  | 0.737923654  | GPRC5B,IQCK                                 |
| 25 | 17,625,000 | 17,775,000 | 236 | 691  | 0.270089897  | GPR139                                      |
| 25 | 17,700,000 | 17,850,000 | 237 | 726  | 0.163228523  | GPR139                                      |
| 25 | 17,775,000 | 17,925,000 | 238 | 870  | 0.511494913  | GPR139                                      |
| 25 | 17,850,000 | 18,000,000 | 239 | 1331 | 1.206649892  |                                             |
| 25 | 17,925,000 | 18,075,000 | 240 | 1226 | 0.952049195  |                                             |
| 25 | 18,000,000 | 18,150,000 | 241 | 836  | 0.386011527  | GP2,PDILT,UMOD                              |
| 25 | 18,075,000 | 18,225,000 | 242 | 922  | 1.25537425   | ACSM5,GP2,PDILT,UMOD                        |
| 25 | 18,150,000 | 18,300,000 | 243 | 736  | 1.21036614   | ACSM2A,ACSM5,PDILT                          |
| 25 | 18,225,000 | 18,375,000 | 244 | 530  | 0.596862057  | ACSM1,ACSM2A,ACSM5                          |
| 25 | 18,300,000 | 18,450,000 | 245 | 749  | 0.139031448  | ACSM1,ACSM2A                                |
| 25 | 18,375,000 | 18,525,000 | 246 | 1196 | 0.214557266  | ACSM1                                       |
| 25 | 18,450,000 | 18,600,000 | 247 | 1327 | 0.258873133  | ACSM4,THUMPD1                               |
| 25 | 18,525,000 | 18,675,000 | 248 | 1027 | -0.069375051 | ACSM3,ACSM4,ERI2,THUMPD1,ENSBTAG00000006449 |
| 25 | 18,600,000 | 18,750,000 | 249 | 612  | -0.336711897 | ACSM3,DCUN1D3,ERI2,ENSBTAG00000006449       |
| 25 | 18,675,000 | 18,825,000 | 250 | 488  | 0.087508035  | DCUN1D3,LYRM1,ENSBTAG00000006449            |
| 25 | 18,750,000 | 18,900,000 | 251 | 846  | 0.246911489  | DCUN1D3,DNAH3,LYRM1                         |
| 25 | 18,825,000 | 18,975,000 | 252 | 1035 | 0.459985417  | DNAH3,LYRM1                                 |
| 25 | 18,900,000 | 19,050,000 | 253 | 890  | 0.893397612  | DNAH3                                       |
| 25 | 18,975,000 | 19,125,000 | 254 | 1451 | 0.694615568  | DNAH3                                       |
| 25 | 19,050,000 | 19,200,000 | 255 | 1531 | 0.535169183  | DNAH3,TMEM159                               |
| 25 | 19,125,000 | 19,275,000 | 256 | 792  | 0.477879396  | ANKS4B,DNAH3,TMEM159,ZP2                    |
| 25 | 19,200,000 | 19,350,000 | 257 | 919  | 0.857098989  | ANKS4B,CRYM,TMEM159,ZP2,ENSBTAG00000006717  |
| 25 | 19,275,000 | 19,425,000 | 258 | 1351 | 1.010329712  | ANKS4B,CRYM,ENSBTAG00000006717              |
| 25 | 19,350,000 | 19,500,000 | 259 | 1660 | 0.949754612  | ENSBTAG00000006717                          |
| 25 | 19,425,000 | 19,575,000 | 260 | 1729 | 1.027470885  | ENSBTAG00000006717                          |
| 25 | 19,500,000 | 19,650,000 | 261 | 1944 | 1.052394852  | ENSBTAG00000006717,ENSBTAG000000035915      |
| 25 | 19,575,000 | 19,725,000 | 262 | 1610 | 0.970502385  | ENSBTAG00000006717,ENSBTAG000000035915      |
| 25 | 19,650,000 | 19,800,000 | 263 | 1305 | 0.95467775   | ENSBTAG000000035915                         |
| 25 | 19,725,000 | 19,875,000 | 264 | 1156 | 0.99150665   | UQCRC2,ENSBTAG000000035915                  |
| 25 | 19,800,000 | 19,950,000 | 265 | 689  | 0.776428044  | PDZD9,UQCRC2,ENSBTAG000000035915            |
| 25 | 19,875,000 | 20,025,000 | 266 | 898  | 0.752369214  | C16orf52,PDZD9,UQCRC2,VWA3A                 |
| 25 | 19,950,000 | 20,100,000 | 267 | 686  | 0.231057095  | C16orf52,SDR42E2,VWA3A                      |
| 25 | 20,025,000 | 20,175,000 | 268 | 458  | 0.434117237  | EEF2K,SDR42E2,VWA3A                         |
| 25 | 20,100,000 | 20,250,000 | 269 | 630  | 0.661652672  | CDR2,EEF2K,POLR3E,ENSBTAG000000032373       |
| 25 | 20,175,000 | 20,325,000 | 270 | 541  | -0.036053317 | CDR2,METTL9,POLR3E,ENSBTAG000000032373      |
| 25 | 20,250,000 | 20,400,000 | 271 | 466  | -0.592928567 | IGSF6,METTL9,OTOA,ENSBTAG000000032373       |
| 25 | 20,325,000 | 20,475,000 | 272 | 566  | -0.350847206 | IGSF6,METTL9,OTOA                           |
| 25 | 20,400,000 | 20,550,000 | 273 | 885  | -1.623213794 | OTOA                                        |
| 25 | 20,475,000 | 20,625,000 | 274 | 1085 | -1.288679185 | ENSBTAG000000018195                         |
| 25 | 20,550,000 | 20,700,000 | 275 | 921  | 0.506543109  | HS3ST2,ENSBTAG000000018195                  |
| 25 | 20,625,000 | 20,775,000 | 276 | 852  | 0.946803893  | HS3ST2                                      |
| 25 | 20,700,000 | 20,850,000 | 277 | 800  | 0.903962963  | HS3ST2                                      |
| 25 | 20,775,000 | 20,925,000 | 278 | 1124 | 1.120723432  | HS3ST2                                      |
| 25 | 20,850,000 | 21,000,000 | 279 | 1244 | 0.761297553  | USP31                                       |
| 25 | 20,925,000 | 21,075,000 | 280 | 775  | 0.319449948  | USP31                                       |
| 25 | 21,000,000 | 21,150,000 | 281 | 595  | 0.366991736  | SCNN1G,USP31                                |
| 25 | 21,075,000 | 21,225,000 | 282 | 582  | 0.306849991  | SCNN1G                                      |

|    |            |            |     |      |              |                                             |
|----|------------|------------|-----|------|--------------|---------------------------------------------|
| 25 | 21,150,000 | 21,300,000 | 283 | 506  | 0.644875377  | COG7,SCNN1B                                 |
| 25 | 21,225,000 | 21,375,000 | 284 | 822  | 0.557027355  | COG7,SCNN1B                                 |
| 25 | 21,300,000 | 21,450,000 | 285 | 1211 | -0.203287087 | COG7,EARS2,GGA2                             |
| 25 | 21,375,000 | 21,525,000 | 286 | 823  | -0.554168419 | COG7,EARS2,GGA2,NDUFAB1,PALB2,UBFD1         |
| 25 | 21,450,000 | 21,600,000 | 287 | 608  | -0.601265899 | EARS2,ERN2,MGC3248,NDUFAB1,PALB2,PLK1,UBFD1 |
| 25 | 21,525,000 | 21,675,000 | 288 | 864  | -0.4155426   | CHP2,ERN2,MGC3248,PALB2,PLK1                |
| 25 | 21,600,000 | 21,750,000 | 289 | 969  | -0.227586586 | CHP2,ERN2                                   |
| 25 | 21,675,000 | 21,825,000 | 290 | 798  | 0.089006989  | PRKCB                                       |
| 25 | 21,750,000 | 21,900,000 | 291 | 508  | 0.512046065  | PRKCB                                       |
| 25 | 21,825,000 | 21,975,000 | 292 | 522  | 0.198142298  | PRKCB                                       |
| 25 | 21,900,000 | 22,050,000 | 293 | 746  | 0.075930552  | PRKCB                                       |
| 25 | 21,975,000 | 22,125,000 | 294 | 896  | -0.018695652 | PRKCB                                       |
| 25 | 22,050,000 | 22,200,000 | 295 | 738  | 0.189691516  | CACNG3,PRKCB                                |
| 25 | 22,125,000 | 22,275,000 | 296 | 793  | 0.896027429  | CACNG3,PRKCB                                |
| 25 | 22,200,000 | 22,350,000 | 297 | 1001 | 0.994358436  | CACNG3                                      |
| 25 | 22,275,000 | 22,425,000 | 298 | 884  | 0.410854011  | CACNG3                                      |
| 25 | 22,350,000 | 22,500,000 | 299 | 671  | 0.006204448  | RBBP6                                       |
| 25 | 22,425,000 | 22,575,000 | 300 | 551  | 0.379016717  | RBBP6                                       |
| 25 | 22,500,000 | 22,650,000 | 301 | 778  | 0.671317144  |                                             |
| 25 | 22,575,000 | 22,725,000 | 302 | 654  | 0.712471622  | TNRC6A                                      |
| 25 | 22,650,000 | 22,800,000 | 303 | 331  | 0.620381446  | SLC5A11,TNRC6A                              |
| 25 | 22,725,000 | 22,875,000 | 304 | 634  | 0.447954599  | ARHGAP17,SLC5A11,TNRC6A                     |
| 25 | 22,800,000 | 22,950,000 | 305 | 781  | 0.27318685   | ARHGAP17,SLC5A11,ENSBTAG00000046132         |
| 25 | 22,875,000 | 23,025,000 | 306 | 584  | -0.30327208  | ARHGAP17,LCMT1,ENSBTAG00000046132           |
| 25 | 22,950,000 | 23,100,000 | 307 | 1045 | -1.674718282 | AQP8,LCMT1,ZKSCAN2,ENSBTAG00000046132       |
| 25 | 23,025,000 | 23,175,000 | 308 | 1065 | -1.405952436 | AQP8,LCMT1,ZKSCAN2                          |
| 25 | 23,100,000 | 23,250,000 | 309 | 748  | -0.017586103 | ZKSCAN2                                     |
| 25 | 23,175,000 | 23,325,000 | 310 | 930  | 0.021359948  |                                             |
| 25 | 23,250,000 | 23,400,000 | 311 | 663  | 0.02999008   |                                             |
| 25 | 23,325,000 | 23,475,000 | 312 | 561  | 0.340920918  |                                             |
| 25 | 23,400,000 | 23,550,000 | 313 | 551  | 0.267827299  |                                             |
| 25 | 23,475,000 | 23,625,000 | 314 | 704  | -0.105734542 |                                             |
| 25 | 23,550,000 | 23,700,000 | 315 | 1205 | 0.297406504  |                                             |
| 25 | 23,625,000 | 23,775,000 | 316 | 1399 | 0.654553632  |                                             |
| 25 | 23,700,000 | 23,850,000 | 317 | 1333 | 0.893872505  |                                             |
| 25 | 23,775,000 | 23,925,000 | 318 | 1000 | 0.739573965  |                                             |
| 25 | 23,850,000 | 24,000,000 | 319 | 854  | 0.323341442  |                                             |
| 25 | 23,925,000 | 24,075,000 | 320 | 816  | -0.163463529 |                                             |
| 25 | 24,000,000 | 24,150,000 | 321 | 838  | -0.95829793  |                                             |
| 25 | 24,075,000 | 24,225,000 | 322 | 921  | -0.002912012 |                                             |
| 25 | 24,150,000 | 24,300,000 | 323 | 1003 | 0.852671419  |                                             |
| 25 | 24,225,000 | 24,375,000 | 324 | 759  | 0.76698918   |                                             |
| 25 | 24,300,000 | 24,450,000 | 325 | 741  | -1.479688237 |                                             |
| 25 | 24,375,000 | 24,525,000 | 326 | 1299 | -0.397004389 |                                             |
| 25 | 24,450,000 | 24,600,000 | 327 | 1303 | 1.193861657  |                                             |
| 25 | 24,525,000 | 24,675,000 | 328 | 898  | 0.932254293  |                                             |
| 25 | 24,600,000 | 24,750,000 | 329 | 1167 | 0.624107851  |                                             |
| 25 | 24,675,000 | 24,825,000 | 330 | 1374 | 0.71289697   |                                             |
| 25 | 24,750,000 | 24,900,000 | 331 | 976  | 0.195677764  |                                             |
| 25 | 24,825,000 | 24,975,000 | 332 | 1314 | 0.066416878  | C25H16orf82                                 |
| 25 | 24,900,000 | 25,050,000 | 333 | 1233 | 0.045126038  | C25H16orf82                                 |
| 25 | 24,975,000 | 25,125,000 | 334 | 674  | 0.047150543  | KDM8,NSMCE1                                 |
| 25 | 25,050,000 | 25,200,000 | 335 | 647  | -0.214058787 | IL4R,KDM8,NSMCE1                            |



|    |            |            |     |      |              |                                                                                                                         |
|----|------------|------------|-----|------|--------------|-------------------------------------------------------------------------------------------------------------------------|
| 25 | 25,125,000 | 25,275,000 | 336 | 654  | -0.598993633 | IL21R,IL4R                                                                                                              |
| 25 | 25,200,000 | 25,350,000 | 337 | 623  | -0.00344212  | GTF3C1,IL21R                                                                                                            |
| 25 | 25,275,000 | 25,425,000 | 338 | 716  | 0.723158913  | GTF3C1,KIAA0556                                                                                                         |
| 25 | 25,350,000 | 25,500,000 | 339 | 989  | 0.410313463  | GTF3C1,KIAA0556                                                                                                         |
| 25 | 25,425,000 | 25,575,000 | 340 | 1315 | -0.697184009 | KIAA0556                                                                                                                |
| 25 | 25,500,000 | 25,650,000 | 341 | 1263 | -0.053171152 | GSG1L,KIAA0556                                                                                                          |
| 25 | 25,575,000 | 25,725,000 | 342 | 1133 | 1.09839348   | GSG1L,KIAA0556                                                                                                          |
| 25 | 25,650,000 | 25,800,000 | 343 | 904  | 0.945917479  | GSG1L                                                                                                                   |
| 25 | 25,725,000 | 25,875,000 | 344 | 578  | -0.981498298 | GSG1L                                                                                                                   |
| 25 | 25,800,000 | 25,950,000 | 345 | 442  | -1.792278331 | GSG1L,XPO6                                                                                                              |
| 25 | 25,875,000 | 26,025,000 | 346 | 437  | 0.522340635  | XPO6                                                                                                                    |
| 25 | 25,950,000 | 26,100,000 | 347 | 402  | 1.0247185    | SBK1,XPO6                                                                                                               |
| 25 | 26,025,000 | 26,175,000 | 348 | 323  | 0.779209539  | CD19,LAT,NFATC2IP,SBK1,SPNS1                                                                                            |
| 25 | 26,100,000 | 26,250,000 | 349 | 414  | 0.214913059  | ATP2A1,ATXN2L,CD19,LAT,NFATC2IP,RABEP2,SH2B1,SPNS1,TUFM                                                                 |
| 25 | 26,175,000 | 26,325,000 | 350 | 446  | -0.21746922  | APOBR,ATP2A1,ATXN2L,EIF3C,IL27,RABEP2,SH2B1,TUFM,ENSBTAG00000018000                                                     |
| 25 | 26,250,000 | 26,400,000 | 351 | 503  | -0.22332194  | APOBR,CORO1A,EIF3C,IL27,NUPR1,SLX1A,SULT1A1,ENSBTAG00000008632,ENSBTAG00000016883,ENSBTAG00000018000,ENSBTAG00000048253 |
| 25 | 26,325,000 | 26,475,000 | 352 | 459  | 0.142462493  | ALDOA,CORO1A,GDPD3,MAPK3,NUPR1,PPP4C,SLX1A,SULT1A1,IBX6,YPEL3,ENSBTAG00000008632,ENSBTAG00000016883,ENSBTAG00000048253  |
| 25 | 26,400,000 | 26,550,000 | 353 | 267  | 0.671916772  | ALDOA,DOC2A,FAM57B,GDPD3,HIRIP3,INO80E,MAPK3,PPP4C,TAOK2,IBX6,TMEM219,YPEL3                                             |
| 25 | 26,475,000 | 26,625,000 | 354 | 158  | -0.781765259 | ALDOA,ASPHD1,DOC2A,FAM57B,HIRIP3,INO80E,KCTD13,SEZ6L2,TAOK2,TMEM219                                                     |
| 25 | 26,550,000 | 26,700,000 | 355 | 326  | -1.607855666 | ASPHD1,CDIPT,KCTD13,KIF22,MVP,PAGR1,PRRT2,SEZ6L2,TMEM219                                                                |
| 25 | 26,625,000 | 26,775,000 | 356 | 590  | -1.140732478 | C16orf54,CDIPT,KIF22,MVP,PAGR1,PRRT2,QPRT,SEZ6L2,SPN,ZG16                                                               |
| 25 | 26,700,000 | 26,850,000 | 357 | 459  | -0.638503275 | C16orf54,CD2BP2,KIF22,MYLPF,QPRT,SEPT1,SPN,TBC1D10B,ZG16,ZNF48,ZNF771,ENSBTAG00000046855                                |
| 25 | 26,775,000 | 26,925,000 | 358 | 483  | 0.275070543  | CD2BP2,DCTPP1,ITGAL,MYLPF,SEPHS2,SEPT1,TBC1D10B,ZNF48,ZNF771,ENSBTAG00000046855                                         |
| 25 | 26,850,000 | 27,000,000 | 359 | 744  | 0.667272221  | DCTPP1,ITGAL,SEPHS2,ZNF688,ENSBTAG00000043974                                                                           |
| 25 | 26,925,000 | 27,075,000 | 360 | 619  | 1.104117748  | FBRS,ITGAL,PRR14,ZNF688,ZNF689,ENSBTAG00000043974                                                                       |
| 25 | 27,000,000 | 27,150,000 | 361 | 427  | 0.310792226  | C16orf93,FBRS,PHKG2,PRR14,RNF40,SrcAP,ZNF689                                                                            |
| 25 | 27,075,000 | 27,225,000 | 362 | 527  | -0.820719287 | BCL7C,C16orf93,CTF1,PHKG2,RNF40,SrcAP,ZNF629                                                                            |
| 25 | 27,150,000 | 27,300,000 | 363 | 769  | 0.227510748  | BCL7C,CTF1,RNF40,ZNF629,ENSBTAG00000035373                                                                              |
| 25 | 27,225,000 | 27,375,000 | 364 | 702  | 0.448383654  | CTF1,FBXL19,ORAI3,SETD1A,ENSBTAG00000035373                                                                             |
| 25 | 27,300,000 | 27,450,000 | 365 | 506  | 0.019632545  | FBXL19,HSD3B7,ORAI3,SETD1A,STX1B,STX4,ZNF646,ZNF668                                                                     |
| 25 | 27,375,000 | 27,525,000 | 366 | 492  | -0.288413713 | BCKDK,FUS,HSD3B7,KAT8,PRSS36,PRSS53,PRSS8,STX1B,STX4,VKORC1,ZNF646,ZNF668                                               |
| 25 | 27,450,000 | 27,600,000 | 367 | 643  | -1.36775818  | BCKDK,FUS,KAT8,PRSS36,PRSS53,PRSS8,TRIM72,VKORC1,ENSBTAG00000020535                                                     |
| 25 | 27,525,000 | 27,675,000 | 368 | 682  | -1.097400854 | FUS,ITGAM,TRIM72,ENSBTAG00000020535                                                                                     |
| 25 | 27,600,000 | 27,750,000 | 369 | 872  | -1.081121173 | COX6A2,ITGAD,ITGAM                                                                                                      |
| 25 | 27,675,000 | 27,825,000 | 370 | 823  | -1.051634612 | AHSP,ARMC5,C16orf58,COX6A2,ITGAD,SLC5A2,TGFB111,ENSBTAG00000040319                                                      |

|    |            |            |     |      |              |                                                                                        |
|----|------------|------------|-----|------|--------------|----------------------------------------------------------------------------------------|
| 25 | 27,750,000 | 27,900,000 | 371 | 646  | -2.333406112 | AHSP,ARMC5,C16orf58,SEPT14,SLC5A2,TGFB1I1,ZNF713,ENSBTAG00000037462,ENSBTAG00000040319 |
| 25 | 27,825,000 | 27,975,000 | 372 | 680  | -2.795616286 | GBAS,MRPS17,PSPH,SEPT14,ZNF713,ENSBTAG00000037462                                      |
| 25 | 27,900,000 | 28,050,000 | 373 | 689  | -1.531365779 | CCT6A,CHCHD9,GBAS,MRPS17,NUPR1L,PHKG1,PSPH,SUMF2,ENSBTAG00000031582                    |
| 25 | 27,975,000 | 28,125,000 | 374 | 742  | -1.0352093   | CCT6A,CHCHD9,NUPR1L,PHKG1,PSPH,SUMF2,ENSBTAG0000014448,ENSBTAG00000031582              |
| 25 | 28,050,000 | 28,200,000 | 375 | 555  | -0.30972722  | GUSB,ENSBTAG00000014448                                                                |
| 25 | 28,125,000 | 28,275,000 | 376 | 462  | 0.16493872   | CRCP,GUSB,ENSBTAG00000014448,ENSBTAG00000015314                                        |
| 25 | 28,200,000 | 28,350,000 | 377 | 563  | 0.707771378  | CRCP,TPST1,ENSBTAG00000015314                                                          |
| 25 | 28,275,000 | 28,425,000 | 378 | 450  | 0.40169284   | CRCP,TPST1                                                                             |
| 25 | 28,350,000 | 28,500,000 | 379 | 295  | -1.006790137 | KCTD7,TPST1                                                                            |
| 25 | 28,425,000 | 28,575,000 | 380 | 220  | -0.939869338 | KCTD7,RABGEF1,TMEM248,TPST1                                                            |
| 25 | 28,500,000 | 28,650,000 | 381 | 469  | -1.730786932 | RABGEF1,SBDS,TMEM248,TYW1                                                              |
| 25 | 28,575,000 | 28,725,000 | 382 | 621  | -2.130249359 | SBDS,TMEM248,TYW1                                                                      |
| 25 | 28,650,000 | 28,800,000 | 383 | 526  | -2.085974313 | TYW1                                                                                   |
| 25 | 28,725,000 | 28,875,000 | 384 | 429  | -1.615943301 | TYW1                                                                                   |
| 25 | 28,800,000 | 28,950,000 | 385 | 205  | -0.818564397 | CALN1                                                                                  |
| 25 | 28,875,000 | 29,025,000 | 386 | 376  | 0.245634572  | CALN1                                                                                  |
| 25 | 28,950,000 | 29,100,000 | 387 | 506  | 0.221382571  | CALN1                                                                                  |
| 25 | 29,025,000 | 29,175,000 | 388 | 523  | -0.255635271 | CALN1                                                                                  |
| 25 | 29,100,000 | 29,250,000 | 389 | 449  | -0.135166113 | CALN1                                                                                  |
| 25 | 29,175,000 | 29,325,000 | 390 | 340  | 0.769899556  | CALN1                                                                                  |
| 25 | 29,250,000 | 29,400,000 | 391 | 390  | 0.728012754  | CALN1,WBSCR17                                                                          |
| 25 | 29,325,000 | 29,475,000 | 392 | 522  | 0.10369901   | CALN1,WBSCR17                                                                          |
| 25 | 29,400,000 | 29,550,000 | 393 | 671  | 0.183186131  | WBSCR17                                                                                |
| 25 | 29,475,000 | 29,625,000 | 394 | 670  | 0.783762322  | WBSCR17                                                                                |
| 25 | 29,550,000 | 29,700,000 | 395 | 747  | 0.60918276   | WBSCR17                                                                                |
| 25 | 29,625,000 | 29,775,000 | 396 | 942  | 0.057953264  | WBSCR17                                                                                |
| 25 | 29,700,000 | 29,850,000 | 397 | 969  | -0.630039307 | WBSCR17                                                                                |
| 25 | 29,775,000 | 29,925,000 | 398 | 811  | -1.209918317 | WBSCR17                                                                                |
| 25 | 29,850,000 | 30,000,000 | 399 | 759  | -0.213770974 |                                                                                        |
| 25 | 29,925,000 | 30,075,000 | 400 | 897  | -0.15518726  | AUTS2                                                                                  |
| 25 | 30,000,000 | 30,150,000 | 401 | 1013 | -0.93268147  | AUTS2                                                                                  |
| 25 | 30,075,000 | 30,225,000 | 402 | 942  | -0.309319525 | AUTS2                                                                                  |
| 25 | 30,150,000 | 30,300,000 | 403 | 613  | 0.610242347  |                                                                                        |
| 25 | 30,225,000 | 30,375,000 | 404 | 183  | 0.555694924  |                                                                                        |
| 25 | 30,300,000 | 30,450,000 | 405 | 339  | 0.108463791  |                                                                                        |
| 25 | 30,375,000 | 30,525,000 | 406 | 724  | -0.508926716 |                                                                                        |
| 25 | 30,450,000 | 30,600,000 | 407 | 765  | -0.335267421 |                                                                                        |
| 25 | 30,525,000 | 30,675,000 | 408 | 572  | 0.195489716  |                                                                                        |
| 25 | 30,600,000 | 30,750,000 | 409 | 373  | -0.188318404 |                                                                                        |
| 25 | 30,675,000 | 30,825,000 | 410 | 315  | -0.225070293 |                                                                                        |
| 25 | 30,750,000 | 30,900,000 | 411 | 266  | -0.0137455   |                                                                                        |
| 25 | 30,825,000 | 30,975,000 | 412 | 275  | -0.577807529 |                                                                                        |
| 25 | 30,900,000 | 31,050,000 | 413 | 260  | -1.005887737 |                                                                                        |
| 25 | 30,975,000 | 31,125,000 | 414 | 287  | -1.350003057 | ENSBTAG00000047342                                                                     |
| 25 | 31,050,000 | 31,200,000 | 415 | 297  | -1.187883346 | ENSBTAG00000047342                                                                     |
| 25 | 31,125,000 | 31,275,000 | 416 | 380  | -0.299385228 |                                                                                        |
| 25 | 31,200,000 | 31,350,000 | 417 | 460  | -0.347722817 |                                                                                        |
| 25 | 31,275,000 | 31,425,000 | 418 | 483  | -1.35265404  |                                                                                        |

|    |            |            |     |      |              |                                                          |
|----|------------|------------|-----|------|--------------|----------------------------------------------------------|
| 25 | 31,350,000 | 31,500,000 | 419 | 498  | -1.618044569 |                                                          |
| 25 | 31,425,000 | 31,575,000 | 420 | 377  | -1.067062379 |                                                          |
| 25 | 31,500,000 | 31,650,000 | 421 | 498  | -1.452596891 |                                                          |
| 25 | 31,575,000 | 31,725,000 | 422 | 623  | -0.974873878 |                                                          |
| 25 | 31,650,000 | 31,800,000 | 423 | 519  | -0.593623738 |                                                          |
| 25 | 31,725,000 | 31,875,000 | 424 | 481  | -1.009540939 |                                                          |
| 25 | 31,800,000 | 31,950,000 | 425 | 782  | 0.245283495  |                                                          |
| 25 | 31,875,000 | 32,025,000 | 426 | 1101 | 0.673716495  |                                                          |
| 25 | 31,950,000 | 32,100,000 | 427 | 1301 | 0.543978445  |                                                          |
| 25 | 32,025,000 | 32,175,000 | 428 | 1195 | 0.284879039  |                                                          |
| 25 | 32,100,000 | 32,250,000 | 429 | 1270 | 0.000475404  |                                                          |
| 25 | 32,175,000 | 32,325,000 | 430 | 1727 | 0.32954053   |                                                          |
| 25 | 32,250,000 | 32,400,000 | 431 | 1642 | 0.352509658  | ENSBTAG00000047264                                       |
| 25 | 32,325,000 | 32,475,000 | 432 | 746  | -0.007057269 | ENSBTAG00000047264                                       |
| 25 | 32,400,000 | 32,550,000 | 433 | 768  | -0.440128138 |                                                          |
| 25 | 32,475,000 | 32,625,000 | 434 | 1490 | -0.455442633 |                                                          |
| 25 | 32,550,000 | 32,700,000 | 435 | 1123 | -0.014103176 |                                                          |
| 25 | 32,625,000 | 32,775,000 | 436 | 885  | 0.301524736  |                                                          |
| 25 | 32,700,000 | 32,850,000 | 437 | 769  | -0.419128771 |                                                          |
| 25 | 32,775,000 | 32,925,000 | 438 | 787  | -0.333765944 |                                                          |
| 25 | 32,850,000 | 33,000,000 | 439 | 1071 | 0.022147181  |                                                          |
| 25 | 32,925,000 | 33,075,000 | 440 | 1210 | 0.233351406  |                                                          |
| 25 | 33,000,000 | 33,150,000 | 441 | 813  | -0.090517998 |                                                          |
| 25 | 33,075,000 | 33,225,000 | 442 | 523  | -3.019038118 | WBSCR16,ENSBTAG00000014417,ENSBTAG00000026286            |
| 25 | 33,150,000 | 33,300,000 | 443 | 910  | -2.937925939 | GTF2I,NCF1,WBSCR16,ENSBTAG00000014417,ENSBTAG00000026286 |
| 25 | 33,225,000 | 33,375,000 | 444 | 861  | -0.950772547 | GTF2I,NCF1,ENSBTAG00000026286                            |
| 25 | 33,300,000 | 33,450,000 | 445 | 874  | 0.545741824  | GTF2I,GTF2IRD1                                           |
| 25 | 33,375,000 | 33,525,000 | 446 | 1190 | 0.222625658  | GTF2IRD1                                                 |
| 25 | 33,450,000 | 33,600,000 | 447 | 877  | 0.1091376    | CLIP2,GTF2IRD1                                           |
| 25 | 33,525,000 | 33,675,000 | 448 | 674  | 0.180839241  | CLIP2,RFC2                                               |
| 25 | 33,600,000 | 33,750,000 | 449 | 693  | 0.095415541  | CLIP2,LAT2,RFC2,WBSCR1                                   |
| 25 | 33,675,000 | 33,825,000 | 450 | 620  | 0.056762203  | ELN,LAT2,LIMK1,RFC2,WBSCR1                               |
| 25 | 33,750,000 | 33,900,000 | 451 | 797  | 0.550293519  | ELN,LIMK1                                                |
| 25 | 33,825,000 | 33,975,000 | 452 | 668  | 0.7146048    | WBSCR28                                                  |
| 25 | 33,900,000 | 34,050,000 | 453 | 584  | -0.283134259 | ABHD11,CLDN3,CLDN4,WBSCR27,WBSCR28                       |
| 25 | 33,975,000 | 34,125,000 | 454 | 508  | -0.740346026 | ABHD11,CLDN3,CLDN4,DNAJC30,STX1A,VPS37D,WBSCR27,WBSCR27  |
| 25 | 34,050,000 | 34,200,000 | 455 | 349  | 0.280235165  | BAZ1B,BCL7B,DNAJC30,MLXIPL,STX1A,TBL2,VPS37D,WBSCR22     |
| 25 | 34,125,000 | 34,275,000 | 456 | 320  | -0.016653746 | BAZ1B,BCL7B,FZD9,MLXIPL,TBL2                             |
| 25 | 34,200,000 | 34,350,000 | 457 | 298  | -0.24704945  | BAZ1B,FKBP6,FZD9,NSUN5,TRIM50,ENSBTAG00000017939         |
| 25 | 34,275,000 | 34,425,000 | 458 | 379  | 0.381831033  | FKBP6,HIP1,NSUN5,TRIM50,ENSBTAG00000017939               |
| 25 | 34,350,000 | 34,500,000 | 459 | 511  | 0.371466946  | HIP1,ENSBTAG00000017939                                  |
| 25 | 34,425,000 | 34,575,000 | 460 | 570  | -0.193817982 | HIP1                                                     |
| 25 | 34,500,000 | 34,650,000 | 461 | 522  | -0.466444785 | CCL24,HIP1,RHBDD2                                        |
| 25 | 34,575,000 | 34,725,000 | 462 | 579  | 0.165700511  | CCL24,POR,RHBDD2                                         |
| 25 | 34,650,000 | 34,800,000 | 463 | 641  | -0.385142117 | MDH2,POR,SRRM3,STYXL1,TMEM120A                           |
| 25 | 34,725,000 | 34,875,000 | 464 | 633  | -0.615451686 | HSPB1,MDH2,POR,SRRM3,STYXL1,TMEM120A                     |
| 25 | 34,800,000 | 34,950,000 | 465 | 705  | 0.388761914  | HSPB1,SRRM3,SSC4D,YWHAG                                  |
| 25 | 34,875,000 | 35,025,000 | 466 | 767  | 0.554528858  | DTX2,SSC4D,UPK3B,YWHAG,ZP3                               |

|    |            |            |     |      |              |                                                                                                             |
|----|------------|------------|-----|------|--------------|-------------------------------------------------------------------------------------------------------------|
| 25 | 34,950,000 | 35,100,000 | 467 | 855  | -0.10495803  | DKFZP434K1815,DTX2,POLR2J,UPK3B,ZP3,ENSBTAG00000005448,ENSBTAG00000020524                                   |
| 25 | 35,025,000 | 35,175,000 | 468 | 645  | -1.936131478 | ALKBH4,DKFZP434K1815,ORAI2,POLR2J,PRKRIP1,ENSBTAG0000005448,ENSBTAG00000020524                              |
| 25 | 35,100,000 | 35,250,000 | 469 | 542  | -3.35471088  | ALKBH4,CUX1,DKFZP434K1815,ORAI2,PRKRIP1,SH2B2,ENSBTAG00000047266                                            |
| 25 | 35,175,000 | 35,325,000 | 470 | 801  | -1.393908587 | CUX1,SH2B2,ENSBTAG00000047266                                                                               |
| 25 | 35,250,000 | 35,400,000 | 471 | 715  | -1.181332082 | CUX1                                                                                                        |
| 25 | 35,325,000 | 35,475,000 | 472 | 453  | -2.161391553 | CUX1                                                                                                        |
| 25 | 35,400,000 | 35,550,000 | 473 | 284  | -1.659494846 | CUX1                                                                                                        |
| 25 | 35,475,000 | 35,625,000 | 474 | 205  | -0.478582447 | CUX1                                                                                                        |
| 25 | 35,550,000 | 35,700,000 | 475 | 547  | -1.376251558 |                                                                                                             |
| 25 | 35,625,000 | 35,775,000 | 476 | 877  | -1.538594117 | MYL10                                                                                                       |
| 25 | 35,700,000 | 35,850,000 | 477 | 1063 | -1.475613539 | COL26A1,MYL10                                                                                               |
| 25 | 35,775,000 | 35,925,000 | 478 | 1137 | -0.492464489 | COL26A1                                                                                                     |
| 25 | 35,850,000 | 36,000,000 | 479 | 903  | 0.153244961  | COL26A1,IFT22,ENSBTAG00000047808                                                                            |
| 25 | 35,925,000 | 36,075,000 | 480 | 1016 | 0.227338859  | CLDN15,COL26A1,FIS1,IFT22,PLOD3,ZNHIT1,ENSBTAG00000047808                                                   |
| 25 | 36,000,000 | 36,150,000 | 481 | 1223 | 0.173251536  | CLDN15,FIS1,MUC3A,PLOD3,ZNHIT1,ENSBTAG00000020157                                                           |
| 25 | 36,075,000 | 36,225,000 | 482 | 1039 | 0.310673404  | AP1S1,MUC3A,SERPINE1,VGF,ENSBTAG00000020157                                                                 |
| 25 | 36,150,000 | 36,300,000 | 483 | 912  | 0.352610746  | AP1S1,MUC12,SERPINE1,TRIM56,VGF,ENSBTAG00000047125                                                          |
| 25 | 36,225,000 | 36,375,000 | 484 | 945  | 0.047878633  | ACHE,EPHB4,MUC12,SLC12A9,SRRT,TRIM56,TRIP6,UFSP1,ZAN,ENSBTAG00000047125                                     |
| 25 | 36,300,000 | 36,450,000 | 485 | 901  | 0.182598171  | ACHE,EPHB4,EPO,GIGYF1,GNB2,POP7,SLC12A9,SRRT,TRIP6,UFSP1,ZAN                                                |
| 25 | 36,375,000 | 36,525,000 | 486 | 843  | 0.295828176  | ACTL6B,EPO,FBXO24,GIGYF1,GNB2,LRCH4,MOSPD3,PCOLCE,POP7,SAP25,TFR2,ZAN,ENSBTAG00000046753                    |
| 25 | 36,450,000 | 36,600,000 | 487 | 736  | 0.167649417  | ACTL6B,AGFG2,FBXO24,GNB2,LRCH4,MOSPD3,PCOLCE,SAP25,TFR2,ENSBTAG00000046753                                  |
| 25 | 36,525,000 | 36,675,000 | 488 | 609  | 0.370607799  | AGFG2,BCDIN3,C7orf61,NYAP1,PILRA,PPP1R35,TSC22D4,ZCWPW1,ENSBTAG00000015272                                  |
| 25 | 36,600,000 | 36,750,000 | 489 | 1151 | 0.738074557  | BCDIN3,C7orf61,NYAP1,PILRA,PPP1R35,PVRIG,STAG3,TSC22D4,ZCWPW1,ENSBTAG00000015272                            |
| 25 | 36,675,000 | 36,825,000 | 490 | 1240 | 0.68522355   | C7orf43,GAL3ST4,GPC2,LAMTOR4,PILRA,PVRIG,STAG3,ENSBTAG00000011470                                           |
| 25 | 36,750,000 | 36,900,000 | 491 | 841  | 0.691409436  | AP4M1,C7orf43,CNPY4,COPS6,GAL3ST4,GPC2,LAMTOR4,MBLAC1,MCM7,STAG3,TAF6,ENSBTAG00000011470,ENSBTAG00000012668 |
| 25 | 36,825,000 | 36,975,000 | 492 | 987  | -0.51193214  | AP4M1,CNPY4,COPS6,MBLAC1,MCM7,TAF6,ZKSCAN1,ZNF3,ZSCAN21,ENSBTAG00000012668                                  |
| 25 | 36,900,000 | 37,050,000 | 493 | 1014 | -1.101901524 | AZGP1,CYP3A5,GJC3,ZKSCAN1,ZNF3,ZSCAN21                                                                      |
| 25 | 36,975,000 | 37,125,000 | 494 | 1228 | -0.319695981 | AZGP1,CYP3A5,GJC3,OR2AE1                                                                                    |
| 25 | 37,050,000 | 37,200,000 | 495 | 1169 | -0.51901795  | CYP3A5,OR2AE1,ENSBTAG00000047379                                                                            |
| 25 | 37,125,000 | 37,275,000 | 496 | 587  | -0.995807747 | CYP3A5,ENSBTAG00000047379                                                                                   |
| 25 | 37,200,000 | 37,350,000 | 497 | 458  | 0.477348086  | CYP3A5,ZSCAN25,ENSBTAG00000019435                                                                           |
| 25 | 37,275,000 | 37,425,000 | 498 | 465  | 0.413701069  | ZNF655,ZNF789,ZSCAN25,ENSBTAG00000019435,ENSBTAG00000039720                                                 |
| 25 | 37,350,000 | 37,500,000 | 499 | 306  | 0.558297081  | ATP5J2,ZNF394,ZNF655,ZNF789,ENSBTAG00000039720,ENSBTAG00000040568                                           |
| 25 | 37,425,000 | 37,575,000 | 500 | 482  | -0.25033168  | ARPC1A,ARPC1B,ATP5J2,BUD31,CPSF4,PDAP1,ZNF394,ENSBTAG00000020440,ENSBTAG00000040568                         |

|    |            |            |     |      |              |                                                                                             |
|----|------------|------------|-----|------|--------------|---------------------------------------------------------------------------------------------|
| 25 | 37,500,000 | 37,650,000 | 501 | 720  | -0.904958676 | ARPC1A,ARPC1B,BUD31,CPSF4,PDAP1,ENSBTAG00000020440                                          |
| 25 | 37,575,000 | 37,725,000 | 502 | 876  | -0.680642928 | ARPC1A,KPNA7                                                                                |
| 25 | 37,650,000 | 37,800,000 | 503 | 868  | -0.167396533 | KPNA7,SMURF1                                                                                |
| 25 | 37,725,000 | 37,875,000 | 504 | 770  | -0.112750441 | SMURF1,TRRAP                                                                                |
| 25 | 37,800,000 | 37,950,000 | 505 | 873  | -0.970887478 | SMURF1,TMEM130,TRRAP                                                                        |
| 25 | 37,875,000 | 38,025,000 | 506 | 926  | -0.360280397 | TMEM130,TRRAP                                                                               |
| 25 | 37,950,000 | 38,100,000 | 507 | 1260 | 0.969981145  | NPTX2                                                                                       |
| 25 | 38,025,000 | 38,175,000 | 508 | 1433 | 0.422609455  | NPTX2                                                                                       |
| 25 | 38,100,000 | 38,250,000 | 509 | 1085 | -0.317660267 | BAIAP2L1                                                                                    |
| 25 | 38,175,000 | 38,325,000 | 510 | 913  | -0.434161907 | BAIAP2L1,BRI3                                                                               |
| 25 | 38,250,000 | 38,400,000 | 511 | 593  | -1.793361077 | BAIAP2L1,BHLHA15,BRI3,LMTK2                                                                 |
| 25 | 38,325,000 | 38,475,000 | 512 | 407  | 0.518397564  | BHLHA15,LMTK2                                                                               |
| 25 | 38,400,000 | 38,550,000 | 513 | 564  | 0.450646995  | CCZ1,ENSBTAG00000005908,ENSBTAG00000046943                                                  |
| 25 | 38,475,000 | 38,625,000 | 514 | 568  | 0.237924603  | AIMP2,ANKRD61,CCZ1,EIF2AK1,PMS2,ENSBTAG00000005908,ENSBTAG00000046943                       |
| 25 | 38,550,000 | 38,700,000 | 515 | 572  | -0.328601904 | AIMP2,ANKRD61,CYTH3,EIF2AK1,PMS2,USP42,ENSBTAG0000005908                                    |
| 25 | 38,625,000 | 38,775,000 | 516 | 745  | -1.174171783 | CYTH3,USP42,ENSBTAG00000046517                                                              |
| 25 | 38,700,000 | 38,850,000 | 517 | 978  | -0.390301899 | DAGLB,RAC1,ENSBTAG00000046517                                                               |
| 25 | 38,775,000 | 38,925,000 | 518 | 815  | 0.443382602  | DAGLB,GRID2IP,KDELR2,RAC1                                                                   |
| 25 | 38,850,000 | 39,000,000 | 519 | 660  | 0.530859538  | C25H7ORF26,DAGLB,GRID2IP,KDELR2,ZDHHC4                                                      |
| 25 | 38,925,000 | 39,075,000 | 520 | 759  | -1.675235756 | C25H7ORF26,GRID2IP,ZDHHC4,ZNF12,ZNF316,ENSBTAG0000038613,ENSBTAG00000040014                 |
| 25 | 39,000,000 | 39,150,000 | 521 | 795  | -1.633681677 | RBAK,ZNF12,ZNF316,ENSBTAG00000005600,ENSBTAG000038613,ENSBTAG00000038627,ENSBTAG00000040014 |
| 25 | 39,075,000 | 39,225,000 | 522 | 610  | -0.011941682 | RBAK,RNF216,ENSBTAG00000005600,ENSBTAG00000038627,ENSBTAG00000040014,ENSBTAG00000048231     |
| 25 | 39,150,000 | 39,300,000 | 523 | 358  | 0.21019017   | FSCN1,RNF216,ENSBTAG00000048231                                                             |
| 25 | 39,225,000 | 39,375,000 | 524 | 395  | 0.433195641  | ACTB,FBXL18,FSCN1,RNF216,ENSBTAG00000047781                                                 |
| 25 | 39,300,000 | 39,450,000 | 525 | 545  | 0.401396848  | ACTB,FBXL18,FSCN1,TNRC18,ENSBTAG00000047781                                                 |
| 25 | 39,375,000 | 39,525,000 | 526 | 479  | 0.552908471  | FBXL18,SLC29A4,TNRC18                                                                       |
| 25 | 39,450,000 | 39,600,000 | 527 | 611  | 0.794138462  | SLC29A4,TNRC18,WIPI2                                                                        |
| 25 | 39,525,000 | 39,675,000 | 528 | 972  | 0.742788581  | MMD2,SLC29A4,WIPI2                                                                          |
| 25 | 39,600,000 | 39,750,000 | 529 | 903  | 0.390888753  | KIAA0415,MMD2,RADIL                                                                         |
| 25 | 39,675,000 | 39,825,000 | 530 | 757  | -0.213508831 | FOXK1,KIAA0415,RADIL                                                                        |
| 25 | 39,750,000 | 39,900,000 | 531 | 850  | -1.025603798 | FOXK1                                                                                       |
| 25 | 39,825,000 | 39,975,000 | 532 | 883  | -0.3117289   |                                                                                             |
| 25 | 39,900,000 | 40,050,000 | 533 | 909  | -0.536293712 | SDK1                                                                                        |
| 25 | 39,975,000 | 40,125,000 | 534 | 1053 | -1.860655932 | SDK1                                                                                        |
| 25 | 40,050,000 | 40,200,000 | 535 | 920  | -0.526476284 | SDK1                                                                                        |
| 25 | 40,125,000 | 40,275,000 | 536 | 942  | 0.391543546  | SDK1                                                                                        |
| 25 | 40,200,000 | 40,350,000 | 537 | 1147 | 0.12329106   |                                                                                             |
| 25 | 40,275,000 | 40,425,000 | 538 | 1596 | 0.654157927  |                                                                                             |
| 25 | 40,350,000 | 40,500,000 | 539 | 1739 | 0.716032134  |                                                                                             |
| 25 | 40,425,000 | 40,575,000 | 540 | 1277 | 0.387465072  |                                                                                             |
| 25 | 40,500,000 | 40,650,000 | 541 | 1151 | 0.736872852  |                                                                                             |
| 25 | 40,575,000 | 40,725,000 | 542 | 1207 | 0.965543361  |                                                                                             |
| 25 | 40,650,000 | 40,800,000 | 543 | 1202 | 1.068153579  |                                                                                             |
| 25 | 40,725,000 | 40,875,000 | 544 | 1245 | 0.956641045  |                                                                                             |
| 25 | 40,800,000 | 40,950,000 | 545 | 1110 | 0.69327799   |                                                                                             |
| 25 | 40,875,000 | 41,025,000 | 546 | 969  | 0.439890377  | CARD11                                                                                      |

|    |            |            |     |      |              |                                                              |
|----|------------|------------|-----|------|--------------|--------------------------------------------------------------|
| 25 | 40,950,000 | 41,100,000 | 547 | 802  | 0.247960108  | CARD11,GNA12                                                 |
| 25 | 41,025,000 | 41,175,000 | 548 | 827  | 0.148732823  | CARD11,GNA12                                                 |
| 25 | 41,100,000 | 41,250,000 | 549 | 941  | 0.114998408  | AMZ1,BRAT1,GNA12,IQCE                                        |
| 25 | 41,175,000 | 41,325,000 | 550 | 672  | -0.02127313  | AMZ1,BRAT1,IQCE,LFNG,TTYH3                                   |
| 25 | 41,250,000 | 41,400,000 | 551 | 576  | 0.472299388  | CHST12,GRIFIN,IQCE,LFNG,TTYH3                                |
| 25 | 41,325,000 | 41,475,000 | 552 | 679  | 0.389719889  | CHST12,EIF3B,GRIFIN,ENSBTAG00000038978                       |
| 25 | 41,400,000 | 41,550,000 | 553 | 1046 | 0.876608711  | EIF3B,FTSJ2,MAD1L1,NUDT1,SNX8,ENSBTAG00000038978             |
| 25 | 41,475,000 | 41,625,000 | 554 | 1441 | 1.159633317  | FTSJ2,MAD1L1,NUDT1,SNX8                                      |
| 25 | 41,550,000 | 41,700,000 | 555 | 1062 | 0.698069424  | MAD1L1                                                       |
| 25 | 41,625,000 | 41,775,000 | 556 | 530  | -2.197905365 | MAD1L1                                                       |
| 25 | 41,700,000 | 41,850,000 | 557 | 748  | -2.216871314 | ELFN1,MAD1L1                                                 |
| 25 | 41,775,000 | 41,925,000 | 558 | 812  | -0.751177099 | ELFN1,MAD1L1                                                 |
| 25 | 41,850,000 | 42,000,000 | 559 | 624  | 0.313863533  | INTS1,MAFK,PSMG3,TMEM184A                                    |
| 25 | 41,925,000 | 42,075,000 | 560 | 624  | -0.748864909 | INTS1,MAFK,MICALL2,PSMG3,TMEM184A                            |
| 25 | 42,000,000 | 42,150,000 | 561 | 548  | -1.527661659 | INTS1,MICALL2                                                |
| 25 | 42,075,000 | 42,225,000 | 562 | 580  | -1.433253883 | UNCX,ZFAND2A                                                 |
| 25 | 42,150,000 | 42,300,000 | 563 | 484  | -1.377255488 | C25H7ORF50,GPER1,GPR146,UNCX,ZFAND2A                         |
| 25 | 42,225,000 | 42,375,000 | 564 | 349  | 0.240200483  | ADAP1,C25H7ORF50,COX19,CYP2W1,GPER1,GPR146,ZFAND2A           |
| 25 | 42,300,000 | 42,450,000 | 565 | 393  | 0.420185839  | ADAP1,C25H7ORF50,COX19,CYP2W1,GET4,HEATR2,ENSBTAG00000046498 |
| 25 | 42,375,000 | 42,525,000 | 566 | 645  | 0.264962664  | GET4,HEATR2,PRKAR1B,ENSBTAG00000046498                       |
| 25 | 42,450,000 | 42,600,000 | 567 | 594  | 0.366979699  | HEATR2,PDGFA,PRKAR1B                                         |
| 25 | 42,525,000 | 42,675,000 | 568 | 366  | 0.226900813  | PDGFA,PRKAR1B                                                |
| 25 | 42,600,000 | 42,750,000 | 569 | 517  | -0.228199198 | FAM20C                                                       |
| 25 | 42,675,000 | 42,825,000 | 570 | 464  | -1.836156889 | FAM20C,ENSBTAG00000006239                                    |
| 25 | 42,750,000 | 42,900,000 | 571 | 382  | -5.000372581 | ENSBTAG00000006239                                           |
| 25 | 42,825,000 | 42,904,170 | 572 | 233  | -4.443689831 |                                                              |
| 26 | 0          | 150,000    | 1   | 88   | 0.494375145  | ENSBTAG00000038930,ENSBTAG00000040222                        |
| 26 | 75,000     | 225,000    | 2   | 104  | 0.475244055  | ENSBTAG00000040222                                           |
| 26 | 150,000    | 300,000    | 3   | 85   | 0.500309737  |                                                              |
| 26 | 225,000    | 375,000    | 4   | 40   | 0.920491437  | ENSBTAG00000008152                                           |
| 26 | 300,000    | 450,000    | 5   | 36   | 1.248037243  | ENSBTAG00000008152,ENSBTAG00000035282,ENSBTAG0000046109      |
| 26 | 375,000    | 525,000    | 6   | 35   | 1.003405402  | ENSBTAG00000035282,ENSBTAG00000046109                        |
| 26 | 450,000    | 600,000    | 7   | 35   | 0.49779461   |                                                              |
| 26 | 525,000    | 675,000    | 8   | 41   | 0.694945816  | UBE2D1                                                       |
| 26 | 600,000    | 750,000    | 9   | 189  | 1.272376502  | CISD1,UBE2D1                                                 |
| 26 | 675,000    | 825,000    | 10  | 359  | 0.766682952  | CISD1,IPMK,UBE2D1                                            |
| 26 | 750,000    | 900,000    | 11  | 384  | 0.221986763  | CISD1,IPMK                                                   |
| 26 | 825,000    | 975,000    | 12  | 548  | 0.971442132  |                                                              |
| 26 | 900,000    | 1,050,000  | 13  | 919  | 0.629275762  |                                                              |
| 26 | 975,000    | 1,125,000  | 14  | 1034 | 0.345714038  |                                                              |
| 26 | 1,050,000  | 1,200,000  | 15  | 1211 | 0.667880532  |                                                              |
| 26 | 1,125,000  | 1,275,000  | 16  | 1375 | 0.39395132   |                                                              |
| 26 | 1,200,000  | 1,350,000  | 17  | 1371 | -0.036825776 |                                                              |
| 26 | 1,275,000  | 1,425,000  | 18  | 1284 | 0.120170604  |                                                              |
| 26 | 1,350,000  | 1,500,000  | 19  | 772  | 0.155558871  |                                                              |
| 26 | 1,425,000  | 1,575,000  | 20  | 589  | 0.282201133  |                                                              |
| 26 | 1,500,000  | 1,650,000  | 21  | 914  | 0.910750327  |                                                              |
| 26 | 1,575,000  | 1,725,000  | 22  | 1130 | 1.065280539  |                                                              |
| 26 | 1,650,000  | 1,800,000  | 23  | 1085 | 0.834846332  |                                                              |

|    |           |           |    |      |              |                    |
|----|-----------|-----------|----|------|--------------|--------------------|
| 26 | 1,725,000 | 1,875,000 | 24 | 1332 | -0.672268353 |                    |
| 26 | 1,800,000 | 1,950,000 | 25 | 1430 | -0.798268993 |                    |
| 26 | 1,875,000 | 2,025,000 | 26 | 854  | 1.050489898  |                    |
| 26 | 1,950,000 | 2,100,000 | 27 | 657  | 0.871924343  |                    |
| 26 | 2,025,000 | 2,175,000 | 28 | 972  | 0.662188609  |                    |
| 26 | 2,100,000 | 2,250,000 | 29 | 1011 | -0.311367358 |                    |
| 26 | 2,175,000 | 2,325,000 | 30 | 1042 | -0.509104014 |                    |
| 26 | 2,250,000 | 2,400,000 | 31 | 1116 | 0.152870458  |                    |
| 26 | 2,325,000 | 2,475,000 | 32 | 1180 | 0.521715137  |                    |
| 26 | 2,400,000 | 2,550,000 | 33 | 1028 | 0.192963357  |                    |
| 26 | 2,475,000 | 2,625,000 | 34 | 601  | -0.814497216 |                    |
| 26 | 2,550,000 | 2,700,000 | 35 | 765  | 0.225459138  |                    |
| 26 | 2,625,000 | 2,775,000 | 36 | 782  | 0.717672256  |                    |
| 26 | 2,700,000 | 2,850,000 | 37 | 1078 | 1.271566061  |                    |
| 26 | 2,775,000 | 2,925,000 | 38 | 1448 | 1.180172563  | ENSBTAG00000002655 |
| 26 | 2,850,000 | 3,000,000 | 39 | 1064 | 0.875843118  | ENSBTAG00000002655 |
| 26 | 2,925,000 | 3,075,000 | 40 | 544  | -0.171820508 |                    |
| 26 | 3,000,000 | 3,150,000 | 41 | 235  | -0.485808042 |                    |
| 26 | 3,075,000 | 3,225,000 | 42 | 689  | 1.267935564  |                    |
| 26 | 3,150,000 | 3,300,000 | 43 | 1476 | 1.382189315  |                    |
| 26 | 3,225,000 | 3,375,000 | 44 | 1457 | 1.373214838  |                    |
| 26 | 3,300,000 | 3,450,000 | 45 | 878  | 1.139562729  |                    |
| 26 | 3,375,000 | 3,525,000 | 46 | 761  | 0.768450623  |                    |
| 26 | 3,450,000 | 3,600,000 | 47 | 1333 | 0.961816307  |                    |
| 26 | 3,525,000 | 3,675,000 | 48 | 1417 | 0.139147175  |                    |
| 26 | 3,600,000 | 3,750,000 | 49 | 1083 | -2.371387264 |                    |
| 26 | 3,675,000 | 3,825,000 | 50 | 993  | -2.368447965 |                    |
| 26 | 3,750,000 | 3,900,000 | 51 | 1101 | -2.94804445  |                    |
| 26 | 3,825,000 | 3,975,000 | 52 | 1090 | -2.658283798 |                    |
| 26 | 3,900,000 | 4,050,000 | 53 | 1129 | 0.611077313  |                    |
| 26 | 3,975,000 | 4,125,000 | 54 | 1082 | 0.774105686  |                    |
| 26 | 4,050,000 | 4,200,000 | 55 | 697  | -1.310975455 |                    |
| 26 | 4,125,000 | 4,275,000 | 56 | 1038 | -1.367827865 |                    |
| 26 | 4,200,000 | 4,350,000 | 57 | 975  | -0.212904477 |                    |
| 26 | 4,275,000 | 4,425,000 | 58 | 778  | 0.489394512  |                    |
| 26 | 4,350,000 | 4,500,000 | 59 | 976  | 0.563755538  |                    |
| 26 | 4,425,000 | 4,575,000 | 60 | 1176 | -0.70170151  |                    |
| 26 | 4,500,000 | 4,650,000 | 61 | 1125 | -1.041893175 |                    |
| 26 | 4,575,000 | 4,725,000 | 62 | 945  | -0.741675555 |                    |
| 26 | 4,650,000 | 4,800,000 | 63 | 1219 | 0.117092652  |                    |
| 26 | 4,725,000 | 4,875,000 | 64 | 1125 | 0.943449413  |                    |
| 26 | 4,800,000 | 4,950,000 | 65 | 960  | 0.568483461  |                    |
| 26 | 4,875,000 | 5,025,000 | 66 | 1147 | -0.341662931 | PCDH15             |
| 26 | 4,950,000 | 5,100,000 | 67 | 1369 | -0.31947314  | PCDH15             |
| 26 | 5,025,000 | 5,175,000 | 68 | 1687 | 0.437915601  | PCDH15             |
| 26 | 5,100,000 | 5,250,000 | 69 | 1835 | 0.673953381  | PCDH15             |
| 26 | 5,175,000 | 5,325,000 | 70 | 1856 | 0.756379182  | PCDH15             |
| 26 | 5,250,000 | 5,400,000 | 71 | 1110 | 0.297693906  | PCDH15             |
| 26 | 5,325,000 | 5,475,000 | 72 | 665  | -1.162375122 | PCDH15             |
| 26 | 5,400,000 | 5,550,000 | 73 | 1189 | -0.128071422 | PCDH15             |
| 26 | 5,475,000 | 5,625,000 | 74 | 1414 | -0.018778118 | PCDH15             |
| 26 | 5,550,000 | 5,700,000 | 75 | 1696 | -2.015688531 | PCDH15             |
| 26 | 5,625,000 | 5,775,000 | 76 | 1524 | -1.482553575 |                    |

|    |           |           |     |      |              |                          |
|----|-----------|-----------|-----|------|--------------|--------------------------|
| 26 | 5,700,000 | 5,850,000 | 77  | 1164 | 0.898335186  |                          |
| 26 | 5,775,000 | 5,925,000 | 78  | 1070 | 0.646058051  |                          |
| 26 | 5,850,000 | 6,000,000 | 79  | 941  | 0.564361738  |                          |
| 26 | 5,925,000 | 6,075,000 | 80  | 1112 | 1.027918512  |                          |
| 26 | 6,000,000 | 6,150,000 | 81  | 1279 | 1.071846578  |                          |
| 26 | 6,075,000 | 6,225,000 | 82  | 1274 | 0.3523209    |                          |
| 26 | 6,150,000 | 6,300,000 | 83  | 967  | -0.184604224 |                          |
| 26 | 6,225,000 | 6,375,000 | 84  | 783  | -1.217900351 | MBL                      |
| 26 | 6,300,000 | 6,450,000 | 85  | 647  | -1.582002448 | MBL                      |
| 26 | 6,375,000 | 6,525,000 | 86  | 356  | -0.874574899 |                          |
| 26 | 6,450,000 | 6,600,000 | 87  | 310  | 0.300339299  |                          |
| 26 | 6,525,000 | 6,675,000 | 88  | 477  | -0.655050997 |                          |
| 26 | 6,600,000 | 6,750,000 | 89  | 641  | -0.219315463 |                          |
| 26 | 6,675,000 | 6,825,000 | 90  | 604  | 0.487679328  |                          |
| 26 | 6,750,000 | 6,900,000 | 91  | 427  | 0.054786356  | DKK1                     |
| 26 | 6,825,000 | 6,975,000 | 92  | 556  | 0.682201175  | DKK1,PRKG1               |
| 26 | 6,900,000 | 7,050,000 | 93  | 912  | 0.990248227  | PRKG1                    |
| 26 | 6,975,000 | 7,125,000 | 94  | 807  | 0.95685384   | PRKG1                    |
| 26 | 7,050,000 | 7,200,000 | 95  | 745  | 1.135410689  | PRKG1                    |
| 26 | 7,125,000 | 7,275,000 | 96  | 1077 | 0.361234741  | PRKG1                    |
| 26 | 7,200,000 | 7,350,000 | 97  | 1386 | 0.330261234  | PRKG1                    |
| 26 | 7,275,000 | 7,425,000 | 98  | 1279 | 1.120592555  | PRKG1                    |
| 26 | 7,350,000 | 7,500,000 | 99  | 864  | 0.779423396  | CSTF2T,PRKG1             |
| 26 | 7,425,000 | 7,575,000 | 100 | 937  | 0.283637032  | CSTF2T,PRKG1             |
| 26 | 7,500,000 | 7,650,000 | 101 | 1203 | 0.397028828  | PRKG1                    |
| 26 | 7,575,000 | 7,725,000 | 102 | 1340 | 0.604149387  | PRKG1                    |
| 26 | 7,650,000 | 7,800,000 | 103 | 1067 | -0.344368239 | PRKG1                    |
| 26 | 7,725,000 | 7,875,000 | 104 | 699  | -2.072054467 | PRKG1                    |
| 26 | 7,800,000 | 7,950,000 | 105 | 684  | -1.476751147 | PRKG1                    |
| 26 | 7,875,000 | 8,025,000 | 106 | 496  | -0.654563054 | PRKG1                    |
| 26 | 7,950,000 | 8,100,000 | 107 | 591  | -0.039704153 | PRKG1                    |
| 26 | 8,025,000 | 8,175,000 | 108 | 871  | -0.107021126 | PRKG1                    |
| 26 | 8,100,000 | 8,250,000 | 109 | 818  | 0.524822752  | PRKG1                    |
| 26 | 8,175,000 | 8,325,000 | 110 | 571  | 0.531312785  | PRKG1                    |
| 26 | 8,250,000 | 8,400,000 | 111 | 492  | -0.443778255 | PRKG1                    |
| 26 | 8,325,000 | 8,475,000 | 112 | 719  | -1.080782599 | PRKG1                    |
| 26 | 8,400,000 | 8,550,000 | 113 | 860  | -0.782746089 | A1CF                     |
| 26 | 8,475,000 | 8,625,000 | 114 | 707  | -0.480024836 | A1CF                     |
| 26 | 8,550,000 | 8,700,000 | 115 | 724  | -0.544302574 | A1CF,ENSBTAG00000003529  |
| 26 | 8,625,000 | 8,775,000 | 116 | 871  | -0.351555777 | SGMS1,ENSBTAG00000003529 |
| 26 | 8,700,000 | 8,850,000 | 117 | 779  | 0.121521878  | SGMS1                    |
| 26 | 8,775,000 | 8,925,000 | 118 | 580  | 0.072425632  | SGMS1                    |
| 26 | 8,850,000 | 9,000,000 | 119 | 638  | -0.37108605  |                          |
| 26 | 8,925,000 | 9,075,000 | 120 | 610  | 0.246926056  |                          |
| 26 | 9,000,000 | 9,150,000 | 121 | 516  | 0.496682731  |                          |
| 26 | 9,075,000 | 9,225,000 | 122 | 466  | 0.416231145  | MINPP1                   |
| 26 | 9,150,000 | 9,300,000 | 123 | 613  | 0.970617331  | MINPP1                   |
| 26 | 9,225,000 | 9,375,000 | 124 | 735  | 0.28240832   | MINPP1,PAPSS2            |
| 26 | 9,300,000 | 9,450,000 | 125 | 490  | -0.823924869 | ATAD1,PAPSS2             |
| 26 | 9,375,000 | 9,525,000 | 126 | 439  | 0.099712477  | ATAD1,PAPSS2,PTEN        |
| 26 | 9,450,000 | 9,600,000 | 127 | 461  | 0.792768692  | PTEN                     |
| 26 | 9,525,000 | 9,675,000 | 128 | 683  | 0.582467071  | PTEN                     |
| 26 | 9,600,000 | 9,750,000 | 129 | 755  | -0.196528941 |                          |



|    |            |            |     |      |              |                                       |
|----|------------|------------|-----|------|--------------|---------------------------------------|
| 26 | 9,675,000  | 9,825,000  | 130 | 589  | -0.658518579 |                                       |
| 26 | 9,750,000  | 9,900,000  | 131 | 544  | -0.712591664 |                                       |
| 26 | 9,825,000  | 9,975,000  | 132 | 411  | -3.520466521 |                                       |
| 26 | 9,900,000  | 10,050,000 | 133 | 276  | -4.437040593 |                                       |
| 26 | 9,975,000  | 10,125,000 | 134 | 594  | 0.488392438  |                                       |
| 26 | 10,050,000 | 10,200,000 | 135 | 861  | 0.745102434  |                                       |
| 26 | 10,125,000 | 10,275,000 | 136 | 1084 | 0.272439826  | LIPJ                                  |
| 26 | 10,200,000 | 10,350,000 | 137 | 1322 | -0.670572815 | LIPJ                                  |
| 26 | 10,275,000 | 10,425,000 | 138 | 1173 | -1.442723703 |                                       |
| 26 | 10,350,000 | 10,500,000 | 139 | 1068 | -1.397756663 | LIPF,LIPK,LIPN                        |
| 26 | 10,425,000 | 10,575,000 | 140 | 886  | -1.232527517 | ANKRD22,LIPF,LIPK,LIPM,LIPN           |
| 26 | 10,500,000 | 10,650,000 | 141 | 648  | -0.093181149 | ANKRD22,LIPM,STAMBPL1                 |
| 26 | 10,575,000 | 10,725,000 | 142 | 498  | 0.625351269  | ACTA2,FAS,STAMBPL1                    |
| 26 | 10,650,000 | 10,800,000 | 143 | 682  | -0.511858188 | ACTA2,FAS,STAMBPL1                    |
| 26 | 10,725,000 | 10,875,000 | 144 | 647  | -1.617287541 | FAS                                   |
| 26 | 10,800,000 | 10,950,000 | 145 | 453  | -1.313189052 |                                       |
| 26 | 10,875,000 | 11,025,000 | 146 | 837  | -0.228058277 | CH25H,LIPA                            |
| 26 | 10,950,000 | 11,100,000 | 147 | 998  | -0.394363857 | CH25H,IFIT2,IFIT3,LIPA                |
| 26 | 11,025,000 | 11,175,000 | 148 | 654  | -0.065167074 | IFIT1,IFIT2,IFIT3,IFIT5,LIPA,SLC16A12 |
| 26 | 11,100,000 | 11,250,000 | 149 | 414  | 0.078169131  | IFIT1,IFIT5,SLC16A12                  |
| 26 | 11,175,000 | 11,325,000 | 150 | 336  | -0.011764204 | PANK1                                 |
| 26 | 11,250,000 | 11,400,000 | 151 | 325  | 0.448544871  | PANK1,ENSBTAG00000005708              |
| 26 | 11,325,000 | 11,475,000 | 152 | 395  | 0.58752956   | PANK1,ENSBTAG00000005708              |
| 26 | 11,400,000 | 11,550,000 | 153 | 612  | -0.986650528 | ENSBTAG00000005708                    |
| 26 | 11,475,000 | 11,625,000 | 154 | 690  | -0.225225819 |                                       |
| 26 | 11,550,000 | 11,700,000 | 155 | 480  | 0.743466736  |                                       |
| 26 | 11,625,000 | 11,775,000 | 156 | 849  | 0.480531174  |                                       |
| 26 | 11,700,000 | 11,850,000 | 157 | 1219 | 0.825472489  |                                       |
| 26 | 11,775,000 | 11,925,000 | 158 | 1081 | 0.560418172  |                                       |
| 26 | 11,850,000 | 12,000,000 | 159 | 1090 | -0.269834632 |                                       |
| 26 | 11,925,000 | 12,075,000 | 160 | 1011 | -1.31853351  |                                       |
| 26 | 12,000,000 | 12,150,000 | 161 | 733  | -1.657370508 |                                       |
| 26 | 12,075,000 | 12,225,000 | 162 | 692  | -0.398849308 |                                       |
| 26 | 12,150,000 | 12,300,000 | 163 | 673  | -0.308586979 | ENSBTAG00000034597                    |
| 26 | 12,225,000 | 12,375,000 | 164 | 672  | -0.16976877  | ENSBTAG00000034597                    |
| 26 | 12,300,000 | 12,450,000 | 165 | 736  | 0.859997663  | HTR7                                  |
| 26 | 12,375,000 | 12,525,000 | 166 | 635  | 1.362431551  | HTR7                                  |
| 26 | 12,450,000 | 12,600,000 | 167 | 629  | 0.779137655  | ANKRD1,HTR7,RPP30                     |
| 26 | 12,525,000 | 12,675,000 | 168 | 450  | -0.880677408 | ANKRD1,RPP30                          |
| 26 | 12,600,000 | 12,750,000 | 169 | 326  | -0.613169409 |                                       |
| 26 | 12,675,000 | 12,825,000 | 170 | 611  | 0.22689385   |                                       |
| 26 | 12,750,000 | 12,900,000 | 171 | 617  | -0.009621295 | PCGF5                                 |
| 26 | 12,825,000 | 12,975,000 | 172 | 723  | 0.583034858  | PCGF5                                 |
| 26 | 12,900,000 | 13,050,000 | 173 | 697  | 0.956849764  | PCGF5                                 |
| 26 | 12,975,000 | 13,125,000 | 174 | 625  | 1.096138832  | HECTD2                                |
| 26 | 13,050,000 | 13,200,000 | 175 | 662  | 0.934785089  | HECTD2                                |
| 26 | 13,125,000 | 13,275,000 | 176 | 606  | -0.342754302 | HECTD2,PPP1R3C                        |
| 26 | 13,200,000 | 13,350,000 | 177 | 665  | -0.50068787  | PPP1R3C                               |
| 26 | 13,275,000 | 13,425,000 | 178 | 769  | 0.411846002  | TNKS2                                 |
| 26 | 13,350,000 | 13,500,000 | 179 | 1043 | 0.258160013  | FGFBP3,TNKS2                          |
| 26 | 13,425,000 | 13,575,000 | 180 | 758  | -0.143713811 | BTA1F1,FGFBP3,TNKS2                   |
| 26 | 13,500,000 | 13,650,000 | 181 | 576  | 0.052082163  | BTA1F1,CPEB3                          |
| 26 | 13,575,000 | 13,725,000 | 182 | 549  | 0.519396161  | BTA1F1,CPEB3                          |

|    |            |            |     |      |              |                                                       |
|----|------------|------------|-----|------|--------------|-------------------------------------------------------|
| 26 | 13,650,000 | 13,800,000 | 183 | 438  | 0.905867372  | CPEB3                                                 |
| 26 | 13,725,000 | 13,875,000 | 184 | 419  | 0.945108359  | CPEB3,MARCH5                                          |
| 26 | 13,800,000 | 13,950,000 | 185 | 415  | 0.829460679  | IDE,MARCH5                                            |
| 26 | 13,875,000 | 14,025,000 | 186 | 611  | -0.225077775 | IDE                                                   |
| 26 | 13,950,000 | 14,100,000 | 187 | 588  | -0.194880446 | IDE,KIF11                                             |
| 26 | 14,025,000 | 14,175,000 | 188 | 639  | 0.024589768  | HHEX,KIF11                                            |
| 26 | 14,100,000 | 14,250,000 | 189 | 688  | -0.91198694  | HHEX                                                  |
| 26 | 14,175,000 | 14,325,000 | 190 | 438  | -0.708111777 | EXOC6                                                 |
| 26 | 14,250,000 | 14,400,000 | 191 | 274  | 0.777456944  | EXOC6                                                 |
| 26 | 14,325,000 | 14,475,000 | 192 | 222  | 0.817701342  | CYP26A1,CYP26C1,EXOC6                                 |
| 26 | 14,400,000 | 14,550,000 | 193 | 465  | 0.259537498  | CYP26A1,CYP26C1,EXOC6                                 |
| 26 | 14,475,000 | 14,625,000 | 194 | 569  | 0.045299582  |                                                       |
| 26 | 14,550,000 | 14,700,000 | 195 | 495  | 0.216263314  | MYOF                                                  |
| 26 | 14,625,000 | 14,775,000 | 196 | 559  | 0.272697549  | MYOF                                                  |
| 26 | 14,700,000 | 14,850,000 | 197 | 781  | 1.035645395  | MYOF                                                  |
| 26 | 14,775,000 | 14,925,000 | 198 | 918  | 1.207406058  | CEP55,FFAR4,MYOF                                      |
| 26 | 14,850,000 | 15,000,000 | 199 | 911  | 1.014574114  | CEP55,FFAR4,PDE6C,RBP4                                |
| 26 | 14,925,000 | 15,075,000 | 200 | 708  | 0.681147175  | C26H10ORF4,FFAR4,PDE6C,RBP4                           |
| 26 | 15,000,000 | 15,150,000 | 201 | 565  | -0.194622613 | C26H10ORF4,PDE6C,ENSBTAG00000005106,ENSBTAG0000048118 |
| 26 | 15,075,000 | 15,225,000 | 202 | 739  | 0.318904616  | ENSBTAG00000005106,ENSBTAG00000048118                 |
| 26 | 15,150,000 | 15,300,000 | 203 | 763  | 0.892265017  | TMEM20                                                |
| 26 | 15,225,000 | 15,375,000 | 204 | 735  | 0.873069455  | PLCE1,TMEM20                                          |
| 26 | 15,300,000 | 15,450,000 | 205 | 759  | 0.862830828  | PLCE1                                                 |
| 26 | 15,375,000 | 15,525,000 | 206 | 611  | 0.339545464  | PLCE1                                                 |
| 26 | 15,450,000 | 15,600,000 | 207 | 542  | -0.572211378 | PLCE1                                                 |
| 26 | 15,525,000 | 15,675,000 | 208 | 739  | -0.781502257 | PLCE1                                                 |
| 26 | 15,600,000 | 15,750,000 | 209 | 709  | -0.716909804 | NOC3L,PLCE1                                           |
| 26 | 15,675,000 | 15,825,000 | 210 | 374  | 0.078653942  | NOC3L,PLCE1,TBC1D12                                   |
| 26 | 15,750,000 | 15,900,000 | 211 | 189  | 1.072054125  | HELLS,TBC1D12                                         |
| 26 | 15,825,000 | 15,975,000 | 212 | 293  | 0.88398117   | CYP2C18,HELLS,TBC1D12                                 |
| 26 | 15,900,000 | 16,050,000 | 213 | 672  | 1.227478572  | CYP2C18,CYP2C87                                       |
| 26 | 15,975,000 | 16,125,000 | 214 | 833  | 1.37292725   | CYP2C87                                               |
| 26 | 16,050,000 | 16,200,000 | 215 | 765  | 1.281752614  | CYP2C87,ENSBTAG00000020375                            |
| 26 | 16,125,000 | 16,275,000 | 216 | 769  | 1.211824401  | ENSBTAG00000020375,ENSBTAG00000023955                 |
| 26 | 16,200,000 | 16,350,000 | 217 | 610  | 1.06248258   | CYP2C19,ENSBTAG00000023955                            |
| 26 | 16,275,000 | 16,425,000 | 218 | 538  | 0.780135853  | CYP2C19,ENSBTAG00000023955,ENSBTAG00000024700         |
| 26 | 16,350,000 | 16,500,000 | 219 | 609  | 0.632365123  | CYP2C19,ENSBTAG00000024700,ENSBTAG00000047324         |
| 26 | 16,425,000 | 16,575,000 | 220 | 983  | 1.125946593  | ENSBTAG00000024700,ENSBTAG00000047324                 |
| 26 | 16,500,000 | 16,650,000 | 221 | 1390 | 1.285354573  | PDLIM1,ENSBTAG00000047324                             |
| 26 | 16,575,000 | 16,725,000 | 222 | 1225 | 0.905751061  | PDLIM1,SORBS1                                         |
| 26 | 16,650,000 | 16,800,000 | 223 | 654  | 0.205843545  | SORBS1                                                |
| 26 | 16,725,000 | 16,875,000 | 224 | 629  | 0.407480228  | SORBS1                                                |
| 26 | 16,800,000 | 16,950,000 | 225 | 889  | 0.318436083  | SORBS1                                                |
| 26 | 16,875,000 | 17,025,000 | 226 | 1144 | 0.258874779  | ALDH18A1,SORBS1,TCTN3                                 |
| 26 | 16,950,000 | 17,100,000 | 227 | 1130 | 0.143405667  | ALDH18A1,ENTPD1,TCTN3                                 |
| 26 | 17,025,000 | 17,175,000 | 228 | 797  | 0.25775176   | ENTPD1,ENSBTAG00000039132                             |
| 26 | 17,100,000 | 17,250,000 | 229 | 967  | 1.003754     | ENTPD1,ENSBTAG00000039132                             |
| 26 | 17,175,000 | 17,325,000 | 230 | 879  | 0.427239788  | CCNJ,ENSBTAG00000039132                               |
| 26 | 17,250,000 | 17,400,000 | 231 | 467  | -0.328389467 | BLNK,CCNJ,ZNF518A,ENSBTAG00000039132                  |
| 26 | 17,325,000 | 17,475,000 | 232 | 710  | 0.268248635  | BLNK,ZNF518A                                          |
| 26 | 17,400,000 | 17,550,000 | 233 | 935  | 0.170277622  | BLNK,DNTT,OPALIN                                      |
| 26 | 17,475,000 | 17,625,000 | 234 | 740  | 0.274552004  | DNTT,OPALIN,TLL2                                      |

|    |            |            |     |      |              |                                                               |
|----|------------|------------|-----|------|--------------|---------------------------------------------------------------|
| 26 | 17,550,000 | 17,700,000 | 235 | 819  | 0.091818257  | OPALIN,TLL2                                                   |
| 26 | 17,625,000 | 17,775,000 | 236 | 640  | 0.057345919  | TLL2,TM9SF3                                                   |
| 26 | 17,700,000 | 17,850,000 | 237 | 400  | 0.531152697  | PIK3AP1,TM9SF3                                                |
| 26 | 17,775,000 | 17,925,000 | 238 | 414  | 0.381973867  | PIK3AP1                                                       |
| 26 | 17,850,000 | 18,000,000 | 239 | 384  | -0.278400292 |                                                               |
| 26 | 17,925,000 | 18,075,000 | 240 | 416  | -0.112083704 |                                                               |
| 26 | 18,000,000 | 18,150,000 | 241 | 404  | 0.285707265  | C10orf12,LCOR,SLIT1                                           |
| 26 | 18,075,000 | 18,225,000 | 242 | 476  | -0.194117253 | C10orf12,LCOR,SLIT1                                           |
| 26 | 18,150,000 | 18,300,000 | 243 | 636  | -2.431875199 | SLIT1                                                         |
| 26 | 18,225,000 | 18,375,000 | 244 | 516  | -3.484198806 | ENSBTAG00000040427                                            |
| 26 | 18,300,000 | 18,450,000 | 245 | 341  | -1.703790115 | FRAT2,ENSBTAG0000007956,ENSBTAG00000040427                    |
| 26 | 18,375,000 | 18,525,000 | 246 | 326  | -1.103771853 | EXOSC1,FRAT2,PGAM1,RRP12,ENSBTAG0000007956,ENSBTAG00000040427 |
| 26 | 18,450,000 | 18,600,000 | 247 | 302  | -0.031409858 | EXOSC1,MMS19,PGAM1,RRP12,UBTD1,ZDHHC16                        |
| 26 | 18,525,000 | 18,675,000 | 248 | 561  | -0.630671766 | ANKRD2,EXOSC1,HOGA1,MMS19,MORN4,UBTD1,ZDHHC16                 |
| 26 | 18,600,000 | 18,750,000 | 249 | 665  | -0.438023256 | ANKRD2,AVPI1,HOGA1,MARVELD1,MORN4,PI4K2A,UBTD1                |
| 26 | 18,675,000 | 18,825,000 | 250 | 755  | 0.985601741  | AVPI1,MARVELD1,PI4K2A,SFRP5,ZFYVE27                           |
| 26 | 18,750,000 | 18,900,000 | 251 | 816  | 0.789680237  | CRTAC1,GOLGA7B,SFRP5,ZFYVE27                                  |
| 26 | 18,825,000 | 18,975,000 | 252 | 699  | 0.633685882  | CRTAC1,GOLGA7B                                                |
| 26 | 18,900,000 | 19,050,000 | 253 | 707  | 0.984357994  | CRTAC1                                                        |
| 26 | 18,975,000 | 19,125,000 | 254 | 731  | 1.077450435  | CRTAC1                                                        |
| 26 | 19,050,000 | 19,200,000 | 255 | 604  | 0.825286757  | R3HCC1L                                                       |
| 26 | 19,125,000 | 19,275,000 | 256 | 771  | -0.330948145 | LOXL4,R3HCC1L,ENSBTAG00000046848                              |
| 26 | 19,200,000 | 19,350,000 | 257 | 963  | -0.013155225 | LOXL4,PYROXD2,ENSBTAG00000046848                              |
| 26 | 19,275,000 | 19,425,000 | 258 | 713  | 0.659696888  | HPS1,PYROXD2                                                  |
| 26 | 19,350,000 | 19,500,000 | 259 | 661  | 0.586032269  | HPS1,PYROXD2                                                  |
| 26 | 19,425,000 | 19,575,000 | 260 | 604  | 0.848027253  |                                                               |
| 26 | 19,500,000 | 19,650,000 | 261 | 503  | 0.885682353  |                                                               |
| 26 | 19,575,000 | 19,725,000 | 262 | 392  | 0.71756318   |                                                               |
| 26 | 19,650,000 | 19,800,000 | 263 | 247  | 0.867504254  |                                                               |
| 26 | 19,725,000 | 19,875,000 | 264 | 274  | 0.572361844  |                                                               |
| 26 | 19,800,000 | 19,950,000 | 265 | 503  | 0.015194682  |                                                               |
| 26 | 19,875,000 | 20,025,000 | 266 | 661  | 0.25721004   |                                                               |
| 26 | 19,950,000 | 20,100,000 | 267 | 685  | 0.899720401  |                                                               |
| 26 | 20,025,000 | 20,175,000 | 268 | 438  | 1.127761452  |                                                               |
| 26 | 20,100,000 | 20,250,000 | 269 | 221  | 1.020888902  | CNNM1                                                         |
| 26 | 20,175,000 | 20,325,000 | 270 | 244  | 0.970731826  | CNNM1,GOT1                                                    |
| 26 | 20,250,000 | 20,400,000 | 271 | 316  | 0.291976599  | CNNM1,GOT1                                                    |
| 26 | 20,325,000 | 20,475,000 | 272 | 477  | 0.324917843  | NKX2-3,SLC25A28                                               |
| 26 | 20,400,000 | 20,550,000 | 273 | 535  | -0.218005384 | COX15,ENTPD7,NKX2-3,SLC25A28,ENSBTAG00000023629               |
| 26 | 20,475,000 | 20,625,000 | 274 | 946  | 0.049568664  | ABCC2,COX15,CUTC,ENTPD7,SLC25A28,ENSBTAG00000023629           |
| 26 | 20,550,000 | 20,700,000 | 275 | 1259 | 0.9245109    | ABCC2,COX15,CUTC,DNMBP                                        |
| 26 | 20,625,000 | 20,775,000 | 276 | 1167 | 0.69702351   | ABCC2,DNMBP                                                   |
| 26 | 20,700,000 | 20,850,000 | 277 | 1007 | 0.327315947  | CPN1,DNMBP                                                    |
| 26 | 20,775,000 | 20,925,000 | 278 | 688  | 0.286726248  | CPN1,DNMBP,ERLIN1,ENSBTAG00000023939                          |
| 26 | 20,850,000 | 21,000,000 | 279 | 678  | 0.466928098  | CHUK,CPN1,ERLIN1,ENSBTAG00000023939                           |
| 26 | 20,925,000 | 21,075,000 | 280 | 782  | 0.589321866  | BLOC1S2,CHUK,CWF19L1,ERLIN1,PKD2L1                            |
| 26 | 21,000,000 | 21,150,000 | 281 | 516  | 0.204273019  | BLOC1S2,CHUK,CWF19L1,PKD2L1,SCD                               |
| 26 | 21,075,000 | 21,225,000 | 282 | 365  | -1.181354965 | PKD2L1,SCD                                                    |

|    |            |            |     |      |              |                                                                            |
|----|------------|------------|-----|------|--------------|----------------------------------------------------------------------------|
| 26 | 21,150,000 | 21,300,000 | 283 | 483  | -0.389448803 | HIF1AN,NDUFB8,SEC31B,WNT8B                                                 |
| 26 | 21,225,000 | 21,375,000 | 284 | 705  | -0.816465997 | HIF1AN,NDUFB8,SEC31B,WNT8B                                                 |
| 26 | 21,300,000 | 21,450,000 | 285 | 601  | -1.152070359 | HIF1AN                                                                     |
| 26 | 21,375,000 | 21,525,000 | 286 | 345  | 0.053648464  | PAX2                                                                       |
| 26 | 21,450,000 | 21,600,000 | 287 | 378  | 0.254212918  | PAX2                                                                       |
| 26 | 21,525,000 | 21,675,000 | 288 | 311  | 0.306190715  | C26H10ORF6,PAX2                                                            |
| 26 | 21,600,000 | 21,750,000 | 289 | 237  | -0.693154345 | C26H10ORF2,C26H10ORF6,LZTS2,MRPL43,PDZD7,SEMA4G,SFXN3,ENSBTAG00000039834   |
| 26 | 21,675,000 | 21,825,000 | 290 | 288  | -1.061346686 | C26H10ORF2,KAZALD1,LZTS2,MRPL43,PDZD7,SEMA4G,SFXN3,TLX1,ENSBTAG00000039834 |
| 26 | 21,750,000 | 21,900,000 | 291 | 333  | -0.858897039 | KAZALD1,LBX1,TLX1                                                          |
| 26 | 21,825,000 | 21,975,000 | 292 | 349  | -0.122885018 | LBX1,TLX1                                                                  |
| 26 | 21,900,000 | 22,050,000 | 293 | 457  | -0.224020869 | BTRC                                                                       |
| 26 | 21,975,000 | 22,125,000 | 294 | 357  | -0.684588121 | BTRC                                                                       |
| 26 | 22,050,000 | 22,200,000 | 295 | 156  | -0.017677803 | BTRC,POLL                                                                  |
| 26 | 22,125,000 | 22,275,000 | 296 | 176  | -0.818266107 | BTRC,DPCD,FBXW4,POLL                                                       |
| 26 | 22,200,000 | 22,350,000 | 297 | 228  | -0.390618961 | DPCD,FBXW4,POLL                                                            |
| 26 | 22,275,000 | 22,425,000 | 298 | 283  | -1.421807732 | FBXW4,FGF8,KCNIP2,MGEA5,NPM3                                               |
| 26 | 22,350,000 | 22,500,000 | 299 | 349  | -1.460424328 | C10orf76,FGF8,KCNIP2,MGEA5,NPM3                                            |
| 26 | 22,425,000 | 22,575,000 | 300 | 389  | -1.552084817 | C10orf76,KCNIP2                                                            |
| 26 | 22,500,000 | 22,650,000 | 301 | 352  | -2.186492138 | C10orf76,HPS6                                                              |
| 26 | 22,575,000 | 22,725,000 | 302 | 262  | -0.876915027 | C10orf76,HPS6,LDB1,NOLC1,PPRC1                                             |
| 26 | 22,650,000 | 22,800,000 | 303 | 169  | 0.76136236   | ELOVL3,GBF1,LDB1,NOLC1,PITX3,PPRC1                                         |
| 26 | 22,725,000 | 22,875,000 | 304 | 124  | 0.49284753   | ELOVL3,GBF1,PITX3                                                          |
| 26 | 22,800,000 | 22,950,000 | 305 | 141  | -0.142262249 | CUEDC2,FBXL15,GBF1,NFKB2,PSD,TMEM180                                       |
| 26 | 22,875,000 | 23,025,000 | 306 | 214  | -0.205032437 | ACTR1A,CUEDC2,FBXL15,GBF1,NFKB2,PSD,TMEM180                                |
| 26 | 22,950,000 | 23,100,000 | 307 | 538  | 0.691169855  | ACTR1A,TMEM180                                                             |
| 26 | 23,025,000 | 23,175,000 | 308 | 1012 | 0.997101789  |                                                                            |
| 26 | 23,100,000 | 23,250,000 | 309 | 1036 | 0.974166759  |                                                                            |
| 26 | 23,175,000 | 23,325,000 | 310 | 1012 | 0.300977939  |                                                                            |
| 26 | 23,250,000 | 23,400,000 | 311 | 1133 | -0.17509415  |                                                                            |
| 26 | 23,325,000 | 23,475,000 | 312 | 1092 | 0.345679979  | SUFU                                                                       |
| 26 | 23,400,000 | 23,550,000 | 313 | 698  | 0.533461167  | SUFU,TRIM8                                                                 |
| 26 | 23,475,000 | 23,625,000 | 314 | 382  | 0.165028403  | ARL3,SFXN2,SUFU,TRIM8                                                      |
| 26 | 23,550,000 | 23,700,000 | 315 | 568  | 0.303891981  | ARL3,CYP17A1,SFXN2,WBP1L                                                   |
| 26 | 23,625,000 | 23,775,000 | 316 | 467  | 0.330591943  | ARL3,AS3MT,CYP17A1,WBP1L,ENSBTAG00000021246                                |
| 26 | 23,700,000 | 23,850,000 | 317 | 456  | 0.248358933  | ARL3,AS3MT,CNNM2,CYP17A1,ENSBTAG00000021246                                |
| 26 | 23,775,000 | 23,925,000 | 318 | 1038 | -1.351686348 | CNNM2                                                                      |
| 26 | 23,850,000 | 24,000,000 | 319 | 998  | -1.483544948 | CNNM2,NT5C2                                                                |
| 26 | 23,925,000 | 24,075,000 | 320 | 455  | 0.623632654  | CNNM2,NT5C2                                                                |
| 26 | 24,000,000 | 24,150,000 | 321 | 383  | 0.654056595  | INA,NT5C2                                                                  |
| 26 | 24,075,000 | 24,225,000 | 322 | 481  | 0.759486432  | INA,NT5C2,TAF5,ENSBTAG00000009879,ENSBTAG00000038993                       |
| 26 | 24,150,000 | 24,300,000 | 323 | 619  | 0.92717047   | CALHM1,CALHM2,PDCD11,TAF5,USMG5,ENSBTAG00000009879,ENSBTAG00000038993      |
| 26 | 24,225,000 | 24,375,000 | 324 | 756  | 0.996650748  | CALHM1,CALHM2,CALHM3,NEURL1,PDCD11,TAF5,USMG5                              |
| 26 | 24,300,000 | 24,450,000 | 325 | 734  | 0.087936423  | CALHM3,NEURL1,SH3PXD2A                                                     |
| 26 | 24,375,000 | 24,525,000 | 326 | 692  | -0.375863687 | NEURL1,SH3PXD2A                                                            |
| 26 | 24,450,000 | 24,600,000 | 327 | 711  | 0.462537104  | SH3PXD2A                                                                   |
| 26 | 24,525,000 | 24,675,000 | 328 | 623  | 0.345900707  | ASMTL                                                                      |
| 26 | 24,600,000 | 24,750,000 | 329 | 561  | 0.177364179  | ASMTL,OBFC1                                                                |
| 26 | 24,675,000 | 24,825,000 | 330 | 528  | -0.066665328 | ASMTL,OBFC1,SLK                                                            |

|    |            |            |     |      |              |                                                                        |
|----|------------|------------|-----|------|--------------|------------------------------------------------------------------------|
| 26 | 24,750,000 | 24,900,000 | 331 | 455  | -0.031942611 | COL17A1,SLK                                                            |
| 26 | 24,825,000 | 24,975,000 | 332 | 429  | 0.366116762  | CFAP43,COL17A1,SFR1,SLK                                                |
| 26 | 24,900,000 | 25,050,000 | 333 | 507  | -0.151738293 | CFAP43,SFR1                                                            |
| 26 | 24,975,000 | 25,125,000 | 334 | 813  | -0.057396503 | CFAP43,GSTO2,ENSBTAG00000003989,ENSBTAG00000038540                     |
| 26 | 25,050,000 | 25,200,000 | 335 | 1209 | -0.465166751 | CFAP43,CFAP58,GSTO2,ITPRIP,ENSBTAG00000003989,ENSBTAG00000038540       |
| 26 | 25,125,000 | 25,275,000 | 336 | 1025 | -0.508721757 | CFAP58,ITPRIP                                                          |
| 26 | 25,200,000 | 25,350,000 | 337 | 559  | 0.084718591  | CFAP58                                                                 |
| 26 | 25,275,000 | 25,425,000 | 338 | 576  | 0.526615504  | CFAP58                                                                 |
| 26 | 25,350,000 | 25,500,000 | 339 | 783  | 0.528413907  |                                                                        |
| 26 | 25,425,000 | 25,575,000 | 340 | 748  | -0.975679908 |                                                                        |
| 26 | 25,500,000 | 25,650,000 | 341 | 828  | -0.230173709 |                                                                        |
| 26 | 25,575,000 | 25,725,000 | 342 | 960  | 0.509610634  | ENSBTAG00000010522                                                     |
| 26 | 25,650,000 | 25,800,000 | 343 | 766  | 0.136739606  | ENSBTAG00000010522,ENSBTAG00000046727                                  |
| 26 | 25,725,000 | 25,875,000 | 344 | 643  | -0.365588029 | ECHS1,FUOM,MTG1,PAOX,SPRN,ENSBTAG00000010522,ENSBTAG00000046727        |
| 26 | 25,800,000 | 25,950,000 | 345 | 739  | 0.42855574   | CALY,ECHS1,FUOM,MTG1,PAOX,PRAP1,SPRN,TUBGCP2,ZNF511,ENSBTAG00000046499 |
| 26 | 25,875,000 | 26,025,000 | 346 | 867  | 0.756519463  | ADAM8,CALY,FUOM,PRAP1,TUBGCP2,UTF1,ZNF511,ENSBTAG00000046499           |
| 26 | 25,950,000 | 26,100,000 | 347 | 833  | 0.747624667  | ADAM8,TUBGCP2,UTF1                                                     |
| 26 | 26,025,000 | 26,175,000 | 348 | 656  | 0.831698446  |                                                                        |
| 26 | 26,100,000 | 26,250,000 | 349 | 542  | 0.286152995  |                                                                        |
| 26 | 26,175,000 | 26,325,000 | 350 | 624  | -0.472736167 | SORCS3                                                                 |
| 26 | 26,250,000 | 26,400,000 | 351 | 880  | 0.064619332  | SORCS3                                                                 |
| 26 | 26,325,000 | 26,475,000 | 352 | 1000 | -0.137811378 | SORCS3                                                                 |
| 26 | 26,400,000 | 26,550,000 | 353 | 647  | -0.774563292 |                                                                        |
| 26 | 26,475,000 | 26,625,000 | 354 | 404  | -0.663814872 |                                                                        |
| 26 | 26,550,000 | 26,700,000 | 355 | 586  | -1.778625679 |                                                                        |
| 26 | 26,625,000 | 26,775,000 | 356 | 838  | -1.281836421 |                                                                        |
| 26 | 26,700,000 | 26,850,000 | 357 | 644  | -0.230311705 |                                                                        |
| 26 | 26,775,000 | 26,925,000 | 358 | 320  | -0.33397343  |                                                                        |
| 26 | 26,850,000 | 27,000,000 | 359 | 445  | -1.798594614 |                                                                        |
| 26 | 26,925,000 | 27,075,000 | 360 | 664  | -1.340170113 |                                                                        |
| 26 | 27,000,000 | 27,150,000 | 361 | 878  | -0.696143287 |                                                                        |
| 26 | 27,075,000 | 27,225,000 | 362 | 920  | -1.891990906 |                                                                        |
| 26 | 27,150,000 | 27,300,000 | 363 | 742  | -3.042608333 |                                                                        |
| 26 | 27,225,000 | 27,375,000 | 364 | 877  | -1.957419757 |                                                                        |
| 26 | 27,300,000 | 27,450,000 | 365 | 707  | -0.472244289 |                                                                        |
| 26 | 27,375,000 | 27,525,000 | 366 | 533  | 0.199400372  |                                                                        |
| 26 | 27,450,000 | 27,600,000 | 367 | 738  | -1.117819226 |                                                                        |
| 26 | 27,525,000 | 27,675,000 | 368 | 581  | -1.816657079 |                                                                        |
| 26 | 27,600,000 | 27,750,000 | 369 | 703  | -0.007829137 |                                                                        |
| 26 | 27,675,000 | 27,825,000 | 370 | 1010 | 0.790589338  | SORCS1                                                                 |
| 26 | 27,750,000 | 27,900,000 | 371 | 1141 | 0.835660053  | SORCS1                                                                 |
| 26 | 27,825,000 | 27,975,000 | 372 | 1158 | 0.500957501  | SORCS1                                                                 |
| 26 | 27,900,000 | 28,050,000 | 373 | 1019 | 0.139825077  | SORCS1                                                                 |
| 26 | 27,975,000 | 28,125,000 | 374 | 608  | -0.137988758 | SORCS1                                                                 |
| 26 | 28,050,000 | 28,200,000 | 375 | 675  | -0.721298613 | SORCS1                                                                 |
| 26 | 28,125,000 | 28,275,000 | 376 | 872  | -0.360094861 | SORCS1                                                                 |
| 26 | 28,200,000 | 28,350,000 | 377 | 859  | -0.393569736 | SORCS1                                                                 |
| 26 | 28,275,000 | 28,425,000 | 378 | 790  | -0.258151227 | SORCS1                                                                 |

|    |            |            |     |      |              |                                      |
|----|------------|------------|-----|------|--------------|--------------------------------------|
| 26 | 28,350,000 | 28,500,000 | 379 | 508  | 0.293647871  | SORCS1                               |
| 26 | 28,425,000 | 28,575,000 | 380 | 761  | 0.846186214  |                                      |
| 26 | 28,500,000 | 28,650,000 | 381 | 960  | 0.680818328  |                                      |
| 26 | 28,575,000 | 28,725,000 | 382 | 746  | -0.110439661 |                                      |
| 26 | 28,650,000 | 28,800,000 | 383 | 960  | 0.121319309  |                                      |
| 26 | 28,725,000 | 28,875,000 | 384 | 1069 | -0.025621155 |                                      |
| 26 | 28,800,000 | 28,950,000 | 385 | 551  | -0.705525252 |                                      |
| 26 | 28,875,000 | 29,025,000 | 386 | 184  | 0.176417249  |                                      |
| 26 | 28,950,000 | 29,100,000 | 387 | 169  | -0.567828493 |                                      |
| 26 | 29,025,000 | 29,175,000 | 388 | 542  | -0.105087627 |                                      |
| 26 | 29,100,000 | 29,250,000 | 389 | 820  | 0.488567535  |                                      |
| 26 | 29,175,000 | 29,325,000 | 390 | 1047 | 0.632837726  |                                      |
| 26 | 29,250,000 | 29,400,000 | 391 | 1099 | 0.745387256  |                                      |
| 26 | 29,325,000 | 29,475,000 | 392 | 1055 | 1.062990898  |                                      |
| 26 | 29,400,000 | 29,550,000 | 393 | 1095 | 0.928138379  |                                      |
| 26 | 29,475,000 | 29,625,000 | 394 | 887  | 0.482286378  |                                      |
| 26 | 29,550,000 | 29,700,000 | 395 | 858  | 0.441428421  |                                      |
| 26 | 29,625,000 | 29,775,000 | 396 | 798  | 0.792353743  |                                      |
| 26 | 29,700,000 | 29,850,000 | 397 | 751  | 0.842007814  |                                      |
| 26 | 29,775,000 | 29,925,000 | 398 | 721  | 0.301110623  |                                      |
| 26 | 29,850,000 | 30,000,000 | 399 | 929  | -0.455681186 |                                      |
| 26 | 29,925,000 | 30,075,000 | 400 | 1241 | 0.302063276  |                                      |
| 26 | 30,000,000 | 30,150,000 | 401 | 1191 | 0.781569186  |                                      |
| 26 | 30,075,000 | 30,225,000 | 402 | 946  | 0.754237917  |                                      |
| 26 | 30,150,000 | 30,300,000 | 403 | 912  | -0.259107468 |                                      |
| 26 | 30,225,000 | 30,375,000 | 404 | 972  | -0.958861294 |                                      |
| 26 | 30,300,000 | 30,450,000 | 405 | 945  | 0.384125429  |                                      |
| 26 | 30,375,000 | 30,525,000 | 406 | 978  | 0.91994999   |                                      |
| 26 | 30,450,000 | 30,600,000 | 407 | 796  | 0.477938886  |                                      |
| 26 | 30,525,000 | 30,675,000 | 408 | 715  | -0.11299184  |                                      |
| 26 | 30,600,000 | 30,750,000 | 409 | 903  | 0.359512464  | XPNPEP1                              |
| 26 | 30,675,000 | 30,825,000 | 410 | 771  | 0.601837337  | XPNPEP1                              |
| 26 | 30,750,000 | 30,900,000 | 411 | 569  | -0.149797172 | ADD3                                 |
| 26 | 30,825,000 | 30,975,000 | 412 | 634  | -1.013445691 | ADD3                                 |
| 26 | 30,900,000 | 31,050,000 | 413 | 555  | -0.985996422 | ADD3,MXI1                            |
| 26 | 30,975,000 | 31,125,000 | 414 | 351  | -0.858089818 | MXI1                                 |
| 26 | 31,050,000 | 31,200,000 | 415 | 346  | -1.2955324   | MXI1,SMNDC1                          |
| 26 | 31,125,000 | 31,275,000 | 416 | 535  | -1.136686129 | MXI1,SMNDC1                          |
| 26 | 31,200,000 | 31,350,000 | 417 | 603  | -0.969165548 | DUSP5                                |
| 26 | 31,275,000 | 31,425,000 | 418 | 469  | -1.377118161 | DUSP5,SMC3                           |
| 26 | 31,350,000 | 31,500,000 | 419 | 356  | -1.05524183  | RBM20,SMC3                           |
| 26 | 31,425,000 | 31,575,000 | 420 | 577  | -0.034175168 | RBM20,SMC3                           |
| 26 | 31,500,000 | 31,650,000 | 421 | 819  | -0.283612712 | RBM20,ENSBTAG00000047270             |
| 26 | 31,575,000 | 31,725,000 | 422 | 643  | -0.288055351 | PDCD4,RBM20,ENSBTAG00000047270       |
| 26 | 31,650,000 | 31,800,000 | 423 | 356  | -0.112740104 | PDCD4,RBM20,SHOC2,ENSBTAG00000046362 |
| 26 | 31,725,000 | 31,875,000 | 424 | 274  | 0.229496392  | PDCD4,SHOC2,ENSBTAG00000046362       |
| 26 | 31,800,000 | 31,950,000 | 425 | 333  | -0.008636936 | SHOC2                                |
| 26 | 31,875,000 | 32,025,000 | 426 | 389  | 0.363921691  |                                      |
| 26 | 31,950,000 | 32,100,000 | 427 | 695  | 0.059089494  |                                      |
| 26 | 32,025,000 | 32,175,000 | 428 | 1182 | 0.437670808  |                                      |
| 26 | 32,100,000 | 32,250,000 | 429 | 888  | 0.680749713  |                                      |
| 26 | 32,175,000 | 32,325,000 | 430 | 487  | -0.690477646 |                                      |
| 26 | 32,250,000 | 32,400,000 | 431 | 702  | -1.261139956 |                                      |

|    |            |            |     |      |              |                           |
|----|------------|------------|-----|------|--------------|---------------------------|
| 26 | 32,325,000 | 32,475,000 | 432 | 864  | -1.139958362 |                           |
| 26 | 32,400,000 | 32,550,000 | 433 | 775  | -1.008948304 |                           |
| 26 | 32,475,000 | 32,625,000 | 434 | 798  | -0.050995273 |                           |
| 26 | 32,550,000 | 32,700,000 | 435 | 767  | 0.464495776  |                           |
| 26 | 32,625,000 | 32,775,000 | 436 | 785  | 0.38974289   |                           |
| 26 | 32,700,000 | 32,850,000 | 437 | 880  | 0.132290103  |                           |
| 26 | 32,775,000 | 32,925,000 | 438 | 923  | -0.346841996 |                           |
| 26 | 32,850,000 | 33,000,000 | 439 | 834  | -0.134714607 | GPAM                      |
| 26 | 32,925,000 | 33,075,000 | 440 | 616  | 0.605466708  | GPAM                      |
| 26 | 33,000,000 | 33,150,000 | 441 | 672  | -0.108769549 | GPAM,TECTB                |
| 26 | 33,075,000 | 33,225,000 | 442 | 764  | 0.390015619  | ACSL5,TECTB               |
| 26 | 33,150,000 | 33,300,000 | 443 | 824  | 0.944461203  | ACSL5,VTI1A,ZDHHC6        |
| 26 | 33,225,000 | 33,375,000 | 444 | 722  | 0.561242479  | ACSL5,VTI1A,ZDHHC6        |
| 26 | 33,300,000 | 33,450,000 | 445 | 690  | 0.055435619  | VTI1A                     |
| 26 | 33,375,000 | 33,525,000 | 446 | 702  | -2.558384666 |                           |
| 26 | 33,450,000 | 33,600,000 | 447 | 500  | -4.227499243 |                           |
| 26 | 33,525,000 | 33,675,000 | 448 | 495  | -0.584816108 |                           |
| 26 | 33,600,000 | 33,750,000 | 449 | 897  | 0.338583858  |                           |
| 26 | 33,675,000 | 33,825,000 | 450 | 920  | 0.176747586  | TCFL2                     |
| 26 | 33,750,000 | 33,900,000 | 451 | 673  | 0.491428045  | TCFL2                     |
| 26 | 33,825,000 | 33,975,000 | 452 | 770  | -0.094697234 | TCFL2                     |
| 26 | 33,900,000 | 34,050,000 | 453 | 816  | -0.619761664 | TCFL2                     |
| 26 | 33,975,000 | 34,125,000 | 454 | 753  | -2.037944456 |                           |
| 26 | 34,050,000 | 34,200,000 | 455 | 596  | -2.656260117 |                           |
| 26 | 34,125,000 | 34,275,000 | 456 | 564  | -0.84548704  |                           |
| 26 | 34,200,000 | 34,350,000 | 457 | 887  | 0.375724912  | HABP2,NRAP                |
| 26 | 34,275,000 | 34,425,000 | 458 | 978  | 0.699493739  | HABP2,NRAP                |
| 26 | 34,350,000 | 34,500,000 | 459 | 753  | 0.514662484  | CASP7,NRAP                |
| 26 | 34,425,000 | 34,575,000 | 460 | 460  | 0.625303832  | CASP7,DCLRE1A,PLEKHS1     |
| 26 | 34,500,000 | 34,650,000 | 461 | 306  | 0.702004635  | DCLRE1A,NHLRC2,PLEKHS1    |
| 26 | 34,575,000 | 34,725,000 | 462 | 514  | 0.340166696  | DCLRE1A,NHLRC2            |
| 26 | 34,650,000 | 34,800,000 | 463 | 525  | -0.056990341 |                           |
| 26 | 34,725,000 | 34,875,000 | 464 | 365  | 0.227738871  | ADRB1                     |
| 26 | 34,800,000 | 34,950,000 | 465 | 289  | 0.064787397  | ADRB1,CCDC186,TDRD1       |
| 26 | 34,875,000 | 35,025,000 | 466 | 484  | -1.507786753 | CCDC186,TDRD1,VWA2        |
| 26 | 34,950,000 | 35,100,000 | 467 | 675  | -0.841577085 | AFAP1L2,TDRD1,VWA2        |
| 26 | 35,025,000 | 35,175,000 | 468 | 529  | 0.180882287  | AFAP1L2,VWA2              |
| 26 | 35,100,000 | 35,250,000 | 469 | 497  | -0.422348953 | ABLIM1,AFAP1L2            |
| 26 | 35,175,000 | 35,325,000 | 470 | 708  | -0.625402691 | ABLIM1                    |
| 26 | 35,250,000 | 35,400,000 | 471 | 938  | -0.266843131 | ABLIM1                    |
| 26 | 35,325,000 | 35,475,000 | 472 | 943  | 0.384447609  | ABLIM1,ENSBTAG00000013820 |
| 26 | 35,400,000 | 35,550,000 | 473 | 814  | 0.749301215  | ENSBTAG00000013820        |
| 26 | 35,475,000 | 35,625,000 | 474 | 836  | -0.120020188 | FAM160B1                  |
| 26 | 35,550,000 | 35,700,000 | 475 | 934  | -0.592081481 | FAM160B1,TRUB1            |
| 26 | 35,625,000 | 35,775,000 | 476 | 1011 | -0.212002346 | TRUB1                     |
| 26 | 35,700,000 | 35,850,000 | 477 | 946  | -0.026204566 | TRUB1                     |
| 26 | 35,775,000 | 35,925,000 | 478 | 674  | 0.275999493  | ATRNL1                    |
| 26 | 35,850,000 | 36,000,000 | 479 | 493  | 0.592513769  | ATRNL1                    |
| 26 | 35,925,000 | 36,075,000 | 480 | 825  | 0.977555791  | ATRNL1                    |
| 26 | 36,000,000 | 36,150,000 | 481 | 876  | 0.876888695  | ATRNL1                    |
| 26 | 36,075,000 | 36,225,000 | 482 | 524  | -1.320904152 | ATRNL1                    |
| 26 | 36,150,000 | 36,300,000 | 483 | 490  | -2.023851503 | ATRNL1                    |
| 26 | 36,225,000 | 36,375,000 | 484 | 631  | -1.434759396 |                           |

|    |            |            |     |      |              |                                  |
|----|------------|------------|-----|------|--------------|----------------------------------|
| 26 | 36,300,000 | 36,450,000 | 485 | 682  | -1.619552905 |                                  |
| 26 | 36,375,000 | 36,525,000 | 486 | 634  | -2.859788116 |                                  |
| 26 | 36,450,000 | 36,600,000 | 487 | 553  | -1.808439647 |                                  |
| 26 | 36,525,000 | 36,675,000 | 488 | 693  | 0.348887848  |                                  |
| 26 | 36,600,000 | 36,750,000 | 489 | 1029 | -0.452064895 |                                  |
| 26 | 36,675,000 | 36,825,000 | 490 | 1048 | -0.407298674 | GFRA1                            |
| 26 | 36,750,000 | 36,900,000 | 491 | 1079 | 0.848612758  | GFRA1                            |
| 26 | 36,825,000 | 36,975,000 | 492 | 945  | 0.857095815  | GFRA1                            |
| 26 | 36,900,000 | 37,050,000 | 493 | 707  | 0.012643938  | GFRA1                            |
| 26 | 36,975,000 | 37,125,000 | 494 | 618  | 0.139928759  | CCDC172,GFRA1                    |
| 26 | 37,050,000 | 37,200,000 | 495 | 562  | -0.945171365 | CCDC172,PNLIPRP3                 |
| 26 | 37,125,000 | 37,275,000 | 496 | 566  | -0.842335095 | CCDC172,PNLIPRP3                 |
| 26 | 37,200,000 | 37,350,000 | 497 | 582  | -0.373704784 | PNLIP,PNLIPRP2,PNLIPRP3          |
| 26 | 37,275,000 | 37,425,000 | 498 | 659  | 0.438038052  | C10orf82,HSPA12A,PNLIP,PNLIPRP2  |
| 26 | 37,350,000 | 37,500,000 | 499 | 617  | 0.885272877  | C10orf82,HSPA12A,PNLIPRP2        |
| 26 | 37,425,000 | 37,575,000 | 500 | 413  | 0.862012665  | ENO4,HSPA12A                     |
| 26 | 37,500,000 | 37,650,000 | 501 | 359  | 0.761397155  | ENO4,KIAA1598                    |
| 26 | 37,575,000 | 37,725,000 | 502 | 478  | 0.35327336   | ENO4,KIAA1598                    |
| 26 | 37,650,000 | 37,800,000 | 503 | 455  | -0.40650534  | KIAA1598,VAX1                    |
| 26 | 37,725,000 | 37,875,000 | 504 | 688  | 0.304470223  | KCNK18,VAX1                      |
| 26 | 37,800,000 | 37,950,000 | 505 | 1194 | 0.364889881  | KCNK18,PDZD8,SLC18A2,VAX1        |
| 26 | 37,875,000 | 38,025,000 | 506 | 910  | -0.434897154 | PDZD8,SLC18A2                    |
| 26 | 37,950,000 | 38,100,000 | 507 | 690  | -1.672784593 | PDZD8                            |
| 26 | 38,025,000 | 38,175,000 | 508 | 790  | -1.797109172 | EMX2                             |
| 26 | 38,100,000 | 38,250,000 | 509 | 563  | -2.140381756 | EMX2                             |
| 26 | 38,175,000 | 38,325,000 | 510 | 486  | -0.457323733 |                                  |
| 26 | 38,250,000 | 38,400,000 | 511 | 680  | 0.310514377  |                                  |
| 26 | 38,325,000 | 38,475,000 | 512 | 745  | 0.322953448  |                                  |
| 26 | 38,400,000 | 38,550,000 | 513 | 433  | 0.532836282  |                                  |
| 26 | 38,475,000 | 38,625,000 | 514 | 208  | 0.323441285  | RAB11FIP2                        |
| 26 | 38,550,000 | 38,700,000 | 515 | 212  | -1.622769845 | RAB11FIP2                        |
| 26 | 38,625,000 | 38,775,000 | 516 | 438  | -2.004640867 | RAB11FIP2                        |
| 26 | 38,700,000 | 38,850,000 | 517 | 614  | -0.810404915 |                                  |
| 26 | 38,775,000 | 38,925,000 | 518 | 640  | 0.754879109  | FAM204A                          |
| 26 | 38,850,000 | 39,000,000 | 519 | 622  | -0.05403162  | FAM204A                          |
| 26 | 38,925,000 | 39,075,000 | 520 | 647  | -0.638119423 | FAM204A                          |
| 26 | 39,000,000 | 39,150,000 | 521 | 653  | -0.704810158 |                                  |
| 26 | 39,075,000 | 39,225,000 | 522 | 511  | -0.980689143 | PRLHR                            |
| 26 | 39,150,000 | 39,300,000 | 523 | 343  | -0.490930594 | CACUL1,PRLHR                     |
| 26 | 39,225,000 | 39,375,000 | 524 | 375  | -1.667281072 | CACUL1                           |
| 26 | 39,300,000 | 39,450,000 | 525 | 546  | -0.303213878 | CACUL1                           |
| 26 | 39,375,000 | 39,525,000 | 526 | 625  | 0.593498691  |                                  |
| 26 | 39,450,000 | 39,600,000 | 527 | 501  | 0.204024865  | EIF3A                            |
| 26 | 39,525,000 | 39,675,000 | 528 | 394  | -0.51211376  | EIF3A,FAM45A,PRDX3,SFXN4         |
| 26 | 39,600,000 | 39,750,000 | 529 | 385  | -0.393751211 | EIF3A,FAM45A,GRK5,PRDX3,SFXN4    |
| 26 | 39,675,000 | 39,825,000 | 530 | 524  | -0.045366151 | GRK5,PRDX3                       |
| 26 | 39,750,000 | 39,900,000 | 531 | 541  | -0.44274486  | GRK5                             |
| 26 | 39,825,000 | 39,975,000 | 532 | 350  | -1.821273737 | GRK5                             |
| 26 | 39,900,000 | 40,050,000 | 533 | 432  | -2.289136695 | GRK5,RGS10,TIAL1                 |
| 26 | 39,975,000 | 40,125,000 | 534 | 578  | -0.307309253 | BAG3,RGS10,TIAL1                 |
| 26 | 40,050,000 | 40,200,000 | 535 | 446  | 0.619016496  | BAG3,TIAL1                       |
| 26 | 40,125,000 | 40,275,000 | 536 | 258  | 0.367938728  | BAG3                             |
| 26 | 40,200,000 | 40,350,000 | 537 | 314  | 0.293452209  | MCMBP,SEC23IP,ENSBTAG00000021801 |



|    |            |            |     |      |              |                                                                          |
|----|------------|------------|-----|------|--------------|--------------------------------------------------------------------------|
| 26 | 40,275,000 | 40,425,000 | 538 | 597  | 0.221151006  | MCMBP,SEC23IP,ENSBTAG00000021801                                         |
| 26 | 40,350,000 | 40,500,000 | 539 | 670  | -1.483208279 | SEC23IP                                                                  |
| 26 | 40,425,000 | 40,575,000 | 540 | 825  | -0.124213812 |                                                                          |
| 26 | 40,500,000 | 40,650,000 | 541 | 1084 | 0.943826438  |                                                                          |
| 26 | 40,575,000 | 40,725,000 | 542 | 1505 | -0.013368248 |                                                                          |
| 26 | 40,650,000 | 40,800,000 | 543 | 1271 | -0.417706343 |                                                                          |
| 26 | 40,725,000 | 40,875,000 | 544 | 538  | 0.442556501  |                                                                          |
| 26 | 40,800,000 | 40,950,000 | 545 | 522  | 0.216152261  | PPAPDC1A                                                                 |
| 26 | 40,875,000 | 41,025,000 | 546 | 500  | -0.421865961 | PPAPDC1A                                                                 |
| 26 | 40,950,000 | 41,100,000 | 547 | 570  | -0.164195755 | PPAPDC1A                                                                 |
| 26 | 41,025,000 | 41,175,000 | 548 | 706  | 0.014665781  | PPAPDC1A                                                                 |
| 26 | 41,100,000 | 41,250,000 | 549 | 713  | -0.483162403 | BRWD2                                                                    |
| 26 | 41,175,000 | 41,325,000 | 550 | 586  | -0.683698663 | BRWD2                                                                    |
| 26 | 41,250,000 | 41,400,000 | 551 | 404  | -0.639982994 | BRWD2                                                                    |
| 26 | 41,325,000 | 41,475,000 | 552 | 404  | -0.701979712 |                                                                          |
| 26 | 41,400,000 | 41,550,000 | 553 | 401  | -2.327057559 |                                                                          |
| 26 | 41,475,000 | 41,625,000 | 554 | 333  | -1.232904651 |                                                                          |
| 26 | 41,550,000 | 41,700,000 | 555 | 533  | 1.050467498  |                                                                          |
| 26 | 41,625,000 | 41,775,000 | 556 | 911  | 0.569415564  |                                                                          |
| 26 | 41,700,000 | 41,850,000 | 557 | 907  | 0.398649225  | FGFR2                                                                    |
| 26 | 41,775,000 | 41,925,000 | 558 | 491  | 0.445572437  | FGFR2                                                                    |
| 26 | 41,850,000 | 42,000,000 | 559 | 234  | 0.533577579  | FGFR2                                                                    |
| 26 | 41,925,000 | 42,075,000 | 560 | 219  | 0.555391307  | ATE1,FGFR2                                                               |
| 26 | 42,000,000 | 42,150,000 | 561 | 245  | -1.644331695 | ATE1                                                                     |
| 26 | 42,075,000 | 42,225,000 | 562 | 369  | -3.590802059 | ATE1,NSMCE4A,ENSBTAG00000047642                                          |
| 26 | 42,150,000 | 42,300,000 | 563 | 374  | -2.471496317 | ATE1,NSMCE4A,ENSBTAG00000047642                                          |
| 26 | 42,225,000 | 42,375,000 | 564 | 386  | 0.18071789   | NSMCE4A,TACC2                                                            |
| 26 | 42,300,000 | 42,450,000 | 565 | 756  | 0.617926733  | TACC2                                                                    |
| 26 | 42,375,000 | 42,525,000 | 566 | 705  | 0.532837776  | BTBD16,TACC2                                                             |
| 26 | 42,450,000 | 42,600,000 | 567 | 568  | -0.469453798 | BTBD16,PLEKHA1,TACC2                                                     |
| 26 | 42,525,000 | 42,675,000 | 568 | 779  | -0.149658841 | BTBD16,HTRA1,PLEKHA1                                                     |
| 26 | 42,600,000 | 42,750,000 | 569 | 1291 | 0.766716759  | HTRA1,PLEKHA1                                                            |
| 26 | 42,675,000 | 42,825,000 | 570 | 1411 | 0.690307816  | DMBT1,HTRA1,ENSBTAG00000038684                                           |
| 26 | 42,750,000 | 42,900,000 | 571 | 1366 | 0.040492018  | C26H10orf120,DMBT1,SPADH1,SPADH2,ENSBTAG00000038684                      |
| 26 | 42,825,000 | 42,975,000 | 572 | 1885 | 0.317290913  | C26H10orf120,SPADH1,SPADH2,ENSBTAG00000038684,ENSBTAG00000039755         |
| 26 | 42,900,000 | 43,050,000 | 573 | 1872 | 0.358340356  | ENSBTAG00000023845,ENSBTAG00000039755                                    |
| 26 | 42,975,000 | 43,125,000 | 574 | 1194 | -0.459924745 | IKZF5,PSTK,ENSBTAG00000023845,ENSBTAG00000023846,ENSBTAG00000039755      |
| 26 | 43,050,000 | 43,200,000 | 575 | 797  | -0.274287148 | ACADSB,IKZF5,PSTK,ENSBTAG00000023845,ENSBTAG000023846,ENSBTAG00000048256 |
| 26 | 43,125,000 | 43,275,000 | 576 | 790  | 0.796189215  | ACADSB,HMX2,HMX3,IKZF5,ENSBTAG00000048256                                |
| 26 | 43,200,000 | 43,350,000 | 577 | 794  | 1.185437228  | BUB3,HMX2,HMX3                                                           |
| 26 | 43,275,000 | 43,425,000 | 578 | 1006 | 0.338789492  | BUB3                                                                     |
| 26 | 43,350,000 | 43,500,000 | 579 | 920  | -0.891378496 |                                                                          |
| 26 | 43,425,000 | 43,575,000 | 580 | 487  | -0.655188106 |                                                                          |
| 26 | 43,500,000 | 43,650,000 | 581 | 376  | 0.96607704   |                                                                          |
| 26 | 43,575,000 | 43,725,000 | 582 | 648  | 1.159258444  |                                                                          |
| 26 | 43,650,000 | 43,800,000 | 583 | 812  | -0.240616288 | GPR26                                                                    |
| 26 | 43,725,000 | 43,875,000 | 584 | 856  | -2.021582336 | CPXM2,GPR26                                                              |
| 26 | 43,800,000 | 43,950,000 | 585 | 840  | -0.123399492 | CPXM2                                                                    |
| 26 | 43,875,000 | 44,025,000 | 586 | 554  | 0.5144374    | CPXM2                                                                    |

|    |            |            |     |      |              |                              |
|----|------------|------------|-----|------|--------------|------------------------------|
| 26 | 43,950,000 | 44,100,000 | 587 | 592  | 0.004989807  | CHST15,CPXM2                 |
| 26 | 44,025,000 | 44,175,000 | 588 | 775  | -0.204571992 | CHST15                       |
| 26 | 44,100,000 | 44,250,000 | 589 | 1049 | 0.694638636  |                              |
| 26 | 44,175,000 | 44,325,000 | 590 | 1486 | 0.909701727  |                              |
| 26 | 44,250,000 | 44,400,000 | 591 | 1300 | 0.138653758  | OAT                          |
| 26 | 44,325,000 | 44,475,000 | 592 | 1196 | -0.490321703 | LHPP,NKX1-2,OAT              |
| 26 | 44,400,000 | 44,550,000 | 593 | 1400 | 0.14873597   | LHPP,NKX1-2                  |
| 26 | 44,475,000 | 44,625,000 | 594 | 1142 | 0.350002912  | FAM53B,LHPP                  |
| 26 | 44,550,000 | 44,700,000 | 595 | 675  | 0.534656868  | FAM53B,LHPP                  |
| 26 | 44,625,000 | 44,775,000 | 596 | 438  | 0.247461599  | FAM175B,FAM53B               |
| 26 | 44,700,000 | 44,850,000 | 597 | 303  | 0.09169495   | FAM175B,ZRANB1               |
| 26 | 44,775,000 | 44,925,000 | 598 | 272  | -0.242849001 | CTBP2,ZRANB1                 |
| 26 | 44,850,000 | 45,000,000 | 599 | 446  | -0.261419927 | CTBP2,ZRANB1                 |
| 26 | 44,925,000 | 45,075,000 | 600 | 555  | 0.359506856  | CTBP2                        |
| 26 | 45,000,000 | 45,150,000 | 601 | 489  | 0.818744135  |                              |
| 26 | 45,075,000 | 45,225,000 | 602 | 403  | 0.839939232  |                              |
| 26 | 45,150,000 | 45,300,000 | 603 | 382  | 0.27845169   |                              |
| 26 | 45,225,000 | 45,375,000 | 604 | 544  | 0.131791686  |                              |
| 26 | 45,300,000 | 45,450,000 | 605 | 607  | 0.311376424  |                              |
| 26 | 45,375,000 | 45,525,000 | 606 | 489  | 0.446093277  |                              |
| 26 | 45,450,000 | 45,600,000 | 607 | 618  | 0.702830394  | EDRF1,TEX36                  |
| 26 | 45,525,000 | 45,675,000 | 608 | 994  | 0.423577082  | BCCIP,EDRF1,TEX36,UROS       |
| 26 | 45,600,000 | 45,750,000 | 609 | 1613 | 0.829243956  | BCCIP,DHX32,EDRF1,FANK1,UROS |
| 26 | 45,675,000 | 45,825,000 | 610 | 1400 | 1.101674688  | BCCIP,DHX32,FANK1            |
| 26 | 45,750,000 | 45,900,000 | 611 | 958  | 0.702308949  | ADAM12,FANK1                 |
| 26 | 45,825,000 | 45,975,000 | 612 | 806  | 0.482187038  | ADAM12,FANK1                 |
| 26 | 45,900,000 | 46,050,000 | 613 | 892  | 1.01416817   | ADAM12                       |
| 26 | 45,975,000 | 46,125,000 | 614 | 959  | 0.718999626  | ADAM12                       |
| 26 | 46,050,000 | 46,200,000 | 615 | 606  | -1.731690636 | ADAM12                       |
| 26 | 46,125,000 | 46,275,000 | 616 | 575  | -2.247425607 | ADAM12,C10orf90              |
| 26 | 46,200,000 | 46,350,000 | 617 | 738  | -0.167849093 | ADAM12,C10orf90              |
| 26 | 46,275,000 | 46,425,000 | 618 | 1048 | 0.542036395  | C10orf90                     |
| 26 | 46,350,000 | 46,500,000 | 619 | 897  | -0.158067351 | C10orf90                     |
| 26 | 46,425,000 | 46,575,000 | 620 | 1043 | -1.965277445 |                              |
| 26 | 46,500,000 | 46,650,000 | 621 | 1206 | -1.891601692 |                              |
| 26 | 46,575,000 | 46,725,000 | 622 | 898  | -2.024916588 |                              |
| 26 | 46,650,000 | 46,800,000 | 623 | 715  | -1.361378804 | DOCK1                        |
| 26 | 46,725,000 | 46,875,000 | 624 | 854  | 0.382374716  | DOCK1                        |
| 26 | 46,800,000 | 46,950,000 | 625 | 1040 | -0.897382283 | DOCK1                        |
| 26 | 46,875,000 | 47,025,000 | 626 | 810  | -1.138742296 | DOCK1,FAM196A                |
| 26 | 46,950,000 | 47,100,000 | 627 | 801  | 0.820088019  | DOCK1,FAM196A                |
| 26 | 47,025,000 | 47,175,000 | 628 | 946  | 0.152509597  | DOCK1                        |
| 26 | 47,100,000 | 47,250,000 | 629 | 976  | -0.770849087 | DOCK1                        |
| 26 | 47,175,000 | 47,325,000 | 630 | 907  | -0.41154188  | DOCK1                        |
| 26 | 47,250,000 | 47,400,000 | 631 | 978  | -0.452366007 | DOCK1                        |
| 26 | 47,325,000 | 47,475,000 | 632 | 954  | -0.514682218 |                              |
| 26 | 47,400,000 | 47,550,000 | 633 | 759  | 0.05956422   | FOXI2                        |
| 26 | 47,475,000 | 47,625,000 | 634 | 977  | 0.293173602  | FOXI2                        |
| 26 | 47,550,000 | 47,700,000 | 635 | 1412 | 0.641755054  | CLRN3                        |
| 26 | 47,625,000 | 47,775,000 | 636 | 1335 | 0.889889263  | CLRN3                        |
| 26 | 47,700,000 | 47,850,000 | 637 | 865  | 0.556737749  | PTPRE                        |
| 26 | 47,775,000 | 47,925,000 | 638 | 724  | -0.555682008 | MKI67,PTPRE                  |
| 26 | 47,850,000 | 48,000,000 | 639 | 738  | -1.020673976 | MKI67                        |

|    |            |            |     |      |              |                                                                                    |
|----|------------|------------|-----|------|--------------|------------------------------------------------------------------------------------|
| 26 | 47,925,000 | 48,075,000 | 640 | 520  | 0.090913782  |                                                                                    |
| 26 | 48,000,000 | 48,150,000 | 641 | 444  | 0.36279777   |                                                                                    |
| 26 | 48,075,000 | 48,225,000 | 642 | 760  | -1.681872162 |                                                                                    |
| 26 | 48,150,000 | 48,300,000 | 643 | 710  | -1.698421412 |                                                                                    |
| 26 | 48,225,000 | 48,375,000 | 644 | 730  | 0.329315722  |                                                                                    |
| 26 | 48,300,000 | 48,450,000 | 645 | 1091 | 0.800091491  |                                                                                    |
| 26 | 48,375,000 | 48,525,000 | 646 | 935  | 0.894752562  |                                                                                    |
| 26 | 48,450,000 | 48,600,000 | 647 | 525  | 0.793464349  |                                                                                    |
| 26 | 48,525,000 | 48,675,000 | 648 | 352  | 0.475742879  |                                                                                    |
| 26 | 48,600,000 | 48,750,000 | 649 | 429  | 0.397307438  |                                                                                    |
| 26 | 48,675,000 | 48,825,000 | 650 | 698  | 0.577084439  |                                                                                    |
| 26 | 48,750,000 | 48,900,000 | 651 | 754  | 0.579563877  |                                                                                    |
| 26 | 48,825,000 | 48,975,000 | 652 | 571  | 0.863518643  |                                                                                    |
| 26 | 48,900,000 | 49,050,000 | 653 | 584  | 0.706375626  |                                                                                    |
| 26 | 48,975,000 | 49,125,000 | 654 | 586  | 0.58896516   |                                                                                    |
| 26 | 49,050,000 | 49,200,000 | 655 | 714  | 0.509484891  |                                                                                    |
| 26 | 49,125,000 | 49,275,000 | 656 | 661  | 0.463593087  |                                                                                    |
| 26 | 49,200,000 | 49,350,000 | 657 | 397  | 0.859697649  |                                                                                    |
| 26 | 49,275,000 | 49,425,000 | 658 | 422  | 0.606205336  |                                                                                    |
| 26 | 49,350,000 | 49,500,000 | 659 | 604  | 0.543055563  |                                                                                    |
| 26 | 49,425,000 | 49,575,000 | 660 | 527  | 0.55920731   | EBF3                                                                               |
| 26 | 49,500,000 | 49,650,000 | 661 | 261  | -0.706911566 | EBF3,ENSBTAG00000047164                                                            |
| 26 | 49,575,000 | 49,725,000 | 662 | 422  | -2.398558449 | ENSBTAG00000047164                                                                 |
| 26 | 49,650,000 | 49,800,000 | 663 | 493  | -2.110055703 | GLRX3                                                                              |
| 26 | 49,725,000 | 49,875,000 | 664 | 684  | -1.908732514 | GLRX3                                                                              |
| 26 | 49,800,000 | 49,950,000 | 665 | 1026 | -1.401884297 |                                                                                    |
| 26 | 49,875,000 | 50,025,000 | 666 | 882  | -0.582239861 |                                                                                    |
| 26 | 49,950,000 | 50,100,000 | 667 | 730  | -1.692187165 |                                                                                    |
| 26 | 50,025,000 | 50,175,000 | 668 | 844  | -0.596018199 |                                                                                    |
| 26 | 50,100,000 | 50,250,000 | 669 | 989  | 0.409852258  |                                                                                    |
| 26 | 50,175,000 | 50,325,000 | 670 | 1080 | 0.124634134  |                                                                                    |
| 26 | 50,250,000 | 50,400,000 | 671 | 1528 | -0.59556874  |                                                                                    |
| 26 | 50,325,000 | 50,475,000 | 672 | 1456 | -0.408546123 |                                                                                    |
| 26 | 50,400,000 | 50,550,000 | 673 | 673  | 0.579348875  | SYCE1                                                                              |
| 26 | 50,475,000 | 50,625,000 | 674 | 500  | 0.293010166  | CYP2E1,SYCE1,ENSBTAG00000005267                                                    |
| 26 | 50,550,000 | 50,700,000 | 675 | 737  | 0.284636979  | CYP2E1,ENSBTAG00000005267,ENSBTAG00000007248,ENSBTAG00000010461,ENSBTAG00000026185 |
| 26 | 50,625,000 | 50,775,000 | 676 | 773  | 0.404758281  | ENSBTAG00000007248,ENSBTAG00000010461,ENSBTAG0000026185                            |
| 26 | 50,700,000 | 50,850,000 | 677 | 719  | -0.86684181  | KNDC1                                                                              |
| 26 | 50,775,000 | 50,925,000 | 678 | 677  | -1.153411412 | GPR123,KNDC1                                                                       |
| 26 | 50,850,000 | 51,000,000 | 679 | 917  | 0.439965919  | GPR123                                                                             |
| 26 | 50,925,000 | 51,075,000 | 680 | 934  | 0.31132369   | CFAP46                                                                             |
| 26 | 51,000,000 | 51,150,000 | 681 | 575  | 0.210922312  | CFAP46,INPP5A,ENSBTAG00000015651                                                   |
| 26 | 51,075,000 | 51,225,000 | 682 | 601  | 0.955931077  | INPP5A,ENSBTAG00000015651                                                          |
| 26 | 51,150,000 | 51,300,000 | 683 | 796  | 0.750823262  | INPP5A                                                                             |
| 26 | 51,225,000 | 51,375,000 | 684 | 902  | -0.006099835 | BNIP3                                                                              |
| 26 | 51,300,000 | 51,450,000 | 685 | 970  | -0.421657869 | BNIP3                                                                              |
| 26 | 51,375,000 | 51,525,000 | 686 | 847  | -0.056904814 | DPYSL4,JAKMIP3                                                                     |
| 26 | 51,450,000 | 51,600,000 | 687 | 759  | 0.271914118  | DPYSL4,JAKMIP3,STK32C                                                              |
| 26 | 51,525,000 | 51,675,000 | 688 | 636  | -0.190437487 | DPYSL4,LRRC27,PWWP2B,STK32C                                                        |
| 26 | 51,600,000 | 51,681,464 | 689 | 253  | -0.745011128 | LRRC27,PWWP2B,STK32C                                                               |
| 27 | 0          | 150,000    | 1   | 758  | -2.545818662 | CLN8                                                                               |

|    |           |           |    |      |              |                        |
|----|-----------|-----------|----|------|--------------|------------------------|
| 27 | 75,000    | 225,000   | 2  | 1189 | -1.148684133 | ARHGEF10,CLN8          |
| 27 | 150,000   | 300,000   | 3  | 1228 | -0.383345343 | ARHGEF10,KBTBD11       |
| 27 | 225,000   | 375,000   | 4  | 942  | -0.535099114 | ARHGEF10,KBTBD11,MYOM2 |
| 27 | 300,000   | 450,000   | 5  | 1023 | 0.381847345  | MYOM2                  |
| 27 | 375,000   | 525,000   | 6  | 1365 | 0.191190949  | MYOM2                  |
| 27 | 450,000   | 600,000   | 7  | 1158 | -0.240523242 |                        |
| 27 | 525,000   | 675,000   | 8  | 980  | 0.425142411  |                        |
| 27 | 600,000   | 750,000   | 9  | 925  | 0.972886498  |                        |
| 27 | 675,000   | 825,000   | 10 | 1044 | -0.113250655 |                        |
| 27 | 750,000   | 900,000   | 11 | 1119 | 0.050051635  |                        |
| 27 | 825,000   | 975,000   | 12 | 854  | 0.690034351  |                        |
| 27 | 900,000   | 1,050,000 | 13 | 1203 | 0.899507044  | CSMD1                  |
| 27 | 975,000   | 1,125,000 | 14 | 1575 | 0.508477649  | CSMD1                  |
| 27 | 1,050,000 | 1,200,000 | 15 | 971  | -0.003345314 | CSMD1                  |
| 27 | 1,125,000 | 1,275,000 | 16 | 655  | -0.516222167 | CSMD1                  |
| 27 | 1,200,000 | 1,350,000 | 17 | 1272 | -2.347714424 | CSMD1                  |
| 27 | 1,275,000 | 1,425,000 | 18 | 1310 | -2.669407697 | CSMD1                  |
| 27 | 1,350,000 | 1,500,000 | 19 | 720  | -1.881768282 | CSMD1                  |
| 27 | 1,425,000 | 1,575,000 | 20 | 936  | -2.197936442 |                        |
| 27 | 1,500,000 | 1,650,000 | 21 | 1627 | -0.790453635 |                        |
| 27 | 1,575,000 | 1,725,000 | 22 | 1595 | -0.145895876 |                        |
| 27 | 1,650,000 | 1,800,000 | 23 | 1246 | -0.428080205 |                        |
| 27 | 1,725,000 | 1,875,000 | 24 | 912  | 0.178695193  |                        |
| 27 | 1,800,000 | 1,950,000 | 25 | 826  | 0.49916453   |                        |
| 27 | 1,875,000 | 2,025,000 | 26 | 954  | 0.455845828  |                        |
| 27 | 1,950,000 | 2,100,000 | 27 | 1026 | 0.17499831   |                        |
| 27 | 2,025,000 | 2,175,000 | 28 | 1161 | -0.295050801 |                        |
| 27 | 2,100,000 | 2,250,000 | 29 | 758  | -0.489106668 |                        |
| 27 | 2,175,000 | 2,325,000 | 30 | 498  | 0.198524733  |                        |
| 27 | 2,250,000 | 2,400,000 | 31 | 549  | 0.692432156  |                        |
| 27 | 2,325,000 | 2,475,000 | 32 | 682  | 0.859747128  |                        |
| 27 | 2,400,000 | 2,550,000 | 33 | 1086 | 0.061697032  |                        |
| 27 | 2,475,000 | 2,625,000 | 34 | 1116 | -0.716050942 |                        |
| 27 | 2,550,000 | 2,700,000 | 35 | 1271 | -0.098044032 |                        |
| 27 | 2,625,000 | 2,775,000 | 36 | 1569 | 0.962547456  |                        |
| 27 | 2,700,000 | 2,850,000 | 37 | 1434 | 0.847829881  |                        |
| 27 | 2,775,000 | 2,925,000 | 38 | 1445 | 0.558434077  |                        |
| 27 | 2,850,000 | 3,000,000 | 39 | 1123 | 0.01982683   |                        |
| 27 | 2,925,000 | 3,075,000 | 40 | 842  | -1.368400476 |                        |
| 27 | 3,000,000 | 3,150,000 | 41 | 795  | -2.250178944 |                        |
| 27 | 3,075,000 | 3,225,000 | 42 | 753  | -2.005549976 | ENSBTAG00000035013     |
| 27 | 3,150,000 | 3,300,000 | 43 | 928  | -2.245017497 | ENSBTAG00000035013     |
| 27 | 3,225,000 | 3,375,000 | 44 | 985  | -1.300967973 |                        |
| 27 | 3,300,000 | 3,450,000 | 45 | 804  | -0.178971231 |                        |
| 27 | 3,375,000 | 3,525,000 | 46 | 832  | -0.530716805 |                        |
| 27 | 3,450,000 | 3,600,000 | 47 | 1297 | 0.512829163  |                        |
| 27 | 3,525,000 | 3,675,000 | 48 | 1455 | 1.270616841  |                        |
| 27 | 3,600,000 | 3,750,000 | 49 | 1309 | 0.578929521  |                        |
| 27 | 3,675,000 | 3,825,000 | 50 | 1091 | -0.130259694 |                        |
| 27 | 3,750,000 | 3,900,000 | 51 | 1235 | -0.100086874 |                        |
| 27 | 3,825,000 | 3,975,000 | 52 | 1116 | 0.399913188  |                        |
| 27 | 3,900,000 | 4,050,000 | 53 | 479  | 0.221359203  |                        |
| 27 | 3,975,000 | 4,125,000 | 54 | 322  | 0.057083517  |                        |

|    |           |           |     |      |              |                                                                                       |
|----|-----------|-----------|-----|------|--------------|---------------------------------------------------------------------------------------|
| 27 | 4,050,000 | 4,200,000 | 55  | 341  | 0.400393211  |                                                                                       |
| 27 | 4,125,000 | 4,275,000 | 56  | 695  | 0.732128964  |                                                                                       |
| 27 | 4,200,000 | 4,350,000 | 57  | 1004 | 0.718369174  | MCPH1                                                                                 |
| 27 | 4,275,000 | 4,425,000 | 58  | 613  | 0.615628752  | ANGPT2,MCPH1                                                                          |
| 27 | 4,350,000 | 4,500,000 | 59  | 331  | 0.882859964  | ANGPT2,MCPH1                                                                          |
| 27 | 4,425,000 | 4,575,000 | 60  | 565  | 1.248378816  | ANGPT2,MCPH1                                                                          |
| 27 | 4,500,000 | 4,650,000 | 61  | 596  | 1.295029447  | MCPH1                                                                                 |
| 27 | 4,575,000 | 4,725,000 | 62  | 481  | 0.122520249  | AGPAT5                                                                                |
| 27 | 4,650,000 | 4,800,000 | 63  | 762  | 0.337231064  | AGPAT5,XKR5,ENSBTAG00000007477,ENSBTAG00000008519                                     |
| 27 | 4,725,000 | 4,875,000 | 64  | 826  | 0.385928446  | AGPAT5,XKR5,ENSBTAG00000007477,ENSBTAG00000008519                                     |
| 27 | 4,800,000 | 4,950,000 | 65  | 726  | 0.381872057  | DEFB300,SPAG11,TAP,ENSBTAG00000007477,ENSBTAG000008519                                |
| 27 | 4,875,000 | 5,025,000 | 66  | 647  | 0.895493115  | DEFB300,SPAG11,TAP,ZNF705A,ENSBTAG00000007340                                         |
| 27 | 4,950,000 | 5,100,000 | 67  | 807  | 0.812981268  | ZNF705A,ENSBTAG00000007340                                                            |
| 27 | 5,025,000 | 5,175,000 | 68  | 777  | 0.6773667    | LAP,ENSBTAG00000007340,ENSBTAG00000046937,ENSBTAG00000047421                          |
| 27 | 5,100,000 | 5,250,000 | 69  | 401  | 0.412526826  | DEFB7,LAP,ENSBTAG00000039856,ENSBTAG00000046937,ENSBTAG00000047421,ENSBTAG00000047740 |
| 27 | 5,175,000 | 5,325,000 | 70  | 556  | 0.7032695    | DEFB7,ENSBTAG00000039856,ENSBTAG00000047740                                           |
| 27 | 5,250,000 | 5,400,000 | 71  | 987  | 0.790153067  | ENSBTAG00000023157,ENSBTAG00000047363                                                 |
| 27 | 5,325,000 | 5,475,000 | 72  | 936  | 0.786528605  | DEFB,ENSBTAG00000023157,ENSBTAG00000047284,ENSBTAG00000047363                         |
| 27 | 5,400,000 | 5,550,000 | 73  | 683  | 0.419743695  | DEFB,EBD,ENSBTAG00000047284                                                           |
| 27 | 5,475,000 | 5,625,000 | 74  | 571  | 0.407775887  | DEFB5,EBD                                                                             |
| 27 | 5,550,000 | 5,700,000 | 75  | 462  | 0.665446578  | DEFB5                                                                                 |
| 27 | 5,625,000 | 5,775,000 | 76  | 699  | 0.551194627  | ENSBTAG00000010248                                                                    |
| 27 | 5,700,000 | 5,850,000 | 77  | 1025 | 0.563656994  | DEFB1,ENSBTAG00000010248,ENSBTAG00000046405                                           |
| 27 | 5,775,000 | 5,925,000 | 78  | 822  | 0.281147563  | DEFB1,ENSBTAG00000046405                                                              |
| 27 | 5,850,000 | 6,000,000 | 79  | 1055 | -0.201507673 |                                                                                       |
| 27 | 5,925,000 | 6,075,000 | 80  | 1064 | -0.085515122 | ENSBTAG00000038504                                                                    |
| 27 | 6,000,000 | 6,150,000 | 81  | 269  | 0.221292274  | ENSBTAG00000038504                                                                    |
| 27 | 6,075,000 | 6,225,000 | 82  | 220  | 0.5302703    | DEFB405                                                                               |
| 27 | 6,150,000 | 6,300,000 | 83  | 560  | 0.360492868  | DEFB405,GPM6A                                                                         |
| 27 | 6,225,000 | 6,375,000 | 84  | 541  | 0.048877461  | GPM6A                                                                                 |
| 27 | 6,300,000 | 6,450,000 | 85  | 448  | -0.46812106  | GPM6A                                                                                 |
| 27 | 6,375,000 | 6,525,000 | 86  | 774  | -0.328710341 | GPM6A,ENSBTAG00000046071                                                              |
| 27 | 6,450,000 | 6,600,000 | 87  | 896  | -0.352182706 | ENSBTAG00000046071                                                                    |
| 27 | 6,525,000 | 6,675,000 | 88  | 1079 | 0.702928897  | SPATA4,WDR17                                                                          |
| 27 | 6,600,000 | 6,750,000 | 89  | 1388 | 0.927949042  | ASB5,SPATA4,WDR17                                                                     |
| 27 | 6,675,000 | 6,825,000 | 90  | 990  | 0.800887565  | ASB5,SPATA4,SPCS3                                                                     |
| 27 | 6,750,000 | 6,900,000 | 91  | 721  | 0.896442384  | SPCS3                                                                                 |
| 27 | 6,825,000 | 6,975,000 | 92  | 930  | -0.652984105 |                                                                                       |
| 27 | 6,900,000 | 7,050,000 | 93  | 689  | -1.522475549 | VEGFC                                                                                 |
| 27 | 6,975,000 | 7,125,000 | 94  | 296  | 0.207665354  | VEGFC                                                                                 |
| 27 | 7,050,000 | 7,200,000 | 95  | 299  | 0.105225615  | VEGFC                                                                                 |
| 27 | 7,125,000 | 7,275,000 | 96  | 340  | -0.41504872  |                                                                                       |
| 27 | 7,200,000 | 7,350,000 | 97  | 429  | 0.088908552  |                                                                                       |
| 27 | 7,275,000 | 7,425,000 | 98  | 579  | 0.200801948  |                                                                                       |
| 27 | 7,350,000 | 7,500,000 | 99  | 628  | -0.086408392 |                                                                                       |
| 27 | 7,425,000 | 7,575,000 | 100 | 829  | -0.031742319 | NEIL3                                                                                 |
| 27 | 7,500,000 | 7,650,000 | 101 | 1052 | -0.044397067 | NEIL3                                                                                 |

|    |            |            |     |      |              |           |
|----|------------|------------|-----|------|--------------|-----------|
| 27 | 7,575,000  | 7,725,000  | 102 | 823  | -0.019325124 | AGA,NEIL3 |
| 27 | 7,650,000  | 7,800,000  | 103 | 759  | 0.527922405  | AGA       |
| 27 | 7,725,000  | 7,875,000  | 104 | 751  | 0.669888156  |           |
| 27 | 7,800,000  | 7,950,000  | 105 | 896  | 0.304015384  |           |
| 27 | 7,875,000  | 8,025,000  | 106 | 1056 | 0.363457183  |           |
| 27 | 7,950,000  | 8,100,000  | 107 | 877  | 0.176692023  |           |
| 27 | 8,025,000  | 8,175,000  | 108 | 652  | -0.904658145 |           |
| 27 | 8,100,000  | 8,250,000  | 109 | 776  | -0.641295273 |           |
| 27 | 8,175,000  | 8,325,000  | 110 | 1106 | 0.47168416   |           |
| 27 | 8,250,000  | 8,400,000  | 111 | 1025 | 0.971923212  |           |
| 27 | 8,325,000  | 8,475,000  | 112 | 931  | 0.094510264  |           |
| 27 | 8,400,000  | 8,550,000  | 113 | 777  | -0.950723173 |           |
| 27 | 8,475,000  | 8,625,000  | 114 | 472  | -0.7383148   |           |
| 27 | 8,550,000  | 8,700,000  | 115 | 491  | -1.096539515 |           |
| 27 | 8,625,000  | 8,775,000  | 116 | 480  | -1.378314534 |           |
| 27 | 8,700,000  | 8,850,000  | 117 | 902  | -0.502415647 |           |
| 27 | 8,775,000  | 8,925,000  | 118 | 1215 | -1.850574877 |           |
| 27 | 8,850,000  | 9,000,000  | 119 | 1025 | -2.607196416 |           |
| 27 | 8,925,000  | 9,075,000  | 120 | 1098 | -0.919933889 |           |
| 27 | 9,000,000  | 9,150,000  | 121 | 1348 | 0.517574921  |           |
| 27 | 9,075,000  | 9,225,000  | 122 | 1214 | 0.843586304  |           |
| 27 | 9,150,000  | 9,300,000  | 123 | 606  | 0.312254885  |           |
| 27 | 9,225,000  | 9,375,000  | 124 | 649  | 0.300041729  |           |
| 27 | 9,300,000  | 9,450,000  | 125 | 693  | 0.531226608  |           |
| 27 | 9,375,000  | 9,525,000  | 126 | 621  | -0.519299796 |           |
| 27 | 9,450,000  | 9,600,000  | 127 | 707  | -1.628451098 |           |
| 27 | 9,525,000  | 9,675,000  | 128 | 567  | -1.038422371 |           |
| 27 | 9,600,000  | 9,750,000  | 129 | 376  | 0.044644852  |           |
| 27 | 9,675,000  | 9,825,000  | 130 | 460  | -0.150217703 |           |
| 27 | 9,750,000  | 9,900,000  | 131 | 623  | -0.158226831 |           |
| 27 | 9,825,000  | 9,975,000  | 132 | 872  | -0.043667913 |           |
| 27 | 9,900,000  | 10,050,000 | 133 | 825  | -0.732677767 |           |
| 27 | 9,975,000  | 10,125,000 | 134 | 826  | -0.479718765 |           |
| 27 | 10,050,000 | 10,200,000 | 135 | 898  | 0.713518209  |           |
| 27 | 10,125,000 | 10,275,000 | 136 | 724  | 0.133025606  |           |
| 27 | 10,200,000 | 10,350,000 | 137 | 565  | -0.11550161  |           |
| 27 | 10,275,000 | 10,425,000 | 138 | 567  | 0.819451487  |           |
| 27 | 10,350,000 | 10,500,000 | 139 | 1092 | 1.148145936  |           |
| 27 | 10,425,000 | 10,575,000 | 140 | 1270 | 0.878731062  |           |
| 27 | 10,500,000 | 10,650,000 | 141 | 788  | 0.519180262  |           |
| 27 | 10,575,000 | 10,725,000 | 142 | 591  | -1.088057444 |           |
| 27 | 10,650,000 | 10,800,000 | 143 | 737  | -0.50941151  |           |
| 27 | 10,725,000 | 10,875,000 | 144 | 607  | -0.205003097 |           |
| 27 | 10,800,000 | 10,950,000 | 145 | 561  | -0.865167673 |           |
| 27 | 10,875,000 | 11,025,000 | 146 | 752  | 0.081532841  |           |
| 27 | 10,950,000 | 11,100,000 | 147 | 1234 | 0.311419308  |           |
| 27 | 11,025,000 | 11,175,000 | 148 | 1210 | 0.283708632  |           |
| 27 | 11,100,000 | 11,250,000 | 149 | 787  | 0.576525275  |           |
| 27 | 11,175,000 | 11,325,000 | 150 | 784  | 0.717278214  |           |
| 27 | 11,250,000 | 11,400,000 | 151 | 712  | 0.466908974  |           |
| 27 | 11,325,000 | 11,475,000 | 152 | 819  | -0.045478237 |           |
| 27 | 11,400,000 | 11,550,000 | 153 | 780  | 0.014971604  |           |
| 27 | 11,475,000 | 11,625,000 | 154 | 988  | -0.152182655 |           |

|    |            |            |     |      |              |                                                          |
|----|------------|------------|-----|------|--------------|----------------------------------------------------------|
| 27 | 11,550,000 | 11,700,000 | 155 | 1166 | 0.063746846  |                                                          |
| 27 | 11,625,000 | 11,775,000 | 156 | 731  | 0.635442723  |                                                          |
| 27 | 11,700,000 | 11,850,000 | 157 | 426  | 0.866558448  |                                                          |
| 27 | 11,775,000 | 11,925,000 | 158 | 493  | 1.064531718  |                                                          |
| 27 | 11,850,000 | 12,000,000 | 159 | 451  | 0.846341903  |                                                          |
| 27 | 11,925,000 | 12,075,000 | 160 | 361  | 0.194613713  |                                                          |
| 27 | 12,000,000 | 12,150,000 | 161 | 468  | 0.59181061   |                                                          |
| 27 | 12,075,000 | 12,225,000 | 162 | 476  | 0.549770134  |                                                          |
| 27 | 12,150,000 | 12,300,000 | 163 | 665  | 0.090190909  |                                                          |
| 27 | 12,225,000 | 12,375,000 | 164 | 848  | 0.674805065  | ENSBTAG00000047749                                       |
| 27 | 12,300,000 | 12,450,000 | 165 | 836  | 0.684374122  | ENSBTAG00000047749                                       |
| 27 | 12,375,000 | 12,525,000 | 166 | 1010 | 0.541281572  | ENSBTAG00000047749                                       |
| 27 | 12,450,000 | 12,600,000 | 167 | 1183 | 0.476157718  |                                                          |
| 27 | 12,525,000 | 12,675,000 | 168 | 977  | 0.237402952  | ENSBTAG00000021133                                       |
| 27 | 12,600,000 | 12,750,000 | 169 | 1137 | 0.309634962  | ENSBTAG00000021133                                       |
| 27 | 12,675,000 | 12,825,000 | 170 | 1142 | 0.563529819  | ENSBTAG00000021133                                       |
| 27 | 12,750,000 | 12,900,000 | 171 | 1110 | 0.819093684  | ENSBTAG00000021133                                       |
| 27 | 12,825,000 | 12,975,000 | 172 | 1312 | 0.628544501  | DCTD                                                     |
| 27 | 12,900,000 | 13,050,000 | 173 | 838  | 0.510384509  | DCTD                                                     |
| 27 | 12,975,000 | 13,125,000 | 174 | 356  | 0.592291121  |                                                          |
| 27 | 13,050,000 | 13,200,000 | 175 | 328  | 0.622088144  | WWC2                                                     |
| 27 | 13,125,000 | 13,275,000 | 176 | 369  | 0.247451302  | WWC2,ENSBTAG00000012207,ENSBTAG00000012209               |
| 27 | 13,200,000 | 13,350,000 | 177 | 353  | -1.257964556 | CDKN2AIP,ING2,WWC2,ENSBTAG00000012207,ENSBTAG00000012209 |
| 27 | 13,275,000 | 13,425,000 | 178 | 409  | -0.696497201 | CDKN2AIP,ING2,RWDD4A,TRAPPC11                            |
| 27 | 13,350,000 | 13,500,000 | 179 | 492  | 0.074649895  | RWDD4A,STOX2,TRAPPC11                                    |
| 27 | 13,425,000 | 13,575,000 | 180 | 607  | 0.161748005  | STOX2,TRAPPC11                                           |
| 27 | 13,500,000 | 13,650,000 | 181 | 469  | 0.293674342  | STOX2                                                    |
| 27 | 13,575,000 | 13,725,000 | 182 | 246  | 0.416526824  | STOX2                                                    |
| 27 | 13,650,000 | 13,800,000 | 183 | 246  | 0.919895061  | ENPP6,STOX2                                              |
| 27 | 13,725,000 | 13,875,000 | 184 | 361  | 0.563481227  | ENPP6                                                    |
| 27 | 13,800,000 | 13,950,000 | 185 | 557  | -0.342512468 | ENPP6,IRF2                                               |
| 27 | 13,875,000 | 14,025,000 | 186 | 757  | -0.117106582 | IRF2                                                     |
| 27 | 13,950,000 | 14,100,000 | 187 | 999  | 0.957323502  | CASP3,IRF2                                               |
| 27 | 14,025,000 | 14,175,000 | 188 | 1145 | 1.063905487  | CASP3,CENPU,PRIMPOL                                      |
| 27 | 14,100,000 | 14,250,000 | 189 | 1046 | 0.921546352  | ACSL1,CASP3,CENPU,PRIMPOL                                |
| 27 | 14,175,000 | 14,325,000 | 190 | 700  | 0.138176992  | ACSL1,CENPU                                              |
| 27 | 14,250,000 | 14,400,000 | 191 | 513  | -1.9483109   | ACSL1                                                    |
| 27 | 14,325,000 | 14,475,000 | 192 | 397  | -2.043812017 | HELT                                                     |
| 27 | 14,400,000 | 14,550,000 | 193 | 599  | 0.09207936   | HELT,SLC25A4                                             |
| 27 | 14,475,000 | 14,625,000 | 194 | 717  | 0.136829131  | CFAP97,SLC25A4,SNX25                                     |
| 27 | 14,550,000 | 14,700,000 | 195 | 873  | 0.356362409  | CFAP97,LRP2BP,SLC25A4,SNX25                              |
| 27 | 14,625,000 | 14,775,000 | 196 | 974  | 0.344014377  | ANKRD37,C4orf47,CCDC110,LRP2BP,PDLIM3,SNX25,UFSP2        |
| 27 | 14,700,000 | 14,850,000 | 197 | 583  | 0.650058507  | ANKRD37,C4orf47,CCDC110,PDLIM3,UFSP2                     |
| 27 | 14,775,000 | 14,925,000 | 198 | 722  | 0.97993874   | PDLIM3,SORBS2                                            |
| 27 | 14,850,000 | 15,000,000 | 199 | 905  | 1.003830661  | SORBS2                                                   |
| 27 | 14,925,000 | 15,075,000 | 200 | 658  | 0.958961869  | SORBS2                                                   |
| 27 | 15,000,000 | 15,150,000 | 201 | 524  | 0.288301734  | SORBS2                                                   |
| 27 | 15,075,000 | 15,225,000 | 202 | 645  | 0.652669934  |                                                          |
| 27 | 15,150,000 | 15,300,000 | 203 | 684  | 0.06693023   | FAM149A,TLR3                                             |
| 27 | 15,225,000 | 15,375,000 | 204 | 661  | -2.534938608 | CYP4V2,F11,FAM149A,KLKB1,TLR3                            |
| 27 | 15,300,000 | 15,450,000 | 205 | 830  | -3.603574071 | CYP4V2,F11,FAM149A,KLKB1,MTNR1A                          |

|    |            |            |     |      |              |                           |
|----|------------|------------|-----|------|--------------|---------------------------|
| 27 | 15,375,000 | 15,525,000 | 206 | 844  | -1.17172993  | FAT1,MTNR1A               |
| 27 | 15,450,000 | 15,600,000 | 207 | 651  | 0.276437515  | FAT1,MTNR1A               |
| 27 | 15,525,000 | 15,675,000 | 208 | 780  | 0.536828498  | FAT1                      |
| 27 | 15,600,000 | 15,750,000 | 209 | 939  | -0.97358216  | FAT1                      |
| 27 | 15,675,000 | 15,825,000 | 210 | 780  | -1.77877444  |                           |
| 27 | 15,750,000 | 15,900,000 | 211 | 730  | 0.914234524  |                           |
| 27 | 15,825,000 | 15,975,000 | 212 | 865  | -0.349606639 |                           |
| 27 | 15,900,000 | 16,050,000 | 213 | 706  | -1.127696164 |                           |
| 27 | 15,975,000 | 16,125,000 | 214 | 429  | -0.359359546 |                           |
| 27 | 16,050,000 | 16,200,000 | 215 | 622  | 0.64860243   |                           |
| 27 | 16,125,000 | 16,275,000 | 216 | 784  | 0.927764803  |                           |
| 27 | 16,200,000 | 16,350,000 | 217 | 755  | 1.047222044  |                           |
| 27 | 16,275,000 | 16,425,000 | 218 | 789  | -0.851000147 |                           |
| 27 | 16,350,000 | 16,500,000 | 219 | 724  | -3.993710704 |                           |
| 27 | 16,425,000 | 16,575,000 | 220 | 764  | -2.436867802 |                           |
| 27 | 16,500,000 | 16,650,000 | 221 | 787  | 0.75691369   | ZFP42                     |
| 27 | 16,575,000 | 16,725,000 | 222 | 1019 | 0.832891575  | TRIML2,ZFP42              |
| 27 | 16,650,000 | 16,800,000 | 223 | 1347 | -0.060894343 | TRIML1,TRIML2             |
| 27 | 16,725,000 | 16,875,000 | 224 | 1271 | -0.665534328 | TRIML1,ENSBTAG00000045531 |
| 27 | 16,800,000 | 16,950,000 | 225 | 1090 | -0.17994965  | ENSBTAG00000045531        |
| 27 | 16,875,000 | 17,025,000 | 226 | 1207 | 0.357237772  |                           |
| 27 | 16,950,000 | 17,100,000 | 227 | 1009 | -0.339723298 |                           |
| 27 | 17,025,000 | 17,175,000 | 228 | 852  | -0.966455657 |                           |
| 27 | 17,100,000 | 17,250,000 | 229 | 1441 | 0.898569037  |                           |
| 27 | 17,175,000 | 17,325,000 | 230 | 1540 | 1.318573186  |                           |
| 27 | 17,250,000 | 17,400,000 | 231 | 1329 | 1.126760194  |                           |
| 27 | 17,325,000 | 17,475,000 | 232 | 1260 | 1.217669052  |                           |
| 27 | 17,400,000 | 17,550,000 | 233 | 1244 | 1.1501906    | ENSBTAG00000047159        |
| 27 | 17,475,000 | 17,625,000 | 234 | 1306 | 0.8398783    | ENSBTAG00000047159        |
| 27 | 17,550,000 | 17,700,000 | 235 | 1267 | -0.336438874 |                           |
| 27 | 17,625,000 | 17,775,000 | 236 | 1055 | -1.106501473 |                           |
| 27 | 17,700,000 | 17,850,000 | 237 | 1131 | 0.190266135  |                           |
| 27 | 17,775,000 | 17,925,000 | 238 | 954  | 0.740237693  |                           |
| 27 | 17,850,000 | 18,000,000 | 239 | 326  | 0.650656377  |                           |
| 27 | 17,925,000 | 18,075,000 | 240 | 168  | 0.436529593  |                           |
| 27 | 18,000,000 | 18,150,000 | 241 | 163  | 0.48050449   |                           |
| 27 | 18,075,000 | 18,225,000 | 242 | 399  | 0.617615944  |                           |
| 27 | 18,150,000 | 18,300,000 | 243 | 619  | -0.452676897 | ASAH1,FRG1                |
| 27 | 18,225,000 | 18,375,000 | 244 | 456  | -1.041270488 | ASAH1,FRG1,PCM1           |
| 27 | 18,300,000 | 18,450,000 | 245 | 296  | 0.871438983  | ASAH1,PCM1                |
| 27 | 18,375,000 | 18,525,000 | 246 | 384  | 1.151028481  | FGL1,PCM1                 |
| 27 | 18,450,000 | 18,600,000 | 247 | 450  | 1.170534371  | FGL1,MTUS1                |
| 27 | 18,525,000 | 18,675,000 | 248 | 761  | 0.593258367  | MTUS1                     |
| 27 | 18,600,000 | 18,750,000 | 249 | 1129 | 0.108307335  | MTUS1,PDGFRL              |
| 27 | 18,675,000 | 18,825,000 | 250 | 1020 | -0.300437119 | MTUS1,PDGFRL,SLC7A2       |
| 27 | 18,750,000 | 18,900,000 | 251 | 574  | -0.13415958  | PDGFRL,SLC7A2             |
| 27 | 18,825,000 | 18,975,000 | 252 | 660  | 1.083855329  | MTMR7                     |
| 27 | 18,900,000 | 19,050,000 | 253 | 981  | -0.004931407 | MTMR7,VPS37A              |
| 27 | 18,975,000 | 19,125,000 | 254 | 812  | -1.748155256 | CNOT7,MTMR7,VPS37A,ZDHHC2 |
| 27 | 19,050,000 | 19,200,000 | 255 | 519  | -0.855130809 | CNOT7,MICU3,VPS37A,ZDHHC2 |
| 27 | 19,125,000 | 19,275,000 | 256 | 304  | 0.668767688  | FGF20,MICU3               |
| 27 | 19,200,000 | 19,350,000 | 257 | 621  | 0.455026536  | FGF20,MICU3               |
| 27 | 19,275,000 | 19,425,000 | 258 | 885  | 0.804775678  | FGF20                     |



|    |            |            |     |      |              |                               |
|----|------------|------------|-----|------|--------------|-------------------------------|
| 27 | 19,350,000 | 19,500,000 | 259 | 823  | 1.365478012  |                               |
| 27 | 19,425,000 | 19,575,000 | 260 | 1007 | 1.343692986  |                               |
| 27 | 19,500,000 | 19,650,000 | 261 | 1342 | 1.331217029  |                               |
| 27 | 19,575,000 | 19,725,000 | 262 | 1049 | 1.068270726  |                               |
| 27 | 19,650,000 | 19,800,000 | 263 | 457  | -1.38405618  |                               |
| 27 | 19,725,000 | 19,875,000 | 264 | 387  | -0.817101303 |                               |
| 27 | 19,800,000 | 19,950,000 | 265 | 517  | 0.940417649  |                               |
| 27 | 19,875,000 | 20,025,000 | 266 | 519  | 0.106715977  | MSR1                          |
| 27 | 19,950,000 | 20,100,000 | 267 | 828  | -0.595661563 | MSR1                          |
| 27 | 20,025,000 | 20,175,000 | 268 | 1222 | 0.424926097  | MSR1                          |
| 27 | 20,100,000 | 20,250,000 | 269 | 1292 | 0.832649363  | ENSBTAG00000022767            |
| 27 | 20,175,000 | 20,325,000 | 270 | 1193 | 0.064805209  | ENSBTAG00000022767            |
| 27 | 20,250,000 | 20,400,000 | 271 | 1386 | 0.487018064  |                               |
| 27 | 20,325,000 | 20,475,000 | 272 | 1487 | 0.987302272  | TUSC3                         |
| 27 | 20,400,000 | 20,550,000 | 273 | 1212 | 1.021974825  | TUSC3                         |
| 27 | 20,475,000 | 20,625,000 | 274 | 1278 | 1.256142146  | TUSC3,ENSBTAG00000045830      |
| 27 | 20,550,000 | 20,700,000 | 275 | 1161 | 1.253121056  | TUSC3,ENSBTAG00000045830      |
| 27 | 20,625,000 | 20,775,000 | 276 | 857  | 1.110991125  | TUSC3                         |
| 27 | 20,700,000 | 20,850,000 | 277 | 1068 | 1.203068967  |                               |
| 27 | 20,775,000 | 20,925,000 | 278 | 1267 | 1.268974715  |                               |
| 27 | 20,850,000 | 21,000,000 | 279 | 1015 | 1.303767796  |                               |
| 27 | 20,925,000 | 21,075,000 | 280 | 940  | 1.091856556  |                               |
| 27 | 21,000,000 | 21,150,000 | 281 | 819  | 0.95837341   |                               |
| 27 | 21,075,000 | 21,225,000 | 282 | 513  | 1.042629537  |                               |
| 27 | 21,150,000 | 21,300,000 | 283 | 356  | 0.118876594  |                               |
| 27 | 21,225,000 | 21,375,000 | 284 | 460  | -0.316778338 |                               |
| 27 | 21,300,000 | 21,450,000 | 285 | 706  | 0.58342612   |                               |
| 27 | 21,375,000 | 21,525,000 | 286 | 615  | 0.784063548  |                               |
| 27 | 21,450,000 | 21,600,000 | 287 | 630  | 0.563759722  |                               |
| 27 | 21,525,000 | 21,675,000 | 288 | 1012 | 0.877025591  |                               |
| 27 | 21,600,000 | 21,750,000 | 289 | 1228 | 0.417028135  |                               |
| 27 | 21,675,000 | 21,825,000 | 290 | 925  | -0.112635035 |                               |
| 27 | 21,750,000 | 21,900,000 | 291 | 699  | 0.576847185  |                               |
| 27 | 21,825,000 | 21,975,000 | 292 | 1119 | 0.003280831  |                               |
| 27 | 21,900,000 | 22,050,000 | 293 | 951  | -0.569227056 |                               |
| 27 | 21,975,000 | 22,125,000 | 294 | 916  | 0.389145532  |                               |
| 27 | 22,050,000 | 22,200,000 | 295 | 1185 | 0.475032083  |                               |
| 27 | 22,125,000 | 22,275,000 | 296 | 1106 | -0.072158067 |                               |
| 27 | 22,200,000 | 22,350,000 | 297 | 1032 | -0.417388821 |                               |
| 27 | 22,275,000 | 22,425,000 | 298 | 867  | -0.165752974 | ENSBTAG00000045990            |
| 27 | 22,350,000 | 22,500,000 | 299 | 842  | 0.341013537  | C27H8orf48,ENSBTAG00000045990 |
| 27 | 22,425,000 | 22,575,000 | 300 | 690  | 0.278271383  | C27H8orf48,ENSBTAG00000024526 |
| 27 | 22,500,000 | 22,650,000 | 301 | 449  | -0.577710747 | C27H8orf48,ENSBTAG00000024526 |
| 27 | 22,575,000 | 22,725,000 | 302 | 408  | -0.976732054 | ENSBTAG00000024526            |
| 27 | 22,650,000 | 22,800,000 | 303 | 468  | -1.792376498 |                               |
| 27 | 22,725,000 | 22,875,000 | 304 | 398  | -1.27083953  | DLC1                          |
| 27 | 22,800,000 | 22,950,000 | 305 | 417  | 0.54860833   | DLC1                          |
| 27 | 22,875,000 | 23,025,000 | 306 | 418  | 0.236715874  | DLC1                          |
| 27 | 22,950,000 | 23,100,000 | 307 | 451  | -0.106478853 | DLC1,KIAA1456                 |
| 27 | 23,025,000 | 23,175,000 | 308 | 693  | -1.090389482 | KIAA1456                      |
| 27 | 23,100,000 | 23,250,000 | 309 | 1065 | -1.437892578 | KIAA1456                      |
| 27 | 23,175,000 | 23,325,000 | 310 | 1201 | -0.290953651 | LONRF1                        |
| 27 | 23,250,000 | 23,400,000 | 311 | 892  | 0.341857081  | LONRF1                        |

|    |            |            |     |      |              |                              |
|----|------------|------------|-----|------|--------------|------------------------------|
| 27 | 23,325,000 | 23,475,000 | 312 | 733  | 0.301564724  | LONRF1,ENSBTAG00000000357    |
| 27 | 23,400,000 | 23,550,000 | 313 | 677  | 0.384331071  | ENSBTAG00000000357           |
| 27 | 23,475,000 | 23,625,000 | 314 | 590  | 0.793776044  | ENSBTAG00000000357           |
| 27 | 23,550,000 | 23,700,000 | 315 | 434  | 0.321676131  |                              |
| 27 | 23,625,000 | 23,775,000 | 316 | 390  | -0.014884278 |                              |
| 27 | 23,700,000 | 23,850,000 | 317 | 602  | 0.254792785  |                              |
| 27 | 23,775,000 | 23,925,000 | 318 | 593  | -0.367120718 | CLDN23                       |
| 27 | 23,850,000 | 24,000,000 | 319 | 643  | -0.662083832 | CLDN23                       |
| 27 | 23,925,000 | 24,075,000 | 320 | 733  | 0.131642606  |                              |
| 27 | 24,000,000 | 24,150,000 | 321 | 686  | 0.637586217  | MFHAS1                       |
| 27 | 24,075,000 | 24,225,000 | 322 | 652  | 0.344828037  | MFHAS1,THEX1                 |
| 27 | 24,150,000 | 24,300,000 | 323 | 676  | 0.18972084   | THEX1                        |
| 27 | 24,225,000 | 24,375,000 | 324 | 651  | 0.186400333  | PPP1R3B                      |
| 27 | 24,300,000 | 24,450,000 | 325 | 609  | 0.198577651  | PPP1R3B                      |
| 27 | 24,375,000 | 24,525,000 | 326 | 672  | -0.362188428 |                              |
| 27 | 24,450,000 | 24,600,000 | 327 | 644  | -0.348041139 |                              |
| 27 | 24,525,000 | 24,675,000 | 328 | 898  | 0.486242587  | TNKS                         |
| 27 | 24,600,000 | 24,750,000 | 329 | 1342 | 0.947057242  | TNKS                         |
| 27 | 24,675,000 | 24,825,000 | 330 | 1068 | 0.971560638  | DUSP4,TNKS                   |
| 27 | 24,750,000 | 24,900,000 | 331 | 611  | 0.460666307  | DUSP4,TNKS                   |
| 27 | 24,825,000 | 24,975,000 | 332 | 843  | 0.699217005  | DUSP4                        |
| 27 | 24,900,000 | 25,050,000 | 333 | 974  | 0.378903026  |                              |
| 27 | 24,975,000 | 25,125,000 | 334 | 587  | 0.090805591  |                              |
| 27 | 25,050,000 | 25,200,000 | 335 | 560  | 1.007433605  |                              |
| 27 | 25,125,000 | 25,275,000 | 336 | 803  | 0.463197838  |                              |
| 27 | 25,200,000 | 25,350,000 | 337 | 998  | 0.302832343  |                              |
| 27 | 25,275,000 | 25,425,000 | 338 | 1154 | 0.808322699  | LEPROTL1,TMEM66              |
| 27 | 25,350,000 | 25,500,000 | 339 | 898  | 0.524024219  | DCTN6,LEPROTL1,MBOAT4,TMEM66 |
| 27 | 25,425,000 | 25,575,000 | 340 | 653  | -1.030235647 | DCTN6,LEPROTL1,MBOAT4        |
| 27 | 25,500,000 | 25,650,000 | 341 | 752  | -2.476821781 | RPMS                         |
| 27 | 25,575,000 | 25,725,000 | 342 | 713  | -1.541775269 | RPMS                         |
| 27 | 25,650,000 | 25,800,000 | 343 | 825  | 0.372046474  | RPMS                         |
| 27 | 25,725,000 | 25,875,000 | 344 | 980  | 0.563095254  | GTF2E2,RPMS                  |
| 27 | 25,800,000 | 25,950,000 | 345 | 797  | -0.097717878 | GSR,GTF2E2,RPMS              |
| 27 | 25,875,000 | 26,025,000 | 346 | 661  | 0.20981226   | GSR,GTF2E2,UBXN8             |
| 27 | 25,950,000 | 26,100,000 | 347 | 710  | 1.164202295  | GSR,PPP2CB,TEX15,UBXN8       |
| 27 | 26,025,000 | 26,175,000 | 348 | 560  | 1.165894271  | PPP2CB,TEX15,UBXN8           |
| 27 | 26,100,000 | 26,250,000 | 349 | 569  | 0.63593151   |                              |
| 27 | 26,175,000 | 26,325,000 | 350 | 923  | 0.866642909  | PURG,WRN                     |
| 27 | 26,250,000 | 26,400,000 | 351 | 536  | 0.996202577  | PURG,WRN                     |
| 27 | 26,325,000 | 26,475,000 | 352 | 599  | 0.589368174  | WRN                          |
| 27 | 26,400,000 | 26,550,000 | 353 | 768  | 0.692499794  | WRN                          |
| 27 | 26,475,000 | 26,625,000 | 354 | 930  | 0.248659365  |                              |
| 27 | 26,550,000 | 26,700,000 | 355 | 1282 | 0.007496181  |                              |
| 27 | 26,625,000 | 26,775,000 | 356 | 952  | 0.263364768  |                              |
| 27 | 26,700,000 | 26,850,000 | 357 | 947  | -0.038742199 |                              |
| 27 | 26,775,000 | 26,925,000 | 358 | 856  | -0.184401118 |                              |
| 27 | 26,850,000 | 27,000,000 | 359 | 513  | 0.187029343  |                              |
| 27 | 26,925,000 | 27,075,000 | 360 | 556  | 0.466492307  |                              |
| 27 | 27,000,000 | 27,150,000 | 361 | 613  | 0.389092379  |                              |
| 27 | 27,075,000 | 27,225,000 | 362 | 430  | -0.334464464 |                              |
| 27 | 27,150,000 | 27,300,000 | 363 | 403  | 0.228269763  |                              |
| 27 | 27,225,000 | 27,375,000 | 364 | 559  | 0.488379603  |                              |

|    |            |            |     |      |              |                               |
|----|------------|------------|-----|------|--------------|-------------------------------|
| 27 | 27,300,000 | 27,450,000 | 365 | 752  | -0.639117132 |                               |
| 27 | 27,375,000 | 27,525,000 | 366 | 653  | -0.62896525  |                               |
| 27 | 27,450,000 | 27,600,000 | 367 | 454  | 0.383319688  |                               |
| 27 | 27,525,000 | 27,675,000 | 368 | 336  | 0.729746215  | GGFBPP5                       |
| 27 | 27,600,000 | 27,750,000 | 369 | 373  | 0.479937763  | GGFBPP5                       |
| 27 | 27,675,000 | 27,825,000 | 370 | 449  | 0.182358825  | GGFBPP5                       |
| 27 | 27,750,000 | 27,900,000 | 371 | 446  | 0.691883125  | GGFBPP5                       |
| 27 | 27,825,000 | 27,975,000 | 372 | 480  | 0.779751727  | GGFBPP5                       |
| 27 | 27,900,000 | 28,050,000 | 373 | 577  | 0.003023745  |                               |
| 27 | 27,975,000 | 28,125,000 | 374 | 852  | -0.655268051 |                               |
| 27 | 28,050,000 | 28,200,000 | 375 | 692  | -0.434164365 |                               |
| 27 | 28,125,000 | 28,275,000 | 376 | 572  | 0.586224732  |                               |
| 27 | 28,200,000 | 28,350,000 | 377 | 740  | 0.384129644  | FUT10,PSIP1                   |
| 27 | 28,275,000 | 28,425,000 | 378 | 743  | 0.5981841    | C27H8ORF41,FUT10,MAK16,PSIP1  |
| 27 | 28,350,000 | 28,500,000 | 379 | 562  | 0.566907544  | C27H8ORF41,FUT10,MAK16,RNF122 |
| 27 | 28,425,000 | 28,575,000 | 380 | 183  | -0.429290116 | C27H8ORF41,RNF122             |
| 27 | 28,500,000 | 28,650,000 | 381 | 4    | 0.091622664  |                               |
| 27 | 28,575,000 | 28,725,000 | 382 | 5    | -0.843215899 |                               |
| 27 | 28,650,000 | 28,800,000 | 383 | 4    | -0.37034775  |                               |
| 27 | 28,725,000 | 28,875,000 | 384 | 2    | -3.549492077 |                               |
| 27 | 28,800,000 | 28,950,000 | 385 | 42   | -2.352602011 |                               |
| 27 | 28,875,000 | 29,025,000 | 386 | 452  | -1.911040765 | DUSP26                        |
| 27 | 28,950,000 | 29,100,000 | 387 | 575  | -2.587712179 | DUSP26                        |
| 27 | 29,025,000 | 29,175,000 | 388 | 267  | -2.618453664 |                               |
| 27 | 29,100,000 | 29,250,000 | 389 | 319  | -3.362338296 |                               |
| 27 | 29,175,000 | 29,325,000 | 390 | 480  | -4.910342737 |                               |
| 27 | 29,250,000 | 29,400,000 | 391 | 898  | -0.230333679 |                               |
| 27 | 29,325,000 | 29,475,000 | 392 | 707  | 1.240089657  |                               |
| 27 | 29,400,000 | 29,550,000 | 393 | 127  | 0.669954809  |                               |
| 27 | 29,475,000 | 29,625,000 | 394 | 199  | -0.560973522 |                               |
| 27 | 29,550,000 | 29,700,000 | 395 | 286  | -1.185751189 |                               |
| 27 | 29,625,000 | 29,775,000 | 396 | 409  | 0.258360052  |                               |
| 27 | 29,700,000 | 29,850,000 | 397 | 586  | 0.493195549  |                               |
| 27 | 29,775,000 | 29,925,000 | 398 | 690  | -0.178877837 |                               |
| 27 | 29,850,000 | 30,000,000 | 399 | 615  | -1.896860859 |                               |
| 27 | 29,925,000 | 30,075,000 | 400 | 791  | -3.54474253  |                               |
| 27 | 30,000,000 | 30,150,000 | 401 | 636  | -3.010642892 |                               |
| 27 | 30,075,000 | 30,225,000 | 402 | 277  | 0.337003826  |                               |
| 27 | 30,150,000 | 30,300,000 | 403 | 594  | 0.538881057  |                               |
| 27 | 30,225,000 | 30,375,000 | 404 | 707  | 0.230977959  |                               |
| 27 | 30,300,000 | 30,450,000 | 405 | 772  | -0.36648363  | UNC5D                         |
| 27 | 30,375,000 | 30,525,000 | 406 | 1057 | -0.334223659 | UNC5D                         |
| 27 | 30,450,000 | 30,600,000 | 407 | 1037 | -0.17537275  | UNC5D                         |
| 27 | 30,525,000 | 30,675,000 | 408 | 1073 | -0.800105387 | UNC5D                         |
| 27 | 30,600,000 | 30,750,000 | 409 | 1223 | -0.890496867 | UNC5D                         |
| 27 | 30,675,000 | 30,825,000 | 410 | 1178 | 0.069761293  | UNC5D                         |
| 27 | 30,750,000 | 30,900,000 | 411 | 966  | 0.640316093  | UNC5D                         |
| 27 | 30,825,000 | 30,975,000 | 412 | 632  | 0.567631631  | UNC5D                         |
| 27 | 30,900,000 | 31,050,000 | 413 | 551  | -0.748235386 | UNC5D                         |
| 27 | 30,975,000 | 31,125,000 | 414 | 643  | -0.706466157 | UNC5D                         |
| 27 | 31,050,000 | 31,200,000 | 415 | 571  | -1.662256466 | UNC5D,ENSBTAG00000026515      |
| 27 | 31,125,000 | 31,275,000 | 416 | 817  | -2.117704003 | ENSBTAG00000026515            |
| 27 | 31,200,000 | 31,350,000 | 417 | 1227 | -0.374026975 |                               |

|    |            |            |     |      |              |                                             |
|----|------------|------------|-----|------|--------------|---------------------------------------------|
| 27 | 31,275,000 | 31,425,000 | 418 | 810  | 0.332851603  |                                             |
| 27 | 31,350,000 | 31,500,000 | 419 | 684  | -1.251315205 |                                             |
| 27 | 31,425,000 | 31,575,000 | 420 | 950  | -0.870244163 |                                             |
| 27 | 31,500,000 | 31,650,000 | 421 | 621  | -0.060930492 |                                             |
| 27 | 31,575,000 | 31,725,000 | 422 | 699  | 0.683783262  |                                             |
| 27 | 31,650,000 | 31,800,000 | 423 | 1017 | 0.913833786  |                                             |
| 27 | 31,725,000 | 31,875,000 | 424 | 987  | 0.786798874  | KCNU1                                       |
| 27 | 31,800,000 | 31,950,000 | 425 | 1014 | 0.308654603  | KCNU1                                       |
| 27 | 31,875,000 | 32,025,000 | 426 | 1158 | 0.180993057  | KCNU1                                       |
| 27 | 31,950,000 | 32,100,000 | 427 | 1071 | 0.552597212  | KCNU1                                       |
| 27 | 32,025,000 | 32,175,000 | 428 | 766  | 0.600197045  |                                             |
| 27 | 32,100,000 | 32,250,000 | 429 | 917  | 0.312381479  |                                             |
| 27 | 32,175,000 | 32,325,000 | 430 | 924  | 0.010838659  |                                             |
| 27 | 32,250,000 | 32,400,000 | 431 | 472  | 0.201783575  |                                             |
| 27 | 32,325,000 | 32,475,000 | 432 | 331  | 0.752605981  | ENSBTAG00000033381                          |
| 27 | 32,400,000 | 32,550,000 | 433 | 597  | 0.545167718  | ENSBTAG00000033381                          |
| 27 | 32,475,000 | 32,625,000 | 434 | 976  | 0.745055804  |                                             |
| 27 | 32,550,000 | 32,700,000 | 435 | 953  | 0.99178069   | ZNF703                                      |
| 27 | 32,625,000 | 32,775,000 | 436 | 612  | 0.812489094  | ERLIN2,GPR124,PROSC,ZNF703                  |
| 27 | 32,700,000 | 32,850,000 | 437 | 684  | -0.090197596 | BRF2,ERLIN2,GPR124,PROSC,RAB11FIP1          |
| 27 | 32,775,000 | 32,925,000 | 438 | 791  | -0.108180064 | ADRB3,BRF2,GOT1L1,GPR124,RAB11FIP1          |
| 27 | 32,850,000 | 33,000,000 | 439 | 631  | 0.597494297  | ADRB3,ASH2L,EIF4EBP1,GOT1L1,RAB11FIP1       |
| 27 | 32,925,000 | 33,075,000 | 440 | 486  | 0.93240487   | ASH2L,BAG4,EIF4EBP1,LSM1,PPAPDC1B,STAR      |
| 27 | 33,000,000 | 33,150,000 | 441 | 282  | 0.563419776  | ASH2L,BAG4,DDHD2,LSM1,PPAPDC1B,STAR,WHSC1L1 |
| 27 | 33,075,000 | 33,225,000 | 442 | 210  | 0.42150223   | BAG4,DDHD2,WHSC1L1                          |
| 27 | 33,150,000 | 33,300,000 | 443 | 247  | 0.629247097  | FGFR1,LETM2,WHSC1L1                         |
| 27 | 33,225,000 | 33,375,000 | 444 | 353  | 0.496802577  | FGFR1,LETM2,WHSC1L1                         |
| 27 | 33,300,000 | 33,450,000 | 445 | 369  | 0.955839695  |                                             |
| 27 | 33,375,000 | 33,525,000 | 446 | 381  | 0.841312493  |                                             |
| 27 | 33,450,000 | 33,600,000 | 447 | 860  | 0.249588333  | TACC1                                       |
| 27 | 33,525,000 | 33,675,000 | 448 | 867  | 0.385424618  | TACC1                                       |
| 27 | 33,600,000 | 33,750,000 | 449 | 649  | -0.016598156 | PLEKHA2,TACC1                               |
| 27 | 33,675,000 | 33,825,000 | 450 | 787  | -0.454648925 | ADAM-9,HTRA4,PLEKHA2,TM2D2                  |
| 27 | 33,750,000 | 33,900,000 | 451 | 755  | 0.34606942   | ADAM-9,HTRA4,PLEKHA2,TM2D2                  |
| 27 | 33,825,000 | 33,975,000 | 452 | 879  | 0.80701403   | ADAM-9,ADAM32                               |
| 27 | 33,900,000 | 34,050,000 | 453 | 1039 | 0.860210836  | ADAM32                                      |
| 27 | 33,975,000 | 34,125,000 | 454 | 746  | 0.828498724  | ADAM32,ENSBTAG00000040445                   |
| 27 | 34,050,000 | 34,200,000 | 455 | 478  | 0.732024437  | ADAM32,ENSBTAG00000040445                   |
| 27 | 34,125,000 | 34,275,000 | 456 | 480  | 0.550810448  | ADAM2,ENSBTAG00000009406,ENSBTAG00000040445 |
| 27 | 34,200,000 | 34,350,000 | 457 | 553  | -1.073091219 | ADAM2,ENSBTAG00000009406,ENSBTAG00000040445 |
| 27 | 34,275,000 | 34,425,000 | 458 | 925  | -0.265407663 | ADAM2,ENSBTAG00000033312                    |
| 27 | 34,350,000 | 34,500,000 | 459 | 1117 | 0.706821679  | ADAM2,ENSBTAG00000033312                    |
| 27 | 34,425,000 | 34,575,000 | 460 | 763  | 0.733613952  | ADAM18,ENSBTAG00000033312                   |
| 27 | 34,500,000 | 34,650,000 | 461 | 1041 | 0.28275523   | ADAM18                                      |
| 27 | 34,575,000 | 34,725,000 | 462 | 1592 | 0.543323137  | ADAM18,IDO1,IDO2                            |
| 27 | 34,650,000 | 34,800,000 | 463 | 1451 | 0.932797623  | IDO1,IDO2                                   |
| 27 | 34,725,000 | 34,875,000 | 464 | 1036 | 0.991520424  | IDO2                                        |
| 27 | 34,800,000 | 34,950,000 | 465 | 591  | 0.56608752   | C27H8orf4,ENSBTAG00000018713                |
| 27 | 34,875,000 | 35,025,000 | 466 | 489  | 0.288715768  | C27H8orf4,ENSBTAG00000018713                |
| 27 | 34,950,000 | 35,100,000 | 467 | 804  | -0.345086856 |                                             |
| 27 | 35,025,000 | 35,175,000 | 468 | 976  | -0.115750005 |                                             |
| 27 | 35,100,000 | 35,250,000 | 469 | 1101 | 0.13965391   | ZMAT4                                       |
| 27 | 35,175,000 | 35,325,000 | 470 | 1659 | -0.198116673 | ZMAT4                                       |

|    |            |            |     |      |              |                               |
|----|------------|------------|-----|------|--------------|-------------------------------|
| 27 | 35,250,000 | 35,400,000 | 471 | 1670 | 0.339285548  | ZMAT4                         |
| 27 | 35,325,000 | 35,475,000 | 472 | 1259 | 1.239677386  | ZMAT4                         |
| 27 | 35,400,000 | 35,550,000 | 473 | 1037 | 1.338749728  | ZMAT4                         |
| 27 | 35,475,000 | 35,625,000 | 474 | 803  | 0.7176793    | ZMAT4                         |
| 27 | 35,550,000 | 35,700,000 | 475 | 1054 | 0.347499786  | ZMAT4                         |
| 27 | 35,625,000 | 35,775,000 | 476 | 1387 | 0.552168282  |                               |
| 27 | 35,700,000 | 35,850,000 | 477 | 975  | -0.260815504 |                               |
| 27 | 35,775,000 | 35,925,000 | 478 | 549  | -0.737195758 | SFRP1                         |
| 27 | 35,850,000 | 36,000,000 | 479 | 633  | -0.306571098 | SFRP1                         |
| 27 | 35,925,000 | 36,075,000 | 480 | 784  | 0.022231716  | SFRP1                         |
| 27 | 36,000,000 | 36,150,000 | 481 | 592  | 0.785048666  | GINS4,GOLGA7                  |
| 27 | 36,075,000 | 36,225,000 | 482 | 415  | 0.381937251  | AGPAT6,GINS4,GOLGA7           |
| 27 | 36,150,000 | 36,300,000 | 483 | 612  | 0.298624174  | AGPAT6,ANK1,GINS4,NKX6-3      |
| 27 | 36,225,000 | 36,375,000 | 484 | 1130 | 0.60278226   | AGPAT6,ANK1,NKX6-3            |
| 27 | 36,300,000 | 36,450,000 | 485 | 1288 | 0.41820303   | ANK1                          |
| 27 | 36,375,000 | 36,525,000 | 486 | 1028 | 0.590230513  |                               |
| 27 | 36,450,000 | 36,600,000 | 487 | 772  | 1.004804867  | KAT6A                         |
| 27 | 36,525,000 | 36,675,000 | 488 | 532  | 0.93184036   | KAT6A                         |
| 27 | 36,600,000 | 36,750,000 | 489 | 420  | 1.128664309  | AP3M2,KAT6A,PLAT              |
| 27 | 36,675,000 | 36,825,000 | 490 | 411  | 1.083858288  | AP3M2,IKBKB,PLAT              |
| 27 | 36,750,000 | 36,900,000 | 491 | 678  | 1.12188355   | IKBKB,PLAT,POLB               |
| 27 | 36,825,000 | 36,975,000 | 492 | 792  | 1.090131617  | DKK4,IKBKB,POLB,SLC20A2,VDAC3 |
| 27 | 36,900,000 | 37,050,000 | 493 | 797  | 1.048666233  | DKK4,POLB,SLC20A2,VDAC3       |
| 27 | 36,975,000 | 37,125,000 | 494 | 801  | 0.926011785  | SLC20A2,SMIM19                |
| 27 | 37,050,000 | 37,200,000 | 495 | 721  | 1.01209082   | CHRNA6,CHRN3,SMIM19           |
| 27 | 37,125,000 | 37,275,000 | 496 | 777  | 1.298214397  | CHRNA6,CHRN3,RNF170,THAP1     |
| 27 | 37,200,000 | 37,350,000 | 497 | 1196 | 0.374303301  | CHRNA6,HOOK3,RNF170,THAP1     |
| 27 | 37,275,000 | 37,425,000 | 498 | 1398 | 0.671481009  | FNTA,HOOK3,POMK               |
| 27 | 37,350,000 | 37,500,000 | 499 | 1150 | 1.172491604  | FNTA,HGSNAT,HOOK3,INTS10,POMK |
| 27 | 37,425,000 | 37,575,000 | 500 | 745  | 0.664630436  | HGSNAT,INTS10,POMK            |
| 27 | 37,500,000 | 37,650,000 | 501 | 206  | 0.132186885  | INTS10                        |
| 27 | 37,575,000 | 37,725,000 | 502 | 156  | 0.762502648  |                               |
| 27 | 37,650,000 | 37,800,000 | 503 | 427  | 0.772438522  |                               |
| 27 | 37,725,000 | 37,875,000 | 504 | 561  | -0.345733414 | CSGALNACT1                    |
| 27 | 37,800,000 | 37,950,000 | 505 | 727  | -1.484674661 | CSGALNACT1                    |
| 27 | 37,875,000 | 38,025,000 | 506 | 876  | -0.436455489 | CSGALNACT1                    |
| 27 | 37,950,000 | 38,100,000 | 507 | 989  | 0.542556649  | CSGALNACT1,SH2D4A             |
| 27 | 38,025,000 | 38,175,000 | 508 | 1358 | 0.29813601   | SH2D4A                        |
| 27 | 38,100,000 | 38,250,000 | 509 | 1635 | 0.444388316  |                               |
| 27 | 38,175,000 | 38,325,000 | 510 | 1252 | 0.725458485  |                               |
| 27 | 38,250,000 | 38,400,000 | 511 | 975  | 0.650418655  |                               |
| 27 | 38,325,000 | 38,475,000 | 512 | 1017 | 0.170648418  |                               |
| 27 | 38,400,000 | 38,550,000 | 513 | 990  | 0.308719332  | PSD3                          |
| 27 | 38,475,000 | 38,625,000 | 514 | 960  | 1.170444912  | PSD3                          |
| 27 | 38,550,000 | 38,700,000 | 515 | 1032 | 0.059814178  | PSD3                          |
| 27 | 38,625,000 | 38,775,000 | 516 | 1669 | 0.220747472  | PSD3                          |
| 27 | 38,700,000 | 38,850,000 | 517 | 1638 | 0.71232125   | PSD3                          |
| 27 | 38,775,000 | 38,925,000 | 518 | 1249 | 0.933701153  | NAT1,PSD3                     |
| 27 | 38,850,000 | 39,000,000 | 519 | 1521 | 1.007761686  | NAT1                          |
| 27 | 38,925,000 | 39,075,000 | 520 | 1739 | 0.605510781  |                               |
| 27 | 39,000,000 | 39,150,000 | 521 | 1358 | -0.494717774 | LRR3B                         |
| 27 | 39,075,000 | 39,225,000 | 522 | 895  | -0.352622991 | LRR3B                         |
| 27 | 39,150,000 | 39,300,000 | 523 | 828  | 1.333900534  |                               |

|    |            |            |     |      |              |                         |
|----|------------|------------|-----|------|--------------|-------------------------|
| 27 | 39,225,000 | 39,375,000 | 524 | 1189 | 1.360763231  |                         |
| 27 | 39,300,000 | 39,450,000 | 525 | 1330 | 0.917290858  |                         |
| 27 | 39,375,000 | 39,525,000 | 526 | 1130 | 0.59465613   |                         |
| 27 | 39,450,000 | 39,600,000 | 527 | 1083 | 0.77199361   |                         |
| 27 | 39,525,000 | 39,675,000 | 528 | 826  | -0.632667867 |                         |
| 27 | 39,600,000 | 39,750,000 | 529 | 967  | -0.588089549 |                         |
| 27 | 39,675,000 | 39,825,000 | 530 | 1623 | 0.740784256  |                         |
| 27 | 39,750,000 | 39,900,000 | 531 | 1544 | 0.73653695   | NGLY1,OXSM              |
| 27 | 39,825,000 | 39,975,000 | 532 | 895  | 0.381234143  | NGLY1,OXSM              |
| 27 | 39,900,000 | 40,050,000 | 533 | 769  | -0.499780664 | NGLY1,TOP2B             |
| 27 | 39,975,000 | 40,125,000 | 534 | 815  | -1.197875216 | TOP2B                   |
| 27 | 40,050,000 | 40,200,000 | 535 | 962  | -1.966389724 | RARB,TOP2B              |
| 27 | 40,125,000 | 40,275,000 | 536 | 843  | -1.617390132 | RARB                    |
| 27 | 40,200,000 | 40,350,000 | 537 | 532  | 0.043291231  | RARB                    |
| 27 | 40,275,000 | 40,425,000 | 538 | 532  | 0.309641188  |                         |
| 27 | 40,350,000 | 40,500,000 | 539 | 685  | -0.213081664 |                         |
| 27 | 40,425,000 | 40,575,000 | 540 | 976  | -0.009916262 |                         |
| 27 | 40,500,000 | 40,650,000 | 541 | 1293 | 1.056465946  |                         |
| 27 | 40,575,000 | 40,725,000 | 542 | 1489 | 0.90635368   |                         |
| 27 | 40,650,000 | 40,800,000 | 543 | 1265 | 0.436649355  |                         |
| 27 | 40,725,000 | 40,875,000 | 544 | 866  | 0.464837414  |                         |
| 27 | 40,800,000 | 40,950,000 | 545 | 770  | 0.346218589  |                         |
| 27 | 40,875,000 | 41,025,000 | 546 | 636  | -0.071026178 |                         |
| 27 | 40,950,000 | 41,100,000 | 547 | 416  | 0.049273725  | MCM4,ENSBTAG00000045690 |
| 27 | 41,025,000 | 41,175,000 | 548 | 432  | -0.174416071 | MCM4,ENSBTAG00000045690 |
| 27 | 41,100,000 | 41,250,000 | 549 | 503  | -0.745472149 |                         |
| 27 | 41,175,000 | 41,325,000 | 550 | 869  | 0.37758511   |                         |
| 27 | 41,250,000 | 41,400,000 | 551 | 1107 | 0.4637201    |                         |
| 27 | 41,325,000 | 41,475,000 | 552 | 775  | 0.167581043  |                         |
| 27 | 41,400,000 | 41,550,000 | 553 | 586  | 0.395620674  |                         |
| 27 | 41,475,000 | 41,625,000 | 554 | 658  | 0.832241899  |                         |
| 27 | 41,550,000 | 41,700,000 | 555 | 731  | 0.57259191   | THRB                    |
| 27 | 41,625,000 | 41,775,000 | 556 | 765  | -0.572324471 | THRB                    |
| 27 | 41,700,000 | 41,850,000 | 557 | 684  | -1.212326991 | THRB                    |
| 27 | 41,775,000 | 41,925,000 | 558 | 515  | 0.219111012  | NR1D2                   |
| 27 | 41,850,000 | 42,000,000 | 559 | 694  | 0.888327357  | NKIRAS1,NR1D2,RPL15     |
| 27 | 41,925,000 | 42,075,000 | 560 | 854  | 0.819705897  | NKIRAS1,RPL15           |
| 27 | 42,000,000 | 42,150,000 | 561 | 525  | 0.150516582  |                         |
| 27 | 42,075,000 | 42,225,000 | 562 | 384  | -0.666096795 | UBE2E2                  |
| 27 | 42,150,000 | 42,300,000 | 563 | 536  | -1.072375702 | UBE2E2                  |
| 27 | 42,225,000 | 42,375,000 | 564 | 627  | -0.986845075 | UBE2E2                  |
| 27 | 42,300,000 | 42,450,000 | 565 | 517  | -0.318115131 | ENSBTAG00000021882      |
| 27 | 42,375,000 | 42,525,000 | 566 | 310  | 0.16645803   | ENSBTAG00000021882      |
| 27 | 42,450,000 | 42,600,000 | 567 | 258  | -0.064256685 | ENSBTAG00000021882      |
| 27 | 42,525,000 | 42,675,000 | 568 | 341  | -0.067507672 |                         |
| 27 | 42,600,000 | 42,750,000 | 569 | 564  | -0.501667192 |                         |
| 27 | 42,675,000 | 42,825,000 | 570 | 808  | -0.672895792 |                         |
| 27 | 42,750,000 | 42,900,000 | 571 | 1192 | 0.463678057  |                         |
| 27 | 42,825,000 | 42,975,000 | 572 | 1388 | 1.216748584  |                         |
| 27 | 42,900,000 | 43,050,000 | 573 | 867  | 1.078878964  |                         |
| 27 | 42,975,000 | 43,125,000 | 574 | 792  | 0.681456753  |                         |
| 27 | 43,050,000 | 43,200,000 | 575 | 799  | 0.613924794  |                         |
| 27 | 43,125,000 | 43,275,000 | 576 | 745  | -0.246925016 |                         |

|    |            |            |     |      |              |                          |
|----|------------|------------|-----|------|--------------|--------------------------|
| 27 | 43,200,000 | 43,350,000 | 577 | 1346 | -0.873220195 |                          |
| 27 | 43,275,000 | 43,425,000 | 578 | 1583 | -1.087700154 |                          |
| 27 | 43,350,000 | 43,500,000 | 579 | 1388 | -0.363343058 |                          |
| 27 | 43,425,000 | 43,575,000 | 580 | 965  | 0.135854405  |                          |
| 27 | 43,500,000 | 43,650,000 | 581 | 1152 | 0.749749734  |                          |
| 27 | 43,575,000 | 43,725,000 | 582 | 1556 | 0.773700244  |                          |
| 27 | 43,650,000 | 43,800,000 | 583 | 1608 | 0.475083733  |                          |
| 27 | 43,725,000 | 43,875,000 | 584 | 1938 | 0.68574564   |                          |
| 27 | 43,800,000 | 43,950,000 | 585 | 1875 | 0.861057649  |                          |
| 27 | 43,875,000 | 44,025,000 | 586 | 1554 | 0.771956799  |                          |
| 27 | 43,950,000 | 44,100,000 | 587 | 1624 | 0.86072446   |                          |
| 27 | 44,025,000 | 44,175,000 | 588 | 1633 | 0.521250533  |                          |
| 27 | 44,100,000 | 44,250,000 | 589 | 1420 | 0.362365491  |                          |
| 27 | 44,175,000 | 44,325,000 | 590 | 1530 | 1.075500569  |                          |
| 27 | 44,250,000 | 44,400,000 | 591 | 1560 | 0.866574951  |                          |
| 27 | 44,325,000 | 44,475,000 | 592 | 1531 | -0.097569133 |                          |
| 27 | 44,400,000 | 44,550,000 | 593 | 1369 | -0.437503014 |                          |
| 27 | 44,475,000 | 44,625,000 | 594 | 1221 | 0.329300787  |                          |
| 27 | 44,550,000 | 44,700,000 | 595 | 1506 | 0.884509748  |                          |
| 27 | 44,625,000 | 44,775,000 | 596 | 1665 | 0.853843021  |                          |
| 27 | 44,700,000 | 44,850,000 | 597 | 1587 | 0.751645965  |                          |
| 27 | 44,775,000 | 44,925,000 | 598 | 1221 | 0.71148843   |                          |
| 27 | 44,850,000 | 45,000,000 | 599 | 1021 | 0.322583643  |                          |
| 27 | 44,925,000 | 45,075,000 | 600 | 1335 | -0.081513607 |                          |
| 27 | 45,000,000 | 45,150,000 | 601 | 1335 | -0.332053637 |                          |
| 27 | 45,075,000 | 45,225,000 | 602 | 1140 | -0.025425104 |                          |
| 27 | 45,150,000 | 45,300,000 | 603 | 1628 | -0.370340751 |                          |
| 27 | 45,225,000 | 45,375,000 | 604 | 1402 | -0.696873811 |                          |
| 27 | 45,300,000 | 45,407,902 | 605 | 665  | 0.016596957  |                          |
| 28 | 0          | 150,000    | 1   | 974  | -0.407344763 |                          |
| 28 | 75,000     | 225,000    | 2   | 1003 | 0.196682372  | RAB4A                    |
| 28 | 150,000    | 300,000    | 3   | 1278 | 0.211757867  | CCSAP,RAB4A              |
| 28 | 225,000    | 375,000    | 4   | 1619 | -1.225031255 | CCSAP,RAB4A              |
| 28 | 300,000    | 450,000    | 5   | 1225 | -1.690641817 | ACTA1,NUP133             |
| 28 | 375,000    | 525,000    | 6   | 755  | -0.090041947 | ABCB10,ACTA1,NUP133      |
| 28 | 450,000    | 600,000    | 7   | 584  | 0.740632197  | ABCB10,NUP133,TAF5L,URB2 |
| 28 | 525,000    | 675,000    | 8   | 880  | 0.057545519  | ABCB10,TAF5L,URB2        |
| 28 | 600,000    | 750,000    | 9   | 1046 | 0.04332097   | URB2                     |
| 28 | 675,000    | 825,000    | 10  | 869  | 0.849143633  |                          |
| 28 | 750,000    | 900,000    | 11  | 804  | 0.805770465  |                          |
| 28 | 825,000    | 975,000    | 12  | 479  | 0.36829034   |                          |
| 28 | 900,000    | 1,050,000  | 13  | 977  | 0.906082206  |                          |
| 28 | 975,000    | 1,125,000  | 14  | 1011 | 0.76316413   |                          |
| 28 | 1,050,000  | 1,200,000  | 15  | 718  | 0.173118912  | GALNT2                   |
| 28 | 1,125,000  | 1,275,000  | 16  | 1205 | 0.30700221   | GALNT2                   |
| 28 | 1,200,000  | 1,350,000  | 17  | 1240 | -0.982223733 | GALNT2,PGBD5             |
| 28 | 1,275,000  | 1,425,000  | 18  | 1296 | -1.463128458 | GALNT2,PGBD5             |
| 28 | 1,350,000  | 1,500,000  | 19  | 1523 | -0.123889509 | PGBD5                    |
| 28 | 1,425,000  | 1,575,000  | 20  | 1473 | 0.756561792  |                          |
| 28 | 1,500,000  | 1,650,000  | 21  | 1681 | 0.353760864  |                          |
| 28 | 1,575,000  | 1,725,000  | 22  | 1787 | 0.453907637  | ENSBTAG00000048153       |
| 28 | 1,650,000  | 1,800,000  | 23  | 1290 | 0.931910828  | ENSBTAG00000048153       |
| 28 | 1,725,000  | 1,875,000  | 24  | 862  | 0.827194236  | ENSBTAG00000048153       |

|    |           |           |    |      |              |                                                    |
|----|-----------|-----------|----|------|--------------|----------------------------------------------------|
| 28 | 1,800,000 | 1,950,000 | 25 | 749  | -0.280368408 |                                                    |
| 28 | 1,875,000 | 2,025,000 | 26 | 843  | 0.555435576  |                                                    |
| 28 | 1,950,000 | 2,100,000 | 27 | 1126 | 0.988583235  |                                                    |
| 28 | 2,025,000 | 2,175,000 | 28 | 1169 | 0.900041448  | RHOU                                               |
| 28 | 2,100,000 | 2,250,000 | 29 | 822  | 0.135234669  | RHOU                                               |
| 28 | 2,175,000 | 2,325,000 | 30 | 784  | -0.882130157 | RHOU                                               |
| 28 | 2,250,000 | 2,400,000 | 31 | 759  | -0.323015966 |                                                    |
| 28 | 2,325,000 | 2,475,000 | 32 | 511  | 0.024580594  |                                                    |
| 28 | 2,400,000 | 2,550,000 | 33 | 378  | -0.214907019 |                                                    |
| 28 | 2,475,000 | 2,625,000 | 34 | 260  | -1.464044377 | OR5AS1,ENSBTAG00000033555,ENSBTAG00000039837       |
| 28 | 2,550,000 | 2,700,000 | 35 | 246  | -0.364671575 | OR5AS1,ENSBTAG00000033555,ENSBTAG00000039837       |
| 28 | 2,625,000 | 2,775,000 | 36 | 246  | 0.540978013  | OR5D14,ENSBTAG00000038418                          |
| 28 | 2,700,000 | 2,850,000 | 37 | 242  | 0.641480572  | OR5D14,ENSBTAG00000004217,ENSBTAG00000038418       |
| 28 | 2,775,000 | 2,925,000 | 38 | 585  | -0.45999664  | OR4P4,ENSBTAG00000004217                           |
| 28 | 2,850,000 | 3,000,000 | 39 | 783  | -1.818846732 | OR4P4                                              |
| 28 | 2,925,000 | 3,075,000 | 40 | 666  | -3.254633505 | TSNAX                                              |
| 28 | 3,000,000 | 3,150,000 | 41 | 916  | -0.086001987 | TSNAX                                              |
| 28 | 3,075,000 | 3,225,000 | 42 | 810  | 0.745667753  | TSNAX,ENSBTAG00000004624                           |
| 28 | 3,150,000 | 3,300,000 | 43 | 461  | 0.105431129  | ENSBTAG00000004624,ENSBTAG000000045608             |
| 28 | 3,225,000 | 3,375,000 | 44 | 364  | -0.061210515 | EXOC8,SPRTN,ENSBTAG00000010500,ENSBTAG000000045608 |
| 28 | 3,300,000 | 3,450,000 | 45 | 403  | -0.445821787 | C1orf131,EXOC8,GNPAT,SPRTN,ENSBTAG00000010500      |
| 28 | 3,375,000 | 3,525,000 | 46 | 578  | -0.59599932  | C1orf131,GNPAT,TRIM67                              |
| 28 | 3,450,000 | 3,600,000 | 47 | 783  | 0.215413785  | C1orf131,TRIM67                                    |
| 28 | 3,525,000 | 3,675,000 | 48 | 946  | 0.672958431  | FAM89A                                             |
| 28 | 3,600,000 | 3,750,000 | 49 | 689  | 0.61030943   | ARV1,FAM89A,TTC13                                  |
| 28 | 3,675,000 | 3,825,000 | 50 | 724  | 0.481131471  | ARV1,FAM89A,TTC13                                  |
| 28 | 3,750,000 | 3,900,000 | 51 | 967  | -1.394317134 | C1orf198,TTC13                                     |
| 28 | 3,825,000 | 3,975,000 | 52 | 709  | -1.341500911 | C1orf198,ENSBTAG00000045932                        |
| 28 | 3,900,000 | 4,050,000 | 53 | 1084 | 0.708279501  | ENSBTAG00000039845,ENSBTAG00000045932              |
| 28 | 3,975,000 | 4,125,000 | 54 | 1185 | 0.952068553  | FMN2,ENSBTAG00000039845                            |
| 28 | 4,050,000 | 4,200,000 | 55 | 683  | 0.938150803  | FMN2                                               |
| 28 | 4,125,000 | 4,275,000 | 56 | 447  | 0.495114864  | FMN2                                               |
| 28 | 4,200,000 | 4,350,000 | 57 | 321  | -0.198940847 | FMN2                                               |
| 28 | 4,275,000 | 4,425,000 | 58 | 479  | -0.248074786 | FMN2                                               |
| 28 | 4,350,000 | 4,500,000 | 59 | 622  | 0.083543952  | FMN2                                               |
| 28 | 4,425,000 | 4,575,000 | 60 | 623  | 0.466587364  | FMN2                                               |
| 28 | 4,500,000 | 4,650,000 | 61 | 1043 | 0.375503534  |                                                    |
| 28 | 4,575,000 | 4,725,000 | 62 | 1270 | 0.498527504  |                                                    |
| 28 | 4,650,000 | 4,800,000 | 63 | 1081 | 0.805482401  |                                                    |
| 28 | 4,725,000 | 4,875,000 | 64 | 1106 | 0.807645289  |                                                    |
| 28 | 4,800,000 | 4,950,000 | 65 | 1195 | 0.918620107  |                                                    |
| 28 | 4,875,000 | 5,025,000 | 66 | 1239 | 0.914367541  |                                                    |
| 28 | 4,950,000 | 5,100,000 | 67 | 859  | 0.780982284  |                                                    |
| 28 | 5,025,000 | 5,175,000 | 68 | 780  | 0.975269476  |                                                    |
| 28 | 5,100,000 | 5,250,000 | 69 | 1022 | 1.039136808  |                                                    |
| 28 | 5,175,000 | 5,325,000 | 70 | 1114 | 0.651977529  | SIPA1L2                                            |
| 28 | 5,250,000 | 5,400,000 | 71 | 992  | 0.484137655  | SIPA1L2                                            |
| 28 | 5,325,000 | 5,475,000 | 72 | 650  | 0.277622287  | SIPA1L2                                            |
| 28 | 5,400,000 | 5,550,000 | 73 | 780  | 0.169697895  |                                                    |
| 28 | 5,475,000 | 5,625,000 | 74 | 1235 | 0.424909827  |                                                    |
| 28 | 5,550,000 | 5,700,000 | 75 | 1073 | 0.633564199  |                                                    |
| 28 | 5,625,000 | 5,775,000 | 76 | 962  | 1.133270297  | MAP10                                              |



|    |           |           |     |      |              |                            |
|----|-----------|-----------|-----|------|--------------|----------------------------|
| 28 | 5,700,000 | 5,850,000 | 77  | 1252 | 1.204357481  | MAP10                      |
| 28 | 5,775,000 | 5,925,000 | 78  | 1595 | 1.268966488  | NTPCR,PCNXL2               |
| 28 | 5,850,000 | 6,000,000 | 79  | 1597 | 1.12832995   | NTPCR,PCNXL2               |
| 28 | 5,925,000 | 6,075,000 | 80  | 1062 | 0.818764001  | PCNXL2                     |
| 28 | 6,000,000 | 6,150,000 | 81  | 859  | 0.834367047  | PCNXL2                     |
| 28 | 6,075,000 | 6,225,000 | 82  | 896  | 1.104512661  | PCNXL2                     |
| 28 | 6,150,000 | 6,300,000 | 83  | 852  | 1.080701966  | PCNXL2,ENSBTAG00000021183  |
| 28 | 6,225,000 | 6,375,000 | 84  | 1185 | 1.297845991  | PCNXL2,ENSBTAG00000021183  |
| 28 | 6,300,000 | 6,450,000 | 85  | 1390 | 1.373964075  |                            |
| 28 | 6,375,000 | 6,525,000 | 86  | 1134 | 1.184192932  | KCNK1                      |
| 28 | 6,450,000 | 6,600,000 | 87  | 1441 | 0.534733588  | KCNK1                      |
| 28 | 6,525,000 | 6,675,000 | 88  | 1272 | 0.188959709  | KCNK1                      |
| 28 | 6,600,000 | 6,750,000 | 89  | 786  | -0.024756411 |                            |
| 28 | 6,675,000 | 6,825,000 | 90  | 609  | 0.050657344  | SLC35F3                    |
| 28 | 6,750,000 | 6,900,000 | 91  | 707  | 0.625009895  | SLC35F3                    |
| 28 | 6,825,000 | 6,975,000 | 92  | 1093 | 0.618263905  | SLC35F3                    |
| 28 | 6,900,000 | 7,050,000 | 93  | 1180 | -0.061426006 | SLC35F3                    |
| 28 | 6,975,000 | 7,125,000 | 94  | 1211 | -0.403273354 | SLC35F3                    |
| 28 | 7,050,000 | 7,200,000 | 95  | 782  | -0.299958803 | SLC35F3                    |
| 28 | 7,125,000 | 7,275,000 | 96  | 524  | -0.766005897 | SLC35F3,TARBP1             |
| 28 | 7,200,000 | 7,350,000 | 97  | 1003 | -0.240241699 | TARBP1                     |
| 28 | 7,275,000 | 7,425,000 | 98  | 771  | -0.22337801  | TARBP1                     |
| 28 | 7,350,000 | 7,500,000 | 99  | 308  | -1.415344799 | IRF2BP2                    |
| 28 | 7,425,000 | 7,575,000 | 100 | 510  | -2.20895732  | IRF2BP2                    |
| 28 | 7,500,000 | 7,650,000 | 101 | 665  | -1.541439949 |                            |
| 28 | 7,575,000 | 7,725,000 | 102 | 567  | -0.681257786 |                            |
| 28 | 7,650,000 | 7,800,000 | 103 | 506  | -0.080370244 |                            |
| 28 | 7,725,000 | 7,875,000 | 104 | 730  | -0.835969206 |                            |
| 28 | 7,800,000 | 7,950,000 | 105 | 724  | -0.466602208 | RBM34,TOMM20               |
| 28 | 7,875,000 | 8,025,000 | 106 | 494  | 0.631099819  | ARID4B,RBM34,TOMM20        |
| 28 | 7,950,000 | 8,100,000 | 107 | 363  | 0.619386912  | ARID4B,RBM34               |
| 28 | 8,025,000 | 8,175,000 | 108 | 375  | 0.387840567  | ARID4B,GGPS1,TBCE          |
| 28 | 8,100,000 | 8,250,000 | 109 | 735  | -0.516594932 | ARID4B,B3GALNT2,GGPS1,TBCE |
| 28 | 8,175,000 | 8,325,000 | 110 | 1341 | -0.365507965 | B3GALNT2,TBCE              |
| 28 | 8,250,000 | 8,400,000 | 111 | 1760 | -0.421872593 | B3GALNT2,GNG4              |
| 28 | 8,325,000 | 8,475,000 | 112 | 1456 | -0.872312102 | GNG4,LYST                  |
| 28 | 8,400,000 | 8,550,000 | 113 | 805  | -1.077853239 | GNG4,LYST                  |
| 28 | 8,475,000 | 8,625,000 | 114 | 638  | -0.492491086 | LYST                       |
| 28 | 8,550,000 | 8,700,000 | 115 | 863  | -1.2035231   | LYST                       |
| 28 | 8,625,000 | 8,775,000 | 116 | 1104 | -0.334988773 | NID1                       |
| 28 | 8,700,000 | 8,850,000 | 117 | 1036 | 0.613613444  | NID1                       |
| 28 | 8,775,000 | 8,925,000 | 118 | 974  | 1.163686731  | GPR137B,NID1               |
| 28 | 8,850,000 | 9,000,000 | 119 | 978  | 0.671233575  | ERO1LB,GPR137B             |
| 28 | 8,925,000 | 9,075,000 | 120 | 939  | -0.720094312 | ERO1LB,GPR137B             |
| 28 | 9,000,000 | 9,150,000 | 121 | 1262 | -0.204833102 | EDARADD,ERO1LB             |
| 28 | 9,075,000 | 9,225,000 | 122 | 1228 | 0.079719504  | EDARADD,LGALS8             |
| 28 | 9,150,000 | 9,300,000 | 123 | 976  | -0.250174317 | EDARADD,HEATR1,LGALS8      |
| 28 | 9,225,000 | 9,375,000 | 124 | 994  | -0.486244828 | HEATR1,LGALS8              |
| 28 | 9,300,000 | 9,450,000 | 125 | 769  | 0.189009915  | ACTN2                      |
| 28 | 9,375,000 | 9,525,000 | 126 | 619  | -0.515614094 | ACTN2,MTR                  |
| 28 | 9,450,000 | 9,600,000 | 127 | 760  | 0.122427694  | ACTN2,MTR                  |
| 28 | 9,525,000 | 9,675,000 | 128 | 1277 | 0.765122549  | MTR                        |
| 28 | 9,600,000 | 9,750,000 | 129 | 1373 | 0.538599546  |                            |

|    |            |            |     |      |              |                                            |
|----|------------|------------|-----|------|--------------|--------------------------------------------|
| 28 | 9,675,000  | 9,825,000  | 130 | 774  | 0.179227018  |                                            |
| 28 | 9,750,000  | 9,900,000  | 131 | 754  | 0.089004717  |                                            |
| 28 | 9,825,000  | 9,975,000  | 132 | 1164 | -1.447333175 | RYR2                                       |
| 28 | 9,900,000  | 10,050,000 | 133 | 1099 | -1.471567047 | RYR2                                       |
| 28 | 9,975,000  | 10,125,000 | 134 | 1158 | -1.77958793  | RYR2                                       |
| 28 | 10,050,000 | 10,200,000 | 135 | 1330 | -1.545408038 | RYR2                                       |
| 28 | 10,125,000 | 10,275,000 | 136 | 1050 | 0.222395937  | RYR2                                       |
| 28 | 10,200,000 | 10,350,000 | 137 | 1121 | -0.102586469 | RYR2                                       |
| 28 | 10,275,000 | 10,425,000 | 138 | 1173 | 0.408401861  | RYR2                                       |
| 28 | 10,350,000 | 10,500,000 | 139 | 701  | 1.050662035  | RYR2                                       |
| 28 | 10,425,000 | 10,575,000 | 140 | 848  | 0.385766146  | RYR2                                       |
| 28 | 10,500,000 | 10,650,000 | 141 | 1333 | -0.375939393 | RYR2                                       |
| 28 | 10,575,000 | 10,725,000 | 142 | 1084 | -0.049128273 | ZP4                                        |
| 28 | 10,650,000 | 10,800,000 | 143 | 1029 | 0.358178679  | ZP4                                        |
| 28 | 10,725,000 | 10,875,000 | 144 | 966  | -0.57566741  |                                            |
| 28 | 10,800,000 | 10,950,000 | 145 | 840  | -0.095950801 |                                            |
| 28 | 10,875,000 | 11,025,000 | 146 | 1210 | 0.057691915  |                                            |
| 28 | 10,950,000 | 11,100,000 | 147 | 910  | -0.051177711 |                                            |
| 28 | 11,025,000 | 11,175,000 | 148 | 549  | 0.68631383   |                                            |
| 28 | 11,100,000 | 11,250,000 | 149 | 861  | 1.165376864  |                                            |
| 28 | 11,175,000 | 11,325,000 | 150 | 1027 | 1.218394479  | ENSBTAG00000004702                         |
| 28 | 11,250,000 | 11,400,000 | 151 | 768  | 1.055353825  | ENSBTAG00000004702                         |
| 28 | 11,325,000 | 11,475,000 | 152 | 526  | 0.247866988  |                                            |
| 28 | 11,400,000 | 11,550,000 | 153 | 680  | 0.675992644  |                                            |
| 28 | 11,475,000 | 11,625,000 | 154 | 933  | -0.057248945 |                                            |
| 28 | 11,550,000 | 11,700,000 | 155 | 722  | -0.52377079  |                                            |
| 28 | 11,625,000 | 11,775,000 | 156 | 347  | 0.543937028  |                                            |
| 28 | 11,700,000 | 11,850,000 | 157 | 362  | -0.31795739  |                                            |
| 28 | 11,775,000 | 11,925,000 | 158 | 429  | -0.881995219 |                                            |
| 28 | 11,850,000 | 12,000,000 | 159 | 329  | -1.507003905 |                                            |
| 28 | 11,925,000 | 12,075,000 | 160 | 246  | -2.713256791 |                                            |
| 28 | 12,000,000 | 12,150,000 | 161 | 404  | -2.197822775 |                                            |
| 28 | 12,075,000 | 12,225,000 | 162 | 530  | -1.021731037 |                                            |
| 28 | 12,150,000 | 12,300,000 | 163 | 786  | -0.243305682 |                                            |
| 28 | 12,225,000 | 12,375,000 | 164 | 868  | -0.610172454 |                                            |
| 28 | 12,300,000 | 12,450,000 | 165 | 607  | 0.371713025  |                                            |
| 28 | 12,375,000 | 12,525,000 | 166 | 384  | 0.898975243  |                                            |
| 28 | 12,450,000 | 12,600,000 | 167 | 312  | -0.960427822 |                                            |
| 28 | 12,525,000 | 12,675,000 | 168 | 593  | 0.345567495  |                                            |
| 28 | 12,600,000 | 12,750,000 | 169 | 658  | 0.776178192  |                                            |
| 28 | 12,675,000 | 12,825,000 | 170 | 657  | 0.570822906  | CHRM3                                      |
| 28 | 12,750,000 | 12,900,000 | 171 | 770  | -0.997877044 | CHRM3                                      |
| 28 | 12,825,000 | 12,975,000 | 172 | 902  | -0.917218982 | ZNF33B,ENSBTAG00000018960                  |
| 28 | 12,900,000 | 13,050,000 | 173 | 750  | -0.511714031 | ZNF33B,ENSBTAG00000018960                  |
| 28 | 12,975,000 | 13,125,000 | 174 | 443  | -0.329533132 | ENSBTAG00000047340                         |
| 28 | 13,050,000 | 13,200,000 | 175 | 435  | 0.807244242  | ZNF25,ENSBTAG0000002955,ENSBTAG00000047340 |
| 28 | 13,125,000 | 13,275,000 | 176 | 514  | 0.819870126  | ZNF248,ZNF25,ENSBTAG0000002955             |
| 28 | 13,200,000 | 13,350,000 | 177 | 727  | 0.774312731  | BMS1,ZNF248                                |
| 28 | 13,275,000 | 13,425,000 | 178 | 1133 | 0.331544869  | BMS1                                       |
| 28 | 13,350,000 | 13,500,000 | 179 | 1507 | -0.486400106 |                                            |
| 28 | 13,425,000 | 13,575,000 | 180 | 1124 | -0.701385592 | RET                                        |
| 28 | 13,500,000 | 13,650,000 | 181 | 968  | -0.938839115 | RET                                        |
| 28 | 13,575,000 | 13,725,000 | 182 | 972  | -1.176301669 | CSGALNACT2,RASGEF1A,RET                    |

|    |            |            |     |      |              |                     |
|----|------------|------------|-----|------|--------------|---------------------|
| 28 | 13,650,000 | 13,800,000 | 183 | 559  | -2.589700691 | CSGALNACT2,RASGEF1A |
| 28 | 13,725,000 | 13,875,000 | 184 | 482  | -4.150687459 |                     |
| 28 | 13,800,000 | 13,950,000 | 185 | 359  | -4.267016963 | HNRNPF              |
| 28 | 13,875,000 | 14,025,000 | 186 | 505  | 0.224282021  | HNRNPF              |
| 28 | 13,950,000 | 14,100,000 | 187 | 598  | 0.375606647  |                     |
| 28 | 14,025,000 | 14,175,000 | 188 | 772  | -0.05393913  |                     |
| 28 | 14,100,000 | 14,250,000 | 189 | 1038 | 0.504172687  |                     |
| 28 | 14,175,000 | 14,325,000 | 190 | 1038 | 0.614777168  |                     |
| 28 | 14,250,000 | 14,400,000 | 191 | 1049 | 0.441633721  | BICC1               |
| 28 | 14,325,000 | 14,475,000 | 192 | 1011 | 0.761471992  | BICC1               |
| 28 | 14,400,000 | 14,550,000 | 193 | 1143 | 1.139135002  | BICC1               |
| 28 | 14,475,000 | 14,625,000 | 194 | 962  | 0.81404164   |                     |
| 28 | 14,550,000 | 14,700,000 | 195 | 807  | 0.730988132  |                     |
| 28 | 14,625,000 | 14,775,000 | 196 | 756  | 0.954476705  |                     |
| 28 | 14,700,000 | 14,850,000 | 197 | 607  | 0.76837707   |                     |
| 28 | 14,775,000 | 14,925,000 | 198 | 740  | 0.332102555  | PHYHIPL             |
| 28 | 14,850,000 | 15,000,000 | 199 | 937  | 0.287136366  | FAM13C,PHYHIPL      |
| 28 | 14,925,000 | 15,075,000 | 200 | 949  | 0.49299074   | FAM13C,PHYHIPL      |
| 28 | 15,000,000 | 15,150,000 | 201 | 837  | -0.235853128 | FAM13C              |
| 28 | 15,075,000 | 15,225,000 | 202 | 624  | -0.457849519 | FAM13C              |
| 28 | 15,150,000 | 15,300,000 | 203 | 668  | 0.311197296  |                     |
| 28 | 15,225,000 | 15,375,000 | 204 | 568  | 0.127285788  |                     |
| 28 | 15,300,000 | 15,450,000 | 205 | 182  | -0.563135578 | SLC16A9             |
| 28 | 15,375,000 | 15,525,000 | 206 | 444  | 0.248281043  | SLC16A9             |
| 28 | 15,450,000 | 15,600,000 | 207 | 704  | 0.417855663  | CCDC6,SLC16A9       |
| 28 | 15,525,000 | 15,675,000 | 208 | 739  | 0.515694846  | CCDC6               |
| 28 | 15,600,000 | 15,750,000 | 209 | 797  | 0.917991315  | CCDC6               |
| 28 | 15,675,000 | 15,825,000 | 210 | 580  | 1.026123057  | ANK3                |
| 28 | 15,750,000 | 15,900,000 | 211 | 308  | 0.437355715  | ANK3                |
| 28 | 15,825,000 | 15,975,000 | 212 | 408  | -0.210097381 | ANK3                |
| 28 | 15,900,000 | 16,050,000 | 213 | 755  | 0.845987989  | ANK3                |
| 28 | 15,975,000 | 16,125,000 | 214 | 903  | 1.127443159  | ANK3                |
| 28 | 16,050,000 | 16,200,000 | 215 | 963  | 1.006566023  | ANK3                |
| 28 | 16,125,000 | 16,275,000 | 216 | 782  | 1.152473567  |                     |
| 28 | 16,200,000 | 16,350,000 | 217 | 592  | 0.733456496  |                     |
| 28 | 16,275,000 | 16,425,000 | 218 | 775  | 0.480212823  |                     |
| 28 | 16,350,000 | 16,500,000 | 219 | 893  | 0.776480553  |                     |
| 28 | 16,425,000 | 16,575,000 | 220 | 1142 | 0.442678882  |                     |
| 28 | 16,500,000 | 16,650,000 | 221 | 1231 | 0.276960738  | CDK1                |
| 28 | 16,575,000 | 16,725,000 | 222 | 918  | 0.392778979  | CDK1                |
| 28 | 16,650,000 | 16,800,000 | 223 | 866  | -0.077298563 | RHOBTB1             |
| 28 | 16,725,000 | 16,875,000 | 224 | 864  | -0.796280537 | RHOBTB1             |
| 28 | 16,800,000 | 16,950,000 | 225 | 1124 | -0.1736844   | RHOBTB1             |
| 28 | 16,875,000 | 17,025,000 | 226 | 958  | 0.309711522  |                     |
| 28 | 16,950,000 | 17,100,000 | 227 | 434  | 0.453722963  |                     |
| 28 | 17,025,000 | 17,175,000 | 228 | 888  | 1.163570683  |                     |
| 28 | 17,100,000 | 17,250,000 | 229 | 1229 | 0.834776593  |                     |
| 28 | 17,175,000 | 17,325,000 | 230 | 942  | 0.266133598  |                     |
| 28 | 17,250,000 | 17,400,000 | 231 | 906  | 0.2676362    | TMEM26              |
| 28 | 17,325,000 | 17,475,000 | 232 | 666  | 0.253107802  | TMEM26              |
| 28 | 17,400,000 | 17,550,000 | 233 | 448  | 0.547366686  | TMEM26              |
| 28 | 17,475,000 | 17,625,000 | 234 | 583  | -0.153495858 |                     |
| 28 | 17,550,000 | 17,700,000 | 235 | 446  | -0.270424671 | C10ORF107           |

|    |            |            |     |      |              |              |
|----|------------|------------|-----|------|--------------|--------------|
| 28 | 17,625,000 | 17,775,000 | 236 | 292  | -0.31042702  | C10ORF107    |
| 28 | 17,700,000 | 17,850,000 | 237 | 236  | -0.10632586  | C10ORF107    |
| 28 | 17,775,000 | 17,925,000 | 238 | 497  | 0.985171462  |              |
| 28 | 17,850,000 | 18,000,000 | 239 | 783  | 0.989983222  |              |
| 28 | 17,925,000 | 18,075,000 | 240 | 603  | 0.460253758  | ARID5B       |
| 28 | 18,000,000 | 18,150,000 | 241 | 449  | 0.597847847  | ARID5B       |
| 28 | 18,075,000 | 18,225,000 | 242 | 421  | 0.295665703  | ARID5B       |
| 28 | 18,150,000 | 18,300,000 | 243 | 404  | -0.073831525 | ARID5B       |
| 28 | 18,225,000 | 18,375,000 | 244 | 445  | 0.585479246  | RTKN2        |
| 28 | 18,300,000 | 18,450,000 | 245 | 418  | 0.607341875  | RTKN2        |
| 28 | 18,375,000 | 18,525,000 | 246 | 495  | 1.034537443  | RTKN2        |
| 28 | 18,450,000 | 18,600,000 | 247 | 608  | 0.77979869   | RTKN2,ZNF365 |
| 28 | 18,525,000 | 18,675,000 | 248 | 529  | 0.445246252  | ZNF365       |
| 28 | 18,600,000 | 18,750,000 | 249 | 423  | 0.515043703  |              |
| 28 | 18,675,000 | 18,825,000 | 250 | 312  | 0.576759257  |              |
| 28 | 18,750,000 | 18,900,000 | 251 | 225  | 1.200309639  |              |
| 28 | 18,825,000 | 18,975,000 | 252 | 364  | 1.285884901  |              |
| 28 | 18,900,000 | 19,050,000 | 253 | 562  | 1.075256077  | ADO,EGR2     |
| 28 | 18,975,000 | 19,125,000 | 254 | 614  | 0.954012703  | ADO,EGR2     |
| 28 | 19,050,000 | 19,200,000 | 255 | 466  | 0.741671971  |              |
| 28 | 19,125,000 | 19,275,000 | 256 | 424  | 0.46189584   |              |
| 28 | 19,200,000 | 19,350,000 | 257 | 608  | 0.358196548  |              |
| 28 | 19,275,000 | 19,425,000 | 258 | 477  | 0.272881114  | JMJD1C,NRBF2 |
| 28 | 19,350,000 | 19,500,000 | 259 | 284  | 0.617651366  | JMJD1C,NRBF2 |
| 28 | 19,425,000 | 19,575,000 | 260 | 642  | -0.80005008  | JMJD1C       |
| 28 | 19,500,000 | 19,650,000 | 261 | 858  | -1.82434626  | JMJD1C       |
| 28 | 19,575,000 | 19,725,000 | 262 | 785  | -1.160633056 | JMJD1C,REEP3 |
| 28 | 19,650,000 | 19,800,000 | 263 | 655  | 0.000282563  | JMJD1C,REEP3 |
| 28 | 19,725,000 | 19,875,000 | 264 | 640  | 0.647042347  | REEP3        |
| 28 | 19,800,000 | 19,950,000 | 265 | 700  | 0.232864889  | REEP3        |
| 28 | 19,875,000 | 20,025,000 | 266 | 510  | -0.292309288 |              |
| 28 | 19,950,000 | 20,100,000 | 267 | 457  | 0.625114183  |              |
| 28 | 20,025,000 | 20,175,000 | 268 | 884  | 0.662249185  |              |
| 28 | 20,100,000 | 20,250,000 | 269 | 854  | 0.646596218  |              |
| 28 | 20,175,000 | 20,325,000 | 270 | 571  | 0.753779482  |              |
| 28 | 20,250,000 | 20,400,000 | 271 | 779  | 0.86007198   |              |
| 28 | 20,325,000 | 20,475,000 | 272 | 814  | 0.861654684  |              |
| 28 | 20,400,000 | 20,550,000 | 273 | 1357 | 0.642395274  |              |
| 28 | 20,475,000 | 20,625,000 | 274 | 1795 | 0.497125935  |              |
| 28 | 20,550,000 | 20,700,000 | 275 | 1176 | 0.272390799  |              |
| 28 | 20,625,000 | 20,775,000 | 276 | 740  | -0.050051938 |              |
| 28 | 20,700,000 | 20,850,000 | 277 | 957  | 0.532261773  |              |
| 28 | 20,775,000 | 20,925,000 | 278 | 1181 | -0.469271883 |              |
| 28 | 20,850,000 | 21,000,000 | 279 | 911  | -1.906030346 |              |
| 28 | 20,925,000 | 21,075,000 | 280 | 705  | -0.956272694 |              |
| 28 | 21,000,000 | 21,150,000 | 281 | 1006 | -0.379535274 |              |
| 28 | 21,075,000 | 21,225,000 | 282 | 1165 | 0.172983852  |              |
| 28 | 21,150,000 | 21,300,000 | 283 | 941  | 0.067322043  |              |
| 28 | 21,225,000 | 21,375,000 | 284 | 1146 | -0.951561132 |              |
| 28 | 21,300,000 | 21,450,000 | 285 | 1462 | -0.150112348 |              |
| 28 | 21,375,000 | 21,525,000 | 286 | 870  | 0.85813747   |              |
| 28 | 21,450,000 | 21,600,000 | 287 | 463  | 0.634054042  |              |
| 28 | 21,525,000 | 21,675,000 | 288 | 752  | 0.755417451  |              |

|    |            |            |     |      |              |                                               |
|----|------------|------------|-----|------|--------------|-----------------------------------------------|
| 28 | 21,600,000 | 21,750,000 | 289 | 865  | 0.704418804  |                                               |
| 28 | 21,675,000 | 21,825,000 | 290 | 812  | 0.608993541  |                                               |
| 28 | 21,750,000 | 21,900,000 | 291 | 767  | 0.756718444  |                                               |
| 28 | 21,825,000 | 21,975,000 | 292 | 671  | 0.794904669  |                                               |
| 28 | 21,900,000 | 22,050,000 | 293 | 1005 | 0.273237559  |                                               |
| 28 | 21,975,000 | 22,125,000 | 294 | 933  | 0.121082246  |                                               |
| 28 | 22,050,000 | 22,200,000 | 295 | 620  | 0.692810792  |                                               |
| 28 | 22,125,000 | 22,275,000 | 296 | 678  | -0.419146309 |                                               |
| 28 | 22,200,000 | 22,350,000 | 297 | 729  | -0.574872398 |                                               |
| 28 | 22,275,000 | 22,425,000 | 298 | 1073 | 0.920481685  | CTNNA3                                        |
| 28 | 22,350,000 | 22,500,000 | 299 | 1180 | 0.790626428  | CTNNA3                                        |
| 28 | 22,425,000 | 22,575,000 | 300 | 1197 | 0.235866328  | CTNNA3                                        |
| 28 | 22,500,000 | 22,650,000 | 301 | 1328 | 0.380019362  | CTNNA3                                        |
| 28 | 22,575,000 | 22,725,000 | 302 | 1006 | 0.045195414  | CTNNA3                                        |
| 28 | 22,650,000 | 22,800,000 | 303 | 677  | -0.500571303 | CTNNA3                                        |
| 28 | 22,725,000 | 22,875,000 | 304 | 637  | -0.067017677 | CTNNA3                                        |
| 28 | 22,800,000 | 22,950,000 | 305 | 886  | 0.688366312  | CTNNA3                                        |
| 28 | 22,875,000 | 23,025,000 | 306 | 897  | 0.512161699  | CTNNA3                                        |
| 28 | 22,950,000 | 23,100,000 | 307 | 1106 | 0.545870557  | CTNNA3                                        |
| 28 | 23,025,000 | 23,175,000 | 308 | 1488 | 0.4037407    | CTNNA3                                        |
| 28 | 23,100,000 | 23,250,000 | 309 | 1332 | 0.089722675  | CTNNA3                                        |
| 28 | 23,175,000 | 23,325,000 | 310 | 950  | 0.133303753  | CTNNA3                                        |
| 28 | 23,250,000 | 23,400,000 | 311 | 945  | 0.585592476  | CTNNA3                                        |
| 28 | 23,325,000 | 23,475,000 | 312 | 1220 | -0.002583661 | CTNNA3                                        |
| 28 | 23,400,000 | 23,550,000 | 313 | 1133 | 0.158059214  | CTNNA3,LRRTM3                                 |
| 28 | 23,475,000 | 23,625,000 | 314 | 953  | 0.74373145   | CTNNA3,LRRTM3                                 |
| 28 | 23,550,000 | 23,700,000 | 315 | 828  | 0.167970352  | CTNNA3,LRRTM3                                 |
| 28 | 23,625,000 | 23,775,000 | 316 | 924  | -0.132278784 | CTNNA3,LRRTM3,ENSBTAG00000045493              |
| 28 | 23,700,000 | 23,850,000 | 317 | 990  | -0.366999017 | CTNNA3,LRRTM3,ENSBTAG00000045493              |
| 28 | 23,775,000 | 23,925,000 | 318 | 698  | -0.051399407 | CTNNA3                                        |
| 28 | 23,850,000 | 24,000,000 | 319 | 483  | 0.385772701  | CTNNA3                                        |
| 28 | 23,925,000 | 24,075,000 | 320 | 521  | -0.77407617  | CTNNA3                                        |
| 28 | 24,000,000 | 24,150,000 | 321 | 477  | -0.204438818 | CTNNA3                                        |
| 28 | 24,075,000 | 24,225,000 | 322 | 609  | 1.015611393  | CTNNA3                                        |
| 28 | 24,150,000 | 24,300,000 | 323 | 844  | 0.71310015   | CTNNA3                                        |
| 28 | 24,225,000 | 24,375,000 | 324 | 1081 | 0.462774966  | CTNNA3                                        |
| 28 | 24,300,000 | 24,450,000 | 325 | 1018 | 0.929125609  | DNAJC12                                       |
| 28 | 24,375,000 | 24,525,000 | 326 | 936  | 1.22428376   | DNAJC12                                       |
| 28 | 24,450,000 | 24,600,000 | 327 | 900  | 1.230483615  | HERC4,SIRT1                                   |
| 28 | 24,525,000 | 24,675,000 | 328 | 573  | 1.137393226  | HERC4,SIRT1                                   |
| 28 | 24,600,000 | 24,750,000 | 329 | 371  | 0.260446719  | HERC4,MYPN                                    |
| 28 | 24,675,000 | 24,825,000 | 330 | 287  | 0.667482474  | HERC4,MYPN                                    |
| 28 | 24,750,000 | 24,900,000 | 331 | 354  | 0.697332306  | ATOH7,MYPN,PBLD                               |
| 28 | 24,825,000 | 24,975,000 | 332 | 440  | 0.502437688  | ATOH7,DNA2,MYPN,PBLD,RUFY2,ENSBTAG00000014316 |
| 28 | 24,900,000 | 25,050,000 | 333 | 412  | 0.554789489  | DNA2,RUFY2,SLC25A16,ENSBTAG00000014316        |
| 28 | 24,975,000 | 25,125,000 | 334 | 451  | 0.617632047  | DNA2,SLC25A16,TET1                            |
| 28 | 25,050,000 | 25,200,000 | 335 | 395  | 0.621902459  | TET1                                          |
| 28 | 25,125,000 | 25,275,000 | 336 | 344  | 1.059265325  | CCAR1,STOX1,TET1,ENSBTAG00000033457           |
| 28 | 25,200,000 | 25,350,000 | 337 | 440  | 1.010556077  | CCAR1,DDX50,STOX1,ENSBTAG00000033457          |
| 28 | 25,275,000 | 25,425,000 | 338 | 818  | 0.549582958  | DDX21,DDX50,KBP,STOX1                         |
| 28 | 25,350,000 | 25,500,000 | 339 | 944  | -0.330979408 | DDX21,DDX50,KBP                               |
| 28 | 25,425,000 | 25,575,000 | 340 | 1341 | -1.908997625 | KBP                                           |
| 28 | 25,500,000 | 25,650,000 | 341 | 1658 | -1.417656211 | SRGN                                          |

|    |            |            |     |      |              |                                                    |
|----|------------|------------|-----|------|--------------|----------------------------------------------------|
| 28 | 25,575,000 | 25,725,000 | 342 | 975  | -0.24527576  | SRGN,SUPV3L1,VPS26A                                |
| 28 | 25,650,000 | 25,800,000 | 343 | 1046 | 0.357917367  | HKDC1,SUPV3L1,VPS26A                               |
| 28 | 25,725,000 | 25,875,000 | 344 | 1228 | 0.283747691  | HK1,HKDC1,SUPV3L1                                  |
| 28 | 25,800,000 | 25,950,000 | 345 | 1141 | 0.509799203  | HK1,TACR2                                          |
| 28 | 25,875,000 | 26,025,000 | 346 | 1185 | 0.258133905  | HK1,TACR2,TSPAN15                                  |
| 28 | 25,950,000 | 26,100,000 | 347 | 975  | -0.589362379 | NEUROG3,TSPAN15                                    |
| 28 | 26,025,000 | 26,175,000 | 348 | 1102 | -0.993205883 | C28H10ORF35,NEUROG3                                |
| 28 | 26,100,000 | 26,250,000 | 349 | 1096 | -0.473117071 | C28H10ORF35                                        |
| 28 | 26,175,000 | 26,325,000 | 350 | 1051 | -0.036981191 | COL13A1                                            |
| 28 | 26,250,000 | 26,400,000 | 351 | 1005 | -0.372099347 | COL13A1                                            |
| 28 | 26,325,000 | 26,475,000 | 352 | 698  | -0.02884019  | COL13A1,H2AFY2                                     |
| 28 | 26,400,000 | 26,550,000 | 353 | 552  | -1.626623773 | AIFM2,COL13A1,H2AFY2,SAR1A,TYSND1                  |
| 28 | 26,475,000 | 26,625,000 | 354 | 775  | -1.097162155 | AIFM2,H2AFY2,PPA1,SAR1A,TYSND1                     |
| 28 | 26,550,000 | 26,700,000 | 355 | 1046 | 0.338716128  | LRRC20,NPFFR1,PPA1,SAR1A                           |
| 28 | 26,625,000 | 26,775,000 | 356 | 1168 | 0.542198223  | EIF4EBP2,LRRC20,NPFFR1                             |
| 28 | 26,700,000 | 26,850,000 | 357 | 1002 | 0.737122164  | EIF4EBP2,LRRC20,NODAL                              |
| 28 | 26,775,000 | 26,925,000 | 358 | 706  | 0.693357636  | EIF4EBP2,KIAA1274,NODAL,ENSBTAG00000047227         |
| 28 | 26,850,000 | 27,000,000 | 359 | 730  | 0.724214711  | ADAMTS14,KIAA1274,PRF1,ENSBTAG00000047227          |
| 28 | 26,925,000 | 27,075,000 | 360 | 1207 | 0.608610342  | ADAMTS14,PRF1                                      |
| 28 | 27,000,000 | 27,150,000 | 361 | 1367 | 0.445027876  | ADAMTS14,SGPL1,TBATA                               |
| 28 | 27,075,000 | 27,225,000 | 362 | 1023 | 0.537539157  | ADAMTS14,SGPL1,TBATA                               |
| 28 | 27,150,000 | 27,300,000 | 363 | 1318 | 0.055343473  | PCBD1,SGPL1                                        |
| 28 | 27,225,000 | 27,375,000 | 364 | 1537 | -0.027238669 | PCBD1                                              |
| 28 | 27,300,000 | 27,450,000 | 365 | 1308 | 0.321590628  |                                                    |
| 28 | 27,375,000 | 27,525,000 | 366 | 935  | 0.866853084  | UNC5B                                              |
| 28 | 27,450,000 | 27,600,000 | 367 | 835  | 0.516840361  | UNC5B                                              |
| 28 | 27,525,000 | 27,675,000 | 368 | 934  | 0.445672746  | UNC5B,ENSBTAG00000047119                           |
| 28 | 27,600,000 | 27,750,000 | 369 | 984  | 0.427527808  | CDH23,SLC29A3,ENSBTAG00000047119                   |
| 28 | 27,675,000 | 27,825,000 | 370 | 1193 | -0.81487157  | CDH23,SLC29A3                                      |
| 28 | 27,750,000 | 27,900,000 | 371 | 1231 | -1.451765491 | CDH23                                              |
| 28 | 27,825,000 | 27,975,000 | 372 | 1425 | -0.707537342 | CDH23                                              |
| 28 | 27,900,000 | 28,050,000 | 373 | 1168 | 0.024764407  | C10orf105,CDH23                                    |
| 28 | 27,975,000 | 28,125,000 | 374 | 1033 | 0.469357506  | C10orf105,CDH23,MGC151567,PSAP                     |
| 28 | 28,050,000 | 28,200,000 | 375 | 1273 | 0.277772463  | CDH23,MGC151567,PSAP                               |
| 28 | 28,125,000 | 28,275,000 | 376 | 1214 | -0.058819127 | CHST3,PSAP                                         |
| 28 | 28,200,000 | 28,350,000 | 377 | 1311 | 0.235397398  | ASCC1,CHST3,SPOCK2                                 |
| 28 | 28,275,000 | 28,425,000 | 378 | 1372 | 0.430680274  | ASCC1,SPOCK2                                       |
| 28 | 28,350,000 | 28,500,000 | 379 | 1139 | -0.144983772 | ANAPC16,ASCC1,DDIT4                                |
| 28 | 28,425,000 | 28,575,000 | 380 | 808  | -0.629925479 | ANAPC16,ASCC1,DDIT4,DNAJB12,MICU1                  |
| 28 | 28,500,000 | 28,650,000 | 381 | 1040 | -0.266321322 | DNAJB12,MICU1                                      |
| 28 | 28,575,000 | 28,725,000 | 382 | 1315 | 0.013261145  | MICU1                                              |
| 28 | 28,650,000 | 28,800,000 | 383 | 1059 | 0.427682364  | MICU1                                              |
| 28 | 28,725,000 | 28,875,000 | 384 | 1325 | 1.030021751  | MCU,MICU1                                          |
| 28 | 28,800,000 | 28,950,000 | 385 | 1641 | 0.985461991  | MCU                                                |
| 28 | 28,875,000 | 29,025,000 | 386 | 1137 | 0.319462668  | MCU                                                |
| 28 | 28,950,000 | 29,100,000 | 387 | 827  | -0.428198408 | MCU,ENSBTAG00000009348,ENSBTAG00000047323          |
| 28 | 29,025,000 | 29,175,000 | 388 | 1017 | 0.197100025  | MCU,PLA2G12B,ENSBTAG00000009348,ENSBTAG00000047323 |
| 28 | 29,100,000 | 29,250,000 | 389 | 1549 | 0.900918293  | P4HA1,PLA2G12B,ENSBTAG00000009348                  |
| 28 | 29,175,000 | 29,325,000 | 390 | 1397 | 0.979507293  | P4HA1                                              |
| 28 | 29,250,000 | 29,400,000 | 391 | 789  | 0.383851852  | ECD,FAM149B1,NUDT13,P4HA1                          |
| 28 | 29,325,000 | 29,475,000 | 392 | 579  | -1.658881446 | DNAJC9,ECD,FAM149B1,MRPS16,NUDT13,P4HA1            |
| 28 | 29,400,000 | 29,550,000 | 393 | 554  | -2.019479999 | DNAJC9,FAM149B1,MRPS16                             |

|    |            |            |     |      |              |                                                       |
|----|------------|------------|-----|------|--------------|-------------------------------------------------------|
| 28 | 29,475,000 | 29,625,000 | 394 | 553  | -0.754707628 | ANXA7,MSS51,PPP3CB,ENSBTAG00000019525                 |
| 28 | 29,550,000 | 29,700,000 | 395 | 385  | 0.441424868  | ANXA7,MSS51,PPP3CB,USP54,ENSBTAG00000019525           |
| 28 | 29,625,000 | 29,775,000 | 396 | 409  | 0.042234742  | USP54,ENSBTAG00000019525                              |
| 28 | 29,700,000 | 29,850,000 | 397 | 504  | 0.043199712  | FUT11,MYOZ1,SEC24C,SYNPO2L,USP54                      |
| 28 | 29,775,000 | 29,925,000 | 398 | 546  | 0.210219268  | CAMK2G,CHCHD1,FUT11,MYOZ1,NDST2,SEC24C,SYNPO2L,ZSWIM8 |
| 28 | 29,850,000 | 30,000,000 | 399 | 644  | 0.398942627  | CAMK2G,CHCHD1,NDST2,PLAU,ZSWIM8                       |
| 28 | 29,925,000 | 30,075,000 | 400 | 663  | 0.546611147  | CAMK2G,PLAU,VCL,ENSBTAG00000046355,ENSBTAG0000048036  |
| 28 | 30,000,000 | 30,150,000 | 401 | 656  | 0.738767454  | VCL,ENSBTAG00000046355,ENSBTAG00000048036             |
| 28 | 30,075,000 | 30,225,000 | 402 | 625  | 0.696893452  | AP3M1,VCL,ENSBTAG00000011072                          |
| 28 | 30,150,000 | 30,300,000 | 403 | 784  | 0.969664016  | AP3M1,VCL,ENSBTAG00000011072                          |
| 28 | 30,225,000 | 30,375,000 | 404 | 779  | 1.09130946   | ENSBTAG00000011072                                    |
| 28 | 30,300,000 | 30,450,000 | 405 | 924  | 1.066174024  | ENSBTAG00000011072                                    |
| 28 | 30,375,000 | 30,525,000 | 406 | 827  | 0.947015118  | ENSBTAG00000011072                                    |
| 28 | 30,450,000 | 30,600,000 | 407 | 295  | 0.27093777   | ENSBTAG00000011072                                    |
| 28 | 30,525,000 | 30,675,000 | 408 | 286  | 0.32354534   | ENSBTAG00000011072                                    |
| 28 | 30,600,000 | 30,750,000 | 409 | 441  | 0.318268825  | ENSBTAG00000011072                                    |
| 28 | 30,675,000 | 30,825,000 | 410 | 569  | 0.523603471  | KAT6B,ENSBTAG00000011072                              |
| 28 | 30,750,000 | 30,900,000 | 411 | 529  | 0.881873305  | KAT6B                                                 |
| 28 | 30,825,000 | 30,975,000 | 412 | 426  | 1.173841013  | KAT6B                                                 |
| 28 | 30,900,000 | 31,050,000 | 413 | 478  | 0.797477719  | DUPD1,KAT6B,ENSBTAG00000023039                        |
| 28 | 30,975,000 | 31,125,000 | 414 | 624  | -0.025906657 | DUPD1,KAT6B,SAMD8,ENSBTAG00000023039                  |
| 28 | 31,050,000 | 31,200,000 | 415 | 680  | 0.4276101    | COMTD1,SAMD8,VDAC2,ENSBTAG00000023039                 |
| 28 | 31,125,000 | 31,275,000 | 416 | 705  | 0.640077679  | COMTD1,VDAC2,ENSBTAG00000013585                       |
| 28 | 31,200,000 | 31,350,000 | 417 | 521  | 0.237381596  | ZNF503,ENSBTAG00000013585                             |
| 28 | 31,275,000 | 31,425,000 | 418 | 341  | -0.20166014  | ZNF503                                                |
| 28 | 31,350,000 | 31,500,000 | 419 | 396  | 0.303700784  |                                                       |
| 28 | 31,425,000 | 31,575,000 | 420 | 461  | 0.610688151  |                                                       |
| 28 | 31,500,000 | 31,650,000 | 421 | 564  | 0.772849949  |                                                       |
| 28 | 31,575,000 | 31,725,000 | 422 | 996  | 0.223986375  |                                                       |
| 28 | 31,650,000 | 31,800,000 | 423 | 1241 | 0.456492329  |                                                       |
| 28 | 31,725,000 | 31,875,000 | 424 | 997  | 1.065421564  |                                                       |
| 28 | 31,800,000 | 31,950,000 | 425 | 851  | 1.192114449  |                                                       |
| 28 | 31,875,000 | 32,025,000 | 426 | 979  | 1.114040395  |                                                       |
| 28 | 31,950,000 | 32,100,000 | 427 | 959  | 0.968622992  |                                                       |
| 28 | 32,025,000 | 32,175,000 | 428 | 601  | 0.88636071   |                                                       |
| 28 | 32,100,000 | 32,250,000 | 429 | 482  | 0.94896181   |                                                       |
| 28 | 32,175,000 | 32,325,000 | 430 | 733  | 0.378152706  |                                                       |
| 28 | 32,250,000 | 32,400,000 | 431 | 840  | 0.058493994  |                                                       |
| 28 | 32,325,000 | 32,475,000 | 432 | 782  | -0.093209197 |                                                       |
| 28 | 32,400,000 | 32,550,000 | 433 | 652  | -0.256414062 |                                                       |
| 28 | 32,475,000 | 32,625,000 | 434 | 740  | 0.242793314  |                                                       |
| 28 | 32,550,000 | 32,700,000 | 435 | 1095 | 0.43973476   |                                                       |
| 28 | 32,625,000 | 32,775,000 | 436 | 1271 | 0.496449723  |                                                       |
| 28 | 32,700,000 | 32,850,000 | 437 | 1282 | 0.451884943  | KCNMA1                                                |
| 28 | 32,775,000 | 32,925,000 | 438 | 1136 | 0.094159502  | KCNMA1,ENSBTAG00000047535                             |
| 28 | 32,850,000 | 33,000,000 | 439 | 1064 | 0.047105269  | KCNMA1,ENSBTAG00000047535                             |
| 28 | 32,925,000 | 33,075,000 | 440 | 1153 | 0.471555403  | KCNMA1                                                |
| 28 | 33,000,000 | 33,150,000 | 441 | 1322 | 0.602958127  | KCNMA1                                                |
| 28 | 33,075,000 | 33,225,000 | 442 | 1209 | 0.73622912   | KCNMA1                                                |
| 28 | 33,150,000 | 33,300,000 | 443 | 779  | 1.069016432  | KCNMA1                                                |
| 28 | 33,225,000 | 33,375,000 | 444 | 618  | 0.892338942  | KCNMA1                                                |

|    |            |            |     |      |              |                                         |
|----|------------|------------|-----|------|--------------|-----------------------------------------|
| 28 | 33,300,000 | 33,450,000 | 445 | 970  | -0.030670133 | KCNMA1                                  |
| 28 | 33,375,000 | 33,525,000 | 446 | 1194 | -0.179381603 | KCNMA1                                  |
| 28 | 33,450,000 | 33,600,000 | 447 | 906  | 0.662679997  | KCNMA1                                  |
| 28 | 33,525,000 | 33,675,000 | 448 | 542  | 0.858521699  | KCNMA1                                  |
| 28 | 33,600,000 | 33,750,000 | 449 | 309  | 0.232617878  | DLG5                                    |
| 28 | 33,675,000 | 33,825,000 | 450 | 464  | 0.973486811  | DLG5                                    |
| 28 | 33,750,000 | 33,900,000 | 451 | 614  | 0.521243579  | DLG5,POLR3A                             |
| 28 | 33,825,000 | 33,975,000 | 452 | 470  | 0.006503256  | DLG5,POLR3A,RPS24                       |
| 28 | 33,900,000 | 34,050,000 | 453 | 528  | 0.832171165  | POLR3A,RPS24                            |
| 28 | 33,975,000 | 34,125,000 | 454 | 719  | 0.334597376  |                                         |
| 28 | 34,050,000 | 34,200,000 | 455 | 963  | 0.092464055  |                                         |
| 28 | 34,125,000 | 34,275,000 | 456 | 925  | -0.063007355 |                                         |
| 28 | 34,200,000 | 34,350,000 | 457 | 870  | -0.298429887 |                                         |
| 28 | 34,275,000 | 34,425,000 | 458 | 1016 | -0.039166218 |                                         |
| 28 | 34,350,000 | 34,500,000 | 459 | 1191 | 0.604939767  |                                         |
| 28 | 34,425,000 | 34,575,000 | 460 | 1192 | 0.763118309  |                                         |
| 28 | 34,500,000 | 34,650,000 | 461 | 792  | 0.780909332  |                                         |
| 28 | 34,575,000 | 34,725,000 | 462 | 734  | 0.64018058   |                                         |
| 28 | 34,650,000 | 34,800,000 | 463 | 912  | -1.026943991 |                                         |
| 28 | 34,725,000 | 34,875,000 | 464 | 791  | -2.316897637 |                                         |
| 28 | 34,800,000 | 34,950,000 | 465 | 486  | -1.954501633 |                                         |
| 28 | 34,875,000 | 35,025,000 | 466 | 292  | 0.476964362  |                                         |
| 28 | 34,950,000 | 35,100,000 | 467 | 396  | 0.751837108  | ZMIZ1                                   |
| 28 | 35,025,000 | 35,175,000 | 468 | 648  | 0.498907427  | PPIF,ZMIZ1                              |
| 28 | 35,100,000 | 35,250,000 | 469 | 765  | 0.818877929  | PPIF,ZCCHC24,ZMIZ1                      |
| 28 | 35,175,000 | 35,325,000 | 470 | 918  | 1.151174104  | ANXA11,ZCCHC24                          |
| 28 | 35,250,000 | 35,400,000 | 471 | 1135 | 0.894961702  | ANXA11,PLAC9,ZCCHC24                    |
| 28 | 35,325,000 | 35,475,000 | 472 | 1388 | 0.501700407  | ANXA11,PLAC9,TMEM254,ENSBTAG00000045788 |
| 28 | 35,400,000 | 35,550,000 | 473 | 1459 | 0.248478135  | TMEM254,ENSBTAG00000045788              |
| 28 | 35,475,000 | 35,625,000 | 474 | 881  | 0.202859782  | CGN1                                    |
| 28 | 35,550,000 | 35,700,000 | 475 | 571  | 0.593416577  | CGN1,CL46                               |
| 28 | 35,625,000 | 35,775,000 | 476 | 653  | 0.24985539   | CL43,CL46                               |
| 28 | 35,700,000 | 35,850,000 | 477 | 861  | 0.000183598  | CL43,CL46,SFTPA1,SFTPD                  |
| 28 | 35,775,000 | 35,925,000 | 478 | 1128 | -0.424922525 | DYDC1,MAT1A,SFTPA1,SFTPD                |
| 28 | 35,850,000 | 36,000,000 | 479 | 1096 | -0.138209415 | DYDC1,DYDC2,MAT1A,SFTPA1                |
| 28 | 35,925,000 | 36,075,000 | 480 | 1043 | 0.519056376  | DYDC1,DYDC2,FAM213A                     |
| 28 | 36,000,000 | 36,150,000 | 481 | 689  | 0.293334494  | FAM213A,SH2D4B,TSPAN14                  |
| 28 | 36,075,000 | 36,225,000 | 482 | 816  | 0.471251715  | SH2D4B,TSPAN14                          |
| 28 | 36,150,000 | 36,300,000 | 483 | 1142 | 0.158176219  | SH2D4B                                  |
| 28 | 36,225,000 | 36,375,000 | 484 | 1175 | -0.722726036 |                                         |
| 28 | 36,300,000 | 36,450,000 | 485 | 1005 | -0.420841325 |                                         |
| 28 | 36,375,000 | 36,525,000 | 486 | 760  | 0.421579637  |                                         |
| 28 | 36,450,000 | 36,600,000 | 487 | 959  | 0.909922391  |                                         |
| 28 | 36,525,000 | 36,675,000 | 488 | 1053 | 0.795112205  |                                         |
| 28 | 36,600,000 | 36,750,000 | 489 | 1009 | 0.664769164  |                                         |
| 28 | 36,675,000 | 36,825,000 | 490 | 774  | 0.438473394  |                                         |
| 28 | 36,750,000 | 36,900,000 | 491 | 771  | -0.87186676  |                                         |
| 28 | 36,825,000 | 36,975,000 | 492 | 949  | -0.405284422 |                                         |
| 28 | 36,900,000 | 37,050,000 | 493 | 1047 | 0.250766333  |                                         |
| 28 | 36,975,000 | 37,125,000 | 494 | 1099 | 0.147968269  |                                         |
| 28 | 37,050,000 | 37,200,000 | 495 | 998  | -2.97507914  |                                         |
| 28 | 37,125,000 | 37,275,000 | 496 | 765  | -3.958422089 |                                         |
| 28 | 37,200,000 | 37,350,000 | 497 | 672  | 0.660028639  |                                         |



|    |            |            |     |      |              |                         |
|----|------------|------------|-----|------|--------------|-------------------------|
| 28 | 37,275,000 | 37,425,000 | 498 | 821  | 0.571080026  |                         |
| 28 | 37,350,000 | 37,500,000 | 499 | 720  | -0.041120356 |                         |
| 28 | 37,425,000 | 37,575,000 | 500 | 750  | 0.197427602  |                         |
| 28 | 37,500,000 | 37,650,000 | 501 | 763  | -0.112987446 |                         |
| 28 | 37,575,000 | 37,725,000 | 502 | 759  | -0.510732636 |                         |
| 28 | 37,650,000 | 37,800,000 | 503 | 1073 | -0.722904266 |                         |
| 28 | 37,725,000 | 37,875,000 | 504 | 1314 | -0.769241842 |                         |
| 28 | 37,800,000 | 37,950,000 | 505 | 1110 | -0.085425359 |                         |
| 28 | 37,875,000 | 38,025,000 | 506 | 1197 | 0.463006359  |                         |
| 28 | 37,950,000 | 38,100,000 | 507 | 1458 | 0.724059592  |                         |
| 28 | 38,025,000 | 38,175,000 | 508 | 1448 | 0.963298406  |                         |
| 28 | 38,100,000 | 38,250,000 | 509 | 1229 | 0.348623926  |                         |
| 28 | 38,175,000 | 38,325,000 | 510 | 901  | -0.835295948 | NRG3                    |
| 28 | 38,250,000 | 38,400,000 | 511 | 918  | -0.037717755 | NRG3                    |
| 28 | 38,325,000 | 38,475,000 | 512 | 699  | 0.302779285  | NRG3                    |
| 28 | 38,400,000 | 38,550,000 | 513 | 466  | 0.584047134  |                         |
| 28 | 38,475,000 | 38,625,000 | 514 | 449  | 1.020816411  |                         |
| 28 | 38,550,000 | 38,700,000 | 515 | 911  | 0.791107431  |                         |
| 28 | 38,625,000 | 38,775,000 | 516 | 1397 | 0.752938374  |                         |
| 28 | 38,700,000 | 38,850,000 | 517 | 1289 | -0.002786902 |                         |
| 28 | 38,775,000 | 38,925,000 | 518 | 1326 | -0.507885628 |                         |
| 28 | 38,850,000 | 39,000,000 | 519 | 1176 | 0.233325926  |                         |
| 28 | 38,925,000 | 39,075,000 | 520 | 1342 | 0.518528925  |                         |
| 28 | 39,000,000 | 39,150,000 | 521 | 1567 | 0.231065576  |                         |
| 28 | 39,075,000 | 39,225,000 | 522 | 1161 | -0.050726625 |                         |
| 28 | 39,150,000 | 39,300,000 | 523 | 1048 | -0.151000128 |                         |
| 28 | 39,225,000 | 39,375,000 | 524 | 689  | -0.175469364 |                         |
| 28 | 39,300,000 | 39,450,000 | 525 | 849  | -0.87839482  | GHITM                   |
| 28 | 39,375,000 | 39,525,000 | 526 | 1387 | -0.282380972 | CDHR1,GHITM,LRIT1,LRIT2 |
| 28 | 39,450,000 | 39,600,000 | 527 | 1026 | 0.434004894  | CDHR1,LRIT1,LRIT2,RGR   |
| 28 | 39,525,000 | 39,675,000 | 528 | 544  | 0.597578076  | CCSER2,LRIT1,RGR        |
| 28 | 39,600,000 | 39,750,000 | 529 | 383  | 0.667955205  | CCSER2                  |
| 28 | 39,675,000 | 39,825,000 | 530 | 811  | 0.895193116  | CCSER2                  |
| 28 | 39,750,000 | 39,900,000 | 531 | 1015 | 0.617958133  |                         |
| 28 | 39,825,000 | 39,975,000 | 532 | 963  | -0.252505403 |                         |
| 28 | 39,900,000 | 40,050,000 | 533 | 838  | -0.166070912 |                         |
| 28 | 39,975,000 | 40,125,000 | 534 | 569  | 0.066206811  |                         |
| 28 | 40,050,000 | 40,200,000 | 535 | 637  | 0.194915239  |                         |
| 28 | 40,125,000 | 40,275,000 | 536 | 526  | 0.705272523  |                         |
| 28 | 40,200,000 | 40,350,000 | 537 | 495  | -0.24431806  |                         |
| 28 | 40,275,000 | 40,425,000 | 538 | 743  | 0.138857885  |                         |
| 28 | 40,350,000 | 40,500,000 | 539 | 857  | 0.860397236  |                         |
| 28 | 40,425,000 | 40,575,000 | 540 | 1055 | 1.026202315  |                         |
| 28 | 40,500,000 | 40,650,000 | 541 | 971  | 0.843365751  |                         |
| 28 | 40,575,000 | 40,725,000 | 542 | 755  | 0.72474901   |                         |
| 28 | 40,650,000 | 40,800,000 | 543 | 887  | 0.400889054  | GRID1                   |
| 28 | 40,725,000 | 40,875,000 | 544 | 1077 | -0.365548801 | GRID1                   |
| 28 | 40,800,000 | 40,950,000 | 545 | 1100 | -0.05136712  | GRID1                   |
| 28 | 40,875,000 | 41,025,000 | 546 | 1225 | 0.112356113  | GRID1                   |
| 28 | 40,950,000 | 41,100,000 | 547 | 1249 | -0.467942792 | GRID1                   |
| 28 | 41,025,000 | 41,175,000 | 548 | 801  | -1.039678701 |                         |
| 28 | 41,100,000 | 41,250,000 | 549 | 667  | -1.090045585 |                         |
| 28 | 41,175,000 | 41,325,000 | 550 | 748  | -0.443567422 |                         |

|    |            |            |     |      |              |                                                              |
|----|------------|------------|-----|------|--------------|--------------------------------------------------------------|
| 28 | 41,250,000 | 41,400,000 | 551 | 1013 | -0.027246641 |                                                              |
| 28 | 41,325,000 | 41,475,000 | 552 | 1107 | 0.241776445  |                                                              |
| 28 | 41,400,000 | 41,550,000 | 553 | 602  | 0.347324469  | WAPAL                                                        |
| 28 | 41,475,000 | 41,625,000 | 554 | 302  | 0.262525773  | WAPAL                                                        |
| 28 | 41,550,000 | 41,700,000 | 555 | 435  | -0.177200049 | LDB3,OPN4,WAPAL                                              |
| 28 | 41,625,000 | 41,775,000 | 556 | 588  | -0.174219749 | LDB3,OPN4                                                    |
| 28 | 41,700,000 | 41,850,000 | 557 | 576  | 0.55203407   | BMPR-IA,LDB3                                                 |
| 28 | 41,775,000 | 41,925,000 | 558 | 511  | 0.705778946  | BMPR-<br>IA,C28H10ORF116,MMRN2,SNCG,ENSBTAG00000017946       |
| 28 | 41,850,000 | 42,000,000 | 559 | 472  | 1.04749254   | BMPR-<br>IA,C28H10ORF116,GLUD1,MMRN2,SNCG,ENSBTAG00000017946 |
| 28 | 41,925,000 | 42,075,000 | 560 | 626  | 0.768342581  | FAM35A,GLUD1                                                 |
| 28 | 42,000,000 | 42,150,000 | 561 | 891  | 0.109063331  | FAM35A,GPRIN2,ENSBTAG00000018356                             |
| 28 | 42,075,000 | 42,225,000 | 562 | 1118 | 0.516048059  | FAM35A,GPRIN2,ENSBTAG00000018356                             |
| 28 | 42,150,000 | 42,300,000 | 563 | 1047 | 0.745192051  | ANXA8,PPYR1                                                  |
| 28 | 42,225,000 | 42,375,000 | 564 | 662  | 0.053071686  | ANTXRL,ANXA8,PPYR1                                           |
| 28 | 42,300,000 | 42,450,000 | 565 | 633  | -0.197820917 | ANTXRL,ANXA8                                                 |
| 28 | 42,375,000 | 42,525,000 | 566 | 739  | 0.163520459  |                                                              |
| 28 | 42,450,000 | 42,600,000 | 567 | 1039 | 0.168640931  | RBP3                                                         |
| 28 | 42,525,000 | 42,675,000 | 568 | 1131 | 0.186361713  | GDF10,GDF2,RBP3                                              |
| 28 | 42,600,000 | 42,750,000 | 569 | 849  | 0.805316527  | GDF10,GDF2,RBP3                                              |
| 28 | 42,675,000 | 42,825,000 | 570 | 1104 | 0.927639916  |                                                              |
| 28 | 42,750,000 | 42,900,000 | 571 | 1343 | 0.458070702  | ENSBTAG00000014938                                           |
| 28 | 42,825,000 | 42,975,000 | 572 | 1004 | 0.092379495  | ENSBTAG00000005568,ENSBTAG00000014938                        |
| 28 | 42,900,000 | 43,050,000 | 573 | 816  | -0.416116655 | ENSBTAG00000005568                                           |
| 28 | 42,975,000 | 43,125,000 | 574 | 667  | -0.670462734 | ENSBTAG00000005568                                           |
| 28 | 43,050,000 | 43,200,000 | 575 | 358  | -0.750461154 | MAPK8                                                        |
| 28 | 43,125,000 | 43,275,000 | 576 | 497  | -1.6157049   | ARHGAP22,MAPK8                                               |
| 28 | 43,200,000 | 43,350,000 | 577 | 857  | -0.363159791 | ARHGAP22                                                     |
| 28 | 43,275,000 | 43,425,000 | 578 | 838  | 0.26220068   |                                                              |
| 28 | 43,350,000 | 43,500,000 | 579 | 882  | -0.254585556 | WDFY4                                                        |
| 28 | 43,425,000 | 43,575,000 | 580 | 1017 | -0.350883118 | WDFY4                                                        |
| 28 | 43,500,000 | 43,650,000 | 581 | 1243 | -0.596695698 | LRRC18,WDFY4                                                 |
| 28 | 43,575,000 | 43,725,000 | 582 | 1465 | -0.241403307 | LRRC18,VSTM4,WDFY4                                           |
| 28 | 43,650,000 | 43,800,000 | 583 | 1046 | 0.303926505  | FAM170B,VSTM4,WDFY4                                          |
| 28 | 43,725,000 | 43,875,000 | 584 | 696  | 0.598408181  | C10orf128,FAM170B,VSTM4                                      |
| 28 | 43,800,000 | 43,950,000 | 585 | 771  | 0.578126629  | C10orf128,C10orf71                                           |
| 28 | 43,875,000 | 44,025,000 | 586 | 930  | 0.689344429  | C10orf71,DRGX,ERCC6                                          |
| 28 | 43,950,000 | 44,100,000 | 587 | 1054 | 0.861893872  | DRGX,ERCC6                                                   |
| 28 | 44,025,000 | 44,175,000 | 588 | 1213 | 0.565486673  | CHAT,ERCC6,SLC18A3                                           |
| 28 | 44,100,000 | 44,250,000 | 589 | 1313 | 0.422991352  | C28H10orf53,CHAT,OGDHL,SLC18A3                               |
| 28 | 44,175,000 | 44,325,000 | 590 | 1093 | 0.697316048  | C28H10orf53,CHAT,OGDHL,PARG                                  |
| 28 | 44,250,000 | 44,400,000 | 591 | 687  | 0.581798828  | OGDHL,PARG,TIMM23                                            |
| 28 | 44,325,000 | 44,475,000 | 592 | 843  | -0.568435206 | MSMB,NCOA4,PARG,TIMM23                                       |
| 28 | 44,400,000 | 44,550,000 | 593 | 1262 | -0.066079856 | ANUBL1,MSMB,NCOA4,TIMM23,ENSBTAG00000018915                  |
| 28 | 44,475,000 | 44,625,000 | 594 | 1128 | 0.300176733  | ANUBL1,MARCH8,ENSBTAG00000018915                             |
| 28 | 44,550,000 | 44,700,000 | 595 | 802  | 0.933957818  | ANUBL1,MARCH8                                                |
| 28 | 44,625,000 | 44,775,000 | 596 | 801  | 1.2265123    | ALOX5,MARCH8                                                 |
| 28 | 44,700,000 | 44,850,000 | 597 | 837  | 0.977246995  | ALOX5,MARCH8,OR13A1,ENSBTAG00000009763                       |
| 28 | 44,775,000 | 44,925,000 | 598 | 597  | 0.55460165   | ALOX5,OR13A1,ENSBTAG00000009763,ENSBTAG00000048311           |

|    |            |            |     |      |              |                                                                 |
|----|------------|------------|-----|------|--------------|-----------------------------------------------------------------|
| 28 | 44,850,000 | 45,000,000 | 599 | 459  | 0.421646724  | C28H10ORF10,RASSF4,ENSBTAG00000024811,ENSBTAG0000048311         |
| 28 | 44,925,000 | 45,075,000 | 600 | 547  | 0.209636272  | C28H10ORF10,RASSF4,TMEM72,ENSBTAG00000024811,ENSBTAG00000047666 |
| 28 | 45,000,000 | 45,150,000 | 601 | 721  | 0.151569839  | RASSF4,TMEM72,ENSBTAG00000047666                                |
| 28 | 45,075,000 | 45,225,000 | 602 | 1086 | 0.157949832  |                                                                 |
| 28 | 45,150,000 | 45,300,000 | 603 | 1225 | 0.287186905  |                                                                 |
| 28 | 45,225,000 | 45,375,000 | 604 | 1233 | 0.270451267  |                                                                 |
| 28 | 45,300,000 | 45,450,000 | 605 | 981  | -0.906638282 | CXCL12                                                          |
| 28 | 45,375,000 | 45,525,000 | 606 | 742  | -1.164331679 | CXCL12                                                          |
| 28 | 45,450,000 | 45,600,000 | 607 | 659  | 0.055228167  |                                                                 |
| 28 | 45,525,000 | 45,675,000 | 608 | 927  | 0.883101109  |                                                                 |
| 28 | 45,600,000 | 45,750,000 | 609 | 1401 | 0.072333893  |                                                                 |
| 28 | 45,675,000 | 45,825,000 | 610 | 1354 | -1.175159897 |                                                                 |
| 28 | 45,750,000 | 45,900,000 | 611 | 1230 | -0.934831727 |                                                                 |
| 28 | 45,825,000 | 45,975,000 | 612 | 1031 | 0.155375389  |                                                                 |
| 28 | 45,900,000 | 46,050,000 | 613 | 1050 | 1.07699949   | ZNF32,ENSBTAG00000032655                                        |
| 28 | 45,975,000 | 46,125,000 | 614 | 1192 | 0.90527866   | TFAM,ZNF239,ZNF32,ENSBTAG00000032655                            |
| 28 | 46,050,000 | 46,200,000 | 615 | 977  | -0.088006394 | AGT,COG2,TFAM,ZNF239                                            |
| 28 | 46,125,000 | 46,275,000 | 616 | 624  | -1.145225257 | AGT,COG2                                                        |
| 28 | 46,200,000 | 46,312,546 | 617 | 382  | -0.557420057 | COG2                                                            |
| 29 | 0          | 150,000    | 1   | 142  | 0.046551855  | ENSBTAG00000005930                                              |
| 29 | 75,000     | 225,000    | 2   | 116  | 0.694694122  | ENSBTAG00000005930                                              |
| 29 | 150,000    | 300,000    | 3   | 94   | 0.816722669  |                                                                 |
| 29 | 225,000    | 375,000    | 4   | 68   | 0.630238806  |                                                                 |
| 29 | 300,000    | 450,000    | 5   | 76   | 0.300407973  |                                                                 |
| 29 | 375,000    | 525,000    | 6   | 96   | 0.397076041  |                                                                 |
| 29 | 450,000    | 600,000    | 7   | 191  | 0.894161248  | PANX1                                                           |
| 29 | 525,000    | 675,000    | 8   | 510  | 0.530317678  | HEPHL1,PANX1                                                    |
| 29 | 600,000    | 750,000    | 9   | 661  | 0.281031714  | HEPHL1,PANX1                                                    |
| 29 | 675,000    | 825,000    | 10  | 429  | 0.364889691  | HEPHL1                                                          |
| 29 | 750,000    | 900,000    | 11  | 337  | -0.019668968 |                                                                 |
| 29 | 825,000    | 975,000    | 12  | 390  | -0.165018391 |                                                                 |
| 29 | 900,000    | 1,050,000  | 13  | 444  | -0.695203615 | C11orf54,MED17,VSTM5                                            |
| 29 | 975,000    | 1,125,000  | 14  | 413  | -1.049248701 | C11orf54,KIAA1731,MED17,TAF1D,VSTM5                             |
| 29 | 1,050,000  | 1,200,000  | 15  | 655  | -0.265384712 | C11orf54,KIAA1731,TAF1D                                         |
| 29 | 1,125,000  | 1,275,000  | 16  | 1034 | 0.215227358  |                                                                 |
| 29 | 1,200,000  | 1,350,000  | 17  | 1141 | 0.64309273   | SMCO4                                                           |
| 29 | 1,275,000  | 1,425,000  | 18  | 1043 | 0.464267498  | CCDC67,SMCO4                                                    |
| 29 | 1,350,000  | 1,500,000  | 19  | 778  | -0.611898516 | CCDC67,SMCO4                                                    |
| 29 | 1,425,000  | 1,575,000  | 20  | 980  | -1.54266624  | CCDC67                                                          |
| 29 | 1,500,000  | 1,650,000  | 21  | 1056 | -1.037362841 |                                                                 |
| 29 | 1,575,000  | 1,725,000  | 22  | 963  | -0.267921915 | SLC36A4                                                         |
| 29 | 1,650,000  | 1,800,000  | 23  | 1266 | 0.29492982   | SLC36A4                                                         |
| 29 | 1,725,000  | 1,875,000  | 24  | 1235 | 0.508981957  |                                                                 |
| 29 | 1,800,000  | 1,950,000  | 25  | 1259 | 0.493172864  | ENSBTAG00000013398,ENSBTAG00000047614                           |
| 29 | 1,875,000  | 2,025,000  | 26  | 1169 | 0.925418767  | FAT3,ENSBTAG00000013398,ENSBTAG00000047614                      |
| 29 | 1,950,000  | 2,100,000  | 27  | 818  | 0.218434917  | FAT3                                                            |
| 29 | 2,025,000  | 2,175,000  | 28  | 930  | -0.075804373 | FAT3                                                            |
| 29 | 2,100,000  | 2,250,000  | 29  | 1094 | 0.178808301  | FAT3                                                            |
| 29 | 2,175,000  | 2,325,000  | 30  | 1182 | -0.243731463 | FAT3                                                            |
| 29 | 2,250,000  | 2,400,000  | 31  | 1291 | -0.085587843 | FAT3                                                            |
| 29 | 2,325,000  | 2,475,000  | 32  | 1405 | 0.802957739  | FAT3                                                            |

|    |           |           |    |      |              |                                                                 |
|----|-----------|-----------|----|------|--------------|-----------------------------------------------------------------|
| 29 | 2,400,000 | 2,550,000 | 33 | 1580 | 0.860322301  | FAT3                                                            |
| 29 | 2,475,000 | 2,625,000 | 34 | 1449 | 0.667412727  | FAT3                                                            |
| 29 | 2,550,000 | 2,700,000 | 35 | 1028 | 0.020186823  | FAT3                                                            |
| 29 | 2,625,000 | 2,775,000 | 36 | 706  | -0.736404686 |                                                                 |
| 29 | 2,700,000 | 2,850,000 | 37 | 668  | -0.0260402   |                                                                 |
| 29 | 2,775,000 | 2,925,000 | 38 | 974  | 0.220176315  |                                                                 |
| 29 | 2,850,000 | 3,000,000 | 39 | 1340 | 0.660082103  |                                                                 |
| 29 | 2,925,000 | 3,075,000 | 40 | 1463 | 0.656995872  |                                                                 |
| 29 | 3,000,000 | 3,150,000 | 41 | 1117 | 0.728976439  |                                                                 |
| 29 | 3,075,000 | 3,225,000 | 42 | 1063 | 0.332016142  |                                                                 |
| 29 | 3,150,000 | 3,300,000 | 43 | 1198 | 0.557665454  |                                                                 |
| 29 | 3,225,000 | 3,375,000 | 44 | 1180 | -0.056495064 |                                                                 |
| 29 | 3,300,000 | 3,450,000 | 45 | 1139 | -0.744245276 |                                                                 |
| 29 | 3,375,000 | 3,525,000 | 46 | 1160 | -0.800101036 |                                                                 |
| 29 | 3,450,000 | 3,600,000 | 47 | 1130 | -1.74768177  |                                                                 |
| 29 | 3,525,000 | 3,675,000 | 48 | 794  | -1.823345547 |                                                                 |
| 29 | 3,600,000 | 3,750,000 | 49 | 1207 | -0.356654071 |                                                                 |
| 29 | 3,675,000 | 3,825,000 | 50 | 1200 | -0.732753621 |                                                                 |
| 29 | 3,750,000 | 3,900,000 | 51 | 1124 | -1.301856962 |                                                                 |
| 29 | 3,825,000 | 3,975,000 | 52 | 1341 | -0.187923183 |                                                                 |
| 29 | 3,900,000 | 4,050,000 | 53 | 1266 | 0.36218128   |                                                                 |
| 29 | 3,975,000 | 4,125,000 | 54 | 1324 | -0.112626503 |                                                                 |
| 29 | 4,050,000 | 4,200,000 | 55 | 1059 | -0.534280733 |                                                                 |
| 29 | 4,125,000 | 4,275,000 | 56 | 898  | -0.595425431 |                                                                 |
| 29 | 4,200,000 | 4,350,000 | 57 | 1180 | -1.499248801 |                                                                 |
| 29 | 4,275,000 | 4,425,000 | 58 | 1565 | -1.273341106 |                                                                 |
| 29 | 4,350,000 | 4,500,000 | 59 | 1561 | -0.084361905 |                                                                 |
| 29 | 4,425,000 | 4,575,000 | 60 | 1125 | 0.598119568  |                                                                 |
| 29 | 4,500,000 | 4,650,000 | 61 | 932  | 0.394068177  |                                                                 |
| 29 | 4,575,000 | 4,725,000 | 62 | 988  | 0.331740523  |                                                                 |
| 29 | 4,650,000 | 4,800,000 | 63 | 1045 | -0.375007353 |                                                                 |
| 29 | 4,725,000 | 4,875,000 | 64 | 942  | -1.149047552 |                                                                 |
| 29 | 4,800,000 | 4,950,000 | 65 | 813  | -2.030921184 |                                                                 |
| 29 | 4,875,000 | 5,025,000 | 66 | 1236 | -0.544444395 |                                                                 |
| 29 | 4,950,000 | 5,100,000 | 67 | 1445 | -0.079826368 | CHORDC1,NAALAD2                                                 |
| 29 | 5,025,000 | 5,175,000 | 68 | 1069 | -0.337833074 | CHORDC1,NAALAD2                                                 |
| 29 | 5,100,000 | 5,250,000 | 69 | 632  | -1.274469248 | NAALAD2,RNF18,ENSBTAG00000034940,ENSBTAG00000046740             |
| 29 | 5,175,000 | 5,325,000 | 70 | 538  | -1.221537876 | RNF18,ENSBTAG00000034940,ENSBTAG00000046740,ENSBTAG00000046789  |
| 29 | 5,250,000 | 5,400,000 | 71 | 455  | 0.160352907  | ENSBTAG00000033656,ENSBTAG00000046789                           |
| 29 | 5,325,000 | 5,475,000 | 72 | 749  | 0.442733752  | ENSBTAG00000033656,ENSBTAG00000046202                           |
| 29 | 5,400,000 | 5,550,000 | 73 | 1127 | -0.661190009 | ENSBTAG00000046202                                              |
| 29 | 5,475,000 | 5,625,000 | 74 | 964  | -0.626974486 |                                                                 |
| 29 | 5,550,000 | 5,700,000 | 75 | 1079 | -0.647176251 | TRIM43,ENSBTAG00000034891                                       |
| 29 | 5,625,000 | 5,775,000 | 76 | 1241 | -0.54294357  | TRIM43,ENSBTAG00000034891,ENSBTAG00000034921,ENSBTAG00000038209 |
| 29 | 5,700,000 | 5,850,000 | 77 | 864  | -0.117165613 | ENSBTAG00000034921,ENSBTAG00000038169,ENSBTAG00000038209        |
| 29 | 5,775,000 | 5,925,000 | 78 | 793  | 0.595042098  | FOLH1,ENSBTAG00000038169,ENSBTAG00000039825                     |
| 29 | 5,850,000 | 6,000,000 | 79 | 1049 | 0.653393399  | FOLH1,ENSBTAG00000038169,ENSBTAG00000039825                     |
| 29 | 5,925,000 | 6,075,000 | 80 | 1147 | 0.027812756  | FOLH1                                                           |
| 29 | 6,000,000 | 6,150,000 | 81 | 949  | 0.291333857  | NOX4                                                            |

|    |           |            |     |      |              |                                       |
|----|-----------|------------|-----|------|--------------|---------------------------------------|
| 29 | 6,075,000 | 6,225,000  | 82  | 844  | 0.816290114  | NOX4                                  |
| 29 | 6,150,000 | 6,300,000  | 83  | 1352 | 0.169837194  | NOX4                                  |
| 29 | 6,225,000 | 6,375,000  | 84  | 1393 | -0.468491004 | NOX4,TYR                              |
| 29 | 6,300,000 | 6,450,000  | 85  | 1260 | 0.109193978  | NOX4,TYR                              |
| 29 | 6,375,000 | 6,525,000  | 86  | 1154 | 0.971341798  | TYR                                   |
| 29 | 6,450,000 | 6,600,000  | 87  | 1103 | 0.397148924  | TYR                                   |
| 29 | 6,525,000 | 6,675,000  | 88  | 1359 | -0.236484444 |                                       |
| 29 | 6,600,000 | 6,750,000  | 89  | 1362 | -0.654824236 |                                       |
| 29 | 6,675,000 | 6,825,000  | 90  | 1223 | -0.978637003 |                                       |
| 29 | 6,750,000 | 6,900,000  | 91  | 972  | -0.972330527 |                                       |
| 29 | 6,825,000 | 6,975,000  | 92  | 612  | -0.493077668 |                                       |
| 29 | 6,900,000 | 7,050,000  | 93  | 682  | 0.558820823  |                                       |
| 29 | 6,975,000 | 7,125,000  | 94  | 623  | 0.521437849  |                                       |
| 29 | 7,050,000 | 7,200,000  | 95  | 514  | -1.311646525 | GRM5                                  |
| 29 | 7,125,000 | 7,275,000  | 96  | 866  | -0.993638043 | GRM5                                  |
| 29 | 7,200,000 | 7,350,000  | 97  | 827  | -1.003714522 | GRM5                                  |
| 29 | 7,275,000 | 7,425,000  | 98  | 973  | -0.908425479 | ENSBTAG00000034845                    |
| 29 | 7,350,000 | 7,500,000  | 99  | 1256 | -0.307995176 | CTSC,ENSBTAG00000034845               |
| 29 | 7,425,000 | 7,575,000  | 100 | 1375 | -0.386653515 | CTSC,RAB38,ENSBTAG00000046360         |
| 29 | 7,500,000 | 7,650,000  | 101 | 1476 | -0.288473067 | RAB38,ENSBTAG00000046360              |
| 29 | 7,575,000 | 7,725,000  | 102 | 1762 | 0.69950686   | DENR,RAB38                            |
| 29 | 7,650,000 | 7,800,000  | 103 | 1607 | 0.810339734  | DENR                                  |
| 29 | 7,725,000 | 7,875,000  | 104 | 1348 | 0.988871136  | DENR                                  |
| 29 | 7,800,000 | 7,950,000  | 105 | 1596 | 1.095308727  |                                       |
| 29 | 7,875,000 | 8,025,000  | 106 | 1668 | 0.638817971  |                                       |
| 29 | 7,950,000 | 8,100,000  | 107 | 1717 | 0.741590146  |                                       |
| 29 | 8,025,000 | 8,175,000  | 108 | 1741 | 1.048039013  |                                       |
| 29 | 8,100,000 | 8,250,000  | 109 | 1809 | 0.188723975  |                                       |
| 29 | 8,175,000 | 8,325,000  | 110 | 1422 | -0.25717071  | TMEM135                               |
| 29 | 8,250,000 | 8,400,000  | 111 | 1107 | 0.520805088  | TMEM135                               |
| 29 | 8,325,000 | 8,475,000  | 112 | 822  | 0.62417279   | TMEM135                               |
| 29 | 8,400,000 | 8,550,000  | 113 | 603  | -0.3853714   |                                       |
| 29 | 8,475,000 | 8,625,000  | 114 | 634  | -0.152208203 |                                       |
| 29 | 8,550,000 | 8,700,000  | 115 | 641  | 0.428512128  | FZD4                                  |
| 29 | 8,625,000 | 8,775,000  | 116 | 1367 | 0.485510069  | FZD4                                  |
| 29 | 8,700,000 | 8,850,000  | 117 | 1674 | 0.374790008  | PRSS23                                |
| 29 | 8,775,000 | 8,925,000  | 118 | 1464 | 0.40962535   | PRSS23                                |
| 29 | 8,850,000 | 9,000,000  | 119 | 1606 | -0.01699188  | ME3                                   |
| 29 | 8,925,000 | 9,075,000  | 120 | 2094 | -0.100997437 | ME3                                   |
| 29 | 9,000,000 | 9,150,000  | 121 | 2258 | 0.322819584  | ME3                                   |
| 29 | 9,075,000 | 9,225,000  | 122 | 1804 | 0.322973969  | CCDC81,ME3                            |
| 29 | 9,150,000 | 9,300,000  | 123 | 1390 | 0.004864479  | C29H11orf73,CCDC81,ME3                |
| 29 | 9,225,000 | 9,375,000  | 124 | 923  | 0.082986053  | C29H11orf73,CCDC81,EED                |
| 29 | 9,300,000 | 9,450,000  | 125 | 525  | 0.235630488  | C29H11orf73,EED                       |
| 29 | 9,375,000 | 9,525,000  | 126 | 586  | -0.440235179 |                                       |
| 29 | 9,450,000 | 9,600,000  | 127 | 550  | -1.0812487   |                                       |
| 29 | 9,525,000 | 9,675,000  | 128 | 291  | -1.746107459 | PICALM                                |
| 29 | 9,600,000 | 9,750,000  | 129 | 343  | -2.355249116 | CCDC83,PICALM                         |
| 29 | 9,675,000 | 9,825,000  | 130 | 396  | -1.968005942 | CCDC83,SYTL2                          |
| 29 | 9,750,000 | 9,900,000  | 131 | 513  | -0.619604763 | CCDC83,SYTL2                          |
| 29 | 9,825,000 | 9,975,000  | 132 | 854  | 0.293422905  | CCDC89,CREBZF,SYTL2,TMEM126A          |
| 29 | 9,900,000 | 10,050,000 | 133 | 968  | 0.450912452  | CCDC89,CREBZF,SYTL2,TMEM126A,TMEM126B |
| 29 | 9,975,000 | 10,125,000 | 134 | 782  | -0.152443908 | TMEM126B                              |

|    |            |            |     |      |              |                         |
|----|------------|------------|-----|------|--------------|-------------------------|
| 29 | 10,050,000 | 10,200,000 | 135 | 746  | -0.014900417 |                         |
| 29 | 10,125,000 | 10,275,000 | 136 | 891  | 0.213904944  |                         |
| 29 | 10,200,000 | 10,350,000 | 137 | 1109 | 0.173939615  |                         |
| 29 | 10,275,000 | 10,425,000 | 138 | 1395 | 0.469630426  |                         |
| 29 | 10,350,000 | 10,500,000 | 139 | 1270 | 0.408470816  |                         |
| 29 | 10,425,000 | 10,575,000 | 140 | 966  | 0.507088016  |                         |
| 29 | 10,500,000 | 10,650,000 | 141 | 1181 | -0.152231308 |                         |
| 29 | 10,575,000 | 10,725,000 | 142 | 1131 | -0.598861705 |                         |
| 29 | 10,650,000 | 10,800,000 | 143 | 862  | 0.016194834  | ENSBTAG00000047436      |
| 29 | 10,725,000 | 10,875,000 | 144 | 875  | -2.051181052 | ENSBTAG00000047436      |
| 29 | 10,800,000 | 10,950,000 | 145 | 795  | -2.483289234 |                         |
| 29 | 10,875,000 | 11,025,000 | 146 | 859  | -0.108718539 |                         |
| 29 | 10,950,000 | 11,100,000 | 147 | 1129 | 0.567406943  |                         |
| 29 | 11,025,000 | 11,175,000 | 148 | 1124 | 0.141056625  |                         |
| 29 | 11,100,000 | 11,250,000 | 149 | 663  | -0.412108332 |                         |
| 29 | 11,175,000 | 11,325,000 | 150 | 655  | 0.660029623  |                         |
| 29 | 11,250,000 | 11,400,000 | 151 | 785  | 0.581978251  |                         |
| 29 | 11,325,000 | 11,475,000 | 152 | 706  | 0.013832132  |                         |
| 29 | 11,400,000 | 11,550,000 | 153 | 831  | 0.617441956  |                         |
| 29 | 11,475,000 | 11,625,000 | 154 | 1027 | 0.252793073  |                         |
| 29 | 11,550,000 | 11,700,000 | 155 | 1390 | 0.151977012  |                         |
| 29 | 11,625,000 | 11,775,000 | 156 | 1622 | 0.586915835  |                         |
| 29 | 11,700,000 | 11,850,000 | 157 | 1560 | 0.477632359  |                         |
| 29 | 11,775,000 | 11,925,000 | 158 | 1557 | 0.400857606  |                         |
| 29 | 11,850,000 | 12,000,000 | 159 | 1407 | 0.404764045  |                         |
| 29 | 11,925,000 | 12,075,000 | 160 | 865  | -0.710232302 |                         |
| 29 | 12,000,000 | 12,150,000 | 161 | 656  | -2.846554486 | DLG2                    |
| 29 | 12,075,000 | 12,225,000 | 162 | 809  | -1.106888026 | DLG2,ENSBTAG00000017735 |
| 29 | 12,150,000 | 12,300,000 | 163 | 869  | -0.084126428 | DLG2,ENSBTAG00000017735 |
| 29 | 12,225,000 | 12,375,000 | 164 | 821  | -0.393759185 | DLG2                    |
| 29 | 12,300,000 | 12,450,000 | 165 | 950  | -0.148941269 | DLG2                    |
| 29 | 12,375,000 | 12,525,000 | 166 | 895  | 0.094066146  | ANKRD42,CCDC90B         |
| 29 | 12,450,000 | 12,600,000 | 167 | 521  | 0.252674253  | ANKRD42,CCDC90B,PCF11   |
| 29 | 12,525,000 | 12,675,000 | 168 | 629  | 0.876568797  | ANKRD42,PCF11,RAB30     |
| 29 | 12,600,000 | 12,750,000 | 169 | 809  | 0.244575825  | RAB30                   |
| 29 | 12,675,000 | 12,825,000 | 170 | 475  | -1.047207548 | DDIAS,PRCP,RAB30        |
| 29 | 12,750,000 | 12,900,000 | 171 | 250  | 0.093618389  | DDIAS,PRCP,RAB30        |
| 29 | 12,825,000 | 12,975,000 | 172 | 250  | 0.0075962    | PRCP                    |
| 29 | 12,900,000 | 13,050,000 | 173 | 331  | -0.043977719 | FAM181B,PRCP            |
| 29 | 12,975,000 | 13,125,000 | 174 | 874  | -0.505290809 | FAM181B                 |
| 29 | 13,050,000 | 13,200,000 | 175 | 1130 | 0.083805326  |                         |
| 29 | 13,125,000 | 13,275,000 | 176 | 1389 | 0.287083272  |                         |
| 29 | 13,200,000 | 13,350,000 | 177 | 1826 | 0.293308216  |                         |
| 29 | 13,275,000 | 13,425,000 | 178 | 1444 | 0.854059353  |                         |
| 29 | 13,350,000 | 13,500,000 | 179 | 946  | 1.127190445  | ENSBTAG00000010970      |
| 29 | 13,425,000 | 13,575,000 | 180 | 927  | 1.143182665  | ENSBTAG00000010970      |
| 29 | 13,500,000 | 13,650,000 | 181 | 1288 | 1.143434416  | ENSBTAG00000022427      |
| 29 | 13,575,000 | 13,725,000 | 182 | 1236 | 1.197568671  | ENSBTAG00000022427      |
| 29 | 13,650,000 | 13,800,000 | 183 | 900  | 0.733637794  |                         |
| 29 | 13,725,000 | 13,875,000 | 184 | 691  | 0.173940993  |                         |
| 29 | 13,800,000 | 13,950,000 | 185 | 794  | 0.761697121  |                         |
| 29 | 13,875,000 | 14,025,000 | 186 | 1326 | -0.022980756 |                         |
| 29 | 13,950,000 | 14,100,000 | 187 | 1137 | -0.377524379 |                         |

|    |            |            |     |      |              |                                 |
|----|------------|------------|-----|------|--------------|---------------------------------|
| 29 | 14,025,000 | 14,175,000 | 188 | 763  | 0.674555454  |                                 |
| 29 | 14,100,000 | 14,250,000 | 189 | 843  | 0.656072092  |                                 |
| 29 | 14,175,000 | 14,325,000 | 190 | 826  | 0.253379954  |                                 |
| 29 | 14,250,000 | 14,400,000 | 191 | 867  | 0.1566929    |                                 |
| 29 | 14,325,000 | 14,475,000 | 192 | 1146 | 0.759502317  |                                 |
| 29 | 14,400,000 | 14,550,000 | 193 | 1447 | 1.093452041  |                                 |
| 29 | 14,475,000 | 14,625,000 | 194 | 1239 | 1.025402272  |                                 |
| 29 | 14,550,000 | 14,700,000 | 195 | 1007 | -1.353080402 |                                 |
| 29 | 14,625,000 | 14,775,000 | 196 | 1742 | -2.590115921 |                                 |
| 29 | 14,700,000 | 14,850,000 | 197 | 1656 | -1.648401048 |                                 |
| 29 | 14,775,000 | 14,925,000 | 198 | 1163 | 0.223245612  |                                 |
| 29 | 14,850,000 | 15,000,000 | 199 | 1303 | -0.275340562 |                                 |
| 29 | 14,925,000 | 15,075,000 | 200 | 1021 | -0.045015768 |                                 |
| 29 | 15,000,000 | 15,150,000 | 201 | 903  | 1.234465851  |                                 |
| 29 | 15,075,000 | 15,225,000 | 202 | 1241 | 1.333776101  |                                 |
| 29 | 15,150,000 | 15,300,000 | 203 | 1480 | 1.009586929  |                                 |
| 29 | 15,225,000 | 15,375,000 | 204 | 1415 | 0.611694379  |                                 |
| 29 | 15,300,000 | 15,450,000 | 205 | 1486 | 0.256229522  |                                 |
| 29 | 15,375,000 | 15,525,000 | 206 | 1300 | 0.255642625  |                                 |
| 29 | 15,450,000 | 15,600,000 | 207 | 960  | 0.852025289  |                                 |
| 29 | 15,525,000 | 15,675,000 | 208 | 1129 | 0.85130207   |                                 |
| 29 | 15,600,000 | 15,750,000 | 209 | 1470 | 0.592936297  |                                 |
| 29 | 15,675,000 | 15,825,000 | 210 | 1796 | 0.616697659  |                                 |
| 29 | 15,750,000 | 15,900,000 | 211 | 1744 | 0.570666648  |                                 |
| 29 | 15,825,000 | 15,975,000 | 212 | 1013 | -0.265815653 |                                 |
| 29 | 15,900,000 | 16,050,000 | 213 | 557  | 0.042358003  |                                 |
| 29 | 15,975,000 | 16,125,000 | 214 | 724  | 1.077682926  |                                 |
| 29 | 16,050,000 | 16,200,000 | 215 | 887  | 0.252521639  |                                 |
| 29 | 16,125,000 | 16,275,000 | 216 | 959  | -0.629257007 |                                 |
| 29 | 16,200,000 | 16,350,000 | 217 | 1446 | -0.010388872 |                                 |
| 29 | 16,275,000 | 16,425,000 | 218 | 1779 | -0.020120852 |                                 |
| 29 | 16,350,000 | 16,500,000 | 219 | 1557 | 0.100676693  |                                 |
| 29 | 16,425,000 | 16,575,000 | 220 | 1338 | 0.690114702  |                                 |
| 29 | 16,500,000 | 16,650,000 | 221 | 1274 | 0.720971479  |                                 |
| 29 | 16,575,000 | 16,725,000 | 222 | 1208 | 0.913145222  |                                 |
| 29 | 16,650,000 | 16,800,000 | 223 | 1200 | 0.440367188  |                                 |
| 29 | 16,725,000 | 16,875,000 | 224 | 1349 | 0.518688836  |                                 |
| 29 | 16,800,000 | 16,950,000 | 225 | 1451 | 0.772255956  |                                 |
| 29 | 16,875,000 | 17,025,000 | 226 | 1349 | 0.836121129  |                                 |
| 29 | 16,950,000 | 17,100,000 | 227 | 1084 | 0.40729816   | TENM4                           |
| 29 | 17,025,000 | 17,175,000 | 228 | 908  | 0.276444347  | TENM4                           |
| 29 | 17,100,000 | 17,250,000 | 229 | 964  | 0.811426698  | TENM4                           |
| 29 | 17,175,000 | 17,325,000 | 230 | 1195 | 0.741232043  | TENM4                           |
| 29 | 17,250,000 | 17,400,000 | 231 | 1463 | -0.339942346 | TENM4                           |
| 29 | 17,325,000 | 17,475,000 | 232 | 1592 | -1.636618175 | TENM4                           |
| 29 | 17,400,000 | 17,550,000 | 233 | 1375 | -1.163561684 | NARS2,TENM4,ENSBTAG00000040202  |
| 29 | 17,475,000 | 17,625,000 | 234 | 886  | -0.030888195 | NARS2,TENM4,ENSBTAG00000040202  |
| 29 | 17,550,000 | 17,700,000 | 235 | 571  | -0.547291219 | NARS2                           |
| 29 | 17,625,000 | 17,775,000 | 236 | 682  | -0.653364688 | NARS2                           |
| 29 | 17,700,000 | 17,850,000 | 237 | 799  | -0.281378758 | ENSBTAG00000002922              |
| 29 | 17,775,000 | 17,925,000 | 238 | 604  | 0.510841611  | USP35,ENSBTAG00000002922        |
| 29 | 17,850,000 | 18,000,000 | 239 | 334  | 0.420981721  | KCTD21,USP35,ENSBTAG00000002922 |
| 29 | 17,925,000 | 18,075,000 | 240 | 218  | 0.055783429  | ALG8,KCTD21,NDUFC2,USP35        |

|    |            |            |     |      |              |                                |
|----|------------|------------|-----|------|--------------|--------------------------------|
| 29 | 18,000,000 | 18,150,000 | 241 | 231  | 0.63382878   | ALG8,INTS4,KCTD14,NDUFC2,THRSP |
| 29 | 18,075,000 | 18,225,000 | 242 | 254  | 0.877105629  | INTS4,KCTD14,NDUFC2,THRSP      |
| 29 | 18,150,000 | 18,300,000 | 243 | 248  | 1.224448817  | AAMDC,INTS4,RSF1               |
| 29 | 18,225,000 | 18,375,000 | 244 | 273  | 1.108600828  | AAMDC,INTS4,RSF1               |
| 29 | 18,300,000 | 18,450,000 | 245 | 295  | 1.128430755  | CLNS1A,RSF1                    |
| 29 | 18,375,000 | 18,525,000 | 246 | 273  | 0.242004832  | AQP11,CLNS1A,RSF1              |
| 29 | 18,450,000 | 18,600,000 | 247 | 334  | -1.865508583 | AQP11,CLNS1A                   |
| 29 | 18,525,000 | 18,675,000 | 248 | 377  | -3.6707308   |                                |
| 29 | 18,600,000 | 18,750,000 | 249 | 320  | -3.078266876 | PAK1                           |
| 29 | 18,675,000 | 18,825,000 | 250 | 323  | 0.000637494  | PAK1                           |
| 29 | 18,750,000 | 18,900,000 | 251 | 326  | 0.363500276  | PAK1                           |
| 29 | 18,825,000 | 18,975,000 | 252 | 332  | 0.112035299  |                                |
| 29 | 18,900,000 | 19,050,000 | 253 | 449  | -1.376145141 |                                |
| 29 | 18,975,000 | 19,125,000 | 254 | 591  | -1.781239212 | ENSBTAG00000034536             |
| 29 | 19,050,000 | 19,200,000 | 255 | 628  | -1.199241866 | ENSBTAG00000034536             |
| 29 | 19,125,000 | 19,275,000 | 256 | 1023 | -0.596573043 | ENSBTAG00000034536             |
| 29 | 19,200,000 | 19,350,000 | 257 | 1463 | 0.043183309  |                                |
| 29 | 19,275,000 | 19,425,000 | 258 | 1260 | 0.593343889  |                                |
| 29 | 19,350,000 | 19,500,000 | 259 | 1007 | 0.816879045  |                                |
| 29 | 19,425,000 | 19,575,000 | 260 | 739  | 0.810376987  |                                |
| 29 | 19,500,000 | 19,650,000 | 261 | 529  | 1.038772946  |                                |
| 29 | 19,575,000 | 19,725,000 | 262 | 1033 | 0.57379327   |                                |
| 29 | 19,650,000 | 19,800,000 | 263 | 1720 | 0.014636361  |                                |
| 29 | 19,725,000 | 19,875,000 | 264 | 1695 | -0.992681549 |                                |
| 29 | 19,800,000 | 19,950,000 | 265 | 1346 | -1.981904032 |                                |
| 29 | 19,875,000 | 20,025,000 | 266 | 1213 | -0.652217311 |                                |
| 29 | 19,950,000 | 20,100,000 | 267 | 935  | -0.661343281 |                                |
| 29 | 20,025,000 | 20,175,000 | 268 | 636  | -1.541800311 |                                |
| 29 | 20,100,000 | 20,250,000 | 269 | 828  | 0.007128062  |                                |
| 29 | 20,175,000 | 20,325,000 | 270 | 1169 | -1.407486896 | MGC157332                      |
| 29 | 20,250,000 | 20,400,000 | 271 | 923  | -1.7426607   | MGC157332                      |
| 29 | 20,325,000 | 20,475,000 | 272 | 1000 | 0.11612843   | MGC157332                      |
| 29 | 20,400,000 | 20,550,000 | 273 | 891  | 0.057056229  | MGC157332                      |
| 29 | 20,475,000 | 20,625,000 | 274 | 720  | 0.572895025  | MGC157332                      |
| 29 | 20,550,000 | 20,700,000 | 275 | 843  | 0.515786743  | MGC157332                      |
| 29 | 20,625,000 | 20,775,000 | 276 | 503  | 0.540107322  |                                |
| 29 | 20,700,000 | 20,850,000 | 277 | 532  | 0.884203548  |                                |
| 29 | 20,775,000 | 20,925,000 | 278 | 840  | 0.803364789  |                                |
| 29 | 20,850,000 | 21,000,000 | 279 | 1366 | 0.726853749  |                                |
| 29 | 20,925,000 | 21,075,000 | 280 | 1648 | 0.761504563  |                                |
| 29 | 21,000,000 | 21,150,000 | 281 | 1704 | 0.257323931  |                                |
| 29 | 21,075,000 | 21,225,000 | 282 | 1465 | -0.156099664 |                                |
| 29 | 21,150,000 | 21,300,000 | 283 | 1251 | -1.133193376 |                                |
| 29 | 21,225,000 | 21,375,000 | 284 | 1142 | -2.049360292 |                                |
| 29 | 21,300,000 | 21,450,000 | 285 | 1019 | -1.316788869 |                                |
| 29 | 21,375,000 | 21,525,000 | 286 | 1002 | 0.198991124  |                                |
| 29 | 21,450,000 | 21,600,000 | 287 | 826  | 0.851171921  |                                |
| 29 | 21,525,000 | 21,675,000 | 288 | 850  | 0.933817639  |                                |
| 29 | 21,600,000 | 21,750,000 | 289 | 1066 | 0.482063144  |                                |
| 29 | 21,675,000 | 21,825,000 | 290 | 885  | 0.20062469   |                                |
| 29 | 21,750,000 | 21,900,000 | 291 | 635  | 0.157406645  |                                |
| 29 | 21,825,000 | 21,975,000 | 292 | 770  | 0.144207344  |                                |
| 29 | 21,900,000 | 22,050,000 | 293 | 834  | 0.510358863  |                                |



|    |            |            |     |      |              |                                  |
|----|------------|------------|-----|------|--------------|----------------------------------|
| 29 | 21,975,000 | 22,125,000 | 294 | 853  | 0.678481598  |                                  |
| 29 | 22,050,000 | 22,200,000 | 295 | 1127 | 0.52337105   |                                  |
| 29 | 22,125,000 | 22,275,000 | 296 | 1054 | 0.71660705   |                                  |
| 29 | 22,200,000 | 22,350,000 | 297 | 953  | 0.330761879  | GAS2                             |
| 29 | 22,275,000 | 22,425,000 | 298 | 749  | 0.014142009  | GAS2                             |
| 29 | 22,350,000 | 22,500,000 | 299 | 282  | 0.493958961  | FANCF,GAS2                       |
| 29 | 22,425,000 | 22,575,000 | 300 | 584  | -0.473392084 | FANCF                            |
| 29 | 22,500,000 | 22,650,000 | 301 | 669  | -0.68676337  |                                  |
| 29 | 22,575,000 | 22,725,000 | 302 | 674  | -0.280734497 | SLC17A6                          |
| 29 | 22,650,000 | 22,800,000 | 303 | 605  | 0.189990736  | ANO5,SLC17A6                     |
| 29 | 22,725,000 | 22,875,000 | 304 | 476  | 1.035684062  | ANO5,SLC17A6                     |
| 29 | 22,800,000 | 22,950,000 | 305 | 1124 | 0.901402823  | ANO5                             |
| 29 | 22,875,000 | 23,025,000 | 306 | 1745 | 0.903203851  |                                  |
| 29 | 22,950,000 | 23,100,000 | 307 | 1933 | 0.771732903  |                                  |
| 29 | 23,025,000 | 23,175,000 | 308 | 1892 | 0.549594796  |                                  |
| 29 | 23,100,000 | 23,250,000 | 309 | 1464 | 0.74309562   |                                  |
| 29 | 23,175,000 | 23,325,000 | 310 | 1378 | 0.753987172  |                                  |
| 29 | 23,250,000 | 23,400,000 | 311 | 1711 | 0.056751335  |                                  |
| 29 | 23,325,000 | 23,475,000 | 312 | 1883 | 0.140718124  |                                  |
| 29 | 23,400,000 | 23,550,000 | 313 | 1782 | 0.463374003  |                                  |
| 29 | 23,475,000 | 23,625,000 | 314 | 1736 | 0.369849972  |                                  |
| 29 | 23,550,000 | 23,700,000 | 315 | 1730 | 0.470931811  |                                  |
| 29 | 23,625,000 | 23,775,000 | 316 | 1423 | 0.101248354  |                                  |
| 29 | 23,700,000 | 23,850,000 | 317 | 1190 | 0.400773903  |                                  |
| 29 | 23,775,000 | 23,925,000 | 318 | 1175 | 0.677383818  |                                  |
| 29 | 23,850,000 | 24,000,000 | 319 | 1135 | 0.619764403  |                                  |
| 29 | 23,925,000 | 24,075,000 | 320 | 1095 | 0.884854288  |                                  |
| 29 | 24,000,000 | 24,150,000 | 321 | 946  | 0.935155921  |                                  |
| 29 | 24,075,000 | 24,225,000 | 322 | 718  | 0.561813279  |                                  |
| 29 | 24,150,000 | 24,300,000 | 323 | 1263 | 0.220806034  |                                  |
| 29 | 24,225,000 | 24,375,000 | 324 | 1210 | 0.358543435  |                                  |
| 29 | 24,300,000 | 24,450,000 | 325 | 608  | 0.328850674  |                                  |
| 29 | 24,375,000 | 24,525,000 | 326 | 756  | 0.124603671  |                                  |
| 29 | 24,450,000 | 24,600,000 | 327 | 839  | 0.602252177  | SLC6A5                           |
| 29 | 24,525,000 | 24,675,000 | 328 | 615  | 0.47523718   | SLC6A5                           |
| 29 | 24,600,000 | 24,750,000 | 329 | 521  | 0.104968555  | PRMT3,SLC6A5                     |
| 29 | 24,675,000 | 24,825,000 | 330 | 523  | 0.961443004  | HTATIP2,PRMT3                    |
| 29 | 24,750,000 | 24,900,000 | 331 | 499  | 0.615232071  | HTATIP2,PRMT3,ENSBTAG00000008684 |
| 29 | 24,825,000 | 24,975,000 | 332 | 807  | 0.599968132  | ENSBTAG00000008684               |
| 29 | 24,900,000 | 25,050,000 | 333 | 1029 | 0.664965262  | DBX1,NAV2                        |
| 29 | 24,975,000 | 25,125,000 | 334 | 955  | 0.45915208   | DBX1,NAV2                        |
| 29 | 25,050,000 | 25,200,000 | 335 | 1048 | 0.859662562  | NAV2                             |
| 29 | 25,125,000 | 25,275,000 | 336 | 947  | 0.683657727  | NAV2                             |
| 29 | 25,200,000 | 25,350,000 | 337 | 751  | -0.124521808 | NAV2                             |
| 29 | 25,275,000 | 25,425,000 | 338 | 629  | -0.24959022  | NAV2                             |
| 29 | 25,350,000 | 25,500,000 | 339 | 902  | -2.096784302 | NAV2                             |
| 29 | 25,425,000 | 25,575,000 | 340 | 1250 | -1.116294208 |                                  |
| 29 | 25,500,000 | 25,650,000 | 341 | 848  | -0.266680551 |                                  |
| 29 | 25,575,000 | 25,725,000 | 342 | 622  | -2.49612293  |                                  |
| 29 | 25,650,000 | 25,800,000 | 343 | 862  | -1.932387511 |                                  |
| 29 | 25,725,000 | 25,875,000 | 344 | 873  | 0.230742218  |                                  |
| 29 | 25,800,000 | 25,950,000 | 345 | 833  | -0.03024576  | E2F8                             |
| 29 | 25,875,000 | 26,025,000 | 346 | 706  | -0.415544312 | CSRP3,E2F8,ZDHHC13               |

|    |            |            |     |      |              |                                                                                                                                                                           |
|----|------------|------------|-----|------|--------------|---------------------------------------------------------------------------------------------------------------------------------------------------------------------------|
| 29 | 25,950,000 | 26,100,000 | 347 | 524  | 0.14822396   | CSRP3,E2F8,ZDHHC13                                                                                                                                                        |
| 29 | 26,025,000 | 26,175,000 | 348 | 566  | -0.083097652 | MRGPRX2,ZDHHC13                                                                                                                                                           |
| 29 | 26,100,000 | 26,250,000 | 349 | 578  | -0.275253941 | MRGPRX2,PTPN5                                                                                                                                                             |
| 29 | 26,175,000 | 26,325,000 | 350 | 482  | -0.10686416  | PTPN5,TMEM86A                                                                                                                                                             |
| 29 | 26,250,000 | 26,400,000 | 351 | 618  | 0.503414611  | PTPN5,SPTY2D1,TMEM86A,UEVLD                                                                                                                                               |
| 29 | 26,325,000 | 26,475,000 | 352 | 723  | -0.196243528 | SPTY2D1,TSG101,UEVLD                                                                                                                                                      |
| 29 | 26,400,000 | 26,550,000 | 353 | 498  | -2.506874087 | LDHA,LDHC,TSG101,UEVLD                                                                                                                                                    |
| 29 | 26,475,000 | 26,625,000 | 354 | 371  | -2.178314402 | GTF2H1,HPS5,LDHA,LDHC,TSG101                                                                                                                                              |
| 29 | 26,550,000 | 26,700,000 | 355 | 612  | -1.34260585  | GTF2H1,HPS5,LDHA,SAA3,ENSBTAG00000022395                                                                                                                                  |
| 29 | 26,625,000 | 26,775,000 | 356 | 1080 | -0.367645908 | HPS5,M-SAA3.2,SAA1,SAA3,SAA4,ENSBTAG00000022395                                                                                                                           |
| 29 | 26,700,000 | 26,850,000 | 357 | 1266 | 0.316446747  | M-SAA3.2,OR4D5,OR6M1,OR8D4,SAA1,SAA4                                                                                                                                      |
| 29 | 26,775,000 | 26,925,000 | 358 | 1121 | 0.521372876  | OR4D5,OR6M1,OR8D4,ENSBTAG00000038590,ENSBTAG0000046745,ENSBTAG00000047090,ENSBTAG00000048240                                                                              |
| 29 | 26,850,000 | 27,000,000 | 359 | 1165 | 0.831689896  | ENSBTAG00000038590,ENSBTAG00000046459,ENSBTAG0000046745,ENSBTAG00000047090,ENSBTAG00000048222,ENSBTAG00000048240                                                          |
| 29 | 26,925,000 | 27,075,000 | 360 | 1502 | 0.551888043  | OR10G6,ENSBTAG00000046459,ENSBTAG00000047304,ENSBTAG00000047557,ENSBTAG00000048192,ENSBTAG0000048222                                                                      |
| 29 | 27,000,000 | 27,150,000 | 361 | 1503 | -0.491544909 | OR10G6,ENSBTAG00000047267,ENSBTAG00000047304,ENSBTAG00000047463,ENSBTAG00000047557,ENSBTAG0000048192                                                                      |
| 29 | 27,075,000 | 27,225,000 | 362 | 1364 | -1.312176106 | VWA5A,ENSBTAG00000022384,ENSBTAG00000039757,ENSBTAG00000047267,ENSBTAG00000047463,ENSBTAG0000047934                                                                       |
| 29 | 27,150,000 | 27,300,000 | 363 | 1590 | 0.211851987  | OR10D3,VWA5A,ENSBTAG00000022384,ENSBTAG00000039517,ENSBTAG00000039757,ENSBTAG00000047934,ENSBTAG00000048043                                                               |
| 29 | 27,225,000 | 27,375,000 | 364 | 1696 | 0.574990963  | OR10D3,ENSBTAG00000005112,ENSBTAG00000039517,ENSBTAG00000046247,ENSBTAG00000047530,ENSBTAG0000048043                                                                      |
| 29 | 27,300,000 | 27,450,000 | 365 | 1589 | -0.71694867  | ENSBTAG00000005112,ENSBTAG00000039964,ENSBTAG0000046247,ENSBTAG00000046299,ENSBTAG00000047530                                                                             |
| 29 | 27,375,000 | 27,525,000 | 366 | 1833 | -1.28437981  | ENSBTAG00000039964,ENSBTAG00000040239,ENSBTAG0000046299                                                                                                                   |
| 29 | 27,450,000 | 27,600,000 | 367 | 2327 | 0.459645297  | TMEM225,ENSBTAG00000040239                                                                                                                                                |
| 29 | 27,525,000 | 27,675,000 | 368 | 2244 | 0.719386267  | TMEM225,ENSBTAG00000047151,ENSBTAG00000047916                                                                                                                             |
| 29 | 27,600,000 | 27,750,000 | 369 | 2146 | -0.250232396 | ENSBTAG00000017495,ENSBTAG00000046665,ENSBTAG0000047151,ENSBTAG00000047916                                                                                                |
| 29 | 27,675,000 | 27,825,000 | 370 | 2135 | -2.225310352 | ENSBTAG00000017495,ENSBTAG00000035631,ENSBTAG0000037623,ENSBTAG00000040250,ENSBTAG00000046665                                                                             |
| 29 | 27,750,000 | 27,900,000 | 371 | 1765 | -3.03849496  | ENSBTAG00000035631,ENSBTAG00000037623,ENSBTAG0000040250,ENSBTAG00000046086,ENSBTAG00000047100,ENSBTAG00000047204,ENSBTAG00000047753,ENSBTAG00000047840                    |
| 29 | 27,825,000 | 27,975,000 | 372 | 1658 | -1.182642401 | ENSBTAG00000046086,ENSBTAG00000046130,ENSBTAG0000047020,ENSBTAG00000047100,ENSBTAG00000047204,ENSBTAG00000047310,ENSBTAG00000047730,ENSBTAG00000047753,ENSBTAG00000047840 |

|    |            |            |     |      |              |                                                                                                                                                                           |
|----|------------|------------|-----|------|--------------|---------------------------------------------------------------------------------------------------------------------------------------------------------------------------|
| 29 | 27,900,000 | 28,050,000 | 373 | 1662 | -1.333278439 | ENSBTAG00000046130,ENSBTAG00000047020,ENSBTAG0000047310,ENSBTAG00000047730                                                                                                |
| 29 | 27,975,000 | 28,125,000 | 374 | 1112 | -1.810801415 | ENSBTAG00000005199,ENSBTAG00000006629,ENSBTAG0000014305,ENSBTAG00000037467                                                                                                |
| 29 | 28,050,000 | 28,200,000 | 375 | 691  | -1.555238707 | OR8B8,ENSBTAG00000005199,ENSBTAG00000006629,ENSBTAG00000014305,ENSBTAG00000033480,ENSBTAG0000037467                                                                       |
| 29 | 28,125,000 | 28,275,000 | 376 | 911  | -0.320063111 | OR8B8,ENSBTAG00000033480,ENSBTAG00000046410,ENSBTAG00000047716,ENSBTAG00000048018                                                                                         |
| 29 | 28,200,000 | 28,350,000 | 377 | 1131 | 0.403208208  | ENSBTAG00000022376,ENSBTAG00000022378,ENSBTAG0000033476,ENSBTAG00000033477,ENSBTAG00000038182,ENSBTAG00000039676,ENSBTAG00000046410,ENSBTAG00000047716,ENSBTAG00000048018 |
| 29 | 28,275,000 | 28,425,000 | 378 | 984  | 0.433515539  | ENSBTAG00000022376,ENSBTAG00000022378,ENSBTAG0000024769,ENSBTAG00000033476,ENSBTAG00000033477,ENSBTAG00000038182,ENSBTAG00000039676,ENSBTAG00000040090                    |
| 29 | 28,350,000 | 28,500,000 | 379 | 884  | 0.418938199  | PANX3,SIAE,TBRG1,ENSBTAG00000024769,ENSBTAG0000033476,ENSBTAG00000040090                                                                                                  |
| 29 | 28,425,000 | 28,575,000 | 380 | 1049 | 0.270820217  | PANX3,SIAE,SPA17,TBRG1                                                                                                                                                    |
| 29 | 28,500,000 | 28,650,000 | 381 | 991  | -0.374110365 | ESAM,MSANTD2,NRGN,SIAE,SPA17,VSIG2                                                                                                                                        |
| 29 | 28,575,000 | 28,725,000 | 382 | 830  | -0.558012833 | ESAM,MSANTD2,NRGN,ROBO3,ROBO4,VSIG2                                                                                                                                       |
| 29 | 28,650,000 | 28,800,000 | 383 | 778  | -1.22580538  | CCDC15,HEPACAM,ROBO3,ROBO4                                                                                                                                                |
| 29 | 28,725,000 | 28,875,000 | 384 | 607  | -1.26964752  | CCDC15,HEPACAM,ROBO4,SLC37A2                                                                                                                                              |
| 29 | 28,800,000 | 28,950,000 | 385 | 487  | 0.855393     | CCDC15,SLC37A2,TMEM218                                                                                                                                                    |
| 29 | 28,875,000 | 29,025,000 | 386 | 799  | 1.01080894   | SLC37A2,TMEM218                                                                                                                                                           |
| 29 | 28,950,000 | 29,100,000 | 387 | 869  | 0.900406972  |                                                                                                                                                                           |
| 29 | 29,025,000 | 29,175,000 | 388 | 789  | 0.834344063  |                                                                                                                                                                           |
| 29 | 29,100,000 | 29,250,000 | 389 | 886  | 0.727654602  | PKNOX2                                                                                                                                                                    |
| 29 | 29,175,000 | 29,325,000 | 390 | 1218 | 0.673882066  | FEZ1,PKNOX2                                                                                                                                                               |
| 29 | 29,250,000 | 29,400,000 | 391 | 1121 | 0.287473534  | EI24,FEZ1,PKNOX2,STT3A                                                                                                                                                    |
| 29 | 29,325,000 | 29,475,000 | 392 | 916  | -0.020173123 | ACRV1,CHEK1,EI24,SSLP1,STT3A                                                                                                                                              |
| 29 | 29,400,000 | 29,550,000 | 393 | 1314 | 0.543722722  | ACRV1,CHEK1,SSLP1,ENSBTAG00000023300,ENSBTAG0000023301                                                                                                                    |
| 29 | 29,475,000 | 29,625,000 | 394 | 961  | 0.603052036  | HYLS1,PATE2,PUS3,ENSBTAG00000023300,ENSBTAG0000023301,ENSBTAG00000033377                                                                                                  |
| 29 | 29,550,000 | 29,700,000 | 395 | 385  | 0.390859738  | CDON,DDX25,HYLS1,PATE2,PUS3,ENSBTAG00000033377                                                                                                                            |
| 29 | 29,625,000 | 29,775,000 | 396 | 891  | 0.60689902   | CDON,DDX25,HYLS1                                                                                                                                                          |
| 29 | 29,700,000 | 29,850,000 | 397 | 1174 | 0.785581519  | CDON                                                                                                                                                                      |
| 29 | 29,775,000 | 29,925,000 | 398 | 937  | 0.772482292  | RPUSD4                                                                                                                                                                    |
| 29 | 29,850,000 | 30,000,000 | 399 | 758  | -0.525739155 | FAM118B,FOXRED1,RPUSD4,SRPR,ENSBTAG00000048137                                                                                                                            |
| 29 | 29,925,000 | 30,075,000 | 400 | 639  | -5.429506402 | DCPS,FAM118B,FOXRED1,RPUSD4,SRPR,ST3GAL-IV,TIRAP,ENSBTAG00000048137                                                                                                       |
| 29 | 30,000,000 | 30,150,000 | 401 | 843  | -1.536991571 | DCPS,KIRREL3,ST3GAL-IV,TIRAP                                                                                                                                              |
| 29 | 30,075,000 | 30,225,000 | 402 | 824  | 0.651863471  | KIRREL3,ST3GAL-IV                                                                                                                                                         |
| 29 | 30,150,000 | 30,300,000 | 403 | 331  | 0.729746215  | KIRREL3                                                                                                                                                                   |
| 29 | 30,225,000 | 30,375,000 | 404 | 6    | -0.240785023 |                                                                                                                                                                           |
| 29 | 30,300,000 | 30,450,000 | 405 | 462  | 0.986307492  |                                                                                                                                                                           |
| 29 | 30,375,000 | 30,525,000 | 406 | 941  | -0.551417467 |                                                                                                                                                                           |
| 29 | 30,450,000 | 30,600,000 | 407 | 838  | -0.713815752 |                                                                                                                                                                           |
| 29 | 30,525,000 | 30,675,000 | 408 | 1000 | 0.227664592  |                                                                                                                                                                           |
| 29 | 30,600,000 | 30,750,000 | 409 | 932  | 0.278324627  |                                                                                                                                                                           |

|    |            |            |     |      |              |                      |
|----|------------|------------|-----|------|--------------|----------------------|
| 29 | 30,675,000 | 30,825,000 | 410 | 843  | 0.453692914  |                      |
| 29 | 30,750,000 | 30,900,000 | 411 | 920  | 0.30597239   |                      |
| 29 | 30,825,000 | 30,975,000 | 412 | 626  | 0.278289087  |                      |
| 29 | 30,900,000 | 31,050,000 | 413 | 442  | 0.038843578  |                      |
| 29 | 30,975,000 | 31,125,000 | 414 | 453  | -0.484931532 |                      |
| 29 | 31,050,000 | 31,200,000 | 415 | 740  | -1.181524723 |                      |
| 29 | 31,125,000 | 31,275,000 | 416 | 854  | -1.338605758 |                      |
| 29 | 31,200,000 | 31,350,000 | 417 | 925  | -1.559877114 |                      |
| 29 | 31,275,000 | 31,425,000 | 418 | 1148 | -0.734153828 |                      |
| 29 | 31,350,000 | 31,500,000 | 419 | 1208 | 0.036282569  |                      |
| 29 | 31,425,000 | 31,575,000 | 420 | 1065 | -0.337674776 |                      |
| 29 | 31,500,000 | 31,650,000 | 421 | 949  | 0.264651415  |                      |
| 29 | 31,575,000 | 31,725,000 | 422 | 1017 | 0.748544398  |                      |
| 29 | 31,650,000 | 31,800,000 | 423 | 762  | 0.530902002  |                      |
| 29 | 31,725,000 | 31,875,000 | 424 | 708  | 0.330059757  |                      |
| 29 | 31,800,000 | 31,950,000 | 425 | 946  | 0.301871396  |                      |
| 29 | 31,875,000 | 32,025,000 | 426 | 981  | 0.308309769  |                      |
| 29 | 31,950,000 | 32,100,000 | 427 | 789  | 0.594173808  |                      |
| 29 | 32,025,000 | 32,175,000 | 428 | 798  | 0.879216152  |                      |
| 29 | 32,100,000 | 32,250,000 | 429 | 725  | 0.381971477  |                      |
| 29 | 32,175,000 | 32,325,000 | 430 | 448  | -0.898299382 |                      |
| 29 | 32,250,000 | 32,400,000 | 431 | 543  | 0.369575313  | ETS1                 |
| 29 | 32,325,000 | 32,475,000 | 432 | 513  | 0.995198885  | ETS1                 |
| 29 | 32,400,000 | 32,550,000 | 433 | 830  | -0.223361405 | ETS1                 |
| 29 | 32,475,000 | 32,625,000 | 434 | 971  | -0.378344125 |                      |
| 29 | 32,550,000 | 32,700,000 | 435 | 618  | 0.417392158  | FLI1                 |
| 29 | 32,625,000 | 32,775,000 | 436 | 659  | 0.309517244  | FLI1,KCNJ1           |
| 29 | 32,700,000 | 32,850,000 | 437 | 1070 | -0.129036179 | FLI1,KCNJ1,KCNJ5     |
| 29 | 32,775,000 | 32,925,000 | 438 | 1180 | -0.130437326 | ARHGAP32,KCNJ1,KCNJ5 |
| 29 | 32,850,000 | 33,000,000 | 439 | 949  | 0.595933739  | ARHGAP32             |
| 29 | 32,925,000 | 33,075,000 | 440 | 674  | 0.918024479  | ARHGAP32             |
| 29 | 33,000,000 | 33,150,000 | 441 | 540  | 1.06659421   | ARHGAP32             |
| 29 | 33,075,000 | 33,225,000 | 442 | 568  | 1.022777967  |                      |
| 29 | 33,150,000 | 33,300,000 | 443 | 538  | 0.720373562  | BARX2                |
| 29 | 33,225,000 | 33,375,000 | 444 | 549  | -0.384423769 | BARX2                |
| 29 | 33,300,000 | 33,450,000 | 445 | 691  | -0.60736327  |                      |
| 29 | 33,375,000 | 33,525,000 | 446 | 1074 | 0.345055419  |                      |
| 29 | 33,450,000 | 33,600,000 | 447 | 1286 | 0.310519704  | JAM3                 |
| 29 | 33,525,000 | 33,675,000 | 448 | 975  | -0.023380709 | JAM3                 |
| 29 | 33,600,000 | 33,750,000 | 449 | 497  | -0.276896424 | IGSF9B               |
| 29 | 33,675,000 | 33,825,000 | 450 | 413  | -0.412795718 | IGSF9B,SPATA19       |
| 29 | 33,750,000 | 33,900,000 | 451 | 523  | -0.504118493 | SPATA19              |
| 29 | 33,825,000 | 33,975,000 | 452 | 585  | -0.069596847 |                      |
| 29 | 33,900,000 | 34,050,000 | 453 | 1035 | -0.408721212 |                      |
| 29 | 33,975,000 | 34,125,000 | 454 | 1313 | -0.608886099 |                      |
| 29 | 34,050,000 | 34,200,000 | 455 | 1133 | -0.44652646  |                      |
| 29 | 34,125,000 | 34,275,000 | 456 | 1001 | -0.50011802  |                      |
| 29 | 34,200,000 | 34,350,000 | 457 | 892  | -0.553443826 |                      |
| 29 | 34,275,000 | 34,425,000 | 458 | 788  | 0.230325822  |                      |
| 29 | 34,350,000 | 34,500,000 | 459 | 912  | 0.315513207  |                      |
| 29 | 34,425,000 | 34,575,000 | 460 | 869  | -0.054747817 | OPCML                |
| 29 | 34,500,000 | 34,650,000 | 461 | 539  | 0.030286512  | OPCML                |
| 29 | 34,575,000 | 34,725,000 | 462 | 729  | -0.98702541  | OPCML                |

|    |            |            |     |      |              |                                                                  |
|----|------------|------------|-----|------|--------------|------------------------------------------------------------------|
| 29 | 34,650,000 | 34,800,000 | 463 | 1011 | -1.456152188 | OPCML                                                            |
| 29 | 34,725,000 | 34,875,000 | 464 | 1174 | -0.250981654 | OPCML                                                            |
| 29 | 34,800,000 | 34,950,000 | 465 | 1060 | 0.757745559  | OPCML                                                            |
| 29 | 34,875,000 | 35,025,000 | 466 | 1283 | 0.728309102  | OPCML                                                            |
| 29 | 34,950,000 | 35,100,000 | 467 | 1732 | 0.683057423  | OPCML,ENSBTAG00000033030                                         |
| 29 | 35,025,000 | 35,175,000 | 468 | 1327 | 0.818722976  | NTM,OPCML,ENSBTAG00000033030                                     |
| 29 | 35,100,000 | 35,250,000 | 469 | 1066 | 0.985020743  | NTM                                                              |
| 29 | 35,175,000 | 35,325,000 | 470 | 1566 | 0.57724304   | NTM                                                              |
| 29 | 35,250,000 | 35,400,000 | 471 | 1677 | 0.454090123  | NTM                                                              |
| 29 | 35,325,000 | 35,475,000 | 472 | 1524 | 0.640521563  | NTM                                                              |
| 29 | 35,400,000 | 35,550,000 | 473 | 1299 | 0.767601576  | NTM                                                              |
| 29 | 35,475,000 | 35,625,000 | 474 | 628  | 0.665184804  | NTM                                                              |
| 29 | 35,550,000 | 35,700,000 | 475 | 538  | 0.57608834   | NTM                                                              |
| 29 | 35,625,000 | 35,775,000 | 476 | 1030 | 0.904630575  |                                                                  |
| 29 | 35,700,000 | 35,850,000 | 477 | 1012 | 1.004504897  |                                                                  |
| 29 | 35,775,000 | 35,925,000 | 478 | 784  | 1.111360203  |                                                                  |
| 29 | 35,850,000 | 36,000,000 | 479 | 648  | 1.036968413  |                                                                  |
| 29 | 35,925,000 | 36,075,000 | 480 | 621  | 0.49961045   |                                                                  |
| 29 | 36,000,000 | 36,150,000 | 481 | 939  | -0.659228262 |                                                                  |
| 29 | 36,075,000 | 36,225,000 | 482 | 1202 | -1.133747803 |                                                                  |
| 29 | 36,150,000 | 36,300,000 | 483 | 1086 | -0.028391162 |                                                                  |
| 29 | 36,225,000 | 36,375,000 | 484 | 786  | -0.914612902 |                                                                  |
| 29 | 36,300,000 | 36,450,000 | 485 | 763  | -1.437911783 |                                                                  |
| 29 | 36,375,000 | 36,525,000 | 486 | 933  | 0.043688177  |                                                                  |
| 29 | 36,450,000 | 36,600,000 | 487 | 1339 | 0.092504823  |                                                                  |
| 29 | 36,525,000 | 36,675,000 | 488 | 1172 | -0.114134281 | NFRKB,TMEM45B                                                    |
| 29 | 36,600,000 | 36,750,000 | 489 | 781  | 0.122277724  | NFRKB,PRDM10,TMEM45B                                             |
| 29 | 36,675,000 | 36,825,000 | 490 | 837  | -0.15527986  | NFRKB,PRDM10,ZNF740                                              |
| 29 | 36,750,000 | 36,900,000 | 491 | 934  | -0.26829869  | APLP2,ZNF740                                                     |
| 29 | 36,825,000 | 36,975,000 | 492 | 1040 | 0.556021441  | APLP2,ST14,ENSBTAG00000033237                                    |
| 29 | 36,900,000 | 37,050,000 | 493 | 724  | 0.628357678  | APLP2,ST14,ZBTB44,ENSBTAG00000033237                             |
| 29 | 36,975,000 | 37,125,000 | 494 | 457  | 0.775950838  | ADAMTS8,ZBTB44                                                   |
| 29 | 37,050,000 | 37,200,000 | 495 | 553  | 1.012007589  | ADAMTS15,ADAMTS8                                                 |
| 29 | 37,125,000 | 37,275,000 | 496 | 600  | 0.870171559  | ADAMTS15                                                         |
| 29 | 37,200,000 | 37,350,000 | 497 | 492  | 1.000187876  |                                                                  |
| 29 | 37,275,000 | 37,425,000 | 498 | 304  | 1.052336718  |                                                                  |
| 29 | 37,350,000 | 37,500,000 | 499 | 647  | 0.145586977  | ENSBTAG00000046647                                               |
| 29 | 37,425,000 | 37,575,000 | 500 | 1273 | 0.179299058  | SNX19,ENSBTAG00000046647                                         |
| 29 | 37,500,000 | 37,650,000 | 501 | 1310 | 0.414691064  | MS4A8B,SNX19                                                     |
| 29 | 37,575,000 | 37,725,000 | 502 | 891  | 0.319738246  | MS4A10,MS4A15,MS4A18,MS4A8B                                      |
| 29 | 37,650,000 | 37,800,000 | 503 | 700  | -0.317611777 | MS4A10,MS4A15,MS4A18,MS4A8B,PTGDR2,ENSBTAG000014215              |
| 29 | 37,725,000 | 37,875,000 | 504 | 692  | -0.549287318 | MS4A10,PRPF19,PTGDR2,SLC15A3,TMEM109,TMEM132A,ENSBTAG00000014215 |
| 29 | 37,800,000 | 37,950,000 | 505 | 1029 | 0.229098369  | CD6,PRPF19,SLC15A3,TMEM109,TMEM132A                              |
| 29 | 37,875,000 | 38,025,000 | 506 | 1024 | 0.402481251  | CD5,CD6                                                          |
| 29 | 37,950,000 | 38,100,000 | 507 | 619  | -0.477296065 | CD5,VPS37C                                                       |
| 29 | 38,025,000 | 38,175,000 | 508 | 632  | -0.592338652 | CD5,PAG10,PAG2,VPS37C                                            |
| 29 | 38,100,000 | 38,250,000 | 509 | 717  | -0.255098086 | PAG10,PAG12,PAG2                                                 |
| 29 | 38,175,000 | 38,325,000 | 510 | 781  | 0.148409738  | PAG12,ENSBTAG00000024611,ENSBTAG00000045802,ENSBTAG00000048298   |

|    |            |            |     |      |             |                                                                                               |
|----|------------|------------|-----|------|-------------|-----------------------------------------------------------------------------------------------|
| 29 | 38,250,000 | 38,400,000 | 511 | 1269 | 0.730426041 | ENSBTAG00000024611,ENSBTAG00000045802,ENSBTAG0000046127,ENSBTAG00000047145,ENSBTAG00000048298 |
| 29 | 38,325,000 | 38,475,000 | 512 | 1714 | 0.691554041 | PAG-18,ENSBTAG00000045802,ENSBTAG00000046127,ENSBTAG00000047145                               |
| 29 | 38,400,000 | 38,550,000 | 513 | 1406 | 0.320013913 | PAG-18,PAG7,ENSBTAG00000047145                                                                |
| 29 | 38,475,000 | 38,625,000 | 514 | 1690 | 0.895190002 | PAG7,ENSBTAG00000007849,ENSBTAG00000045670                                                    |
| 29 | 38,550,000 | 38,700,000 | 515 | 2107 | 1.215294681 | PAG-15,PAG7,ENSBTAG00000007849,ENSBTAG00000045670                                             |
| 29 | 38,625,000 | 38,775,000 | 516 | 1572 | 1.096792649 | PAG-15,ENSBTAG00000046038                                                                     |
| 29 | 38,700,000 | 38,850,000 | 517 | 1256 | 1.191680298 | PAG4,ENSBTAG00000040140,ENSBTAG00000046038                                                    |
| 29 | 38,775,000 | 38,925,000 | 518 | 1374 | 1.259286793 | PAG4,ENSBTAG00000040140,ENSBTAG00000046497,ENSBTAG00000047989                                 |
| 29 | 38,850,000 | 39,000,000 | 519 | 1104 | 1.28162314  | ENSBTAG00000039045,ENSBTAG00000039970,ENSBTAG0000046497,ENSBTAG00000047989                    |
| 29 | 38,925,000 | 39,075,000 | 520 | 911  | 1.117009009 | PAG-21,PAG20,ENSBTAG00000039045,ENSBTAG00000039970,ENSBTAG00000047989                         |
| 29 | 39,000,000 | 39,150,000 | 521 | 1512 | 1.018901319 | PAG-21,PAG20,ENSBTAG00000047758                                                               |
| 29 | 39,075,000 | 39,225,000 | 522 | 1481 | 1.011110172 | PAG1,ENSBTAG00000047758,ENSBTAG00000048202                                                    |
| 29 | 39,150,000 | 39,300,000 | 523 | 1260 | 1.142577851 | PAG1,PAG19,ENSBTAG00000048202                                                                 |
| 29 | 39,225,000 | 39,375,000 | 524 | 1233 | 0.987582234 | PAG19,ENSBTAG00000034244,ENSBTAG00000047419,ENSBTAG00000048202                                |
| 29 | 39,300,000 | 39,450,000 | 525 | 946  | 0.694121154 | ENSBTAG00000034244,ENSBTAG00000047419,ENSBTAG0000048073                                       |
| 29 | 39,375,000 | 39,525,000 | 526 | 1122 | 0.73516013  | MGC157408,ENSBTAG00000047419,ENSBTAG00000048073                                               |
| 29 | 39,450,000 | 39,600,000 | 527 | 1266 | 0.87293063  | MGC157408,ENSBTAG00000035736,ENSBTAG00000038918                                               |
| 29 | 39,525,000 | 39,675,000 | 528 | 1265 | 1.016016924 | PAG17,ENSBTAG00000035736,ENSBTAG00000038918,ENSBTAG00000046085                                |
| 29 | 39,600,000 | 39,750,000 | 529 | 1753 | 0.912942984 | MGC157405,PAG17,ENSBTAG00000038918,ENSBTAG0000046085,ENSBTAG00000046686                       |
| 29 | 39,675,000 | 39,825,000 | 530 | 1800 | 0.639560299 | MGC157405,ENSBTAG00000038506,ENSBTAG00000046686                                               |
| 29 | 39,750,000 | 39,900,000 | 531 | 1360 | 0.598508625 | PAG9,ENSBTAG00000003236,ENSBTAG00000038506,ENSBTAG00000048190                                 |
| 29 | 39,825,000 | 39,975,000 | 532 | 1310 | 0.421496148 | HRASLS5,PAG9,ENSBTAG00000003236,ENSBTAG00000048190                                            |
| 29 | 39,900,000 | 40,050,000 | 533 | 1223 | 0.240414133 | HRASLS5,ENSBTAG00000003236,ENSBTAG00000022348,ENSBTAG00000047172                              |
| 29 | 39,975,000 | 40,125,000 | 534 | 1173 | 0.946255684 | PAG6,ENSBTAG00000022348,ENSBTAG00000046870,ENSBTAG00000047172                                 |
| 29 | 40,050,000 | 40,200,000 | 535 | 1250 | 1.212545258 | PAG6,ENSBTAG00000022759,ENSBTAG00000046870                                                    |
| 29 | 40,125,000 | 40,275,000 | 536 | 1242 | 1.122532272 | ENSBTAG00000013214,ENSBTAG00000022759                                                         |
| 29 | 40,200,000 | 40,350,000 | 537 | 1341 | 0.574087612 | ENSBTAG00000013214,ENSBTAG00000040257                                                         |
| 29 | 40,275,000 | 40,425,000 | 538 | 1271 | 0.321985274 | ENSBTAG00000019226,ENSBTAG00000040257                                                         |
| 29 | 40,350,000 | 40,500,000 | 539 | 831  | 0.143404972 | PGA,VWCE,ENSBTAG00000019226                                                                   |
| 29 | 40,425,000 | 40,575,000 | 540 | 498  | 0.065944168 | CYB561A3,DAK,DDB1,PGA,TMEM138,VWCE,ENSBTAG0000019226                                          |
| 29 | 40,500,000 | 40,650,000 | 541 | 369  | 0.705568449 | CPSF7,CYB561A3,DAK,DDB1,PPP1R32,SDHAF2,TMEM138,TMEM216,VWCE                                   |

|    |            |            |     |      |              |                                                                                                                                                                    |
|----|------------|------------|-----|------|--------------|--------------------------------------------------------------------------------------------------------------------------------------------------------------------|
| 29 | 40,575,000 | 40,725,000 | 542 | 328  | 0.798730973  | CPSF7,LRRC10B,PPP1R32,SDHAF2,SYT7,TMEM216                                                                                                                          |
| 29 | 40,650,000 | 40,800,000 | 543 | 418  | -0.214057534 | LRRC10B,PPP1R32,SYT7                                                                                                                                               |
| 29 | 40,725,000 | 40,875,000 | 544 | 499  | -0.96363394  | DAGLA                                                                                                                                                              |
| 29 | 40,800,000 | 40,950,000 | 545 | 393  | -0.431861818 | DAGLA,FADS1,FEN1,MYRF,TMEM258                                                                                                                                      |
| 29 | 40,875,000 | 41,025,000 | 546 | 476  | 0.124955649  | DAGLA,FADS1,FEN1,MYRF,TMEM258                                                                                                                                      |
| 29 | 40,950,000 | 41,100,000 | 547 | 724  | 0.205237573  | FADS1,FADS2,FADS3                                                                                                                                                  |
| 29 | 41,025,000 | 41,175,000 | 548 | 815  | 0.331265339  | BEST1,FADS2,FADS3,FTH1,RAB3IL1                                                                                                                                     |
| 29 | 41,100,000 | 41,250,000 | 549 | 921  | -0.144682316 | BEST1,FADS3,FTH1,RAB3IL1                                                                                                                                           |
| 29 | 41,175,000 | 41,325,000 | 550 | 1115 | -1.222965221 | FTH1                                                                                                                                                               |
| 29 | 41,250,000 | 41,400,000 | 551 | 1194 | -0.42905117  | SCGB1D,SCGB2A2                                                                                                                                                     |
| 29 | 41,325,000 | 41,475,000 | 552 | 797  | 0.45752191   | ASRGL1,SCGB1D,SCGB2A2                                                                                                                                              |
| 29 | 41,400,000 | 41,550,000 | 553 | 442  | -0.471094881 | ASRGL1,SCGB1A1,SCGB2A2                                                                                                                                             |
| 29 | 41,475,000 | 41,625,000 | 554 | 621  | 0.0285433    | AHNAK,EEF1G,SCGB1A1                                                                                                                                                |
| 29 | 41,550,000 | 41,700,000 | 555 | 550  | 0.5512502    | AHNAK,B3GAT3,EEF1G,EML3,GANAB,KIAA1698,METTL12,<br>MGC134282,MTA2,ROM1,TUT1,UQCC3                                                                                  |
| 29 | 41,625,000 | 41,775,000 | 556 | 644  | 0.003336408  | B3GAT3,BSCL2,EML3,GANAB,GNG3,HNRNPUL2,KIAA1698,<br>LRRN4CL,METTL12,MGC134282,MTA2,ROM1,TTC9C,TUT1,<br>UBXN1,UQCC3,ZBTB3                                            |
| 29 | 41,700,000 | 41,850,000 | 557 | 674  | 0.005811526  | BSCL2,GNG3,HNRNPUL2,LRRN4CL,NXF1,POLR2G,STX5,TA<br>F6L,TMEM179B,TMEM223,TTC9C,UBXN1,WDR74,ZBTB3                                                                    |
| 29 | 41,775,000 | 41,925,000 | 558 | 521  | 0.019124451  | CHRM1,NXF1,POLR2G,SLC3A2,STX5,TAF6L,TMEM179B,TM<br>EM223,WDR74                                                                                                     |
| 29 | 41,850,000 | 42,000,000 | 559 | 458  | -0.073812652 | CHRM1,SLC22A6,SLC3A2,ENSBTAG00000047110                                                                                                                            |
| 29 | 41,925,000 | 42,075,000 | 560 | 278  | -0.92816825  | OAT3,SLC22A6,ENSBTAG0000000518,ENSBTAG0000004<br>7110                                                                                                              |
| 29 | 42,000,000 | 42,150,000 | 561 | 269  | -0.581840286 | OAT3,ENSBTAG0000000518,ENSBTAG00000037570                                                                                                                          |
| 29 | 42,075,000 | 42,225,000 | 562 | 321  | 0.668352971  | ENSBTAG0000000518,ENSBTAG00000037570                                                                                                                               |
| 29 | 42,150,000 | 42,300,000 | 563 | 376  | 0.284638225  | ENSBTAG00000014584,ENSBTAG00000037570,ENSBTAG0<br>0000038655                                                                                                       |
| 29 | 42,225,000 | 42,375,000 | 564 | 663  | 0.604648481  | ENSBTAG00000014584,ENSBTAG00000038655,ENSBTAG0<br>0000039463                                                                                                       |
| 29 | 42,300,000 | 42,450,000 | 565 | 681  | 0.97894937   | LGALS12,ENSBTAG00000014584,ENSBTAG00000037645,E<br>NSBTAG00000039463,ENSBTAG00000039511                                                                            |
| 29 | 42,375,000 | 42,525,000 | 566 | 924  | 1.129667061  | LGALS12,ENSBTAG00000011019,ENSBTAG00000037645,E<br>NSBTAG00000039511                                                                                               |
| 29 | 42,450,000 | 42,600,000 | 567 | 1192 | -0.177468871 | PLA2G16,ENSBTAG00000011019,ENSBTAG00000037645                                                                                                                      |
| 29 | 42,525,000 | 42,675,000 | 568 | 770  | -1.58268281  | ATL3,PLA2G16,RTN3                                                                                                                                                  |
| 29 | 42,600,000 | 42,750,000 | 569 | 520  | -0.409849356 | ATL3,C11orf95,PLA2G16,RTN3,ENSBTAG00000045971                                                                                                                      |
| 29 | 42,675,000 | 42,825,000 | 570 | 417  | -1.883738985 | C11orf95,C29H11orf84,RTN3,ENSBTAG00000045971                                                                                                                       |
| 29 | 42,750,000 | 42,900,000 | 571 | 347  | -2.367236187 | C29H11orf84,MACROD1,MARK2,OTUB1,RCOR2,RTN3                                                                                                                         |
| 29 | 42,825,000 | 42,975,000 | 572 | 391  | -0.834726392 | MACROD1,MARK2,OTUB1,RCOR2                                                                                                                                          |
| 29 | 42,900,000 | 43,050,000 | 573 | 514  | -0.826660413 | FLRT1,MACROD1,NAT11,ENSBTAG00000006386                                                                                                                             |
| 29 | 42,975,000 | 43,125,000 | 574 | 674  | 0.085899448  | FLRT1,MACROD1,NAT11,STIP1,ENSBTAG00000006386<br>BAD,DNAJC4,FERMT3,FKBP2,FLRT1,MACROD1,NUDT22,PL<br>CB3,STIP1,TRPT1,VEGFB,ENSBTAG00000016551,ENSBTAG<br>00000047265 |
| 29 | 43,050,000 | 43,200,000 | 575 | 655  | 0.440115072  | BAD,CCDC88B,DNAJC4,ESRRA,FERMT3,FKBP2,GPR137,KC<br>NK4,NUDT22,PLCB3,PRDX5,RPS6KA4,TRMT112,TRPT1,VEG<br>FB,ENSBTAG00000016551,ENSBTAG00000047265                    |
| 29 | 43,125,000 | 43,275,000 | 576 | 539  | 0.533329721  | BAD,CCDC88B,ESRRA,GPR137,KCNK4,PRDX5,RPS6KA4,TR<br>MT112                                                                                                           |
| 29 | 43,200,000 | 43,350,000 | 577 | 792  | 0.649246802  | RPS6KA4,SLC22A11                                                                                                                                                   |
| 29 | 43,275,000 | 43,425,000 | 578 | 863  | 0.071952844  | RPS6KA4,SLC22A11                                                                                                                                                   |
| 29 | 43,350,000 | 43,500,000 | 579 | 544  | -1.114577771 | NRXN2,SLC22A11,SLC22A12                                                                                                                                            |

|    |            |            |     |     |              |                                                                                                                                   |
|----|------------|------------|-----|-----|--------------|-----------------------------------------------------------------------------------------------------------------------------------|
| 29 | 43,425,000 | 43,575,000 | 580 | 295 | -2.497539154 | NRXN2,SLC22A11,SLC22A12                                                                                                           |
| 29 | 43,500,000 | 43,650,000 | 581 | 232 | -1.561400144 | MAP4K2,NRXN2,PYGM,RASGRP2,SF1                                                                                                     |
| 29 | 43,575,000 | 43,725,000 | 582 | 345 | 0.149106584  | CDC42BPG,EHD1,MAP4K2,MEN1,NRXN2,PYGM,RASGRP2,SF1                                                                                  |
| 29 | 43,650,000 | 43,800,000 | 583 | 412 | -0.106941141 | ATG2A,C11orf85,CDC42BPG,EHD1,GPHA2,MAP4K2,MEN1,PPP2R5B                                                                            |
| 29 | 43,725,000 | 43,875,000 | 584 | 434 | 0.13080869   | ARL2,ATG2A,BATF2,C11orf85,GPHA2,PPP2R5B                                                                                           |
| 29 | 43,800,000 | 43,950,000 | 585 | 399 | 0.803848941  | ARL2,BATF2,C11orf85,CDCA5,NAALADL1,SAC3D1,SNX15                                                                                   |
| 29 | 43,875,000 | 44,025,000 | 586 | 442 | 0.925922906  | CDCA5,FAU,MRPL49,NAALADL1,SAC3D1,SNX15,SYVN1,TM7SF2,VPS51,ZFPL1,ZNHIT2                                                            |
| 29 | 43,950,000 | 44,100,000 | 587 | 597 | 0.540001603  | CAPN1,CDCA5,FAU,MRPL49,SPDYC,SYVN1,TM7SF2,VPS51,ZFPL1,ZNHIT2,ENSBTAG00000010233                                                   |
| 29 | 44,025,000 | 44,175,000 | 588 | 813 | -0.092731979 | CAPN1,POLA2,SPDYC,ENSBTAG00000010233                                                                                              |
| 29 | 44,100,000 | 44,250,000 | 589 | 851 | -1.938914306 | CDC42EP2,DPF2,FRMD8,POLA2,SLC25A45,TIGD3,ENSBTAG00000010233                                                                       |
| 29 | 44,175,000 | 44,325,000 | 590 | 708 | -1.967567754 | CDC42EP2,DPF2,FRMD8,SLC25A45,TIGD3                                                                                                |
| 29 | 44,250,000 | 44,400,000 | 591 | 626 | -0.464965087 | FRMD8,LTBP3,SCYL1                                                                                                                 |
| 29 | 44,325,000 | 44,475,000 | 592 | 390 | -0.241582775 | EHBP1L1,KCNK7,LTBP3,MAP3K11,MGC140823,PCNXL3,SCYL1,SSSCA1                                                                         |
| 29 | 44,400,000 | 44,550,000 | 593 | 292 | 1.000693407  | EHBP1L1,KAT5,KCNK7,LTBP3,MAP3K11,MGC140823,PCNXL3,RELA,SIPA1,SSSCA1                                                               |
| 29 | 44,475,000 | 44,625,000 | 594 | 441 | 0.513866875  | AP5B1,KAT5,OVOL1,PCNXL3,RELA,RNASEH2C,SIPA1,ENSBTAG00000046150,ENSBTAG00000047811                                                 |
| 29 | 44,550,000 | 44,700,000 | 595 | 360 | -0.646146625 | AP5B1,C29H11orf68,CCDC85B,CFL1,CTSW,DRAP1,EFEMP2,FIBP,FOSL1,KAT5,MUS81,OVOL1,RNASEH2C,SNX32,ENSBTAG00000046150,ENSBTAG00000047811 |
| 29 | 44,625,000 | 44,775,000 | 596 | 336 | -0.327243715 | BANF1,C29H11orf68,CATSPER1,CCDC85B,CFL1,CST6,CTSW,DRAP1,EFEMP2,EIF1AD,FIBP,FOSL1,MUS81,SART1,SNX32,TSGA10IP,ENSBTAG00000046587    |
| 29 | 44,700,000 | 44,850,000 | 597 | 380 | 0.809417237  | BANF1,CATSPER1,CST6,EIF1AD,GAL3ST3,SART1,SF3B2,TSGA10IP,ENSBTAG00000046587                                                        |
| 29 | 44,775,000 | 44,925,000 | 598 | 336 | -0.479225068 | CATSPER1,GAL3ST3,PACS1,SF3B2                                                                                                      |
| 29 | 44,850,000 | 45,000,000 | 599 | 351 | -1.047695208 | KLC2,PACS1,RAB1B,TMEM151A,YIF1A                                                                                                   |
| 29 | 44,925,000 | 45,075,000 | 600 | 315 | -0.467428698 | B3GNT1,BRMS1,CD248,KLC2,PACS1,RAB1B,RIN1,SLC29A2,TMEM151A,YIF1A                                                                   |
| 29 | 45,000,000 | 45,150,000 | 601 | 313 | 0.027156135  | B3GNT1,BRMS1,CD248,MRPL11,NPAS4,RIN1,SLC29A2                                                                                      |
| 29 | 45,075,000 | 45,225,000 | 602 | 295 | -0.85432319  | DPP3,MRPL11,NPAS4,PELI3,ZDHHC24,ENSBTAG00000020147                                                                                |
| 29 | 45,150,000 | 45,300,000 | 603 | 284 | -2.09398589  | ACTN3,CCDC87,CCS,CTSF,DPP3,PELI3,RBM14,ZDHHC24,ENSBTAG00000020147                                                                 |
| 29 | 45,225,000 | 45,375,000 | 604 | 410 | -0.755777093 | ACTN3,CCDC87,CCS,CTSF,RBM14,RBM4,RBM4B,SPTBN2,ZDHHC24                                                                             |
| 29 | 45,300,000 | 45,450,000 | 605 | 372 | -0.444344748 | C11orf80,RBM14,RBM4,RBM4B,SPTBN2                                                                                                  |
| 29 | 45,375,000 | 45,525,000 | 606 | 277 | -0.470630043 | C11orf80,LRFN4,PC,RCE1,SPTBN2                                                                                                     |
| 29 | 45,450,000 | 45,600,000 | 607 | 456 | -5.625457583 | C11orf80,LRFN4,PC,RCE1                                                                                                            |
| 29 | 45,525,000 | 45,675,000 | 608 | 450 | -5.584784008 | C29H11orf86,PC,SYT12                                                                                                              |
| 29 | 45,600,000 | 45,750,000 | 609 | 305 | -0.525644863 | C29H11orf86,PC,RHOD,SYT12                                                                                                         |
| 29 | 45,675,000 | 45,825,000 | 610 | 265 | 0.700503357  | KDM2A,RHOD,SYT12                                                                                                                  |
| 29 | 45,750,000 | 45,900,000 | 611 | 225 | 0.531100406  | ADRBK1,ANKRD13D,KDM2A,POLD4,SSH3                                                                                                  |
| 29 | 45,825,000 | 45,975,000 | 612 | 253 | 0.537864088  | ADRBK1,ANKRD13D,CARNS1,CLCF1,CORO1B,POLD4,PTPRCAP,RAD9A,RPS6KB2,SSH3,TBC1D10C,ENSBTAG00000012146                                  |



|    |            |            |     |      |              |                                                                                                                            |
|----|------------|------------|-----|------|--------------|----------------------------------------------------------------------------------------------------------------------------|
| 29 | 45,900,000 | 46,050,000 | 613 | 315  | 0.241919926  | AIP,CABP2,CABP4,CARNS1,CDK2AP2,CLCF1,CORO1B,GPR152,PITPNM1,POLD4,PTPRCAP,RAD9A,RPS6KB2,TBC1D10C,TMEM134,ENSBTAG00000012146 |
| 29 | 45,975,000 | 46,125,000 | 614 | 569  | -2.633375941 | AIP,CABP2,CABP4,CDK2AP2,CORO1B,DOC2G,GPR152,GSTP1,NDUFV1,NUDT8,PITPNM1,TMEM134,ENSBTAG00000038054                          |
| 29 | 46,050,000 | 46,200,000 | 615 | 611  | -1.441033136 | ALDH3B1,ALDH3B2,DOC2G,GSTP1,NDUFV1,NUDT8,TBX10,UNC93B1,ENSBTAG00000038054                                                  |
| 29 | 46,125,000 | 46,275,000 | 616 | 339  | 1.229471906  | ALDH3B1,ALDH3B2,CHKA,NDUFS8,NUDT8,TBX10,TCIRG1,UNC93B1                                                                     |
| 29 | 46,200,000 | 46,350,000 | 617 | 263  | 0.641899558  | ALDH3B1,CHKA,NDUFS8,SUV420H1,TCIRG1                                                                                        |
| 29 | 46,275,000 | 46,425,000 | 618 | 303  | 0.815359948  | C11orf24,SUV420H1                                                                                                          |
| 29 | 46,350,000 | 46,500,000 | 619 | 368  | 0.982738927  | C11orf24,LRP5                                                                                                              |
| 29 | 46,425,000 | 46,575,000 | 620 | 703  | 0.234049817  | LRP5                                                                                                                       |
| 29 | 46,500,000 | 46,650,000 | 621 | 754  | 0.126929819  | LRP5,SAPS3                                                                                                                 |
| 29 | 46,575,000 | 46,725,000 | 622 | 397  | 0.549770068  | SAPS3                                                                                                                      |
| 29 | 46,650,000 | 46,800,000 | 623 | 409  | 0.612824048  | GAL,SAPS3                                                                                                                  |
| 29 | 46,725,000 | 46,875,000 | 624 | 690  | -0.18993556  | CPT1A,GAL                                                                                                                  |
| 29 | 46,800,000 | 46,950,000 | 625 | 620  | -0.895862084 | CPT1A,IGHMBP2,MRPL21                                                                                                       |
| 29 | 46,875,000 | 47,025,000 | 626 | 701  | -0.996943916 | IGHMBP2,MRGPRF,MRPL21,ENSBTAG00000016774,ENSBTAG00000046090                                                                |
| 29 | 46,950,000 | 47,100,000 | 627 | 881  | -0.964230906 | MRGPRF,TPCN2,ENSBTAG00000016774,ENSBTAG00000046090                                                                         |
| 29 | 47,025,000 | 47,175,000 | 628 | 702  | -1.006469357 | TPCN2                                                                                                                      |
| 29 | 47,100,000 | 47,250,000 | 629 | 536  | 0.033688408  |                                                                                                                            |
| 29 | 47,175,000 | 47,325,000 | 630 | 587  | 0.163888105  |                                                                                                                            |
| 29 | 47,250,000 | 47,400,000 | 631 | 550  | -0.074803459 |                                                                                                                            |
| 29 | 47,325,000 | 47,475,000 | 632 | 416  | 0.858096005  |                                                                                                                            |
| 29 | 47,400,000 | 47,550,000 | 633 | 621  | 0.297322817  | CCND1                                                                                                                      |
| 29 | 47,475,000 | 47,625,000 | 634 | 745  | 0.296892935  | CCND1,FGF19,ORAOV1                                                                                                         |
| 29 | 47,550,000 | 47,700,000 | 635 | 608  | 0.644326448  | CCND1,FGF19,FGF3,FGF4,ORAOV1                                                                                               |
| 29 | 47,625,000 | 47,775,000 | 636 | 655  | 1.009772189  | FGF3,FGF4                                                                                                                  |
| 29 | 47,700,000 | 47,850,000 | 637 | 988  | 1.038378381  |                                                                                                                            |
| 29 | 47,775,000 | 47,925,000 | 638 | 1186 | 1.054416404  | ANO1                                                                                                                       |
| 29 | 47,850,000 | 48,000,000 | 639 | 769  | 1.046099966  | ANO1                                                                                                                       |
| 29 | 47,925,000 | 48,075,000 | 640 | 549  | 0.511184094  | ANO1,FADD,ENSBTAG00000008477                                                                                               |
| 29 | 48,000,000 | 48,150,000 | 641 | 598  | 0.213862194  | ANO1,FADD,PPFIA1,ENSBTAG00000008477                                                                                        |
| 29 | 48,075,000 | 48,225,000 | 642 | 437  | -1.136819467 | CTTN,PPFIA1,SHANK2                                                                                                         |
| 29 | 48,150,000 | 48,300,000 | 643 | 791  | -0.286144475 | CTTN,PPFIA1,SHANK2                                                                                                         |
| 29 | 48,225,000 | 48,375,000 | 644 | 1307 | -0.156642902 | SHANK2                                                                                                                     |
| 29 | 48,300,000 | 48,450,000 | 645 | 1221 | -0.267601393 | SHANK2                                                                                                                     |
| 29 | 48,375,000 | 48,525,000 | 646 | 862  | 0.084173425  | SHANK2                                                                                                                     |
| 29 | 48,450,000 | 48,600,000 | 647 | 1141 | 0.725939849  |                                                                                                                            |
| 29 | 48,525,000 | 48,675,000 | 648 | 1780 | 0.936158883  |                                                                                                                            |
| 29 | 48,600,000 | 48,750,000 | 649 | 2126 | 0.544959948  |                                                                                                                            |
| 29 | 48,675,000 | 48,825,000 | 650 | 1611 | 0.307592214  |                                                                                                                            |
| 29 | 48,750,000 | 48,900,000 | 651 | 951  | -0.064442359 | ENSBTAG00000004212                                                                                                         |
| 29 | 48,825,000 | 48,975,000 | 652 | 708  | -0.362521508 | DHCR7,NADSYN1,ENSBTAG00000004212                                                                                           |
| 29 | 48,900,000 | 49,050,000 | 653 | 846  | 0.440779189  | DHCR7,MRGPRG,NADSYN1,ENSBTAG0000000776,ENSBTAG00000004212                                                                  |
| 29 | 48,975,000 | 49,125,000 | 654 | 946  | 0.560850242  | MRGPRG,NADSYN1,OSBPL5,ENSBTAG0000000776                                                                                    |
| 29 | 49,050,000 | 49,200,000 | 655 | 872  | 0.634583863  | OSBPL5,TNFRSF10A                                                                                                           |
| 29 | 49,125,000 | 49,275,000 | 656 | 1191 | 0.706473026  | CARS,NAP1L4,OSBPL5,TNFRSF10A                                                                                               |

|    |            |            |     |      |              |                                                               |
|----|------------|------------|-----|------|--------------|---------------------------------------------------------------|
| 29 | 49,200,000 | 49,350,000 | 657 | 1101 | 0.510873156  | CARS,NAP1L4,PHLDA2,SLC22A18                                   |
| 29 | 49,275,000 | 49,425,000 | 658 | 840  | 0.52566608   | CDKN1C,NAP1L4,PHLDA2,SLC22A18                                 |
| 29 | 49,350,000 | 49,500,000 | 659 | 736  | 0.350467228  | CDKN1C,SLC22A18                                               |
| 29 | 49,425,000 | 49,575,000 | 660 | 538  | -1.061561083 |                                                               |
| 29 | 49,500,000 | 49,650,000 | 661 | 399  | -1.859554208 |                                                               |
| 29 | 49,575,000 | 49,725,000 | 662 | 488  | -1.611403373 | KCNQ1                                                         |
| 29 | 49,650,000 | 49,800,000 | 663 | 700  | -0.835253347 | KCNQ1,ENSBTAG00000047349                                      |
| 29 | 49,725,000 | 49,875,000 | 664 | 638  | 0.071273337  | CD81,TRPM5,TSSC4,ENSBTAG00000047349                           |
| 29 | 49,800,000 | 49,950,000 | 665 | 643  | 0.380983841  | CD81,TRPM5,TSPAN32,TSSC4                                      |
| 29 | 49,875,000 | 50,025,000 | 666 | 733  | 0.554277184  | ASCL2,TSPAN32                                                 |
| 29 | 49,950,000 | 50,100,000 | 667 | 547  | 0.469700653  | ASCL2,IGF2,INS,TH                                             |
| 29 | 50,025,000 | 50,175,000 | 668 | 429  | 0.380941132  | IGF2,INS,TH                                                   |
| 29 | 50,100,000 | 50,250,000 | 669 | 402  | 0.36234138   | LSP1,MRPL23,TNNT3                                             |
| 29 | 50,175,000 | 50,325,000 | 670 | 496  | 0.102816134  | LSP1,MRPL23,SYT8,TNNI2,TNNT3                                  |
| 29 | 50,250,000 | 50,400,000 | 671 | 1038 | 0.11434179   | CATD,CRLF2,LSP1,SYT8,TNNI2                                    |
| 29 | 50,325,000 | 50,475,000 | 672 | 1186 | 0.090048188  | AP2A2,CATD,CRLF2,IFITM10                                      |
| 29 | 50,400,000 | 50,550,000 | 673 | 965  | 0.13110367   | AP2A2,CHID1,IFITM10                                           |
| 29 | 50,475,000 | 50,625,000 | 674 | 1045 | 0.278091598  | CHID1,TSPAN4                                                  |
| 29 | 50,550,000 | 50,700,000 | 675 | 1251 | -0.14180707  | CD151,CHID1,POLR2L,TSPAN4,ENSBTAG00000019579                  |
| 29 | 50,625,000 | 50,775,000 | 676 | 1208 | -0.303441499 | CD151,CRACR2B,PIDD1,PNPLA2,POLR2L,RPLP2,ENSBTAG00000019579    |
| 29 | 50,700,000 | 50,850,000 | 677 | 969  | 0.191335556  | CD151,CEND1,CRACR2B,PDDC1,PIDD1,PNPLA2,RPLP2,SC T,SLC25A22    |
| 29 | 50,775,000 | 50,925,000 | 678 | 951  | 0.429912452  | CEND1,DUSP8,IRF7,MUPCDH,PDDC1,PHRF1,PIDD1,SCT,SLC25A22,TALDO1 |
| 29 | 50,850,000 | 51,000,000 | 679 | 1058 | 0.306551459  | DUSP8,EP8L2,IRF7,MOB2,MUPCDH,PDDC1,PHRF1,TALDO1               |
| 29 | 50,925,000 | 51,075,000 | 680 | 854  | 0.390405188  | BRSK2,DUSP8,EP8L2,LMNTD2,MOB2,PHRF1,RASSF7,TMEM80             |
| 29 | 51,000,000 | 51,150,000 | 681 | 688  | 0.384266455  | BRSK2,HRAS,LMNTD2,LRRC56,MOB2,RASSF7,TMEM80                   |
| 29 | 51,075,000 | 51,225,000 | 682 | 934  | 0.463189415  | BRSK2,HRAS,LMNTD2,LRRC56,ENSBTAG00000047697                   |
| 29 | 51,150,000 | 51,300,000 | 683 | 1146 | 0.435048993  | B4GALNT4,PKP3,SIGIRR,ENSBTAG00000047697                       |
| 29 | 51,225,000 | 51,375,000 | 684 | 1076 | 0.552257498  | B4GALNT4,IFITM3,MUC5B,PKP3,SIGIRR,TOLLIP                      |
| 29 | 51,300,000 | 51,450,000 | 685 | 1076 | 0.696070388  | B4GALNT4,IFITM3,MUC5B,TOLLIP,ENSBTAG00000038262               |
| 29 | 51,375,000 | 51,505,224 | 686 | 1152 | 0.622428093  | MUC5B,ENSBTAG00000038262                                      |

**Supplementary File 4.** The complete list of the Z-transformation of the pooled heterozygosity (ZHp) scores for all the overlapping sliding windows across all 29 autosomes in YAN.

| Chr | Start     | End       | Bin | No. SNP | ZHp          | GeneList                                         |
|-----|-----------|-----------|-----|---------|--------------|--------------------------------------------------|
| 1   | 0         | 150,000   | 1   | 1746    | 0.916881598  | ENSBTAG00000001753,ENSBTAG000000039257           |
| 1   | 75,000    | 225,000   | 2   | 1686    | 0.757161107  | ENSBTAG00000001753                               |
| 1   | 150,000   | 300,000   | 3   | 1627    | 0.941107524  | CBX3,ENSBTAG00000001753                          |
| 1   | 225,000   | 375,000   | 4   | 1544    | 0.589445243  | CBX3,RCAN1                                       |
| 1   | 300,000   | 450,000   | 5   | 1656    | -0.065989385 | KCNE1,RCAN1,ENSBTAG000000026259                  |
| 1   | 375,000   | 525,000   | 6   | 1635    | 0.643871232  | C21orf140,KCNE1,KCNE2,SMIM11,ENSBTAG000000026259 |
| 1   | 450,000   | 600,000   | 7   | 1379    | 0.798826441  | C21orf140,KCNE2,SMIM11,ENSBTAG000000045984       |
| 1   | 525,000   | 675,000   | 8   | 867     | -1.796753095 | MRPS6,ENSBTAG000000045984                        |
| 1   | 600,000   | 750,000   | 9   | 387     | -4.51659713  | MRPS6                                            |
| 1   | 675,000   | 825,000   | 10  | 281     | -2.123872955 | MRPS6                                            |
| 1   | 750,000   | 900,000   | 11  | 659     | -2.005173897 |                                                  |
| 1   | 825,000   | 975,000   | 12  | 850     | -1.277480575 | ATP5O,ITSN1                                      |
| 1   | 900,000   | 1,050,000 | 13  | 529     | 0.32109826   | ATP5O,ITSN1                                      |
| 1   | 975,000   | 1,125,000 | 14  | 465     | 1.142978532  | ITSN1                                            |
| 1   | 1,050,000 | 1,200,000 | 15  | 404     | 1.162922587  | CRYZL1,ITSN1                                     |
| 1   | 1,125,000 | 1,275,000 | 16  | 329     | 0.615411091  | CRYZL1,DONSON,GART,ITSN1,SON                     |
| 1   | 1,200,000 | 1,350,000 | 17  | 565     | 0.334882735  | CRYZL1,DNAJC28,DONSON,GART,SON,TMEM50B           |
| 1   | 1,275,000 | 1,425,000 | 18  | 736     | 0.006693924  | DNAJC28,GART,IFNGR2,TMEM50B                      |
| 1   | 1,350,000 | 1,500,000 | 19  | 767     | 0.265494126  | IFNAR1,IFNGR2,TMEM50B                            |
| 1   | 1,425,000 | 1,575,000 | 20  | 1133    | 0.123711614  | IFNAR1,IL10RB                                    |
| 1   | 1,500,000 | 1,650,000 | 21  | 1111    | -0.027483419 | IFNAR2,IL10RB                                    |
| 1   | 1,575,000 | 1,725,000 | 22  | 856     | -0.838181085 | HIST1H4H,IFNAR2,IL10RB                           |
| 1   | 1,650,000 | 1,800,000 | 23  | 617     | -1.669775977 | HIST1H4H,OLIG1                                   |
| 1   | 1,725,000 | 1,875,000 | 24  | 391     | -0.343857317 | OLIG1                                            |
| 1   | 1,800,000 | 1,950,000 | 25  | 743     | -0.598516594 |                                                  |
| 1   | 1,875,000 | 2,025,000 | 26  | 813     | -0.212076919 |                                                  |
| 1   | 1,950,000 | 2,100,000 | 27  | 602     | 0.688954906  | C21orf62,GCFC                                    |
| 1   | 2,025,000 | 2,175,000 | 28  | 368     | 0.600217179  | C21orf62,GCFC,SYNJ1                              |
| 1   | 2,100,000 | 2,250,000 | 29  | 207     | 0.375305515  | C1H21orf59,SYNJ1                                 |
| 1   | 2,175,000 | 2,325,000 | 30  | 530     | 1.270636859  | C1H21orf59,EVA1C,SYNJ1                           |
| 1   | 2,250,000 | 2,400,000 | 31  | 806     | 0.66786516   | EVA1C,URB1                                       |
| 1   | 2,325,000 | 2,475,000 | 32  | 945     | -1.310271807 | EVA1C,MRAP,URB1                                  |
| 1   | 2,400,000 | 2,550,000 | 33  | 1016    | -1.057702926 | MIS18A,MRAP,URB1                                 |
| 1   | 2,475,000 | 2,625,000 | 34  | 927     | 0.457958578  | MIS18A,MRAP                                      |
| 1   | 2,550,000 | 2,700,000 | 35  | 1118    | 0.623890107  |                                                  |
| 1   | 2,625,000 | 2,775,000 | 36  | 1573    | -0.230108946 |                                                  |
| 1   | 2,700,000 | 2,850,000 | 37  | 1544    | 0.013632403  | HUNK                                             |
| 1   | 2,775,000 | 2,925,000 | 38  | 1281    | 0.694570751  | HUNK                                             |
| 1   | 2,850,000 | 3,000,000 | 39  | 1541    | 1.041029861  | HUNK                                             |
| 1   | 2,925,000 | 3,075,000 | 40  | 1382    | 1.018103026  | SCAF4                                            |
| 1   | 3,000,000 | 3,150,000 | 41  | 800     | 0.397944564  | SCAF4,SOD1                                       |
| 1   | 3,075,000 | 3,225,000 | 42  | 1097    | 0.812941065  | SCAF4,SOD1                                       |
| 1   | 3,150,000 | 3,300,000 | 43  | 1203    | 0.697854491  |                                                  |
| 1   | 3,225,000 | 3,375,000 | 44  | 847     | 0.275043805  |                                                  |
| 1   | 3,300,000 | 3,450,000 | 45  | 892     | 0.08856762   |                                                  |
| 1   | 3,375,000 | 3,525,000 | 46  | 1014    | 0.589737017  | TIAM1                                            |

|   |           |           |    |      |              |                                         |
|---|-----------|-----------|----|------|--------------|-----------------------------------------|
| 1 | 3,450,000 | 3,600,000 | 47 | 985  | -0.350565904 | TIAM1                                   |
| 1 | 3,525,000 | 3,675,000 | 48 | 750  | -2.480435151 | TIAM1                                   |
| 1 | 3,600,000 | 3,750,000 | 49 | 662  | -1.808292382 | TIAM1                                   |
| 1 | 3,675,000 | 3,825,000 | 50 | 838  | 0.31398297   | TIAM1                                   |
| 1 | 3,750,000 | 3,900,000 | 51 | 979  | -0.608899654 |                                         |
| 1 | 3,825,000 | 3,975,000 | 52 | 953  | -1.252648561 | KRTAP11-1                               |
| 1 | 3,900,000 | 4,050,000 | 53 | 956  | -0.574744082 | KRTAP11-1,KRTAP7-1                      |
| 1 | 3,975,000 | 4,125,000 | 54 | 855  | -0.717323161 | KRTAP7-1,KRTAP8-1                       |
| 1 | 4,050,000 | 4,200,000 | 55 | 903  | -0.179553966 | KRTAP8-1                                |
| 1 | 4,125,000 | 4,275,000 | 56 | 985  | -0.321178353 | ENSBTAG00000044154                      |
| 1 | 4,200,000 | 4,350,000 | 57 | 697  | -1.502633512 | ENSBTAG00000044154                      |
| 1 | 4,275,000 | 4,425,000 | 58 | 809  | -0.034052958 |                                         |
| 1 | 4,350,000 | 4,500,000 | 59 | 861  | 0.527001104  |                                         |
| 1 | 4,425,000 | 4,575,000 | 60 | 852  | 0.344882611  |                                         |
| 1 | 4,500,000 | 4,650,000 | 61 | 1169 | -0.093803913 |                                         |
| 1 | 4,575,000 | 4,725,000 | 62 | 1244 | -0.609429018 |                                         |
| 1 | 4,650,000 | 4,800,000 | 63 | 1314 | -0.231680724 | KRTAP13-1                               |
| 1 | 4,725,000 | 4,875,000 | 64 | 1395 | 0.244001432  | KRTAP13-1,ENSBTAG00000037933            |
| 1 | 4,800,000 | 4,950,000 | 65 | 1400 | 0.580200987  | KRTAP27-1,ENSBTAG00000037933            |
| 1 | 4,875,000 | 5,025,000 | 66 | 1430 | 0.64407643   | KRTAP24-1,KRTAP27-1                     |
| 1 | 4,950,000 | 5,100,000 | 67 | 1496 | 0.640255409  | CLDN17,CLDN8,KRTAP24-1                  |
| 1 | 5,025,000 | 5,175,000 | 68 | 1271 | 0.798848192  | CLDN17,CLDN8                            |
| 1 | 5,100,000 | 5,250,000 | 69 | 1172 | 0.684728119  |                                         |
| 1 | 5,175,000 | 5,325,000 | 70 | 987  | 0.4112775    |                                         |
| 1 | 5,250,000 | 5,400,000 | 71 | 830  | 0.642859463  |                                         |
| 1 | 5,325,000 | 5,475,000 | 72 | 1070 | 0.674268587  |                                         |
| 1 | 5,400,000 | 5,550,000 | 73 | 1069 | 0.010708964  |                                         |
| 1 | 5,475,000 | 5,625,000 | 74 | 911  | 0.139706418  |                                         |
| 1 | 5,550,000 | 5,700,000 | 75 | 827  | -0.135330221 |                                         |
| 1 | 5,625,000 | 5,775,000 | 76 | 1245 | 0.26143424   | GRIK1                                   |
| 1 | 5,700,000 | 5,850,000 | 77 | 1427 | 0.659219671  | GRIK1                                   |
| 1 | 5,775,000 | 5,925,000 | 78 | 1103 | -0.035454698 | GRIK1,ENSBTAG00000045873                |
| 1 | 5,850,000 | 6,000,000 | 79 | 1223 | -2.033475571 | GRIK1,ENSBTAG00000045873                |
| 1 | 5,925,000 | 6,075,000 | 80 | 1183 | -2.265079378 |                                         |
| 1 | 6,000,000 | 6,150,000 | 81 | 944  | -0.487116202 |                                         |
| 1 | 6,075,000 | 6,225,000 | 82 | 631  | -0.526324005 | BACH1                                   |
| 1 | 6,150,000 | 6,300,000 | 83 | 370  | -1.47307343  | BACH1                                   |
| 1 | 6,225,000 | 6,375,000 | 84 | 523  | -2.547449012 | C1H21ORF7                               |
| 1 | 6,300,000 | 6,450,000 | 85 | 810  | -1.536612415 | C1H21ORF7                               |
| 1 | 6,375,000 | 6,525,000 | 86 | 770  | -0.599106304 | C1H21ORF7,CCT8,RWDD2B,USP16             |
| 1 | 6,450,000 | 6,600,000 | 87 | 539  | 0.220762664  | CCT8,RNF160,RWDD2B,USP16                |
| 1 | 6,525,000 | 6,675,000 | 88 | 992  | 0.523440915  | N6AMT1,RNF160,RWDD2B,ENSBTAG00000038433 |
| 1 | 6,600,000 | 6,750,000 | 89 | 1229 | 0.455558015  | N6AMT1,RNF160,ENSBTAG00000038433        |
| 1 | 6,675,000 | 6,825,000 | 90 | 940  | 0.291124616  |                                         |
| 1 | 6,750,000 | 6,900,000 | 91 | 1269 | 0.047927394  |                                         |
| 1 | 6,825,000 | 6,975,000 | 92 | 1464 | 0.407043333  |                                         |
| 1 | 6,900,000 | 7,050,000 | 93 | 1213 | 0.924399884  |                                         |
| 1 | 6,975,000 | 7,125,000 | 94 | 968  | 0.992685008  |                                         |
| 1 | 7,050,000 | 7,200,000 | 95 | 742  | 0.775636831  |                                         |
| 1 | 7,125,000 | 7,275,000 | 96 | 671  | 0.442270905  |                                         |
| 1 | 7,200,000 | 7,350,000 | 97 | 543  | 0.399321336  |                                         |
| 1 | 7,275,000 | 7,425,000 | 98 | 550  | 0.00774724   |                                         |
| 1 | 7,350,000 | 7,500,000 | 99 | 735  | -0.277722648 |                                         |

|   |            |            |     |      |              |                    |
|---|------------|------------|-----|------|--------------|--------------------|
| 1 | 7,425,000  | 7,575,000  | 100 | 680  | 0.387118237  |                    |
| 1 | 7,500,000  | 7,650,000  | 101 | 584  | 0.907609523  |                    |
| 1 | 7,575,000  | 7,725,000  | 102 | 828  | 0.533076092  |                    |
| 1 | 7,650,000  | 7,800,000  | 103 | 972  | 0.419871772  |                    |
| 1 | 7,725,000  | 7,875,000  | 104 | 674  | 0.401652049  |                    |
| 1 | 7,800,000  | 7,950,000  | 105 | 627  | 0.684834984  |                    |
| 1 | 7,875,000  | 8,025,000  | 106 | 943  | 1.152650951  |                    |
| 1 | 7,950,000  | 8,100,000  | 107 | 1221 | -0.183440791 |                    |
| 1 | 8,025,000  | 8,175,000  | 108 | 1284 | -0.925512798 |                    |
| 1 | 8,100,000  | 8,250,000  | 109 | 1053 | 0.181731023  |                    |
| 1 | 8,175,000  | 8,325,000  | 110 | 914  | 0.85017624   |                    |
| 1 | 8,250,000  | 8,400,000  | 111 | 1176 | 0.953923109  | ENSBTAG00000040155 |
| 1 | 8,325,000  | 8,475,000  | 112 | 1353 | 0.847899223  | ENSBTAG00000040155 |
| 1 | 8,400,000  | 8,550,000  | 113 | 1082 | 0.610354213  |                    |
| 1 | 8,475,000  | 8,625,000  | 114 | 1080 | 0.276227918  |                    |
| 1 | 8,550,000  | 8,700,000  | 115 | 919  | -0.098161274 |                    |
| 1 | 8,625,000  | 8,775,000  | 116 | 592  | 0.373312937  |                    |
| 1 | 8,700,000  | 8,850,000  | 117 | 484  | 0.165509072  | ADAMTS5            |
| 1 | 8,775,000  | 8,925,000  | 118 | 403  | -0.571245669 | ADAMTS5            |
| 1 | 8,850,000  | 9,000,000  | 119 | 477  | 0.148620447  | ADAMTS1,ADAMTS5    |
| 1 | 8,925,000  | 9,075,000  | 120 | 672  | 0.559923338  | ADAMTS1            |
| 1 | 9,000,000  | 9,150,000  | 121 | 767  | 0.739761461  |                    |
| 1 | 9,075,000  | 9,225,000  | 122 | 737  | 0.452190368  |                    |
| 1 | 9,150,000  | 9,300,000  | 123 | 736  | 0.382078672  | CYYR1              |
| 1 | 9,225,000  | 9,375,000  | 124 | 605  | 0.647419317  | CYYR1              |
| 1 | 9,300,000  | 9,450,000  | 125 | 757  | -1.810029918 |                    |
| 1 | 9,375,000  | 9,525,000  | 126 | 1188 | -1.583197002 |                    |
| 1 | 9,450,000  | 9,600,000  | 127 | 1540 | 0.021382605  |                    |
| 1 | 9,525,000  | 9,675,000  | 128 | 1515 | -0.395402051 | APP                |
| 1 | 9,600,000  | 9,750,000  | 129 | 1185 | -0.844385265 | APP                |
| 1 | 9,675,000  | 9,825,000  | 130 | 1225 | -0.750052982 | APP                |
| 1 | 9,750,000  | 9,900,000  | 131 | 1218 | -0.688722336 | APP                |
| 1 | 9,825,000  | 9,975,000  | 132 | 1179 | -0.23608397  | APP                |
| 1 | 9,900,000  | 10,050,000 | 133 | 968  | -0.136959676 | APP,GABPA          |
| 1 | 9,975,000  | 10,125,000 | 134 | 520  | 0.125825628  | ATP5J,GABPA,JAM2   |
| 1 | 10,050,000 | 10,200,000 | 135 | 739  | 0.050876022  | ATP5J,GABPA,JAM2   |
| 1 | 10,125,000 | 10,275,000 | 136 | 734  | 0.058186853  | JAM2,MRPL39        |
| 1 | 10,200,000 | 10,350,000 | 137 | 386  | -0.081011739 | MRPL39             |
| 1 | 10,275,000 | 10,425,000 | 138 | 405  | -1.214369023 |                    |
| 1 | 10,350,000 | 10,500,000 | 139 | 456  | -1.485431611 |                    |
| 1 | 10,425,000 | 10,575,000 | 140 | 426  | -1.501052767 |                    |
| 1 | 10,500,000 | 10,650,000 | 141 | 697  | -1.545332584 |                    |
| 1 | 10,575,000 | 10,725,000 | 142 | 747  | -1.188547273 |                    |
| 1 | 10,650,000 | 10,800,000 | 143 | 484  | 0.055572041  |                    |
| 1 | 10,725,000 | 10,875,000 | 144 | 860  | 1.035941251  |                    |
| 1 | 10,800,000 | 10,950,000 | 145 | 1136 | 1.050164029  |                    |
| 1 | 10,875,000 | 11,025,000 | 146 | 1223 | 0.949153456  | ENSBTAG00000038900 |
| 1 | 10,950,000 | 11,100,000 | 147 | 1348 | 0.46981728   | ENSBTAG00000038900 |
| 1 | 11,025,000 | 11,175,000 | 148 | 1310 | 0.488582203  |                    |
| 1 | 11,100,000 | 11,250,000 | 149 | 1092 | 0.203770746  |                    |
| 1 | 11,175,000 | 11,325,000 | 150 | 1159 | -4.229950259 |                    |
| 1 | 11,250,000 | 11,400,000 | 151 | 1004 | -4.724941087 |                    |
| 1 | 11,325,000 | 11,475,000 | 152 | 596  | -2.914641132 |                    |

|   |            |            |     |      |              |       |
|---|------------|------------|-----|------|--------------|-------|
| 1 | 11,400,000 | 11,550,000 | 153 | 605  | -2.07812979  |       |
| 1 | 11,475,000 | 11,625,000 | 154 | 827  | 0.629656247  |       |
| 1 | 11,550,000 | 11,700,000 | 155 | 1125 | 0.051481014  |       |
| 1 | 11,625,000 | 11,775,000 | 156 | 1201 | 0.094267524  |       |
| 1 | 11,700,000 | 11,850,000 | 157 | 1330 | 0.385093122  |       |
| 1 | 11,775,000 | 11,925,000 | 158 | 1489 | 0.076299718  |       |
| 1 | 11,850,000 | 12,000,000 | 159 | 1268 | 0.09665796   |       |
| 1 | 11,925,000 | 12,075,000 | 160 | 960  | 1.072695799  |       |
| 1 | 12,000,000 | 12,150,000 | 161 | 1092 | 1.087375463  |       |
| 1 | 12,075,000 | 12,225,000 | 162 | 1339 | 0.354143851  |       |
| 1 | 12,150,000 | 12,300,000 | 163 | 1402 | -0.193502555 |       |
| 1 | 12,225,000 | 12,375,000 | 164 | 1214 | -1.513295402 |       |
| 1 | 12,300,000 | 12,450,000 | 165 | 1252 | -1.722128474 |       |
| 1 | 12,375,000 | 12,525,000 | 166 | 1520 | -1.463386209 |       |
| 1 | 12,450,000 | 12,600,000 | 167 | 1230 | -1.895626121 |       |
| 1 | 12,525,000 | 12,675,000 | 168 | 889  | -4.772913807 |       |
| 1 | 12,600,000 | 12,750,000 | 169 | 1169 | -5.484379435 |       |
| 1 | 12,675,000 | 12,825,000 | 170 | 1395 | -3.342254313 |       |
| 1 | 12,750,000 | 12,900,000 | 171 | 1566 | -2.741606171 |       |
| 1 | 12,825,000 | 12,975,000 | 172 | 1831 | -1.552999123 |       |
| 1 | 12,900,000 | 13,050,000 | 173 | 1675 | -1.377231004 |       |
| 1 | 12,975,000 | 13,125,000 | 174 | 1365 | -1.391779806 |       |
| 1 | 13,050,000 | 13,200,000 | 175 | 1352 | 0.991986489  |       |
| 1 | 13,125,000 | 13,275,000 | 176 | 1149 | 0.731609093  |       |
| 1 | 13,200,000 | 13,350,000 | 177 | 1349 | 0.772289296  |       |
| 1 | 13,275,000 | 13,425,000 | 178 | 1593 | 1.16210588   |       |
| 1 | 13,350,000 | 13,500,000 | 179 | 1218 | -0.533342882 |       |
| 1 | 13,425,000 | 13,575,000 | 180 | 1144 | -0.631824031 |       |
| 1 | 13,500,000 | 13,650,000 | 181 | 1145 | 0.688284471  |       |
| 1 | 13,575,000 | 13,725,000 | 182 | 1320 | -0.293309027 |       |
| 1 | 13,650,000 | 13,800,000 | 183 | 1768 | 0.053443988  |       |
| 1 | 13,725,000 | 13,875,000 | 184 | 1736 | 0.489848478  |       |
| 1 | 13,800,000 | 13,950,000 | 185 | 1353 | 0.008173431  |       |
| 1 | 13,875,000 | 14,025,000 | 186 | 1500 | 0.094699719  |       |
| 1 | 13,950,000 | 14,100,000 | 187 | 1914 | 0.912901147  |       |
| 1 | 14,025,000 | 14,175,000 | 188 | 2167 | 1.328615455  |       |
| 1 | 14,100,000 | 14,250,000 | 189 | 2033 | 0.725556805  |       |
| 1 | 14,175,000 | 14,325,000 | 190 | 1813 | -0.468516866 |       |
| 1 | 14,250,000 | 14,400,000 | 191 | 1449 | -0.931501969 |       |
| 1 | 14,325,000 | 14,475,000 | 192 | 1005 | -0.570732194 |       |
| 1 | 14,400,000 | 14,550,000 | 193 | 1020 | 0.443119818  |       |
| 1 | 14,475,000 | 14,625,000 | 194 | 803  | 0.415450775  |       |
| 1 | 14,550,000 | 14,700,000 | 195 | 891  | 0.983788177  |       |
| 1 | 14,625,000 | 14,775,000 | 196 | 1244 | 0.787764185  |       |
| 1 | 14,700,000 | 14,850,000 | 197 | 1119 | 0.345356299  | NCAM2 |
| 1 | 14,775,000 | 14,925,000 | 198 | 947  | 0.72454132   | NCAM2 |
| 1 | 14,850,000 | 15,000,000 | 199 | 1366 | -1.88114941  | NCAM2 |
| 1 | 14,925,000 | 15,075,000 | 200 | 1621 | -2.232852981 | NCAM2 |
| 1 | 15,000,000 | 15,150,000 | 201 | 1465 | -0.483909971 | NCAM2 |
| 1 | 15,075,000 | 15,225,000 | 202 | 1464 | -0.031444406 |       |
| 1 | 15,150,000 | 15,300,000 | 203 | 1140 | -0.282565156 |       |
| 1 | 15,225,000 | 15,375,000 | 204 | 716  | -0.014608561 |       |
| 1 | 15,300,000 | 15,450,000 | 205 | 760  | -0.2845232   |       |

|   |            |            |     |      |              |                               |
|---|------------|------------|-----|------|--------------|-------------------------------|
| 1 | 15,375,000 | 15,525,000 | 206 | 1184 | -0.170919551 |                               |
| 1 | 15,450,000 | 15,600,000 | 207 | 1315 | -0.613905186 |                               |
| 1 | 15,525,000 | 15,675,000 | 208 | 1187 | -1.019598358 |                               |
| 1 | 15,600,000 | 15,750,000 | 209 | 1039 | -0.822649976 |                               |
| 1 | 15,675,000 | 15,825,000 | 210 | 924  | -0.229216186 |                               |
| 1 | 15,750,000 | 15,900,000 | 211 | 1073 | -0.453009897 |                               |
| 1 | 15,825,000 | 15,975,000 | 212 | 1135 | -0.531795535 |                               |
| 1 | 15,900,000 | 16,050,000 | 213 | 1229 | -0.731029419 |                               |
| 1 | 15,975,000 | 16,125,000 | 214 | 1358 | 0.043053552  |                               |
| 1 | 16,050,000 | 16,200,000 | 215 | 1483 | 0.947846779  |                               |
| 1 | 16,125,000 | 16,275,000 | 216 | 1185 | 0.830686506  |                               |
| 1 | 16,200,000 | 16,350,000 | 217 | 908  | 0.257429     |                               |
| 1 | 16,275,000 | 16,425,000 | 218 | 1007 | 0.337473254  |                               |
| 1 | 16,350,000 | 16,500,000 | 219 | 949  | -0.157618213 |                               |
| 1 | 16,425,000 | 16,575,000 | 220 | 1449 | 0.089447807  |                               |
| 1 | 16,500,000 | 16,650,000 | 221 | 1819 | 0.529443765  |                               |
| 1 | 16,575,000 | 16,725,000 | 222 | 1609 | 0.798035748  |                               |
| 1 | 16,650,000 | 16,800,000 | 223 | 1433 | 0.76804286   |                               |
| 1 | 16,725,000 | 16,875,000 | 224 | 1312 | 0.584404644  |                               |
| 1 | 16,800,000 | 16,950,000 | 225 | 1333 | 0.998855868  |                               |
| 1 | 16,875,000 | 17,025,000 | 226 | 1537 | 0.719353232  |                               |
| 1 | 16,950,000 | 17,100,000 | 227 | 1758 | 0.835025131  |                               |
| 1 | 17,025,000 | 17,175,000 | 228 | 1616 | 1.207367681  |                               |
| 1 | 17,100,000 | 17,250,000 | 229 | 1126 | -1.602238217 |                               |
| 1 | 17,175,000 | 17,325,000 | 230 | 550  | -6.602176484 |                               |
| 1 | 17,250,000 | 17,400,000 | 231 | 828  | -0.799465213 |                               |
| 1 | 17,325,000 | 17,475,000 | 232 | 1526 | 0.676755735  |                               |
| 1 | 17,400,000 | 17,550,000 | 233 | 1931 | 0.758632624  |                               |
| 1 | 17,475,000 | 17,625,000 | 234 | 2027 | 0.038640672  |                               |
| 1 | 17,550,000 | 17,700,000 | 235 | 1697 | -0.540086667 |                               |
| 1 | 17,625,000 | 17,775,000 | 236 | 1200 | 0.174206275  |                               |
| 1 | 17,700,000 | 17,850,000 | 237 | 955  | -0.227001076 |                               |
| 1 | 17,775,000 | 17,925,000 | 238 | 1196 | 0.171630301  |                               |
| 1 | 17,850,000 | 18,000,000 | 239 | 1117 | 0.859274352  |                               |
| 1 | 17,925,000 | 18,075,000 | 240 | 1024 | 0.735981811  | TMPRSS15                      |
| 1 | 18,000,000 | 18,150,000 | 241 | 877  | 0.550486311  | TMPRSS15                      |
| 1 | 18,075,000 | 18,225,000 | 242 | 933  | 1.16194703   | CHODL,TMPRSS15                |
| 1 | 18,150,000 | 18,300,000 | 243 | 1520 | 1.130358145  | CHODL,TMPRSS15                |
| 1 | 18,225,000 | 18,375,000 | 244 | 1554 | 1.089488408  | CHODL                         |
| 1 | 18,300,000 | 18,450,000 | 245 | 1187 | 0.540492123  |                               |
| 1 | 18,375,000 | 18,525,000 | 246 | 1188 | -0.182600337 |                               |
| 1 | 18,450,000 | 18,600,000 | 247 | 1119 | 0.420441406  |                               |
| 1 | 18,525,000 | 18,675,000 | 248 | 932  | 0.997137346  |                               |
| 1 | 18,600,000 | 18,750,000 | 249 | 668  | 0.995387659  | C1H21ORF91                    |
| 1 | 18,675,000 | 18,825,000 | 250 | 837  | 1.401883555  | C1H21ORF91                    |
| 1 | 18,750,000 | 18,900,000 | 251 | 1209 | 1.313992301  |                               |
| 1 | 18,825,000 | 18,975,000 | 252 | 973  | 0.932160786  | BTG3,CXADR,ENSBTAG00000047943 |
| 1 | 18,900,000 | 19,050,000 | 253 | 1006 | 1.095879261  | BTG3,CXADR,ENSBTAG00000047943 |
| 1 | 18,975,000 | 19,125,000 | 254 | 841  | 1.15922908   | CXADR                         |
| 1 | 19,050,000 | 19,200,000 | 255 | 518  | -0.118414793 |                               |
| 1 | 19,125,000 | 19,275,000 | 256 | 853  | -0.624992069 |                               |
| 1 | 19,200,000 | 19,350,000 | 257 | 1430 | 0.788748227  |                               |
| 1 | 19,275,000 | 19,425,000 | 258 | 1718 | 1.236304905  |                               |

|   |            |            |     |      |              |                    |
|---|------------|------------|-----|------|--------------|--------------------|
| 1 | 19,350,000 | 19,500,000 | 259 | 1609 | 0.914869286  |                    |
| 1 | 19,425,000 | 19,575,000 | 260 | 1582 | 0.856951712  |                    |
| 1 | 19,500,000 | 19,650,000 | 261 | 1436 | 0.405019675  |                    |
| 1 | 19,575,000 | 19,725,000 | 262 | 1172 | -0.719077124 |                    |
| 1 | 19,650,000 | 19,800,000 | 263 | 1386 | -2.262352875 |                    |
| 1 | 19,725,000 | 19,875,000 | 264 | 1452 | -1.944392993 | PPP1CA             |
| 1 | 19,800,000 | 19,950,000 | 265 | 1063 | 0.708731574  | PPP1CA             |
| 1 | 19,875,000 | 20,025,000 | 266 | 1203 | 1.046334722  |                    |
| 1 | 19,950,000 | 20,100,000 | 267 | 1417 | -0.057968849 |                    |
| 1 | 20,025,000 | 20,175,000 | 268 | 1122 | -0.564449794 |                    |
| 1 | 20,100,000 | 20,250,000 | 269 | 812  | 0.359382015  |                    |
| 1 | 20,175,000 | 20,325,000 | 270 | 542  | 0.533871971  |                    |
| 1 | 20,250,000 | 20,400,000 | 271 | 577  | 1.152710265  |                    |
| 1 | 20,325,000 | 20,475,000 | 272 | 838  | 1.083460712  | ENSBTAG00000047183 |
| 1 | 20,400,000 | 20,550,000 | 273 | 905  | 0.812906985  | ENSBTAG00000047183 |
| 1 | 20,475,000 | 20,625,000 | 274 | 960  | -1.313816763 |                    |
| 1 | 20,550,000 | 20,700,000 | 275 | 1169 | -0.702960128 | USP25              |
| 1 | 20,625,000 | 20,775,000 | 276 | 1106 | 0.856880041  | USP25              |
| 1 | 20,700,000 | 20,850,000 | 277 | 993  | 0.060319368  | USP25              |
| 1 | 20,775,000 | 20,925,000 | 278 | 968  | -0.042376568 | USP25              |
| 1 | 20,850,000 | 21,000,000 | 279 | 1032 | -0.139780291 |                    |
| 1 | 20,925,000 | 21,075,000 | 280 | 1223 | -0.08571449  |                    |
| 1 | 21,000,000 | 21,150,000 | 281 | 1093 | -0.450523951 |                    |
| 1 | 21,075,000 | 21,225,000 | 282 | 843  | -0.89728318  |                    |
| 1 | 21,150,000 | 21,300,000 | 283 | 865  | -0.004336202 |                    |
| 1 | 21,225,000 | 21,375,000 | 284 | 1122 | 0.713503362  |                    |
| 1 | 21,300,000 | 21,450,000 | 285 | 1253 | 0.614403218  |                    |
| 1 | 21,375,000 | 21,525,000 | 286 | 1093 | 0.619745384  |                    |
| 1 | 21,450,000 | 21,600,000 | 287 | 996  | 0.894606657  |                    |
| 1 | 21,525,000 | 21,675,000 | 288 | 938  | 0.561716095  |                    |
| 1 | 21,600,000 | 21,750,000 | 289 | 920  | 0.56264325   | NRIP1              |
| 1 | 21,675,000 | 21,825,000 | 290 | 833  | -1.27308732  | NRIP1              |
| 1 | 21,750,000 | 21,900,000 | 291 | 732  | -1.041606567 |                    |
| 1 | 21,825,000 | 21,975,000 | 292 | 1089 | 0.10799621   |                    |
| 1 | 21,900,000 | 22,050,000 | 293 | 1030 | -0.73409941  |                    |
| 1 | 21,975,000 | 22,125,000 | 294 | 848  | -1.301998585 | SAMSN1             |
| 1 | 22,050,000 | 22,200,000 | 295 | 831  | -1.000274716 | SAMSN1             |
| 1 | 22,125,000 | 22,275,000 | 296 | 900  | -0.279426887 | SAMSN1             |
| 1 | 22,200,000 | 22,350,000 | 297 | 1007 | 1.156708408  | HSPA13             |
| 1 | 22,275,000 | 22,425,000 | 298 | 1033 | 1.186327485  | HSPA13             |
| 1 | 22,350,000 | 22,500,000 | 299 | 1098 | 0.803119854  | LIPI,RBM11         |
| 1 | 22,425,000 | 22,575,000 | 300 | 1132 | -0.036235405 | LIPI,RBM11         |
| 1 | 22,500,000 | 22,650,000 | 301 | 945  | -0.09336761  |                    |
| 1 | 22,575,000 | 22,725,000 | 302 | 605  | -1.678585586 |                    |
| 1 | 22,650,000 | 22,800,000 | 303 | 482  | -1.830420923 |                    |
| 1 | 22,725,000 | 22,875,000 | 304 | 618  | -0.307552011 |                    |
| 1 | 22,800,000 | 22,950,000 | 305 | 872  | 0.062651509  |                    |
| 1 | 22,875,000 | 23,025,000 | 306 | 931  | 0.133987581  |                    |
| 1 | 22,950,000 | 23,100,000 | 307 | 1263 | -1.334359105 |                    |
| 1 | 23,025,000 | 23,175,000 | 308 | 1501 | -1.880617886 |                    |
| 1 | 23,100,000 | 23,250,000 | 309 | 1332 | -1.657017283 |                    |
| 1 | 23,175,000 | 23,325,000 | 310 | 1164 | -1.426095744 |                    |
| 1 | 23,250,000 | 23,400,000 | 311 | 1231 | -1.157275086 |                    |



|   |            |            |     |      |              |                    |
|---|------------|------------|-----|------|--------------|--------------------|
| 1 | 23,325,000 | 23,475,000 | 312 | 1616 | -1.043429413 |                    |
| 1 | 23,400,000 | 23,550,000 | 313 | 1308 | -0.906539479 |                    |
| 1 | 23,475,000 | 23,625,000 | 314 | 817  | 0.118493849  |                    |
| 1 | 23,550,000 | 23,700,000 | 315 | 912  | 0.576538212  |                    |
| 1 | 23,625,000 | 23,775,000 | 316 | 988  | 0.455035554  |                    |
| 1 | 23,700,000 | 23,850,000 | 317 | 1296 | 0.332335773  |                    |
| 1 | 23,775,000 | 23,925,000 | 318 | 1451 | 0.421815964  |                    |
| 1 | 23,850,000 | 24,000,000 | 319 | 1171 | -0.460720361 | ENSBTAG00000046755 |
| 1 | 23,925,000 | 24,075,000 | 320 | 925  | -0.824649968 | ENSBTAG00000046755 |
| 1 | 24,000,000 | 24,150,000 | 321 | 1323 | 0.768913235  |                    |
| 1 | 24,075,000 | 24,225,000 | 322 | 1694 | 0.371515331  |                    |
| 1 | 24,150,000 | 24,300,000 | 323 | 1585 | -0.194083283 |                    |
| 1 | 24,225,000 | 24,375,000 | 324 | 1410 | 0.238228638  |                    |
| 1 | 24,300,000 | 24,450,000 | 325 | 1172 | 0.777894415  | ROBO2              |
| 1 | 24,375,000 | 24,525,000 | 326 | 923  | 0.494299876  | ROBO2              |
| 1 | 24,450,000 | 24,600,000 | 327 | 862  | -0.16624666  | ROBO2              |
| 1 | 24,525,000 | 24,675,000 | 328 | 1089 | 0.360663196  | ROBO2              |
| 1 | 24,600,000 | 24,750,000 | 329 | 1392 | 0.521577305  |                    |
| 1 | 24,675,000 | 24,825,000 | 330 | 1525 | -0.432009566 |                    |
| 1 | 24,750,000 | 24,900,000 | 331 | 1584 | -0.218025573 |                    |
| 1 | 24,825,000 | 24,975,000 | 332 | 1656 | -0.078317364 |                    |
| 1 | 24,900,000 | 25,050,000 | 333 | 1329 | -0.517113825 |                    |
| 1 | 24,975,000 | 25,125,000 | 334 | 1068 | -0.716266056 |                    |
| 1 | 25,050,000 | 25,200,000 | 335 | 916  | -0.357009885 |                    |
| 1 | 25,125,000 | 25,275,000 | 336 | 1090 | 0.120277425  |                    |
| 1 | 25,200,000 | 25,350,000 | 337 | 1568 | 0.196048048  |                    |
| 1 | 25,275,000 | 25,425,000 | 338 | 1604 | 0.609857942  |                    |
| 1 | 25,350,000 | 25,500,000 | 339 | 1377 | 0.51630028   |                    |
| 1 | 25,425,000 | 25,575,000 | 340 | 1300 | 0.342235315  |                    |
| 1 | 25,500,000 | 25,650,000 | 341 | 1146 | 0.189302838  | ROBO1              |
| 1 | 25,575,000 | 25,725,000 | 342 | 843  | 0.178036613  | ROBO1              |
| 1 | 25,650,000 | 25,800,000 | 343 | 981  | 0.501480481  | ROBO1              |
| 1 | 25,725,000 | 25,875,000 | 344 | 1111 | -0.10760635  | ROBO1              |
| 1 | 25,800,000 | 25,950,000 | 345 | 779  | -1.001751116 | ROBO1              |
| 1 | 25,875,000 | 26,025,000 | 346 | 703  | -0.921248943 | ROBO1              |
| 1 | 25,950,000 | 26,100,000 | 347 | 897  | -0.917153752 | ROBO1              |
| 1 | 26,025,000 | 26,175,000 | 348 | 1108 | -0.794695404 | ROBO1              |
| 1 | 26,100,000 | 26,250,000 | 349 | 1289 | 0.167856192  | ROBO1              |
| 1 | 26,175,000 | 26,325,000 | 350 | 1355 | 0.518772376  | ROBO1              |
| 1 | 26,250,000 | 26,400,000 | 351 | 1293 | -0.229188785 |                    |
| 1 | 26,325,000 | 26,475,000 | 352 | 1108 | -1.549989608 |                    |
| 1 | 26,400,000 | 26,550,000 | 353 | 774  | -2.725723754 |                    |
| 1 | 26,475,000 | 26,625,000 | 354 | 597  | -2.909333097 |                    |
| 1 | 26,550,000 | 26,700,000 | 355 | 678  | -1.198641048 |                    |
| 1 | 26,625,000 | 26,775,000 | 356 | 879  | -0.086095497 |                    |
| 1 | 26,700,000 | 26,850,000 | 357 | 1217 | -0.03620882  |                    |
| 1 | 26,775,000 | 26,925,000 | 358 | 1454 | 0.407912821  |                    |
| 1 | 26,850,000 | 27,000,000 | 359 | 1682 | 0.214438645  |                    |
| 1 | 26,925,000 | 27,075,000 | 360 | 1462 | 0.160678581  |                    |
| 1 | 27,000,000 | 27,150,000 | 361 | 1043 | -0.058107315 |                    |
| 1 | 27,075,000 | 27,225,000 | 362 | 633  | -0.535067565 |                    |
| 1 | 27,150,000 | 27,300,000 | 363 | 642  | -1.780952613 |                    |
| 1 | 27,225,000 | 27,375,000 | 364 | 1264 | -1.166781122 |                    |

|   |            |            |     |      |              |                         |
|---|------------|------------|-----|------|--------------|-------------------------|
| 1 | 27,300,000 | 27,450,000 | 365 | 1475 | -0.130977204 |                         |
| 1 | 27,375,000 | 27,525,000 | 366 | 1489 | 0.344412612  |                         |
| 1 | 27,450,000 | 27,600,000 | 367 | 1273 | 0.187714246  |                         |
| 1 | 27,525,000 | 27,675,000 | 368 | 685  | -0.252413472 |                         |
| 1 | 27,600,000 | 27,750,000 | 369 | 442  | -2.354559646 |                         |
| 1 | 27,675,000 | 27,825,000 | 370 | 845  | -0.076707155 |                         |
| 1 | 27,750,000 | 27,900,000 | 371 | 1081 | 0.467967629  |                         |
| 1 | 27,825,000 | 27,975,000 | 372 | 1036 | -0.444166441 |                         |
| 1 | 27,900,000 | 28,050,000 | 373 | 1012 | -0.255117805 |                         |
| 1 | 27,975,000 | 28,125,000 | 374 | 770  | 0.05588249   |                         |
| 1 | 28,050,000 | 28,200,000 | 375 | 553  | -1.62123677  |                         |
| 1 | 28,125,000 | 28,275,000 | 376 | 504  | -1.65916752  |                         |
| 1 | 28,200,000 | 28,350,000 | 377 | 834  | 0.27448736   |                         |
| 1 | 28,275,000 | 28,425,000 | 378 | 1039 | 0.420616713  |                         |
| 1 | 28,350,000 | 28,500,000 | 379 | 787  | 0.046527451  |                         |
| 1 | 28,425,000 | 28,575,000 | 380 | 467  | 0.164058929  |                         |
| 1 | 28,500,000 | 28,650,000 | 381 | 591  | -1.006070105 | ENSBTAG00000008359      |
| 1 | 28,575,000 | 28,725,000 | 382 | 797  | -0.791686073 | GBE1,ENSBTAG00000008359 |
| 1 | 28,650,000 | 28,800,000 | 383 | 525  | -0.161706756 | GBE1                    |
| 1 | 28,725,000 | 28,875,000 | 384 | 659  | 0.745287345  | GBE1                    |
| 1 | 28,800,000 | 28,950,000 | 385 | 844  | 0.119032913  | GBE1                    |
| 1 | 28,875,000 | 29,025,000 | 386 | 646  | -0.860428561 | GBE1                    |
| 1 | 28,950,000 | 29,100,000 | 387 | 910  | 0.699578235  |                         |
| 1 | 29,025,000 | 29,175,000 | 388 | 875  | 0.44058999   |                         |
| 1 | 29,100,000 | 29,250,000 | 389 | 472  | -0.723853995 |                         |
| 1 | 29,175,000 | 29,325,000 | 390 | 980  | 0.268700733  |                         |
| 1 | 29,250,000 | 29,400,000 | 391 | 1114 | 0.042233594  |                         |
| 1 | 29,325,000 | 29,475,000 | 392 | 859  | -0.602785964 |                         |
| 1 | 29,400,000 | 29,550,000 | 393 | 1155 | 0.221113063  |                         |
| 1 | 29,475,000 | 29,625,000 | 394 | 1206 | 0.397038874  |                         |
| 1 | 29,550,000 | 29,700,000 | 395 | 1159 | -0.155131376 |                         |
| 1 | 29,625,000 | 29,775,000 | 396 | 849  | -0.634247318 |                         |
| 1 | 29,700,000 | 29,850,000 | 397 | 949  | 0.026330326  |                         |
| 1 | 29,775,000 | 29,925,000 | 398 | 1318 | 0.561356103  |                         |
| 1 | 29,850,000 | 30,000,000 | 399 | 1278 | 0.0942732    |                         |
| 1 | 29,925,000 | 30,075,000 | 400 | 907  | -0.555050847 |                         |
| 1 | 30,000,000 | 30,150,000 | 401 | 786  | -0.103152148 |                         |
| 1 | 30,075,000 | 30,225,000 | 402 | 1280 | -1.409079885 |                         |
| 1 | 30,150,000 | 30,300,000 | 403 | 1559 | -0.853493491 |                         |
| 1 | 30,225,000 | 30,375,000 | 404 | 1561 | 0.36409033   | ENSBTAG00000046383      |
| 1 | 30,300,000 | 30,450,000 | 405 | 997  | 0.207013898  | ENSBTAG00000046383      |
| 1 | 30,375,000 | 30,525,000 | 406 | 588  | 0.070375011  |                         |
| 1 | 30,450,000 | 30,600,000 | 407 | 747  | -0.093327405 |                         |
| 1 | 30,525,000 | 30,675,000 | 408 | 1380 | 0.570406834  |                         |
| 1 | 30,600,000 | 30,750,000 | 409 | 1618 | 0.535178573  |                         |
| 1 | 30,675,000 | 30,825,000 | 410 | 1086 | -0.501869147 |                         |
| 1 | 30,750,000 | 30,900,000 | 411 | 924  | -0.437611741 |                         |
| 1 | 30,825,000 | 30,975,000 | 412 | 903  | -0.169307979 |                         |
| 1 | 30,900,000 | 31,050,000 | 413 | 744  | -0.676826157 |                         |
| 1 | 30,975,000 | 31,125,000 | 414 | 1012 | -0.260851522 |                         |
| 1 | 31,050,000 | 31,200,000 | 415 | 1280 | 0.443620655  |                         |
| 1 | 31,125,000 | 31,275,000 | 416 | 1109 | 0.336804825  |                         |
| 1 | 31,200,000 | 31,350,000 | 417 | 1036 | -0.802609933 |                         |

|   |            |            |     |      |              |              |
|---|------------|------------|-----|------|--------------|--------------|
| 1 | 31,275,000 | 31,425,000 | 418 | 950  | -1.71608125  |              |
| 1 | 31,350,000 | 31,500,000 | 419 | 684  | -1.52673688  |              |
| 1 | 31,425,000 | 31,575,000 | 420 | 399  | -0.603592745 |              |
| 1 | 31,500,000 | 31,650,000 | 421 | 315  | 0.468256397  |              |
| 1 | 31,575,000 | 31,725,000 | 422 | 682  | -0.234355726 |              |
| 1 | 31,650,000 | 31,800,000 | 423 | 826  | -0.5512411   |              |
| 1 | 31,725,000 | 31,875,000 | 424 | 1013 | 0.91328677   |              |
| 1 | 31,800,000 | 31,950,000 | 425 | 1246 | 1.0980992    |              |
| 1 | 31,875,000 | 32,025,000 | 426 | 855  | 0.677960697  |              |
| 1 | 31,950,000 | 32,100,000 | 427 | 636  | 1.138907929  |              |
| 1 | 32,025,000 | 32,175,000 | 428 | 748  | 1.25029368   |              |
| 1 | 32,100,000 | 32,250,000 | 429 | 801  | 1.159996907  |              |
| 1 | 32,175,000 | 32,325,000 | 430 | 601  | 0.285879042  |              |
| 1 | 32,250,000 | 32,400,000 | 431 | 502  | -0.226586544 |              |
| 1 | 32,325,000 | 32,475,000 | 432 | 800  | 0.754932582  |              |
| 1 | 32,400,000 | 32,550,000 | 433 | 1072 | 0.80424626   |              |
| 1 | 32,475,000 | 32,625,000 | 434 | 1253 | 0.036732478  |              |
| 1 | 32,550,000 | 32,700,000 | 435 | 1462 | 0.188741571  |              |
| 1 | 32,625,000 | 32,775,000 | 436 | 1129 | 0.429500358  |              |
| 1 | 32,700,000 | 32,850,000 | 437 | 916  | -0.121485494 |              |
| 1 | 32,775,000 | 32,925,000 | 438 | 929  | 0.126645778  |              |
| 1 | 32,850,000 | 33,000,000 | 439 | 906  | 0.256731236  |              |
| 1 | 32,925,000 | 33,075,000 | 440 | 1223 | 0.18261059   |              |
| 1 | 33,000,000 | 33,150,000 | 441 | 1628 | 0.031021694  |              |
| 1 | 33,075,000 | 33,225,000 | 442 | 1722 | 0.573281485  |              |
| 1 | 33,150,000 | 33,300,000 | 443 | 1296 | 0.70845574   | CADM2        |
| 1 | 33,225,000 | 33,375,000 | 444 | 1063 | -0.262470119 | CADM2        |
| 1 | 33,300,000 | 33,450,000 | 445 | 889  | -0.527434794 | CADM2        |
| 1 | 33,375,000 | 33,525,000 | 446 | 831  | -0.115488197 | CADM2        |
| 1 | 33,450,000 | 33,600,000 | 447 | 1034 | 0.246556969  | CADM2        |
| 1 | 33,525,000 | 33,675,000 | 448 | 1095 | 0.043370425  | CADM2        |
| 1 | 33,600,000 | 33,750,000 | 449 | 1111 | 0.399541276  | CADM2        |
| 1 | 33,675,000 | 33,825,000 | 450 | 819  | 1.203048255  |              |
| 1 | 33,750,000 | 33,900,000 | 451 | 384  | 1.09050222   |              |
| 1 | 33,825,000 | 33,975,000 | 452 | 465  | -0.413673226 |              |
| 1 | 33,900,000 | 34,050,000 | 453 | 966  | -2.592696153 |              |
| 1 | 33,975,000 | 34,125,000 | 454 | 1081 | -1.439710224 |              |
| 1 | 34,050,000 | 34,200,000 | 455 | 903  | 0.13973616   |              |
| 1 | 34,125,000 | 34,275,000 | 456 | 930  | -1.9111755   |              |
| 1 | 34,200,000 | 34,350,000 | 457 | 785  | -2.575399875 |              |
| 1 | 34,275,000 | 34,425,000 | 458 | 554  | -0.893160551 |              |
| 1 | 34,350,000 | 34,500,000 | 459 | 754  | -1.902618874 |              |
| 1 | 34,425,000 | 34,575,000 | 460 | 828  | -1.248409676 |              |
| 1 | 34,500,000 | 34,650,000 | 461 | 605  | -0.399496942 |              |
| 1 | 34,575,000 | 34,725,000 | 462 | 405  | -1.036295152 | VGLL3        |
| 1 | 34,650,000 | 34,800,000 | 463 | 460  | -0.332580997 | VGLL3        |
| 1 | 34,725,000 | 34,875,000 | 464 | 577  | -0.019524014 |              |
| 1 | 34,800,000 | 34,950,000 | 465 | 493  | 0.381456322  |              |
| 1 | 34,875,000 | 35,025,000 | 466 | 584  | 0.572796291  | CHMP2B,PIT-1 |
| 1 | 34,950,000 | 35,100,000 | 467 | 736  | 0.214097662  | CHMP2B,PIT-1 |
| 1 | 35,025,000 | 35,175,000 | 468 | 841  | 0.282636949  |              |
| 1 | 35,100,000 | 35,250,000 | 469 | 1174 | -1.693715391 |              |
| 1 | 35,175,000 | 35,325,000 | 470 | 1288 | -2.12414316  |              |

|   |            |            |     |      |              |                       |
|---|------------|------------|-----|------|--------------|-----------------------|
| 1 | 35,250,000 | 35,400,000 | 471 | 809  | -0.406609501 |                       |
| 1 | 35,325,000 | 35,475,000 | 472 | 732  | 1.022708092  |                       |
| 1 | 35,400,000 | 35,550,000 | 473 | 673  | 1.125245054  |                       |
| 1 | 35,475,000 | 35,625,000 | 474 | 542  | 1.30694911   | 5HTR1F                |
| 1 | 35,550,000 | 35,700,000 | 475 | 510  | 1.247333788  | 5HTR1F,CGGBP1,ZNF654  |
| 1 | 35,625,000 | 35,775,000 | 476 | 349  | 0.971084296  | C3orf38,CGGBP1,ZNF654 |
| 1 | 35,700,000 | 35,850,000 | 477 | 552  | 1.034308659  | C3orf38,ZNF654        |
| 1 | 35,775,000 | 35,925,000 | 478 | 717  | 0.620221917  |                       |
| 1 | 35,850,000 | 36,000,000 | 479 | 1023 | 0.292434834  |                       |
| 1 | 35,925,000 | 36,075,000 | 480 | 1289 | -0.000957843 |                       |
| 1 | 36,000,000 | 36,150,000 | 481 | 942  | -0.085709769 | ENSBTAG00000045590    |
| 1 | 36,075,000 | 36,225,000 | 482 | 517  | 0.50600663   | ENSBTAG00000045590    |
| 1 | 36,150,000 | 36,300,000 | 483 | 749  | 0.39810495   |                       |
| 1 | 36,225,000 | 36,375,000 | 484 | 760  | 0.264623295  |                       |
| 1 | 36,300,000 | 36,450,000 | 485 | 658  | -0.620749435 |                       |
| 1 | 36,375,000 | 36,525,000 | 486 | 712  | -2.261914364 |                       |
| 1 | 36,450,000 | 36,600,000 | 487 | 584  | -0.832746036 |                       |
| 1 | 36,525,000 | 36,675,000 | 488 | 668  | -0.197251888 |                       |
| 1 | 36,600,000 | 36,750,000 | 489 | 751  | -0.239008471 |                       |
| 1 | 36,675,000 | 36,825,000 | 490 | 569  | 0.024114592  |                       |
| 1 | 36,750,000 | 36,900,000 | 491 | 498  | 0.276277906  | EPHA3                 |
| 1 | 36,825,000 | 36,975,000 | 492 | 630  | 0.229991417  | EPHA3                 |
| 1 | 36,900,000 | 37,050,000 | 493 | 662  | 0.953600523  | EPHA3                 |
| 1 | 36,975,000 | 37,125,000 | 494 | 511  | 1.456985535  | EPHA3                 |
| 1 | 37,050,000 | 37,200,000 | 495 | 471  | 0.034712838  | EPHA3                 |
| 1 | 37,125,000 | 37,275,000 | 496 | 721  | -1.93039076  |                       |
| 1 | 37,200,000 | 37,350,000 | 497 | 1058 | -2.170986209 |                       |
| 1 | 37,275,000 | 37,425,000 | 498 | 1176 | -1.654833197 |                       |
| 1 | 37,350,000 | 37,500,000 | 499 | 828  | -0.886786821 |                       |
| 1 | 37,425,000 | 37,575,000 | 500 | 963  | 0.547039478  |                       |
| 1 | 37,500,000 | 37,650,000 | 501 | 1229 | 0.541012963  |                       |
| 1 | 37,575,000 | 37,725,000 | 502 | 804  | 0.305950095  |                       |
| 1 | 37,650,000 | 37,800,000 | 503 | 516  | -0.420599924 |                       |
| 1 | 37,725,000 | 37,875,000 | 504 | 956  | -0.085468166 | PROS1                 |
| 1 | 37,800,000 | 37,950,000 | 505 | 812  | -0.005274697 | ARL13B,PROS1,STX19    |
| 1 | 37,875,000 | 38,025,000 | 506 | 254  | 0.288139552  | ARL13B,NSUN3,STX19    |
| 1 | 37,950,000 | 38,100,000 | 507 | 226  | 0.735156495  | ARL13B,NSUN3          |
| 1 | 38,025,000 | 38,175,000 | 508 | 349  | -2.887816022 |                       |
| 1 | 38,100,000 | 38,250,000 | 509 | 660  | -2.300116489 |                       |
| 1 | 38,175,000 | 38,325,000 | 510 | 1334 | 0.327399741  |                       |
| 1 | 38,250,000 | 38,400,000 | 511 | 1550 | 0.508809907  |                       |
| 1 | 38,325,000 | 38,475,000 | 512 | 1087 | 0.673044622  |                       |
| 1 | 38,400,000 | 38,550,000 | 513 | 793  | 0.684347113  |                       |
| 1 | 38,475,000 | 38,625,000 | 514 | 583  | 0.29235846   |                       |
| 1 | 38,550,000 | 38,700,000 | 515 | 611  | 0.152671251  |                       |
| 1 | 38,625,000 | 38,775,000 | 516 | 731  | 0.686154389  |                       |
| 1 | 38,700,000 | 38,850,000 | 517 | 680  | -0.166647464 |                       |
| 1 | 38,775,000 | 38,925,000 | 518 | 925  | 0.107444502  |                       |
| 1 | 38,850,000 | 39,000,000 | 519 | 1334 | 1.254520142  |                       |
| 1 | 38,925,000 | 39,075,000 | 520 | 1120 | 1.4365111    |                       |
| 1 | 39,000,000 | 39,150,000 | 521 | 722  | 0.353050919  |                       |
| 1 | 39,075,000 | 39,225,000 | 522 | 609  | -1.145913468 |                       |
| 1 | 39,150,000 | 39,300,000 | 523 | 986  | -1.504141145 |                       |

|   |            |            |     |      |              |                                                          |
|---|------------|------------|-----|------|--------------|----------------------------------------------------------|
| 1 | 39,225,000 | 39,375,000 | 524 | 1459 | -1.038180218 |                                                          |
| 1 | 39,300,000 | 39,450,000 | 525 | 1057 | -0.134465193 |                                                          |
| 1 | 39,375,000 | 39,525,000 | 526 | 723  | -1.684897454 |                                                          |
| 1 | 39,450,000 | 39,600,000 | 527 | 1221 | -0.313781491 |                                                          |
| 1 | 39,525,000 | 39,675,000 | 528 | 1387 | 0.439649367  |                                                          |
| 1 | 39,600,000 | 39,750,000 | 529 | 1055 | 0.63375621   |                                                          |
| 1 | 39,675,000 | 39,825,000 | 530 | 980  | 0.312662487  |                                                          |
| 1 | 39,750,000 | 39,900,000 | 531 | 1023 | 0.177003762  |                                                          |
| 1 | 39,825,000 | 39,975,000 | 532 | 721  | 0.47004459   |                                                          |
| 1 | 39,900,000 | 40,050,000 | 533 | 362  | -0.515891335 |                                                          |
| 1 | 39,975,000 | 40,125,000 | 534 | 437  | -0.656387837 |                                                          |
| 1 | 40,050,000 | 40,200,000 | 535 | 816  | -0.251909682 |                                                          |
| 1 | 40,125,000 | 40,275,000 | 536 | 1328 | -1.532793668 |                                                          |
| 1 | 40,200,000 | 40,350,000 | 537 | 1502 | -1.718637207 |                                                          |
| 1 | 40,275,000 | 40,425,000 | 538 | 1295 | -0.096096697 |                                                          |
| 1 | 40,350,000 | 40,500,000 | 539 | 815  | 0.574937049  |                                                          |
| 1 | 40,425,000 | 40,575,000 | 540 | 580  | 0.863309771  |                                                          |
| 1 | 40,500,000 | 40,650,000 | 541 | 933  | 0.095633896  | EPHA6                                                    |
| 1 | 40,575,000 | 40,725,000 | 542 | 871  | -0.283492062 | EPHA6                                                    |
| 1 | 40,650,000 | 40,800,000 | 543 | 609  | 0.357121353  | EPHA6                                                    |
| 1 | 40,725,000 | 40,875,000 | 544 | 774  | -0.414298331 | EPHA6                                                    |
| 1 | 40,800,000 | 40,950,000 | 545 | 972  | -1.288669822 | EPHA6                                                    |
| 1 | 40,875,000 | 41,025,000 | 546 | 936  | -0.774357392 | EPHA6                                                    |
| 1 | 40,950,000 | 41,100,000 | 547 | 791  | 0.190755038  | EPHA6                                                    |
| 1 | 41,025,000 | 41,175,000 | 548 | 648  | 0.040192807  | EPHA6                                                    |
| 1 | 41,100,000 | 41,250,000 | 549 | 616  | -0.884233162 | EPHA6                                                    |
| 1 | 41,175,000 | 41,325,000 | 550 | 679  | -0.745844886 | EPHA6                                                    |
| 1 | 41,250,000 | 41,400,000 | 551 | 812  | -0.756889248 | EPHA6                                                    |
| 1 | 41,325,000 | 41,475,000 | 552 | 846  | -0.199266627 | EPHA6                                                    |
| 1 | 41,400,000 | 41,550,000 | 553 | 791  | 0.695733303  | EPHA6                                                    |
| 1 | 41,475,000 | 41,625,000 | 554 | 897  | 0.577336203  | EPHA6                                                    |
| 1 | 41,550,000 | 41,700,000 | 555 | 706  | 0.669179484  | ARL6,EPHA6                                               |
| 1 | 41,625,000 | 41,775,000 | 556 | 663  | 1.070327523  | ARL6,CRYBG3,ENSBTAG00000047147                           |
| 1 | 41,700,000 | 41,850,000 | 557 | 688  | 0.896144439  | CRYBG3,MINA,ENSBTAG00000047147                           |
| 1 | 41,775,000 | 41,925,000 | 558 | 779  | 0.339919568  | CRYBG3,GABRR3,MINA                                       |
| 1 | 41,850,000 | 42,000,000 | 559 | 1214 | -0.141842977 | GABRR3,MINA,ENSBTAG00000023668,ENSBTAG0000047095         |
| 1 | 41,925,000 | 42,075,000 | 560 | 1436 | 0.011752251  | ENSBTAG00000023668,ENSBTAG00000047095                    |
| 1 | 42,000,000 | 42,150,000 | 561 | 1908 | 0.631367257  | ENSBTAG00000022908,ENSBTAG00000027113                    |
| 1 | 42,075,000 | 42,225,000 | 562 | 1877 | -0.79006706  | ENSBTAG00000022908,ENSBTAG00000027113,ENSBTAG00000033437 |
| 1 | 42,150,000 | 42,300,000 | 563 | 1491 | -1.492763482 | ENSBTAG00000033437                                       |
| 1 | 42,225,000 | 42,375,000 | 564 | 1094 | 0.213034921  | ENSBTAG00000037820,ENSBTAG00000047371                    |
| 1 | 42,300,000 | 42,450,000 | 565 | 523  | 0.613274909  | ENSBTAG00000027782,ENSBTAG00000037820,ENSBTAG00000047371 |
| 1 | 42,375,000 | 42,525,000 | 566 | 485  | 0.278964144  | CLDND1,CPOX,GPR15,ENSBTAG00000027782                     |
| 1 | 42,450,000 | 42,600,000 | 567 | 908  | 0.228917171  | CLDND1,CPOX,GPR15,ENSBTAG00000023666                     |
| 1 | 42,525,000 | 42,675,000 | 568 | 926  | 0.456846049  | CPOX,ENSBTAG00000023666                                  |
| 1 | 42,600,000 | 42,750,000 | 569 | 584  | 0.765872633  | DCBLD2,ST3GAL6                                           |
| 1 | 42,675,000 | 42,825,000 | 570 | 711  | 0.099161307  | DCBLD2,ST3GAL6                                           |
| 1 | 42,750,000 | 42,900,000 | 571 | 805  | 0.197395481  | DCBLD2                                                   |
| 1 | 42,825,000 | 42,975,000 | 572 | 987  | 0.941215198  |                                                          |
| 1 | 42,900,000 | 43,050,000 | 573 | 1173 | 0.221058598  |                                                          |

|   |            |            |     |      |              |                                                  |
|---|------------|------------|-----|------|--------------|--------------------------------------------------|
| 1 | 42,975,000 | 43,125,000 | 574 | 979  | -1.025059186 |                                                  |
| 1 | 43,050,000 | 43,200,000 | 575 | 939  | -0.08176635  |                                                  |
| 1 | 43,125,000 | 43,275,000 | 576 | 1002 | -1.207284419 |                                                  |
| 1 | 43,200,000 | 43,350,000 | 577 | 1122 | -1.34202851  |                                                  |
| 1 | 43,275,000 | 43,425,000 | 578 | 1365 | -0.224306599 |                                                  |
| 1 | 43,350,000 | 43,500,000 | 579 | 1387 | 0.361814822  |                                                  |
| 1 | 43,425,000 | 43,575,000 | 580 | 1170 | 0.852264334  | COL8A1                                           |
| 1 | 43,500,000 | 43,650,000 | 581 | 1048 | 0.318295822  | COL8A1                                           |
| 1 | 43,575,000 | 43,725,000 | 582 | 1152 | 0.496732611  | COL8A1                                           |
| 1 | 43,650,000 | 43,800,000 | 583 | 1094 | 1.070296689  | CMSS1,COL8A1,FILIP1L                             |
| 1 | 43,725,000 | 43,875,000 | 584 | 710  | 0.9850686    | CMSS1,FILIP1L                                    |
| 1 | 43,800,000 | 43,950,000 | 585 | 543  | 0.587359     | CMSS1                                            |
| 1 | 43,875,000 | 44,025,000 | 586 | 527  | -0.17225122  | CMSS1                                            |
| 1 | 43,950,000 | 44,100,000 | 587 | 465  | -0.883239954 | CMSS1                                            |
| 1 | 44,025,000 | 44,175,000 | 588 | 549  | -0.836710391 | CMSS1,TMEM30C                                    |
| 1 | 44,100,000 | 44,250,000 | 589 | 714  | -1.717670131 | CMSS1,TBC1D23,TMEM30C                            |
| 1 | 44,175,000 | 44,325,000 | 590 | 876  | -0.448155153 | NIT2,TBC1D23,TOMM70A                             |
| 1 | 44,250,000 | 44,400,000 | 591 | 933  | 0.722429449  | LNP1,NIT2,TBC1D23,TOMM70A,ENSBTAG0000001332<br>1 |
| 1 | 44,325,000 | 44,475,000 | 592 | 881  | 0.726602214  | LNP1,TOMM70A,ENSBTAG00000013321                  |
| 1 | 44,400,000 | 44,550,000 | 593 | 1031 | 0.622113127  | ENSBTAG00000013321                               |
| 1 | 44,475,000 | 44,625,000 | 594 | 1598 | 0.984791424  | ENSBTAG00000013321                               |
| 1 | 44,550,000 | 44,700,000 | 595 | 1609 | 1.137083649  | EFHB                                             |
| 1 | 44,625,000 | 44,775,000 | 596 | 1135 | 0.878960573  | EFHB,PP2D1,RAB5A                                 |
| 1 | 44,700,000 | 44,850,000 | 597 | 1241 | 0.528715808  | EFHB,PP2D1,RAB5A                                 |
| 1 | 44,775,000 | 44,925,000 | 598 | 1148 | 0.100681658  | PCAF                                             |
| 1 | 44,850,000 | 45,000,000 | 599 | 895  | -0.797307955 | PCAF,SGOL1                                       |
| 1 | 44,925,000 | 45,075,000 | 600 | 1094 | 0.248890562  | PCAF,PRDM9,SGOL1                                 |
| 1 | 45,000,000 | 45,150,000 | 601 | 1030 | 0.625163499  | PRDM9,ENSBTAG00000047076                         |
| 1 | 45,075,000 | 45,225,000 | 602 | 1093 | -0.487170279 | PRDM9,ENSBTAG00000047076                         |
| 1 | 45,150,000 | 45,300,000 | 603 | 1307 | -0.215228571 | ENSBTAG00000004459                               |
| 1 | 45,225,000 | 45,375,000 | 604 | 1296 | 0.689713863  | ENSBTAG00000004459                               |
| 1 | 45,300,000 | 45,450,000 | 605 | 1186 | 0.332961745  | GPR128,ENSBTAG00000004459                        |
| 1 | 45,375,000 | 45,525,000 | 606 | 918  | 0.174406144  | ABI3BP,GPR128,TFG,ENSBTAG00000004459             |
| 1 | 45,450,000 | 45,600,000 | 607 | 1027 | 0.931818504  | ABI3BP,GPR128,TFG                                |
| 1 | 45,525,000 | 45,675,000 | 608 | 1143 | 0.787888978  | ABI3BP                                           |
| 1 | 45,600,000 | 45,750,000 | 609 | 1056 | -0.455112022 | ABI3BP                                           |
| 1 | 45,675,000 | 45,825,000 | 610 | 1085 | -0.464773415 | ABI3BP                                           |
| 1 | 45,750,000 | 45,900,000 | 611 | 893  | 0.527876914  | ABI3BP                                           |
| 1 | 45,825,000 | 45,975,000 | 612 | 956  | 1.171866079  |                                                  |
| 1 | 45,900,000 | 46,050,000 | 613 | 847  | 1.314380434  |                                                  |
| 1 | 45,975,000 | 46,125,000 | 614 | 401  | 0.857500655  | IMPG2                                            |
| 1 | 46,050,000 | 46,200,000 | 615 | 295  | 0.289066062  | IMPG2,SEN7                                       |
| 1 | 46,125,000 | 46,275,000 | 616 | 342  | 0.432240983  | IMPG2,SEN7                                       |
| 1 | 46,200,000 | 46,350,000 | 617 | 379  | -0.050927789 | FAM172A,SEN7,TRMT10C                             |
| 1 | 46,275,000 | 46,425,000 | 618 | 384  | 0.163826179  | FAM172A,PCNP,RPL24,SEN7,TRMT10C,ZBTB11           |
| 1 | 46,350,000 | 46,500,000 | 619 | 456  | 1.126455427  | CEP97,NXPE3,PCNP,RPL24,ZBTB11                    |
| 1 | 46,425,000 | 46,575,000 | 620 | 548  | 1.399266246  | CEP97,NFKBIZ,NXPE3                               |
| 1 | 46,500,000 | 46,650,000 | 621 | 474  | 1.363935934  | NFKBIZ,NXPE3                                     |
| 1 | 46,575,000 | 46,725,000 | 622 | 567  | 0.612442699  |                                                  |
| 1 | 46,650,000 | 46,800,000 | 623 | 845  | 0.657134738  |                                                  |
| 1 | 46,725,000 | 46,875,000 | 624 | 978  | 0.884193592  |                                                  |
| 1 | 46,800,000 | 46,950,000 | 625 | 866  | 0.87454502   |                                                  |

|   |            |            |     |      |              |                                       |
|---|------------|------------|-----|------|--------------|---------------------------------------|
| 1 | 46,875,000 | 47,025,000 | 626 | 813  | 0.794921259  | ENSBTAG00000024806                    |
| 1 | 46,950,000 | 47,100,000 | 627 | 787  | 0.88824377   | ENSBTAG00000024806,ENSBTAG00000047093 |
| 1 | 47,025,000 | 47,175,000 | 628 | 1198 | 1.028329869  | ENSBTAG00000047093                    |
| 1 | 47,100,000 | 47,250,000 | 629 | 1547 | 1.17564783   |                                       |
| 1 | 47,175,000 | 47,325,000 | 630 | 1047 | 0.927182566  | ZPLD1                                 |
| 1 | 47,250,000 | 47,400,000 | 631 | 984  | 0.871080663  | ZPLD1                                 |
| 1 | 47,325,000 | 47,475,000 | 632 | 999  | 0.378011647  |                                       |
| 1 | 47,400,000 | 47,550,000 | 633 | 552  | -0.868278059 |                                       |
| 1 | 47,475,000 | 47,625,000 | 634 | 539  | 0.856880945  |                                       |
| 1 | 47,550,000 | 47,700,000 | 635 | 936  | 0.70693214   |                                       |
| 1 | 47,625,000 | 47,775,000 | 636 | 1019 | 0.293024513  |                                       |
| 1 | 47,700,000 | 47,850,000 | 637 | 590  | 0.063633363  |                                       |
| 1 | 47,775,000 | 47,925,000 | 638 | 572  | 0.723721087  |                                       |
| 1 | 47,850,000 | 48,000,000 | 639 | 1129 | 0.288594437  |                                       |
| 1 | 47,925,000 | 48,075,000 | 640 | 1538 | -0.778384508 |                                       |
| 1 | 48,000,000 | 48,150,000 | 641 | 1672 | -1.491707952 |                                       |
| 1 | 48,075,000 | 48,225,000 | 642 | 1360 | -1.730824893 |                                       |
| 1 | 48,150,000 | 48,300,000 | 643 | 835  | -1.51518606  |                                       |
| 1 | 48,225,000 | 48,375,000 | 644 | 928  | 0.264144645  |                                       |
| 1 | 48,300,000 | 48,450,000 | 645 | 1263 | 0.482963742  |                                       |
| 1 | 48,375,000 | 48,525,000 | 646 | 1550 | -0.11779066  |                                       |
| 1 | 48,450,000 | 48,600,000 | 647 | 1689 | 0.194795174  |                                       |
| 1 | 48,525,000 | 48,675,000 | 648 | 1457 | 0.450043503  |                                       |
| 1 | 48,600,000 | 48,750,000 | 649 | 1224 | -0.221129367 |                                       |
| 1 | 48,675,000 | 48,825,000 | 650 | 1145 | 0.056689922  |                                       |
| 1 | 48,750,000 | 48,900,000 | 651 | 1360 | 0.604241348  |                                       |
| 1 | 48,825,000 | 48,975,000 | 652 | 1274 | -0.175772636 |                                       |
| 1 | 48,900,000 | 49,050,000 | 653 | 1082 | -0.543322481 |                                       |
| 1 | 48,975,000 | 49,125,000 | 654 | 1276 | 0.486836436  |                                       |
| 1 | 49,050,000 | 49,200,000 | 655 | 1122 | -0.09130909  |                                       |
| 1 | 49,125,000 | 49,275,000 | 656 | 951  | -0.581743194 |                                       |
| 1 | 49,200,000 | 49,350,000 | 657 | 1100 | 0.634139074  |                                       |
| 1 | 49,275,000 | 49,425,000 | 658 | 988  | 0.637792408  |                                       |
| 1 | 49,350,000 | 49,500,000 | 659 | 857  | 0.604971036  |                                       |
| 1 | 49,425,000 | 49,575,000 | 660 | 685  | 0.231640895  |                                       |
| 1 | 49,500,000 | 49,650,000 | 661 | 801  | -0.881897808 |                                       |
| 1 | 49,575,000 | 49,725,000 | 662 | 1176 | -0.593242632 |                                       |
| 1 | 49,650,000 | 49,800,000 | 663 | 1114 | 0.308996936  |                                       |
| 1 | 49,725,000 | 49,875,000 | 664 | 929  | 0.282537776  |                                       |
| 1 | 49,800,000 | 49,950,000 | 665 | 964  | 0.228750139  |                                       |
| 1 | 49,875,000 | 50,025,000 | 666 | 1165 | 1.234094964  |                                       |
| 1 | 49,950,000 | 50,100,000 | 667 | 1368 | 1.143805771  |                                       |
| 1 | 50,025,000 | 50,175,000 | 668 | 1116 | 0.533677323  |                                       |
| 1 | 50,100,000 | 50,250,000 | 669 | 867  | -0.642277202 |                                       |
| 1 | 50,175,000 | 50,325,000 | 670 | 913  | -0.799072909 |                                       |
| 1 | 50,250,000 | 50,400,000 | 671 | 711  | -0.048072514 | ALCAM                                 |
| 1 | 50,325,000 | 50,475,000 | 672 | 606  | -0.212193936 | ALCAM                                 |
| 1 | 50,400,000 | 50,550,000 | 673 | 778  | 0.274607389  | ALCAM                                 |
| 1 | 50,475,000 | 50,625,000 | 674 | 995  | 0.86077045   | ALCAM                                 |
| 1 | 50,550,000 | 50,700,000 | 675 | 1064 | -0.982314985 | ALCAM,CBLB                            |
| 1 | 50,625,000 | 50,775,000 | 676 | 657  | -1.556612209 | CBLB                                  |
| 1 | 50,700,000 | 50,850,000 | 677 | 438  | 0.048970325  | CBLB                                  |
| 1 | 50,775,000 | 50,925,000 | 678 | 769  | 0.408933018  | CBLB                                  |

|   |            |            |     |      |              |                          |
|---|------------|------------|-----|------|--------------|--------------------------|
| 1 | 50,850,000 | 51,000,000 | 679 | 1230 | 1.114037689  | CBLB                     |
| 1 | 50,925,000 | 51,075,000 | 680 | 1385 | 0.773877055  | ENSBTAG00000005414       |
| 1 | 51,000,000 | 51,150,000 | 681 | 922  | 0.408703482  | ENSBTAG00000005414       |
| 1 | 51,075,000 | 51,225,000 | 682 | 767  | 1.104324471  |                          |
| 1 | 51,150,000 | 51,300,000 | 683 | 1121 | 0.811748693  |                          |
| 1 | 51,225,000 | 51,375,000 | 684 | 1215 | 1.00505248   |                          |
| 1 | 51,300,000 | 51,450,000 | 685 | 1182 | 0.972250502  |                          |
| 1 | 51,375,000 | 51,525,000 | 686 | 989  | 0.149465459  |                          |
| 1 | 51,450,000 | 51,600,000 | 687 | 1026 | 0.491029794  |                          |
| 1 | 51,525,000 | 51,675,000 | 688 | 914  | 0.667184551  |                          |
| 1 | 51,600,000 | 51,750,000 | 689 | 776  | 0.706407489  |                          |
| 1 | 51,675,000 | 51,825,000 | 690 | 891  | 1.149279544  |                          |
| 1 | 51,750,000 | 51,900,000 | 691 | 714  | 0.553350455  |                          |
| 1 | 51,825,000 | 51,975,000 | 692 | 529  | -0.539145869 |                          |
| 1 | 51,900,000 | 52,050,000 | 693 | 709  | -0.025968243 |                          |
| 1 | 51,975,000 | 52,125,000 | 694 | 1051 | 0.05604647   |                          |
| 1 | 52,050,000 | 52,200,000 | 695 | 926  | 0.106017204  |                          |
| 1 | 52,125,000 | 52,275,000 | 696 | 792  | 0.592539556  |                          |
| 1 | 52,200,000 | 52,350,000 | 697 | 652  | 0.516066792  |                          |
| 1 | 52,275,000 | 52,425,000 | 698 | 662  | 0.070508708  | CCDC54                   |
| 1 | 52,350,000 | 52,500,000 | 699 | 557  | 0.121088896  | CCDC54                   |
| 1 | 52,425,000 | 52,575,000 | 700 | 350  | -0.314118673 | BBX                      |
| 1 | 52,500,000 | 52,650,000 | 701 | 573  | -0.271305586 | BBX                      |
| 1 | 52,575,000 | 52,725,000 | 702 | 763  | 0.171530119  | BBX                      |
| 1 | 52,650,000 | 52,800,000 | 703 | 872  | -0.239260142 | BBX                      |
| 1 | 52,725,000 | 52,875,000 | 704 | 1118 | 0.25635588   | BBX                      |
| 1 | 52,800,000 | 52,950,000 | 705 | 1453 | 0.289880115  | BBX                      |
| 1 | 52,875,000 | 53,025,000 | 706 | 1659 | -0.086974383 |                          |
| 1 | 52,950,000 | 53,100,000 | 707 | 1525 | 0.409049036  |                          |
| 1 | 53,025,000 | 53,175,000 | 708 | 1198 | 0.777431327  | CD47                     |
| 1 | 53,100,000 | 53,250,000 | 709 | 1229 | 0.674117693  | CD47                     |
| 1 | 53,175,000 | 53,325,000 | 710 | 1275 | 0.507350162  | IFT57                    |
| 1 | 53,250,000 | 53,400,000 | 711 | 1168 | 0.191526952  | IFT57                    |
| 1 | 53,325,000 | 53,475,000 | 712 | 1338 | 0.515516799  | IFT57                    |
| 1 | 53,400,000 | 53,550,000 | 713 | 1469 | 0.764339773  | HHLA2,MYH15              |
| 1 | 53,475,000 | 53,625,000 | 714 | 1408 | -0.458174851 | HHLA2,MYH15              |
| 1 | 53,550,000 | 53,700,000 | 715 | 1421 | -0.710163204 | MYH15                    |
| 1 | 53,625,000 | 53,775,000 | 716 | 1366 | -0.345071028 | DZIP3,KIAA1524,MYH15     |
| 1 | 53,700,000 | 53,850,000 | 717 | 1098 | -0.105890123 | DZIP3,KIAA1524           |
| 1 | 53,775,000 | 53,925,000 | 718 | 1079 | 0.643563839  | DZIP3                    |
| 1 | 53,850,000 | 54,000,000 | 719 | 1309 | 0.794611789  | DZIP3,TRAT1              |
| 1 | 53,925,000 | 54,075,000 | 720 | 1542 | 0.617304438  | TRAT1                    |
| 1 | 54,000,000 | 54,150,000 | 721 | 1943 | 0.633103791  | MORC1,TRAT1              |
| 1 | 54,075,000 | 54,225,000 | 722 | 1930 | 0.703296644  | MORC1                    |
| 1 | 54,150,000 | 54,300,000 | 723 | 1449 | 0.562001547  | MORC1                    |
| 1 | 54,225,000 | 54,375,000 | 724 | 1405 | 1.068674915  | MORC1                    |
| 1 | 54,300,000 | 54,450,000 | 725 | 1554 | 1.013307775  | MORC1                    |
| 1 | 54,375,000 | 54,525,000 | 726 | 1378 | 0.584684282  | DPPA2,ENSBTAG00000038103 |
| 1 | 54,450,000 | 54,600,000 | 727 | 1466 | 0.698687211  | DPPA2,ENSBTAG00000038103 |
| 1 | 54,525,000 | 54,675,000 | 728 | 1700 | 0.920566293  | RPL10                    |
| 1 | 54,600,000 | 54,750,000 | 729 | 1206 | 0.355889994  | RPL10                    |
| 1 | 54,675,000 | 54,825,000 | 730 | 812  | -3.951528116 |                          |
| 1 | 54,750,000 | 54,900,000 | 731 | 863  | -4.683962865 |                          |



|   |            |            |     |      |              |                                       |
|---|------------|------------|-----|------|--------------|---------------------------------------|
| 1 | 54,825,000 | 54,975,000 | 732 | 1044 | -0.825237098 |                                       |
| 1 | 54,900,000 | 55,050,000 | 733 | 1210 | 0.67996839   |                                       |
| 1 | 54,975,000 | 55,125,000 | 734 | 1096 | 0.314945224  |                                       |
| 1 | 55,050,000 | 55,200,000 | 735 | 1223 | -0.408311094 |                                       |
| 1 | 55,125,000 | 55,275,000 | 736 | 1228 | -0.817399836 |                                       |
| 1 | 55,200,000 | 55,350,000 | 737 | 1038 | -0.548559467 |                                       |
| 1 | 55,275,000 | 55,425,000 | 738 | 1064 | -0.431226834 |                                       |
| 1 | 55,350,000 | 55,500,000 | 739 | 1122 | -0.160709002 |                                       |
| 1 | 55,425,000 | 55,575,000 | 740 | 1056 | 0.503280352  |                                       |
| 1 | 55,500,000 | 55,650,000 | 741 | 1039 | 0.50200988   |                                       |
| 1 | 55,575,000 | 55,725,000 | 742 | 903  | -0.255561932 |                                       |
| 1 | 55,650,000 | 55,800,000 | 743 | 925  | -0.829680497 |                                       |
| 1 | 55,725,000 | 55,875,000 | 744 | 1204 | 0.295653106  | ENSBTAG00000045855                    |
| 1 | 55,800,000 | 55,950,000 | 745 | 1391 | 1.217985321  | ENSBTAG00000045855                    |
| 1 | 55,875,000 | 56,025,000 | 746 | 1522 | 0.679119422  |                                       |
| 1 | 55,950,000 | 56,100,000 | 747 | 1687 | 0.109593082  | ENSBTAG00000045820                    |
| 1 | 56,025,000 | 56,175,000 | 748 | 1652 | 0.496284547  | ENSBTAG00000038651,ENSBTAG00000045820 |
| 1 | 56,100,000 | 56,250,000 | 749 | 1083 | 0.836391261  | ENSBTAG00000038651                    |
| 1 | 56,175,000 | 56,325,000 | 750 | 956  | 1.06908004   |                                       |
| 1 | 56,250,000 | 56,400,000 | 751 | 862  | 0.901146965  | PVRL3                                 |
| 1 | 56,325,000 | 56,475,000 | 752 | 766  | 0.992714335  | PVRL3                                 |
| 1 | 56,400,000 | 56,550,000 | 753 | 1168 | 1.000676273  |                                       |
| 1 | 56,475,000 | 56,625,000 | 754 | 1343 | 0.345327994  |                                       |
| 1 | 56,550,000 | 56,700,000 | 755 | 1524 | 0.178651481  |                                       |
| 1 | 56,625,000 | 56,775,000 | 756 | 1490 | 0.174558601  | CD96,ZBED2                            |
| 1 | 56,700,000 | 56,850,000 | 757 | 1617 | -0.139372504 | CD96,PLCXD2,ZBED2                     |
| 1 | 56,775,000 | 56,925,000 | 758 | 1610 | -0.443051393 | CD96,PLCXD2                           |
| 1 | 56,850,000 | 57,000,000 | 759 | 1236 | -1.197323026 | PLCXD2                                |
| 1 | 56,925,000 | 57,075,000 | 760 | 1048 | -0.63733088  | PHLDB2                                |
| 1 | 57,000,000 | 57,150,000 | 761 | 823  | 0.354208339  | PHLDB2                                |
| 1 | 57,075,000 | 57,225,000 | 762 | 981  | 0.306980247  | ABHD10,PHLDB2,TAGLN3,TMPRSS7          |
| 1 | 57,150,000 | 57,300,000 | 763 | 1010 | 0.061414601  | ABHD10,C3orf52,TAGLN3,TMPRSS7         |
| 1 | 57,225,000 | 57,375,000 | 764 | 1023 | -0.06892693  | C3orf52,GCSAM,SLC9C1,TMPRSS7          |
| 1 | 57,300,000 | 57,450,000 | 765 | 1081 | -0.087999918 | C3orf52,GCSAM,SLC9C1                  |
| 1 | 57,375,000 | 57,525,000 | 766 | 723  | 0.010686529  | SLC9C1                                |
| 1 | 57,450,000 | 57,600,000 | 767 | 527  | 0.272208024  | CD200,SLC9C1                          |
| 1 | 57,525,000 | 57,675,000 | 768 | 883  | 0.136150687  | BTLA,CD200                            |
| 1 | 57,600,000 | 57,750,000 | 769 | 823  | 0.32669639   | BTLA                                  |
| 1 | 57,675,000 | 57,825,000 | 770 | 416  | 0.001327735  | ATG3,BTLA,CCDC80,SLC35A5              |
| 1 | 57,750,000 | 57,900,000 | 771 | 413  | 0.255447866  | ATG3,CCDC80,SLC35A5                   |
| 1 | 57,825,000 | 57,975,000 | 772 | 545  | 0.792077081  | CCDC80                                |
| 1 | 57,900,000 | 58,050,000 | 773 | 737  | 0.823377565  | ENSBTAG00000040144                    |
| 1 | 57,975,000 | 58,125,000 | 774 | 1095 | 0.492428916  | CD200R1,ENSBTAG00000040144            |
| 1 | 58,050,000 | 58,200,000 | 775 | 1019 | 0.461917532  | C3orf17,CD200R1,GTPBP8                |
| 1 | 58,125,000 | 58,275,000 | 776 | 629  | 0.765968736  | C3orf17,CD200R1,GTPBP8                |
| 1 | 58,200,000 | 58,350,000 | 777 | 946  | 0.570731143  |                                       |
| 1 | 58,275,000 | 58,425,000 | 778 | 881  | 0.245898087  |                                       |
| 1 | 58,350,000 | 58,500,000 | 779 | 372  | -0.303445168 | BOC,CFAP44                            |
| 1 | 58,425,000 | 58,575,000 | 780 | 491  | 0.725376759  | BOC,CFAP44                            |
| 1 | 58,500,000 | 58,650,000 | 781 | 621  | 0.333768203  | CFAP44,SPICE1                         |
| 1 | 58,575,000 | 58,725,000 | 782 | 656  | -3.074767142 | CFAP44,SIDT1,SPICE1                   |
| 1 | 58,650,000 | 58,800,000 | 783 | 687  | -3.155410522 | KIAA2018,SIDT1                        |
| 1 | 58,725,000 | 58,875,000 | 784 | 381  | -0.344719605 | KIAA2018,NAA50,SIDT1                  |

|   |            |            |     |      |              |                          |
|---|------------|------------|-----|------|--------------|--------------------------|
| 1 | 58,800,000 | 58,950,000 | 785 | 570  | 0.46960821   | ATP6V1A,KIAA2018,NAA50   |
| 1 | 58,875,000 | 59,025,000 | 786 | 643  | 0.762723279  | ATP6V1A,GRAMD1C,NAA50    |
| 1 | 58,950,000 | 59,100,000 | 787 | 469  | 1.083574698  | GRAMD1C,KIAA1407,ZDHHC23 |
| 1 | 59,025,000 | 59,175,000 | 788 | 502  | 1.061433428  | GRAMD1C,KIAA1407,ZDHHC23 |
| 1 | 59,100,000 | 59,250,000 | 789 | 509  | 0.676961049  | KIAA1407,QTRTD1          |
| 1 | 59,175,000 | 59,325,000 | 790 | 635  | 0.383305859  | DRD3,KIAA1407,QTRTD1     |
| 1 | 59,250,000 | 59,400,000 | 791 | 576  | 0.165498056  | DRD3,TIGIT               |
| 1 | 59,325,000 | 59,475,000 | 792 | 518  | -0.285393721 | DRD3,TIGIT,ZBTB20        |
| 1 | 59,400,000 | 59,550,000 | 793 | 475  | -0.411679197 | ZBTB20                   |
| 1 | 59,475,000 | 59,625,000 | 794 | 461  | 0.343295031  | ZBTB20                   |
| 1 | 59,550,000 | 59,700,000 | 795 | 571  | 0.541020229  | ZBTB20                   |
| 1 | 59,625,000 | 59,775,000 | 796 | 538  | 0.410944491  | ZBTB20                   |
| 1 | 59,700,000 | 59,850,000 | 797 | 367  | 0.433372005  | ZBTB20                   |
| 1 | 59,775,000 | 59,925,000 | 798 | 394  | 0.294396104  |                          |
| 1 | 59,850,000 | 60,000,000 | 799 | 425  | 0.609781677  |                          |
| 1 | 59,925,000 | 60,075,000 | 800 | 507  | 0.854183072  |                          |
| 1 | 60,000,000 | 60,150,000 | 801 | 713  | -0.1701122   |                          |
| 1 | 60,075,000 | 60,225,000 | 802 | 894  | -0.012587689 |                          |
| 1 | 60,150,000 | 60,300,000 | 803 | 758  | -0.092205857 |                          |
| 1 | 60,225,000 | 60,375,000 | 804 | 553  | -1.484275158 |                          |
| 1 | 60,300,000 | 60,450,000 | 805 | 762  | -1.965652321 |                          |
| 1 | 60,375,000 | 60,525,000 | 806 | 882  | -1.244282217 |                          |
| 1 | 60,450,000 | 60,600,000 | 807 | 717  | -0.098914332 |                          |
| 1 | 60,525,000 | 60,675,000 | 808 | 590  | -3.621375962 |                          |
| 1 | 60,600,000 | 60,750,000 | 809 | 671  | -3.059407431 |                          |
| 1 | 60,675,000 | 60,825,000 | 810 | 856  | 0.8182195    |                          |
| 1 | 60,750,000 | 60,900,000 | 811 | 868  | 0.941302462  | GAP43                    |
| 1 | 60,825,000 | 60,975,000 | 812 | 835  | 0.881030742  | GAP43                    |
| 1 | 60,900,000 | 61,050,000 | 813 | 680  | 0.265613782  | GAP43                    |
| 1 | 60,975,000 | 61,125,000 | 814 | 796  | -0.959731525 |                          |
| 1 | 61,050,000 | 61,200,000 | 815 | 1282 | -0.419142182 |                          |
| 1 | 61,125,000 | 61,275,000 | 816 | 972  | 0.157828133  |                          |
| 1 | 61,200,000 | 61,350,000 | 817 | 608  | 0.404467434  |                          |
| 1 | 61,275,000 | 61,425,000 | 818 | 640  | 0.300313432  |                          |
| 1 | 61,350,000 | 61,500,000 | 819 | 589  | 0.434836172  |                          |
| 1 | 61,425,000 | 61,575,000 | 820 | 581  | 0.508721309  |                          |
| 1 | 61,500,000 | 61,650,000 | 821 | 656  | 0.450112896  |                          |
| 1 | 61,575,000 | 61,725,000 | 822 | 717  | -0.181635982 |                          |
| 1 | 61,650,000 | 61,800,000 | 823 | 771  | -0.789968015 |                          |
| 1 | 61,725,000 | 61,875,000 | 824 | 1118 | -0.757135479 |                          |
| 1 | 61,800,000 | 61,950,000 | 825 | 1264 | -0.502771017 |                          |
| 1 | 61,875,000 | 62,025,000 | 826 | 1217 | 0.364308232  |                          |
| 1 | 61,950,000 | 62,100,000 | 827 | 832  | 0.503964533  |                          |
| 1 | 62,025,000 | 62,175,000 | 828 | 749  | -0.810403381 | ENSBTAG00000040393       |
| 1 | 62,100,000 | 62,250,000 | 829 | 1023 | -0.21645852  | ENSBTAG00000040393       |
| 1 | 62,175,000 | 62,325,000 | 830 | 708  | 0.071188569  |                          |
| 1 | 62,250,000 | 62,400,000 | 831 | 520  | -0.439126595 | ENSBTAG00000046854       |
| 1 | 62,325,000 | 62,475,000 | 832 | 665  | -0.329424962 | ENSBTAG00000046854       |
| 1 | 62,400,000 | 62,550,000 | 833 | 745  | 0.626293819  |                          |
| 1 | 62,475,000 | 62,625,000 | 834 | 833  | 0.919122855  |                          |
| 1 | 62,550,000 | 62,700,000 | 835 | 1028 | 0.557955248  |                          |
| 1 | 62,625,000 | 62,775,000 | 836 | 928  | 0.639371162  |                          |
| 1 | 62,700,000 | 62,850,000 | 837 | 988  | 0.654946388  |                          |

|   |            |            |     |      |              |                                          |
|---|------------|------------|-----|------|--------------|------------------------------------------|
| 1 | 62,775,000 | 62,925,000 | 838 | 1067 | 0.377096573  |                                          |
| 1 | 62,850,000 | 63,000,000 | 839 | 1112 | 0.518326184  |                                          |
| 1 | 62,925,000 | 63,075,000 | 840 | 1208 | 0.673077198  |                                          |
| 1 | 63,000,000 | 63,150,000 | 841 | 1111 | 0.888442731  |                                          |
| 1 | 63,075,000 | 63,225,000 | 842 | 1047 | 0.965419149  |                                          |
| 1 | 63,150,000 | 63,300,000 | 843 | 1051 | -0.318640872 |                                          |
| 1 | 63,225,000 | 63,375,000 | 844 | 1021 | -0.971676596 |                                          |
| 1 | 63,300,000 | 63,450,000 | 845 | 882  | 0.14909573   |                                          |
| 1 | 63,375,000 | 63,525,000 | 846 | 842  | 0.169797402  |                                          |
| 1 | 63,450,000 | 63,600,000 | 847 | 1003 | 0.057405269  |                                          |
| 1 | 63,525,000 | 63,675,000 | 848 | 967  | 0.610832204  |                                          |
| 1 | 63,600,000 | 63,750,000 | 849 | 901  | 0.933104594  |                                          |
| 1 | 63,675,000 | 63,825,000 | 850 | 809  | 0.784743617  |                                          |
| 1 | 63,750,000 | 63,900,000 | 851 | 617  | 0.466962251  |                                          |
| 1 | 63,825,000 | 63,975,000 | 852 | 629  | 0.068608947  |                                          |
| 1 | 63,900,000 | 64,050,000 | 853 | 679  | 0.543126649  |                                          |
| 1 | 63,975,000 | 64,125,000 | 854 | 878  | 0.998578087  |                                          |
| 1 | 64,050,000 | 64,200,000 | 855 | 666  | 0.640849314  |                                          |
| 1 | 64,125,000 | 64,275,000 | 856 | 494  | 0.318622904  |                                          |
| 1 | 64,200,000 | 64,350,000 | 857 | 601  | -0.221639918 |                                          |
| 1 | 64,275,000 | 64,425,000 | 858 | 866  | -0.36451381  | IGSF11                                   |
| 1 | 64,350,000 | 64,500,000 | 859 | 1189 | -0.455296967 | IGSF11                                   |
| 1 | 64,425,000 | 64,575,000 | 860 | 982  | -0.437086238 | C3orf30,IGSF11                           |
| 1 | 64,500,000 | 64,650,000 | 861 | 730  | 0.102600371  | B4GALT4,C3orf30,UPK1B                    |
| 1 | 64,575,000 | 64,725,000 | 862 | 699  | 0.054030721  | B4GALT4,UPK1B                            |
| 1 | 64,650,000 | 64,800,000 | 863 | 747  | 0.908807442  | ARHGAP31                                 |
| 1 | 64,725,000 | 64,875,000 | 864 | 702  | 0.827297882  | ARHGAP31,POGLUT1,TIMMDC1,TMEM39A         |
| 1 | 64,800,000 | 64,950,000 | 865 | 641  | 0.680146827  | ADPRH,CD80,PLA1A,POGLUT1,TIMMDC1,TMEM39A |
| 1 | 64,875,000 | 65,025,000 | 866 | 776  | 0.707752572  | ADPRH,CD80,COX17,PLA1A,POPDC2,TIMMDC1    |
| 1 | 64,950,000 | 65,100,000 | 867 | 1019 | 0.702343701  | COX17,MAATS1,PLA1A,POPDC2                |
| 1 | 65,025,000 | 65,175,000 | 868 | 928  | 0.685859179  | COX17,MAATS1                             |
| 1 | 65,100,000 | 65,250,000 | 869 | 504  | -0.126667713 | MAATS1,NR1I2                             |
| 1 | 65,175,000 | 65,325,000 | 870 | 267  | -0.506500171 | GSK3B,NR1I2,ENSBTAG00000040597           |
| 1 | 65,250,000 | 65,400,000 | 871 | 252  | -0.210265728 | GSK3B,ENSBTAG00000040597                 |
| 1 | 65,325,000 | 65,475,000 | 872 | 258  | -0.332854929 | GSK3B                                    |
| 1 | 65,400,000 | 65,550,000 | 873 | 238  | -0.220466394 | GPR156,GSK3B                             |
| 1 | 65,475,000 | 65,625,000 | 874 | 250  | -0.602944348 | GPR156                                   |
| 1 | 65,550,000 | 65,700,000 | 875 | 248  | -0.123801168 | GPR156,LRRC58                            |
| 1 | 65,625,000 | 65,775,000 | 876 | 286  | 0.620288162  | FSTL1,LRRC58                             |
| 1 | 65,700,000 | 65,850,000 | 877 | 319  | 0.604754592  | FSTL1,LRRC58                             |
| 1 | 65,775,000 | 65,925,000 | 878 | 279  | -0.152137987 | FSTL1,NDUFB4                             |
| 1 | 65,850,000 | 66,000,000 | 879 | 593  | 0.030786536  | HGD,NDUFB4,RABL3                         |
| 1 | 65,925,000 | 66,075,000 | 880 | 623  | 0.337830964  | GTF2E1,HGD,NDUFB4,RABL3                  |
| 1 | 66,000,000 | 66,150,000 | 881 | 570  | 0.671818559  | GTF2E1,RABL3                             |
| 1 | 66,075,000 | 66,225,000 | 882 | 756  | -0.160000232 | STXBP5L                                  |
| 1 | 66,150,000 | 66,300,000 | 883 | 469  | -0.921906023 | STXBP5L                                  |
| 1 | 66,225,000 | 66,375,000 | 884 | 220  | -0.190858305 | STXBP5L                                  |
| 1 | 66,300,000 | 66,450,000 | 885 | 570  | -0.68319594  | STXBP5L                                  |
| 1 | 66,375,000 | 66,525,000 | 886 | 1175 | -0.338279183 | STXBP5L                                  |
| 1 | 66,450,000 | 66,600,000 | 887 | 1207 | 0.32015428   | POLQ,STXBP5L                             |
| 1 | 66,525,000 | 66,675,000 | 888 | 998  | 0.773902474  | POLQ,STXBP5L                             |
| 1 | 66,600,000 | 66,750,000 | 889 | 699  | 0.834343165  | ARGFX,FBXO40,HCLS1,POLQ                  |
| 1 | 66,675,000 | 66,825,000 | 890 | 440  | 0.893807165  | ARGFX,FBXO40,GOLGB1,HCLS1                |

|   |            |            |     |      |              |                                              |
|---|------------|------------|-----|------|--------------|----------------------------------------------|
| 1 | 66,750,000 | 66,900,000 | 891 | 315  | 0.369807921  | GOLGB1,HCLS1,IQCB1                           |
| 1 | 66,825,000 | 66,975,000 | 892 | 155  | -1.21439787  | EAF2,IQCB1,SLC15A2                           |
| 1 | 66,900,000 | 67,050,000 | 893 | 217  | 0.004029666  | EAF2,IQCB1,SLC15A2,ENSBTAG00000001442        |
| 1 | 66,975,000 | 67,125,000 | 894 | 460  | 0.331121106  | ILDR1,SLC15A2,ENSBTAG00000001442             |
| 1 | 67,050,000 | 67,200,000 | 895 | 460  | 0.309190598  | CD86,ILDR1                                   |
| 1 | 67,125,000 | 67,275,000 | 896 | 289  | -0.006100279 | CASR,CD86                                    |
| 1 | 67,200,000 | 67,350,000 | 897 | 498  | -0.208122144 | CASR,CD86                                    |
| 1 | 67,275,000 | 67,425,000 | 898 | 759  | 0.284472789  | CASR,CCDC58,CSTA,FAM162A,ENSBTAG00000014133  |
| 1 | 67,350,000 | 67,500,000 | 899 | 703  | 1.149106728  | CCDC58,CSTA,FAM162A,KPNA1,ENSBTAG00000014133 |
| 1 | 67,425,000 | 67,575,000 | 900 | 634  | 0.81929744   | CCDC58,FAM162A,KPNA1,PARP9                   |
| 1 | 67,500,000 | 67,650,000 | 901 | 652  | 0.436437995  | DTX3L,KPNA1,PARP14,PARP9                     |
| 1 | 67,575,000 | 67,725,000 | 902 | 624  | -0.794682728 | DIRC2,DTX3L,HSPBAP1,PARP14,PARP9             |
| 1 | 67,650,000 | 67,800,000 | 903 | 473  | -1.080482775 | DIRC2,HSPBAP1,PARP14                         |
| 1 | 67,725,000 | 67,875,000 | 904 | 346  | -0.449092678 | DIRC2,SEMA5B                                 |
| 1 | 67,800,000 | 67,950,000 | 905 | 593  | -0.076327622 | DIRC2,SEMA5B                                 |
| 1 | 67,875,000 | 68,025,000 | 906 | 751  | 0.167770143  | PDIA5,SEMA5B                                 |
| 1 | 67,950,000 | 68,100,000 | 907 | 741  | -0.953411033 | PDIA5                                        |
| 1 | 68,025,000 | 68,175,000 | 908 | 1161 | -0.794023926 | PDIA5,SEC22A                                 |
| 1 | 68,100,000 | 68,250,000 | 909 | 1179 | -0.685447255 | PDIA5,SEC22A                                 |
| 1 | 68,175,000 | 68,325,000 | 910 | 864  | -0.628899502 | ADCY5,SEC22A                                 |
| 1 | 68,250,000 | 68,400,000 | 911 | 609  | -0.531380575 | ADCY5                                        |
| 1 | 68,325,000 | 68,475,000 | 912 | 363  | -1.583091859 | ADCY5,PTPLB                                  |
| 1 | 68,400,000 | 68,550,000 | 913 | 382  | -0.881893244 | ADCY5,PTPLB                                  |
| 1 | 68,475,000 | 68,625,000 | 914 | 446  | -0.921887736 | MYLK,PTPLB                                   |
| 1 | 68,550,000 | 68,700,000 | 915 | 433  | -1.453200911 | MYLK,PTPLB                                   |
| 1 | 68,625,000 | 68,775,000 | 916 | 549  | -0.716040586 | MYLK                                         |
| 1 | 68,700,000 | 68,850,000 | 917 | 752  | 0.39505221   |                                              |
| 1 | 68,775,000 | 68,925,000 | 918 | 916  | -0.889100173 | CCDC14                                       |
| 1 | 68,850,000 | 69,000,000 | 919 | 846  | -1.640641339 | CCDC14,ROPN1                                 |
| 1 | 68,925,000 | 69,075,000 | 920 | 706  | -2.531680791 | CCDC14,ROPN1                                 |
| 1 | 69,000,000 | 69,150,000 | 921 | 672  | -2.034997267 |                                              |
| 1 | 69,075,000 | 69,225,000 | 922 | 628  | 0.21953373   |                                              |
| 1 | 69,150,000 | 69,300,000 | 923 | 975  | -0.736760198 | KALRN                                        |
| 1 | 69,225,000 | 69,375,000 | 924 | 985  | -0.965411404 | KALRN                                        |
| 1 | 69,300,000 | 69,450,000 | 925 | 894  | 0.251493676  | KALRN,ENSBTAG00000046935                     |
| 1 | 69,375,000 | 69,525,000 | 926 | 1215 | 0.673412925  | KALRN,ENSBTAG00000046935                     |
| 1 | 69,450,000 | 69,600,000 | 927 | 1098 | 0.486758188  | KALRN                                        |
| 1 | 69,525,000 | 69,675,000 | 928 | 894  | -0.076576818 | KALRN                                        |
| 1 | 69,600,000 | 69,750,000 | 929 | 984  | -0.554008651 | KALRN,UMPS                                   |
| 1 | 69,675,000 | 69,825,000 | 930 | 1246 | -0.351323601 | ITGB5,KALRN,UMPS                             |
| 1 | 69,750,000 | 69,900,000 | 931 | 1239 | -0.348638333 | ITGB5,UMPS                                   |
| 1 | 69,825,000 | 69,975,000 | 932 | 924  | -0.899912642 | ITGB5,MUC13                                  |
| 1 | 69,900,000 | 70,050,000 | 933 | 906  | -0.002045489 | HEG1,MUC13                                   |
| 1 | 69,975,000 | 70,125,000 | 934 | 680  | 0.725896281  | HEG1                                         |
| 1 | 70,050,000 | 70,200,000 | 935 | 459  | 1.215624657  | HEG1,SLC12A8                                 |
| 1 | 70,125,000 | 70,275,000 | 936 | 361  | 0.800285768  | SLC12A8                                      |
| 1 | 70,200,000 | 70,350,000 | 937 | 212  | 0.586427406  | SLC12A8,ZNF148                               |
| 1 | 70,275,000 | 70,425,000 | 938 | 327  | 0.650106402  | ZNF148                                       |
| 1 | 70,350,000 | 70,500,000 | 939 | 441  | 0.752571892  | ZNF148                                       |
| 1 | 70,425,000 | 70,575,000 | 940 | 397  | 0.90437133   | OSBPL11,SNX4                                 |
| 1 | 70,500,000 | 70,650,000 | 941 | 331  | 0.836967348  | OSBPL11,SNX4                                 |

|   |            |            |     |      |              |                                                             |
|---|------------|------------|-----|------|--------------|-------------------------------------------------------------|
| 1 | 70,575,000 | 70,725,000 | 942 | 511  | 0.977754697  | OSBPL11,ENSBTAG00000003383                                  |
| 1 | 70,650,000 | 70,800,000 | 943 | 860  | -0.849252388 | IQCG,LMLN,OSBPL11,RPL35A,ENSBTAG00000003383                 |
| 1 | 70,725,000 | 70,875,000 | 944 | 814  | -3.366335349 | IQCG,LMLN,LRCH3,RPL35A                                      |
| 1 | 70,800,000 | 70,950,000 | 945 | 484  | -3.287079391 | IQCG,LRCH3                                                  |
| 1 | 70,875,000 | 71,025,000 | 946 | 532  | -1.084250762 | FYTDD1,KIAA0226,LRCH3                                       |
| 1 | 70,950,000 | 71,100,000 | 947 | 751  | -1.589318607 | FYTDD1,KIAA0226,MUC20,MUC4                                  |
| 1 | 71,025,000 | 71,175,000 | 948 | 977  | -2.093050732 | KIAA0226,MUC20,MUC4                                         |
| 1 | 71,100,000 | 71,250,000 | 949 | 1198 | -2.006299802 | MUC4,TNK2                                                   |
| 1 | 71,175,000 | 71,325,000 | 950 | 934  | -2.222475543 | TFRC,TNK2                                                   |
| 1 | 71,250,000 | 71,400,000 | 951 | 674  | -1.092832384 | TFRC,ZDHHC19                                                |
| 1 | 71,325,000 | 71,475,000 | 952 | 767  | 0.669628073  | PCYT1A,SLC51A,ZDHHC19                                       |
| 1 | 71,400,000 | 71,550,000 | 953 | 715  | 0.968347864  | PCYT1A,SLC51A,TCTEX1D2,UBXN7,ZDHHC19,ENSBTA<br>G00000040161 |
| 1 | 71,475,000 | 71,625,000 | 954 | 642  | 1.226954441  | PCYT1A,TCTEX1D2,UBXN7,ENSBTAG00000040161                    |
| 1 | 71,550,000 | 71,700,000 | 955 | 654  | 0.932663198  | MGC152484,RNF168,UBXN7,WDR53                                |
| 1 | 71,625,000 | 71,775,000 | 956 | 695  | 0.687686649  | FBXO45,MGC152484,NRROS,RNF168,WDR53                         |
| 1 | 71,700,000 | 71,850,000 | 957 | 798  | 0.67363104   | CEP19,FBXO45,NRROS,PIGX,WDR53                               |
| 1 | 71,775,000 | 71,925,000 | 958 | 742  | 0.295762245  | CEP19,NRROS,PAK2,PIGX                                       |
| 1 | 71,850,000 | 72,000,000 | 959 | 593  | 0.045704084  | PAK2,PIGX,SENP5                                             |
| 1 | 71,925,000 | 72,075,000 | 960 | 524  | -0.133843837 | NCBP2,PAK2,PIGX,SENP5                                       |
| 1 | 72,000,000 | 72,150,000 | 961 | 465  | -0.007176527 | DLG1,MFI2,NCBP2,PIGX,SENP5                                  |
| 1 | 72,075,000 | 72,225,000 | 962 | 376  | 0.519374409  | DLG1,MFI2                                                   |
| 1 | 72,150,000 | 72,300,000 | 963 | 329  | 0.819558376  | DLG1                                                        |
| 1 | 72,225,000 | 72,375,000 | 964 | 349  | 0.772386747  | DLG1                                                        |
| 1 | 72,300,000 | 72,450,000 | 965 | 350  | 0.560282698  |                                                             |
| 1 | 72,375,000 | 72,525,000 | 966 | 353  | 0.628409416  | ENSBTAG00000048225                                          |
| 1 | 72,450,000 | 72,600,000 | 967 | 429  | 1.143231805  | BDH1,ENSBTAG00000048225                                     |
| 1 | 72,525,000 | 72,675,000 | 968 | 697  | 1.347558615  | APOD,BDH1                                                   |
| 1 | 72,600,000 | 72,750,000 | 969 | 761  | 1.155443664  | APOD,BDH1,PPP1R2                                            |
| 1 | 72,675,000 | 72,825,000 | 970 | 533  | 0.591183428  | ACAP2,APOD,PPP1R2                                           |
| 1 | 72,750,000 | 72,900,000 | 971 | 576  | 0.561000394  | ACAP2                                                       |
| 1 | 72,825,000 | 72,975,000 | 972 | 636  | 1.004678632  | ACAP2,XXYLT1                                                |
| 1 | 72,900,000 | 73,050,000 | 973 | 745  | 0.124372189  | ACAP2,XXYLT1                                                |
| 1 | 72,975,000 | 73,125,000 | 974 | 1094 | -0.329914195 | XXYLT1                                                      |
| 1 | 73,050,000 | 73,200,000 | 975 | 1133 | 0.250600266  | XXYLT1                                                      |
| 1 | 73,125,000 | 73,275,000 | 976 | 675  | 0.638268613  |                                                             |
| 1 | 73,200,000 | 73,350,000 | 977 | 513  | 0.053385819  |                                                             |
| 1 | 73,275,000 | 73,425,000 | 978 | 634  | 0.248770989  |                                                             |
| 1 | 73,350,000 | 73,500,000 | 979 | 654  | 0.641752253  | FAM43A,LSG1                                                 |
| 1 | 73,425,000 | 73,575,000 | 980 | 518  | 0.784804567  | FAM43A,LSG1,TMEM44                                          |
| 1 | 73,500,000 | 73,650,000 | 981 | 291  | 1.092599608  | LSG1,TMEM44                                                 |
| 1 | 73,575,000 | 73,725,000 | 982 | 276  | 1.224514052  | ATP13A3                                                     |
| 1 | 73,650,000 | 73,800,000 | 983 | 324  | 1.001059125  | ATP13A3,CPN2,GP5,LRRC15                                     |
| 1 | 73,725,000 | 73,875,000 | 984 | 383  | 0.108959355  | ATP13A3,CPN2,GP5,LRRC15                                     |
| 1 | 73,800,000 | 73,950,000 | 985 | 709  | -0.204230154 | CPN2                                                        |
| 1 | 73,875,000 | 74,025,000 | 986 | 837  | -0.111431639 | HES1                                                        |
| 1 | 73,950,000 | 74,100,000 | 987 | 747  | 0.110331955  | HES1                                                        |
| 1 | 74,025,000 | 74,175,000 | 988 | 782  | 0.411974393  |                                                             |
| 1 | 74,100,000 | 74,250,000 | 989 | 616  | 0.114874462  |                                                             |
| 1 | 74,175,000 | 74,325,000 | 990 | 625  | 0.031965723  |                                                             |
| 1 | 74,250,000 | 74,400,000 | 991 | 902  | -0.464639817 | OPA1                                                        |
| 1 | 74,325,000 | 74,475,000 | 992 | 1009 | 0.181692979  | OPA1                                                        |
| 1 | 74,400,000 | 74,550,000 | 993 | 1002 | 0.854796435  | ATP13A4,OPA1                                                |

|   |            |            |      |      |              |                       |
|---|------------|------------|------|------|--------------|-----------------------|
| 1 | 74,475,000 | 74,625,000 | 994  | 987  | -0.81766438  | ATP13A4               |
| 1 | 74,550,000 | 74,700,000 | 995  | 883  | -1.53744031  | ATP13A4,ATP13A5       |
| 1 | 74,625,000 | 74,775,000 | 996  | 597  | -0.540186557 | ATP13A4,ATP13A5       |
| 1 | 74,700,000 | 74,850,000 | 997  | 685  | 0.912394499  | ATP13A5,HRASLS        |
| 1 | 74,775,000 | 74,925,000 | 998  | 1155 | 1.397411853  | HRASLS                |
| 1 | 74,850,000 | 75,000,000 | 999  | 956  | 1.550197751  |                       |
| 1 | 74,925,000 | 75,075,000 | 1000 | 562  | 1.319264865  |                       |
| 1 | 75,000,000 | 75,150,000 | 1001 | 949  | 0.729079384  |                       |
| 1 | 75,075,000 | 75,225,000 | 1002 | 1374 | -0.309888638 | MB21D2                |
| 1 | 75,150,000 | 75,300,000 | 1003 | 1094 | -1.303974836 | MB21D2                |
| 1 | 75,225,000 | 75,375,000 | 1004 | 830  | -0.380063267 |                       |
| 1 | 75,300,000 | 75,450,000 | 1005 | 953  | -0.359518226 |                       |
| 1 | 75,375,000 | 75,525,000 | 1006 | 693  | -1.194042458 |                       |
| 1 | 75,450,000 | 75,600,000 | 1007 | 480  | -0.138622119 |                       |
| 1 | 75,525,000 | 75,675,000 | 1008 | 481  | -0.293704789 | ENSBTAG00000012413    |
| 1 | 75,600,000 | 75,750,000 | 1009 | 395  | -0.095536149 | ENSBTAG00000012413    |
| 1 | 75,675,000 | 75,825,000 | 1010 | 490  | 0.383883412  | ENSBTAG00000012413    |
| 1 | 75,750,000 | 75,900,000 | 1011 | 470  | -0.27224195  | ENSBTAG00000012413    |
| 1 | 75,825,000 | 75,975,000 | 1012 | 657  | 0.125617674  | ENSBTAG00000012413    |
| 1 | 75,900,000 | 76,050,000 | 1013 | 999  | 0.805230072  |                       |
| 1 | 75,975,000 | 76,125,000 | 1014 | 909  | 0.482589174  |                       |
| 1 | 76,050,000 | 76,200,000 | 1015 | 927  | 0.811149272  |                       |
| 1 | 76,125,000 | 76,275,000 | 1016 | 922  | 1.182811399  |                       |
| 1 | 76,200,000 | 76,350,000 | 1017 | 842  | 0.698387662  |                       |
| 1 | 76,275,000 | 76,425,000 | 1018 | 1000 | 0.64701194   |                       |
| 1 | 76,350,000 | 76,500,000 | 1019 | 1215 | 0.932135113  |                       |
| 1 | 76,425,000 | 76,575,000 | 1020 | 1119 | 1.073892086  | CCDC50                |
| 1 | 76,500,000 | 76,650,000 | 1021 | 726  | 1.335970312  | CCDC50                |
| 1 | 76,575,000 | 76,725,000 | 1022 | 775  | 1.32112374   | CCDC50,OSTN,UTS2B     |
| 1 | 76,650,000 | 76,800,000 | 1023 | 963  | 0.727663811  | OSTN,UTS2B            |
| 1 | 76,725,000 | 76,875,000 | 1024 | 972  | -0.012591938 |                       |
| 1 | 76,800,000 | 76,950,000 | 1025 | 1116 | 0.744641159  |                       |
| 1 | 76,875,000 | 77,025,000 | 1026 | 930  | 0.541239483  | GMNC                  |
| 1 | 76,950,000 | 77,100,000 | 1027 | 754  | -0.294841935 | GMNC                  |
| 1 | 77,025,000 | 77,175,000 | 1028 | 769  | 0.110420167  |                       |
| 1 | 77,100,000 | 77,250,000 | 1029 | 628  | 0.804423048  | IL1RAP                |
| 1 | 77,175,000 | 77,325,000 | 1030 | 647  | 0.801157589  | IL1RAP                |
| 1 | 77,250,000 | 77,400,000 | 1031 | 536  | 0.165628848  | IL1RAP                |
| 1 | 77,325,000 | 77,475,000 | 1032 | 839  | 0.49427588   | CLDN16,IL1RAP,TMEM207 |
| 1 | 77,400,000 | 77,550,000 | 1033 | 1083 | 0.297091592  | CLDN16,TMEM207        |
| 1 | 77,475,000 | 77,625,000 | 1034 | 915  | 0.300450392  | CLDN1,CLDN16          |
| 1 | 77,550,000 | 77,700,000 | 1035 | 1046 | 0.84013427   | CLDN1                 |
| 1 | 77,625,000 | 77,775,000 | 1036 | 832  | 0.873171662  | LEPREL1               |
| 1 | 77,700,000 | 77,850,000 | 1037 | 516  | 0.098147046  | LEPREL1               |
| 1 | 77,775,000 | 77,925,000 | 1038 | 482  | -0.557285892 | LEPREL1               |
| 1 | 77,850,000 | 78,000,000 | 1039 | 534  | -1.166228196 | LEPREL1               |
| 1 | 77,925,000 | 78,075,000 | 1040 | 519  | -1.095134504 | LEPREL1,TP63          |
| 1 | 78,000,000 | 78,150,000 | 1041 | 656  | -0.054386649 | TP63                  |
| 1 | 78,075,000 | 78,225,000 | 1042 | 916  | 0.545122788  | TP63                  |
| 1 | 78,150,000 | 78,300,000 | 1043 | 613  | 1.014228754  | TP63                  |
| 1 | 78,225,000 | 78,375,000 | 1044 | 318  | -0.607205416 | TP63                  |
| 1 | 78,300,000 | 78,450,000 | 1045 | 617  | -0.422338353 |                       |
| 1 | 78,375,000 | 78,525,000 | 1046 | 828  | -0.781494639 |                       |

|   |            |            |      |      |              |                                                  |
|---|------------|------------|------|------|--------------|--------------------------------------------------|
| 1 | 78,450,000 | 78,600,000 | 1047 | 549  | -1.187933125 |                                                  |
| 1 | 78,525,000 | 78,675,000 | 1048 | 483  | -0.013736332 | TPRG1                                            |
| 1 | 78,600,000 | 78,750,000 | 1049 | 855  | -0.023934649 | TPRG1                                            |
| 1 | 78,675,000 | 78,825,000 | 1050 | 746  | -0.233280122 | TPRG1                                            |
| 1 | 78,750,000 | 78,900,000 | 1051 | 345  | -0.708933384 | TPRG1                                            |
| 1 | 78,825,000 | 78,975,000 | 1052 | 346  | -0.91583815  |                                                  |
| 1 | 78,900,000 | 79,050,000 | 1053 | 366  | -0.589600118 | LPP                                              |
| 1 | 78,975,000 | 79,125,000 | 1054 | 348  | -0.285686551 | LPP                                              |
| 1 | 79,050,000 | 79,200,000 | 1055 | 402  | 0.127523135  | LPP                                              |
| 1 | 79,125,000 | 79,275,000 | 1056 | 444  | 0.724054039  | LPP                                              |
| 1 | 79,200,000 | 79,350,000 | 1057 | 507  | 0.885690001  | LPP                                              |
| 1 | 79,275,000 | 79,425,000 | 1058 | 579  | 0.781892091  | LPP                                              |
| 1 | 79,350,000 | 79,500,000 | 1059 | 537  | 0.757774552  | LPP                                              |
| 1 | 79,425,000 | 79,575,000 | 1060 | 616  | 0.699469463  | LPP                                              |
| 1 | 79,500,000 | 79,650,000 | 1061 | 690  | 0.436022268  | LPP                                              |
| 1 | 79,575,000 | 79,725,000 | 1062 | 680  | 0.582832575  | LPP                                              |
| 1 | 79,650,000 | 79,800,000 | 1063 | 730  | -0.047462123 | LPP                                              |
| 1 | 79,725,000 | 79,875,000 | 1064 | 979  | -0.971811878 | LPP                                              |
| 1 | 79,800,000 | 79,950,000 | 1065 | 1172 | -0.292943393 |                                                  |
| 1 | 79,875,000 | 80,025,000 | 1066 | 912  | 0.226521431  |                                                  |
| 1 | 79,950,000 | 80,100,000 | 1067 | 789  | -0.304412556 |                                                  |
| 1 | 80,025,000 | 80,175,000 | 1068 | 948  | -0.040601159 |                                                  |
| 1 | 80,100,000 | 80,250,000 | 1069 | 916  | 0.597400283  | BCL6,RTP2                                        |
| 1 | 80,175,000 | 80,325,000 | 1070 | 1230 | 0.471584592  | BCL6,RTP2,SST                                    |
| 1 | 80,250,000 | 80,400,000 | 1071 | 1353 | 0.609275822  | SST                                              |
| 1 | 80,325,000 | 80,475,000 | 1072 | 867  | -0.284031278 |                                                  |
| 1 | 80,400,000 | 80,550,000 | 1073 | 634  | -0.878790595 | RTP4                                             |
| 1 | 80,475,000 | 80,625,000 | 1074 | 884  | 0.220333688  | MASP1,RTP4                                       |
| 1 | 80,550,000 | 80,700,000 | 1075 | 1051 | -1.400385579 | MASP1,RTP1                                       |
| 1 | 80,625,000 | 80,775,000 | 1076 | 861  | -1.686077532 | MASP1,RTP1                                       |
| 1 | 80,700,000 | 80,850,000 | 1077 | 794  | 0.650682814  | ST6GAL1                                          |
| 1 | 80,775,000 | 80,925,000 | 1078 | 835  | 0.820624715  | ST6GAL1                                          |
| 1 | 80,850,000 | 81,000,000 | 1079 | 791  | 0.160872975  |                                                  |
| 1 | 80,925,000 | 81,075,000 | 1080 | 685  | -0.866443726 | ADIPOQ,EIF4A2,RFC4                               |
| 1 | 81,000,000 | 81,150,000 | 1081 | 746  | 0.445296966  | ADIPOQ,EIF4A2,HRG,KNG1,RFC4                      |
| 1 | 81,075,000 | 81,225,000 | 1082 | 887  | 1.223966407  | AHSG,FETUB,HRG,KNG1                              |
| 1 | 81,150,000 | 81,300,000 | 1083 | 877  | 0.996188879  | AHSG,CRYGS,DNAJB11,FETUB,TBCCD1                  |
| 1 | 81,225,000 | 81,375,000 | 1084 | 824  | 0.078785703  | CRYGS,DNAJB11,TBCCD1                             |
| 1 | 81,300,000 | 81,450,000 | 1085 | 690  | -0.514255215 |                                                  |
| 1 | 81,375,000 | 81,525,000 | 1086 | 477  | -0.623590251 | DGKG                                             |
| 1 | 81,450,000 | 81,600,000 | 1087 | 516  | 0.633085974  | DGKG                                             |
| 1 | 81,525,000 | 81,675,000 | 1088 | 608  | 1.113048152  | DGKG                                             |
| 1 | 81,600,000 | 81,750,000 | 1089 | 512  | 0.202303373  | DGKG,ETV5                                        |
| 1 | 81,675,000 | 81,825,000 | 1090 | 440  | -1.16117237  | DGKG,ETV5                                        |
| 1 | 81,750,000 | 81,900,000 | 1091 | 369  | -1.091808384 | ETV5,TRA2B,ENSBTAG00000011305,ENSBTAG00000047841 |
| 1 | 81,825,000 | 81,975,000 | 1092 | 474  | 0.320272165  | TRA2B,ENSBTAG00000011305,ENSBTAG00000047841      |
| 1 | 81,900,000 | 82,050,000 | 1093 | 561  | 0.796867357  | IGF2BP2                                          |
| 1 | 81,975,000 | 82,125,000 | 1094 | 409  | 0.710008192  | IGF2BP2                                          |
| 1 | 82,050,000 | 82,200,000 | 1095 | 474  | 0.299878391  | IGF2BP2,SEN2                                     |
| 1 | 82,125,000 | 82,275,000 | 1096 | 706  | 0.177622188  | IGF2BP2,LIPH,SEN2                                |
| 1 | 82,200,000 | 82,350,000 | 1097 | 693  | -0.278708017 | LIPH,MAP3K13,SEN2,TMEM41A                        |

|   |            |            |      |      |              |                                                                          |
|---|------------|------------|------|------|--------------|--------------------------------------------------------------------------|
| 1 | 82,275,000 | 82,425,000 | 1098 | 574  | -0.412360346 | LIPH,MAP3K13,TMEM41A                                                     |
| 1 | 82,350,000 | 82,500,000 | 1099 | 563  | -0.492769796 | EHHADH,MAP3K13                                                           |
| 1 | 82,425,000 | 82,575,000 | 1100 | 614  | -1.233130007 | C3orf70,EHHADH,MAP3K13,ENSBTAG00000007296                                |
| 1 | 82,500,000 | 82,650,000 | 1101 | 542  | -2.059674066 | C3orf70,EHHADH,ENSBTAG00000007296                                        |
| 1 | 82,575,000 | 82,725,000 | 1102 | 489  | -1.441395295 | C3orf70,VPS8                                                             |
| 1 | 82,650,000 | 82,800,000 | 1103 | 663  | 0.159267657  | C3orf70,VPS8                                                             |
| 1 | 82,725,000 | 82,875,000 | 1104 | 862  | 0.827284572  | VPS8                                                                     |
| 1 | 82,800,000 | 82,950,000 | 1105 | 1212 | 0.845217909  | VPS8                                                                     |
| 1 | 82,875,000 | 83,025,000 | 1106 | 1003 | 0.83860762   | VPS8                                                                     |
| 1 | 82,950,000 | 83,100,000 | 1107 | 664  | 0.549352467  | MAGEF1,VPS8                                                              |
| 1 | 83,025,000 | 83,175,000 | 1108 | 731  | 0.562874158  | MAGEF1                                                                   |
| 1 | 83,100,000 | 83,250,000 | 1109 | 444  | 0.53092717   | EPHB3                                                                    |
| 1 | 83,175,000 | 83,325,000 | 1110 | 272  | -0.576518717 | EPHB3,ENSBTAG00000008343                                                 |
| 1 | 83,250,000 | 83,400,000 | 1111 | 464  | -0.379335753 | GTF2F1,ENSBTAG00000008343                                                |
| 1 | 83,325,000 | 83,475,000 | 1112 | 558  | -0.472667826 | CHRD,CLCN2,EIF4G1,FAM131A,GTF2F1,POLR2H,THPO                             |
| 1 | 83,400,000 | 83,550,000 | 1113 | 482  | -0.83502211  | ALG3,CAMK2N2,CHRD,CLCN2,ECE2,EIF4G1,FAM131A,<br>POLR2H,PSMD2,THPO,VWA5B2 |
| 1 | 83,475,000 | 83,625,000 | 1114 | 395  | -0.402737777 | ABCF3,ALG3,AP2M1,CAMK2N2,DVL3,ECE2,EIF2B5,EIF4<br>G1,PSMD2,VWA5B2        |
| 1 | 83,550,000 | 83,700,000 | 1115 | 414  | 0.030448004  | ABCF3,AP2M1,DVL3,EIF2B5,HTR3C,HTR3E,VWA5B2                               |
| 1 | 83,625,000 | 83,775,000 | 1116 | 617  | -0.012848646 | ABCC5,EIF2B5,HTR3C,HTR3E                                                 |
| 1 | 83,700,000 | 83,850,000 | 1117 | 637  | -0.132654864 | ABCC5,HTR3C                                                              |
| 1 | 83,775,000 | 83,925,000 | 1118 | 534  | -0.007697737 | ABCC5,MAP6D1,PARL                                                        |
| 1 | 83,850,000 | 84,000,000 | 1119 | 557  | -0.021699592 | MAP6D1,PARL,YEATS2                                                       |
| 1 | 83,925,000 | 84,075,000 | 1120 | 413  | -1.091329783 | KLHL24,MAP6D1,YEATS2,ENSBTAG00000014449                                  |
| 1 | 84,000,000 | 84,150,000 | 1121 | 399  | -2.013269366 | KLHL24,YEATS2,ENSBTAG00000014449                                         |
| 1 | 84,075,000 | 84,225,000 | 1122 | 778  | -3.019869394 | KLHL24,KLHL6                                                             |
| 1 | 84,150,000 | 84,300,000 | 1123 | 1130 | -2.196690274 | KLHL6                                                                    |
| 1 | 84,225,000 | 84,375,000 | 1124 | 1248 | -1.466283187 | B3GNT5,MCF2L2                                                            |
| 1 | 84,300,000 | 84,450,000 | 1125 | 819  | -1.250082084 | B3GNT5,MCF2L2                                                            |
| 1 | 84,375,000 | 84,525,000 | 1126 | 483  | 0.557654097  | B3GNT5,MCF2L2                                                            |
| 1 | 84,450,000 | 84,600,000 | 1127 | 719  | 0.331836391  | LAMP3,MCCC1,MCF2L2                                                       |
| 1 | 84,525,000 | 84,675,000 | 1128 | 815  | 0.020724846  | DCUN1D1,LAMP3,MCCC1,MCF2L2                                               |
| 1 | 84,600,000 | 84,750,000 | 1129 | 606  | 0.05005611   | ATP11B,DCUN1D1,MCCC1                                                     |
| 1 | 84,675,000 | 84,825,000 | 1130 | 421  | -0.532645021 | ATP11B,DCUN1D1                                                           |
| 1 | 84,750,000 | 84,900,000 | 1131 | 479  | -2.199525307 | ATP11B                                                                   |
| 1 | 84,825,000 | 84,975,000 | 1132 | 537  | -2.128203119 |                                                                          |
| 1 | 84,900,000 | 85,050,000 | 1133 | 445  | -0.655123784 |                                                                          |
| 1 | 84,975,000 | 85,125,000 | 1134 | 352  | -0.31761785  |                                                                          |
| 1 | 85,050,000 | 85,200,000 | 1135 | 564  | -0.856075173 |                                                                          |
| 1 | 85,125,000 | 85,275,000 | 1136 | 846  | 0.38916405   |                                                                          |
| 1 | 85,200,000 | 85,350,000 | 1137 | 646  | 1.16617887   |                                                                          |
| 1 | 85,275,000 | 85,425,000 | 1138 | 425  | 1.28709343   |                                                                          |
| 1 | 85,350,000 | 85,500,000 | 1139 | 486  | 1.352998448  |                                                                          |
| 1 | 85,425,000 | 85,575,000 | 1140 | 477  | 1.536814617  |                                                                          |
| 1 | 85,500,000 | 85,650,000 | 1141 | 709  | 1.397073981  |                                                                          |
| 1 | 85,575,000 | 85,725,000 | 1142 | 979  | 1.158130325  |                                                                          |
| 1 | 85,650,000 | 85,800,000 | 1143 | 857  | 0.699134749  |                                                                          |
| 1 | 85,725,000 | 85,875,000 | 1144 | 578  | 0.489929663  |                                                                          |
| 1 | 85,800,000 | 85,950,000 | 1145 | 498  | 0.172408135  | SOX2                                                                     |
| 1 | 85,875,000 | 86,025,000 | 1146 | 465  | -0.760321609 | SOX2                                                                     |
| 1 | 85,950,000 | 86,100,000 | 1147 | 345  | -1.622004262 |                                                                          |



|   |            |            |      |      |              |                            |
|---|------------|------------|------|------|--------------|----------------------------|
| 1 | 86,025,000 | 86,175,000 | 1148 | 358  | -1.195313759 |                            |
| 1 | 86,100,000 | 86,250,000 | 1149 | 391  | -0.067611771 |                            |
| 1 | 86,175,000 | 86,325,000 | 1150 | 551  | 0.902430981  |                            |
| 1 | 86,250,000 | 86,400,000 | 1151 | 641  | 1.093082127  |                            |
| 1 | 86,325,000 | 86,475,000 | 1152 | 811  | 1.085191022  |                            |
| 1 | 86,400,000 | 86,550,000 | 1153 | 672  | 0.972042714  |                            |
| 1 | 86,475,000 | 86,625,000 | 1154 | 361  | 0.767913768  |                            |
| 1 | 86,550,000 | 86,700,000 | 1155 | 343  | 1.066413086  | DNAJC19,FXR1               |
| 1 | 86,625,000 | 86,775,000 | 1156 | 326  | 1.225902746  | DNAJC19,FXR1               |
| 1 | 86,700,000 | 86,850,000 | 1157 | 480  | 0.422546407  | FXR1                       |
| 1 | 86,775,000 | 86,925,000 | 1158 | 556  | 0.079786749  |                            |
| 1 | 86,850,000 | 87,000,000 | 1159 | 419  | 0.482488484  | CCDC39                     |
| 1 | 86,925,000 | 87,075,000 | 1160 | 363  | 0.850550178  | CCDC39,TTC14               |
| 1 | 87,000,000 | 87,150,000 | 1161 | 419  | 0.869594515  | CCDC39,TTC14               |
| 1 | 87,075,000 | 87,225,000 | 1162 | 545  | 0.770680475  |                            |
| 1 | 87,150,000 | 87,300,000 | 1163 | 621  | -0.055385448 |                            |
| 1 | 87,225,000 | 87,375,000 | 1164 | 741  | -1.453713705 |                            |
| 1 | 87,300,000 | 87,450,000 | 1165 | 1101 | -2.133621289 |                            |
| 1 | 87,375,000 | 87,525,000 | 1166 | 1322 | -2.668647346 |                            |
| 1 | 87,450,000 | 87,600,000 | 1167 | 1112 | -2.374206143 |                            |
| 1 | 87,525,000 | 87,675,000 | 1168 | 799  | -0.972100462 |                            |
| 1 | 87,600,000 | 87,750,000 | 1169 | 640  | -1.119500131 |                            |
| 1 | 87,675,000 | 87,825,000 | 1170 | 697  | -0.988300994 | PEX5L                      |
| 1 | 87,750,000 | 87,900,000 | 1171 | 1049 | -1.401190878 | PEX5L                      |
| 1 | 87,825,000 | 87,975,000 | 1172 | 1075 | -1.128980574 | PEX5L,USP13                |
| 1 | 87,900,000 | 88,050,000 | 1173 | 771  | -0.686046652 | PEX5L,USP13                |
| 1 | 87,975,000 | 88,125,000 | 1174 | 497  | -0.842856292 | MRPL47,NDUFB5,USP13        |
| 1 | 88,050,000 | 88,200,000 | 1175 | 359  | 0.087326203  | ACTL6A,MRPL47,NDUFB5,USP13 |
| 1 | 88,125,000 | 88,275,000 | 1176 | 493  | -0.582316308 | ACTL6A,GNB4,MFN1,MRPL47    |
| 1 | 88,200,000 | 88,350,000 | 1177 | 462  | -0.456266503 | GNB4,MFN1                  |
| 1 | 88,275,000 | 88,425,000 | 1178 | 465  | 0.206384295  | MFN1,ZNF639                |
| 1 | 88,350,000 | 88,500,000 | 1179 | 464  | 0.203764263  | KCNMB3,MFN1,ZNF639         |
| 1 | 88,425,000 | 88,575,000 | 1180 | 241  | 0.623256984  | KCNMB3,PIK3CA              |
| 1 | 88,500,000 | 88,650,000 | 1181 | 358  | 0.626930733  | PIK3CA,ZMAT3               |
| 1 | 88,575,000 | 88,725,000 | 1182 | 687  | 0.245779943  | ZMAT3                      |
| 1 | 88,650,000 | 88,800,000 | 1183 | 714  | 0.105047085  | KCNMB3,ZMAT3               |
| 1 | 88,725,000 | 88,875,000 | 1184 | 533  | -0.011135944 | KCNMB3                     |
| 1 | 88,800,000 | 88,950,000 | 1185 | 433  | -0.130392238 | KCNMB3                     |
| 1 | 88,875,000 | 89,025,000 | 1186 | 487  | 0.134156959  |                            |
| 1 | 88,950,000 | 89,100,000 | 1187 | 538  | 0.208755114  |                            |
| 1 | 89,025,000 | 89,175,000 | 1188 | 671  | -0.261572955 |                            |
| 1 | 89,100,000 | 89,250,000 | 1189 | 1088 | -0.226122329 |                            |
| 1 | 89,175,000 | 89,325,000 | 1190 | 1107 | 0.103614362  |                            |
| 1 | 89,250,000 | 89,400,000 | 1191 | 885  | -0.079707349 |                            |
| 1 | 89,325,000 | 89,475,000 | 1192 | 884  | -0.291839574 |                            |
| 1 | 89,400,000 | 89,550,000 | 1193 | 715  | -0.692007143 |                            |
| 1 | 89,475,000 | 89,625,000 | 1194 | 739  | -2.628340882 |                            |
| 1 | 89,550,000 | 89,700,000 | 1195 | 671  | -2.864782052 |                            |
| 1 | 89,625,000 | 89,775,000 | 1196 | 454  | -1.815442267 |                            |
| 1 | 89,700,000 | 89,850,000 | 1197 | 815  | -0.364661252 |                            |
| 1 | 89,775,000 | 89,925,000 | 1198 | 861  | -0.228446922 |                            |
| 1 | 89,850,000 | 90,000,000 | 1199 | 823  | -0.063967255 |                            |
| 1 | 89,925,000 | 90,075,000 | 1200 | 758  | 0.591931421  |                            |

|   |            |            |      |      |              |         |
|---|------------|------------|------|------|--------------|---------|
| 1 | 90,000,000 | 90,150,000 | 1201 | 529  | 0.438040118  |         |
| 1 | 90,075,000 | 90,225,000 | 1202 | 700  | 0.375604998  |         |
| 1 | 90,150,000 | 90,300,000 | 1203 | 697  | 0.237762747  |         |
| 1 | 90,225,000 | 90,375,000 | 1204 | 462  | -0.549230228 |         |
| 1 | 90,300,000 | 90,450,000 | 1205 | 537  | -0.367897391 |         |
| 1 | 90,375,000 | 90,525,000 | 1206 | 726  | 0.637830079  | TBL1XR1 |
| 1 | 90,450,000 | 90,600,000 | 1207 | 800  | 0.714139301  | TBL1XR1 |
| 1 | 90,525,000 | 90,675,000 | 1208 | 811  | 0.264459997  | TBL1XR1 |
| 1 | 90,600,000 | 90,750,000 | 1209 | 572  | -0.299176277 | TBL1XR1 |
| 1 | 90,675,000 | 90,825,000 | 1210 | 467  | 0.221225847  |         |
| 1 | 90,750,000 | 90,900,000 | 1211 | 638  | 0.39000594   |         |
| 1 | 90,825,000 | 90,975,000 | 1212 | 772  | -0.662839429 |         |
| 1 | 90,900,000 | 91,050,000 | 1213 | 657  | -1.30462951  |         |
| 1 | 90,975,000 | 91,125,000 | 1214 | 597  | -0.963921759 |         |
| 1 | 91,050,000 | 91,200,000 | 1215 | 562  | 0.180940903  |         |
| 1 | 91,125,000 | 91,275,000 | 1216 | 318  | 0.830842585  |         |
| 1 | 91,200,000 | 91,350,000 | 1217 | 284  | -0.438661178 |         |
| 1 | 91,275,000 | 91,425,000 | 1218 | 494  | 0.175132678  |         |
| 1 | 91,350,000 | 91,500,000 | 1219 | 770  | 0.05704364   |         |
| 1 | 91,425,000 | 91,575,000 | 1220 | 1000 | -0.048195643 |         |
| 1 | 91,500,000 | 91,650,000 | 1221 | 1040 | 0.480685961  |         |
| 1 | 91,575,000 | 91,725,000 | 1222 | 747  | 0.588707002  |         |
| 1 | 91,650,000 | 91,800,000 | 1223 | 552  | 0.51150279   |         |
| 1 | 91,725,000 | 91,875,000 | 1224 | 1120 | 0.958636949  |         |
| 1 | 91,800,000 | 91,950,000 | 1225 | 1105 | 0.802838965  |         |
| 1 | 91,875,000 | 92,025,000 | 1226 | 829  | 0.293528018  |         |
| 1 | 91,950,000 | 92,100,000 | 1227 | 1216 | -0.55883447  |         |
| 1 | 92,025,000 | 92,175,000 | 1228 | 1190 | -0.402523804 |         |
| 1 | 92,100,000 | 92,250,000 | 1229 | 1127 | -1.238812023 |         |
| 1 | 92,175,000 | 92,325,000 | 1230 | 1180 | -1.943843249 |         |
| 1 | 92,250,000 | 92,400,000 | 1231 | 1292 | -0.680605155 |         |
| 1 | 92,325,000 | 92,475,000 | 1232 | 1283 | 0.078882156  |         |
| 1 | 92,400,000 | 92,550,000 | 1233 | 1062 | 0.612612728  |         |
| 1 | 92,475,000 | 92,625,000 | 1234 | 1144 | 0.51021035   |         |
| 1 | 92,550,000 | 92,700,000 | 1235 | 1342 | 0.551366002  |         |
| 1 | 92,625,000 | 92,775,000 | 1236 | 1050 | 0.610557956  |         |
| 1 | 92,700,000 | 92,850,000 | 1237 | 738  | 0.631863085  |         |
| 1 | 92,775,000 | 92,925,000 | 1238 | 688  | -0.051824236 |         |
| 1 | 92,850,000 | 93,000,000 | 1239 | 611  | -0.036252577 |         |
| 1 | 92,925,000 | 93,075,000 | 1240 | 645  | 0.107176425  |         |
| 1 | 93,000,000 | 93,150,000 | 1241 | 631  | 0.06382004   |         |
| 1 | 93,075,000 | 93,225,000 | 1242 | 664  | 0.835823457  |         |
| 1 | 93,150,000 | 93,300,000 | 1243 | 730  | 0.718009489  |         |
| 1 | 93,225,000 | 93,375,000 | 1244 | 1006 | 0.786586291  |         |
| 1 | 93,300,000 | 93,450,000 | 1245 | 845  | 0.754856809  |         |
| 1 | 93,375,000 | 93,525,000 | 1246 | 488  | 0.514922648  |         |
| 1 | 93,450,000 | 93,600,000 | 1247 | 775  | 1.266977958  |         |
| 1 | 93,525,000 | 93,675,000 | 1248 | 814  | 1.369122328  | NLGN1   |
| 1 | 93,600,000 | 93,750,000 | 1249 | 748  | 0.470382488  | NLGN1   |
| 1 | 93,675,000 | 93,825,000 | 1250 | 690  | -0.93530298  |         |
| 1 | 93,750,000 | 93,900,000 | 1251 | 708  | -3.401448402 |         |
| 1 | 93,825,000 | 93,975,000 | 1252 | 980  | -0.815342041 |         |
| 1 | 93,900,000 | 94,050,000 | 1253 | 996  | 1.386015128  |         |

|   |            |            |      |      |              |                           |
|---|------------|------------|------|------|--------------|---------------------------|
| 1 | 93,975,000 | 94,125,000 | 1254 | 1063 | -0.140531986 |                           |
| 1 | 94,050,000 | 94,200,000 | 1255 | 904  | -0.988723886 |                           |
| 1 | 94,125,000 | 94,275,000 | 1256 | 511  | 0.381230841  |                           |
| 1 | 94,200,000 | 94,350,000 | 1257 | 493  | 0.840523007  |                           |
| 1 | 94,275,000 | 94,425,000 | 1258 | 921  | -1.635019451 |                           |
| 1 | 94,350,000 | 94,500,000 | 1259 | 1062 | -2.203436622 |                           |
| 1 | 94,425,000 | 94,575,000 | 1260 | 729  | -2.004699493 |                           |
| 1 | 94,500,000 | 94,650,000 | 1261 | 766  | -0.909984336 |                           |
| 1 | 94,575,000 | 94,725,000 | 1262 | 789  | -0.995073297 |                           |
| 1 | 94,650,000 | 94,800,000 | 1263 | 697  | -0.417826038 |                           |
| 1 | 94,725,000 | 94,875,000 | 1264 | 992  | 0.231752233  |                           |
| 1 | 94,800,000 | 94,950,000 | 1265 | 954  | 0.194632253  |                           |
| 1 | 94,875,000 | 95,025,000 | 1266 | 537  | 0.873167804  | SPATA16                   |
| 1 | 94,950,000 | 95,100,000 | 1267 | 750  | 0.946917956  | SPATA16                   |
| 1 | 95,025,000 | 95,175,000 | 1268 | 1709 | 1.027052804  | GPX5,GPX6,SPATA16         |
| 1 | 95,100,000 | 95,250,000 | 1269 | 1837 | 0.775859015  | GPX5,GPX6,SPATA16,ZSCAN23 |
| 1 | 95,175,000 | 95,325,000 | 1270 | 1184 | -0.169474833 | SPATA16,ZSCAN23           |
| 1 | 95,250,000 | 95,400,000 | 1271 | 888  | -0.320739172 | SPATA16                   |
| 1 | 95,325,000 | 95,475,000 | 1272 | 656  | -0.093685617 | SPATA16                   |
| 1 | 95,400,000 | 95,550,000 | 1273 | 449  | -0.318291146 | ECT2                      |
| 1 | 95,475,000 | 95,625,000 | 1274 | 341  | 0.047605701  | ECT2,NCEH1                |
| 1 | 95,550,000 | 95,700,000 | 1275 | 500  | 1.040667618  | NCEH1                     |
| 1 | 95,625,000 | 95,775,000 | 1276 | 708  | 0.817453753  | NCEH1,TNFSF10             |
| 1 | 95,700,000 | 95,850,000 | 1277 | 815  | -0.084585649 | GHSR,TNFSF10              |
| 1 | 95,775,000 | 95,925,000 | 1278 | 734  | -0.709092965 | FNDC3B,GHSR               |
| 1 | 95,850,000 | 96,000,000 | 1279 | 559  | -0.731034797 | FNDC3B                    |
| 1 | 95,925,000 | 96,075,000 | 1280 | 451  | -0.062131086 | FNDC3B                    |
| 1 | 96,000,000 | 96,150,000 | 1281 | 391  | 0.407629439  | FNDC3B                    |
| 1 | 96,075,000 | 96,225,000 | 1282 | 536  | 0.220227985  | FNDC3B                    |
| 1 | 96,150,000 | 96,300,000 | 1283 | 596  | -0.108853212 | FNDC3B                    |
| 1 | 96,225,000 | 96,375,000 | 1284 | 574  | -0.118812799 |                           |
| 1 | 96,300,000 | 96,450,000 | 1285 | 590  | 0.135660718  | TMEM212                   |
| 1 | 96,375,000 | 96,525,000 | 1286 | 549  | -0.901521675 | PRKCSH,TMEM212            |
| 1 | 96,450,000 | 96,600,000 | 1287 | 694  | -0.825764302 | PRKCSH                    |
| 1 | 96,525,000 | 96,675,000 | 1288 | 826  | 0.748396276  | PRKCSH                    |
| 1 | 96,600,000 | 96,750,000 | 1289 | 626  | 0.850813485  | PRKCSH                    |
| 1 | 96,675,000 | 96,825,000 | 1290 | 574  | -0.959279685 | PRKCSH,TNIK               |
| 1 | 96,750,000 | 96,900,000 | 1291 | 533  | -0.858745553 | TNIK                      |
| 1 | 96,825,000 | 96,975,000 | 1292 | 568  | 1.145148919  | TNIK,ENSBTAG00000031795   |
| 1 | 96,900,000 | 97,050,000 | 1293 | 735  | 1.22860521   | TNIK,ENSBTAG00000031795   |
| 1 | 96,975,000 | 97,125,000 | 1294 | 991  | -0.176125622 | TNIK                      |
| 1 | 97,050,000 | 97,200,000 | 1295 | 932  | -0.397848005 | TNIK                      |
| 1 | 97,125,000 | 97,275,000 | 1296 | 831  | 0.124705223  | SLC2A2,TNIK               |
| 1 | 97,200,000 | 97,350,000 | 1297 | 1141 | -1.0255359   | EIF5A2,RPL22L1,SLC2A2     |
| 1 | 97,275,000 | 97,425,000 | 1298 | 947  | -1.246401602 | EIF5A2,RPL22L1            |
| 1 | 97,350,000 | 97,500,000 | 1299 | 764  | 0.578529278  |                           |
| 1 | 97,425,000 | 97,575,000 | 1300 | 878  | 0.446481635  |                           |
| 1 | 97,500,000 | 97,650,000 | 1301 | 841  | -0.731712453 |                           |
| 1 | 97,575,000 | 97,725,000 | 1302 | 971  | -1.285027304 | SLC7A14                   |
| 1 | 97,650,000 | 97,800,000 | 1303 | 998  | -0.740102578 | CLDN11,SLC7A14            |
| 1 | 97,725,000 | 97,875,000 | 1304 | 765  | -0.548010494 | CLDN11,SKIL,SLC7A14       |
| 1 | 97,800,000 | 97,950,000 | 1305 | 818  | -1.268699776 | CLDN11,PRKCI,SKIL         |
| 1 | 97,875,000 | 98,025,000 | 1306 | 817  | -1.424153397 | PHC3,PRKCI                |

|   |             |             |      |      |              |                                       |
|---|-------------|-------------|------|------|--------------|---------------------------------------|
| 1 | 97,950,000  | 98,100,000  | 1307 | 832  | -0.908764673 | GPR160,PHC3,PRKCI                     |
| 1 | 98,025,000  | 98,175,000  | 1308 | 1154 | -0.22391748  | GPR160,PHC3,ENSBTAG00000045991        |
| 1 | 98,100,000  | 98,250,000  | 1309 | 1163 | 0.353973063  | SAMD7,SEC62,ENSBTAG00000045991        |
| 1 | 98,175,000  | 98,325,000  | 1310 | 900  | 0.987425745  | LRRC31,SAMD7,SEC62                    |
| 1 | 98,250,000  | 98,400,000  | 1311 | 734  | 1.126406827  | ARPM1,LRRC31,LRRC34,LRRIQ4,MYNN,SAMD7 |
| 1 | 98,325,000  | 98,475,000  | 1312 | 594  | 0.950817064  | ARPM1,LRRC31,LRRC34,LRRIQ4,MYNN       |
| 1 | 98,400,000  | 98,550,000  | 1313 | 863  | 0.080595196  |                                       |
| 1 | 98,475,000  | 98,625,000  | 1314 | 1107 | 0.032531723  |                                       |
| 1 | 98,550,000  | 98,700,000  | 1315 | 1292 | 0.576545976  |                                       |
| 1 | 98,625,000  | 98,775,000  | 1316 | 1256 | 0.661279505  |                                       |
| 1 | 98,700,000  | 98,850,000  | 1317 | 968  | 0.482906549  | ENSBTAG00000047144                    |
| 1 | 98,775,000  | 98,925,000  | 1318 | 801  | 0.357248694  | ENSBTAG00000047144                    |
| 1 | 98,850,000  | 99,000,000  | 1319 | 569  | 0.247702435  |                                       |
| 1 | 98,925,000  | 99,075,000  | 1320 | 588  | 0.612852849  |                                       |
| 1 | 99,000,000  | 99,150,000  | 1321 | 719  | -0.234442679 | MECOM                                 |
| 1 | 99,075,000  | 99,225,000  | 1322 | 1068 | -0.505354027 | MECOM                                 |
| 1 | 99,150,000  | 99,300,000  | 1323 | 1492 | 0.581989562  |                                       |
| 1 | 99,225,000  | 99,375,000  | 1324 | 1312 | 0.641967195  |                                       |
| 1 | 99,300,000  | 99,450,000  | 1325 | 875  | -0.390189495 |                                       |
| 1 | 99,375,000  | 99,525,000  | 1326 | 622  | -0.294224973 |                                       |
| 1 | 99,450,000  | 99,600,000  | 1327 | 724  | 0.450096595  |                                       |
| 1 | 99,525,000  | 99,675,000  | 1328 | 1067 | 0.816820741  |                                       |
| 1 | 99,600,000  | 99,750,000  | 1329 | 1163 | 1.041805556  |                                       |
| 1 | 99,675,000  | 99,825,000  | 1330 | 1119 | 1.067008811  |                                       |
| 1 | 99,750,000  | 99,900,000  | 1331 | 800  | 0.953640752  |                                       |
| 1 | 99,825,000  | 99,975,000  | 1332 | 739  | 1.08466349   |                                       |
| 1 | 99,900,000  | 100,050,000 | 1333 | 947  | 0.326357374  |                                       |
| 1 | 99,975,000  | 100,125,000 | 1334 | 815  | 0.35257433   |                                       |
| 1 | 100,050,000 | 100,200,000 | 1335 | 659  | 0.618714449  | GOLIM4                                |
| 1 | 100,125,000 | 100,275,000 | 1336 | 555  | 0.094444955  | GOLIM4                                |
| 1 | 100,200,000 | 100,350,000 | 1337 | 723  | -0.20469645  | GOLIM4,MGC133804                      |
| 1 | 100,275,000 | 100,425,000 | 1338 | 764  | -0.34359542  | MGC133804                             |
| 1 | 100,350,000 | 100,500,000 | 1339 | 622  | -0.123578984 | MGC133804,SERPINI1                    |
| 1 | 100,425,000 | 100,575,000 | 1340 | 556  | 0.267715008  | PDCD10,SERPINI1                       |
| 1 | 100,500,000 | 100,650,000 | 1341 | 423  | 0.617439302  | MGC151671,PDCD10,SERPINI1             |
| 1 | 100,575,000 | 100,725,000 | 1342 | 645  | -2.368558773 | MGC151671,PDCD10,WDR49                |
| 1 | 100,650,000 | 100,800,000 | 1343 | 1028 | -2.360405088 | MGC151671,SERPINI2,WDR49              |
| 1 | 100,725,000 | 100,875,000 | 1344 | 1518 | -0.363960204 | SERPINI2,WDR49                        |
| 1 | 100,800,000 | 100,950,000 | 1345 | 1381 | 0.124991797  | SERPINI2,ZBBX                         |
| 1 | 100,875,000 | 101,025,000 | 1346 | 918  | 0.636485803  | ZBBX                                  |
| 1 | 100,950,000 | 101,100,000 | 1347 | 1041 | 0.470466117  | ZBBX                                  |
| 1 | 101,025,000 | 101,175,000 | 1348 | 1300 | 0.388358901  |                                       |
| 1 | 101,100,000 | 101,250,000 | 1349 | 1112 | 0.641622554  |                                       |
| 1 | 101,175,000 | 101,325,000 | 1350 | 730  | 0.501107155  |                                       |
| 1 | 101,250,000 | 101,400,000 | 1351 | 669  | -0.344049061 |                                       |
| 1 | 101,325,000 | 101,475,000 | 1352 | 1061 | 0.635994219  |                                       |
| 1 | 101,400,000 | 101,550,000 | 1353 | 1044 | 1.115146778  |                                       |
| 1 | 101,475,000 | 101,625,000 | 1354 | 471  | 1.150190017  |                                       |
| 1 | 101,550,000 | 101,700,000 | 1355 | 621  | 1.501765096  |                                       |
| 1 | 101,625,000 | 101,775,000 | 1356 | 857  | 1.495312063  |                                       |
| 1 | 101,700,000 | 101,850,000 | 1357 | 853  | 1.020867734  |                                       |
| 1 | 101,775,000 | 101,925,000 | 1358 | 1048 | 0.225572736  |                                       |
| 1 | 101,850,000 | 102,000,000 | 1359 | 1333 | 0.741532298  |                                       |

|   |             |             |      |      |              |                                       |
|---|-------------|-------------|------|------|--------------|---------------------------------------|
| 1 | 101,925,000 | 102,075,000 | 1360 | 1322 | -0.094734476 |                                       |
| 1 | 102,000,000 | 102,150,000 | 1361 | 1047 | -0.543257565 |                                       |
| 1 | 102,075,000 | 102,225,000 | 1362 | 1054 | 1.065014843  |                                       |
| 1 | 102,150,000 | 102,300,000 | 1363 | 1014 | 1.07716653   |                                       |
| 1 | 102,225,000 | 102,375,000 | 1364 | 716  | -0.032706276 | BCHE                                  |
| 1 | 102,300,000 | 102,450,000 | 1365 | 666  | -1.735212683 | BCHE                                  |
| 1 | 102,375,000 | 102,525,000 | 1366 | 731  | -0.524583919 | BCHE                                  |
| 1 | 102,450,000 | 102,600,000 | 1367 | 609  | -0.164895737 |                                       |
| 1 | 102,525,000 | 102,675,000 | 1368 | 782  | -0.086775105 |                                       |
| 1 | 102,600,000 | 102,750,000 | 1369 | 944  | 0.334893328  |                                       |
| 1 | 102,675,000 | 102,825,000 | 1370 | 645  | 0.652067259  |                                       |
| 1 | 102,750,000 | 102,900,000 | 1371 | 497  | 0.036571834  |                                       |
| 1 | 102,825,000 | 102,975,000 | 1372 | 403  | -1.291246786 |                                       |
| 1 | 102,900,000 | 103,050,000 | 1373 | 477  | 0.000116885  | SLITRK3                               |
| 1 | 102,975,000 | 103,125,000 | 1374 | 983  | 0.682790277  | SI,SLITRK3                            |
| 1 | 103,050,000 | 103,200,000 | 1375 | 1135 | 0.827789134  | SI                                    |
| 1 | 103,125,000 | 103,275,000 | 1376 | 761  | 0.639903715  | SI                                    |
| 1 | 103,200,000 | 103,350,000 | 1377 | 613  | -0.697022613 | SI                                    |
| 1 | 103,275,000 | 103,425,000 | 1378 | 804  | -1.648541037 |                                       |
| 1 | 103,350,000 | 103,500,000 | 1379 | 784  | -0.797290454 |                                       |
| 1 | 103,425,000 | 103,575,000 | 1380 | 620  | 0.086854711  |                                       |
| 1 | 103,500,000 | 103,650,000 | 1381 | 958  | 0.258859775  |                                       |
| 1 | 103,575,000 | 103,725,000 | 1382 | 1398 | -0.294124036 |                                       |
| 1 | 103,650,000 | 103,800,000 | 1383 | 1304 | -0.563806433 |                                       |
| 1 | 103,725,000 | 103,875,000 | 1384 | 1270 | 0.207646891  |                                       |
| 1 | 103,800,000 | 103,950,000 | 1385 | 1369 | 0.667991452  |                                       |
| 1 | 103,875,000 | 104,025,000 | 1386 | 1414 | 1.255526358  |                                       |
| 1 | 103,950,000 | 104,100,000 | 1387 | 1730 | 1.233667864  |                                       |
| 1 | 104,025,000 | 104,175,000 | 1388 | 1224 | 1.011249876  | ENSBTAG00000018312                    |
| 1 | 104,100,000 | 104,250,000 | 1389 | 495  | 0.179356092  | ENSBTAG00000018312                    |
| 1 | 104,175,000 | 104,325,000 | 1390 | 704  | -0.135449727 |                                       |
| 1 | 104,250,000 | 104,400,000 | 1391 | 734  | 0.317551548  |                                       |
| 1 | 104,325,000 | 104,475,000 | 1392 | 748  | 1.283891595  |                                       |
| 1 | 104,400,000 | 104,550,000 | 1393 | 962  | 1.541473116  |                                       |
| 1 | 104,475,000 | 104,625,000 | 1394 | 1099 | 1.500495594  |                                       |
| 1 | 104,550,000 | 104,700,000 | 1395 | 1049 | 1.33784278   |                                       |
| 1 | 104,625,000 | 104,775,000 | 1396 | 836  | 0.708829334  |                                       |
| 1 | 104,700,000 | 104,850,000 | 1397 | 906  | -0.172273647 |                                       |
| 1 | 104,775,000 | 104,925,000 | 1398 | 1027 | 0.238690845  |                                       |
| 1 | 104,850,000 | 105,000,000 | 1399 | 1261 | 0.4050043    |                                       |
| 1 | 104,925,000 | 105,075,000 | 1400 | 1250 | 0.621996094  |                                       |
| 1 | 105,000,000 | 105,150,000 | 1401 | 934  | 0.50828159   |                                       |
| 1 | 105,075,000 | 105,225,000 | 1402 | 1207 | 0.140254416  | ENSBTAG00000027213                    |
| 1 | 105,150,000 | 105,300,000 | 1403 | 1254 | 0.618608248  | ENSBTAG00000025847,ENSBTAG00000027213 |
| 1 | 105,225,000 | 105,375,000 | 1404 | 1232 | 0.665902818  | ENSBTAG00000025847                    |
| 1 | 105,300,000 | 105,450,000 | 1405 | 1404 | 0.410812888  |                                       |
| 1 | 105,375,000 | 105,525,000 | 1406 | 974  | -0.285158706 |                                       |
| 1 | 105,450,000 | 105,600,000 | 1407 | 532  | -0.406998494 |                                       |
| 1 | 105,525,000 | 105,675,000 | 1408 | 524  | -0.046401824 |                                       |
| 1 | 105,600,000 | 105,750,000 | 1409 | 1521 | -0.512335569 |                                       |
| 1 | 105,675,000 | 105,825,000 | 1410 | 1864 | -0.601054517 |                                       |
| 1 | 105,750,000 | 105,900,000 | 1411 | 1465 | 0.084356747  |                                       |
| 1 | 105,825,000 | 105,975,000 | 1412 | 1332 | 1.112456137  |                                       |

|   |             |             |      |      |              |                          |
|---|-------------|-------------|------|------|--------------|--------------------------|
| 1 | 105,900,000 | 106,050,000 | 1413 | 993  | 0.841926791  |                          |
| 1 | 105,975,000 | 106,125,000 | 1414 | 686  | 0.994982059  |                          |
| 1 | 106,050,000 | 106,200,000 | 1415 | 395  | 1.281020349  |                          |
| 1 | 106,125,000 | 106,275,000 | 1416 | 365  | 0.521422381  |                          |
| 1 | 106,200,000 | 106,350,000 | 1417 | 411  | 0.385566731  |                          |
| 1 | 106,275,000 | 106,425,000 | 1418 | 581  | 0.005221736  |                          |
| 1 | 106,350,000 | 106,500,000 | 1419 | 575  | 0.017290203  |                          |
| 1 | 106,425,000 | 106,575,000 | 1420 | 484  | 0.346430053  |                          |
| 1 | 106,500,000 | 106,650,000 | 1421 | 510  | -1.683639335 |                          |
| 1 | 106,575,000 | 106,725,000 | 1422 | 640  | -0.798691943 | OTOL1                    |
| 1 | 106,650,000 | 106,800,000 | 1423 | 646  | 0.740190804  | OTOL1                    |
| 1 | 106,725,000 | 106,875,000 | 1424 | 577  | 0.586533808  | OTOL1                    |
| 1 | 106,800,000 | 106,950,000 | 1425 | 483  | -0.027248611 | SPTSSB                   |
| 1 | 106,875,000 | 107,025,000 | 1426 | 291  | 0.336839765  | NMD3,SPTSSB              |
| 1 | 106,950,000 | 107,100,000 | 1427 | 769  | 1.163044514  | NMD3                     |
| 1 | 107,025,000 | 107,175,000 | 1428 | 848  | 1.177577316  |                          |
| 1 | 107,100,000 | 107,250,000 | 1429 | 687  | 1.135571865  | B3GALNT1,PPM1L           |
| 1 | 107,175,000 | 107,325,000 | 1430 | 884  | 0.754692306  | B3GALNT1,PPM1L           |
| 1 | 107,250,000 | 107,400,000 | 1431 | 1037 | 0.531289251  | PPM1L                    |
| 1 | 107,325,000 | 107,475,000 | 1432 | 867  | 0.948055974  | PPM1L                    |
| 1 | 107,400,000 | 107,550,000 | 1433 | 569  | 0.087144559  | PPM1L                    |
| 1 | 107,475,000 | 107,625,000 | 1434 | 617  | 0.164239042  | PPM1L                    |
| 1 | 107,550,000 | 107,700,000 | 1435 | 623  | 0.30647655   | ARL14,PPM1L              |
| 1 | 107,625,000 | 107,775,000 | 1436 | 709  | 0.601895563  | ARL14,KPNA4              |
| 1 | 107,700,000 | 107,850,000 | 1437 | 463  | 1.180628842  | KPNA4                    |
| 1 | 107,775,000 | 107,925,000 | 1438 | 204  | 1.102647632  | KPNA4,MGC137058,SMC4     |
| 1 | 107,850,000 | 108,000,000 | 1439 | 258  | 0.981965613  | IFT80,MGC137058,SMC4     |
| 1 | 107,925,000 | 108,075,000 | 1440 | 328  | 1.102877721  | IFT80,SMC4               |
| 1 | 108,000,000 | 108,150,000 | 1441 | 371  | 0.38802007   | C3orf80,IFT80            |
| 1 | 108,075,000 | 108,225,000 | 1442 | 575  | -0.058400235 | C3orf80                  |
| 1 | 108,150,000 | 108,300,000 | 1443 | 725  | -0.385007083 | IL12A                    |
| 1 | 108,225,000 | 108,375,000 | 1444 | 728  | -0.414659662 | IL12A                    |
| 1 | 108,300,000 | 108,450,000 | 1445 | 802  | 0.610411764  | SCHIP1                   |
| 1 | 108,375,000 | 108,525,000 | 1446 | 598  | 0.55157764   | SCHIP1                   |
| 1 | 108,450,000 | 108,600,000 | 1447 | 326  | -0.096729169 | SCHIP1                   |
| 1 | 108,525,000 | 108,675,000 | 1448 | 529  | 0.2619176    |                          |
| 1 | 108,600,000 | 108,750,000 | 1449 | 1062 | -0.089320005 |                          |
| 1 | 108,675,000 | 108,825,000 | 1450 | 1165 | 0.285639397  |                          |
| 1 | 108,750,000 | 108,900,000 | 1451 | 1121 | 1.198369464  |                          |
| 1 | 108,825,000 | 108,975,000 | 1452 | 1322 | 1.024863043  |                          |
| 1 | 108,900,000 | 109,050,000 | 1453 | 1230 | 0.660957649  |                          |
| 1 | 108,975,000 | 109,125,000 | 1454 | 1123 | -0.322572807 | IQCJ                     |
| 1 | 109,050,000 | 109,200,000 | 1455 | 1387 | -0.230497862 | IQCJ                     |
| 1 | 109,125,000 | 109,275,000 | 1456 | 1514 | 0.447567036  |                          |
| 1 | 109,200,000 | 109,350,000 | 1457 | 1176 | 0.679900362  |                          |
| 1 | 109,275,000 | 109,425,000 | 1458 | 792  | 0.775344315  |                          |
| 1 | 109,350,000 | 109,500,000 | 1459 | 812  | 0.537447818  |                          |
| 1 | 109,425,000 | 109,575,000 | 1460 | 937  | -0.220357033 | MFSD1,ENSBTAG00000038395 |
| 1 | 109,500,000 | 109,650,000 | 1461 | 696  | -1.437074801 | MFSD1,ENSBTAG00000038395 |
| 1 | 109,575,000 | 109,725,000 | 1462 | 868  | -0.370304491 | GFM1,LXN,MFSD1,RARRES1   |
| 1 | 109,650,000 | 109,800,000 | 1463 | 908  | 0.908866069  | GFM1,LXN,MLF1,RARRES1    |
| 1 | 109,725,000 | 109,875,000 | 1464 | 397  | 0.692699951  | GFM1,LXN,MLF1,RSRC1      |
| 1 | 109,800,000 | 109,950,000 | 1465 | 230  | 0.093012412  | RSRC1                    |

|   |             |             |      |      |              |                           |
|---|-------------|-------------|------|------|--------------|---------------------------|
| 1 | 109,875,000 | 110,025,000 | 1466 | 247  | 0.349969637  | RSRC1,ENSBTAG00000047570  |
| 1 | 109,950,000 | 110,100,000 | 1467 | 386  | 0.272084358  | RSRC1,ENSBTAG00000047570  |
| 1 | 110,025,000 | 110,175,000 | 1468 | 617  | 0.757520176  | RSRC1,ENSBTAG00000047570  |
| 1 | 110,100,000 | 110,250,000 | 1469 | 673  | 1.114321062  | RSRC1                     |
| 1 | 110,175,000 | 110,325,000 | 1470 | 409  | 0.97788951   | RSRC1,SHOX2               |
| 1 | 110,250,000 | 110,400,000 | 1471 | 533  | -0.381312995 | RSRC1,SHOX2               |
| 1 | 110,325,000 | 110,475,000 | 1472 | 621  | -0.286949247 |                           |
| 1 | 110,400,000 | 110,550,000 | 1473 | 331  | 0.563878272  |                           |
| 1 | 110,475,000 | 110,625,000 | 1474 | 442  | 0.683036895  |                           |
| 1 | 110,550,000 | 110,700,000 | 1475 | 458  | 0.745707171  |                           |
| 1 | 110,625,000 | 110,775,000 | 1476 | 619  | 0.280589086  |                           |
| 1 | 110,700,000 | 110,850,000 | 1477 | 950  | 0.153652857  |                           |
| 1 | 110,775,000 | 110,925,000 | 1478 | 750  | -0.115691423 |                           |
| 1 | 110,850,000 | 111,000,000 | 1479 | 605  | -0.180750521 | VEPH1                     |
| 1 | 110,925,000 | 111,075,000 | 1480 | 752  | -0.282869006 | PTX3,VEPH1                |
| 1 | 111,000,000 | 111,150,000 | 1481 | 1063 | 0.362675876  | PTX3,VEPH1                |
| 1 | 111,075,000 | 111,225,000 | 1482 | 1449 | 0.474823078  | VEPH1                     |
| 1 | 111,150,000 | 111,300,000 | 1483 | 1320 | -0.501315518 | VEPH1                     |
| 1 | 111,225,000 | 111,375,000 | 1484 | 974  | -0.588818622 | CCNL1                     |
| 1 | 111,300,000 | 111,450,000 | 1485 | 980  | 0.736394753  | CCNL1,ENSBTAG00000018009  |
| 1 | 111,375,000 | 111,525,000 | 1486 | 943  | 1.171487474  | ENSBTAG00000018009        |
| 1 | 111,450,000 | 111,600,000 | 1487 | 1027 | 1.206659989  | ENSBTAG00000018009        |
| 1 | 111,525,000 | 111,675,000 | 1488 | 898  | 0.842614146  |                           |
| 1 | 111,600,000 | 111,750,000 | 1489 | 552  | 0.64100857   |                           |
| 1 | 111,675,000 | 111,825,000 | 1490 | 370  | 1.297044599  |                           |
| 1 | 111,750,000 | 111,900,000 | 1491 | 219  | 1.23785888   | TIPARP                    |
| 1 | 111,825,000 | 111,975,000 | 1492 | 392  | 0.309190064  | TIPARP                    |
| 1 | 111,900,000 | 112,050,000 | 1493 | 418  | -0.207048491 | KCNAB1,SSR3               |
| 1 | 111,975,000 | 112,125,000 | 1494 | 482  | 0.882646638  | KCNAB1,SSR3               |
| 1 | 112,050,000 | 112,200,000 | 1495 | 829  | 1.271707194  | KCNAB1                    |
| 1 | 112,125,000 | 112,275,000 | 1496 | 964  | -4.411239193 | KCNAB1                    |
| 1 | 112,200,000 | 112,350,000 | 1497 | 969  | -5.067664638 | KCNAB1                    |
| 1 | 112,275,000 | 112,425,000 | 1498 | 867  | -0.691212024 | KCNAB1                    |
| 1 | 112,350,000 | 112,500,000 | 1499 | 913  | -1.417768669 | KCNAB1                    |
| 1 | 112,425,000 | 112,575,000 | 1500 | 1099 | -0.925425417 | KCNAB1,ENSBTAG00000009622 |
| 1 | 112,500,000 | 112,650,000 | 1501 | 1315 | 0.704373651  | GMPS,ENSBTAG00000009622   |
| 1 | 112,575,000 | 112,725,000 | 1502 | 1329 | 0.264617622  | GMPS                      |
| 1 | 112,650,000 | 112,800,000 | 1503 | 1045 | 0.200293407  | C3orf33,GMPS,SLC33A1      |
| 1 | 112,725,000 | 112,875,000 | 1504 | 1001 | 0.642363941  | C3orf33,SLC33A1           |
| 1 | 112,800,000 | 112,950,000 | 1505 | 856  | 0.45028692   | C3orf33                   |
| 1 | 112,875,000 | 113,025,000 | 1506 | 698  | -0.939686419 | PLCH1                     |
| 1 | 112,950,000 | 113,100,000 | 1507 | 1071 | -1.227269181 | PLCH1                     |
| 1 | 113,025,000 | 113,175,000 | 1508 | 1592 | -2.293590371 | PLCH1                     |
| 1 | 113,100,000 | 113,250,000 | 1509 | 1286 | -2.209577807 |                           |
| 1 | 113,175,000 | 113,325,000 | 1510 | 1000 | 0.042449768  |                           |
| 1 | 113,250,000 | 113,400,000 | 1511 | 1019 | 0.409091023  | MME                       |
| 1 | 113,325,000 | 113,475,000 | 1512 | 820  | 0.888325012  | MME                       |
| 1 | 113,400,000 | 113,550,000 | 1513 | 857  | 1.364253331  | MME                       |
| 1 | 113,475,000 | 113,625,000 | 1514 | 802  | 1.468783094  | MME,ENSBTAG00000024623    |
| 1 | 113,550,000 | 113,700,000 | 1515 | 671  | 1.318888075  | ENSBTAG00000024623        |
| 1 | 113,625,000 | 113,775,000 | 1516 | 854  | 1.040783206  |                           |
| 1 | 113,700,000 | 113,850,000 | 1517 | 669  | 0.989436428  |                           |
| 1 | 113,775,000 | 113,925,000 | 1518 | 270  | 0.43200037   |                           |

|   |             |             |      |      |              |                                             |
|---|-------------|-------------|------|------|--------------|---------------------------------------------|
| 1 | 113,850,000 | 114,000,000 | 1519 | 704  | 1.06571279   |                                             |
| 1 | 113,925,000 | 114,075,000 | 1520 | 755  | 1.18853862   |                                             |
| 1 | 114,000,000 | 114,150,000 | 1521 | 714  | -0.095029378 | GPR149                                      |
| 1 | 114,075,000 | 114,225,000 | 1522 | 1269 | -0.052719315 | GPR149                                      |
| 1 | 114,150,000 | 114,300,000 | 1523 | 1258 | 0.247533707  | ARHGEF26,DHX36,GPR149                       |
| 1 | 114,225,000 | 114,375,000 | 1524 | 1016 | -0.169249136 | ARHGEF26,DHX36,GPR149                       |
| 1 | 114,300,000 | 114,450,000 | 1525 | 888  | -0.438246065 | ARHGEF26                                    |
| 1 | 114,375,000 | 114,525,000 | 1526 | 743  | 0.226714438  | ARHGEF26                                    |
| 1 | 114,450,000 | 114,600,000 | 1527 | 967  | -0.752551299 |                                             |
| 1 | 114,525,000 | 114,675,000 | 1528 | 1222 | -0.628848611 |                                             |
| 1 | 114,600,000 | 114,750,000 | 1529 | 1131 | -0.006387717 | YWHAH                                       |
| 1 | 114,675,000 | 114,825,000 | 1530 | 813  | 0.0616568    | YWHAH                                       |
| 1 | 114,750,000 | 114,900,000 | 1531 | 749  | 0.060291763  |                                             |
| 1 | 114,825,000 | 114,975,000 | 1532 | 1107 | 0.793701429  |                                             |
| 1 | 114,900,000 | 115,050,000 | 1533 | 1161 | 0.728938714  |                                             |
| 1 | 114,975,000 | 115,125,000 | 1534 | 1384 | 0.822960098  |                                             |
| 1 | 115,050,000 | 115,200,000 | 1535 | 1631 | 1.020765469  |                                             |
| 1 | 115,125,000 | 115,275,000 | 1536 | 1440 | 1.044369219  |                                             |
| 1 | 115,200,000 | 115,350,000 | 1537 | 917  | 1.062388034  | ENSBTAG00000047341                          |
| 1 | 115,275,000 | 115,425,000 | 1538 | 1032 | -3.213667688 | ENSBTAG00000047341                          |
| 1 | 115,350,000 | 115,500,000 | 1539 | 1198 | -3.654571876 | RAP2B                                       |
| 1 | 115,425,000 | 115,575,000 | 1540 | 919  | -2.253606312 | RAP2B                                       |
| 1 | 115,500,000 | 115,650,000 | 1541 | 700  | -1.300028441 |                                             |
| 1 | 115,575,000 | 115,725,000 | 1542 | 325  | 0.310024608  |                                             |
| 1 | 115,650,000 | 115,800,000 | 1543 | 463  | -1.128676447 |                                             |
| 1 | 115,725,000 | 115,875,000 | 1544 | 566  | -0.832495983 | P2RY1                                       |
| 1 | 115,800,000 | 115,950,000 | 1545 | 512  | 0.090195024  | P2RY1                                       |
| 1 | 115,875,000 | 116,025,000 | 1546 | 539  | 0.580244354  |                                             |
| 1 | 115,950,000 | 116,100,000 | 1547 | 442  | 0.993457719  |                                             |
| 1 | 116,025,000 | 116,175,000 | 1548 | 407  | -0.403789187 |                                             |
| 1 | 116,100,000 | 116,250,000 | 1549 | 687  | 0.443896178  | MBNL1                                       |
| 1 | 116,175,000 | 116,325,000 | 1550 | 616  | 0.968081576  | MBNL1                                       |
| 1 | 116,250,000 | 116,400,000 | 1551 | 612  | -0.993916959 | MBNL1                                       |
| 1 | 116,325,000 | 116,475,000 | 1552 | 884  | -0.832299431 | MBNL1                                       |
| 1 | 116,400,000 | 116,550,000 | 1553 | 807  | 0.41707004   |                                             |
| 1 | 116,475,000 | 116,625,000 | 1554 | 864  | 0.045326332  |                                             |
| 1 | 116,550,000 | 116,700,000 | 1555 | 1034 | -0.09188384  |                                             |
| 1 | 116,625,000 | 116,775,000 | 1556 | 821  | -1.151301053 |                                             |
| 1 | 116,700,000 | 116,850,000 | 1557 | 609  | -2.376731207 |                                             |
| 1 | 116,775,000 | 116,925,000 | 1558 | 462  | -1.25083158  | SUCNR1                                      |
| 1 | 116,850,000 | 117,000,000 | 1559 | 228  | -0.844382843 | AADAC,SUCNR1                                |
| 1 | 116,925,000 | 117,075,000 | 1560 | 181  | 0.34516423   | AADAC                                       |
| 1 | 117,000,000 | 117,150,000 | 1561 | 244  | -0.491893238 | AADACL2                                     |
| 1 | 117,075,000 | 117,225,000 | 1562 | 237  | -0.429618717 | AADACL2                                     |
| 1 | 117,150,000 | 117,300,000 | 1563 | 337  | -3.205476435 | AADACL2,ENSBTAG00000010385                  |
| 1 | 117,225,000 | 117,375,000 | 1564 | 770  | -1.890127145 | ENSBTAG00000010385                          |
| 1 | 117,300,000 | 117,450,000 | 1565 | 905  | 0.346828682  | ENSBTAG00000023447                          |
| 1 | 117,375,000 | 117,525,000 | 1566 | 574  | 1.230363148  | ENSBTAG00000023447                          |
| 1 | 117,450,000 | 117,600,000 | 1567 | 523  | 0.476256844  | IGSF10,MED12L,P2RY12                        |
| 1 | 117,525,000 | 117,675,000 | 1568 | 575  | 0.506565039  | IGSF10,MED12L,P2RY12                        |
| 1 | 117,600,000 | 117,750,000 | 1569 | 563  | 0.28724861   | GPR87,MED12L,P2RY12,P2RY13,ENSBTAG000000460 |



|   |             |             |      |      |              |                                               |
|---|-------------|-------------|------|------|--------------|-----------------------------------------------|
| 1 | 117,675,000 | 117,825,000 | 1570 | 760  | -0.562581934 | GPR87,MED12L,P2RY13,P2RY14,ENSBTAG00000046051 |
| 1 | 117,750,000 | 117,900,000 | 1571 | 604  | -0.416074732 | GPR171,MED12L,P2RY14                          |
| 1 | 117,825,000 | 117,975,000 | 1572 | 400  | -0.270106383 | GPR171,MED12L                                 |
| 1 | 117,900,000 | 118,050,000 | 1573 | 528  | -0.167193514 | MED12L                                        |
| 1 | 117,975,000 | 118,125,000 | 1574 | 712  | 0.721951726  | ENSBTAG00000011267                            |
| 1 | 118,050,000 | 118,200,000 | 1575 | 907  | 0.330725031  | ENSBTAG00000011267,ENSBTAG00000038069         |
| 1 | 118,125,000 | 118,275,000 | 1576 | 676  | 0.26049998   | ENSBTAG00000011267,ENSBTAG00000038069         |
| 1 | 118,200,000 | 118,350,000 | 1577 | 489  | 0.886038269  | SIAH2,ENSBTAG00000038069                      |
| 1 | 118,275,000 | 118,425,000 | 1578 | 1145 | 0.399508683  | ERICH6,SIAH2                                  |
| 1 | 118,350,000 | 118,500,000 | 1579 | 1352 | 0.232982245  | EIF2A,ERICH6,SELT                             |
| 1 | 118,425,000 | 118,575,000 | 1580 | 899  | 0.031463532  | EIF2A,SELT,SERP1                              |
| 1 | 118,500,000 | 118,650,000 | 1581 | 790  | 0.637110999  | EIF2A,SERP1,TSC22D2                           |
| 1 | 118,575,000 | 118,725,000 | 1582 | 889  | 0.743504005  | TSC22D2                                       |
| 1 | 118,650,000 | 118,800,000 | 1583 | 994  | 0.437938413  | TSC22D2                                       |
| 1 | 118,725,000 | 118,875,000 | 1584 | 1007 | 0.308458379  |                                               |
| 1 | 118,800,000 | 118,950,000 | 1585 | 1140 | 0.766329963  |                                               |
| 1 | 118,875,000 | 119,025,000 | 1586 | 1052 | 1.13927655   |                                               |
| 1 | 118,950,000 | 119,100,000 | 1587 | 886  | 0.634839605  |                                               |
| 1 | 119,025,000 | 119,175,000 | 1588 | 1100 | 0.505078149  | PFN2,RNF13                                    |
| 1 | 119,100,000 | 119,250,000 | 1589 | 1365 | 0.658337979  | PFN2,RNF13                                    |
| 1 | 119,175,000 | 119,325,000 | 1590 | 1484 | 0.512635805  | ANKUB1,RNF13                                  |
| 1 | 119,250,000 | 119,400,000 | 1591 | 1405 | -0.519146996 | ANKUB1,COMMD2,RNF13                           |
| 1 | 119,325,000 | 119,475,000 | 1592 | 1132 | -1.450126983 | ANKUB1,COMMD2,WWTR1                           |
| 1 | 119,400,000 | 119,550,000 | 1593 | 912  | -0.278100362 | WWTR1                                         |
| 1 | 119,475,000 | 119,625,000 | 1594 | 1024 | 0.367611811  | TM4SF4,WWTR1                                  |
| 1 | 119,550,000 | 119,700,000 | 1595 | 1334 | 0.903246949  | TM4SF4,WWTR1                                  |
| 1 | 119,625,000 | 119,775,000 | 1596 | 1259 | 1.121199965  | TM4SF1,TM4SF4                                 |
| 1 | 119,700,000 | 119,850,000 | 1597 | 842  | 1.121634187  | TM4SF1,TM4SF18                                |
| 1 | 119,775,000 | 119,925,000 | 1598 | 858  | 0.617462423  | CP,TM4SF18                                    |
| 1 | 119,850,000 | 120,000,000 | 1599 | 993  | 0.388233879  | CP,HPS3,ENSBTAG00000048150                    |
| 1 | 119,925,000 | 120,075,000 | 1600 | 816  | 0.926539522  | CP,HLTF,HPS3,ENSBTAG00000048150               |
| 1 | 120,000,000 | 120,150,000 | 1601 | 727  | 1.342773888  | GYG1,HLTF                                     |
| 1 | 120,075,000 | 120,225,000 | 1602 | 867  | 1.115476383  | GYG1,HLTF                                     |
| 1 | 120,150,000 | 120,300,000 | 1603 | 1136 | 0.693591965  | CPA3,PCPB                                     |
| 1 | 120,225,000 | 120,375,000 | 1604 | 1249 | 0.304457065  | CPA3,PCPB                                     |
| 1 | 120,300,000 | 120,450,000 | 1605 | 1160 | 0.338655044  | AGTR1,PCPB                                    |
| 1 | 120,375,000 | 120,525,000 | 1606 | 1165 | 0.761166642  | AGTR1                                         |
| 1 | 120,450,000 | 120,600,000 | 1607 | 1161 | 0.766280669  |                                               |
| 1 | 120,525,000 | 120,675,000 | 1608 | 1175 | 0.920784201  |                                               |
| 1 | 120,600,000 | 120,750,000 | 1609 | 1043 | 0.67621066   | ENSBTAG00000046008                            |
| 1 | 120,675,000 | 120,825,000 | 1610 | 966  | 0.806362946  | ENSBTAG00000046008                            |
| 1 | 120,750,000 | 120,900,000 | 1611 | 1158 | 0.623489959  |                                               |
| 1 | 120,825,000 | 120,975,000 | 1612 | 968  | -0.063295083 |                                               |
| 1 | 120,900,000 | 121,050,000 | 1613 | 911  | -1.154661514 |                                               |
| 1 | 120,975,000 | 121,125,000 | 1614 | 831  | -0.885158636 |                                               |
| 1 | 121,050,000 | 121,200,000 | 1615 | 907  | 0.603047548  |                                               |
| 1 | 121,125,000 | 121,275,000 | 1616 | 1143 | 0.570002342  |                                               |
| 1 | 121,200,000 | 121,350,000 | 1617 | 880  | 0.605750749  | ENSBTAG00000039334                            |
| 1 | 121,275,000 | 121,425,000 | 1618 | 1234 | 0.939303689  | ENSBTAG00000039334                            |
| 1 | 121,350,000 | 121,500,000 | 1619 | 1499 | 0.26770763   | ENSBTAG00000025146                            |
| 1 | 121,425,000 | 121,575,000 | 1620 | 1173 | -0.317527844 | ENSBTAG00000025146                            |
| 1 | 121,500,000 | 121,650,000 | 1621 | 943  | 0.438959248  |                                               |

|   |             |             |      |      |              |               |
|---|-------------|-------------|------|------|--------------|---------------|
| 1 | 121,575,000 | 121,725,000 | 1622 | 969  | 0.989743447  |               |
| 1 | 121,650,000 | 121,800,000 | 1623 | 863  | 0.567840806  |               |
| 1 | 121,725,000 | 121,875,000 | 1624 | 719  | 0.521071871  | ZIC1,ZIC4     |
| 1 | 121,800,000 | 121,950,000 | 1625 | 738  | 0.407025527  | ZIC1,ZIC4     |
| 1 | 121,875,000 | 122,025,000 | 1626 | 781  | 0.346095665  | ZIC4          |
| 1 | 121,950,000 | 122,100,000 | 1627 | 928  | 0.974745946  |               |
| 1 | 122,025,000 | 122,175,000 | 1628 | 1194 | 0.903115019  |               |
| 1 | 122,100,000 | 122,250,000 | 1629 | 991  | -0.484892592 |               |
| 1 | 122,175,000 | 122,325,000 | 1630 | 699  | -3.247887623 |               |
| 1 | 122,250,000 | 122,400,000 | 1631 | 842  | -2.280504856 |               |
| 1 | 122,325,000 | 122,475,000 | 1632 | 966  | -1.156045207 |               |
| 1 | 122,400,000 | 122,550,000 | 1633 | 884  | -1.160057258 |               |
| 1 | 122,475,000 | 122,625,000 | 1634 | 630  | -0.784823839 |               |
| 1 | 122,550,000 | 122,700,000 | 1635 | 905  | 0.166252274  |               |
| 1 | 122,625,000 | 122,775,000 | 1636 | 997  | 0.524739157  |               |
| 1 | 122,700,000 | 122,850,000 | 1637 | 890  | 0.316054791  | PLSCR5        |
| 1 | 122,775,000 | 122,925,000 | 1638 | 1022 | 0.813749078  | PLSCR2,PLSCR5 |
| 1 | 122,850,000 | 123,000,000 | 1639 | 1215 | -0.025407376 | PLSCR2        |
| 1 | 122,925,000 | 123,075,000 | 1640 | 1280 | -0.283715337 | PLSCR1,PLSCR2 |
| 1 | 123,000,000 | 123,150,000 | 1641 | 893  | 0.87084978   | PLSCR1        |
| 1 | 123,075,000 | 123,225,000 | 1642 | 633  | 0.27336384   |               |
| 1 | 123,150,000 | 123,300,000 | 1643 | 575  | 0.029960643  | PLSCR4        |
| 1 | 123,225,000 | 123,375,000 | 1644 | 364  | -1.668374138 | PLOD2,PLSCR4  |
| 1 | 123,300,000 | 123,450,000 | 1645 | 258  | -0.370400949 | PLOD2         |
| 1 | 123,375,000 | 123,525,000 | 1646 | 656  | -0.422343375 | PLOD2         |
| 1 | 123,450,000 | 123,600,000 | 1647 | 1115 | -0.51999571  |               |
| 1 | 123,525,000 | 123,675,000 | 1648 | 1010 | -0.154587198 |               |
| 1 | 123,600,000 | 123,750,000 | 1649 | 868  | -0.128453691 |               |
| 1 | 123,675,000 | 123,825,000 | 1650 | 710  | -0.111094897 |               |
| 1 | 123,750,000 | 123,900,000 | 1651 | 851  | 0.327972826  |               |
| 1 | 123,825,000 | 123,975,000 | 1652 | 786  | 0.120675217  |               |
| 1 | 123,900,000 | 124,050,000 | 1653 | 590  | -1.503446363 |               |
| 1 | 123,975,000 | 124,125,000 | 1654 | 905  | -2.285040908 |               |
| 1 | 124,050,000 | 124,200,000 | 1655 | 870  | -4.443256959 |               |
| 1 | 124,125,000 | 124,275,000 | 1656 | 562  | -5.092955424 |               |
| 1 | 124,200,000 | 124,350,000 | 1657 | 437  | -0.652632744 |               |
| 1 | 124,275,000 | 124,425,000 | 1658 | 425  | -0.216489139 |               |
| 1 | 124,350,000 | 124,500,000 | 1659 | 403  | 0.826030863  |               |
| 1 | 124,425,000 | 124,575,000 | 1660 | 655  | 0.807815732  |               |
| 1 | 124,500,000 | 124,650,000 | 1661 | 1029 | 0.504016535  |               |
| 1 | 124,575,000 | 124,725,000 | 1662 | 1456 | 0.686000611  |               |
| 1 | 124,650,000 | 124,800,000 | 1663 | 1459 | 0.952287437  |               |
| 1 | 124,725,000 | 124,875,000 | 1664 | 1126 | 0.454142295  |               |
| 1 | 124,800,000 | 124,950,000 | 1665 | 771  | 0.052074918  |               |
| 1 | 124,875,000 | 125,025,000 | 1666 | 825  | 0.750198372  |               |
| 1 | 124,950,000 | 125,100,000 | 1667 | 1242 | 0.612177741  |               |
| 1 | 125,025,000 | 125,175,000 | 1668 | 1239 | 0.057401927  |               |
| 1 | 125,100,000 | 125,250,000 | 1669 | 1301 | -1.18479549  |               |
| 1 | 125,175,000 | 125,325,000 | 1670 | 1307 | -0.325667552 |               |
| 1 | 125,250,000 | 125,400,000 | 1671 | 1172 | 0.890668018  |               |
| 1 | 125,325,000 | 125,475,000 | 1672 | 954  | 1.029337308  |               |
| 1 | 125,400,000 | 125,550,000 | 1673 | 828  | 0.401376605  |               |
| 1 | 125,475,000 | 125,625,000 | 1674 | 777  | -0.425942298 |               |

|   |             |             |      |      |              |                                      |
|---|-------------|-------------|------|------|--------------|--------------------------------------|
| 1 | 125,550,000 | 125,700,000 | 1675 | 925  | -0.128155573 |                                      |
| 1 | 125,625,000 | 125,775,000 | 1676 | 1189 | 0.294193923  |                                      |
| 1 | 125,700,000 | 125,850,000 | 1677 | 958  | 0.269633849  |                                      |
| 1 | 125,775,000 | 125,925,000 | 1678 | 776  | -0.259824507 | C1H3orf58                            |
| 1 | 125,850,000 | 126,000,000 | 1679 | 1094 | -0.917415386 | C1H3orf58                            |
| 1 | 125,925,000 | 126,075,000 | 1680 | 1007 | -1.436044608 | SLC9A9                               |
| 1 | 126,000,000 | 126,150,000 | 1681 | 768  | -1.450336721 | SLC9A9                               |
| 1 | 126,075,000 | 126,225,000 | 1682 | 911  | -2.642780491 | SLC9A9                               |
| 1 | 126,150,000 | 126,300,000 | 1683 | 933  | -1.337403534 | SLC9A9                               |
| 1 | 126,225,000 | 126,375,000 | 1684 | 912  | 0.055043034  | SLC9A9                               |
| 1 | 126,300,000 | 126,450,000 | 1685 | 696  | -0.250818181 | SLC9A9                               |
| 1 | 126,375,000 | 126,525,000 | 1686 | 578  | -0.723350085 | SLC9A9                               |
| 1 | 126,450,000 | 126,600,000 | 1687 | 885  | 0.220759916  | SLC9A9                               |
| 1 | 126,525,000 | 126,675,000 | 1688 | 989  | 0.831714646  | SLC9A9                               |
| 1 | 126,600,000 | 126,750,000 | 1689 | 936  | 0.608047488  | SLC9A9                               |
| 1 | 126,675,000 | 126,825,000 | 1690 | 826  | -0.174172564 | SLC9A9                               |
| 1 | 126,750,000 | 126,900,000 | 1691 | 819  | 0.163464622  | CHST2                                |
| 1 | 126,825,000 | 126,975,000 | 1692 | 705  | 0.722383816  | CHST2,U2SURP                         |
| 1 | 126,900,000 | 127,050,000 | 1693 | 370  | 0.877964983  | PAQR9,U2SURP                         |
| 1 | 126,975,000 | 127,125,000 | 1694 | 472  | 0.761092466  | PAQR9,U2SURP                         |
| 1 | 127,050,000 | 127,200,000 | 1695 | 700  | 0.836091115  | PCOLCE2,ENSBTAG00000038111           |
| 1 | 127,125,000 | 127,275,000 | 1696 | 590  | 0.537793818  | PCOLCE2,TRPC1,ENSBTAG00000038111     |
| 1 | 127,200,000 | 127,350,000 | 1697 | 359  | -0.038715342 | PCOLCE2,PLS1,TRPC1                   |
| 1 | 127,275,000 | 127,425,000 | 1698 | 565  | 1.317834815  | PLS1,TRPC1                           |
| 1 | 127,350,000 | 127,500,000 | 1699 | 639  | 1.41664973   | ATR,PLS1                             |
| 1 | 127,425,000 | 127,575,000 | 1700 | 397  | 1.213491497  | ATR                                  |
| 1 | 127,500,000 | 127,650,000 | 1701 | 298  | 0.876405274  | ATR,XRN1                             |
| 1 | 127,575,000 | 127,725,000 | 1702 | 270  | 0.962979176  | ATR,XRN1                             |
| 1 | 127,650,000 | 127,800,000 | 1703 | 340  | 1.128942435  | GK5,XRN1                             |
| 1 | 127,725,000 | 127,875,000 | 1704 | 578  | 0.611780246  | GK5                                  |
| 1 | 127,800,000 | 127,950,000 | 1705 | 622  | 0.398571626  | GK5                                  |
| 1 | 127,875,000 | 128,025,000 | 1706 | 514  | 0.713768769  | TFDP2                                |
| 1 | 127,950,000 | 128,100,000 | 1707 | 642  | 0.941083146  | ATP1B3,TFDP2,ENSBTAG00000019007      |
| 1 | 128,025,000 | 128,175,000 | 1708 | 635  | 0.833505676  | ATP1B3,GRK7,TFDP2,ENSBTAG00000019007 |
| 1 | 128,100,000 | 128,250,000 | 1709 | 851  | 0.623307609  | GRK7,RNF7                            |
| 1 | 128,175,000 | 128,325,000 | 1710 | 1137 | -0.182321586 | GRK7,RNF7                            |
| 1 | 128,250,000 | 128,400,000 | 1711 | 819  | -0.808962976 | RASA2                                |
| 1 | 128,325,000 | 128,475,000 | 1712 | 675  | -0.107246996 | RASA2                                |
| 1 | 128,400,000 | 128,550,000 | 1713 | 1056 | -0.273742145 | RASA2,ZBTB38                         |
| 1 | 128,475,000 | 128,625,000 | 1714 | 1009 | -0.439240459 | ZBTB38                               |
| 1 | 128,550,000 | 128,700,000 | 1715 | 683  | -0.378024434 | PXYLP1                               |
| 1 | 128,625,000 | 128,775,000 | 1716 | 702  | 0.029606953  | PXYLP1                               |
| 1 | 128,700,000 | 128,850,000 | 1717 | 652  | 0.221448695  | PXYLP1,SPSB4                         |
| 1 | 128,775,000 | 128,925,000 | 1718 | 661  | 0.589220704  | SPSB4                                |
| 1 | 128,850,000 | 129,000,000 | 1719 | 864  | 0.418314027  | SPSB4                                |
| 1 | 128,925,000 | 129,075,000 | 1720 | 817  | 0.354916343  | SLC25A36                             |
| 1 | 129,000,000 | 129,150,000 | 1721 | 1114 | 0.57703633   | SLC25A36                             |
| 1 | 129,075,000 | 129,225,000 | 1722 | 1512 | 0.758921923  |                                      |
| 1 | 129,150,000 | 129,300,000 | 1723 | 1404 | 0.67359391   | TRIM42                               |
| 1 | 129,225,000 | 129,375,000 | 1724 | 1614 | 0.021937537  | TRIM42                               |
| 1 | 129,300,000 | 129,450,000 | 1725 | 1552 | -0.026538986 | CLSTN2                               |
| 1 | 129,375,000 | 129,525,000 | 1726 | 1196 | 0.248624782  | CLSTN2                               |
| 1 | 129,450,000 | 129,600,000 | 1727 | 884  | -0.082743828 | CLSTN2                               |

|   |             |             |      |      |              |                                                          |
|---|-------------|-------------|------|------|--------------|----------------------------------------------------------|
| 1 | 129,525,000 | 129,675,000 | 1728 | 832  | 0.026542429  | CLSTN2                                                   |
| 1 | 129,600,000 | 129,750,000 | 1729 | 1054 | -0.860896987 |                                                          |
| 1 | 129,675,000 | 129,825,000 | 1730 | 1267 | -0.408123251 |                                                          |
| 1 | 129,750,000 | 129,900,000 | 1731 | 1405 | 0.928604419  |                                                          |
| 1 | 129,825,000 | 129,975,000 | 1732 | 1286 | 1.035406183  |                                                          |
| 1 | 129,900,000 | 130,050,000 | 1733 | 1097 | 0.863369908  |                                                          |
| 1 | 129,975,000 | 130,125,000 | 1734 | 673  | 0.866166447  |                                                          |
| 1 | 130,050,000 | 130,200,000 | 1735 | 446  | 0.638051861  |                                                          |
| 1 | 130,125,000 | 130,275,000 | 1736 | 368  | 0.499901743  |                                                          |
| 1 | 130,200,000 | 130,350,000 | 1737 | 637  | 1.300660992  |                                                          |
| 1 | 130,275,000 | 130,425,000 | 1738 | 1189 | 1.18030392   |                                                          |
| 1 | 130,350,000 | 130,500,000 | 1739 | 1157 | 0.926129271  | NMNAT3                                                   |
| 1 | 130,425,000 | 130,575,000 | 1740 | 778  | 0.627485524  | KPNA6,NMNAT3                                             |
| 1 | 130,500,000 | 130,650,000 | 1741 | 755  | -0.177459084 | KPNA6,NMNAT3,RBP1                                        |
| 1 | 130,575,000 | 130,725,000 | 1742 | 781  | -0.685771515 | KPNA6,RBP1,RBP2,TXLNA                                    |
| 1 | 130,650,000 | 130,800,000 | 1743 | 554  | -0.494231253 | COPB2,MRPS22,RBP2,TXLNA                                  |
| 1 | 130,725,000 | 130,875,000 | 1744 | 474  | 0.19600269   | COPB2,MRPS22                                             |
| 1 | 130,800,000 | 130,950,000 | 1745 | 325  | 0.383158213  | COPB2                                                    |
| 1 | 130,875,000 | 131,025,000 | 1746 | 233  | -0.925771979 |                                                          |
| 1 | 130,950,000 | 131,100,000 | 1747 | 483  | -1.106358559 | ENSBTAG00000046040                                       |
| 1 | 131,025,000 | 131,175,000 | 1748 | 681  | -0.040525909 | ENSBTAG00000045637,ENSBTAG00000046040,ENSBTAG00000046738 |
| 1 | 131,100,000 | 131,250,000 | 1749 | 726  | -0.581226479 | FOXL2,ENSBTAG00000045637,ENSBTAG00000046738              |
| 1 | 131,175,000 | 131,325,000 | 1750 | 675  | -1.461970677 | FOXL2                                                    |
| 1 | 131,250,000 | 131,400,000 | 1751 | 511  | -0.951608482 |                                                          |
| 1 | 131,325,000 | 131,475,000 | 1752 | 440  | -0.305819102 | PIK3CB                                                   |
| 1 | 131,400,000 | 131,550,000 | 1753 | 555  | -0.365776883 | FAIM,PIK3CB                                              |
| 1 | 131,475,000 | 131,625,000 | 1754 | 614  | 0.709411008  | CEP70,FAIM,PIK3CB                                        |
| 1 | 131,550,000 | 131,700,000 | 1755 | 541  | 1.519675682  | CEP70,ESYT3,FAIM                                         |
| 1 | 131,625,000 | 131,775,000 | 1756 | 672  | 0.627922537  | CEP70,ESYT3,MRAS                                         |
| 1 | 131,700,000 | 131,850,000 | 1757 | 832  | -1.803545364 | ESYT3,MRAS                                               |
| 1 | 131,775,000 | 131,925,000 | 1758 | 643  | -1.680561172 | ARMC8,MRAS,NME9                                          |
| 1 | 131,850,000 | 132,000,000 | 1759 | 329  | 0.346053254  | ARMC8,NME9                                               |
| 1 | 131,925,000 | 132,075,000 | 1760 | 497  | -0.526465367 | A4GNT,ARMC8,DBR1                                         |
| 1 | 132,000,000 | 132,150,000 | 1761 | 970  | 0.022533977  | A4GNT,DBR1,DZIP1L                                        |
| 1 | 132,075,000 | 132,225,000 | 1762 | 966  | 0.520062107  | CLDN18,DZIP1L                                            |
| 1 | 132,150,000 | 132,300,000 | 1763 | 667  | 0.507556516  | CLDN18                                                   |
| 1 | 132,225,000 | 132,375,000 | 1764 | 649  | -0.545970428 |                                                          |
| 1 | 132,300,000 | 132,450,000 | 1765 | 522  | -1.579231818 |                                                          |
| 1 | 132,375,000 | 132,525,000 | 1766 | 551  | 0.088214612  |                                                          |
| 1 | 132,450,000 | 132,600,000 | 1767 | 875  | 0.556816776  |                                                          |
| 1 | 132,525,000 | 132,675,000 | 1768 | 1101 | -1.169642163 |                                                          |
| 1 | 132,600,000 | 132,750,000 | 1769 | 1273 | -2.194758139 |                                                          |
| 1 | 132,675,000 | 132,825,000 | 1770 | 1179 | -1.442492518 |                                                          |
| 1 | 132,750,000 | 132,900,000 | 1771 | 1245 | -0.059498104 |                                                          |
| 1 | 132,825,000 | 132,975,000 | 1772 | 1279 | -0.534916688 |                                                          |
| 1 | 132,900,000 | 133,050,000 | 1773 | 984  | -0.98251173  |                                                          |
| 1 | 132,975,000 | 133,125,000 | 1774 | 739  | 0.256163999  |                                                          |
| 1 | 133,050,000 | 133,200,000 | 1775 | 751  | 0.571773921  |                                                          |
| 1 | 133,125,000 | 133,275,000 | 1776 | 1084 | 0.607067397  | IL20RB,ENSBTAG00000046781                                |
| 1 | 133,200,000 | 133,350,000 | 1777 | 1041 | 0.865885924  | IL20RB,NCK1,ENSBTAG00000046781                           |
| 1 | 133,275,000 | 133,425,000 | 1778 | 544  | 1.19028878   | IL20RB,NCK1,TMEM22                                       |

|   |             |             |      |      |              |                                |
|---|-------------|-------------|------|------|--------------|--------------------------------|
| 1 | 133,350,000 | 133,500,000 | 1779 | 457  | 0.058385083  | NCK1,TMEM22,ENSBTAG00000048305 |
| 1 | 133,425,000 | 133,575,000 | 1780 | 439  | -1.129916487 | TMEM22,ENSBTAG00000048305      |
| 1 | 133,500,000 | 133,650,000 | 1781 | 315  | -1.255126415 |                                |
| 1 | 133,575,000 | 133,725,000 | 1782 | 384  | -0.876935398 | PFDN4,STAG1                    |
| 1 | 133,650,000 | 133,800,000 | 1783 | 397  | -0.43664595  | PFDN4,STAG1                    |
| 1 | 133,725,000 | 133,875,000 | 1784 | 362  | -0.290791534 | STAG1                          |
| 1 | 133,800,000 | 133,950,000 | 1785 | 350  | -0.699222151 | STAG1                          |
| 1 | 133,875,000 | 134,025,000 | 1786 | 321  | -0.648149744 | STAG1                          |
| 1 | 133,950,000 | 134,100,000 | 1787 | 428  | -0.127393391 | PCCB,STAG1                     |
| 1 | 134,025,000 | 134,175,000 | 1788 | 483  | -0.780835167 | PCCB,STAG1                     |
| 1 | 134,100,000 | 134,250,000 | 1789 | 343  | -1.139781846 | MSL2,PCCB,PPP2R3A              |
| 1 | 134,175,000 | 134,325,000 | 1790 | 305  | -0.00587335  | MSL2,PPP2R3A                   |
| 1 | 134,250,000 | 134,400,000 | 1791 | 354  | 0.560837873  | PPP2R3A                        |
| 1 | 134,325,000 | 134,475,000 | 1792 | 477  | 0.9592624    | PPP2R3A                        |
| 1 | 134,400,000 | 134,550,000 | 1793 | 509  | 0.77047068   |                                |
| 1 | 134,475,000 | 134,625,000 | 1794 | 669  | 0.244203369  |                                |
| 1 | 134,550,000 | 134,700,000 | 1795 | 642  | 0.093414334  |                                |
| 1 | 134,625,000 | 134,775,000 | 1796 | 563  | 0.35287372   |                                |
| 1 | 134,700,000 | 134,850,000 | 1797 | 1034 | 0.43866144   |                                |
| 1 | 134,775,000 | 134,925,000 | 1798 | 1028 | 0.474035836  |                                |
| 1 | 134,850,000 | 135,000,000 | 1799 | 729  | 0.040742061  |                                |
| 1 | 134,925,000 | 135,075,000 | 1800 | 1139 | -2.545970758 |                                |
| 1 | 135,000,000 | 135,150,000 | 1801 | 1326 | -1.932720778 |                                |
| 1 | 135,075,000 | 135,225,000 | 1802 | 993  | -0.583284816 | EPHB1                          |
| 1 | 135,150,000 | 135,300,000 | 1803 | 841  | -0.005914272 | EPHB1                          |
| 1 | 135,225,000 | 135,375,000 | 1804 | 1083 | 0.870788779  | EPHB1                          |
| 1 | 135,300,000 | 135,450,000 | 1805 | 1248 | 0.318510008  | EPHB1                          |
| 1 | 135,375,000 | 135,525,000 | 1806 | 1340 | -0.785842994 | EPHB1                          |
| 1 | 135,450,000 | 135,600,000 | 1807 | 1493 | -0.099087193 | EPHB1                          |
| 1 | 135,525,000 | 135,675,000 | 1808 | 1229 | 0.875611477  |                                |
| 1 | 135,600,000 | 135,750,000 | 1809 | 1129 | 1.221218805  |                                |
| 1 | 135,675,000 | 135,825,000 | 1810 | 909  | 0.997025062  |                                |
| 1 | 135,750,000 | 135,900,000 | 1811 | 645  | 0.022497178  | CEP63                          |
| 1 | 135,825,000 | 135,975,000 | 1812 | 800  | 0.129154725  | ANAPC13,CEP63                  |
| 1 | 135,900,000 | 136,050,000 | 1813 | 766  | 0.197994339  | ANAPC13,CEP63                  |
| 1 | 135,975,000 | 136,125,000 | 1814 | 672  | 0.290315084  | AMOTL2                         |
| 1 | 136,050,000 | 136,200,000 | 1815 | 806  | -0.657993958 | AMOTL2                         |
| 1 | 136,125,000 | 136,275,000 | 1816 | 755  | -1.593917891 | RYK                            |
| 1 | 136,200,000 | 136,350,000 | 1817 | 520  | -0.788046745 | RYK                            |
| 1 | 136,275,000 | 136,425,000 | 1818 | 776  | 1.502513123  | RYK                            |
| 1 | 136,350,000 | 136,500,000 | 1819 | 802  | 1.418555368  | SLCO2A1                        |
| 1 | 136,425,000 | 136,575,000 | 1820 | 652  | 0.064502539  | RAB6B,SLCO2A1                  |
| 1 | 136,500,000 | 136,650,000 | 1821 | 1321 | 0.75963383   | RAB6B,SLCO2A1,SRPRB            |
| 1 | 136,575,000 | 136,725,000 | 1822 | 1388 | 0.563247324  | RAB6B,SRPRB,TF                 |
| 1 | 136,650,000 | 136,800,000 | 1823 | 1411 | 0.097619723  | SRPRB,TF,ENSBTAG00000023411    |
| 1 | 136,725,000 | 136,875,000 | 1824 | 1387 | 0.01155402   | TOPBP1,ENSBTAG00000023411      |
| 1 | 136,800,000 | 136,950,000 | 1825 | 980  | -0.249812319 | TOPBP1,ENSBTAG00000035556      |
| 1 | 136,875,000 | 137,025,000 | 1826 | 879  | -1.85021025  | TOPBP1,ENSBTAG00000035556      |
| 1 | 136,950,000 | 137,100,000 | 1827 | 842  | -6.346970137 | BFSP2,ENSBTAG00000035556       |
| 1 | 137,025,000 | 137,175,000 | 1828 | 1065 | -5.30013118  | BFSP2,TMEM108                  |
| 1 | 137,100,000 | 137,250,000 | 1829 | 1081 | -1.644118511 | BFSP2,TMEM108                  |
| 1 | 137,175,000 | 137,325,000 | 1830 | 835  | 0.371395685  |                                |
| 1 | 137,250,000 | 137,400,000 | 1831 | 814  | 0.879984022  |                                |

|   |             |             |      |      |              |                                       |
|---|-------------|-------------|------|------|--------------|---------------------------------------|
| 1 | 137,325,000 | 137,475,000 | 1832 | 1114 | 0.398653864  |                                       |
| 1 | 137,400,000 | 137,550,000 | 1833 | 916  | -0.255475613 |                                       |
| 1 | 137,475,000 | 137,625,000 | 1834 | 583  | -0.081368394 |                                       |
| 1 | 137,550,000 | 137,700,000 | 1835 | 668  | 0.541993163  |                                       |
| 1 | 137,625,000 | 137,775,000 | 1836 | 1150 | -0.487141584 |                                       |
| 1 | 137,700,000 | 137,850,000 | 1837 | 1391 | -0.569319226 | ENSBTAG00000035654                    |
| 1 | 137,775,000 | 137,925,000 | 1838 | 1406 | 0.419901619  | NPHP3-ACAD11,ENSBTAG00000035654       |
| 1 | 137,850,000 | 138,000,000 | 1839 | 1184 | 1.066631025  | ACAD11,NPHP3-ACAD11,UBA5              |
| 1 | 137,925,000 | 138,075,000 | 1840 | 774  | 0.856340579  | ACAD11,ACKR4,NPHP3-ACAD11,UBA5        |
| 1 | 138,000,000 | 138,150,000 | 1841 | 995  | 0.923458293  | ACAD11,ACKR4,DNAJC13                  |
| 1 | 138,075,000 | 138,225,000 | 1842 | 1707 | 0.912229701  | ACAD11,DNAJC13                        |
| 1 | 138,150,000 | 138,300,000 | 1843 | 1738 | 0.708703563  | DNAJC13                               |
| 1 | 138,225,000 | 138,375,000 | 1844 | 1353 | 0.66504403   | ACPP,DNAJC13                          |
| 1 | 138,300,000 | 138,450,000 | 1845 | 1173 | 0.646789214  | ACPP,DNAJC13                          |
| 1 | 138,375,000 | 138,525,000 | 1846 | 1047 | -0.265361534 | ACPP,KCNH8                            |
| 1 | 138,450,000 | 138,600,000 | 1847 | 1171 | -0.606605279 | KCNH8                                 |
| 1 | 138,525,000 | 138,675,000 | 1848 | 1440 | -1.014824812 | KCNH8                                 |
| 1 | 138,600,000 | 138,750,000 | 1849 | 1708 | 0.110186167  | KCNH8                                 |
| 1 | 138,675,000 | 138,825,000 | 1850 | 1712 | 0.808412197  | KCNH8                                 |
| 1 | 138,750,000 | 138,900,000 | 1851 | 1512 | -0.020967808 |                                       |
| 1 | 138,825,000 | 138,975,000 | 1852 | 1072 | -0.059834199 |                                       |
| 1 | 138,900,000 | 139,050,000 | 1853 | 747  | -0.037977002 |                                       |
| 1 | 138,975,000 | 139,125,000 | 1854 | 545  | -0.361301337 |                                       |
| 1 | 139,050,000 | 139,200,000 | 1855 | 455  | 0.959377705  |                                       |
| 1 | 139,125,000 | 139,275,000 | 1856 | 857  | 0.946636871  |                                       |
| 1 | 139,200,000 | 139,350,000 | 1857 | 1206 | 0.653902277  |                                       |
| 1 | 139,275,000 | 139,425,000 | 1858 | 820  | 0.129262031  |                                       |
| 1 | 139,350,000 | 139,500,000 | 1859 | 516  | -1.88551185  |                                       |
| 1 | 139,425,000 | 139,575,000 | 1860 | 837  | -1.238805435 |                                       |
| 1 | 139,500,000 | 139,650,000 | 1861 | 994  | 0.024176314  |                                       |
| 1 | 139,575,000 | 139,725,000 | 1862 | 1038 | 0.633175241  | CPNE4                                 |
| 1 | 139,650,000 | 139,800,000 | 1863 | 1183 | 0.367439896  | CPNE4                                 |
| 1 | 139,725,000 | 139,875,000 | 1864 | 908  | 0.18231412   | CPNE4                                 |
| 1 | 139,800,000 | 139,950,000 | 1865 | 782  | 0.615637225  | CPNE4,MRPL3                           |
| 1 | 139,875,000 | 140,025,000 | 1866 | 1102 | 1.160744409  | MRPL3                                 |
| 1 | 139,950,000 | 140,100,000 | 1867 | 1094 | 1.00708018   | NEK11,NUDT16                          |
| 1 | 140,025,000 | 140,175,000 | 1868 | 748  | 0.386940624  | NEK11,NUDT16                          |
| 1 | 140,100,000 | 140,250,000 | 1869 | 570  | -0.640166795 | NEK11                                 |
| 1 | 140,175,000 | 140,325,000 | 1870 | 757  | -0.316601401 | NEK11                                 |
| 1 | 140,250,000 | 140,400,000 | 1871 | 788  | 0.500790782  | ASTE1,ATP2C1,NEK11                    |
| 1 | 140,325,000 | 140,475,000 | 1872 | 646  | 0.86957996   | ASTE1,ATP2C1,NEK11,ENSBTAG00000035701 |
| 1 | 140,400,000 | 140,550,000 | 1873 | 723  | 0.75091715   | ATP2C1,ENSBTAG00000035701             |
| 1 | 140,475,000 | 140,625,000 | 1874 | 1038 | -0.141944791 | ATP2C1,RPL38                          |
| 1 | 140,550,000 | 140,700,000 | 1875 | 1299 | -1.559835093 | RPL38                                 |
| 1 | 140,625,000 | 140,775,000 | 1876 | 863  | -2.651739125 | BRWD1,PSMG1                           |
| 1 | 140,700,000 | 140,850,000 | 1877 | 317  | -2.187258363 | BRWD1,PSMG1                           |
| 1 | 140,775,000 | 140,925,000 | 1878 | 283  | 0.878137834  | BRWD1,HMGN1,SETMAR                    |
| 1 | 140,850,000 | 141,000,000 | 1879 | 411  | 1.079866063  | BRWD1,HMGN1,LCA5L,SETMAR,WRB          |
| 1 | 140,925,000 | 141,075,000 | 1880 | 382  | 1.106497503  | LCA5L,SETMAR,SH3BGR,WRB               |
| 1 | 141,000,000 | 141,150,000 | 1881 | 708  | 1.191160758  | LCA5L,SH3BGR                          |
| 1 | 141,075,000 | 141,225,000 | 1882 | 924  | 0.921587783  | SH3BGR                                |
| 1 | 141,150,000 | 141,300,000 | 1883 | 824  | 0.582984804  | B3GALT5                               |
| 1 | 141,225,000 | 141,375,000 | 1884 | 979  | 0.761728459  | B3GALT5,IGSF5                         |

|   |             |             |      |      |              |                                       |
|---|-------------|-------------|------|------|--------------|---------------------------------------|
| 1 | 141,300,000 | 141,450,000 | 1885 | 1401 | 1.064164006  | IGSF5                                 |
| 1 | 141,375,000 | 141,525,000 | 1886 | 1315 | 1.17766506   | IGSF5                                 |
| 1 | 141,450,000 | 141,600,000 | 1887 | 904  | 0.998822777  |                                       |
| 1 | 141,525,000 | 141,675,000 | 1888 | 791  | 0.144250477  | DSCAM                                 |
| 1 | 141,600,000 | 141,750,000 | 1889 | 885  | -1.10582465  | DSCAM                                 |
| 1 | 141,675,000 | 141,825,000 | 1890 | 1077 | -0.541831947 | DSCAM                                 |
| 1 | 141,750,000 | 141,900,000 | 1891 | 999  | -1.519699012 | DSCAM                                 |
| 1 | 141,825,000 | 141,975,000 | 1892 | 1147 | -2.645638858 | DSCAM                                 |
| 1 | 141,900,000 | 142,050,000 | 1893 | 1168 | -1.524241473 | DSCAM                                 |
| 1 | 141,975,000 | 142,125,000 | 1894 | 1037 | -0.976594132 | DSCAM                                 |
| 1 | 142,050,000 | 142,200,000 | 1895 | 1337 | 0.177407001  |                                       |
| 1 | 142,125,000 | 142,275,000 | 1896 | 1377 | 0.829067508  |                                       |
| 1 | 142,200,000 | 142,350,000 | 1897 | 1469 | 1.016404046  |                                       |
| 1 | 142,275,000 | 142,425,000 | 1898 | 1279 | 0.952887907  |                                       |
| 1 | 142,350,000 | 142,500,000 | 1899 | 901  | 0.197166404  |                                       |
| 1 | 142,425,000 | 142,575,000 | 1900 | 1126 | -0.220027535 |                                       |
| 1 | 142,500,000 | 142,650,000 | 1901 | 959  | -0.296799819 |                                       |
| 1 | 142,575,000 | 142,725,000 | 1902 | 618  | 0.249740915  |                                       |
| 1 | 142,650,000 | 142,800,000 | 1903 | 498  | -0.662747711 |                                       |
| 1 | 142,725,000 | 142,875,000 | 1904 | 537  | -0.994204236 |                                       |
| 1 | 142,800,000 | 142,950,000 | 1905 | 514  | -0.506908217 | BACE2                                 |
| 1 | 142,875,000 | 143,025,000 | 1906 | 939  | -0.667080133 | BACE2                                 |
| 1 | 142,950,000 | 143,100,000 | 1907 | 1353 | -0.202788633 | BACE2,FAM3B                           |
| 1 | 143,025,000 | 143,175,000 | 1908 | 1343 | 0.454603801  | FAM3B,MX2                             |
| 1 | 143,100,000 | 143,250,000 | 1909 | 1599 | 0.811535657  | FAM3B,MX1,MX2,TMPRSS2                 |
| 1 | 143,175,000 | 143,325,000 | 1910 | 1361 | 0.704336232  | MX1,TMPRSS2                           |
| 1 | 143,250,000 | 143,400,000 | 1911 | 1178 | -0.696346801 | ENSBTAG00000045771,ENSBTAG00000046015 |
| 1 | 143,325,000 | 143,475,000 | 1912 | 1490 | -1.020284206 | ENSBTAG00000045771,ENSBTAG00000046015 |
| 1 | 143,400,000 | 143,550,000 | 1913 | 1462 | -0.540823149 | RIPK4                                 |
| 1 | 143,475,000 | 143,625,000 | 1914 | 1181 | -1.631772746 | PRDM15,RIPK4                          |
| 1 | 143,550,000 | 143,700,000 | 1915 | 1081 | -1.746627318 | C2CD2,PRDM15                          |
| 1 | 143,625,000 | 143,775,000 | 1916 | 1110 | 0.48853886   | C2CD2,ZNF295                          |
| 1 | 143,700,000 | 143,850,000 | 1917 | 1341 | 1.004433137  | C2CD2,UMODL1,ZNF295                   |
| 1 | 143,775,000 | 143,925,000 | 1918 | 2154 | 0.777255664  | UMODL1                                |
| 1 | 143,850,000 | 144,000,000 | 1919 | 2425 | 0.773516913  | ABCG1,UMODL1                          |
| 1 | 143,925,000 | 144,075,000 | 1920 | 1976 | 0.844359984  | ABCG1,TFF3                            |
| 1 | 144,000,000 | 144,150,000 | 1921 | 1104 | 0.636660486  | ABCG1,TFF3                            |
| 1 | 144,075,000 | 144,225,000 | 1922 | 1460 | 0.938849348  | TFF1,TFF2,TMPRSS3                     |
| 1 | 144,150,000 | 144,300,000 | 1923 | 1884 | 1.120259651  | TFF1,TFF2,TMPRSS3,UBASH3A             |
| 1 | 144,225,000 | 144,375,000 | 1924 | 1516 | 0.468009415  | RSPH1,SLC37A1,TMPRSS3,UBASH3A         |
| 1 | 144,300,000 | 144,450,000 | 1925 | 1905 | -0.481692273 | RSPH1,SLC37A1                         |
| 1 | 144,375,000 | 144,525,000 | 1926 | 1779 | 0.006908347  | PDE9A,SLC37A1                         |
| 1 | 144,450,000 | 144,600,000 | 1927 | 1370 | 0.362048042  | PDE9A                                 |
| 1 | 144,525,000 | 144,675,000 | 1928 | 1285 | -0.546029493 | PDE9A,WDR4,ENSBTAG00000046859         |
| 1 | 144,600,000 | 144,750,000 | 1929 | 1268 | -0.089107751 | NDUFV3,PDE9A,WDR4,ENSBTAG00000046859  |
| 1 | 144,675,000 | 144,825,000 | 1930 | 1312 | 0.50480674   | NDUFV3,PKNOX1,WDR4,ENSBTAG00000000160 |
| 1 | 144,750,000 | 144,900,000 | 1931 | 1281 | 0.955220721  | CRYAA,PKNOX1,U2AF1,ENSBTAG00000000160 |
| 1 | 144,825,000 | 144,975,000 | 1932 | 1387 | -0.088618302 | CRYAA,U2AF1                           |
| 1 | 144,900,000 | 145,050,000 | 1933 | 1267 | -0.229833475 | SUMO3                                 |
| 1 | 144,975,000 | 145,125,000 | 1934 | 639  | 0.714011392  | ITGB2,PTTG1IP,SUMO3                   |
| 1 | 145,050,000 | 145,200,000 | 1935 | 949  | 0.375162432  | C1H21ORF70,ITGB2,PTTG1IP              |
| 1 | 145,125,000 | 145,275,000 | 1936 | 1427 | -0.791351289 | C1H21ORF70,ITGB2                      |
| 1 | 145,200,000 | 145,350,000 | 1937 | 779  | -1.160302894 |                                       |

|   |             |             |      |      |              |                                                                        |
|---|-------------|-------------|------|------|--------------|------------------------------------------------------------------------|
| 1 | 145,275,000 | 145,425,000 | 1938 | 96   | 0.070770668  |                                                                        |
| 1 | 145,350,000 | 145,500,000 | 1939 | 255  | 0.511952012  |                                                                        |
| 1 | 145,425,000 | 145,575,000 | 1940 | 807  | 1.077733065  | ADARB1                                                                 |
| 1 | 145,500,000 | 145,650,000 | 1941 | 1038 | 0.433375825  | ADARB1,POFUT2                                                          |
| 1 | 145,575,000 | 145,725,000 | 1942 | 1047 | -0.103707928 | POFUT2,ENSBTAG00000014880,ENSBTAG00000014882                           |
| 1 | 145,650,000 | 145,800,000 | 1943 | 1008 | 0.687160817  | AIRE,PFKL,ENSBTAG00000014880,ENSBTAG00000014882                        |
| 1 | 145,725,000 | 145,875,000 | 1944 | 1065 | 0.584442351  | AIRE,C1H21ORF2,PFKL,TRPM2                                              |
| 1 | 145,800,000 | 145,950,000 | 1945 | 1524 | 1.005556591  | C1H21ORF2,KRTAP10-8,LRRC3,TRPM2,TSPEAR,ENSBTAG00000037662              |
| 1 | 145,875,000 | 146,025,000 | 1946 | 1591 | 0.982923548  | KRTAP10-8,KRTAP12-2,LRRC3,TSPEAR,ENSBTAG00000030862,ENSBTAG00000037662 |
| 1 | 145,950,000 | 146,100,000 | 1947 | 1388 | 0.55647013   | KRTAP10-2,KRTAP12-2,TSPEAR,ENSBTAG00000011012,ENSBTAG00000030862       |
| 1 | 146,025,000 | 146,175,000 | 1948 | 1310 | 0.685423292  | KRTAP10-2,UBE2G2,ENSBTAG00000011012                                    |
| 1 | 146,100,000 | 146,250,000 | 1949 | 1159 | 1.02549977   | UBE2G2,ENSBTAG00000011437                                              |
| 1 | 146,175,000 | 146,325,000 | 1950 | 1455 | 0.98495581   | ENSBTAG00000011437                                                     |
| 1 | 146,250,000 | 146,400,000 | 1951 | 1390 | 0.926259545  | HSF2BP                                                                 |
| 1 | 146,325,000 | 146,475,000 | 1952 | 907  | 0.728921542  | HSF2BP,RRP1B                                                           |
| 1 | 146,400,000 | 146,550,000 | 1953 | 940  | -0.11034599  | CSTB,HSF2BP,PDXK,RRP1B                                                 |
| 1 | 146,475,000 | 146,625,000 | 1954 | 1134 | 0.05776621   | CSTB,PDXK,RRP1                                                         |
| 1 | 146,550,000 | 146,700,000 | 1955 | 1213 | 0.560371098  | CSTB,RRP1                                                              |
| 1 | 146,625,000 | 146,775,000 | 1956 | 1198 | 0.69301708   | AGPAT3                                                                 |
| 1 | 146,700,000 | 146,850,000 | 1957 | 873  | 0.841033186  | AGPAT3,ENSBTAG00000007100,ENSBTAG00000007105                           |
| 1 | 146,775,000 | 146,925,000 | 1958 | 671  | -0.111227342 | ES1,ENSBTAG00000007100,ENSBTAG00000007105                              |
| 1 | 146,850,000 | 147,000,000 | 1959 | 726  | -0.84245559  | COL18A1,ES1,ENSBTAG00000007105                                         |
| 1 | 146,925,000 | 147,075,000 | 1960 | 778  | -1.629179046 | COL18A1,SLC19A1                                                        |
| 1 | 147,000,000 | 147,150,000 | 1961 | 910  | -1.209774657 | COL18A1,PCBP3,SLC19A1                                                  |
| 1 | 147,075,000 | 147,225,000 | 1962 | 612  | -0.455254107 | PCBP3                                                                  |
| 1 | 147,150,000 | 147,300,000 | 1963 | 290  | 0.148032886  | PCBP3                                                                  |
| 1 | 147,225,000 | 147,375,000 | 1964 | 918  | 0.463098023  | PCBP3                                                                  |
| 1 | 147,300,000 | 147,450,000 | 1965 | 1404 | 0.616808963  | COL6A1,PCBP3                                                           |
| 1 | 147,375,000 | 147,525,000 | 1966 | 1385 | 0.573958088  | COL6A1                                                                 |
| 1 | 147,450,000 | 147,600,000 | 1967 | 1193 | 0.585601055  | COL6A2,FTCD                                                            |
| 1 | 147,525,000 | 147,675,000 | 1968 | 867  | 0.39156927   | C1H21ORF56,COL6A2,FTCD,LSS,MCM3AP                                      |
| 1 | 147,600,000 | 147,750,000 | 1969 | 940  | 0.566882954  | C1H21ORF56,C21orf58,LSS,MCM3AP,PCNT,YBEY                               |
| 1 | 147,675,000 | 147,825,000 | 1970 | 1192 | 1.13784985   | C21orf58,MCM3AP,PCNT,YBEY                                              |
| 1 | 147,750,000 | 147,900,000 | 1971 | 1245 | 0.834140359  | DIP2A,PCNT                                                             |
| 1 | 147,825,000 | 147,975,000 | 1972 | 1337 | 0.455578263  | DIP2A,PCNT                                                             |
| 1 | 147,900,000 | 148,050,000 | 1973 | 1344 | 0.620413579  | DIP2A,S100B                                                            |
| 1 | 147,975,000 | 148,125,000 | 1974 | 1455 | 0.943288162  | DIP2A,HRMT1L1,S100B                                                    |
| 1 | 148,050,000 | 148,200,000 | 1975 | 1662 | 0.443320524  | HRMT1L1                                                                |
| 1 | 148,125,000 | 148,275,000 | 1976 | 1159 | -0.34483708  | FBXO25                                                                 |
| 1 | 148,200,000 | 148,350,000 | 1977 | 529  | 0.230105011  | FBXO25,TDRP                                                            |
| 1 | 148,275,000 | 148,425,000 | 1978 | 330  | 0.615738609  | FBXO25,TDRP                                                            |
| 1 | 148,350,000 | 148,500,000 | 1979 | 557  | 0.966905201  |                                                                        |
| 1 | 148,425,000 | 148,575,000 | 1980 | 882  | 0.853793638  | ENSBTAG00000046447                                                     |
| 1 | 148,500,000 | 148,650,000 | 1981 | 864  | 0.636221318  | ENSBTAG00000046447                                                     |
| 1 | 148,575,000 | 148,725,000 | 1982 | 535  | 0.849083567  | RUNX1,ENSBTAG00000046447                                               |



|   |             |             |      |      |              |                                         |
|---|-------------|-------------|------|------|--------------|-----------------------------------------|
| 1 | 148,650,000 | 148,800,000 | 1983 | 638  | 0.501435057  | RUNX1                                   |
| 1 | 148,725,000 | 148,875,000 | 1984 | 898  | 0.024150073  | RUNX1                                   |
| 1 | 148,800,000 | 148,950,000 | 1985 | 1002 | -0.393154237 |                                         |
| 1 | 148,875,000 | 149,025,000 | 1986 | 1108 | -0.466146357 |                                         |
| 1 | 148,950,000 | 149,100,000 | 1987 | 1206 | -0.111435236 |                                         |
| 1 | 149,025,000 | 149,175,000 | 1988 | 1010 | 0.342550208  |                                         |
| 1 | 149,100,000 | 149,250,000 | 1989 | 861  | 0.511944038  |                                         |
| 1 | 149,175,000 | 149,325,000 | 1990 | 985  | 0.612592239  |                                         |
| 1 | 149,250,000 | 149,400,000 | 1991 | 1096 | 0.502429207  |                                         |
| 1 | 149,325,000 | 149,475,000 | 1992 | 1294 | 0.923219768  |                                         |
| 1 | 149,400,000 | 149,550,000 | 1993 | 953  | 1.210021937  |                                         |
| 1 | 149,475,000 | 149,625,000 | 1994 | 946  | 0.371746643  |                                         |
| 1 | 149,550,000 | 149,700,000 | 1995 | 1093 | 0.330436198  |                                         |
| 1 | 149,625,000 | 149,775,000 | 1996 | 1069 | 0.845356727  |                                         |
| 1 | 149,700,000 | 149,850,000 | 1997 | 1335 | 0.809183508  |                                         |
| 1 | 149,775,000 | 149,925,000 | 1998 | 1023 | 0.680716002  |                                         |
| 1 | 149,850,000 | 150,000,000 | 1999 | 931  | 0.776114089  |                                         |
| 1 | 149,925,000 | 150,075,000 | 2000 | 1074 | 0.904746963  | SETD4,ENSBTAG00000023384                |
| 1 | 150,000,000 | 150,150,000 | 2001 | 724  | 0.762621805  | CBR3,MGC127133,SETD4,ENSBTAG00000023384 |
| 1 | 150,075,000 | 150,225,000 | 2002 | 977  | 0.861636425  | CBR3,DOPEY2,MGC127133                   |
| 1 | 150,150,000 | 150,300,000 | 2003 | 1446 | 1.115425612  | CBR3,DOPEY2                             |
| 1 | 150,225,000 | 150,375,000 | 2004 | 1005 | 1.117617542  | CHAF1B,DOPEY2,MORC3                     |
| 1 | 150,300,000 | 150,450,000 | 2005 | 880  | 0.964404323  | CHAF1B,CLDN14,MORC3                     |
| 1 | 150,375,000 | 150,525,000 | 2006 | 1240 | 1.055025123  | CHAF1B,CLDN14                           |
| 1 | 150,450,000 | 150,600,000 | 2007 | 1334 | 1.117263424  |                                         |
| 1 | 150,525,000 | 150,675,000 | 2008 | 1372 | 0.812195166  |                                         |
| 1 | 150,600,000 | 150,750,000 | 2009 | 1154 | 0.503149332  | HLCS,SIM2                               |
| 1 | 150,675,000 | 150,825,000 | 2010 | 968  | 0.627182137  | HLCS,SIM2                               |
| 1 | 150,750,000 | 150,900,000 | 2011 | 995  | 0.647169014  | HLCS                                    |
| 1 | 150,825,000 | 150,975,000 | 2012 | 863  | -0.297260272 | HLCS,RIPPLY3                            |
| 1 | 150,900,000 | 151,050,000 | 2013 | 803  | -0.746306155 | HLCS,PIGP,RIPPLY3,TTC3                  |
| 1 | 150,975,000 | 151,125,000 | 2014 | 871  | 0.063050645  | PIGP,TTC3                               |
| 1 | 151,050,000 | 151,200,000 | 2015 | 1011 | 0.687804297  | DSCR3,TTC3                              |
| 1 | 151,125,000 | 151,275,000 | 2016 | 758  | 0.675969192  | DSCR3,TTC3                              |
| 1 | 151,200,000 | 151,350,000 | 2017 | 400  | -0.85815154  |                                         |
| 1 | 151,275,000 | 151,425,000 | 2018 | 502  | -0.973547977 | DYRK1A                                  |
| 1 | 151,350,000 | 151,500,000 | 2019 | 667  | -0.77568048  | DYRK1A                                  |
| 1 | 151,425,000 | 151,575,000 | 2020 | 749  | -0.432232085 |                                         |
| 1 | 151,500,000 | 151,650,000 | 2021 | 835  | -0.540826006 | KCNJ6                                   |
| 1 | 151,575,000 | 151,725,000 | 2022 | 968  | 0.017301882  | KCNJ6                                   |
| 1 | 151,650,000 | 151,800,000 | 2023 | 947  | 0.103448679  |                                         |
| 1 | 151,725,000 | 151,875,000 | 2024 | 838  | -0.829320022 |                                         |
| 1 | 151,800,000 | 151,950,000 | 2025 | 788  | -0.277427135 |                                         |
| 1 | 151,875,000 | 152,025,000 | 2026 | 753  | 0.683545926  |                                         |
| 1 | 151,950,000 | 152,100,000 | 2027 | 727  | 0.13607239   |                                         |
| 1 | 152,025,000 | 152,175,000 | 2028 | 833  | -0.071239863 |                                         |
| 1 | 152,100,000 | 152,250,000 | 2029 | 890  | 0.217860012  |                                         |
| 1 | 152,175,000 | 152,325,000 | 2030 | 741  | 0.043534024  | KCNJ15                                  |
| 1 | 152,250,000 | 152,400,000 | 2031 | 782  | 0.245416037  | ERG,KCNJ15                              |
| 1 | 152,325,000 | 152,475,000 | 2032 | 759  | -0.08778977  | ERG                                     |
| 1 | 152,400,000 | 152,550,000 | 2033 | 750  | -0.680047002 | ERG                                     |
| 1 | 152,475,000 | 152,625,000 | 2034 | 981  | -0.097563563 | ERG                                     |
| 1 | 152,550,000 | 152,700,000 | 2035 | 1096 | 0.323025946  |                                         |

|   |             |             |      |      |              |                         |
|---|-------------|-------------|------|------|--------------|-------------------------|
| 1 | 152,625,000 | 152,775,000 | 2036 | 933  | -0.20851052  |                         |
| 1 | 152,700,000 | 152,850,000 | 2037 | 818  | 0.015781573  |                         |
| 1 | 152,775,000 | 152,925,000 | 2038 | 994  | 0.858918677  | ETS2                    |
| 1 | 152,850,000 | 153,000,000 | 2039 | 906  | 1.145177916  | ETS2                    |
| 1 | 152,925,000 | 153,075,000 | 2040 | 774  | 0.881578886  |                         |
| 1 | 153,000,000 | 153,150,000 | 2041 | 799  | 0.54768698   |                         |
| 1 | 153,075,000 | 153,225,000 | 2042 | 776  | -0.199018434 |                         |
| 1 | 153,150,000 | 153,300,000 | 2043 | 679  | -0.318583965 | PIK3R4                  |
| 1 | 153,225,000 | 153,375,000 | 2044 | 601  | 0.235079891  | COL6A6,PIK3R4           |
| 1 | 153,300,000 | 153,450,000 | 2045 | 1087 | 0.816620803  | COL6A6,PIK3R4           |
| 1 | 153,375,000 | 153,525,000 | 2046 | 1619 | 1.013807293  | COL6A6                  |
| 1 | 153,450,000 | 153,600,000 | 2047 | 1375 | 1.192059743  | ENSBTAG00000021906      |
| 1 | 153,525,000 | 153,675,000 | 2048 | 1216 | 1.084888931  | ENSBTAG00000021906      |
| 1 | 153,600,000 | 153,750,000 | 2049 | 1271 | 0.960187694  |                         |
| 1 | 153,675,000 | 153,825,000 | 2050 | 1478 | 0.391631959  | ENSBTAG00000021139      |
| 1 | 153,750,000 | 153,900,000 | 2051 | 1609 | 0.104534698  | ENSBTAG00000021139      |
| 1 | 153,825,000 | 153,975,000 | 2052 | 1704 | 0.486418581  | CAPN7                   |
| 1 | 153,900,000 | 154,050,000 | 2053 | 1893 | 1.013793488  | CAPN7,SH3BP5            |
| 1 | 153,975,000 | 154,125,000 | 2054 | 1861 | 1.08747392   | CAPN7,SH3BP5            |
| 1 | 154,050,000 | 154,200,000 | 2055 | 1582 | 0.899304121  | EAF1,METTL6,SH3BP5,UBL5 |
| 1 | 154,125,000 | 154,275,000 | 2056 | 1317 | 0.934901115  | COLQ,EAF1,METTL6,UBL5   |
| 1 | 154,200,000 | 154,350,000 | 2057 | 1545 | 0.949718184  | COLQ,EAF1,HACL1         |
| 1 | 154,275,000 | 154,425,000 | 2058 | 1408 | 0.907679704  | BTD,COLQ,HACL1          |
| 1 | 154,350,000 | 154,500,000 | 2059 | 901  | 0.718647001  | ANKRD28,BTD,HACL1       |
| 1 | 154,425,000 | 154,575,000 | 2060 | 814  | 0.246986742  | ANKRD28                 |
| 1 | 154,500,000 | 154,650,000 | 2061 | 1195 | 0.617473168  | ANKRD28                 |
| 1 | 154,575,000 | 154,725,000 | 2062 | 1278 | 0.581135927  |                         |
| 1 | 154,650,000 | 154,800,000 | 2063 | 1342 | 0.399769395  |                         |
| 1 | 154,725,000 | 154,875,000 | 2064 | 1702 | 0.037052042  |                         |
| 1 | 154,800,000 | 154,950,000 | 2065 | 1662 | -0.939647585 | GALNT15                 |
| 1 | 154,875,000 | 155,025,000 | 2066 | 1661 | -0.499416793 | DPH3,GALNT15,OXNAD1     |
| 1 | 154,950,000 | 155,100,000 | 2067 | 1618 | 0.471122786  | DPH3,GALNT15,OXNAD1     |
| 1 | 155,025,000 | 155,175,000 | 2068 | 1452 | 0.114364083  | OXNAD1                  |
| 1 | 155,100,000 | 155,250,000 | 2069 | 1408 | -0.844695485 | OXNAD1,RFTN1            |
| 1 | 155,175,000 | 155,325,000 | 2070 | 1573 | -0.808916138 | RFTN1                   |
| 1 | 155,250,000 | 155,400,000 | 2071 | 1699 | -0.050963161 | DAZL                    |
| 1 | 155,325,000 | 155,475,000 | 2072 | 1465 | 0.076391334  | DAZL                    |
| 1 | 155,400,000 | 155,550,000 | 2073 | 1297 | -1.040705236 | DAZL                    |
| 1 | 155,475,000 | 155,625,000 | 2074 | 1142 | -1.362968457 | PLCL2                   |
| 1 | 155,550,000 | 155,700,000 | 2075 | 914  | -0.167250126 | PLCL2                   |
| 1 | 155,625,000 | 155,775,000 | 2076 | 1025 | 0.234359283  | PLCL2                   |
| 1 | 155,700,000 | 155,850,000 | 2077 | 1347 | 0.074392411  | PLCL2,TBC1D5            |
| 1 | 155,775,000 | 155,925,000 | 2078 | 1416 | -0.385550598 | PLCL2,TBC1D5            |
| 1 | 155,850,000 | 156,000,000 | 2079 | 1304 | -0.588777554 | TBC1D5                  |
| 1 | 155,925,000 | 156,075,000 | 2080 | 1324 | 0.570303921  | TBC1D5                  |
| 1 | 156,000,000 | 156,150,000 | 2081 | 1186 | 0.754542359  | TBC1D5                  |
| 1 | 156,075,000 | 156,225,000 | 2082 | 905  | 0.69549298   | TBC1D5                  |
| 1 | 156,150,000 | 156,300,000 | 2083 | 993  | -0.058477773 | TBC1D5                  |
| 1 | 156,225,000 | 156,375,000 | 2084 | 1132 | 0.305487109  |                         |
| 1 | 156,300,000 | 156,450,000 | 2085 | 992  | 0.872307908  |                         |
| 1 | 156,375,000 | 156,525,000 | 2086 | 1124 | 1.213778251  |                         |
| 1 | 156,450,000 | 156,600,000 | 2087 | 1134 | 1.094971492  |                         |
| 1 | 156,525,000 | 156,675,000 | 2088 | 1190 | 1.134187372  |                         |

|   |             |             |      |      |              |                             |
|---|-------------|-------------|------|------|--------------|-----------------------------|
| 1 | 156,600,000 | 156,750,000 | 2089 | 1310 | 1.264095596  |                             |
| 1 | 156,675,000 | 156,825,000 | 2090 | 1148 | 1.12468972   |                             |
| 1 | 156,750,000 | 156,900,000 | 2091 | 1286 | 0.558185602  |                             |
| 1 | 156,825,000 | 156,975,000 | 2092 | 1238 | 0.083046344  |                             |
| 1 | 156,900,000 | 157,050,000 | 2093 | 1484 | -0.640183423 |                             |
| 1 | 156,975,000 | 157,125,000 | 2094 | 1520 | -0.311334254 |                             |
| 1 | 157,050,000 | 157,200,000 | 2095 | 1266 | 0.318213486  | SATB1                       |
| 1 | 157,125,000 | 157,275,000 | 2096 | 1157 | -0.138113058 | SATB1                       |
| 1 | 157,200,000 | 157,350,000 | 2097 | 1103 | -0.283966162 | SATB1                       |
| 1 | 157,275,000 | 157,425,000 | 2098 | 1432 | -0.059771484 |                             |
| 1 | 157,350,000 | 157,500,000 | 2099 | 1422 | -0.037988551 |                             |
| 1 | 157,425,000 | 157,575,000 | 2100 | 1414 | 0.566707158  |                             |
| 1 | 157,500,000 | 157,650,000 | 2101 | 1429 | 0.98041229   |                             |
| 1 | 157,575,000 | 157,725,000 | 2102 | 1461 | 0.836059559  |                             |
| 1 | 157,650,000 | 157,800,000 | 2103 | 1428 | 0.199858826  |                             |
| 1 | 157,725,000 | 157,875,000 | 2104 | 1197 | -0.52773594  |                             |
| 1 | 157,800,000 | 157,950,000 | 2105 | 1224 | -2.748837332 |                             |
| 1 | 157,875,000 | 158,025,000 | 2106 | 1553 | -2.284176508 |                             |
| 1 | 157,950,000 | 158,100,000 | 2107 | 1835 | 0.175489228  |                             |
| 1 | 158,025,000 | 158,175,000 | 2108 | 1663 | 0.315082419  |                             |
| 1 | 158,100,000 | 158,250,000 | 2109 | 1679 | 0.25042217   |                             |
| 1 | 158,175,000 | 158,325,000 | 2110 | 1639 | 0.044323768  | ENSBTAG00000047978          |
| 1 | 158,250,000 | 158,337,067 | 2111 | 794  | -0.308558343 | ENSBTAG00000047978          |
| 2 | 0           | 150,000     | 1    | 1019 | 0.386605869  |                             |
| 2 | 75,000      | 225,000     | 2    | 934  | 0.213447794  |                             |
| 2 | 150,000     | 300,000     | 3    | 590  | 0.263479545  | LGSN                        |
| 2 | 225,000     | 375,000     | 4    | 464  | -0.125237351 | LGSN,OCA2                   |
| 2 | 300,000     | 450,000     | 5    | 506  | -0.261682127 | LGSN,OCA2                   |
| 2 | 375,000     | 525,000     | 6    | 604  | 0.052783256  | OCA2                        |
| 2 | 450,000     | 600,000     | 7    | 918  | 0.008018537  | OCA2                        |
| 2 | 525,000     | 675,000     | 8    | 1295 | -2.538809241 | HERC2,OCA2                  |
| 2 | 600,000     | 750,000     | 9    | 1158 | -3.948066945 | HERC2                       |
| 2 | 675,000     | 825,000     | 10   | 988  | -3.334993254 | HERC2                       |
| 2 | 750,000     | 900,000     | 11   | 1240 | -1.944788211 | HERC2                       |
| 2 | 825,000     | 975,000     | 12   | 1210 | -0.881327988 | HERC2,NIPA1,NIPA2           |
| 2 | 900,000     | 1,050,000   | 13   | 1113 | -0.200409852 | CYFIP1,NIPA1,NIPA2          |
| 2 | 975,000     | 1,125,000   | 14   | 1180 | 0.437835843  | CYFIP1,NIPA2                |
| 2 | 1,050,000   | 1,200,000   | 15   | 1155 | 0.516230897  | CYFIP1,TUBGCP5              |
| 2 | 1,125,000   | 1,275,000   | 16   | 1048 | 0.218791943  | CCDC115,IMP4,PTPN18,TUBGCP5 |
| 2 | 1,200,000   | 1,350,000   | 17   | 1146 | 0.334820481  | CCDC115,IMP4,PTPN18,TUBGCP5 |
| 2 | 1,275,000   | 1,425,000   | 18   | 1501 | 0.027331095  | AMER3,PTPN18                |
| 2 | 1,350,000   | 1,500,000   | 19   | 1640 | 0.364443399  | AMER3                       |
| 2 | 1,425,000   | 1,575,000   | 20   | 1622 | 1.037601634  |                             |
| 2 | 1,500,000   | 1,650,000   | 21   | 1575 | 0.953044108  | ARHGEF4                     |
| 2 | 1,575,000   | 1,725,000   | 22   | 1183 | 0.618558814  | ARHGEF4                     |
| 2 | 1,650,000   | 1,800,000   | 23   | 1159 | -0.366654891 | ARHGEF4,FAM168B             |
| 2 | 1,725,000   | 1,875,000   | 24   | 1443 | 0.244245695  | ARHGEF4,FAM168B,PLEKHB2     |
| 2 | 1,800,000   | 1,950,000   | 25   | 1647 | 0.57154989   | FAM168B,PLEKHB2             |
| 2 | 1,875,000   | 2,025,000   | 26   | 1702 | 0.415453824  | PLEKHB2                     |
| 2 | 1,950,000   | 2,100,000   | 27   | 1295 | 0.233146814  |                             |
| 2 | 2,025,000   | 2,175,000   | 28   | 1089 | 0.085272288  |                             |
| 2 | 2,100,000   | 2,250,000   | 29   | 1175 | 0.503662104  |                             |
| 2 | 2,175,000   | 2,325,000   | 30   | 1411 | -0.272066148 |                             |

|   |           |           |    |      |              |                                 |
|---|-----------|-----------|----|------|--------------|---------------------------------|
| 2 | 2,250,000 | 2,400,000 | 31 | 1125 | -1.03104542  |                                 |
| 2 | 2,325,000 | 2,475,000 | 32 | 514  | -2.176039438 |                                 |
| 2 | 2,400,000 | 2,550,000 | 33 | 348  | -1.388504209 |                                 |
| 2 | 2,475,000 | 2,625,000 | 34 | 512  | -2.031262883 |                                 |
| 2 | 2,550,000 | 2,700,000 | 35 | 709  | -1.374717153 |                                 |
| 2 | 2,625,000 | 2,775,000 | 36 | 853  | 0.480782881  |                                 |
| 2 | 2,700,000 | 2,850,000 | 37 | 842  | 0.660959855  |                                 |
| 2 | 2,775,000 | 2,925,000 | 38 | 629  | -0.027612206 |                                 |
| 2 | 2,850,000 | 3,000,000 | 39 | 802  | -2.163155344 |                                 |
| 2 | 2,925,000 | 3,075,000 | 40 | 867  | -2.446384712 |                                 |
| 2 | 3,000,000 | 3,150,000 | 41 | 534  | -1.290703899 |                                 |
| 2 | 3,075,000 | 3,225,000 | 42 | 557  | 0.461453145  |                                 |
| 2 | 3,150,000 | 3,300,000 | 43 | 1048 | 1.025605567  |                                 |
| 2 | 3,225,000 | 3,375,000 | 44 | 1037 | 1.066097443  |                                 |
| 2 | 3,300,000 | 3,450,000 | 45 | 990  | 1.217403965  |                                 |
| 2 | 3,375,000 | 3,525,000 | 46 | 1289 | 1.211360667  |                                 |
| 2 | 3,450,000 | 3,600,000 | 47 | 1241 | 1.021059756  |                                 |
| 2 | 3,525,000 | 3,675,000 | 48 | 1400 | 0.876876316  |                                 |
| 2 | 3,600,000 | 3,750,000 | 49 | 1898 | 0.975878029  |                                 |
| 2 | 3,675,000 | 3,825,000 | 50 | 1592 | 0.632864968  |                                 |
| 2 | 3,750,000 | 3,900,000 | 51 | 939  | -0.128955899 |                                 |
| 2 | 3,825,000 | 3,975,000 | 52 | 761  | 0.304361689  |                                 |
| 2 | 3,900,000 | 4,050,000 | 53 | 697  | 0.159359556  |                                 |
| 2 | 3,975,000 | 4,125,000 | 54 | 654  | -0.057074689 | HS6ST1                          |
| 2 | 4,050,000 | 4,200,000 | 55 | 1137 | 0.053144536  | HS6ST1                          |
| 2 | 4,125,000 | 4,275,000 | 56 | 1593 | 0.183934794  | HS6ST1,UGGT1                    |
| 2 | 4,200,000 | 4,350,000 | 57 | 1264 | -0.317749675 | UGGT1                           |
| 2 | 4,275,000 | 4,425,000 | 58 | 822  | -1.893667891 | SAP130,UGGT1                    |
| 2 | 4,350,000 | 4,500,000 | 59 | 534  | -2.466761651 | SAP130                          |
| 2 | 4,425,000 | 4,575,000 | 60 | 702  | -0.817629583 | AMMECR1L,POLR2D,SAP130          |
| 2 | 4,500,000 | 4,650,000 | 61 | 707  | 0.067811212  | AMMECR1L,POLR2D,WDR33           |
| 2 | 4,575,000 | 4,725,000 | 62 | 421  | 0.049768983  | SFT2D3,WDR33                    |
| 2 | 4,650,000 | 4,800,000 | 63 | 408  | -0.490545228 | LIMS2,SFT2D3,WDR33              |
| 2 | 4,725,000 | 4,875,000 | 64 | 754  | 0.641672145  | GPR17,LIMS2,MYO7B               |
| 2 | 4,800,000 | 4,950,000 | 65 | 1076 | -0.394051726 | GPR17,IWS1,LIMS2,MYO7B          |
| 2 | 4,875,000 | 5,025,000 | 66 | 799  | -0.858368918 | IWS1,MYO7B                      |
| 2 | 4,950,000 | 5,100,000 | 67 | 531  | -0.276303964 | IWS1,PROC                       |
| 2 | 5,025,000 | 5,175,000 | 68 | 561  | -0.223632152 | MAP3K2,PROC                     |
| 2 | 5,100,000 | 5,250,000 | 69 | 658  | 0.596540101  | CYP27C1,ERCC3,MAP3K2            |
| 2 | 5,175,000 | 5,325,000 | 70 | 910  | 0.559890529  | CYP27C1,ERCC3                   |
| 2 | 5,250,000 | 5,400,000 | 71 | 947  | -0.866614756 | BIN1,CYP27C1,ENSBTAG00000034949 |
| 2 | 5,325,000 | 5,475,000 | 72 | 1201 | -2.323103853 | BIN1,ENSBTAG00000034949         |
| 2 | 5,400,000 | 5,550,000 | 73 | 1593 | -0.881343201 | BIN1,ENSBTAG00000017214         |
| 2 | 5,475,000 | 5,625,000 | 74 | 1141 | 0.151722138  | NAB1,ENSBTAG00000017214         |
| 2 | 5,550,000 | 5,700,000 | 75 | 752  | -0.138716127 | NAB1                            |
| 2 | 5,625,000 | 5,775,000 | 76 | 715  | -0.346962755 | MFSD6,TMEM194B                  |
| 2 | 5,700,000 | 5,850,000 | 77 | 706  | -0.851826714 | MFSD6,TMEM194B                  |
| 2 | 5,775,000 | 5,925,000 | 78 | 769  | -0.592899669 | INPP1,MFSD6                     |
| 2 | 5,850,000 | 6,000,000 | 79 | 741  | 0.071485859  | HIBCH,INPP1                     |
| 2 | 5,925,000 | 6,075,000 | 80 | 756  | 0.787382187  | C2H2orf88,HIBCH                 |
| 2 | 6,000,000 | 6,150,000 | 81 | 1045 | 0.132762958  | C2H2orf88,HIBCH                 |
| 2 | 6,075,000 | 6,225,000 | 82 | 1166 | -0.21428584  | C2H2orf88,MSTN                  |
| 2 | 6,150,000 | 6,300,000 | 83 | 782  | 0.380570261  | MSTN                            |

|   |            |            |     |      |              |                           |
|---|------------|------------|-----|------|--------------|---------------------------|
| 2 | 6,225,000  | 6,375,000  | 84  | 475  | 0.659676906  |                           |
| 2 | 6,300,000  | 6,450,000  | 85  | 311  | 0.281919464  | PMS1                      |
| 2 | 6,375,000  | 6,525,000  | 86  | 272  | -0.935971548 | ORMDL1,PMS1               |
| 2 | 6,450,000  | 6,600,000  | 87  | 503  | 0.290783875  | ANKAR,ORMDL1,OSGEPL1,PMS1 |
| 2 | 6,525,000  | 6,675,000  | 88  | 723  | 0.77877207   | ANKAR,ASNSD1,OSGEPL1      |
| 2 | 6,600,000  | 6,750,000  | 89  | 875  | 0.785935127  | ASNSD1,SLC40A1            |
| 2 | 6,675,000  | 6,825,000  | 90  | 997  | 1.151014263  | SLC40A1                   |
| 2 | 6,750,000  | 6,900,000  | 91  | 1188 | -0.060451707 | WDR75                     |
| 2 | 6,825,000  | 6,975,000  | 92  | 1199 | -1.184276787 | WDR75                     |
| 2 | 6,900,000  | 7,050,000  | 93  | 990  | -1.281961004 | WDR75                     |
| 2 | 6,975,000  | 7,125,000  | 94  | 1057 | -1.14716924  |                           |
| 2 | 7,050,000  | 7,200,000  | 95  | 1269 | -0.249856272 | COL5A2                    |
| 2 | 7,125,000  | 7,275,000  | 96  | 1308 | 0.149159584  | COL5A2                    |
| 2 | 7,200,000  | 7,350,000  | 97  | 964  | 0.518997489  | COL3A1,COL5A2             |
| 2 | 7,275,000  | 7,425,000  | 98  | 680  | 1.261767214  | COL3A1,COL5A2             |
| 2 | 7,350,000  | 7,500,000  | 99  | 773  | 0.571594927  | COL3A1                    |
| 2 | 7,425,000  | 7,575,000  | 100 | 824  | 0.316126445  |                           |
| 2 | 7,500,000  | 7,650,000  | 101 | 974  | 0.49604722   |                           |
| 2 | 7,575,000  | 7,725,000  | 102 | 1019 | -0.131907778 |                           |
| 2 | 7,650,000  | 7,800,000  | 103 | 850  | -0.738627169 | GULP1                     |
| 2 | 7,725,000  | 7,875,000  | 104 | 622  | -0.857126434 | GULP1                     |
| 2 | 7,800,000  | 7,950,000  | 105 | 554  | -0.636992135 | GULP1                     |
| 2 | 7,875,000  | 8,025,000  | 106 | 519  | -0.594887536 | GULP1                     |
| 2 | 7,950,000  | 8,100,000  | 107 | 362  | -1.961895654 |                           |
| 2 | 8,025,000  | 8,175,000  | 108 | 940  | -1.636544117 |                           |
| 2 | 8,100,000  | 8,250,000  | 109 | 1115 | -1.893328554 |                           |
| 2 | 8,175,000  | 8,325,000  | 110 | 931  | -0.809506014 |                           |
| 2 | 8,250,000  | 8,400,000  | 111 | 1192 | 0.523633788  |                           |
| 2 | 8,325,000  | 8,475,000  | 112 | 1193 | -0.473928433 |                           |
| 2 | 8,400,000  | 8,550,000  | 113 | 1041 | -1.586172888 |                           |
| 2 | 8,475,000  | 8,625,000  | 114 | 1174 | 0.222094942  |                           |
| 2 | 8,550,000  | 8,700,000  | 115 | 1191 | 0.531278419  |                           |
| 2 | 8,625,000  | 8,775,000  | 116 | 1386 | -0.402226379 |                           |
| 2 | 8,700,000  | 8,850,000  | 117 | 1429 | 0.001659115  |                           |
| 2 | 8,775,000  | 8,925,000  | 118 | 872  | 0.616429499  | CALCRL                    |
| 2 | 8,850,000  | 9,000,000  | 119 | 634  | 0.219571781  | CALCRL                    |
| 2 | 8,925,000  | 9,075,000  | 120 | 638  | -0.053829696 | CALCRL                    |
| 2 | 9,000,000  | 9,150,000  | 121 | 770  | 0.91864369   | CALCRL                    |
| 2 | 9,075,000  | 9,225,000  | 122 | 707  | 0.82291596   |                           |
| 2 | 9,150,000  | 9,300,000  | 123 | 510  | 0.0333869    |                           |
| 2 | 9,225,000  | 9,375,000  | 124 | 739  | 0.884250533  |                           |
| 2 | 9,300,000  | 9,450,000  | 125 | 840  | 0.784206085  |                           |
| 2 | 9,375,000  | 9,525,000  | 126 | 595  | 0.360323868  | ZSWIM2                    |
| 2 | 9,450,000  | 9,600,000  | 127 | 743  | 0.682103496  | FAM171B,ZSWIM2            |
| 2 | 9,525,000  | 9,675,000  | 128 | 847  | 0.477277201  | FAM171B,ITGAV             |
| 2 | 9,600,000  | 9,750,000  | 129 | 618  | -0.073446205 | ITGAV                     |
| 2 | 9,675,000  | 9,825,000  | 130 | 571  | -0.072254867 | ITGAV                     |
| 2 | 9,750,000  | 9,900,000  | 131 | 585  | 0.272680939  | ITGAV,ZC3H15              |
| 2 | 9,825,000  | 9,975,000  | 132 | 410  | 0.336271902  | ZC3H15                    |
| 2 | 9,900,000  | 10,050,000 | 133 | 384  | -0.149602088 |                           |
| 2 | 9,975,000  | 10,125,000 | 134 | 476  | -0.188156277 |                           |
| 2 | 10,050,000 | 10,200,000 | 135 | 454  | -0.306709263 |                           |
| 2 | 10,125,000 | 10,275,000 | 136 | 605  | 0.199842486  |                           |

|   |            |            |     |      |              |                    |
|---|------------|------------|-----|------|--------------|--------------------|
| 2 | 10,200,000 | 10,350,000 | 137 | 688  | 0.213214581  |                    |
| 2 | 10,275,000 | 10,425,000 | 138 | 914  | 0.633851837  |                    |
| 2 | 10,350,000 | 10,500,000 | 139 | 1357 | -0.242080101 |                    |
| 2 | 10,425,000 | 10,575,000 | 140 | 1255 | 0.246980159  |                    |
| 2 | 10,500,000 | 10,650,000 | 141 | 971  | 1.2955103    | FSIP2              |
| 2 | 10,575,000 | 10,725,000 | 142 | 770  | 1.324570017  | FSIP2              |
| 2 | 10,650,000 | 10,800,000 | 143 | 583  | 1.235391992  | FSIP2              |
| 2 | 10,725,000 | 10,875,000 | 144 | 853  | 1.330754076  | FSIP2              |
| 2 | 10,800,000 | 10,950,000 | 145 | 1029 | 1.403912663  |                    |
| 2 | 10,875,000 | 11,025,000 | 146 | 985  | 1.26127436   |                    |
| 2 | 10,950,000 | 11,100,000 | 147 | 1150 | 1.174942964  |                    |
| 2 | 11,025,000 | 11,175,000 | 148 | 1405 | 0.91669639   |                    |
| 2 | 11,100,000 | 11,250,000 | 149 | 1639 | 0.692574127  |                    |
| 2 | 11,175,000 | 11,325,000 | 150 | 1756 | 0.899359809  |                    |
| 2 | 11,250,000 | 11,400,000 | 151 | 1734 | -0.510106612 |                    |
| 2 | 11,325,000 | 11,475,000 | 152 | 1473 | -2.475549009 |                    |
| 2 | 11,400,000 | 11,550,000 | 153 | 1453 | -1.654565893 |                    |
| 2 | 11,475,000 | 11,625,000 | 154 | 1457 | -0.109558269 | ZNF804A            |
| 2 | 11,550,000 | 11,700,000 | 155 | 1389 | 0.814286251  | ZNF804A            |
| 2 | 11,625,000 | 11,775,000 | 156 | 1271 | 0.618633087  | ENSBTAG00000038064 |
| 2 | 11,700,000 | 11,850,000 | 157 | 1386 | -0.95592769  | ENSBTAG00000038064 |
| 2 | 11,775,000 | 11,925,000 | 158 | 1547 | -1.075643233 |                    |
| 2 | 11,850,000 | 12,000,000 | 159 | 1292 | -0.226216283 |                    |
| 2 | 11,925,000 | 12,075,000 | 160 | 1544 | 0.164476713  |                    |
| 2 | 12,000,000 | 12,150,000 | 161 | 1707 | 0.470623915  |                    |
| 2 | 12,075,000 | 12,225,000 | 162 | 1164 | 0.044632058  |                    |
| 2 | 12,150,000 | 12,300,000 | 163 | 1058 | -0.108121242 |                    |
| 2 | 12,225,000 | 12,375,000 | 164 | 1075 | 0.535695569  |                    |
| 2 | 12,300,000 | 12,450,000 | 165 | 1486 | 1.204092105  |                    |
| 2 | 12,375,000 | 12,525,000 | 166 | 1916 | 0.550312989  |                    |
| 2 | 12,450,000 | 12,600,000 | 167 | 1588 | -0.453497884 |                    |
| 2 | 12,525,000 | 12,675,000 | 168 | 1568 | 0.190160214  |                    |
| 2 | 12,600,000 | 12,750,000 | 169 | 1513 | -0.382562693 |                    |
| 2 | 12,675,000 | 12,825,000 | 170 | 1304 | -1.115983744 |                    |
| 2 | 12,750,000 | 12,900,000 | 171 | 933  | -0.679781744 |                    |
| 2 | 12,825,000 | 12,975,000 | 172 | 636  | -1.945732465 |                    |
| 2 | 12,900,000 | 13,050,000 | 173 | 994  | -0.50970111  |                    |
| 2 | 12,975,000 | 13,125,000 | 174 | 1411 | 0.143513393  |                    |
| 2 | 13,050,000 | 13,200,000 | 175 | 1544 | -0.037612445 |                    |
| 2 | 13,125,000 | 13,275,000 | 176 | 1476 | 0.720440015  |                    |
| 2 | 13,200,000 | 13,350,000 | 177 | 1157 | 1.280041816  |                    |
| 2 | 13,275,000 | 13,425,000 | 178 | 1052 | 1.032283545  |                    |
| 2 | 13,350,000 | 13,500,000 | 179 | 1611 | 0.909268189  | NUP35              |
| 2 | 13,425,000 | 13,575,000 | 180 | 1771 | 1.153915057  | DUSP19,NUP35       |
| 2 | 13,500,000 | 13,650,000 | 181 | 1044 | 1.260449627  | DUSP19,NCKAP1      |
| 2 | 13,575,000 | 13,725,000 | 182 | 968  | 0.961826144  | FRZB,NCKAP1        |
| 2 | 13,650,000 | 13,800,000 | 183 | 1532 | 0.005335237  | FRZB,NCKAP1        |
| 2 | 13,725,000 | 13,875,000 | 184 | 1781 | -0.488132821 | DNAJC10,FRZB       |
| 2 | 13,800,000 | 13,950,000 | 185 | 1906 | 0.016032695  | DNAJC10            |
| 2 | 13,875,000 | 14,025,000 | 186 | 1844 | -0.067491224 |                    |
| 2 | 13,950,000 | 14,100,000 | 187 | 1609 | -0.169680762 | PDE1A              |
| 2 | 14,025,000 | 14,175,000 | 188 | 1344 | -0.102094932 | PDE1A              |
| 2 | 14,100,000 | 14,250,000 | 189 | 1093 | -0.375704439 | PDE1A              |

|   |            |            |     |      |              |                                  |
|---|------------|------------|-----|------|--------------|----------------------------------|
| 2 | 14,175,000 | 14,325,000 | 190 | 965  | -0.658217346 | PDE1A                            |
| 2 | 14,250,000 | 14,400,000 | 191 | 1078 | -1.913837781 | PDE1A                            |
| 2 | 14,325,000 | 14,475,000 | 192 | 1241 | -2.579413626 | PDE1A,ENSBTAG00000033523         |
| 2 | 14,400,000 | 14,550,000 | 193 | 1372 | -0.559529471 | PDE1A,PPP1R1C,ENSBTAG00000033523 |
| 2 | 14,475,000 | 14,625,000 | 194 | 1475 | -0.475263082 | PDE1A,PPP1R1C                    |
| 2 | 14,550,000 | 14,700,000 | 195 | 1321 | -1.314411455 | PPP1R1C,SSFA2                    |
| 2 | 14,625,000 | 14,775,000 | 196 | 1234 | -0.489475378 | SSFA2                            |
| 2 | 14,700,000 | 14,850,000 | 197 | 1116 | 0.06193809   | SSFA2                            |
| 2 | 14,775,000 | 14,925,000 | 198 | 1427 | 0.418796486  |                                  |
| 2 | 14,850,000 | 15,000,000 | 199 | 1527 | 0.521456533  | NEUROD1                          |
| 2 | 14,925,000 | 15,075,000 | 200 | 1180 | 0.955671215  | CERKL,NEUROD1                    |
| 2 | 15,000,000 | 15,150,000 | 201 | 997  | 1.041844521  | CERKL,ITGA4                      |
| 2 | 15,075,000 | 15,225,000 | 202 | 915  | -0.534402124 | CERKL,ITGA4                      |
| 2 | 15,150,000 | 15,300,000 | 203 | 859  | -1.044836848 | ITGA4                            |
| 2 | 15,225,000 | 15,375,000 | 204 | 753  | -0.393995753 |                                  |
| 2 | 15,300,000 | 15,450,000 | 205 | 937  | -1.476414397 |                                  |
| 2 | 15,375,000 | 15,525,000 | 206 | 954  | -0.50829097  |                                  |
| 2 | 15,450,000 | 15,600,000 | 207 | 985  | 1.006926711  |                                  |
| 2 | 15,525,000 | 15,675,000 | 208 | 940  | 0.964853359  | UBE2E3                           |
| 2 | 15,600,000 | 15,750,000 | 209 | 869  | -0.786031386 | UBE2E3                           |
| 2 | 15,675,000 | 15,825,000 | 210 | 700  | -1.60882917  | UBE2E3                           |
| 2 | 15,750,000 | 15,900,000 | 211 | 640  | -0.93739421  | UBE2E3                           |
| 2 | 15,825,000 | 15,975,000 | 212 | 846  | -1.944287845 |                                  |
| 2 | 15,900,000 | 16,050,000 | 213 | 930  | -0.63577059  |                                  |
| 2 | 15,975,000 | 16,125,000 | 214 | 1050 | -0.026230925 |                                  |
| 2 | 16,050,000 | 16,200,000 | 215 | 930  | -0.569186986 |                                  |
| 2 | 16,125,000 | 16,275,000 | 216 | 540  | -0.781562461 |                                  |
| 2 | 16,200,000 | 16,350,000 | 217 | 382  | -0.439844424 |                                  |
| 2 | 16,275,000 | 16,425,000 | 218 | 671  | 1.086466683  |                                  |
| 2 | 16,350,000 | 16,500,000 | 219 | 878  | 0.363418998  |                                  |
| 2 | 16,425,000 | 16,575,000 | 220 | 749  | -1.444550002 |                                  |
| 2 | 16,500,000 | 16,650,000 | 221 | 757  | 0.6410877    |                                  |
| 2 | 16,575,000 | 16,725,000 | 222 | 904  | 1.303877002  |                                  |
| 2 | 16,650,000 | 16,800,000 | 223 | 973  | 0.560155517  |                                  |
| 2 | 16,725,000 | 16,875,000 | 224 | 917  | -0.716081933 | CWC22                            |
| 2 | 16,800,000 | 16,950,000 | 225 | 552  | -1.758747492 | CWC22                            |
| 2 | 16,875,000 | 17,025,000 | 226 | 246  | -3.395639833 | CWC22                            |
| 2 | 16,950,000 | 17,100,000 | 227 | 675  | 0.696556381  | MGC139239                        |
| 2 | 17,025,000 | 17,175,000 | 228 | 1297 | 0.967653943  | MGC139239                        |
| 2 | 17,100,000 | 17,250,000 | 229 | 1331 | 0.988246757  | MGC139239                        |
| 2 | 17,175,000 | 17,325,000 | 230 | 1117 | 1.13509039   | MGC139239                        |
| 2 | 17,250,000 | 17,400,000 | 231 | 1066 | 0.809507201  | MGC139239                        |
| 2 | 17,325,000 | 17,475,000 | 232 | 1055 | 0.403641888  | MGC139239                        |
| 2 | 17,400,000 | 17,550,000 | 233 | 1182 | 0.819685589  | MGC139239                        |
| 2 | 17,475,000 | 17,625,000 | 234 | 1101 | 0.646932675  |                                  |
| 2 | 17,550,000 | 17,700,000 | 235 | 1164 | 0.627702502  |                                  |
| 2 | 17,625,000 | 17,775,000 | 236 | 1553 | 0.965898447  | SESTD1                           |
| 2 | 17,700,000 | 17,850,000 | 237 | 1596 | 0.331979502  | CCDC141,SESTD1                   |
| 2 | 17,775,000 | 17,925,000 | 238 | 1582 | -0.206099618 | CCDC141                          |
| 2 | 17,850,000 | 18,000,000 | 239 | 1523 | 0.699285755  | CCDC141                          |
| 2 | 17,925,000 | 18,075,000 | 240 | 1310 | 1.103146877  | CCDC141,TTN                      |
| 2 | 18,000,000 | 18,150,000 | 241 | 1091 | 0.57768329   | CCDC141,TTN                      |
| 2 | 18,075,000 | 18,225,000 | 242 | 1014 | 0.395692827  | TTN                              |

|   |            |            |     |      |              |                                             |
|---|------------|------------|-----|------|--------------|---------------------------------------------|
| 2 | 18,150,000 | 18,300,000 | 243 | 730  | 0.672266385  | TTN                                         |
| 2 | 18,225,000 | 18,375,000 | 244 | 626  | 1.073429775  | TTN                                         |
| 2 | 18,300,000 | 18,450,000 | 245 | 782  | 1.22411728   | DFNB59,FKBP7,PLEKHA3,PRKRA,TTN              |
| 2 | 18,375,000 | 18,525,000 | 246 | 905  | 1.024957864  | DFNB59,FKBP7,OSBPL6,PLEKHA3,PRKRA           |
| 2 | 18,450,000 | 18,600,000 | 247 | 981  | 0.466813847  | OSBPL6                                      |
| 2 | 18,525,000 | 18,675,000 | 248 | 1022 | -0.247451044 | OSBPL6                                      |
| 2 | 18,600,000 | 18,750,000 | 249 | 1213 | -0.20634259  |                                             |
| 2 | 18,675,000 | 18,825,000 | 250 | 1048 | -0.190223537 | CYCT,PDE11A,RBM45                           |
| 2 | 18,750,000 | 18,900,000 | 251 | 688  | -0.198531349 | CYCT,PDE11A,RBM45                           |
| 2 | 18,825,000 | 18,975,000 | 252 | 890  | 0.298404017  | PDE11A                                      |
| 2 | 18,900,000 | 19,050,000 | 253 | 1192 | 0.190224719  | PDE11A                                      |
| 2 | 18,975,000 | 19,125,000 | 254 | 990  | 0.086148601  | PDE11A                                      |
| 2 | 19,050,000 | 19,200,000 | 255 | 769  | 0.83342008   | PDE11A                                      |
| 2 | 19,125,000 | 19,275,000 | 256 | 673  | 0.641533555  | PDE11A,TTC30A                               |
| 2 | 19,200,000 | 19,350,000 | 257 | 494  | 0.090552926  | AGPS,PDE11A,TTC30A,TTC30B                   |
| 2 | 19,275,000 | 19,425,000 | 258 | 486  | 0.535694669  | AGPS,TTC30B                                 |
| 2 | 19,350,000 | 19,500,000 | 259 | 506  | -0.523454998 | AGPS                                        |
| 2 | 19,425,000 | 19,575,000 | 260 | 494  | -0.866599189 | AGPS                                        |
| 2 | 19,500,000 | 19,650,000 | 261 | 819  | -0.647690102 |                                             |
| 2 | 19,575,000 | 19,725,000 | 262 | 932  | -0.151718333 | HNRNPA3,NFE2L2                              |
| 2 | 19,650,000 | 19,800,000 | 263 | 754  | 0.571209427  | HNRNPA3,NFE2L2                              |
| 2 | 19,725,000 | 19,875,000 | 264 | 785  | 0.330741051  |                                             |
| 2 | 19,800,000 | 19,950,000 | 265 | 748  | 0.199595801  |                                             |
| 2 | 19,875,000 | 20,025,000 | 266 | 729  | 0.157136442  |                                             |
| 2 | 19,950,000 | 20,100,000 | 267 | 896  | -1.736495831 |                                             |
| 2 | 20,025,000 | 20,175,000 | 268 | 732  | -2.155655116 |                                             |
| 2 | 20,100,000 | 20,250,000 | 269 | 340  | -0.828042625 |                                             |
| 2 | 20,175,000 | 20,325,000 | 270 | 313  | -1.839656488 |                                             |
| 2 | 20,250,000 | 20,400,000 | 271 | 538  | -1.052446267 |                                             |
| 2 | 20,325,000 | 20,475,000 | 272 | 733  | 0.423998976  |                                             |
| 2 | 20,400,000 | 20,550,000 | 273 | 887  | 0.426675628  |                                             |
| 2 | 20,475,000 | 20,625,000 | 274 | 1002 | 0.369052799  | MTX2                                        |
| 2 | 20,550,000 | 20,700,000 | 275 | 808  | 0.307422466  | MTX2                                        |
| 2 | 20,625,000 | 20,775,000 | 276 | 441  | 0.370286476  | HOXD1,MTX2                                  |
| 2 | 20,700,000 | 20,850,000 | 277 | 254  | 0.30830846   | HOXD,HOXD1,HOXD10,HOXD12,HOXD3,HOXD4,HOXD9  |
| 2 | 20,775,000 | 20,925,000 | 278 | 326  | -0.033308893 | HOXD,HOXD10,HOXD12,HOXD13,HOXD3,HOXD4,HOXD9 |
| 2 | 20,850,000 | 21,000,000 | 279 | 515  | 0.015929569  | HOXD13,KIAA1715                             |
| 2 | 20,925,000 | 21,075,000 | 280 | 584  | -0.284252682 | KIAA1715,ENSBTAG00000031711                 |
| 2 | 21,000,000 | 21,150,000 | 281 | 558  | -0.026101767 | KIAA1715,ENSBTAG00000031711                 |
| 2 | 21,075,000 | 21,225,000 | 282 | 651  | 0.28011416   |                                             |
| 2 | 21,150,000 | 21,300,000 | 283 | 805  | -0.001641611 |                                             |
| 2 | 21,225,000 | 21,375,000 | 284 | 802  | -0.083012951 |                                             |
| 2 | 21,300,000 | 21,450,000 | 285 | 1167 | -0.33203897  |                                             |
| 2 | 21,375,000 | 21,525,000 | 286 | 1564 | -0.737330762 |                                             |
| 2 | 21,450,000 | 21,600,000 | 287 | 1245 | -0.675236814 |                                             |
| 2 | 21,525,000 | 21,675,000 | 288 | 1164 | 0.180114538  |                                             |
| 2 | 21,600,000 | 21,750,000 | 289 | 1118 | 0.151196591  | ATF2,ATP5G3                                 |
| 2 | 21,675,000 | 21,825,000 | 290 | 639  | 0.164134829  | ATF2,ATP5G3                                 |
| 2 | 21,750,000 | 21,900,000 | 291 | 503  | 0.21086734   | ATF2,CHN1                                   |
| 2 | 21,825,000 | 21,975,000 | 292 | 618  | -0.009698437 | ATF2,CHN1                                   |
| 2 | 21,900,000 | 22,050,000 | 293 | 595  | -0.213049262 | CHN1                                        |



|   |            |            |     |      |              |                                 |
|---|------------|------------|-----|------|--------------|---------------------------------|
| 2 | 21,975,000 | 22,125,000 | 294 | 540  | -0.217894774 | CHN1,CHRNA1                     |
| 2 | 22,050,000 | 22,200,000 | 295 | 596  | -0.719335357 | CHN1,CHRNA1                     |
| 2 | 22,125,000 | 22,275,000 | 296 | 592  | -1.627750697 | CHRNA1,WIPF1                    |
| 2 | 22,200,000 | 22,350,000 | 297 | 573  | -0.745012649 | WIPF1                           |
| 2 | 22,275,000 | 22,425,000 | 298 | 637  | -0.361555848 | GPR155,SCRN3,WIPF1              |
| 2 | 22,350,000 | 22,500,000 | 299 | 675  | -0.404043785 | CIR1,GPR155,SCRN3,SP9           |
| 2 | 22,425,000 | 22,575,000 | 300 | 697  | 0.485640723  | CIR1,OLA1,SCRN3,SP9             |
| 2 | 22,500,000 | 22,650,000 | 301 | 564  | 0.558299764  | OLA1                            |
| 2 | 22,575,000 | 22,725,000 | 302 | 379  | 0.55083051   | OLA1                            |
| 2 | 22,650,000 | 22,800,000 | 303 | 388  | 0.623010986  | OLA1                            |
| 2 | 22,725,000 | 22,875,000 | 304 | 344  | 0.900877593  | OLA1,SP3                        |
| 2 | 22,800,000 | 22,950,000 | 305 | 334  | 1.402167521  | SP3                             |
| 2 | 22,875,000 | 23,025,000 | 306 | 517  | 1.235334228  | SP3                             |
| 2 | 22,950,000 | 23,100,000 | 307 | 804  | 0.892133679  |                                 |
| 2 | 23,025,000 | 23,175,000 | 308 | 841  | 0.848161164  |                                 |
| 2 | 23,100,000 | 23,250,000 | 309 | 701  | 0.472381599  |                                 |
| 2 | 23,175,000 | 23,325,000 | 310 | 705  | -0.324269579 | UBL5                            |
| 2 | 23,250,000 | 23,400,000 | 311 | 674  | -0.571387106 | CDCA7,UBL5                      |
| 2 | 23,325,000 | 23,475,000 | 312 | 493  | -0.245277131 | CDCA7,ENSBTAG00000001083        |
| 2 | 23,400,000 | 23,550,000 | 313 | 399  | 0.500513593  | ENSBTAG00000001083              |
| 2 | 23,475,000 | 23,625,000 | 314 | 514  | 0.271781869  | ENSBTAG00000001083              |
| 2 | 23,550,000 | 23,700,000 | 315 | 828  | 0.025805939  | RAPGEF4,ENSBTAG00000001083      |
| 2 | 23,625,000 | 23,775,000 | 316 | 1046 | 0.770988886  | RAPGEF4                         |
| 2 | 23,700,000 | 23,850,000 | 317 | 759  | 1.38294353   | RAPGEF4                         |
| 2 | 23,775,000 | 23,925,000 | 318 | 712  | 1.283405849  | RAPGEF4                         |
| 2 | 23,850,000 | 24,000,000 | 319 | 809  | 1.273224385  | RAPGEF4                         |
| 2 | 23,925,000 | 24,075,000 | 320 | 998  | 0.954865381  | PDK1,RAPGEF4                    |
| 2 | 24,000,000 | 24,150,000 | 321 | 962  | 0.87039283   | ITGA6,PDK1                      |
| 2 | 24,075,000 | 24,225,000 | 322 | 740  | 0.149391955  | ITGA6,PDK1                      |
| 2 | 24,150,000 | 24,300,000 | 323 | 810  | -0.583198639 | ITGA6                           |
| 2 | 24,225,000 | 24,375,000 | 324 | 894  | -0.874926469 |                                 |
| 2 | 24,300,000 | 24,450,000 | 325 | 827  | -0.642776592 |                                 |
| 2 | 24,375,000 | 24,525,000 | 326 | 618  | -0.659141395 | DLX1,DLX2,MAP1D                 |
| 2 | 24,450,000 | 24,600,000 | 327 | 770  | -1.201407034 | DLX1,DLX2,MAP1D                 |
| 2 | 24,525,000 | 24,675,000 | 328 | 637  | -1.228627438 | HAT1,MAP1D                      |
| 2 | 24,600,000 | 24,750,000 | 329 | 426  | 1.104037572  | HAT1,SLC25A12                   |
| 2 | 24,675,000 | 24,825,000 | 330 | 494  | 1.099815958  | DYNC1I2,SLC25A12                |
| 2 | 24,750,000 | 24,900,000 | 331 | 488  | 0.021525545  | DYNC1I2,SLC25A12                |
| 2 | 24,825,000 | 24,975,000 | 332 | 673  | -2.523784847 | CYBRD1,DYNC1I2                  |
| 2 | 24,900,000 | 25,050,000 | 333 | 595  | -2.83704965  | CYBRD1,DCAF17                   |
| 2 | 24,975,000 | 25,125,000 | 334 | 401  | 0.567773949  | CYBRD1,DCAF17,METTL8            |
| 2 | 25,050,000 | 25,200,000 | 335 | 405  | 0.383716011  | DCAF17,METTL8                   |
| 2 | 25,125,000 | 25,275,000 | 336 | 456  | -0.543571411 | METTL8                          |
| 2 | 25,200,000 | 25,350,000 | 337 | 501  | -0.063202002 |                                 |
| 2 | 25,275,000 | 25,425,000 | 338 | 514  | 0.708011189  | TLK1                            |
| 2 | 25,350,000 | 25,500,000 | 339 | 524  | 1.059066389  | TLK1                            |
| 2 | 25,425,000 | 25,575,000 | 340 | 610  | 1.226653387  | GORASP2,TLK1,ENSBTAG00000036258 |
| 2 | 25,500,000 | 25,650,000 | 341 | 959  | 0.632657664  | GAD1,GORASP2,ENSBTAG00000036258 |
| 2 | 25,575,000 | 25,725,000 | 342 | 1020 | 0.328161994  | ERICH2,GAD1,GORASP2             |
| 2 | 25,650,000 | 25,800,000 | 343 | 904  | 0.250559054  | ERICH2,GAD1,SP5                 |
| 2 | 25,725,000 | 25,875,000 | 344 | 975  | -0.284590038 | SP5                             |
| 2 | 25,800,000 | 25,950,000 | 345 | 1020 | -0.158885559 |                                 |
| 2 | 25,875,000 | 26,025,000 | 346 | 1056 | 0.355001948  | MYO3B                           |

|   |            |            |     |      |              |                                                         |
|---|------------|------------|-----|------|--------------|---------------------------------------------------------|
| 2 | 25,950,000 | 26,100,000 | 347 | 931  | 0.924700428  | MYO3B                                                   |
| 2 | 26,025,000 | 26,175,000 | 348 | 995  | 1.433253868  | MYO3B                                                   |
| 2 | 26,100,000 | 26,250,000 | 349 | 1469 | 1.267397119  | MYO3B                                                   |
| 2 | 26,175,000 | 26,325,000 | 350 | 1791 | 0.439459084  | MYO3B                                                   |
| 2 | 26,250,000 | 26,400,000 | 351 | 1697 | 0.060988893  | MYO3B,UBR3                                              |
| 2 | 26,325,000 | 26,475,000 | 352 | 1196 | 0.411595997  | UBR3                                                    |
| 2 | 26,400,000 | 26,550,000 | 353 | 796  | 0.692111363  | UBR3                                                    |
| 2 | 26,475,000 | 26,625,000 | 354 | 642  | 0.719858392  | KLHL23,METTL5,SSB,UBR3                                  |
| 2 | 26,550,000 | 26,700,000 | 355 | 532  | 0.980696443  | CCDC173,KLHL23,METTL5,PHOSPHO2,PPIG,SSB,UBR3            |
| 2 | 26,625,000 | 26,775,000 | 356 | 528  | 1.171415038  | CCDC173,FASTKD1,KLHL23,PHOSPHO2,PPIG,ENSBTAG00000046878 |
| 2 | 26,700,000 | 26,850,000 | 357 | 864  | 0.878165126  | BBS5,FASTKD1,KBTBD10,PPIG,ENSBTAG00000046878            |
| 2 | 26,775,000 | 26,925,000 | 358 | 1108 | 0.692540233  | BBS5,FASTKD1,KBTBD10                                    |
| 2 | 26,850,000 | 27,000,000 | 359 | 939  | 0.571052272  | LRP2                                                    |
| 2 | 26,925,000 | 27,075,000 | 360 | 1320 | 0.547374294  | LRP2                                                    |
| 2 | 27,000,000 | 27,150,000 | 361 | 1523 | 0.858673513  | DHRS9,LRP2                                              |
| 2 | 27,075,000 | 27,225,000 | 362 | 1034 | 0.834862968  | ABCB11,DHRS9,LRP2                                       |
| 2 | 27,150,000 | 27,300,000 | 363 | 828  | 0.452457565  | ABCB11,G6PC2,SPC25                                      |
| 2 | 27,225,000 | 27,375,000 | 364 | 1146 | 0.150161357  | ABCB11,G6PC2,NOSTRIN,SPC25                              |
| 2 | 27,300,000 | 27,450,000 | 365 | 1310 | 0.503742591  | CERS6,NOSTRIN,SPC25                                     |
| 2 | 27,375,000 | 27,525,000 | 366 | 1197 | 0.869616743  | CERS6,NOSTRIN                                           |
| 2 | 27,450,000 | 27,600,000 | 367 | 1196 | -0.653307042 | CERS6                                                   |
| 2 | 27,525,000 | 27,675,000 | 368 | 1236 | -1.965784248 | CERS6                                                   |
| 2 | 27,600,000 | 27,750,000 | 369 | 1212 | -1.187313016 | CERS6                                                   |
| 2 | 27,675,000 | 27,825,000 | 370 | 1336 | -1.154329879 | CERS6                                                   |
| 2 | 27,750,000 | 27,900,000 | 371 | 1558 | -0.574900645 | CERS6                                                   |
| 2 | 27,825,000 | 27,975,000 | 372 | 1373 | 0.368592119  | STK39                                                   |
| 2 | 27,900,000 | 28,050,000 | 373 | 1278 | 0.470549352  | STK39                                                   |
| 2 | 27,975,000 | 28,125,000 | 374 | 1453 | 0.709333386  | STK39                                                   |
| 2 | 28,050,000 | 28,200,000 | 375 | 1269 | 0.709662475  |                                                         |
| 2 | 28,125,000 | 28,275,000 | 376 | 1134 | 0.302812268  |                                                         |
| 2 | 28,200,000 | 28,350,000 | 377 | 1347 | 0.00280531   |                                                         |
| 2 | 28,275,000 | 28,425,000 | 378 | 1292 | -0.493969752 | B3GALT1                                                 |
| 2 | 28,350,000 | 28,500,000 | 379 | 1293 | -0.988089406 | B3GALT1                                                 |
| 2 | 28,425,000 | 28,575,000 | 380 | 1123 | -0.329940402 |                                                         |
| 2 | 28,500,000 | 28,650,000 | 381 | 711  | 0.407210346  |                                                         |
| 2 | 28,575,000 | 28,725,000 | 382 | 521  | -0.165550835 |                                                         |
| 2 | 28,650,000 | 28,800,000 | 383 | 758  | 0.986494786  |                                                         |
| 2 | 28,725,000 | 28,875,000 | 384 | 981  | -0.429699414 |                                                         |
| 2 | 28,800,000 | 28,950,000 | 385 | 1362 | -1.240321746 |                                                         |
| 2 | 28,875,000 | 29,025,000 | 386 | 1883 | 0.752970313  |                                                         |
| 2 | 28,950,000 | 29,100,000 | 387 | 1766 | 0.718622486  | XIRP2                                                   |
| 2 | 29,025,000 | 29,175,000 | 388 | 1544 | 0.469361928  | XIRP2                                                   |
| 2 | 29,100,000 | 29,250,000 | 389 | 1544 | -0.718776308 | XIRP2                                                   |
| 2 | 29,175,000 | 29,325,000 | 390 | 1645 | -0.747416883 |                                                         |
| 2 | 29,250,000 | 29,400,000 | 391 | 1548 | -0.344690609 |                                                         |
| 2 | 29,325,000 | 29,475,000 | 392 | 1285 | -0.452440932 | ENSBTAG00000046347                                      |
| 2 | 29,400,000 | 29,550,000 | 393 | 1132 | -0.631375638 | ENSBTAG00000046347                                      |
| 2 | 29,475,000 | 29,625,000 | 394 | 936  | -0.401237988 |                                                         |
| 2 | 29,550,000 | 29,700,000 | 395 | 598  | 0.551540515  |                                                         |
| 2 | 29,625,000 | 29,775,000 | 396 | 666  | 0.789497124  |                                                         |

|   |            |            |     |      |              |                                             |
|---|------------|------------|-----|------|--------------|---------------------------------------------|
| 2 | 29,700,000 | 29,850,000 | 397 | 1001 | -0.341472577 |                                             |
| 2 | 29,775,000 | 29,925,000 | 398 | 977  | -0.785752575 |                                             |
| 2 | 29,850,000 | 30,000,000 | 399 | 1044 | -0.722629735 | SCN7A                                       |
| 2 | 29,925,000 | 30,075,000 | 400 | 1314 | -0.164848729 | SCN7A                                       |
| 2 | 30,000,000 | 30,150,000 | 401 | 993  | -0.609831737 | SCN9A,ENSBTAG00000026882                    |
| 2 | 30,075,000 | 30,225,000 | 402 | 586  | -2.851381555 | SCN9A,ENSBTAG00000026882                    |
| 2 | 30,150,000 | 30,300,000 | 403 | 633  | -0.195305303 | SCN9A                                       |
| 2 | 30,225,000 | 30,375,000 | 404 | 936  | -0.599322337 | SCN1A                                       |
| 2 | 30,300,000 | 30,450,000 | 405 | 1286 | 0.307012454  | SCN1A,TTC21B                                |
| 2 | 30,375,000 | 30,525,000 | 406 | 1186 | 1.111103117  | SCN1A,TTC21B                                |
| 2 | 30,450,000 | 30,600,000 | 407 | 831  | 1.045769632  | TTC21B                                      |
| 2 | 30,525,000 | 30,675,000 | 408 | 823  | 0.886259961  | GALNT3,TTC21B                               |
| 2 | 30,600,000 | 30,750,000 | 409 | 987  | 0.291366154  | CSRNP3,GALNT3                               |
| 2 | 30,675,000 | 30,825,000 | 410 | 1094 | 0.447065775  | CSRNP3                                      |
| 2 | 30,750,000 | 30,900,000 | 411 | 1295 | 0.565049437  | CSRNP3                                      |
| 2 | 30,825,000 | 30,975,000 | 412 | 1312 | -0.132268407 |                                             |
| 2 | 30,900,000 | 31,050,000 | 413 | 1196 | -0.082896574 | SCN2A                                       |
| 2 | 30,975,000 | 31,125,000 | 414 | 1247 | 0.530717952  | SCN2A                                       |
| 2 | 31,050,000 | 31,200,000 | 415 | 1109 | 0.567160607  | SCN2A,SCN3A                                 |
| 2 | 31,125,000 | 31,275,000 | 416 | 1032 | 0.122399539  | SCN3A                                       |
| 2 | 31,200,000 | 31,350,000 | 417 | 1057 | -1.602549084 | SCN3A                                       |
| 2 | 31,275,000 | 31,425,000 | 418 | 882  | -2.55061278  | SCN3A,SLC38A11                              |
| 2 | 31,350,000 | 31,500,000 | 419 | 921  | 0.088333689  | SLC38A11                                    |
| 2 | 31,425,000 | 31,575,000 | 420 | 1075 | 0.535953209  | SLC38A11                                    |
| 2 | 31,500,000 | 31,650,000 | 421 | 1143 | 0.61063459   | ENSBTAG00000005501                          |
| 2 | 31,575,000 | 31,725,000 | 422 | 1364 | 0.360459926  | ENSBTAG00000005501,ENSBTAG00000047880       |
| 2 | 31,650,000 | 31,800,000 | 423 | 1561 | 0.276714102  | GRB14,ENSBTAG00000005501,ENSBTAG00000047880 |
| 2 | 31,725,000 | 31,875,000 | 424 | 1348 | 0.797621803  | GRB14                                       |
| 2 | 31,800,000 | 31,950,000 | 425 | 1209 | 1.241719648  | GRB14                                       |
| 2 | 31,875,000 | 32,025,000 | 426 | 1172 | 1.064902382  | GRB14                                       |
| 2 | 31,950,000 | 32,100,000 | 427 | 733  | 0.383167102  |                                             |
| 2 | 32,025,000 | 32,175,000 | 428 | 634  | -0.316199885 |                                             |
| 2 | 32,100,000 | 32,250,000 | 429 | 642  | 0.137638431  |                                             |
| 2 | 32,175,000 | 32,325,000 | 430 | 671  | 0.362686732  |                                             |
| 2 | 32,250,000 | 32,400,000 | 431 | 905  | -1.022298913 |                                             |
| 2 | 32,325,000 | 32,475,000 | 432 | 643  | -1.66812749  |                                             |
| 2 | 32,400,000 | 32,550,000 | 433 | 497  | 0.358328217  |                                             |
| 2 | 32,475,000 | 32,625,000 | 434 | 690  | 1.094645657  |                                             |
| 2 | 32,550,000 | 32,700,000 | 435 | 597  | 1.100510469  |                                             |
| 2 | 32,625,000 | 32,775,000 | 436 | 369  | 0.74716765   |                                             |
| 2 | 32,700,000 | 32,850,000 | 437 | 371  | 0.780001241  |                                             |
| 2 | 32,775,000 | 32,925,000 | 438 | 372  | 0.861894274  | FIGN                                        |
| 2 | 32,850,000 | 33,000,000 | 439 | 380  | 0.061380444  | FIGN                                        |
| 2 | 32,925,000 | 33,075,000 | 440 | 384  | 0.083851496  |                                             |
| 2 | 33,000,000 | 33,150,000 | 441 | 624  | 0.317999906  |                                             |
| 2 | 33,075,000 | 33,225,000 | 442 | 761  | 0.619731942  |                                             |
| 2 | 33,150,000 | 33,300,000 | 443 | 826  | 0.719698597  |                                             |
| 2 | 33,225,000 | 33,375,000 | 444 | 994  | -0.420954872 |                                             |
| 2 | 33,300,000 | 33,450,000 | 445 | 957  | -1.139393353 |                                             |
| 2 | 33,375,000 | 33,525,000 | 446 | 784  | -0.793020693 |                                             |
| 2 | 33,450,000 | 33,600,000 | 447 | 568  | -0.00927534  |                                             |
| 2 | 33,525,000 | 33,675,000 | 448 | 744  | 0.826319012  |                                             |

|   |            |            |     |      |              |                                 |
|---|------------|------------|-----|------|--------------|---------------------------------|
| 2 | 33,600,000 | 33,750,000 | 449 | 943  | 1.268947622  |                                 |
| 2 | 33,675,000 | 33,825,000 | 450 | 943  | 1.447725643  |                                 |
| 2 | 33,750,000 | 33,900,000 | 451 | 1133 | 1.332720943  |                                 |
| 2 | 33,825,000 | 33,975,000 | 452 | 1313 | 0.895722652  |                                 |
| 2 | 33,900,000 | 34,050,000 | 453 | 945  | 0.650061906  | KCNH7                           |
| 2 | 33,975,000 | 34,125,000 | 454 | 550  | 0.409443701  | KCNH7                           |
| 2 | 34,050,000 | 34,200,000 | 455 | 414  | -0.050140634 | GCA,KCNH7                       |
| 2 | 34,125,000 | 34,275,000 | 456 | 325  | -0.179369138 | GCA,IFIH1,KCNH7                 |
| 2 | 34,200,000 | 34,350,000 | 457 | 414  | -0.210342965 | FAP,IFIH1                       |
| 2 | 34,275,000 | 34,425,000 | 458 | 527  | 0.451315295  | FAP,GCG                         |
| 2 | 34,350,000 | 34,500,000 | 459 | 828  | -2.248769468 | DPP4,FAP,GCG                    |
| 2 | 34,425,000 | 34,575,000 | 460 | 786  | -2.831093828 | DPP4,SLC4A10,ENSBTAG00000048246 |
| 2 | 34,500,000 | 34,650,000 | 461 | 771  | -1.70451795  | DPP4,SLC4A10,ENSBTAG00000048246 |
| 2 | 34,575,000 | 34,725,000 | 462 | 748  | -2.07790562  | SLC4A10                         |
| 2 | 34,650,000 | 34,800,000 | 463 | 516  | -1.791477979 | SLC4A10                         |
| 2 | 34,725,000 | 34,875,000 | 464 | 563  | -0.631514513 | SLC4A10                         |
| 2 | 34,800,000 | 34,950,000 | 465 | 590  | 0.649951571  | SLC4A10                         |
| 2 | 34,875,000 | 35,025,000 | 466 | 903  | 0.355692716  |                                 |
| 2 | 34,950,000 | 35,100,000 | 467 | 759  | 0.313823976  | PSMD14,TBR1                     |
| 2 | 35,025,000 | 35,175,000 | 468 | 336  | 1.012712856  | PSMD14,TBR1                     |
| 2 | 35,100,000 | 35,250,000 | 469 | 380  | 1.105895864  | PSMD14,TANK                     |
| 2 | 35,175,000 | 35,325,000 | 470 | 353  | 1.171774616  | PSMD14,TANK                     |
| 2 | 35,250,000 | 35,400,000 | 471 | 353  | 1.371159149  | TANK                            |
| 2 | 35,325,000 | 35,475,000 | 472 | 351  | 1.400806911  | TANK                            |
| 2 | 35,400,000 | 35,550,000 | 473 | 242  | 0.973448336  |                                 |
| 2 | 35,475,000 | 35,625,000 | 474 | 259  | -0.502593647 |                                 |
| 2 | 35,550,000 | 35,700,000 | 475 | 432  | -1.082198619 |                                 |
| 2 | 35,625,000 | 35,775,000 | 476 | 473  | -0.620288406 |                                 |
| 2 | 35,700,000 | 35,850,000 | 477 | 390  | 0.387683325  |                                 |
| 2 | 35,775,000 | 35,925,000 | 478 | 412  | -0.931630642 |                                 |
| 2 | 35,850,000 | 36,000,000 | 479 | 483  | -1.614495584 | RBMS1                           |
| 2 | 35,925,000 | 36,075,000 | 480 | 451  | -1.143741411 | RBMS1                           |
| 2 | 36,000,000 | 36,150,000 | 481 | 350  | -1.529581944 | RBMS1                           |
| 2 | 36,075,000 | 36,225,000 | 482 | 370  | -1.896601169 | RBMS1                           |
| 2 | 36,150,000 | 36,300,000 | 483 | 702  | -0.201106233 | ITGB6,RBMS1                     |
| 2 | 36,225,000 | 36,375,000 | 484 | 810  | 0.507348539  | ITGB6,PLA2R1                    |
| 2 | 36,300,000 | 36,450,000 | 485 | 877  | 0.899129069  | ITGB6,PLA2R1                    |
| 2 | 36,375,000 | 36,525,000 | 486 | 1152 | 0.701391378  | PLA2R1                          |
| 2 | 36,450,000 | 36,600,000 | 487 | 900  | 0.49885525   | LY75,PLA2R1                     |
| 2 | 36,525,000 | 36,675,000 | 488 | 486  | 1.074494197  | CD302,LY75                      |
| 2 | 36,600,000 | 36,750,000 | 489 | 322  | 0.8440338    | CD302,LY75,MARCH7               |
| 2 | 36,675,000 | 36,825,000 | 490 | 311  | 0.875271063  | BAZ2B,CD302,MARCH7              |
| 2 | 36,750,000 | 36,900,000 | 491 | 364  | 1.027454012  | BAZ2B                           |
| 2 | 36,825,000 | 36,975,000 | 492 | 388  | 1.018489863  | BAZ2B                           |
| 2 | 36,900,000 | 37,050,000 | 493 | 335  | 1.24904894   | BAZ2B                           |
| 2 | 36,975,000 | 37,125,000 | 494 | 305  | 1.374754881  | BAZ2B                           |
| 2 | 37,050,000 | 37,200,000 | 495 | 282  | 1.33055598   | BAZ2B,WDSUB1                    |
| 2 | 37,125,000 | 37,275,000 | 496 | 316  | 1.017769907  | BAZ2B,TANC1,WDSUB1              |
| 2 | 37,200,000 | 37,350,000 | 497 | 622  | 0.884942121  | TANC1,WDSUB1                    |
| 2 | 37,275,000 | 37,425,000 | 498 | 1032 | 0.980126149  | TANC1                           |
| 2 | 37,350,000 | 37,500,000 | 499 | 1245 | 1.224854338  | TANC1                           |
| 2 | 37,425,000 | 37,575,000 | 500 | 1135 | 1.355773989  | TANC1                           |
| 2 | 37,500,000 | 37,650,000 | 501 | 970  | 1.365432479  | DAPL1                           |

|   |            |            |     |      |              |                    |
|---|------------|------------|-----|------|--------------|--------------------|
| 2 | 37,575,000 | 37,725,000 | 502 | 942  | -0.672422649 | DAPL1              |
| 2 | 37,650,000 | 37,800,000 | 503 | 968  | -2.994053959 |                    |
| 2 | 37,725,000 | 37,875,000 | 504 | 892  | -2.176570169 | PKP4               |
| 2 | 37,800,000 | 37,950,000 | 505 | 845  | -0.502991505 | PKP4               |
| 2 | 37,875,000 | 38,025,000 | 506 | 926  | -0.451722385 | CCDC148,PKP4       |
| 2 | 37,950,000 | 38,100,000 | 507 | 829  | -0.763890011 | CCDC148            |
| 2 | 38,025,000 | 38,175,000 | 508 | 978  | -2.844478577 | CCDC148            |
| 2 | 38,100,000 | 38,250,000 | 509 | 822  | -2.724300023 | CCDC148            |
| 2 | 38,175,000 | 38,325,000 | 510 | 473  | -0.266722145 |                    |
| 2 | 38,250,000 | 38,400,000 | 511 | 796  | 0.090071446  | UPP2               |
| 2 | 38,325,000 | 38,475,000 | 512 | 976  | 0.598115799  | UPP2               |
| 2 | 38,400,000 | 38,550,000 | 513 | 902  | 0.500978291  | ACVR1C             |
| 2 | 38,475,000 | 38,625,000 | 514 | 785  | 0.250793826  | ACVR1C             |
| 2 | 38,550,000 | 38,700,000 | 515 | 727  | 0.511390802  | ACVR1C,CYTIP       |
| 2 | 38,625,000 | 38,775,000 | 516 | 698  | 0.539457176  | CYTIP              |
| 2 | 38,700,000 | 38,850,000 | 517 | 733  | 0.640276329  | CYTIP,ERMN,GALNT5  |
| 2 | 38,775,000 | 38,925,000 | 518 | 649  | 0.586383056  | ERMN,GALNT5        |
| 2 | 38,850,000 | 39,000,000 | 519 | 629  | 0.081192301  |                    |
| 2 | 38,925,000 | 39,075,000 | 520 | 754  | 0.423161702  |                    |
| 2 | 39,000,000 | 39,150,000 | 521 | 705  | 0.263214446  |                    |
| 2 | 39,075,000 | 39,225,000 | 522 | 677  | -0.018382582 |                    |
| 2 | 39,150,000 | 39,300,000 | 523 | 646  | 1.171540953  | ACVR1              |
| 2 | 39,225,000 | 39,375,000 | 524 | 534  | 1.445847626  | ACVR1              |
| 2 | 39,300,000 | 39,450,000 | 525 | 594  | 0.950593548  | ACVR1              |
| 2 | 39,375,000 | 39,525,000 | 526 | 747  | 1.004674873  |                    |
| 2 | 39,450,000 | 39,600,000 | 527 | 555  | 1.168043289  | ENSBTAG00000032405 |
| 2 | 39,525,000 | 39,675,000 | 528 | 412  | 1.013730882  | ENSBTAG00000032405 |
| 2 | 39,600,000 | 39,750,000 | 529 | 633  | -0.271217827 |                    |
| 2 | 39,675,000 | 39,825,000 | 530 | 674  | -1.641784587 | GPD2               |
| 2 | 39,750,000 | 39,900,000 | 531 | 355  | -1.796604631 | GPD2               |
| 2 | 39,825,000 | 39,975,000 | 532 | 299  | 0.998085946  | GPD2               |
| 2 | 39,900,000 | 40,050,000 | 533 | 384  | 0.729413399  | GPD2,NR4A2         |
| 2 | 39,975,000 | 40,125,000 | 534 | 490  | -0.023121059 | NR4A2              |
| 2 | 40,050,000 | 40,200,000 | 535 | 488  | 0.024081141  |                    |
| 2 | 40,125,000 | 40,275,000 | 536 | 413  | -0.34021288  |                    |
| 2 | 40,200,000 | 40,350,000 | 537 | 524  | -0.808893328 |                    |
| 2 | 40,275,000 | 40,425,000 | 538 | 492  | -0.458150833 |                    |
| 2 | 40,350,000 | 40,500,000 | 539 | 455  | -0.375913729 |                    |
| 2 | 40,425,000 | 40,575,000 | 540 | 676  | -0.855103575 |                    |
| 2 | 40,500,000 | 40,650,000 | 541 | 612  | -0.772512139 |                    |
| 2 | 40,575,000 | 40,725,000 | 542 | 401  | -0.622323566 |                    |
| 2 | 40,650,000 | 40,800,000 | 543 | 483  | -0.908959883 |                    |
| 2 | 40,725,000 | 40,875,000 | 544 | 594  | -0.018307467 |                    |
| 2 | 40,800,000 | 40,950,000 | 545 | 502  | 0.459430193  |                    |
| 2 | 40,875,000 | 41,025,000 | 546 | 723  | 0.524670673  |                    |
| 2 | 40,950,000 | 41,100,000 | 547 | 1097 | 0.603991515  |                    |
| 2 | 41,025,000 | 41,175,000 | 548 | 1034 | -0.293054439 |                    |
| 2 | 41,100,000 | 41,250,000 | 549 | 700  | -0.210135858 |                    |
| 2 | 41,175,000 | 41,325,000 | 550 | 447  | 0.448966816  |                    |
| 2 | 41,250,000 | 41,400,000 | 551 | 597  | -0.616269864 | KCNJ3              |
| 2 | 41,325,000 | 41,475,000 | 552 | 764  | -0.222433488 | KCNJ3              |
| 2 | 41,400,000 | 41,550,000 | 553 | 606  | 0.492864813  | KCNJ3              |
| 2 | 41,475,000 | 41,625,000 | 554 | 779  | -0.042165821 | KCNJ3              |

|   |            |            |     |      |              |                                 |
|---|------------|------------|-----|------|--------------|---------------------------------|
| 2 | 41,550,000 | 41,700,000 | 555 | 1027 | 0.240620791  |                                 |
| 2 | 41,625,000 | 41,775,000 | 556 | 690  | 0.991035311  |                                 |
| 2 | 41,700,000 | 41,850,000 | 557 | 512  | 0.292503829  | GALNT13                         |
| 2 | 41,775,000 | 41,925,000 | 558 | 686  | -0.211754874 | GALNT13                         |
| 2 | 41,850,000 | 42,000,000 | 559 | 586  | 0.259668911  | GALNT13                         |
| 2 | 41,925,000 | 42,075,000 | 560 | 661  | 0.450166823  | GALNT13                         |
| 2 | 42,000,000 | 42,150,000 | 561 | 819  | 0.32914756   | GALNT13                         |
| 2 | 42,075,000 | 42,225,000 | 562 | 753  | 0.48885184   | GALNT13                         |
| 2 | 42,150,000 | 42,300,000 | 563 | 700  | 0.576026039  | GALNT13                         |
| 2 | 42,225,000 | 42,375,000 | 564 | 751  | 0.267549376  | GALNT13                         |
| 2 | 42,300,000 | 42,450,000 | 565 | 712  | 0.25126907   | GALNT13                         |
| 2 | 42,375,000 | 42,525,000 | 566 | 465  | 0.873277367  |                                 |
| 2 | 42,450,000 | 42,600,000 | 567 | 649  | 0.928312066  |                                 |
| 2 | 42,525,000 | 42,675,000 | 568 | 852  | 0.97188446   |                                 |
| 2 | 42,600,000 | 42,750,000 | 569 | 888  | 1.188577305  |                                 |
| 2 | 42,675,000 | 42,825,000 | 570 | 889  | 0.480558214  | RPRM                            |
| 2 | 42,750,000 | 42,900,000 | 571 | 671  | -0.596604815 | RPRM                            |
| 2 | 42,825,000 | 42,975,000 | 572 | 492  | -1.139884076 |                                 |
| 2 | 42,900,000 | 43,050,000 | 573 | 618  | -1.081129655 |                                 |
| 2 | 42,975,000 | 43,125,000 | 574 | 782  | -0.822402759 |                                 |
| 2 | 43,050,000 | 43,200,000 | 575 | 519  | -0.501107976 |                                 |
| 2 | 43,125,000 | 43,275,000 | 576 | 214  | 0.045012419  |                                 |
| 2 | 43,200,000 | 43,350,000 | 577 | 155  | 0.659066253  |                                 |
| 2 | 43,275,000 | 43,425,000 | 578 | 677  | 0.536325325  | ENSBTAG00000012816              |
| 2 | 43,350,000 | 43,500,000 | 579 | 871  | 0.538416736  | ENSBTAG00000012816              |
| 2 | 43,425,000 | 43,575,000 | 580 | 582  | 1.132297123  | ARL6IP6                         |
| 2 | 43,500,000 | 43,650,000 | 581 | 441  | 1.477398023  | ARL6IP6,PRPF40A                 |
| 2 | 43,575,000 | 43,725,000 | 582 | 302  | 1.119654337  | ARL6IP6,FMNL2,PRPF40A           |
| 2 | 43,650,000 | 43,800,000 | 583 | 368  | 0.968463356  | FMNL2,ENSBTAG00000034503        |
| 2 | 43,725,000 | 43,875,000 | 584 | 602  | 1.186104292  | FMNL2,ENSBTAG00000034503        |
| 2 | 43,800,000 | 43,950,000 | 585 | 814  | 0.721225693  | FMNL2                           |
| 2 | 43,875,000 | 44,025,000 | 586 | 796  | -1.699507915 | FMNL2                           |
| 2 | 43,950,000 | 44,100,000 | 587 | 779  | -0.802810118 | FMNL2                           |
| 2 | 44,025,000 | 44,175,000 | 588 | 735  | 0.64985986   | STAM2,ENSBTAG00000048306        |
| 2 | 44,100,000 | 44,250,000 | 589 | 900  | 0.322989711  | CACNB4,STAM2,ENSBTAG00000048306 |
| 2 | 44,175,000 | 44,325,000 | 590 | 1027 | 0.203313237  | CACNB4                          |
| 2 | 44,250,000 | 44,400,000 | 591 | 809  | 0.155814127  | CACNB4                          |
| 2 | 44,325,000 | 44,475,000 | 592 | 468  | -0.891086933 | ARL5A,CACNB4                    |
| 2 | 44,400,000 | 44,550,000 | 593 | 375  | -2.761867833 | ARL5A,CACNB4,NEB                |
| 2 | 44,475,000 | 44,625,000 | 594 | 407  | -2.023910838 | ARL5A,NEB                       |
| 2 | 44,550,000 | 44,700,000 | 595 | 355  | 0.363405271  | NEB                             |
| 2 | 44,625,000 | 44,775,000 | 596 | 389  | 0.454698434  | NEB,RIF1                        |
| 2 | 44,700,000 | 44,850,000 | 597 | 403  | 0.384020879  | NEB,RIF1                        |
| 2 | 44,775,000 | 44,925,000 | 598 | 487  | 0.361918174  | RIF1,TSG-6                      |
| 2 | 44,850,000 | 45,000,000 | 599 | 606  | -0.068397173 | NMI,RBM43,TSG-6                 |
| 2 | 44,925,000 | 45,075,000 | 600 | 771  | -0.404881269 | NMI,RBM43                       |
| 2 | 45,000,000 | 45,150,000 | 601 | 855  | -0.220857439 |                                 |
| 2 | 45,075,000 | 45,225,000 | 602 | 1109 | 0.878082946  |                                 |
| 2 | 45,150,000 | 45,300,000 | 603 | 1036 | 0.589344842  |                                 |
| 2 | 45,225,000 | 45,375,000 | 604 | 541  | -1.083980242 |                                 |
| 2 | 45,300,000 | 45,450,000 | 605 | 435  | -0.446421401 |                                 |
| 2 | 45,375,000 | 45,525,000 | 606 | 467  | 0.585688863  |                                 |
| 2 | 45,450,000 | 45,600,000 | 607 | 613  | 0.169788758  |                                 |

|   |            |            |     |      |              |                    |
|---|------------|------------|-----|------|--------------|--------------------|
| 2 | 45,525,000 | 45,675,000 | 608 | 708  | 0.080248226  |                    |
| 2 | 45,600,000 | 45,750,000 | 609 | 701  | 0.477024014  |                    |
| 2 | 45,675,000 | 45,825,000 | 610 | 624  | -0.57578645  | RND3               |
| 2 | 45,750,000 | 45,900,000 | 611 | 466  | -0.50188635  | RND3               |
| 2 | 45,825,000 | 45,975,000 | 612 | 533  | 0.685957708  |                    |
| 2 | 45,900,000 | 46,050,000 | 613 | 700  | -0.033170633 |                    |
| 2 | 45,975,000 | 46,125,000 | 614 | 677  | -0.169759571 |                    |
| 2 | 46,050,000 | 46,200,000 | 615 | 587  | 0.59221373   |                    |
| 2 | 46,125,000 | 46,275,000 | 616 | 611  | 0.43903787   |                    |
| 2 | 46,200,000 | 46,350,000 | 617 | 554  | -0.593922123 |                    |
| 2 | 46,275,000 | 46,425,000 | 618 | 421  | -1.122671168 |                    |
| 2 | 46,350,000 | 46,500,000 | 619 | 565  | -1.064927313 |                    |
| 2 | 46,425,000 | 46,575,000 | 620 | 839  | -0.805315754 |                    |
| 2 | 46,500,000 | 46,650,000 | 621 | 658  | 0.136343123  | MMADHC             |
| 2 | 46,575,000 | 46,725,000 | 622 | 729  | 0.32914756   | LYPD6,MMADHC       |
| 2 | 46,650,000 | 46,800,000 | 623 | 875  | -0.006255519 | LYPD6,MMADHC       |
| 2 | 46,725,000 | 46,875,000 | 624 | 609  | 0.171800871  | LYPD6              |
| 2 | 46,800,000 | 46,950,000 | 625 | 462  | 0.226903551  |                    |
| 2 | 46,875,000 | 47,025,000 | 626 | 652  | -0.543648261 |                    |
| 2 | 46,950,000 | 47,100,000 | 627 | 1013 | -1.092157842 | LYPD6B             |
| 2 | 47,025,000 | 47,175,000 | 628 | 873  | -1.192251787 | LYPD6B             |
| 2 | 47,100,000 | 47,250,000 | 629 | 843  | -0.578258627 |                    |
| 2 | 47,175,000 | 47,325,000 | 630 | 1102 | 0.084205568  | KIF5C              |
| 2 | 47,250,000 | 47,400,000 | 631 | 854  | 0.696293886  | KIF5C              |
| 2 | 47,325,000 | 47,475,000 | 632 | 513  | 1.077391756  | KIF5C              |
| 2 | 47,400,000 | 47,550,000 | 633 | 438  | 0.871448499  | EPC2,KIF5C         |
| 2 | 47,475,000 | 47,625,000 | 634 | 382  | 0.764108351  | EPC2               |
| 2 | 47,550,000 | 47,700,000 | 635 | 391  | 0.704803989  | EPC2               |
| 2 | 47,625,000 | 47,775,000 | 636 | 449  | -0.071575409 | EPC2               |
| 2 | 47,700,000 | 47,850,000 | 637 | 415  | -0.289237821 | MBD5               |
| 2 | 47,775,000 | 47,925,000 | 638 | 286  | 0.027244942  | MBD5               |
| 2 | 47,850,000 | 48,000,000 | 639 | 315  | -0.310831987 | MBD5,PTMA          |
| 2 | 47,925,000 | 48,075,000 | 640 | 392  | -0.540732665 | PTMA               |
| 2 | 48,000,000 | 48,150,000 | 641 | 381  | -0.950114765 |                    |
| 2 | 48,075,000 | 48,225,000 | 642 | 501  | -1.643469623 |                    |
| 2 | 48,150,000 | 48,300,000 | 643 | 838  | -0.151577755 | ORC4               |
| 2 | 48,225,000 | 48,375,000 | 644 | 778  | 0.74714053   | ORC4               |
| 2 | 48,300,000 | 48,450,000 | 645 | 460  | 0.142954117  | ACVR2A,ORC4        |
| 2 | 48,375,000 | 48,525,000 | 646 | 423  | -0.329834348 | ACVR2A,ORC4        |
| 2 | 48,450,000 | 48,600,000 | 647 | 598  | -2.320016568 | ACVR2A             |
| 2 | 48,525,000 | 48,675,000 | 648 | 652  | -3.039641501 |                    |
| 2 | 48,600,000 | 48,750,000 | 649 | 565  | -1.969334297 |                    |
| 2 | 48,675,000 | 48,825,000 | 650 | 696  | -0.087824617 |                    |
| 2 | 48,750,000 | 48,900,000 | 651 | 850  | 0.834352592  |                    |
| 2 | 48,825,000 | 48,975,000 | 652 | 758  | 0.711619296  |                    |
| 2 | 48,900,000 | 49,050,000 | 653 | 633  | 0.285868043  |                    |
| 2 | 48,975,000 | 49,125,000 | 654 | 852  | 0.560882147  |                    |
| 2 | 49,050,000 | 49,200,000 | 655 | 1007 | 0.530697905  |                    |
| 2 | 49,125,000 | 49,275,000 | 656 | 639  | 0.392612304  |                    |
| 2 | 49,200,000 | 49,350,000 | 657 | 268  | 0.682153473  |                    |
| 2 | 49,275,000 | 49,425,000 | 658 | 390  | 0.62714222   | ENSBTAG00000046032 |
| 2 | 49,350,000 | 49,500,000 | 659 | 412  | 0.37452568   | ENSBTAG00000046032 |
| 2 | 49,425,000 | 49,575,000 | 660 | 533  | 0.567444268  |                    |

|   |            |            |     |      |              |          |
|---|------------|------------|-----|------|--------------|----------|
| 2 | 49,500,000 | 49,650,000 | 661 | 564  | 0.377088274  |          |
| 2 | 49,575,000 | 49,725,000 | 662 | 382  | 0.546363817  |          |
| 2 | 49,650,000 | 49,800,000 | 663 | 515  | 0.518316575  | SNRPD1   |
| 2 | 49,725,000 | 49,875,000 | 664 | 651  | 0.086946351  | SNRPD1   |
| 2 | 49,800,000 | 49,950,000 | 665 | 732  | 0.261340955  |          |
| 2 | 49,875,000 | 50,025,000 | 666 | 802  | 0.191985571  |          |
| 2 | 49,950,000 | 50,100,000 | 667 | 748  | 0.511078379  |          |
| 2 | 50,025,000 | 50,175,000 | 668 | 697  | 0.900636219  |          |
| 2 | 50,100,000 | 50,250,000 | 669 | 752  | 0.57261846   |          |
| 2 | 50,175,000 | 50,325,000 | 670 | 616  | -0.305445019 |          |
| 2 | 50,250,000 | 50,400,000 | 671 | 449  | -1.096522687 |          |
| 2 | 50,325,000 | 50,475,000 | 672 | 501  | 0.415130067  |          |
| 2 | 50,400,000 | 50,550,000 | 673 | 564  | 1.060649428  |          |
| 2 | 50,475,000 | 50,625,000 | 674 | 536  | 1.20892735   |          |
| 2 | 50,550,000 | 50,700,000 | 675 | 556  | 0.824744127  |          |
| 2 | 50,625,000 | 50,775,000 | 676 | 729  | 0.572298762  |          |
| 2 | 50,700,000 | 50,850,000 | 677 | 847  | 0.742098735  |          |
| 2 | 50,775,000 | 50,925,000 | 678 | 689  | 0.150851014  |          |
| 2 | 50,850,000 | 51,000,000 | 679 | 808  | 0.266922875  |          |
| 2 | 50,925,000 | 51,075,000 | 680 | 1124 | 0.221608196  |          |
| 2 | 51,000,000 | 51,150,000 | 681 | 992  | -0.10261105  |          |
| 2 | 51,075,000 | 51,225,000 | 682 | 763  | -0.044557298 |          |
| 2 | 51,150,000 | 51,300,000 | 683 | 889  | 0.426973336  |          |
| 2 | 51,225,000 | 51,375,000 | 684 | 922  | 0.827972333  |          |
| 2 | 51,300,000 | 51,450,000 | 685 | 1333 | 0.769863766  |          |
| 2 | 51,375,000 | 51,525,000 | 686 | 1364 | 0.728135649  |          |
| 2 | 51,450,000 | 51,600,000 | 687 | 677  | 0.544402467  |          |
| 2 | 51,525,000 | 51,675,000 | 688 | 464  | 0.35767342   |          |
| 2 | 51,600,000 | 51,750,000 | 689 | 573  | 0.431841634  |          |
| 2 | 51,675,000 | 51,825,000 | 690 | 629  | 0.606836495  |          |
| 2 | 51,750,000 | 51,900,000 | 691 | 541  | 0.515589947  |          |
| 2 | 51,825,000 | 51,975,000 | 692 | 905  | -0.264541815 |          |
| 2 | 51,900,000 | 52,050,000 | 693 | 932  | -0.609864672 |          |
| 2 | 51,975,000 | 52,125,000 | 694 | 785  | 0.413288554  |          |
| 2 | 52,050,000 | 52,200,000 | 695 | 720  | 0.69725305   |          |
| 2 | 52,125,000 | 52,275,000 | 696 | 487  | 0.04325329   |          |
| 2 | 52,200,000 | 52,350,000 | 697 | 370  | -0.626506899 | ZEB2     |
| 2 | 52,275,000 | 52,425,000 | 698 | 305  | -1.059416777 | ZEB2     |
| 2 | 52,350,000 | 52,500,000 | 699 | 324  | -1.333570595 | ZEB2     |
| 2 | 52,425,000 | 52,575,000 | 700 | 279  | -1.579313804 |          |
| 2 | 52,500,000 | 52,650,000 | 701 | 315  | -1.053339921 | GTDC1    |
| 2 | 52,575,000 | 52,725,000 | 702 | 327  | -0.960090584 | GTDC1    |
| 2 | 52,650,000 | 52,800,000 | 703 | 302  | -1.090940691 | GTDC1    |
| 2 | 52,725,000 | 52,875,000 | 704 | 348  | -0.540360912 | GTDC1    |
| 2 | 52,800,000 | 52,950,000 | 705 | 441  | 0.324434138  | GTDC1    |
| 2 | 52,875,000 | 53,025,000 | 706 | 611  | 0.500974938  | GTDC1    |
| 2 | 52,950,000 | 53,100,000 | 707 | 593  | 0.16960215   | ARHGAP15 |
| 2 | 53,025,000 | 53,175,000 | 708 | 451  | -0.160860487 | ARHGAP15 |
| 2 | 53,100,000 | 53,250,000 | 709 | 591  | -0.465009477 | ARHGAP15 |
| 2 | 53,175,000 | 53,325,000 | 710 | 643  | -0.557217192 | ARHGAP15 |
| 2 | 53,250,000 | 53,400,000 | 711 | 537  | -0.03708195  | ARHGAP15 |
| 2 | 53,325,000 | 53,475,000 | 712 | 503  | 0.122369539  | ARHGAP15 |
| 2 | 53,400,000 | 53,550,000 | 713 | 553  | 0.051778494  | ARHGAP15 |



|   |            |            |     |      |              |                    |
|---|------------|------------|-----|------|--------------|--------------------|
| 2 | 53,475,000 | 53,625,000 | 714 | 523  | 0.12769459   | ARHGAP15           |
| 2 | 53,550,000 | 53,700,000 | 715 | 425  | -0.052693029 | ARHGAP15           |
| 2 | 53,625,000 | 53,775,000 | 716 | 436  | 0.171830937  | ARHGAP15           |
| 2 | 53,700,000 | 53,850,000 | 717 | 893  | -0.43339689  | ARHGAP15,KYNU      |
| 2 | 53,775,000 | 53,925,000 | 718 | 1038 | -0.422338136 | KYNU               |
| 2 | 53,850,000 | 54,000,000 | 719 | 686  | -0.28151462  | KYNU               |
| 2 | 53,925,000 | 54,075,000 | 720 | 617  | -0.022439724 | KYNU               |
| 2 | 54,000,000 | 54,150,000 | 721 | 582  | 0.06753139   |                    |
| 2 | 54,075,000 | 54,225,000 | 722 | 492  | -0.088582646 |                    |
| 2 | 54,150,000 | 54,300,000 | 723 | 694  | 0.116993194  |                    |
| 2 | 54,225,000 | 54,375,000 | 724 | 713  | -0.145279122 |                    |
| 2 | 54,300,000 | 54,450,000 | 725 | 727  | -3.971459278 |                    |
| 2 | 54,375,000 | 54,525,000 | 726 | 879  | -3.286380123 |                    |
| 2 | 54,450,000 | 54,600,000 | 727 | 753  | -0.994016115 |                    |
| 2 | 54,525,000 | 54,675,000 | 728 | 450  | -0.510442629 |                    |
| 2 | 54,600,000 | 54,750,000 | 729 | 451  | -0.179257772 |                    |
| 2 | 54,675,000 | 54,825,000 | 730 | 758  | -1.774877075 |                    |
| 2 | 54,750,000 | 54,900,000 | 731 | 810  | -1.644758672 |                    |
| 2 | 54,825,000 | 54,975,000 | 732 | 993  | 0.612291147  |                    |
| 2 | 54,900,000 | 55,050,000 | 733 | 988  | 0.103963256  |                    |
| 2 | 54,975,000 | 55,125,000 | 734 | 1080 | -0.713170681 |                    |
| 2 | 55,050,000 | 55,200,000 | 735 | 1117 | -0.20741202  |                    |
| 2 | 55,125,000 | 55,275,000 | 736 | 1163 | 0.519024056  |                    |
| 2 | 55,200,000 | 55,350,000 | 737 | 1300 | 0.45076707   |                    |
| 2 | 55,275,000 | 55,425,000 | 738 | 1074 | 0.5963499    |                    |
| 2 | 55,350,000 | 55,500,000 | 739 | 894  | 0.535152916  |                    |
| 2 | 55,425,000 | 55,575,000 | 740 | 889  | 0.169401102  | ENSBTAG00000032264 |
| 2 | 55,500,000 | 55,650,000 | 741 | 977  | -2.104494999 | ENSBTAG00000032264 |
| 2 | 55,575,000 | 55,725,000 | 742 | 1078 | -2.136451225 |                    |
| 2 | 55,650,000 | 55,800,000 | 743 | 847  | -0.8657708   |                    |
| 2 | 55,725,000 | 55,875,000 | 744 | 963  | -0.004870311 |                    |
| 2 | 55,800,000 | 55,950,000 | 745 | 1058 | 0.243862431  |                    |
| 2 | 55,875,000 | 56,025,000 | 746 | 592  | 0.260792718  |                    |
| 2 | 55,950,000 | 56,100,000 | 747 | 691  | 0.769031115  |                    |
| 2 | 56,025,000 | 56,175,000 | 748 | 923  | 1.155938175  |                    |
| 2 | 56,100,000 | 56,250,000 | 749 | 663  | 0.676225006  |                    |
| 2 | 56,175,000 | 56,325,000 | 750 | 679  | -0.453532108 |                    |
| 2 | 56,250,000 | 56,400,000 | 751 | 1224 | 0.029079141  |                    |
| 2 | 56,325,000 | 56,475,000 | 752 | 1394 | -0.396531317 |                    |
| 2 | 56,400,000 | 56,550,000 | 753 | 1033 | -1.347516674 |                    |
| 2 | 56,475,000 | 56,625,000 | 754 | 653  | -2.421869762 |                    |
| 2 | 56,550,000 | 56,700,000 | 755 | 805  | -2.094727378 |                    |
| 2 | 56,625,000 | 56,775,000 | 756 | 1021 | -0.226181467 | LRP1B              |
| 2 | 56,700,000 | 56,850,000 | 757 | 894  | -0.089335043 | LRP1B              |
| 2 | 56,775,000 | 56,925,000 | 758 | 1034 | -2.124289413 | LRP1B              |
| 2 | 56,850,000 | 57,000,000 | 759 | 803  | -1.733607364 | LRP1B              |
| 2 | 56,925,000 | 57,075,000 | 760 | 333  | -1.575471141 | LRP1B              |
| 2 | 57,000,000 | 57,150,000 | 761 | 408  | 0.104318838  | LRP1B              |
| 2 | 57,075,000 | 57,225,000 | 762 | 431  | 0.291998318  |                    |
| 2 | 57,150,000 | 57,300,000 | 763 | 420  | -0.297699662 |                    |
| 2 | 57,225,000 | 57,375,000 | 764 | 724  | -0.341646384 |                    |
| 2 | 57,300,000 | 57,450,000 | 765 | 748  | -0.879689886 |                    |
| 2 | 57,375,000 | 57,525,000 | 766 | 484  | -3.856144519 |                    |

|   |            |            |     |      |              |                           |
|---|------------|------------|-----|------|--------------|---------------------------|
| 2 | 57,450,000 | 57,600,000 | 767 | 603  | -2.855741911 |                           |
| 2 | 57,525,000 | 57,675,000 | 768 | 992  | 0.751424579  |                           |
| 2 | 57,600,000 | 57,750,000 | 769 | 1362 | 0.964051151  |                           |
| 2 | 57,675,000 | 57,825,000 | 770 | 1524 | 0.683297701  |                           |
| 2 | 57,750,000 | 57,900,000 | 771 | 1703 | 1.054901383  |                           |
| 2 | 57,825,000 | 57,975,000 | 772 | 1754 | 1.269902341  |                           |
| 2 | 57,900,000 | 58,050,000 | 773 | 1332 | 1.275611394  |                           |
| 2 | 57,975,000 | 58,125,000 | 774 | 894  | 0.504221601  |                           |
| 2 | 58,050,000 | 58,200,000 | 775 | 646  | 0.141873797  |                           |
| 2 | 58,125,000 | 58,275,000 | 776 | 810  | 0.785950589  |                           |
| 2 | 58,200,000 | 58,350,000 | 777 | 895  | 0.933091744  |                           |
| 2 | 58,275,000 | 58,425,000 | 778 | 974  | -2.38561148  |                           |
| 2 | 58,350,000 | 58,500,000 | 779 | 1056 | -3.596071327 |                           |
| 2 | 58,425,000 | 58,575,000 | 780 | 872  | -2.818319946 | ENSBTAG00000017629        |
| 2 | 58,500,000 | 58,650,000 | 781 | 1131 | -0.412016912 | NXP2,ENSBTAG00000017629   |
| 2 | 58,575,000 | 58,725,000 | 782 | 1064 | 0.330866684  | NXP2                      |
| 2 | 58,650,000 | 58,800,000 | 783 | 751  | -0.067916969 | NXP2,SPOPL                |
| 2 | 58,725,000 | 58,875,000 | 784 | 426  | 0.120338613  | SPOPL                     |
| 2 | 58,800,000 | 58,950,000 | 785 | 155  | 0.54634303   | SPOPL                     |
| 2 | 58,875,000 | 59,025,000 | 786 | 429  | 0.387176446  |                           |
| 2 | 58,950,000 | 59,100,000 | 787 | 1067 | 0.405243876  |                           |
| 2 | 59,025,000 | 59,175,000 | 788 | 1508 | 0.677868274  | ENSBTAG0000001627         |
| 2 | 59,100,000 | 59,250,000 | 789 | 1262 | 1.028342201  | ENSBTAG0000001627         |
| 2 | 59,175,000 | 59,325,000 | 790 | 741  | 0.97042839   |                           |
| 2 | 59,250,000 | 59,400,000 | 791 | 407  | 0.39879891   | HNMT                      |
| 2 | 59,325,000 | 59,475,000 | 792 | 611  | 0.210601324  | HNMT                      |
| 2 | 59,400,000 | 59,550,000 | 793 | 898  | 0.361047573  | HNMT                      |
| 2 | 59,475,000 | 59,625,000 | 794 | 1247 | 0.211693211  |                           |
| 2 | 59,550,000 | 59,700,000 | 795 | 1331 | 0.265143621  | ENSBTAG00000039437        |
| 2 | 59,625,000 | 59,775,000 | 796 | 1260 | 0.429199544  | THSD7B,ENSBTAG00000039437 |
| 2 | 59,700,000 | 59,850,000 | 797 | 1806 | 0.356350652  | THSD7B                    |
| 2 | 59,775,000 | 59,925,000 | 798 | 1790 | 0.416159014  | THSD7B                    |
| 2 | 59,850,000 | 60,000,000 | 799 | 1109 | 0.501720707  | THSD7B                    |
| 2 | 59,925,000 | 60,075,000 | 800 | 672  | -0.049884509 | THSD7B                    |
| 2 | 60,000,000 | 60,150,000 | 801 | 768  | 0.326485609  | THSD7B                    |
| 2 | 60,075,000 | 60,225,000 | 802 | 1054 | 0.659849532  | THSD7B                    |
| 2 | 60,150,000 | 60,300,000 | 803 | 1147 | -0.314680412 | THSD7B                    |
| 2 | 60,225,000 | 60,375,000 | 804 | 926  | -0.6248302   | THSD7B                    |
| 2 | 60,300,000 | 60,450,000 | 805 | 1164 | 0.20198446   | THSD7B                    |
| 2 | 60,375,000 | 60,525,000 | 806 | 1657 | -0.091635192 | THSD7B                    |
| 2 | 60,450,000 | 60,600,000 | 807 | 1495 | 0.003753869  | THSD7B                    |
| 2 | 60,525,000 | 60,675,000 | 808 | 1111 | 0.607056991  | THSD7B                    |
| 2 | 60,600,000 | 60,750,000 | 809 | 1141 | 0.499662962  |                           |
| 2 | 60,675,000 | 60,825,000 | 810 | 1108 | -0.687712697 |                           |
| 2 | 60,750,000 | 60,900,000 | 811 | 731  | -1.736751977 |                           |
| 2 | 60,825,000 | 60,975,000 | 812 | 648  | -0.017776304 |                           |
| 2 | 60,900,000 | 61,050,000 | 813 | 807  | -4.424870864 |                           |
| 2 | 60,975,000 | 61,125,000 | 814 | 1030 | -3.477417575 |                           |
| 2 | 61,050,000 | 61,200,000 | 815 | 1128 | 0.077098958  |                           |
| 2 | 61,125,000 | 61,275,000 | 816 | 1159 | 0.629436494  |                           |
| 2 | 61,200,000 | 61,350,000 | 817 | 1222 | 0.535702769  |                           |
| 2 | 61,275,000 | 61,425,000 | 818 | 1123 | -1.130127138 |                           |
| 2 | 61,350,000 | 61,500,000 | 819 | 668  | -1.97639156  |                           |

|   |            |            |     |      |              |                              |
|---|------------|------------|-----|------|--------------|------------------------------|
| 2 | 61,425,000 | 61,575,000 | 820 | 411  | -0.913945305 |                              |
| 2 | 61,500,000 | 61,650,000 | 821 | 548  | -0.052264819 | CXCR4                        |
| 2 | 61,575,000 | 61,725,000 | 822 | 659  | 0.492454972  | CXCR4,DARS                   |
| 2 | 61,650,000 | 61,800,000 | 823 | 871  | -0.567114592 | DARS                         |
| 2 | 61,725,000 | 61,875,000 | 824 | 1177 | -0.778400619 | DARS,LCT,MCM6                |
| 2 | 61,800,000 | 61,950,000 | 825 | 928  | -0.853601403 | LCT,MCM6,UBXN4               |
| 2 | 61,875,000 | 62,025,000 | 826 | 615  | -1.366081324 | LCT,R3HDM1,UBXN4             |
| 2 | 61,950,000 | 62,100,000 | 827 | 872  | -0.612068178 | R3HDM1                       |
| 2 | 62,025,000 | 62,175,000 | 828 | 1051 | -0.494118945 | R3HDM1                       |
| 2 | 62,100,000 | 62,250,000 | 829 | 1138 | 0.164811619  | R3HDM1                       |
| 2 | 62,175,000 | 62,325,000 | 830 | 855  | 0.879357686  | ZRANB3                       |
| 2 | 62,250,000 | 62,400,000 | 831 | 632  | 0.878419357  | ZRANB3                       |
| 2 | 62,325,000 | 62,475,000 | 832 | 590  | 1.023362666  | RAB3GAP1,ZRANB3              |
| 2 | 62,400,000 | 62,550,000 | 833 | 389  | 0.969181355  | RAB3GAP1,ZRANB3              |
| 2 | 62,475,000 | 62,625,000 | 834 | 398  | 0.930260109  | MAP3K19,RAB3GAP1             |
| 2 | 62,550,000 | 62,700,000 | 835 | 479  | 0.883449026  | ACMSD,CCNT2,MAP3K19,RAB3GAP1 |
| 2 | 62,625,000 | 62,775,000 | 836 | 504  | 0.857946571  | ACMSD,CCNT2,MAP3K19          |
| 2 | 62,700,000 | 62,850,000 | 837 | 492  | 0.597043031  | ACMSD,TMEM163                |
| 2 | 62,775,000 | 62,925,000 | 838 | 576  | 0.78833343   | TMEM163                      |
| 2 | 62,850,000 | 63,000,000 | 839 | 641  | -0.128392954 | TMEM163                      |
| 2 | 62,925,000 | 63,075,000 | 840 | 567  | -1.780459719 | TMEM163                      |
| 2 | 63,000,000 | 63,150,000 | 841 | 624  | -0.41497352  | MGAT5,TMEM163                |
| 2 | 63,075,000 | 63,225,000 | 842 | 634  | 0.698229609  | MGAT5,TMEM163                |
| 2 | 63,150,000 | 63,300,000 | 843 | 722  | 1.082751895  | MGAT5                        |
| 2 | 63,225,000 | 63,375,000 | 844 | 1015 | 1.322172463  | MGAT5                        |
| 2 | 63,300,000 | 63,450,000 | 845 | 880  | 0.852543127  | MGAT5                        |
| 2 | 63,375,000 | 63,525,000 | 846 | 532  | -0.548430368 |                              |
| 2 | 63,450,000 | 63,600,000 | 847 | 551  | -0.54769133  |                              |
| 2 | 63,525,000 | 63,675,000 | 848 | 549  | -0.245340362 |                              |
| 2 | 63,600,000 | 63,750,000 | 849 | 415  | 0.276472529  |                              |
| 2 | 63,675,000 | 63,825,000 | 850 | 326  | 0.245855159  |                              |
| 2 | 63,750,000 | 63,900,000 | 851 | 306  | 0.629655395  |                              |
| 2 | 63,825,000 | 63,975,000 | 852 | 535  | 1.22363376   |                              |
| 2 | 63,900,000 | 64,050,000 | 853 | 607  | 0.993868137  |                              |
| 2 | 63,975,000 | 64,125,000 | 854 | 420  | 0.54956179   |                              |
| 2 | 64,050,000 | 64,200,000 | 855 | 382  | 0.41301604   |                              |
| 2 | 64,125,000 | 64,275,000 | 856 | 524  | -1.160658616 |                              |
| 2 | 64,200,000 | 64,350,000 | 857 | 506  | -1.967896628 |                              |
| 2 | 64,275,000 | 64,425,000 | 858 | 617  | 0.089879392  |                              |
| 2 | 64,350,000 | 64,500,000 | 859 | 717  | -0.204435047 |                              |
| 2 | 64,425,000 | 64,575,000 | 860 | 707  | -0.401324538 |                              |
| 2 | 64,500,000 | 64,650,000 | 861 | 793  | 0.204377505  |                              |
| 2 | 64,575,000 | 64,725,000 | 862 | 664  | 0.949987117  |                              |
| 2 | 64,650,000 | 64,800,000 | 863 | 897  | 1.213372461  |                              |
| 2 | 64,725,000 | 64,875,000 | 864 | 1210 | 1.122597586  |                              |
| 2 | 64,800,000 | 64,950,000 | 865 | 776  | 0.908878716  |                              |
| 2 | 64,875,000 | 65,025,000 | 866 | 769  | 0.511923185  |                              |
| 2 | 64,950,000 | 65,100,000 | 867 | 1024 | 0.126642701  | NCKAP5                       |
| 2 | 65,025,000 | 65,175,000 | 868 | 971  | 0.156494203  | NCKAP5                       |
| 2 | 65,100,000 | 65,250,000 | 869 | 858  | 0.614072468  | LYPD1,NCKAP5                 |
| 2 | 65,175,000 | 65,325,000 | 870 | 659  | 0.268586913  | LYPD1,ENSBTAG00000047466     |
| 2 | 65,250,000 | 65,400,000 | 871 | 715  | -0.247644284 | LYPD1,ENSBTAG00000047466     |
| 2 | 65,325,000 | 65,475,000 | 872 | 1113 | -0.702213117 |                              |

|   |            |            |     |      |              |                    |
|---|------------|------------|-----|------|--------------|--------------------|
| 2 | 65,400,000 | 65,550,000 | 873 | 1437 | -1.276981788 | GPR39              |
| 2 | 65,475,000 | 65,625,000 | 874 | 1245 | -2.166264775 | GPR39              |
| 2 | 65,550,000 | 65,700,000 | 875 | 756  | -1.690437257 | SLC35F5            |
| 2 | 65,625,000 | 65,775,000 | 876 | 414  | 0.378910308  | SLC35F5            |
| 2 | 65,700,000 | 65,850,000 | 877 | 448  | -2.347970487 | SLC35F5            |
| 2 | 65,775,000 | 65,925,000 | 878 | 530  | -2.5939723   | ACTR3              |
| 2 | 65,850,000 | 66,000,000 | 879 | 883  | -0.124344487 | ACTR3              |
| 2 | 65,925,000 | 66,075,000 | 880 | 1084 | 0.581054644  |                    |
| 2 | 66,000,000 | 66,150,000 | 881 | 1047 | -0.036625866 |                    |
| 2 | 66,075,000 | 66,225,000 | 882 | 1044 | 0.086769084  |                    |
| 2 | 66,150,000 | 66,300,000 | 883 | 797  | 0.137492144  |                    |
| 2 | 66,225,000 | 66,375,000 | 884 | 562  | -0.920849176 |                    |
| 2 | 66,300,000 | 66,450,000 | 885 | 825  | 0.211612453  |                    |
| 2 | 66,375,000 | 66,525,000 | 886 | 1086 | 0.488234075  |                    |
| 2 | 66,450,000 | 66,600,000 | 887 | 1002 | -0.843608078 |                    |
| 2 | 66,525,000 | 66,675,000 | 888 | 953  | -1.021441917 |                    |
| 2 | 66,600,000 | 66,750,000 | 889 | 672  | 0.485090462  |                    |
| 2 | 66,675,000 | 66,825,000 | 890 | 407  | 0.611126482  |                    |
| 2 | 66,750,000 | 66,900,000 | 891 | 628  | 0.39164741   |                    |
| 2 | 66,825,000 | 66,975,000 | 892 | 1293 | -0.373454163 |                    |
| 2 | 66,900,000 | 67,050,000 | 893 | 1569 | -0.355313851 |                    |
| 2 | 66,975,000 | 67,125,000 | 894 | 1562 | 0.744153194  |                    |
| 2 | 67,050,000 | 67,200,000 | 895 | 1396 | 0.986837395  |                    |
| 2 | 67,125,000 | 67,275,000 | 896 | 889  | 1.02753562   |                    |
| 2 | 67,200,000 | 67,350,000 | 897 | 761  | 1.041083432  |                    |
| 2 | 67,275,000 | 67,425,000 | 898 | 718  | 0.625243869  |                    |
| 2 | 67,350,000 | 67,500,000 | 899 | 628  | -1.337587636 |                    |
| 2 | 67,425,000 | 67,575,000 | 900 | 728  | -1.659094712 |                    |
| 2 | 67,500,000 | 67,650,000 | 901 | 565  | -1.46714179  |                    |
| 2 | 67,575,000 | 67,725,000 | 902 | 370  | -1.940039681 |                    |
| 2 | 67,650,000 | 67,800,000 | 903 | 436  | -1.19743228  |                    |
| 2 | 67,725,000 | 67,875,000 | 904 | 691  | -0.267190409 |                    |
| 2 | 67,800,000 | 67,950,000 | 905 | 887  | 0.370685518  | DPP10              |
| 2 | 67,875,000 | 68,025,000 | 906 | 663  | 0.138751076  | DPP10              |
| 2 | 67,950,000 | 68,100,000 | 907 | 519  | -0.90742303  | DPP10              |
| 2 | 68,025,000 | 68,175,000 | 908 | 771  | -2.431687845 | DPP10              |
| 2 | 68,100,000 | 68,250,000 | 909 | 824  | -3.741846153 | DPP10              |
| 2 | 68,175,000 | 68,325,000 | 910 | 787  | -4.901151953 |                    |
| 2 | 68,250,000 | 68,400,000 | 911 | 853  | -3.147300198 |                    |
| 2 | 68,325,000 | 68,475,000 | 912 | 935  | -0.694736974 |                    |
| 2 | 68,400,000 | 68,550,000 | 913 | 943  | 0.357857534  | ENSBTAG00000046281 |
| 2 | 68,475,000 | 68,625,000 | 914 | 1018 | 1.017713882  | ENSBTAG00000046281 |
| 2 | 68,550,000 | 68,700,000 | 915 | 1168 | 0.970788709  |                    |
| 2 | 68,625,000 | 68,775,000 | 916 | 1030 | -0.189868407 |                    |
| 2 | 68,700,000 | 68,850,000 | 917 | 772  | -2.692792546 |                    |
| 2 | 68,775,000 | 68,925,000 | 918 | 986  | -0.977183965 |                    |
| 2 | 68,850,000 | 69,000,000 | 919 | 1202 | 0.058015176  |                    |
| 2 | 68,925,000 | 69,075,000 | 920 | 1241 | 0.210144703  |                    |
| 2 | 69,000,000 | 69,150,000 | 921 | 1156 | 0.602494351  |                    |
| 2 | 69,075,000 | 69,225,000 | 922 | 826  | 0.898086196  |                    |
| 2 | 69,150,000 | 69,300,000 | 923 | 819  | 0.182631614  |                    |
| 2 | 69,225,000 | 69,375,000 | 924 | 1189 | 0.889056902  |                    |
| 2 | 69,300,000 | 69,450,000 | 925 | 1306 | 0.970512541  |                    |

|   |            |            |     |      |              |                                              |
|---|------------|------------|-----|------|--------------|----------------------------------------------|
| 2 | 69,375,000 | 69,525,000 | 926 | 1208 | 0.684558118  |                                              |
| 2 | 69,450,000 | 69,600,000 | 927 | 1142 | 0.716307132  |                                              |
| 2 | 69,525,000 | 69,675,000 | 928 | 1032 | 0.957771493  |                                              |
| 2 | 69,600,000 | 69,750,000 | 929 | 923  | 0.825856416  |                                              |
| 2 | 69,675,000 | 69,825,000 | 930 | 694  | 0.559132593  |                                              |
| 2 | 69,750,000 | 69,900,000 | 931 | 634  | 0.733542754  | ENSBTAG00000015077,ENSBTAG00000016785        |
| 2 | 69,825,000 | 69,975,000 | 932 | 1013 | 0.513184334  | CCDC93,ENSBTAG00000015077,ENSBTAG00000016785 |
| 2 | 69,900,000 | 70,050,000 | 933 | 1017 | 0.568438103  | CCDC93,ENSBTAG00000016785                    |
| 2 | 69,975,000 | 70,125,000 | 934 | 625  | 0.828243032  | CCDC93,INSIG2                                |
| 2 | 70,050,000 | 70,200,000 | 935 | 758  | 0.876990395  | INSIG2                                       |
| 2 | 70,125,000 | 70,275,000 | 936 | 889  | 0.543165945  | INSIG2                                       |
| 2 | 70,200,000 | 70,350,000 | 937 | 784  | 0.157198909  |                                              |
| 2 | 70,275,000 | 70,425,000 | 938 | 739  | 0.427964076  |                                              |
| 2 | 70,350,000 | 70,500,000 | 939 | 860  | 0.765903847  |                                              |
| 2 | 70,425,000 | 70,575,000 | 940 | 955  | -0.136138085 |                                              |
| 2 | 70,500,000 | 70,650,000 | 941 | 875  | -1.332109306 |                                              |
| 2 | 70,575,000 | 70,725,000 | 942 | 929  | -1.540340182 |                                              |
| 2 | 70,650,000 | 70,800,000 | 943 | 969  | -0.596753223 |                                              |
| 2 | 70,725,000 | 70,875,000 | 944 | 644  | 0.386828613  |                                              |
| 2 | 70,800,000 | 70,950,000 | 945 | 373  | 0.241193797  |                                              |
| 2 | 70,875,000 | 71,025,000 | 946 | 471  | 0.198718346  | EN1                                          |
| 2 | 70,950,000 | 71,100,000 | 947 | 839  | 0.345717067  | EN1,MARCO                                    |
| 2 | 71,025,000 | 71,175,000 | 948 | 1074 | 0.02388803   | MARCO                                        |
| 2 | 71,100,000 | 71,250,000 | 949 | 942  | -0.450706775 | MARCO                                        |
| 2 | 71,175,000 | 71,325,000 | 950 | 705  | -0.311236334 | C1QL2,ENSBTAG00000020794                     |
| 2 | 71,250,000 | 71,400,000 | 951 | 476  | 0.712257868  | C1QL2,STEAP3,ENSBTAG00000020794              |
| 2 | 71,325,000 | 71,475,000 | 952 | 561  | 1.365694802  | C2orf76,STEAP3                               |
| 2 | 71,400,000 | 71,550,000 | 953 | 756  | 1.514848345  | C2orf76,STEAP3                               |
| 2 | 71,475,000 | 71,625,000 | 954 | 721  | 1.448856625  | C2orf76,DBI,SCTR,TMEM37                      |
| 2 | 71,550,000 | 71,700,000 | 955 | 586  | 1.262887255  | C2orf76,DBI,SCTR,TMEM37                      |
| 2 | 71,625,000 | 71,775,000 | 956 | 445  | 1.175331986  | CFAP221,SCTR                                 |
| 2 | 71,700,000 | 71,850,000 | 957 | 588  | 1.351000289  | CFAP221,SCTR                                 |
| 2 | 71,775,000 | 71,925,000 | 958 | 628  | 1.455952434  | CFAP221,TMEM177                              |
| 2 | 71,850,000 | 72,000,000 | 959 | 389  | 1.3650912    | CFAP221,TMEM177                              |
| 2 | 71,925,000 | 72,075,000 | 960 | 234  | 0.706999809  | PTPN4                                        |
| 2 | 72,000,000 | 72,150,000 | 961 | 181  | 1.123069038  | PTPN4                                        |
| 2 | 72,075,000 | 72,225,000 | 962 | 208  | 1.102649834  | EPB41L5,PTPN4                                |
| 2 | 72,150,000 | 72,300,000 | 963 | 203  | 1.057889432  | EPB41L5                                      |
| 2 | 72,225,000 | 72,375,000 | 964 | 174  | 1.286498868  | EPB41L5,RALB,TMEM185B                        |
| 2 | 72,300,000 | 72,450,000 | 965 | 448  | 1.337639727  | EPB41L5,RALB,TMEM185B                        |
| 2 | 72,375,000 | 72,525,000 | 966 | 602  | 1.31009841   | INHBB,RALB                                   |
| 2 | 72,450,000 | 72,600,000 | 967 | 523  | 1.146029256  | INHBB                                        |
| 2 | 72,525,000 | 72,675,000 | 968 | 536  | -1.286306062 | INHBB                                        |
| 2 | 72,600,000 | 72,750,000 | 969 | 421  | -3.753471794 |                                              |
| 2 | 72,675,000 | 72,825,000 | 970 | 468  | -3.448146807 |                                              |
| 2 | 72,750,000 | 72,900,000 | 971 | 509  | -1.12537984  |                                              |
| 2 | 72,825,000 | 72,975,000 | 972 | 362  | 0.947574883  |                                              |
| 2 | 72,900,000 | 73,050,000 | 973 | 435  | 0.892534229  | GLI2                                         |
| 2 | 72,975,000 | 73,125,000 | 974 | 412  | 1.038578029  | GLI2                                         |
| 2 | 73,050,000 | 73,200,000 | 975 | 333  | 1.064776159  | GLI2                                         |
| 2 | 73,125,000 | 73,275,000 | 976 | 575  | 0.5607939    | GLI2                                         |
| 2 | 73,200,000 | 73,350,000 | 977 | 883  | -2.046598618 |                                              |

|   |            |            |      |      |              |                    |
|---|------------|------------|------|------|--------------|--------------------|
| 2 | 73,275,000 | 73,425,000 | 978  | 861  | -3.099851789 | TFCP2L1            |
| 2 | 73,350,000 | 73,500,000 | 979  | 627  | 0.158579021  | CLASP1,TFCP2L1     |
| 2 | 73,425,000 | 73,575,000 | 980  | 536  | 0.163401461  | CLASP1,TFCP2L1     |
| 2 | 73,500,000 | 73,650,000 | 981  | 850  | 0.127715845  | CLASP1             |
| 2 | 73,575,000 | 73,725,000 | 982  | 829  | 0.346938789  | CLASP1             |
| 2 | 73,650,000 | 73,800,000 | 983  | 488  | 0.367602015  | CLASP1             |
| 2 | 73,725,000 | 73,875,000 | 984  | 418  | 0.439038852  | NIFK,TSN           |
| 2 | 73,800,000 | 73,950,000 | 985  | 737  | -1.303648589 | NIFK,TSN           |
| 2 | 73,875,000 | 74,025,000 | 986  | 746  | -1.68694475  |                    |
| 2 | 73,950,000 | 74,100,000 | 987  | 580  | -0.671707958 | ENSBTAG00000026822 |
| 2 | 74,025,000 | 74,175,000 | 988  | 714  | -0.346358835 | ENSBTAG00000026822 |
| 2 | 74,100,000 | 74,250,000 | 989  | 921  | -2.474027005 |                    |
| 2 | 74,175,000 | 74,325,000 | 990  | 1005 | -2.124481489 |                    |
| 2 | 74,250,000 | 74,400,000 | 991  | 1028 | 0.447731449  |                    |
| 2 | 74,325,000 | 74,475,000 | 992  | 1120 | -1.319963554 |                    |
| 2 | 74,400,000 | 74,550,000 | 993  | 1060 | -2.698844848 |                    |
| 2 | 74,475,000 | 74,625,000 | 994  | 1052 | -2.217921162 |                    |
| 2 | 74,550,000 | 74,700,000 | 995  | 737  | -1.005855983 | ENSBTAG00000031918 |
| 2 | 74,625,000 | 74,775,000 | 996  | 519  | 0.492327381  | ENSBTAG00000031918 |
| 2 | 74,700,000 | 74,850,000 | 997  | 496  | 0.421544984  |                    |
| 2 | 74,775,000 | 74,925,000 | 998  | 741  | 0.532425155  |                    |
| 2 | 74,850,000 | 75,000,000 | 999  | 1091 | -0.944550587 |                    |
| 2 | 74,925,000 | 75,075,000 | 1000 | 1175 | -0.905620653 |                    |
| 2 | 75,000,000 | 75,150,000 | 1001 | 1356 | 0.074055248  |                    |
| 2 | 75,075,000 | 75,225,000 | 1002 | 1223 | 0.124083512  |                    |
| 2 | 75,150,000 | 75,300,000 | 1003 | 827  | 0.393977164  |                    |
| 2 | 75,225,000 | 75,375,000 | 1004 | 683  | 0.637062679  |                    |
| 2 | 75,300,000 | 75,450,000 | 1005 | 1005 | 0.884646861  | ENSBTAG00000047681 |
| 2 | 75,375,000 | 75,525,000 | 1006 | 1244 | 1.037631707  | ENSBTAG00000047681 |
| 2 | 75,450,000 | 75,600,000 | 1007 | 786  | 0.572540328  |                    |
| 2 | 75,525,000 | 75,675,000 | 1008 | 823  | -2.766101399 |                    |
| 2 | 75,600,000 | 75,750,000 | 1009 | 1610 | -1.478554585 |                    |
| 2 | 75,675,000 | 75,825,000 | 1010 | 1864 | -0.45322674  |                    |
| 2 | 75,750,000 | 75,900,000 | 1011 | 1243 | -0.593710693 |                    |
| 2 | 75,825,000 | 75,975,000 | 1012 | 958  | 0.594516247  |                    |
| 2 | 75,900,000 | 76,050,000 | 1013 | 1354 | 0.585435437  |                    |
| 2 | 75,975,000 | 76,125,000 | 1014 | 1162 | -0.319261772 |                    |
| 2 | 76,050,000 | 76,200,000 | 1015 | 1079 | -1.764927215 |                    |
| 2 | 76,125,000 | 76,275,000 | 1016 | 1426 | -2.149169704 |                    |
| 2 | 76,200,000 | 76,350,000 | 1017 | 1325 | -1.459849341 |                    |
| 2 | 76,275,000 | 76,425,000 | 1018 | 1055 | -0.170547088 |                    |
| 2 | 76,350,000 | 76,500,000 | 1019 | 809  | 0.005587834  |                    |
| 2 | 76,425,000 | 76,575,000 | 1020 | 792  | 0.076096301  |                    |
| 2 | 76,500,000 | 76,650,000 | 1021 | 1104 | 0.159282083  |                    |
| 2 | 76,575,000 | 76,725,000 | 1022 | 1370 | 0.329820973  |                    |
| 2 | 76,650,000 | 76,800,000 | 1023 | 1218 | -0.111903107 | CNTNAP5            |
| 2 | 76,725,000 | 76,875,000 | 1024 | 1043 | -0.524542904 | CNTNAP5            |
| 2 | 76,800,000 | 76,950,000 | 1025 | 869  | 0.310326291  | CNTNAP5            |
| 2 | 76,875,000 | 77,025,000 | 1026 | 667  | -0.10456094  | CNTNAP5            |
| 2 | 76,950,000 | 77,100,000 | 1027 | 704  | -1.268140349 | CNTNAP5            |
| 2 | 77,025,000 | 77,175,000 | 1028 | 719  | -0.528194015 | CNTNAP5            |
| 2 | 77,100,000 | 77,250,000 | 1029 | 845  | -0.196806158 | CNTNAP5            |
| 2 | 77,175,000 | 77,325,000 | 1030 | 721  | 0.526388443  | CNTNAP5            |

|   |            |            |      |      |              |             |
|---|------------|------------|------|------|--------------|-------------|
| 2 | 77,250,000 | 77,400,000 | 1031 | 884  | 1.250514796  | CNTNAP5     |
| 2 | 77,325,000 | 77,475,000 | 1032 | 1166 | 1.076852066  |             |
| 2 | 77,400,000 | 77,550,000 | 1033 | 882  | 0.990303796  |             |
| 2 | 77,475,000 | 77,625,000 | 1034 | 993  | 1.078645409  |             |
| 2 | 77,550,000 | 77,700,000 | 1035 | 1078 | 1.06857246   |             |
| 2 | 77,625,000 | 77,775,000 | 1036 | 948  | 0.582433818  |             |
| 2 | 77,700,000 | 77,850,000 | 1037 | 770  | -0.944528248 |             |
| 2 | 77,775,000 | 77,925,000 | 1038 | 686  | -0.4204333   |             |
| 2 | 77,850,000 | 78,000,000 | 1039 | 608  | 0.959121367  |             |
| 2 | 77,925,000 | 78,075,000 | 1040 | 609  | -2.210570171 |             |
| 2 | 78,000,000 | 78,150,000 | 1041 | 622  | -2.775323663 |             |
| 2 | 78,075,000 | 78,225,000 | 1042 | 744  | 0.476909052  |             |
| 2 | 78,150,000 | 78,300,000 | 1043 | 938  | 0.612527065  |             |
| 2 | 78,225,000 | 78,375,000 | 1044 | 943  | 0.683045083  |             |
| 2 | 78,300,000 | 78,450,000 | 1045 | 733  | 0.57672395   |             |
| 2 | 78,375,000 | 78,525,000 | 1046 | 411  | 0.470434387  |             |
| 2 | 78,450,000 | 78,600,000 | 1047 | 653  | -0.0983029   |             |
| 2 | 78,525,000 | 78,675,000 | 1048 | 1110 | 0.021967474  |             |
| 2 | 78,600,000 | 78,750,000 | 1049 | 1091 | -1.94072236  |             |
| 2 | 78,675,000 | 78,825,000 | 1050 | 724  | -2.776688549 |             |
| 2 | 78,750,000 | 78,900,000 | 1051 | 979  | 0.962005922  |             |
| 2 | 78,825,000 | 78,975,000 | 1052 | 1355 | 1.072161508  |             |
| 2 | 78,900,000 | 79,050,000 | 1053 | 1211 | 0.898532974  |             |
| 2 | 78,975,000 | 79,125,000 | 1054 | 1097 | 0.679112954  |             |
| 2 | 79,050,000 | 79,200,000 | 1055 | 976  | 0.363712499  |             |
| 2 | 79,125,000 | 79,275,000 | 1056 | 942  | -0.26754344  | GPC         |
| 2 | 79,200,000 | 79,350,000 | 1057 | 982  | -1.254923476 | GPC         |
| 2 | 79,275,000 | 79,425,000 | 1058 | 774  | -3.083753852 | GPC         |
| 2 | 79,350,000 | 79,500,000 | 1059 | 783  | -5.655613513 |             |
| 2 | 79,425,000 | 79,575,000 | 1060 | 769  | -3.946238453 |             |
| 2 | 79,500,000 | 79,650,000 | 1061 | 395  | 1.123591861  |             |
| 2 | 79,575,000 | 79,725,000 | 1062 | 237  | 0.629283726  |             |
| 2 | 79,650,000 | 79,800,000 | 1063 | 261  | 0.448133877  | GLS         |
| 2 | 79,725,000 | 79,875,000 | 1064 | 313  | 0.486975885  | GLS         |
| 2 | 79,800,000 | 79,950,000 | 1065 | 373  | 0.421188825  | GLS,STAT1   |
| 2 | 79,875,000 | 80,025,000 | 1066 | 575  | 0.868454583  | STAT1,STAT4 |
| 2 | 79,950,000 | 80,100,000 | 1067 | 670  | 0.869476268  | STAT1,STAT4 |
| 2 | 80,025,000 | 80,175,000 | 1068 | 764  | 0.366348149  | MYO1B,STAT4 |
| 2 | 80,100,000 | 80,250,000 | 1069 | 852  | -0.097746017 | MYO1B       |
| 2 | 80,175,000 | 80,325,000 | 1070 | 615  | -0.355427254 | MYO1B       |
| 2 | 80,250,000 | 80,400,000 | 1071 | 574  | 0.839511614  | MYO1B       |
| 2 | 80,325,000 | 80,475,000 | 1072 | 685  | 1.29662912   | MYO1B       |
| 2 | 80,400,000 | 80,550,000 | 1073 | 665  | 0.943768135  |             |
| 2 | 80,475,000 | 80,625,000 | 1074 | 485  | 0.440098195  |             |
| 2 | 80,550,000 | 80,700,000 | 1075 | 635  | -0.091700042 | NABP1       |
| 2 | 80,625,000 | 80,775,000 | 1076 | 911  | 0.057387323  | NABP1       |
| 2 | 80,700,000 | 80,850,000 | 1077 | 893  | 0.279909401  |             |
| 2 | 80,775,000 | 80,925,000 | 1078 | 778  | 0.567487975  | SDPR        |
| 2 | 80,850,000 | 81,000,000 | 1079 | 598  | 1.205451806  | SDPR,TMEFF2 |
| 2 | 80,925,000 | 81,075,000 | 1080 | 539  | 1.209322844  | TMEFF2      |
| 2 | 81,000,000 | 81,150,000 | 1081 | 661  | 0.401539079  | TMEFF2      |
| 2 | 81,075,000 | 81,225,000 | 1082 | 835  | -0.140288593 | TMEFF2      |
| 2 | 81,150,000 | 81,300,000 | 1083 | 799  | 0.294208122  | TMEFF2      |

|   |            |            |      |      |              |                                 |
|---|------------|------------|------|------|--------------|---------------------------------|
| 2 | 81,225,000 | 81,375,000 | 1084 | 721  | 0.150508405  | TMEFF2                          |
| 2 | 81,300,000 | 81,450,000 | 1085 | 671  | 0.565996934  |                                 |
| 2 | 81,375,000 | 81,525,000 | 1086 | 554  | 0.046809599  |                                 |
| 2 | 81,450,000 | 81,600,000 | 1087 | 472  | -0.957756538 |                                 |
| 2 | 81,525,000 | 81,675,000 | 1088 | 390  | 0.127695169  | ENSBTAG00000047783              |
| 2 | 81,600,000 | 81,750,000 | 1089 | 398  | 0.287283692  | ENSBTAG00000047783              |
| 2 | 81,675,000 | 81,825,000 | 1090 | 544  | -0.658399848 |                                 |
| 2 | 81,750,000 | 81,900,000 | 1091 | 860  | 0.711770767  |                                 |
| 2 | 81,825,000 | 81,975,000 | 1092 | 871  | 0.852543561  |                                 |
| 2 | 81,900,000 | 82,050,000 | 1093 | 656  | 0.655772355  |                                 |
| 2 | 81,975,000 | 82,125,000 | 1094 | 1216 | 0.400820918  |                                 |
| 2 | 82,050,000 | 82,200,000 | 1095 | 1355 | -2.192037418 |                                 |
| 2 | 82,125,000 | 82,275,000 | 1096 | 1118 | -1.718050377 |                                 |
| 2 | 82,200,000 | 82,350,000 | 1097 | 1178 | -0.267032724 |                                 |
| 2 | 82,275,000 | 82,425,000 | 1098 | 1266 | -0.452885359 |                                 |
| 2 | 82,350,000 | 82,500,000 | 1099 | 1203 | -0.143542198 |                                 |
| 2 | 82,425,000 | 82,575,000 | 1100 | 1133 | -0.700264171 |                                 |
| 2 | 82,500,000 | 82,650,000 | 1101 | 1194 | -1.259942509 |                                 |
| 2 | 82,575,000 | 82,725,000 | 1102 | 1088 | -1.737366717 |                                 |
| 2 | 82,650,000 | 82,800,000 | 1103 | 1072 | -0.634689242 |                                 |
| 2 | 82,725,000 | 82,875,000 | 1104 | 800  | 0.457247758  |                                 |
| 2 | 82,800,000 | 82,950,000 | 1105 | 760  | 0.126785681  | ENSBTAG00000037816              |
| 2 | 82,875,000 | 83,025,000 | 1106 | 862  | 0.429214316  | ENSBTAG00000037816              |
| 2 | 82,950,000 | 83,100,000 | 1107 | 1254 | -0.894595218 |                                 |
| 2 | 83,025,000 | 83,175,000 | 1108 | 1484 | -0.614905517 |                                 |
| 2 | 83,100,000 | 83,250,000 | 1109 | 1237 | 0.871349874  |                                 |
| 2 | 83,175,000 | 83,325,000 | 1110 | 1471 | 0.248808625  |                                 |
| 2 | 83,250,000 | 83,400,000 | 1111 | 1495 | -0.28202057  |                                 |
| 2 | 83,325,000 | 83,475,000 | 1112 | 1206 | -0.319822249 |                                 |
| 2 | 83,400,000 | 83,550,000 | 1113 | 842  | -0.644031489 |                                 |
| 2 | 83,475,000 | 83,625,000 | 1114 | 723  | -2.370666336 |                                 |
| 2 | 83,550,000 | 83,700,000 | 1115 | 596  | -2.718455543 |                                 |
| 2 | 83,625,000 | 83,775,000 | 1116 | 308  | -0.782951553 |                                 |
| 2 | 83,700,000 | 83,850,000 | 1117 | 341  | -1.259704022 |                                 |
| 2 | 83,775,000 | 83,925,000 | 1118 | 397  | 0.10724459   |                                 |
| 2 | 83,850,000 | 84,000,000 | 1119 | 466  | 0.891780262  |                                 |
| 2 | 83,925,000 | 84,075,000 | 1120 | 654  | 0.086067653  |                                 |
| 2 | 84,000,000 | 84,150,000 | 1121 | 809  | -0.096536352 |                                 |
| 2 | 84,075,000 | 84,225,000 | 1122 | 491  | 0.035330903  |                                 |
| 2 | 84,150,000 | 84,300,000 | 1123 | 258  | 0.175841361  |                                 |
| 2 | 84,225,000 | 84,375,000 | 1124 | 335  | -0.181736193 |                                 |
| 2 | 84,300,000 | 84,450,000 | 1125 | 468  | 0.509774444  |                                 |
| 2 | 84,375,000 | 84,525,000 | 1126 | 588  | 0.559629836  |                                 |
| 2 | 84,450,000 | 84,600,000 | 1127 | 485  | -0.858463609 |                                 |
| 2 | 84,525,000 | 84,675,000 | 1128 | 505  | -0.966623339 |                                 |
| 2 | 84,600,000 | 84,750,000 | 1129 | 443  | -0.224498946 | SLC39A10                        |
| 2 | 84,675,000 | 84,825,000 | 1130 | 536  | 0.609377496  | DNAH7,SLC39A10                  |
| 2 | 84,750,000 | 84,900,000 | 1131 | 780  | 0.711274145  | DNAH7,SLC39A10                  |
| 2 | 84,825,000 | 84,975,000 | 1132 | 1118 | 1.14437809   | DNAH7                           |
| 2 | 84,900,000 | 85,050,000 | 1133 | 1082 | 0.772081682  | DNAH7                           |
| 2 | 84,975,000 | 85,125,000 | 1134 | 533  | 0.120188392  | DNAH7,STK17B                    |
| 2 | 85,050,000 | 85,200,000 | 1135 | 441  | -0.435994988 | HECW2,STK17B,ENSBTAG00000047862 |
| 2 | 85,125,000 | 85,275,000 | 1136 | 487  | -0.174564722 | HECW2,ENSBTAG00000047862        |



|   |            |            |      |      |              |                                                    |
|---|------------|------------|------|------|--------------|----------------------------------------------------|
| 2 | 85,200,000 | 85,350,000 | 1137 | 496  | 0.88052755   | HECW2                                              |
| 2 | 85,275,000 | 85,425,000 | 1138 | 980  | -1.446854126 | HECW2                                              |
| 2 | 85,350,000 | 85,500,000 | 1139 | 964  | -2.429121779 |                                                    |
| 2 | 85,425,000 | 85,575,000 | 1140 | 724  | -1.856846927 |                                                    |
| 2 | 85,500,000 | 85,650,000 | 1141 | 631  | -1.097734441 | CCDC150                                            |
| 2 | 85,575,000 | 85,725,000 | 1142 | 422  | 1.150362755  | CCDC150                                            |
| 2 | 85,650,000 | 85,800,000 | 1143 | 405  | 1.234035406  | CCDC150,GTF3C3,ENSBTAG00000047452                  |
| 2 | 85,725,000 | 85,875,000 | 1144 | 282  | 0.751295597  | CCDC150,GTF3C3,PGAP1,ENSBTAG00000047452            |
| 2 | 85,800,000 | 85,950,000 | 1145 | 402  | 0.5296374    | PGAP1,ENSBTAG00000047452                           |
| 2 | 85,875,000 | 86,025,000 | 1146 | 626  | -1.226279461 | ANKRD44,PGAP1                                      |
| 2 | 85,950,000 | 86,100,000 | 1147 | 844  | -1.056930593 | ANKRD44                                            |
| 2 | 86,025,000 | 86,175,000 | 1148 | 1045 | -0.514386993 | ANKRD44                                            |
| 2 | 86,100,000 | 86,250,000 | 1149 | 978  | 0.071499463  | ANKRD44                                            |
| 2 | 86,175,000 | 86,325,000 | 1150 | 673  | 0.914580853  |                                                    |
| 2 | 86,250,000 | 86,400,000 | 1151 | 423  | 0.472262987  | SF3B1,ENSBTAG00000012171                           |
| 2 | 86,325,000 | 86,475,000 | 1152 | 338  | 1.30000525   | COQ10B,HSPD1,HSPE1,MOBKL3,SF3B1,ENSBTAG00000012171 |
| 2 | 86,400,000 | 86,550,000 | 1153 | 456  | 1.384769703  | COQ10B,HSPD1,HSPE1,MOBKL3,RFTN2                    |
| 2 | 86,475,000 | 86,625,000 | 1154 | 457  | 1.290260182  | MARS2,MOBKL3,RFTN2                                 |
| 2 | 86,550,000 | 86,700,000 | 1155 | 347  | 1.138599996  | BOLL,MARS2,RFTN2                                   |
| 2 | 86,625,000 | 86,775,000 | 1156 | 375  | 0.964354186  | BOLL,PLCL1                                         |
| 2 | 86,700,000 | 86,850,000 | 1157 | 562  | 1.266420073  | PLCL1                                              |
| 2 | 86,775,000 | 86,925,000 | 1158 | 556  | 1.268437978  | PLCL1                                              |
| 2 | 86,850,000 | 87,000,000 | 1159 | 481  | 0.917025172  | PLCL1                                              |
| 2 | 86,925,000 | 87,075,000 | 1160 | 725  | 0.835858111  | PLCL1                                              |
| 2 | 87,000,000 | 87,150,000 | 1161 | 762  | 0.75861471   | PLCL1                                              |
| 2 | 87,075,000 | 87,225,000 | 1162 | 530  | -0.072389381 | PLCL1                                              |
| 2 | 87,150,000 | 87,300,000 | 1163 | 379  | -0.756580793 |                                                    |
| 2 | 87,225,000 | 87,375,000 | 1164 | 281  | -0.644686212 |                                                    |
| 2 | 87,300,000 | 87,450,000 | 1165 | 275  | -0.42265252  |                                                    |
| 2 | 87,375,000 | 87,525,000 | 1166 | 617  | 0.556205133  |                                                    |
| 2 | 87,450,000 | 87,600,000 | 1167 | 770  | 0.259036457  |                                                    |
| 2 | 87,525,000 | 87,675,000 | 1168 | 626  | -1.229348506 |                                                    |
| 2 | 87,600,000 | 87,750,000 | 1169 | 598  | -1.649119155 |                                                    |
| 2 | 87,675,000 | 87,825,000 | 1170 | 437  | -1.653646402 |                                                    |
| 2 | 87,750,000 | 87,900,000 | 1171 | 414  | -0.585444446 |                                                    |
| 2 | 87,825,000 | 87,975,000 | 1172 | 562  | -0.3352811   |                                                    |
| 2 | 87,900,000 | 88,050,000 | 1173 | 699  | 0.320031382  |                                                    |
| 2 | 87,975,000 | 88,125,000 | 1174 | 577  | 0.897389156  |                                                    |
| 2 | 88,050,000 | 88,200,000 | 1175 | 319  | 0.968342814  |                                                    |
| 2 | 88,125,000 | 88,275,000 | 1176 | 487  | 0.900986391  | SATB2                                              |
| 2 | 88,200,000 | 88,350,000 | 1177 | 468  | 0.617722983  | SATB2                                              |
| 2 | 88,275,000 | 88,425,000 | 1178 | 272  | 0.148343871  | SATB2                                              |
| 2 | 88,350,000 | 88,500,000 | 1179 | 370  | 0.557317854  | SATB2                                              |
| 2 | 88,425,000 | 88,575,000 | 1180 | 638  | 1.185347156  | SATB2                                              |
| 2 | 88,500,000 | 88,650,000 | 1181 | 891  | 1.487191207  |                                                    |
| 2 | 88,575,000 | 88,725,000 | 1182 | 695  | 1.142218801  |                                                    |
| 2 | 88,650,000 | 88,800,000 | 1183 | 308  | 0.129905192  |                                                    |
| 2 | 88,725,000 | 88,875,000 | 1184 | 196  | -1.739075519 | FTCDNL1                                            |
| 2 | 88,800,000 | 88,950,000 | 1185 | 213  | -1.920393663 | C2orf47,C2orf69,FTCDNL1,TYW5                       |
| 2 | 88,875,000 | 89,025,000 | 1186 | 223  | -0.411865743 | C2orf47,C2orf69,TYW5                               |
| 2 | 88,950,000 | 89,100,000 | 1187 | 386  | -1.47842442  |                                                    |
| 2 | 89,025,000 | 89,175,000 | 1188 | 654  | -2.272822468 | ENSBTAG00000024003                                 |

|   |            |            |      |      |              |                                                           |
|---|------------|------------|------|------|--------------|-----------------------------------------------------------|
| 2 | 89,100,000 | 89,250,000 | 1189 | 598  | -2.041722499 | SPATS2L,ENSBTAG00000024003                                |
| 2 | 89,175,000 | 89,325,000 | 1190 | 329  | -0.596177684 | SPATS2L                                                   |
| 2 | 89,250,000 | 89,400,000 | 1191 | 442  | 0.318199338  | SPATS2L                                                   |
| 2 | 89,325,000 | 89,475,000 | 1192 | 631  | 0.974250055  | KCTD18,SPATS2L                                            |
| 2 | 89,400,000 | 89,550,000 | 1193 | 868  | 1.057092743  | AOX1,KCTD18,SGOL2,SPATS2L                                 |
| 2 | 89,475,000 | 89,625,000 | 1194 | 1367 | 0.897067561  | AOX1,SGOL2                                                |
| 2 | 89,550,000 | 89,700,000 | 1195 | 1560 | 0.680174616  | AOX1,AOX4                                                 |
| 2 | 89,625,000 | 89,775,000 | 1196 | 1643 | 0.405475125  | AOX4                                                      |
| 2 | 89,700,000 | 89,850,000 | 1197 | 1388 | 0.483265236  | AOX4,ENSBTAG00000026812                                   |
| 2 | 89,775,000 | 89,925,000 | 1198 | 766  | 0.589955996  | BZW1,CLK1,ENSBTAG00000026812                              |
| 2 | 89,850,000 | 90,000,000 | 1199 | 496  | -1.978128848 | BZW1,CLK1,NIF3L1,ORC2,PPIL3,ENSBTAG00000026812            |
| 2 | 89,925,000 | 90,075,000 | 1200 | 354  | -2.58537946  | CLK1,FAM126B,NIF3L1,ORC2,PPIL3                            |
| 2 | 90,000,000 | 90,150,000 | 1201 | 352  | -0.159688648 | FAM126B,FLIP,NDUFB3,ORC2,ENSBTAG00000012763               |
| 2 | 90,075,000 | 90,225,000 | 1202 | 449  | 0.614467588  | FAM126B,FLIP,NDUFB3,ENSBTAG00000003731,ENSBTAG00000012763 |
| 2 | 90,150,000 | 90,300,000 | 1203 | 659  | 0.957037404  | CASP8,FLIP,ENSBTAG00000003731                             |
| 2 | 90,225,000 | 90,375,000 | 1204 | 900  | 0.302230745  | ALS2CR12,CASP8,TRAK2                                      |
| 2 | 90,300,000 | 90,450,000 | 1205 | 977  | 0.387092383  | ALS2CR12,CASP8,STRADB,TRAK2                               |
| 2 | 90,375,000 | 90,525,000 | 1206 | 957  | 0.76043718   | ALS2CR11,STRADB,TRAK2                                     |
| 2 | 90,450,000 | 90,600,000 | 1207 | 1078 | -4.307630639 | ALS2CR11,STRADB,TMEM237                                   |
| 2 | 90,525,000 | 90,675,000 | 1208 | 798  | -5.715712378 | ALS2,ALS2CR11,TMEM237                                     |
| 2 | 90,600,000 | 90,750,000 | 1209 | 363  | -0.192909391 | ALS2,TMEM237                                              |
| 2 | 90,675,000 | 90,825,000 | 1210 | 613  | 0.215862908  | ALS2                                                      |
| 2 | 90,750,000 | 90,900,000 | 1211 | 601  | 0.311662817  |                                                           |
| 2 | 90,825,000 | 90,975,000 | 1212 | 375  | 0.366525295  |                                                           |
| 2 | 90,900,000 | 91,050,000 | 1213 | 320  | 0.132193487  | FZD7,ENSBTAG00000034192                                   |
| 2 | 90,975,000 | 91,125,000 | 1214 | 332  | -2.327684251 | FZD7,ENSBTAG00000034192                                   |
| 2 | 91,050,000 | 91,200,000 | 1215 | 374  | -2.672472062 | SUMO1,ENSBTAG00000034192                                  |
| 2 | 91,125,000 | 91,275,000 | 1216 | 276  | -1.126269024 | NOP58,SUMO1,ENSBTAG00000034192                            |
| 2 | 91,200,000 | 91,350,000 | 1217 | 240  | 0.245097118  | NOP58                                                     |
| 2 | 91,275,000 | 91,425,000 | 1218 | 322  | -1.706675918 | BMPRII                                                    |
| 2 | 91,350,000 | 91,500,000 | 1219 | 419  | -4.153932659 | ALS2CR13,BMPRII                                           |
| 2 | 91,425,000 | 91,575,000 | 1220 | 356  | -3.95570236  | ALS2CR13,BMPRII,ICA1L                                     |
| 2 | 91,500,000 | 91,650,000 | 1221 | 324  | -1.148575054 | ALS2CR13,ICA1L,WDR12                                      |
| 2 | 91,575,000 | 91,725,000 | 1222 | 328  | 0.037197541  | CARF,ICA1L,WDR12                                          |
| 2 | 91,650,000 | 91,800,000 | 1223 | 391  | 1.383585319  | CARF,NBEAL1                                               |
| 2 | 91,725,000 | 91,875,000 | 1224 | 469  | 1.313091708  | CARF,NBEAL1                                               |
| 2 | 91,800,000 | 91,950,000 | 1225 | 308  | 0.729355649  | CYP20A1,NBEAL1                                            |
| 2 | 91,875,000 | 92,025,000 | 1226 | 219  | -0.405182775 | ABI2,CYP20A1,NBEAL1                                       |
| 2 | 91,950,000 | 92,100,000 | 1227 | 230  | -0.225249895 | ABI2,RAPH1                                                |
| 2 | 92,025,000 | 92,175,000 | 1228 | 422  | 0.482245702  | ABI2,RAPH1                                                |
| 2 | 92,100,000 | 92,250,000 | 1229 | 637  | -1.307186841 | RAPH1                                                     |
| 2 | 92,175,000 | 92,325,000 | 1230 | 757  | -1.763059378 |                                                           |
| 2 | 92,250,000 | 92,400,000 | 1231 | 722  | -0.678258386 | CD28                                                      |
| 2 | 92,325,000 | 92,475,000 | 1232 | 606  | -2.698676688 | CD28                                                      |
| 2 | 92,400,000 | 92,550,000 | 1233 | 452  | -4.010412312 | CTLA4                                                     |
| 2 | 92,475,000 | 92,625,000 | 1234 | 407  | -1.557073049 | CTLA4,ICOS                                                |
| 2 | 92,550,000 | 92,700,000 | 1235 | 472  | -1.094306489 | ICOS                                                      |
| 2 | 92,625,000 | 92,775,000 | 1236 | 475  | 0.7215734    |                                                           |
| 2 | 92,700,000 | 92,850,000 | 1237 | 596  | 0.591234253  |                                                           |
| 2 | 92,775,000 | 92,925,000 | 1238 | 792  | -1.796327345 |                                                           |
| 2 | 92,850,000 | 93,000,000 | 1239 | 894  | -2.912063032 | ENSBTAG00000040367                                        |

|   |            |            |      |      |              |                                                                   |
|---|------------|------------|------|------|--------------|-------------------------------------------------------------------|
| 2 | 92,925,000 | 93,075,000 | 1240 | 1200 | -1.960857806 | ENSBTAG00000040367                                                |
| 2 | 93,000,000 | 93,150,000 | 1241 | 1212 | -0.986926663 |                                                                   |
| 2 | 93,075,000 | 93,225,000 | 1242 | 903  | 0.033162934  |                                                                   |
| 2 | 93,150,000 | 93,300,000 | 1243 | 798  | 0.690514418  |                                                                   |
| 2 | 93,225,000 | 93,375,000 | 1244 | 630  | 0.798834321  |                                                                   |
| 2 | 93,300,000 | 93,450,000 | 1245 | 625  | -0.565174584 |                                                                   |
| 2 | 93,375,000 | 93,525,000 | 1246 | 651  | -1.028140926 |                                                                   |
| 2 | 93,450,000 | 93,600,000 | 1247 | 678  | 0.074180211  |                                                                   |
| 2 | 93,525,000 | 93,675,000 | 1248 | 880  | -0.155267916 |                                                                   |
| 2 | 93,600,000 | 93,750,000 | 1249 | 732  | -0.167857242 | ENSBTAG00000046521                                                |
| 2 | 93,675,000 | 93,825,000 | 1250 | 699  | -0.93442771  | ENSBTAG00000046521                                                |
| 2 | 93,750,000 | 93,900,000 | 1251 | 1007 | -1.05941629  | PARD3B                                                            |
| 2 | 93,825,000 | 93,975,000 | 1252 | 1054 | -2.294300101 | PARD3B                                                            |
| 2 | 93,900,000 | 94,050,000 | 1253 | 1056 | -3.305058111 | PARD3B                                                            |
| 2 | 93,975,000 | 94,125,000 | 1254 | 947  | -1.759950112 |                                                                   |
| 2 | 94,050,000 | 94,200,000 | 1255 | 997  | -1.036012334 |                                                                   |
| 2 | 94,125,000 | 94,275,000 | 1256 | 1060 | -1.474776323 | ENSBTAG00000046783                                                |
| 2 | 94,200,000 | 94,350,000 | 1257 | 953  | -1.051439221 | ENSBTAG00000046783                                                |
| 2 | 94,275,000 | 94,425,000 | 1258 | 919  | -2.074443152 | ENSBTAG00000046029                                                |
| 2 | 94,350,000 | 94,500,000 | 1259 | 734  | -2.898657637 | NRP2,ENSBTAG00000046029                                           |
| 2 | 94,425,000 | 94,575,000 | 1260 | 610  | -0.970570871 | NRP2                                                              |
| 2 | 94,500,000 | 94,650,000 | 1261 | 747  | -0.069536114 | NRP2                                                              |
| 2 | 94,575,000 | 94,725,000 | 1262 | 794  | -0.251255941 |                                                                   |
| 2 | 94,650,000 | 94,800,000 | 1263 | 529  | -0.163954192 | INO80D                                                            |
| 2 | 94,725,000 | 94,875,000 | 1264 | 404  | -2.371305371 | INO80D                                                            |
| 2 | 94,800,000 | 94,950,000 | 1265 | 461  | -1.895670867 | EEF1B,GPR1,INO80D,NDUFS1                                          |
| 2 | 94,875,000 | 95,025,000 | 1266 | 494  | 0.59734963   | EEF1B,GPR1,NDUFS1                                                 |
| 2 | 94,950,000 | 95,100,000 | 1267 | 570  | 0.832886563  | ZDBF2                                                             |
| 2 | 95,025,000 | 95,175,000 | 1268 | 673  | -0.033727694 | ADAM23,ZDBF2                                                      |
| 2 | 95,100,000 | 95,250,000 | 1269 | 888  | 0.010053901  | ADAM23                                                            |
| 2 | 95,175,000 | 95,325,000 | 1270 | 1022 | 0.636528546  | ADAM23                                                            |
| 2 | 95,250,000 | 95,400,000 | 1271 | 984  | 0.720120673  | ADAM23,DYTN                                                       |
| 2 | 95,325,000 | 95,475,000 | 1272 | 981  | 0.696193526  | ADAM23,DYTN                                                       |
| 2 | 95,400,000 | 95,550,000 | 1273 | 1155 | 0.323601232  | DYTN,FASTKD2,MDH1B                                                |
| 2 | 95,475,000 | 95,625,000 | 1274 | 1046 | -0.708980403 | FASTKD2,MDH1B                                                     |
| 2 | 95,550,000 | 95,700,000 | 1275 | 837  | -0.729424422 | CPO                                                               |
| 2 | 95,625,000 | 95,775,000 | 1276 | 863  | -0.03977625  | CPO                                                               |
| 2 | 95,700,000 | 95,850,000 | 1277 | 801  | 0.349873976  | CPO,KLF7                                                          |
| 2 | 95,775,000 | 95,925,000 | 1278 | 706  | 0.627201734  | KLF7                                                              |
| 2 | 95,850,000 | 96,000,000 | 1279 | 618  | 0.236864593  | KLF7                                                              |
| 2 | 95,925,000 | 96,075,000 | 1280 | 804  | -0.479868574 |                                                                   |
| 2 | 96,000,000 | 96,150,000 | 1281 | 1104 | -0.156249802 |                                                                   |
| 2 | 96,075,000 | 96,225,000 | 1282 | 854  | 0.256972365  |                                                                   |
| 2 | 96,150,000 | 96,300,000 | 1283 | 553  | 0.310723672  | CREB1                                                             |
| 2 | 96,225,000 | 96,375,000 | 1284 | 571  | 0.139600272  | CREB1,METTL21A                                                    |
| 2 | 96,300,000 | 96,450,000 | 1285 | 414  | 0.076481932  | CCNYL1,CREB1,METTL21A                                             |
| 2 | 96,375,000 | 96,525,000 | 1286 | 256  | 0.085444502  | CCNYL1,FZD5                                                       |
| 2 | 96,450,000 | 96,600,000 | 1287 | 335  | -0.407420418 | CCNYL1,FZD5                                                       |
| 2 | 96,525,000 | 96,675,000 | 1288 | 419  | -0.23624714  | PLEKHM3                                                           |
| 2 | 96,600,000 | 96,750,000 | 1289 | 750  | 0.057226212  | PLEKHM3                                                           |
| 2 | 96,675,000 | 96,825,000 | 1290 | 1072 | -0.093718422 | PLEKHM3,ENSBTAG00000014094                                        |
| 2 | 96,750,000 | 96,900,000 | 1291 | 1267 | -1.330766821 | C2H2orf80,CRYGB,CRYGC,CRYGD,ENSBTAG00000014094,ENSBTAG00000046832 |

|   |             |             |      |      |              |                                                    |
|---|-------------|-------------|------|------|--------------|----------------------------------------------------|
| 2 | 96,825,000  | 96,975,000  | 1292 | 1439 | -1.698599463 | C2H2orf80,CRYGB,CRYGC,CRYGD,IDH1,ENSBTAG0000046832 |
| 2 | 96,900,000  | 97,050,000  | 1293 | 1281 | -1.072734469 | IDH1,PIKFYVE                                       |
| 2 | 96,975,000  | 97,125,000  | 1294 | 1009 | 0.268501758  | PIKFYVE,PTH2R                                      |
| 2 | 97,050,000  | 97,200,000  | 1295 | 1226 | 1.216274239  | PIKFYVE,PTH2R                                      |
| 2 | 97,125,000  | 97,275,000  | 1296 | 1464 | 1.266591191  | PTH2R                                              |
| 2 | 97,200,000  | 97,350,000  | 1297 | 1171 | 0.9852357    |                                                    |
| 2 | 97,275,000  | 97,425,000  | 1298 | 1271 | 0.871547053  |                                                    |
| 2 | 97,350,000  | 97,500,000  | 1299 | 1562 | 1.240989401  |                                                    |
| 2 | 97,425,000  | 97,575,000  | 1300 | 1273 | 1.24923535   | CRYGF                                              |
| 2 | 97,500,000  | 97,650,000  | 1301 | 1238 | 1.184166619  | CRYGF                                              |
| 2 | 97,575,000  | 97,725,000  | 1302 | 1012 | 0.938278569  |                                                    |
| 2 | 97,650,000  | 97,800,000  | 1303 | 560  | 0.395365132  |                                                    |
| 2 | 97,725,000  | 97,875,000  | 1304 | 669  | 0.434950785  | MAP-2                                              |
| 2 | 97,800,000  | 97,950,000  | 1305 | 583  | 0.269791913  | MAP-2                                              |
| 2 | 97,875,000  | 98,025,000  | 1306 | 384  | -0.001651918 | MAP-2,UNC80                                        |
| 2 | 97,950,000  | 98,100,000  | 1307 | 390  | -1.675297041 | MAP-2,UNC80                                        |
| 2 | 98,025,000  | 98,175,000  | 1308 | 502  | -1.406093817 | UNC80                                              |
| 2 | 98,100,000  | 98,250,000  | 1309 | 519  | -0.322948908 | UNC80                                              |
| 2 | 98,175,000  | 98,325,000  | 1310 | 554  | -0.140729055 | KANSL1L,RPE,UNC80                                  |
| 2 | 98,250,000  | 98,400,000  | 1311 | 714  | 0.816176453  | KANSL1L,RPE,UNC80                                  |
| 2 | 98,325,000  | 98,475,000  | 1312 | 878  | 1.393433586  | ACADL,KANSL1L                                      |
| 2 | 98,400,000  | 98,550,000  | 1313 | 941  | 0.595536245  | ACADL,MYL1                                         |
| 2 | 98,475,000  | 98,625,000  | 1314 | 922  | -0.749262967 | LANCL1,MYL1                                        |
| 2 | 98,550,000  | 98,700,000  | 1315 | 895  | -0.233097584 | LANCL1,MYL1                                        |
| 2 | 98,625,000  | 98,775,000  | 1316 | 772  | 0.423337901  | CPS1,LANCL1                                        |
| 2 | 98,700,000  | 98,850,000  | 1317 | 653  | -0.158333402 | CPS1                                               |
| 2 | 98,775,000  | 98,925,000  | 1318 | 726  | -0.452129637 | CPS1                                               |
| 2 | 98,850,000  | 99,000,000  | 1319 | 787  | 0.173497392  | CPS1                                               |
| 2 | 98,925,000  | 99,075,000  | 1320 | 820  | 0.87099029   |                                                    |
| 2 | 99,000,000  | 99,150,000  | 1321 | 910  | 0.806149937  |                                                    |
| 2 | 99,075,000  | 99,225,000  | 1322 | 852  | 0.595378168  |                                                    |
| 2 | 99,150,000  | 99,300,000  | 1323 | 692  | 0.277553215  |                                                    |
| 2 | 99,225,000  | 99,375,000  | 1324 | 550  | 0.001424982  |                                                    |
| 2 | 99,300,000  | 99,450,000  | 1325 | 1078 | 0.931450063  |                                                    |
| 2 | 99,375,000  | 99,525,000  | 1326 | 1339 | 0.984526893  |                                                    |
| 2 | 99,450,000  | 99,600,000  | 1327 | 860  | -0.847446142 |                                                    |
| 2 | 99,525,000  | 99,675,000  | 1328 | 704  | -1.896638261 | ENSBTAG00000012647                                 |
| 2 | 99,600,000  | 99,750,000  | 1329 | 627  | 0.360753551  | ENSBTAG00000012647,ENSBTAG00000047490              |
| 2 | 99,675,000  | 99,825,000  | 1330 | 587  | 0.656226384  | ENSBTAG00000012647,ENSBTAG00000047490              |
| 2 | 99,750,000  | 99,900,000  | 1331 | 946  | 0.511707084  | ENSBTAG00000012647                                 |
| 2 | 99,825,000  | 99,975,000  | 1332 | 1006 | 0.656919256  | ENSBTAG00000012647                                 |
| 2 | 99,900,000  | 100,050,000 | 1333 | 529  | 1.00723893   | ENSBTAG00000012647                                 |
| 2 | 99,975,000  | 100,125,000 | 1334 | 502  | 0.461224869  | ENSBTAG00000012647                                 |
| 2 | 100,050,000 | 100,200,000 | 1335 | 754  | 0.63497599   |                                                    |
| 2 | 100,125,000 | 100,275,000 | 1336 | 941  | 0.329948102  |                                                    |
| 2 | 100,200,000 | 100,350,000 | 1337 | 1465 | -1.180645283 | ENSBTAG00000005239                                 |
| 2 | 100,275,000 | 100,425,000 | 1338 | 1783 | -1.701922175 | ENSBTAG00000005239                                 |
| 2 | 100,350,000 | 100,500,000 | 1339 | 1456 | -0.692882232 |                                                    |
| 2 | 100,425,000 | 100,575,000 | 1340 | 1438 | -1.293856879 |                                                    |
| 2 | 100,500,000 | 100,650,000 | 1341 | 1335 | -1.790051907 |                                                    |
| 2 | 100,575,000 | 100,725,000 | 1342 | 918  | 0.130884831  |                                                    |
| 2 | 100,650,000 | 100,800,000 | 1343 | 1104 | 0.794466198  |                                                    |

|   |             |             |      |      |              |                          |
|---|-------------|-------------|------|------|--------------|--------------------------|
| 2 | 100,725,000 | 100,875,000 | 1344 | 1308 | 1.120866822  |                          |
| 2 | 100,800,000 | 100,950,000 | 1345 | 1139 | 1.340296391  |                          |
| 2 | 100,875,000 | 101,025,000 | 1346 | 986  | 1.076980421  |                          |
| 2 | 100,950,000 | 101,100,000 | 1347 | 1342 | 0.323856408  |                          |
| 2 | 101,025,000 | 101,175,000 | 1348 | 1593 | -0.117352058 |                          |
| 2 | 101,100,000 | 101,250,000 | 1349 | 1387 | -0.042272964 |                          |
| 2 | 101,175,000 | 101,325,000 | 1350 | 1324 | 0.661890402  |                          |
| 2 | 101,250,000 | 101,400,000 | 1351 | 1341 | 0.746223417  |                          |
| 2 | 101,325,000 | 101,475,000 | 1352 | 921  | 0.316166042  |                          |
| 2 | 101,400,000 | 101,550,000 | 1353 | 357  | -0.027407127 | IKZF2                    |
| 2 | 101,475,000 | 101,625,000 | 1354 | 306  | 0.688934769  | IKZF2                    |
| 2 | 101,550,000 | 101,700,000 | 1355 | 419  | -0.64218429  | IKZF2                    |
| 2 | 101,625,000 | 101,775,000 | 1356 | 414  | -1.281409652 | IKZF2                    |
| 2 | 101,700,000 | 101,850,000 | 1357 | 689  | 0.017340853  | IKZF2                    |
| 2 | 101,775,000 | 101,925,000 | 1358 | 901  | 0.24172083   | SPAG16                   |
| 2 | 101,850,000 | 102,000,000 | 1359 | 753  | 0.428722279  | SPAG16                   |
| 2 | 101,925,000 | 102,075,000 | 1360 | 569  | 0.552295801  |                          |
| 2 | 102,000,000 | 102,150,000 | 1361 | 436  | 0.137790172  |                          |
| 2 | 102,075,000 | 102,225,000 | 1362 | 363  | -0.549950683 |                          |
| 2 | 102,150,000 | 102,300,000 | 1363 | 304  | -1.253236197 |                          |
| 2 | 102,225,000 | 102,375,000 | 1364 | 477  | -3.011339897 |                          |
| 2 | 102,300,000 | 102,450,000 | 1365 | 1094 | -0.226753943 |                          |
| 2 | 102,375,000 | 102,525,000 | 1366 | 1401 | 0.397440152  |                          |
| 2 | 102,450,000 | 102,600,000 | 1367 | 1485 | -0.17887106  |                          |
| 2 | 102,525,000 | 102,675,000 | 1368 | 1457 | 0.415380542  |                          |
| 2 | 102,600,000 | 102,750,000 | 1369 | 1255 | 0.63397496   |                          |
| 2 | 102,675,000 | 102,825,000 | 1370 | 1416 | 0.664758923  |                          |
| 2 | 102,750,000 | 102,900,000 | 1371 | 1520 | 0.567371459  |                          |
| 2 | 102,825,000 | 102,975,000 | 1372 | 1394 | 0.435015541  | VWC2L,ENSBTAG00000048219 |
| 2 | 102,900,000 | 103,050,000 | 1373 | 1242 | 0.970916478  | VWC2L,ENSBTAG00000048219 |
| 2 | 102,975,000 | 103,125,000 | 1374 | 1451 | 1.006449667  | VWC2L                    |
| 2 | 103,050,000 | 103,200,000 | 1375 | 1781 | 0.701574487  | VWC2L                    |
| 2 | 103,125,000 | 103,275,000 | 1376 | 1847 | 0.178311119  | VWC2L                    |
| 2 | 103,200,000 | 103,350,000 | 1377 | 1594 | -0.228391545 | BARD1                    |
| 2 | 103,275,000 | 103,425,000 | 1378 | 1283 | 0.059969232  | BARD1                    |
| 2 | 103,350,000 | 103,500,000 | 1379 | 1281 | 0.0123443    | BARD1                    |
| 2 | 103,425,000 | 103,575,000 | 1380 | 1218 | -1.608714194 | ABCA12                   |
| 2 | 103,500,000 | 103,650,000 | 1381 | 1114 | -1.918412728 | ABCA12                   |
| 2 | 103,575,000 | 103,725,000 | 1382 | 1199 | 0.142540396  | ABCA12                   |
| 2 | 103,650,000 | 103,800,000 | 1383 | 1525 | -0.183961533 | ABCA12                   |
| 2 | 103,725,000 | 103,875,000 | 1384 | 1695 | 0.257504882  | ATIC                     |
| 2 | 103,800,000 | 103,950,000 | 1385 | 1308 | 0.83414694   | ATIC,FN1                 |
| 2 | 103,875,000 | 104,025,000 | 1386 | 1090 | 0.725505256  | FN1                      |
| 2 | 103,950,000 | 104,100,000 | 1387 | 994  | 0.629305651  | FN1                      |
| 2 | 104,025,000 | 104,175,000 | 1388 | 780  | 0.488327442  |                          |
| 2 | 104,100,000 | 104,250,000 | 1389 | 904  | 0.347255884  |                          |
| 2 | 104,175,000 | 104,325,000 | 1390 | 1117 | 0.553045908  |                          |
| 2 | 104,250,000 | 104,400,000 | 1391 | 1281 | 1.05417753   |                          |
| 2 | 104,325,000 | 104,475,000 | 1392 | 1250 | 1.091279036  |                          |
| 2 | 104,400,000 | 104,550,000 | 1393 | 1306 | 1.022265103  | MREG                     |
| 2 | 104,475,000 | 104,625,000 | 1394 | 1351 | 1.026527526  | MREG,PECR,TMEM169        |
| 2 | 104,550,000 | 104,700,000 | 1395 | 1160 | 1.034659196  | MREG,PECR,TMEM169,XRCC5  |
| 2 | 104,625,000 | 104,775,000 | 1396 | 1289 | 0.507599837  | PECR,TMEM169,XRCC5       |

|   |             |             |      |      |              |                                                                                  |        |
|---|-------------|-------------|------|------|--------------|----------------------------------------------------------------------------------|--------|
| 2 | 104,700,000 | 104,850,000 | 1397 | 1378 | 0.111277852  | MARCH4,XRCC5                                                                     |        |
| 2 | 104,775,000 | 104,925,000 | 1398 | 1323 | -0.161713542 |                                                                                  | 04-Mar |
| 2 | 104,850,000 | 105,000,000 | 1399 | 999  | -0.529188712 | SHOX                                                                             |        |
| 2 | 104,925,000 | 105,075,000 | 1400 | 1191 | 0.880047909  | SHOX                                                                             |        |
| 2 | 105,000,000 | 105,150,000 | 1401 | 1407 | 0.910944838  | SMARCAL1                                                                         |        |
| 2 | 105,075,000 | 105,225,000 | 1402 | 979  | -0.061089242 | RPL37A,SMARCAL1                                                                  |        |
| 2 | 105,150,000 | 105,300,000 | 1403 | 722  | 0.278167774  | RPL37A,SMARCAL1                                                                  |        |
| 2 | 105,225,000 | 105,375,000 | 1404 | 643  | -1.367153106 | IGFBP2,ENSBTAG00000048210                                                        |        |
| 2 | 105,300,000 | 105,450,000 | 1405 | 579  | -2.843158986 | IGFBP2,IGFBP5,ENSBTAG00000048210                                                 |        |
| 2 | 105,375,000 | 105,525,000 | 1406 | 480  | -1.693624992 | IGFBP5,ENSBTAG00000048210                                                        |        |
| 2 | 105,450,000 | 105,600,000 | 1407 | 487  | -0.26144348  | TNP1                                                                             |        |
| 2 | 105,525,000 | 105,675,000 | 1408 | 671  | 0.145297946  | TNP1                                                                             |        |
| 2 | 105,600,000 | 105,750,000 | 1409 | 952  | 0.472961743  |                                                                                  |        |
| 2 | 105,675,000 | 105,825,000 | 1410 | 874  | 0.576524429  |                                                                                  |        |
| 2 | 105,750,000 | 105,900,000 | 1411 | 745  | -0.13621783  |                                                                                  |        |
| 2 | 105,825,000 | 105,975,000 | 1412 | 841  | -1.186773975 |                                                                                  |        |
| 2 | 105,900,000 | 106,050,000 | 1413 | 690  | -2.123392056 |                                                                                  |        |
| 2 | 105,975,000 | 106,125,000 | 1414 | 504  | -2.140734242 |                                                                                  |        |
| 2 | 106,050,000 | 106,200,000 | 1415 | 480  | -1.378442924 |                                                                                  |        |
| 2 | 106,125,000 | 106,275,000 | 1416 | 519  | -0.864245095 |                                                                                  |        |
| 2 | 106,200,000 | 106,350,000 | 1417 | 607  | -0.777931748 |                                                                                  |        |
| 2 | 106,275,000 | 106,425,000 | 1418 | 531  | -0.244749595 |                                                                                  |        |
| 2 | 106,350,000 | 106,500,000 | 1419 | 352  | -0.131422776 |                                                                                  |        |
| 2 | 106,425,000 | 106,575,000 | 1420 | 422  | -0.490940245 |                                                                                  |        |
| 2 | 106,500,000 | 106,650,000 | 1421 | 576  | -0.340543214 | TNS1                                                                             |        |
| 2 | 106,575,000 | 106,725,000 | 1422 | 493  | -1.086749676 | TNS1                                                                             |        |
| 2 | 106,650,000 | 106,800,000 | 1423 | 375  | -1.481928643 | TNS1                                                                             |        |
| 2 | 106,725,000 | 106,875,000 | 1424 | 350  | -1.288650797 | TNS1                                                                             |        |
| 2 | 106,800,000 | 106,950,000 | 1425 | 466  | -0.571728218 | CXCR2,MGC157327                                                                  |        |
| 2 | 106,875,000 | 107,025,000 | 1426 | 509  | 0.151883237  | AAMP,ARPC2,CXCR2,GPBAR1,MGC157327,PNKD,RECS1                                     |        |
| 2 | 106,950,000 | 107,100,000 | 1427 | 380  | 0.593109465  | AAMP,ARPC2,GPBAR1,PNKD,RECS1                                                     |        |
| 2 | 107,025,000 | 107,175,000 | 1428 | 400  | 0.959492946  | CATIP,CTDSP1,PNKD,RECS1,SLC11A1,USP37,VIL1                                       |        |
| 2 | 107,100,000 | 107,250,000 | 1429 | 472  | 0.681833657  | CATIP,CTDSP1,SLC11A1,USP37,VIL1                                                  |        |
| 2 | 107,175,000 | 107,325,000 | 1430 | 601  | 0.062689933  | PLCD4,RQCD1,USP37,ZNF142                                                         |        |
| 2 | 107,250,000 | 107,400,000 | 1431 | 557  | -0.315743547 | BCS1L,PLCD4,RNF25,RQCD1,STK36,ZNF142                                             |        |
| 2 | 107,325,000 | 107,475,000 | 1432 | 413  | -0.207942351 | BCS1L,CYP27A1,RNF25,STK36,TTLL4,ZNF142                                           |        |
| 2 | 107,400,000 | 107,550,000 | 1433 | 678  | -0.482071524 | CYP27A1,PRKAG3,TTLL4,WNT6                                                        |        |
| 2 | 107,475,000 | 107,625,000 | 1434 | 619  | -0.533302775 | CDK5R2,CYP27A1,PRKAG3,WNT10A,WNT6                                                |        |
| 2 | 107,550,000 | 107,700,000 | 1435 | 342  | -0.026841577 | CCDC108,CDK5R2,CRYBA2,FEV,WNT10A,WNT6                                            |        |
| 2 | 107,625,000 | 107,775,000 | 1436 | 343  | 0.029535224  | CCDC108,CRYBA2,FEV,IHH,NHEJ1                                                     |        |
| 2 | 107,700,000 | 107,850,000 | 1437 | 282  | 0.287625399  | C2H2ORF24,CCDC108,IHH,NHEJ1,SLC23A3                                              |        |
| 2 | 107,775,000 | 107,925,000 | 1438 | 224  | -1.072786282 | ABCB6,ANKZF1,ATG9A,C2H2ORF24,C2ORF17,GLB1L,NHEJ1,SLC23A3,STK16,TUBA4A,ZFAND2B    |        |
| 2 | 107,850,000 | 108,000,000 | 1439 | 214  | -2.176155614 | ABCB6,ANKZF1,ATG9A,C2ORF17,DNAJB2,GLB1L,PTPRN,RESP18,STK16,TUBA1D,TUBA4A,ZFAND2B |        |
| 2 | 107,925,000 | 108,075,000 | 1440 | 287  | -0.13913167  | DNAJB2,DNPEP,PTPRN,RESP18,TUBA1D,TUBA4A                                          |        |
| 2 | 108,000,000 | 108,150,000 | 1441 | 393  | 1.129708355  | DES,DNPEP,SPEG                                                                   |        |
| 2 | 108,075,000 | 108,225,000 | 1442 | 391  | 0.745095874  | ASIC4,CHPF,DES,GMPPA,OBSL1,SPEG,TMEM198                                          |        |
| 2 | 108,150,000 | 108,300,000 | 1443 | 501  | -0.310693822 | ASIC4,CHPF,GMPPA,INHA,OBSL1,SLC4A3,STK11IP,TMEM198                               |        |
| 2 | 108,225,000 | 108,375,000 | 1444 | 744  | 0.614053621  | INHA,OBSL1,SLC4A3,STK11IP                                                        |        |
| 2 | 108,300,000 | 108,450,000 | 1445 | 990  | 1.147144247  |                                                                                  |        |

|   |             |             |      |      |              |                                 |
|---|-------------|-------------|------|------|--------------|---------------------------------|
| 2 | 108,375,000 | 108,525,000 | 1446 | 1222 | 1.099013867  |                                 |
| 2 | 108,450,000 | 108,600,000 | 1447 | 1037 | 0.891211438  |                                 |
| 2 | 108,525,000 | 108,675,000 | 1448 | 634  | 0.438680188  |                                 |
| 2 | 108,600,000 | 108,750,000 | 1449 | 653  | 0.349472923  |                                 |
| 2 | 108,675,000 | 108,825,000 | 1450 | 917  | 0.741450375  |                                 |
| 2 | 108,750,000 | 108,900,000 | 1451 | 1048 | -0.757017371 |                                 |
| 2 | 108,825,000 | 108,975,000 | 1452 | 1010 | -1.714001104 |                                 |
| 2 | 108,900,000 | 109,050,000 | 1453 | 763  | -0.813534415 |                                 |
| 2 | 108,975,000 | 109,125,000 | 1454 | 600  | -2.124346402 |                                 |
| 2 | 109,050,000 | 109,200,000 | 1455 | 594  | -1.639068295 |                                 |
| 2 | 109,125,000 | 109,275,000 | 1456 | 766  | 0.1050123    |                                 |
| 2 | 109,200,000 | 109,350,000 | 1457 | 801  | 0.099439308  |                                 |
| 2 | 109,275,000 | 109,425,000 | 1458 | 555  | -0.188992171 |                                 |
| 2 | 109,350,000 | 109,500,000 | 1459 | 909  | -0.44163111  |                                 |
| 2 | 109,425,000 | 109,575,000 | 1460 | 1040 | -0.038100237 |                                 |
| 2 | 109,500,000 | 109,650,000 | 1461 | 676  | 0.588786535  |                                 |
| 2 | 109,575,000 | 109,725,000 | 1462 | 582  | -0.513186466 |                                 |
| 2 | 109,650,000 | 109,800,000 | 1463 | 549  | -1.085310879 |                                 |
| 2 | 109,725,000 | 109,875,000 | 1464 | 665  | -0.222071698 |                                 |
| 2 | 109,800,000 | 109,950,000 | 1465 | 1020 | 0.808917606  |                                 |
| 2 | 109,875,000 | 110,025,000 | 1466 | 895  | 0.836264296  |                                 |
| 2 | 109,950,000 | 110,100,000 | 1467 | 603  | -0.304627024 |                                 |
| 2 | 110,025,000 | 110,175,000 | 1468 | 627  | -0.067638369 |                                 |
| 2 | 110,100,000 | 110,250,000 | 1469 | 660  | -0.362647552 |                                 |
| 2 | 110,175,000 | 110,325,000 | 1470 | 717  | -0.418127391 | EPHA4                           |
| 2 | 110,250,000 | 110,400,000 | 1471 | 604  | -0.052715634 | EPHA4                           |
| 2 | 110,325,000 | 110,475,000 | 1472 | 543  | 0.298786461  | EPHA4                           |
| 2 | 110,400,000 | 110,550,000 | 1473 | 488  | 0.191576261  | EPHA4                           |
| 2 | 110,475,000 | 110,625,000 | 1474 | 707  | 0.833596529  |                                 |
| 2 | 110,550,000 | 110,700,000 | 1475 | 1097 | 1.069669838  |                                 |
| 2 | 110,625,000 | 110,775,000 | 1476 | 1194 | 0.133904564  |                                 |
| 2 | 110,700,000 | 110,850,000 | 1477 | 909  | -0.561456874 |                                 |
| 2 | 110,775,000 | 110,925,000 | 1478 | 724  | -1.568174257 |                                 |
| 2 | 110,850,000 | 111,000,000 | 1479 | 643  | -0.628214497 |                                 |
| 2 | 110,925,000 | 111,075,000 | 1480 | 498  | -0.713463571 |                                 |
| 2 | 111,000,000 | 111,150,000 | 1481 | 686  | -0.818079276 | PAX3                            |
| 2 | 111,075,000 | 111,225,000 | 1482 | 789  | 1.17526569   | PAX3                            |
| 2 | 111,150,000 | 111,300,000 | 1483 | 839  | 0.844749086  | PAX3                            |
| 2 | 111,225,000 | 111,375,000 | 1484 | 699  | -0.006771679 | PAX3                            |
| 2 | 111,300,000 | 111,450,000 | 1485 | 840  | -0.436330854 | SGPP2                           |
| 2 | 111,375,000 | 111,525,000 | 1486 | 1214 | -0.376162151 | FARSB,SGPP2                     |
| 2 | 111,450,000 | 111,600,000 | 1487 | 1118 | 0.161882338  | FARSB,SGPP2,ENSBTAG00000000301  |
| 2 | 111,525,000 | 111,675,000 | 1488 | 877  | 0.881577937  | FARSB,MOGAT1,ENSBTAG00000000301 |
| 2 | 111,600,000 | 111,750,000 | 1489 | 905  | 0.647047463  | MOGAT1,ENSBTAG00000000301       |
| 2 | 111,675,000 | 111,825,000 | 1490 | 769  | 0.134219091  | ACSL3,RPS6                      |
| 2 | 111,750,000 | 111,900,000 | 1491 | 598  | -0.363761634 | ACSL3,RPS6                      |
| 2 | 111,825,000 | 111,975,000 | 1492 | 904  | -0.264378274 | ACSL3                           |
| 2 | 111,900,000 | 112,050,000 | 1493 | 790  | -0.239387155 | KCNE4                           |
| 2 | 111,975,000 | 112,125,000 | 1494 | 664  | 0.062254866  | KCNE4                           |
| 2 | 112,050,000 | 112,200,000 | 1495 | 678  | 0.257004935  |                                 |
| 2 | 112,125,000 | 112,275,000 | 1496 | 776  | 0.241746179  |                                 |
| 2 | 112,200,000 | 112,350,000 | 1497 | 1235 | -0.189906307 |                                 |
| 2 | 112,275,000 | 112,425,000 | 1498 | 1132 | -0.286626398 |                                 |

|   |             |             |      |      |              |                                |
|---|-------------|-------------|------|------|--------------|--------------------------------|
| 2 | 112,350,000 | 112,500,000 | 1499 | 719  | 0.561955823  |                                |
| 2 | 112,425,000 | 112,575,000 | 1500 | 484  | 0.928182883  | SCG2                           |
| 2 | 112,500,000 | 112,650,000 | 1501 | 473  | -1.45238696  | SCG2                           |
| 2 | 112,575,000 | 112,725,000 | 1502 | 546  | -1.426755962 | AP1S3                          |
| 2 | 112,650,000 | 112,800,000 | 1503 | 641  | -0.223943205 | AP1S3,WDFY1                    |
| 2 | 112,725,000 | 112,875,000 | 1504 | 735  | -0.0747626   | AP1S3,MRPL44,SERPINE2,WDFY1    |
| 2 | 112,800,000 | 112,950,000 | 1505 | 669  | -0.274494604 | MRPL44,SERPINE2,WDFY1          |
| 2 | 112,875,000 | 113,025,000 | 1506 | 535  | -0.117383132 | SERPINE2                       |
| 2 | 112,950,000 | 113,100,000 | 1507 | 550  | 0.621853588  |                                |
| 2 | 113,025,000 | 113,175,000 | 1508 | 679  | -1.096929604 |                                |
| 2 | 113,100,000 | 113,250,000 | 1509 | 714  | -4.026348501 |                                |
| 2 | 113,175,000 | 113,325,000 | 1510 | 981  | -1.897639077 | FAM124B                        |
| 2 | 113,250,000 | 113,400,000 | 1511 | 919  | -0.243777182 | CUL3,FAM124B                   |
| 2 | 113,325,000 | 113,475,000 | 1512 | 563  | -0.067061297 | CUL3                           |
| 2 | 113,400,000 | 113,550,000 | 1513 | 571  | 0.226123884  | CUL3                           |
| 2 | 113,475,000 | 113,625,000 | 1514 | 1047 | 0.524110471  | CUL3                           |
| 2 | 113,550,000 | 113,700,000 | 1515 | 1264 | 0.23518264   | DOCK10                         |
| 2 | 113,625,000 | 113,775,000 | 1516 | 1115 | -0.007945679 | DOCK10                         |
| 2 | 113,700,000 | 113,850,000 | 1517 | 963  | 0.265072724  | DOCK10                         |
| 2 | 113,775,000 | 113,925,000 | 1518 | 731  | -1.19452446  | DOCK10                         |
| 2 | 113,850,000 | 114,000,000 | 1519 | 850  | -0.987960675 | DOCK10                         |
| 2 | 113,925,000 | 114,075,000 | 1520 | 1146 | 0.198421017  |                                |
| 2 | 114,000,000 | 114,150,000 | 1521 | 1206 | -0.313115062 |                                |
| 2 | 114,075,000 | 114,225,000 | 1522 | 851  | -0.328269544 |                                |
| 2 | 114,150,000 | 114,300,000 | 1523 | 746  | 0.352662384  |                                |
| 2 | 114,225,000 | 114,375,000 | 1524 | 880  | -0.209349246 | NYAP2                          |
| 2 | 114,300,000 | 114,450,000 | 1525 | 1172 | -0.134034584 | NYAP2                          |
| 2 | 114,375,000 | 114,525,000 | 1526 | 1544 | 0.141323722  | NYAP2                          |
| 2 | 114,450,000 | 114,600,000 | 1527 | 1054 | 0.084940266  | NYAP2                          |
| 2 | 114,525,000 | 114,675,000 | 1528 | 587  | -0.028677043 | NYAP2                          |
| 2 | 114,600,000 | 114,750,000 | 1529 | 743  | -0.10096588  |                                |
| 2 | 114,675,000 | 114,825,000 | 1530 | 827  | 0.263882523  |                                |
| 2 | 114,750,000 | 114,900,000 | 1531 | 642  | 0.741297173  |                                |
| 2 | 114,825,000 | 114,975,000 | 1532 | 436  | 0.44401447   |                                |
| 2 | 114,900,000 | 115,050,000 | 1533 | 500  | 0.453182077  |                                |
| 2 | 114,975,000 | 115,125,000 | 1534 | 726  | 0.694679812  |                                |
| 2 | 115,050,000 | 115,200,000 | 1535 | 908  | 0.339554837  |                                |
| 2 | 115,125,000 | 115,275,000 | 1536 | 683  | 0.061275906  |                                |
| 2 | 115,200,000 | 115,350,000 | 1537 | 358  | 0.390015996  |                                |
| 2 | 115,275,000 | 115,425,000 | 1538 | 298  | -0.018751346 |                                |
| 2 | 115,350,000 | 115,500,000 | 1539 | 335  | -0.41091956  |                                |
| 2 | 115,425,000 | 115,575,000 | 1540 | 436  | -0.028766589 |                                |
| 2 | 115,500,000 | 115,650,000 | 1541 | 725  | 0.325908467  |                                |
| 2 | 115,575,000 | 115,725,000 | 1542 | 662  | -0.025557977 |                                |
| 2 | 115,650,000 | 115,800,000 | 1543 | 341  | -0.76217204  | IRS1                           |
| 2 | 115,725,000 | 115,875,000 | 1544 | 307  | -0.026268015 | IRS1,RHBDD1,ENSBTAG00000023964 |
| 2 | 115,800,000 | 115,950,000 | 1545 | 700  | 0.70881055   | RHBDD1,ENSBTAG00000023964      |
| 2 | 115,875,000 | 116,025,000 | 1546 | 951  | 0.395824815  | COL4A4,RHBDD1                  |
| 2 | 115,950,000 | 116,100,000 | 1547 | 1227 | 0.580765093  | COL4A4,RHBDD1                  |
| 2 | 116,025,000 | 116,175,000 | 1548 | 1277 | 0.667606971  | COL4A3,COL4A4                  |
| 2 | 116,100,000 | 116,250,000 | 1549 | 620  | 0.349587927  | COL4A3,COL4A4                  |
| 2 | 116,175,000 | 116,325,000 | 1550 | 536  | 0.600494906  | C2H2ORF33,COL4A3               |
| 2 | 116,250,000 | 116,400,000 | 1551 | 770  | 0.512383539  | C2H2ORF33,COL4A3,TM4SF20       |



|   |             |             |      |      |              |                                                                        |
|---|-------------|-------------|------|------|--------------|------------------------------------------------------------------------|
| 2 | 116,325,000 | 116,475,000 | 1552 | 626  | 0.090655254  | AGFG1,C2H2ORF33,TM4SF20                                                |
| 2 | 116,400,000 | 116,550,000 | 1553 | 548  | 0.461886472  | AGFG1                                                                  |
| 2 | 116,475,000 | 116,625,000 | 1554 | 896  | 1.024032421  | AGFG1,SLC19A3                                                          |
| 2 | 116,550,000 | 116,700,000 | 1555 | 1040 | 0.776033676  | SLC19A3                                                                |
| 2 | 116,625,000 | 116,775,000 | 1556 | 1072 | 0.607074292  | CCL20,SLC19A3                                                          |
| 2 | 116,700,000 | 116,850,000 | 1557 | 1260 | 0.873141826  | CCL20,DAW1                                                             |
| 2 | 116,775,000 | 116,925,000 | 1558 | 1332 | 1.13135037   | DAW1,SPHKAP                                                            |
| 2 | 116,850,000 | 117,000,000 | 1559 | 1252 | 0.120981413  | SPHKAP                                                                 |
| 2 | 116,925,000 | 117,075,000 | 1560 | 927  | -1.789937294 | SPHKAP                                                                 |
| 2 | 117,000,000 | 117,150,000 | 1561 | 639  | -3.44232539  |                                                                        |
| 2 | 117,075,000 | 117,225,000 | 1562 | 471  | -2.957010842 |                                                                        |
| 2 | 117,150,000 | 117,300,000 | 1563 | 499  | 0.774348007  |                                                                        |
| 2 | 117,225,000 | 117,375,000 | 1564 | 853  | 0.973636101  |                                                                        |
| 2 | 117,300,000 | 117,450,000 | 1565 | 1032 | 0.624222785  |                                                                        |
| 2 | 117,375,000 | 117,525,000 | 1566 | 821  | 0.054547721  |                                                                        |
| 2 | 117,450,000 | 117,600,000 | 1567 | 887  | 0.651351291  |                                                                        |
| 2 | 117,525,000 | 117,675,000 | 1568 | 878  | 0.035788728  |                                                                        |
| 2 | 117,600,000 | 117,750,000 | 1569 | 495  | -0.778661965 |                                                                        |
| 2 | 117,675,000 | 117,825,000 | 1570 | 355  | 0.662511685  |                                                                        |
| 2 | 117,750,000 | 117,900,000 | 1571 | 611  | -0.340202082 | PID1                                                                   |
| 2 | 117,825,000 | 117,975,000 | 1572 | 813  | -0.398057843 | PID1                                                                   |
| 2 | 117,900,000 | 118,050,000 | 1573 | 700  | 0.068718171  | PID1                                                                   |
| 2 | 117,975,000 | 118,125,000 | 1574 | 639  | 0.540457921  | PID1                                                                   |
| 2 | 118,050,000 | 118,200,000 | 1575 | 607  | 1.071461083  | DNER,PID1                                                              |
| 2 | 118,125,000 | 118,275,000 | 1576 | 625  | -0.237484226 | DNER                                                                   |
| 2 | 118,200,000 | 118,350,000 | 1577 | 663  | -1.163551475 | DNER                                                                   |
| 2 | 118,275,000 | 118,425,000 | 1578 | 802  | 0.726982875  | DNER                                                                   |
| 2 | 118,350,000 | 118,500,000 | 1579 | 798  | 1.061161968  | DNER                                                                   |
| 2 | 118,425,000 | 118,575,000 | 1580 | 598  | 0.022752964  | DNER                                                                   |
| 2 | 118,500,000 | 118,650,000 | 1581 | 392  | -1.879600926 | MGC127538,TRIP12                                                       |
| 2 | 118,575,000 | 118,725,000 | 1582 | 236  | -3.369039098 | MGC127538,TRIP12                                                       |
| 2 | 118,650,000 | 118,800,000 | 1583 | 248  | -1.52466895  | FBXO36,TRIP12                                                          |
| 2 | 118,725,000 | 118,875,000 | 1584 | 406  | 0.438767616  | FBXO36,TRIP12                                                          |
| 2 | 118,800,000 | 118,950,000 | 1585 | 605  | 0.533845902  | FBXO36,SLC16A14,SP140L                                                 |
| 2 | 118,875,000 | 119,025,000 | 1586 | 776  | -0.082096552 | FBXO36,SLC16A14,SP140L                                                 |
| 2 | 118,950,000 | 119,100,000 | 1587 | 765  | -0.358743759 | SP110,SP140L,ENSBTAG00000007280,ENSBTAG00000047133                     |
| 2 | 119,025,000 | 119,175,000 | 1588 | 707  | -0.195945541 | SP110,SP140L,ENSBTAG00000007280,ENSBTAG00000037989,ENSBTAG000000047133 |
| 2 | 119,100,000 | 119,250,000 | 1589 | 1149 | 0.674427315  | SP110,SP140L,ENSBTAG00000037989,ENSBTAG00000038710                     |
| 2 | 119,175,000 | 119,325,000 | 1590 | 1357 | 0.895510061  | SP140L,ENSBTAG00000038710                                              |
| 2 | 119,250,000 | 119,400,000 | 1591 | 903  | -0.091498882 | CAB39,ENSBTAG00000038710                                               |
| 2 | 119,325,000 | 119,475,000 | 1592 | 658  | -1.410822015 | CAB39                                                                  |
| 2 | 119,400,000 | 119,550,000 | 1593 | 683  | -1.537204812 | CAB39,GPR55,ITM2C                                                      |
| 2 | 119,475,000 | 119,625,000 | 1594 | 894  | -1.309702095 | GPR55,ITM2C,SPATA3                                                     |
| 2 | 119,550,000 | 119,700,000 | 1595 | 921  | -1.948328025 | C2orf72,PSMD1,SPATA3                                                   |
| 2 | 119,625,000 | 119,775,000 | 1596 | 640  | -3.073595078 | 5HTR2B,C2orf72,PSMD1,SPATA3                                            |
| 2 | 119,700,000 | 119,850,000 | 1597 | 643  | -2.500807415 | 5HTR2B,ARMC9,PSMD1                                                     |
| 2 | 119,775,000 | 119,925,000 | 1598 | 535  | -3.1737485   | ARMC9                                                                  |
| 2 | 119,850,000 | 120,000,000 | 1599 | 463  | -1.756301415 | ARMC9,B3GNT7                                                           |
| 2 | 119,925,000 | 120,075,000 | 1600 | 484  | -0.239032379 | ARMC9,B3GNT7,NCL,ENSBTAG00000001357                                    |
| 2 | 120,000,000 | 120,150,000 | 1601 | 509  | -0.531248518 | C2orf57,NCL,NMUR1,ENSBTAG00000001357                                   |

|   |             |             |      |      |              |                                                                                                           |
|---|-------------|-------------|------|------|--------------|-----------------------------------------------------------------------------------------------------------|
| 2 | 120,075,000 | 120,225,000 | 1602 | 449  | -0.471222345 | C2orf57,NMUR1                                                                                             |
| 2 | 120,150,000 | 120,300,000 | 1603 | 266  | -1.427064502 | PDE6D,PTMA,ENSBTAG00000014988                                                                             |
| 2 | 120,225,000 | 120,375,000 | 1604 | 462  | -1.511988672 | COPS7B,PDE6D,PTMA,ENSBTAG00000014988                                                                      |
| 2 | 120,300,000 | 120,450,000 | 1605 | 490  | 0.301173308  | COPS7B,NPPC,PDE6D                                                                                         |
| 2 | 120,375,000 | 120,525,000 | 1606 | 282  | 1.400714129  | DIS3L2,NPPC                                                                                               |
| 2 | 120,450,000 | 120,600,000 | 1607 | 253  | 1.05972496   | DIS3L2                                                                                                    |
| 2 | 120,525,000 | 120,675,000 | 1608 | 274  | 0.843424754  | DIS3L2                                                                                                    |
| 2 | 120,600,000 | 120,750,000 | 1609 | 320  | 0.843479399  | DIS3L2                                                                                                    |
| 2 | 120,675,000 | 120,825,000 | 1610 | 421  | 0.527185548  | DIS3L2                                                                                                    |
| 2 | 120,750,000 | 120,900,000 | 1611 | 800  | 0.569058575  | DIS3L2,ENSBTAG00000016748,ENSBTAG00000039346                                                              |
| 2 | 120,825,000 | 120,975,000 | 1612 | 867  | 0.718207566  | ECEL1,ENSBTAG00000004519,ENSBTAG00000012363,ENSBTAG00000016748,ENSBTAG00000039346                         |
| 2 | 120,900,000 | 121,050,000 | 1613 | 673  | -0.095446725 | CHRND,CHRNA,ECEL1,EIF4E2,ENSBTAG00000004519,ENSBTAG00000012363                                            |
| 2 | 120,975,000 | 121,125,000 | 1614 | 715  | -0.843250863 | CHRND,CHRNA,EIF4E2,ENSBTAG000000045513                                                                    |
| 2 | 121,050,000 | 121,200,000 | 1615 | 534  | -0.035845947 | PHC2,ENSBTAG000000045513                                                                                  |
| 2 | 121,125,000 | 121,275,000 | 1616 | 344  | 1.046149715  | A3GALT2,PHC2,ZNF362                                                                                       |
| 2 | 121,200,000 | 121,350,000 | 1617 | 286  | 0.472065316  | A3GALT2,PHC2,TRIM62,ZNF362                                                                                |
| 2 | 121,275,000 | 121,425,000 | 1618 | 441  | 0.593038041  | AZIN2,TRIM62                                                                                              |
| 2 | 121,350,000 | 121,500,000 | 1619 | 510  | 1.012908202  | AK2,AZIN2,TRIM62                                                                                          |
| 2 | 121,425,000 | 121,575,000 | 1620 | 296  | 1.080908234  | AK2,AZIN2,RNF19B                                                                                          |
| 2 | 121,500,000 | 121,650,000 | 1621 | 219  | 0.673968067  | AK2,FNDC5,HPCA,RNF19B,S100PBP,TMEM54                                                                      |
| 2 | 121,575,000 | 121,725,000 | 1622 | 296  | 0.647696501  | FNDC5,HPCA,KIAA1522,RNF19B,S100PBP,TMEM54,YARS                                                            |
| 2 | 121,650,000 | 121,800,000 | 1623 | 617  | -1.690426433 | KIAA1522,S100PBP,SYNC,YARS                                                                                |
| 2 | 121,725,000 | 121,875,000 | 1624 | 712  | -1.467937248 | RBBP4,SYNC,ZBTB8A,ZBTB8OS                                                                                 |
| 2 | 121,800,000 | 121,950,000 | 1625 | 579  | -0.960944954 | RBBP4,SYNC,ZBTB8A,ZBTB8OS                                                                                 |
| 2 | 121,875,000 | 122,025,000 | 1626 | 1061 | 0.097067706  | BSDC1,ZBTB8A,ENSBTAG00000046044                                                                           |
| 2 | 121,950,000 | 122,100,000 | 1627 | 983  | 0.880460455  | BSDC1,FAM229A,HDAC1,LCK,MARCKSL1,TSSK3,ENSBTAG00000046044                                                 |
| 2 | 122,025,000 | 122,175,000 | 1628 | 464  | -0.877592927 | BSDC1,CCDC28B,DCDC2B,EIF3I,FAM167B,FAM229A,HDAC1,IQCC,LCK,MARCKSL1,MTMR9,TMEM234,TSSK3,ENSBTAG00000027930 |
| 2 | 122,100,000 | 122,250,000 | 1629 | 443  | -1.398384838 | CCDC28B,DCDC2B,EIF3I,FAM167B,IQCC,KHDRBS1,LCK,MTMR9,TMEM234,TMEM39B,ENSBTAG00000027930                    |
| 2 | 122,175,000 | 122,325,000 | 1630 | 412  | 0.307281524  | KHDRBS1,TMEM39B                                                                                           |
| 2 | 122,250,000 | 122,400,000 | 1631 | 361  | 1.544413636  | KHDRBS1,PTP4A2                                                                                            |
| 2 | 122,325,000 | 122,475,000 | 1632 | 345  | 1.598396148  | PTP4A2,SPOCD1                                                                                             |
| 2 | 122,400,000 | 122,550,000 | 1633 | 401  | 1.605544885  | BAI2,SPOCD1                                                                                               |
| 2 | 122,475,000 | 122,625,000 | 1634 | 410  | 1.570333425  | BAI2,COL16A1,PEF1                                                                                         |
| 2 | 122,550,000 | 122,700,000 | 1635 | 383  | 1.512396245  | COL16A1,HCRTR1,PEF1,TINAGL1                                                                               |
| 2 | 122,625,000 | 122,775,000 | 1636 | 505  | 1.214827564  | FABP3,HCRTR1,PEF1,TINAGL1,ENSBTAG00000039994                                                              |
| 2 | 122,700,000 | 122,850,000 | 1637 | 690  | 0.558713615  | FABP3,SERINC2,ZCCHC17,ENSBTAG00000039994                                                                  |
| 2 | 122,775,000 | 122,925,000 | 1638 | 559  | 0.309686595  | FABP3,SERINC2,SNRNP40,ZCCHC17                                                                             |
| 2 | 122,850,000 | 123,000,000 | 1639 | 381  | 0.861200893  | NKAIN1,SNRNP40,ZCCHC17                                                                                    |
| 2 | 122,925,000 | 123,075,000 | 1640 | 555  | 0.815557173  | NKAIN1,PUM1                                                                                               |
| 2 | 123,000,000 | 123,150,000 | 1641 | 571  | 0.583267215  | PUM1                                                                                                      |
| 2 | 123,075,000 | 123,225,000 | 1642 | 425  | 0.798207846  | PUM1                                                                                                      |
| 2 | 123,150,000 | 123,300,000 | 1643 | 400  | 0.850936736  | PUM1,SDC3                                                                                                 |
| 2 | 123,225,000 | 123,375,000 | 1644 | 591  | 1.043881794  | LAPTM5,SDC3                                                                                               |

|   |             |             |      |      |              |                                                      |
|---|-------------|-------------|------|------|--------------|------------------------------------------------------|
| 2 | 123,300,000 | 123,450,000 | 1645 | 936  | 0.589783296  | LAPTM5,MATN1                                         |
| 2 | 123,375,000 | 123,525,000 | 1646 | 1027 | 0.346629076  | LAPTM5,MATN1                                         |
| 2 | 123,450,000 | 123,600,000 | 1647 | 1115 | -0.026229222 |                                                      |
| 2 | 123,525,000 | 123,675,000 | 1648 | 1495 | 0.140956426  |                                                      |
| 2 | 123,600,000 | 123,750,000 | 1649 | 2065 | 0.956034685  |                                                      |
| 2 | 123,675,000 | 123,825,000 | 1650 | 1809 | 1.024315407  |                                                      |
| 2 | 123,750,000 | 123,900,000 | 1651 | 1035 | 1.28843631   |                                                      |
| 2 | 123,825,000 | 123,975,000 | 1652 | 609  | 1.274581684  |                                                      |
| 2 | 123,900,000 | 124,050,000 | 1653 | 649  | 0.924931201  |                                                      |
| 2 | 123,975,000 | 124,125,000 | 1654 | 743  | 0.58149139   |                                                      |
| 2 | 124,050,000 | 124,200,000 | 1655 | 558  | 0.170899099  |                                                      |
| 2 | 124,125,000 | 124,275,000 | 1656 | 626  | 0.489348197  |                                                      |
| 2 | 124,200,000 | 124,350,000 | 1657 | 976  | -0.448201674 |                                                      |
| 2 | 124,275,000 | 124,425,000 | 1658 | 1057 | -0.376949291 |                                                      |
| 2 | 124,350,000 | 124,500,000 | 1659 | 746  | 0.197890916  |                                                      |
| 2 | 124,425,000 | 124,575,000 | 1660 | 679  | -0.6478259   |                                                      |
| 2 | 124,500,000 | 124,650,000 | 1661 | 654  | -1.048042768 |                                                      |
| 2 | 124,575,000 | 124,725,000 | 1662 | 505  | -0.856412259 |                                                      |
| 2 | 124,650,000 | 124,800,000 | 1663 | 472  | 0.784946636  |                                                      |
| 2 | 124,725,000 | 124,875,000 | 1664 | 529  | 0.804304249  | PTPRU                                                |
| 2 | 124,800,000 | 124,950,000 | 1665 | 508  | -0.216628186 | MECR,PTPRU                                           |
| 2 | 124,875,000 | 125,025,000 | 1666 | 359  | -0.900945571 | EPB41,MECR,PTPRU,SFRS4,TMEM200B                      |
| 2 | 124,950,000 | 125,100,000 | 1667 | 267  | 0.081705172  | EPB41,SFRS4,TMEM200B                                 |
| 2 | 125,025,000 | 125,175,000 | 1668 | 396  | -0.389660927 | EPB41                                                |
| 2 | 125,100,000 | 125,250,000 | 1669 | 551  | -0.404641614 | EPB41,OPRD1                                          |
| 2 | 125,175,000 | 125,325,000 | 1670 | 508  | 0.6520583    | OPRD1,YTHDF2                                         |
| 2 | 125,250,000 | 125,400,000 | 1671 | 401  | 1.03984231   | GMEB1,OPRD1,TAF12,YTHDF2                             |
| 2 | 125,325,000 | 125,475,000 | 1672 | 377  | 0.541502547  | GMEB1,RAB42,RCC1,TAF12,TRNAU1AP,ENSBTAG00000048228   |
| 2 | 125,400,000 | 125,550,000 | 1673 | 340  | 0.635941372  | PHACTR4,RAB42,RCC1,TAF12,TRNAU1AP,ENSBTAG00000048228 |
| 2 | 125,475,000 | 125,625,000 | 1674 | 330  | -0.110674295 | PHACTR4,RCC1,ENSBTAG000000003676                     |
| 2 | 125,550,000 | 125,700,000 | 1675 | 534  | 0.079652862  | MED18,PHACTR4,SESN2,ENSBTAG000000003676              |
| 2 | 125,625,000 | 125,775,000 | 1676 | 946  | 0.916360129  | ATPIF1,DNAJC8,MED18,SESN2                            |
| 2 | 125,700,000 | 125,850,000 | 1677 | 1066 | 1.070594683  | ATPIF1,DNAJC8,PTAFR,SESN2,ENSBTAG00000009937         |
| 2 | 125,775,000 | 125,925,000 | 1678 | 937  | 0.601809795  | EYA3,PTAFR,ENSBTAG00000009937                        |
| 2 | 125,850,000 | 126,000,000 | 1679 | 1121 | -0.185007978 | EYA3,SMPDL3B,XKR8                                    |
| 2 | 125,925,000 | 126,075,000 | 1680 | 1294 | -0.524144356 | EYA3,RPA2,SMPDL3B,THEMIS2,XKR8                       |
| 2 | 126,000,000 | 126,150,000 | 1681 | 1144 | -1.360404755 | PPP1R8,RPA2,SMPDL3B,STX12,THEMIS2,ENSBTAG0000003867  |
| 2 | 126,075,000 | 126,225,000 | 1682 | 809  | -1.952590792 | FAM76A,PPP1R8,STX12,ENSBTAG00000003867               |
| 2 | 126,150,000 | 126,300,000 | 1683 | 650  | -0.2915733   | FAM76A,FGR,IFI6,STX12                                |
| 2 | 126,225,000 | 126,375,000 | 1684 | 491  | 0.375196243  | AHDC1,FGR,IFI6                                       |
| 2 | 126,300,000 | 126,450,000 | 1685 | 358  | 0.671095717  | AHDC1,WASF2                                          |
| 2 | 126,375,000 | 126,525,000 | 1686 | 390  | 0.673738927  | CD164L2,GPR3,MAP3K6,SYTL1,WASF2                      |
| 2 | 126,450,000 | 126,600,000 | 1687 | 374  | 0.728789516  | CD164L2,GPR3,MAP3K6,SYTL1,TMEM222,WASF2              |
| 2 | 126,525,000 | 126,675,000 | 1688 | 369  | 0.183905643  | SYTL1,TMEM222                                        |
| 2 | 126,600,000 | 126,750,000 | 1689 | 463  | -0.37780311  | SLC9A1                                               |
| 2 | 126,675,000 | 126,825,000 | 1690 | 454  | -0.201269283 | FAM46B,SLC9A1                                        |
| 2 | 126,750,000 | 126,900,000 | 1691 | 326  | -0.094175863 | FAM46B,MGC159903,NR0B2,NUDC                          |
| 2 | 126,825,000 | 126,975,000 | 1692 | 333  | -0.723127789 | GPATCH3,GPN2,MGC159903,NR0B2,NUDC,SFN,ZDHHC18        |
| 2 | 126,900,000 | 127,050,000 | 1693 | 328  | -0.577916131 | ARID1A,GPATCH3,GPN2,PIGV,SFN,ZDHHC18                 |

|   |             |             |      |      |              |                                                                                                               |
|---|-------------|-------------|------|------|--------------|---------------------------------------------------------------------------------------------------------------|
| 2 | 126,975,000 | 127,125,000 | 1694 | 315  | -0.249230947 | ARID1A,PIGV                                                                                                   |
| 2 | 127,050,000 | 127,200,000 | 1695 | 415  | 0.291962484  | ARID1A,RPS6KA1                                                                                                |
| 2 | 127,125,000 | 127,275,000 | 1696 | 474  | 0.271294789  | DHDDS,RPS6KA1,ENSBTAG00000038104                                                                              |
| 2 | 127,200,000 | 127,350,000 | 1697 | 484  | -1.418627298 | DHDDS,RPS6KA1,ENSBTAG00000038104,ENSBTAG0000040497                                                            |
| 2 | 127,275,000 | 127,425,000 | 1698 | 442  | -4.045043054 | AIM1L,CD52,DHDDS,UBXN11,ZNF683,ENSBTAG00000040497                                                             |
| 2 | 127,350,000 | 127,500,000 | 1699 | 416  | -3.996496002 | AIM1L,CATSPER4,CD52,CEP85,SH3BGRL3,UBXN11,ZNF683,ENSBTAG00000039276                                           |
| 2 | 127,425,000 | 127,575,000 | 1700 | 368  | -0.541076474 | CATSPER4,CEP85,FAM110D,PDIK1L,SH3BGRL3,UBXN11,ZNF593,ENSBTAG00000019399,ENSBTAG00000039276,ENSBTAG00000047148 |
| 2 | 127,500,000 | 127,650,000 | 1701 | 493  | -1.361414969 | EXTL1,FAM110D,PDIK1L,SLC30A2,TRIM63,ZNF593,ENSBTAG00000019399,ENSBTAG00000047148                              |
| 2 | 127,575,000 | 127,725,000 | 1702 | 645  | -1.513611228 | EXTL1,PAFAH2,SLC30A2,TRIM63                                                                                   |
| 2 | 127,650,000 | 127,800,000 | 1703 | 573  | -0.318719198 | EXTL1,PAFAH2,STMN1                                                                                            |
| 2 | 127,725,000 | 127,875,000 | 1704 | 563  | -0.291587237 | AUNIP,MTFR1L,PAQR7,SEPN1,STMN1                                                                                |
| 2 | 127,800,000 | 127,950,000 | 1705 | 803  | 0.247617091  | AUNIP,MAN1C1,MTFR1L,PAQR7,SEPN1                                                                               |
| 2 | 127,875,000 | 128,025,000 | 1706 | 795  | 0.669209193  | MAN1C1                                                                                                        |
| 2 | 127,950,000 | 128,100,000 | 1707 | 495  | 0.797792933  | LDLRAP1,MAN1C1                                                                                                |
| 2 | 128,025,000 | 128,175,000 | 1708 | 462  | 0.56084573   | LDLRAP1,TMEM57                                                                                                |
| 2 | 128,100,000 | 128,250,000 | 1709 | 521  | 0.529271695  | LDLRAP1,TMEM57,ENSBTAG00000001297                                                                             |
| 2 | 128,175,000 | 128,325,000 | 1710 | 671  | 0.886819576  | RSRP1,SYF2,TMEM50A,TMEM57,ENSBTAG00000001297                                                                  |
| 2 | 128,250,000 | 128,400,000 | 1711 | 828  | 0.834685422  | RSRP1,SYF2,TMEM50A,ENSBTAG00000001297                                                                         |
| 2 | 128,325,000 | 128,475,000 | 1712 | 697  | -0.211682039 | SYF2                                                                                                          |
| 2 | 128,400,000 | 128,550,000 | 1713 | 477  | -0.077476338 |                                                                                                               |
| 2 | 128,475,000 | 128,625,000 | 1714 | 618  | 0.48049856   |                                                                                                               |
| 2 | 128,550,000 | 128,700,000 | 1715 | 769  | -0.025049311 | RUNX3                                                                                                         |
| 2 | 128,625,000 | 128,775,000 | 1716 | 569  | 0.262630596  | CLIC4,RUNX3                                                                                                   |
| 2 | 128,700,000 | 128,850,000 | 1717 | 558  | -0.059379206 | CLIC4,SRRM1                                                                                                   |
| 2 | 128,775,000 | 128,925,000 | 1718 | 836  | -2.292381857 | CLIC4,NCMAP,SRRM1                                                                                             |
| 2 | 128,850,000 | 129,000,000 | 1719 | 967  | -1.923876261 | NCMAP,RCAN3,SRRM1                                                                                             |
| 2 | 128,925,000 | 129,075,000 | 1720 | 863  | -0.785443346 | NCMAP,NIPAL3,RCAN3                                                                                            |
| 2 | 129,000,000 | 129,150,000 | 1721 | 980  | 0.238598056  | NIPAL3,RCAN3,STPG1                                                                                            |
| 2 | 129,075,000 | 129,225,000 | 1722 | 1356 | 0.648513348  | GRHL3,NIPAL3,STPG1                                                                                            |
| 2 | 129,150,000 | 129,300,000 | 1723 | 1230 | 0.918596894  | GRHL3,STPG1                                                                                                   |
| 2 | 129,225,000 | 129,375,000 | 1724 | 1157 | 1.04468042   | IFNLR1,IL22RA1                                                                                                |
| 2 | 129,300,000 | 129,450,000 | 1725 | 1239 | 0.903215991  | IFNLR1,IL22RA1,MYOM3                                                                                          |
| 2 | 129,375,000 | 129,525,000 | 1726 | 1021 | 0.94160421   | FUSIP1,IL22RA1,MYOM3                                                                                          |
| 2 | 129,450,000 | 129,600,000 | 1727 | 826  | 1.292781015  | CNR2,FUSIP1,PNRC2                                                                                             |
| 2 | 129,525,000 | 129,675,000 | 1728 | 664  | 0.960728614  | CNR2,FUCA1,FUSIP1,PNRC2                                                                                       |
| 2 | 129,600,000 | 129,750,000 | 1729 | 517  | -0.282164209 | CNR2,FUCA1,GALE,HMGCL,LYPLA2,MGC159500,TCEB3,ENSBTAG00000047467                                               |
| 2 | 129,675,000 | 129,825,000 | 1730 | 508  | -0.277725655 | FUCA1,GALE,HMGCL,LYPLA2,MGC159500,RPL11,TCEB3,ENSBTAG00000047467                                              |
| 2 | 129,750,000 | 129,900,000 | 1731 | 501  | 0.166382271  | ID3,RPL11,TCEB3                                                                                               |
| 2 | 129,825,000 | 129,975,000 | 1732 | 561  | 0.534140221  | ASAP3,E2F2,ID3                                                                                                |
| 2 | 129,900,000 | 130,050,000 | 1733 | 563  | 0.901519468  | ASAP3,E2F2,TCEA3                                                                                              |
| 2 | 129,975,000 | 130,125,000 | 1734 | 343  | 1.178083444  | ASAP3,HNRNPR,TCEA3,ZNF436                                                                                     |
| 2 | 130,050,000 | 130,200,000 | 1735 | 363  | 0.776995976  | HNRNPR,TCEA3,ZNF436                                                                                           |
| 2 | 130,125,000 | 130,275,000 | 1736 | 485  | 0.327253168  | HNRNPR,HTR1D                                                                                                  |
| 2 | 130,200,000 | 130,350,000 | 1737 | 396  | 0.470329642  | HTR1D                                                                                                         |

|   |             |             |      |      |              |                                                   |
|---|-------------|-------------|------|------|--------------|---------------------------------------------------|
| 2 | 130,275,000 | 130,425,000 | 1738 | 301  | 0.165886044  | KDM1A,LUZP1                                       |
| 2 | 130,350,000 | 130,500,000 | 1739 | 496  | -2.765966295 | EPHB2,KDM1A,LACTBL1,LUZP1                         |
| 2 | 130,425,000 | 130,575,000 | 1740 | 1007 | -0.694281988 | EPHB2,KDM1A,LACTBL1                               |
| 2 | 130,500,000 | 130,650,000 | 1741 | 1353 | 0.494932794  | EPHB2                                             |
| 2 | 130,575,000 | 130,725,000 | 1742 | 933  | 0.525801027  |                                                   |
| 2 | 130,650,000 | 130,800,000 | 1743 | 745  | 0.322894538  | C1QA,C1QB,C1QC,ENSBTAG00000011195                 |
| 2 | 130,725,000 | 130,875,000 | 1744 | 1173 | -0.058626199 | C1QA,C1QB,C1QC,EPHA8,ENSBTAG00000011195           |
| 2 | 130,800,000 | 130,950,000 | 1745 | 1196 | 0.159229393  | EPHA8,ZBTB40                                      |
| 2 | 130,875,000 | 131,025,000 | 1746 | 974  | 0.988973589  | ZBTB40                                            |
| 2 | 130,950,000 | 131,100,000 | 1747 | 979  | 0.946433232  |                                                   |
| 2 | 131,025,000 | 131,175,000 | 1748 | 1032 | 0.457110342  |                                                   |
| 2 | 131,100,000 | 131,250,000 | 1749 | 800  | -0.055289752 |                                                   |
| 2 | 131,175,000 | 131,325,000 | 1750 | 503  | -1.009438606 | WNT4                                              |
| 2 | 131,250,000 | 131,400,000 | 1751 | 463  | -1.046255759 | CDC42,WNT4                                        |
| 2 | 131,325,000 | 131,475,000 | 1752 | 744  | -1.211464175 | CDC42,CELA3B,ENSBTAG00000030269,ENSBTAG0000040602 |
| 2 | 131,400,000 | 131,550,000 | 1753 | 1039 | -0.867665074 | CELA3B,HSPG2,ENSBTAG00000030269,ENSBTAG0000040602 |
| 2 | 131,475,000 | 131,625,000 | 1754 | 801  | -0.164770984 | HSPG2,LDLRAD2,USP48                               |
| 2 | 131,550,000 | 131,700,000 | 1755 | 538  | -1.191857592 | HSPG2,LDLRAD2,USP48                               |
| 2 | 131,625,000 | 131,775,000 | 1756 | 627  | -2.072488723 | RAP1GAP,USP48                                     |
| 2 | 131,700,000 | 131,850,000 | 1757 | 729  | -3.004124522 | ALPL,RAP1GAP                                      |
| 2 | 131,775,000 | 131,925,000 | 1758 | 920  | -2.322018082 | ALPL,RAP1GAP                                      |
| 2 | 131,850,000 | 132,000,000 | 1759 | 918  | -0.369193349 | ALPL,ECE1                                         |
| 2 | 131,925,000 | 132,075,000 | 1760 | 573  | 0.367103247  | ECE1                                              |
| 2 | 132,000,000 | 132,150,000 | 1761 | 331  | -0.118438828 | ECE1,EIF4G3                                       |
| 2 | 132,075,000 | 132,225,000 | 1762 | 447  | 0.095676171  | EIF4G3                                            |
| 2 | 132,150,000 | 132,300,000 | 1763 | 604  | 0.621857224  | EIF4G3                                            |
| 2 | 132,225,000 | 132,375,000 | 1764 | 571  | 1.037250101  | EIF4G3                                            |
| 2 | 132,300,000 | 132,450,000 | 1765 | 455  | 1.115954409  | EIF4G3                                            |
| 2 | 132,375,000 | 132,525,000 | 1766 | 377  | 0.720948956  | EIF4G3,HP1BP3,SH2D5                               |
| 2 | 132,450,000 | 132,600,000 | 1767 | 661  | 0.757582717  | DDOST,EIF4G3,HP1BP3,KIF17,SH2D5                   |
| 2 | 132,525,000 | 132,675,000 | 1768 | 994  | 0.628293812  | CDA,DDOST,KIF17,PINK1,SH2D5                       |
| 2 | 132,600,000 | 132,750,000 | 1769 | 910  | -0.292554554 | CDA,DDOST,FAM43B,MUL1,PINK1                       |
| 2 | 132,675,000 | 132,825,000 | 1770 | 646  | -1.405653223 | CAMK2N1,FAM43B,MUL1                               |
| 2 | 132,750,000 | 132,900,000 | 1771 | 458  | -1.02044841  | CAMK2N1,VWA5B1                                    |
| 2 | 132,825,000 | 132,975,000 | 1772 | 761  | -0.260252304 | VWA5B1                                            |
| 2 | 132,900,000 | 133,050,000 | 1773 | 758  | -0.135208216 | VWA5B1                                            |
| 2 | 132,975,000 | 133,125,000 | 1774 | 615  | -0.21304358  | PLA2G2C,PLA2G2F,UBXN10                            |
| 2 | 133,050,000 | 133,200,000 | 1775 | 1546 | 0.581473529  | PLA2G2C,PLA2G2D3,PLA2G2D4,PLA2G2F,UBXN10          |
| 2 | 133,125,000 | 133,275,000 | 1776 | 2115 | 0.459830548  | PLA2G2A,PLA2G2D3,PLA2G2D4,PLA2G5                  |
| 2 | 133,200,000 | 133,350,000 | 1777 | 2401 | -0.169611984 | PLA2G2A,PLA2G5,ENSBTAG00000013039                 |
| 2 | 133,275,000 | 133,425,000 | 1778 | 2397 | 0.121464384  | OTUD3,PLA2G2A,PLA2G2E,ENSBTAG00000013039          |
| 2 | 133,350,000 | 133,500,000 | 1779 | 1968 | 0.78727116   | OTUD3,PLA2G2E,RNF186                              |
| 2 | 133,425,000 | 133,575,000 | 1780 | 1806 | -0.570103306 | RNF186,TMCO4                                      |
| 2 | 133,500,000 | 133,650,000 | 1781 | 1234 | -1.486218415 | HTR6,TMCO4,ENSBTAG00000005140                     |
| 2 | 133,575,000 | 133,725,000 | 1782 | 668  | -0.465292624 | HTR6,TMCO4,ENSBTAG00000005140                     |
| 2 | 133,650,000 | 133,800,000 | 1783 | 672  | 0.558021515  | CAPZB                                             |
| 2 | 133,725,000 | 133,875,000 | 1784 | 822  | 0.231229265  | CAPZB                                             |
| 2 | 133,800,000 | 133,950,000 | 1785 | 967  | 0.122799422  | CAPZB,PQLC2                                       |
| 2 | 133,875,000 | 134,025,000 | 1786 | 904  | 0.082043329  | AKR7A2,CAPZB,EMC1,MRTO4,PQLC2,ENSBTAG00000026758  |
| 2 | 133,950,000 | 134,100,000 | 1787 | 527  | 0.324667901  | AKR7A2,EMC1,MRTO4,UBR4,ENSBTAG00000026758         |

|   |             |             |      |      |              |                                                  |
|---|-------------|-------------|------|------|--------------|--------------------------------------------------|
| 2 | 134,025,000 | 134,175,000 | 1788 | 432  | 1.289630083  | UBR4                                             |
| 2 | 134,100,000 | 134,250,000 | 1789 | 778  | 0.430229139  | UBR4                                             |
| 2 | 134,175,000 | 134,325,000 | 1790 | 998  | -0.070239017 | UBR4,ENSBTAG00000030340                          |
| 2 | 134,250,000 | 134,400,000 | 1791 | 869  | 0.042949733  | ALDH4A1,TAS1R2,ENSBTAG00000030340                |
| 2 | 134,325,000 | 134,475,000 | 1792 | 1341 | 0.402211951  | ALDH4A1,TAS1R2,ENSBTAG00000030340                |
| 2 | 134,400,000 | 134,550,000 | 1793 | 1428 | 0.417118641  | PAX7,TAS1R2                                      |
| 2 | 134,475,000 | 134,625,000 | 1794 | 1044 | 0.236884453  | PAX7                                             |
| 2 | 134,550,000 | 134,700,000 | 1795 | 1601 | 0.526072864  | PAX7                                             |
| 2 | 134,625,000 | 134,775,000 | 1796 | 1793 | 0.88545264   |                                                  |
| 2 | 134,700,000 | 134,850,000 | 1797 | 1574 | 0.757295485  | KLHDC7A                                          |
| 2 | 134,775,000 | 134,925,000 | 1798 | 1907 | 0.579819405  | IGSF21,KLHDC7A                                   |
| 2 | 134,850,000 | 135,000,000 | 1799 | 1775 | 0.600380961  | IGSF21                                           |
| 2 | 134,925,000 | 135,075,000 | 1800 | 1459 | 0.219123733  |                                                  |
| 2 | 135,000,000 | 135,150,000 | 1801 | 1204 | -0.001832966 |                                                  |
| 2 | 135,075,000 | 135,225,000 | 1802 | 1104 | -0.582322497 |                                                  |
| 2 | 135,150,000 | 135,300,000 | 1803 | 1193 | -0.886703307 |                                                  |
| 2 | 135,225,000 | 135,375,000 | 1804 | 1361 | -0.286885374 |                                                  |
| 2 | 135,300,000 | 135,450,000 | 1805 | 1383 | 0.053737247  | ACTL8                                            |
| 2 | 135,375,000 | 135,525,000 | 1806 | 1102 | 0.544826834  | ACTL8                                            |
| 2 | 135,450,000 | 135,600,000 | 1807 | 1139 | 0.494619131  | ARHGEF10L                                        |
| 2 | 135,525,000 | 135,675,000 | 1808 | 1287 | 0.471998501  | ARHGEF10L                                        |
| 2 | 135,600,000 | 135,750,000 | 1809 | 1340 | 0.576430043  | ARHGEF10L                                        |
| 2 | 135,675,000 | 135,825,000 | 1810 | 894  | 0.469092593  | PADI6,RCC2                                       |
| 2 | 135,750,000 | 135,900,000 | 1811 | 939  | -0.197461508 | PADI3,PADI4,PADI6,RCC2                           |
| 2 | 135,825,000 | 135,975,000 | 1812 | 1159 | -0.60226225  | PADI1,PADI3,PADI4,PADI6                          |
| 2 | 135,900,000 | 136,050,000 | 1813 | 758  | -0.893241134 | PADI1,PADI2,PADI3                                |
| 2 | 135,975,000 | 136,125,000 | 1814 | 762  | -0.066843453 | PADI2                                            |
| 2 | 136,050,000 | 136,200,000 | 1815 | 1100 | 0.875545632  | ATP13A2,CROCC,MFAP2,PADI2,SDHB                   |
| 2 | 136,125,000 | 136,275,000 | 1816 | 1290 | 0.501806598  | ATP13A2,CROCC,MFAP2,NECAP2,SDHB                  |
| 2 | 136,200,000 | 136,350,000 | 1817 | 1200 | 0.331857796  | CROCC,NECAP2,SPATA21,SZRD1,ENSBTAG00000047837    |
| 2 | 136,275,000 | 136,425,000 | 1818 | 1122 | 0.854316487  | FBXO42,SPATA21,SZRD1,ENSBTAG00000047837          |
| 2 | 136,350,000 | 136,500,000 | 1819 | 1117 | 0.52399005   | ARHGEF19,FBXO42,RSG1,ENSBTAG00000047837          |
| 2 | 136,425,000 | 136,575,000 | 1820 | 1128 | 0.653258431  | ARHGEF19,EPHA2,FBXO42,RSG1                       |
| 2 | 136,500,000 | 136,650,000 | 1821 | 1015 | 0.740308607  | C2H1orf64,EPHA2,FAM131C,HSPB7,ENSBTAG00000034674 |
| 2 | 136,575,000 | 136,725,000 | 1822 | 995  | 0.120714469  | C2H1orf64,FAM131C,HSPB7,ENSBTAG00000034674       |
| 2 | 136,650,000 | 136,800,000 | 1823 | 1075 | 0.27642852   | C2H1orf64                                        |
| 2 | 136,725,000 | 136,875,000 | 1824 | 622  | 0.299459035  |                                                  |
| 2 | 136,800,000 | 136,950,000 | 1825 | 148  | -0.390332818 |                                                  |
| 2 | 136,875,000 | 137,025,000 | 1826 | 215  | 0.240910367  |                                                  |
| 2 | 136,950,000 | 137,060,424 | 1827 | 271  | 0.07882371   |                                                  |
| 3 | 0           | 150,000     | 1    | 736  | 0.563031071  | ENSBTAG00000003249,ENSBTAG00000047047            |
| 3 | 75,000      | 225,000     | 2    | 1240 | 0.538382852  | ENSBTAG00000000584,ENSBTAG00000003249            |
| 3 | 150,000     | 300,000     | 3    | 1277 | 0.629796513  | TBX19,ENSBTAG00000000584                         |
| 3 | 225,000     | 375,000     | 4    | 1111 | 1.000493205  | SFT2D2,TBX19                                     |
| 3 | 300,000     | 450,000     | 5    | 1009 | 0.812537214  | SFT2D2,TIPRL                                     |
| 3 | 375,000     | 525,000     | 6    | 688  | 0.296497366  | TIPRL                                            |
| 3 | 450,000     | 600,000     | 7    | 715  | -0.524364269 | GPR161,IQWD1,TIPRL,ENSBTAG00000047162            |
| 3 | 525,000     | 675,000     | 8    | 857  | -0.294197479 | GPR161,IQWD1,ENSBTAG00000047162                  |
| 3 | 600,000     | 750,000     | 9    | 809  | -0.314920206 | IQWD1                                            |
| 3 | 675,000     | 825,000     | 10   | 885  | -0.247711165 | IQWD1,MPC2                                       |
| 3 | 750,000     | 900,000     | 11   | 847  | -0.103451226 | ADCY10,IQWD1,MPC2                                |

|   |           |           |    |      |              |                     |
|---|-----------|-----------|----|------|--------------|---------------------|
| 3 | 825,000   | 975,000   | 12 | 1005 | -1.065696849 | ADCY10,MPZL1        |
| 3 | 900,000   | 1,050,000 | 13 | 908  | -1.426220746 | ADCY10,MPZL1        |
| 3 | 975,000   | 1,125,000 | 14 | 673  | -1.301237283 | MPZL1,RCSD1         |
| 3 | 1,050,000 | 1,200,000 | 15 | 1059 | -0.289113806 | CREG1,RCSD1         |
| 3 | 1,125,000 | 1,275,000 | 16 | 1738 | 0.915761687  | CD247,CREG1,RCSD1   |
| 3 | 1,200,000 | 1,350,000 | 17 | 1641 | 1.075313551  | CD247,CREG1,POU2F1  |
| 3 | 1,275,000 | 1,425,000 | 18 | 1113 | 0.64783521   | CD247,POU2F1        |
| 3 | 1,350,000 | 1,500,000 | 19 | 1016 | -0.350889261 | POU2F1              |
| 3 | 1,425,000 | 1,575,000 | 20 | 906  | -0.255749215 |                     |
| 3 | 1,500,000 | 1,650,000 | 21 | 765  | 0.707197352  |                     |
| 3 | 1,575,000 | 1,725,000 | 22 | 764  | 0.703505104  | DUSP27              |
| 3 | 1,650,000 | 1,800,000 | 23 | 999  | 0.542637936  | DUSP27,GPA33        |
| 3 | 1,725,000 | 1,875,000 | 24 | 1336 | 0.589018682  | GPA33               |
| 3 | 1,800,000 | 1,950,000 | 25 | 968  | 0.580044278  | MAEL                |
| 3 | 1,875,000 | 2,025,000 | 26 | 611  | -0.245363383 | ILDR2,MAEL          |
| 3 | 1,950,000 | 2,100,000 | 27 | 1129 | -0.022293759 | ILDR2,TADA1         |
| 3 | 2,025,000 | 2,175,000 | 28 | 1591 | -0.863138228 | POGK,TADA1          |
| 3 | 2,100,000 | 2,250,000 | 29 | 1429 | -1.326357588 | POGK,TADA1          |
| 3 | 2,175,000 | 2,325,000 | 30 | 1315 | 0.385259726  |                     |
| 3 | 2,250,000 | 2,400,000 | 31 | 1603 | 0.723669024  | ENSBTAG00000022504  |
| 3 | 2,325,000 | 2,475,000 | 32 | 1354 | 0.187075436  | ENSBTAG00000022504  |
| 3 | 2,400,000 | 2,550,000 | 33 | 1384 | -0.385969892 |                     |
| 3 | 2,475,000 | 2,625,000 | 34 | 1795 | 0.329667505  |                     |
| 3 | 2,550,000 | 2,700,000 | 35 | 1869 | 0.306701013  | ENSBTAG00000022954  |
| 3 | 2,625,000 | 2,775,000 | 36 | 1651 | -0.913956428 | ENSBTAG00000022954  |
| 3 | 2,700,000 | 2,850,000 | 37 | 1217 | -2.492034531 |                     |
| 3 | 2,775,000 | 2,925,000 | 38 | 1558 | -0.077391806 | FAM78B              |
| 3 | 2,850,000 | 3,000,000 | 39 | 1818 | 0.405022267  | FAM78B              |
| 3 | 2,925,000 | 3,075,000 | 40 | 1672 | 0.205931734  | UCK2                |
| 3 | 3,000,000 | 3,150,000 | 41 | 1296 | 0.077960482  | UCK2                |
| 3 | 3,075,000 | 3,225,000 | 42 | 1068 | 0.324710852  | TMCO1,UCK2          |
| 3 | 3,150,000 | 3,300,000 | 43 | 1410 | -0.023717741 | ALDH9A1,MGST3,TMCO1 |
| 3 | 3,225,000 | 3,375,000 | 44 | 1710 | -0.742799101 | ALDH9A1,MGST3       |
| 3 | 3,300,000 | 3,450,000 | 45 | 1552 | -0.135825926 | LRRRC52,MGST3       |
| 3 | 3,375,000 | 3,525,000 | 46 | 1197 | 0.76059094   | LRRRC52             |
| 3 | 3,450,000 | 3,600,000 | 47 | 1193 | 0.271709275  | RXRG                |
| 3 | 3,525,000 | 3,675,000 | 48 | 1002 | -0.173023632 | RXRG                |
| 3 | 3,600,000 | 3,750,000 | 49 | 1119 | 0.125709312  | LMX1A,RXRG          |
| 3 | 3,675,000 | 3,825,000 | 50 | 1305 | 0.74082175   | LMX1A               |
| 3 | 3,750,000 | 3,900,000 | 51 | 1294 | 0.562247383  | LMX1A               |
| 3 | 3,825,000 | 3,975,000 | 52 | 1123 | 0.11593092   | LMX1A               |
| 3 | 3,900,000 | 4,050,000 | 53 | 813  | 0.051325879  |                     |
| 3 | 3,975,000 | 4,125,000 | 54 | 1131 | 0.365054124  |                     |
| 3 | 4,050,000 | 4,200,000 | 55 | 1214 | -0.05584086  |                     |
| 3 | 4,125,000 | 4,275,000 | 56 | 753  | -0.488751626 | PBX1                |
| 3 | 4,200,000 | 4,350,000 | 57 | 494  | -0.988808013 | PBX1                |
| 3 | 4,275,000 | 4,425,000 | 58 | 601  | -0.371456352 | PBX1                |
| 3 | 4,350,000 | 4,500,000 | 59 | 920  | 0.295946925  | PBX1                |
| 3 | 4,425,000 | 4,575,000 | 60 | 1040 | 0.291869538  | PBX1                |
| 3 | 4,500,000 | 4,650,000 | 61 | 1185 | 0.244060412  | PBX1                |
| 3 | 4,575,000 | 4,725,000 | 62 | 1123 | 0.410244905  |                     |
| 3 | 4,650,000 | 4,800,000 | 63 | 949  | 0.986232803  |                     |
| 3 | 4,725,000 | 4,875,000 | 64 | 1158 | 0.885625227  |                     |

|   |           |           |     |      |              |                                                                                          |
|---|-----------|-----------|-----|------|--------------|------------------------------------------------------------------------------------------|
| 3 | 4,800,000 | 4,950,000 | 65  | 1023 | 0.612898227  |                                                                                          |
| 3 | 4,875,000 | 5,025,000 | 66  | 983  | -1.425384703 |                                                                                          |
| 3 | 4,950,000 | 5,100,000 | 67  | 1101 | -4.846667416 |                                                                                          |
| 3 | 5,025,000 | 5,175,000 | 68  | 987  | -2.347621261 |                                                                                          |
| 3 | 5,100,000 | 5,250,000 | 69  | 1003 | 0.782164413  |                                                                                          |
| 3 | 5,175,000 | 5,325,000 | 70  | 1268 | 0.954060441  |                                                                                          |
| 3 | 5,250,000 | 5,400,000 | 71  | 1388 | 0.339352609  | ENSBTAG00000045987                                                                       |
| 3 | 5,325,000 | 5,475,000 | 72  | 1144 | -0.742828401 | GNG11,ENSBTAG00000045987                                                                 |
| 3 | 5,400,000 | 5,550,000 | 73  | 1046 | -0.594395964 | GNG11                                                                                    |
| 3 | 5,475,000 | 5,625,000 | 74  | 1306 | 0.792976757  |                                                                                          |
| 3 | 5,550,000 | 5,700,000 | 75  | 1356 | 0.936110686  |                                                                                          |
| 3 | 5,625,000 | 5,775,000 | 76  | 838  | 0.133369855  |                                                                                          |
| 3 | 5,700,000 | 5,850,000 | 77  | 830  | -0.275873287 |                                                                                          |
| 3 | 5,775,000 | 5,925,000 | 78  | 1130 | 0.203637462  |                                                                                          |
| 3 | 5,850,000 | 6,000,000 | 79  | 886  | 0.868076133  |                                                                                          |
| 3 | 5,925,000 | 6,075,000 | 80  | 774  | 0.856512507  | NUF2                                                                                     |
| 3 | 6,000,000 | 6,150,000 | 81  | 748  | 0.996744004  | NUF2                                                                                     |
| 3 | 6,075,000 | 6,225,000 | 82  | 1192 | -1.260494132 |                                                                                          |
| 3 | 6,150,000 | 6,300,000 | 83  | 1836 | -0.992991229 | RGS4,RGS5                                                                                |
| 3 | 6,225,000 | 6,375,000 | 84  | 1853 | 0.124003585  | RGS4,RGS5                                                                                |
| 3 | 6,300,000 | 6,450,000 | 85  | 1707 | -0.645124008 | RGS5                                                                                     |
| 3 | 6,375,000 | 6,525,000 | 86  | 1483 | -0.756077968 | RGS5                                                                                     |
| 3 | 6,450,000 | 6,600,000 | 87  | 1530 | 0.426947909  | C1orf110                                                                                 |
| 3 | 6,525,000 | 6,675,000 | 88  | 1689 | 0.527404767  | C1orf110,DDR2,HSD17B7                                                                    |
| 3 | 6,600,000 | 6,750,000 | 89  | 1359 | 0.53174491   | DDR2,HSD17B7                                                                             |
| 3 | 6,675,000 | 6,825,000 | 90  | 1393 | 0.942774587  | DDR2                                                                                     |
| 3 | 6,750,000 | 6,900,000 | 91  | 1178 | 0.435009806  | DDR2                                                                                     |
| 3 | 6,825,000 | 6,975,000 | 92  | 563  | -0.974584024 | DDR2,UAP1                                                                                |
| 3 | 6,900,000 | 7,050,000 | 93  | 653  | 0.093437941  | UAP1,UHMK1                                                                               |
| 3 | 6,975,000 | 7,125,000 | 94  | 1158 | 0.269238055  | C3H1orf111,NOS1AP,SH2D1B,UHMK1                                                           |
| 3 | 7,050,000 | 7,200,000 | 95  | 1466 | -0.563145096 | C3H1orf111,NOS1AP,SH2D1B                                                                 |
| 3 | 7,125,000 | 7,275,000 | 96  | 1305 | -0.609323124 | NOS1AP                                                                                   |
| 3 | 7,200,000 | 7,350,000 | 97  | 983  | 0.261337696  | NOS1AP                                                                                   |
| 3 | 7,275,000 | 7,425,000 | 98  | 1379 | 0.469187539  | NOS1AP                                                                                   |
| 3 | 7,350,000 | 7,500,000 | 99  | 1758 | 0.086528359  | NOS1AP                                                                                   |
| 3 | 7,425,000 | 7,575,000 | 100 | 1090 | -0.826840865 | NOS1AP,OLFML2B,ENSBTAG00000046175                                                        |
| 3 | 7,500,000 | 7,650,000 | 101 | 720  | -2.958332399 | ATF6,OLFML2B,ENSBTAG00000046175                                                          |
| 3 | 7,575,000 | 7,725,000 | 102 | 732  | -1.37688597  | ATF6,OLFML2B                                                                             |
| 3 | 7,650,000 | 7,800,000 | 103 | 754  | 0.713355993  | ATF6                                                                                     |
| 3 | 7,725,000 | 7,875,000 | 104 | 946  | -0.746411275 | ATF6,DUSP12                                                                              |
| 3 | 7,800,000 | 7,950,000 | 105 | 1170 | -0.514340612 | ATF6,DUSP12,FCGR2,FCRLA,FCRLB                                                            |
| 3 | 7,875,000 | 8,025,000 | 106 | 1316 | 0.031082666  | FCGR2,FCGR3A,FCRLA,FCRLB                                                                 |
| 3 | 7,950,000 | 8,100,000 | 107 | 1262 | 0.14949986   | FCGR2C,FCGR3A,HSPA6                                                                      |
| 3 | 8,025,000 | 8,175,000 | 108 | 1154 | -0.231596358 | C1ORF192,FCGR2C,HSPA6                                                                    |
| 3 | 8,100,000 | 8,250,000 | 109 | 1062 | -4.49E-06    | C1ORF192,MPZ,PCP4L1,SDHC                                                                 |
| 3 | 8,175,000 | 8,325,000 | 110 | 977  | 0.506861655  | ADAMTS4,APOA2,C1ORF192,FCER1G,MPZ,NDUFS2,NR1I3,PCP4L1,SDHC,TOMM40L                       |
| 3 | 8,250,000 | 8,400,000 | 111 | 830  | -0.541071445 | ADAMTS4,APOA2,B4GALT3,DEDD,FCER1G,NDUFS2,NIT1,NR1I3,PCP4L1,PFDN2,PPOX,TOMM40L,UFC1,USP21 |
| 3 | 8,325,000 | 8,475,000 | 112 | 610  | -0.98353366  | ADAMTS4,ARHGAP30,B4GALT3,DEDD,KLHDC9,NIT1,PFDN2,PPOX,PVRL4,TSTD1,UFC1,USF1,USP21         |



|   |            |            |     |      |              |                                                                                         |
|---|------------|------------|-----|------|--------------|-----------------------------------------------------------------------------------------|
| 3 | 8,400,000  | 8,550,000  | 113 | 510  | 0.164926574  | ARHGAP30,F11R,ITLN2,KLHDC9,PFDN2,PVRL4,TSTD1,USF1                                       |
| 3 | 8,475,000  | 8,625,000  | 114 | 1255 | 0.534905291  | F11R,ITLN2,ENSBTAG00000027775                                                           |
| 3 | 8,550,000  | 8,700,000  | 115 | 1732 | -0.660692053 | ITLN2,ENSBTAG00000027775                                                                |
| 3 | 8,625,000  | 8,775,000  | 116 | 1451 | -1.335355984 | ITLN2,ENSBTAG00000027775,ENSBTAG00000040437,ENSBTAG00000046231                          |
| 3 | 8,700,000  | 8,850,000  | 117 | 1080 | -0.653764069 | CD244,LY9,ENSBTAG00000040437,ENSBTAG00000046231                                         |
| 3 | 8,775,000  | 8,925,000  | 118 | 659  | -0.541960685 | CD244,LY9,PIFO,ENSBTAG00000010458                                                       |
| 3 | 8,850,000  | 9,000,000  | 119 | 744  | -0.543010869 | LY9,PIFO,SLAMF7,ENSBTAG00000010458,ENSBTAG000024849                                     |
| 3 | 8,925,000  | 9,075,000  | 120 | 798  | -0.930741493 | CD48,PIFO,SLAMF7,ENSBTAG00000024849                                                     |
| 3 | 9,000,000  | 9,150,000  | 121 | 639  | 0.065703112  | CD48,SLAMF1                                                                             |
| 3 | 9,075,000  | 9,225,000  | 122 | 491  | 1.222322193  | CD84,SLAMF1                                                                             |
| 3 | 9,150,000  | 9,300,000  | 123 | 678  | 0.989700755  | CD84,SLAMF6                                                                             |
| 3 | 9,225,000  | 9,375,000  | 124 | 756  | 0.723208986  | CD84,SLAMF6                                                                             |
| 3 | 9,300,000  | 9,450,000  | 125 | 581  | 0.450599372  | NHLH1,VANGL2                                                                            |
| 3 | 9,375,000  | 9,525,000  | 126 | 612  | -1.049403285 | COPA,NCSTN,NHLH1,PEX19,VANGL2                                                           |
| 3 | 9,450,000  | 9,600,000  | 127 | 538  | -2.065994834 | CASQ1,COPA,NCSTN,PEA15,PEX19,ENSBTAG00000005796                                         |
| 3 | 9,525,000  | 9,675,000  | 128 | 572  | -1.075831505 | ATP1A2,ATP1A4,CASQ1,PEA15,ENSBTAG00000005796                                            |
| 3 | 9,600,000  | 9,750,000  | 129 | 1079 | -0.219121826 | ATP1A2,ATP1A4,CASQ1,IGSF8,KCNJ10,KCNJ9                                                  |
| 3 | 9,675,000  | 9,825,000  | 130 | 1685 | -0.200775081 | IGSF8,KCNJ10,KCNJ9,PIGM                                                                 |
| 3 | 9,750,000  | 9,900,000  | 131 | 1577 | -1.150259324 | IGSF9,KCNJ10,PIGM,SLAMF9,TAGLN2                                                         |
| 3 | 9,825,000  | 9,975,000  | 132 | 1103 | -1.380002885 | CCDC19,IGSF9,SLAMF8,SLAMF9,TAGLN2,VSIG8                                                 |
| 3 | 9,900,000  | 10,050,000 | 133 | 1007 | -1.446551653 | CCDC19,DUSP23,FCRL6,SLAMF8,VSIG8                                                        |
| 3 | 9,975,000  | 10,125,000 | 134 | 1224 | -0.764131883 | CRP,DUSP23,FCRL6,SLAMF8                                                                 |
| 3 | 10,050,000 | 10,200,000 | 135 | 1448 | 0.346884902  | CRP                                                                                     |
| 3 | 10,125,000 | 10,275,000 | 136 | 1874 | 0.420057945  | APCS,ENSBTAG00000046656                                                                 |
| 3 | 10,200,000 | 10,350,000 | 137 | 2031 | 0.642332563  | APCS,OR10J5,ENSBTAG00000046656                                                          |
| 3 | 10,275,000 | 10,425,000 | 138 | 1768 | 0.71058473   | OR10J1,OR10J5,ENSBTAG00000019618                                                        |
| 3 | 10,350,000 | 10,500,000 | 139 | 1416 | 0.314504261  | OR10J1,ENSBTAG00000019618,ENSBTAG00000020765                                            |
| 3 | 10,425,000 | 10,575,000 | 140 | 1302 | -0.405238155 | FCER1A,OR10J3,ENSBTAG00000020765                                                        |
| 3 | 10,500,000 | 10,650,000 | 141 | 1552 | 0.45005558   | ACKR1,FCER1A,MPTX,OR10J3,ENSBTAG00000022528                                             |
| 3 | 10,575,000 | 10,725,000 | 142 | 1469 | 0.72574103   | ACKR1,CADM3,MPTX,ENSBTAG00000022528                                                     |
| 3 | 10,650,000 | 10,800,000 | 143 | 1279 | 0.495077074  | CADM3                                                                                   |
| 3 | 10,725,000 | 10,875,000 | 144 | 1090 | 1.128210382  | ENSBTAG00000011511                                                                      |
| 3 | 10,800,000 | 10,950,000 | 145 | 1122 | 1.156380379  | ENSBTAG00000011511                                                                      |
| 3 | 10,875,000 | 11,025,000 | 146 | 1659 | 1.121042506  | OR6N2,ENSBTAG00000020838,ENSBTAG00000048292                                             |
| 3 | 10,950,000 | 11,100,000 | 147 | 2048 | 1.000034494  | OR6K3,OR6K6,OR6N1,OR6N2,ENSBTAG00000020838,ENSBTAG00000038961,ENSBTAG00000048292        |
| 3 | 11,025,000 | 11,175,000 | 148 | 2144 | 0.500638668  | OR6K2,OR6K3,OR6K6,OR6N1,SPTA1,ENSBTAG00000038961                                        |
| 3 | 11,100,000 | 11,250,000 | 149 | 2004 | -1.239087732 | OR10Z1,OR6K2,SPTA1,ENSBTAG00000039653                                                   |
| 3 | 11,175,000 | 11,325,000 | 150 | 1915 | -2.463515193 | OR10Z1,SPTA1,ENSBTAG00000038362,ENSBTAG0000038669,ENSBTAG00000039653,ENSBTAG00000047541 |
| 3 | 11,250,000 | 11,400,000 | 151 | 1647 | -1.907298615 | OR6P1,OR6Y1,ENSBTAG00000038362,ENSBTAG0000038669,ENSBTAG00000047541                     |

|   |            |            |     |      |              |                                                                                                     |
|---|------------|------------|-----|------|--------------|-----------------------------------------------------------------------------------------------------|
| 3 | 11,325,000 | 11,475,000 | 152 | 1411 | -0.691661341 | OR10K2,OR6P1,OR6Y1,ENSBTAG00000022556,ENSBTAG00000023247                                            |
| 3 | 11,400,000 | 11,550,000 | 153 | 1304 | -0.224954747 | CD1A,OR10K2,OR10R2,ENSBTAG00000022556,ENSBTAG00000023247                                            |
| 3 | 11,475,000 | 11,625,000 | 154 | 1226 | 0.637421532  | CD1A,OR10R2,ENSBTAG00000037546                                                                      |
| 3 | 11,550,000 | 11,700,000 | 155 | 1499 | 0.839567311  | OR10T2,ENSBTAG00000037546,ENSBTAG00000037575,ENSBTAG00000037807                                     |
| 3 | 11,625,000 | 11,775,000 | 156 | 1579 | 0.589879228  | CD1B5,CD1E,OR10T2,ENSBTAG00000037575,ENSBTAG00000037807                                             |
| 3 | 11,700,000 | 11,850,000 | 157 | 1495 | 0.41275365   | CD1B3,CD1B5,CD1E,ENSBTAG0000000963                                                                  |
| 3 | 11,775,000 | 11,925,000 | 158 | 1400 | 0.659283901  | CD1B3,ENSBTAG0000000963,ENSBTAG00000026180,ENSBTAG00000038366,ENSBTAG00000038426,ENSBTAG00000039189 |
| 3 | 11,850,000 | 12,000,000 | 159 | 1615 | 0.844067373  | CD1A,CD1B3,ENSBTAG00000026180,ENSBTAG00000038366,ENSBTAG00000038426,ENSBTAG00000039189              |
| 3 | 11,925,000 | 12,075,000 | 160 | 1704 | 0.583280586  | CD1A                                                                                                |
| 3 | 12,000,000 | 12,150,000 | 161 | 1241 | 0.591907315  | CD1D,ENSBTAG00000047988                                                                             |
| 3 | 12,075,000 | 12,225,000 | 162 | 670  | 0.799870537  | CD1D,ENSBTAG00000039993,ENSBTAG00000047776,ENSBTAG00000047988                                       |
| 3 | 12,150,000 | 12,300,000 | 163 | 523  | -2.037030205 | ENSBTAG00000039993,ENSBTAG00000047776                                                               |
| 3 | 12,225,000 | 12,375,000 | 164 | 620  | -2.861439833 | KIRREL                                                                                              |
| 3 | 12,300,000 | 12,450,000 | 165 | 771  | -1.502068412 | KIRREL                                                                                              |
| 3 | 12,375,000 | 12,525,000 | 166 | 1259 | 0.213755047  | FCRL2                                                                                               |
| 3 | 12,450,000 | 12,600,000 | 167 | 1298 | 0.418299478  | CD5L,FCRL2                                                                                          |
| 3 | 12,525,000 | 12,675,000 | 168 | 832  | 0.184681424  | CD5L,FCRL1                                                                                          |
| 3 | 12,600,000 | 12,750,000 | 169 | 1018 | 0.868601561  | FCRL1,FCRL3                                                                                         |
| 3 | 12,675,000 | 12,825,000 | 170 | 1197 | 1.0464631    | FCRL3                                                                                               |
| 3 | 12,750,000 | 12,900,000 | 171 | 1024 | 0.95160279   | FCRL5                                                                                               |
| 3 | 12,825,000 | 12,975,000 | 172 | 1336 | 0.642836286  | FCRL5                                                                                               |
| 3 | 12,900,000 | 13,050,000 | 173 | 1420 | 0.461154349  | FCRL5                                                                                               |
| 3 | 12,975,000 | 13,125,000 | 174 | 1201 | 0.379451249  |                                                                                                     |
| 3 | 13,050,000 | 13,200,000 | 175 | 1419 | 0.08784124   |                                                                                                     |
| 3 | 13,125,000 | 13,275,000 | 176 | 1726 | -0.481448395 |                                                                                                     |
| 3 | 13,200,000 | 13,350,000 | 177 | 1740 | -1.077173649 |                                                                                                     |
| 3 | 13,275,000 | 13,425,000 | 178 | 1950 | -0.407352453 |                                                                                                     |
| 3 | 13,350,000 | 13,500,000 | 179 | 2074 | -0.283707721 |                                                                                                     |
| 3 | 13,425,000 | 13,575,000 | 180 | 1712 | -2.613962797 |                                                                                                     |
| 3 | 13,500,000 | 13,650,000 | 181 | 1829 | -1.551780458 |                                                                                                     |
| 3 | 13,575,000 | 13,725,000 | 182 | 1710 | -0.866393583 |                                                                                                     |
| 3 | 13,650,000 | 13,800,000 | 183 | 1066 | -1.6039912   | ETV3,ETV3L                                                                                          |
| 3 | 13,725,000 | 13,875,000 | 184 | 1122 | 0.152539845  | ETV3,ETV3L                                                                                          |
| 3 | 13,800,000 | 13,950,000 | 185 | 1174 | 0.474612891  | ARHGEF11                                                                                            |
| 3 | 13,875,000 | 14,025,000 | 186 | 1138 | 0.128122801  | ARHGEF11,C3H1ORF92,NTRK1,PEAR1                                                                      |
| 3 | 13,950,000 | 14,100,000 | 187 | 1323 | 0.483610192  | ARHGEF11,C3H1ORF92,INSRR,NTRK1,PEAR1,PRCC,SH2D2A                                                    |
| 3 | 14,025,000 | 14,175,000 | 188 | 1266 | 0.944227012  | CRABP2,HDGF,INSRR,ISG20L2,MRPL24,NTRK1,PRCC,RRNAD1,SH2D2A                                           |
| 3 | 14,100,000 | 14,250,000 | 189 | 1073 | 0.799804879  | BCAN,CRABP2,HDGF,ISG20L2,MRPL24,NES,PRCC,RRNAD1                                                     |
| 3 | 14,175,000 | 14,325,000 | 190 | 1179 | -0.618510109 | APOA1BP,BCAN,CRABP2,GPATCH4,HAPLN2,IQGAP3,NES,TTC24                                                 |

|   |            |            |     |      |              |                                                                                     |
|---|------------|------------|-----|------|--------------|-------------------------------------------------------------------------------------|
| 3 | 14,250,000 | 14,400,000 | 191 | 1009 | -1.022628188 | APOA1BP,GPATCH4,HAPLN2,IQGAP3,MEF2D,TTC24,ENSBTAG00000021649                        |
| 3 | 14,325,000 | 14,475,000 | 192 | 604  | -0.47720852  | IQGAP3,MEF2D,ENSBTAG00000021649                                                     |
| 3 | 14,400,000 | 14,550,000 | 193 | 715  | 0.099259177  | CCT3,MEF2D,RHBG,TSACC                                                               |
| 3 | 14,475,000 | 14,625,000 | 194 | 900  | 0.371521566  | BGLAP,C1orf85,CCT3,PAQR6,PMF1,RHBG,SMG5,TMEM79,TSACC                                |
| 3 | 14,550,000 | 14,700,000 | 195 | 1074 | 0.65940531   | BGLAP,C1orf85,CCT3,LMNA,PAQR6,PMF1,SEMA4A,SLC25A44,SMG5,TMEM79                      |
| 3 | 14,625,000 | 14,775,000 | 196 | 839  | 0.304544761  | LAMTOR2,LMNA,MEX3A,PMF1,RAB25,SEMA4A,SLC25A44,UBQLN4                                |
| 3 | 14,700,000 | 14,850,000 | 197 | 630  | 0.118913878  | ARHGEF2,LAMTOR2,LMNA,MEX3A,RAB25,SSR2,UBQLN4                                        |
| 3 | 14,775,000 | 14,925,000 | 198 | 1051 | 0.451372794  | ARHGEF2,KIAA0907,RIT1,RXFP4,SSR2,UBQLN4                                             |
| 3 | 14,850,000 | 15,000,000 | 199 | 1324 | 0.69772242   | ARHGEF2,KIAA0907,RIT1,RXFP4,SYT11,YY1AP1                                            |
| 3 | 14,925,000 | 15,075,000 | 200 | 1170 | -0.563546791 | GON4L,SYT11,YY1AP1                                                                  |
| 3 | 15,000,000 | 15,150,000 | 201 | 1062 | -2.004696878 | DAP3,GON4L,MSTO1                                                                    |
| 3 | 15,075,000 | 15,225,000 | 202 | 897  | -1.923355505 | ASH1L,DAP3,GON4L,MSTO1                                                              |
| 3 | 15,150,000 | 15,300,000 | 203 | 737  | -2.455322903 | ASH1L                                                                               |
| 3 | 15,225,000 | 15,375,000 | 204 | 740  | -3.679554709 | ASH1L,FDPS                                                                          |
| 3 | 15,300,000 | 15,450,000 | 205 | 731  | -3.787216215 | ASH1L,CLK2,FAM189B,FDPS,GBA,HCN3,PKLR,SCAMP3                                        |
| 3 | 15,375,000 | 15,525,000 | 206 | 851  | -2.546945155 | CLK2,DPM3,EFNA1,FAM189B,GBA,HCN3,KRTCAP2,MTX1,MUC1,PKLR,SCAMP3,SLC50A1,THBS3,TRIM46 |
| 3 | 15,450,000 | 15,600,000 | 207 | 951  | -1.063831532 | ADAM15,DPM3,EFNA1,EFNA3,EFNA4,GBA,KRTCAP2,MTX1,MUC1,SLC50A1,THBS3,TRIM46            |
| 3 | 15,525,000 | 15,675,000 | 208 | 712  | 0.140730491  | ADAM15,CKS1B,DCST1,DCST2,EFNA1,EFNA3,EFNA4,FLAD1,LENEP,SHC1,ZBTB7B                  |
| 3 | 15,600,000 | 15,750,000 | 209 | 607  | 0.569851271  | ADAM15,CKS1B,DCST1,DCST2,FLAD1,LENEP,PBXIP1,PMVK,PYGO2,SHC1,ZBTB7B                  |
| 3 | 15,675,000 | 15,825,000 | 210 | 713  | 1.019571193  | KCNN3,PBXIP1,PMVK,PYGO2,SHC1                                                        |
| 3 | 15,750,000 | 15,900,000 | 211 | 938  | 1.160313221  | KCNN3                                                                               |
| 3 | 15,825,000 | 15,975,000 | 212 | 1189 | 0.604236276  | KCNN3                                                                               |
| 3 | 15,900,000 | 16,050,000 | 213 | 1150 | 0.27542674   | ADAR,KCNN3                                                                          |
| 3 | 15,975,000 | 16,125,000 | 214 | 929  | -0.436772663 | ADAR,CHRN2,TDRD10,UBE2Q1                                                            |
| 3 | 16,050,000 | 16,200,000 | 215 | 995  | -0.214310263 | ADAR,CHRN2,IL6R,SHE,TDRD10,UBE2Q1,ENSBTAG0000045672                                 |
| 3 | 16,125,000 | 16,275,000 | 216 | 1048 | 0.230773099  | ATP8B2,IL6R,SHE,TDRD10,ENSBTAG0000045672                                            |
| 3 | 16,200,000 | 16,350,000 | 217 | 618  | -0.869920802 | AQP10,ATP8B2,HAX1,IL6R,UBAP2L                                                       |
| 3 | 16,275,000 | 16,425,000 | 218 | 467  | -0.875522161 | AQP10,ATP8B2,C3H1orf189,HAX1,NUP210L,TPM3,UBAP2L,ENSBTAG0000020026                  |
| 3 | 16,350,000 | 16,500,000 | 219 | 469  | 0.197024158  | C3H1orf189,NUP210L,TPM3,UBAP2L,ENSBTAG0000020026                                    |
| 3 | 16,425,000 | 16,575,000 | 220 | 430  | 0.542060268  | CREB3L4,CRTC2,DENND4B,JTB,NUP210L,RAB13,RPS25,RPS27,SLC39A1                         |
| 3 | 16,500,000 | 16,650,000 | 221 | 453  | -0.068010668 | CREB3L4,CRTC2,DENND4B,GATAD2B,JTB,NUP210L,RAB13,RPS25,RPS27,SLC39A1                 |
| 3 | 16,575,000 | 16,725,000 | 222 | 679  | 0.095264809  | GATAD2B,INTS3,SLC27A3                                                               |
| 3 | 16,650,000 | 16,800,000 | 223 | 826  | 0.222864051  | ILF2,INTS3,NPR1,SLC27A3,SNAPIN                                                      |
| 3 | 16,725,000 | 16,875,000 | 224 | 893  | 0.395017994  | CHTOP,ILF2,NPR1,S100A1,S100A13,S100A14,S100A16,S100A2,SNAPIN                        |
| 3 | 16,800,000 | 16,950,000 | 225 | 931  | 0.845401425  | CHTOP,S100A1,S100A13,S100A14,S100A16,S100A2,S100A3,S100A4,S100A5                    |
| 3 | 16,875,000 | 17,025,000 | 226 | 1183 | 1.124509957  | S100A3,S100A4,S100A5,S100A7                                                         |

|   |            |            |     |      |              |                                                                                             |
|---|------------|------------|-----|------|--------------|---------------------------------------------------------------------------------------------|
| 3 | 16,950,000 | 17,100,000 | 227 | 1565 | 0.781296433  | S100A7,ENSBTAG00000033007                                                                   |
| 3 | 17,025,000 | 17,175,000 | 228 | 1329 | 0.199528327  | S100A12,S100A8,ENSBTAG00000024437,ENSBTAG0000033007                                         |
| 3 | 17,100,000 | 17,250,000 | 229 | 1347 | -1.180682563 | PGLYRP3,S100A12,S100A8,S100A9,ENSBTAG00000024437                                            |
| 3 | 17,175,000 | 17,325,000 | 230 | 1520 | -2.200228193 | LOR,PGLYRP3,S100A9,ENSBTAG00000039487                                                       |
| 3 | 17,250,000 | 17,400,000 | 231 | 1104 | -1.994765965 | LLEP1,LOR,ENSBTAG00000039487                                                                |
| 3 | 17,325,000 | 17,475,000 | 232 | 768  | -1.234762754 | LLEP1,ENSBTAG00000039487                                                                    |
| 3 | 17,400,000 | 17,550,000 | 233 | 748  | -0.760813526 |                                                                                             |
| 3 | 17,475,000 | 17,625,000 | 234 | 984  | 0.415357883  |                                                                                             |
| 3 | 17,550,000 | 17,700,000 | 235 | 1342 | 0.339795569  |                                                                                             |
| 3 | 17,625,000 | 17,775,000 | 236 | 1140 | 0.602233881  |                                                                                             |
| 3 | 17,700,000 | 17,850,000 | 237 | 851  | -2.347996823 | SPRR3                                                                                       |
| 3 | 17,775,000 | 17,925,000 | 238 | 782  | -2.885662506 | IVL,SMCP,SPRR3                                                                              |
| 3 | 17,850,000 | 18,000,000 | 239 | 960  | 0.263514481  | IVL,SMCP                                                                                    |
| 3 | 17,925,000 | 18,075,000 | 240 | 1371 | 0.313456502  | KPRP                                                                                        |
| 3 | 18,000,000 | 18,150,000 | 241 | 1375 | -0.084118366 | C1orf68,KPRP                                                                                |
| 3 | 18,075,000 | 18,225,000 | 242 | 1093 | -0.054672623 | C1orf68,CRCT1                                                                               |
| 3 | 18,150,000 | 18,300,000 | 243 | 646  | -0.421792293 | CRCT1,ENSBTAG00000032446                                                                    |
| 3 | 18,225,000 | 18,375,000 | 244 | 847  | -2.432721462 | CRNN,ENSBTAG00000032446                                                                     |
| 3 | 18,300,000 | 18,450,000 | 245 | 913  | -2.989827466 | CRNN,FLG2                                                                                   |
| 3 | 18,375,000 | 18,525,000 | 246 | 475  | -5.194104837 | FLG2,ENSBTAG00000039357                                                                     |
| 3 | 18,450,000 | 18,600,000 | 247 | 583  | -4.422860064 | FLG2,ENSBTAG00000039357                                                                     |
| 3 | 18,525,000 | 18,675,000 | 248 | 770  | -1.606636507 | RPTN                                                                                        |
| 3 | 18,600,000 | 18,750,000 | 249 | 633  | 0.371345751  | RPTN,TCHHL1                                                                                 |
| 3 | 18,675,000 | 18,825,000 | 250 | 681  | 0.383031771  | S100A10,S100A11,TCHHL1                                                                      |
| 3 | 18,750,000 | 18,900,000 | 251 | 878  | 0.370997603  | S100A10,S100A11,THEM4                                                                       |
| 3 | 18,825,000 | 18,975,000 | 252 | 638  | 0.775782471  | THEM4,THEM5                                                                                 |
| 3 | 18,900,000 | 19,050,000 | 253 | 388  | 0.776160796  | C2CD4D,LINGO4,RORC,TDRKH,THEM4,THEM5                                                        |
| 3 | 18,975,000 | 19,125,000 | 254 | 422  | 1.098248415  | C2CD4D,LINGO4,MRPL9,OAZ3,RIAD1,RORC,TDRKH,TNRC4                                             |
| 3 | 19,050,000 | 19,200,000 | 255 | 572  | 1.214761918  | MRPL9,OAZ3,RIAD1,SNX27,TDRKH,TNRC4                                                          |
| 3 | 19,125,000 | 19,275,000 | 256 | 574  | 0.981065271  | SNX27,TUFT1                                                                                 |
| 3 | 19,200,000 | 19,350,000 | 257 | 542  | 1.06930763   | CGN,SNX27,TUFT1                                                                             |
| 3 | 19,275,000 | 19,425,000 | 258 | 427  | 1.020917021  | CGN,POGZ,PSMB4,TUFT1                                                                        |
| 3 | 19,350,000 | 19,500,000 | 259 | 310  | 0.593702915  | POGZ,PSMB4,SELENBP1                                                                         |
| 3 | 19,425,000 | 19,575,000 | 260 | 328  | 0.599831532  | PI4KB,RFX5,SELENBP1,ZNF687                                                                  |
| 3 | 19,500,000 | 19,650,000 | 261 | 363  | 0.602592373  | PI4KB,PIP5K1A,PSMD4,RFX5,ZNF687,ENSBTAG00000019709                                          |
| 3 | 19,575,000 | 19,725,000 | 262 | 404  | -0.398942758 | LYSMD1,PIP5K1A,PSMD4,SCNM1,SEMA6C,TMOD4,TNFAIP8L2,VPS72,ENSBTAG00000019709                  |
| 3 | 19,650,000 | 19,800,000 | 263 | 431  | -0.798652303 | BNIP1,C1orf56,CDC42SE1,GABPB2,LYSMD1,MLLT11,PI5K1A,PRUNE,SCNM1,SEMA6C,TMOD4,TNFAIP8L2,VPS72 |
| 3 | 19,725,000 | 19,875,000 | 264 | 407  | -1.611597613 | ANXA9,BNIP1,C1orf56,CDC42SE1,CERS2,FAM63A,GABPB2,MLLT11,PRUNE,SEMA6C,SETDB1                 |
| 3 | 19,800,000 | 19,950,000 | 265 | 469  | -1.466565069 | ANXA9,CERS2,FAM63A,PRUNE,SETDB1                                                             |
| 3 | 19,875,000 | 20,025,000 | 266 | 586  | -1.124583551 | ARNT,CTSK,CTSS,SETDB1                                                                       |
| 3 | 19,950,000 | 20,100,000 | 267 | 602  | -1.529338761 | ARNT,CTSK,CTSS,GOLPH3L,HORMAD1                                                              |
| 3 | 20,025,000 | 20,175,000 | 268 | 693  | -0.41406922  | CTSS,ENSA,GOLPH3L,HORMAD1,MCL1                                                              |
| 3 | 20,100,000 | 20,250,000 | 269 | 579  | 0.006617304  | ADAMTSL4,ECM1,ENSA,GOLPH3L,MCL1,TARS2                                                       |
| 3 | 20,175,000 | 20,325,000 | 270 | 346  | -0.080769953 | ADAMTSL4,ECM1,MCL1,RPRD2,TARS2                                                              |
| 3 | 20,250,000 | 20,400,000 | 271 | 268  | -0.024243805 | MRPS21,PRPF3,RPRD2                                                                          |

|   |            |            |     |      |              |                                                                                                                                                              |
|---|------------|------------|-----|------|--------------|--------------------------------------------------------------------------------------------------------------------------------------------------------------|
| 3 | 20,325,000 | 20,475,000 | 272 | 190  | -0.571769463 | ANP32E,APH1A,C1orf54,CA14,CIART,MRPS21,PRPF3,RPD2                                                                                                            |
| 3 | 20,400,000 | 20,550,000 | 273 | 350  | -1.396662981 | ANP32E,APH1A,C1orf54,CA14,CIART,PLEKHO1,VPS45                                                                                                                |
| 3 | 20,475,000 | 20,625,000 | 274 | 638  | -0.690686463 | PLEKHO1,VPS45                                                                                                                                                |
| 3 | 20,550,000 | 20,700,000 | 275 | 727  | 0.014376078  | OTUD7B,VPS45                                                                                                                                                 |
| 3 | 20,625,000 | 20,775,000 | 276 | 645  | -0.983252099 | BOLA1,H2B,HIST2H2AB,MTMR11,OTUD7B,SF3B4,SV2A,ENSBTAG00000040098                                                                                              |
| 3 | 20,700,000 | 20,850,000 | 277 | 626  | -2.815445414 | BOLA1,FCGR1A,H2B,HIST2H2AB,HIST2H2AC,MTMR11,OTUD7B,SF3B4,SV2A,ENSBTAG00000032452,ENSBTAG00000032453,ENSBTAG00000032458,ENSBTAG00000040098,ENSBTAG00000046368 |
| 3 | 20,775,000 | 20,925,000 | 278 | 749  | -2.59147774  | FCGR1A,H2B,HIST2H2AC,MGC152321,ENSBTAG00000032452,ENSBTAG00000032453,ENSBTAG00000032458,ENSBTAG00000046368                                                   |
| 3 | 20,850,000 | 21,000,000 | 279 | 923  | -0.294005504 | FCGR1A,MGC152321,ENSBTAG00000022741                                                                                                                          |
| 3 | 20,925,000 | 21,075,000 | 280 | 1082 | 0.447942679  | ENSBTAG00000022741                                                                                                                                           |
| 3 | 21,000,000 | 21,150,000 | 281 | 954  | 0.367556717  |                                                                                                                                                              |
| 3 | 21,075,000 | 21,225,000 | 282 | 805  | 0.651104246  |                                                                                                                                                              |
| 3 | 21,150,000 | 21,300,000 | 283 | 795  | 0.949646664  |                                                                                                                                                              |
| 3 | 21,225,000 | 21,375,000 | 284 | 804  | 1.058845844  |                                                                                                                                                              |
| 3 | 21,300,000 | 21,450,000 | 285 | 613  | 1.142236863  |                                                                                                                                                              |
| 3 | 21,375,000 | 21,525,000 | 286 | 367  | 0.717591928  | ANKRD34A,HFE2,LIX1L,POLR3GL,TXNIP                                                                                                                            |
| 3 | 21,450,000 | 21,600,000 | 287 | 319  | 0.420827144  | ANKRD34A,ANKRD35,HFE2,ITGA10,LIX1L,PEX11B,POLR3GL,RBM8A,TXNIP,ENSBTAG00000008370                                                                             |
| 3 | 21,525,000 | 21,675,000 | 288 | 314  | 0.284539102  | ANKRD35,ITGA10,LIX1L,NUDT17,PEX11B,PIAS3,POLR3C,RBM8A,RNF115,ENSBTAG00000008370                                                                              |
| 3 | 21,600,000 | 21,750,000 | 289 | 405  | 0.415814854  | ANKRD35,NUDT17,PIAS3,POLR3C,RNF115                                                                                                                           |
| 3 | 21,675,000 | 21,825,000 | 290 | 438  | 0.130789197  | GPR89,PDZK1,RNF115                                                                                                                                           |
| 3 | 21,750,000 | 21,900,000 | 291 | 444  | -0.084011319 | GJA8,GPR89,PDZK1                                                                                                                                             |
| 3 | 21,825,000 | 21,975,000 | 292 | 743  | 0.515367099  | GJA8,GPR89                                                                                                                                                   |
| 3 | 21,900,000 | 22,050,000 | 293 | 1147 | 0.55716799   | GJA5                                                                                                                                                         |
| 3 | 21,975,000 | 22,125,000 | 294 | 833  | 0.152680323  | ACP6,BCL9,GJA5                                                                                                                                               |
| 3 | 22,050,000 | 22,200,000 | 295 | 521  | -0.13951247  | ACP6,BCL9                                                                                                                                                    |
| 3 | 22,125,000 | 22,275,000 | 296 | 704  | -0.329748014 |                                                                                                                                                              |
| 3 | 22,200,000 | 22,350,000 | 297 | 1211 | -0.988255378 | ENSBTAG00000046242,ENSBTAG00000046872                                                                                                                        |
| 3 | 22,275,000 | 22,425,000 | 298 | 1309 | -1.600408528 | ENSBTAG00000046242,ENSBTAG00000046872                                                                                                                        |
| 3 | 22,350,000 | 22,500,000 | 299 | 1131 | -1.894234583 | CHD1L,ENSBTAG00000046766                                                                                                                                     |
| 3 | 22,425,000 | 22,575,000 | 300 | 1315 | -1.090364078 | CHD1L,FMO5,ENSBTAG00000046766                                                                                                                                |
| 3 | 22,500,000 | 22,650,000 | 301 | 972  | -0.788335816 | CHD1L,FMO5,PRKAB2                                                                                                                                            |
| 3 | 22,575,000 | 22,725,000 | 302 | 826  | -0.22735671  | FMO5,PRKAB2                                                                                                                                                  |
| 3 | 22,650,000 | 22,800,000 | 303 | 1309 | -0.17334616  | ENSBTAG00000021104                                                                                                                                           |
| 3 | 22,725,000 | 22,875,000 | 304 | 1653 | -0.003121325 | ENSBTAG00000021104                                                                                                                                           |
| 3 | 22,800,000 | 22,950,000 | 305 | 1663 | 0.395039039  | PDE4DIP,ENSBTAG00000017316                                                                                                                                   |
| 3 | 22,875,000 | 23,025,000 | 306 | 1580 | 0.798270669  | PDE4DIP,ENSBTAG00000017316                                                                                                                                   |
| 3 | 22,950,000 | 23,100,000 | 307 | 1430 | 0.940342831  | PDE4DIP                                                                                                                                                      |
| 3 | 23,025,000 | 23,175,000 | 308 | 1274 | 0.517126672  | PDE4DIP                                                                                                                                                      |
| 3 | 23,100,000 | 23,250,000 | 309 | 1093 | -0.013871289 | SEC22B,ENSBTAG00000047910                                                                                                                                    |
| 3 | 23,175,000 | 23,325,000 | 310 | 1098 | -0.188426    | NOTCH2,SEC22B,ENSBTAG00000047910                                                                                                                             |
| 3 | 23,250,000 | 23,400,000 | 311 | 993  | 0.286608892  | NOTCH2                                                                                                                                                       |
| 3 | 23,325,000 | 23,475,000 | 312 | 821  | 0.613638548  | NOTCH2                                                                                                                                                       |
| 3 | 23,400,000 | 23,550,000 | 313 | 1154 | 0.333057135  | NOTCH2,ENSBTAG0000006903,ENSBTAG00000046315                                                                                                                  |

|   |            |            |     |      |              |                                                                      |
|---|------------|------------|-----|------|--------------|----------------------------------------------------------------------|
| 3 | 23,475,000 | 23,625,000 | 314 | 1391 | 0.637288238  | NOTCH2,REG4,ENSBTAG00000006903,ENSBTAG00000046293,ENSBTAG00000046315 |
| 3 | 23,550,000 | 23,700,000 | 315 | 1293 | -0.260119308 | HMGCS2,PHGDH,REG4,ENSBTAG00000046293                                 |
| 3 | 23,625,000 | 23,775,000 | 316 | 847  | -1.463987889 | HMGCS2,PHGDH                                                         |
| 3 | 23,700,000 | 23,850,000 | 317 | 549  | -0.494311984 | HAO2,HSD3B,PHGDH,ZNF697                                              |
| 3 | 23,775,000 | 23,925,000 | 318 | 606  | -0.436699177 | HAO2,HSD3B,ZNF697                                                    |
| 3 | 23,850,000 | 24,000,000 | 319 | 788  | -0.50377545  | HAO2                                                                 |
| 3 | 23,925,000 | 24,075,000 | 320 | 1065 | -0.180934668 |                                                                      |
| 3 | 24,000,000 | 24,150,000 | 321 | 989  | -0.423463343 | WARS2                                                                |
| 3 | 24,075,000 | 24,225,000 | 322 | 737  | -0.236882035 | WARS2                                                                |
| 3 | 24,150,000 | 24,300,000 | 323 | 638  | -0.183746464 | TBX15,WARS2                                                          |
| 3 | 24,225,000 | 24,375,000 | 324 | 804  | 0.498555173  | TBX15                                                                |
| 3 | 24,300,000 | 24,450,000 | 325 | 1026 | 0.688018517  | TBX15                                                                |
| 3 | 24,375,000 | 24,525,000 | 326 | 963  | 0.199796462  |                                                                      |
| 3 | 24,450,000 | 24,600,000 | 327 | 1130 | -0.978135936 |                                                                      |
| 3 | 24,525,000 | 24,675,000 | 328 | 1246 | -0.21823305  |                                                                      |
| 3 | 24,600,000 | 24,750,000 | 329 | 1048 | -0.154512305 |                                                                      |
| 3 | 24,675,000 | 24,825,000 | 330 | 1131 | 0.330792057  |                                                                      |
| 3 | 24,750,000 | 24,900,000 | 331 | 1206 | 0.887132199  |                                                                      |
| 3 | 24,825,000 | 24,975,000 | 332 | 1066 | 0.218369895  |                                                                      |
| 3 | 24,900,000 | 25,050,000 | 333 | 1130 | -0.844746711 |                                                                      |
| 3 | 24,975,000 | 25,125,000 | 334 | 1421 | -0.677204603 | SPAG17                                                               |
| 3 | 25,050,000 | 25,200,000 | 335 | 1216 | 0.007624188  | SPAG17                                                               |
| 3 | 25,125,000 | 25,275,000 | 336 | 731  | 0.343058255  | SPAG17                                                               |
| 3 | 25,200,000 | 25,350,000 | 337 | 658  | 0.685472596  | SPAG17                                                               |
| 3 | 25,275,000 | 25,425,000 | 338 | 1092 | 0.329289772  | GDAP2,SPAG17,WDR3                                                    |
| 3 | 25,350,000 | 25,500,000 | 339 | 1228 | 0.426027996  | GDAP2,SPAG17,WDR3                                                    |
| 3 | 25,425,000 | 25,575,000 | 340 | 996  | 0.298751946  | GDAP2                                                                |
| 3 | 25,500,000 | 25,650,000 | 341 | 1086 | -0.430641707 |                                                                      |
| 3 | 25,575,000 | 25,725,000 | 342 | 980  | -0.658003716 | FAM46C                                                               |
| 3 | 25,650,000 | 25,800,000 | 343 | 898  | 0.186034925  | FAM46C                                                               |
| 3 | 25,725,000 | 25,875,000 | 344 | 1188 | 0.381316773  | MAN1A2                                                               |
| 3 | 25,800,000 | 25,950,000 | 345 | 1457 | -0.628240305 | MAN1A2                                                               |
| 3 | 25,875,000 | 26,025,000 | 346 | 1288 | -0.424394004 | MAN1A2                                                               |
| 3 | 25,950,000 | 26,100,000 | 347 | 1203 | 0.574951797  | MAN1A2                                                               |
| 3 | 26,025,000 | 26,175,000 | 348 | 1490 | 0.49224465   | VTCN1                                                                |
| 3 | 26,100,000 | 26,250,000 | 349 | 1418 | 0.195556893  | TRIM45,TTF2,VTCN1                                                    |
| 3 | 26,175,000 | 26,325,000 | 350 | 1232 | 0.490483018  | CD101,TRIM45,TTF2,VTCN1                                              |
| 3 | 26,250,000 | 26,400,000 | 351 | 1090 | 0.828182531  | CD101,PTGFRN,TTF2                                                    |
| 3 | 26,325,000 | 26,475,000 | 352 | 858  | 0.135014978  | CD101,PTGFRN                                                         |
| 3 | 26,400,000 | 26,550,000 | 353 | 784  | -0.710196528 | PTGFRN                                                               |
| 3 | 26,475,000 | 26,625,000 | 354 | 800  | -1.052866543 | CD2                                                                  |
| 3 | 26,550,000 | 26,700,000 | 355 | 756  | -1.142867308 | CD2                                                                  |
| 3 | 26,625,000 | 26,775,000 | 356 | 1004 | -0.797930362 | IGSF3                                                                |
| 3 | 26,700,000 | 26,850,000 | 357 | 873  | -0.365830489 | CD58,IGSF3                                                           |
| 3 | 26,775,000 | 26,925,000 | 358 | 602  | 0.123020183  | CD58,IGSF3                                                           |
| 3 | 26,850,000 | 27,000,000 | 359 | 1046 | 0.340920906  | CD58                                                                 |
| 3 | 26,925,000 | 27,075,000 | 360 | 999  | 0.25792481   | ATP1A1                                                               |
| 3 | 27,000,000 | 27,150,000 | 361 | 706  | -0.884425757 | ATP1A1                                                               |
| 3 | 27,075,000 | 27,225,000 | 362 | 846  | -0.41603792  |                                                                      |
| 3 | 27,150,000 | 27,300,000 | 363 | 1202 | 0.852431042  |                                                                      |
| 3 | 27,225,000 | 27,375,000 | 364 | 1253 | 0.790036162  | MAB21L3                                                              |
| 3 | 27,300,000 | 27,450,000 | 365 | 802  | 0.510153517  | MAB21L3,SLC22A15                                                     |

|   |            |            |     |      |              |                                             |
|---|------------|------------|-----|------|--------------|---------------------------------------------|
| 3 | 27,375,000 | 27,525,000 | 366 | 603  | 0.565468191  | SLC22A15                                    |
| 3 | 27,450,000 | 27,600,000 | 367 | 892  | -1.504871354 | NHLH2,SLC22A15                              |
| 3 | 27,525,000 | 27,675,000 | 368 | 1219 | -0.466033054 | CASQ2,NHLH2                                 |
| 3 | 27,600,000 | 27,750,000 | 369 | 1201 | 0.641770872  | CASQ2,VANGL1                                |
| 3 | 27,675,000 | 27,825,000 | 370 | 1438 | 0.739157307  | CASQ2,VANGL1                                |
| 3 | 27,750,000 | 27,900,000 | 371 | 1518 | -0.778217652 | VANGL1                                      |
| 3 | 27,825,000 | 27,975,000 | 372 | 1206 | -2.118388171 |                                             |
| 3 | 27,900,000 | 28,050,000 | 373 | 1205 | 1.068775063  |                                             |
| 3 | 27,975,000 | 28,125,000 | 374 | 1216 | 1.261671197  | NGF                                         |
| 3 | 28,050,000 | 28,200,000 | 375 | 1159 | 1.247189835  | NGF                                         |
| 3 | 28,125,000 | 28,275,000 | 376 | 1047 | 1.048117221  | NGF                                         |
| 3 | 28,200,000 | 28,350,000 | 377 | 1017 | 0.846922717  |                                             |
| 3 | 28,275,000 | 28,425,000 | 378 | 1089 | 1.073139484  | TSHB,TSPAN2                                 |
| 3 | 28,350,000 | 28,500,000 | 379 | 972  | 1.44691857   | SYCP1,TSHB,TSPAN2                           |
| 3 | 28,425,000 | 28,575,000 | 380 | 877  | 1.521978236  | SYCP1,TSPAN2                                |
| 3 | 28,500,000 | 28,650,000 | 381 | 948  | 1.484445584  | SYCP1,ENSBTAG00000032057                    |
| 3 | 28,575,000 | 28,725,000 | 382 | 923  | 1.361581424  | CSDE1,NRAS,SIKE1,SYCP1,ENSBTAG00000032057   |
| 3 | 28,650,000 | 28,800,000 | 383 | 861  | 1.232172704  | AMPD1,CSDE1,NRAS,SIKE1,ENSBTAG00000045889   |
| 3 | 28,725,000 | 28,875,000 | 384 | 590  | 1.276653022  | AMPD1,BCAS2,DENND2C,NRAS,ENSBTAG00000045889 |
| 3 | 28,800,000 | 28,950,000 | 385 | 417  | 1.154534164  | BCAS2,DENND2C,TRIM33                        |
| 3 | 28,875,000 | 29,025,000 | 386 | 625  | 0.844230555  | BCAS2,TRIM33                                |
| 3 | 28,950,000 | 29,100,000 | 387 | 501  | 0.778266656  | TRIM33                                      |
| 3 | 29,025,000 | 29,175,000 | 388 | 758  | -0.008067723 | TRIM33                                      |
| 3 | 29,100,000 | 29,250,000 | 389 | 1526 | 0.255424954  |                                             |
| 3 | 29,175,000 | 29,325,000 | 390 | 1642 | 0.780685092  |                                             |
| 3 | 29,250,000 | 29,400,000 | 391 | 1418 | 1.092209282  | SYT6                                        |
| 3 | 29,325,000 | 29,475,000 | 392 | 1221 | 0.844599455  | SYT6                                        |
| 3 | 29,400,000 | 29,550,000 | 393 | 1034 | 0.493757102  | HIPK1,OLFML3,SYT6                           |
| 3 | 29,475,000 | 29,625,000 | 394 | 850  | 0.571575756  | AP4B1,DCLRE1B,HIPK1,OLFML3                  |
| 3 | 29,550,000 | 29,700,000 | 395 | 971  | 0.628286209  | AP4B1,BCL2L15,DCLRE1B,HIPK1,PTPN22          |
| 3 | 29,625,000 | 29,775,000 | 396 | 1110 | 1.02590476   | AP4B1,BCL2L15,PHTF1,PTPN22,RSBN1            |
| 3 | 29,700,000 | 29,850,000 | 397 | 1293 | 1.206483828  | MAGI3,PHTF1,PTPN22,RSBN1                    |
| 3 | 29,775,000 | 29,925,000 | 398 | 1290 | 0.956773805  | MAGI3,PHTF1                                 |
| 3 | 29,850,000 | 30,000,000 | 399 | 862  | 0.656017942  | MAGI3                                       |
| 3 | 29,925,000 | 30,075,000 | 400 | 827  | 0.658798947  | MAGI3                                       |
| 3 | 30,000,000 | 30,150,000 | 401 | 940  | 0.663706338  | MAGI3                                       |
| 3 | 30,075,000 | 30,225,000 | 402 | 740  | 0.940790946  | MAGI3                                       |
| 3 | 30,150,000 | 30,300,000 | 403 | 466  | 1.098617268  |                                             |
| 3 | 30,225,000 | 30,375,000 | 404 | 1069 | 0.777119335  | LRIG2,ENSBTAG00000027172                    |
| 3 | 30,300,000 | 30,450,000 | 405 | 1313 | 0.78426584   | LRIG2,ENSBTAG00000027172                    |
| 3 | 30,375,000 | 30,525,000 | 406 | 836  | -0.491315396 | LRIG2                                       |
| 3 | 30,450,000 | 30,600,000 | 407 | 774  | -1.449647264 | SLC16A1                                     |
| 3 | 30,525,000 | 30,675,000 | 408 | 810  | -0.702279592 | SLC16A1                                     |
| 3 | 30,600,000 | 30,750,000 | 409 | 729  | -0.283500339 |                                             |
| 3 | 30,675,000 | 30,825,000 | 410 | 612  | 0.25904415   | CAPZA1,MOV10,PPM1J,RHOC                     |
| 3 | 30,750,000 | 30,900,000 | 411 | 552  | 0.33045796   | CAPZA1,MOV10,PPM1J,RHOC,ST7L                |
| 3 | 30,825,000 | 30,975,000 | 412 | 521  | 0.173247064  | CAPZA1,ST7L,WNT2B                           |
| 3 | 30,900,000 | 31,050,000 | 413 | 648  | 0.122380351  | CTTNBP2NL,ST7L,WNT2B                        |
| 3 | 30,975,000 | 31,125,000 | 414 | 1131 | 0.70381365   | CTTNBP2NL                                   |
| 3 | 31,050,000 | 31,200,000 | 415 | 1205 | 0.518525718  |                                             |
| 3 | 31,125,000 | 31,275,000 | 416 | 868  | 0.13632745   |                                             |
| 3 | 31,200,000 | 31,350,000 | 417 | 822  | 0.672666271  |                                             |

|   |            |            |     |      |              |                                                  |
|---|------------|------------|-----|------|--------------|--------------------------------------------------|
| 3 | 31,275,000 | 31,425,000 | 418 | 1211 | 0.917316138  |                                                  |
| 3 | 31,350,000 | 31,500,000 | 419 | 1306 | 0.816326171  | KCND3                                            |
| 3 | 31,425,000 | 31,575,000 | 420 | 947  | 0.594869258  | KCND3                                            |
| 3 | 31,500,000 | 31,650,000 | 421 | 830  | 0.547691842  | KCND3                                            |
| 3 | 31,575,000 | 31,725,000 | 422 | 833  | -0.196730271 | DDX20,FAM212B,KCND3                              |
| 3 | 31,650,000 | 31,800,000 | 423 | 785  | -1.015876774 | DDX20,FAM212B,KCND3,RAP1A                        |
| 3 | 31,725,000 | 31,875,000 | 424 | 720  | -0.463284618 | FAM212B,RAP1A                                    |
| 3 | 31,800,000 | 31,950,000 | 425 | 780  | 0.563719828  | ADORA3                                           |
| 3 | 31,875,000 | 32,025,000 | 426 | 819  | 0.780749187  | ADORA3,ATP5F1,WDR77                              |
| 3 | 31,950,000 | 32,100,000 | 427 | 1318 | 0.179061228  | ADORA3,ATP5F1,OVGP1,WDR77,ENSBTAG00000034841     |
| 3 | 32,025,000 | 32,175,000 | 428 | 1483 | -0.010514141 | OVGP1,WDR77,ENSBTAG00000023535,ENSBTAG0000034841 |
| 3 | 32,100,000 | 32,250,000 | 429 | 1002 | 0.044656835  | CHIA,ENSBTAG00000023535                          |
| 3 | 32,175,000 | 32,325,000 | 430 | 640  | -0.511532365 | CHI3L2,CHIA,DENND2D                              |
| 3 | 32,250,000 | 32,400,000 | 431 | 423  | -2.181390146 | CEPT1,CHI3L2,DENND2D,DRAM2                       |
| 3 | 32,325,000 | 32,475,000 | 432 | 437  | -1.577343651 | CEPT1,DENND2D,DRAM2                              |
| 3 | 32,400,000 | 32,550,000 | 433 | 479  | -0.79978868  | DRAM2,LRIF1                                      |
| 3 | 32,475,000 | 32,625,000 | 434 | 532  | -0.804876772 | CD53,LRIF1                                       |
| 3 | 32,550,000 | 32,700,000 | 435 | 696  | 0.089779558  | CD53                                             |
| 3 | 32,625,000 | 32,775,000 | 436 | 1006 | 0.901192056  | CD53                                             |
| 3 | 32,700,000 | 32,850,000 | 437 | 838  | 0.692740191  |                                                  |
| 3 | 32,775,000 | 32,925,000 | 438 | 429  | 0.661340654  | KCNA3                                            |
| 3 | 32,850,000 | 33,000,000 | 439 | 381  | 0.704839362  | KCNA2,KCNA3                                      |
| 3 | 32,925,000 | 33,075,000 | 440 | 627  | 0.326969183  | CYM,KCNA10,KCNA2                                 |
| 3 | 33,000,000 | 33,150,000 | 441 | 808  | 0.392210093  | CYM,KCNA10,LAMTOR5,PROK1                         |
| 3 | 33,075,000 | 33,225,000 | 442 | 668  | 0.604177286  | LAMTOR5,PROK1,RBM15,SLC16A4                      |
| 3 | 33,150,000 | 33,300,000 | 443 | 616  | 0.635052155  | RBM15,SLC16A4                                    |
| 3 | 33,225,000 | 33,375,000 | 444 | 748  | 0.217849004  | KCNC4,SLC6A17                                    |
| 3 | 33,300,000 | 33,450,000 | 445 | 917  | 0.241806015  | KCNC4,SLC6A17,UBL4B                              |
| 3 | 33,375,000 | 33,525,000 | 446 | 850  | 0.286477489  | AHCYL1,ALX3,STRIP1,UBL4B                         |
| 3 | 33,450,000 | 33,600,000 | 447 | 664  | -0.758289864 | AHCYL1,ALX3,STRIP1                               |
| 3 | 33,525,000 | 33,675,000 | 448 | 674  | -1.006303681 | AHCYL1,CSF1                                      |
| 3 | 33,600,000 | 33,750,000 | 449 | 813  | -1.246082088 | CSF1,EPS8L3                                      |
| 3 | 33,675,000 | 33,825,000 | 450 | 879  | -0.377204263 | EPS8L3,GSTM1,GSTM2,GSTM3                         |
| 3 | 33,750,000 | 33,900,000 | 451 | 919  | 0.836602139  | EPS8L3,GSTM1,GSTM2,GSTM3,GSTM4,ENSBTAG0000012692 |
| 3 | 33,825,000 | 33,975,000 | 452 | 859  | 0.612197367  | AMPD2,GNAI3,GNAT2,GSTM2,GSTM4,ENSBTAG0000012692  |
| 3 | 33,900,000 | 34,050,000 | 453 | 669  | 0.286350445  | AMPD2,GNAI3,GNAT2,GPR61                          |
| 3 | 33,975,000 | 34,125,000 | 454 | 612  | 0.074827732  | AMIGO1,ATXN7L2,CYB561D1,GNAI3,GPR61,SYPL2        |
| 3 | 34,050,000 | 34,200,000 | 455 | 591  | -0.818113537 | AMIGO1,ATXN7L2,CYB561D1,PSMA5,SORT1,SYPL2        |
| 3 | 34,125,000 | 34,275,000 | 456 | 595  | -0.915553125 | CELSR2,MYBPHL,PSMA5,PSRC1,SORT1                  |
| 3 | 34,200,000 | 34,350,000 | 457 | 546  | 0.260720177  | CELSR2,KIAA1324,MYBPHL,PSRC1,SARS,SORT1          |
| 3 | 34,275,000 | 34,425,000 | 458 | 391  | 0.21616457   | C1orf194,KIAA1324,SARS,TAF13,TMEM167B            |
| 3 | 34,350,000 | 34,500,000 | 459 | 399  | 0.989748529  | C1orf194,KIAA1324,TAF13,TMEM167B,WDR47           |
| 3 | 34,425,000 | 34,575,000 | 460 | 505  | 1.129277025  | CLCC1,GPSM2,TAF13,WDR47                          |
| 3 | 34,500,000 | 34,650,000 | 461 | 707  | 0.392074247  | CLCC1,GPSM2,WDR47,ENSBTAG00000007333             |
| 3 | 34,575,000 | 34,725,000 | 462 | 890  | -0.795489641 | GPSM2,STXBP3,ENSBTAG00000007333                  |
| 3 | 34,650,000 | 34,800,000 | 463 | 796  | -1.360115657 | FNDC7,PRPF38B,STXBP3,ENSBTAG00000007333          |
| 3 | 34,725,000 | 34,875,000 | 464 | 606  | -1.506424082 | FAM102B,FNDC7,HENMT1,PRPF38B,STXBP3              |
| 3 | 34,800,000 | 34,950,000 | 465 | 712  | -1.228457011 | FAM102B,HENMT1                                   |
| 3 | 34,875,000 | 35,025,000 | 466 | 1009 | 0.450258749  | FAM102B                                          |



|   |            |            |     |      |              |                 |
|---|------------|------------|-----|------|--------------|-----------------|
| 3 | 34,950,000 | 35,100,000 | 467 | 1398 | 0.699259649  |                 |
| 3 | 35,025,000 | 35,175,000 | 468 | 1790 | 0.907332377  | SLC25A24        |
| 3 | 35,100,000 | 35,250,000 | 469 | 1744 | 1.368095646  | SLC25A24        |
| 3 | 35,175,000 | 35,325,000 | 470 | 1171 | 1.43452594   | SLC25A24        |
| 3 | 35,250,000 | 35,400,000 | 471 | 794  | 0.882202104  |                 |
| 3 | 35,325,000 | 35,475,000 | 472 | 1064 | 0.615625515  | VAV3            |
| 3 | 35,400,000 | 35,550,000 | 473 | 1257 | 0.637029758  | VAV3            |
| 3 | 35,475,000 | 35,625,000 | 474 | 1033 | 0.334586093  | VAV3            |
| 3 | 35,550,000 | 35,700,000 | 475 | 1036 | 0.051190945  | VAV3            |
| 3 | 35,625,000 | 35,775,000 | 476 | 1164 | 0.078853688  | VAV3            |
| 3 | 35,700,000 | 35,850,000 | 477 | 847  | -0.465400682 | VAV3            |
| 3 | 35,775,000 | 35,925,000 | 478 | 509  | -1.30703322  | VAV3            |
| 3 | 35,850,000 | 36,000,000 | 479 | 826  | -1.376380177 | MGC139448,VAV3  |
| 3 | 35,925,000 | 36,075,000 | 480 | 1079 | -0.870882559 | MGC139448       |
| 3 | 36,000,000 | 36,150,000 | 481 | 1128 | 0.793625982  | MGC139448       |
| 3 | 36,075,000 | 36,225,000 | 482 | 1165 | 1.108166643  | MGC139448       |
| 3 | 36,150,000 | 36,300,000 | 483 | 1119 | 1.165692641  | MGC139448       |
| 3 | 36,225,000 | 36,375,000 | 484 | 1423 | 0.74815072   | MGC139448       |
| 3 | 36,300,000 | 36,450,000 | 485 | 1659 | 0.096784646  | MGC139448,PRMT6 |
| 3 | 36,375,000 | 36,525,000 | 486 | 1888 | -0.033093271 | PRMT6           |
| 3 | 36,450,000 | 36,600,000 | 487 | 1856 | 0.68029962   |                 |
| 3 | 36,525,000 | 36,675,000 | 488 | 2019 | 1.251345301  |                 |
| 3 | 36,600,000 | 36,750,000 | 489 | 2335 | 1.176848142  |                 |
| 3 | 36,675,000 | 36,825,000 | 490 | 2107 | 0.773830139  |                 |
| 3 | 36,750,000 | 36,900,000 | 491 | 2183 | 0.65392871   |                 |
| 3 | 36,825,000 | 36,975,000 | 492 | 2501 | 0.319100077  |                 |
| 3 | 36,900,000 | 37,050,000 | 493 | 2193 | -0.030206809 |                 |
| 3 | 36,975,000 | 37,125,000 | 494 | 1335 | -0.093214673 |                 |
| 3 | 37,050,000 | 37,200,000 | 495 | 1209 | -0.328650775 |                 |
| 3 | 37,125,000 | 37,275,000 | 496 | 1172 | -0.607948989 |                 |
| 3 | 37,200,000 | 37,350,000 | 497 | 1194 | 0.560768246  |                 |
| 3 | 37,275,000 | 37,425,000 | 498 | 1521 | 0.669895775  |                 |
| 3 | 37,350,000 | 37,500,000 | 499 | 1285 | 0.093148696  |                 |
| 3 | 37,425,000 | 37,575,000 | 500 | 1135 | -0.35166347  |                 |
| 3 | 37,500,000 | 37,650,000 | 501 | 1552 | -0.973805657 |                 |
| 3 | 37,575,000 | 37,725,000 | 502 | 1895 | -0.773146763 |                 |
| 3 | 37,650,000 | 37,800,000 | 503 | 1766 | -0.128535466 |                 |
| 3 | 37,725,000 | 37,875,000 | 504 | 1564 | 0.17681034   |                 |
| 3 | 37,800,000 | 37,950,000 | 505 | 1616 | 0.374852896  |                 |
| 3 | 37,875,000 | 38,025,000 | 506 | 1891 | -0.49019789  |                 |
| 3 | 37,950,000 | 38,100,000 | 507 | 1934 | -1.408280343 |                 |
| 3 | 38,025,000 | 38,175,000 | 508 | 1575 | -0.830612537 |                 |
| 3 | 38,100,000 | 38,250,000 | 509 | 1048 | -0.205618595 |                 |
| 3 | 38,175,000 | 38,325,000 | 510 | 1211 | -0.128579029 |                 |
| 3 | 38,250,000 | 38,400,000 | 511 | 1569 | 0.54181152   |                 |
| 3 | 38,325,000 | 38,475,000 | 512 | 1458 | 0.792039178  |                 |
| 3 | 38,400,000 | 38,550,000 | 513 | 1214 | 0.755256553  |                 |
| 3 | 38,475,000 | 38,625,000 | 514 | 1425 | 0.784363319  |                 |
| 3 | 38,550,000 | 38,700,000 | 515 | 1834 | 0.590532193  |                 |
| 3 | 38,625,000 | 38,775,000 | 516 | 1702 | 0.255028448  |                 |
| 3 | 38,700,000 | 38,850,000 | 517 | 1268 | -0.043656839 |                 |
| 3 | 38,775,000 | 38,925,000 | 518 | 1311 | -1.080828794 |                 |
| 3 | 38,850,000 | 39,000,000 | 519 | 1204 | -1.18152049  |                 |

|   |            |            |     |      |              |                          |
|---|------------|------------|-----|------|--------------|--------------------------|
| 3 | 38,925,000 | 39,075,000 | 520 | 1098 | -0.132688179 |                          |
| 3 | 39,000,000 | 39,150,000 | 521 | 1278 | 0.017050546  | ENSBTAG00000015180       |
| 3 | 39,075,000 | 39,225,000 | 522 | 1097 | 0.386309549  | ENSBTAG00000015180       |
| 3 | 39,150,000 | 39,300,000 | 523 | 1220 | 0.969619921  |                          |
| 3 | 39,225,000 | 39,375,000 | 524 | 1369 | 0.96812746   |                          |
| 3 | 39,300,000 | 39,450,000 | 525 | 1346 | 0.870914974  |                          |
| 3 | 39,375,000 | 39,525,000 | 526 | 1195 | 0.415821637  |                          |
| 3 | 39,450,000 | 39,600,000 | 527 | 1450 | 0.231594108  |                          |
| 3 | 39,525,000 | 39,675,000 | 528 | 1441 | 0.554039123  |                          |
| 3 | 39,600,000 | 39,750,000 | 529 | 1323 | 0.771205699  |                          |
| 3 | 39,675,000 | 39,825,000 | 530 | 1114 | 0.777718553  |                          |
| 3 | 39,750,000 | 39,900,000 | 531 | 574  | -0.013218483 | ENSBTAG00000024288       |
| 3 | 39,825,000 | 39,975,000 | 532 | 533  | -0.446408243 | AMY2B,ENSBTAG00000024288 |
| 3 | 39,900,000 | 40,050,000 | 533 | 504  | 0.145067649  | AMY2B,RNPC3              |
| 3 | 39,975,000 | 40,125,000 | 534 | 698  | 0.815181532  | RNPC3                    |
| 3 | 40,050,000 | 40,200,000 | 535 | 1115 | 0.103396975  |                          |
| 3 | 40,125,000 | 40,275,000 | 536 | 1147 | -0.326057488 |                          |
| 3 | 40,200,000 | 40,350,000 | 537 | 865  | -0.078493763 |                          |
| 3 | 40,275,000 | 40,425,000 | 538 | 1043 | 0.489708559  |                          |
| 3 | 40,350,000 | 40,500,000 | 539 | 1156 | 0.56998674   | COL11A1                  |
| 3 | 40,425,000 | 40,575,000 | 540 | 905  | 0.086719437  | COL11A1                  |
| 3 | 40,500,000 | 40,650,000 | 541 | 1015 | -0.484611383 | COL11A1                  |
| 3 | 40,575,000 | 40,725,000 | 542 | 1204 | 0.470681143  | COL11A1                  |
| 3 | 40,650,000 | 40,800,000 | 543 | 972  | 1.323891537  | COL11A1                  |
| 3 | 40,725,000 | 40,875,000 | 544 | 699  | 1.194201784  |                          |
| 3 | 40,800,000 | 40,950,000 | 545 | 615  | -0.866728218 |                          |
| 3 | 40,875,000 | 41,025,000 | 546 | 950  | -0.488728767 |                          |
| 3 | 40,950,000 | 41,100,000 | 547 | 1283 | 0.698916679  |                          |
| 3 | 41,025,000 | 41,175,000 | 548 | 1281 | 0.892156429  |                          |
| 3 | 41,100,000 | 41,250,000 | 549 | 1743 | 0.464330663  |                          |
| 3 | 41,175,000 | 41,325,000 | 550 | 1760 | 0.098514246  |                          |
| 3 | 41,250,000 | 41,400,000 | 551 | 1043 | -0.072289874 |                          |
| 3 | 41,325,000 | 41,475,000 | 552 | 1101 | 0.181461905  | OLFM3                    |
| 3 | 41,400,000 | 41,550,000 | 553 | 1515 | 0.321749746  | OLFM3                    |
| 3 | 41,475,000 | 41,625,000 | 554 | 1517 | 0.089231055  | OLFM3                    |
| 3 | 41,550,000 | 41,700,000 | 555 | 1298 | -1.111621042 | OLFM3                    |
| 3 | 41,625,000 | 41,775,000 | 556 | 1075 | -0.080081644 | OLFM3                    |
| 3 | 41,700,000 | 41,850,000 | 557 | 1275 | 1.276947898  |                          |
| 3 | 41,775,000 | 41,925,000 | 558 | 1158 | 0.963940687  |                          |
| 3 | 41,850,000 | 42,000,000 | 559 | 896  | 1.218953923  |                          |
| 3 | 41,925,000 | 42,075,000 | 560 | 1317 | 1.346618669  |                          |
| 3 | 42,000,000 | 42,150,000 | 561 | 1097 | 0.978437106  |                          |
| 3 | 42,075,000 | 42,225,000 | 562 | 472  | -0.339576777 | S1PR1                    |
| 3 | 42,150,000 | 42,300,000 | 563 | 596  | 0.023838704  | S1PR1                    |
| 3 | 42,225,000 | 42,375,000 | 564 | 785  | 0.183502943  |                          |
| 3 | 42,300,000 | 42,450,000 | 565 | 823  | 0.802682123  | DPH5                     |
| 3 | 42,375,000 | 42,525,000 | 566 | 812  | 1.106289553  | DPH5,SLC30A7             |
| 3 | 42,450,000 | 42,600,000 | 567 | 852  | 1.201126887  | EXTL2,SLC30A7            |
| 3 | 42,525,000 | 42,675,000 | 568 | 1062 | 1.149488838  | EXTL2,SLC30A7            |
| 3 | 42,600,000 | 42,750,000 | 569 | 1128 | 0.875365798  | VCAM1                    |
| 3 | 42,675,000 | 42,825,000 | 570 | 949  | 0.531582874  | VCAM1                    |
| 3 | 42,750,000 | 42,900,000 | 571 | 732  | 0.76503547   | GPR88,VCAM1              |
| 3 | 42,825,000 | 42,975,000 | 572 | 730  | 1.236848377  | CDC14A,GPR88             |

|   |            |            |     |      |              |                                    |
|---|------------|------------|-----|------|--------------|------------------------------------|
| 3 | 42,900,000 | 43,050,000 | 573 | 740  | 1.303087629  | CDC14A                             |
| 3 | 42,975,000 | 43,125,000 | 574 | 706  | 0.98098933   | CDC14A                             |
| 3 | 43,050,000 | 43,200,000 | 575 | 973  | -0.401027175 | CDC14A,DBT,RTCA                    |
| 3 | 43,125,000 | 43,275,000 | 576 | 920  | -0.348543425 | CCDC76,DBT,LRRC39,RTCA             |
| 3 | 43,200,000 | 43,350,000 | 577 | 702  | 0.778450882  | CCDC76,DBT,HIAT1,LRRC39,SASS6      |
| 3 | 43,275,000 | 43,425,000 | 578 | 841  | 0.491091645  | CCDC76,HIAT1,SASS6,SLC35A3         |
| 3 | 43,350,000 | 43,500,000 | 579 | 1009 | 0.916065794  | HIAT1,SLC35A3                      |
| 3 | 43,425,000 | 43,575,000 | 580 | 1161 | 0.814856388  | AGL,SLC35A3                        |
| 3 | 43,500,000 | 43,650,000 | 581 | 1039 | 0.105617255  | AGL,ENSBTAG00000048022             |
| 3 | 43,575,000 | 43,725,000 | 582 | 835  | -0.661136527 | AGL,FRRS1,PALMD,ENSBTAG00000048022 |
| 3 | 43,650,000 | 43,800,000 | 583 | 916  | -0.094964736 | FRRS1,PALMD                        |
| 3 | 43,725,000 | 43,875,000 | 584 | 1123 | -0.07085342  | PALMD                              |
| 3 | 43,800,000 | 43,950,000 | 585 | 1463 | 0.330419438  |                                    |
| 3 | 43,875,000 | 44,025,000 | 586 | 1490 | 0.834920644  |                                    |
| 3 | 43,950,000 | 44,100,000 | 587 | 1441 | 0.690325156  | ENSBTAG00000019031                 |
| 3 | 44,025,000 | 44,175,000 | 588 | 1611 | -0.909657876 | ENSBTAG00000019031                 |
| 3 | 44,100,000 | 44,250,000 | 589 | 1347 | -3.173096137 | ENSBTAG00000019031                 |
| 3 | 44,175,000 | 44,325,000 | 590 | 1225 | -0.953678896 |                                    |
| 3 | 44,250,000 | 44,400,000 | 591 | 1333 | -0.06200455  | ENSBTAG00000004591                 |
| 3 | 44,325,000 | 44,475,000 | 592 | 1276 | -0.648777283 | ENSBTAG00000004591                 |
| 3 | 44,400,000 | 44,550,000 | 593 | 1440 | -0.772950561 | ENSBTAG00000004591                 |
| 3 | 44,475,000 | 44,625,000 | 594 | 1214 | -0.035505246 |                                    |
| 3 | 44,550,000 | 44,700,000 | 595 | 1025 | 0.510580625  | SNX7                               |
| 3 | 44,625,000 | 44,775,000 | 596 | 1150 | 0.657777076  | SNX7                               |
| 3 | 44,700,000 | 44,850,000 | 597 | 1275 | 0.360674133  | SNX7                               |
| 3 | 44,775,000 | 44,925,000 | 598 | 1160 | 0.246002669  | SNX7                               |
| 3 | 44,850,000 | 45,000,000 | 599 | 723  | 0.701989772  |                                    |
| 3 | 44,925,000 | 45,075,000 | 600 | 666  | 0.659880694  |                                    |
| 3 | 45,000,000 | 45,150,000 | 601 | 635  | 0.879919448  |                                    |
| 3 | 45,075,000 | 45,225,000 | 602 | 682  | 1.034136218  |                                    |
| 3 | 45,150,000 | 45,300,000 | 603 | 818  | 1.131485036  |                                    |
| 3 | 45,225,000 | 45,375,000 | 604 | 698  | 1.080076243  |                                    |
| 3 | 45,300,000 | 45,450,000 | 605 | 546  | 0.675105252  |                                    |
| 3 | 45,375,000 | 45,525,000 | 606 | 564  | -0.63743719  |                                    |
| 3 | 45,450,000 | 45,600,000 | 607 | 681  | -0.464839245 | DPYD                               |
| 3 | 45,525,000 | 45,675,000 | 608 | 777  | -1.231913572 | DPYD                               |
| 3 | 45,600,000 | 45,750,000 | 609 | 966  | -0.685677943 | DPYD                               |
| 3 | 45,675,000 | 45,825,000 | 610 | 1323 | 0.461155333  | DPYD                               |
| 3 | 45,750,000 | 45,900,000 | 611 | 1399 | 0.699152275  | DPYD                               |
| 3 | 45,825,000 | 45,975,000 | 612 | 1112 | 1.295766497  | DPYD                               |
| 3 | 45,900,000 | 46,050,000 | 613 | 971  | 0.710882959  | DPYD                               |
| 3 | 45,975,000 | 46,125,000 | 614 | 904  | 0.46817755   | DPYD                               |
| 3 | 46,050,000 | 46,200,000 | 615 | 837  | 1.077452638  | DPYD                               |
| 3 | 46,125,000 | 46,275,000 | 616 | 803  | 1.231505111  | DPYD                               |
| 3 | 46,200,000 | 46,350,000 | 617 | 656  | 0.961483832  | DPYD                               |
| 3 | 46,275,000 | 46,425,000 | 618 | 661  | -1.99105664  | DPYD                               |
| 3 | 46,350,000 | 46,500,000 | 619 | 814  | -0.819082487 | DPYD                               |
| 3 | 46,425,000 | 46,575,000 | 620 | 1049 | 1.060574152  | DPYD                               |
| 3 | 46,500,000 | 46,650,000 | 621 | 859  | 0.633336535  |                                    |
| 3 | 46,575,000 | 46,725,000 | 622 | 496  | -0.423619795 |                                    |
| 3 | 46,650,000 | 46,800,000 | 623 | 765  | 0.55659107   |                                    |
| 3 | 46,725,000 | 46,875,000 | 624 | 1023 | 0.494746991  | PTBP2                              |
| 3 | 46,800,000 | 46,950,000 | 625 | 1048 | 0.967980675  | PTBP2                              |

|   |            |            |     |      |              |                          |
|---|------------|------------|-----|------|--------------|--------------------------|
| 3 | 46,875,000 | 47,025,000 | 626 | 1068 | 0.591714262  | PTBP2                    |
| 3 | 46,950,000 | 47,100,000 | 627 | 943  | -0.358799029 |                          |
| 3 | 47,025,000 | 47,175,000 | 628 | 896  | -2.059783332 |                          |
| 3 | 47,100,000 | 47,250,000 | 629 | 823  | -2.351779535 |                          |
| 3 | 47,175,000 | 47,325,000 | 630 | 680  | -0.610512036 |                          |
| 3 | 47,250,000 | 47,400,000 | 631 | 1059 | 0.726283778  |                          |
| 3 | 47,325,000 | 47,475,000 | 632 | 1300 | 0.488478341  |                          |
| 3 | 47,400,000 | 47,550,000 | 633 | 1149 | 0.401196127  |                          |
| 3 | 47,475,000 | 47,625,000 | 634 | 872  | 0.109290841  |                          |
| 3 | 47,550,000 | 47,700,000 | 635 | 759  | -1.736241201 |                          |
| 3 | 47,625,000 | 47,775,000 | 636 | 1134 | -0.794998982 |                          |
| 3 | 47,700,000 | 47,850,000 | 637 | 1116 | 0.209783127  |                          |
| 3 | 47,775,000 | 47,925,000 | 638 | 839  | 0.719114463  |                          |
| 3 | 47,850,000 | 48,000,000 | 639 | 628  | 0.968019287  |                          |
| 3 | 47,925,000 | 48,075,000 | 640 | 606  | 0.491808961  |                          |
| 3 | 48,000,000 | 48,150,000 | 641 | 752  | 0.236186914  |                          |
| 3 | 48,075,000 | 48,225,000 | 642 | 823  | 0.752073013  |                          |
| 3 | 48,150,000 | 48,300,000 | 643 | 731  | -0.003680945 |                          |
| 3 | 48,225,000 | 48,375,000 | 644 | 463  | -1.88353242  |                          |
| 3 | 48,300,000 | 48,450,000 | 645 | 533  | -0.437968353 | RWDD3                    |
| 3 | 48,375,000 | 48,525,000 | 646 | 692  | -0.214975947 | RWDD3,ENSBTAG00000044125 |
| 3 | 48,450,000 | 48,600,000 | 647 | 864  | -1.716406735 | ENSBTAG00000044125       |
| 3 | 48,525,000 | 48,675,000 | 648 | 848  | -3.188772937 | ALG14                    |
| 3 | 48,600,000 | 48,750,000 | 649 | 545  | -5.591202306 | ALG14                    |
| 3 | 48,675,000 | 48,825,000 | 650 | 307  | -6.326797185 | ALG14,CNN3,SLC44A3       |
| 3 | 48,750,000 | 48,900,000 | 651 | 267  | 0.144135748  | CNN3,SLC44A3             |
| 3 | 48,825,000 | 48,975,000 | 652 | 525  | 0.650565138  | SLC44A3                  |
| 3 | 48,900,000 | 49,050,000 | 653 | 860  | -0.316835507 |                          |
| 3 | 48,975,000 | 49,125,000 | 654 | 1132 | -0.545071448 | F3                       |
| 3 | 49,050,000 | 49,200,000 | 655 | 1206 | -0.094004575 | ABCD3,F3                 |
| 3 | 49,125,000 | 49,275,000 | 656 | 912  | 0.05695217   | ABCD3                    |
| 3 | 49,200,000 | 49,350,000 | 657 | 984  | 0.187311751  | ABCD3                    |
| 3 | 49,275,000 | 49,425,000 | 658 | 1088 | -0.295885312 | ARHGAP29                 |
| 3 | 49,350,000 | 49,500,000 | 659 | 777  | -2.318267839 | ARHGAP29                 |
| 3 | 49,425,000 | 49,575,000 | 660 | 910  | -2.698438659 | ABCA4,ARHGAP29           |
| 3 | 49,500,000 | 49,650,000 | 661 | 1215 | -0.673604641 | ABCA4                    |
| 3 | 49,575,000 | 49,725,000 | 662 | 1384 | 0.806232716  | ABCA4                    |
| 3 | 49,650,000 | 49,800,000 | 663 | 1078 | 0.781763158  | ABCA4,DNTTIP2,GCLM       |
| 3 | 49,725,000 | 49,875,000 | 664 | 828  | 0.439705233  | BCAR3,DNTTIP2,GCLM       |
| 3 | 49,800,000 | 49,950,000 | 665 | 1249 | 0.671775948  | BCAR3                    |
| 3 | 49,875,000 | 50,025,000 | 666 | 1465 | 0.693121309  | BCAR3                    |
| 3 | 49,950,000 | 50,100,000 | 667 | 1052 | 0.709421847  | BCAR3,FNBP1L             |
| 3 | 50,025,000 | 50,175,000 | 668 | 575  | 0.18626479   | BCAR3,FNBP1L             |
| 3 | 50,100,000 | 50,250,000 | 669 | 461  | -0.487124172 | DR1,FNBP1L               |
| 3 | 50,175,000 | 50,325,000 | 670 | 490  | -0.588410569 | DR1                      |
| 3 | 50,250,000 | 50,400,000 | 671 | 446  | -0.482828655 | CCDC18,DR1               |
| 3 | 50,325,000 | 50,475,000 | 672 | 411  | 0.295673223  | CCDC18,TMED5             |
| 3 | 50,400,000 | 50,550,000 | 673 | 419  | -0.071609904 | CCDC18,MTF2,TMED5        |
| 3 | 50,475,000 | 50,625,000 | 674 | 756  | 0.835988225  | MTF2                     |
| 3 | 50,550,000 | 50,700,000 | 675 | 1067 | 1.051439697  | MGC143035,MTF2           |
| 3 | 50,625,000 | 50,775,000 | 676 | 985  | 0.924771747  | MGC143035                |
| 3 | 50,700,000 | 50,850,000 | 677 | 763  | 0.77813466   | MGC143035,RPL5           |
| 3 | 50,775,000 | 50,925,000 | 678 | 659  | 1.070125624  | EVI5,MGC143035,RPL5      |

|   |            |            |     |      |              |                                                                    |
|---|------------|------------|-----|------|--------------|--------------------------------------------------------------------|
| 3 | 50,850,000 | 51,000,000 | 679 | 719  | 1.18088022   | EVI5                                                               |
| 3 | 50,925,000 | 51,075,000 | 680 | 609  | 0.631782039  | EVI5                                                               |
| 3 | 51,000,000 | 51,150,000 | 681 | 511  | 0.112818529  | EVI5,GFI1                                                          |
| 3 | 51,075,000 | 51,225,000 | 682 | 520  | -0.620102909 | GFI1,RPAP2                                                         |
| 3 | 51,150,000 | 51,300,000 | 683 | 590  | -1.21194767  | GLMN,RPAP2                                                         |
| 3 | 51,225,000 | 51,375,000 | 684 | 548  | -1.403161529 | C1orf146,GLMN,RPAP2                                                |
| 3 | 51,300,000 | 51,450,000 | 685 | 512  | -1.021684482 | BTBD8,C1orf146,GLMN                                                |
| 3 | 51,375,000 | 51,525,000 | 686 | 833  | -2.454569408 | ABHD7,BTBD8,ENSBTAG00000040248                                     |
| 3 | 51,450,000 | 51,600,000 | 687 | 914  | -5.009818778 | ABHD7,BRDT,BTBD8,ENSBTAG00000040248                                |
| 3 | 51,525,000 | 51,675,000 | 688 | 798  | -6.155266808 | ABHD7,BRDT,TGFBR3                                                  |
| 3 | 51,600,000 | 51,750,000 | 689 | 895  | -2.669159487 | TGFBR3                                                             |
| 3 | 51,675,000 | 51,825,000 | 690 | 845  | -1.099515315 | TGFBR3                                                             |
| 3 | 51,750,000 | 51,900,000 | 691 | 660  | -0.615908837 | TGFBR3,ENSBTAG00000048081                                          |
| 3 | 51,825,000 | 51,975,000 | 692 | 715  | -1.578262441 | TGFBR3,ENSBTAG00000048081                                          |
| 3 | 51,900,000 | 52,050,000 | 693 | 755  | -1.157037831 | CDC7L1                                                             |
| 3 | 51,975,000 | 52,125,000 | 694 | 776  | 0.528556566  | CDC7L1                                                             |
| 3 | 52,050,000 | 52,200,000 | 695 | 981  | 0.102859563  | HFM1                                                               |
| 3 | 52,125,000 | 52,275,000 | 696 | 692  | -0.371918017 | HFM1,ENSBTAG00000046077                                            |
| 3 | 52,200,000 | 52,350,000 | 697 | 867  | 0.380732866  | HFM1,ENSBTAG00000046077                                            |
| 3 | 52,275,000 | 52,425,000 | 698 | 1176 | 0.664577393  | ZNF644                                                             |
| 3 | 52,350,000 | 52,500,000 | 699 | 891  | 0.919574627  | ZNF644                                                             |
| 3 | 52,425,000 | 52,575,000 | 700 | 888  | 0.970361443  | ZNF644                                                             |
| 3 | 52,500,000 | 52,650,000 | 701 | 937  | 1.084508145  | ZNF644                                                             |
| 3 | 52,575,000 | 52,725,000 | 702 | 718  | 0.89559245   | BARHL2                                                             |
| 3 | 52,650,000 | 52,800,000 | 703 | 655  | 0.304047292  | BARHL2                                                             |
| 3 | 52,725,000 | 52,875,000 | 704 | 1029 | -2.095635179 |                                                                    |
| 3 | 52,800,000 | 52,950,000 | 705 | 1417 | -2.226897131 |                                                                    |
| 3 | 52,875,000 | 53,025,000 | 706 | 1453 | 0.279243116  |                                                                    |
| 3 | 52,950,000 | 53,100,000 | 707 | 1088 | 0.063679442  |                                                                    |
| 3 | 53,025,000 | 53,175,000 | 708 | 843  | -0.117224108 |                                                                    |
| 3 | 53,100,000 | 53,250,000 | 709 | 1021 | -0.031498126 |                                                                    |
| 3 | 53,175,000 | 53,325,000 | 710 | 1095 | 0.180331448  |                                                                    |
| 3 | 53,250,000 | 53,400,000 | 711 | 886  | 0.759692812  | ZNF326                                                             |
| 3 | 53,325,000 | 53,475,000 | 712 | 778  | 1.105984405  | ZNF326                                                             |
| 3 | 53,400,000 | 53,550,000 | 713 | 836  | 0.817308273  | LRRRC8D,ZNF326                                                     |
| 3 | 53,475,000 | 53,625,000 | 714 | 874  | -0.55241674  | LRRRC8D                                                            |
| 3 | 53,550,000 | 53,700,000 | 715 | 783  | -0.953416812 | LRRRC8D                                                            |
| 3 | 53,625,000 | 53,775,000 | 716 | 941  | 0.28304631   | LRRRC8C                                                            |
| 3 | 53,700,000 | 53,850,000 | 717 | 935  | 0.860145112  | LRRRC8C                                                            |
| 3 | 53,775,000 | 53,925,000 | 718 | 848  | 0.954970222  | LRRRC8B,LRRRC8C                                                    |
| 3 | 53,850,000 | 54,000,000 | 719 | 1208 | 0.85259175   | LRRRC8B                                                            |
| 3 | 53,925,000 | 54,075,000 | 720 | 1205 | 0.929776318  | ENSBTAG00000014857                                                 |
| 3 | 54,000,000 | 54,150,000 | 721 | 1089 | -1.614667856 | ENSBTAG00000014857                                                 |
| 3 | 54,075,000 | 54,225,000 | 722 | 1128 | -5.026476616 | GBP6,ENSBTAG00000046294                                            |
| 3 | 54,150,000 | 54,300,000 | 723 | 1677 | -3.725827165 | GBP5,GBP6,ENSBTAG00000046294                                       |
| 3 | 54,225,000 | 54,375,000 | 724 | 1952 | -1.312408053 | GBP5,ENSBTAG00000017670,ENSBTAG00000038938                         |
| 3 | 54,300,000 | 54,450,000 | 725 | 1106 | 0.1234108    | HNRNPA1L2,ENSBTAG00000017670,ENSBTAG00000038233,ENSBTAG00000038938 |
| 3 | 54,375,000 | 54,525,000 | 726 | 558  | -0.220484423 | HNRNPA1L2,ENSBTAG00000037490,ENSBTAG00000038233                    |
| 3 | 54,450,000 | 54,600,000 | 727 | 926  | -0.309814851 | ENSBTAG00000037490,ENSBTAG00000037634                              |
| 3 | 54,525,000 | 54,675,000 | 728 | 1394 | 0.004664659  | GBP4,ENSBTAG00000037490,ENSBTAG00000037634                         |
| 3 | 54,600,000 | 54,750,000 | 729 | 1097 | 0.44018046   | GBP4,ENSBTAG00000037634                                            |

|   |            |            |     |      |              |                                               |
|---|------------|------------|-----|------|--------------|-----------------------------------------------|
| 3 | 54,675,000 | 54,825,000 | 730 | 868  | 1.186368155  | GBP4,GBP6,ENSBTAG00000024272                  |
| 3 | 54,750,000 | 54,900,000 | 731 | 1089 | 1.105663349  | GBP6,ENSBTAG00000024272,ENSBTAG00000038625    |
| 3 | 54,825,000 | 54,975,000 | 732 | 1068 | 1.023987089  | ENSBTAG00000002416,ENSBTAG00000038625         |
| 3 | 54,900,000 | 55,050,000 | 733 | 809  | 0.957131279  | ENSBTAG00000002416,ENSBTAG00000038500         |
| 3 | 54,975,000 | 55,125,000 | 734 | 938  | 1.096305741  | CCBL2,ENSBTAG00000001143,ENSBTAG00000038500   |
| 3 | 55,050,000 | 55,200,000 | 735 | 1276 | 0.797375836  | CCBL2,GTF2B,ENSBTAG00000001143                |
| 3 | 55,125,000 | 55,275,000 | 736 | 1085 | -0.082651221 | CCBL2,GTF2B,PKN2                              |
| 3 | 55,200,000 | 55,350,000 | 737 | 1013 | -0.830040831 | GTF2B,PKN2                                    |
| 3 | 55,275,000 | 55,425,000 | 738 | 1263 | -0.654920215 | PKN2                                          |
| 3 | 55,350,000 | 55,500,000 | 739 | 1325 | 0.786883294  | PKN2                                          |
| 3 | 55,425,000 | 55,575,000 | 740 | 1192 | 1.278517119  |                                               |
| 3 | 55,500,000 | 55,650,000 | 741 | 1025 | 0.860587754  |                                               |
| 3 | 55,575,000 | 55,725,000 | 742 | 923  | 0.935599164  |                                               |
| 3 | 55,650,000 | 55,800,000 | 743 | 746  | 0.751752385  |                                               |
| 3 | 55,725,000 | 55,875,000 | 744 | 701  | 0.664317315  |                                               |
| 3 | 55,800,000 | 55,950,000 | 745 | 809  | 1.18714796   |                                               |
| 3 | 55,875,000 | 56,025,000 | 746 | 742  | 1.121476715  |                                               |
| 3 | 55,950,000 | 56,100,000 | 747 | 695  | 1.302147769  |                                               |
| 3 | 56,025,000 | 56,175,000 | 748 | 669  | 1.382498314  |                                               |
| 3 | 56,100,000 | 56,250,000 | 749 | 615  | 0.613394135  | ENSBTAG00000001873                            |
| 3 | 56,175,000 | 56,325,000 | 750 | 884  | 0.335914209  | ENSBTAG00000001873                            |
| 3 | 56,250,000 | 56,400,000 | 751 | 1019 | 0.006300808  |                                               |
| 3 | 56,325,000 | 56,475,000 | 752 | 1052 | 0.003574771  |                                               |
| 3 | 56,400,000 | 56,550,000 | 753 | 1116 | 0.687782402  |                                               |
| 3 | 56,475,000 | 56,625,000 | 754 | 750  | 0.907366698  |                                               |
| 3 | 56,550,000 | 56,700,000 | 755 | 578  | 0.235100581  |                                               |
| 3 | 56,625,000 | 56,775,000 | 756 | 638  | 0.249134321  |                                               |
| 3 | 56,700,000 | 56,850,000 | 757 | 785  | 0.642619788  | LMO4                                          |
| 3 | 56,775,000 | 56,925,000 | 758 | 867  | 0.49648391   | LMO4                                          |
| 3 | 56,850,000 | 57,000,000 | 759 | 525  | 0.290387005  |                                               |
| 3 | 56,925,000 | 57,075,000 | 760 | 638  | 0.170594689  |                                               |
| 3 | 57,000,000 | 57,150,000 | 761 | 1109 | -0.569585181 | ENSBTAG00000017595                            |
| 3 | 57,075,000 | 57,225,000 | 762 | 1348 | -1.06623674  | ENSBTAG00000017595                            |
| 3 | 57,150,000 | 57,300,000 | 763 | 1366 | -0.381610592 |                                               |
| 3 | 57,225,000 | 57,375,000 | 764 | 1350 | -0.613356544 | ENSBTAG00000012502                            |
| 3 | 57,300,000 | 57,450,000 | 765 | 1226 | -1.439077369 | SH3GLB1,ENSBTAG00000012502                    |
| 3 | 57,375,000 | 57,525,000 | 766 | 997  | -0.56115376  | SH3GLB1,ENSBTAG00000021501                    |
| 3 | 57,450,000 | 57,600,000 | 767 | 849  | 0.494568613  | SH3GLB1,ENSBTAG00000016712,ENSBTAG00000021501 |
| 3 | 57,525,000 | 57,675,000 | 768 | 942  | -0.498930619 | CLCA4,ENSBTAG00000016712,ENSBTAG00000021501   |
| 3 | 57,600,000 | 57,750,000 | 769 | 1231 | 0.501191084  | CLCA1,CLCA4                                   |
| 3 | 57,675,000 | 57,825,000 | 770 | 1522 | 0.82357964   | CLCA1,CLCA2,ODF2L                             |
| 3 | 57,750,000 | 57,900,000 | 771 | 1501 | 0.631868947  | CLCA2,ODF2L                                   |
| 3 | 57,825,000 | 57,975,000 | 772 | 1646 | 0.811052329  | ODF2L                                         |
| 3 | 57,900,000 | 58,050,000 | 773 | 1501 | 0.688590285  |                                               |
| 3 | 57,975,000 | 58,125,000 | 774 | 755  | 0.600993629  |                                               |
| 3 | 58,050,000 | 58,200,000 | 775 | 699  | 0.112285271  |                                               |
| 3 | 58,125,000 | 58,275,000 | 776 | 1304 | 0.225603968  |                                               |
| 3 | 58,200,000 | 58,350,000 | 777 | 1200 | 0.428954461  |                                               |
| 3 | 58,275,000 | 58,425,000 | 778 | 954  | 0.522543558  |                                               |
| 3 | 58,350,000 | 58,500,000 | 779 | 1006 | 0.379278195  |                                               |

|   |            |            |     |      |              |                                        |
|---|------------|------------|-----|------|--------------|----------------------------------------|
| 3 | 58,425,000 | 58,575,000 | 780 | 837  | 0.517338213  | ZNHIT6,ENSBTAG00000048312              |
| 3 | 58,500,000 | 58,650,000 | 781 | 816  | 0.797945853  | ZNHIT6,ENSBTAG00000048312              |
| 3 | 58,575,000 | 58,725,000 | 782 | 1011 | 1.234579145  | CYR61,ZNHIT6                           |
| 3 | 58,650,000 | 58,800,000 | 783 | 1099 | 0.953483407  | CYR61                                  |
| 3 | 58,725,000 | 58,875,000 | 784 | 866  | -0.085296501 | DDAH1                                  |
| 3 | 58,800,000 | 58,950,000 | 785 | 751  | 0.052663049  | DDAH1                                  |
| 3 | 58,875,000 | 59,025,000 | 786 | 514  | -1.137407604 | BCL10,DDAH1                            |
| 3 | 58,950,000 | 59,100,000 | 787 | 318  | -2.012152235 | BCL10,C1orf52,DDAH1,SYDE2              |
| 3 | 59,025,000 | 59,175,000 | 788 | 353  | -1.394013029 | C1orf52,SYDE2,WDR63,ENSBTAG00000047351 |
| 3 | 59,100,000 | 59,250,000 | 789 | 374  | -1.067698041 | SYDE2,WDR63,ENSBTAG00000047351         |
| 3 | 59,175,000 | 59,325,000 | 790 | 453  | -3.589686187 | MCOLN2,MCOLN3,WDR63,ENSBTAG00000047351 |
| 3 | 59,250,000 | 59,400,000 | 791 | 431  | -3.459209914 | MCOLN2,MCOLN3                          |
| 3 | 59,325,000 | 59,475,000 | 792 | 483  | -0.381583016 | LPAR3,MCOLN2                           |
| 3 | 59,400,000 | 59,550,000 | 793 | 525  | -0.550904098 | LPAR3                                  |
| 3 | 59,475,000 | 59,625,000 | 794 | 401  | -0.307498327 | SSX2IP                                 |
| 3 | 59,550,000 | 59,700,000 | 795 | 447  | -0.079435681 | SSX2IP                                 |
| 3 | 59,625,000 | 59,775,000 | 796 | 341  | 0.124225952  | CTB,SSX2IP,ENSBTAG00000020010          |
| 3 | 59,700,000 | 59,850,000 | 797 | 394  | -0.841525935 | BXDC5,CTB,GNG5,ENSBTAG00000020010      |
| 3 | 59,775,000 | 59,925,000 | 798 | 681  | -0.351173932 | BXDC5,DNASE2B,GNG5,UOX                 |
| 3 | 59,850,000 | 60,000,000 | 799 | 670  | 0.047037449  | DNASE2B,SAMD13,UOX,ENSBTAG00000007724  |
| 3 | 59,925,000 | 60,075,000 | 800 | 699  | 0.765155713  | SAMD13,UOX,ENSBTAG00000007724          |
| 3 | 60,000,000 | 60,150,000 | 801 | 656  | 0.923334826  | PRKACB,SAMD13                          |
| 3 | 60,075,000 | 60,225,000 | 802 | 560  | 0.406302114  | PRKACB                                 |
| 3 | 60,150,000 | 60,300,000 | 803 | 1028 | 0.381077715  | PRKACB                                 |
| 3 | 60,225,000 | 60,375,000 | 804 | 1350 | -0.730002551 | EIF1,TTLL7                             |
| 3 | 60,300,000 | 60,450,000 | 805 | 1350 | -0.987342973 | EIF1,TTLL7                             |
| 3 | 60,375,000 | 60,525,000 | 806 | 1112 | 0.616216982  | TTLL7                                  |
| 3 | 60,450,000 | 60,600,000 | 807 | 854  | 1.110168248  |                                        |
| 3 | 60,525,000 | 60,675,000 | 808 | 869  | 0.838657478  |                                        |
| 3 | 60,600,000 | 60,750,000 | 809 | 989  | -0.37849667  |                                        |
| 3 | 60,675,000 | 60,825,000 | 810 | 934  | -0.48738265  |                                        |
| 3 | 60,750,000 | 60,900,000 | 811 | 1014 | -0.184241743 |                                        |
| 3 | 60,825,000 | 60,975,000 | 812 | 1279 | 0.054497527  |                                        |
| 3 | 60,900,000 | 61,050,000 | 813 | 1399 | -0.806582204 |                                        |
| 3 | 60,975,000 | 61,125,000 | 814 | 1249 | -1.315642782 |                                        |
| 3 | 61,050,000 | 61,200,000 | 815 | 1123 | -0.590081031 |                                        |
| 3 | 61,125,000 | 61,275,000 | 816 | 1124 | -0.81398898  | ENSBTAG00000031088                     |
| 3 | 61,200,000 | 61,350,000 | 817 | 984  | -0.307952078 | ENSBTAG00000031088                     |
| 3 | 61,275,000 | 61,425,000 | 818 | 1139 | 0.723606484  |                                        |
| 3 | 61,350,000 | 61,500,000 | 819 | 1275 | 0.892355022  |                                        |
| 3 | 61,425,000 | 61,575,000 | 820 | 1288 | 0.801538199  |                                        |
| 3 | 61,500,000 | 61,650,000 | 821 | 1251 | 0.940132145  |                                        |
| 3 | 61,575,000 | 61,725,000 | 822 | 1122 | 0.823020284  |                                        |
| 3 | 61,650,000 | 61,800,000 | 823 | 1158 | 0.764473956  |                                        |
| 3 | 61,725,000 | 61,875,000 | 824 | 1169 | 0.750488768  |                                        |
| 3 | 61,800,000 | 61,950,000 | 825 | 1174 | 0.84684575   |                                        |
| 3 | 61,875,000 | 62,025,000 | 826 | 1135 | 0.562374445  |                                        |
| 3 | 61,950,000 | 62,100,000 | 827 | 979  | 0.098907728  |                                        |
| 3 | 62,025,000 | 62,175,000 | 828 | 912  | -0.236544254 |                                        |
| 3 | 62,100,000 | 62,250,000 | 829 | 931  | -0.120646825 |                                        |
| 3 | 62,175,000 | 62,325,000 | 830 | 1080 | -0.181054435 |                                        |
| 3 | 62,250,000 | 62,400,000 | 831 | 1223 | -0.511277634 |                                        |
| 3 | 62,325,000 | 62,475,000 | 832 | 1455 | -1.618352217 |                                        |

|   |            |            |     |      |              |                    |
|---|------------|------------|-----|------|--------------|--------------------|
| 3 | 62,400,000 | 62,550,000 | 833 | 1357 | -3.504434292 |                    |
| 3 | 62,475,000 | 62,625,000 | 834 | 1139 | -2.628134924 |                    |
| 3 | 62,550,000 | 62,700,000 | 835 | 1063 | -1.005644495 | LPHN2              |
| 3 | 62,625,000 | 62,775,000 | 836 | 950  | -1.152313853 | LPHN2              |
| 3 | 62,700,000 | 62,850,000 | 837 | 942  | 0.013202276  | LPHN2              |
| 3 | 62,775,000 | 62,925,000 | 838 | 1101 | 0.328766782  | LPHN2              |
| 3 | 62,850,000 | 63,000,000 | 839 | 1175 | 0.305605419  |                    |
| 3 | 62,925,000 | 63,075,000 | 840 | 1068 | 0.318553303  | ENSBTAG00000047248 |
| 3 | 63,000,000 | 63,150,000 | 841 | 1157 | 0.998607754  | ENSBTAG00000047248 |
| 3 | 63,075,000 | 63,225,000 | 842 | 1096 | 1.082962238  |                    |
| 3 | 63,150,000 | 63,300,000 | 843 | 905  | -1.362691647 |                    |
| 3 | 63,225,000 | 63,375,000 | 844 | 810  | -1.288110015 |                    |
| 3 | 63,300,000 | 63,450,000 | 845 | 893  | 0.456728585  |                    |
| 3 | 63,375,000 | 63,525,000 | 846 | 1038 | 0.906970686  |                    |
| 3 | 63,450,000 | 63,600,000 | 847 | 938  | 1.136923124  |                    |
| 3 | 63,525,000 | 63,675,000 | 848 | 1010 | 0.932156976  |                    |
| 3 | 63,600,000 | 63,750,000 | 849 | 1225 | -0.08320211  |                    |
| 3 | 63,675,000 | 63,825,000 | 850 | 1075 | -1.16781886  |                    |
| 3 | 63,750,000 | 63,900,000 | 851 | 1131 | 0.147803833  |                    |
| 3 | 63,825,000 | 63,975,000 | 852 | 1484 | 0.637648499  |                    |
| 3 | 63,900,000 | 64,050,000 | 853 | 1539 | 0.256915092  |                    |
| 3 | 63,975,000 | 64,125,000 | 854 | 1650 | 0.010424748  |                    |
| 3 | 64,050,000 | 64,200,000 | 855 | 1837 | 0.355343922  |                    |
| 3 | 64,125,000 | 64,275,000 | 856 | 1914 | 0.36169243   |                    |
| 3 | 64,200,000 | 64,350,000 | 857 | 1685 | 0.087737649  |                    |
| 3 | 64,275,000 | 64,425,000 | 858 | 1129 | 0.644351768  |                    |
| 3 | 64,350,000 | 64,500,000 | 859 | 1401 | 0.701652163  |                    |
| 3 | 64,425,000 | 64,575,000 | 860 | 1758 | 0.515910936  |                    |
| 3 | 64,500,000 | 64,650,000 | 861 | 1562 | 0.54249443   |                    |
| 3 | 64,575,000 | 64,725,000 | 862 | 1510 | 0.642736957  |                    |
| 3 | 64,650,000 | 64,800,000 | 863 | 1731 | -0.021224222 |                    |
| 3 | 64,725,000 | 64,875,000 | 864 | 1663 | 0.015556024  |                    |
| 3 | 64,800,000 | 64,950,000 | 865 | 1434 | 1.123389123  |                    |
| 3 | 64,875,000 | 65,025,000 | 866 | 1582 | 1.300989967  |                    |
| 3 | 64,950,000 | 65,100,000 | 867 | 1580 | 1.211836267  |                    |
| 3 | 65,025,000 | 65,175,000 | 868 | 1387 | 1.198137143  |                    |
| 3 | 65,100,000 | 65,250,000 | 869 | 1146 | 1.093285906  |                    |
| 3 | 65,175,000 | 65,325,000 | 870 | 805  | 0.816573707  |                    |
| 3 | 65,250,000 | 65,400,000 | 871 | 632  | -0.536732251 |                    |
| 3 | 65,325,000 | 65,475,000 | 872 | 1101 | -1.266168459 |                    |
| 3 | 65,400,000 | 65,550,000 | 873 | 1394 | -0.421885822 |                    |
| 3 | 65,475,000 | 65,625,000 | 874 | 1119 | 0.928252172  |                    |
| 3 | 65,550,000 | 65,700,000 | 875 | 829  | 1.093704878  |                    |
| 3 | 65,625,000 | 65,775,000 | 876 | 868  | 0.789849651  |                    |
| 3 | 65,700,000 | 65,850,000 | 877 | 1067 | 0.164097185  |                    |
| 3 | 65,775,000 | 65,925,000 | 878 | 915  | 0.202339038  | ELTD1              |
| 3 | 65,850,000 | 66,000,000 | 879 | 577  | 0.764495683  | ELTD1              |
| 3 | 65,925,000 | 66,075,000 | 880 | 811  | 0.112873638  | ELTD1              |
| 3 | 66,000,000 | 66,150,000 | 881 | 1166 | -1.016910613 | ELTD1              |
| 3 | 66,075,000 | 66,225,000 | 882 | 1280 | -1.204645003 |                    |
| 3 | 66,150,000 | 66,300,000 | 883 | 1227 | -0.382203012 | IFI44              |
| 3 | 66,225,000 | 66,375,000 | 884 | 1042 | 0.04305028   | IFI44,IFI44L       |
| 3 | 66,300,000 | 66,450,000 | 885 | 833  | 0.115645943  | FP,IFI44L          |



|   |            |            |     |      |              |                          |
|---|------------|------------|-----|------|--------------|--------------------------|
| 3 | 66,375,000 | 66,525,000 | 886 | 819  | 0.153360736  | FP                       |
| 3 | 66,450,000 | 66,600,000 | 887 | 1064 | 0.449504646  |                          |
| 3 | 66,525,000 | 66,675,000 | 888 | 914  | 0.396926248  |                          |
| 3 | 66,600,000 | 66,750,000 | 889 | 1170 | 0.853828489  |                          |
| 3 | 66,675,000 | 66,825,000 | 890 | 1489 | 0.705149749  | GIPC2,ENSBTAG00000031082 |
| 3 | 66,750,000 | 66,900,000 | 891 | 1145 | -0.117117697 | GIPC2,ENSBTAG00000031082 |
| 3 | 66,825,000 | 66,975,000 | 892 | 741  | -0.295337602 | DNAJB4,FUBP1,GIPC2       |
| 3 | 66,900,000 | 67,050,000 | 893 | 572  | 0.208421103  | DNAJB4,FUBP1,NEXN        |
| 3 | 66,975,000 | 67,125,000 | 894 | 923  | 0.871202427  | FAM73A,FUBP1,NEXN        |
| 3 | 67,050,000 | 67,200,000 | 895 | 1139 | 1.080892136  | FAM73A,NEXN,USP33        |
| 3 | 67,125,000 | 67,275,000 | 896 | 884  | 0.865081886  | FAM73A,USP33,ZZZ3        |
| 3 | 67,200,000 | 67,350,000 | 897 | 640  | 0.216029107  | USP33,ZZZ3               |
| 3 | 67,275,000 | 67,425,000 | 898 | 999  | -0.140717407 | AK5,ZZZ3                 |
| 3 | 67,350,000 | 67,500,000 | 899 | 1772 | 0.222955389  | AK5                      |
| 3 | 67,425,000 | 67,575,000 | 900 | 1742 | 0.918157538  | AK5                      |
| 3 | 67,500,000 | 67,650,000 | 901 | 1403 | 0.981980831  | AK5                      |
| 3 | 67,575,000 | 67,725,000 | 902 | 1616 | 0.517573217  | AK5,PIGK                 |
| 3 | 67,650,000 | 67,800,000 | 903 | 1744 | 0.785244435  | PIGK                     |
| 3 | 67,725,000 | 67,875,000 | 904 | 1610 | 1.019265266  | PIGK,ST6GALNAC5          |
| 3 | 67,800,000 | 67,950,000 | 905 | 1667 | 1.29525217   | PIGK,ST6GALNAC5          |
| 3 | 67,875,000 | 68,025,000 | 906 | 1782 | 1.310551329  | ST6GALNAC5               |
| 3 | 67,950,000 | 68,100,000 | 907 | 1815 | 0.930066178  | ST6GALNAC5               |
| 3 | 68,025,000 | 68,175,000 | 908 | 2134 | 0.892653059  | ST6GALNAC5               |
| 3 | 68,100,000 | 68,250,000 | 909 | 2087 | 0.951264411  |                          |
| 3 | 68,175,000 | 68,325,000 | 910 | 1569 | 0.923301139  |                          |
| 3 | 68,250,000 | 68,400,000 | 911 | 1242 | 0.476886223  |                          |
| 3 | 68,325,000 | 68,475,000 | 912 | 1044 | 0.096471716  |                          |
| 3 | 68,400,000 | 68,550,000 | 913 | 1201 | 0.293186761  |                          |
| 3 | 68,475,000 | 68,625,000 | 914 | 1222 | 0.27273163   |                          |
| 3 | 68,550,000 | 68,700,000 | 915 | 1212 | 0.351586856  |                          |
| 3 | 68,625,000 | 68,775,000 | 916 | 1521 | 0.016619286  |                          |
| 3 | 68,700,000 | 68,850,000 | 917 | 1858 | 0.272068405  |                          |
| 3 | 68,775,000 | 68,925,000 | 918 | 1815 | 1.043381962  |                          |
| 3 | 68,850,000 | 69,000,000 | 919 | 1415 | 0.983121052  |                          |
| 3 | 68,925,000 | 69,075,000 | 920 | 1013 | 0.700838475  |                          |
| 3 | 69,000,000 | 69,150,000 | 921 | 921  | 0.173095552  |                          |
| 3 | 69,075,000 | 69,225,000 | 922 | 659  | 0.140102272  | ASB17,MSH4               |
| 3 | 69,150,000 | 69,300,000 | 923 | 311  | -0.227165019 | ASB17,MSH4               |
| 3 | 69,225,000 | 69,375,000 | 924 | 369  | -0.504108965 | ACADM,MSH4,RABGGTB       |
| 3 | 69,300,000 | 69,450,000 | 925 | 438  | -0.42028504  | ACADM,MSH4,RABGGTB       |
| 3 | 69,375,000 | 69,525,000 | 926 | 751  | 0.667243726  | ACADM                    |
| 3 | 69,450,000 | 69,600,000 | 927 | 996  | 0.579698289  |                          |
| 3 | 69,525,000 | 69,675,000 | 928 | 1122 | -0.342028822 |                          |
| 3 | 69,600,000 | 69,750,000 | 929 | 1339 | -0.336511878 |                          |
| 3 | 69,675,000 | 69,825,000 | 930 | 1441 | 0.264358326  | SLC44A5                  |
| 3 | 69,750,000 | 69,900,000 | 931 | 1289 | 0.39093852   | LHX8,SLC44A5             |
| 3 | 69,825,000 | 69,975,000 | 932 | 1037 | 0.214077932  | LHX8,SLC44A5             |
| 3 | 69,900,000 | 70,050,000 | 933 | 971  | 1.255869413  | LHX8                     |
| 3 | 69,975,000 | 70,125,000 | 934 | 1125 | 1.363462684  |                          |
| 3 | 70,050,000 | 70,200,000 | 935 | 1056 | 1.253294205  |                          |
| 3 | 70,125,000 | 70,275,000 | 936 | 1114 | 0.98235271   | CRYZ,TYW3                |
| 3 | 70,200,000 | 70,350,000 | 937 | 1112 | 0.807295474  | CRYZ,ERICH3,TYW3         |
| 3 | 70,275,000 | 70,425,000 | 938 | 796  | 0.67064247   | CRYZ,ERICH3              |

|   |            |            |     |      |              |                    |
|---|------------|------------|-----|------|--------------|--------------------|
| 3 | 70,350,000 | 70,500,000 | 939 | 619  | 0.518322124  | ERICH3,TNNI3K      |
| 3 | 70,425,000 | 70,575,000 | 940 | 673  | 0.332229364  | TNNI3K             |
| 3 | 70,500,000 | 70,650,000 | 941 | 973  | 0.306959893  | TNNI3K             |
| 3 | 70,575,000 | 70,725,000 | 942 | 1054 | -0.117843707 | TNNI3K             |
| 3 | 70,650,000 | 70,800,000 | 943 | 1123 | -0.872231638 | TNNI3K             |
| 3 | 70,725,000 | 70,875,000 | 944 | 958  | -0.481912074 | TNNI3K             |
| 3 | 70,800,000 | 70,950,000 | 945 | 480  | 0.511689665  | FPGT,LRRIQ3,TNNI3K |
| 3 | 70,875,000 | 71,025,000 | 946 | 289  | 0.545291576  | FPGT,LRRIQ3        |
| 3 | 70,950,000 | 71,100,000 | 947 | 562  | 1.073810199  | LRRIQ3             |
| 3 | 71,025,000 | 71,175,000 | 948 | 832  | 0.201741351  |                    |
| 3 | 71,100,000 | 71,250,000 | 949 | 759  | -0.880771956 |                    |
| 3 | 71,175,000 | 71,325,000 | 950 | 723  | -0.295309612 |                    |
| 3 | 71,250,000 | 71,400,000 | 951 | 874  | -0.44225706  |                    |
| 3 | 71,325,000 | 71,475,000 | 952 | 1043 | 0.019593057  |                    |
| 3 | 71,400,000 | 71,550,000 | 953 | 1090 | 0.760128746  |                    |
| 3 | 71,475,000 | 71,625,000 | 954 | 871  | 0.629010253  |                    |
| 3 | 71,550,000 | 71,700,000 | 955 | 725  | 0.718156164  |                    |
| 3 | 71,625,000 | 71,775,000 | 956 | 1061 | 0.861635526  |                    |
| 3 | 71,700,000 | 71,850,000 | 957 | 1376 | 0.043918276  |                    |
| 3 | 71,775,000 | 71,925,000 | 958 | 1276 | -0.455171378 |                    |
| 3 | 71,850,000 | 72,000,000 | 959 | 1392 | 0.295894763  |                    |
| 3 | 71,925,000 | 72,075,000 | 960 | 1436 | 0.749631869  |                    |
| 3 | 72,000,000 | 72,150,000 | 961 | 1260 | 0.063095582  |                    |
| 3 | 72,075,000 | 72,225,000 | 962 | 1261 | -1.476159307 |                    |
| 3 | 72,150,000 | 72,300,000 | 963 | 1098 | -0.864237962 |                    |
| 3 | 72,225,000 | 72,375,000 | 964 | 940  | 0.652819294  |                    |
| 3 | 72,300,000 | 72,450,000 | 965 | 911  | 0.711488501  |                    |
| 3 | 72,375,000 | 72,525,000 | 966 | 836  | 0.788131349  | ENSBTAG00000006600 |
| 3 | 72,450,000 | 72,600,000 | 967 | 1014 | 0.310956016  | ENSBTAG00000006600 |
| 3 | 72,525,000 | 72,675,000 | 968 | 1236 | 0.501471733  |                    |
| 3 | 72,600,000 | 72,750,000 | 969 | 1169 | 0.979757053  |                    |
| 3 | 72,675,000 | 72,825,000 | 970 | 1386 | 1.093258831  |                    |
| 3 | 72,750,000 | 72,900,000 | 971 | 1226 | 1.017573724  |                    |
| 3 | 72,825,000 | 72,975,000 | 972 | 506  | 1.194219091  |                    |
| 3 | 72,900,000 | 73,050,000 | 973 | 183  | 0.77758428   |                    |
| 3 | 72,975,000 | 73,125,000 | 974 | 528  | 0.180094301  |                    |
| 3 | 73,050,000 | 73,200,000 | 975 | 723  | 0.039022306  |                    |
| 3 | 73,125,000 | 73,275,000 | 976 | 668  | -0.250806603 |                    |
| 3 | 73,200,000 | 73,350,000 | 977 | 743  | -0.142218256 |                    |
| 3 | 73,275,000 | 73,425,000 | 978 | 547  | -0.474603535 |                    |
| 3 | 73,350,000 | 73,500,000 | 979 | 754  | -0.222817844 |                    |
| 3 | 73,425,000 | 73,575,000 | 980 | 953  | 0.597297287  |                    |
| 3 | 73,500,000 | 73,650,000 | 981 | 696  | 0.745779884  |                    |
| 3 | 73,575,000 | 73,725,000 | 982 | 799  | 1.089878069  |                    |
| 3 | 73,650,000 | 73,800,000 | 983 | 913  | 1.34349909   |                    |
| 3 | 73,725,000 | 73,875,000 | 984 | 880  | 1.04034676   |                    |
| 3 | 73,800,000 | 73,950,000 | 985 | 811  | 0.953558015  |                    |
| 3 | 73,875,000 | 74,025,000 | 986 | 766  | 1.243194638  |                    |
| 3 | 73,950,000 | 74,100,000 | 987 | 926  | 0.950242322  |                    |
| 3 | 74,025,000 | 74,175,000 | 988 | 782  | 0.79080896   |                    |
| 3 | 74,100,000 | 74,250,000 | 989 | 620  | 0.946318208  |                    |
| 3 | 74,175,000 | 74,325,000 | 990 | 880  | 1.211138622  |                    |
| 3 | 74,250,000 | 74,400,000 | 991 | 646  | 1.170452056  |                    |

|   |            |            |      |      |              |                                 |
|---|------------|------------|------|------|--------------|---------------------------------|
| 3 | 74,325,000 | 74,475,000 | 992  | 261  | 0.240628816  | ZRANB2                          |
| 3 | 74,400,000 | 74,550,000 | 993  | 499  | -0.229713788 | PTGER3,ZRANB2                   |
| 3 | 74,475,000 | 74,625,000 | 994  | 1008 | -1.115174153 | PTGER3                          |
| 3 | 74,550,000 | 74,700,000 | 995  | 1324 | -0.730698738 |                                 |
| 3 | 74,625,000 | 74,775,000 | 996  | 1563 | 0.822817455  |                                 |
| 3 | 74,700,000 | 74,850,000 | 997  | 1927 | 1.142374771  |                                 |
| 3 | 74,775,000 | 74,925,000 | 998  | 1718 | 1.248326814  |                                 |
| 3 | 74,850,000 | 75,000,000 | 999  | 885  | 0.754187946  |                                 |
| 3 | 74,925,000 | 75,075,000 | 1000 | 422  | 0.455733124  |                                 |
| 3 | 75,000,000 | 75,150,000 | 1001 | 541  | 0.528662341  | ANKRD13C,CTH                    |
| 3 | 75,075,000 | 75,225,000 | 1002 | 559  | -0.112414007 | ANKRD13C,CTH                    |
| 3 | 75,150,000 | 75,300,000 | 1003 | 432  | -0.132380154 | ANKRD13C,LRRC40,SFRS11          |
| 3 | 75,225,000 | 75,375,000 | 1004 | 457  | 0.667565132  | ANKRD13C,LRRC40,LRRC7,SFRS11    |
| 3 | 75,300,000 | 75,450,000 | 1005 | 774  | 0.183664345  | LRRC40,LRRC7                    |
| 3 | 75,375,000 | 75,525,000 | 1006 | 930  | 0.010603231  | LRRC7                           |
| 3 | 75,450,000 | 75,600,000 | 1007 | 884  | 0.417681261  | LRRC7                           |
| 3 | 75,525,000 | 75,675,000 | 1008 | 830  | 0.585012159  | LRRC7                           |
| 3 | 75,600,000 | 75,750,000 | 1009 | 1003 | 0.526823737  | LRRC7                           |
| 3 | 75,675,000 | 75,825,000 | 1010 | 1070 | -0.027891085 | LRRC7                           |
| 3 | 75,750,000 | 75,900,000 | 1011 | 860  | -0.820187896 |                                 |
| 3 | 75,825,000 | 75,975,000 | 1012 | 791  | -0.114832728 |                                 |
| 3 | 75,900,000 | 76,050,000 | 1013 | 1054 | 0.990011578  |                                 |
| 3 | 75,975,000 | 76,125,000 | 1014 | 1026 | 1.048691354  |                                 |
| 3 | 76,050,000 | 76,200,000 | 1015 | 821  | 0.533192791  |                                 |
| 3 | 76,125,000 | 76,275,000 | 1016 | 728  | 0.613783881  |                                 |
| 3 | 76,200,000 | 76,350,000 | 1017 | 487  | -0.260490417 |                                 |
| 3 | 76,275,000 | 76,425,000 | 1018 | 514  | -0.473132017 |                                 |
| 3 | 76,350,000 | 76,500,000 | 1019 | 656  | 0.379066235  |                                 |
| 3 | 76,425,000 | 76,575,000 | 1020 | 1068 | -0.050771429 |                                 |
| 3 | 76,500,000 | 76,650,000 | 1021 | 1053 | -0.212978138 |                                 |
| 3 | 76,575,000 | 76,725,000 | 1022 | 958  | -0.019413145 |                                 |
| 3 | 76,650,000 | 76,800,000 | 1023 | 862  | -0.130856452 |                                 |
| 3 | 76,725,000 | 76,875,000 | 1024 | 626  | -0.91467428  |                                 |
| 3 | 76,800,000 | 76,950,000 | 1025 | 726  | -0.607918969 |                                 |
| 3 | 76,875,000 | 77,025,000 | 1026 | 632  | 0.225948768  |                                 |
| 3 | 76,950,000 | 77,100,000 | 1027 | 675  | 0.781406983  | DEPDC1                          |
| 3 | 77,025,000 | 77,175,000 | 1028 | 563  | 0.807710695  | DEPDC1,RPE65,ENSBTAG00000030890 |
| 3 | 77,100,000 | 77,250,000 | 1029 | 323  | 0.013357476  | DEPDC1,RPE65,ENSBTAG00000030890 |
| 3 | 77,175,000 | 77,325,000 | 1030 | 335  | -0.2126143   | RPE65                           |
| 3 | 77,250,000 | 77,400,000 | 1031 | 338  | 0.161131686  | WLS                             |
| 3 | 77,325,000 | 77,475,000 | 1032 | 392  | 0.058123795  | WLS                             |
| 3 | 77,400,000 | 77,550,000 | 1033 | 444  | 0.323261054  | WLS                             |
| 3 | 77,475,000 | 77,625,000 | 1034 | 452  | 0.84953215   | DIRAS3,WLS                      |
| 3 | 77,550,000 | 77,700,000 | 1035 | 382  | 0.721316245  | DIRAS3                          |
| 3 | 77,625,000 | 77,775,000 | 1036 | 474  | 0.705027279  |                                 |
| 3 | 77,700,000 | 77,850,000 | 1037 | 550  | 0.991693232  |                                 |
| 3 | 77,775,000 | 77,925,000 | 1038 | 395  | 0.775489691  | GNG12                           |
| 3 | 77,850,000 | 78,000,000 | 1039 | 320  | 0.026406594  | GADD45A,GNG12                   |
| 3 | 77,925,000 | 78,075,000 | 1040 | 328  | -0.434550278 | GADD45A,GNG12                   |
| 3 | 78,000,000 | 78,150,000 | 1041 | 489  | 0.058080739  |                                 |
| 3 | 78,075,000 | 78,225,000 | 1042 | 694  | 1.011038479  |                                 |
| 3 | 78,150,000 | 78,300,000 | 1043 | 492  | 1.019125224  | IL12RB2,SERBP1                  |
| 3 | 78,225,000 | 78,375,000 | 1044 | 417  | 0.9033476    | IL12RB2,SERBP1                  |

|   |            |            |      |      |              |                            |
|---|------------|------------|------|------|--------------|----------------------------|
| 3 | 78,300,000 | 78,450,000 | 1045 | 600  | 0.554937524  | IL12RB2,IL23R              |
| 3 | 78,375,000 | 78,525,000 | 1046 | 1044 | 0.098496691  | C1orf141,IL23R             |
| 3 | 78,450,000 | 78,600,000 | 1047 | 1571 | 0.033763307  | C1orf141,IL23R             |
| 3 | 78,525,000 | 78,675,000 | 1048 | 1387 | -0.155218407 | C1orf141,MIER1,SLC35D2     |
| 3 | 78,600,000 | 78,750,000 | 1049 | 859  | 0.3106499    | MIER1,SLC35D2,WDR78        |
| 3 | 78,675,000 | 78,825,000 | 1050 | 900  | -1.766346787 | MIER1,WDR78                |
| 3 | 78,750,000 | 78,900,000 | 1051 | 1163 | -3.023798513 | INSL5,TCTEX1D1,WDR78       |
| 3 | 78,825,000 | 78,975,000 | 1052 | 1106 | -1.887277098 | INSL5,SGIP1,TCTEX1D1,WDR78 |
| 3 | 78,900,000 | 79,050,000 | 1053 | 930  | 0.374874845  | SGIP1,TCTEX1D1             |
| 3 | 78,975,000 | 79,125,000 | 1054 | 683  | 0.770519902  | SGIP1                      |
| 3 | 79,050,000 | 79,200,000 | 1055 | 773  | 0.668034931  | SGIP1                      |
| 3 | 79,125,000 | 79,275,000 | 1056 | 1012 | 0.888015725  | SGIP1                      |
| 3 | 79,200,000 | 79,350,000 | 1057 | 899  | 1.017552414  | PDE4B                      |
| 3 | 79,275,000 | 79,425,000 | 1058 | 821  | 0.961497294  | PDE4B                      |
| 3 | 79,350,000 | 79,500,000 | 1059 | 924  | 0.496767995  | PDE4B                      |
| 3 | 79,425,000 | 79,575,000 | 1060 | 1076 | 0.240820543  | PDE4B                      |
| 3 | 79,500,000 | 79,650,000 | 1061 | 809  | 0.484544816  | MGC137454,PDE4B            |
| 3 | 79,575,000 | 79,725,000 | 1062 | 503  | 0.467802763  | MGC137454,PDE4B            |
| 3 | 79,650,000 | 79,800,000 | 1063 | 985  | 0.539955139  | MGC137454,PDE4B            |
| 3 | 79,725,000 | 79,875,000 | 1064 | 1116 | 0.686107619  | MGC137454,PDE4B            |
| 3 | 79,800,000 | 79,950,000 | 1065 | 797  | 0.534679394  | MGC137454                  |
| 3 | 79,875,000 | 80,025,000 | 1066 | 908  | 0.515114484  |                            |
| 3 | 79,950,000 | 80,100,000 | 1067 | 958  | 0.640226095  | OB-R                       |
| 3 | 80,025,000 | 80,175,000 | 1068 | 760  | 0.300793963  | OB-R                       |
| 3 | 80,100,000 | 80,250,000 | 1069 | 566  | -0.353825412 | LEPROT,OB-R                |
| 3 | 80,175,000 | 80,325,000 | 1070 | 484  | -1.396098658 | DNAJC6,LEPROT              |
| 3 | 80,250,000 | 80,400,000 | 1071 | 685  | -1.101041111 | DNAJC6,LEPROT              |
| 3 | 80,325,000 | 80,475,000 | 1072 | 822  | 0.415455918  | DNAJC6                     |
| 3 | 80,400,000 | 80,550,000 | 1073 | 665  | 1.073024616  | AK4                        |
| 3 | 80,475,000 | 80,625,000 | 1074 | 577  | 0.890722758  | AK4                        |
| 3 | 80,550,000 | 80,700,000 | 1075 | 745  | 0.860644949  | AK4                        |
| 3 | 80,625,000 | 80,775,000 | 1076 | 849  | 0.926834809  |                            |
| 3 | 80,700,000 | 80,850,000 | 1077 | 734  | 0.768837265  |                            |
| 3 | 80,775,000 | 80,925,000 | 1078 | 807  | 0.439034124  | JAK1                       |
| 3 | 80,850,000 | 81,000,000 | 1079 | 1345 | -0.101915843 | JAK1,RAVER2                |
| 3 | 80,925,000 | 81,075,000 | 1080 | 1590 | 0.069913095  | RAVER2                     |
| 3 | 81,000,000 | 81,150,000 | 1081 | 1187 | 0.908151373  | CACHD1,RAVER2              |
| 3 | 81,075,000 | 81,225,000 | 1082 | 977  | 1.072108393  | CACHD1                     |
| 3 | 81,150,000 | 81,300,000 | 1083 | 1063 | 0.938435009  | CACHD1                     |
| 3 | 81,225,000 | 81,375,000 | 1084 | 946  | 0.822623903  |                            |
| 3 | 81,300,000 | 81,450,000 | 1085 | 1167 | 0.412367438  |                            |
| 3 | 81,375,000 | 81,525,000 | 1086 | 1374 | 0.086823373  |                            |
| 3 | 81,450,000 | 81,600,000 | 1087 | 1391 | -1.177173415 | UBE2U                      |
| 3 | 81,525,000 | 81,675,000 | 1088 | 1303 | -2.188152146 | ROR1,UBE2U                 |
| 3 | 81,600,000 | 81,750,000 | 1089 | 839  | -2.333359493 | ROR1,UBE2U                 |
| 3 | 81,675,000 | 81,825,000 | 1090 | 741  | -0.907372257 | ROR1                       |
| 3 | 81,750,000 | 81,900,000 | 1091 | 785  | -0.327929955 |                            |
| 3 | 81,825,000 | 81,975,000 | 1092 | 532  | -0.656615753 |                            |
| 3 | 81,900,000 | 82,050,000 | 1093 | 373  | -0.915274357 |                            |
| 3 | 81,975,000 | 82,125,000 | 1094 | 467  | -0.847679707 |                            |
| 3 | 82,050,000 | 82,200,000 | 1095 | 513  | -0.849770876 |                            |
| 3 | 82,125,000 | 82,275,000 | 1096 | 436  | 0.216436734  | PGM1                       |
| 3 | 82,200,000 | 82,350,000 | 1097 | 543  | 0.644975561  | EFCAB7,PGM1                |

|   |            |            |      |      |              |                                             |
|---|------------|------------|------|------|--------------|---------------------------------------------|
| 3 | 82,275,000 | 82,425,000 | 1098 | 535  | 0.315934669  | EFCAB7,ITGB3BP,PGM1                         |
| 3 | 82,350,000 | 82,500,000 | 1099 | 356  | -0.191954385 | ALG6,EFCAB7,ITGB3BP                         |
| 3 | 82,425,000 | 82,575,000 | 1100 | 436  | 0.258645319  | ALG6,ITGB3BP                                |
| 3 | 82,500,000 | 82,650,000 | 1101 | 502  | 0.783888295  | ALG6,FOXD3                                  |
| 3 | 82,575,000 | 82,725,000 | 1102 | 479  | 0.667249151  | FOXD3                                       |
| 3 | 82,650,000 | 82,800,000 | 1103 | 229  | 0.264882412  |                                             |
| 3 | 82,725,000 | 82,875,000 | 1104 | 1    | -1.092374377 |                                             |
| 3 | 82,800,000 | 82,950,000 | 1105 | 79   | -0.606961145 |                                             |
| 3 | 82,875,000 | 83,025,000 | 1106 | 278  | -1.073788502 |                                             |
| 3 | 82,950,000 | 83,100,000 | 1107 | 499  | -1.304334665 |                                             |
| 3 | 83,025,000 | 83,175,000 | 1108 | 886  | -0.17417729  |                                             |
| 3 | 83,100,000 | 83,250,000 | 1109 | 828  | 0.117441202  |                                             |
| 3 | 83,175,000 | 83,325,000 | 1110 | 624  | -1.737750324 | ATG4C                                       |
| 3 | 83,250,000 | 83,400,000 | 1111 | 518  | -2.038314439 | ATG4C                                       |
| 3 | 83,325,000 | 83,475,000 | 1112 | 376  | 0.1203149    | ATG4C,ENSBTAG00000048179                    |
| 3 | 83,400,000 | 83,550,000 | 1113 | 559  | 0.778490086  | ANGPTL3,DOCK7,ENSBTAG00000048179            |
| 3 | 83,475,000 | 83,625,000 | 1114 | 640  | 0.147435649  | ANGPTL3,DOCK7                               |
| 3 | 83,550,000 | 83,700,000 | 1115 | 540  | -0.127646105 | DOCK7,USP1                                  |
| 3 | 83,625,000 | 83,775,000 | 1116 | 903  | 0.153853718  | DOCK7,USP1                                  |
| 3 | 83,700,000 | 83,850,000 | 1117 | 972  | 0.314407907  | KANK4                                       |
| 3 | 83,775,000 | 83,925,000 | 1118 | 660  | -1.80229617  | KANK4                                       |
| 3 | 83,850,000 | 84,000,000 | 1119 | 1012 | -3.062094929 | KANK4,ENSBTAG00000045912                    |
| 3 | 83,925,000 | 84,075,000 | 1120 | 1098 | -0.899654255 | ENSBTAG00000045912,ENSBTAG00000047830       |
| 3 | 84,000,000 | 84,150,000 | 1121 | 1033 | 1.478049099  | INADL,ENSBTAG00000046720,ENSBTAG00000047830 |
| 3 | 84,075,000 | 84,225,000 | 1122 | 1061 | 1.286187282  | INADL,ENSBTAG00000046720                    |
| 3 | 84,150,000 | 84,300,000 | 1123 | 792  | 0.510008435  | INADL                                       |
| 3 | 84,225,000 | 84,375,000 | 1124 | 862  | -0.371161802 | INADL                                       |
| 3 | 84,300,000 | 84,450,000 | 1125 | 829  | -0.417466288 | INADL                                       |
| 3 | 84,375,000 | 84,525,000 | 1126 | 475  | -0.336971371 | INADL,TM2D1                                 |
| 3 | 84,450,000 | 84,600,000 | 1127 | 430  | -0.252948323 | INADL,TM2D1                                 |
| 3 | 84,525,000 | 84,675,000 | 1128 | 519  | 0.274359562  | TM2D1                                       |
| 3 | 84,600,000 | 84,750,000 | 1129 | 668  | -0.005573317 | NFIA                                        |
| 3 | 84,675,000 | 84,825,000 | 1130 | 538  | -0.198522821 | NFIA                                        |
| 3 | 84,750,000 | 84,900,000 | 1131 | 367  | 0.208857048  | NFIA                                        |
| 3 | 84,825,000 | 84,975,000 | 1132 | 377  | 0.302068699  | NFIA                                        |
| 3 | 84,900,000 | 85,050,000 | 1133 | 387  | 0.489122607  | NFIA                                        |
| 3 | 84,975,000 | 85,125,000 | 1134 | 423  | 0.118987228  | NFIA                                        |
| 3 | 85,050,000 | 85,200,000 | 1135 | 462  | -0.866699977 | NFIA                                        |
| 3 | 85,125,000 | 85,275,000 | 1136 | 724  | -0.144017223 | NFIA                                        |
| 3 | 85,200,000 | 85,350,000 | 1137 | 701  | 0.618291097  |                                             |
| 3 | 85,275,000 | 85,425,000 | 1138 | 397  | 0.221143692  |                                             |
| 3 | 85,350,000 | 85,500,000 | 1139 | 483  | 0.7720879    |                                             |
| 3 | 85,425,000 | 85,575,000 | 1140 | 621  | 0.658652354  |                                             |
| 3 | 85,500,000 | 85,650,000 | 1141 | 762  | 0.36391183   |                                             |
| 3 | 85,575,000 | 85,725,000 | 1142 | 758  | 0.786371875  |                                             |
| 3 | 85,650,000 | 85,800,000 | 1143 | 822  | 0.937022576  |                                             |
| 3 | 85,725,000 | 85,875,000 | 1144 | 780  | 0.773621761  |                                             |
| 3 | 85,800,000 | 85,950,000 | 1145 | 506  | 0.113080353  |                                             |
| 3 | 85,875,000 | 86,025,000 | 1146 | 784  | 0.617971934  |                                             |
| 3 | 85,950,000 | 86,100,000 | 1147 | 793  | 0.696342866  |                                             |
| 3 | 86,025,000 | 86,175,000 | 1148 | 803  | 0.413199468  |                                             |
| 3 | 86,100,000 | 86,250,000 | 1149 | 1131 | 0.558150673  |                                             |

|   |            |            |      |      |              |                                                         |
|---|------------|------------|------|------|--------------|---------------------------------------------------------|
| 3 | 86,175,000 | 86,325,000 | 1150 | 994  | -1.33074073  | C1orf87                                                 |
| 3 | 86,250,000 | 86,400,000 | 1151 | 881  | -1.087681766 | C1orf87,ENSBTAG00000038085                              |
| 3 | 86,325,000 | 86,475,000 | 1152 | 1097 | 0.641429672  | C1orf87,ENSBTAG00000038085                              |
| 3 | 86,400,000 | 86,550,000 | 1153 | 1159 | -0.302466442 | ENSBTAG0000000258,ENSBTAG00000013693,ENSBTAG00000038085 |
| 3 | 86,475,000 | 86,625,000 | 1154 | 834  | -1.968584203 | ENSBTAG0000000258,ENSBTAG00000010033,ENSBTAG00000013693 |
| 3 | 86,550,000 | 86,700,000 | 1155 | 573  | -2.077113439 | HOOK1,ENSBTAG00000010033                                |
| 3 | 86,625,000 | 86,775,000 | 1156 | 576  | -1.418125604 | HOOK1,ENSBTAG00000010033                                |
| 3 | 86,700,000 | 86,850,000 | 1157 | 661  | -1.162512933 | FGGY,HOOK1                                              |
| 3 | 86,775,000 | 86,925,000 | 1158 | 590  | -1.411362759 | FGGY                                                    |
| 3 | 86,850,000 | 87,000,000 | 1159 | 563  | -1.162851801 | FGGY                                                    |
| 3 | 86,925,000 | 87,075,000 | 1160 | 751  | -0.726779924 | FGGY                                                    |
| 3 | 87,000,000 | 87,150,000 | 1161 | 814  | -1.417116251 | FGGY                                                    |
| 3 | 87,075,000 | 87,225,000 | 1162 | 626  | -1.349793339 | FGGY                                                    |
| 3 | 87,150,000 | 87,300,000 | 1163 | 580  | -0.556698826 | FGGY                                                    |
| 3 | 87,225,000 | 87,375,000 | 1164 | 522  | -0.974432277 | FGGY                                                    |
| 3 | 87,300,000 | 87,450,000 | 1165 | 574  | -2.508976432 |                                                         |
| 3 | 87,375,000 | 87,525,000 | 1166 | 620  | -2.406243478 |                                                         |
| 3 | 87,450,000 | 87,600,000 | 1167 | 444  | 0.635569276  |                                                         |
| 3 | 87,525,000 | 87,675,000 | 1168 | 663  | 0.257026507  |                                                         |
| 3 | 87,600,000 | 87,750,000 | 1169 | 734  | 0.232332965  |                                                         |
| 3 | 87,675,000 | 87,825,000 | 1170 | 461  | 0.208587834  |                                                         |
| 3 | 87,750,000 | 87,900,000 | 1171 | 577  | 0.291955178  | JUN                                                     |
| 3 | 87,825,000 | 87,975,000 | 1172 | 547  | 0.337941408  | JUN,MYSM1                                               |
| 3 | 87,900,000 | 88,050,000 | 1173 | 611  | -0.680675642 | MYSM1,TACSTD2                                           |
| 3 | 87,975,000 | 88,125,000 | 1174 | 681  | -0.5000227   | OMA1,TACSTD2                                            |
| 3 | 88,050,000 | 88,200,000 | 1175 | 579  | 0.845118654  | OMA1                                                    |
| 3 | 88,125,000 | 88,275,000 | 1176 | 594  | 0.622083255  |                                                         |
| 3 | 88,200,000 | 88,350,000 | 1177 | 938  | 0.263585316  |                                                         |
| 3 | 88,275,000 | 88,425,000 | 1178 | 953  | 0.392651305  |                                                         |
| 3 | 88,350,000 | 88,500,000 | 1179 | 595  | 0.626361245  |                                                         |
| 3 | 88,425,000 | 88,575,000 | 1180 | 526  | 0.597122441  |                                                         |
| 3 | 88,500,000 | 88,650,000 | 1181 | 619  | -2.097423982 |                                                         |
| 3 | 88,575,000 | 88,725,000 | 1182 | 1011 | -0.285031544 |                                                         |
| 3 | 88,650,000 | 88,800,000 | 1183 | 883  | 0.373756291  |                                                         |
| 3 | 88,725,000 | 88,875,000 | 1184 | 605  | -0.248575977 |                                                         |
| 3 | 88,800,000 | 88,950,000 | 1185 | 551  | 0.56655072   |                                                         |
| 3 | 88,875,000 | 89,025,000 | 1186 | 783  | 0.878555368  |                                                         |
| 3 | 88,950,000 | 89,100,000 | 1187 | 1197 | 0.309686521  |                                                         |
| 3 | 89,025,000 | 89,175,000 | 1188 | 1231 | 0.091239586  |                                                         |
| 3 | 89,100,000 | 89,250,000 | 1189 | 1062 | -0.050829924 |                                                         |
| 3 | 89,175,000 | 89,325,000 | 1190 | 1255 | 0.444089029  | ENSBTAG00000024201                                      |
| 3 | 89,250,000 | 89,400,000 | 1191 | 1242 | 0.183513259  | ENSBTAG00000024201                                      |
| 3 | 89,325,000 | 89,475,000 | 1192 | 769  | -0.785225453 |                                                         |
| 3 | 89,400,000 | 89,550,000 | 1193 | 898  | 0.460584744  |                                                         |
| 3 | 89,475,000 | 89,625,000 | 1194 | 926  | -0.064671511 |                                                         |
| 3 | 89,550,000 | 89,700,000 | 1195 | 622  | -2.198347226 | DAB1                                                    |
| 3 | 89,625,000 | 89,775,000 | 1196 | 623  | -1.3847223   | C8B,DAB1                                                |
| 3 | 89,700,000 | 89,850,000 | 1197 | 731  | -1.27683179  | C8A,C8B                                                 |
| 3 | 89,775,000 | 89,925,000 | 1198 | 919  | -0.641589857 | C8A,C8B                                                 |
| 3 | 89,850,000 | 90,000,000 | 1199 | 936  | 0.244427209  | C1orf168,C8A                                            |
| 3 | 89,925,000 | 90,075,000 | 1200 | 1017 | 0.206258279  | C1orf168,PRKAA2                                         |

|   |            |            |      |      |              |                                                     |
|---|------------|------------|------|------|--------------|-----------------------------------------------------|
| 3 | 90,000,000 | 90,150,000 | 1201 | 763  | 0.246300041  | C1orf168,PRKAA2                                     |
| 3 | 90,075,000 | 90,225,000 | 1202 | 460  | 0.742774026  | PPAP2B,PRKAA2                                       |
| 3 | 90,150,000 | 90,300,000 | 1203 | 494  | 0.617704073  | PPAP2B                                              |
| 3 | 90,225,000 | 90,375,000 | 1204 | 581  | 0.140497296  | PPAP2B                                              |
| 3 | 90,300,000 | 90,450,000 | 1205 | 864  | 0.603132879  |                                                     |
| 3 | 90,375,000 | 90,525,000 | 1206 | 889  | 0.954651527  |                                                     |
| 3 | 90,450,000 | 90,600,000 | 1207 | 856  | 1.344012794  |                                                     |
| 3 | 90,525,000 | 90,675,000 | 1208 | 1057 | 1.030196391  |                                                     |
| 3 | 90,600,000 | 90,750,000 | 1209 | 1188 | 0.461301638  |                                                     |
| 3 | 90,675,000 | 90,825,000 | 1210 | 866  | -0.082862236 |                                                     |
| 3 | 90,750,000 | 90,900,000 | 1211 | 756  | 0.087351744  |                                                     |
| 3 | 90,825,000 | 90,975,000 | 1212 | 898  | 0.580187679  |                                                     |
| 3 | 90,900,000 | 91,050,000 | 1213 | 1091 | 0.844399285  |                                                     |
| 3 | 90,975,000 | 91,125,000 | 1214 | 1293 | 0.727825177  |                                                     |
| 3 | 91,050,000 | 91,200,000 | 1215 | 846  | 0.41374661   |                                                     |
| 3 | 91,125,000 | 91,275,000 | 1216 | 704  | 0.770435475  |                                                     |
| 3 | 91,200,000 | 91,350,000 | 1217 | 969  | 0.447596393  |                                                     |
| 3 | 91,275,000 | 91,425,000 | 1218 | 830  | 0.556080148  |                                                     |
| 3 | 91,350,000 | 91,500,000 | 1219 | 687  | 0.107871971  |                                                     |
| 3 | 91,425,000 | 91,575,000 | 1220 | 769  | -0.450010065 | ENSBTAG00000046915                                  |
| 3 | 91,500,000 | 91,650,000 | 1221 | 1115 | 0.040524997  | ENSBTAG00000046915                                  |
| 3 | 91,575,000 | 91,725,000 | 1222 | 1043 | 0.490939878  | USP24                                               |
| 3 | 91,650,000 | 91,800,000 | 1223 | 511  | 0.925561934  | USP24                                               |
| 3 | 91,725,000 | 91,875,000 | 1224 | 498  | 0.557989696  | USP24                                               |
| 3 | 91,800,000 | 91,950,000 | 1225 | 990  | 1.079309113  | BSND,TMEM61,USP24                                   |
| 3 | 91,875,000 | 92,025,000 | 1226 | 944  | 1.202807213  | BSND,C1orf177,DHCR24,TMEM61                         |
| 3 | 91,950,000 | 92,100,000 | 1227 | 731  | 0.503069183  | C1orf177,DHCR24,PARS2,TTC22                         |
| 3 | 92,025,000 | 92,175,000 | 1228 | 820  | 0.257541524  | C1orf177,HEATR8,PARS2,TTC22,TTC4,ENSBTAG00000030623 |
| 3 | 92,100,000 | 92,250,000 | 1229 | 801  | 0.901213302  | FAM151A,HEATR8,PARS2,TTC4,ENSBTAG00000030623        |
| 3 | 92,175,000 | 92,325,000 | 1230 | 790  | 1.289417913  | ACOT11,FAM151A,ENSBTAG00000030623                   |
| 3 | 92,250,000 | 92,400,000 | 1231 | 664  | 1.322050879  | ACOT11,FAM151A                                      |
| 3 | 92,325,000 | 92,475,000 | 1232 | 472  | 1.230188799  | SSBP3                                               |
| 3 | 92,400,000 | 92,550,000 | 1233 | 358  | 0.324176929  | SSBP3                                               |
| 3 | 92,475,000 | 92,625,000 | 1234 | 747  | 0.670337911  | CYB5RL,MRPL37,SSBP3                                 |
| 3 | 92,550,000 | 92,700,000 | 1235 | 822  | 0.810213482  | CDCP2,CYB5RL,MRPL37,SSBP3                           |
| 3 | 92,625,000 | 92,775,000 | 1236 | 650  | 0.232680541  | CDCP2,TCEANC2,TMEM59                                |
| 3 | 92,700,000 | 92,850,000 | 1237 | 611  | 0.195164674  | C3H1ORF41,LDLRAD1,LRRC42,TCEANC2,TMEM59             |
| 3 | 92,775,000 | 92,925,000 | 1238 | 485  | -0.205892881 | C3H1ORF41,DIO1,LDLRAD1,LRRC42                       |
| 3 | 92,850,000 | 93,000,000 | 1239 | 389  | -0.929446177 | C3H1ORF41,DIO1,NDC1                                 |
| 3 | 92,925,000 | 93,075,000 | 1240 | 466  | 0.434742717  | NDC1                                                |
| 3 | 93,000,000 | 93,150,000 | 1241 | 594  | 0.412776822  | NDC1                                                |
| 3 | 93,075,000 | 93,225,000 | 1242 | 639  | 0.654773858  | GLIS1                                               |
| 3 | 93,150,000 | 93,300,000 | 1243 | 657  | 0.691370347  | GLIS1                                               |
| 3 | 93,225,000 | 93,375,000 | 1244 | 509  | 0.098290085  | DMRTB1,GLIS1,ENSBTAG00000039540                     |
| 3 | 93,300,000 | 93,450,000 | 1245 | 706  | -0.233016321 | DMRTB1,GLIS1,ENSBTAG00000039540                     |
| 3 | 93,375,000 | 93,525,000 | 1246 | 824  | -0.298562159 | LRP8,ENSBTAG00000039540                             |
| 3 | 93,450,000 | 93,600,000 | 1247 | 624  | -1.031917331 | C3H1orf123,LRP8,MAGOH                               |
| 3 | 93,525,000 | 93,675,000 | 1248 | 751  | -0.584795536 | C3H1orf123,CPT2,LRP8,MAGOH,SLC1A7                   |
| 3 | 93,600,000 | 93,750,000 | 1249 | 718  | 0.106301123  | CPT2,PODN,SLC1A7                                    |
| 3 | 93,675,000 | 93,825,000 | 1250 | 554  | 0.188473579  | PODN,SLC1A7                                         |
| 3 | 93,750,000 | 93,900,000 | 1251 | 574  | 0.926850939  | PODN,SCP2                                           |

|   |            |            |      |      |              |                                         |
|---|------------|------------|------|------|--------------|-----------------------------------------|
| 3 | 93,825,000 | 93,975,000 | 1252 | 486  | 1.338949621  | SCP2                                    |
| 3 | 93,900,000 | 94,050,000 | 1253 | 599  | 0.778997922  | ECHDC2,SCP2,ZYG11A,ENSBTAG00000047375   |
| 3 | 93,975,000 | 94,125,000 | 1254 | 845  | -0.296011538 | ECHDC2,ZYG11A,ZYG11B,ENSBTAG00000047375 |
| 3 | 94,050,000 | 94,200,000 | 1255 | 844  | -0.389008341 | ZYG11A,ZYG11B                           |
| 3 | 94,125,000 | 94,275,000 | 1256 | 708  | -0.112009227 | COA7,ZYG11B                             |
| 3 | 94,200,000 | 94,350,000 | 1257 | 605  | -0.356627986 | COA7,FAM159A,GPX7                       |
| 3 | 94,275,000 | 94,425,000 | 1258 | 621  | 0.791445055  | FAM159A,GPX7,ZCCHC11                    |
| 3 | 94,350,000 | 94,500,000 | 1259 | 614  | 1.040641213  | ZCCHC11                                 |
| 3 | 94,425,000 | 94,575,000 | 1260 | 498  | 1.121430423  | ORC1,PRPF38A,ZCCHC11                    |
| 3 | 94,500,000 | 94,650,000 | 1261 | 551  | 0.598156215  | CC2D1B,ORC1,PRPF38A,ZCCHC11,ZFYVE9      |
| 3 | 94,575,000 | 94,725,000 | 1262 | 488  | 0.232325124  | CC2D1B,ORC1,ZFYVE9                      |
| 3 | 94,650,000 | 94,800,000 | 1263 | 346  | 0.403920786  | ZFYVE9                                  |
| 3 | 94,725,000 | 94,875,000 | 1264 | 388  | -0.139985802 | BTF3L4,TXNDC12                          |
| 3 | 94,800,000 | 94,950,000 | 1265 | 392  | 0.066988407  | BTF3L4,RAB3B,TXNDC12                    |
| 3 | 94,875,000 | 95,025,000 | 1266 | 328  | 0.265046831  | RAB3B,TXNDC12                           |
| 3 | 94,950,000 | 95,100,000 | 1267 | 253  | 0.347058897  | NRD1,RAB3B                              |
| 3 | 95,025,000 | 95,175,000 | 1268 | 238  | 1.053196623  | NRD1,OSBPL9                             |
| 3 | 95,100,000 | 95,250,000 | 1269 | 223  | 0.711654756  | NRD1,OSBPL9                             |
| 3 | 95,175,000 | 95,325,000 | 1270 | 385  | 0.059024989  | OSBPL9                                  |
| 3 | 95,250,000 | 95,400,000 | 1271 | 425  | -0.52743948  | EPS15,OSBPL9,ENSBTAG00000024153         |
| 3 | 95,325,000 | 95,475,000 | 1272 | 272  | -0.959803606 | EPS15,ENSBTAG00000024153                |
| 3 | 95,400,000 | 95,550,000 | 1273 | 312  | -0.64249188  | EPS15                                   |
| 3 | 95,475,000 | 95,625,000 | 1274 | 345  | -0.277113935 | EPS15,RNF11,TTC39A                      |
| 3 | 95,550,000 | 95,700,000 | 1275 | 309  | -0.107823897 | RNF11,TTC39A                            |
| 3 | 95,625,000 | 95,775,000 | 1276 | 445  | 0.283209218  | C3H1orf185                              |
| 3 | 95,700,000 | 95,850,000 | 1277 | 736  | 0.939892053  | C3H1orf185                              |
| 3 | 95,775,000 | 95,925,000 | 1278 | 631  | 0.994220268  | CDKN2C                                  |
| 3 | 95,850,000 | 96,000,000 | 1279 | 353  | 0.20823866   | CDKN2C,FAF1                             |
| 3 | 95,925,000 | 96,075,000 | 1280 | 280  | -1.156056528 | CDKN2C,FAF1                             |
| 3 | 96,000,000 | 96,150,000 | 1281 | 326  | -1.779029915 | FAF1                                    |
| 3 | 96,075,000 | 96,225,000 | 1282 | 435  | -1.450582394 | FAF1                                    |
| 3 | 96,150,000 | 96,300,000 | 1283 | 458  | -0.426125095 | FAF1                                    |
| 3 | 96,225,000 | 96,375,000 | 1284 | 676  | 0.561927159  | FAF1                                    |
| 3 | 96,300,000 | 96,450,000 | 1285 | 891  | 0.874863623  | FAF1                                    |
| 3 | 96,375,000 | 96,525,000 | 1286 | 778  | 0.305096496  | DMRTA2,FAF1                             |
| 3 | 96,450,000 | 96,600,000 | 1287 | 923  | 0.206937557  | DMRTA2                                  |
| 3 | 96,525,000 | 96,675,000 | 1288 | 1056 | 0.353310083  | ELAVL4                                  |
| 3 | 96,600,000 | 96,750,000 | 1289 | 821  | -0.187047967 | ELAVL4                                  |
| 3 | 96,675,000 | 96,825,000 | 1290 | 567  | 0.126779323  | ELAVL4                                  |
| 3 | 96,750,000 | 96,900,000 | 1291 | 445  | 1.047548865  |                                         |
| 3 | 96,825,000 | 96,975,000 | 1292 | 365  | 0.961843068  |                                         |
| 3 | 96,900,000 | 97,050,000 | 1293 | 452  | 0.678219463  |                                         |
| 3 | 96,975,000 | 97,125,000 | 1294 | 695  | 0.598715554  |                                         |
| 3 | 97,050,000 | 97,200,000 | 1295 | 721  | 0.46025422   |                                         |
| 3 | 97,125,000 | 97,275,000 | 1296 | 924  | 0.822093321  |                                         |
| 3 | 97,200,000 | 97,350,000 | 1297 | 744  | 0.889639697  |                                         |
| 3 | 97,275,000 | 97,425,000 | 1298 | 411  | -0.132981591 |                                         |
| 3 | 97,350,000 | 97,500,000 | 1299 | 772  | -0.002984008 |                                         |
| 3 | 97,425,000 | 97,575,000 | 1300 | 1260 | 0.262694294  |                                         |
| 3 | 97,500,000 | 97,650,000 | 1301 | 1148 | -0.582633213 |                                         |
| 3 | 97,575,000 | 97,725,000 | 1302 | 694  | -2.737489201 |                                         |
| 3 | 97,650,000 | 97,800,000 | 1303 | 517  | -1.744543773 |                                         |
| 3 | 97,725,000 | 97,875,000 | 1304 | 535  | -0.27187144  |                                         |



|   |             |             |      |      |              |                                                                      |
|---|-------------|-------------|------|------|--------------|----------------------------------------------------------------------|
| 3 | 97,800,000  | 97,950,000  | 1305 | 491  | -0.617604163 |                                                                      |
| 3 | 97,875,000  | 98,025,000  | 1306 | 521  | -1.375269222 |                                                                      |
| 3 | 97,950,000  | 98,100,000  | 1307 | 695  | -1.555874736 | BEND5                                                                |
| 3 | 98,025,000  | 98,175,000  | 1308 | 897  | -0.627855685 | BEND5                                                                |
| 3 | 98,100,000  | 98,250,000  | 1309 | 1008 | -0.017408967 | BEND5                                                                |
| 3 | 98,175,000  | 98,325,000  | 1310 | 957  | 0.150487435  | AGBL4                                                                |
| 3 | 98,250,000  | 98,400,000  | 1311 | 1025 | 0.202181139  | AGBL4,SPATA6                                                         |
| 3 | 98,325,000  | 98,475,000  | 1312 | 1427 | 0.008486125  | SPATA6                                                               |
| 3 | 98,400,000  | 98,550,000  | 1313 | 1428 | 0.372249225  | SPATA6                                                               |
| 3 | 98,475,000  | 98,625,000  | 1314 | 844  | 0.90311582   | SLC5A9,SPATA6                                                        |
| 3 | 98,550,000  | 98,700,000  | 1315 | 553  | 0.304163847  | SKINT1,SLC5A9                                                        |
| 3 | 98,625,000  | 98,775,000  | 1316 | 603  | 0.538938557  | SKINT1,ENSBTAG00000030553                                            |
| 3 | 98,700,000  | 98,850,000  | 1317 | 746  | 0.037252798  | ENSBTAG00000030553                                                   |
| 3 | 98,775,000  | 98,925,000  | 1318 | 748  | -1.753289553 |                                                                      |
| 3 | 98,850,000  | 99,000,000  | 1319 | 683  | -1.238781212 |                                                                      |
| 3 | 98,925,000  | 99,075,000  | 1320 | 567  | 0.21323168   |                                                                      |
| 3 | 99,000,000  | 99,150,000  | 1321 | 781  | 0.653532908  |                                                                      |
| 3 | 99,075,000  | 99,225,000  | 1322 | 1074 | 0.891440665  |                                                                      |
| 3 | 99,150,000  | 99,300,000  | 1323 | 860  | 0.802356483  |                                                                      |
| 3 | 99,225,000  | 99,375,000  | 1324 | 536  | -1.112881298 |                                                                      |
| 3 | 99,300,000  | 99,450,000  | 1325 | 473  | -2.728126021 | FOXD2                                                                |
| 3 | 99,375,000  | 99,525,000  | 1326 | 656  | 0.138841788  | CMPK1,FOXD2                                                          |
| 3 | 99,450,000  | 99,600,000  | 1327 | 911  | 0.932464599  | CMPK1,STIL                                                           |
| 3 | 99,525,000  | 99,675,000  | 1328 | 920  | -0.459697214 | CYP4X1,PDZK1IP1,STIL,TAL1                                            |
| 3 | 99,600,000  | 99,750,000  | 1329 | 657  | -1.020630178 | CYP4X1,PDZK1IP1,TAL1                                                 |
| 3 | 99,675,000  | 99,825,000  | 1330 | 491  | 0.803052366  | CYP4X1,ENSBTAG00000037890                                            |
| 3 | 99,750,000  | 99,900,000  | 1331 | 416  | 1.345249651  | ENSBTAG00000000229,ENSBTAG00000037890                                |
| 3 | 99,825,000  | 99,975,000  | 1332 | 508  | 1.28026223   | CYP4A22,CYP4B1,ENSBTAG00000000229                                    |
| 3 | 99,900,000  | 100,050,000 | 1333 | 763  | 1.387838291  | CYP4A22,CYP4B1,EFCAB14                                               |
| 3 | 99,975,000  | 100,125,000 | 1334 | 978  | 1.463174866  | ATPAF1,EFCAB14,MOB3C,TEX38                                           |
| 3 | 100,050,000 | 100,200,000 | 1335 | 992  | 1.457757293  | ATPAF1,EFCAB14,KNCN,MKNK1,MOB3C,TEX38                                |
| 3 | 100,125,000 | 100,275,000 | 1336 | 809  | 1.468643135  | DMBX1,KNCN,MKNK1                                                     |
| 3 | 100,200,000 | 100,350,000 | 1337 | 531  | 1.442895972  | DMBX1,FAAH,ENSBTAG00000037858                                        |
| 3 | 100,275,000 | 100,425,000 | 1338 | 515  | 1.135619691  | FAAH,LRR41,NSUN4,RAD54L,UQCRH,ENSBTAG0000019904,ENSBTAG00000037858   |
| 3 | 100,350,000 | 100,500,000 | 1339 | 879  | 0.750958242  | LRR41,LURAP1,NSUN4,POMGNT1,RAD54L,TSPAN1,UQCRH,ENSBTAG00000019904    |
| 3 | 100,425,000 | 100,575,000 | 1340 | 1077 | 0.747925658  | LURAP1,PIK3R3,POMGNT1,RAD54L,TSPAN1                                  |
| 3 | 100,500,000 | 100,650,000 | 1341 | 1106 | 0.318261465  | PIK3R3,TSPAN1                                                        |
| 3 | 100,575,000 | 100,725,000 | 1342 | 984  | 0.044877558  | MAST2,PIK3R3                                                         |
| 3 | 100,650,000 | 100,800,000 | 1343 | 917  | 0.290496427  | MAST2,PIK3R3                                                         |
| 3 | 100,725,000 | 100,875,000 | 1344 | 805  | 0.191746763  | MAST2                                                                |
| 3 | 100,800,000 | 100,950,000 | 1345 | 697  | 0.053858041  | IPP                                                                  |
| 3 | 100,875,000 | 101,025,000 | 1346 | 901  | -0.05804833  | IPP,ENSBTAG00000008810                                               |
| 3 | 100,950,000 | 101,100,000 | 1347 | 795  | -0.172197599 | CCDC17,IPP,NASP,ENSBTAG00000008810                                   |
| 3 | 101,025,000 | 101,175,000 | 1348 | 778  | 0.040944998  | AKR1A1,CCDC17,MMACHC,NASP,PRDX1,ENSBTAG0000008810,ENSBTAG00000017029 |
| 3 | 101,100,000 | 101,250,000 | 1349 | 1109 | 0.591710459  | AKR1A1,MMACHC,PRDX1,TESK2,ENSBTAG00000017029                         |
| 3 | 101,175,000 | 101,325,000 | 1350 | 1009 | 0.453741892  | MUTYH,TESK2,TOE1,ENSBTAG00000017029                                  |
| 3 | 101,250,000 | 101,400,000 | 1351 | 832  | 0.938508049  | HPDL,MUTYH,RPS27L,TESK2,TOE1                                         |
| 3 | 101,325,000 | 101,475,000 | 1352 | 854  | 1.206116032  | HPDL,MUTYH,RPS27L                                                    |
| 3 | 101,400,000 | 101,550,000 | 1353 | 719  | 0.979542433  |                                                                      |

|   |             |             |      |      |              |                                                                                                                        |
|---|-------------|-------------|------|------|--------------|------------------------------------------------------------------------------------------------------------------------|
| 3 | 101,475,000 | 101,625,000 | 1354 | 590  | 0.489351256  | HECTD3,UROD,ZSWIM5                                                                                                     |
| 3 | 101,550,000 | 101,700,000 | 1355 | 534  | 0.581658952  | EIF2B3,HECTD3,UROD,ZSWIM5                                                                                              |
| 3 | 101,625,000 | 101,775,000 | 1356 | 577  | 0.002543387  | EIF2B3,HECTD3,PTCH2                                                                                                    |
| 3 | 101,700,000 | 101,850,000 | 1357 | 548  | 0.007183964  | BEST4,BTBD19,EIF2B3,KIF2C,PLK3,PTCH2,RPS8,TCTEX1D4                                                                     |
| 3 | 101,775,000 | 101,925,000 | 1358 | 570  | 0.17096797   | BEST4,BTBD19,C1orf228,KIF2C,PLK3,PTCH2,RPS8,TCTEX1D4                                                                   |
| 3 | 101,850,000 | 102,000,000 | 1359 | 625  | 0.106365733  | C1orf228,KIF2C,RNF220,TMEM53                                                                                           |
| 3 | 101,925,000 | 102,075,000 | 1360 | 556  | 0.689957206  | C1orf228,RNF220,TMEM53                                                                                                 |
| 3 | 102,000,000 | 102,150,000 | 1361 | 809  | 0.065481412  | RNF220                                                                                                                 |
| 3 | 102,075,000 | 102,225,000 | 1362 | 977  | -0.028650479 | RNF220                                                                                                                 |
| 3 | 102,150,000 | 102,300,000 | 1363 | 760  | 0.444857482  | ERI3,RNF220                                                                                                            |
| 3 | 102,225,000 | 102,375,000 | 1364 | 558  | 0.64508997   | ERI3,RNF220                                                                                                            |
| 3 | 102,300,000 | 102,450,000 | 1365 | 359  | 0.331964462  | DMAP1,ERI3                                                                                                             |
| 3 | 102,375,000 | 102,525,000 | 1366 | 587  | -2.762513173 | DMAP1,ERI3                                                                                                             |
| 3 | 102,450,000 | 102,600,000 | 1367 | 868  | -3.231477878 | ENSBTAG00000005143,ENSBTAG000000047871                                                                                 |
| 3 | 102,525,000 | 102,675,000 | 1368 | 684  | -2.130846802 | ATP6V0B,B4GALT2,CCDC24,ENSBTAG00000005143,ENSBTAG00000008690,ENSBTAG000000047871                                       |
| 3 | 102,600,000 | 102,750,000 | 1369 | 726  | -0.660445084 | ARTN,ATP6V0B,B4GALT2,CCDC24,DPH2,IPO13,SIAT6,ENSBTAG00000008690                                                        |
| 3 | 102,675,000 | 102,825,000 | 1370 | 1043 | 0.042220689  | ARTN,DPH2,IPO13,SIAT6                                                                                                  |
| 3 | 102,750,000 | 102,900,000 | 1371 | 1011 | 0.810229814  |                                                                                                                        |
| 3 | 102,825,000 | 102,975,000 | 1372 | 584  | 1.144543185  | KDM4A                                                                                                                  |
| 3 | 102,900,000 | 103,050,000 | 1373 | 242  | 0.91713339   | KDM4A,PTPRF                                                                                                            |
| 3 | 102,975,000 | 103,125,000 | 1374 | 413  | -0.601388642 | PTPRF                                                                                                                  |
| 3 | 103,050,000 | 103,200,000 | 1375 | 685  | 0.051742683  | HYI,PTPRF,SZT2                                                                                                         |
| 3 | 103,125,000 | 103,275,000 | 1376 | 615  | 1.143868179  | CDC20,ELOVL1,HYI,MED8,MPL,SZT2                                                                                         |
| 3 | 103,200,000 | 103,350,000 | 1377 | 683  | 0.956245933  | C3H1ORF210,CDC20,ELOVL1,HPRT1,MED8,MPL,SZT2,TIE1,TMEM125                                                               |
| 3 | 103,275,000 | 103,425,000 | 1378 | 874  | 0.074873691  | C3H1ORF210,CFAP57,EBNA1BP2,HPRT1,TIE1,TMEM125                                                                          |
| 3 | 103,350,000 | 103,500,000 | 1379 | 1007 | -0.069049754 | CFAP57,EBNA1BP2,FAM183A,ENSBTAG000000030386,ENSBTAG000000037432                                                        |
| 3 | 103,425,000 | 103,575,000 | 1380 | 1252 | 0.312610141  | EBNA1BP2,FAM183A,ENSBTAG00000001397,ENSBTAG000000030385,ENSBTAG000000030386,ENSBTAG000000037432                        |
| 3 | 103,500,000 | 103,650,000 | 1381 | 1442 | 0.944753277  | ENSBTAG00000001397,ENSBTAG000000023748,ENSBTAG000000030385,ENSBTAG000000030386,ENSBTAG000000037770,ENSBTAG000000037810 |
| 3 | 103,575,000 | 103,725,000 | 1382 | 1139 | 1.268857057  | ENSBTAG00000007627,ENSBTAG00000012414,ENSBTAG000000023748,ENSBTAG00000037770,ENSBTAG000000037810                       |
| 3 | 103,650,000 | 103,800,000 | 1383 | 788  | 1.442006647  | ENSBTAG00000007627,ENSBTAG00000012414                                                                                  |
| 3 | 103,725,000 | 103,875,000 | 1384 | 765  | 1.406876542  |                                                                                                                        |
| 3 | 103,800,000 | 103,950,000 | 1385 | 760  | 0.785458886  | SLC2A1,ENSBTAG000000023986                                                                                             |
| 3 | 103,875,000 | 104,025,000 | 1386 | 713  | 0.939298141  | SLC2A1,ZNF691,ENSBTAG000000023986                                                                                      |
| 3 | 103,950,000 | 104,100,000 | 1387 | 817  | 1.082949548  | C3H1ORF50,CCDC23,CLDN19,LEPRE1,ZNF691,ENSBTAG00000017387                                                               |
| 3 | 104,025,000 | 104,175,000 | 1388 | 776  | 0.874268805  | C3H1ORF50,CCDC23,CCDC30,CLDN19,LEPRE1,PPIH,YBX1,ENSBTAG00000017387                                                     |
| 3 | 104,100,000 | 104,250,000 | 1389 | 592  | 0.566922047  | CCDC30,PPIH,YBX1                                                                                                       |
| 3 | 104,175,000 | 104,325,000 | 1390 | 754  | 0.926730541  | CCDC30,PPCS,ZMYND12                                                                                                    |
| 3 | 104,250,000 | 104,400,000 | 1391 | 879  | 1.006054797  | CCDC30,PPCS,RIMKLA,ZMYND12                                                                                             |

|   |             |             |      |      |              |                                            |
|---|-------------|-------------|------|------|--------------|--------------------------------------------|
| 3 | 104,325,000 | 104,475,000 | 1392 | 909  | 0.4746125    | RIMKLA,ZMYND12                             |
| 3 | 104,400,000 | 104,550,000 | 1393 | 690  | 0.164289598  | FOXJ3,RIMKLA                               |
| 3 | 104,475,000 | 104,625,000 | 1394 | 786  | 0.939807403  | FOXJ3,GUCA2A,GUCA2B                        |
| 3 | 104,550,000 | 104,700,000 | 1395 | 1378 | 1.148311472  | FOXJ3,GUCA2A,GUCA2B                        |
| 3 | 104,625,000 | 104,775,000 | 1396 | 1233 | 0.780015136  |                                            |
| 3 | 104,700,000 | 104,850,000 | 1397 | 910  | -0.271614474 |                                            |
| 3 | 104,775,000 | 104,925,000 | 1398 | 970  | -0.028987341 |                                            |
| 3 | 104,850,000 | 105,000,000 | 1399 | 948  | -0.43599226  |                                            |
| 3 | 104,925,000 | 105,075,000 | 1400 | 1117 | -0.144934509 |                                            |
| 3 | 105,000,000 | 105,150,000 | 1401 | 1153 | 0.699717124  |                                            |
| 3 | 105,075,000 | 105,225,000 | 1402 | 958  | 0.502522294  | HIVEP3                                     |
| 3 | 105,150,000 | 105,300,000 | 1403 | 980  | 0.600902571  | EDN2,HIVEP3                                |
| 3 | 105,225,000 | 105,375,000 | 1404 | 1056 | 0.856359374  | EDN2,HIVEP3                                |
| 3 | 105,300,000 | 105,450,000 | 1405 | 1063 | 0.550521489  | EDN2,FOXO6                                 |
| 3 | 105,375,000 | 105,525,000 | 1406 | 1163 | -0.455688779 | FOXO6                                      |
| 3 | 105,450,000 | 105,600,000 | 1407 | 1335 | -1.014350786 |                                            |
| 3 | 105,525,000 | 105,675,000 | 1408 | 1257 | -1.985254927 | SCMH1                                      |
| 3 | 105,600,000 | 105,750,000 | 1409 | 1112 | -1.465481426 | SCMH1                                      |
| 3 | 105,675,000 | 105,825,000 | 1410 | 1183 | 0.020289139  | CTPS,SCMH1,SLFNL1                          |
| 3 | 105,750,000 | 105,900,000 | 1411 | 1328 | 0.216590108  | CTPS,SCMH1,SLFNL1                          |
| 3 | 105,825,000 | 105,975,000 | 1412 | 1241 | 0.600166719  | CITED4,CTPS                                |
| 3 | 105,900,000 | 106,050,000 | 1413 | 926  | 0.851773813  | CITED4,KCNQ4,NFYC                          |
| 3 | 105,975,000 | 106,125,000 | 1414 | 785  | 0.921784614  | KCNQ4,NFYC                                 |
| 3 | 106,050,000 | 106,200,000 | 1415 | 1169 | -0.344033656 | NFYC,RIMS3,ENSBTAG00000034332              |
| 3 | 106,125,000 | 106,275,000 | 1416 | 1562 | -0.203945093 | EXO5,RIMS3,ZFP69,ZNF684,ENSBTAG00000034332 |
| 3 | 106,200,000 | 106,350,000 | 1417 | 1432 | 0.379003376  | EXO5,SMAP2,ZFP69,ZNF684                    |
| 3 | 106,275,000 | 106,425,000 | 1418 | 1416 | 0.684526996  | COL9A2,SMAP2,ZFP69                         |
| 3 | 106,350,000 | 106,500,000 | 1419 | 1380 | 0.848605036  | COL9A2,RLF,SMAP2,TMCO2,ZMPSTE24            |
| 3 | 106,425,000 | 106,575,000 | 1420 | 1044 | 0.8589881    | RLF,TMCO2,ZMPSTE24                         |
| 3 | 106,500,000 | 106,650,000 | 1421 | 1078 | 0.766384213  | CAP1,CLN1,RLF                              |
| 3 | 106,575,000 | 106,725,000 | 1422 | 1168 | 0.851709997  | CAP1,CLN1,MFSD2,RLF                        |
| 3 | 106,650,000 | 106,800,000 | 1423 | 1076 | 0.836426738  | CAP1,MFSD2,MYCL                            |
| 3 | 106,725,000 | 106,875,000 | 1424 | 1160 | 0.153570129  | MFSD2,MYCL,TRIT1                           |
| 3 | 106,800,000 | 106,950,000 | 1425 | 1341 | -0.431025243 | PPIE,TRIT1,ENSBTAG00000017892              |
| 3 | 106,875,000 | 107,025,000 | 1426 | 1117 | -0.20866818  | HPCAL4,NT5C1A,PPIE,ENSBTAG00000017892      |
| 3 | 106,950,000 | 107,100,000 | 1427 | 649  | 0.728621945  | HEYL,HPCAL4,NT5C1A,PABPC4                  |
| 3 | 107,025,000 | 107,175,000 | 1428 | 634  | 0.946659347  | HEYL,PABPC4,ENSBTAG00000046807             |
| 3 | 107,100,000 | 107,250,000 | 1429 | 898  | 0.973904196  | KIAA0754,MACF1,ENSBTAG00000046807          |
| 3 | 107,175,000 | 107,325,000 | 1430 | 872  | 0.652160169  | KIAA0754,MACF1                             |
| 3 | 107,250,000 | 107,400,000 | 1431 | 944  | 0.228054533  | MACF1                                      |
| 3 | 107,325,000 | 107,475,000 | 1432 | 1213 | 0.595696833  | MACF1                                      |
| 3 | 107,400,000 | 107,550,000 | 1433 | 1089 | 0.549121567  | ENSBTAG00000047038                         |
| 3 | 107,475,000 | 107,625,000 | 1434 | 873  | 0.001447783  | AKIRIN1,NDUFS5,ENSBTAG00000047038          |
| 3 | 107,550,000 | 107,700,000 | 1435 | 918  | 0.610272311  | AKIRIN1,GJA9,NDUFS5,RHBDL2                 |
| 3 | 107,625,000 | 107,775,000 | 1436 | 747  | 0.801090289  | GJA9,MYCBP,RHBDL2,RRAGC                    |
| 3 | 107,700,000 | 107,850,000 | 1437 | 482  | 0.745128868  | MYCBP,RRAGC                                |
| 3 | 107,775,000 | 107,925,000 | 1438 | 401  | 0.697753319  |                                            |
| 3 | 107,850,000 | 108,000,000 | 1439 | 669  | 0.836811845  |                                            |
| 3 | 107,925,000 | 108,075,000 | 1440 | 869  | 1.020510299  |                                            |
| 3 | 108,000,000 | 108,150,000 | 1441 | 985  | 0.93069698   |                                            |
| 3 | 108,075,000 | 108,225,000 | 1442 | 1058 | 0.511063299  |                                            |
| 3 | 108,150,000 | 108,300,000 | 1443 | 611  | 0.164333872  |                                            |
| 3 | 108,225,000 | 108,375,000 | 1444 | 433  | 0.726542653  |                                            |

|   |             |             |      |      |              |                                                        |
|---|-------------|-------------|------|------|--------------|--------------------------------------------------------|
| 3 | 108,300,000 | 108,450,000 | 1445 | 613  | 0.562591656  |                                                        |
| 3 | 108,375,000 | 108,525,000 | 1446 | 651  | 0.521110928  | POU3F1                                                 |
| 3 | 108,450,000 | 108,600,000 | 1447 | 651  | 0.529694491  | FHL3,INPP5B,POU3F1,SF3A3,UTP11L                        |
| 3 | 108,525,000 | 108,675,000 | 1448 | 738  | 0.251458245  | FHL3,INPP5B,MTF1,SF3A3,UTP11L                          |
| 3 | 108,600,000 | 108,750,000 | 1449 | 689  | 0.139729069  | C1orf122,EPHA10,INPP5B,MANEAL,MTF1,YRDC                |
| 3 | 108,675,000 | 108,825,000 | 1450 | 863  | 0.860082775  | C1orf122,CDCA8,EPHA10,MANEAL,MGC166151,MTF1,<br>YRDC   |
| 3 | 108,750,000 | 108,900,000 | 1451 | 1034 | 0.514241127  | CDCA8,EPHA10,GNL2,MGC166151,RSPO1                      |
| 3 | 108,825,000 | 108,975,000 | 1452 | 674  | 0.371190359  | DNALI1,GNL2,MEAF6,RSPO1,SNIP1                          |
| 3 | 108,900,000 | 109,050,000 | 1453 | 481  | 1.382909113  | DNALI1,GNL2,MEAF6,SNIP1,ZC3H12A                        |
| 3 | 108,975,000 | 109,125,000 | 1454 | 751  | 1.052697584  | MEAF6,ZC3H12A                                          |
| 3 | 109,050,000 | 109,200,000 | 1455 | 984  | 0.764737849  |                                                        |
| 3 | 109,125,000 | 109,275,000 | 1456 | 870  | 0.96351501   |                                                        |
| 3 | 109,200,000 | 109,350,000 | 1457 | 1059 | -0.278351732 |                                                        |
| 3 | 109,275,000 | 109,425,000 | 1458 | 1088 | -0.485425706 |                                                        |
| 3 | 109,350,000 | 109,500,000 | 1459 | 975  | 0.974999633  |                                                        |
| 3 | 109,425,000 | 109,575,000 | 1460 | 1134 | 0.857140337  | GRIK3                                                  |
| 3 | 109,500,000 | 109,650,000 | 1461 | 911  | 0.597914169  | GRIK3                                                  |
| 3 | 109,575,000 | 109,725,000 | 1462 | 663  | -0.215920384 | GRIK3                                                  |
| 3 | 109,650,000 | 109,800,000 | 1463 | 935  | -0.457568335 | GRIK3                                                  |
| 3 | 109,725,000 | 109,875,000 | 1464 | 1435 | 0.559834205  |                                                        |
| 3 | 109,800,000 | 109,950,000 | 1465 | 1603 | 0.85803459   |                                                        |
| 3 | 109,875,000 | 110,025,000 | 1466 | 1524 | 0.628547301  | CSF3R,ENSBTAG00000024097                               |
| 3 | 109,950,000 | 110,100,000 | 1467 | 1410 | 0.128358717  | CSF3R,LSM10,OSCP1,STK40,ENSBTAG00000024097             |
| 3 | 110,025,000 | 110,175,000 | 1468 | 1031 | 0.403016846  | EVA1B,LSM10,OSCP1,STK40,THRAP3,ENSBTAG000000<br>038617 |
| 3 | 110,100,000 | 110,250,000 | 1469 | 762  | 0.788120581  | EVA1B,MAP7D1,STK40,THRAP3,ENSBTAG0000003861<br>7       |
| 3 | 110,175,000 | 110,325,000 | 1470 | 840  | 0.352247571  | ADPRHL2,COL8A2,MAP7D1,TEKT2,THRAP3,TRAPPC3             |
| 3 | 110,250,000 | 110,400,000 | 1471 | 835  | 0.429295058  | ADPRHL2,AGO3,COL8A2,TEKT2,TRAPPC3                      |
| 3 | 110,325,000 | 110,475,000 | 1472 | 779  | 0.694156382  | AGO3,EIF2C1                                            |
| 3 | 110,400,000 | 110,550,000 | 1473 | 611  | -0.075369418 | AGO3,AGO4,EIF2C1                                       |
| 3 | 110,475,000 | 110,625,000 | 1474 | 682  | 0.563258312  | AGO4,CLSPN,EIF2C1                                      |
| 3 | 110,550,000 | 110,700,000 | 1475 | 1040 | 0.273389019  | AGO4,C1orf216,CLSPN                                    |
| 3 | 110,625,000 | 110,775,000 | 1476 | 1012 | -0.35092117  | C1orf216,CLSPN,PSMB2,TFAP2E                            |
| 3 | 110,700,000 | 110,850,000 | 1477 | 730  | -0.028225266 | KIAA0319L,NCDN,PSMB2,TFAP2E                            |
| 3 | 110,775,000 | 110,925,000 | 1478 | 818  | 0.696969585  | KIAA0319L,NCDN,TFAP2E,ZMYM4                            |
| 3 | 110,850,000 | 111,000,000 | 1479 | 775  | 0.355596184  | KIAA0319L,ZMYM4                                        |
| 3 | 110,925,000 | 111,075,000 | 1480 | 492  | -0.092067544 | ZMYM4                                                  |
| 3 | 111,000,000 | 111,150,000 | 1481 | 383  | 0.502606163  | SFPQ                                                   |
| 3 | 111,075,000 | 111,225,000 | 1482 | 461  | 1.001083511  | SFPQ,ZMYM1                                             |
| 3 | 111,150,000 | 111,300,000 | 1483 | 688  | 0.722300557  | ZMYM1,ZMYM6NB,ENSBTAG00000021948                       |
| 3 | 111,225,000 | 111,375,000 | 1484 | 639  | 0.464065893  | ZMYM6NB,ENSBTAG00000021948                             |
| 3 | 111,300,000 | 111,450,000 | 1485 | 752  | 0.560778627  | DLGAP3,SMIM12                                          |
| 3 | 111,375,000 | 111,525,000 | 1486 | 961  | 0.318063748  | DLGAP3,GJA4,GJB3,GJB4,GJB5,SMIM12                      |
| 3 | 111,450,000 | 111,600,000 | 1487 | 825  | -0.004983427 | GJA4,GJB3,GJB4,GJB5                                    |
| 3 | 111,525,000 | 111,675,000 | 1488 | 806  | 0.874198582  | GJB5                                                   |
| 3 | 111,600,000 | 111,750,000 | 1489 | 1042 | 1.20948851   |                                                        |
| 3 | 111,675,000 | 111,825,000 | 1490 | 895  | 1.122168362  |                                                        |
| 3 | 111,750,000 | 111,900,000 | 1491 | 560  | 0.937045848  |                                                        |
| 3 | 111,825,000 | 111,975,000 | 1492 | 689  | 0.653215183  |                                                        |
| 3 | 111,900,000 | 112,050,000 | 1493 | 794  | 0.641978955  |                                                        |

|   |             |             |      |      |              |                                                                               |
|---|-------------|-------------|------|------|--------------|-------------------------------------------------------------------------------|
| 3 | 111,975,000 | 112,125,000 | 1494 | 826  | 1.037560833  |                                                                               |
| 3 | 112,050,000 | 112,200,000 | 1495 | 800  | 1.194486142  | C1orf94                                                                       |
| 3 | 112,125,000 | 112,275,000 | 1496 | 802  | 0.469788339  | C1orf94                                                                       |
| 3 | 112,200,000 | 112,350,000 | 1497 | 720  | 0.183736909  |                                                                               |
| 3 | 112,275,000 | 112,425,000 | 1498 | 869  | 0.921839138  |                                                                               |
| 3 | 112,350,000 | 112,500,000 | 1499 | 979  | 1.038431871  |                                                                               |
| 3 | 112,425,000 | 112,575,000 | 1500 | 997  | 1.046587935  | CSMD2,HMGB4                                                                   |
| 3 | 112,500,000 | 112,650,000 | 1501 | 1070 | 1.318643888  | CSMD2,HMGB4                                                                   |
| 3 | 112,575,000 | 112,725,000 | 1502 | 804  | 1.271560041  | CSMD2                                                                         |
| 3 | 112,650,000 | 112,800,000 | 1503 | 721  | -0.226879004 | CSMD2                                                                         |
| 3 | 112,725,000 | 112,875,000 | 1504 | 1066 | 0.101620363  | CSMD2                                                                         |
| 3 | 112,800,000 | 112,950,000 | 1505 | 1188 | 1.151570282  | CSMD2,ZSCAN20                                                                 |
| 3 | 112,875,000 | 113,025,000 | 1506 | 785  | 1.198008518  | CSMD2,EFHD1,ZSCAN20                                                           |
| 3 | 112,950,000 | 113,100,000 | 1507 | 529  | 1.060872395  | EFHD1,GIGYF2                                                                  |
| 3 | 113,025,000 | 113,175,000 | 1508 | 429  | 0.775834886  | EFHD1,GIGYF2,KCNJ13                                                           |
| 3 | 113,100,000 | 113,250,000 | 1509 | 552  | 1.025723659  | C2orf82,GIGYF2,KCNJ13,NGEF                                                    |
| 3 | 113,175,000 | 113,325,000 | 1510 | 744  | 0.293072229  | C2orf82,GIGYF2,NGEF                                                           |
| 3 | 113,250,000 | 113,400,000 | 1511 | 828  | -0.97779023  | NEU2,NGEF                                                                     |
| 3 | 113,325,000 | 113,475,000 | 1512 | 814  | -0.41206068  | INPP5D,NEU2                                                                   |
| 3 | 113,400,000 | 113,550,000 | 1513 | 752  | 0.168858736  | INPP5D,ENSBTAG00000030239                                                     |
| 3 | 113,475,000 | 113,625,000 | 1514 | 607  | -0.256210964 | ATG16L1,INPP5D,ENSBTAG00000030239                                             |
| 3 | 113,550,000 | 113,700,000 | 1515 | 496  | 0.542966562  | ATG16L1,SAG                                                                   |
| 3 | 113,625,000 | 113,775,000 | 1516 | 517  | 0.606665729  | DGKH,SAG                                                                      |
| 3 | 113,700,000 | 113,850,000 | 1517 | 604  | 0.831187988  | DGKH,USP40                                                                    |
| 3 | 113,775,000 | 113,925,000 | 1518 | 502  | 0.939183844  | DGKH,UGT1A1,USP40                                                             |
| 3 | 113,850,000 | 114,000,000 | 1519 | 506  | 0.434120688  | UGT1A1,USP40,ENSBTAG00000046353,ENSBTAG0000048275                             |
| 3 | 113,925,000 | 114,075,000 | 1520 | 618  | 0.168940696  | DNAJB3,MROH2A,UGT1A1,ENSBTAG00000046353,ENSBTAG00000048212,ENSBTAG00000048275 |
| 3 | 114,000,000 | 114,150,000 | 1521 | 495  | -0.053328727 | DNAJB3,HJURP,MROH2A,UGT1A1,ENSBTAG00000048212                                 |
| 3 | 114,075,000 | 114,225,000 | 1522 | 1124 | -0.899354338 | HJURP,MROH2A,TRPM8                                                            |
| 3 | 114,150,000 | 114,300,000 | 1523 | 1301 | -1.171230746 | TRPM8                                                                         |
| 3 | 114,225,000 | 114,375,000 | 1524 | 1020 | 0.368135507  | SPP2,TRPM8                                                                    |
| 3 | 114,300,000 | 114,450,000 | 1525 | 1565 | 0.385135641  | SPP2                                                                          |
| 3 | 114,375,000 | 114,525,000 | 1526 | 1558 | -0.292702648 |                                                                               |
| 3 | 114,450,000 | 114,600,000 | 1527 | 1091 | -0.128759192 |                                                                               |
| 3 | 114,525,000 | 114,675,000 | 1528 | 967  | 0.910718957  |                                                                               |
| 3 | 114,600,000 | 114,750,000 | 1529 | 1060 | 1.045481521  | ARL4C                                                                         |
| 3 | 114,675,000 | 114,825,000 | 1530 | 1534 | 0.18612164   | ARL4C                                                                         |
| 3 | 114,750,000 | 114,900,000 | 1531 | 1218 | 0.004548001  |                                                                               |
| 3 | 114,825,000 | 114,975,000 | 1532 | 816  | 0.943260639  |                                                                               |
| 3 | 114,900,000 | 115,050,000 | 1533 | 839  | 1.05463098   |                                                                               |
| 3 | 114,975,000 | 115,125,000 | 1534 | 757  | 0.909795306  |                                                                               |
| 3 | 115,050,000 | 115,200,000 | 1535 | 754  | 0.707992877  |                                                                               |
| 3 | 115,125,000 | 115,275,000 | 1536 | 1352 | -0.065407913 | SH3BP4                                                                        |
| 3 | 115,200,000 | 115,350,000 | 1537 | 1836 | 0.429128647  | SH3BP4                                                                        |
| 3 | 115,275,000 | 115,425,000 | 1538 | 1622 | 0.550327016  |                                                                               |
| 3 | 115,350,000 | 115,500,000 | 1539 | 1229 | 0.263672569  |                                                                               |
| 3 | 115,425,000 | 115,575,000 | 1540 | 787  | 0.143730905  |                                                                               |
| 3 | 115,500,000 | 115,650,000 | 1541 | 1005 | 0.379101192  |                                                                               |
| 3 | 115,575,000 | 115,725,000 | 1542 | 1190 | 0.774325483  |                                                                               |
| 3 | 115,650,000 | 115,800,000 | 1543 | 842  | 1.029567857  |                                                                               |

|   |             |             |      |      |              |                                                                   |
|---|-------------|-------------|------|------|--------------|-------------------------------------------------------------------|
| 3 | 115,725,000 | 115,875,000 | 1544 | 669  | 0.406847898  | AGAP1                                                             |
| 3 | 115,800,000 | 115,950,000 | 1545 | 1100 | 0.549079115  | AGAP1                                                             |
| 3 | 115,875,000 | 116,025,000 | 1546 | 1492 | 0.845477724  | AGAP1                                                             |
| 3 | 115,950,000 | 116,100,000 | 1547 | 1381 | 0.689699792  | AGAP1                                                             |
| 3 | 116,025,000 | 116,175,000 | 1548 | 829  | 0.36338745   | AGAP1                                                             |
| 3 | 116,100,000 | 116,250,000 | 1549 | 692  | -0.018419754 | AGAP1                                                             |
| 3 | 116,175,000 | 116,325,000 | 1550 | 652  | 0.237725274  | AGAP1,ASB18,GBX2                                                  |
| 3 | 116,250,000 | 116,400,000 | 1551 | 839  | 0.09807692   | ASB18,GBX2                                                        |
| 3 | 116,325,000 | 116,475,000 | 1552 | 1403 | -0.225835464 | ASB18,IQCA1                                                       |
| 3 | 116,400,000 | 116,550,000 | 1553 | 972  | -0.455976435 | IQCA1                                                             |
| 3 | 116,475,000 | 116,625,000 | 1554 | 560  | -2.157392722 | IQCA1                                                             |
| 3 | 116,550,000 | 116,700,000 | 1555 | 1168 | 0.130843844  | CXCR7,IQCA1                                                       |
| 3 | 116,625,000 | 116,775,000 | 1556 | 1111 | 1.033761211  | CXCR7                                                             |
| 3 | 116,700,000 | 116,850,000 | 1557 | 936  | 0.739314782  |                                                                   |
| 3 | 116,775,000 | 116,925,000 | 1558 | 1065 | 0.419367782  |                                                                   |
| 3 | 116,850,000 | 117,000,000 | 1559 | 1005 | -0.492855745 |                                                                   |
| 3 | 116,925,000 | 117,075,000 | 1560 | 1435 | -0.490275893 |                                                                   |
| 3 | 117,000,000 | 117,150,000 | 1561 | 1726 | 0.334478959  |                                                                   |
| 3 | 117,075,000 | 117,225,000 | 1562 | 1408 | 0.790672303  | COPS8                                                             |
| 3 | 117,150,000 | 117,300,000 | 1563 | 1069 | 0.205633428  | COPS8                                                             |
| 3 | 117,225,000 | 117,375,000 | 1564 | 992  | 0.174768177  |                                                                   |
| 3 | 117,300,000 | 117,450,000 | 1565 | 1013 | 0.841597402  | COL6A3                                                            |
| 3 | 117,375,000 | 117,525,000 | 1566 | 858  | 0.064395756  | COL6A3,RPS16                                                      |
| 3 | 117,450,000 | 117,600,000 | 1567 | 1065 | -1.861766394 | COL6A3,MLPH,RPS16                                                 |
| 3 | 117,525,000 | 117,675,000 | 1568 | 1520 | -1.479313444 | MLPH,PRLH,RAB17                                                   |
| 3 | 117,600,000 | 117,750,000 | 1569 | 1594 | -0.724089358 | LRRFIP1,MLPH,PRLH,RAB17                                           |
| 3 | 117,675,000 | 117,825,000 | 1570 | 1308 | -0.261340366 | LRRFIP1                                                           |
| 3 | 117,750,000 | 117,900,000 | 1571 | 1025 | 0.370979332  | LRRFIP1,RBM44                                                     |
| 3 | 117,825,000 | 117,975,000 | 1572 | 1012 | -0.570493432 | LRRFIP1,RAMP1,RBM44,ENSBTAG00000045970                            |
| 3 | 117,900,000 | 118,050,000 | 1573 | 662  | -0.654855252 | RAMP1,RBM44,SCLY,UBE2F,ENSBTAG00000045970                         |
| 3 | 117,975,000 | 118,125,000 | 1574 | 428  | 0.080509868  | ESPNL,FAM132B,SCLY,UBE2F                                          |
| 3 | 118,050,000 | 118,200,000 | 1575 | 545  | 0.879211335  | ESPNL,FAM132B,HES6,ILKAP,SCLY,ENSBTAG00000001879                  |
| 3 | 118,125,000 | 118,275,000 | 1576 | 858  | 1.267410697  | FAM132B,HES6,ILKAP,TRAF3IP1,ENSBTAG00000001879,ENSBTAG00000045685 |
| 3 | 118,200,000 | 118,350,000 | 1577 | 1037 | 1.26710131   | TRAF3IP1,ENSBTAG00000001879,ENSBTAG00000045685                    |
| 3 | 118,275,000 | 118,425,000 | 1578 | 889  | 0.693548377  | ASB1,TRAF3IP1                                                     |
| 3 | 118,350,000 | 118,500,000 | 1579 | 886  | 0.123556448  | ASB1                                                              |
| 3 | 118,425,000 | 118,575,000 | 1580 | 1052 | 0.9925348    |                                                                   |
| 3 | 118,500,000 | 118,650,000 | 1581 | 904  | 1.032712443  | TWIST2                                                            |
| 3 | 118,575,000 | 118,725,000 | 1582 | 827  | 0.307158651  | TWIST2                                                            |
| 3 | 118,650,000 | 118,800,000 | 1583 | 1104 | 0.12538441   | TWIST2                                                            |
| 3 | 118,725,000 | 118,875,000 | 1584 | 967  | 0.254567998  |                                                                   |
| 3 | 118,800,000 | 118,950,000 | 1585 | 688  | 0.199011719  | HDAC4                                                             |
| 3 | 118,875,000 | 119,025,000 | 1586 | 1085 | 0.497770528  | HDAC4                                                             |
| 3 | 118,950,000 | 119,100,000 | 1587 | 1586 | 0.760694206  | HDAC4                                                             |
| 3 | 119,025,000 | 119,175,000 | 1588 | 2046 | 0.525009986  | HDAC4                                                             |
| 3 | 119,100,000 | 119,250,000 | 1589 | 2291 | 0.611882306  | HDAC4,ENSBTAG00000045515                                          |
| 3 | 119,175,000 | 119,325,000 | 1590 | 2552 | 0.4570738    | HDAC4,ENSBTAG00000045515                                          |
| 3 | 119,250,000 | 119,400,000 | 1591 | 2565 | 0.283423224  | HDAC4                                                             |
| 3 | 119,325,000 | 119,475,000 | 1592 | 2335 | 0.072351579  | CSF2RA,HDAC4                                                      |
| 3 | 119,400,000 | 119,550,000 | 1593 | 2419 | -0.090836038 | CSF2RA,HDAC4                                                      |

|   |             |             |      |      |              |                                                                                                                            |
|---|-------------|-------------|------|------|--------------|----------------------------------------------------------------------------------------------------------------------------|
| 3 | 119,475,000 | 119,625,000 | 1594 | 2588 | 0.267702057  |                                                                                                                            |
| 3 | 119,550,000 | 119,700,000 | 1595 | 2627 | -0.293494253 | ENSBTAG00000046002,ENSBTAG00000046792                                                                                      |
| 3 | 119,625,000 | 119,775,000 | 1596 | 2043 | -0.920791338 | ENSBTAG00000045833,ENSBTAG00000045911,ENSBTAG00000046002,ENSBTAG00000046792                                                |
| 3 | 119,700,000 | 119,850,000 | 1597 | 1768 | -1.333692994 | NDUFA10,ENSBTAG00000003281,ENSBTAG000000030221,ENSBTAG00000040084,ENSBTAG00000045833,ENSBTAG00000045911                    |
| 3 | 119,775,000 | 119,925,000 | 1598 | 1875 | -0.755004092 | NDUFA10,ENSBTAG00000003281,ENSBTAG000000030221,ENSBTAG00000039566,ENSBTAG00000040084,ENSBTAG00000047496,ENSBTAG00000048084 |
| 3 | 119,850,000 | 120,000,000 | 1599 | 2055 | 0.805138647  | ENSBTAG00000039566,ENSBTAG00000046632,ENSBTAG00000047496,ENSBTAG00000047813,ENSBTAG00000048084                             |
| 3 | 119,925,000 | 120,075,000 | 1600 | 1920 | 0.889038932  | ENSBTAG00000039281,ENSBTAG00000040217,ENSBTAG00000040382,ENSBTAG00000046632,ENSBTAG00000047813                             |
| 3 | 120,000,000 | 120,150,000 | 1601 | 1644 | 0.63841322   | MYEOV2,OTOS,ENSBTAG00000033837,ENSBTAG0000038082,ENSBTAG00000039281,ENSBTAG00000040217,ENSBTAG00000040382                  |
| 3 | 120,075,000 | 120,225,000 | 1602 | 2101 | 0.803773317  | MYEOV2,OTOS,ENSBTAG00000033837,ENSBTAG0000038082                                                                           |
| 3 | 120,150,000 | 120,300,000 | 1603 | 2228 | 0.934499142  | ANKMY1                                                                                                                     |
| 3 | 120,225,000 | 120,375,000 | 1604 | 1854 | 0.709866659  | ANKMY1,CAPN10,RNPEPL1                                                                                                      |
| 3 | 120,300,000 | 120,450,000 | 1605 | 1874 | 0.504211763  | CAPN10,GPC1,GPR35,RNPEPL1                                                                                                  |
| 3 | 120,375,000 | 120,525,000 | 1606 | 1730 | 0.286762289  | GPC1,GPR35,KIF1A,ENSBTAG00000003389                                                                                        |
| 3 | 120,450,000 | 120,600,000 | 1607 | 1592 | 0.254849112  | GPC1,KIF1A,ENSBTAG00000003389                                                                                              |
| 3 | 120,525,000 | 120,675,000 | 1608 | 1863 | 0.681976066  | AGXT,C2orf54,KIF1A                                                                                                         |
| 3 | 120,600,000 | 120,750,000 | 1609 | 1830 | 0.77984155   | AGXT,C2orf54,KIF1A,ENSBTAG00000005168                                                                                      |
| 3 | 120,675,000 | 120,825,000 | 1610 | 1654 | 0.893644316  | MTERFD2,PASK,SNED1,ENSBTAG00000005168                                                                                      |
| 3 | 120,750,000 | 120,900,000 | 1611 | 1833 | 0.834095118  | MTERFD2,PASK,PPP1R7,SNED1                                                                                                  |
| 3 | 120,825,000 | 120,975,000 | 1612 | 1935 | 0.791890283  | HDLBP,PASK,PPP1R7,SEPT2                                                                                                    |
| 3 | 120,900,000 | 121,050,000 | 1613 | 2013 | 0.971122692  | HDLBP,SEPT2                                                                                                                |
| 3 | 120,975,000 | 121,125,000 | 1614 | 1863 | 1.133102451  | BOK,SEPT2,STK25,THAP4,ENSBTAG00000013110                                                                                   |
| 3 | 121,050,000 | 121,200,000 | 1615 | 1460 | 0.782587843  | ATG4B,BOK,DTYMK,ING5,STK25,THAP4,ENSBTAG00000013110                                                                        |
| 3 | 121,125,000 | 121,275,000 | 1616 | 1360 | 0.672593574  | ATG4B,D2HGDH,DTYMK,GAL3ST2,ING5,NEU4,THAP4                                                                                 |
| 3 | 121,200,000 | 121,350,000 | 1617 | 1217 | 0.898926964  | D2HGDH,GAL3ST2,ING5,NEU4,PDCD1,RTP5                                                                                        |
| 3 | 121,275,000 | 121,425,000 | 1618 | 1143 | 0.777037355  | PDCD1,RTP5                                                                                                                 |
| 3 | 121,350,000 | 121,430,405 | 1619 | 619  | 0.760627409  |                                                                                                                            |
| 4 | 0           | 150,000     | 1    | 598  | 1.312673021  |                                                                                                                            |
| 4 | 75,000      | 225,000     | 2    | 289  | -0.055925626 |                                                                                                                            |
| 4 | 150,000     | 300,000     | 3    | 273  | 0.405469612  |                                                                                                                            |
| 4 | 225,000     | 375,000     | 4    | 354  | 0.538571534  |                                                                                                                            |
| 4 | 300,000     | 450,000     | 5    | 472  | 0.044539799  | VSTM2A                                                                                                                     |
| 4 | 375,000     | 525,000     | 6    | 499  | -1.090754864 | VSTM2A                                                                                                                     |
| 4 | 450,000     | 600,000     | 7    | 541  | -2.614962507 |                                                                                                                            |
| 4 | 525,000     | 675,000     | 8    | 537  | -2.351536953 |                                                                                                                            |
| 4 | 600,000     | 750,000     | 9    | 709  | 0.012882887  |                                                                                                                            |
| 4 | 675,000     | 825,000     | 10   | 1096 | 0.194951159  |                                                                                                                            |
| 4 | 750,000     | 900,000     | 11   | 1146 | -0.14777647  |                                                                                                                            |
| 4 | 825,000     | 975,000     | 12   | 921  | -0.083475286 |                                                                                                                            |
| 4 | 900,000     | 1,050,000   | 13   | 859  | -0.010846733 |                                                                                                                            |

|   |           |           |    |      |              |      |
|---|-----------|-----------|----|------|--------------|------|
| 4 | 975,000   | 1,125,000 | 14 | 1105 | -0.590815308 |      |
| 4 | 1,050,000 | 1,200,000 | 15 | 1255 | -1.022661975 |      |
| 4 | 1,125,000 | 1,275,000 | 16 | 1124 | -0.512914655 |      |
| 4 | 1,200,000 | 1,350,000 | 17 | 1308 | 0.227339854  |      |
| 4 | 1,275,000 | 1,425,000 | 18 | 1687 | 0.722436271  |      |
| 4 | 1,350,000 | 1,500,000 | 19 | 1681 | 0.661797308  |      |
| 4 | 1,425,000 | 1,575,000 | 20 | 1342 | 0.665523883  |      |
| 4 | 1,500,000 | 1,650,000 | 21 | 1355 | 0.932354351  |      |
| 4 | 1,575,000 | 1,725,000 | 22 | 1401 | -1.635714419 |      |
| 4 | 1,650,000 | 1,800,000 | 23 | 1177 | -2.559181283 |      |
| 4 | 1,725,000 | 1,875,000 | 24 | 895  | -0.353340079 |      |
| 4 | 1,800,000 | 1,950,000 | 25 | 828  | 0.021723744  |      |
| 4 | 1,875,000 | 2,025,000 | 26 | 746  | 0.406169992  |      |
| 4 | 1,950,000 | 2,100,000 | 27 | 720  | 0.433751994  |      |
| 4 | 2,025,000 | 2,175,000 | 28 | 988  | 0.564512422  |      |
| 4 | 2,100,000 | 2,250,000 | 29 | 955  | 0.918725494  |      |
| 4 | 2,175,000 | 2,325,000 | 30 | 1062 | -0.33980396  |      |
| 4 | 2,250,000 | 2,400,000 | 31 | 1221 | -1.057823493 |      |
| 4 | 2,325,000 | 2,475,000 | 32 | 1346 | -0.18212333  |      |
| 4 | 2,400,000 | 2,550,000 | 33 | 1082 | 0.024584191  |      |
| 4 | 2,475,000 | 2,625,000 | 34 | 932  | -0.385042178 |      |
| 4 | 2,550,000 | 2,700,000 | 35 | 974  | -0.533544988 |      |
| 4 | 2,625,000 | 2,775,000 | 36 | 809  | -1.889537656 |      |
| 4 | 2,700,000 | 2,850,000 | 37 | 1269 | -0.694198328 |      |
| 4 | 2,775,000 | 2,925,000 | 38 | 1615 | 0.554339631  |      |
| 4 | 2,850,000 | 3,000,000 | 39 | 1575 | 0.627217246  |      |
| 4 | 2,925,000 | 3,075,000 | 40 | 1469 | 0.67260679   |      |
| 4 | 3,000,000 | 3,150,000 | 41 | 1323 | -0.205191795 |      |
| 4 | 3,075,000 | 3,225,000 | 42 | 1400 | -1.654139123 |      |
| 4 | 3,150,000 | 3,300,000 | 43 | 1315 | -1.536206587 |      |
| 4 | 3,225,000 | 3,375,000 | 44 | 1288 | -0.385070091 |      |
| 4 | 3,300,000 | 3,450,000 | 45 | 1417 | -0.100898972 |      |
| 4 | 3,375,000 | 3,525,000 | 46 | 1308 | 0.244815525  |      |
| 4 | 3,450,000 | 3,600,000 | 47 | 1334 | 0.494278667  |      |
| 4 | 3,525,000 | 3,675,000 | 48 | 1519 | 0.496091689  |      |
| 4 | 3,600,000 | 3,750,000 | 49 | 1512 | 0.413584489  |      |
| 4 | 3,675,000 | 3,825,000 | 50 | 1485 | 0.827016988  |      |
| 4 | 3,750,000 | 3,900,000 | 51 | 1381 | 0.42178867   |      |
| 4 | 3,825,000 | 3,975,000 | 52 | 1294 | -0.30428521  |      |
| 4 | 3,900,000 | 4,050,000 | 53 | 1264 | -0.000959901 |      |
| 4 | 3,975,000 | 4,125,000 | 54 | 1172 | -0.648017625 |      |
| 4 | 4,050,000 | 4,200,000 | 55 | 1021 | -0.697675775 |      |
| 4 | 4,125,000 | 4,275,000 | 56 | 854  | 0.434265888  |      |
| 4 | 4,200,000 | 4,350,000 | 57 | 1244 | -1.807263568 |      |
| 4 | 4,275,000 | 4,425,000 | 58 | 1466 | -1.16439207  |      |
| 4 | 4,350,000 | 4,500,000 | 59 | 1378 | 0.023031177  | COBL |
| 4 | 4,425,000 | 4,575,000 | 60 | 1304 | 0.291519595  | COBL |
| 4 | 4,500,000 | 4,650,000 | 61 | 966  | 0.129061387  | COBL |
| 4 | 4,575,000 | 4,725,000 | 62 | 973  | -1.443795687 | COBL |
| 4 | 4,650,000 | 4,800,000 | 63 | 1221 | -0.343380756 | COBL |
| 4 | 4,725,000 | 4,875,000 | 64 | 1104 | -0.095260246 | COBL |
| 4 | 4,800,000 | 4,950,000 | 65 | 905  | -0.946297325 |      |
| 4 | 4,875,000 | 5,025,000 | 66 | 1108 | -1.406646067 |      |



|   |           |           |     |      |              |                                     |
|---|-----------|-----------|-----|------|--------------|-------------------------------------|
| 4 | 4,950,000 | 5,100,000 | 67  | 1406 | -1.667850763 |                                     |
| 4 | 5,025,000 | 5,175,000 | 68  | 1454 | -1.197526459 | GRB10                               |
| 4 | 5,100,000 | 5,250,000 | 69  | 1106 | 0.543631703  | GRB10                               |
| 4 | 5,175,000 | 5,325,000 | 70  | 1180 | 0.397528555  | DDC,GRB10                           |
| 4 | 5,250,000 | 5,400,000 | 71  | 1277 | 0.140605319  | DDC,FIGNL1,ENSBTAG00000001502       |
| 4 | 5,325,000 | 5,475,000 | 72  | 1141 | 0.842386243  | DDC,FIGNL1,IKZF1,ENSBTAG00000001502 |
| 4 | 5,400,000 | 5,550,000 | 73  | 1102 | 0.893008524  | IKZF1                               |
| 4 | 5,475,000 | 5,625,000 | 74  | 936  | 0.294425465  | IKZF1                               |
| 4 | 5,550,000 | 5,700,000 | 75  | 978  | 0.173092315  | C7orf72                             |
| 4 | 5,625,000 | 5,775,000 | 76  | 1009 | 0.296350489  | C7orf72,ZPBP                        |
| 4 | 5,700,000 | 5,850,000 | 77  | 921  | 0.302071936  | C7orf72,ZPBP                        |
| 4 | 5,775,000 | 5,925,000 | 78  | 1255 | 0.503579231  | VWC2,ZPBP                           |
| 4 | 5,850,000 | 6,000,000 | 79  | 1637 | 0.548117442  | VWC2                                |
| 4 | 5,925,000 | 6,075,000 | 80  | 1296 | 0.409256431  | VWC2                                |
| 4 | 6,000,000 | 6,150,000 | 81  | 1265 | -0.216673306 | VWC2                                |
| 4 | 6,075,000 | 6,225,000 | 82  | 1569 | -0.560914024 |                                     |
| 4 | 6,150,000 | 6,300,000 | 83  | 1675 | -0.038149088 |                                     |
| 4 | 6,225,000 | 6,375,000 | 84  | 1833 | 0.48664757   |                                     |
| 4 | 6,300,000 | 6,450,000 | 85  | 1440 | 0.440941933  |                                     |
| 4 | 6,375,000 | 6,525,000 | 86  | 1228 | 0.527014752  |                                     |
| 4 | 6,450,000 | 6,600,000 | 87  | 1364 | 0.363918342  |                                     |
| 4 | 6,525,000 | 6,675,000 | 88  | 1405 | 0.282654064  |                                     |
| 4 | 6,600,000 | 6,750,000 | 89  | 1155 | 0.561711628  |                                     |
| 4 | 6,675,000 | 6,825,000 | 90  | 1212 | 0.71744406   |                                     |
| 4 | 6,750,000 | 6,900,000 | 91  | 1653 | 0.292371282  |                                     |
| 4 | 6,825,000 | 6,975,000 | 92  | 1539 | -0.570958458 |                                     |
| 4 | 6,900,000 | 7,050,000 | 93  | 1521 | -0.289780597 |                                     |
| 4 | 6,975,000 | 7,125,000 | 94  | 1662 | 0.099789243  | ABCA13                              |
| 4 | 7,050,000 | 7,200,000 | 95  | 1826 | -0.126307721 | ABCA13                              |
| 4 | 7,125,000 | 7,275,000 | 96  | 1993 | 0.092632778  | ABCA13                              |
| 4 | 7,200,000 | 7,350,000 | 97  | 2046 | 0.619972737  | ABCA13                              |
| 4 | 7,275,000 | 7,425,000 | 98  | 1978 | 1.116774146  | ABCA13                              |
| 4 | 7,350,000 | 7,500,000 | 99  | 1939 | 0.933932024  | ABCA13                              |
| 4 | 7,425,000 | 7,575,000 | 100 | 1923 | 0.437788637  | ABCA13,UPP1                         |
| 4 | 7,500,000 | 7,650,000 | 101 | 2005 | 0.630830626  | C4H7orf57,SUN3,UPP1                 |
| 4 | 7,575,000 | 7,725,000 | 102 | 2124 | 0.791269105  | C4H7orf57,CLDN12,SUN3               |
| 4 | 7,650,000 | 7,800,000 | 103 | 1807 | 0.931254574  | CLDN12,SUN3                         |
| 4 | 7,725,000 | 7,875,000 | 104 | 1285 | 0.604803401  |                                     |
| 4 | 7,800,000 | 7,950,000 | 105 | 1476 | 0.546334578  |                                     |
| 4 | 7,875,000 | 8,025,000 | 106 | 1683 | 0.756054305  |                                     |
| 4 | 7,950,000 | 8,100,000 | 107 | 1649 | 0.761405254  |                                     |
| 4 | 8,025,000 | 8,175,000 | 108 | 1706 | 0.590016099  |                                     |
| 4 | 8,100,000 | 8,250,000 | 109 | 1408 | 0.406059207  |                                     |
| 4 | 8,175,000 | 8,325,000 | 110 | 1292 | 0.136960821  |                                     |
| 4 | 8,250,000 | 8,400,000 | 111 | 1332 | 0.280774135  |                                     |
| 4 | 8,325,000 | 8,475,000 | 112 | 1032 | 0.220665578  |                                     |
| 4 | 8,400,000 | 8,550,000 | 113 | 1007 | 0.217200148  | FZD1                                |
| 4 | 8,475,000 | 8,625,000 | 114 | 1004 | 0.617314948  | FZD1,ENSBTAG00000027319             |
| 4 | 8,550,000 | 8,700,000 | 115 | 1089 | 0.502386467  | ENSBTAG00000027319                  |
| 4 | 8,625,000 | 8,775,000 | 116 | 1359 | 0.435652712  |                                     |
| 4 | 8,700,000 | 8,850,000 | 117 | 1337 | 0.556619108  |                                     |
| 4 | 8,775,000 | 8,925,000 | 118 | 1305 | 0.885631214  |                                     |
| 4 | 8,850,000 | 9,000,000 | 119 | 1161 | 0.989737571  |                                     |

|   |            |            |     |      |              |                                               |
|---|------------|------------|-----|------|--------------|-----------------------------------------------|
| 4 | 8,925,000  | 9,075,000  | 120 | 1322 | 0.614402766  |                                               |
| 4 | 9,000,000  | 9,150,000  | 121 | 1540 | 0.777775708  | MTERF1                                        |
| 4 | 9,075,000  | 9,225,000  | 122 | 1652 | 1.058168152  | AKAP9,MTERF1                                  |
| 4 | 9,150,000  | 9,300,000  | 123 | 1670 | 1.10782213   | AKAP9                                         |
| 4 | 9,225,000  | 9,375,000  | 124 | 1603 | 1.222679598  | AKAP9,CYP51A1,LRRD1                           |
| 4 | 9,300,000  | 9,450,000  | 125 | 1633 | 1.175128745  | AKAP9,CYP51A1,KRIT1,LRRD1                     |
| 4 | 9,375,000  | 9,525,000  | 126 | 1509 | 0.977038217  | ANKIB1,KRIT1                                  |
| 4 | 9,450,000  | 9,600,000  | 127 | 1471 | 0.789040924  | ANKIB1,TMBIM1B,ENSBTAG00000048169             |
| 4 | 9,525,000  | 9,675,000  | 128 | 1887 | 0.974823085  | ANKIB1,GATAD1,PEX1,TMBIM1B,ENSBTAG00000048169 |
| 4 | 9,600,000  | 9,750,000  | 129 | 2013 | 1.059156438  | GATAD1,PEX1,RBM48,TMBIM1B,ENSBTAG00000003810  |
| 4 | 9,675,000  | 9,825,000  | 130 | 1568 | 1.085001133  | CDK6,PEX1,RBM48,ENSBTAG00000003810            |
| 4 | 9,750,000  | 9,900,000  | 131 | 1250 | 0.934203583  | CDK6                                          |
| 4 | 9,825,000  | 9,975,000  | 132 | 1235 | 0.497946492  | CDK6                                          |
| 4 | 9,900,000  | 10,050,000 | 133 | 1259 | 0.062149424  | CDK6                                          |
| 4 | 9,975,000  | 10,125,000 | 134 | 1092 | -0.892384067 | CDK6                                          |
| 4 | 10,050,000 | 10,200,000 | 135 | 969  | -1.235428794 |                                               |
| 4 | 10,125,000 | 10,275,000 | 136 | 1091 | 0.679274364  |                                               |
| 4 | 10,200,000 | 10,350,000 | 137 | 1451 | 0.706490532  | SAMD9                                         |
| 4 | 10,275,000 | 10,425,000 | 138 | 1719 | 0.849720169  | HEPACAM2,SAMD9                                |
| 4 | 10,350,000 | 10,500,000 | 139 | 1562 | 1.383791926  | CCDC132,HEPACAM2                              |
| 4 | 10,425,000 | 10,575,000 | 140 | 1585 | 1.278017361  | CCDC132                                       |
| 4 | 10,500,000 | 10,650,000 | 141 | 1664 | 1.110563134  | CALCR,CCDC132                                 |
| 4 | 10,575,000 | 10,725,000 | 142 | 1564 | 0.37603922   | CALCR                                         |
| 4 | 10,650,000 | 10,800,000 | 143 | 1616 | -0.505836255 | CALCR                                         |
| 4 | 10,725,000 | 10,875,000 | 144 | 1654 | -1.059531468 |                                               |
| 4 | 10,800,000 | 10,950,000 | 145 | 1572 | -0.940880028 |                                               |
| 4 | 10,875,000 | 11,025,000 | 146 | 1648 | -1.020351998 |                                               |
| 4 | 10,950,000 | 11,100,000 | 147 | 1882 | -0.692219209 | GNG11,GNGT1,TFPI2                             |
| 4 | 11,025,000 | 11,175,000 | 148 | 2297 | 0.504331632  | BET1,GNG11,GNGT1,TFPI2                        |
| 4 | 11,100,000 | 11,250,000 | 149 | 2202 | 0.756760876  | BET1                                          |
| 4 | 11,175,000 | 11,325,000 | 150 | 1610 | 0.726364824  | BET1                                          |
| 4 | 11,250,000 | 11,400,000 | 151 | 1612 | 0.894310123  |                                               |
| 4 | 11,325,000 | 11,475,000 | 152 | 1680 | 0.710496353  |                                               |
| 4 | 11,400,000 | 11,550,000 | 153 | 1402 | 0.688398787  |                                               |
| 4 | 11,475,000 | 11,625,000 | 154 | 1310 | 0.510367791  | COL1A2                                        |
| 4 | 11,550,000 | 11,700,000 | 155 | 1155 | 0.218185067  | COL1A2                                        |
| 4 | 11,625,000 | 11,775,000 | 156 | 808  | 0.776694768  | CASD1,COL1A2                                  |
| 4 | 11,700,000 | 11,850,000 | 157 | 771  | 1.109383817  | CASD1,SGCE                                    |
| 4 | 11,775,000 | 11,925,000 | 158 | 708  | 0.938266553  | CASD1,PEG10,SGCE                              |
| 4 | 11,850,000 | 12,000,000 | 159 | 1026 | -0.64697497  | PEG10,SGCE                                    |
| 4 | 11,925,000 | 12,075,000 | 160 | 1208 | 0.106222995  | PPP1R9A                                       |
| 4 | 12,000,000 | 12,150,000 | 161 | 791  | 1.283665456  | PPP1R9A                                       |
| 4 | 12,075,000 | 12,225,000 | 162 | 987  | 0.924971587  | PPP1R9A                                       |
| 4 | 12,150,000 | 12,300,000 | 163 | 1153 | 0.96039751   | PPP1R9A                                       |
| 4 | 12,225,000 | 12,375,000 | 164 | 872  | 0.746813926  | PPP1R9A                                       |
| 4 | 12,300,000 | 12,450,000 | 165 | 849  | 0.09293841   | PON1,PON3,PPP1R9A                             |
| 4 | 12,375,000 | 12,525,000 | 166 | 777  | -0.100642645 | PON1,PON2,PON3,PPP1R9A                        |
| 4 | 12,450,000 | 12,600,000 | 167 | 1094 | 0.422823464  | ASB4,PON2,PON3                                |
| 4 | 12,525,000 | 12,675,000 | 168 | 1148 | 0.023298566  | ASB4,ENSBTAG00000038030                       |
| 4 | 12,600,000 | 12,750,000 | 169 | 667  | -1.345070062 | ASB4,ENSBTAG00000038030,ENSBTAG00000047555    |
| 4 | 12,675,000 | 12,825,000 | 170 | 751  | -0.919870198 | ASB4,PKD4,ENSBTAG00000047555                  |

|   |            |            |     |      |              |                             |
|---|------------|------------|-----|------|--------------|-----------------------------|
| 4 | 12,750,000 | 12,900,000 | 171 | 702  | -0.596601538 | PDK4                        |
| 4 | 12,825,000 | 12,975,000 | 172 | 951  | 0.762425199  | DYNC1I1                     |
| 4 | 12,900,000 | 13,050,000 | 173 | 1513 | 0.864693682  | DYNC1I1                     |
| 4 | 12,975,000 | 13,125,000 | 174 | 1717 | 0.694024138  | DYNC1I1                     |
| 4 | 13,050,000 | 13,200,000 | 175 | 1822 | 0.640391994  | DYNC1I1                     |
| 4 | 13,125,000 | 13,275,000 | 176 | 1606 | 0.338022449  | DYNC1I1                     |
| 4 | 13,200,000 | 13,350,000 | 177 | 1309 | 0.038283504  | DYNC1I1,SLC25A13            |
| 4 | 13,275,000 | 13,425,000 | 178 | 1255 | 0.506903655  | DYNC1I1,SLC25A13            |
| 4 | 13,350,000 | 13,500,000 | 179 | 1216 | 1.127862894  | SLC25A13                    |
| 4 | 13,425,000 | 13,575,000 | 180 | 753  | 1.058039081  | SLC25A13                    |
| 4 | 13,500,000 | 13,650,000 | 181 | 498  | 0.629942389  | SLC25A13,ENSBTAG00000035660 |
| 4 | 13,575,000 | 13,725,000 | 182 | 621  | 0.562605369  | ENSBTAG00000035660          |
| 4 | 13,650,000 | 13,800,000 | 183 | 624  | 0.858698582  |                             |
| 4 | 13,725,000 | 13,875,000 | 184 | 776  | -0.428474323 |                             |
| 4 | 13,800,000 | 13,950,000 | 185 | 772  | -0.116459535 |                             |
| 4 | 13,875,000 | 14,025,000 | 186 | 690  | 0.34696357   | ENSBTAG00000020685          |
| 4 | 13,950,000 | 14,100,000 | 187 | 996  | 0.818773836  | ENSBTAG00000020685          |
| 4 | 14,025,000 | 14,175,000 | 188 | 1216 | 1.173369877  |                             |
| 4 | 14,100,000 | 14,250,000 | 189 | 1077 | 0.942856542  |                             |
| 4 | 14,175,000 | 14,325,000 | 190 | 797  | 0.952211938  | DLX5,DLX6                   |
| 4 | 14,250,000 | 14,400,000 | 191 | 909  | 0.738687467  | ACN9,DLX5,DLX6              |
| 4 | 14,325,000 | 14,475,000 | 192 | 1185 | 0.626988502  | ACN9                        |
| 4 | 14,400,000 | 14,550,000 | 193 | 1237 | 0.581705262  | ACN9                        |
| 4 | 14,475,000 | 14,625,000 | 194 | 1287 | 0.393132752  | ENSBTAG00000020550          |
| 4 | 14,550,000 | 14,700,000 | 195 | 1407 | 0.502522983  | ENSBTAG00000020550          |
| 4 | 14,625,000 | 14,775,000 | 196 | 1597 | -0.144401761 |                             |
| 4 | 14,700,000 | 14,850,000 | 197 | 1315 | -0.328365587 |                             |
| 4 | 14,775,000 | 14,925,000 | 198 | 991  | 0.16374019   | TAC1                        |
| 4 | 14,850,000 | 15,000,000 | 199 | 1341 | 0.39359864   | TAC1                        |
| 4 | 14,925,000 | 15,075,000 | 200 | 1610 | 0.711700754  | ASNS,TAC1                   |
| 4 | 15,000,000 | 15,150,000 | 201 | 1383 | 1.0871458    | ASNS                        |
| 4 | 15,075,000 | 15,225,000 | 202 | 1210 | 0.745091342  | ASNS,C1GALT1                |
| 4 | 15,150,000 | 15,300,000 | 203 | 1176 | 0.192897915  | ASNS,C1GALT1                |
| 4 | 15,225,000 | 15,375,000 | 204 | 1476 | -0.002835874 | C1GALT1,COL28A1             |
| 4 | 15,300,000 | 15,450,000 | 205 | 1673 | -0.42427152  | COL28A1                     |
| 4 | 15,375,000 | 15,525,000 | 206 | 1584 | -0.311279388 | COL28A1                     |
| 4 | 15,450,000 | 15,600,000 | 207 | 1473 | 0.285840939  | COL28A1,MIOS                |
| 4 | 15,525,000 | 15,675,000 | 208 | 1257 | 0.291347672  | MIOS,RPA3                   |
| 4 | 15,600,000 | 15,750,000 | 209 | 800  | 0.273152176  | RPA3                        |
| 4 | 15,675,000 | 15,825,000 | 210 | 315  | 1.205321492  |                             |
| 4 | 15,750,000 | 15,900,000 | 211 | 749  | 0.677440391  |                             |
| 4 | 15,825,000 | 15,975,000 | 212 | 1008 | 0.460252509  |                             |
| 4 | 15,900,000 | 16,050,000 | 213 | 980  | 0.285524556  |                             |
| 4 | 15,975,000 | 16,125,000 | 214 | 1559 | -0.104015719 |                             |
| 4 | 16,050,000 | 16,200,000 | 215 | 1350 | -0.079491782 |                             |
| 4 | 16,125,000 | 16,275,000 | 216 | 932  | -1.602020829 |                             |
| 4 | 16,200,000 | 16,350,000 | 217 | 985  | -2.170874258 |                             |
| 4 | 16,275,000 | 16,425,000 | 218 | 783  | -1.025432014 |                             |
| 4 | 16,350,000 | 16,500,000 | 219 | 931  | -0.346726528 |                             |
| 4 | 16,425,000 | 16,575,000 | 220 | 1162 | 0.055388224  |                             |
| 4 | 16,500,000 | 16,650,000 | 221 | 1197 | -0.669557699 |                             |
| 4 | 16,575,000 | 16,725,000 | 222 | 1311 | -0.568422748 |                             |
| 4 | 16,650,000 | 16,800,000 | 223 | 1170 | 0.539534877  |                             |

|   |            |            |     |      |              |                                 |
|---|------------|------------|-----|------|--------------|---------------------------------|
| 4 | 16,725,000 | 16,875,000 | 224 | 907  | 0.52173361   |                                 |
| 4 | 16,800,000 | 16,950,000 | 225 | 1027 | 0.479839244  |                                 |
| 4 | 16,875,000 | 17,025,000 | 226 | 1153 | 0.288908149  |                                 |
| 4 | 16,950,000 | 17,100,000 | 227 | 924  | 0.186784894  | GLCCI1                          |
| 4 | 17,025,000 | 17,175,000 | 228 | 998  | 0.47652133   | GLCCI1                          |
| 4 | 17,100,000 | 17,250,000 | 229 | 1194 | 0.202352918  | GLCCI1,ICA1                     |
| 4 | 17,175,000 | 17,325,000 | 230 | 1576 | -1.276717053 | ICA1                            |
| 4 | 17,250,000 | 17,400,000 | 231 | 2322 | -0.736709595 | ICA1                            |
| 4 | 17,325,000 | 17,475,000 | 232 | 2394 | 0.347217083  | ICA1                            |
| 4 | 17,400,000 | 17,550,000 | 233 | 2133 | 0.319265463  |                                 |
| 4 | 17,475,000 | 17,625,000 | 234 | 1724 | 0.134772437  |                                 |
| 4 | 17,550,000 | 17,700,000 | 235 | 1337 | -0.128240263 |                                 |
| 4 | 17,625,000 | 17,775,000 | 236 | 1417 | -0.405091146 |                                 |
| 4 | 17,700,000 | 17,850,000 | 237 | 1484 | -0.449495275 |                                 |
| 4 | 17,775,000 | 17,925,000 | 238 | 1334 | -2.282854356 | NXPH1                           |
| 4 | 17,850,000 | 18,000,000 | 239 | 1346 | -1.827923418 | NXPH1                           |
| 4 | 17,925,000 | 18,075,000 | 240 | 1504 | -0.124717903 | ENSBTAG00000046275              |
| 4 | 18,000,000 | 18,150,000 | 241 | 1657 | 0.769706947  | ENSBTAG00000046275              |
| 4 | 18,075,000 | 18,225,000 | 242 | 1761 | 0.834428448  |                                 |
| 4 | 18,150,000 | 18,300,000 | 243 | 1573 | 0.584093918  |                                 |
| 4 | 18,225,000 | 18,375,000 | 244 | 1521 | 0.393763706  |                                 |
| 4 | 18,300,000 | 18,450,000 | 245 | 1382 | 0.499073464  |                                 |
| 4 | 18,375,000 | 18,525,000 | 246 | 1202 | -0.219002009 |                                 |
| 4 | 18,450,000 | 18,600,000 | 247 | 1767 | -0.083843264 |                                 |
| 4 | 18,525,000 | 18,675,000 | 248 | 1812 | 0.278688142  |                                 |
| 4 | 18,600,000 | 18,750,000 | 249 | 1551 | 0.719575652  |                                 |
| 4 | 18,675,000 | 18,825,000 | 250 | 1214 | 0.467392667  |                                 |
| 4 | 18,750,000 | 18,900,000 | 251 | 952  | 0.310681283  |                                 |
| 4 | 18,825,000 | 18,975,000 | 252 | 1028 | 0.417102055  | NDUFA4,ENSBTAG00000038527       |
| 4 | 18,900,000 | 19,050,000 | 253 | 986  | 0.193776501  | NDUFA4,PHF14,ENSBTAG00000038527 |
| 4 | 18,975,000 | 19,125,000 | 254 | 914  | 0.469059922  | NDUFA4,PHF14                    |
| 4 | 19,050,000 | 19,200,000 | 255 | 639  | 0.888220962  | PHF14                           |
| 4 | 19,125,000 | 19,275,000 | 256 | 1012 | 1.17905715   |                                 |
| 4 | 19,200,000 | 19,350,000 | 257 | 1113 | 0.332435379  |                                 |
| 4 | 19,275,000 | 19,425,000 | 258 | 1242 | -0.241821907 |                                 |
| 4 | 19,350,000 | 19,500,000 | 259 | 1347 | 0.209059963  | THSD7A                          |
| 4 | 19,425,000 | 19,575,000 | 260 | 957  | -1.17723172  | THSD7A                          |
| 4 | 19,500,000 | 19,650,000 | 261 | 913  | -0.296261899 | THSD7A                          |
| 4 | 19,575,000 | 19,725,000 | 262 | 862  | 0.261075799  | THSD7A                          |
| 4 | 19,650,000 | 19,800,000 | 263 | 813  | -0.521969079 | THSD7A                          |
| 4 | 19,725,000 | 19,875,000 | 264 | 1017 | -0.461797773 | THSD7A                          |
| 4 | 19,800,000 | 19,950,000 | 265 | 1309 | -0.108531276 | TMEM106B                        |
| 4 | 19,875,000 | 20,025,000 | 266 | 1549 | 0.047439754  | TMEM106B                        |
| 4 | 19,950,000 | 20,100,000 | 267 | 1555 | 0.038445317  |                                 |
| 4 | 20,025,000 | 20,175,000 | 268 | 1646 | 0.864129299  | SCIN                            |
| 4 | 20,100,000 | 20,250,000 | 269 | 1561 | 0.950267739  | SCIN                            |
| 4 | 20,175,000 | 20,325,000 | 270 | 1362 | -0.110463787 | ARL4A,SCIN                      |
| 4 | 20,250,000 | 20,400,000 | 271 | 1506 | -0.129310236 | ARL4A                           |
| 4 | 20,325,000 | 20,475,000 | 272 | 1581 | 0.275357394  |                                 |
| 4 | 20,400,000 | 20,550,000 | 273 | 1568 | 0.573598207  |                                 |
| 4 | 20,475,000 | 20,625,000 | 274 | 1564 | 0.891816477  |                                 |
| 4 | 20,550,000 | 20,700,000 | 275 | 1582 | 0.706772813  |                                 |
| 4 | 20,625,000 | 20,775,000 | 276 | 1538 | -0.091438524 |                                 |

|   |            |            |     |      |              |                    |
|---|------------|------------|-----|------|--------------|--------------------|
| 4 | 20,700,000 | 20,850,000 | 277 | 1477 | -0.225067726 |                    |
| 4 | 20,775,000 | 20,925,000 | 278 | 1409 | -2.266386875 |                    |
| 4 | 20,850,000 | 21,000,000 | 279 | 1482 | -1.472957123 |                    |
| 4 | 20,925,000 | 21,075,000 | 280 | 1584 | 0.892282953  |                    |
| 4 | 21,000,000 | 21,150,000 | 281 | 1666 | 0.600335294  |                    |
| 4 | 21,075,000 | 21,225,000 | 282 | 1646 | -0.035687372 |                    |
| 4 | 21,150,000 | 21,300,000 | 283 | 1688 | 0.196938906  |                    |
| 4 | 21,225,000 | 21,375,000 | 284 | 1832 | 0.045560028  |                    |
| 4 | 21,300,000 | 21,450,000 | 285 | 1496 | 0.044325463  |                    |
| 4 | 21,375,000 | 21,525,000 | 286 | 1141 | 0.946817798  |                    |
| 4 | 21,450,000 | 21,600,000 | 287 | 1380 | 0.878382085  |                    |
| 4 | 21,525,000 | 21,675,000 | 288 | 1405 | 0.700276228  |                    |
| 4 | 21,600,000 | 21,750,000 | 289 | 1249 | 0.24187192   |                    |
| 4 | 21,675,000 | 21,825,000 | 290 | 1407 | 0.865649083  |                    |
| 4 | 21,750,000 | 21,900,000 | 291 | 1332 | 1.353390877  |                    |
| 4 | 21,825,000 | 21,975,000 | 292 | 1129 | 1.123244613  |                    |
| 4 | 21,900,000 | 22,050,000 | 293 | 1106 | 0.7375249    | ETV1               |
| 4 | 21,975,000 | 22,125,000 | 294 | 1125 | 0.465040696  | ETV1               |
| 4 | 22,050,000 | 22,200,000 | 295 | 1092 | 0.07751903   | ETV1               |
| 4 | 22,125,000 | 22,275,000 | 296 | 1123 | 0.137308934  | ETV1               |
| 4 | 22,200,000 | 22,350,000 | 297 | 989  | 0.008950671  | DGKB               |
| 4 | 22,275,000 | 22,425,000 | 298 | 1031 | 0.955071578  | DGKB               |
| 4 | 22,350,000 | 22,500,000 | 299 | 1127 | 1.224180841  | DGKB               |
| 4 | 22,425,000 | 22,575,000 | 300 | 905  | 0.866968813  | DGKB               |
| 4 | 22,500,000 | 22,650,000 | 301 | 1075 | 0.459094342  | DGKB               |
| 4 | 22,575,000 | 22,725,000 | 302 | 1007 | 0.251286268  | DGKB               |
| 4 | 22,650,000 | 22,800,000 | 303 | 990  | -0.393797893 | DGKB               |
| 4 | 22,725,000 | 22,875,000 | 304 | 1612 | 0.437353935  | DGKB               |
| 4 | 22,800,000 | 22,950,000 | 305 | 1700 | 0.294441305  | DGKB               |
| 4 | 22,875,000 | 23,025,000 | 306 | 1397 | -0.363796494 | DGKB               |
| 4 | 22,950,000 | 23,100,000 | 307 | 1400 | 0.548724498  | DGKB               |
| 4 | 23,025,000 | 23,175,000 | 308 | 1167 | 0.23969931   | DGKB               |
| 4 | 23,100,000 | 23,250,000 | 309 | 1027 | 0.524810696  | DGKB               |
| 4 | 23,175,000 | 23,325,000 | 310 | 1212 | 0.810472535  |                    |
| 4 | 23,250,000 | 23,400,000 | 311 | 1370 | 0.47235133   |                    |
| 4 | 23,325,000 | 23,475,000 | 312 | 1409 | 0.776216484  |                    |
| 4 | 23,400,000 | 23,550,000 | 313 | 1445 | 0.945306589  | AGMO               |
| 4 | 23,475,000 | 23,625,000 | 314 | 1309 | 0.457695929  | AGMO               |
| 4 | 23,550,000 | 23,700,000 | 315 | 817  | 0.1181856    | AGMO               |
| 4 | 23,625,000 | 23,775,000 | 316 | 883  | 0.502615036  | AGMO               |
| 4 | 23,700,000 | 23,850,000 | 317 | 1144 | 0.76258608   | AGMO               |
| 4 | 23,775,000 | 23,925,000 | 318 | 1150 | 0.200861661  | AGMO               |
| 4 | 23,850,000 | 24,000,000 | 319 | 1304 | 0.422213924  | AGMO,MEOX2         |
| 4 | 23,925,000 | 24,075,000 | 320 | 1158 | 1.194933515  | MEOX2              |
| 4 | 24,000,000 | 24,150,000 | 321 | 777  | 0.857159031  | MEOX2              |
| 4 | 24,075,000 | 24,225,000 | 322 | 556  | 0.567413252  | ENSBTAG00000010168 |
| 4 | 24,150,000 | 24,300,000 | 323 | 631  | 0.18206185   | ENSBTAG00000010168 |
| 4 | 24,225,000 | 24,375,000 | 324 | 825  | 0.121883735  |                    |
| 4 | 24,300,000 | 24,450,000 | 325 | 730  | 0.400689353  |                    |
| 4 | 24,375,000 | 24,525,000 | 326 | 816  | 0.350332616  | ISPD               |
| 4 | 24,450,000 | 24,600,000 | 327 | 1063 | 0.102409843  | ISPD               |
| 4 | 24,525,000 | 24,675,000 | 328 | 1008 | 0.037967939  | ISPD               |
| 4 | 24,600,000 | 24,750,000 | 329 | 729  | 0.135779046  | ISPD               |

|   |            |            |     |      |              |                                      |
|---|------------|------------|-----|------|--------------|--------------------------------------|
| 4 | 24,675,000 | 24,825,000 | 330 | 793  | 0.046647916  | ISPD                                 |
| 4 | 24,750,000 | 24,900,000 | 331 | 967  | 0.135377537  | ISPD                                 |
| 4 | 24,825,000 | 24,975,000 | 332 | 846  | 0.418234247  | ISPD,SOSTDC1                         |
| 4 | 24,900,000 | 25,050,000 | 333 | 697  | 0.355223932  | LRR72,SOSTDC1,ENSBTAG00000045648     |
| 4 | 24,975,000 | 25,125,000 | 334 | 412  | 0.088460345  | ANKMY2,BZW2,LRR72,ENSBTAG00000045648 |
| 4 | 25,050,000 | 25,200,000 | 335 | 296  | 0.009143601  | ANKMY2,BZW2,LRR72,ENSBTAG00000045648 |
| 4 | 25,125,000 | 25,275,000 | 336 | 546  | -0.589400665 | AGR2,BZW2,TSPAN13                    |
| 4 | 25,200,000 | 25,350,000 | 337 | 1037 | 0.487188519  | AGR2,AGR3,TSPAN13                    |
| 4 | 25,275,000 | 25,425,000 | 338 | 1413 | 1.058261684  | AGR3                                 |
| 4 | 25,350,000 | 25,500,000 | 339 | 1175 | 0.477867157  |                                      |
| 4 | 25,425,000 | 25,575,000 | 340 | 1065 | -0.352346621 |                                      |
| 4 | 25,500,000 | 25,650,000 | 341 | 982  | -0.287080241 |                                      |
| 4 | 25,575,000 | 25,725,000 | 342 | 707  | 0.093790453  |                                      |
| 4 | 25,650,000 | 25,800,000 | 343 | 669  | 0.12478124   | AHR                                  |
| 4 | 25,725,000 | 25,875,000 | 344 | 773  | -0.333613774 | AHR                                  |
| 4 | 25,800,000 | 25,950,000 | 345 | 845  | 0.416536581  | AHR                                  |
| 4 | 25,875,000 | 26,025,000 | 346 | 838  | 0.983303877  |                                      |
| 4 | 25,950,000 | 26,100,000 | 347 | 702  | 0.466448341  |                                      |
| 4 | 26,025,000 | 26,175,000 | 348 | 490  | 0.446510781  |                                      |
| 4 | 26,100,000 | 26,250,000 | 349 | 706  | 0.887186111  |                                      |
| 4 | 26,175,000 | 26,325,000 | 350 | 833  | 1.061983935  |                                      |
| 4 | 26,250,000 | 26,400,000 | 351 | 529  | 1.033961697  | SNX13                                |
| 4 | 26,325,000 | 26,475,000 | 352 | 579  | 0.854838577  | SNX13                                |
| 4 | 26,400,000 | 26,550,000 | 353 | 1102 | 0.672193156  | PRPS1L1,SNX13                        |
| 4 | 26,475,000 | 26,625,000 | 354 | 1037 | 0.586894329  | PRPS1L1                              |
| 4 | 26,550,000 | 26,700,000 | 355 | 647  | 0.556581765  |                                      |
| 4 | 26,625,000 | 26,775,000 | 356 | 575  | 0.106989178  |                                      |
| 4 | 26,700,000 | 26,850,000 | 357 | 603  | -1.350960854 |                                      |
| 4 | 26,775,000 | 26,925,000 | 358 | 694  | -1.411293258 |                                      |
| 4 | 26,850,000 | 27,000,000 | 359 | 650  | -0.690998473 |                                      |
| 4 | 26,925,000 | 27,075,000 | 360 | 882  | 0.139394135  |                                      |
| 4 | 27,000,000 | 27,150,000 | 361 | 1078 | 0.428006902  |                                      |
| 4 | 27,075,000 | 27,225,000 | 362 | 752  | 0.639009403  | HDAC9                                |
| 4 | 27,150,000 | 27,300,000 | 363 | 591  | -0.643404421 | HDAC9                                |
| 4 | 27,225,000 | 27,375,000 | 364 | 798  | -1.178478984 | HDAC9                                |
| 4 | 27,300,000 | 27,450,000 | 365 | 874  | -0.426013468 | HDAC9                                |
| 4 | 27,375,000 | 27,525,000 | 366 | 696  | 0.237373515  | HDAC9                                |
| 4 | 27,450,000 | 27,600,000 | 367 | 642  | -0.469795293 | HDAC9                                |
| 4 | 27,525,000 | 27,675,000 | 368 | 526  | 0.126686251  |                                      |
| 4 | 27,600,000 | 27,750,000 | 369 | 290  | 0.392136435  |                                      |
| 4 | 27,675,000 | 27,825,000 | 370 | 310  | -1.705032814 |                                      |
| 4 | 27,750,000 | 27,900,000 | 371 | 463  | -0.593957612 | FERD3L,TWIST1                        |
| 4 | 27,825,000 | 27,975,000 | 372 | 695  | 0.24956111   | FERD3L,TWIST1                        |
| 4 | 27,900,000 | 28,050,000 | 373 | 997  | 0.306347608  |                                      |
| 4 | 27,975,000 | 28,125,000 | 374 | 717  | 0.75332093   |                                      |
| 4 | 28,050,000 | 28,200,000 | 375 | 673  | 1.054541836  |                                      |
| 4 | 28,125,000 | 28,275,000 | 376 | 989  | 1.092102716  |                                      |
| 4 | 28,200,000 | 28,350,000 | 377 | 1014 | 0.917544615  |                                      |
| 4 | 28,275,000 | 28,425,000 | 378 | 1278 | 0.033725484  |                                      |
| 4 | 28,350,000 | 28,500,000 | 379 | 1376 | -0.464681434 | TMEM196,TWISTNB                      |
| 4 | 28,425,000 | 28,575,000 | 380 | 1209 | 0.449972811  | TMEM196,TWISTNB                      |
| 4 | 28,500,000 | 28,650,000 | 381 | 1165 | 0.839668722  |                                      |
| 4 | 28,575,000 | 28,725,000 | 382 | 1039 | 0.73213077   |                                      |

|   |            |            |     |      |              |                                  |
|---|------------|------------|-----|------|--------------|----------------------------------|
| 4 | 28,650,000 | 28,800,000 | 383 | 1183 | 0.882346321  |                                  |
| 4 | 28,725,000 | 28,875,000 | 384 | 1321 | 0.551883436  | MACC1                            |
| 4 | 28,800,000 | 28,950,000 | 385 | 979  | -0.057391045 | MACC1                            |
| 4 | 28,875,000 | 29,025,000 | 386 | 495  | 0.392255408  |                                  |
| 4 | 28,950,000 | 29,100,000 | 387 | 686  | -2.831957583 |                                  |
| 4 | 29,025,000 | 29,175,000 | 388 | 826  | -3.166262163 | ITGB8                            |
| 4 | 29,100,000 | 29,250,000 | 389 | 589  | -1.64639472  | ITGB8                            |
| 4 | 29,175,000 | 29,325,000 | 390 | 625  | -0.990746684 | ITGB8                            |
| 4 | 29,250,000 | 29,400,000 | 391 | 553  | 0.001718908  |                                  |
| 4 | 29,325,000 | 29,475,000 | 392 | 548  | 0.497321331  | ABCB5                            |
| 4 | 29,400,000 | 29,550,000 | 393 | 802  | 0.063537409  | ABCB5                            |
| 4 | 29,475,000 | 29,625,000 | 394 | 881  | 0.511090335  | ABCB5,SP8                        |
| 4 | 29,550,000 | 29,700,000 | 395 | 589  | 1.199682958  | ABCB5,SP8                        |
| 4 | 29,625,000 | 29,775,000 | 396 | 429  | 0.589311927  |                                  |
| 4 | 29,700,000 | 29,850,000 | 397 | 507  | -0.456377384 |                                  |
| 4 | 29,775,000 | 29,925,000 | 398 | 816  | 0.486887863  |                                  |
| 4 | 29,850,000 | 30,000,000 | 399 | 841  | 0.807747735  |                                  |
| 4 | 29,925,000 | 30,075,000 | 400 | 817  | -0.058474864 |                                  |
| 4 | 30,000,000 | 30,150,000 | 401 | 1055 | 0.616588413  | ENSBTAG00000045673               |
| 4 | 30,075,000 | 30,225,000 | 402 | 1349 | 1.15150409   | ENSBTAG00000045673               |
| 4 | 30,150,000 | 30,300,000 | 403 | 1198 | 0.99433407   |                                  |
| 4 | 30,225,000 | 30,375,000 | 404 | 768  | 0.332575821  | SP4                              |
| 4 | 30,300,000 | 30,450,000 | 405 | 696  | 0.058800774  | DNAH11,SP4                       |
| 4 | 30,375,000 | 30,525,000 | 406 | 770  | -0.640827739 | DNAH11,SP4                       |
| 4 | 30,450,000 | 30,600,000 | 407 | 905  | -0.358093238 | DNAH11                           |
| 4 | 30,525,000 | 30,675,000 | 408 | 1238 | 0.688950885  | DNAH11                           |
| 4 | 30,600,000 | 30,750,000 | 409 | 1524 | 0.25854555   | DNAH11                           |
| 4 | 30,675,000 | 30,825,000 | 410 | 1664 | 0.606348258  | CDCA7L,DNAH11                    |
| 4 | 30,750,000 | 30,900,000 | 411 | 1678 | 1.003054873  | CDCA7L,DNAH11                    |
| 4 | 30,825,000 | 30,975,000 | 412 | 1648 | 0.393752053  | CDCA7L                           |
| 4 | 30,900,000 | 31,050,000 | 413 | 1377 | 0.221478879  | RAPGEF5                          |
| 4 | 30,975,000 | 31,125,000 | 414 | 1026 | 0.48032066   | RAPGEF5                          |
| 4 | 31,050,000 | 31,200,000 | 415 | 885  | -0.337209009 | RAPGEF5                          |
| 4 | 31,125,000 | 31,275,000 | 416 | 966  | -1.164216834 | RAPGEF5                          |
| 4 | 31,200,000 | 31,350,000 | 417 | 980  | -0.351847953 | RAPGEF5                          |
| 4 | 31,275,000 | 31,425,000 | 418 | 971  | 0.258204801  |                                  |
| 4 | 31,350,000 | 31,500,000 | 419 | 743  | -0.156490906 |                                  |
| 4 | 31,425,000 | 31,575,000 | 420 | 423  | 0.133613743  |                                  |
| 4 | 31,500,000 | 31,650,000 | 421 | 491  | -0.055815816 | IL6                              |
| 4 | 31,575,000 | 31,725,000 | 422 | 468  | -0.811919584 | IL6,ENSBTAG00000033806           |
| 4 | 31,650,000 | 31,800,000 | 423 | 420  | -1.88417849  | FAM126A,ENSBTAG00000033806       |
| 4 | 31,725,000 | 31,875,000 | 424 | 844  | -4.390110774 | FAM126A                          |
| 4 | 31,800,000 | 31,950,000 | 425 | 1066 | -3.958575618 | KLHL7                            |
| 4 | 31,875,000 | 32,025,000 | 426 | 1053 | -1.522185989 | GPNMB,KLHL7,NUPL2                |
| 4 | 31,950,000 | 32,100,000 | 427 | 1374 | -0.87422387  | GPNMB,IGF2BP3,KLHL7,MALSU1,NUPL2 |
| 4 | 32,025,000 | 32,175,000 | 428 | 1201 | -0.73037522  | GPNMB,IGF2BP3,MALSU1             |
| 4 | 32,100,000 | 32,250,000 | 429 | 783  | -0.882834888 | IGF2BP3                          |
| 4 | 32,175,000 | 32,325,000 | 430 | 846  | -0.169798157 | IGF2BP3,TRA2A                    |
| 4 | 32,250,000 | 32,400,000 | 431 | 1313 | 0.091676983  | CCDC126,TRA2A                    |
| 4 | 32,325,000 | 32,475,000 | 432 | 1460 | 0.469805914  | CCDC126,DBF4                     |
| 4 | 32,400,000 | 32,550,000 | 433 | 1501 | 0.778753668  | DBF4                             |
| 4 | 32,475,000 | 32,625,000 | 434 | 1614 | 0.481459966  | ENSBTAG00000015666               |
| 4 | 32,550,000 | 32,700,000 | 435 | 1579 | 0.362539238  | RUNDC3B,ENSBTAG00000015666       |

|   |            |            |     |      |              |                            |
|---|------------|------------|-----|------|--------------|----------------------------|
| 4 | 32,625,000 | 32,775,000 | 436 | 1583 | 0.353083835  | RUNDC3B,ENSBTAG00000015666 |
| 4 | 32,700,000 | 32,850,000 | 437 | 1477 | 0.874536798  | RUNDC3B                    |
| 4 | 32,775,000 | 32,925,000 | 438 | 1414 | 0.946368369  | RUNDC3B,SLC25A40           |
| 4 | 32,850,000 | 33,000,000 | 439 | 1516 | 0.867841653  | RUNDC3B,SLC25A40           |
| 4 | 32,925,000 | 33,075,000 | 440 | 1583 | 0.700566562  | ABCB1                      |
| 4 | 33,000,000 | 33,150,000 | 441 | 1370 | 0.791864987  | ABCB1,ABCB4                |
| 4 | 33,075,000 | 33,225,000 | 442 | 888  | 1.156430099  | ABCB1,ABCB4,CROT           |
| 4 | 33,150,000 | 33,300,000 | 443 | 895  | 0.302084661  | ABCB4,CROT                 |
| 4 | 33,225,000 | 33,375,000 | 444 | 1154 | 0.466612704  | CROT,DMTF1,TMEM243         |
| 4 | 33,300,000 | 33,450,000 | 445 | 988  | 1.077957531  | DMTF1,TMEM243              |
| 4 | 33,375,000 | 33,525,000 | 446 | 1355 | 1.296794682  | DMTF1,KIAA1324L            |
| 4 | 33,450,000 | 33,600,000 | 447 | 1537 | 0.689375052  | KIAA1324L                  |
| 4 | 33,525,000 | 33,675,000 | 448 | 1289 | -0.026552755 | KIAA1324L                  |
| 4 | 33,600,000 | 33,750,000 | 449 | 1240 | 0.686669987  | KIAA1324L                  |
| 4 | 33,675,000 | 33,825,000 | 450 | 1285 | -0.82550543  | GRM3,KIAA1324L             |
| 4 | 33,750,000 | 33,900,000 | 451 | 1420 | -0.863139355 | GRM3,KIAA1324L             |
| 4 | 33,825,000 | 33,975,000 | 452 | 1385 | 0.783697066  | GRM3                       |
| 4 | 33,900,000 | 34,050,000 | 453 | 1242 | 1.1113165    | GRM3                       |
| 4 | 33,975,000 | 34,125,000 | 454 | 1065 | 0.652280481  | GRM3                       |
| 4 | 34,050,000 | 34,200,000 | 455 | 1191 | 0.313471226  |                            |
| 4 | 34,125,000 | 34,275,000 | 456 | 1213 | 0.273389176  |                            |
| 4 | 34,200,000 | 34,350,000 | 457 | 1210 | -0.20752537  |                            |
| 4 | 34,275,000 | 34,425,000 | 458 | 1373 | 0.592406536  |                            |
| 4 | 34,350,000 | 34,500,000 | 459 | 1181 | 1.090657437  |                            |
| 4 | 34,425,000 | 34,575,000 | 460 | 993  | 0.253959335  |                            |
| 4 | 34,500,000 | 34,650,000 | 461 | 1244 | 0.427874246  |                            |
| 4 | 34,575,000 | 34,725,000 | 462 | 1581 | 0.887296077  |                            |
| 4 | 34,650,000 | 34,800,000 | 463 | 1542 | 0.538620915  |                            |
| 4 | 34,725,000 | 34,875,000 | 464 | 1681 | 0.855323214  |                            |
| 4 | 34,800,000 | 34,950,000 | 465 | 2021 | 1.081862436  |                            |
| 4 | 34,875,000 | 35,025,000 | 466 | 1838 | 1.026998465  |                            |
| 4 | 34,950,000 | 35,100,000 | 467 | 1589 | 0.894295489  |                            |
| 4 | 35,025,000 | 35,175,000 | 468 | 1297 | 1.15195251   |                            |
| 4 | 35,100,000 | 35,250,000 | 469 | 905  | 1.300408224  |                            |
| 4 | 35,175,000 | 35,325,000 | 470 | 727  | 0.905665822  |                            |
| 4 | 35,250,000 | 35,400,000 | 471 | 864  | 0.627062574  |                            |
| 4 | 35,325,000 | 35,475,000 | 472 | 1025 | 0.470249162  |                            |
| 4 | 35,400,000 | 35,550,000 | 473 | 1073 | 0.147336197  |                            |
| 4 | 35,475,000 | 35,625,000 | 474 | 1167 | -0.707662451 | SEMA3D                     |
| 4 | 35,550,000 | 35,700,000 | 475 | 1125 | -0.57321438  | SEMA3D                     |
| 4 | 35,625,000 | 35,775,000 | 476 | 1012 | 0.318813393  | SEMA3D                     |
| 4 | 35,700,000 | 35,850,000 | 477 | 926  | 0.531938221  | SEMA3D                     |
| 4 | 35,775,000 | 35,925,000 | 478 | 1055 | 0.330590939  | SEMA3D                     |
| 4 | 35,850,000 | 36,000,000 | 479 | 1273 | 0.349123535  |                            |
| 4 | 35,925,000 | 36,075,000 | 480 | 1303 | 0.49562809   |                            |
| 4 | 36,000,000 | 36,150,000 | 481 | 965  | 0.487195226  |                            |
| 4 | 36,075,000 | 36,225,000 | 482 | 995  | 0.788877561  |                            |
| 4 | 36,150,000 | 36,300,000 | 483 | 1285 | 0.855643189  |                            |
| 4 | 36,225,000 | 36,375,000 | 484 | 1140 | 0.642625849  |                            |
| 4 | 36,300,000 | 36,450,000 | 485 | 1031 | -0.088843211 |                            |
| 4 | 36,375,000 | 36,525,000 | 486 | 1308 | 0.4147075    |                            |
| 4 | 36,450,000 | 36,600,000 | 487 | 1329 | 0.669121561  |                            |
| 4 | 36,525,000 | 36,675,000 | 488 | 1023 | 0.380626623  | SEMA3A                     |



|   |            |            |     |      |              |                                                          |
|---|------------|------------|-----|------|--------------|----------------------------------------------------------|
| 4 | 36,600,000 | 36,750,000 | 489 | 1253 | 0.683192293  | SEMA3A                                                   |
| 4 | 36,675,000 | 36,825,000 | 490 | 1362 | 0.628111525  | SEMA3A                                                   |
| 4 | 36,750,000 | 36,900,000 | 491 | 1225 | 0.801192466  | SEMA3A                                                   |
| 4 | 36,825,000 | 36,975,000 | 492 | 1407 | 0.863811251  |                                                          |
| 4 | 36,900,000 | 37,050,000 | 493 | 1523 | 0.623943527  |                                                          |
| 4 | 36,975,000 | 37,125,000 | 494 | 1353 | 0.652432306  |                                                          |
| 4 | 37,050,000 | 37,200,000 | 495 | 1323 | -0.560137002 |                                                          |
| 4 | 37,125,000 | 37,275,000 | 496 | 1385 | -1.069889303 |                                                          |
| 4 | 37,200,000 | 37,350,000 | 497 | 1288 | -0.915475812 | SEMA3E                                                   |
| 4 | 37,275,000 | 37,425,000 | 498 | 1078 | -0.953355321 | SEMA3E                                                   |
| 4 | 37,350,000 | 37,500,000 | 499 | 1172 | 0.159206781  | SEMA3E                                                   |
| 4 | 37,425,000 | 37,575,000 | 500 | 1402 | -0.723673244 |                                                          |
| 4 | 37,500,000 | 37,650,000 | 501 | 1430 | -1.280187869 | PCLO                                                     |
| 4 | 37,575,000 | 37,725,000 | 502 | 1338 | -0.240320895 | PCLO                                                     |
| 4 | 37,650,000 | 37,800,000 | 503 | 1404 | 0.783094044  | PCLO                                                     |
| 4 | 37,725,000 | 37,875,000 | 504 | 1506 | 0.973987935  | PCLO                                                     |
| 4 | 37,800,000 | 37,950,000 | 505 | 1494 | 0.804158076  | PCLO                                                     |
| 4 | 37,875,000 | 38,025,000 | 506 | 1403 | 0.829156935  | PCLO                                                     |
| 4 | 37,950,000 | 38,100,000 | 507 | 1384 | 0.643650186  | PCLO                                                     |
| 4 | 38,025,000 | 38,175,000 | 508 | 1436 | -0.118597678 |                                                          |
| 4 | 38,100,000 | 38,250,000 | 509 | 1273 | 0.090762566  |                                                          |
| 4 | 38,175,000 | 38,325,000 | 510 | 1186 | -0.688831224 |                                                          |
| 4 | 38,250,000 | 38,400,000 | 511 | 1125 | -1.154790548 |                                                          |
| 4 | 38,325,000 | 38,475,000 | 512 | 1197 | 1.219115471  |                                                          |
| 4 | 38,400,000 | 38,550,000 | 513 | 1245 | 0.992505624  |                                                          |
| 4 | 38,475,000 | 38,625,000 | 514 | 1329 | 0.507821898  |                                                          |
| 4 | 38,550,000 | 38,700,000 | 515 | 1224 | 0.243003281  |                                                          |
| 4 | 38,625,000 | 38,775,000 | 516 | 1264 | 0.446477477  | CACNA2D1                                                 |
| 4 | 38,700,000 | 38,850,000 | 517 | 1146 | 0.514521977  | CACNA2D1                                                 |
| 4 | 38,775,000 | 38,925,000 | 518 | 880  | 0.223182703  | CACNA2D1                                                 |
| 4 | 38,850,000 | 39,000,000 | 519 | 1393 | 0.645755021  | CACNA2D1                                                 |
| 4 | 38,925,000 | 39,075,000 | 520 | 1308 | 0.636987248  |                                                          |
| 4 | 39,000,000 | 39,150,000 | 521 | 682  | 0.43516487   | HGF                                                      |
| 4 | 39,075,000 | 39,225,000 | 522 | 632  | 0.726763737  | HGF                                                      |
| 4 | 39,150,000 | 39,300,000 | 523 | 791  | 0.976663115  | HGF                                                      |
| 4 | 39,225,000 | 39,375,000 | 524 | 786  | 0.785070766  |                                                          |
| 4 | 39,300,000 | 39,450,000 | 525 | 884  | 0.582575933  |                                                          |
| 4 | 39,375,000 | 39,525,000 | 526 | 893  | 0.40288879   |                                                          |
| 4 | 39,450,000 | 39,600,000 | 527 | 1220 | 0.363427374  | ENSBTAG00000033359                                       |
| 4 | 39,525,000 | 39,675,000 | 528 | 1532 | 0.68744478   | ENSBTAG00000033359                                       |
| 4 | 39,600,000 | 39,750,000 | 529 | 1148 | 0.668163614  |                                                          |
| 4 | 39,675,000 | 39,825,000 | 530 | 910  | 0.356394715  |                                                          |
| 4 | 39,750,000 | 39,900,000 | 531 | 1030 | 0.614056522  |                                                          |
| 4 | 39,825,000 | 39,975,000 | 532 | 1075 | 0.576602358  |                                                          |
| 4 | 39,900,000 | 40,050,000 | 533 | 1402 | -0.124516876 |                                                          |
| 4 | 39,975,000 | 40,125,000 | 534 | 1782 | 0.256604174  |                                                          |
| 4 | 40,050,000 | 40,200,000 | 535 | 1358 | 0.447386417  | SEMA3C                                                   |
| 4 | 40,125,000 | 40,275,000 | 536 | 745  | 0.110306474  | SEMA3C                                                   |
| 4 | 40,200,000 | 40,350,000 | 537 | 612  | 0.366783591  | SEMA3C                                                   |
| 4 | 40,275,000 | 40,425,000 | 538 | 548  | 0.184012164  | SEMA3C                                                   |
| 4 | 40,350,000 | 40,500,000 | 539 | 955  | 0.443783507  | ENSBTAG00000014220,ENSBTAG00000047646                    |
| 4 | 40,425,000 | 40,575,000 | 540 | 1142 | 0.633859604  | ENSBTAG00000014220,ENSBTAG00000046905,ENSBTAG00000047646 |

|   |            |            |     |      |              |                                            |
|---|------------|------------|-----|------|--------------|--------------------------------------------|
| 4 | 40,500,000 | 40,650,000 | 541 | 878  | 0.834685305  | CD36,ENSBTAG00000014220,ENSBTAG00000046905 |
| 4 | 40,575,000 | 40,725,000 | 542 | 1035 | 0.453456409  | CD36                                       |
| 4 | 40,650,000 | 40,800,000 | 543 | 1168 | 0.298512899  | GNAT3                                      |
| 4 | 40,725,000 | 40,875,000 | 544 | 1343 | 0.622847572  | GNAT3                                      |
| 4 | 40,800,000 | 40,950,000 | 545 | 1317 | 0.732937314  | GNAT3                                      |
| 4 | 40,875,000 | 41,025,000 | 546 | 863  | -0.095437757 |                                            |
| 4 | 40,950,000 | 41,100,000 | 547 | 580  | -0.772797813 | ENSBTAG00000047294                         |
| 4 | 41,025,000 | 41,175,000 | 548 | 869  | -0.439736962 | GNAI1,ENSBTAG00000047294                   |
| 4 | 41,100,000 | 41,250,000 | 549 | 1112 | 0.329809689  | GNAI1                                      |
| 4 | 41,175,000 | 41,325,000 | 550 | 977  | 0.834715238  | GNAI1                                      |
| 4 | 41,250,000 | 41,400,000 | 551 | 1059 | -1.353931753 | GNAI1                                      |
| 4 | 41,325,000 | 41,475,000 | 552 | 1082 | -1.845767911 |                                            |
| 4 | 41,400,000 | 41,550,000 | 553 | 755  | -0.078980803 |                                            |
| 4 | 41,475,000 | 41,625,000 | 554 | 754  | 0.112540337  |                                            |
| 4 | 41,550,000 | 41,700,000 | 555 | 724  | -0.144219653 |                                            |
| 4 | 41,625,000 | 41,775,000 | 556 | 442  | -0.903712389 |                                            |
| 4 | 41,700,000 | 41,850,000 | 557 | 596  | -0.327603569 |                                            |
| 4 | 41,775,000 | 41,925,000 | 558 | 871  | 0.694091389  |                                            |
| 4 | 41,850,000 | 42,000,000 | 559 | 1350 | -0.900832841 |                                            |
| 4 | 41,925,000 | 42,075,000 | 560 | 1460 | -1.618993653 |                                            |
| 4 | 42,000,000 | 42,150,000 | 561 | 850  | -0.211147391 |                                            |
| 4 | 42,075,000 | 42,225,000 | 562 | 566  | 0.69626622   |                                            |
| 4 | 42,150,000 | 42,300,000 | 563 | 553  | 0.549805838  |                                            |
| 4 | 42,225,000 | 42,375,000 | 564 | 647  | -0.69984067  |                                            |
| 4 | 42,300,000 | 42,450,000 | 565 | 781  | -0.556323416 |                                            |
| 4 | 42,375,000 | 42,525,000 | 566 | 683  | -0.397605166 |                                            |
| 4 | 42,450,000 | 42,600,000 | 567 | 592  | -0.0457471   |                                            |
| 4 | 42,525,000 | 42,675,000 | 568 | 740  | 0.987860857  |                                            |
| 4 | 42,600,000 | 42,750,000 | 569 | 693  | 1.076970834  |                                            |
| 4 | 42,675,000 | 42,825,000 | 570 | 801  | 0.701583023  |                                            |
| 4 | 42,750,000 | 42,900,000 | 571 | 1072 | 0.646164565  |                                            |
| 4 | 42,825,000 | 42,975,000 | 572 | 1207 | 0.663009964  |                                            |
| 4 | 42,900,000 | 43,050,000 | 573 | 1150 | 0.801028573  |                                            |
| 4 | 42,975,000 | 43,125,000 | 574 | 1108 | 0.594238037  |                                            |
| 4 | 43,050,000 | 43,200,000 | 575 | 1207 | 0.344496223  |                                            |
| 4 | 43,125,000 | 43,275,000 | 576 | 842  | 0.312866737  |                                            |
| 4 | 43,200,000 | 43,350,000 | 577 | 833  | -0.098637382 |                                            |
| 4 | 43,275,000 | 43,425,000 | 578 | 1169 | 0.526585337  | ENSBTAG00000022498                         |
| 4 | 43,350,000 | 43,500,000 | 579 | 1213 | 1.114073361  | ENSBTAG00000022498                         |
| 4 | 43,425,000 | 43,575,000 | 580 | 857  | 1.027832473  | PHTF2                                      |
| 4 | 43,500,000 | 43,650,000 | 581 | 428  | 0.002646723  | PHTF2                                      |
| 4 | 43,575,000 | 43,725,000 | 582 | 429  | -0.397514868 | PHTF2,RSBN1L,TMEM60                        |
| 4 | 43,650,000 | 43,800,000 | 583 | 463  | -0.746194829 | RSBN1L,TMEM60                              |
| 4 | 43,725,000 | 43,875,000 | 584 | 367  | -0.560192138 | PTPN12,RSBN1L                              |
| 4 | 43,800,000 | 43,950,000 | 585 | 364  | 0.050864968  | PTPN12                                     |
| 4 | 43,875,000 | 44,025,000 | 586 | 594  | 0.228402362  | PTPN12                                     |
| 4 | 43,950,000 | 44,100,000 | 587 | 580  | 0.317892964  | PION                                       |
| 4 | 44,025,000 | 44,175,000 | 588 | 618  | 0.60942002   | CCDC146,PION                               |
| 4 | 44,100,000 | 44,250,000 | 589 | 1157 | 0.559224954  | CCDC146,FGL2,PION                          |
| 4 | 44,175,000 | 44,325,000 | 590 | 1269 | 0.050572165  | CCDC146,FAM185A,FGL2                       |
| 4 | 44,250,000 | 44,400,000 | 591 | 797  | -0.217642759 | FAM185A,FBXL13                             |
| 4 | 44,325,000 | 44,475,000 | 592 | 854  | -1.326378955 | FAM185A,FBXL13                             |
| 4 | 44,400,000 | 44,550,000 | 593 | 1245 | -0.698042805 | FBXL13,LRRC17                              |

|   |            |            |     |      |              |                                    |
|---|------------|------------|-----|------|--------------|------------------------------------|
| 4 | 44,475,000 | 44,625,000 | 594 | 1430 | 0.304422276  | ARMC10,FBXL13,LRRC17               |
| 4 | 44,550,000 | 44,700,000 | 595 | 1376 | 0.083817281  | ARMC10,FBXL13,NAPEPLD              |
| 4 | 44,625,000 | 44,775,000 | 596 | 1366 | 0.404181281  | ARMC10,DNAJC2,NAPEPLD,PMPCB        |
| 4 | 44,700,000 | 44,850,000 | 597 | 1381 | 0.522731498  | DNAJC2,NAPEPLD,PMPCB,PSMC2,SLC26A5 |
| 4 | 44,775,000 | 44,925,000 | 598 | 1383 | -0.481121045 | DNAJC2,PSMC2,RELN,SLC26A5          |
| 4 | 44,850,000 | 45,000,000 | 599 | 1183 | -1.230301121 | RELN,SLC26A5                       |
| 4 | 44,925,000 | 45,075,000 | 600 | 833  | -1.16725329  | RELN                               |
| 4 | 45,000,000 | 45,150,000 | 601 | 739  | -0.20729972  | RELN                               |
| 4 | 45,075,000 | 45,225,000 | 602 | 587  | 0.296533943  | RELN                               |
| 4 | 45,150,000 | 45,300,000 | 603 | 504  | 0.100301524  | RELN                               |
| 4 | 45,225,000 | 45,375,000 | 604 | 748  | 0.219245206  | RELN                               |
| 4 | 45,300,000 | 45,450,000 | 605 | 1059 | 0.000731644  |                                    |
| 4 | 45,375,000 | 45,525,000 | 606 | 853  | -0.225286977 | ENSBTAG00000046817                 |
| 4 | 45,450,000 | 45,600,000 | 607 | 1037 | 0.259988899  | ORC5L,ENSBTAG00000046817           |
| 4 | 45,525,000 | 45,675,000 | 608 | 1388 | 0.336595258  | ORC5L                              |
| 4 | 45,600,000 | 45,750,000 | 609 | 1065 | 0.055422147  | ORC5L                              |
| 4 | 45,675,000 | 45,825,000 | 610 | 799  | 0.015739435  | LHFPL3,ORC5L                       |
| 4 | 45,750,000 | 45,900,000 | 611 | 715  | 0.122050508  | LHFPL3                             |
| 4 | 45,825,000 | 45,975,000 | 612 | 977  | 0.576662614  | LHFPL3                             |
| 4 | 45,900,000 | 46,050,000 | 613 | 1302 | 0.68535361   | LHFPL3                             |
| 4 | 45,975,000 | 46,125,000 | 614 | 1225 | 0.475325972  | LHFPL3                             |
| 4 | 46,050,000 | 46,200,000 | 615 | 1071 | -1.927824792 | LHFPL3                             |
| 4 | 46,125,000 | 46,275,000 | 616 | 1070 | -2.978495505 | LHFPL3                             |
| 4 | 46,200,000 | 46,350,000 | 617 | 1385 | -0.622271731 | LHFPL3                             |
| 4 | 46,275,000 | 46,425,000 | 618 | 1387 | 0.585912214  |                                    |
| 4 | 46,350,000 | 46,500,000 | 619 | 851  | 0.486788878  | KMT2E                              |
| 4 | 46,425,000 | 46,575,000 | 620 | 561  | -0.541140001 | KMT2E,SRPK2                        |
| 4 | 46,500,000 | 46,650,000 | 621 | 659  | -0.711961464 | KMT2E,SRPK2                        |
| 4 | 46,575,000 | 46,725,000 | 622 | 683  | -0.110563479 | SRPK2                              |
| 4 | 46,650,000 | 46,800,000 | 623 | 537  | -0.181582116 |                                    |
| 4 | 46,725,000 | 46,875,000 | 624 | 721  | 0.22077266   | PUS7                               |
| 4 | 46,800,000 | 46,950,000 | 625 | 996  | -1.343181005 | PUS7,RINT1                         |
| 4 | 46,875,000 | 47,025,000 | 626 | 913  | -1.288445062 | ATXN7L1,PUS7,RINT1                 |
| 4 | 46,950,000 | 47,100,000 | 627 | 957  | 0.479658116  | ATXN7L1                            |
| 4 | 47,025,000 | 47,175,000 | 628 | 1065 | 0.787640117  | ATXN7L1                            |
| 4 | 47,100,000 | 47,250,000 | 629 | 1093 | 1.004666771  | ATXN7L1                            |
| 4 | 47,175,000 | 47,325,000 | 630 | 1092 | 0.983933814  | ATXN7L1,CDHR3                      |
| 4 | 47,250,000 | 47,400,000 | 631 | 992  | 0.632431271  | CDHR3                              |
| 4 | 47,325,000 | 47,475,000 | 632 | 937  | -0.274962303 | CDHR3,SYPL1                        |
| 4 | 47,400,000 | 47,550,000 | 633 | 1223 | 0.23830781   | SYPL1                              |
| 4 | 47,475,000 | 47,625,000 | 634 | 1153 | 0.71626389   | NAMPT                              |
| 4 | 47,550,000 | 47,700,000 | 635 | 916  | -0.872478855 | NAMPT                              |
| 4 | 47,625,000 | 47,775,000 | 636 | 1145 | -3.008773434 | NAMPT                              |
| 4 | 47,700,000 | 47,850,000 | 637 | 1162 | -2.266613461 |                                    |
| 4 | 47,775,000 | 47,925,000 | 638 | 1136 | 0.345929281  |                                    |
| 4 | 47,850,000 | 48,000,000 | 639 | 1213 | 1.065890005  |                                    |
| 4 | 47,925,000 | 48,075,000 | 640 | 1273 | 0.791809536  |                                    |
| 4 | 48,000,000 | 48,150,000 | 641 | 1226 | 0.571725092  |                                    |
| 4 | 48,075,000 | 48,225,000 | 642 | 1150 | 0.117157088  |                                    |
| 4 | 48,150,000 | 48,300,000 | 643 | 836  | -0.187276941 | PIK3CG                             |
| 4 | 48,225,000 | 48,375,000 | 644 | 777  | -0.768485966 | PIK3CG                             |
| 4 | 48,300,000 | 48,450,000 | 645 | 1051 | -0.974318517 | PIK3CG,PRKAR2B                     |
| 4 | 48,375,000 | 48,525,000 | 646 | 793  | -0.285986564 | PRKAR2B                            |

|   |            |            |     |      |              |                                      |
|---|------------|------------|-----|------|--------------|--------------------------------------|
| 4 | 48,450,000 | 48,600,000 | 647 | 527  | -0.532801954 | COG5,HBP1,PRKAR2B                    |
| 4 | 48,525,000 | 48,675,000 | 648 | 666  | -0.099404745 | COG5,HBP1,PRKAR2B                    |
| 4 | 48,600,000 | 48,750,000 | 649 | 657  | 0.579158158  | COG5                                 |
| 4 | 48,675,000 | 48,825,000 | 650 | 479  | 0.155159341  | COG5,GPR22                           |
| 4 | 48,750,000 | 48,900,000 | 651 | 465  | -1.470082987 | BCAP29,COG5,DUS4L,GPR22              |
| 4 | 48,825,000 | 48,975,000 | 652 | 674  | -1.554824463 | BCAP29,COG5,DUS4L,SLC26A4            |
| 4 | 48,900,000 | 49,050,000 | 653 | 1148 | -0.013236236 | BCAP29,SLC26A4,ENSBTAG00000018348    |
| 4 | 48,975,000 | 49,125,000 | 654 | 1521 | 0.655179537  | SLC26A3,SLC26A4,ENSBTAG00000018348   |
| 4 | 49,050,000 | 49,200,000 | 655 | 1593 | 0.330767528  | SLC26A3,ENSBTAG00000018348           |
| 4 | 49,125,000 | 49,275,000 | 656 | 1544 | -0.218328329 | DLD,LAMB1                            |
| 4 | 49,200,000 | 49,350,000 | 657 | 1496 | 0.135897085  | DLD,LAMB1                            |
| 4 | 49,275,000 | 49,425,000 | 658 | 1569 | 0.81138128   | LAMB1,LAMB4                          |
| 4 | 49,350,000 | 49,500,000 | 659 | 1275 | 0.599645554  | LAMB4                                |
| 4 | 49,425,000 | 49,575,000 | 660 | 861  | 0.260449134  | LAMB4,NRCAM                          |
| 4 | 49,500,000 | 49,650,000 | 661 | 676  | 0.275291307  | NRCAM                                |
| 4 | 49,575,000 | 49,725,000 | 662 | 833  | 0.959767434  | NRCAM                                |
| 4 | 49,650,000 | 49,800,000 | 663 | 1448 | 0.778313414  |                                      |
| 4 | 49,725,000 | 49,875,000 | 664 | 1592 | -0.042436413 | PNPLA8                               |
| 4 | 49,800,000 | 49,950,000 | 665 | 1186 | 0.128229035  | PNPLA8,ENSBTAG00000014795            |
| 4 | 49,875,000 | 50,025,000 | 666 | 741  | 0.686896755  | NME8,PNPLA8,SFRP4,ENSBTAG00000014795 |
| 4 | 49,950,000 | 50,100,000 | 667 | 427  | 0.829099583  | EPDR1,NME8,SFRP4                     |
| 4 | 50,025,000 | 50,175,000 | 668 | 371  | 1.067885895  | EPDR1                                |
| 4 | 50,100,000 | 50,250,000 | 669 | 342  | 1.107461597  |                                      |
| 4 | 50,175,000 | 50,325,000 | 670 | 345  | 0.762366889  | STARD3NL                             |
| 4 | 50,250,000 | 50,400,000 | 671 | 543  | 0.560235097  | STARD3NL,ENSBTAG00000035945          |
| 4 | 50,325,000 | 50,475,000 | 672 | 1012 | 0.465317875  | STARD3NL,ENSBTAG00000035945          |
| 4 | 50,400,000 | 50,550,000 | 673 | 1323 | 0.789266002  |                                      |
| 4 | 50,475,000 | 50,625,000 | 674 | 1299 | 0.591843623  |                                      |
| 4 | 50,550,000 | 50,700,000 | 675 | 1120 | 0.323719045  |                                      |
| 4 | 50,625,000 | 50,775,000 | 676 | 1121 | 0.030962926  |                                      |
| 4 | 50,700,000 | 50,850,000 | 677 | 1343 | -0.577040633 | CTTNBP2,ENSBTAG00000036154           |
| 4 | 50,775,000 | 50,925,000 | 678 | 1411 | -0.140305277 | CTTNBP2,ENSBTAG00000036154           |
| 4 | 50,850,000 | 51,000,000 | 679 | 1355 | 0.961344025  | CTTNBP2                              |
| 4 | 50,925,000 | 51,075,000 | 680 | 1255 | 1.172616207  | CFTR,CTTNBP2                         |
| 4 | 51,000,000 | 51,150,000 | 681 | 1211 | 0.750043395  | CFTR                                 |
| 4 | 51,075,000 | 51,225,000 | 682 | 993  | 0.578664437  | CFTR                                 |
| 4 | 51,150,000 | 51,300,000 | 683 | 642  | 0.877286233  | ASZ1,CFTR                            |
| 4 | 51,225,000 | 51,375,000 | 684 | 490  | -0.009895515 | ASZ1,CFTR                            |
| 4 | 51,300,000 | 51,450,000 | 685 | 638  | -0.315414219 | ASZ1,WNT2                            |
| 4 | 51,375,000 | 51,525,000 | 686 | 744  | 0.251953149  | ST7,WNT2                             |
| 4 | 51,450,000 | 51,600,000 | 687 | 595  | 0.506797087  | ST7                                  |
| 4 | 51,525,000 | 51,675,000 | 688 | 558  | 0.499633878  | ST7                                  |
| 4 | 51,600,000 | 51,750,000 | 689 | 638  | 0.351734537  | ST7                                  |
| 4 | 51,675,000 | 51,825,000 | 690 | 730  | 0.731468479  | CAPZA2,ST7                           |
| 4 | 51,750,000 | 51,900,000 | 691 | 1082 | 0.90201864   | CAPZA2                               |
| 4 | 51,825,000 | 51,975,000 | 692 | 1037 | 0.671632048  | C-MET,CAPZA2                         |
| 4 | 51,900,000 | 52,050,000 | 693 | 684  | -0.180260471 | C-MET                                |
| 4 | 51,975,000 | 52,125,000 | 694 | 793  | 0.246117398  | C-MET                                |
| 4 | 52,050,000 | 52,200,000 | 695 | 1013 | 0.455697486  | CAV1                                 |
| 4 | 52,125,000 | 52,275,000 | 696 | 1152 | 0.314439867  | CAV1,CAV2                            |
| 4 | 52,200,000 | 52,350,000 | 697 | 1050 | 0.383549303  | CAV1,CAV2                            |
| 4 | 52,275,000 | 52,425,000 | 698 | 650  | 0.214652497  |                                      |
| 4 | 52,350,000 | 52,500,000 | 699 | 497  | -0.22801042  | TES                                  |

|   |            |            |     |      |              |                          |
|---|------------|------------|-----|------|--------------|--------------------------|
| 4 | 52,425,000 | 52,575,000 | 700 | 483  | -0.574321998 | TES                      |
| 4 | 52,500,000 | 52,650,000 | 701 | 769  | -0.492104027 | TES,TFEC                 |
| 4 | 52,575,000 | 52,725,000 | 702 | 898  | -0.737112821 | TFEC                     |
| 4 | 52,650,000 | 52,800,000 | 703 | 798  | -1.250498506 | TFEC                     |
| 4 | 52,725,000 | 52,875,000 | 704 | 833  | -0.735066733 | TFEC                     |
| 4 | 52,800,000 | 52,950,000 | 705 | 688  | 0.134203521  | TFEC                     |
| 4 | 52,875,000 | 53,025,000 | 706 | 998  | 1.070179168  |                          |
| 4 | 52,950,000 | 53,100,000 | 707 | 1111 | 1.114115648  |                          |
| 4 | 53,025,000 | 53,175,000 | 708 | 1070 | 0.845244757  |                          |
| 4 | 53,100,000 | 53,250,000 | 709 | 1262 | 0.605990649  |                          |
| 4 | 53,175,000 | 53,325,000 | 710 | 1088 | 0.345851642  |                          |
| 4 | 53,250,000 | 53,400,000 | 711 | 754  | 0.323670904  |                          |
| 4 | 53,325,000 | 53,475,000 | 712 | 776  | 0.644813839  |                          |
| 4 | 53,400,000 | 53,550,000 | 713 | 764  | 0.373868181  |                          |
| 4 | 53,475,000 | 53,625,000 | 714 | 678  | -0.092737255 |                          |
| 4 | 53,550,000 | 53,700,000 | 715 | 753  | 0.524695127  |                          |
| 4 | 53,625,000 | 53,775,000 | 716 | 675  | 1.148533774  | MDFIC                    |
| 4 | 53,700,000 | 53,850,000 | 717 | 692  | 1.095967778  | MDFIC                    |
| 4 | 53,775,000 | 53,925,000 | 718 | 690  | 0.814228388  | MDFIC                    |
| 4 | 53,850,000 | 54,000,000 | 719 | 579  | 0.851996534  | MDFIC                    |
| 4 | 53,925,000 | 54,075,000 | 720 | 812  | 0.918733897  |                          |
| 4 | 54,000,000 | 54,150,000 | 721 | 672  | 0.862118549  | FOXP2                    |
| 4 | 54,075,000 | 54,225,000 | 722 | 369  | 1.028124055  | FOXP2                    |
| 4 | 54,150,000 | 54,300,000 | 723 | 373  | 1.259276257  | FOXP2                    |
| 4 | 54,225,000 | 54,375,000 | 724 | 324  | 1.271013577  |                          |
| 4 | 54,300,000 | 54,450,000 | 725 | 279  | 1.128137094  |                          |
| 4 | 54,375,000 | 54,525,000 | 726 | 197  | 0.931571382  |                          |
| 4 | 54,450,000 | 54,600,000 | 727 | 221  | 1.199087638  |                          |
| 4 | 54,525,000 | 54,675,000 | 728 | 309  | 1.331170949  |                          |
| 4 | 54,600,000 | 54,750,000 | 729 | 276  | 0.858138831  |                          |
| 4 | 54,675,000 | 54,825,000 | 730 | 144  | -0.837400927 |                          |
| 4 | 54,750,000 | 54,900,000 | 731 | 390  | -0.180009396 | PPP1R3A                  |
| 4 | 54,825,000 | 54,975,000 | 732 | 497  | 0.087732283  | PPP1R3A                  |
| 4 | 54,900,000 | 55,050,000 | 733 | 362  | 0.613647371  | PPP1R3A                  |
| 4 | 54,975,000 | 55,125,000 | 734 | 311  | 0.80236262   |                          |
| 4 | 55,050,000 | 55,200,000 | 735 | 262  | 0.66262439   |                          |
| 4 | 55,125,000 | 55,275,000 | 736 | 242  | 0.877947163  |                          |
| 4 | 55,200,000 | 55,350,000 | 737 | 234  | 0.821469001  |                          |
| 4 | 55,275,000 | 55,425,000 | 738 | 289  | 0.70776246   |                          |
| 4 | 55,350,000 | 55,500,000 | 739 | 340  | 0.553848317  |                          |
| 4 | 55,425,000 | 55,575,000 | 740 | 336  | 0.074151264  |                          |
| 4 | 55,500,000 | 55,650,000 | 741 | 327  | -0.240370933 | GPR85,ENSBTAG00000046823 |
| 4 | 55,575,000 | 55,725,000 | 742 | 659  | -0.373454163 | GPR85,ENSBTAG00000046823 |
| 4 | 55,650,000 | 55,800,000 | 743 | 946  | 0.396667229  |                          |
| 4 | 55,725,000 | 55,875,000 | 744 | 996  | 0.196174726  | IFRD1,LSMEM1             |
| 4 | 55,800,000 | 55,950,000 | 745 | 931  | -0.173135032 | IFRD1,LSMEM1             |
| 4 | 55,875,000 | 56,025,000 | 746 | 849  | -0.124353029 | IFRD1,ZNF277             |
| 4 | 55,950,000 | 56,100,000 | 747 | 787  | -0.019248266 | ZNF277                   |
| 4 | 56,025,000 | 56,175,000 | 748 | 732  | 0.699985865  | ZNF277                   |
| 4 | 56,100,000 | 56,250,000 | 749 | 845  | 0.08940033   | ZNF277                   |
| 4 | 56,175,000 | 56,325,000 | 750 | 968  | 0.480062224  |                          |
| 4 | 56,250,000 | 56,400,000 | 751 | 778  | 0.849825567  | C7orf60                  |
| 4 | 56,325,000 | 56,475,000 | 752 | 590  | 0.356502229  | C7orf60,TMEM168          |

|   |            |            |     |      |              |                                        |
|---|------------|------------|-----|------|--------------|----------------------------------------|
| 4 | 56,400,000 | 56,550,000 | 753 | 921  | 0.482503097  | C7orf60,TMEM168,ENSBTAG00000024361     |
| 4 | 56,475,000 | 56,625,000 | 754 | 1167 | 0.409027618  | TMEM168,ENSBTAG00000024361             |
| 4 | 56,550,000 | 56,700,000 | 755 | 1114 | -0.14706807  | DOCK4                                  |
| 4 | 56,625,000 | 56,775,000 | 756 | 1089 | 0.085372819  | DOCK4                                  |
| 4 | 56,700,000 | 56,850,000 | 757 | 1075 | 0.922496142  | DOCK4                                  |
| 4 | 56,775,000 | 56,925,000 | 758 | 1190 | 0.754157556  | DOCK4                                  |
| 4 | 56,850,000 | 57,000,000 | 759 | 1147 | 0.704240498  | DOCK4                                  |
| 4 | 56,925,000 | 57,075,000 | 760 | 905  | 0.647139083  |                                        |
| 4 | 57,000,000 | 57,150,000 | 761 | 756  | 0.5601059    | IMMP2L                                 |
| 4 | 57,075,000 | 57,225,000 | 762 | 686  | 0.787120229  | IMMP2L,ENSBTAG00000045592              |
| 4 | 57,150,000 | 57,300,000 | 763 | 767  | 0.855252251  | IMMP2L,ENSBTAG00000045592              |
| 4 | 57,225,000 | 57,375,000 | 764 | 936  | 0.792501962  | IMMP2L                                 |
| 4 | 57,300,000 | 57,450,000 | 765 | 705  | 0.595565344  | IMMP2L                                 |
| 4 | 57,375,000 | 57,525,000 | 766 | 574  | 0.246917214  | IMMP2L                                 |
| 4 | 57,450,000 | 57,600,000 | 767 | 748  | 0.247742596  | IMMP2L,LRRN3                           |
| 4 | 57,525,000 | 57,675,000 | 768 | 782  | 0.305256471  | IMMP2L,LRRN3                           |
| 4 | 57,600,000 | 57,750,000 | 769 | 815  | 0.386338873  | IMMP2L                                 |
| 4 | 57,675,000 | 57,825,000 | 770 | 945  | 0.59432619   | IMMP2L                                 |
| 4 | 57,750,000 | 57,900,000 | 771 | 1337 | 0.127448823  | IMMP2L                                 |
| 4 | 57,825,000 | 57,975,000 | 772 | 1368 | -0.218385934 | IMMP2L                                 |
| 4 | 57,900,000 | 58,050,000 | 773 | 1247 | 0.461719109  | IMMP2L                                 |
| 4 | 57,975,000 | 58,125,000 | 774 | 1251 | 0.824641818  | IMMP2L                                 |
| 4 | 58,050,000 | 58,200,000 | 775 | 1461 | 0.766895663  | IMMP2L                                 |
| 4 | 58,125,000 | 58,275,000 | 776 | 1424 | 0.55648259   |                                        |
| 4 | 58,200,000 | 58,350,000 | 777 | 1091 | 0.101939094  |                                        |
| 4 | 58,275,000 | 58,425,000 | 778 | 1245 | 0.655004812  |                                        |
| 4 | 58,350,000 | 58,500,000 | 779 | 1443 | 1.052046217  |                                        |
| 4 | 58,425,000 | 58,575,000 | 780 | 1197 | 0.810348485  |                                        |
| 4 | 58,500,000 | 58,650,000 | 781 | 864  | 0.276229471  |                                        |
| 4 | 58,575,000 | 58,725,000 | 782 | 818  | 0.183604259  |                                        |
| 4 | 58,650,000 | 58,800,000 | 783 | 851  | -0.206680771 |                                        |
| 4 | 58,725,000 | 58,875,000 | 784 | 631  | -0.054682521 |                                        |
| 4 | 58,800,000 | 58,950,000 | 785 | 514  | 0.13432795   |                                        |
| 4 | 58,875,000 | 59,025,000 | 786 | 973  | 0.014335006  |                                        |
| 4 | 58,950,000 | 59,100,000 | 787 | 1357 | -0.580866817 |                                        |
| 4 | 59,025,000 | 59,175,000 | 788 | 1496 | -0.417223105 |                                        |
| 4 | 59,100,000 | 59,250,000 | 789 | 1447 | 0.665789582  |                                        |
| 4 | 59,175,000 | 59,325,000 | 790 | 1473 | 0.814019537  |                                        |
| 4 | 59,250,000 | 59,400,000 | 791 | 1544 | 1.009399542  |                                        |
| 4 | 59,325,000 | 59,475,000 | 792 | 1628 | 0.031556718  |                                        |
| 4 | 59,400,000 | 59,550,000 | 793 | 1579 | -0.733932277 |                                        |
| 4 | 59,475,000 | 59,625,000 | 794 | 1551 | 0.436263595  |                                        |
| 4 | 59,550,000 | 59,700,000 | 795 | 1625 | 0.752592919  |                                        |
| 4 | 59,625,000 | 59,775,000 | 796 | 1467 | 0.913412548  |                                        |
| 4 | 59,700,000 | 59,850,000 | 797 | 1527 | 0.908219118  |                                        |
| 4 | 59,775,000 | 59,925,000 | 798 | 1505 | -0.440677529 |                                        |
| 4 | 59,850,000 | 60,000,000 | 799 | 1203 | -1.405734231 | DNAJB9,THAP5                           |
| 4 | 59,925,000 | 60,075,000 | 800 | 1387 | 0.56274428   | DNAJB9,GPR141,THAP5,ENSBTAG00000046491 |
| 4 | 60,000,000 | 60,150,000 | 801 | 1636 | 0.264640338  | GPR141,ENSBTAG00000046491              |
| 4 | 60,075,000 | 60,225,000 | 802 | 1541 | 0.452880765  |                                        |
| 4 | 60,150,000 | 60,300,000 | 803 | 1389 | 0.804862029  |                                        |
| 4 | 60,225,000 | 60,375,000 | 804 | 1054 | 0.845478657  | ELMO1                                  |
| 4 | 60,300,000 | 60,450,000 | 805 | 857  | 0.980163915  | ELMO1                                  |

|   |            |            |     |      |              |                                       |
|---|------------|------------|-----|------|--------------|---------------------------------------|
| 4 | 60,375,000 | 60,525,000 | 806 | 832  | 0.719773876  | ELMO1                                 |
| 4 | 60,450,000 | 60,600,000 | 807 | 1079 | 0.82963531   | ELMO1                                 |
| 4 | 60,525,000 | 60,675,000 | 808 | 1243 | -0.451740395 | ELMO1                                 |
| 4 | 60,600,000 | 60,750,000 | 809 | 1177 | -1.008102635 | ELMO1                                 |
| 4 | 60,675,000 | 60,825,000 | 810 | 1181 | 0.535355535  | ELMO1                                 |
| 4 | 60,750,000 | 60,900,000 | 811 | 1186 | 0.388645684  | ELMO1                                 |
| 4 | 60,825,000 | 60,975,000 | 812 | 1175 | 0.089799889  | AOAH,ELMO1                            |
| 4 | 60,900,000 | 61,050,000 | 813 | 1470 | -0.72801753  | AOAH                                  |
| 4 | 60,975,000 | 61,125,000 | 814 | 1593 | -0.209583238 | AOAH                                  |
| 4 | 61,050,000 | 61,200,000 | 815 | 1220 | 0.826171605  | ANLN,AOAH,ENSBTAG00000048186          |
| 4 | 61,125,000 | 61,275,000 | 816 | 1063 | -0.997215664 | ANLN,AOAH,KIAA0895,ENSBTAG00000048186 |
| 4 | 61,200,000 | 61,350,000 | 817 | 1358 | -0.369815249 | ANLN,KIAA0895                         |
| 4 | 61,275,000 | 61,425,000 | 818 | 1727 | -0.051835995 | EEDP1,KIAA0895                        |
| 4 | 61,350,000 | 61,500,000 | 819 | 1609 | -0.122141287 | EEDP1                                 |
| 4 | 61,425,000 | 61,575,000 | 820 | 1445 | 0.701151504  | EEDP1                                 |
| 4 | 61,500,000 | 61,650,000 | 821 | 1161 | 0.328399195  | CDC10                                 |
| 4 | 61,575,000 | 61,725,000 | 822 | 658  | 0.021421051  | CDC10                                 |
| 4 | 61,650,000 | 61,800,000 | 823 | 685  | 0.351790829  | CDC10                                 |
| 4 | 61,725,000 | 61,875,000 | 824 | 928  | 0.596706131  | HERPUD2                               |
| 4 | 61,800,000 | 61,950,000 | 825 | 1148 | 1.171281634  | HERPUD2                               |
| 4 | 61,875,000 | 62,025,000 | 826 | 1265 | 1.268950281  |                                       |
| 4 | 61,950,000 | 62,100,000 | 827 | 1203 | 1.195520904  | RBX1                                  |
| 4 | 62,025,000 | 62,175,000 | 828 | 1351 | 0.679075785  | RBX1                                  |
| 4 | 62,100,000 | 62,250,000 | 829 | 1560 | 0.664569171  | TBX20                                 |
| 4 | 62,175,000 | 62,325,000 | 830 | 1662 | 0.964401211  | DPY19L2,TBX20                         |
| 4 | 62,250,000 | 62,400,000 | 831 | 1597 | 0.726342212  | DPY19L1,DPY19L2                       |
| 4 | 62,325,000 | 62,475,000 | 832 | 1638 | 0.231562025  | DPY19L1,DPY19L2                       |
| 4 | 62,400,000 | 62,550,000 | 833 | 1534 | 0.285288103  | DPY19L1,NPSR1                         |
| 4 | 62,475,000 | 62,625,000 | 834 | 1119 | 0.162554389  | DPY19L1,NPSR1                         |
| 4 | 62,550,000 | 62,700,000 | 835 | 1029 | -0.166180257 | NPSR1                                 |
| 4 | 62,625,000 | 62,775,000 | 836 | 1433 | -0.131133566 | NPSR1                                 |
| 4 | 62,700,000 | 62,850,000 | 837 | 1437 | -0.188372366 |                                       |
| 4 | 62,775,000 | 62,925,000 | 838 | 912  | -0.374031153 |                                       |
| 4 | 62,850,000 | 63,000,000 | 839 | 982  | 0.030732617  |                                       |
| 4 | 62,925,000 | 63,075,000 | 840 | 1125 | 0.320660022  | BMPER                                 |
| 4 | 63,000,000 | 63,150,000 | 841 | 1119 | 0.126225256  | BMPER                                 |
| 4 | 63,075,000 | 63,225,000 | 842 | 1030 | -0.028396122 | BMPER                                 |
| 4 | 63,150,000 | 63,300,000 | 843 | 1062 | -0.297871241 | BMPER                                 |
| 4 | 63,225,000 | 63,375,000 | 844 | 1309 | -0.462058406 | BMPER                                 |
| 4 | 63,300,000 | 63,450,000 | 845 | 1296 | -0.744765967 | BMPER                                 |
| 4 | 63,375,000 | 63,525,000 | 846 | 1166 | -1.348614413 |                                       |
| 4 | 63,450,000 | 63,600,000 | 847 | 1180 | -0.7563714   |                                       |
| 4 | 63,525,000 | 63,675,000 | 848 | 1338 | 0.481722158  | BBS9                                  |
| 4 | 63,600,000 | 63,750,000 | 849 | 1493 | 0.78491063   | BBS9                                  |
| 4 | 63,675,000 | 63,825,000 | 850 | 1788 | 0.819058081  | BBS9                                  |
| 4 | 63,750,000 | 63,900,000 | 851 | 1742 | 0.907723971  | BBS9                                  |
| 4 | 63,825,000 | 63,975,000 | 852 | 1548 | 0.992029303  | BBS9                                  |
| 4 | 63,900,000 | 64,050,000 | 853 | 1693 | 0.881993526  | BBS9                                  |
| 4 | 63,975,000 | 64,125,000 | 854 | 1666 | 0.864704939  | BBS9                                  |
| 4 | 64,050,000 | 64,200,000 | 855 | 1496 | 0.806604913  | BBS9,NT5C3,RP9                        |
| 4 | 64,125,000 | 64,275,000 | 856 | 1684 | 0.474794602  | FKBP9,NT5C3,RP9                       |
| 4 | 64,200,000 | 64,350,000 | 857 | 1883 | 0.436137906  | FKBP9,KBTBD2,NT5C3                    |
| 4 | 64,275,000 | 64,425,000 | 858 | 1786 | 0.4712099    | AVL9,KBTBD2,LSM5                      |

|   |            |            |     |      |              |                                            |
|---|------------|------------|-----|------|--------------|--------------------------------------------|
| 4 | 64,350,000 | 64,500,000 | 859 | 1726 | 0.617233103  | AVL9,LSM5                                  |
| 4 | 64,425,000 | 64,575,000 | 860 | 1430 | 0.055274238  |                                            |
| 4 | 64,500,000 | 64,650,000 | 861 | 1151 | -0.407885891 |                                            |
| 4 | 64,575,000 | 64,725,000 | 862 | 1059 | 0.265097037  |                                            |
| 4 | 64,650,000 | 64,800,000 | 863 | 898  | 0.092078609  |                                            |
| 4 | 64,725,000 | 64,875,000 | 864 | 930  | 0.564164314  |                                            |
| 4 | 64,800,000 | 64,950,000 | 865 | 1154 | -0.097453072 |                                            |
| 4 | 64,875,000 | 65,025,000 | 866 | 1188 | -0.432957043 | PDE1C                                      |
| 4 | 64,950,000 | 65,100,000 | 867 | 1340 | -0.685919177 | PDE1C                                      |
| 4 | 65,025,000 | 65,175,000 | 868 | 1489 | -1.046245671 | PDE1C,PPP1R17                              |
| 4 | 65,100,000 | 65,250,000 | 869 | 1454 | 0.270731961  | CCDC129,PPP1R17                            |
| 4 | 65,175,000 | 65,325,000 | 870 | 1219 | 0.639785279  | CCDC129,PPP1R17                            |
| 4 | 65,250,000 | 65,400,000 | 871 | 1038 | 0.369759141  | CCDC129                                    |
| 4 | 65,325,000 | 65,475,000 | 872 | 956  | 0.31167741   |                                            |
| 4 | 65,400,000 | 65,550,000 | 873 | 1054 | 0.924323884  | NEUROD6                                    |
| 4 | 65,475,000 | 65,625,000 | 874 | 1380 | 1.254925428  | NEUROD6                                    |
| 4 | 65,550,000 | 65,700,000 | 875 | 1252 | 1.272784808  | ADCYAP1R1                                  |
| 4 | 65,625,000 | 65,775,000 | 876 | 1087 | 1.17622504   | ADCYAP1R1                                  |
| 4 | 65,700,000 | 65,850,000 | 877 | 1241 | 1.16348587   | ADCYAP1R1,AQP1,GHRHR                       |
| 4 | 65,775,000 | 65,925,000 | 878 | 1410 | 0.954013504  | AQP1,FAM188B,GHRHR                         |
| 4 | 65,850,000 | 66,000,000 | 879 | 1357 | 0.977855454  | FAM188B                                    |
| 4 | 65,925,000 | 66,075,000 | 880 | 1509 | 1.02105314   | CRHR2,FAM188B,INMT                         |
| 4 | 66,000,000 | 66,150,000 | 881 | 1432 | 0.993602125  | CRHR2,GARS,INMT                            |
| 4 | 66,075,000 | 66,225,000 | 882 | 1212 | 1.12648901   | CRHR2,GARS,GGCT                            |
| 4 | 66,150,000 | 66,300,000 | 883 | 1341 | 0.927675235  | GARS,GGCT,NOD1                             |
| 4 | 66,225,000 | 66,375,000 | 884 | 1450 | 0.809075282  | NOD1,ZNRF2                                 |
| 4 | 66,300,000 | 66,450,000 | 885 | 1393 | 0.825705386  | NOD1,ZNRF2                                 |
| 4 | 66,375,000 | 66,525,000 | 886 | 1271 | 0.365007844  | ZNRF2                                      |
| 4 | 66,450,000 | 66,600,000 | 887 | 1000 | 0.156401408  | ZNRF2                                      |
| 4 | 66,525,000 | 66,675,000 | 888 | 824  | 1.304604565  | MTURN                                      |
| 4 | 66,600,000 | 66,750,000 | 889 | 864  | 1.29400769   | MTURN,PLEKHA8                              |
| 4 | 66,675,000 | 66,825,000 | 890 | 846  | 0.610536143  | FKBP14,PLEKHA8,SCRN1                       |
| 4 | 66,750,000 | 66,900,000 | 891 | 897  | 0.281144808  | FKBP14,PLEKHA8,SCRN1,WIPF3                 |
| 4 | 66,825,000 | 66,975,000 | 892 | 920  | 0.056895912  | SCRN1,WIPF3                                |
| 4 | 66,900,000 | 67,050,000 | 893 | 1176 | 0.246387323  | PRR15                                      |
| 4 | 66,975,000 | 67,125,000 | 894 | 1215 | 0.586533099  | CHN2,PRR15                                 |
| 4 | 67,050,000 | 67,200,000 | 895 | 1095 | 1.112057241  | CHN2                                       |
| 4 | 67,125,000 | 67,275,000 | 896 | 971  | 1.095694304  | CHN2                                       |
| 4 | 67,200,000 | 67,350,000 | 897 | 663  | 0.519119456  | CHN2                                       |
| 4 | 67,275,000 | 67,425,000 | 898 | 626  | 0.454600096  | CHN2                                       |
| 4 | 67,350,000 | 67,500,000 | 899 | 807  | 0.528110084  | CHN2,CPVL                                  |
| 4 | 67,425,000 | 67,575,000 | 900 | 898  | 0.723226591  | CPVL                                       |
| 4 | 67,500,000 | 67,650,000 | 901 | 834  | 0.743674592  | CPVL                                       |
| 4 | 67,575,000 | 67,725,000 | 902 | 628  | -0.313320354 | CPVL,TRIL                                  |
| 4 | 67,650,000 | 67,800,000 | 903 | 473  | -0.509867395 | TRIL,ENSBTAG00000018909,ENSBTAG00000046308 |
| 4 | 67,725,000 | 67,875,000 | 904 | 496  | 0.70772439   | ENSBTAG00000018909,ENSBTAG00000046308      |
| 4 | 67,800,000 | 67,950,000 | 905 | 447  | 0.308852548  | ENSBTAG00000018909,ENSBTAG00000046308      |
| 4 | 67,875,000 | 68,025,000 | 906 | 425  | -0.021244444 | ENSBTAG00000018909,ENSBTAG00000046308      |
| 4 | 67,950,000 | 68,100,000 | 907 | 433  | 0.379898919  | ENSBTAG00000046308                         |
| 4 | 68,025,000 | 68,175,000 | 908 | 409  | 0.600154275  | ENSBTAG00000046308                         |
| 4 | 68,100,000 | 68,250,000 | 909 | 458  | 0.122620875  | ENSBTAG00000046308                         |
| 4 | 68,175,000 | 68,325,000 | 910 | 596  | -0.069059312 | ENSBTAG00000046308                         |
| 4 | 68,250,000 | 68,400,000 | 911 | 888  | -0.107522749 |                                            |



|   |            |            |     |      |              |                                                               |
|---|------------|------------|-----|------|--------------|---------------------------------------------------------------|
| 4 | 68,325,000 | 68,475,000 | 912 | 805  | 0.132645141  | JAZF1                                                         |
| 4 | 68,400,000 | 68,550,000 | 913 | 618  | 0.936880867  | JAZF1                                                         |
| 4 | 68,475,000 | 68,625,000 | 914 | 781  | 0.05997227   | JAZF1                                                         |
| 4 | 68,550,000 | 68,700,000 | 915 | 919  | -0.062467837 | JAZF1                                                         |
| 4 | 68,625,000 | 68,775,000 | 916 | 920  | 0.160671923  | JAZF1                                                         |
| 4 | 68,700,000 | 68,850,000 | 917 | 695  | 0.394145275  | JAZF1,TAX1BP1                                                 |
| 4 | 68,775,000 | 68,925,000 | 918 | 636  | 0.48514022   | TAX1BP1                                                       |
| 4 | 68,850,000 | 69,000,000 | 919 | 702  | -0.333123981 | HIBADH,TAX1BP1                                                |
| 4 | 68,925,000 | 69,075,000 | 920 | 657  | -1.056022945 | HIBADH                                                        |
| 4 | 69,000,000 | 69,150,000 | 921 | 720  | -0.780984435 | HIBADH                                                        |
| 4 | 69,075,000 | 69,225,000 | 922 | 535  | -0.251676953 |                                                               |
| 4 | 69,150,000 | 69,300,000 | 923 | 185  | 0.3253905    | EVX1,HOXA13                                                   |
| 4 | 69,225,000 | 69,375,000 | 924 | 125  | -0.146281734 | EVX1,HOXA10,HOXA11,HOXA13,HOXA3,HOXA4,HOXA5,HOXA6,HOXA7,HOXA9 |
| 4 | 69,300,000 | 69,450,000 | 925 | 172  | 0.218147022  | HOXA1,HOXA10,HOXA11,HOXA2,HOXA3,HOXA4,HOXA5,HOXA6,HOXA7,HOXA9 |
| 4 | 69,375,000 | 69,525,000 | 926 | 297  | 0.685975598  | HOXA1,HOXA2,HOXA3                                             |
| 4 | 69,450,000 | 69,600,000 | 927 | 441  | 0.205292416  | SKAP2                                                         |
| 4 | 69,525,000 | 69,675,000 | 928 | 460  | -0.005867022 | SKAP2                                                         |
| 4 | 69,600,000 | 69,750,000 | 929 | 391  | 0.350129093  | SKAP2                                                         |
| 4 | 69,675,000 | 69,825,000 | 930 | 532  | 0.238492844  | SKAP2                                                         |
| 4 | 69,750,000 | 69,900,000 | 931 | 695  | -0.172020357 | SKAP2                                                         |
| 4 | 69,825,000 | 69,975,000 | 932 | 1114 | -0.019461293 |                                                               |
| 4 | 69,900,000 | 70,050,000 | 933 | 984  | 0.242107388  | SNX10                                                         |
| 4 | 69,975,000 | 70,125,000 | 934 | 388  | 0.364977     | SNX10                                                         |
| 4 | 70,050,000 | 70,200,000 | 935 | 322  | 0.814175556  | HNRNPA2B1,SNX10                                               |
| 4 | 70,125,000 | 70,275,000 | 936 | 336  | 1.11660973   | HNRNPA2B1,NFE2L3                                              |
| 4 | 70,200,000 | 70,350,000 | 937 | 349  | 0.616665565  | HNRNPA2B1,NFE2L3                                              |
| 4 | 70,275,000 | 70,425,000 | 938 | 351  | 0.379576265  |                                                               |
| 4 | 70,350,000 | 70,500,000 | 939 | 320  | 0.552828888  |                                                               |
| 4 | 70,425,000 | 70,575,000 | 940 | 278  | 0.462317705  |                                                               |
| 4 | 70,500,000 | 70,650,000 | 941 | 398  | -0.767905505 |                                                               |
| 4 | 70,575,000 | 70,725,000 | 942 | 425  | 0.02163383   |                                                               |
| 4 | 70,650,000 | 70,800,000 | 943 | 327  | 0.512718574  |                                                               |
| 4 | 70,725,000 | 70,875,000 | 944 | 381  | -0.24369239  |                                                               |
| 4 | 70,800,000 | 70,950,000 | 945 | 404  | 0.392098691  |                                                               |
| 4 | 70,875,000 | 71,025,000 | 946 | 399  | 0.394562074  |                                                               |
| 4 | 70,950,000 | 71,100,000 | 947 | 656  | 0.790030947  |                                                               |
| 4 | 71,025,000 | 71,175,000 | 948 | 860  | 0.799190043  | C7orf31,NPVF                                                  |
| 4 | 71,100,000 | 71,250,000 | 949 | 658  | 0.522794271  | C7orf31,CYCS,NPVF                                             |
| 4 | 71,175,000 | 71,325,000 | 950 | 638  | 1.047659767  | C7orf31,CYCS                                                  |
| 4 | 71,250,000 | 71,400,000 | 951 | 693  | 0.686163511  | OSBPL3                                                        |
| 4 | 71,325,000 | 71,475,000 | 952 | 884  | -1.881014492 | OSBPL3                                                        |
| 4 | 71,400,000 | 71,550,000 | 953 | 1258 | -0.81489092  | DFNA5,OSBPL3,ENSBTAG00000046586                               |
| 4 | 71,475,000 | 71,625,000 | 954 | 1193 | 0.690899016  | DFNA5,OSBPL3,ENSBTAG00000046586                               |
| 4 | 71,550,000 | 71,700,000 | 955 | 760  | 0.537152006  | DFNA5,MPP6                                                    |
| 4 | 71,625,000 | 71,775,000 | 956 | 392  | 0.343815642  | MPP6                                                          |
| 4 | 71,700,000 | 71,850,000 | 957 | 435  | 0.055972177  |                                                               |
| 4 | 71,775,000 | 71,925,000 | 958 | 626  | 0.365758314  |                                                               |
| 4 | 71,850,000 | 72,000,000 | 959 | 592  | 0.541018902  |                                                               |
| 4 | 71,925,000 | 72,075,000 | 960 | 546  | 0.623276339  | NPY                                                           |
| 4 | 72,000,000 | 72,150,000 | 961 | 713  | 0.484156426  | NPY                                                           |
| 4 | 72,075,000 | 72,225,000 | 962 | 654  | 0.556947491  | NPY                                                           |

|   |            |            |      |      |              |                                    |
|---|------------|------------|------|------|--------------|------------------------------------|
| 4 | 72,150,000 | 72,300,000 | 963  | 654  | 0.831358214  |                                    |
| 4 | 72,225,000 | 72,375,000 | 964  | 682  | 0.106454686  |                                    |
| 4 | 72,300,000 | 72,450,000 | 965  | 535  | -0.380070204 | STK31                              |
| 4 | 72,375,000 | 72,525,000 | 966  | 442  | 0.19620745   | MGC134574,STK31                    |
| 4 | 72,450,000 | 72,600,000 | 967  | 406  | 0.059222827  | MGC134574,STK31,ENSBTAG00000046457 |
| 4 | 72,525,000 | 72,675,000 | 968  | 458  | -0.143186376 | ENSBTAG00000046457                 |
| 4 | 72,600,000 | 72,750,000 | 969  | 607  | 0.501701235  | ADAM22                             |
| 4 | 72,675,000 | 72,825,000 | 970  | 586  | 0.566991447  | ADAM22,SRI                         |
| 4 | 72,750,000 | 72,900,000 | 971  | 685  | 0.94664226   | ADAM22,SRI,STEAP4                  |
| 4 | 72,825,000 | 72,975,000 | 972  | 811  | 0.980538294  | STEAP4                             |
| 4 | 72,900,000 | 73,050,000 | 973  | 907  | 0.038772387  |                                    |
| 4 | 72,975,000 | 73,125,000 | 974  | 1092 | 0.124966945  |                                    |
| 4 | 73,050,000 | 73,200,000 | 975  | 778  | 0.14816027   |                                    |
| 4 | 73,125,000 | 73,275,000 | 976  | 1117 | 0.394336086  |                                    |
| 4 | 73,200,000 | 73,350,000 | 977  | 1461 | -0.204057223 | ZNF804B                            |
| 4 | 73,275,000 | 73,425,000 | 978  | 860  | -0.666469041 | C4H7orf62,ZNF804B                  |
| 4 | 73,350,000 | 73,500,000 | 979  | 479  | 0.20433706   | C4H7orf62,ZNF804B                  |
| 4 | 73,425,000 | 73,575,000 | 980  | 774  | -1.533158568 | ZNF804B                            |
| 4 | 73,500,000 | 73,650,000 | 981  | 1082 | -1.461163872 | ZNF804B,ENSBTAG00000015800         |
| 4 | 73,575,000 | 73,725,000 | 982  | 888  | -0.480378421 | ZNF804B,ENSBTAG00000015800         |
| 4 | 73,650,000 | 73,800,000 | 983  | 633  | -0.034166988 | ZNF804B                            |
| 4 | 73,725,000 | 73,875,000 | 984  | 579  | 1.014586108  | ZNF804B                            |
| 4 | 73,800,000 | 73,950,000 | 985  | 782  | 1.251236801  | ZNF804B                            |
| 4 | 73,875,000 | 74,025,000 | 986  | 1327 | 1.114163861  | ZNF804B                            |
| 4 | 73,950,000 | 74,100,000 | 987  | 1111 | 1.09240885   |                                    |
| 4 | 74,025,000 | 74,175,000 | 988  | 884  | 0.559356873  |                                    |
| 4 | 74,100,000 | 74,250,000 | 989  | 1115 | 0.877061217  |                                    |
| 4 | 74,175,000 | 74,325,000 | 990  | 1017 | -1.731046118 |                                    |
| 4 | 74,250,000 | 74,400,000 | 991  | 1112 | -3.551935306 |                                    |
| 4 | 74,325,000 | 74,475,000 | 992  | 1297 | -0.900425777 |                                    |
| 4 | 74,400,000 | 74,550,000 | 993  | 1237 | -0.734345397 |                                    |
| 4 | 74,475,000 | 74,625,000 | 994  | 802  | -0.346410382 |                                    |
| 4 | 74,550,000 | 74,700,000 | 995  | 546  | -0.595030596 |                                    |
| 4 | 74,625,000 | 74,775,000 | 996  | 595  | -0.091131066 |                                    |
| 4 | 74,700,000 | 74,850,000 | 997  | 809  | 0.168273052  | ENSBTAG00000015749                 |
| 4 | 74,775,000 | 74,925,000 | 998  | 1064 | 0.175800426  | CFAP69,STEAP2,ENSBTAG00000015749   |
| 4 | 74,850,000 | 75,000,000 | 999  | 1009 | 0.435172509  | CFAP69,STEAP2                      |
| 4 | 74,925,000 | 75,075,000 | 1000 | 754  | 0.399893575  | CFAP69,GTPBP10                     |
| 4 | 75,000,000 | 75,150,000 | 1001 | 754  | 0.407564986  | GTPBP10,HUS1,ENSBTAG00000047435    |
| 4 | 75,075,000 | 75,225,000 | 1002 | 1031 | 0.822298496  | GTPBP10,HUS1,ENSBTAG00000047435    |
| 4 | 75,150,000 | 75,300,000 | 1003 | 1290 | 0.535068939  | HUS1                               |
| 4 | 75,225,000 | 75,375,000 | 1004 | 1036 | 0.159009956  |                                    |
| 4 | 75,300,000 | 75,450,000 | 1005 | 1023 | 0.417745538  |                                    |
| 4 | 75,375,000 | 75,525,000 | 1006 | 1086 | 0.228269839  | TNS3                               |
| 4 | 75,450,000 | 75,600,000 | 1007 | 1040 | -0.17892831  | TNS3                               |
| 4 | 75,525,000 | 75,675,000 | 1008 | 1086 | -0.829733186 | TNS3                               |
| 4 | 75,600,000 | 75,750,000 | 1009 | 1082 | -0.657915293 |                                    |
| 4 | 75,675,000 | 75,825,000 | 1010 | 1425 | -1.475944398 |                                    |
| 4 | 75,750,000 | 75,900,000 | 1011 | 1221 | -1.678362315 |                                    |
| 4 | 75,825,000 | 75,975,000 | 1012 | 1076 | 0.55654245   |                                    |
| 4 | 75,900,000 | 76,050,000 | 1013 | 1327 | 0.698644272  |                                    |
| 4 | 75,975,000 | 76,125,000 | 1014 | 1155 | -0.022541529 |                                    |
| 4 | 76,050,000 | 76,200,000 | 1015 | 1078 | -0.783434364 |                                    |

|   |            |            |      |      |              |                                                 |
|---|------------|------------|------|------|--------------|-------------------------------------------------|
| 4 | 76,125,000 | 76,275,000 | 1016 | 1090 | -0.587035328 |                                                 |
| 4 | 76,200,000 | 76,350,000 | 1017 | 947  | 0.544899129  |                                                 |
| 4 | 76,275,000 | 76,425,000 | 1018 | 1096 | 0.899111398  |                                                 |
| 4 | 76,350,000 | 76,500,000 | 1019 | 1091 | 0.836174494  |                                                 |
| 4 | 76,425,000 | 76,575,000 | 1020 | 910  | 0.718976701  |                                                 |
| 4 | 76,500,000 | 76,650,000 | 1021 | 930  | 0.966227246  |                                                 |
| 4 | 76,575,000 | 76,725,000 | 1022 | 810  | 0.858874817  | IGFBP1,IGFBP3                                   |
| 4 | 76,650,000 | 76,800,000 | 1023 | 599  | 0.937648943  | IGFBP1,IGFBP3                                   |
| 4 | 76,725,000 | 76,875,000 | 1024 | 466  | 0.789105175  | ADCY1,IGFBP1                                    |
| 4 | 76,800,000 | 76,950,000 | 1025 | 1164 | 0.706865869  | ADCY1                                           |
| 4 | 76,875,000 | 77,025,000 | 1026 | 1645 | 0.923818081  | ADCY1                                           |
| 4 | 76,950,000 | 77,100,000 | 1027 | 1126 | 0.456825164  | ADCY1                                           |
| 4 | 77,025,000 | 77,175,000 | 1028 | 1001 | -0.193133288 | RAMP3                                           |
| 4 | 77,100,000 | 77,250,000 | 1029 | 814  | -0.812764229 | NACAD,RAMP3,TBRG4,ENSBTAG00000046334            |
| 4 | 77,175,000 | 77,325,000 | 1030 | 454  | -2.370806321 | CCM2,MYO1G,NACAD,RAMP3,TBRG4,ENSBTAG00000046334 |
| 4 | 77,250,000 | 77,400,000 | 1031 | 412  | -0.527721066 | CCM2,H2AFV,MYO1G,PURB                           |
| 4 | 77,325,000 | 77,475,000 | 1032 | 414  | -0.132108334 | H2AFV,MYO1G,OGDH,PPIA,PURB,ZMIZ2                |
| 4 | 77,400,000 | 77,550,000 | 1033 | 349  | 0.088297162  | DDX56,H2AFV,OGDH,PPIA,TMED4,ZMIZ2               |
| 4 | 77,475,000 | 77,625,000 | 1034 | 370  | 0.412788695  | DDX56,NPC1L1,NUDCD3,OGDH,TMED4                  |
| 4 | 77,550,000 | 77,700,000 | 1035 | 659  | 0.600558877  | DDX56,NPC1L1,NUDCD3                             |
| 4 | 77,625,000 | 77,775,000 | 1036 | 895  | 0.814286933  | CAMK2B,NUDCD3                                   |
| 4 | 77,700,000 | 77,850,000 | 1037 | 962  | 0.856422324  | CAMK2B,GCK,YKT6                                 |
| 4 | 77,775,000 | 77,925,000 | 1038 | 661  | 0.655432801  | AEBP1,CAMK2B,GCK,MYL7,POLD2,POLM,YKT6           |
| 4 | 77,850,000 | 78,000,000 | 1039 | 406  | 0.768903412  | AEBP1,BLVRA,GCK,MYL7,POLD2,POLM                 |
| 4 | 77,925,000 | 78,075,000 | 1040 | 623  | 0.419955573  | BLVRA                                           |
| 4 | 78,000,000 | 78,150,000 | 1041 | 948  | 0.651833657  | BLVRA,FLJ10803                                  |
| 4 | 78,075,000 | 78,225,000 | 1042 | 879  | 1.057715167  | FLJ10803,HECW1,STK17A                           |
| 4 | 78,150,000 | 78,300,000 | 1043 | 807  | 1.033323738  | HECW1,STK17A                                    |
| 4 | 78,225,000 | 78,375,000 | 1044 | 881  | -0.306373633 | HECW1                                           |
| 4 | 78,300,000 | 78,450,000 | 1045 | 1004 | -2.695291765 | HECW1                                           |
| 4 | 78,375,000 | 78,525,000 | 1046 | 814  | -1.609352061 | HECW1                                           |
| 4 | 78,450,000 | 78,600,000 | 1047 | 611  | 0.392810363  | HECW1                                           |
| 4 | 78,525,000 | 78,675,000 | 1048 | 733  | 0.770572456  |                                                 |
| 4 | 78,600,000 | 78,750,000 | 1049 | 636  | -0.233687335 |                                                 |
| 4 | 78,675,000 | 78,825,000 | 1050 | 532  | -0.731573311 | MRPL32,PSMA2                                    |
| 4 | 78,750,000 | 78,900,000 | 1051 | 659  | 0.744119234  | C7orf25,MRPL32,PSMA2                            |
| 4 | 78,825,000 | 78,975,000 | 1052 | 902  | 1.036740981  | C7orf25,PSMA2                                   |
| 4 | 78,900,000 | 79,050,000 | 1053 | 754  | 1.14956059   |                                                 |
| 4 | 78,975,000 | 79,125,000 | 1054 | 575  | 0.899118476  |                                                 |
| 4 | 79,050,000 | 79,200,000 | 1055 | 807  | 0.104069586  |                                                 |
| 4 | 79,125,000 | 79,275,000 | 1056 | 1074 | 0.2533673    |                                                 |
| 4 | 79,200,000 | 79,350,000 | 1057 | 906  | 0.377416016  |                                                 |
| 4 | 79,275,000 | 79,425,000 | 1058 | 564  | 0.38952741   |                                                 |
| 4 | 79,350,000 | 79,500,000 | 1059 | 532  | 0.430113932  | GLI3                                            |
| 4 | 79,425,000 | 79,575,000 | 1060 | 837  | 0.565039719  | GLI3                                            |
| 4 | 79,500,000 | 79,650,000 | 1061 | 760  | 0.439009105  | GLI3                                            |
| 4 | 79,575,000 | 79,725,000 | 1062 | 646  | -0.266043504 | GLI3                                            |
| 4 | 79,650,000 | 79,800,000 | 1063 | 982  | 0.398914532  | GLI3                                            |
| 4 | 79,725,000 | 79,875,000 | 1064 | 1210 | 0.675879574  | GLI3                                            |
| 4 | 79,800,000 | 79,950,000 | 1065 | 1104 | -0.268680558 |                                                 |
| 4 | 79,875,000 | 80,025,000 | 1066 | 724  | -2.325517117 | INHBA                                           |
| 4 | 79,950,000 | 80,100,000 | 1067 | 571  | -3.04567953  | INHBA                                           |

|   |            |            |      |      |              |                                                               |
|---|------------|------------|------|------|--------------|---------------------------------------------------------------|
| 4 | 80,025,000 | 80,175,000 | 1068 | 564  | -1.378893314 |                                                               |
| 4 | 80,100,000 | 80,250,000 | 1069 | 418  | -0.88031138  |                                                               |
| 4 | 80,175,000 | 80,325,000 | 1070 | 280  | -2.486066065 |                                                               |
| 4 | 80,250,000 | 80,400,000 | 1071 | 247  | 0.010969976  |                                                               |
| 4 | 80,325,000 | 80,475,000 | 1072 | 533  | 1.09424585   |                                                               |
| 4 | 80,400,000 | 80,550,000 | 1073 | 1036 | 1.275279169  |                                                               |
| 4 | 80,475,000 | 80,625,000 | 1074 | 1233 | 1.264524799  |                                                               |
| 4 | 80,550,000 | 80,700,000 | 1075 | 1081 | 0.857050275  |                                                               |
| 4 | 80,625,000 | 80,775,000 | 1076 | 968  | 0.700361401  |                                                               |
| 4 | 80,700,000 | 80,850,000 | 1077 | 1033 | 0.291822157  |                                                               |
| 4 | 80,775,000 | 80,925,000 | 1078 | 1113 | 0.049565397  | SUGCT                                                         |
| 4 | 80,850,000 | 81,000,000 | 1079 | 949  | 0.178551857  | SUGCT                                                         |
| 4 | 80,925,000 | 81,075,000 | 1080 | 836  | 0.116015829  | SUGCT                                                         |
| 4 | 81,000,000 | 81,150,000 | 1081 | 1075 | 0.081825826  | SUGCT                                                         |
| 4 | 81,075,000 | 81,225,000 | 1082 | 1226 | 0.726813845  | SUGCT                                                         |
| 4 | 81,150,000 | 81,300,000 | 1083 | 1091 | 1.030198271  | SUGCT                                                         |
| 4 | 81,225,000 | 81,375,000 | 1084 | 1085 | 0.649216118  | SUGCT                                                         |
| 4 | 81,300,000 | 81,450,000 | 1085 | 1028 | 0.745556203  | SUGCT                                                         |
| 4 | 81,375,000 | 81,525,000 | 1086 | 865  | 0.853737959  | SUGCT                                                         |
| 4 | 81,450,000 | 81,600,000 | 1087 | 882  | 0.846434412  | SUGCT                                                         |
| 4 | 81,525,000 | 81,675,000 | 1088 | 725  | 0.853248647  | C4H7ORF11,CDK13,SUGCT                                         |
| 4 | 81,600,000 | 81,750,000 | 1089 | 457  | 0.909203884  | C4H7ORF11,CDK13,SUGCT                                         |
| 4 | 81,675,000 | 81,825,000 | 1090 | 701  | 0.642731048  | CDK13                                                         |
| 4 | 81,750,000 | 81,900,000 | 1091 | 988  | -0.021679853 | CDK13                                                         |
| 4 | 81,825,000 | 81,975,000 | 1092 | 1187 | 0.431404487  | RALA                                                          |
| 4 | 81,900,000 | 82,050,000 | 1093 | 1234 | 0.740447133  | RALA,YAE1D1                                                   |
| 4 | 81,975,000 | 82,125,000 | 1094 | 964  | 0.67309171   | POU6F2,YAE1D1                                                 |
| 4 | 82,050,000 | 82,200,000 | 1095 | 1117 | 0.284685936  | POU6F2                                                        |
| 4 | 82,125,000 | 82,275,000 | 1096 | 1433 | 0.754440565  | POU6F2                                                        |
| 4 | 82,200,000 | 82,350,000 | 1097 | 1456 | 0.810217924  | POU6F2                                                        |
| 4 | 82,275,000 | 82,425,000 | 1098 | 1499 | 0.688455609  | POU6F2                                                        |
| 4 | 82,350,000 | 82,500,000 | 1099 | 1261 | 1.062068317  | POU6F2                                                        |
| 4 | 82,425,000 | 82,575,000 | 1100 | 1078 | 1.054939438  | POU6F2                                                        |
| 4 | 82,500,000 | 82,650,000 | 1101 | 953  | 0.714580132  |                                                               |
| 4 | 82,575,000 | 82,725,000 | 1102 | 592  | -0.065648089 | VPS41                                                         |
| 4 | 82,650,000 | 82,800,000 | 1103 | 710  | 0.054665247  | VPS41                                                         |
| 4 | 82,725,000 | 82,875,000 | 1104 | 880  | 0.246685622  | VPS41                                                         |
| 4 | 82,800,000 | 82,950,000 | 1105 | 1204 | 0.235485548  | VPS41                                                         |
| 4 | 82,875,000 | 83,025,000 | 1106 | 1410 | 0.003284928  | VPS41                                                         |
| 4 | 82,950,000 | 83,100,000 | 1107 | 1385 | 0.562797855  | AMPH                                                          |
| 4 | 83,025,000 | 83,175,000 | 1108 | 1475 | 1.024087809  | AMPH                                                          |
| 4 | 83,100,000 | 83,250,000 | 1109 | 1053 | 0.664880007  | AMPH                                                          |
| 4 | 83,175,000 | 83,325,000 | 1110 | 1048 | 0.343233296  | AMPH,TRGV11,ENSBTAG00000000144                                |
| 4 | 83,250,000 | 83,400,000 | 1111 | 2011 | 0.441327735  | TRGV11,ENSBTAG00000000144,ENSBTAG00000010300                  |
| 4 | 83,325,000 | 83,475,000 | 1112 | 2514 | 0.588113289  | 0<br>ENSBTAG00000002859,ENSBTAG00000010300,ENSBTAG00000047684 |
| 4 | 83,400,000 | 83,550,000 | 1113 | 1826 | 0.43195989   | LSM8,ENSBTAG00000002859,ENSBTAG00000010300,ENSBTAG00000047684 |
| 4 | 83,475,000 | 83,625,000 | 1114 | 1310 | 0.005431924  | LSM8,ENSBTAG00000002859                                       |
| 4 | 83,550,000 | 83,700,000 | 1115 | 1131 | 0.345833635  |                                                               |
| 4 | 83,625,000 | 83,775,000 | 1116 | 891  | 0.616729064  |                                                               |
| 4 | 83,700,000 | 83,850,000 | 1117 | 1062 | 0.844523671  |                                                               |

|   |            |            |      |      |              |                   |
|---|------------|------------|------|------|--------------|-------------------|
| 4 | 83,775,000 | 83,925,000 | 1118 | 966  | 0.763411415  |                   |
| 4 | 83,850,000 | 84,000,000 | 1119 | 780  | -1.055288279 |                   |
| 4 | 83,925,000 | 84,075,000 | 1120 | 810  | -0.422931117 |                   |
| 4 | 84,000,000 | 84,150,000 | 1121 | 738  | 0.750185561  |                   |
| 4 | 84,075,000 | 84,225,000 | 1122 | 577  | 0.498461616  |                   |
| 4 | 84,150,000 | 84,300,000 | 1123 | 817  | 0.250544779  |                   |
| 4 | 84,225,000 | 84,375,000 | 1124 | 773  | 0.416401819  |                   |
| 4 | 84,300,000 | 84,450,000 | 1125 | 602  | -0.876432944 |                   |
| 4 | 84,375,000 | 84,525,000 | 1126 | 928  | -0.464147954 |                   |
| 4 | 84,450,000 | 84,600,000 | 1127 | 925  | -0.3134546   |                   |
| 4 | 84,525,000 | 84,675,000 | 1128 | 789  | -0.548283979 |                   |
| 4 | 84,600,000 | 84,750,000 | 1129 | 830  | 0.274517481  |                   |
| 4 | 84,675,000 | 84,825,000 | 1130 | 1275 | 0.732246638  |                   |
| 4 | 84,750,000 | 84,900,000 | 1131 | 1235 | 0.818556602  |                   |
| 4 | 84,825,000 | 84,975,000 | 1132 | 607  | 0.558641801  |                   |
| 4 | 84,900,000 | 85,050,000 | 1133 | 563  | -0.110102737 |                   |
| 4 | 84,975,000 | 85,125,000 | 1134 | 808  | 0.24534833   |                   |
| 4 | 85,050,000 | 85,200,000 | 1135 | 941  | 0.164902449  |                   |
| 4 | 85,125,000 | 85,275,000 | 1136 | 880  | 0.225134644  |                   |
| 4 | 85,200,000 | 85,350,000 | 1137 | 699  | 0.965092543  |                   |
| 4 | 85,275,000 | 85,425,000 | 1138 | 740  | 1.117848056  |                   |
| 4 | 85,350,000 | 85,500,000 | 1139 | 723  | 0.975370852  | KCND2             |
| 4 | 85,425,000 | 85,575,000 | 1140 | 875  | 0.994443694  | KCND2             |
| 4 | 85,500,000 | 85,650,000 | 1141 | 1045 | 0.519676985  | KCND2             |
| 4 | 85,575,000 | 85,725,000 | 1142 | 803  | -0.497948647 | KCND2             |
| 4 | 85,650,000 | 85,800,000 | 1143 | 753  | -0.99725836  | KCND2             |
| 4 | 85,725,000 | 85,875,000 | 1144 | 646  | -1.160089944 | KCND2             |
| 4 | 85,800,000 | 85,950,000 | 1145 | 718  | -0.549514213 | KCND2             |
| 4 | 85,875,000 | 86,025,000 | 1146 | 1016 | -0.47158062  | KCND2             |
| 4 | 85,950,000 | 86,100,000 | 1147 | 1149 | -0.044651637 | KCND2,TSPAN12     |
| 4 | 86,025,000 | 86,175,000 | 1148 | 1186 | 0.712569911  | TSPAN12           |
| 4 | 86,100,000 | 86,250,000 | 1149 | 818  | 0.538323423  | ING3,TSPAN12      |
| 4 | 86,175,000 | 86,325,000 | 1150 | 663  | 0.175074875  | CPED1,ING3        |
| 4 | 86,250,000 | 86,400,000 | 1151 | 1174 | -0.103762388 | CPED1             |
| 4 | 86,325,000 | 86,475,000 | 1152 | 1334 | -0.178425001 | CPED1             |
| 4 | 86,400,000 | 86,550,000 | 1153 | 920  | 0.173697501  | CPED1             |
| 4 | 86,475,000 | 86,625,000 | 1154 | 597  | 0.10543065   | CPED1,FAM3C,WNT16 |
| 4 | 86,550,000 | 86,700,000 | 1155 | 509  | 0.508664285  | CPED1,FAM3C,WNT16 |
| 4 | 86,625,000 | 86,775,000 | 1156 | 595  | 0.443654015  | FAM3C             |
| 4 | 86,700,000 | 86,850,000 | 1157 | 640  | 0.281899514  |                   |
| 4 | 86,775,000 | 86,925,000 | 1158 | 909  | 0.604529918  |                   |
| 4 | 86,850,000 | 87,000,000 | 1159 | 1169 | 0.712694431  |                   |
| 4 | 86,925,000 | 87,075,000 | 1160 | 870  | 0.276379935  |                   |
| 4 | 87,000,000 | 87,150,000 | 1161 | 770  | -0.192892924 | PTPRZ1            |
| 4 | 87,075,000 | 87,225,000 | 1162 | 903  | 0.38554766   | PTPRZ1            |
| 4 | 87,150,000 | 87,300,000 | 1163 | 741  | 0.470422172  | PTPRZ1            |
| 4 | 87,225,000 | 87,375,000 | 1164 | 710  | 0.70960023   | AASS,PTPRZ1       |
| 4 | 87,300,000 | 87,450,000 | 1165 | 704  | 1.036478783  | AASS              |
| 4 | 87,375,000 | 87,525,000 | 1166 | 736  | 1.173292089  | CADPS2,FEZF1      |
| 4 | 87,450,000 | 87,600,000 | 1167 | 571  | 0.950432336  | CADPS2,FEZF1      |
| 4 | 87,525,000 | 87,675,000 | 1168 | 591  | -0.23805019  | CADPS2            |
| 4 | 87,600,000 | 87,750,000 | 1169 | 748  | -0.111154954 | CADPS2            |
| 4 | 87,675,000 | 87,825,000 | 1170 | 702  | -0.2642019   | CADPS2            |

|   |            |            |      |      |              |                                             |
|---|------------|------------|------|------|--------------|---------------------------------------------|
| 4 | 87,750,000 | 87,900,000 | 1171 | 615  | -0.029776064 | CADPS2                                      |
| 4 | 87,825,000 | 87,975,000 | 1172 | 422  | 0.869299605  | CADPS2                                      |
| 4 | 87,900,000 | 88,050,000 | 1173 | 626  | 0.197924446  | CADPS2                                      |
| 4 | 87,975,000 | 88,125,000 | 1174 | 887  | -0.069307095 | CADPS2                                      |
| 4 | 88,050,000 | 88,200,000 | 1175 | 923  | 0.156826305  | CADPS2,TAS2R16                              |
| 4 | 88,125,000 | 88,275,000 | 1176 | 980  | 0.037201795  | SLC13A1,TAS2R16                             |
| 4 | 88,200,000 | 88,350,000 | 1177 | 858  | -0.635668659 | SLC13A1                                     |
| 4 | 88,275,000 | 88,425,000 | 1178 | 628  | -0.132489251 | SLC13A1                                     |
| 4 | 88,350,000 | 88,500,000 | 1179 | 533  | -0.04190921  | SLC13A1                                     |
| 4 | 88,425,000 | 88,575,000 | 1180 | 344  | -0.671908216 | IQUB                                        |
| 4 | 88,500,000 | 88,650,000 | 1181 | 319  | -0.161933802 | IQUB                                        |
| 4 | 88,575,000 | 88,725,000 | 1182 | 459  | 0.316794702  | ASB15,IQUB,NDUFA5                           |
| 4 | 88,650,000 | 88,800,000 | 1183 | 648  | 0.751388963  | ASB15,LMOD2,NDUFA5,WASL                     |
| 4 | 88,725,000 | 88,875,000 | 1184 | 750  | 0.725164571  | ASB15,LMOD2,WASL                            |
| 4 | 88,800,000 | 88,950,000 | 1185 | 994  | 0.404160908  | WASL                                        |
| 4 | 88,875,000 | 89,025,000 | 1186 | 1480 | -0.190689747 | HYAL4,ENSBTAG00000004640                    |
| 4 | 88,950,000 | 89,100,000 | 1187 | 1378 | -0.208930722 | HYAL4,ENSBTAG00000004640,ENSBTAG00000040349 |
| 4 | 89,025,000 | 89,175,000 | 1188 | 1021 | 0.331491581  | ENSBTAG00000031958,ENSBTAG00000040349       |
| 4 | 89,100,000 | 89,250,000 | 1189 | 1035 | 0.447877454  | ENSBTAG00000031958                          |
| 4 | 89,175,000 | 89,325,000 | 1190 | 1343 | -0.066521412 |                                             |
| 4 | 89,250,000 | 89,400,000 | 1191 | 1404 | 0.188159264  |                                             |
| 4 | 89,325,000 | 89,475,000 | 1192 | 1636 | 1.1005877    |                                             |
| 4 | 89,400,000 | 89,550,000 | 1193 | 1702 | 1.103246904  |                                             |
| 4 | 89,475,000 | 89,625,000 | 1194 | 1279 | 0.184623483  |                                             |
| 4 | 89,550,000 | 89,700,000 | 1195 | 1023 | -1.007040111 |                                             |
| 4 | 89,625,000 | 89,775,000 | 1196 | 939  | -1.406202118 |                                             |
| 4 | 89,700,000 | 89,850,000 | 1197 | 1026 | -0.643117053 | GPR37                                       |
| 4 | 89,775,000 | 89,925,000 | 1198 | 1125 | -0.959857902 | GPR37,POT1                                  |
| 4 | 89,850,000 | 90,000,000 | 1199 | 1147 | -1.302513345 | POT1                                        |
| 4 | 89,925,000 | 90,075,000 | 1200 | 1279 | 0.134636626  | POT1                                        |
| 4 | 90,000,000 | 90,150,000 | 1201 | 1268 | 1.04353428   |                                             |
| 4 | 90,075,000 | 90,225,000 | 1202 | 1262 | 0.859305322  |                                             |
| 4 | 90,150,000 | 90,300,000 | 1203 | 1291 | 0.81890725   |                                             |
| 4 | 90,225,000 | 90,375,000 | 1204 | 1230 | 1.172701104  |                                             |
| 4 | 90,300,000 | 90,450,000 | 1205 | 1483 | 0.702301352  |                                             |
| 4 | 90,375,000 | 90,525,000 | 1206 | 1507 | 0.413928495  |                                             |
| 4 | 90,450,000 | 90,600,000 | 1207 | 1540 | 0.605692254  |                                             |
| 4 | 90,525,000 | 90,675,000 | 1208 | 1569 | 0.173085504  |                                             |
| 4 | 90,600,000 | 90,750,000 | 1209 | 1499 | -0.491180613 |                                             |
| 4 | 90,675,000 | 90,825,000 | 1210 | 1705 | 0.02680757   |                                             |
| 4 | 90,750,000 | 90,900,000 | 1211 | 1737 | 0.766713223  |                                             |
| 4 | 90,825,000 | 90,975,000 | 1212 | 1678 | 0.529218061  |                                             |
| 4 | 90,900,000 | 91,050,000 | 1213 | 1867 | 0.270468061  |                                             |
| 4 | 90,975,000 | 91,125,000 | 1214 | 1963 | -0.372349754 |                                             |
| 4 | 91,050,000 | 91,200,000 | 1215 | 1949 | -1.507551343 |                                             |
| 4 | 91,125,000 | 91,275,000 | 1216 | 1732 | -1.258603049 |                                             |
| 4 | 91,200,000 | 91,350,000 | 1217 | 1352 | -0.366854808 |                                             |
| 4 | 91,275,000 | 91,425,000 | 1218 | 1381 | 0.564594965  |                                             |
| 4 | 91,350,000 | 91,500,000 | 1219 | 1454 | 1.071274131  |                                             |
| 4 | 91,425,000 | 91,575,000 | 1220 | 1340 | 0.920835456  |                                             |
| 4 | 91,500,000 | 91,650,000 | 1221 | 1306 | 0.576164157  |                                             |
| 4 | 91,575,000 | 91,725,000 | 1222 | 976  | 0.244868231  |                                             |

|   |            |            |      |      |              |                                                         |
|---|------------|------------|------|------|--------------|---------------------------------------------------------|
| 4 | 91,650,000 | 91,800,000 | 1223 | 907  | -0.362317186 |                                                         |
| 4 | 91,725,000 | 91,875,000 | 1224 | 1164 | -0.170881735 |                                                         |
| 4 | 91,800,000 | 91,950,000 | 1225 | 986  | -0.423069098 |                                                         |
| 4 | 91,875,000 | 92,025,000 | 1226 | 807  | -0.480293209 |                                                         |
| 4 | 91,950,000 | 92,100,000 | 1227 | 1093 | 0.841283018  |                                                         |
| 4 | 92,025,000 | 92,175,000 | 1228 | 1358 | 0.669288554  |                                                         |
| 4 | 92,100,000 | 92,250,000 | 1229 | 981  | 0.417511196  |                                                         |
| 4 | 92,175,000 | 92,325,000 | 1230 | 669  | 0.840652715  |                                                         |
| 4 | 92,250,000 | 92,400,000 | 1231 | 692  | 0.960326576  |                                                         |
| 4 | 92,325,000 | 92,475,000 | 1232 | 720  | 1.013238566  | ZNF800                                                  |
| 4 | 92,400,000 | 92,550,000 | 1233 | 620  | 0.16627853   | ZNF800                                                  |
| 4 | 92,475,000 | 92,625,000 | 1234 | 867  | -0.105928396 | ARF5,GCC1                                               |
| 4 | 92,550,000 | 92,700,000 | 1235 | 1094 | 0.198358834  | ARF5,FSCN3,GCC1,PAX4,SND1                               |
| 4 | 92,625,000 | 92,775,000 | 1236 | 977  | 0.709057955  | ARF5,FSCN3,PAX4,SND1                                    |
| 4 | 92,700,000 | 92,850,000 | 1237 | 833  | 0.746805331  | SND1                                                    |
| 4 | 92,775,000 | 92,925,000 | 1238 | 729  | 0.184532255  | SND1                                                    |
| 4 | 92,850,000 | 93,000,000 | 1239 | 1059 | -0.081411985 | LRRRC4,SND1                                             |
| 4 | 92,925,000 | 93,075,000 | 1240 | 967  | -0.232990604 | LRRRC4,SND1                                             |
| 4 | 93,000,000 | 93,150,000 | 1241 | 627  | -0.898449582 | LRRRC4,SND1                                             |
| 4 | 93,075,000 | 93,225,000 | 1242 | 618  | -1.895775676 | SND1                                                    |
| 4 | 93,150,000 | 93,300,000 | 1243 | 1144 | -1.841568528 | OB                                                      |
| 4 | 93,225,000 | 93,375,000 | 1244 | 1368 | -1.307783645 | OB,PRRT4,RBM28                                          |
| 4 | 93,300,000 | 93,450,000 | 1245 | 866  | -0.827408891 | IMPDH1,PRRT4,RBM28,ENSBTAG00000031866                   |
| 4 | 93,375,000 | 93,525,000 | 1246 | 799  | 0.188334468  | FAM71F1,FAM71F2,HIG2,IMPDH1,ENSBTAG00000031866          |
| 4 | 93,450,000 | 93,600,000 | 1247 | 821  | 0.644673771  | CALU,CCDC136,FAM71F1,FAM71F2,HIG2,OPN1SW                |
| 4 | 93,525,000 | 93,675,000 | 1248 | 631  | 0.57980891   | ATP6V1F,CALU,CCDC136,FLNC,KCP,OPN1SW,ENSBTAG00000045645 |
| 4 | 93,600,000 | 93,750,000 | 1249 | 638  | 0.532208663  | ATP6V1F,CCDC136,FLNC,IRF5,KCP,TNPO3,ENSBTAG00000045645  |
| 4 | 93,675,000 | 93,825,000 | 1250 | 653  | 0.54664521   | IRF5,KCP,TNPO3                                          |
| 4 | 93,750,000 | 93,900,000 | 1251 | 595  | -0.049314716 | TNPO3,TSPAN33                                           |
| 4 | 93,825,000 | 93,975,000 | 1252 | 537  | 0.10921509   | AHCYL2,SMO,TSPAN33                                      |
| 4 | 93,900,000 | 94,050,000 | 1253 | 607  | 1.010057701  | AHCYL2,SMO,TSPAN33                                      |
| 4 | 93,975,000 | 94,125,000 | 1254 | 818  | 1.130635871  | AHCYL2                                                  |
| 4 | 94,050,000 | 94,200,000 | 1255 | 836  | 1.217056764  | AHCYL2,STRIP2                                           |
| 4 | 94,125,000 | 94,275,000 | 1256 | 794  | 0.137069852  | AHCYL2,NRF1,STRIP2                                      |
| 4 | 94,200,000 | 94,350,000 | 1257 | 609  | -0.434414387 | NRF1,STRIP2                                             |
| 4 | 94,275,000 | 94,425,000 | 1258 | 315  | 0.232614906  | NRF1                                                    |
| 4 | 94,350,000 | 94,500,000 | 1259 | 196  | -0.611687298 | NRF1,UBE2H,ENSBTAG00000047845                           |
| 4 | 94,425,000 | 94,575,000 | 1260 | 129  | 0.010795393  | UBE2H,ENSBTAG00000047845                                |
| 4 | 94,500,000 | 94,650,000 | 1261 | 137  | 0.862218286  | UBE2H,ZC3HC1                                            |
| 4 | 94,575,000 | 94,725,000 | 1262 | 142  | 1.346559396  | KLHDC10,ZC3HC1                                          |
| 4 | 94,650,000 | 94,800,000 | 1263 | 199  | 0.492876803  | KLHDC10,TMEM209,ZC3HC1                                  |
| 4 | 94,725,000 | 94,875,000 | 1264 | 232  | -1.807502829 | CPA4,KLHDC10,MGC127766,TMEM209                          |
| 4 | 94,800,000 | 94,950,000 | 1265 | 196  | -5.241373854 | CPA1,CPA4,CPA5,MGC127766                                |
| 4 | 94,875,000 | 95,025,000 | 1266 | 190  | -3.235767702 | CEP41,CPA1,CPA4,CPA5                                    |
| 4 | 94,950,000 | 95,100,000 | 1267 | 190  | -0.952725678 | CEP41,COPG2,MEST                                        |
| 4 | 95,025,000 | 95,175,000 | 1268 | 216  | 0.962198528  | COPG2,MEST                                              |
| 4 | 95,100,000 | 95,250,000 | 1269 | 280  | 1.410465854  | COPG2,TSGA13                                            |
| 4 | 95,175,000 | 95,325,000 | 1270 | 336  | 1.448271323  | COPG2,TSGA13                                            |
| 4 | 95,250,000 | 95,400,000 | 1271 | 503  | 0.39147156   |                                                         |
| 4 | 95,325,000 | 95,475,000 | 1272 | 561  | 0.602124559  |                                                         |

|   |            |            |      |      |              |                           |
|---|------------|------------|------|------|--------------|---------------------------|
| 4 | 95,400,000 | 95,550,000 | 1273 | 706  | 1.294034926  |                           |
| 4 | 95,475,000 | 95,625,000 | 1274 | 854  | 1.253341937  |                           |
| 4 | 95,550,000 | 95,700,000 | 1275 | 764  | 1.219046156  |                           |
| 4 | 95,625,000 | 95,775,000 | 1276 | 480  | 1.263333924  |                           |
| 4 | 95,700,000 | 95,850,000 | 1277 | 438  | 1.335328752  | MKLN1                     |
| 4 | 95,775,000 | 95,925,000 | 1278 | 530  | 1.26972457   | MKLN1                     |
| 4 | 95,850,000 | 96,000,000 | 1279 | 456  | 0.868028892  | MKLN1                     |
| 4 | 95,925,000 | 96,075,000 | 1280 | 986  | 0.344138726  | MKLN1,PODXL               |
| 4 | 96,000,000 | 96,150,000 | 1281 | 1408 | 0.264931265  | MKLN1,PODXL               |
| 4 | 96,075,000 | 96,225,000 | 1282 | 1291 | -0.022810644 |                           |
| 4 | 96,150,000 | 96,300,000 | 1283 | 1441 | -0.196119297 |                           |
| 4 | 96,225,000 | 96,375,000 | 1284 | 1102 | -0.129066564 |                           |
| 4 | 96,300,000 | 96,450,000 | 1285 | 444  | -0.555124469 |                           |
| 4 | 96,375,000 | 96,525,000 | 1286 | 604  | 0.223885162  |                           |
| 4 | 96,450,000 | 96,600,000 | 1287 | 973  | 0.680954746  | PLEX2                     |
| 4 | 96,525,000 | 96,675,000 | 1288 | 1430 | 0.916872055  | PLEX2                     |
| 4 | 96,600,000 | 96,750,000 | 1289 | 1794 | 0.90676041   | PLEX2                     |
| 4 | 96,675,000 | 96,825,000 | 1290 | 1933 | 0.201033909  | PLEX2                     |
| 4 | 96,750,000 | 96,900,000 | 1291 | 1343 | -0.671288317 | PLEX2,ENSBTAG00000038448  |
| 4 | 96,825,000 | 96,975,000 | 1292 | 541  | -0.832126294 | PLEX2,ENSBTAG00000038448  |
| 4 | 96,900,000 | 97,050,000 | 1293 | 491  | 0.687273261  | PLEX2                     |
| 4 | 96,975,000 | 97,125,000 | 1294 | 739  | 1.238462913  | PLEX2                     |
| 4 | 97,050,000 | 97,200,000 | 1295 | 820  | 1.327268705  |                           |
| 4 | 97,125,000 | 97,275,000 | 1296 | 794  | 0.002190631  |                           |
| 4 | 97,200,000 | 97,350,000 | 1297 | 922  | -0.344247948 | CHCHD3                    |
| 4 | 97,275,000 | 97,425,000 | 1298 | 831  | 0.222423767  | CHCHD3                    |
| 4 | 97,350,000 | 97,500,000 | 1299 | 533  | 0.232299133  | CHCHD3                    |
| 4 | 97,425,000 | 97,575,000 | 1300 | 461  | -0.608272722 | CHCHD3                    |
| 4 | 97,500,000 | 97,650,000 | 1301 | 387  | -0.170521789 | CHCHD3                    |
| 4 | 97,575,000 | 97,725,000 | 1302 | 716  | 0.714819301  | CHCHD3                    |
| 4 | 97,650,000 | 97,800,000 | 1303 | 1203 | 0.881758689  | EXOC4                     |
| 4 | 97,725,000 | 97,875,000 | 1304 | 1407 | 1.206762424  | EXOC4                     |
| 4 | 97,800,000 | 97,950,000 | 1305 | 1054 | 0.809548113  | EXOC4                     |
| 4 | 97,875,000 | 98,025,000 | 1306 | 485  | -0.412413503 | EXOC4                     |
| 4 | 97,950,000 | 98,100,000 | 1307 | 333  | -0.64769575  | EXOC4                     |
| 4 | 98,025,000 | 98,175,000 | 1308 | 227  | -1.158410342 | EXOC4                     |
| 4 | 98,100,000 | 98,250,000 | 1309 | 648  | 0.416684634  | EXOC4                     |
| 4 | 98,175,000 | 98,325,000 | 1310 | 1008 | 0.662860506  | EXOC4                     |
| 4 | 98,250,000 | 98,400,000 | 1311 | 972  | 0.403796835  | EXOC4                     |
| 4 | 98,325,000 | 98,475,000 | 1312 | 965  | 0.572724252  | EXOC4                     |
| 4 | 98,400,000 | 98,550,000 | 1313 | 1108 | 0.842716798  | EXOC4                     |
| 4 | 98,475,000 | 98,625,000 | 1314 | 1135 | 0.921575193  | EXOC4                     |
| 4 | 98,550,000 | 98,700,000 | 1315 | 938  | 1.213480411  | EXOC4,LRGUK               |
| 4 | 98,625,000 | 98,775,000 | 1316 | 468  | 1.439441581  | LRGUK                     |
| 4 | 98,700,000 | 98,850,000 | 1317 | 307  | 0.401725484  | LRGUK,SLC35B4             |
| 4 | 98,775,000 | 98,925,000 | 1318 | 629  | -0.700521402 | LRGUK,SLC35B4             |
| 4 | 98,850,000 | 99,000,000 | 1319 | 781  | -0.680094954 | SLC35B4                   |
| 4 | 98,925,000 | 99,075,000 | 1320 | 599  | -0.21270702  | AKR1B1                    |
| 4 | 99,000,000 | 99,150,000 | 1321 | 646  | 0.583468287  | AKR1B1,ENSBTAG00000001582 |
| 4 | 99,075,000 | 99,225,000 | 1322 | 645  | 0.902165156  | BPGM,ENSBTAG00000001582   |
| 4 | 99,150,000 | 99,300,000 | 1323 | 467  | 0.42600519   | BPGM                      |
| 4 | 99,225,000 | 99,375,000 | 1324 | 826  | 0.654171639  | BPGM                      |
| 4 | 99,300,000 | 99,450,000 | 1325 | 1070 | 0.588889013  |                           |



|   |             |             |      |      |              |                                                     |
|---|-------------|-------------|------|------|--------------|-----------------------------------------------------|
| 4 | 99,375,000  | 99,525,000  | 1326 | 1032 | 0.367747605  | CALD1                                               |
| 4 | 99,450,000  | 99,600,000  | 1327 | 1158 | 0.307741153  | AGBL3,CALD1                                         |
| 4 | 99,525,000  | 99,675,000  | 1328 | 1083 | 0.484221005  | AGBL3,CALD1                                         |
| 4 | 99,600,000  | 99,750,000  | 1329 | 999  | 0.560694878  | AGBL3,C7orf49,TMEM140,WDR91                         |
| 4 | 99,675,000  | 99,825,000  | 1330 | 1161 | -0.310395725 | AGBL3,C7orf49,STRA8,TMEM140,WDR91,ENSBTAG0000031548 |
| 4 | 99,750,000  | 99,900,000  | 1331 | 1234 | -0.772878412 | STRA8,WDR91,ENSBTAG0000031548,ENSBTAG0000047605     |
| 4 | 99,825,000  | 99,975,000  | 1332 | 1686 | 0.139716269  | ENSBTAG0000031548,ENSBTAG0000047605                 |
| 4 | 99,900,000  | 100,050,000 | 1333 | 1507 | 0.408450178  | CNOT4,ENSBTAG0000031548,ENSBTAG0000047605           |
| 4 | 99,975,000  | 100,125,000 | 1334 | 975  | 0.235741266  | CNOT4                                               |
| 4 | 100,050,000 | 100,200,000 | 1335 | 1085 | 0.325608479  | CNOT4,NUP205                                        |
| 4 | 100,125,000 | 100,275,000 | 1336 | 1187 | 0.354398586  | CNOT4,NUP205,PL-5283                                |
| 4 | 100,200,000 | 100,350,000 | 1337 | 1171 | 0.766304321  | FAM180A,NUP205,PL-5283,SLC13A4                      |
| 4 | 100,275,000 | 100,425,000 | 1338 | 1158 | 0.899399057  | FAM180A,PL-5283,SLC13A4                             |
| 4 | 100,350,000 | 100,500,000 | 1339 | 1317 | -0.465734313 |                                                     |
| 4 | 100,425,000 | 100,575,000 | 1340 | 1366 | 0.190609486  | MTPN                                                |
| 4 | 100,500,000 | 100,650,000 | 1341 | 1454 | 0.92765824   | MTPN                                                |
| 4 | 100,575,000 | 100,725,000 | 1342 | 1689 | 1.015872298  | MTPN                                                |
| 4 | 100,650,000 | 100,800,000 | 1343 | 1670 | 1.221393444  |                                                     |
| 4 | 100,725,000 | 100,875,000 | 1344 | 1474 | 0.085869583  |                                                     |
| 4 | 100,800,000 | 100,950,000 | 1345 | 1097 | -0.855066454 |                                                     |
| 4 | 100,875,000 | 101,025,000 | 1346 | 639  | -0.033049499 |                                                     |
| 4 | 100,950,000 | 101,100,000 | 1347 | 450  | 1.175173679  |                                                     |
| 4 | 101,025,000 | 101,175,000 | 1348 | 518  | 0.633859843  |                                                     |
| 4 | 101,100,000 | 101,250,000 | 1349 | 718  | 0.318215756  |                                                     |
| 4 | 101,175,000 | 101,325,000 | 1350 | 807  | 0.414511575  |                                                     |
| 4 | 101,250,000 | 101,400,000 | 1351 | 680  | 0.483954508  |                                                     |
| 4 | 101,325,000 | 101,475,000 | 1352 | 903  | 0.068052251  |                                                     |
| 4 | 101,400,000 | 101,550,000 | 1353 | 948  | 0.162207089  |                                                     |
| 4 | 101,475,000 | 101,625,000 | 1354 | 1016 | 0.073331132  | CHRM2                                               |
| 4 | 101,550,000 | 101,700,000 | 1355 | 1159 | -0.337684614 | CHRM2,PTN                                           |
| 4 | 101,625,000 | 101,775,000 | 1356 | 1075 | -0.087500355 | PTN                                                 |
| 4 | 101,700,000 | 101,850,000 | 1357 | 1235 | -0.404207846 | PTN                                                 |
| 4 | 101,775,000 | 101,925,000 | 1358 | 1193 | -0.593209238 | DGKI,PTN                                            |
| 4 | 101,850,000 | 102,000,000 | 1359 | 1285 | 0.367364453  | DGKI                                                |
| 4 | 101,925,000 | 102,075,000 | 1360 | 1316 | -0.154913076 | DGKI                                                |
| 4 | 102,000,000 | 102,150,000 | 1361 | 1079 | -2.935593208 | DGKI                                                |
| 4 | 102,075,000 | 102,225,000 | 1362 | 1005 | -2.42896523  | DGKI                                                |
| 4 | 102,150,000 | 102,300,000 | 1363 | 1066 | -0.709862137 | DGKI                                                |
| 4 | 102,225,000 | 102,375,000 | 1364 | 1161 | -0.17078061  |                                                     |
| 4 | 102,300,000 | 102,450,000 | 1365 | 1295 | 0.726329844  | CREB3L2                                             |
| 4 | 102,375,000 | 102,525,000 | 1366 | 1386 | 0.999458102  | CREB3L2                                             |
| 4 | 102,450,000 | 102,600,000 | 1367 | 1000 | 0.766349332  | AKR1D1,CREB3L2                                      |
| 4 | 102,525,000 | 102,675,000 | 1368 | 650  | 0.503688188  | AKR1D1,CREB3L2                                      |
| 4 | 102,600,000 | 102,750,000 | 1369 | 512  | 0.411976672  | AKR1D1                                              |
| 4 | 102,675,000 | 102,825,000 | 1370 | 435  | 0.266608752  |                                                     |
| 4 | 102,750,000 | 102,900,000 | 1371 | 467  | 0.189045706  |                                                     |
| 4 | 102,825,000 | 102,975,000 | 1372 | 354  | -0.016872653 |                                                     |
| 4 | 102,900,000 | 103,050,000 | 1373 | 389  | 0.331185759  | TRIM24                                              |
| 4 | 102,975,000 | 103,125,000 | 1374 | 556  | 0.074033936  | SVOPL,TRIM24                                        |
| 4 | 103,050,000 | 103,200,000 | 1375 | 602  | -1.139796945 | ATP6V0A4,SVOPL,TRIM24                               |

|   |             |             |      |      |              |                                                                                                                        |
|---|-------------|-------------|------|------|--------------|------------------------------------------------------------------------------------------------------------------------|
| 4 | 103,125,000 | 103,275,000 | 1376 | 422  | -2.491352885 | ATP6V0A4,SVOPL,TMEM213                                                                                                 |
| 4 | 103,200,000 | 103,350,000 | 1377 | 424  | 0.116890683  | ATP6V0A4,KIAA1549,TMEM213                                                                                              |
| 4 | 103,275,000 | 103,425,000 | 1378 | 884  | 0.608432391  | KIAA1549,TMEM213                                                                                                       |
| 4 | 103,350,000 | 103,500,000 | 1379 | 859  | 0.405376492  | KIAA1549,ZC3HAV1,ZC3HAV1L                                                                                              |
| 4 | 103,425,000 | 103,575,000 | 1380 | 490  | 0.740647074  | TTC26,ZC3HAV1,ZC3HAV1L                                                                                                 |
| 4 | 103,500,000 | 103,650,000 | 1381 | 423  | 1.192697791  | TTC26,UBN2,ZC3HAV1                                                                                                     |
| 4 | 103,575,000 | 103,725,000 | 1382 | 339  | 0.975766113  | TTC26,UBN2,ENSBTAG00000017770                                                                                          |
| 4 | 103,650,000 | 103,800,000 | 1383 | 387  | 0.775936795  | KLRG2,UBN2,ENSBTAG00000017770                                                                                          |
| 4 | 103,725,000 | 103,875,000 | 1384 | 708  | 1.153210322  | CLEC2L,KLRG2,ENSBTAG00000017770                                                                                        |
| 4 | 103,800,000 | 103,950,000 | 1385 | 867  | 1.150007544  | CLEC2L,HIPK2,KLRG2                                                                                                     |
| 4 | 103,875,000 | 104,025,000 | 1386 | 638  | 0.991964519  | HIPK2                                                                                                                  |
| 4 | 103,950,000 | 104,100,000 | 1387 | 551  | 0.934978379  | HIPK2                                                                                                                  |
| 4 | 104,025,000 | 104,175,000 | 1388 | 468  | 0.443622821  | TBXAS1                                                                                                                 |
| 4 | 104,100,000 | 104,250,000 | 1389 | 580  | -1.16052172  | TBXAS1                                                                                                                 |
| 4 | 104,175,000 | 104,325,000 | 1390 | 743  | -1.829474147 | PARP12,TBXAS1                                                                                                          |
| 4 | 104,250,000 | 104,400,000 | 1391 | 479  | -1.96357313  | KDM7A,PARP12,TBXAS1                                                                                                    |
| 4 | 104,325,000 | 104,475,000 | 1392 | 549  | -0.026174152 | KDM7A,PARP12                                                                                                           |
| 4 | 104,400,000 | 104,550,000 | 1393 | 766  | 0.059403406  | KDM7A                                                                                                                  |
| 4 | 104,475,000 | 104,625,000 | 1394 | 880  | -0.017565465 | SLC37A3                                                                                                                |
| 4 | 104,550,000 | 104,700,000 | 1395 | 1035 | 0.284480869  | MKRN1,RAB19,SLC37A3                                                                                                    |
| 4 | 104,625,000 | 104,775,000 | 1396 | 668  | 0.055915881  | DENND2A,MKRN1,RAB19                                                                                                    |
| 4 | 104,700,000 | 104,850,000 | 1397 | 423  | -0.657151101 | ADCK2,DENND2A                                                                                                          |
| 4 | 104,775,000 | 104,925,000 | 1398 | 513  | 0.128731875  | ADCK2,BRAF,DENND2A,NDUFB2                                                                                              |
| 4 | 104,850,000 | 105,000,000 | 1399 | 399  | 0.61291635   | BRAF,NDUFB2                                                                                                            |
| 4 | 104,925,000 | 105,075,000 | 1400 | 514  | 0.514657873  | BRAF,ENSBTAG00000046211                                                                                                |
| 4 | 105,000,000 | 105,150,000 | 1401 | 857  | 0.543215877  | BRAF,MRPS33,ENSBTAG00000046211                                                                                         |
| 4 | 105,075,000 | 105,225,000 | 1402 | 990  | 0.147042628  | MRPS33                                                                                                                 |
| 4 | 105,150,000 | 105,300,000 | 1403 | 899  | 0.301362692  |                                                                                                                        |
| 4 | 105,225,000 | 105,375,000 | 1404 | 927  | -1.471943687 |                                                                                                                        |
| 4 | 105,300,000 | 105,450,000 | 1405 | 841  | -2.527209776 |                                                                                                                        |
| 4 | 105,375,000 | 105,525,000 | 1406 | 920  | -1.607160334 |                                                                                                                        |
| 4 | 105,450,000 | 105,600,000 | 1407 | 1249 | -1.693632491 | ENSBTAG00000046341                                                                                                     |
| 4 | 105,525,000 | 105,675,000 | 1408 | 1028 | -1.231279386 | AGK,ENSBTAG00000046341                                                                                                 |
| 4 | 105,600,000 | 105,750,000 | 1409 | 843  | 0.96779576   | AGK                                                                                                                    |
| 4 | 105,675,000 | 105,825,000 | 1410 | 1171 | 0.611186796  | AGK,KIAA1147,WEE2                                                                                                      |
| 4 | 105,750,000 | 105,900,000 | 1411 | 1346 | -0.03479671  | KIAA1147,SSBP1,TAS2R3,TAS2R4,WEE2                                                                                      |
| 4 | 105,825,000 | 105,975,000 | 1412 | 1323 | -1.630232577 | PRSS37,SSBP1,TAS2R3,TAS2R4,WEE2,ENSBTAG00000027341                                                                     |
| 4 | 105,900,000 | 106,050,000 | 1413 | 1755 | -0.579294035 | OR9A4,PRSS37,ENSBTAG00000027341                                                                                        |
| 4 | 105,975,000 | 106,125,000 | 1414 | 2026 | 0.100868643  | CLEC5A,MGAM,OR9A4,TAS2R38,ENSBTAG00000003664                                                                           |
| 4 | 106,050,000 | 106,200,000 | 1415 | 2136 | 0.09179711   | CLEC5A,MGAM,TAS2R38,ENSBTAG00000003664                                                                                 |
| 4 | 106,125,000 | 106,275,000 | 1416 | 2082 | 0.325754279  | MGAM,ENSBTAG00000046616                                                                                                |
| 4 | 106,200,000 | 106,350,000 | 1417 | 1374 | 0.697484694  | MGAM,PRSS58,ENSBTAG0000003621,ENSBTAG00000031236,ENSBTAG00000046616,ENSBTAG00000048012                                 |
| 4 | 106,275,000 | 106,425,000 | 1418 | 1093 | 0.590570083  | PRSS58,ENSBTAG0000003621,ENSBTAG0000003633,ENSBTAG00000024245,ENSBTAG00000031236,ENSBTAG00000046616,ENSBTAG00000048012 |

|   |             |             |      |      |              |                                                                                                                                                                                                                                                                                                                                                                                                                                                                                                                                                                                             |
|---|-------------|-------------|------|------|--------------|---------------------------------------------------------------------------------------------------------------------------------------------------------------------------------------------------------------------------------------------------------------------------------------------------------------------------------------------------------------------------------------------------------------------------------------------------------------------------------------------------------------------------------------------------------------------------------------------|
| 4 | 106,350,000 | 106,500,000 | 1419 | 1801 | 0.246346467  | TRB@,ENSBTAG00000003633,ENSBTAG00000024245,ENSBTAG00000031232,ENSBTAG00000031236,ENSBTAG00000038385,ENSBTAG00000039956,ENSBTAG0000040281,ENSBTAG00000045978,ENSBTAG00000046164,ENSBTAG00000046660,ENSBTAG00000046793,ENSBTAG00000047072,ENSBTAG00000047562,ENSBTAG00000047657,ENSBTAG00000047722,ENSBTAG0000047725,ENSBTAG00000048016                                                                                                                                                                                                                                                       |
| 4 | 106,425,000 | 106,575,000 | 1420 | 2150 | -0.424867595 | TRB@,ENSBTAG00000031232,ENSBTAG00000031234,ENSBTAG00000038127,ENSBTAG00000038307,ENSBTAG00000038385,ENSBTAG00000038690,ENSBTAG0000038934,ENSBTAG00000038943,ENSBTAG00000038960,ENSBTAG00000039093,ENSBTAG00000039956,ENSBTAG00000040261,ENSBTAG00000040281,ENSBTAG00000040387,ENSBTAG00000040388,ENSBTAG0000040387,ENSBTAG00000046164,ENSBTAG00000046496,ENSBTAG00000046660,ENSBTAG00000046793,ENSBTAG00000047072,ENSBTAG00000047193,ENSBTAG00000047562,ENSBTAG00000047657,ENSBTAG0000047722,ENSBTAG00000047725,ENSBTAG00000047844,ENSBTAG00000047922,ENSBTAG00000048016,ENSBTAG00000048189 |
| 4 | 106,500,000 | 106,650,000 | 1421 | 1850 | -1.790522847 | TRB@,TRBV16,ENSBTAG00000031234,ENSBTAG0000038127,ENSBTAG00000038307,ENSBTAG00000038605,ENSBTAG00000038690,ENSBTAG00000038934,ENSBTAG00000038943,ENSBTAG00000038960,ENSBTAG00000039093,ENSBTAG00000039559,ENSBTAG00000039674,ENSBTAG00000040261,ENSBTAG00000040387,ENSBTAG00000040388,ENSBTAG00000046496,ENSBTAG00000047193,ENSBTAG00000047657,ENSBTAG0000047844,ENSBTAG00000047922,ENSBTAG00000048189                                                                                                                                                                                       |
| 4 | 106,575,000 | 106,725,000 | 1422 | 1364 | -1.183919723 | TRB@,TRBV16,ENSBTAG00000031216,ENSBTAG0000038605,ENSBTAG00000039559,ENSBTAG00000039674                                                                                                                                                                                                                                                                                                                                                                                                                                                                                                      |
| 4 | 106,650,000 | 106,800,000 | 1423 | 1069 | -0.082618046 | ENSBTAG00000031216                                                                                                                                                                                                                                                                                                                                                                                                                                                                                                                                                                          |
| 4 | 106,725,000 | 106,875,000 | 1424 | 1511 | -0.317222894 | TRBV29-1,ENSBTAG00000027204,ENSBTAG00000034609                                                                                                                                                                                                                                                                                                                                                                                                                                                                                                                                              |
| 4 | 106,800,000 | 106,950,000 | 1425 | 1547 | -0.137721915 | PRSS2,TRBV29-1,TRBV30,ENSBTAG00000002259,ENSBTAG00000027204,ENSBTAG00000034609                                                                                                                                                                                                                                                                                                                                                                                                                                                                                                              |
| 4 | 106,875,000 | 107,025,000 | 1426 | 1182 | 0.035446261  | EPHB6,PRSS2,TRBV29-1,TRBV30,TRPV6,ENSBTAG00000002259,ENSBTAG00000027204,ENSBTAG00000034609                                                                                                                                                                                                                                                                                                                                                                                                                                                                                                  |
| 4 | 106,950,000 | 107,100,000 | 1427 | 879  | -0.553888114 | C7orf34,EPHB6,KEL,TRPV5,TRPV6                                                                                                                                                                                                                                                                                                                                                                                                                                                                                                                                                               |
| 4 | 107,025,000 | 107,175,000 | 1428 | 720  | -1.104334443 | C7orf34,KEL,TRPV5                                                                                                                                                                                                                                                                                                                                                                                                                                                                                                                                                                           |
| 4 | 107,100,000 | 107,250,000 | 1429 | 1352 | 0.099608613  | ENSBTAG00000024230,ENSBTAG00000024231,ENSBTAG00000037918                                                                                                                                                                                                                                                                                                                                                                                                                                                                                                                                    |
| 4 | 107,175,000 | 107,325,000 | 1430 | 1764 | 0.063563863  | PIP,ENSBTAG00000024230,ENSBTAG00000024231,ENSBTAG00000037918,ENSBTAG00000045677                                                                                                                                                                                                                                                                                                                                                                                                                                                                                                             |
| 4 | 107,250,000 | 107,400,000 | 1431 | 1481 | -0.422082287 | PIP,ENSBTAG00000031212,ENSBTAG00000045677                                                                                                                                                                                                                                                                                                                                                                                                                                                                                                                                                   |
| 4 | 107,325,000 | 107,475,000 | 1432 | 1127 | 0.157352132  | GSTK1,TAS2R40,ENSBTAG00000031212                                                                                                                                                                                                                                                                                                                                                                                                                                                                                                                                                            |
| 4 | 107,400,000 | 107,550,000 | 1433 | 771  | 0.65177595   | CASP2,CLCN1,GSTK1,TAS2R40,TMEM139                                                                                                                                                                                                                                                                                                                                                                                                                                                                                                                                                           |

|   |             |             |      |      |              |                                                                                                        |
|---|-------------|-------------|------|------|--------------|--------------------------------------------------------------------------------------------------------|
| 4 | 107,475,000 | 107,625,000 | 1434 | 571  | 1.01903092   | CASP2,CLCN1,EPHA1,FAM131B,TMEM139,ZYX                                                                  |
| 4 | 107,550,000 | 107,700,000 | 1435 | 812  | 0.786801397  | CLCN1,EPHA1,FAM131B,ZYX,ENSBTAG00000038649                                                             |
| 4 | 107,625,000 | 107,775,000 | 1436 | 1291 | 0.235967737  | ENSBTAG00000013248,ENSBTAG00000038649,ENSBTAG00000039614                                               |
| 4 | 107,700,000 | 107,850,000 | 1437 | 1098 | 0.155680232  | FAM115A,FAM115C,ENSBTAG00000013248,ENSBTAG00000039614                                                  |
| 4 | 107,775,000 | 107,925,000 | 1438 | 840  | 0.873388065  | FAM115A,FAM115C,ENSBTAG00000045576                                                                     |
| 4 | 107,850,000 | 108,000,000 | 1439 | 996  | 0.294465164  | FAM115A,ENSBTAG00000011191,ENSBTAG00000045576,ENSBTAG00000046020,ENSBTAG00000047188,ENSBTAG00000048115 |
| 4 | 107,925,000 | 108,075,000 | 1440 | 1407 | -0.049353754 | OR2A5,OR6B1,ENSBTAG00000011191,ENSBTAG0000046020,ENSBTAG00000047188,ENSBTAG00000048115                 |
| 4 | 108,000,000 | 108,150,000 | 1441 | 1505 | 0.324677127  | OR2A12,OR2A2,OR2A5,OR6B1,ENSBTAG00000013673,ENSBTAG00000037927                                         |
| 4 | 108,075,000 | 108,225,000 | 1442 | 1126 | 0.158863991  | OR2A12,OR2A2,ENSBTAG00000013673,ENSBTAG00000037927                                                     |
| 4 | 108,150,000 | 108,300,000 | 1443 | 870  | -0.257063994 |                                                                                                        |
| 4 | 108,225,000 | 108,375,000 | 1444 | 876  | 0.630011107  |                                                                                                        |
| 4 | 108,300,000 | 108,450,000 | 1445 | 867  | 1.108733063  | ARHGEF5,ENSBTAG00000020364                                                                             |
| 4 | 108,375,000 | 108,525,000 | 1446 | 1040 | -0.095567273 | ARHGEF5,NOBOX,ENSBTAG00000020364                                                                       |
| 4 | 108,450,000 | 108,600,000 | 1447 | 1214 | -0.06878888  | ARHGEF5,NOBOX,TPK1                                                                                     |
| 4 | 108,525,000 | 108,675,000 | 1448 | 900  | -0.435708678 | TPK1                                                                                                   |
| 4 | 108,600,000 | 108,750,000 | 1449 | 941  | -1.916274577 | TPK1                                                                                                   |
| 4 | 108,675,000 | 108,825,000 | 1450 | 916  | -0.53080649  | TPK1                                                                                                   |
| 4 | 108,750,000 | 108,900,000 | 1451 | 1006 | -0.641063065 | TPK1                                                                                                   |
| 4 | 108,825,000 | 108,975,000 | 1452 | 1222 | -0.828591774 | TPK1                                                                                                   |
| 4 | 108,900,000 | 109,050,000 | 1453 | 1278 | 0.013513257  | TPK1                                                                                                   |
| 4 | 108,975,000 | 109,125,000 | 1454 | 1279 | 0.627172593  |                                                                                                        |
| 4 | 109,050,000 | 109,200,000 | 1455 | 1169 | 0.361827643  |                                                                                                        |
| 4 | 109,125,000 | 109,275,000 | 1456 | 1304 | 0.645391781  |                                                                                                        |
| 4 | 109,200,000 | 109,350,000 | 1457 | 1568 | 0.438441644  |                                                                                                        |
| 4 | 109,275,000 | 109,425,000 | 1458 | 1687 | 0.436162576  |                                                                                                        |
| 4 | 109,350,000 | 109,500,000 | 1459 | 1812 | 1.029705876  |                                                                                                        |
| 4 | 109,425,000 | 109,575,000 | 1460 | 1429 | 0.832434305  |                                                                                                        |
| 4 | 109,500,000 | 109,650,000 | 1461 | 996  | 0.597113611  |                                                                                                        |
| 4 | 109,575,000 | 109,725,000 | 1462 | 1568 | 0.290240515  |                                                                                                        |
| 4 | 109,650,000 | 109,800,000 | 1463 | 1948 | 0.310404952  |                                                                                                        |
| 4 | 109,725,000 | 109,875,000 | 1464 | 1820 | 0.441089681  |                                                                                                        |
| 4 | 109,800,000 | 109,950,000 | 1465 | 1604 | 0.360243098  |                                                                                                        |
| 4 | 109,875,000 | 110,025,000 | 1466 | 998  | 0.185135798  |                                                                                                        |
| 4 | 109,950,000 | 110,100,000 | 1467 | 553  | -0.257171054 |                                                                                                        |
| 4 | 110,025,000 | 110,175,000 | 1468 | 548  | 0.167163346  |                                                                                                        |
| 4 | 110,100,000 | 110,250,000 | 1469 | 892  | 0.653573465  |                                                                                                        |
| 4 | 110,175,000 | 110,325,000 | 1470 | 1208 | 0.388952273  |                                                                                                        |
| 4 | 110,250,000 | 110,400,000 | 1471 | 1221 | 0.30665409   |                                                                                                        |
| 4 | 110,325,000 | 110,475,000 | 1472 | 1198 | 0.494669077  |                                                                                                        |
| 4 | 110,400,000 | 110,550,000 | 1473 | 913  | 0.460473028  |                                                                                                        |
| 4 | 110,475,000 | 110,625,000 | 1474 | 931  | 1.141879277  |                                                                                                        |
| 4 | 110,550,000 | 110,700,000 | 1475 | 1289 | -0.077579089 |                                                                                                        |
| 4 | 110,625,000 | 110,775,000 | 1476 | 1476 | -0.740361655 |                                                                                                        |
| 4 | 110,700,000 | 110,850,000 | 1477 | 1423 | -0.081030142 |                                                                                                        |
| 4 | 110,775,000 | 110,925,000 | 1478 | 1106 | -0.148751977 |                                                                                                        |

|   |             |             |      |      |              |                                                                                              |
|---|-------------|-------------|------|------|--------------|----------------------------------------------------------------------------------------------|
| 4 | 110,850,000 | 111,000,000 | 1479 | 1220 | 0.338686787  | ENSBTAG00000048097                                                                           |
| 4 | 110,925,000 | 111,075,000 | 1480 | 1588 | 0.377235472  | ENSBTAG00000048097                                                                           |
| 4 | 111,000,000 | 111,150,000 | 1481 | 1770 | -0.475392903 |                                                                                              |
| 4 | 111,075,000 | 111,225,000 | 1482 | 1444 | -1.146343666 | ENSBTAG0000000719                                                                            |
| 4 | 111,150,000 | 111,300,000 | 1483 | 884  | -1.037851888 | ENSBTAG00000000719                                                                           |
| 4 | 111,225,000 | 111,375,000 | 1484 | 1288 | 0.94219614   | ENSBTAG00000000719                                                                           |
| 4 | 111,300,000 | 111,450,000 | 1485 | 1574 | 1.194540848  |                                                                                              |
| 4 | 111,375,000 | 111,525,000 | 1486 | 979  | 0.34617994   |                                                                                              |
| 4 | 111,450,000 | 111,600,000 | 1487 | 733  | -2.376797272 | ENSBTAG00000047459                                                                           |
| 4 | 111,525,000 | 111,675,000 | 1488 | 925  | -1.313359747 | ENSBTAG00000047459                                                                           |
| 4 | 111,600,000 | 111,750,000 | 1489 | 883  | -0.814693708 |                                                                                              |
| 4 | 111,675,000 | 111,825,000 | 1490 | 970  | -3.49841978  |                                                                                              |
| 4 | 111,750,000 | 111,900,000 | 1491 | 1155 | -2.558904427 |                                                                                              |
| 4 | 111,825,000 | 111,975,000 | 1492 | 1319 | 0.647214396  |                                                                                              |
| 4 | 111,900,000 | 112,050,000 | 1493 | 1240 | 0.80810476   | ENSBTAG00000047873                                                                           |
| 4 | 111,975,000 | 112,125,000 | 1494 | 1245 | 0.251151164  | ENSBTAG00000047873                                                                           |
| 4 | 112,050,000 | 112,200,000 | 1495 | 1288 | 0.009589823  | ENSBTAG00000045871                                                                           |
| 4 | 112,125,000 | 112,275,000 | 1496 | 1272 | 0.134707027  | ENSBTAG00000027832,ENSBTAG00000045871                                                        |
| 4 | 112,200,000 | 112,350,000 | 1497 | 1426 | -0.772665153 | ENSBTAG00000027832                                                                           |
| 4 | 112,275,000 | 112,425,000 | 1498 | 1337 | -1.794468742 | ENSBTAG00000027832                                                                           |
| 4 | 112,350,000 | 112,500,000 | 1499 | 1502 | -0.723096083 | ENSBTAG00000027832                                                                           |
| 4 | 112,425,000 | 112,575,000 | 1500 | 1568 | -0.311763153 | ENSBTAG00000027832                                                                           |
| 4 | 112,500,000 | 112,650,000 | 1501 | 1386 | -0.273518448 | ENSBTAG00000027832                                                                           |
| 4 | 112,575,000 | 112,725,000 | 1502 | 1081 | 0.319450557  |                                                                                              |
| 4 | 112,650,000 | 112,800,000 | 1503 | 670  | -0.331856245 | CUL1                                                                                         |
| 4 | 112,725,000 | 112,875,000 | 1504 | 433  | -2.002625699 | CUL1,EZH2                                                                                    |
| 4 | 112,800,000 | 112,950,000 | 1505 | 485  | -1.360746855 | CUL1,EZH2                                                                                    |
| 4 | 112,875,000 | 113,025,000 | 1506 | 733  | -0.961017707 | ERP70,ZNF786                                                                                 |
| 4 | 112,950,000 | 113,100,000 | 1507 | 754  | -0.560307453 | ERP70,ZNF282,ZNF398,ZNF786                                                                   |
| 4 | 113,025,000 | 113,175,000 | 1508 | 395  | 0.061450395  | ZNF212,ZNF282,ZNF398,ZNF783,ZNF786                                                           |
| 4 | 113,100,000 | 113,250,000 | 1509 | 282  | 1.018790212  | ZNF212,ZNF282,ZNF777,ZNF783                                                                  |
| 4 | 113,175,000 | 113,325,000 | 1510 | 556  | 1.212321468  | ZNF746,ZNF777                                                                                |
| 4 | 113,250,000 | 113,400,000 | 1511 | 804  | 0.63386515   | KRBA1,ZNF746,ZNF777                                                                          |
| 4 | 113,325,000 | 113,475,000 | 1512 | 813  | 0.747560584  | KRBA1,SSPO,ZNF467                                                                            |
| 4 | 113,400,000 | 113,550,000 | 1513 | 898  | 0.947547339  | ATP6V0E2,SSPO,ZNF467,ZNF862                                                                  |
| 4 | 113,475,000 | 113,625,000 | 1514 | 1177 | 0.560031007  | ATP6V0E2,LRRC61,RARRES2,REPIN1,SSPO,ZNF862                                                   |
| 4 | 113,550,000 | 113,700,000 | 1515 | 1762 | 0.220553142  | GIMAP8,LRRC61,RARRES2,REPIN1,ZNF775                                                          |
| 4 | 113,625,000 | 113,775,000 | 1516 | 2139 | 0.06979783   | GIMAP7,GIMAP8,ZNF775,ENSBTAG00000039588                                                      |
| 4 | 113,700,000 | 113,850,000 | 1517 | 1700 | -0.071713914 | GIMAP7,ENSBTAG00000039588                                                                    |
| 4 | 113,775,000 | 113,925,000 | 1518 | 1397 | 0.128664411  | GIMAP4,GIMAP7                                                                                |
| 4 | 113,850,000 | 114,000,000 | 1519 | 1482 | -0.366646745 | GIMAP1,GIMAP4,GIMAP7                                                                         |
| 4 | 113,925,000 | 114,075,000 | 1520 | 1393 | -0.559982748 | GIMAP1,GIMAP7,ENSBTAG00000039928                                                             |
| 4 | 114,000,000 | 114,150,000 | 1521 | 1549 | -0.995515079 | ENSBTAG00000000715,ENSBTAG00000004894,ENSBTAG00000008550,ENSBTAG00000037510,ENSBTAG000039928 |
| 4 | 114,075,000 | 114,225,000 | 1522 | 1564 | -1.48330613  | TMEM176A,TMEM176B,ENSBTAG00000000715,ENSBTAG00000004894,ENSBTAG00000008550,ENSBTAG000037510  |
| 4 | 114,150,000 | 114,300,000 | 1523 | 1197 | -1.287054732 | ABP1,TMEM176A,TMEM176B,ENSBTAG00000000715                                                    |
| 4 | 114,225,000 | 114,375,000 | 1524 | 1173 | -0.489067108 | ABP1,KCNH2                                                                                   |
| 4 | 114,300,000 | 114,450,000 | 1525 | 1031 | -0.557884871 | ABCB8,ACCN3,ATG9B,CDK5,KCNH2,NOS3,SLC4A2                                                     |
| 4 | 114,375,000 | 114,525,000 | 1526 | 759  | -2.021721581 | ABCB8,ACCN3,AGAP3,ATG9B,CDK5,FASTK,GBX1,NOS3,SLC4A2,TMUB1                                    |

|   |             |             |      |      |              |                                                                      |
|---|-------------|-------------|------|------|--------------|----------------------------------------------------------------------|
| 4 | 114,450,000 | 114,600,000 | 1527 | 809  | -0.4886155   | ABCF2,AGAP3,ASB10,FASTK,GBX1,IQCA1P1,SLC4A2,TMUB1,ENSBTAG00000024204 |
| 4 | 114,525,000 | 114,675,000 | 1528 | 1103 | -0.005271779 | ABCF2,ASB10,CHPF2,GBX1,IQCA1P1,SMARCD3,ENSBTAG00000024204            |
| 4 | 114,600,000 | 114,750,000 | 1529 | 1098 | -0.471916532 | ABCF2,CHPF2,NUB1,SMARCD3,WDR86                                       |
| 4 | 114,675,000 | 114,825,000 | 1530 | 938  | -1.117844032 | CRYGN,NUB1,RHEB,SMARCD3,WDR86                                        |
| 4 | 114,750,000 | 114,900,000 | 1531 | 662  | -0.379493503 | CRYGN,PRKAG2,RHEB,WDR86                                              |
| 4 | 114,825,000 | 114,975,000 | 1532 | 448  | 0.581019851  | PRKAG2,RHEB,ENSBTAG00000046461                                       |
| 4 | 114,900,000 | 115,050,000 | 1533 | 743  | 0.297687168  | PRKAG2,ENSBTAG00000046461                                            |
| 4 | 114,975,000 | 115,125,000 | 1534 | 973  | 0.141030382  |                                                                      |
| 4 | 115,050,000 | 115,200,000 | 1535 | 890  | -0.008888737 |                                                                      |
| 4 | 115,125,000 | 115,275,000 | 1536 | 1071 | -0.724518489 | GALNTL5                                                              |
| 4 | 115,200,000 | 115,350,000 | 1537 | 1053 | -1.011528834 | GALNT11,GALNTL5                                                      |
| 4 | 115,275,000 | 115,425,000 | 1538 | 707  | -0.034722615 | GALNT11,GALNTL5,KMT2C                                                |
| 4 | 115,350,000 | 115,500,000 | 1539 | 784  | 0.153791499  | GALNT11,KMT2C                                                        |
| 4 | 115,425,000 | 115,575,000 | 1540 | 1072 | 0.289030315  | KMT2C                                                                |
| 4 | 115,500,000 | 115,650,000 | 1541 | 910  | 0.095094095  | CCT8L2,KMT2C                                                         |
| 4 | 115,575,000 | 115,725,000 | 1542 | 890  | -0.71254641  | CCT8L2                                                               |
| 4 | 115,650,000 | 115,800,000 | 1543 | 1139 | -1.989831352 | XRCC2                                                                |
| 4 | 115,725,000 | 115,875,000 | 1544 | 1156 | -1.419016805 | XRCC2                                                                |
| 4 | 115,800,000 | 115,950,000 | 1545 | 893  | -0.141432546 | XRCC2,ENSBTAG0000008032                                              |
| 4 | 115,875,000 | 116,025,000 | 1546 | 966  | -0.784045444 | ENSBTAG0000008032                                                    |
| 4 | 115,950,000 | 116,100,000 | 1547 | 1186 | -0.619970556 | ENSBTAG0000008032                                                    |
| 4 | 116,025,000 | 116,175,000 | 1548 | 1158 | 0.575601486  |                                                                      |
| 4 | 116,100,000 | 116,250,000 | 1549 | 1353 | 0.360488135  | PPDPF                                                                |
| 4 | 116,175,000 | 116,325,000 | 1550 | 1227 | 0.274631543  | PPDPF                                                                |
| 4 | 116,250,000 | 116,400,000 | 1551 | 1046 | 0.425453313  |                                                                      |
| 4 | 116,325,000 | 116,475,000 | 1552 | 1311 | -1.430576063 |                                                                      |
| 4 | 116,400,000 | 116,550,000 | 1553 | 1664 | -1.003970995 |                                                                      |
| 4 | 116,475,000 | 116,625,000 | 1554 | 1661 | 0.287900175  |                                                                      |
| 4 | 116,550,000 | 116,700,000 | 1555 | 1617 | -0.665463133 |                                                                      |
| 4 | 116,625,000 | 116,775,000 | 1556 | 1413 | -0.453437553 |                                                                      |
| 4 | 116,700,000 | 116,850,000 | 1557 | 1013 | 0.191918786  |                                                                      |
| 4 | 116,775,000 | 116,925,000 | 1558 | 688  | -0.636038393 |                                                                      |
| 4 | 116,850,000 | 117,000,000 | 1559 | 1171 | -0.183746503 |                                                                      |
| 4 | 116,925,000 | 117,075,000 | 1560 | 1704 | 0.976096005  |                                                                      |
| 4 | 117,000,000 | 117,150,000 | 1561 | 1350 | -0.07222175  |                                                                      |
| 4 | 117,075,000 | 117,225,000 | 1562 | 1321 | -0.29443109  | ENSBTAG00000047979                                                   |
| 4 | 117,150,000 | 117,300,000 | 1563 | 1830 | 1.217187781  | ENSBTAG00000047979                                                   |
| 4 | 117,225,000 | 117,375,000 | 1564 | 1649 | 0.764957817  | ENSBTAG00000047979                                                   |
| 4 | 117,300,000 | 117,450,000 | 1565 | 1199 | -1.442298596 | ENSBTAG00000047979                                                   |
| 4 | 117,375,000 | 117,525,000 | 1566 | 1123 | -2.17495788  | ENSBTAG00000047979                                                   |
| 4 | 117,450,000 | 117,600,000 | 1567 | 1644 | -0.868168838 | DPP6                                                                 |
| 4 | 117,525,000 | 117,675,000 | 1568 | 1653 | -0.404624844 | DPP6                                                                 |
| 4 | 117,600,000 | 117,750,000 | 1569 | 1080 | 0.334234412  | DPP6,HTR5A                                                           |
| 4 | 117,675,000 | 117,825,000 | 1570 | 1017 | 0.386390123  | DPP6,HTR5A,PAXIP1                                                    |
| 4 | 117,750,000 | 117,900,000 | 1571 | 818  | 0.144469593  | DPP6,PAXIP1                                                          |
| 4 | 117,825,000 | 117,975,000 | 1572 | 799  | 0.357596898  | INSIG1,PAXIP1                                                        |
| 4 | 117,900,000 | 118,050,000 | 1573 | 747  | -1.337743895 | CNPY1,EN2,INSIG1                                                     |
| 4 | 117,975,000 | 118,125,000 | 1574 | 791  | -1.011292518 | CNPY1,EN2                                                            |
| 4 | 118,050,000 | 118,200,000 | 1575 | 944  | -0.453591539 | RBM33                                                                |
| 4 | 118,125,000 | 118,275,000 | 1576 | 822  | -1.793593182 | RBM33,SHH                                                            |
| 4 | 118,200,000 | 118,350,000 | 1577 | 992  | -0.404688689 | RBM33,SHH                                                            |

|   |             |             |      |      |              |                                       |
|---|-------------|-------------|------|------|--------------|---------------------------------------|
| 4 | 118,275,000 | 118,425,000 | 1578 | 1444 | 0.292724401  |                                       |
| 4 | 118,350,000 | 118,500,000 | 1579 | 1281 | -0.548446147 |                                       |
| 4 | 118,425,000 | 118,575,000 | 1580 | 1219 | -0.742461035 |                                       |
| 4 | 118,500,000 | 118,650,000 | 1581 | 1000 | -0.198871356 |                                       |
| 4 | 118,575,000 | 118,725,000 | 1582 | 510  | -2.09210636  |                                       |
| 4 | 118,650,000 | 118,800,000 | 1583 | 392  | -2.048088522 |                                       |
| 4 | 118,725,000 | 118,875,000 | 1584 | 389  | -0.673743197 |                                       |
| 4 | 118,800,000 | 118,950,000 | 1585 | 674  | -0.533165459 | LMBR1,RNF32                           |
| 4 | 118,875,000 | 119,025,000 | 1586 | 610  | -0.214793155 | LMBR1,RNF32                           |
| 4 | 118,950,000 | 119,100,000 | 1587 | 460  | 0.854501667  | LMBR1                                 |
| 4 | 119,025,000 | 119,175,000 | 1588 | 498  | 0.725040234  | LMBR1,MNX1,NOM1                       |
| 4 | 119,100,000 | 119,250,000 | 1589 | 429  | 0.096023939  | MNX1,NOM1,UBE3C                       |
| 4 | 119,175,000 | 119,325,000 | 1590 | 448  | 0.118016803  | UBE3C                                 |
| 4 | 119,250,000 | 119,400,000 | 1591 | 439  | 0.340056927  | UBE3C                                 |
| 4 | 119,325,000 | 119,475,000 | 1592 | 427  | 0.826596917  | DNAJB6,UBE3C                          |
| 4 | 119,400,000 | 119,550,000 | 1593 | 458  | -0.228313134 | DNAJB6,PTPRN2                         |
| 4 | 119,475,000 | 119,625,000 | 1594 | 572  | -1.850419021 | PTPRN2                                |
| 4 | 119,550,000 | 119,700,000 | 1595 | 603  | -0.985143167 | PTPRN2                                |
| 4 | 119,625,000 | 119,775,000 | 1596 | 663  | -0.323527457 |                                       |
| 4 | 119,700,000 | 119,850,000 | 1597 | 625  | -0.569824711 |                                       |
| 4 | 119,775,000 | 119,925,000 | 1598 | 462  | -0.921295511 |                                       |
| 4 | 119,850,000 | 120,000,000 | 1599 | 677  | -0.949759201 |                                       |
| 4 | 119,925,000 | 120,075,000 | 1600 | 717  | -0.844892325 |                                       |
| 4 | 120,000,000 | 120,150,000 | 1601 | 487  | -1.221585162 | NCAPG2                                |
| 4 | 120,075,000 | 120,225,000 | 1602 | 434  | -2.302813933 | NCAPG2                                |
| 4 | 120,150,000 | 120,300,000 | 1603 | 481  | -1.412119641 | ESYT2,NCAPG2                          |
| 4 | 120,225,000 | 120,375,000 | 1604 | 504  | -0.523135105 | ESYT2,WDR60                           |
| 4 | 120,300,000 | 120,450,000 | 1605 | 499  | -1.369172708 | ESYT2,VIPR2,WDR60                     |
| 4 | 120,375,000 | 120,525,000 | 1606 | 456  | -1.440179308 | VIPR2                                 |
| 4 | 120,450,000 | 120,600,000 | 1607 | 453  | -0.49031869  | VIPR2                                 |
| 4 | 120,525,000 | 120,675,000 | 1608 | 468  | -0.795827208 |                                       |
| 4 | 120,600,000 | 120,750,000 | 1609 | 419  | -0.961645095 |                                       |
| 4 | 120,675,000 | 120,825,000 | 1610 | 323  | -0.742027131 |                                       |
| 4 | 120,750,000 | 120,829,699 | 1611 | 109  | -1.222290873 |                                       |
| 5 | 0           | 150,000     | 1    | 735  | -0.661123263 |                                       |
| 5 | 75,000      | 225,000     | 2    | 869  | -0.96475827  |                                       |
| 5 | 150,000     | 300,000     | 3    | 1061 | -0.777736354 | ENSBTAG00000027770,ENSBTAG00000037552 |
| 5 | 225,000     | 375,000     | 4    | 1090 | -1.059779862 | ENSBTAG00000027770,ENSBTAG00000037552 |
| 5 | 300,000     | 450,000     | 5    | 934  | -0.750505808 | ENSBTAG00000027770,ENSBTAG00000038351 |
| 5 | 375,000     | 525,000     | 6    | 840  | 0.404724292  | ENSBTAG00000038351,ENSBTAG00000045542 |
| 5 | 450,000     | 600,000     | 7    | 898  | 0.493981834  | ENSBTAG00000045542                    |
| 5 | 525,000     | 675,000     | 8    | 1230 | 0.791917629  |                                       |
| 5 | 600,000     | 750,000     | 9    | 1243 | 0.877810556  |                                       |
| 5 | 675,000     | 825,000     | 10   | 1288 | 1.012339345  | TSPAN8                                |
| 5 | 750,000     | 900,000     | 11   | 1545 | 0.584963838  | TSPAN8                                |
| 5 | 825,000     | 975,000     | 12   | 1393 | 0.408996447  | TSPAN8                                |
| 5 | 900,000     | 1,050,000   | 13   | 1124 | 0.745660847  |                                       |
| 5 | 975,000     | 1,125,000   | 14   | 1053 | 0.615711718  | LGR5                                  |
| 5 | 1,050,000   | 1,200,000   | 15   | 998  | 0.153602589  | LGR5                                  |
| 5 | 1,125,000   | 1,275,000   | 16   | 692  | -0.34403956  | LGR5,ZFC3H1                           |
| 5 | 1,200,000   | 1,350,000   | 17   | 925  | 0.077799042  | LGR5,THAP2,TMEM19,ZFC3H1              |
| 5 | 1,275,000   | 1,425,000   | 18   | 1078 | 0.318041004  | THAP2,TMEM19,ZFC3H1                   |
| 5 | 1,350,000   | 1,500,000   | 19   | 921  | 0.468843326  | TBC1D15                               |

|   |           |           |    |      |              |                         |
|---|-----------|-----------|----|------|--------------|-------------------------|
| 5 | 1,425,000 | 1,575,000 | 20 | 930  | 0.715007764  | TBC1D15,TPH2            |
| 5 | 1,500,000 | 1,650,000 | 21 | 936  | 0.510197041  | TBC1D15,TPH2            |
| 5 | 1,575,000 | 1,725,000 | 22 | 1299 | 0.554190719  | TPH2                    |
| 5 | 1,650,000 | 1,800,000 | 23 | 1219 | 0.676458298  |                         |
| 5 | 1,725,000 | 1,875,000 | 24 | 949  | 0.615917008  |                         |
| 5 | 1,800,000 | 1,950,000 | 25 | 1130 | 0.578501141  | TRHDE                   |
| 5 | 1,875,000 | 2,025,000 | 26 | 1219 | 0.209523462  | TRHDE                   |
| 5 | 1,950,000 | 2,100,000 | 27 | 1442 | -0.51621794  | TRHDE                   |
| 5 | 2,025,000 | 2,175,000 | 28 | 1471 | -0.626121855 | TRHDE                   |
| 5 | 2,100,000 | 2,250,000 | 29 | 1155 | -0.171007685 | TRHDE                   |
| 5 | 2,175,000 | 2,325,000 | 30 | 891  | 0.861108341  | TRHDE                   |
| 5 | 2,250,000 | 2,400,000 | 31 | 810  | 0.866010667  | TRHDE                   |
| 5 | 2,325,000 | 2,475,000 | 32 | 819  | 0.52022846   | TRHDE                   |
| 5 | 2,400,000 | 2,550,000 | 33 | 962  | 0.495491335  |                         |
| 5 | 2,475,000 | 2,625,000 | 34 | 901  | 0.480327228  |                         |
| 5 | 2,550,000 | 2,700,000 | 35 | 863  | -0.478964769 |                         |
| 5 | 2,625,000 | 2,775,000 | 36 | 988  | -0.717757593 |                         |
| 5 | 2,700,000 | 2,850,000 | 37 | 1019 | 0.378721649  |                         |
| 5 | 2,775,000 | 2,925,000 | 38 | 1378 | 0.399720429  |                         |
| 5 | 2,850,000 | 3,000,000 | 39 | 1266 | -0.557847753 |                         |
| 5 | 2,925,000 | 3,075,000 | 40 | 757  | -1.096558589 |                         |
| 5 | 3,000,000 | 3,150,000 | 41 | 560  | 0.26964736   |                         |
| 5 | 3,075,000 | 3,225,000 | 42 | 695  | 0.732217579  |                         |
| 5 | 3,150,000 | 3,300,000 | 43 | 842  | -0.011656989 |                         |
| 5 | 3,225,000 | 3,375,000 | 44 | 949  | -1.047870879 |                         |
| 5 | 3,300,000 | 3,450,000 | 45 | 891  | -1.410327    |                         |
| 5 | 3,375,000 | 3,525,000 | 46 | 972  | 0.492650106  |                         |
| 5 | 3,450,000 | 3,600,000 | 47 | 1046 | 1.306826331  |                         |
| 5 | 3,525,000 | 3,675,000 | 48 | 930  | 1.237512575  |                         |
| 5 | 3,600,000 | 3,750,000 | 49 | 867  | 0.257600273  |                         |
| 5 | 3,675,000 | 3,825,000 | 50 | 1252 | 0.138907975  |                         |
| 5 | 3,750,000 | 3,900,000 | 51 | 1571 | 0.75619198   |                         |
| 5 | 3,825,000 | 3,975,000 | 52 | 1082 | 1.08235983   |                         |
| 5 | 3,900,000 | 4,050,000 | 53 | 1078 | 0.540440331  | ATXN7L3B                |
| 5 | 3,975,000 | 4,125,000 | 54 | 1499 | 0.539960974  | ATXN7L3B                |
| 5 | 4,050,000 | 4,200,000 | 55 | 1460 | 0.778116506  | ATXN7L3B                |
| 5 | 4,125,000 | 4,275,000 | 56 | 1092 | 0.533046207  |                         |
| 5 | 4,200,000 | 4,350,000 | 57 | 1174 | 0.403930867  |                         |
| 5 | 4,275,000 | 4,425,000 | 58 | 1505 | -0.327662778 |                         |
| 5 | 4,350,000 | 4,500,000 | 59 | 1542 | -1.007605832 |                         |
| 5 | 4,425,000 | 4,575,000 | 60 | 1413 | -0.339875599 |                         |
| 5 | 4,500,000 | 4,650,000 | 61 | 1296 | 0.064208928  |                         |
| 5 | 4,575,000 | 4,725,000 | 62 | 1184 | -0.187211641 |                         |
| 5 | 4,650,000 | 4,800,000 | 63 | 1091 | -0.314243919 | CAPS2                   |
| 5 | 4,725,000 | 4,875,000 | 64 | 1324 | 0.724490011  | CAPS2,GLIPR1L1          |
| 5 | 4,800,000 | 4,950,000 | 65 | 1485 | 0.74430147   | CAPS2,GLIPR1L1,GLIPR1L2 |
| 5 | 4,875,000 | 5,025,000 | 66 | 1335 | 0.322415723  | GLIPR1,GLIPR1L2,KRR1    |
| 5 | 4,950,000 | 5,100,000 | 67 | 878  | 0.427229184  | GLIPR1,KRR1             |
| 5 | 5,025,000 | 5,175,000 | 68 | 964  | -0.756524881 | KRR1                    |
| 5 | 5,100,000 | 5,250,000 | 69 | 1575 | -0.791681245 |                         |
| 5 | 5,175,000 | 5,325,000 | 70 | 1309 | -0.430257292 |                         |
| 5 | 5,250,000 | 5,400,000 | 71 | 770  | 0.298886942  |                         |
| 5 | 5,325,000 | 5,475,000 | 72 | 664  | -0.097514184 |                         |



|   |           |           |     |      |              |               |
|---|-----------|-----------|-----|------|--------------|---------------|
| 5 | 5,400,000 | 5,550,000 | 73  | 940  | -0.458395722 |               |
| 5 | 5,475,000 | 5,625,000 | 74  | 866  | -0.36949235  | NAP1L1,PHLDA1 |
| 5 | 5,550,000 | 5,700,000 | 75  | 563  | 0.034653606  | NAP1L1,PHLDA1 |
| 5 | 5,625,000 | 5,775,000 | 76  | 825  | 0.21409954   |               |
| 5 | 5,700,000 | 5,850,000 | 77  | 844  | 0.587429595  | BBS10,OSBPL8  |
| 5 | 5,775,000 | 5,925,000 | 78  | 657  | 0.804955481  | BBS10,OSBPL8  |
| 5 | 5,850,000 | 6,000,000 | 79  | 872  | 0.675716216  | OSBPL8        |
| 5 | 5,925,000 | 6,075,000 | 80  | 955  | 0.568266103  |               |
| 5 | 6,000,000 | 6,150,000 | 81  | 727  | 0.040114699  |               |
| 5 | 6,075,000 | 6,225,000 | 82  | 606  | -0.119386931 | ZDHHC17       |
| 5 | 6,150,000 | 6,300,000 | 83  | 805  | -0.500380185 | CSRP2,ZDHHC17 |
| 5 | 6,225,000 | 6,375,000 | 84  | 968  | -0.402306052 | CSRP2,ZDHHC17 |
| 5 | 6,300,000 | 6,450,000 | 85  | 722  | 0.02370782   | E2F7          |
| 5 | 6,375,000 | 6,525,000 | 86  | 572  | -0.024274283 | E2F7          |
| 5 | 6,450,000 | 6,600,000 | 87  | 765  | -0.477613914 | E2F7          |
| 5 | 6,525,000 | 6,675,000 | 88  | 860  | -1.568591829 |               |
| 5 | 6,600,000 | 6,750,000 | 89  | 806  | -2.20094327  |               |
| 5 | 6,675,000 | 6,825,000 | 90  | 691  | -1.365224092 |               |
| 5 | 6,750,000 | 6,900,000 | 91  | 810  | 0.170788711  |               |
| 5 | 6,825,000 | 6,975,000 | 92  | 1233 | 0.198459267  |               |
| 5 | 6,900,000 | 7,050,000 | 93  | 1534 | 0.05467299   |               |
| 5 | 6,975,000 | 7,125,000 | 94  | 1360 | 0.025737944  |               |
| 5 | 7,050,000 | 7,200,000 | 95  | 941  | 0.011647084  |               |
| 5 | 7,125,000 | 7,275,000 | 96  | 855  | 0.231931974  |               |
| 5 | 7,200,000 | 7,350,000 | 97  | 743  | -0.03726227  |               |
| 5 | 7,275,000 | 7,425,000 | 98  | 582  | -1.250239044 | NAV3          |
| 5 | 7,350,000 | 7,500,000 | 99  | 536  | -0.343128767 | NAV3          |
| 5 | 7,425,000 | 7,575,000 | 100 | 657  | 0.36938583   | NAV3          |
| 5 | 7,500,000 | 7,650,000 | 101 | 768  | -0.484054934 | NAV3          |
| 5 | 7,575,000 | 7,725,000 | 102 | 895  | -1.445710401 | NAV3          |
| 5 | 7,650,000 | 7,800,000 | 103 | 1275 | -0.847625669 | NAV3          |
| 5 | 7,725,000 | 7,875,000 | 104 | 1600 | -0.655408306 |               |
| 5 | 7,800,000 | 7,950,000 | 105 | 1423 | -0.111047576 |               |
| 5 | 7,875,000 | 8,025,000 | 106 | 1125 | -0.51544401  |               |
| 5 | 7,950,000 | 8,100,000 | 107 | 1285 | -0.509768131 |               |
| 5 | 8,025,000 | 8,175,000 | 108 | 1348 | -0.165171663 |               |
| 5 | 8,100,000 | 8,250,000 | 109 | 1432 | 0.020379175  |               |
| 5 | 8,175,000 | 8,325,000 | 110 | 1486 | 0.649422638  |               |
| 5 | 8,250,000 | 8,400,000 | 111 | 1003 | 0.564918249  |               |
| 5 | 8,325,000 | 8,475,000 | 112 | 726  | 0.150488255  |               |
| 5 | 8,400,000 | 8,550,000 | 113 | 1008 | 0.172503533  |               |
| 5 | 8,475,000 | 8,625,000 | 114 | 1174 | 0.131069736  |               |
| 5 | 8,550,000 | 8,700,000 | 115 | 1024 | 0.361553785  |               |
| 5 | 8,625,000 | 8,775,000 | 116 | 974  | 0.178431692  |               |
| 5 | 8,700,000 | 8,850,000 | 117 | 864  | -0.656046975 | SYT1          |
| 5 | 8,775,000 | 8,925,000 | 118 | 893  | -1.030738177 | SYT1          |
| 5 | 8,850,000 | 9,000,000 | 119 | 1188 | 0.363867063  | SYT1          |
| 5 | 8,925,000 | 9,075,000 | 120 | 937  | 0.698735976  | SYT1          |
| 5 | 9,000,000 | 9,150,000 | 121 | 809  | -0.09625499  | SYT1          |
| 5 | 9,075,000 | 9,225,000 | 122 | 743  | -0.184020981 | PAWR          |
| 5 | 9,150,000 | 9,300,000 | 123 | 370  | 0.574370797  | PAWR          |
| 5 | 9,225,000 | 9,375,000 | 124 | 428  | 0.258769408  | PPP1R12A      |
| 5 | 9,300,000 | 9,450,000 | 125 | 585  | -1.526807294 | PPP1R12A      |

|   |            |            |     |      |              |                       |
|---|------------|------------|-----|------|--------------|-----------------------|
| 5 | 9,375,000  | 9,525,000  | 126 | 651  | -2.882920223 | PPP1R12A              |
| 5 | 9,450,000  | 9,600,000  | 127 | 649  | -1.151343157 | PPP1R12A              |
| 5 | 9,525,000  | 9,675,000  | 128 | 471  | 1.168712923  |                       |
| 5 | 9,600,000  | 9,750,000  | 129 | 454  | 1.047445026  |                       |
| 5 | 9,675,000  | 9,825,000  | 130 | 860  | -0.068043832 | OTOGL                 |
| 5 | 9,750,000  | 9,900,000  | 131 | 1131 | 0.136273328  | OTOGL                 |
| 5 | 9,825,000  | 9,975,000  | 132 | 1046 | 0.586586351  | OTOGL                 |
| 5 | 9,900,000  | 10,050,000 | 133 | 991  | 0.490000377  | OTOGL                 |
| 5 | 9,975,000  | 10,125,000 | 134 | 1071 | 0.177586447  | PTPRQ                 |
| 5 | 10,050,000 | 10,200,000 | 135 | 1220 | -0.016138419 | PTPRQ                 |
| 5 | 10,125,000 | 10,275,000 | 136 | 1226 | 0.309430135  | PTPRQ                 |
| 5 | 10,200,000 | 10,350,000 | 137 | 815  | 0.484720343  | MYF5,MYF6,PTPRQ       |
| 5 | 10,275,000 | 10,425,000 | 138 | 638  | 0.734818227  | LIN7A,MYF5,MYF6,PTPRQ |
| 5 | 10,350,000 | 10,500,000 | 139 | 715  | -0.060351118 | LIN7A                 |
| 5 | 10,425,000 | 10,575,000 | 140 | 728  | -0.474444764 | LIN7A                 |
| 5 | 10,500,000 | 10,650,000 | 141 | 1014 | 0.075975599  | LIN7A                 |
| 5 | 10,575,000 | 10,725,000 | 142 | 1186 | -0.16497689  |                       |
| 5 | 10,650,000 | 10,800,000 | 143 | 1257 | -0.17703867  | ACSS3                 |
| 5 | 10,725,000 | 10,875,000 | 144 | 1261 | -0.032268602 | ACSS3                 |
| 5 | 10,800,000 | 10,950,000 | 145 | 807  | -0.504298837 | ACSS3,PPFIA2          |
| 5 | 10,875,000 | 11,025,000 | 146 | 574  | 0.025060463  | ACSS3,PPFIA2          |
| 5 | 10,950,000 | 11,100,000 | 147 | 844  | -0.245830472 | PPFIA2                |
| 5 | 11,025,000 | 11,175,000 | 148 | 1193 | -0.082940065 | PPFIA2                |
| 5 | 11,100,000 | 11,250,000 | 149 | 1109 | -0.078237047 | PPFIA2                |
| 5 | 11,175,000 | 11,325,000 | 150 | 1298 | -1.294953041 | TMA7                  |
| 5 | 11,250,000 | 11,400,000 | 151 | 1350 | -1.411964299 | TMA7                  |
| 5 | 11,325,000 | 11,475,000 | 152 | 1115 | 0.296507303  |                       |
| 5 | 11,400,000 | 11,550,000 | 153 | 1317 | 0.213037206  |                       |
| 5 | 11,475,000 | 11,625,000 | 154 | 1293 | -0.560579315 |                       |
| 5 | 11,550,000 | 11,700,000 | 155 | 1085 | -1.015735434 |                       |
| 5 | 11,625,000 | 11,775,000 | 156 | 1104 | -1.112762922 |                       |
| 5 | 11,700,000 | 11,850,000 | 157 | 1442 | -0.20038485  |                       |
| 5 | 11,775,000 | 11,925,000 | 158 | 1201 | -0.246028216 |                       |
| 5 | 11,850,000 | 12,000,000 | 159 | 896  | -0.113151708 | CCDC59,METTL25        |
| 5 | 11,925,000 | 12,075,000 | 160 | 1008 | 0.352243308  | CCDC59,METTL25        |
| 5 | 12,000,000 | 12,150,000 | 161 | 950  | 0.552739924  | METTL25               |
| 5 | 12,075,000 | 12,225,000 | 162 | 1182 | 0.987566487  | METTL25               |
| 5 | 12,150,000 | 12,300,000 | 163 | 1155 | 1.199239126  |                       |
| 5 | 12,225,000 | 12,375,000 | 164 | 757  | 0.96795712   |                       |
| 5 | 12,300,000 | 12,450,000 | 165 | 967  | 0.867776408  |                       |
| 5 | 12,375,000 | 12,525,000 | 166 | 1217 | 1.040512289  | TMTC2                 |
| 5 | 12,450,000 | 12,600,000 | 167 | 947  | 0.448775108  | TMTC2                 |
| 5 | 12,525,000 | 12,675,000 | 168 | 957  | -3.38809021  | TMTC2                 |
| 5 | 12,600,000 | 12,750,000 | 169 | 1001 | -4.358904301 |                       |
| 5 | 12,675,000 | 12,825,000 | 170 | 918  | -2.708505432 |                       |
| 5 | 12,750,000 | 12,900,000 | 171 | 907  | -1.03773229  |                       |
| 5 | 12,825,000 | 12,975,000 | 172 | 608  | 0.355471516  |                       |
| 5 | 12,900,000 | 13,050,000 | 173 | 693  | -0.962665614 |                       |
| 5 | 12,975,000 | 13,125,000 | 174 | 1143 | -2.028697954 |                       |
| 5 | 13,050,000 | 13,200,000 | 175 | 1272 | -1.266270414 |                       |
| 5 | 13,125,000 | 13,275,000 | 176 | 1236 | -0.592563087 |                       |
| 5 | 13,200,000 | 13,350,000 | 177 | 1347 | 0.052608976  |                       |
| 5 | 13,275,000 | 13,425,000 | 178 | 1123 | 0.960108632  |                       |

|   |            |            |     |      |              |                |
|---|------------|------------|-----|------|--------------|----------------|
| 5 | 13,350,000 | 13,500,000 | 179 | 893  | 0.726244855  |                |
| 5 | 13,425,000 | 13,575,000 | 180 | 1180 | 0.125214431  |                |
| 5 | 13,500,000 | 13,650,000 | 181 | 1335 | 0.201378924  |                |
| 5 | 13,575,000 | 13,725,000 | 182 | 925  | 0.518738994  |                |
| 5 | 13,650,000 | 13,800,000 | 183 | 635  | 0.698903893  |                |
| 5 | 13,725,000 | 13,875,000 | 184 | 597  | 1.056428608  |                |
| 5 | 13,800,000 | 13,950,000 | 185 | 494  | 0.848137419  |                |
| 5 | 13,875,000 | 14,025,000 | 186 | 470  | 0.465437382  |                |
| 5 | 13,950,000 | 14,100,000 | 187 | 493  | -0.146438139 |                |
| 5 | 14,025,000 | 14,175,000 | 188 | 904  | 0.247309376  |                |
| 5 | 14,100,000 | 14,250,000 | 189 | 1093 | 0.035111246  |                |
| 5 | 14,175,000 | 14,325,000 | 190 | 705  | -0.849068409 |                |
| 5 | 14,250,000 | 14,400,000 | 191 | 688  | -0.878835504 |                |
| 5 | 14,325,000 | 14,475,000 | 192 | 823  | 0.022466125  |                |
| 5 | 14,400,000 | 14,550,000 | 193 | 845  | 0.358544581  |                |
| 5 | 14,475,000 | 14,625,000 | 194 | 784  | -0.145485508 | SLC6A15        |
| 5 | 14,550,000 | 14,700,000 | 195 | 553  | -0.173242653 | SLC6A15        |
| 5 | 14,625,000 | 14,775,000 | 196 | 460  | 0.321559585  | LRRIQ1,TSPAN19 |
| 5 | 14,700,000 | 14,850,000 | 197 | 549  | -0.16373587  | LRRIQ1,TSPAN19 |
| 5 | 14,775,000 | 14,925,000 | 198 | 544  | -0.173527473 | LRRIQ1         |
| 5 | 14,850,000 | 15,000,000 | 199 | 457  | -0.743468256 | ALX1,LRRIQ1    |
| 5 | 14,925,000 | 15,075,000 | 200 | 746  | -1.494001464 | ALX1,LRRIQ1    |
| 5 | 15,000,000 | 15,150,000 | 201 | 882  | -1.206773221 | ALX1           |
| 5 | 15,075,000 | 15,225,000 | 202 | 731  | -2.586300881 |                |
| 5 | 15,150,000 | 15,300,000 | 203 | 1000 | -1.699077465 |                |
| 5 | 15,225,000 | 15,375,000 | 204 | 1002 | 0.109390139  |                |
| 5 | 15,300,000 | 15,450,000 | 205 | 821  | -1.564354135 |                |
| 5 | 15,375,000 | 15,525,000 | 206 | 1124 | -0.56176225  |                |
| 5 | 15,450,000 | 15,600,000 | 207 | 1140 | -2.604364471 | RASSF9         |
| 5 | 15,525,000 | 15,675,000 | 208 | 1368 | -1.717415294 | NTS,RASSF9     |
| 5 | 15,600,000 | 15,750,000 | 209 | 1721 | -0.518337577 | MGAT4C,NTS     |
| 5 | 15,675,000 | 15,825,000 | 210 | 1183 | -1.93316643  | MGAT4C         |
| 5 | 15,750,000 | 15,900,000 | 211 | 1007 | 0.395938833  | MGAT4C         |
| 5 | 15,825,000 | 15,975,000 | 212 | 1355 | -2.530804418 |                |
| 5 | 15,900,000 | 16,050,000 | 213 | 1366 | -3.640035417 |                |
| 5 | 15,975,000 | 16,125,000 | 214 | 997  | -1.655163109 |                |
| 5 | 16,050,000 | 16,200,000 | 215 | 735  | 1.206756929  |                |
| 5 | 16,125,000 | 16,275,000 | 216 | 916  | 0.947892001  |                |
| 5 | 16,200,000 | 16,350,000 | 217 | 1088 | 0.492452025  |                |
| 5 | 16,275,000 | 16,425,000 | 218 | 931  | 0.17996664   |                |
| 5 | 16,350,000 | 16,500,000 | 219 | 734  | -0.280337391 |                |
| 5 | 16,425,000 | 16,575,000 | 220 | 974  | -0.026324131 |                |
| 5 | 16,500,000 | 16,650,000 | 221 | 1093 | 0.114763258  |                |
| 5 | 16,575,000 | 16,725,000 | 222 | 1029 | -0.025203826 |                |
| 5 | 16,650,000 | 16,800,000 | 223 | 1298 | 0.173305248  |                |
| 5 | 16,725,000 | 16,875,000 | 224 | 1588 | 0.511397607  |                |
| 5 | 16,800,000 | 16,950,000 | 225 | 1731 | 0.945289765  |                |
| 5 | 16,875,000 | 17,025,000 | 226 | 1541 | 0.846823034  |                |
| 5 | 16,950,000 | 17,100,000 | 227 | 1479 | 0.428595632  |                |
| 5 | 17,025,000 | 17,175,000 | 228 | 1094 | 0.139095452  |                |
| 5 | 17,100,000 | 17,250,000 | 229 | 1043 | -0.063547316 |                |
| 5 | 17,175,000 | 17,325,000 | 230 | 1660 | 0.410603942  |                |
| 5 | 17,250,000 | 17,400,000 | 231 | 1692 | 0.689008467  |                |

|   |            |            |     |      |              |                            |
|---|------------|------------|-----|------|--------------|----------------------------|
| 5 | 17,325,000 | 17,475,000 | 232 | 1232 | 0.754782761  |                            |
| 5 | 17,400,000 | 17,550,000 | 233 | 1132 | 0.907668662  |                            |
| 5 | 17,475,000 | 17,625,000 | 234 | 1439 | 1.303624968  |                            |
| 5 | 17,550,000 | 17,700,000 | 235 | 850  | 1.324085015  |                            |
| 5 | 17,625,000 | 17,775,000 | 236 | 437  | 0.848287309  |                            |
| 5 | 17,700,000 | 17,850,000 | 237 | 603  | 0.356359787  |                            |
| 5 | 17,775,000 | 17,925,000 | 238 | 441  | -0.20799734  | C12orf50,C5H12orf29,CEP290 |
| 5 | 17,850,000 | 18,000,000 | 239 | 286  | 0.813984927  | C12orf50,C5H12orf29,CEP290 |
| 5 | 17,925,000 | 18,075,000 | 240 | 260  | -0.293963733 | CEP290,TMTC3               |
| 5 | 18,000,000 | 18,150,000 | 241 | 333  | -1.407306213 | TMTC3                      |
| 5 | 18,075,000 | 18,225,000 | 242 | 532  | 0.319759023  |                            |
| 5 | 18,150,000 | 18,300,000 | 243 | 676  | 0.551017559  |                            |
| 5 | 18,225,000 | 18,375,000 | 244 | 492  | -0.46604248  | KITLG                      |
| 5 | 18,300,000 | 18,450,000 | 245 | 313  | -0.836473476 | KITLG                      |
| 5 | 18,375,000 | 18,525,000 | 246 | 501  | 0.34297475   | KITLG                      |
| 5 | 18,450,000 | 18,600,000 | 247 | 708  | 0.802454832  |                            |
| 5 | 18,525,000 | 18,675,000 | 248 | 812  | 0.917051907  |                            |
| 5 | 18,600,000 | 18,750,000 | 249 | 684  | 0.715286228  |                            |
| 5 | 18,675,000 | 18,825,000 | 250 | 423  | 0.710760823  |                            |
| 5 | 18,750,000 | 18,900,000 | 251 | 376  | 1.135876065  |                            |
| 5 | 18,825,000 | 18,975,000 | 252 | 565  | 1.016933426  |                            |
| 5 | 18,900,000 | 19,050,000 | 253 | 797  | 1.068557885  |                            |
| 5 | 18,975,000 | 19,125,000 | 254 | 748  | 1.110368091  |                            |
| 5 | 19,050,000 | 19,200,000 | 255 | 423  | 0.73512078   |                            |
| 5 | 19,125,000 | 19,275,000 | 256 | 275  | 0.086228283  |                            |
| 5 | 19,200,000 | 19,350,000 | 257 | 403  | 0.109366619  | DUSP6                      |
| 5 | 19,275,000 | 19,425,000 | 258 | 616  | 0.81875596   | DUSP6,WDR51B               |
| 5 | 19,350,000 | 19,500,000 | 259 | 745  | -0.003041764 | WDR51B                     |
| 5 | 19,425,000 | 19,575,000 | 260 | 836  | -1.172616174 | ATP2B1,WDR51B              |
| 5 | 19,500,000 | 19,650,000 | 261 | 1102 | -0.728669178 | ATP2B1                     |
| 5 | 19,575,000 | 19,725,000 | 262 | 1062 | -0.626455995 | ATP2B1                     |
| 5 | 19,650,000 | 19,800,000 | 263 | 1002 | -0.442160451 | ATP2B1                     |
| 5 | 19,725,000 | 19,875,000 | 264 | 1150 | -0.022452314 |                            |
| 5 | 19,800,000 | 19,950,000 | 265 | 788  | 0.141617489  |                            |
| 5 | 19,875,000 | 20,025,000 | 266 | 452  | 0.538917181  |                            |
| 5 | 19,950,000 | 20,100,000 | 267 | 615  | 1.212360128  |                            |
| 5 | 20,025,000 | 20,175,000 | 268 | 918  | 0.98046209   |                            |
| 5 | 20,100,000 | 20,250,000 | 269 | 1249 | 0.370383718  |                            |
| 5 | 20,175,000 | 20,325,000 | 270 | 1400 | -0.092773049 |                            |
| 5 | 20,250,000 | 20,400,000 | 271 | 1152 | 0.580010674  |                            |
| 5 | 20,325,000 | 20,475,000 | 272 | 878  | 1.268626103  |                            |
| 5 | 20,400,000 | 20,550,000 | 273 | 640  | 1.018141502  |                            |
| 5 | 20,475,000 | 20,625,000 | 274 | 720  | 0.772273383  |                            |
| 5 | 20,550,000 | 20,700,000 | 275 | 917  | -0.340850276 |                            |
| 5 | 20,625,000 | 20,775,000 | 276 | 1134 | -0.466367884 |                            |
| 5 | 20,700,000 | 20,850,000 | 277 | 932  | -0.04998015  |                            |
| 5 | 20,775,000 | 20,925,000 | 278 | 713  | 0.167366113  | CCER1,EPYC                 |
| 5 | 20,850,000 | 21,000,000 | 279 | 877  | 0.752406408  | CCER1,EPYC,KERA            |
| 5 | 20,925,000 | 21,075,000 | 280 | 1012 | 0.459795448  | EPYC,KERA,LUM              |
| 5 | 21,000,000 | 21,150,000 | 281 | 1004 | 0.003493759  | DCN,KERA,LUM               |
| 5 | 21,075,000 | 21,225,000 | 282 | 910  | -0.36040859  | DCN                        |
| 5 | 21,150,000 | 21,300,000 | 283 | 736  | -0.308011752 |                            |
| 5 | 21,225,000 | 21,375,000 | 284 | 579  | -0.683074508 |                            |

|   |            |            |     |      |              |                                       |
|---|------------|------------|-----|------|--------------|---------------------------------------|
| 5 | 21,300,000 | 21,450,000 | 285 | 584  | -1.77596254  |                                       |
| 5 | 21,375,000 | 21,525,000 | 286 | 519  | -0.937829205 |                                       |
| 5 | 21,450,000 | 21,600,000 | 287 | 681  | 0.20162199   |                                       |
| 5 | 21,525,000 | 21,675,000 | 288 | 709  | -0.665567879 |                                       |
| 5 | 21,600,000 | 21,750,000 | 289 | 930  | -0.453008543 |                                       |
| 5 | 21,675,000 | 21,825,000 | 290 | 937  | -0.703644442 |                                       |
| 5 | 21,750,000 | 21,900,000 | 291 | 712  | -3.091616986 |                                       |
| 5 | 21,825,000 | 21,975,000 | 292 | 874  | -1.149354615 |                                       |
| 5 | 21,900,000 | 22,050,000 | 293 | 968  | -0.43860309  |                                       |
| 5 | 21,975,000 | 22,125,000 | 294 | 856  | -1.204516686 | BTG1                                  |
| 5 | 22,050,000 | 22,200,000 | 295 | 999  | 0.235778808  | BTG1                                  |
| 5 | 22,125,000 | 22,275,000 | 296 | 882  | 0.296379489  |                                       |
| 5 | 22,200,000 | 22,350,000 | 297 | 775  | 0.261725007  | ENSBTAG00000033600                    |
| 5 | 22,275,000 | 22,425,000 | 298 | 920  | 0.23478621   | ENSBTAG00000033600                    |
| 5 | 22,350,000 | 22,500,000 | 299 | 888  | 0.166734409  |                                       |
| 5 | 22,425,000 | 22,575,000 | 300 | 497  | 0.2608285    |                                       |
| 5 | 22,500,000 | 22,650,000 | 301 | 461  | -0.224793415 |                                       |
| 5 | 22,575,000 | 22,725,000 | 302 | 1238 | 0.089828688  | C12orf74                              |
| 5 | 22,650,000 | 22,800,000 | 303 | 1225 | 0.378898643  | C12orf74,PLEKHG7                      |
| 5 | 22,725,000 | 22,875,000 | 304 | 792  | 0.973318174  | EEA1,PLEKHG7                          |
| 5 | 22,800,000 | 22,950,000 | 305 | 722  | 0.457340319  | EEA1                                  |
| 5 | 22,875,000 | 23,025,000 | 306 | 569  | 0.019899603  | EEA1                                  |
| 5 | 22,950,000 | 23,100,000 | 307 | 667  | 0.706959186  |                                       |
| 5 | 23,025,000 | 23,175,000 | 308 | 1027 | 0.207144263  |                                       |
| 5 | 23,100,000 | 23,250,000 | 309 | 1038 | -0.396488117 |                                       |
| 5 | 23,175,000 | 23,325,000 | 310 | 782  | -1.601030564 |                                       |
| 5 | 23,250,000 | 23,400,000 | 311 | 458  | -2.214414914 | NUDT4,UBE2N,ENSBTAG00000033531        |
| 5 | 23,325,000 | 23,475,000 | 312 | 445  | 0.026204258  | MRPL42,NUDT4,UBE2N,ENSBTAG00000033531 |
| 5 | 23,400,000 | 23,550,000 | 313 | 512  | 0.526588435  | MRPL42,SOCS2,UBE2N                    |
| 5 | 23,475,000 | 23,625,000 | 314 | 502  | 0.748052365  | SOCS2                                 |
| 5 | 23,550,000 | 23,700,000 | 315 | 497  | 0.745629961  | CRADD                                 |
| 5 | 23,625,000 | 23,775,000 | 316 | 562  | 0.091278581  | CRADD                                 |
| 5 | 23,700,000 | 23,850,000 | 317 | 831  | 0.418968641  |                                       |
| 5 | 23,775,000 | 23,925,000 | 318 | 690  | 0.47146808   |                                       |
| 5 | 23,850,000 | 24,000,000 | 319 | 636  | -0.44161295  |                                       |
| 5 | 23,925,000 | 24,075,000 | 320 | 751  | -1.06874926  | PLXNC1                                |
| 5 | 24,000,000 | 24,150,000 | 321 | 778  | -0.558680554 | PLXNC1                                |
| 5 | 24,075,000 | 24,225,000 | 322 | 684  | 0.532158741  | PLXNC1                                |
| 5 | 24,150,000 | 24,300,000 | 323 | 434  | 0.086871588  | CEP83,PLXNC1                          |
| 5 | 24,225,000 | 24,375,000 | 324 | 310  | 0.188673369  | CEP83                                 |
| 5 | 24,300,000 | 24,450,000 | 325 | 732  | 1.068320849  | CEP83                                 |
| 5 | 24,375,000 | 24,525,000 | 326 | 1210 | 0.791611409  | TMCC3                                 |
| 5 | 24,450,000 | 24,600,000 | 327 | 1147 | -0.27358351  | TMCC3                                 |
| 5 | 24,525,000 | 24,675,000 | 328 | 1528 | -0.530370424 | TMCC3                                 |
| 5 | 24,600,000 | 24,750,000 | 329 | 1936 | -0.786251722 |                                       |
| 5 | 24,675,000 | 24,825,000 | 330 | 1545 | -0.66832726  |                                       |
| 5 | 24,750,000 | 24,900,000 | 331 | 1401 | 0.552084462  | NDUFA12,NR2C1                         |
| 5 | 24,825,000 | 24,975,000 | 332 | 1188 | 0.661422535  | FGD6,NDUFA12,NR2C1                    |
| 5 | 24,900,000 | 25,050,000 | 333 | 889  | 0.950133011  | FGD6,NR2C1                            |
| 5 | 24,975,000 | 25,125,000 | 334 | 1090 | 1.376930746  | FGD6,VEZT                             |
| 5 | 25,050,000 | 25,200,000 | 335 | 1381 | 1.244253434  | VEZT                                  |
| 5 | 25,125,000 | 25,275,000 | 336 | 1247 | 0.744004339  | METAP2                                |
| 5 | 25,200,000 | 25,350,000 | 337 | 824  | 0.394362885  | METAP2,USP44,ENSBTAG00000010711       |

|   |            |            |     |      |              |                                                                                 |
|---|------------|------------|-----|------|--------------|---------------------------------------------------------------------------------|
| 5 | 25,275,000 | 25,425,000 | 338 | 658  | 0.293984024  | METAP2,USP44,ENSBTAG00000010711,ENSBTAG0000023670                               |
| 5 | 25,350,000 | 25,500,000 | 339 | 751  | -0.373413332 | ENSBTAG00000023670                                                              |
| 5 | 25,425,000 | 25,575,000 | 340 | 829  | 0.104948365  |                                                                                 |
| 5 | 25,500,000 | 25,650,000 | 341 | 669  | 0.269178096  | GLYCAM1,PDE1B,PPP1R1A                                                           |
| 5 | 25,575,000 | 25,725,000 | 342 | 729  | -0.527018394 | GLYCAM1,NCKAP1L,PDE1B,PPP1R1A                                                   |
| 5 | 25,650,000 | 25,800,000 | 343 | 743  | -1.399399924 | GTSF1,ITGA5,NCKAP1L,PDE1B                                                       |
| 5 | 25,725,000 | 25,875,000 | 344 | 595  | -2.465126495 | COPZ1,GPR84,GTSF1,ITGA5,ZNF385A                                                 |
| 5 | 25,800,000 | 25,950,000 | 345 | 734  | -1.124273168 | CBX5,COPZ1,GPR84,HNRNPA1,NFE2,ZNF385A                                           |
| 5 | 25,875,000 | 26,025,000 | 346 | 737  | -0.355049002 | CBX5,HNRNPA1,NFE2,SMUG1                                                         |
| 5 | 25,950,000 | 26,100,000 | 347 | 574  | -0.679093566 | CBX5,SMUG1                                                                      |
| 5 | 26,025,000 | 26,175,000 | 348 | 470  | -0.277058469 | HOXC4,HOXC5,HOXC6                                                               |
| 5 | 26,100,000 | 26,250,000 | 349 | 232  | 0.811417002  | HOXC10,HOXC11,HOXC12,HOXC13,HOXC4,HOXC5,HOXC6,HOXC8,HOXC9                       |
| 5 | 26,175,000 | 26,325,000 | 350 | 275  | 1.450010861  | HOXC10,HOXC11,HOXC12,HOXC13,HOXC8,HOXC9                                         |
| 5 | 26,250,000 | 26,400,000 | 351 | 393  | 1.175315039  | HOXC13                                                                          |
| 5 | 26,325,000 | 26,475,000 | 352 | 391  | -1.653820508 |                                                                                 |
| 5 | 26,400,000 | 26,550,000 | 353 | 380  | -1.936682256 | ATP5G2,CALCOCO1                                                                 |
| 5 | 26,475,000 | 26,625,000 | 354 | 411  | -0.300848827 | ATP5G2,CALCOCO1,ENSBTAG00000005863                                              |
| 5 | 26,550,000 | 26,700,000 | 355 | 391  | -0.070310931 | MAP3K12,NPFF,TARBP2,ENSBTAG00000005863                                          |
| 5 | 26,625,000 | 26,775,000 | 356 | 283  | -4.20059635  | AMHR2,MAP3K12,NPFF,PCBP2,PRR13,SP1,TARBP2,ENSBTAG00000005863                    |
| 5 | 26,700,000 | 26,850,000 | 357 | 276  | -4.202684272 | AMHR2,MAP3K12,PCBP2,PRR13,SP1,SP7                                               |
| 5 | 26,775,000 | 26,925,000 | 358 | 238  | -0.045756732 | AAAS,C5H12orf10,ESPL1,MFSD5,PFDN5,SP1,SP7                                       |
| 5 | 26,850,000 | 27,000,000 | 359 | 241  | -0.438410053 | AAAS,C5H12orf10,CSAD,ESPL1,ITGB7,MFSD5,PFDN5,RARG,SP7,ZNF740                    |
| 5 | 26,925,000 | 27,075,000 | 360 | 311  | 0.261529064  | CSAD,IGFBP6,ITGB7,RARG,SOAT2,SPRYD3,TENC1,ZNF740                                |
| 5 | 27,000,000 | 27,150,000 | 361 | 261  | 0.01531053   | CSAD,EIF4B,IGFBP6,SOAT2,SPRYD3,TENC1                                            |
| 5 | 27,075,000 | 27,225,000 | 362 | 449  | -1.071248723 | EIF4B,KRT18,KRT8,TENC1                                                          |
| 5 | 27,150,000 | 27,300,000 | 363 | 1090 | 0.284466652  | KRT18,KRT4,KRT78,KRT79,KRT8                                                     |
| 5 | 27,225,000 | 27,375,000 | 364 | 1605 | 0.840716353  | KRT3,KRT4,KRT78,KRT79,ENSBTAG00000027974                                        |
| 5 | 27,300,000 | 27,450,000 | 365 | 1441 | 0.962442996  | KRT1,KRT2,KRT3,KRT73,KRT77,ENSBTAG00000027974                                   |
| 5 | 27,375,000 | 27,525,000 | 366 | 1095 | -0.017391253 | KRT1,KRT2,KRT71,KRT72,KRT73,KRT74,KRT77                                         |
| 5 | 27,450,000 | 27,600,000 | 367 | 737  | -1.844804173 | KRT5,KRT6B,KRT71,KRT72,KRT73,KRT74,ENSBTAG000039425,ENSBTAG00000040019          |
| 5 | 27,525,000 | 27,675,000 | 368 | 674  | -0.794118425 | KRT5,KRT6B,KRT75,KRT82,ENSBTAG00000037791,ENSBTAG00000039425,ENSBTAG00000040019 |
| 5 | 27,600,000 | 27,750,000 | 369 | 861  | 0.366653547  | KRT75,KRT82,KRT83,KRT84,KRT85,ENSBTAG0000003791                                 |
| 5 | 27,675,000 | 27,825,000 | 370 | 548  | -0.213748997 | KRT81,KRT83,KRT84,KRT85,KRT86,ENSBTAG00000013756,ENSBTAG00000016166             |
| 5 | 27,750,000 | 27,900,000 | 371 | 397  | -0.231477413 | KRT7,KRT80,KRT81,KRT83,KRT86,ENSBTAG00000013756,ENSBTAG00000016166              |
| 5 | 27,825,000 | 27,975,000 | 372 | 424  | 0.979082077  | ATG101,KRT7,KRT80,ENSBTAG00000016166                                            |
| 5 | 27,900,000 | 28,050,000 | 373 | 335  | 0.354963816  | ACVR1B,ATG101,GRASP,KRT80,NR4A1                                                 |
| 5 | 27,975,000 | 28,125,000 | 374 | 351  | 0.362027598  | ACVR1B,ACVRL1,GRASP,NR4A1                                                       |
| 5 | 28,050,000 | 28,200,000 | 375 | 332  | 0.004191451  | ACVR1B,ACVRL1,ANKRD33,ENSBTAG00000002673                                        |
| 5 | 28,125,000 | 28,275,000 | 376 | 322  | -0.140204417 | ANKRD33,SCN8A,ENSBTAG00000002673                                                |
| 5 | 28,200,000 | 28,350,000 | 377 | 665  | 0.664506195  | SCN8A                                                                           |
| 5 | 28,275,000 | 28,425,000 | 378 | 941  | 0.87613001   | SCN8A                                                                           |
| 5 | 28,350,000 | 28,500,000 | 379 | 938  | 0.822929581  | SLC4A8                                                                          |

|   |            |            |     |      |              |                                                                    |
|---|------------|------------|-----|------|--------------|--------------------------------------------------------------------|
| 5 | 28,425,000 | 28,575,000 | 380 | 784  | 0.636410665  | RPL36,SLC4A8                                                       |
| 5 | 28,500,000 | 28,650,000 | 381 | 453  | 0.623588282  | BIN2,CELA1,GALNT6,RPL36,SLC4A8                                     |
| 5 | 28,575,000 | 28,725,000 | 382 | 544  | -0.715644512 | BIN2,CELA1,DAZAP2,GALNT6,SMAGP                                     |
| 5 | 28,650,000 | 28,800,000 | 383 | 754  | -0.383744851 | BIN2,DAZAP2,POU6F1,SMAGP,TFCP2                                     |
| 5 | 28,725,000 | 28,875,000 | 384 | 617  | 0.200463689  | CSRNP2,LETMD1,POU6F1,TFCP2                                         |
| 5 | 28,800,000 | 28,950,000 | 385 | 500  | -0.199851783 | CSRNP2,LETMD1,SLC11A2,TFCP2                                        |
| 5 | 28,875,000 | 29,025,000 | 386 | 536  | -0.203795827 | SLC11A2                                                            |
| 5 | 28,950,000 | 29,100,000 | 387 | 620  | -0.174895802 | SLC11A2,ENSBTAG00000032899                                         |
| 5 | 29,025,000 | 29,175,000 | 388 | 739  | 0.511456644  | HIGD1C,METTL7A,SLC11A2,ENSBTAG0000002355,E<br>NSBTAG00000032899    |
| 5 | 29,100,000 | 29,250,000 | 389 | 706  | -0.156697587 | HIGD1C,METTL7A,ENSBTAG0000002355,ENSBTAG0<br>0000038893            |
| 5 | 29,175,000 | 29,325,000 | 390 | 587  | -0.430631305 | ATF1,ENSBTAG00000038893                                            |
| 5 | 29,250,000 | 29,400,000 | 391 | 500  | 0.424729698  | ATF1,DIP2B                                                         |
| 5 | 29,325,000 | 29,475,000 | 392 | 341  | -0.654185715 | ATF1,DIP2B,HIST1H4I                                                |
| 5 | 29,400,000 | 29,550,000 | 393 | 360  | -0.565632096 | DIP2B,HIST1H4I                                                     |
| 5 | 29,475,000 | 29,625,000 | 394 | 369  | -0.497065171 | DIP2B,LARP4,ENSBTAG00000047199                                     |
| 5 | 29,550,000 | 29,700,000 | 395 | 282  | -0.944877655 | DIP2B,LARP4,ENSBTAG00000047199                                     |
| 5 | 29,625,000 | 29,775,000 | 396 | 319  | -0.421141998 | FAM186A,LARP4                                                      |
| 5 | 29,700,000 | 29,850,000 | 397 | 435  | 0.671538179  | FAM186A,LIMA1                                                      |
| 5 | 29,775,000 | 29,925,000 | 398 | 439  | 0.336095575  | LASS5,LIMA1                                                        |
| 5 | 29,850,000 | 30,000,000 | 399 | 424  | -0.133710063 | ASIC1,COX14,GPD1,LASS5,LIMA1,SMARCD1                               |
| 5 | 29,925,000 | 30,075,000 | 400 | 374  | -0.139933614 | AQP6,ASIC1,COX14,GPD1,LASS5,RACGAP1,SMARCD1                        |
| 5 | 30,000,000 | 30,150,000 | 401 | 470  | 0.300728812  | AQP2,AQP5,AQP6,ASIC1,RACGAP1                                       |
| 5 | 30,075,000 | 30,225,000 | 402 | 720  | 0.901043417  | AQP2,AQP5,BCDIN3D,FAIM2                                            |
| 5 | 30,150,000 | 30,300,000 | 403 | 586  | 0.811597902  | BCDIN3D,FAIM2,NCKAP5L,TMBIM6                                       |
| 5 | 30,225,000 | 30,375,000 | 404 | 406  | 0.575698751  | FMNL3,NCKAP5L,PRPF40B,TMBIM6                                       |
| 5 | 30,300,000 | 30,450,000 | 405 | 352  | 0.580948875  | FAM186B,FMNL3,KCNH3,MCRS1,PRPF40B                                  |
| 5 | 30,375,000 | 30,525,000 | 406 | 346  | -0.569061136 | FAM186B,KCNH3,MCRS1,PRPF40B,ENSBTAG0000000<br>4660                 |
| 5 | 30,450,000 | 30,600,000 | 407 | 459  | -0.638305796 | KCNH3,ENSBTAG00000004660                                           |
| 5 | 30,525,000 | 30,675,000 | 408 | 741  | 0.045491714  | C1QL4,DNAJC22,TROAP,ENSBTAG00000004660                             |
| 5 | 30,600,000 | 30,750,000 | 409 | 852  | 0.687756055  | C1QL4,DNAJC22,PRPH,TROAP,TUBA1C,ENSBTAG0000<br>0037775             |
| 5 | 30,675,000 | 30,825,000 | 410 | 518  | 0.919263062  | PRPH,TUBA1A,TUBA1C,ENSBTAG00000037775                              |
| 5 | 30,750,000 | 30,900,000 | 411 | 272  | -0.278843305 | DHH,LMBR1L,TUBA1A,TUBA1B                                           |
| 5 | 30,825,000 | 30,975,000 | 412 | 240  | -0.602801638 | DHH,KMT2D,LMBR1L,PRKAG1,RHEBL1,TUBA1A,TUBA<br>1B                   |
| 5 | 30,900,000 | 31,050,000 | 413 | 238  | -0.293808802 | DDN,FKBP11,KMT2D,PRKAG1,RHEBL1,WNT1,WNT10B                         |
| 5 | 30,975,000 | 31,125,000 | 414 | 248  | 0.258864588  | CACNB3,CCDC65,DDN,DDX23,FKBP11,PRKAG1,RND1,<br>WNT1,WNT10B         |
| 5 | 31,050,000 | 31,200,000 | 415 | 228  | 0.737064968  | ADCY6,CACNB3,CCDC65,DDX23,FKBP11,RND1                              |
| 5 | 31,125,000 | 31,275,000 | 416 | 189  | 1.109710588  | ADCY6,CACNB3,CCNT1,KANSL2                                          |
| 5 | 31,200,000 | 31,350,000 | 417 | 212  | 0.376796371  | CCNT1,KANSL2,LALBA                                                 |
| 5 | 31,275,000 | 31,425,000 | 418 | 259  | -1.386132    | KANSL2,LALBA                                                       |
| 5 | 31,350,000 | 31,500,000 | 419 | 434  | -1.578640653 | ENSBTAG00000038290                                                 |
| 5 | 31,425,000 | 31,575,000 | 420 | 526  | -1.154198014 | ENSBTAG00000000280,ENSBTAG00000007706,ENSBT<br>AG00000038290       |
| 5 | 31,500,000 | 31,650,000 | 421 | 1012 | -0.401721151 | OR8S1,ENSBTAG00000000280,ENSBTAG00000007706<br>,ENSBTAG00000016905 |

|   |            |            |     |      |              |                                                         |
|---|------------|------------|-----|------|--------------|---------------------------------------------------------|
| 5 | 31,575,000 | 31,725,000 | 422 | 1505 | 0.466450011  | C5H12orf54,OR8S1,ENSBTAG00000016317,ENSBTAG00000016905  |
| 5 | 31,650,000 | 31,800,000 | 423 | 1119 | 0.882229816  | C5H12orf54,ENSBTAG00000016317,ENSBTAG00000039152        |
| 5 | 31,725,000 | 31,875,000 | 424 | 1191 | 1.061171902  | C5H12orf54,ENSBTAG00000005054,ENSBTAG00000039152        |
| 5 | 31,800,000 | 31,950,000 | 425 | 1304 | 1.290813081  | ENSBTAG00000005054,ENSBTAG00000014748                   |
| 5 | 31,875,000 | 32,025,000 | 426 | 782  | 0.832624567  | ENSBTAG00000004181,ENSBTAG00000014748                   |
| 5 | 31,950,000 | 32,100,000 | 427 | 398  | 0.185744103  | ENSBTAG00000004181                                      |
| 5 | 32,025,000 | 32,175,000 | 428 | 410  | 1.336276753  | ZNF641                                                  |
| 5 | 32,100,000 | 32,250,000 | 429 | 691  | 1.172648367  | ZNF641,ENSBTAG00000032428                               |
| 5 | 32,175,000 | 32,325,000 | 430 | 791  | 0.967101784  | ASB8,CCDC184,PFKM,ENSBTAG00000032428,ENSBTAG00000032429 |
| 5 | 32,250,000 | 32,400,000 | 431 | 554  | 1.032175749  | ASB8,CCDC184,PFKM,SENP1,ENSBTAG00000032429              |
| 5 | 32,325,000 | 32,475,000 | 432 | 350  | 0.759283769  | COL2A1,PFKM,SENP1                                       |
| 5 | 32,400,000 | 32,550,000 | 433 | 485  | -1.030340545 | COL2A1,SENP1,TMEM106C                                   |
| 5 | 32,475,000 | 32,625,000 | 434 | 508  | -0.80413437  | COL2A1,TMEM106C,VDR                                     |
| 5 | 32,550,000 | 32,700,000 | 435 | 310  | -0.027795066 | HDAC7,RAPGEF3,SLC48A1,VDR                               |
| 5 | 32,625,000 | 32,775,000 | 436 | 351  | -0.678213892 | ENDOU,HDAC7,RAPGEF3,RPAP3,SLC48A1                       |
| 5 | 32,700,000 | 32,850,000 | 437 | 528  | -0.163481594 | ENDOU,RAPGEF3,RPAP3                                     |
| 5 | 32,775,000 | 32,925,000 | 438 | 826  | -0.030739029 | RPAP3                                                   |
| 5 | 32,850,000 | 33,000,000 | 439 | 1208 | -0.034407505 |                                                         |
| 5 | 32,925,000 | 33,075,000 | 440 | 1058 | -0.612521942 |                                                         |
| 5 | 33,000,000 | 33,150,000 | 441 | 781  | -1.895926624 | ENSBTAG00000038027                                      |
| 5 | 33,075,000 | 33,225,000 | 442 | 827  | -1.036691366 | PCED1B,ENSBTAG00000038027                               |
| 5 | 33,150,000 | 33,300,000 | 443 | 687  | -0.656633358 | PCED1B                                                  |
| 5 | 33,225,000 | 33,375,000 | 444 | 615  | -0.338794867 | AMIGO2,PCED1B                                           |
| 5 | 33,300,000 | 33,450,000 | 445 | 693  | 0.52723083   | AMIGO2,PCED1B                                           |
| 5 | 33,375,000 | 33,525,000 | 446 | 881  | 0.683836299  |                                                         |
| 5 | 33,450,000 | 33,600,000 | 447 | 955  | 0.747351674  |                                                         |
| 5 | 33,525,000 | 33,675,000 | 448 | 743  | 0.343781926  | ATA3                                                    |
| 5 | 33,600,000 | 33,750,000 | 449 | 805  | -0.241808588 | ATA3                                                    |
| 5 | 33,675,000 | 33,825,000 | 450 | 828  | -0.075399399 |                                                         |
| 5 | 33,750,000 | 33,900,000 | 451 | 639  | -0.259276244 |                                                         |
| 5 | 33,825,000 | 33,975,000 | 452 | 671  | -1.354858236 |                                                         |
| 5 | 33,900,000 | 34,050,000 | 453 | 624  | -1.28770203  | SLC38A2                                                 |
| 5 | 33,975,000 | 34,125,000 | 454 | 498  | -0.02353508  | SLC38A2                                                 |
| 5 | 34,050,000 | 34,200,000 | 455 | 573  | -0.787144127 | SLC38A1                                                 |
| 5 | 34,125,000 | 34,275,000 | 456 | 545  | -0.477282999 | SLC38A1                                                 |
| 5 | 34,200,000 | 34,350,000 | 457 | 594  | 0.972142989  |                                                         |
| 5 | 34,275,000 | 34,425,000 | 458 | 571  | 0.378757785  |                                                         |
| 5 | 34,350,000 | 34,500,000 | 459 | 323  | -1.098747588 | ARID2,SCAF11                                            |
| 5 | 34,425,000 | 34,575,000 | 460 | 211  | -1.056510972 | ARID2,SCAF11                                            |
| 5 | 34,500,000 | 34,650,000 | 461 | 199  | -2.060984138 | ARID2                                                   |
| 5 | 34,575,000 | 34,725,000 | 462 | 159  | -2.717051832 | ARID2                                                   |
| 5 | 34,650,000 | 34,800,000 | 463 | 126  | -1.741413437 |                                                         |
| 5 | 34,725,000 | 34,875,000 | 464 | 121  | -2.000400211 |                                                         |
| 5 | 34,800,000 | 34,950,000 | 465 | 317  | -0.281835981 |                                                         |
| 5 | 34,875,000 | 35,025,000 | 466 | 629  | 0.571430833  |                                                         |
| 5 | 34,950,000 | 35,100,000 | 467 | 568  | 0.480834763  | ANO6                                                    |
| 5 | 35,025,000 | 35,175,000 | 468 | 413  | 0.496218362  | ANO6,ENSBTAG00000026249                                 |
| 5 | 35,100,000 | 35,250,000 | 469 | 873  | 0.528292289  | ANO6,ENSBTAG00000026249                                 |
| 5 | 35,175,000 | 35,325,000 | 470 | 932  | -1.797608287 |                                                         |



|   |            |            |     |      |              |                                    |
|---|------------|------------|-----|------|--------------|------------------------------------|
| 5 | 35,250,000 | 35,400,000 | 471 | 600  | -3.028692989 |                                    |
| 5 | 35,325,000 | 35,475,000 | 472 | 745  | 0.566254759  | DBX2                               |
| 5 | 35,400,000 | 35,550,000 | 473 | 528  | 1.375409847  | DBX2                               |
| 5 | 35,475,000 | 35,625,000 | 474 | 301  | 1.327778567  | DBX2                               |
| 5 | 35,550,000 | 35,700,000 | 475 | 330  | 0.660451316  | NELL2                              |
| 5 | 35,625,000 | 35,775,000 | 476 | 448  | -0.4777704   | NELL2                              |
| 5 | 35,700,000 | 35,850,000 | 477 | 472  | -0.443725583 | NELL2                              |
| 5 | 35,775,000 | 35,925,000 | 478 | 458  | 0.148520646  | NELL2                              |
| 5 | 35,850,000 | 36,000,000 | 479 | 650  | 0.567052445  | NELL2                              |
| 5 | 35,925,000 | 36,075,000 | 480 | 758  | 0.849141861  | NELL2                              |
| 5 | 36,000,000 | 36,150,000 | 481 | 907  | 1.112884957  | NELL2                              |
| 5 | 36,075,000 | 36,225,000 | 482 | 734  | 0.935486064  | TMEM117                            |
| 5 | 36,150,000 | 36,300,000 | 483 | 787  | 0.369957609  | TMEM117                            |
| 5 | 36,225,000 | 36,375,000 | 484 | 907  | -0.124157789 | TMEM117                            |
| 5 | 36,300,000 | 36,450,000 | 485 | 667  | -0.147358606 | TMEM117                            |
| 5 | 36,375,000 | 36,525,000 | 486 | 582  | -0.960010183 | TMEM117                            |
| 5 | 36,450,000 | 36,600,000 | 487 | 648  | -1.999072133 | TMEM117                            |
| 5 | 36,525,000 | 36,675,000 | 488 | 596  | -1.083044376 | TMEM117                            |
| 5 | 36,600,000 | 36,750,000 | 489 | 623  | -1.042422384 | TMEM117                            |
| 5 | 36,675,000 | 36,825,000 | 490 | 733  | -0.328915833 | TMEM117                            |
| 5 | 36,750,000 | 36,900,000 | 491 | 473  | 0.58374157   | IRAK4,TMEM117,TWF1                 |
| 5 | 36,825,000 | 36,975,000 | 492 | 689  | -0.712963423 | IRAK4,PUS7L,TWF1                   |
| 5 | 36,900,000 | 37,050,000 | 493 | 728  | -0.493252225 | IRAK4,PUS7L                        |
| 5 | 36,975,000 | 37,125,000 | 494 | 372  | 0.279617134  | ADAMTS20                           |
| 5 | 37,050,000 | 37,200,000 | 495 | 370  | -0.205036626 | ADAMTS20                           |
| 5 | 37,125,000 | 37,275,000 | 496 | 332  | -0.978668494 | ADAMTS20                           |
| 5 | 37,200,000 | 37,350,000 | 497 | 371  | -0.279703632 | ADAMTS20                           |
| 5 | 37,275,000 | 37,425,000 | 498 | 715  | -0.243223935 | ADAMTS20                           |
| 5 | 37,350,000 | 37,500,000 | 499 | 708  | -0.503886326 |                                    |
| 5 | 37,425,000 | 37,575,000 | 500 | 426  | -1.044742312 |                                    |
| 5 | 37,500,000 | 37,650,000 | 501 | 455  | -1.847170434 | ENSBTAG00000046601                 |
| 5 | 37,575,000 | 37,725,000 | 502 | 745  | -3.200971872 | ENSBTAG00000046601                 |
| 5 | 37,650,000 | 37,800,000 | 503 | 1204 | -1.591201955 |                                    |
| 5 | 37,725,000 | 37,875,000 | 504 | 1149 | -0.247037431 |                                    |
| 5 | 37,800,000 | 37,950,000 | 505 | 663  | -0.03779855  |                                    |
| 5 | 37,875,000 | 38,025,000 | 506 | 411  | 0.348776497  |                                    |
| 5 | 37,950,000 | 38,100,000 | 507 | 499  | -1.400141234 |                                    |
| 5 | 38,025,000 | 38,175,000 | 508 | 483  | -1.443564696 |                                    |
| 5 | 38,100,000 | 38,250,000 | 509 | 387  | 0.021402363  |                                    |
| 5 | 38,175,000 | 38,325,000 | 510 | 401  | -0.340902314 | PRICKLE1,ENSBTAG00000045487        |
| 5 | 38,250,000 | 38,400,000 | 511 | 651  | -0.988954343 | PPHLN1,PRICKLE1,ENSBTAG00000045487 |
| 5 | 38,325,000 | 38,475,000 | 512 | 696  | -0.768224239 | PPHLN1,PRICKLE1                    |
| 5 | 38,400,000 | 38,550,000 | 513 | 621  | 0.521933335  | PPHLN1                             |
| 5 | 38,475,000 | 38,625,000 | 514 | 800  | -0.416436915 | PPHLN1,ZCRB1                       |
| 5 | 38,550,000 | 38,700,000 | 515 | 618  | -1.170233529 | PPHLN1,YAF2,ZCRB1                  |
| 5 | 38,625,000 | 38,775,000 | 516 | 361  | 0.391623323  | GXYLT1,YAF2                        |
| 5 | 38,700,000 | 38,850,000 | 517 | 530  | 0.735324257  | GXYLT1,YAF2                        |
| 5 | 38,775,000 | 38,925,000 | 518 | 952  | 0.030852334  | GXYLT1                             |
| 5 | 38,850,000 | 39,000,000 | 519 | 1322 | -0.059495767 |                                    |
| 5 | 38,925,000 | 39,075,000 | 520 | 1436 | 0.50794543   |                                    |
| 5 | 39,000,000 | 39,150,000 | 521 | 1002 | 0.431304949  |                                    |
| 5 | 39,075,000 | 39,225,000 | 522 | 714  | 0.686238452  |                                    |
| 5 | 39,150,000 | 39,300,000 | 523 | 567  | 1.182443261  |                                    |

|   |            |            |     |      |              |                                             |
|---|------------|------------|-----|------|--------------|---------------------------------------------|
| 5 | 39,225,000 | 39,375,000 | 524 | 699  | 0.900031379  |                                             |
| 5 | 39,300,000 | 39,450,000 | 525 | 859  | 0.853339619  | PDZRN4                                      |
| 5 | 39,375,000 | 39,525,000 | 526 | 856  | -4.677127218 | PDZRN4                                      |
| 5 | 39,450,000 | 39,600,000 | 527 | 877  | -3.790698762 |                                             |
| 5 | 39,525,000 | 39,675,000 | 528 | 597  | 1.023767602  |                                             |
| 5 | 39,600,000 | 39,750,000 | 529 | 812  | -0.458485193 |                                             |
| 5 | 39,675,000 | 39,825,000 | 530 | 922  | -0.108823298 |                                             |
| 5 | 39,750,000 | 39,900,000 | 531 | 605  | 0.812855957  |                                             |
| 5 | 39,825,000 | 39,975,000 | 532 | 656  | 0.235341411  |                                             |
| 5 | 39,900,000 | 40,050,000 | 533 | 761  | 0.121484183  | CNTN1                                       |
| 5 | 39,975,000 | 40,125,000 | 534 | 534  | -0.109033088 | CNTN1                                       |
| 5 | 40,050,000 | 40,200,000 | 535 | 854  | 0.087125544  | CNTN1                                       |
| 5 | 40,125,000 | 40,275,000 | 536 | 1168 | 0.451490177  | CNTN1                                       |
| 5 | 40,200,000 | 40,350,000 | 537 | 853  | 0.700321953  | CNTN1                                       |
| 5 | 40,275,000 | 40,425,000 | 538 | 922  | -2.281032887 |                                             |
| 5 | 40,350,000 | 40,500,000 | 539 | 1204 | -1.394921776 |                                             |
| 5 | 40,425,000 | 40,575,000 | 540 | 1213 | 0.539061032  | ENSBTAG00000026792                          |
| 5 | 40,500,000 | 40,650,000 | 541 | 1131 | 1.008076407  | ENSBTAG00000026792,ENSBTAG00000037783       |
| 5 | 40,575,000 | 40,725,000 | 542 | 862  | 0.888607682  | LRRK2,ENSBTAG00000026792,ENSBTAG00000037783 |
| 5 | 40,650,000 | 40,800,000 | 543 | 723  | 0.117931506  | LRRK2,ENSBTAG00000037783                    |
| 5 | 40,725,000 | 40,875,000 | 544 | 1016 | -2.023200971 | LRRK2                                       |
| 5 | 40,800,000 | 40,950,000 | 545 | 1046 | -2.2455397   | LRRK2                                       |
| 5 | 40,875,000 | 41,025,000 | 546 | 851  | -0.652014234 | LRRK2                                       |
| 5 | 40,950,000 | 41,100,000 | 547 | 806  | -0.576788859 | SLC2A13                                     |
| 5 | 41,025,000 | 41,175,000 | 548 | 846  | -0.252952929 | SLC2A13                                     |
| 5 | 41,100,000 | 41,250,000 | 549 | 855  | 0.382039298  | SLC2A13                                     |
| 5 | 41,175,000 | 41,325,000 | 550 | 762  | -0.005607294 | SLC2A13                                     |
| 5 | 41,250,000 | 41,400,000 | 551 | 777  | -0.59220069  | SLC2A13                                     |
| 5 | 41,325,000 | 41,475,000 | 552 | 776  | -0.547967575 | SLC2A13                                     |
| 5 | 41,400,000 | 41,550,000 | 553 | 911  | 0.49827007   | SLC2A13                                     |
| 5 | 41,475,000 | 41,625,000 | 554 | 1066 | 0.677158809  | C12orf40,SLC2A13                            |
| 5 | 41,550,000 | 41,700,000 | 555 | 1105 | 0.547929753  | ABCD2,C12orf40,SLC2A13                      |
| 5 | 41,625,000 | 41,775,000 | 556 | 1119 | 0.401597666  | ABCD2,C12orf40                              |
| 5 | 41,700,000 | 41,850,000 | 557 | 1052 | 0.580476418  | ABCD2                                       |
| 5 | 41,775,000 | 41,925,000 | 558 | 1336 | 0.553958414  | ABCD2                                       |
| 5 | 41,850,000 | 42,000,000 | 559 | 1491 | 0.508973598  |                                             |
| 5 | 41,925,000 | 42,075,000 | 560 | 1058 | 0.63526622   |                                             |
| 5 | 42,000,000 | 42,150,000 | 561 | 828  | 0.972575397  | KIF21A                                      |
| 5 | 42,075,000 | 42,225,000 | 562 | 1266 | -0.461954389 | KIF21A                                      |
| 5 | 42,150,000 | 42,300,000 | 563 | 1485 | -1.684180145 |                                             |
| 5 | 42,225,000 | 42,375,000 | 564 | 1301 | -1.667253866 |                                             |
| 5 | 42,300,000 | 42,450,000 | 565 | 1127 | -0.207200795 | CPNE8                                       |
| 5 | 42,375,000 | 42,525,000 | 566 | 1251 | 0.588846257  | CPNE8                                       |
| 5 | 42,450,000 | 42,600,000 | 567 | 1884 | 0.415725516  | CPNE8                                       |
| 5 | 42,525,000 | 42,675,000 | 568 | 2200 | 0.604916169  | CPNE8                                       |
| 5 | 42,600,000 | 42,750,000 | 569 | 1902 | 1.087506264  | CPNE8                                       |
| 5 | 42,675,000 | 42,825,000 | 570 | 1466 | 0.691946895  | CPNE8                                       |
| 5 | 42,750,000 | 42,900,000 | 571 | 1379 | -0.323791248 | PTPRR                                       |
| 5 | 42,825,000 | 42,975,000 | 572 | 1256 | 0.322113583  | PTPRR                                       |
| 5 | 42,900,000 | 43,050,000 | 573 | 1018 | 0.900676327  | PTPRR                                       |
| 5 | 42,975,000 | 43,125,000 | 574 | 1022 | 0.095316585  | PTPRB,PTPRR                                 |
| 5 | 43,050,000 | 43,200,000 | 575 | 828  | -0.414804839 | PTPRB,PTPRR                                 |

|   |            |            |     |      |              |                                                                             |
|---|------------|------------|-----|------|--------------|-----------------------------------------------------------------------------|
| 5 | 43,125,000 | 43,275,000 | 576 | 517  | -0.286589054 | KCNMB4,PTPRB                                                                |
| 5 | 43,200,000 | 43,350,000 | 577 | 586  | -0.829291575 | KCNMB4,PTPRB                                                                |
| 5 | 43,275,000 | 43,425,000 | 578 | 525  | -0.893968221 | CNOT2,KCNMB4                                                                |
| 5 | 43,350,000 | 43,500,000 | 579 | 324  | 0.292035584  | CNOT2                                                                       |
| 5 | 43,425,000 | 43,575,000 | 580 | 536  | 0.247505517  | CNOT2                                                                       |
| 5 | 43,500,000 | 43,650,000 | 581 | 742  | 0.173410581  |                                                                             |
| 5 | 43,575,000 | 43,725,000 | 582 | 651  | 0.204185972  |                                                                             |
| 5 | 43,650,000 | 43,800,000 | 583 | 665  | 0.320157759  | MYRFL                                                                       |
| 5 | 43,725,000 | 43,875,000 | 584 | 853  | -0.39313643  | MYRFL                                                                       |
| 5 | 43,800,000 | 43,950,000 | 585 | 869  | -0.393938407 | MYRFL,RAB3IP                                                                |
| 5 | 43,875,000 | 44,025,000 | 586 | 674  | 0.364417657  | BEST3,RAB3IP                                                                |
| 5 | 43,950,000 | 44,100,000 | 587 | 714  | 0.264868876  | BEST3,LRRRC10                                                               |
| 5 | 44,025,000 | 44,175,000 | 588 | 745  | 0.752606155  | BEST3,CCT2,FRS2,LRRRC10                                                     |
| 5 | 44,100,000 | 44,250,000 | 589 | 515  | 0.960977893  | CCT2,FRS2                                                                   |
| 5 | 44,175,000 | 44,325,000 | 590 | 674  | -1.531614213 | YEATS4                                                                      |
| 5 | 44,250,000 | 44,400,000 | 591 | 862  | -3.252151599 | LYZ1,YEATS4                                                                 |
| 5 | 44,325,000 | 44,475,000 | 592 | 1079 | -1.519907932 | LYZ1,YEATS4,ENSBTAG00000000198,ENSBTAG00000022971                           |
| 5 | 44,400,000 | 44,550,000 | 593 | 1002 | -1.080713983 | ENSBTAG00000000198,ENSBTAG00000020564,ENSBTAG00000022971,ENSBTAG00000039170 |
| 5 | 44,475,000 | 44,625,000 | 594 | 706  | -2.037232548 | LYSB,LYZ1,LYZ2,ENSBTAG00000020564,ENSBTAG0000039170                         |
| 5 | 44,550,000 | 44,700,000 | 595 | 901  | 0.300442211  | LYSB,LYZ1,LYZ2,LYZ3,ENSBTAG00000020564,ENSBTAG0000026322                    |
| 5 | 44,625,000 | 44,775,000 | 596 | 671  | 0.730794851  | CPSF6,LYZ,LYZ3,ENSBTAG00000026322                                           |
| 5 | 44,700,000 | 44,850,000 | 597 | 321  | 0.098093616  | CPSF6,LYZ                                                                   |
| 5 | 44,775,000 | 44,925,000 | 598 | 729  | 1.137196681  | CPSF6                                                                       |
| 5 | 44,850,000 | 45,000,000 | 599 | 890  | 1.306477707  |                                                                             |
| 5 | 44,925,000 | 45,075,000 | 600 | 683  | 0.79136998   |                                                                             |
| 5 | 45,000,000 | 45,150,000 | 601 | 742  | -0.140411155 | CPM                                                                         |
| 5 | 45,075,000 | 45,225,000 | 602 | 608  | -0.717284663 | CPM,MDM2                                                                    |
| 5 | 45,150,000 | 45,300,000 | 603 | 551  | -1.529608746 | CPM,MDM2,NUP107,SLC35E3                                                     |
| 5 | 45,225,000 | 45,375,000 | 604 | 628  | -0.981846038 | NUP107,RAP1B,SLC35E3                                                        |
| 5 | 45,300,000 | 45,450,000 | 605 | 601  | -0.32170127  | NUP107,RAP1B                                                                |
| 5 | 45,375,000 | 45,525,000 | 606 | 483  | 0.184054717  | RAP1B                                                                       |
| 5 | 45,450,000 | 45,600,000 | 607 | 453  | 1.405877925  |                                                                             |
| 5 | 45,525,000 | 45,675,000 | 608 | 581  | 1.387346073  | MDM1                                                                        |
| 5 | 45,600,000 | 45,750,000 | 609 | 614  | 1.033560963  | IL-22,MDM1                                                                  |
| 5 | 45,675,000 | 45,825,000 | 610 | 718  | 0.365181397  | IL-22                                                                       |
| 5 | 45,750,000 | 45,900,000 | 611 | 596  | -0.052918823 | IFNG                                                                        |
| 5 | 45,825,000 | 45,975,000 | 612 | 343  | 0.078620094  | IFNG                                                                        |
| 5 | 45,900,000 | 46,050,000 | 613 | 284  | 0.202864976  |                                                                             |
| 5 | 45,975,000 | 46,125,000 | 614 | 400  | 0.32914756   |                                                                             |
| 5 | 46,050,000 | 46,200,000 | 615 | 525  | 0.501326425  |                                                                             |
| 5 | 46,125,000 | 46,275,000 | 616 | 749  | 0.680825378  |                                                                             |
| 5 | 46,200,000 | 46,350,000 | 617 | 922  | 0.509134944  | DYRK2                                                                       |
| 5 | 46,275,000 | 46,425,000 | 618 | 750  | 0.337201494  | DYRK2                                                                       |
| 5 | 46,350,000 | 46,500,000 | 619 | 868  | -1.296283671 |                                                                             |
| 5 | 46,425,000 | 46,575,000 | 620 | 927  | -0.917846606 |                                                                             |
| 5 | 46,500,000 | 46,650,000 | 621 | 666  | -0.30062256  |                                                                             |
| 5 | 46,575,000 | 46,725,000 | 622 | 865  | -0.44745229  | CAND1                                                                       |
| 5 | 46,650,000 | 46,800,000 | 623 | 889  | 0.151320271  | CAND1                                                                       |
| 5 | 46,725,000 | 46,875,000 | 624 | 653  | 0.51319361   | CAND1                                                                       |

|   |            |            |     |      |              |                                       |
|---|------------|------------|-----|------|--------------|---------------------------------------|
| 5 | 46,800,000 | 46,950,000 | 625 | 826  | 0.082166234  |                                       |
| 5 | 46,875,000 | 47,025,000 | 626 | 1026 | 0.265014445  |                                       |
| 5 | 46,950,000 | 47,100,000 | 627 | 903  | 0.992469618  |                                       |
| 5 | 47,025,000 | 47,175,000 | 628 | 880  | 0.083761162  |                                       |
| 5 | 47,100,000 | 47,250,000 | 629 | 878  | -1.099528928 |                                       |
| 5 | 47,175,000 | 47,325,000 | 630 | 702  | -0.116401783 |                                       |
| 5 | 47,250,000 | 47,400,000 | 631 | 579  | 0.364611015  |                                       |
| 5 | 47,325,000 | 47,475,000 | 632 | 714  | -0.625344501 |                                       |
| 5 | 47,400,000 | 47,550,000 | 633 | 655  | -0.666382765 | GRIP1                                 |
| 5 | 47,475,000 | 47,625,000 | 634 | 557  | 0.21892252   | GRIP1                                 |
| 5 | 47,550,000 | 47,700,000 | 635 | 834  | 0.698171649  | GRIP1                                 |
| 5 | 47,625,000 | 47,775,000 | 636 | 852  | -0.667749744 | FAU,GRIP1,HELB                        |
| 5 | 47,700,000 | 47,850,000 | 637 | 552  | -1.695079434 | FAU,GRIP1,HELB,IRAKM                  |
| 5 | 47,775,000 | 47,925,000 | 638 | 286  | -1.077902225 | CGI-119,IRAKM,LLPH                    |
| 5 | 47,850,000 | 48,000,000 | 639 | 336  | -0.086010272 | CGI-119,LLPH                          |
| 5 | 47,925,000 | 48,075,000 | 640 | 548  | 0.863901689  | HMGA2                                 |
| 5 | 48,000,000 | 48,150,000 | 641 | 756  | 0.911640136  | HMGA2                                 |
| 5 | 48,075,000 | 48,225,000 | 642 | 644  | -0.037968739 | HMGA2                                 |
| 5 | 48,150,000 | 48,300,000 | 643 | 496  | -1.13215547  | HMGA2                                 |
| 5 | 48,225,000 | 48,375,000 | 644 | 771  | 0.011303326  |                                       |
| 5 | 48,300,000 | 48,450,000 | 645 | 958  | 0.162987868  |                                       |
| 5 | 48,375,000 | 48,525,000 | 646 | 852  | 0.470429939  |                                       |
| 5 | 48,450,000 | 48,600,000 | 647 | 713  | 0.992057897  | MSRB3                                 |
| 5 | 48,525,000 | 48,675,000 | 648 | 490  | 0.758610138  | MSRB3                                 |
| 5 | 48,600,000 | 48,750,000 | 649 | 306  | 0.955570236  | MSRB3                                 |
| 5 | 48,675,000 | 48,825,000 | 650 | 330  | 1.370392742  | LEMD3,MSRB3                           |
| 5 | 48,750,000 | 48,900,000 | 651 | 569  | 1.341658699  | LEMD3                                 |
| 5 | 48,825,000 | 48,975,000 | 652 | 622  | 1.238775867  | LEMD3,WIF1                            |
| 5 | 48,900,000 | 49,050,000 | 653 | 406  | 0.958233458  | WIF1                                  |
| 5 | 48,975,000 | 49,125,000 | 654 | 474  | 0.875894806  | WIF1                                  |
| 5 | 49,050,000 | 49,200,000 | 655 | 699  | 0.305864329  | TBC1D30                               |
| 5 | 49,125,000 | 49,275,000 | 656 | 707  | 0.293643203  | TBC1D30,ENSBTAG00000000237            |
| 5 | 49,200,000 | 49,350,000 | 657 | 474  | 0.172187876  | GNS,RASSF3,TBC1D30,ENSBTAG00000000237 |
| 5 | 49,275,000 | 49,425,000 | 658 | 302  | -0.305283517 | GNS,RASSF3                            |
| 5 | 49,350,000 | 49,500,000 | 659 | 379  | -0.49487126  | RASSF3                                |
| 5 | 49,425,000 | 49,575,000 | 660 | 503  | -0.727740599 | TBK1,XPOT                             |
| 5 | 49,500,000 | 49,650,000 | 661 | 468  | -0.143258605 | C12orf56,TBK1,XPOT                    |
| 5 | 49,575,000 | 49,725,000 | 662 | 791  | 0.042125598  | C12orf56,C5H12orf66,XPOT              |
| 5 | 49,650,000 | 49,800,000 | 663 | 1266 | 0.43831098   | C12orf56,C5H12orf66                   |
| 5 | 49,725,000 | 49,875,000 | 664 | 902  | 0.519410026  | C5H12orf66,SRGAP1                     |
| 5 | 49,800,000 | 49,950,000 | 665 | 557  | -0.560759821 | SRGAP1                                |
| 5 | 49,875,000 | 50,025,000 | 666 | 691  | -0.756879874 | SRGAP1                                |
| 5 | 49,950,000 | 50,100,000 | 667 | 789  | -0.378274246 | SRGAP1                                |
| 5 | 50,025,000 | 50,175,000 | 668 | 573  | 0.115474289  | TMEM5                                 |
| 5 | 50,100,000 | 50,250,000 | 669 | 529  | 0.720329761  | TMEM5                                 |
| 5 | 50,175,000 | 50,325,000 | 670 | 696  | 0.60026723   | TMEM5                                 |
| 5 | 50,250,000 | 50,400,000 | 671 | 767  | 0.288778222  |                                       |
| 5 | 50,325,000 | 50,475,000 | 672 | 750  | 0.153333811  |                                       |
| 5 | 50,400,000 | 50,550,000 | 673 | 600  | 0.290153186  |                                       |
| 5 | 50,475,000 | 50,625,000 | 674 | 796  | 1.052358462  | AVPR1A                                |
| 5 | 50,550,000 | 50,700,000 | 675 | 632  | 0.954846572  | AVPR1A                                |
| 5 | 50,625,000 | 50,775,000 | 676 | 566  | -0.438757092 |                                       |
| 5 | 50,700,000 | 50,850,000 | 677 | 1061 | -0.58511874  |                                       |

|   |            |            |     |      |              |                            |
|---|------------|------------|-----|------|--------------|----------------------------|
| 5 | 50,775,000 | 50,925,000 | 678 | 965  | -0.761097423 | PPM1H                      |
| 5 | 50,850,000 | 51,000,000 | 679 | 670  | -0.655488981 | PPM1H                      |
| 5 | 50,925,000 | 51,075,000 | 680 | 921  | 0.729497965  | PPM1H                      |
| 5 | 51,000,000 | 51,150,000 | 681 | 1060 | 0.864949451  | PPM1H                      |
| 5 | 51,075,000 | 51,225,000 | 682 | 772  | -0.419552433 | MON2,PPM1H                 |
| 5 | 51,150,000 | 51,300,000 | 683 | 773  | -1.900578426 | MON2,PPM1H                 |
| 5 | 51,225,000 | 51,375,000 | 684 | 872  | -1.967063039 | MON2                       |
| 5 | 51,300,000 | 51,450,000 | 685 | 587  | -1.555725243 | MON2,USP15                 |
| 5 | 51,375,000 | 51,525,000 | 686 | 367  | -1.197500426 | USP15                      |
| 5 | 51,450,000 | 51,600,000 | 687 | 520  | -1.238228145 | USP15                      |
| 5 | 51,525,000 | 51,675,000 | 688 | 521  | -0.698564076 |                            |
| 5 | 51,600,000 | 51,750,000 | 689 | 690  | 1.035817081  |                            |
| 5 | 51,675,000 | 51,825,000 | 690 | 970  | 1.372869054  |                            |
| 5 | 51,750,000 | 51,900,000 | 691 | 866  | 0.890387612  |                            |
| 5 | 51,825,000 | 51,975,000 | 692 | 809  | 0.159693126  |                            |
| 5 | 51,900,000 | 52,050,000 | 693 | 810  | 0.701225825  | FAM19A2                    |
| 5 | 51,975,000 | 52,125,000 | 694 | 570  | 1.023147175  | FAM19A2                    |
| 5 | 52,050,000 | 52,200,000 | 695 | 580  | 0.308350873  | FAM19A2,ENSBTAG00000045842 |
| 5 | 52,125,000 | 52,275,000 | 696 | 1076 | 0.029639437  | ENSBTAG00000045842         |
| 5 | 52,200,000 | 52,350,000 | 697 | 1368 | 0.407126533  |                            |
| 5 | 52,275,000 | 52,425,000 | 698 | 971  | 0.672738563  |                            |
| 5 | 52,350,000 | 52,500,000 | 699 | 470  | -0.762406606 |                            |
| 5 | 52,425,000 | 52,575,000 | 700 | 436  | -0.723109692 |                            |
| 5 | 52,500,000 | 52,650,000 | 701 | 582  | -0.103551551 |                            |
| 5 | 52,575,000 | 52,725,000 | 702 | 831  | -0.159591421 |                            |
| 5 | 52,650,000 | 52,800,000 | 703 | 1027 | 0.179169444  |                            |
| 5 | 52,725,000 | 52,875,000 | 704 | 1063 | -0.175935545 | ENSBTAG00000040344         |
| 5 | 52,800,000 | 52,950,000 | 705 | 758  | -0.59639455  | ENSBTAG00000040344         |
| 5 | 52,875,000 | 53,025,000 | 706 | 645  | -0.775886935 |                            |
| 5 | 52,950,000 | 53,100,000 | 707 | 597  | -0.945310819 |                            |
| 5 | 53,025,000 | 53,175,000 | 708 | 697  | 0.575864152  |                            |
| 5 | 53,100,000 | 53,250,000 | 709 | 800  | 0.87447514   |                            |
| 5 | 53,175,000 | 53,325,000 | 710 | 542  | 0.71965931   |                            |
| 5 | 53,250,000 | 53,400,000 | 711 | 488  | 0.727978195  |                            |
| 5 | 53,325,000 | 53,475,000 | 712 | 433  | 0.571187767  |                            |
| 5 | 53,400,000 | 53,550,000 | 713 | 444  | 0.516185197  |                            |
| 5 | 53,475,000 | 53,625,000 | 714 | 619  | 0.323086673  |                            |
| 5 | 53,550,000 | 53,700,000 | 715 | 674  | 0.061101931  |                            |
| 5 | 53,625,000 | 53,775,000 | 716 | 613  | -0.135077031 |                            |
| 5 | 53,700,000 | 53,850,000 | 717 | 924  | 0.291404414  |                            |
| 5 | 53,775,000 | 53,925,000 | 718 | 930  | 0.280391823  |                            |
| 5 | 53,850,000 | 54,000,000 | 719 | 714  | -0.26284083  | SLC16A7                    |
| 5 | 53,925,000 | 54,075,000 | 720 | 620  | -0.701669054 | SLC16A7                    |
| 5 | 54,000,000 | 54,150,000 | 721 | 432  | -3.095732484 | SLC16A7                    |
| 5 | 54,075,000 | 54,225,000 | 722 | 477  | -2.079711174 | SLC16A7                    |
| 5 | 54,150,000 | 54,300,000 | 723 | 575  | -0.606874658 | SLC16A7                    |
| 5 | 54,225,000 | 54,375,000 | 724 | 786  | 0.752525775  |                            |
| 5 | 54,300,000 | 54,450,000 | 725 | 885  | 0.938347186  |                            |
| 5 | 54,375,000 | 54,525,000 | 726 | 766  | 0.061128535  |                            |
| 5 | 54,450,000 | 54,600,000 | 727 | 731  | -0.146954231 |                            |
| 5 | 54,525,000 | 54,675,000 | 728 | 923  | 0.376096316  |                            |
| 5 | 54,600,000 | 54,750,000 | 729 | 996  | 0.653572208  |                            |
| 5 | 54,675,000 | 54,825,000 | 730 | 759  | 0.716457397  |                            |

|   |            |            |     |      |              |                                                |
|---|------------|------------|-----|------|--------------|------------------------------------------------|
| 5 | 54,750,000 | 54,900,000 | 731 | 535  | 0.411860207  | LRIG3                                          |
| 5 | 54,825,000 | 54,975,000 | 732 | 524  | -0.73009285  | LRIG3                                          |
| 5 | 54,900,000 | 55,050,000 | 733 | 749  | -1.556457939 | LRIG3                                          |
| 5 | 54,975,000 | 55,125,000 | 734 | 707  | -1.09856371  |                                                |
| 5 | 55,050,000 | 55,200,000 | 735 | 474  | -0.006673619 |                                                |
| 5 | 55,125,000 | 55,275,000 | 736 | 495  | 0.232673772  |                                                |
| 5 | 55,200,000 | 55,350,000 | 737 | 808  | -1.12811127  |                                                |
| 5 | 55,275,000 | 55,425,000 | 738 | 991  | -2.134937095 |                                                |
| 5 | 55,350,000 | 55,500,000 | 739 | 1058 | -0.762666647 |                                                |
| 5 | 55,425,000 | 55,575,000 | 740 | 938  | 0.346022089  |                                                |
| 5 | 55,500,000 | 55,650,000 | 741 | 671  | 0.427284864  |                                                |
| 5 | 55,575,000 | 55,725,000 | 742 | 996  | -0.267421753 |                                                |
| 5 | 55,650,000 | 55,800,000 | 743 | 941  | -0.406453634 |                                                |
| 5 | 55,725,000 | 55,875,000 | 744 | 468  | 0.039757868  | XRCC6BP1                                       |
| 5 | 55,800,000 | 55,950,000 | 745 | 403  | 0.974862551  | XRCC6BP1                                       |
| 5 | 55,875,000 | 56,025,000 | 746 | 396  | 1.121618645  | AVIL,CTDSP2,CYP27B1,METTL1,METTL21B,TSFM       |
| 5 | 55,950,000 | 56,100,000 | 747 | 268  | 0.611793503  | AGAP2,AVIL,CDK4,CTDSP2,CYP27B1,MARCH9,METTL    |
| 5 | 56,025,000 | 56,175,000 | 748 | 187  | -1.016885937 | 1,METTL21B,OS9,TSFM,TSPAN31                    |
| 5 | 56,100,000 | 56,250,000 | 749 | 204  | -1.092594948 | AGAP2,CDK4,CYP27B1,MARCH9,OS9,TSPAN31          |
| 5 | 56,175,000 | 56,325,000 | 750 | 204  | -0.213646943 | DTX3,GALGT,GEFT,KIF5A,OS9,PIP4K2C,SLC26A10,ENS |
| 5 | 56,250,000 | 56,400,000 | 751 | 246  | 0.204643931  | BTAG00000047374                                |
| 5 | 56,325,000 | 56,475,000 | 752 | 306  | 0.433309616  | ARHGAP9,DCTN2,DDIT3,DTX3,GALGT,GEFT,GLI1,KIF5  |
| 5 | 56,400,000 | 56,550,000 | 753 | 299  | 0.641602195  | A,MARS,MBD6,PIP4K2C,SLC26A10,ENSBTAG0000004    |
| 5 | 56,475,000 | 56,625,000 | 754 | 273  | 0.013612787  | 7374                                           |
| 5 | 56,550,000 | 56,700,000 | 755 | 254  | -1.366895408 | ARHGAP9,DCTN2,DDIT3,GLI1,INHBC,INHBE,KIF5A,MA  |
| 5 | 56,625,000 | 56,775,000 | 756 | 256  | -1.475628107 | RS,MBD6                                        |
| 5 | 56,700,000 | 56,850,000 | 757 | 248  | -1.516310453 | GLI1,INHBC,INHBE                               |
| 5 | 56,775,000 | 56,925,000 | 758 | 204  | -1.624593774 | NDUFA4L2,NXPH4,R3HDM2,SHMT2,STAC3              |
| 5 | 56,850,000 | 57,000,000 | 759 | 217  | -0.234779597 | LRP1,NDUFA4L2,NXPH4,R3HDM2,SHMT2,STAC3         |
| 5 | 56,925,000 | 57,075,000 | 760 | 205  | -0.319132484 | LRP1,NAB2,NXPH4,STAT6,TMEM194A                 |
| 5 | 57,000,000 | 57,150,000 | 761 | 170  | -0.858005902 | GPR182,LRP1,MYO1A,NAB2,STAT6,TAC3,TMEM194A,    |
| 5 | 57,075,000 | 57,225,000 | 762 | 202  | -1.238120937 | ZBTB39                                         |
| 5 | 57,150,000 | 57,300,000 | 763 | 243  | -0.953241587 | GPR182,MYO1A,TAC3,TMEM194A,ZBTB39              |
| 5 | 57,225,000 | 57,375,000 | 764 | 260  | -0.204547708 | GPR182,RDH16,SDR9C7                            |
| 5 | 57,300,000 | 57,450,000 | 765 | 241  | -1.054633895 | RDH16,SDR9C7                                   |
| 5 | 57,375,000 | 57,525,000 | 766 | 236  | -1.720851172 | HSD17B6,NACA,PRIM1                             |
| 5 | 57,450,000 | 57,600,000 | 767 | 345  | -1.512866299 | ATP5B,BAZ2A,HSD17B6,NACA,PRIM1,PTGES3          |
| 5 | 57,525,000 | 57,675,000 | 768 | 476  | -0.533138544 | ATP5B,BAZ2A,PTGES3,RBMS2                       |
| 5 | 57,600,000 | 57,750,000 | 769 | 602  | 0.469947181  | BAZ2A,GLS2,MIP,RBMS2,SPRYD4,TIMELESS           |
| 5 | 57,675,000 | 57,825,000 | 770 | 590  | 0.72775889   | APOF,APON,CNPY2,CS,GLS2,IL23A,MIP,PAN2,SPRYD4, |
|   |            |            |     |      |              | STAT2,TIMELESS                                 |
|   |            |            |     |      |              | ANKRD52,APOF,APON,CNPY2,COQ10A,CS,IL23A,NAB    |
|   |            |            |     |      |              | P2,PAN2,RNF41,SLC39A5,STAT2                    |
|   |            |            |     |      |              | ANKRD52,COQ10A,CS,FAM62A,MYL6,MYL6B,NABP2,     |
|   |            |            |     |      |              | RNF41,SLC39A5,SMARCC2,ZC3H10                   |
|   |            |            |     |      |              | ERBB3,FAM62A,MYL6,MYL6B,PA2G4,RNF41,SMARCC2    |
|   |            |            |     |      |              | ,ZC3H10                                        |
|   |            |            |     |      |              | CDK2,ERBB3,IKZF4,PA2G4,PMEL17,RAB5B,RPS26,SUO  |
|   |            |            |     |      |              | X,ZC3H10                                       |
|   |            |            |     |      |              | CDK2,DGKA,IKZF4,PMEL17,RAB5B,RPS26,SUOX,WIBG   |
|   |            |            |     |      |              | CIP29,DGKA,DNAJC14,MMP19,ORMDL2,PMEL17,WIB     |
|   |            |            |     |      |              | G,ENSBTAG00000009049                           |

|   |            |            |     |      |              |                                                                                                                                  |
|---|------------|------------|-----|------|--------------|----------------------------------------------------------------------------------------------------------------------------------|
| 5 | 57,750,000 | 57,900,000 | 771 | 457  | 0.18254421   | BLOC1S1,CD63,CIP29,DNAJC14,GDF11,ITGA7,METTL7<br>B,MMP19,ORMDL2,RDH5,ENSBTAG00000009049                                          |
| 5 | 57,825,000 | 57,975,000 | 772 | 886  | 0.386745184  | BLOC1S1,CD63,GDF11,ITGA7,METTL7B,OR10P1,RDH5,<br>ENSBTAG00000006605,ENSBTAG00000021621                                           |
| 5 | 57,900,000 | 58,050,000 | 773 | 1393 | 0.326087524  | METTL7B,OR10P1,OR2AP1,ENSBTAG00000006605,EN<br>SBTAG00000018506,ENSBTAG00000021621                                               |
| 5 | 57,975,000 | 58,125,000 | 774 | 1340 | 0.129584133  | OR2AP1,ENSBTAG00000018506,ENSBTAG000000211<br>22,ENSBTAG00000037758,ENSBTAG00000047733                                           |
| 5 | 58,050,000 | 58,200,000 | 775 | 1195 | 0.354092155  | ENSBTAG00000021122,ENSBTAG00000037758,ENSBT<br>AG00000047733,ENSBTAG00000047931                                                  |
| 5 | 58,125,000 | 58,275,000 | 776 | 1729 | 0.783233252  | ENSBTAG00000037842,ENSBTAG00000047931,ENSBT<br>AG00000047980                                                                     |
| 5 | 58,200,000 | 58,350,000 | 777 | 1882 | 0.838510933  | ENSBTAG00000037842,ENSBTAG00000047980                                                                                            |
| 5 | 58,275,000 | 58,425,000 | 778 | 1352 | 0.477297104  | ENSBTAG00000047825                                                                                                               |
| 5 | 58,350,000 | 58,500,000 | 779 | 1368 | 0.805381769  | ENSBTAG00000021460,ENSBTAG00000024798,ENSBT<br>AG00000047825                                                                     |
| 5 | 58,425,000 | 58,575,000 | 780 | 1307 | 0.616016102  | ENSBTAG00000021460,ENSBTAG00000024798,ENSBT<br>AG00000046778,ENSBTAG00000048295                                                  |
| 5 | 58,500,000 | 58,650,000 | 781 | 1168 | -0.774453744 | OR6C2,ENSBTAG00000046778,ENSBTAG0000004729<br>2,ENSBTAG00000048295                                                               |
| 5 | 58,575,000 | 58,725,000 | 782 | 1191 | -0.063875467 | OR6C2,ENSBTAG00000047292                                                                                                         |
| 5 | 58,650,000 | 58,800,000 | 783 | 1486 | -0.145777018 | ENSBTAG00000026030,ENSBTAG00000031111,ENSBT<br>AG00000038521                                                                     |
| 5 | 58,725,000 | 58,875,000 | 784 | 1831 | 0.250979428  | OR6C76,ENSBTAG00000026030,ENSBTAG000000311<br>11,ENSBTAG00000038521                                                              |
| 5 | 58,800,000 | 58,950,000 | 785 | 1915 | 1.026118039  | OR6C75,OR6C76,ENSBTAG00000048224                                                                                                 |
| 5 | 58,875,000 | 59,025,000 | 786 | 1574 | 0.671493751  | OR6C75,ENSBTAG00000045684,ENSBTAG000000482<br>24                                                                                 |
| 5 | 58,950,000 | 59,100,000 | 787 | 1937 | -1.017908124 | ENSBTAG00000045684,ENSBTAG00000046994                                                                                            |
| 5 | 59,025,000 | 59,175,000 | 788 | 2636 | -1.133083799 | OR6C1,ENSBTAG00000046994,ENSBTAG0000004823<br>3                                                                                  |
| 5 | 59,100,000 | 59,250,000 | 789 | 2405 | -0.384106734 | OR6C1,ENSBTAG00000046016,ENSBTAG0000004710<br>9,ENSBTAG00000048233                                                               |
| 5 | 59,175,000 | 59,325,000 | 790 | 1760 | 0.294048802  | ENSBTAG00000045816,ENSBTAG00000045922,ENSBT<br>AG00000046016,ENSBTAG00000047056,ENSBTAG000<br>00047109,ENSBTAG00000048277        |
| 5 | 59,250,000 | 59,400,000 | 791 | 1002 | 0.689916267  | ENSBTAG00000045752,ENSBTAG00000045816,ENSBT<br>AG00000045922,ENSBTAG00000047056,ENSBTAG000<br>00048277                           |
| 5 | 59,325,000 | 59,475,000 | 792 | 656  | 0.216937342  | ENSBTAG00000002913,ENSBTAG00000045752,ENSBT<br>AG00000047890                                                                     |
| 5 | 59,400,000 | 59,550,000 | 793 | 576  | 0.453609592  | ENSBTAG00000002913,ENSBTAG00000031099,ENSBT<br>AG00000046446,ENSBTAG00000047890                                                  |
| 5 | 59,475,000 | 59,625,000 | 794 | 816  | 0.768408483  | ENSBTAG00000026078,ENSBTAG00000031097,ENSBT<br>AG00000031099,ENSBTAG00000046446                                                  |
| 5 | 59,550,000 | 59,700,000 | 795 | 1323 | -0.009717948 | OR10A7,ENSBTAG00000026078,ENSBTAG000000310<br>96,ENSBTAG00000031097,ENSBTAG00000047259,EN<br>SBTAG00000047619,ENSBTAG00000047967 |
| 5 | 59,625,000 | 59,775,000 | 796 | 1516 | -0.780175226 | OR10A7,ENSBTAG00000031096,ENSBTAG000000376<br>29,ENSBTAG00000047259,ENSBTAG00000047619,EN<br>SBTAG00000047967                    |
| 5 | 59,700,000 | 59,850,000 | 797 | 1595 | -1.313368349 | ENSBTAG00000037629,ENSBTAG00000038567,ENSBT<br>AG00000046639                                                                     |

|   |            |            |     |      |              |                                                                                                |
|---|------------|------------|-----|------|--------------|------------------------------------------------------------------------------------------------|
| 5 | 59,775,000 | 59,925,000 | 798 | 1770 | -1.195128629 | ENSBTAG00000038567,ENSBTAG00000045722,ENSBTAG00000046599,ENSBTAG00000046639,ENSBTAG00000047886 |
| 5 | 59,850,000 | 60,000,000 | 799 | 1532 | -0.436845334 | ENSBTAG00000045722,ENSBTAG00000046599,ENSBTAG00000046610,ENSBTAG00000047886                    |
| 5 | 59,925,000 | 60,075,000 | 800 | 1056 | -0.376849559 | ENSBTAG00000046317,ENSBTAG00000046610,ENSBTAG00000046884                                       |
| 5 | 60,000,000 | 60,150,000 | 801 | 1178 | 0.537356634  | ENSBTAG00000045807,ENSBTAG00000045982,ENSBTAG00000046317,ENSBTAG00000046761,ENSBTAG00000046884 |
| 5 | 60,075,000 | 60,225,000 | 802 | 1287 | 0.614689719  | ENSBTAG00000045807,ENSBTAG00000045982,ENSBTAG00000046761,ENSBTAG00000047631                    |
| 5 | 60,150,000 | 60,300,000 | 803 | 1045 | 0.623854859  | NEUROD4,TESPA1,ENSBTAG00000047631                                                              |
| 5 | 60,225,000 | 60,375,000 | 804 | 1139 | 0.775025918  | NEUROD4,NTN4,TESPA1                                                                            |
| 5 | 60,300,000 | 60,450,000 | 805 | 1199 | 1.046799517  | NTN4,TESPA1                                                                                    |
| 5 | 60,375,000 | 60,525,000 | 806 | 762  | 1.07228032   | NTN4                                                                                           |
| 5 | 60,450,000 | 60,600,000 | 807 | 863  | -0.067684299 | AMDHD1,CCDC38,NTN4,SNRPF                                                                       |
| 5 | 60,525,000 | 60,675,000 | 808 | 1177 | -1.092631413 | AMDHD1,CCDC38,HAL,LTA4H,SNRPF                                                                  |
| 5 | 60,600,000 | 60,750,000 | 809 | 861  | -1.153564276 | AMDHD1,HAL,LTA4H                                                                               |
| 5 | 60,675,000 | 60,825,000 | 810 | 562  | 0.120132571  | ELK3,LTA4H                                                                                     |
| 5 | 60,750,000 | 60,900,000 | 811 | 403  | 0.098173701  | CDK17,ELK3                                                                                     |
| 5 | 60,825,000 | 60,975,000 | 812 | 324  | -0.465104979 | CDK17,ELK3                                                                                     |
| 5 | 60,900,000 | 61,050,000 | 813 | 389  | 0.128410586  | CDK17                                                                                          |
| 5 | 60,975,000 | 61,125,000 | 814 | 576  | -3.450708412 | C12orf55,CDK17                                                                                 |
| 5 | 61,050,000 | 61,200,000 | 815 | 585  | -2.227668881 | C12orf55                                                                                       |
| 5 | 61,125,000 | 61,275,000 | 816 | 631  | 1.536581382  | C12orf55,ENSBTAG00000015792                                                                    |
| 5 | 61,200,000 | 61,350,000 | 817 | 682  | 1.382488058  | ENSBTAG00000015792                                                                             |
| 5 | 61,275,000 | 61,425,000 | 818 | 687  | 0.887414823  | ENSBTAG00000015792                                                                             |
| 5 | 61,350,000 | 61,500,000 | 819 | 583  | 0.597323549  | NEDD1                                                                                          |
| 5 | 61,425,000 | 61,575,000 | 820 | 521  | -0.564982184 | NEDD1                                                                                          |
| 5 | 61,500,000 | 61,650,000 | 821 | 624  | -1.081789389 |                                                                                                |
| 5 | 61,575,000 | 61,725,000 | 822 | 543  | -0.632325757 |                                                                                                |
| 5 | 61,650,000 | 61,800,000 | 823 | 478  | -0.413217484 |                                                                                                |
| 5 | 61,725,000 | 61,875,000 | 824 | 669  | -0.362697098 |                                                                                                |
| 5 | 61,800,000 | 61,950,000 | 825 | 743  | 0.184339225  |                                                                                                |
| 5 | 61,875,000 | 62,025,000 | 826 | 662  | -0.079260247 |                                                                                                |
| 5 | 61,950,000 | 62,100,000 | 827 | 580  | -0.093549125 |                                                                                                |
| 5 | 62,025,000 | 62,175,000 | 828 | 527  | 0.622133702  |                                                                                                |
| 5 | 62,100,000 | 62,250,000 | 829 | 647  | 0.203829574  |                                                                                                |
| 5 | 62,175,000 | 62,325,000 | 830 | 768  | -0.545513724 |                                                                                                |
| 5 | 62,250,000 | 62,400,000 | 831 | 747  | -1.047612616 | ENSBTAG00000045919                                                                             |
| 5 | 62,325,000 | 62,475,000 | 832 | 646  | -1.586372513 | ENSBTAG00000045919                                                                             |
| 5 | 62,400,000 | 62,550,000 | 833 | 722  | -0.284374769 |                                                                                                |
| 5 | 62,475,000 | 62,625,000 | 834 | 709  | 0.990953389  |                                                                                                |
| 5 | 62,550,000 | 62,700,000 | 835 | 629  | -0.048678091 |                                                                                                |
| 5 | 62,625,000 | 62,775,000 | 836 | 547  | -0.577870776 |                                                                                                |
| 5 | 62,700,000 | 62,850,000 | 837 | 717  | 1.07328801   |                                                                                                |
| 5 | 62,775,000 | 62,925,000 | 838 | 1102 | 0.995275123  |                                                                                                |
| 5 | 62,850,000 | 63,000,000 | 839 | 827  | 0.561376697  |                                                                                                |
| 5 | 62,925,000 | 63,075,000 | 840 | 383  | 0.12739191   | TMPO                                                                                           |
| 5 | 63,000,000 | 63,150,000 | 841 | 335  | 0.696081812  | APAF1,IKBIP,SLC25A3,TMPO                                                                       |
| 5 | 63,075,000 | 63,225,000 | 842 | 415  | 0.500065115  | APAF1,IKBIP,SLC25A3,ENSBTAG00000017385                                                         |
| 5 | 63,150,000 | 63,300,000 | 843 | 489  | 0.408896843  | ANKS1B,APAF1,ENSBTAG00000017385                                                                |



|   |            |            |     |      |              |                                      |
|---|------------|------------|-----|------|--------------|--------------------------------------|
| 5 | 63,225,000 | 63,375,000 | 844 | 772  | 1.18583127   | ANKS1B                               |
| 5 | 63,300,000 | 63,450,000 | 845 | 794  | 1.002813048  | ANKS1B                               |
| 5 | 63,375,000 | 63,525,000 | 846 | 751  | -0.228305991 | ANKS1B                               |
| 5 | 63,450,000 | 63,600,000 | 847 | 992  | 0.61593199   | ANKS1B                               |
| 5 | 63,525,000 | 63,675,000 | 848 | 1042 | 0.941452802  | ANKS1B                               |
| 5 | 63,600,000 | 63,750,000 | 849 | 1139 | 0.63318778   | ANKS1B                               |
| 5 | 63,675,000 | 63,825,000 | 850 | 1186 | 0.429500602  |                                      |
| 5 | 63,750,000 | 63,900,000 | 851 | 1282 | 0.026781376  |                                      |
| 5 | 63,825,000 | 63,975,000 | 852 | 1514 | 0.248731428  |                                      |
| 5 | 63,900,000 | 64,050,000 | 853 | 1621 | 0.540585232  |                                      |
| 5 | 63,975,000 | 64,125,000 | 854 | 1307 | 0.384528009  |                                      |
| 5 | 64,050,000 | 64,200,000 | 855 | 916  | 0.42379162   |                                      |
| 5 | 64,125,000 | 64,275,000 | 856 | 932  | 0.522014638  | ENSBTAG00000013979                   |
| 5 | 64,200,000 | 64,350,000 | 857 | 874  | 0.569635471  | ENSBTAG00000013979                   |
| 5 | 64,275,000 | 64,425,000 | 858 | 827  | 0.699563424  | UHRF1BP1L                            |
| 5 | 64,350,000 | 64,500,000 | 859 | 1050 | 0.82490757   | UHRF1BP1L                            |
| 5 | 64,425,000 | 64,575,000 | 860 | 1406 | 0.79474744   | ACTR6,SCYL2,UHRF1BP1L                |
| 5 | 64,500,000 | 64,650,000 | 861 | 1422 | 0.571448174  | ACTR6,SCYL2,SLC17A8                  |
| 5 | 64,575,000 | 64,725,000 | 862 | 968  | 0.44298649   | SCYL2,SLC17A8                        |
| 5 | 64,650,000 | 64,800,000 | 863 | 932  | -0.018354167 | NR1H4,SLC17A8                        |
| 5 | 64,725,000 | 64,875,000 | 864 | 1182 | 0.265520157  | GAS2L3,NR1H4                         |
| 5 | 64,800,000 | 64,950,000 | 865 | 909  | 0.797986554  | GAS2L3,NR1H4                         |
| 5 | 64,875,000 | 65,025,000 | 866 | 603  | 0.091595551  | ANO4                                 |
| 5 | 64,950,000 | 65,100,000 | 867 | 668  | -0.798280765 | ANO4                                 |
| 5 | 65,025,000 | 65,175,000 | 868 | 848  | -2.756482662 | ANO4                                 |
| 5 | 65,100,000 | 65,250,000 | 869 | 1004 | -1.773182666 | ANO4                                 |
| 5 | 65,175,000 | 65,325,000 | 870 | 1093 | 0.389029112  | ANO4                                 |
| 5 | 65,250,000 | 65,400,000 | 871 | 831  | 0.615381164  | ANO4,SMCT1,ENSBTAG00000047741        |
| 5 | 65,325,000 | 65,475,000 | 872 | 408  | 1.050176392  | ANO4,SMCT1,ENSBTAG00000047741        |
| 5 | 65,400,000 | 65,550,000 | 873 | 288  | 0.391261434  | SMCT1,UTP20                          |
| 5 | 65,475,000 | 65,625,000 | 874 | 513  | 0.43130894   | ARL1,UTP20                           |
| 5 | 65,550,000 | 65,700,000 | 875 | 746  | 0.084529615  | ARL1,SPIC,UTP20,ENSBTAG00000008020   |
| 5 | 65,625,000 | 65,775,000 | 876 | 603  | 0.120986185  | MYBPC1,SPIC,ENSBTAG00000008020       |
| 5 | 65,700,000 | 65,850,000 | 877 | 410  | 0.684785304  | MYBPC1                               |
| 5 | 65,775,000 | 65,925,000 | 878 | 643  | 0.041553446  | CHPT1,GNPTAB,MYBPC1,SYCP3            |
| 5 | 65,850,000 | 66,000,000 | 879 | 708  | 0.105278427  | CHPT1,GNPTAB,SYCP3                   |
| 5 | 65,925,000 | 66,075,000 | 880 | 624  | -0.015790004 | FLJ11259,GNPTAB                      |
| 5 | 66,000,000 | 66,150,000 | 881 | 675  | 0.046823181  | FLJ11259                             |
| 5 | 66,075,000 | 66,225,000 | 882 | 482  | 0.342860137  | FLJ11259,ENSBTAG00000000021          |
| 5 | 66,150,000 | 66,300,000 | 883 | 323  | 0.013809086  | NUP37,PARPBP,ENSBTAG00000000021      |
| 5 | 66,225,000 | 66,375,000 | 884 | 266  | -0.224474651 | NUP37,PARPBP,PMCH,ENSBTAG00000000021 |
| 5 | 66,300,000 | 66,450,000 | 885 | 392  | 0.020445961  | PARPBP,PMCH                          |
| 5 | 66,375,000 | 66,525,000 | 886 | 744  | 0.301648585  |                                      |
| 5 | 66,450,000 | 66,600,000 | 887 | 710  | 0.137118527  | IGF-I                                |
| 5 | 66,525,000 | 66,675,000 | 888 | 445  | -0.810299156 | IGF-I                                |
| 5 | 66,600,000 | 66,750,000 | 889 | 468  | -1.03880593  | IGF-I                                |
| 5 | 66,675,000 | 66,825,000 | 890 | 581  | 0.159101554  |                                      |
| 5 | 66,750,000 | 66,900,000 | 891 | 603  | -0.019527684 |                                      |
| 5 | 66,825,000 | 66,975,000 | 892 | 760  | -1.782052845 | PAH                                  |
| 5 | 66,900,000 | 67,050,000 | 893 | 646  | -2.053980229 | PAH                                  |
| 5 | 66,975,000 | 67,125,000 | 894 | 315  | -0.586917064 | ASCL1,PAH                            |
| 5 | 67,050,000 | 67,200,000 | 895 | 437  | -0.691186337 | ASCL1                                |
| 5 | 67,125,000 | 67,275,000 | 896 | 462  | -0.085046267 |                                      |

|   |            |            |     |      |              |                                                |
|---|------------|------------|-----|------|--------------|------------------------------------------------|
| 5 | 67,200,000 | 67,350,000 | 897 | 562  | 1.102205023  |                                                |
| 5 | 67,275,000 | 67,425,000 | 898 | 928  | 1.16311584   |                                                |
| 5 | 67,350,000 | 67,500,000 | 899 | 1121 | 1.15314776   |                                                |
| 5 | 67,425,000 | 67,575,000 | 900 | 1217 | 0.823758481  |                                                |
| 5 | 67,500,000 | 67,650,000 | 901 | 1639 | 1.004827872  | STAB2                                          |
| 5 | 67,575,000 | 67,725,000 | 902 | 1807 | 0.931898361  | STAB2                                          |
| 5 | 67,650,000 | 67,800,000 | 903 | 1542 | -0.107071632 | NT5DC3,STAB2                                   |
| 5 | 67,725,000 | 67,875,000 | 904 | 1200 | -0.973006939 | NT5DC3,STAB2,ENSBTAG00000027899                |
| 5 | 67,800,000 | 67,950,000 | 905 | 1040 | -0.245654883 | HSP90B1,NT5DC3,ENSBTAG00000027899              |
| 5 | 67,875,000 | 68,025,000 | 906 | 738  | 0.58258616   | C12orf73,GLT8D2,HSP90B1,TDG,ENSBTAG00000027899 |
| 5 | 67,950,000 | 68,100,000 | 907 | 356  | 0.995921899  | C12orf73,GLT8D2,HCFC2,HSP90B1,TDG              |
| 5 | 68,025,000 | 68,175,000 | 908 | 507  | 0.651972313  | GLT8D2,HCFC2,NFYB                              |
| 5 | 68,100,000 | 68,250,000 | 909 | 767  | 0.006337339  | NFYB,TXNRD1                                    |
| 5 | 68,175,000 | 68,325,000 | 910 | 1208 | 0.670566936  | TXNRD1                                         |
| 5 | 68,250,000 | 68,400,000 | 911 | 1101 | 0.741873146  | CHST11,TXNRD1                                  |
| 5 | 68,325,000 | 68,475,000 | 912 | 649  | 0.227290629  | CHST11                                         |
| 5 | 68,400,000 | 68,550,000 | 913 | 871  | 0.3700323    | CHST11                                         |
| 5 | 68,475,000 | 68,625,000 | 914 | 1150 | -0.210272217 | CHST11                                         |
| 5 | 68,550,000 | 68,700,000 | 915 | 829  | 0.033171943  | CHST11                                         |
| 5 | 68,625,000 | 68,775,000 | 916 | 473  | 1.346780108  | CHST11,SLC41A2                                 |
| 5 | 68,700,000 | 68,850,000 | 917 | 713  | 1.283520716  | SLC41A2                                        |
| 5 | 68,775,000 | 68,925,000 | 918 | 1100 | 0.833680289  | ALDH1L2,C5H12orf45,SLC41A2                     |
| 5 | 68,850,000 | 69,000,000 | 919 | 777  | -0.444790812 | ALDH1L2,C5H12orf45,KIAA1033                    |
| 5 | 68,925,000 | 69,075,000 | 920 | 513  | -0.44293866  | ALDH1L2,APPL2,KIAA1033                         |
| 5 | 69,000,000 | 69,150,000 | 921 | 805  | 0.609756931  | APPL2,KIAA1033                                 |
| 5 | 69,075,000 | 69,225,000 | 922 | 716  | 0.983960535  | APPL2,C12orf75,ENSBTAG00000047983              |
| 5 | 69,150,000 | 69,300,000 | 923 | 534  | 0.761409005  | C12orf75,ENSBTAG00000047983                    |
| 5 | 69,225,000 | 69,375,000 | 924 | 595  | 0.545128376  |                                                |
| 5 | 69,300,000 | 69,450,000 | 925 | 770  | 0.70797418   |                                                |
| 5 | 69,375,000 | 69,525,000 | 926 | 857  | 0.622859054  |                                                |
| 5 | 69,450,000 | 69,600,000 | 927 | 785  | 0.35240842   |                                                |
| 5 | 69,525,000 | 69,675,000 | 928 | 647  | 0.001638468  |                                                |
| 5 | 69,600,000 | 69,750,000 | 929 | 657  | -0.154179457 |                                                |
| 5 | 69,675,000 | 69,825,000 | 930 | 837  | -0.296920208 | NUAK1                                          |
| 5 | 69,750,000 | 69,900,000 | 931 | 889  | 0.079506883  | NUAK1                                          |
| 5 | 69,825,000 | 69,975,000 | 932 | 803  | -0.252813041 | CKAP4,NUAK1                                    |
| 5 | 69,900,000 | 70,050,000 | 933 | 796  | -1.186932231 | CKAP4,TCP11L2                                  |
| 5 | 69,975,000 | 70,125,000 | 934 | 609  | -1.49334871  | CKAP4,POLR3B,TCP11L2                           |
| 5 | 70,050,000 | 70,200,000 | 935 | 261  | -3.901983485 | POLR3B,TCP11L2                                 |
| 5 | 70,125,000 | 70,275,000 | 936 | 261  | -7.478404119 | POLR3B                                         |
| 5 | 70,200,000 | 70,350,000 | 937 | 339  | -6.659324922 | RFX4                                           |
| 5 | 70,275,000 | 70,425,000 | 938 | 234  | -3.262660362 | RFX4,RIC8B                                     |
| 5 | 70,350,000 | 70,500,000 | 939 | 147  | -3.794440869 | RFX4,RIC8B                                     |
| 5 | 70,425,000 | 70,575,000 | 940 | 217  | -3.234859805 | RIC8B,TMEM263                                  |
| 5 | 70,500,000 | 70,650,000 | 941 | 305  | -1.332942867 | CRY1,MTERF2,RIC8B,TMEM263                      |
| 5 | 70,575,000 | 70,725,000 | 942 | 432  | -0.487874535 | CRY1,MTERF2,TMEM263                            |
| 5 | 70,650,000 | 70,800,000 | 943 | 596  | -0.103430804 | CRY1                                           |
| 5 | 70,725,000 | 70,875,000 | 944 | 611  | 0.171049639  |                                                |
| 5 | 70,800,000 | 70,950,000 | 945 | 602  | 0.338455696  | BTBD11                                         |
| 5 | 70,875,000 | 71,025,000 | 946 | 553  | -0.28550245  | BTBD11                                         |
| 5 | 70,950,000 | 71,100,000 | 947 | 720  | -0.443273774 | BTBD11                                         |
| 5 | 71,025,000 | 71,175,000 | 948 | 991  | -0.045274282 | BTBD11                                         |

|   |            |            |     |      |              |                                                                    |
|---|------------|------------|-----|------|--------------|--------------------------------------------------------------------|
| 5 | 71,100,000 | 71,250,000 | 949 | 1200 | 0.557330316  | BTBD11                                                             |
| 5 | 71,175,000 | 71,325,000 | 950 | 1456 | 1.107571481  | BTBD11,PRDM4,PWP1                                                  |
| 5 | 71,250,000 | 71,400,000 | 951 | 1168 | 1.124129884  | ASCL4,BPIFC,BTBD11,PRDM4,PWP1,RTCB                                 |
| 5 | 71,325,000 | 71,475,000 | 952 | 1096 | 1.071097229  | ASCL4,BPIFC,FBXO7,PRDM4,RTCB                                       |
| 5 | 71,400,000 | 71,550,000 | 953 | 1361 | 1.105081983  | BPIFC,FBXO7,SYN3                                                   |
| 5 | 71,475,000 | 71,625,000 | 954 | 1585 | 0.631643223  | SYN3                                                               |
| 5 | 71,550,000 | 71,700,000 | 955 | 2146 | 0.628685827  | SYN3                                                               |
| 5 | 71,625,000 | 71,775,000 | 956 | 1797 | 0.73989457   | SYN3,TIMP3                                                         |
| 5 | 71,700,000 | 71,850,000 | 957 | 892  | 0.652374338  | SYN3,TIMP3                                                         |
| 5 | 71,775,000 | 71,925,000 | 958 | 663  | 0.522704878  | SYN3,TIMP3                                                         |
| 5 | 71,850,000 | 72,000,000 | 959 | 703  | 0.253800825  | SYN3                                                               |
| 5 | 71,925,000 | 72,075,000 | 960 | 697  | 0.387162653  | MGC137211,SYN3,ENSBTAG00000030683                                  |
| 5 | 72,000,000 | 72,150,000 | 961 | 1079 | 0.698587904  | MGC137014,MGC137211,ENSBTAG00000030683                             |
| 5 | 72,075,000 | 72,225,000 | 962 | 1371 | 0.73713554   | LARGE,MGC137014                                                    |
| 5 | 72,150,000 | 72,300,000 | 963 | 1049 | 0.633978915  | LARGE                                                              |
| 5 | 72,225,000 | 72,375,000 | 964 | 1092 | 0.765222078  | LARGE                                                              |
| 5 | 72,300,000 | 72,450,000 | 965 | 1210 | 0.800322836  | LARGE                                                              |
| 5 | 72,375,000 | 72,525,000 | 966 | 893  | 0.735797535  | LARGE                                                              |
| 5 | 72,450,000 | 72,600,000 | 967 | 1150 | 1.324676789  | LARGE                                                              |
| 5 | 72,525,000 | 72,675,000 | 968 | 1460 | 1.185839297  | LARGE                                                              |
| 5 | 72,600,000 | 72,750,000 | 969 | 909  | 0.791629612  | LARGE                                                              |
| 5 | 72,675,000 | 72,825,000 | 970 | 489  | 1.1115452    | LARGE                                                              |
| 5 | 72,750,000 | 72,900,000 | 971 | 619  | 0.888094468  | LARGE                                                              |
| 5 | 72,825,000 | 72,975,000 | 972 | 892  | 0.601095373  |                                                                    |
| 5 | 72,900,000 | 73,050,000 | 973 | 933  | 0.381743367  |                                                                    |
| 5 | 72,975,000 | 73,125,000 | 974 | 979  | -0.628380331 |                                                                    |
| 5 | 73,050,000 | 73,200,000 | 975 | 1327 | -0.046555669 |                                                                    |
| 5 | 73,125,000 | 73,275,000 | 976 | 1499 | 0.598802313  |                                                                    |
| 5 | 73,200,000 | 73,350,000 | 977 | 1391 | 0.522756761  |                                                                    |
| 5 | 73,275,000 | 73,425,000 | 978 | 911  | 0.728342239  |                                                                    |
| 5 | 73,350,000 | 73,500,000 | 979 | 811  | -0.359861127 |                                                                    |
| 5 | 73,425,000 | 73,575,000 | 980 | 882  | -0.643043384 |                                                                    |
| 5 | 73,500,000 | 73,650,000 | 981 | 976  | 0.714420609  |                                                                    |
| 5 | 73,575,000 | 73,725,000 | 982 | 991  | 0.669678396  | ISX                                                                |
| 5 | 73,650,000 | 73,800,000 | 983 | 755  | -0.662654024 | ISX                                                                |
| 5 | 73,725,000 | 73,875,000 | 984 | 942  | -1.145334592 | HMGXB4,ISX                                                         |
| 5 | 73,800,000 | 73,950,000 | 985 | 1021 | 0.085601265  | HMGXB4,TOM1                                                        |
| 5 | 73,875,000 | 74,025,000 | 986 | 869  | 0.661273593  | HMGXB4,HMOX1,MCM5,TOM1                                             |
| 5 | 73,950,000 | 74,100,000 | 987 | 1095 | 0.479447111  | HMOX1,MCM5                                                         |
| 5 | 74,025,000 | 74,175,000 | 988 | 1004 | 0.462433309  | MB,RASD2                                                           |
| 5 | 74,100,000 | 74,250,000 | 989 | 634  | 0.991055531  | APOL6,MB,RASD2                                                     |
| 5 | 74,175,000 | 74,325,000 | 990 | 579  | 1.428022143  | APOL6,MB,RBFOX2                                                    |
| 5 | 74,250,000 | 74,400,000 | 991 | 389  | 1.389065901  | RBFOX2                                                             |
| 5 | 74,325,000 | 74,475,000 | 992 | 340  | 1.075483705  | RBFOX2                                                             |
| 5 | 74,400,000 | 74,550,000 | 993 | 337  | 0.992459948  | RBFOX2                                                             |
| 5 | 74,475,000 | 74,625,000 | 994 | 389  | 0.496286756  |                                                                    |
| 5 | 74,550,000 | 74,700,000 | 995 | 873  | -0.320700722 | ENSBTAG00000037799,ENSBTAG00000046392                              |
| 5 | 74,625,000 | 74,775,000 | 996 | 994  | -0.169922421 | ENSBTAG00000037799,ENSBTAG00000046392                              |
| 5 | 74,700,000 | 74,850,000 | 997 | 784  | 0.616518901  |                                                                    |
| 5 | 74,775,000 | 74,925,000 | 998 | 1717 | 0.459852236  | ENSBTAG00000039524                                                 |
| 5 | 74,850,000 | 75,000,000 | 999 | 2057 | 0.245596301  | APOL3,ENSBTAG00000012192,ENSBTAG00000038652<br>,ENSBTAG00000039524 |

|   |            |            |      |      |              |                                             |
|---|------------|------------|------|------|--------------|---------------------------------------------|
| 5 | 74,925,000 | 75,075,000 | 1000 | 1741 | 0.554158888  | APOL3,ENSBTAG00000012192,ENSBTAG00000038652 |
| 5 | 75,000,000 | 75,150,000 | 1001 | 1652 | 0.57811398   | APOL3,MYH9,ENSBTAG00000012192               |
| 5 | 75,075,000 | 75,225,000 | 1002 | 1278 | 0.02161395   | APOL3,MYH9                                  |
| 5 | 75,150,000 | 75,300,000 | 1003 | 1240 | 0.938289462  | EIF3D,FOXRED2,MYH9,TXN2                     |
| 5 | 75,225,000 | 75,375,000 | 1004 | 1197 | 1.536492004  | CACNG2,EIF3D,FOXRED2,TXN2                   |
| 5 | 75,300,000 | 75,450,000 | 1005 | 1020 | 1.486314755  | CACNG2,EIF3D                                |
| 5 | 75,375,000 | 75,525,000 | 1006 | 922  | 1.418906706  | CACNG2,IFT27,ENSBTAG00000008137             |
| 5 | 75,450,000 | 75,600,000 | 1007 | 1132 | 0.926595584  | CACNG2,IFT27,PVALB,ENSBTAG00000008137       |
| 5 | 75,525,000 | 75,675,000 | 1008 | 1376 | 0.667472293  | IFT27,NCF4,PVALB                            |
| 5 | 75,600,000 | 75,750,000 | 1009 | 1464 | 0.521886155  | CSF2RB,NCF4                                 |
| 5 | 75,675,000 | 75,825,000 | 1010 | 1164 | 0.396573983  | CSF2RB,MGC133880,MPST,TST                   |
| 5 | 75,750,000 | 75,900,000 | 1011 | 862  | 0.701053534  | KCTD17,MGC133880,MPST,TMPRSS6,TST           |
| 5 | 75,825,000 | 75,975,000 | 1012 | 989  | 1.135250944  | IL2RB,KCTD17,MPST,TMPRSS6                   |
| 5 | 75,900,000 | 76,050,000 | 1013 | 1042 | 0.906683093  | C1QTNF6,IL2RB,RAC2,SSTR3,TMPRSS6            |
| 5 | 75,975,000 | 76,125,000 | 1014 | 967  | 0.499659589  | C1QTNF6,CYTH4,RAC2,SSTR3                    |
| 5 | 76,050,000 | 76,200,000 | 1015 | 609  | 0.440992564  | CYTH4,ELFN2,RAC2                            |
| 5 | 76,125,000 | 76,275,000 | 1016 | 364  | 0.185685107  | ELFN2,MFNG                                  |
| 5 | 76,200,000 | 76,350,000 | 1017 | 808  | 0.420831272  | CARD10,MFNG                                 |
| 5 | 76,275,000 | 76,425,000 | 1018 | 1071 | 0.300144507  | CARD10,MFNG,USP18                           |
| 5 | 76,350,000 | 76,500,000 | 1019 | 1043 | 0.475992428  | ALG10,USP18                                 |
| 5 | 76,425,000 | 76,575,000 | 1020 | 821  | 0.76605487   | ALG10                                       |
| 5 | 76,500,000 | 76,650,000 | 1021 | 448  | 0.475213597  | ALG10                                       |
| 5 | 76,575,000 | 76,725,000 | 1022 | 408  | 0.180899269  | SYT10                                       |
| 5 | 76,650,000 | 76,800,000 | 1023 | 393  | 0.031545535  | SYT10                                       |
| 5 | 76,725,000 | 76,875,000 | 1024 | 402  | 0.33938931   | SYT10                                       |
| 5 | 76,800,000 | 76,950,000 | 1025 | 464  | 0.355200145  | SYT10                                       |
| 5 | 76,875,000 | 77,025,000 | 1026 | 616  | 0.151201997  |                                             |
| 5 | 76,950,000 | 77,100,000 | 1027 | 983  | 0.798192664  |                                             |
| 5 | 77,025,000 | 77,175,000 | 1028 | 1297 | 1.140271863  |                                             |
| 5 | 77,100,000 | 77,250,000 | 1029 | 1360 | 0.853865517  |                                             |
| 5 | 77,175,000 | 77,325,000 | 1030 | 1284 | 0.460916006  |                                             |
| 5 | 77,250,000 | 77,400,000 | 1031 | 1176 | 0.95627718   | PKP2                                        |
| 5 | 77,325,000 | 77,475,000 | 1032 | 815  | 1.262729344  | PKP2                                        |
| 5 | 77,400,000 | 77,550,000 | 1033 | 656  | 1.462695459  | DNM1L,PKP2,YARS2                            |
| 5 | 77,475,000 | 77,625,000 | 1034 | 920  | 1.347924634  | DNM1L,FGD4,YARS2                            |
| 5 | 77,550,000 | 77,700,000 | 1035 | 743  | 1.062977314  | DNM1L,FGD4                                  |
| 5 | 77,625,000 | 77,775,000 | 1036 | 680  | -0.001043716 | FGD4                                        |
| 5 | 77,700,000 | 77,850,000 | 1037 | 617  | -1.539137468 |                                             |
| 5 | 77,775,000 | 77,925,000 | 1038 | 350  | -1.944673077 | BICD1                                       |
| 5 | 77,850,000 | 78,000,000 | 1039 | 879  | 1.212263932  | BICD1                                       |
| 5 | 77,925,000 | 78,075,000 | 1040 | 1127 | 1.108373196  |                                             |
| 5 | 78,000,000 | 78,150,000 | 1041 | 696  | 0.269192414  |                                             |
| 5 | 78,075,000 | 78,225,000 | 1042 | 835  | -0.31171636  |                                             |
| 5 | 78,150,000 | 78,300,000 | 1043 | 956  | -1.146729494 | KIAA1551                                    |
| 5 | 78,225,000 | 78,375,000 | 1044 | 793  | -2.048599052 | KIAA1551                                    |
| 5 | 78,300,000 | 78,450,000 | 1045 | 1301 | -1.63638449  | KIAA1551                                    |
| 5 | 78,375,000 | 78,525,000 | 1046 | 1336 | -1.387943118 |                                             |
| 5 | 78,450,000 | 78,600,000 | 1047 | 1079 | -0.207007124 | AMN1                                        |
| 5 | 78,525,000 | 78,675,000 | 1048 | 1168 | -0.27494051  | AMN1,METTTL20                               |
| 5 | 78,600,000 | 78,750,000 | 1049 | 766  | -1.609006104 | AMN1,METTTL20                               |
| 5 | 78,675,000 | 78,825,000 | 1050 | 460  | -1.756497053 |                                             |
| 5 | 78,750,000 | 78,900,000 | 1051 | 674  | -0.181862635 | DENND5B                                     |

|   |            |            |      |      |              |                                    |
|---|------------|------------|------|------|--------------|------------------------------------|
| 5 | 78,825,000 | 78,975,000 | 1052 | 915  | -0.657947686 | DENND5B                            |
| 5 | 78,900,000 | 79,050,000 | 1053 | 662  | -1.096837961 | DENND5B,FAM60A                     |
| 5 | 78,975,000 | 79,125,000 | 1054 | 501  | -0.194973212 | FAM60A                             |
| 5 | 79,050,000 | 79,200,000 | 1055 | 435  | 0.677958536  | CAPRIN2,FAM60A                     |
| 5 | 79,125,000 | 79,275,000 | 1056 | 402  | 0.861631144  | CAPRIN2,IPO8                       |
| 5 | 79,200,000 | 79,350,000 | 1057 | 508  | 0.919163172  | CAPRIN2,IPO8                       |
| 5 | 79,275,000 | 79,425,000 | 1058 | 420  | 0.229430901  | IPO8                               |
| 5 | 79,350,000 | 79,500,000 | 1059 | 333  | -1.036775627 |                                    |
| 5 | 79,425,000 | 79,575,000 | 1060 | 261  | -1.028401486 |                                    |
| 5 | 79,500,000 | 79,650,000 | 1061 | 471  | -0.189778227 |                                    |
| 5 | 79,575,000 | 79,725,000 | 1062 | 938  | -1.019248042 |                                    |
| 5 | 79,650,000 | 79,800,000 | 1063 | 1226 | -2.191516423 |                                    |
| 5 | 79,725,000 | 79,875,000 | 1064 | 1200 | -1.769623356 |                                    |
| 5 | 79,800,000 | 79,950,000 | 1065 | 918  | -0.386211576 |                                    |
| 5 | 79,875,000 | 80,025,000 | 1066 | 933  | -0.088565061 |                                    |
| 5 | 79,950,000 | 80,100,000 | 1067 | 1156 | -0.030963148 |                                    |
| 5 | 80,025,000 | 80,175,000 | 1068 | 966  | 0.010408465  |                                    |
| 5 | 80,100,000 | 80,250,000 | 1069 | 688  | -0.324735595 | TMTC1                              |
| 5 | 80,175,000 | 80,325,000 | 1070 | 452  | 0.092044919  | TMTC1                              |
| 5 | 80,250,000 | 80,400,000 | 1071 | 356  | 0.541014064  | TMTC1                              |
| 5 | 80,325,000 | 80,475,000 | 1072 | 616  | 0.481057688  | TMTC1                              |
| 5 | 80,400,000 | 80,550,000 | 1073 | 868  | -0.265485599 | OVCH1,TMTC1                        |
| 5 | 80,475,000 | 80,625,000 | 1074 | 797  | -0.919125339 | ERGIC2,OVCH1,TMTC1                 |
| 5 | 80,550,000 | 80,700,000 | 1075 | 515  | -0.849278862 | ERGIC2,FAR2,OVCH1                  |
| 5 | 80,625,000 | 80,775,000 | 1076 | 331  | -0.989910072 | ERGIC2,FAR2                        |
| 5 | 80,700,000 | 80,850,000 | 1077 | 279  | -0.014927211 | FAR2                               |
| 5 | 80,775,000 | 80,925,000 | 1078 | 452  | -1.003732351 |                                    |
| 5 | 80,850,000 | 81,000,000 | 1079 | 1127 | -0.641230369 |                                    |
| 5 | 80,925,000 | 81,075,000 | 1080 | 1216 | -0.160656243 |                                    |
| 5 | 81,000,000 | 81,150,000 | 1081 | 794  | 0.439702665  |                                    |
| 5 | 81,075,000 | 81,225,000 | 1082 | 734  | 0.635030135  |                                    |
| 5 | 81,150,000 | 81,300,000 | 1083 | 512  | -1.350931138 |                                    |
| 5 | 81,225,000 | 81,375,000 | 1084 | 443  | -1.429543979 |                                    |
| 5 | 81,300,000 | 81,450,000 | 1085 | 620  | -0.021354495 |                                    |
| 5 | 81,375,000 | 81,525,000 | 1086 | 639  | 0.35399739   |                                    |
| 5 | 81,450,000 | 81,600,000 | 1087 | 472  | 0.354343448  | CCDC91                             |
| 5 | 81,525,000 | 81,675,000 | 1088 | 371  | -0.297200132 | CCDC91                             |
| 5 | 81,600,000 | 81,750,000 | 1089 | 429  | -1.212475037 | CCDC91                             |
| 5 | 81,675,000 | 81,825,000 | 1090 | 451  | -0.701229061 | CCDC91                             |
| 5 | 81,750,000 | 81,900,000 | 1091 | 340  | -0.48874603  | CCDC91                             |
| 5 | 81,825,000 | 81,975,000 | 1092 | 244  | -1.24540242  | CCDC91                             |
| 5 | 81,900,000 | 82,050,000 | 1093 | 268  | -3.422198838 | CCDC91                             |
| 5 | 81,975,000 | 82,125,000 | 1094 | 384  | -6.705643673 | CCDC91                             |
| 5 | 82,050,000 | 82,200,000 | 1095 | 431  | -5.298997607 |                                    |
| 5 | 82,125,000 | 82,275,000 | 1096 | 426  | -0.44158299  | PTHLH                              |
| 5 | 82,200,000 | 82,350,000 | 1097 | 631  | -0.381763328 | PTHLH                              |
| 5 | 82,275,000 | 82,425,000 | 1098 | 707  | -0.979579446 |                                    |
| 5 | 82,350,000 | 82,500,000 | 1099 | 730  | 0.34694938   | KLHL42,MANSC4,MRPS35               |
| 5 | 82,425,000 | 82,575,000 | 1100 | 898  | 0.328861466  | KLHL42,MANSC4,MRPS35,PPFIBP1,REP15 |
| 5 | 82,500,000 | 82,650,000 | 1101 | 1045 | 0.082238075  | MRPS35,PPFIBP1,REP15               |
| 5 | 82,575,000 | 82,725,000 | 1102 | 916  | 0.407608598  | C12orf71,PPFIBP1                   |
| 5 | 82,650,000 | 82,800,000 | 1103 | 762  | 0.203231832  | C12orf71,SMCO2                     |
| 5 | 82,725,000 | 82,875,000 | 1104 | 1057 | 0.255160673  | SMCO2                              |

|   |            |            |      |      |              |                                  |
|---|------------|------------|------|------|--------------|----------------------------------|
| 5 | 82,800,000 | 82,950,000 | 1105 | 1077 | -0.005669259 | ARNTL2,SMCO2                     |
| 5 | 82,875,000 | 83,025,000 | 1106 | 831  | -0.512385487 | ARNTL2,STK38L                    |
| 5 | 82,950,000 | 83,100,000 | 1107 | 660  | -0.476237508 | STK38L                           |
| 5 | 83,025,000 | 83,175,000 | 1108 | 563  | -0.533046075 | STK38L                           |
| 5 | 83,100,000 | 83,250,000 | 1109 | 576  | 0.352654331  | MED21,TM7SF3                     |
| 5 | 83,175,000 | 83,325,000 | 1110 | 499  | 0.565950758  | C5H12ORF11,FGFR1OP2,MED21,TM7SF3 |
| 5 | 83,250,000 | 83,400,000 | 1111 | 377  | 0.954247847  | C5H12ORF11,FGFR1OP2,ITPR2        |
| 5 | 83,325,000 | 83,475,000 | 1112 | 399  | 0.962692583  | ITPR2                            |
| 5 | 83,400,000 | 83,550,000 | 1113 | 594  | 0.829794351  | ITPR2                            |
| 5 | 83,475,000 | 83,625,000 | 1114 | 749  | 0.791437344  | ITPR2                            |
| 5 | 83,550,000 | 83,700,000 | 1115 | 668  | 0.507323764  | ITPR2                            |
| 5 | 83,625,000 | 83,775,000 | 1116 | 599  | 0.193625582  | ITPR2                            |
| 5 | 83,700,000 | 83,850,000 | 1117 | 740  | 0.637259703  | ITPR2                            |
| 5 | 83,775,000 | 83,925,000 | 1118 | 675  | 0.361470018  | ITPR2                            |
| 5 | 83,850,000 | 84,000,000 | 1119 | 561  | 0.393953093  | ITPR2                            |
| 5 | 83,925,000 | 84,075,000 | 1120 | 570  | 0.862848092  | ITPR2                            |
| 5 | 84,000,000 | 84,150,000 | 1121 | 407  | 0.38624363   | SSPN                             |
| 5 | 84,075,000 | 84,225,000 | 1122 | 474  | 0.585040313  | SSPN                             |
| 5 | 84,150,000 | 84,300,000 | 1123 | 667  | -0.372868513 | BHLHE41,C12ORF2                  |
| 5 | 84,225,000 | 84,375,000 | 1124 | 723  | -2.189252333 | BHLHE41,C12ORF2                  |
| 5 | 84,300,000 | 84,450,000 | 1125 | 662  | -1.179304241 | C12ORF2                          |
| 5 | 84,375,000 | 84,525,000 | 1126 | 652  | -1.537265156 |                                  |
| 5 | 84,450,000 | 84,600,000 | 1127 | 557  | -1.756920089 |                                  |
| 5 | 84,525,000 | 84,675,000 | 1128 | 528  | 0.779202913  |                                  |
| 5 | 84,600,000 | 84,750,000 | 1129 | 948  | 0.576077556  |                                  |
| 5 | 84,675,000 | 84,825,000 | 1130 | 1263 | 0.666259613  | ENSBTAG00000046108               |
| 5 | 84,750,000 | 84,900,000 | 1131 | 814  | 0.805846597  | LMNTD1,ENSBTAG00000046108        |
| 5 | 84,825,000 | 84,975,000 | 1132 | 615  | -1.722665199 | LMNTD1                           |
| 5 | 84,900,000 | 85,050,000 | 1133 | 656  | -1.872310297 |                                  |
| 5 | 84,975,000 | 85,125,000 | 1134 | 466  | -0.513739409 |                                  |
| 5 | 85,050,000 | 85,200,000 | 1135 | 523  | -1.207446769 | KRAS                             |
| 5 | 85,125,000 | 85,275,000 | 1136 | 556  | -2.113710643 | CASC1,KRAS,LYRM5                 |
| 5 | 85,200,000 | 85,350,000 | 1137 | 436  | -1.431191328 | CASC1,KRAS,LRMP,LYRM5            |
| 5 | 85,275,000 | 85,425,000 | 1138 | 548  | 0.307064255  | CASC1,LRMP                       |
| 5 | 85,350,000 | 85,500,000 | 1139 | 1159 | -0.026876506 | BCAT1,LRMP                       |
| 5 | 85,425,000 | 85,575,000 | 1140 | 1480 | 0.227194464  | BCAT1                            |
| 5 | 85,500,000 | 85,650,000 | 1141 | 1325 | 0.522249025  | BCAT1                            |
| 5 | 85,575,000 | 85,725,000 | 1142 | 935  | -0.397698916 | BCAT1                            |
| 5 | 85,650,000 | 85,800,000 | 1143 | 865  | -0.627775212 |                                  |
| 5 | 85,725,000 | 85,875,000 | 1144 | 973  | 0.356744112  |                                  |
| 5 | 85,800,000 | 85,950,000 | 1145 | 822  | 0.669531832  |                                  |
| 5 | 85,875,000 | 86,025,000 | 1146 | 830  | 0.766548333  |                                  |
| 5 | 85,950,000 | 86,100,000 | 1147 | 1030 | 0.609047433  |                                  |
| 5 | 86,025,000 | 86,175,000 | 1148 | 1101 | 0.2859857    |                                  |
| 5 | 86,100,000 | 86,250,000 | 1149 | 1141 | -0.170099194 |                                  |
| 5 | 86,175,000 | 86,325,000 | 1150 | 1211 | 0.376650678  |                                  |
| 5 | 86,250,000 | 86,400,000 | 1151 | 1050 | 0.748801261  |                                  |
| 5 | 86,325,000 | 86,475,000 | 1152 | 798  | 0.142498068  |                                  |
| 5 | 86,400,000 | 86,550,000 | 1153 | 639  | -0.898176797 |                                  |
| 5 | 86,475,000 | 86,625,000 | 1154 | 574  | -0.715137522 | SOX5                             |
| 5 | 86,550,000 | 86,700,000 | 1155 | 690  | 0.587789113  | SOX5                             |
| 5 | 86,625,000 | 86,775,000 | 1156 | 803  | 0.801709524  | SOX5                             |
| 5 | 86,700,000 | 86,850,000 | 1157 | 881  | 0.796904936  | SOX5                             |

|   |            |            |      |      |              |                                               |
|---|------------|------------|------|------|--------------|-----------------------------------------------|
| 5 | 86,775,000 | 86,925,000 | 1158 | 859  | 0.877764281  | SOX5                                          |
| 5 | 86,850,000 | 87,000,000 | 1159 | 727  | 0.426154381  | SOX5                                          |
| 5 | 86,925,000 | 87,075,000 | 1160 | 737  | 0.332384658  | SOX5                                          |
| 5 | 87,000,000 | 87,150,000 | 1161 | 960  | 0.393959727  | SOX5                                          |
| 5 | 87,075,000 | 87,225,000 | 1162 | 1195 | 0.448492027  |                                               |
| 5 | 87,150,000 | 87,300,000 | 1163 | 1115 | 0.321106565  |                                               |
| 5 | 87,225,000 | 87,375,000 | 1164 | 894  | -0.132527783 |                                               |
| 5 | 87,300,000 | 87,450,000 | 1165 | 980  | -0.561201145 |                                               |
| 5 | 87,375,000 | 87,525,000 | 1166 | 1095 | 0.325819518  |                                               |
| 5 | 87,450,000 | 87,600,000 | 1167 | 990  | 0.795625446  |                                               |
| 5 | 87,525,000 | 87,675,000 | 1168 | 794  | -0.30576235  |                                               |
| 5 | 87,600,000 | 87,750,000 | 1169 | 543  | 0.006849356  |                                               |
| 5 | 87,675,000 | 87,825,000 | 1170 | 562  | 0.981771333  |                                               |
| 5 | 87,750,000 | 87,900,000 | 1171 | 817  | 1.065610805  |                                               |
| 5 | 87,825,000 | 87,975,000 | 1172 | 644  | 0.877495982  | ETNK1                                         |
| 5 | 87,900,000 | 88,050,000 | 1173 | 350  | 0.321981196  | ETNK1                                         |
| 5 | 87,975,000 | 88,125,000 | 1174 | 457  | 0.267213257  | C2CD5,ETNK1                                   |
| 5 | 88,050,000 | 88,200,000 | 1175 | 638  | 0.473296533  | C2CD5                                         |
| 5 | 88,125,000 | 88,275,000 | 1176 | 889  | 0.43493102   | C2CD5                                         |
| 5 | 88,200,000 | 88,350,000 | 1177 | 752  | 0.090142119  | ST8SIA1                                       |
| 5 | 88,275,000 | 88,425,000 | 1178 | 485  | -0.741126    | ST8SIA1                                       |
| 5 | 88,350,000 | 88,500,000 | 1179 | 552  | -0.312564223 | ST8SIA1                                       |
| 5 | 88,425,000 | 88,575,000 | 1180 | 536  | 0.08368871   | CMAS,ST8SIA1,ENSBTAG00000026611               |
| 5 | 88,500,000 | 88,650,000 | 1181 | 728  | -0.252970527 | CMAS,ENSBTAG00000026611                       |
| 5 | 88,575,000 | 88,725,000 | 1182 | 724  | -0.236997215 | ABCC9,CMAS                                    |
| 5 | 88,650,000 | 88,800,000 | 1183 | 708  | -0.493515752 | ABCC9                                         |
| 5 | 88,725,000 | 88,875,000 | 1184 | 859  | 0.191767774  | ABCC9,KCNJ8                                   |
| 5 | 88,800,000 | 88,950,000 | 1185 | 742  | 0.966703154  | ABCC9,KCNJ8                                   |
| 5 | 88,875,000 | 89,025,000 | 1186 | 973  | 0.403292132  | GYS2,LDHB                                     |
| 5 | 88,950,000 | 89,100,000 | 1187 | 1404 | 0.249886666  | C5H12orf39,GYS2,LDHB                          |
| 5 | 89,025,000 | 89,175,000 | 1188 | 1121 | -0.032166974 | C5H12orf39,GOLT1B,GYS2,PYROXD1,RECQL          |
| 5 | 89,100,000 | 89,250,000 | 1189 | 851  | -1.018654535 | GOLT1B,IAPP,PYROXD1,RECQL                     |
| 5 | 89,175,000 | 89,325,000 | 1190 | 825  | -1.488748673 | IAPP,PYROXD1,SLCO1A2,ENSBTAG00000022329       |
| 5 | 89,250,000 | 89,400,000 | 1191 | 700  | -2.030559083 | SLCO1A2,ENSBTAG00000016876,ENSBTAG00000022329 |
| 5 | 89,325,000 | 89,475,000 | 1192 | 713  | -1.077087335 | SLCO1C1,ENSBTAG00000016876,ENSBTAG00000022329 |
| 5 | 89,400,000 | 89,550,000 | 1193 | 950  | -0.108434381 | SLCO1C1                                       |
| 5 | 89,475,000 | 89,625,000 | 1194 | 1057 | -0.289414116 | PDE3A,SLCO1C1                                 |
| 5 | 89,550,000 | 89,700,000 | 1195 | 890  | -0.575000446 | PDE3A                                         |
| 5 | 89,625,000 | 89,775,000 | 1196 | 690  | -0.240820425 |                                               |
| 5 | 89,700,000 | 89,850,000 | 1197 | 657  | -0.121749173 |                                               |
| 5 | 89,775,000 | 89,925,000 | 1198 | 685  | 0.396579111  |                                               |
| 5 | 89,850,000 | 90,000,000 | 1199 | 462  | 0.788060548  |                                               |
| 5 | 89,925,000 | 90,075,000 | 1200 | 767  | 0.018027527  |                                               |
| 5 | 90,000,000 | 90,150,000 | 1201 | 1025 | -0.094140372 |                                               |
| 5 | 90,075,000 | 90,225,000 | 1202 | 858  | -0.472365231 |                                               |
| 5 | 90,150,000 | 90,300,000 | 1203 | 886  | -1.721963135 |                                               |
| 5 | 90,225,000 | 90,375,000 | 1204 | 992  | -1.635957423 |                                               |
| 5 | 90,300,000 | 90,450,000 | 1205 | 1024 | -0.529256713 |                                               |
| 5 | 90,375,000 | 90,525,000 | 1206 | 965  | 0.200487796  |                                               |
| 5 | 90,450,000 | 90,600,000 | 1207 | 786  | 0.56900355   |                                               |
| 5 | 90,525,000 | 90,675,000 | 1208 | 534  | 0.988405368  |                                               |

|   |            |            |      |      |              |                                  |
|---|------------|------------|------|------|--------------|----------------------------------|
| 5 | 90,600,000 | 90,750,000 | 1209 | 456  | 1.035725095  |                                  |
| 5 | 90,675,000 | 90,825,000 | 1210 | 501  | 0.048184894  |                                  |
| 5 | 90,750,000 | 90,900,000 | 1211 | 580  | 0.118662467  | AEBP2                            |
| 5 | 90,825,000 | 90,975,000 | 1212 | 726  | 0.761037267  | AEBP2                            |
| 5 | 90,900,000 | 91,050,000 | 1213 | 776  | -0.939917169 | AEBP2,PLEKHA5                    |
| 5 | 90,975,000 | 91,125,000 | 1214 | 719  | -2.071243521 | PLEKHA5                          |
| 5 | 91,050,000 | 91,200,000 | 1215 | 692  | 0.153721025  | PLEKHA5                          |
| 5 | 91,125,000 | 91,275,000 | 1216 | 581  | 0.391866789  | PLEKHA5                          |
| 5 | 91,200,000 | 91,350,000 | 1217 | 525  | 0.36985357   |                                  |
| 5 | 91,275,000 | 91,425,000 | 1218 | 613  | 0.87003138   |                                  |
| 5 | 91,350,000 | 91,500,000 | 1219 | 782  | 0.097464857  |                                  |
| 5 | 91,425,000 | 91,575,000 | 1220 | 652  | 0.040809281  |                                  |
| 5 | 91,500,000 | 91,650,000 | 1221 | 417  | 1.248237733  |                                  |
| 5 | 91,575,000 | 91,725,000 | 1222 | 509  | 1.479853961  |                                  |
| 5 | 91,650,000 | 91,800,000 | 1223 | 722  | 1.211016244  | CAPZA3,PLCZ1                     |
| 5 | 91,725,000 | 91,875,000 | 1224 | 1090 | 1.007506301  | CAPZA3,PIK3C2G,PLCZ1             |
| 5 | 91,800,000 | 91,950,000 | 1225 | 1374 | 0.606662963  | PIK3C2G,PLCZ1,ENSBTAG00000047048 |
| 5 | 91,875,000 | 92,025,000 | 1226 | 1041 | 0.247713628  | PIK3C2G,ENSBTAG00000047048       |
| 5 | 91,950,000 | 92,100,000 | 1227 | 637  | -0.280751037 | PIK3C2G                          |
| 5 | 92,025,000 | 92,175,000 | 1228 | 846  | -0.756844444 | PIK3C2G                          |
| 5 | 92,100,000 | 92,250,000 | 1229 | 945  | -0.408087804 | PIK3C2G                          |
| 5 | 92,175,000 | 92,325,000 | 1230 | 757  | -1.629066957 | PIK3C2G                          |
| 5 | 92,250,000 | 92,400,000 | 1231 | 585  | -4.696457218 | PIK3C2G                          |
| 5 | 92,325,000 | 92,475,000 | 1232 | 699  | -2.727767565 | RERGL                            |
| 5 | 92,400,000 | 92,550,000 | 1233 | 1010 | -1.089256291 | RERGL                            |
| 5 | 92,475,000 | 92,625,000 | 1234 | 850  | -0.462261403 |                                  |
| 5 | 92,550,000 | 92,700,000 | 1235 | 558  | -0.595429922 |                                  |
| 5 | 92,625,000 | 92,775,000 | 1236 | 620  | -1.952176381 |                                  |
| 5 | 92,700,000 | 92,850,000 | 1237 | 752  | -2.563194009 |                                  |
| 5 | 92,775,000 | 92,925,000 | 1238 | 884  | -1.415157883 |                                  |
| 5 | 92,850,000 | 93,000,000 | 1239 | 813  | -0.236366418 |                                  |
| 5 | 92,925,000 | 93,075,000 | 1240 | 884  | 0.713538303  |                                  |
| 5 | 93,000,000 | 93,150,000 | 1241 | 918  | -0.096377843 |                                  |
| 5 | 93,075,000 | 93,225,000 | 1242 | 749  | -1.667641191 |                                  |
| 5 | 93,150,000 | 93,300,000 | 1243 | 791  | -0.925842899 |                                  |
| 5 | 93,225,000 | 93,375,000 | 1244 | 759  | 0.63971581   |                                  |
| 5 | 93,300,000 | 93,450,000 | 1245 | 432  | 0.751949261  |                                  |
| 5 | 93,375,000 | 93,525,000 | 1246 | 332  | 0.258775689  |                                  |
| 5 | 93,450,000 | 93,600,000 | 1247 | 556  | 0.526135675  |                                  |
| 5 | 93,525,000 | 93,675,000 | 1248 | 585  | 1.008739942  |                                  |
| 5 | 93,600,000 | 93,750,000 | 1249 | 415  | 0.402105958  | LMO3                             |
| 5 | 93,675,000 | 93,825,000 | 1250 | 515  | 0.328571952  | LMO3                             |
| 5 | 93,750,000 | 93,900,000 | 1251 | 814  | 0.948660109  | LMO3                             |
| 5 | 93,825,000 | 93,975,000 | 1252 | 1019 | 0.958751645  | MGST1                            |
| 5 | 93,900,000 | 94,050,000 | 1253 | 931  | 0.615225486  | MGST1,SLC15A5                    |
| 5 | 93,975,000 | 94,125,000 | 1254 | 900  | 0.799286373  | SLC15A5                          |
| 5 | 94,050,000 | 94,200,000 | 1255 | 1021 | 0.750021046  | SLC15A5                          |
| 5 | 94,125,000 | 94,275,000 | 1256 | 1460 | 0.825659681  | SLC15A5                          |
| 5 | 94,200,000 | 94,350,000 | 1257 | 1811 | 1.182580039  | DERA                             |
| 5 | 94,275,000 | 94,425,000 | 1258 | 1802 | 1.267966417  | COX6B1,DERA                      |
| 5 | 94,350,000 | 94,500,000 | 1259 | 1378 | 1.027023731  | COX6B1,DERA,STRAP                |
| 5 | 94,425,000 | 94,575,000 | 1260 | 917  | 0.356863059  | DERA,STRAP                       |
| 5 | 94,500,000 | 94,650,000 | 1261 | 1042 | -0.310347643 |                                  |



|   |            |            |      |      |              |                                                                        |
|---|------------|------------|------|------|--------------|------------------------------------------------------------------------|
| 5 | 94,575,000 | 94,725,000 | 1262 | 792  | -0.398743078 | EPS8                                                                   |
| 5 | 94,650,000 | 94,800,000 | 1263 | 739  | 0.308495759  | EPS8,PTPRO                                                             |
| 5 | 94,725,000 | 94,875,000 | 1264 | 835  | 0.655347598  | EPS8,PTPRO                                                             |
| 5 | 94,800,000 | 94,950,000 | 1265 | 800  | 1.035946206  | PTPRO                                                                  |
| 5 | 94,875,000 | 95,025,000 | 1266 | 823  | 1.090956063  | PTPRO                                                                  |
| 5 | 94,950,000 | 95,100,000 | 1267 | 640  | 0.915601473  | RERG                                                                   |
| 5 | 95,025,000 | 95,175,000 | 1268 | 695  | 0.405400675  | RERG                                                                   |
| 5 | 95,100,000 | 95,250,000 | 1269 | 744  | -0.271764409 | RERG                                                                   |
| 5 | 95,175,000 | 95,325,000 | 1270 | 575  | -0.527521412 | RERG                                                                   |
| 5 | 95,250,000 | 95,400,000 | 1271 | 566  | 0.69550351   | ARHGDIB,ERP27,PDE6H                                                    |
| 5 | 95,325,000 | 95,475,000 | 1272 | 766  | 1.084047243  | ARHGDIB,ERP27,MGP,PDE6H                                                |
| 5 | 95,400,000 | 95,550,000 | 1273 | 691  | 1.017281375  | ART4,C12orf60,ERP27,MGP,SMCO3,ENSBTAG00000014759                       |
| 5 | 95,475,000 | 95,625,000 | 1274 | 530  | -0.458868895 | ART4,C12orf60,GUCY2C,H2AFJ,SMCO3,ENSBTAG00000014759,ENSBTAG00000030504 |
| 5 | 95,550,000 | 95,700,000 | 1275 | 455  | -0.47243353  | GUCY2C,H2AFJ,ENSBTAG00000030504                                        |
| 5 | 95,625,000 | 95,775,000 | 1276 | 340  | 0.919878071  | GUCY2C,PLBD1                                                           |
| 5 | 95,700,000 | 95,850,000 | 1277 | 324  | 0.906013555  | ATF7IP,PLBD1                                                           |
| 5 | 95,775,000 | 95,925,000 | 1278 | 266  | 0.310445221  | ATF7IP,PLBD1                                                           |
| 5 | 95,850,000 | 96,000,000 | 1279 | 243  | 0.295499625  | ATF7IP                                                                 |
| 5 | 95,925,000 | 96,075,000 | 1280 | 574  | 0.503442781  |                                                                        |
| 5 | 96,000,000 | 96,150,000 | 1281 | 896  | 0.495626016  |                                                                        |
| 5 | 96,075,000 | 96,225,000 | 1282 | 1193 | -0.401433628 |                                                                        |
| 5 | 96,150,000 | 96,300,000 | 1283 | 1199 | -0.031148664 |                                                                        |
| 5 | 96,225,000 | 96,375,000 | 1284 | 735  | 1.117240269  |                                                                        |
| 5 | 96,300,000 | 96,450,000 | 1285 | 723  | 0.495047524  | GRIN2B                                                                 |
| 5 | 96,375,000 | 96,525,000 | 1286 | 689  | 0.046943442  | GRIN2B                                                                 |
| 5 | 96,450,000 | 96,600,000 | 1287 | 567  | 0.70421564   | GRIN2B                                                                 |
| 5 | 96,525,000 | 96,675,000 | 1288 | 862  | 0.068777335  | GRIN2B                                                                 |
| 5 | 96,600,000 | 96,750,000 | 1289 | 1144 | -0.152406241 | GRIN2B                                                                 |
| 5 | 96,675,000 | 96,825,000 | 1290 | 1133 | 0.756430741  | GRIN2B                                                                 |
| 5 | 96,750,000 | 96,900,000 | 1291 | 966  | 1.267735059  | GRIN2B                                                                 |
| 5 | 96,825,000 | 96,975,000 | 1292 | 746  | 1.231174333  |                                                                        |
| 5 | 96,900,000 | 97,050,000 | 1293 | 726  | 0.934336412  |                                                                        |
| 5 | 96,975,000 | 97,125,000 | 1294 | 899  | 0.985378161  | EMP1                                                                   |
| 5 | 97,050,000 | 97,200,000 | 1295 | 705  | 0.90810556   | EMP1                                                                   |
| 5 | 97,125,000 | 97,275,000 | 1296 | 649  | -0.39591241  | GSG1,KIAA1467                                                          |
| 5 | 97,200,000 | 97,350,000 | 1297 | 853  | 0.090120568  | GSG1,HEBP1,KIAA1467                                                    |
| 5 | 97,275,000 | 97,425,000 | 1298 | 1049 | 1.112376928  | GPRC5D,HEBP1,KIAA1467                                                  |
| 5 | 97,350,000 | 97,500,000 | 1299 | 1240 | 0.409357208  | DDX47,GPRC5A,GPRC5D,HEBP1                                              |
| 5 | 97,425,000 | 97,575,000 | 1300 | 965  | -0.100254611 | APOLD1,DDX47,GPRC5A                                                    |
| 5 | 97,500,000 | 97,650,000 | 1301 | 507  | 0.87795115   | APOLD1,CDKN1B,CREBL2,DDX47,GPR19                                       |
| 5 | 97,575,000 | 97,725,000 | 1302 | 300  | 0.746455198  | CDKN1B,CREBL2,GPR19                                                    |
| 5 | 97,650,000 | 97,800,000 | 1303 | 375  | 0.73668095   | CREBL2,DUSP16                                                          |
| 5 | 97,725,000 | 97,875,000 | 1304 | 425  | 0.644856452  | DUSP16,LOH12CR1                                                        |
| 5 | 97,800,000 | 97,950,000 | 1305 | 462  | 1.053931424  | DUSP16,LOH12CR1,MANSC1,ENSBTAG00000039496                              |
| 5 | 97,875,000 | 98,025,000 | 1306 | 572  | 1.318491593  | LOH12CR1,LRP6,MANSC1,ENSBTAG00000039496                                |
| 5 | 97,950,000 | 98,100,000 | 1307 | 491  | 1.144048956  | LRP6                                                                   |
| 5 | 98,025,000 | 98,175,000 | 1308 | 377  | 0.801503901  | LRP6                                                                   |
| 5 | 98,100,000 | 98,250,000 | 1309 | 561  | 0.487303225  | BCL2L14,LRP6                                                           |
| 5 | 98,175,000 | 98,325,000 | 1310 | 526  | 0.471074349  | BCL2L14                                                                |
| 5 | 98,250,000 | 98,400,000 | 1311 | 662  | 0.9188       |                                                                        |
| 5 | 98,325,000 | 98,475,000 | 1312 | 834  | 1.064744477  | ETV6                                                                   |

|   |             |             |      |      |              |                                                         |
|---|-------------|-------------|------|------|--------------|---------------------------------------------------------|
| 5 | 98,400,000  | 98,550,000  | 1313 | 749  | 0.733596857  | ETV6                                                    |
| 5 | 98,475,000  | 98,625,000  | 1314 | 776  | 0.379411729  |                                                         |
| 5 | 98,550,000  | 98,700,000  | 1315 | 812  | 0.134884773  |                                                         |
| 5 | 98,625,000  | 98,775,000  | 1316 | 894  | -0.669035835 |                                                         |
| 5 | 98,700,000  | 98,850,000  | 1317 | 1282 | -0.940641951 |                                                         |
| 5 | 98,775,000  | 98,925,000  | 1318 | 1460 | -0.43552806  |                                                         |
| 5 | 98,850,000  | 99,000,000  | 1319 | 1282 | 0.34273189   | ENSBTAG00000030476                                      |
| 5 | 98,925,000  | 99,075,000  | 1320 | 1643 | 0.264555128  | TAS2R42,TAS2R46,ENSBTAG00000001336,ENSBTAGO0000030476   |
| 5 | 99,000,000  | 99,150,000  | 1321 | 2086 | 0.146832186  | T2R12,T2R65A,TAS2R42,TAS2R46,ENSBTAG00000001336         |
| 5 | 99,075,000  | 99,225,000  | 1322 | 2057 | -0.586917006 | BOTA-T2R10B,T2R12,T2R65A                                |
| 5 | 99,150,000  | 99,300,000  | 1323 | 1779 | -0.872929092 | BOTA-T2R10B,T2R10C,TAS2R10                              |
| 5 | 99,225,000  | 99,375,000  | 1324 | 1710 | -0.772704382 | CSDA,T2R10C,TAS2R10                                     |
| 5 | 99,300,000  | 99,450,000  | 1325 | 2019 | -0.260458875 | CSDA,MAGOHB,STYK1                                       |
| 5 | 99,375,000  | 99,525,000  | 1326 | 2334 | 0.423375318  | KLRA1,MAGOHB,STYK1                                      |
| 5 | 99,450,000  | 99,600,000  | 1327 | 2305 | 0.518918077  | KLRA1,MAGOHB,ENSBTAG00000046268                         |
| 5 | 99,525,000  | 99,675,000  | 1328 | 2135 | 0.61854046   | ENSBTAG00000014332,ENSBTAG00000046268                   |
| 5 | 99,600,000  | 99,750,000  | 1329 | 1766 | 0.570835293  | ENSBTAG00000014332,ENSBTAG00000046268                   |
| 5 | 99,675,000  | 99,825,000  | 1330 | 1478 | 0.552106404  | KLRC1,NKG2A,ENSBTAG00000014332,ENSBTAG00000033671       |
| 5 | 99,750,000  | 99,900,000  | 1331 | 1762 | 0.16664086   | KLRC1,KLRJ1,NKG2A,ENSBTAG00000033671                    |
| 5 | 99,825,000  | 99,975,000  | 1332 | 2058 | 0.432973645  | KLRC1,KLRJ1,NKG2A                                       |
| 5 | 99,900,000  | 100,050,000 | 1333 | 1963 | 0.707256343  | NKG2A,NKG2C,ENSBTAG00000004917                          |
| 5 | 99,975,000  | 100,125,000 | 1334 | 2197 | 0.222869117  | KLRD1,NKG2A,NKG2C,ENSBTAG00000000966,ENSBTAG00000004917 |
| 5 | 100,050,000 | 100,200,000 | 1335 | 2195 | 0.419474842  | KLRD1,ENSBTAG00000000966,ENSBTAG00000030426             |
| 5 | 100,125,000 | 100,275,000 | 1336 | 1676 | 0.839955158  | GABARAPL1,OLR1,TMEM52B,ENSBTAG00000030426               |
| 5 | 100,200,000 | 100,350,000 | 1337 | 1420 | 0.559289537  | CLEC1A,CLEC1B,CLEC7A,CLEC9A,GABARAPL1,OLR1,TMEM52B      |
| 5 | 100,275,000 | 100,425,000 | 1338 | 1212 | 0.571241737  | CLEC12A,CLEC12B,CLEC1A,CLEC1B,CLEC7A,CLEC9A             |
| 5 | 100,350,000 | 100,500,000 | 1339 | 1131 | 0.50885053   | CLEC12A,CLEC12B,CLEC1B,CLEC2A,KLRF2                     |
| 5 | 100,425,000 | 100,575,000 | 1340 | 1003 | -0.158677731 | CLEC2A,KLRF2,ENSBTAG00000006851                         |
| 5 | 100,500,000 | 100,650,000 | 1341 | 918  | -0.892693859 | KLRF2,ENSBTAG00000006851,ENSBTAG00000012026             |
| 5 | 100,575,000 | 100,725,000 | 1342 | 815  | -0.868722067 | KLRF1,ENSBTAG00000006851,ENSBTAG00000012026             |
| 5 | 100,650,000 | 100,800,000 | 1343 | 976  | -0.802407223 | CD69,CLECL1,KLRF1                                       |
| 5 | 100,725,000 | 100,875,000 | 1344 | 1215 | -0.969962142 | CD69,CLECL1                                             |
| 5 | 100,800,000 | 100,950,000 | 1345 | 962  | -0.756947431 | KLRB1,ENSBTAG00000046324                                |
| 5 | 100,875,000 | 101,025,000 | 1346 | 665  | -0.58092721  | KLRB1,ENSBTAG00000046324                                |
| 5 | 100,950,000 | 101,100,000 | 1347 | 716  | -1.38675719  | KLRB1                                                   |
| 5 | 101,025,000 | 101,175,000 | 1348 | 813  | -0.988919958 | OVOS2                                                   |
| 5 | 101,100,000 | 101,250,000 | 1349 | 975  | 0.698788627  | OVOS2,ENSBTAG00000038461                                |
| 5 | 101,175,000 | 101,325,000 | 1350 | 1307 | 0.963358535  | A2M,OVOS2,ENSBTAG00000038461                            |
| 5 | 101,250,000 | 101,400,000 | 1351 | 1535 | 0.779517283  | A2M,ENSBTAG00000038461                                  |
| 5 | 101,325,000 | 101,475,000 | 1352 | 1531 | -0.337024972 | A2M,KLRG1,M6PR,PHC1                                     |
| 5 | 101,400,000 | 101,550,000 | 1353 | 1392 | -0.761652135 | A2ML1,KLRG1,M6PR,PHC1                                   |
| 5 | 101,475,000 | 101,625,000 | 1354 | 1186 | -0.43623744  | A2ML1,RIMKLB                                            |
| 5 | 101,550,000 | 101,700,000 | 1355 | 1037 | -0.879123071 | AICDA,MFAP5,RIMKLB                                      |
| 5 | 101,625,000 | 101,775,000 | 1356 | 877  | -1.522432649 | AICDA,APOBEC1,MFAP5,ENSBTAG00000023192                  |
| 5 | 101,700,000 | 101,850,000 | 1357 | 594  | -0.671010279 | APOBEC1,DPPA3,ENSBTAG00000023192                        |
| 5 | 101,775,000 | 101,925,000 | 1358 | 422  | 0.441411077  | DPPA3,NANOG,SLC2A3                                      |
| 5 | 101,850,000 | 102,000,000 | 1359 | 313  | 0.629996813  | NANOG,SLC2A3                                            |

|   |             |             |      |      |              |                                                                                  |
|---|-------------|-------------|------|------|--------------|----------------------------------------------------------------------------------|
| 5 | 101,925,000 | 102,075,000 | 1360 | 408  | 0.246837038  | C3AR1,FOXJ2,NECAP1                                                               |
| 5 | 102,000,000 | 102,150,000 | 1361 | 647  | 0.58563444   | C3AR1,CLEC4A,CLEC4D,CLEC6A,FOXJ2,NECAP1                                          |
| 5 | 102,075,000 | 102,225,000 | 1362 | 830  | 0.125506463  | CLEC4A,CLEC4D,CLEC4E,CLEC6A                                                      |
| 5 | 102,150,000 | 102,300,000 | 1363 | 658  | -1.414285022 | CD163,CLEC4D,CLEC4E                                                              |
| 5 | 102,225,000 | 102,375,000 | 1364 | 839  | -0.749754615 | CD163,ENSBTAG00000039847                                                         |
| 5 | 102,300,000 | 102,450,000 | 1365 | 1339 | -0.029773917 | ENSBTAG00000039817,ENSBTAG00000039847                                            |
| 5 | 102,375,000 | 102,525,000 | 1366 | 1582 | 0.220231915  | ENSBTAG00000039380,ENSBTAG00000039817                                            |
| 5 | 102,450,000 | 102,600,000 | 1367 | 2205 | 0.349414086  | ENSBTAG00000039380                                                               |
| 5 | 102,525,000 | 102,675,000 | 1368 | 2289 | 0.299989592  |                                                                                  |
| 5 | 102,600,000 | 102,750,000 | 1369 | 1886 | 0.481823433  | ENSBTAG00000039041                                                               |
| 5 | 102,675,000 | 102,825,000 | 1370 | 2144 | 1.139290903  | ENSBTAG00000039041                                                               |
| 5 | 102,750,000 | 102,900,000 | 1371 | 2696 | 1.176519818  | ENSBTAG00000048175                                                               |
| 5 | 102,825,000 | 102,975,000 | 1372 | 2320 | 0.356010601  | ENSBTAG00000024318,ENSBTAG00000030371,ENSBTAG00000048175                         |
| 5 | 102,900,000 | 103,050,000 | 1373 | 1408 | -0.432761998 | ENSBTAG00000024318,ENSBTAG00000030371,ENSBTAG00000045768,ENSBTAG00000048175      |
| 5 | 102,975,000 | 103,125,000 | 1374 | 1252 | -0.783463202 | ENSBTAG00000030371,ENSBTAG00000034678,ENSBTAG00000045768                         |
| 5 | 103,050,000 | 103,200,000 | 1375 | 1662 | 0.247332235  | ENSBTAG00000034678,ENSBTAG00000039470,ENSBTAG00000045768                         |
| 5 | 103,125,000 | 103,275,000 | 1376 | 1762 | 0.305224115  | ENSBTAG00000039470                                                               |
| 5 | 103,200,000 | 103,350,000 | 1377 | 1900 | -0.231095971 | ENSBTAG00000039256,ENSBTAG00000039470                                            |
| 5 | 103,275,000 | 103,425,000 | 1378 | 2211 | 0.102189081  | CD163L1,ENSBTAG00000039256                                                       |
| 5 | 103,350,000 | 103,500,000 | 1379 | 1881 | 0.343709676  | CD163L1,ENSBTAG00000024771                                                       |
| 5 | 103,425,000 | 103,575,000 | 1380 | 1473 | 0.307373169  | CD163L1,PEX5,ENSBTAG00000024771                                                  |
| 5 | 103,500,000 | 103,650,000 | 1381 | 1303 | 0.567399043  | C1RL,CLSTN3,PEX5,RBP5                                                            |
| 5 | 103,575,000 | 103,725,000 | 1382 | 1353 | 0.542893052  | C1R,C1RL,CLSTN3,RBP5                                                             |
| 5 | 103,650,000 | 103,800,000 | 1383 | 1204 | 0.33277717   | C1R,C1S                                                                          |
| 5 | 103,725,000 | 103,875,000 | 1384 | 785  | -0.169925089 | C1R,C1S,LPCAT3,PHB2,PTPN6,ENSBTAG00000013126                                     |
| 5 | 103,800,000 | 103,950,000 | 1385 | 487  | -0.398228148 | ATN1,C5H12orf57,ENO2,LPCAT3,LRRC23,PHB2,PTPN6,SPSB2,TPI1,USP5,ENSBTAG00000013126 |
| 5 | 103,875,000 | 104,025,000 | 1386 | 426  | -0.18759975  | ATN1,C5H12orf57,CD4,CDCA3,ENO2,GNB3,GPR162,LEPREL2,LRRC23,SPSB2,TPI1,USP5        |
| 5 | 103,950,000 | 104,100,000 | 1387 | 533  | -0.042348592 | CD4,CDCA3,COPS7A,GNB3,GPR162,LAG3,LEPREL2,MLF2,PTMS,USP5                         |
| 5 | 104,025,000 | 104,175,000 | 1388 | 525  | 0.440033564  | ACRBP,C5H12ORF53,COPS7A,ING4,LAG3,LPAR5,MLF2,PTMS,ZNF384                         |
| 5 | 104,100,000 | 104,250,000 | 1389 | 533  | 0.634656298  | ACRBP,C5H12ORF53,CHD4,GAPDH,IFFO1,ING4,LPAR5,NCAPD2,NOP2,ZNF384                  |
| 5 | 104,175,000 | 104,325,000 | 1390 | 548  | 0.16465619   | CD27,CHD4,GAPDH,IFFO1,MRPL51,NCAPD2,NOP2,TAPBPL,VAMP1                            |
| 5 | 104,250,000 | 104,400,000 | 1391 | 382  | 0.074256356  | CD27,LTBR,MRPL51,NCAPD2,SCNN1A,TAPBPL,VAMP1                                      |
| 5 | 104,325,000 | 104,475,000 | 1392 | 412  | 0.467817941  | LTBR,PLEKHG6,SCNN1A,TNFRSF1A                                                     |
| 5 | 104,400,000 | 104,550,000 | 1393 | 766  | 0.29516399   | CD9,PLEKHG6,TNFRSF1A                                                             |
| 5 | 104,475,000 | 104,625,000 | 1394 | 958  | 0.42412853   | CD9,VWF                                                                          |
| 5 | 104,550,000 | 104,700,000 | 1395 | 1052 | -0.454059609 | VWF                                                                              |
| 5 | 104,625,000 | 104,775,000 | 1396 | 1017 | 0.014332277  | ANO2,VWF,ENSBTAG00000011758                                                      |
| 5 | 104,700,000 | 104,850,000 | 1397 | 797  | 1.036487092  | ANO2,VWF,ENSBTAG00000011758                                                      |
| 5 | 104,775,000 | 104,925,000 | 1398 | 780  | 0.956307135  | ANO2                                                                             |
| 5 | 104,850,000 | 105,000,000 | 1399 | 852  | 0.807733367  | ANO2                                                                             |
| 5 | 104,925,000 | 105,075,000 | 1400 | 1069 | 0.854802206  | ANO2                                                                             |

|   |             |             |      |      |              |                                                                        |
|---|-------------|-------------|------|------|--------------|------------------------------------------------------------------------|
| 5 | 105,000,000 | 105,150,000 | 1401 | 1142 | 0.813624136  | ANO2,NTF3                                                              |
| 5 | 105,075,000 | 105,225,000 | 1402 | 1060 | 0.839726703  | ANO2,NTF3                                                              |
| 5 | 105,150,000 | 105,300,000 | 1403 | 962  | 1.010494424  | NTF3                                                                   |
| 5 | 105,225,000 | 105,375,000 | 1404 | 1066 | 0.615549137  |                                                                        |
| 5 | 105,300,000 | 105,450,000 | 1405 | 1089 | 0.588560274  |                                                                        |
| 5 | 105,375,000 | 105,525,000 | 1406 | 1255 | 0.111485003  |                                                                        |
| 5 | 105,450,000 | 105,600,000 | 1407 | 1689 | -0.474029956 | KCNA5,ENSBTAG00000026522                                               |
| 5 | 105,525,000 | 105,675,000 | 1408 | 1732 | 0.216537636  | KCNA1,KCNA5,ENSBTAG00000026522                                         |
| 5 | 105,600,000 | 105,750,000 | 1409 | 1778 | 0.912148421  | KCNA1                                                                  |
| 5 | 105,675,000 | 105,825,000 | 1410 | 1530 | 0.686543887  | GALNT8,KCNA6                                                           |
| 5 | 105,750,000 | 105,900,000 | 1411 | 1004 | 0.866160615  | AKAP3,GALNT8,KCNA6,NDUFA9                                              |
| 5 | 105,825,000 | 105,975,000 | 1412 | 793  | 1.176337829  | AKAP3,DYRK4,GALNT8,NDUFA9                                              |
| 5 | 105,900,000 | 106,050,000 | 1413 | 548  | 1.254220026  | AKAP3,C5H12ORF4,DYRK4,RAD51AP1                                         |
| 5 | 105,975,000 | 106,125,000 | 1414 | 141  | 1.157981531  | C5H12ORF4,DYRK4,RAD51AP1                                               |
| 5 | 106,050,000 | 106,200,000 | 1415 | 756  | 0.766538709  | C5H12ORF4,FGF6,RAD51AP1                                                |
| 5 | 106,125,000 | 106,275,000 | 1416 | 1235 | 0.506821242  | C5H12ORF4,CCND2,FGF23,FGF6,TIGAR                                       |
| 5 | 106,200,000 | 106,350,000 | 1417 | 770  | 0.233246754  | CCND2,FGF23,TIGAR                                                      |
| 5 | 106,275,000 | 106,425,000 | 1418 | 694  | 1.137418788  | CCND2                                                                  |
| 5 | 106,350,000 | 106,500,000 | 1419 | 983  | 0.843265555  |                                                                        |
| 5 | 106,425,000 | 106,575,000 | 1420 | 1316 | -0.636268838 |                                                                        |
| 5 | 106,500,000 | 106,650,000 | 1421 | 1395 | -0.395924252 | PARP11                                                                 |
| 5 | 106,575,000 | 106,725,000 | 1422 | 1809 | 0.158519676  | CRACR2A,PARP11                                                         |
| 5 | 106,650,000 | 106,800,000 | 1423 | 1591 | -0.150747892 | CRACR2A                                                                |
| 5 | 106,725,000 | 106,875,000 | 1424 | 1012 | 0.663064219  | CRACR2A,PRMT8                                                          |
| 5 | 106,800,000 | 106,950,000 | 1425 | 1117 | 0.616738022  | PRMT8                                                                  |
| 5 | 106,875,000 | 107,025,000 | 1426 | 1041 | 0.620206757  | TSPAN11                                                                |
| 5 | 106,950,000 | 107,100,000 | 1427 | 1004 | 0.850149441  | TSPAN11,TSPAN9                                                         |
| 5 | 107,025,000 | 107,175,000 | 1428 | 1221 | 0.158929787  | TSPAN11,TSPAN9                                                         |
| 5 | 107,100,000 | 107,250,000 | 1429 | 1451 | 0.513552853  |                                                                        |
| 5 | 107,175,000 | 107,325,000 | 1430 | 1124 | 0.542367136  | TEAD4                                                                  |
| 5 | 107,250,000 | 107,400,000 | 1431 | 825  | 0.064031061  | FOXM1,RHNO1,TEAD4,TULP3,ENSBTAG00000030325                             |
| 5 | 107,325,000 | 107,475,000 | 1432 | 1085 | 0.828524218  | DDX11,FKBP4,FOXM1,ITFG2,NRIP2,RHNO1,TEAD4,TU<br>LP3,ENSBTAG00000030325 |
| 5 | 107,400,000 | 107,550,000 | 1433 | 922  | 1.027712575  | DDX11,FKBP4,IQSEC3,ITFG2,NRIP2,WASH1,ENSBTAG0<br>0000030325            |
| 5 | 107,475,000 | 107,625,000 | 1434 | 793  | 0.887452836  | DDX11,IQSEC3,WASH1                                                     |
| 5 | 107,550,000 | 107,700,000 | 1435 | 1086 | 0.221230968  | IQSEC3,SLC6A12,SLC6A13                                                 |
| 5 | 107,625,000 | 107,775,000 | 1436 | 1086 | -0.043953864 | IQSEC3,KDM5A,SLC6A12,SLC6A13,ENSBTAG0000002<br>3274                    |
| 5 | 107,700,000 | 107,850,000 | 1437 | 1052 | 0.537434893  | CCDC77,KDM5A,SLC6A13,ENSBTAG00000023274                                |
| 5 | 107,775,000 | 107,925,000 | 1438 | 1065 | 0.426759381  | B4GALNT3,CCDC77,KDM5A                                                  |
| 5 | 107,850,000 | 108,000,000 | 1439 | 1223 | 0.968503495  | B4GALNT3,NINJ2                                                         |
| 5 | 107,925,000 | 108,075,000 | 1440 | 919  | 1.009072095  | B4GALNT3,NINJ2                                                         |
| 5 | 108,000,000 | 108,150,000 | 1441 | 371  | -0.161770297 | NINJ2,WNK1,ENSBTAG00000024477                                          |
| 5 | 108,075,000 | 108,225,000 | 1442 | 265  | 0.179773654  | RAD52,WNK1,ENSBTAG00000024477                                          |
| 5 | 108,150,000 | 108,300,000 | 1443 | 362  | 0.403857919  | RAD52,WNK1                                                             |
| 5 | 108,225,000 | 108,375,000 | 1444 | 526  | -0.844823527 | ERC1,RAD52                                                             |
| 5 | 108,300,000 | 108,450,000 | 1445 | 532  | -0.902464242 | ERC1                                                                   |
| 5 | 108,375,000 | 108,525,000 | 1446 | 526  | -0.180373899 | ERC1                                                                   |
| 5 | 108,450,000 | 108,600,000 | 1447 | 595  | -0.164212341 | ERC1                                                                   |
| 5 | 108,525,000 | 108,675,000 | 1448 | 565  | 0.71155725   | ERC1,FBXL14,WNT5B                                                      |
| 5 | 108,600,000 | 108,750,000 | 1449 | 511  | 0.406582635  | ADIPOR2,CACNA2D4,FBXL14,WNT5B                                          |

|   |             |             |      |      |              |                                                       |
|---|-------------|-------------|------|------|--------------|-------------------------------------------------------|
| 5 | 108,675,000 | 108,825,000 | 1450 | 472  | 0.271338217  | ADIPOR2,CACNA2D4,DCP1B,LRTM2                          |
| 5 | 108,750,000 | 108,900,000 | 1451 | 292  | 1.261858945  | CACNA2D4,DCP1B,LRTM2                                  |
| 5 | 108,825,000 | 108,975,000 | 1452 | 281  | 0.991284575  | DCP1B                                                 |
| 5 | 108,900,000 | 109,050,000 | 1453 | 364  | -0.47669882  |                                                       |
| 5 | 108,975,000 | 109,125,000 | 1454 | 514  | -5.062482529 |                                                       |
| 5 | 109,050,000 | 109,200,000 | 1455 | 780  | -3.78628119  | CACNA1C                                               |
| 5 | 109,125,000 | 109,275,000 | 1456 | 852  | -1.432832741 | CACNA1C                                               |
| 5 | 109,200,000 | 109,350,000 | 1457 | 799  | 0.081562745  | CACNA1C                                               |
| 5 | 109,275,000 | 109,425,000 | 1458 | 692  | -0.003140914 | CACNA1C,CECR5,IL17RA                                  |
| 5 | 109,350,000 | 109,500,000 | 1459 | 563  | -0.426014976 | CACNA1C,CECR1,CECR5,IL17RA                            |
| 5 | 109,425,000 | 109,575,000 | 1460 | 607  | 1.361849123  | ATP6V1E1,CECR1,CECR2,CECR5                            |
| 5 | 109,500,000 | 109,650,000 | 1461 | 685  | 1.174265145  | ATP6V1E1,BCL2L13,BID2,CECR2                           |
| 5 | 109,575,000 | 109,725,000 | 1462 | 749  | 0.239728194  | ATP6V1E1,BCL2L13,BID2,MICAL3                          |
| 5 | 109,650,000 | 109,800,000 | 1463 | 800  | -0.729843797 | BID2,MICAL3                                           |
| 5 | 109,725,000 | 109,875,000 | 1464 | 727  | 0.450637421  | MICAL3,PEX26                                          |
| 5 | 109,800,000 | 109,950,000 | 1465 | 995  | 1.255915699  | CDC42EP1,LGALS3,PEX26,TUBA8                           |
| 5 | 109,875,000 | 110,025,000 | 1466 | 1069 | 1.060241105  | CDC42EP1,GGA1,LGALS1,LGALS3,NOL12,PDXP,SH3BP1,TUBA8   |
| 5 | 109,950,000 | 110,100,000 | 1467 | 822  | 0.633292675  | GGA1,LGALS1,NOL12,PDXP,SH3BP1,TRIOBP                  |
| 5 | 110,025,000 | 110,175,000 | 1468 | 918  | 0.993239943  | ANKRD54,EIF3L,GALR3,GCAT,H1F0,NOL12,TRIOBP            |
| 5 | 110,100,000 | 110,250,000 | 1469 | 1130 | 1.316526883  | ANKRD54,C22orf23,EIF3L,GALR3,GCAT,H1F0,MICALL1,POLR2F |
| 5 | 110,175,000 | 110,325,000 | 1470 | 934  | 1.105784881  | C22orf23,EIF3L,MICALL1,POLR2F,SOX10                   |
| 5 | 110,250,000 | 110,400,000 | 1471 | 890  | 0.748445218  | BAIAP2L2,POLR2F,PRKCABP,SLC16A8,SOX10                 |
| 5 | 110,325,000 | 110,475,000 | 1472 | 1101 | 0.814523396  | BAIAP2L2,PLA2G6,PRKCABP,SLC16A8                       |
| 5 | 110,400,000 | 110,550,000 | 1473 | 894  | 0.742647515  | BAIAP2L2,MAFF,PLA2G6,TMEM184B                         |
| 5 | 110,475,000 | 110,625,000 | 1474 | 833  | 0.239529409  | CSNK1E,MAFF,TMEM184B                                  |
| 5 | 110,550,000 | 110,700,000 | 1475 | 976  | -0.463312144 | CSNK1E,DDX17,KDEL3                                    |
| 5 | 110,625,000 | 110,775,000 | 1476 | 1028 | -1.133965309 | DDX17,DMC1,FAM227A,KDEL3                              |
| 5 | 110,700,000 | 110,850,000 | 1477 | 976  | -1.349809328 | CBY1,DMC1,FAM227A,GTPBP1,JOSD1,TOMM22                 |
| 5 | 110,775,000 | 110,925,000 | 1478 | 884  | -0.304606257 | CBY1,DNAL4,FAM227A,GTPBP1,JOSD1,TOMM22,UNC84B         |
| 5 | 110,850,000 | 111,000,000 | 1479 | 844  | 0.815227593  | CBX6,DNAL4,GTPBP1,NPTXR,UNC84B                        |
| 5 | 110,925,000 | 111,075,000 | 1480 | 1042 | 0.653434477  | APOBEC3A,APOBEC3Z3,CBX6,NPTXR                         |
| 5 | 111,000,000 | 111,150,000 | 1481 | 1024 | -0.014874721 | APOBEC3A,APOBEC3Z3,CBX7                               |
| 5 | 111,075,000 | 111,225,000 | 1482 | 690  | -1.366698701 | APOBEC3Z3,CBX7,PDGFB                                  |
| 5 | 111,150,000 | 111,300,000 | 1483 | 695  | 0.044207099  | PDGFB,RPL3,SYNGR1                                     |
| 5 | 111,225,000 | 111,375,000 | 1484 | 937  | 0.850254618  | MAP3K7IP1,RPL3,SYNGR1                                 |
| 5 | 111,300,000 | 111,450,000 | 1485 | 946  | 1.083915237  | MAP3K7IP1,MGAT3,MIEF1,SYNGR1                          |
| 5 | 111,375,000 | 111,525,000 | 1486 | 806  | 0.855652148  | ATF4,CACNA1I,MGAT3,MIEF1,RPS19BP1                     |
| 5 | 111,450,000 | 111,600,000 | 1487 | 1095 | -0.142225762 | ATF4,CACNA1I,MIEF1,RPS19BP1                           |
| 5 | 111,525,000 | 111,675,000 | 1488 | 1371 | 0.134201133  | CACNA1I,ENTHD1                                        |
| 5 | 111,600,000 | 111,750,000 | 1489 | 1152 | 0.382061119  | CACNA1I,ENTHD1                                        |
| 5 | 111,675,000 | 111,825,000 | 1490 | 879  | 0.411319667  | ENTHD1,GRAP2                                          |
| 5 | 111,750,000 | 111,900,000 | 1491 | 830  | 0.941072173  | ENTHD1,FAM83F,GRAP2                                   |
| 5 | 111,825,000 | 111,975,000 | 1492 | 812  | 0.981741168  | FAM83F,GRAP2                                          |
| 5 | 111,900,000 | 112,050,000 | 1493 | 696  | 1.039035404  | TNRC6B                                                |
| 5 | 111,975,000 | 112,125,000 | 1494 | 629  | 0.585841251  | TNRC6B                                                |
| 5 | 112,050,000 | 112,200,000 | 1495 | 626  | 0.401575308  | ADSL,TNRC6B                                           |
| 5 | 112,125,000 | 112,275,000 | 1496 | 574  | 0.525182392  | ADSL,MKL1,SGSM3,TNRC6B                                |
| 5 | 112,200,000 | 112,350,000 | 1497 | 668  | 0.254498012  | ADSL,MKL1,SGSM3                                       |
| 5 | 112,275,000 | 112,425,000 | 1498 | 823  | 0.249488587  | MKL1                                                  |
| 5 | 112,350,000 | 112,500,000 | 1499 | 991  | -0.100751348 | MKL1                                                  |

|   |             |             |      |      |              |                                                              |
|---|-------------|-------------|------|------|--------------|--------------------------------------------------------------|
| 5 | 112,425,000 | 112,575,000 | 1500 | 1144 | -0.269680377 | MCHR1,SLC25A17                                               |
| 5 | 112,500,000 | 112,650,000 | 1501 | 1071 | 0.0184916    | DNAJB7,MCHR1,SLC25A17,ST13,XPNPEP3                           |
| 5 | 112,575,000 | 112,725,000 | 1502 | 1039 | 0.068994915  | DNAJB7,RBX1,SLC25A17,ST13,XPNPEP3                            |
| 5 | 112,650,000 | 112,800,000 | 1503 | 1016 | 0.456720412  | RBX1,XPNPEP3                                                 |
| 5 | 112,725,000 | 112,875,000 | 1504 | 775  | 0.345402897  | EP300                                                        |
| 5 | 112,800,000 | 112,950,000 | 1505 | 843  | 0.399786581  | CHADL,EP300,L3MBTL2,RANGAP1                                  |
| 5 | 112,875,000 | 113,025,000 | 1506 | 958  | 1.127563538  | CHADL,L3MBTL2,RANGAP1,ZC3H7B                                 |
| 5 | 112,950,000 | 113,100,000 | 1507 | 664  | 0.914065718  | ACO2,PHF5A,TEF,TOB2,ZC3H7B                                   |
| 5 | 113,025,000 | 113,175,000 | 1508 | 757  | 0.37013924   | ACO2,CSDC2,PHF5A,PMM1,POLR3H,TEF,TOB2                        |
| 5 | 113,100,000 | 113,250,000 | 1509 | 919  | 0.57873004   | ACO2,CSDC2,DESI1,PMM1,POLR3H,XRCC6                           |
| 5 | 113,175,000 | 113,325,000 | 1510 | 788  | -1.337926832 | C22orf46,DESI1,MEI1,NHP2L1,PMM1,XRCC6,ENSBTAG00000046927     |
| 5 | 113,250,000 | 113,400,000 | 1511 | 457  | -2.917462901 | C22orf46,CCDC134,MEI1,NHP2L1,SREBF2,XRCC6,ENSBTAG00000046927 |
| 5 | 113,325,000 | 113,475,000 | 1512 | 325  | -0.238160614 | CCDC134,CENPM,MEI1,SREBF2,TNFRSF13C                          |
| 5 | 113,400,000 | 113,550,000 | 1513 | 511  | 0.898774085  | CENPM,SEPT3,SREBF2,TNFRSF13C,WBP2NL                          |
| 5 | 113,475,000 | 113,625,000 | 1514 | 530  | 0.854136685  | FAM109B,MGC127055,MGC152344,NAGA,NDUFA6,S                    |
| 5 | 113,550,000 | 113,700,000 | 1515 | 682  | 1.05409689   | EPT3,SMDT1,WBP2NL,ENSBTAG00000026502,ENSBTAG00000037632      |
| 5 | 113,625,000 | 113,775,000 | 1516 | 647  | 1.047318762  | FAM109B,MGC127055,MGC152344,NAGA,NDUFA6,S                    |
| 5 | 113,700,000 | 113,850,000 | 1517 | 450  | 0.006299569  | MDT1,TCF20,ENSBTAG00000026502,ENSBTAG00000037632             |
| 5 | 113,775,000 | 113,925,000 | 1518 | 649  | -0.375018274 | MGC127055,TCF20                                              |
| 5 | 113,850,000 | 114,000,000 | 1519 | 845  | -0.294077663 | NFAM1,ENSBTAG00000046721                                     |
| 5 | 113,925,000 | 114,075,000 | 1520 | 719  | -1.30231246  | NFAM1,ENSBTAG00000046721                                     |
| 5 | 114,000,000 | 114,150,000 | 1521 | 372  | -1.868688678 | NFAM1,POLDIP3,RRP7A,SERHL2                                   |
| 5 | 114,075,000 | 114,225,000 | 1522 | 72   | 0.072420209  | A4GALT,CYB5R3,POLDIP3,RRP7A,SERHL2                           |
| 5 | 114,150,000 | 114,300,000 | 1523 | 376  | 1.030760536  | A4GALT,CYB5R3,POLDIP3,ENSBTAG00000030199                     |
| 5 | 114,225,000 | 114,375,000 | 1524 | 1023 | 1.026511601  | ENSBTAG00000030199                                           |
| 5 | 114,300,000 | 114,450,000 | 1525 | 1252 | 0.977064317  | ARFGAP3                                                      |
| 5 | 114,375,000 | 114,525,000 | 1526 | 1486 | 1.082586628  | ARFGAP3,PACSIN2                                              |
| 5 | 114,450,000 | 114,600,000 | 1527 | 1243 | 0.926330688  | ARFGAP3,PACSIN2                                              |
| 5 | 114,525,000 | 114,675,000 | 1528 | 723  | 0.225476575  | PACSIN2,TLL1                                                 |
| 5 | 114,600,000 | 114,750,000 | 1529 | 707  | 0.717887876  | MCAT,PACSIN2,TSPO,TLL1                                       |
| 5 | 114,675,000 | 114,825,000 | 1530 | 863  | 0.130250558  | MCAT,SCUBE1,TSPO,TLL1,TLL12                                  |
| 5 | 114,750,000 | 114,900,000 | 1531 | 1061 | -1.228657038 | SCUBE1,TSPO,TLL12                                            |
| 5 | 114,825,000 | 114,975,000 | 1532 | 1250 | -1.286916276 | SCUBE1                                                       |
| 5 | 114,900,000 | 115,050,000 | 1533 | 1083 | -0.742429867 | SCUBE1                                                       |
| 5 | 114,975,000 | 115,125,000 | 1534 | 746  | -0.408081499 | SAMM50,ENSBTAG0000003367                                     |
| 5 | 115,050,000 | 115,200,000 | 1535 | 986  | 0.174608072  | SAMM50,ENSBTAG0000003367,ENSBTAG00000045746                  |
| 5 | 115,125,000 | 115,275,000 | 1536 | 1315 | -0.205039406 | PNPLA5,SULT4A1,ENSBTAG0000003367,ENSBTAG00000045746          |
| 5 | 115,200,000 | 115,350,000 | 1537 | 1450 | -1.388661132 | EFCAB6                                                       |
| 5 | 115,275,000 | 115,425,000 | 1538 | 1348 | -0.929272677 | EFCAB6                                                       |
| 5 | 115,350,000 | 115,500,000 | 1539 | 1333 | -0.494656027 | EFCAB6                                                       |
| 5 | 115,425,000 | 115,575,000 | 1540 | 1637 | -1.034594297 | EFCAB6                                                       |
| 5 | 115,500,000 | 115,650,000 | 1541 | 1553 | -0.23777801  | PARVB                                                        |
| 5 | 115,575,000 | 115,725,000 | 1542 | 816  | 0.559274925  | MGC148449,PARVB                                              |
| 5 | 115,650,000 | 115,800,000 | 1543 | 752  | 0.67001868   | KIAA1644,MGC148449                                           |
| 5 | 115,725,000 | 115,875,000 | 1544 | 781  | 0.654062274  | KIAA1644                                                     |
| 5 |             |             |      |      |              | LDOC1L                                                       |

|   |             |             |      |      |              |                                               |
|---|-------------|-------------|------|------|--------------|-----------------------------------------------|
| 5 | 115,800,000 | 115,950,000 | 1545 | 734  | 0.378855954  | LDOC1L                                        |
| 5 | 115,875,000 | 116,025,000 | 1546 | 982  | 0.972403965  | PRR5                                          |
| 5 | 115,950,000 | 116,100,000 | 1547 | 939  | 0.907157783  | PRR5,ENSBTAG00000008858                       |
| 5 | 116,025,000 | 116,175,000 | 1548 | 1294 | -1.012441098 | PHF21B,PRR5,ENSBTAG00000008858                |
| 5 | 116,100,000 | 116,250,000 | 1549 | 1656 | -0.210260893 | PHF21B,ENSBTAG00000008858                     |
| 5 | 116,175,000 | 116,325,000 | 1550 | 1663 | 0.943412384  | NUP50                                         |
| 5 | 116,250,000 | 116,400,000 | 1551 | 1357 | 0.735560716  | KIAA0930,NUP50                                |
| 5 | 116,325,000 | 116,475,000 | 1552 | 1091 | 0.481575957  | FAM118A,KIAA0930,NUP50,SMC1B,UPK3A            |
| 5 | 116,400,000 | 116,550,000 | 1553 | 732  | 0.428322738  | FAM118A,RIBC2,SMC1B,UPK3A                     |
| 5 | 116,475,000 | 116,625,000 | 1554 | 826  | -0.351380031 | FBLN1,RIBC2,SMC1B                             |
| 5 | 116,550,000 | 116,700,000 | 1555 | 1276 | -0.157273128 | FBLN1,RIBC2                                   |
| 5 | 116,625,000 | 116,775,000 | 1556 | 1346 | 0.43779628   | ATXN10,FBLN1                                  |
| 5 | 116,700,000 | 116,850,000 | 1557 | 1094 | -0.158400088 | ATXN10                                        |
| 5 | 116,775,000 | 116,925,000 | 1558 | 875  | -1.328407384 | ATXN10                                        |
| 5 | 116,850,000 | 117,000,000 | 1559 | 733  | -0.841085855 | ATXN10,WNT7B                                  |
| 5 | 116,925,000 | 117,075,000 | 1560 | 487  | 0.107845821  | WNT7B                                         |
| 5 | 117,000,000 | 117,150,000 | 1561 | 527  | -0.384723993 |                                               |
| 5 | 117,075,000 | 117,225,000 | 1562 | 800  | -0.350335805 | PPARA                                         |
| 5 | 117,150,000 | 117,300,000 | 1563 | 1265 | -0.579785109 | CDPF1,PPARA                                   |
| 5 | 117,225,000 | 117,375,000 | 1564 | 2381 | -0.141701806 | CDPF1,PPARA                                   |
| 5 | 117,300,000 | 117,450,000 | 1565 | 3309 | -5.34E-06    |                                               |
| 5 | 117,375,000 | 117,525,000 | 1566 | 2992 | -0.003914991 |                                               |
| 5 | 117,450,000 | 117,600,000 | 1567 | 2630 | -1.016715141 |                                               |
| 5 | 117,525,000 | 117,675,000 | 1568 | 2236 | -3.144041372 | TTC38                                         |
| 5 | 117,600,000 | 117,750,000 | 1569 | 1233 | -0.779766529 | GTSE1,PKDREJ,TRMU,TTC38                       |
| 5 | 117,675,000 | 117,825,000 | 1570 | 827  | 0.071751211  | CELSR1,GTSE1,PKDREJ,TRMU                      |
| 5 | 117,750,000 | 117,900,000 | 1571 | 1259 | 0.182992031  | CELSR1,TRMU                                   |
| 5 | 117,825,000 | 117,975,000 | 1572 | 1120 | -0.081351542 | CELSR1                                        |
| 5 | 117,900,000 | 118,050,000 | 1573 | 692  | -0.443840941 | CERK,GRAMD4                                   |
| 5 | 117,975,000 | 118,125,000 | 1574 | 868  | -1.365565096 | CERK,GRAMD4,TBC1D22A                          |
| 5 | 118,050,000 | 118,200,000 | 1575 | 1158 | -0.805683414 | TBC1D22A                                      |
| 5 | 118,125,000 | 118,275,000 | 1576 | 1117 | 0.24047086   | TBC1D22A                                      |
| 5 | 118,200,000 | 118,350,000 | 1577 | 1211 | 0.22233126   | TBC1D22A                                      |
| 5 | 118,275,000 | 118,425,000 | 1578 | 1346 | -0.592873699 | TBC1D22A                                      |
| 5 | 118,350,000 | 118,500,000 | 1579 | 1335 | -0.345712882 |                                               |
| 5 | 118,425,000 | 118,575,000 | 1580 | 1297 | 0.378444075  |                                               |
| 5 | 118,500,000 | 118,650,000 | 1581 | 1197 | 0.115877782  |                                               |
| 5 | 118,575,000 | 118,725,000 | 1582 | 1469 | 0.407724849  |                                               |
| 5 | 118,650,000 | 118,800,000 | 1583 | 1900 | 0.609106147  |                                               |
| 5 | 118,725,000 | 118,875,000 | 1584 | 1951 | -0.010726366 |                                               |
| 5 | 118,800,000 | 118,950,000 | 1585 | 1647 | -1.006644584 |                                               |
| 5 | 118,875,000 | 119,025,000 | 1586 | 1814 | -0.522367077 |                                               |
| 5 | 118,950,000 | 119,100,000 | 1587 | 1662 | -2.054874047 |                                               |
| 5 | 119,025,000 | 119,175,000 | 1588 | 1469 | -2.816173746 |                                               |
| 5 | 119,100,000 | 119,250,000 | 1589 | 1561 | -1.109448085 |                                               |
| 5 | 119,175,000 | 119,325,000 | 1590 | 1486 | -0.856175468 |                                               |
| 5 | 119,250,000 | 119,400,000 | 1591 | 1563 | -0.133081103 |                                               |
| 5 | 119,325,000 | 119,475,000 | 1592 | 1248 | 1.225442528  | FAM19A5                                       |
| 5 | 119,400,000 | 119,550,000 | 1593 | 916  | 0.942893797  | FAM19A5                                       |
| 5 | 119,475,000 | 119,625,000 | 1594 | 798  | -0.915361634 | FAM19A5                                       |
| 5 | 119,550,000 | 119,700,000 | 1595 | 1218 | -0.040331809 | FAM19A5,ENSBTAG00000026385,ENSBTAG00000030185 |
| 5 | 119,625,000 | 119,775,000 | 1596 | 1678 | 0.751209     | SELO,ENSBTAG00000026385,ENSBTAG00000030185    |

|   |             |             |      |      |              |                                                                                             |
|---|-------------|-------------|------|------|--------------|---------------------------------------------------------------------------------------------|
| 5 | 119,700,000 | 119,850,000 | 1597 | 1095 | 1.022350802  | HDAC10,MAPK11,MAPK12,PLXNB2,SELO,TUBGCP6                                                    |
| 5 | 119,775,000 | 119,925,000 | 1598 | 491  | 1.210621737  | DENND6B,HDAC10,MAPK11,MAPK12,PLXNB2,SELO,TUBGCP6                                            |
| 5 | 119,850,000 | 120,000,000 | 1599 | 419  | 1.262140135  | ADM2,DENND6B,PLXNB2,PPP6R2,SBF1                                                             |
| 5 | 119,925,000 | 120,075,000 | 1600 | 322  | 1.264577952  | ADM2,KLHDC7B,LMF2,MGC128071,MIOX,NCAPH2,PPP6R2,SBF1,SCO2,SYCE3,ENSBTAG00000046250           |
| 5 | 120,000,000 | 120,150,000 | 1601 | 344  | 0.750100418  | CHKB,CPT1B,KLHDC7B,LMF2,MAPK8IP2,MGC128071,MIOX,NCAPH2,PPP6R2,SCO2,SYCE3,ENSBTAG00000046250 |
| 5 | 120,075,000 | 120,225,000 | 1602 | 350  | 0.73693701   | ACR,ARSA,CHKB,CPT1B,MAPK8IP2,SYCE3,ENSBTAG0000030180                                        |
| 5 | 120,150,000 | 120,300,000 | 1603 | 433  | 0.982620299  | ACR,ARSA,RABL2B,ENSBTAG00000030180                                                          |
| 5 | 120,225,000 | 120,375,000 | 1604 | 1153 | 1.265854712  | ACR,RABL2B                                                                                  |
| 5 | 120,300,000 | 120,450,000 | 1605 | 1353 | 1.232904412  |                                                                                             |
| 5 | 120,375,000 | 120,525,000 | 1606 | 962  | 0.656495431  |                                                                                             |
| 5 | 120,450,000 | 120,600,000 | 1607 | 1284 | 0.648781783  |                                                                                             |
| 5 | 120,525,000 | 120,675,000 | 1608 | 1493 | 0.400890113  |                                                                                             |
| 5 | 120,600,000 | 120,750,000 | 1609 | 1608 | 0.075066645  |                                                                                             |
| 5 | 120,675,000 | 120,825,000 | 1610 | 1555 | 0.164766129  | ENSBTAG00000014987                                                                          |
| 5 | 120,750,000 | 120,900,000 | 1611 | 963  | 0.000788382  | BRD1,ENSBTAG00000014987                                                                     |
| 5 | 120,825,000 | 120,975,000 | 1612 | 575  | -0.356761507 | ALG12,BRD1,CRELD2,PIM3                                                                      |
| 5 | 120,900,000 | 121,050,000 | 1613 | 435  | -0.70021995  | ALG12,CRELD2,IL17REL,PIM3,TTLL8                                                             |
| 5 | 120,975,000 | 121,125,000 | 1614 | 539  | 0.440947798  | IL17REL,MLC1,MOV10L1,TTLL8                                                                  |
| 5 | 121,050,000 | 121,191,424 | 1615 | 530  | 1.036378396  | MLC1,MOV10L1,PANX2,TRABD,TTLL8,ENSBTAG00000047080                                           |
| 6 | 0           | 150,000     | 1    | 387  | -1.251973295 | ENSBTAG00000040324                                                                          |
| 6 | 75,000      | 225,000     | 2    | 769  | -0.706357795 |                                                                                             |
| 6 | 150,000     | 300,000     | 3    | 987  | -0.275627174 |                                                                                             |
| 6 | 225,000     | 375,000     | 4    | 1012 | 0.472700005  |                                                                                             |
| 6 | 300,000     | 450,000     | 5    | 1010 | -0.000940486 |                                                                                             |
| 6 | 375,000     | 525,000     | 6    | 1004 | -0.485632888 |                                                                                             |
| 6 | 450,000     | 600,000     | 7    | 1140 | -0.727051503 |                                                                                             |
| 6 | 525,000     | 675,000     | 8    | 1316 | -0.571609633 |                                                                                             |
| 6 | 600,000     | 750,000     | 9    | 1132 | -0.116811932 |                                                                                             |
| 6 | 675,000     | 825,000     | 10   | 827  | 0.072215114  |                                                                                             |
| 6 | 750,000     | 900,000     | 11   | 1102 | 0.258014246  |                                                                                             |
| 6 | 825,000     | 975,000     | 12   | 1288 | 0.564126498  |                                                                                             |
| 6 | 900,000     | 1,050,000   | 13   | 1323 | 0.700961013  |                                                                                             |
| 6 | 975,000     | 1,125,000   | 14   | 1606 | -0.282422161 |                                                                                             |
| 6 | 1,050,000   | 1,200,000   | 15   | 1632 | -0.293807866 |                                                                                             |
| 6 | 1,125,000   | 1,275,000   | 16   | 1203 | 0.661164157  |                                                                                             |
| 6 | 1,200,000   | 1,350,000   | 17   | 766  | 0.56539598   |                                                                                             |
| 6 | 1,275,000   | 1,425,000   | 18   | 614  | -0.251858456 |                                                                                             |
| 6 | 1,350,000   | 1,500,000   | 19   | 731  | -0.460511135 |                                                                                             |
| 6 | 1,425,000   | 1,575,000   | 20   | 895  | 0.014017135  |                                                                                             |
| 6 | 1,500,000   | 1,650,000   | 21   | 1091 | 0.512634313  |                                                                                             |
| 6 | 1,575,000   | 1,725,000   | 22   | 1140 | 0.859826     |                                                                                             |
| 6 | 1,650,000   | 1,800,000   | 23   | 1289 | 1.155586849  |                                                                                             |
| 6 | 1,725,000   | 1,875,000   | 24   | 980  | 1.210135325  |                                                                                             |
| 6 | 1,800,000   | 1,950,000   | 25   | 700  | 0.368766313  |                                                                                             |
| 6 | 1,875,000   | 2,025,000   | 26   | 910  | 0.444132298  |                                                                                             |
| 6 | 1,950,000   | 2,100,000   | 27   | 797  | 1.248616731  | MARCH1,TMA16                                                                                |
| 6 | 2,025,000   | 2,175,000   | 28   | 709  | 1.116175184  | MARCH1,TKTL2,TMA16                                                                          |

01-Mar

01-Mar



|   |           |           |    |      |              |                                                          |
|---|-----------|-----------|----|------|--------------|----------------------------------------------------------|
| 6 | 2,100,000 | 2,250,000 | 29 | 692  | 0.319921713  | TKTL2,TMA16                                              |
| 6 | 2,175,000 | 2,325,000 | 30 | 759  | 0.507592448  |                                                          |
| 6 | 2,250,000 | 2,400,000 | 31 | 929  | 0.385944477  | NPY5R                                                    |
| 6 | 2,325,000 | 2,475,000 | 32 | 1037 | 0.326335352  | NPY1R,NPY5R                                              |
| 6 | 2,400,000 | 2,550,000 | 33 | 719  | 0.385950731  | NPY1R                                                    |
| 6 | 2,475,000 | 2,625,000 | 34 | 627  | 0.205573081  | NAF1                                                     |
| 6 | 2,550,000 | 2,700,000 | 35 | 666  | -0.211839422 | NAF1                                                     |
| 6 | 2,625,000 | 2,775,000 | 36 | 932  | -0.087355791 | NAF1                                                     |
| 6 | 2,700,000 | 2,850,000 | 37 | 1072 | 0.457748975  |                                                          |
| 6 | 2,775,000 | 2,925,000 | 38 | 624  | 0.949132514  |                                                          |
| 6 | 2,850,000 | 3,000,000 | 39 | 761  | 0.316695003  |                                                          |
| 6 | 2,925,000 | 3,075,000 | 40 | 1177 | 0.117408737  |                                                          |
| 6 | 3,000,000 | 3,150,000 | 41 | 1285 | 0.369150865  |                                                          |
| 6 | 3,075,000 | 3,225,000 | 42 | 1163 | 0.709472869  |                                                          |
| 6 | 3,150,000 | 3,300,000 | 43 | 806  | 0.258926557  |                                                          |
| 6 | 3,225,000 | 3,375,000 | 44 | 614  | 0.061546692  |                                                          |
| 6 | 3,300,000 | 3,450,000 | 45 | 699  | 0.547083793  | BBS7,CCNA2,EXOSC9                                        |
| 6 | 3,375,000 | 3,525,000 | 46 | 1154 | 0.615685226  | BBS7,CCNA2,EXOSC9                                        |
| 6 | 3,450,000 | 3,600,000 | 47 | 1575 | -0.41553588  | ANXA5                                                    |
| 6 | 3,525,000 | 3,675,000 | 48 | 1437 | -0.899050632 | ANXA5                                                    |
| 6 | 3,600,000 | 3,750,000 | 49 | 1315 | 0.584399882  |                                                          |
| 6 | 3,675,000 | 3,825,000 | 50 | 1084 | 0.645896319  |                                                          |
| 6 | 3,750,000 | 3,900,000 | 51 | 972  | 0.634492571  |                                                          |
| 6 | 3,825,000 | 3,975,000 | 52 | 1283 | 0.564726641  |                                                          |
| 6 | 3,900,000 | 4,050,000 | 53 | 1403 | 0.530780601  |                                                          |
| 6 | 3,975,000 | 4,125,000 | 54 | 1259 | 0.546408351  | QRFPR                                                    |
| 6 | 4,050,000 | 4,200,000 | 55 | 1420 | 0.639953606  | QRFPR                                                    |
| 6 | 4,125,000 | 4,275,000 | 56 | 1310 | 0.573185029  | QRFPR                                                    |
| 6 | 4,200,000 | 4,350,000 | 57 | 904  | -0.219685175 |                                                          |
| 6 | 4,275,000 | 4,425,000 | 58 | 992  | 0.169688016  | C6H4ORF31                                                |
| 6 | 4,350,000 | 4,500,000 | 59 | 1189 | 1.019644355  | C6H4ORF31,PRDM5                                          |
| 6 | 4,425,000 | 4,575,000 | 60 | 887  | 1.078401011  | PRDM5                                                    |
| 6 | 4,500,000 | 4,650,000 | 61 | 623  | 0.49248801   | PRDM5                                                    |
| 6 | 4,575,000 | 4,725,000 | 62 | 802  | 0.381792286  | PRDM5                                                    |
| 6 | 4,650,000 | 4,800,000 | 63 | 948  | 0.418331868  | PRDM5                                                    |
| 6 | 4,725,000 | 4,875,000 | 64 | 998  | -0.535078533 | PRDM5                                                    |
| 6 | 4,800,000 | 4,950,000 | 65 | 798  | -0.89177135  |                                                          |
| 6 | 4,875,000 | 5,025,000 | 66 | 550  | 0.561446979  |                                                          |
| 6 | 4,950,000 | 5,100,000 | 67 | 607  | 0.95658753   |                                                          |
| 6 | 5,025,000 | 5,175,000 | 68 | 885  | 0.490322328  |                                                          |
| 6 | 5,100,000 | 5,250,000 | 69 | 978  | -1.060013946 |                                                          |
| 6 | 5,175,000 | 5,325,000 | 70 | 532  | -1.668684253 |                                                          |
| 6 | 5,250,000 | 5,400,000 | 71 | 81   | -0.318658275 | ENSBTAG00000037426                                       |
| 6 | 5,325,000 | 5,475,000 | 72 | 27   | -2.469316573 | ENSBTAG00000037426,ENSBTAG00000047900                    |
| 6 | 5,400,000 | 5,550,000 | 73 | 0    | -100         | ENSBTAG00000024874,ENSBTAG00000035129,ENSBTAG00000047900 |
| 6 | 5,475,000 | 5,625,000 | 74 | 1    | -0.177418285 | ENSBTAG00000024874,ENSBTAG00000035129,ENSBTAG00000047900 |
| 6 | 5,550,000 | 5,700,000 | 75 | 1    | -0.177418285 | ENSBTAG00000035129                                       |
| 6 | 5,625,000 | 5,775,000 | 76 | 0    | -100         |                                                          |
| 6 | 5,700,000 | 5,850,000 | 77 | 0    | -100         |                                                          |
| 6 | 5,775,000 | 5,925,000 | 78 | 3    | 1.601668825  |                                                          |
| 6 | 5,850,000 | 6,000,000 | 79 | 32   | -0.18609544  |                                                          |

|   |           |           |     |      |              |                                      |
|---|-----------|-----------|-----|------|--------------|--------------------------------------|
| 6 | 5,925,000 | 6,075,000 | 80  | 51   | -8.522760132 | ENSBTAG00000035319                   |
| 6 | 6,000,000 | 6,150,000 | 81  | 22   | -8.798825146 | ENSBTAG00000035319                   |
| 6 | 6,075,000 | 6,225,000 | 82  | 0    | -100         | MGC134093,ENSBTAG00000040228         |
| 6 | 6,150,000 | 6,300,000 | 83  | 0    | -100         | MGC134093,ENSBTAG00000040228         |
| 6 | 6,225,000 | 6,375,000 | 84  | 0    | -100         | MGC134093,ENSBTAG00000040228         |
| 6 | 6,300,000 | 6,450,000 | 85  | 0    | -100         |                                      |
| 6 | 6,375,000 | 6,525,000 | 86  | 204  | 1.552636551  |                                      |
| 6 | 6,450,000 | 6,600,000 | 87  | 219  | 1.286568804  |                                      |
| 6 | 6,525,000 | 6,675,000 | 88  | 148  | 1.233373507  |                                      |
| 6 | 6,600,000 | 6,750,000 | 89  | 644  | 1.410353959  |                                      |
| 6 | 6,675,000 | 6,825,000 | 90  | 921  | -0.044906038 |                                      |
| 6 | 6,750,000 | 6,900,000 | 91  | 654  | -0.696233469 | PDE5A                                |
| 6 | 6,825,000 | 6,975,000 | 92  | 598  | 0.135517607  | PDE5A                                |
| 6 | 6,900,000 | 7,050,000 | 93  | 699  | 0.149884627  | PDE5A                                |
| 6 | 6,975,000 | 7,125,000 | 94  | 697  | 0.596542933  | FABP2,PDE5A                          |
| 6 | 7,050,000 | 7,200,000 | 95  | 917  | 0.536279449  | FABP2,PDE5A,USP53,ENSBTAG00000048273 |
| 6 | 7,125,000 | 7,275,000 | 96  | 939  | 0.675075949  | MYOZ2,USP53,ENSBTAG00000048273       |
| 6 | 7,200,000 | 7,350,000 | 97  | 782  | 0.605477771  | MYOZ2,USP53                          |
| 6 | 7,275,000 | 7,425,000 | 98  | 733  | -0.218485044 | MYOZ2,SYNPO2                         |
| 6 | 7,350,000 | 7,500,000 | 99  | 630  | -0.320463257 | SYNPO2                               |
| 6 | 7,425,000 | 7,575,000 | 100 | 784  | -0.080537317 | SYNPO2                               |
| 6 | 7,500,000 | 7,650,000 | 101 | 843  | 0.203257586  | SYNPO2                               |
| 6 | 7,575,000 | 7,725,000 | 102 | 1045 | 0.547883807  | SEC24D,SYNPO2                        |
| 6 | 7,650,000 | 7,800,000 | 103 | 1114 | 0.42232969   | METTL14,SEC24D                       |
| 6 | 7,725,000 | 7,875,000 | 104 | 917  | 0.189152882  | METTL14,SEC24D                       |
| 6 | 7,800,000 | 7,950,000 | 105 | 985  | 0.495184037  | METTL14,PRSS12                       |
| 6 | 7,875,000 | 8,025,000 | 106 | 990  | -0.093924094 | PRSS12                               |
| 6 | 7,950,000 | 8,100,000 | 107 | 866  | -0.528715917 | NDST3,PRSS12                         |
| 6 | 8,025,000 | 8,175,000 | 108 | 721  | 0.980198081  | NDST3                                |
| 6 | 8,100,000 | 8,250,000 | 109 | 554  | 0.861349363  | NDST3                                |
| 6 | 8,175,000 | 8,325,000 | 110 | 687  | 1.120324856  | NDST3                                |
| 6 | 8,250,000 | 8,400,000 | 111 | 913  | 0.754273473  | NDST3                                |
| 6 | 8,325,000 | 8,475,000 | 112 | 1098 | 0.473518441  | RPL39                                |
| 6 | 8,400,000 | 8,550,000 | 113 | 1243 | 0.452779265  | RPL39                                |
| 6 | 8,475,000 | 8,625,000 | 114 | 1330 | 0.000669528  |                                      |
| 6 | 8,550,000 | 8,700,000 | 115 | 1378 | 0.372636373  |                                      |
| 6 | 8,625,000 | 8,775,000 | 116 | 957  | 0.581968546  |                                      |
| 6 | 8,700,000 | 8,850,000 | 117 | 1014 | 0.843190777  |                                      |
| 6 | 8,775,000 | 8,925,000 | 118 | 1199 | 0.411306744  |                                      |
| 6 | 8,850,000 | 9,000,000 | 119 | 853  | -0.185704219 |                                      |
| 6 | 8,925,000 | 9,075,000 | 120 | 829  | 0.403599006  | ENSBTAG00000034849                   |
| 6 | 9,000,000 | 9,150,000 | 121 | 790  | 0.919984044  | ENSBTAG00000034849                   |
| 6 | 9,075,000 | 9,225,000 | 122 | 457  | 0.788273766  |                                      |
| 6 | 9,150,000 | 9,300,000 | 123 | 431  | 0.935297563  |                                      |
| 6 | 9,225,000 | 9,375,000 | 124 | 731  | 0.114239383  |                                      |
| 6 | 9,300,000 | 9,450,000 | 125 | 1008 | -0.230987139 |                                      |
| 6 | 9,375,000 | 9,525,000 | 126 | 1255 | 0.086389195  | TRAM1L1                              |
| 6 | 9,450,000 | 9,600,000 | 127 | 1875 | 0.453832436  | TRAM1L1                              |
| 6 | 9,525,000 | 9,675,000 | 128 | 2014 | 0.751930244  |                                      |
| 6 | 9,600,000 | 9,750,000 | 129 | 1512 | 1.035801604  |                                      |
| 6 | 9,675,000 | 9,825,000 | 130 | 994  | 0.888153271  |                                      |
| 6 | 9,750,000 | 9,900,000 | 131 | 1038 | 0.614714243  |                                      |
| 6 | 9,825,000 | 9,975,000 | 132 | 1825 | 0.060759396  |                                      |

|   |            |            |     |      |              |        |
|---|------------|------------|-----|------|--------------|--------|
| 6 | 9,900,000  | 10,050,000 | 133 | 1673 | -0.18507411  |        |
| 6 | 9,975,000  | 10,125,000 | 134 | 1289 | 0.379130032  |        |
| 6 | 10,050,000 | 10,200,000 | 135 | 1394 | 0.815517197  |        |
| 6 | 10,125,000 | 10,275,000 | 136 | 1224 | -0.386961854 |        |
| 6 | 10,200,000 | 10,350,000 | 137 | 1329 | -0.932904796 |        |
| 6 | 10,275,000 | 10,425,000 | 138 | 1505 | 0.055049186  |        |
| 6 | 10,350,000 | 10,500,000 | 139 | 1632 | 0.898950631  |        |
| 6 | 10,425,000 | 10,575,000 | 140 | 1692 | 1.040966631  |        |
| 6 | 10,500,000 | 10,650,000 | 141 | 1560 | 0.723329601  |        |
| 6 | 10,575,000 | 10,725,000 | 142 | 1265 | 0.032473847  |        |
| 6 | 10,650,000 | 10,800,000 | 143 | 1197 | 0.364190484  |        |
| 6 | 10,725,000 | 10,875,000 | 144 | 1170 | 0.337834323  |        |
| 6 | 10,800,000 | 10,950,000 | 145 | 1029 | -1.309797695 |        |
| 6 | 10,875,000 | 11,025,000 | 146 | 1115 | -1.670558021 |        |
| 6 | 10,950,000 | 11,100,000 | 147 | 930  | -1.13043713  |        |
| 6 | 11,025,000 | 11,175,000 | 148 | 714  | -0.180201461 |        |
| 6 | 11,100,000 | 11,250,000 | 149 | 744  | -0.067633243 |        |
| 6 | 11,175,000 | 11,325,000 | 150 | 904  | -0.277704536 |        |
| 6 | 11,250,000 | 11,400,000 | 151 | 781  | 0.33664384   |        |
| 6 | 11,325,000 | 11,475,000 | 152 | 712  | 0.753859208  |        |
| 6 | 11,400,000 | 11,550,000 | 153 | 969  | 0.946190377  |        |
| 6 | 11,475,000 | 11,625,000 | 154 | 1192 | 0.974622492  |        |
| 6 | 11,550,000 | 11,700,000 | 155 | 1502 | 0.082487053  | NDST4  |
| 6 | 11,625,000 | 11,775,000 | 156 | 1495 | 0.043846289  | NDST4  |
| 6 | 11,700,000 | 11,850,000 | 157 | 1614 | 1.201759     | NDST4  |
| 6 | 11,775,000 | 11,925,000 | 158 | 1682 | 1.123605772  | NDST4  |
| 6 | 11,850,000 | 12,000,000 | 159 | 1355 | 1.06249579   | NDST4  |
| 6 | 11,925,000 | 12,075,000 | 160 | 1373 | 1.056965333  | NDST4  |
| 6 | 12,000,000 | 12,150,000 | 161 | 1230 | 0.674827427  | UGT8   |
| 6 | 12,075,000 | 12,225,000 | 162 | 1317 | 0.040853769  | UGT8   |
| 6 | 12,150,000 | 12,300,000 | 163 | 1764 | -1.029318466 | UGT8   |
| 6 | 12,225,000 | 12,375,000 | 164 | 1917 | -0.497703114 |        |
| 6 | 12,300,000 | 12,450,000 | 165 | 2076 | 0.550849029  |        |
| 6 | 12,375,000 | 12,525,000 | 166 | 2065 | 0.692591072  |        |
| 6 | 12,450,000 | 12,600,000 | 167 | 1928 | -1.519107509 |        |
| 6 | 12,525,000 | 12,675,000 | 168 | 1837 | -3.860436573 |        |
| 6 | 12,600,000 | 12,750,000 | 169 | 1919 | -1.629194503 | ARSJ   |
| 6 | 12,675,000 | 12,825,000 | 170 | 2224 | 0.047026996  | ARSJ   |
| 6 | 12,750,000 | 12,900,000 | 171 | 2243 | 0.316386604  | ARSJ   |
| 6 | 12,825,000 | 12,975,000 | 172 | 1784 | 0.564098119  | CAMK2D |
| 6 | 12,900,000 | 13,050,000 | 173 | 1480 | 0.585881664  | CAMK2D |
| 6 | 12,975,000 | 13,125,000 | 174 | 1507 | 0.361062343  | CAMK2D |
| 6 | 13,050,000 | 13,200,000 | 175 | 1373 | 0.344805486  | CAMK2D |
| 6 | 13,125,000 | 13,275,000 | 176 | 942  | 0.531994892  | CAMK2D |
| 6 | 13,200,000 | 13,350,000 | 177 | 922  | 0.500668864  | CAMK2D |
| 6 | 13,275,000 | 13,425,000 | 178 | 914  | 0.043347625  | ANK2   |
| 6 | 13,350,000 | 13,500,000 | 179 | 461  | -0.209402719 | ANK2   |
| 6 | 13,425,000 | 13,575,000 | 180 | 449  | -0.210812424 | ANK2   |
| 6 | 13,500,000 | 13,650,000 | 181 | 1028 | -0.908888906 | ANK2   |
| 6 | 13,575,000 | 13,725,000 | 182 | 1294 | -2.627380201 |        |
| 6 | 13,650,000 | 13,800,000 | 183 | 840  | -3.084799578 |        |
| 6 | 13,725,000 | 13,875,000 | 184 | 955  | -1.032588484 |        |
| 6 | 13,800,000 | 13,950,000 | 185 | 1150 | -0.611756795 |        |

|   |            |            |     |      |              |                                        |
|---|------------|------------|-----|------|--------------|----------------------------------------|
| 6 | 13,875,000 | 14,025,000 | 186 | 836  | 0.178979121  |                                        |
| 6 | 13,950,000 | 14,100,000 | 187 | 1046 | -0.595394915 |                                        |
| 6 | 14,025,000 | 14,175,000 | 188 | 1090 | -0.106974835 | LARP7,ENSBTAG00000026936               |
| 6 | 14,100,000 | 14,250,000 | 189 | 565  | 0.745364204  | LARP7,NEUROG2,ZGRF1,ENSBTAG00000026936 |
| 6 | 14,175,000 | 14,325,000 | 190 | 554  | 0.462790624  | ALPK1,NEUROG2,ZGRF1,ENSBTAG00000026936 |
| 6 | 14,250,000 | 14,400,000 | 191 | 859  | 0.500415917  | ALPK1,NEUROG2                          |
| 6 | 14,325,000 | 14,475,000 | 192 | 1075 | -0.363070519 | ALPK1,MGC155012,TIFA                   |
| 6 | 14,400,000 | 14,550,000 | 193 | 840  | -1.001484242 | C6H4orf32,MGC155012,TIFA               |
| 6 | 14,475,000 | 14,625,000 | 194 | 700  | -0.481664855 | C6H4orf32                              |
| 6 | 14,550,000 | 14,700,000 | 195 | 958  | -1.268088759 | C6H4orf32                              |
| 6 | 14,625,000 | 14,775,000 | 196 | 996  | -0.999447585 |                                        |
| 6 | 14,700,000 | 14,850,000 | 197 | 911  | -0.182904384 |                                        |
| 6 | 14,775,000 | 14,925,000 | 198 | 1077 | 0.030062207  |                                        |
| 6 | 14,850,000 | 15,000,000 | 199 | 1368 | 0.798644388  |                                        |
| 6 | 14,925,000 | 15,075,000 | 200 | 1475 | 1.151925685  |                                        |
| 6 | 15,000,000 | 15,150,000 | 201 | 1384 | 0.956965721  |                                        |
| 6 | 15,075,000 | 15,225,000 | 202 | 1144 | 0.297622526  |                                        |
| 6 | 15,150,000 | 15,300,000 | 203 | 1156 | 0.359123689  |                                        |
| 6 | 15,225,000 | 15,375,000 | 204 | 1086 | 0.434106235  |                                        |
| 6 | 15,300,000 | 15,450,000 | 205 | 860  | -0.013340153 |                                        |
| 6 | 15,375,000 | 15,525,000 | 206 | 994  | -0.631516824 |                                        |
| 6 | 15,450,000 | 15,600,000 | 207 | 939  | -0.847724195 |                                        |
| 6 | 15,525,000 | 15,675,000 | 208 | 630  | -0.417308296 |                                        |
| 6 | 15,600,000 | 15,750,000 | 209 | 624  | -0.861248601 |                                        |
| 6 | 15,675,000 | 15,825,000 | 210 | 581  | -0.370252901 |                                        |
| 6 | 15,750,000 | 15,900,000 | 211 | 533  | 0.862716651  |                                        |
| 6 | 15,825,000 | 15,975,000 | 212 | 733  | 1.054031669  |                                        |
| 6 | 15,900,000 | 16,050,000 | 213 | 639  | 1.073415879  | PITX2                                  |
| 6 | 15,975,000 | 16,125,000 | 214 | 493  | 0.483697347  | ENPEP,PITX2                            |
| 6 | 16,050,000 | 16,200,000 | 215 | 777  | -0.033223341 | ENPEP                                  |
| 6 | 16,125,000 | 16,275,000 | 216 | 661  | 0.073622917  | ENPEP                                  |
| 6 | 16,200,000 | 16,350,000 | 217 | 501  | 0.67220002   |                                        |
| 6 | 16,275,000 | 16,425,000 | 218 | 554  | 0.425398181  | MGC139109,ENSBTAG00000038368           |
| 6 | 16,350,000 | 16,500,000 | 219 | 483  | -0.685285126 | MGC139109,ENSBTAG00000038368           |
| 6 | 16,425,000 | 16,575,000 | 220 | 725  | -1.373343508 | MGC139109                              |
| 6 | 16,500,000 | 16,650,000 | 221 | 1023 | 0.073444385  | MGC139109                              |
| 6 | 16,575,000 | 16,725,000 | 222 | 953  | 0.117938439  | LRIT3,RPS26                            |
| 6 | 16,650,000 | 16,800,000 | 223 | 929  | -0.228321043 | CFI,GAR1,LRIT3,RPS26,RRH               |
| 6 | 16,725,000 | 16,875,000 | 224 | 846  | 0.161281641  | CASP6,CCDC109B,CFI,GAR1,PLA2G12A,RRH   |
| 6 | 16,800,000 | 16,950,000 | 225 | 717  | -0.261987663 | CASP6,CCDC109B,CFI,PLA2G12A            |
| 6 | 16,875,000 | 17,025,000 | 226 | 836  | 0.220999571  | CCDC109B,SEC24B                        |
| 6 | 16,950,000 | 17,100,000 | 227 | 664  | 0.088217443  | CCDC109B,SEC24B                        |
| 6 | 17,025,000 | 17,175,000 | 228 | 657  | -0.511294885 | SEC24B                                 |
| 6 | 17,100,000 | 17,250,000 | 229 | 762  | 0.537097774  |                                        |
| 6 | 17,175,000 | 17,325,000 | 230 | 527  | 1.045639533  |                                        |
| 6 | 17,250,000 | 17,400,000 | 231 | 525  | 0.506654961  |                                        |
| 6 | 17,325,000 | 17,475,000 | 232 | 709  | -0.268863311 |                                        |
| 6 | 17,400,000 | 17,550,000 | 233 | 929  | 0.234642757  | COL25A1                                |
| 6 | 17,475,000 | 17,625,000 | 234 | 825  | 0.547542093  | COL25A1                                |
| 6 | 17,550,000 | 17,700,000 | 235 | 589  | 0.234771959  | COL25A1                                |
| 6 | 17,625,000 | 17,775,000 | 236 | 864  | 0.712033175  | COL25A1,ETNPPL                         |
| 6 | 17,700,000 | 17,850,000 | 237 | 1045 | 0.590331215  | ETNPPL,OSTC,RPL34                      |
| 6 | 17,775,000 | 17,925,000 | 238 | 743  | 0.684698788  | OSTC,RPL34                             |

|   |            |            |     |      |              |                                                   |
|---|------------|------------|-----|------|--------------|---------------------------------------------------|
| 6 | 17,850,000 | 18,000,000 | 239 | 263  | 1.133842778  |                                                   |
| 6 | 17,925,000 | 18,075,000 | 240 | 364  | 1.175290128  |                                                   |
| 6 | 18,000,000 | 18,150,000 | 241 | 763  | 0.381479351  |                                                   |
| 6 | 18,075,000 | 18,225,000 | 242 | 683  | -0.734375403 |                                                   |
| 6 | 18,150,000 | 18,300,000 | 243 | 465  | -1.101555151 |                                                   |
| 6 | 18,225,000 | 18,375,000 | 244 | 461  | -0.058774339 | LEF1                                              |
| 6 | 18,300,000 | 18,450,000 | 245 | 516  | 0.809549956  | LEF1                                              |
| 6 | 18,375,000 | 18,525,000 | 246 | 608  | 0.721763005  | CYP2U1,HADH,LEF1                                  |
| 6 | 18,450,000 | 18,600,000 | 247 | 627  | 0.410386515  | CYP2U1,HADH,LEF1,SGMS2                            |
| 6 | 18,525,000 | 18,675,000 | 248 | 943  | 0.678779651  | CYP2U1,SGMS2                                      |
| 6 | 18,600,000 | 18,750,000 | 249 | 1354 | 0.26910107   | PAPSS1                                            |
| 6 | 18,675,000 | 18,825,000 | 250 | 1150 | 0.044370339  | PAPSS1                                            |
| 6 | 18,750,000 | 18,900,000 | 251 | 820  | 0.86197858   | PAPSS1                                            |
| 6 | 18,825,000 | 18,975,000 | 252 | 810  | 0.312650896  | PAPSS1                                            |
| 6 | 18,900,000 | 19,050,000 | 253 | 932  | -1.134174184 |                                                   |
| 6 | 18,975,000 | 19,125,000 | 254 | 1152 | -0.062782061 |                                                   |
| 6 | 19,050,000 | 19,200,000 | 255 | 1505 | 0.862935005  |                                                   |
| 6 | 19,125,000 | 19,275,000 | 256 | 1224 | 0.382269975  |                                                   |
| 6 | 19,200,000 | 19,350,000 | 257 | 971  | -1.532945041 |                                                   |
| 6 | 19,275,000 | 19,425,000 | 258 | 896  | -1.637344307 | DKK2                                              |
| 6 | 19,350,000 | 19,500,000 | 259 | 652  | -0.220219605 | DKK2                                              |
| 6 | 19,425,000 | 19,575,000 | 260 | 557  | -0.408792468 | DKK2                                              |
| 6 | 19,500,000 | 19,650,000 | 261 | 636  | 0.582276796  | DKK2                                              |
| 6 | 19,575,000 | 19,725,000 | 262 | 642  | -0.240415461 |                                                   |
| 6 | 19,650,000 | 19,800,000 | 263 | 630  | -2.638741597 |                                                   |
| 6 | 19,725,000 | 19,875,000 | 264 | 738  | -1.283237211 |                                                   |
| 6 | 19,800,000 | 19,950,000 | 265 | 573  | 0.629095045  |                                                   |
| 6 | 19,875,000 | 20,025,000 | 266 | 524  | 1.131486184  |                                                   |
| 6 | 19,950,000 | 20,100,000 | 267 | 537  | 0.249689402  | GIMD1                                             |
| 6 | 20,025,000 | 20,175,000 | 268 | 953  | -0.480235866 | GIMD1,SCYE1,TBCK                                  |
| 6 | 20,100,000 | 20,250,000 | 269 | 1265 | 0.352854647  | GIMD1,SCYE1,TBCK                                  |
| 6 | 20,175,000 | 20,325,000 | 270 | 1063 | 0.315747699  | TBCK                                              |
| 6 | 20,250,000 | 20,400,000 | 271 | 942  | -0.460625157 | TBCK                                              |
| 6 | 20,325,000 | 20,475,000 | 272 | 712  | -0.306978442 | NPNT,TBCK,ENSBTAG00000038232                      |
| 6 | 20,400,000 | 20,550,000 | 273 | 737  | -0.023151195 | NPNT,ENSBTAG00000038232                           |
| 6 | 20,475,000 | 20,625,000 | 274 | 917  | 0.210639398  | GSTCD,NPNT                                        |
| 6 | 20,550,000 | 20,700,000 | 275 | 987  | -0.682802183 | GSTCD                                             |
| 6 | 20,625,000 | 20,775,000 | 276 | 972  | -0.918388564 | GSTCD,INTS12,ENSBTAG00000008797                   |
| 6 | 20,700,000 | 20,850,000 | 277 | 1282 | -0.211544479 | GSTCD,INTS12,ENSBTAG00000008797,ENSBTAG0000033643 |
| 6 | 20,775,000 | 20,925,000 | 278 | 1484 | 0.042096519  | ENSBTAG00000008797,ENSBTAG00000033643             |
| 6 | 20,850,000 | 21,000,000 | 279 | 1305 | 0.287443012  | PPA2,ENSBTAG00000033643                           |
| 6 | 20,925,000 | 21,075,000 | 280 | 951  | 0.075810135  | PPA2                                              |
| 6 | 21,000,000 | 21,150,000 | 281 | 882  | -0.223302167 | PPA2                                              |
| 6 | 21,075,000 | 21,225,000 | 282 | 961  | 0.393833998  | PPA2,TET2                                         |
| 6 | 21,150,000 | 21,300,000 | 283 | 891  | 1.221660286  | TET2                                              |
| 6 | 21,225,000 | 21,375,000 | 284 | 873  | 1.076657264  |                                                   |
| 6 | 21,300,000 | 21,450,000 | 285 | 787  | 0.300943393  |                                                   |
| 6 | 21,375,000 | 21,525,000 | 286 | 999  | -0.531577584 |                                                   |
| 6 | 21,450,000 | 21,600,000 | 287 | 1040 | -0.29437512  |                                                   |
| 6 | 21,525,000 | 21,675,000 | 288 | 673  | -0.218149312 |                                                   |
| 6 | 21,600,000 | 21,750,000 | 289 | 394  | -1.123730497 |                                                   |
| 6 | 21,675,000 | 21,825,000 | 290 | 795  | 0.586328817  |                                                   |

|   |            |            |     |      |              |                     |
|---|------------|------------|-----|------|--------------|---------------------|
| 6 | 21,750,000 | 21,900,000 | 291 | 1340 | 0.367592325  |                     |
| 6 | 21,825,000 | 21,975,000 | 292 | 1118 | 0.434358019  |                     |
| 6 | 21,900,000 | 22,050,000 | 293 | 580  | 0.878700389  | CXXC4               |
| 6 | 21,975,000 | 22,125,000 | 294 | 435  | -0.269481728 | CXXC4               |
| 6 | 22,050,000 | 22,200,000 | 295 | 468  | -0.521832789 |                     |
| 6 | 22,125,000 | 22,275,000 | 296 | 719  | 0.258268657  |                     |
| 6 | 22,200,000 | 22,350,000 | 297 | 696  | 0.206023162  |                     |
| 6 | 22,275,000 | 22,425,000 | 298 | 358  | 0.237112629  |                     |
| 6 | 22,350,000 | 22,500,000 | 299 | 710  | 0.937903243  |                     |
| 6 | 22,425,000 | 22,575,000 | 300 | 1181 | 0.745787076  |                     |
| 6 | 22,500,000 | 22,650,000 | 301 | 1048 | 0.347898724  | TACR3               |
| 6 | 22,575,000 | 22,725,000 | 302 | 673  | 0.822862749  | TACR3               |
| 6 | 22,650,000 | 22,800,000 | 303 | 589  | 1.103157144  | TACR3               |
| 6 | 22,725,000 | 22,875,000 | 304 | 498  | 0.524213565  | TACR3               |
| 6 | 22,800,000 | 22,950,000 | 305 | 388  | -1.821768694 |                     |
| 6 | 22,875,000 | 23,025,000 | 306 | 712  | -0.756715768 | CENPE               |
| 6 | 22,950,000 | 23,100,000 | 307 | 1092 | -0.010479317 | BDH2,CENPE,SLC9B2   |
| 6 | 23,025,000 | 23,175,000 | 308 | 1388 | 0.065285289  | BDH2,CENPE,SLC9B2   |
| 6 | 23,100,000 | 23,250,000 | 309 | 1206 | 0.213430527  | NHEDC1,SLC9B2       |
| 6 | 23,175,000 | 23,325,000 | 310 | 686  | -0.702952169 | CISD2,NHEDC1,SLC9B2 |
| 6 | 23,250,000 | 23,400,000 | 311 | 519  | -2.229637195 | CISD2,MANBA,NHEDC1  |
| 6 | 23,325,000 | 23,475,000 | 312 | 798  | 0.047563052  | MANBA               |
| 6 | 23,400,000 | 23,550,000 | 313 | 801  | 0.336374673  | MANBA               |
| 6 | 23,475,000 | 23,625,000 | 314 | 486  | -0.695361933 | MANBA,NFKB1         |
| 6 | 23,550,000 | 23,700,000 | 315 | 466  | -1.266019893 | NFKB1               |
| 6 | 23,625,000 | 23,775,000 | 316 | 582  | 0.12495697   | NFKB1               |
| 6 | 23,700,000 | 23,850,000 | 317 | 595  | 0.557429614  | SLC39A8             |
| 6 | 23,775,000 | 23,925,000 | 318 | 682  | 0.805569269  | SLC39A8             |
| 6 | 23,850,000 | 24,000,000 | 319 | 1050 | 1.108167433  | SLC39A8             |
| 6 | 23,925,000 | 24,075,000 | 320 | 1148 | 1.22451118   | BANK1               |
| 6 | 24,000,000 | 24,150,000 | 321 | 992  | 1.066178376  | BANK1               |
| 6 | 24,075,000 | 24,225,000 | 322 | 916  | 1.082191624  | BANK1               |
| 6 | 24,150,000 | 24,300,000 | 323 | 984  | 0.693882528  |                     |
| 6 | 24,225,000 | 24,375,000 | 324 | 817  | 0.26600297   |                     |
| 6 | 24,300,000 | 24,450,000 | 325 | 685  | 0.147774544  |                     |
| 6 | 24,375,000 | 24,525,000 | 326 | 746  | 0.289369495  |                     |
| 6 | 24,450,000 | 24,600,000 | 327 | 567  | 0.225517372  |                     |
| 6 | 24,525,000 | 24,675,000 | 328 | 767  | -0.093028985 |                     |
| 6 | 24,600,000 | 24,750,000 | 329 | 896  | -0.349550034 |                     |
| 6 | 24,675,000 | 24,825,000 | 330 | 622  | -0.527584465 | PPP3CA              |
| 6 | 24,750,000 | 24,900,000 | 331 | 513  | -0.421243896 | PPP3CA              |
| 6 | 24,825,000 | 24,975,000 | 332 | 701  | -0.391438193 | PPP3CA              |
| 6 | 24,900,000 | 25,050,000 | 333 | 779  | 0.017866762  | PPP3CA              |
| 6 | 24,975,000 | 25,125,000 | 334 | 478  | 0.367791894  | PPP3CA              |
| 6 | 25,050,000 | 25,200,000 | 335 | 394  | -0.404627165 | PPP3CA              |
| 6 | 25,125,000 | 25,275,000 | 336 | 749  | -0.603738345 | PPP3CA              |
| 6 | 25,200,000 | 25,350,000 | 337 | 729  | 0.07923077   |                     |
| 6 | 25,275,000 | 25,425,000 | 338 | 600  | 0.431025862  |                     |
| 6 | 25,350,000 | 25,500,000 | 339 | 931  | 0.209522381  |                     |
| 6 | 25,425,000 | 25,575,000 | 340 | 874  | 0.364863999  |                     |
| 6 | 25,500,000 | 25,650,000 | 341 | 887  | -1.737828511 | EMCN                |
| 6 | 25,575,000 | 25,725,000 | 342 | 927  | -3.483823337 | EMCN                |
| 6 | 25,650,000 | 25,800,000 | 343 | 833  | -1.802650546 | EMCN                |

|   |            |            |     |      |              |                                                               |
|---|------------|------------|-----|------|--------------|---------------------------------------------------------------|
| 6 | 25,725,000 | 25,875,000 | 344 | 661  | -0.148567616 |                                                               |
| 6 | 25,800,000 | 25,950,000 | 345 | 593  | 0.026812624  | DDIT4L                                                        |
| 6 | 25,875,000 | 26,025,000 | 346 | 881  | -0.114260234 | DDIT4L                                                        |
| 6 | 25,950,000 | 26,100,000 | 347 | 650  | -0.269848263 | MGC157237                                                     |
| 6 | 26,025,000 | 26,175,000 | 348 | 405  | 0.426031104  | DAPP1,DNAJB14,H2AFZ,LAMTOR3,MGC157237                         |
| 6 | 26,100,000 | 26,250,000 | 349 | 479  | 0.494188908  | DAPP1,DNAJB14,H2AFZ,LAMTOR3                                   |
| 6 | 26,175,000 | 26,325,000 | 350 | 446  | 0.482113345  | DAPP1                                                         |
| 6 | 26,250,000 | 26,400,000 | 351 | 558  | 0.002316403  | MTTP,ENSBTAG00000046333                                       |
| 6 | 26,325,000 | 26,475,000 | 352 | 549  | -0.425583188 | MTTP,TRMT10A,ENSBTAG00000046333                               |
| 6 | 26,400,000 | 26,550,000 | 353 | 613  | -0.335311089 | ADH7,C4orf17,MTTP,TRMT10A                                     |
| 6 | 26,475,000 | 26,625,000 | 354 | 939  | -0.074581859 | ADH7,C4orf17                                                  |
| 6 | 26,550,000 | 26,700,000 | 355 | 863  | 0.544349345  | ADH7,ENSBTAG00000006986,ENSBTAG00000034189,ENSBTAG00000034514 |
| 6 | 26,625,000 | 26,775,000 | 356 | 913  | 0.885867887  | ENSBTAG00000006986,ENSBTAG00000034189,ENSBTAG00000034514      |
| 6 | 26,700,000 | 26,850,000 | 357 | 1063 | 0.375025978  | ADH6,ENSBTAG00000006986                                       |
| 6 | 26,775,000 | 26,925,000 | 358 | 872  | 0.772766678  | ADH4,ADH5,ADH6                                                |
| 6 | 26,850,000 | 27,000,000 | 359 | 733  | 1.180739347  | ADH4,ADH5,METAP1                                              |
| 6 | 26,925,000 | 27,075,000 | 360 | 696  | 0.688175152  | EIF4E,METAP1,ENSBTAG00000024125                               |
| 6 | 27,000,000 | 27,150,000 | 361 | 777  | 0.782760178  | EIF4E,ENSBTAG00000024125                                      |
| 6 | 27,075,000 | 27,225,000 | 362 | 878  | 0.541805597  | EIF4E                                                         |
| 6 | 27,150,000 | 27,300,000 | 363 | 1053 | 0.296651001  |                                                               |
| 6 | 27,225,000 | 27,375,000 | 364 | 1023 | 0.479071774  | TSPAN5                                                        |
| 6 | 27,300,000 | 27,450,000 | 365 | 1149 | 0.776504645  | TSPAN5                                                        |
| 6 | 27,375,000 | 27,525,000 | 366 | 1185 | 0.665078918  | TSPAN5                                                        |
| 6 | 27,450,000 | 27,600,000 | 367 | 656  | 0.359367571  | RAP1GDS1,TSPAN5                                               |
| 6 | 27,525,000 | 27,675,000 | 368 | 437  | -0.01122334  | RAP1GDS1                                                      |
| 6 | 27,600,000 | 27,750,000 | 369 | 543  | 0.126453072  | RAP1GDS1                                                      |
| 6 | 27,675,000 | 27,825,000 | 370 | 852  | 0.260107457  |                                                               |
| 6 | 27,750,000 | 27,900,000 | 371 | 910  | 0.147316945  |                                                               |
| 6 | 27,825,000 | 27,975,000 | 372 | 1045 | 0.096893602  |                                                               |
| 6 | 27,900,000 | 28,050,000 | 373 | 1441 | 0.62201572   |                                                               |
| 6 | 27,975,000 | 28,125,000 | 374 | 1231 | 0.781197341  | ENSBTAG00000023000                                            |
| 6 | 28,050,000 | 28,200,000 | 375 | 1115 | 0.220818567  | ENSBTAG00000023000                                            |
| 6 | 28,125,000 | 28,275,000 | 376 | 1319 | -0.113542653 |                                                               |
| 6 | 28,200,000 | 28,350,000 | 377 | 1552 | -1.375732671 |                                                               |
| 6 | 28,275,000 | 28,425,000 | 378 | 1439 | -1.497852499 |                                                               |
| 6 | 28,350,000 | 28,500,000 | 379 | 936  | -0.612548172 |                                                               |
| 6 | 28,425,000 | 28,575,000 | 380 | 783  | -1.359455996 |                                                               |
| 6 | 28,500,000 | 28,650,000 | 381 | 904  | -0.990399115 |                                                               |
| 6 | 28,575,000 | 28,725,000 | 382 | 827  | -0.174635412 |                                                               |
| 6 | 28,650,000 | 28,800,000 | 383 | 906  | -0.162932054 |                                                               |
| 6 | 28,725,000 | 28,875,000 | 384 | 1046 | -1.335927684 |                                                               |
| 6 | 28,800,000 | 28,950,000 | 385 | 1037 | -0.295533434 |                                                               |
| 6 | 28,875,000 | 29,025,000 | 386 | 1112 | 0.909466329  |                                                               |
| 6 | 28,950,000 | 29,100,000 | 387 | 1139 | 1.18562547   |                                                               |
| 6 | 29,025,000 | 29,175,000 | 388 | 1006 | 0.800571538  |                                                               |
| 6 | 29,100,000 | 29,250,000 | 389 | 909  | 0.241011309  |                                                               |
| 6 | 29,175,000 | 29,325,000 | 390 | 954  | 0.659410369  |                                                               |
| 6 | 29,250,000 | 29,400,000 | 391 | 855  | 0.667900378  | ENSBTAG00000015464                                            |
| 6 | 29,325,000 | 29,475,000 | 392 | 863  | -0.155381254 | ENSBTAG00000015464                                            |
| 6 | 29,400,000 | 29,550,000 | 393 | 856  | 0.738892967  |                                                               |
| 6 | 29,475,000 | 29,625,000 | 394 | 922  | 1.350690974  |                                                               |

|   |            |            |     |      |              |                                |
|---|------------|------------|-----|------|--------------|--------------------------------|
| 6 | 29,550,000 | 29,700,000 | 395 | 933  | 0.910455123  |                                |
| 6 | 29,625,000 | 29,775,000 | 396 | 784  | -0.118822816 |                                |
| 6 | 29,700,000 | 29,850,000 | 397 | 651  | -0.103050618 |                                |
| 6 | 29,775,000 | 29,925,000 | 398 | 692  | -0.024361003 |                                |
| 6 | 29,850,000 | 30,000,000 | 399 | 805  | -0.19920348  |                                |
| 6 | 29,925,000 | 30,075,000 | 400 | 1106 | 0.421487597  | PDHA2                          |
| 6 | 30,000,000 | 30,150,000 | 401 | 1001 | 0.489209758  | PDHA2                          |
| 6 | 30,075,000 | 30,225,000 | 402 | 651  | 0.32503329   |                                |
| 6 | 30,150,000 | 30,300,000 | 403 | 1008 | -1.295444414 |                                |
| 6 | 30,225,000 | 30,375,000 | 404 | 1109 | -2.140425524 |                                |
| 6 | 30,300,000 | 30,450,000 | 405 | 770  | -2.184121111 |                                |
| 6 | 30,375,000 | 30,525,000 | 406 | 867  | -0.552478473 |                                |
| 6 | 30,450,000 | 30,600,000 | 407 | 1018 | 0.18391561   | UNC5C                          |
| 6 | 30,525,000 | 30,675,000 | 408 | 1116 | 0.085700331  | UNC5C                          |
| 6 | 30,600,000 | 30,750,000 | 409 | 1242 | -0.739052298 | UNC5C                          |
| 6 | 30,675,000 | 30,825,000 | 410 | 1274 | -0.052825551 | BMPR1B,UNC5C                   |
| 6 | 30,750,000 | 30,900,000 | 411 | 1068 | 0.510450764  | BMPR1B,UNC5C                   |
| 6 | 30,825,000 | 30,975,000 | 412 | 713  | 0.088766982  | BMPR1B                         |
| 6 | 30,900,000 | 31,050,000 | 413 | 649  | -0.427238141 |                                |
| 6 | 30,975,000 | 31,125,000 | 414 | 524  | -0.678599039 |                                |
| 6 | 31,050,000 | 31,200,000 | 415 | 427  | -0.12724356  |                                |
| 6 | 31,125,000 | 31,275,000 | 416 | 505  | 0.746913242  |                                |
| 6 | 31,200,000 | 31,350,000 | 417 | 530  | 0.659367236  | PDLIM5                         |
| 6 | 31,275,000 | 31,425,000 | 418 | 420  | -0.019287449 | PDLIM5                         |
| 6 | 31,350,000 | 31,500,000 | 419 | 487  | -0.284814209 | PDLIM5                         |
| 6 | 31,425,000 | 31,575,000 | 420 | 725  | 0.678955135  | PDLIM5                         |
| 6 | 31,500,000 | 31,650,000 | 421 | 667  | 0.499299832  | PDLIM5                         |
| 6 | 31,575,000 | 31,725,000 | 422 | 646  | 0.324145023  | HPGDS                          |
| 6 | 31,650,000 | 31,800,000 | 423 | 849  | 0.693223379  | HPGDS,SMARCAD1                 |
| 6 | 31,725,000 | 31,875,000 | 424 | 605  | 0.622208257  | HPGDS,SMARCAD1                 |
| 6 | 31,800,000 | 31,950,000 | 425 | 382  | 0.104932836  | SMARCAD1                       |
| 6 | 31,875,000 | 32,025,000 | 426 | 876  | -0.309817317 |                                |
| 6 | 31,950,000 | 32,100,000 | 427 | 898  | -1.15429669  |                                |
| 6 | 32,025,000 | 32,175,000 | 428 | 491  | -3.113647411 | ATOH1                          |
| 6 | 32,100,000 | 32,250,000 | 429 | 650  | -2.598879402 | ATOH1,GRID2,ENSBTAG00000046473 |
| 6 | 32,175,000 | 32,325,000 | 430 | 637  | -3.275045358 | GRID2,ENSBTAG00000046473       |
| 6 | 32,250,000 | 32,400,000 | 431 | 612  | -1.391767376 |                                |
| 6 | 32,325,000 | 32,475,000 | 432 | 1139 | 1.059448707  |                                |
| 6 | 32,400,000 | 32,550,000 | 433 | 1504 | 1.141488395  |                                |
| 6 | 32,475,000 | 32,625,000 | 434 | 1520 | 1.300624413  |                                |
| 6 | 32,550,000 | 32,700,000 | 435 | 1568 | 0.57041666   |                                |
| 6 | 32,625,000 | 32,775,000 | 436 | 1605 | 0.813175116  |                                |
| 6 | 32,700,000 | 32,850,000 | 437 | 1472 | 1.330640799  |                                |
| 6 | 32,775,000 | 32,925,000 | 438 | 1189 | 0.10610801   |                                |
| 6 | 32,850,000 | 33,000,000 | 439 | 855  | -0.416969321 | ENSBTAG00000047255             |
| 6 | 32,925,000 | 33,075,000 | 440 | 789  | 0.562210082  | ENSBTAG00000047255             |
| 6 | 33,000,000 | 33,150,000 | 441 | 989  | 0.777831441  |                                |
| 6 | 33,075,000 | 33,225,000 | 442 | 1369 | 1.080968078  |                                |
| 6 | 33,150,000 | 33,300,000 | 443 | 1334 | 1.031376089  | ENSBTAG00000019490             |
| 6 | 33,225,000 | 33,375,000 | 444 | 982  | 0.546883118  | ENSBTAG00000019490             |
| 6 | 33,300,000 | 33,450,000 | 445 | 789  | 0.037926968  |                                |
| 6 | 33,375,000 | 33,525,000 | 446 | 609  | -4.158769848 | ENSBTAG00000047821             |
| 6 | 33,450,000 | 33,600,000 | 447 | 859  | -3.701062195 | ENSBTAG00000047821             |



|   |            |            |     |      |              |                          |
|---|------------|------------|-----|------|--------------|--------------------------|
| 6 | 33,525,000 | 33,675,000 | 448 | 1110 | -2.258002417 |                          |
| 6 | 33,600,000 | 33,750,000 | 449 | 1084 | -3.729635691 |                          |
| 6 | 33,675,000 | 33,825,000 | 450 | 1045 | -3.652839894 |                          |
| 6 | 33,750,000 | 33,900,000 | 451 | 971  | -1.542420535 |                          |
| 6 | 33,825,000 | 33,975,000 | 452 | 1093 | -0.014053207 |                          |
| 6 | 33,900,000 | 34,050,000 | 453 | 1194 | -0.647050442 |                          |
| 6 | 33,975,000 | 34,125,000 | 454 | 806  | -0.71042011  |                          |
| 6 | 34,050,000 | 34,200,000 | 455 | 663  | 0.338088162  |                          |
| 6 | 34,125,000 | 34,275,000 | 456 | 955  | 0.116387959  |                          |
| 6 | 34,200,000 | 34,350,000 | 457 | 1473 | 0.317060736  |                          |
| 6 | 34,275,000 | 34,425,000 | 458 | 1646 | 0.317487745  |                          |
| 6 | 34,350,000 | 34,500,000 | 459 | 1375 | -0.123227809 |                          |
| 6 | 34,425,000 | 34,575,000 | 460 | 1179 | -0.036597339 |                          |
| 6 | 34,500,000 | 34,650,000 | 461 | 1100 | 0.019226323  |                          |
| 6 | 34,575,000 | 34,725,000 | 462 | 1184 | -0.110968822 |                          |
| 6 | 34,650,000 | 34,800,000 | 463 | 957  | 0.295765301  |                          |
| 6 | 34,725,000 | 34,875,000 | 464 | 676  | 0.741239591  |                          |
| 6 | 34,800,000 | 34,950,000 | 465 | 657  | 0.761597388  |                          |
| 6 | 34,875,000 | 35,025,000 | 466 | 563  | -1.604061514 |                          |
| 6 | 34,950,000 | 35,100,000 | 467 | 689  | -2.948854557 |                          |
| 6 | 35,025,000 | 35,175,000 | 468 | 1029 | -0.442014896 | CCSER1                   |
| 6 | 35,100,000 | 35,250,000 | 469 | 975  | 0.426563333  | CCSER1                   |
| 6 | 35,175,000 | 35,325,000 | 470 | 630  | 0.431100129  | CCSER1                   |
| 6 | 35,250,000 | 35,400,000 | 471 | 522  | 1.067136166  | CCSER1                   |
| 6 | 35,325,000 | 35,475,000 | 472 | 793  | 0.057892617  | CCSER1                   |
| 6 | 35,400,000 | 35,550,000 | 473 | 1088 | -0.846708247 | CCSER1                   |
| 6 | 35,475,000 | 35,625,000 | 474 | 875  | -0.448281914 | CCSER1                   |
| 6 | 35,550,000 | 35,700,000 | 475 | 725  | 0.632810884  | CCSER1                   |
| 6 | 35,625,000 | 35,775,000 | 476 | 858  | 0.817718688  | CCSER1                   |
| 6 | 35,700,000 | 35,850,000 | 477 | 1000 | 1.090204064  | CCSER1                   |
| 6 | 35,775,000 | 35,925,000 | 478 | 1116 | 1.204579749  | CCSER1                   |
| 6 | 35,850,000 | 36,000,000 | 479 | 966  | 0.753008979  | CCSER1                   |
| 6 | 35,925,000 | 36,075,000 | 480 | 862  | 0.528021351  | CCSER1                   |
| 6 | 36,000,000 | 36,150,000 | 481 | 611  | 0.388306983  | MMRN1                    |
| 6 | 36,075,000 | 36,225,000 | 482 | 507  | -3.107529888 | MMRN1                    |
| 6 | 36,150,000 | 36,300,000 | 483 | 721  | -2.936456936 | MMRN1,SNCA               |
| 6 | 36,225,000 | 36,375,000 | 484 | 549  | -1.082070569 | SNCA                     |
| 6 | 36,300,000 | 36,450,000 | 485 | 388  | 0.182734888  | SNCA                     |
| 6 | 36,375,000 | 36,525,000 | 486 | 577  | 0.848373809  | SNCA                     |
| 6 | 36,450,000 | 36,600,000 | 487 | 954  | 1.005032224  |                          |
| 6 | 36,525,000 | 36,675,000 | 488 | 1169 | 0.913681661  |                          |
| 6 | 36,600,000 | 36,750,000 | 489 | 1202 | 0.405824277  |                          |
| 6 | 36,675,000 | 36,825,000 | 490 | 1035 | -1.33690988  |                          |
| 6 | 36,750,000 | 36,900,000 | 491 | 638  | -1.769353729 |                          |
| 6 | 36,825,000 | 36,975,000 | 492 | 697  | -0.407581599 |                          |
| 6 | 36,900,000 | 37,050,000 | 493 | 812  | -0.100527884 | GPRIN3                   |
| 6 | 36,975,000 | 37,125,000 | 494 | 737  | 0.865687061  | GPRIN3,TIGD2             |
| 6 | 37,050,000 | 37,200,000 | 495 | 518  | 1.086566858  | TIGD2,ENSBTAG00000033346 |
| 6 | 37,125,000 | 37,275,000 | 496 | 497  | 0.022067609  | ENSBTAG00000033346       |
| 6 | 37,200,000 | 37,350,000 | 497 | 653  | 0.045909227  |                          |
| 6 | 37,275,000 | 37,425,000 | 498 | 577  | 0.869856646  | FAM13A                   |
| 6 | 37,350,000 | 37,500,000 | 499 | 463  | 0.700055655  | FAM13A,HERC3             |
| 6 | 37,425,000 | 37,575,000 | 500 | 397  | -0.120142203 | FAM13A,HERC3,NAP1L5      |

|   |            |            |     |      |              |                       |
|---|------------|------------|-----|------|--------------|-----------------------|
| 6 | 37,500,000 | 37,650,000 | 501 | 414  | -1.249332425 | HERC3,NAP1L5          |
| 6 | 37,575,000 | 37,725,000 | 502 | 374  | -2.582217879 | HERC3,HERC5,PIGY      |
| 6 | 37,650,000 | 37,800,000 | 503 | 506  | -2.845648843 | HERC5,HERC6,PIGY      |
| 6 | 37,725,000 | 37,875,000 | 504 | 863  | -2.005918254 | HERC5,HERC6           |
| 6 | 37,800,000 | 37,950,000 | 505 | 1094 | -0.94597603  | ABCG2,PPM1K           |
| 6 | 37,875,000 | 38,025,000 | 506 | 1098 | -0.370845183 | ABCG2,PPM1K           |
| 6 | 37,950,000 | 38,100,000 | 507 | 715  | -0.245458591 | ABCG2,PKD2            |
| 6 | 38,025,000 | 38,175,000 | 508 | 411  | 0.834320984  | ABCG2,PKD2,SPP1       |
| 6 | 38,100,000 | 38,250,000 | 509 | 746  | 0.772798415  | SPP1                  |
| 6 | 38,175,000 | 38,325,000 | 510 | 783  | 0.283480114  | IBSP,MEPE             |
| 6 | 38,250,000 | 38,400,000 | 511 | 640  | -0.032294851 | IBSP,MEPE             |
| 6 | 38,325,000 | 38,475,000 | 512 | 1096 | -0.033266802 |                       |
| 6 | 38,400,000 | 38,550,000 | 513 | 1692 | -0.214139368 |                       |
| 6 | 38,475,000 | 38,625,000 | 514 | 1496 | 0.096472048  | FAM184B,LAP3,MED28    |
| 6 | 38,550,000 | 38,700,000 | 515 | 883  | 0.546463616  | FAM184B,LAP3,MED28    |
| 6 | 38,625,000 | 38,775,000 | 516 | 871  | -1.384901385 | DCAF16,FAM184B,HCAP-G |
| 6 | 38,700,000 | 38,850,000 | 517 | 817  | -2.904613665 | DCAF16,HCAP-G,LCORL   |
| 6 | 38,775,000 | 38,925,000 | 518 | 541  | -2.234049781 | HCAP-G,LCORL          |
| 6 | 38,850,000 | 39,000,000 | 519 | 446  | -0.57467424  | LCORL                 |
| 6 | 38,925,000 | 39,075,000 | 520 | 384  | 0.258456356  | LCORL                 |
| 6 | 39,000,000 | 39,150,000 | 521 | 358  | 0.567979066  |                       |
| 6 | 39,075,000 | 39,225,000 | 522 | 519  | -0.423816657 |                       |
| 6 | 39,150,000 | 39,300,000 | 523 | 862  | 0.124532664  |                       |
| 6 | 39,225,000 | 39,375,000 | 524 | 1185 | 0.982035973  |                       |
| 6 | 39,300,000 | 39,450,000 | 525 | 1149 | 1.182688721  |                       |
| 6 | 39,375,000 | 39,525,000 | 526 | 1003 | 1.085079496  |                       |
| 6 | 39,450,000 | 39,600,000 | 527 | 907  | 0.76244659   |                       |
| 6 | 39,525,000 | 39,675,000 | 528 | 872  | 0.135991294  |                       |
| 6 | 39,600,000 | 39,750,000 | 529 | 865  | -0.21590129  |                       |
| 6 | 39,675,000 | 39,825,000 | 530 | 1016 | -0.574881733 |                       |
| 6 | 39,750,000 | 39,900,000 | 531 | 790  | -0.58980122  |                       |
| 6 | 39,825,000 | 39,975,000 | 532 | 298  | -0.777406649 |                       |
| 6 | 39,900,000 | 40,050,000 | 533 | 454  | -0.141004289 |                       |
| 6 | 39,975,000 | 40,125,000 | 534 | 608  | 0.002256146  |                       |
| 6 | 40,050,000 | 40,200,000 | 535 | 551  | -0.022299706 |                       |
| 6 | 40,125,000 | 40,275,000 | 536 | 659  | -0.309120275 |                       |
| 6 | 40,200,000 | 40,350,000 | 537 | 995  | 0.199640206  |                       |
| 6 | 40,275,000 | 40,425,000 | 538 | 837  | 0.635166702  |                       |
| 6 | 40,350,000 | 40,500,000 | 539 | 519  | 1.094642762  |                       |
| 6 | 40,425,000 | 40,575,000 | 540 | 886  | 1.172856546  |                       |
| 6 | 40,500,000 | 40,650,000 | 541 | 1308 | 0.533573339  |                       |
| 6 | 40,575,000 | 40,725,000 | 542 | 1279 | 0.274665134  |                       |
| 6 | 40,650,000 | 40,800,000 | 543 | 972  | 0.822298496  |                       |
| 6 | 40,725,000 | 40,875,000 | 544 | 847  | 0.975254211  |                       |
| 6 | 40,800,000 | 40,950,000 | 545 | 1073 | 0.492950854  |                       |
| 6 | 40,875,000 | 41,025,000 | 546 | 1030 | 0.289555388  |                       |
| 6 | 40,950,000 | 41,100,000 | 547 | 674  | 0.521880302  |                       |
| 6 | 41,025,000 | 41,175,000 | 548 | 624  | 0.771601357  |                       |
| 6 | 41,100,000 | 41,250,000 | 549 | 869  | 0.313256123  | SLIT2                 |
| 6 | 41,175,000 | 41,325,000 | 550 | 885  | 0.135394442  | SLIT2                 |
| 6 | 41,250,000 | 41,400,000 | 551 | 875  | 0.795526939  | SLIT2                 |
| 6 | 41,325,000 | 41,475,000 | 552 | 1164 | 0.980638474  | SLIT2                 |
| 6 | 41,400,000 | 41,550,000 | 553 | 1071 | 0.50194203   | SLIT2                 |

|   |            |            |     |      |              |                     |
|---|------------|------------|-----|------|--------------|---------------------|
| 6 | 41,475,000 | 41,625,000 | 554 | 713  | 0.451701636  | SLIT2               |
| 6 | 41,550,000 | 41,700,000 | 555 | 794  | 0.967889403  | PACRGL,SLIT2        |
| 6 | 41,625,000 | 41,775,000 | 556 | 1155 | 0.045356306  | KCNIP4,PACRGL,SLIT2 |
| 6 | 41,700,000 | 41,850,000 | 557 | 1367 | -0.680537703 | KCNIP4,PACRGL       |
| 6 | 41,775,000 | 41,925,000 | 558 | 1550 | 0.079536159  | KCNIP4              |
| 6 | 41,850,000 | 42,000,000 | 559 | 1587 | 0.351091788  | KCNIP4              |
| 6 | 41,925,000 | 42,075,000 | 560 | 1477 | -0.178424406 | KCNIP4              |
| 6 | 42,000,000 | 42,150,000 | 561 | 1441 | 0.061330372  | KCNIP4              |
| 6 | 42,075,000 | 42,225,000 | 562 | 1358 | 0.030240639  | KCNIP4              |
| 6 | 42,150,000 | 42,300,000 | 563 | 1506 | -1.032972438 | KCNIP4              |
| 6 | 42,225,000 | 42,375,000 | 564 | 1519 | -0.039337177 | KCNIP4              |
| 6 | 42,300,000 | 42,450,000 | 565 | 1297 | 0.433946765  | KCNIP4              |
| 6 | 42,375,000 | 42,525,000 | 566 | 1375 | -1.444645235 | KCNIP4              |
| 6 | 42,450,000 | 42,600,000 | 567 | 1193 | -1.220069386 | KCNIP4              |
| 6 | 42,525,000 | 42,675,000 | 568 | 622  | -0.99498207  | KCNIP4              |
| 6 | 42,600,000 | 42,750,000 | 569 | 478  | -0.316031248 | KCNIP4              |
| 6 | 42,675,000 | 42,825,000 | 570 | 633  | 0.76721261   | KCNIP4              |
| 6 | 42,750,000 | 42,900,000 | 571 | 765  | 0.835700714  | KCNIP4              |
| 6 | 42,825,000 | 42,975,000 | 572 | 901  | 0.638911015  | KCNIP4              |
| 6 | 42,900,000 | 43,050,000 | 573 | 928  | -0.441443545 | KCNIP4              |
| 6 | 42,975,000 | 43,125,000 | 574 | 885  | -1.327714386 | KCNIP4              |
| 6 | 43,050,000 | 43,200,000 | 575 | 833  | 0.085041452  |                     |
| 6 | 43,125,000 | 43,275,000 | 576 | 823  | 0.252193118  |                     |
| 6 | 43,200,000 | 43,350,000 | 577 | 780  | 0.409205838  |                     |
| 6 | 43,275,000 | 43,425,000 | 578 | 1071 | 0.819986307  |                     |
| 6 | 43,350,000 | 43,500,000 | 579 | 1267 | 0.508338968  | GPR125              |
| 6 | 43,425,000 | 43,575,000 | 580 | 1085 | 0.542992693  | GPR125              |
| 6 | 43,500,000 | 43,650,000 | 581 | 1305 | -0.086457979 | GPR125              |
| 6 | 43,575,000 | 43,725,000 | 582 | 1241 | -1.612718643 | GBA3                |
| 6 | 43,650,000 | 43,800,000 | 583 | 863  | -1.538170064 | GBA3                |
| 6 | 43,725,000 | 43,875,000 | 584 | 876  | 0.099368716  | GBA3                |
| 6 | 43,800,000 | 43,950,000 | 585 | 966  | 0.201178115  | GBA3                |
| 6 | 43,875,000 | 44,025,000 | 586 | 852  | -0.178434748 |                     |
| 6 | 43,950,000 | 44,100,000 | 587 | 632  | -0.08868083  |                     |
| 6 | 44,025,000 | 44,175,000 | 588 | 771  | 0.327941859  |                     |
| 6 | 44,100,000 | 44,250,000 | 589 | 696  | 0.488748865  |                     |
| 6 | 44,175,000 | 44,325,000 | 590 | 569  | 0.224347266  |                     |
| 6 | 44,250,000 | 44,400,000 | 591 | 850  | -0.412384609 |                     |
| 6 | 44,325,000 | 44,475,000 | 592 | 946  | -0.123287627 |                     |
| 6 | 44,400,000 | 44,550,000 | 593 | 838  | 0.685604595  |                     |
| 6 | 44,475,000 | 44,625,000 | 594 | 862  | 1.148324812  |                     |
| 6 | 44,550,000 | 44,700,000 | 595 | 1018 | 1.183479147  | ENSBTAG00000033327  |
| 6 | 44,625,000 | 44,775,000 | 596 | 844  | 1.028127128  | ENSBTAG00000033327  |
| 6 | 44,700,000 | 44,850,000 | 597 | 811  | 0.723286601  |                     |
| 6 | 44,775,000 | 44,925,000 | 598 | 813  | 0.624800868  | PPARGC1A            |
| 6 | 44,850,000 | 45,000,000 | 599 | 728  | 0.389830006  | PPARGC1A            |
| 6 | 44,925,000 | 45,075,000 | 600 | 681  | -0.032191423 | PPARGC1A            |
| 6 | 45,000,000 | 45,150,000 | 601 | 567  | 0.211423765  |                     |
| 6 | 45,075,000 | 45,225,000 | 602 | 541  | 1.10253734   |                     |
| 6 | 45,150,000 | 45,300,000 | 603 | 475  | 1.175232582  |                     |
| 6 | 45,225,000 | 45,375,000 | 604 | 553  | -0.393740505 |                     |
| 6 | 45,300,000 | 45,450,000 | 605 | 628  | -0.368509818 |                     |
| 6 | 45,375,000 | 45,525,000 | 606 | 849  | 0.369454369  |                     |

|   |            |            |     |      |              |                       |
|---|------------|------------|-----|------|--------------|-----------------------|
| 6 | 45,450,000 | 45,600,000 | 607 | 1020 | 0.198188915  |                       |
| 6 | 45,525,000 | 45,675,000 | 608 | 935  | 0.705209018  | DHX15                 |
| 6 | 45,600,000 | 45,750,000 | 609 | 931  | 1.013356242  | DHX15                 |
| 6 | 45,675,000 | 45,825,000 | 610 | 895  | 0.814043576  | DHX15                 |
| 6 | 45,750,000 | 45,900,000 | 611 | 1144 | 0.589191235  |                       |
| 6 | 45,825,000 | 45,975,000 | 612 | 1434 | 0.321944941  | CCDC149,ECSOD         |
| 6 | 45,900,000 | 46,050,000 | 613 | 1339 | 0.38759718   | CCDC149,ECSOD         |
| 6 | 45,975,000 | 46,125,000 | 614 | 966  | 0.580131064  | CCDC149               |
| 6 | 46,050,000 | 46,200,000 | 615 | 564  | 0.389935821  | CCDC149,LGI2          |
| 6 | 46,125,000 | 46,275,000 | 616 | 440  | 0.561355282  | LGI2,SEPSECS          |
| 6 | 46,200,000 | 46,350,000 | 617 | 400  | 0.702564769  | SEPSECS               |
| 6 | 46,275,000 | 46,425,000 | 618 | 345  | 1.089988522  | PI4K2B,SEPSECS,ZCCHC4 |
| 6 | 46,350,000 | 46,500,000 | 619 | 557  | -0.865551656 | ANAPC4,PI4K2B,ZCCHC4  |
| 6 | 46,425,000 | 46,575,000 | 620 | 767  | -1.283456105 | ANAPC4,ZCCHC4         |
| 6 | 46,500,000 | 46,650,000 | 621 | 802  | -0.12850906  | ANAPC4                |
| 6 | 46,575,000 | 46,725,000 | 622 | 775  | 0.485850457  | SLC34A2               |
| 6 | 46,650,000 | 46,800,000 | 623 | 895  | 1.056836446  | SEL1L3,SLC34A2        |
| 6 | 46,725,000 | 46,875,000 | 624 | 1005 | 0.486887392  | SEL1L3,SLC34A2        |
| 6 | 46,800,000 | 46,950,000 | 625 | 1097 | -1.057965842 | SEL1L3                |
| 6 | 46,875,000 | 47,025,000 | 626 | 1073 | -1.463683969 | SEL1L3,SMIM20         |
| 6 | 46,950,000 | 47,100,000 | 627 | 774  | -1.435924084 | SMIM20                |
| 6 | 47,025,000 | 47,175,000 | 628 | 525  | -0.277291073 |                       |
| 6 | 47,100,000 | 47,250,000 | 629 | 401  | 1.334944214  |                       |
| 6 | 47,175,000 | 47,325,000 | 630 | 334  | 1.284159796  | RBPJ                  |
| 6 | 47,250,000 | 47,400,000 | 631 | 226  | 0.585284635  | RBPJ                  |
| 6 | 47,325,000 | 47,475,000 | 632 | 283  | 0.667679877  | CCKAR,RBPJ            |
| 6 | 47,400,000 | 47,550,000 | 633 | 548  | -0.223038762 | CCKAR,RBPJ            |
| 6 | 47,475,000 | 47,625,000 | 634 | 601  | -0.007800812 | CCKAR,TBC1D19         |
| 6 | 47,550,000 | 47,700,000 | 635 | 664  | 0.7174688    | TBC1D19               |
| 6 | 47,625,000 | 47,775,000 | 636 | 787  | 0.826078384  | TBC1D19               |
| 6 | 47,700,000 | 47,850,000 | 637 | 547  | 0.974523873  | TBC1D19               |
| 6 | 47,775,000 | 47,925,000 | 638 | 631  | 1.047358773  |                       |
| 6 | 47,850,000 | 48,000,000 | 639 | 576  | 1.122630015  | STIM2                 |
| 6 | 47,925,000 | 48,075,000 | 640 | 477  | 0.600188405  | STIM2                 |
| 6 | 48,000,000 | 48,150,000 | 641 | 743  | 0.649423631  | STIM2                 |
| 6 | 48,075,000 | 48,225,000 | 642 | 861  | 0.750329935  |                       |
| 6 | 48,150,000 | 48,300,000 | 643 | 1216 | 1.162261853  |                       |
| 6 | 48,225,000 | 48,375,000 | 644 | 1316 | 1.340633403  |                       |
| 6 | 48,300,000 | 48,450,000 | 645 | 1194 | 0.955310497  |                       |
| 6 | 48,375,000 | 48,525,000 | 646 | 1281 | -0.45381262  | ENSBTAG00000045570    |
| 6 | 48,450,000 | 48,600,000 | 647 | 1328 | -0.515944752 | ENSBTAG00000045570    |
| 6 | 48,525,000 | 48,675,000 | 648 | 1292 | -0.288336559 |                       |
| 6 | 48,600,000 | 48,750,000 | 649 | 1293 | -0.897401143 |                       |
| 6 | 48,675,000 | 48,825,000 | 650 | 1414 | -0.680517379 |                       |
| 6 | 48,750,000 | 48,900,000 | 651 | 1274 | -0.626497844 |                       |
| 6 | 48,825,000 | 48,975,000 | 652 | 970  | -0.359452528 |                       |
| 6 | 48,900,000 | 49,050,000 | 653 | 1100 | 0.324673451  |                       |
| 6 | 48,975,000 | 49,125,000 | 654 | 1403 | 0.592827589  |                       |
| 6 | 49,050,000 | 49,200,000 | 655 | 1498 | 0.88706965   |                       |
| 6 | 49,125,000 | 49,275,000 | 656 | 1447 | 0.899421686  |                       |
| 6 | 49,200,000 | 49,350,000 | 657 | 1522 | 0.244167802  |                       |
| 6 | 49,275,000 | 49,425,000 | 658 | 1455 | 0.338260342  |                       |
| 6 | 49,350,000 | 49,500,000 | 659 | 1224 | 0.753968793  |                       |

|   |            |            |     |      |              |       |
|---|------------|------------|-----|------|--------------|-------|
| 6 | 49,425,000 | 49,575,000 | 660 | 990  | 0.055310041  |       |
| 6 | 49,500,000 | 49,650,000 | 661 | 942  | -0.854242979 |       |
| 6 | 49,575,000 | 49,725,000 | 662 | 969  | -1.481967996 |       |
| 6 | 49,650,000 | 49,800,000 | 663 | 974  | -1.227882256 |       |
| 6 | 49,725,000 | 49,875,000 | 664 | 1277 | -1.053485638 |       |
| 6 | 49,800,000 | 49,950,000 | 665 | 1234 | -0.746999812 |       |
| 6 | 49,875,000 | 50,025,000 | 666 | 901  | 0.483563636  |       |
| 6 | 49,950,000 | 50,100,000 | 667 | 661  | 0.504509141  |       |
| 6 | 50,025,000 | 50,175,000 | 668 | 706  | 0.196058493  |       |
| 6 | 50,100,000 | 50,250,000 | 669 | 768  | 0.076485941  |       |
| 6 | 50,175,000 | 50,325,000 | 670 | 985  | 0.528903602  |       |
| 6 | 50,250,000 | 50,400,000 | 671 | 1339 | 0.569596714  |       |
| 6 | 50,325,000 | 50,475,000 | 672 | 1116 | 0.215340252  |       |
| 6 | 50,400,000 | 50,550,000 | 673 | 932  | -0.481196814 |       |
| 6 | 50,475,000 | 50,625,000 | 674 | 966  | 0.075574827  |       |
| 6 | 50,550,000 | 50,700,000 | 675 | 928  | -0.333990528 |       |
| 6 | 50,625,000 | 50,775,000 | 676 | 1052 | -0.348906318 |       |
| 6 | 50,700,000 | 50,850,000 | 677 | 954  | 0.188329944  |       |
| 6 | 50,775,000 | 50,925,000 | 678 | 1157 | -0.171830835 |       |
| 6 | 50,850,000 | 51,000,000 | 679 | 1761 | -0.732289848 |       |
| 6 | 50,925,000 | 51,075,000 | 680 | 1755 | -1.12362785  |       |
| 6 | 51,000,000 | 51,150,000 | 681 | 1485 | -0.350968645 |       |
| 6 | 51,075,000 | 51,225,000 | 682 | 1194 | 0.54963033   |       |
| 6 | 51,150,000 | 51,300,000 | 683 | 1221 | 0.781556804  |       |
| 6 | 51,225,000 | 51,375,000 | 684 | 1351 | 0.361144669  |       |
| 6 | 51,300,000 | 51,450,000 | 685 | 1228 | -0.244734014 |       |
| 6 | 51,375,000 | 51,525,000 | 686 | 949  | -0.157849246 |       |
| 6 | 51,450,000 | 51,600,000 | 687 | 651  | -0.032241954 | PCDH7 |
| 6 | 51,525,000 | 51,675,000 | 688 | 763  | -0.2273262   | PCDH7 |
| 6 | 51,600,000 | 51,750,000 | 689 | 864  | -0.498801283 | PCDH7 |
| 6 | 51,675,000 | 51,825,000 | 690 | 753  | -0.252690433 | PCDH7 |
| 6 | 51,750,000 | 51,900,000 | 691 | 738  | -0.282925564 | PCDH7 |
| 6 | 51,825,000 | 51,975,000 | 692 | 872  | -0.543879395 | PCDH7 |
| 6 | 51,900,000 | 52,050,000 | 693 | 898  | -0.506405373 | PCDH7 |
| 6 | 51,975,000 | 52,125,000 | 694 | 839  | -1.063570396 | PCDH7 |
| 6 | 52,050,000 | 52,200,000 | 695 | 885  | -1.211440575 |       |
| 6 | 52,125,000 | 52,275,000 | 696 | 803  | -0.473618923 |       |
| 6 | 52,200,000 | 52,350,000 | 697 | 753  | -0.581530572 |       |
| 6 | 52,275,000 | 52,425,000 | 698 | 797  | -0.840222913 |       |
| 6 | 52,350,000 | 52,500,000 | 699 | 805  | -0.166564336 |       |
| 6 | 52,425,000 | 52,575,000 | 700 | 724  | -0.420429681 |       |
| 6 | 52,500,000 | 52,650,000 | 701 | 504  | -0.719464547 |       |
| 6 | 52,575,000 | 52,725,000 | 702 | 520  | 1.075512857  |       |
| 6 | 52,650,000 | 52,800,000 | 703 | 605  | 0.307757732  |       |
| 6 | 52,725,000 | 52,875,000 | 704 | 673  | -0.337486977 |       |
| 6 | 52,800,000 | 52,950,000 | 705 | 919  | -2.177653907 |       |
| 6 | 52,875,000 | 53,025,000 | 706 | 875  | -2.750387629 |       |
| 6 | 52,950,000 | 53,100,000 | 707 | 709  | -0.874425757 |       |
| 6 | 53,025,000 | 53,175,000 | 708 | 1369 | 0.352549736  |       |
| 6 | 53,100,000 | 53,250,000 | 709 | 1434 | 0.542682085  |       |
| 6 | 53,175,000 | 53,325,000 | 710 | 860  | -0.434411228 |       |
| 6 | 53,250,000 | 53,400,000 | 711 | 1136 | -0.139236954 |       |
| 6 | 53,325,000 | 53,475,000 | 712 | 1022 | -0.163736527 |       |

|   |            |            |     |      |              |             |
|---|------------|------------|-----|------|--------------|-------------|
| 6 | 53,400,000 | 53,550,000 | 713 | 798  | -0.996261608 |             |
| 6 | 53,475,000 | 53,625,000 | 714 | 784  | -0.223502356 |             |
| 6 | 53,550,000 | 53,700,000 | 715 | 686  | -0.211695711 |             |
| 6 | 53,625,000 | 53,775,000 | 716 | 609  | -0.600457808 |             |
| 6 | 53,700,000 | 53,850,000 | 717 | 848  | -0.239984566 |             |
| 6 | 53,775,000 | 53,925,000 | 718 | 1254 | -0.954895102 |             |
| 6 | 53,850,000 | 54,000,000 | 719 | 1479 | -1.87104506  |             |
| 6 | 53,925,000 | 54,075,000 | 720 | 1328 | -3.165470076 |             |
| 6 | 54,000,000 | 54,150,000 | 721 | 938  | -2.653536751 |             |
| 6 | 54,075,000 | 54,225,000 | 722 | 1465 | 0.375044517  |             |
| 6 | 54,150,000 | 54,300,000 | 723 | 1997 | -0.252185982 |             |
| 6 | 54,225,000 | 54,375,000 | 724 | 1548 | -0.79374333  |             |
| 6 | 54,300,000 | 54,450,000 | 725 | 1293 | 0.563617832  |             |
| 6 | 54,375,000 | 54,525,000 | 726 | 1589 | -0.0734583   |             |
| 6 | 54,450,000 | 54,600,000 | 727 | 1823 | -0.42575124  |             |
| 6 | 54,525,000 | 54,675,000 | 728 | 1655 | -0.632050747 |             |
| 6 | 54,600,000 | 54,750,000 | 729 | 1439 | -0.244403331 |             |
| 6 | 54,675,000 | 54,825,000 | 730 | 1629 | 0.461899441  |             |
| 6 | 54,750,000 | 54,900,000 | 731 | 1632 | 0.581055021  |             |
| 6 | 54,825,000 | 54,975,000 | 732 | 1913 | 1.036658507  |             |
| 6 | 54,900,000 | 55,050,000 | 733 | 1930 | 1.003102137  |             |
| 6 | 54,975,000 | 55,125,000 | 734 | 1671 | -0.054668803 |             |
| 6 | 55,050,000 | 55,200,000 | 735 | 1614 | 0.164998973  |             |
| 6 | 55,125,000 | 55,275,000 | 736 | 1633 | 0.418060949  |             |
| 6 | 55,200,000 | 55,350,000 | 737 | 1564 | -0.422603087 |             |
| 6 | 55,275,000 | 55,425,000 | 738 | 1494 | -0.885763621 |             |
| 6 | 55,350,000 | 55,500,000 | 739 | 1611 | -0.119313997 |             |
| 6 | 55,425,000 | 55,575,000 | 740 | 1592 | 0.828792359  |             |
| 6 | 55,500,000 | 55,650,000 | 741 | 1534 | 0.881511519  |             |
| 6 | 55,575,000 | 55,725,000 | 742 | 1478 | 0.909044713  |             |
| 6 | 55,650,000 | 55,800,000 | 743 | 1510 | 1.114813529  |             |
| 6 | 55,725,000 | 55,875,000 | 744 | 1537 | 1.138663414  |             |
| 6 | 55,800,000 | 55,950,000 | 745 | 1641 | 1.193288825  |             |
| 6 | 55,875,000 | 56,025,000 | 746 | 1792 | 1.283899088  |             |
| 6 | 55,950,000 | 56,100,000 | 747 | 2053 | 1.264550957  |             |
| 6 | 56,025,000 | 56,175,000 | 748 | 2198 | 1.182840776  |             |
| 6 | 56,100,000 | 56,250,000 | 749 | 1931 | -0.153485854 |             |
| 6 | 56,175,000 | 56,325,000 | 750 | 1669 | -1.228382753 |             |
| 6 | 56,250,000 | 56,400,000 | 751 | 1866 | 0.318377032  |             |
| 6 | 56,325,000 | 56,475,000 | 752 | 1986 | 0.338739701  |             |
| 6 | 56,400,000 | 56,550,000 | 753 | 2025 | 0.07128709   |             |
| 6 | 56,475,000 | 56,625,000 | 754 | 1930 | -0.08302667  |             |
| 6 | 56,550,000 | 56,700,000 | 755 | 1465 | -0.509868804 |             |
| 6 | 56,625,000 | 56,775,000 | 756 | 1340 | -1.17797437  |             |
| 6 | 56,700,000 | 56,850,000 | 757 | 1041 | -1.703195458 |             |
| 6 | 56,775,000 | 56,925,000 | 758 | 1131 | -0.068689512 |             |
| 6 | 56,850,000 | 57,000,000 | 759 | 1657 | 0.40906418   |             |
| 6 | 56,925,000 | 57,075,000 | 760 | 1294 | 0.278987604  | ARAP2       |
| 6 | 57,000,000 | 57,150,000 | 761 | 1005 | 0.553817213  | ARAP2       |
| 6 | 57,075,000 | 57,225,000 | 762 | 1025 | 0.453978431  | ARAP2       |
| 6 | 57,150,000 | 57,300,000 | 763 | 773  | -0.109676486 | ARAP2       |
| 6 | 57,225,000 | 57,375,000 | 764 | 811  | -1.497466898 | ARAP2,DTHD1 |
| 6 | 57,300,000 | 57,450,000 | 765 | 737  | -0.996859171 | DTHD1       |

|   |            |            |     |      |              |                           |
|---|------------|------------|-----|------|--------------|---------------------------|
| 6 | 57,375,000 | 57,525,000 | 766 | 483  | 1.147051263  | DTHD1                     |
| 6 | 57,450,000 | 57,600,000 | 767 | 648  | -0.399860424 |                           |
| 6 | 57,525,000 | 57,675,000 | 768 | 779  | -0.086520795 |                           |
| 6 | 57,600,000 | 57,750,000 | 769 | 505  | 0.462501159  |                           |
| 6 | 57,675,000 | 57,825,000 | 770 | 528  | 0.776742555  |                           |
| 6 | 57,750,000 | 57,900,000 | 771 | 829  | -0.486513974 |                           |
| 6 | 57,825,000 | 57,975,000 | 772 | 931  | -0.604351634 |                           |
| 6 | 57,900,000 | 58,050,000 | 773 | 910  | -0.797802303 |                           |
| 6 | 57,975,000 | 58,125,000 | 774 | 964  | -1.299466352 | ENSBTAG00000039222        |
| 6 | 58,050,000 | 58,200,000 | 775 | 1221 | -0.045628497 | ENSBTAG00000039222        |
| 6 | 58,125,000 | 58,275,000 | 776 | 1166 | 0.514026542  |                           |
| 6 | 58,200,000 | 58,350,000 | 777 | 1058 | 0.888422956  |                           |
| 6 | 58,275,000 | 58,425,000 | 778 | 880  | 0.491665628  |                           |
| 6 | 58,350,000 | 58,500,000 | 779 | 563  | -0.39798257  | C4orf19,NWD2              |
| 6 | 58,425,000 | 58,575,000 | 780 | 529  | 0.453447149  | C4orf19,NWD2              |
| 6 | 58,500,000 | 58,650,000 | 781 | 613  | 0.024328484  | C4orf19,RELL1             |
| 6 | 58,575,000 | 58,725,000 | 782 | 611  | 0.034232187  | RELL1                     |
| 6 | 58,650,000 | 58,800,000 | 783 | 656  | 0.54065885   | PGM2,RELL1                |
| 6 | 58,725,000 | 58,875,000 | 784 | 716  | 0.89572186   | PGM2,TBC1D1               |
| 6 | 58,800,000 | 58,950,000 | 785 | 589  | -0.42376008  | PGM2,TBC1D1               |
| 6 | 58,875,000 | 59,025,000 | 786 | 482  | -1.423488192 | TBC1D1                    |
| 6 | 58,950,000 | 59,100,000 | 787 | 370  | -0.066912847 | TBC1D1                    |
| 6 | 59,025,000 | 59,175,000 | 788 | 259  | -0.266438523 | TBC1D1                    |
| 6 | 59,100,000 | 59,250,000 | 789 | 303  | 0.600512239  |                           |
| 6 | 59,175,000 | 59,325,000 | 790 | 323  | 0.556932274  |                           |
| 6 | 59,250,000 | 59,400,000 | 791 | 313  | 0.479712355  |                           |
| 6 | 59,325,000 | 59,475,000 | 792 | 394  | 0.495984836  |                           |
| 6 | 59,400,000 | 59,550,000 | 793 | 416  | 0.664385232  |                           |
| 6 | 59,475,000 | 59,625,000 | 794 | 545  | -0.098852943 | KLF3                      |
| 6 | 59,550,000 | 59,700,000 | 795 | 793  | -0.011133701 | KLF3,TLR10,TLR6           |
| 6 | 59,625,000 | 59,775,000 | 796 | 976  | 0.176339103  | FAM114A1,TLR10,TLR6       |
| 6 | 59,700,000 | 59,850,000 | 797 | 777  | 0.326285908  | FAM114A1,TLR6,TMEM156     |
| 6 | 59,775,000 | 59,925,000 | 798 | 424  | 0.231886842  | FAM114A1,KLHL5,TMEM156    |
| 6 | 59,850,000 | 60,000,000 | 799 | 693  | 0.602182145  | KLHL5,TMEM156,WDR19       |
| 6 | 59,925,000 | 60,075,000 | 800 | 897  | 0.783512494  | KLHL5,RFC1,WDR19          |
| 6 | 60,000,000 | 60,150,000 | 801 | 577  | 0.033881119  | RFC1,WDR19                |
| 6 | 60,075,000 | 60,225,000 | 802 | 423  | -0.575985353 | KLB,LIAS,RFC1,RPL9        |
| 6 | 60,150,000 | 60,300,000 | 803 | 613  | 0.008906024  | KLB,LIAS,RPL9,SMIM14,UGDH |
| 6 | 60,225,000 | 60,375,000 | 804 | 660  | 0.506253599  | LIAS,SMIM14,UGDH          |
| 6 | 60,300,000 | 60,450,000 | 805 | 446  | 0.792231317  | SMIM14,UBE2K              |
| 6 | 60,375,000 | 60,525,000 | 806 | 352  | -0.060285436 | UBE2K                     |
| 6 | 60,450,000 | 60,600,000 | 807 | 314  | 0.296474673  | PDS5A,UBE2K               |
| 6 | 60,525,000 | 60,675,000 | 808 | 266  | 0.670953986  | PDS5A                     |
| 6 | 60,600,000 | 60,750,000 | 809 | 425  | 0.668946842  | PDS5A                     |
| 6 | 60,675,000 | 60,825,000 | 810 | 571  | 0.503474496  | N4BP2                     |
| 6 | 60,750,000 | 60,900,000 | 811 | 622  | -0.282686796 | N4BP2,RHOH                |
| 6 | 60,825,000 | 60,975,000 | 812 | 595  | 0.228823994  | CHRNA9,RHOH               |
| 6 | 60,900,000 | 61,050,000 | 813 | 554  | 0.276229471  | CHRNA9,DKFZP686F02235     |
| 6 | 60,975,000 | 61,125,000 | 814 | 482  | -0.496224875 | CHRNA9,DKFZP686F02235     |
| 6 | 61,050,000 | 61,200,000 | 815 | 501  | 0.792818263  | DKFZP686F02235            |
| 6 | 61,125,000 | 61,275,000 | 816 | 664  | 0.726485054  |                           |
| 6 | 61,200,000 | 61,350,000 | 817 | 610  | 0.453173751  | NSUN7                     |
| 6 | 61,275,000 | 61,425,000 | 818 | 697  | -0.082012099 | APBB2,NSUN7               |

|   |            |            |     |      |              |                    |
|---|------------|------------|-----|------|--------------|--------------------|
| 6 | 61,350,000 | 61,500,000 | 819 | 926  | -0.327541435 | APBB2,NSUN7        |
| 6 | 61,425,000 | 61,575,000 | 820 | 1068 | 0.728204452  | APBB2              |
| 6 | 61,500,000 | 61,650,000 | 821 | 741  | 1.281948033  | APBB2              |
| 6 | 61,575,000 | 61,725,000 | 822 | 284  | 0.916029403  | APBB2              |
| 6 | 61,650,000 | 61,800,000 | 823 | 359  | 0.691443183  | APBB2,UCHL1        |
| 6 | 61,725,000 | 61,875,000 | 824 | 788  | 0.347947159  | APBB2,LIMCH1,UCHL1 |
| 6 | 61,800,000 | 61,950,000 | 825 | 851  | 0.42533434   | LIMCH1,UCHL1       |
| 6 | 61,875,000 | 62,025,000 | 826 | 506  | 0.78009785   | LIMCH1             |
| 6 | 61,950,000 | 62,100,000 | 827 | 442  | 0.214011868  | LIMCH1             |
| 6 | 62,025,000 | 62,175,000 | 828 | 517  | -1.580125222 | LIMCH1             |
| 6 | 62,100,000 | 62,250,000 | 829 | 785  | -0.070784142 | LIMCH1             |
| 6 | 62,175,000 | 62,325,000 | 830 | 828  | 0.843034685  | LIMCH1,PHOX2B      |
| 6 | 62,250,000 | 62,400,000 | 831 | 667  | -0.694035408 | PHOX2B             |
| 6 | 62,325,000 | 62,475,000 | 832 | 885  | -2.122709642 | TMEM33             |
| 6 | 62,400,000 | 62,550,000 | 833 | 747  | -1.669345855 | SLC30A9,TMEM33     |
| 6 | 62,475,000 | 62,625,000 | 834 | 613  | -1.750214355 | SLC30A9,TMEM33     |
| 6 | 62,550,000 | 62,700,000 | 835 | 813  | -1.46256109  | BEND4,SLC30A9      |
| 6 | 62,625,000 | 62,775,000 | 836 | 929  | -0.08692892  | BEND4              |
| 6 | 62,700,000 | 62,850,000 | 837 | 928  | -0.366938498 |                    |
| 6 | 62,775,000 | 62,925,000 | 838 | 641  | -0.445780531 | ATP8A1,SHISA3      |
| 6 | 62,850,000 | 63,000,000 | 839 | 429  | 0.352747631  | ATP8A1,SHISA3      |
| 6 | 62,925,000 | 63,075,000 | 840 | 876  | 1.238613146  | ATP8A1             |
| 6 | 63,000,000 | 63,150,000 | 841 | 904  | 1.310370184  | ATP8A1             |
| 6 | 63,075,000 | 63,225,000 | 842 | 587  | 0.762146243  | ATP8A1             |
| 6 | 63,150,000 | 63,300,000 | 843 | 776  | 0.136120861  |                    |
| 6 | 63,225,000 | 63,375,000 | 844 | 619  | -0.703891963 | GRXCR1             |
| 6 | 63,300,000 | 63,450,000 | 845 | 714  | -1.726668555 | GRXCR1             |
| 6 | 63,375,000 | 63,525,000 | 846 | 1179 | 0.006654353  | GRXCR1             |
| 6 | 63,450,000 | 63,600,000 | 847 | 1106 | 0.871096474  | GRXCR1             |
| 6 | 63,525,000 | 63,675,000 | 848 | 921  | 0.164114902  |                    |
| 6 | 63,600,000 | 63,750,000 | 849 | 612  | -0.200440784 |                    |
| 6 | 63,675,000 | 63,825,000 | 850 | 338  | 0.344410629  |                    |
| 6 | 63,750,000 | 63,900,000 | 851 | 461  | 0.447620685  |                    |
| 6 | 63,825,000 | 63,975,000 | 852 | 743  | 1.224472408  |                    |
| 6 | 63,900,000 | 64,050,000 | 853 | 826  | 1.207598319  |                    |
| 6 | 63,975,000 | 64,125,000 | 854 | 942  | 0.29873811   |                    |
| 6 | 64,050,000 | 64,200,000 | 855 | 904  | 0.248175539  |                    |
| 6 | 64,125,000 | 64,275,000 | 856 | 783  | 0.821218547  |                    |
| 6 | 64,200,000 | 64,350,000 | 857 | 1026 | 1.329802659  |                    |
| 6 | 64,275,000 | 64,425,000 | 858 | 724  | 1.473192802  |                    |
| 6 | 64,350,000 | 64,500,000 | 859 | 556  | -0.58722045  |                    |
| 6 | 64,425,000 | 64,575,000 | 860 | 930  | -1.026740456 |                    |
| 6 | 64,500,000 | 64,650,000 | 861 | 1257 | 0.561815197  |                    |
| 6 | 64,575,000 | 64,725,000 | 862 | 1335 | 1.055400875  |                    |
| 6 | 64,650,000 | 64,800,000 | 863 | 1304 | 0.438918054  | KCTD8              |
| 6 | 64,725,000 | 64,875,000 | 864 | 1141 | 0.387228939  | KCTD8              |
| 6 | 64,800,000 | 64,950,000 | 865 | 908  | 0.320689589  | GUF1,YIPF7         |
| 6 | 64,875,000 | 65,025,000 | 866 | 621  | 0.244883672  | GNPDA2,GUF1,YIPF7  |
| 6 | 64,950,000 | 65,100,000 | 867 | 775  | 0.745093177  | GNPDA2,GUF1        |
| 6 | 65,025,000 | 65,175,000 | 868 | 1245 | -0.225454529 |                    |
| 6 | 65,100,000 | 65,250,000 | 869 | 1363 | 0.150319077  |                    |
| 6 | 65,175,000 | 65,325,000 | 870 | 1272 | 0.78447557   |                    |
| 6 | 65,250,000 | 65,400,000 | 871 | 1195 | 0.243163654  |                    |



|   |            |            |     |      |              |                          |
|---|------------|------------|-----|------|--------------|--------------------------|
| 6 | 65,325,000 | 65,475,000 | 872 | 1076 | 0.079180076  |                          |
| 6 | 65,400,000 | 65,550,000 | 873 | 1226 | 0.983298196  |                          |
| 6 | 65,475,000 | 65,625,000 | 874 | 1575 | 0.990730974  |                          |
| 6 | 65,550,000 | 65,700,000 | 875 | 1579 | 0.895465715  |                          |
| 6 | 65,625,000 | 65,775,000 | 876 | 1722 | 0.912662024  |                          |
| 6 | 65,700,000 | 65,850,000 | 877 | 1639 | 0.244349317  |                          |
| 6 | 65,775,000 | 65,925,000 | 878 | 1574 | -0.423529958 |                          |
| 6 | 65,850,000 | 66,000,000 | 879 | 1499 | -0.106370508 |                          |
| 6 | 65,925,000 | 66,075,000 | 880 | 1341 | 0.002041977  |                          |
| 6 | 66,000,000 | 66,150,000 | 881 | 1360 | 0.185135613  |                          |
| 6 | 66,075,000 | 66,225,000 | 882 | 1304 | 0.812588081  |                          |
| 6 | 66,150,000 | 66,300,000 | 883 | 1420 | 1.102173164  | GABRG1                   |
| 6 | 66,225,000 | 66,375,000 | 884 | 1573 | 0.930391235  | GABRG1                   |
| 6 | 66,300,000 | 66,450,000 | 885 | 1719 | 0.730259304  | GABRG1                   |
| 6 | 66,375,000 | 66,525,000 | 886 | 1549 | 0.555118342  | GABRA2                   |
| 6 | 66,450,000 | 66,600,000 | 887 | 1463 | 0.560432853  | GABRA2                   |
| 6 | 66,525,000 | 66,675,000 | 888 | 1362 | 1.058971827  | GABRA2                   |
| 6 | 66,600,000 | 66,750,000 | 889 | 912  | 1.211793154  | GABRA2                   |
| 6 | 66,675,000 | 66,825,000 | 890 | 1034 | 0.050813784  |                          |
| 6 | 66,750,000 | 66,900,000 | 891 | 1194 | -0.738297166 |                          |
| 6 | 66,825,000 | 66,975,000 | 892 | 998  | -0.555625087 |                          |
| 6 | 66,900,000 | 67,050,000 | 893 | 852  | 1.078458335  |                          |
| 6 | 66,975,000 | 67,125,000 | 894 | 711  | 0.998941164  | HIST1H4G                 |
| 6 | 67,050,000 | 67,200,000 | 895 | 690  | 0.488343548  | GABRA4,HIST1H4G          |
| 6 | 67,125,000 | 67,275,000 | 896 | 639  | 0.574610659  | GABRA4,GABRB1            |
| 6 | 67,200,000 | 67,350,000 | 897 | 667  | 1.095940634  | GABRA4,GABRB1            |
| 6 | 67,275,000 | 67,425,000 | 898 | 584  | 1.253166726  | GABRB1                   |
| 6 | 67,350,000 | 67,500,000 | 899 | 359  | 0.835860576  | GABRB1                   |
| 6 | 67,425,000 | 67,575,000 | 900 | 550  | 0.729289224  | GABRB1                   |
| 6 | 67,500,000 | 67,650,000 | 901 | 522  | 0.786531672  | GABRB1                   |
| 6 | 67,575,000 | 67,725,000 | 902 | 384  | 0.434093608  | GABRB1                   |
| 6 | 67,650,000 | 67,800,000 | 903 | 623  | -0.724018028 | ATP10D,COMMD8,GABRB1     |
| 6 | 67,725,000 | 67,875,000 | 904 | 695  | -3.714881236 | ATP10D,COMMD8            |
| 6 | 67,800,000 | 67,950,000 | 905 | 505  | -3.123496188 | ATP10D,CORIN             |
| 6 | 67,875,000 | 68,025,000 | 906 | 427  | -0.993375689 | ATP10D,CORIN             |
| 6 | 67,950,000 | 68,100,000 | 907 | 344  | -0.783731202 | CORIN                    |
| 6 | 68,025,000 | 68,175,000 | 908 | 364  | 1.066221156  | CORIN                    |
| 6 | 68,100,000 | 68,250,000 | 909 | 541  | 0.747557872  | CORIN,NFXL1              |
| 6 | 68,175,000 | 68,325,000 | 910 | 484  | 0.605740675  | CNGA1,CORIN,NFXL1        |
| 6 | 68,250,000 | 68,400,000 | 911 | 630  | 1.183959061  | CNGA1,NFXL1,NIPAL1       |
| 6 | 68,325,000 | 68,475,000 | 912 | 741  | 0.349729662  | CNGA1,NIPAL1,TEC,TXK     |
| 6 | 68,400,000 | 68,550,000 | 913 | 767  | -0.098694056 | TEC,TXK                  |
| 6 | 68,475,000 | 68,625,000 | 914 | 1063 | 0.648497673  | TEC                      |
| 6 | 68,550,000 | 68,700,000 | 915 | 1106 | -0.577491442 | SLAIN2                   |
| 6 | 68,625,000 | 68,775,000 | 916 | 687  | -3.282669972 | SLAIN2                   |
| 6 | 68,700,000 | 68,850,000 | 917 | 347  | -2.800301758 | FRYL,SLAIN2,SLC10A4,ZAR1 |
| 6 | 68,775,000 | 68,925,000 | 918 | 308  | -1.68423385  | FRYL,SLC10A4,ZAR1        |
| 6 | 68,850,000 | 69,000,000 | 919 | 300  | -0.698364087 | FRYL                     |
| 6 | 68,925,000 | 69,075,000 | 920 | 482  | 1.095885897  | FRYL                     |
| 6 | 69,000,000 | 69,150,000 | 921 | 565  | 1.187463011  | OCIAD1                   |
| 6 | 69,075,000 | 69,225,000 | 922 | 590  | 0.885460538  | OCIAD1,OCIAD2            |
| 6 | 69,150,000 | 69,300,000 | 923 | 927  | 0.463406905  | CWH43,OCIAD1,OCIAD2      |
| 6 | 69,225,000 | 69,375,000 | 924 | 856  | 0.151484778  | CWH43,DCUN1D4            |

|   |            |            |     |      |              |                                         |
|---|------------|------------|-----|------|--------------|-----------------------------------------|
| 6 | 69,300,000 | 69,450,000 | 925 | 537  | -0.343224487 | CWH43,DCUN1D4                           |
| 6 | 69,375,000 | 69,525,000 | 926 | 644  | -0.121902588 | DCUN1D4,LRRC66                          |
| 6 | 69,450,000 | 69,600,000 | 927 | 602  | 0.169408649  | LRRC66,SGCB,SPATA18                     |
| 6 | 69,525,000 | 69,675,000 | 928 | 506  | -0.283658956 | SGCB,SPATA18                            |
| 6 | 69,600,000 | 69,750,000 | 929 | 456  | -0.110754509 | SPATA18                                 |
| 6 | 69,675,000 | 69,825,000 | 930 | 590  | 0.825174778  |                                         |
| 6 | 69,750,000 | 69,900,000 | 931 | 1141 | 0.802703271  |                                         |
| 6 | 69,825,000 | 69,975,000 | 932 | 939  | 0.894059037  | USP46                                   |
| 6 | 69,900,000 | 70,050,000 | 933 | 435  | 0.991911469  | USP46                                   |
| 6 | 69,975,000 | 70,125,000 | 934 | 906  | 0.278971525  | USP46                                   |
| 6 | 70,050,000 | 70,200,000 | 935 | 1064 | 0.108311381  | RASL11B,SCFD2                           |
| 6 | 70,125,000 | 70,275,000 | 936 | 926  | -0.703181931 | RASL11B,SCFD2                           |
| 6 | 70,200,000 | 70,350,000 | 937 | 1054 | -0.697235014 | SCFD2                                   |
| 6 | 70,275,000 | 70,425,000 | 938 | 808  | -0.817008284 | SCFD2                                   |
| 6 | 70,350,000 | 70,500,000 | 939 | 643  | -0.391367869 | SCFD2                                   |
| 6 | 70,425,000 | 70,575,000 | 940 | 548  | -0.195665605 | SCFD2                                   |
| 6 | 70,500,000 | 70,650,000 | 941 | 521  | -2.32553087  | FIP1L1,SCFD2                            |
| 6 | 70,575,000 | 70,725,000 | 942 | 616  | -0.640123958 | FIP1L1,LNX1,SCFD2                       |
| 6 | 70,650,000 | 70,800,000 | 943 | 900  | 0.705101208  | FIP1L1,LNX1                             |
| 6 | 70,725,000 | 70,875,000 | 944 | 894  | 0.560115022  | LNX1                                    |
| 6 | 70,800,000 | 70,950,000 | 945 | 701  | 1.130938964  |                                         |
| 6 | 70,875,000 | 71,025,000 | 946 | 647  | 0.978793964  |                                         |
| 6 | 70,950,000 | 71,100,000 | 947 | 437  | 0.400394575  |                                         |
| 6 | 71,025,000 | 71,175,000 | 948 | 505  | 1.060704299  |                                         |
| 6 | 71,100,000 | 71,250,000 | 949 | 476  | 1.244644644  | CHIC2                                   |
| 6 | 71,175,000 | 71,325,000 | 950 | 378  | 1.356319158  | CHIC2,GSX2                              |
| 6 | 71,250,000 | 71,400,000 | 951 | 518  | 1.24890881   | GSX2,PDGFRA                             |
| 6 | 71,325,000 | 71,475,000 | 952 | 751  | -0.901091671 | PDGFRA                                  |
| 6 | 71,400,000 | 71,550,000 | 953 | 616  | -0.986552859 | PDGFRA                                  |
| 6 | 71,475,000 | 71,625,000 | 954 | 454  | 0.63539992   |                                         |
| 6 | 71,550,000 | 71,700,000 | 955 | 734  | 0.7681482    |                                         |
| 6 | 71,625,000 | 71,775,000 | 956 | 856  | 0.993463855  |                                         |
| 6 | 71,700,000 | 71,850,000 | 957 | 548  | 1.094974838  | KIT                                     |
| 6 | 71,775,000 | 71,925,000 | 958 | 477  | 1.045260318  | KIT                                     |
| 6 | 71,850,000 | 72,000,000 | 959 | 688  | 1.058953029  | KIT                                     |
| 6 | 71,925,000 | 72,075,000 | 960 | 833  | 0.742744775  |                                         |
| 6 | 72,000,000 | 72,150,000 | 961 | 952  | 0.566437428  |                                         |
| 6 | 72,075,000 | 72,225,000 | 962 | 947  | 0.501958035  |                                         |
| 6 | 72,150,000 | 72,300,000 | 963 | 893  | 0.61342219   | KDR                                     |
| 6 | 72,225,000 | 72,375,000 | 964 | 657  | 0.88828071   | KDR                                     |
| 6 | 72,300,000 | 72,450,000 | 965 | 705  | 0.260424937  |                                         |
| 6 | 72,375,000 | 72,525,000 | 966 | 907  | 0.081364591  | SRD5A3,ENSBTAG00000045602               |
| 6 | 72,450,000 | 72,600,000 | 967 | 619  | 0.451885288  | CLOCK,SRD5A3,TMEM165,ENSBTAG00000045602 |
| 6 | 72,525,000 | 72,675,000 | 968 | 332  | 0.536040986  | CLOCK,TMEM165                           |
| 6 | 72,600,000 | 72,750,000 | 969 | 360  | 0.478308919  | CLOCK,NMU,PDCL2                         |
| 6 | 72,675,000 | 72,825,000 | 970 | 465  | 0.629891959  | NMU,PDCL2                               |
| 6 | 72,750,000 | 72,900,000 | 971 | 793  | -0.441574685 | NMU                                     |
| 6 | 72,825,000 | 72,975,000 | 972 | 1239 | -0.312807254 | EXOC1                                   |
| 6 | 72,900,000 | 73,050,000 | 973 | 1367 | 0.679149084  | CEP135,EXOC1                            |
| 6 | 72,975,000 | 73,125,000 | 974 | 1350 | 0.244832708  | CEP135,EXOC1                            |
| 6 | 73,050,000 | 73,200,000 | 975 | 1425 | -0.149511502 | CEP135                                  |
| 6 | 73,125,000 | 73,275,000 | 976 | 1345 | -0.248849646 |                                         |
| 6 | 73,200,000 | 73,350,000 | 977 | 1162 | -0.37844004  |                                         |

|   |            |            |      |      |              |                                         |
|---|------------|------------|------|------|--------------|-----------------------------------------|
| 6 | 73,275,000 | 73,425,000 | 978  | 743  | -0.5256143   | AASDH,MGC148692                         |
| 6 | 73,350,000 | 73,500,000 | 979  | 353  | -0.472234954 | AASDH,MGC148692,PAICS,PPAT              |
| 6 | 73,425,000 | 73,575,000 | 980  | 451  | -0.812921664 | AASDH,ARL9,PAICS,PPAT,SRP72             |
| 6 | 73,500,000 | 73,650,000 | 981  | 883  | -2.052562901 | ARL9,HOP,PAICS,SRP72,ENSBTAG00000002330 |
| 6 | 73,575,000 | 73,725,000 | 982  | 1192 | -1.760758406 | HOP,ENSBTAG00000002330                  |
| 6 | 73,650,000 | 73,800,000 | 983  | 1370 | -0.710852748 | SPINK2                                  |
| 6 | 73,725,000 | 73,875,000 | 984  | 1247 | -1.323154187 | MGC157163,SPINK2                        |
| 6 | 73,800,000 | 73,950,000 | 985  | 953  | -1.795076559 | MGC157163                               |
| 6 | 73,875,000 | 74,025,000 | 986  | 980  | -1.817572269 | NOA1,ENSBTAG00000019359                 |
| 6 | 73,950,000 | 74,100,000 | 987  | 1061 | -1.150829094 | IGFBP7,NOA1,POLR2B,ENSBTAG00000019359   |
| 6 | 74,025,000 | 74,175,000 | 988  | 1055 | -0.027479832 | IGFBP7,NOA1,POLR2B                      |
| 6 | 74,100,000 | 74,250,000 | 989  | 1225 | 0.333596765  | IGFBP7                                  |
| 6 | 74,175,000 | 74,325,000 | 990  | 1397 | 0.169626787  |                                         |
| 6 | 74,250,000 | 74,400,000 | 991  | 1490 | 0.498851357  |                                         |
| 6 | 74,325,000 | 74,475,000 | 992  | 1452 | 0.658056968  |                                         |
| 6 | 74,400,000 | 74,550,000 | 993  | 1200 | 0.208497128  |                                         |
| 6 | 74,475,000 | 74,625,000 | 994  | 1210 | 0.055563202  |                                         |
| 6 | 74,550,000 | 74,700,000 | 995  | 1117 | -0.036684826 |                                         |
| 6 | 74,625,000 | 74,775,000 | 996  | 1102 | 0.349676037  |                                         |
| 6 | 74,700,000 | 74,850,000 | 997  | 1561 | 0.954057357  |                                         |
| 6 | 74,775,000 | 74,925,000 | 998  | 1655 | 0.880152495  |                                         |
| 6 | 74,850,000 | 75,000,000 | 999  | 1325 | -0.754903894 |                                         |
| 6 | 74,925,000 | 75,075,000 | 1000 | 1072 | -1.338712106 |                                         |
| 6 | 75,000,000 | 75,150,000 | 1001 | 1300 | -2.757693579 |                                         |
| 6 | 75,075,000 | 75,225,000 | 1002 | 1512 | -3.091541152 |                                         |
| 6 | 75,150,000 | 75,300,000 | 1003 | 1240 | -2.407825226 |                                         |
| 6 | 75,225,000 | 75,375,000 | 1004 | 1138 | -2.941002636 |                                         |
| 6 | 75,300,000 | 75,450,000 | 1005 | 1054 | -2.760835962 |                                         |
| 6 | 75,375,000 | 75,525,000 | 1006 | 1055 | -0.910565231 |                                         |
| 6 | 75,450,000 | 75,600,000 | 1007 | 1237 | -0.460346154 |                                         |
| 6 | 75,525,000 | 75,675,000 | 1008 | 1125 | -3.192901847 |                                         |
| 6 | 75,600,000 | 75,750,000 | 1009 | 972  | -2.911643898 |                                         |
| 6 | 75,675,000 | 75,825,000 | 1010 | 1041 | 0.800667709  |                                         |
| 6 | 75,750,000 | 75,900,000 | 1011 | 1085 | 0.888608281  |                                         |
| 6 | 75,825,000 | 75,975,000 | 1012 | 1215 | -0.504085986 |                                         |
| 6 | 75,900,000 | 76,050,000 | 1013 | 1375 | 0.17993778   |                                         |
| 6 | 75,975,000 | 76,125,000 | 1014 | 1285 | 0.896088788  |                                         |
| 6 | 76,050,000 | 76,200,000 | 1015 | 1651 | 0.803756287  |                                         |
| 6 | 76,125,000 | 76,275,000 | 1016 | 1859 | 0.828125612  |                                         |
| 6 | 76,200,000 | 76,350,000 | 1017 | 1632 | 1.066937567  |                                         |
| 6 | 76,275,000 | 76,425,000 | 1018 | 1399 | 1.20142237   |                                         |
| 6 | 76,350,000 | 76,500,000 | 1019 | 1208 | 1.220870493  |                                         |
| 6 | 76,425,000 | 76,575,000 | 1020 | 1484 | -0.077986671 |                                         |
| 6 | 76,500,000 | 76,650,000 | 1021 | 1525 | -0.411092147 |                                         |
| 6 | 76,575,000 | 76,725,000 | 1022 | 1347 | 0.279726982  |                                         |
| 6 | 76,650,000 | 76,800,000 | 1023 | 1300 | -0.244557663 |                                         |
| 6 | 76,725,000 | 76,875,000 | 1024 | 1179 | -0.310111222 |                                         |
| 6 | 76,800,000 | 76,950,000 | 1025 | 1156 | -1.313572444 |                                         |
| 6 | 76,875,000 | 77,025,000 | 1026 | 1286 | -1.070419518 |                                         |
| 6 | 76,950,000 | 77,100,000 | 1027 | 1218 | -0.428764103 |                                         |
| 6 | 77,025,000 | 77,175,000 | 1028 | 942  | -0.919359609 |                                         |
| 6 | 77,100,000 | 77,250,000 | 1029 | 817  | -1.993818638 |                                         |
| 6 | 77,175,000 | 77,325,000 | 1030 | 992  | -0.319457737 |                                         |

|   |            |            |      |      |              |       |
|---|------------|------------|------|------|--------------|-------|
| 6 | 77,250,000 | 77,400,000 | 1031 | 1567 | 1.24934739   |       |
| 6 | 77,325,000 | 77,475,000 | 1032 | 1520 | 0.343429652  |       |
| 6 | 77,400,000 | 77,550,000 | 1033 | 966  | -3.092698554 |       |
| 6 | 77,475,000 | 77,625,000 | 1034 | 860  | -5.290851882 |       |
| 6 | 77,550,000 | 77,700,000 | 1035 | 1064 | -4.233916559 |       |
| 6 | 77,625,000 | 77,775,000 | 1036 | 849  | -3.517891753 |       |
| 6 | 77,700,000 | 77,850,000 | 1037 | 512  | -1.318369761 |       |
| 6 | 77,775,000 | 77,925,000 | 1038 | 538  | -0.489584447 |       |
| 6 | 77,850,000 | 78,000,000 | 1039 | 691  | 0.621049629  |       |
| 6 | 77,925,000 | 78,075,000 | 1040 | 1074 | 1.210638251  |       |
| 6 | 78,000,000 | 78,150,000 | 1041 | 1010 | 0.698660611  |       |
| 6 | 78,075,000 | 78,225,000 | 1042 | 789  | -1.245975688 |       |
| 6 | 78,150,000 | 78,300,000 | 1043 | 1115 | -2.734858527 |       |
| 6 | 78,225,000 | 78,375,000 | 1044 | 1198 | -1.275878432 |       |
| 6 | 78,300,000 | 78,450,000 | 1045 | 820  | 0.531777276  |       |
| 6 | 78,375,000 | 78,525,000 | 1046 | 781  | 0.686756846  |       |
| 6 | 78,450,000 | 78,600,000 | 1047 | 1013 | 0.551852237  |       |
| 6 | 78,525,000 | 78,675,000 | 1048 | 896  | 0.266485898  |       |
| 6 | 78,600,000 | 78,750,000 | 1049 | 634  | 0.325516932  |       |
| 6 | 78,675,000 | 78,825,000 | 1050 | 784  | 1.137271974  |       |
| 6 | 78,750,000 | 78,900,000 | 1051 | 832  | 1.25286311   |       |
| 6 | 78,825,000 | 78,975,000 | 1052 | 518  | 0.365313988  |       |
| 6 | 78,900,000 | 79,050,000 | 1053 | 699  | -0.267511928 | LPHN3 |
| 6 | 78,975,000 | 79,125,000 | 1054 | 754  | 0.450978583  | LPHN3 |
| 6 | 79,050,000 | 79,200,000 | 1055 | 535  | 0.823682011  | LPHN3 |
| 6 | 79,125,000 | 79,275,000 | 1056 | 768  | 0.421451774  | LPHN3 |
| 6 | 79,200,000 | 79,350,000 | 1057 | 627  | -0.041199102 | LPHN3 |
| 6 | 79,275,000 | 79,425,000 | 1058 | 612  | -0.31744749  | LPHN3 |
| 6 | 79,350,000 | 79,500,000 | 1059 | 1100 | -0.649955083 |       |
| 6 | 79,425,000 | 79,575,000 | 1060 | 1381 | -0.158568165 |       |
| 6 | 79,500,000 | 79,650,000 | 1061 | 1050 | 0.221608154  |       |
| 6 | 79,575,000 | 79,725,000 | 1062 | 837  | -0.419787177 |       |
| 6 | 79,650,000 | 79,800,000 | 1063 | 985  | -0.187249292 |       |
| 6 | 79,725,000 | 79,875,000 | 1064 | 734  | -0.326771493 |       |
| 6 | 79,800,000 | 79,950,000 | 1065 | 548  | -0.001011457 |       |
| 6 | 79,875,000 | 80,025,000 | 1066 | 607  | 0.706516086  |       |
| 6 | 79,950,000 | 80,100,000 | 1067 | 581  | 0.653596666  |       |
| 6 | 80,025,000 | 80,175,000 | 1068 | 498  | 0.348600456  |       |
| 6 | 80,100,000 | 80,250,000 | 1069 | 639  | 0.300354005  |       |
| 6 | 80,175,000 | 80,325,000 | 1070 | 1163 | 0.263746479  |       |
| 6 | 80,250,000 | 80,400,000 | 1071 | 1033 | 0.018738661  |       |
| 6 | 80,325,000 | 80,475,000 | 1072 | 603  | -0.794592092 |       |
| 6 | 80,400,000 | 80,550,000 | 1073 | 737  | 0.609950595  |       |
| 6 | 80,475,000 | 80,625,000 | 1074 | 682  | 1.076456153  |       |
| 6 | 80,550,000 | 80,700,000 | 1075 | 835  | 1.081172515  |       |
| 6 | 80,625,000 | 80,775,000 | 1076 | 1304 | 1.038553908  |       |
| 6 | 80,700,000 | 80,850,000 | 1077 | 1334 | -1.803217038 |       |
| 6 | 80,775,000 | 80,925,000 | 1078 | 1259 | -5.309642917 |       |
| 6 | 80,850,000 | 81,000,000 | 1079 | 1241 | -2.773482344 |       |
| 6 | 80,925,000 | 81,075,000 | 1080 | 1328 | -1.284803678 |       |
| 6 | 81,000,000 | 81,150,000 | 1081 | 1733 | 0.178030848  |       |
| 6 | 81,075,000 | 81,225,000 | 1082 | 1620 | 0.097170015  |       |
| 6 | 81,150,000 | 81,300,000 | 1083 | 1354 | -0.605832145 |       |

|   |            |            |      |      |              |                                         |
|---|------------|------------|------|------|--------------|-----------------------------------------|
| 6 | 81,225,000 | 81,375,000 | 1084 | 1690 | -2.305513266 |                                         |
| 6 | 81,300,000 | 81,450,000 | 1085 | 1888 | -3.221636918 |                                         |
| 6 | 81,375,000 | 81,525,000 | 1086 | 1863 | -3.675486331 | TECRL                                   |
| 6 | 81,450,000 | 81,600,000 | 1087 | 1575 | -3.683321154 | TECRL                                   |
| 6 | 81,525,000 | 81,675,000 | 1088 | 1199 | -3.081258935 | TECRL                                   |
| 6 | 81,600,000 | 81,750,000 | 1089 | 1255 | -3.627933993 | TECRL                                   |
| 6 | 81,675,000 | 81,825,000 | 1090 | 1143 | -4.144612018 |                                         |
| 6 | 81,750,000 | 81,900,000 | 1091 | 1092 | -3.078915018 |                                         |
| 6 | 81,825,000 | 81,975,000 | 1092 | 1187 | -1.721910556 |                                         |
| 6 | 81,900,000 | 82,050,000 | 1093 | 803  | -1.732704607 |                                         |
| 6 | 81,975,000 | 82,125,000 | 1094 | 579  | -1.905791819 |                                         |
| 6 | 82,050,000 | 82,200,000 | 1095 | 550  | -0.928440785 |                                         |
| 6 | 82,125,000 | 82,275,000 | 1096 | 401  | 0.362518581  |                                         |
| 6 | 82,200,000 | 82,350,000 | 1097 | 381  | 0.294572789  |                                         |
| 6 | 82,275,000 | 82,425,000 | 1098 | 369  | -0.540850229 |                                         |
| 6 | 82,350,000 | 82,500,000 | 1099 | 559  | -1.822466736 |                                         |
| 6 | 82,425,000 | 82,575,000 | 1100 | 902  | -0.267500115 | EPHA5                                   |
| 6 | 82,500,000 | 82,650,000 | 1101 | 1015 | 0.540398057  | EPHA5                                   |
| 6 | 82,575,000 | 82,725,000 | 1102 | 1255 | -0.093946256 | EPHA5                                   |
| 6 | 82,650,000 | 82,800,000 | 1103 | 1137 | -0.283380647 | EPHA5                                   |
| 6 | 82,725,000 | 82,875,000 | 1104 | 830  | 0.133356865  | EPHA5                                   |
| 6 | 82,800,000 | 82,950,000 | 1105 | 1171 | 0.695911268  | EPHA5                                   |
| 6 | 82,875,000 | 83,025,000 | 1106 | 1183 | 0.520000042  | EPHA5                                   |
| 6 | 82,950,000 | 83,100,000 | 1107 | 1261 | -0.206416355 | EPHA5                                   |
| 6 | 83,025,000 | 83,175,000 | 1108 | 1513 | -0.727859607 |                                         |
| 6 | 83,100,000 | 83,250,000 | 1109 | 1375 | -0.127064339 |                                         |
| 6 | 83,175,000 | 83,325,000 | 1110 | 1581 | 0.695567546  |                                         |
| 6 | 83,250,000 | 83,400,000 | 1111 | 1374 | 0.447115945  |                                         |
| 6 | 83,325,000 | 83,475,000 | 1112 | 1094 | 0.448529341  |                                         |
| 6 | 83,400,000 | 83,550,000 | 1113 | 1299 | -0.354872537 |                                         |
| 6 | 83,475,000 | 83,625,000 | 1114 | 1535 | 0.02633038   |                                         |
| 6 | 83,550,000 | 83,700,000 | 1115 | 1541 | 1.171803583  |                                         |
| 6 | 83,625,000 | 83,775,000 | 1116 | 1230 | 1.020660549  |                                         |
| 6 | 83,700,000 | 83,850,000 | 1117 | 1405 | -0.127755707 |                                         |
| 6 | 83,775,000 | 83,925,000 | 1118 | 1648 | 0.117556118  |                                         |
| 6 | 83,850,000 | 84,000,000 | 1119 | 1565 | 0.477765787  |                                         |
| 6 | 83,925,000 | 84,075,000 | 1120 | 1690 | -0.427914843 |                                         |
| 6 | 84,000,000 | 84,150,000 | 1121 | 1876 | 0.001101315  |                                         |
| 6 | 84,075,000 | 84,225,000 | 1122 | 1707 | 0.563272095  |                                         |
| 6 | 84,150,000 | 84,300,000 | 1123 | 1532 | -0.987764652 |                                         |
| 6 | 84,225,000 | 84,375,000 | 1124 | 1278 | -0.956170547 |                                         |
| 6 | 84,300,000 | 84,450,000 | 1125 | 1120 | 0.576847314  |                                         |
| 6 | 84,375,000 | 84,525,000 | 1126 | 1037 | 0.649475914  |                                         |
| 6 | 84,450,000 | 84,600,000 | 1127 | 1119 | 1.084906668  |                                         |
| 6 | 84,525,000 | 84,675,000 | 1128 | 1295 | 1.180046344  |                                         |
| 6 | 84,600,000 | 84,750,000 | 1129 | 1367 | 1.019258013  |                                         |
| 6 | 84,675,000 | 84,825,000 | 1130 | 1526 | 1.135005222  |                                         |
| 6 | 84,750,000 | 84,900,000 | 1131 | 1396 | 0.704673228  |                                         |
| 6 | 84,825,000 | 84,975,000 | 1132 | 1048 | 0.290811017  | CENPC1                                  |
| 6 | 84,900,000 | 85,050,000 | 1133 | 830  | 0.456134291  | CENPC1,STAP1                            |
| 6 | 84,975,000 | 85,125,000 | 1134 | 696  | -0.412288436 | CENPC1,STAP1,UBA6                       |
| 6 | 85,050,000 | 85,200,000 | 1135 | 805  | -2.300844935 | GNRHR,UBA6,ENSBTAG00000038648           |
| 6 | 85,125,000 | 85,275,000 | 1136 | 1167 | -1.085324267 | GNRHR,TMPRSS11D,UBA6,ENSBTAG00000038648 |

|   |            |            |      |      |              |                                                                             |
|---|------------|------------|------|------|--------------|-----------------------------------------------------------------------------|
| 6 | 85,200,000 | 85,350,000 | 1137 | 1129 | 0.954337112  | TMPRSS11A,TMPRSS11D,ENSBTAG00000038648                                      |
| 6 | 85,275,000 | 85,425,000 | 1138 | 922  | 0.968541958  | TMPRSS11A,TMPRSS11D,ENSBTAG00000025920                                      |
| 6 | 85,350,000 | 85,500,000 | 1139 | 929  | 0.575729071  | TMPRSS11A,TMPRSS11F,ENSBTAG00000025920                                      |
| 6 | 85,425,000 | 85,575,000 | 1140 | 1016 | 0.323620471  | TMPRSS11F,ENSBTAG00000025920                                                |
| 6 | 85,500,000 | 85,650,000 | 1141 | 810  | -0.054063099 | TMPRSS11F,ENSBTAG00000038520                                                |
| 6 | 85,575,000 | 85,725,000 | 1142 | 955  | 0.165217494  | ENSBTAG00000038520                                                          |
| 6 | 85,650,000 | 85,800,000 | 1143 | 854  | 0.340902556  | ENSBTAG00000038520                                                          |
| 6 | 85,725,000 | 85,875,000 | 1144 | 488  | 0.474570168  | YTHDC1                                                                      |
| 6 | 85,800,000 | 85,950,000 | 1145 | 606  | 0.004079793  | YTHDC1,ENSBTAG00000048013                                                   |
| 6 | 85,875,000 | 86,025,000 | 1146 | 687  | 0.206507414  | YTHDC1,ENSBTAG00000039362,ENSBTAG00000048013                                |
| 6 | 85,950,000 | 86,100,000 | 1147 | 853  | 0.868194284  | ENSBTAG00000032350,ENSBTAG00000037613,ENSBTAG00000039362                    |
| 6 | 86,025,000 | 86,175,000 | 1148 | 862  | 0.454434889  | ENSBTAG00000032350,ENSBTAG00000037613,ENSBTAG00000039991,ENSBTAG00000040337 |
| 6 | 86,100,000 | 86,250,000 | 1149 | 887  | -0.132915266 | ENSBTAG00000022205,ENSBTAG00000039991,ENSBTAG00000040337                    |
| 6 | 86,175,000 | 86,325,000 | 1150 | 1003 | 0.251314288  | ENSBTAG00000022205,ENSBTAG00000039991                                       |
| 6 | 86,250,000 | 86,400,000 | 1151 | 1176 | 0.503105664  | ENSBTAG00000003523                                                          |
| 6 | 86,325,000 | 86,475,000 | 1152 | 1410 | 0.539410403  | MGC152010,ENSBTAG00000003523                                                |
| 6 | 86,400,000 | 86,550,000 | 1153 | 1264 | 0.596367643  | MGC152010                                                                   |
| 6 | 86,475,000 | 86,625,000 | 1154 | 1095 | 0.566513892  |                                                                             |
| 6 | 86,550,000 | 86,700,000 | 1155 | 1129 | 0.552786637  | ENSBTAG00000015047                                                          |
| 6 | 86,625,000 | 86,775,000 | 1156 | 1104 | 0.185961661  | ENSBTAG00000015047                                                          |
| 6 | 86,700,000 | 86,850,000 | 1157 | 1292 | 0.521701846  | UGT2A3,ENSBTAG00000015047                                                   |
| 6 | 86,775,000 | 86,925,000 | 1158 | 1091 | 0.954457907  | SULT1B1,UGT2A1,UGT2A3                                                       |
| 6 | 86,850,000 | 87,000,000 | 1159 | 852  | 1.14816403   | SULT1B1,UGT2A1,ENSBTAG00000038214                                           |
| 6 | 86,925,000 | 87,075,000 | 1160 | 1043 | 1.127690675  | SULT1B1,SULT1E1,ENSBTAG00000038214                                          |
| 6 | 87,000,000 | 87,150,000 | 1161 | 995  | 0.875222103  | CSN1S1,SULT1E1,ENSBTAG00000038214                                           |
| 6 | 87,075,000 | 87,225,000 | 1162 | 1152 | 0.260083323  | CSN1S1,CSN2,HSTN,SULT1E1                                                    |
| 6 | 87,150,000 | 87,300,000 | 1163 | 909  | -0.425478508 | CSN1S1,CSN1S2,CSN2,HSTN,STATH                                               |
| 6 | 87,225,000 | 87,375,000 | 1164 | 627  | 0.467659108  | CSN1S2,ODAM,STATH                                                           |
| 6 | 87,300,000 | 87,450,000 | 1165 | 968  | 0.914669771  | CSN3,ODAM                                                                   |
| 6 | 87,375,000 | 87,525,000 | 1166 | 752  | 0.436610678  | CABS1,CSN3,ENSBTAG00000027531                                               |
| 6 | 87,450,000 | 87,600,000 | 1167 | 843  | 0.251014615  | CABS1,ENSBTAG00000027531                                                    |
| 6 | 87,525,000 | 87,675,000 | 1168 | 1078 | -0.132951335 | AMTN                                                                        |
| 6 | 87,600,000 | 87,750,000 | 1169 | 856  | -0.216330165 | AMBN,AMTN,ENAM                                                              |
| 6 | 87,675,000 | 87,825,000 | 1170 | 595  | 0.362150691  | AMBN,ENAM,IGJ,RUFY3,UTP3                                                    |
| 6 | 87,750,000 | 87,900,000 | 1171 | 357  | -0.274614517 | IGJ,RUFY3,UTP3                                                              |
| 6 | 87,825,000 | 87,975,000 | 1172 | 411  | 0.66860088   | GRSF1,RUFY3                                                                 |
| 6 | 87,900,000 | 88,050,000 | 1173 | 433  | 0.465716387  | DCK,GRSF1,MOB1B,RUFY3                                                       |
| 6 | 87,975,000 | 88,125,000 | 1174 | 408  | 0.117658229  | DCK,MOB1B                                                                   |
| 6 | 88,050,000 | 88,200,000 | 1175 | 422  | 0.375752135  | DCK,SLC4A4                                                                  |
| 6 | 88,125,000 | 88,275,000 | 1176 | 501  | 0.224797859  | SLC4A4                                                                      |
| 6 | 88,200,000 | 88,350,000 | 1177 | 512  | 0.420074491  | SLC4A4                                                                      |
| 6 | 88,275,000 | 88,425,000 | 1178 | 574  | 0.532740407  | SLC4A4                                                                      |
| 6 | 88,350,000 | 88,500,000 | 1179 | 844  | 0.586585967  | SLC4A4                                                                      |
| 6 | 88,425,000 | 88,575,000 | 1180 | 768  | 0.847432897  | SLC4A4                                                                      |
| 6 | 88,500,000 | 88,650,000 | 1181 | 711  | 0.042125424  | SLC4A4                                                                      |
| 6 | 88,575,000 | 88,725,000 | 1182 | 1154 | 0.304734725  | GC                                                                          |
| 6 | 88,650,000 | 88,800,000 | 1183 | 1449 | 0.345088521  | GC                                                                          |
| 6 | 88,725,000 | 88,875,000 | 1184 | 1316 | -1.056502227 | GC                                                                          |
| 6 | 88,800,000 | 88,950,000 | 1185 | 1498 | -0.987665951 |                                                                             |

|   |            |            |      |      |              |                                                     |
|---|------------|------------|------|------|--------------|-----------------------------------------------------|
| 6 | 88,875,000 | 89,025,000 | 1186 | 1533 | -0.706146459 |                                                     |
| 6 | 88,950,000 | 89,100,000 | 1187 | 1253 | -0.558705767 | NPFFR2                                              |
| 6 | 89,025,000 | 89,175,000 | 1188 | 1231 | -0.637807564 | ADAMTS3,NPFFR2                                      |
| 6 | 89,100,000 | 89,250,000 | 1189 | 932  | -1.251533179 | ADAMTS3                                             |
| 6 | 89,175,000 | 89,325,000 | 1190 | 1049 | -1.084255779 | ADAMTS3                                             |
| 6 | 89,250,000 | 89,400,000 | 1191 | 1153 | -1.262357097 | ADAMTS3                                             |
| 6 | 89,325,000 | 89,475,000 | 1192 | 691  | -0.568783817 | ADAMTS3                                             |
| 6 | 89,400,000 | 89,550,000 | 1193 | 665  | 0.57742689   | ADAMTS3                                             |
| 6 | 89,475,000 | 89,625,000 | 1194 | 714  | 0.378581999  |                                                     |
| 6 | 89,550,000 | 89,700,000 | 1195 | 731  | 0.042954413  |                                                     |
| 6 | 89,625,000 | 89,775,000 | 1196 | 665  | 0.050279356  |                                                     |
| 6 | 89,700,000 | 89,850,000 | 1197 | 513  | 0.626881389  |                                                     |
| 6 | 89,775,000 | 89,925,000 | 1198 | 491  | 0.274309509  | COX18                                               |
| 6 | 89,850,000 | 90,000,000 | 1199 | 315  | -0.186209729 | ANKRD17,COX18                                       |
| 6 | 89,925,000 | 90,075,000 | 1200 | 221  | 0.569174638  | ANKRD17,COX18                                       |
| 6 | 90,000,000 | 90,150,000 | 1201 | 314  | 0.993074814  | ANKRD17                                             |
| 6 | 90,075,000 | 90,225,000 | 1202 | 437  | 1.029046013  | ANKRD17                                             |
| 6 | 90,150,000 | 90,300,000 | 1203 | 656  | 0.74244963   | AFM,AFP,ALB                                         |
| 6 | 90,225,000 | 90,375,000 | 1204 | 940  | 0.473029431  | AFM,AFP,ALB,RASSF6                                  |
| 6 | 90,300,000 | 90,450,000 | 1205 | 885  | 0.010927257  | AFM,RASSF6                                          |
| 6 | 90,375,000 | 90,525,000 | 1206 | 604  | -0.283543286 | RASSF6                                              |
| 6 | 90,450,000 | 90,600,000 | 1207 | 681  | -0.228945754 | CXCL8                                               |
| 6 | 90,525,000 | 90,675,000 | 1208 | 856  | -0.017655624 | CXCL6,CXCL8,PF4,PPBP,ENSBTAG00000024080             |
| 6 | 90,600,000 | 90,750,000 | 1209 | 765  | -0.007321737 | CXCL6,PF4,PPBP,ENSBTAG00000024080,ENSBTAG0000027513 |
| 6 | 90,675,000 | 90,825,000 | 1210 | 729  | -1.475162106 | CXCL3,GRO1,ENSBTAG00000027513                       |
| 6 | 90,750,000 | 90,900,000 | 1211 | 868  | -0.79419946  | CXCL3,GRO1,MTHFD2L                                  |
| 6 | 90,825,000 | 90,975,000 | 1212 | 1048 | 0.241612434  | MTHFD2L                                             |
| 6 | 90,900,000 | 91,050,000 | 1213 | 1020 | 0.433971316  | EPGN,MTHFD2L                                        |
| 6 | 90,975,000 | 91,125,000 | 1214 | 811  | 0.603701697  | EPGN,EREG,MTHFD2L                                   |
| 6 | 91,050,000 | 91,200,000 | 1215 | 1168 | -0.295509609 | AREG,EREG                                           |
| 6 | 91,125,000 | 91,275,000 | 1216 | 1422 | 0.167584596  | AREG                                                |
| 6 | 91,200,000 | 91,350,000 | 1217 | 1436 | 0.595758437  |                                                     |
| 6 | 91,275,000 | 91,425,000 | 1218 | 1552 | 0.598646988  |                                                     |
| 6 | 91,350,000 | 91,500,000 | 1219 | 1249 | 0.378994817  | BTC                                                 |
| 6 | 91,425,000 | 91,575,000 | 1220 | 1248 | -0.549861944 | BTC                                                 |
| 6 | 91,500,000 | 91,650,000 | 1221 | 1018 | -1.555125842 | DKFZP564O0823                                       |
| 6 | 91,575,000 | 91,725,000 | 1222 | 508  | -1.962668414 | DKFZP564O0823                                       |
| 6 | 91,650,000 | 91,800,000 | 1223 | 690  | 0.541779479  | DKFZP564O0823                                       |
| 6 | 91,725,000 | 91,875,000 | 1224 | 859  | 0.786142286  |                                                     |
| 6 | 91,800,000 | 91,950,000 | 1225 | 568  | 0.359493031  |                                                     |
| 6 | 91,875,000 | 92,025,000 | 1226 | 445  | -0.012864482 |                                                     |
| 6 | 91,950,000 | 92,100,000 | 1227 | 534  | 0.289725641  | RCHY1,THAP6                                         |
| 6 | 92,025,000 | 92,175,000 | 1228 | 786  | 0.048441967  | CDKL2,RCHY1,THAP6                                   |
| 6 | 92,100,000 | 92,250,000 | 1229 | 792  | -0.08248777  | CDKL2,G3BP2,THAP6                                   |
| 6 | 92,175,000 | 92,325,000 | 1230 | 453  | -0.029194183 | CDKL2,G3BP2,USO1                                    |
| 6 | 92,250,000 | 92,400,000 | 1231 | 510  | 0.037457457  | USO1                                                |
| 6 | 92,325,000 | 92,475,000 | 1232 | 1106 | 0.508521373  | PPEF2,USO1                                          |
| 6 | 92,400,000 | 92,550,000 | 1233 | 1312 | 0.450363062  | NAAA,PPEF2                                          |
| 6 | 92,475,000 | 92,625,000 | 1234 | 1055 | -0.125137068 | ART3,CXCL10,CXCL9,NAAA,PPEF2,SDAD1                  |
| 6 | 92,550,000 | 92,700,000 | 1235 | 785  | -0.466888073 | ART3,CXCL10,CXCL11,CXCL9,SDAD1                      |
| 6 | 92,625,000 | 92,775,000 | 1236 | 829  | -0.907084499 | ART3,CXCL10,CXCL11,NUP54                            |
| 6 | 92,700,000 | 92,850,000 | 1237 | 1330 | -1.173167048 | ART3,NUP54,SCARB2                                   |

|   |            |            |      |      |              |                                                |
|---|------------|------------|------|------|--------------|------------------------------------------------|
| 6 | 92,775,000 | 92,925,000 | 1238 | 1591 | -0.447366798 | NUP54,SCARB2,ENSBTAG00000004921                |
| 6 | 92,850,000 | 93,000,000 | 1239 | 1294 | -0.323726287 | CCDC158,FAM47E-STBD1,SCARB2,ENSBTAG00000004921 |
| 6 | 92,925,000 | 93,075,000 | 1240 | 1291 | -0.531027279 | CCDC158,FAM47E-STBD1,ENSBTAG00000004921        |
| 6 | 93,000,000 | 93,150,000 | 1241 | 1659 | -0.198173597 | CCDC158                                        |
| 6 | 93,075,000 | 93,225,000 | 1242 | 1553 | -0.869572074 |                                                |
| 6 | 93,150,000 | 93,300,000 | 1243 | 1332 | -1.088484213 |                                                |
| 6 | 93,225,000 | 93,375,000 | 1244 | 1150 | -0.210122807 | SHROOM3                                        |
| 6 | 93,300,000 | 93,450,000 | 1245 | 718  | -0.23679101  | SHROOM3                                        |
| 6 | 93,375,000 | 93,525,000 | 1246 | 656  | -0.498653955 | SHROOM3,SOWAHB                                 |
| 6 | 93,450,000 | 93,600,000 | 1247 | 1041 | 0.332953587  | SEPT11,SOWAHB                                  |
| 6 | 93,525,000 | 93,675,000 | 1248 | 1235 | -0.658574063 | CCNI,SEPT11                                    |
| 6 | 93,600,000 | 93,750,000 | 1249 | 1246 | -1.584414494 | CCNG2,CCNI,SEPT11                              |
| 6 | 93,675,000 | 93,825,000 | 1250 | 1200 | -0.917377312 | CCNG2                                          |
| 6 | 93,750,000 | 93,900,000 | 1251 | 1227 | 0.163695959  | CCNG2,SLC25A16                                 |
| 6 | 93,825,000 | 93,975,000 | 1252 | 815  | 0.308386253  | SLC25A16                                       |
| 6 | 93,900,000 | 94,050,000 | 1253 | 541  | -1.151961237 | CXCL13                                         |
| 6 | 93,975,000 | 94,125,000 | 1254 | 663  | -2.75396803  | CXCL13,RPL23A                                  |
| 6 | 94,050,000 | 94,200,000 | 1255 | 579  | -2.068938728 | CNOT6L,RPL23A                                  |
| 6 | 94,125,000 | 94,275,000 | 1256 | 486  | 0.632384881  | CNOT6L                                         |
| 6 | 94,200,000 | 94,350,000 | 1257 | 486  | -0.086306139 | CNOT6L,MRPL1                                   |
| 6 | 94,275,000 | 94,425,000 | 1258 | 576  | -1.007684409 | MRPL1                                          |
| 6 | 94,350,000 | 94,500,000 | 1259 | 743  | 0.276898452  | MRPL1                                          |
| 6 | 94,425,000 | 94,575,000 | 1260 | 879  | 0.700373187  |                                                |
| 6 | 94,500,000 | 94,650,000 | 1261 | 859  | 0.507029441  |                                                |
| 6 | 94,575,000 | 94,725,000 | 1262 | 808  | -1.026057551 | FRAS1                                          |
| 6 | 94,650,000 | 94,800,000 | 1263 | 978  | -2.439462306 | FRAS1                                          |
| 6 | 94,725,000 | 94,875,000 | 1264 | 1010 | -1.871209621 | FRAS1                                          |
| 6 | 94,800,000 | 94,950,000 | 1265 | 735  | -1.732693133 | FRAS1                                          |
| 6 | 94,875,000 | 95,025,000 | 1266 | 452  | -1.537759595 | FRAS1                                          |
| 6 | 94,950,000 | 95,100,000 | 1267 | 418  | -0.33228428  | ANXA3,FRAS1                                    |
| 6 | 95,025,000 | 95,175,000 | 1268 | 558  | -0.581603155 | ANXA3,FRAS1                                    |
| 6 | 95,100,000 | 95,250,000 | 1269 | 772  | -0.541097825 | ANXA3                                          |
| 6 | 95,175,000 | 95,325,000 | 1270 | 804  | 0.074563682  |                                                |
| 6 | 95,250,000 | 95,400,000 | 1271 | 601  | -0.564953405 | BMP2K                                          |
| 6 | 95,325,000 | 95,475,000 | 1272 | 694  | -1.215586322 | BMP2K,PAQR3                                    |
| 6 | 95,400,000 | 95,550,000 | 1273 | 821  | -0.500254295 | BMP2K,PAQR3                                    |
| 6 | 95,475,000 | 95,625,000 | 1274 | 943  | 0.470610412  |                                                |
| 6 | 95,550,000 | 95,700,000 | 1275 | 1196 | 0.345397116  |                                                |
| 6 | 95,625,000 | 95,775,000 | 1276 | 1081 | -0.395232982 |                                                |
| 6 | 95,700,000 | 95,850,000 | 1277 | 958  | 0.205141401  | NAA11                                          |
| 6 | 95,775,000 | 95,925,000 | 1278 | 894  | 0.993744237  | DYNLL1,GK2,NAA11                               |
| 6 | 95,850,000 | 96,000,000 | 1279 | 764  | -0.702532645 | DYNLL1,GK2                                     |
| 6 | 95,925,000 | 96,075,000 | 1280 | 1243 | -1.812879998 |                                                |
| 6 | 96,000,000 | 96,150,000 | 1281 | 1368 | -0.845221014 |                                                |
| 6 | 96,075,000 | 96,225,000 | 1282 | 848  | -0.321001645 |                                                |
| 6 | 96,150,000 | 96,300,000 | 1283 | 800  | 0.60078916   |                                                |
| 6 | 96,225,000 | 96,375,000 | 1284 | 740  | 1.071045788  | ANTXR2                                         |
| 6 | 96,300,000 | 96,450,000 | 1285 | 577  | 1.149557628  | ANTXR2                                         |
| 6 | 96,375,000 | 96,525,000 | 1286 | 653  | 1.120686216  | ANTXR2                                         |
| 6 | 96,450,000 | 96,600,000 | 1287 | 572  | 0.419434656  | ANTXR2                                         |
| 6 | 96,525,000 | 96,675,000 | 1288 | 652  | 0.258472482  | ANTXR2,PRDM8                                   |
| 6 | 96,600,000 | 96,750,000 | 1289 | 777  | 0.658009715  | FGF5,PRDM8                                     |



|   |             |             |      |      |              |                                           |
|---|-------------|-------------|------|------|--------------|-------------------------------------------|
| 6 | 96,675,000  | 96,825,000  | 1290 | 565  | 0.684133703  | C4orf22,FGF5                              |
| 6 | 96,750,000  | 96,900,000  | 1291 | 780  | 1.136671927  | C4orf22                                   |
| 6 | 96,825,000  | 96,975,000  | 1292 | 1095 | 0.66643009   | C4orf22                                   |
| 6 | 96,900,000  | 97,050,000  | 1293 | 1024 | 0.206899514  | C4orf22                                   |
| 6 | 96,975,000  | 97,125,000  | 1294 | 1108 | 0.669247267  | C4orf22                                   |
| 6 | 97,050,000  | 97,200,000  | 1295 | 1260 | 0.613117691  | C4orf22                                   |
| 6 | 97,125,000  | 97,275,000  | 1296 | 1337 | 0.541059764  | C4orf22                                   |
| 6 | 97,200,000  | 97,350,000  | 1297 | 1139 | -0.928301914 | C4orf22                                   |
| 6 | 97,275,000  | 97,425,000  | 1298 | 888  | -1.34492761  | C4orf22                                   |
| 6 | 97,350,000  | 97,500,000  | 1299 | 695  | 0.524630135  | C4orf22                                   |
| 6 | 97,425,000  | 97,575,000  | 1300 | 708  | 0.801439853  | C4orf22                                   |
| 6 | 97,500,000  | 97,650,000  | 1301 | 718  | 0.636824676  | BMP3,C4orf22                              |
| 6 | 97,575,000  | 97,725,000  | 1302 | 910  | 0.003049125  | BMP3,PRKG2                                |
| 6 | 97,650,000  | 97,800,000  | 1303 | 1125 | 0.241090629  | PRKG2                                     |
| 6 | 97,725,000  | 97,875,000  | 1304 | 1041 | -0.269279358 | PRKG2                                     |
| 6 | 97,800,000  | 97,950,000  | 1305 | 1260 | -0.116562233 |                                           |
| 6 | 97,875,000  | 98,025,000  | 1306 | 1384 | 0.611883267  | RASGEF1B                                  |
| 6 | 97,950,000  | 98,100,000  | 1307 | 1274 | 0.106603158  | RASGEF1B                                  |
| 6 | 98,025,000  | 98,175,000  | 1308 | 1040 | -0.028633808 | RASGEF1B                                  |
| 6 | 98,100,000  | 98,250,000  | 1309 | 932  | 0.263680912  |                                           |
| 6 | 98,175,000  | 98,325,000  | 1310 | 1079 | 0.015662688  |                                           |
| 6 | 98,250,000  | 98,400,000  | 1311 | 1029 | -0.090938584 |                                           |
| 6 | 98,325,000  | 98,475,000  | 1312 | 833  | 0.224954941  |                                           |
| 6 | 98,400,000  | 98,550,000  | 1313 | 696  | 0.402644131  |                                           |
| 6 | 98,475,000  | 98,625,000  | 1314 | 859  | 1.032485534  |                                           |
| 6 | 98,550,000  | 98,700,000  | 1315 | 1031 | 1.276755494  |                                           |
| 6 | 98,625,000  | 98,775,000  | 1316 | 782  | 1.223637056  |                                           |
| 6 | 98,700,000  | 98,850,000  | 1317 | 937  | 1.01659558   |                                           |
| 6 | 98,775,000  | 98,925,000  | 1318 | 1115 | 0.624673467  | HNRPD                                     |
| 6 | 98,850,000  | 99,000,000  | 1319 | 1053 | 0.807233965  | ENOPH1,HNRPD,HNRPDL                       |
| 6 | 98,925,000  | 99,075,000  | 1320 | 1302 | 1.215120279  | ENOPH1,HNRPD,HNRPDL,TMEM150C              |
| 6 | 99,000,000  | 99,150,000  | 1321 | 1181 | 0.49666179   | ENOPH1,TMEM150C                           |
| 6 | 99,075,000  | 99,225,000  | 1322 | 1133 | -0.492905225 |                                           |
| 6 | 99,150,000  | 99,300,000  | 1323 | 1403 | 0.1379153    | SCD5                                      |
| 6 | 99,225,000  | 99,375,000  | 1324 | 1177 | 0.355380433  | SCD5                                      |
| 6 | 99,300,000  | 99,450,000  | 1325 | 700  | -0.534369494 | SCD5,SEC31A                               |
| 6 | 99,375,000  | 99,525,000  | 1326 | 425  | -0.532965166 | SCD5,SEC31A,THAP9                         |
| 6 | 99,450,000  | 99,600,000  | 1327 | 266  | 0.372687554  | LIN54,SEC31A,THAP9                        |
| 6 | 99,525,000  | 99,675,000  | 1328 | 328  | 0.455589389  | COPS4,LIN54,PLAC8                         |
| 6 | 99,600,000  | 99,750,000  | 1329 | 583  | 0.616157138  | COPS4,PLAC8                               |
| 6 | 99,675,000  | 99,825,000  | 1330 | 720  | 0.365824592  | COQ2,PLAC8                                |
| 6 | 99,750,000  | 99,900,000  | 1331 | 1122 | 0.002604783  | COQ2,HPSE,PLAC8                           |
| 6 | 99,825,000  | 99,975,000  | 1332 | 1229 | -0.68807449  | COQ2,HPSE                                 |
| 6 | 99,900,000  | 100,050,000 | 1333 | 979  | -1.180169221 | FAM175A,MRPS18C,ENSBTAG00000018151        |
| 6 | 99,975,000  | 100,125,000 | 1334 | 1039 | -0.491633872 | AGPAT9,FAM175A,MRPS18C,ENSBTAG00000018151 |
| 6 | 100,050,000 | 100,200,000 | 1335 | 900  | 0.058927049  | AGPAT9                                    |
| 6 | 100,125,000 | 100,275,000 | 1336 | 862  | -0.172267319 | AGPAT9                                    |
| 6 | 100,200,000 | 100,350,000 | 1337 | 1137 | -0.005250275 |                                           |
| 6 | 100,275,000 | 100,425,000 | 1338 | 1135 | 0.379196577  |                                           |
| 6 | 100,350,000 | 100,500,000 | 1339 | 1249 | 0.722805242  |                                           |
| 6 | 100,425,000 | 100,575,000 | 1340 | 1233 | 0.757923847  |                                           |
| 6 | 100,500,000 | 100,650,000 | 1341 | 1083 | 0.658761676  |                                           |
| 6 | 100,575,000 | 100,725,000 | 1342 | 1381 | 0.645942697  |                                           |

|   |             |             |      |      |              |                                       |
|---|-------------|-------------|------|------|--------------|---------------------------------------|
| 6 | 100,650,000 | 100,800,000 | 1343 | 1307 | 0.639619803  |                                       |
| 6 | 100,725,000 | 100,875,000 | 1344 | 1053 | 0.314734537  |                                       |
| 6 | 100,800,000 | 100,950,000 | 1345 | 1096 | -0.120994741 |                                       |
| 6 | 100,875,000 | 101,025,000 | 1346 | 997  | -0.372391538 |                                       |
| 6 | 100,950,000 | 101,100,000 | 1347 | 890  | -0.438370254 | NKX6-1                                |
| 6 | 101,025,000 | 101,175,000 | 1348 | 1021 | -0.06761262  | NKX6-1                                |
| 6 | 101,100,000 | 101,250,000 | 1349 | 1145 | -0.186505238 | CDS1                                  |
| 6 | 101,175,000 | 101,325,000 | 1350 | 1029 | -0.371937349 | CDS1,WDFY3                            |
| 6 | 101,250,000 | 101,400,000 | 1351 | 940  | 0.272254273  | CDS1,WDFY3                            |
| 6 | 101,325,000 | 101,475,000 | 1352 | 867  | 0.375590203  | WDFY3                                 |
| 6 | 101,400,000 | 101,550,000 | 1353 | 715  | 0.604029927  | WDFY3                                 |
| 6 | 101,475,000 | 101,625,000 | 1354 | 952  | 0.881806548  | WDFY3                                 |
| 6 | 101,550,000 | 101,700,000 | 1355 | 1064 | 0.683570488  |                                       |
| 6 | 101,625,000 | 101,775,000 | 1356 | 982  | -0.188893206 |                                       |
| 6 | 101,700,000 | 101,850,000 | 1357 | 1263 | 0.395065139  |                                       |
| 6 | 101,775,000 | 101,925,000 | 1358 | 1369 | -0.022559227 |                                       |
| 6 | 101,850,000 | 102,000,000 | 1359 | 1502 | -0.518881761 |                                       |
| 6 | 101,925,000 | 102,075,000 | 1360 | 1758 | 0.502754364  |                                       |
| 6 | 102,000,000 | 102,150,000 | 1361 | 1600 | -0.405807882 |                                       |
| 6 | 102,075,000 | 102,225,000 | 1362 | 1280 | -1.355188869 |                                       |
| 6 | 102,150,000 | 102,300,000 | 1363 | 1280 | 0.342001048  |                                       |
| 6 | 102,225,000 | 102,375,000 | 1364 | 1322 | 0.777049514  |                                       |
| 6 | 102,300,000 | 102,450,000 | 1365 | 1074 | 0.741306775  |                                       |
| 6 | 102,375,000 | 102,525,000 | 1366 | 1244 | 0.7155348    | ARHGAP24                              |
| 6 | 102,450,000 | 102,600,000 | 1367 | 1182 | 0.72994502   | ARHGAP24                              |
| 6 | 102,525,000 | 102,675,000 | 1368 | 734  | -0.819973303 | ARHGAP24                              |
| 6 | 102,600,000 | 102,750,000 | 1369 | 959  | -1.234367757 | ARHGAP24,MAPK10                       |
| 6 | 102,675,000 | 102,825,000 | 1370 | 1042 | -0.312124136 | MAPK10                                |
| 6 | 102,750,000 | 102,900,000 | 1371 | 1162 | 0.985446716  | MAPK10                                |
| 6 | 102,825,000 | 102,975,000 | 1372 | 1522 | 1.246106754  | MAPK10                                |
| 6 | 102,900,000 | 103,050,000 | 1373 | 1067 | 1.184844416  | MAPK10                                |
| 6 | 102,975,000 | 103,125,000 | 1374 | 650  | 0.293160644  | MAPK10                                |
| 6 | 103,050,000 | 103,200,000 | 1375 | 595  | 0.322171117  | LAMTOR5,MAPK10                        |
| 6 | 103,125,000 | 103,275,000 | 1376 | 761  | 0.590621996  | LAMTOR5                               |
| 6 | 103,200,000 | 103,350,000 | 1377 | 728  | 0.618543497  |                                       |
| 6 | 103,275,000 | 103,425,000 | 1378 | 946  | 0.764219303  | PTPN13                                |
| 6 | 103,350,000 | 103,500,000 | 1379 | 1083 | 0.529402938  | PTPN13                                |
| 6 | 103,425,000 | 103,575,000 | 1380 | 698  | -1.381146231 | PTPN13,SLC10A6                        |
| 6 | 103,500,000 | 103,650,000 | 1381 | 719  | -0.379780181 | PTPN13,SLC10A6                        |
| 6 | 103,575,000 | 103,725,000 | 1382 | 744  | 0.607521814  | AFF1                                  |
| 6 | 103,650,000 | 103,800,000 | 1383 | 714  | 0.468405434  | AFF1                                  |
| 6 | 103,725,000 | 103,875,000 | 1384 | 662  | 0.421867929  | AFF1,KLHL8                            |
| 6 | 103,800,000 | 103,950,000 | 1385 | 647  | 0.362832591  | AFF1,KLHL8                            |
| 6 | 103,875,000 | 104,025,000 | 1386 | 605  | -0.249154154 | HSD17B11,HSD17B13                     |
| 6 | 103,950,000 | 104,100,000 | 1387 | 856  | 0.322399884  | HSD17B11,HSD17B13,NUDT9               |
| 6 | 104,025,000 | 104,175,000 | 1388 | 756  | 0.831380202  | HSD17B11,NUDT9,SPARCL1                |
| 6 | 104,100,000 | 104,250,000 | 1389 | 411  | 0.171322142  | NUDT9,SPARCL1                         |
| 6 | 104,175,000 | 104,325,000 | 1390 | 510  | -1.127702966 | DMP1,DSPP,SPARCL1                     |
| 6 | 104,250,000 | 104,400,000 | 1391 | 964  | -1.25366219  | DMP1,DSPP,ENSBTAG00000017829          |
| 6 | 104,325,000 | 104,475,000 | 1392 | 1360 | -0.138270707 | ENSBTAG00000006508,ENSBTAG00000017829 |
| 6 | 104,400,000 | 104,550,000 | 1393 | 1297 | 0.256922356  | ENSBTAG00000006508                    |
| 6 | 104,475,000 | 104,625,000 | 1394 | 869  | 0.096240655  | PPP2R2C                               |
| 6 | 104,550,000 | 104,700,000 | 1395 | 534  | -0.828354998 | PPP2R2C,WFS1                          |

|   |             |             |      |      |              |                                 |
|---|-------------|-------------|------|------|--------------|---------------------------------|
| 6 | 104,625,000 | 104,775,000 | 1396 | 843  | -0.813316773 | PPP2R2C,WFS1                    |
| 6 | 104,700,000 | 104,850,000 | 1397 | 990  | -0.362226337 | JAKMIP1                         |
| 6 | 104,775,000 | 104,925,000 | 1398 | 993  | 0.34138824   | JAKMIP1                         |
| 6 | 104,850,000 | 105,000,000 | 1399 | 1162 | -0.072398336 | C4orf50,JAKMIP1                 |
| 6 | 104,925,000 | 105,075,000 | 1400 | 1414 | 0.351322628  | C4orf50,JAKMIP1                 |
| 6 | 105,000,000 | 105,150,000 | 1401 | 1526 | 0.480014363  | C4orf50,CRMP1                   |
| 6 | 105,075,000 | 105,225,000 | 1402 | 1342 | 0.009194444  | CRMP1,EVC                       |
| 6 | 105,150,000 | 105,300,000 | 1403 | 1397 | -0.464086341 | CRMP1,EVC,EVC2                  |
| 6 | 105,225,000 | 105,375,000 | 1404 | 1356 | -1.083700764 | EVC,EVC2                        |
| 6 | 105,300,000 | 105,450,000 | 1405 | 1187 | -0.095811489 | EVC2                            |
| 6 | 105,375,000 | 105,525,000 | 1406 | 1182 | 0.810102057  | EVC2,STK32B                     |
| 6 | 105,450,000 | 105,600,000 | 1407 | 1293 | -0.322224537 | EVC2,STK32B                     |
| 6 | 105,525,000 | 105,675,000 | 1408 | 1363 | -0.29914805  | STK32B                          |
| 6 | 105,600,000 | 105,750,000 | 1409 | 1265 | 0.998070714  |                                 |
| 6 | 105,675,000 | 105,825,000 | 1410 | 1222 | 0.826171274  |                                 |
| 6 | 105,750,000 | 105,900,000 | 1411 | 1290 | 0.836022266  |                                 |
| 6 | 105,825,000 | 105,975,000 | 1412 | 1484 | 0.986885561  | CYTL1                           |
| 6 | 105,900,000 | 106,050,000 | 1413 | 1479 | 0.711155762  | CYTL1                           |
| 6 | 105,975,000 | 106,125,000 | 1414 | 1296 | 0.310746293  | MSX1                            |
| 6 | 106,050,000 | 106,200,000 | 1415 | 1264 | 0.321823079  | MSX1                            |
| 6 | 106,125,000 | 106,275,000 | 1416 | 1149 | 0.143275993  |                                 |
| 6 | 106,200,000 | 106,350,000 | 1417 | 834  | 0.200320817  |                                 |
| 6 | 106,275,000 | 106,425,000 | 1418 | 630  | 0.447354007  | STX18                           |
| 6 | 106,350,000 | 106,500,000 | 1419 | 696  | -0.255204711 | ACOX3,NSG1,STX18                |
| 6 | 106,425,000 | 106,575,000 | 1420 | 709  | -0.744244975 | ACOX3,NSG1,STX18,TRMT44         |
| 6 | 106,500,000 | 106,650,000 | 1421 | 755  | 0.029821941  | ACOX3,CPZ,NSG1,TRMT44           |
| 6 | 106,575,000 | 106,725,000 | 1422 | 1255 | 0.760243137  | CPZ,NSG1,TRMT44                 |
| 6 | 106,650,000 | 106,800,000 | 1423 | 1288 | 0.559473244  | CPZ,NSG1                        |
| 6 | 106,725,000 | 106,875,000 | 1424 | 1025 | 0.102033949  | HMX1,NSG1                       |
| 6 | 106,800,000 | 106,950,000 | 1425 | 1659 | 0.3137109    | HMX1,NSG1                       |
| 6 | 106,875,000 | 107,025,000 | 1426 | 2061 | 0.186640321  | NSG1                            |
| 6 | 106,950,000 | 107,100,000 | 1427 | 1823 | 0.266380163  | NSG1                            |
| 6 | 107,025,000 | 107,175,000 | 1428 | 1896 | 0.341126321  | NSG1                            |
| 6 | 107,100,000 | 107,250,000 | 1429 | 1864 | 0.389569827  | DOK7,LRPAP1,NSG1                |
| 6 | 107,175,000 | 107,325,000 | 1430 | 1282 | 0.695120306  | DOK7,HGFAC,LRPAP1,NSG1,RGS12    |
| 6 | 107,250,000 | 107,400,000 | 1431 | 891  | 0.505070462  | DOK7,HGFAC,NSG1,RGS12           |
| 6 | 107,325,000 | 107,475,000 | 1432 | 922  | -0.57231825  | LYAR,NSG1,RGS12,ZBTB49          |
| 6 | 107,400,000 | 107,550,000 | 1433 | 1233 | -0.500218987 | LYAR,OTOP1,TMEM128,ZBTB49       |
| 6 | 107,475,000 | 107,625,000 | 1434 | 1256 | 0.19176107   | DBDR,OTOP1,TMEM128              |
| 6 | 107,550,000 | 107,700,000 | 1435 | 1027 | 0.539840174  | DBDR,HTT,MSANTD1                |
| 6 | 107,625,000 | 107,775,000 | 1436 | 1062 | 0.519299676  | HTT,MSANTD1                     |
| 6 | 107,700,000 | 107,850,000 | 1437 | 1047 | 0.547056557  | GRK4,HTT                        |
| 6 | 107,775,000 | 107,925,000 | 1438 | 1153 | 0.544873723  | GRK4,HTT,MFSD10,NOP14           |
| 6 | 107,850,000 | 108,000,000 | 1439 | 1432 | 0.322296993  | ADD1,GRK4,MFSD10,NOP14          |
| 6 | 107,925,000 | 108,075,000 | 1440 | 1254 | 0.404940168  | ADD1,MFSD10,SH3BP2              |
| 6 | 108,000,000 | 108,150,000 | 1441 | 1096 | 0.842873358  | ADD1,FAM193A,SH3BP2,TNIP2       |
| 6 | 108,075,000 | 108,225,000 | 1442 | 1111 | 0.044620027  | FAM193A,TNIP2                   |
| 6 | 108,150,000 | 108,300,000 | 1443 | 957  | -1.873159988 | FAM193A                         |
| 6 | 108,225,000 | 108,375,000 | 1444 | 824  | -1.610405408 | RNF4,ENSBTAG00000047977         |
| 6 | 108,300,000 | 108,450,000 | 1445 | 1065 | 0.060340893  | RNF4,ZFYVE28,ENSBTAG00000047977 |
| 6 | 108,375,000 | 108,525,000 | 1446 | 1155 | 0.819645124  | HAUS3,MXD4,ZFYVE28              |
| 6 | 108,450,000 | 108,600,000 | 1447 | 1376 | 1.32505231   | HAUS3,MXD4,POLN,ZFYVE28         |
| 6 | 108,525,000 | 108,675,000 | 1448 | 1966 | 1.195363696  | POLN                            |

|   |             |             |      |      |              |                                                    |
|---|-------------|-------------|------|------|--------------|----------------------------------------------------|
| 6 | 108,600,000 | 108,750,000 | 1449 | 1535 | 0.93336399   | NAT8L,PIGG,POLN                                    |
| 6 | 108,675,000 | 108,825,000 | 1450 | 904  | 0.868330794  | NAT8L,PDE6B,PIGG,POLN                              |
| 6 | 108,750,000 | 108,900,000 | 1451 | 940  | 0.203161678  | ATP5I,MFSD7,PDE6B,PIGG                             |
| 6 | 108,825,000 | 108,975,000 | 1452 | 1106 | 0.351226347  | ATP5I,MFSD7,PCGF3,PDE6B,ENSBTAG00000048119         |
| 6 | 108,900,000 | 109,050,000 | 1453 | 943  | 0.708151925  | GAK,PCGF3,TMEM175,ENSBTAG00000048119               |
| 6 | 108,975,000 | 109,125,000 | 1454 | 753  | 0.393253653  | DGKQ,GAK,IDUA,SLC26A1,TMEM175                      |
| 6 | 109,050,000 | 109,200,000 | 1455 | 765  | 0.57069164   | DGKQ,FGFRL1,IDUA,SLC26A1,TMEM175,ENSBTAG0000002247 |
| 6 | 109,125,000 | 109,275,000 | 1456 | 901  | 0.863682324  | CTBP1,FGFRL1,SPON2,ENSBTAG0000002247               |
| 6 | 109,200,000 | 109,350,000 | 1457 | 883  | 0.933999867  | CTBP1,MAEA,SPON2,ENSBTAG0000002247                 |
| 6 | 109,275,000 | 109,425,000 | 1458 | 686  | -0.000883655 | MAEA,UVSSA                                         |
| 6 | 109,350,000 | 109,500,000 | 1459 | 672  | -0.34703335  | UVSSA                                              |
| 6 | 109,425,000 | 109,575,000 | 1460 | 608  | 0.817306013  |                                                    |
| 6 | 109,500,000 | 109,650,000 | 1461 | 477  | -0.13891891  | SLBP,TACC3,TMEM129                                 |
| 6 | 109,575,000 | 109,725,000 | 1462 | 448  | -0.044978222 | FGFR3,LETM1,SLBP,TACC3,TMEM129                     |
| 6 | 109,650,000 | 109,800,000 | 1463 | 717  | 0.926715514  | FGFR3,LETM1,WHSC1                                  |
| 6 | 109,725,000 | 109,875,000 | 1464 | 949  | 0.93753483   | C4orf48,LETM1,WHSC1,WHSC2                          |
| 6 | 109,800,000 | 109,950,000 | 1465 | 989  | 0.791585231  | C4orf48,SLC2A9,WHSC1,WHSC2                         |
| 6 | 109,875,000 | 110,025,000 | 1466 | 1049 | 0.853252249  | SLC2A9                                             |
| 6 | 109,950,000 | 110,100,000 | 1467 | 1241 | 0.499366106  | SLC2A9                                             |
| 6 | 110,025,000 | 110,175,000 | 1468 | 1271 | 0.18405457   | SLC2A9,WDR1                                        |
| 6 | 110,100,000 | 110,250,000 | 1469 | 1178 | 0.516951567  | WDR1                                               |
| 6 | 110,175,000 | 110,325,000 | 1470 | 1531 | 0.081868633  | WDR1                                               |
| 6 | 110,250,000 | 110,400,000 | 1471 | 1563 | -0.625774913 | CLNK,ZNF518B                                       |
| 6 | 110,325,000 | 110,475,000 | 1472 | 1598 | -0.315644615 | CLNK,ZNF518B                                       |
| 6 | 110,400,000 | 110,550,000 | 1473 | 1830 | -0.003386417 | CLNK                                               |
| 6 | 110,475,000 | 110,625,000 | 1474 | 1438 | -0.22129551  | CLNK                                               |
| 6 | 110,550,000 | 110,700,000 | 1475 | 994  | -0.395276653 | CLNK                                               |
| 6 | 110,625,000 | 110,775,000 | 1476 | 1190 | -0.21341014  |                                                    |
| 6 | 110,700,000 | 110,850,000 | 1477 | 1156 | 0.163606319  |                                                    |
| 6 | 110,775,000 | 110,925,000 | 1478 | 1155 | -0.051201994 |                                                    |
| 6 | 110,850,000 | 111,000,000 | 1479 | 1364 | -0.118521209 |                                                    |
| 6 | 110,925,000 | 111,075,000 | 1480 | 1045 | -0.774082444 |                                                    |
| 6 | 111,000,000 | 111,150,000 | 1481 | 1044 | -0.293678469 |                                                    |
| 6 | 111,075,000 | 111,225,000 | 1482 | 1493 | 0.656854946  |                                                    |
| 6 | 111,150,000 | 111,300,000 | 1483 | 1449 | 0.666500087  |                                                    |
| 6 | 111,225,000 | 111,375,000 | 1484 | 1156 | 0.897191934  | HS3ST1                                             |
| 6 | 111,300,000 | 111,450,000 | 1485 | 1017 | 0.749606779  | HS3ST1                                             |
| 6 | 111,375,000 | 111,525,000 | 1486 | 735  | 0.276931714  | HS3ST1                                             |
| 6 | 111,450,000 | 111,600,000 | 1487 | 735  | -0.317112273 |                                                    |
| 6 | 111,525,000 | 111,675,000 | 1488 | 1217 | 0.2471312    |                                                    |
| 6 | 111,600,000 | 111,750,000 | 1489 | 1389 | 0.711998931  |                                                    |
| 6 | 111,675,000 | 111,825,000 | 1490 | 1282 | 0.952794238  |                                                    |
| 6 | 111,750,000 | 111,900,000 | 1491 | 1187 | -0.489130736 |                                                    |
| 6 | 111,825,000 | 111,975,000 | 1492 | 856  | -0.891360843 |                                                    |
| 6 | 111,900,000 | 112,050,000 | 1493 | 785  | 0.734115859  |                                                    |
| 6 | 111,975,000 | 112,125,000 | 1494 | 997  | 0.511479333  |                                                    |
| 6 | 112,050,000 | 112,200,000 | 1495 | 1279 | 0.406650007  |                                                    |
| 6 | 112,125,000 | 112,275,000 | 1496 | 1296 | 0.328030944  |                                                    |
| 6 | 112,200,000 | 112,350,000 | 1497 | 1243 | -0.285811974 |                                                    |
| 6 | 112,275,000 | 112,425,000 | 1498 | 1232 | -0.770749289 |                                                    |
| 6 | 112,350,000 | 112,500,000 | 1499 | 1155 | -0.61759021  |                                                    |
| 6 | 112,425,000 | 112,575,000 | 1500 | 1479 | 0.294702259  |                                                    |

|   |             |             |      |      |              |                          |
|---|-------------|-------------|------|------|--------------|--------------------------|
| 6 | 112,500,000 | 112,650,000 | 1501 | 1753 | 1.095569489  |                          |
| 6 | 112,575,000 | 112,725,000 | 1502 | 1543 | 1.096431082  |                          |
| 6 | 112,650,000 | 112,800,000 | 1503 | 916  | 0.444158754  |                          |
| 6 | 112,725,000 | 112,875,000 | 1504 | 483  | -1.030936737 |                          |
| 6 | 112,800,000 | 112,950,000 | 1505 | 870  | 0.608675769  |                          |
| 6 | 112,875,000 | 113,025,000 | 1506 | 914  | 0.700051293  |                          |
| 6 | 112,950,000 | 113,100,000 | 1507 | 513  | -0.165899675 |                          |
| 6 | 113,025,000 | 113,175,000 | 1508 | 658  | 0.057232662  |                          |
| 6 | 113,100,000 | 113,250,000 | 1509 | 709  | 0.4451591    |                          |
| 6 | 113,175,000 | 113,325,000 | 1510 | 712  | 0.805846714  |                          |
| 6 | 113,250,000 | 113,400,000 | 1511 | 885  | 0.709878459  | ENSBTAG00000000872       |
| 6 | 113,325,000 | 113,475,000 | 1512 | 1021 | 0.937880774  | RAB28,ENSBTAG00000000872 |
| 6 | 113,400,000 | 113,550,000 | 1513 | 838  | 0.610926978  | RAB28                    |
| 6 | 113,475,000 | 113,625,000 | 1514 | 537  | -0.40087114  | NKX3-2,RAB28             |
| 6 | 113,550,000 | 113,700,000 | 1515 | 583  | -1.989686925 | BOD1L,NKX3-2,RAB28       |
| 6 | 113,625,000 | 113,775,000 | 1516 | 986  | -0.918550923 | BOD1L,NKX3-2             |
| 6 | 113,700,000 | 113,850,000 | 1517 | 1300 | -1.054797938 | BOD1L                    |
| 6 | 113,775,000 | 113,925,000 | 1518 | 1163 | -2.236308578 |                          |
| 6 | 113,850,000 | 114,000,000 | 1519 | 1034 | -0.964161426 |                          |
| 6 | 113,925,000 | 114,075,000 | 1520 | 1055 | 0.373985953  |                          |
| 6 | 114,000,000 | 114,150,000 | 1521 | 993  | 0.576106777  |                          |
| 6 | 114,075,000 | 114,225,000 | 1522 | 844  | 0.12577594   |                          |
| 6 | 114,150,000 | 114,300,000 | 1523 | 678  | -0.414231624 |                          |
| 6 | 114,225,000 | 114,375,000 | 1524 | 621  | -0.404174198 |                          |
| 6 | 114,300,000 | 114,450,000 | 1525 | 637  | -0.521333835 |                          |
| 6 | 114,375,000 | 114,525,000 | 1526 | 748  | 0.296180979  |                          |
| 6 | 114,450,000 | 114,600,000 | 1527 | 1064 | 0.556798954  |                          |
| 6 | 114,525,000 | 114,675,000 | 1528 | 1116 | 0.653462938  |                          |
| 6 | 114,600,000 | 114,750,000 | 1529 | 737  | 0.845238965  |                          |
| 6 | 114,675,000 | 114,825,000 | 1530 | 784  | -0.373191221 |                          |
| 6 | 114,750,000 | 114,900,000 | 1531 | 778  | -0.807683721 |                          |
| 6 | 114,825,000 | 114,975,000 | 1532 | 444  | -0.078859578 | CPEB2                    |
| 6 | 114,900,000 | 115,050,000 | 1533 | 528  | 0.493986942  | CPEB2                    |
| 6 | 114,975,000 | 115,125,000 | 1534 | 955  | 0.803357842  | CPEB2                    |
| 6 | 115,050,000 | 115,200,000 | 1535 | 1316 | 1.053166725  |                          |
| 6 | 115,125,000 | 115,275,000 | 1536 | 1282 | 0.805899278  |                          |
| 6 | 115,200,000 | 115,350,000 | 1537 | 962  | 0.411043673  | C1QTNF7                  |
| 6 | 115,275,000 | 115,425,000 | 1538 | 1004 | 0.562040547  | C1QTNF7                  |
| 6 | 115,350,000 | 115,500,000 | 1539 | 1455 | 1.011794381  | C1QTNF7,CC2D2A           |
| 6 | 115,425,000 | 115,575,000 | 1540 | 1288 | 1.225305894  | CC2D2A,FBXL5             |
| 6 | 115,500,000 | 115,650,000 | 1541 | 974  | 0.637270897  | CC2D2A,FBXL5             |
| 6 | 115,575,000 | 115,725,000 | 1542 | 917  | -0.338373162 | BST1,FBXL5               |
| 6 | 115,650,000 | 115,800,000 | 1543 | 1070 | -0.045303573 | BST1                     |
| 6 | 115,725,000 | 115,875,000 | 1544 | 1767 | 0.255600376  | CD38                     |
| 6 | 115,800,000 | 115,950,000 | 1545 | 1845 | -0.449610171 | CD38,FGFBP1              |
| 6 | 115,875,000 | 116,025,000 | 1546 | 2042 | 0.322372662  | FGFBP1,PROM1             |
| 6 | 115,950,000 | 116,100,000 | 1547 | 1990 | 0.776411388  | PROM1                    |
| 6 | 116,025,000 | 116,175,000 | 1548 | 1415 | 0.675281024  | PROM1                    |
| 6 | 116,100,000 | 116,250,000 | 1549 | 1281 | 0.689353303  | PROM1,TAPT1              |
| 6 | 116,175,000 | 116,325,000 | 1550 | 1160 | 0.351143709  | TAPT1                    |
| 6 | 116,250,000 | 116,400,000 | 1551 | 1157 | 0.650536466  |                          |
| 6 | 116,325,000 | 116,475,000 | 1552 | 1289 | 0.340755922  |                          |
| 6 | 116,400,000 | 116,550,000 | 1553 | 1714 | -0.097399603 | LDB2                     |

|   |             |             |      |      |              |                                             |
|---|-------------|-------------|------|------|--------------|---------------------------------------------|
| 6 | 116,475,000 | 116,625,000 | 1554 | 1938 | 0.084749846  | LDB2                                        |
| 6 | 116,550,000 | 116,700,000 | 1555 | 1859 | 0.163986989  | LDB2                                        |
| 6 | 116,625,000 | 116,775,000 | 1556 | 1867 | 0.309205892  | LDB2                                        |
| 6 | 116,700,000 | 116,850,000 | 1557 | 1745 | -0.054892949 | LDB2                                        |
| 6 | 116,775,000 | 116,925,000 | 1558 | 1689 | -0.045074597 | LDB2                                        |
| 6 | 116,850,000 | 117,000,000 | 1559 | 1863 | 0.724614754  | LDB2,ENSBTAG00000045917                     |
| 6 | 116,925,000 | 117,075,000 | 1560 | 1774 | 0.514877698  | LDB2,ENSBTAG00000045917                     |
| 6 | 117,000,000 | 117,150,000 | 1561 | 2036 | 0.151604849  |                                             |
| 6 | 117,075,000 | 117,225,000 | 1562 | 2109 | 0.393258217  |                                             |
| 6 | 117,150,000 | 117,300,000 | 1563 | 1718 | 0.638672244  | ENSBTAG00000039645                          |
| 6 | 117,225,000 | 117,375,000 | 1564 | 1416 | 0.34273198   | ENSBTAG00000039645                          |
| 6 | 117,300,000 | 117,450,000 | 1565 | 1079 | -0.37147189  |                                             |
| 6 | 117,375,000 | 117,525,000 | 1566 | 999  | -0.297641047 |                                             |
| 6 | 117,450,000 | 117,600,000 | 1567 | 1577 | 1.047588048  |                                             |
| 6 | 117,525,000 | 117,675,000 | 1568 | 1921 | 1.156064949  |                                             |
| 6 | 117,600,000 | 117,750,000 | 1569 | 1516 | 0.86070623   | CLRN2,QDPR                                  |
| 6 | 117,675,000 | 117,825,000 | 1570 | 1451 | 0.815052096  | CLRN2,QDPR,ENSBTAG00000019584               |
| 6 | 117,750,000 | 117,900,000 | 1571 | 1422 | 0.938795652  | CLRN2,ENSBTAG00000019584,ENSBTAG00000027825 |
| 6 | 117,825,000 | 117,975,000 | 1572 | 1113 | 0.844571172  | ENSBTAG00000019584,ENSBTAG00000027825       |
| 6 | 117,900,000 | 118,050,000 | 1573 | 1192 | 0.658471329  | CNO,MRFAP1,ENSBTAG00000027825               |
| 6 | 117,975,000 | 118,125,000 | 1574 | 1469 | 0.753335627  | CNO,MRFAP1                                  |
| 6 | 118,050,000 | 118,200,000 | 1575 | 1232 | 0.710250164  | KIAA0232                                    |
| 6 | 118,125,000 | 118,275,000 | 1576 | 1108 | -0.896467651 | KIAA0232,TBC1D14                            |
| 6 | 118,200,000 | 118,350,000 | 1577 | 1079 | -2.037376304 | CCDC96,GRPEL1,TBC1D14,ENSBTAG00000010185    |
| 6 | 118,275,000 | 118,425,000 | 1578 | 1096 | -1.244458733 | CCDC96,GRPEL1,TBC1D14,ENSBTAG00000010185    |
| 6 | 118,350,000 | 118,500,000 | 1579 | 1383 | -0.147115551 |                                             |
| 6 | 118,425,000 | 118,575,000 | 1580 | 1524 | -0.663965569 |                                             |
| 6 | 118,500,000 | 118,650,000 | 1581 | 1908 | -1.308012526 |                                             |
| 6 | 118,575,000 | 118,725,000 | 1582 | 2233 | -0.246545056 | PSAPL1                                      |
| 6 | 118,650,000 | 118,800,000 | 1583 | 2100 | 0.769883742  | PSAPL1                                      |
| 6 | 118,725,000 | 118,875,000 | 1584 | 2050 | 0.996312516  |                                             |
| 6 | 118,800,000 | 118,950,000 | 1585 | 1777 | 0.954853159  | AFAP1,SORCS2                                |
| 6 | 118,875,000 | 119,025,000 | 1586 | 1036 | 0.261161285  | AFAP1,SORCS2                                |
| 6 | 118,950,000 | 119,100,000 | 1587 | 783  | 0.275187501  | AFAP1                                       |
| 6 | 119,025,000 | 119,175,000 | 1588 | 761  | 0.202563017  | ABLIM2,AFAP1                                |
| 6 | 119,100,000 | 119,250,000 | 1589 | 1129 | -0.518256784 | ABLIM2                                      |
| 6 | 119,175,000 | 119,325,000 | 1590 | 1575 | -1.456309111 | ABLIM2,SH3TC1                               |
| 6 | 119,250,000 | 119,400,000 | 1591 | 1456 | -1.300338426 | HTRA3,SH3TC1                                |
| 6 | 119,325,000 | 119,458,736 | 1592 | 970  | 0.133202812  | HTRA3,SH3TC1                                |
| 7 | 0           | 150,000     | 1    | 659  | 0.517244876  |                                             |
| 7 | 75,000      | 225,000     | 2    | 588  | 0.287196733  | ENSBTAG00000040610                          |
| 7 | 150,000     | 300,000     | 3    | 754  | 0.472919052  | ENSBTAG00000037602,ENSBTAG00000040610       |
| 7 | 225,000     | 375,000     | 4    | 1198 | 0.713693581  | ENSBTAG00000037602                          |
| 7 | 300,000     | 450,000     | 5    | 1086 | 0.552658768  | FLT4                                        |
| 7 | 375,000     | 525,000     | 6    | 628  | 0.508946396  | CNOT6,FLT4                                  |
| 7 | 450,000     | 600,000     | 7    | 425  | 0.239799286  | CNOT6                                       |
| 7 | 525,000     | 675,000     | 8    | 710  | 0.903326674  | CNOT6                                       |
| 7 | 600,000     | 750,000     | 9    | 1163 | -0.070126599 |                                             |
| 7 | 675,000     | 825,000     | 10   | 1177 | -0.300809872 | GFPT2                                       |
| 7 | 750,000     | 900,000     | 11   | 931  | 0.702619465  | GFPT2,MAPK9                                 |
| 7 | 825,000     | 975,000     | 12   | 1089 | 0.981793735  | MAPK9,ENSBTAG00000047695                    |
| 7 | 900,000     | 1,050,000   | 13   | 1224 | 1.006052493  | RASGEF1C,ENSBTAG00000047695                 |

|   |           |           |    |      |              |                                                                  |
|---|-----------|-----------|----|------|--------------|------------------------------------------------------------------|
| 7 | 975,000   | 1,125,000 | 14 | 1045 | 0.527551315  | RASGEF1C,RNF130                                                  |
| 7 | 1,050,000 | 1,200,000 | 15 | 865  | -0.225049589 | RNF130                                                           |
| 7 | 1,125,000 | 1,275,000 | 16 | 956  | 0.265598485  | RNF130,TBC1D9B                                                   |
| 7 | 1,200,000 | 1,350,000 | 17 | 1278 | 0.954013747  | C7H5orf45,RNF130,SQSTM1,TBC1D9B                                  |
| 7 | 1,275,000 | 1,425,000 | 18 | 1077 | 0.996642522  | C7H5orf45,LTC4S,MGAT4B,SQSTM1,TBC1D9B                            |
| 7 | 1,350,000 | 1,500,000 | 19 | 618  | -0.426541761 | LTC4S,MAML1,MGAT4B                                               |
| 7 | 1,425,000 | 1,575,000 | 20 | 480  | -0.466191874 | CANX,CBY3,MAML1                                                  |
| 7 | 1,500,000 | 1,650,000 | 21 | 531  | 0.899671377  | CANX,CBY3,HNRNPH1,RUFY1                                          |
| 7 | 1,575,000 | 1,725,000 | 22 | 704  | 0.960385106  | HNRNPH1,RUFY1                                                    |
| 7 | 1,650,000 | 1,800,000 | 23 | 981  | 0.328058271  | RUFY1                                                            |
| 7 | 1,725,000 | 1,875,000 | 24 | 1121 | 0.087989011  |                                                                  |
| 7 | 1,800,000 | 1,950,000 | 25 | 1292 | 0.616773367  |                                                                  |
| 7 | 1,875,000 | 2,025,000 | 26 | 1544 | 0.849315245  | ADAMTS2                                                          |
| 7 | 1,950,000 | 2,100,000 | 27 | 1462 | 0.783115869  | ADAMTS2                                                          |
| 7 | 2,025,000 | 2,175,000 | 28 | 1271 | 0.868519882  | ADAMTS2                                                          |
| 7 | 2,100,000 | 2,250,000 | 29 | 1133 | 0.885274765  | ADAMTS2,ZNF354C,ZNF879                                           |
| 7 | 2,175,000 | 2,325,000 | 30 | 1335 | 0.62899887   | GRM6,ZNF354C,ZNF879,ENSBTAG00000034973                           |
| 7 | 2,250,000 | 2,400,000 | 31 | 1495 | 0.12447712   | GRM6,ZFP2,ZNF454,ZNF879,ENSBTAG00000034973                       |
| 7 | 2,325,000 | 2,475,000 | 32 | 1137 | -0.90298383  | RNF187,ZFP2,ZNF454                                               |
| 7 | 2,400,000 | 2,550,000 | 33 | 899  | -0.337794719 | HIST3H2A,HIST3H2BB,RNF187,TRIM11,TRIM17                          |
| 7 | 2,475,000 | 2,625,000 | 34 | 1139 | 0.5008185    | HIST3H2A,HIST3H2BB,MGC166429,TRIM11,TRIM17,ENSBTAG00000001604    |
| 7 | 2,550,000 | 2,700,000 | 35 | 1535 | 0.787922223  | MGC166429,TRIM11,ENSBTAG00000001604                              |
| 7 | 2,625,000 | 2,775,000 | 36 | 1942 | 0.828407385  |                                                                  |
| 7 | 2,700,000 | 2,850,000 | 37 | 2026 | 0.535592042  |                                                                  |
| 7 | 2,775,000 | 2,925,000 | 38 | 1374 | 0.286875012  | ARF1,GJC2,GUK1,IBA57,MMTAG2,MRPL55                               |
| 7 | 2,850,000 | 3,000,000 | 39 | 924  | 0.69679775   | ARF1,GJC2,GUK1,IBA57,MMTAG2,MRPL55,WNT3A                         |
| 7 | 2,925,000 | 3,075,000 | 40 | 1043 | 0.813096128  | ARF1,WNT3A,WNT9A                                                 |
| 7 | 3,000,000 | 3,150,000 | 41 | 1408 | 0.516475728  | WNT9A,ENSBTAG00000011216                                         |
| 7 | 3,075,000 | 3,225,000 | 42 | 1574 | 0.084447634  | PRSS38,ENSBTAG00000011216                                        |
| 7 | 3,150,000 | 3,300,000 | 43 | 1287 | 0.046327674  | PRSS38,ENSBTAG00000011216                                        |
| 7 | 3,225,000 | 3,375,000 | 44 | 1288 | 0.200122635  | SNAP47                                                           |
| 7 | 3,300,000 | 3,450,000 | 45 | 1344 | 0.047651852  | JMJD4,SNAP47,ZNF354B                                             |
| 7 | 3,375,000 | 3,525,000 | 46 | 1059 | -0.581704382 | JMJD4,SNAP47,ZNF354B                                             |
| 7 | 3,450,000 | 3,600,000 | 47 | 1052 | -0.2755281   | ATP13A1                                                          |
| 7 | 3,525,000 | 3,675,000 | 48 | 1192 | 0.381681143  | ATP13A1,GMIP,LPAR2,PBX4                                          |
| 7 | 3,600,000 | 3,750,000 | 49 | 893  | 0.585974876  | ATP13A1,CILP2,GATAD2A,GMIP,LPAR2,NDUFA13,PBX4,TSSK6,YJEFN3       |
| 7 | 3,675,000 | 3,825,000 | 50 | 751  | 0.895893678  | CILP2,GATAD2A,NDUFA13,PBX4,TSSK6,YJEFN3                          |
| 7 | 3,750,000 | 3,900,000 | 51 | 820  | 0.7248668    | GATAD2A,MAU2,SF4                                                 |
| 7 | 3,825,000 | 3,975,000 | 52 | 998  | -0.295375802 | GATAD2A,HAPLN4,MAU2,NCAN,SF4,TM6SF2                              |
| 7 | 3,900,000 | 4,050,000 | 53 | 1241 | -0.446355942 | HAPLN4,MEF2B,MEF2BNB,NCAN,NR2C2AP,RFXANK,SLC25A42,SUGP2,TMEM161A |
| 7 | 3,975,000 | 4,125,000 | 54 | 1032 | 0.349006154  | ARMC6,MEF2B,MEF2BNB,NCAN,NR2C2AP,RFXANK,SLC25A42,SUGP2,TMEM161A  |
| 7 | 4,050,000 | 4,200,000 | 55 | 1130 | -0.954162963 | ARMC6,SLC25A42,SUGP2                                             |
| 7 | 4,125,000 | 4,275,000 | 56 | 1148 | -1.279348581 | COPE,DDX49,HOMER3,LASS1,SUGP2,UPF1,ENSBTAG0000020923             |
| 7 | 4,200,000 | 4,350,000 | 57 | 1035 | -0.508351254 | COPE,DDX49,HOMER3,LASS1,UPF1,ENSBTAG000000020923                 |
| 7 | 4,275,000 | 4,425,000 | 58 | 1084 | -0.543007677 | COMP,CRTC1,UPF1                                                  |
| 7 | 4,350,000 | 4,500,000 | 59 | 941  | -0.048261541 | COMP,CRTC1,KLHL26                                                |

|   |           |           |     |      |              |                                                                                              |
|---|-----------|-----------|-----|------|--------------|----------------------------------------------------------------------------------------------|
| 7 | 4,425,000 | 4,575,000 | 60  | 781  | 0.292593604  | C19orf60,CRLF1,CRTC1,FKBP8,KLHL26,KXD1,TMEM59L,UBA52                                         |
| 7 | 4,500,000 | 4,650,000 | 61  | 644  | 0.642190785  | C19orf60,CRLF1,ELL,FKBP8,KXD1,TMEM59L,UBA52                                                  |
| 7 | 4,575,000 | 4,725,000 | 62  | 822  | 0.671061906  | ELL,GDF15,ISYNA1,LRRC25,SSBP4                                                                |
| 7 | 4,650,000 | 4,800,000 | 63  | 1114 | 0.943877832  | ELL,GDF15,ISYNA1,LRRC25,PGPEP1,SSBP4                                                         |
| 7 | 4,725,000 | 4,875,000 | 64  | 1031 | 1.130376657  | CIST1,LSM4,PGPEP1                                                                            |
| 7 | 4,800,000 | 4,950,000 | 65  | 1012 | 0.995947473  | CIST1,KIAA1683,LSM4,PDE4C,RAB3A                                                              |
| 7 | 4,875,000 | 5,025,000 | 66  | 1344 | 0.758584616  | CIST1,IFI30,KIAA1683,MAST3,MPV17L2,PDE4C,PIK3R2,RAB3A                                        |
| 7 | 4,950,000 | 5,100,000 | 67  | 1252 | 0.206257495  | IFI30,IL12RB1,MAST3,MPV17L2,PIK3R2,RAB3A                                                     |
| 7 | 5,025,000 | 5,175,000 | 68  | 722  | -0.08621941  | ARRDC2,CCDC124,IL12RB1,KCNN1,MAST3                                                           |
| 7 | 5,100,000 | 5,250,000 | 69  | 455  | -0.205255498 | ARRDC2,CCDC124,JAK3,KCNN1,RPL18A,SLC5A5                                                      |
| 7 | 5,175,000 | 5,325,000 | 70  | 691  | 0.240664996  | B3GNT3,FCHO1,INSL3,JAK3,RPL18A,SLC5A5                                                        |
| 7 | 5,250,000 | 5,400,000 | 71  | 1040 | 0.692181314  | B3GNT3,FCHO1,INSL3,MAP1S,UNC13A                                                              |
| 7 | 5,325,000 | 5,475,000 | 72  | 1180 | 0.88663246   | COLGALT1,MAP1S,UNC13A                                                                        |
| 7 | 5,400,000 | 5,550,000 | 73  | 1192 | 0.883931623  | COLGALT1,FAM129C,PGLS,SLC27A1,UNC13A                                                         |
| 7 | 5,475,000 | 5,625,000 | 74  | 1275 | 0.494654703  | COLGALT1,FAM129C,MVB12A,NXNL1,PGLS,SLC27A1,ENSBTAG00000025767                                |
| 7 | 5,550,000 | 5,700,000 | 75  | 1395 | -0.023540037 | MVB12A,NXNL1,PLVAP,SLC27A1,ENSBTAG00000008021,ENSBTAG00000025767,ENSBTAG00000045588          |
| 7 | 5,625,000 | 5,775,000 | 76  | 1027 | -0.144101212 | ABHD8,ANKLE1,ANO8,BABAM1,DDA1,GTPBP3,MRPL34,PLVAP,USHBP1,ENSBTAG0000008021,ENSBTAG0000045588 |
| 7 | 5,700,000 | 5,850,000 | 77  | 887  | 0.675663096  | ABHD8,ANKLE1,ANO8,BABAM1,DDA1,GTPBP3,MRPL34,MYO9B,NR2F6,PLVAP,USE1,USHBP1,ENSBTAG0000011135  |
| 7 | 5,775,000 | 5,925,000 | 78  | 1335 | 0.718057266  | HICE1,MYO9B,NR2F6,USE1,USHBP1,ENSBTAG00000011135                                             |
| 7 | 5,850,000 | 6,000,000 | 79  | 1588 | 0.267213257  | CPAMD8,HICE1,MYO9B                                                                           |
| 7 | 5,925,000 | 6,075,000 | 80  | 1902 | 0.34669963   | CPAMD8,HICE1                                                                                 |
| 7 | 6,000,000 | 6,150,000 | 81  | 1949 | 0.260650077  | CPAMD8,F2RL3,SIN3B                                                                           |
| 7 | 6,075,000 | 6,225,000 | 82  | 1475 | -0.045664361 | CPAMD8,F2RL3,NWD1,SIN3B                                                                      |
| 7 | 6,150,000 | 6,300,000 | 83  | 1409 | -0.011541922 | NWD1,TMEM38A                                                                                 |
| 7 | 6,225,000 | 6,375,000 | 84  | 1326 | -0.062353429 | MED26,TMEM38A,ENSBTAG00000013613                                                             |
| 7 | 6,300,000 | 6,450,000 | 85  | 933  | 0.37689269   | C19orf44,CHERP,MED26,SLC35E1,TMEM38A,ENSBTAG00000013613,ENSBTAG00000027878                   |
| 7 | 6,375,000 | 6,525,000 | 86  | 1214 | 0.297852261  | C19orf44,CALR3,CHERP,EP515L1,MED26,SLC35E1,ENSBTAG00000027878                                |
| 7 | 6,450,000 | 6,600,000 | 87  | 1675 | 0.597517883  | CALR3,EP515L1                                                                                |
| 7 | 6,525,000 | 6,675,000 | 88  | 1368 | 0.614958062  | EP515L1                                                                                      |
| 7 | 6,600,000 | 6,750,000 | 89  | 742  | -0.469235581 | ENSBTAG00000047589                                                                           |
| 7 | 6,675,000 | 6,825,000 | 90  | 262  | -1.331951302 | ENSBTAG00000047589                                                                           |
| 7 | 6,750,000 | 6,900,000 | 91  | 0    | -100         |                                                                                              |
| 7 | 6,825,000 | 6,975,000 | 92  | 0    | -100         |                                                                                              |
| 7 | 6,900,000 | 7,050,000 | 93  | 0    | -100         |                                                                                              |
| 7 | 6,975,000 | 7,125,000 | 94  | 0    | -100         |                                                                                              |
| 7 | 7,050,000 | 7,200,000 | 95  | 0    | -100         |                                                                                              |
| 7 | 7,125,000 | 7,275,000 | 96  | 0    | -100         |                                                                                              |
| 7 | 7,200,000 | 7,350,000 | 97  | 0    | -100         |                                                                                              |
| 7 | 7,275,000 | 7,425,000 | 98  | 0    | -100         |                                                                                              |
| 7 | 7,350,000 | 7,500,000 | 99  | 0    | -100         |                                                                                              |
| 7 | 7,425,000 | 7,575,000 | 100 | 0    | -100         |                                                                                              |
| 7 | 7,500,000 | 7,650,000 | 101 | 0    | -100         |                                                                                              |



|   |           |           |     |      |              |                                                                                                                                                         |
|---|-----------|-----------|-----|------|--------------|---------------------------------------------------------------------------------------------------------------------------------------------------------|
| 7 | 7,575,000 | 7,725,000 | 102 | 0    | -100         |                                                                                                                                                         |
| 7 | 7,650,000 | 7,800,000 | 103 | 16   | 0.835845114  |                                                                                                                                                         |
| 7 | 7,725,000 | 7,875,000 | 104 | 418  | -0.625827829 | AP1M1,CIB3,FAM32A                                                                                                                                       |
| 7 | 7,800,000 | 7,950,000 | 105 | 899  | -0.492874367 | AP1M1,CIB3,FAM32A,HSH2D,RAB8A,TPM4                                                                                                                      |
| 7 | 7,875,000 | 8,025,000 | 106 | 1531 | 0.107358351  | CIB3,HSH2D,RAB8A,TPM4,ENSBTAG00000039983,ENSBTAG00000047796                                                                                             |
| 7 | 7,950,000 | 8,100,000 | 107 | 2151 | 0.096083853  | ENSBTAG00000009069,ENSBTAG00000033092,ENSBTAG00000039983,ENSBTAG00000047796                                                                             |
| 7 | 8,025,000 | 8,175,000 | 108 | 2316 | 0.820940983  | ENSBTAG00000009069,ENSBTAG00000018736,ENSBTAG00000033092,ENSBTAG00000033146,ENSBTAG00000045972,ENSBTAG00000047215                                       |
| 7 | 8,100,000 | 8,250,000 | 109 | 1817 | 1.102867639  | ENSBTAG00000008335,ENSBTAG00000018736,ENSBTAG00000033146,ENSBTAG00000037458,ENSBTAG00000038980,ENSBTAG00000039921,ENSBTAG00000045972,ENSBTAG00000047215 |
| 7 | 8,175,000 | 8,325,000 | 110 | 1337 | 1.026500778  | OR10H1,ENSBTAG00000006488,ENSBTAG00000008335,ENSBTAG00000037458,ENSBTAG00000038980,ENSBTAG00000039921                                                   |
| 7 | 8,250,000 | 8,400,000 | 111 | 1378 | 1.028157532  | OR10H1,ENSBTAG00000006216,ENSBTAG00000006488,ENSBTAG00000039337                                                                                         |
| 7 | 8,325,000 | 8,475,000 | 112 | 933  | 1.001565193  | CYP4F2,ENSBTAG00000006216,ENSBTAG00000038549,ENSBTAG00000039337                                                                                         |
| 7 | 8,400,000 | 8,550,000 | 113 | 615  | 0.340387359  | CYP4F2,ENSBTAG00000038549,ENSBTAG00000039319                                                                                                            |
| 7 | 8,475,000 | 8,625,000 | 114 | 741  | -0.134903483 | CYP4F3,ENSBTAG00000025748,ENSBTAG00000038549,ENSBTAG00000039319                                                                                         |
| 7 | 8,550,000 | 8,700,000 | 115 | 762  | 0.36293704   | CYP4F22,CYP4F3,ENSBTAG00000025748                                                                                                                       |
| 7 | 8,625,000 | 8,775,000 | 116 | 771  | 1.030569655  | AKAP8L,CYP4F22,PGLYRP2,RASAL3,WIZ                                                                                                                       |
| 7 | 8,700,000 | 8,850,000 | 117 | 858  | 1.153056284  | AKAP8,AKAP8L,PGLYRP2,RASAL3,WIZ                                                                                                                         |
| 7 | 8,775,000 | 8,925,000 | 118 | 970  | 1.155044318  | AKAP8,AKAP8L,BRD4,EPHX3                                                                                                                                 |
| 7 | 8,850,000 | 9,000,000 | 119 | 1031 | 1.093330251  | BRD4,EPHX3,NOTCH3,ENSBTAG00000040305                                                                                                                    |
| 7 | 8,925,000 | 9,075,000 | 120 | 878  | 1.182110047  | ILVBL,NOTCH3,SYDE1,ENSBTAG00000002686,ENSBTAG00000040305                                                                                                |
| 7 | 9,000,000 | 9,150,000 | 121 | 1018 | 1.362414385  | CASP14,ILVBL,SYDE1,ENSBTAG00000002686,ENSBTAG00000011496,ENSBTAG00000040305                                                                             |
| 7 | 9,075,000 | 9,225,000 | 122 | 1462 | 1.397761508  | CASP14,CCDC105,SLC1A6,ENSBTAG00000011496                                                                                                                |
| 7 | 9,150,000 | 9,300,000 | 123 | 1510 | 0.857124597  | CCDC105,OR7C2,SLC1A6,ENSBTAG00000027699,ENSBTAG00000039533                                                                                              |
| 7 | 9,225,000 | 9,375,000 | 124 | 1150 | 0.17759477   | OR7C2,ENSBTAG00000027699,ENSBTAG00000039533                                                                                                             |
| 7 | 9,300,000 | 9,450,000 | 125 | 887  | 0.359155226  | ENSBTAG00000045638                                                                                                                                      |
| 7 | 9,375,000 | 9,525,000 | 126 | 1393 | 0.654366538  | ENSBTAG00000036175,ENSBTAG00000045638,ENSBTAG00000047429,ENSBTAG00000047888                                                                             |
| 7 | 9,450,000 | 9,600,000 | 127 | 1703 | 0.526631315  | ENSBTAG00000034909,ENSBTAG00000036175,ENSBTAG00000036331,ENSBTAG00000047429,ENSBTAG00000047888,ENSBTAG00000048056                                       |
| 7 | 9,525,000 | 9,675,000 | 128 | 1505 | 0.057863602  | ENSBTAG00000034909,ENSBTAG00000036331,ENSBTAG00000048015,ENSBTAG00000048056                                                                             |
| 7 | 9,600,000 | 9,750,000 | 129 | 1968 | 0.89875758   | ENSBTAG00000038533,ENSBTAG00000046423,ENSBTAG00000048015                                                                                                |
| 7 | 9,675,000 | 9,825,000 | 130 | 2323 | 1.060639532  | ENSBTAG00000038533,ENSBTAG00000046423                                                                                                                   |
| 7 | 9,750,000 | 9,900,000 | 131 | 2019 | 0.978332143  |                                                                                                                                                         |
| 7 | 9,825,000 | 9,975,000 | 132 | 1558 | 0.894203358  | ENSBTAG00000046297                                                                                                                                      |

|   |            |            |     |      |              |                                                                             |
|---|------------|------------|-----|------|--------------|-----------------------------------------------------------------------------|
| 7 | 9,900,000  | 10,050,000 | 133 | 1448 | 0.569879246  | ENSBTAG00000046297,ENSBTAG00000046945,ENSBTAG00000048208                    |
| 7 | 9,975,000  | 10,125,000 | 134 | 1839 | 0.358366036  | ENSBTAG00000046945,ENSBTAG00000048208                                       |
| 7 | 10,050,000 | 10,200,000 | 135 | 1891 | 0.472621428  | ENSBTAG00000022663,ENSBTAG00000024397,ENSBTAG00000039877                    |
| 7 | 10,125,000 | 10,275,000 | 136 | 1998 | -0.510469998 | ENSBTAG00000022663,ENSBTAG00000024397,ENSBTAG00000039877,ENSBTAG00000047539 |
| 7 | 10,200,000 | 10,350,000 | 137 | 1919 | -1.041363215 | ENSBTAG00000046233,ENSBTAG00000047539                                       |
| 7 | 10,275,000 | 10,425,000 | 138 | 1764 | -0.104169749 | ENSBTAG00000046233,ENSBTAG00000048072                                       |
| 7 | 10,350,000 | 10,500,000 | 139 | 1806 | -0.046260271 | ENSBTAG00000047817,ENSBTAG00000048066,ENSBTAG00000048072                    |
| 7 | 10,425,000 | 10,575,000 | 140 | 1531 | 0.345990222  | ENSBTAG00000046513,ENSBTAG00000047817,ENSBTAG00000048066                    |
| 7 | 10,500,000 | 10,650,000 | 141 | 1644 | 0.238779714  | ENSBTAG00000046513                                                          |
| 7 | 10,575,000 | 10,725,000 | 142 | 1729 | 0.525089374  | ENSBTAG00000047244,ENSBTAG00000048193                                       |
| 7 | 10,650,000 | 10,800,000 | 143 | 1638 | 0.941129826  | ENSBTAG00000047244,ENSBTAG00000048193                                       |
| 7 | 10,725,000 | 10,875,000 | 144 | 1553 | 0.548362343  |                                                                             |
| 7 | 10,800,000 | 10,950,000 | 145 | 1423 | -0.875696467 | ENSBTAG00000046958,ENSBTAG00000047696                                       |
| 7 | 10,875,000 | 11,025,000 | 146 | 2011 | -1.049405492 | ENSBTAG00000034917,ENSBTAG00000035241,ENSBTAG00000046958,ENSBTAG00000047696 |
| 7 | 10,950,000 | 11,100,000 | 147 | 2248 | -0.204307625 | ENSBTAG00000034917,ENSBTAG00000035241                                       |
| 7 | 11,025,000 | 11,175,000 | 148 | 1700 | -0.241818562 | ENSBTAG00000045561,ENSBTAG00000046163                                       |
| 7 | 11,100,000 | 11,250,000 | 149 | 1816 | -0.306535177 | ENSBTAG00000045561,ENSBTAG00000046163,ENSBTAG00000046397                    |
| 7 | 11,175,000 | 11,325,000 | 150 | 2318 | 0.673662646  | ENSBTAG00000045927,ENSBTAG00000046397,ENSBTAG00000046798,ENSBTAG00000047576 |
| 7 | 11,250,000 | 11,400,000 | 151 | 1906 | 0.689753883  | ENSBTAG00000045927,ENSBTAG00000046798,ENSBTAG00000047433,ENSBTAG00000047576 |
| 7 | 11,325,000 | 11,475,000 | 152 | 1203 | -0.048485057 | ENSBTAG00000014365,ENSBTAG00000047433,ENSBTAG00000047576                    |
| 7 | 11,400,000 | 11,550,000 | 153 | 1116 | -0.241528695 | ENSBTAG00000014365                                                          |
| 7 | 11,475,000 | 11,625,000 | 154 | 1175 | 0.016727645  | ENSBTAG00000026148,ENSBTAG00000033061                                       |
| 7 | 11,550,000 | 11,700,000 | 155 | 1255 | 0.099433976  | ENSBTAG00000026148,ENSBTAG00000033061                                       |
| 7 | 11,625,000 | 11,775,000 | 156 | 1405 | 0.305130223  | ENSBTAG00000026148,ENSBTAG00000033055                                       |
| 7 | 11,700,000 | 11,850,000 | 157 | 1441 | 0.779293172  | ENSBTAG00000003528,ENSBTAG00000033055                                       |
| 7 | 11,775,000 | 11,925,000 | 158 | 1043 | 0.871567131  | ENSBTAG00000003528                                                          |
| 7 | 11,850,000 | 12,000,000 | 159 | 1255 | 0.05723535   |                                                                             |
| 7 | 11,925,000 | 12,075,000 | 160 | 1571 | 0.082536368  | ENSBTAG00000025908                                                          |
| 7 | 12,000,000 | 12,150,000 | 161 | 726  | 0.334103456  | ENSBTAG00000025908                                                          |
| 7 | 12,075,000 | 12,225,000 | 162 | 847  | 0.089144956  | EMR3,ZNF333                                                                 |
| 7 | 12,150,000 | 12,300,000 | 163 | 1507 | 0.391721495  | EMR3,ZNF333                                                                 |
| 7 | 12,225,000 | 12,375,000 | 164 | 1269 | 0.970641042  | DNAJB1,EMR3,NDUFB7,TECR                                                     |
| 7 | 12,300,000 | 12,450,000 | 165 | 1084 | 1.005871139  | DDX39,DNAJB1,EP1,GIPC1,NDUFB7,PKN1,TECR                                     |
| 7 | 12,375,000 | 12,525,000 | 166 | 1136 | 0.436563071  | CD97,DDX39,EP1,GIPC1,PKN1                                                   |
| 7 | 12,450,000 | 12,600,000 | 167 | 1262 | 0.128134027  | CD97,DDX39                                                                  |
| 7 | 12,525,000 | 12,675,000 | 168 | 1158 | 0.633999111  | LPHN1                                                                       |
| 7 | 12,600,000 | 12,750,000 | 169 | 999  | 1.225534604  | ASF1B,C19orf67,IL27RA,LPHN1,MIR1199,PALM3,PRKACA                            |
| 7 | 12,675,000 | 12,825,000 | 170 | 979  | 0.942149217  | ASF1B,C19orf67,HGNC:9982,IL27RA,MIR1199,PALM3,PRKACA,RLN3,RPL13A            |
| 7 | 12,750,000 | 12,900,000 | 171 | 859  | 0.561184893  | C19orf57,CC2D1A,DCAF15,HGNC:9982,IL27RA,PODN1,RLN3,RPL13A                   |

|   |            |            |     |      |              |                                                                                                                   |
|---|------------|------------|-----|------|--------------|-------------------------------------------------------------------------------------------------------------------|
| 7 | 12,825,000 | 12,975,000 | 172 | 722  | 0.15209963   | C19orf57,C7H19orf53,CC2D1A,CCDC130,DCAF15,HGNC:9982,MRI1,NANOS3,PODNL1,ZSWIM4                                     |
| 7 | 12,900,000 | 13,050,000 | 173 | 791  | -0.092705211 | C19orf57,C7H19orf53,CCDC130,MRI1,NANOS3,ZSWIM4                                                                    |
| 7 | 12,975,000 | 13,125,000 | 174 | 1214 | 0.702907729  | ZSWIM4                                                                                                            |
| 7 | 13,050,000 | 13,200,000 | 175 | 1397 | 0.672072371  |                                                                                                                   |
| 7 | 13,125,000 | 13,275,000 | 176 | 999  | -0.161829614 | CACNA1A                                                                                                           |
| 7 | 13,200,000 | 13,350,000 | 177 | 993  | -1.25198357  | CACNA1A                                                                                                           |
| 7 | 13,275,000 | 13,425,000 | 178 | 1145 | -0.803359732 | CACNA1A                                                                                                           |
| 7 | 13,350,000 | 13,500,000 | 179 | 960  | -0.003974402 | CACNA1A                                                                                                           |
| 7 | 13,425,000 | 13,575,000 | 180 | 784  | -0.496208134 | CACNA1A,IER2,NACC1,STX10,TRMT1                                                                                    |
| 7 | 13,500,000 | 13,650,000 | 181 | 799  | -1.138188483 | CACNA1A,IER2,LYL1,NACC1,NFIX,STX10,TRMT1                                                                          |
| 7 | 13,575,000 | 13,725,000 | 182 | 657  | -1.435092893 | GADD45GIP1,LYL1,NFIX,RAD23A,TRMT1                                                                                 |
| 7 | 13,650,000 | 13,800,000 | 183 | 559  | 0.072465593  | CALR,DNASE2,FARSA,GADD45GIP1,GCDH,KLF1,MAST1,NFIX,RAD23A,SYCE2                                                    |
| 7 | 13,725,000 | 13,875,000 | 184 | 681  | 0.080144298  | CALR,DNASE2,FARSA,GCDH,HOOK2,JUNB,KLF1,MAST1,PRDX2,RAD23A,RNASEH2A,RTBDN,SYCE2                                    |
| 7 | 13,800,000 | 13,950,000 | 185 | 674  | 0.38372923   | ASNA1,BEST2,C7H19orf43,DHPS,FBXW9,HOOK2,JUNB,MAST1,MORG1,PRDX2,RNASEH2A,RTBDN,TNPO2,WDR83OS,ENSBTAG00000006251    |
| 7 | 13,875,000 | 14,025,000 | 186 | 777  | 0.949382052  | ASNA1,BEST2,C7H19orf43,DHPS,FBXW9,MAN2B1,MORG1,TNPO2,WDR83OS,ZNF791,ENSBTAG00000006251                            |
| 7 | 13,950,000 | 14,100,000 | 187 | 1174 | 0.085151829  | MAN2B1,WDR83OS,ZNF791                                                                                             |
| 7 | 14,025,000 | 14,175,000 | 188 | 1366 | 0.162553882  |                                                                                                                   |
| 7 | 14,100,000 | 14,250,000 | 189 | 1315 | 0.721318262  |                                                                                                                   |
| 7 | 14,175,000 | 14,325,000 | 190 | 1471 | 0.731659055  | MUC16,ENSBTAG00000021529                                                                                          |
| 7 | 14,250,000 | 14,400,000 | 191 | 1838 | 0.704967401  | MUC16,ENSBTAG00000021529                                                                                          |
| 7 | 14,325,000 | 14,475,000 | 192 | 1812 | 0.365123674  | MUC16                                                                                                             |
| 7 | 14,400,000 | 14,550,000 | 193 | 1293 | -0.315846167 | OR1M1                                                                                                             |
| 7 | 14,475,000 | 14,625,000 | 194 | 1064 | -0.280242238 | OR1M1,ENSBTAG00000022640,ENSBTAG00000023623,ENSBTAG00000032142                                                    |
| 7 | 14,550,000 | 14,700,000 | 195 | 1569 | -0.518687307 | ENSBTAG00000022640,ENSBTAG00000023623,ENSBTAG00000032142,ENSBTAG00000038714,ENSBTAG00000039130,ENSBTAG00000040157 |
| 7 | 14,625,000 | 14,775,000 | 196 | 1732 | 0.16667811   | OR7D2,ZNF317,ENSBTAG00000038510,ENSBTAG00000038714,ENSBTAG00000039130,ENSBTAG00000040157                          |
| 7 | 14,700,000 | 14,850,000 | 197 | 1752 | 0.828874166  | OR7D2,ZNF317,ENSBTAG00000038510                                                                                   |
| 7 | 14,775,000 | 14,925,000 | 198 | 2041 | 0.684239743  | OR7G2,ENSBTAG00000035395,ENSBTAG00000039809                                                                       |
| 7 | 14,850,000 | 15,000,000 | 199 | 1977 | 0.654661037  | OR7G2,ENSBTAG00000035395,ENSBTAG00000039809,ENSBTAG00000040482,ENSBTAG00000046808,ENSBTAG00000046982              |
| 7 | 14,925,000 | 15,075,000 | 200 | 2282 | 0.821064511  | ENSBTAG00000004369,ENSBTAG00000040482,ENSBTAG00000046808,ENSBTAG00000046982,ENSBTAG00000047921                    |
| 7 | 15,000,000 | 15,150,000 | 201 | 2183 | 0.970500889  | ENSBTAG00000004369,ENSBTAG00000046564,ENSBTAG00000046982,ENSBTAG00000047921                                       |
| 7 | 15,075,000 | 15,225,000 | 202 | 1907 | 0.925215683  | ENSBTAG00000046139,ENSBTAG00000046249,ENSBTAG00000046564,ENSBTAG00000047799                                       |
| 7 | 15,150,000 | 15,300,000 | 203 | 2067 | 1.037194948  | ENSBTAG00000046139,ENSBTAG00000046249,ENSBTAG00000047414,ENSBTAG00000047799                                       |

|   |            |            |     |      |              |                                                                                              |
|---|------------|------------|-----|------|--------------|----------------------------------------------------------------------------------------------|
| 7 | 15,225,000 | 15,375,000 | 204 | 1950 | 0.764159497  | ZNF699,ENSBTAG00000039493,ENSBTAG00000046139,ENSBTAG00000047414                              |
| 7 | 15,300,000 | 15,450,000 | 205 | 1475 | 0.010854338  | ZNF266,ZNF699,ENSBTAG00000039493,ENSBTAG000046265                                            |
| 7 | 15,375,000 | 15,525,000 | 206 | 977  | -0.209122027 | FBXL12,ZNF266,ENSBTAG00000035777,ENSBTAG000046265                                            |
| 7 | 15,450,000 | 15,600,000 | 207 | 994  | 0.371896297  | FBXL12,OLFM2,PIN1,ZNF266,ENSBTAG00000035777IGHV6-                                            |
| 7 | 15,525,000 | 15,675,000 | 208 | 1078 | 0.314352573  | 1,OLFM2,PIN1,ENSBTAG00000045635,ENSBTAG0000047507IGHV6-                                      |
| 7 | 15,600,000 | 15,750,000 | 209 | 1092 | 0.197581694  | 1,ENSBTAG00000045635,ENSBTAG00000046813,ENSBTAG00000047177,ENSBTAG00000047507                |
| 7 | 15,675,000 | 15,825,000 | 210 | 1194 | 0.398190329  | COL5A3,RDH8,ENSBTAG00000046813,ENSBTAG0000047177                                             |
| 7 | 15,750,000 | 15,900,000 | 211 | 1104 | 0.531852549  | ANGPTL6,C7H19orf66,COL5A3,EIF3G,P2RY11,PPAN-P2RY11,RDH8,ENSBTAG00000015557                   |
| 7 | 15,825,000 | 15,975,000 | 212 | 973  | 0.204893123  | ANGPTL6,C7H19orf66,DNMT1,EIF3G,P2RY11,PPAN-P2RY11,S1PR2,ENSBTAG00000015557                   |
| 7 | 15,900,000 | 16,050,000 | 213 | 854  | 0.241629519  | DNMT1,EIF3G,ICAM1,MRPL4,S1PR2                                                                |
| 7 | 15,975,000 | 16,125,000 | 214 | 695  | 0.357676645  | FDX1L,ICAM1,ICAM3,ICAM4,ICAM5,MRPL4,RAVER1,S1PR2,TYK2,ZGLP1                                  |
| 7 | 16,050,000 | 16,200,000 | 215 | 544  | 0.104821054  | CDC37,FDX1L,ICAM1,ICAM3,ICAM4,ICAM5,PDE4A,RAVER1,TYK2,ZGLP1                                  |
| 7 | 16,125,000 | 16,275,000 | 216 | 544  | -0.057834993 | CDC37,KEAP1,PDE4A,S1PR5,TYK2                                                                 |
| 7 | 16,200,000 | 16,350,000 | 217 | 816  | -0.695394373 | AP1M2,ATG4D,CDKN2D,KEAP1,KRI1,PDE4A,S1PR5,SLC44A2                                            |
| 7 | 16,275,000 | 16,425,000 | 218 | 994  | -0.283088585 | AP1M2,ATG4D,CDKN2D,ILF3,KRI1,QTRT1,SLC44A2                                                   |
| 7 | 16,350,000 | 16,500,000 | 219 | 1031 | -2.099556758 | DNM2,ILF3,QTRT1,SLC44A2                                                                      |
| 7 | 16,425,000 | 16,575,000 | 220 | 920  | -3.941467841 | C19orf38,CARM1,DNM2,TMED1                                                                    |
| 7 | 16,500,000 | 16,650,000 | 221 | 946  | -1.69986835  | C19orf38,C7H19orf52,CARM1,DNM2,SMARCA4,TMED1,YIPF2,ENSBTAG00000032364                        |
| 7 | 16,575,000 | 16,725,000 | 222 | 1149 | 0.216330992  | C7H19orf52,CARM1,SMARCA4,YIPF2,ENSBTAG00000032364                                            |
| 7 | 16,650,000 | 16,800,000 | 223 | 1060 | 0.665090638  | LDLR,SMARCA4                                                                                 |
| 7 | 16,725,000 | 16,875,000 | 224 | 1079 | -0.034924966 | DOCK6,KANK2,LDLR,SMARCA4,SPC24                                                               |
| 7 | 16,800,000 | 16,950,000 | 225 | 1050 | -0.098951445 | C19orf80,DOCK6,KANK2,LDLR,SPC24,TSPAN16                                                      |
| 7 | 16,875,000 | 17,025,000 | 226 | 831  | 1.186842413  | C19orf80,CCDC151,CCDC159,DOCK6,EPOR,RAB3D,RGL3,SWSAP1,TMEM205,TSPAN16,ENSBTAG00000008192     |
| 7 | 16,950,000 | 17,100,000 | 227 | 676  | 1.520419458  | CCDC151,CCDC159,ECSIT,ELAVL3,EPOR,PRKCSH,RAB3D,RGL3,SWSAP1,TMEM205,ZNF653,ENSBTAG00000008192 |
| 7 | 17,025,000 | 17,175,000 | 228 | 701  | 1.358224939  | ACP5,CCDC151,CNN1,ECSIT,ELAVL3,ELOF1,PRKCSH,ZNF653,ENSBTAG00000040153                        |
| 7 | 17,100,000 | 17,250,000 | 229 | 865  | 0.158890106  | ACP5,CNN1,ELOF1,ZNF558,ENSBTAG00000040153                                                    |
| 7 | 17,175,000 | 17,325,000 | 230 | 907  | 0.179942128  | IR-A,ZNF558,ENSBTAG00000046336,ENSBTAG00000047612                                            |
| 7 | 17,250,000 | 17,400,000 | 231 | 822  | -0.008047389 | IR-A,ENSBTAG00000046336,ENSBTAG00000047612                                                   |
| 7 | 17,325,000 | 17,475,000 | 232 | 1046 | -0.682713842 | IR-A                                                                                         |
| 7 | 17,400,000 | 17,550,000 | 233 | 1263 | -0.720777683 | IR-A,ENSBTAG00000032125,ENSBTAG00000040507                                                   |

|   |            |            |     |      |              |                                                                                                      |
|---|------------|------------|-----|------|--------------|------------------------------------------------------------------------------------------------------|
| 7 | 17,475,000 | 17,625,000 | 234 | 982  | -0.95319179  | C19orf45,MCOLN1,PEX11G,PNPLA6,ZNF358,ENSBTA<br>G00000032125,ENSBTAG00000040507                       |
| 7 | 17,550,000 | 17,700,000 | 235 | 641  | -2.230242698 | C19orf45,CAMSAP3,MCOLN1,PEX11G,PNPLA6,XAB2,Z<br>NF358,ENSBTAG00000040507                             |
| 7 | 17,625,000 | 17,775,000 | 236 | 477  | -2.1146793   | CAMSAP3,FCER2,MCEMP1,PCP2,PNPLA6,RETN,STXBP<br>2,TRAPPC5,XAB2                                        |
| 7 | 17,700,000 | 17,850,000 | 237 | 534  | 0.896576718  | CD209,CLEC4G,EVI5L,FCER2,MCEMP1,PCP2,RETN,STX<br>BP2,TRAPPC5                                         |
| 7 | 17,775,000 | 17,925,000 | 238 | 487  | 1.015927834  | CD209,CLEC4G,CTXN1,EVI5L,LRRRC8E,MAP2K7,SNAPC<br>2,TIMM44,ENSBTAG00000044018                         |
| 7 | 17,850,000 | 18,000,000 | 239 | 407  | 0.736027627  | CTXN1,ELAVL1,EVI5L,LRRRC8E,MAP2K7,SNAPC2,TIMM<br>44,ENSBTAG00000044018                               |
| 7 | 17,925,000 | 18,075,000 | 240 | 762  | 0.99506265   | CCL25,ELAVL1,FBN3                                                                                    |
| 7 | 18,000,000 | 18,150,000 | 241 | 924  | 0.822931889  | CCL25,CERS4,FBN3                                                                                     |
| 7 | 18,075,000 | 18,225,000 | 242 | 806  | 0.275951105  | CD320,CERS4,FBN3,KANK3,NDUFA7,RPS28                                                                  |
| 7 | 18,150,000 | 18,300,000 | 243 | 603  | 0.196022643  | ANGPTL4,CD320,CERS4,KANK3,MARCH2,NDUFA7,RA<br>B11B,RPS28,ENSBTAG00000021039                          |
| 7 | 18,225,000 | 18,375,000 | 244 | 385  | 0.862671018  | ANGPTL4,MARCH2,MYO1F,PRAM1,RAB11B,ZNF414,E<br>NSBTAG00000021039                                      |
| 7 | 18,300,000 | 18,450,000 | 245 | 532  | 1.225637707  | ADAMTS10,MYO1F,PRAM1,ZNF414,ENSBTAG000000<br>21039                                                   |
| 7 | 18,375,000 | 18,525,000 | 246 | 1003 | 1.217468587  | ACTL9,ADAMTS10,MYO1F,OR2Z1,ENSBTAG00000002<br>284                                                    |
| 7 | 18,450,000 | 18,600,000 | 247 | 1281 | 0.765283148  | ACTL9,OR2Z1,ENSBTAG00000002284,ENSBTAG00000<br>045860                                                |
| 7 | 18,525,000 | 18,675,000 | 248 | 1121 | 0.355290267  | ENSBTAG000000045860                                                                                  |
| 7 | 18,600,000 | 18,750,000 | 249 | 1109 | 0.06781389   | ENSBTAG000000038981                                                                                  |
| 7 | 18,675,000 | 18,825,000 | 250 | 1117 | 0.011016669  | EMR1,ENSBTAG000000038981                                                                             |
| 7 | 18,750,000 | 18,900,000 | 251 | 1022 | 0.501166261  | EMR1,VAV1                                                                                            |
| 7 | 18,825,000 | 18,975,000 | 252 | 761  | 0.277224658  | EMR1,GPR108,SH2D3A,TRIP10,VAV1,ENSBTAG000000<br>13834                                                |
| 7 | 18,900,000 | 19,050,000 | 253 | 347  | 0.203696578  | C3,GPR108,SH2D3A,TRIP10,VAV1,ENSBTAG00000013<br>834                                                  |
| 7 | 18,975,000 | 19,125,000 | 254 | 368  | -3.718191631 | C3,GPR108,TNFSF14                                                                                    |
| 7 | 19,050,000 | 19,200,000 | 255 | 554  | -1.994392607 | CD70,TNFSF14,TNFSF9                                                                                  |
| 7 | 19,125,000 | 19,275,000 | 256 | 743  | 0.594118111  | CD70,DENND1C,KHSRP,SLC25A23,SLC25A41,TNFSF9,<br>TUBB4A,ENSBTAG00000046865                            |
| 7 | 19,200,000 | 19,350,000 | 257 | 907  | 0.680153479  | ACER1,ALKBH7,CLPP,DENND1C,GTF2F1,KHSRP,PSPN,<br>SLC25A23,SLC25A41,TUBB4A,ENSBTAG00000046865          |
| 7 | 19,275,000 | 19,425,000 | 258 | 814  | 0.701444785  | ACER1,ALKBH7,CLPP,GTF2F1,MLLT1,PSPN                                                                  |
| 7 | 19,350,000 | 19,500,000 | 259 | 851  | 0.204489636  | ACER1,ACSBG2,MLLT1                                                                                   |
| 7 | 19,425,000 | 19,575,000 | 260 | 833  | 0.720478776  | ACSBG2,MLLT1,RFX2                                                                                    |
| 7 | 19,500,000 | 19,650,000 | 261 | 838  | 0.798205156  | RANBP3,RFX2                                                                                          |
| 7 | 19,575,000 | 19,725,000 | 262 | 816  | 0.193112664  | CAPS,NDUFA11,RANBP3,RFX2,VMAC                                                                        |
| 7 | 19,650,000 | 19,800,000 | 263 | 715  | 0.229828512  | CAPS,CATSPERD,NDUFA11,NRTN,PRR22,RANBP3,VM<br>AC,ENSBTAG00000000414,ENSBTAG00000011842               |
| 7 | 19,725,000 | 19,875,000 | 264 | 656  | -0.155600576 | C19orf70,CATSPERD,HSD11B1L,LONP1,NRTN,PRR22,<br>RPL36,SAFB,ENSBTAG00000000414,ENSBTAG000000<br>11842 |
| 7 | 19,800,000 | 19,950,000 | 265 | 507  | -0.673220622 | C19orf70,CATSPERD,HSD11B1L,LONP1,RPL36,SAFB,S<br>AFB2,ENSBTAG000000035584                            |
| 7 | 19,875,000 | 20,025,000 | 266 | 708  | 0.802244777  | SAFB,SAFB2,ENSBTAG000000035584                                                                       |

|   |            |            |     |      |              |                                                                                    |
|---|------------|------------|-----|------|--------------|------------------------------------------------------------------------------------|
| 7 | 19,950,000 | 20,100,000 | 267 | 1042 | 1.350839517  | ZNRF4                                                                              |
| 7 | 20,025,000 | 20,175,000 | 268 | 759  | 1.385302967  | ZNRF4                                                                              |
| 7 | 20,100,000 | 20,250,000 | 269 | 297  | 1.245560724  | PTPRS                                                                              |
| 7 | 20,175,000 | 20,325,000 | 270 | 301  | 0.699313938  | KDM4B,PTPRS                                                                        |
| 7 | 20,250,000 | 20,400,000 | 271 | 471  | -0.942025033 | KDM4B,PTPRS                                                                        |
| 7 | 20,325,000 | 20,475,000 | 272 | 479  | -1.701689895 | ARRDC5,KDM4B,UHRF1                                                                 |
| 7 | 20,400,000 | 20,550,000 | 273 | 511  | -0.701095289 | ARRDC5,M6PRBP1,TICAM1,UHRF1                                                        |
| 7 | 20,475,000 | 20,625,000 | 274 | 781  | 0.208217769  | ARRDC5,FEM1A,M6PRBP1,TICAM1                                                        |
| 7 | 20,550,000 | 20,700,000 | 275 | 887  | 0.849894581  | C7H19orf10,DPP9,FEM1A,TICAM1,TNFAIP8L1                                             |
| 7 | 20,625,000 | 20,775,000 | 276 | 680  | 1.176002088  | C7H19orf10,DPP9,TNFAIP8L1                                                          |
| 7 | 20,700,000 | 20,850,000 | 277 | 378  | 1.202669073  | LRG1,PLIN4,PLIN5,SEMA6B,TNFAIP8L1,ENSBTAG0000013251                                |
| 7 | 20,775,000 | 20,925,000 | 278 | 287  | 0.627271259  | CHAF1A,LRG1,PLIN4,PLIN5,SEMA6B,SH3GL1,UBXN6,ENSBTAG00000013251                     |
| 7 | 20,850,000 | 21,000,000 | 279 | 356  | 0.466000629  | CHAF1A,FSD1,MPND,SH3GL1,STAP2,TMIGD2,UBXN6,ENSBTAG00000013251                      |
| 7 | 20,925,000 | 21,075,000 | 280 | 319  | 0.456720969  | ANKRD24,CCDC94,EBI3,FSD1,MPND,SH3GL1,SHD,STAP2,TMIGD2                              |
| 7 | 21,000,000 | 21,150,000 | 281 | 248  | 0.474675029  | ANKRD24,CCDC94,CREB3L3,EBI3,MAP2K2,SHD,SIRT6,TMIGD2                                |
| 7 | 21,075,000 | 21,225,000 | 282 | 237  | 0.886054607  | CREB3L3,MAP2K2,PIAS4,SIRT6,ZBTB7A                                                  |
| 7 | 21,150,000 | 21,300,000 | 283 | 290  | 1.273948691  | DAPK3,EEF2,ITGB1BP3,MAP2K2,PIAS4,ZBTB7A,ENSBTAG00000045914                         |
| 7 | 21,225,000 | 21,375,000 | 284 | 766  | 0.711688499  | ATCAY,DAPK3,EEF2,ITGB1BP3,PIAS4,ENSBTAG00000045914                                 |
| 7 | 21,300,000 | 21,450,000 | 285 | 879  | 0.546508312  | APBA3,ATCAY,MATK,MRPL54,RAX2,ZFR2,ZO3                                              |
| 7 | 21,375,000 | 21,525,000 | 286 | 581  | 0.91134574   | APBA3,MATK,MRPL54,PIP5K1C,RAX2,ZFR2,ZO3                                            |
| 7 | 21,450,000 | 21,600,000 | 287 | 613  | 0.358583695  | CACTIN,HMG20B,MFSD12,PIP5K1C,TBXA2R,ZO3,ENSBTAG00000008789                         |
| 7 | 21,525,000 | 21,675,000 | 288 | 593  | -2.01007329  | C7H19orf71,CACTIN,DOHH,FZR1,HMG20B,MFSD12,PIP5K1C,SMIM24,TBXA2R,ENSBTAG00000008789 |
| 7 | 21,600,000 | 21,750,000 | 289 | 436  | -2.537613141 | C7H19orf71,DOHH,FZR1,MFSD12,NFIC,SMIM24                                            |
| 7 | 21,675,000 | 21,825,000 | 290 | 415  | 0.175923919  | CELF5,NFIC                                                                         |
| 7 | 21,750,000 | 21,900,000 | 291 | 461  | 1.296879861  | CELF5,NCLN,S1PR4                                                                   |
| 7 | 21,825,000 | 21,975,000 | 292 | 528  | 0.970778916  | CELF5,GNA11,GNA15,NCLN,S1PR4                                                       |
| 7 | 21,900,000 | 22,050,000 | 293 | 753  | -0.106262475 | AES,GNA11,GNA15,TLE2,TLE6                                                          |
| 7 | 21,975,000 | 22,125,000 | 294 | 818  | -0.344865845 | AES,TLE2,TLE6,ZNF554,ZNF555,ZNF77                                                  |
| 7 | 22,050,000 | 22,200,000 | 295 | 635  | 0.364376965  | DIRAS1,SGTA,SLC39A3,THOP1,ZNF554,ZNF555,ZNF77                                      |
| 7 | 22,125,000 | 22,275,000 | 296 | 488  | 0.427324336  | DIRAS1,GNG7,SGTA,SLC39A3,THOP1                                                     |
| 7 | 22,200,000 | 22,350,000 | 297 | 475  | 0.108436922  | GNG7                                                                               |
| 7 | 22,275,000 | 22,425,000 | 298 | 591  | -0.132317481 | GADD45B,GNG7,ENSBTAG00000024041,ENSBTAG00000045755                                 |
| 7 | 22,350,000 | 22,500,000 | 299 | 896  | 0.106264446  | GADD45B,LMNB2,TIMM13,TMPRSS9,ENSBTAG00000024041,ENSBTAG000000045755                |
| 7 | 22,425,000 | 22,575,000 | 300 | 696  | 0.083686802  | C19orf35,LINGO3,LMNB2,LSM7,SPPL2B,TIMM13,TMPRSS9                                   |
| 7 | 22,500,000 | 22,650,000 | 301 | 259  | -0.608033654 | C19orf35,DOT1L,LINGO3,LSM7,OAZ1,SPPL2B                                             |
| 7 | 22,575,000 | 22,725,000 | 302 | 214  | -0.434898821 | AMH,AP3D1,DOT1L,JSRP1,OAZ1,PLEKHJ1,SF3A2                                           |
| 7 | 22,650,000 | 22,800,000 | 303 | 229  | -0.549824295 | AMH,AP3D1,DOT1L,IZUMO4,JSRP1,MKNK2,MOB3A,PLEKHJ1,SF3A2                             |
| 7 | 22,725,000 | 22,875,000 | 304 | 394  | -0.441766807 | AP3D1,IZUMO4,MKNK2,MOB3A,SEPT8                                                     |
| 7 | 22,800,000 | 22,950,000 | 305 | 751  | 0.098913132  | CCNI2,KIF3A,SEPT8                                                                  |

|   |            |            |     |      |              |                             |
|---|------------|------------|-----|------|--------------|-----------------------------|
| 7 | 22,875,000 | 23,025,000 | 306 | 795  | 0.485384781  | CCNI2,IL13,IL4,KIF3A,SEPT8  |
| 7 | 22,950,000 | 23,100,000 | 307 | 765  | 1.053422961  | IL13,IL4,KIF3A,RAD50        |
| 7 | 23,025,000 | 23,175,000 | 308 | 538  | 0.884195391  | RAD50                       |
| 7 | 23,100,000 | 23,250,000 | 309 | 163  | -1.443526205 | IL5,IRF1,RAD50              |
| 7 | 23,175,000 | 23,325,000 | 310 | 472  | -0.22023419  | IL5,IRF1                    |
| 7 | 23,250,000 | 23,400,000 | 311 | 859  | 0.452796095  | SLC22A4,SLC22A5             |
| 7 | 23,325,000 | 23,475,000 | 312 | 947  | 0.951969138  | PDLIM4,SLC22A4,SLC22A5      |
| 7 | 23,400,000 | 23,550,000 | 313 | 1010 | 0.834261079  | P4HA2,PDLIM4,SLC22A4        |
| 7 | 23,475,000 | 23,625,000 | 314 | 919  | 0.857062859  | P4HA2,RPS4X                 |
| 7 | 23,550,000 | 23,700,000 | 315 | 808  | 0.872243189  | CSF2,RPS4X                  |
| 7 | 23,625,000 | 23,775,000 | 316 | 803  | 0.569233197  | CSF2,IL3                    |
| 7 | 23,700,000 | 23,850,000 | 317 | 689  | -0.333672197 | ACSL6,IL3                   |
| 7 | 23,775,000 | 23,925,000 | 318 | 627  | -0.179256543 | ACSL6                       |
| 7 | 23,850,000 | 24,000,000 | 319 | 599  | -0.162574184 | ACSL6,FNIP1                 |
| 7 | 23,925,000 | 24,075,000 | 320 | 366  | -1.157867144 | FNIP1                       |
| 7 | 24,000,000 | 24,150,000 | 321 | 250  | -1.643805022 | FNIP1,ENSBTAG00000000682    |
| 7 | 24,075,000 | 24,225,000 | 322 | 351  | -1.714894613 | ENSBTAG00000000682          |
| 7 | 24,150,000 | 24,300,000 | 323 | 363  | -1.807407457 | ENSBTAG00000000682          |
| 7 | 24,225,000 | 24,375,000 | 324 | 450  | -1.041265805 | CDC42SE2,ENSBTAG00000000682 |
| 7 | 24,300,000 | 24,450,000 | 325 | 757  | 0.087993318  | CDC42SE2                    |
| 7 | 24,375,000 | 24,525,000 | 326 | 888  | 0.552598151  | CDC42SE2,HINT1,LYRM7        |
| 7 | 24,450,000 | 24,600,000 | 327 | 832  | 0.73872433   | HINT1,LYRM7                 |
| 7 | 24,525,000 | 24,675,000 | 328 | 1015 | 0.769643136  |                             |
| 7 | 24,600,000 | 24,750,000 | 329 | 1153 | 0.058405988  |                             |
| 7 | 24,675,000 | 24,825,000 | 330 | 1293 | -0.39479742  |                             |
| 7 | 24,750,000 | 24,900,000 | 331 | 1129 | -0.373272169 |                             |
| 7 | 24,825,000 | 24,975,000 | 332 | 945  | 0.763930599  |                             |
| 7 | 24,900,000 | 25,050,000 | 333 | 1081 | 1.06449936   |                             |
| 7 | 24,975,000 | 25,125,000 | 334 | 1060 | 1.022951524  |                             |
| 7 | 25,050,000 | 25,200,000 | 335 | 1101 | 0.706793742  | CHSY3                       |
| 7 | 25,125,000 | 25,275,000 | 336 | 1108 | 0.75812206   | CHSY3                       |
| 7 | 25,200,000 | 25,350,000 | 337 | 1080 | 0.876864416  | CHSY3                       |
| 7 | 25,275,000 | 25,425,000 | 338 | 897  | 0.146365119  | CHSY3                       |
| 7 | 25,350,000 | 25,500,000 | 339 | 886  | -0.238935254 | CHSY3                       |
| 7 | 25,425,000 | 25,575,000 | 340 | 1231 | 0.134032547  | CHSY3                       |
| 7 | 25,500,000 | 25,650,000 | 341 | 1274 | 0.298357028  | ADAMTS19,KIAA1024L          |
| 7 | 25,575,000 | 25,725,000 | 342 | 986  | 0.399393402  | ADAMTS19,KIAA1024L          |
| 7 | 25,650,000 | 25,800,000 | 343 | 781  | -0.063688231 | ADAMTS19                    |
| 7 | 25,725,000 | 25,875,000 | 344 | 611  | -0.31643139  | ADAMTS19                    |
| 7 | 25,800,000 | 25,950,000 | 345 | 822  | 0.617308518  | ADAMTS19                    |
| 7 | 25,875,000 | 26,025,000 | 346 | 1114 | 0.459393772  | ADAMTS19                    |
| 7 | 25,950,000 | 26,100,000 | 347 | 1041 | -0.360944178 |                             |
| 7 | 26,025,000 | 26,175,000 | 348 | 1118 | -1.013140041 | ISOC1                       |
| 7 | 26,100,000 | 26,250,000 | 349 | 895  | -1.694373167 | ISOC1,SLC27A6               |
| 7 | 26,175,000 | 26,325,000 | 350 | 671  | -2.471355678 | ISOC1,SLC27A6               |
| 7 | 26,250,000 | 26,400,000 | 351 | 847  | -0.832693306 | SLC27A6                     |
| 7 | 26,325,000 | 26,475,000 | 352 | 747  | -0.053274276 | SLC27A6                     |
| 7 | 26,400,000 | 26,550,000 | 353 | 679  | 0.478522249  |                             |
| 7 | 26,475,000 | 26,625,000 | 354 | 710  | 0.753686532  |                             |
| 7 | 26,550,000 | 26,700,000 | 355 | 545  | -0.011569754 | FBN2                        |
| 7 | 26,625,000 | 26,775,000 | 356 | 505  | -0.030369051 | FBN2                        |
| 7 | 26,700,000 | 26,850,000 | 357 | 608  | 0.520616261  | FBN2                        |
| 7 | 26,775,000 | 26,925,000 | 358 | 703  | 0.336758367  | FBN2                        |

|   |            |            |     |      |              |                          |
|---|------------|------------|-----|------|--------------|--------------------------|
| 7 | 26,850,000 | 27,000,000 | 359 | 852  | 0.776702241  | FBN2,SLC12A2             |
| 7 | 26,925,000 | 27,075,000 | 360 | 770  | 0.776911742  | SLC12A2                  |
| 7 | 27,000,000 | 27,150,000 | 361 | 880  | 0.771502775  | SLC12A2                  |
| 7 | 27,075,000 | 27,225,000 | 362 | 1055 | 0.953699982  |                          |
| 7 | 27,150,000 | 27,300,000 | 363 | 980  | 0.675614688  |                          |
| 7 | 27,225,000 | 27,375,000 | 364 | 807  | 0.491709355  |                          |
| 7 | 27,300,000 | 27,450,000 | 365 | 712  | 0.40666613   |                          |
| 7 | 27,375,000 | 27,525,000 | 366 | 683  | 0.476104147  | CTXN3                    |
| 7 | 27,450,000 | 27,600,000 | 367 | 615  | -0.195077195 | CTXN3                    |
| 7 | 27,525,000 | 27,675,000 | 368 | 1081 | -0.086024532 |                          |
| 7 | 27,600,000 | 27,750,000 | 369 | 1436 | -0.640126393 | PRRC1                    |
| 7 | 27,675,000 | 27,825,000 | 370 | 1294 | -2.153898967 | MEGF10,PRRC1             |
| 7 | 27,750,000 | 27,900,000 | 371 | 1064 | -1.900754918 | MEGF10                   |
| 7 | 27,825,000 | 27,975,000 | 372 | 924  | -0.050559703 | MEGF10                   |
| 7 | 27,900,000 | 28,050,000 | 373 | 956  | 0.060084556  | MEGF10                   |
| 7 | 27,975,000 | 28,125,000 | 374 | 893  | 0.180069672  | MEGF10                   |
| 7 | 28,050,000 | 28,200,000 | 375 | 779  | -0.032112092 | C5orf63                  |
| 7 | 28,125,000 | 28,275,000 | 376 | 652  | -0.235605271 | C5orf63,MARCH3           |
| 7 | 28,200,000 | 28,350,000 | 377 | 886  | 0.754418812  |                          |
| 7 | 28,275,000 | 28,425,000 | 378 | 1035 | 0.615415877  | LMNB1,MARCH3             |
| 7 | 28,350,000 | 28,500,000 | 379 | 829  | 0.873306108  | LMNB1,MARCH3             |
| 7 | 28,425,000 | 28,575,000 | 380 | 736  | 1.155107282  | ALDH7A1,LMNB1,PHAX,TEX43 |
| 7 | 28,500,000 | 28,650,000 | 381 | 561  | 1.056567321  | ALDH7A1,PHAX,TEX43       |
| 7 | 28,575,000 | 28,725,000 | 382 | 552  | 0.776689754  | ALDH7A1,GRAMD3           |
| 7 | 28,650,000 | 28,800,000 | 383 | 592  | 0.647099824  | GRAMD3                   |
| 7 | 28,725,000 | 28,875,000 | 384 | 675  | 0.118933149  | GRAMD3                   |
| 7 | 28,800,000 | 28,950,000 | 385 | 998  | 0.706288244  |                          |
| 7 | 28,875,000 | 29,025,000 | 386 | 920  | 0.753496664  |                          |
| 7 | 28,950,000 | 29,100,000 | 387 | 669  | -0.024112023 |                          |
| 7 | 29,025,000 | 29,175,000 | 388 | 845  | -0.077875194 |                          |
| 7 | 29,100,000 | 29,250,000 | 389 | 1070 | -0.166669312 |                          |
| 7 | 29,175,000 | 29,325,000 | 390 | 993  | -0.080419904 |                          |
| 7 | 29,250,000 | 29,400,000 | 391 | 874  | -0.370529395 |                          |
| 7 | 29,325,000 | 29,475,000 | 392 | 797  | -0.410292408 |                          |
| 7 | 29,400,000 | 29,550,000 | 393 | 701  | -0.092133872 |                          |
| 7 | 29,475,000 | 29,625,000 | 394 | 848  | 0.588838365  |                          |
| 7 | 29,550,000 | 29,700,000 | 395 | 1119 | 0.640893189  | ENSBTAG00000046696       |
| 7 | 29,625,000 | 29,775,000 | 396 | 1305 | 0.780128743  | ENSBTAG00000046696       |
| 7 | 29,700,000 | 29,850,000 | 397 | 963  | 0.462466283  |                          |
| 7 | 29,775,000 | 29,925,000 | 398 | 534  | -0.328730721 |                          |
| 7 | 29,850,000 | 30,000,000 | 399 | 689  | 0.634760237  |                          |
| 7 | 29,925,000 | 30,075,000 | 400 | 933  | 0.889521844  |                          |
| 7 | 30,000,000 | 30,150,000 | 401 | 779  | 0.821013701  |                          |
| 7 | 30,075,000 | 30,225,000 | 402 | 822  | 0.470563556  |                          |
| 7 | 30,150,000 | 30,300,000 | 403 | 937  | -0.396608915 |                          |
| 7 | 30,225,000 | 30,375,000 | 404 | 708  | -0.371516906 | ZNF608                   |
| 7 | 30,300,000 | 30,450,000 | 405 | 685  | 0.930719551  | ZNF608                   |
| 7 | 30,375,000 | 30,525,000 | 406 | 903  | 1.026940695  | ZNF608                   |
| 7 | 30,450,000 | 30,600,000 | 407 | 1101 | 1.063814603  | ZNF608                   |
| 7 | 30,525,000 | 30,675,000 | 408 | 1204 | -0.140802195 |                          |
| 7 | 30,600,000 | 30,750,000 | 409 | 978  | -1.092298869 |                          |
| 7 | 30,675,000 | 30,825,000 | 410 | 652  | -0.734465906 |                          |
| 7 | 30,750,000 | 30,900,000 | 411 | 439  | -0.660812047 |                          |

03-Mar



|   |            |            |     |      |              |                                       |
|---|------------|------------|-----|------|--------------|---------------------------------------|
| 7 | 30,825,000 | 30,975,000 | 412 | 709  | -0.943740576 |                                       |
| 7 | 30,900,000 | 31,050,000 | 413 | 890  | -0.593598148 |                                       |
| 7 | 30,975,000 | 31,125,000 | 414 | 475  | 0.396411802  |                                       |
| 7 | 31,050,000 | 31,200,000 | 415 | 520  | 0.625566135  | ENSBTAG00000047546                    |
| 7 | 31,125,000 | 31,275,000 | 416 | 1030 | 0.281272417  | ENSBTAG00000047546                    |
| 7 | 31,200,000 | 31,350,000 | 417 | 972  | 0.654255129  |                                       |
| 7 | 31,275,000 | 31,425,000 | 418 | 638  | 0.859592992  |                                       |
| 7 | 31,350,000 | 31,500,000 | 419 | 573  | -0.320307103 | CSNK1G3                               |
| 7 | 31,425,000 | 31,575,000 | 420 | 378  | -0.58487225  | CSNK1G3                               |
| 7 | 31,500,000 | 31,650,000 | 421 | 578  | -1.33673218  | CSNK1G3                               |
| 7 | 31,575,000 | 31,725,000 | 422 | 1300 | -0.781801894 | CEP120,CSNK1G3                        |
| 7 | 31,650,000 | 31,800,000 | 423 | 1405 | 0.011971747  | CEP120                                |
| 7 | 31,725,000 | 31,875,000 | 424 | 1077 | 0.182598696  | CEP120                                |
| 7 | 31,800,000 | 31,950,000 | 425 | 1070 | -0.208832315 |                                       |
| 7 | 31,875,000 | 32,025,000 | 426 | 1128 | -1.746348441 | PRDM6                                 |
| 7 | 31,950,000 | 32,100,000 | 427 | 1086 | -2.469417808 | PRDM6                                 |
| 7 | 32,025,000 | 32,175,000 | 428 | 702  | -0.715213272 | PPIC,PRDM6,SNX24                      |
| 7 | 32,100,000 | 32,250,000 | 429 | 707  | 0.409941033  | PPIC,SNX24                            |
| 7 | 32,175,000 | 32,325,000 | 430 | 1154 | -0.234017441 | SNX24                                 |
| 7 | 32,250,000 | 32,400,000 | 431 | 1206 | 0.270442047  | SNX2,SNX24                            |
| 7 | 32,325,000 | 32,475,000 | 432 | 936  | 0.501831016  | SNX2                                  |
| 7 | 32,400,000 | 32,550,000 | 433 | 661  | -0.190262562 |                                       |
| 7 | 32,475,000 | 32,625,000 | 434 | 875  | 1.064047488  |                                       |
| 7 | 32,550,000 | 32,700,000 | 435 | 1146 | 0.878147779  |                                       |
| 7 | 32,625,000 | 32,775,000 | 436 | 853  | 0.159422174  | SNCAIP                                |
| 7 | 32,700,000 | 32,850,000 | 437 | 591  | 0.507515836  | SNCAIP                                |
| 7 | 32,775,000 | 32,925,000 | 438 | 606  | 0.929949816  |                                       |
| 7 | 32,850,000 | 33,000,000 | 439 | 704  | 0.436416905  | ZNF474                                |
| 7 | 32,925,000 | 33,075,000 | 440 | 633  | 0.254287457  | ZNF474                                |
| 7 | 33,000,000 | 33,150,000 | 441 | 571  | 0.837748067  | LOX,SRFBP1,ZNF474                     |
| 7 | 33,075,000 | 33,225,000 | 442 | 511  | 1.183295097  | LOX,SRFBP1                            |
| 7 | 33,150,000 | 33,300,000 | 443 | 377  | 1.139824506  | SRFBP1                                |
| 7 | 33,225,000 | 33,375,000 | 444 | 647  | 0.312794691  | FTMT                                  |
| 7 | 33,300,000 | 33,450,000 | 445 | 740  | -0.170954879 | FTMT                                  |
| 7 | 33,375,000 | 33,525,000 | 446 | 488  | -0.219285796 |                                       |
| 7 | 33,450,000 | 33,600,000 | 447 | 616  | 0.30631394   |                                       |
| 7 | 33,525,000 | 33,675,000 | 448 | 1020 | 0.377908915  | RPLP2                                 |
| 7 | 33,600,000 | 33,750,000 | 449 | 1177 | 0.739539893  | RPLP2                                 |
| 7 | 33,675,000 | 33,825,000 | 450 | 1483 | 0.934823644  |                                       |
| 7 | 33,750,000 | 33,900,000 | 451 | 1366 | 0.207543407  |                                       |
| 7 | 33,825,000 | 33,975,000 | 452 | 1090 | -0.581946439 |                                       |
| 7 | 33,900,000 | 34,050,000 | 453 | 1576 | -0.319236297 |                                       |
| 7 | 33,975,000 | 34,125,000 | 454 | 1572 | 0.643362269  | ENSBTAG00000046914                    |
| 7 | 34,050,000 | 34,200,000 | 455 | 1190 | 1.121142944  | ENSBTAG00000046914,ENSBTAG00000047190 |
| 7 | 34,125,000 | 34,275,000 | 456 | 1350 | 1.024427541  | ENSBTAG00000047190                    |
| 7 | 34,200,000 | 34,350,000 | 457 | 1303 | 0.426750243  |                                       |
| 7 | 34,275,000 | 34,425,000 | 458 | 1201 | -0.036755159 |                                       |
| 7 | 34,350,000 | 34,500,000 | 459 | 1173 | 0.619772714  |                                       |
| 7 | 34,425,000 | 34,575,000 | 460 | 1078 | 0.174361523  | PRR16                                 |
| 7 | 34,500,000 | 34,650,000 | 461 | 822  | 0.031256731  | PRR16,ENSBTAG00000046688              |
| 7 | 34,575,000 | 34,725,000 | 462 | 573  | 0.246231238  | ENSBTAG00000046688                    |
| 7 | 34,650,000 | 34,800,000 | 463 | 986  | 0.67989413   |                                       |
| 7 | 34,725,000 | 34,875,000 | 464 | 1158 | 0.801389368  |                                       |

|   |            |            |     |      |              |                 |
|---|------------|------------|-----|------|--------------|-----------------|
| 7 | 34,800,000 | 34,950,000 | 465 | 1021 | 0.028415278  |                 |
| 7 | 34,875,000 | 35,025,000 | 466 | 814  | -0.544548423 |                 |
| 7 | 34,950,000 | 35,100,000 | 467 | 774  | -0.457539581 |                 |
| 7 | 35,025,000 | 35,175,000 | 468 | 944  | 0.029614064  |                 |
| 7 | 35,100,000 | 35,250,000 | 469 | 887  | -0.227806783 |                 |
| 7 | 35,175,000 | 35,325,000 | 470 | 988  | -0.346363287 |                 |
| 7 | 35,250,000 | 35,400,000 | 471 | 942  | -0.066897418 |                 |
| 7 | 35,325,000 | 35,475,000 | 472 | 1001 | -1.952711954 |                 |
| 7 | 35,400,000 | 35,550,000 | 473 | 1242 | -2.090428618 |                 |
| 7 | 35,475,000 | 35,625,000 | 474 | 1195 | -1.595572941 | FAM170A         |
| 7 | 35,550,000 | 35,700,000 | 475 | 1084 | -1.608944527 | FAM170A,HSD17B4 |
| 7 | 35,625,000 | 35,775,000 | 476 | 1175 | -0.730760044 | HSD17B4         |
| 7 | 35,700,000 | 35,850,000 | 477 | 1230 | -0.072190541 | HSD17B4,TNFAIP8 |
| 7 | 35,775,000 | 35,925,000 | 478 | 981  | -1.746055234 | TNFAIP8         |
| 7 | 35,850,000 | 36,000,000 | 479 | 583  | -2.681932072 | DMXL1,TNFAIP8   |
| 7 | 35,925,000 | 36,075,000 | 480 | 319  | 0.178982287  | DMXL1           |
| 7 | 36,000,000 | 36,150,000 | 481 | 356  | 0.403068331  | DMXL1           |
| 7 | 36,075,000 | 36,225,000 | 482 | 546  | 0.801573448  | DMXL1,DTWD2     |
| 7 | 36,150,000 | 36,300,000 | 483 | 1120 | 0.826050875  | DTWD2           |
| 7 | 36,225,000 | 36,375,000 | 484 | 1485 | 0.762297358  | DTWD2           |
| 7 | 36,300,000 | 36,450,000 | 485 | 1635 | 1.000463638  |                 |
| 7 | 36,375,000 | 36,525,000 | 486 | 1591 | 0.764892363  |                 |
| 7 | 36,450,000 | 36,600,000 | 487 | 1407 | 0.20207434   |                 |
| 7 | 36,525,000 | 36,675,000 | 488 | 1813 | 0.525615478  |                 |
| 7 | 36,600,000 | 36,750,000 | 489 | 1573 | 0.525576261  |                 |
| 7 | 36,675,000 | 36,825,000 | 490 | 981  | 0.385105517  |                 |
| 7 | 36,750,000 | 36,900,000 | 491 | 993  | 0.494916509  |                 |
| 7 | 36,825,000 | 36,975,000 | 492 | 905  | -0.249725564 |                 |
| 7 | 36,900,000 | 37,050,000 | 493 | 938  | 0.083365111  |                 |
| 7 | 36,975,000 | 37,125,000 | 494 | 1379 | 0.064012479  |                 |
| 7 | 37,050,000 | 37,200,000 | 495 | 1523 | -0.628403007 |                 |
| 7 | 37,125,000 | 37,275,000 | 496 | 1091 | -0.329801637 |                 |
| 7 | 37,200,000 | 37,350,000 | 497 | 1150 | 0.098958868  |                 |
| 7 | 37,275,000 | 37,425,000 | 498 | 1229 | 0.285236771  |                 |
| 7 | 37,350,000 | 37,500,000 | 499 | 877  | 0.146735406  |                 |
| 7 | 37,425,000 | 37,575,000 | 500 | 878  | -1.115459681 |                 |
| 7 | 37,500,000 | 37,650,000 | 501 | 1052 | -1.199801396 |                 |
| 7 | 37,575,000 | 37,725,000 | 502 | 1226 | -0.215492817 |                 |
| 7 | 37,650,000 | 37,800,000 | 503 | 1368 | 0.711032152  |                 |
| 7 | 37,725,000 | 37,875,000 | 504 | 1431 | 0.892642188  |                 |
| 7 | 37,800,000 | 37,950,000 | 505 | 1214 | 0.537093561  |                 |
| 7 | 37,875,000 | 38,025,000 | 506 | 1057 | 0.00676808   |                 |
| 7 | 37,950,000 | 38,100,000 | 507 | 1101 | -0.336133153 |                 |
| 7 | 38,025,000 | 38,175,000 | 508 | 1086 | -0.890218456 |                 |
| 7 | 38,100,000 | 38,250,000 | 509 | 1161 | -0.996749382 |                 |
| 7 | 38,175,000 | 38,325,000 | 510 | 1217 | -1.156121846 |                 |
| 7 | 38,250,000 | 38,400,000 | 511 | 1171 | -1.322082318 |                 |
| 7 | 38,325,000 | 38,475,000 | 512 | 921  | -2.349401781 |                 |
| 7 | 38,400,000 | 38,550,000 | 513 | 833  | -1.825241446 |                 |
| 7 | 38,475,000 | 38,625,000 | 514 | 1039 | 0.205582767  |                 |
| 7 | 38,550,000 | 38,700,000 | 515 | 1257 | -0.020417087 |                 |
| 7 | 38,625,000 | 38,775,000 | 516 | 984  | -0.47446695  | SEMA6A          |
| 7 | 38,700,000 | 38,850,000 | 517 | 699  | -0.201854388 | SEMA6A          |

|   |            |            |     |      |              |                                                                                         |
|---|------------|------------|-----|------|--------------|-----------------------------------------------------------------------------------------|
| 7 | 38,775,000 | 38,925,000 | 518 | 856  | 0.257751207  | SEMA6A                                                                                  |
| 7 | 38,850,000 | 39,000,000 | 519 | 835  | 0.664867543  | COMMD10                                                                                 |
| 7 | 38,925,000 | 39,075,000 | 520 | 778  | 0.180847308  | COMMD10                                                                                 |
| 7 | 39,000,000 | 39,150,000 | 521 | 925  | -0.799067993 | COMMD10                                                                                 |
| 7 | 39,075,000 | 39,225,000 | 522 | 899  | -0.708393524 | ARL10,CLTB,COMMD10,HIGD2A,NOP16                                                         |
| 7 | 39,150,000 | 39,300,000 | 523 | 780  | -0.026226504 | ARL10,CLTB,FAF2,HIGD2A,NOP16                                                            |
| 7 | 39,225,000 | 39,375,000 | 524 | 794  | 0.547522918  | CLTB,FAF2,RNF44                                                                         |
| 7 | 39,300,000 | 39,450,000 | 525 | 757  | 0.838925148  | CDHR2,FAF2,GPRIN1,RNF44,SNCB                                                            |
| 7 | 39,375,000 | 39,525,000 | 526 | 675  | 0.537224832  | CDHR2,EIF4E1B,GPRIN1,SNCB,TSPAN17                                                       |
| 7 | 39,450,000 | 39,600,000 | 527 | 854  | -0.235859544 | EIF4E1B,SNCB,TSPAN17                                                                    |
| 7 | 39,525,000 | 39,675,000 | 528 | 802  | -0.1060978   |                                                                                         |
| 7 | 39,600,000 | 39,750,000 | 529 | 551  | 0.291521579  | HK3,UIMC1,UNC5A                                                                         |
| 7 | 39,675,000 | 39,825,000 | 530 | 497  | 0.678224558  | HK3,UIMC1,UNC5A                                                                         |
| 7 | 39,750,000 | 39,900,000 | 531 | 414  | 0.789231286  | UIMC1,ZNF346                                                                            |
| 7 | 39,825,000 | 39,975,000 | 532 | 307  | 0.566471952  | FGFR4,UIMC1,ZNF346                                                                      |
| 7 | 39,900,000 | 40,050,000 | 533 | 191  | 1.207229944  | FGFR4,NSD1,ZNF346                                                                       |
| 7 | 39,975,000 | 40,125,000 | 534 | 215  | 1.336169831  | NSD1                                                                                    |
| 7 | 40,050,000 | 40,200,000 | 535 | 388  | 0.40286775   | LMAN2,MXD3,NSD1,PRELID1,RAB24                                                           |
| 7 | 40,125,000 | 40,275,000 | 536 | 672  | 0.569263121  | F12,LMAN2,MXD3,PFN3,PRELID1,RAB24,RGS14,SLC34A1                                         |
| 7 | 40,200,000 | 40,350,000 | 537 | 540  | 0.839025078  | DBN1,F12,GRK6,LMAN2,PDLIM7,PFN3,PRR7,RGS14,SLC34A1                                      |
| 7 | 40,275,000 | 40,425,000 | 538 | 220  | 0.313281588  | DBN1,DDX41,DOK3,FAM193B,GRK6,PDLIM7,PRR7                                                |
| 7 | 40,350,000 | 40,500,000 | 539 | 177  | -0.264245567 | B4GALT7,DDX41,DOK3,EEF1A1,FAM193B,PDLIM7,TMED9,ENSBTAG00000039886                       |
| 7 | 40,425,000 | 40,575,000 | 540 | 458  | 0.324031144  | B4GALT7,EEF1A1,N4BP3,TMED9,ENSBTAG00000039886                                           |
| 7 | 40,500,000 | 40,650,000 | 541 | 611  | 0.457200233  | HNRNPAB,N4BP3,NHP2,PHYKPL,RMND5B                                                        |
| 7 | 40,575,000 | 40,725,000 | 542 | 628  | -2.319963757 | COL23A1,HNRNPAB,N4BP3,NHP2,PHYKPL,RMND5B                                                |
| 7 | 40,650,000 | 40,800,000 | 543 | 1024 | -1.977391355 | COL23A1,PHYKPL                                                                          |
| 7 | 40,725,000 | 40,875,000 | 544 | 965  | -0.682133509 |                                                                                         |
| 7 | 40,800,000 | 40,950,000 | 545 | 875  | -0.79577882  |                                                                                         |
| 7 | 40,875,000 | 41,025,000 | 546 | 813  | -0.298627162 |                                                                                         |
| 7 | 40,950,000 | 41,100,000 | 547 | 673  | 0.274996563  |                                                                                         |
| 7 | 41,025,000 | 41,175,000 | 548 | 645  | -0.289465737 | CLK4,ZNF354A                                                                            |
| 7 | 41,100,000 | 41,250,000 | 549 | 497  | -1.447093722 | CLK4,PROP1,ZNF354A,ENSBTAG00000030704                                                   |
| 7 | 41,175,000 | 41,325,000 | 550 | 463  | -1.454311392 | OR2Y1,PROP1,ZNF354A,ENSBTAG00000030704,ENSBTAG00000046963                               |
| 7 | 41,250,000 | 41,400,000 | 551 | 334  | -0.883741474 | MGAT1,OR2Y1,ENSBTAG00000046963                                                          |
| 7 | 41,325,000 | 41,475,000 | 552 | 898  | 0.295328118  | MGAT1,ZFP62,ENSBTAG00000024713,ENSBTAG00000046424                                       |
| 7 | 41,400,000 | 41,550,000 | 553 | 1305 | 0.304504145  | ZFP62,ENSBTAG00000024713,ENSBTAG00000046424,ENSBTAG00000047182                          |
| 7 | 41,475,000 | 41,625,000 | 554 | 1020 | 0.593809604  | OR2V1,ENSBTAG00000039706,ENSBTAG00000047182,ENSBTAG00000047300                          |
| 7 | 41,550,000 | 41,700,000 | 555 | 1229 | 0.618721915  | BTNL9,OR2V1,ENSBTAG00000039706,ENSBTAG00000047082,ENSBTAG00000047300,ENSBTAG00000047927 |
| 7 | 41,625,000 | 41,775,000 | 556 | 1167 | 0.578082761  | BTNL9,GNB2L1,TRIM41,TRIM7,ENSBTAG00000047082,ENSBTAG00000047927                         |
| 7 | 41,700,000 | 41,850,000 | 557 | 1088 | 0.349224914  | GNB2L1,IFI47,TRIM41,TRIM52,TRIM7,ENSBTAG0000004815                                      |
| 7 | 41,775,000 | 41,925,000 | 558 | 1329 | -0.222375364 | IFI47,TRIM52,ENSBTAG0000004815                                                          |

|   |            |            |     |      |              |                                                                                                       |
|---|------------|------------|-----|------|--------------|-------------------------------------------------------------------------------------------------------|
| 7 | 41,850,000 | 42,000,000 | 559 | 1169 | -0.011819449 | ZNF496                                                                                                |
| 7 | 41,925,000 | 42,075,000 | 560 | 890  | -0.243374214 | NLRP3,ZNF496                                                                                          |
| 7 | 42,000,000 | 42,150,000 | 561 | 1120 | 0.074260093  | NLRP3,OR2B11,ENSBTAG00000039986                                                                       |
| 7 | 42,075,000 | 42,225,000 | 562 | 1039 | 0.039693473  | NLRP3,OR2B11,ENSBTAG00000039986,ENSBTAG0000048069,ENSBTAG00000048315                                  |
| 7 | 42,150,000 | 42,300,000 | 563 | 830  | 0.71349441   | OR2G2,ENSBTAG00000039484,ENSBTAG00000048069,ENSBTAG00000048315                                        |
| 7 | 42,225,000 | 42,375,000 | 564 | 1084 | 1.222034411  | COX7B,OR2G2,OR2G3,ENSBTAG00000037611,ENSBTAG00000039484,ENSBTAG00000039804                            |
| 7 | 42,300,000 | 42,450,000 | 565 | 1009 | 0.352284832  | COX7B,OR2G3,ENSBTAG00000037611,ENSBTAG0000039804                                                      |
| 7 | 42,375,000 | 42,525,000 | 566 | 1058 | 0.330344853  | OR6F1,ENSBTAG00000045691                                                                              |
| 7 | 42,450,000 | 42,600,000 | 567 | 928  | 0.571641575  | OR11L1,OR6F1,ENSBTAG0000001761,ENSBTAG0000040109,ENSBTAG00000045691                                   |
| 7 | 42,525,000 | 42,675,000 | 568 | 672  | 0.265367138  | OR11L1,TRIM58,ENSBTAG0000001761,ENSBTAG0000025293,ENSBTAG00000038623,ENSBTAG00000040109               |
| 7 | 42,600,000 | 42,750,000 | 569 | 730  | 0.370254561  | TRIM58,ENSBTAG00000025293,ENSBTAG00000038623,ENSBTAG00000039797,ENSBTAG00000039805,ENSBTAG00000046318 |
| 7 | 42,675,000 | 42,825,000 | 570 | 954  | 0.704845613  | OR2AK2,ENSBTAG00000039797,ENSBTAG00000039805,ENSBTAG00000046318,ENSBTAG00000047016                    |
| 7 | 42,750,000 | 42,900,000 | 571 | 1359 | 0.661039079  | OR2AK2,ENSBTAG00000027241,ENSBTAG00000045733,ENSBTAG00000046417,ENSBTAG00000047016                    |
| 7 | 42,825,000 | 42,975,000 | 572 | 1106 | 0.569168675  | ENSBTAG00000027241,ENSBTAG00000045733,ENSBTAG00000046417,ENSBTAG00000046474                           |
| 7 | 42,900,000 | 43,050,000 | 573 | 495  | 0.791847466  | OR2AJ1,ENSBTAG00000046474                                                                             |
| 7 | 42,975,000 | 43,125,000 | 574 | 861  | 1.113015309  | OR2AJ1,ENSBTAG00000030725,ENSBTAG00000047180                                                          |
| 7 | 43,050,000 | 43,200,000 | 575 | 1138 | 1.089174526  | OR2L13,ENSBTAG00000022690,ENSBTAG00000030725,ENSBTAG00000047180,ENSBTAG00000048025                    |
| 7 | 43,125,000 | 43,275,000 | 576 | 991  | 0.668842258  | OR2L13,ENSBTAG00000009497,ENSBTAG00000022690,ENSBTAG00000048025                                       |
| 7 | 43,200,000 | 43,350,000 | 577 | 1107 | 0.158127881  | OR14C36,OR2M4,ENSBTAG00000009497,ENSBTAG0000019925,ENSBTAG00000038564                                 |
| 7 | 43,275,000 | 43,425,000 | 578 | 714  | -0.192428458 | OR14C36,OR2M4,OR2T1,OR2T6,ENSBTAG00000019925,ENSBTAG00000038564                                       |
| 7 | 43,350,000 | 43,500,000 | 579 | 667  | 0.54024757   | OR2T1,OR2T6,ENSBTAG00000003551,ENSBTAG00000034743,ENSBTAG00000038722                                  |
| 7 | 43,425,000 | 43,575,000 | 580 | 950  | 0.226022805  | ENSBTAG00000003551,ENSBTAG00000021098,ENSBTAG00000034743,ENSBTAG00000038722                           |
| 7 | 43,500,000 | 43,650,000 | 581 | 576  | -0.338215033 | ENSBTAG00000021098,ENSBTAG00000046950                                                                 |
| 7 | 43,575,000 | 43,725,000 | 582 | 699  | 0.720895109  | ENSBTAG00000030714,ENSBTAG00000046950,ENSBTAG00000047415                                              |
| 7 | 43,650,000 | 43,800,000 | 583 | 1394 | -0.971432061 | ENSBTAG00000030714,ENSBTAG00000047415,ENSBTAG00000047519                                              |
| 7 | 43,725,000 | 43,875,000 | 584 | 1721 | -0.613283319 | LYPD8,MGC137030,ENSBTAG00000016065,ENSBTAG00000047519                                                 |
| 7 | 43,800,000 | 43,950,000 | 585 | 1380 | 0.805462083  | LYPD8,MGC137030,SH3BP5L,ENSBTAG00000016065                                                            |
| 7 | 43,875,000 | 44,025,000 | 586 | 920  | 0.821450572  | FLJ20531,SH3BP5L,ZNF672,ENSBTAG00000023507                                                            |
| 7 | 43,950,000 | 44,100,000 | 587 | 835  | 0.886789194  | FLJ20531,PGBD2,ZNF672,ENSBTAG00000023507,ENSBTAG00000046200                                           |

|   |            |            |     |      |              |                                                                                                     |
|---|------------|------------|-----|------|--------------|-----------------------------------------------------------------------------------------------------|
| 7 | 44,025,000 | 44,175,000 | 588 | 799  | 0.517344345  | PGBD2,ENSBTAG00000009273,ENSBTAG00000046200,ENSBTAG00000046953                                      |
| 7 | 44,100,000 | 44,250,000 | 589 | 502  | 0.2518586    | ENSBTAG00000009273,ENSBTAG00000046953                                                               |
| 7 | 44,175,000 | 44,325,000 | 590 | 159  | 0.197948955  | ENSBTAG00000009273                                                                                  |
| 7 | 44,250,000 | 44,400,000 | 591 | 44   | -4.529703563 |                                                                                                     |
| 7 | 44,325,000 | 44,475,000 | 592 | 192  | -0.405792949 | ENSBTAG00000045589                                                                                  |
| 7 | 44,400,000 | 44,550,000 | 593 | 559  | -0.20774439  | ENSBTAG00000045589,ENSBTAG00000045623,ENSBTAG00000046115                                            |
| 7 | 44,475,000 | 44,625,000 | 594 | 758  | -0.887812162 | MIER2,PPAP2C,ENSBTAG00000045623,ENSBTAG0000046115                                                   |
| 7 | 44,550,000 | 44,700,000 | 595 | 686  | -1.876442511 | MIER2,PPAP2C,THEG                                                                                   |
| 7 | 44,625,000 | 44,775,000 | 596 | 582  | -1.115291921 | C2CD4C,MADCAM1,ODF3L2,SHC2,THEG                                                                     |
| 7 | 44,700,000 | 44,850,000 | 597 | 569  | -0.062207922 | BSG,C2CD4C,CDC34,GZMM,HCN2,MADCAM1,ODF3L2,SHC2,TPGS1                                                |
| 7 | 44,775,000 | 44,925,000 | 598 | 437  | -0.11765714  | BSG,CDC34,FGF22,FSTL3,GZMM,HCN2,MADCAM1,POLRMT,PRSS57,RNF126,TPGS1                                  |
| 7 | 44,850,000 | 45,000,000 | 599 | 233  | -0.485464838 | AZU1,ELA2,FGF22,FSTL3,HCN2,MISP,PALM,POLRMT,PRSS57,PRTN3,RNF126                                     |
| 7 | 44,925,000 | 45,075,000 | 600 | 187  | -0.733452671 | AZU1,CFD,ELA2,KISS1R,MED16,MISP,PALM,PRTN3,PTBP1,R3HDM4,ENSBTAG00000046245                          |
| 7 | 45,000,000 | 45,150,000 | 601 | 169  | -0.366197812 | ARID3A,CFD,GRIN3B,KISS1R,MED16,PTBP1,R3HDM4,TMEM259,WDR18,ENSBTAG00000046245                        |
| 7 | 45,075,000 | 45,225,000 | 602 | 136  | 0.268989434  | ABCA7,ARID3A,CNN2,GRIN3B,HMHA1,POLR2E,SBNO2,TMEM259,WDR18                                           |
| 7 | 45,150,000 | 45,300,000 | 603 | 145  | 0.495699124  | ABCA7,C19orf26,CNN2,HMHA1,POLR2E,SBNO2,STK11                                                        |
| 7 | 45,225,000 | 45,375,000 | 604 | 167  | 0.410036759  | ATP5D,C19orf26,C7H19orf24,CIRBP,EFNA2,MIDN,SBNO2,STK11                                              |
| 7 | 45,300,000 | 45,450,000 | 605 | 282  | -2.335046074 | ATP5D,C7H19orf24,CIRBP,EFNA2,GAMT,MIDN,MUM1,NDUFS7                                                  |
| 7 | 45,375,000 | 45,525,000 | 606 | 349  | -2.037358185 | APC2,C7H19orf25,DAZAP1,GAMT,MUM1,NDUFS7,PCSK4,REEP6,RPS15                                           |
| 7 | 45,450,000 | 45,600,000 | 607 | 312  | 0.1395146    | APC2,C7H19orf25,DAZAP1,MBD3,PCSK4,PLK5,REEP6,RPS15,TCF3,UQCR11,ENSBTAG0000006662,ENSBTAG00000046263 |
| 7 | 45,525,000 | 45,675,000 | 608 | 365  | 0.841638882  | MBD3,PLK5,TCF3,UQCR11,ENSBTAG0000006662,ENSBTAG00000046263                                          |
| 7 | 45,600,000 | 45,750,000 | 609 | 365  | 0.734703222  | ATP8B3,ONECUT3,TCF3                                                                                 |
| 7 | 45,675,000 | 45,825,000 | 610 | 389  | 0.659778151  | ABHD17A,ATP8B3,KLF16,ONECUT3,REXO1                                                                  |
| 7 | 45,750,000 | 45,900,000 | 611 | 566  | 0.663570694  | ABHD17A,ATP8B3,CSNK1G2,KLF16,REXO1,SCAMP4                                                           |
| 7 | 45,825,000 | 45,975,000 | 612 | 676  | 0.836974464  | BTBD2,CSNK1G2,SCAMP4                                                                                |
| 7 | 45,900,000 | 46,050,000 | 613 | 870  | 0.764051596  | BTBD2,SHROOM1,SOWAHA,ENSBTAG00000046234                                                             |
| 7 | 45,975,000 | 46,125,000 | 614 | 705  | 0.685585446  | AFF4,GDF9,LEAP2,SHROOM1,SOWAHA,UQCRQ,ENSBTAG00000046234                                             |
| 7 | 46,050,000 | 46,200,000 | 615 | 434  | 0.452388277  | AFF4,GDF9,LEAP2,UQCRQ,ZCCHC10                                                                       |
| 7 | 46,125,000 | 46,275,000 | 616 | 587  | -0.007942058 | AFF4,HSPA4,ZCCHC10                                                                                  |
| 7 | 46,200,000 | 46,350,000 | 617 | 549  | 0.076287002  | HSPA4,ZCCHC10                                                                                       |
| 7 | 46,275,000 | 46,425,000 | 618 | 923  | -0.609263308 | HSPA4                                                                                               |
| 7 | 46,350,000 | 46,500,000 | 619 | 1004 | -0.383174473 | FSTL4                                                                                               |
| 7 | 46,425,000 | 46,575,000 | 620 | 852  | -0.177479335 | FSTL4                                                                                               |
| 7 | 46,500,000 | 46,650,000 | 621 | 1034 | -0.868776707 | FSTL4                                                                                               |
| 7 | 46,575,000 | 46,725,000 | 622 | 942  | -0.437015858 |                                                                                                     |
| 7 | 46,650,000 | 46,800,000 | 623 | 911  | 0.462958423  |                                                                                                     |

|   |            |            |     |      |              |                              |
|---|------------|------------|-----|------|--------------|------------------------------|
| 7 | 46,725,000 | 46,875,000 | 624 | 976  | 0.286222908  |                              |
| 7 | 46,800,000 | 46,950,000 | 625 | 782  | -0.080547551 |                              |
| 7 | 46,875,000 | 47,025,000 | 626 | 585  | -1.019104804 |                              |
| 7 | 46,950,000 | 47,100,000 | 627 | 891  | -0.949907343 |                              |
| 7 | 47,025,000 | 47,175,000 | 628 | 1495 | 0.101356336  |                              |
| 7 | 47,100,000 | 47,250,000 | 629 | 1565 | 0.706838859  | C7H5ORF15,VDAC1              |
| 7 | 47,175,000 | 47,325,000 | 630 | 1080 | 0.801358656  | C7H5ORF15,VDAC1              |
| 7 | 47,250,000 | 47,400,000 | 631 | 620  | 0.740647074  | SKP1,TCF7,VDAC1              |
| 7 | 47,325,000 | 47,475,000 | 632 | 377  | 0.996303207  | PPP2CA,SKP1,TCF7             |
| 7 | 47,400,000 | 47,550,000 | 633 | 509  | 1.204606009  | CDKL3,PPP2CA,SKP1,UBE2B      |
| 7 | 47,475,000 | 47,625,000 | 634 | 533  | 1.050396292  | CDKL3,CDKN2AIPNL,UBE2B       |
| 7 | 47,550,000 | 47,700,000 | 635 | 434  | 0.468855787  | CDKN2AIPNL,JADE2             |
| 7 | 47,625,000 | 47,775,000 | 636 | 436  | 0.395842996  | JADE2,SAR1B,SEC24A           |
| 7 | 47,700,000 | 47,850,000 | 637 | 601  | 0.172715482  | CAMLG,SAR1B,SEC24A           |
| 7 | 47,775,000 | 47,925,000 | 638 | 783  | -0.288492817 | C7H5orf24,CAMLG,DDX46,SEC24A |
| 7 | 47,850,000 | 48,000,000 | 639 | 856  | 0.239561061  | C7H5orf24,DDX46,TXNDC15      |
| 7 | 47,925,000 | 48,075,000 | 640 | 771  | 0.348781314  | CATSPER3,PITX1,TXNDC15       |
| 7 | 48,000,000 | 48,150,000 | 641 | 783  | -0.285119304 | CATSPER3,PITX1               |
| 7 | 48,075,000 | 48,225,000 | 642 | 917  | 0.277388725  |                              |
| 7 | 48,150,000 | 48,300,000 | 643 | 891  | 0.603759177  |                              |
| 7 | 48,225,000 | 48,375,000 | 644 | 969  | 0.578221949  |                              |
| 7 | 48,300,000 | 48,450,000 | 645 | 975  | 0.237025436  | H2AFY                        |
| 7 | 48,375,000 | 48,525,000 | 646 | 938  | 0.000909566  | H2AFY,TIFAB                  |
| 7 | 48,450,000 | 48,600,000 | 647 | 1050 | 0.698179254  | H2AFY,TIFAB                  |
| 7 | 48,525,000 | 48,675,000 | 648 | 903  | 0.70791651   | CXCL14,NEUROG1,TIFAB         |
| 7 | 48,600,000 | 48,750,000 | 649 | 1011 | -0.112306871 | CXCL14,NEUROG1               |
| 7 | 48,675,000 | 48,825,000 | 650 | 1228 | -0.454429099 |                              |
| 7 | 48,750,000 | 48,900,000 | 651 | 1143 | -0.155372927 | SLC25A48                     |
| 7 | 48,825,000 | 48,975,000 | 652 | 845  | 0.130367345  | FBXL21,IL9,SLC25A48          |
| 7 | 48,900,000 | 49,050,000 | 653 | 440  | -0.025541822 | FBXL21,IL9,LECT2,SLC25A48    |
| 7 | 48,975,000 | 49,125,000 | 654 | 386  | -3.264844378 | FBXL21,LECT2,TGFBI           |
| 7 | 49,050,000 | 49,200,000 | 655 | 448  | -4.282538353 | SMAD5,TGFBI                  |
| 7 | 49,125,000 | 49,275,000 | 656 | 415  | -2.27228907  | SMAD5,TRPC7                  |
| 7 | 49,200,000 | 49,350,000 | 657 | 404  | -0.312702652 | SMAD5,TRPC7                  |
| 7 | 49,275,000 | 49,425,000 | 658 | 514  | 0.344642761  | TRPC7                        |
| 7 | 49,350,000 | 49,500,000 | 659 | 645  | 1.122115754  | TRPC7                        |
| 7 | 49,425,000 | 49,575,000 | 660 | 854  | 1.313818479  |                              |
| 7 | 49,500,000 | 49,650,000 | 661 | 916  | 1.041936811  |                              |
| 7 | 49,575,000 | 49,725,000 | 662 | 709  | 0.939785178  |                              |
| 7 | 49,650,000 | 49,800,000 | 663 | 806  | 0.950668403  |                              |
| 7 | 49,725,000 | 49,875,000 | 664 | 1111 | 1.150118478  |                              |
| 7 | 49,800,000 | 49,950,000 | 665 | 1127 | 1.187731559  |                              |
| 7 | 49,875,000 | 50,025,000 | 666 | 1021 | 0.605964704  | SPOCK1                       |
| 7 | 49,950,000 | 50,100,000 | 667 | 769  | 0.337452935  | SPOCK1                       |
| 7 | 50,025,000 | 50,175,000 | 668 | 859  | 0.196780322  |                              |
| 7 | 50,100,000 | 50,250,000 | 669 | 1127 | 0.012517271  |                              |
| 7 | 50,175,000 | 50,325,000 | 670 | 1092 | 0.019463963  |                              |
| 7 | 50,250,000 | 50,400,000 | 671 | 1130 | 0.363566468  |                              |
| 7 | 50,325,000 | 50,475,000 | 672 | 894  | 0.737436247  |                              |
| 7 | 50,400,000 | 50,550,000 | 673 | 694  | 0.470636588  |                              |
| 7 | 50,475,000 | 50,625,000 | 674 | 863  | -0.688552107 |                              |
| 7 | 50,550,000 | 50,700,000 | 675 | 655  | -0.447030914 | KLHL3                        |
| 7 | 50,625,000 | 50,775,000 | 676 | 345  | 1.259052328  | KLHL3                        |

|   |            |            |     |      |              |                                                                                                     |
|---|------------|------------|-----|------|--------------|-----------------------------------------------------------------------------------------------------|
| 7 | 50,700,000 | 50,850,000 | 677 | 279  | 1.221307436  | HNRPA0,KLHL3                                                                                        |
| 7 | 50,775,000 | 50,925,000 | 678 | 198  | 0.828525567  | HNRPA0                                                                                              |
| 7 | 50,850,000 | 51,000,000 | 679 | 216  | 0.473137255  | MYOT,PKD2L2                                                                                         |
| 7 | 50,925,000 | 51,075,000 | 680 | 187  | -1.153061127 | FAM13B,MYOT,PKD2L2                                                                                  |
| 7 | 51,000,000 | 51,150,000 | 681 | 141  | -6.78386318  | FAM13B,PKD2L2,WNT8A                                                                                 |
| 7 | 51,075,000 | 51,225,000 | 682 | 129  | -9.732361863 | BRD8,CDC23,KIF20A,NME5,WNT8A                                                                        |
| 7 | 51,150,000 | 51,300,000 | 683 | 78   | -8.441617118 | BRD8,CDC23,GFRA3,KIF20A,NME5                                                                        |
| 7 | 51,225,000 | 51,375,000 | 684 | 61   | 1.176296094  | CDC23,CDC25C,FAM53C,GFRA3,KDM3B,SLBP2                                                               |
| 7 | 51,300,000 | 51,450,000 | 685 | 74   | 0.978716354  | CDC25C,EGR1,FAM53C,GFRA3,KDM3B,REEP2,SLBP2                                                          |
| 7 | 51,375,000 | 51,525,000 | 686 | 135  | 0.838413062  | EGR1,ETF1,HSPA9,KDM3B,REEP2                                                                         |
| 7 | 51,450,000 | 51,600,000 | 687 | 312  | 0.499463612  | ETF1,HSPA9                                                                                          |
| 7 | 51,525,000 | 51,675,000 | 688 | 364  | 0.407090309  |                                                                                                     |
| 7 | 51,600,000 | 51,750,000 | 689 | 304  | 0.45497403   | CTNNA1                                                                                              |
| 7 | 51,675,000 | 51,825,000 | 690 | 330  | 0.678956203  | CTNNA1,LRRTM2                                                                                       |
| 7 | 51,750,000 | 51,900,000 | 691 | 412  | 1.157063725  | CTNNA1,LRRTM2,SIL1                                                                                  |
| 7 | 51,825,000 | 51,975,000 | 692 | 323  | 1.246179741  | CTNNA1,GPX4,SIL1                                                                                    |
| 7 | 51,900,000 | 52,050,000 | 693 | 178  | 1.095502108  | GPX4,SIL1                                                                                           |
| 7 | 51,975,000 | 52,125,000 | 694 | 199  | 1.007123244  | SIL1                                                                                                |
| 7 | 52,050,000 | 52,200,000 | 695 | 175  | 1.271813888  | SIL1                                                                                                |
| 7 | 52,125,000 | 52,275,000 | 696 | 176  | 1.249629073  | PAIP2,SIL1,SLC23A1,ENSBTAG00000006756                                                               |
| 7 | 52,200,000 | 52,350,000 | 697 | 192  | 1.121378145  | DNAJC18,ECSCR,MZB1,PAIP2,PROB1,SLC23A1,SPATA24,ENSBTAG00000006756                                   |
| 7 | 52,275,000 | 52,425,000 | 698 | 156  | 1.227911514  | DNAJC18,ECSCR,MZB1,PROB1,SLC23A1,SPATA24,TEM173,UBE2D2,ENSBTAG000000030517                          |
| 7 | 52,350,000 | 52,500,000 | 699 | 148  | 1.33743778   | ECSCR,TMEM173,UBE2D2,ENSBTAG000000030517                                                            |
| 7 | 52,425,000 | 52,575,000 | 700 | 158  | 1.225009246  | CXXC5,UBE2D2                                                                                        |
| 7 | 52,500,000 | 52,650,000 | 701 | 660  | 0.171158931  | CXXC5                                                                                               |
| 7 | 52,575,000 | 52,725,000 | 702 | 704  | 0.426172326  | NRG2,PSD2                                                                                           |
| 7 | 52,650,000 | 52,800,000 | 703 | 286  | 0.317276211  | NRG2,PSD2                                                                                           |
| 7 | 52,725,000 | 52,875,000 | 704 | 315  | -0.092604446 | NRG2                                                                                                |
| 7 | 52,800,000 | 52,950,000 | 705 | 305  | 0.285014996  |                                                                                                     |
| 7 | 52,875,000 | 53,025,000 | 706 | 255  | 0.527485092  | IGIP,PURA                                                                                           |
| 7 | 52,950,000 | 53,100,000 | 707 | 311  | 1.306173209  | CYSTM1,IGIP,PURA                                                                                    |
| 7 | 53,025,000 | 53,175,000 | 708 | 354  | 0.027489568  | CYSTM1,PFDN1                                                                                        |
| 7 | 53,100,000 | 53,250,000 | 709 | 282  | -0.868192575 | CYSTM1,HBEGF,PFDN1,SLC4A9                                                                           |
| 7 | 53,175,000 | 53,325,000 | 710 | 241  | 0.05864599   | EIF4EBP3,HBEGF,PFDN1,SLC4A9                                                                         |
| 7 | 53,250,000 | 53,400,000 | 711 | 194  | 0.601965983  | EIF4EBP3,SLC4A9                                                                                     |
| 7 | 53,325,000 | 53,475,000 | 712 | 211  | 0.728762032  | APBB3,CD14,EIF4EBP3,IK,NDUFA2,SLC35A4,SRA1,TMCO6,ENSBTAG00000003987                                 |
| 7 | 53,400,000 | 53,550,000 | 713 | 538  | -0.16701944  | APBB3,CD14,DND1,EIF4EBP3,HARS,HARS2,IK,NDUFA2,SLC35A4,SRA1,TMCO6,WDR55,ZMAT2,ENSBTAG00000003987     |
| 7 | 53,475,000 | 53,625,000 | 714 | 1128 | -1.368580297 | DND1,HARS,HARS2,IK,PCDHA3,PCDHA5,WDR55,ZMAT2,ENSBTAG00000015439,ENSBTAG00000046717                  |
| 7 | 53,550,000 | 53,700,000 | 715 | 957  | -1.61686624  | PCDHA11,PCDHA13,PCDHA3,PCDHA5,ENSBTAG00000015439,ENSBTAG00000046717                                 |
| 7 | 53,625,000 | 53,775,000 | 716 | 434  | -0.468824385 | PCDHA11,PCDHA13                                                                                     |
| 7 | 53,700,000 | 53,850,000 | 717 | 294  | 0.514352915  | PCDHA13                                                                                             |
| 7 | 53,775,000 | 53,925,000 | 718 | 624  | 0.612554375  | PCDHA13,PCDHB1,PCDHB4,ENSBTAG00000045858                                                            |
| 7 | 53,850,000 | 54,000,000 | 719 | 953  | 0.601706418  | PCDHB1,PCDHB16,PCDHB4,PCDHB5,PCDHB6,PCDHB7,ENSBTAG00000045743,ENSBTAG00000045858,ENSBTAG00000045859 |

|   |            |            |     |     |              |                                                                                                              |
|---|------------|------------|-----|-----|--------------|--------------------------------------------------------------------------------------------------------------|
| 7 | 53,925,000 | 54,075,000 | 720 | 680 | 0.554549297  | PCDHB11,PCDHB14,PCDHB15,PCDHB16,PCDHB5,PCDHB6,PCDHB7,ENSBTAG00000007350,ENSBTAG0000045743,ENSBTAG00000045859 |
| 7 | 54,000,000 | 54,150,000 | 721 | 582 | 1.155621596  | PCDHB11,PCDHB14,PCDHB15,PCDHGA2,PCDHGA3,PCDHGA5,PCDHGA7,PCDHGB1,TAF7,ENSBTAG0000007350,ENSBTAG00000046103    |
| 7 | 54,075,000 | 54,225,000 | 722 | 790 | 1.454910075  | PCDHGA2,PCDHGA3,PCDHGA5,PCDHGA7,PCDHGA8,PCDHGB1,TAF7,ENSBTAG00000046103,ENSBTAG000047946                     |
| 7 | 54,150,000 | 54,300,000 | 723 | 573 | 1.442359092  | DIAPH1,PCDHGA7,PCDHGA8,ENSBTAG00000047946                                                                    |
| 7 | 54,225,000 | 54,375,000 | 724 | 268 | 1.2041672    | DIAPH1,PCDHGA8,RELL2                                                                                         |
| 7 | 54,300,000 | 54,450,000 | 725 | 267 | 1.203475485  | ARAP3,DIAPH1,HDAC3,RELL2                                                                                     |
| 7 | 54,375,000 | 54,525,000 | 726 | 279 | 1.169992911  | ARAP3,DIAPH1,HDAC3                                                                                           |
| 7 | 54,450,000 | 54,600,000 | 727 | 374 | 1.209569551  | ARAP3                                                                                                        |
| 7 | 54,525,000 | 54,675,000 | 728 | 332 | 1.342514501  | KIAA0141,PCDH1                                                                                               |
| 7 | 54,600,000 | 54,750,000 | 729 | 278 | 1.351139752  | GNPDA1,KIAA0141,PCDH1,PCDH12,RNF14                                                                           |
| 7 | 54,675,000 | 54,825,000 | 730 | 563 | 0.410877236  | GNPDA1,KIAA0141,PCDH12,RNF14                                                                                 |
| 7 | 54,750,000 | 54,900,000 | 731 | 582 | -0.722929125 | GNPDA1,ENSBTAG00000018503                                                                                    |
| 7 | 54,825,000 | 54,975,000 | 732 | 448 | -1.251332386 | ENSBTAG00000018503                                                                                           |
| 7 | 54,900,000 | 55,050,000 | 733 | 413 | -1.048040483 | ENSBTAG00000012339,ENSBTAG00000016789,ENSBTAG00000045651                                                     |
| 7 | 54,975,000 | 55,125,000 | 734 | 286 | -0.465679409 | NDFIP1,ENSBTAG00000012339,ENSBTAG00000016789,ENSBTAG00000045651                                              |
| 7 | 55,050,000 | 55,200,000 | 735 | 258 | -0.386353429 | NDFIP1                                                                                                       |
| 7 | 55,125,000 | 55,275,000 | 736 | 236 | 0.21200985   | SPRY4                                                                                                        |
| 7 | 55,200,000 | 55,350,000 | 737 | 228 | 1.212351387  | SPRY4                                                                                                        |
| 7 | 55,275,000 | 55,425,000 | 738 | 298 | 0.930899903  |                                                                                                              |
| 7 | 55,350,000 | 55,500,000 | 739 | 327 | 0.473452627  |                                                                                                              |
| 7 | 55,425,000 | 55,575,000 | 740 | 276 | 0.142575399  | FGF1                                                                                                         |
| 7 | 55,500,000 | 55,650,000 | 741 | 376 | 0.700255585  | FGF1                                                                                                         |
| 7 | 55,575,000 | 55,725,000 | 742 | 526 | 0.175991216  | FGF1                                                                                                         |
| 7 | 55,650,000 | 55,800,000 | 743 | 542 | -0.231925304 |                                                                                                              |
| 7 | 55,725,000 | 55,875,000 | 744 | 489 | -0.312104113 | ARHGAP26                                                                                                     |
| 7 | 55,800,000 | 55,950,000 | 745 | 323 | -1.139262795 | ARHGAP26                                                                                                     |
| 7 | 55,875,000 | 56,025,000 | 746 | 199 | -3.984126462 | ARHGAP26                                                                                                     |
| 7 | 55,950,000 | 56,100,000 | 747 | 272 | -3.364636924 | ARHGAP26                                                                                                     |
| 7 | 56,025,000 | 56,175,000 | 748 | 333 | -2.010051327 | ARHGAP26                                                                                                     |
| 7 | 56,100,000 | 56,250,000 | 749 | 331 | -0.608465858 | ARHGAP26,GR-A                                                                                                |
| 7 | 56,175,000 | 56,325,000 | 750 | 321 | 0.339540958  | GR-A                                                                                                         |
| 7 | 56,250,000 | 56,400,000 | 751 | 321 | -0.524762894 | GR-A                                                                                                         |
| 7 | 56,325,000 | 56,475,000 | 752 | 294 | -1.363200499 | GR-A                                                                                                         |
| 7 | 56,400,000 | 56,550,000 | 753 | 347 | -0.21258269  |                                                                                                              |
| 7 | 56,475,000 | 56,625,000 | 754 | 249 | 0.175084823  |                                                                                                              |
| 7 | 56,550,000 | 56,700,000 | 755 | 307 | 0.876734009  |                                                                                                              |
| 7 | 56,625,000 | 56,775,000 | 756 | 432 | 0.186637904  |                                                                                                              |
| 7 | 56,700,000 | 56,850,000 | 757 | 357 | -0.914047203 |                                                                                                              |
| 7 | 56,775,000 | 56,925,000 | 758 | 410 | -0.390289377 |                                                                                                              |
| 7 | 56,850,000 | 57,000,000 | 759 | 379 | 0.747294108  |                                                                                                              |
| 7 | 56,925,000 | 57,075,000 | 760 | 276 | 0.849832355  |                                                                                                              |
| 7 | 57,000,000 | 57,150,000 | 761 | 232 | 0.289168326  |                                                                                                              |
| 7 | 57,075,000 | 57,225,000 | 762 | 340 | 0.130294372  | YIPF5                                                                                                        |
| 7 | 57,150,000 | 57,300,000 | 763 | 420 | 0.292195057  | KCTD16,YIPF5,ENSBTAG00000010283                                                                              |



|   |            |            |     |      |              |                                           |
|---|------------|------------|-----|------|--------------|-------------------------------------------|
| 7 | 57,225,000 | 57,375,000 | 764 | 691  | -0.306337205 | KCTD16,ENSBTAG00000010283                 |
| 7 | 57,300,000 | 57,450,000 | 765 | 947  | -0.027320219 | KCTD16                                    |
| 7 | 57,375,000 | 57,525,000 | 766 | 917  | 0.571439447  | KCTD16                                    |
| 7 | 57,450,000 | 57,600,000 | 767 | 784  | 0.754497313  | KCTD16                                    |
| 7 | 57,525,000 | 57,675,000 | 768 | 830  | 1.002137197  | KCTD16                                    |
| 7 | 57,600,000 | 57,750,000 | 769 | 876  | 0.34649223   |                                           |
| 7 | 57,675,000 | 57,825,000 | 770 | 1081 | 0.08782949   |                                           |
| 7 | 57,750,000 | 57,900,000 | 771 | 1223 | 0.639697495  |                                           |
| 7 | 57,825,000 | 57,975,000 | 772 | 1025 | 0.330983889  |                                           |
| 7 | 57,900,000 | 58,050,000 | 773 | 750  | 0.14238125   |                                           |
| 7 | 57,975,000 | 58,125,000 | 774 | 630  | 0.776179577  |                                           |
| 7 | 58,050,000 | 58,200,000 | 775 | 663  | 0.772376291  |                                           |
| 7 | 58,125,000 | 58,275,000 | 776 | 843  | -0.109559248 |                                           |
| 7 | 58,200,000 | 58,350,000 | 777 | 951  | -0.325617912 |                                           |
| 7 | 58,275,000 | 58,425,000 | 778 | 881  | 0.247303216  |                                           |
| 7 | 58,350,000 | 58,500,000 | 779 | 678  | 0.365595443  |                                           |
| 7 | 58,425,000 | 58,575,000 | 780 | 639  | 0.584432047  |                                           |
| 7 | 58,500,000 | 58,650,000 | 781 | 924  | 0.87664918   |                                           |
| 7 | 58,575,000 | 58,725,000 | 782 | 1016 | 0.928431334  |                                           |
| 7 | 58,650,000 | 58,800,000 | 783 | 981  | 0.681495085  |                                           |
| 7 | 58,725,000 | 58,875,000 | 784 | 1167 | -0.356543089 |                                           |
| 7 | 58,800,000 | 58,950,000 | 785 | 1327 | -0.870797643 | PRELID2                                   |
| 7 | 58,875,000 | 59,025,000 | 786 | 976  | -1.222701294 | PRELID2                                   |
| 7 | 58,950,000 | 59,100,000 | 787 | 943  | -1.717962383 | GRXCR2,PRELID2                            |
| 7 | 59,025,000 | 59,175,000 | 788 | 1103 | -0.342950984 | GRXCR2,SH3RF2                             |
| 7 | 59,100,000 | 59,250,000 | 789 | 1082 | 1.062150667  | SH3RF2                                    |
| 7 | 59,175,000 | 59,325,000 | 790 | 978  | 1.016863127  | LARS,PLAC8L1,SH3RF2                       |
| 7 | 59,250,000 | 59,400,000 | 791 | 706  | 0.745552453  | LARS,PLAC8L1,SH3RF2                       |
| 7 | 59,325,000 | 59,475,000 | 792 | 496  | 0.030327106  | LARS,ENSBTAG00000011642                   |
| 7 | 59,400,000 | 59,550,000 | 793 | 427  | -0.362878844 | POU4F3,ENSBTAG00000011642                 |
| 7 | 59,475,000 | 59,625,000 | 794 | 621  | -0.011351218 | POU4F3                                    |
| 7 | 59,550,000 | 59,700,000 | 795 | 779  | -1.009679213 | GPR151,TCERG1                             |
| 7 | 59,625,000 | 59,775,000 | 796 | 909  | -2.580966827 | GPR151,TCERG1                             |
| 7 | 59,700,000 | 59,850,000 | 797 | 935  | -1.666594179 | PPP2R2B                                   |
| 7 | 59,775,000 | 59,925,000 | 798 | 817  | -0.589756036 | PPP2R2B                                   |
| 7 | 59,850,000 | 60,000,000 | 799 | 817  | -0.602892004 | PPP2R2B                                   |
| 7 | 59,925,000 | 60,075,000 | 800 | 511  | -0.354130204 | PPP2R2B                                   |
| 7 | 60,000,000 | 60,150,000 | 801 | 330  | -0.230002082 | PPP2R2B                                   |
| 7 | 60,075,000 | 60,225,000 | 802 | 724  | 0.22441022   | PPP2R2B                                   |
| 7 | 60,150,000 | 60,300,000 | 803 | 958  | 0.600010023  |                                           |
| 7 | 60,225,000 | 60,375,000 | 804 | 939  | 0.71509154   |                                           |
| 7 | 60,300,000 | 60,450,000 | 805 | 1216 | -0.000166997 |                                           |
| 7 | 60,375,000 | 60,525,000 | 806 | 1077 | -0.853206546 | STK32A                                    |
| 7 | 60,450,000 | 60,600,000 | 807 | 1016 | -0.968144313 | DPYSL3,STK32A                             |
| 7 | 60,525,000 | 60,675,000 | 808 | 1134 | -0.276148975 | DPYSL3,STK32A                             |
| 7 | 60,600,000 | 60,750,000 | 809 | 1067 | 0.13106277   | DPYSL3                                    |
| 7 | 60,675,000 | 60,825,000 | 810 | 1060 | 0.582525     | DPYSL3,JAKMIP2                            |
| 7 | 60,750,000 | 60,900,000 | 811 | 1064 | -0.657403079 | JAKMIP2                                   |
| 7 | 60,825,000 | 60,975,000 | 812 | 1258 | -0.435386195 | JAKMIP2                                   |
| 7 | 60,900,000 | 61,050,000 | 813 | 1245 | -0.467635845 | JAKMIP2,SPINK1,ENSBTAG00000047835         |
| 7 | 60,975,000 | 61,125,000 | 814 | 1244 | -0.497357645 | JAKMIP2,SCGB3A2,SPINK1,ENSBTAG00000047835 |
| 7 | 61,050,000 | 61,200,000 | 815 | 1171 | 0.004451844  | C7H5orf46,SCGB3A2                         |
| 7 | 61,125,000 | 61,275,000 | 816 | 875  | -0.229588498 | C7H5orf46                                 |

|   |            |            |     |      |              |                                                |
|---|------------|------------|-----|------|--------------|------------------------------------------------|
| 7 | 61,200,000 | 61,350,000 | 817 | 783  | -0.081865105 | SPINK5                                         |
| 7 | 61,275,000 | 61,425,000 | 818 | 873  | 0.372933     | SPINK5                                         |
| 7 | 61,350,000 | 61,500,000 | 819 | 892  | 0.072578829  | SPINK5,SPINK6                                  |
| 7 | 61,425,000 | 61,575,000 | 820 | 662  | -0.507723916 | SPINK6                                         |
| 7 | 61,500,000 | 61,650,000 | 821 | 685  | -1.502898904 | ENSBTAG00000033759                             |
| 7 | 61,575,000 | 61,725,000 | 822 | 1055 | -0.025217306 | SPINK7,ENSBTAG00000033759                      |
| 7 | 61,650,000 | 61,800,000 | 823 | 915  | 0.458199471  | SPINK7,ENSBTAG00000033759                      |
| 7 | 61,725,000 | 61,875,000 | 824 | 397  | 0.301214729  | FBXO38,SPINK7,ENSBTAG00000033759               |
| 7 | 61,800,000 | 61,950,000 | 825 | 260  | -0.794268279 | FBXO38,HTR4,ENSBTAG00000047660                 |
| 7 | 61,875,000 | 62,025,000 | 826 | 337  | -2.320096083 | HTR4,ENSBTAG00000047660                        |
| 7 | 61,950,000 | 62,100,000 | 827 | 425  | -1.198100898 | HTR4                                           |
| 7 | 62,025,000 | 62,175,000 | 828 | 859  | 0.311089379  | HTR4                                           |
| 7 | 62,100,000 | 62,250,000 | 829 | 922  | 0.4598226    | ADRB2                                          |
| 7 | 62,175,000 | 62,325,000 | 830 | 559  | 0.811238569  | ADRB2                                          |
| 7 | 62,250,000 | 62,400,000 | 831 | 433  | 1.33387488   | SH3TC2                                         |
| 7 | 62,325,000 | 62,475,000 | 832 | 360  | 1.343565224  | SH3TC2                                         |
| 7 | 62,400,000 | 62,550,000 | 833 | 439  | 0.743360482  | ABLIM3,SH3TC2                                  |
| 7 | 62,475,000 | 62,625,000 | 834 | 474  | 0.746718303  | ABLIM3                                         |
| 7 | 62,550,000 | 62,700,000 | 835 | 435  | 0.600434804  | ABLIM3,AFAP1L1                                 |
| 7 | 62,625,000 | 62,775,000 | 836 | 389  | -0.277558756 | ABLIM3,AFAP1L1,GRPEL2,IL17B,PCYOX1L            |
| 7 | 62,700,000 | 62,850,000 | 837 | 411  | 0.052076189  | AFAP1L1,GRPEL2,IL17B,PCYOX1L                   |
| 7 | 62,775,000 | 62,925,000 | 838 | 397  | 0.355005861  | ARHGEF37,CSNK1A1                               |
| 7 | 62,850,000 | 63,000,000 | 839 | 631  | 0.989068738  | ARHGEF37,CSNK1A1                               |
| 7 | 62,925,000 | 63,075,000 | 840 | 661  | 0.840734151  | ARHGEF37                                       |
| 7 | 63,000,000 | 63,150,000 | 841 | 656  | 0.11691296   |                                                |
| 7 | 63,075,000 | 63,225,000 | 842 | 795  | 0.66494592   | PDE6A,PPARGC1B                                 |
| 7 | 63,150,000 | 63,300,000 | 843 | 531  | 0.997091404  | PDE6A,PPARGC1B,SLC26A2                         |
| 7 | 63,225,000 | 63,375,000 | 844 | 496  | 1.12826926   | HMGXB3,PDE6A,SLC26A2                           |
| 7 | 63,300,000 | 63,450,000 | 845 | 514  | 1.133720279  | CSF1R,HMGXB3                                   |
| 7 | 63,375,000 | 63,525,000 | 846 | 507  | 0.713207595  | CDX1,CSF1R,HMGXB3,PDGFRB                       |
| 7 | 63,450,000 | 63,600,000 | 847 | 463  | 0.656087725  | CAMK2A,CDX1,PDGFRB,SLC6A7                      |
| 7 | 63,525,000 | 63,675,000 | 848 | 308  | 0.621285945  | ARSI,CAMK2A,PDGFRB,SLC6A7                      |
| 7 | 63,600,000 | 63,750,000 | 849 | 272  | 0.588238067  | ARSI,CAMK2A,CD74,TCOF1                         |
| 7 | 63,675,000 | 63,825,000 | 850 | 279  | -1.903126109 | CD74,NDST1,RPS14,TCOF1                         |
| 7 | 63,750,000 | 63,900,000 | 851 | 273  | -2.518882742 | CD74,NDST1,RPS14                               |
| 7 | 63,825,000 | 63,975,000 | 852 | 440  | -0.589161498 | NDST1                                          |
| 7 | 63,900,000 | 64,050,000 | 853 | 571  | 0.080069557  | MYOZ3,NDST1,SYNPO                              |
| 7 | 63,975,000 | 64,125,000 | 854 | 757  | 0.77841601   | DCTN4,MYOZ3,RBM22,SYNPO                        |
| 7 | 64,050,000 | 64,200,000 | 855 | 975  | 0.102735704  | DCTN4,MGC128424,RBM22                          |
| 7 | 64,125,000 | 64,275,000 | 856 | 894  | -0.185953842 | MGC128424,ZNF300,ENSBTAG00000046873            |
| 7 | 64,200,000 | 64,350,000 | 857 | 783  | 0.600983495  | GPX3,TNIP1,ZNF300,ENSBTAG00000046873           |
| 7 | 64,275,000 | 64,425,000 | 858 | 847  | 0.626255646  | ANXA6,GPX3,TNIP1                               |
| 7 | 64,350,000 | 64,500,000 | 859 | 754  | 0.478534968  | ANXA6,CCDC69,GM2A,ENSBTAG00000045615           |
| 7 | 64,425,000 | 64,575,000 | 860 | 867  | -0.768211182 | CCDC69,GM2A,SLC36A2,SLC36A3,ENSBTAG00000045615 |
| 7 | 64,500,000 | 64,650,000 | 861 | 1081 | -0.755518205 | GM2A,SLC36A2,SLC36A3                           |
| 7 | 64,575,000 | 64,725,000 | 862 | 985  | 0.561142703  | FAT2,SLC36A1,SLC36A2                           |
| 7 | 64,650,000 | 64,800,000 | 863 | 775  | 0.848857386  | FAT2,SLC36A1,ENSBTAG00000047625                |
| 7 | 64,725,000 | 64,875,000 | 864 | 609  | 0.25555805   | FAT2,ENSBTAG00000047625                        |
| 7 | 64,800,000 | 64,950,000 | 865 | 890  | 0.334013878  | ATOX1,SPARC                                    |
| 7 | 64,875,000 | 65,025,000 | 866 | 984  | 0.193809532  | ATOX1,G3BP,SPARC                               |
| 7 | 64,950,000 | 65,100,000 | 867 | 812  | 0.116758591  | ATOX1,G3BP,GLRA1                               |
| 7 | 65,025,000 | 65,175,000 | 868 | 793  | 0.612147347  | GLRA1                                          |

|   |            |            |     |      |              |                       |
|---|------------|------------|-----|------|--------------|-----------------------|
| 7 | 65,100,000 | 65,250,000 | 869 | 952  | 0.665396169  | GLRA1                 |
| 7 | 65,175,000 | 65,325,000 | 870 | 1263 | 0.298907321  |                       |
| 7 | 65,250,000 | 65,400,000 | 871 | 1239 | 0.166126396  |                       |
| 7 | 65,325,000 | 65,475,000 | 872 | 809  | 0.33405847   |                       |
| 7 | 65,400,000 | 65,550,000 | 873 | 595  | 0.497134332  |                       |
| 7 | 65,475,000 | 65,625,000 | 874 | 845  | 0.73364663   |                       |
| 7 | 65,550,000 | 65,700,000 | 875 | 907  | 0.561100584  | NMUR2                 |
| 7 | 65,625,000 | 65,775,000 | 876 | 609  | 0.377901962  | NMUR2                 |
| 7 | 65,700,000 | 65,850,000 | 877 | 441  | 0.039654127  |                       |
| 7 | 65,775,000 | 65,925,000 | 878 | 748  | 0.241605248  |                       |
| 7 | 65,850,000 | 66,000,000 | 879 | 1221 | 0.649718575  |                       |
| 7 | 65,925,000 | 66,075,000 | 880 | 1439 | 0.749930408  |                       |
| 7 | 66,000,000 | 66,150,000 | 881 | 1447 | 0.780085546  |                       |
| 7 | 66,075,000 | 66,225,000 | 882 | 1463 | 0.561213452  |                       |
| 7 | 66,150,000 | 66,300,000 | 883 | 1504 | 0.163652149  |                       |
| 7 | 66,225,000 | 66,375,000 | 884 | 941  | 0.151978268  |                       |
| 7 | 66,300,000 | 66,450,000 | 885 | 633  | 0.547306007  |                       |
| 7 | 66,375,000 | 66,525,000 | 886 | 896  | 0.921572683  |                       |
| 7 | 66,450,000 | 66,600,000 | 887 | 962  | 1.191747676  |                       |
| 7 | 66,525,000 | 66,675,000 | 888 | 1105 | 0.802603615  |                       |
| 7 | 66,600,000 | 66,750,000 | 889 | 985  | 0.010693467  |                       |
| 7 | 66,675,000 | 66,825,000 | 890 | 836  | -0.466146041 | GRIA1                 |
| 7 | 66,750,000 | 66,900,000 | 891 | 840  | 0.168409745  | GRIA1                 |
| 7 | 66,825,000 | 66,975,000 | 892 | 934  | 0.387150091  | GRIA1                 |
| 7 | 66,900,000 | 67,050,000 | 893 | 1165 | 0.43220601   | GRIA1                 |
| 7 | 66,975,000 | 67,125,000 | 894 | 1338 | 0.76737328   | GRIA1                 |
| 7 | 67,050,000 | 67,200,000 | 895 | 1205 | 0.50301924   | GRIA1                 |
| 7 | 67,125,000 | 67,275,000 | 896 | 1167 | 0.085858778  |                       |
| 7 | 67,200,000 | 67,350,000 | 897 | 1041 | 0.416782221  | FAM114A2,MFAP3        |
| 7 | 67,275,000 | 67,425,000 | 898 | 940  | 0.665431506  | FAM114A2,MFAP3,SMIM15 |
| 7 | 67,350,000 | 67,500,000 | 899 | 1009 | 0.736788402  | GALNT10,SMIM15        |
| 7 | 67,425,000 | 67,575,000 | 900 | 743  | 0.513515022  | GALNT10               |
| 7 | 67,500,000 | 67,650,000 | 901 | 536  | -0.319949354 | GALNT10               |
| 7 | 67,575,000 | 67,725,000 | 902 | 314  | -2.195898105 | GALNT10,HAND1         |
| 7 | 67,650,000 | 67,800,000 | 903 | 276  | -2.573426832 | GALNT10,HAND1,SAP30L  |
| 7 | 67,725,000 | 67,875,000 | 904 | 398  | -1.329545088 | SAP30L                |
| 7 | 67,800,000 | 67,950,000 | 905 | 346  | -0.801472832 |                       |
| 7 | 67,875,000 | 68,025,000 | 906 | 255  | -0.9717729   | LARP1                 |
| 7 | 67,950,000 | 68,100,000 | 907 | 324  | 0.078785646  | CNOT8,GEMIN5,LARP1    |
| 7 | 68,025,000 | 68,175,000 | 908 | 637  | 0.260608733  | CNOT8,GEMIN5,MRPL22   |
| 7 | 68,100,000 | 68,250,000 | 909 | 621  | 0.093953899  | GEMIN5,MRPL22         |
| 7 | 68,175,000 | 68,325,000 | 910 | 362  | -0.498435989 |                       |
| 7 | 68,250,000 | 68,400,000 | 911 | 449  | -0.056803534 |                       |
| 7 | 68,325,000 | 68,475,000 | 912 | 466  | 0.413069815  |                       |
| 7 | 68,400,000 | 68,550,000 | 913 | 419  | -0.147162985 |                       |
| 7 | 68,475,000 | 68,625,000 | 914 | 589  | -0.144339153 |                       |
| 7 | 68,550,000 | 68,700,000 | 915 | 893  | -2.465415976 |                       |
| 7 | 68,625,000 | 68,775,000 | 916 | 824  | -2.80131287  |                       |
| 7 | 68,700,000 | 68,850,000 | 917 | 571  | -0.81754195  |                       |
| 7 | 68,775,000 | 68,925,000 | 918 | 598  | -0.346097135 |                       |
| 7 | 68,850,000 | 69,000,000 | 919 | 863  | 0.35960793   |                       |
| 7 | 68,925,000 | 69,075,000 | 920 | 1103 | 0.073140154  |                       |
| 7 | 69,000,000 | 69,150,000 | 921 | 1060 | 0.272326995  |                       |

|   |            |            |     |      |              |                            |
|---|------------|------------|-----|------|--------------|----------------------------|
| 7 | 69,075,000 | 69,225,000 | 922 | 735  | 0.795618233  |                            |
| 7 | 69,150,000 | 69,300,000 | 923 | 836  | 0.822856866  |                            |
| 7 | 69,225,000 | 69,375,000 | 924 | 1217 | 0.387644418  |                            |
| 7 | 69,300,000 | 69,450,000 | 925 | 1275 | -0.201672845 |                            |
| 7 | 69,375,000 | 69,525,000 | 926 | 1463 | 0.390582264  |                            |
| 7 | 69,450,000 | 69,600,000 | 927 | 1544 | 0.328057807  | SGCD                       |
| 7 | 69,525,000 | 69,675,000 | 928 | 1645 | 0.069843308  | SGCD                       |
| 7 | 69,600,000 | 69,750,000 | 929 | 1381 | 0.646345629  | SGCD                       |
| 7 | 69,675,000 | 69,825,000 | 930 | 1112 | 0.669073633  | SGCD                       |
| 7 | 69,750,000 | 69,900,000 | 931 | 1399 | 0.818796226  | SGCD                       |
| 7 | 69,825,000 | 69,975,000 | 932 | 1572 | 0.231427506  | SGCD                       |
| 7 | 69,900,000 | 70,050,000 | 933 | 1280 | -0.391782214 | SGCD                       |
| 7 | 69,975,000 | 70,125,000 | 934 | 1359 | 0.291759844  | SGCD                       |
| 7 | 70,050,000 | 70,200,000 | 935 | 1464 | 0.515485423  |                            |
| 7 | 70,125,000 | 70,275,000 | 936 | 1216 | 0.42719384   | MGC137099                  |
| 7 | 70,200,000 | 70,350,000 | 937 | 1362 | -0.028746073 | MGC137099,TIMD4            |
| 7 | 70,275,000 | 70,425,000 | 938 | 1720 | 0.00989014   | TIMD4                      |
| 7 | 70,350,000 | 70,500,000 | 939 | 1539 | -0.098150306 |                            |
| 7 | 70,425,000 | 70,575,000 | 940 | 1034 | -0.371016628 |                            |
| 7 | 70,500,000 | 70,650,000 | 941 | 1240 | 0.082642152  |                            |
| 7 | 70,575,000 | 70,725,000 | 942 | 1454 | 0.186958721  | ENSBTAG00000036102         |
| 7 | 70,650,000 | 70,800,000 | 943 | 1292 | 0.284441121  | ENSBTAG00000036102         |
| 7 | 70,725,000 | 70,875,000 | 944 | 1247 | 0.928581568  | HAVCR2,ENSBTAG00000036102  |
| 7 | 70,800,000 | 70,950,000 | 945 | 1254 | 1.054038336  | FAM71B,HAVCR2,ITK          |
| 7 | 70,875,000 | 71,025,000 | 946 | 1362 | -0.021637301 | CYFIP2,FAM71B,ITK          |
| 7 | 70,950,000 | 71,100,000 | 947 | 1432 | 0.207467529  | CYFIP2,FNDC9,ITK           |
| 7 | 71,025,000 | 71,175,000 | 948 | 1082 | 0.824046443  | ADAM19,CYFIP2,FNDC9,NIPAL4 |
| 7 | 71,100,000 | 71,250,000 | 949 | 756  | -0.43298579  | ADAM19,CYFIP2,NIPAL4       |
| 7 | 71,175,000 | 71,325,000 | 950 | 520  | -0.728962071 | ADAM19,SOX30               |
| 7 | 71,250,000 | 71,400,000 | 951 | 321  | 0.954838333  | ADAM19,LSM11,SOX30,THG1L   |
| 7 | 71,325,000 | 71,475,000 | 952 | 271  | 0.88274507   | CLINT1,LSM11,SOX30,THG1L   |
| 7 | 71,400,000 | 71,550,000 | 953 | 310  | 0.916372403  | CLINT1                     |
| 7 | 71,475,000 | 71,625,000 | 954 | 280  | 0.18322708   | CLINT1                     |
| 7 | 71,550,000 | 71,700,000 | 955 | 178  | -0.974346842 |                            |
| 7 | 71,625,000 | 71,775,000 | 956 | 173  | -0.49075902  |                            |
| 7 | 71,700,000 | 71,850,000 | 957 | 269  | -0.535738471 |                            |
| 7 | 71,775,000 | 71,925,000 | 958 | 289  | -0.832262965 |                            |
| 7 | 71,850,000 | 72,000,000 | 959 | 232  | -0.402183911 |                            |
| 7 | 71,925,000 | 72,075,000 | 960 | 578  | -0.010010795 |                            |
| 7 | 72,000,000 | 72,150,000 | 961 | 815  | 0.863631405  |                            |
| 7 | 72,075,000 | 72,225,000 | 962 | 625  | 0.90480154   |                            |
| 7 | 72,150,000 | 72,300,000 | 963 | 574  | -0.843245288 |                            |
| 7 | 72,225,000 | 72,375,000 | 964 | 532  | -1.447794543 |                            |
| 7 | 72,300,000 | 72,450,000 | 965 | 531  | 0.087650768  | EBF1                       |
| 7 | 72,375,000 | 72,525,000 | 966 | 514  | 0.162198837  | EBF1                       |
| 7 | 72,450,000 | 72,600,000 | 967 | 418  | 0.09557871   | EBF1                       |
| 7 | 72,525,000 | 72,675,000 | 968 | 301  | 0.637111429  | EBF1                       |
| 7 | 72,600,000 | 72,750,000 | 969 | 286  | -1.484425125 | EBF1                       |
| 7 | 72,675,000 | 72,825,000 | 970 | 290  | -2.656362036 | EBF1                       |
| 7 | 72,750,000 | 72,900,000 | 971 | 199  | -2.078578559 | EBF1,RNF145                |
| 7 | 72,825,000 | 72,975,000 | 972 | 176  | -3.311041778 | RNF145,UBLCP1              |
| 7 | 72,900,000 | 73,050,000 | 973 | 234  | -3.533406349 | IL12B,RNF145,UBLCP1        |
| 7 | 72,975,000 | 73,125,000 | 974 | 294  | -1.56335722  | IL12B,UBLCP1               |

|   |            |            |      |      |              |                           |
|---|------------|------------|------|------|--------------|---------------------------|
| 7 | 73,050,000 | 73,200,000 | 975  | 555  | 0.978998411  |                           |
| 7 | 73,125,000 | 73,275,000 | 976  | 676  | 0.337452652  |                           |
| 7 | 73,200,000 | 73,350,000 | 977  | 455  | -1.683509367 |                           |
| 7 | 73,275,000 | 73,425,000 | 978  | 523  | -1.026281823 |                           |
| 7 | 73,350,000 | 73,500,000 | 979  | 525  | -1.83105951  |                           |
| 7 | 73,425,000 | 73,575,000 | 980  | 540  | -2.186142478 |                           |
| 7 | 73,500,000 | 73,650,000 | 981  | 636  | -0.776604103 | ADRA1B                    |
| 7 | 73,575,000 | 73,725,000 | 982  | 507  | -1.065207748 | ADRA1B,TTC1               |
| 7 | 73,650,000 | 73,800,000 | 983  | 419  | -0.458451332 | ADRA1B,PWWP2A,TTC1        |
| 7 | 73,725,000 | 73,875,000 | 984  | 564  | 0.187011855  | PWWP2A,TTC1               |
| 7 | 73,800,000 | 73,950,000 | 985  | 745  | 0.498483489  | CCNJL,FABP6               |
| 7 | 73,875,000 | 74,025,000 | 986  | 872  | 0.855335615  | CCNJL,FABP6               |
| 7 | 73,950,000 | 74,100,000 | 987  | 746  | 1.051918214  | C1QTNF2,CCNJL,SLU7,ZBED8  |
| 7 | 74,025,000 | 74,175,000 | 988  | 506  | 0.752560235  | C1QTNF2,PTTG1,SLU7,ZBED8  |
| 7 | 74,100,000 | 74,250,000 | 989  | 372  | 0.53492961   | PTTG1,SLU7                |
| 7 | 74,175,000 | 74,325,000 | 990  | 320  | 0.476688376  |                           |
| 7 | 74,250,000 | 74,400,000 | 991  | 487  | 0.099798731  | ATP10B                    |
| 7 | 74,325,000 | 74,475,000 | 992  | 586  | -0.269541902 | ATP10B                    |
| 7 | 74,400,000 | 74,550,000 | 993  | 965  | -1.830725683 | ATP10B                    |
| 7 | 74,475,000 | 74,625,000 | 994  | 1370 | -1.261777111 |                           |
| 7 | 74,550,000 | 74,700,000 | 995  | 1138 | 0.602435694  |                           |
| 7 | 74,625,000 | 74,775,000 | 996  | 951  | 1.237915306  |                           |
| 7 | 74,700,000 | 74,850,000 | 997  | 1041 | 1.05563516   |                           |
| 7 | 74,775,000 | 74,925,000 | 998  | 907  | 0.654474984  |                           |
| 7 | 74,850,000 | 75,000,000 | 999  | 767  | 0.791101025  |                           |
| 7 | 74,925,000 | 75,075,000 | 1000 | 685  | 0.935834305  | ENSBTAG00000046349        |
| 7 | 75,000,000 | 75,150,000 | 1001 | 635  | 0.221031516  | GABRB2,ENSBTAG00000046349 |
| 7 | 75,075,000 | 75,225,000 | 1002 | 602  | -0.208140016 | GABRB2                    |
| 7 | 75,150,000 | 75,300,000 | 1003 | 571  | 0.082873675  | GABRB2                    |
| 7 | 75,225,000 | 75,375,000 | 1004 | 564  | 0.907416261  | GABRB2                    |
| 7 | 75,300,000 | 75,450,000 | 1005 | 574  | 1.048656503  | GABRB2                    |
| 7 | 75,375,000 | 75,525,000 | 1006 | 560  | 1.133182152  | GABRA6,GABRB2             |
| 7 | 75,450,000 | 75,600,000 | 1007 | 342  | 0.563770632  | GABRA6                    |
| 7 | 75,525,000 | 75,675,000 | 1008 | 188  | -0.627579276 | GABRA6                    |
| 7 | 75,600,000 | 75,750,000 | 1009 | 334  | 0.445346926  | GABRA1                    |
| 7 | 75,675,000 | 75,825,000 | 1010 | 441  | 0.827672264  | GABRA1                    |
| 7 | 75,750,000 | 75,900,000 | 1011 | 588  | 0.944875755  | GABRA1,GABRG2             |
| 7 | 75,825,000 | 75,975,000 | 1012 | 823  | 0.29149943   | GABRG2                    |
| 7 | 75,900,000 | 76,050,000 | 1013 | 614  | 0.196099484  | GABRG2                    |
| 7 | 75,975,000 | 76,125,000 | 1014 | 464  | 1.308947715  | GABRG2                    |
| 7 | 76,050,000 | 76,200,000 | 1015 | 656  | 0.815498003  |                           |
| 7 | 76,125,000 | 76,275,000 | 1016 | 601  | 0.23858547   |                           |
| 7 | 76,200,000 | 76,350,000 | 1017 | 632  | 0.64067569   |                           |
| 7 | 76,275,000 | 76,425,000 | 1018 | 836  | 0.087464579  |                           |
| 7 | 76,350,000 | 76,500,000 | 1019 | 712  | -1.808211602 |                           |
| 7 | 76,425,000 | 76,575,000 | 1020 | 426  | -3.242697274 |                           |
| 7 | 76,500,000 | 76,650,000 | 1021 | 549  | -1.127082986 |                           |
| 7 | 76,575,000 | 76,725,000 | 1022 | 1112 | -0.767464546 |                           |
| 7 | 76,650,000 | 76,800,000 | 1023 | 1214 | -0.664241238 |                           |
| 7 | 76,725,000 | 76,875,000 | 1024 | 824  | -0.843258732 |                           |
| 7 | 76,800,000 | 76,950,000 | 1025 | 787  | 0.422112991  |                           |
| 7 | 76,875,000 | 77,025,000 | 1026 | 908  | -0.66509092  |                           |
| 7 | 76,950,000 | 77,100,000 | 1027 | 640  | -3.748880485 |                           |

|   |            |            |      |      |              |                         |
|---|------------|------------|------|------|--------------|-------------------------|
| 7 | 77,025,000 | 77,175,000 | 1028 | 430  | -2.883076327 |                         |
| 7 | 77,100,000 | 77,250,000 | 1029 | 403  | -1.749874307 | CCNG1                   |
| 7 | 77,175,000 | 77,325,000 | 1030 | 373  | -0.659893835 | CCNG1,HMMR,MAT2B,NUDCD2 |
| 7 | 77,250,000 | 77,400,000 | 1031 | 344  | -1.742567527 | CCNG1,HMMR,MAT2B,NUDCD2 |
| 7 | 77,325,000 | 77,475,000 | 1032 | 270  | -4.901408098 | MAT2B                   |
| 7 | 77,400,000 | 77,550,000 | 1033 | 403  | -4.535505433 |                         |
| 7 | 77,475,000 | 77,625,000 | 1034 | 426  | -3.037934129 |                         |
| 7 | 77,550,000 | 77,700,000 | 1035 | 340  | -0.093393413 |                         |
| 7 | 77,625,000 | 77,775,000 | 1036 | 404  | -0.596697079 |                         |
| 7 | 77,700,000 | 77,850,000 | 1037 | 686  | -3.006242773 |                         |
| 7 | 77,775,000 | 77,925,000 | 1038 | 752  | -2.544477057 |                         |
| 7 | 77,850,000 | 78,000,000 | 1039 | 839  | -0.127962616 |                         |
| 7 | 77,925,000 | 78,075,000 | 1040 | 731  | 0.003021091  |                         |
| 7 | 78,000,000 | 78,150,000 | 1041 | 376  | -0.282053086 |                         |
| 7 | 78,075,000 | 78,225,000 | 1042 | 411  | -0.258532013 |                         |
| 7 | 78,150,000 | 78,300,000 | 1043 | 467  | -1.36100825  |                         |
| 7 | 78,225,000 | 78,375,000 | 1044 | 709  | -3.18639174  |                         |
| 7 | 78,300,000 | 78,450,000 | 1045 | 666  | -3.150728425 |                         |
| 7 | 78,375,000 | 78,525,000 | 1046 | 662  | -0.831192746 |                         |
| 7 | 78,450,000 | 78,600,000 | 1047 | 984  | -2.116023552 |                         |
| 7 | 78,525,000 | 78,675,000 | 1048 | 1074 | -2.043276308 |                         |
| 7 | 78,600,000 | 78,750,000 | 1049 | 809  | -0.532360894 |                         |
| 7 | 78,675,000 | 78,825,000 | 1050 | 465  | -0.176439141 |                         |
| 7 | 78,750,000 | 78,900,000 | 1051 | 436  | -0.267546904 |                         |
| 7 | 78,825,000 | 78,975,000 | 1052 | 495  | -0.449498997 |                         |
| 7 | 78,900,000 | 79,050,000 | 1053 | 880  | -0.542510122 |                         |
| 7 | 78,975,000 | 79,125,000 | 1054 | 855  | -0.407928931 |                         |
| 7 | 79,050,000 | 79,200,000 | 1055 | 250  | 0.162995897  |                         |
| 7 | 79,125,000 | 79,275,000 | 1056 | 38   | -4.358552112 |                         |
| 7 | 79,200,000 | 79,350,000 | 1057 | 263  | -0.77664276  |                         |
| 7 | 79,275,000 | 79,425,000 | 1058 | 438  | -0.746608666 |                         |
| 7 | 79,350,000 | 79,500,000 | 1059 | 557  | -0.523062524 |                         |
| 7 | 79,425,000 | 79,575,000 | 1060 | 869  | -0.217158812 |                         |
| 7 | 79,500,000 | 79,650,000 | 1061 | 917  | 0.225266027  |                         |
| 7 | 79,575,000 | 79,725,000 | 1062 | 975  | 0.681689937  |                         |
| 7 | 79,650,000 | 79,800,000 | 1063 | 977  | 0.455701086  |                         |
| 7 | 79,725,000 | 79,875,000 | 1064 | 651  | 0.387026023  |                         |
| 7 | 79,800,000 | 79,950,000 | 1065 | 683  | 0.234812884  |                         |
| 7 | 79,875,000 | 80,025,000 | 1066 | 738  | -0.328663361 |                         |
| 7 | 79,950,000 | 80,100,000 | 1067 | 716  | -0.411501477 |                         |
| 7 | 80,025,000 | 80,175,000 | 1068 | 846  | 0.790958189  |                         |
| 7 | 80,100,000 | 80,250,000 | 1069 | 995  | 0.672922583  | ENSBTAG00000046080      |
| 7 | 80,175,000 | 80,325,000 | 1070 | 844  | -0.161515831 | ENSBTAG00000046080      |
| 7 | 80,250,000 | 80,400,000 | 1071 | 674  | -2.112787238 |                         |
| 7 | 80,325,000 | 80,475,000 | 1072 | 654  | -1.329112006 |                         |
| 7 | 80,400,000 | 80,550,000 | 1073 | 833  | -1.016234047 |                         |
| 7 | 80,475,000 | 80,625,000 | 1074 | 881  | -0.610770615 |                         |
| 7 | 80,550,000 | 80,700,000 | 1075 | 572  | 1.175676276  |                         |
| 7 | 80,625,000 | 80,775,000 | 1076 | 464  | 1.329477877  |                         |
| 7 | 80,700,000 | 80,850,000 | 1077 | 447  | 1.266665037  |                         |
| 7 | 80,775,000 | 80,925,000 | 1078 | 700  | 1.247933214  |                         |
| 7 | 80,850,000 | 81,000,000 | 1079 | 608  | 1.243215794  |                         |
| 7 | 80,925,000 | 81,075,000 | 1080 | 382  | 1.197389554  |                         |

|   |            |            |      |      |              |                               |
|---|------------|------------|------|------|--------------|-------------------------------|
| 7 | 81,000,000 | 81,150,000 | 1081 | 338  | 1.149317778  |                               |
| 7 | 81,075,000 | 81,225,000 | 1082 | 357  | 1.214964923  |                               |
| 7 | 81,150,000 | 81,300,000 | 1083 | 504  | 0.475213642  |                               |
| 7 | 81,225,000 | 81,375,000 | 1084 | 636  | -0.066281955 |                               |
| 7 | 81,300,000 | 81,450,000 | 1085 | 646  | 0.611122016  | CMC2                          |
| 7 | 81,375,000 | 81,525,000 | 1086 | 483  | 0.859248549  | CMC2                          |
| 7 | 81,450,000 | 81,600,000 | 1087 | 497  | 0.455240652  |                               |
| 7 | 81,525,000 | 81,675,000 | 1088 | 586  | 0.284679645  |                               |
| 7 | 81,600,000 | 81,750,000 | 1089 | 758  | -1.070388985 |                               |
| 7 | 81,675,000 | 81,825,000 | 1090 | 722  | -1.198571799 |                               |
| 7 | 81,750,000 | 81,900,000 | 1091 | 504  | -0.594027408 |                               |
| 7 | 81,825,000 | 81,975,000 | 1092 | 494  | -0.182070604 |                               |
| 7 | 81,900,000 | 82,050,000 | 1093 | 659  | -0.625381868 |                               |
| 7 | 81,975,000 | 82,125,000 | 1094 | 830  | -0.740214503 |                               |
| 7 | 82,050,000 | 82,200,000 | 1095 | 876  | -0.504917904 |                               |
| 7 | 82,125,000 | 82,275,000 | 1096 | 635  | -0.282906535 |                               |
| 7 | 82,200,000 | 82,350,000 | 1097 | 324  | -0.755863149 |                               |
| 7 | 82,275,000 | 82,425,000 | 1098 | 515  | -0.712364763 | TENM2                         |
| 7 | 82,350,000 | 82,500,000 | 1099 | 574  | -0.175850981 | TENM2                         |
| 7 | 82,425,000 | 82,575,000 | 1100 | 478  | 0.097629018  | TENM2                         |
| 7 | 82,500,000 | 82,650,000 | 1101 | 587  | 0.466798018  | TENM2                         |
| 7 | 82,575,000 | 82,725,000 | 1102 | 749  | 0.727003763  | TENM2,WWC1                    |
| 7 | 82,650,000 | 82,800,000 | 1103 | 953  | 0.944264215  | RARS,WWC1                     |
| 7 | 82,725,000 | 82,875,000 | 1104 | 1195 | 0.522475599  | FBLL1,RARS,WWC1               |
| 7 | 82,800,000 | 82,950,000 | 1105 | 1077 | 0.379565086  | FAM151B,FBLL1,RARS,ZFYVE16    |
| 7 | 82,875,000 | 83,025,000 | 1106 | 880  | 0.092833679  | ANKRD34B,DHFR,FAM151B,ZFYVE16 |
| 7 | 82,950,000 | 83,100,000 | 1107 | 819  | -0.731290762 | ANKRD34B,DHFR,FAM151B,MSH3    |
| 7 | 83,025,000 | 83,175,000 | 1108 | 654  | 0.131834159  | DHFR,MSH3                     |
| 7 | 83,100,000 | 83,250,000 | 1109 | 773  | -0.442771263 | MSH3                          |
| 7 | 83,175,000 | 83,325,000 | 1110 | 661  | -0.637181873 | MSH3                          |
| 7 | 83,250,000 | 83,400,000 | 1111 | 728  | 0.193275888  | RASGRF2                       |
| 7 | 83,325,000 | 83,475,000 | 1112 | 1074 | 0.600666673  | RASGRF2                       |
| 7 | 83,400,000 | 83,550,000 | 1113 | 852  | 0.700691966  | RASGRF2                       |
| 7 | 83,475,000 | 83,625,000 | 1114 | 643  | -0.077408418 | ACOT12,CKMT2,RASGRF2,ZCCHC9   |
| 7 | 83,550,000 | 83,700,000 | 1115 | 1041 | -1.673207993 | ACOT12,CKMT2,ZCCHC9           |
| 7 | 83,625,000 | 83,775,000 | 1116 | 895  | -1.846256813 | ACOT12,SSBP2                  |
| 7 | 83,700,000 | 83,850,000 | 1117 | 564  | -0.634475802 | SSBP2                         |
| 7 | 83,775,000 | 83,925,000 | 1118 | 772  | -0.220505348 | SSBP2                         |
| 7 | 83,850,000 | 84,000,000 | 1119 | 676  | 0.294645758  | SSBP2                         |
| 7 | 83,925,000 | 84,075,000 | 1120 | 504  | 0.303433457  | SSBP2                         |
| 7 | 84,000,000 | 84,150,000 | 1121 | 430  | -0.090362713 | SSBP2                         |
| 7 | 84,075,000 | 84,225,000 | 1122 | 601  | -0.583142043 |                               |
| 7 | 84,150,000 | 84,300,000 | 1123 | 721  | -0.856019165 | MGC138057                     |
| 7 | 84,225,000 | 84,375,000 | 1124 | 516  | -0.774099163 | MGC138057                     |
| 7 | 84,300,000 | 84,450,000 | 1125 | 412  | -0.354231773 | MGC138057                     |
| 7 | 84,375,000 | 84,525,000 | 1126 | 554  | 0.204680447  | MGC138057,RPS23               |
| 7 | 84,450,000 | 84,600,000 | 1127 | 588  | 0.058261469  | MGC138057,RPS23               |
| 7 | 84,525,000 | 84,675,000 | 1128 | 460  | -0.842006426 | RPS23                         |
| 7 | 84,600,000 | 84,750,000 | 1129 | 531  | -1.106449187 |                               |
| 7 | 84,675,000 | 84,825,000 | 1130 | 650  | -0.897787822 |                               |
| 7 | 84,750,000 | 84,900,000 | 1131 | 713  | -0.198516023 |                               |
| 7 | 84,825,000 | 84,975,000 | 1132 | 820  | 0.583517794  |                               |
| 7 | 84,900,000 | 85,050,000 | 1133 | 644  | 0.531717454  |                               |

|   |            |            |      |      |              |                |
|---|------------|------------|------|------|--------------|----------------|
| 7 | 84,975,000 | 85,125,000 | 1134 | 457  | -0.463648368 |                |
| 7 | 85,050,000 | 85,200,000 | 1135 | 409  | -0.415006912 |                |
| 7 | 85,125,000 | 85,275,000 | 1136 | 376  | 0.754686794  | TMEM167A,XRCC4 |
| 7 | 85,200,000 | 85,350,000 | 1137 | 367  | 0.526536096  | TMEM167A,XRCC4 |
| 7 | 85,275,000 | 85,425,000 | 1138 | 313  | 0.151757418  | XRCC4          |
| 7 | 85,350,000 | 85,500,000 | 1139 | 399  | 0.101091271  | XRCC4          |
| 7 | 85,425,000 | 85,575,000 | 1140 | 511  | 0.056680076  | XRCC4          |
| 7 | 85,500,000 | 85,650,000 | 1141 | 782  | 0.034575374  | XRCC4          |
| 7 | 85,575,000 | 85,725,000 | 1142 | 885  | -0.079999219 | VCAN           |
| 7 | 85,650,000 | 85,800,000 | 1143 | 568  | -0.298956028 | VCAN           |
| 7 | 85,725,000 | 85,875,000 | 1144 | 494  | 0.093311951  | HAPLN1,VCAN    |
| 7 | 85,800,000 | 85,950,000 | 1145 | 696  | -0.069844963 | HAPLN1         |
| 7 | 85,875,000 | 86,025,000 | 1146 | 787  | 0.240020203  | HAPLN1         |
| 7 | 85,950,000 | 86,100,000 | 1147 | 670  | 0.690473164  |                |
| 7 | 86,025,000 | 86,175,000 | 1148 | 724  | 0.571376872  | EDIL3          |
| 7 | 86,100,000 | 86,250,000 | 1149 | 850  | 0.725051033  | EDIL3          |
| 7 | 86,175,000 | 86,325,000 | 1150 | 651  | 0.657715959  | EDIL3          |
| 7 | 86,250,000 | 86,400,000 | 1151 | 576  | 0.256450318  | EDIL3          |
| 7 | 86,325,000 | 86,475,000 | 1152 | 791  | -0.206074894 | EDIL3          |
| 7 | 86,400,000 | 86,550,000 | 1153 | 672  | 0.001559053  | EDIL3          |
| 7 | 86,475,000 | 86,625,000 | 1154 | 809  | 0.35017162   | EDIL3          |
| 7 | 86,550,000 | 86,700,000 | 1155 | 1058 | -0.776923446 | EDIL3          |
| 7 | 86,625,000 | 86,775,000 | 1156 | 1024 | -2.735796496 | EDIL3          |
| 7 | 86,700,000 | 86,850,000 | 1157 | 945  | -1.981465091 |                |
| 7 | 86,775,000 | 86,925,000 | 1158 | 832  | -2.672572225 |                |
| 7 | 86,850,000 | 87,000,000 | 1159 | 935  | -2.525028316 |                |
| 7 | 86,925,000 | 87,075,000 | 1160 | 667  | -1.233367339 |                |
| 7 | 87,000,000 | 87,150,000 | 1161 | 498  | -1.954730411 |                |
| 7 | 87,075,000 | 87,225,000 | 1162 | 798  | 0.737616665  |                |
| 7 | 87,150,000 | 87,300,000 | 1163 | 598  | 1.093459594  |                |
| 7 | 87,225,000 | 87,375,000 | 1164 | 302  | -0.263242461 |                |
| 7 | 87,300,000 | 87,450,000 | 1165 | 438  | -0.347949965 |                |
| 7 | 87,375,000 | 87,525,000 | 1166 | 570  | 0.021301375  |                |
| 7 | 87,450,000 | 87,600,000 | 1167 | 579  | 0.047153899  |                |
| 7 | 87,525,000 | 87,675,000 | 1168 | 928  | -2.248481219 |                |
| 7 | 87,600,000 | 87,750,000 | 1169 | 1201 | -2.82854399  |                |
| 7 | 87,675,000 | 87,825,000 | 1170 | 631  | -2.160287115 |                |
| 7 | 87,750,000 | 87,900,000 | 1171 | 325  | -1.684146876 |                |
| 7 | 87,825,000 | 87,975,000 | 1172 | 718  | -1.158332324 |                |
| 7 | 87,900,000 | 88,050,000 | 1173 | 956  | -0.994796686 |                |
| 7 | 87,975,000 | 88,125,000 | 1174 | 663  | -1.012088769 |                |
| 7 | 88,050,000 | 88,200,000 | 1175 | 508  | -2.232306634 |                |
| 7 | 88,125,000 | 88,275,000 | 1176 | 810  | -2.075266398 |                |
| 7 | 88,200,000 | 88,350,000 | 1177 | 1257 | -1.128854342 |                |
| 7 | 88,275,000 | 88,425,000 | 1178 | 1258 | -0.938617989 |                |
| 7 | 88,350,000 | 88,500,000 | 1179 | 1081 | -1.105788873 |                |
| 7 | 88,425,000 | 88,575,000 | 1180 | 903  | -1.021568013 |                |
| 7 | 88,500,000 | 88,650,000 | 1181 | 711  | 0.827608226  | COX7C          |
| 7 | 88,575,000 | 88,725,000 | 1182 | 928  | 1.263668421  | COX7C          |
| 7 | 88,650,000 | 88,800,000 | 1183 | 1000 | 0.878798557  | COX7C          |
| 7 | 88,725,000 | 88,875,000 | 1184 | 763  | 0.626522367  |                |
| 7 | 88,800,000 | 88,950,000 | 1185 | 710  | -0.090104281 |                |
| 7 | 88,875,000 | 89,025,000 | 1186 | 837  | -1.032354092 |                |



|   |            |            |      |      |              |                                 |
|---|------------|------------|------|------|--------------|---------------------------------|
| 7 | 88,950,000 | 89,100,000 | 1187 | 606  | -1.258160384 |                                 |
| 7 | 89,025,000 | 89,175,000 | 1188 | 656  | 0.291950743  |                                 |
| 7 | 89,100,000 | 89,250,000 | 1189 | 804  | 0.192729924  |                                 |
| 7 | 89,175,000 | 89,325,000 | 1190 | 565  | -0.429762124 | RASA1                           |
| 7 | 89,250,000 | 89,400,000 | 1191 | 433  | -0.649061374 | RASA1,ENSBTAG00000009566        |
| 7 | 89,325,000 | 89,475,000 | 1192 | 689  | -1.089386046 | RASA1,ENSBTAG00000009566        |
| 7 | 89,400,000 | 89,550,000 | 1193 | 899  | -1.043714797 | ENSBTAG00000009566              |
| 7 | 89,475,000 | 89,625,000 | 1194 | 589  | -1.19532793  |                                 |
| 7 | 89,550,000 | 89,700,000 | 1195 | 383  | -3.794936464 |                                 |
| 7 | 89,625,000 | 89,775,000 | 1196 | 487  | -3.118722748 |                                 |
| 7 | 89,700,000 | 89,850,000 | 1197 | 493  | -1.613696897 |                                 |
| 7 | 89,775,000 | 89,925,000 | 1198 | 384  | 0.02033129   |                                 |
| 7 | 89,850,000 | 90,000,000 | 1199 | 540  | 0.375463416  |                                 |
| 7 | 89,925,000 | 90,075,000 | 1200 | 864  | -0.113520475 |                                 |
| 7 | 90,000,000 | 90,150,000 | 1201 | 823  | -0.350046707 | TMEM161B                        |
| 7 | 90,075,000 | 90,225,000 | 1202 | 855  | -1.359857437 | TMEM161B                        |
| 7 | 90,150,000 | 90,300,000 | 1203 | 1092 | -1.544982999 | TMEM161B                        |
| 7 | 90,225,000 | 90,375,000 | 1204 | 855  | -1.037293457 |                                 |
| 7 | 90,300,000 | 90,450,000 | 1205 | 400  | 0.045480676  |                                 |
| 7 | 90,375,000 | 90,525,000 | 1206 | 311  | 0.64139019   |                                 |
| 7 | 90,450,000 | 90,600,000 | 1207 | 376  | 0.459381375  |                                 |
| 7 | 90,525,000 | 90,675,000 | 1208 | 395  | 0.268990144  | MEF2C                           |
| 7 | 90,600,000 | 90,750,000 | 1209 | 507  | 0.594387795  | MEF2C                           |
| 7 | 90,675,000 | 90,825,000 | 1210 | 458  | 0.236544708  | MEF2C                           |
| 7 | 90,750,000 | 90,900,000 | 1211 | 498  | -0.060698631 | MEF2C                           |
| 7 | 90,825,000 | 90,975,000 | 1212 | 633  | -0.038477969 |                                 |
| 7 | 90,900,000 | 91,050,000 | 1213 | 569  | -0.093400245 |                                 |
| 7 | 90,975,000 | 91,125,000 | 1214 | 412  | 0.691842151  |                                 |
| 7 | 91,050,000 | 91,200,000 | 1215 | 386  | 0.4260532    |                                 |
| 7 | 91,125,000 | 91,275,000 | 1216 | 642  | 0.060560465  |                                 |
| 7 | 91,200,000 | 91,350,000 | 1217 | 739  | -0.151307144 |                                 |
| 7 | 91,275,000 | 91,425,000 | 1218 | 612  | -0.015136942 |                                 |
| 7 | 91,350,000 | 91,500,000 | 1219 | 573  | 0.675036006  |                                 |
| 7 | 91,425,000 | 91,575,000 | 1220 | 598  | 1.000087821  |                                 |
| 7 | 91,500,000 | 91,650,000 | 1221 | 750  | 1.165273827  |                                 |
| 7 | 91,575,000 | 91,725,000 | 1222 | 814  | 0.634215695  |                                 |
| 7 | 91,650,000 | 91,800,000 | 1223 | 735  | -0.866448384 |                                 |
| 7 | 91,725,000 | 91,875,000 | 1224 | 911  | -0.534025815 |                                 |
| 7 | 91,800,000 | 91,950,000 | 1225 | 883  | 0.146041846  |                                 |
| 7 | 91,875,000 | 92,025,000 | 1226 | 700  | 0.006647048  |                                 |
| 7 | 91,950,000 | 92,100,000 | 1227 | 853  | 0.868471004  |                                 |
| 7 | 92,025,000 | 92,175,000 | 1228 | 796  | 1.300136719  |                                 |
| 7 | 92,100,000 | 92,250,000 | 1229 | 584  | 1.312366681  |                                 |
| 7 | 92,175,000 | 92,325,000 | 1230 | 478  | 0.759200185  | CETN3,ENSBTAG00000045800        |
| 7 | 92,250,000 | 92,400,000 | 1231 | 419  | 0.35328139   | CETN3,MBLAC2,ENSBTAG00000045800 |
| 7 | 92,325,000 | 92,475,000 | 1232 | 422  | 0.725971425  | LYSMD3,MBLAC2,POLR3G            |
| 7 | 92,400,000 | 92,550,000 | 1233 | 467  | 0.542716118  | GPR98,LYSMD3,POLR3G             |
| 7 | 92,475,000 | 92,625,000 | 1234 | 651  | 0.628210275  | GPR98                           |
| 7 | 92,550,000 | 92,700,000 | 1235 | 1096 | 1.168092745  | GPR98                           |
| 7 | 92,625,000 | 92,775,000 | 1236 | 1006 | 1.050254547  | GPR98                           |
| 7 | 92,700,000 | 92,850,000 | 1237 | 929  | 0.47717982   |                                 |
| 7 | 92,775,000 | 92,925,000 | 1238 | 1123 | 0.864532025  | ENSBTAG00000046227              |
| 7 | 92,850,000 | 93,000,000 | 1239 | 603  | 0.845588665  | ENSBTAG00000046227              |

|   |            |            |      |      |              |                  |
|---|------------|------------|------|------|--------------|------------------|
| 7 | 92,925,000 | 93,075,000 | 1240 | 288  | 0.47684067   |                  |
| 7 | 93,000,000 | 93,150,000 | 1241 | 456  | 0.988447546  |                  |
| 7 | 93,075,000 | 93,225,000 | 1242 | 535  | -0.604768562 |                  |
| 7 | 93,150,000 | 93,300,000 | 1243 | 404  | -1.924147622 | ARRDC3           |
| 7 | 93,225,000 | 93,375,000 | 1244 | 411  | -0.105554378 | ARRDC3           |
| 7 | 93,300,000 | 93,450,000 | 1245 | 592  | 0.552439111  |                  |
| 7 | 93,375,000 | 93,525,000 | 1246 | 648  | -1.222449621 |                  |
| 7 | 93,450,000 | 93,600,000 | 1247 | 1069 | -1.74868456  |                  |
| 7 | 93,525,000 | 93,675,000 | 1248 | 1259 | -0.336793748 |                  |
| 7 | 93,600,000 | 93,750,000 | 1249 | 740  | 0.917257013  |                  |
| 7 | 93,675,000 | 93,825,000 | 1250 | 410  | 0.906760856  |                  |
| 7 | 93,750,000 | 93,900,000 | 1251 | 349  | 0.533907122  |                  |
| 7 | 93,825,000 | 93,975,000 | 1252 | 445  | -0.240777166 |                  |
| 7 | 93,900,000 | 94,050,000 | 1253 | 1000 | -1.435843659 |                  |
| 7 | 93,975,000 | 94,125,000 | 1254 | 1351 | -2.070222858 |                  |
| 7 | 94,050,000 | 94,200,000 | 1255 | 1300 | -2.886262559 |                  |
| 7 | 94,125,000 | 94,275,000 | 1256 | 1251 | -2.791506346 |                  |
| 7 | 94,200,000 | 94,350,000 | 1257 | 1142 | -2.853282031 |                  |
| 7 | 94,275,000 | 94,425,000 | 1258 | 1106 | -1.753253456 |                  |
| 7 | 94,350,000 | 94,500,000 | 1259 | 915  | -0.184707403 |                  |
| 7 | 94,425,000 | 94,575,000 | 1260 | 821  | 0.002651881  |                  |
| 7 | 94,500,000 | 94,650,000 | 1261 | 737  | -0.520561802 |                  |
| 7 | 94,575,000 | 94,725,000 | 1262 | 730  | 0.30700427   |                  |
| 7 | 94,650,000 | 94,800,000 | 1263 | 797  | 0.4685257    |                  |
| 7 | 94,725,000 | 94,875,000 | 1264 | 1007 | -0.007556095 |                  |
| 7 | 94,800,000 | 94,950,000 | 1265 | 873  | 0.262488557  |                  |
| 7 | 94,875,000 | 95,025,000 | 1266 | 567  | 0.570238256  |                  |
| 7 | 94,950,000 | 95,100,000 | 1267 | 608  | 0.242933218  |                  |
| 7 | 95,025,000 | 95,175,000 | 1268 | 571  | -0.534172479 |                  |
| 7 | 95,100,000 | 95,250,000 | 1269 | 565  | -0.225912815 |                  |
| 7 | 95,175,000 | 95,325,000 | 1270 | 530  | -0.182754133 |                  |
| 7 | 95,250,000 | 95,400,000 | 1271 | 580  | 0.012721255  |                  |
| 7 | 95,325,000 | 95,475,000 | 1272 | 390  | 0.703908074  | NR2F1            |
| 7 | 95,400,000 | 95,550,000 | 1273 | 243  | 0.52388812   | NR2F1            |
| 7 | 95,475,000 | 95,625,000 | 1274 | 345  | 0.048450402  |                  |
| 7 | 95,550,000 | 95,700,000 | 1275 | 402  | -0.717005948 |                  |
| 7 | 95,625,000 | 95,775,000 | 1276 | 467  | -0.233775127 |                  |
| 7 | 95,700,000 | 95,850,000 | 1277 | 780  | 0.339884558  |                  |
| 7 | 95,775,000 | 95,925,000 | 1278 | 937  | 0.239001738  |                  |
| 7 | 95,850,000 | 96,000,000 | 1279 | 891  | 0.714970647  |                  |
| 7 | 95,925,000 | 96,075,000 | 1280 | 900  | 0.579024338  |                  |
| 7 | 96,000,000 | 96,150,000 | 1281 | 718  | -0.372563075 | KIAA0825         |
| 7 | 96,075,000 | 96,225,000 | 1282 | 753  | 0.333534362  | KIAA0825         |
| 7 | 96,150,000 | 96,300,000 | 1283 | 724  | 0.879579399  | KIAA0825         |
| 7 | 96,225,000 | 96,375,000 | 1284 | 677  | 0.773028445  | ANKRD32,KIAA0825 |
| 7 | 96,300,000 | 96,450,000 | 1285 | 634  | 0.888858595  | ANKRD32,KIAA0825 |
| 7 | 96,375,000 | 96,525,000 | 1286 | 624  | 0.995310445  | ANKRD32          |
| 7 | 96,450,000 | 96,600,000 | 1287 | 583  | 0.975998557  |                  |
| 7 | 96,525,000 | 96,675,000 | 1288 | 405  | 0.769927836  |                  |
| 7 | 96,600,000 | 96,750,000 | 1289 | 567  | -0.758631288 | MCTP1            |
| 7 | 96,675,000 | 96,825,000 | 1290 | 1042 | -1.315816009 | MCTP1            |
| 7 | 96,750,000 | 96,900,000 | 1291 | 1466 | -0.419562933 |                  |
| 7 | 96,825,000 | 96,975,000 | 1292 | 1321 | 0.138822503  |                  |

|   |             |             |      |      |              |                           |
|---|-------------|-------------|------|------|--------------|---------------------------|
| 7 | 96,900,000  | 97,050,000  | 1293 | 1541 | 0.698383087  |                           |
| 7 | 96,975,000  | 97,125,000  | 1294 | 1419 | 0.711238739  | FAM81B                    |
| 7 | 97,050,000  | 97,200,000  | 1295 | 760  | -0.140007714 | FAM81B,TTC37              |
| 7 | 97,125,000  | 97,275,000  | 1296 | 598  | -0.079910675 | FAM81B,TTC37              |
| 7 | 97,200,000  | 97,350,000  | 1297 | 456  | -0.805554126 | ARSK,RHOBTB3,TTC37        |
| 7 | 97,275,000  | 97,425,000  | 1298 | 504  | -0.43435976  | ARSK,RHOBTB3              |
| 7 | 97,350,000  | 97,500,000  | 1299 | 626  | -1.570536395 | RFESD,RHOBTB3,SPATA9      |
| 7 | 97,425,000  | 97,575,000  | 1300 | 629  | -1.678886713 | GLRX,RFESD,RHOBTB3,SPATA9 |
| 7 | 97,500,000  | 97,650,000  | 1301 | 534  | 0.296158814  | ELL2,GLRX,SPATA9          |
| 7 | 97,575,000  | 97,725,000  | 1302 | 393  | 0.393269457  | ELL2                      |
| 7 | 97,650,000  | 97,800,000  | 1303 | 450  | 0.17034268   | ELL2                      |
| 7 | 97,725,000  | 97,875,000  | 1304 | 532  | -0.106157284 |                           |
| 7 | 97,800,000  | 97,950,000  | 1305 | 450  | 0.207562891  |                           |
| 7 | 97,875,000  | 98,025,000  | 1306 | 432  | 1.036553395  |                           |
| 7 | 97,950,000  | 98,100,000  | 1307 | 692  | 1.126523442  |                           |
| 7 | 98,025,000  | 98,175,000  | 1308 | 1288 | 0.562404243  | PCSK1                     |
| 7 | 98,100,000  | 98,250,000  | 1309 | 1340 | 0.372347621  | PCSK1                     |
| 7 | 98,175,000  | 98,325,000  | 1310 | 1175 | -0.006720448 | PCSK1                     |
| 7 | 98,250,000  | 98,400,000  | 1311 | 1200 | -0.246506552 |                           |
| 7 | 98,325,000  | 98,475,000  | 1312 | 1387 | -1.025218506 | CAST                      |
| 7 | 98,400,000  | 98,550,000  | 1313 | 1816 | -1.123816177 | CAST                      |
| 7 | 98,475,000  | 98,625,000  | 1314 | 2087 | -1.419019061 | CAST,ERAP1                |
| 7 | 98,550,000  | 98,700,000  | 1315 | 2284 | -1.278735266 | CAST,ERAP1                |
| 7 | 98,625,000  | 98,775,000  | 1316 | 2223 | -0.602996426 | ERAP2                     |
| 7 | 98,700,000  | 98,850,000  | 1317 | 1881 | -0.52767924  | ERAP2,LNPEP               |
| 7 | 98,775,000  | 98,925,000  | 1318 | 1573 | 0.086916992  | LNPEP                     |
| 7 | 98,850,000  | 99,000,000  | 1319 | 1623 | 0.584118027  | LIX1,LNPEP                |
| 7 | 98,925,000  | 99,075,000  | 1320 | 1668 | 0.298451341  | LIX1,RIOK2                |
| 7 | 99,000,000  | 99,150,000  | 1321 | 1660 | 0.117243143  | LIX1,RIOK2                |
| 7 | 99,075,000  | 99,225,000  | 1322 | 1788 | 0.151982819  |                           |
| 7 | 99,150,000  | 99,300,000  | 1323 | 1658 | -0.175854979 |                           |
| 7 | 99,225,000  | 99,375,000  | 1324 | 1563 | 0.33597367   |                           |
| 7 | 99,300,000  | 99,450,000  | 1325 | 1650 | 0.919105705  |                           |
| 7 | 99,375,000  | 99,525,000  | 1326 | 1722 | 0.908276742  |                           |
| 7 | 99,450,000  | 99,600,000  | 1327 | 1773 | -0.298908596 |                           |
| 7 | 99,525,000  | 99,675,000  | 1328 | 1875 | -0.227509332 |                           |
| 7 | 99,600,000  | 99,750,000  | 1329 | 1916 | 0.692394395  |                           |
| 7 | 99,675,000  | 99,825,000  | 1330 | 1567 | 0.383834139  |                           |
| 7 | 99,750,000  | 99,900,000  | 1331 | 1207 | -0.260835158 |                           |
| 7 | 99,825,000  | 99,975,000  | 1332 | 1310 | -0.999014414 |                           |
| 7 | 99,900,000  | 100,050,000 | 1333 | 1529 | -0.434235078 |                           |
| 7 | 99,975,000  | 100,125,000 | 1334 | 1373 | 0.405836774  |                           |
| 7 | 100,050,000 | 100,200,000 | 1335 | 739  | 0.091119073  |                           |
| 7 | 100,125,000 | 100,275,000 | 1336 | 262  | 0.405379278  |                           |
| 7 | 100,200,000 | 100,350,000 | 1337 | 673  | 0.845870039  |                           |
| 7 | 100,275,000 | 100,425,000 | 1338 | 940  | 0.273179765  |                           |
| 7 | 100,350,000 | 100,500,000 | 1339 | 648  | -0.103921965 | CHD1,RGMB                 |
| 7 | 100,425,000 | 100,575,000 | 1340 | 476  | -3.357856691 | CHD1,RGMB                 |
| 7 | 100,500,000 | 100,650,000 | 1341 | 454  | -3.619325562 | CHD1                      |
| 7 | 100,575,000 | 100,725,000 | 1342 | 815  | -1.420597323 |                           |
| 7 | 100,650,000 | 100,800,000 | 1343 | 1348 | -0.73799788  |                           |
| 7 | 100,725,000 | 100,875,000 | 1344 | 1366 | -0.088070669 |                           |
| 7 | 100,800,000 | 100,950,000 | 1345 | 975  | 0.293257568  |                           |

|   |             |             |      |      |              |                        |
|---|-------------|-------------|------|------|--------------|------------------------|
| 7 | 100,875,000 | 101,025,000 | 1346 | 726  | 0.765500545  |                        |
| 7 | 100,950,000 | 101,100,000 | 1347 | 773  | 0.917119959  |                        |
| 7 | 101,025,000 | 101,175,000 | 1348 | 648  | 0.317716128  |                        |
| 7 | 101,100,000 | 101,250,000 | 1349 | 703  | -0.791514186 |                        |
| 7 | 101,175,000 | 101,325,000 | 1350 | 859  | -0.410636071 |                        |
| 7 | 101,250,000 | 101,400,000 | 1351 | 1008 | -0.309163013 |                        |
| 7 | 101,325,000 | 101,475,000 | 1352 | 898  | -0.298650313 |                        |
| 7 | 101,400,000 | 101,550,000 | 1353 | 1004 | 0.301089145  |                        |
| 7 | 101,475,000 | 101,625,000 | 1354 | 1382 | 0.491859998  |                        |
| 7 | 101,550,000 | 101,700,000 | 1355 | 1408 | 0.961598653  |                        |
| 7 | 101,625,000 | 101,775,000 | 1356 | 1247 | 0.822333991  |                        |
| 7 | 101,700,000 | 101,850,000 | 1357 | 1117 | 0.869626042  |                        |
| 7 | 101,775,000 | 101,925,000 | 1358 | 1428 | 1.177308186  |                        |
| 7 | 101,850,000 | 102,000,000 | 1359 | 1448 | 0.934827719  |                        |
| 7 | 101,925,000 | 102,075,000 | 1360 | 1439 | 0.873833142  |                        |
| 7 | 102,000,000 | 102,150,000 | 1361 | 1319 | 1.06551201   |                        |
| 7 | 102,075,000 | 102,225,000 | 1362 | 977  | 0.921745434  |                        |
| 7 | 102,150,000 | 102,300,000 | 1363 | 1280 | 0.825209457  | FAM174A                |
| 7 | 102,225,000 | 102,375,000 | 1364 | 1371 | 0.508254654  | FAM174A                |
| 7 | 102,300,000 | 102,450,000 | 1365 | 952  | -0.176616621 |                        |
| 7 | 102,375,000 | 102,525,000 | 1366 | 924  | -0.078372428 | ST8SIA4                |
| 7 | 102,450,000 | 102,600,000 | 1367 | 1384 | -0.66779889  | ST8SIA4                |
| 7 | 102,525,000 | 102,675,000 | 1368 | 1315 | -0.462045843 | ST8SIA4                |
| 7 | 102,600,000 | 102,750,000 | 1369 | 716  | 0.523901143  |                        |
| 7 | 102,675,000 | 102,825,000 | 1370 | 784  | 0.180330963  |                        |
| 7 | 102,750,000 | 102,900,000 | 1371 | 1050 | 0.197212136  |                        |
| 7 | 102,825,000 | 102,975,000 | 1372 | 1167 | -0.028120053 |                        |
| 7 | 102,900,000 | 103,050,000 | 1373 | 1266 | -0.195081492 |                        |
| 7 | 102,975,000 | 103,125,000 | 1374 | 1353 | -0.165674751 |                        |
| 7 | 103,050,000 | 103,200,000 | 1375 | 1549 | -0.226353379 |                        |
| 7 | 103,125,000 | 103,275,000 | 1376 | 1633 | 0.648990514  |                        |
| 7 | 103,200,000 | 103,350,000 | 1377 | 1638 | 1.330300189  |                        |
| 7 | 103,275,000 | 103,425,000 | 1378 | 1368 | 1.352424313  |                        |
| 7 | 103,350,000 | 103,500,000 | 1379 | 1228 | -1.875536826 |                        |
| 7 | 103,425,000 | 103,575,000 | 1380 | 958  | -2.836883588 |                        |
| 7 | 103,500,000 | 103,650,000 | 1381 | 724  | 0.94587167   |                        |
| 7 | 103,575,000 | 103,725,000 | 1382 | 756  | 0.598572667  | SLCO4C1                |
| 7 | 103,650,000 | 103,800,000 | 1383 | 568  | 0.362613025  | SLCO4C1                |
| 7 | 103,725,000 | 103,875,000 | 1384 | 934  | 0.220004982  | SLCO4C1,SLCO6A1        |
| 7 | 103,800,000 | 103,950,000 | 1385 | 1255 | 0.524481928  | SLCO6A1                |
| 7 | 103,875,000 | 104,025,000 | 1386 | 1105 | 0.985068038  | SLCO6A1                |
| 7 | 103,950,000 | 104,100,000 | 1387 | 1137 | -0.53970449  |                        |
| 7 | 104,025,000 | 104,175,000 | 1388 | 1380 | -0.883480809 |                        |
| 7 | 104,100,000 | 104,250,000 | 1389 | 1110 | 0.218760434  |                        |
| 7 | 104,175,000 | 104,325,000 | 1390 | 668  | -0.442018961 | PAM                    |
| 7 | 104,250,000 | 104,400,000 | 1391 | 588  | -0.009337736 | PAM                    |
| 7 | 104,325,000 | 104,475,000 | 1392 | 600  | 0.254083685  | PAM                    |
| 7 | 104,400,000 | 104,550,000 | 1393 | 634  | -0.625253791 | GIN1,PAM               |
| 7 | 104,475,000 | 104,625,000 | 1394 | 477  | -0.678696269 | GIN1,PAM,PPIP5K2       |
| 7 | 104,550,000 | 104,700,000 | 1395 | 464  | 0.352573363  | C7H5orf30,GIN1,PPIP5K2 |
| 7 | 104,625,000 | 104,775,000 | 1396 | 846  | 0.985055478  | C7H5orf30,PPIP5K2      |
| 7 | 104,700,000 | 104,850,000 | 1397 | 1192 | 1.004075407  | C7H5orf30              |
| 7 | 104,775,000 | 104,925,000 | 1398 | 1032 | 0.71227064   | ENSBTAG00000027727     |

|   |             |             |      |      |              |                                       |
|---|-------------|-------------|------|------|--------------|---------------------------------------|
| 7 | 104,850,000 | 105,000,000 | 1399 | 674  | -0.762806367 | ENSBTAG00000027727                    |
| 7 | 104,925,000 | 105,075,000 | 1400 | 513  | -1.240827073 | NUDT12,ENSBTAG00000027727             |
| 7 | 105,000,000 | 105,150,000 | 1401 | 978  | 0.891627458  | NUDT12,ENSBTAG00000027727             |
| 7 | 105,075,000 | 105,225,000 | 1402 | 1391 | 0.627892379  |                                       |
| 7 | 105,150,000 | 105,300,000 | 1403 | 1176 | -0.096179647 |                                       |
| 7 | 105,225,000 | 105,375,000 | 1404 | 1025 | -0.784657442 | ENSBTAG00000030204                    |
| 7 | 105,300,000 | 105,450,000 | 1405 | 793  | -0.583981087 | ENSBTAG00000030204,ENSBTAG00000046867 |
| 7 | 105,375,000 | 105,525,000 | 1406 | 844  | 0.17626359   | ENSBTAG00000046867                    |
| 7 | 105,450,000 | 105,600,000 | 1407 | 1120 | -0.327333684 |                                       |
| 7 | 105,525,000 | 105,675,000 | 1408 | 846  | -0.666759296 |                                       |
| 7 | 105,600,000 | 105,750,000 | 1409 | 706  | -2.192791893 |                                       |
| 7 | 105,675,000 | 105,825,000 | 1410 | 799  | -2.10974312  |                                       |
| 7 | 105,750,000 | 105,900,000 | 1411 | 376  | -0.47294327  |                                       |
| 7 | 105,825,000 | 105,975,000 | 1412 | 258  | 0.599371172  |                                       |
| 7 | 105,900,000 | 106,050,000 | 1413 | 758  | 0.217117256  |                                       |
| 7 | 105,975,000 | 106,125,000 | 1414 | 1002 | -0.279221028 |                                       |
| 7 | 106,050,000 | 106,200,000 | 1415 | 1062 | -0.072280816 |                                       |
| 7 | 106,125,000 | 106,275,000 | 1416 | 1087 | 0.40605962   |                                       |
| 7 | 106,200,000 | 106,350,000 | 1417 | 847  | 0.18091193   |                                       |
| 7 | 106,275,000 | 106,425,000 | 1418 | 819  | -1.310969767 |                                       |
| 7 | 106,350,000 | 106,500,000 | 1419 | 828  | -1.406307851 |                                       |
| 7 | 106,425,000 | 106,575,000 | 1420 | 727  | -0.051550392 |                                       |
| 7 | 106,500,000 | 106,650,000 | 1421 | 908  | 0.657711113  |                                       |
| 7 | 106,575,000 | 106,725,000 | 1422 | 1006 | 0.223297259  |                                       |
| 7 | 106,650,000 | 106,800,000 | 1423 | 1303 | -0.42768922  |                                       |
| 7 | 106,725,000 | 106,875,000 | 1424 | 1489 | -0.367501667 |                                       |
| 7 | 106,800,000 | 106,950,000 | 1425 | 1077 | -0.151499555 |                                       |
| 7 | 106,875,000 | 107,025,000 | 1426 | 802  | -0.072255894 |                                       |
| 7 | 106,950,000 | 107,100,000 | 1427 | 710  | -0.7251959   |                                       |
| 7 | 107,025,000 | 107,175,000 | 1428 | 1147 | 0.22340071   |                                       |
| 7 | 107,100,000 | 107,250,000 | 1429 | 1777 | 0.342938314  |                                       |
| 7 | 107,175,000 | 107,325,000 | 1430 | 1647 | -0.403052858 |                                       |
| 7 | 107,250,000 | 107,400,000 | 1431 | 1366 | -0.131503604 |                                       |
| 7 | 107,325,000 | 107,475,000 | 1432 | 1454 | 0.972492884  |                                       |
| 7 | 107,400,000 | 107,550,000 | 1433 | 1427 | 0.740308887  |                                       |
| 7 | 107,475,000 | 107,625,000 | 1434 | 1118 | 0.28767021   |                                       |
| 7 | 107,550,000 | 107,700,000 | 1435 | 1105 | 0.496374644  |                                       |
| 7 | 107,625,000 | 107,775,000 | 1436 | 1429 | 0.367292397  |                                       |
| 7 | 107,700,000 | 107,850,000 | 1437 | 1503 | 0.381878914  |                                       |
| 7 | 107,775,000 | 107,925,000 | 1438 | 1352 | 0.314093801  |                                       |
| 7 | 107,850,000 | 108,000,000 | 1439 | 1280 | 0.336616663  |                                       |
| 7 | 107,925,000 | 108,075,000 | 1440 | 1468 | 0.855110593  |                                       |
| 7 | 108,000,000 | 108,150,000 | 1441 | 1626 | 0.929822557  |                                       |
| 7 | 108,075,000 | 108,225,000 | 1442 | 1457 | 0.291070966  |                                       |
| 7 | 108,150,000 | 108,300,000 | 1443 | 1237 | -0.287265852 |                                       |
| 7 | 108,225,000 | 108,375,000 | 1444 | 1088 | -0.45162046  |                                       |
| 7 | 108,300,000 | 108,450,000 | 1445 | 1184 | -0.63570306  |                                       |
| 7 | 108,375,000 | 108,525,000 | 1446 | 1113 | -0.520224211 |                                       |
| 7 | 108,450,000 | 108,600,000 | 1447 | 974  | 0.14185529   |                                       |
| 7 | 108,525,000 | 108,675,000 | 1448 | 897  | 0.302362872  |                                       |
| 7 | 108,600,000 | 108,750,000 | 1449 | 604  | 0.616528253  |                                       |
| 7 | 108,675,000 | 108,825,000 | 1450 | 613  | -0.51754015  |                                       |
| 7 | 108,750,000 | 108,900,000 | 1451 | 742  | -0.90230384  |                                       |

|   |             |             |      |      |              |                   |
|---|-------------|-------------|------|------|--------------|-------------------|
| 7 | 108,825,000 | 108,975,000 | 1452 | 723  | 0.024962438  |                   |
| 7 | 108,900,000 | 109,050,000 | 1453 | 784  | 0.692956961  | EFNA5             |
| 7 | 108,975,000 | 109,125,000 | 1454 | 806  | 0.54654594   | EFNA5             |
| 7 | 109,050,000 | 109,200,000 | 1455 | 1063 | 0.151977461  | EFNA5             |
| 7 | 109,125,000 | 109,275,000 | 1456 | 1245 | 0.150298033  | EFNA5             |
| 7 | 109,200,000 | 109,350,000 | 1457 | 1121 | 0.753763732  | EFNA5             |
| 7 | 109,275,000 | 109,425,000 | 1458 | 1411 | 0.586625086  |                   |
| 7 | 109,350,000 | 109,500,000 | 1459 | 1798 | 0.205385773  |                   |
| 7 | 109,425,000 | 109,575,000 | 1460 | 1938 | 0.485484744  |                   |
| 7 | 109,500,000 | 109,650,000 | 1461 | 1827 | 0.515343689  |                   |
| 7 | 109,575,000 | 109,725,000 | 1462 | 1806 | 0.4870286    |                   |
| 7 | 109,650,000 | 109,800,000 | 1463 | 1683 | 0.92317775   |                   |
| 7 | 109,725,000 | 109,875,000 | 1464 | 1362 | 1.302282803  |                   |
| 7 | 109,800,000 | 109,950,000 | 1465 | 1386 | 1.342556637  |                   |
| 7 | 109,875,000 | 110,025,000 | 1466 | 1222 | 1.121680176  | FBXL17            |
| 7 | 109,950,000 | 110,100,000 | 1467 | 959  | 0.553395102  | FBXL17            |
| 7 | 110,025,000 | 110,175,000 | 1468 | 1169 | 0.669939635  | FBXL17            |
| 7 | 110,100,000 | 110,250,000 | 1469 | 1461 | 0.86313521   |                   |
| 7 | 110,175,000 | 110,325,000 | 1470 | 1594 | 0.648758215  |                   |
| 7 | 110,250,000 | 110,400,000 | 1471 | 1782 | 0.700644439  |                   |
| 7 | 110,325,000 | 110,475,000 | 1472 | 1716 | 1.023095952  | FER               |
| 7 | 110,400,000 | 110,550,000 | 1473 | 1509 | 1.167042835  | FER               |
| 7 | 110,475,000 | 110,625,000 | 1474 | 1457 | 0.895953176  | FER               |
| 7 | 110,550,000 | 110,700,000 | 1475 | 1321 | -0.573893    | FER               |
| 7 | 110,625,000 | 110,775,000 | 1476 | 1190 | -2.052983731 | FER               |
| 7 | 110,700,000 | 110,850,000 | 1477 | 1290 | -0.435843429 | FER               |
| 7 | 110,775,000 | 110,925,000 | 1478 | 1574 | 0.229782571  | FER               |
| 7 | 110,850,000 | 111,000,000 | 1479 | 2051 | 0.474329912  | FER               |
| 7 | 110,925,000 | 111,075,000 | 1480 | 2054 | 0.896991949  | PJA2              |
| 7 | 111,000,000 | 111,150,000 | 1481 | 1814 | 0.403617434  | PJA2              |
| 7 | 111,075,000 | 111,225,000 | 1482 | 1928 | -0.520736681 | PJA2              |
| 7 | 111,150,000 | 111,300,000 | 1483 | 2161 | -0.367034789 |                   |
| 7 | 111,225,000 | 111,375,000 | 1484 | 1849 | 0.387946179  |                   |
| 7 | 111,300,000 | 111,450,000 | 1485 | 1444 | 0.899905376  | MAN2A1            |
| 7 | 111,375,000 | 111,525,000 | 1486 | 1415 | 0.836185543  | MAN2A1            |
| 7 | 111,450,000 | 111,600,000 | 1487 | 1147 | 0.397044066  | MAN2A1            |
| 7 | 111,525,000 | 111,675,000 | 1488 | 1607 | 0.979122288  | MAN2A1            |
| 7 | 111,600,000 | 111,750,000 | 1489 | 1560 | 0.765789126  | MAN2A1            |
| 7 | 111,675,000 | 111,825,000 | 1490 | 1199 | 0.450192762  |                   |
| 7 | 111,750,000 | 111,900,000 | 1491 | 1347 | 0.933405929  |                   |
| 7 | 111,825,000 | 111,975,000 | 1492 | 1268 | 0.900419641  |                   |
| 7 | 111,900,000 | 112,050,000 | 1493 | 1349 | 0.664673485  |                   |
| 7 | 111,975,000 | 112,125,000 | 1494 | 1632 | 0.497039825  |                   |
| 7 | 112,050,000 | 112,200,000 | 1495 | 1736 | 0.170567454  | TMEM232           |
| 7 | 112,125,000 | 112,275,000 | 1496 | 1291 | -0.143092264 | TMEM232           |
| 7 | 112,200,000 | 112,350,000 | 1497 | 957  | 0.350769155  | SLC25A46, TMEM232 |
| 7 | 112,275,000 | 112,425,000 | 1498 | 629  | 0.510615441  | SLC25A46, TMEM232 |
| 7 | 112,350,000 | 112,500,000 | 1499 | 376  | 0.506107051  | SLC25A46          |
| 7 | 112,425,000 | 112,575,000 | 1500 | 448  | 0.408974776  |                   |
| 7 | 112,500,000 | 112,638,659 | 1501 | 395  | 0.417936835  |                   |
| 8 | 0           | 150,000     | 1    | 253  | 0.365495384  | HIATL1            |
| 8 | 75,000      | 225,000     | 2    | 318  | 0.04236309   | HIATL1            |
| 8 | 150,000     | 300,000     | 3    | 359  | -0.100154934 | HIATL1            |

|   |           |           |    |      |              |                                  |
|---|-----------|-----------|----|------|--------------|----------------------------------|
| 8 | 225,000   | 375,000   | 4  | 456  | 0.322315956  | ANXA10,HIATL1                    |
| 8 | 300,000   | 450,000   | 5  | 724  | 0.665868618  | ANXA10                           |
| 8 | 375,000   | 525,000   | 6  | 790  | 0.975565536  | ANXA10                           |
| 8 | 450,000   | 600,000   | 7  | 897  | 0.891023217  | ANXA10,PALLD                     |
| 8 | 525,000   | 675,000   | 8  | 1021 | 0.930622803  | ANXA10,PALLD                     |
| 8 | 600,000   | 750,000   | 9  | 923  | 0.923453996  | PALLD                            |
| 8 | 675,000   | 825,000   | 10 | 869  | 0.2630803    | PALLD                            |
| 8 | 750,000   | 900,000   | 11 | 784  | 0.071562545  | PALLD                            |
| 8 | 825,000   | 975,000   | 12 | 662  | 0.434904187  | CBR4,PALLD                       |
| 8 | 900,000   | 1,050,000 | 13 | 721  | 0.426265539  | CBR4,PALLD,SH3RF1                |
| 8 | 975,000   | 1,125,000 | 14 | 758  | 0.368402494  | SH3RF1                           |
| 8 | 1,050,000 | 1,200,000 | 15 | 913  | 0.655651624  | SH3RF1                           |
| 8 | 1,125,000 | 1,275,000 | 16 | 1285 | 0.787045984  | NEK1                             |
| 8 | 1,200,000 | 1,350,000 | 17 | 1345 | 0.21005471   | NEK1                             |
| 8 | 1,275,000 | 1,425,000 | 18 | 1098 | -0.697629664 | NEK1                             |
| 8 | 1,350,000 | 1,500,000 | 19 | 714  | 0.275939851  | CLCN3,NEK1                       |
| 8 | 1,425,000 | 1,575,000 | 20 | 573  | 0.094720092  | C4orf27,CLCN3,ENSBTAG00000035293 |
| 8 | 1,500,000 | 1,650,000 | 21 | 854  | 0.200669465  | C4orf27,CLCN3,ENSBTAG00000035293 |
| 8 | 1,575,000 | 1,725,000 | 22 | 912  | 0.347502354  | MFAP3L                           |
| 8 | 1,650,000 | 1,800,000 | 23 | 988  | 0.668254643  | AADAT,MFAP3L                     |
| 8 | 1,725,000 | 1,875,000 | 24 | 1165 | 0.508225402  | AADAT                            |
| 8 | 1,800,000 | 1,950,000 | 25 | 937  | -0.910912288 | AADAT                            |
| 8 | 1,875,000 | 2,025,000 | 26 | 868  | -0.553833065 |                                  |
| 8 | 1,950,000 | 2,100,000 | 27 | 964  | 0.609829339  |                                  |
| 8 | 2,025,000 | 2,175,000 | 28 | 841  | 0.420932746  |                                  |
| 8 | 2,100,000 | 2,250,000 | 29 | 1022 | -0.354014271 |                                  |
| 8 | 2,175,000 | 2,325,000 | 30 | 1400 | -0.376271676 |                                  |
| 8 | 2,250,000 | 2,400,000 | 31 | 1167 | -0.908192735 |                                  |
| 8 | 2,325,000 | 2,475,000 | 32 | 815  | -0.553549584 |                                  |
| 8 | 2,400,000 | 2,550,000 | 33 | 968  | 1.02122562   |                                  |
| 8 | 2,475,000 | 2,625,000 | 34 | 921  | 0.804539632  |                                  |
| 8 | 2,550,000 | 2,700,000 | 35 | 869  | 0.675359159  |                                  |
| 8 | 2,625,000 | 2,775,000 | 36 | 921  | 0.701002079  |                                  |
| 8 | 2,700,000 | 2,850,000 | 37 | 571  | 0.467149921  |                                  |
| 8 | 2,775,000 | 2,925,000 | 38 | 773  | 1.057498758  |                                  |
| 8 | 2,850,000 | 3,000,000 | 39 | 1096 | 1.360401509  |                                  |
| 8 | 2,925,000 | 3,075,000 | 40 | 879  | -0.148097131 |                                  |
| 8 | 3,000,000 | 3,150,000 | 41 | 1020 | -0.833154395 |                                  |
| 8 | 3,075,000 | 3,225,000 | 42 | 1333 | -0.943386449 |                                  |
| 8 | 3,150,000 | 3,300,000 | 43 | 1300 | -3.11882784  |                                  |
| 8 | 3,225,000 | 3,375,000 | 44 | 1256 | -2.233908069 |                                  |
| 8 | 3,300,000 | 3,450,000 | 45 | 1222 | -0.215163633 |                                  |
| 8 | 3,375,000 | 3,525,000 | 46 | 1468 | -1.68645757  |                                  |
| 8 | 3,450,000 | 3,600,000 | 47 | 1622 | -0.996824793 |                                  |
| 8 | 3,525,000 | 3,675,000 | 48 | 1451 | 0.585977746  |                                  |
| 8 | 3,600,000 | 3,750,000 | 49 | 1122 | 0.430486408  |                                  |
| 8 | 3,675,000 | 3,825,000 | 50 | 1073 | -0.181722391 | GALNTL6                          |
| 8 | 3,750,000 | 3,900,000 | 51 | 1179 | -0.334495078 | GALNTL6                          |
| 8 | 3,825,000 | 3,975,000 | 52 | 814  | -0.142926743 | GALNTL6                          |
| 8 | 3,900,000 | 4,050,000 | 53 | 627  | 0.610606826  | GALNTL6                          |
| 8 | 3,975,000 | 4,125,000 | 54 | 648  | 0.484789184  | GALNTL6                          |
| 8 | 4,050,000 | 4,200,000 | 55 | 768  | 0.715278961  | GALNTL6                          |
| 8 | 4,125,000 | 4,275,000 | 56 | 979  | 0.222542788  | GALNTL6                          |

|   |           |           |     |      |              |                                                                             |
|---|-----------|-----------|-----|------|--------------|-----------------------------------------------------------------------------|
| 8 | 4,200,000 | 4,350,000 | 57  | 953  | -0.160232917 | GALNTL6                                                                     |
| 8 | 4,275,000 | 4,425,000 | 58  | 936  | -0.12324588  | GALNTL6                                                                     |
| 8 | 4,350,000 | 4,500,000 | 59  | 1055 | 0.199497707  | GALNTL6                                                                     |
| 8 | 4,425,000 | 4,575,000 | 60  | 969  | 0.491331014  | GALNTL6                                                                     |
| 8 | 4,500,000 | 4,650,000 | 61  | 751  | 0.033826182  | GALNTL6                                                                     |
| 8 | 4,575,000 | 4,725,000 | 62  | 1192 | -0.030698478 | GALNTL6                                                                     |
| 8 | 4,650,000 | 4,800,000 | 63  | 1273 | -0.233318224 | GALNTL6                                                                     |
| 8 | 4,725,000 | 4,875,000 | 64  | 591  | -0.894133978 | GALNTL6                                                                     |
| 8 | 4,800,000 | 4,950,000 | 65  | 414  | -0.829090227 | GALNTL6                                                                     |
| 8 | 4,875,000 | 5,025,000 | 66  | 635  | -0.308419821 | GALNTL6                                                                     |
| 8 | 4,950,000 | 5,100,000 | 67  | 813  | -0.900591481 | GALNTL6                                                                     |
| 8 | 5,025,000 | 5,175,000 | 68  | 868  | -4.199663923 | GALNTL6                                                                     |
| 8 | 5,100,000 | 5,250,000 | 69  | 783  | -3.715855246 | GALNTL6                                                                     |
| 8 | 5,175,000 | 5,325,000 | 70  | 880  | 0.690651003  | GALNTL6                                                                     |
| 8 | 5,250,000 | 5,400,000 | 71  | 1298 | 1.021641165  | GALNTL6                                                                     |
| 8 | 5,325,000 | 5,475,000 | 72  | 1343 | 0.95716934   | GALNTL6                                                                     |
| 8 | 5,400,000 | 5,550,000 | 73  | 1369 | 0.933792386  | GALNT7                                                                      |
| 8 | 5,475,000 | 5,625,000 | 74  | 1259 | 0.750315853  | GALNT7,HMGB2,SAP30                                                          |
| 8 | 5,550,000 | 5,700,000 | 75  | 999  | 0.845895797  | GALNT7,HMGB2,SAP30,SCRG1                                                    |
| 8 | 5,625,000 | 5,775,000 | 76  | 879  | 0.850844807  | HAND2,SCRG1                                                                 |
| 8 | 5,700,000 | 5,850,000 | 77  | 736  | 0.765903869  | HAND2                                                                       |
| 8 | 5,775,000 | 5,925,000 | 78  | 770  | 0.736978867  |                                                                             |
| 8 | 5,850,000 | 6,000,000 | 79  | 1124 | 0.097919559  |                                                                             |
| 8 | 5,925,000 | 6,075,000 | 80  | 1079 | -0.011627757 |                                                                             |
| 8 | 6,000,000 | 6,150,000 | 81  | 668  | 0.354336905  |                                                                             |
| 8 | 6,075,000 | 6,225,000 | 82  | 639  | 0.543808152  |                                                                             |
| 8 | 6,150,000 | 6,300,000 | 83  | 688  | 0.574241136  |                                                                             |
| 8 | 6,225,000 | 6,375,000 | 84  | 594  | 0.413372883  |                                                                             |
| 8 | 6,300,000 | 6,450,000 | 85  | 660  | -0.658382722 | CEP44,FBXO8                                                                 |
| 8 | 6,375,000 | 6,525,000 | 86  | 654  | -1.094622024 | CEP44,FBXO8                                                                 |
| 8 | 6,450,000 | 6,600,000 | 87  | 776  | -0.018924374 | CEP44                                                                       |
| 8 | 6,525,000 | 6,675,000 | 88  | 1096 | 0.942697962  | HPGD                                                                        |
| 8 | 6,600,000 | 6,750,000 | 89  | 1209 | 1.140873196  | HPGD                                                                        |
| 8 | 6,675,000 | 6,825,000 | 90  | 1046 | 1.1779897    | GLRA3,HPGD                                                                  |
| 8 | 6,750,000 | 6,900,000 | 91  | 892  | 1.303710586  | GLRA3                                                                       |
| 8 | 6,825,000 | 6,975,000 | 92  | 946  | 1.261331482  | GLRA3                                                                       |
| 8 | 6,900,000 | 7,050,000 | 93  | 995  | 0.851047746  | GLRA3                                                                       |
| 8 | 6,975,000 | 7,125,000 | 94  | 794  | 0.444926934  | ENSBTAG00000035768                                                          |
| 8 | 7,050,000 | 7,200,000 | 95  | 523  | 0.467008321  | ENSBTAG00000008678,ENSBTAG00000025954,ENSBTAG00000035768,ENSBTAG00000039873 |
| 8 | 7,125,000 | 7,275,000 | 96  | 692  | -0.028846685 | ENSBTAG00000008678,ENSBTAG00000025954,ENSBTAG00000039873                    |
| 8 | 7,200,000 | 7,350,000 | 97  | 1121 | -1.27335538  |                                                                             |
| 8 | 7,275,000 | 7,425,000 | 98  | 1298 | -0.755015016 | CTSB                                                                        |
| 8 | 7,350,000 | 7,500,000 | 99  | 1223 | 0.809723686  | CTSB,FDFT1,GATA4,NEIL2                                                      |
| 8 | 7,425,000 | 7,575,000 | 100 | 988  | 0.969702754  | FDFT1,GATA4,NEIL2                                                           |
| 8 | 7,500,000 | 7,650,000 | 101 | 968  | 0.921983482  | GATA4                                                                       |
| 8 | 7,575,000 | 7,725,000 | 102 | 1245 | 1.250905213  | BLK                                                                         |
| 8 | 7,650,000 | 7,800,000 | 103 | 1203 | 1.17719119   | BLK,FAM167A,TDH                                                             |
| 8 | 7,725,000 | 7,875,000 | 104 | 1062 | 0.137182167  | FAM167A,MTMR9,TDH                                                           |
| 8 | 7,800,000 | 7,950,000 | 105 | 1234 | 0.405095138  | MTMR9,TDH                                                                   |
| 8 | 7,875,000 | 8,025,000 | 106 | 1173 | 1.171635906  | MTMR9,XKR6                                                                  |
| 8 | 7,950,000 | 8,100,000 | 107 | 744  | 1.469252843  | XKR6                                                                        |



|   |            |            |     |      |              |                                                   |
|---|------------|------------|-----|------|--------------|---------------------------------------------------|
| 8 | 8,025,000  | 8,175,000  | 108 | 805  | 0.732881404  |                                                   |
| 8 | 8,100,000  | 8,250,000  | 109 | 781  | 0.539415813  |                                                   |
| 8 | 8,175,000  | 8,325,000  | 110 | 775  | 0.465203956  | FLJ20565,ENSBTAG00000048007                       |
| 8 | 8,250,000  | 8,400,000  | 111 | 854  | 0.455325637  | FLJ20565,ENSBTAG00000048007                       |
| 8 | 8,325,000  | 8,475,000  | 112 | 785  | 0.695918149  | C8orf74,FLJ20565,SOX7                             |
| 8 | 8,400,000  | 8,550,000  | 113 | 980  | 0.236192562  | C8orf74,RP1L1,SOX7                                |
| 8 | 8,475,000  | 8,625,000  | 114 | 1033 | 0.485522465  | PRSS55,RP1L1,ENSBTAG00000038291,ENSBTAG0000040038 |
| 8 | 8,550,000  | 8,700,000  | 115 | 727  | 0.779140138  | MSRA,PRSS55,ENSBTAG00000038291,ENSBTAG0000040038  |
| 8 | 8,625,000  | 8,775,000  | 116 | 520  | 0.761261868  | MSRA,ENSBTAG00000040038                           |
| 8 | 8,700,000  | 8,850,000  | 117 | 457  | 0.952579787  | MSRA                                              |
| 8 | 8,775,000  | 8,925,000  | 118 | 734  | 0.486751343  | MSRA                                              |
| 8 | 8,850,000  | 9,000,000  | 119 | 948  | 0.428543575  | MSRA                                              |
| 8 | 8,925,000  | 9,075,000  | 120 | 817  | 0.502951286  | MSRA                                              |
| 8 | 9,000,000  | 9,150,000  | 121 | 612  | 0.548397069  | MSRA                                              |
| 8 | 9,075,000  | 9,225,000  | 122 | 554  | 0.28953464   |                                                   |
| 8 | 9,150,000  | 9,300,000  | 123 | 943  | -1.27950738  | KIF13B                                            |
| 8 | 9,225,000  | 9,375,000  | 124 | 1043 | -0.805745111 | KIF13B                                            |
| 8 | 9,300,000  | 9,450,000  | 125 | 1071 | 1.087975277  | KIF13B                                            |
| 8 | 9,375,000  | 9,525,000  | 126 | 1065 | 0.754605618  | HMBOX1,KIF13B                                     |
| 8 | 9,450,000  | 9,600,000  | 127 | 883  | 0.481941836  | HMBOX1,KIF13B                                     |
| 8 | 9,525,000  | 9,675,000  | 128 | 971  | -1.104685078 | HMBOX1                                            |
| 8 | 9,600,000  | 9,750,000  | 129 | 882  | -1.62104127  | HMBOX1,INTS9                                      |
| 8 | 9,675,000  | 9,825,000  | 130 | 918  | -0.643060611 | HMBOX1,INTS9                                      |
| 8 | 9,750,000  | 9,900,000  | 131 | 831  | -1.087420253 | EXTL3,INTS9                                       |
| 8 | 9,825,000  | 9,975,000  | 132 | 406  | -1.964556872 | EXTL3                                             |
| 8 | 9,900,000  | 10,050,000 | 133 | 485  | -0.87448981  | FZD3                                              |
| 8 | 9,975,000  | 10,125,000 | 134 | 508  | -0.45304645  | FZD3,ENSBTAG00000034626                           |
| 8 | 10,050,000 | 10,200,000 | 135 | 419  | -0.643535788 | FZD3,ZNF395,ENSBTAG00000034626                    |
| 8 | 10,125,000 | 10,275,000 | 136 | 589  | 0.577156183  | PNOC,ZNF395,ENSBTAG00000034626                    |
| 8 | 10,200,000 | 10,350,000 | 137 | 790  | 1.348225754  | PNOC,ZNF395                                       |
| 8 | 10,275,000 | 10,425,000 | 138 | 734  | 1.360030528  | PNOC                                              |
| 8 | 10,350,000 | 10,500,000 | 139 | 832  | 0.989485673  | ELP3                                              |
| 8 | 10,425,000 | 10,575,000 | 140 | 1378 | 0.341243867  | ELP3                                              |
| 8 | 10,500,000 | 10,650,000 | 141 | 1668 | -0.023646528 | ELP3,NUGGC                                        |
| 8 | 10,575,000 | 10,725,000 | 142 | 1490 | -0.5226175   | ELP3,NUGGC,SCARA5                                 |
| 8 | 10,650,000 | 10,800,000 | 143 | 1201 | -1.059661645 | SCARA5                                            |
| 8 | 10,725,000 | 10,875,000 | 144 | 890  | -0.814078406 | ESCO2,PBK,SCARA5                                  |
| 8 | 10,800,000 | 10,950,000 | 145 | 802  | -0.022198299 | CCDC25,ESCO2,PBK                                  |
| 8 | 10,875,000 | 11,025,000 | 146 | 731  | 0.386137446  | CCDC25,ESCO2,SCARA3                               |
| 8 | 10,950,000 | 11,100,000 | 147 | 1058 | 0.534766307  | CLU,SCARA3                                        |
| 8 | 11,025,000 | 11,175,000 | 148 | 1687 | 1.009608955  | CLU                                               |
| 8 | 11,100,000 | 11,250,000 | 149 | 1964 | 1.098734699  | TMEM215                                           |
| 8 | 11,175,000 | 11,325,000 | 150 | 2171 | 6.76E-05     | TMEM215                                           |
| 8 | 11,250,000 | 11,400,000 | 151 | 1935 | -0.058958982 | NDUFB6,TOPORS                                     |
| 8 | 11,325,000 | 11,475,000 | 152 | 1610 | 0.428170343  | DDX58,NDUFB6,TOPORS                               |
| 8 | 11,400,000 | 11,550,000 | 153 | 1702 | 0.227571316  | ACO1,DDX58,TOPORS                                 |
| 8 | 11,475,000 | 11,625,000 | 154 | 1769 | 0.180055681  | ACO1                                              |
| 8 | 11,550,000 | 11,700,000 | 155 | 1646 | 0.520906759  |                                                   |
| 8 | 11,625,000 | 11,775,000 | 156 | 1690 | 0.697158639  |                                                   |
| 8 | 11,700,000 | 11,850,000 | 157 | 1593 | 0.497238527  |                                                   |
| 8 | 11,775,000 | 11,925,000 | 158 | 1731 | 0.396155102  |                                                   |

|   |            |            |     |      |              |
|---|------------|------------|-----|------|--------------|
| 8 | 11,850,000 | 12,000,000 | 159 | 1372 | 0.654908116  |
| 8 | 11,925,000 | 12,075,000 | 160 | 1148 | 0.549344578  |
| 8 | 12,000,000 | 12,150,000 | 161 | 1430 | -0.056891399 |
| 8 | 12,075,000 | 12,225,000 | 162 | 1350 | -0.317688395 |
| 8 | 12,150,000 | 12,300,000 | 163 | 1277 | 0.141154626  |
| 8 | 12,225,000 | 12,375,000 | 164 | 766  | 0.46339294   |
| 8 | 12,300,000 | 12,450,000 | 165 | 624  | -0.6579894   |
| 8 | 12,375,000 | 12,525,000 | 166 | 716  | -0.718633773 |
| 8 | 12,450,000 | 12,600,000 | 167 | 597  | 0.10716939   |
| 8 | 12,525,000 | 12,675,000 | 168 | 842  | 0.129979226  |
| 8 | 12,600,000 | 12,750,000 | 169 | 1106 | 0.069456387  |
| 8 | 12,675,000 | 12,825,000 | 170 | 1137 | 0.276967211  |
| 8 | 12,750,000 | 12,900,000 | 171 | 918  | 0.508148775  |
| 8 | 12,825,000 | 12,975,000 | 172 | 743  | -3.286918421 |
| 8 | 12,900,000 | 13,050,000 | 173 | 1016 | -4.024184945 |
| 8 | 12,975,000 | 13,125,000 | 174 | 1186 | -1.443788388 |
| 8 | 13,050,000 | 13,200,000 | 175 | 1283 | 0.15857314   |
| 8 | 13,125,000 | 13,275,000 | 176 | 1453 | 0.279081008  |
| 8 | 13,200,000 | 13,350,000 | 177 | 1675 | -0.151288746 |
| 8 | 13,275,000 | 13,425,000 | 178 | 1069 | 0.302890781  |
| 8 | 13,350,000 | 13,500,000 | 179 | 939  | 0.878577327  |
| 8 | 13,425,000 | 13,575,000 | 180 | 1045 | 0.579538382  |
| 8 | 13,500,000 | 13,650,000 | 181 | 513  | -0.279954881 |
| 8 | 13,575,000 | 13,725,000 | 182 | 738  | 0.094719119  |
| 8 | 13,650,000 | 13,800,000 | 183 | 1044 | 0.008227615  |
| 8 | 13,725,000 | 13,875,000 | 184 | 1322 | -0.489607806 |
| 8 | 13,800,000 | 13,950,000 | 185 | 1567 | -0.604923456 |
| 8 | 13,875,000 | 14,025,000 | 186 | 1542 | -0.192870735 |
| 8 | 13,950,000 | 14,100,000 | 187 | 1288 | 0.202888231  |
| 8 | 14,025,000 | 14,175,000 | 188 | 1098 | 0.111725186  |
| 8 | 14,100,000 | 14,250,000 | 189 | 973  | -0.162797531 |
| 8 | 14,175,000 | 14,325,000 | 190 | 956  | -0.337895419 |
| 8 | 14,250,000 | 14,400,000 | 191 | 760  | -0.594864514 |
| 8 | 14,325,000 | 14,475,000 | 192 | 704  | -1.782247234 |
| 8 | 14,400,000 | 14,550,000 | 193 | 736  | -1.879145895 |
| 8 | 14,475,000 | 14,625,000 | 194 | 572  | -0.284681309 |
| 8 | 14,550,000 | 14,700,000 | 195 | 1075 | 0.743491471  |
| 8 | 14,625,000 | 14,775,000 | 196 | 1225 | 0.864216823  |
| 8 | 14,700,000 | 14,850,000 | 197 | 780  | 0.503944303  |
| 8 | 14,775,000 | 14,925,000 | 198 | 719  | -1.210477208 |
| 8 | 14,850,000 | 15,000,000 | 199 | 723  | -2.251865885 |
| 8 | 14,925,000 | 15,075,000 | 200 | 893  | -1.186934523 |
| 8 | 15,000,000 | 15,150,000 | 201 | 1084 | -2.352921486 |
| 8 | 15,075,000 | 15,225,000 | 202 | 893  | -4.152069586 |
| 8 | 15,150,000 | 15,300,000 | 203 | 782  | -2.985526832 |
| 8 | 15,225,000 | 15,375,000 | 204 | 1001 | 0.07705836   |
| 8 | 15,300,000 | 15,450,000 | 205 | 1347 | 0.461962113  |
| 8 | 15,375,000 | 15,525,000 | 206 | 1068 | -0.37846569  |
| 8 | 15,450,000 | 15,600,000 | 207 | 515  | -1.729090966 |
| 8 | 15,525,000 | 15,675,000 | 208 | 621  | -0.342850787 |
| 8 | 15,600,000 | 15,750,000 | 209 | 1077 | 0.507069758  |
| 8 | 15,675,000 | 15,825,000 | 210 | 1183 | -0.825474504 |
| 8 | 15,750,000 | 15,900,000 | 211 | 1088 | -0.78407169  |

|   |            |            |     |      |              |                                   |
|---|------------|------------|-----|------|--------------|-----------------------------------|
| 8 | 15,825,000 | 15,975,000 | 212 | 832  | 1.202079955  |                                   |
| 8 | 15,900,000 | 16,050,000 | 213 | 728  | 0.832560943  |                                   |
| 8 | 15,975,000 | 16,125,000 | 214 | 931  | 0.400630395  |                                   |
| 8 | 16,050,000 | 16,200,000 | 215 | 989  | -0.070872515 |                                   |
| 8 | 16,125,000 | 16,275,000 | 216 | 937  | 0.25704689   | LINGO2                            |
| 8 | 16,200,000 | 16,350,000 | 217 | 818  | 0.761797944  | LINGO2                            |
| 8 | 16,275,000 | 16,425,000 | 218 | 755  | -0.21199002  |                                   |
| 8 | 16,350,000 | 16,500,000 | 219 | 869  | -1.092636629 |                                   |
| 8 | 16,425,000 | 16,575,000 | 220 | 804  | -0.229081363 |                                   |
| 8 | 16,500,000 | 16,650,000 | 221 | 632  | -0.089357568 |                                   |
| 8 | 16,575,000 | 16,725,000 | 222 | 622  | -0.255128184 | C9orf72                           |
| 8 | 16,650,000 | 16,800,000 | 223 | 645  | 0.698109024  | C9orf72,IFNK,MOB3B                |
| 8 | 16,725,000 | 16,875,000 | 224 | 545  | 0.680564247  | IFNK,MOB3B                        |
| 8 | 16,800,000 | 16,950,000 | 225 | 718  | -0.217814495 | MOB3B                             |
| 8 | 16,875,000 | 17,025,000 | 226 | 1023 | -0.787401159 | EQTN,MOB3B,ENSBTAG00000020151     |
| 8 | 16,950,000 | 17,100,000 | 227 | 920  | -0.358695844 | EQTN,MOB3B,TEK,ENSBTAG00000020151 |
| 8 | 17,025,000 | 17,175,000 | 228 | 743  | 0.52607949   | TEK,ENSBTAG00000020151            |
| 8 | 17,100,000 | 17,250,000 | 229 | 517  | 0.563664307  | IFT74,LRRRC19,TEK                 |
| 8 | 17,175,000 | 17,325,000 | 230 | 367  | 0.72343773   | CAAP1,IFT74,LRRRC19,PLAA          |
| 8 | 17,250,000 | 17,400,000 | 231 | 394  | 0.637718683  | CAAP1,IFT74,PLAA                  |
| 8 | 17,325,000 | 17,475,000 | 232 | 514  | 0.742212049  | CAAP1                             |
| 8 | 17,400,000 | 17,550,000 | 233 | 644  | 0.699317966  |                                   |
| 8 | 17,475,000 | 17,625,000 | 234 | 705  | 0.512920884  |                                   |
| 8 | 17,550,000 | 17,700,000 | 235 | 1085 | -0.209680397 |                                   |
| 8 | 17,625,000 | 17,775,000 | 236 | 990  | 0.011694409  |                                   |
| 8 | 17,700,000 | 17,850,000 | 237 | 636  | -0.312923246 |                                   |
| 8 | 17,775,000 | 17,925,000 | 238 | 817  | -1.365180569 |                                   |
| 8 | 17,850,000 | 18,000,000 | 239 | 696  | -1.024130223 |                                   |
| 8 | 17,925,000 | 18,075,000 | 240 | 609  | 0.26876154   |                                   |
| 8 | 18,000,000 | 18,150,000 | 241 | 849  | -0.122155592 |                                   |
| 8 | 18,075,000 | 18,225,000 | 242 | 923  | -0.806548722 |                                   |
| 8 | 18,150,000 | 18,300,000 | 243 | 1282 | 0.100898182  |                                   |
| 8 | 18,225,000 | 18,375,000 | 244 | 1468 | 0.589553182  |                                   |
| 8 | 18,300,000 | 18,450,000 | 245 | 1487 | 0.148933001  |                                   |
| 8 | 18,375,000 | 18,525,000 | 246 | 1278 | 0.110806405  |                                   |
| 8 | 18,450,000 | 18,600,000 | 247 | 713  | -0.583260979 | TUSC1                             |
| 8 | 18,525,000 | 18,675,000 | 248 | 622  | -0.687070729 | TUSC1                             |
| 8 | 18,600,000 | 18,750,000 | 249 | 523  | 0.500591102  |                                   |
| 8 | 18,675,000 | 18,825,000 | 250 | 662  | 0.547923703  |                                   |
| 8 | 18,750,000 | 18,900,000 | 251 | 756  | 0.574962205  |                                   |
| 8 | 18,825,000 | 18,975,000 | 252 | 805  | 1.28075871   |                                   |
| 8 | 18,900,000 | 19,050,000 | 253 | 942  | 1.128624901  |                                   |
| 8 | 18,975,000 | 19,125,000 | 254 | 847  | 0.585230249  |                                   |
| 8 | 19,050,000 | 19,200,000 | 255 | 910  | 0.894062526  |                                   |
| 8 | 19,125,000 | 19,275,000 | 256 | 692  | 0.775033965  |                                   |
| 8 | 19,200,000 | 19,350,000 | 257 | 300  | -0.637874166 |                                   |
| 8 | 19,275,000 | 19,425,000 | 258 | 145  | -1.411875244 |                                   |
| 8 | 19,350,000 | 19,500,000 | 259 | 314  | 0.870003473  |                                   |
| 8 | 19,425,000 | 19,575,000 | 260 | 572  | 0.528633387  |                                   |
| 8 | 19,500,000 | 19,650,000 | 261 | 864  | -1.752096045 | IZUMO3                            |
| 8 | 19,575,000 | 19,725,000 | 262 | 861  | -1.785755814 | IZUMO3                            |
| 8 | 19,650,000 | 19,800,000 | 263 | 515  | 0.194212635  |                                   |
| 8 | 19,725,000 | 19,875,000 | 264 | 822  | 0.255767146  |                                   |

|   |            |            |     |      |              |                                                                                                                                                  |
|---|------------|------------|-----|------|--------------|--------------------------------------------------------------------------------------------------------------------------------------------------|
| 8 | 19,800,000 | 19,950,000 | 265 | 1034 | -0.606742225 |                                                                                                                                                  |
| 8 | 19,875,000 | 20,025,000 | 266 | 786  | -2.897852258 |                                                                                                                                                  |
| 8 | 19,950,000 | 20,100,000 | 267 | 551  | -4.351942723 |                                                                                                                                                  |
| 8 | 20,025,000 | 20,175,000 | 268 | 453  | -1.368897129 |                                                                                                                                                  |
| 8 | 20,100,000 | 20,250,000 | 269 | 645  | 0.150972771  |                                                                                                                                                  |
| 8 | 20,175,000 | 20,325,000 | 270 | 741  | 0.537124839  |                                                                                                                                                  |
| 8 | 20,250,000 | 20,400,000 | 271 | 597  | 0.598139125  | ELAVL2                                                                                                                                           |
| 8 | 20,325,000 | 20,475,000 | 272 | 631  | 0.840443382  | ELAVL2                                                                                                                                           |
| 8 | 20,400,000 | 20,550,000 | 273 | 825  | 0.439118152  | ELAVL2                                                                                                                                           |
| 8 | 20,475,000 | 20,625,000 | 274 | 787  | 0.275378467  |                                                                                                                                                  |
| 8 | 20,550,000 | 20,700,000 | 275 | 738  | 0.425888015  |                                                                                                                                                  |
| 8 | 20,625,000 | 20,775,000 | 276 | 884  | 0.238321369  |                                                                                                                                                  |
| 8 | 20,700,000 | 20,850,000 | 277 | 932  | 0.647215674  |                                                                                                                                                  |
| 8 | 20,775,000 | 20,925,000 | 278 | 766  | 0.688330539  |                                                                                                                                                  |
| 8 | 20,850,000 | 21,000,000 | 279 | 610  | -0.245458004 |                                                                                                                                                  |
| 8 | 20,925,000 | 21,075,000 | 280 | 925  | -0.180888713 |                                                                                                                                                  |
| 8 | 21,000,000 | 21,150,000 | 281 | 989  | -0.001841818 |                                                                                                                                                  |
| 8 | 21,075,000 | 21,225,000 | 282 | 845  | -0.046325427 |                                                                                                                                                  |
| 8 | 21,150,000 | 21,300,000 | 283 | 809  | -0.637070035 |                                                                                                                                                  |
| 8 | 21,225,000 | 21,375,000 | 284 | 758  | -1.403036395 |                                                                                                                                                  |
| 8 | 21,300,000 | 21,450,000 | 285 | 721  | -1.852362198 |                                                                                                                                                  |
| 8 | 21,375,000 | 21,525,000 | 286 | 489  | -1.304848106 |                                                                                                                                                  |
| 8 | 21,450,000 | 21,600,000 | 287 | 499  | -0.508785265 |                                                                                                                                                  |
| 8 | 21,525,000 | 21,675,000 | 288 | 677  | -0.167830751 |                                                                                                                                                  |
| 8 | 21,600,000 | 21,750,000 | 289 | 720  | 0.548993499  |                                                                                                                                                  |
| 8 | 21,675,000 | 21,825,000 | 290 | 702  | 0.00124972   | DMRTA1                                                                                                                                           |
| 8 | 21,750,000 | 21,900,000 | 291 | 752  | 0.520848174  | DMRTA1                                                                                                                                           |
| 8 | 21,825,000 | 21,975,000 | 292 | 595  | 0.79337147   |                                                                                                                                                  |
| 8 | 21,900,000 | 22,050,000 | 293 | 319  | -0.507486995 |                                                                                                                                                  |
| 8 | 21,975,000 | 22,125,000 | 294 | 234  | -0.668030866 | CDKN2B                                                                                                                                           |
| 8 | 22,050,000 | 22,200,000 | 295 | 297  | -0.781005288 | CDKN2A,CDKN2B                                                                                                                                    |
| 8 | 22,125,000 | 22,275,000 | 296 | 406  | -1.34213103  | CDKN2A,ENSBTAG00000025929                                                                                                                        |
| 8 | 22,200,000 | 22,350,000 | 297 | 624  | -1.046025853 | ENSBTAG00000025929                                                                                                                               |
| 8 | 22,275,000 | 22,425,000 | 298 | 748  | -0.967331399 |                                                                                                                                                  |
| 8 | 22,350,000 | 22,500,000 | 299 | 645  | -0.596093276 |                                                                                                                                                  |
| 8 | 22,425,000 | 22,575,000 | 300 | 539  | 0.107262056  | IFNE                                                                                                                                             |
| 8 | 22,500,000 | 22,650,000 | 301 | 827  | 0.124044011  | IFNE,IFNT                                                                                                                                        |
| 8 | 22,575,000 | 22,725,000 | 302 | 987  | 0.126613591  | IFNT,INFAF,ENSBTAG00000025928,ENSBTAG00000047748,ENSBTAG00000048063                                                                              |
| 8 | 22,650,000 | 22,800,000 | 303 | 922  | -0.168035841 | IFNW1,INFAF,ENSBTAG00000025928,ENSBTAG00000046119,ENSBTAG00000046427,ENSBTAG00000047195,ENSBTAG00000047748,ENSBTAG00000047782,ENSBTAG00000048063 |
| 8 | 22,725,000 | 22,875,000 | 304 | 891  | -0.099377792 | IFN-TAU,IFNAG,IFNW1,ENSBTAG00000046119,ENSBTAG00000046427,ENSBTAG00000047195,ENSBTAG00000047745,ENSBTAG00000047782                               |
| 8 | 22,800,000 | 22,950,000 | 305 | 641  | 0.178589145  | IFN-TAU,IFNAG,KLHL9,ENSBTAG00000034326,ENSBTAG00000046598,ENSBTAG00000047745                                                                     |

|   |            |            |     |      |              |                                                                                                                                                                                           |
|---|------------|------------|-----|------|--------------|-------------------------------------------------------------------------------------------------------------------------------------------------------------------------------------------|
| 8 | 22,875,000 | 23,025,000 | 306 | 856  | -2.641637934 | IFNAG, KLHL9, ENSBTAG00000034326, ENSBTAG00000045552, ENSBTAG00000046443, ENSBTAG00000046598, ENSBTAG00000046629, ENSBTAG00000047134, ENSBTAG00000047413                                  |
| 8 | 22,950,000 | 23,100,000 | 307 | 1283 | -3.259379117 | IFNAH, ENSBTAG00000039963, ENSBTAG00000045552, ENSBTAG00000045845, ENSBTAG00000046097, ENSBTAG00000046443, ENSBTAG00000046629, ENSBTAG00000046815, ENSBTAG00000047134, ENSBTAG00000047413 |
| 8 | 23,025,000 | 23,175,000 | 308 | 1130 | -3.441113498 | IFNAH, ENSBTAG00000022787, ENSBTAG00000039827, ENSBTAG00000039963, ENSBTAG00000045845, ENSBTAG00000046097, ENSBTAG00000046683, ENSBTAG00000046815, ENSBTAG00000047982                     |
| 8 | 23,100,000 | 23,250,000 | 309 | 1055 | -0.736545501 | IFNB1, IFNB3, ENSBTAG00000022787, ENSBTAG00000033708, ENSBTAG00000039827, ENSBTAG00000045674, ENSBTAG00000046683, ENSBTAG00000047982                                                      |
| 8 | 23,175,000 | 23,325,000 | 310 | 844  | 0.187498634  | IFNB1, IFNB2, IFNB3, IL6, ENSBTAG00000033708, ENSBTAG00000045674, ENSBTAG00000046967                                                                                                      |
| 8 | 23,250,000 | 23,400,000 | 311 | 654  | -0.384543527 | IFNB2, IL6, KIAA1797, PTPLAD2, ENSBTAG00000046967                                                                                                                                         |
| 8 | 23,325,000 | 23,475,000 | 312 | 903  | -1.082372621 | KIAA1797, PTPLAD2                                                                                                                                                                         |
| 8 | 23,400,000 | 23,550,000 | 313 | 856  | -2.150525498 | KIAA1797                                                                                                                                                                                  |
| 8 | 23,475,000 | 23,625,000 | 314 | 783  | -0.330363286 | KIAA1797                                                                                                                                                                                  |
| 8 | 23,550,000 | 23,700,000 | 315 | 766  | 0.572792312  | KIAA1797                                                                                                                                                                                  |
| 8 | 23,625,000 | 23,775,000 | 316 | 628  | 0.731328007  | KIAA1797, MLLT3                                                                                                                                                                           |
| 8 | 23,700,000 | 23,850,000 | 317 | 571  | 0.168839088  | MLLT3                                                                                                                                                                                     |
| 8 | 23,775,000 | 23,925,000 | 318 | 592  | -0.620704969 | MLLT3                                                                                                                                                                                     |
| 8 | 23,850,000 | 24,000,000 | 319 | 708  | -0.045303573 | MLLT3                                                                                                                                                                                     |
| 8 | 23,925,000 | 24,075,000 | 320 | 810  | 0.383535368  | MLLT3                                                                                                                                                                                     |
| 8 | 24,000,000 | 24,150,000 | 321 | 848  | 0.583429921  | MLLT3                                                                                                                                                                                     |
| 8 | 24,075,000 | 24,225,000 | 322 | 954  | 0.668203259  |                                                                                                                                                                                           |
| 8 | 24,150,000 | 24,300,000 | 323 | 973  | 0.489956879  |                                                                                                                                                                                           |
| 8 | 24,225,000 | 24,375,000 | 324 | 1015 | 0.659850069  |                                                                                                                                                                                           |
| 8 | 24,300,000 | 24,450,000 | 325 | 1062 | 0.814610983  |                                                                                                                                                                                           |
| 8 | 24,375,000 | 24,525,000 | 326 | 1079 | 0.955544739  | SLC24A2                                                                                                                                                                                   |
| 8 | 24,450,000 | 24,600,000 | 327 | 1243 | 0.413781074  | SLC24A2                                                                                                                                                                                   |
| 8 | 24,525,000 | 24,675,000 | 328 | 1379 | -0.448823708 | SLC24A2                                                                                                                                                                                   |
| 8 | 24,600,000 | 24,750,000 | 329 | 1375 | -0.019590973 | SLC24A2                                                                                                                                                                                   |
| 8 | 24,675,000 | 24,825,000 | 330 | 1328 | 0.581433343  | SLC24A2                                                                                                                                                                                   |
| 8 | 24,750,000 | 24,900,000 | 331 | 737  | 0.424301705  | ACER2, SLC24A2                                                                                                                                                                            |
| 8 | 24,825,000 | 24,975,000 | 332 | 148  | -0.824244892 | ACER2, DENND4C, RPS6                                                                                                                                                                      |
| 8 | 24,900,000 | 25,050,000 | 333 | 139  | 0.53092632   | DENND4C, RPS6                                                                                                                                                                             |
| 8 | 24,975,000 | 25,125,000 | 334 | 304  | -0.102094008 | DENND4C                                                                                                                                                                                   |
| 8 | 25,050,000 | 25,200,000 | 335 | 395  | -0.167693567 | HAUS6, PLIN2, Rraga                                                                                                                                                                       |
| 8 | 25,125,000 | 25,275,000 | 336 | 431  | 0.860483133  | FAM154A, HAUS6, PLIN2, Rraga                                                                                                                                                              |
| 8 | 25,200,000 | 25,350,000 | 337 | 468  | 0.942360534  | ADAMTSL1, FAM154A                                                                                                                                                                         |
| 8 | 25,275,000 | 25,425,000 | 338 | 458  | 0.57310569   | ADAMTSL1, FAM154A                                                                                                                                                                         |
| 8 | 25,350,000 | 25,500,000 | 339 | 510  | -0.281734976 | ADAMTSL1                                                                                                                                                                                  |
| 8 | 25,425,000 | 25,575,000 | 340 | 531  | -1.257485055 | ADAMTSL1                                                                                                                                                                                  |
| 8 | 25,500,000 | 25,650,000 | 341 | 537  | -1.063308941 | ADAMTSL1                                                                                                                                                                                  |
| 8 | 25,575,000 | 25,725,000 | 342 | 503  | -1.276620926 | ADAMTSL1                                                                                                                                                                                  |
| 8 | 25,650,000 | 25,800,000 | 343 | 532  | -2.763525881 | ADAMTSL1                                                                                                                                                                                  |
| 8 | 25,725,000 | 25,875,000 | 344 | 544  | -1.531584351 | ADAMTSL1                                                                                                                                                                                  |
| 8 | 25,800,000 | 25,950,000 | 345 | 490  | 0.111048143  | ADAMTSL1                                                                                                                                                                                  |

|   |            |            |     |      |              |                      |
|---|------------|------------|-----|------|--------------|----------------------|
| 8 | 25,875,000 | 26,025,000 | 346 | 809  | 0.156158917  |                      |
| 8 | 25,950,000 | 26,100,000 | 347 | 1019 | 0.069325633  |                      |
| 8 | 26,025,000 | 26,175,000 | 348 | 966  | -0.422060612 |                      |
| 8 | 26,100,000 | 26,250,000 | 349 | 846  | 0.286152576  |                      |
| 8 | 26,175,000 | 26,325,000 | 350 | 430  | 1.006009075  |                      |
| 8 | 26,250,000 | 26,400,000 | 351 | 351  | -2.191804258 |                      |
| 8 | 26,325,000 | 26,475,000 | 352 | 615  | -1.623616452 |                      |
| 8 | 26,400,000 | 26,550,000 | 353 | 690  | 0.136333701  |                      |
| 8 | 26,475,000 | 26,625,000 | 354 | 757  | -1.172097385 |                      |
| 8 | 26,550,000 | 26,700,000 | 355 | 1027 | -0.476936937 | SH3GL2               |
| 8 | 26,625,000 | 26,775,000 | 356 | 1127 | 0.84369241   | SH3GL2               |
| 8 | 26,700,000 | 26,850,000 | 357 | 1010 | 0.630507356  | SH3GL2               |
| 8 | 26,775,000 | 26,925,000 | 358 | 1113 | -0.606608714 | SH3GL2               |
| 8 | 26,850,000 | 27,000,000 | 359 | 1081 | -0.62182195  | CNTLN,SH3GL2         |
| 8 | 26,925,000 | 27,075,000 | 360 | 571  | 0.426647314  | CNTLN                |
| 8 | 27,000,000 | 27,150,000 | 361 | 317  | 0.441446722  | CNTLN                |
| 8 | 27,075,000 | 27,225,000 | 362 | 524  | 0.195909641  | CNTLN                |
| 8 | 27,150,000 | 27,300,000 | 363 | 722  | 0.150063702  | CNTLN                |
| 8 | 27,225,000 | 27,375,000 | 364 | 862  | 0.265333903  |                      |
| 8 | 27,300,000 | 27,450,000 | 365 | 701  | 0.272616817  |                      |
| 8 | 27,375,000 | 27,525,000 | 366 | 478  | 0.702989371  |                      |
| 8 | 27,450,000 | 27,600,000 | 367 | 585  | 0.621508367  |                      |
| 8 | 27,525,000 | 27,675,000 | 368 | 527  | -0.276663627 |                      |
| 8 | 27,600,000 | 27,750,000 | 369 | 385  | -0.628929171 |                      |
| 8 | 27,675,000 | 27,825,000 | 370 | 375  | 0.08170446   |                      |
| 8 | 27,750,000 | 27,900,000 | 371 | 367  | 0.018403297  |                      |
| 8 | 27,825,000 | 27,975,000 | 372 | 632  | 0.589568572  | BNC2                 |
| 8 | 27,900,000 | 28,050,000 | 373 | 1026 | 1.08063163   | BNC2                 |
| 8 | 27,975,000 | 28,125,000 | 374 | 1285 | 1.038351284  | BNC2                 |
| 8 | 28,050,000 | 28,200,000 | 375 | 1397 | 0.79145104   |                      |
| 8 | 28,125,000 | 28,275,000 | 376 | 1185 | 0.743782495  |                      |
| 8 | 28,200,000 | 28,350,000 | 377 | 807  | 0.596331399  |                      |
| 8 | 28,275,000 | 28,425,000 | 378 | 571  | 0.212248075  |                      |
| 8 | 28,350,000 | 28,500,000 | 379 | 764  | -1.640174103 | CCDC171              |
| 8 | 28,425,000 | 28,575,000 | 380 | 837  | -1.704029304 | CCDC171              |
| 8 | 28,500,000 | 28,650,000 | 381 | 640  | -0.011562932 | CCDC171              |
| 8 | 28,575,000 | 28,725,000 | 382 | 695  | 0.796569111  | CCDC171              |
| 8 | 28,650,000 | 28,800,000 | 383 | 846  | -1.061139015 | CCDC171              |
| 8 | 28,725,000 | 28,875,000 | 384 | 704  | -2.255788314 | CCDC171,PSIP1        |
| 8 | 28,800,000 | 28,950,000 | 385 | 446  | -0.869177062 | CCDC171,PSIP1,SNAPC3 |
| 8 | 28,875,000 | 29,025,000 | 386 | 512  | -0.664280622 | PSIP1,SNAPC3         |
| 8 | 28,950,000 | 29,100,000 | 387 | 776  | -0.612435364 |                      |
| 8 | 29,025,000 | 29,175,000 | 388 | 1084 | -0.54603067  | TTC39B               |
| 8 | 29,100,000 | 29,250,000 | 389 | 1401 | 0.323212285  | TTC39B               |
| 8 | 29,175,000 | 29,325,000 | 390 | 1138 | 0.809171923  |                      |
| 8 | 29,250,000 | 29,400,000 | 391 | 745  | 1.186578775  | FREM1                |
| 8 | 29,325,000 | 29,475,000 | 392 | 794  | 1.08753367   | FREM1                |
| 8 | 29,400,000 | 29,550,000 | 393 | 619  | 0.960040937  | CER1,FREM1           |
| 8 | 29,475,000 | 29,625,000 | 394 | 523  | 0.561420771  | CER1,FREM1,ZDHHC21   |
| 8 | 29,550,000 | 29,700,000 | 395 | 777  | -0.118833085 | ZDHHC21              |
| 8 | 29,625,000 | 29,775,000 | 396 | 823  | -0.251130028 |                      |
| 8 | 29,700,000 | 29,850,000 | 397 | 630  | -0.792232324 |                      |
| 8 | 29,775,000 | 29,925,000 | 398 | 508  | -1.882008053 |                      |

|   |            |            |     |      |              |                    |
|---|------------|------------|-----|------|--------------|--------------------|
| 8 | 29,850,000 | 30,000,000 | 399 | 462  | -1.91180017  |                    |
| 8 | 29,925,000 | 30,075,000 | 400 | 515  | -1.575381631 | NFIB               |
| 8 | 30,000,000 | 30,150,000 | 401 | 542  | -0.884625861 | NFIB               |
| 8 | 30,075,000 | 30,225,000 | 402 | 644  | 0.166437291  | NFIB               |
| 8 | 30,150,000 | 30,300,000 | 403 | 569  | 0.465159256  | NFIB               |
| 8 | 30,225,000 | 30,375,000 | 404 | 417  | 0.202340205  |                    |
| 8 | 30,300,000 | 30,450,000 | 405 | 518  | -0.202733292 |                    |
| 8 | 30,375,000 | 30,525,000 | 406 | 624  | -0.451989131 |                    |
| 8 | 30,450,000 | 30,600,000 | 407 | 800  | 0.532522842  |                    |
| 8 | 30,525,000 | 30,675,000 | 408 | 779  | 1.129848056  |                    |
| 8 | 30,600,000 | 30,750,000 | 409 | 828  | 0.775369967  |                    |
| 8 | 30,675,000 | 30,825,000 | 410 | 866  | -0.024040925 |                    |
| 8 | 30,750,000 | 30,900,000 | 411 | 631  | -0.934875083 |                    |
| 8 | 30,825,000 | 30,975,000 | 412 | 425  | -2.052413707 |                    |
| 8 | 30,900,000 | 31,050,000 | 413 | 247  | -2.971732465 |                    |
| 8 | 30,975,000 | 31,125,000 | 414 | 390  | -1.590436647 | MPDZ               |
| 8 | 31,050,000 | 31,200,000 | 415 | 716  | -1.174874324 | MPDZ               |
| 8 | 31,125,000 | 31,275,000 | 416 | 832  | -0.281664821 | MPDZ               |
| 8 | 31,200,000 | 31,350,000 | 417 | 908  | 0.74270747   | MPDZ               |
| 8 | 31,275,000 | 31,425,000 | 418 | 1142 | 1.234897681  | MPDZ               |
| 8 | 31,350,000 | 31,500,000 | 419 | 1211 | 1.232967038  | ENSBTAG00000048272 |
| 8 | 31,425,000 | 31,575,000 | 420 | 1235 | 0.967702437  | ENSBTAG00000048272 |
| 8 | 31,500,000 | 31,650,000 | 421 | 1261 | 1.033172336  | LURAP1L            |
| 8 | 31,575,000 | 31,725,000 | 422 | 1168 | 1.169980545  | LURAP1L, TYRP1     |
| 8 | 31,650,000 | 31,800,000 | 423 | 1146 | 1.097438523  | TYRP1              |
| 8 | 31,725,000 | 31,875,000 | 424 | 1213 | 0.808175355  | TYRP1              |
| 8 | 31,800,000 | 31,950,000 | 425 | 1629 | 1.043298799  |                    |
| 8 | 31,875,000 | 32,025,000 | 426 | 1768 | 1.292991592  |                    |
| 8 | 31,950,000 | 32,100,000 | 427 | 1129 | 1.094273764  |                    |
| 8 | 32,025,000 | 32,175,000 | 428 | 938  | 0.613915675  |                    |
| 8 | 32,100,000 | 32,250,000 | 429 | 1234 | 0.612305168  |                    |
| 8 | 32,175,000 | 32,325,000 | 430 | 1289 | 0.672260452  |                    |
| 8 | 32,250,000 | 32,400,000 | 431 | 1158 | 0.761051928  |                    |
| 8 | 32,325,000 | 32,475,000 | 432 | 1106 | 0.764782014  |                    |
| 8 | 32,400,000 | 32,550,000 | 433 | 1478 | 1.026049451  |                    |
| 8 | 32,475,000 | 32,625,000 | 434 | 1636 | 1.160648373  |                    |
| 8 | 32,550,000 | 32,700,000 | 435 | 1403 | 0.963645755  |                    |
| 8 | 32,625,000 | 32,775,000 | 436 | 1350 | 0.704279657  |                    |
| 8 | 32,700,000 | 32,850,000 | 437 | 1548 | 0.886479588  |                    |
| 8 | 32,775,000 | 32,925,000 | 438 | 1836 | 0.861048233  |                    |
| 8 | 32,850,000 | 33,000,000 | 439 | 2211 | -0.247840173 |                    |
| 8 | 32,925,000 | 33,075,000 | 440 | 1870 | -0.936471818 |                    |
| 8 | 33,000,000 | 33,150,000 | 441 | 1230 | 0.256045926  |                    |
| 8 | 33,075,000 | 33,225,000 | 442 | 1321 | -6.02337965  |                    |
| 8 | 33,150,000 | 33,300,000 | 443 | 1395 | -5.664376143 |                    |
| 8 | 33,225,000 | 33,375,000 | 444 | 1478 | -2.294957671 |                    |
| 8 | 33,300,000 | 33,450,000 | 445 | 1546 | -1.59860923  |                    |
| 8 | 33,375,000 | 33,525,000 | 446 | 1375 | 0.122005661  |                    |
| 8 | 33,450,000 | 33,600,000 | 447 | 1118 | 0.366214447  |                    |
| 8 | 33,525,000 | 33,675,000 | 448 | 1057 | 1.043541582  |                    |
| 8 | 33,600,000 | 33,750,000 | 449 | 1496 | 0.889517198  |                    |
| 8 | 33,675,000 | 33,825,000 | 450 | 1825 | 0.440947616  |                    |
| 8 | 33,750,000 | 33,900,000 | 451 | 1720 | 0.38868454   |                    |

|   |            |            |     |      |              |                    |
|---|------------|------------|-----|------|--------------|--------------------|
| 8 | 33,825,000 | 33,975,000 | 452 | 1550 | 0.509770177  |                    |
| 8 | 33,900,000 | 34,050,000 | 453 | 1473 | 0.616247573  |                    |
| 8 | 33,975,000 | 34,125,000 | 454 | 1294 | 0.7484518    |                    |
| 8 | 34,050,000 | 34,200,000 | 455 | 888  | 0.537905889  |                    |
| 8 | 34,125,000 | 34,275,000 | 456 | 570  | 0.138976714  |                    |
| 8 | 34,200,000 | 34,350,000 | 457 | 429  | -0.007975946 |                    |
| 8 | 34,275,000 | 34,425,000 | 458 | 435  | 0.150170081  |                    |
| 8 | 34,350,000 | 34,500,000 | 459 | 515  | -0.389764778 |                    |
| 8 | 34,425,000 | 34,575,000 | 460 | 839  | 0.383228849  |                    |
| 8 | 34,500,000 | 34,650,000 | 461 | 1048 | 0.92167489   |                    |
| 8 | 34,575,000 | 34,725,000 | 462 | 970  | 1.312073624  |                    |
| 8 | 34,650,000 | 34,800,000 | 463 | 865  | 1.38668129   |                    |
| 8 | 34,725,000 | 34,875,000 | 464 | 875  | 0.266577833  |                    |
| 8 | 34,800,000 | 34,950,000 | 465 | 1380 | -0.790190428 |                    |
| 8 | 34,875,000 | 35,025,000 | 466 | 1163 | -0.949297519 |                    |
| 8 | 34,950,000 | 35,100,000 | 467 | 826  | 0.594582146  |                    |
| 8 | 35,025,000 | 35,175,000 | 468 | 937  | 0.865252699  |                    |
| 8 | 35,100,000 | 35,250,000 | 469 | 623  | 0.585444132  |                    |
| 8 | 35,175,000 | 35,325,000 | 470 | 930  | -1.340455822 |                    |
| 8 | 35,250,000 | 35,400,000 | 471 | 1185 | -1.309774418 |                    |
| 8 | 35,325,000 | 35,475,000 | 472 | 913  | -0.759628585 |                    |
| 8 | 35,400,000 | 35,550,000 | 473 | 823  | -0.409813916 |                    |
| 8 | 35,475,000 | 35,625,000 | 474 | 890  | -0.100220225 |                    |
| 8 | 35,550,000 | 35,700,000 | 475 | 1066 | -0.030795377 |                    |
| 8 | 35,625,000 | 35,775,000 | 476 | 951  | 0.106481762  |                    |
| 8 | 35,700,000 | 35,850,000 | 477 | 783  | 0.67828594   |                    |
| 8 | 35,775,000 | 35,925,000 | 478 | 1063 | 1.014634118  |                    |
| 8 | 35,850,000 | 36,000,000 | 479 | 1589 | 0.995124142  |                    |
| 8 | 35,925,000 | 36,075,000 | 480 | 1544 | 0.91623094   |                    |
| 8 | 36,000,000 | 36,150,000 | 481 | 633  | 1.00865009   |                    |
| 8 | 36,075,000 | 36,225,000 | 482 | 570  | 1.002037221  |                    |
| 8 | 36,150,000 | 36,300,000 | 483 | 946  | 1.086515787  |                    |
| 8 | 36,225,000 | 36,375,000 | 484 | 921  | 0.683932643  |                    |
| 8 | 36,300,000 | 36,450,000 | 485 | 1294 | 0.427726331  |                    |
| 8 | 36,375,000 | 36,525,000 | 486 | 1193 | 0.634153706  |                    |
| 8 | 36,450,000 | 36,600,000 | 487 | 849  | 0.74600237   | PTPRD              |
| 8 | 36,525,000 | 36,675,000 | 488 | 775  | 0.247731492  | PTPRD              |
| 8 | 36,600,000 | 36,750,000 | 489 | 760  | 0.039936712  | PTPRD              |
| 8 | 36,675,000 | 36,825,000 | 490 | 695  | -0.564748168 | PTPRD              |
| 8 | 36,750,000 | 36,900,000 | 491 | 659  | -0.917315673 | PTPRD              |
| 8 | 36,825,000 | 36,975,000 | 492 | 624  | -0.094238928 |                    |
| 8 | 36,900,000 | 37,050,000 | 493 | 853  | -0.291566076 |                    |
| 8 | 36,975,000 | 37,125,000 | 494 | 1072 | -0.139897214 |                    |
| 8 | 37,050,000 | 37,200,000 | 495 | 959  | 0.421421181  |                    |
| 8 | 37,125,000 | 37,275,000 | 496 | 815  | 0.615862658  |                    |
| 8 | 37,200,000 | 37,350,000 | 497 | 742  | 0.580998642  | MGC127919          |
| 8 | 37,275,000 | 37,425,000 | 498 | 864  | 0.748539139  | MGC127919          |
| 8 | 37,350,000 | 37,500,000 | 499 | 1008 | 1.268677522  |                    |
| 8 | 37,425,000 | 37,575,000 | 500 | 1181 | 1.268771133  |                    |
| 8 | 37,500,000 | 37,650,000 | 501 | 1249 | 0.971228207  |                    |
| 8 | 37,575,000 | 37,725,000 | 502 | 1304 | 0.79097652   | ENSBTAG00000038698 |
| 8 | 37,650,000 | 37,800,000 | 503 | 941  | 0.686249324  | ENSBTAG00000038698 |
| 8 | 37,725,000 | 37,875,000 | 504 | 641  | 0.60779899   |                    |



|   |            |            |     |      |              |                                                       |
|---|------------|------------|-----|------|--------------|-------------------------------------------------------|
| 8 | 37,800,000 | 37,950,000 | 505 | 621  | 1.012997977  |                                                       |
| 8 | 37,875,000 | 38,025,000 | 506 | 412  | 1.504011229  | ENSBTAG00000043987                                    |
| 8 | 37,950,000 | 38,100,000 | 507 | 341  | 1.448451815  | ENSBTAG00000043987                                    |
| 8 | 38,025,000 | 38,175,000 | 508 | 581  | 1.352528974  | ENSBTAG00000043987                                    |
| 8 | 38,100,000 | 38,250,000 | 509 | 685  | 0.869927415  | ENSBTAG00000043987                                    |
| 8 | 38,175,000 | 38,325,000 | 510 | 507  | -0.006819178 | ENSBTAG00000043987                                    |
| 8 | 38,250,000 | 38,400,000 | 511 | 395  | 0.366002457  |                                                       |
| 8 | 38,325,000 | 38,475,000 | 512 | 270  | 1.347057441  | GLDC                                                  |
| 8 | 38,400,000 | 38,550,000 | 513 | 269  | 0.701925599  | GLDC                                                  |
| 8 | 38,475,000 | 38,625,000 | 514 | 401  | -0.089424064 | GLDC,UHRF2                                            |
| 8 | 38,550,000 | 38,700,000 | 515 | 422  | 0.316465251  | GLDC,TPD52L3,UHRF2                                    |
| 8 | 38,625,000 | 38,775,000 | 516 | 430  | 1.052696241  | IL33,TPD52L3,UHRF2                                    |
| 8 | 38,700,000 | 38,850,000 | 517 | 484  | 0.555567173  | IL33                                                  |
| 8 | 38,775,000 | 38,925,000 | 518 | 515  | -0.107320358 | IL33,RANBP6                                           |
| 8 | 38,850,000 | 39,000,000 | 519 | 525  | 0.50228873   | RANBP6                                                |
| 8 | 38,925,000 | 39,075,000 | 520 | 508  | 1.105448967  | KIAA2026,MLANA,RANBP6                                 |
| 8 | 39,000,000 | 39,150,000 | 521 | 403  | 1.012721635  | ERMP1,KIAA2026,MLANA                                  |
| 8 | 39,075,000 | 39,225,000 | 522 | 219  | 0.541859544  | ERMP1,RIC1                                            |
| 8 | 39,150,000 | 39,300,000 | 523 | 225  | 0.34133059   | ERMP1,RIC1                                            |
| 8 | 39,225,000 | 39,375,000 | 524 | 338  | 0.682190857  | RIC1                                                  |
| 8 | 39,300,000 | 39,450,000 | 525 | 441  | 0.800861431  | PDCD1LG2,RIC1                                         |
| 8 | 39,375,000 | 39,525,000 | 526 | 481  | 0.849450287  | PD-L1,PDCD1LG2                                        |
| 8 | 39,450,000 | 39,600,000 | 527 | 537  | 1.021429164  | C8H9ORF46,PD-L1,PDCD1LG2                              |
| 8 | 39,525,000 | 39,675,000 | 528 | 534  | 0.977533374  | C8H9ORF46,INSL6,JAK2                                  |
| 8 | 39,600,000 | 39,750,000 | 529 | 537  | 0.945390529  | INSL6,JAK2                                            |
| 8 | 39,675,000 | 39,825,000 | 530 | 727  | 1.06528702   | JAK2                                                  |
| 8 | 39,750,000 | 39,900,000 | 531 | 967  | 1.191931477  |                                                       |
| 8 | 39,825,000 | 39,975,000 | 532 | 1127 | 1.297226606  | RCL1                                                  |
| 8 | 39,900,000 | 40,050,000 | 533 | 1054 | 1.188783333  | AK3,RCL1,ENSBTAG00000046486                           |
| 8 | 39,975,000 | 40,125,000 | 534 | 796  | 1.127227849  | AK3,CDC37L1,PPAPDC2,RCL1,SPATA6L,ENSBTAG00000046486   |
| 8 | 40,050,000 | 40,200,000 | 535 | 922  | 1.403656347  | AK3,CDC37L1,PPAPDC2,SLC1A1,SPATA6L,ENSBTAG00000046486 |
| 8 | 40,125,000 | 40,275,000 | 536 | 981  | 0.951457148  | SLC1A1,SPATA6L,ENSBTAG00000046687                     |
| 8 | 40,200,000 | 40,350,000 | 537 | 611  | 0.300534656  | SLC1A1,ENSBTAG00000046687                             |
| 8 | 40,275,000 | 40,425,000 | 538 | 497  | -0.803323866 |                                                       |
| 8 | 40,350,000 | 40,500,000 | 539 | 579  | -5.206405352 |                                                       |
| 8 | 40,425,000 | 40,575,000 | 540 | 844  | -4.077188824 |                                                       |
| 8 | 40,500,000 | 40,650,000 | 541 | 1033 | -1.253575204 |                                                       |
| 8 | 40,575,000 | 40,725,000 | 542 | 844  | 0.050642034  |                                                       |
| 8 | 40,650,000 | 40,800,000 | 543 | 761  | -0.199313737 |                                                       |
| 8 | 40,725,000 | 40,875,000 | 544 | 574  | -1.387015691 | GLIS3                                                 |
| 8 | 40,800,000 | 40,950,000 | 545 | 353  | -1.296992799 | GLIS3                                                 |
| 8 | 40,875,000 | 41,025,000 | 546 | 626  | 0.807088388  | GLIS3                                                 |
| 8 | 40,950,000 | 41,100,000 | 547 | 909  | 0.568276259  | GLIS3                                                 |
| 8 | 41,025,000 | 41,175,000 | 548 | 857  | 0.165875605  |                                                       |
| 8 | 41,100,000 | 41,250,000 | 549 | 728  | -0.073909848 |                                                       |
| 8 | 41,175,000 | 41,325,000 | 550 | 848  | -1.233794315 |                                                       |
| 8 | 41,250,000 | 41,400,000 | 551 | 739  | -1.237866062 |                                                       |
| 8 | 41,325,000 | 41,475,000 | 552 | 445  | 0.579240336  | RFX3                                                  |
| 8 | 41,400,000 | 41,550,000 | 553 | 406  | 0.816557763  | RFX3                                                  |
| 8 | 41,475,000 | 41,625,000 | 554 | 617  | 0.670872532  | RFX3                                                  |
| 8 | 41,550,000 | 41,700,000 | 555 | 747  | 0.671757288  | RFX3                                                  |

|   |            |            |     |      |              |                                            |
|---|------------|------------|-----|------|--------------|--------------------------------------------|
| 8 | 41,625,000 | 41,775,000 | 556 | 945  | 0.771885226  |                                            |
| 8 | 41,700,000 | 41,850,000 | 557 | 1163 | 0.65888519   |                                            |
| 8 | 41,775,000 | 41,925,000 | 558 | 1173 | 0.526025198  |                                            |
| 8 | 41,850,000 | 42,000,000 | 559 | 1299 | 0.984355376  | KIAA0020                                   |
| 8 | 41,925,000 | 42,075,000 | 560 | 1230 | 0.973663537  | KCNV2,KIAA0020                             |
| 8 | 42,000,000 | 42,150,000 | 561 | 1130 | 0.370507303  | KCNV2,VLDLR                                |
| 8 | 42,075,000 | 42,225,000 | 562 | 1156 | 0.426775056  | VLDLR                                      |
| 8 | 42,150,000 | 42,300,000 | 563 | 1175 | 0.53188496   |                                            |
| 8 | 42,225,000 | 42,375,000 | 564 | 1132 | 0.390054369  |                                            |
| 8 | 42,300,000 | 42,450,000 | 565 | 1020 | 0.307301813  |                                            |
| 8 | 42,375,000 | 42,525,000 | 566 | 1341 | 0.676331762  |                                            |
| 8 | 42,450,000 | 42,600,000 | 567 | 1654 | 0.700013989  |                                            |
| 8 | 42,525,000 | 42,675,000 | 568 | 1167 | 0.480109683  | SMARCA2                                    |
| 8 | 42,600,000 | 42,750,000 | 569 | 728  | 0.408467272  | SMARCA2                                    |
| 8 | 42,675,000 | 42,825,000 | 570 | 753  | -1.385060844 | SMARCA2                                    |
| 8 | 42,750,000 | 42,900,000 | 571 | 799  | -1.740468499 | SMARCA2                                    |
| 8 | 42,825,000 | 42,975,000 | 572 | 1011 | 0.25297286   | SMARCA2                                    |
| 8 | 42,900,000 | 43,050,000 | 573 | 1331 | 0.465894421  |                                            |
| 8 | 42,975,000 | 43,125,000 | 574 | 1377 | -0.456981824 |                                            |
| 8 | 43,050,000 | 43,200,000 | 575 | 1344 | -0.654488921 |                                            |
| 8 | 43,125,000 | 43,275,000 | 576 | 1516 | -1.070047324 |                                            |
| 8 | 43,200,000 | 43,350,000 | 577 | 1419 | -1.585589562 |                                            |
| 8 | 43,275,000 | 43,425,000 | 578 | 849  | -1.0901822   |                                            |
| 8 | 43,350,000 | 43,500,000 | 579 | 601  | -0.42671956  |                                            |
| 8 | 43,425,000 | 43,575,000 | 580 | 624  | -0.523434227 |                                            |
| 8 | 43,500,000 | 43,650,000 | 581 | 737  | 0.459848258  |                                            |
| 8 | 43,575,000 | 43,725,000 | 582 | 1009 | 0.876030393  |                                            |
| 8 | 43,650,000 | 43,800,000 | 583 | 851  | 1.074708761  | DMRT2                                      |
| 8 | 43,725,000 | 43,875,000 | 584 | 596  | 0.342231064  | DMRT2,DMRT3                                |
| 8 | 43,800,000 | 43,950,000 | 585 | 562  | -0.378411733 | DMRT1,DMRT3                                |
| 8 | 43,875,000 | 44,025,000 | 586 | 562  | 0.184932545  | DMRT1                                      |
| 8 | 43,950,000 | 44,100,000 | 587 | 623  | -0.230683071 | DMRT1,KANK1                                |
| 8 | 44,025,000 | 44,175,000 | 588 | 873  | 0.002533802  | KANK1                                      |
| 8 | 44,100,000 | 44,250,000 | 589 | 1154 | 0.417215564  |                                            |
| 8 | 44,175,000 | 44,325,000 | 590 | 1153 | 0.340277164  | DOCK8                                      |
| 8 | 44,250,000 | 44,400,000 | 591 | 1127 | -0.07354128  | DOCK8                                      |
| 8 | 44,325,000 | 44,475,000 | 592 | 953  | -0.189325654 | DOCK8                                      |
| 8 | 44,400,000 | 44,550,000 | 593 | 600  | -0.213421422 | DOCK8                                      |
| 8 | 44,475,000 | 44,625,000 | 594 | 354  | 0.092088341  | DOCK8,ENSBTAG00000000269                   |
| 8 | 44,550,000 | 44,700,000 | 595 | 263  | 0.841742953  | PGM5,ENSBTAG00000000269,ENSBTAG00000033122 |
| 8 | 44,625,000 | 44,775,000 | 596 | 323  | 0.907695     | PGM5,ENSBTAG00000033122                    |
| 8 | 44,700,000 | 44,850,000 | 597 | 397  | 1.040445231  | PGM5                                       |
| 8 | 44,775,000 | 44,925,000 | 598 | 385  | 0.622046189  | PGM5,TMEM252                               |
| 8 | 44,850,000 | 45,000,000 | 599 | 507  | -1.599406305 | PGM5,TMEM252                               |
| 8 | 44,925,000 | 45,075,000 | 600 | 702  | -1.736218478 |                                            |
| 8 | 45,000,000 | 45,150,000 | 601 | 603  | -0.393316021 |                                            |
| 8 | 45,075,000 | 45,225,000 | 602 | 486  | 0.504865922  | FAM122A,PIP5K1B                            |
| 8 | 45,150,000 | 45,300,000 | 603 | 460  | 0.659367764  | FAM122A,PIP5K1B                            |
| 8 | 45,225,000 | 45,375,000 | 604 | 415  | 0.543299329  | PIP5K1B                                    |
| 8 | 45,300,000 | 45,450,000 | 605 | 568  | 0.353024602  | PIP5K1B                                    |
| 8 | 45,375,000 | 45,525,000 | 606 | 775  | -0.462705625 | FXN                                        |
| 8 | 45,450,000 | 45,600,000 | 607 | 1073 | -0.484213515 | FXN,ZO2                                    |

|   |            |            |     |      |              |                            |
|---|------------|------------|-----|------|--------------|----------------------------|
| 8 | 45,525,000 | 45,675,000 | 608 | 1235 | -0.102448773 | FXN,ZO2                    |
| 8 | 45,600,000 | 45,750,000 | 609 | 1291 | 0.466690437  | ZO2                        |
| 8 | 45,675,000 | 45,825,000 | 610 | 1196 | 0.713909846  | FAM189A2,ZO2               |
| 8 | 45,750,000 | 45,900,000 | 611 | 887  | 0.255251565  | APBA1,FAM189A2             |
| 8 | 45,825,000 | 45,975,000 | 612 | 668  | -0.640320716 | APBA1                      |
| 8 | 45,900,000 | 46,050,000 | 613 | 678  | 0.144745261  | APBA1                      |
| 8 | 45,975,000 | 46,125,000 | 614 | 652  | 0.601944478  |                            |
| 8 | 46,050,000 | 46,200,000 | 615 | 499  | -0.026950412 | PTAR1                      |
| 8 | 46,125,000 | 46,275,000 | 616 | 612  | -2.094152556 | C8H9orf135,PTAR1           |
| 8 | 46,200,000 | 46,350,000 | 617 | 878  | -2.896515529 | C8H9orf135                 |
| 8 | 46,275,000 | 46,425,000 | 618 | 828  | -2.800821434 | C8H9orf135                 |
| 8 | 46,350,000 | 46,500,000 | 619 | 769  | -0.515505089 |                            |
| 8 | 46,425,000 | 46,575,000 | 620 | 725  | -0.204266717 |                            |
| 8 | 46,500,000 | 46,650,000 | 621 | 570  | 0.22415353   | MAMDC2                     |
| 8 | 46,575,000 | 46,725,000 | 622 | 540  | 1.013640781  | MAMDC2,SMC5                |
| 8 | 46,650,000 | 46,800,000 | 623 | 470  | 0.564593244  | MAMDC2,SMC5                |
| 8 | 46,725,000 | 46,875,000 | 624 | 660  | -0.378863118 | SMC5                       |
| 8 | 46,800,000 | 46,950,000 | 625 | 575  | -0.477643396 | KLF9,SMC5                  |
| 8 | 46,875,000 | 47,025,000 | 626 | 338  | 0.554971105  | KLF9,TRPM3                 |
| 8 | 46,950,000 | 47,100,000 | 627 | 328  | 0.615717283  | TRPM3                      |
| 8 | 47,025,000 | 47,175,000 | 628 | 476  | -2.635263175 | TRPM3                      |
| 8 | 47,100,000 | 47,250,000 | 629 | 727  | -1.199536312 | TRPM3                      |
| 8 | 47,175,000 | 47,325,000 | 630 | 730  | 0.079766862  | TRPM3                      |
| 8 | 47,250,000 | 47,400,000 | 631 | 501  | -0.025899804 | TRPM3                      |
| 8 | 47,325,000 | 47,475,000 | 632 | 321  | 0.161290005  |                            |
| 8 | 47,400,000 | 47,550,000 | 633 | 352  | -1.247796884 |                            |
| 8 | 47,475,000 | 47,625,000 | 634 | 580  | -1.366745036 |                            |
| 8 | 47,550,000 | 47,700,000 | 635 | 771  | -0.83940382  |                            |
| 8 | 47,625,000 | 47,775,000 | 636 | 842  | 0.254650343  |                            |
| 8 | 47,700,000 | 47,850,000 | 637 | 1490 | 0.213031481  |                            |
| 8 | 47,775,000 | 47,925,000 | 638 | 1828 | -0.724376677 |                            |
| 8 | 47,850,000 | 48,000,000 | 639 | 1371 | -0.193252815 |                            |
| 8 | 47,925,000 | 48,075,000 | 640 | 1006 | 1.432962832  |                            |
| 8 | 48,000,000 | 48,150,000 | 641 | 685  | 1.474896598  |                            |
| 8 | 48,075,000 | 48,225,000 | 642 | 451  | 0.951417125  | TMEM2                      |
| 8 | 48,150,000 | 48,300,000 | 643 | 795  | 0.822693643  | TMEM2                      |
| 8 | 48,225,000 | 48,375,000 | 644 | 1171 | 0.63088474   | TMEM2                      |
| 8 | 48,300,000 | 48,450,000 | 645 | 989  | 0.291177088  | FAM108B1,TMEM2             |
| 8 | 48,375,000 | 48,525,000 | 646 | 646  | 0.308932749  | C8H9ORF85,FAM108B1         |
| 8 | 48,450,000 | 48,600,000 | 647 | 575  | 0.192974055  | C8H9ORF85,FAM108B1         |
| 8 | 48,525,000 | 48,675,000 | 648 | 787  | 0.795122087  | GDA                        |
| 8 | 48,600,000 | 48,750,000 | 649 | 869  | 0.775220985  | GDA                        |
| 8 | 48,675,000 | 48,825,000 | 650 | 884  | 0.956075099  | GDA                        |
| 8 | 48,750,000 | 48,900,000 | 651 | 643  | 1.074299845  | GDA,ZFAND5                 |
| 8 | 48,825,000 | 48,975,000 | 652 | 262  | 0.473694564  | ZFAND5                     |
| 8 | 48,900,000 | 49,050,000 | 653 | 331  | 0.395636271  | ZFAND5                     |
| 8 | 48,975,000 | 49,125,000 | 654 | 528  | -0.392510675 |                            |
| 8 | 49,050,000 | 49,200,000 | 655 | 636  | -2.642793313 |                            |
| 8 | 49,125,000 | 49,275,000 | 656 | 805  | -2.060101487 | TMC1                       |
| 8 | 49,200,000 | 49,350,000 | 657 | 774  | -0.444298898 | TMC1                       |
| 8 | 49,275,000 | 49,425,000 | 658 | 853  | -1.007236966 | ALDH1A1,TMC1               |
| 8 | 49,350,000 | 49,500,000 | 659 | 1029 | -0.882935475 | ALDH1A1,ENSBTAG00000047442 |
| 8 | 49,425,000 | 49,575,000 | 660 | 1372 | 0.292673064  | ENSBTAG00000047442         |

|   |            |            |     |      |              |                             |
|---|------------|------------|-----|------|--------------|-----------------------------|
| 8 | 49,500,000 | 49,650,000 | 661 | 1430 | 0.2888736    | ANXA1,ENSBTAG00000047442    |
| 8 | 49,575,000 | 49,725,000 | 662 | 1276 | 0.627948831  | ANXA1                       |
| 8 | 49,650,000 | 49,800,000 | 663 | 1208 | 0.528357221  |                             |
| 8 | 49,725,000 | 49,875,000 | 664 | 1197 | 0.207295736  |                             |
| 8 | 49,800,000 | 49,950,000 | 665 | 1071 | 0.448897167  |                             |
| 8 | 49,875,000 | 50,025,000 | 666 | 728  | -0.959718731 |                             |
| 8 | 49,950,000 | 50,100,000 | 667 | 707  | -1.047568808 |                             |
| 8 | 50,025,000 | 50,175,000 | 668 | 790  | -0.035868349 |                             |
| 8 | 50,100,000 | 50,250,000 | 669 | 860  | 0.136982192  |                             |
| 8 | 50,175,000 | 50,325,000 | 670 | 916  | -0.676122048 |                             |
| 8 | 50,250,000 | 50,400,000 | 671 | 1241 | 0.09054782   |                             |
| 8 | 50,325,000 | 50,475,000 | 672 | 1581 | 0.322008728  |                             |
| 8 | 50,400,000 | 50,550,000 | 673 | 1509 | -0.074642212 |                             |
| 8 | 50,475,000 | 50,625,000 | 674 | 1259 | 0.287574338  |                             |
| 8 | 50,550,000 | 50,700,000 | 675 | 1353 | -2.074800787 |                             |
| 8 | 50,625,000 | 50,775,000 | 676 | 1501 | -2.70824625  |                             |
| 8 | 50,700,000 | 50,850,000 | 677 | 1545 | -2.551882834 |                             |
| 8 | 50,775,000 | 50,925,000 | 678 | 1389 | -1.314296615 | RORB                        |
| 8 | 50,850,000 | 51,000,000 | 679 | 1005 | 0.099185577  | RORB                        |
| 8 | 50,925,000 | 51,075,000 | 680 | 897  | -0.890728054 | RORB                        |
| 8 | 51,000,000 | 51,150,000 | 681 | 1109 | -1.798627065 | RORB,TRPM6                  |
| 8 | 51,075,000 | 51,225,000 | 682 | 1180 | -2.569633118 | RORB,TRPM6                  |
| 8 | 51,150,000 | 51,300,000 | 683 | 1017 | -1.646148541 | TRPM6                       |
| 8 | 51,225,000 | 51,375,000 | 684 | 793  | -0.113759767 | C9orf40,C9orf41             |
| 8 | 51,300,000 | 51,450,000 | 685 | 731  | 0.225016298  | C9orf40,C9orf41,NMRK1,OSTF1 |
| 8 | 51,375,000 | 51,525,000 | 686 | 802  | 0.920350545  | C9orf41,NMRK1,OSTF1         |
| 8 | 51,450,000 | 51,600,000 | 687 | 871  | 0.923051097  | OSTF1                       |
| 8 | 51,525,000 | 51,675,000 | 688 | 1093 | 0.662324574  |                             |
| 8 | 51,600,000 | 51,750,000 | 689 | 1096 | 0.231844402  |                             |
| 8 | 51,675,000 | 51,825,000 | 690 | 751  | -0.163946863 |                             |
| 8 | 51,750,000 | 51,900,000 | 691 | 865  | 0.119912846  |                             |
| 8 | 51,825,000 | 51,975,000 | 692 | 1146 | -0.113313651 |                             |
| 8 | 51,900,000 | 52,050,000 | 693 | 818  | -0.091342273 |                             |
| 8 | 51,975,000 | 52,125,000 | 694 | 556  | 0.871898506  |                             |
| 8 | 52,050,000 | 52,200,000 | 695 | 705  | 0.954362577  |                             |
| 8 | 52,125,000 | 52,275,000 | 696 | 882  | 0.716529006  |                             |
| 8 | 52,200,000 | 52,350,000 | 697 | 871  | 0.303048177  | PCSK5                       |
| 8 | 52,275,000 | 52,425,000 | 698 | 734  | -0.007588595 | PCSK5                       |
| 8 | 52,350,000 | 52,500,000 | 699 | 972  | 0.194467756  | PCSK5                       |
| 8 | 52,425,000 | 52,575,000 | 700 | 1140 | 0.316292399  | PCSK5                       |
| 8 | 52,500,000 | 52,650,000 | 701 | 841  | 0.588514484  | PCSK5                       |
| 8 | 52,575,000 | 52,725,000 | 702 | 757  | 0.848901168  | PCSK5                       |
| 8 | 52,650,000 | 52,800,000 | 703 | 784  | 0.936996295  | PCSK5,RFK                   |
| 8 | 52,725,000 | 52,875,000 | 704 | 983  | 0.700478985  | GCNT1,RFK                   |
| 8 | 52,800,000 | 52,950,000 | 705 | 1105 | 0.573124829  | GCNT1                       |
| 8 | 52,875,000 | 53,025,000 | 706 | 1214 | 0.829912383  | PRUNE2                      |
| 8 | 52,950,000 | 53,100,000 | 707 | 1514 | 1.131999074  | PRUNE2                      |
| 8 | 53,025,000 | 53,175,000 | 708 | 1482 | 0.705978836  | PRUNE2                      |
| 8 | 53,100,000 | 53,250,000 | 709 | 1354 | 0.186203531  | PRUNE2                      |
| 8 | 53,175,000 | 53,325,000 | 710 | 1130 | 0.45844511   | PRUNE2                      |
| 8 | 53,250,000 | 53,400,000 | 711 | 924  | 0.303005133  | FOXB2                       |
| 8 | 53,325,000 | 53,475,000 | 712 | 1061 | 0.025422934  | FOXB2                       |
| 8 | 53,400,000 | 53,550,000 | 713 | 1373 | -1.152379463 |                             |

|   |            |            |     |      |              |                                             |
|---|------------|------------|-----|------|--------------|---------------------------------------------|
| 8 | 53,475,000 | 53,625,000 | 714 | 1398 | -1.402693946 | ENSBTAG00000047788                          |
| 8 | 53,550,000 | 53,700,000 | 715 | 1016 | -0.475888167 | GNA14,ENSBTAG00000047788                    |
| 8 | 53,625,000 | 53,775,000 | 716 | 789  | -0.258258199 | GNA14,ENSBTAG00000017734,ENSBTAG00000047788 |
| 8 | 53,700,000 | 53,850,000 | 717 | 733  | -1.059871002 | GNA14,ENSBTAG00000017734                    |
| 8 | 53,775,000 | 53,925,000 | 718 | 568  | -1.581700508 | GNA14,ENSBTAG00000017734                    |
| 8 | 53,850,000 | 54,000,000 | 719 | 534  | -1.056024352 | GNA14,GNAQ                                  |
| 8 | 53,925,000 | 54,075,000 | 720 | 899  | 0.21219519   | GNA14,GNAQ                                  |
| 8 | 54,000,000 | 54,150,000 | 721 | 998  | 0.57911331   | GNAQ                                        |
| 8 | 54,075,000 | 54,225,000 | 722 | 1003 | 0.428534406  | GNAQ                                        |
| 8 | 54,150,000 | 54,300,000 | 723 | 1131 | 0.160042394  | GNAQ                                        |
| 8 | 54,225,000 | 54,375,000 | 724 | 1028 | -0.190604875 | GNAQ                                        |
| 8 | 54,300,000 | 54,450,000 | 725 | 1000 | -0.153140767 | CEP78                                       |
| 8 | 54,375,000 | 54,525,000 | 726 | 1006 | -3.651784418 | CEP78,PSAT1                                 |
| 8 | 54,450,000 | 54,600,000 | 727 | 972  | -5.810524291 | CEP78,PSAT1                                 |
| 8 | 54,525,000 | 54,675,000 | 728 | 1095 | -3.048150411 | PSAT1                                       |
| 8 | 54,600,000 | 54,750,000 | 729 | 1141 | -0.856171615 |                                             |
| 8 | 54,675,000 | 54,825,000 | 730 | 1110 | -1.253280508 |                                             |
| 8 | 54,750,000 | 54,900,000 | 731 | 1127 | -1.443050845 |                                             |
| 8 | 54,825,000 | 54,975,000 | 732 | 1167 | -0.493205186 | RAN                                         |
| 8 | 54,900,000 | 55,050,000 | 733 | 1437 | -0.290617386 | RAN                                         |
| 8 | 54,975,000 | 55,125,000 | 734 | 1570 | 0.392052985  |                                             |
| 8 | 55,050,000 | 55,200,000 | 735 | 1433 | 0.181630957  |                                             |
| 8 | 55,125,000 | 55,275,000 | 736 | 1343 | -0.707342989 |                                             |
| 8 | 55,200,000 | 55,350,000 | 737 | 1351 | -0.570364007 |                                             |
| 8 | 55,275,000 | 55,425,000 | 738 | 1143 | -0.021561636 |                                             |
| 8 | 55,350,000 | 55,500,000 | 739 | 1021 | 0.731282677  |                                             |
| 8 | 55,425,000 | 55,575,000 | 740 | 1022 | 0.131144027  |                                             |
| 8 | 55,500,000 | 55,650,000 | 741 | 934  | -1.840168843 |                                             |
| 8 | 55,575,000 | 55,725,000 | 742 | 695  | -2.128532923 |                                             |
| 8 | 55,650,000 | 55,800,000 | 743 | 426  | -1.550408607 |                                             |
| 8 | 55,725,000 | 55,875,000 | 744 | 481  | -1.123623665 | TLE4                                        |
| 8 | 55,800,000 | 55,950,000 | 745 | 614  | -1.46289058  | TLE4                                        |
| 8 | 55,875,000 | 56,025,000 | 746 | 528  | -1.27229278  | TLE4                                        |
| 8 | 55,950,000 | 56,100,000 | 747 | 418  | -0.639489107 | TLE4                                        |
| 8 | 56,025,000 | 56,175,000 | 748 | 524  | -1.046036768 |                                             |
| 8 | 56,100,000 | 56,250,000 | 749 | 456  | -0.376519192 |                                             |
| 8 | 56,175,000 | 56,325,000 | 750 | 482  | -1.064162501 |                                             |
| 8 | 56,250,000 | 56,400,000 | 751 | 475  | -0.44401269  |                                             |
| 8 | 56,325,000 | 56,475,000 | 752 | 268  | 0.458737163  |                                             |
| 8 | 56,400,000 | 56,550,000 | 753 | 467  | -0.456155409 | ENSBTAG00000046462                          |
| 8 | 56,475,000 | 56,625,000 | 754 | 571  | 0.386665122  | ENSBTAG00000046462                          |
| 8 | 56,550,000 | 56,700,000 | 755 | 584  | 0.185949204  | ENSBTAG00000046462                          |
| 8 | 56,625,000 | 56,775,000 | 756 | 459  | -0.749456968 |                                             |
| 8 | 56,700,000 | 56,850,000 | 757 | 99   | -0.495825389 |                                             |
| 8 | 56,775,000 | 56,925,000 | 758 | 515  | -0.142188345 |                                             |
| 8 | 56,850,000 | 57,000,000 | 759 | 958  | -0.125578891 |                                             |
| 8 | 56,925,000 | 57,075,000 | 760 | 922  | 0.117036436  |                                             |
| 8 | 57,000,000 | 57,150,000 | 761 | 1292 | 1.058996622  |                                             |
| 8 | 57,075,000 | 57,225,000 | 762 | 1371 | 0.974509121  |                                             |
| 8 | 57,150,000 | 57,300,000 | 763 | 761  | -0.178767203 |                                             |
| 8 | 57,225,000 | 57,375,000 | 764 | 402  | -1.670193978 |                                             |
| 8 | 57,300,000 | 57,450,000 | 765 | 761  | -1.345751627 |                                             |

|   |            |            |     |      |              |                                                                                                                  |
|---|------------|------------|-----|------|--------------|------------------------------------------------------------------------------------------------------------------|
| 8 | 57,375,000 | 57,525,000 | 766 | 1182 | -0.079893793 |                                                                                                                  |
| 8 | 57,450,000 | 57,600,000 | 767 | 962  | 0.307857125  |                                                                                                                  |
| 8 | 57,525,000 | 57,675,000 | 768 | 629  | 0.884137783  |                                                                                                                  |
| 8 | 57,600,000 | 57,750,000 | 769 | 773  | -0.245630507 |                                                                                                                  |
| 8 | 57,675,000 | 57,825,000 | 770 | 739  | -1.269798666 |                                                                                                                  |
| 8 | 57,750,000 | 57,900,000 | 771 | 746  | -0.055122891 |                                                                                                                  |
| 8 | 57,825,000 | 57,975,000 | 772 | 813  | -0.613278753 | TLE1                                                                                                             |
| 8 | 57,900,000 | 58,050,000 | 773 | 593  | -3.29846835  | TLE1                                                                                                             |
| 8 | 57,975,000 | 58,125,000 | 774 | 774  | -0.425447878 | TLE1                                                                                                             |
| 8 | 58,050,000 | 58,200,000 | 775 | 983  | 0.788492851  |                                                                                                                  |
| 8 | 58,125,000 | 58,275,000 | 776 | 862  | 0.356007232  | SPATA31D1,ENSBTAG00000046782                                                                                     |
| 8 | 58,200,000 | 58,350,000 | 777 | 1023 | 0.646738708  | SPATA31D1,ENSBTAG00000046782                                                                                     |
| 8 | 58,275,000 | 58,425,000 | 778 | 1030 | 1.090955207  |                                                                                                                  |
| 8 | 58,350,000 | 58,500,000 | 779 | 852  | 0.517835685  |                                                                                                                  |
| 8 | 58,425,000 | 58,575,000 | 780 | 1021 | -0.2069657   |                                                                                                                  |
| 8 | 58,500,000 | 58,650,000 | 781 | 1097 | -2.027178191 | FKBP8                                                                                                            |
| 8 | 58,575,000 | 58,725,000 | 782 | 1026 | -3.281121467 | FKBP8                                                                                                            |
| 8 | 58,650,000 | 58,800,000 | 783 | 938  | -0.845711142 |                                                                                                                  |
| 8 | 58,725,000 | 58,875,000 | 784 | 794  | 0.745763365  |                                                                                                                  |
| 8 | 58,800,000 | 58,950,000 | 785 | 979  | 0.679799423  |                                                                                                                  |
| 8 | 58,875,000 | 59,025,000 | 786 | 1125 | 0.92438061   |                                                                                                                  |
| 8 | 58,950,000 | 59,100,000 | 787 | 972  | 0.367190275  |                                                                                                                  |
| 8 | 59,025,000 | 59,175,000 | 788 | 817  | -0.485021782 |                                                                                                                  |
| 8 | 59,100,000 | 59,250,000 | 789 | 915  | 0.352374683  |                                                                                                                  |
| 8 | 59,175,000 | 59,325,000 | 790 | 1041 | 0.881979267  |                                                                                                                  |
| 8 | 59,250,000 | 59,400,000 | 791 | 921  | 0.858442378  |                                                                                                                  |
| 8 | 59,325,000 | 59,475,000 | 792 | 955  | 0.584786664  |                                                                                                                  |
| 8 | 59,400,000 | 59,550,000 | 793 | 1078 | 0.745781606  | ENSBTAG00000038982                                                                                               |
| 8 | 59,475,000 | 59,625,000 | 794 | 1081 | 0.963412786  | ENSBTAG00000017338,ENSBTAG00000038982                                                                            |
| 8 | 59,550,000 | 59,700,000 | 795 | 702  | 0.826549491  | DNAJB5,KIAA1045,ENSBTAG00000017338                                                                               |
| 8 | 59,625,000 | 59,775,000 | 796 | 490  | 0.389163446  | DNAJB5,FAM214B,KIAA1045,MGC159566,PIGO,STOML2,VCP                                                                |
| 8 | 59,700,000 | 59,850,000 | 797 | 828  | 0.302911047  | FAM214B,MGC159566,PIGO,STOML2,UNC13B,VCP                                                                         |
| 8 | 59,775,000 | 59,925,000 | 798 | 988  | 0.212561329  | FAM214B,UNC13B                                                                                                   |
| 8 | 59,850,000 | 60,000,000 | 799 | 714  | 0.081999245  | UNC13B                                                                                                           |
| 8 | 59,925,000 | 60,075,000 | 800 | 625  | -0.211292299 | UNC13B,ENSBTAG00000011402                                                                                        |
| 8 | 60,000,000 | 60,150,000 | 801 | 556  | 0.194915117  | RUSC2,UNC13B,ENSBTAG00000011402                                                                                  |
| 8 | 60,075,000 | 60,225,000 | 802 | 357  | 1.006620534  | CD72,FAM166B,RUSC2,TESK1,ENSBTAG00000011402                                                                      |
| 8 | 60,150,000 | 60,300,000 | 803 | 410  | 0.049940278  | ARHGEF39,CA9,CCDC107,CD72,FAM166B,RUSC2,SIT1,TESK1,TLN1,TPM2                                                     |
| 8 | 60,225,000 | 60,375,000 | 804 | 557  | -0.113794918 | ARHGEF39,CA9,CCDC107,CREB3,GBA2,MSMP,NPR2,RGP1,SIT1,TLN1,TPM2                                                    |
| 8 | 60,300,000 | 60,450,000 | 805 | 681  | 0.675948332  | CREB3,FAM221B,GBA2,HINT2,MSMP,NPR2,RGP1,SPAG8,TLN1,TMEM8B,ENSBTAG00000047598                                     |
| 8 | 60,375,000 | 60,525,000 | 806 | 960  | 0.796021388  | FAM221B,HINT2,NPR2,SPAG8,TMEM8B,ENSBTAG0000026123,ENSBTAG00000045900,ENSBTAG00000047237,ENSBTAG00000047598       |
| 8 | 60,450,000 | 60,600,000 | 807 | 1133 | 0.426919616  | ENSBTAG00000026123,ENSBTAG00000032668,ENSBTAG00000032669,ENSBTAG00000045900,ENSBTAG0000045958,ENSBTAG00000047237 |

|   |            |            |     |      |              |                                                                                                                                              |
|---|------------|------------|-----|------|--------------|----------------------------------------------------------------------------------------------------------------------------------------------|
|   |            |            |     |      |              | OR13C7P,ENSBTAG00000032668,ENSBTAG00000032669,ENSBTAG00000032670,ENSBTAG00000038308,ENSBTAG00000039443,ENSBTAG00000045958,ENSBTAG00000047099 |
| 8 | 60,525,000 | 60,675,000 | 808 | 770  | 0.305827289  | OR13C7P,RECK,ENSBTAG00000032670,ENSBTAG00000038086,ENSBTAG00000038308,ENSBTAG00000039443,ENSBTAG00000047099                                  |
| 8 | 60,600,000 | 60,750,000 | 809 | 474  | 0.344735188  | CCIN,GLIPR2,RECK,ENSBTAG00000038086                                                                                                          |
| 8 | 60,675,000 | 60,825,000 | 810 | 892  | 0.531617126  | CCIN,CLTA,GLIPR2,GNE,RECK                                                                                                                    |
| 8 | 60,750,000 | 60,900,000 | 811 | 983  | 0.094896226  | CLTA,GNE,RNF38                                                                                                                               |
| 8 | 60,825,000 | 60,975,000 | 812 | 624  | -0.941572488 | GNE,RNF38                                                                                                                                    |
| 8 | 60,900,000 | 61,050,000 | 813 | 557  | -1.15467751  | RNF38                                                                                                                                        |
| 8 | 60,975,000 | 61,125,000 | 814 | 556  | -1.35645885  | MELK                                                                                                                                         |
| 8 | 61,050,000 | 61,200,000 | 815 | 738  | 0.575436314  | MELK                                                                                                                                         |
| 8 | 61,125,000 | 61,275,000 | 816 | 966  | 1.084205215  | MELK                                                                                                                                         |
| 8 | 61,200,000 | 61,350,000 | 817 | 1135 | 1.116418382  | MELK                                                                                                                                         |
| 8 | 61,275,000 | 61,425,000 | 818 | 1140 | 1.07366034   | PAX5                                                                                                                                         |
| 8 | 61,350,000 | 61,500,000 | 819 | 1001 | 0.75699835   | PAX5                                                                                                                                         |
| 8 | 61,425,000 | 61,575,000 | 820 | 894  | 0.554707505  | PAX5                                                                                                                                         |
| 8 | 61,500,000 | 61,650,000 | 821 | 617  | 0.667983618  | PAX5,ZCCHC7                                                                                                                                  |
| 8 | 61,575,000 | 61,725,000 | 822 | 474  | 0.541212725  | ZCCHC7                                                                                                                                       |
| 8 | 61,650,000 | 61,800,000 | 823 | 554  | 0.439663603  | ZCCHC7                                                                                                                                       |
| 8 | 61,725,000 | 61,875,000 | 824 | 646  | 0.47422768   | ZCCHC7                                                                                                                                       |
| 8 | 61,800,000 | 61,950,000 | 825 | 888  | 0.907372838  | GRHPR,ZCCHC7                                                                                                                                 |
| 8 | 61,875,000 | 62,025,000 | 826 | 1085 | 1.285707923  | FBXO10,GRHPR,POLR1E,ZBTB5,ZCCHC7                                                                                                             |
| 8 | 61,950,000 | 62,100,000 | 827 | 1212 | 0.983065413  | FBXO10,GRHPR,POLR1E,TOMM5,ZBTB5                                                                                                              |
| 8 | 62,025,000 | 62,175,000 | 828 | 1004 | 0.830631732  | FBXO10,TOMM5                                                                                                                                 |
| 8 | 62,100,000 | 62,250,000 | 829 | 745  | 1.288092117  |                                                                                                                                              |
| 8 | 62,175,000 | 62,325,000 | 830 | 952  | 1.288903803  | FRMPD1                                                                                                                                       |
| 8 | 62,250,000 | 62,400,000 | 831 | 842  | 0.728155998  | DCAF10,EXOSC3,FRMPD1,TRMT10B                                                                                                                 |
| 8 | 62,325,000 | 62,475,000 | 832 | 611  | -0.278865368 | DCAF10,EXOSC3,MCART1,SHB,TRMT10B                                                                                                             |
| 8 | 62,400,000 | 62,550,000 | 833 | 1038 | 0.535781735  | DCAF10,MCART1,SHB                                                                                                                            |
| 8 | 62,475,000 | 62,625,000 | 834 | 1284 | 0.935041658  | SHB                                                                                                                                          |
| 8 | 62,550,000 | 62,700,000 | 835 | 1157 | 0.913195563  | SHB                                                                                                                                          |
| 8 | 62,625,000 | 62,775,000 | 836 | 1101 | 0.801405099  |                                                                                                                                              |
| 8 | 62,700,000 | 62,850,000 | 837 | 1341 | -1.512846106 |                                                                                                                                              |
| 8 | 62,775,000 | 62,925,000 | 838 | 1309 | -1.699489636 | ALDH1B1,IGFBPL1                                                                                                                              |
| 8 | 62,850,000 | 63,000,000 | 839 | 1226 | -0.078149442 | ALDH1B1,CCDC180,IGFBPL1,ENSBTAG00000040034                                                                                                   |
| 8 | 62,925,000 | 63,075,000 | 840 | 1259 | 0.052773619  | CCDC180,TDRD7,ENSBTAG00000040034                                                                                                             |
| 8 | 63,000,000 | 63,150,000 | 841 | 841  | -0.110994209 | CCDC180,TDRD7                                                                                                                                |
| 8 | 63,075,000 | 63,225,000 | 842 | 892  | 0.639804754  | TDRD7,TMOD1                                                                                                                                  |
| 8 | 63,150,000 | 63,300,000 | 843 | 1243 | 1.151134094  | NCBP1,TDRD7,TMOD1,TSTD2                                                                                                                      |
| 8 | 63,225,000 | 63,375,000 | 844 | 1078 | 1.162817891  | NCBP1,TMOD1,TSTD2,XPA                                                                                                                        |
| 8 | 63,300,000 | 63,450,000 | 845 | 1012 | 1.078322125  | NCBP1,XPA                                                                                                                                    |
| 8 | 63,375,000 | 63,525,000 | 846 | 1020 | 1.122648625  | FOXE1                                                                                                                                        |
| 8 | 63,450,000 | 63,600,000 | 847 | 903  | 0.83723235   | C8H9ORF156,FOXE1,HEMGN                                                                                                                       |
| 8 | 63,525,000 | 63,675,000 | 848 | 781  | 0.494989064  | ANP32B,C8H9ORF156,HEMGN,NANS                                                                                                                 |
| 8 | 63,600,000 | 63,750,000 | 849 | 716  | 0.87608274   | ANP32B,CORO2A,NANS,TRIM14                                                                                                                    |
| 8 | 63,675,000 | 63,825,000 | 850 | 1005 | 1.121725824  | CORO2A,TBC1D2,TRIM14                                                                                                                         |
| 8 | 63,750,000 | 63,900,000 | 851 | 1293 | 0.844553053  | CORO2A,GABBR2,TBC1D2                                                                                                                         |
| 8 | 63,825,000 | 63,975,000 | 852 | 1316 | 0.443682744  | GABBR2                                                                                                                                       |
| 8 | 63,900,000 | 64,050,000 | 853 | 841  | -0.377764994 | GABBR2                                                                                                                                       |
| 8 | 63,975,000 | 64,125,000 | 854 | 601  | -0.487030745 | GABBR2                                                                                                                                       |
| 8 | 64,050,000 | 64,200,000 | 855 | 667  | 0.295888842  | GABBR2                                                                                                                                       |

|   |            |            |     |      |              |                                                          |
|---|------------|------------|-----|------|--------------|----------------------------------------------------------|
| 8 | 64,125,000 | 64,275,000 | 856 | 750  | 1.023004539  | ANKS6                                                    |
| 8 | 64,200,000 | 64,350,000 | 857 | 904  | 1.025720576  | ANKS6,GALNT12                                            |
| 8 | 64,275,000 | 64,425,000 | 858 | 988  | 0.800144806  | ANKS6,GALNT12                                            |
| 8 | 64,350,000 | 64,500,000 | 859 | 969  | 0.32957574   | COL15A1                                                  |
| 8 | 64,425,000 | 64,575,000 | 860 | 782  | -0.472231651 | COL15A1,TGFBR1                                           |
| 8 | 64,500,000 | 64,650,000 | 861 | 507  | -1.573809633 | COL15A1,TGFBR1,ENSBTAG00000047836                        |
| 8 | 64,575,000 | 64,725,000 | 862 | 341  | -1.170125445 | ALG2,SEC61B,TGFBR1,ENSBTAG00000047836                    |
| 8 | 64,650,000 | 64,800,000 | 863 | 395  | 0.255725956  | ALG2,SEC61B                                              |
| 8 | 64,725,000 | 64,875,000 | 864 | 448  | 0.69777449   | SEC61B                                                   |
| 8 | 64,800,000 | 64,950,000 | 865 | 505  | 1.015984714  |                                                          |
| 8 | 64,875,000 | 65,025,000 | 866 | 797  | 1.162133798  | ENSBTAG00000019143                                       |
| 8 | 64,950,000 | 65,100,000 | 867 | 991  | 1.363790163  | ENSBTAG00000019143                                       |
| 8 | 65,025,000 | 65,175,000 | 868 | 954  | 1.28443664   |                                                          |
| 8 | 65,100,000 | 65,250,000 | 869 | 860  | 1.10481004   |                                                          |
| 8 | 65,175,000 | 65,325,000 | 870 | 725  | 1.059901035  |                                                          |
| 8 | 65,250,000 | 65,400,000 | 871 | 786  | 0.805989973  | NR4A3                                                    |
| 8 | 65,325,000 | 65,475,000 | 872 | 887  | 0.554493564  | NR4A3,STX17                                              |
| 8 | 65,400,000 | 65,550,000 | 873 | 799  | 0.364862507  | ERP44,STX17                                              |
| 8 | 65,475,000 | 65,625,000 | 874 | 804  | 0.824124318  | ERP44,INVS,STX17                                         |
| 8 | 65,550,000 | 65,700,000 | 875 | 832  | 0.61033711   | ERP44,INVS                                               |
| 8 | 65,625,000 | 65,775,000 | 876 | 851  | 0.545689401  | INVS,TEX10                                               |
| 8 | 65,700,000 | 65,850,000 | 877 | 1022 | 0.736544229  | INVS,TEX10,ENSBTAG00000035708                            |
| 8 | 65,775,000 | 65,925,000 | 878 | 1390 | 0.584179296  | TEX10,ENSBTAG00000035707,ENSBTAG00000035708              |
| 8 | 65,850,000 | 66,000,000 | 879 | 1595 | 0.812024517  | ENSBTAG00000018095,ENSBTAG00000035707,ENSBTAG00000035708 |
| 8 | 65,925,000 | 66,075,000 | 880 | 1497 | 0.651683996  | ENSBTAG00000018095,ENSBTAG00000035709                    |
| 8 | 66,000,000 | 66,150,000 | 881 | 1303 | 0.283473229  | ENSBTAG00000035709,ENSBTAG00000037971                    |
| 8 | 66,075,000 | 66,225,000 | 882 | 1239 | 0.820211245  | ENSBTAG00000037971,ENSBTAG00000047647                    |
| 8 | 66,150,000 | 66,300,000 | 883 | 1115 | 1.125353612  | ENSBTAG00000047647                                       |
| 8 | 66,225,000 | 66,375,000 | 884 | 1181 | 0.960461146  |                                                          |
| 8 | 66,300,000 | 66,450,000 | 885 | 1156 | 0.346327134  | ENSBTAG00000006446                                       |
| 8 | 66,375,000 | 66,525,000 | 886 | 1211 | 0.549876075  | ENSBTAG00000006446                                       |
| 8 | 66,450,000 | 66,600,000 | 887 | 1442 | 0.901712343  | ENSBTAG00000006446                                       |
| 8 | 66,525,000 | 66,675,000 | 888 | 1265 | 1.003524993  | ENSBTAG00000006446                                       |
| 8 | 66,600,000 | 66,750,000 | 889 | 1248 | 0.646306086  | ENSBTAG00000006446                                       |
| 8 | 66,675,000 | 66,825,000 | 890 | 1125 | 0.135768671  |                                                          |
| 8 | 66,750,000 | 66,900,000 | 891 | 1010 | -0.874082957 |                                                          |
| 8 | 66,825,000 | 66,975,000 | 892 | 970  | -0.799742977 |                                                          |
| 8 | 66,900,000 | 67,050,000 | 893 | 705  | -0.318234129 |                                                          |
| 8 | 66,975,000 | 67,125,000 | 894 | 549  | 0.981044562  |                                                          |
| 8 | 67,050,000 | 67,200,000 | 895 | 1167 | 1.319452777  |                                                          |
| 8 | 67,125,000 | 67,275,000 | 896 | 1341 | 1.33214573   | ENSBTAG00000005966                                       |
| 8 | 67,200,000 | 67,350,000 | 897 | 1053 | 1.150472932  | ENSBTAG00000005966                                       |
| 8 | 67,275,000 | 67,425,000 | 898 | 1207 | 0.937173251  |                                                          |
| 8 | 67,350,000 | 67,500,000 | 899 | 1345 | 0.269235476  | LPL                                                      |
| 8 | 67,425,000 | 67,575,000 | 900 | 1590 | 0.275207742  | LPL                                                      |
| 8 | 67,500,000 | 67,650,000 | 901 | 1498 | 0.720223564  | LPL                                                      |
| 8 | 67,575,000 | 67,725,000 | 902 | 1257 | 1.15795718   | SLC18A1                                                  |
| 8 | 67,650,000 | 67,800,000 | 903 | 1187 | 1.128628889  | ATP6V1B2,SLC18A1                                         |
| 8 | 67,725,000 | 67,875,000 | 904 | 1122 | -0.896916738 | ATP6V1B2,LZTS1,SLC18A1                                   |
| 8 | 67,800,000 | 67,950,000 | 905 | 949  | -1.374651981 | ATP6V1B2,LZTS1                                           |
| 8 | 67,875,000 | 68,025,000 | 906 | 1116 | 0.488613561  |                                                          |
| 8 | 67,950,000 | 68,100,000 | 907 | 1266 | 0.580124084  |                                                          |



|   |            |            |     |      |              |                                                          |
|---|------------|------------|-----|------|--------------|----------------------------------------------------------|
| 8 | 68,025,000 | 68,175,000 | 908 | 991  | 0.609767511  |                                                          |
| 8 | 68,100,000 | 68,250,000 | 909 | 1073 | 0.352986574  |                                                          |
| 8 | 68,175,000 | 68,325,000 | 910 | 1253 | -0.492914789 |                                                          |
| 8 | 68,250,000 | 68,400,000 | 911 | 1038 | -1.623020878 |                                                          |
| 8 | 68,325,000 | 68,475,000 | 912 | 820  | -1.412113545 |                                                          |
| 8 | 68,400,000 | 68,550,000 | 913 | 908  | -2.835981382 |                                                          |
| 8 | 68,475,000 | 68,625,000 | 914 | 1058 | -2.669792552 |                                                          |
| 8 | 68,550,000 | 68,700,000 | 915 | 1294 | -1.084825222 |                                                          |
| 8 | 68,625,000 | 68,775,000 | 916 | 1140 | -0.778142927 |                                                          |
| 8 | 68,700,000 | 68,850,000 | 917 | 846  | 0.154966621  |                                                          |
| 8 | 68,775,000 | 68,925,000 | 918 | 1067 | -0.835575129 |                                                          |
| 8 | 68,850,000 | 69,000,000 | 919 | 1307 | -0.488769848 |                                                          |
| 8 | 68,925,000 | 69,075,000 | 920 | 948  | 0.208309871  |                                                          |
| 8 | 69,000,000 | 69,150,000 | 921 | 664  | 0.836683338  |                                                          |
| 8 | 69,075,000 | 69,225,000 | 922 | 1059 | 0.156558973  |                                                          |
| 8 | 69,150,000 | 69,300,000 | 923 | 1090 | -0.596826761 |                                                          |
| 8 | 69,225,000 | 69,375,000 | 924 | 902  | 0.02537852   |                                                          |
| 8 | 69,300,000 | 69,450,000 | 925 | 1227 | 0.943223021  |                                                          |
| 8 | 69,375,000 | 69,525,000 | 926 | 1283 | 0.370844459  | GFRA2                                                    |
| 8 | 69,450,000 | 69,600,000 | 927 | 986  | -0.592318097 | GFRA2                                                    |
| 8 | 69,525,000 | 69,675,000 | 928 | 930  | 0.449166118  | GFRA2                                                    |
| 8 | 69,600,000 | 69,750,000 | 929 | 862  | 0.963839414  | DOK2,GFRA2,XPO7                                          |
| 8 | 69,675,000 | 69,825,000 | 930 | 610  | 0.815008343  | DOK2,XPO7                                                |
| 8 | 69,750,000 | 69,900,000 | 931 | 477  | 0.373351688  | DMTN,FGF17,NPM2,XPO7                                     |
| 8 | 69,825,000 | 69,975,000 | 932 | 509  | 0.603488761  | DMTN,FAM160B2,FGF17,HR,LGI3,NPM2,NUDT18,REEP4,XPO7       |
| 8 | 69,900,000 | 70,050,000 | 933 | 678  | 0.760774991  | BMP1,FAM160B2,HR,LGI3,NUDT18,PHYHIP,REEP4,SFTPC          |
| 8 | 69,975,000 | 70,125,000 | 934 | 804  | 0.114264751  | BMP1,PHYHIP,PIWIL2,POLR3D,SFTPC                          |
| 8 | 70,050,000 | 70,200,000 | 935 | 798  | 0.048344752  | PIWIL2,POLR3D,SLC39A14                                   |
| 8 | 70,125,000 | 70,275,000 | 936 | 730  | 0.394356997  | PIWIL2,PPP3CC,SLC39A14                                   |
| 8 | 70,200,000 | 70,350,000 | 937 | 515  | 0.510509923  | PPP3CC,SLC39A14                                          |
| 8 | 70,275,000 | 70,425,000 | 938 | 514  | 0.642772776  | CCAR2,PDLIM2,PPP3CC,SORBS3,ENSBTAG00000005466            |
| 8 | 70,350,000 | 70,500,000 | 939 | 594  | -0.168511402 | BIN3,CCAR2,PDLIM2,SORBS3,ENSBTAG00000005466              |
| 8 | 70,425,000 | 70,575,000 | 940 | 590  | -0.249341473 | BIN3,CCAR2,EGR3,PEBP4                                    |
| 8 | 70,500,000 | 70,650,000 | 941 | 641  | 0.112695341  | EGR3,PEBP4                                               |
| 8 | 70,575,000 | 70,725,000 | 942 | 838  | -0.181898644 | PEBP4                                                    |
| 8 | 70,650,000 | 70,800,000 | 943 | 863  | 0.36649566   | PEBP4                                                    |
| 8 | 70,725,000 | 70,875,000 | 944 | 715  | -0.042502035 | PEBP4,RHOBTB2,ENSBTAG00000035958                         |
| 8 | 70,800,000 | 70,950,000 | 945 | 809  | -0.57335246  | RHOBTB2,TNFRSF10D,ENSBTAG00000035958                     |
| 8 | 70,875,000 | 71,025,000 | 946 | 904  | -0.670912767 | RHOBTB2,TNFRSF10D                                        |
| 8 | 70,950,000 | 71,100,000 | 947 | 587  | -0.576254259 |                                                          |
| 8 | 71,025,000 | 71,175,000 | 948 | 292  | -0.143976693 | ENSBTAG00000048226                                       |
| 8 | 71,100,000 | 71,250,000 | 949 | 701  | 0.067407062  | CHMP7,ENSBTAG00000046431,ENSBTAG00000048226              |
| 8 | 71,175,000 | 71,325,000 | 950 | 1151 | -0.608669521 | CHMP7,LOXL2,R3HCC1,ENSBTAG00000046431,ENSBTAG00000048226 |
| 8 | 71,250,000 | 71,400,000 | 951 | 1138 | -1.434184586 | CHMP7,LOXL2,R3HCC1                                       |
| 8 | 71,325,000 | 71,475,000 | 952 | 1038 | -0.227447238 | ENTPD4,LOXL2                                             |
| 8 | 71,400,000 | 71,550,000 | 953 | 979  | 0.795376554  | ENTPD4,SLC25A37                                          |
| 8 | 71,475,000 | 71,625,000 | 954 | 764  | 0.929199313  | SLC25A37                                                 |
| 8 | 71,550,000 | 71,700,000 | 955 | 569  | 0.10224937   | NKX2-6,NKX3-1,SLC25A37                                   |

|   |            |            |      |      |              |                                                                 |
|---|------------|------------|------|------|--------------|-----------------------------------------------------------------|
| 8 | 71,625,000 | 71,775,000 | 956  | 470  | -0.097967245 | NKX2-6,NKX3-1                                                   |
| 8 | 71,700,000 | 71,850,000 | 957  | 535  | 0.255973021  | NKX2-6                                                          |
| 8 | 71,775,000 | 71,925,000 | 958  | 673  | 0.928531534  | STC1                                                            |
| 8 | 71,850,000 | 72,000,000 | 959  | 505  | 0.465670709  | STC1                                                            |
| 8 | 71,925,000 | 72,075,000 | 960  | 321  | -1.223250174 |                                                                 |
| 8 | 72,000,000 | 72,150,000 | 961  | 372  | -0.401187257 |                                                                 |
| 8 | 72,075,000 | 72,225,000 | 962  | 459  | -1.346456151 |                                                                 |
| 8 | 72,150,000 | 72,300,000 | 963  | 467  | -1.589371012 | ENSBTAG00000047207                                              |
| 8 | 72,225,000 | 72,375,000 | 964  | 584  | 0.445210675  | ENSBTAG00000047207                                              |
| 8 | 72,300,000 | 72,450,000 | 965  | 687  | 0.724528011  | ADAM28                                                          |
| 8 | 72,375,000 | 72,525,000 | 966  | 774  | 0.465169103  | ADAM28,ADAMDEC1                                                 |
| 8 | 72,450,000 | 72,600,000 | 967  | 1138 | 0.212395146  | ADAM28,ADAM7,ADAMDEC1                                           |
| 8 | 72,525,000 | 72,675,000 | 968  | 1296 | -0.311403099 | ADAM7                                                           |
| 8 | 72,600,000 | 72,750,000 | 969  | 1264 | -0.544250787 |                                                                 |
| 8 | 72,675,000 | 72,825,000 | 970  | 1422 | -0.026495671 |                                                                 |
| 8 | 72,750,000 | 72,900,000 | 971  | 1256 | 0.370849422  |                                                                 |
| 8 | 72,825,000 | 72,975,000 | 972  | 1102 | 0.617401877  |                                                                 |
| 8 | 72,900,000 | 73,050,000 | 973  | 1202 | 0.372708389  |                                                                 |
| 8 | 72,975,000 | 73,125,000 | 974  | 1237 | 0.23971445   | ENSBTAG00000001219                                              |
| 8 | 73,050,000 | 73,200,000 | 975  | 948  | 0.121022968  | NEFL,NF-M,ENSBTAG00000001219                                    |
| 8 | 73,125,000 | 73,275,000 | 976  | 471  | -0.406769849 | NEFL,NF-M                                                       |
| 8 | 73,200,000 | 73,350,000 | 977  | 747  | 0.403178692  |                                                                 |
| 8 | 73,275,000 | 73,425,000 | 978  | 1015 | 0.214654455  |                                                                 |
| 8 | 73,350,000 | 73,500,000 | 979  | 898  | 0.029250216  |                                                                 |
| 8 | 73,425,000 | 73,575,000 | 980  | 848  | 0.867636693  | DOCK5                                                           |
| 8 | 73,500,000 | 73,650,000 | 981  | 590  | 1.2761167    | DOCK5                                                           |
| 8 | 73,575,000 | 73,725,000 | 982  | 456  | 0.71914038   | DOCK5,GNRH1,KCTD9                                               |
| 8 | 73,650,000 | 73,800,000 | 983  | 510  | 0.506036629  | DOCK5,GNRH1,KCTD9,ENSBTAG00000002756                            |
| 8 | 73,725,000 | 73,875,000 | 984  | 624  | 0.311862138  | KCTD9,ENSBTAG00000002756,ENSBTAG00000010829,ENSBTAG000000046594 |
| 8 | 73,800,000 | 73,950,000 | 985  | 611  | 0.252245882  | ENSBTAG00000002756,ENSBTAG00000010829,ENSBTAG000000046594       |
| 8 | 73,875,000 | 74,025,000 | 986  | 492  | -0.078258465 | ENSBTAG00000010829                                              |
| 8 | 73,950,000 | 74,100,000 | 987  | 651  | -0.244207443 |                                                                 |
| 8 | 74,025,000 | 74,175,000 | 988  | 877  | 0.373097375  | EBF2                                                            |
| 8 | 74,100,000 | 74,250,000 | 989  | 758  | 0.776141436  | EBF2                                                            |
| 8 | 74,175,000 | 74,325,000 | 990  | 596  | 0.471323214  | EBF2                                                            |
| 8 | 74,250,000 | 74,400,000 | 991  | 895  | -0.692687192 | EBF2                                                            |
| 8 | 74,325,000 | 74,475,000 | 992  | 982  | 0.192397547  | EBF2                                                            |
| 8 | 74,400,000 | 74,550,000 | 993  | 414  | 1.296540408  |                                                                 |
| 8 | 74,475,000 | 74,625,000 | 994  | 21   | 1.427056482  |                                                                 |
| 8 | 74,550,000 | 74,700,000 | 995  | 3    | -2.98773696  |                                                                 |
| 8 | 74,625,000 | 74,775,000 | 996  | 8    | 0.729926517  |                                                                 |
| 8 | 74,700,000 | 74,850,000 | 997  | 177  | 1.196935981  | PPP2R2A                                                         |
| 8 | 74,775,000 | 74,925,000 | 998  | 467  | 1.106055374  | BNIP3L,PPP2R2A                                                  |
| 8 | 74,850,000 | 75,000,000 | 999  | 687  | 0.840187517  | BNIP3L,PPP2R2A                                                  |
| 8 | 74,925,000 | 75,075,000 | 1000 | 1036 | 0.853135279  | BNIP3L,PNMA2                                                    |
| 8 | 75,000,000 | 75,150,000 | 1001 | 1377 | 0.166901633  | DPYSL2,PNMA2                                                    |
| 8 | 75,075,000 | 75,225,000 | 1002 | 1666 | -0.364610836 | DPYSL2                                                          |
| 8 | 75,150,000 | 75,300,000 | 1003 | 1727 | -0.071619788 | ADRA1A,DPYSL2                                                   |
| 8 | 75,225,000 | 75,375,000 | 1004 | 1265 | 0.337999805  | ADRA1A                                                          |
| 8 | 75,300,000 | 75,450,000 | 1005 | 1091 | 0.922062365  | ADRA1A                                                          |
| 8 | 75,375,000 | 75,525,000 | 1006 | 1062 | 0.858936885  |                                                                 |

|   |            |            |      |      |              |                                                                       |
|---|------------|------------|------|------|--------------|-----------------------------------------------------------------------|
| 8 | 75,450,000 | 75,600,000 | 1007 | 780  | 0.909965854  |                                                                       |
| 8 | 75,525,000 | 75,675,000 | 1008 | 772  | 1.00140524   | STMN4                                                                 |
| 8 | 75,600,000 | 75,750,000 | 1009 | 1085 | 0.230784991  | PTK2B,STMN4,TRIM35                                                    |
| 8 | 75,675,000 | 75,825,000 | 1010 | 1114 | -0.08116608  | PTK2B,TRIM35                                                          |
| 8 | 75,750,000 | 75,900,000 | 1011 | 896  | 0.071027216  | CHRNA2,PTK2B                                                          |
| 8 | 75,825,000 | 75,975,000 | 1012 | 1064 | -0.436110915 | CHRNA2,EPHX2,PTK2B                                                    |
| 8 | 75,900,000 | 76,050,000 | 1013 | 1299 | -0.356208128 | EPHX2,GULO,ENSBTAG00000015027                                         |
| 8 | 75,975,000 | 76,125,000 | 1014 | 1110 | 0.401294247  | APTX,DNAJA1,EPHX2,GULO,SMU1,ENSBTAG00000015027                        |
| 8 | 76,050,000 | 76,200,000 | 1015 | 810  | 0.252845758  | APTX,B4GALT1,DNAJA1,SMU1                                              |
| 8 | 76,125,000 | 76,275,000 | 1016 | 640  | 0.086258609  | B4GALT1,SMU1                                                          |
| 8 | 76,200,000 | 76,350,000 | 1017 | 596  | -0.899957162 | B4GALT1,SPINK4                                                        |
| 8 | 76,275,000 | 76,425,000 | 1018 | 752  | -1.029449491 | BAG1,CHMP5,NFX1,SPINK4                                                |
| 8 | 76,350,000 | 76,500,000 | 1019 | 904  | 0.246846661  | BAG1,CHMP5,NFX1,ENSBTAG00000020105                                    |
| 8 | 76,425,000 | 76,575,000 | 1020 | 834  | 0.125363493  | AQP3,NFX1,NOL6,UBE2R2,ENSBTAG00000020105                              |
| 8 | 76,500,000 | 76,650,000 | 1021 | 585  | -0.399119125 | AQP3,NOL6,UBE2R2                                                      |
| 8 | 76,575,000 | 76,725,000 | 1022 | 449  | -1.047106079 | UBAP2,UBE2R2                                                          |
| 8 | 76,650,000 | 76,800,000 | 1023 | 434  | -0.926021893 | UBAP2,UBE2R2                                                          |
| 8 | 76,725,000 | 76,875,000 | 1024 | 683  | 0.212401699  | DCAF12,UBAP2                                                          |
| 8 | 76,800,000 | 76,950,000 | 1025 | 919  | 0.551123713  | DCAF12                                                                |
| 8 | 76,875,000 | 77,025,000 | 1026 | 839  | 0.355670179  | KIF24,UBAP1                                                           |
| 8 | 76,950,000 | 77,100,000 | 1027 | 757  | -0.022788867 | KIF24,NUDT2,SMRP1,UBAP1,ENSBTAG00000005495                            |
| 8 | 77,025,000 | 77,175,000 | 1028 | 679  | -0.112378315 | DNAI1,FAM219A,KIF24,NUDT2,SMRP1,ENSBTAG00000005495                    |
| 8 | 77,100,000 | 77,250,000 | 1029 | 869  | -0.12637692  | DNAI1,ENHO,FAM219A,SMRP1,ENSBTAG00000005495                           |
| 8 | 77,175,000 | 77,325,000 | 1030 | 827  | -0.052420502 | CNTFR,DCTN3,DNAI1,ENHO,RPP25L,ENSBTAG00000005495                      |
| 8 | 77,250,000 | 77,400,000 | 1031 | 525  | 0.197157571  | ARID3C,CCL19,CCL27,CNTFR,DCTN3,GALT,IL11RA,RP25L,SIGMAR1              |
| 8 | 77,325,000 | 77,475,000 | 1032 | 727  | -1.452033016 | ARID3C,CCL19,CCL21,CCL27,DCTN3,GALT,IL11RA,SIGMAR1,ENSBTAG00000039021 |
| 8 | 77,400,000 | 77,550,000 | 1033 | 936  | -0.49288378  | CCL21,RASEF,ENSBTAG00000039021                                        |
| 8 | 77,475,000 | 77,625,000 | 1034 | 1042 | 0.711764602  | RASEF                                                                 |
| 8 | 77,550,000 | 77,700,000 | 1035 | 1245 | 0.588483135  | RASEF                                                                 |
| 8 | 77,625,000 | 77,775,000 | 1036 | 1274 | 0.694945106  |                                                                       |
| 8 | 77,700,000 | 77,850,000 | 1037 | 1380 | 0.709688592  | FRMD3                                                                 |
| 8 | 77,775,000 | 77,925,000 | 1038 | 1569 | 0.309963928  | FRMD3                                                                 |
| 8 | 77,850,000 | 78,000,000 | 1039 | 1705 | 0.205534291  | FRMD3                                                                 |
| 8 | 77,925,000 | 78,075,000 | 1040 | 1851 | 0.444770237  |                                                                       |
| 8 | 78,000,000 | 78,150,000 | 1041 | 1631 | 0.494288738  |                                                                       |
| 8 | 78,075,000 | 78,225,000 | 1042 | 1402 | -0.856427794 | IDNK,UBQLN1                                                           |
| 8 | 78,150,000 | 78,300,000 | 1043 | 1371 | -0.488642635 | IDNK,UBQLN1                                                           |
| 8 | 78,225,000 | 78,375,000 | 1044 | 1070 | 1.084567785  | GKAP1,UBQLN1                                                          |
| 8 | 78,300,000 | 78,450,000 | 1045 | 832  | -0.158684755 | GKAP1,KIF27                                                           |
| 8 | 78,375,000 | 78,525,000 | 1046 | 674  | -0.558488515 | GKAP1,KIF27                                                           |
| 8 | 78,450,000 | 78,600,000 | 1047 | 703  | 0.017193273  | C8H9orf64,HNRNPK,KIF27                                                |
| 8 | 78,525,000 | 78,675,000 | 1048 | 871  | 0.017810378  | C8H9orf64,HNRNPK                                                      |
| 8 | 78,600,000 | 78,750,000 | 1049 | 930  | -0.488146042 |                                                                       |
| 8 | 78,675,000 | 78,825,000 | 1050 | 1254 | -2.242351739 |                                                                       |
| 8 | 78,750,000 | 78,900,000 | 1051 | 1244 | -1.831432653 | SLC28A3                                                               |
| 8 | 78,825,000 | 78,975,000 | 1052 | 920  | 0.443931153  | SLC28A3                                                               |
| 8 | 78,900,000 | 79,050,000 | 1053 | 631  | 0.485757165  | SLC28A3                                                               |

|   |            |            |      |      |              |                          |
|---|------------|------------|------|------|--------------|--------------------------|
| 8 | 78,975,000 | 79,125,000 | 1054 | 343  | 0.695365008  |                          |
| 8 | 79,050,000 | 79,200,000 | 1055 | 329  | 0.509343946  |                          |
| 8 | 79,125,000 | 79,275,000 | 1056 | 431  | -0.003532063 |                          |
| 8 | 79,200,000 | 79,350,000 | 1057 | 396  | -0.240261915 | NTRK2                    |
| 8 | 79,275,000 | 79,425,000 | 1058 | 405  | 0.43054502   | NTRK2                    |
| 8 | 79,350,000 | 79,500,000 | 1059 | 560  | 0.860395948  | NTRK2                    |
| 8 | 79,425,000 | 79,575,000 | 1060 | 441  | 0.674476913  | NTRK2                    |
| 8 | 79,500,000 | 79,650,000 | 1061 | 265  | -2.222137785 | NTRK2                    |
| 8 | 79,575,000 | 79,725,000 | 1062 | 386  | -4.167664416 | NTRK2                    |
| 8 | 79,650,000 | 79,800,000 | 1063 | 612  | -1.499400618 | NTRK2                    |
| 8 | 79,725,000 | 79,875,000 | 1064 | 864  | 0.177156393  | NTRK2                    |
| 8 | 79,800,000 | 79,950,000 | 1065 | 882  | -0.49252561  |                          |
| 8 | 79,875,000 | 80,025,000 | 1066 | 863  | -0.51330227  |                          |
| 8 | 79,950,000 | 80,100,000 | 1067 | 871  | -0.102164802 |                          |
| 8 | 80,025,000 | 80,175,000 | 1068 | 841  | -1.515511534 |                          |
| 8 | 80,100,000 | 80,250,000 | 1069 | 1101 | -0.887149908 | AGTPBP1                  |
| 8 | 80,175,000 | 80,325,000 | 1070 | 1262 | 0.260549701  | AGTPBP1                  |
| 8 | 80,250,000 | 80,400,000 | 1071 | 801  | 0.3817613    | AGTPBP1                  |
| 8 | 80,325,000 | 80,475,000 | 1072 | 473  | 1.31568253   | AGTPBP1                  |
| 8 | 80,400,000 | 80,550,000 | 1073 | 427  | 1.391295854  | NAA35                    |
| 8 | 80,475,000 | 80,625,000 | 1074 | 250  | 0.985486846  | NAA35                    |
| 8 | 80,550,000 | 80,700,000 | 1075 | 340  | 0.350828377  | GOLM1,NAA35              |
| 8 | 80,625,000 | 80,775,000 | 1076 | 580  | 0.136849803  | GOLM1,NAA35              |
| 8 | 80,700,000 | 80,850,000 | 1077 | 679  | 0.354766679  | C9orf153,ISCA1,ZCCHC6    |
| 8 | 80,775,000 | 80,925,000 | 1078 | 512  | 0.516113103  | C9orf153,ISCA1,ZCCHC6    |
| 8 | 80,850,000 | 81,000,000 | 1079 | 393  | 0.134575961  | ZCCHC6                   |
| 8 | 80,925,000 | 81,075,000 | 1080 | 376  | 0.419706974  |                          |
| 8 | 81,000,000 | 81,150,000 | 1081 | 333  | 0.567682573  |                          |
| 8 | 81,075,000 | 81,225,000 | 1082 | 610  | -0.151587125 |                          |
| 8 | 81,150,000 | 81,300,000 | 1083 | 636  | -0.28886004  |                          |
| 8 | 81,225,000 | 81,375,000 | 1084 | 366  | -0.112346661 |                          |
| 8 | 81,300,000 | 81,450,000 | 1085 | 385  | 1.140941242  |                          |
| 8 | 81,375,000 | 81,525,000 | 1086 | 378  | 1.400402313  | GAS1                     |
| 8 | 81,450,000 | 81,600,000 | 1087 | 391  | 0.191952948  | GAS1                     |
| 8 | 81,525,000 | 81,675,000 | 1088 | 595  | -0.274482164 |                          |
| 8 | 81,600,000 | 81,750,000 | 1089 | 533  | 0.041201013  |                          |
| 8 | 81,675,000 | 81,825,000 | 1090 | 505  | 0.359905043  |                          |
| 8 | 81,750,000 | 81,900,000 | 1091 | 485  | -0.435932132 |                          |
| 8 | 81,825,000 | 81,975,000 | 1092 | 460  | -2.387238125 |                          |
| 8 | 81,900,000 | 82,050,000 | 1093 | 785  | -0.489086895 |                          |
| 8 | 81,975,000 | 82,125,000 | 1094 | 612  | 0.189534588  |                          |
| 8 | 82,050,000 | 82,200,000 | 1095 | 429  | -3.520336883 |                          |
| 8 | 82,125,000 | 82,275,000 | 1096 | 831  | -2.405529272 | DAPK1                    |
| 8 | 82,200,000 | 82,350,000 | 1097 | 1135 | -0.848468087 | DAPK1                    |
| 8 | 82,275,000 | 82,425,000 | 1098 | 1110 | -1.164038473 | CTSL1,DAPK1,FBP2         |
| 8 | 82,350,000 | 82,500,000 | 1099 | 952  | -1.446970965 | CTSL1,FBP1,FBP2          |
| 8 | 82,425,000 | 82,575,000 | 1100 | 1040 | -0.809632297 | FBP1,FBP2                |
| 8 | 82,500,000 | 82,650,000 | 1101 | 837  | -0.843511344 |                          |
| 8 | 82,575,000 | 82,725,000 | 1102 | 484  | -0.678074887 | ENSBTAG00000000699       |
| 8 | 82,650,000 | 82,800,000 | 1103 | 616  | 0.614481437  | ENSBTAG00000000699       |
| 8 | 82,725,000 | 82,875,000 | 1104 | 725  | 0.944696277  |                          |
| 8 | 82,800,000 | 82,950,000 | 1105 | 711  | 0.564532886  |                          |
| 8 | 82,875,000 | 83,025,000 | 1106 | 478  | 0.207602736  | FANCC,ENSBTAG00000045622 |

|   |            |            |      |      |              |                                |
|---|------------|------------|------|------|--------------|--------------------------------|
| 8 | 82,950,000 | 83,100,000 | 1107 | 507  | 0.579556007  | FANCC,ENSBTAG00000045622       |
| 8 | 83,025,000 | 83,175,000 | 1108 | 727  | 1.015752789  | FANCC                          |
| 8 | 83,100,000 | 83,250,000 | 1109 | 677  | 0.189289126  | FANCC,TSPY-M2                  |
| 8 | 83,175,000 | 83,325,000 | 1110 | 657  | -2.370677176 | FANCC,TSPY-M2                  |
| 8 | 83,250,000 | 83,400,000 | 1111 | 526  | -1.76423762  | FANCC,TSPY-M2                  |
| 8 | 83,325,000 | 83,475,000 | 1112 | 538  | -1.336773264 |                                |
| 8 | 83,400,000 | 83,550,000 | 1113 | 505  | -1.209813511 | ENSBTAG00000009903             |
| 8 | 83,475,000 | 83,625,000 | 1114 | 284  | -1.178219458 | PTCH1,ENSBTAG00000009903       |
| 8 | 83,550,000 | 83,700,000 | 1115 | 254  | -0.085437384 | PTCH1                          |
| 8 | 83,625,000 | 83,775,000 | 1116 | 319  | -0.525691007 |                                |
| 8 | 83,700,000 | 83,850,000 | 1117 | 367  | -0.476187214 |                                |
| 8 | 83,775,000 | 83,925,000 | 1118 | 496  | 0.156909257  |                                |
| 8 | 83,850,000 | 84,000,000 | 1119 | 606  | 0.175579645  | ERCC6L2                        |
| 8 | 83,925,000 | 84,075,000 | 1120 | 915  | 0.75129288   | ERCC6L2                        |
| 8 | 84,000,000 | 84,150,000 | 1121 | 1318 | 1.132930177  | ERCC6L2                        |
| 8 | 84,075,000 | 84,225,000 | 1122 | 1530 | 1.229773106  | ERCC6L2                        |
| 8 | 84,150,000 | 84,300,000 | 1123 | 1340 | 1.079644002  |                                |
| 8 | 84,225,000 | 84,375,000 | 1124 | 1086 | 0.894929763  |                                |
| 8 | 84,300,000 | 84,450,000 | 1125 | 933  | 0.469358178  | HSD17B3                        |
| 8 | 84,375,000 | 84,525,000 | 1126 | 648  | -2.32490813  | HSD17B3,SLC35D2,ZNF367         |
| 8 | 84,450,000 | 84,600,000 | 1127 | 438  | -3.6269536   | HABP4,SLC35D2,ZNF367           |
| 8 | 84,525,000 | 84,675,000 | 1128 | 314  | -0.786776785 | CDC14B,HABP4,ZNF367            |
| 8 | 84,600,000 | 84,750,000 | 1129 | 646  | -1.89892692  | CDC14B,HABP4                   |
| 8 | 84,675,000 | 84,825,000 | 1130 | 659  | -2.613080107 | AAED1,CDC14B                   |
| 8 | 84,750,000 | 84,900,000 | 1131 | 605  | -2.7249669   | AAED1,RPS15A,ZNF782            |
| 8 | 84,825,000 | 84,975,000 | 1132 | 971  | -2.89775156  | RPS15A,ZNF782                  |
| 8 | 84,900,000 | 85,050,000 | 1133 | 717  | -2.448815824 | CTSL,ZNF782                    |
| 8 | 84,975,000 | 85,125,000 | 1134 | 482  | -1.274051985 | CTSL                           |
| 8 | 85,050,000 | 85,200,000 | 1135 | 642  | -0.269887456 | ENSBTAG00000009764             |
| 8 | 85,125,000 | 85,275,000 | 1136 | 593  | -0.121913721 | IARS,ZNF484,ENSBTAG00000009764 |
| 8 | 85,200,000 | 85,350,000 | 1137 | 463  | 0.013426606  | IARS,ZNF484                    |
| 8 | 85,275,000 | 85,425,000 | 1138 | 360  | 0.400629507  | CENPP,IARS,NOL8                |
| 8 | 85,350,000 | 85,500,000 | 1139 | 300  | -0.650743219 | ASPN,CENPP,IARS,NOL8,OGN,OMD   |
| 8 | 85,425,000 | 85,575,000 | 1140 | 361  | -1.206055412 | ASPN,ECM2,OGN,OMD              |
| 8 | 85,500,000 | 85,650,000 | 1141 | 336  | -0.935927717 | ASPN,ECM2,IPPK                 |
| 8 | 85,575,000 | 85,725,000 | 1142 | 341  | 0.060564229  | BICD2,ECM2,IPPK                |
| 8 | 85,650,000 | 85,800,000 | 1143 | 404  | 0.362435181  | BICD2,IPPK                     |
| 8 | 85,725,000 | 85,875,000 | 1144 | 502  | -0.281453672 | BICD2,FGD3                     |
| 8 | 85,800,000 | 85,950,000 | 1145 | 565  | -0.836841601 | C9orf89,FGD3,NINJ1,SUSD3       |
| 8 | 85,875,000 | 86,025,000 | 1146 | 490  | -0.772331231 | C9orf89,NINJ1,SUSD3,WNK2       |
| 8 | 85,950,000 | 86,100,000 | 1147 | 473  | 0.313810306  | WNK2                           |
| 8 | 86,025,000 | 86,175,000 | 1148 | 713  | -0.445791864 | WNK2                           |
| 8 | 86,100,000 | 86,250,000 | 1149 | 902  | -1.122282841 | FAM120A,WNK2                   |
| 8 | 86,175,000 | 86,325,000 | 1150 | 629  | -2.777808553 | FAM120A                        |
| 8 | 86,250,000 | 86,400,000 | 1151 | 485  | -3.764984885 | FAM120A,PHF2                   |
| 8 | 86,325,000 | 86,475,000 | 1152 | 544  | -1.824069993 | PHF2                           |
| 8 | 86,400,000 | 86,550,000 | 1153 | 902  | 0.955732396  | PHF2                           |
| 8 | 86,475,000 | 86,625,000 | 1154 | 1357 | 0.504968205  | ENSBTAG00000009073             |
| 8 | 86,550,000 | 86,700,000 | 1155 | 961  | -0.219745377 | BARX1,ENSBTAG00000009073       |
| 8 | 86,625,000 | 86,775,000 | 1156 | 788  | -1.968461331 | BARX1                          |
| 8 | 86,700,000 | 86,850,000 | 1157 | 1233 | -1.92839169  | PTPDC1                         |
| 8 | 86,775,000 | 86,925,000 | 1158 | 1125 | -0.756402496 | PTPDC1                         |
| 8 | 86,850,000 | 87,000,000 | 1159 | 848  | -0.060811094 | ZNF169                         |

|   |            |            |      |      |              |                             |
|---|------------|------------|------|------|--------------|-----------------------------|
| 8 | 86,925,000 | 87,075,000 | 1160 | 1486 | 0.94425892   | ZNF169,ENSBTAG00000031359   |
| 8 | 87,000,000 | 87,150,000 | 1161 | 1785 | 1.055643698  | CDC42BPA,ENSBTAG00000031359 |
| 8 | 87,075,000 | 87,225,000 | 1162 | 1434 | 0.91961621   | CDC42BPA,SPTLC1             |
| 8 | 87,150,000 | 87,300,000 | 1163 | 1447 | 0.623063721  | CDC42BPA,SPTLC1             |
| 8 | 87,225,000 | 87,375,000 | 1164 | 1409 | 0.555762706  | ROR2,SPTLC1                 |
| 8 | 87,300,000 | 87,450,000 | 1165 | 1570 | 0.532047592  | ROR2                        |
| 8 | 87,375,000 | 87,525,000 | 1166 | 1511 | 0.411147431  | ROR2                        |
| 8 | 87,450,000 | 87,600,000 | 1167 | 1443 | 0.648034445  | ROR2                        |
| 8 | 87,525,000 | 87,675,000 | 1168 | 1542 | 0.676006652  | ROR2                        |
| 8 | 87,600,000 | 87,750,000 | 1169 | 1188 | 0.645109974  |                             |
| 8 | 87,675,000 | 87,825,000 | 1170 | 652  | -0.083175471 |                             |
| 8 | 87,750,000 | 87,900,000 | 1171 | 326  | -1.277846501 | NFIL3                       |
| 8 | 87,825,000 | 87,975,000 | 1172 | 396  | -0.344539117 | AUH,NFIL3                   |
| 8 | 87,900,000 | 88,050,000 | 1173 | 714  | 0.352199538  | AUH                         |
| 8 | 87,975,000 | 88,125,000 | 1174 | 584  | -0.207485202 | AUH                         |
| 8 | 88,050,000 | 88,200,000 | 1175 | 685  | -1.076037206 |                             |
| 8 | 88,125,000 | 88,275,000 | 1176 | 1418 | -0.496497971 |                             |
| 8 | 88,200,000 | 88,350,000 | 1177 | 1488 | 0.091015633  |                             |
| 8 | 88,275,000 | 88,425,000 | 1178 | 1379 | 0.49782702   | SYK                         |
| 8 | 88,350,000 | 88,500,000 | 1179 | 1730 | 0.693999531  | SYK                         |
| 8 | 88,425,000 | 88,575,000 | 1180 | 1766 | 0.54286971   | SYK                         |
| 8 | 88,500,000 | 88,650,000 | 1181 | 1469 | 0.52324731   | SYK,ENSBTAG00000046969      |
| 8 | 88,575,000 | 88,725,000 | 1182 | 1591 | 0.015003904  | DIRAS2,ENSBTAG00000046969   |
| 8 | 88,650,000 | 88,800,000 | 1183 | 1560 | 0.094440852  | DIRAS2                      |
| 8 | 88,725,000 | 88,875,000 | 1184 | 1167 | 0.321621035  |                             |
| 8 | 88,800,000 | 88,950,000 | 1185 | 1480 | 0.085270305  |                             |
| 8 | 88,875,000 | 89,025,000 | 1186 | 1647 | 0.067720237  |                             |
| 8 | 88,950,000 | 89,100,000 | 1187 | 1475 | -0.069272717 |                             |
| 8 | 89,025,000 | 89,175,000 | 1188 | 1576 | 0.329904845  |                             |
| 8 | 89,100,000 | 89,250,000 | 1189 | 1697 | 0.625953402  |                             |
| 8 | 89,175,000 | 89,325,000 | 1190 | 1469 | 0.707963889  |                             |
| 8 | 89,250,000 | 89,400,000 | 1191 | 1184 | 0.281346873  |                             |
| 8 | 89,325,000 | 89,475,000 | 1192 | 1057 | 0.071283084  |                             |
| 8 | 89,400,000 | 89,550,000 | 1193 | 849  | -0.470490258 |                             |
| 8 | 89,475,000 | 89,625,000 | 1194 | 848  | -0.741168812 |                             |
| 8 | 89,550,000 | 89,700,000 | 1195 | 1201 | -1.99727036  |                             |
| 8 | 89,625,000 | 89,775,000 | 1196 | 1233 | -2.989096456 |                             |
| 8 | 89,700,000 | 89,850,000 | 1197 | 982  | -2.841016973 |                             |
| 8 | 89,775,000 | 89,925,000 | 1198 | 1013 | -1.59425212  |                             |
| 8 | 89,850,000 | 90,000,000 | 1199 | 1074 | -0.177196791 |                             |
| 8 | 89,925,000 | 90,075,000 | 1200 | 1212 | 0.469698266  | GADD45G                     |
| 8 | 90,000,000 | 90,150,000 | 1201 | 1124 | 0.370055246  | GADD45G,SEMA4D              |
| 8 | 90,075,000 | 90,225,000 | 1202 | 752  | 0.404053467  | SEMA4D                      |
| 8 | 90,150,000 | 90,300,000 | 1203 | 456  | 0.637804648  | SECISBP2,SEMA4D             |
| 8 | 90,225,000 | 90,375,000 | 1204 | 544  | 0.81130328   | CKS2,SECISBP2,SEMA4D        |
| 8 | 90,300,000 | 90,450,000 | 1205 | 649  | 0.885739131  | CKS2                        |
| 8 | 90,375,000 | 90,525,000 | 1206 | 625  | 0.452277632  |                             |
| 8 | 90,450,000 | 90,600,000 | 1207 | 889  | 0.963293365  | SHC3                        |
| 8 | 90,525,000 | 90,675,000 | 1208 | 1008 | 0.698920049  | S1PR3,SHC3                  |
| 8 | 90,600,000 | 90,750,000 | 1209 | 986  | 0.437476509  | S1PR3,SHC3                  |
| 8 | 90,675,000 | 90,825,000 | 1210 | 1326 | 1.039670863  |                             |
| 8 | 90,750,000 | 90,900,000 | 1211 | 1214 | 0.859406298  |                             |
| 8 | 90,825,000 | 90,975,000 | 1212 | 814  | -0.17379089  |                             |

|   |            |            |      |      |              |                                       |
|---|------------|------------|------|------|--------------|---------------------------------------|
| 8 | 90,900,000 | 91,050,000 | 1213 | 930  | -0.523504976 |                                       |
| 8 | 90,975,000 | 91,125,000 | 1214 | 921  | -0.013893602 | NXNL2                                 |
| 8 | 91,050,000 | 91,200,000 | 1215 | 680  | 0.657095087  | NXNL2,SPIN1                           |
| 8 | 91,125,000 | 91,275,000 | 1216 | 542  | 0.849896127  | NXNL2,SPIN1                           |
| 8 | 91,200,000 | 91,350,000 | 1217 | 490  | 0.364747229  | SPIN1                                 |
| 8 | 91,275,000 | 91,425,000 | 1218 | 783  | 1.024192198  |                                       |
| 8 | 91,350,000 | 91,500,000 | 1219 | 820  | 0.255253158  |                                       |
| 8 | 91,425,000 | 91,575,000 | 1220 | 884  | -0.512155285 |                                       |
| 8 | 91,500,000 | 91,650,000 | 1221 | 971  | -0.217776848 | CCRK,FBXW12                           |
| 8 | 91,575,000 | 91,725,000 | 1222 | 632  | -0.461118568 | CCRK,FBXW12,ENSBTAG00000021235        |
| 8 | 91,650,000 | 91,800,000 | 1223 | 456  | 0.059771567  | FBXW12,ENSBTAG00000021235             |
| 8 | 91,725,000 | 91,875,000 | 1224 | 730  | -1.466193079 | ENSBTAG00000021235,ENSBTAG00000021991 |
| 8 | 91,800,000 | 91,950,000 | 1225 | 923  | -1.727603489 | MURC,ENSBTAG00000021991               |
| 8 | 91,875,000 | 92,025,000 | 1226 | 713  | -0.727156326 | MURC,ENSBTAG00000021991               |
| 8 | 91,950,000 | 92,100,000 | 1227 | 654  | -0.563163279 |                                       |
| 8 | 92,025,000 | 92,175,000 | 1228 | 577  | -0.639283717 |                                       |
| 8 | 92,100,000 | 92,250,000 | 1229 | 442  | -0.715269365 |                                       |
| 8 | 92,175,000 | 92,325,000 | 1230 | 574  | 0.235166191  |                                       |
| 8 | 92,250,000 | 92,400,000 | 1231 | 1082 | 0.16142033   | LPPR1                                 |
| 8 | 92,325,000 | 92,475,000 | 1232 | 1026 | 0.239246959  | LPPR1                                 |
| 8 | 92,400,000 | 92,550,000 | 1233 | 825  | 0.312965793  | LPPR1                                 |
| 8 | 92,475,000 | 92,625,000 | 1234 | 977  | 0.59962597   | LPPR1                                 |
| 8 | 92,550,000 | 92,700,000 | 1235 | 893  | 0.606447163  | BAAT,LPPR1                            |
| 8 | 92,625,000 | 92,775,000 | 1236 | 566  | -0.036185403 | ALDOB,BAAT,LPPR1,MRPL50,ZNF189        |
| 8 | 92,700,000 | 92,850,000 | 1237 | 365  | 0.942881547  | ALDOB,MRPL50,TMEM246,ZNF189           |
| 8 | 92,775,000 | 92,925,000 | 1238 | 340  | -2.835895067 | ALDOB,RNF20,TMEM246                   |
| 8 | 92,850,000 | 93,000,000 | 1239 | 535  | -2.429351125 | ALDOB,GRIN3A,RNF20,TMEM246            |
| 8 | 92,925,000 | 93,075,000 | 1240 | 731  | -0.637036748 | GRIN3A,RNF20                          |
| 8 | 93,000,000 | 93,150,000 | 1241 | 530  | -0.74319294  | GRIN3A                                |
| 8 | 93,075,000 | 93,225,000 | 1242 | 652  | 0.383875662  | GRIN3A                                |
| 8 | 93,150,000 | 93,300,000 | 1243 | 1275 | -0.221305032 | ENSBTAG00000030953                    |
| 8 | 93,225,000 | 93,375,000 | 1244 | 1695 | -0.2997855   | ENSBTAG00000030953                    |
| 8 | 93,300,000 | 93,450,000 | 1245 | 1687 | -0.361200875 |                                       |
| 8 | 93,375,000 | 93,525,000 | 1246 | 1486 | -0.177830997 |                                       |
| 8 | 93,450,000 | 93,600,000 | 1247 | 1714 | 0.424973434  |                                       |
| 8 | 93,525,000 | 93,675,000 | 1248 | 2164 | -0.437604406 |                                       |
| 8 | 93,600,000 | 93,750,000 | 1249 | 1844 | -1.249220788 |                                       |
| 8 | 93,675,000 | 93,825,000 | 1250 | 1834 | -1.556528349 |                                       |
| 8 | 93,750,000 | 93,900,000 | 1251 | 2064 | 0.24606073   |                                       |
| 8 | 93,825,000 | 93,975,000 | 1252 | 1965 | 0.642650307  |                                       |
| 8 | 93,900,000 | 94,050,000 | 1253 | 1745 | -1.202904009 |                                       |
| 8 | 93,975,000 | 94,125,000 | 1254 | 1494 | -1.035065111 |                                       |
| 8 | 94,050,000 | 94,200,000 | 1255 | 1275 | -1.712245558 |                                       |
| 8 | 94,125,000 | 94,275,000 | 1256 | 900  | -1.64181253  | CYLC2                                 |
| 8 | 94,200,000 | 94,350,000 | 1257 | 778  | -0.586355917 | CYLC2                                 |
| 8 | 94,275,000 | 94,425,000 | 1258 | 852  | -1.000164795 |                                       |
| 8 | 94,350,000 | 94,500,000 | 1259 | 1141 | -0.122626237 |                                       |
| 8 | 94,425,000 | 94,575,000 | 1260 | 1394 | 0.431623393  |                                       |
| 8 | 94,500,000 | 94,650,000 | 1261 | 1360 | -0.833337726 |                                       |
| 8 | 94,575,000 | 94,725,000 | 1262 | 1213 | -1.998524736 |                                       |
| 8 | 94,650,000 | 94,800,000 | 1263 | 835  | -0.678076301 |                                       |
| 8 | 94,725,000 | 94,875,000 | 1264 | 711  | 0.921925278  |                                       |
| 8 | 94,800,000 | 94,950,000 | 1265 | 1187 | 0.449440036  |                                       |

|   |            |            |      |      |              |                                                                                               |
|---|------------|------------|------|------|--------------|-----------------------------------------------------------------------------------------------|
| 8 | 94,875,000 | 95,025,000 | 1266 | 1114 | -0.997517464 |                                                                                               |
| 8 | 94,950,000 | 95,100,000 | 1267 | 619  | -1.033031516 |                                                                                               |
| 8 | 95,025,000 | 95,175,000 | 1268 | 501  | 0.702830471  |                                                                                               |
| 8 | 95,100,000 | 95,250,000 | 1269 | 822  | -1.732280834 |                                                                                               |
| 8 | 95,175,000 | 95,325,000 | 1270 | 966  | -1.417386167 |                                                                                               |
| 8 | 95,250,000 | 95,400,000 | 1271 | 848  | 0.894205211  | SMC2                                                                                          |
| 8 | 95,325,000 | 95,475,000 | 1272 | 1151 | 1.19488327   | SMC2                                                                                          |
| 8 | 95,400,000 | 95,550,000 | 1273 | 1015 | 1.202161209  | SMC2                                                                                          |
| 8 | 95,475,000 | 95,625,000 | 1274 | 885  | 1.203323282  | ENSBTAG00000047350                                                                            |
| 8 | 95,550,000 | 95,700,000 | 1275 | 1030 | 0.82616692   | ENSBTAG00000047350                                                                            |
| 8 | 95,625,000 | 95,775,000 | 1276 | 956  | 0.609038437  | OR13F1                                                                                        |
| 8 | 95,700,000 | 95,850,000 | 1277 | 807  | 0.467545576  | OR13F1,ENSBTAG00000046292                                                                     |
| 8 | 95,775,000 | 95,925,000 | 1278 | 492  | -0.124072233 | ENSBTAG00000016173,ENSBTAG00000036005,ENSBTAG00000036008,ENSBTAG00000046292                   |
| 8 | 95,850,000 | 96,000,000 | 1279 | 550  | 0.606625512  | ENSBTAG0000000145,ENSBTAG00000016173,ENSBTAG00000036005,ENSBTAG00000036008,ENSBTAG00000048106 |
| 8 | 95,925,000 | 96,075,000 | 1280 | 652  | 0.365336869  | OR13C3,ENSBTAG00000000145,ENSBTAG00000048106                                                  |
| 8 | 96,000,000 | 96,150,000 | 1281 | 688  | -0.106554476 | OR13C3,OR13C8                                                                                 |
| 8 | 96,075,000 | 96,225,000 | 1282 | 840  | 0.077539403  | OR13C8,ENSBTAG00000039868                                                                     |
| 8 | 96,150,000 | 96,300,000 | 1283 | 819  | -0.205116117 | ABCA1,NIPSNAP3A,ENSBTAG00000039868                                                            |
| 8 | 96,225,000 | 96,375,000 | 1284 | 633  | -0.576419502 | ABCA1,NIPSNAP3A                                                                               |
| 8 | 96,300,000 | 96,450,000 | 1285 | 627  | -0.692734262 | ABCA1                                                                                         |
| 8 | 96,375,000 | 96,525,000 | 1286 | 628  | -0.506679641 | ABCA1                                                                                         |
| 8 | 96,450,000 | 96,600,000 | 1287 | 410  | 0.129346555  |                                                                                               |
| 8 | 96,525,000 | 96,675,000 | 1288 | 421  | 0.579148207  |                                                                                               |
| 8 | 96,600,000 | 96,750,000 | 1289 | 441  | 0.481278618  |                                                                                               |
| 8 | 96,675,000 | 96,825,000 | 1290 | 627  | 0.815182924  | SLC44A1                                                                                       |
| 8 | 96,750,000 | 96,900,000 | 1291 | 721  | 0.540053422  | SLC44A1                                                                                       |
| 8 | 96,825,000 | 96,975,000 | 1292 | 579  | -0.01532912  | FSD1L,SLC44A1                                                                                 |
| 8 | 96,900,000 | 97,050,000 | 1293 | 810  | 0.184738613  | FKTN,FSD1L                                                                                    |
| 8 | 96,975,000 | 97,125,000 | 1294 | 1233 | 0.744060036  | FKTN,FSD1L,TAL2                                                                               |
| 8 | 97,050,000 | 97,200,000 | 1295 | 1405 | 0.644150319  | FKTN,TAL2,TMEM38B                                                                             |
| 8 | 97,125,000 | 97,275,000 | 1296 | 1335 | 0.207331263  | TMEM38B                                                                                       |
| 8 | 97,200,000 | 97,350,000 | 1297 | 954  | 0.454488363  | TMEM38B                                                                                       |
| 8 | 97,275,000 | 97,425,000 | 1298 | 666  | 0.540657552  |                                                                                               |
| 8 | 97,350,000 | 97,500,000 | 1299 | 927  | 0.132964243  |                                                                                               |
| 8 | 97,425,000 | 97,575,000 | 1300 | 831  | -0.264301508 |                                                                                               |
| 8 | 97,500,000 | 97,650,000 | 1301 | 396  | -0.980766911 |                                                                                               |
| 8 | 97,575,000 | 97,725,000 | 1302 | 442  | -0.830885576 |                                                                                               |
| 8 | 97,650,000 | 97,800,000 | 1303 | 824  | -0.512616574 |                                                                                               |
| 8 | 97,725,000 | 97,875,000 | 1304 | 921  | 0.05374396   |                                                                                               |
| 8 | 97,800,000 | 97,950,000 | 1305 | 769  | 0.100956371  |                                                                                               |
| 8 | 97,875,000 | 98,025,000 | 1306 | 776  | -0.367939791 |                                                                                               |
| 8 | 97,950,000 | 98,100,000 | 1307 | 816  | 0.484863581  |                                                                                               |
| 8 | 98,025,000 | 98,175,000 | 1308 | 782  | 0.968619901  |                                                                                               |
| 8 | 98,100,000 | 98,250,000 | 1309 | 811  | 0.767716568  |                                                                                               |
| 8 | 98,175,000 | 98,325,000 | 1310 | 691  | 0.685140639  |                                                                                               |
| 8 | 98,250,000 | 98,400,000 | 1311 | 403  | 0.186572127  | ZNF462                                                                                        |
| 8 | 98,325,000 | 98,475,000 | 1312 | 451  | 0.310316651  | ZNF462                                                                                        |
| 8 | 98,400,000 | 98,550,000 | 1313 | 1069 | 0.997405109  | ZNF462                                                                                        |
| 8 | 98,475,000 | 98,625,000 | 1314 | 1133 | 0.884053617  |                                                                                               |



|   |             |             |      |      |              |                                          |
|---|-------------|-------------|------|------|--------------|------------------------------------------|
| 8 | 98,550,000  | 98,700,000  | 1315 | 773  | -0.029760272 | RAD23B                                   |
| 8 | 98,625,000  | 98,775,000  | 1316 | 674  | 0.023873005  | RAD23B                                   |
| 8 | 98,700,000  | 98,850,000  | 1317 | 565  | -0.502619757 | KLF4,RAD23B                              |
| 8 | 98,775,000  | 98,925,000  | 1318 | 629  | -0.782842163 | KLF4                                     |
| 8 | 98,850,000  | 99,000,000  | 1319 | 753  | -0.538927026 |                                          |
| 8 | 98,925,000  | 99,075,000  | 1320 | 901  | -0.26044122  |                                          |
| 8 | 99,000,000  | 99,150,000  | 1321 | 796  | 0.769631972  |                                          |
| 8 | 99,075,000  | 99,225,000  | 1322 | 553  | 0.954260268  |                                          |
| 8 | 99,150,000  | 99,300,000  | 1323 | 471  | 0.871259438  |                                          |
| 8 | 99,225,000  | 99,375,000  | 1324 | 337  | 0.983153529  |                                          |
| 8 | 99,300,000  | 99,450,000  | 1325 | 534  | 0.675381433  |                                          |
| 8 | 99,375,000  | 99,525,000  | 1326 | 738  | 0.348671065  |                                          |
| 8 | 99,450,000  | 99,600,000  | 1327 | 633  | 0.269958461  |                                          |
| 8 | 99,525,000  | 99,675,000  | 1328 | 529  | 0.025828298  |                                          |
| 8 | 99,600,000  | 99,750,000  | 1329 | 536  | -1.011990361 |                                          |
| 8 | 99,675,000  | 99,825,000  | 1330 | 652  | -1.729829102 |                                          |
| 8 | 99,750,000  | 99,900,000  | 1331 | 532  | -1.929169371 | ENSBTAG00000000885                       |
| 8 | 99,825,000  | 99,975,000  | 1332 | 394  | -0.748594257 | ENSBTAG00000000885                       |
| 8 | 99,900,000  | 100,050,000 | 1333 | 355  | -0.213539355 |                                          |
| 8 | 99,975,000  | 100,125,000 | 1334 | 297  | 0.039021476  |                                          |
| 8 | 100,050,000 | 100,200,000 | 1335 | 371  | 0.544880535  | ACTL7A,ACTL7B,IKBKAP                     |
| 8 | 100,125,000 | 100,275,000 | 1336 | 412  | 0.699562099  | ACTL7A,ACTL7B,CTNNAL1,FAM206A,IKBKAP     |
| 8 | 100,200,000 | 100,350,000 | 1337 | 360  | 0.992124357  | CTNNAL1,FAM206A,IKBKAP,TMEM245           |
| 8 | 100,275,000 | 100,425,000 | 1338 | 313  | 1.02532983   | CTNNAL1,EPB41L4B,FRRS1L,TMEM245          |
| 8 | 100,350,000 | 100,500,000 | 1339 | 291  | 0.748106838  | EPB41L4B,FRRS1L,TMEM245                  |
| 8 | 100,425,000 | 100,575,000 | 1340 | 497  | 0.58344201   | EPB41L4B                                 |
| 8 | 100,500,000 | 100,650,000 | 1341 | 728  | 0.579183524  | EPB41L4B,PTPN3                           |
| 8 | 100,575,000 | 100,725,000 | 1342 | 603  | 0.888574798  | PTPN3                                    |
| 8 | 100,650,000 | 100,800,000 | 1343 | 665  | 1.130386945  | PTPN3                                    |
| 8 | 100,725,000 | 100,875,000 | 1344 | 974  | 0.119257343  |                                          |
| 8 | 100,800,000 | 100,950,000 | 1345 | 892  | 0.272876564  |                                          |
| 8 | 100,875,000 | 101,025,000 | 1346 | 910  | 0.72946279   | PALM2                                    |
| 8 | 100,950,000 | 101,100,000 | 1347 | 1246 | 0.758224851  | PALM2                                    |
| 8 | 101,025,000 | 101,175,000 | 1348 | 1443 | 0.844315875  | PALM2                                    |
| 8 | 101,100,000 | 101,250,000 | 1349 | 1514 | 0.554797458  | PALM2                                    |
| 8 | 101,175,000 | 101,325,000 | 1350 | 1526 | 0.103001021  | PALM2                                    |
| 8 | 101,250,000 | 101,400,000 | 1351 | 1419 | -0.389933205 | ENSBTAG00000014471                       |
| 8 | 101,325,000 | 101,475,000 | 1352 | 1229 | -0.152657175 | C8H9orf152,ENSBTAG00000014471            |
| 8 | 101,400,000 | 101,550,000 | 1353 | 845  | -1.223030598 | C8H9orf152,TXN,TXNDC8,ENSBTAG00000014471 |
| 8 | 101,475,000 | 101,625,000 | 1354 | 436  | -1.852326113 | SVEP1,TXN,TXNDC8                         |
| 8 | 101,550,000 | 101,700,000 | 1355 | 708  | 0.705500506  | SVEP1,TXNDC8                             |
| 8 | 101,625,000 | 101,775,000 | 1356 | 915  | 0.741240016  | SVEP1                                    |
| 8 | 101,700,000 | 101,850,000 | 1357 | 585  | 0.859024754  | SVEP1                                    |
| 8 | 101,775,000 | 101,925,000 | 1358 | 410  | 0.725268687  | MUSK,SVEP1                               |
| 8 | 101,850,000 | 102,000,000 | 1359 | 381  | -0.050296647 | MUSK                                     |
| 8 | 101,925,000 | 102,075,000 | 1360 | 796  | 0.259507297  | LPAR1,MUSK                               |
| 8 | 102,000,000 | 102,150,000 | 1361 | 967  | 0.27835853   | LPAR1                                    |
| 8 | 102,075,000 | 102,225,000 | 1362 | 838  | 0.728769946  | LPAR1                                    |
| 8 | 102,150,000 | 102,300,000 | 1363 | 844  | 0.78047425   |                                          |
| 8 | 102,225,000 | 102,375,000 | 1364 | 638  | 0.479856702  |                                          |
| 8 | 102,300,000 | 102,450,000 | 1365 | 901  | 0.612099505  |                                          |
| 8 | 102,375,000 | 102,525,000 | 1366 | 891  | 0.541763645  | KIAA0368,OR2K2                           |
| 8 | 102,450,000 | 102,600,000 | 1367 | 540  | 0.609599253  | KIAA0368,OR2K2                           |

|   |             |             |      |      |              |                                                          |
|---|-------------|-------------|------|------|--------------|----------------------------------------------------------|
| 8 | 102,525,000 | 102,675,000 | 1368 | 530  | 0.445549499  | KIAA0368,PTGR1,ZNF483                                    |
| 8 | 102,600,000 | 102,750,000 | 1369 | 686  | -0.779372558 | PTGR1,ZNF483                                             |
| 8 | 102,675,000 | 102,825,000 | 1370 | 717  | -2.355398466 | C9orf84,DNAJC25,GNG10,PTGR1                              |
| 8 | 102,750,000 | 102,900,000 | 1371 | 449  | -3.340626685 | C9orf84,DNAJC25,GNG10                                    |
| 8 | 102,825,000 | 102,975,000 | 1372 | 401  | -0.726011914 | C9orf84                                                  |
| 8 | 102,900,000 | 103,050,000 | 1373 | 513  | -0.573035359 | UGCG                                                     |
| 8 | 102,975,000 | 103,125,000 | 1374 | 586  | 0.097528103  | UGCG                                                     |
| 8 | 103,050,000 | 103,200,000 | 1375 | 727  | 1.132987068  | SUSD1                                                    |
| 8 | 103,125,000 | 103,275,000 | 1376 | 891  | 0.43185803   | SUSD1                                                    |
| 8 | 103,200,000 | 103,350,000 | 1377 | 678  | -1.099779584 | PTBP3,SUSD1                                              |
| 8 | 103,275,000 | 103,425,000 | 1378 | 452  | -0.128767503 | IGBP1,PTBP3,SUSD1                                        |
| 8 | 103,350,000 | 103,500,000 | 1379 | 580  | 1.160222648  | HSDL2,IGBP1,PTBP3                                        |
| 8 | 103,425,000 | 103,575,000 | 1380 | 763  | 1.10947687   | HSDL2,IGBP1                                              |
| 8 | 103,500,000 | 103,650,000 | 1381 | 535  | 0.723595647  | HSDL2,KIAA1958                                           |
| 8 | 103,575,000 | 103,725,000 | 1382 | 571  | -0.972627576 | INIP,KIAA1958                                            |
| 8 | 103,650,000 | 103,800,000 | 1383 | 898  | 0.164857596  | INIP,SNX30                                               |
| 8 | 103,725,000 | 103,875,000 | 1384 | 660  | 1.115081737  | SNX30,TSCOT                                              |
| 8 | 103,800,000 | 103,950,000 | 1385 | 617  | 1.04999368   | SNX30,TSCOT,ENSBTAG00000018481,ENSBTAG00000047990        |
| 8 | 103,875,000 | 104,025,000 | 1386 | 1116 | 0.915258064  | ENSBTAG00000018481,ENSBTAG00000045868,ENSBTAG00000047990 |
| 8 | 103,950,000 | 104,100,000 | 1387 | 1268 | 1.001837554  | ENSBTAG00000045868                                       |
| 8 | 104,025,000 | 104,175,000 | 1388 | 998  | -0.239574273 | FKBP15,SLC31A1,SLC31A2                                   |
| 8 | 104,100,000 | 104,250,000 | 1389 | 728  | -0.816492016 | CDC26,FKBP15,PRPF4,RNF183,SLC31A1,SLC31A2                |
| 8 | 104,175,000 | 104,325,000 | 1390 | 596  | 0.929556856  | BSPRY,CDC26,PRPF4,RNF183,SLC31A1,WDR31                   |
| 8 | 104,250,000 | 104,400,000 | 1391 | 851  | 0.869514493  | ALAD,BSPRY,C9orf43,HDHD3,POLE3,WDR31,ENSBTAG00000045506  |
| 8 | 104,325,000 | 104,475,000 | 1392 | 1023 | 0.185146748  | ALAD,BSPRY,C9orf43,HDHD3,POLE3,RGS3,ENSBTAG00000045506   |
| 8 | 104,400,000 | 104,550,000 | 1393 | 782  | -0.834486978 | RGS3                                                     |
| 8 | 104,475,000 | 104,625,000 | 1394 | 546  | -0.79484389  | RGS3                                                     |
| 8 | 104,550,000 | 104,700,000 | 1395 | 690  | 0.536837711  |                                                          |
| 8 | 104,625,000 | 104,775,000 | 1396 | 708  | 1.165645645  |                                                          |
| 8 | 104,700,000 | 104,850,000 | 1397 | 502  | -0.547052978 | ZNF618                                                   |
| 8 | 104,775,000 | 104,925,000 | 1398 | 686  | -0.60747246  | ZNF618                                                   |
| 8 | 104,850,000 | 105,000,000 | 1399 | 899  | -0.692329852 | ZNF618                                                   |
| 8 | 104,925,000 | 105,075,000 | 1400 | 933  | -0.811389701 | AMBP,KIF12,ZNF618                                        |
| 8 | 105,000,000 | 105,150,000 | 1401 | 672  | -0.429409043 | AMBP,COL27A1,KIF12                                       |
| 8 | 105,075,000 | 105,225,000 | 1402 | 474  | -0.019939119 | AGP,AKNA,COL27A1                                         |
| 8 | 105,150,000 | 105,300,000 | 1403 | 517  | 0.155540656  | AGP,AKNA,COL27A1                                         |
| 8 | 105,225,000 | 105,375,000 | 1404 | 504  | 0.227285202  | AKNA,DFNB31                                              |
| 8 | 105,300,000 | 105,450,000 | 1405 | 491  | 0.024021235  | AKNA,DFNB31                                              |
| 8 | 105,375,000 | 105,525,000 | 1406 | 490  | -0.176253705 | ATP6V1G1,C9orf91,DFNB31                                  |
| 8 | 105,450,000 | 105,600,000 | 1407 | 497  | -0.24692857  | ATP6V1G1,C9orf91                                         |
| 8 | 105,525,000 | 105,675,000 | 1408 | 411  | -0.442548206 | C9orf91                                                  |
| 8 | 105,600,000 | 105,750,000 | 1409 | 360  | -1.32491929  | TNFSF15                                                  |
| 8 | 105,675,000 | 105,825,000 | 1410 | 382  | -1.612720967 | TNFSF15                                                  |
| 8 | 105,750,000 | 105,900,000 | 1411 | 467  | -1.759102203 | TNFSF8                                                   |
| 8 | 105,825,000 | 105,975,000 | 1412 | 593  | -0.018495815 | TNC,TNFSF8                                               |
| 8 | 105,900,000 | 106,050,000 | 1413 | 577  | 0.699697538  | TNC                                                      |
| 8 | 105,975,000 | 106,125,000 | 1414 | 574  | 0.143291242  | TNC                                                      |
| 8 | 106,050,000 | 106,200,000 | 1415 | 794  | -0.664594566 | TNC                                                      |
| 8 | 106,125,000 | 106,275,000 | 1416 | 829  | -1.282283787 |                                                          |

|   |             |             |      |      |              |                           |
|---|-------------|-------------|------|------|--------------|---------------------------|
| 8 | 106,200,000 | 106,350,000 | 1417 | 859  | -0.022656543 |                           |
| 8 | 106,275,000 | 106,425,000 | 1418 | 807  | 0.609028843  |                           |
| 8 | 106,350,000 | 106,500,000 | 1419 | 783  | 1.026911769  |                           |
| 8 | 106,425,000 | 106,575,000 | 1420 | 991  | 0.432248975  |                           |
| 8 | 106,500,000 | 106,650,000 | 1421 | 778  | -0.110736334 |                           |
| 8 | 106,575,000 | 106,725,000 | 1422 | 796  | 0.354874517  |                           |
| 8 | 106,650,000 | 106,800,000 | 1423 | 937  | 0.587860581  |                           |
| 8 | 106,725,000 | 106,875,000 | 1424 | 951  | 1.196443353  |                           |
| 8 | 106,800,000 | 106,950,000 | 1425 | 865  | 1.068274735  |                           |
| 8 | 106,875,000 | 107,025,000 | 1426 | 750  | -0.143102116 |                           |
| 8 | 106,950,000 | 107,100,000 | 1427 | 713  | -0.253882763 |                           |
| 8 | 107,025,000 | 107,175,000 | 1428 | 462  | -0.274135039 | PAPPA                     |
| 8 | 107,100,000 | 107,250,000 | 1429 | 367  | -1.494248124 | PAPPA                     |
| 8 | 107,175,000 | 107,325,000 | 1430 | 351  | -0.416163877 | PAPPA                     |
| 8 | 107,250,000 | 107,400,000 | 1431 | 482  | 0.084416743  | PAPPA                     |
| 8 | 107,325,000 | 107,475,000 | 1432 | 611  | 0.7589836    | PAPPA,ENSBTAG00000047511  |
| 8 | 107,400,000 | 107,550,000 | 1433 | 529  | 1.02804903   | ENSBTAG00000047511        |
| 8 | 107,475,000 | 107,625,000 | 1434 | 524  | 0.610114836  | ENSBTAG00000025667        |
| 8 | 107,550,000 | 107,700,000 | 1435 | 523  | 0.481162831  | TRIM32,ENSBTAG00000025667 |
| 8 | 107,625,000 | 107,775,000 | 1436 | 534  | 0.023517411  | TRIM32,ENSBTAG00000025667 |
| 8 | 107,700,000 | 107,850,000 | 1437 | 633  | 0.312643311  | ENSBTAG00000025667        |
| 8 | 107,775,000 | 107,925,000 | 1438 | 1082 | -0.123637409 | ENSBTAG00000025667        |
| 8 | 107,850,000 | 108,000,000 | 1439 | 1359 | 0.172090977  |                           |
| 8 | 107,925,000 | 108,075,000 | 1440 | 1077 | 0.709325876  |                           |
| 8 | 108,000,000 | 108,150,000 | 1441 | 944  | -0.060573956 |                           |
| 8 | 108,075,000 | 108,225,000 | 1442 | 879  | -1.02564215  |                           |
| 8 | 108,150,000 | 108,300,000 | 1443 | 892  | -1.065003547 |                           |
| 8 | 108,225,000 | 108,375,000 | 1444 | 931  | 0.212550074  |                           |
| 8 | 108,300,000 | 108,450,000 | 1445 | 568  | 0.942850618  |                           |
| 8 | 108,375,000 | 108,525,000 | 1446 | 435  | 0.519708528  |                           |
| 8 | 108,450,000 | 108,600,000 | 1447 | 738  | 0.271107084  |                           |
| 8 | 108,525,000 | 108,675,000 | 1448 | 867  | 0.090495733  |                           |
| 8 | 108,600,000 | 108,750,000 | 1449 | 584  | 0.258319009  |                           |
| 8 | 108,675,000 | 108,825,000 | 1450 | 443  | -0.834209339 |                           |
| 8 | 108,750,000 | 108,900,000 | 1451 | 1008 | 0.053190475  | TLR4                      |
| 8 | 108,825,000 | 108,975,000 | 1452 | 969  | 0.803194381  | TLR4                      |
| 8 | 108,900,000 | 109,050,000 | 1453 | 572  | 1.098515003  |                           |
| 8 | 108,975,000 | 109,125,000 | 1454 | 673  | 1.273490425  |                           |
| 8 | 109,050,000 | 109,200,000 | 1455 | 493  | 1.24666992   |                           |
| 8 | 109,125,000 | 109,275,000 | 1456 | 531  | -2.083115249 |                           |
| 8 | 109,200,000 | 109,350,000 | 1457 | 848  | -1.544114135 |                           |
| 8 | 109,275,000 | 109,425,000 | 1458 | 1150 | 0.131237373  |                           |
| 8 | 109,350,000 | 109,500,000 | 1459 | 1131 | 0.545498406  |                           |
| 8 | 109,425,000 | 109,575,000 | 1460 | 833  | 0.752412271  |                           |
| 8 | 109,500,000 | 109,650,000 | 1461 | 770  | 0.527325246  |                           |
| 8 | 109,575,000 | 109,725,000 | 1462 | 624  | 0.28194843   |                           |
| 8 | 109,650,000 | 109,800,000 | 1463 | 466  | 0.347141027  |                           |
| 8 | 109,725,000 | 109,875,000 | 1464 | 514  | -0.908079641 | ENSBTAG00000046729        |
| 8 | 109,800,000 | 109,950,000 | 1465 | 566  | -1.644362995 | ENSBTAG00000046729        |
| 8 | 109,875,000 | 110,025,000 | 1466 | 892  | -1.232850048 |                           |
| 8 | 109,950,000 | 110,100,000 | 1467 | 1157 | -0.27842278  |                           |
| 8 | 110,025,000 | 110,175,000 | 1468 | 998  | 1.010041955  |                           |
| 8 | 110,100,000 | 110,250,000 | 1469 | 701  | 1.206620049  |                           |

|   |             |             |      |      |              |                                                               |
|---|-------------|-------------|------|------|--------------|---------------------------------------------------------------|
| 8 | 110,175,000 | 110,325,000 | 1470 | 639  | 1.074596408  |                                                               |
| 8 | 110,250,000 | 110,400,000 | 1471 | 621  | 0.878454781  |                                                               |
| 8 | 110,325,000 | 110,475,000 | 1472 | 575  | 1.110741361  | BRINP1                                                        |
| 8 | 110,400,000 | 110,550,000 | 1473 | 710  | 0.931015613  | BRINP1                                                        |
| 8 | 110,475,000 | 110,625,000 | 1474 | 1025 | 0.093240648  | BRINP1                                                        |
| 8 | 110,550,000 | 110,700,000 | 1475 | 1039 | 0.213482297  | BRINP1                                                        |
| 8 | 110,625,000 | 110,775,000 | 1476 | 418  | 0.671846304  |                                                               |
| 8 | 110,700,000 | 110,850,000 | 1477 | 840  | 0.689870869  |                                                               |
| 8 | 110,775,000 | 110,925,000 | 1478 | 1497 | 0.552296439  |                                                               |
| 8 | 110,850,000 | 111,000,000 | 1479 | 1113 | 0.420999989  |                                                               |
| 8 | 110,925,000 | 111,075,000 | 1480 | 867  | 0.292887858  |                                                               |
| 8 | 111,000,000 | 111,150,000 | 1481 | 1156 | 0.465133402  |                                                               |
| 8 | 111,075,000 | 111,225,000 | 1482 | 1141 | 0.916167109  |                                                               |
| 8 | 111,150,000 | 111,300,000 | 1483 | 840  | 0.665353204  |                                                               |
| 8 | 111,225,000 | 111,375,000 | 1484 | 800  | -0.080998243 |                                                               |
| 8 | 111,300,000 | 111,450,000 | 1485 | 1364 | -1.069150251 |                                                               |
| 8 | 111,375,000 | 111,525,000 | 1486 | 1785 | -0.876893988 |                                                               |
| 8 | 111,450,000 | 111,600,000 | 1487 | 1623 | -0.843082331 |                                                               |
| 8 | 111,525,000 | 111,675,000 | 1488 | 1756 | -1.599937146 |                                                               |
| 8 | 111,600,000 | 111,750,000 | 1489 | 1821 | -1.623649865 | CDK5RAP2                                                      |
| 8 | 111,675,000 | 111,825,000 | 1490 | 1634 | -1.302847128 | CDK5RAP2                                                      |
| 8 | 111,750,000 | 111,900,000 | 1491 | 1393 | -0.511072485 | CDK5RAP2                                                      |
| 8 | 111,825,000 | 111,975,000 | 1492 | 1031 | 0.596367963  | CDK5RAP2,MEGF9                                                |
| 8 | 111,900,000 | 112,050,000 | 1493 | 1108 | 0.852278458  | MEGF9                                                         |
| 8 | 111,975,000 | 112,125,000 | 1494 | 1206 | 0.287540585  | FBXW2,MEGF9,PSMD5,ENSBTAG00000016957,ENSBTAG00000038486       |
| 8 | 112,050,000 | 112,200,000 | 1495 | 1090 | 0.101776931  | FBXW2,PHF19,PSMD5,TRAF1,ENSBTAG00000016957,ENSBTAG00000038486 |
| 8 | 112,125,000 | 112,275,000 | 1496 | 1059 | 1.228257602  | C5,PHF19,TRAF1,ENSBTAG00000016957                             |
| 8 | 112,200,000 | 112,350,000 | 1497 | 1149 | -0.654694347 | C5,TRAF1                                                      |
| 8 | 112,275,000 | 112,425,000 | 1498 | 1250 | -1.160674047 | C5,CNTRL                                                      |
| 8 | 112,350,000 | 112,500,000 | 1499 | 1095 | 0.164345769  | CNTRL                                                         |
| 8 | 112,425,000 | 112,575,000 | 1500 | 914  | 0.229523204  | CNTRL,RAB14                                                   |
| 8 | 112,500,000 | 112,650,000 | 1501 | 913  | -0.312061683 | GSN,RAB14,STOM                                                |
| 8 | 112,575,000 | 112,725,000 | 1502 | 971  | -0.215916456 | GSN,STOM                                                      |
| 8 | 112,650,000 | 112,800,000 | 1503 | 940  | 0.034519235  | DCDC2C,STOM                                                   |
| 8 | 112,725,000 | 112,875,000 | 1504 | 957  | -0.713768294 | ALLC,COLEC11,DCDC2C                                           |
| 8 | 112,800,000 | 112,950,000 | 1505 | 976  | -0.339302248 | ADI1,ALLC,COLEC11,DCDC2C,RNASEH1,RPS7                         |
| 8 | 112,875,000 | 113,025,000 | 1506 | 1174 | 0.208744053  | ADI1,COLEC11,RNASEH1,RPS7,TSSC1,TTC15                         |
| 8 | 112,950,000 | 113,100,000 | 1507 | 1104 | 0.197756742  | ADI1,TSSC1,TTC15                                              |
| 8 | 113,025,000 | 113,175,000 | 1508 | 1009 | -0.022824786 | TSSC1                                                         |
| 8 | 113,100,000 | 113,250,000 | 1509 | 1283 | -0.744726191 |                                                               |
| 8 | 113,175,000 | 113,325,000 | 1510 | 1304 | -1.119833164 |                                                               |
| 8 | 113,250,000 | 113,384,836 | 1511 | 921  | -0.580550902 |                                                               |
| 9 | 0           | 150,000     | 1    | 363  | -3.646658678 |                                                               |
| 9 | 75,000      | 225,000     | 2    | 350  | -4.748455654 |                                                               |
| 9 | 150,000     | 300,000     | 3    | 321  | -5.977808418 | ENSBTAG00000036273                                            |
| 9 | 225,000     | 375,000     | 4    | 322  | -6.832090648 | ENSBTAG00000036273,ENSBTAG00000047687                         |
| 9 | 300,000     | 450,000     | 5    | 350  | -7.395125286 | ENSBTAG00000047032,ENSBTAG00000047687                         |
| 9 | 375,000     | 525,000     | 6    | 317  | -6.368436655 | PTP4A1,ENSBTAG00000047032                                     |
| 9 | 450,000     | 600,000     | 7    | 255  | -4.354147182 | PTP4A1                                                        |
| 9 | 525,000     | 675,000     | 8    | 235  | -3.988077454 | PHF3                                                          |
| 9 | 600,000     | 750,000     | 9    | 241  | -5.272855197 | PHF3                                                          |

|   |           |           |    |      |              |      |
|---|-----------|-----------|----|------|--------------|------|
| 9 | 675,000   | 825,000   | 10 | 408  | -3.958308825 | PHF3 |
| 9 | 750,000   | 900,000   | 11 | 509  | -3.819153932 |      |
| 9 | 825,000   | 975,000   | 12 | 413  | -3.692775671 |      |
| 9 | 900,000   | 1,050,000 | 13 | 531  | -2.245556429 |      |
| 9 | 975,000   | 1,125,000 | 14 | 647  | -1.277549253 |      |
| 9 | 1,050,000 | 1,200,000 | 15 | 638  | -1.162278252 |      |
| 9 | 1,125,000 | 1,275,000 | 16 | 791  | -0.922083482 |      |
| 9 | 1,200,000 | 1,350,000 | 17 | 903  | -0.454605786 |      |
| 9 | 1,275,000 | 1,425,000 | 18 | 979  | -0.58591034  |      |
| 9 | 1,350,000 | 1,500,000 | 19 | 1022 | -0.157304206 |      |
| 9 | 1,425,000 | 1,575,000 | 20 | 1060 | 0.501862947  |      |
| 9 | 1,500,000 | 1,650,000 | 21 | 830  | 0.186850083  |      |
| 9 | 1,575,000 | 1,725,000 | 22 | 616  | 0.304158999  |      |
| 9 | 1,650,000 | 1,800,000 | 23 | 669  | 0.656814202  |      |
| 9 | 1,725,000 | 1,875,000 | 24 | 718  | 0.407861402  |      |
| 9 | 1,800,000 | 1,950,000 | 25 | 823  | 0.483049398  |      |
| 9 | 1,875,000 | 2,025,000 | 26 | 676  | 0.748177349  |      |
| 9 | 1,950,000 | 2,100,000 | 27 | 719  | 0.730412042  |      |
| 9 | 2,025,000 | 2,175,000 | 28 | 787  | 0.31793626   |      |
| 9 | 2,100,000 | 2,250,000 | 29 | 542  | -0.426285903 |      |
| 9 | 2,175,000 | 2,325,000 | 30 | 517  | -0.689844961 |      |
| 9 | 2,250,000 | 2,400,000 | 31 | 557  | -0.042469774 |      |
| 9 | 2,325,000 | 2,475,000 | 32 | 510  | 0.519832365  |      |
| 9 | 2,400,000 | 2,550,000 | 33 | 589  | 0.508484312  |      |
| 9 | 2,475,000 | 2,625,000 | 34 | 793  | 0.810822485  |      |
| 9 | 2,550,000 | 2,700,000 | 35 | 869  | -0.299322134 |      |
| 9 | 2,625,000 | 2,775,000 | 36 | 785  | -0.407470672 |      |
| 9 | 2,700,000 | 2,850,000 | 37 | 919  | 0.488695314  |      |
| 9 | 2,775,000 | 2,925,000 | 38 | 1550 | 0.468120842  |      |
| 9 | 2,850,000 | 3,000,000 | 39 | 1374 | 0.289678517  |      |
| 9 | 2,925,000 | 3,075,000 | 40 | 549  | 0.145792818  |      |
| 9 | 3,000,000 | 3,150,000 | 41 | 821  | 0.526485225  |      |
| 9 | 3,075,000 | 3,225,000 | 42 | 917  | 0.551505046  |      |
| 9 | 3,150,000 | 3,300,000 | 43 | 635  | 0.611877344  |      |
| 9 | 3,225,000 | 3,375,000 | 44 | 632  | -0.32753066  |      |
| 9 | 3,300,000 | 3,450,000 | 45 | 749  | -1.338131813 |      |
| 9 | 3,375,000 | 3,525,000 | 46 | 962  | -1.085982453 |      |
| 9 | 3,450,000 | 3,600,000 | 47 | 1031 | 0.05252452   |      |
| 9 | 3,525,000 | 3,675,000 | 48 | 1059 | -0.114574319 |      |
| 9 | 3,600,000 | 3,750,000 | 49 | 1092 | -0.683160904 |      |
| 9 | 3,675,000 | 3,825,000 | 50 | 935  | 0.919112887  |      |
| 9 | 3,750,000 | 3,900,000 | 51 | 805  | 1.128145974  |      |
| 9 | 3,825,000 | 3,975,000 | 52 | 987  | 1.079894175  |      |
| 9 | 3,900,000 | 4,050,000 | 53 | 949  | -0.116334486 |      |
| 9 | 3,975,000 | 4,125,000 | 54 | 683  | -1.545125202 |      |
| 9 | 4,050,000 | 4,200,000 | 55 | 1083 | -1.876927087 |      |
| 9 | 4,125,000 | 4,275,000 | 56 | 1155 | -1.77720199  |      |
| 9 | 4,200,000 | 4,350,000 | 57 | 639  | -1.943328637 |      |
| 9 | 4,275,000 | 4,425,000 | 58 | 831  | -3.635406774 |      |
| 9 | 4,350,000 | 4,500,000 | 59 | 1052 | -3.905932115 |      |
| 9 | 4,425,000 | 4,575,000 | 60 | 1177 | -1.032847987 |      |
| 9 | 4,500,000 | 4,650,000 | 61 | 1471 | 0.404188995  |      |
| 9 | 4,575,000 | 4,725,000 | 62 | 1501 | 0.396787277  |      |

|   |           |           |     |      |              |      |
|---|-----------|-----------|-----|------|--------------|------|
| 9 | 4,650,000 | 4,800,000 | 63  | 1313 | 0.763189143  |      |
| 9 | 4,725,000 | 4,875,000 | 64  | 1643 | 0.697479549  |      |
| 9 | 4,800,000 | 4,950,000 | 65  | 1815 | 0.385473302  |      |
| 9 | 4,875,000 | 5,025,000 | 66  | 1070 | -0.106677565 |      |
| 9 | 4,950,000 | 5,100,000 | 67  | 1100 | 0.336683793  |      |
| 9 | 5,025,000 | 5,175,000 | 68  | 1916 | 0.138523718  |      |
| 9 | 5,100,000 | 5,250,000 | 69  | 1714 | 0.414642651  |      |
| 9 | 5,175,000 | 5,325,000 | 70  | 876  | 0.847991534  |      |
| 9 | 5,250,000 | 5,400,000 | 71  | 743  | 0.271658717  |      |
| 9 | 5,325,000 | 5,475,000 | 72  | 887  | -0.012465844 |      |
| 9 | 5,400,000 | 5,550,000 | 73  | 732  | 0.172280074  |      |
| 9 | 5,475,000 | 5,625,000 | 74  | 966  | 0.221226869  |      |
| 9 | 5,550,000 | 5,700,000 | 75  | 1095 | 0.11461806   |      |
| 9 | 5,625,000 | 5,775,000 | 76  | 1296 | 0.191332356  |      |
| 9 | 5,700,000 | 5,850,000 | 77  | 1621 | 0.503184166  |      |
| 9 | 5,775,000 | 5,925,000 | 78  | 1321 | 0.26787273   |      |
| 9 | 5,850,000 | 6,000,000 | 79  | 1074 | 0.371347737  |      |
| 9 | 5,925,000 | 6,075,000 | 80  | 1419 | 1.22282979   |      |
| 9 | 6,000,000 | 6,150,000 | 81  | 1488 | 1.191825304  |      |
| 9 | 6,075,000 | 6,225,000 | 82  | 1051 | 0.67283632   |      |
| 9 | 6,150,000 | 6,300,000 | 83  | 780  | -0.89137561  |      |
| 9 | 6,225,000 | 6,375,000 | 84  | 850  | -1.136066161 |      |
| 9 | 6,300,000 | 6,450,000 | 85  | 1244 | -1.960381459 |      |
| 9 | 6,375,000 | 6,525,000 | 86  | 1404 | -1.463260292 |      |
| 9 | 6,450,000 | 6,600,000 | 87  | 998  | 0.055061099  |      |
| 9 | 6,525,000 | 6,675,000 | 88  | 1017 | 0.404352558  |      |
| 9 | 6,600,000 | 6,750,000 | 89  | 1751 | 0.825575702  |      |
| 9 | 6,675,000 | 6,825,000 | 90  | 1686 | 0.735168939  |      |
| 9 | 6,750,000 | 6,900,000 | 91  | 1123 | -0.207454546 |      |
| 9 | 6,825,000 | 6,975,000 | 92  | 960  | -1.002123174 |      |
| 9 | 6,900,000 | 7,050,000 | 93  | 1368 | -0.535000166 |      |
| 9 | 6,975,000 | 7,125,000 | 94  | 1344 | 0.324874463  |      |
| 9 | 7,050,000 | 7,200,000 | 95  | 915  | 0.879475791  |      |
| 9 | 7,125,000 | 7,275,000 | 96  | 1366 | -0.548179421 |      |
| 9 | 7,200,000 | 7,350,000 | 97  | 1586 | -0.413509795 |      |
| 9 | 7,275,000 | 7,425,000 | 98  | 1142 | -0.730940775 |      |
| 9 | 7,350,000 | 7,500,000 | 99  | 886  | -1.717604595 |      |
| 9 | 7,425,000 | 7,575,000 | 100 | 798  | 0.720612559  |      |
| 9 | 7,500,000 | 7,650,000 | 101 | 652  | 1.363641998  |      |
| 9 | 7,575,000 | 7,725,000 | 102 | 722  | 1.110925782  |      |
| 9 | 7,650,000 | 7,800,000 | 103 | 630  | 0.605144347  |      |
| 9 | 7,725,000 | 7,875,000 | 104 | 531  | 0.068935251  |      |
| 9 | 7,800,000 | 7,950,000 | 105 | 1045 | -0.691209505 | BAI3 |
| 9 | 7,875,000 | 8,025,000 | 106 | 1528 | -0.414892635 | BAI3 |
| 9 | 7,950,000 | 8,100,000 | 107 | 1357 | -0.482377881 | BAI3 |
| 9 | 8,025,000 | 8,175,000 | 108 | 1036 | -1.05885569  | BAI3 |
| 9 | 8,100,000 | 8,250,000 | 109 | 1046 | 0.18644533   | BAI3 |
| 9 | 8,175,000 | 8,325,000 | 110 | 883  | 0.820486345  | BAI3 |
| 9 | 8,250,000 | 8,400,000 | 111 | 855  | 0.563803284  | BAI3 |
| 9 | 8,325,000 | 8,475,000 | 112 | 900  | -0.688826832 | BAI3 |
| 9 | 8,400,000 | 8,550,000 | 113 | 575  | -1.611168716 | BAI3 |
| 9 | 8,475,000 | 8,625,000 | 114 | 979  | 0.079080862  |      |
| 9 | 8,550,000 | 8,700,000 | 115 | 1591 | 0.177070495  |      |

|   |            |            |     |      |              |                                      |
|---|------------|------------|-----|------|--------------|--------------------------------------|
| 9 | 8,625,000  | 8,775,000  | 116 | 1529 | 0.494579016  |                                      |
| 9 | 8,700,000  | 8,850,000  | 117 | 1264 | 0.646053567  | LMBRD1                               |
| 9 | 8,775,000  | 8,925,000  | 118 | 1043 | 0.586519693  | LMBRD1                               |
| 9 | 8,850,000  | 9,000,000  | 119 | 1369 | 0.855844714  | LMBRD1                               |
| 9 | 8,925,000  | 9,075,000  | 120 | 1403 | 0.246136126  | LMBRD1                               |
| 9 | 9,000,000  | 9,150,000  | 121 | 853  | -0.207584031 |                                      |
| 9 | 9,075,000  | 9,225,000  | 122 | 660  | 0.635668769  |                                      |
| 9 | 9,150,000  | 9,300,000  | 123 | 945  | 0.478853147  |                                      |
| 9 | 9,225,000  | 9,375,000  | 124 | 1091 | 0.696918649  |                                      |
| 9 | 9,300,000  | 9,450,000  | 125 | 821  | 1.078383903  | COL19A1                              |
| 9 | 9,375,000  | 9,525,000  | 126 | 825  | 1.057203899  | COL19A1,COL9A1                       |
| 9 | 9,450,000  | 9,600,000  | 127 | 1236 | -0.220670863 | COL19A1,COL9A1                       |
| 9 | 9,525,000  | 9,675,000  | 128 | 1271 | -2.092848499 | COL9A1                               |
| 9 | 9,600,000  | 9,750,000  | 129 | 1055 | 0.098099249  | COL9A1,ENSBTAG00000045999            |
| 9 | 9,675,000  | 9,825,000  | 130 | 1073 | 0.544189839  | FAM135A,ENSBTAG00000045999           |
| 9 | 9,750,000  | 9,900,000  | 131 | 1105 | 0.453221807  | FAM135A                              |
| 9 | 9,825,000  | 9,975,000  | 132 | 987  | 0.038425977  | FAM135A,MGC137021,ENSBTAG00000035076 |
| 9 | 9,900,000  | 10,050,000 | 133 | 624  | 0.213951944  | MGC137021,SMAP1,ENSBTAG00000035076   |
| 9 | 9,975,000  | 10,125,000 | 134 | 638  | 0.918458223  | SMAP1                                |
| 9 | 10,050,000 | 10,200,000 | 135 | 682  | 0.8605212    | SMAP1                                |
| 9 | 10,125,000 | 10,275,000 | 136 | 565  | 0.944118597  | B3GAT2,SMAP1                         |
| 9 | 10,200,000 | 10,350,000 | 137 | 822  | 0.873804263  | B3GAT2,SMAP1                         |
| 9 | 10,275,000 | 10,425,000 | 138 | 1098 | -0.065272346 | B3GAT2                               |
| 9 | 10,350,000 | 10,500,000 | 139 | 1488 | 0.389537612  |                                      |
| 9 | 10,425,000 | 10,575,000 | 140 | 1707 | 0.159948363  |                                      |
| 9 | 10,500,000 | 10,650,000 | 141 | 1364 | -0.035700331 | OGFRL1                               |
| 9 | 10,575,000 | 10,725,000 | 142 | 816  | 0.510588129  | OGFRL1                               |
| 9 | 10,650,000 | 10,800,000 | 143 | 441  | -0.368889676 |                                      |
| 9 | 10,725,000 | 10,875,000 | 144 | 626  | 0.268604189  |                                      |
| 9 | 10,800,000 | 10,950,000 | 145 | 1031 | 0.204856387  |                                      |
| 9 | 10,875,000 | 11,025,000 | 146 | 989  | -1.839810846 |                                      |
| 9 | 10,950,000 | 11,100,000 | 147 | 925  | -3.151229274 |                                      |
| 9 | 11,025,000 | 11,175,000 | 148 | 1205 | -0.015268594 |                                      |
| 9 | 11,100,000 | 11,250,000 | 149 | 1068 | 1.002119959  |                                      |
| 9 | 11,175,000 | 11,325,000 | 150 | 619  | -0.195828073 |                                      |
| 9 | 11,250,000 | 11,400,000 | 151 | 505  | -0.251990346 |                                      |
| 9 | 11,325,000 | 11,475,000 | 152 | 759  | 0.042806504  |                                      |
| 9 | 11,400,000 | 11,550,000 | 153 | 901  | -0.198412899 |                                      |
| 9 | 11,475,000 | 11,625,000 | 154 | 875  | 0.317042672  |                                      |
| 9 | 11,550,000 | 11,700,000 | 155 | 1096 | 0.480629592  | RIMS1                                |
| 9 | 11,625,000 | 11,775,000 | 156 | 1251 | 0.263983023  | RIMS1                                |
| 9 | 11,700,000 | 11,850,000 | 157 | 1287 | 0.470153075  | RIMS1                                |
| 9 | 11,775,000 | 11,925,000 | 158 | 1200 | 0.506512219  | RIMS1                                |
| 9 | 11,850,000 | 12,000,000 | 159 | 1000 | -0.493062324 | RIMS1                                |
| 9 | 11,925,000 | 12,075,000 | 160 | 1151 | -0.034575535 | RIMS1                                |
| 9 | 12,000,000 | 12,150,000 | 161 | 1131 | -0.176865331 |                                      |
| 9 | 12,075,000 | 12,225,000 | 162 | 1060 | -0.652612598 |                                      |
| 9 | 12,150,000 | 12,300,000 | 163 | 866  | -0.162244814 |                                      |
| 9 | 12,225,000 | 12,375,000 | 164 | 579  | 0.318440478  |                                      |
| 9 | 12,300,000 | 12,450,000 | 165 | 740  | 0.435981846  |                                      |
| 9 | 12,375,000 | 12,525,000 | 166 | 789  | 0.575451741  |                                      |
| 9 | 12,450,000 | 12,600,000 | 167 | 704  | 0.533400242  |                                      |
| 9 | 12,525,000 | 12,675,000 | 168 | 726  | 0.046656641  |                                      |

|   |            |            |     |      |              |                               |
|---|------------|------------|-----|------|--------------|-------------------------------|
| 9 | 12,600,000 | 12,750,000 | 169 | 845  | -0.334638309 | KCNQ5                         |
| 9 | 12,675,000 | 12,825,000 | 170 | 769  | -0.238597709 | KCNQ5                         |
| 9 | 12,750,000 | 12,900,000 | 171 | 984  | 0.646740185  | KCNQ5                         |
| 9 | 12,825,000 | 12,975,000 | 172 | 1305 | 0.745368551  | KCNQ5,KHDC3L                  |
| 9 | 12,900,000 | 13,050,000 | 173 | 899  | 0.516839527  | DDX43,KHDC3L,OOEP             |
| 9 | 12,975,000 | 13,125,000 | 174 | 956  | 0.544804313  | DDX43,OOEP                    |
| 9 | 13,050,000 | 13,200,000 | 175 | 933  | 0.702816386  | MB21D1,MTO1                   |
| 9 | 13,125,000 | 13,275,000 | 176 | 390  | 0.518337381  | EEF1A1,MB21D1,MTO1            |
| 9 | 13,200,000 | 13,350,000 | 177 | 412  | 0.633062056  | EEF1A1,MTO1,SLC17A5           |
| 9 | 13,275,000 | 13,425,000 | 178 | 452  | 0.688031565  | CD109,SLC17A5                 |
| 9 | 13,350,000 | 13,500,000 | 179 | 622  | 0.026020819  | CD109,SLC17A5                 |
| 9 | 13,425,000 | 13,575,000 | 180 | 975  | 0.247253738  | CD109                         |
| 9 | 13,500,000 | 13,650,000 | 181 | 1039 | 0.293541921  | CD109                         |
| 9 | 13,575,000 | 13,725,000 | 182 | 836  | 0.60484351   |                               |
| 9 | 13,650,000 | 13,800,000 | 183 | 951  | 1.223874542  |                               |
| 9 | 13,725,000 | 13,875,000 | 184 | 1340 | 1.097076932  |                               |
| 9 | 13,800,000 | 13,950,000 | 185 | 1412 | 0.605954948  |                               |
| 9 | 13,875,000 | 14,025,000 | 186 | 1234 | 0.428486052  |                               |
| 9 | 13,950,000 | 14,100,000 | 187 | 1071 | 0.506110467  |                               |
| 9 | 14,025,000 | 14,175,000 | 188 | 939  | -1.493028196 |                               |
| 9 | 14,100,000 | 14,250,000 | 189 | 965  | -1.653088122 |                               |
| 9 | 14,175,000 | 14,325,000 | 190 | 1112 | 0.073201889  |                               |
| 9 | 14,250,000 | 14,400,000 | 191 | 998  | 0.292953735  |                               |
| 9 | 14,325,000 | 14,475,000 | 192 | 978  | 0.059782208  |                               |
| 9 | 14,400,000 | 14,550,000 | 193 | 903  | 0.201307038  |                               |
| 9 | 14,475,000 | 14,625,000 | 194 | 521  | -0.001166455 |                               |
| 9 | 14,550,000 | 14,700,000 | 195 | 477  | 0.041247441  |                               |
| 9 | 14,625,000 | 14,775,000 | 196 | 529  | -0.15590476  |                               |
| 9 | 14,700,000 | 14,850,000 | 197 | 592  | -0.612252081 |                               |
| 9 | 14,775,000 | 14,925,000 | 198 | 839  | -0.033548263 | COL12A1                       |
| 9 | 14,850,000 | 15,000,000 | 199 | 1050 | 0.533507551  | COL12A1                       |
| 9 | 14,925,000 | 15,075,000 | 200 | 1279 | 0.580678267  | COL12A1,COX7A2,TMEM30A        |
| 9 | 15,000,000 | 15,150,000 | 201 | 1037 | 0.588670273  | COX7A2,FILIP1,TMEM30A         |
| 9 | 15,075,000 | 15,225,000 | 202 | 944  | 0.47314543   | FILIP1,TMEM30A                |
| 9 | 15,150,000 | 15,300,000 | 203 | 1161 | 0.05363036   | FILIP1                        |
| 9 | 15,225,000 | 15,375,000 | 204 | 1168 | 0.511880894  | FILIP1                        |
| 9 | 15,300,000 | 15,450,000 | 205 | 1281 | 0.073626529  | ENSBTAG00000032382            |
| 9 | 15,375,000 | 15,525,000 | 206 | 872  | -1.390399561 | SENTP6,ENSBTAG00000032382     |
| 9 | 15,450,000 | 15,600,000 | 207 | 421  | -2.512829613 | SENTP6                        |
| 9 | 15,525,000 | 15,675,000 | 208 | 705  | -5.15279276  | MYO6,SENTP6                   |
| 9 | 15,600,000 | 15,750,000 | 209 | 1393 | -1.454634389 | MYO6                          |
| 9 | 15,675,000 | 15,825,000 | 210 | 1502 | -0.575716369 | MYO6,ENSBTAG00000045726       |
| 9 | 15,750,000 | 15,900,000 | 211 | 1419 | -1.244293985 | IMPG1,MYO6,ENSBTAG00000045726 |
| 9 | 15,825,000 | 15,975,000 | 212 | 1619 | 0.240609981  | IMPG1                         |
| 9 | 15,900,000 | 16,050,000 | 213 | 1408 | 0.448691255  |                               |
| 9 | 15,975,000 | 16,125,000 | 214 | 1351 | 0.125727855  |                               |
| 9 | 16,050,000 | 16,200,000 | 215 | 1746 | -0.261165489 |                               |
| 9 | 16,125,000 | 16,275,000 | 216 | 1905 | -0.235377088 |                               |
| 9 | 16,200,000 | 16,350,000 | 217 | 1757 | -0.08971508  | ENSBTAG00000016391            |
| 9 | 16,275,000 | 16,425,000 | 218 | 1803 | -0.547896287 | ENSBTAG00000016391            |
| 9 | 16,350,000 | 16,500,000 | 219 | 1531 | -0.184626091 |                               |
| 9 | 16,425,000 | 16,575,000 | 220 | 1264 | 0.406388807  |                               |
| 9 | 16,500,000 | 16,650,000 | 221 | 1206 | 0.505039916  |                               |



|   |            |            |     |      |              |                   |
|---|------------|------------|-----|------|--------------|-------------------|
| 9 | 16,575,000 | 16,725,000 | 222 | 905  | 0.449053529  |                   |
| 9 | 16,650,000 | 16,800,000 | 223 | 1101 | 0.380141323  |                   |
| 9 | 16,725,000 | 16,875,000 | 224 | 1252 | 0.146437377  |                   |
| 9 | 16,800,000 | 16,950,000 | 225 | 1406 | 0.648766712  |                   |
| 9 | 16,875,000 | 17,025,000 | 226 | 1487 | 1.088216322  |                   |
| 9 | 16,950,000 | 17,100,000 | 227 | 1032 | 0.924680471  |                   |
| 9 | 17,025,000 | 17,175,000 | 228 | 930  | 0.826596537  |                   |
| 9 | 17,100,000 | 17,250,000 | 229 | 1509 | 1.142342237  |                   |
| 9 | 17,175,000 | 17,325,000 | 230 | 1536 | 1.243438875  | HTR1B             |
| 9 | 17,250,000 | 17,400,000 | 231 | 1143 | 0.930505914  | HTR1B             |
| 9 | 17,325,000 | 17,475,000 | 232 | 1109 | 0.15150546   |                   |
| 9 | 17,400,000 | 17,550,000 | 233 | 785  | -0.594554955 |                   |
| 9 | 17,475,000 | 17,625,000 | 234 | 857  | 0.701178922  |                   |
| 9 | 17,550,000 | 17,700,000 | 235 | 1292 | 1.121785905  |                   |
| 9 | 17,625,000 | 17,775,000 | 236 | 1174 | 0.874145214  |                   |
| 9 | 17,700,000 | 17,850,000 | 237 | 1387 | 0.760206191  |                   |
| 9 | 17,775,000 | 17,925,000 | 238 | 1691 | 0.979485657  |                   |
| 9 | 17,850,000 | 18,000,000 | 239 | 1567 | 1.012205733  |                   |
| 9 | 17,925,000 | 18,075,000 | 240 | 1471 | 1.164259936  |                   |
| 9 | 18,000,000 | 18,150,000 | 241 | 1357 | 1.02691786   |                   |
| 9 | 18,075,000 | 18,225,000 | 242 | 881  | 0.574541131  |                   |
| 9 | 18,150,000 | 18,300,000 | 243 | 760  | 0.815672373  |                   |
| 9 | 18,225,000 | 18,375,000 | 244 | 939  | -0.388971712 |                   |
| 9 | 18,300,000 | 18,450,000 | 245 | 1036 | -0.75065773  |                   |
| 9 | 18,375,000 | 18,525,000 | 246 | 1142 | 0.18622526   |                   |
| 9 | 18,450,000 | 18,600,000 | 247 | 673  | 0.321825142  |                   |
| 9 | 18,525,000 | 18,675,000 | 248 | 555  | -1.821321985 |                   |
| 9 | 18,600,000 | 18,750,000 | 249 | 615  | -1.886560286 | IRAK1BP1,PHIP     |
| 9 | 18,675,000 | 18,825,000 | 250 | 471  | -1.235802875 | IRAK1BP1,PHIP     |
| 9 | 18,750,000 | 18,900,000 | 251 | 429  | -2.074953784 | PHIP              |
| 9 | 18,825,000 | 18,975,000 | 252 | 524  | -0.501141444 | PHIP              |
| 9 | 18,900,000 | 19,050,000 | 253 | 763  | 0.532881185  | HMG3              |
| 9 | 18,975,000 | 19,125,000 | 254 | 1152 | 0.475221483  | HMG3              |
| 9 | 19,050,000 | 19,200,000 | 255 | 1220 | 0.573710411  |                   |
| 9 | 19,125,000 | 19,275,000 | 256 | 801  | 0.050299402  |                   |
| 9 | 19,200,000 | 19,350,000 | 257 | 887  | -0.574060318 | LCA5              |
| 9 | 19,275,000 | 19,425,000 | 258 | 1348 | -0.000302763 | LCA5              |
| 9 | 19,350,000 | 19,500,000 | 259 | 1237 | 0.251015974  | LCA5              |
| 9 | 19,425,000 | 19,575,000 | 260 | 831  | -1.490345099 | SH3BGRL2          |
| 9 | 19,500,000 | 19,650,000 | 261 | 556  | -1.717221594 | SH3BGRL2          |
| 9 | 19,575,000 | 19,725,000 | 262 | 746  | 0.028300811  |                   |
| 9 | 19,650,000 | 19,800,000 | 263 | 978  | 0.326530003  |                   |
| 9 | 19,725,000 | 19,875,000 | 264 | 682  | 1.053746427  | ELOVL4            |
| 9 | 19,800,000 | 19,950,000 | 265 | 560  | 1.259422962  | ELOVL4,TTK        |
| 9 | 19,875,000 | 20,025,000 | 266 | 429  | 1.226035819  | ELOVL4,TTK        |
| 9 | 19,950,000 | 20,100,000 | 267 | 211  | 1.067471615  | BCKDHB,RPA3OS,TTK |
| 9 | 20,025,000 | 20,175,000 | 268 | 410  | 0.040820191  | BCKDHB,RPA3OS     |
| 9 | 20,100,000 | 20,250,000 | 269 | 505  | -1.126116189 | BCKDHB            |
| 9 | 20,175,000 | 20,325,000 | 270 | 462  | -3.933045066 | BCKDHB            |
| 9 | 20,250,000 | 20,400,000 | 271 | 589  | -3.782543672 | BCKDHB            |
| 9 | 20,325,000 | 20,475,000 | 272 | 724  | -2.347378443 | BCKDHB            |
| 9 | 20,400,000 | 20,550,000 | 273 | 497  | -2.428486461 |                   |
| 9 | 20,475,000 | 20,625,000 | 274 | 344  | -1.706931229 |                   |

|   |            |            |     |      |              |                                                   |
|---|------------|------------|-----|------|--------------|---------------------------------------------------|
| 9 | 20,550,000 | 20,700,000 | 275 | 517  | -0.531411847 |                                                   |
| 9 | 20,625,000 | 20,775,000 | 276 | 906  | -0.792981816 |                                                   |
| 9 | 20,700,000 | 20,850,000 | 277 | 819  | -0.874975584 |                                                   |
| 9 | 20,775,000 | 20,925,000 | 278 | 575  | -1.253189094 |                                                   |
| 9 | 20,850,000 | 21,000,000 | 279 | 941  | -0.25864425  |                                                   |
| 9 | 20,925,000 | 21,075,000 | 280 | 1233 | 0.977592395  |                                                   |
| 9 | 21,000,000 | 21,150,000 | 281 | 836  | 0.940192493  |                                                   |
| 9 | 21,075,000 | 21,225,000 | 282 | 413  | 0.038815812  |                                                   |
| 9 | 21,150,000 | 21,300,000 | 283 | 460  | 0.012563162  |                                                   |
| 9 | 21,225,000 | 21,375,000 | 284 | 483  | 0.294022964  |                                                   |
| 9 | 21,300,000 | 21,450,000 | 285 | 430  | 0.975438555  |                                                   |
| 9 | 21,375,000 | 21,525,000 | 286 | 318  | -0.315823367 |                                                   |
| 9 | 21,450,000 | 21,600,000 | 287 | 284  | -0.31259797  |                                                   |
| 9 | 21,525,000 | 21,675,000 | 288 | 503  | -1.732569204 |                                                   |
| 9 | 21,600,000 | 21,750,000 | 289 | 697  | -2.668238802 |                                                   |
| 9 | 21,675,000 | 21,825,000 | 290 | 482  | -2.332252017 | FAM46A                                            |
| 9 | 21,750,000 | 21,900,000 | 291 | 367  | -2.289486208 | FAM46A                                            |
| 9 | 21,825,000 | 21,975,000 | 292 | 395  | -1.223006584 |                                                   |
| 9 | 21,900,000 | 22,050,000 | 293 | 467  | 0.042106025  |                                                   |
| 9 | 21,975,000 | 22,125,000 | 294 | 648  | 0.4224017    |                                                   |
| 9 | 22,050,000 | 22,200,000 | 295 | 879  | 0.743993575  |                                                   |
| 9 | 22,125,000 | 22,275,000 | 296 | 993  | 0.412500294  | IBTK                                              |
| 9 | 22,200,000 | 22,350,000 | 297 | 843  | 0.361699389  | IBTK                                              |
| 9 | 22,275,000 | 22,425,000 | 298 | 1205 | 0.283398953  | IBTK                                              |
| 9 | 22,350,000 | 22,500,000 | 299 | 1162 | 0.180317547  | TPBG                                              |
| 9 | 22,425,000 | 22,575,000 | 300 | 462  | -0.017428207 | TPBG                                              |
| 9 | 22,500,000 | 22,650,000 | 301 | 750  | -1.92208263  |                                                   |
| 9 | 22,575,000 | 22,725,000 | 302 | 796  | -0.980027111 |                                                   |
| 9 | 22,650,000 | 22,800,000 | 303 | 595  | 1.008959701  |                                                   |
| 9 | 22,725,000 | 22,875,000 | 304 | 910  | 0.794144081  |                                                   |
| 9 | 22,800,000 | 22,950,000 | 305 | 1108 | 0.605816265  |                                                   |
| 9 | 22,875,000 | 23,025,000 | 306 | 1026 | 0.729847683  |                                                   |
| 9 | 22,950,000 | 23,100,000 | 307 | 881  | 0.741209549  | UBE3D                                             |
| 9 | 23,025,000 | 23,175,000 | 308 | 687  | 0.852739239  | UBE3D                                             |
| 9 | 23,100,000 | 23,250,000 | 309 | 491  | 1.106319348  | UBE3D                                             |
| 9 | 23,175,000 | 23,325,000 | 310 | 869  | 1.124207293  | DOPEY1,UBE3D                                      |
| 9 | 23,250,000 | 23,400,000 | 311 | 1058 | 1.024223679  | DOPEY1,PGM3,RWDD2A                                |
| 9 | 23,325,000 | 23,475,000 | 312 | 893  | -0.025781428 | DOPEY1,ME1,PGM3,RWDD2A                            |
| 9 | 23,400,000 | 23,550,000 | 313 | 865  | -1.01553707  | ME1                                               |
| 9 | 23,475,000 | 23,625,000 | 314 | 921  | -0.348414699 | ME1                                               |
| 9 | 23,550,000 | 23,700,000 | 315 | 899  | 0.782800686  | ME1                                               |
| 9 | 23,625,000 | 23,775,000 | 316 | 1015 | 0.060871488  | PRSS35,SNAP91                                     |
| 9 | 23,700,000 | 23,850,000 | 317 | 1041 | -0.387538426 | PRSS35,SNAP91,ENSBTAG00000046593,ENSBTAG000047118 |
| 9 | 23,775,000 | 23,925,000 | 318 | 855  | -0.249557466 | SNAP91,ENSBTAG00000046593,ENSBTAG00000047118      |
| 9 | 23,850,000 | 24,000,000 | 319 | 928  | -0.740288958 | SNAP91                                            |
| 9 | 23,925,000 | 24,075,000 | 320 | 792  | -0.483020421 | C6orf58,ENSBTAG00000003921                        |
| 9 | 24,000,000 | 24,150,000 | 321 | 680  | 0.683766821  | C6orf58,KIAA0408,ENSBTAG00000003921               |
| 9 | 24,075,000 | 24,225,000 | 322 | 827  | 0.574670993  | KIAA0408,ENSBTAG00000003921                       |
| 9 | 24,150,000 | 24,300,000 | 323 | 733  | 0.494594795  | ECHDC1,RNF146B                                    |
| 9 | 24,225,000 | 24,375,000 | 324 | 722  | 0.818518497  | ECHDC1,RNF146B,RSPO3                              |
| 9 | 24,300,000 | 24,450,000 | 325 | 568  | 0.296738915  | RNF146B,RSPO3                                     |

|   |            |            |     |      |              |                                       |
|---|------------|------------|-----|------|--------------|---------------------------------------|
| 9 | 24,375,000 | 24,525,000 | 326 | 400  | -2.07569317  | RSPO3                                 |
| 9 | 24,450,000 | 24,600,000 | 327 | 549  | -1.236742784 | LAPTM4B,RSPO3                         |
| 9 | 24,525,000 | 24,675,000 | 328 | 556  | 0.109856379  | LAPTM4B                               |
| 9 | 24,600,000 | 24,750,000 | 329 | 472  | -0.377043729 |                                       |
| 9 | 24,675,000 | 24,825,000 | 330 | 403  | -0.930341035 |                                       |
| 9 | 24,750,000 | 24,900,000 | 331 | 349  | -0.780866187 |                                       |
| 9 | 24,825,000 | 24,975,000 | 332 | 503  | -1.101982561 |                                       |
| 9 | 24,900,000 | 25,050,000 | 333 | 811  | -0.816955084 |                                       |
| 9 | 24,975,000 | 25,125,000 | 334 | 663  | -0.024014636 |                                       |
| 9 | 25,050,000 | 25,200,000 | 335 | 405  | 0.642601135  |                                       |
| 9 | 25,125,000 | 25,275,000 | 336 | 391  | 0.175164282  | C6ORF173                              |
| 9 | 25,200,000 | 25,350,000 | 337 | 510  | -0.501887672 | C6ORF173                              |
| 9 | 25,275,000 | 25,425,000 | 338 | 469  | -0.620514683 | C6ORF173                              |
| 9 | 25,350,000 | 25,500,000 | 339 | 471  | -0.05453006  |                                       |
| 9 | 25,425,000 | 25,575,000 | 340 | 475  | 0.237590187  |                                       |
| 9 | 25,500,000 | 25,650,000 | 341 | 268  | 0.220545532  | HINT3,TRMT11                          |
| 9 | 25,575,000 | 25,725,000 | 342 | 536  | 0.455405999  | HINT3,NCOA7,TRMT11,ENSBTAG00000046503 |
| 9 | 25,650,000 | 25,800,000 | 343 | 905  | 0.447958161  | HINT3,NCOA7,ENSBTAG00000046503        |
| 9 | 25,725,000 | 25,875,000 | 344 | 1000 | 0.131843554  | HEY2,ENSBTAG00000046503               |
| 9 | 25,800,000 | 25,950,000 | 345 | 698  | -0.040201454 | HEY2                                  |
| 9 | 25,875,000 | 26,025,000 | 346 | 353  | 0.704999368  | HEY2                                  |
| 9 | 25,950,000 | 26,100,000 | 347 | 396  | 0.665372638  |                                       |
| 9 | 26,025,000 | 26,175,000 | 348 | 596  | 0.187073453  |                                       |
| 9 | 26,100,000 | 26,250,000 | 349 | 644  | 0.313654238  |                                       |
| 9 | 26,175,000 | 26,325,000 | 350 | 767  | 1.212150748  | HDDC2,TPD52L1                         |
| 9 | 26,250,000 | 26,400,000 | 351 | 1222 | 1.16216828   | HDDC2,TPD52L1                         |
| 9 | 26,325,000 | 26,475,000 | 352 | 1148 | 0.868987942  | RNF217,TPD52L1                        |
| 9 | 26,400,000 | 26,550,000 | 353 | 980  | 0.520324443  | RNF217,TPD52L1                        |
| 9 | 26,475,000 | 26,625,000 | 354 | 915  | -0.202767101 | RNF217                                |
| 9 | 26,550,000 | 26,700,000 | 355 | 635  | -1.206263798 | ENSBTAG00000021667                    |
| 9 | 26,625,000 | 26,775,000 | 356 | 825  | 0.379507365  | ENSBTAG00000021667                    |
| 9 | 26,700,000 | 26,850,000 | 357 | 871  | 1.071876695  | ENSBTAG00000021667                    |
| 9 | 26,775,000 | 26,925,000 | 358 | 742  | 0.978232123  | ENSBTAG00000021667                    |
| 9 | 26,850,000 | 27,000,000 | 359 | 819  | -0.24521249  | ENSBTAG00000021667                    |
| 9 | 26,925,000 | 27,075,000 | 360 | 839  | -0.925639124 |                                       |
| 9 | 27,000,000 | 27,150,000 | 361 | 864  | 0.065434745  |                                       |
| 9 | 27,075,000 | 27,225,000 | 362 | 785  | -0.325887405 |                                       |
| 9 | 27,150,000 | 27,300,000 | 363 | 518  | -1.722557238 | ENSBTAG00000033195                    |
| 9 | 27,225,000 | 27,375,000 | 364 | 482  | -0.378770583 | ENSBTAG00000033195                    |
| 9 | 27,300,000 | 27,450,000 | 365 | 574  | 0.199833391  | ENSBTAG00000033195                    |
| 9 | 27,375,000 | 27,525,000 | 366 | 805  | 0.437740309  |                                       |
| 9 | 27,450,000 | 27,600,000 | 367 | 1228 | 0.938697727  |                                       |
| 9 | 27,525,000 | 27,675,000 | 368 | 1196 | 0.93658022   | ENSBTAG00000047309                    |
| 9 | 27,600,000 | 27,750,000 | 369 | 1211 | 1.000153102  | ENSBTAG00000047309                    |
| 9 | 27,675,000 | 27,825,000 | 370 | 1081 | 0.988924943  |                                       |
| 9 | 27,750,000 | 27,900,000 | 371 | 974  | 1.029952232  |                                       |
| 9 | 27,825,000 | 27,975,000 | 372 | 1026 | 0.7016651    |                                       |
| 9 | 27,900,000 | 28,050,000 | 373 | 896  | 0.088348846  |                                       |
| 9 | 27,975,000 | 28,125,000 | 374 | 870  | 0.056412196  | TRDN                                  |
| 9 | 28,050,000 | 28,200,000 | 375 | 890  | -0.224859314 | TRDN                                  |
| 9 | 28,125,000 | 28,275,000 | 376 | 1083 | -0.849555953 | TRDN                                  |
| 9 | 28,200,000 | 28,350,000 | 377 | 1026 | -1.323178792 | TRDN                                  |
| 9 | 28,275,000 | 28,425,000 | 378 | 862  | -0.98165253  |                                       |

|   |            |            |     |      |              |                          |
|---|------------|------------|-----|------|--------------|--------------------------|
| 9 | 28,350,000 | 28,500,000 | 379 | 567  | -0.54509129  |                          |
| 9 | 28,425,000 | 28,575,000 | 380 | 318  | -4.567002089 | ENSBTAG00000046232       |
| 9 | 28,500,000 | 28,650,000 | 381 | 333  | -5.209731724 | CLVS2,ENSBTAG00000046232 |
| 9 | 28,575,000 | 28,725,000 | 382 | 542  | 0.762433464  | CLVS2                    |
| 9 | 28,650,000 | 28,800,000 | 383 | 741  | 1.171133769  | CLVS2                    |
| 9 | 28,725,000 | 28,875,000 | 384 | 530  | 0.71308254   | FABP7,SMPDL3A            |
| 9 | 28,800,000 | 28,950,000 | 385 | 658  | 0.101038001  | FABP7,PKIB,SMPDL3A       |
| 9 | 28,875,000 | 29,025,000 | 386 | 1182 | 0.611930742  | PKIB                     |
| 9 | 28,950,000 | 29,100,000 | 387 | 1214 | 1.017755481  | PKIB,SERINC1             |
| 9 | 29,025,000 | 29,175,000 | 388 | 702  | 0.566026939  | HSF2,SERINC1             |
| 9 | 29,100,000 | 29,250,000 | 389 | 410  | -0.148704888 | HSF2,SERINC1             |
| 9 | 29,175,000 | 29,325,000 | 390 | 529  | 0.702877953  |                          |
| 9 | 29,250,000 | 29,400,000 | 391 | 662  | 0.844838859  |                          |
| 9 | 29,325,000 | 29,475,000 | 392 | 483  | -0.266257697 |                          |
| 9 | 29,400,000 | 29,550,000 | 393 | 326  | -0.314534567 |                          |
| 9 | 29,475,000 | 29,625,000 | 394 | 608  | 1.387071972  |                          |
| 9 | 29,550,000 | 29,700,000 | 395 | 740  | 1.493530905  |                          |
| 9 | 29,625,000 | 29,775,000 | 396 | 623  | 1.154944735  | ENSBTAG00000011735       |
| 9 | 29,700,000 | 29,850,000 | 397 | 653  | 0.51681406   | ENSBTAG00000011735       |
| 9 | 29,775,000 | 29,925,000 | 398 | 804  | 0.750307162  |                          |
| 9 | 29,850,000 | 30,000,000 | 399 | 927  | 0.47479014   |                          |
| 9 | 29,925,000 | 30,075,000 | 400 | 761  | -0.216162672 |                          |
| 9 | 30,000,000 | 30,150,000 | 401 | 468  | -0.241511462 | GJA1                     |
| 9 | 30,075,000 | 30,225,000 | 402 | 557  | 1.01482969   | GJA1,TBC1D32             |
| 9 | 30,150,000 | 30,300,000 | 403 | 945  | 1.552976869  | TBC1D32                  |
| 9 | 30,225,000 | 30,375,000 | 404 | 715  | 1.549183461  | TBC1D32                  |
| 9 | 30,300,000 | 30,450,000 | 405 | 462  | 1.406811902  | TBC1D32                  |
| 9 | 30,375,000 | 30,525,000 | 406 | 948  | -0.063207118 | TBC1D32                  |
| 9 | 30,450,000 | 30,600,000 | 407 | 905  | -0.523245353 |                          |
| 9 | 30,525,000 | 30,675,000 | 408 | 734  | 0.400896166  |                          |
| 9 | 30,600,000 | 30,750,000 | 409 | 765  | 0.784716454  |                          |
| 9 | 30,675,000 | 30,825,000 | 410 | 472  | 1.182299237  |                          |
| 9 | 30,750,000 | 30,900,000 | 411 | 572  | 1.052860116  |                          |
| 9 | 30,825,000 | 30,975,000 | 412 | 972  | 0.717253964  |                          |
| 9 | 30,900,000 | 31,050,000 | 413 | 1114 | 0.286775237  |                          |
| 9 | 30,975,000 | 31,125,000 | 414 | 1106 | -2.313908585 |                          |
| 9 | 31,050,000 | 31,200,000 | 415 | 1174 | -2.674083215 |                          |
| 9 | 31,125,000 | 31,275,000 | 416 | 1249 | -0.221962706 |                          |
| 9 | 31,200,000 | 31,350,000 | 417 | 1111 | -0.552805477 |                          |
| 9 | 31,275,000 | 31,425,000 | 418 | 1095 | -0.71458846  |                          |
| 9 | 31,350,000 | 31,500,000 | 419 | 793  | 0.038966741  |                          |
| 9 | 31,425,000 | 31,575,000 | 420 | 343  | 0.28094592   |                          |
| 9 | 31,500,000 | 31,650,000 | 421 | 337  | 0.570041394  |                          |
| 9 | 31,575,000 | 31,725,000 | 422 | 344  | 0.625566894  |                          |
| 9 | 31,650,000 | 31,800,000 | 423 | 504  | 0.388155556  |                          |
| 9 | 31,725,000 | 31,875,000 | 424 | 597  | 0.522773883  |                          |
| 9 | 31,800,000 | 31,950,000 | 425 | 847  | 0.977611909  |                          |
| 9 | 31,875,000 | 32,025,000 | 426 | 1090 | 1.002301494  |                          |
| 9 | 31,950,000 | 32,100,000 | 427 | 861  | 0.830633593  | MAN1A1                   |
| 9 | 32,025,000 | 32,175,000 | 428 | 817  | 0.234204005  | MAN1A1                   |
| 9 | 32,100,000 | 32,250,000 | 429 | 1053 | -1.016595252 | MAN1A1                   |
| 9 | 32,175,000 | 32,325,000 | 430 | 1438 | -0.320384688 | MAN1A1                   |
| 9 | 32,250,000 | 32,400,000 | 431 | 1638 | -0.144655636 | MAN1A1                   |

|   |            |            |     |      |              |                                         |
|---|------------|------------|-----|------|--------------|-----------------------------------------|
| 9 | 32,325,000 | 32,475,000 | 432 | 1546 | -0.871910247 | FAM184A                                 |
| 9 | 32,400,000 | 32,550,000 | 433 | 976  | -1.060151272 | ASF1A,FAM184A,MCM9                      |
| 9 | 32,475,000 | 32,625,000 | 434 | 363  | -0.819698199 | ASF1A,FAM184A,MCM9                      |
| 9 | 32,550,000 | 32,700,000 | 435 | 606  | 0.089107853  | ASF1A,MCM9                              |
| 9 | 32,625,000 | 32,775,000 | 436 | 612  | 0.423761644  |                                         |
| 9 | 32,700,000 | 32,850,000 | 437 | 374  | -1.799559871 | CEP85L,PLN,ENSBTAG00000047280           |
| 9 | 32,775,000 | 32,925,000 | 438 | 663  | -1.411885    | CEP85L,PLN,ENSBTAG00000047280           |
| 9 | 32,850,000 | 33,000,000 | 439 | 977  | 0.304360344  | CEP85L                                  |
| 9 | 32,925,000 | 33,075,000 | 440 | 1111 | -0.849454948 | SLC35F1                                 |
| 9 | 33,000,000 | 33,150,000 | 441 | 1241 | -0.572913959 | SLC35F1                                 |
| 9 | 33,075,000 | 33,225,000 | 442 | 1500 | 1.021351207  | SLC35F1                                 |
| 9 | 33,150,000 | 33,300,000 | 443 | 1656 | 1.369519233  |                                         |
| 9 | 33,225,000 | 33,375,000 | 444 | 1441 | 1.257164555  |                                         |
| 9 | 33,300,000 | 33,450,000 | 445 | 1108 | 1.184141707  |                                         |
| 9 | 33,375,000 | 33,525,000 | 446 | 852  | 0.963326561  |                                         |
| 9 | 33,450,000 | 33,600,000 | 447 | 647  | 0.516309195  | NEPN,NUS1                               |
| 9 | 33,525,000 | 33,675,000 | 448 | 472  | -0.957977663 | GOPC,NEPN,NUS1                          |
| 9 | 33,600,000 | 33,750,000 | 449 | 601  | -0.013263769 | DCBLD1,GOPC,NEPN                        |
| 9 | 33,675,000 | 33,825,000 | 450 | 592  | 0.531499935  | DCBLD1,ROS1                             |
| 9 | 33,750,000 | 33,900,000 | 451 | 547  | 0.709178921  | ROS1                                    |
| 9 | 33,825,000 | 33,975,000 | 452 | 530  | 0.936160971  | ROS1,VGLL2                              |
| 9 | 33,900,000 | 34,050,000 | 453 | 318  | 0.656908015  | ROS1,VGLL2                              |
| 9 | 33,975,000 | 34,125,000 | 454 | 369  | -0.252124269 |                                         |
| 9 | 34,050,000 | 34,200,000 | 455 | 556  | 0.162060326  | RFX6                                    |
| 9 | 34,125,000 | 34,275,000 | 456 | 707  | 0.26171776   | RFX6                                    |
| 9 | 34,200,000 | 34,350,000 | 457 | 823  | 0.531303083  | FAM162B,KPNA5,RFX6                      |
| 9 | 34,275,000 | 34,425,000 | 458 | 829  | 0.723663442  | FAM162B,KPNA5,RSPH4A,TMEM230,ZUFSP      |
| 9 | 34,350,000 | 34,500,000 | 459 | 863  | 0.445520575  | KPNA5,RSPH4A,TMEM230,ZUFSP              |
| 9 | 34,425,000 | 34,575,000 | 460 | 983  | 0.378602514  | SULT1C4                                 |
| 9 | 34,500,000 | 34,650,000 | 461 | 1004 | 0.384972058  | FAM26D,RWDD1,SULT1C4,TRAPPC3L           |
| 9 | 34,575,000 | 34,725,000 | 462 | 847  | -0.208340564 | DSE,FAM26D,FAM26E,FAM26F,RWDD1,TRAPPC3L |
| 9 | 34,650,000 | 34,800,000 | 463 | 526  | -1.325870568 | DSE,FAM26E,FAM26F,TRAPPC3L              |
| 9 | 34,725,000 | 34,875,000 | 464 | 328  | -0.503079735 | DSE,TSPYL1                              |
| 9 | 34,800,000 | 34,950,000 | 465 | 323  | 0.687612724  | NT5DC1,TSPYL1,TSPYL4                    |
| 9 | 34,875,000 | 35,025,000 | 466 | 434  | 0.522239738  | COL10A1,NT5DC1,TSPYL1,TSPYL4            |
| 9 | 34,950,000 | 35,100,000 | 467 | 493  | 0.14699182   | COL10A1,FRK,NT5DC1                      |
| 9 | 35,025,000 | 35,175,000 | 468 | 621  | -1.285798413 | FRK                                     |
| 9 | 35,100,000 | 35,250,000 | 469 | 633  | -1.177011032 | FRK                                     |
| 9 | 35,175,000 | 35,325,000 | 470 | 613  | -1.01623613  |                                         |
| 9 | 35,250,000 | 35,400,000 | 471 | 1044 | -0.587814473 |                                         |
| 9 | 35,325,000 | 35,475,000 | 472 | 980  | -0.222039192 |                                         |
| 9 | 35,400,000 | 35,550,000 | 473 | 842  | -0.630681495 |                                         |
| 9 | 35,475,000 | 35,625,000 | 474 | 1208 | -0.188624237 |                                         |
| 9 | 35,550,000 | 35,700,000 | 475 | 887  | 0.368605292  |                                         |
| 9 | 35,625,000 | 35,775,000 | 476 | 738  | -0.36146348  |                                         |
| 9 | 35,700,000 | 35,850,000 | 477 | 1046 | 0.64158753   |                                         |
| 9 | 35,775,000 | 35,925,000 | 478 | 828  | 1.088198629  |                                         |
| 9 | 35,850,000 | 36,000,000 | 479 | 692  | 1.020540842  |                                         |
| 9 | 35,925,000 | 36,075,000 | 480 | 925  | 0.830196849  |                                         |
| 9 | 36,000,000 | 36,150,000 | 481 | 1113 | 0.95202937   |                                         |
| 9 | 36,075,000 | 36,225,000 | 482 | 1506 | 1.213169716  |                                         |
| 9 | 36,150,000 | 36,300,000 | 483 | 1629 | 0.217625255  |                                         |
| 9 | 36,225,000 | 36,375,000 | 484 | 1512 | -0.806610487 |                                         |

|   |            |            |     |      |              |                                   |
|---|------------|------------|-----|------|--------------|-----------------------------------|
| 9 | 36,300,000 | 36,450,000 | 485 | 1288 | -0.197860616 |                                   |
| 9 | 36,375,000 | 36,525,000 | 486 | 913  | 0.725806231  |                                   |
| 9 | 36,450,000 | 36,600,000 | 487 | 941  | 0.535235825  | HS3ST5                            |
| 9 | 36,525,000 | 36,675,000 | 488 | 1057 | 0.483497947  | HS3ST5                            |
| 9 | 36,600,000 | 36,750,000 | 489 | 1466 | 0.195393813  | HS3ST5                            |
| 9 | 36,675,000 | 36,825,000 | 490 | 1435 | -0.083844427 | HS3ST5                            |
| 9 | 36,750,000 | 36,900,000 | 491 | 1009 | -0.685870688 | HS3ST5                            |
| 9 | 36,825,000 | 36,975,000 | 492 | 777  | -2.033345118 | HDAC2,HS3ST5                      |
| 9 | 36,900,000 | 37,050,000 | 493 | 557  | -2.617210554 | HDAC2,MARCKS                      |
| 9 | 36,975,000 | 37,125,000 | 494 | 441  | -0.790750791 | MARCKS                            |
| 9 | 37,050,000 | 37,200,000 | 495 | 306  | -0.704564717 |                                   |
| 9 | 37,125,000 | 37,275,000 | 496 | 395  | -0.553205456 |                                   |
| 9 | 37,200,000 | 37,350,000 | 497 | 587  | -0.043432243 |                                   |
| 9 | 37,275,000 | 37,425,000 | 498 | 923  | 0.841295788  |                                   |
| 9 | 37,350,000 | 37,500,000 | 499 | 807  | 0.945756291  |                                   |
| 9 | 37,425,000 | 37,575,000 | 500 | 474  | 0.723281011  |                                   |
| 9 | 37,500,000 | 37,650,000 | 501 | 469  | 1.012064699  |                                   |
| 9 | 37,575,000 | 37,725,000 | 502 | 474  | 0.742481162  |                                   |
| 9 | 37,650,000 | 37,800,000 | 503 | 525  | 0.600683421  |                                   |
| 9 | 37,725,000 | 37,875,000 | 504 | 560  | 0.741505373  |                                   |
| 9 | 37,800,000 | 37,950,000 | 505 | 502  | 0.841425599  |                                   |
| 9 | 37,875,000 | 38,025,000 | 506 | 706  | 0.874766441  |                                   |
| 9 | 37,950,000 | 38,100,000 | 507 | 771  | 0.374344451  |                                   |
| 9 | 38,025,000 | 38,175,000 | 508 | 567  | -1.555176629 |                                   |
| 9 | 38,100,000 | 38,250,000 | 509 | 737  | -0.163342129 |                                   |
| 9 | 38,175,000 | 38,325,000 | 510 | 632  | 0.865548985  |                                   |
| 9 | 38,250,000 | 38,400,000 | 511 | 827  | 0.541833647  |                                   |
| 9 | 38,325,000 | 38,475,000 | 512 | 1228 | 0.668155926  |                                   |
| 9 | 38,400,000 | 38,550,000 | 513 | 734  | 0.694204253  |                                   |
| 9 | 38,475,000 | 38,625,000 | 514 | 435  | 1.112558112  |                                   |
| 9 | 38,550,000 | 38,700,000 | 515 | 573  | 0.927937592  | LAMA4                             |
| 9 | 38,625,000 | 38,775,000 | 516 | 577  | 0.960983563  | LAMA4                             |
| 9 | 38,700,000 | 38,850,000 | 517 | 712  | 1.266112713  | FAM229B,LAMA4,TUBE1,WISP3         |
| 9 | 38,775,000 | 38,925,000 | 518 | 683  | 1.360368558  | FAM229B,LAMA4,TUBE1,WISP3         |
| 9 | 38,850,000 | 39,000,000 | 519 | 388  | 0.289033385  | WISP3                             |
| 9 | 38,925,000 | 39,075,000 | 520 | 348  | -4.456902335 |                                   |
| 9 | 39,000,000 | 39,150,000 | 521 | 422  | -2.684572228 | FYN                               |
| 9 | 39,075,000 | 39,225,000 | 522 | 722  | -1.95841799  | FYN                               |
| 9 | 39,150,000 | 39,300,000 | 523 | 739  | -1.856175516 | FYN                               |
| 9 | 39,225,000 | 39,375,000 | 524 | 360  | -0.592592122 | FYN,TRAF3IP2                      |
| 9 | 39,300,000 | 39,450,000 | 525 | 264  | -0.356705708 | REV3L,TRAF3IP2,ENSBTAG00000039456 |
| 9 | 39,375,000 | 39,525,000 | 526 | 213  | 0.592724522  | REV3L,ENSBTAG00000039456          |
| 9 | 39,450,000 | 39,600,000 | 527 | 212  | 0.654508788  | REV3L                             |
| 9 | 39,525,000 | 39,675,000 | 528 | 461  | 0.743727948  | KIAA1919,REV3L,SLC16A10           |
| 9 | 39,600,000 | 39,750,000 | 529 | 507  | 0.618506738  | KIAA1919,SLC16A10                 |
| 9 | 39,675,000 | 39,825,000 | 530 | 367  | 0.922281544  | RPF2,SLC16A10                     |
| 9 | 39,750,000 | 39,900,000 | 531 | 271  | 1.377299732  | GTF3C6,RPF2,SLC16A10              |
| 9 | 39,825,000 | 39,975,000 | 532 | 115  | 1.23737257   | AMD1,GTF3C6,RPF2                  |
| 9 | 39,900,000 | 40,050,000 | 533 | 187  | 1.245898039  | AMD1                              |
| 9 | 39,975,000 | 40,125,000 | 534 | 401  | -0.428664555 | CDK19                             |
| 9 | 40,050,000 | 40,200,000 | 535 | 548  | -0.047228636 | CDK19                             |
| 9 | 40,125,000 | 40,275,000 | 536 | 856  | 0.519470168  | SLC22A16                          |
| 9 | 40,200,000 | 40,350,000 | 537 | 816  | 0.197784067  | C9H6orf186,DDO,SLC22A16           |

|   |            |            |     |      |              |                                                    |
|---|------------|------------|-----|------|--------------|----------------------------------------------------|
| 9 | 40,275,000 | 40,425,000 | 538 | 516  | -1.114474773 | C9H6orf186,DDO                                     |
| 9 | 40,350,000 | 40,500,000 | 539 | 694  | -0.897950176 | C9H6orf186,CDC40                                   |
| 9 | 40,425,000 | 40,575,000 | 540 | 562  | -1.250818459 | C9H6orf186,CDC40,WASF1                             |
| 9 | 40,500,000 | 40,650,000 | 541 | 392  | -4.695824526 | CDC40,WASF1                                        |
| 9 | 40,575,000 | 40,725,000 | 542 | 876  | -1.258694051 | GPR6,WASF1                                         |
| 9 | 40,650,000 | 40,800,000 | 543 | 887  | 0.337001029  | GPR6                                               |
| 9 | 40,725,000 | 40,875,000 | 544 | 594  | -0.623306284 | FIG4                                               |
| 9 | 40,800,000 | 40,950,000 | 545 | 588  | -1.381991706 | FIG4                                               |
| 9 | 40,875,000 | 41,025,000 | 546 | 594  | -1.304910624 | FIG4                                               |
| 9 | 40,950,000 | 41,100,000 | 547 | 1087 | -0.566030722 | AK9,FIG4                                           |
| 9 | 41,025,000 | 41,175,000 | 548 | 1003 | -0.504965774 | AK9,FIG4,ZBTB24                                    |
| 9 | 41,100,000 | 41,250,000 | 549 | 379  | -0.261925434 | AK9,CD164,MICAL1,PPIL6,SMPD2,ZBTB24                |
| 9 | 41,175,000 | 41,325,000 | 550 | 202  | 0.052964093  | CD164,MICAL1,PPIL6,SMPD2,ZBTB24,ENSBTAG00000026637 |
| 9 | 41,250,000 | 41,400,000 | 551 | 216  | -0.108973472 | CD164,ENSBTAG00000026637,ENSBTAG00000047024        |
| 9 | 41,325,000 | 41,475,000 | 552 | 269  | -0.219813639 | CEP57L1,ENSBTAG00000026637,ENSBTAG00000047024      |
| 9 | 41,400,000 | 41,550,000 | 553 | 254  | -1.168630085 | CEP57L1                                            |
| 9 | 41,475,000 | 41,625,000 | 554 | 325  | -0.744174107 | CEP57L1,SESN1                                      |
| 9 | 41,550,000 | 41,700,000 | 555 | 371  | -0.44397563  | CEP57L1,SESN1                                      |
| 9 | 41,625,000 | 41,775,000 | 556 | 508  | -0.348381814 | ARMC2,SESN1                                        |
| 9 | 41,700,000 | 41,850,000 | 557 | 489  | -0.168527514 | ARMC2                                              |
| 9 | 41,775,000 | 41,925,000 | 558 | 404  | 0.373273796  | ARMC2                                              |
| 9 | 41,850,000 | 42,000,000 | 559 | 349  | 0.319633919  |                                                    |
| 9 | 41,925,000 | 42,075,000 | 560 | 284  | -0.031372078 | FOXO3                                              |
| 9 | 42,000,000 | 42,150,000 | 561 | 418  | -0.8222805   | FOXO3                                              |
| 9 | 42,075,000 | 42,225,000 | 562 | 452  | -2.024463646 | FOXO3,LACE1                                        |
| 9 | 42,150,000 | 42,300,000 | 563 | 463  | -0.848408852 | LACE1                                              |
| 9 | 42,225,000 | 42,375,000 | 564 | 370  | 0.307297496  | LACE1,SNX3,ENSBTAG00000045504                      |
| 9 | 42,300,000 | 42,450,000 | 565 | 247  | -0.405775432 | LACE1,NR2E1,SNX3,ENSBTAG00000045504                |
| 9 | 42,375,000 | 42,525,000 | 566 | 239  | -1.056299992 | NR2E1,SNX3                                         |
| 9 | 42,450,000 | 42,600,000 | 567 | 312  | -0.75469676  | NR2E1,OSTM1,ENSBTAG00000023792                     |
| 9 | 42,525,000 | 42,675,000 | 568 | 389  | -2.710463265 | OSTM1,SEC63,ENSBTAG00000023792                     |
| 9 | 42,600,000 | 42,750,000 | 569 | 468  | -2.899813749 | SEC63                                              |
| 9 | 42,675,000 | 42,825,000 | 570 | 833  | 0.738963628  | SCML4,SEC63                                        |
| 9 | 42,750,000 | 42,900,000 | 571 | 872  | 0.627909679  | SCML4                                              |
| 9 | 42,825,000 | 42,975,000 | 572 | 500  | -1.136915364 | SCML4,SOBP                                         |
| 9 | 42,900,000 | 43,050,000 | 573 | 439  | -0.738754134 | SOBP                                               |
| 9 | 42,975,000 | 43,125,000 | 574 | 385  | 0.396459739  | PDSS2,SOBP                                         |
| 9 | 43,050,000 | 43,200,000 | 575 | 365  | 0.362084109  | PDSS2,SOBP                                         |
| 9 | 43,125,000 | 43,275,000 | 576 | 360  | -0.434028487 | PDSS2                                              |
| 9 | 43,200,000 | 43,350,000 | 577 | 455  | -0.070217057 | PDSS2                                              |
| 9 | 43,275,000 | 43,425,000 | 578 | 742  | 1.007399289  | BEND3,PDSS2                                        |
| 9 | 43,350,000 | 43,500,000 | 579 | 640  | 1.11968634   | BEND3,C9H6ORF203,PDSS2,ENSBTAG00000045655          |
| 9 | 43,425,000 | 43,575,000 | 580 | 657  | 1.068279937  | C9H6ORF203,ENSBTAG00000045655                      |
| 9 | 43,500,000 | 43,650,000 | 581 | 829  | 0.733174145  |                                                    |
| 9 | 43,575,000 | 43,725,000 | 582 | 772  | 0.272830504  |                                                    |
| 9 | 43,650,000 | 43,800,000 | 583 | 656  | 0.486887363  | QRSL1                                              |
| 9 | 43,725,000 | 43,875,000 | 584 | 444  | 0.802560567  | QRSL1,RTN4IP1                                      |
| 9 | 43,800,000 | 43,950,000 | 585 | 632  | -0.242311374 | AIM1,QRSL1,RTN4IP1                                 |
| 9 | 43,875,000 | 44,025,000 | 586 | 896  | -2.339763533 | AIM1,RTN4IP1                                       |
| 9 | 43,950,000 | 44,100,000 | 587 | 1031 | -3.808618077 |                                                    |

|   |            |            |     |      |              |                                |
|---|------------|------------|-----|------|--------------|--------------------------------|
| 9 | 44,025,000 | 44,175,000 | 588 | 1053 | -2.210822367 | ATG5                           |
| 9 | 44,100,000 | 44,250,000 | 589 | 669  | -0.025681293 | ATG5                           |
| 9 | 44,175,000 | 44,325,000 | 590 | 430  | 0.049728106  | ATG5                           |
| 9 | 44,250,000 | 44,400,000 | 591 | 494  | -1.011322209 | PRDM1                          |
| 9 | 44,325,000 | 44,475,000 | 592 | 444  | -1.232076858 | PRDM1                          |
| 9 | 44,400,000 | 44,550,000 | 593 | 353  | -0.079324788 |                                |
| 9 | 44,475,000 | 44,625,000 | 594 | 500  | 0.914857901  |                                |
| 9 | 44,550,000 | 44,700,000 | 595 | 573  | 1.124746638  | ENSBTAG00000020368             |
| 9 | 44,625,000 | 44,775,000 | 596 | 445  | 1.021468948  | ENSBTAG00000020368             |
| 9 | 44,700,000 | 44,850,000 | 597 | 722  | 1.049541045  |                                |
| 9 | 44,775,000 | 44,925,000 | 598 | 995  | 1.018343746  |                                |
| 9 | 44,850,000 | 45,000,000 | 599 | 695  | 0.720411746  |                                |
| 9 | 44,925,000 | 45,075,000 | 600 | 278  | 0.479060968  |                                |
| 9 | 45,000,000 | 45,150,000 | 601 | 208  | 0.759347641  |                                |
| 9 | 45,075,000 | 45,225,000 | 602 | 482  | 0.938236949  | PREP                           |
| 9 | 45,150,000 | 45,300,000 | 603 | 531  | 0.918663102  | PREP                           |
| 9 | 45,225,000 | 45,375,000 | 604 | 415  | 0.874496021  | PREP                           |
| 9 | 45,300,000 | 45,450,000 | 605 | 559  | 1.002414272  | PREP,ENSBTAG00000033218        |
| 9 | 45,375,000 | 45,525,000 | 606 | 613  | 0.527225297  | BVES,POPDC3,ENSBTAG00000033218 |
| 9 | 45,450,000 | 45,600,000 | 607 | 432  | -0.198574258 | BVES,LIN28B,POPDC3             |
| 9 | 45,525,000 | 45,675,000 | 608 | 349  | -0.470307604 | LIN28B                         |
| 9 | 45,600,000 | 45,750,000 | 609 | 377  | 0.288388374  | HACE1                          |
| 9 | 45,675,000 | 45,825,000 | 610 | 387  | 0.87806462   | HACE1                          |
| 9 | 45,750,000 | 45,900,000 | 611 | 358  | 0.425988759  | HACE1                          |
| 9 | 45,825,000 | 45,975,000 | 612 | 265  | 0.310184792  | HACE1                          |
| 9 | 45,900,000 | 46,050,000 | 613 | 169  | 0.32791821   |                                |
| 9 | 45,975,000 | 46,125,000 | 614 | 225  | -1.124144008 |                                |
| 9 | 46,050,000 | 46,200,000 | 615 | 321  | -2.139560215 |                                |
| 9 | 46,125,000 | 46,275,000 | 616 | 308  | -1.748705395 |                                |
| 9 | 46,200,000 | 46,350,000 | 617 | 291  | -0.539778582 |                                |
| 9 | 46,275,000 | 46,425,000 | 618 | 582  | -4.375003972 |                                |
| 9 | 46,350,000 | 46,500,000 | 619 | 782  | -3.208618571 |                                |
| 9 | 46,425,000 | 46,575,000 | 620 | 675  | -0.145178947 |                                |
| 9 | 46,500,000 | 46,650,000 | 621 | 582  | -0.087746469 |                                |
| 9 | 46,575,000 | 46,725,000 | 622 | 723  | 0.148053844  |                                |
| 9 | 46,650,000 | 46,800,000 | 623 | 996  | -0.413727862 |                                |
| 9 | 46,725,000 | 46,875,000 | 624 | 667  | -1.054804884 |                                |
| 9 | 46,800,000 | 46,950,000 | 625 | 308  | -0.253942796 |                                |
| 9 | 46,875,000 | 47,025,000 | 626 | 396  | 0.195122537  |                                |
| 9 | 46,950,000 | 47,100,000 | 627 | 394  | 0.359840566  |                                |
| 9 | 47,025,000 | 47,175,000 | 628 | 384  | -0.073415468 |                                |
| 9 | 47,100,000 | 47,250,000 | 629 | 664  | -0.314276727 |                                |
| 9 | 47,175,000 | 47,325,000 | 630 | 750  | 0.139221515  |                                |
| 9 | 47,250,000 | 47,400,000 | 631 | 947  | 0.57035638   |                                |
| 9 | 47,325,000 | 47,475,000 | 632 | 1294 | -0.51856042  |                                |
| 9 | 47,400,000 | 47,550,000 | 633 | 1187 | -0.283804306 |                                |
| 9 | 47,475,000 | 47,625,000 | 634 | 1099 | 0.936082099  |                                |
| 9 | 47,550,000 | 47,700,000 | 635 | 856  | 0.907523178  |                                |
| 9 | 47,625,000 | 47,775,000 | 636 | 580  | 0.778630574  |                                |
| 9 | 47,700,000 | 47,850,000 | 637 | 514  | 0.95568827   |                                |
| 9 | 47,775,000 | 47,925,000 | 638 | 700  | 0.997948386  |                                |
| 9 | 47,850,000 | 48,000,000 | 639 | 1320 | 0.551848185  |                                |
| 9 | 47,925,000 | 48,075,000 | 640 | 1482 | 0.704779137  |                                |



|   |            |            |     |      |              |                                           |
|---|------------|------------|-----|------|--------------|-------------------------------------------|
| 9 | 48,000,000 | 48,150,000 | 641 | 1131 | 0.134770948  |                                           |
| 9 | 48,075,000 | 48,225,000 | 642 | 1275 | -0.690086616 |                                           |
| 9 | 48,150,000 | 48,300,000 | 643 | 1104 | -1.093271842 |                                           |
| 9 | 48,225,000 | 48,375,000 | 644 | 880  | -1.490661937 |                                           |
| 9 | 48,300,000 | 48,450,000 | 645 | 982  | -0.398677404 |                                           |
| 9 | 48,375,000 | 48,525,000 | 646 | 1073 | -0.479729661 | GRIK2                                     |
| 9 | 48,450,000 | 48,600,000 | 647 | 1106 | -0.765324478 | GRIK2                                     |
| 9 | 48,525,000 | 48,675,000 | 648 | 1004 | -0.552224277 | GRIK2                                     |
| 9 | 48,600,000 | 48,750,000 | 649 | 999  | -0.605010722 | GRIK2                                     |
| 9 | 48,675,000 | 48,825,000 | 650 | 837  | -0.803636052 | GRIK2                                     |
| 9 | 48,750,000 | 48,900,000 | 651 | 661  | -0.272020938 | GRIK2                                     |
| 9 | 48,825,000 | 48,975,000 | 652 | 589  | -0.150365269 | GRIK2                                     |
| 9 | 48,900,000 | 49,050,000 | 653 | 481  | -0.497802603 | GRIK2                                     |
| 9 | 48,975,000 | 49,125,000 | 654 | 350  | -0.482215581 | GRIK2,ENSBTAG00000030490                  |
| 9 | 49,050,000 | 49,200,000 | 655 | 319  | -0.401900293 | GRIK2,ENSBTAG00000030490                  |
| 9 | 49,125,000 | 49,275,000 | 656 | 369  | -0.723369165 | GRIK2                                     |
| 9 | 49,200,000 | 49,350,000 | 657 | 505  | -1.534835821 | GRIK2                                     |
| 9 | 49,275,000 | 49,425,000 | 658 | 763  | -0.406661999 |                                           |
| 9 | 49,350,000 | 49,500,000 | 659 | 873  | -0.539946259 |                                           |
| 9 | 49,425,000 | 49,575,000 | 660 | 880  | -0.691519132 |                                           |
| 9 | 49,500,000 | 49,650,000 | 661 | 843  | -0.832024155 |                                           |
| 9 | 49,575,000 | 49,725,000 | 662 | 563  | -1.985309724 | ASCC3                                     |
| 9 | 49,650,000 | 49,800,000 | 663 | 395  | -1.330782076 | ASCC3                                     |
| 9 | 49,725,000 | 49,875,000 | 664 | 627  | -4.163086442 | ASCC3,ENSBTAG00000045624                  |
| 9 | 49,800,000 | 49,950,000 | 665 | 820  | -5.067892464 | ASCC3,ENSBTAG00000045624                  |
| 9 | 49,875,000 | 50,025,000 | 666 | 688  | -4.712345787 | ASCC3                                     |
| 9 | 49,950,000 | 50,100,000 | 667 | 836  | -0.662094331 | ASCC3                                     |
| 9 | 50,025,000 | 50,175,000 | 668 | 900  | 0.904965127  | ASCC3,SIM1                                |
| 9 | 50,100,000 | 50,250,000 | 669 | 563  | 0.324720091  | ASCC3,SIM1                                |
| 9 | 50,175,000 | 50,325,000 | 670 | 517  | -0.185267207 | SIM1                                      |
| 9 | 50,250,000 | 50,400,000 | 671 | 599  | -0.754504371 |                                           |
| 9 | 50,325,000 | 50,475,000 | 672 | 697  | -0.476797997 |                                           |
| 9 | 50,400,000 | 50,550,000 | 673 | 843  | -1.027800726 | ENSBTAG00000014104                        |
| 9 | 50,475,000 | 50,625,000 | 674 | 911  | -3.510230293 | MCHR2,ENSBTAG00000014104                  |
| 9 | 50,550,000 | 50,700,000 | 675 | 1019 | -2.256138863 | MCHR2                                     |
| 9 | 50,625,000 | 50,775,000 | 676 | 971  | -0.375843405 |                                           |
| 9 | 50,700,000 | 50,850,000 | 677 | 649  | 0.229127948  |                                           |
| 9 | 50,775,000 | 50,925,000 | 678 | 346  | 0.093839636  | CCNC,PRDM13                               |
| 9 | 50,850,000 | 51,000,000 | 679 | 310  | 0.185417331  | CCNC,PRDM13,USP45,ENSBTAG00000038931      |
| 9 | 50,925,000 | 51,075,000 | 680 | 352  | 0.533113456  | CCNC,COQ3,SFRS18,USP45,ENSBTAG00000038931 |
| 9 | 51,000,000 | 51,150,000 | 681 | 335  | 0.449828065  | COQ3,FAXC,SFRS18,USP45                    |
| 9 | 51,075,000 | 51,225,000 | 682 | 605  | 0.245612298  | COQ3,FAXC                                 |
| 9 | 51,150,000 | 51,300,000 | 683 | 1230 | 0.41096054   | FAXC                                      |
| 9 | 51,225,000 | 51,375,000 | 684 | 1224 | -0.553932999 |                                           |
| 9 | 51,300,000 | 51,450,000 | 685 | 654  | -2.199239549 |                                           |
| 9 | 51,375,000 | 51,525,000 | 686 | 552  | -0.882371373 | FBXL4                                     |
| 9 | 51,450,000 | 51,600,000 | 687 | 644  | -0.892671455 | FBXL4,POU3F2                              |
| 9 | 51,525,000 | 51,675,000 | 688 | 594  | -0.130807375 | FBXL4,POU3F2                              |
| 9 | 51,600,000 | 51,750,000 | 689 | 705  | -0.916839776 | POU3F2                                    |
| 9 | 51,675,000 | 51,825,000 | 690 | 1048 | -0.303084451 |                                           |
| 9 | 51,750,000 | 51,900,000 | 691 | 960  | -0.307170741 |                                           |
| 9 | 51,825,000 | 51,975,000 | 692 | 597  | -2.655631144 |                                           |
| 9 | 51,900,000 | 52,050,000 | 693 | 527  | -1.978262056 |                                           |

|   |            |            |     |      |              |                    |
|---|------------|------------|-----|------|--------------|--------------------|
| 9 | 51,975,000 | 52,125,000 | 694 | 473  | 0.083421254  |                    |
| 9 | 52,050,000 | 52,200,000 | 695 | 420  | -0.501280656 |                    |
| 9 | 52,125,000 | 52,275,000 | 696 | 493  | 0.026403808  |                    |
| 9 | 52,200,000 | 52,350,000 | 697 | 682  | 0.736414124  |                    |
| 9 | 52,275,000 | 52,425,000 | 698 | 610  | 0.929505696  |                    |
| 9 | 52,350,000 | 52,500,000 | 699 | 484  | 0.623398143  |                    |
| 9 | 52,425,000 | 52,575,000 | 700 | 661  | 0.805082805  |                    |
| 9 | 52,500,000 | 52,650,000 | 701 | 633  | 1.316526299  |                    |
| 9 | 52,575,000 | 52,725,000 | 702 | 666  | 0.119153431  |                    |
| 9 | 52,650,000 | 52,800,000 | 703 | 750  | -0.222338844 |                    |
| 9 | 52,725,000 | 52,875,000 | 704 | 489  | 0.537304568  |                    |
| 9 | 52,800,000 | 52,950,000 | 705 | 336  | 0.812771856  | ENSBTAG00000017170 |
| 9 | 52,875,000 | 53,025,000 | 706 | 564  | 0.408445201  | ENSBTAG00000017170 |
| 9 | 52,950,000 | 53,100,000 | 707 | 654  | -0.68257574  |                    |
| 9 | 53,025,000 | 53,175,000 | 708 | 556  | -1.068045258 |                    |
| 9 | 53,100,000 | 53,250,000 | 709 | 611  | -1.407063826 | MMS22L             |
| 9 | 53,175,000 | 53,325,000 | 710 | 616  | -1.473271844 | MMS22L             |
| 9 | 53,250,000 | 53,400,000 | 711 | 822  | 0.27454693   | KLHL32,MMS22L      |
| 9 | 53,325,000 | 53,475,000 | 712 | 996  | 0.617666045  | KLHL32,MMS22L      |
| 9 | 53,400,000 | 53,550,000 | 713 | 869  | 0.444561121  | KLHL32             |
| 9 | 53,475,000 | 53,625,000 | 714 | 461  | -0.005909355 |                    |
| 9 | 53,550,000 | 53,700,000 | 715 | 597  | 0.592197368  | NDUFAF4            |
| 9 | 53,625,000 | 53,775,000 | 716 | 1048 | 0.696725878  | NDUFAF4            |
| 9 | 53,700,000 | 53,850,000 | 717 | 828  | 0.575128407  | GPR63              |
| 9 | 53,775,000 | 53,925,000 | 718 | 858  | -0.880130957 | GPR63              |
| 9 | 53,850,000 | 54,000,000 | 719 | 937  | -0.731519711 | FHL5               |
| 9 | 53,925,000 | 54,075,000 | 720 | 776  | 0.998675257  | FHL5,UFL1          |
| 9 | 54,000,000 | 54,150,000 | 721 | 635  | 1.087106516  | FHL5,UFL1          |
| 9 | 54,075,000 | 54,225,000 | 722 | 567  | 0.686711737  | UFL1               |
| 9 | 54,150,000 | 54,300,000 | 723 | 463  | 0.259161899  |                    |
| 9 | 54,225,000 | 54,375,000 | 724 | 330  | 0.218262183  |                    |
| 9 | 54,300,000 | 54,450,000 | 725 | 488  | -0.13027947  | FUT9               |
| 9 | 54,375,000 | 54,525,000 | 726 | 644  | 0.082083622  | FUT9               |
| 9 | 54,450,000 | 54,600,000 | 727 | 893  | 0.931443617  |                    |
| 9 | 54,525,000 | 54,675,000 | 728 | 985  | 1.098576206  |                    |
| 9 | 54,600,000 | 54,750,000 | 729 | 996  | 0.898465089  |                    |
| 9 | 54,675,000 | 54,825,000 | 730 | 903  | 0.829398708  | ENSBTAG00000045583 |
| 9 | 54,750,000 | 54,900,000 | 731 | 899  | 0.606054172  | ENSBTAG00000045583 |
| 9 | 54,825,000 | 54,975,000 | 732 | 1386 | 0.544642308  |                    |
| 9 | 54,900,000 | 55,050,000 | 733 | 1212 | 0.663450125  |                    |
| 9 | 54,975,000 | 55,125,000 | 734 | 860  | 0.110367337  | MANEA              |
| 9 | 55,050,000 | 55,200,000 | 735 | 818  | 0.173827184  | MANEA              |
| 9 | 55,125,000 | 55,275,000 | 736 | 711  | 0.852486266  | MANEA              |
| 9 | 55,200,000 | 55,350,000 | 737 | 1005 | 0.969214077  |                    |
| 9 | 55,275,000 | 55,425,000 | 738 | 1179 | 0.961268795  |                    |
| 9 | 55,350,000 | 55,500,000 | 739 | 910  | 0.948560236  |                    |
| 9 | 55,425,000 | 55,575,000 | 740 | 959  | 0.326425663  |                    |
| 9 | 55,500,000 | 55,650,000 | 741 | 1208 | -1.050588621 |                    |
| 9 | 55,575,000 | 55,725,000 | 742 | 1093 | -1.46649152  |                    |
| 9 | 55,650,000 | 55,800,000 | 743 | 1291 | 0.467329084  |                    |
| 9 | 55,725,000 | 55,875,000 | 744 | 1258 | 0.680894511  |                    |
| 9 | 55,800,000 | 55,950,000 | 745 | 1057 | 0.871072147  |                    |
| 9 | 55,875,000 | 56,025,000 | 746 | 1449 | 0.93499733   |                    |

|   |            |            |     |      |              |                    |
|---|------------|------------|-----|------|--------------|--------------------|
| 9 | 55,950,000 | 56,100,000 | 747 | 1469 | 0.158086335  |                    |
| 9 | 56,025,000 | 56,175,000 | 748 | 1125 | -0.139160936 |                    |
| 9 | 56,100,000 | 56,250,000 | 749 | 876  | 0.776085081  |                    |
| 9 | 56,175,000 | 56,325,000 | 750 | 930  | 0.787411621  |                    |
| 9 | 56,250,000 | 56,400,000 | 751 | 1332 | 0.955620025  | ENSBTAG00000033083 |
| 9 | 56,325,000 | 56,475,000 | 752 | 1359 | 0.586267006  | ENSBTAG00000033083 |
| 9 | 56,400,000 | 56,550,000 | 753 | 1354 | 0.237417793  |                    |
| 9 | 56,475,000 | 56,625,000 | 754 | 1267 | 0.506071961  |                    |
| 9 | 56,550,000 | 56,700,000 | 755 | 1021 | 0.445494863  |                    |
| 9 | 56,625,000 | 56,775,000 | 756 | 1055 | 0.763764267  |                    |
| 9 | 56,700,000 | 56,850,000 | 757 | 808  | 0.898659332  |                    |
| 9 | 56,775,000 | 56,925,000 | 758 | 598  | 0.254055928  |                    |
| 9 | 56,850,000 | 57,000,000 | 759 | 1082 | 0.917445262  |                    |
| 9 | 56,925,000 | 57,075,000 | 760 | 1089 | 0.997770855  |                    |
| 9 | 57,000,000 | 57,150,000 | 761 | 587  | 0.594324838  |                    |
| 9 | 57,075,000 | 57,225,000 | 762 | 825  | -0.736458893 |                    |
| 9 | 57,150,000 | 57,300,000 | 763 | 930  | -1.073300615 |                    |
| 9 | 57,225,000 | 57,375,000 | 764 | 627  | -0.268596453 |                    |
| 9 | 57,300,000 | 57,450,000 | 765 | 665  | -0.515075433 |                    |
| 9 | 57,375,000 | 57,525,000 | 766 | 1141 | 0.273523286  | ENSBTAG00000003743 |
| 9 | 57,450,000 | 57,600,000 | 767 | 968  | 0.690607753  | ENSBTAG00000003743 |
| 9 | 57,525,000 | 57,675,000 | 768 | 637  | -0.177955956 | EPHA7              |
| 9 | 57,600,000 | 57,750,000 | 769 | 846  | -0.538768185 | EPHA7              |
| 9 | 57,675,000 | 57,825,000 | 770 | 771  | -1.173278934 | EPHA7              |
| 9 | 57,750,000 | 57,900,000 | 771 | 858  | -0.528342485 | EPHA7              |
| 9 | 57,825,000 | 57,975,000 | 772 | 1145 | -0.399775138 | EPHA7              |
| 9 | 57,900,000 | 58,050,000 | 773 | 1017 | -0.360951345 |                    |
| 9 | 57,975,000 | 58,125,000 | 774 | 933  | 0.751042465  |                    |
| 9 | 58,050,000 | 58,200,000 | 775 | 1218 | 0.804836123  |                    |
| 9 | 58,125,000 | 58,275,000 | 776 | 1052 | 0.48084965   |                    |
| 9 | 58,200,000 | 58,350,000 | 777 | 697  | 0.785508451  |                    |
| 9 | 58,275,000 | 58,425,000 | 778 | 696  | 0.827140668  |                    |
| 9 | 58,350,000 | 58,500,000 | 779 | 995  | 1.026509712  |                    |
| 9 | 58,425,000 | 58,575,000 | 780 | 1194 | 0.362554873  |                    |
| 9 | 58,500,000 | 58,650,000 | 781 | 1200 | 0.316473419  |                    |
| 9 | 58,575,000 | 58,725,000 | 782 | 1298 | 0.268600672  |                    |
| 9 | 58,650,000 | 58,800,000 | 783 | 1075 | -0.820914194 |                    |
| 9 | 58,725,000 | 58,875,000 | 784 | 796  | -1.071726022 |                    |
| 9 | 58,800,000 | 58,950,000 | 785 | 871  | 0.41509398   |                    |
| 9 | 58,875,000 | 59,025,000 | 786 | 1045 | 0.896271098  |                    |
| 9 | 58,950,000 | 59,100,000 | 787 | 1127 | 0.752631884  |                    |
| 9 | 59,025,000 | 59,175,000 | 788 | 1219 | 0.50970594   |                    |
| 9 | 59,100,000 | 59,250,000 | 789 | 1170 | -0.762245098 |                    |
| 9 | 59,175,000 | 59,325,000 | 790 | 1185 | -1.841890433 |                    |
| 9 | 59,250,000 | 59,400,000 | 791 | 1018 | -0.429568993 |                    |
| 9 | 59,325,000 | 59,475,000 | 792 | 670  | 0.780508042  |                    |
| 9 | 59,400,000 | 59,550,000 | 793 | 797  | 1.059425573  |                    |
| 9 | 59,475,000 | 59,625,000 | 794 | 988  | 0.68821304   |                    |
| 9 | 59,550,000 | 59,700,000 | 795 | 1128 | 0.517697877  |                    |
| 9 | 59,625,000 | 59,775,000 | 796 | 1061 | 0.528811026  |                    |
| 9 | 59,700,000 | 59,850,000 | 797 | 803  | 0.181351773  |                    |
| 9 | 59,775,000 | 59,925,000 | 798 | 963  | 1.121149375  |                    |
| 9 | 59,850,000 | 60,000,000 | 799 | 1000 | 1.25323246   |                    |

|   |            |            |     |      |              |                                            |
|---|------------|------------|-----|------|--------------|--------------------------------------------|
| 9 | 59,925,000 | 60,075,000 | 800 | 982  | 0.84166135   |                                            |
| 9 | 60,000,000 | 60,150,000 | 801 | 803  | 0.761794556  |                                            |
| 9 | 60,075,000 | 60,225,000 | 802 | 698  | 0.120151661  |                                            |
| 9 | 60,150,000 | 60,300,000 | 803 | 1010 | 0.302746154  |                                            |
| 9 | 60,225,000 | 60,375,000 | 804 | 860  | 0.584857556  |                                            |
| 9 | 60,300,000 | 60,450,000 | 805 | 962  | 0.148296555  |                                            |
| 9 | 60,375,000 | 60,525,000 | 806 | 826  | -0.131644809 |                                            |
| 9 | 60,450,000 | 60,600,000 | 807 | 354  | -0.973150439 | MAP3K7                                     |
| 9 | 60,525,000 | 60,675,000 | 808 | 432  | 0.01372667   | MAP3K7                                     |
| 9 | 60,600,000 | 60,750,000 | 809 | 561  | -0.300600849 | MAP3K7                                     |
| 9 | 60,675,000 | 60,825,000 | 810 | 656  | -0.906801884 |                                            |
| 9 | 60,750,000 | 60,900,000 | 811 | 533  | 0.309005111  |                                            |
| 9 | 60,825,000 | 60,975,000 | 812 | 399  | 0.872674692  |                                            |
| 9 | 60,900,000 | 61,050,000 | 813 | 358  | 0.64032711   |                                            |
| 9 | 60,975,000 | 61,125,000 | 814 | 322  | 0.967789986  | BACH2,ENSBTAG0000004749                    |
| 9 | 61,050,000 | 61,200,000 | 815 | 465  | -0.452312487 | BACH2,ENSBTAG0000004749                    |
| 9 | 61,125,000 | 61,275,000 | 816 | 540  | -0.150050503 | BACH2,CASP8AP2,GJA10                       |
| 9 | 61,200,000 | 61,350,000 | 817 | 481  | 0.709960381  | BACH2,CASP8AP2,GJA10,MDN1                  |
| 9 | 61,275,000 | 61,425,000 | 818 | 563  | 0.847660499  | MDN1                                       |
| 9 | 61,350,000 | 61,500,000 | 819 | 680  | 0.183748483  | ANKRD6,LYRM2,MDN1                          |
| 9 | 61,425,000 | 61,575,000 | 820 | 755  | -0.385776595 | ANKRD6,LYRM2,MDN1                          |
| 9 | 61,500,000 | 61,650,000 | 821 | 985  | -1.149725662 | ANKRD6,RRAGD                               |
| 9 | 61,575,000 | 61,725,000 | 822 | 689  | -1.528360127 | ANKRD6,GABRR2,RRAGD                        |
| 9 | 61,650,000 | 61,800,000 | 823 | 509  | 0.138867075  | GABRR2,RRAGD,UBE2J1                        |
| 9 | 61,725,000 | 61,875,000 | 824 | 654  | 1.033389682  | GABRR1,PM20D2,RRAGD,UBE2J1                 |
| 9 | 61,800,000 | 61,950,000 | 825 | 367  | 1.30570165   | GABRR1,PM20D2,PNRC1,SRSF12                 |
| 9 | 61,875,000 | 62,025,000 | 826 | 214  | 0.909848649  | PNRC1,RNGTT,SRSF12                         |
| 9 | 61,950,000 | 62,100,000 | 827 | 249  | 1.269186358  | RNGTT                                      |
| 9 | 62,025,000 | 62,175,000 | 828 | 299  | 1.528252385  | RNGTT                                      |
| 9 | 62,100,000 | 62,250,000 | 829 | 338  | 1.443628879  | RNGTT                                      |
| 9 | 62,175,000 | 62,325,000 | 830 | 637  | 0.743632778  | RNGTT                                      |
| 9 | 62,250,000 | 62,400,000 | 831 | 1046 | 0.523388646  |                                            |
| 9 | 62,325,000 | 62,475,000 | 832 | 915  | 0.591570479  |                                            |
| 9 | 62,400,000 | 62,550,000 | 833 | 705  | -0.023268867 |                                            |
| 9 | 62,475,000 | 62,625,000 | 834 | 741  | -0.14029803  |                                            |
| 9 | 62,550,000 | 62,700,000 | 835 | 719  | -0.032042075 | CNR1                                       |
| 9 | 62,625,000 | 62,775,000 | 836 | 488  | -0.038932797 | CNR1,SPACA1                                |
| 9 | 62,700,000 | 62,850,000 | 837 | 517  | 0.249020784  | SPACA1                                     |
| 9 | 62,775,000 | 62,925,000 | 838 | 558  | 0.389849561  | SPACA1                                     |
| 9 | 62,850,000 | 63,000,000 | 839 | 339  | 0.881960016  |                                            |
| 9 | 62,925,000 | 63,075,000 | 840 | 454  | 1.03710161   |                                            |
| 9 | 63,000,000 | 63,150,000 | 841 | 476  | 0.97429521   | AKIRIN2                                    |
| 9 | 63,075,000 | 63,225,000 | 842 | 298  | 0.59278789   | AKIRIN2,ORC3                               |
| 9 | 63,150,000 | 63,300,000 | 843 | 237  | 0.353395018  | AKIRIN2,ORC3,RARS2                         |
| 9 | 63,225,000 | 63,375,000 | 844 | 280  | 0.266925931  | ORC3,RARS2,SLC35A1,ENSBTAG00000014054      |
| 9 | 63,300,000 | 63,450,000 | 845 | 413  | 0.22532626   | C9H6orf163,SLC35A1,ENSBTAG00000014054      |
| 9 | 63,375,000 | 63,525,000 | 846 | 409  | 0.256368248  | C9H6orf163,SMIM8,ZNF292,ENSBTAG00000014054 |
| 9 | 63,450,000 | 63,600,000 | 847 | 275  | 0.511309289  | C9H6orf163,SMIM8,ZNF292                    |
| 9 | 63,525,000 | 63,675,000 | 848 | 270  | 0.910629003  | ZNF292                                     |
| 9 | 63,600,000 | 63,750,000 | 849 | 286  | 0.713606629  | CGA,ZNF292                                 |
| 9 | 63,675,000 | 63,825,000 | 850 | 399  | 0.647680269  | CGA,HTR1E,ENSBTAG00000047011               |
| 9 | 63,750,000 | 63,900,000 | 851 | 859  | 0.931671285  | HTR1E,ENSBTAG00000047011                   |
| 9 | 63,825,000 | 63,975,000 | 852 | 1149 | 0.856327357  |                                            |

|   |            |            |     |      |              |                                             |
|---|------------|------------|-----|------|--------------|---------------------------------------------|
| 9 | 63,900,000 | 64,050,000 | 853 | 1153 | 0.525683422  |                                             |
| 9 | 63,975,000 | 64,125,000 | 854 | 773  | 0.421790392  |                                             |
| 9 | 64,050,000 | 64,200,000 | 855 | 400  | 0.342804805  |                                             |
| 9 | 64,125,000 | 64,275,000 | 856 | 753  | 0.523222749  |                                             |
| 9 | 64,200,000 | 64,350,000 | 857 | 914  | 0.417384783  |                                             |
| 9 | 64,275,000 | 64,425,000 | 858 | 660  | 0.081821438  |                                             |
| 9 | 64,350,000 | 64,500,000 | 859 | 484  | -0.563340258 |                                             |
| 9 | 64,425,000 | 64,575,000 | 860 | 742  | -1.445785586 |                                             |
| 9 | 64,500,000 | 64,650,000 | 861 | 991  | -1.243308365 |                                             |
| 9 | 64,575,000 | 64,725,000 | 862 | 647  | -0.60452915  | SYNCRIP                                     |
| 9 | 64,650,000 | 64,800,000 | 863 | 324  | 1.066247528  | SNX14,SYNCRIP                               |
| 9 | 64,725,000 | 64,875,000 | 864 | 468  | 1.041916066  | SNX14,SYNCRIP,ENSBTAG00000045976            |
| 9 | 64,800,000 | 64,950,000 | 865 | 627  | -0.647839762 | SNX14,ENSBTAG00000011330,ENSBTAG00000045976 |
| 9 | 64,875,000 | 65,025,000 | 866 | 798  | -1.729808739 | ENSBTAG00000011330                          |
| 9 | 64,950,000 | 65,100,000 | 867 | 859  | -1.393525528 |                                             |
| 9 | 65,025,000 | 65,175,000 | 868 | 910  | -0.34920212  |                                             |
| 9 | 65,100,000 | 65,250,000 | 869 | 806  | 0.462757739  |                                             |
| 9 | 65,175,000 | 65,325,000 | 870 | 539  | 0.125738292  |                                             |
| 9 | 65,250,000 | 65,400,000 | 871 | 633  | -0.37659465  |                                             |
| 9 | 65,325,000 | 65,475,000 | 872 | 767  | -0.661155792 |                                             |
| 9 | 65,400,000 | 65,550,000 | 873 | 867  | -0.40835453  |                                             |
| 9 | 65,475,000 | 65,625,000 | 874 | 794  | 0.082160081  | TBX18                                       |
| 9 | 65,550,000 | 65,700,000 | 875 | 556  | -0.136610714 | TBX18                                       |
| 9 | 65,625,000 | 65,775,000 | 876 | 456  | -1.236292335 |                                             |
| 9 | 65,700,000 | 65,850,000 | 877 | 710  | -0.112261852 |                                             |
| 9 | 65,775,000 | 65,925,000 | 878 | 926  | 0.486773578  |                                             |
| 9 | 65,850,000 | 66,000,000 | 879 | 853  | -0.908878725 |                                             |
| 9 | 65,925,000 | 66,075,000 | 880 | 683  | -1.324764858 |                                             |
| 9 | 66,000,000 | 66,150,000 | 881 | 869  | 0.414319606  | KIAA1009                                    |
| 9 | 66,075,000 | 66,225,000 | 882 | 993  | 0.774055469  | KIAA1009,MRAP2                              |
| 9 | 66,150,000 | 66,300,000 | 883 | 588  | 0.859596692  | KIAA1009,MRAP2                              |
| 9 | 66,225,000 | 66,375,000 | 884 | 483  | 0.577513426  | MRAP2                                       |
| 9 | 66,300,000 | 66,450,000 | 885 | 1146 | 0.393097892  | CYB5R4                                      |
| 9 | 66,375,000 | 66,525,000 | 886 | 1416 | -0.070647043 | CYB5R4,RIPPLY2                              |
| 9 | 66,450,000 | 66,600,000 | 887 | 957  | -0.365951599 | CYB5R4,RIPPLY2                              |
| 9 | 66,525,000 | 66,675,000 | 888 | 897  | 0.163763054  | ENSBTAG00000026578                          |
| 9 | 66,600,000 | 66,750,000 | 889 | 993  | 0.135461923  | THEMIS,ENSBTAG00000026578                   |
| 9 | 66,675,000 | 66,825,000 | 890 | 716  | 0.188540941  | THEMIS                                      |
| 9 | 66,750,000 | 66,900,000 | 891 | 427  | 0.272045778  | THEMIS                                      |
| 9 | 66,825,000 | 66,975,000 | 892 | 695  | 0.662555534  | PTPRK,THEMIS                                |
| 9 | 66,900,000 | 67,050,000 | 893 | 1014 | 0.108012726  | PTPRK                                       |
| 9 | 66,975,000 | 67,125,000 | 894 | 1069 | -0.831611566 | PTPRK                                       |
| 9 | 67,050,000 | 67,200,000 | 895 | 1119 | -0.370638226 | PTPRK                                       |
| 9 | 67,125,000 | 67,275,000 | 896 | 1158 | 0.368931143  | PTPRK                                       |
| 9 | 67,200,000 | 67,350,000 | 897 | 1011 | 0.345798143  | PTPRK                                       |
| 9 | 67,275,000 | 67,425,000 | 898 | 729  | 0.950860213  | PTPRK                                       |
| 9 | 67,350,000 | 67,500,000 | 899 | 607  | 1.307149114  | PTPRK                                       |
| 9 | 67,425,000 | 67,575,000 | 900 | 481  | 1.279032253  | PTPRK                                       |
| 9 | 67,500,000 | 67,650,000 | 901 | 487  | 1.346680745  | PTPRK                                       |
| 9 | 67,575,000 | 67,725,000 | 902 | 736  | 0.661657416  | PTPRK                                       |
| 9 | 67,650,000 | 67,800,000 | 903 | 653  | -0.039332824 |                                             |
| 9 | 67,725,000 | 67,875,000 | 904 | 621  | 0.061087909  |                                             |

|   |            |            |     |      |              |                                                                     |
|---|------------|------------|-----|------|--------------|---------------------------------------------------------------------|
| 9 | 67,800,000 | 67,950,000 | 905 | 723  | 0.722940717  |                                                                     |
| 9 | 67,875,000 | 68,025,000 | 906 | 719  | 0.684307724  |                                                                     |
| 9 | 67,950,000 | 68,100,000 | 907 | 958  | 0.455997604  |                                                                     |
| 9 | 68,025,000 | 68,175,000 | 908 | 1126 | -1.593452222 | LAMA2                                                               |
| 9 | 68,100,000 | 68,250,000 | 909 | 870  | -1.915236577 | LAMA2                                                               |
| 9 | 68,175,000 | 68,325,000 | 910 | 569  | 0.16659344   | LAMA2                                                               |
| 9 | 68,250,000 | 68,400,000 | 911 | 832  | 0.608003876  | LAMA2                                                               |
| 9 | 68,325,000 | 68,475,000 | 912 | 867  | 0.742448065  | LAMA2                                                               |
| 9 | 68,400,000 | 68,550,000 | 913 | 802  | 0.14067842   | LAMA2                                                               |
| 9 | 68,475,000 | 68,625,000 | 914 | 879  | -0.515046177 | LAMA2                                                               |
| 9 | 68,550,000 | 68,700,000 | 915 | 657  | -0.513223324 | LAMA2                                                               |
| 9 | 68,625,000 | 68,775,000 | 916 | 465  | 0.135406115  | ARHGAP18,LAMA2                                                      |
| 9 | 68,700,000 | 68,850,000 | 917 | 356  | 0.254585491  | ARHGAP18                                                            |
| 9 | 68,775,000 | 68,925,000 | 918 | 356  | 0.550219342  | ARHGAP18                                                            |
| 9 | 68,850,000 | 69,000,000 | 919 | 531  | -0.773433703 |                                                                     |
| 9 | 68,925,000 | 69,075,000 | 920 | 639  | -0.552485648 | ENSBTAG00000021446                                                  |
| 9 | 69,000,000 | 69,150,000 | 921 | 512  | 0.928357936  | ENSBTAG00000021446                                                  |
| 9 | 69,075,000 | 69,225,000 | 922 | 355  | 0.29840854   | L3MBTL3                                                             |
| 9 | 69,150,000 | 69,300,000 | 923 | 522  | -1.184085603 | L3MBTL3,SAMD3                                                       |
| 9 | 69,225,000 | 69,375,000 | 924 | 623  | -1.093079315 | L3MBTL3,SAMD3                                                       |
| 9 | 69,300,000 | 69,450,000 | 925 | 492  | 0.288421118  | SAMD3                                                               |
| 9 | 69,375,000 | 69,525,000 | 926 | 678  | 0.733010154  | TMEM200A                                                            |
| 9 | 69,450,000 | 69,600,000 | 927 | 1137 | 0.545327966  | TMEM200A                                                            |
| 9 | 69,525,000 | 69,675,000 | 928 | 1186 | 0.679898591  |                                                                     |
| 9 | 69,600,000 | 69,750,000 | 929 | 1067 | 0.626908743  |                                                                     |
| 9 | 69,675,000 | 69,825,000 | 930 | 1043 | 0.178939973  |                                                                     |
| 9 | 69,750,000 | 69,900,000 | 931 | 938  | 0.477919105  |                                                                     |
| 9 | 69,825,000 | 69,975,000 | 932 | 1075 | 0.43171721   | EPB41L2                                                             |
| 9 | 69,900,000 | 70,050,000 | 933 | 880  | -0.377167665 | EPB41L2                                                             |
| 9 | 69,975,000 | 70,125,000 | 934 | 615  | -2.308210718 | EPB41L2                                                             |
| 9 | 70,050,000 | 70,200,000 | 935 | 639  | -1.21913939  | AKAP7                                                               |
| 9 | 70,125,000 | 70,275,000 | 936 | 669  | 0.960192083  | AKAP7                                                               |
| 9 | 70,200,000 | 70,350,000 | 937 | 629  | 1.12383819   | AKAP7                                                               |
| 9 | 70,275,000 | 70,425,000 | 938 | 896  | 1.200377643  | AKAP7                                                               |
| 9 | 70,350,000 | 70,500,000 | 939 | 931  | 0.838281158  | ARG1                                                                |
| 9 | 70,425,000 | 70,575,000 | 940 | 724  | 0.355188908  | ARG1,MED23                                                          |
| 9 | 70,500,000 | 70,650,000 | 941 | 981  | 0.761636506  | ARG1,ENPP3,MED23                                                    |
| 9 | 70,575,000 | 70,725,000 | 942 | 1067 | 0.186913734  | ENPP3                                                               |
| 9 | 70,650,000 | 70,800,000 | 943 | 925  | 0.046491523  | ENPP1,ENPP3                                                         |
| 9 | 70,725,000 | 70,875,000 | 944 | 586  | 0.668421582  | CTGF,ENPP1                                                          |
| 9 | 70,800,000 | 70,950,000 | 945 | 541  | -0.125470527 | CTGF,ENPP1                                                          |
| 9 | 70,875,000 | 71,025,000 | 946 | 617  | -0.394089381 | CTGF                                                                |
| 9 | 70,950,000 | 71,100,000 | 947 | 386  | 0.009343791  |                                                                     |
| 9 | 71,025,000 | 71,175,000 | 948 | 361  | 1.263428155  |                                                                     |
| 9 | 71,100,000 | 71,250,000 | 949 | 750  | 1.348299772  | MOXD1                                                               |
| 9 | 71,175,000 | 71,325,000 | 950 | 931  | 0.964147887  | MOXD1                                                               |
| 9 | 71,250,000 | 71,400,000 | 951 | 921  | 0.520902845  | MOXD1,STX7                                                          |
| 9 | 71,325,000 | 71,475,000 | 952 | 939  | 0.390375382  | MOXD1,STX7,TAAR9                                                    |
| 9 | 71,400,000 | 71,550,000 | 953 | 893  | 0.318560107  | STX7,TAAR9,ENSBTAG00000040354,ENSBTAG00000046954,ENSBTAG00000047327 |

|   |            |            |     |      |              |                                                                                                                                      |
|---|------------|------------|-----|------|--------------|--------------------------------------------------------------------------------------------------------------------------------------|
| 9 | 71,475,000 | 71,625,000 | 954 | 1065 | -3.080416264 | ENSBTAG00000027223,ENSBTAG00000038447,ENSBTAG00000039058,ENSBTAG00000040354,ENSBTAG00000046954,ENSBTAG00000047327,ENSBTAG00000047912 |
| 9 | 71,550,000 | 71,700,000 | 955 | 967  | -4.736939692 | TAAR6,ENSBTAG00000026548,ENSBTAG00000027223,ENSBTAG00000038447,ENSBTAG00000039058,ENSBTAG00000040489,ENSBTAG00000047912              |
| 9 | 71,625,000 | 71,775,000 | 956 | 1238 | -1.323387341 | TAAR5,TAAR6,ENSBTAG00000026548,ENSBTAG00000038483,ENSBTAG00000038761,ENSBTAG00000039615,ENSBTAG00000040489,ENSBTAG00000040533        |
| 9 | 71,700,000 | 71,850,000 | 957 | 1449 | -2.116891802 | TAAR1,TAAR2,TAAR5,VNN1,ENSBTAG00000038483,ENSBTAG00000038761,ENSBTAG00000039615,ENSBTAG00000040533                                   |
| 9 | 71,775,000 | 71,925,000 | 958 | 1088 | -3.42629993  | TAAR1,TAAR2,VNN1,VNN2                                                                                                                |
| 9 | 71,850,000 | 72,000,000 | 959 | 1047 | -2.667228948 | RPS12,SLC18B1,VNN1,VNN2                                                                                                              |
| 9 | 71,925,000 | 72,075,000 | 960 | 738  | -1.470852385 | RPS12,SLC18B1                                                                                                                        |
| 9 | 72,000,000 | 72,150,000 | 961 | 434  | 0.05205005   |                                                                                                                                      |
| 9 | 72,075,000 | 72,225,000 | 962 | 409  | 0.381836186  |                                                                                                                                      |
| 9 | 72,150,000 | 72,300,000 | 963 | 301  | -0.224977417 |                                                                                                                                      |
| 9 | 72,225,000 | 72,375,000 | 964 | 455  | -0.214880156 |                                                                                                                                      |
| 9 | 72,300,000 | 72,450,000 | 965 | 471  | 0.596632989  |                                                                                                                                      |
| 9 | 72,375,000 | 72,525,000 | 966 | 364  | 0.462583503  |                                                                                                                                      |
| 9 | 72,450,000 | 72,600,000 | 967 | 536  | 0.699240478  |                                                                                                                                      |
| 9 | 72,525,000 | 72,675,000 | 968 | 632  | 0.835356448  | EYA4                                                                                                                                 |
| 9 | 72,600,000 | 72,750,000 | 969 | 520  | -0.90657543  | EYA4                                                                                                                                 |
| 9 | 72,675,000 | 72,825,000 | 970 | 454  | -1.276757379 | EYA4                                                                                                                                 |
| 9 | 72,750,000 | 72,900,000 | 971 | 692  | -1.111393783 |                                                                                                                                      |
| 9 | 72,825,000 | 72,975,000 | 972 | 880  | -0.768356258 |                                                                                                                                      |
| 9 | 72,900,000 | 73,050,000 | 973 | 748  | 0.374521664  |                                                                                                                                      |
| 9 | 72,975,000 | 73,125,000 | 974 | 445  | 0.129427971  | TBPL1,TCF21                                                                                                                          |
| 9 | 73,050,000 | 73,200,000 | 975 | 406  | 0.816426339  | SLC2A12,TBPL1,TCF21                                                                                                                  |
| 9 | 73,125,000 | 73,275,000 | 976 | 592  | 1.027454679  | SLC2A12,TBPL1                                                                                                                        |
| 9 | 73,200,000 | 73,350,000 | 977 | 524  | 1.009179454  | SGK1,SLC2A12                                                                                                                         |
| 9 | 73,275,000 | 73,425,000 | 978 | 535  | 0.868149987  | SGK1                                                                                                                                 |
| 9 | 73,350,000 | 73,500,000 | 979 | 779  | -0.117868388 |                                                                                                                                      |
| 9 | 73,425,000 | 73,575,000 | 980 | 870  | -1.146612225 |                                                                                                                                      |
| 9 | 73,500,000 | 73,650,000 | 981 | 649  | -1.194451548 |                                                                                                                                      |
| 9 | 73,575,000 | 73,725,000 | 982 | 455  | -0.076737613 | ENSBTAG00000026543                                                                                                                   |
| 9 | 73,650,000 | 73,800,000 | 983 | 553  | -2.163621419 | ENSBTAG00000026543                                                                                                                   |
| 9 | 73,725,000 | 73,875,000 | 984 | 575  | -2.887536083 |                                                                                                                                      |
| 9 | 73,800,000 | 73,950,000 | 985 | 630  | -2.846476249 |                                                                                                                                      |
| 9 | 73,875,000 | 74,025,000 | 986 | 607  | -2.461463927 | ALDH8A1,HBS1L                                                                                                                        |
| 9 | 73,950,000 | 74,100,000 | 987 | 380  | -0.406800354 | ALDH8A1,HBS1L                                                                                                                        |
| 9 | 74,025,000 | 74,175,000 | 988 | 329  | -0.007212867 | HBS1L                                                                                                                                |
| 9 | 74,100,000 | 74,250,000 | 989 | 385  | -0.545140113 | MYB                                                                                                                                  |
| 9 | 74,175,000 | 74,325,000 | 990 | 535  | -0.929906195 | MYB                                                                                                                                  |
| 9 | 74,250,000 | 74,400,000 | 991 | 717  | -1.004952253 | AHI1,MYB                                                                                                                             |
| 9 | 74,325,000 | 74,475,000 | 992 | 747  | -1.097544314 | AHI1                                                                                                                                 |
| 9 | 74,400,000 | 74,550,000 | 993 | 788  | -2.003976989 | AHI1                                                                                                                                 |
| 9 | 74,475,000 | 74,625,000 | 994 | 829  | -3.054625789 | AHI1                                                                                                                                 |
| 9 | 74,550,000 | 74,700,000 | 995 | 936  | -1.054930547 |                                                                                                                                      |
| 9 | 74,625,000 | 74,775,000 | 996 | 1222 | -0.270871924 |                                                                                                                                      |
| 9 | 74,700,000 | 74,850,000 | 997 | 963  | -0.444532582 |                                                                                                                                      |

|   |            |            |      |      |              |                                           |
|---|------------|------------|------|------|--------------|-------------------------------------------|
| 9 | 74,775,000 | 74,925,000 | 998  | 532  | 0.033013945  |                                           |
| 9 | 74,850,000 | 75,000,000 | 999  | 767  | 0.625228635  |                                           |
| 9 | 74,925,000 | 75,075,000 | 1000 | 757  | 1.164437138  | PDE7B                                     |
| 9 | 75,000,000 | 75,150,000 | 1001 | 451  | 0.660314997  | PDE7B                                     |
| 9 | 75,075,000 | 75,225,000 | 1002 | 489  | 0.351919679  | PDE7B                                     |
| 9 | 75,150,000 | 75,300,000 | 1003 | 456  | 0.729070138  | BCLAF1,MTFR2,PDE7B                        |
| 9 | 75,225,000 | 75,375,000 | 1004 | 455  | 0.768983083  | BCLAF1,MGC151537,MTFR2,ENSBTAG00000046168 |
| 9 | 75,300,000 | 75,450,000 | 1005 | 705  | 0.67836588   | MGC151537,ENSBTAG00000046168              |
| 9 | 75,375,000 | 75,525,000 | 1006 | 1050 | -0.145283645 | MGC151537                                 |
| 9 | 75,450,000 | 75,600,000 | 1007 | 974  | 0.127716231  | MAP3K5,MGC151537                          |
| 9 | 75,525,000 | 75,675,000 | 1008 | 930  | -0.929796697 | MAP3K5                                    |
| 9 | 75,600,000 | 75,750,000 | 1009 | 785  | -1.552928548 | MAP3K5                                    |
| 9 | 75,675,000 | 75,825,000 | 1010 | 639  | -0.192515115 | MAP3K5,PEX7                               |
| 9 | 75,750,000 | 75,900,000 | 1011 | 875  | -0.592558175 | MAP3K5,PEX7,SLC35D3                       |
| 9 | 75,825,000 | 75,975,000 | 1012 | 954  | -0.734065471 | PEX7,SLC35D3                              |
| 9 | 75,900,000 | 76,050,000 | 1013 | 1114 | 0.138786082  | IL20RA,SLC35D3                            |
| 9 | 75,975,000 | 76,125,000 | 1014 | 1126 | 0.60184316   | IFNGR1,IL20RA,IL22RA2                     |
| 9 | 76,050,000 | 76,200,000 | 1015 | 745  | 0.689090829  | IFNGR1,IL22RA2                            |
| 9 | 76,125,000 | 76,275,000 | 1016 | 751  | 0.157787551  |                                           |
| 9 | 76,200,000 | 76,350,000 | 1017 | 979  | 0.342783233  |                                           |
| 9 | 76,275,000 | 76,425,000 | 1018 | 661  | 0.726384095  | OLIG3                                     |
| 9 | 76,350,000 | 76,500,000 | 1019 | 359  | 0.035513728  | OLIG3                                     |
| 9 | 76,425,000 | 76,575,000 | 1020 | 475  | -1.171241486 |                                           |
| 9 | 76,500,000 | 76,650,000 | 1021 | 643  | -0.715734624 |                                           |
| 9 | 76,575,000 | 76,725,000 | 1022 | 811  | 0.908287542  |                                           |
| 9 | 76,650,000 | 76,800,000 | 1023 | 842  | 0.977155508  | TNFAIP3                                   |
| 9 | 76,725,000 | 76,875,000 | 1024 | 720  | 0.526829222  | TNFAIP3                                   |
| 9 | 76,800,000 | 76,950,000 | 1025 | 708  | 0.776758252  | PERP                                      |
| 9 | 76,875,000 | 77,025,000 | 1026 | 622  | 1.00148583   | PERP                                      |
| 9 | 76,950,000 | 77,100,000 | 1027 | 646  | 0.516851376  | KIAA1244,PERP                             |
| 9 | 77,025,000 | 77,175,000 | 1028 | 970  | -0.812398538 | KIAA1244                                  |
| 9 | 77,100,000 | 77,250,000 | 1029 | 1217 | -0.717607735 | HEBP2,KIAA1244,NHSL1                      |
| 9 | 77,175,000 | 77,325,000 | 1030 | 974  | -0.105049199 | HEBP2,NHSL1                               |
| 9 | 77,250,000 | 77,400,000 | 1031 | 730  | 0.402015348  | NHSL1                                     |
| 9 | 77,325,000 | 77,475,000 | 1032 | 744  | 0.898884341  |                                           |
| 9 | 77,400,000 | 77,550,000 | 1033 | 729  | 0.557449564  |                                           |
| 9 | 77,475,000 | 77,625,000 | 1034 | 719  | 0.439830507  | CCDC28A,ECT2L                             |
| 9 | 77,550,000 | 77,700,000 | 1035 | 860  | 0.37372434   | CCDC28A,ECT2L,REPS1                       |
| 9 | 77,625,000 | 77,775,000 | 1036 | 1021 | 0.222194225  | ECT2L,REPS1                               |
| 9 | 77,700,000 | 77,850,000 | 1037 | 974  | 0.348758098  | ABRACL,REPS1                              |
| 9 | 77,775,000 | 77,925,000 | 1038 | 873  | -0.028601654 | ABRACL,HECA                               |
| 9 | 77,850,000 | 78,000,000 | 1039 | 762  | -0.534187478 | HECA,TXLNB                                |
| 9 | 77,925,000 | 78,075,000 | 1040 | 672  | -0.485642791 | CITED2,TXLNB                              |
| 9 | 78,000,000 | 78,150,000 | 1041 | 655  | 0.688907588  | CITED2                                    |
| 9 | 78,075,000 | 78,225,000 | 1042 | 503  | 1.125006078  |                                           |
| 9 | 78,150,000 | 78,300,000 | 1043 | 459  | 1.057842033  |                                           |
| 9 | 78,225,000 | 78,375,000 | 1044 | 736  | -1.297596078 |                                           |
| 9 | 78,300,000 | 78,450,000 | 1045 | 724  | -2.618428903 |                                           |
| 9 | 78,375,000 | 78,525,000 | 1046 | 566  | -0.994044104 |                                           |
| 9 | 78,450,000 | 78,600,000 | 1047 | 780  | 0.265651829  |                                           |
| 9 | 78,525,000 | 78,675,000 | 1048 | 770  | 0.180446368  |                                           |
| 9 | 78,600,000 | 78,750,000 | 1049 | 751  | 0.424449905  |                                           |
| 9 | 78,675,000 | 78,825,000 | 1050 | 664  | 0.750971293  |                                           |



|   |            |            |      |      |              |                             |
|---|------------|------------|------|------|--------------|-----------------------------|
| 9 | 78,750,000 | 78,900,000 | 1051 | 406  | 0.677470135  |                             |
| 9 | 78,825,000 | 78,975,000 | 1052 | 425  | 0.508587353  |                             |
| 9 | 78,900,000 | 79,050,000 | 1053 | 591  | 0.671587641  |                             |
| 9 | 78,975,000 | 79,125,000 | 1054 | 552  | 0.756125335  |                             |
| 9 | 79,050,000 | 79,200,000 | 1055 | 313  | 1.138818493  |                             |
| 9 | 79,125,000 | 79,275,000 | 1056 | 306  | 0.986496387  |                             |
| 9 | 79,200,000 | 79,350,000 | 1057 | 472  | 0.255537367  |                             |
| 9 | 79,275,000 | 79,425,000 | 1058 | 745  | 0.300430614  |                             |
| 9 | 79,350,000 | 79,500,000 | 1059 | 842  | 0.132497755  |                             |
| 9 | 79,425,000 | 79,575,000 | 1060 | 918  | -0.711243948 |                             |
| 9 | 79,500,000 | 79,650,000 | 1061 | 871  | -0.996954085 |                             |
| 9 | 79,575,000 | 79,725,000 | 1062 | 1221 | -0.188722259 |                             |
| 9 | 79,650,000 | 79,800,000 | 1063 | 1543 | 0.12688462   |                             |
| 9 | 79,725,000 | 79,875,000 | 1064 | 1660 | -0.600894618 |                             |
| 9 | 79,800,000 | 79,950,000 | 1065 | 1618 | -0.685459849 |                             |
| 9 | 79,875,000 | 80,025,000 | 1066 | 1462 | 0.749750231  |                             |
| 9 | 79,950,000 | 80,100,000 | 1067 | 1618 | 0.879417003  |                             |
| 9 | 80,025,000 | 80,175,000 | 1068 | 1410 | 0.642839839  |                             |
| 9 | 80,100,000 | 80,250,000 | 1069 | 1555 | 0.531100082  |                             |
| 9 | 80,175,000 | 80,325,000 | 1070 | 1738 | 0.578412001  |                             |
| 9 | 80,250,000 | 80,400,000 | 1071 | 1461 | 0.775575299  |                             |
| 9 | 80,325,000 | 80,475,000 | 1072 | 1383 | 0.666192605  |                             |
| 9 | 80,400,000 | 80,550,000 | 1073 | 1601 | 0.734884969  |                             |
| 9 | 80,475,000 | 80,625,000 | 1074 | 1670 | 0.868531114  | NMBR                        |
| 9 | 80,550,000 | 80,700,000 | 1075 | 1303 | 0.671611126  | NMBR,VTA1                   |
| 9 | 80,625,000 | 80,775,000 | 1076 | 1092 | 0.827006559  | VTA1                        |
| 9 | 80,700,000 | 80,850,000 | 1077 | 911  | 0.683230074  | VTA1                        |
| 9 | 80,775,000 | 80,925,000 | 1078 | 822  | 0.342131211  | GPR126                      |
| 9 | 80,850,000 | 81,000,000 | 1079 | 1129 | -0.15463732  | GPR126                      |
| 9 | 80,925,000 | 81,075,000 | 1080 | 1190 | -0.095126379 | GPR126                      |
| 9 | 81,000,000 | 81,150,000 | 1081 | 1009 | 0.238432009  |                             |
| 9 | 81,075,000 | 81,225,000 | 1082 | 950  | -0.241784251 |                             |
| 9 | 81,150,000 | 81,300,000 | 1083 | 826  | 0.371485833  | HIVEP2                      |
| 9 | 81,225,000 | 81,375,000 | 1084 | 767  | 0.769047868  | HIVEP2                      |
| 9 | 81,300,000 | 81,450,000 | 1085 | 738  | 0.542641387  |                             |
| 9 | 81,375,000 | 81,525,000 | 1086 | 443  | 0.749382485  |                             |
| 9 | 81,450,000 | 81,600,000 | 1087 | 568  | 1.241662796  | AIG1                        |
| 9 | 81,525,000 | 81,675,000 | 1088 | 808  | 1.302238001  | AIG1                        |
| 9 | 81,600,000 | 81,750,000 | 1089 | 1091 | 0.805950122  | AIG1                        |
| 9 | 81,675,000 | 81,825,000 | 1090 | 1045 | 0.125142453  | AIG1                        |
| 9 | 81,750,000 | 81,900,000 | 1091 | 507  | 0.031302819  | AIG1                        |
| 9 | 81,825,000 | 81,975,000 | 1092 | 371  | 0.960309575  | AIG1,DEADC1,PEX3            |
| 9 | 81,900,000 | 82,050,000 | 1093 | 842  | 1.376406327  | DEADC1,FUCA2,PEX3           |
| 9 | 81,975,000 | 82,125,000 | 1094 | 1387 | 1.341139575  | FUCA2,PEX3                  |
| 9 | 82,050,000 | 82,200,000 | 1095 | 1402 | 0.831827502  |                             |
| 9 | 82,125,000 | 82,275,000 | 1096 | 1313 | 0.572645478  | PHACTR2                     |
| 9 | 82,200,000 | 82,350,000 | 1097 | 1271 | 0.821357689  | PHACTR2                     |
| 9 | 82,275,000 | 82,425,000 | 1098 | 889  | 0.915821875  | LTV1,PHACTR2,PLAGL1,ZC2HC1B |
| 9 | 82,350,000 | 82,500,000 | 1099 | 547  | 0.395092233  | LTV1,PLAGL1,ZC2HC1B         |
| 9 | 82,425,000 | 82,575,000 | 1100 | 676  | -0.040891729 | SF3B5                       |
| 9 | 82,500,000 | 82,650,000 | 1101 | 1104 | -0.480207429 | SF3B5,STX11                 |
| 9 | 82,575,000 | 82,725,000 | 1102 | 989  | -0.370156737 | STX11                       |
| 9 | 82,650,000 | 82,800,000 | 1103 | 553  | 0.398613634  | UTRN                        |

|   |            |            |      |      |              |                                                  |
|---|------------|------------|------|------|--------------|--------------------------------------------------|
| 9 | 82,725,000 | 82,875,000 | 1104 | 898  | 0.092512014  | UTRN                                             |
| 9 | 82,800,000 | 82,950,000 | 1105 | 1180 | 0.227803828  | UTRN                                             |
| 9 | 82,875,000 | 83,025,000 | 1106 | 1119 | 0.669488501  | UTRN                                             |
| 9 | 82,950,000 | 83,100,000 | 1107 | 916  | 0.683549216  | UTRN                                             |
| 9 | 83,025,000 | 83,175,000 | 1108 | 896  | 0.383704266  | UTRN                                             |
| 9 | 83,100,000 | 83,250,000 | 1109 | 1117 | 0.298019367  | UTRN                                             |
| 9 | 83,175,000 | 83,325,000 | 1110 | 980  | 0.245153918  | UTRN                                             |
| 9 | 83,250,000 | 83,400,000 | 1111 | 1170 | 0.306686198  | UTRN                                             |
| 9 | 83,325,000 | 83,475,000 | 1112 | 1556 | 0.409341286  |                                                  |
| 9 | 83,400,000 | 83,550,000 | 1113 | 1474 | -0.513672351 |                                                  |
| 9 | 83,475,000 | 83,625,000 | 1114 | 1231 | -0.122764916 |                                                  |
| 9 | 83,550,000 | 83,700,000 | 1115 | 1385 | 0.526006404  |                                                  |
| 9 | 83,625,000 | 83,775,000 | 1116 | 1570 | 0.094870646  |                                                  |
| 9 | 83,700,000 | 83,850,000 | 1117 | 1869 | -0.033316002 |                                                  |
| 9 | 83,775,000 | 83,925,000 | 1118 | 2148 | 0.021796792  |                                                  |
| 9 | 83,850,000 | 84,000,000 | 1119 | 2031 | 0.278443509  |                                                  |
| 9 | 83,925,000 | 84,075,000 | 1120 | 1797 | 0.428341642  | EPM2A                                            |
| 9 | 84,000,000 | 84,150,000 | 1121 | 1562 | 0.47465089   | EPM2A                                            |
| 9 | 84,075,000 | 84,225,000 | 1122 | 1146 | 0.289187315  | EPM2A,FBXO30                                     |
| 9 | 84,150,000 | 84,300,000 | 1123 | 871  | 0.153948789  | FBXO30,SHPRH                                     |
| 9 | 84,225,000 | 84,375,000 | 1124 | 1175 | 0.385206929  | SHPRH                                            |
| 9 | 84,300,000 | 84,450,000 | 1125 | 1413 | -0.463446471 | SHPRH                                            |
| 9 | 84,375,000 | 84,525,000 | 1126 | 1579 | -0.670911229 |                                                  |
| 9 | 84,450,000 | 84,600,000 | 1127 | 1715 | -0.099924708 |                                                  |
| 9 | 84,525,000 | 84,675,000 | 1128 | 1468 | -0.294244546 |                                                  |
| 9 | 84,600,000 | 84,750,000 | 1129 | 1359 | 0.7326111    | GRM1                                             |
| 9 | 84,675,000 | 84,825,000 | 1130 | 1140 | 0.963493901  | GRM1                                             |
| 9 | 84,750,000 | 84,900,000 | 1131 | 685  | -1.628463489 | GRM1                                             |
| 9 | 84,825,000 | 84,975,000 | 1132 | 658  | -3.141429083 | RAB32                                            |
| 9 | 84,900,000 | 85,050,000 | 1133 | 888  | -1.215162898 | ADGB,RAB32                                       |
| 9 | 84,975,000 | 85,125,000 | 1134 | 1001 | 0.014750147  | ADGB                                             |
| 9 | 85,050,000 | 85,200,000 | 1135 | 867  | 0.007837353  | ADGB                                             |
| 9 | 85,125,000 | 85,275,000 | 1136 | 911  | -0.939537215 | ADGB                                             |
| 9 | 85,200,000 | 85,350,000 | 1137 | 836  | -0.807620985 | ADGB                                             |
| 9 | 85,275,000 | 85,425,000 | 1138 | 494  | 0.657331113  |                                                  |
| 9 | 85,350,000 | 85,500,000 | 1139 | 641  | 0.927308826  |                                                  |
| 9 | 85,425,000 | 85,575,000 | 1140 | 607  | 0.870448119  |                                                  |
| 9 | 85,500,000 | 85,650,000 | 1141 | 262  | 0.036537365  | STXBP5                                           |
| 9 | 85,575,000 | 85,725,000 | 1142 | 267  | -0.230683071 | STXBP5                                           |
| 9 | 85,650,000 | 85,800,000 | 1143 | 284  | -0.355140404 | STXBP5                                           |
| 9 | 85,725,000 | 85,875,000 | 1144 | 528  | -0.500460027 | STXBP5,ENSBTAG00000039444,ENSBTAG00000047224     |
| 9 | 85,800,000 | 85,950,000 | 1145 | 703  | 0.021846935  | SAMD5,ULBP3,ENSBTAG00000039444,ENSBTAG0000047224 |
| 9 | 85,875,000 | 86,025,000 | 1146 | 708  | 0.563464475  | SAMD5,ULBP3                                      |
| 9 | 85,950,000 | 86,100,000 | 1147 | 721  | -0.501421164 | SAMD5,ULBP3                                      |
| 9 | 86,025,000 | 86,175,000 | 1148 | 914  | -0.982409246 |                                                  |
| 9 | 86,100,000 | 86,250,000 | 1149 | 1242 | 0.631417748  |                                                  |
| 9 | 86,175,000 | 86,325,000 | 1150 | 1317 | 0.97020777   |                                                  |
| 9 | 86,250,000 | 86,400,000 | 1151 | 1336 | -0.176102675 |                                                  |
| 9 | 86,325,000 | 86,475,000 | 1152 | 1270 | -0.619056979 |                                                  |
| 9 | 86,400,000 | 86,550,000 | 1153 | 1143 | 0.657617906  |                                                  |
| 9 | 86,475,000 | 86,625,000 | 1154 | 1130 | 0.4520384    |                                                  |

|   |            |            |      |      |              |                                                                                                       |
|---|------------|------------|------|------|--------------|-------------------------------------------------------------------------------------------------------|
| 9 | 86,550,000 | 86,700,000 | 1155 | 1021 | 0.183001035  |                                                                                                       |
| 9 | 86,625,000 | 86,775,000 | 1156 | 1121 | 0.011762751  |                                                                                                       |
| 9 | 86,700,000 | 86,850,000 | 1157 | 1205 | -0.629704227 |                                                                                                       |
| 9 | 86,775,000 | 86,925,000 | 1158 | 1053 | -0.6626584   | SASH1                                                                                                 |
| 9 | 86,850,000 | 87,000,000 | 1159 | 927  | 0.14249883   | SASH1                                                                                                 |
| 9 | 86,925,000 | 87,075,000 | 1160 | 995  | 0.31669284   | SASH1                                                                                                 |
| 9 | 87,000,000 | 87,150,000 | 1161 | 1295 | 0.175466099  |                                                                                                       |
| 9 | 87,075,000 | 87,225,000 | 1162 | 1180 | -0.076465614 |                                                                                                       |
| 9 | 87,150,000 | 87,300,000 | 1163 | 1119 | 0.217803308  |                                                                                                       |
| 9 | 87,225,000 | 87,375,000 | 1164 | 1213 | 0.306959014  |                                                                                                       |
| 9 | 87,300,000 | 87,450,000 | 1165 | 1129 | 0.578250817  |                                                                                                       |
| 9 | 87,375,000 | 87,525,000 | 1166 | 992  | 0.631094214  |                                                                                                       |
| 9 | 87,450,000 | 87,600,000 | 1167 | 914  | -0.274593719 |                                                                                                       |
| 9 | 87,525,000 | 87,675,000 | 1168 | 794  | 0.079134233  |                                                                                                       |
| 9 | 87,600,000 | 87,750,000 | 1169 | 589  | 1.056829907  |                                                                                                       |
| 9 | 87,675,000 | 87,825,000 | 1170 | 447  | 1.034690563  | TAB2                                                                                                  |
| 9 | 87,750,000 | 87,900,000 | 1171 | 440  | 0.493506811  | PPIL4,TAB2,ZC3H12D                                                                                    |
| 9 | 87,825,000 | 87,975,000 | 1172 | 492  | -0.502628666 | KATNA1,MGC133692,PPIL4,ZC3H12D                                                                        |
| 9 | 87,900,000 | 88,050,000 | 1173 | 471  | -0.061759258 | KATNA1,LATS1,MGC133692,PPIL4                                                                          |
| 9 | 87,975,000 | 88,125,000 | 1174 | 624  | 0.889490379  | KATNA1,LATS1,LRP11,NUP43,PCMT1                                                                        |
| 9 | 88,050,000 | 88,200,000 | 1175 | 966  | -0.699508303 | LRP11,NUP43,PCMT1                                                                                     |
| 9 | 88,125,000 | 88,275,000 | 1176 | 1114 | -0.028677543 | LRP11,RAET1G,ENSBTAG00000024751,ENSBTAG0000036061,ENSBTAG00000038891,ENSBTAG00000047902               |
| 9 | 88,200,000 | 88,350,000 | 1177 | 1074 | 0.275254549  | RAET1G,ENSBTAG00000024751,ENSBTAG00000036061,ENSBTAG00000038891,ENSBTAG00000039875,ENSBTAG00000047902 |
| 9 | 88,275,000 | 88,425,000 | 1178 | 1076 | 0.128241532  | PPP1R14C,RAET1G,ENSBTAG00000039875,ENSBTAG00000047902                                                 |
| 9 | 88,350,000 | 88,500,000 | 1179 | 1109 | 0.690794399  | PPP1R14C,RAET1G                                                                                       |
| 9 | 88,425,000 | 88,575,000 | 1180 | 1325 | 0.399879267  | IYD,PPP1R14C                                                                                          |
| 9 | 88,500,000 | 88,650,000 | 1181 | 1055 | -0.095655876 | IYD,PPP1R14C,ENSBTAG00000048114                                                                       |
| 9 | 88,575,000 | 88,725,000 | 1182 | 786  | -0.35900425  | IYD,ENSBTAG00000048114                                                                                |
| 9 | 88,650,000 | 88,800,000 | 1183 | 820  | -0.677501336 |                                                                                                       |
| 9 | 88,725,000 | 88,875,000 | 1184 | 558  | -0.683869924 |                                                                                                       |
| 9 | 88,800,000 | 88,950,000 | 1185 | 637  | 0.487924857  |                                                                                                       |
| 9 | 88,875,000 | 89,025,000 | 1186 | 856  | 1.009353014  | PLEKHG1                                                                                               |
| 9 | 88,950,000 | 89,100,000 | 1187 | 848  | 0.86719618   | PLEKHG1                                                                                               |
| 9 | 89,025,000 | 89,175,000 | 1188 | 653  | 0.151096162  | MTHFD1L,PLEKHG1                                                                                       |
| 9 | 89,100,000 | 89,250,000 | 1189 | 857  | 0.480294217  | MTHFD1L,PLEKHG1                                                                                       |
| 9 | 89,175,000 | 89,325,000 | 1190 | 1060 | 0.439957159  | MTHFD1L                                                                                               |
| 9 | 89,250,000 | 89,400,000 | 1191 | 842  | -0.230955144 | MTHFD1L                                                                                               |
| 9 | 89,325,000 | 89,475,000 | 1192 | 931  | 0.577141388  |                                                                                                       |
| 9 | 89,400,000 | 89,550,000 | 1193 | 1229 | 0.350591825  |                                                                                                       |
| 9 | 89,475,000 | 89,625,000 | 1194 | 1096 | -0.28322594  | AKAP12,RMND1,ZBTB2                                                                                    |
| 9 | 89,550,000 | 89,700,000 | 1195 | 749  | -0.314748857 | AKAP12,C9H6orf211,RMND1,TOMM7,ZBTB2                                                                   |
| 9 | 89,625,000 | 89,775,000 | 1196 | 823  | -0.42267771  | C9H6orf211,CCDC170,RMND1,TOMM7                                                                        |
| 9 | 89,700,000 | 89,850,000 | 1197 | 1007 | -0.034091445 | CCDC170                                                                                               |
| 9 | 89,775,000 | 89,925,000 | 1198 | 699  | 0.772447709  | CCDC170                                                                                               |
| 9 | 89,850,000 | 90,000,000 | 1199 | 511  | 0.509652995  | ESR1                                                                                                  |
| 9 | 89,925,000 | 90,075,000 | 1200 | 765  | 0.099006613  | ESR1                                                                                                  |
| 9 | 90,000,000 | 90,150,000 | 1201 | 965  | 0.56413044   | ESR1                                                                                                  |
| 9 | 90,075,000 | 90,225,000 | 1202 | 900  | 0.984649423  | ESR1                                                                                                  |

|   |            |            |      |      |              |                                       |
|---|------------|------------|------|------|--------------|---------------------------------------|
| 9 | 90,150,000 | 90,300,000 | 1203 | 948  | 0.759451139  | ESR1,SYNE1                            |
| 9 | 90,225,000 | 90,375,000 | 1204 | 1272 | 0.497929111  | ESR1,SYNE1                            |
| 9 | 90,300,000 | 90,450,000 | 1205 | 1246 | 0.59895857   | SYNE1                                 |
| 9 | 90,375,000 | 90,525,000 | 1206 | 938  | 0.739349654  | SYNE1                                 |
| 9 | 90,450,000 | 90,600,000 | 1207 | 1062 | 0.745672808  | SYNE1                                 |
| 9 | 90,525,000 | 90,675,000 | 1208 | 1524 | 0.636719621  | SYNE1                                 |
| 9 | 90,600,000 | 90,750,000 | 1209 | 1418 | 0.326875074  | SYNE1                                 |
| 9 | 90,675,000 | 90,825,000 | 1210 | 1048 | 0.813722886  |                                       |
| 9 | 90,750,000 | 90,900,000 | 1211 | 996  | 1.076410421  | MYCT1,VIP                             |
| 9 | 90,825,000 | 90,975,000 | 1212 | 884  | 0.322410704  | MYCT1,VIP                             |
| 9 | 90,900,000 | 91,050,000 | 1213 | 831  | 0.319073093  |                                       |
| 9 | 90,975,000 | 91,125,000 | 1214 | 815  | 0.906314795  | FBXO5,MTRF1L,RGS17                    |
| 9 | 91,050,000 | 91,200,000 | 1215 | 773  | 0.55487704   | FBXO5,MTRF1L,RGS17                    |
| 9 | 91,125,000 | 91,275,000 | 1216 | 739  | -0.026461118 | RGS17,ENSBTAG00000046219              |
| 9 | 91,200,000 | 91,350,000 | 1217 | 578  | -1.261155865 | ENSBTAG00000016405,ENSBTAG00000046219 |
| 9 | 91,275,000 | 91,425,000 | 1218 | 590  | -0.258610331 | ENSBTAG00000016405                    |
| 9 | 91,350,000 | 91,500,000 | 1219 | 933  | 0.228980329  |                                       |
| 9 | 91,425,000 | 91,575,000 | 1220 | 1307 | -0.170815847 |                                       |
| 9 | 91,500,000 | 91,650,000 | 1221 | 1316 | -0.501760869 |                                       |
| 9 | 91,575,000 | 91,725,000 | 1222 | 1130 | 0.296517479  |                                       |
| 9 | 91,650,000 | 91,800,000 | 1223 | 1230 | 0.696990297  |                                       |
| 9 | 91,725,000 | 91,875,000 | 1224 | 1570 | 0.457876897  |                                       |
| 9 | 91,800,000 | 91,950,000 | 1225 | 1571 | 0.632121247  |                                       |
| 9 | 91,875,000 | 92,025,000 | 1226 | 1390 | 0.827599893  |                                       |
| 9 | 91,950,000 | 92,100,000 | 1227 | 1132 | 0.809699204  |                                       |
| 9 | 92,025,000 | 92,175,000 | 1228 | 1021 | 0.041652605  | OPRM1                                 |
| 9 | 92,100,000 | 92,250,000 | 1229 | 992  | -0.283868572 | OPRM1,ENSBTAG00000003489              |
| 9 | 92,175,000 | 92,325,000 | 1230 | 1030 | -0.255534004 | OPRM1,ENSBTAG00000003489              |
| 9 | 92,250,000 | 92,400,000 | 1231 | 1032 | -2.648369883 | ENSBTAG00000003489                    |
| 9 | 92,325,000 | 92,475,000 | 1232 | 1131 | -2.508230525 | ENSBTAG00000012674                    |
| 9 | 92,400,000 | 92,550,000 | 1233 | 1448 | 0.246194129  | ENSBTAG00000012674                    |
| 9 | 92,475,000 | 92,625,000 | 1234 | 1337 | 1.229056902  | ENSBTAG00000012674                    |
| 9 | 92,550,000 | 92,700,000 | 1235 | 1141 | 1.272801891  |                                       |
| 9 | 92,625,000 | 92,775,000 | 1236 | 1017 | 1.359105511  |                                       |
| 9 | 92,700,000 | 92,850,000 | 1237 | 758  | 1.449269152  | SCAF8                                 |
| 9 | 92,775,000 | 92,925,000 | 1238 | 803  | 1.03157577   | SCAF8                                 |
| 9 | 92,850,000 | 93,000,000 | 1239 | 1061 | 0.775644572  | SCAF8                                 |
| 9 | 92,925,000 | 93,075,000 | 1240 | 826  | 0.67540325   |                                       |
| 9 | 93,000,000 | 93,150,000 | 1241 | 828  | 0.553729296  | TIAM2                                 |
| 9 | 93,075,000 | 93,225,000 | 1242 | 1096 | 0.503561452  | TIAM2                                 |
| 9 | 93,150,000 | 93,300,000 | 1243 | 954  | 0.550386489  | CLDN20,TFB1M,TIAM2                    |
| 9 | 93,225,000 | 93,375,000 | 1244 | 937  | 0.116409335  | CLDN20,NOX3,TFB1M,TIAM2               |
| 9 | 93,300,000 | 93,450,000 | 1245 | 1144 | 0.291184032  | NOX3,TFB1M                            |
| 9 | 93,375,000 | 93,525,000 | 1246 | 978  | 0.306149715  | NOX3                                  |
| 9 | 93,450,000 | 93,600,000 | 1247 | 873  | -0.554221676 |                                       |
| 9 | 93,525,000 | 93,675,000 | 1248 | 873  | -0.033569959 | ENSBTAG00000035623                    |
| 9 | 93,600,000 | 93,750,000 | 1249 | 1054 | 0.483396889  | ENSBTAG00000035623                    |
| 9 | 93,675,000 | 93,825,000 | 1250 | 1331 | 0.10612463   |                                       |
| 9 | 93,750,000 | 93,900,000 | 1251 | 1459 | -1.68405086  |                                       |
| 9 | 93,825,000 | 93,975,000 | 1252 | 1655 | -1.681341211 |                                       |
| 9 | 93,900,000 | 94,050,000 | 1253 | 1517 | -1.039135657 |                                       |
| 9 | 93,975,000 | 94,125,000 | 1254 | 1280 | -1.130703921 |                                       |
| 9 | 94,050,000 | 94,200,000 | 1255 | 1440 | -0.027768458 |                                       |

|   |            |            |      |      |              |                                    |
|---|------------|------------|------|------|--------------|------------------------------------|
| 9 | 94,125,000 | 94,275,000 | 1256 | 1454 | 0.452660416  |                                    |
| 9 | 94,200,000 | 94,350,000 | 1257 | 1041 | 0.823642521  |                                    |
| 9 | 94,275,000 | 94,425,000 | 1258 | 1153 | 1.041013246  |                                    |
| 9 | 94,350,000 | 94,500,000 | 1259 | 1352 | 1.137174773  |                                    |
| 9 | 94,425,000 | 94,575,000 | 1260 | 1295 | 1.091282308  |                                    |
| 9 | 94,500,000 | 94,650,000 | 1261 | 1431 | 1.211072651  |                                    |
| 9 | 94,575,000 | 94,725,000 | 1262 | 1580 | 1.169803908  |                                    |
| 9 | 94,650,000 | 94,800,000 | 1263 | 1145 | 0.902860247  |                                    |
| 9 | 94,725,000 | 94,875,000 | 1264 | 821  | 0.738284316  |                                    |
| 9 | 94,800,000 | 94,950,000 | 1265 | 809  | 0.925708174  | ARID1B                             |
| 9 | 94,875,000 | 95,025,000 | 1266 | 625  | 1.031480684  | ARID1B                             |
| 9 | 94,950,000 | 95,100,000 | 1267 | 682  | 0.871619264  | ARID1B                             |
| 9 | 95,025,000 | 95,175,000 | 1268 | 867  | 0.794034073  | ARID1B,ENSBTAG00000045772          |
| 9 | 95,100,000 | 95,250,000 | 1269 | 797  | 0.761147985  | ARID1B,ENSBTAG00000045772          |
| 9 | 95,175,000 | 95,325,000 | 1270 | 976  | 0.905891457  | ARID1B                             |
| 9 | 95,250,000 | 95,400,000 | 1271 | 1329 | 1.128270085  | ARID1B,C9H6ORF35                   |
| 9 | 95,325,000 | 95,475,000 | 1272 | 1333 | 1.202408053  | C9H6ORF35,ZDHHC14                  |
| 9 | 95,400,000 | 95,550,000 | 1273 | 1208 | 0.906298786  | ZDHHC14                            |
| 9 | 95,475,000 | 95,625,000 | 1274 | 1177 | 0.628870988  | ZDHHC14                            |
| 9 | 95,550,000 | 95,700,000 | 1275 | 1387 | 0.817119725  | ZDHHC14                            |
| 9 | 95,625,000 | 95,775,000 | 1276 | 1630 | 0.633059608  | ZDHHC14                            |
| 9 | 95,700,000 | 95,850,000 | 1277 | 1415 | 0.083925755  | ZDHHC14                            |
| 9 | 95,775,000 | 95,925,000 | 1278 | 827  | 0.049245474  | SNX9                               |
| 9 | 95,850,000 | 96,000,000 | 1279 | 741  | 0.194635524  | SNX9                               |
| 9 | 95,925,000 | 96,075,000 | 1280 | 1024 | -0.060193164 | SNX9,SYNJ2                         |
| 9 | 96,000,000 | 96,150,000 | 1281 | 1277 | 0.781138351  | SERAC1,SYNJ2                       |
| 9 | 96,075,000 | 96,225,000 | 1282 | 1022 | 0.942576482  | GTF2H5,SERAC1,SYNJ2                |
| 9 | 96,150,000 | 96,300,000 | 1283 | 646  | 0.190201309  | GTF2H5,TULP4                       |
| 9 | 96,225,000 | 96,375,000 | 1284 | 867  | 0.436903879  | TULP4                              |
| 9 | 96,300,000 | 96,450,000 | 1285 | 958  | 0.627850205  | TMEM181,TULP4                      |
| 9 | 96,375,000 | 96,525,000 | 1286 | 1172 | 0.930501806  | DYNLT1,SYTL3,TMEM181,TULP4         |
| 9 | 96,450,000 | 96,600,000 | 1287 | 1777 | 0.268537104  | DYNLT1,EZR,SYTL3,TMEM181           |
| 9 | 96,525,000 | 96,675,000 | 1288 | 1622 | 0.005327013  | EZR,SYTL3                          |
| 9 | 96,600,000 | 96,750,000 | 1289 | 1363 | 0.298423465  | EZR                                |
| 9 | 96,675,000 | 96,825,000 | 1290 | 1562 | 0.555055323  | RSPH3,TAGAP                        |
| 9 | 96,750,000 | 96,900,000 | 1291 | 1543 | 0.984495762  | RSPH3,TAGAP                        |
| 9 | 96,825,000 | 96,975,000 | 1292 | 1629 | 0.680931668  | FNDC1                              |
| 9 | 96,900,000 | 97,050,000 | 1293 | 1755 | 0.254645116  | FNDC1                              |
| 9 | 96,975,000 | 97,125,000 | 1294 | 1651 | 0.268070112  | FNDC1                              |
| 9 | 97,050,000 | 97,200,000 | 1295 | 1656 | 0.641394254  |                                    |
| 9 | 97,125,000 | 97,275,000 | 1296 | 1638 | 0.794115243  |                                    |
| 9 | 97,200,000 | 97,350,000 | 1297 | 1629 | 0.181918875  |                                    |
| 9 | 97,275,000 | 97,425,000 | 1298 | 1650 | -0.755559004 | SOD2                               |
| 9 | 97,350,000 | 97,500,000 | 1299 | 1181 | -1.081222612 | ACAT2,MRPL18,SOD2,TCP1,WTAP        |
| 9 | 97,425,000 | 97,575,000 | 1300 | 1014 | 0.088646646  | ACAT2,MAS1,MRPL18,PNLDC1,TCP1,WTAP |
| 9 | 97,500,000 | 97,650,000 | 1301 | 1006 | 0.551380742  | IGF2R,MAS1,PNLDC1                  |
| 9 | 97,575,000 | 97,725,000 | 1302 | 721  | 0.64990309   | IGF2R                              |
| 9 | 97,650,000 | 97,800,000 | 1303 | 1047 | 0.436267087  | IGF2R,SLC22A1                      |
| 9 | 97,725,000 | 97,875,000 | 1304 | 1513 | 0.495157938  | IGF2R,SLC22A1,SLC22A2              |
| 9 | 97,800,000 | 97,950,000 | 1305 | 1412 | 0.573718943  | SLC22A2,SLC22A3                    |
| 9 | 97,875,000 | 98,025,000 | 1306 | 917  | 0.045779918  | PLG,SLC22A3                        |
| 9 | 97,950,000 | 98,100,000 | 1307 | 901  | -0.507307534 | PLG,SLC22A3                        |
| 9 | 98,025,000 | 98,175,000 | 1308 | 1357 | -0.331937753 | MAP3K4,PLG                         |

|   |             |             |      |      |              |                           |
|---|-------------|-------------|------|------|--------------|---------------------------|
| 9 | 98,100,000  | 98,250,000  | 1309 | 1317 | -0.156795987 | AGPAT4,MAP3K4             |
| 9 | 98,175,000  | 98,325,000  | 1310 | 1473 | 0.453829396  | AGPAT4,MAP3K4             |
| 9 | 98,250,000  | 98,400,000  | 1311 | 1559 | 0.862116557  | AGPAT4                    |
| 9 | 98,325,000  | 98,475,000  | 1312 | 1675 | 1.056745292  | AGPAT4,PARK2              |
| 9 | 98,400,000  | 98,550,000  | 1313 | 2179 | 1.018428555  | PARK2                     |
| 9 | 98,475,000  | 98,625,000  | 1314 | 2040 | 0.833125023  | PARK2                     |
| 9 | 98,550,000  | 98,700,000  | 1315 | 1597 | 0.424842199  | PARK2                     |
| 9 | 98,625,000  | 98,775,000  | 1316 | 1915 | -0.010009466 | PARK2                     |
| 9 | 98,700,000  | 98,850,000  | 1317 | 2111 | -0.738442468 | PARK2                     |
| 9 | 98,775,000  | 98,925,000  | 1318 | 1586 | 0.144748699  | PARK2                     |
| 9 | 98,850,000  | 99,000,000  | 1319 | 1305 | 0.908856643  | PARK2                     |
| 9 | 98,925,000  | 99,075,000  | 1320 | 1717 | -1.467485446 | PARK2                     |
| 9 | 99,000,000  | 99,150,000  | 1321 | 2018 | -1.409935735 | PARK2                     |
| 9 | 99,075,000  | 99,225,000  | 1322 | 2006 | -0.872873476 | PARK2                     |
| 9 | 99,150,000  | 99,300,000  | 1323 | 2299 | -1.197129324 | PARK2                     |
| 9 | 99,225,000  | 99,375,000  | 1324 | 1859 | -0.347522849 | PARK2                     |
| 9 | 99,300,000  | 99,450,000  | 1325 | 1230 | 0.702853515  | PARK2                     |
| 9 | 99,375,000  | 99,525,000  | 1326 | 1054 | 0.728969651  | PARK2                     |
| 9 | 99,450,000  | 99,600,000  | 1327 | 872  | 0.502846831  | PARK2                     |
| 9 | 99,525,000  | 99,675,000  | 1328 | 948  | 0.710953673  | PACRG,PARK2               |
| 9 | 99,600,000  | 99,750,000  | 1329 | 1173 | 0.754635818  | PACRG                     |
| 9 | 99,675,000  | 99,825,000  | 1330 | 1466 | 0.734886629  | PACRG                     |
| 9 | 99,750,000  | 99,900,000  | 1331 | 1394 | 0.666509578  | PACRG                     |
| 9 | 99,825,000  | 99,975,000  | 1332 | 1425 | -0.191325907 | PACRG                     |
| 9 | 99,900,000  | 100,050,000 | 1333 | 1730 | -0.303087298 | PACRG                     |
| 9 | 99,975,000  | 100,125,000 | 1334 | 1509 | 0.202926872  | PACRG                     |
| 9 | 100,050,000 | 100,200,000 | 1335 | 1213 | 0.584152618  | PACRG                     |
| 9 | 100,125,000 | 100,275,000 | 1336 | 1246 | 0.502234726  | PACRG                     |
| 9 | 100,200,000 | 100,350,000 | 1337 | 969  | 0.052573101  | ENSBTAG00000037598        |
| 9 | 100,275,000 | 100,425,000 | 1338 | 505  | -0.360703032 | QKI,ENSBTAG00000037598    |
| 9 | 100,350,000 | 100,500,000 | 1339 | 471  | 0.378423374  | QKI                       |
| 9 | 100,425,000 | 100,575,000 | 1340 | 853  | -1.903752315 | QKI                       |
| 9 | 100,500,000 | 100,650,000 | 1341 | 1175 | -0.789937943 |                           |
| 9 | 100,575,000 | 100,725,000 | 1342 | 1210 | 0.206801199  |                           |
| 9 | 100,650,000 | 100,800,000 | 1343 | 1233 | 0.184479443  |                           |
| 9 | 100,725,000 | 100,875,000 | 1344 | 1287 | 0.773856452  |                           |
| 9 | 100,800,000 | 100,950,000 | 1345 | 1515 | 0.220381153  |                           |
| 9 | 100,875,000 | 101,025,000 | 1346 | 1517 | -0.185695332 |                           |
| 9 | 100,950,000 | 101,100,000 | 1347 | 1446 | 0.178980905  |                           |
| 9 | 101,025,000 | 101,175,000 | 1348 | 1349 | 0.355303378  |                           |
| 9 | 101,100,000 | 101,250,000 | 1349 | 1144 | 0.425224992  |                           |
| 9 | 101,175,000 | 101,325,000 | 1350 | 947  | 0.083072787  |                           |
| 9 | 101,250,000 | 101,400,000 | 1351 | 876  | 0.632094815  |                           |
| 9 | 101,325,000 | 101,475,000 | 1352 | 868  | 1.047503498  |                           |
| 9 | 101,400,000 | 101,550,000 | 1353 | 1042 | 0.379491627  |                           |
| 9 | 101,475,000 | 101,625,000 | 1354 | 1143 | 0.139358548  |                           |
| 9 | 101,550,000 | 101,700,000 | 1355 | 1326 | 0.645092475  |                           |
| 9 | 101,625,000 | 101,775,000 | 1356 | 1638 | 0.680706508  |                           |
| 9 | 101,700,000 | 101,850,000 | 1357 | 1433 | 0.573976374  |                           |
| 9 | 101,775,000 | 101,925,000 | 1358 | 1230 | 0.305889664  |                           |
| 9 | 101,850,000 | 102,000,000 | 1359 | 1105 | 0.16737928   | MGC134132,PDE10A          |
| 9 | 101,925,000 | 102,075,000 | 1360 | 1037 | 0.673346972  | MGC134132,PDE10A          |
| 9 | 102,000,000 | 102,150,000 | 1361 | 1437 | 0.762553657  | PDE10A,ENSBTAG00000046733 |

|    |             |             |      |      |              |                                                           |
|----|-------------|-------------|------|------|--------------|-----------------------------------------------------------|
| 9  | 102,075,000 | 102,225,000 | 1362 | 1448 | 0.640660324  | ENSBTAG00000046733                                        |
| 9  | 102,150,000 | 102,300,000 | 1363 | 1037 | 0.78860993   |                                                           |
| 9  | 102,225,000 | 102,375,000 | 1364 | 1141 | 0.473273302  |                                                           |
| 9  | 102,300,000 | 102,450,000 | 1365 | 1058 | 0.21197329   |                                                           |
| 9  | 102,375,000 | 102,525,000 | 1366 | 1090 | 0.455286274  |                                                           |
| 9  | 102,450,000 | 102,600,000 | 1367 | 1169 | -0.29529194  |                                                           |
| 9  | 102,525,000 | 102,675,000 | 1368 | 1041 | -0.343914797 | T                                                         |
| 9  | 102,600,000 | 102,750,000 | 1369 | 792  | 0.213009725  | T                                                         |
| 9  | 102,675,000 | 102,825,000 | 1370 | 669  | 0.645947972  | T                                                         |
| 9  | 102,750,000 | 102,900,000 | 1371 | 1056 | 1.142959569  | MPC1,SFT2D1                                               |
| 9  | 102,825,000 | 102,975,000 | 1372 | 1391 | 1.050109284  | MPC1,RPS6KA2,SFT2D1                                       |
| 9  | 102,900,000 | 103,050,000 | 1373 | 1285 | 1.031705755  | RPS6KA2                                                   |
| 9  | 102,975,000 | 103,125,000 | 1374 | 959  | 0.621673277  | RPS6KA2                                                   |
| 9  | 103,050,000 | 103,200,000 | 1375 | 875  | -0.294998225 | RPS6KA2                                                   |
| 9  | 103,125,000 | 103,275,000 | 1376 | 1016 | 0.390869333  |                                                           |
| 9  | 103,200,000 | 103,350,000 | 1377 | 990  | 0.503069787  | RNASET2                                                   |
| 9  | 103,275,000 | 103,425,000 | 1378 | 706  | 0.167966343  | FGFR1OP,RNASET2                                           |
| 9  | 103,350,000 | 103,500,000 | 1379 | 640  | -0.182366548 | FGFR1OP,GPR31,ENSBTAG00000014496,ENSBTAG0000026133        |
| 9  | 103,425,000 | 103,575,000 | 1380 | 1025 | 0.126858528  | GPR31,TTLL2,UNC93A,ENSBTAG00000014496,ENSBTAG000000026133 |
| 9  | 103,500,000 | 103,650,000 | 1381 | 1815 | 0.42201491   | TTLL2,UNC93A,ENSBTAG00000026133                           |
| 9  | 103,575,000 | 103,725,000 | 1382 | 2027 | -0.335147195 |                                                           |
| 9  | 103,650,000 | 103,800,000 | 1383 | 1689 | -0.423079236 |                                                           |
| 9  | 103,725,000 | 103,875,000 | 1384 | 1243 | 0.62465232   | MLLT4                                                     |
| 9  | 103,800,000 | 103,950,000 | 1385 | 762  | 0.006833874  | KIF25,MLLT4                                               |
| 9  | 103,875,000 | 104,025,000 | 1386 | 959  | 0.417548073  | FRMD1,KIF25,MLLT4                                         |
| 9  | 103,950,000 | 104,100,000 | 1387 | 1128 | 0.445434457  | FRMD1,KIF25,ENSBTAG00000047235                            |
| 9  | 104,025,000 | 104,175,000 | 1388 | 1039 | -0.1030555   | DACT2,ENSBTAG00000047235                                  |
| 9  | 104,100,000 | 104,250,000 | 1389 | 1371 | 0.42095868   | DACT2                                                     |
| 9  | 104,175,000 | 104,325,000 | 1390 | 1559 | 0.313371158  | SMOC2                                                     |
| 9  | 104,250,000 | 104,400,000 | 1391 | 1575 | 0.603558861  | SMOC2                                                     |
| 9  | 104,325,000 | 104,475,000 | 1392 | 1506 | 0.982814969  | SMOC2                                                     |
| 9  | 104,400,000 | 104,550,000 | 1393 | 1268 | 0.630498709  |                                                           |
| 9  | 104,475,000 | 104,625,000 | 1394 | 1175 | 0.590442808  |                                                           |
| 9  | 104,550,000 | 104,700,000 | 1395 | 1079 | 0.567254369  |                                                           |
| 9  | 104,625,000 | 104,775,000 | 1396 | 987  | 1.023191303  | THBS2                                                     |
| 9  | 104,700,000 | 104,850,000 | 1397 | 1029 | 1.370051922  | THBS2                                                     |
| 9  | 104,775,000 | 104,925,000 | 1398 | 1010 | 1.104727421  |                                                           |
| 9  | 104,850,000 | 105,000,000 | 1399 | 1073 | 0.710468997  | WDR27                                                     |
| 9  | 104,925,000 | 105,075,000 | 1400 | 1022 | 0.946140161  | C9H6orf120,PHF10,WDR27                                    |
| 9  | 105,000,000 | 105,150,000 | 1401 | 720  | 1.144760426  | C9H6orf120,ERMARD,PHF10,TCTE3,WDR27                       |
| 9  | 105,075,000 | 105,225,000 | 1402 | 744  | 0.680986806  | C9H6orf120,ERMARD,PHF10,TCTE3                             |
| 9  | 105,150,000 | 105,300,000 | 1403 | 1002 | -0.210611434 | ERMARD                                                    |
| 9  | 105,225,000 | 105,375,000 | 1404 | 926  | -0.199362236 |                                                           |
| 9  | 105,300,000 | 105,450,000 | 1405 | 793  | 0.80417525   |                                                           |
| 9  | 105,375,000 | 105,525,000 | 1406 | 728  | 0.769849724  | DLL1                                                      |
| 9  | 105,450,000 | 105,600,000 | 1407 | 624  | 0.453316139  | DLL1,FAM120B                                              |
| 9  | 105,525,000 | 105,675,000 | 1408 | 627  | 1.153999444  | FAM120B,PSMB1                                             |
| 9  | 105,600,000 | 105,708,250 | 1409 | 456  | 1.351508808  | PDCD2,PSMB1,TBP                                           |
| 10 | 0           | 150,000     | 1    | 510  | -0.859676131 |                                                           |
| 10 | 75,000      | 225,000     | 2    | 447  | -0.628643388 | ENSBTAG00000047105                                        |
| 10 | 150,000     | 300,000     | 3    | 771  | -0.138382226 | ENSBTAG00000017396,ENSBTAG00000047105                     |

|    |           |           |    |      |              |                                       |
|----|-----------|-----------|----|------|--------------|---------------------------------------|
| 10 | 225,000   | 375,000   | 4  | 1084 | 0.113422257  | ENSBTAG00000003493,ENSBTAG00000017396 |
| 10 | 300,000   | 450,000   | 5  | 1214 | -0.803214033 | ENSBTAG00000003493                    |
| 10 | 375,000   | 525,000   | 6  | 1364 | -0.03016571  |                                       |
| 10 | 450,000   | 600,000   | 7  | 1171 | 0.929025951  | ENSBTAG00000046432                    |
| 10 | 525,000   | 675,000   | 8  | 1063 | 0.306497762  | MCC,ENSBTAG00000046432                |
| 10 | 600,000   | 750,000   | 9  | 1143 | 0.09798284   | MCC                                   |
| 10 | 675,000   | 825,000   | 10 | 921  | 0.129691675  | MCC                                   |
| 10 | 750,000   | 900,000   | 11 | 1088 | 0.368554375  | MCC                                   |
| 10 | 825,000   | 975,000   | 12 | 1061 | 0.467182315  | DCP2,MCC                              |
| 10 | 900,000   | 1,050,000 | 13 | 621  | 0.01294561   | DCP2,MCC,REEP5                        |
| 10 | 975,000   | 1,125,000 | 14 | 901  | 0.352816762  | APC,DCP2,REEP5,SRP19                  |
| 10 | 1,050,000 | 1,200,000 | 15 | 1194 | 0.97995505   | APC,REEP5,SRP19                       |
| 10 | 1,125,000 | 1,275,000 | 16 | 1125 | 0.829571944  | APC                                   |
| 10 | 1,200,000 | 1,350,000 | 17 | 1204 | 0.084778808  | APC                                   |
| 10 | 1,275,000 | 1,425,000 | 18 | 1164 | 0.06129311   |                                       |
| 10 | 1,350,000 | 1,500,000 | 19 | 1027 | -0.078803732 | EPB41L4A                              |
| 10 | 1,425,000 | 1,575,000 | 20 | 1118 | -0.454299775 | EPB41L4A                              |
| 10 | 1,500,000 | 1,650,000 | 21 | 1149 | -0.419670951 | EPB41L4A                              |
| 10 | 1,575,000 | 1,725,000 | 22 | 911  | -0.019420824 | EPB41L4A                              |
| 10 | 1,650,000 | 1,800,000 | 23 | 976  | -0.831564912 | EPB41L4A                              |
| 10 | 1,725,000 | 1,875,000 | 24 | 1454 | -0.977513399 | EPB41L4A                              |
| 10 | 1,800,000 | 1,950,000 | 25 | 1455 | -1.117101965 |                                       |
| 10 | 1,875,000 | 2,025,000 | 26 | 1269 | -0.871735399 |                                       |
| 10 | 1,950,000 | 2,100,000 | 27 | 1018 | 0.28818139   |                                       |
| 10 | 2,025,000 | 2,175,000 | 28 | 985  | 0.962808684  | NREP                                  |
| 10 | 2,100,000 | 2,250,000 | 29 | 1303 | 0.708542639  | NREP                                  |
| 10 | 2,175,000 | 2,325,000 | 30 | 1265 | -0.152284455 | NREP                                  |
| 10 | 2,250,000 | 2,400,000 | 31 | 1052 | -0.866281391 | YTHDC2                                |
| 10 | 2,325,000 | 2,475,000 | 32 | 635  | -1.017161264 | YTHDC2                                |
| 10 | 2,400,000 | 2,550,000 | 33 | 411  | -1.775770595 | YTHDC2                                |
| 10 | 2,475,000 | 2,625,000 | 34 | 689  | -5.445628322 |                                       |
| 10 | 2,550,000 | 2,700,000 | 35 | 859  | -3.158082164 |                                       |
| 10 | 2,625,000 | 2,775,000 | 36 | 914  | 1.018997688  |                                       |
| 10 | 2,700,000 | 2,850,000 | 37 | 1151 | 1.010293372  |                                       |
| 10 | 2,775,000 | 2,925,000 | 38 | 1190 | 0.908620912  |                                       |
| 10 | 2,850,000 | 3,000,000 | 39 | 1018 | 0.673573829  |                                       |
| 10 | 2,925,000 | 3,075,000 | 40 | 736  | 0.490297915  |                                       |
| 10 | 3,000,000 | 3,150,000 | 41 | 530  | -0.010317044 |                                       |
| 10 | 3,075,000 | 3,225,000 | 42 | 472  | 0.258515992  | KCNN2                                 |
| 10 | 3,150,000 | 3,300,000 | 43 | 666  | -0.256578211 | KCNN2                                 |
| 10 | 3,225,000 | 3,375,000 | 44 | 1033 | -0.019303077 | KCNN2                                 |
| 10 | 3,300,000 | 3,450,000 | 45 | 931  | 0.509512554  | KCNN2                                 |
| 10 | 3,375,000 | 3,525,000 | 46 | 1098 | 0.990294161  |                                       |
| 10 | 3,450,000 | 3,600,000 | 47 | 1556 | 1.136390894  | ENSBTAG00000023186                    |
| 10 | 3,525,000 | 3,675,000 | 48 | 1466 | 1.084653638  | ENSBTAG00000023186                    |
| 10 | 3,600,000 | 3,750,000 | 49 | 997  | 0.58759509   |                                       |
| 10 | 3,675,000 | 3,825,000 | 50 | 807  | -1.211346287 |                                       |
| 10 | 3,750,000 | 3,900,000 | 51 | 1143 | -0.050964532 |                                       |
| 10 | 3,825,000 | 3,975,000 | 52 | 977  | 0.63841737   | TRIM36                                |
| 10 | 3,900,000 | 4,050,000 | 53 | 788  | 0.201812069  | PGGT1B,TRIM36                         |
| 10 | 3,975,000 | 4,125,000 | 54 | 837  | 0.969322671  | CCDC112,PGGT1B                        |
| 10 | 4,050,000 | 4,200,000 | 55 | 1255 | 0.849757867  | CCDC112,PGGT1B                        |
| 10 | 4,125,000 | 4,275,000 | 56 | 1804 | 0.864612776  |                                       |



|    |           |           |     |      |              |                               |
|----|-----------|-----------|-----|------|--------------|-------------------------------|
| 10 | 4,200,000 | 4,350,000 | 57  | 1449 | 0.793489136  | FEM1C                         |
| 10 | 4,275,000 | 4,425,000 | 58  | 1193 | -0.342204772 | FEM1C,TICAM2,TMED7            |
| 10 | 4,350,000 | 4,500,000 | 59  | 1678 | -0.350628342 | TICAM2,TMED7                  |
| 10 | 4,425,000 | 4,575,000 | 60  | 1800 | 0.159819303  |                               |
| 10 | 4,500,000 | 4,650,000 | 61  | 1499 | -0.22756038  | ATG12,CDO1,ENSBTAG00000048058 |
| 10 | 4,575,000 | 4,725,000 | 62  | 1423 | -0.843434314 | ATG12,CDO1,ENSBTAG00000048058 |
| 10 | 4,650,000 | 4,800,000 | 63  | 1646 | 0.342615183  | AQPEP,ATG12                   |
| 10 | 4,725,000 | 4,875,000 | 64  | 1331 | 0.68752051   | AQPEP,ATG12,C10H11ORF46       |
| 10 | 4,800,000 | 4,950,000 | 65  | 627  | 0.280416587  | AQPEP,C10H11ORF46             |
| 10 | 4,875,000 | 5,025,000 | 66  | 375  | 0.374042547  | C10H11ORF46,P33MONOX,SIMC1    |
| 10 | 4,950,000 | 5,100,000 | 67  | 387  | 0.207972722  | P33MONOX,SIMC1                |
| 10 | 5,025,000 | 5,175,000 | 68  | 564  | 0.594281982  | THOC3                         |
| 10 | 5,100,000 | 5,250,000 | 69  | 580  | 0.774277678  | CPLX2,THOC3                   |
| 10 | 5,175,000 | 5,325,000 | 70  | 443  | 0.33704038   | CPLX2                         |
| 10 | 5,250,000 | 5,400,000 | 71  | 750  | -0.028970192 |                               |
| 10 | 5,325,000 | 5,475,000 | 72  | 1111 | -0.289804761 | HRH2                          |
| 10 | 5,400,000 | 5,550,000 | 73  | 1016 | -0.772955543 | HRH2                          |
| 10 | 5,475,000 | 5,625,000 | 74  | 996  | -0.469565867 | SFXN1                         |
| 10 | 5,550,000 | 5,700,000 | 75  | 770  | 0.499310175  | DRD1,SFXN1                    |
| 10 | 5,625,000 | 5,775,000 | 76  | 701  | 1.460972451  | DRD1                          |
| 10 | 5,700,000 | 5,850,000 | 77  | 1135 | 1.327214218  |                               |
| 10 | 5,775,000 | 5,925,000 | 78  | 1174 | 1.252252567  |                               |
| 10 | 5,850,000 | 6,000,000 | 79  | 1126 | 0.568220703  |                               |
| 10 | 5,925,000 | 6,075,000 | 80  | 1320 | 0.297274779  |                               |
| 10 | 6,000,000 | 6,150,000 | 81  | 1474 | 0.279537048  |                               |
| 10 | 6,075,000 | 6,225,000 | 82  | 1063 | -0.155680442 |                               |
| 10 | 6,150,000 | 6,300,000 | 83  | 975  | -0.678563431 |                               |
| 10 | 6,225,000 | 6,375,000 | 84  | 1543 | -0.587899457 |                               |
| 10 | 6,300,000 | 6,450,000 | 85  | 1521 | -0.636546421 | GCNT4                         |
| 10 | 6,375,000 | 6,525,000 | 86  | 1294 | -0.557803927 | ANKRD31,GCNT4                 |
| 10 | 6,450,000 | 6,600,000 | 87  | 1062 | -0.931638232 | ANKRD31                       |
| 10 | 6,525,000 | 6,675,000 | 88  | 1166 | -1.400518755 | ANKRD31                       |
| 10 | 6,600,000 | 6,750,000 | 89  | 1075 | -0.941136534 | COL4A3BP,HMGCR                |
| 10 | 6,675,000 | 6,825,000 | 90  | 774  | -0.21648496  | COL4A3BP,HMGCR                |
| 10 | 6,750,000 | 6,900,000 | 91  | 810  | 0.834661546  | COL4A3BP,POLK                 |
| 10 | 6,825,000 | 6,975,000 | 92  | 931  | 1.074654474  | ANKDD1B,COL4A3BP,POLK         |
| 10 | 6,900,000 | 7,050,000 | 93  | 939  | 0.767167461  | ANKDD1B,MGC157319,POLK        |
| 10 | 6,975,000 | 7,125,000 | 94  | 770  | 0.681629383  | ANKDD1B,MGC157319             |
| 10 | 7,050,000 | 7,200,000 | 95  | 785  | 0.847846123  |                               |
| 10 | 7,125,000 | 7,275,000 | 96  | 1074 | 0.700059114  |                               |
| 10 | 7,200,000 | 7,350,000 | 97  | 1305 | -0.753578371 | SV2C                          |
| 10 | 7,275,000 | 7,425,000 | 98  | 1651 | -0.776341733 | SV2C                          |
| 10 | 7,350,000 | 7,500,000 | 99  | 1767 | 0.4008757    | SV2C                          |
| 10 | 7,425,000 | 7,575,000 | 100 | 1252 | -0.846654995 | IQGAP2,SV2C                   |
| 10 | 7,500,000 | 7,650,000 | 101 | 921  | -2.80225785  | IQGAP2,SV2C                   |
| 10 | 7,575,000 | 7,725,000 | 102 | 935  | -1.39214875  | IQGAP2                        |
| 10 | 7,650,000 | 7,800,000 | 103 | 1025 | 0.192280066  | F2RL2,IQGAP2                  |
| 10 | 7,725,000 | 7,875,000 | 104 | 1148 | 0.825784853  | F2RL2,IQGAP2                  |
| 10 | 7,800,000 | 7,950,000 | 105 | 1099 | 0.717551304  | F2R,IQGAP2                    |
| 10 | 7,875,000 | 8,025,000 | 106 | 942  | 0.50409827   | F2R,F2RL1,S100Z               |
| 10 | 7,950,000 | 8,100,000 | 107 | 1044 | 0.962533197  | CRHBP,F2RL1,S100Z             |
| 10 | 8,025,000 | 8,175,000 | 108 | 960  | 0.853566591  | AGGF1,CRHBP                   |
| 10 | 8,100,000 | 8,250,000 | 109 | 1040 | 0.38915685   | AGGF1                         |

|    |            |            |     |      |              |                                   |
|----|------------|------------|-----|------|--------------|-----------------------------------|
| 10 | 8,175,000  | 8,325,000  | 110 | 1206 | 0.333794616  |                                   |
| 10 | 8,250,000  | 8,400,000  | 111 | 1025 | 0.272330595  |                                   |
| 10 | 8,325,000  | 8,475,000  | 112 | 1048 | 0.509488258  | PDE8B                             |
| 10 | 8,400,000  | 8,550,000  | 113 | 1354 | 0.198023019  | PDE8B,WDR41                       |
| 10 | 8,475,000  | 8,625,000  | 114 | 1164 | 0.282881248  | PDE8B,WDR41                       |
| 10 | 8,550,000  | 8,700,000  | 115 | 814  | 1.128060627  | OTP,WDR41                         |
| 10 | 8,625,000  | 8,775,000  | 116 | 819  | 1.118567945  | OTP,TBCA                          |
| 10 | 8,700,000  | 8,850,000  | 117 | 806  | -0.30323285  | TBCA                              |
| 10 | 8,775,000  | 8,925,000  | 118 | 983  | 0.041915435  | TBCA                              |
| 10 | 8,850,000  | 9,000,000  | 119 | 982  | 0.463243958  |                                   |
| 10 | 8,925,000  | 9,075,000  | 120 | 845  | 0.449088054  | AP3B1                             |
| 10 | 9,000,000  | 9,150,000  | 121 | 807  | 1.205042862  | AP3B1                             |
| 10 | 9,075,000  | 9,225,000  | 122 | 995  | 1.293483401  | AP3B1                             |
| 10 | 9,150,000  | 9,300,000  | 123 | 1393 | 1.409687225  | AP3B1                             |
| 10 | 9,225,000  | 9,375,000  | 124 | 1426 | 0.392823217  | AP3B1,SCAMP1                      |
| 10 | 9,300,000  | 9,450,000  | 125 | 1207 | -0.775378625 | AP3B1,SCAMP1                      |
| 10 | 9,375,000  | 9,525,000  | 126 | 1231 | 0.164713272  | LHFPL2,SCAMP1                     |
| 10 | 9,450,000  | 9,600,000  | 127 | 1072 | 0.441338311  | LHFPL2,SCAMP1                     |
| 10 | 9,525,000  | 9,675,000  | 128 | 855  | -0.322655624 | LHFPL2                            |
| 10 | 9,600,000  | 9,750,000  | 129 | 779  | -0.378337669 |                                   |
| 10 | 9,675,000  | 9,825,000  | 130 | 637  | 0.990457298  | ARSB                              |
| 10 | 9,750,000  | 9,900,000  | 131 | 671  | 1.297963021  | ARSB                              |
| 10 | 9,825,000  | 9,975,000  | 132 | 792  | 0.961868532  | ARSB                              |
| 10 | 9,900,000  | 10,050,000 | 133 | 693  | 0.428897859  | ARSB,DMGDH                        |
| 10 | 9,975,000  | 10,125,000 | 134 | 703  | -0.006186091 | BHMT2,DMGDH                       |
| 10 | 10,050,000 | 10,200,000 | 135 | 885  | -0.191627271 | BHMT,BHMT2,DMGDH                  |
| 10 | 10,125,000 | 10,275,000 | 136 | 859  | -0.019306885 | BHMT,JMY                          |
| 10 | 10,200,000 | 10,350,000 | 137 | 744  | 0.117896917  | JMY                               |
| 10 | 10,275,000 | 10,425,000 | 138 | 966  | -0.321835797 | HOMER1,JMY                        |
| 10 | 10,350,000 | 10,500,000 | 139 | 1125 | -0.938761275 | HOMER1                            |
| 10 | 10,425,000 | 10,575,000 | 140 | 990  | -2.522311902 | HOMER1,PAPD4                      |
| 10 | 10,500,000 | 10,650,000 | 141 | 976  | -2.153990089 | PAPD4                             |
| 10 | 10,575,000 | 10,725,000 | 142 | 961  | -0.831144865 | CMYA5,PAPD4                       |
| 10 | 10,650,000 | 10,800,000 | 143 | 1181 | 0.095794171  | CMYA5                             |
| 10 | 10,725,000 | 10,875,000 | 144 | 1289 | 0.136989676  |                                   |
| 10 | 10,800,000 | 10,950,000 | 145 | 1001 | -0.082625557 | MTX3,THBS4                        |
| 10 | 10,875,000 | 11,025,000 | 146 | 1227 | 0.756961449  | MTX3,THBS4                        |
| 10 | 10,950,000 | 11,100,000 | 147 | 1525 | 0.405372925  | SERINC5,THBS4                     |
| 10 | 11,025,000 | 11,175,000 | 148 | 1425 | 0.036020264  | SERINC5                           |
| 10 | 11,100,000 | 11,250,000 | 149 | 1423 | 0.237536228  | SERINC5                           |
| 10 | 11,175,000 | 11,325,000 | 150 | 931  | -0.175596457 |                                   |
| 10 | 11,250,000 | 11,400,000 | 151 | 360  | -0.82849808  | GNPNAT1,STYX                      |
| 10 | 11,325,000 | 11,475,000 | 152 | 573  | 1.065233529  | ERO1L,GNPNAT1,PSMC6,STYX          |
| 10 | 11,400,000 | 11,550,000 | 153 | 924  | 0.926555396  | ERO1L,GPR137C,PSMC6               |
| 10 | 11,475,000 | 11,625,000 | 154 | 895  | 0.673201351  | ERO1L,GPR137C,TXNDC16             |
| 10 | 11,550,000 | 11,700,000 | 155 | 832  | 0.404617958  | GPR137C,TXNDC16                   |
| 10 | 11,625,000 | 11,775,000 | 156 | 774  | 0.045873465  | PTGER2,TXNDC16                    |
| 10 | 11,700,000 | 11,850,000 | 157 | 575  | 0.581996609  | ANKDD1A,PTGER2                    |
| 10 | 11,775,000 | 11,925,000 | 158 | 599  | 0.914045692  | ANKDD1A,MTFMT,PTGER2,SPG21        |
| 10 | 11,850,000 | 12,000,000 | 159 | 837  | 0.634033524  | KBTBD13,MTFMT,RASL12,SLC51B,SPG21 |
| 10 | 11,925,000 | 12,075,000 | 160 | 657  | 0.42635504   | CLPX,KBTBD13,PDCD7,RASL12,SLC51B  |
| 10 | 12,000,000 | 12,150,000 | 161 | 708  | 0.784702354  | CILP,CLPX,PDCD7                   |
| 10 | 12,075,000 | 12,225,000 | 162 | 942  | 0.964291562  | CILP,IGDCC3,PARP16                |

|    |            |            |     |      |              |                                  |
|----|------------|------------|-----|------|--------------|----------------------------------|
| 10 | 12,150,000 | 12,300,000 | 163 | 684  | 0.814426856  | IGDCC3,IGDCC4,PARP16             |
| 10 | 12,225,000 | 12,375,000 | 164 | 426  | 0.438749434  | DPP8,IGDCC3,IGDCC4               |
| 10 | 12,300,000 | 12,450,000 | 165 | 411  | 0.27642459   | DPP8,PTPLAD1,VWA9                |
| 10 | 12,375,000 | 12,525,000 | 166 | 373  | 0.21042504   | DENND4A,PTPLAD1,SLC24A1,VWA9     |
| 10 | 12,450,000 | 12,600,000 | 167 | 266  | 0.24483589   | DENND4A,SLC24A1                  |
| 10 | 12,525,000 | 12,675,000 | 168 | 284  | 0.73961765   | DENND4A                          |
| 10 | 12,600,000 | 12,750,000 | 169 | 335  | 0.448466706  | MEGF11,RAB11A                    |
| 10 | 12,675,000 | 12,825,000 | 170 | 753  | -1.516994635 | MEGF11,RAB11A                    |
| 10 | 12,750,000 | 12,900,000 | 171 | 1249 | -1.01193711  | MEGF11                           |
| 10 | 12,825,000 | 12,975,000 | 172 | 1284 | 0.246763052  |                                  |
| 10 | 12,900,000 | 13,050,000 | 173 | 1178 | 0.378341383  |                                  |
| 10 | 12,975,000 | 13,125,000 | 174 | 1116 | -0.467113666 |                                  |
| 10 | 13,050,000 | 13,200,000 | 175 | 1241 | -0.429385548 | DIS3L,TIPIN                      |
| 10 | 13,125,000 | 13,275,000 | 176 | 1055 | 0.088488457  | DIS3L,MAP2K1,TIPIN               |
| 10 | 13,200,000 | 13,350,000 | 177 | 568  | -0.677971987 | MAP2K1,RPL4,SNAPC5,TIPIN,ZWILCH  |
| 10 | 13,275,000 | 13,425,000 | 178 | 384  | -0.690772611 | LCTL,MAP2K1,RPL4,SNAPC5,ZWILCH   |
| 10 | 13,350,000 | 13,500,000 | 179 | 301  | -0.698029891 | LCTL,ZWILCH                      |
| 10 | 13,425,000 | 13,575,000 | 180 | 445  | 0.172877023  | SMAD6                            |
| 10 | 13,500,000 | 13,650,000 | 181 | 959  | 0.509586364  | SMAD6                            |
| 10 | 13,575,000 | 13,725,000 | 182 | 1446 | 0.399344608  | SMAD6                            |
| 10 | 13,650,000 | 13,800,000 | 183 | 1383 | 0.571332584  |                                  |
| 10 | 13,725,000 | 13,875,000 | 184 | 833  | 0.80357759   |                                  |
| 10 | 13,800,000 | 13,950,000 | 185 | 800  | 0.828511022  |                                  |
| 10 | 13,875,000 | 14,025,000 | 186 | 702  | 0.562080388  | MGC152585,SMAD3                  |
| 10 | 13,950,000 | 14,100,000 | 187 | 576  | 0.121895943  | IQCH,MGC152585,SMAD3             |
| 10 | 14,025,000 | 14,175,000 | 188 | 606  | 0.140128694  | IQCH,MGC152585                   |
| 10 | 14,100,000 | 14,250,000 | 189 | 631  | 0.101827151  | IQCH                             |
| 10 | 14,175,000 | 14,325,000 | 190 | 703  | -0.73176361  | IQCH                             |
| 10 | 14,250,000 | 14,400,000 | 191 | 589  | -1.410795912 | C15orf61,IQCH,MAP2K5             |
| 10 | 14,325,000 | 14,475,000 | 192 | 672  | 0.172749025  | C15orf61,MAP2K5                  |
| 10 | 14,400,000 | 14,550,000 | 193 | 564  | 0.110537347  | MAP2K5                           |
| 10 | 14,475,000 | 14,625,000 | 194 | 687  | -0.085614883 | MAP2K5                           |
| 10 | 14,550,000 | 14,700,000 | 195 | 1067 | 0.535955085  | MAP2K5,SKOR1                     |
| 10 | 14,625,000 | 14,775,000 | 196 | 1062 | 0.51915196   | MAP2K5,SKOR1                     |
| 10 | 14,700,000 | 14,850,000 | 197 | 860  | 0.630781345  |                                  |
| 10 | 14,775,000 | 14,925,000 | 198 | 648  | 0.568716753  | PIAS1                            |
| 10 | 14,850,000 | 15,000,000 | 199 | 488  | 0.280814817  | PIAS1                            |
| 10 | 14,925,000 | 15,075,000 | 200 | 816  | 0.447164564  | CALML4,CLN6,PIAS1                |
| 10 | 15,000,000 | 15,150,000 | 201 | 965  | 0.160544911  | CALML4,CLN6,FEM1B,ITGA11,PIAS1   |
| 10 | 15,075,000 | 15,225,000 | 202 | 939  | -0.856700571 | FEM1B,ITGA11                     |
| 10 | 15,150,000 | 15,300,000 | 203 | 1147 | -0.467260738 | ITGA11                           |
| 10 | 15,225,000 | 15,375,000 | 204 | 1082 | 0.0341571    |                                  |
| 10 | 15,300,000 | 15,450,000 | 205 | 875  | 0.248341433  |                                  |
| 10 | 15,375,000 | 15,525,000 | 206 | 885  | 0.204368999  | CORO2B                           |
| 10 | 15,450,000 | 15,600,000 | 207 | 1023 | -1.531585211 | ANP32A,CORO2B,ENSBTAG00000045866 |
| 10 | 15,525,000 | 15,675,000 | 208 | 1041 | -1.578919901 | ANP32A,CORO2B,ENSBTAG00000045866 |
| 10 | 15,600,000 | 15,750,000 | 209 | 1040 | -0.303259254 | ANP32A,SPESP1                    |
| 10 | 15,675,000 | 15,825,000 | 210 | 1062 | 0.20166137   | SPESP1                           |
| 10 | 15,750,000 | 15,900,000 | 211 | 1396 | -0.987731206 | NOX5,SPESP1                      |
| 10 | 15,825,000 | 15,975,000 | 212 | 1303 | -1.909357206 | NOX5                             |
| 10 | 15,900,000 | 16,050,000 | 213 | 637  | -1.440235219 |                                  |
| 10 | 15,975,000 | 16,125,000 | 214 | 366  | -0.70224254  | GLCE                             |
| 10 | 16,050,000 | 16,200,000 | 215 | 798  | 0.387205085  | GLCE,PAQR5                       |

|    |            |            |     |      |              |                                                         |
|----|------------|------------|-----|------|--------------|---------------------------------------------------------|
| 10 | 16,125,000 | 16,275,000 | 216 | 1153 | 0.758008017  | KIF23,PAQR5                                             |
| 10 | 16,200,000 | 16,350,000 | 217 | 1073 | 0.848319464  | KIF23,PAQR5,RPLP1                                       |
| 10 | 16,275,000 | 16,425,000 | 218 | 1109 | 0.331350277  | KIF23,RPLP1                                             |
| 10 | 16,350,000 | 16,500,000 | 219 | 1247 | 0.252287514  |                                                         |
| 10 | 16,425,000 | 16,575,000 | 220 | 1248 | 0.693363108  |                                                         |
| 10 | 16,500,000 | 16,650,000 | 221 | 1011 | -0.04024972  |                                                         |
| 10 | 16,575,000 | 16,725,000 | 222 | 827  | -0.173151255 |                                                         |
| 10 | 16,650,000 | 16,800,000 | 223 | 1008 | -0.101979838 |                                                         |
| 10 | 16,725,000 | 16,875,000 | 224 | 1099 | -0.044235469 |                                                         |
| 10 | 16,800,000 | 16,950,000 | 225 | 756  | -0.446074555 | TLE3                                                    |
| 10 | 16,875,000 | 17,025,000 | 226 | 528  | -1.096378635 | TLE3                                                    |
| 10 | 16,950,000 | 17,100,000 | 227 | 842  | -0.584118697 |                                                         |
| 10 | 17,025,000 | 17,175,000 | 228 | 1110 | 0.151043449  |                                                         |
| 10 | 17,100,000 | 17,250,000 | 229 | 711  | 0.693410598  | ENSBTAG00000030439                                      |
| 10 | 17,175,000 | 17,325,000 | 230 | 405  | -0.134072237 | ENSBTAG00000030439                                      |
| 10 | 17,250,000 | 17,400,000 | 231 | 617  | -0.211456929 |                                                         |
| 10 | 17,325,000 | 17,475,000 | 232 | 753  | 0.375443219  |                                                         |
| 10 | 17,400,000 | 17,550,000 | 233 | 625  | 0.73405183   | UACA                                                    |
| 10 | 17,475,000 | 17,625,000 | 234 | 611  | 0.28334759   | UACA                                                    |
| 10 | 17,550,000 | 17,700,000 | 235 | 1038 | 0.452878003  | LARP6,UACA                                              |
| 10 | 17,625,000 | 17,775,000 | 236 | 989  | 0.441559044  | LARP6,LRRC49,THAP10                                     |
| 10 | 17,700,000 | 17,850,000 | 237 | 891  | -1.543327485 | LRRC49,THAP10                                           |
| 10 | 17,775,000 | 17,925,000 | 238 | 1185 | -1.241600305 | LRRC49                                                  |
| 10 | 17,850,000 | 18,000,000 | 239 | 987  | -0.104520887 | LRRC49                                                  |
| 10 | 17,925,000 | 18,075,000 | 240 | 796  | 0.499576001  |                                                         |
| 10 | 18,000,000 | 18,150,000 | 241 | 574  | 0.785982354  |                                                         |
| 10 | 18,075,000 | 18,225,000 | 242 | 705  | 0.31327767   |                                                         |
| 10 | 18,150,000 | 18,300,000 | 243 | 890  | -0.360163093 |                                                         |
| 10 | 18,225,000 | 18,375,000 | 244 | 940  | -0.340196236 |                                                         |
| 10 | 18,300,000 | 18,450,000 | 245 | 1174 | -0.026649317 |                                                         |
| 10 | 18,375,000 | 18,525,000 | 246 | 1110 | -0.367690659 | THSD4                                                   |
| 10 | 18,450,000 | 18,600,000 | 247 | 1361 | -0.195576624 | THSD4                                                   |
| 10 | 18,525,000 | 18,675,000 | 248 | 1613 | 0.380654749  | NR2E3,THSD4,ENSBTAG00000007433                          |
| 10 | 18,600,000 | 18,750,000 | 249 | 1279 | 0.899670417  | NR2E3,THSD4,ENSBTAG00000007433                          |
| 10 | 18,675,000 | 18,825,000 | 250 | 865  | 0.865150013  | ENSBTAG00000007433                                      |
| 10 | 18,750,000 | 18,900,000 | 251 | 671  | 0.273519055  | ENSBTAG00000007433,ENSBTAG00000033344                   |
| 10 | 18,825,000 | 18,975,000 | 252 | 739  | -0.306904986 | GRAMD2,PKM2,ENSBTAG00000007433,ENSBTAG00000033344       |
| 10 | 18,900,000 | 19,050,000 | 253 | 604  | -0.354015436 | GRAMD2,PARP6,PKM2,ENSBTAG00000014092,ENSBTAG00000033344 |
| 10 | 18,975,000 | 19,125,000 | 254 | 804  | -0.741146985 | HEXA,PARP6,PKM2,ENSBTAG00000014092                      |
| 10 | 19,050,000 | 19,200,000 | 255 | 1229 | 0.167189277  | ARIH1,HEXA,TMEM202,ENSBTAG00000014092                   |
| 10 | 19,125,000 | 19,275,000 | 256 | 860  | 1.126801862  | ARIH1,HEXA,TMEM202                                      |
| 10 | 19,200,000 | 19,350,000 | 257 | 596  | 0.997878882  | ARIH1,BBS4                                              |
| 10 | 19,275,000 | 19,425,000 | 258 | 818  | 0.991849164  | ADPGK,ARIH1,BBS4                                        |
| 10 | 19,350,000 | 19,500,000 | 259 | 1186 | 0.76806665   | ADPGK,BBS4                                              |
| 10 | 19,425,000 | 19,575,000 | 260 | 1448 | 0.993494056  |                                                         |
| 10 | 19,500,000 | 19,650,000 | 261 | 1094 | 1.128323397  |                                                         |
| 10 | 19,575,000 | 19,725,000 | 262 | 652  | 1.053464364  |                                                         |
| 10 | 19,650,000 | 19,800,000 | 263 | 679  | 0.791986868  | NEO1                                                    |
| 10 | 19,725,000 | 19,875,000 | 264 | 478  | 0.427546762  | NEO1                                                    |
| 10 | 19,800,000 | 19,950,000 | 265 | 317  | 0.49560469   | NEO1                                                    |
| 10 | 19,875,000 | 20,025,000 | 266 | 622  | 0.322469158  | HCN4,NEO1                                               |

|    |            |            |     |      |              |                                                                                                                                           |
|----|------------|------------|-----|------|--------------|-------------------------------------------------------------------------------------------------------------------------------------------|
| 10 | 19,950,000 | 20,100,000 | 267 | 836  | 0.171442557  | HCN4,NEO1                                                                                                                                 |
| 10 | 20,025,000 | 20,175,000 | 268 | 931  | 0.310916492  |                                                                                                                                           |
| 10 | 20,100,000 | 20,250,000 | 269 | 840  | 0.544105051  | NPTN                                                                                                                                      |
| 10 | 20,175,000 | 20,325,000 | 270 | 701  | 0.603180527  | NPTN                                                                                                                                      |
| 10 | 20,250,000 | 20,400,000 | 271 | 731  | 0.121925746  | C15orf59,CD276,NPTN                                                                                                                       |
| 10 | 20,325,000 | 20,475,000 | 272 | 853  | 0.375074178  | C15orf59,CD276                                                                                                                            |
| 10 | 20,400,000 | 20,550,000 | 273 | 1034 | 0.696711904  | TBC1D21                                                                                                                                   |
| 10 | 20,475,000 | 20,625,000 | 274 | 1057 | 0.48367123   | CBLN3,KHNYN,NYNRIN,SDR39U1,TBC1D21                                                                                                        |
| 10 | 20,550,000 | 20,700,000 | 275 | 796  | 0.45624134   | ADCY4,C10H14orf21,CBLN3,CIDEB,KHNYN,LTB4R,LTB4R2,NFATC4,NYNRIN,RIPK3,SDR39U1                                                              |
| 10 | 20,625,000 | 20,775,000 | 276 | 750  | -0.511206036 | ADCY4,C10H14orf21,CIDEB,DHRS1,GMPT2,LTB4R,LTB4R2,NFATC4,RABGGTA,RIPK3,TGM1,TINF2                                                          |
| 10 | 20,700,000 | 20,850,000 | 277 | 728  | -0.964192549 | C10H14orf21,CHMP4A,DHRS1,EMC9,GMPT2,IPO4,ISGF3G,MDP-1,NEDD8,PSME1,PSME2,RABGGTA,REC8,TGM1,TINF2,TSSK4,ENSBTAG0000002709,ENSBTAG0000005815 |
| 10 | 20,775,000 | 20,925,000 | 278 | 607  | -0.048543477 | CHMP4A,CPNE6,DHRS4,EMC9,FITM1,IPO4,ISGF3G,LRRC16B,MDP-1,NEDD8,NRL,PCK2,PSME1,PSME2,REC8,TSSK4,WDR23,ENSBTAG0000002709,ENSBTAG0000005815   |
| 10 | 20,850,000 | 21,000,000 | 279 | 1015 | -0.239167588 | CPNE6,DHRS4,FITM1,LRRC16B,NRL,PCK2,WDR23,ENSBTAG00000045993                                                                               |
| 10 | 20,925,000 | 21,075,000 | 280 | 1395 | 0.398182754  | DHRS4,ENSBTAG00000030841,ENSBTAG00000045993                                                                                               |
| 10 | 21,000,000 | 21,150,000 | 281 | 1228 | 0.975563037  | ENSBTAG00000030841                                                                                                                        |
| 10 | 21,075,000 | 21,225,000 | 282 | 1001 | 0.516616448  | AP1G2,JPH4,THTPA                                                                                                                          |
| 10 | 21,150,000 | 21,300,000 | 283 | 684  | -0.058696057 | AP1G2,JPH4,NGDN,THTPA,ZFH2                                                                                                                |
| 10 | 21,225,000 | 21,375,000 | 284 | 634  | 1.020108489  | MYH7,NGDN,THTPA,ZFH2                                                                                                                      |
| 10 | 21,300,000 | 21,450,000 | 285 | 598  | 1.178357269  | BCL2L2,CMTM5,EFS,IL25,MYH7,NGDN,PABPN1,PPP1R3E,SLC22A17                                                                                   |
| 10 | 21,375,000 | 21,525,000 | 286 | 369  | 0.950842551  | BCL2L2,CMTM5,EFS,IL25,KIAA1443,MYH7,PABPN1,PPP1R3E,RNF212B,SLC22A17,SLC7A8                                                                |
| 10 | 21,450,000 | 21,600,000 | 287 | 357  | -0.057293848 | ACIN1,C14orf119,CEBPE,KIAA1443,RNF212B,SLC7A8                                                                                             |
| 10 | 21,525,000 | 21,675,000 | 288 | 431  | -1.015196776 | ACIN1,C14orf119,CDH24,CEBPE,PSMB11,PSMB5,SLC7A8                                                                                           |
| 10 | 21,600,000 | 21,750,000 | 289 | 468  | -1.114033748 | ACIN1,AJUBA,C10H14ORF93,CDH24,PSMB11,PSMB5,ENSBTAG00000012723                                                                             |
| 10 | 21,675,000 | 21,825,000 | 290 | 423  | -0.803111796 | AJUBA,C10H14ORF93,LRP10,MMP14,MRPL52,PRMT5,RBM23,REM2,ENSBTAG00000012723                                                                  |
| 10 | 21,750,000 | 21,900,000 | 291 | 313  | 0.054673108  | LRP10,MMP14,MRPL52,OXA1L,PRMT5,RBM23,REM2,SLC7A7                                                                                          |
| 10 | 21,825,000 | 21,975,000 | 292 | 360  | -1.977867743 | OXA1L,SLC7A7,ENSBTAG00000046906,ENSBTAG0000047305,ENSBTAG00000047672,ENSBTAG00000047893                                                   |
| 10 | 21,900,000 | 22,050,000 | 293 | 802  | -3.236323387 | ABHD4,OR6J1,ENSBTAG00000009274,ENSBTAG0000045760,ENSBTAG00000046906,ENSBTAG00000047305,ENSBTAG00000047672,ENSBTAG00000047893              |
| 10 | 21,975,000 | 22,125,000 | 294 | 852  | -1.699870806 | ABHD4,DAD1,OR6J1,TRAC,ENSBTAG00000009274,ENSBTAG00000045760                                                                               |
| 10 | 22,050,000 | 22,200,000 | 295 | 1057 | 0.517729376  | ABHD4,DAD1,TRAC,TRD@                                                                                                                      |
| 10 | 22,125,000 | 22,275,000 | 296 | 1606 | 0.640111739  | TRAC,TRD@                                                                                                                                 |
| 10 | 22,200,000 | 22,350,000 | 297 | 1477 | 0.877631167  | TRAC,TRD@,TRDV2,ENSBTAG00000039402                                                                                                        |

|    |            |            |     |      |              |                                                                                                                                                                                    |
|----|------------|------------|-----|------|--------------|------------------------------------------------------------------------------------------------------------------------------------------------------------------------------------|
| 10 | 22,275,000 | 22,425,000 | 298 | 1401 | 0.850495422  | TRAC,TRDV2,ENSBTAG00000039402                                                                                                                                                      |
| 10 | 22,350,000 | 22,500,000 | 299 | 2056 | 0.778807876  | TRAC,TRDV2,ENSBTAG00000039402                                                                                                                                                      |
| 10 | 22,425,000 | 22,575,000 | 300 | 2181 | 0.653288894  | TRAC,ENSBTAG00000039402,ENSBTAG00000046962                                                                                                                                         |
| 10 | 22,500,000 | 22,650,000 | 301 | 1749 | 0.643246687  | TRAC,ENSBTAG00000045595,ENSBTAG00000046962,ENSBTAG00000047258                                                                                                                      |
| 10 | 22,575,000 | 22,725,000 | 302 | 1673 | 0.679323006  | TRAC,ENSBTAG00000045595,ENSBTAG00000045758,ENSBTAG00000047258,ENSBTAG00000048302                                                                                                   |
| 10 | 22,650,000 | 22,800,000 | 303 | 1680 | 0.660434299  | TRAC,ENSBTAG00000045758,ENSBTAG00000046464,ENSBTAG00000048302                                                                                                                      |
| 10 | 22,725,000 | 22,875,000 | 304 | 1580 | 0.372719943  | TRAC,ENSBTAG00000039077,ENSBTAG00000046464,ENSBTAG00000046530,ENSBTAG00000047041,ENSBTAG00000047444                                                                                |
| 10 | 22,800,000 | 22,950,000 | 305 | 2320 | 0.784811073  | TRAC,ENSBTAG00000039077,ENSBTAG00000046530,ENSBTAG00000046682,ENSBTAG00000047041,ENSBTAG00000047444                                                                                |
| 10 | 22,875,000 | 23,025,000 | 306 | 2408 | 0.978310632  | TRAC,ENSBTAG00000046682                                                                                                                                                            |
| 10 | 22,950,000 | 23,100,000 | 307 | 1684 | 1.082157077  | TRAC,TRAV29DV5                                                                                                                                                                     |
| 10 | 23,025,000 | 23,175,000 | 308 | 1882 | 0.766615152  | TRAC,TRAV29DV5,ENSBTAG00000047276                                                                                                                                                  |
| 10 | 23,100,000 | 23,250,000 | 309 | 1374 | 0.026965784  | TRAC,ENSBTAG00000036202,ENSBTAG00000047276,ENSBTAG00000048064                                                                                                                      |
| 10 | 23,175,000 | 23,325,000 | 310 | 590  | -2.747751994 | TRAC,ENSBTAG00000036202,ENSBTAG00000048064                                                                                                                                         |
| 10 | 23,250,000 | 23,400,000 | 311 | 1242 | -1.262329182 | TRAC,ENSBTAG00000038565,ENSBTAG00000047312,ENSBTAG00000038565,ENSBTAG00000046477,ENSBTAG00000047091,ENSBTAG00000047312,ENSBTAG00000047683                                          |
| 10 | 23,325,000 | 23,475,000 | 312 | 1509 | -1.149230473 | ENSBTAG00000046477,ENSBTAG00000046897,ENSBTAG00000047001,ENSBTAG00000047091,ENSBTAG00000047683                                                                                     |
| 10 | 23,400,000 | 23,550,000 | 313 | 1460 | -0.463852449 | TRA@,ENSBTAG00000046897,ENSBTAG00000047001,ENSBTAG00000047981                                                                                                                      |
| 10 | 23,475,000 | 23,625,000 | 314 | 2319 | -0.174062352 | TRA@,ENSBTAG00000045953,ENSBTAG00000047097,ENSBTAG00000047981                                                                                                                      |
| 10 | 23,550,000 | 23,700,000 | 315 | 1817 | 0.026718704  | ENSBTAG00000045953,ENSBTAG00000047097,ENSBTAG00000047522,ENSBTAG00000047909                                                                                                        |
| 10 | 23,625,000 | 23,775,000 | 316 | 995  | -0.180365207 | ENSBTAG00000047398,ENSBTAG00000047522,ENSBTAG00000047909                                                                                                                           |
| 10 | 23,700,000 | 23,850,000 | 317 | 1262 | -0.586450862 | ENSBTAG00000047398,ENSBTAG00000048236                                                                                                                                              |
| 10 | 23,775,000 | 23,925,000 | 318 | 1623 | -0.126812982 | ENSBTAG00000037924,ENSBTAG00000039807,ENSBTAG00000048236                                                                                                                           |
| 10 | 23,850,000 | 24,000,000 | 319 | 1641 | 0.236686418  | TRAV8-1,ENSBTAG00000037924,ENSBTAG00000039038,ENSBTAG00000039807,ENSBTAG00000048074                                                                                                |
| 10 | 23,925,000 | 24,075,000 | 320 | 1757 | 0.257348466  | TRAV8-1,ENSBTAG00000039038,ENSBTAG00000046102,ENSBTAG00000046157,ENSBTAG00000046305,ENSBTAG00000047096,ENSBTAG00000047624,ENSBTAG00000047639,ENSBTAG00000047952,ENSBTAG00000048074 |
| 10 | 24,000,000 | 24,150,000 | 321 | 2144 | 0.250658565  | ENSBTAG00000046102,ENSBTAG00000046157,ENSBTAG00000046305,ENSBTAG00000047096,ENSBTAG00000047639,ENSBTAG00000047952,ENSBTAG00000048074                                               |
| 10 | 24,075,000 | 24,225,000 | 322 | 2219 | 0.329692932  | ENSBTAG00000046305,ENSBTAG00000047096,ENSBTAG00000047624,ENSBTAG00000047639,ENSBTAG00000047952                                                                                     |
| 10 | 24,150,000 | 24,300,000 | 323 | 2021 | 0.352136525  | ENSBTAG00000046546,ENSBTAG00000047690                                                                                                                                              |

|    |            |            |     |      |              |                                                                                                                                             |
|----|------------|------------|-----|------|--------------|---------------------------------------------------------------------------------------------------------------------------------------------|
| 10 | 24,225,000 | 24,375,000 | 324 | 1540 | 0.068219862  | ENSBTAG00000046546,ENSBTAG00000047690                                                                                                       |
| 10 | 24,300,000 | 24,450,000 | 325 | 715  | 0.031320198  |                                                                                                                                             |
| 10 | 24,375,000 | 24,525,000 | 326 | 832  | 0.206248135  |                                                                                                                                             |
| 10 | 24,450,000 | 24,600,000 | 327 | 1989 | 0.389140039  |                                                                                                                                             |
| 10 | 24,525,000 | 24,675,000 | 328 | 2203 | 0.627591024  | ENSBTAG00000046802                                                                                                                          |
| 10 | 24,600,000 | 24,750,000 | 329 | 1535 | 0.651444307  | ENSBTAG00000027170,ENSBTAG00000046802,ENSBTAG00000047058                                                                                    |
| 10 | 24,675,000 | 24,825,000 | 330 | 1577 | 0.238428107  | ENSBTAG00000027170,ENSBTAG00000035785,ENSBTAG00000047058                                                                                    |
| 10 | 24,750,000 | 24,900,000 | 331 | 1370 | -0.100345097 | TRAV14DV4,ENSBTAG00000035785,ENSBTAG00000046819                                                                                             |
| 10 | 24,825,000 | 24,975,000 | 332 | 933  | 0.187824367  | TRAV14DV4,ENSBTAG00000024659,ENSBTAG00000038060,ENSBTAG00000046819                                                                          |
| 10 | 24,900,000 | 25,050,000 | 333 | 1261 | 0.329762267  | TRAV16,TRAV17,ENSBTAG00000024659,ENSBTAG00000038060                                                                                         |
| 10 | 24,975,000 | 25,125,000 | 334 | 1178 | 0.137901955  | TRAV16,TRAV17,TRAV18,ENSBTAG00000045883,ENSBTAG00000046993,ENSBTAG00000047015                                                               |
| 10 | 25,050,000 | 25,200,000 | 335 | 1268 | 0.462984064  | TRAV18,ENSBTAG00000033045,ENSBTAG00000038544,ENSBTAG00000045883,ENSBTAG00000046426,ENSBTAG00000046993,ENSBTAG00000046995,ENSBTAG00000047015 |
| 10 | 25,125,000 | 25,275,000 | 336 | 1540 | 0.722082674  | ENSBTAG00000033045,ENSBTAG00000038544,ENSBTAG00000046361,ENSBTAG00000046426,ENSBTAG00000046995                                              |
| 10 | 25,200,000 | 25,350,000 | 337 | 1690 | 0.596399689  | ENSBTAG00000033036,ENSBTAG00000046361,ENSBTAG00000046643                                                                                    |
| 10 | 25,275,000 | 25,425,000 | 338 | 2070 | 0.667738475  | ENSBTAG00000033034,ENSBTAG00000033036,ENSBTAG00000035530,ENSBTAG00000039546,ENSBTAG00000046478,ENSBTAG00000046643                           |
| 10 | 25,350,000 | 25,500,000 | 339 | 2473 | 0.929994528  | ENSBTAG00000033034,ENSBTAG00000035530,ENSBTAG00000039546,ENSBTAG00000046478                                                                 |
| 10 | 25,425,000 | 25,575,000 | 340 | 2401 | 0.948927159  | TRAV3                                                                                                                                       |
| 10 | 25,500,000 | 25,650,000 | 341 | 1815 | 0.981965247  | OR4E2,TRAV3,ENSBTAG00000011925,ENSBTAG00000047253,ENSBTAG00000047746                                                                        |
| 10 | 25,575,000 | 25,725,000 | 342 | 1315 | 1.004573786  | METTL3,OR10G3,OR4E2,SALL2,ENSBTAG00000011925,ENSBTAG00000047253,ENSBTAG00000047746                                                          |
| 10 | 25,650,000 | 25,800,000 | 343 | 801  | 1.207428271  | CHD8,METTL3,OR10G3,RAB2B,SALL2,TOX4                                                                                                         |
| 10 | 25,725,000 | 25,875,000 | 344 | 521  | 1.254111709  | CHD8,METTL3,RAB2B,RPGRIP1,SUPT16H,TOX4                                                                                                      |
| 10 | 25,800,000 | 25,950,000 | 345 | 975  | 1.215023452  | CHD8,HNRPC,RPGRIP1,SUPT16H                                                                                                                  |
| 10 | 25,875,000 | 26,025,000 | 346 | 1390 | 1.22272594   | HNRPC,OR5AU1,RPGRIP1                                                                                                                        |
| 10 | 25,950,000 | 26,100,000 | 347 | 1143 | 1.166007556  | ARHGEF40,HNRPC,OR5AU1,TMEM253,ZNF219                                                                                                        |
| 10 | 26,025,000 | 26,175,000 | 348 | 905  | 1.070070365  | ARHGEF40,NDRG2,RNASE13,SLC39A2,TMEM253,TPPP2,ZNF219,ENSBTAG00000046482                                                                      |
| 10 | 26,100,000 | 26,250,000 | 349 | 1359 | 0.716735604  | METTL17,NDRG2,RNASE13,SLC39A2,TPPP2,ENSBTAG00000025664,ENSBTAG00000046482                                                                   |
| 10 | 26,175,000 | 26,325,000 | 350 | 1769 | 0.538391125  | BRN,METTL17,RAC1,ENSBTAG00000025664,ENSBTAG00000032873                                                                                      |
| 10 | 26,250,000 | 26,400,000 | 351 | 1296 | -0.060508708 | BRN,RAC1,RNASE1,ENSBTAG00000032873                                                                                                          |
| 10 | 26,325,000 | 26,475,000 | 352 | 928  | -0.092107324 | ANG,ANG2,RNASE1,RNASE4,RNASE6                                                                                                               |
| 10 | 26,400,000 | 26,550,000 | 353 | 1043 | 0.37986422   | ANG,ANG2,OR6S1,RNASE4,RNASE6,ENSBTAG00000046058                                                                                             |
| 10 | 26,475,000 | 26,625,000 | 354 | 1234 | 0.694910253  | OR6S1,RAK1,ENSBTAG00000046058                                                                                                               |
| 10 | 26,550,000 | 26,700,000 | 355 | 1327 | 0.778977287  | PNP,RAK1,RNASE10,ENSBTAG00000037452                                                                                                         |

|    |            |            |     |      |              |                                                                                                                                                                           |
|----|------------|------------|-----|------|--------------|---------------------------------------------------------------------------------------------------------------------------------------------------------------------------|
| 10 | 26,625,000 | 26,775,000 | 356 | 1270 | 0.767123414  | APEX1,KLHL33,OSGEP,PNP,RNASE10,TEP1,TMEM55B,ENSBTAG00000037452                                                                                                            |
| 10 | 26,700,000 | 26,850,000 | 357 | 1105 | 0.146054235  | APEX1,CCNB1IP1,KLHL33,OSGEP,PARP2,RPS29,TEP1,TMEM55B,TTC5                                                                                                                 |
| 10 | 26,775,000 | 26,925,000 | 358 | 1385 | 0.177854543  | CCNB1IP1,OR11H4,OR11H6,OR11H7,PARP2,RPS29,TEP1,TTC5,ENSBTAG00000015983                                                                                                    |
| 10 | 26,850,000 | 27,000,000 | 359 | 2040 | 0.590291621  | OR11H4,OR11H6,OR11H7,TTC5,ENSBTAG00000006198,ENSBTAG00000015983,ENSBTAG00000032798,ENSBTAG00000032799,ENSBTAG00000037959,ENSBTAG00000038868                               |
| 10 | 26,925,000 | 27,075,000 | 360 | 1714 | 0.76528801   | OR11H6,ENSBTAG00000006198,ENSBTAG00000032798,ENSBTAG00000032799,ENSBTAG00000037959,ENSBTAG00000038227,ENSBTAG00000038868,ENSBTAG00000039315,ENSBTAG00000048109            |
| 10 | 27,000,000 | 27,150,000 | 361 | 1318 | 0.92786463   | ENSBTAG00000025068,ENSBTAG00000038227,ENSBTAG00000038485,ENSBTAG00000039315,ENSBTAG00000046970,ENSBTAG00000047483,ENSBTAG00000048109                                      |
| 10 | 27,075,000 | 27,225,000 | 362 | 1549 | 0.74122218   | OR4Q3,ENSBTAG00000025068,ENSBTAG00000037411,ENSBTAG00000038485,ENSBTAG00000038672,ENSBTAG00000039120,ENSBTAG00000039416,ENSBTAG00000046970,ENSBTAG00000047483             |
| 10 | 27,150,000 | 27,300,000 | 363 | 1436 | 0.523444062  | OR4K2,OR4N2,OR4Q3,ENSBTAG00000037411,ENSBTAG00000037511,ENSBTAG00000038672,ENSBTAG00000039120,ENSBTAG00000039416,ENSBTAG00000046390,ENSBTAG00000046651,ENSBTAG00000047311 |
| 10 | 27,225,000 | 27,375,000 | 364 | 1309 | 0.518242495  | OR4K1,OR4K2,OR4K5,OR4N2,ENSBTAG00000037511,ENSBTAG00000046390,ENSBTAG00000046651,ENSBTAG00000047311                                                                       |
| 10 | 27,300,000 | 27,450,000 | 365 | 992  | 0.122737251  | OR4K1,OR4K15,OR4K5                                                                                                                                                        |
| 10 | 27,375,000 | 27,525,000 | 366 | 996  | -2.032576466 | OR4K14,OR4K15,OR4L1,OR4N5,OR4Q2                                                                                                                                           |
| 10 | 27,450,000 | 27,600,000 | 367 | 1427 | -2.418769155 | OR4K14,OR4L1,OR4N5,OR4Q2                                                                                                                                                  |
| 10 | 27,525,000 | 27,675,000 | 368 | 1623 | -1.000272183 | ENSBTAG00000047348,ENSBTAG00000047984                                                                                                                                     |
| 10 | 27,600,000 | 27,750,000 | 369 | 2021 | 0.479392562  | ENSBTAG00000046009,ENSBTAG00000046061,ENSBTAG00000046370,ENSBTAG00000047348,ENSBTAG00000047984                                                                            |
| 10 | 27,675,000 | 27,825,000 | 370 | 1744 | 0.743367356  | ENSBTAG00000046009,ENSBTAG00000046061,ENSBTAG00000046370                                                                                                                  |
| 10 | 27,750,000 | 27,900,000 | 371 | 1434 | 0.062531104  | ENSBTAG00000013255,ENSBTAG00000038188,ENSBTAG00000046207,ENSBTAG00000047465,ENSBTAG00000047566                                                                            |
| 10 | 27,825,000 | 27,975,000 | 372 | 1798 | -2.371834977 | ENSBTAG00000013255,ENSBTAG00000038188,ENSBTAG00000039354,ENSBTAG00000045618,ENSBTAG00000046207,ENSBTAG00000047465,ENSBTAG00000047566                                      |
| 10 | 27,900,000 | 28,050,000 | 373 | 1597 | -2.938198219 | OR4F15,ENSBTAG00000003549,ENSBTAG00000039354,ENSBTAG00000039554,ENSBTAG00000045618                                                                                        |
| 10 | 27,975,000 | 28,125,000 | 374 | 865  | -2.037345865 | OR4F15,ENSBTAG00000003549,ENSBTAG00000039554,ENSBTAG00000039707,ENSBTAG00000040459                                                                                        |
| 10 | 28,050,000 | 28,200,000 | 375 | 957  | 1.004575416  | ENSBTAG00000037647,ENSBTAG00000038083,ENSBTAG00000039707,ENSBTAG00000040459                                                                                               |



|    |            |            |     |      |              |                                                                                               |
|----|------------|------------|-----|------|--------------|-----------------------------------------------------------------------------------------------|
| 10 | 28,125,000 | 28,275,000 | 376 | 1214 | -0.583795697 | ENSBTAG00000037647,ENSBTAG00000038083,ENSBTAG00000038963,ENSBTAG00000039884,ENSBTAG0000040609 |
| 10 | 28,200,000 | 28,350,000 | 377 | 860  | -2.994525267 | LPCAT4,NUTM1,ENSBTAG00000038531,ENSBTAG0000038963,ENSBTAG00000039884,ENSBTAG00000040609       |
| 10 | 28,275,000 | 28,425,000 | 378 | 509  | -0.389986197 | LPCAT4,NOP10,NUTM1,SLC12A6,ENSBTAG00000038531                                                 |
| 10 | 28,350,000 | 28,500,000 | 379 | 466  | -0.803507301 | EMC4,KATNBL1,NOP10,NUTM1,SLC12A6                                                              |
| 10 | 28,425,000 | 28,575,000 | 380 | 834  | -0.366399123 | C10H15ORF24,EMC4,KATNBL1,SLC12A6                                                              |
| 10 | 28,500,000 | 28,650,000 | 381 | 1190 | -0.229241868 | AVEN,C10H15ORF24,CHRM5,KATNBL1                                                                |
| 10 | 28,575,000 | 28,725,000 | 382 | 1373 | -0.245567891 | AVEN,CHRM5                                                                                    |
| 10 | 28,650,000 | 28,800,000 | 383 | 1196 | 0.626681737  | AVEN,RYR3                                                                                     |
| 10 | 28,725,000 | 28,875,000 | 384 | 963  | 0.849868677  | AVEN,RYR3                                                                                     |
| 10 | 28,800,000 | 28,950,000 | 385 | 1087 | -0.107846388 | RYR3                                                                                          |
| 10 | 28,875,000 | 29,025,000 | 386 | 1285 | -0.074901303 | RYR3                                                                                          |
| 10 | 28,950,000 | 29,100,000 | 387 | 1142 | 0.311581499  | RYR3                                                                                          |
| 10 | 29,025,000 | 29,175,000 | 388 | 781  | 0.241437001  | RYR3                                                                                          |
| 10 | 29,100,000 | 29,250,000 | 389 | 770  | -0.522775146 | RYR3                                                                                          |
| 10 | 29,175,000 | 29,325,000 | 390 | 1036 | -0.041487218 |                                                                                               |
| 10 | 29,250,000 | 29,400,000 | 391 | 1252 | -0.136263446 |                                                                                               |
| 10 | 29,325,000 | 29,475,000 | 392 | 1038 | -0.285833685 | ENSBTAG00000021414                                                                            |
| 10 | 29,400,000 | 29,550,000 | 393 | 668  | -1.954439808 | ENSBTAG00000021414                                                                            |
| 10 | 29,475,000 | 29,625,000 | 394 | 803  | -2.254385823 |                                                                                               |
| 10 | 29,550,000 | 29,700,000 | 395 | 920  | -0.443121193 | ENSBTAG00000025634                                                                            |
| 10 | 29,625,000 | 29,775,000 | 396 | 747  | 0.335730135  | ENSBTAG00000025634                                                                            |
| 10 | 29,700,000 | 29,850,000 | 397 | 692  | 0.010343169  | ENSBTAG00000025634                                                                            |
| 10 | 29,775,000 | 29,925,000 | 398 | 532  | -0.341121094 | ENSBTAG00000025634                                                                            |
| 10 | 29,850,000 | 30,000,000 | 399 | 555  | -0.74041356  | ENSBTAG00000047645                                                                            |
| 10 | 29,925,000 | 30,075,000 | 400 | 654  | -0.500698104 | GREM1,ENSBTAG00000047645                                                                      |
| 10 | 30,000,000 | 30,150,000 | 401 | 534  | -0.471522291 | ARHGAP11A,GREM1,SCG5                                                                          |
| 10 | 30,075,000 | 30,225,000 | 402 | 979  | 0.300295728  | ARHGAP11A,SCG5                                                                                |
| 10 | 30,150,000 | 30,300,000 | 403 | 992  | 0.430585682  | ARHGAP11A                                                                                     |
| 10 | 30,225,000 | 30,375,000 | 404 | 777  | -0.637656649 | ACTC1,GJD2                                                                                    |
| 10 | 30,300,000 | 30,450,000 | 405 | 973  | -0.783036287 | ACTC1,AQR,GJD2                                                                                |
| 10 | 30,375,000 | 30,525,000 | 406 | 1121 | -0.865612249 | AQR                                                                                           |
| 10 | 30,450,000 | 30,600,000 | 407 | 1129 | -0.993034536 | AQR,ZNF770                                                                                    |
| 10 | 30,525,000 | 30,675,000 | 408 | 1105 | -0.288995375 | ZNF770                                                                                        |
| 10 | 30,600,000 | 30,750,000 | 409 | 1136 | -0.15445694  |                                                                                               |
| 10 | 30,675,000 | 30,825,000 | 410 | 1023 | 0.261142275  |                                                                                               |
| 10 | 30,750,000 | 30,900,000 | 411 | 952  | 0.596026152  |                                                                                               |
| 10 | 30,825,000 | 30,975,000 | 412 | 638  | 0.301414141  | DPH6                                                                                          |
| 10 | 30,900,000 | 31,050,000 | 413 | 361  | 0.465403942  | DPH6                                                                                          |
| 10 | 30,975,000 | 31,125,000 | 414 | 403  | -0.519266726 | DPH6                                                                                          |
| 10 | 31,050,000 | 31,200,000 | 415 | 597  | -0.223559766 | DPH6                                                                                          |
| 10 | 31,125,000 | 31,275,000 | 416 | 535  | -0.516637637 |                                                                                               |
| 10 | 31,200,000 | 31,350,000 | 417 | 339  | -1.545869307 |                                                                                               |
| 10 | 31,275,000 | 31,425,000 | 418 | 422  | -1.209906629 |                                                                                               |
| 10 | 31,350,000 | 31,500,000 | 419 | 592  | -0.996179762 |                                                                                               |
| 10 | 31,425,000 | 31,575,000 | 420 | 639  | -0.090957322 |                                                                                               |
| 10 | 31,500,000 | 31,650,000 | 421 | 435  | 0.3971727    |                                                                                               |
| 10 | 31,575,000 | 31,725,000 | 422 | 524  | -0.174979454 |                                                                                               |
| 10 | 31,650,000 | 31,800,000 | 423 | 661  | -0.169901915 |                                                                                               |

|    |            |            |     |      |              |                                |
|----|------------|------------|-----|------|--------------|--------------------------------|
| 10 | 31,725,000 | 31,875,000 | 424 | 661  | -0.016194898 |                                |
| 10 | 31,800,000 | 31,950,000 | 425 | 529  | 0.134565707  |                                |
| 10 | 31,875,000 | 32,025,000 | 426 | 339  | -1.546503102 |                                |
| 10 | 31,950,000 | 32,100,000 | 427 | 506  | -1.126986882 |                                |
| 10 | 32,025,000 | 32,175,000 | 428 | 680  | 0.24618376   |                                |
| 10 | 32,100,000 | 32,250,000 | 429 | 585  | 0.988603113  |                                |
| 10 | 32,175,000 | 32,325,000 | 430 | 596  | 0.654304784  |                                |
| 10 | 32,250,000 | 32,400,000 | 431 | 770  | 0.344476853  | C10H15ORF41                    |
| 10 | 32,325,000 | 32,475,000 | 432 | 761  | 0.423367427  | C10H15ORF41                    |
| 10 | 32,400,000 | 32,550,000 | 433 | 751  | 0.378025683  | C10H15ORF41,ENSBTAG00000047974 |
| 10 | 32,475,000 | 32,625,000 | 434 | 609  | -0.838475618 | C10H15ORF41,ENSBTAG00000047974 |
| 10 | 32,550,000 | 32,700,000 | 435 | 499  | -0.744365922 | C10H15ORF41,MEIS2              |
| 10 | 32,625,000 | 32,775,000 | 436 | 491  | 0.125845955  | MEIS2                          |
| 10 | 32,700,000 | 32,850,000 | 437 | 503  | -0.602664991 | MEIS2                          |
| 10 | 32,775,000 | 32,925,000 | 438 | 533  | 0.099029029  | MEIS2                          |
| 10 | 32,850,000 | 33,000,000 | 439 | 513  | 0.556213937  | MEIS2                          |
| 10 | 32,925,000 | 33,075,000 | 440 | 525  | 0.619380956  |                                |
| 10 | 33,000,000 | 33,150,000 | 441 | 658  | -0.350755929 |                                |
| 10 | 33,075,000 | 33,225,000 | 442 | 1017 | -0.465080233 |                                |
| 10 | 33,150,000 | 33,300,000 | 443 | 871  | -0.0033275   |                                |
| 10 | 33,225,000 | 33,375,000 | 444 | 749  | 0.642318134  |                                |
| 10 | 33,300,000 | 33,450,000 | 445 | 1030 | 0.547975203  |                                |
| 10 | 33,375,000 | 33,525,000 | 446 | 940  | 0.330381424  |                                |
| 10 | 33,450,000 | 33,600,000 | 447 | 554  | 0.380964078  |                                |
| 10 | 33,525,000 | 33,675,000 | 448 | 399  | -0.439583546 | TMCO5A                         |
| 10 | 33,600,000 | 33,750,000 | 449 | 399  | -0.341799834 | TMCO5A                         |
| 10 | 33,675,000 | 33,825,000 | 450 | 377  | -0.125802779 | TMCO5A                         |
| 10 | 33,750,000 | 33,900,000 | 451 | 704  | -0.008355496 |                                |
| 10 | 33,825,000 | 33,975,000 | 452 | 754  | 0.331551228  | SPRED1                         |
| 10 | 33,900,000 | 34,050,000 | 453 | 474  | 0.836706486  | SPRED1                         |
| 10 | 33,975,000 | 34,125,000 | 454 | 456  | 1.206058824  | SPRED1                         |
| 10 | 34,050,000 | 34,200,000 | 455 | 559  | 0.449333523  | FAM98B,SPRED1                  |
| 10 | 34,125,000 | 34,275,000 | 456 | 510  | -0.485982663 | FAM98B,RASGRP1                 |
| 10 | 34,200,000 | 34,350,000 | 457 | 403  | -0.502706707 | RASGRP1                        |
| 10 | 34,275,000 | 34,425,000 | 458 | 761  | 0.781904038  | RASGRP1                        |
| 10 | 34,350,000 | 34,500,000 | 459 | 1028 | 0.204777742  |                                |
| 10 | 34,425,000 | 34,575,000 | 460 | 882  | -0.337015508 |                                |
| 10 | 34,500,000 | 34,650,000 | 461 | 776  | 0.249967592  |                                |
| 10 | 34,575,000 | 34,725,000 | 462 | 896  | 0.865774462  |                                |
| 10 | 34,650,000 | 34,800,000 | 463 | 801  | 0.995010895  |                                |
| 10 | 34,725,000 | 34,875,000 | 464 | 709  | 0.462153809  |                                |
| 10 | 34,800,000 | 34,950,000 | 465 | 853  | -0.369072953 |                                |
| 10 | 34,875,000 | 35,025,000 | 466 | 940  | -0.971925799 |                                |
| 10 | 34,950,000 | 35,100,000 | 467 | 893  | -0.744284481 |                                |
| 10 | 35,025,000 | 35,175,000 | 468 | 851  | 0.013790256  |                                |
| 10 | 35,100,000 | 35,250,000 | 469 | 896  | -0.259831826 |                                |
| 10 | 35,175,000 | 35,325,000 | 470 | 1025 | 0.11854795   | THBS1                          |
| 10 | 35,250,000 | 35,400,000 | 471 | 745  | 0.472119432  | FSIP1,THBS1                    |
| 10 | 35,325,000 | 35,475,000 | 472 | 246  | -0.165748399 | FSIP1,THBS1                    |
| 10 | 35,400,000 | 35,550,000 | 473 | 260  | -0.511453237 | FSIP1                          |
| 10 | 35,475,000 | 35,625,000 | 474 | 266  | -0.686156979 | FSIP1,GPR176                   |
| 10 | 35,550,000 | 35,700,000 | 475 | 300  | -0.476938492 | GPR176                         |
| 10 | 35,625,000 | 35,775,000 | 476 | 371  | -0.228532656 | EIF2AK4,GPR176                 |

|    |            |            |     |      |              |                                                                 |
|----|------------|------------|-----|------|--------------|-----------------------------------------------------------------|
| 10 | 35,700,000 | 35,850,000 | 477 | 363  | 0.566263951  | EIF2AK4,SRP14                                                   |
| 10 | 35,775,000 | 35,925,000 | 478 | 286  | 0.66755584   | BMF,BUB1B,EIF2AK4,SRP14                                         |
| 10 | 35,850,000 | 36,000,000 | 479 | 280  | -0.181474719 | BMF,BUB1B,ENSBTAG00000019076                                    |
| 10 | 35,925,000 | 36,075,000 | 480 | 327  | -0.421381768 | ANKRD63,BUB1B,C15orf52,PLCB2,ENSBTAG00000019076                 |
| 10 | 36,000,000 | 36,150,000 | 481 | 444  | -0.757314182 | ANKRD63,C10H15ORF23,C15orf52,DISP2,IVD,PLCB2,ENSBTAG00000019076 |
| 10 | 36,075,000 | 36,225,000 | 482 | 452  | -0.526667845 | BAHD1,C10H15ORF23,CHST14,DISP2,IVD                              |
| 10 | 36,150,000 | 36,300,000 | 483 | 401  | 0.68312293   | BAHD1,CCDC32,CHST14,IVD,RPUSD2                                  |
| 10 | 36,225,000 | 36,375,000 | 484 | 324  | 0.802026586  | CCDC32,RAD51,RPUSD2                                             |
| 10 | 36,300,000 | 36,450,000 | 485 | 204  | 0.464153787  | C15orf62,DNAJC17,GCHFR,RAD51,RMDN3                              |
| 10 | 36,375,000 | 36,525,000 | 486 | 250  | -0.516445055 | C15orf62,DNAJC17,GCHFR,PPP1R14D,RAD51,RHOV,RMDN3,SPINT1,ZFYVE19 |
| 10 | 36,450,000 | 36,600,000 | 487 | 305  | -0.622557984 | CHAC1,DLL4,DNAJC17,PPP1R14D,RHOV,SPINT1,VPS18,ZFYVE19           |
| 10 | 36,525,000 | 36,675,000 | 488 | 455  | -0.427902375 | CHAC1,DLL4,INO80,RHOV,VPS18                                     |
| 10 | 36,600,000 | 36,750,000 | 489 | 582  | -0.322811992 | CHAC1,INO80                                                     |
| 10 | 36,675,000 | 36,825,000 | 490 | 615  | -0.155959763 | EXD1,INO80,SUMO1                                                |
| 10 | 36,750,000 | 36,900,000 | 491 | 619  | -0.06743241  | CHP1,EXD1,OIP5,SUMO1                                            |
| 10 | 36,825,000 | 36,975,000 | 492 | 641  | 0.11859133   | CHP1,EXD1,NDUFAF1,NUSAP1,OIP5                                   |
| 10 | 36,900,000 | 37,050,000 | 493 | 636  | -0.291753478 | ITPKA,NDUFAF1,NUSAP1,OIP5,RTF1                                  |
| 10 | 36,975,000 | 37,125,000 | 494 | 602  | -0.34546606  | ITPKA,RPAP1,RTF1,TYRO3                                          |
| 10 | 37,050,000 | 37,200,000 | 495 | 522  | -0.102253617 | MGA,RPAP1,TYRO3                                                 |
| 10 | 37,125,000 | 37,275,000 | 496 | 393  | -0.34578404  | MGA,ENSBTAG00000014662                                          |
| 10 | 37,200,000 | 37,350,000 | 497 | 484  | -0.05425691  | JMJD7,MAPKBP1,MGA,PLA2G4B,ENSBTAG00000014662                    |
| 10 | 37,275,000 | 37,425,000 | 498 | 815  | 0.117376257  | EHD4,JMJD7,MAPKBP1,MGA,PLA2G4B,SPTBN5                           |
| 10 | 37,350,000 | 37,500,000 | 499 | 1038 | -0.832758896 | EHD4,PLA2G4B,SPTBN5                                             |
| 10 | 37,425,000 | 37,575,000 | 500 | 1038 | -1.419154936 | EHD4,PLA2G4E                                                    |
| 10 | 37,500,000 | 37,650,000 | 501 | 981  | -0.666268546 | PLA2G4D,PLA2G4E                                                 |
| 10 | 37,575,000 | 37,725,000 | 502 | 674  | -0.224893873 | PLA2G4D,PLA2G4F,TMEM87A,VPS39                                   |
| 10 | 37,650,000 | 37,800,000 | 503 | 541  | -0.27678682  | GANC,PLA2G4F,TMEM87A,VPS39                                      |
| 10 | 37,725,000 | 37,875,000 | 504 | 768  | -0.578192552 | CAPN3,GANC,TMEM87A                                              |
| 10 | 37,800,000 | 37,950,000 | 505 | 740  | -0.436557345 | CAPN3,GANC,SNAP23,ZNF106                                        |
| 10 | 37,875,000 | 38,025,000 | 506 | 517  | -0.469741427 | CAPN3,CEP27,LRRC57,SNAP23,ZNF106                                |
| 10 | 37,950,000 | 38,100,000 | 507 | 593  | -0.433514757 | CEP27,LRRC57,SNAP23                                             |
| 10 | 38,025,000 | 38,175,000 | 508 | 680  | -0.352956094 | CDAN1,TTBK2,ENSBTAG00000003754,ENSBTAG00000039789               |
| 10 | 38,100,000 | 38,250,000 | 509 | 539  | -0.67675797  | CDAN1,TTBK2,ENSBTAG00000003754,ENSBTAG00000039789               |
| 10 | 38,175,000 | 38,325,000 | 510 | 518  | -1.34151874  | TTBK2,UBR1                                                      |
| 10 | 38,250,000 | 38,400,000 | 511 | 533  | -0.936540382 | UBR1                                                            |
| 10 | 38,325,000 | 38,475,000 | 512 | 456  | 0.126643583  | TMEM62,UBR1                                                     |
| 10 | 38,400,000 | 38,550,000 | 513 | 559  | 0.387424786  | CCNDBP1,EPB42,TMEM62,UBR1                                       |
| 10 | 38,475,000 | 38,625,000 | 514 | 810  | 0.608325908  | CCNDBP1,EPB42,TMEM62                                            |
| 10 | 38,550,000 | 38,700,000 | 515 | 1080 | 0.314966589  |                                                                 |
| 10 | 38,625,000 | 38,775,000 | 516 | 921  | -0.966841725 |                                                                 |
| 10 | 38,700,000 | 38,850,000 | 517 | 718  | -0.900584416 |                                                                 |
| 10 | 38,775,000 | 38,925,000 | 518 | 744  | 0.551137744  |                                                                 |
| 10 | 38,850,000 | 39,000,000 | 519 | 842  | -1.279362666 |                                                                 |
| 10 | 38,925,000 | 39,075,000 | 520 | 1235 | -1.083962404 |                                                                 |
| 10 | 39,000,000 | 39,150,000 | 521 | 1269 | 0.445193348  |                                                                 |
| 10 | 39,075,000 | 39,225,000 | 522 | 1257 | 0.653962991  |                                                                 |

|    |            |            |     |      |              |                                                    |
|----|------------|------------|-----|------|--------------|----------------------------------------------------|
| 10 | 39,150,000 | 39,300,000 | 523 | 907  | 0.548660818  |                                                    |
| 10 | 39,225,000 | 39,375,000 | 524 | 679  | 0.715760273  |                                                    |
| 10 | 39,300,000 | 39,450,000 | 525 | 827  | 0.757710717  |                                                    |
| 10 | 39,375,000 | 39,525,000 | 526 | 1075 | 0.2848232    |                                                    |
| 10 | 39,450,000 | 39,600,000 | 527 | 1600 | 0.461961505  |                                                    |
| 10 | 39,525,000 | 39,675,000 | 528 | 1569 | 0.727673816  |                                                    |
| 10 | 39,600,000 | 39,750,000 | 529 | 1390 | 0.058597068  | RPL10L                                             |
| 10 | 39,675,000 | 39,825,000 | 530 | 1583 | 0.073092238  | RPL10L                                             |
| 10 | 39,750,000 | 39,900,000 | 531 | 1533 | 0.57149227   |                                                    |
| 10 | 39,825,000 | 39,975,000 | 532 | 1027 | 0.770165108  | MDGA2                                              |
| 10 | 39,900,000 | 40,050,000 | 533 | 813  | 0.598007353  | MDGA2                                              |
| 10 | 39,975,000 | 40,125,000 | 534 | 690  | 0.263829377  | MDGA2                                              |
| 10 | 40,050,000 | 40,200,000 | 535 | 498  | 0.477703414  | MDGA2,ENSBTAG00000032894                           |
| 10 | 40,125,000 | 40,275,000 | 536 | 654  | 0.882527287  | MDGA2,ENSBTAG00000032894                           |
| 10 | 40,200,000 | 40,350,000 | 537 | 736  | -0.105313794 | MDGA2                                              |
| 10 | 40,275,000 | 40,425,000 | 538 | 857  | -0.922900892 | MDGA2                                              |
| 10 | 40,350,000 | 40,500,000 | 539 | 1166 | -0.0561145   | MDGA2                                              |
| 10 | 40,425,000 | 40,575,000 | 540 | 1145 | 0.576357852  | MDGA2                                              |
| 10 | 40,500,000 | 40,650,000 | 541 | 1034 | -0.21816549  |                                                    |
| 10 | 40,575,000 | 40,725,000 | 542 | 754  | -0.44965627  |                                                    |
| 10 | 40,650,000 | 40,800,000 | 543 | 558  | 0.316951598  |                                                    |
| 10 | 40,725,000 | 40,875,000 | 544 | 655  | 0.256734319  |                                                    |
| 10 | 40,800,000 | 40,950,000 | 545 | 928  | 0.110209001  |                                                    |
| 10 | 40,875,000 | 41,025,000 | 546 | 1117 | -0.477231886 |                                                    |
| 10 | 40,950,000 | 41,100,000 | 547 | 981  | -0.380266732 |                                                    |
| 10 | 41,025,000 | 41,175,000 | 548 | 916  | 0.367545098  |                                                    |
| 10 | 41,100,000 | 41,250,000 | 549 | 1115 | 0.214141599  |                                                    |
| 10 | 41,175,000 | 41,325,000 | 550 | 1192 | -0.063557705 |                                                    |
| 10 | 41,250,000 | 41,400,000 | 551 | 824  | -0.315704294 |                                                    |
| 10 | 41,325,000 | 41,475,000 | 552 | 819  | -0.011448346 |                                                    |
| 10 | 41,400,000 | 41,550,000 | 553 | 794  | 0.286651536  |                                                    |
| 10 | 41,475,000 | 41,625,000 | 554 | 849  | 0.312735675  |                                                    |
| 10 | 41,550,000 | 41,700,000 | 555 | 1249 | 0.662555369  |                                                    |
| 10 | 41,625,000 | 41,775,000 | 556 | 1494 | 0.732777295  |                                                    |
| 10 | 41,700,000 | 41,850,000 | 557 | 1440 | -0.171123529 |                                                    |
| 10 | 41,775,000 | 41,925,000 | 558 | 927  | -0.582102923 |                                                    |
| 10 | 41,850,000 | 42,000,000 | 559 | 478  | 0.351407753  | ENSBTAG00000047222                                 |
| 10 | 41,925,000 | 42,075,000 | 560 | 658  | 0.67942007   | ENSBTAG00000047222                                 |
| 10 | 42,000,000 | 42,150,000 | 561 | 1214 | 0.955224183  |                                                    |
| 10 | 42,075,000 | 42,225,000 | 562 | 1444 | 0.926149973  |                                                    |
| 10 | 42,150,000 | 42,300,000 | 563 | 1600 | 0.27147836   |                                                    |
| 10 | 42,225,000 | 42,375,000 | 564 | 1909 | 0.412205895  |                                                    |
| 10 | 42,300,000 | 42,450,000 | 565 | 1798 | 0.705572906  |                                                    |
| 10 | 42,375,000 | 42,525,000 | 566 | 1477 | 0.44126484   |                                                    |
| 10 | 42,450,000 | 42,600,000 | 567 | 1061 | 0.030921774  |                                                    |
| 10 | 42,525,000 | 42,675,000 | 568 | 798  | -0.066679207 |                                                    |
| 10 | 42,600,000 | 42,750,000 | 569 | 807  | -0.205965329 | DNAAF2,KLHDC1,MGAT2,POLE2,PPIL5,RPL36A             |
| 10 | 42,675,000 | 42,825,000 | 570 | 719  | -0.333481168 | DNAAF2,KLHDC1,KLHDC2,MGAT2,NEMF,POLE2,PPIL5,RPL36A |
| 10 | 42,750,000 | 42,900,000 | 571 | 595  | -0.06361756  | KLHDC1,KLHDC2,NEMF                                 |
| 10 | 42,825,000 | 42,975,000 | 572 | 648  | -0.259279998 | ARF6,NEMF                                          |
| 10 | 42,900,000 | 43,050,000 | 573 | 838  | 0.066222775  | ARF6                                               |
| 10 | 42,975,000 | 43,125,000 | 574 | 886  | 0.584496339  | SOS2,VCPKMT                                        |

|    |            |            |     |      |              |                                  |
|----|------------|------------|-----|------|--------------|----------------------------------|
| 10 | 43,050,000 | 43,200,000 | 575 | 980  | 1.034130412  | SOS2,VCPKMT                      |
| 10 | 43,125,000 | 43,275,000 | 576 | 820  | 0.802434463  | ATP5S,L2HGDH,SOS2                |
| 10 | 43,200,000 | 43,350,000 | 577 | 666  | 0.718614798  | ATP5S,CDKL1,L2HGDH               |
| 10 | 43,275,000 | 43,425,000 | 578 | 555  | 1.202462926  | ATP5S,CDKL1,MAP4K5               |
| 10 | 43,350,000 | 43,500,000 | 579 | 376  | 1.42854732   | ATL1,MAP4K5                      |
| 10 | 43,425,000 | 43,575,000 | 580 | 276  | 1.456499355  | ATL1,MAP4K5,SAV1                 |
| 10 | 43,500,000 | 43,650,000 | 581 | 217  | 1.326093396  | ATL1,NIN,SAV1                    |
| 10 | 43,575,000 | 43,725,000 | 582 | 614  | 1.518490802  | NIN,SAV1                         |
| 10 | 43,650,000 | 43,800,000 | 583 | 901  | 1.363560311  | ABHD12B,NIN                      |
| 10 | 43,725,000 | 43,875,000 | 584 | 774  | 0.341194492  | ABHD12B,PYGL,TRIM9               |
| 10 | 43,800,000 | 43,950,000 | 585 | 696  | -0.303192194 | PYGL,TRIM9                       |
| 10 | 43,875,000 | 44,025,000 | 586 | 601  | -0.237459277 | TRIM9                            |
| 10 | 43,950,000 | 44,100,000 | 587 | 752  | -0.380535844 | TRIM9                            |
| 10 | 44,025,000 | 44,175,000 | 588 | 852  | -1.085475233 | TMX1                             |
| 10 | 44,100,000 | 44,250,000 | 589 | 594  | -2.381542064 | TMX1                             |
| 10 | 44,175,000 | 44,325,000 | 590 | 482  | -2.223912594 |                                  |
| 10 | 44,250,000 | 44,400,000 | 591 | 732  | -0.267082801 | FRMD6                            |
| 10 | 44,325,000 | 44,475,000 | 592 | 1022 | 0.088162242  | FRMD6                            |
| 10 | 44,400,000 | 44,550,000 | 593 | 931  | -0.266476913 | FRMD6                            |
| 10 | 44,475,000 | 44,625,000 | 594 | 696  | -0.852654309 | FRMD6                            |
| 10 | 44,550,000 | 44,700,000 | 595 | 869  | -0.542702904 | FRMD6                            |
| 10 | 44,625,000 | 44,775,000 | 596 | 1003 | -0.217906277 | GNG2                             |
| 10 | 44,700,000 | 44,850,000 | 597 | 928  | 0.006967922  | GNG2                             |
| 10 | 44,775,000 | 44,925,000 | 598 | 855  | 0.262982923  | C10H14ORF166,GNG2,NID2           |
| 10 | 44,850,000 | 45,000,000 | 599 | 947  | -0.330144952 | C10H14ORF166,NID2                |
| 10 | 44,925,000 | 45,075,000 | 600 | 1269 | -0.015257406 | NID2                             |
| 10 | 45,000,000 | 45,150,000 | 601 | 1033 | 0.719691903  |                                  |
| 10 | 45,075,000 | 45,225,000 | 602 | 663  | 0.836520892  | PTGDR,ENSBTAG00000001423         |
| 10 | 45,150,000 | 45,300,000 | 603 | 695  | 0.719835238  | PLEKHO2,PTGDR,ENSBTAG00000001423 |
| 10 | 45,225,000 | 45,375,000 | 604 | 782  | 0.674339498  | PIF1,PLEKHO2                     |
| 10 | 45,300,000 | 45,450,000 | 605 | 789  | 0.910537916  | OAZ2,PIF1,PLEKHO2,RBPMS2,ZNF609  |
| 10 | 45,375,000 | 45,525,000 | 606 | 784  | 1.065329733  | OAZ2,RBPMS2,ZNF609               |
| 10 | 45,450,000 | 45,600,000 | 607 | 921  | 1.206944448  | ZNF609,ENSBTAG00000017641        |
| 10 | 45,525,000 | 45,675,000 | 608 | 716  | 1.278646137  | TRIP4,ZNF609,ENSBTAG00000017641  |
| 10 | 45,600,000 | 45,750,000 | 609 | 436  | 1.340307236  | CSNK1G1,PAF,TRIP4,ZNF609         |
| 10 | 45,675,000 | 45,825,000 | 610 | 461  | 1.333285889  | CSNK1G1,PAF,TRIP4                |
| 10 | 45,750,000 | 45,900,000 | 611 | 627  | 1.251555107  | CSNK1G1,PPIB,SNX1,SNX22          |
| 10 | 45,825,000 | 45,975,000 | 612 | 892  | 0.89872581   | CSNK1G1,FAM96A,PPIB,SNX1,SNX22   |
| 10 | 45,900,000 | 46,050,000 | 613 | 950  | -0.0194731   | DAPK2,FAM96A,SNX1                |
| 10 | 45,975,000 | 46,125,000 | 614 | 1076 | -0.245147065 | DAPK2                            |
| 10 | 46,050,000 | 46,200,000 | 615 | 939  | 0.601667834  | DAPK2                            |
| 10 | 46,125,000 | 46,275,000 | 616 | 480  | 0.482054707  | DAPK2,HERC1                      |
| 10 | 46,200,000 | 46,350,000 | 617 | 326  | 0.257989666  | HERC1                            |
| 10 | 46,275,000 | 46,425,000 | 618 | 337  | 1.014866231  | HERC1                            |
| 10 | 46,350,000 | 46,500,000 | 619 | 495  | 1.3077842    | FBXL22,HERC1,USP3                |
| 10 | 46,425,000 | 46,575,000 | 620 | 571  | 1.023576222  | FBXL22,HERC1,USP3                |
| 10 | 46,500,000 | 46,650,000 | 621 | 864  | 0.428685382  | USP3                             |
| 10 | 46,575,000 | 46,725,000 | 622 | 1093 | 0.606433732  |                                  |
| 10 | 46,650,000 | 46,800,000 | 623 | 956  | 0.634120671  | APH1B,CA12                       |
| 10 | 46,725,000 | 46,875,000 | 624 | 742  | 0.345917349  | APH1B,CA12,RAB8B                 |
| 10 | 46,800,000 | 46,950,000 | 625 | 515  | 0.225695954  | APH1B,RAB8B,RPS27L               |
| 10 | 46,875,000 | 47,025,000 | 626 | 605  | -0.094654444 | LACTB,RAB8B,RPS27L               |
| 10 | 46,950,000 | 47,100,000 | 627 | 630  | -0.024548912 | LACTB,TPM1                       |

|    |            |            |     |      |              |                           |
|----|------------|------------|-----|------|--------------|---------------------------|
| 10 | 47,025,000 | 47,175,000 | 628 | 738  | 0.024896823  | TPM1                      |
| 10 | 47,100,000 | 47,250,000 | 629 | 1128 | -1.161431704 |                           |
| 10 | 47,175,000 | 47,325,000 | 630 | 863  | -2.051170562 | TLN2                      |
| 10 | 47,250,000 | 47,400,000 | 631 | 401  | -1.511462022 | TLN2                      |
| 10 | 47,325,000 | 47,475,000 | 632 | 495  | -1.723848217 | TLN2                      |
| 10 | 47,400,000 | 47,550,000 | 633 | 855  | -2.072010431 | TLN2                      |
| 10 | 47,475,000 | 47,625,000 | 634 | 1109 | -2.267779817 | TLN2                      |
| 10 | 47,550,000 | 47,700,000 | 635 | 1116 | -0.49334041  | TLN2                      |
| 10 | 47,625,000 | 47,775,000 | 636 | 944  | 0.397517384  | TLN2                      |
| 10 | 47,700,000 | 47,850,000 | 637 | 940  | 1.105524258  | TLN2                      |
| 10 | 47,775,000 | 47,925,000 | 638 | 896  | 1.049142627  | TLN2                      |
| 10 | 47,850,000 | 48,000,000 | 639 | 798  | 0.708599802  | C2CD4A                    |
| 10 | 47,925,000 | 48,075,000 | 640 | 986  | 1.110102879  | C2CD4A,ENSBTAG00000010952 |
| 10 | 48,000,000 | 48,150,000 | 641 | 1114 | 0.952499824  | VPS13C,ENSBTAG00000010952 |
| 10 | 48,075,000 | 48,225,000 | 642 | 1086 | 0.589579215  | VPS13C                    |
| 10 | 48,150,000 | 48,300,000 | 643 | 647  | 0.495846656  | VPS13C                    |
| 10 | 48,225,000 | 48,375,000 | 644 | 389  | 1.072606891  | VPS13C                    |
| 10 | 48,300,000 | 48,450,000 | 645 | 663  | 0.301288992  |                           |
| 10 | 48,375,000 | 48,525,000 | 646 | 685  | -0.130036213 |                           |
| 10 | 48,450,000 | 48,600,000 | 647 | 751  | 0.118244461  |                           |
| 10 | 48,525,000 | 48,675,000 | 648 | 1141 | 0.455154607  |                           |
| 10 | 48,600,000 | 48,750,000 | 649 | 1187 | 0.809931102  |                           |
| 10 | 48,675,000 | 48,825,000 | 650 | 1001 | 0.863197749  |                           |
| 10 | 48,750,000 | 48,900,000 | 651 | 848  | 0.086761146  |                           |
| 10 | 48,825,000 | 48,975,000 | 652 | 642  | -0.413913074 | RORA                      |
| 10 | 48,900,000 | 49,050,000 | 653 | 460  | -0.34194361  | RORA                      |
| 10 | 48,975,000 | 49,125,000 | 654 | 392  | -0.102977109 | RORA                      |
| 10 | 49,050,000 | 49,200,000 | 655 | 437  | -0.083860928 | RORA                      |
| 10 | 49,125,000 | 49,275,000 | 656 | 503  | -0.819052767 | RORA                      |
| 10 | 49,200,000 | 49,350,000 | 657 | 458  | -1.604357675 | RORA                      |
| 10 | 49,275,000 | 49,425,000 | 658 | 413  | -1.24890742  | RORA                      |
| 10 | 49,350,000 | 49,500,000 | 659 | 522  | -1.039913511 | RORA                      |
| 10 | 49,425,000 | 49,575,000 | 660 | 491  | -0.690218258 | RORA                      |
| 10 | 49,500,000 | 49,650,000 | 661 | 366  | -0.57051963  | RORA                      |
| 10 | 49,575,000 | 49,725,000 | 662 | 345  | -2.097122403 | RORA                      |
| 10 | 49,650,000 | 49,800,000 | 663 | 447  | -0.71061714  | ICE2,RORA                 |
| 10 | 49,725,000 | 49,875,000 | 664 | 837  | 0.422025385  | ANXA2,ICE2,RORA           |
| 10 | 49,800,000 | 49,950,000 | 665 | 1267 | 0.591394429  | ANXA2,ICE2                |
| 10 | 49,875,000 | 50,025,000 | 666 | 1518 | 0.784753966  | ANXA2                     |
| 10 | 49,950,000 | 50,100,000 | 667 | 1390 | 0.885899758  |                           |
| 10 | 50,025,000 | 50,175,000 | 668 | 830  | 0.257040409  |                           |
| 10 | 50,100,000 | 50,250,000 | 669 | 744  | -0.973820515 |                           |
| 10 | 50,175,000 | 50,325,000 | 670 | 866  | -0.614781431 | FOXB1                     |
| 10 | 50,250,000 | 50,400,000 | 671 | 949  | -0.160474335 | FOXB1                     |
| 10 | 50,325,000 | 50,475,000 | 672 | 1090 | -0.04931538  |                           |
| 10 | 50,400,000 | 50,550,000 | 673 | 1198 | 0.378588697  |                           |
| 10 | 50,475,000 | 50,625,000 | 674 | 956  | 0.555309472  |                           |
| 10 | 50,550,000 | 50,700,000 | 675 | 498  | 0.263095583  | BNIP2,GTF2A2              |
| 10 | 50,625,000 | 50,775,000 | 676 | 752  | 0.325018386  | BNIP2,GCNT3,GTF2A2        |
| 10 | 50,700,000 | 50,850,000 | 677 | 1523 | 0.707960779  | GCNT3                     |
| 10 | 50,775,000 | 50,925,000 | 678 | 1719 | 0.99436175   | FAM81A                    |
| 10 | 50,850,000 | 51,000,000 | 679 | 1401 | 1.260721004  | FAM81A                    |
| 10 | 50,925,000 | 51,075,000 | 680 | 1176 | 1.028955659  | FAM81A,MYO1E              |

|    |            |            |     |      |              |                          |
|----|------------|------------|-----|------|--------------|--------------------------|
| 10 | 51,000,000 | 51,150,000 | 681 | 1247 | 0.582469959  | MYO1E                    |
| 10 | 51,075,000 | 51,225,000 | 682 | 1336 | 0.074952593  | MYO1E                    |
| 10 | 51,150,000 | 51,300,000 | 683 | 845  | -0.252057648 | CCNB2,MYO1E,RNF111       |
| 10 | 51,225,000 | 51,375,000 | 684 | 494  | -0.007450247 | CCNB2,MYO1E,RNF111       |
| 10 | 51,300,000 | 51,450,000 | 685 | 401  | -0.62416034  | RNF111,SLTM              |
| 10 | 51,375,000 | 51,525,000 | 686 | 332  | 0.223551705  | FAM63B,RNF111,SLTM       |
| 10 | 51,450,000 | 51,600,000 | 687 | 315  | 0.978672556  | ADAM10,FAM63B,SLTM       |
| 10 | 51,525,000 | 51,675,000 | 688 | 399  | 0.771851979  | ADAM10,FAM63B            |
| 10 | 51,600,000 | 51,750,000 | 689 | 413  | -0.662842502 | ADAM10                   |
| 10 | 51,675,000 | 51,825,000 | 690 | 398  | -1.487042327 | ADAM10,LIPC              |
| 10 | 51,750,000 | 51,900,000 | 691 | 564  | -1.039033704 | LIPC                     |
| 10 | 51,825,000 | 51,975,000 | 692 | 543  | -1.63187654  | LIPC                     |
| 10 | 51,900,000 | 52,050,000 | 693 | 515  | -3.177911226 | LIPC                     |
| 10 | 51,975,000 | 52,125,000 | 694 | 612  | -1.149298686 |                          |
| 10 | 52,050,000 | 52,200,000 | 695 | 866  | 1.033301637  | AQP9                     |
| 10 | 52,125,000 | 52,275,000 | 696 | 906  | 1.231469217  | AQP9                     |
| 10 | 52,200,000 | 52,350,000 | 697 | 535  | 1.128325224  | ALDH1A2                  |
| 10 | 52,275,000 | 52,425,000 | 698 | 574  | 0.92911621   | ALDH1A2                  |
| 10 | 52,350,000 | 52,500,000 | 699 | 651  | 0.634170513  | ALDH1A2                  |
| 10 | 52,425,000 | 52,575,000 | 700 | 720  | -0.242624084 |                          |
| 10 | 52,500,000 | 52,650,000 | 701 | 817  | -0.13928228  | POLR2M                   |
| 10 | 52,575,000 | 52,725,000 | 702 | 784  | 0.584945577  | MYZAP,POLR2M             |
| 10 | 52,650,000 | 52,800,000 | 703 | 840  | 0.466756985  | MYZAP,POLR2M             |
| 10 | 52,725,000 | 52,875,000 | 704 | 1087 | -0.599569466 | CGNL1,MYZAP              |
| 10 | 52,800,000 | 52,950,000 | 705 | 1167 | -0.040925924 | CGNL1                    |
| 10 | 52,875,000 | 53,025,000 | 706 | 853  | 0.650607882  | CGNL1                    |
| 10 | 52,950,000 | 53,100,000 | 707 | 879  | -0.806063755 | TCF12                    |
| 10 | 53,025,000 | 53,175,000 | 708 | 816  | -1.486473065 | TCF12                    |
| 10 | 53,100,000 | 53,250,000 | 709 | 741  | -0.712510232 | TCF12                    |
| 10 | 53,175,000 | 53,325,000 | 710 | 886  | -0.303762281 | TCF12                    |
| 10 | 53,250,000 | 53,400,000 | 711 | 784  | -0.094680221 | TCF12                    |
| 10 | 53,325,000 | 53,475,000 | 712 | 663  | 0.265006822  | TCF12                    |
| 10 | 53,400,000 | 53,550,000 | 713 | 493  | 0.164280728  | TCF12                    |
| 10 | 53,475,000 | 53,625,000 | 714 | 378  | -0.157627256 | TCF12                    |
| 10 | 53,550,000 | 53,700,000 | 715 | 541  | 0.406763278  |                          |
| 10 | 53,625,000 | 53,775,000 | 716 | 571  | 0.533721376  | ZNF280D                  |
| 10 | 53,700,000 | 53,850,000 | 717 | 529  | 0.045346766  | ZNF280D                  |
| 10 | 53,775,000 | 53,925,000 | 718 | 744  | -0.311859755 | ZNF280D                  |
| 10 | 53,850,000 | 54,000,000 | 719 | 699  | -0.301958545 | MNS1                     |
| 10 | 53,925,000 | 54,075,000 | 720 | 532  | -0.401012371 | MNS1                     |
| 10 | 54,000,000 | 54,150,000 | 721 | 701  | -0.912141988 | MNS1,TEX9                |
| 10 | 54,075,000 | 54,225,000 | 722 | 1058 | 0.205779222  | TEX9                     |
| 10 | 54,150,000 | 54,300,000 | 723 | 1221 | 1.016596285  | RFX7,TEX9                |
| 10 | 54,225,000 | 54,375,000 | 724 | 871  | 0.804735836  | RFX7                     |
| 10 | 54,300,000 | 54,450,000 | 725 | 783  | 0.142787042  | RFX7                     |
| 10 | 54,375,000 | 54,525,000 | 726 | 1147 | 0.257666394  | RFX7,ENSBTAG00000031396  |
| 10 | 54,450,000 | 54,600,000 | 727 | 942  | 0.481925254  | NEDD4,ENSBTAG00000031396 |
| 10 | 54,525,000 | 54,675,000 | 728 | 702  | 0.761165089  | NEDD4                    |
| 10 | 54,600,000 | 54,750,000 | 729 | 609  | -0.047617299 | NEDD4                    |
| 10 | 54,675,000 | 54,825,000 | 730 | 471  | -2.613055219 | PRTG                     |
| 10 | 54,750,000 | 54,900,000 | 731 | 637  | -2.877410995 | PRTG,PYGO1               |
| 10 | 54,825,000 | 54,975,000 | 732 | 742  | -1.377070607 | DYX1C1,PRTG,PYGO1        |
| 10 | 54,900,000 | 55,050,000 | 733 | 647  | 0.664736037  | CCPG1,DYX1C1,PIGB        |

|    |            |            |     |      |              |                                |
|----|------------|------------|-----|------|--------------|--------------------------------|
| 10 | 54,975,000 | 55,125,000 | 734 | 607  | 0.284741826  | CCPG1,PIGB,RAB27A              |
| 10 | 55,050,000 | 55,200,000 | 735 | 880  | 0.872475842  | PIGB,RAB27A,RSL24D1            |
| 10 | 55,125,000 | 55,275,000 | 736 | 1038 | 1.193882619  | RAB27A,RSL24D1                 |
| 10 | 55,200,000 | 55,350,000 | 737 | 1000 | 0.751706134  |                                |
| 10 | 55,275,000 | 55,425,000 | 738 | 1261 | 0.415328622  |                                |
| 10 | 55,350,000 | 55,500,000 | 739 | 1427 | 0.5799494    |                                |
| 10 | 55,425,000 | 55,575,000 | 740 | 1535 | -0.601052889 |                                |
| 10 | 55,500,000 | 55,650,000 | 741 | 1618 | -1.550890662 |                                |
| 10 | 55,575,000 | 55,725,000 | 742 | 1389 | -0.644966589 | UNC13C                         |
| 10 | 55,650,000 | 55,800,000 | 743 | 1542 | 0.276160792  | UNC13C                         |
| 10 | 55,725,000 | 55,875,000 | 744 | 1246 | 0.050051349  | UNC13C                         |
| 10 | 55,800,000 | 55,950,000 | 745 | 1027 | 0.358350261  | UNC13C                         |
| 10 | 55,875,000 | 56,025,000 | 746 | 1398 | 0.373221107  | UNC13C                         |
| 10 | 55,950,000 | 56,100,000 | 747 | 1171 | 0.511484367  | UNC13C                         |
| 10 | 56,025,000 | 56,175,000 | 748 | 1507 | 1.071597099  | UNC13C                         |
| 10 | 56,100,000 | 56,250,000 | 749 | 1572 | 1.037734713  | UNC13C                         |
| 10 | 56,175,000 | 56,325,000 | 750 | 1117 | 0.228795908  | UNC13C                         |
| 10 | 56,250,000 | 56,400,000 | 751 | 1140 | -0.807119802 | UNC13C                         |
| 10 | 56,325,000 | 56,475,000 | 752 | 1431 | -1.003205928 | UNC13C                         |
| 10 | 56,400,000 | 56,550,000 | 753 | 1710 | -0.622981333 |                                |
| 10 | 56,475,000 | 56,625,000 | 754 | 1512 | -0.537843975 |                                |
| 10 | 56,550,000 | 56,700,000 | 755 | 1005 | -0.905627921 | WDR72                          |
| 10 | 56,625,000 | 56,775,000 | 756 | 831  | -0.425404804 | WDR72                          |
| 10 | 56,700,000 | 56,850,000 | 757 | 801  | -0.043516562 | WDR72                          |
| 10 | 56,775,000 | 56,925,000 | 758 | 817  | -0.26643124  | WDR72                          |
| 10 | 56,850,000 | 57,000,000 | 759 | 850  | -0.820000718 |                                |
| 10 | 56,925,000 | 57,075,000 | 760 | 890  | -0.995508866 |                                |
| 10 | 57,000,000 | 57,150,000 | 761 | 770  | -0.677457024 |                                |
| 10 | 57,075,000 | 57,225,000 | 762 | 400  | -0.062927483 |                                |
| 10 | 57,150,000 | 57,300,000 | 763 | 498  | 0.401368356  |                                |
| 10 | 57,225,000 | 57,375,000 | 764 | 888  | 0.845432385  |                                |
| 10 | 57,300,000 | 57,450,000 | 765 | 1067 | 0.568408629  |                                |
| 10 | 57,375,000 | 57,525,000 | 766 | 930  | 0.600407681  |                                |
| 10 | 57,450,000 | 57,600,000 | 767 | 615  | 0.827110186  |                                |
| 10 | 57,525,000 | 57,675,000 | 768 | 275  | 0.609222286  |                                |
| 10 | 57,600,000 | 57,750,000 | 769 | 228  | 0.838519264  | ONECUT1                        |
| 10 | 57,675,000 | 57,825,000 | 770 | 350  | 0.765080954  | ONECUT1                        |
| 10 | 57,750,000 | 57,900,000 | 771 | 350  | -0.99224118  | FAM214A                        |
| 10 | 57,825,000 | 57,975,000 | 772 | 258  | -2.718809227 | ARPP19,FAM214A                 |
| 10 | 57,900,000 | 58,050,000 | 773 | 361  | -0.611828688 | ARPP19,FAM214A,MYO5A           |
| 10 | 57,975,000 | 58,125,000 | 774 | 452  | -0.415704221 | MYO5A                          |
| 10 | 58,050,000 | 58,200,000 | 775 | 583  | -0.928665534 | MYO5A,MYO5C                    |
| 10 | 58,125,000 | 58,275,000 | 776 | 818  | -0.280448779 | MYO5A,MYO5C                    |
| 10 | 58,200,000 | 58,350,000 | 777 | 901  | 0.52475081   | GNB5,MYO5C,ENSBTAG00000005429  |
| 10 | 58,275,000 | 58,425,000 | 778 | 664  | 0.072647653  | GNB5,MYO5C,ENSBTAG00000005429  |
| 10 | 58,350,000 | 58,500,000 | 779 | 400  | -0.001401346 | MAPK6                          |
| 10 | 58,425,000 | 58,575,000 | 780 | 469  | 1.21770403   | LEO1,MAPK6,ENSBTAG00000019601  |
| 10 | 58,500,000 | 58,650,000 | 781 | 411  | 1.408285597  | LEO1,TMOD3,ENSBTAG00000019601  |
| 10 | 58,575,000 | 58,725,000 | 782 | 507  | 0.860178767  | TMOD2,TMOD3,ENSBTAG00000019601 |
| 10 | 58,650,000 | 58,800,000 | 783 | 579  | 0.956148637  | LYSMD2,SCG3,TMOD2              |
| 10 | 58,725,000 | 58,875,000 | 784 | 460  | 1.267079883  | LYSMD2,SCG3                    |
| 10 | 58,800,000 | 58,950,000 | 785 | 539  | 0.923723923  | DMXL2                          |
| 10 | 58,875,000 | 59,025,000 | 786 | 396  | 1.039331354  | DMXL2                          |



|    |            |            |     |      |              |                                                          |
|----|------------|------------|-----|------|--------------|----------------------------------------------------------|
| 10 | 58,950,000 | 59,100,000 | 787 | 195  | 0.966312824  | DMXL2,GLDN                                               |
| 10 | 59,025,000 | 59,175,000 | 788 | 346  | -0.085204279 | GLDN                                                     |
| 10 | 59,100,000 | 59,250,000 | 789 | 297  | -0.118747063 | CYP19A1,GLDN                                             |
| 10 | 59,175,000 | 59,325,000 | 790 | 44   | -0.615647051 | CYP19A1                                                  |
| 10 | 59,250,000 | 59,400,000 | 791 | 516  | 1.133614594  | CYP19A1                                                  |
| 10 | 59,325,000 | 59,475,000 | 792 | 1134 | 1.191254752  |                                                          |
| 10 | 59,400,000 | 59,550,000 | 793 | 772  | 0.748612513  | TNFAIP8L3                                                |
| 10 | 59,475,000 | 59,625,000 | 794 | 565  | 0.040377781  | AP4E1,TNFAIP8L3                                          |
| 10 | 59,550,000 | 59,700,000 | 795 | 921  | 0.336924698  | AP4E1                                                    |
| 10 | 59,625,000 | 59,775,000 | 796 | 906  | 0.328415782  | AP4E1                                                    |
| 10 | 59,700,000 | 59,850,000 | 797 | 752  | -1.037562839 | SPPL2A                                                   |
| 10 | 59,775,000 | 59,925,000 | 798 | 588  | -0.545209026 | SPPL2A,TRPM7                                             |
| 10 | 59,850,000 | 60,000,000 | 799 | 594  | 0.985029087  | TRPM7,USP50,USP8                                         |
| 10 | 59,925,000 | 60,075,000 | 800 | 791  | 0.947544444  | TRPM7,USP50,USP8                                         |
| 10 | 60,000,000 | 60,150,000 | 801 | 805  | 0.77933161   | GABPB1,HDC,USP8                                          |
| 10 | 60,075,000 | 60,225,000 | 802 | 626  | -0.237847589 | GABPB1,HDC,SLC27A2,ENSBTAG00000045591,ENSBTAG00000045634 |
| 10 | 60,150,000 | 60,300,000 | 803 | 568  | -0.004688158 | HDC,SLC27A2,ENSBTAG00000045591,ENSBTAG00000045634        |
| 10 | 60,225,000 | 60,375,000 | 804 | 774  | 1.076388388  | SLC27A2                                                  |
| 10 | 60,300,000 | 60,450,000 | 805 | 816  | 0.924131276  | ATP8B4                                                   |
| 10 | 60,375,000 | 60,525,000 | 806 | 876  | 0.789616592  | ATP8B4                                                   |
| 10 | 60,450,000 | 60,600,000 | 807 | 864  | 1.041893995  | ATP8B4                                                   |
| 10 | 60,525,000 | 60,675,000 | 808 | 753  | 0.301615282  | ATP8B4                                                   |
| 10 | 60,600,000 | 60,750,000 | 809 | 785  | 0.027222219  | ATP8B4                                                   |
| 10 | 60,675,000 | 60,825,000 | 810 | 599  | 0.324844614  |                                                          |
| 10 | 60,750,000 | 60,900,000 | 811 | 630  | 0.530305553  |                                                          |
| 10 | 60,825,000 | 60,975,000 | 812 | 659  | 0.850452766  | DTWD1                                                    |
| 10 | 60,900,000 | 61,050,000 | 813 | 423  | 1.155217346  | DTWD1,FGF7                                               |
| 10 | 60,975,000 | 61,125,000 | 814 | 355  | 1.399628079  | FGF7                                                     |
| 10 | 61,050,000 | 61,200,000 | 815 | 377  | 1.480885586  | FGF7,GALK2                                               |
| 10 | 61,125,000 | 61,275,000 | 816 | 317  | 1.36737751   | GALK2                                                    |
| 10 | 61,200,000 | 61,350,000 | 817 | 286  | 0.852304971  | COPS2,GALK2                                              |
| 10 | 61,275,000 | 61,425,000 | 818 | 345  | 0.698042968  | COPS2,GALK2,SECISBP2L                                    |
| 10 | 61,350,000 | 61,500,000 | 819 | 344  | 0.737540883  | SECISBP2L                                                |
| 10 | 61,425,000 | 61,575,000 | 820 | 320  | 0.450981244  | SECISBP2L,ENSBTAG00000005217,ENSBTAG00000046376          |
| 10 | 61,500,000 | 61,650,000 | 821 | 469  | 0.371530006  | EID1,SHC4,ENSBTAG00000005217,ENSBTAG00000046376          |
| 10 | 61,575,000 | 61,725,000 | 822 | 895  | 0.566280126  | CEP152,EID1,SHC4                                         |
| 10 | 61,650,000 | 61,800,000 | 823 | 1069 | 0.760484929  | CEP152                                                   |
| 10 | 61,725,000 | 61,875,000 | 824 | 959  | 1.096297468  | CEP152                                                   |
| 10 | 61,800,000 | 61,950,000 | 825 | 920  | 1.149576613  | FBN1                                                     |
| 10 | 61,875,000 | 62,025,000 | 826 | 728  | 0.975927688  | FBN1                                                     |
| 10 | 61,950,000 | 62,100,000 | 827 | 809  | 1.009339401  | FBN1                                                     |
| 10 | 62,025,000 | 62,175,000 | 828 | 775  | 0.971356658  | FBN1                                                     |
| 10 | 62,100,000 | 62,250,000 | 829 | 580  | 0.466649525  | FBN1                                                     |
| 10 | 62,175,000 | 62,325,000 | 830 | 676  | 0.567146217  | DUT,SLC12A1                                              |
| 10 | 62,250,000 | 62,400,000 | 831 | 885  | 0.578810292  | DUT,SLC12A1                                              |
| 10 | 62,325,000 | 62,475,000 | 832 | 816  | 0.55404221   | CTXN2,MYEF2,SLC12A1,SLC24A5                              |
| 10 | 62,400,000 | 62,550,000 | 833 | 535  | 0.25263772   | CTXN2,MYEF2,SLC12A1,SLC24A5                              |
| 10 | 62,475,000 | 62,625,000 | 834 | 617  | 0.214442871  | SLC24A5                                                  |
| 10 | 62,550,000 | 62,700,000 | 835 | 691  | 0.415259725  |                                                          |

|    |            |            |     |      |              |                                              |
|----|------------|------------|-----|------|--------------|----------------------------------------------|
| 10 | 62,625,000 | 62,775,000 | 836 | 860  | 0.688269476  |                                              |
| 10 | 62,700,000 | 62,850,000 | 837 | 877  | 0.717578337  |                                              |
| 10 | 62,775,000 | 62,925,000 | 838 | 512  | 0.011029963  | SEMA6D                                       |
| 10 | 62,850,000 | 63,000,000 | 839 | 579  | -0.833791802 | SEMA6D                                       |
| 10 | 62,925,000 | 63,075,000 | 840 | 796  | -1.434972639 |                                              |
| 10 | 63,000,000 | 63,150,000 | 841 | 859  | -1.506856022 |                                              |
| 10 | 63,075,000 | 63,225,000 | 842 | 1154 | -0.920033886 |                                              |
| 10 | 63,150,000 | 63,300,000 | 843 | 1222 | -0.242514734 |                                              |
| 10 | 63,225,000 | 63,375,000 | 844 | 880  | 0.68581713   |                                              |
| 10 | 63,300,000 | 63,450,000 | 845 | 873  | 0.223918187  |                                              |
| 10 | 63,375,000 | 63,525,000 | 846 | 874  | 0.436005166  |                                              |
| 10 | 63,450,000 | 63,600,000 | 847 | 869  | 0.662275171  |                                              |
| 10 | 63,525,000 | 63,675,000 | 848 | 1014 | 1.023425333  | ENSBTAG00000006267                           |
| 10 | 63,600,000 | 63,750,000 | 849 | 1021 | 1.292893891  | ENSBTAG00000006267                           |
| 10 | 63,675,000 | 63,825,000 | 850 | 953  | 1.125558954  |                                              |
| 10 | 63,750,000 | 63,900,000 | 851 | 1362 | 1.317017241  |                                              |
| 10 | 63,825,000 | 63,975,000 | 852 | 1816 | 1.513179104  |                                              |
| 10 | 63,900,000 | 64,050,000 | 853 | 1254 | 1.566895564  |                                              |
| 10 | 63,975,000 | 64,125,000 | 854 | 665  | 1.585821657  |                                              |
| 10 | 64,050,000 | 64,200,000 | 855 | 508  | 0.8500425    |                                              |
| 10 | 64,125,000 | 64,275,000 | 856 | 587  | -0.085671117 |                                              |
| 10 | 64,200,000 | 64,350,000 | 857 | 841  | 0.791911207  |                                              |
| 10 | 64,275,000 | 64,425,000 | 858 | 846  | 0.118011328  |                                              |
| 10 | 64,350,000 | 64,500,000 | 859 | 651  | -1.202706858 |                                              |
| 10 | 64,425,000 | 64,575,000 | 860 | 520  | -1.206700533 |                                              |
| 10 | 64,500,000 | 64,650,000 | 861 | 717  | 0.682706073  |                                              |
| 10 | 64,575,000 | 64,725,000 | 862 | 1484 | 1.195867661  |                                              |
| 10 | 64,650,000 | 64,800,000 | 863 | 1451 | 1.071772153  |                                              |
| 10 | 64,725,000 | 64,875,000 | 864 | 1186 | -0.237526647 |                                              |
| 10 | 64,800,000 | 64,950,000 | 865 | 1438 | 0.478049904  |                                              |
| 10 | 64,875,000 | 65,025,000 | 866 | 1111 | 0.372826369  |                                              |
| 10 | 64,950,000 | 65,100,000 | 867 | 775  | -2.34058356  | SQRDL                                        |
| 10 | 65,025,000 | 65,175,000 | 868 | 706  | -1.98141241  | BLOC1S6,SQRDL                                |
| 10 | 65,100,000 | 65,250,000 | 869 | 728  | 0.519806688  | BLOC1S6,MGC165862,SLC30A4                    |
| 10 | 65,175,000 | 65,325,000 | 870 | 525  | 0.397061326  | MGC165862,SLC30A4,SPATA5L1                   |
| 10 | 65,250,000 | 65,400,000 | 871 | 338  | 0.112052667  | GATM,SLC28A2,SPATA5L1,ENSBTAG00000027251     |
| 10 | 65,325,000 | 65,475,000 | 872 | 557  | 0.231588882  | GATM,SHF,SLC28A2,ENSBTAG00000027251          |
| 10 | 65,400,000 | 65,550,000 | 873 | 535  | -0.142206729 | DUOX1,DUOX2,DUOXA1,DUOXA2,SHF,SLC28A2        |
| 10 | 65,475,000 | 65,625,000 | 874 | 425  | 0.330852759  | DUOX1,DUOX2,DUOXA1,DUOXA2,SHF,SORD           |
| 10 | 65,550,000 | 65,700,000 | 875 | 902  | 1.250727927  | DUOX2,SORD,ENSBTAG00000038327                |
| 10 | 65,625,000 | 65,775,000 | 876 | 1011 | 1.157940098  | FERMT2,ENSBTAG00000038327,ENSBTAG00000047170 |
| 10 | 65,700,000 | 65,850,000 | 877 | 523  | 0.87394495   | FERMT2,ENSBTAG00000047170                    |
| 10 | 65,775,000 | 65,925,000 | 878 | 699  | -1.417707455 | DDHD1,FERMT2                                 |
| 10 | 65,850,000 | 66,000,000 | 879 | 907  | -1.093302446 | DDHD1                                        |
| 10 | 65,925,000 | 66,075,000 | 880 | 752  | 0.614767679  | DDHD1                                        |
| 10 | 66,000,000 | 66,150,000 | 881 | 869  | 1.148382397  |                                              |
| 10 | 66,075,000 | 66,225,000 | 882 | 707  | 0.680363001  |                                              |
| 10 | 66,150,000 | 66,300,000 | 883 | 601  | 0.324885011  |                                              |
| 10 | 66,225,000 | 66,375,000 | 884 | 667  | 0.052414344  |                                              |
| 10 | 66,300,000 | 66,450,000 | 885 | 640  | -0.03681077  |                                              |
| 10 | 66,375,000 | 66,525,000 | 886 | 661  | 0.243343704  |                                              |
| 10 | 66,450,000 | 66,600,000 | 887 | 513  | -0.394089578 |                                              |

|    |            |            |     |      |              |                                     |
|----|------------|------------|-----|------|--------------|-------------------------------------|
| 10 | 66,525,000 | 66,675,000 | 888 | 414  | -0.867124759 |                                     |
| 10 | 66,600,000 | 66,750,000 | 889 | 412  | -2.739026318 | ENSBTAG00000047239                  |
| 10 | 66,675,000 | 66,825,000 | 890 | 586  | -2.168308035 | BMP4,ENSBTAG00000047239             |
| 10 | 66,750,000 | 66,900,000 | 891 | 648  | -0.509066872 | BMP4                                |
| 10 | 66,825,000 | 66,975,000 | 892 | 642  | -1.852185263 |                                     |
| 10 | 66,900,000 | 67,050,000 | 893 | 705  | -1.494684631 |                                     |
| 10 | 66,975,000 | 67,125,000 | 894 | 663  | -0.216248327 |                                     |
| 10 | 67,050,000 | 67,200,000 | 895 | 736  | 0.685310907  | CDKN3,CNIH1                         |
| 10 | 67,125,000 | 67,275,000 | 896 | 1025 | 1.31642003   | CDKN3,CGRRF1,CNIH1,GMFB             |
| 10 | 67,200,000 | 67,350,000 | 897 | 1029 | 0.932506729  | CGRRF1,GMFB                         |
| 10 | 67,275,000 | 67,425,000 | 898 | 615  | 0.121779068  |                                     |
| 10 | 67,350,000 | 67,500,000 | 899 | 365  | 0.350297112  | SAMD4A                              |
| 10 | 67,425,000 | 67,575,000 | 900 | 399  | 0.744279351  | SAMD4A                              |
| 10 | 67,500,000 | 67,650,000 | 901 | 537  | 0.684167383  | GCH1,SAMD4A                         |
| 10 | 67,575,000 | 67,725,000 | 902 | 410  | 0.394319912  | GCH1,WDHD1                          |
| 10 | 67,650,000 | 67,800,000 | 903 | 251  | 0.021437693  | MAPK1IP1L,SOCS4,WDHD1               |
| 10 | 67,725,000 | 67,875,000 | 904 | 398  | 0.672409016  | DLGAP5,LGALS3,MAPK1IP1L,SOCS4,WDHD1 |
| 10 | 67,800,000 | 67,950,000 | 905 | 637  | 0.486084623  | DLGAP5,LGALS3                       |
| 10 | 67,875,000 | 68,025,000 | 906 | 950  | 0.551887373  | DLGAP5                              |
| 10 | 67,950,000 | 68,100,000 | 907 | 968  | 0.90264062   | ATG14,FBXO34                        |
| 10 | 68,025,000 | 68,175,000 | 908 | 798  | 0.26933803   | ATG14,FBXO34,TBPL2                  |
| 10 | 68,100,000 | 68,250,000 | 909 | 818  | 0.356153847  | ATG14,KTN1,TBPL2                    |
| 10 | 68,175,000 | 68,325,000 | 910 | 867  | 0.340353761  | KTN1                                |
| 10 | 68,250,000 | 68,400,000 | 911 | 846  | -0.339863182 | KTN1                                |
| 10 | 68,325,000 | 68,475,000 | 912 | 811  | -1.559302668 | KTN1                                |
| 10 | 68,400,000 | 68,550,000 | 913 | 861  | -1.838816366 |                                     |
| 10 | 68,475,000 | 68,625,000 | 914 | 659  | -1.591495187 |                                     |
| 10 | 68,550,000 | 68,700,000 | 915 | 472  | -2.282097394 |                                     |
| 10 | 68,625,000 | 68,775,000 | 916 | 467  | -2.353654548 |                                     |
| 10 | 68,700,000 | 68,850,000 | 917 | 866  | -0.481817909 | PELI2                               |
| 10 | 68,775,000 | 68,925,000 | 918 | 1110 | 0.46585207   | PELI2                               |
| 10 | 68,850,000 | 69,000,000 | 919 | 760  | 1.132875081  | PELI2                               |
| 10 | 68,925,000 | 69,075,000 | 920 | 813  | 0.600888295  | PELI2                               |
| 10 | 69,000,000 | 69,150,000 | 921 | 992  | 0.124855195  |                                     |
| 10 | 69,075,000 | 69,225,000 | 922 | 846  | -0.477621885 |                                     |
| 10 | 69,150,000 | 69,300,000 | 923 | 719  | 0.12224063   | TMEM260                             |
| 10 | 69,225,000 | 69,375,000 | 924 | 691  | -1.063051952 | TMEM260                             |
| 10 | 69,300,000 | 69,450,000 | 925 | 584  | -1.045469192 | TMEM260                             |
| 10 | 69,375,000 | 69,525,000 | 926 | 601  | 0.160313259  | OTX2                                |
| 10 | 69,450,000 | 69,600,000 | 927 | 676  | -0.393266469 | OTX2                                |
| 10 | 69,525,000 | 69,675,000 | 928 | 730  | -0.180847019 |                                     |
| 10 | 69,600,000 | 69,750,000 | 929 | 835  | 0.371016148  |                                     |
| 10 | 69,675,000 | 69,825,000 | 930 | 904  | -0.343583892 |                                     |
| 10 | 69,750,000 | 69,900,000 | 931 | 705  | -0.677958542 | EXOC5                               |
| 10 | 69,825,000 | 69,975,000 | 932 | 503  | 0.473642252  | AP5M1,EXOC5                         |
| 10 | 69,900,000 | 70,050,000 | 933 | 439  | 0.801414849  | AP5M1,EXOC5,NAA30                   |
| 10 | 69,975,000 | 70,125,000 | 934 | 648  | 0.479399469  | C14orf105,NAA30                     |
| 10 | 70,050,000 | 70,200,000 | 935 | 788  | -0.153480965 | C14orf105,SLC35F4                   |
| 10 | 70,125,000 | 70,275,000 | 936 | 659  | -0.735912221 | SLC35F4                             |
| 10 | 70,200,000 | 70,350,000 | 937 | 964  | 0.194413506  |                                     |
| 10 | 70,275,000 | 70,425,000 | 938 | 922  | 0.428734523  |                                     |
| 10 | 70,350,000 | 70,500,000 | 939 | 835  | 0.980006662  |                                     |
| 10 | 70,425,000 | 70,575,000 | 940 | 995  | 0.950632418  |                                     |

|    |            |            |     |      |              |                                  |
|----|------------|------------|-----|------|--------------|----------------------------------|
| 10 | 70,500,000 | 70,650,000 | 941 | 888  | 0.05750192   | C14orf37                         |
| 10 | 70,575,000 | 70,725,000 | 942 | 630  | -0.761571548 | C14orf37                         |
| 10 | 70,650,000 | 70,800,000 | 943 | 414  | -1.736648117 | ACTR10,C14orf37,PSMA3            |
| 10 | 70,725,000 | 70,875,000 | 944 | 334  | -1.43076836  | ACTR10,ARID4A,PSMA3              |
| 10 | 70,800,000 | 70,950,000 | 945 | 333  | -2.346206232 | ARID4A,KIAA0586,PSMA3,TIMM9      |
| 10 | 70,875,000 | 71,025,000 | 946 | 355  | -3.866919245 | ARID4A,KIAA0586,TIMM9            |
| 10 | 70,950,000 | 71,100,000 | 947 | 605  | -1.608476061 | KIAA0586                         |
| 10 | 71,025,000 | 71,175,000 | 948 | 720  | -0.325265994 | DACT1,KIAA0586                   |
| 10 | 71,100,000 | 71,250,000 | 949 | 586  | 0.992292512  | DACT1                            |
| 10 | 71,175,000 | 71,325,000 | 950 | 570  | 0.9907028    |                                  |
| 10 | 71,250,000 | 71,400,000 | 951 | 503  | 0.856532163  |                                  |
| 10 | 71,325,000 | 71,475,000 | 952 | 511  | 0.808296477  |                                  |
| 10 | 71,400,000 | 71,550,000 | 953 | 564  | 0.940450789  |                                  |
| 10 | 71,475,000 | 71,625,000 | 954 | 665  | -0.121922751 | ENSBTAG00000045799               |
| 10 | 71,550,000 | 71,700,000 | 955 | 758  | -0.226393502 | ENSBTAG00000045799               |
| 10 | 71,625,000 | 71,775,000 | 956 | 685  | -0.747026664 | DAAM1                            |
| 10 | 71,700,000 | 71,850,000 | 957 | 432  | -2.619366037 | DAAM1                            |
| 10 | 71,775,000 | 71,925,000 | 958 | 281  | -3.212840807 | DAAM1                            |
| 10 | 71,850,000 | 72,000,000 | 959 | 464  | -4.034971179 | DAAM1,GPR135,L3HYPDH             |
| 10 | 71,925,000 | 72,075,000 | 960 | 717  | -2.008441155 | CCDC175,GPR135,JAMP,L3HYPDH      |
| 10 | 72,000,000 | 72,150,000 | 961 | 521  | 0.29033208   | CCDC175,JAMP,L3HYPDH,RTN1        |
| 10 | 72,075,000 | 72,225,000 | 962 | 324  | 0.808340364  | CCDC175,RTN1                     |
| 10 | 72,150,000 | 72,300,000 | 963 | 718  | 0.800742671  | COX7C,RTN1                       |
| 10 | 72,225,000 | 72,375,000 | 964 | 967  | 0.204437332  | COX7C,RTN1                       |
| 10 | 72,300,000 | 72,450,000 | 965 | 714  | -0.109163788 | LRRC9                            |
| 10 | 72,375,000 | 72,525,000 | 966 | 557  | 0.847948369  | LRRC9                            |
| 10 | 72,450,000 | 72,600,000 | 967 | 708  | 0.344698239  | LRRC9,PCNXL4                     |
| 10 | 72,525,000 | 72,675,000 | 968 | 779  | 0.244106221  | DHRS7,PCNXL4                     |
| 10 | 72,600,000 | 72,750,000 | 969 | 749  | 0.58966173   | DHRS7,PCNXL4                     |
| 10 | 72,675,000 | 72,825,000 | 970 | 658  | 0.872274109  | PPM1A                            |
| 10 | 72,750,000 | 72,900,000 | 971 | 407  | 1.170199728  | C14orf39,PPM1A                   |
| 10 | 72,825,000 | 72,975,000 | 972 | 268  | 1.500910406  | C14orf39,SIX6                    |
| 10 | 72,900,000 | 73,050,000 | 973 | 396  | 1.342362885  | C14orf39,SIX6                    |
| 10 | 72,975,000 | 73,125,000 | 974 | 416  | 1.298718201  | SIX1                             |
| 10 | 73,050,000 | 73,200,000 | 975 | 381  | 1.360418842  | MNAT1,SIX1,ENSBTAG00000046309    |
| 10 | 73,125,000 | 73,275,000 | 976 | 367  | 1.271569015  | MNAT1,ENSBTAG00000046309         |
| 10 | 73,200,000 | 73,350,000 | 977 | 236  | 1.183417722  | MNAT1                            |
| 10 | 73,275,000 | 73,425,000 | 978 | 375  | 0.006434983  | MNAT1,SLC38A6,TRMT5              |
| 10 | 73,350,000 | 73,500,000 | 979 | 598  | -1.386663858 | MNAT1,SLC38A6,TRMT5              |
| 10 | 73,425,000 | 73,575,000 | 980 | 534  | -1.073753036 | SLC38A6                          |
| 10 | 73,500,000 | 73,650,000 | 981 | 475  | 1.059822794  | TMEM30B,ENSBTAG00000047000       |
| 10 | 73,575,000 | 73,725,000 | 982 | 512  | 0.960540965  | PRKCH,TMEM30B,ENSBTAG00000047000 |
| 10 | 73,650,000 | 73,800,000 | 983 | 801  | -0.450733639 | PRKCH                            |
| 10 | 73,725,000 | 73,875,000 | 984 | 991  | -1.041163943 | PRKCH                            |
| 10 | 73,800,000 | 73,950,000 | 985 | 882  | -1.622687566 | PRKCH                            |
| 10 | 73,875,000 | 74,025,000 | 986 | 670  | -1.589917933 | PRKCH                            |
| 10 | 73,950,000 | 74,100,000 | 987 | 484  | -0.042046063 | HIF1A                            |
| 10 | 74,025,000 | 74,175,000 | 988 | 603  | 0.22996353   | HIF1A,SNAPC1                     |
| 10 | 74,100,000 | 74,250,000 | 989 | 906  | -0.139946578 | HIF1A,SNAPC1                     |
| 10 | 74,175,000 | 74,325,000 | 990 | 1279 | 0.40218409   | SNAPC1                           |
| 10 | 74,250,000 | 74,400,000 | 991 | 984  | 0.216810181  | SYT16                            |
| 10 | 74,325,000 | 74,475,000 | 992 | 610  | -1.698915212 | SYT16                            |
| 10 | 74,400,000 | 74,550,000 | 993 | 753  | -2.657342874 | SYT16,ENSBTAG00000030792         |

|    |            |            |      |      |              |                                        |
|----|------------|------------|------|------|--------------|----------------------------------------|
| 10 | 74,475,000 | 74,625,000 | 994  | 707  | -2.894473075 | SYT16,ENSBTAG00000030792               |
| 10 | 74,550,000 | 74,700,000 | 995  | 972  | 0.427201037  |                                        |
| 10 | 74,625,000 | 74,775,000 | 996  | 1362 | 0.956955924  |                                        |
| 10 | 74,700,000 | 74,850,000 | 997  | 1223 | 0.803536002  |                                        |
| 10 | 74,775,000 | 74,925,000 | 998  | 789  | 0.035118464  |                                        |
| 10 | 74,850,000 | 75,000,000 | 999  | 518  | -0.638285487 |                                        |
| 10 | 74,925,000 | 75,075,000 | 1000 | 510  | -3.034442613 |                                        |
| 10 | 75,000,000 | 75,150,000 | 1001 | 542  | -3.283069765 |                                        |
| 10 | 75,075,000 | 75,225,000 | 1002 | 520  | -0.272775897 |                                        |
| 10 | 75,150,000 | 75,300,000 | 1003 | 548  | 0.928499395  | KCNH5                                  |
| 10 | 75,225,000 | 75,375,000 | 1004 | 592  | 0.841190572  | KCNH5                                  |
| 10 | 75,300,000 | 75,450,000 | 1005 | 946  | 1.180076832  | KCNH5                                  |
| 10 | 75,375,000 | 75,525,000 | 1006 | 1417 | 1.083330902  | KCNH5                                  |
| 10 | 75,450,000 | 75,600,000 | 1007 | 1078 | 0.640687913  | KCNH5                                  |
| 10 | 75,525,000 | 75,675,000 | 1008 | 825  | 0.436589497  | KCNH5                                  |
| 10 | 75,600,000 | 75,750,000 | 1009 | 1031 | 0.407663664  | KCNH5                                  |
| 10 | 75,675,000 | 75,825,000 | 1010 | 1163 | 0.437978623  | RHOJ                                   |
| 10 | 75,750,000 | 75,900,000 | 1011 | 779  | 0.657834095  | RHOJ                                   |
| 10 | 75,825,000 | 75,975,000 | 1012 | 685  | 0.571367628  | PPP2R5E,RHOJ                           |
| 10 | 75,900,000 | 76,050,000 | 1013 | 905  | 0.348243198  | PPP2R5E                                |
| 10 | 75,975,000 | 76,125,000 | 1014 | 811  | 0.15838189   | PPP2R5E                                |
| 10 | 76,050,000 | 76,200,000 | 1015 | 666  | 0.488972532  | PPP2R5E,WDR89                          |
| 10 | 76,125,000 | 76,275,000 | 1016 | 551  | 0.630866036  | SGPP1,WDR89                            |
| 10 | 76,200,000 | 76,350,000 | 1017 | 911  | 0.519176843  | SGPP1                                  |
| 10 | 76,275,000 | 76,425,000 | 1018 | 1090 | 0.325423126  | SGPP1,SYNE2                            |
| 10 | 76,350,000 | 76,500,000 | 1019 | 1166 | -0.69689185  | SYNE2                                  |
| 10 | 76,425,000 | 76,575,000 | 1020 | 1368 | -0.871819308 | SYNE2                                  |
| 10 | 76,500,000 | 76,650,000 | 1021 | 942  | -0.081775039 | SYNE2                                  |
| 10 | 76,575,000 | 76,725,000 | 1022 | 500  | 0.397363943  | ESR2,SYNE2                             |
| 10 | 76,650,000 | 76,800,000 | 1023 | 716  | -0.045323424 | ESR2,SYNE2                             |
| 10 | 76,725,000 | 76,875,000 | 1024 | 967  | -0.67741325  | ESR2,MTHFD1,ENSBTAG00000013836         |
| 10 | 76,800,000 | 76,950,000 | 1025 | 797  | -0.654724137 | AKAP5,MTHFD1,ZBTB25,ENSBTAG00000013836 |
| 10 | 76,875,000 | 77,025,000 | 1026 | 610  | -0.13127989  | AKAP5,MTHFD1,PPP1R36,ZBTB1,ZBTB25      |
| 10 | 76,950,000 | 77,100,000 | 1027 | 977  | -0.156323622 | PPP1R36,ZBTB1,ZBTB25                   |
| 10 | 77,025,000 | 77,175,000 | 1028 | 1092 | -0.046120234 |                                        |
| 10 | 77,100,000 | 77,250,000 | 1029 | 645  | 0.453688198  | PLEKHG3,SPTB                           |
| 10 | 77,175,000 | 77,325,000 | 1030 | 450  | 0.339685584  | PLEKHG3,SPTB                           |
| 10 | 77,250,000 | 77,400,000 | 1031 | 707  | 0.645807158  | CHURC1,GPX2,RAB15,SPTB                 |
| 10 | 77,325,000 | 77,475,000 | 1032 | 897  | 0.590070527  | CHURC1,FNTB,GPX2,RAB15                 |
| 10 | 77,400,000 | 77,550,000 | 1033 | 749  | 0.286711395  | FNTB,MAX,RAB15                         |
| 10 | 77,475,000 | 77,625,000 | 1034 | 642  | 0.351564677  | FNTB,MAX                               |
| 10 | 77,550,000 | 77,700,000 | 1035 | 781  | 0.705764372  |                                        |
| 10 | 77,625,000 | 77,775,000 | 1036 | 854  | -0.046459197 |                                        |
| 10 | 77,700,000 | 77,850,000 | 1037 | 889  | -0.402730151 |                                        |
| 10 | 77,775,000 | 77,925,000 | 1038 | 952  | -0.363064753 |                                        |
| 10 | 77,850,000 | 78,000,000 | 1039 | 724  | -0.669485304 | FUT8                                   |
| 10 | 77,925,000 | 78,075,000 | 1040 | 840  | 0.65412793   | FUT8                                   |
| 10 | 78,000,000 | 78,150,000 | 1041 | 1151 | 1.078461048  | FUT8                                   |
| 10 | 78,075,000 | 78,225,000 | 1042 | 1207 | 1.162614288  | FUT8                                   |
| 10 | 78,150,000 | 78,300,000 | 1043 | 974  | 0.951661809  | FUT8                                   |
| 10 | 78,225,000 | 78,375,000 | 1044 | 552  | 0.356281185  |                                        |
| 10 | 78,300,000 | 78,450,000 | 1045 | 690  | 0.156086884  |                                        |
| 10 | 78,375,000 | 78,525,000 | 1046 | 1016 | 0.647232928  | ENSBTAG00000037625                     |

|    |            |            |      |     |              |                                       |
|----|------------|------------|------|-----|--------------|---------------------------------------|
| 10 | 78,450,000 | 78,600,000 | 1047 | 977 | 0.826491582  | ENSBTAG00000037625                    |
| 10 | 78,525,000 | 78,675,000 | 1048 | 928 | 0.775181171  |                                       |
| 10 | 78,600,000 | 78,750,000 | 1049 | 697 | 0.98224961   |                                       |
| 10 | 78,675,000 | 78,825,000 | 1050 | 624 | 0.800269086  |                                       |
| 10 | 78,750,000 | 78,900,000 | 1051 | 549 | 0.564515292  | C10H14orf53                           |
| 10 | 78,825,000 | 78,975,000 | 1052 | 317 | -1.012742162 | C10H14orf53,GPHN                      |
| 10 | 78,900,000 | 79,050,000 | 1053 | 360 | -1.27126245  | GPHN                                  |
| 10 | 78,975,000 | 79,125,000 | 1054 | 361 | -0.593887184 | GPHN                                  |
| 10 | 79,050,000 | 79,200,000 | 1055 | 642 | -0.091989138 | GPHN                                  |
| 10 | 79,125,000 | 79,275,000 | 1056 | 659 | -0.089312424 | GPHN                                  |
| 10 | 79,200,000 | 79,350,000 | 1057 | 437 | 0.213530775  | GPHN                                  |
| 10 | 79,275,000 | 79,425,000 | 1058 | 434 | 0.615585194  | GPHN                                  |
| 10 | 79,350,000 | 79,500,000 | 1059 | 604 | 0.767466366  | FAM71D,GPHN                           |
| 10 | 79,425,000 | 79,575,000 | 1060 | 531 | 0.824924075  | FAM71D,GPHN,MPP5                      |
| 10 | 79,500,000 | 79,650,000 | 1061 | 250 | 0.922947108  | ATP6V1D,EIF2S1,MPP5,PLEK2             |
| 10 | 79,575,000 | 79,725,000 | 1062 | 287 | 0.238593153  | ATP6V1D,EIF2S1,MPP5,PLEK2,TMEM229B    |
| 10 | 79,650,000 | 79,800,000 | 1063 | 320 | 0.336235749  | PLEKHH1,TMEM229B                      |
| 10 | 79,725,000 | 79,875,000 | 1064 | 326 | 1.150881481  | PIGH,PLEKHH1,RPL39,ENSBTAG00000046048 |
| 10 | 79,800,000 | 79,950,000 | 1065 | 363 | 0.756547988  | PIGH,PLEKHH1,RPL39,ENSBTAG00000046048 |
| 10 | 79,875,000 | 80,025,000 | 1066 | 403 | 0.813255143  |                                       |
| 10 | 79,950,000 | 80,100,000 | 1067 | 353 | 1.0260174    | ARG2                                  |
| 10 | 80,025,000 | 80,175,000 | 1068 | 254 | 0.920782892  | ARG2,RDH11,RDH12,VTI1B                |
| 10 | 80,100,000 | 80,250,000 | 1069 | 345 | 1.414873296  | ARG2,RAD51B,RDH11,RDH12,VTI1B,ZFYVE26 |
| 10 | 80,175,000 | 80,325,000 | 1070 | 526 | 1.257221321  | RAD51B,ZFYVE26                        |
| 10 | 80,250,000 | 80,400,000 | 1071 | 461 | 1.063537934  | RAD51B                                |
| 10 | 80,325,000 | 80,475,000 | 1072 | 381 | 1.130435572  | RAD51B                                |
| 10 | 80,400,000 | 80,550,000 | 1073 | 353 | 0.892695565  | RAD51B                                |
| 10 | 80,475,000 | 80,625,000 | 1074 | 370 | 0.488846132  | RAD51B                                |
| 10 | 80,550,000 | 80,700,000 | 1075 | 399 | 0.674159291  | RAD51B                                |
| 10 | 80,625,000 | 80,775,000 | 1076 | 311 | 0.738738878  | RAD51B                                |
| 10 | 80,700,000 | 80,850,000 | 1077 | 326 | -0.413975452 |                                       |
| 10 | 80,775,000 | 80,925,000 | 1078 | 533 | -1.904916285 |                                       |
| 10 | 80,850,000 | 81,000,000 | 1079 | 576 | -1.914868961 | ZFP36L1                               |
| 10 | 80,925,000 | 81,075,000 | 1080 | 520 | -1.111657132 | ACTN1,ZFP36L1                         |
| 10 | 81,000,000 | 81,150,000 | 1081 | 804 | -1.153092776 | ACTN1                                 |
| 10 | 81,075,000 | 81,225,000 | 1082 | 738 | -0.617667274 | ACTN1,DCAF5                           |
| 10 | 81,150,000 | 81,300,000 | 1083 | 358 | 0.911194698  | DCAF5                                 |
| 10 | 81,225,000 | 81,375,000 | 1084 | 483 | 1.004355161  | DCAF5,EXD2                            |
| 10 | 81,300,000 | 81,450,000 | 1085 | 686 | 0.832969285  | EXD2,GALNTL1                          |
| 10 | 81,375,000 | 81,525,000 | 1086 | 863 | 0.755349262  | ERH,EXD2,GALNTL1                      |
| 10 | 81,450,000 | 81,600,000 | 1087 | 841 | 0.749154478  | ERH,GALNTL1,PLEKHD1,SLC39A9           |
| 10 | 81,525,000 | 81,675,000 | 1088 | 579 | 0.73142994   | ERH,PLEKHD1,SLC39A9                   |
| 10 | 81,600,000 | 81,750,000 | 1089 | 444 | 0.332854915  | CCDC177,PLEKHD1                       |
| 10 | 81,675,000 | 81,825,000 | 1090 | 341 | -0.864992105 | CCDC177,KIAA0247                      |
| 10 | 81,750,000 | 81,900,000 | 1091 | 367 | -0.135223744 | KIAA0247,SFRS5,SLC10A1                |
| 10 | 81,825,000 | 81,975,000 | 1092 | 447 | 0.512910021  | SFRS5,SLC10A1,SMOC1                   |
| 10 | 81,900,000 | 82,050,000 | 1093 | 437 | 0.721373737  | SMOC1                                 |
| 10 | 81,975,000 | 82,125,000 | 1094 | 426 | 0.771279345  | SMOC1                                 |
| 10 | 82,050,000 | 82,200,000 | 1095 | 569 | 1.025864438  | SLC8A3,SMOC1                          |
| 10 | 82,125,000 | 82,275,000 | 1096 | 661 | 1.091809325  | SLC8A3                                |
| 10 | 82,200,000 | 82,350,000 | 1097 | 488 | 0.21034644   | SLC8A3,SYNJ2BP                        |
| 10 | 82,275,000 | 82,425,000 | 1098 | 532 | -0.293242804 | COX16,SYNJ2BP                         |
| 10 | 82,350,000 | 82,500,000 | 1099 | 655 | 0.486632006  | COX16,SYNJ2BP,ENSBTAG00000037932      |

|    |            |            |      |      |              |                                             |
|----|------------|------------|------|------|--------------|---------------------------------------------|
| 10 | 82,425,000 | 82,575,000 | 1100 | 599  | 0.148521715  | ADAM20,ADAM21,COX16,MED6,ENSBTAG000000379   |
|    |            |            |      |      |              | 32,ENSBTAG00000039950,ENSBTAG00000045679    |
| 10 | 82,500,000 | 82,650,000 | 1101 | 815  | -2.103921227 | ADAM20,ADAM21,MED6,TTC9,ENSBTAG0000003995   |
|    |            |            |      |      |              | 0,ENSBTAG00000045679                        |
| 10 | 82,575,000 | 82,725,000 | 1102 | 880  | -1.581851231 | MED6,TTC9,ENSBTAG00000039950,ENSBTAG0000004 |
|    |            |            |      |      |              | 5679                                        |
| 10 | 82,650,000 | 82,800,000 | 1103 | 693  | -0.066939804 | MAP3K9,TTC9                                 |
| 10 | 82,725,000 | 82,875,000 | 1104 | 666  | 0.004871542  | MAP3K9                                      |
| 10 | 82,800,000 | 82,950,000 | 1105 | 606  | 0.500873581  | MAP3K9,PCNX                                 |
| 10 | 82,875,000 | 83,025,000 | 1106 | 590  | 0.881767975  | PCNX                                        |
| 10 | 82,950,000 | 83,100,000 | 1107 | 704  | 1.108772058  | PCNX                                        |
| 10 | 83,025,000 | 83,175,000 | 1108 | 973  | 0.965666584  | PCNX                                        |
| 10 | 83,100,000 | 83,250,000 | 1109 | 1066 | 1.049989015  | ENSBTAG00000005395                          |
| 10 | 83,175,000 | 83,325,000 | 1110 | 771  | 1.405556717  | ENSBTAG00000005395                          |
| 10 | 83,250,000 | 83,400,000 | 1111 | 656  | 1.102852487  |                                             |
| 10 | 83,325,000 | 83,475,000 | 1112 | 768  | 0.005722625  |                                             |
| 10 | 83,400,000 | 83,550,000 | 1113 | 630  | -0.732485323 | RPL12,SIPA1L1                               |
| 10 | 83,475,000 | 83,625,000 | 1114 | 646  | 0.240853183  | RPL12,SIPA1L1                               |
| 10 | 83,550,000 | 83,700,000 | 1115 | 695  | 0.599553832  | SIPA1L1                                     |
| 10 | 83,625,000 | 83,775,000 | 1116 | 552  | 0.969551945  |                                             |
| 10 | 83,700,000 | 83,850,000 | 1117 | 571  | 0.909393172  |                                             |
| 10 | 83,775,000 | 83,925,000 | 1118 | 992  | 1.001732418  |                                             |
| 10 | 83,850,000 | 84,000,000 | 1119 | 1284 | 1.135738707  |                                             |
| 10 | 83,925,000 | 84,075,000 | 1120 | 949  | 1.001338693  |                                             |
| 10 | 84,000,000 | 84,150,000 | 1121 | 556  | 0.376742944  |                                             |
| 10 | 84,075,000 | 84,225,000 | 1122 | 575  | 0.729639211  |                                             |
| 10 | 84,150,000 | 84,300,000 | 1123 | 1009 | 1.157148287  |                                             |
| 10 | 84,225,000 | 84,375,000 | 1124 | 991  | 0.568205198  | RGS6                                        |
| 10 | 84,300,000 | 84,450,000 | 1125 | 710  | -0.053030932 | RGS6                                        |
| 10 | 84,375,000 | 84,525,000 | 1126 | 928  | 0.563830296  | DPF3,RGS6                                   |
| 10 | 84,450,000 | 84,600,000 | 1127 | 782  | 0.639463088  | DPF3                                        |
| 10 | 84,525,000 | 84,675,000 | 1128 | 502  | 0.275414936  | DPF3                                        |
| 10 | 84,600,000 | 84,750,000 | 1129 | 808  | 0.360727317  | DPF3,ENSBTAG00000046952                     |
| 10 | 84,675,000 | 84,825,000 | 1130 | 1129 | 0.612746576  | ENSBTAG00000046952                          |
| 10 | 84,750,000 | 84,900,000 | 1131 | 879  | 0.323898281  | WDR21A,ZFYVE1                               |
| 10 | 84,825,000 | 84,975,000 | 1132 | 312  | -1.191819634 | RBM25,WDR21A,ZFYVE1                         |
| 10 | 84,900,000 | 85,050,000 | 1133 | 197  | -3.233643834 | PSEN1,RBM25,ZFYVE1                          |
| 10 | 84,975,000 | 85,125,000 | 1134 | 307  | -2.180984579 | PAPLN,PSEN1,RBM25                           |
| 10 | 85,050,000 | 85,200,000 | 1135 | 316  | -0.878107998 | NUMB,PAPLN,PSEN1                            |
| 10 | 85,125,000 | 85,275,000 | 1136 | 282  | 0.087861459  | NUMB                                        |
| 10 | 85,200,000 | 85,350,000 | 1137 | 341  | 0.611587906  | C14orf169,HEATR4                            |
| 10 | 85,275,000 | 85,425,000 | 1138 | 592  | -0.889470395 | ACOT2,C14orf169,HEATR4,MGC160092            |
| 10 | 85,350,000 | 85,500,000 | 1139 | 957  | -3.632111408 | ACOT2,ACOT6,DNAL1,HEATR4,MGC160092,ENSBTAG  |
|    |            |            |      |      |              | 0000009783,ENSBTAG00000010270               |
| 10 | 85,425,000 | 85,575,000 | 1140 | 810  | -4.88747963  | ACOT6,DNAL1,ELMSAN1,PNMA1,ENSBTAG00000009   |
|    |            |            |      |      |              | 783,ENSBTAG00000010270                      |
| 10 | 85,500,000 | 85,650,000 | 1141 | 570  | -4.01889894  | DNAL1,ELMSAN1,PNMA1,PTGR2                   |
| 10 | 85,575,000 | 85,725,000 | 1142 | 597  | -3.122256403 | FAM161B,PTGR2,ZNF410                        |
| 10 | 85,650,000 | 85,800,000 | 1143 | 517  | -0.432381441 | CCDC176,COQ6,ENTPD5,FAM161B,PTGR2,ZNF410    |
| 10 | 85,725,000 | 85,875,000 | 1144 | 386  | -0.244886084 | ALDH6A1,CCDC176,COQ6,ENTPD5,LIN52           |
| 10 | 85,800,000 | 85,950,000 | 1145 | 237  | -0.003265046 | ALDH6A1,CCDC176,LIN52                       |
| 10 | 85,875,000 | 86,025,000 | 1146 | 357  | -0.818449071 | ABCD4,LIN52,VSX2                            |
| 10 | 85,950,000 | 86,100,000 | 1147 | 663  | 0.415042076  | ABCD4,LIN52,VRTN,VSX2                       |

|    |            |            |      |      |              |                                                |
|----|------------|------------|------|------|--------------|------------------------------------------------|
| 10 | 86,025,000 | 86,175,000 | 1148 | 911  | 0.926266917  | ABCD4,NPC2,SYNDIG1L,VRTN                       |
| 10 | 86,100,000 | 86,250,000 | 1149 | 963  | 0.949474075  | ISCA2,LTBP2,NPC2,SYNDIG1L                      |
| 10 | 86,175,000 | 86,325,000 | 1150 | 752  | 1.325584964  | ISCA2,LTBP2,NPC2                               |
| 10 | 86,250,000 | 86,400,000 | 1151 | 686  | 1.308373324  | AREL1,FCF1,LTBP2                               |
| 10 | 86,325,000 | 86,475,000 | 1152 | 625  | 1.073595326  | AREL1,FCF1,YLPM1                               |
| 10 | 86,400,000 | 86,550,000 | 1153 | 627  | 0.013761306  | DLST,PROX2,YLPM1                               |
| 10 | 86,475,000 | 86,625,000 | 1154 | 752  | -0.603739179 | DLST,PGF,PROX2,RPS6KL1,YLPM1                   |
| 10 | 86,550,000 | 86,700,000 | 1155 | 633  | -1.701054824 | DLST,EIF2B2,MLH3,PGF,RPS6KL1                   |
| 10 | 86,625,000 | 86,775,000 | 1156 | 535  | -1.434621463 | ACYP1,EIF2B2,MLH3,NEK9,TMED10,ZC2HC1C          |
| 10 | 86,700,000 | 86,850,000 | 1157 | 675  | 0.183734419  | ACYP1,NEK9,TMED10,ZC2HC1C                      |
| 10 | 86,775,000 | 86,925,000 | 1158 | 907  | 0.147131444  | FOS,TMED10                                     |
| 10 | 86,850,000 | 87,000,000 | 1159 | 830  | -0.146306532 | FOS                                            |
| 10 | 86,925,000 | 87,075,000 | 1160 | 715  | 0.379004695  | JDP2                                           |
| 10 | 87,000,000 | 87,150,000 | 1161 | 598  | 0.499569667  | BATF,JDP2                                      |
| 10 | 87,075,000 | 87,225,000 | 1162 | 497  | -0.577291235 | BATF,ENSBTAG00000040078                        |
| 10 | 87,150,000 | 87,300,000 | 1163 | 612  | -0.182754133 | CAMK4,STARD4,ENSBTAG00000040078                |
| 10 | 87,225,000 | 87,375,000 | 1164 | 637  | 0.381145055  | CAMK4,NCL,STARD4                               |
| 10 | 87,300,000 | 87,450,000 | 1165 | 798  | 0.6358601    | CAMK4,NCL                                      |
| 10 | 87,375,000 | 87,525,000 | 1166 | 720  | 0.88091948   |                                                |
| 10 | 87,450,000 | 87,600,000 | 1167 | 555  | 1.170095424  |                                                |
| 10 | 87,525,000 | 87,675,000 | 1168 | 520  | 0.861745317  | WDR36                                          |
| 10 | 87,600,000 | 87,750,000 | 1169 | 353  | -0.301623849 | WDR36                                          |
| 10 | 87,675,000 | 87,825,000 | 1170 | 433  | -1.58341783  | WDR36                                          |
| 10 | 87,750,000 | 87,900,000 | 1171 | 691  | -0.88968079  | ENSBTAG00000011985                             |
| 10 | 87,825,000 | 87,975,000 | 1172 | 647  | 0.594795311  | C10H14ORF1,TTLL5,ENSBTAG00000011985            |
| 10 | 87,900,000 | 88,050,000 | 1173 | 447  | 0.59359141   | C10H14ORF1,TTLL5,ENSBTAG00000011985            |
| 10 | 87,975,000 | 88,125,000 | 1174 | 410  | 0.47570659   | TTLL5                                          |
| 10 | 88,050,000 | 88,200,000 | 1175 | 485  | 0.126475147  | TTLL5                                          |
| 10 | 88,125,000 | 88,275,000 | 1176 | 425  | -0.006081177 | IFT43,TGFB3,TTLL5                              |
| 10 | 88,200,000 | 88,350,000 | 1177 | 382  | -0.362825094 | IFT43,TGFB3,TTLL5                              |
| 10 | 88,275,000 | 88,425,000 | 1178 | 1184 | -0.435239561 | IFT43                                          |
| 10 | 88,350,000 | 88,500,000 | 1179 | 1412 | -0.606712501 | IFT43,MGC166084                                |
| 10 | 88,425,000 | 88,575,000 | 1180 | 714  | -0.539403108 | MGC166084                                      |
| 10 | 88,500,000 | 88,650,000 | 1181 | 775  | -0.851180414 | MGC166084                                      |
| 10 | 88,575,000 | 88,725,000 | 1182 | 839  | -1.23323372  |                                                |
| 10 | 88,650,000 | 88,800,000 | 1183 | 552  | -1.126523048 | ESRRB                                          |
| 10 | 88,725,000 | 88,875,000 | 1184 | 675  | -0.18970848  | ESRRB                                          |
| 10 | 88,800,000 | 88,950,000 | 1185 | 591  | 0.382778538  | ESRRB                                          |
| 10 | 88,875,000 | 89,025,000 | 1186 | 325  | -0.219180213 |                                                |
| 10 | 88,950,000 | 89,100,000 | 1187 | 378  | -0.4582176   | ANGEL1,LRRRC74A,VASH1                          |
| 10 | 89,025,000 | 89,175,000 | 1188 | 569  | 0.026102623  | ANGEL1,LRRRC74A,VASH1                          |
| 10 | 89,100,000 | 89,250,000 | 1189 | 677  | 0.034379944  | IRF2BPL,LRRRC74A                               |
| 10 | 89,175,000 | 89,325,000 | 1190 | 404  | -0.114281582 | IRF2BPL                                        |
| 10 | 89,250,000 | 89,400,000 | 1191 | 276  | -0.761550841 | KIAA1737,ZDHHC22                               |
| 10 | 89,325,000 | 89,475,000 | 1192 | 601  | 0.307346064  | KIAA1737,ZDHHC22                               |
| 10 | 89,400,000 | 89,550,000 | 1193 | 718  | 0.8509396    | NGB,POMT2,TMEM63C,ZDHHC22                      |
| 10 | 89,475,000 | 89,625,000 | 1194 | 585  | 1.073115569  | GSTZ1,NGB,POMT2,TMED8,TMEM63C                  |
| 10 | 89,550,000 | 89,700,000 | 1195 | 474  | 1.219754214  | GSTZ1,NOXRED1,POMT2,SAMD15,TMED8,VIPAS39       |
| 10 | 89,625,000 | 89,775,000 | 1196 | 362  | 0.648181595  | AHSA1,ISM2,NOXRED1,SAMD15,SPTLC2,TMED8,VIPAS39 |
| 10 | 89,700,000 | 89,850,000 | 1197 | 426  | 0.631944258  | AHSA1,ISM2,SPTLC2,VIPAS39                      |
| 10 | 89,775,000 | 89,925,000 | 1198 | 753  | -0.035624914 | ALKBH1,SLIRP,SNW1,SPTLC2                       |
| 10 | 89,850,000 | 90,000,000 | 1199 | 871  | -0.244506507 | ALKBH1,SLIRP,SNW1,SPTLC2                       |



|    |            |            |      |      |              |                                            |
|----|------------|------------|------|------|--------------|--------------------------------------------|
| 10 | 89,925,000 | 90,075,000 | 1200 | 1092 | 0.575367084  | ADCK1,SNW1                                 |
| 10 | 90,000,000 | 90,150,000 | 1201 | 1227 | 1.061332776  | ADCK1                                      |
| 10 | 90,075,000 | 90,225,000 | 1202 | 1109 | 0.959867184  | ADCK1                                      |
| 10 | 90,150,000 | 90,300,000 | 1203 | 1100 | 0.700489853  |                                            |
| 10 | 90,225,000 | 90,375,000 | 1204 | 962  | 0.976976568  |                                            |
| 10 | 90,300,000 | 90,450,000 | 1205 | 726  | 0.092898165  |                                            |
| 10 | 90,375,000 | 90,525,000 | 1206 | 556  | -1.027520483 |                                            |
| 10 | 90,450,000 | 90,600,000 | 1207 | 550  | -0.783063326 |                                            |
| 10 | 90,525,000 | 90,675,000 | 1208 | 882  | -0.005987302 |                                            |
| 10 | 90,600,000 | 90,750,000 | 1209 | 1388 | 0.178417427  |                                            |
| 10 | 90,675,000 | 90,825,000 | 1210 | 1519 | 0.608376964  |                                            |
| 10 | 90,750,000 | 90,900,000 | 1211 | 1280 | 0.828845685  |                                            |
| 10 | 90,825,000 | 90,975,000 | 1212 | 1051 | 0.308846141  |                                            |
| 10 | 90,900,000 | 91,050,000 | 1213 | 925  | 0.332052622  |                                            |
| 10 | 90,975,000 | 91,125,000 | 1214 | 1024 | 0.609457781  |                                            |
| 10 | 91,050,000 | 91,200,000 | 1215 | 1043 | 0.046319692  |                                            |
| 10 | 91,125,000 | 91,275,000 | 1216 | 664  | -1.00039481  |                                            |
| 10 | 91,200,000 | 91,350,000 | 1217 | 948  | 0.192260116  |                                            |
| 10 | 91,275,000 | 91,425,000 | 1218 | 1311 | 0.692880857  |                                            |
| 10 | 91,350,000 | 91,500,000 | 1219 | 1587 | -0.028524686 |                                            |
| 10 | 91,425,000 | 91,575,000 | 1220 | 1845 | 0.471599503  |                                            |
| 10 | 91,500,000 | 91,650,000 | 1221 | 1273 | 1.156602501  | ENSBTAG00000025324                         |
| 10 | 91,575,000 | 91,725,000 | 1222 | 1048 | 0.676502341  | ENSBTAG00000025324                         |
| 10 | 91,650,000 | 91,800,000 | 1223 | 1056 | 0.831577458  | ENSBTAG00000025324                         |
| 10 | 91,725,000 | 91,875,000 | 1224 | 963  | 1.087198739  | ENSBTAG00000025324                         |
| 10 | 91,800,000 | 91,950,000 | 1225 | 1130 | 1.046943999  | ENSBTAG00000025324                         |
| 10 | 91,875,000 | 92,025,000 | 1226 | 1326 | 0.189410309  | ENSBTAG00000025324                         |
| 10 | 91,950,000 | 92,100,000 | 1227 | 946  | -0.471212681 | ENSBTAG00000025324                         |
| 10 | 92,025,000 | 92,175,000 | 1228 | 715  | -1.688145173 | ENSBTAG00000025324                         |
| 10 | 92,100,000 | 92,250,000 | 1229 | 830  | -1.095686967 | ENSBTAG00000025324                         |
| 10 | 92,175,000 | 92,325,000 | 1230 | 606  | 0.963322667  | ENSBTAG00000025324                         |
| 10 | 92,250,000 | 92,400,000 | 1231 | 1020 | 0.271698183  |                                            |
| 10 | 92,325,000 | 92,475,000 | 1232 | 1213 | 0.289948266  |                                            |
| 10 | 92,400,000 | 92,550,000 | 1233 | 917  | 0.048090706  |                                            |
| 10 | 92,475,000 | 92,625,000 | 1234 | 825  | -0.119636204 | DIO2                                       |
| 10 | 92,550,000 | 92,700,000 | 1235 | 823  | 0.272087079  | DIO2                                       |
| 10 | 92,625,000 | 92,775,000 | 1236 | 642  | 0.282306279  | DIO2                                       |
| 10 | 92,700,000 | 92,850,000 | 1237 | 498  | 0.507067151  |                                            |
| 10 | 92,775,000 | 92,925,000 | 1238 | 750  | 0.819735471  | ENSBTAG00000040167,ENSBTAG00000047260      |
| 10 | 92,850,000 | 93,000,000 | 1239 | 814  | 0.098212817  | ENSBTAG00000040167,ENSBTAG00000047260      |
| 10 | 92,925,000 | 93,075,000 | 1240 | 605  | -0.487214119 | ENSBTAG00000047260                         |
| 10 | 93,000,000 | 93,150,000 | 1241 | 364  | 0.220714479  |                                            |
| 10 | 93,075,000 | 93,225,000 | 1242 | 450  | 0.100701948  | ENSBTAG00000021708                         |
| 10 | 93,150,000 | 93,300,000 | 1243 | 512  | -0.588637775 | ENSBTAG00000021708                         |
| 10 | 93,225,000 | 93,375,000 | 1244 | 503  | -1.73327682  | ENSBTAG00000021708,ENSBTAG00000047322      |
| 10 | 93,300,000 | 93,450,000 | 1245 | 635  | -1.002892632 | TSHR,ENSBTAG00000021708,ENSBTAG00000047322 |
| 10 | 93,375,000 | 93,525,000 | 1246 | 789  | 0.04140341   | TSHR                                       |
| 10 | 93,450,000 | 93,600,000 | 1247 | 632  | 0.397600492  | TSHR                                       |
| 10 | 93,525,000 | 93,675,000 | 1248 | 334  | -0.476293729 | GTF2A1,TSHR                                |
| 10 | 93,600,000 | 93,750,000 | 1249 | 456  | -0.254233672 | GTF2A1,STON2                               |
| 10 | 93,675,000 | 93,825,000 | 1250 | 890  | 0.059342693  | GTF2A1,STON2                               |
| 10 | 93,750,000 | 93,900,000 | 1251 | 969  | -0.717714403 | STON2                                      |
| 10 | 93,825,000 | 93,975,000 | 1252 | 743  | -1.512951178 | SEL1L                                      |

|    |            |            |      |      |              |                    |
|----|------------|------------|------|------|--------------|--------------------|
| 10 | 93,900,000 | 94,050,000 | 1253 | 900  | -0.43932075  | SEL1L              |
| 10 | 93,975,000 | 94,125,000 | 1254 | 720  | -0.434605329 |                    |
| 10 | 94,050,000 | 94,200,000 | 1255 | 780  | 0.310142955  |                    |
| 10 | 94,125,000 | 94,275,000 | 1256 | 1005 | 0.40467499   |                    |
| 10 | 94,200,000 | 94,350,000 | 1257 | 735  | -0.117110658 |                    |
| 10 | 94,275,000 | 94,425,000 | 1258 | 919  | 0.703427127  |                    |
| 10 | 94,350,000 | 94,500,000 | 1259 | 1248 | 1.221528889  |                    |
| 10 | 94,425,000 | 94,575,000 | 1260 | 1257 | 0.94566096   |                    |
| 10 | 94,500,000 | 94,650,000 | 1261 | 1396 | 0.013291297  |                    |
| 10 | 94,575,000 | 94,725,000 | 1262 | 1458 | -0.075785636 |                    |
| 10 | 94,650,000 | 94,800,000 | 1263 | 1231 | 0.131574452  |                    |
| 10 | 94,725,000 | 94,875,000 | 1264 | 1060 | 0.241288462  |                    |
| 10 | 94,800,000 | 94,950,000 | 1265 | 1252 | 0.149738785  |                    |
| 10 | 94,875,000 | 95,025,000 | 1266 | 1406 | 0.217404046  |                    |
| 10 | 94,950,000 | 95,100,000 | 1267 | 1546 | -0.263421697 |                    |
| 10 | 95,025,000 | 95,175,000 | 1268 | 1654 | -0.454989585 |                    |
| 10 | 95,100,000 | 95,250,000 | 1269 | 1655 | -0.954658486 |                    |
| 10 | 95,175,000 | 95,325,000 | 1270 | 1419 | -0.728895813 |                    |
| 10 | 95,250,000 | 95,400,000 | 1271 | 1372 | 0.177648162  |                    |
| 10 | 95,325,000 | 95,475,000 | 1272 | 1473 | 0.292406215  | ENSBTAG00000018039 |
| 10 | 95,400,000 | 95,550,000 | 1273 | 1263 | 0.900728137  | ENSBTAG00000018039 |
| 10 | 95,475,000 | 95,625,000 | 1274 | 1077 | 0.579117927  |                    |
| 10 | 95,550,000 | 95,700,000 | 1275 | 888  | 0.684354613  |                    |
| 10 | 95,625,000 | 95,775,000 | 1276 | 845  | 0.865658578  |                    |
| 10 | 95,700,000 | 95,850,000 | 1277 | 1040 | -0.936424142 |                    |
| 10 | 95,775,000 | 95,925,000 | 1278 | 1154 | -1.437259531 |                    |
| 10 | 95,850,000 | 96,000,000 | 1279 | 795  | -0.644821651 |                    |
| 10 | 95,925,000 | 96,075,000 | 1280 | 751  | 0.486753894  |                    |
| 10 | 96,000,000 | 96,150,000 | 1281 | 1045 | -0.223525991 |                    |
| 10 | 96,075,000 | 96,225,000 | 1282 | 1161 | -0.783643488 |                    |
| 10 | 96,150,000 | 96,300,000 | 1283 | 1122 | -0.130422376 |                    |
| 10 | 96,225,000 | 96,375,000 | 1284 | 1009 | 0.551521751  |                    |
| 10 | 96,300,000 | 96,450,000 | 1285 | 883  | 1.106527604  |                    |
| 10 | 96,375,000 | 96,525,000 | 1286 | 740  | 0.939312424  |                    |
| 10 | 96,450,000 | 96,600,000 | 1287 | 1007 | 1.014497039  |                    |
| 10 | 96,525,000 | 96,675,000 | 1288 | 1133 | 0.965662081  |                    |
| 10 | 96,600,000 | 96,750,000 | 1289 | 735  | 0.600913313  |                    |
| 10 | 96,675,000 | 96,825,000 | 1290 | 960  | -2.401549952 |                    |
| 10 | 96,750,000 | 96,900,000 | 1291 | 1173 | -1.972272294 |                    |
| 10 | 96,825,000 | 96,975,000 | 1292 | 1471 | 0.699308977  |                    |
| 10 | 96,900,000 | 97,050,000 | 1293 | 1285 | -0.062953137 |                    |
| 10 | 96,975,000 | 97,125,000 | 1294 | 1196 | -1.339913594 |                    |
| 10 | 97,050,000 | 97,200,000 | 1295 | 1460 | -0.0613527   |                    |
| 10 | 97,125,000 | 97,275,000 | 1296 | 1252 | 0.552491705  |                    |
| 10 | 97,200,000 | 97,350,000 | 1297 | 1403 | 0.748785444  |                    |
| 10 | 97,275,000 | 97,425,000 | 1298 | 1338 | 1.032104798  |                    |
| 10 | 97,350,000 | 97,500,000 | 1299 | 841  | 0.668684344  |                    |
| 10 | 97,425,000 | 97,575,000 | 1300 | 369  | -0.217422843 |                    |
| 10 | 97,500,000 | 97,650,000 | 1301 | 558  | 1.187283029  |                    |
| 10 | 97,575,000 | 97,725,000 | 1302 | 992  | 1.086719594  |                    |
| 10 | 97,650,000 | 97,800,000 | 1303 | 986  | 0.619501635  |                    |
| 10 | 97,725,000 | 97,875,000 | 1304 | 983  | 0.567720302  |                    |
| 10 | 97,800,000 | 97,950,000 | 1305 | 1149 | 0.702501762  |                    |

|    |             |             |      |      |              |                    |
|----|-------------|-------------|------|------|--------------|--------------------|
| 10 | 97,875,000  | 98,025,000  | 1306 | 1200 | 0.518133702  |                    |
| 10 | 97,950,000  | 98,100,000  | 1307 | 1085 | -0.466458209 |                    |
| 10 | 98,025,000  | 98,175,000  | 1308 | 970  | -4.451967708 |                    |
| 10 | 98,100,000  | 98,250,000  | 1309 | 917  | -4.619546831 |                    |
| 10 | 98,175,000  | 98,325,000  | 1310 | 1020 | -1.03605257  |                    |
| 10 | 98,250,000  | 98,400,000  | 1311 | 849  | -0.776851352 | FLRT2              |
| 10 | 98,325,000  | 98,475,000  | 1312 | 736  | -0.424002265 | FLRT2              |
| 10 | 98,400,000  | 98,550,000  | 1313 | 940  | 0.490385795  |                    |
| 10 | 98,475,000  | 98,625,000  | 1314 | 915  | 0.604831569  |                    |
| 10 | 98,550,000  | 98,700,000  | 1315 | 1291 | 0.49337806   |                    |
| 10 | 98,625,000  | 98,775,000  | 1316 | 1514 | 0.516871829  |                    |
| 10 | 98,700,000  | 98,850,000  | 1317 | 1414 | 0.91904616   |                    |
| 10 | 98,775,000  | 98,925,000  | 1318 | 1468 | 1.201890365  |                    |
| 10 | 98,850,000  | 99,000,000  | 1319 | 1316 | 0.863889316  |                    |
| 10 | 98,925,000  | 99,075,000  | 1320 | 1349 | -0.427985942 |                    |
| 10 | 99,000,000  | 99,150,000  | 1321 | 1528 | -0.19016014  |                    |
| 10 | 99,075,000  | 99,225,000  | 1322 | 1614 | 0.342115222  |                    |
| 10 | 99,150,000  | 99,300,000  | 1323 | 1388 | -0.136286069 |                    |
| 10 | 99,225,000  | 99,375,000  | 1324 | 982  | -0.815052302 |                    |
| 10 | 99,300,000  | 99,450,000  | 1325 | 815  | -0.35896116  |                    |
| 10 | 99,375,000  | 99,525,000  | 1326 | 775  | -0.181180175 |                    |
| 10 | 99,450,000  | 99,600,000  | 1327 | 1018 | 0.20766523   |                    |
| 10 | 99,525,000  | 99,675,000  | 1328 | 1197 | 0.659735281  |                    |
| 10 | 99,600,000  | 99,750,000  | 1329 | 1039 | 0.94958534   |                    |
| 10 | 99,675,000  | 99,825,000  | 1330 | 969  | 0.855913938  |                    |
| 10 | 99,750,000  | 99,900,000  | 1331 | 931  | 1.019257651  |                    |
| 10 | 99,825,000  | 99,975,000  | 1332 | 856  | 0.556272635  |                    |
| 10 | 99,900,000  | 100,050,000 | 1333 | 1163 | 0.333841651  |                    |
| 10 | 99,975,000  | 100,125,000 | 1334 | 1138 | 0.601381366  |                    |
| 10 | 100,050,000 | 100,200,000 | 1335 | 1198 | 0.491321755  |                    |
| 10 | 100,125,000 | 100,275,000 | 1336 | 1224 | 0.404212275  |                    |
| 10 | 100,200,000 | 100,350,000 | 1337 | 997  | -1.263288917 |                    |
| 10 | 100,275,000 | 100,425,000 | 1338 | 987  | -1.485283107 |                    |
| 10 | 100,350,000 | 100,500,000 | 1339 | 728  | -0.349271827 |                    |
| 10 | 100,425,000 | 100,575,000 | 1340 | 706  | -0.763365557 |                    |
| 10 | 100,500,000 | 100,650,000 | 1341 | 1141 | 0.422310455  |                    |
| 10 | 100,575,000 | 100,725,000 | 1342 | 1272 | -0.592768042 |                    |
| 10 | 100,650,000 | 100,800,000 | 1343 | 1035 | -2.545382384 | GALC               |
| 10 | 100,725,000 | 100,875,000 | 1344 | 1382 | 0.1476855    | GALC,GPR65         |
| 10 | 100,800,000 | 100,950,000 | 1345 | 1430 | 0.700609975  | GPR65              |
| 10 | 100,875,000 | 101,025,000 | 1346 | 1206 | 0.412350229  | KCNK10             |
| 10 | 100,950,000 | 101,100,000 | 1347 | 1400 | -0.451420181 | KCNK10             |
| 10 | 101,025,000 | 101,175,000 | 1348 | 1230 | -0.526644465 | KCNK10             |
| 10 | 101,100,000 | 101,250,000 | 1349 | 793  | -0.029440658 | PTPN21,SPATA7      |
| 10 | 101,175,000 | 101,325,000 | 1350 | 862  | -0.577089809 | PTPN21,SPATA7      |
| 10 | 101,250,000 | 101,400,000 | 1351 | 814  | 0.061587182  | EML5,PTPN21,ZC3H14 |
| 10 | 101,325,000 | 101,475,000 | 1352 | 382  | 0.381010354  | EML5,ZC3H14        |
| 10 | 101,400,000 | 101,550,000 | 1353 | 369  | -0.623586884 | EML5               |
| 10 | 101,475,000 | 101,625,000 | 1354 | 442  | 0.078159058  | EML5,TTC8          |
| 10 | 101,550,000 | 101,700,000 | 1355 | 907  | 0.327129107  | TTC8               |
| 10 | 101,625,000 | 101,775,000 | 1356 | 907  | 0.170899212  | TTC8               |
| 10 | 101,700,000 | 101,850,000 | 1357 | 855  | 0.97257369   |                    |
| 10 | 101,775,000 | 101,925,000 | 1358 | 1047 | 0.623990911  |                    |

|    |             |             |      |      |              |                           |
|----|-------------|-------------|------|------|--------------|---------------------------|
| 10 | 101,850,000 | 102,000,000 | 1359 | 997  | 0.10326492   |                           |
| 10 | 101,925,000 | 102,075,000 | 1360 | 1379 | 0.23782591   | FOXN3                     |
| 10 | 102,000,000 | 102,150,000 | 1361 | 1128 | -0.321252478 | FOXN3                     |
| 10 | 102,075,000 | 102,225,000 | 1362 | 794  | -0.252879278 | FOXN3                     |
| 10 | 102,150,000 | 102,300,000 | 1363 | 927  | 0.503730008  | FOXN3                     |
| 10 | 102,225,000 | 102,375,000 | 1364 | 898  | 0.544655968  | FOXN3                     |
| 10 | 102,300,000 | 102,450,000 | 1365 | 939  | 0.441856243  | FOXN3                     |
| 10 | 102,375,000 | 102,525,000 | 1366 | 1273 | 0.6768009    |                           |
| 10 | 102,450,000 | 102,600,000 | 1367 | 1333 | 0.403869763  |                           |
| 10 | 102,525,000 | 102,675,000 | 1368 | 1004 | 0.011603601  | EFCAB11                   |
| 10 | 102,600,000 | 102,750,000 | 1369 | 820  | -1.099005145 | EFCAB11,TDP1              |
| 10 | 102,675,000 | 102,825,000 | 1370 | 1062 | -0.676023439 | EFCAB11,TDP1              |
| 10 | 102,750,000 | 102,900,000 | 1371 | 1567 | 0.563182037  | KCNK13,TDP1               |
| 10 | 102,825,000 | 102,975,000 | 1372 | 1838 | 0.707593243  | KCNK13,NRDE2,PSMC1        |
| 10 | 102,900,000 | 103,050,000 | 1373 | 1583 | 0.475778324  | NRDE2,PSMC1               |
| 10 | 102,975,000 | 103,125,000 | 1374 | 1059 | 0.441479733  | CALM                      |
| 10 | 103,050,000 | 103,200,000 | 1375 | 1034 | 1.080057608  | CALM,TTC7B                |
| 10 | 103,125,000 | 103,275,000 | 1376 | 1124 | 0.94085453   | TTC7B                     |
| 10 | 103,200,000 | 103,350,000 | 1377 | 1284 | 0.352378887  | TTC7B                     |
| 10 | 103,275,000 | 103,425,000 | 1378 | 1464 | 0.110462074  | TTC7B                     |
| 10 | 103,350,000 | 103,500,000 | 1379 | 1291 | 0.322014449  | TTC7B                     |
| 10 | 103,425,000 | 103,575,000 | 1380 | 1133 | 0.728018573  | RPS6KA5                   |
| 10 | 103,500,000 | 103,650,000 | 1381 | 1175 | 0.770293845  | RPS6KA5                   |
| 10 | 103,575,000 | 103,725,000 | 1382 | 1171 | 0.325189214  | RPS6KA5                   |
| 10 | 103,650,000 | 103,800,000 | 1383 | 1237 | 0.259241605  | RPS6KA5                   |
| 10 | 103,725,000 | 103,875,000 | 1384 | 1154 | 0.648956294  | CASC4                     |
| 10 | 103,800,000 | 103,950,000 | 1385 | 801  | 0.821243509  | CASC4,CTDSPL2             |
| 10 | 103,875,000 | 104,025,000 | 1386 | 589  | 0.256090083  | CASC4,CTDSPL2,EIF3J,SPG11 |
| 10 | 103,950,000 | 104,100,000 | 1387 | 626  | -2.23648217  | CTDSPL2,EIF3J,PATL2,SPG11 |
| 10 | 104,025,000 | 104,175,000 | 1388 | 664  | -3.227860635 | B2M,PATL2,SPG11           |
| 10 | 104,100,000 | 104,250,000 | 1389 | 472  | -2.284594872 | B2M,C10H15orf43,TRIM69    |
| 10 | 104,175,000 | 104,305,016 | 1390 | 367  | 0.090669647  | C10H15orf43,TRIM69        |
| 11 | 0           | 150,000     | 1    | 854  | -0.21025685  | ZC3H6,ENSBTAG00000038257  |
| 11 | 75,000      | 225,000     | 2    | 1419 | -1.284668905 | FBLN7,ZC3H6,ZC3H8         |
| 11 | 150,000     | 300,000     | 3    | 1605 | -0.556056263 | FBLN7,TMEM87B,ZC3H8       |
| 11 | 225,000     | 375,000     | 4    | 1582 | 0.696232937  | FBLN7,MERTK,TMEM87B       |
| 11 | 300,000     | 450,000     | 5    | 1622 | 0.337788207  | MERTK,TMEM87B             |
| 11 | 375,000     | 525,000     | 6    | 1507 | 0.429346244  | ANAPC1,MERTK              |
| 11 | 450,000     | 600,000     | 7    | 1477 | 0.868248603  | ANAPC1,ENSBTAG00000023163 |
| 11 | 525,000     | 675,000     | 8    | 1428 | 0.262409829  | ANAPC1,ENSBTAG00000023163 |
| 11 | 600,000     | 750,000     | 9    | 1572 | 0.091650817  |                           |
| 11 | 675,000     | 825,000     | 10   | 1668 | -0.107925552 |                           |
| 11 | 750,000     | 900,000     | 11   | 1357 | -0.417607532 |                           |
| 11 | 825,000     | 975,000     | 12   | 1255 | 0.311619549  |                           |
| 11 | 900,000     | 1,050,000   | 13   | 1454 | 0.286292106  |                           |
| 11 | 975,000     | 1,125,000   | 14   | 1471 | 0.215668177  |                           |
| 11 | 1,050,000   | 1,200,000   | 15   | 1420 | 0.452521415  | BCL2L11                   |
| 11 | 1,125,000   | 1,275,000   | 16   | 1376 | 0.019182984  | ACOXL,BCL2L11             |
| 11 | 1,200,000   | 1,350,000   | 17   | 1233 | -0.759281585 | ACOXL                     |
| 11 | 1,275,000   | 1,425,000   | 18   | 1161 | -0.485227293 | ACOXL                     |
| 11 | 1,350,000   | 1,500,000   | 19   | 1208 | 0.440707842  | ACOXL                     |
| 11 | 1,425,000   | 1,575,000   | 20   | 1285 | -0.137843258 | ACOXL,BUB1                |
| 11 | 1,500,000   | 1,650,000   | 21   | 1264 | -0.651329284 | ACOXL,BUB1,TPC3           |

|    |           |           |    |      |              |                                                               |
|----|-----------|-----------|----|------|--------------|---------------------------------------------------------------|
| 11 | 1,575,000 | 1,725,000 | 22 | 1386 | -0.06908994  | BUB1,LINC00116,NPHP1,TPC3                                     |
| 11 | 1,650,000 | 1,800,000 | 23 | 1375 | 0.44679366   | LINC00116,MALL,NPHP1                                          |
| 11 | 1,725,000 | 1,875,000 | 24 | 1057 | 0.181048963  | MALL,NPHP1,ENSBTAG00000034586                                 |
| 11 | 1,800,000 | 1,950,000 | 25 | 1226 | 0.31428695   | MRPS5,ZNF514,ENSBTAG00000034586,ENSBTAG0000034657             |
| 11 | 1,875,000 | 2,025,000 | 26 | 1332 | 0.383255219  | MRPS5,PROM2,ZNF2,ZNF514,ENSBTAG00000034657,ENSBTAG00000047503 |
| 11 | 1,950,000 | 2,100,000 | 27 | 1214 | 0.605223058  | PROM2,ZNF2,ENSBTAG00000017955,ENSBTAG00000047503              |
| 11 | 2,025,000 | 2,175,000 | 28 | 1172 | 0.336699194  | GPAT2,ENSBTAG00000011553,ENSBTAG00000017955                   |
| 11 | 2,100,000 | 2,250,000 | 29 | 956  | -0.352749607 | ADRA2B,ASTL,GPAT2,ENSBTAG00000011553                          |
| 11 | 2,175,000 | 2,325,000 | 30 | 876  | 0.434751334  | ADRA2B,ASTL,DUSP2,STARD7,TMEM127                              |
| 11 | 2,250,000 | 2,400,000 | 31 | 1291 | 1.065647687  | CIAO1,DUSP2,ITPRIPL1,SNRNP200,STARD7,TMEM127                  |
| 11 | 2,325,000 | 2,475,000 | 32 | 1833 | 0.800743588  | CIAO1,ITPRIPL1,NCAPH,SNRNP200,TMEM127                         |
| 11 | 2,400,000 | 2,550,000 | 33 | 1294 | 0.420631311  | ARID5A,NCAPH,NEURL3                                           |
| 11 | 2,475,000 | 2,625,000 | 34 | 706  | -0.329066154 | ARID5A,FER1L5,KANSL3,NEURL3                                   |
| 11 | 2,550,000 | 2,700,000 | 35 | 1059 | 0.268508656  | CNNM4,FER1L5,KANSL3,LMAN2L                                    |
| 11 | 2,625,000 | 2,775,000 | 36 | 1400 | 0.538282475  | ANKRD23,CNNM3,CNNM4,FER1L5,LMAN2L                             |
| 11 | 2,700,000 | 2,850,000 | 37 | 1536 | 0.037773617  | ANKRD23,ANKRD39,CNNM3,CNNM4,FAM178B,SEMA4C                    |
| 11 | 2,775,000 | 2,925,000 | 38 | 1530 | -0.08524278  | ANKRD39,COX5B,FAM178B,SEMA4C                                  |
| 11 | 2,850,000 | 3,000,000 | 39 | 1857 | 0.650487528  | ACTR1B,COX5B,FAM178B                                          |
| 11 | 2,925,000 | 3,075,000 | 40 | 1929 | 0.755445704  | ACTR1B,ZAP70                                                  |
| 11 | 3,000,000 | 3,150,000 | 41 | 1212 | 0.575852248  | TMEM131,ZAP70                                                 |
| 11 | 3,075,000 | 3,225,000 | 42 | 751  | 0.53992124   | TMEM131                                                       |
| 11 | 3,150,000 | 3,300,000 | 43 | 842  | 0.274599378  | TMEM131                                                       |
| 11 | 3,225,000 | 3,375,000 | 44 | 1276 | 0.263262684  | VWA3B                                                         |
| 11 | 3,300,000 | 3,450,000 | 45 | 1191 | 0.267105314  | VWA3B                                                         |
| 11 | 3,375,000 | 3,525,000 | 46 | 1365 | -1.035645549 | VWA3B                                                         |
| 11 | 3,450,000 | 3,600,000 | 47 | 1795 | -0.696476919 | CNGA3,VWA3B                                                   |
| 11 | 3,525,000 | 3,675,000 | 48 | 1550 | 0.237207658  | CNGA3,VWA3B                                                   |
| 11 | 3,600,000 | 3,750,000 | 49 | 1358 | 0.681223326  | INPP4A                                                        |
| 11 | 3,675,000 | 3,825,000 | 50 | 1401 | 0.479286769  | COA5,INPP4A,MGAT4A,UNC50                                      |
| 11 | 3,750,000 | 3,900,000 | 51 | 1243 | 0.352959714  | COA5,MGAT4A,UNC50                                             |
| 11 | 3,825,000 | 3,975,000 | 52 | 838  | -0.099882769 | MGAT4A                                                        |
| 11 | 3,900,000 | 4,050,000 | 53 | 601  | -0.328926469 | MGAT4A                                                        |
| 11 | 3,975,000 | 4,125,000 | 54 | 656  | 0.382644934  |                                                               |
| 11 | 4,050,000 | 4,200,000 | 55 | 659  | 0.388665626  | TSGA10                                                        |
| 11 | 4,125,000 | 4,275,000 | 56 | 464  | -0.261312676 | C2orf15,TSGA10                                                |
| 11 | 4,200,000 | 4,350,000 | 57 | 676  | -3.203818214 | C2orf15,LIPT1,LYG2,MITD1,MRPL30,TSGA10                        |
| 11 | 4,275,000 | 4,425,000 | 58 | 1368 | -1.148105682 | LIPT1,LYG2,MITD1,MRPL30,TXNDC9                                |
| 11 | 4,350,000 | 4,500,000 | 59 | 1350 | 0.125685974  | EIF5B,TXNDC9                                                  |
| 11 | 4,425,000 | 4,575,000 | 60 | 912  | -0.110328399 | EIF5B,REV1                                                    |
| 11 | 4,500,000 | 4,650,000 | 61 | 917  | 0.017590109  | AFF3,EIF5B,REV1                                               |
| 11 | 4,575,000 | 4,725,000 | 62 | 1284 | -0.301334208 | AFF3,REV1                                                     |
| 11 | 4,650,000 | 4,800,000 | 63 | 2128 | 0.297224041  | AFF3                                                          |
| 11 | 4,725,000 | 4,875,000 | 64 | 2145 | 0.928351183  |                                                               |
| 11 | 4,800,000 | 4,950,000 | 65 | 1526 | 0.044265966  |                                                               |
| 11 | 4,875,000 | 5,025,000 | 66 | 1162 | -0.483354498 |                                                               |
| 11 | 4,950,000 | 5,100,000 | 67 | 1296 | 0.696921456  |                                                               |
| 11 | 5,025,000 | 5,175,000 | 68 | 1384 | 0.297505034  |                                                               |

|    |           |           |     |      |              |                              |
|----|-----------|-----------|-----|------|--------------|------------------------------|
| 11 | 5,100,000 | 5,250,000 | 69  | 1470 | 0.02027124   |                              |
| 11 | 5,175,000 | 5,325,000 | 70  | 1711 | 0.104071133  |                              |
| 11 | 5,250,000 | 5,400,000 | 71  | 1639 | 0.160494897  |                              |
| 11 | 5,325,000 | 5,475,000 | 72  | 1718 | 0.342644933  | CHST10,LONRF2                |
| 11 | 5,400,000 | 5,550,000 | 73  | 1781 | 0.615656084  | CHST10,LONRF2,NMS            |
| 11 | 5,475,000 | 5,625,000 | 74  | 1596 | 0.64309232   | CHST10,NMS,PDCL3             |
| 11 | 5,550,000 | 5,700,000 | 75  | 1509 | -0.246345491 | PDCL3                        |
| 11 | 5,625,000 | 5,775,000 | 76  | 1417 | 0.173530022  | PTPN13                       |
| 11 | 5,700,000 | 5,850,000 | 77  | 1098 | 0.284510427  | PTPN13,SLC10A6               |
| 11 | 5,775,000 | 5,925,000 | 78  | 973  | -0.695993267 | NPAS2,PTPN13,SLC10A6         |
| 11 | 5,850,000 | 6,000,000 | 79  | 1293 | -0.16226516  | NPAS2                        |
| 11 | 5,925,000 | 6,075,000 | 80  | 1406 | 0.435108549  | NPAS2,RPL31,TBC1D8           |
| 11 | 6,000,000 | 6,150,000 | 81  | 1283 | 0.335452862  | NPAS2,RPL31,TBC1D8           |
| 11 | 6,075,000 | 6,225,000 | 82  | 1271 | -0.456393598 | CNOT11,RNF149                |
| 11 | 6,150,000 | 6,300,000 | 83  | 1368 | -1.571023593 | CNOT11,CREG2,RNF149          |
| 11 | 6,225,000 | 6,375,000 | 84  | 1565 | -1.281240522 | CREG2,RFX8,RNF149            |
| 11 | 6,300,000 | 6,450,000 | 85  | 1446 | -0.677879754 | RFX8                         |
| 11 | 6,375,000 | 6,525,000 | 86  | 1209 | -0.464439506 |                              |
| 11 | 6,450,000 | 6,600,000 | 87  | 1318 | 0.081495162  |                              |
| 11 | 6,525,000 | 6,675,000 | 88  | 1524 | 0.164819941  | MAP4K4                       |
| 11 | 6,600,000 | 6,750,000 | 89  | 1546 | -0.367782249 | IL1R2,MAP4K4                 |
| 11 | 6,675,000 | 6,825,000 | 90  | 1456 | 0.065988196  | IL1R2                        |
| 11 | 6,750,000 | 6,900,000 | 91  | 1382 | 0.940144737  | IL1R1,IL1R2                  |
| 11 | 6,825,000 | 6,975,000 | 92  | 1296 | 0.103305239  | IL1R1                        |
| 11 | 6,900,000 | 7,050,000 | 93  | 1382 | 0.06602965   | IL1R1,IL1RL2                 |
| 11 | 6,975,000 | 7,125,000 | 94  | 1755 | 0.916177583  | IL1RL1,IL1RL2                |
| 11 | 7,050,000 | 7,200,000 | 95  | 1433 | 1.132191808  | IL18R1,IL18RAP,IL1RL1        |
| 11 | 7,125,000 | 7,275,000 | 96  | 978  | 0.059327522  | IL18R1,IL18RAP,IL1RL1,SLC9A4 |
| 11 | 7,200,000 | 7,350,000 | 97  | 1021 | -0.930969823 | IL18RAP,SLC9A2,SLC9A4        |
| 11 | 7,275,000 | 7,425,000 | 98  | 1582 | 0.346953682  | MFSD9,SLC9A2,SLC9A4          |
| 11 | 7,350,000 | 7,500,000 | 99  | 2048 | 0.789976239  | MFSD9,SLC9A2,TMEM182         |
| 11 | 7,425,000 | 7,575,000 | 100 | 1827 | 0.260408274  | MFSD9,TMEM182                |
| 11 | 7,500,000 | 7,650,000 | 101 | 1394 | -0.240940158 |                              |
| 11 | 7,575,000 | 7,725,000 | 102 | 885  | -0.550723946 |                              |
| 11 | 7,650,000 | 7,800,000 | 103 | 744  | -0.138251678 |                              |
| 11 | 7,725,000 | 7,875,000 | 104 | 671  | -0.177065174 |                              |
| 11 | 7,800,000 | 7,950,000 | 105 | 574  | -0.630449374 |                              |
| 11 | 7,875,000 | 8,025,000 | 106 | 662  | 0.397027726  |                              |
| 11 | 7,950,000 | 8,100,000 | 107 | 604  | 0.717909523  |                              |
| 11 | 8,025,000 | 8,175,000 | 108 | 510  | 0.321974427  |                              |
| 11 | 8,100,000 | 8,250,000 | 109 | 663  | 0.031758389  |                              |
| 11 | 8,175,000 | 8,325,000 | 110 | 544  | -0.047718283 |                              |
| 11 | 8,250,000 | 8,400,000 | 111 | 411  | 0.407228007  |                              |
| 11 | 8,325,000 | 8,475,000 | 112 | 575  | -0.413985316 |                              |
| 11 | 8,400,000 | 8,550,000 | 113 | 474  | -1.257932132 |                              |
| 11 | 8,475,000 | 8,625,000 | 114 | 639  | 0.83765765   |                              |
| 11 | 8,550,000 | 8,700,000 | 115 | 707  | 1.237151559  |                              |
| 11 | 8,625,000 | 8,775,000 | 116 | 741  | -0.32407266  |                              |
| 11 | 8,700,000 | 8,850,000 | 117 | 698  | -1.466718286 |                              |
| 11 | 8,775,000 | 8,925,000 | 118 | 347  | -1.58750605  |                              |
| 11 | 8,850,000 | 9,000,000 | 119 | 311  | -0.900717205 |                              |
| 11 | 8,925,000 | 9,075,000 | 120 | 390  | 0.092204657  |                              |
| 11 | 9,000,000 | 9,150,000 | 121 | 876  | 0.153715179  | MRPS9                        |

|    |            |            |     |      |              |                                                                                                                 |
|----|------------|------------|-----|------|--------------|-----------------------------------------------------------------------------------------------------------------|
| 11 | 9,075,000  | 9,225,000  | 122 | 1267 | -0.698085464 | GPR45,MRPS9,TGFBRAP1                                                                                            |
| 11 | 9,150,000  | 9,300,000  | 123 | 1011 | -1.19054434  | C2orf49,FHL2,GPR45,MRPS9,TGFBRAP1                                                                               |
| 11 | 9,225,000  | 9,375,000  | 124 | 953  | -0.872188978 | C2orf49,FHL2,TGFBRAP1                                                                                           |
| 11 | 9,300,000  | 9,450,000  | 125 | 1129 | -2.02466099  | FHL2                                                                                                            |
| 11 | 9,375,000  | 9,525,000  | 126 | 994  | -2.489933001 | NK1R                                                                                                            |
| 11 | 9,450,000  | 9,600,000  | 127 | 714  | -0.766150962 | NK1R                                                                                                            |
| 11 | 9,525,000  | 9,675,000  | 128 | 697  | 0.720962548  | NK1R                                                                                                            |
| 11 | 9,600,000  | 9,750,000  | 129 | 956  | -0.277306175 | HK2,NK1R,POLE4                                                                                                  |
| 11 | 9,675,000  | 9,825,000  | 130 | 1103 | -0.4241138   | HK2,POLE4                                                                                                       |
| 11 | 9,750,000  | 9,900,000  | 131 | 902  | -0.267186348 | HK2                                                                                                             |
| 11 | 9,825,000  | 9,975,000  | 132 | 594  | -1.029314989 | M1AP,SEMA4F                                                                                                     |
| 11 | 9,900,000  | 10,050,000 | 133 | 348  | -0.658264046 | M1AP,SEMA4F                                                                                                     |
| 11 | 9,975,000  | 10,125,000 | 134 | 216  | -0.664246683 | AUP1,DOK1,DQX1,HTRA2,LBX2,LOXL3,M1AP,PCGF1,TLX2                                                                 |
| 11 | 10,050,000 | 10,200,000 | 135 | 225  | -0.136807484 | AUP1,C11H2orf81,CCDC142,DOK1,DQX1,HTRA2,INO80B,LBX2,LOXL3,M1AP,MGC152281,MOGS,MRPL53,PCGF1,RTKN,TLX2,WBP1,WDR54 |
| 11 | 10,125,000 | 10,275,000 | 136 | 356  | 0.786752182  | C11H2orf81,CCDC142,DCTN1,INO80B,MGC152281,MOGS,MRPL53,RTKN,WBP1,WDR54                                           |
| 11 | 10,200,000 | 10,350,000 | 137 | 847  | 0.854083569  | DCTN1,MGC152281,SLC4A5                                                                                          |
| 11 | 10,275,000 | 10,425,000 | 138 | 910  | 0.875273127  | MTHFD2,SLC4A5                                                                                                   |
| 11 | 10,350,000 | 10,500,000 | 139 | 508  | 0.630202036  | BOLA3,MOBKL1B,MTHFD2,SLC4A5                                                                                     |
| 11 | 10,425,000 | 10,575,000 | 140 | 631  | 0.765123077  | BOLA3,MOBKL1B,MTHFD2,TET3                                                                                       |
| 11 | 10,500,000 | 10,650,000 | 141 | 795  | 0.856145041  | TET3                                                                                                            |
| 11 | 10,575,000 | 10,725,000 | 142 | 869  | 0.745152752  | ACTB,DGUOK,TET3                                                                                                 |
| 11 | 10,650,000 | 10,800,000 | 143 | 1195 | 0.704620362  | ACTB,DGUOK,STAMBP                                                                                               |
| 11 | 10,725,000 | 10,875,000 | 144 | 1312 | 0.309115187  | ACTB,C2orf78,DUSP11,STAMBP,TPRKB                                                                                |
| 11 | 10,800,000 | 10,950,000 | 145 | 1648 | -0.033198119 | ALMS1,C2orf78,DUSP11,TPRKB,ENSBTAG00000047969                                                                   |
| 11 | 10,875,000 | 11,025,000 | 146 | 1658 | 0.504940267  | ALMS1,ENSBTAG00000047969                                                                                        |
| 11 | 10,950,000 | 11,100,000 | 147 | 1763 | 1.307154289  | ALMS1                                                                                                           |
| 11 | 11,025,000 | 11,175,000 | 148 | 1647 | 1.298357323  | ALMS1,EGR4,FBXO41                                                                                               |
| 11 | 11,100,000 | 11,250,000 | 149 | 1116 | 0.286522027  | C11H2ORF7,CCT7,EGR4,FBXO41,NOTO,SMYD5                                                                           |
| 11 | 11,175,000 | 11,325,000 | 150 | 1008 | -0.832161394 | C11H2ORF7,CCT7,FBXO41,NOTO,RAB11FIP5,SMYD5                                                                      |
| 11 | 11,250,000 | 11,400,000 | 151 | 1023 | -0.888459497 | RAB11FIP5,SFXN5                                                                                                 |
| 11 | 11,325,000 | 11,475,000 | 152 | 1247 | -0.208579702 | RAB11FIP5,SFXN5                                                                                                 |
| 11 | 11,400,000 | 11,550,000 | 153 | 1054 | 0.391896528  | EMX1,SFXN5,SPR                                                                                                  |
| 11 | 11,475,000 | 11,625,000 | 154 | 800  | 0.767752204  | EMX1,EXOC6B,SFXN5,SPR                                                                                           |
| 11 | 11,550,000 | 11,700,000 | 155 | 662  | 0.017488068  | EXOC6B                                                                                                          |
| 11 | 11,625,000 | 11,775,000 | 156 | 664  | -0.098240567 | EXOC6B                                                                                                          |
| 11 | 11,700,000 | 11,850,000 | 157 | 772  | 0.349036549  | EXOC6B                                                                                                          |
| 11 | 11,775,000 | 11,925,000 | 158 | 854  | 0.309001506  | EXOC6B,ENSBTAG00000039263                                                                                       |
| 11 | 11,850,000 | 12,000,000 | 159 | 737  | -0.111638797 | EXOC6B,ENSBTAG00000039263                                                                                       |
| 11 | 11,925,000 | 12,075,000 | 160 | 745  | -0.691674452 | EXOC6B                                                                                                          |
| 11 | 12,000,000 | 12,150,000 | 161 | 875  | -1.327364331 | EXOC6B                                                                                                          |
| 11 | 12,075,000 | 12,225,000 | 162 | 884  | -1.911849735 | EXOC6B                                                                                                          |
| 11 | 12,150,000 | 12,300,000 | 163 | 853  | -1.370472707 | EXOC6B                                                                                                          |
| 11 | 12,225,000 | 12,375,000 | 164 | 893  | 0.007850552  | CYP26B1,EXOC6B                                                                                                  |
| 11 | 12,300,000 | 12,450,000 | 165 | 973  | 0.00382275   | CYP26B1,EXOC6B                                                                                                  |
| 11 | 12,375,000 | 12,525,000 | 166 | 823  | 0.345302045  | CYP26B1                                                                                                         |
| 11 | 12,450,000 | 12,600,000 | 167 | 717  | 0.699379322  |                                                                                                                 |
| 11 | 12,525,000 | 12,675,000 | 168 | 564  | 0.707692311  |                                                                                                                 |
| 11 | 12,600,000 | 12,750,000 | 169 | 510  | 1.05380262   |                                                                                                                 |

|    |            |            |     |      |              |                                          |
|----|------------|------------|-----|------|--------------|------------------------------------------|
| 11 | 12,675,000 | 12,825,000 | 170 | 459  | 1.064691504  |                                          |
| 11 | 12,750,000 | 12,900,000 | 171 | 431  | 0.421797062  | DYSF                                     |
| 11 | 12,825,000 | 12,975,000 | 172 | 453  | 0.236725565  | DYSF                                     |
| 11 | 12,900,000 | 13,050,000 | 173 | 475  | -0.060063162 | DYSF                                     |
| 11 | 12,975,000 | 13,125,000 | 174 | 672  | -0.881839893 | DYSF                                     |
| 11 | 13,050,000 | 13,200,000 | 175 | 539  | -2.334402063 | DYSF,ZNF638                              |
| 11 | 13,125,000 | 13,275,000 | 176 | 329  | -4.426715751 | ZNF638                                   |
| 11 | 13,200,000 | 13,350,000 | 177 | 391  | -1.971415112 | ZNF638                                   |
| 11 | 13,275,000 | 13,425,000 | 178 | 561  | 0.398471503  | NAGK,PAIP2B                              |
| 11 | 13,350,000 | 13,500,000 | 179 | 779  | 0.825042592  | ANKRD53,ATP6V1B1,NAGK,PAIP2B,TEX261,VAX2 |
| 11 | 13,425,000 | 13,575,000 | 180 | 842  | 0.900294458  | ANKRD53,ATP6V1B1,CD207,TEX261,VAX2       |
| 11 | 13,500,000 | 13,650,000 | 181 | 972  | -0.581878196 | CD207,CLEC4F,FIGLA,VAX2                  |
| 11 | 13,575,000 | 13,725,000 | 182 | 892  | -0.85951426  | ADD2,CD207,CLEC4F,FIGLA                  |
| 11 | 13,650,000 | 13,800,000 | 183 | 779  | 0.038998376  | ADD2                                     |
| 11 | 13,725,000 | 13,875,000 | 184 | 821  | 0.030873513  | ADD2                                     |
| 11 | 13,800,000 | 13,950,000 | 185 | 438  | 0.329480052  |                                          |
| 11 | 13,875,000 | 14,025,000 | 186 | 360  | -0.200756066 | TGFA                                     |
| 11 | 13,950,000 | 14,100,000 | 187 | 878  | 0.55034748   | TGFA                                     |
| 11 | 14,025,000 | 14,175,000 | 188 | 1075 | 0.57768329   | FAM136A                                  |
| 11 | 14,100,000 | 14,250,000 | 189 | 903  | 0.532137549  | FAM136A,XDH                              |
| 11 | 14,175,000 | 14,325,000 | 190 | 767  | 0.399515331  | XDH                                      |
| 11 | 14,250,000 | 14,400,000 | 191 | 862  | 0.296107639  | SRD5A2,XDH                               |
| 11 | 14,325,000 | 14,475,000 | 192 | 874  | 0.743958281  | SRD5A2                                   |
| 11 | 14,400,000 | 14,550,000 | 193 | 747  | 1.054413854  |                                          |
| 11 | 14,475,000 | 14,625,000 | 194 | 805  | 1.127658174  | MEMO1,RPL36A-HNRNPH2                     |
| 11 | 14,550,000 | 14,700,000 | 195 | 609  | 1.221047139  | DPY30,MEMO1,RPL36A-HNRNPH2               |
| 11 | 14,625,000 | 14,775,000 | 196 | 558  | 1.030850022  | DPY30,MEMO1,SPAST                        |
| 11 | 14,700,000 | 14,850,000 | 197 | 898  | 1.282226197  | NLRC4,SLC30A6,SPAST                      |
| 11 | 14,775,000 | 14,925,000 | 198 | 1156 | 1.315872592  | NLRC4,SLC30A6,YIPF4                      |
| 11 | 14,850,000 | 15,000,000 | 199 | 1114 | 1.224298657  | BIRC6,NLRC4,YIPF4                        |
| 11 | 14,925,000 | 15,075,000 | 200 | 912  | 1.046506422  | BIRC6,YIPF4                              |
| 11 | 15,000,000 | 15,150,000 | 201 | 560  | 0.490244971  | BIRC6                                    |
| 11 | 15,075,000 | 15,225,000 | 202 | 435  | -0.236416104 | BIRC6,TTC27                              |
| 11 | 15,150,000 | 15,300,000 | 203 | 531  | -0.04166723  | BIRC6,TTC27                              |
| 11 | 15,225,000 | 15,375,000 | 204 | 547  | 0.205415684  | TTC27                                    |
| 11 | 15,300,000 | 15,450,000 | 205 | 584  | -0.75204534  | TTC27                                    |
| 11 | 15,375,000 | 15,525,000 | 206 | 515  | -0.42426737  | LTBP1,TTC27                              |
| 11 | 15,450,000 | 15,600,000 | 207 | 424  | 0.927247672  | LTBP1                                    |
| 11 | 15,525,000 | 15,675,000 | 208 | 538  | 0.649930341  | LTBP1                                    |
| 11 | 15,600,000 | 15,750,000 | 209 | 614  | 0.069556765  | LTBP1                                    |
| 11 | 15,675,000 | 15,825,000 | 210 | 449  | -0.177092051 | LTBP1                                    |
| 11 | 15,750,000 | 15,900,000 | 211 | 518  | -1.488414937 | LTBP1                                    |
| 11 | 15,825,000 | 15,975,000 | 212 | 765  | -0.705778589 | LTBP1                                    |
| 11 | 15,900,000 | 16,050,000 | 213 | 765  | 0.179375354  | LTBP1                                    |
| 11 | 15,975,000 | 16,125,000 | 214 | 674  | 0.565469314  | RASGRP3                                  |
| 11 | 16,050,000 | 16,200,000 | 215 | 673  | 0.691834858  | FAM98A,RASGRP3                           |
| 11 | 16,125,000 | 16,275,000 | 216 | 538  | 0.280419359  | FAM98A,RASGRP3                           |
| 11 | 16,200,000 | 16,350,000 | 217 | 541  | 0.242555953  |                                          |
| 11 | 16,275,000 | 16,425,000 | 218 | 823  | -0.505309945 |                                          |
| 11 | 16,350,000 | 16,500,000 | 219 | 987  | 1.062482764  |                                          |
| 11 | 16,425,000 | 16,575,000 | 220 | 923  | 1.435612659  |                                          |
| 11 | 16,500,000 | 16,650,000 | 221 | 620  | 0.82437961   |                                          |
| 11 | 16,575,000 | 16,725,000 | 222 | 537  | 0.216066432  |                                          |



|    |            |            |     |      |              |                                              |
|----|------------|------------|-----|------|--------------|----------------------------------------------|
| 11 | 16,650,000 | 16,800,000 | 223 | 925  | 0.58922957   |                                              |
| 11 | 16,725,000 | 16,875,000 | 224 | 1105 | 0.33174681   |                                              |
| 11 | 16,800,000 | 16,950,000 | 225 | 1330 | 0.203340478  |                                              |
| 11 | 16,875,000 | 17,025,000 | 226 | 1473 | 0.350185798  |                                              |
| 11 | 16,950,000 | 17,100,000 | 227 | 1503 | 0.035171683  |                                              |
| 11 | 17,025,000 | 17,175,000 | 228 | 1462 | 0.317857707  |                                              |
| 11 | 17,100,000 | 17,250,000 | 229 | 1034 | 0.910734147  |                                              |
| 11 | 17,175,000 | 17,325,000 | 230 | 783  | 0.907610945  |                                              |
| 11 | 17,250,000 | 17,400,000 | 231 | 1009 | 0.997435113  |                                              |
| 11 | 17,325,000 | 17,475,000 | 232 | 931  | 1.042492842  |                                              |
| 11 | 17,400,000 | 17,550,000 | 233 | 576  | 1.168370389  |                                              |
| 11 | 17,475,000 | 17,625,000 | 234 | 687  | 0.511391121  |                                              |
| 11 | 17,550,000 | 17,700,000 | 235 | 999  | -0.903378871 |                                              |
| 11 | 17,625,000 | 17,775,000 | 236 | 1000 | -1.701814494 |                                              |
| 11 | 17,700,000 | 17,850,000 | 237 | 1078 | -0.948747273 |                                              |
| 11 | 17,775,000 | 17,925,000 | 238 | 1215 | -0.436243931 |                                              |
| 11 | 17,850,000 | 18,000,000 | 239 | 1007 | 0.157613124  |                                              |
| 11 | 17,925,000 | 18,075,000 | 240 | 820  | 0.480328421  |                                              |
| 11 | 18,000,000 | 18,150,000 | 241 | 604  | 0.302087473  |                                              |
| 11 | 18,075,000 | 18,225,000 | 242 | 555  | 0.823580099  |                                              |
| 11 | 18,150,000 | 18,300,000 | 243 | 620  | -0.851137612 |                                              |
| 11 | 18,225,000 | 18,375,000 | 244 | 696  | -2.413698994 |                                              |
| 11 | 18,300,000 | 18,450,000 | 245 | 943  | -0.67575902  |                                              |
| 11 | 18,375,000 | 18,525,000 | 246 | 950  | -0.344769606 |                                              |
| 11 | 18,450,000 | 18,600,000 | 247 | 691  | -0.158293744 |                                              |
| 11 | 18,525,000 | 18,675,000 | 248 | 683  | -1.092277455 |                                              |
| 11 | 18,600,000 | 18,750,000 | 249 | 995  | -0.838840827 |                                              |
| 11 | 18,675,000 | 18,825,000 | 250 | 779  | -0.454103953 |                                              |
| 11 | 18,750,000 | 18,900,000 | 251 | 519  | -0.483166579 | CRIM1                                        |
| 11 | 18,825,000 | 18,975,000 | 252 | 542  | 0.066108804  | CRIM1                                        |
| 11 | 18,900,000 | 19,050,000 | 253 | 467  | 0.946047446  | CRIM1,FEZ2                                   |
| 11 | 18,975,000 | 19,125,000 | 254 | 777  | 0.79614648   | CRIM1,FEZ2                                   |
| 11 | 19,050,000 | 19,200,000 | 255 | 704  | 0.446597638  | FEZ2,VIT                                     |
| 11 | 19,125,000 | 19,275,000 | 256 | 736  | -0.269354047 | VIT                                          |
| 11 | 19,200,000 | 19,350,000 | 257 | 763  | -0.474935366 | STRN,VIT                                     |
| 11 | 19,275,000 | 19,425,000 | 258 | 420  | -0.964095892 | STRN,VIT                                     |
| 11 | 19,350,000 | 19,500,000 | 259 | 545  | 0.475916285  | HEATR5B,STRN                                 |
| 11 | 19,425,000 | 19,575,000 | 260 | 705  | 0.492438515  | GPATCH11,HEATR5B,STRN                        |
| 11 | 19,500,000 | 19,650,000 | 261 | 666  | -0.196677675 | EIF2AK2,GPATCH11,HEATR5B,SULT6B1             |
| 11 | 19,575,000 | 19,725,000 | 262 | 508  | 0.059831136  | CEBPZ,EIF2AK2,GPATCH11,NDUFAF7,PRKD3,SULT6B1 |
| 11 | 19,650,000 | 19,800,000 | 263 | 412  | 0.679048867  | CEBPZ,NDUFAF7,PRKD3                          |
| 11 | 19,725,000 | 19,875,000 | 264 | 404  | 0.629297129  | PRKD3,QPCT                                   |
| 11 | 19,800,000 | 19,950,000 | 265 | 520  | 0.845257577  | QPCT                                         |
| 11 | 19,875,000 | 20,025,000 | 266 | 942  | 0.723459282  |                                              |
| 11 | 19,950,000 | 20,100,000 | 267 | 911  | 0.562785603  |                                              |
| 11 | 20,025,000 | 20,175,000 | 268 | 441  | 0.659526395  | CDC42EP3                                     |
| 11 | 20,100,000 | 20,250,000 | 269 | 301  | 0.689488179  | CDC42EP3                                     |
| 11 | 20,175,000 | 20,325,000 | 270 | 534  | 0.560355001  |                                              |
| 11 | 20,250,000 | 20,400,000 | 271 | 866  | 0.860668505  | RMDN2                                        |
| 11 | 20,325,000 | 20,475,000 | 272 | 878  | 0.434402528  | RMDN2                                        |
| 11 | 20,400,000 | 20,550,000 | 273 | 585  | -0.142193924 | CYP1B1,RMDN2                                 |
| 11 | 20,475,000 | 20,625,000 | 274 | 603  | -0.325844625 | CYP1B1                                       |

|    |            |            |     |      |              |                                            |
|----|------------|------------|-----|------|--------------|--------------------------------------------|
| 11 | 20,550,000 | 20,700,000 | 275 | 764  | -1.090667408 | ATL2                                       |
| 11 | 20,625,000 | 20,775,000 | 276 | 707  | -0.600146837 | ATL2                                       |
| 11 | 20,700,000 | 20,850,000 | 277 | 979  | 0.747239583  | ATL2                                       |
| 11 | 20,775,000 | 20,925,000 | 278 | 927  | 1.077760733  |                                            |
| 11 | 20,850,000 | 21,000,000 | 279 | 430  | 1.161790678  | HNRNPLL                                    |
| 11 | 20,925,000 | 21,075,000 | 280 | 371  | 0.099497832  | GALM,HNRNPLL                               |
| 11 | 21,000,000 | 21,150,000 | 281 | 564  | 0.025340689  | GALM,GEMIN6,SRSF7,ENSBTAG00000012984       |
| 11 | 21,075,000 | 21,225,000 | 282 | 519  | 0.037238602  | DHX57,GALM,GEMIN6,SRSF7,ENSBTAG00000012984 |
| 11 | 21,150,000 | 21,300,000 | 283 | 424  | -0.048794521 | ARHGEF33,DHX57,GEMIN6,MORN2                |
| 11 | 21,225,000 | 21,375,000 | 284 | 367  | -0.903910752 | ARHGEF33,MORN2,SOS1                        |
| 11 | 21,300,000 | 21,450,000 | 285 | 490  | -3.873416101 | ARHGEF33,SOS1                              |
| 11 | 21,375,000 | 21,525,000 | 286 | 761  | -2.459773847 | SOS1                                       |
| 11 | 21,450,000 | 21,600,000 | 287 | 900  | -0.444743482 | CDKL4,MAP4K3,ENSBTAG00000032775            |
| 11 | 21,525,000 | 21,675,000 | 288 | 1043 | 0.455183585  | CDKL4,MAP4K3,ENSBTAG00000032775            |
| 11 | 21,600,000 | 21,750,000 | 289 | 836  | 0.948935682  | MAP4K3                                     |
| 11 | 21,675,000 | 21,825,000 | 290 | 714  | 0.345913573  | MAP4K3                                     |
| 11 | 21,750,000 | 21,900,000 | 291 | 909  | 0.291359526  | MAP4K3                                     |
| 11 | 21,825,000 | 21,975,000 | 292 | 975  | 0.537125826  |                                            |
| 11 | 21,900,000 | 22,050,000 | 293 | 759  | 0.612292034  | TMEM178                                    |
| 11 | 21,975,000 | 22,125,000 | 294 | 1081 | -0.044369814 | THUMPD2,TMEM178                            |
| 11 | 22,050,000 | 22,200,000 | 295 | 1156 | -0.282349861 | THUMPD2                                    |
| 11 | 22,125,000 | 22,275,000 | 296 | 990  | -0.703791677 |                                            |
| 11 | 22,200,000 | 22,350,000 | 297 | 1148 | -1.251127808 |                                            |
| 11 | 22,275,000 | 22,425,000 | 298 | 1136 | -1.729356105 |                                            |
| 11 | 22,350,000 | 22,500,000 | 299 | 1445 | -1.567964592 | SLC8A1                                     |
| 11 | 22,425,000 | 22,575,000 | 300 | 1539 | -1.13106521  | SLC8A1                                     |
| 11 | 22,500,000 | 22,650,000 | 301 | 1338 | -0.105468808 | SLC8A1                                     |
| 11 | 22,575,000 | 22,725,000 | 302 | 1385 | 0.607756881  | SLC8A1                                     |
| 11 | 22,650,000 | 22,800,000 | 303 | 1203 | 0.741604098  | SLC8A1                                     |
| 11 | 22,725,000 | 22,875,000 | 304 | 652  | -0.351739379 | SLC8A1                                     |
| 11 | 22,800,000 | 22,950,000 | 305 | 603  | -1.256305972 |                                            |
| 11 | 22,875,000 | 23,025,000 | 306 | 983  | 0.644386818  |                                            |
| 11 | 22,950,000 | 23,100,000 | 307 | 1018 | 0.268490269  |                                            |
| 11 | 23,025,000 | 23,175,000 | 308 | 813  | -1.121045878 |                                            |
| 11 | 23,100,000 | 23,250,000 | 309 | 972  | -0.17483074  |                                            |
| 11 | 23,175,000 | 23,325,000 | 310 | 951  | 0.286632642  |                                            |
| 11 | 23,250,000 | 23,400,000 | 311 | 809  | -0.064408355 |                                            |
| 11 | 23,325,000 | 23,475,000 | 312 | 963  | -0.195193692 |                                            |
| 11 | 23,400,000 | 23,550,000 | 313 | 1309 | 0.111315707  |                                            |
| 11 | 23,475,000 | 23,625,000 | 314 | 1354 | 0.353113526  |                                            |
| 11 | 23,550,000 | 23,700,000 | 315 | 1001 | -0.519393117 |                                            |
| 11 | 23,625,000 | 23,775,000 | 316 | 948  | -1.483858154 |                                            |
| 11 | 23,700,000 | 23,850,000 | 317 | 886  | -0.537040865 |                                            |
| 11 | 23,775,000 | 23,925,000 | 318 | 750  | 0.390929205  |                                            |
| 11 | 23,850,000 | 24,000,000 | 319 | 999  | 1.160876024  |                                            |
| 11 | 23,925,000 | 24,075,000 | 320 | 1092 | 0.1316127    |                                            |
| 11 | 24,000,000 | 24,150,000 | 321 | 1119 | -1.548025602 |                                            |
| 11 | 24,075,000 | 24,225,000 | 322 | 902  | -0.04365006  |                                            |
| 11 | 24,150,000 | 24,300,000 | 323 | 640  | 0.706406498  |                                            |
| 11 | 24,225,000 | 24,375,000 | 324 | 762  | 0.437130197  |                                            |
| 11 | 24,300,000 | 24,450,000 | 325 | 837  | -0.290139742 |                                            |
| 11 | 24,375,000 | 24,525,000 | 326 | 793  | 0.192354991  |                                            |
| 11 | 24,450,000 | 24,600,000 | 327 | 695  | 0.968174346  | PKDCC                                      |

|    |            |            |     |      |              |                              |
|----|------------|------------|-----|------|--------------|------------------------------|
| 11 | 24,525,000 | 24,675,000 | 328 | 621  | 0.90341201   | PKDCC                        |
| 11 | 24,600,000 | 24,750,000 | 329 | 516  | 0.555115204  | EML4                         |
| 11 | 24,675,000 | 24,825,000 | 330 | 546  | 0.982604997  | COX7A2L,EML4                 |
| 11 | 24,750,000 | 24,900,000 | 331 | 722  | 0.941823319  | COX7A2L,EML4                 |
| 11 | 24,825,000 | 24,975,000 | 332 | 789  | 0.322253336  | COX7A2L,KCNG3                |
| 11 | 24,900,000 | 25,050,000 | 333 | 550  | -0.470819671 | KCNG3,MTA3                   |
| 11 | 24,975,000 | 25,125,000 | 334 | 524  | -1.064870752 | MTA3                         |
| 11 | 25,050,000 | 25,200,000 | 335 | 449  | -0.658227862 | HAAO,MTA3,OXER1              |
| 11 | 25,125,000 | 25,275,000 | 336 | 298  | 0.011748928  | HAAO,MTA3,OXER1              |
| 11 | 25,200,000 | 25,350,000 | 337 | 318  | -0.024316659 | HAAO,ENSBTAG00000014836      |
| 11 | 25,275,000 | 25,425,000 | 338 | 460  | -2.15553093  | ENSBTAG00000014836           |
| 11 | 25,350,000 | 25,500,000 | 339 | 539  | -2.485397945 |                              |
| 11 | 25,425,000 | 25,575,000 | 340 | 464  | -3.415943618 |                              |
| 11 | 25,500,000 | 25,650,000 | 341 | 625  | -1.608136779 | THADA,ZFP36L2                |
| 11 | 25,575,000 | 25,725,000 | 342 | 554  | 0.690941806  | THADA,ZFP36L2                |
| 11 | 25,650,000 | 25,800,000 | 343 | 389  | -1.024452473 | THADA                        |
| 11 | 25,725,000 | 25,875,000 | 344 | 369  | -1.050609052 | THADA                        |
| 11 | 25,800,000 | 25,950,000 | 345 | 284  | -1.027015604 | THADA                        |
| 11 | 25,875,000 | 26,025,000 | 346 | 452  | -1.951872763 | PLEKHH2,THADA                |
| 11 | 25,950,000 | 26,100,000 | 347 | 678  | -0.919043742 | DYNC2LI1,PLEKHH2             |
| 11 | 26,025,000 | 26,175,000 | 348 | 787  | 0.551448294  | ABCG5,ABCG8,DYNC2LI1,PLEKHH2 |
| 11 | 26,100,000 | 26,250,000 | 349 | 703  | 0.787661486  | ABCG5,ABCG8,DYNC2LI1,LRPPRC  |
| 11 | 26,175,000 | 26,325,000 | 350 | 505  | 0.768276777  | LRPPRC                       |
| 11 | 26,250,000 | 26,400,000 | 351 | 580  | 0.679292942  | LRPPRC                       |
| 11 | 26,325,000 | 26,475,000 | 352 | 683  | 0.80401598   | PPM1B                        |
| 11 | 26,400,000 | 26,550,000 | 353 | 644  | 0.626071128  | PPM1B,SLC3A1                 |
| 11 | 26,475,000 | 26,625,000 | 354 | 418  | 0.374941233  | CAMKMT,PREPL,SLC3A1          |
| 11 | 26,550,000 | 26,700,000 | 355 | 274  | 1.010437911  | CAMKMT,PREPL,SLC3A1          |
| 11 | 26,625,000 | 26,775,000 | 356 | 667  | 1.358347947  | CAMKMT                       |
| 11 | 26,700,000 | 26,850,000 | 357 | 1209 | 0.902238263  | CAMKMT                       |
| 11 | 26,775,000 | 26,925,000 | 358 | 1212 | 0.494918843  | CAMKMT                       |
| 11 | 26,850,000 | 27,000,000 | 359 | 758  | -0.322313744 | CAMKMT                       |
| 11 | 26,925,000 | 27,075,000 | 360 | 498  | -2.022361022 | CAMKMT                       |
| 11 | 27,000,000 | 27,150,000 | 361 | 539  | -2.673935453 | CAMKMT                       |
| 11 | 27,075,000 | 27,225,000 | 362 | 686  | -1.709056341 | SIX3                         |
| 11 | 27,150,000 | 27,300,000 | 363 | 702  | -0.077739611 | SIX2,SIX3                    |
| 11 | 27,225,000 | 27,375,000 | 364 | 613  | -0.33938227  | SIX2                         |
| 11 | 27,300,000 | 27,450,000 | 365 | 664  | 0.099587245  |                              |
| 11 | 27,375,000 | 27,525,000 | 366 | 739  | 0.586425539  |                              |
| 11 | 27,450,000 | 27,600,000 | 367 | 760  | 0.314370584  |                              |
| 11 | 27,525,000 | 27,675,000 | 368 | 581  | -0.451797267 | SRBD1                        |
| 11 | 27,600,000 | 27,750,000 | 369 | 393  | -1.053425074 | SRBD1                        |
| 11 | 27,675,000 | 27,825,000 | 370 | 430  | 0.896233752  | SRBD1,ENSBTAG00000032651     |
| 11 | 27,750,000 | 27,900,000 | 371 | 378  | 0.347388745  | SRBD1,ENSBTAG00000032651     |
| 11 | 27,825,000 | 27,975,000 | 372 | 340  | -0.144261114 | PRKCE,SRBD1                  |
| 11 | 27,900,000 | 28,050,000 | 373 | 541  | 0.751628525  | PRKCE                        |
| 11 | 27,975,000 | 28,125,000 | 374 | 899  | 0.686101927  | PRKCE                        |
| 11 | 28,050,000 | 28,200,000 | 375 | 858  | 0.683378986  | PRKCE                        |
| 11 | 28,125,000 | 28,275,000 | 376 | 532  | 0.37251578   | PRKCE                        |
| 11 | 28,200,000 | 28,350,000 | 377 | 395  | 0.007045063  | PRKCE                        |
| 11 | 28,275,000 | 28,425,000 | 378 | 363  | 0.624168218  | PRKCE                        |
| 11 | 28,350,000 | 28,500,000 | 379 | 451  | 0.655962752  | PRKCE                        |
| 11 | 28,425,000 | 28,575,000 | 380 | 417  | -1.166449584 | PRKCE                        |

|    |            |            |     |      |              |                                                 |
|----|------------|------------|-----|------|--------------|-------------------------------------------------|
| 11 | 28,500,000 | 28,650,000 | 381 | 503  | -1.593884693 | EPAS1                                           |
| 11 | 28,575,000 | 28,725,000 | 382 | 684  | -0.206079435 | EPAS1                                           |
| 11 | 28,650,000 | 28,800,000 | 383 | 670  | 0.283837542  | EPAS1,TMEM247                                   |
| 11 | 28,725,000 | 28,875,000 | 384 | 498  | 0.519437711  | ATP6V1E2,PIGF,RHOQ,TMEM247                      |
| 11 | 28,800,000 | 28,950,000 | 385 | 467  | 0.52397268   | ATP6V1E2,CRIPT,PIGF,RHOQ                        |
| 11 | 28,875,000 | 29,025,000 | 386 | 532  | 0.86664829   | CRIPT,PIGF,SOCS5                                |
| 11 | 28,950,000 | 29,100,000 | 387 | 468  | 0.996468456  | SOCS5                                           |
| 11 | 29,025,000 | 29,175,000 | 388 | 466  | 0.164739739  | SOCS5                                           |
| 11 | 29,100,000 | 29,250,000 | 389 | 799  | -0.844059627 | MCFD2,TTC7A                                     |
| 11 | 29,175,000 | 29,325,000 | 390 | 814  | -0.644731103 | MCFD2,TTC7A                                     |
| 11 | 29,250,000 | 29,400,000 | 391 | 636  | 0.863386199  | TTC7A                                           |
| 11 | 29,325,000 | 29,475,000 | 392 | 677  | -3.523904315 | TTC7A,ENSBTAG00000001575                        |
| 11 | 29,400,000 | 29,550,000 | 393 | 594  | -5.498585441 | ENSBTAG00000001575                              |
| 11 | 29,475,000 | 29,625,000 | 394 | 950  | -2.401950988 |                                                 |
| 11 | 29,550,000 | 29,700,000 | 395 | 1368 | -1.475931778 | EPCAM,MSH2                                      |
| 11 | 29,625,000 | 29,775,000 | 396 | 1537 | -0.599549853 | EPCAM,KCNK12,MSH2                               |
| 11 | 29,700,000 | 29,850,000 | 397 | 1468 | 0.672499822  | KCNK12,MSH2                                     |
| 11 | 29,775,000 | 29,925,000 | 398 | 1315 | 1.043620127  | KCNK12                                          |
| 11 | 29,850,000 | 30,000,000 | 399 | 1097 | 0.909516569  | FBXO11,MSH6                                     |
| 11 | 29,925,000 | 30,075,000 | 400 | 609  | 0.981556554  | FBXO11,MSH6                                     |
| 11 | 30,000,000 | 30,150,000 | 401 | 479  | 0.671159924  | FBXO11                                          |
| 11 | 30,075,000 | 30,225,000 | 402 | 892  | 0.534066608  | FBXO11                                          |
| 11 | 30,150,000 | 30,300,000 | 403 | 1157 | 0.131299675  |                                                 |
| 11 | 30,225,000 | 30,375,000 | 404 | 856  | 0.204414402  |                                                 |
| 11 | 30,300,000 | 30,450,000 | 405 | 661  | 0.887403033  |                                                 |
| 11 | 30,375,000 | 30,525,000 | 406 | 576  | 0.731614162  |                                                 |
| 11 | 30,450,000 | 30,600,000 | 407 | 523  | 0.565112096  | FOXN2,KLRAQ1                                    |
| 11 | 30,525,000 | 30,675,000 | 408 | 638  | -0.074933487 | FOXN2,KLRAQ1                                    |
| 11 | 30,600,000 | 30,750,000 | 409 | 811  | -0.35872634  | KLRAQ1,ENSBTAG00000004168                       |
| 11 | 30,675,000 | 30,825,000 | 410 | 866  | 0.134529989  | LHCGR,ENSBTAG00000004168,ENSBTAG0000002399<br>9 |
| 11 | 30,750,000 | 30,900,000 | 411 | 915  | 0.664278068  | LHCGR,ENSBTAG00000023999                        |
| 11 | 30,825,000 | 30,975,000 | 412 | 1366 | 0.318457302  | LHCGR,ENSBTAG00000027015                        |
| 11 | 30,900,000 | 31,050,000 | 413 | 1567 | 0.233583916  | ENSBTAG00000027015                              |
| 11 | 30,975,000 | 31,125,000 | 414 | 1269 | 0.616181582  | FSHR                                            |
| 11 | 31,050,000 | 31,200,000 | 415 | 1378 | 0.13609023   | FSHR                                            |
| 11 | 31,125,000 | 31,275,000 | 416 | 1269 | -0.228740156 | FSHR                                            |
| 11 | 31,200,000 | 31,350,000 | 417 | 865  | -0.232250172 | FSHR                                            |
| 11 | 31,275,000 | 31,425,000 | 418 | 946  | -0.082409663 | FSHR                                            |
| 11 | 31,350,000 | 31,500,000 | 419 | 967  | -1.880467256 |                                                 |
| 11 | 31,425,000 | 31,575,000 | 420 | 1073 | -1.777162301 |                                                 |
| 11 | 31,500,000 | 31,650,000 | 421 | 955  | -0.139475347 |                                                 |
| 11 | 31,575,000 | 31,725,000 | 422 | 705  | -0.267705793 |                                                 |
| 11 | 31,650,000 | 31,800,000 | 423 | 663  | -1.116756679 |                                                 |
| 11 | 31,725,000 | 31,875,000 | 424 | 627  | -0.547716337 |                                                 |
| 11 | 31,800,000 | 31,950,000 | 425 | 533  | -0.562910553 |                                                 |
| 11 | 31,875,000 | 32,025,000 | 426 | 826  | -0.990936988 |                                                 |
| 11 | 31,950,000 | 32,100,000 | 427 | 1302 | -0.850181447 |                                                 |
| 11 | 32,025,000 | 32,175,000 | 428 | 1195 | 0.076000832  | ENSBTAG00000046199                              |
| 11 | 32,100,000 | 32,250,000 | 429 | 1063 | 0.951304898  | ENSBTAG00000046199                              |
| 11 | 32,175,000 | 32,325,000 | 430 | 1030 | 1.296171297  | ENSBTAG00000046199                              |
| 11 | 32,250,000 | 32,400,000 | 431 | 896  | 0.622862437  | ENSBTAG00000046199                              |
| 11 | 32,325,000 | 32,475,000 | 432 | 785  | -0.861037859 | ENSBTAG00000046199                              |

|    |            |            |     |      |              |                                 |
|----|------------|------------|-----|------|--------------|---------------------------------|
| 11 | 32,400,000 | 32,550,000 | 433 | 602  | -1.091082756 | ENSBTAG00000046199              |
| 11 | 32,475,000 | 32,625,000 | 434 | 742  | -0.180584802 | ENSBTAG00000046199              |
| 11 | 32,550,000 | 32,700,000 | 435 | 909  | 0.073316496  |                                 |
| 11 | 32,625,000 | 32,775,000 | 436 | 827  | 0.631430018  | ENSBTAG00000024021              |
| 11 | 32,700,000 | 32,850,000 | 437 | 975  | -0.064393021 | ENSBTAG00000024021              |
| 11 | 32,775,000 | 32,925,000 | 438 | 1058 | -0.54014877  | ENSBTAG00000024021              |
| 11 | 32,850,000 | 33,000,000 | 439 | 843  | 0.013419639  | ENSBTAG00000024021              |
| 11 | 32,925,000 | 33,075,000 | 440 | 847  | 0.497935669  |                                 |
| 11 | 33,000,000 | 33,150,000 | 441 | 939  | 1.129467195  |                                 |
| 11 | 33,075,000 | 33,225,000 | 442 | 717  | 1.324667253  |                                 |
| 11 | 33,150,000 | 33,300,000 | 443 | 552  | 0.253207323  |                                 |
| 11 | 33,225,000 | 33,375,000 | 444 | 672  | -0.25239777  | ENSBTAG00000014072              |
| 11 | 33,300,000 | 33,450,000 | 445 | 838  | 0.520471755  | ENSBTAG00000014072              |
| 11 | 33,375,000 | 33,525,000 | 446 | 1098 | 0.612508391  |                                 |
| 11 | 33,450,000 | 33,600,000 | 447 | 1551 | 0.622611048  |                                 |
| 11 | 33,525,000 | 33,675,000 | 448 | 1802 | 0.834411732  |                                 |
| 11 | 33,600,000 | 33,750,000 | 449 | 1440 | 0.939679121  |                                 |
| 11 | 33,675,000 | 33,825,000 | 450 | 1252 | 0.939413198  |                                 |
| 11 | 33,750,000 | 33,900,000 | 451 | 1724 | -0.101421381 |                                 |
| 11 | 33,825,000 | 33,975,000 | 452 | 1664 | -1.116562654 |                                 |
| 11 | 33,900,000 | 34,050,000 | 453 | 1225 | -2.6203904   |                                 |
| 11 | 33,975,000 | 34,125,000 | 454 | 1210 | -1.884049704 |                                 |
| 11 | 34,050,000 | 34,200,000 | 455 | 974  | 0.864903107  |                                 |
| 11 | 34,125,000 | 34,275,000 | 456 | 912  | 1.181438304  |                                 |
| 11 | 34,200,000 | 34,350,000 | 457 | 1146 | 1.185832987  |                                 |
| 11 | 34,275,000 | 34,425,000 | 458 | 777  | 0.747246421  |                                 |
| 11 | 34,350,000 | 34,500,000 | 459 | 554  | 0.330327912  |                                 |
| 11 | 34,425,000 | 34,575,000 | 460 | 1276 | 0.972259259  |                                 |
| 11 | 34,500,000 | 34,650,000 | 461 | 1515 | 0.879586955  |                                 |
| 11 | 34,575,000 | 34,725,000 | 462 | 1106 | 0.635496337  |                                 |
| 11 | 34,650,000 | 34,800,000 | 463 | 1412 | 0.261295329  |                                 |
| 11 | 34,725,000 | 34,875,000 | 464 | 1842 | 0.251020549  |                                 |
| 11 | 34,800,000 | 34,950,000 | 465 | 1800 | 0.416428967  |                                 |
| 11 | 34,875,000 | 35,025,000 | 466 | 1747 | 0.547268774  |                                 |
| 11 | 34,950,000 | 35,100,000 | 467 | 1663 | 0.381271433  |                                 |
| 11 | 35,025,000 | 35,175,000 | 468 | 1619 | 0.482267684  |                                 |
| 11 | 35,100,000 | 35,250,000 | 469 | 1566 | 0.625497081  |                                 |
| 11 | 35,175,000 | 35,325,000 | 470 | 1392 | 0.195993395  |                                 |
| 11 | 35,250,000 | 35,400,000 | 471 | 1452 | 0.354686197  |                                 |
| 11 | 35,325,000 | 35,475,000 | 472 | 1308 | -1.215522755 |                                 |
| 11 | 35,400,000 | 35,550,000 | 473 | 1053 | -1.979488684 |                                 |
| 11 | 35,475,000 | 35,625,000 | 474 | 937  | 0.174375905  |                                 |
| 11 | 35,550,000 | 35,700,000 | 475 | 1220 | 0.054699906  |                                 |
| 11 | 35,625,000 | 35,775,000 | 476 | 1359 | -0.364593782 |                                 |
| 11 | 35,700,000 | 35,850,000 | 477 | 1219 | -1.812632985 |                                 |
| 11 | 35,775,000 | 35,925,000 | 478 | 1510 | -1.795911759 |                                 |
| 11 | 35,850,000 | 36,000,000 | 479 | 1436 | -1.004851437 |                                 |
| 11 | 35,925,000 | 36,075,000 | 480 | 1053 | 0.399081025  | ENSBTAG0000002943               |
| 11 | 36,000,000 | 36,150,000 | 481 | 817  | 0.517180258  | ENSBTAG0000002943               |
| 11 | 36,075,000 | 36,225,000 | 482 | 646  | -0.060439047 |                                 |
| 11 | 36,150,000 | 36,300,000 | 483 | 802  | 0.546665865  | ENSBTAG00000019458              |
| 11 | 36,225,000 | 36,375,000 | 484 | 818  | 0.082357034  | CHAC2,ERLEC1,ENSBTAG00000019458 |

|    |            |            |     |      |              |                                             |
|----|------------|------------|-----|------|--------------|---------------------------------------------|
| 11 | 36,300,000 | 36,450,000 | 485 | 721  | 0.03842347   | CHAC2,ERLEC1,GPR75,PSME4,ENSBTAG00000019458 |
| 11 | 36,375,000 | 36,525,000 | 486 | 727  | 1.008997178  | ERLEC1,GPR75,PSME4                          |
| 11 | 36,450,000 | 36,600,000 | 487 | 890  | 0.752279128  | PSME4,ENSBTAG00000024019                    |
| 11 | 36,525,000 | 36,675,000 | 488 | 1245 | 0.897141015  | ENSBTAG00000024019                          |
| 11 | 36,600,000 | 36,750,000 | 489 | 1201 | 0.718312915  | ACYP2                                       |
| 11 | 36,675,000 | 36,825,000 | 490 | 962  | -0.104556489 | ACYP2,TSPYL6                                |
| 11 | 36,750,000 | 36,900,000 | 491 | 901  | 0.723080682  | ACYP2,C2orf73,TSPYL6                        |
| 11 | 36,825,000 | 36,975,000 | 492 | 876  | 0.833849984  | ACYP2,C2orf73                               |
| 11 | 36,900,000 | 37,050,000 | 493 | 883  | 0.85850055   | C2orf73,SPTBN1                              |
| 11 | 36,975,000 | 37,125,000 | 494 | 933  | 0.990227946  | SPTBN1                                      |
| 11 | 37,050,000 | 37,200,000 | 495 | 868  | 0.724797999  | SPTBN1                                      |
| 11 | 37,125,000 | 37,275,000 | 496 | 945  | 0.085418491  | SPTBN1                                      |
| 11 | 37,200,000 | 37,350,000 | 497 | 951  | -0.433834226 | EML6,SPTBN1                                 |
| 11 | 37,275,000 | 37,425,000 | 498 | 926  | -0.985443953 | EML6                                        |
| 11 | 37,350,000 | 37,500,000 | 499 | 1211 | 0.120660247  | EML6                                        |
| 11 | 37,425,000 | 37,575,000 | 500 | 1411 | 0.49881309   | EML6                                        |
| 11 | 37,500,000 | 37,650,000 | 501 | 1247 | 0.131199644  | EML6,RTN4                                   |
| 11 | 37,575,000 | 37,725,000 | 502 | 1228 | 0.681538113  | RTN4                                        |
| 11 | 37,650,000 | 37,800,000 | 503 | 1474 | 0.065085954  | MGC139228                                   |
| 11 | 37,725,000 | 37,875,000 | 504 | 1234 | 0.162640384  | CCDC88A,MGC139228,MTIF2,PRORS1,RPS27A       |
| 11 | 37,800,000 | 37,950,000 | 505 | 784  | 1.254016859  | CCDC88A,MGC139228,MTIF2,PRORS1,RPS27A       |
| 11 | 37,875,000 | 38,025,000 | 506 | 748  | 0.730947694  | CCDC88A                                     |
| 11 | 37,950,000 | 38,100,000 | 507 | 1050 | 0.339273484  | CCDC104,CCDC88A,SMEK2                       |
| 11 | 38,025,000 | 38,175,000 | 508 | 1152 | 0.301351568  | CCDC104,PNPT1,SMEK2                         |
| 11 | 38,100,000 | 38,250,000 | 509 | 1038 | 0.220031685  | PNPT1,SMEK2                                 |
| 11 | 38,175,000 | 38,325,000 | 510 | 808  | -0.170870513 | PNPT1                                       |
| 11 | 38,250,000 | 38,400,000 | 511 | 627  | 0.460701975  | EFEMP1                                      |
| 11 | 38,325,000 | 38,475,000 | 512 | 636  | 1.14543297   | EFEMP1                                      |
| 11 | 38,400,000 | 38,550,000 | 513 | 901  | 1.1233154    | EFEMP1                                      |
| 11 | 38,475,000 | 38,625,000 | 514 | 1482 | 1.206368853  |                                             |
| 11 | 38,550,000 | 38,700,000 | 515 | 1584 | 0.828982045  |                                             |
| 11 | 38,625,000 | 38,775,000 | 516 | 1215 | 0.666350965  | CCDC85A                                     |
| 11 | 38,700,000 | 38,850,000 | 517 | 1051 | 0.686267394  | CCDC85A                                     |
| 11 | 38,775,000 | 38,925,000 | 518 | 1122 | 0.352242789  | CCDC85A                                     |
| 11 | 38,850,000 | 39,000,000 | 519 | 1152 | 0.55927584   | CCDC85A                                     |
| 11 | 38,925,000 | 39,075,000 | 520 | 971  | 0.631439419  | CCDC85A                                     |
| 11 | 39,000,000 | 39,150,000 | 521 | 861  | -0.405515566 |                                             |
| 11 | 39,075,000 | 39,225,000 | 522 | 1313 | -0.401721903 |                                             |
| 11 | 39,150,000 | 39,300,000 | 523 | 1271 | -0.070725539 |                                             |
| 11 | 39,225,000 | 39,375,000 | 524 | 719  | -0.764433195 |                                             |
| 11 | 39,300,000 | 39,450,000 | 525 | 886  | 0.147033477  |                                             |
| 11 | 39,375,000 | 39,525,000 | 526 | 993  | 0.10883077   |                                             |
| 11 | 39,450,000 | 39,600,000 | 527 | 841  | -2.554357027 |                                             |
| 11 | 39,525,000 | 39,675,000 | 528 | 741  | -1.54170419  |                                             |
| 11 | 39,600,000 | 39,750,000 | 529 | 603  | 0.138710384  |                                             |
| 11 | 39,675,000 | 39,825,000 | 530 | 491  | -0.294745087 |                                             |
| 11 | 39,750,000 | 39,900,000 | 531 | 838  | 0.618815147  |                                             |
| 11 | 39,825,000 | 39,975,000 | 532 | 1239 | 0.676916312  |                                             |
| 11 | 39,900,000 | 40,050,000 | 533 | 914  | 0.423313304  |                                             |
| 11 | 39,975,000 | 40,125,000 | 534 | 649  | -0.248566562 |                                             |
| 11 | 40,050,000 | 40,200,000 | 535 | 1026 | -1.438923771 |                                             |
| 11 | 40,125,000 | 40,275,000 | 536 | 908  | -1.831549323 |                                             |

|    |            |            |     |      |              |                                 |
|----|------------|------------|-----|------|--------------|---------------------------------|
| 11 | 40,200,000 | 40,350,000 | 537 | 451  | -0.842797707 |                                 |
| 11 | 40,275,000 | 40,425,000 | 538 | 546  | 0.476012938  |                                 |
| 11 | 40,350,000 | 40,500,000 | 539 | 886  | 0.626902858  |                                 |
| 11 | 40,425,000 | 40,575,000 | 540 | 1222 | 0.121157514  | VRK2                            |
| 11 | 40,500,000 | 40,650,000 | 541 | 963  | -0.173577218 | VRK2                            |
| 11 | 40,575,000 | 40,725,000 | 542 | 591  | -0.529880321 | FANCL,VRK2                      |
| 11 | 40,650,000 | 40,800,000 | 543 | 983  | -0.219443245 | FANCL,VRK2                      |
| 11 | 40,725,000 | 40,875,000 | 544 | 1089 | -0.275625544 | FANCL                           |
| 11 | 40,800,000 | 40,950,000 | 545 | 686  | -0.817002779 |                                 |
| 11 | 40,875,000 | 41,025,000 | 546 | 471  | -1.001061604 |                                 |
| 11 | 40,950,000 | 41,100,000 | 547 | 330  | -0.253072411 |                                 |
| 11 | 41,025,000 | 41,175,000 | 548 | 293  | -0.21145517  |                                 |
| 11 | 41,100,000 | 41,250,000 | 549 | 443  | -0.517511792 |                                 |
| 11 | 41,175,000 | 41,325,000 | 550 | 680  | -1.77537935  |                                 |
| 11 | 41,250,000 | 41,400,000 | 551 | 741  | -3.435929682 |                                 |
| 11 | 41,325,000 | 41,475,000 | 552 | 569  | -2.454427472 |                                 |
| 11 | 41,400,000 | 41,550,000 | 553 | 561  | -0.368933325 |                                 |
| 11 | 41,475,000 | 41,625,000 | 554 | 681  | 0.385103703  |                                 |
| 11 | 41,550,000 | 41,700,000 | 555 | 692  | 0.303095433  |                                 |
| 11 | 41,625,000 | 41,775,000 | 556 | 692  | 0.265870864  |                                 |
| 11 | 41,700,000 | 41,850,000 | 557 | 615  | -1.536521537 |                                 |
| 11 | 41,775,000 | 41,925,000 | 558 | 618  | -2.239609678 |                                 |
| 11 | 41,850,000 | 42,000,000 | 559 | 919  | 0.12165233   |                                 |
| 11 | 41,925,000 | 42,075,000 | 560 | 1011 | 0.022116068  |                                 |
| 11 | 42,000,000 | 42,150,000 | 561 | 696  | -0.836178749 |                                 |
| 11 | 42,075,000 | 42,225,000 | 562 | 859  | 0.031651881  |                                 |
| 11 | 42,150,000 | 42,300,000 | 563 | 1029 | 0.541602842  |                                 |
| 11 | 42,225,000 | 42,375,000 | 564 | 737  | 0.760740328  |                                 |
| 11 | 42,300,000 | 42,450,000 | 565 | 621  | 0.544077204  |                                 |
| 11 | 42,375,000 | 42,525,000 | 566 | 657  | 0.086904463  |                                 |
| 11 | 42,450,000 | 42,600,000 | 567 | 747  | -0.243819542 |                                 |
| 11 | 42,525,000 | 42,675,000 | 568 | 804  | -0.101230916 |                                 |
| 11 | 42,600,000 | 42,750,000 | 569 | 610  | -0.123202848 |                                 |
| 11 | 42,675,000 | 42,825,000 | 570 | 630  | -0.123507375 |                                 |
| 11 | 42,750,000 | 42,900,000 | 571 | 840  | 0.488395537  |                                 |
| 11 | 42,825,000 | 42,975,000 | 572 | 623  | 0.671393166  |                                 |
| 11 | 42,900,000 | 43,050,000 | 573 | 667  | -0.563964338 |                                 |
| 11 | 42,975,000 | 43,125,000 | 574 | 786  | -0.469199623 | BCL11A                          |
| 11 | 43,050,000 | 43,200,000 | 575 | 507  | 0.352312138  | BCL11A                          |
| 11 | 43,125,000 | 43,275,000 | 576 | 506  | 0.856159004  | BCL11A                          |
| 11 | 43,200,000 | 43,350,000 | 577 | 702  | 0.13298643   |                                 |
| 11 | 43,275,000 | 43,425,000 | 578 | 594  | -0.040918947 | PAPOLG                          |
| 11 | 43,350,000 | 43,500,000 | 579 | 438  | 0.846137089  | PAPOLG                          |
| 11 | 43,425,000 | 43,575,000 | 580 | 431  | 0.854943384  | PUS10,REL                       |
| 11 | 43,500,000 | 43,650,000 | 581 | 382  | 0.582110077  | PEX13,PUS10,REL                 |
| 11 | 43,575,000 | 43,725,000 | 582 | 451  | 0.579881288  | PEX13,PUS10                     |
| 11 | 43,650,000 | 43,800,000 | 583 | 795  | 0.757443219  | GCFC2                           |
| 11 | 43,725,000 | 43,875,000 | 584 | 733  | 0.777115624  | GCFC2                           |
| 11 | 43,800,000 | 43,950,000 | 585 | 1090 | 0.803008308  | GCFC2,MRPL19,ENSBTAG00000018554 |
| 11 | 43,875,000 | 44,025,000 | 586 | 1491 | 0.881194845  | MRPL19,ENSBTAG00000018554       |
| 11 | 43,950,000 | 44,100,000 | 587 | 1342 | 1.312924339  |                                 |
| 11 | 44,025,000 | 44,175,000 | 588 | 1200 | 1.562327935  |                                 |
| 11 | 44,100,000 | 44,250,000 | 589 | 880  | 1.53533674   | SEPT10,SH3RF3                   |

|    |            |            |     |      |              |                                                                             |
|----|------------|------------|-----|------|--------------|-----------------------------------------------------------------------------|
| 11 | 44,175,000 | 44,325,000 | 590 | 1088 | 1.414325363  | SEPT10,SH3RF3                                                               |
| 11 | 44,250,000 | 44,400,000 | 591 | 819  | 1.118627348  | SH3RF3                                                                      |
| 11 | 44,325,000 | 44,475,000 | 592 | 335  | -0.957847407 | EDAR,SH3RF3                                                                 |
| 11 | 44,400,000 | 44,550,000 | 593 | 313  | 0.172094646  | CCDC138,EDAR,RANBP2                                                         |
| 11 | 44,475,000 | 44,625,000 | 594 | 270  | -0.35930529  | CCDC138,MGC142792,RANBP2                                                    |
| 11 | 44,550,000 | 44,700,000 | 595 | 410  | 0.540336413  | GCC2,MGC142792,RANBP2                                                       |
| 11 | 44,625,000 | 44,775,000 | 596 | 703  | -0.929573805 | GCC2,MGC142792,SULT1C2,SULT1C3,ENSBTAG00000016032,ENSBTAG000000032051       |
| 11 | 44,700,000 | 44,850,000 | 597 | 807  | -1.765892998 | GCC2,SULT1C2,SULT1C3,ENSBTAG00000016032,ENSBTAG000000032051                 |
| 11 | 44,775,000 | 44,925,000 | 598 | 718  | -1.585852664 | SLC5A7,SULT1C3                                                              |
| 11 | 44,850,000 | 45,000,000 | 599 | 686  | -0.46411077  | SLC5A7                                                                      |
| 11 | 44,925,000 | 45,075,000 | 600 | 803  | -0.100051771 |                                                                             |
| 11 | 45,000,000 | 45,150,000 | 601 | 1064 | -0.332933302 |                                                                             |
| 11 | 45,075,000 | 45,225,000 | 602 | 820  | -0.281193533 |                                                                             |
| 11 | 45,150,000 | 45,300,000 | 603 | 464  | 0.231265633  |                                                                             |
| 11 | 45,225,000 | 45,375,000 | 604 | 355  | 0.778885777  |                                                                             |
| 11 | 45,300,000 | 45,450,000 | 605 | 377  | 1.218844284  | ST6GAL2                                                                     |
| 11 | 45,375,000 | 45,525,000 | 606 | 520  | 1.391335153  | ST6GAL2                                                                     |
| 11 | 45,450,000 | 45,600,000 | 607 | 368  | 1.219752999  | ST6GAL2,UXS1                                                                |
| 11 | 45,525,000 | 45,675,000 | 608 | 307  | 0.922608464  | UXS1                                                                        |
| 11 | 45,600,000 | 45,750,000 | 609 | 706  | 0.982412746  | C11H2orf40,UXS1                                                             |
| 11 | 45,675,000 | 45,825,000 | 610 | 1034 | 0.590552062  | C11H2orf40,NCK2                                                             |
| 11 | 45,750,000 | 45,900,000 | 611 | 1031 | 0.387335666  | NCK2                                                                        |
| 11 | 45,825,000 | 45,975,000 | 612 | 1211 | 0.551196749  | NCK2                                                                        |
| 11 | 45,900,000 | 46,050,000 | 613 | 1627 | 0.986548819  |                                                                             |
| 11 | 45,975,000 | 46,125,000 | 614 | 1492 | 0.84776995   | POLR1B,TTL                                                                  |
| 11 | 46,050,000 | 46,200,000 | 615 | 1171 | 0.033705041  | POLR1B,TTL                                                                  |
| 11 | 46,125,000 | 46,275,000 | 616 | 810  | -0.029204664 | POLR1B,SLC20A1                                                              |
| 11 | 46,200,000 | 46,350,000 | 617 | 731  | 0.650807397  | CKAP2L,IL1A,NT5DC4,SLC20A1                                                  |
| 11 | 46,275,000 | 46,425,000 | 618 | 802  | 0.813495026  | CKAP2L,IL1A,IL1B,NT5DC4                                                     |
| 11 | 46,350,000 | 46,500,000 | 619 | 747  | 0.415443527  | IL1A,IL1B,IL37                                                              |
| 11 | 46,425,000 | 46,575,000 | 620 | 1201 | 0.294678421  | IL36A,IL36G,IL37,ENSBTAG00000039476                                         |
| 11 | 46,500,000 | 46,650,000 | 621 | 1416 | 0.007170326  | IL1F10,IL36A,IL36B,IL36G,IL36RN,ENSBTAG000000039476                         |
| 11 | 46,575,000 | 46,725,000 | 622 | 1319 | -0.517085943 | IL1F10,IL1RN,IL36B,IL36RN                                                   |
| 11 | 46,650,000 | 46,800,000 | 623 | 1419 | -0.086231208 | IL1RN,PAX8,PSD4                                                             |
| 11 | 46,725,000 | 46,875,000 | 624 | 1274 | -0.00590298  | PAX8,PSD4                                                                   |
| 11 | 46,800,000 | 46,950,000 | 625 | 1083 | -0.84586775  | PAX8                                                                        |
| 11 | 46,875,000 | 47,025,000 | 626 | 1260 | 0.000121168  | ENSBTAG00000047185                                                          |
| 11 | 46,950,000 | 47,100,000 | 627 | 1747 | 0.422605719  | ENSBTAG00000047029,ENSBTAG00000047185                                       |
| 11 | 47,025,000 | 47,175,000 | 628 | 1837 | 0.317301591  | ENSBTAG00000003408,ENSBTAG00000045514,ENSBTAG00000045659,ENSBTAG00000047029 |
| 11 | 47,100,000 | 47,250,000 | 629 | 1196 | 0.655119271  | RPIA,ENSBTAG00000003408,ENSBTAG00000045514,ENSBTAG00000045659               |
| 11 | 47,175,000 | 47,325,000 | 630 | 822  | 0.928066067  | EIF2AK3,RPIA                                                                |
| 11 | 47,250,000 | 47,400,000 | 631 | 928  | 0.451942212  | EIF2AK3,RPIA                                                                |
| 11 | 47,325,000 | 47,475,000 | 632 | 966  | -0.10404798  | EIF2AK3,TEX37                                                               |
| 11 | 47,400,000 | 47,550,000 | 633 | 814  | 0.133512645  | FOXI3,TEX37                                                                 |
| 11 | 47,475,000 | 47,625,000 | 634 | 549  | 0.881599678  | FOXI3                                                                       |
| 11 | 47,550,000 | 47,700,000 | 635 | 546  | 1.306044068  |                                                                             |
| 11 | 47,625,000 | 47,775,000 | 636 | 1070 | 0.350016776  | THNSL2                                                                      |
| 11 | 47,700,000 | 47,850,000 | 637 | 1181 | -1.613583244 | FABP1,SMYD1,THNSL2                                                          |



|    |            |            |     |      |              |                                                                       |
|----|------------|------------|-----|------|--------------|-----------------------------------------------------------------------|
| 11 | 47,775,000 | 47,925,000 | 638 | 681  | -3.167769123 | CD8B,FABP1,KRCC1,SMYD1,ENSBTAG00000002545                             |
| 11 | 47,850,000 | 48,000,000 | 639 | 407  | -1.36110541  | CD8A,CD8B,KRCC1,ENSBTAG00000002545                                    |
| 11 | 47,925,000 | 48,075,000 | 640 | 418  | -1.532500988 | CD8A,CD8B,RMND5A                                                      |
| 11 | 48,000,000 | 48,150,000 | 641 | 479  | -2.132990209 | RMND5A,RNF103                                                         |
| 11 | 48,075,000 | 48,225,000 | 642 | 439  | -2.240326563 | CHMP3,RNF103                                                          |
| 11 | 48,150,000 | 48,300,000 | 643 | 322  | -1.416014509 | CHMP3,KDM3A,RNF103                                                    |
| 11 | 48,225,000 | 48,375,000 | 644 | 448  | -1.652132012 | CHMP3,KDM3A                                                           |
| 11 | 48,300,000 | 48,450,000 | 645 | 867  | -0.952518811 | KDM3A,REEP1                                                           |
| 11 | 48,375,000 | 48,525,000 | 646 | 1090 | -0.51371083  | REEP1                                                                 |
| 11 | 48,450,000 | 48,600,000 | 647 | 885  | 0.656657258  | IMMT,MRPL35,PTCD3,REEP1                                               |
| 11 | 48,525,000 | 48,675,000 | 648 | 647  | 1.443645052  | IMMT,MRPL35,POLR1A,PTCD3,REEP1                                        |
| 11 | 48,600,000 | 48,750,000 | 649 | 678  | 0.660124284  | POLR1A,PTCD3                                                          |
| 11 | 48,675,000 | 48,825,000 | 650 | 884  | -0.449325897 | POLR1A                                                                |
| 11 | 48,750,000 | 48,900,000 | 651 | 609  | -0.43735846  | ST3GAL5                                                               |
| 11 | 48,825,000 | 48,975,000 | 652 | 385  | -0.62788091  | ATOH8,ST3GAL5                                                         |
| 11 | 48,900,000 | 49,050,000 | 653 | 565  | -0.460639501 | ATOH8,ST3GAL5                                                         |
| 11 | 48,975,000 | 49,125,000 | 654 | 1409 | 0.424770713  | ATOH8,ENSBTAG00000047449,ENSBTAG00000047816                           |
| 11 | 49,050,000 | 49,200,000 | 655 | 1637 | 0.559346665  | SFTPBP,USP39,ENSBTAG00000031828,ENSBTAG00000047449,ENSBTAG00000047816 |
| 11 | 49,125,000 | 49,275,000 | 656 | 1020 | 0.905674306  | C2orf68,RNF181,SFTPBP,TMEM150A,USP39,VAMP5,VAMP8,ENSBTAG00000031828   |
| 11 | 49,200,000 | 49,350,000 | 657 | 736  | 0.733803706  | C2orf68,GGCX,MAT2A,RNF181,TMEM150A,USP39,VAMP5,VAMP8                  |
| 11 | 49,275,000 | 49,425,000 | 658 | 457  | 0.320080048  | CAPG,GGCX,MAT2A,SH2D6                                                 |
| 11 | 49,350,000 | 49,500,000 | 659 | 442  | 0.288633969  | CAPG,ELMOD3,RETSAT,SH2D6,TGOLN2                                       |
| 11 | 49,425,000 | 49,575,000 | 660 | 459  | 0.431137287  | CAPG,ELMOD3,RETSAT,TGOLN2,ENSBTAG00000010111                          |
| 11 | 49,500,000 | 49,650,000 | 661 | 452  | -1.016264809 | ENSBTAG00000010111                                                    |
| 11 | 49,575,000 | 49,725,000 | 662 | 711  | -0.781038649 | ENSBTAG00000047475                                                    |
| 11 | 49,650,000 | 49,800,000 | 663 | 882  | 0.441592131  | HIGD1D,KCMF1,ENSBTAG00000047475                                       |
| 11 | 49,725,000 | 49,875,000 | 664 | 598  | 0.909798098  | HIGD1D,KCMF1                                                          |
| 11 | 49,800,000 | 49,950,000 | 665 | 536  | 0.257901279  | KCMF1,TMSB10                                                          |
| 11 | 49,875,000 | 50,025,000 | 666 | 643  | -0.201561617 | TMSB10                                                                |
| 11 | 49,950,000 | 50,100,000 | 667 | 907  | -5.887384813 |                                                                       |
| 11 | 50,025,000 | 50,175,000 | 668 | 1002 | -6.462536459 |                                                                       |
| 11 | 50,100,000 | 50,250,000 | 669 | 1105 | -1.672717039 |                                                                       |
| 11 | 50,175,000 | 50,325,000 | 670 | 1219 | 0.228830674  |                                                                       |
| 11 | 50,250,000 | 50,400,000 | 671 | 1062 | 1.094148776  |                                                                       |
| 11 | 50,325,000 | 50,475,000 | 672 | 1007 | 0.481429024  | SUCLG1                                                                |
| 11 | 50,400,000 | 50,550,000 | 673 | 781  | -0.0583999   | SUCLG1                                                                |
| 11 | 50,475,000 | 50,625,000 | 674 | 746  | 0.37217945   |                                                                       |
| 11 | 50,550,000 | 50,700,000 | 675 | 613  | 0.422464472  |                                                                       |
| 11 | 50,625,000 | 50,775,000 | 676 | 402  | 0.262739492  |                                                                       |
| 11 | 50,700,000 | 50,850,000 | 677 | 450  | 0.266666658  |                                                                       |
| 11 | 50,775,000 | 50,925,000 | 678 | 810  | -0.260196276 |                                                                       |
| 11 | 50,850,000 | 51,000,000 | 679 | 1158 | -0.136472105 |                                                                       |
| 11 | 50,925,000 | 51,075,000 | 680 | 1116 | -0.615640816 |                                                                       |
| 11 | 51,000,000 | 51,150,000 | 681 | 1034 | -0.221664398 |                                                                       |
| 11 | 51,075,000 | 51,225,000 | 682 | 1205 | -0.244407187 |                                                                       |
| 11 | 51,150,000 | 51,300,000 | 683 | 1177 | -0.470621177 |                                                                       |
| 11 | 51,225,000 | 51,375,000 | 684 | 1211 | -2.240962235 |                                                                       |
| 11 | 51,300,000 | 51,450,000 | 685 | 1343 | -1.717219852 |                                                                       |

|    |            |            |     |      |              |                           |
|----|------------|------------|-----|------|--------------|---------------------------|
| 11 | 51,375,000 | 51,525,000 | 686 | 1301 | 1.094271988  |                           |
| 11 | 51,450,000 | 51,600,000 | 687 | 1201 | 1.234156078  |                           |
| 11 | 51,525,000 | 51,675,000 | 688 | 996  | 0.356942203  |                           |
| 11 | 51,600,000 | 51,750,000 | 689 | 1192 | -0.713287909 |                           |
| 11 | 51,675,000 | 51,825,000 | 690 | 1411 | -0.101273913 |                           |
| 11 | 51,750,000 | 51,900,000 | 691 | 1355 | 0.897661495  |                           |
| 11 | 51,825,000 | 51,975,000 | 692 | 1409 | 0.861996334  |                           |
| 11 | 51,900,000 | 52,050,000 | 693 | 1380 | 1.003501248  |                           |
| 11 | 51,975,000 | 52,125,000 | 694 | 1175 | 1.382405924  |                           |
| 11 | 52,050,000 | 52,200,000 | 695 | 1148 | 1.474375901  |                           |
| 11 | 52,125,000 | 52,275,000 | 696 | 1288 | 1.422100761  |                           |
| 11 | 52,200,000 | 52,350,000 | 697 | 1457 | 1.317002885  |                           |
| 11 | 52,275,000 | 52,425,000 | 698 | 1193 | 0.90537517   |                           |
| 11 | 52,350,000 | 52,500,000 | 699 | 1260 | 0.267660125  |                           |
| 11 | 52,425,000 | 52,575,000 | 700 | 1723 | 0.329910736  |                           |
| 11 | 52,500,000 | 52,650,000 | 701 | 1528 | -2.362861043 |                           |
| 11 | 52,575,000 | 52,725,000 | 702 | 1200 | -4.069853268 |                           |
| 11 | 52,650,000 | 52,800,000 | 703 | 945  | -2.197382554 |                           |
| 11 | 52,725,000 | 52,875,000 | 704 | 714  | -0.85450249  |                           |
| 11 | 52,800,000 | 52,950,000 | 705 | 704  | -1.040825099 |                           |
| 11 | 52,875,000 | 53,025,000 | 706 | 862  | -0.539099181 |                           |
| 11 | 52,950,000 | 53,100,000 | 707 | 1345 | 0.091137105  |                           |
| 11 | 53,025,000 | 53,175,000 | 708 | 1643 | 0.186072312  |                           |
| 11 | 53,100,000 | 53,250,000 | 709 | 1562 | -0.6281032   |                           |
| 11 | 53,175,000 | 53,325,000 | 710 | 1237 | -1.955499888 |                           |
| 11 | 53,250,000 | 53,400,000 | 711 | 920  | -1.542256952 |                           |
| 11 | 53,325,000 | 53,475,000 | 712 | 942  | -0.772689067 |                           |
| 11 | 53,400,000 | 53,550,000 | 713 | 1220 | -1.182872569 |                           |
| 11 | 53,475,000 | 53,625,000 | 714 | 1048 | -1.076103937 |                           |
| 11 | 53,550,000 | 53,700,000 | 715 | 672  | 0.246104878  |                           |
| 11 | 53,625,000 | 53,775,000 | 716 | 785  | 0.431175056  |                           |
| 11 | 53,700,000 | 53,850,000 | 717 | 972  | -0.134736968 |                           |
| 11 | 53,775,000 | 53,925,000 | 718 | 881  | 0.10217563   |                           |
| 11 | 53,850,000 | 54,000,000 | 719 | 824  | 0.119374596  |                           |
| 11 | 53,925,000 | 54,075,000 | 720 | 1035 | -0.306853199 |                           |
| 11 | 54,000,000 | 54,150,000 | 721 | 853  | -0.292507439 |                           |
| 11 | 54,075,000 | 54,225,000 | 722 | 630  | -0.260385546 |                           |
| 11 | 54,150,000 | 54,300,000 | 723 | 796  | 0.731957973  |                           |
| 11 | 54,225,000 | 54,375,000 | 724 | 1020 | 0.864511865  |                           |
| 11 | 54,300,000 | 54,450,000 | 725 | 1124 | 0.86613412   |                           |
| 11 | 54,375,000 | 54,525,000 | 726 | 1111 | 0.608861856  |                           |
| 11 | 54,450,000 | 54,600,000 | 727 | 795  | 0.447725399  |                           |
| 11 | 54,525,000 | 54,675,000 | 728 | 526  | 1.126361405  |                           |
| 11 | 54,600,000 | 54,750,000 | 729 | 529  | 1.262607552  | CTNNA2                    |
| 11 | 54,675,000 | 54,825,000 | 730 | 709  | -0.153044384 | CTNNA2,ENSBTAG00000047167 |
| 11 | 54,750,000 | 54,900,000 | 731 | 1185 | -3.938275855 | CTNNA2,ENSBTAG00000047167 |
| 11 | 54,825,000 | 54,975,000 | 732 | 1425 | -4.132318892 | CTNNA2,ENSBTAG00000047167 |
| 11 | 54,900,000 | 55,050,000 | 733 | 994  | -2.267512041 | CTNNA2,ENSBTAG00000047167 |
| 11 | 54,975,000 | 55,125,000 | 734 | 690  | -1.124270055 | CTNNA2,ENSBTAG00000047167 |
| 11 | 55,050,000 | 55,200,000 | 735 | 637  | -0.293407918 | CTNNA2                    |
| 11 | 55,125,000 | 55,275,000 | 736 | 536  | 0.186474115  | CTNNA2                    |
| 11 | 55,200,000 | 55,350,000 | 737 | 733  | 0.497695279  | CTNNA2                    |
| 11 | 55,275,000 | 55,425,000 | 738 | 1027 | -0.547889689 | CTNNA2                    |

|    |            |            |     |      |              |                    |
|----|------------|------------|-----|------|--------------|--------------------|
| 11 | 55,350,000 | 55,500,000 | 739 | 1331 | -2.798321213 | CTNNA2             |
| 11 | 55,425,000 | 55,575,000 | 740 | 1348 | -2.420002854 | CTNNA2             |
| 11 | 55,500,000 | 55,650,000 | 741 | 1272 | 0.024787608  | CTNNA2             |
| 11 | 55,575,000 | 55,725,000 | 742 | 959  | 0.642595322  | CTNNA2             |
| 11 | 55,650,000 | 55,800,000 | 743 | 473  | 0.692327807  | CTNNA2             |
| 11 | 55,725,000 | 55,875,000 | 744 | 530  | 1.120446158  | CTNNA2             |
| 11 | 55,800,000 | 55,950,000 | 745 | 870  | 0.174403284  | CTNNA2             |
| 11 | 55,875,000 | 56,025,000 | 746 | 712  | -0.278364476 | CTNNA2             |
| 11 | 55,950,000 | 56,100,000 | 747 | 355  | 1.398857107  |                    |
| 11 | 56,025,000 | 56,175,000 | 748 | 535  | 0.853129834  |                    |
| 11 | 56,100,000 | 56,250,000 | 749 | 854  | 0.718355584  |                    |
| 11 | 56,175,000 | 56,325,000 | 750 | 981  | 0.14334588   |                    |
| 11 | 56,250,000 | 56,400,000 | 751 | 1333 | -1.123752924 |                    |
| 11 | 56,325,000 | 56,475,000 | 752 | 1383 | -0.65469307  |                    |
| 11 | 56,400,000 | 56,550,000 | 753 | 1009 | 0.809740715  | REG3G              |
| 11 | 56,475,000 | 56,625,000 | 754 | 1115 | 1.265197878  | REG3G              |
| 11 | 56,550,000 | 56,700,000 | 755 | 1639 | 1.142198718  | PTP                |
| 11 | 56,625,000 | 56,775,000 | 756 | 1412 | 0.723720815  | PTP                |
| 11 | 56,700,000 | 56,850,000 | 757 | 561  | 0.575812119  |                    |
| 11 | 56,775,000 | 56,925,000 | 758 | 603  | 0.305880178  |                    |
| 11 | 56,850,000 | 57,000,000 | 759 | 592  | 0.227614446  | ENSBTAG00000000168 |
| 11 | 56,925,000 | 57,075,000 | 760 | 535  | -0.328349326 | ENSBTAG00000000168 |
| 11 | 57,000,000 | 57,150,000 | 761 | 977  | 0.204500482  |                    |
| 11 | 57,075,000 | 57,225,000 | 762 | 1205 | 1.160842292  |                    |
| 11 | 57,150,000 | 57,300,000 | 763 | 1006 | 1.382436778  |                    |
| 11 | 57,225,000 | 57,375,000 | 764 | 1056 | -0.464579303 |                    |
| 11 | 57,300,000 | 57,450,000 | 765 | 945  | -1.109175004 |                    |
| 11 | 57,375,000 | 57,525,000 | 766 | 792  | -2.097374634 |                    |
| 11 | 57,450,000 | 57,600,000 | 767 | 891  | -1.984919478 |                    |
| 11 | 57,525,000 | 57,675,000 | 768 | 904  | -0.214707572 |                    |
| 11 | 57,600,000 | 57,750,000 | 769 | 1256 | 0.6441953    |                    |
| 11 | 57,675,000 | 57,825,000 | 770 | 1107 | 0.789248317  |                    |
| 11 | 57,750,000 | 57,900,000 | 771 | 749  | 0.773446906  |                    |
| 11 | 57,825,000 | 57,975,000 | 772 | 844  | 0.010465637  |                    |
| 11 | 57,900,000 | 58,050,000 | 773 | 889  | 0.161674567  |                    |
| 11 | 57,975,000 | 58,125,000 | 774 | 836  | 0.493725241  |                    |
| 11 | 58,050,000 | 58,200,000 | 775 | 806  | 0.909937484  |                    |
| 11 | 58,125,000 | 58,275,000 | 776 | 911  | 0.826912895  |                    |
| 11 | 58,200,000 | 58,350,000 | 777 | 970  | 0.32321812   |                    |
| 11 | 58,275,000 | 58,425,000 | 778 | 959  | 0.809183269  |                    |
| 11 | 58,350,000 | 58,500,000 | 779 | 751  | 1.06237054   | LRRTM4             |
| 11 | 58,425,000 | 58,575,000 | 780 | 772  | 0.939216378  | LRRTM4             |
| 11 | 58,500,000 | 58,650,000 | 781 | 930  | 0.855699165  |                    |
| 11 | 58,575,000 | 58,725,000 | 782 | 644  | 0.486010879  |                    |
| 11 | 58,650,000 | 58,800,000 | 783 | 644  | 0.013986082  |                    |
| 11 | 58,725,000 | 58,875,000 | 784 | 828  | 0.506536484  |                    |
| 11 | 58,800,000 | 58,950,000 | 785 | 838  | 1.109031204  |                    |
| 11 | 58,875,000 | 59,025,000 | 786 | 774  | 0.637730856  |                    |
| 11 | 58,950,000 | 59,100,000 | 787 | 931  | -0.167097023 |                    |
| 11 | 59,025,000 | 59,175,000 | 788 | 1006 | 0.424072679  |                    |
| 11 | 59,100,000 | 59,250,000 | 789 | 839  | 0.890815906  |                    |
| 11 | 59,175,000 | 59,325,000 | 790 | 679  | -0.072126954 |                    |
| 11 | 59,250,000 | 59,400,000 | 791 | 577  | 0.054975682  |                    |

|    |            |            |     |     |              |                     |
|----|------------|------------|-----|-----|--------------|---------------------|
| 11 | 59,325,000 | 59,475,000 | 792 | 671 | 0.102564923  |                     |
| 11 | 59,400,000 | 59,550,000 | 793 | 712 | 0.005943945  |                     |
| 11 | 59,475,000 | 59,625,000 | 794 | 868 | -0.417882201 |                     |
| 11 | 59,550,000 | 59,700,000 | 795 | 833 | -0.682783226 |                     |
| 11 | 59,625,000 | 59,775,000 | 796 | 453 | -0.584347638 | AHSA2,C2orf74       |
| 11 | 59,700,000 | 59,850,000 | 797 | 369 | 0.148092612  | AHSA2,C2orf74,USP34 |
| 11 | 59,775,000 | 59,925,000 | 798 | 423 | -0.856306717 | AHSA2,USP34         |
| 11 | 59,850,000 | 60,000,000 | 799 | 415 | -1.170126017 | USP34               |
| 11 | 59,925,000 | 60,075,000 | 800 | 350 | -0.734816776 | USP34,XPO1          |
| 11 | 60,000,000 | 60,150,000 | 801 | 343 | -0.012744037 | XPO1                |
| 11 | 60,075,000 | 60,225,000 | 802 | 539 | 0.861604744  | XPO1                |
| 11 | 60,150,000 | 60,300,000 | 803 | 642 | 0.091678167  |                     |
| 11 | 60,225,000 | 60,375,000 | 804 | 687 | 0.530960805  | FAM161A             |
| 11 | 60,300,000 | 60,450,000 | 805 | 918 | 0.553018684  | CCT4,COMMD1,FAM161A |
| 11 | 60,375,000 | 60,525,000 | 806 | 945 | 0.176839697  | CCT4,COMMD1,FAM161A |
| 11 | 60,450,000 | 60,600,000 | 807 | 979 | 0.514609655  | COMMD1              |
| 11 | 60,525,000 | 60,675,000 | 808 | 745 | 0.476276263  | B3GNT2,COMMD1       |
| 11 | 60,600,000 | 60,750,000 | 809 | 360 | -0.07483442  | B3GNT2              |
| 11 | 60,675,000 | 60,825,000 | 810 | 650 | -1.228002731 | B3GNT2              |
| 11 | 60,750,000 | 60,900,000 | 811 | 824 | -1.641396666 |                     |
| 11 | 60,825,000 | 60,975,000 | 812 | 739 | -0.614563688 | TMEM17              |
| 11 | 60,900,000 | 61,050,000 | 813 | 664 | 0.075041932  | TMEM17              |
| 11 | 60,975,000 | 61,125,000 | 814 | 737 | -2.673210381 | EHBP1               |
| 11 | 61,050,000 | 61,200,000 | 815 | 607 | -2.608847623 | EHBP1               |
| 11 | 61,125,000 | 61,275,000 | 816 | 304 | 0.508744917  | EHBP1               |
| 11 | 61,200,000 | 61,350,000 | 817 | 368 | 0.565927595  | EHBP1               |
| 11 | 61,275,000 | 61,425,000 | 818 | 434 | -0.477786801 | EHBP1               |
| 11 | 61,350,000 | 61,500,000 | 819 | 341 | -0.209175968 | EHBP1,OTX1          |
| 11 | 61,425,000 | 61,575,000 | 820 | 267 | 0.898031741  | EHBP1,OTX1          |
| 11 | 61,500,000 | 61,650,000 | 821 | 348 | 0.95346667   |                     |
| 11 | 61,575,000 | 61,725,000 | 822 | 389 | 0.931055644  |                     |
| 11 | 61,650,000 | 61,800,000 | 823 | 382 | 0.579719379  | WDPCP               |
| 11 | 61,725,000 | 61,875,000 | 824 | 403 | -0.228282688 | WDPCP               |
| 11 | 61,800,000 | 61,950,000 | 825 | 463 | -0.668957376 | WDPCP               |
| 11 | 61,875,000 | 62,025,000 | 826 | 609 | 1.017960325  | MDH1,WDPCP          |
| 11 | 61,950,000 | 62,100,000 | 827 | 695 | 1.198177595  | MDH1,WDPCP          |
| 11 | 62,025,000 | 62,175,000 | 828 | 482 | 0.135708093  |                     |
| 11 | 62,100,000 | 62,250,000 | 829 | 341 | -2.5148869   | UGP2                |
| 11 | 62,175,000 | 62,325,000 | 830 | 350 | -2.077077688 | UGP2,VPS54          |
| 11 | 62,250,000 | 62,400,000 | 831 | 337 | -1.325243473 | UGP2,VPS54          |
| 11 | 62,325,000 | 62,475,000 | 832 | 356 | -0.141438734 | PELI1,VPS54         |
| 11 | 62,400,000 | 62,550,000 | 833 | 542 | -0.297474014 | PELI1               |
| 11 | 62,475,000 | 62,625,000 | 834 | 764 | -0.648228871 | PELI1               |
| 11 | 62,550,000 | 62,700,000 | 835 | 701 | -0.781487955 |                     |
| 11 | 62,625,000 | 62,775,000 | 836 | 786 | -0.429573081 |                     |
| 11 | 62,700,000 | 62,850,000 | 837 | 765 | -0.677163399 | LGALSL              |
| 11 | 62,775,000 | 62,925,000 | 838 | 424 | -0.572961833 | AFTPH,LGALSL        |
| 11 | 62,850,000 | 63,000,000 | 839 | 274 | 0.693519918  | AFTPH,SERTAD2       |
| 11 | 62,925,000 | 63,075,000 | 840 | 284 | 0.698447469  | AFTPH,SERTAD2       |
| 11 | 63,000,000 | 63,150,000 | 841 | 351 | -0.053893793 |                     |
| 11 | 63,075,000 | 63,225,000 | 842 | 433 | -0.194393116 |                     |
| 11 | 63,150,000 | 63,300,000 | 843 | 585 | 0.135636441  | TMSB4X              |
| 11 | 63,225,000 | 63,375,000 | 844 | 660 | -0.04778092  | SLC1A4,TMSB4X       |

|    |            |            |     |      |              |                                        |
|----|------------|------------|-----|------|--------------|----------------------------------------|
| 11 | 63,300,000 | 63,450,000 | 845 | 626  | 0.123491744  | CEP68,RAB1A,SLC1A4,TMSB4X              |
| 11 | 63,375,000 | 63,525,000 | 846 | 717  | -0.350471435 | CEP68,RAB1A,TMSB4X                     |
| 11 | 63,450,000 | 63,600,000 | 847 | 475  | -0.830309607 | ACTR2,RAB1A                            |
| 11 | 63,525,000 | 63,675,000 | 848 | 264  | 0.092577711  | ACTR2,SPRED2                           |
| 11 | 63,600,000 | 63,750,000 | 849 | 332  | -0.407352494 | SPRED2                                 |
| 11 | 63,675,000 | 63,825,000 | 850 | 370  | -0.290813958 |                                        |
| 11 | 63,750,000 | 63,900,000 | 851 | 743  | 1.076250177  |                                        |
| 11 | 63,825,000 | 63,975,000 | 852 | 958  | 1.24601105   |                                        |
| 11 | 63,900,000 | 64,050,000 | 853 | 633  | 1.111193113  |                                        |
| 11 | 63,975,000 | 64,125,000 | 854 | 441  | 0.087603898  |                                        |
| 11 | 64,050,000 | 64,200,000 | 855 | 754  | -0.641086028 |                                        |
| 11 | 64,125,000 | 64,275,000 | 856 | 1070 | 0.338607951  |                                        |
| 11 | 64,200,000 | 64,350,000 | 857 | 968  | 1.184466129  |                                        |
| 11 | 64,275,000 | 64,425,000 | 858 | 719  | 1.08635123   |                                        |
| 11 | 64,350,000 | 64,500,000 | 859 | 663  | 1.000707353  |                                        |
| 11 | 64,425,000 | 64,575,000 | 860 | 580  | 0.157522282  |                                        |
| 11 | 64,500,000 | 64,650,000 | 861 | 638  | -0.546251739 |                                        |
| 11 | 64,575,000 | 64,725,000 | 862 | 563  | -0.518761046 |                                        |
| 11 | 64,650,000 | 64,800,000 | 863 | 284  | 0.30476485   | MEIS1                                  |
| 11 | 64,725,000 | 64,875,000 | 864 | 331  | 1.018748753  | MEIS1                                  |
| 11 | 64,800,000 | 64,950,000 | 865 | 373  | 1.058235958  | MEIS1                                  |
| 11 | 64,875,000 | 65,025,000 | 866 | 334  | 0.955275716  | MEIS1                                  |
| 11 | 64,950,000 | 65,100,000 | 867 | 328  | 0.01325303   |                                        |
| 11 | 65,025,000 | 65,175,000 | 868 | 383  | -0.607452514 |                                        |
| 11 | 65,100,000 | 65,250,000 | 869 | 518  | -0.596478667 |                                        |
| 11 | 65,175,000 | 65,325,000 | 870 | 698  | 0.308487246  |                                        |
| 11 | 65,250,000 | 65,400,000 | 871 | 666  | 1.018154816  |                                        |
| 11 | 65,325,000 | 65,475,000 | 872 | 572  | 0.474094629  |                                        |
| 11 | 65,400,000 | 65,550,000 | 873 | 742  | 0.719001833  | ENSBTAG00000046310                     |
| 11 | 65,475,000 | 65,625,000 | 874 | 798  | 1.052134773  | ENSBTAG00000046310                     |
| 11 | 65,550,000 | 65,700,000 | 875 | 652  | 0.201466518  |                                        |
| 11 | 65,625,000 | 65,775,000 | 876 | 817  | -0.752100204 |                                        |
| 11 | 65,700,000 | 65,850,000 | 877 | 828  | -1.307842969 | ETAA1                                  |
| 11 | 65,775,000 | 65,925,000 | 878 | 522  | -1.650657937 | ETAA1                                  |
| 11 | 65,850,000 | 66,000,000 | 879 | 616  | -1.26875902  |                                        |
| 11 | 65,925,000 | 66,075,000 | 880 | 903  | 0.05309929   |                                        |
| 11 | 66,000,000 | 66,150,000 | 881 | 993  | 0.360479993  |                                        |
| 11 | 66,075,000 | 66,225,000 | 882 | 947  | -0.171418103 |                                        |
| 11 | 66,150,000 | 66,300,000 | 883 | 842  | 0.605881257  |                                        |
| 11 | 66,225,000 | 66,375,000 | 884 | 724  | 0.97312236   |                                        |
| 11 | 66,300,000 | 66,450,000 | 885 | 853  | 0.927539376  |                                        |
| 11 | 66,375,000 | 66,525,000 | 886 | 1090 | 0.973252997  | C1D                                    |
| 11 | 66,450,000 | 66,600,000 | 887 | 1196 | 0.466943361  | C1D,PNO1,PPP3R1,WDR92                  |
| 11 | 66,525,000 | 66,675,000 | 888 | 924  | 1.0389926    | PNO1,PPP3R1,WDR92                      |
| 11 | 66,600,000 | 66,750,000 | 889 | 547  | 1.309387262  | CNRIP1,PPP3R1                          |
| 11 | 66,675,000 | 66,825,000 | 890 | 548  | 1.130135812  | CNRIP1,PLEK                            |
| 11 | 66,750,000 | 66,900,000 | 891 | 701  | 0.799756051  | APLF,FBXO48,PLEK                       |
| 11 | 66,825,000 | 66,975,000 | 892 | 919  | 0.570482088  | APLF,FBXO48                            |
| 11 | 66,900,000 | 67,050,000 | 893 | 879  | 0.64819581   | APLF,PROKR1                            |
| 11 | 66,975,000 | 67,125,000 | 894 | 535  | 0.46240929   | ARHGAP25,PROKR1                        |
| 11 | 67,050,000 | 67,200,000 | 895 | 403  | 0.044850141  | ARHGAP25,BMP10                         |
| 11 | 67,125,000 | 67,275,000 | 896 | 539  | -2.917654827 | ARHGAP25,BMP10,GKN2,ENSBTAG00000038835 |
| 11 | 67,200,000 | 67,350,000 | 897 | 472  | -3.943424483 | ANTXR1,FOV,GKN2,ENSBTAG00000038835     |

|    |            |            |     |     |              |                                    |
|----|------------|------------|-----|-----|--------------|------------------------------------|
| 11 | 67,275,000 | 67,425,000 | 898 | 598 | -0.424401216 | ANTXR1,FOV                         |
| 11 | 67,350,000 | 67,500,000 | 899 | 982 | 0.655872143  | ANTXR1                             |
| 11 | 67,425,000 | 67,575,000 | 900 | 980 | 0.953768661  | ANTXR1                             |
| 11 | 67,500,000 | 67,650,000 | 901 | 773 | 0.363715129  | ANTXR1                             |
| 11 | 67,575,000 | 67,725,000 | 902 | 655 | 0.497839658  | ANTXR1,GFPT1                       |
| 11 | 67,650,000 | 67,800,000 | 903 | 885 | 1.314932743  | GFPT1,NFU1                         |
| 11 | 67,725,000 | 67,875,000 | 904 | 783 | 1.281879772  | AAK1,GFPT1,NFU1,ENSBTAG00000047822 |
| 11 | 67,800,000 | 67,950,000 | 905 | 504 | 0.994592657  | AAK1,ENSBTAG00000047822            |
| 11 | 67,875,000 | 68,025,000 | 906 | 692 | 0.685509245  | AAK1                               |
| 11 | 67,950,000 | 68,100,000 | 907 | 725 | -0.269649295 | AAK1,ANXA4                         |
| 11 | 68,025,000 | 68,175,000 | 908 | 465 | -0.452863128 | ANXA4,GMCL1                        |
| 11 | 68,100,000 | 68,250,000 | 909 | 239 | -0.996340164 | ANXA4,GMCL1,MXD1,SNRNP27           |
| 11 | 68,175,000 | 68,325,000 | 910 | 229 | -2.691150631 | GMCL1,MXD1,SNRNP27                 |
| 11 | 68,250,000 | 68,400,000 | 911 | 273 | -2.142420432 | MXD1,PCBP1                         |
| 11 | 68,325,000 | 68,475,000 | 912 | 301 | -3.342977057 | C2orf42,PCBP1                      |
| 11 | 68,400,000 | 68,550,000 | 913 | 381 | -1.474952769 | C2orf42,TIA1                       |
| 11 | 68,475,000 | 68,625,000 | 914 | 414 | 0.880177449  | C2orf42,PCYOX1,TIA1                |
| 11 | 68,550,000 | 68,700,000 | 915 | 611 | 1.2127219    | CAPN14,MGC139254,PCYOX1            |
| 11 | 68,625,000 | 68,775,000 | 916 | 893 | 0.494965834  | CAPN14,GALNT14,MGC139254           |
| 11 | 68,700,000 | 68,850,000 | 917 | 665 | -0.135278718 | CAPN14,GALNT14                     |
| 11 | 68,775,000 | 68,925,000 | 918 | 394 | 0.085438571  | GALNT14                            |
| 11 | 68,850,000 | 69,000,000 | 919 | 691 | -1.895884549 | GALNT14                            |
| 11 | 68,925,000 | 69,075,000 | 920 | 841 | -2.583877434 | CAPN13,GALNT14                     |
| 11 | 69,000,000 | 69,150,000 | 921 | 726 | -0.627431457 | CAPN13                             |
| 11 | 69,075,000 | 69,225,000 | 922 | 792 | -1.638002213 | CAPN13,LCLAT1                      |
| 11 | 69,150,000 | 69,300,000 | 923 | 860 | -3.357277489 | LCLAT1                             |
| 11 | 69,225,000 | 69,375,000 | 924 | 646 | -1.744173811 | LCLAT1                             |
| 11 | 69,300,000 | 69,450,000 | 925 | 408 | 0.567398315  | LCLAT1                             |
| 11 | 69,375,000 | 69,525,000 | 926 | 484 | -1.13718317  |                                    |
| 11 | 69,450,000 | 69,600,000 | 927 | 738 | -3.303460724 | LBH                                |
| 11 | 69,525,000 | 69,675,000 | 928 | 675 | -2.811983079 | LBH                                |
| 11 | 69,600,000 | 69,750,000 | 929 | 359 | -0.068359444 | LBH,YPEL5                          |
| 11 | 69,675,000 | 69,825,000 | 930 | 255 | 0.171872352  | YPEL5                              |
| 11 | 69,750,000 | 69,900,000 | 931 | 266 | 0.406923173  |                                    |
| 11 | 69,825,000 | 69,975,000 | 932 | 293 | 0.396138962  |                                    |
| 11 | 69,900,000 | 70,050,000 | 933 | 319 | -1.152998433 |                                    |
| 11 | 69,975,000 | 70,125,000 | 934 | 546 | -3.348997877 |                                    |
| 11 | 70,050,000 | 70,200,000 | 935 | 811 | -2.132467361 |                                    |
| 11 | 70,125,000 | 70,275,000 | 936 | 804 | -0.996956316 |                                    |
| 11 | 70,200,000 | 70,350,000 | 937 | 681 | -2.195700217 |                                    |
| 11 | 70,275,000 | 70,425,000 | 938 | 625 | -2.163299784 |                                    |
| 11 | 70,350,000 | 70,500,000 | 939 | 721 | -1.014059843 |                                    |
| 11 | 70,425,000 | 70,575,000 | 940 | 757 | -2.1401478   | ALK                                |
| 11 | 70,500,000 | 70,650,000 | 941 | 673 | -1.536090503 | ALK                                |
| 11 | 70,575,000 | 70,725,000 | 942 | 485 | 0.567901211  | ALK,CLIP4                          |
| 11 | 70,650,000 | 70,800,000 | 943 | 397 | 1.30377048   | C2orf71,CLIP4,FAM179A              |
| 11 | 70,725,000 | 70,875,000 | 944 | 473 | 1.177626631  | C2orf71,CLIP4,FAM179A,WDR43        |
| 11 | 70,800,000 | 70,950,000 | 945 | 459 | -0.164753725 | FAM179A,SPDYA,WDR43                |
| 11 | 70,875,000 | 71,025,000 | 946 | 330 | -2.235578857 | PPP1CB,SPDYA,WDR43                 |
| 11 | 70,950,000 | 71,100,000 | 947 | 252 | -2.946093623 | PPP1CB,SPDYA                       |
| 11 | 71,025,000 | 71,175,000 | 948 | 378 | -2.214762346 | PLB1                               |
| 11 | 71,100,000 | 71,250,000 | 949 | 646 | -0.476538909 | PLB1                               |
| 11 | 71,175,000 | 71,325,000 | 950 | 842 | -2.797701094 | PLB1                               |

|    |            |            |     |      |              |                                                                         |
|----|------------|------------|-----|------|--------------|-------------------------------------------------------------------------|
| 11 | 71,250,000 | 71,400,000 | 951 | 552  | -4.072154542 | FOSL2                                                                   |
| 11 | 71,325,000 | 71,475,000 | 952 | 311  | -0.740496167 | BRE,FOSL2                                                               |
| 11 | 71,400,000 | 71,550,000 | 953 | 442  | -0.876351231 | BRE                                                                     |
| 11 | 71,475,000 | 71,625,000 | 954 | 593  | -0.006264667 | BRE                                                                     |
| 11 | 71,550,000 | 71,700,000 | 955 | 774  | 0.451077769  | BRE                                                                     |
| 11 | 71,625,000 | 71,775,000 | 956 | 762  | 0.479590914  | BRE                                                                     |
| 11 | 71,700,000 | 71,850,000 | 957 | 637  | 0.166761084  | BRE,RBKS                                                                |
| 11 | 71,775,000 | 71,925,000 | 958 | 731  | -0.337975838 | BRE,RBKS                                                                |
| 11 | 71,850,000 | 72,000,000 | 959 | 707  | -1.291913963 | RBKS,ENSBTAG00000018680                                                 |
| 11 | 71,925,000 | 72,075,000 | 960 | 575  | -1.496650635 | GPN1,SUPT7L,ZNF512,ENSBTAG00000018680                                   |
| 11 | 72,000,000 | 72,150,000 | 961 | 570  | -0.588673939 | C2orf16,GPN1,SUPT7L,ZNF512,ENSBTAG00000018680                           |
| 11 | 72,075,000 | 72,225,000 | 962 | 560  | -0.352594851 | C2orf16,FNDC4,GCKR,IFT172,KRTCAP3,NRBP1,ZNF512                          |
| 11 | 72,150,000 | 72,300,000 | 963 | 496  | -0.019641146 | EIF2B4,FNDC4,GCKR,GTF3C2,IFT172,KRTCAP3,NRBP1,PPM1G,SNX17,ZNF513        |
| 11 | 72,225,000 | 72,375,000 | 964 | 427  | 0.576488961  | DNAJC5G,EIF2B4,GTF3C2,MPV17,NRBP1,PPM1G,SLC30A3,SNX17,TRIM54,UCN,ZNF513 |
| 11 | 72,300,000 | 72,450,000 | 965 | 523  | 0.861629659  | ATRAID,CAD,DNAJC5G,GTF3C2,MPV17,SLC30A3,SLC5A6,TRIM54,UCN               |
| 11 | 72,375,000 | 72,525,000 | 966 | 608  | 0.957475894  | ABHD1,ATRAID,CAD,CGREF1,PRES,PRR30,SLC5A6,TCF23                         |
| 11 | 72,450,000 | 72,600,000 | 967 | 545  | 0.380094331  | ABHD1,AGBL5,CGREF1,EMILIN1,KHK,MAPRE3,PRES,PRR30,TCF23,TMEM214          |
| 11 | 72,525,000 | 72,675,000 | 968 | 713  | 0.328172579  | AGBL5,DPYSL5,EMILIN1,KHK,MAPRE3,TMEM214                                 |
| 11 | 72,600,000 | 72,750,000 | 969 | 835  | 0.053798628  | DPYSL5,MAPRE3                                                           |
| 11 | 72,675,000 | 72,825,000 | 970 | 842  | -0.080140399 | DPYSL5,MGC139367,ENSBTAG00000023938                                     |
| 11 | 72,750,000 | 72,900,000 | 971 | 730  | 0.212188646  | DPYSL5,KCNK3,MGC139367,ENSBTAG00000023938                               |
| 11 | 72,825,000 | 72,975,000 | 972 | 646  | 0.654707335  | C11H2orf70,CIB4,KCNK3                                                   |
| 11 | 72,900,000 | 73,050,000 | 973 | 806  | 0.492400397  | C11H2orf70,CIB4,OTOF                                                    |
| 11 | 72,975,000 | 73,125,000 | 974 | 663  | 0.072841407  | C11H2orf70,DRC1,OTOF                                                    |
| 11 | 73,050,000 | 73,200,000 | 975 | 503  | 0.29629771   | DRC1,EPT1,GPR113,IER3IP1,OTOF                                           |
| 11 | 73,125,000 | 73,275,000 | 976 | 434  | -0.030413841 | EPT1,GPR113,HADHA,HADHB,IER3IP1                                         |
| 11 | 73,200,000 | 73,350,000 | 977 | 385  | -1.007247878 | GAREML,GPR113,HADHA,HADHB,RAB10                                         |
| 11 | 73,275,000 | 73,425,000 | 978 | 331  | -0.170100564 | GAREML,HADHA,RAB10                                                      |
| 11 | 73,350,000 | 73,500,000 | 979 | 261  | 0.618602653  | KIF3C,RAB10                                                             |
| 11 | 73,425,000 | 73,575,000 | 980 | 316  | 0.296005331  | KIF3C                                                                   |
| 11 | 73,500,000 | 73,650,000 | 981 | 295  | -1.082629235 | ASXL2                                                                   |
| 11 | 73,575,000 | 73,725,000 | 982 | 251  | -2.324614258 | ASXL2,DTNB                                                              |
| 11 | 73,650,000 | 73,800,000 | 983 | 427  | 0.900796362  | DTNB                                                                    |
| 11 | 73,725,000 | 73,875,000 | 984 | 554  | 1.212795102  | DTNB                                                                    |
| 11 | 73,800,000 | 73,950,000 | 985 | 436  | 1.144385898  | DTNB                                                                    |
| 11 | 73,875,000 | 74,025,000 | 986 | 397  | -0.141075819 | DTNB                                                                    |
| 11 | 73,950,000 | 74,100,000 | 987 | 422  | -0.802221177 | DNMT3A                                                                  |
| 11 | 74,025,000 | 74,175,000 | 988 | 860  | 0.339076303  | DNMT3A,EFR3B,POMC                                                       |
| 11 | 74,100,000 | 74,250,000 | 989 | 1038 | 0.785575896  | EFR3B,POMC                                                              |
| 11 | 74,175,000 | 74,325,000 | 990 | 425  | 0.758631151  | DNAJC27                                                                 |
| 11 | 74,250,000 | 74,400,000 | 991 | 285  | -0.660938038 | ADCY3,DNAJC27                                                           |
| 11 | 74,325,000 | 74,475,000 | 992 | 481  | -1.045827623 | ADCY3,CENPO,DNAJC27                                                     |
| 11 | 74,400,000 | 74,550,000 | 993 | 387  | -1.413977044 | ADCY3,CENPO,NCOA1,PTRHD1,ENSBTAG00000047575                             |
| 11 | 74,475,000 | 74,625,000 | 994 | 268  | -1.428810951 | CENPO,NCOA1,PTRHD1,ENSBTAG00000047575                                   |
| 11 | 74,550,000 | 74,700,000 | 995 | 251  | -0.609800633 | NCOA1                                                                   |

|    |            |            |      |      |              |                                                                |
|----|------------|------------|------|------|--------------|----------------------------------------------------------------|
| 11 | 74,625,000 | 74,775,000 | 996  | 258  | -0.446222138 |                                                                |
| 11 | 74,700,000 | 74,850,000 | 997  | 254  | -0.910207854 |                                                                |
| 11 | 74,775,000 | 74,925,000 | 998  | 198  | -0.940458924 | ITSN2                                                          |
| 11 | 74,850,000 | 75,000,000 | 999  | 148  | -1.674699273 | FAM228A,FAM228B,ITSN2                                          |
| 11 | 74,925,000 | 75,075,000 | 1000 | 234  | -1.231139274 | C2orf44,FAM228A,FAM228B,FKBP1B,ITSN2,PFN4,SF3B14,TP53I3        |
| 11 | 75,000,000 | 75,150,000 | 1001 | 466  | -0.640218172 | ATAD2B,C2orf44,FAM228B,FKBP1B,MFSD2B,PFN4,SF3B14,TP53I3,UBXN2A |
| 11 | 75,075,000 | 75,225,000 | 1002 | 689  | -0.710951265 | ATAD2B,C2orf44,MFSD2B,UBXN2A                                   |
| 11 | 75,150,000 | 75,300,000 | 1003 | 708  | -0.767344225 | ATAD2B,KLHL29                                                  |
| 11 | 75,225,000 | 75,375,000 | 1004 | 941  | 0.082445031  | ATAD2B,KLHL29                                                  |
| 11 | 75,300,000 | 75,450,000 | 1005 | 915  | -0.529811287 | KLHL29                                                         |
| 11 | 75,375,000 | 75,525,000 | 1006 | 819  | -0.570822906 | KLHL29                                                         |
| 11 | 75,450,000 | 75,600,000 | 1007 | 1012 | 0.207715864  | KLHL29                                                         |
| 11 | 75,525,000 | 75,675,000 | 1008 | 674  | -0.825336101 | KLHL29                                                         |
| 11 | 75,600,000 | 75,750,000 | 1009 | 765  | -1.623156351 | KLHL29                                                         |
| 11 | 75,675,000 | 75,825,000 | 1010 | 910  | -2.256883827 |                                                                |
| 11 | 75,750,000 | 75,900,000 | 1011 | 535  | -3.185236567 |                                                                |
| 11 | 75,825,000 | 75,975,000 | 1012 | 587  | -2.3285941   |                                                                |
| 11 | 75,900,000 | 76,050,000 | 1013 | 950  | -0.95829579  |                                                                |
| 11 | 75,975,000 | 76,125,000 | 1014 | 904  | -0.254991935 |                                                                |
| 11 | 76,050,000 | 76,200,000 | 1015 | 509  | -0.360537668 |                                                                |
| 11 | 76,125,000 | 76,275,000 | 1016 | 344  | -0.936897173 |                                                                |
| 11 | 76,200,000 | 76,350,000 | 1017 | 527  | 0.762253594  |                                                                |
| 11 | 76,275,000 | 76,425,000 | 1018 | 652  | 1.030819469  |                                                                |
| 11 | 76,350,000 | 76,500,000 | 1019 | 661  | 0.369031303  |                                                                |
| 11 | 76,425,000 | 76,575,000 | 1020 | 925  | -0.402542615 |                                                                |
| 11 | 76,500,000 | 76,650,000 | 1021 | 895  | -0.310339133 |                                                                |
| 11 | 76,575,000 | 76,725,000 | 1022 | 867  | -0.378094952 |                                                                |
| 11 | 76,650,000 | 76,800,000 | 1023 | 951  | -0.376077039 |                                                                |
| 11 | 76,725,000 | 76,875,000 | 1024 | 907  | 0.233846212  |                                                                |
| 11 | 76,800,000 | 76,950,000 | 1025 | 1271 | 0.438095223  |                                                                |
| 11 | 76,875,000 | 77,025,000 | 1026 | 1365 | 0.155041767  |                                                                |
| 11 | 76,950,000 | 77,100,000 | 1027 | 902  | -0.380447077 |                                                                |
| 11 | 77,025,000 | 77,175,000 | 1028 | 614  | -0.521392044 |                                                                |
| 11 | 77,100,000 | 77,250,000 | 1029 | 944  | 0.549831063  |                                                                |
| 11 | 77,175,000 | 77,325,000 | 1030 | 1018 | 0.580372361  |                                                                |
| 11 | 77,250,000 | 77,400,000 | 1031 | 810  | -0.138313503 |                                                                |
| 11 | 77,325,000 | 77,475,000 | 1032 | 806  | -0.055094187 |                                                                |
| 11 | 77,400,000 | 77,550,000 | 1033 | 738  | 0.546011854  |                                                                |
| 11 | 77,475,000 | 77,625,000 | 1034 | 820  | 0.870368128  |                                                                |
| 11 | 77,550,000 | 77,700,000 | 1035 | 956  | 0.536623606  | ENSBTAG00000030834                                             |
| 11 | 77,625,000 | 77,775,000 | 1036 | 970  | -0.310675202 | ENSBTAG00000030834                                             |
| 11 | 77,700,000 | 77,850,000 | 1037 | 1072 | -0.301736773 |                                                                |
| 11 | 77,775,000 | 77,925,000 | 1038 | 1125 | 0.779664689  |                                                                |
| 11 | 77,850,000 | 78,000,000 | 1039 | 815  | 1.00361852   | APOB                                                           |
| 11 | 77,925,000 | 78,075,000 | 1040 | 585  | 0.687409905  | APOB                                                           |
| 11 | 78,000,000 | 78,150,000 | 1041 | 599  | 0.452242913  | APOB                                                           |
| 11 | 78,075,000 | 78,225,000 | 1042 | 674  | 0.404846005  | C2ORF43                                                        |
| 11 | 78,150,000 | 78,300,000 | 1043 | 665  | 0.371949325  | C2ORF43,GDF7,HS1BP3                                            |
| 11 | 78,225,000 | 78,375,000 | 1044 | 809  | 0.594596509  | C2ORF43,GDF7,HS1BP3                                            |
| 11 | 78,300,000 | 78,450,000 | 1045 | 902  | 0.489102302  | HS1BP3                                                         |
| 11 | 78,375,000 | 78,525,000 | 1046 | 537  | -0.134946673 | RHOB,ENSBTAG00000016270                                        |



|    |            |            |      |      |              |                              |
|----|------------|------------|------|------|--------------|------------------------------|
| 11 | 78,450,000 | 78,600,000 | 1047 | 351  | -0.48104257  | PUM2,RHOB,ENSBTAG00000016270 |
| 11 | 78,525,000 | 78,675,000 | 1048 | 398  | -0.567412295 | PUM2                         |
| 11 | 78,600,000 | 78,750,000 | 1049 | 435  | -1.497895167 | PUM2,SDC1                    |
| 11 | 78,675,000 | 78,825,000 | 1050 | 422  | -1.620131278 | SDC1                         |
| 11 | 78,750,000 | 78,900,000 | 1051 | 315  | 0.108039188  | LAPTM4A,MATN3                |
| 11 | 78,825,000 | 78,975,000 | 1052 | 379  | -0.609010303 | LAPTM4A,MATN3,TTC32          |
| 11 | 78,900,000 | 79,050,000 | 1053 | 437  | -1.408029771 | MATN3,TTC32                  |
| 11 | 78,975,000 | 79,125,000 | 1054 | 459  | -0.797112774 | TTC32                        |
| 11 | 79,050,000 | 79,200,000 | 1055 | 573  | -0.434414872 |                              |
| 11 | 79,125,000 | 79,275,000 | 1056 | 541  | -0.213384751 |                              |
| 11 | 79,200,000 | 79,350,000 | 1057 | 539  | -1.291485983 |                              |
| 11 | 79,275,000 | 79,425,000 | 1058 | 633  | -1.160799625 |                              |
| 11 | 79,350,000 | 79,500,000 | 1059 | 698  | -0.053818048 | OSR1                         |
| 11 | 79,425,000 | 79,575,000 | 1060 | 566  | 0.439718388  | OSR1                         |
| 11 | 79,500,000 | 79,650,000 | 1061 | 472  | -0.170828925 |                              |
| 11 | 79,575,000 | 79,725,000 | 1062 | 700  | -0.967510454 |                              |
| 11 | 79,650,000 | 79,800,000 | 1063 | 836  | -0.067643184 |                              |
| 11 | 79,725,000 | 79,875,000 | 1064 | 683  | -0.038361489 |                              |
| 11 | 79,800,000 | 79,950,000 | 1065 | 737  | -0.106718054 |                              |
| 11 | 79,875,000 | 80,025,000 | 1066 | 777  | 0.26698965   |                              |
| 11 | 79,950,000 | 80,100,000 | 1067 | 487  | -0.039254089 |                              |
| 11 | 80,025,000 | 80,175,000 | 1068 | 567  | -1.356074435 |                              |
| 11 | 80,100,000 | 80,250,000 | 1069 | 636  | -0.568443672 | ENSBTAG00000005270           |
| 11 | 80,175,000 | 80,325,000 | 1070 | 557  | 0.186092507  | RDH14,ENSBTAG00000005270     |
| 11 | 80,250,000 | 80,400,000 | 1071 | 479  | -0.271493236 | RDH14,ENSBTAG00000005270     |
| 11 | 80,325,000 | 80,475,000 | 1072 | 666  | -0.593094784 |                              |
| 11 | 80,400,000 | 80,550,000 | 1073 | 582  | -0.595859842 |                              |
| 11 | 80,475,000 | 80,625,000 | 1074 | 483  | -0.419239466 |                              |
| 11 | 80,550,000 | 80,700,000 | 1075 | 861  | -0.536711668 |                              |
| 11 | 80,625,000 | 80,775,000 | 1076 | 836  | -1.165401773 |                              |
| 11 | 80,700,000 | 80,850,000 | 1077 | 973  | -0.891480347 | KCNS3                        |
| 11 | 80,775,000 | 80,925,000 | 1078 | 891  | 0.128120113  | KCNS3                        |
| 11 | 80,850,000 | 81,000,000 | 1079 | 395  | 0.549496098  | GEN1,MSGN1                   |
| 11 | 80,925,000 | 81,075,000 | 1080 | 230  | 0.949581898  | GEN1,MSGN1,SMC6              |
| 11 | 81,000,000 | 81,150,000 | 1081 | 296  | 1.466072574  | SMC6,VSNL1                   |
| 11 | 81,075,000 | 81,225,000 | 1082 | 809  | 1.444462333  | VSNL1                        |
| 11 | 81,150,000 | 81,300,000 | 1083 | 1195 | 1.424044718  | RAD51AP2,VSNL1               |
| 11 | 81,225,000 | 81,375,000 | 1084 | 1019 | 1.453255246  | RAD51AP2                     |
| 11 | 81,300,000 | 81,450,000 | 1085 | 926  | 1.444554321  |                              |
| 11 | 81,375,000 | 81,525,000 | 1086 | 1172 | 1.026412157  |                              |
| 11 | 81,450,000 | 81,600,000 | 1087 | 1249 | 1.017312935  |                              |
| 11 | 81,525,000 | 81,675,000 | 1088 | 1459 | 0.748765377  |                              |
| 11 | 81,600,000 | 81,750,000 | 1089 | 1593 | 0.678421393  |                              |
| 11 | 81,675,000 | 81,825,000 | 1090 | 1282 | 0.301879217  |                              |
| 11 | 81,750,000 | 81,900,000 | 1091 | 1132 | -0.969865749 |                              |
| 11 | 81,825,000 | 81,975,000 | 1092 | 957  | -0.702036354 |                              |
| 11 | 81,900,000 | 82,050,000 | 1093 | 958  | 0.689640766  | FAM49A                       |
| 11 | 81,975,000 | 82,125,000 | 1094 | 990  | 0.977645986  | FAM49A                       |
| 11 | 82,050,000 | 82,200,000 | 1095 | 668  | 0.885642827  |                              |
| 11 | 82,125,000 | 82,275,000 | 1096 | 504  | 0.218896754  |                              |
| 11 | 82,200,000 | 82,350,000 | 1097 | 1046 | 0.443651751  |                              |
| 11 | 82,275,000 | 82,425,000 | 1098 | 1265 | 0.854286679  |                              |
| 11 | 82,350,000 | 82,500,000 | 1099 | 967  | 0.854642685  |                              |

|    |            |            |      |      |              |                   |
|----|------------|------------|------|------|--------------|-------------------|
| 11 | 82,425,000 | 82,575,000 | 1100 | 868  | 0.452026408  |                   |
| 11 | 82,500,000 | 82,650,000 | 1101 | 739  | -0.713027498 |                   |
| 11 | 82,575,000 | 82,725,000 | 1102 | 568  | -1.131750412 | MYCN              |
| 11 | 82,650,000 | 82,800,000 | 1103 | 571  | 0.382776201  | MYCN              |
| 11 | 82,725,000 | 82,875,000 | 1104 | 1058 | 1.195069212  | DDX1              |
| 11 | 82,800,000 | 82,950,000 | 1105 | 1284 | 1.402284427  | DDX1,NBAS         |
| 11 | 82,875,000 | 83,025,000 | 1106 | 1344 | 1.127972432  | NBAS              |
| 11 | 82,950,000 | 83,100,000 | 1107 | 1106 | 1.069599532  | NBAS              |
| 11 | 83,025,000 | 83,175,000 | 1108 | 898  | 0.214866431  | NBAS              |
| 11 | 83,100,000 | 83,250,000 | 1109 | 1049 | -0.529537106 | NBAS              |
| 11 | 83,175,000 | 83,325,000 | 1110 | 852  | -0.506126542 | NBAS              |
| 11 | 83,250,000 | 83,400,000 | 1111 | 737  | -0.353057164 |                   |
| 11 | 83,325,000 | 83,475,000 | 1112 | 901  | -0.444104916 |                   |
| 11 | 83,400,000 | 83,550,000 | 1113 | 1208 | -0.355888041 |                   |
| 11 | 83,475,000 | 83,625,000 | 1114 | 915  | -0.455950953 |                   |
| 11 | 83,550,000 | 83,700,000 | 1115 | 555  | -0.281761427 | FAM84A            |
| 11 | 83,625,000 | 83,775,000 | 1116 | 599  | -0.116976775 | FAM84A            |
| 11 | 83,700,000 | 83,850,000 | 1117 | 729  | -1.117611989 |                   |
| 11 | 83,775,000 | 83,925,000 | 1118 | 807  | -1.024971764 |                   |
| 11 | 83,850,000 | 84,000,000 | 1119 | 984  | 0.467924779  |                   |
| 11 | 83,925,000 | 84,075,000 | 1120 | 1085 | 1.253312885  |                   |
| 11 | 84,000,000 | 84,150,000 | 1121 | 620  | 1.262871617  |                   |
| 11 | 84,075,000 | 84,225,000 | 1122 | 416  | 0.760484206  |                   |
| 11 | 84,150,000 | 84,300,000 | 1123 | 561  | 0.687224758  |                   |
| 11 | 84,225,000 | 84,375,000 | 1124 | 717  | 0.791736691  |                   |
| 11 | 84,300,000 | 84,450,000 | 1125 | 1006 | 1.001330949  |                   |
| 11 | 84,375,000 | 84,525,000 | 1126 | 934  | -0.074546985 |                   |
| 11 | 84,450,000 | 84,600,000 | 1127 | 709  | -0.637769191 |                   |
| 11 | 84,525,000 | 84,675,000 | 1128 | 642  | 0.046251971  |                   |
| 11 | 84,600,000 | 84,750,000 | 1129 | 784  | -0.317628253 |                   |
| 11 | 84,675,000 | 84,825,000 | 1130 | 954  | 0.096474153  |                   |
| 11 | 84,750,000 | 84,900,000 | 1131 | 1100 | 1.01036322   |                   |
| 11 | 84,825,000 | 84,975,000 | 1132 | 1193 | 1.351256297  |                   |
| 11 | 84,900,000 | 85,050,000 | 1133 | 1144 | 1.10990635   |                   |
| 11 | 84,975,000 | 85,125,000 | 1134 | 929  | 0.705647063  |                   |
| 11 | 85,050,000 | 85,200,000 | 1135 | 604  | 0.566310481  |                   |
| 11 | 85,125,000 | 85,275,000 | 1136 | 598  | 0.259938407  | TRIB2             |
| 11 | 85,200,000 | 85,350,000 | 1137 | 750  | 0.130407683  | TRIB2             |
| 11 | 85,275,000 | 85,425,000 | 1138 | 836  | 0.614937326  |                   |
| 11 | 85,350,000 | 85,500,000 | 1139 | 720  | 1.001600813  |                   |
| 11 | 85,425,000 | 85,575,000 | 1140 | 617  | 0.816551776  |                   |
| 11 | 85,500,000 | 85,650,000 | 1141 | 498  | 0.213955908  |                   |
| 11 | 85,575,000 | 85,725,000 | 1142 | 621  | -0.059128797 |                   |
| 11 | 85,650,000 | 85,800,000 | 1143 | 1077 | -0.645991642 |                   |
| 11 | 85,725,000 | 85,875,000 | 1144 | 961  | -0.871862837 |                   |
| 11 | 85,800,000 | 85,950,000 | 1145 | 663  | -1.036485528 |                   |
| 11 | 85,875,000 | 86,025,000 | 1146 | 618  | -1.110117608 |                   |
| 11 | 85,950,000 | 86,100,000 | 1147 | 612  | -0.530518566 | LPIN1             |
| 11 | 86,025,000 | 86,175,000 | 1148 | 835  | 0.096638414  | LPIN1             |
| 11 | 86,100,000 | 86,250,000 | 1149 | 842  | 0.095736126  | GREB1,LPIN1,NTSR2 |
| 11 | 86,175,000 | 86,325,000 | 1150 | 686  | -1.055734157 | GREB1,NTSR2       |
| 11 | 86,250,000 | 86,400,000 | 1151 | 784  | -0.819133017 | E2F6,GREB1        |
| 11 | 86,325,000 | 86,475,000 | 1152 | 784  | 0.437629292  | E2F6              |

|    |            |            |      |      |              |                                           |
|----|------------|------------|------|------|--------------|-------------------------------------------|
| 11 | 86,400,000 | 86,550,000 | 1153 | 563  | 0.465901937  | ROCK2,ENSBTAG00000048065                  |
| 11 | 86,475,000 | 86,625,000 | 1154 | 553  | 0.154238971  | C11H2orf50,PQLC3,ROCK2,ENSBTAG00000048065 |
| 11 | 86,550,000 | 86,700,000 | 1155 | 861  | 0.233209898  | C11H2orf50,PQLC3,ROCK2                    |
| 11 | 86,625,000 | 86,775,000 | 1156 | 957  | 0.308563939  | KCNF1                                     |
| 11 | 86,700,000 | 86,850,000 | 1157 | 682  | 0.638581804  | KCNF1,PDIA6                               |
| 11 | 86,775,000 | 86,925,000 | 1158 | 637  | 0.887743882  | ATP6V1C2,PDIA6                            |
| 11 | 86,850,000 | 87,000,000 | 1159 | 880  | 0.242682549  | ATP6V1C2,NOL10,PDIA6                      |
| 11 | 86,925,000 | 87,075,000 | 1160 | 842  | -0.404937317 | NOL10                                     |
| 11 | 87,000,000 | 87,150,000 | 1161 | 603  | -0.440620228 | NOL10                                     |
| 11 | 87,075,000 | 87,225,000 | 1162 | 864  | -0.824074909 | HPCAL1,ODC1                               |
| 11 | 87,150,000 | 87,300,000 | 1163 | 1498 | -2.799592617 | HPCAL1,ODC1                               |
| 11 | 87,225,000 | 87,375,000 | 1164 | 1822 | -1.618892315 | HPCAL1                                    |
| 11 | 87,300,000 | 87,450,000 | 1165 | 1615 | -0.110385762 | HPCAL1                                    |
| 11 | 87,375,000 | 87,525,000 | 1166 | 983  | 0.014704332  | RRM2                                      |
| 11 | 87,450,000 | 87,600,000 | 1167 | 494  | 0.780351683  | GRHL1,RRM2,TIEG2                          |
| 11 | 87,525,000 | 87,675,000 | 1168 | 354  | 0.534133844  | GRHL1,TAF1B,TIEG2                         |
| 11 | 87,600,000 | 87,750,000 | 1169 | 415  | 0.668275156  | GRHL1,TAF1B                               |
| 11 | 87,675,000 | 87,825,000 | 1170 | 542  | 0.73921847   | TAF1B                                     |
| 11 | 87,750,000 | 87,900,000 | 1171 | 511  | 0.924788177  | ADAM17,YWHAQ                              |
| 11 | 87,825,000 | 87,975,000 | 1172 | 802  | -4.593652844 | ADAM17,CPSF3,IAH1,YWHAQ                   |
| 11 | 87,900,000 | 88,050,000 | 1173 | 1062 | -4.483389402 | ADAM17,ASAP2,CPSF3,IAH1,ITGB1BP1          |
| 11 | 87,975,000 | 88,125,000 | 1174 | 1045 | -2.904547285 | ASAP2,CPSF3,ITGB1BP1                      |
| 11 | 88,050,000 | 88,200,000 | 1175 | 1205 | -1.335559942 | ASAP2                                     |
| 11 | 88,125,000 | 88,275,000 | 1176 | 935  | -0.203701447 |                                           |
| 11 | 88,200,000 | 88,350,000 | 1177 | 536  | 0.871172462  |                                           |
| 11 | 88,275,000 | 88,425,000 | 1178 | 603  | 1.186633639  | MBOAT2                                    |
| 11 | 88,350,000 | 88,500,000 | 1179 | 882  | 1.075960987  | KIDINS220,MBOAT2                          |
| 11 | 88,425,000 | 88,575,000 | 1180 | 740  | 1.07400242   | KIDINS220,MBOAT2                          |
| 11 | 88,500,000 | 88,650,000 | 1181 | 712  | 1.219384734  | ID2,KIDINS220                             |
| 11 | 88,575,000 | 88,725,000 | 1182 | 933  | 1.040150451  | ID2                                       |
| 11 | 88,650,000 | 88,800,000 | 1183 | 699  | 0.887622173  |                                           |
| 11 | 88,725,000 | 88,875,000 | 1184 | 721  | 0.63927928   |                                           |
| 11 | 88,800,000 | 88,950,000 | 1185 | 939  | -0.525658405 |                                           |
| 11 | 88,875,000 | 89,025,000 | 1186 | 770  | -1.141856243 |                                           |
| 11 | 88,950,000 | 89,100,000 | 1187 | 681  | 0.056617794  |                                           |
| 11 | 89,025,000 | 89,175,000 | 1188 | 648  | 0.701713935  | ENSBTAG00000037793                        |
| 11 | 89,100,000 | 89,250,000 | 1189 | 675  | 0.953755228  | ENSBTAG00000037793                        |
| 11 | 89,175,000 | 89,325,000 | 1190 | 1046 | -0.488463499 |                                           |
| 11 | 89,250,000 | 89,400,000 | 1191 | 1128 | -1.559145833 |                                           |
| 11 | 89,325,000 | 89,475,000 | 1192 | 1196 | -1.615440762 |                                           |
| 11 | 89,400,000 | 89,550,000 | 1193 | 1100 | -1.44755665  |                                           |
| 11 | 89,475,000 | 89,625,000 | 1194 | 857  | -1.58003957  |                                           |
| 11 | 89,550,000 | 89,700,000 | 1195 | 989  | -0.905955714 |                                           |
| 11 | 89,625,000 | 89,775,000 | 1196 | 833  | 0.302956238  |                                           |
| 11 | 89,700,000 | 89,850,000 | 1197 | 793  | -0.571111489 |                                           |
| 11 | 89,775,000 | 89,925,000 | 1198 | 760  | -1.391415602 | RNF144A                                   |
| 11 | 89,850,000 | 90,000,000 | 1199 | 656  | -1.517764811 | RNF144A                                   |
| 11 | 89,925,000 | 90,075,000 | 1200 | 663  | -0.408442049 | CMPK2,RNF144A,RSAD2                       |
| 11 | 90,000,000 | 90,150,000 | 1201 | 717  | 0.515185931  | CMPK2,RSAD2                               |
| 11 | 90,075,000 | 90,225,000 | 1202 | 981  | 1.134820818  |                                           |
| 11 | 90,150,000 | 90,300,000 | 1203 | 974  | 1.052358951  |                                           |
| 11 | 90,225,000 | 90,375,000 | 1204 | 1145 | -0.114644614 |                                           |
| 11 | 90,300,000 | 90,450,000 | 1205 | 1538 | 0.004367597  |                                           |

|    |            |            |      |      |              |                                                                                                                         |
|----|------------|------------|------|------|--------------|-------------------------------------------------------------------------------------------------------------------------|
| 11 | 90,375,000 | 90,525,000 | 1206 | 1431 | 0.179456499  |                                                                                                                         |
| 11 | 90,450,000 | 90,600,000 | 1207 | 1172 | 0.598562574  |                                                                                                                         |
| 11 | 90,525,000 | 90,675,000 | 1208 | 823  | 1.103824017  |                                                                                                                         |
| 11 | 90,600,000 | 90,750,000 | 1209 | 692  | 1.082080028  |                                                                                                                         |
| 11 | 90,675,000 | 90,825,000 | 1210 | 1037 | -0.260546481 |                                                                                                                         |
| 11 | 90,750,000 | 90,900,000 | 1211 | 850  | -0.962351321 |                                                                                                                         |
| 11 | 90,825,000 | 90,975,000 | 1212 | 558  | -0.65954813  |                                                                                                                         |
| 11 | 90,900,000 | 91,050,000 | 1213 | 697  | -0.390715418 |                                                                                                                         |
| 11 | 90,975,000 | 91,125,000 | 1214 | 903  | -0.229669494 |                                                                                                                         |
| 11 | 91,050,000 | 91,200,000 | 1215 | 860  | -0.111336801 |                                                                                                                         |
| 11 | 91,125,000 | 91,275,000 | 1216 | 967  | 0.603337299  |                                                                                                                         |
| 11 | 91,200,000 | 91,350,000 | 1217 | 976  | 0.985951574  |                                                                                                                         |
| 11 | 91,275,000 | 91,425,000 | 1218 | 932  | 0.959459351  |                                                                                                                         |
| 11 | 91,350,000 | 91,500,000 | 1219 | 1241 | 0.616568951  |                                                                                                                         |
| 11 | 91,425,000 | 91,575,000 | 1220 | 1195 | 0.615141565  |                                                                                                                         |
| 11 | 91,500,000 | 91,650,000 | 1221 | 1242 | 0.712751233  |                                                                                                                         |
| 11 | 91,575,000 | 91,725,000 | 1222 | 1631 | 0.675251352  |                                                                                                                         |
| 11 | 91,650,000 | 91,800,000 | 1223 | 1819 | 0.379019314  |                                                                                                                         |
| 11 | 91,725,000 | 91,875,000 | 1224 | 1542 | 0.242181478  |                                                                                                                         |
| 11 | 91,800,000 | 91,950,000 | 1225 | 1361 | -0.170690045 |                                                                                                                         |
| 11 | 91,875,000 | 92,025,000 | 1226 | 1484 | -0.292649524 |                                                                                                                         |
| 11 | 91,950,000 | 92,100,000 | 1227 | 1611 | -1.422432651 |                                                                                                                         |
| 11 | 92,025,000 | 92,175,000 | 1228 | 1789 | -1.523561205 |                                                                                                                         |
| 11 | 92,100,000 | 92,250,000 | 1229 | 1418 | -0.13750348  | ENSBTAG00000039201                                                                                                      |
| 11 | 92,175,000 | 92,325,000 | 1230 | 1015 | 0.752772062  | GGTA1,MGC151949,ENSBTAG00000039201                                                                                      |
| 11 | 92,250,000 | 92,400,000 | 1231 | 883  | 0.842494055  | GGTA1,MGC151949                                                                                                         |
| 11 | 92,325,000 | 92,475,000 | 1232 | 834  | 1.106326214  | GGTA1                                                                                                                   |
| 11 | 92,400,000 | 92,550,000 | 1233 | 832  | 0.855189721  |                                                                                                                         |
| 11 | 92,475,000 | 92,625,000 | 1234 | 687  | -0.587205806 | DAB2IP                                                                                                                  |
| 11 | 92,550,000 | 92,700,000 | 1235 | 753  | -0.534715107 | DAB2IP                                                                                                                  |
| 11 | 92,625,000 | 92,775,000 | 1236 | 1023 | 0.474996853  | DAB2IP,TTLL11                                                                                                           |
| 11 | 92,700,000 | 92,850,000 | 1237 | 1474 | 1.174040025  | TTLL11                                                                                                                  |
| 11 | 92,775,000 | 92,925,000 | 1238 | 1290 | 1.353634121  | TTLL11                                                                                                                  |
| 11 | 92,850,000 | 93,000,000 | 1239 | 927  | -0.015544581 | TTLL11                                                                                                                  |
| 11 | 92,925,000 | 93,075,000 | 1240 | 821  | -0.043637262 | LHX6,MORN5,NDUFA8                                                                                                       |
| 11 | 93,000,000 | 93,150,000 | 1241 | 599  | -0.683816658 | LHX6,MORN5,MRRF,NDUFA8,RBM18                                                                                            |
| 11 | 93,075,000 | 93,225,000 | 1242 | 831  | 0.323075889  | LHX6,MRRF,PTGS1,RBM18                                                                                                   |
| 11 | 93,150,000 | 93,300,000 | 1243 | 972  | 1.075214389  | MRRF,PTGS1,ENSBTAG00000047610,ENSBTAG00000047693                                                                        |
| 11 | 93,225,000 | 93,375,000 | 1244 | 869  | 0.751018545  | PTGS1,ENSBTAG00000038309,ENSBTAG00000038796,ENSBTAG00000046018,ENSBTAG00000046137,ENSBTAG00000047610,ENSBTAG00000047693 |
| 11 | 93,300,000 | 93,450,000 | 1245 | 1234 | -0.237196204 | ENSBTAG00000037739,ENSBTAG00000038278,ENSBTAG00000038309,ENSBTAG00000038796,ENSBTAG00000046018,ENSBTAG00000046137       |
| 11 | 93,375,000 | 93,525,000 | 1246 | 1646 | -2.306731236 | ENSBTAG00000037739,ENSBTAG00000038278,ENSBTAG00000039225                                                                |
| 11 | 93,450,000 | 93,600,000 | 1247 | 1343 | -2.057555974 | OR1J1,ENSBTAG00000037542,ENSBTAG00000038726,ENSBTAG00000039225                                                          |
| 11 | 93,525,000 | 93,675,000 | 1248 | 1322 | -0.195042729 | OR1J1,OR1J2,OR1N1,ENSBTAG00000037542,ENSBTAG00000038726,ENSBTAG00000046536,ENSBTAG00000047112,ENSBTAG00000047728        |

|    |            |            |      |      |              |                                                                                                                                                       |
|----|------------|------------|------|------|--------------|-------------------------------------------------------------------------------------------------------------------------------------------------------|
| 11 | 93,600,000 | 93,750,000 | 1249 | 1736 | -0.09993764  | OR1J2,OR1N1,OR1Q1,ENSBTAG00000020660,ENSBTAG00000038551,ENSBTAG00000045527,ENSBTAG0000045545,ENSBTAG00000046536,ENSBTAG00000047112,ENSBTAG00000047728 |
| 11 | 93,675,000 | 93,825,000 | 1250 | 2014 | 0.226795645  | OR1L1,OR1L3,OR1Q1,ENSBTAG00000020660,ENSBTAG00000038551,ENSBTAG00000045527,ENSBTAG0000045528,ENSBTAG00000045545                                       |
| 11 | 93,750,000 | 93,900,000 | 1251 | 1639 | -0.098769886 | OR1L1,OR1L3,ENSBTAG00000037822,ENSBTAG0000038665,ENSBTAG00000038941,ENSBTAG00000045528                                                                |
| 11 | 93,825,000 | 93,975,000 | 1252 | 867  | 0.161139885  | OR1K1,OR5C1,ENSBTAG00000004667,ENSBTAG0000030677,ENSBTAG00000037822,ENSBTAG00000038665,ENSBTAG00000038941                                             |
| 11 | 93,900,000 | 94,050,000 | 1253 | 452  | 0.069260001  | OR1K1,OR5C1,PDCL,RC3H2,ENSBTAG00000004667,ENSBTAG00000030677                                                                                          |
| 11 | 93,975,000 | 94,125,000 | 1254 | 227  | -0.938773905 | PDCL,RABGAP1,RC3H2,ZBTB26,ZBTB6                                                                                                                       |
| 11 | 94,050,000 | 94,200,000 | 1255 | 285  | -0.374905619 | GPR21,RABGAP1,RC3H2,ZBTB26,ZBTB6                                                                                                                      |
| 11 | 94,125,000 | 94,275,000 | 1256 | 377  | -0.668492303 | GPR21,RABGAP1,ENSBTAG00000024604                                                                                                                      |
| 11 | 94,200,000 | 94,350,000 | 1257 | 342  | -0.945975857 | RABGAP1,STRBP,ENSBTAG00000024604                                                                                                                      |
| 11 | 94,275,000 | 94,425,000 | 1258 | 261  | -0.742740221 | STRBP,ENSBTAG00000024604                                                                                                                              |
| 11 | 94,350,000 | 94,500,000 | 1259 | 286  | -0.254339998 | STRBP                                                                                                                                                 |
| 11 | 94,425,000 | 94,575,000 | 1260 | 351  | 0.460794504  | CRB2,DENND1A                                                                                                                                          |
| 11 | 94,500,000 | 94,650,000 | 1261 | 368  | 0.679250339  | CRB2,DENND1A                                                                                                                                          |
| 11 | 94,575,000 | 94,725,000 | 1262 | 537  | -1.098735088 | DENND1A                                                                                                                                               |
| 11 | 94,650,000 | 94,800,000 | 1263 | 573  | -0.623756672 | DENND1A                                                                                                                                               |
| 11 | 94,725,000 | 94,875,000 | 1264 | 372  | 1.534064606  | DENND1A                                                                                                                                               |
| 11 | 94,800,000 | 94,950,000 | 1265 | 295  | 1.364574808  | DENND1A,ENSBTAG00000023860                                                                                                                            |
| 11 | 94,875,000 | 95,025,000 | 1266 | 234  | 0.650913976  | DENND1A,ENSBTAG00000023860                                                                                                                            |
| 11 | 94,950,000 | 95,100,000 | 1267 | 222  | 0.608834373  | DENND1A                                                                                                                                               |
| 11 | 95,025,000 | 95,175,000 | 1268 | 218  | 0.729708118  | DENND1A,LHX2                                                                                                                                          |
| 11 | 95,100,000 | 95,250,000 | 1269 | 546  | 0.992890117  | LHX2                                                                                                                                                  |
| 11 | 95,175,000 | 95,325,000 | 1270 | 735  | 0.862316205  | NEK6                                                                                                                                                  |
| 11 | 95,250,000 | 95,400,000 | 1271 | 556  | 0.811418322  | NEK6                                                                                                                                                  |
| 11 | 95,325,000 | 95,475,000 | 1272 | 577  | 0.273709844  | NEK6,PSMB7                                                                                                                                            |
| 11 | 95,400,000 | 95,550,000 | 1273 | 817  | 0.245223932  | GPR144,NEK6,NR5A1,PSMB7                                                                                                                               |
| 11 | 95,475,000 | 95,625,000 | 1274 | 702  | 0.323410822  | GPR144,NR5A1,NR6A1                                                                                                                                    |
| 11 | 95,550,000 | 95,700,000 | 1275 | 391  | -0.154958487 | NR6A1                                                                                                                                                 |
| 11 | 95,625,000 | 95,775,000 | 1276 | 447  | 0.709232971  |                                                                                                                                                       |
| 11 | 95,700,000 | 95,850,000 | 1277 | 536  | 0.27013634   | OLFML2A,WDR38                                                                                                                                         |
| 11 | 95,775,000 | 95,925,000 | 1278 | 451  | -0.23639687  | ARPC5L,GOLGA1,OLFML2A,RPL35,WDR38                                                                                                                     |
| 11 | 95,850,000 | 96,000,000 | 1279 | 294  | 0.204574622  | ARPC5L,GOLGA1,RPL35,SCAI,WDR38                                                                                                                        |
| 11 | 95,925,000 | 96,075,000 | 1280 | 368  | 0.007306437  | PPP6C,SCAI                                                                                                                                            |
| 11 | 96,000,000 | 96,150,000 | 1281 | 499  | 0.274597732  | GAPVD1,GRP78,PPP6C,RABEPK                                                                                                                             |
| 11 | 96,075,000 | 96,225,000 | 1282 | 469  | 0.834870905  | GAPVD1,GRP78,PPP6C,RABEPK                                                                                                                             |
| 11 | 96,150,000 | 96,300,000 | 1283 | 526  | 0.721865352  | GAPVD1,MAPKAP1                                                                                                                                        |
| 11 | 96,225,000 | 96,375,000 | 1284 | 487  | 0.439172759  | MAPKAP1                                                                                                                                               |
| 11 | 96,300,000 | 96,450,000 | 1285 | 309  | 0.037553516  | MAPKAP1                                                                                                                                               |
| 11 | 96,375,000 | 96,525,000 | 1286 | 251  | -1.370371923 | MAPKAP1                                                                                                                                               |
| 11 | 96,450,000 | 96,600,000 | 1287 | 209  | -1.577339708 | MAPKAP1                                                                                                                                               |
| 11 | 96,525,000 | 96,675,000 | 1288 | 178  | -0.910070547 |                                                                                                                                                       |
| 11 | 96,600,000 | 96,750,000 | 1289 | 261  | -0.31012196  | PBX3                                                                                                                                                  |
| 11 | 96,675,000 | 96,825,000 | 1290 | 515  | -0.449325466 | PBX3                                                                                                                                                  |
| 11 | 96,750,000 | 96,900,000 | 1291 | 734  | -0.236905235 | PBX3                                                                                                                                                  |

|    |             |             |      |      |              |                                                                              |
|----|-------------|-------------|------|------|--------------|------------------------------------------------------------------------------|
| 11 | 96,825,000  | 96,975,000  | 1292 | 520  | -0.192718357 |                                                                              |
| 11 | 96,900,000  | 97,050,000  | 1293 | 423  | -2.93324391  |                                                                              |
| 11 | 96,975,000  | 97,125,000  | 1294 | 874  | -0.789184494 |                                                                              |
| 11 | 97,050,000  | 97,200,000  | 1295 | 1281 | 0.55967486   |                                                                              |
| 11 | 97,125,000  | 97,275,000  | 1296 | 1276 | 0.528676783  |                                                                              |
| 11 | 97,200,000  | 97,350,000  | 1297 | 820  | 0.589220604  |                                                                              |
| 11 | 97,275,000  | 97,425,000  | 1298 | 483  | 0.888398076  |                                                                              |
| 11 | 97,350,000  | 97,500,000  | 1299 | 453  | 0.487319955  | LMX1B                                                                        |
| 11 | 97,425,000  | 97,575,000  | 1300 | 505  | -0.117630396 | LMX1B                                                                        |
| 11 | 97,500,000  | 97,650,000  | 1301 | 520  | -1.149196907 | ZNF297B                                                                      |
| 11 | 97,575,000  | 97,725,000  | 1302 | 480  | -0.719154935 | RALGPS1,ZBTB34,ZNF297B                                                       |
| 11 | 97,650,000  | 97,800,000  | 1303 | 421  | 0.658253757  | RALGPS1,ZBTB34                                                               |
| 11 | 97,725,000  | 97,875,000  | 1304 | 457  | 0.34863616   | ANGPTL2,RALGPS1                                                              |
| 11 | 97,800,000  | 97,950,000  | 1305 | 570  | -0.793101305 | ANGPTL2,RALGPS1                                                              |
| 11 | 97,875,000  | 98,025,000  | 1306 | 672  | -1.784677666 | GARNL3,RALGPS1                                                               |
| 11 | 97,950,000  | 98,100,000  | 1307 | 619  | -2.377174148 | GARNL3,RALGPS1                                                               |
| 11 | 98,025,000  | 98,175,000  | 1308 | 487  | -1.258502915 | GARNL3,SLC2A8,ZNF79                                                          |
| 11 | 98,100,000  | 98,250,000  | 1309 | 438  | -0.274787906 | FAM129B,GARNL3,LRSAM1,RPL12,SLC2A8,ZNF79                                     |
| 11 | 98,175,000  | 98,325,000  | 1310 | 460  | -0.086754169 | FAM129B,LRSAM1,RPL12,ZNF79                                                   |
| 11 | 98,250,000  | 98,400,000  | 1311 | 656  | -0.860359487 | CYCS,FAM129B,STXBP1                                                          |
| 11 | 98,325,000  | 98,475,000  | 1312 | 726  | -0.324067928 | C9orf117,CDK9,CYCS,PTRH1,SH2D3C,STXBP1,TOR2A, TTC16                          |
| 11 | 98,400,000  | 98,550,000  | 1313 | 631  | 0.527321115  | C9orf117,CDK9,ENG,FPGS,PTRH1,SH2D3C,TOR2A, TTC 16,ENSBTAG00000046303         |
| 11 | 98,475,000  | 98,625,000  | 1314 | 554  | 0.308141144  | AK1,CDK9,DPM2,ENG,FAM102A,FPGS,PIP5KL1,SIAT7B ,ST6GALNAC6,ENSBTAG00000046303 |
| 11 | 98,550,000  | 98,700,000  | 1315 | 638  | 0.612773944  | AK1,DPM2,FAM102A,PIP5KL1,SIAT7B,ST6GALNAC6                                   |
| 11 | 98,625,000  | 98,775,000  | 1316 | 638  | -0.13507727  | FAM102A,NAIF1,PTGES2,SLC25A25                                                |
| 11 | 98,700,000  | 98,850,000  | 1317 | 589  | -1.128611659 | C11H9orf16,CIZ1,DNM1,LCN2,NAIF1,PTGES2,SLC25A 25                             |
| 11 | 98,775,000  | 98,925,000  | 1318 | 519  | -1.158981573 | C11H9orf16,CIZ1,DNM1,LCN2,PTGES2,SWI5,TRUB2,E NSBTAG00000011317              |
| 11 | 98,850,000  | 99,000,000  | 1319 | 509  | -1.273165424 | COQ4,DNM1,SLC27A4,SWI5,TRUB2,URM1,ENSBTAG0 0000011317                        |
| 11 | 98,925,000  | 99,075,000  | 1320 | 498  | -0.947222184 | CERCAM,COQ4,ODF2,SLC27A4,TRUB2,URM1                                          |
| 11 | 99,000,000  | 99,150,000  | 1321 | 419  | -1.024917044 | CERCAM,GLE1,ODF2,SPTAN1                                                      |
| 11 | 99,075,000  | 99,225,000  | 1322 | 419  | -2.124160545 | GLE1,SET,SPTAN1,WDR34                                                        |
| 11 | 99,150,000  | 99,300,000  | 1323 | 335  | -1.140980722 | PKN3,SET,SPTAN1,TBC1D13,WDR34,ZDHHC12,ZER1                                   |
| 11 | 99,225,000  | 99,375,000  | 1324 | 361  | 0.617042886  | C9orf114,CCBL1,ENDOG,PKN3,SET,TBC1D13,ZDHHC1 2,ZER1,ENSBTAG00000036099       |
| 11 | 99,300,000  | 99,450,000  | 1325 | 474  | 0.125206422  | C9orf114,CCBL1,ENDOG,LLRC8A,PHYHD1,TBC1D13,E NSBTAG00000036099               |
| 11 | 99,375,000  | 99,525,000  | 1326 | 433  | -0.443648647 | CCBL1,DOLK,LLRC8A,NUP188,PHYHD1,SH3GLB2                                      |
| 11 | 99,450,000  | 99,600,000  | 1327 | 352  | -0.110651854 | DOLK,DOLPP1,FAM73B,MGC142781,NUP188,PHYHD1 ,PPP2R4,SH3GLB2                   |
| 11 | 99,525,000  | 99,675,000  | 1328 | 325  | 0.737924285  | DOLPP1,FAM73B,IERSL,MGC142781,PPP2R4                                         |
| 11 | 99,600,000  | 99,750,000  | 1329 | 367  | 0.359386493  | IERSL,PPP2R4                                                                 |
| 11 | 99,675,000  | 99,825,000  | 1330 | 443  | -0.793432259 |                                                                              |
| 11 | 99,750,000  | 99,900,000  | 1331 | 529  | -1.110103428 |                                                                              |
| 11 | 99,825,000  | 99,975,000  | 1332 | 808  | -0.594374646 |                                                                              |
| 11 | 99,900,000  | 100,050,000 | 1333 | 787  | -0.004168899 | C9orf50,NTMT1                                                                |
| 11 | 99,975,000  | 100,125,000 | 1334 | 489  | 0.412269732  | ASB6,C9orf50,NTMT1,PRRX2,ENSBTAG00000038183                                  |
| 11 | 100,050,000 | 100,200,000 | 1335 | 555  | -0.775105553 | ASB6,PRRX2,PTGES,ENSBTAG00000038183                                          |

|    |             |             |      |      |              |                                                              |
|----|-------------|-------------|------|------|--------------|--------------------------------------------------------------|
| 11 | 100,125,000 | 100,275,000 | 1336 | 664  | 0.126153341  | C11H9ORF78,PRRX2,PTGES,TOR1A,TOR1B,USP20,ENSBTAG00000047907  |
| 11 | 100,200,000 | 100,350,000 | 1337 | 679  | 0.996857638  | C11H9ORF78,FNBP1,TOR1A,TOR1B,USP20,ENSBTAG0000047907         |
| 11 | 100,275,000 | 100,425,000 | 1338 | 616  | 0.909610343  | FNBP1,USP20                                                  |
| 11 | 100,350,000 | 100,500,000 | 1339 | 667  | 0.481266786  | FNBP1,GPR107                                                 |
| 11 | 100,425,000 | 100,575,000 | 1340 | 830  | -0.165754244 | GPR107,NCS1                                                  |
| 11 | 100,500,000 | 100,650,000 | 1341 | 813  | -0.832339279 | HMCN2,NCS1                                                   |
| 11 | 100,575,000 | 100,725,000 | 1342 | 1029 | 0.509779312  | HMCN2                                                        |
| 11 | 100,650,000 | 100,800,000 | 1343 | 1091 | 1.432117209  | ASS1,HMCN2                                                   |
| 11 | 100,725,000 | 100,875,000 | 1344 | 1035 | 1.387233907  | ASS1,HMCN2                                                   |
| 11 | 100,800,000 | 100,950,000 | 1345 | 1127 | 0.120815935  | ASS1,FUBP3                                                   |
| 11 | 100,875,000 | 101,025,000 | 1346 | 743  | -0.622076456 | EXOSC2,FUBP3,PRDM12                                          |
| 11 | 100,950,000 | 101,100,000 | 1347 | 566  | 0.899250538  | EXOSC2,FUBP3,PRDM12                                          |
| 11 | 101,025,000 | 101,175,000 | 1348 | 725  | 0.626090454  | ABL1,FIBCD1,QRFP                                             |
| 11 | 101,100,000 | 101,250,000 | 1349 | 650  | -0.21817399  | ABL1,FIBCD1,LAMC3,QRFP                                       |
| 11 | 101,175,000 | 101,325,000 | 1350 | 734  | 0.846147803  | FIBCD1,LAMC3                                                 |
| 11 | 101,250,000 | 101,400,000 | 1351 | 840  | 1.356234817  | AIF1L,LAMC3,NUP214                                           |
| 11 | 101,325,000 | 101,475,000 | 1352 | 900  | 0.836373572  | AIF1L,NUP214                                                 |
| 11 | 101,400,000 | 101,550,000 | 1353 | 927  | -0.207867241 | C9ORF59,NUP214,PPAPDC3                                       |
| 11 | 101,475,000 | 101,625,000 | 1354 | 790  | -0.587748295 | C9ORF59,PPAPDC3,PRRC2B                                       |
| 11 | 101,550,000 | 101,700,000 | 1355 | 796  | 0.250781522  | POMT1,PRRC2B,UCK1                                            |
| 11 | 101,625,000 | 101,775,000 | 1356 | 1008 | 0.148106218  | POMT1,PRRC2B,RAPGEF1,UCK1                                    |
| 11 | 101,700,000 | 101,850,000 | 1357 | 990  | -1.307815421 | RAPGEF1                                                      |
| 11 | 101,775,000 | 101,925,000 | 1358 | 864  | -2.350379088 | RAPGEF1                                                      |
| 11 | 101,850,000 | 102,000,000 | 1359 | 856  | -1.465215622 | MED27                                                        |
| 11 | 101,925,000 | 102,075,000 | 1360 | 813  | -2.017379392 | MED27                                                        |
| 11 | 102,000,000 | 102,150,000 | 1361 | 604  | -2.037259136 | MED27                                                        |
| 11 | 102,075,000 | 102,225,000 | 1362 | 733  | -0.585267095 | MED27                                                        |
| 11 | 102,150,000 | 102,300,000 | 1363 | 940  | -0.747412443 | MED27,NTNG2                                                  |
| 11 | 102,225,000 | 102,375,000 | 1364 | 822  | -0.560698951 | NTNG2,SETX                                                   |
| 11 | 102,300,000 | 102,450,000 | 1365 | 652  | -0.30627615  | NTNG2,SETX                                                   |
| 11 | 102,375,000 | 102,525,000 | 1366 | 834  | 0.138294637  | C9orf171,SETX,TTF1,ENSBTAG00000023697                        |
| 11 | 102,450,000 | 102,600,000 | 1367 | 1043 | 0.632733319  | C9orf171,SETX,TTF1,ENSBTAG00000023697                        |
| 11 | 102,525,000 | 102,675,000 | 1368 | 1078 | 0.523614296  | C9orf171                                                     |
| 11 | 102,600,000 | 102,750,000 | 1369 | 897  | 0.104319484  | BARHL1,C9orf171,DDX31                                        |
| 11 | 102,675,000 | 102,825,000 | 1370 | 478  | -0.405788179 | AK8,BARHL1,DDX31,GTF3C4                                      |
| 11 | 102,750,000 | 102,900,000 | 1371 | 614  | -0.911841092 | AK8,DDX31,GTF3C4                                             |
| 11 | 102,825,000 | 102,975,000 | 1372 | 794  | -0.723232662 | AK8,C11H9ORF9,TSC1                                           |
| 11 | 102,900,000 | 103,050,000 | 1373 | 772  | 0.181000625  | AK8,C11H9ORF9,GFI1B,TSC1                                     |
| 11 | 102,975,000 | 103,125,000 | 1374 | 665  | 1.06165442   | CEL,GFI1B,GTF3C5,TSC1                                        |
| 11 | 103,050,000 | 103,200,000 | 1375 | 813  | 0.398119193  | CEL,GBGT1,GFI1B,GTF3C5,RALGDS,TSC1                           |
| 11 | 103,125,000 | 103,275,000 | 1376 | 1131 | -1.00094295  | GBGT1,RALGDS,ENSBTAG00000000893                              |
| 11 | 103,200,000 | 103,350,000 | 1377 | 1234 | -0.771547041 | GLT6D1,LCN9,LGB,SOHLH1,ENSBTAG00000000893,ENSBTAG00000048091 |
| 11 | 103,275,000 | 103,425,000 | 1378 | 934  | 0.328181721  | GLT6D1,KCNT1,LCN9,LGB,SOHLH1,ENSBTAG00000048091              |
| 11 | 103,350,000 | 103,500,000 | 1379 | 503  | 0.488541259  | CAMSAP1,KCNT1,SOHLH1                                         |
| 11 | 103,425,000 | 103,575,000 | 1380 | 411  | 0.412310943  | CAMSAP1,KCNT1,NACC2,UBAC1                                    |
| 11 | 103,500,000 | 103,650,000 | 1381 | 607  | 0.601828009  | NACC2,UBAC1                                                  |
| 11 | 103,575,000 | 103,725,000 | 1382 | 577  | 0.613178426  | C9orf69,NACC2                                                |
| 11 | 103,650,000 | 103,800,000 | 1383 | 615  | -0.279986546 | C9orf69,LHX3,QSOX2                                           |
| 11 | 103,725,000 | 103,875,000 | 1384 | 687  | -1.100980749 | DNLZ,GPSM1,LHX3,QSOX2,ENSBTAG00000023064                     |

|    |             |             |      |      |              |                                                                                                                                               |
|----|-------------|-------------|------|------|--------------|-----------------------------------------------------------------------------------------------------------------------------------------------|
| 11 | 103,800,000 | 103,950,000 | 1385 | 432  | -1.520678464 | CARD9,DNLZ,GPSM1,INPP5E,PMPCA,SDCCAG3,SEC16A,SNAPC4,ENSBTAG00000023064                                                                        |
| 11 | 103,875,000 | 104,025,000 | 1386 | 457  | -0.792791879 | CARD9,DNLZ,INPP5E,NOTCH1,PMPCA,SDCCAG3,SEC16A,SNAPC4                                                                                          |
| 11 | 103,950,000 | 104,100,000 | 1387 | 767  | 0.775618916  | NOTCH1,SEC16A                                                                                                                                 |
| 11 | 104,025,000 | 104,175,000 | 1388 | 962  | 0.723152851  | AGPAT2,EGFL7,NOTCH1                                                                                                                           |
| 11 | 104,100,000 | 104,250,000 | 1389 | 1578 | 0.62715922   | ABO,AGPAT2,EGFL7,FAM69B                                                                                                                       |
| 11 | 104,175,000 | 104,325,000 | 1390 | 1885 | 0.824428285  | ABO,FAM69B,MED22,RPL7A,SURF1,SURF2,SURF6                                                                                                      |
| 11 | 104,250,000 | 104,400,000 | 1391 | 1499 | 0.871436377  | ABO,ADAMTS13,MED22,REXO4,RPL7A,STKLD1,SURF1,SURF2,SURF6                                                                                       |
| 11 | 104,325,000 | 104,475,000 | 1392 | 1308 | 0.725026982  | ADAMTS13,ADAMTSL2,MGC139698,REXO4,SLC2A6,STKLD1,SURF1,TMEM8C                                                                                  |
| 11 | 104,400,000 | 104,550,000 | 1393 | 1085 | 0.758966326  | ADAMTS13,ADAMTSL2,FAM163B,MGC139698,SLC2A6,TMEM8C                                                                                             |
| 11 | 104,475,000 | 104,625,000 | 1394 | 1406 | 0.97259038   | ADAMTSL2,DBH,FAM163B,SARDH                                                                                                                    |
| 11 | 104,550,000 | 104,700,000 | 1395 | 1219 | 0.500615103  | DBH,SARDH,VAV2                                                                                                                                |
| 11 | 104,625,000 | 104,775,000 | 1396 | 1076 | -1.380773914 | SARDH,VAV2                                                                                                                                    |
| 11 | 104,700,000 | 104,850,000 | 1397 | 1064 | -1.251313675 |                                                                                                                                               |
| 11 | 104,775,000 | 104,925,000 | 1398 | 489  | 0.001736603  | BRD3                                                                                                                                          |
| 11 | 104,850,000 | 105,000,000 | 1399 | 527  | 1.115530139  | BRD3,WDR5                                                                                                                                     |
| 11 | 104,925,000 | 105,075,000 | 1400 | 706  | 0.955096995  | WDR5                                                                                                                                          |
| 11 | 105,000,000 | 105,150,000 | 1401 | 863  | 0.536953105  | ENSBTAG00000008308                                                                                                                            |
| 11 | 105,075,000 | 105,225,000 | 1402 | 1115 | 0.616996742  | CACNA1B,ENSBTAG00000008308                                                                                                                    |
| 11 | 105,150,000 | 105,300,000 | 1403 | 998  | 0.788495877  | CACNA1B                                                                                                                                       |
| 11 | 105,225,000 | 105,375,000 | 1404 | 874  | 0.25933408   | CACNA1B                                                                                                                                       |
| 11 | 105,300,000 | 105,450,000 | 1405 | 1239 | 0.421967411  | CACNA1B,EHMT1                                                                                                                                 |
| 11 | 105,375,000 | 105,525,000 | 1406 | 1592 | 0.738418571  | CACNA1B,EHMT1                                                                                                                                 |
| 11 | 105,450,000 | 105,600,000 | 1407 | 1285 | 0.625082015  | ARRDC1,DPH7,EHMT1,MRPL41,PNPLA7,ZMYND19                                                                                                       |
| 11 | 105,525,000 | 105,675,000 | 1408 | 811  | 0.522789762  | ARRDC1,DPH7,MRPL41,NSMF,PNPLA7,ZMYND19                                                                                                        |
| 11 | 105,600,000 | 105,750,000 | 1409 | 804  | 0.836457552  | ENTPD8,EXD3,NOXA1,NSMF,PNPLA7                                                                                                                 |
| 11 | 105,675,000 | 105,825,000 | 1410 | 856  | 0.607779696  | ENTPD8,EXD3,NOXA1,NRARP,NSMF                                                                                                                  |
| 11 | 105,750,000 | 105,900,000 | 1411 | 653  | 0.28287684   | COBRA1,CYSRT1,EXD3,FAM166A,NDOR1,NRARP,RNF208,RNF224,SLC34A3,TMEM203,TOR4A,TPRN,TUBB4B                                                        |
| 11 | 105,825,000 | 105,975,000 | 1412 | 514  | 0.65287913   | COBRA1,CYSRT1,FAM166A,GRIN1,LRRRC26,NDOR1,RNF208,RNF224,SLC34A3,SSNA1,TMEM203,TMEM210,TOR4A,TPRN,TUBB4B,ENSBTAG00000046223,ENSBTAG00000046416 |
| 11 | 105,900,000 | 106,050,000 | 1413 | 524  | 0.819480945  | GRIN1,LRRRC26,RXRA,SSNA1,TMEM210,TPRN,ENSBTAG00000046223,ENSBTAG00000046416                                                                   |
| 11 | 105,975,000 | 106,125,000 | 1414 | 888  | 0.391057798  | RXRA                                                                                                                                          |
| 11 | 106,050,000 | 106,200,000 | 1415 | 1042 | 0.307931174  | ENTPD2,MAN1B1,NPDC1,SAPCD2,UAP1L1                                                                                                             |
| 11 | 106,125,000 | 106,275,000 | 1416 | 729  | 0.405197383  | ABCA2,C11H9ORF142,CLIC3,ENTPD2,FUT7,LCNL1,MAN1B1,NPDC1,PTGDS,SAPCD2,UAP1L1                                                                    |
| 11 | 106,200,000 | 106,350,000 | 1417 | 698  | 0.022140751  | ABCA2,C11H9ORF142,C8G,C9orf172,CLIC3,EDF1,FBXW5,FUT7,LCN12,LCNL1,MAMDC4,PHPT1,PTGDS,RABL6,TRAF2                                               |
| 11 | 106,275,000 | 106,425,000 | 1418 | 1312 | -0.356055848 | C8G,C9orf172,EDF1,FBXW5,KIAA1984,LCN10,LCN12,LCN15,LCN8,MAMDC4,PHPT1,RABL6,TMEM141,TRAF2,ENSBTAG00000016148,ENSBTAG00000047297                |
| 11 | 106,350,000 | 106,500,000 | 1419 | 1980 | -0.319916991 | C9orf116,KIAA1984,LCN1,LCN10,LCN15,LCN8,MRPS2,PPP1R26,RABL6,TMEM141,ENSBTAG00000016148,ENSBTAG00000038440,ENSBTAG00000047297                  |



|    |             |             |      |      |              |                                                                                  |
|----|-------------|-------------|------|------|--------------|----------------------------------------------------------------------------------|
| 11 | 106,425,000 | 106,575,000 | 1420 | 2085 | -1.981767902 | C9orf116,LCN1,MRPS2,PPP1R26,ENSBTAG00000038440                                   |
| 11 | 106,500,000 | 106,650,000 | 1421 | 1724 | -2.901194457 |                                                                                  |
| 11 | 106,575,000 | 106,725,000 | 1422 | 1260 | -0.875917605 | OLFM1                                                                            |
| 11 | 106,650,000 | 106,800,000 | 1423 | 1628 | 0.147165378  | OLFM1                                                                            |
| 11 | 106,725,000 | 106,875,000 | 1424 | 1647 | 0.473514981  | COL5A1,FCN2                                                                      |
| 11 | 106,800,000 | 106,950,000 | 1425 | 974  | 0.830097797  | COL5A1,FCN2                                                                      |
| 11 | 106,875,000 | 107,025,000 | 1426 | 753  | -0.060411112 | COL5A1                                                                           |
| 11 | 106,950,000 | 107,100,000 | 1427 | 874  | -0.04221448  | COL5A1                                                                           |
| 11 | 107,025,000 | 107,175,000 | 1428 | 962  | 0.334192708  | BET1L,ODF3,RIC8A,SIRT3,ENSBTAG00000022142                                        |
| 11 | 107,100,000 | 107,250,000 | 1429 | 1019 | 0.416619605  | ATHL1,BET1L,COX8B,IFITM2,IFITM5,NLRP6,ODF3,PSMD13,RIC8A,SIRT3,ENSBTAG00000022142 |
| 11 | 107,175,000 | 107,310,763 | 1430 | 828  | -1.317149282 | ATHL1,COX8B,IFITM2,IFITM5,NLRP6,PSMD13,SIRT3,ENSBTAG00000019018                  |
| 12 | 0           | 150,000     | 1    | 381  | -2.01890669  |                                                                                  |
| 12 | 75,000      | 225,000     | 2    | 290  | -1.627015313 |                                                                                  |
| 12 | 150,000     | 300,000     | 3    | 239  | -2.063389102 |                                                                                  |
| 12 | 225,000     | 375,000     | 4    | 223  | -0.382048914 |                                                                                  |
| 12 | 300,000     | 450,000     | 5    | 237  | -0.665081835 | PCDH20                                                                           |
| 12 | 375,000     | 525,000     | 6    | 495  | -2.734039571 | PCDH20                                                                           |
| 12 | 450,000     | 600,000     | 7    | 736  | -3.157395929 |                                                                                  |
| 12 | 525,000     | 675,000     | 8    | 989  | -1.026305063 |                                                                                  |
| 12 | 600,000     | 750,000     | 9    | 1591 | 0.456178766  | ENSBTAG00000035926                                                               |
| 12 | 675,000     | 825,000     | 10   | 1758 | 0.467731062  | ENSBTAG00000035926                                                               |
| 12 | 750,000     | 900,000     | 11   | 1482 | 0.112484283  |                                                                                  |
| 12 | 825,000     | 975,000     | 12   | 1399 | -0.04428543  |                                                                                  |
| 12 | 900,000     | 1,050,000   | 13   | 1112 | 0.474476088  |                                                                                  |
| 12 | 975,000     | 1,125,000   | 14   | 713  | 1.207321126  |                                                                                  |
| 12 | 1,050,000   | 1,200,000   | 15   | 645  | 1.035882888  |                                                                                  |
| 12 | 1,125,000   | 1,275,000   | 16   | 1223 | 1.165588546  |                                                                                  |
| 12 | 1,200,000   | 1,350,000   | 17   | 1489 | 1.122098987  |                                                                                  |
| 12 | 1,275,000   | 1,425,000   | 18   | 1412 | 0.188647628  |                                                                                  |
| 12 | 1,350,000   | 1,500,000   | 19   | 1516 | 0.105923833  |                                                                                  |
| 12 | 1,425,000   | 1,575,000   | 20   | 1384 | 0.226629225  | TDRD3                                                                            |
| 12 | 1,500,000   | 1,650,000   | 21   | 1231 | -0.955223972 | TDRD3                                                                            |
| 12 | 1,575,000   | 1,725,000   | 22   | 1248 | -0.521072641 | TDRD3                                                                            |
| 12 | 1,650,000   | 1,800,000   | 23   | 1343 | 0.426475075  | TDRD3                                                                            |
| 12 | 1,725,000   | 1,875,000   | 24   | 1542 | 0.318208816  | TDRD3                                                                            |
| 12 | 1,800,000   | 1,950,000   | 25   | 1387 | 0.229753801  |                                                                                  |
| 12 | 1,875,000   | 2,025,000   | 26   | 856  | 0.482388522  |                                                                                  |
| 12 | 1,950,000   | 2,100,000   | 27   | 621  | 0.093838308  | ENSBTAG00000026861                                                               |
| 12 | 2,025,000   | 2,175,000   | 28   | 619  | -1.247264396 | DIAPH3,ENSBTAG00000026861                                                        |
| 12 | 2,100,000   | 2,250,000   | 29   | 964  | -0.896458297 | DIAPH3                                                                           |
| 12 | 2,175,000   | 2,325,000   | 30   | 1031 | -1.115050366 | DIAPH3                                                                           |
| 12 | 2,250,000   | 2,400,000   | 31   | 765  | -2.615603545 | DIAPH3                                                                           |
| 12 | 2,325,000   | 2,475,000   | 32   | 762  | -4.417533563 | DIAPH3                                                                           |
| 12 | 2,400,000   | 2,550,000   | 33   | 681  | -3.930353541 | DIAPH3                                                                           |
| 12 | 2,475,000   | 2,625,000   | 34   | 837  | -1.254314528 | DIAPH3                                                                           |
| 12 | 2,550,000   | 2,700,000   | 35   | 1167 | 0.016117078  | DIAPH3                                                                           |
| 12 | 2,625,000   | 2,775,000   | 36   | 933  | 0.739116537  | DIAPH3                                                                           |
| 12 | 2,700,000   | 2,850,000   | 37   | 564  | 0.387216304  |                                                                                  |
| 12 | 2,775,000   | 2,925,000   | 38   | 736  | -0.314657275 |                                                                                  |
| 12 | 2,850,000   | 3,000,000   | 39   | 844  | -0.279672187 |                                                                                  |

|    |           |           |    |      |              |        |
|----|-----------|-----------|----|------|--------------|--------|
| 12 | 2,925,000 | 3,075,000 | 40 | 799  | 0.804535203  |        |
| 12 | 3,000,000 | 3,150,000 | 41 | 1147 | 0.690503029  |        |
| 12 | 3,075,000 | 3,225,000 | 42 | 1110 | 0.128041867  |        |
| 12 | 3,150,000 | 3,300,000 | 43 | 1011 | -0.433830429 |        |
| 12 | 3,225,000 | 3,375,000 | 44 | 1181 | -0.100702864 |        |
| 12 | 3,300,000 | 3,450,000 | 45 | 1229 | -0.279568621 |        |
| 12 | 3,375,000 | 3,525,000 | 46 | 1264 | -0.08923446  |        |
| 12 | 3,450,000 | 3,600,000 | 47 | 1473 | 0.398197463  |        |
| 12 | 3,525,000 | 3,675,000 | 48 | 1469 | 0.206935229  |        |
| 12 | 3,600,000 | 3,750,000 | 49 | 1005 | -1.507442894 |        |
| 12 | 3,675,000 | 3,825,000 | 50 | 811  | -2.938732097 |        |
| 12 | 3,750,000 | 3,900,000 | 51 | 879  | -0.489225801 |        |
| 12 | 3,825,000 | 3,975,000 | 52 | 693  | 0.234043872  |        |
| 12 | 3,900,000 | 4,050,000 | 53 | 1014 | 0.741043765  |        |
| 12 | 3,975,000 | 4,125,000 | 54 | 1063 | 0.729144329  |        |
| 12 | 4,050,000 | 4,200,000 | 55 | 780  | 0.480800738  |        |
| 12 | 4,125,000 | 4,275,000 | 56 | 830  | 0.683701748  |        |
| 12 | 4,200,000 | 4,350,000 | 57 | 640  | -0.765916314 |        |
| 12 | 4,275,000 | 4,425,000 | 58 | 763  | -0.592353375 |        |
| 12 | 4,350,000 | 4,500,000 | 59 | 1569 | -0.134485755 |        |
| 12 | 4,425,000 | 4,575,000 | 60 | 1393 | -0.187354944 |        |
| 12 | 4,500,000 | 4,650,000 | 61 | 699  | 0.475112265  |        |
| 12 | 4,575,000 | 4,725,000 | 62 | 785  | 0.480236132  |        |
| 12 | 4,650,000 | 4,800,000 | 63 | 1196 | 0.953915924  |        |
| 12 | 4,725,000 | 4,875,000 | 64 | 1639 | 0.712889273  |        |
| 12 | 4,800,000 | 4,950,000 | 65 | 1522 | 0.422192622  |        |
| 12 | 4,875,000 | 5,025,000 | 66 | 1313 | 0.626294377  |        |
| 12 | 4,950,000 | 5,100,000 | 67 | 1068 | -0.005456282 | PCDH17 |
| 12 | 5,025,000 | 5,175,000 | 68 | 997  | -0.132745036 | PCDH17 |
| 12 | 5,100,000 | 5,250,000 | 69 | 1123 | -0.115292869 | PCDH17 |
| 12 | 5,175,000 | 5,325,000 | 70 | 1076 | -0.92395383  | PCDH17 |
| 12 | 5,250,000 | 5,400,000 | 71 | 1163 | -1.689098674 |        |
| 12 | 5,325,000 | 5,475,000 | 72 | 1327 | -1.120326527 |        |
| 12 | 5,400,000 | 5,550,000 | 73 | 1490 | 0.745881119  |        |
| 12 | 5,475,000 | 5,625,000 | 74 | 1489 | 1.131355766  |        |
| 12 | 5,550,000 | 5,700,000 | 75 | 1484 | 0.990846745  |        |
| 12 | 5,625,000 | 5,775,000 | 76 | 1565 | 0.710314695  |        |
| 12 | 5,700,000 | 5,850,000 | 77 | 1770 | -0.565870987 |        |
| 12 | 5,775,000 | 5,925,000 | 78 | 1574 | -1.170839868 |        |
| 12 | 5,850,000 | 6,000,000 | 79 | 1193 | -1.6954028   |        |
| 12 | 5,925,000 | 6,075,000 | 80 | 997  | -0.781436884 |        |
| 12 | 6,000,000 | 6,150,000 | 81 | 1082 | 0.019601165  |        |
| 12 | 6,075,000 | 6,225,000 | 82 | 1421 | 0.108267029  |        |
| 12 | 6,150,000 | 6,300,000 | 83 | 1058 | 0.197797006  |        |
| 12 | 6,225,000 | 6,375,000 | 84 | 892  | -0.000496313 |        |
| 12 | 6,300,000 | 6,450,000 | 85 | 917  | 0.167450251  |        |
| 12 | 6,375,000 | 6,525,000 | 86 | 1699 | -0.696885089 |        |
| 12 | 6,450,000 | 6,600,000 | 87 | 1724 | -0.568626925 |        |
| 12 | 6,525,000 | 6,675,000 | 88 | 1115 | 0.673891692  |        |
| 12 | 6,600,000 | 6,750,000 | 89 | 1221 | 0.586115604  |        |
| 12 | 6,675,000 | 6,825,000 | 90 | 1610 | 0.160348643  |        |
| 12 | 6,750,000 | 6,900,000 | 91 | 2237 | 0.135580328  |        |
| 12 | 6,825,000 | 6,975,000 | 92 | 1974 | 0.355667092  |        |

|    |            |            |     |      |              |                    |
|----|------------|------------|-----|------|--------------|--------------------|
| 12 | 6,900,000  | 7,050,000  | 93  | 1074 | 0.662355259  |                    |
| 12 | 6,975,000  | 7,125,000  | 94  | 734  | 0.576807991  |                    |
| 12 | 7,050,000  | 7,200,000  | 95  | 1074 | 0.178912311  |                    |
| 12 | 7,125,000  | 7,275,000  | 96  | 1121 | -0.434739338 |                    |
| 12 | 7,200,000  | 7,350,000  | 97  | 1389 | 0.173951935  |                    |
| 12 | 7,275,000  | 7,425,000  | 98  | 1239 | 0.809763649  |                    |
| 12 | 7,350,000  | 7,500,000  | 99  | 663  | 1.469320669  |                    |
| 12 | 7,425,000  | 7,575,000  | 100 | 720  | 0.986252402  |                    |
| 12 | 7,500,000  | 7,650,000  | 101 | 711  | 0.894996023  |                    |
| 12 | 7,575,000  | 7,725,000  | 102 | 651  | 0.905388239  |                    |
| 12 | 7,650,000  | 7,800,000  | 103 | 1047 | 0.730385394  |                    |
| 12 | 7,725,000  | 7,875,000  | 104 | 1356 | 0.410450029  |                    |
| 12 | 7,800,000  | 7,950,000  | 105 | 1246 | -0.175950047 |                    |
| 12 | 7,875,000  | 8,025,000  | 106 | 1504 | -0.407367147 |                    |
| 12 | 7,950,000  | 8,100,000  | 107 | 1758 | -0.494340664 |                    |
| 12 | 8,025,000  | 8,175,000  | 108 | 1234 | -0.536845224 |                    |
| 12 | 8,100,000  | 8,250,000  | 109 | 842  | -0.966704647 |                    |
| 12 | 8,175,000  | 8,325,000  | 110 | 910  | -1.458848185 |                    |
| 12 | 8,250,000  | 8,400,000  | 111 | 1479 | -0.468479056 |                    |
| 12 | 8,325,000  | 8,475,000  | 112 | 1782 | -0.375689163 |                    |
| 12 | 8,400,000  | 8,550,000  | 113 | 1421 | 0.10024243   |                    |
| 12 | 8,475,000  | 8,625,000  | 114 | 1545 | 0.807024071  |                    |
| 12 | 8,550,000  | 8,700,000  | 115 | 1411 | 0.56932344   |                    |
| 12 | 8,625,000  | 8,775,000  | 116 | 1057 | 0.025052928  |                    |
| 12 | 8,700,000  | 8,850,000  | 117 | 797  | 0.162202549  |                    |
| 12 | 8,775,000  | 8,925,000  | 118 | 709  | 0.29326472   |                    |
| 12 | 8,850,000  | 9,000,000  | 119 | 932  | 0.122083771  |                    |
| 12 | 8,925,000  | 9,075,000  | 120 | 890  | 0.043211667  |                    |
| 12 | 9,000,000  | 9,150,000  | 121 | 936  | 0.106386595  |                    |
| 12 | 9,075,000  | 9,225,000  | 122 | 1042 | -0.088496848 |                    |
| 12 | 9,150,000  | 9,300,000  | 123 | 783  | 0.008700813  |                    |
| 12 | 9,225,000  | 9,375,000  | 124 | 757  | 0.036980683  |                    |
| 12 | 9,300,000  | 9,450,000  | 125 | 986  | 0.452748305  |                    |
| 12 | 9,375,000  | 9,525,000  | 126 | 1325 | 0.74754714   |                    |
| 12 | 9,450,000  | 9,600,000  | 127 | 1505 | -0.1918869   |                    |
| 12 | 9,525,000  | 9,675,000  | 128 | 1260 | -1.839551916 |                    |
| 12 | 9,600,000  | 9,750,000  | 129 | 1158 | -1.274061899 |                    |
| 12 | 9,675,000  | 9,825,000  | 130 | 1021 | -1.125741507 |                    |
| 12 | 9,750,000  | 9,900,000  | 131 | 971  | -0.031807278 |                    |
| 12 | 9,825,000  | 9,975,000  | 132 | 1126 | -0.440548195 |                    |
| 12 | 9,900,000  | 10,050,000 | 133 | 1254 | -0.561124574 |                    |
| 12 | 9,975,000  | 10,125,000 | 134 | 1253 | -1.180876317 |                    |
| 12 | 10,050,000 | 10,200,000 | 135 | 1087 | -1.712435082 |                    |
| 12 | 10,125,000 | 10,275,000 | 136 | 899  | 0.282924983  |                    |
| 12 | 10,200,000 | 10,350,000 | 137 | 1213 | -0.149617876 |                    |
| 12 | 10,275,000 | 10,425,000 | 138 | 1249 | -0.126889357 |                    |
| 12 | 10,350,000 | 10,500,000 | 139 | 1081 | 0.223829788  | ENSBTAG00000048161 |
| 12 | 10,425,000 | 10,575,000 | 140 | 1057 | 0.617848995  | ENSBTAG00000048161 |
| 12 | 10,500,000 | 10,650,000 | 141 | 1159 | 1.199175195  | ENSBTAG00000048161 |
| 12 | 10,575,000 | 10,725,000 | 142 | 1279 | 0.783821471  | OLFM4              |
| 12 | 10,650,000 | 10,800,000 | 143 | 1376 | -0.966878579 | OLFM4              |
| 12 | 10,725,000 | 10,875,000 | 144 | 1438 | -2.080199881 |                    |
| 12 | 10,800,000 | 10,950,000 | 145 | 977  | -1.989971534 | PCDH8              |

|    |            |            |     |      |              |                                      |
|----|------------|------------|-----|------|--------------|--------------------------------------|
| 12 | 10,875,000 | 11,025,000 | 146 | 1039 | 0.516180961  | PCDH8                                |
| 12 | 10,950,000 | 11,100,000 | 147 | 1118 | 0.59347158   | LECT1                                |
| 12 | 11,025,000 | 11,175,000 | 148 | 723  | 0.111703898  | LECT1,SUGT1                          |
| 12 | 11,100,000 | 11,250,000 | 149 | 396  | 1.005179596  | ELF1,LECT1,SUGT1                     |
| 12 | 11,175,000 | 11,325,000 | 150 | 298  | 0.354815014  | ELF1,WBP4                            |
| 12 | 11,250,000 | 11,400,000 | 151 | 435  | 0.136070633  | ELF1,KBTBD6,WBP4                     |
| 12 | 11,325,000 | 11,475,000 | 152 | 695  | 0.097133455  | KBTBD6,MTRF1,WBP4,ENSBTAG00000039823 |
| 12 | 11,400,000 | 11,550,000 | 153 | 641  | 0.060674722  | MTRF1,NAA16,ENSBTAG00000039823       |
| 12 | 11,475,000 | 11,625,000 | 154 | 732  | -1.050787662 | MTRF1,NAA16                          |
| 12 | 11,550,000 | 11,700,000 | 155 | 933  | -0.844672061 | MGC148992,NAA16                      |
| 12 | 11,625,000 | 11,775,000 | 156 | 945  | 0.617733845  | MGC148992,VWA8                       |
| 12 | 11,700,000 | 11,850,000 | 157 | 810  | 0.619338137  | VWA8                                 |
| 12 | 11,775,000 | 11,925,000 | 158 | 873  | -0.173259295 | VWA8                                 |
| 12 | 11,850,000 | 12,000,000 | 159 | 1091 | 0.246527977  | VWA8                                 |
| 12 | 11,925,000 | 12,075,000 | 160 | 688  | 0.724697964  | VWA8                                 |
| 12 | 12,000,000 | 12,150,000 | 161 | 685  | 0.126384365  | VWA8                                 |
| 12 | 12,075,000 | 12,225,000 | 162 | 713  | -0.024941272 |                                      |
| 12 | 12,150,000 | 12,300,000 | 163 | 736  | -0.37930012  | DGKH                                 |
| 12 | 12,225,000 | 12,375,000 | 164 | 835  | -0.233926537 | DGKH                                 |
| 12 | 12,300,000 | 12,450,000 | 165 | 888  | 0.567986089  | DGKH                                 |
| 12 | 12,375,000 | 12,525,000 | 166 | 959  | -0.000628388 | AKAP11,DGKH                          |
| 12 | 12,450,000 | 12,600,000 | 167 | 953  | -0.062258922 | AKAP11                               |
| 12 | 12,525,000 | 12,675,000 | 168 | 1178 | 0.674456295  |                                      |
| 12 | 12,600,000 | 12,750,000 | 169 | 1278 | 1.112054855  | TNFSF11                              |
| 12 | 12,675,000 | 12,825,000 | 170 | 1570 | 1.085500049  | TNFSF11                              |
| 12 | 12,750,000 | 12,900,000 | 171 | 1443 | 0.929821515  | TNFSF11                              |
| 12 | 12,825,000 | 12,975,000 | 172 | 928  | 0.298295736  | FAM216B                              |
| 12 | 12,900,000 | 13,050,000 | 173 | 977  | 0.222400056  | FAM216B                              |
| 12 | 12,975,000 | 13,125,000 | 174 | 1194 | 0.955948259  | EPSTI1,FAM216B                       |
| 12 | 13,050,000 | 13,200,000 | 175 | 1199 | 1.266748848  | DNAJC15,EPSTI1                       |
| 12 | 13,125,000 | 13,275,000 | 176 | 1270 | 0.821094079  | DNAJC15,EPSTI1                       |
| 12 | 13,200,000 | 13,350,000 | 177 | 1081 | 0.828824944  | DNAJC15                              |
| 12 | 13,275,000 | 13,425,000 | 178 | 906  | -0.756377415 | ENOX1                                |
| 12 | 13,350,000 | 13,500,000 | 179 | 1077 | -3.306372707 | ENOX1                                |
| 12 | 13,425,000 | 13,575,000 | 180 | 1268 | -1.732891115 | ENOX1                                |
| 12 | 13,500,000 | 13,650,000 | 181 | 1382 | 0.090649325  | ENOX1                                |
| 12 | 13,575,000 | 13,725,000 | 182 | 1249 | 0.232556006  | ENOX1                                |
| 12 | 13,650,000 | 13,800,000 | 183 | 1195 | 0.178632209  |                                      |
| 12 | 13,725,000 | 13,875,000 | 184 | 1304 | 0.805948132  |                                      |
| 12 | 13,800,000 | 13,950,000 | 185 | 1145 | 0.653192036  |                                      |
| 12 | 13,875,000 | 14,025,000 | 186 | 798  | -0.351202976 |                                      |
| 12 | 13,950,000 | 14,100,000 | 187 | 725  | -1.177618815 |                                      |
| 12 | 14,025,000 | 14,175,000 | 188 | 637  | -0.868241808 | CCDC122,LACC1                        |
| 12 | 14,100,000 | 14,250,000 | 189 | 770  | 0.376172192  | CCDC122,LACC1                        |
| 12 | 14,175,000 | 14,325,000 | 190 | 806  | 0.189776004  |                                      |
| 12 | 14,250,000 | 14,400,000 | 191 | 625  | -0.732342174 |                                      |
| 12 | 14,325,000 | 14,475,000 | 192 | 728  | -0.446167453 |                                      |
| 12 | 14,400,000 | 14,550,000 | 193 | 672  | 0.420141794  |                                      |
| 12 | 14,475,000 | 14,625,000 | 194 | 913  | 0.09338039   |                                      |
| 12 | 14,550,000 | 14,700,000 | 195 | 928  | -0.100813    |                                      |
| 12 | 14,625,000 | 14,775,000 | 196 | 501  | -0.443839546 | TSC22D1                              |
| 12 | 14,700,000 | 14,850,000 | 197 | 354  | -1.63325439  | TSC22D1                              |
| 12 | 14,775,000 | 14,925,000 | 198 | 337  | -1.535952718 | TSC22D1                              |

|    |            |            |     |      |              |                              |
|----|------------|------------|-----|------|--------------|------------------------------|
| 12 | 14,850,000 | 15,000,000 | 199 | 793  | 1.238922303  |                              |
| 12 | 14,925,000 | 15,075,000 | 200 | 1121 | 1.394701862  |                              |
| 12 | 15,000,000 | 15,150,000 | 201 | 1037 | 1.330458741  |                              |
| 12 | 15,075,000 | 15,225,000 | 202 | 872  | 1.112757937  | GPALPP1,NUFIP1               |
| 12 | 15,150,000 | 15,300,000 | 203 | 932  | -0.753012336 | GPALPP1,NUFIP1               |
| 12 | 15,225,000 | 15,375,000 | 204 | 1270 | -1.364775088 | GTF2F2                       |
| 12 | 15,300,000 | 15,450,000 | 205 | 1190 | -1.686377759 | GTF2F2,KCTD4                 |
| 12 | 15,375,000 | 15,525,000 | 206 | 1085 | -3.067735802 | GTF2F2,KCTD4,TPT1            |
| 12 | 15,450,000 | 15,600,000 | 207 | 1154 | -1.160561332 | GTF2F2,SLC25A30,TPT1         |
| 12 | 15,525,000 | 15,675,000 | 208 | 774  | 0.625233601  | COG3,SLC25A30                |
| 12 | 15,600,000 | 15,750,000 | 209 | 680  | 0.499915306  | COG3,SLC25A30                |
| 12 | 15,675,000 | 15,825,000 | 210 | 1127 | 0.52916328   | COG3,SPERT                   |
| 12 | 15,750,000 | 15,900,000 | 211 | 1051 | -0.220747825 | SPERT                        |
| 12 | 15,825,000 | 15,975,000 | 212 | 703  | -0.451809435 | SPERT                        |
| 12 | 15,900,000 | 16,050,000 | 213 | 1112 | 1.26185974   |                              |
| 12 | 15,975,000 | 16,125,000 | 214 | 1144 | 1.276768184  | ZC3H13                       |
| 12 | 16,050,000 | 16,200,000 | 215 | 605  | 0.855840282  | CPB2,ZC3H13                  |
| 12 | 16,125,000 | 16,275,000 | 216 | 849  | -0.044162156 | CPB2,LCP1,ZC3H13             |
| 12 | 16,200,000 | 16,350,000 | 217 | 1145 | -0.084198141 | CPB2,LCP1                    |
| 12 | 16,275,000 | 16,425,000 | 218 | 1197 | -0.390732    | KIAA0226L,LCP1,LRRC63        |
| 12 | 16,350,000 | 16,500,000 | 219 | 1093 | 0.07602796   | KIAA0226L,LRRC63             |
| 12 | 16,425,000 | 16,575,000 | 220 | 901  | 0.056247292  | KIAA0226L,LRCH1              |
| 12 | 16,500,000 | 16,650,000 | 221 | 957  | -0.769469407 | LRCH1                        |
| 12 | 16,575,000 | 16,725,000 | 222 | 808  | -0.187183023 | LRCH1                        |
| 12 | 16,650,000 | 16,800,000 | 223 | 624  | -0.024950636 | ESD,LRCH1                    |
| 12 | 16,725,000 | 16,875,000 | 224 | 688  | 0.141970613  | ESD,HTR2A,LRCH1              |
| 12 | 16,800,000 | 16,950,000 | 225 | 746  | 0.716594574  | HTR2A                        |
| 12 | 16,875,000 | 17,025,000 | 226 | 811  | 0.152544025  | HTR2A                        |
| 12 | 16,950,000 | 17,100,000 | 227 | 815  | -0.637874166 |                              |
| 12 | 17,025,000 | 17,175,000 | 228 | 840  | -0.008310266 |                              |
| 12 | 17,100,000 | 17,250,000 | 229 | 887  | 0.591007926  |                              |
| 12 | 17,175,000 | 17,325,000 | 230 | 880  | 0.805536511  |                              |
| 12 | 17,250,000 | 17,400,000 | 231 | 1051 | 0.897208343  |                              |
| 12 | 17,325,000 | 17,475,000 | 232 | 1015 | 0.975657253  |                              |
| 12 | 17,400,000 | 17,550,000 | 233 | 627  | 0.700189782  |                              |
| 12 | 17,475,000 | 17,625,000 | 234 | 582  | 0.983919754  |                              |
| 12 | 17,550,000 | 17,700,000 | 235 | 516  | 0.831292036  |                              |
| 12 | 17,625,000 | 17,775,000 | 236 | 956  | -1.821859566 |                              |
| 12 | 17,700,000 | 17,850,000 | 237 | 1429 | -3.318175251 |                              |
| 12 | 17,775,000 | 17,925,000 | 238 | 1145 | -3.252733489 | SUCLA2                       |
| 12 | 17,850,000 | 18,000,000 | 239 | 1085 | 0.460645017  | MED4,NUDT15,SUCLA2           |
| 12 | 17,925,000 | 18,075,000 | 240 | 1026 | 0.43133408   | MED4,NUDT15,SUCLA2           |
| 12 | 18,000,000 | 18,150,000 | 241 | 1018 | 0.103972118  | ITM2B                        |
| 12 | 18,075,000 | 18,225,000 | 242 | 870  | 0.32754487   | ITM2B,RB1,ENSBTAG00000003560 |
| 12 | 18,150,000 | 18,300,000 | 243 | 793  | 0.432975999  | P2RY5,RB1,ENSBTAG00000003560 |
| 12 | 18,225,000 | 18,375,000 | 244 | 901  | 0.575449893  | P2RY5,RB1,RCBTB2             |
| 12 | 18,300,000 | 18,450,000 | 245 | 1034 | 1.277346997  | RB1,RCBTB2                   |
| 12 | 18,375,000 | 18,525,000 | 246 | 1219 | 1.218705472  |                              |
| 12 | 18,450,000 | 18,600,000 | 247 | 1211 | 0.873976535  | CYSLTR2                      |
| 12 | 18,525,000 | 18,675,000 | 248 | 1149 | 0.113638976  | CYSLTR2                      |
| 12 | 18,600,000 | 18,750,000 | 249 | 952  | -3.595724734 |                              |
| 12 | 18,675,000 | 18,825,000 | 250 | 908  | -4.905965067 |                              |
| 12 | 18,750,000 | 18,900,000 | 251 | 729  | -2.662213879 | FNDC3A                       |

|    |            |            |     |      |              |                                    |
|----|------------|------------|-----|------|--------------|------------------------------------|
| 12 | 18,825,000 | 18,975,000 | 252 | 578  | -0.719828318 | CDADC1,FNDC3A,MLNR                 |
| 12 | 18,900,000 | 19,050,000 | 253 | 924  | -1.503826823 | CAB39L,CDADC1,FNDC3A,MLNR          |
| 12 | 18,975,000 | 19,125,000 | 254 | 1100 | -1.888420752 | CAB39L,CDADC1,SETDB2               |
| 12 | 19,050,000 | 19,200,000 | 255 | 898  | -1.416284663 | CAB39L,PHF11,RCBTB1,SETDB2         |
| 12 | 19,125,000 | 19,275,000 | 256 | 610  | -0.708431675 | PHF11,RCBTB1,SETDB2                |
| 12 | 19,200,000 | 19,350,000 | 257 | 587  | 0.089376383  | ARL11,EBPL,KPNA3,RCBTB1            |
| 12 | 19,275,000 | 19,425,000 | 258 | 508  | 0.391870975  | ARL11,EBPL,KPNA3                   |
| 12 | 19,350,000 | 19,500,000 | 259 | 413  | 0.288905958  | KPNA3,SPRYD7                       |
| 12 | 19,425,000 | 19,575,000 | 260 | 424  | 0.312464102  | KCNRG,SPRYD7,TRIM13                |
| 12 | 19,500,000 | 19,650,000 | 261 | 347  | 0.642321683  | KCNRG,SPRYD7,TRIM13                |
| 12 | 19,575,000 | 19,725,000 | 262 | 391  | 0.258318452  |                                    |
| 12 | 19,650,000 | 19,800,000 | 263 | 457  | -0.195481008 |                                    |
| 12 | 19,725,000 | 19,875,000 | 264 | 585  | 0.525933469  |                                    |
| 12 | 19,800,000 | 19,950,000 | 265 | 582  | 0.884467369  |                                    |
| 12 | 19,875,000 | 20,025,000 | 266 | 624  | 0.547452203  |                                    |
| 12 | 19,950,000 | 20,100,000 | 267 | 732  | 0.65831729   |                                    |
| 12 | 20,025,000 | 20,175,000 | 268 | 608  | 0.738322155  |                                    |
| 12 | 20,100,000 | 20,250,000 | 269 | 843  | 0.722945437  |                                    |
| 12 | 20,175,000 | 20,325,000 | 270 | 993  | 0.428615687  |                                    |
| 12 | 20,250,000 | 20,400,000 | 271 | 715  | 0.07122736   |                                    |
| 12 | 20,325,000 | 20,475,000 | 272 | 666  | -0.011620223 | RNASEH2B                           |
| 12 | 20,400,000 | 20,550,000 | 273 | 841  | 0.036488672  | RNASEH2B,ENSBTAG00000007457        |
| 12 | 20,475,000 | 20,625,000 | 274 | 883  | 0.448566047  | RNASEH2B,ENSBTAG00000007457        |
| 12 | 20,550,000 | 20,700,000 | 275 | 975  | 0.827832104  | ENSBTAG00000007457                 |
| 12 | 20,625,000 | 20,775,000 | 276 | 1328 | 0.571443896  | FAM124A                            |
| 12 | 20,700,000 | 20,850,000 | 277 | 1511 | 0.507411049  | FAM124A                            |
| 12 | 20,775,000 | 20,925,000 | 278 | 966  | 0.465789734  | FAM124A,INTS6,SERPINE3             |
| 12 | 20,850,000 | 21,000,000 | 279 | 343  | 0.408868069  | INTS6,SERPINE3                     |
| 12 | 20,925,000 | 21,075,000 | 280 | 361  | 0.728871611  | INTS6                              |
| 12 | 21,000,000 | 21,150,000 | 281 | 424  | 0.197245075  | WDFY2                              |
| 12 | 21,075,000 | 21,225,000 | 282 | 481  | -0.774194872 | WDFY2                              |
| 12 | 21,150,000 | 21,300,000 | 283 | 505  | -0.498329656 | DHRS12,WDFY2                       |
| 12 | 21,225,000 | 21,375,000 | 284 | 912  | -3.68818225  | CCDC70,DHRS12,WDFY2                |
| 12 | 21,300,000 | 21,450,000 | 285 | 1599 | -3.979337277 | ATP7B,CCDC70,DHRS12                |
| 12 | 21,375,000 | 21,525,000 | 286 | 1405 | -0.798029312 | ALG11,ATP7B,CCDC70,NEK5            |
| 12 | 21,450,000 | 21,600,000 | 287 | 971  | 1.036878062  | ALG11,ATP7B,NEK3,NEK5              |
| 12 | 21,525,000 | 21,675,000 | 288 | 730  | 1.376292657  | CKAP2,NEK3,NEK5,THSD1,VPS36        |
| 12 | 21,600,000 | 21,750,000 | 289 | 832  | 1.17569877   | CKAP2,THSD1,VPS36                  |
| 12 | 21,675,000 | 21,825,000 | 290 | 1428 | 1.015299524  | SLC25A15,THSD1,ENSBTAG00000011654  |
| 12 | 21,750,000 | 21,900,000 | 291 | 1208 | 0.795613379  | MRPS31,SLC25A15,ENSBTAG00000011654 |
| 12 | 21,825,000 | 21,975,000 | 292 | 647  | -0.156945759 | FOXO1,MRPS31,SLC25A15              |
| 12 | 21,900,000 | 22,050,000 | 293 | 543  | -0.267633699 | FOXO1                              |
| 12 | 21,975,000 | 22,125,000 | 294 | 401  | -0.729935487 | FOXO1                              |
| 12 | 22,050,000 | 22,200,000 | 295 | 268  | -1.361548182 |                                    |
| 12 | 22,125,000 | 22,275,000 | 296 | 271  | -0.327192083 |                                    |
| 12 | 22,200,000 | 22,350,000 | 297 | 351  | 1.187957537  |                                    |
| 12 | 22,275,000 | 22,425,000 | 298 | 360  | 0.753003569  |                                    |
| 12 | 22,350,000 | 22,500,000 | 299 | 471  | 0.64511644   |                                    |
| 12 | 22,425,000 | 22,575,000 | 300 | 698  | -0.282804659 |                                    |
| 12 | 22,500,000 | 22,650,000 | 301 | 637  | -1.444300652 |                                    |
| 12 | 22,575,000 | 22,725,000 | 302 | 500  | -0.509624536 | COG6                               |
| 12 | 22,650,000 | 22,800,000 | 303 | 573  | 0.39655365   | COG6                               |
| 12 | 22,725,000 | 22,875,000 | 304 | 945  | 0.187215713  | COG6,LHFP                          |

|    |            |            |     |      |              |                                |
|----|------------|------------|-----|------|--------------|--------------------------------|
| 12 | 22,800,000 | 22,950,000 | 305 | 1111 | 0.054563603  | LHFP                           |
| 12 | 22,875,000 | 23,025,000 | 306 | 892  | 0.332866639  | LHFP                           |
| 12 | 22,950,000 | 23,100,000 | 307 | 1038 | 0.657209618  | LHFP                           |
| 12 | 23,025,000 | 23,175,000 | 308 | 1325 | 0.941290363  | LHFP                           |
| 12 | 23,100,000 | 23,250,000 | 309 | 1156 | 0.088783774  | NHLRC3,PROSER1                 |
| 12 | 23,175,000 | 23,325,000 | 310 | 1094 | -1.270145926 | FREM2,NHLRC3,PROSER1,STOML3    |
| 12 | 23,250,000 | 23,400,000 | 311 | 1185 | -0.298479638 | FREM2,PROSER1,STOML3           |
| 12 | 23,325,000 | 23,475,000 | 312 | 1090 | 0.60852196   | FREM2                          |
| 12 | 23,400,000 | 23,550,000 | 313 | 1006 | -0.298027715 | FREM2                          |
| 12 | 23,475,000 | 23,625,000 | 314 | 1005 | 0.339488398  |                                |
| 12 | 23,550,000 | 23,700,000 | 315 | 741  | 1.143531989  |                                |
| 12 | 23,625,000 | 23,775,000 | 316 | 464  | -0.376978481 |                                |
| 12 | 23,700,000 | 23,850,000 | 317 | 616  | -1.642545169 |                                |
| 12 | 23,775,000 | 23,925,000 | 318 | 680  | -1.180010427 |                                |
| 12 | 23,850,000 | 24,000,000 | 319 | 787  | 0.176171876  |                                |
| 12 | 23,925,000 | 24,075,000 | 320 | 846  | 0.722512873  | TRPC4                          |
| 12 | 24,000,000 | 24,150,000 | 321 | 964  | 1.062784141  | TRPC4                          |
| 12 | 24,075,000 | 24,225,000 | 322 | 933  | 0.562267116  | TRPC4                          |
| 12 | 24,150,000 | 24,300,000 | 323 | 566  | -0.462270653 | POSTN,TRPC4                    |
| 12 | 24,225,000 | 24,375,000 | 324 | 594  | 1.107460283  | POSTN                          |
| 12 | 24,300,000 | 24,450,000 | 325 | 1195 | 0.835475661  |                                |
| 12 | 24,375,000 | 24,525,000 | 326 | 1600 | 0.339259367  |                                |
| 12 | 24,450,000 | 24,600,000 | 327 | 1666 | -0.360936721 |                                |
| 12 | 24,525,000 | 24,675,000 | 328 | 1525 | -1.8416107   | FAM48A                         |
| 12 | 24,600,000 | 24,750,000 | 329 | 1027 | -2.60379407  | ALG5,EXOSC8,FAM48A             |
| 12 | 24,675,000 | 24,825,000 | 330 | 704  | -1.208752648 | ALG5,EXOSC8,FAM48A,SMAD9       |
| 12 | 24,750,000 | 24,900,000 | 331 | 807  | -1.349724368 | RFXAP,SMAD9                    |
| 12 | 24,825,000 | 24,975,000 | 332 | 805  | -0.663610214 | RFXAP,SERTM1                   |
| 12 | 24,900,000 | 25,050,000 | 333 | 829  | 0.947546064  | SERTM1                         |
| 12 | 24,975,000 | 25,125,000 | 334 | 1110 | 0.932331835  |                                |
| 12 | 25,050,000 | 25,200,000 | 335 | 1346 | 0.677639578  | CCNA1,SPG20                    |
| 12 | 25,125,000 | 25,275,000 | 336 | 1151 | 1.026798237  | CCNA1,SPG20,ENSBTAG00000018955 |
| 12 | 25,200,000 | 25,350,000 | 337 | 859  | 1.227187202  | SPG20,ENSBTAG00000018955       |
| 12 | 25,275,000 | 25,425,000 | 338 | 1065 | -0.181285622 | DCLK1,ENSBTAG00000018955       |
| 12 | 25,350,000 | 25,500,000 | 339 | 1326 | -0.174526929 | DCLK1                          |
| 12 | 25,425,000 | 25,575,000 | 340 | 1266 | 0.46210304   | DCLK1                          |
| 12 | 25,500,000 | 25,650,000 | 341 | 1027 | 0.400222972  | DCLK1                          |
| 12 | 25,575,000 | 25,725,000 | 342 | 919  | -0.102575698 | DCLK1                          |
| 12 | 25,650,000 | 25,800,000 | 343 | 981  | -1.4228911   | DCLK1,NBEA                     |
| 12 | 25,725,000 | 25,875,000 | 344 | 900  | -1.399474493 | NBEA                           |
| 12 | 25,800,000 | 25,950,000 | 345 | 873  | 0.22257062   | NBEA                           |
| 12 | 25,875,000 | 26,025,000 | 346 | 738  | 0.450754042  | MAB21L1,NBEA                   |
| 12 | 25,950,000 | 26,100,000 | 347 | 673  | 0.713279534  | MAB21L1,NBEA                   |
| 12 | 26,025,000 | 26,175,000 | 348 | 955  | 0.820538042  | NBEA,ENSBTAG00000019268        |
| 12 | 26,100,000 | 26,250,000 | 349 | 696  | 0.824390392  | NBEA,ENSBTAG00000019268        |
| 12 | 26,175,000 | 26,325,000 | 350 | 448  | 1.004338988  | NBEA                           |
| 12 | 26,250,000 | 26,400,000 | 351 | 651  | 0.906671347  | NBEA                           |
| 12 | 26,325,000 | 26,475,000 | 352 | 787  | 0.708988979  | NBEA                           |
| 12 | 26,400,000 | 26,550,000 | 353 | 783  | 0.59325525   |                                |
| 12 | 26,475,000 | 26,625,000 | 354 | 765  | 0.379851664  |                                |
| 12 | 26,550,000 | 26,700,000 | 355 | 599  | -0.466832223 |                                |
| 12 | 26,625,000 | 26,775,000 | 356 | 528  | -1.03160356  |                                |
| 12 | 26,700,000 | 26,850,000 | 357 | 650  | -0.957921102 |                                |

|    |            |            |     |      |              |                                  |
|----|------------|------------|-----|------|--------------|----------------------------------|
| 12 | 26,775,000 | 26,925,000 | 358 | 895  | 0.344079201  |                                  |
| 12 | 26,850,000 | 27,000,000 | 359 | 922  | 0.809106439  |                                  |
| 12 | 26,925,000 | 27,075,000 | 360 | 741  | 0.043042297  |                                  |
| 12 | 27,000,000 | 27,150,000 | 361 | 761  | 0.557615667  |                                  |
| 12 | 27,075,000 | 27,225,000 | 362 | 829  | 0.617400734  |                                  |
| 12 | 27,150,000 | 27,300,000 | 363 | 858  | -0.292660646 |                                  |
| 12 | 27,225,000 | 27,375,000 | 364 | 756  | -0.993364392 |                                  |
| 12 | 27,300,000 | 27,450,000 | 365 | 607  | -0.829510872 | RFC3                             |
| 12 | 27,375,000 | 27,525,000 | 366 | 553  | -0.622056607 | RFC3                             |
| 12 | 27,450,000 | 27,600,000 | 367 | 430  | -2.012632552 |                                  |
| 12 | 27,525,000 | 27,675,000 | 368 | 330  | -2.766997903 |                                  |
| 12 | 27,600,000 | 27,750,000 | 369 | 448  | -0.91830391  |                                  |
| 12 | 27,675,000 | 27,825,000 | 370 | 500  | 0.793432753  |                                  |
| 12 | 27,750,000 | 27,900,000 | 371 | 388  | 0.713266659  | STARD13                          |
| 12 | 27,825,000 | 27,975,000 | 372 | 405  | -1.122474257 | STARD13                          |
| 12 | 27,900,000 | 28,050,000 | 373 | 485  | -0.552261645 | STARD13                          |
| 12 | 27,975,000 | 28,125,000 | 374 | 468  | 0.307440213  | KL,STARD13                       |
| 12 | 28,050,000 | 28,200,000 | 375 | 604  | -0.866878911 | KL                               |
| 12 | 28,125,000 | 28,275,000 | 376 | 530  | -1.725438127 |                                  |
| 12 | 28,200,000 | 28,350,000 | 377 | 307  | -0.917349522 | PDS5B                            |
| 12 | 28,275,000 | 28,425,000 | 378 | 264  | 0.398076988  | PDS5B                            |
| 12 | 28,350,000 | 28,500,000 | 379 | 237  | -0.110380117 | PDS5B                            |
| 12 | 28,425,000 | 28,575,000 | 380 | 253  | 0.443817199  | PDS5B,ENSBTAG00000023279         |
| 12 | 28,500,000 | 28,650,000 | 381 | 289  | 0.637947884  | BRCA2,N4BP2L1,ENSBTAG00000023279 |
| 12 | 28,575,000 | 28,725,000 | 382 | 281  | 0.008983618  | BRCA2,N4BP2L1,ZAR1L              |
| 12 | 28,650,000 | 28,800,000 | 383 | 247  | -0.379572945 | BRCA2,FRY,ZAR1L                  |
| 12 | 28,725,000 | 28,875,000 | 384 | 305  | 0.639810027  | FRY                              |
| 12 | 28,800,000 | 28,950,000 | 385 | 530  | 0.95869264   | FRY                              |
| 12 | 28,875,000 | 29,025,000 | 386 | 787  | -0.049308751 | FRY                              |
| 12 | 28,950,000 | 29,100,000 | 387 | 758  | -0.068816423 | FRY                              |
| 12 | 29,025,000 | 29,175,000 | 388 | 526  | 0.799636926  |                                  |
| 12 | 29,100,000 | 29,250,000 | 389 | 362  | 0.328762999  | RXFP2                            |
| 12 | 29,175,000 | 29,325,000 | 390 | 239  | -0.329593071 | RXFP2                            |
| 12 | 29,250,000 | 29,400,000 | 391 | 217  | -1.469037404 | RXFP2                            |
| 12 | 29,325,000 | 29,475,000 | 392 | 244  | -1.342263586 |                                  |
| 12 | 29,400,000 | 29,550,000 | 393 | 265  | -0.457981845 |                                  |
| 12 | 29,475,000 | 29,625,000 | 394 | 415  | 0.481924514  |                                  |
| 12 | 29,550,000 | 29,700,000 | 395 | 928  | 0.552490994  | B3GALTL                          |
| 12 | 29,625,000 | 29,775,000 | 396 | 942  | 0.583196905  | B3GALTL                          |
| 12 | 29,700,000 | 29,850,000 | 397 | 619  | 0.783106907  | B3GALTL,HSPH1                    |
| 12 | 29,775,000 | 29,925,000 | 398 | 973  | 1.005331282  | HSPH1,ENSBTAG00000016052         |
| 12 | 29,850,000 | 30,000,000 | 399 | 1090 | 0.816669348  | C12H13ORF26,ENSBTAG00000016052   |
| 12 | 29,925,000 | 30,075,000 | 400 | 736  | 0.141354924  | C12H13ORF26,MEDAG                |
| 12 | 30,000,000 | 30,150,000 | 401 | 694  | -0.997281151 | ALOX5AP,C12H13ORF26,MEDAG        |
| 12 | 30,075,000 | 30,225,000 | 402 | 895  | -0.30127969  | ALOX5AP,USPL1                    |
| 12 | 30,150,000 | 30,300,000 | 403 | 852  | 0.823110388  | ALOX5AP,USPL1                    |
| 12 | 30,225,000 | 30,375,000 | 404 | 793  | 0.475996274  | HMGB1,USPL1                      |
| 12 | 30,300,000 | 30,450,000 | 405 | 1044 | 0.816340877  | HMGB1                            |
| 12 | 30,375,000 | 30,525,000 | 406 | 1212 | 1.02726828   | KATNAL1                          |
| 12 | 30,450,000 | 30,600,000 | 407 | 979  | 0.999591816  | KATNAL1                          |
| 12 | 30,525,000 | 30,675,000 | 408 | 942  | 0.572644363  | KATNAL1                          |
| 12 | 30,600,000 | 30,750,000 | 409 | 1126 | -1.474941922 |                                  |
| 12 | 30,675,000 | 30,825,000 | 410 | 1153 | -1.726689338 |                                  |



|    |            |            |     |      |              |                                  |
|----|------------|------------|-----|------|--------------|----------------------------------|
| 12 | 30,750,000 | 30,900,000 | 411 | 982  | -0.497439221 | UBL3                             |
| 12 | 30,825,000 | 30,975,000 | 412 | 847  | 0.728383716  | UBL3                             |
| 12 | 30,900,000 | 31,050,000 | 413 | 879  | 1.095878414  | MTUS2,SLC7A1                     |
| 12 | 30,975,000 | 31,125,000 | 414 | 1025 | 0.828779703  | MTUS2,SLC7A1                     |
| 12 | 31,050,000 | 31,200,000 | 415 | 1333 | 0.338345444  | MTUS2                            |
| 12 | 31,125,000 | 31,275,000 | 416 | 1571 | 0.859439055  | MTUS2                            |
| 12 | 31,200,000 | 31,350,000 | 417 | 1349 | 1.319705734  | MTUS2                            |
| 12 | 31,275,000 | 31,425,000 | 418 | 1192 | 0.392690842  | MTUS2                            |
| 12 | 31,350,000 | 31,500,000 | 419 | 940  | -0.044019003 | POMP,SLC46A3                     |
| 12 | 31,425,000 | 31,575,000 | 420 | 489  | 0.449430206  | POMP,SLC46A3                     |
| 12 | 31,500,000 | 31,650,000 | 421 | 451  | -0.897509146 | POMP                             |
| 12 | 31,575,000 | 31,725,000 | 422 | 416  | -0.970810437 | FLT1                             |
| 12 | 31,650,000 | 31,800,000 | 423 | 477  | -0.343241955 | FLT1                             |
| 12 | 31,725,000 | 31,875,000 | 424 | 468  | -1.057620507 | FLT1,PAN3                        |
| 12 | 31,800,000 | 31,950,000 | 425 | 271  | -1.320105444 | FLT1,PAN3                        |
| 12 | 31,875,000 | 32,025,000 | 426 | 255  | -1.374710758 | PAN3                             |
| 12 | 31,950,000 | 32,100,000 | 427 | 744  | -4.367998098 |                                  |
| 12 | 32,025,000 | 32,175,000 | 428 | 1424 | -2.929777658 |                                  |
| 12 | 32,100,000 | 32,250,000 | 429 | 1730 | -0.380724908 | FLT3                             |
| 12 | 32,175,000 | 32,325,000 | 430 | 1175 | 0.125589833  | CDX2,FLT3,URAD                   |
| 12 | 32,250,000 | 32,400,000 | 431 | 460  | -0.251858755 | CDX2,FLT3,PDX1,URAD              |
| 12 | 32,325,000 | 32,475,000 | 432 | 373  | 0.836984583  | GSX1,PDX1                        |
| 12 | 32,400,000 | 32,550,000 | 433 | 553  | 0.59353226   | GSX1,POLR1D                      |
| 12 | 32,475,000 | 32,625,000 | 434 | 633  | 0.402092384  | LNK2,POLR1D                      |
| 12 | 32,550,000 | 32,700,000 | 435 | 654  | 0.679503871  | LNK2,POLR1D                      |
| 12 | 32,625,000 | 32,775,000 | 436 | 723  | 0.532578992  | GTF3A,LNK2,MTIF3                 |
| 12 | 32,700,000 | 32,850,000 | 437 | 606  | 0.005945695  | GTF3A,MTIF3,RASL11A              |
| 12 | 32,775,000 | 32,925,000 | 438 | 440  | 0.151829341  | RASL11A,RPL21,USP12              |
| 12 | 32,850,000 | 33,000,000 | 439 | 366  | -1.366637687 | RPL21,USP12                      |
| 12 | 32,925,000 | 33,075,000 | 440 | 540  | -2.076087508 | USP12                            |
| 12 | 33,000,000 | 33,150,000 | 441 | 708  | -1.132714613 | GPR12                            |
| 12 | 33,075,000 | 33,225,000 | 442 | 771  | -0.991090668 | GPR12,WASF3                      |
| 12 | 33,150,000 | 33,300,000 | 443 | 932  | -0.521384952 | WASF3                            |
| 12 | 33,225,000 | 33,375,000 | 444 | 715  | 0.603980772  | CDK8                             |
| 12 | 33,300,000 | 33,450,000 | 445 | 327  | 0.620177336  | CDK8,RNF6                        |
| 12 | 33,375,000 | 33,525,000 | 446 | 499  | 0.792175777  | RNF6,ENSBTAG00000025428          |
| 12 | 33,450,000 | 33,600,000 | 447 | 824  | 1.190963596  | SHISA2,ENSBTAG00000025428        |
| 12 | 33,525,000 | 33,675,000 | 448 | 778  | 1.011279938  | SHISA2,ENSBTAG00000025428        |
| 12 | 33,600,000 | 33,750,000 | 449 | 750  | 0.065269124  |                                  |
| 12 | 33,675,000 | 33,825,000 | 450 | 919  | -1.385675477 | ATP8A2                           |
| 12 | 33,750,000 | 33,900,000 | 451 | 744  | -2.186646758 | ATP8A2                           |
| 12 | 33,825,000 | 33,975,000 | 452 | 421  | -1.311759146 | ATP8A2                           |
| 12 | 33,900,000 | 34,050,000 | 453 | 429  | -2.295398072 | ATP8A2                           |
| 12 | 33,975,000 | 34,125,000 | 454 | 505  | -0.479301312 | ATP8A2                           |
| 12 | 34,050,000 | 34,200,000 | 455 | 367  | 0.908902114  | ATP8A2,MTMR6,NUPL1               |
| 12 | 34,125,000 | 34,275,000 | 456 | 310  | 0.96722155   | MTMR6,NUPL1                      |
| 12 | 34,200,000 | 34,350,000 | 457 | 324  | 0.653887519  |                                  |
| 12 | 34,275,000 | 34,425,000 | 458 | 579  | 0.840887241  |                                  |
| 12 | 34,350,000 | 34,500,000 | 459 | 844  | 1.132728725  | ENSBTAG00000019545               |
| 12 | 34,425,000 | 34,575,000 | 460 | 724  | 1.117645827  | C1QTNF9,MIPEP,ENSBTAG00000019545 |
| 12 | 34,500,000 | 34,650,000 | 461 | 795  | 0.661620116  | C1QTNF9,MIPEP,ENSBTAG00000019545 |
| 12 | 34,575,000 | 34,725,000 | 462 | 710  | 0.380927329  | MIPEP,TNFRSF19                   |
| 12 | 34,650,000 | 34,800,000 | 463 | 571  | 0.397725502  | TNFRSF19                         |

|    |            |            |     |      |              |                                 |
|----|------------|------------|-----|------|--------------|---------------------------------|
| 12 | 34,725,000 | 34,875,000 | 464 | 610  | 0.263947376  | TNFRSF19                        |
| 12 | 34,800,000 | 34,950,000 | 465 | 484  | -0.715453325 | SACS,SGCG                       |
| 12 | 34,875,000 | 35,025,000 | 466 | 373  | -0.531460139 | SACS,SGCG                       |
| 12 | 34,950,000 | 35,100,000 | 467 | 429  | 0.096802052  | SGCG                            |
| 12 | 35,025,000 | 35,175,000 | 468 | 397  | 0.235748438  |                                 |
| 12 | 35,100,000 | 35,250,000 | 469 | 263  | 0.828790855  |                                 |
| 12 | 35,175,000 | 35,325,000 | 470 | 338  | -0.302565727 |                                 |
| 12 | 35,250,000 | 35,400,000 | 471 | 415  | -2.104225051 |                                 |
| 12 | 35,325,000 | 35,475,000 | 472 | 501  | -0.028795312 |                                 |
| 12 | 35,400,000 | 35,550,000 | 473 | 468  | 0.370855249  |                                 |
| 12 | 35,475,000 | 35,625,000 | 474 | 335  | -2.327290727 |                                 |
| 12 | 35,550,000 | 35,700,000 | 475 | 377  | -1.529653829 | FGF9                            |
| 12 | 35,625,000 | 35,775,000 | 476 | 363  | 0.599750336  | EFHA1,FGF9                      |
| 12 | 35,700,000 | 35,850,000 | 477 | 345  | 1.323835777  | EFHA1,MRPL57,SKA3,ZDHHC20       |
| 12 | 35,775,000 | 35,925,000 | 478 | 391  | 1.124998286  | LATS2,MRPL57,SAP18,SKA3,ZDHHC20 |
| 12 | 35,850,000 | 36,000,000 | 479 | 370  | 0.460975258  | LATS2,SAP18,SKA3,XPO4           |
| 12 | 35,925,000 | 36,075,000 | 480 | 296  | -0.060709164 | LATS2,N6AMT2,XPO4               |
| 12 | 36,000,000 | 36,150,000 | 481 | 216  | 0.132800089  | IFT88,IL17D,N6AMT2,XPO4         |
| 12 | 36,075,000 | 36,225,000 | 482 | 216  | -0.179623442 | CRYL1,IFT88,IL17D,N6AMT2        |
| 12 | 36,150,000 | 36,300,000 | 483 | 458  | -0.577530755 | CRYL1,IFT88                     |
| 12 | 36,225,000 | 36,375,000 | 484 | 461  | -0.749660484 | CRYL1,GJA3,GJB2,GJB6            |
| 12 | 36,300,000 | 36,450,000 | 485 | 232  | -0.644921342 | GJA3,GJB2,GJB6,ZMYM2            |
| 12 | 36,375,000 | 36,525,000 | 486 | 244  | -1.531071645 | ZMYM2,ZMYM5                     |
| 12 | 36,450,000 | 36,600,000 | 487 | 321  | -2.525414393 | PSPC1,ZMYM2,ZMYM5               |
| 12 | 36,525,000 | 36,675,000 | 488 | 340  | -2.258609456 | MPHOSPH8,PARP4,PSPC1            |
| 12 | 36,600,000 | 36,750,000 | 489 | 299  | -1.304890026 | CENPJ,MPHOSPH8,PARP4            |
| 12 | 36,675,000 | 36,825,000 | 490 | 253  | -0.804531968 | CENPJ,PARP4,RNF17               |
| 12 | 36,750,000 | 36,900,000 | 491 | 216  | -0.673550455 | CENPJ,RNF17                     |
| 12 | 36,825,000 | 36,975,000 | 492 | 190  | -0.817668368 | ATP12A,RNF17                    |
| 12 | 36,900,000 | 37,050,000 | 493 | 222  | -0.82756477  | ATP12A                          |
| 12 | 36,975,000 | 37,125,000 | 494 | 364  | -0.735210183 |                                 |
| 12 | 37,050,000 | 37,200,000 | 495 | 381  | -1.068153387 |                                 |
| 12 | 37,125,000 | 37,275,000 | 496 | 451  | 0.51701447   |                                 |
| 12 | 37,200,000 | 37,350,000 | 497 | 832  | 1.239840035  |                                 |
| 12 | 37,275,000 | 37,425,000 | 498 | 1430 | 1.01942549   |                                 |
| 12 | 37,350,000 | 37,500,000 | 499 | 1467 | 0.540529217  |                                 |
| 12 | 37,425,000 | 37,575,000 | 500 | 1050 | -0.198799457 |                                 |
| 12 | 37,500,000 | 37,650,000 | 501 | 891  | 0.340547193  |                                 |
| 12 | 37,575,000 | 37,725,000 | 502 | 1276 | -0.044978446 |                                 |
| 12 | 37,650,000 | 37,800,000 | 503 | 1204 | -0.971431434 | ENSBTAG00000014274              |
| 12 | 37,725,000 | 37,875,000 | 504 | 452  | -1.0152566   | ENSBTAG00000014274              |
| 12 | 37,800,000 | 37,950,000 | 505 | 229  | 1.130129296  |                                 |
| 12 | 37,875,000 | 38,025,000 | 506 | 236  | 0.805770083  |                                 |
| 12 | 37,950,000 | 38,100,000 | 507 | 241  | 0.436149687  |                                 |
| 12 | 38,025,000 | 38,175,000 | 508 | 475  | 0.225634358  |                                 |
| 12 | 38,100,000 | 38,250,000 | 509 | 560  | 0.441690958  |                                 |
| 12 | 38,175,000 | 38,325,000 | 510 | 412  | 1.114154766  |                                 |
| 12 | 38,250,000 | 38,400,000 | 511 | 406  | 1.260040247  |                                 |
| 12 | 38,325,000 | 38,475,000 | 512 | 373  | 1.284152685  |                                 |
| 12 | 38,400,000 | 38,550,000 | 513 | 338  | 1.283294453  |                                 |
| 12 | 38,475,000 | 38,625,000 | 514 | 339  | 1.120931341  |                                 |
| 12 | 38,550,000 | 38,700,000 | 515 | 331  | 1.058264895  |                                 |
| 12 | 38,625,000 | 38,775,000 | 516 | 351  | 1.084393661  |                                 |

|    |            |            |     |      |              |                    |
|----|------------|------------|-----|------|--------------|--------------------|
| 12 | 38,700,000 | 38,850,000 | 517 | 430  | -0.287752231 |                    |
| 12 | 38,775,000 | 38,925,000 | 518 | 878  | -4.358392606 |                    |
| 12 | 38,850,000 | 39,000,000 | 519 | 1086 | -3.892121752 |                    |
| 12 | 38,925,000 | 39,075,000 | 520 | 796  | -0.274390143 |                    |
| 12 | 39,000,000 | 39,150,000 | 521 | 692  | -0.631621798 |                    |
| 12 | 39,075,000 | 39,225,000 | 522 | 601  | -0.76560117  |                    |
| 12 | 39,150,000 | 39,300,000 | 523 | 530  | -0.338011833 |                    |
| 12 | 39,225,000 | 39,375,000 | 524 | 585  | -0.631010932 |                    |
| 12 | 39,300,000 | 39,450,000 | 525 | 578  | -0.210612847 |                    |
| 12 | 39,375,000 | 39,525,000 | 526 | 517  | 0.442810748  |                    |
| 12 | 39,450,000 | 39,600,000 | 527 | 896  | 0.448683923  |                    |
| 12 | 39,525,000 | 39,675,000 | 528 | 1036 | -1.30082262  |                    |
| 12 | 39,600,000 | 39,750,000 | 529 | 650  | -2.710861674 |                    |
| 12 | 39,675,000 | 39,825,000 | 530 | 516  | -1.328890122 |                    |
| 12 | 39,750,000 | 39,900,000 | 531 | 703  | -0.334883131 |                    |
| 12 | 39,825,000 | 39,975,000 | 532 | 796  | 0.181438369  | ENSBTAG00000032984 |
| 12 | 39,900,000 | 40,050,000 | 533 | 752  | -0.473523019 | ENSBTAG00000032984 |
| 12 | 39,975,000 | 40,125,000 | 534 | 856  | -0.163767253 |                    |
| 12 | 40,050,000 | 40,200,000 | 535 | 632  | 0.245853343  |                    |
| 12 | 40,125,000 | 40,275,000 | 536 | 557  | -0.247864408 |                    |
| 12 | 40,200,000 | 40,350,000 | 537 | 772  | 0.177510211  |                    |
| 12 | 40,275,000 | 40,425,000 | 538 | 588  | 0.726696141  |                    |
| 12 | 40,350,000 | 40,500,000 | 539 | 525  | 0.384085818  |                    |
| 12 | 40,425,000 | 40,575,000 | 540 | 727  | 0.050970607  |                    |
| 12 | 40,500,000 | 40,650,000 | 541 | 741  | -0.022849429 |                    |
| 12 | 40,575,000 | 40,725,000 | 542 | 649  | 0.437984958  | ENSBTAG00000047831 |
| 12 | 40,650,000 | 40,800,000 | 543 | 409  | 0.610177045  | ENSBTAG00000047831 |
| 12 | 40,725,000 | 40,875,000 | 544 | 319  | -4.566672509 |                    |
| 12 | 40,800,000 | 40,950,000 | 545 | 382  | -5.377032245 | PCDH9              |
| 12 | 40,875,000 | 41,025,000 | 546 | 528  | 0.589886758  | PCDH9              |
| 12 | 40,950,000 | 41,100,000 | 547 | 874  | 1.211832869  |                    |
| 12 | 41,025,000 | 41,175,000 | 548 | 740  | 1.10097248   |                    |
| 12 | 41,100,000 | 41,250,000 | 549 | 719  | 0.211752169  |                    |
| 12 | 41,175,000 | 41,325,000 | 550 | 726  | -0.500852957 |                    |
| 12 | 41,250,000 | 41,400,000 | 551 | 532  | -0.449744135 |                    |
| 12 | 41,325,000 | 41,475,000 | 552 | 491  | -0.281562222 |                    |
| 12 | 41,400,000 | 41,550,000 | 553 | 362  | -0.04290966  |                    |
| 12 | 41,475,000 | 41,625,000 | 554 | 516  | -0.133737309 |                    |
| 12 | 41,550,000 | 41,700,000 | 555 | 752  | -1.433500088 |                    |
| 12 | 41,625,000 | 41,775,000 | 556 | 970  | -3.182867881 |                    |
| 12 | 41,700,000 | 41,850,000 | 557 | 1045 | -3.712269053 |                    |
| 12 | 41,775,000 | 41,925,000 | 558 | 898  | -2.45253096  | ENSBTAG00000032979 |
| 12 | 41,850,000 | 42,000,000 | 559 | 702  | -0.382984142 | ENSBTAG00000032979 |
| 12 | 41,925,000 | 42,075,000 | 560 | 1153 | 0.043648438  |                    |
| 12 | 42,000,000 | 42,150,000 | 561 | 1463 | -1.564528002 |                    |
| 12 | 42,075,000 | 42,225,000 | 562 | 919  | -2.733502971 |                    |
| 12 | 42,150,000 | 42,300,000 | 563 | 493  | -0.678553168 |                    |
| 12 | 42,225,000 | 42,375,000 | 564 | 477  | 0.557829396  |                    |
| 12 | 42,300,000 | 42,450,000 | 565 | 724  | 0.970271292  |                    |
| 12 | 42,375,000 | 42,525,000 | 566 | 737  | 0.61953486   |                    |
| 12 | 42,450,000 | 42,600,000 | 567 | 583  | -0.555433186 |                    |
| 12 | 42,525,000 | 42,675,000 | 568 | 476  | -0.622719062 |                    |
| 12 | 42,600,000 | 42,750,000 | 569 | 394  | -0.57924003  |                    |

|    |            |            |     |      |              |                    |
|----|------------|------------|-----|------|--------------|--------------------|
| 12 | 42,675,000 | 42,825,000 | 570 | 369  | -0.230627966 |                    |
| 12 | 42,750,000 | 42,900,000 | 571 | 643  | 0.474862747  |                    |
| 12 | 42,825,000 | 42,975,000 | 572 | 746  | -0.986556833 |                    |
| 12 | 42,900,000 | 43,050,000 | 573 | 877  | -2.361412449 |                    |
| 12 | 42,975,000 | 43,125,000 | 574 | 952  | -1.298178749 |                    |
| 12 | 43,050,000 | 43,200,000 | 575 | 676  | 0.228438914  |                    |
| 12 | 43,125,000 | 43,275,000 | 576 | 619  | 1.176471836  |                    |
| 12 | 43,200,000 | 43,350,000 | 577 | 484  | 1.492502371  |                    |
| 12 | 43,275,000 | 43,425,000 | 578 | 519  | 1.169769941  |                    |
| 12 | 43,350,000 | 43,500,000 | 579 | 1044 | -0.145432322 |                    |
| 12 | 43,425,000 | 43,575,000 | 580 | 1102 | -0.356048218 |                    |
| 12 | 43,500,000 | 43,650,000 | 581 | 726  | -4.462204359 |                    |
| 12 | 43,575,000 | 43,725,000 | 582 | 560  | -9.197328416 |                    |
| 12 | 43,650,000 | 43,800,000 | 583 | 624  | -5.427716945 |                    |
| 12 | 43,725,000 | 43,875,000 | 584 | 594  | -1.485019223 |                    |
| 12 | 43,800,000 | 43,950,000 | 585 | 354  | 0.219519258  |                    |
| 12 | 43,875,000 | 44,025,000 | 586 | 370  | -0.686727359 |                    |
| 12 | 43,950,000 | 44,100,000 | 587 | 394  | -2.367465047 |                    |
| 12 | 44,025,000 | 44,175,000 | 588 | 401  | -1.114109801 |                    |
| 12 | 44,100,000 | 44,250,000 | 589 | 732  | -0.06315576  |                    |
| 12 | 44,175,000 | 44,325,000 | 590 | 883  | 0.333090535  | KLHL1              |
| 12 | 44,250,000 | 44,400,000 | 591 | 1179 | 0.372886815  | KLHL1              |
| 12 | 44,325,000 | 44,475,000 | 592 | 1549 | 0.440658505  | KLHL1              |
| 12 | 44,400,000 | 44,550,000 | 593 | 1194 | 0.723822238  | KLHL1              |
| 12 | 44,475,000 | 44,625,000 | 594 | 916  | 0.734057285  | KLHL1              |
| 12 | 44,550,000 | 44,700,000 | 595 | 814  | -0.24695268  | KLHL1              |
| 12 | 44,625,000 | 44,775,000 | 596 | 808  | -0.589988926 |                    |
| 12 | 44,700,000 | 44,850,000 | 597 | 1013 | 0.628184203  | ENSBTAG00000046942 |
| 12 | 44,775,000 | 44,925,000 | 598 | 1220 | 1.214233608  | ENSBTAG00000046942 |
| 12 | 44,850,000 | 45,000,000 | 599 | 1233 | 1.210246943  |                    |
| 12 | 44,925,000 | 45,075,000 | 600 | 853  | 0.986707182  |                    |
| 12 | 45,000,000 | 45,150,000 | 601 | 543  | 0.894856778  |                    |
| 12 | 45,075,000 | 45,225,000 | 602 | 665  | 1.169836997  |                    |
| 12 | 45,150,000 | 45,300,000 | 603 | 708  | 0.333335143  |                    |
| 12 | 45,225,000 | 45,375,000 | 604 | 567  | -0.340303033 |                    |
| 12 | 45,300,000 | 45,450,000 | 605 | 719  | -0.556575005 |                    |
| 12 | 45,375,000 | 45,525,000 | 606 | 710  | -1.017666768 |                    |
| 12 | 45,450,000 | 45,600,000 | 607 | 961  | -2.505266627 |                    |
| 12 | 45,525,000 | 45,675,000 | 608 | 1222 | -2.154954777 |                    |
| 12 | 45,600,000 | 45,750,000 | 609 | 970  | -0.360345633 |                    |
| 12 | 45,675,000 | 45,825,000 | 610 | 750  | 0.341561671  |                    |
| 12 | 45,750,000 | 45,900,000 | 611 | 614  | 0.844556091  |                    |
| 12 | 45,825,000 | 45,975,000 | 612 | 918  | 0.142205596  |                    |
| 12 | 45,900,000 | 46,050,000 | 613 | 917  | 0.1912655    |                    |
| 12 | 45,975,000 | 46,125,000 | 614 | 532  | 0.160581995  |                    |
| 12 | 46,050,000 | 46,200,000 | 615 | 737  | -0.094144577 |                    |
| 12 | 46,125,000 | 46,275,000 | 616 | 1030 | -0.263047632 |                    |
| 12 | 46,200,000 | 46,350,000 | 617 | 1078 | 0.311288787  |                    |
| 12 | 46,275,000 | 46,425,000 | 618 | 960  | 1.026357254  | DACH1              |
| 12 | 46,350,000 | 46,500,000 | 619 | 665  | 0.193183697  | DACH1              |
| 12 | 46,425,000 | 46,575,000 | 620 | 377  | -0.799442575 | DACH1              |
| 12 | 46,500,000 | 46,650,000 | 621 | 379  | -0.152240413 |                    |
| 12 | 46,575,000 | 46,725,000 | 622 | 789  | 0.539233119  |                    |

|    |            |            |     |      |              |                      |
|----|------------|------------|-----|------|--------------|----------------------|
| 12 | 46,650,000 | 46,800,000 | 623 | 899  | 0.57780152   |                      |
| 12 | 46,725,000 | 46,875,000 | 624 | 522  | 0.63727586   |                      |
| 12 | 46,800,000 | 46,950,000 | 625 | 424  | 0.434864403  |                      |
| 12 | 46,875,000 | 47,025,000 | 626 | 647  | 0.045094331  |                      |
| 12 | 46,950,000 | 47,100,000 | 627 | 668  | 0.136890024  |                      |
| 12 | 47,025,000 | 47,175,000 | 628 | 634  | 0.586831927  |                      |
| 12 | 47,100,000 | 47,250,000 | 629 | 651  | 0.864791758  |                      |
| 12 | 47,175,000 | 47,325,000 | 630 | 804  | -0.294926227 |                      |
| 12 | 47,250,000 | 47,400,000 | 631 | 1256 | 0.513252566  |                      |
| 12 | 47,325,000 | 47,475,000 | 632 | 1052 | 0.698561593  |                      |
| 12 | 47,400,000 | 47,550,000 | 633 | 565  | -0.036970525 |                      |
| 12 | 47,475,000 | 47,625,000 | 634 | 847  | 0.003459103  |                      |
| 12 | 47,550,000 | 47,700,000 | 635 | 1001 | -0.106566191 |                      |
| 12 | 47,625,000 | 47,775,000 | 636 | 1030 | 0.001987084  | MZT1                 |
| 12 | 47,700,000 | 47,850,000 | 637 | 940  | -0.109674755 | BORA,DIS3,MZT1,PIBF1 |
| 12 | 47,775,000 | 47,925,000 | 638 | 544  | 0.032502811  | BORA,DIS3,MZT1,PIBF1 |
| 12 | 47,850,000 | 48,000,000 | 639 | 421  | 0.448252123  | PIBF1                |
| 12 | 47,925,000 | 48,075,000 | 640 | 414  | -1.025753378 | PIBF1                |
| 12 | 48,000,000 | 48,150,000 | 641 | 554  | -2.19385222  | KLF5,PIBF1           |
| 12 | 48,075,000 | 48,225,000 | 642 | 647  | -0.542665576 | KLF5                 |
| 12 | 48,150,000 | 48,300,000 | 643 | 784  | 1.117328762  |                      |
| 12 | 48,225,000 | 48,375,000 | 644 | 962  | 1.052134578  |                      |
| 12 | 48,300,000 | 48,450,000 | 645 | 725  | 0.752824776  |                      |
| 12 | 48,375,000 | 48,525,000 | 646 | 528  | 0.791848613  |                      |
| 12 | 48,450,000 | 48,600,000 | 647 | 739  | 0.033467973  |                      |
| 12 | 48,525,000 | 48,675,000 | 648 | 764  | 0.15904879   |                      |
| 12 | 48,600,000 | 48,750,000 | 649 | 653  | 0.929773137  |                      |
| 12 | 48,675,000 | 48,825,000 | 650 | 660  | 1.101234831  |                      |
| 12 | 48,750,000 | 48,900,000 | 651 | 531  | 0.799151147  | KLF12                |
| 12 | 48,825,000 | 48,975,000 | 652 | 820  | -0.18281154  | KLF12                |
| 12 | 48,900,000 | 49,050,000 | 653 | 1093 | -0.355810606 | KLF12                |
| 12 | 48,975,000 | 49,125,000 | 654 | 898  | -0.328149282 | KLF12                |
| 12 | 49,050,000 | 49,200,000 | 655 | 557  | -2.005936224 | KLF12                |
| 12 | 49,125,000 | 49,275,000 | 656 | 322  | -3.638162537 |                      |
| 12 | 49,200,000 | 49,350,000 | 657 | 313  | -1.187853145 |                      |
| 12 | 49,275,000 | 49,425,000 | 658 | 494  | 0.679564532  |                      |
| 12 | 49,350,000 | 49,500,000 | 659 | 941  | 0.417470587  |                      |
| 12 | 49,425,000 | 49,575,000 | 660 | 1028 | 0.451322177  |                      |
| 12 | 49,500,000 | 49,650,000 | 661 | 999  | 0.882794432  |                      |
| 12 | 49,575,000 | 49,725,000 | 662 | 1694 | 1.043461758  |                      |
| 12 | 49,650,000 | 49,800,000 | 663 | 1733 | 0.917064629  |                      |
| 12 | 49,725,000 | 49,875,000 | 664 | 1190 | 0.795819168  |                      |
| 12 | 49,800,000 | 49,950,000 | 665 | 1188 | 0.603059773  |                      |
| 12 | 49,875,000 | 50,025,000 | 666 | 1043 | 0.458683205  |                      |
| 12 | 49,950,000 | 50,100,000 | 667 | 968  | 0.658873904  |                      |
| 12 | 50,025,000 | 50,175,000 | 668 | 1287 | 0.814377663  |                      |
| 12 | 50,100,000 | 50,250,000 | 669 | 1538 | 0.912326136  |                      |
| 12 | 50,175,000 | 50,325,000 | 670 | 1440 | 0.997238596  |                      |
| 12 | 50,250,000 | 50,400,000 | 671 | 1396 | 0.865393252  |                      |
| 12 | 50,325,000 | 50,475,000 | 672 | 1391 | 0.81480375   |                      |
| 12 | 50,400,000 | 50,550,000 | 673 | 1575 | 0.831590678  |                      |
| 12 | 50,475,000 | 50,625,000 | 674 | 1529 | 0.152891537  |                      |
| 12 | 50,550,000 | 50,700,000 | 675 | 1052 | 0.684965635  | TBC1D4               |

|    |            |            |     |      |              |                               |
|----|------------|------------|-----|------|--------------|-------------------------------|
| 12 | 50,625,000 | 50,775,000 | 676 | 1195 | 0.643637669  | TBC1D4                        |
| 12 | 50,700,000 | 50,850,000 | 677 | 1242 | -0.969468839 | TBC1D4                        |
| 12 | 50,775,000 | 50,925,000 | 678 | 1038 | -1.555288617 | TBC1D4                        |
| 12 | 50,850,000 | 51,000,000 | 679 | 949  | -0.805571732 | TBC1D4,UCHL3                  |
| 12 | 50,925,000 | 51,075,000 | 680 | 560  | -0.420211771 | UCHL3,ENSBTAG00000010680      |
| 12 | 51,000,000 | 51,150,000 | 681 | 496  | 0.077002844  | LMO7,ENSBTAG00000010680       |
| 12 | 51,075,000 | 51,225,000 | 682 | 761  | 0.819059986  | LMO7                          |
| 12 | 51,150,000 | 51,300,000 | 683 | 1143 | 0.407538099  | LMO7                          |
| 12 | 51,225,000 | 51,375,000 | 684 | 1443 | -0.881725456 | LMO7,ENSBTAG00000032878       |
| 12 | 51,300,000 | 51,450,000 | 685 | 1457 | -0.560767057 | ENSBTAG00000032878            |
| 12 | 51,375,000 | 51,525,000 | 686 | 1224 | 0.213875212  |                               |
| 12 | 51,450,000 | 51,600,000 | 687 | 751  | 0.20172183   |                               |
| 12 | 51,525,000 | 51,675,000 | 688 | 853  | 0.301627719  |                               |
| 12 | 51,600,000 | 51,750,000 | 689 | 1071 | -0.492857008 |                               |
| 12 | 51,675,000 | 51,825,000 | 690 | 906  | -1.187377745 |                               |
| 12 | 51,750,000 | 51,900,000 | 691 | 750  | -0.098785281 |                               |
| 12 | 51,825,000 | 51,975,000 | 692 | 559  | 0.555976571  |                               |
| 12 | 51,900,000 | 52,050,000 | 693 | 699  | -0.484479531 |                               |
| 12 | 51,975,000 | 52,125,000 | 694 | 1190 | -0.4433014   |                               |
| 12 | 52,050,000 | 52,200,000 | 695 | 1055 | 0.081370386  |                               |
| 12 | 52,125,000 | 52,275,000 | 696 | 728  | 0.499741546  |                               |
| 12 | 52,200,000 | 52,350,000 | 697 | 595  | 0.746273495  |                               |
| 12 | 52,275,000 | 52,425,000 | 698 | 398  | 0.524305728  | IRG1,KCTD12                   |
| 12 | 52,350,000 | 52,500,000 | 699 | 538  | 0.610249513  | CLN5,FBXL3,IRG1,KCTD12,MYCBP2 |
| 12 | 52,425,000 | 52,575,000 | 700 | 514  | 0.641500533  | CLN5,FBXL3,MYCBP2             |
| 12 | 52,500,000 | 52,650,000 | 701 | 380  | 8.12E-05     | MYCBP2                        |
| 12 | 52,575,000 | 52,725,000 | 702 | 368  | 0.065711444  | MYCBP2                        |
| 12 | 52,650,000 | 52,800,000 | 703 | 318  | 0.263903409  | MYCBP2                        |
| 12 | 52,725,000 | 52,875,000 | 704 | 495  | 0.405278905  | MYCBP2                        |
| 12 | 52,800,000 | 52,950,000 | 705 | 726  | 0.397474414  |                               |
| 12 | 52,875,000 | 53,025,000 | 706 | 1016 | 0.050348145  |                               |
| 12 | 52,950,000 | 53,100,000 | 707 | 1214 | 0.170844272  | SCEL                          |
| 12 | 53,025,000 | 53,175,000 | 708 | 1161 | 0.55900505   | SCEL                          |
| 12 | 53,100,000 | 53,250,000 | 709 | 1027 | 0.046340133  | SCEL,SLAIN1                   |
| 12 | 53,175,000 | 53,325,000 | 710 | 996  | -1.06005659  | EDNRB,SLAIN1                  |
| 12 | 53,250,000 | 53,400,000 | 711 | 982  | -1.815166525 | EDNRB                         |
| 12 | 53,325,000 | 53,475,000 | 712 | 912  | -0.772886186 | EDNRB                         |
| 12 | 53,400,000 | 53,550,000 | 713 | 1080 | 0.566712841  | EDNRB                         |
| 12 | 53,475,000 | 53,625,000 | 714 | 1210 | 0.588820001  |                               |
| 12 | 53,550,000 | 53,700,000 | 715 | 1261 | 0.077266463  |                               |
| 12 | 53,625,000 | 53,775,000 | 716 | 1396 | 0.541949364  |                               |
| 12 | 53,700,000 | 53,850,000 | 717 | 1429 | 0.70480103   |                               |
| 12 | 53,775,000 | 53,925,000 | 718 | 1197 | 0.27057059   |                               |
| 12 | 53,850,000 | 54,000,000 | 719 | 1057 | 0.165423885  |                               |
| 12 | 53,925,000 | 54,075,000 | 720 | 1079 | 0.851575165  |                               |
| 12 | 54,000,000 | 54,150,000 | 721 | 841  | 1.182041502  | RNF219                        |
| 12 | 54,075,000 | 54,225,000 | 722 | 953  | 0.917122336  | RNF219                        |
| 12 | 54,150,000 | 54,300,000 | 723 | 1208 | 0.975291944  |                               |
| 12 | 54,225,000 | 54,375,000 | 724 | 1469 | 0.885246152  |                               |
| 12 | 54,300,000 | 54,450,000 | 725 | 1644 | -0.533679602 |                               |
| 12 | 54,375,000 | 54,525,000 | 726 | 1234 | -0.590402507 |                               |
| 12 | 54,450,000 | 54,600,000 | 727 | 990  | 0.590631507  |                               |
| 12 | 54,525,000 | 54,675,000 | 728 | 867  | 0.807101606  |                               |

|    |            |            |     |      |              |                           |
|----|------------|------------|-----|------|--------------|---------------------------|
| 12 | 54,600,000 | 54,750,000 | 729 | 884  | 0.916189089  |                           |
| 12 | 54,675,000 | 54,825,000 | 730 | 665  | 0.323733741  | RBM26                     |
| 12 | 54,750,000 | 54,900,000 | 731 | 436  | -0.13121787  | RBM26                     |
| 12 | 54,825,000 | 54,975,000 | 732 | 486  | -0.232636529 | NDFIP2,RBM26              |
| 12 | 54,900,000 | 55,050,000 | 733 | 693  | -0.769306425 | NDFIP2,ENSBTAG00000032727 |
| 12 | 54,975,000 | 55,125,000 | 734 | 901  | -0.470283209 | NDFIP2,ENSBTAG00000032727 |
| 12 | 55,050,000 | 55,200,000 | 735 | 585  | -0.059723901 |                           |
| 12 | 55,125,000 | 55,275,000 | 736 | 313  | 0.234759567  |                           |
| 12 | 55,200,000 | 55,350,000 | 737 | 331  | -0.548432538 |                           |
| 12 | 55,275,000 | 55,425,000 | 738 | 436  | 0.333606185  |                           |
| 12 | 55,350,000 | 55,500,000 | 739 | 552  | 0.600274176  |                           |
| 12 | 55,425,000 | 55,575,000 | 740 | 643  | 0.546567011  |                           |
| 12 | 55,500,000 | 55,650,000 | 741 | 600  | -0.334407587 |                           |
| 12 | 55,575,000 | 55,725,000 | 742 | 598  | -0.936280898 | SPRY2                     |
| 12 | 55,650,000 | 55,800,000 | 743 | 553  | -0.49301871  | SPRY2                     |
| 12 | 55,725,000 | 55,875,000 | 744 | 755  | -1.084961984 |                           |
| 12 | 55,800,000 | 55,950,000 | 745 | 1105 | -0.734687524 |                           |
| 12 | 55,875,000 | 56,025,000 | 746 | 978  | -1.059280447 |                           |
| 12 | 55,950,000 | 56,100,000 | 747 | 585  | -2.025312624 |                           |
| 12 | 56,025,000 | 56,175,000 | 748 | 319  | -0.345732361 |                           |
| 12 | 56,100,000 | 56,250,000 | 749 | 556  | 0.365099469  |                           |
| 12 | 56,175,000 | 56,325,000 | 750 | 592  | 0.24479984   |                           |
| 12 | 56,250,000 | 56,400,000 | 751 | 588  | -0.417859386 |                           |
| 12 | 56,325,000 | 56,475,000 | 752 | 606  | -0.601939634 |                           |
| 12 | 56,400,000 | 56,550,000 | 753 | 522  | -0.302854496 |                           |
| 12 | 56,475,000 | 56,625,000 | 754 | 633  | 0.036773537  |                           |
| 12 | 56,550,000 | 56,700,000 | 755 | 628  | 0.218982501  |                           |
| 12 | 56,625,000 | 56,775,000 | 756 | 634  | 0.168254895  |                           |
| 12 | 56,700,000 | 56,850,000 | 757 | 648  | -0.708016081 |                           |
| 12 | 56,775,000 | 56,925,000 | 758 | 709  | -0.959618568 |                           |
| 12 | 56,850,000 | 57,000,000 | 759 | 666  | 0.247198407  |                           |
| 12 | 56,925,000 | 57,075,000 | 760 | 622  | 0.802611262  |                           |
| 12 | 57,000,000 | 57,150,000 | 761 | 1082 | 0.624643573  |                           |
| 12 | 57,075,000 | 57,225,000 | 762 | 1449 | 0.872697569  |                           |
| 12 | 57,150,000 | 57,300,000 | 763 | 1245 | 1.210942642  |                           |
| 12 | 57,225,000 | 57,375,000 | 764 | 1299 | 1.264015908  |                           |
| 12 | 57,300,000 | 57,450,000 | 765 | 1356 | 1.176743077  |                           |
| 12 | 57,375,000 | 57,525,000 | 766 | 1063 | 1.061181295  |                           |
| 12 | 57,450,000 | 57,600,000 | 767 | 1116 | 0.802364138  |                           |
| 12 | 57,525,000 | 57,675,000 | 768 | 1276 | 0.500868244  |                           |
| 12 | 57,600,000 | 57,750,000 | 769 | 1496 | -0.165611845 |                           |
| 12 | 57,675,000 | 57,825,000 | 770 | 1618 | -0.554317058 |                           |
| 12 | 57,750,000 | 57,900,000 | 771 | 1449 | -1.055272775 |                           |
| 12 | 57,825,000 | 57,975,000 | 772 | 1520 | -0.479565742 |                           |
| 12 | 57,900,000 | 58,050,000 | 773 | 1759 | 1.186680854  |                           |
| 12 | 57,975,000 | 58,125,000 | 774 | 1782 | 1.254832622  |                           |
| 12 | 58,050,000 | 58,200,000 | 775 | 1740 | 0.948185052  |                           |
| 12 | 58,125,000 | 58,275,000 | 776 | 1470 | 0.691555098  |                           |
| 12 | 58,200,000 | 58,350,000 | 777 | 1230 | 0.440600644  |                           |
| 12 | 58,275,000 | 58,425,000 | 778 | 1571 | -0.436475772 |                           |
| 12 | 58,350,000 | 58,500,000 | 779 | 1820 | 0.358687118  |                           |
| 12 | 58,425,000 | 58,575,000 | 780 | 1805 | 0.020116141  |                           |
| 12 | 58,500,000 | 58,650,000 | 781 | 1885 | -1.748053501 |                           |

|    |            |            |     |      |              |         |
|----|------------|------------|-----|------|--------------|---------|
| 12 | 58,575,000 | 58,725,000 | 782 | 1956 | -0.371885762 |         |
| 12 | 58,650,000 | 58,800,000 | 783 | 1871 | -0.083532365 |         |
| 12 | 58,725,000 | 58,875,000 | 784 | 1835 | -0.105300723 |         |
| 12 | 58,800,000 | 58,950,000 | 785 | 1796 | 0.759204452  |         |
| 12 | 58,875,000 | 59,025,000 | 786 | 1606 | 0.550728309  |         |
| 12 | 58,950,000 | 59,100,000 | 787 | 1383 | 0.53394015   |         |
| 12 | 59,025,000 | 59,175,000 | 788 | 1140 | 0.285643811  | SLITRK1 |
| 12 | 59,100,000 | 59,250,000 | 789 | 875  | 0.21842371   | SLITRK1 |
| 12 | 59,175,000 | 59,325,000 | 790 | 813  | 0.350105553  |         |
| 12 | 59,250,000 | 59,400,000 | 791 | 612  | 0.280275662  |         |
| 12 | 59,325,000 | 59,475,000 | 792 | 890  | -1.032357573 |         |
| 12 | 59,400,000 | 59,550,000 | 793 | 1052 | -0.841968394 |         |
| 12 | 59,475,000 | 59,625,000 | 794 | 885  | 0.969877528  |         |
| 12 | 59,550,000 | 59,700,000 | 795 | 1003 | 1.102796597  |         |
| 12 | 59,625,000 | 59,775,000 | 796 | 1243 | 0.483949134  |         |
| 12 | 59,700,000 | 59,850,000 | 797 | 1372 | 0.610324056  |         |
| 12 | 59,775,000 | 59,925,000 | 798 | 1455 | -0.163088331 |         |
| 12 | 59,850,000 | 60,000,000 | 799 | 1722 | -0.655857067 |         |
| 12 | 59,925,000 | 60,075,000 | 800 | 1581 | -1.248159126 |         |
| 12 | 60,000,000 | 60,150,000 | 801 | 1438 | -0.214828348 |         |
| 12 | 60,075,000 | 60,225,000 | 802 | 1402 | -0.815769292 |         |
| 12 | 60,150,000 | 60,300,000 | 803 | 1355 | -1.217038403 |         |
| 12 | 60,225,000 | 60,375,000 | 804 | 1248 | -0.146849724 |         |
| 12 | 60,300,000 | 60,450,000 | 805 | 1453 | -1.207225865 |         |
| 12 | 60,375,000 | 60,525,000 | 806 | 1603 | -0.731979212 |         |
| 12 | 60,450,000 | 60,600,000 | 807 | 1396 | 0.186864609  |         |
| 12 | 60,525,000 | 60,675,000 | 808 | 1410 | 0.426482876  |         |
| 12 | 60,600,000 | 60,750,000 | 809 | 1327 | -1.272554368 |         |
| 12 | 60,675,000 | 60,825,000 | 810 | 1236 | -1.254184677 |         |
| 12 | 60,750,000 | 60,900,000 | 811 | 1102 | 0.576129633  |         |
| 12 | 60,825,000 | 60,975,000 | 812 | 1222 | 0.683773776  |         |
| 12 | 60,900,000 | 61,050,000 | 813 | 1427 | 0.545455942  |         |
| 12 | 60,975,000 | 61,125,000 | 814 | 1269 | 0.719961776  | SLITRK6 |
| 12 | 61,050,000 | 61,200,000 | 815 | 1322 | 1.245884154  | SLITRK6 |
| 12 | 61,125,000 | 61,275,000 | 816 | 1453 | 0.901929083  |         |
| 12 | 61,200,000 | 61,350,000 | 817 | 1552 | -0.123619684 |         |
| 12 | 61,275,000 | 61,425,000 | 818 | 1639 | -0.901775279 |         |
| 12 | 61,350,000 | 61,500,000 | 819 | 1674 | 0.004920935  |         |
| 12 | 61,425,000 | 61,575,000 | 820 | 1698 | 1.187275032  | HTATSF1 |
| 12 | 61,500,000 | 61,650,000 | 821 | 1565 | 0.710778889  | HTATSF1 |
| 12 | 61,575,000 | 61,725,000 | 822 | 1223 | 0.037457457  |         |
| 12 | 61,650,000 | 61,800,000 | 823 | 1305 | 0.416623177  |         |
| 12 | 61,725,000 | 61,875,000 | 824 | 1388 | 0.2081322    |         |
| 12 | 61,800,000 | 61,950,000 | 825 | 955  | -0.17959938  |         |
| 12 | 61,875,000 | 62,025,000 | 826 | 800  | 0.270596376  |         |
| 12 | 61,950,000 | 62,100,000 | 827 | 1237 | 0.355580769  |         |
| 12 | 62,025,000 | 62,175,000 | 828 | 1456 | 0.524661211  |         |
| 12 | 62,100,000 | 62,250,000 | 829 | 1372 | 0.448038857  |         |
| 12 | 62,175,000 | 62,325,000 | 830 | 1448 | 0.857745342  |         |
| 12 | 62,250,000 | 62,400,000 | 831 | 1246 | 1.054505849  |         |
| 12 | 62,325,000 | 62,475,000 | 832 | 1565 | 0.63528292   |         |
| 12 | 62,400,000 | 62,550,000 | 833 | 1659 | 0.728977072  |         |
| 12 | 62,475,000 | 62,625,000 | 834 | 1105 | 0.565816435  |         |



|    |            |            |     |      |              |         |
|----|------------|------------|-----|------|--------------|---------|
| 12 | 62,550,000 | 62,700,000 | 835 | 1072 | 0.729078481  | SLITRK5 |
| 12 | 62,625,000 | 62,775,000 | 836 | 1301 | 0.706738091  | SLITRK5 |
| 12 | 62,700,000 | 62,850,000 | 837 | 1321 | 0.442026089  |         |
| 12 | 62,775,000 | 62,925,000 | 838 | 1104 | 0.004498182  |         |
| 12 | 62,850,000 | 63,000,000 | 839 | 1256 | -0.441451014 |         |
| 12 | 62,925,000 | 63,075,000 | 840 | 1495 | 0.073255676  |         |
| 12 | 63,000,000 | 63,150,000 | 841 | 1452 | -0.430721671 |         |
| 12 | 63,075,000 | 63,225,000 | 842 | 1602 | -1.727760679 |         |
| 12 | 63,150,000 | 63,300,000 | 843 | 1967 | -1.957855992 |         |
| 12 | 63,225,000 | 63,375,000 | 844 | 1897 | -1.008142609 |         |
| 12 | 63,300,000 | 63,450,000 | 845 | 2032 | -0.342214205 |         |
| 12 | 63,375,000 | 63,525,000 | 846 | 1738 | -0.116878637 |         |
| 12 | 63,450,000 | 63,600,000 | 847 | 1558 | 0.818074148  |         |
| 12 | 63,525,000 | 63,675,000 | 848 | 1849 | 0.677658328  |         |
| 12 | 63,600,000 | 63,750,000 | 849 | 1384 | 0.771740345  |         |
| 12 | 63,675,000 | 63,825,000 | 850 | 1098 | 0.588661882  |         |
| 12 | 63,750,000 | 63,900,000 | 851 | 928  | 0.25395832   |         |
| 12 | 63,825,000 | 63,975,000 | 852 | 961  | 0.692875373  |         |
| 12 | 63,900,000 | 64,050,000 | 853 | 1417 | 0.434970987  |         |
| 12 | 63,975,000 | 64,125,000 | 854 | 1489 | 0.169713596  |         |
| 12 | 64,050,000 | 64,200,000 | 855 | 1573 | 0.0388816    |         |
| 12 | 64,125,000 | 64,275,000 | 856 | 1813 | 0.629895767  |         |
| 12 | 64,200,000 | 64,350,000 | 857 | 1534 | 0.930533832  |         |
| 12 | 64,275,000 | 64,425,000 | 858 | 1772 | 0.056170948  |         |
| 12 | 64,350,000 | 64,500,000 | 859 | 1961 | -0.368196057 |         |
| 12 | 64,425,000 | 64,575,000 | 860 | 1473 | -0.396984969 |         |
| 12 | 64,500,000 | 64,650,000 | 861 | 1509 | -0.763014513 |         |
| 12 | 64,575,000 | 64,725,000 | 862 | 1373 | -1.140250167 |         |
| 12 | 64,650,000 | 64,800,000 | 863 | 1209 | -0.632750803 |         |
| 12 | 64,725,000 | 64,875,000 | 864 | 1185 | -0.119929793 |         |
| 12 | 64,800,000 | 64,950,000 | 865 | 725  | -0.699071979 |         |
| 12 | 64,875,000 | 65,025,000 | 866 | 443  | -1.63181175  |         |
| 12 | 64,950,000 | 65,100,000 | 867 | 672  | -1.312283985 |         |
| 12 | 65,025,000 | 65,175,000 | 868 | 796  | -1.159149153 |         |
| 12 | 65,100,000 | 65,250,000 | 869 | 847  | -0.484399746 |         |
| 12 | 65,175,000 | 65,325,000 | 870 | 807  | 0.523470848  |         |
| 12 | 65,250,000 | 65,400,000 | 871 | 474  | 1.147992756  |         |
| 12 | 65,325,000 | 65,475,000 | 872 | 581  | 0.336914789  |         |
| 12 | 65,400,000 | 65,550,000 | 873 | 662  | -0.015993877 |         |
| 12 | 65,475,000 | 65,625,000 | 874 | 678  | 0.416783292  |         |
| 12 | 65,550,000 | 65,700,000 | 875 | 833  | 0.167076857  |         |
| 12 | 65,625,000 | 65,775,000 | 876 | 1112 | 0.729385022  |         |
| 12 | 65,700,000 | 65,850,000 | 877 | 1163 | 0.796038576  |         |
| 12 | 65,775,000 | 65,925,000 | 878 | 1007 | -0.496243301 |         |
| 12 | 65,850,000 | 66,000,000 | 879 | 884  | -0.259371468 |         |
| 12 | 65,925,000 | 66,075,000 | 880 | 558  | 0.419507466  |         |
| 12 | 66,000,000 | 66,150,000 | 881 | 407  | 0.535966101  |         |
| 12 | 66,075,000 | 66,225,000 | 882 | 501  | -0.310340606 |         |
| 12 | 66,150,000 | 66,300,000 | 883 | 564  | 0.214521427  | GPC5    |
| 12 | 66,225,000 | 66,375,000 | 884 | 639  | 0.856135173  | GPC5    |
| 12 | 66,300,000 | 66,450,000 | 885 | 663  | 0.622620226  | GPC5    |
| 12 | 66,375,000 | 66,525,000 | 886 | 481  | 0.112644965  | GPC5    |
| 12 | 66,450,000 | 66,600,000 | 887 | 377  | 0.153887555  | GPC5    |

|    |            |            |     |      |              |                    |
|----|------------|------------|-----|------|--------------|--------------------|
| 12 | 66,525,000 | 66,675,000 | 888 | 670  | -0.427837801 | GPC5               |
| 12 | 66,600,000 | 66,750,000 | 889 | 980  | -0.772458202 | GPC5               |
| 12 | 66,675,000 | 66,825,000 | 890 | 677  | -0.632655361 | GPC5               |
| 12 | 66,750,000 | 66,900,000 | 891 | 582  | -0.403930358 | GPC5               |
| 12 | 66,825,000 | 66,975,000 | 892 | 708  | -0.107099628 | GPC5               |
| 12 | 66,900,000 | 67,050,000 | 893 | 721  | 0.27188095   | GPC5               |
| 12 | 66,975,000 | 67,125,000 | 894 | 711  | 0.031540695  | GPC5               |
| 12 | 67,050,000 | 67,200,000 | 895 | 701  | 0.390933974  | GPC5               |
| 12 | 67,125,000 | 67,275,000 | 896 | 713  | 0.672845735  | GPC5               |
| 12 | 67,200,000 | 67,350,000 | 897 | 579  | 0.597776714  | GPC5               |
| 12 | 67,275,000 | 67,425,000 | 898 | 591  | -1.418894585 | GPC5               |
| 12 | 67,350,000 | 67,500,000 | 899 | 663  | -3.22608106  |                    |
| 12 | 67,425,000 | 67,575,000 | 900 | 557  | -3.316302882 |                    |
| 12 | 67,500,000 | 67,650,000 | 901 | 389  | -1.267124971 |                    |
| 12 | 67,575,000 | 67,725,000 | 902 | 429  | 0.679642095  |                    |
| 12 | 67,650,000 | 67,800,000 | 903 | 511  | 1.171637717  |                    |
| 12 | 67,725,000 | 67,875,000 | 904 | 864  | 0.662197598  |                    |
| 12 | 67,800,000 | 67,950,000 | 905 | 1278 | 0.63002274   |                    |
| 12 | 67,875,000 | 68,025,000 | 906 | 1627 | 0.240202956  |                    |
| 12 | 67,950,000 | 68,100,000 | 907 | 1574 | -0.219961412 |                    |
| 12 | 68,025,000 | 68,175,000 | 908 | 1620 | 0.122764412  |                    |
| 12 | 68,100,000 | 68,250,000 | 909 | 1646 | 0.407263922  | GPC6               |
| 12 | 68,175,000 | 68,325,000 | 910 | 1297 | 0.572682385  | GPC6               |
| 12 | 68,250,000 | 68,400,000 | 911 | 974  | 0.246152995  | GPC6               |
| 12 | 68,325,000 | 68,475,000 | 912 | 835  | -2.09297781  | GPC6               |
| 12 | 68,400,000 | 68,550,000 | 913 | 1024 | -1.784029868 | GPC6               |
| 12 | 68,475,000 | 68,625,000 | 914 | 1011 | -0.868524616 | GPC6               |
| 12 | 68,550,000 | 68,700,000 | 915 | 987  | -2.593620231 | GPC6               |
| 12 | 68,625,000 | 68,775,000 | 916 | 1010 | -1.75608574  | GPC6               |
| 12 | 68,700,000 | 68,850,000 | 917 | 762  | 0.028828931  | GPC6               |
| 12 | 68,775,000 | 68,925,000 | 918 | 567  | 0.680378132  |                    |
| 12 | 68,850,000 | 69,000,000 | 919 | 994  | 0.99437945   |                    |
| 12 | 68,925,000 | 69,075,000 | 920 | 1070 | 0.935651235  |                    |
| 12 | 69,000,000 | 69,150,000 | 921 | 826  | 0.569113954  |                    |
| 12 | 69,075,000 | 69,225,000 | 922 | 955  | -0.150877919 |                    |
| 12 | 69,150,000 | 69,300,000 | 923 | 869  | -0.173847686 |                    |
| 12 | 69,225,000 | 69,375,000 | 924 | 894  | 0.986035286  |                    |
| 12 | 69,300,000 | 69,450,000 | 925 | 1279 | 0.829164048  |                    |
| 12 | 69,375,000 | 69,525,000 | 926 | 1625 | 0.311712888  | DCT                |
| 12 | 69,450,000 | 69,600,000 | 927 | 1381 | 0.561567681  | DCT                |
| 12 | 69,525,000 | 69,675,000 | 928 | 662  | 0.786335777  | DCT,GPR180,TGDS    |
| 12 | 69,600,000 | 69,750,000 | 929 | 603  | 0.477025083  | GPR180,SOX21,TGDS  |
| 12 | 69,675,000 | 69,825,000 | 930 | 964  | 0.039494578  | SOX21              |
| 12 | 69,750,000 | 69,900,000 | 931 | 1206 | 0.270807228  |                    |
| 12 | 69,825,000 | 69,975,000 | 932 | 1579 | 0.943286907  |                    |
| 12 | 69,900,000 | 70,050,000 | 933 | 1801 | 0.721980657  | ENSBTAG00000032603 |
| 12 | 69,975,000 | 70,125,000 | 934 | 2146 | 0.489866297  | ENSBTAG00000032603 |
| 12 | 70,050,000 | 70,200,000 | 935 | 2630 | 0.87080965   | ENSBTAG00000032603 |
| 12 | 70,125,000 | 70,275,000 | 936 | 2572 | 1.015268745  | ENSBTAG00000032603 |
| 12 | 70,200,000 | 70,350,000 | 937 | 2328 | 0.818652359  |                    |
| 12 | 70,275,000 | 70,425,000 | 938 | 1911 | 0.240123002  |                    |
| 12 | 70,350,000 | 70,500,000 | 939 | 1746 | -1.557545764 |                    |
| 12 | 70,425,000 | 70,575,000 | 940 | 2044 | -0.944190031 |                    |

|    |            |            |     |      |              |                                       |
|----|------------|------------|-----|------|--------------|---------------------------------------|
| 12 | 70,500,000 | 70,650,000 | 941 | 2168 | -0.509412442 |                                       |
| 12 | 70,575,000 | 70,725,000 | 942 | 2140 | -0.204487115 |                                       |
| 12 | 70,650,000 | 70,800,000 | 943 | 2344 | -0.327334169 |                                       |
| 12 | 70,725,000 | 70,875,000 | 944 | 2523 | -0.166838549 |                                       |
| 12 | 70,800,000 | 70,950,000 | 945 | 2280 | -0.13065494  |                                       |
| 12 | 70,875,000 | 71,025,000 | 946 | 1859 | -1.103713074 |                                       |
| 12 | 70,950,000 | 71,100,000 | 947 | 1723 | -1.619216479 |                                       |
| 12 | 71,025,000 | 71,175,000 | 948 | 1566 | -1.750864    |                                       |
| 12 | 71,100,000 | 71,250,000 | 949 | 1283 | -0.652028736 |                                       |
| 12 | 71,175,000 | 71,325,000 | 950 | 1804 | -0.083392967 |                                       |
| 12 | 71,250,000 | 71,400,000 | 951 | 2618 | -0.15160024  |                                       |
| 12 | 71,325,000 | 71,475,000 | 952 | 2415 | -0.484166145 |                                       |
| 12 | 71,400,000 | 71,550,000 | 953 | 1635 | -0.536159716 |                                       |
| 12 | 71,475,000 | 71,625,000 | 954 | 1742 | 0.062653399  |                                       |
| 12 | 71,550,000 | 71,700,000 | 955 | 1673 | 0.039786313  |                                       |
| 12 | 71,625,000 | 71,775,000 | 956 | 1796 | 0.13656516   |                                       |
| 12 | 71,700,000 | 71,850,000 | 957 | 1921 | 0.013024866  | ENSBTAG00000047383                    |
| 12 | 71,775,000 | 71,925,000 | 958 | 1909 | -0.956934601 | ENSBTAG00000047383                    |
| 12 | 71,850,000 | 72,000,000 | 959 | 2557 | -1.125885078 | ENSBTAG00000047383                    |
| 12 | 71,925,000 | 72,075,000 | 960 | 2182 | -0.915803195 | ENSBTAG00000045751,ENSBTAG00000047383 |
| 12 | 72,000,000 | 72,150,000 | 961 | 2297 | -0.137736689 | ENSBTAG00000045751                    |
| 12 | 72,075,000 | 72,225,000 | 962 | 2934 | 0.245731925  | ENSBTAG00000045751                    |
| 12 | 72,150,000 | 72,300,000 | 963 | 2689 | 0.477731427  | ENSBTAG00000045751                    |
| 12 | 72,225,000 | 72,375,000 | 964 | 2466 | 0.283600377  |                                       |
| 12 | 72,300,000 | 72,450,000 | 965 | 2692 | 0.367888487  |                                       |
| 12 | 72,375,000 | 72,525,000 | 966 | 2574 | -0.152381694 |                                       |
| 12 | 72,450,000 | 72,600,000 | 967 | 1789 | -2.130074986 | ENSBTAG00000047181                    |
| 12 | 72,525,000 | 72,675,000 | 968 | 1242 | -3.432370699 | ENSBTAG00000047181                    |
| 12 | 72,600,000 | 72,750,000 | 969 | 1622 | -1.880319624 | ENSBTAG00000047181                    |
| 12 | 72,675,000 | 72,825,000 | 970 | 1442 | -1.546445545 | ENSBTAG00000047181                    |
| 12 | 72,750,000 | 72,900,000 | 971 | 1368 | -0.71231338  |                                       |
| 12 | 72,825,000 | 72,975,000 | 972 | 1758 | 0.210984509  |                                       |
| 12 | 72,900,000 | 73,050,000 | 973 | 1670 | 0.373253481  |                                       |
| 12 | 72,975,000 | 73,125,000 | 974 | 1754 | -0.076547121 |                                       |
| 12 | 73,050,000 | 73,200,000 | 975 | 2007 | -0.380157343 |                                       |
| 12 | 73,125,000 | 73,275,000 | 976 | 2368 | -0.145237676 |                                       |
| 12 | 73,200,000 | 73,350,000 | 977 | 2426 | -0.225911078 |                                       |
| 12 | 73,275,000 | 73,425,000 | 978 | 2384 | -0.962381595 |                                       |
| 12 | 73,350,000 | 73,500,000 | 979 | 1922 | -0.561152275 |                                       |
| 12 | 73,425,000 | 73,575,000 | 980 | 1461 | -0.366624962 | ENSBTAG00000046041                    |
| 12 | 73,500,000 | 73,650,000 | 981 | 1324 | -2.046296721 | ENSBTAG00000046041                    |
| 12 | 73,575,000 | 73,725,000 | 982 | 1680 | -1.227375091 | ENSBTAG00000046041                    |
| 12 | 73,650,000 | 73,800,000 | 983 | 1572 | -0.550131332 | ENSBTAG00000046041                    |
| 12 | 73,725,000 | 73,875,000 | 984 | 1713 | 0.039126473  |                                       |
| 12 | 73,800,000 | 73,950,000 | 985 | 1836 | 0.126142503  | ENSBTAG00000047764                    |
| 12 | 73,875,000 | 74,025,000 | 986 | 1149 | -0.11580747  | ENSBTAG00000047764                    |
| 12 | 73,950,000 | 74,100,000 | 987 | 1480 | 0.161943357  | ENSBTAG00000047764                    |
| 12 | 74,025,000 | 74,175,000 | 988 | 1500 | 0.1834767    |                                       |
| 12 | 74,100,000 | 74,250,000 | 989 | 1865 | -0.240356221 |                                       |
| 12 | 74,175,000 | 74,325,000 | 990 | 2222 | -0.288671876 |                                       |
| 12 | 74,250,000 | 74,400,000 | 991 | 2002 | -0.951127414 |                                       |
| 12 | 74,325,000 | 74,475,000 | 992 | 1744 | -1.561919275 |                                       |
| 12 | 74,400,000 | 74,550,000 | 993 | 2260 | 0.242174705  |                                       |

|    |            |            |      |      |              |                                       |
|----|------------|------------|------|------|--------------|---------------------------------------|
| 12 | 74,475,000 | 74,625,000 | 994  | 2773 | 0.34142945   |                                       |
| 12 | 74,550,000 | 74,700,000 | 995  | 2135 | 0.045121036  |                                       |
| 12 | 74,625,000 | 74,775,000 | 996  | 1784 | -1.049799454 |                                       |
| 12 | 74,700,000 | 74,850,000 | 997  | 1944 | -1.071367737 | ENSBTAG00000023309                    |
| 12 | 74,775,000 | 74,925,000 | 998  | 2572 | 0.140940059  | ENSBTAG00000023309                    |
| 12 | 74,850,000 | 75,000,000 | 999  | 2268 | 0.288001085  | ENSBTAG00000023309                    |
| 12 | 74,925,000 | 75,075,000 | 1000 | 1485 | -0.453819145 | ENSBTAG00000023309                    |
| 12 | 75,000,000 | 75,150,000 | 1001 | 1338 | -0.752683244 |                                       |
| 12 | 75,075,000 | 75,225,000 | 1002 | 1680 | 0.34656802   |                                       |
| 12 | 75,150,000 | 75,300,000 | 1003 | 2444 | 0.56698626   |                                       |
| 12 | 75,225,000 | 75,375,000 | 1004 | 2944 | 0.227477064  |                                       |
| 12 | 75,300,000 | 75,450,000 | 1005 | 2521 | -0.242931663 |                                       |
| 12 | 75,375,000 | 75,525,000 | 1006 | 3360 | -0.068389277 | ENSBTAG00000026070                    |
| 12 | 75,450,000 | 75,600,000 | 1007 | 3596 | 0.015316228  | ENSBTAG00000026070                    |
| 12 | 75,525,000 | 75,675,000 | 1008 | 2614 | 0.021637717  | ENSBTAG00000026070,ENSBTAG00000039714 |
| 12 | 75,600,000 | 75,750,000 | 1009 | 2844 | -0.112016841 | ENSBTAG00000039714                    |
| 12 | 75,675,000 | 75,825,000 | 1010 | 2667 | -0.312842372 | ENSBTAG00000039714                    |
| 12 | 75,750,000 | 75,900,000 | 1011 | 2450 | -0.959675628 | ENSBTAG00000039714                    |
| 12 | 75,825,000 | 75,975,000 | 1012 | 2302 | -2.550538015 | ENSBTAG00000039714                    |
| 12 | 75,900,000 | 76,050,000 | 1013 | 1614 | -1.898450813 |                                       |
| 12 | 75,975,000 | 76,125,000 | 1014 | 1829 | -0.108815836 |                                       |
| 12 | 76,050,000 | 76,200,000 | 1015 | 2405 | -0.289507212 |                                       |
| 12 | 76,125,000 | 76,275,000 | 1016 | 1987 | -0.158253954 |                                       |
| 12 | 76,200,000 | 76,350,000 | 1017 | 1785 | -0.0446792   |                                       |
| 12 | 76,275,000 | 76,425,000 | 1018 | 2170 | -0.551164867 |                                       |
| 12 | 76,350,000 | 76,500,000 | 1019 | 2483 | -0.338206052 |                                       |
| 12 | 76,425,000 | 76,575,000 | 1020 | 2261 | 0.040748335  |                                       |
| 12 | 76,500,000 | 76,650,000 | 1021 | 2124 | -0.136194675 |                                       |
| 12 | 76,575,000 | 76,725,000 | 1022 | 2208 | -0.049424891 |                                       |
| 12 | 76,650,000 | 76,800,000 | 1023 | 2443 | 0.500160283  | CLDN10                                |
| 12 | 76,725,000 | 76,875,000 | 1024 | 2904 | 0.78633261   | CLDN10,DZIP1                          |
| 12 | 76,800,000 | 76,950,000 | 1025 | 2845 | 0.772363015  | CLDN10,DZIP1                          |
| 12 | 76,875,000 | 77,025,000 | 1026 | 2800 | 0.499419951  | DNAJC3,DZIP1                          |
| 12 | 76,950,000 | 77,100,000 | 1027 | 2901 | 0.643727889  | DNAJC3,UGGT2                          |
| 12 | 77,025,000 | 77,175,000 | 1028 | 2543 | 0.756193173  | UGGT2                                 |
| 12 | 77,100,000 | 77,250,000 | 1029 | 2278 | 0.698769919  | HS6ST3,UGGT2                          |
| 12 | 77,175,000 | 77,325,000 | 1030 | 2362 | 1.088164711  | HS6ST3,UGGT2                          |
| 12 | 77,250,000 | 77,400,000 | 1031 | 2316 | 0.548901116  |                                       |
| 12 | 77,325,000 | 77,475,000 | 1032 | 1885 | 0.416752469  |                                       |
| 12 | 77,400,000 | 77,550,000 | 1033 | 1789 | 0.798077039  |                                       |
| 12 | 77,475,000 | 77,625,000 | 1034 | 1866 | 0.584356993  |                                       |
| 12 | 77,550,000 | 77,700,000 | 1035 | 1760 | 0.540570097  |                                       |
| 12 | 77,625,000 | 77,775,000 | 1036 | 1883 | 0.334903366  |                                       |
| 12 | 77,700,000 | 77,850,000 | 1037 | 1708 | 0.604698774  |                                       |
| 12 | 77,775,000 | 77,925,000 | 1038 | 1411 | 1.159727471  |                                       |
| 12 | 77,850,000 | 78,000,000 | 1039 | 1550 | 0.944215298  | HS6ST3,ENSBTAG00000045566             |
| 12 | 77,925,000 | 78,075,000 | 1040 | 1193 | 0.735692465  | HS6ST3,OXGR1,ENSBTAG00000045566       |
| 12 | 78,000,000 | 78,150,000 | 1041 | 828  | 0.667491155  | OXGR1                                 |
| 12 | 78,075,000 | 78,225,000 | 1042 | 866  | 0.540110014  |                                       |
| 12 | 78,150,000 | 78,300,000 | 1043 | 919  | 0.365423379  | MBNL2                                 |
| 12 | 78,225,000 | 78,375,000 | 1044 | 943  | 0.453265833  | MBNL2                                 |
| 12 | 78,300,000 | 78,450,000 | 1045 | 1091 | 0.347188155  | MBNL2                                 |
| 12 | 78,375,000 | 78,525,000 | 1046 | 1568 | -0.15872375  | MBNL2,RAP2A                           |

|    |            |            |      |      |              |                                 |
|----|------------|------------|------|------|--------------|---------------------------------|
| 12 | 78,450,000 | 78,600,000 | 1047 | 1628 | -0.941829211 | RAP2A                           |
| 12 | 78,525,000 | 78,675,000 | 1048 | 1171 | -0.854787082 | RAP2A                           |
| 12 | 78,600,000 | 78,750,000 | 1049 | 976  | 0.437525163  |                                 |
| 12 | 78,675,000 | 78,825,000 | 1050 | 1355 | 0.011951419  |                                 |
| 12 | 78,750,000 | 78,900,000 | 1051 | 1528 | -0.820481763 |                                 |
| 12 | 78,825,000 | 78,975,000 | 1052 | 1138 | -1.531195209 |                                 |
| 12 | 78,900,000 | 79,050,000 | 1053 | 818  | -0.941197927 | RANBP6                          |
| 12 | 78,975,000 | 79,125,000 | 1054 | 1194 | 0.185358109  | RANBP6                          |
| 12 | 79,050,000 | 79,200,000 | 1055 | 1605 | 0.239067528  | FARP1                           |
| 12 | 79,125,000 | 79,275,000 | 1056 | 1462 | 0.246774851  | FARP1                           |
| 12 | 79,200,000 | 79,350,000 | 1057 | 1306 | 0.113778304  | FARP1                           |
| 12 | 79,275,000 | 79,425,000 | 1058 | 1245 | 0.193547148  | FARP1                           |
| 12 | 79,350,000 | 79,500,000 | 1059 | 1210 | 0.70725653   | FARP1,STK24                     |
| 12 | 79,425,000 | 79,575,000 | 1060 | 1196 | 0.668223753  | FARP1,STK24                     |
| 12 | 79,500,000 | 79,650,000 | 1061 | 1416 | 0.078996373  | PEPT-1                          |
| 12 | 79,575,000 | 79,725,000 | 1062 | 1456 | 0.416541413  | DOCK9,PEPT-1                    |
| 12 | 79,650,000 | 79,800,000 | 1063 | 995  | 0.854546404  | DOCK9,PEPT-1                    |
| 12 | 79,725,000 | 79,875,000 | 1064 | 967  | 0.782963811  | DOCK9                           |
| 12 | 79,800,000 | 79,950,000 | 1065 | 1029 | 0.921644366  | DOCK9                           |
| 12 | 79,875,000 | 80,025,000 | 1066 | 874  | 0.859046134  |                                 |
| 12 | 79,950,000 | 80,100,000 | 1067 | 689  | 0.473126923  | GPR18,UBAC2                     |
| 12 | 80,025,000 | 80,175,000 | 1068 | 468  | -0.614016864 | GPR18,GPR183,UBAC2              |
| 12 | 80,100,000 | 80,250,000 | 1069 | 602  | -0.711076844 | GPR183,UBAC2,ENSBTAG00000038268 |
| 12 | 80,175,000 | 80,325,000 | 1070 | 1025 | -0.441187063 | TM9SF2,UBAC2,ENSBTAG00000038268 |
| 12 | 80,250,000 | 80,400,000 | 1071 | 1130 | -0.84069829  | TM9SF2                          |
| 12 | 80,325,000 | 80,475,000 | 1072 | 819  | -0.637481698 | CLYBL,TM9SF2                    |
| 12 | 80,400,000 | 80,550,000 | 1073 | 485  | 0.44059624   | CLYBL                           |
| 12 | 80,475,000 | 80,625,000 | 1074 | 489  | 0.571916895  | CLYBL                           |
| 12 | 80,550,000 | 80,700,000 | 1075 | 624  | -0.395855929 | CLYBL                           |
| 12 | 80,625,000 | 80,775,000 | 1076 | 419  | -1.785550023 | CLYBL,ZIC2,ZIC5                 |
| 12 | 80,700,000 | 80,850,000 | 1077 | 287  | -2.465581413 | PCCA,ZIC2,ZIC5                  |
| 12 | 80,775,000 | 80,925,000 | 1078 | 376  | -2.035160892 | PCCA                            |
| 12 | 80,850,000 | 81,000,000 | 1079 | 452  | -3.312474379 | PCCA                            |
| 12 | 80,925,000 | 81,075,000 | 1080 | 628  | -3.172091275 | PCCA                            |
| 12 | 81,000,000 | 81,150,000 | 1081 | 760  | -1.96375074  | PCCA                            |
| 12 | 81,075,000 | 81,225,000 | 1082 | 655  | -0.426611559 | GGACT,PCCA                      |
| 12 | 81,150,000 | 81,300,000 | 1083 | 501  | 0.180455795  | GGACT,PCCA,TMTC4                |
| 12 | 81,225,000 | 81,375,000 | 1084 | 654  | -0.643370643 | TMTC4                           |
| 12 | 81,300,000 | 81,450,000 | 1085 | 1302 | -1.399418028 | TMTC4                           |
| 12 | 81,375,000 | 81,525,000 | 1086 | 1532 | -0.891379958 |                                 |
| 12 | 81,450,000 | 81,600,000 | 1087 | 1355 | 0.085069746  | NALCN                           |
| 12 | 81,525,000 | 81,675,000 | 1088 | 1642 | 0.770341476  | NALCN                           |
| 12 | 81,600,000 | 81,750,000 | 1089 | 1416 | 0.941461415  | NALCN                           |
| 12 | 81,675,000 | 81,825,000 | 1090 | 1025 | 0.266802943  | NALCN                           |
| 12 | 81,750,000 | 81,900,000 | 1091 | 1124 | 0.708629718  | NALCN                           |
| 12 | 81,825,000 | 81,975,000 | 1092 | 1068 | 0.660479049  | NALCN                           |
| 12 | 81,900,000 | 82,050,000 | 1093 | 1215 | -0.526458589 | ITGBL1                          |
| 12 | 81,975,000 | 82,125,000 | 1094 | 1179 | -0.685730061 | ITGBL1                          |
| 12 | 82,050,000 | 82,200,000 | 1095 | 1305 | -0.279154512 | ITGBL1                          |
| 12 | 82,125,000 | 82,275,000 | 1096 | 1354 | -0.159794078 |                                 |
| 12 | 82,200,000 | 82,350,000 | 1097 | 847  | -0.043693647 |                                 |
| 12 | 82,275,000 | 82,425,000 | 1098 | 754  | -2.866080439 |                                 |
| 12 | 82,350,000 | 82,500,000 | 1099 | 857  | -2.755518522 |                                 |

|    |            |            |      |      |              |                                     |
|----|------------|------------|------|------|--------------|-------------------------------------|
| 12 | 82,425,000 | 82,575,000 | 1100 | 925  | -0.13100085  |                                     |
| 12 | 82,500,000 | 82,650,000 | 1101 | 1061 | -0.1073154   |                                     |
| 12 | 82,575,000 | 82,725,000 | 1102 | 1097 | -0.525413001 |                                     |
| 12 | 82,650,000 | 82,800,000 | 1103 | 1266 | -0.314824624 |                                     |
| 12 | 82,725,000 | 82,875,000 | 1104 | 1642 | 0.320572968  | TPP2                                |
| 12 | 82,800,000 | 82,950,000 | 1105 | 1879 | 0.629497261  | METTL21C,TPP2                       |
| 12 | 82,875,000 | 83,025,000 | 1106 | 1768 | 0.632018251  | CCDC168,KDELC1,METTL21C,TEX30,TPP2  |
| 12 | 82,950,000 | 83,100,000 | 1107 | 1344 | 0.396666255  | CCDC168,ERCC5,KDELC1,METTL21E,TEX30 |
| 12 | 83,025,000 | 83,175,000 | 1108 | 1000 | 0.264701263  | ERCC5,METTL21E                      |
| 12 | 83,100,000 | 83,250,000 | 1109 | 812  | 0.459186173  | METTL21E                            |
| 12 | 83,175,000 | 83,325,000 | 1110 | 1205 | -1.268630548 | SLC10A2                             |
| 12 | 83,250,000 | 83,400,000 | 1111 | 1314 | -1.872383893 | SLC10A2                             |
| 12 | 83,325,000 | 83,475,000 | 1112 | 1049 | -0.06759411  |                                     |
| 12 | 83,400,000 | 83,550,000 | 1113 | 964  | 0.750886668  |                                     |
| 12 | 83,475,000 | 83,625,000 | 1114 | 1051 | 0.221517582  |                                     |
| 12 | 83,550,000 | 83,700,000 | 1115 | 1426 | 0.571470227  |                                     |
| 12 | 83,625,000 | 83,775,000 | 1116 | 1576 | 1.00965794   |                                     |
| 12 | 83,700,000 | 83,850,000 | 1117 | 1788 | 0.44647168   |                                     |
| 12 | 83,775,000 | 83,925,000 | 1118 | 1710 | -0.269786468 |                                     |
| 12 | 83,850,000 | 84,000,000 | 1119 | 1702 | 0.643773154  |                                     |
| 12 | 83,925,000 | 84,075,000 | 1120 | 1924 | 1.198495614  |                                     |
| 12 | 84,000,000 | 84,150,000 | 1121 | 1954 | 1.384961385  |                                     |
| 12 | 84,075,000 | 84,225,000 | 1122 | 1841 | 1.310606032  |                                     |
| 12 | 84,150,000 | 84,300,000 | 1123 | 1774 | 0.695278647  |                                     |
| 12 | 84,225,000 | 84,375,000 | 1124 | 1589 | 0.408667689  |                                     |
| 12 | 84,300,000 | 84,450,000 | 1125 | 1390 | 0.211474859  |                                     |
| 12 | 84,375,000 | 84,525,000 | 1126 | 1571 | 0.470816171  |                                     |
| 12 | 84,450,000 | 84,600,000 | 1127 | 1689 | 0.627557989  |                                     |
| 12 | 84,525,000 | 84,675,000 | 1128 | 1831 | 0.28483763   |                                     |
| 12 | 84,600,000 | 84,750,000 | 1129 | 1842 | -0.316259168 |                                     |
| 12 | 84,675,000 | 84,825,000 | 1130 | 1630 | -0.716144552 |                                     |
| 12 | 84,750,000 | 84,900,000 | 1131 | 1015 | -0.74865668  |                                     |
| 12 | 84,825,000 | 84,975,000 | 1132 | 866  | 0.210928805  |                                     |
| 12 | 84,900,000 | 85,050,000 | 1133 | 865  | 0.551506611  |                                     |
| 12 | 84,975,000 | 85,125,000 | 1134 | 550  | 0.124882937  |                                     |
| 12 | 85,050,000 | 85,200,000 | 1135 | 734  | -0.719282006 |                                     |
| 12 | 85,125,000 | 85,275,000 | 1136 | 1058 | -0.125463705 |                                     |
| 12 | 85,200,000 | 85,350,000 | 1137 | 866  | 0.545468356  |                                     |
| 12 | 85,275,000 | 85,425,000 | 1138 | 479  | 0.118812958  |                                     |
| 12 | 85,350,000 | 85,500,000 | 1139 | 804  | -1.457357984 |                                     |
| 12 | 85,425,000 | 85,575,000 | 1140 | 962  | -0.967887206 |                                     |
| 12 | 85,500,000 | 85,650,000 | 1141 | 789  | 0.874133059  | ENSBTAG00000046889                  |
| 12 | 85,575,000 | 85,725,000 | 1142 | 784  | 0.577882824  | ENSBTAG00000046889                  |
| 12 | 85,650,000 | 85,800,000 | 1143 | 841  | -0.02679299  |                                     |
| 12 | 85,725,000 | 85,875,000 | 1144 | 788  | 0.032179105  |                                     |
| 12 | 85,800,000 | 85,950,000 | 1145 | 702  | -0.320589115 |                                     |
| 12 | 85,875,000 | 86,025,000 | 1146 | 727  | -0.195525512 |                                     |
| 12 | 85,950,000 | 86,100,000 | 1147 | 939  | -0.170707472 |                                     |
| 12 | 86,025,000 | 86,175,000 | 1148 | 1022 | 0.208415767  |                                     |
| 12 | 86,100,000 | 86,250,000 | 1149 | 605  | 0.665940077  | EFNB2                               |
| 12 | 86,175,000 | 86,325,000 | 1150 | 379  | 0.341536884  | ARGLU1,EFNB2                        |
| 12 | 86,250,000 | 86,400,000 | 1151 | 617  | 0.752582002  | ARGLU1,EFNB2                        |
| 12 | 86,325,000 | 86,475,000 | 1152 | 847  | 0.374328086  |                                     |

|    |            |            |      |      |              |                           |
|----|------------|------------|------|------|--------------|---------------------------|
| 12 | 86,400,000 | 86,550,000 | 1153 | 873  | -0.836757656 |                           |
| 12 | 86,475,000 | 86,625,000 | 1154 | 1186 | -0.646889236 |                           |
| 12 | 86,550,000 | 86,700,000 | 1155 | 1124 | -0.293861725 |                           |
| 12 | 86,625,000 | 86,775,000 | 1156 | 1214 | -0.188387173 |                           |
| 12 | 86,700,000 | 86,850,000 | 1157 | 1862 | 0.008556971  | FAM155A                   |
| 12 | 86,775,000 | 86,925,000 | 1158 | 1505 | 0.031738772  | FAM155A                   |
| 12 | 86,850,000 | 87,000,000 | 1159 | 851  | 0.065473161  | FAM155A                   |
| 12 | 86,925,000 | 87,075,000 | 1160 | 724  | -0.894315531 | FAM155A                   |
| 12 | 87,000,000 | 87,150,000 | 1161 | 780  | -0.817638398 | FAM155A                   |
| 12 | 87,075,000 | 87,225,000 | 1162 | 755  | 0.207089726  | FAM155A                   |
| 12 | 87,150,000 | 87,300,000 | 1163 | 790  | -0.568388461 | FAM155A                   |
| 12 | 87,225,000 | 87,375,000 | 1164 | 751  | -1.677609663 | FAM155A                   |
| 12 | 87,300,000 | 87,450,000 | 1165 | 458  | -1.812415496 | FAM155A                   |
| 12 | 87,375,000 | 87,525,000 | 1166 | 447  | -1.142414567 | FAM155A                   |
| 12 | 87,450,000 | 87,600,000 | 1167 | 469  | -0.722016936 |                           |
| 12 | 87,525,000 | 87,675,000 | 1168 | 589  | -0.317768253 | ABHD13,LIG4,TNFSF13B      |
| 12 | 87,600,000 | 87,750,000 | 1169 | 819  | 0.041632927  | ABHD13,LIG4,TNFSF13B      |
| 12 | 87,675,000 | 87,825,000 | 1170 | 685  | -0.733111066 | TNFSF13B                  |
| 12 | 87,750,000 | 87,900,000 | 1171 | 828  | -0.665201436 |                           |
| 12 | 87,825,000 | 87,975,000 | 1172 | 1062 | -0.291381593 | MYO16                     |
| 12 | 87,900,000 | 88,050,000 | 1173 | 877  | -1.17741151  | MYO16                     |
| 12 | 87,975,000 | 88,125,000 | 1174 | 775  | -4.15450966  | MYO16                     |
| 12 | 88,050,000 | 88,200,000 | 1175 | 573  | -3.227959707 | MYO16                     |
| 12 | 88,125,000 | 88,275,000 | 1176 | 452  | -0.027680891 | MYO16                     |
| 12 | 88,200,000 | 88,350,000 | 1177 | 601  | 0.088134636  | MYO16                     |
| 12 | 88,275,000 | 88,425,000 | 1178 | 483  | -0.222404758 | MYO16                     |
| 12 | 88,350,000 | 88,500,000 | 1179 | 377  | -0.03463236  |                           |
| 12 | 88,425,000 | 88,575,000 | 1180 | 594  | 1.180559718  |                           |
| 12 | 88,500,000 | 88,650,000 | 1181 | 530  | 1.412310094  |                           |
| 12 | 88,575,000 | 88,725,000 | 1182 | 597  | -1.614947285 | IRS2                      |
| 12 | 88,650,000 | 88,800,000 | 1183 | 976  | -0.250787956 | IRS2                      |
| 12 | 88,725,000 | 88,875,000 | 1184 | 779  | 0.597099081  |                           |
| 12 | 88,800,000 | 88,950,000 | 1185 | 739  | -0.246037653 | COL4A1                    |
| 12 | 88,875,000 | 89,025,000 | 1186 | 759  | 0.366017082  | COL4A1                    |
| 12 | 88,950,000 | 89,100,000 | 1187 | 496  | 0.790243633  | COL4A1                    |
| 12 | 89,025,000 | 89,175,000 | 1188 | 716  | 0.361113035  | COL4A2                    |
| 12 | 89,100,000 | 89,250,000 | 1189 | 814  | 0.472796773  | CARKD,COL4A2,RAB20        |
| 12 | 89,175,000 | 89,325,000 | 1190 | 749  | 0.370284905  | ANKRD10,CARKD,CARS2,RAB20 |
| 12 | 89,250,000 | 89,400,000 | 1191 | 629  | 0.105054755  | ANKRD10,CARS2,ING1        |
| 12 | 89,325,000 | 89,475,000 | 1192 | 448  | -0.198930116 | ANKRD10,ARHGEF7,ING1      |
| 12 | 89,400,000 | 89,550,000 | 1193 | 536  | -0.424928318 | ARHGEF7                   |
| 12 | 89,475,000 | 89,625,000 | 1194 | 658  | -0.218226544 | ARHGEF7,TEX29             |
| 12 | 89,550,000 | 89,700,000 | 1195 | 839  | 0.253501612  | ARHGEF7,TEX29             |
| 12 | 89,625,000 | 89,775,000 | 1196 | 789  | 0.262260833  |                           |
| 12 | 89,700,000 | 89,850,000 | 1197 | 581  | -0.241989717 |                           |
| 12 | 89,775,000 | 89,925,000 | 1198 | 626  | 0.602063427  |                           |
| 12 | 89,850,000 | 90,000,000 | 1199 | 599  | 0.942714157  |                           |
| 12 | 89,925,000 | 90,075,000 | 1200 | 388  | -0.387302308 | SOX1                      |
| 12 | 90,000,000 | 90,150,000 | 1201 | 472  | -0.742655284 | SOX1                      |
| 12 | 90,075,000 | 90,225,000 | 1202 | 676  | -0.189888881 | TUBGCP3                   |
| 12 | 90,150,000 | 90,300,000 | 1203 | 845  | 0.565307413  | TUBGCP3                   |
| 12 | 90,225,000 | 90,375,000 | 1204 | 1041 | 0.558470747  | ATP11A,TUBGCP3            |
| 12 | 90,300,000 | 90,450,000 | 1205 | 753  | 0.1047732    | ATP11A,MCF2L              |

|    |            |            |      |      |              |                                                          |
|----|------------|------------|------|------|--------------|----------------------------------------------------------|
| 12 | 90,375,000 | 90,525,000 | 1206 | 379  | -1.042487097 | ATP11A,F10,F7,MCF2L                                      |
| 12 | 90,450,000 | 90,600,000 | 1207 | 352  | -1.72493899  | CUL4A,F10,F7,MCF2L,PCID2,PROZ                            |
| 12 | 90,525,000 | 90,675,000 | 1208 | 280  | -2.563496214 | ADPRHL1,CUL4A,F10,GRTP1,LAMP1,PCID2,PROZ                 |
| 12 | 90,600,000 | 90,750,000 | 1209 | 259  | -1.210001376 | ADPRHL1,DCUN1D2,GRTP1,LAMP1,TFDP1,TMCO3,TMEM255B         |
| 12 | 90,675,000 | 90,825,000 | 1210 | 487  | -1.03009656  | ADPRHL1,ATP4B,DCUN1D2,GAS6,GRK1,TFDP1,TMCO3,TMEM255B     |
| 12 | 90,750,000 | 90,900,000 | 1211 | 820  | -0.20122579  | ATP4B,GAS6,GRK1,TFDP1,TMEM255B                           |
| 12 | 90,825,000 | 90,975,000 | 1212 | 1138 | -0.326023748 | GAS6,MGC134473,RASA3                                     |
| 12 | 90,900,000 | 91,050,000 | 1213 | 917  | -1.348170053 | CDC16,MGC134473,RASA3,RPL22                              |
| 12 | 90,975,000 | 91,125,000 | 1214 | 471  | -1.7616228   | CDC16,CHAMP1,RASA3,RPL22,UPF3A                           |
| 12 | 91,050,000 | 91,163,125 | 1215 | 306  | -1.03786734  | CDC16,CHAMP1,UPF3A,ENSBTAG00000023187,ENSBTAG00000038732 |
| 13 | 0          | 150,000    | 1    | 517  | 1.117866175  |                                                          |
| 13 | 75,000     | 225,000    | 2    | 785  | 1.397525322  | OR4S2                                                    |
| 13 | 150,000    | 300,000    | 3    | 685  | 1.125659103  | OR4S2                                                    |
| 13 | 225,000    | 375,000    | 4    | 688  | 0.873693407  | ENSBTAG00000024891                                       |
| 13 | 300,000    | 450,000    | 5    | 927  | 0.851602342  | ENSBTAG00000024891,ENSBTAG00000025720                    |
| 13 | 375,000    | 525,000    | 6    | 1085 | 0.851257659  | ENSBTAG00000025720                                       |
| 13 | 450,000    | 600,000    | 7    | 921  | 0.996343884  | TMX4                                                     |
| 13 | 525,000    | 675,000    | 8    | 633  | 0.825664318  | TMX4                                                     |
| 13 | 600,000    | 750,000    | 9    | 890  | 0.087479029  |                                                          |
| 13 | 675,000    | 825,000    | 10   | 977  | -0.192677075 | PLCB1                                                    |
| 13 | 750,000    | 900,000    | 11   | 954  | 0.137722089  | PLCB1                                                    |
| 13 | 825,000    | 975,000    | 12   | 1164 | 1.069171704  | PLCB1                                                    |
| 13 | 900,000    | 1,050,000  | 13   | 1354 | 0.604936712  | PLCB1                                                    |
| 13 | 975,000    | 1,125,000  | 14   | 1484 | -0.146378154 | PLCB1                                                    |
| 13 | 1,050,000  | 1,200,000  | 15   | 1247 | 0.534419995  | PLCB1                                                    |
| 13 | 1,125,000  | 1,275,000  | 16   | 996  | 0.83686039   | PLCB1                                                    |
| 13 | 1,200,000  | 1,350,000  | 17   | 1263 | -0.725948752 | PLCB1                                                    |
| 13 | 1,275,000  | 1,425,000  | 18   | 1205 | -0.898877076 | PLCB1                                                    |
| 13 | 1,350,000  | 1,500,000  | 19   | 1377 | -1.153166951 | PLCB1                                                    |
| 13 | 1,425,000  | 1,575,000  | 20   | 1541 | -1.031537397 | PLCB1                                                    |
| 13 | 1,500,000  | 1,650,000  | 21   | 1051 | 0.332776163  | PLCB1                                                    |
| 13 | 1,575,000  | 1,725,000  | 22   | 821  | 0.829494803  | PLCB1                                                    |
| 13 | 1,650,000  | 1,800,000  | 23   | 658  | 0.805494354  | PLCB1                                                    |
| 13 | 1,725,000  | 1,875,000  | 24   | 724  | 0.555223133  |                                                          |
| 13 | 1,800,000  | 1,950,000  | 25   | 836  | 0.381963831  |                                                          |
| 13 | 1,875,000  | 2,025,000  | 26   | 997  | 0.452267418  |                                                          |
| 13 | 1,950,000  | 2,100,000  | 27   | 1130 | 0.295207723  |                                                          |
| 13 | 2,025,000  | 2,175,000  | 28   | 1278 | 0.262765411  |                                                          |
| 13 | 2,100,000  | 2,250,000  | 29   | 1082 | 0.161713608  | PLCB4                                                    |
| 13 | 2,175,000  | 2,325,000  | 30   | 1088 | -1.021710292 | PLCB4                                                    |
| 13 | 2,250,000  | 2,400,000  | 31   | 1626 | -0.628818697 | PLCB4                                                    |
| 13 | 2,325,000  | 2,475,000  | 32   | 1468 | 0.529634433  | LAMP5,PAK7,PLCB4                                         |
| 13 | 2,400,000  | 2,550,000  | 33   | 1374 | 0.95932603   | LAMP5,PAK7,PLCB4                                         |
| 13 | 2,475,000  | 2,625,000  | 34   | 1384 | 0.899386611  | PAK7                                                     |
| 13 | 2,550,000  | 2,700,000  | 35   | 1460 | 1.225856008  |                                                          |
| 13 | 2,625,000  | 2,775,000  | 36   | 1454 | 1.269201873  |                                                          |
| 13 | 2,700,000  | 2,850,000  | 37   | 1136 | 0.090782408  | ENSBTAG00000046074                                       |
| 13 | 2,775,000  | 2,925,000  | 38   | 861  | -0.563509784 | MRPL33,ENSBTAG00000046074                                |
| 13 | 2,850,000  | 3,000,000  | 39   | 739  | 0.424423893  | MRPL33                                                   |
| 13 | 2,925,000  | 3,075,000  | 40   | 654  | 0.320084802  |                                                          |
| 13 | 3,000,000  | 3,150,000  | 41   | 1111 | 0.384269231  | ANKEF1                                                   |



|    |           |           |    |      |              |                    |
|----|-----------|-----------|----|------|--------------|--------------------|
| 13 | 3,075,000 | 3,225,000 | 42 | 1422 | 0.491315421  | ANKEF1             |
| 13 | 3,150,000 | 3,300,000 | 43 | 962  | 0.448978795  | ANKEF1             |
| 13 | 3,225,000 | 3,375,000 | 44 | 931  | 0.534541453  | SNAP25             |
| 13 | 3,300,000 | 3,450,000 | 45 | 1323 | 0.360352395  | SNAP25             |
| 13 | 3,375,000 | 3,525,000 | 46 | 1709 | 0.342527006  | SNAP25             |
| 13 | 3,450,000 | 3,600,000 | 47 | 1635 | 0.224213152  | MKKS,SNAP25        |
| 13 | 3,525,000 | 3,675,000 | 48 | 1323 | -0.124645162 | MKKS               |
| 13 | 3,600,000 | 3,750,000 | 49 | 1385 | 0.361817805  | SLX4IP             |
| 13 | 3,675,000 | 3,825,000 | 50 | 1157 | 0.623853685  | SLX4IP             |
| 13 | 3,750,000 | 3,900,000 | 51 | 771  | -0.228521454 | JAG1,SLX4IP        |
| 13 | 3,825,000 | 3,975,000 | 52 | 840  | -0.782973063 | JAG1               |
| 13 | 3,900,000 | 4,050,000 | 53 | 976  | -0.594698639 |                    |
| 13 | 3,975,000 | 4,125,000 | 54 | 809  | -0.726395458 |                    |
| 13 | 4,050,000 | 4,200,000 | 55 | 719  | -0.233007267 |                    |
| 13 | 4,125,000 | 4,275,000 | 56 | 903  | 0.636448358  |                    |
| 13 | 4,200,000 | 4,350,000 | 57 | 917  | 0.798797413  |                    |
| 13 | 4,275,000 | 4,425,000 | 58 | 1003 | 0.171291109  |                    |
| 13 | 4,350,000 | 4,500,000 | 59 | 980  | 0.029368985  |                    |
| 13 | 4,425,000 | 4,575,000 | 60 | 843  | -0.896143791 |                    |
| 13 | 4,500,000 | 4,650,000 | 61 | 700  | -0.577639753 |                    |
| 13 | 4,575,000 | 4,725,000 | 62 | 841  | 1.070410656  |                    |
| 13 | 4,650,000 | 4,800,000 | 63 | 939  | 0.758838712  |                    |
| 13 | 4,725,000 | 4,875,000 | 64 | 775  | 0.398884516  |                    |
| 13 | 4,800,000 | 4,950,000 | 65 | 984  | -1.732335875 |                    |
| 13 | 4,875,000 | 5,025,000 | 66 | 1106 | -1.688032079 |                    |
| 13 | 4,950,000 | 5,100,000 | 67 | 915  | -0.869376776 |                    |
| 13 | 5,025,000 | 5,175,000 | 68 | 786  | -2.161684481 |                    |
| 13 | 5,100,000 | 5,250,000 | 69 | 1186 | -1.721191905 |                    |
| 13 | 5,175,000 | 5,325,000 | 70 | 1338 | -0.061760331 |                    |
| 13 | 5,250,000 | 5,400,000 | 71 | 738  | 0.827249083  |                    |
| 13 | 5,325,000 | 5,475,000 | 72 | 190  | -0.420257696 | SRY                |
| 13 | 5,400,000 | 5,550,000 | 73 | 30   | -10.9616481  | SRY                |
| 13 | 5,475,000 | 5,625,000 | 74 | 344  | 0.789184971  | BTBD3              |
| 13 | 5,550,000 | 5,700,000 | 75 | 1123 | 0.931170237  | BTBD3              |
| 13 | 5,625,000 | 5,775,000 | 76 | 1591 | 0.856017205  | ENSBTAG00000045631 |
| 13 | 5,700,000 | 5,850,000 | 77 | 1535 | 0.367584903  | ENSBTAG00000045631 |
| 13 | 5,775,000 | 5,925,000 | 78 | 1365 | -0.767998967 |                    |
| 13 | 5,850,000 | 6,000,000 | 79 | 1434 | -0.431777351 |                    |
| 13 | 5,925,000 | 6,075,000 | 80 | 1570 | -0.383175069 |                    |
| 13 | 6,000,000 | 6,150,000 | 81 | 1436 | -0.582055266 |                    |
| 13 | 6,075,000 | 6,225,000 | 82 | 1516 | -0.858666541 |                    |
| 13 | 6,150,000 | 6,300,000 | 83 | 1528 | -0.652170222 |                    |
| 13 | 6,225,000 | 6,375,000 | 84 | 1168 | -0.601040279 |                    |
| 13 | 6,300,000 | 6,450,000 | 85 | 909  | -1.041155166 |                    |
| 13 | 6,375,000 | 6,525,000 | 86 | 1277 | -0.000154116 |                    |
| 13 | 6,450,000 | 6,600,000 | 87 | 1877 | 0.521521818  |                    |
| 13 | 6,525,000 | 6,675,000 | 88 | 1648 | 0.602543798  |                    |
| 13 | 6,600,000 | 6,750,000 | 89 | 1318 | 0.386087972  | SPTLC3             |
| 13 | 6,675,000 | 6,825,000 | 90 | 1341 | 0.530168329  | SPTLC3             |
| 13 | 6,750,000 | 6,900,000 | 91 | 1313 | 0.427514945  | SPTLC3             |
| 13 | 6,825,000 | 6,975,000 | 92 | 938  | 0.29384512   | SPTLC3             |
| 13 | 6,900,000 | 7,050,000 | 93 | 754  | -0.18152883  | C20ORF82           |
| 13 | 6,975,000 | 7,125,000 | 94 | 922  | -0.598001472 | C20ORF82           |

|    |            |            |     |      |              |                         |
|----|------------|------------|-----|------|--------------|-------------------------|
| 13 | 7,050,000  | 7,200,000  | 95  | 653  | -0.175413507 | C20ORF82,TASP1          |
| 13 | 7,125,000  | 7,275,000  | 96  | 410  | 0.802344195  | TASP1                   |
| 13 | 7,200,000  | 7,350,000  | 97  | 385  | 0.629993447  | TASP1                   |
| 13 | 7,275,000  | 7,425,000  | 98  | 518  | 0.930599894  | TASP1                   |
| 13 | 7,350,000  | 7,500,000  | 99  | 501  | 1.083700845  | ESF1,TASP1              |
| 13 | 7,425,000  | 7,575,000  | 100 | 493  | -1.244863901 | C13H20orf7,ESF1,SEL1L2  |
| 13 | 7,500,000  | 7,650,000  | 101 | 924  | 0.035695513  | C13H20orf7,ESF1,SEL1L2  |
| 13 | 7,575,000  | 7,725,000  | 102 | 864  | 0.748205251  | SEL1L2                  |
| 13 | 7,650,000  | 7,800,000  | 103 | 464  | -0.32838796  |                         |
| 13 | 7,725,000  | 7,875,000  | 104 | 508  | -0.457323498 |                         |
| 13 | 7,800,000  | 7,950,000  | 105 | 713  | 0.254148899  |                         |
| 13 | 7,875,000  | 8,025,000  | 106 | 678  | 0.352325741  |                         |
| 13 | 7,950,000  | 8,100,000  | 107 | 499  | -0.419817376 | FLRT3                   |
| 13 | 8,025,000  | 8,175,000  | 108 | 423  | -0.088157123 | FLRT3                   |
| 13 | 8,100,000  | 8,250,000  | 109 | 1030 | 0.227801146  |                         |
| 13 | 8,175,000  | 8,325,000  | 110 | 1050 | 0.444775363  |                         |
| 13 | 8,250,000  | 8,400,000  | 111 | 815  | 1.238360338  |                         |
| 13 | 8,325,000  | 8,475,000  | 112 | 1263 | 0.705874153  |                         |
| 13 | 8,400,000  | 8,550,000  | 113 | 1210 | 0.244751969  |                         |
| 13 | 8,475,000  | 8,625,000  | 114 | 1217 | 0.256175981  |                         |
| 13 | 8,550,000  | 8,700,000  | 115 | 1261 | 0.453719438  |                         |
| 13 | 8,625,000  | 8,775,000  | 116 | 1178 | 1.048295311  |                         |
| 13 | 8,700,000  | 8,850,000  | 117 | 1273 | 0.521815338  |                         |
| 13 | 8,775,000  | 8,925,000  | 118 | 1488 | 0.25207022   |                         |
| 13 | 8,850,000  | 9,000,000  | 119 | 1657 | 0.235061411  |                         |
| 13 | 8,925,000  | 9,075,000  | 120 | 1561 | 0.144111446  |                         |
| 13 | 9,000,000  | 9,150,000  | 121 | 1613 | 0.484094139  |                         |
| 13 | 9,075,000  | 9,225,000  | 122 | 1682 | 0.734526884  |                         |
| 13 | 9,150,000  | 9,300,000  | 123 | 1486 | 0.62954839   |                         |
| 13 | 9,225,000  | 9,375,000  | 124 | 1427 | 0.649970143  |                         |
| 13 | 9,300,000  | 9,450,000  | 125 | 1353 | 0.400610553  |                         |
| 13 | 9,375,000  | 9,525,000  | 126 | 1286 | 0.184356774  |                         |
| 13 | 9,450,000  | 9,600,000  | 127 | 1282 | 0.409670052  |                         |
| 13 | 9,525,000  | 9,675,000  | 128 | 1455 | 0.055975076  |                         |
| 13 | 9,600,000  | 9,750,000  | 129 | 1700 | -0.379321153 |                         |
| 13 | 9,675,000  | 9,825,000  | 130 | 1468 | 0.00652735   |                         |
| 13 | 9,750,000  | 9,900,000  | 131 | 1302 | -0.156661093 | MACROD2                 |
| 13 | 9,825,000  | 9,975,000  | 132 | 1328 | -0.478494034 | MACROD2                 |
| 13 | 9,900,000  | 10,050,000 | 133 | 1357 | 0.661490106  | MACROD2                 |
| 13 | 9,975,000  | 10,125,000 | 134 | 1606 | 1.201200369  | MACROD2                 |
| 13 | 10,050,000 | 10,200,000 | 135 | 1775 | 1.004687398  |                         |
| 13 | 10,125,000 | 10,275,000 | 136 | 1625 | 0.456225511  | KIF16B                  |
| 13 | 10,200,000 | 10,350,000 | 137 | 1001 | -0.15532755  | KIF16B                  |
| 13 | 10,275,000 | 10,425,000 | 138 | 718  | -0.683517097 | KIF16B                  |
| 13 | 10,350,000 | 10,500,000 | 139 | 909  | -0.836191271 | KIF16B                  |
| 13 | 10,425,000 | 10,575,000 | 140 | 923  | -3.302708672 | KIF16B                  |
| 13 | 10,500,000 | 10,650,000 | 141 | 782  | -2.637973527 | KIF16B                  |
| 13 | 10,575,000 | 10,725,000 | 142 | 1251 | 1.165100307  |                         |
| 13 | 10,650,000 | 10,800,000 | 143 | 1306 | 0.698977906  | OTOR,SNRPB2             |
| 13 | 10,725,000 | 10,875,000 | 144 | 654  | -0.128027081 | NANP,OTOR,SNRPB2        |
| 13 | 10,800,000 | 10,950,000 | 145 | 748  | -1.116164795 | NANP,ENSBTAG00000023169 |
| 13 | 10,875,000 | 11,025,000 | 146 | 1114 | 0.047987897  | NANP,ENSBTAG00000023169 |
| 13 | 10,950,000 | 11,100,000 | 147 | 1037 | 0.570005401  | ENSBTAG00000023169      |

|    |            |            |     |      |              |                                  |
|----|------------|------------|-----|------|--------------|----------------------------------|
| 13 | 11,025,000 | 11,175,000 | 148 | 898  | 0.412126269  | ENSBTAG00000004354               |
| 13 | 11,100,000 | 11,250,000 | 149 | 1570 | 0.357460464  | ENSBTAG00000004354               |
| 13 | 11,175,000 | 11,325,000 | 150 | 1576 | 0.353610161  | ANKRD26,ENSBTAG00000004354       |
| 13 | 11,250,000 | 11,400,000 | 151 | 999  | -0.358766967 | ANKRD26,ENSBTAG00000040046       |
| 13 | 11,325,000 | 11,475,000 | 152 | 917  | -0.298690585 | ANKRD26,ENSBTAG00000040046       |
| 13 | 11,400,000 | 11,550,000 | 153 | 987  | 0.200285627  | CCDC3,ENSBTAG00000040046         |
| 13 | 11,475,000 | 11,625,000 | 154 | 1003 | 0.375084801  | CCDC3                            |
| 13 | 11,550,000 | 11,700,000 | 155 | 753  | 0.461729536  | CCDC3                            |
| 13 | 11,625,000 | 11,775,000 | 156 | 734  | -1.593888697 | CAMK1D,CCDC3                     |
| 13 | 11,700,000 | 11,850,000 | 157 | 1023 | -3.429416157 | CAMK1D                           |
| 13 | 11,775,000 | 11,925,000 | 158 | 1063 | -3.890523462 | CAMK1D                           |
| 13 | 11,850,000 | 12,000,000 | 159 | 881  | -3.031139064 |                                  |
| 13 | 11,925,000 | 12,075,000 | 160 | 770  | -2.852776401 |                                  |
| 13 | 12,000,000 | 12,150,000 | 161 | 920  | -1.683414353 |                                  |
| 13 | 12,075,000 | 12,225,000 | 162 | 1272 | 1.180219918  | CDC123                           |
| 13 | 12,150,000 | 12,300,000 | 163 | 1001 | 1.252580462  | CDC123,DHTKD1,NUDT5,SEC61A2      |
| 13 | 12,225,000 | 12,375,000 | 164 | 817  | 0.105136127  | CDC123,DHTKD1,NUDT5,SEC61A2,UPF2 |
| 13 | 12,300,000 | 12,450,000 | 165 | 906  | -0.23627594  | DHTKD1,UPF2                      |
| 13 | 12,375,000 | 12,525,000 | 166 | 950  | 0.75274411   | PROSER2,UPF2                     |
| 13 | 12,450,000 | 12,600,000 | 167 | 1041 | 0.932928384  | ECHDC3,PROSER2,UPF2              |
| 13 | 12,525,000 | 12,675,000 | 168 | 1095 | 1.063123908  | ECHDC3,PROSER2                   |
| 13 | 12,600,000 | 12,750,000 | 169 | 1135 | 1.304956048  |                                  |
| 13 | 12,675,000 | 12,825,000 | 170 | 1307 | 1.17674012   | USP6NL                           |
| 13 | 12,750,000 | 12,900,000 | 171 | 1695 | 1.194211017  | USP6NL                           |
| 13 | 12,825,000 | 12,975,000 | 172 | 1512 | 1.199182016  | CELF2,USP6NL                     |
| 13 | 12,900,000 | 13,050,000 | 173 | 1062 | 0.649720384  | CELF2                            |
| 13 | 12,975,000 | 13,125,000 | 174 | 934  | 0.293896391  | CELF2                            |
| 13 | 13,050,000 | 13,200,000 | 175 | 1206 | 0.811460368  |                                  |
| 13 | 13,125,000 | 13,275,000 | 176 | 1542 | 0.595276326  |                                  |
| 13 | 13,200,000 | 13,350,000 | 177 | 1773 | 0.460687742  |                                  |
| 13 | 13,275,000 | 13,425,000 | 178 | 1718 | 0.714005457  |                                  |
| 13 | 13,350,000 | 13,500,000 | 179 | 1486 | 1.016818178  |                                  |
| 13 | 13,425,000 | 13,575,000 | 180 | 1466 | 0.870930905  |                                  |
| 13 | 13,500,000 | 13,650,000 | 181 | 1242 | 0.805766071  |                                  |
| 13 | 13,575,000 | 13,725,000 | 182 | 1184 | -1.435448212 |                                  |
| 13 | 13,650,000 | 13,800,000 | 183 | 1322 | -1.03016467  |                                  |
| 13 | 13,725,000 | 13,875,000 | 184 | 1063 | 1.175135264  |                                  |
| 13 | 13,800,000 | 13,950,000 | 185 | 852  | 0.832547237  |                                  |
| 13 | 13,875,000 | 14,025,000 | 186 | 597  | 0.579107365  |                                  |
| 13 | 13,950,000 | 14,100,000 | 187 | 726  | 0.348646353  |                                  |
| 13 | 14,025,000 | 14,175,000 | 188 | 737  | 0.5511867    |                                  |
| 13 | 14,100,000 | 14,250,000 | 189 | 482  | 1.2585625    |                                  |
| 13 | 14,175,000 | 14,325,000 | 190 | 780  | 1.27466666   |                                  |
| 13 | 14,250,000 | 14,400,000 | 191 | 676  | 0.319154745  |                                  |
| 13 | 14,325,000 | 14,475,000 | 192 | 580  | -2.402920584 |                                  |
| 13 | 14,400,000 | 14,550,000 | 193 | 1182 | -0.550690149 |                                  |
| 13 | 14,475,000 | 14,625,000 | 194 | 1642 | 0.694263048  |                                  |
| 13 | 14,550,000 | 14,700,000 | 195 | 1771 | 0.458819492  |                                  |
| 13 | 14,625,000 | 14,775,000 | 196 | 1809 | 0.235163641  |                                  |
| 13 | 14,700,000 | 14,850,000 | 197 | 1931 | 0.483832085  |                                  |
| 13 | 14,775,000 | 14,925,000 | 198 | 2024 | 0.378954695  |                                  |
| 13 | 14,850,000 | 15,000,000 | 199 | 1887 | 0.317878559  |                                  |
| 13 | 14,925,000 | 15,075,000 | 200 | 1650 | 0.798450945  |                                  |

|    |            |            |     |      |              |                                                                                     |
|----|------------|------------|-----|------|--------------|-------------------------------------------------------------------------------------|
| 13 | 15,000,000 | 15,150,000 | 201 | 1429 | 0.868676008  |                                                                                     |
| 13 | 15,075,000 | 15,225,000 | 202 | 1593 | 0.946462871  | ENSBTAG00000048047                                                                  |
| 13 | 15,150,000 | 15,300,000 | 203 | 1726 | 1.097606128  | ENSBTAG00000048047                                                                  |
| 13 | 15,225,000 | 15,375,000 | 204 | 1080 | 1.130073464  |                                                                                     |
| 13 | 15,300,000 | 15,450,000 | 205 | 363  | 1.212916502  |                                                                                     |
| 13 | 15,375,000 | 15,525,000 | 206 | 361  | 1.157156925  |                                                                                     |
| 13 | 15,450,000 | 15,600,000 | 207 | 495  | 0.998347048  |                                                                                     |
| 13 | 15,525,000 | 15,675,000 | 208 | 580  | 1.247114738  |                                                                                     |
| 13 | 15,600,000 | 15,750,000 | 209 | 447  | 1.384705406  |                                                                                     |
| 13 | 15,675,000 | 15,825,000 | 210 | 346  | 0.157956281  |                                                                                     |
| 13 | 15,750,000 | 15,900,000 | 211 | 554  | -0.670622886 |                                                                                     |
| 13 | 15,825,000 | 15,975,000 | 212 | 731  | -0.052515703 |                                                                                     |
| 13 | 15,900,000 | 16,050,000 | 213 | 627  | -0.057356175 | GATA3,TAF3                                                                          |
| 13 | 15,975,000 | 16,125,000 | 214 | 399  | -1.757660417 | GATA3,TAF3                                                                          |
| 13 | 16,050,000 | 16,200,000 | 215 | 417  | -0.404816978 | ATP5C1,KIN,TAF3                                                                     |
| 13 | 16,125,000 | 16,275,000 | 216 | 579  | 0.496764572  | ATP5C1,ITIH2,KIN,TAF3                                                               |
| 13 | 16,200,000 | 16,350,000 | 217 | 859  | 0.320220269  | ITIH2,ITIH5,KIN                                                                     |
| 13 | 16,275,000 | 16,425,000 | 218 | 1219 | 0.653389433  | ITIH5,SFMBT2                                                                        |
| 13 | 16,350,000 | 16,500,000 | 219 | 1428 | 0.580564887  | ITIH5,SFMBT2                                                                        |
| 13 | 16,425,000 | 16,575,000 | 220 | 1435 | 0.367832457  | SFMBT2                                                                              |
| 13 | 16,500,000 | 16,650,000 | 221 | 1243 | 0.769423991  | SFMBT2                                                                              |
| 13 | 16,575,000 | 16,725,000 | 222 | 924  | 0.606083864  | SFMBT2                                                                              |
| 13 | 16,650,000 | 16,800,000 | 223 | 817  | 0.194196362  |                                                                                     |
| 13 | 16,725,000 | 16,875,000 | 224 | 954  | 0.839206251  |                                                                                     |
| 13 | 16,800,000 | 16,950,000 | 225 | 912  | 0.470240489  |                                                                                     |
| 13 | 16,875,000 | 17,025,000 | 226 | 579  | -0.114896308 |                                                                                     |
| 13 | 16,950,000 | 17,100,000 | 227 | 539  | 0.017879973  | PRKCQ                                                                               |
| 13 | 17,025,000 | 17,175,000 | 228 | 713  | -0.067964621 | PRKCQ                                                                               |
| 13 | 17,100,000 | 17,250,000 | 229 | 590  | 0.190961366  | PRKCQ                                                                               |
| 13 | 17,175,000 | 17,325,000 | 230 | 712  | 1.039664809  | PRKCQ                                                                               |
| 13 | 17,250,000 | 17,400,000 | 231 | 1063 | 0.877433676  | PFKFB3                                                                              |
| 13 | 17,325,000 | 17,475,000 | 232 | 898  | 0.430250518  | PFKFB3                                                                              |
| 13 | 17,400,000 | 17,550,000 | 233 | 765  | 0.627678555  | IL2RA,PFKFB3,RBM17                                                                  |
| 13 | 17,475,000 | 17,625,000 | 234 | 807  | 0.558400342  | IL15RA,IL2RA,RBM17                                                                  |
| 13 | 17,550,000 | 17,700,000 | 235 | 855  | 0.128224329  | FBXO18,IL15RA,IL2RA                                                                 |
| 13 | 17,625,000 | 17,775,000 | 236 | 1137 | 0.169484377  | FBXO18,IL15RA,ENSBTAG00000036222                                                    |
| 13 | 17,700,000 | 17,850,000 | 237 | 1322 | 0.597972746  | ENSBTAG00000017012,ENSBTAG00000022931,ENSBTAG00000036222                            |
| 13 | 17,775,000 | 17,925,000 | 238 | 1086 | 0.757846562  | ANKRD26,ENSBTAG00000017012,ENSBTAG00000022931,ENSBTAG00000034145,ENSBTAG00000036222 |
| 13 | 17,850,000 | 18,000,000 | 239 | 865  | 0.265802409  | ANKRD26,YME1L1,ENSBTAG00000022931,ENSBTAG00000034145                                |
| 13 | 17,925,000 | 18,075,000 | 240 | 933  | 0.573767783  | ACBD5,ANKRD26,MASTL,YME1L1                                                          |
| 13 | 18,000,000 | 18,150,000 | 241 | 800  | 1.125193144  | ABI1,ACBD5,MASTL,YME1L1                                                             |
| 13 | 18,075,000 | 18,225,000 | 242 | 658  | 0.948502613  | ABI1,ACBD5,PDSS1                                                                    |
| 13 | 18,150,000 | 18,300,000 | 243 | 917  | 0.653821582  | ABI1,APBB1IP,PDSS1                                                                  |
| 13 | 18,225,000 | 18,375,000 | 244 | 820  | 0.564421703  | APBB1IP,CCNY                                                                        |
| 13 | 18,300,000 | 18,450,000 | 245 | 440  | 0.399622123  | APBB1IP,CCNY                                                                        |
| 13 | 18,375,000 | 18,525,000 | 246 | 350  | 0.38742843   | CCNY,CREM                                                                           |
| 13 | 18,450,000 | 18,600,000 | 247 | 306  | 0.678158266  | CREM,CUL2                                                                           |
| 13 | 18,525,000 | 18,675,000 | 248 | 421  | 0.331783522  | CREM,CUL2                                                                           |
| 13 | 18,600,000 | 18,750,000 | 249 | 502  | -0.621219152 | CUL2                                                                                |
| 13 | 18,675,000 | 18,825,000 | 250 | 517  | -0.703263142 |                                                                                     |

|    |            |            |     |      |              |                              |
|----|------------|------------|-----|------|--------------|------------------------------|
| 13 | 18,750,000 | 18,900,000 | 251 | 452  | -0.06867948  |                              |
| 13 | 18,825,000 | 18,975,000 | 252 | 369  | -0.026730279 |                              |
| 13 | 18,900,000 | 19,050,000 | 253 | 654  | 0.799713636  | PARD3                        |
| 13 | 18,975,000 | 19,125,000 | 254 | 689  | 1.29978097   | PARD3                        |
| 13 | 19,050,000 | 19,200,000 | 255 | 664  | 0.591473857  | PARD3                        |
| 13 | 19,125,000 | 19,275,000 | 256 | 765  | 0.280859223  | PARD3                        |
| 13 | 19,200,000 | 19,350,000 | 257 | 830  | -0.765842676 | PARD3                        |
| 13 | 19,275,000 | 19,425,000 | 258 | 1027 | -0.630582468 | PARD3                        |
| 13 | 19,350,000 | 19,500,000 | 259 | 794  | -0.347286741 |                              |
| 13 | 19,425,000 | 19,575,000 | 260 | 744  | -1.735253858 |                              |
| 13 | 19,500,000 | 19,650,000 | 261 | 903  | -1.510999031 |                              |
| 13 | 19,575,000 | 19,725,000 | 262 | 578  | -0.789610375 |                              |
| 13 | 19,650,000 | 19,800,000 | 263 | 726  | -0.103489672 |                              |
| 13 | 19,725,000 | 19,875,000 | 264 | 977  | -0.359668335 |                              |
| 13 | 19,800,000 | 19,950,000 | 265 | 820  | -0.458356286 | NRP1                         |
| 13 | 19,875,000 | 20,025,000 | 266 | 667  | -0.025106195 | NRP1                         |
| 13 | 19,950,000 | 20,100,000 | 267 | 681  | -0.217957436 | NRP1                         |
| 13 | 20,025,000 | 20,175,000 | 268 | 816  | 0.119017992  | NRP1                         |
| 13 | 20,100,000 | 20,250,000 | 269 | 739  | 0.561746798  | ITGB1                        |
| 13 | 20,175,000 | 20,325,000 | 270 | 778  | 1.038842746  | ITGB1                        |
| 13 | 20,250,000 | 20,400,000 | 271 | 959  | 1.222186374  | ITGB1                        |
| 13 | 20,325,000 | 20,475,000 | 272 | 876  | 1.259604013  |                              |
| 13 | 20,400,000 | 20,550,000 | 273 | 584  | 1.179625907  | CCDC7                        |
| 13 | 20,475,000 | 20,625,000 | 274 | 382  | 0.49647761   | ARL5B,CCDC7                  |
| 13 | 20,550,000 | 20,700,000 | 275 | 736  | 0.796196392  | ARL5B,CCDC7                  |
| 13 | 20,625,000 | 20,775,000 | 276 | 1092 | 0.611534135  |                              |
| 13 | 20,700,000 | 20,850,000 | 277 | 1325 | -0.172915234 |                              |
| 13 | 20,775,000 | 20,925,000 | 278 | 1533 | 0.322242415  |                              |
| 13 | 20,850,000 | 21,000,000 | 279 | 1407 | 1.172448177  | MGC152301                    |
| 13 | 20,925,000 | 21,075,000 | 280 | 1259 | 0.630076905  | MGC152301,ENSBTAG00000023216 |
| 13 | 21,000,000 | 21,150,000 | 281 | 968  | -0.562142738 | ENSBTAG00000023216           |
| 13 | 21,075,000 | 21,225,000 | 282 | 964  | -0.119091648 | ENSBTAG00000023216           |
| 13 | 21,150,000 | 21,300,000 | 283 | 929  | -0.001544706 | ENSBTAG00000023216           |
| 13 | 21,225,000 | 21,375,000 | 284 | 1081 | -0.463556034 | ENSBTAG00000023216           |
| 13 | 21,300,000 | 21,450,000 | 285 | 1428 | -0.395406725 | ENSBTAG00000023216           |
| 13 | 21,375,000 | 21,525,000 | 286 | 1075 | -0.52624131  | ENSBTAG00000023216           |
| 13 | 21,450,000 | 21,600,000 | 287 | 735  | -0.866731845 | PLXDC2                       |
| 13 | 21,525,000 | 21,675,000 | 288 | 696  | -0.122819414 | PLXDC2                       |
| 13 | 21,600,000 | 21,750,000 | 289 | 633  | 0.614978761  | PLXDC2                       |
| 13 | 21,675,000 | 21,825,000 | 290 | 730  | 0.456932644  | PLXDC2                       |
| 13 | 21,750,000 | 21,900,000 | 291 | 1239 | -1.058515648 | PLXDC2                       |
| 13 | 21,825,000 | 21,975,000 | 292 | 1614 | -1.515920778 | PLXDC2                       |
| 13 | 21,900,000 | 22,050,000 | 293 | 1192 | -0.792531851 | PLXDC2                       |
| 13 | 21,975,000 | 22,125,000 | 294 | 1024 | 0.878999944  | PLXDC2                       |
| 13 | 22,050,000 | 22,200,000 | 295 | 1355 | 0.743210778  |                              |
| 13 | 22,125,000 | 22,275,000 | 296 | 1444 | 0.465725317  |                              |
| 13 | 22,200,000 | 22,350,000 | 297 | 1432 | 0.833766017  |                              |
| 13 | 22,275,000 | 22,425,000 | 298 | 1262 | 0.686484617  | NEBL                         |
| 13 | 22,350,000 | 22,500,000 | 299 | 1019 | 0.446473904  | NEBL                         |
| 13 | 22,425,000 | 22,575,000 | 300 | 900  | -0.035922455 | NEBL                         |
| 13 | 22,500,000 | 22,650,000 | 301 | 630  | -0.05198888  |                              |
| 13 | 22,575,000 | 22,725,000 | 302 | 515  | 0.85532713   |                              |
| 13 | 22,650,000 | 22,800,000 | 303 | 630  | 0.195179605  |                              |

|    |            |            |     |      |              |                      |
|----|------------|------------|-----|------|--------------|----------------------|
| 13 | 22,725,000 | 22,875,000 | 304 | 888  | -1.56507412  | ENSBTAG00000003937   |
| 13 | 22,800,000 | 22,950,000 | 305 | 747  | -1.587731594 | ENSBTAG00000003937   |
| 13 | 22,875,000 | 23,025,000 | 306 | 276  | -0.884831516 | SKIDA1               |
| 13 | 22,950,000 | 23,100,000 | 307 | 152  | -2.072475333 | MLLT10,SKIDA1        |
| 13 | 23,025,000 | 23,175,000 | 308 | 141  | -1.451919828 | MLLT10               |
| 13 | 23,100,000 | 23,250,000 | 309 | 137  | -1.457309625 | MLLT10               |
| 13 | 23,175,000 | 23,325,000 | 310 | 124  | -1.366957367 | DNAJC1,MLLT10        |
| 13 | 23,250,000 | 23,400,000 | 311 | 162  | -1.117722271 | DNAJC1               |
| 13 | 23,325,000 | 23,475,000 | 312 | 247  | -0.539959018 | DNAJC1               |
| 13 | 23,400,000 | 23,550,000 | 313 | 437  | -0.437747732 | DNAJC1               |
| 13 | 23,475,000 | 23,625,000 | 314 | 709  | -1.062217001 |                      |
| 13 | 23,550,000 | 23,700,000 | 315 | 665  | -0.516033683 |                      |
| 13 | 23,625,000 | 23,775,000 | 316 | 397  | 0.27794966   | BMI1,COMMD3,SPAG6    |
| 13 | 23,700,000 | 23,850,000 | 317 | 344  | 0.151859024  | BMI1,COMMD3,SPAG6    |
| 13 | 23,775,000 | 23,925,000 | 318 | 468  | 0.537311408  | PIP4K2A,SPAG6        |
| 13 | 23,850,000 | 24,000,000 | 319 | 642  | -0.046325526 | PIP4K2A              |
| 13 | 23,925,000 | 24,075,000 | 320 | 697  | -0.119832567 | PIP4K2A              |
| 13 | 24,000,000 | 24,150,000 | 321 | 514  | 0.658946373  | PIP4K2A              |
| 13 | 24,075,000 | 24,225,000 | 322 | 335  | 1.106105308  | PIP4K2A              |
| 13 | 24,150,000 | 24,300,000 | 323 | 712  | 1.263844174  | ARMC3                |
| 13 | 24,225,000 | 24,375,000 | 324 | 1063 | 0.846156178  | ARMC3                |
| 13 | 24,300,000 | 24,450,000 | 325 | 1081 | 0.516328189  | ARMC3,MSRB2          |
| 13 | 24,375,000 | 24,525,000 | 326 | 1081 | -0.36069046  | C10orf67,MSRB2,PTF1A |
| 13 | 24,450,000 | 24,600,000 | 327 | 928  | -2.889461295 | C10orf67,PTF1A       |
| 13 | 24,525,000 | 24,675,000 | 328 | 1019 | -2.197507781 | C10orf67,OTUD1       |
| 13 | 24,600,000 | 24,750,000 | 329 | 1020 | -0.41801432  | OTUD1                |
| 13 | 24,675,000 | 24,825,000 | 330 | 843  | 0.93260416   |                      |
| 13 | 24,750,000 | 24,900,000 | 331 | 836  | 0.711723368  |                      |
| 13 | 24,825,000 | 24,975,000 | 332 | 579  | 0.111427818  |                      |
| 13 | 24,900,000 | 25,050,000 | 333 | 536  | 0.34469526   |                      |
| 13 | 24,975,000 | 25,125,000 | 334 | 753  | 0.534958201  |                      |
| 13 | 25,050,000 | 25,200,000 | 335 | 578  | 0.682009116  |                      |
| 13 | 25,125,000 | 25,275,000 | 336 | 485  | 1.013369469  |                      |
| 13 | 25,200,000 | 25,350,000 | 337 | 694  | 1.167131607  | KIAA1217             |
| 13 | 25,275,000 | 25,425,000 | 338 | 1274 | 1.126068903  | KIAA1217             |
| 13 | 25,350,000 | 25,500,000 | 339 | 1696 | 1.153538494  | KIAA1217             |
| 13 | 25,425,000 | 25,575,000 | 340 | 1424 | 0.897470225  | KIAA1217             |
| 13 | 25,500,000 | 25,650,000 | 341 | 1165 | -0.212866159 | KIAA1217             |
| 13 | 25,575,000 | 25,725,000 | 342 | 1056 | -0.571127282 | KIAA1217             |
| 13 | 25,650,000 | 25,800,000 | 343 | 1047 | -0.015903976 | ARHGAP21,KIAA1217    |
| 13 | 25,725,000 | 25,875,000 | 344 | 1104 | -0.196270505 | ARHGAP21             |
| 13 | 25,800,000 | 25,950,000 | 345 | 1095 | -0.571829183 | ARHGAP21             |
| 13 | 25,875,000 | 26,025,000 | 346 | 954  | -0.537878171 |                      |
| 13 | 25,950,000 | 26,100,000 | 347 | 592  | -1.353384874 | ENKUR,PRTFDC1        |
| 13 | 26,025,000 | 26,175,000 | 348 | 367  | -1.134544051 | ENKUR,PRTFDC1,THNSL1 |
| 13 | 26,100,000 | 26,250,000 | 349 | 374  | 0.117032008  | ENKUR,GPR158,THNSL1  |
| 13 | 26,175,000 | 26,325,000 | 350 | 385  | -0.765047797 | GPR158               |
| 13 | 26,250,000 | 26,400,000 | 351 | 354  | -1.205413228 | GPR158               |
| 13 | 26,325,000 | 26,475,000 | 352 | 406  | -1.780542046 | GPR158               |
| 13 | 26,400,000 | 26,550,000 | 353 | 505  | -0.993372198 | GPR158               |
| 13 | 26,475,000 | 26,625,000 | 354 | 604  | -1.555670016 | GPR158               |
| 13 | 26,550,000 | 26,700,000 | 355 | 770  | -1.260911297 |                      |
| 13 | 26,625,000 | 26,775,000 | 356 | 1052 | 0.308823486  | MYO3A                |

|    |            |            |     |      |              |                                                           |
|----|------------|------------|-----|------|--------------|-----------------------------------------------------------|
| 13 | 26,700,000 | 26,850,000 | 357 | 779  | 0.506770667  | MYO3A                                                     |
| 13 | 26,775,000 | 26,925,000 | 358 | 511  | 0.289715648  | MYO3A                                                     |
| 13 | 26,850,000 | 27,000,000 | 359 | 636  | -1.468193729 | GAD2,MYO3A                                                |
| 13 | 26,925,000 | 27,075,000 | 360 | 448  | -2.203055298 | FZD8,GAD2,GJD4,MYO3A                                      |
| 13 | 27,000,000 | 27,150,000 | 361 | 317  | -1.355412408 | FZD8,GJD4                                                 |
| 13 | 27,075,000 | 27,225,000 | 362 | 503  | 0.279181923  |                                                           |
| 13 | 27,150,000 | 27,300,000 | 363 | 696  | 0.844522794  |                                                           |
| 13 | 27,225,000 | 27,375,000 | 364 | 681  | -0.256595044 |                                                           |
| 13 | 27,300,000 | 27,450,000 | 365 | 635  | -1.085958089 |                                                           |
| 13 | 27,375,000 | 27,525,000 | 366 | 781  | 0.107428085  |                                                           |
| 13 | 27,450,000 | 27,600,000 | 367 | 929  | -0.513501871 |                                                           |
| 13 | 27,525,000 | 27,675,000 | 368 | 861  | -0.578942179 |                                                           |
| 13 | 27,600,000 | 27,750,000 | 369 | 937  | 0.442407482  |                                                           |
| 13 | 27,675,000 | 27,825,000 | 370 | 1045 | 0.647255303  |                                                           |
| 13 | 27,750,000 | 27,900,000 | 371 | 981  | 0.91944386   |                                                           |
| 13 | 27,825,000 | 27,975,000 | 372 | 974  | 0.815676587  |                                                           |
| 13 | 27,900,000 | 28,050,000 | 373 | 944  | 0.565065079  |                                                           |
| 13 | 27,975,000 | 28,125,000 | 374 | 748  | 0.940570267  | OPTN                                                      |
| 13 | 28,050,000 | 28,200,000 | 375 | 847  | 1.237182546  | MCM10,OPTN                                                |
| 13 | 28,125,000 | 28,275,000 | 376 | 957  | 1.122451844  | MCM10,PHYH,ENSBTAG00000047869                             |
| 13 | 28,200,000 | 28,350,000 | 377 | 830  | 1.100333713  | PHYH,SEPHS1,ENSBTAG00000047869                            |
| 13 | 28,275,000 | 28,425,000 | 378 | 740  | 0.820742679  | BEND7,PHYH,SEPHS1                                         |
| 13 | 28,350,000 | 28,500,000 | 379 | 617  | 0.7343658    | BEND7                                                     |
| 13 | 28,425,000 | 28,575,000 | 380 | 498  | 1.09157501   | BEND7,PRPF18                                              |
| 13 | 28,500,000 | 28,650,000 | 381 | 410  | 0.868448766  | FRMD4A,PRPF18                                             |
| 13 | 28,575,000 | 28,725,000 | 382 | 478  | -0.969949067 | FRMD4A,PRPF18                                             |
| 13 | 28,650,000 | 28,800,000 | 383 | 675  | -0.836614225 | FRMD4A                                                    |
| 13 | 28,725,000 | 28,875,000 | 384 | 600  | 0.264994782  | FRMD4A                                                    |
| 13 | 28,800,000 | 28,950,000 | 385 | 491  | 0.652097043  | FRMD4A                                                    |
| 13 | 28,875,000 | 29,025,000 | 386 | 561  | 0.415589847  | FRMD4A                                                    |
| 13 | 28,950,000 | 29,100,000 | 387 | 892  | -1.048078611 | FRMD4A                                                    |
| 13 | 29,025,000 | 29,175,000 | 388 | 1117 | -1.040242434 |                                                           |
| 13 | 29,100,000 | 29,250,000 | 389 | 1435 | -0.721620759 |                                                           |
| 13 | 29,175,000 | 29,325,000 | 390 | 1247 | -0.636664884 |                                                           |
| 13 | 29,250,000 | 29,400,000 | 391 | 936  | 0.990108031  |                                                           |
| 13 | 29,325,000 | 29,475,000 | 392 | 1283 | -1.107682269 |                                                           |
| 13 | 29,400,000 | 29,550,000 | 393 | 1291 | -2.420981523 | FAM107B                                                   |
| 13 | 29,475,000 | 29,625,000 | 394 | 1237 | -1.297583389 | FAM107B                                                   |
| 13 | 29,550,000 | 29,700,000 | 395 | 1245 | -0.07593125  | FAM107B                                                   |
| 13 | 29,625,000 | 29,775,000 | 396 | 846  | 0.550512758  | CDNF                                                      |
| 13 | 29,700,000 | 29,850,000 | 397 | 343  | 0.508202219  | CDNF,DCLRE1C,HSPA14,SUV39H2,ENSBTAG00000045609            |
| 13 | 29,775,000 | 29,925,000 | 398 | 495  | 0.868124971  | CDNF,DCLRE1C,HSPA14,MEIG1,OLAH,SUV39H2,ENSBTAG00000045609 |
| 13 | 29,850,000 | 30,000,000 | 399 | 537  | 0.297070704  | ACBD7,DCLRE1C,MEIG1,NMT2,OLAH,RPP38                       |
| 13 | 29,925,000 | 30,075,000 | 400 | 581  | -2.65294822  | ACBD7,C13H10ORF38,NMT2,OLAH,RPP38                         |
| 13 | 30,000,000 | 30,150,000 | 401 | 921  | -1.733609425 | C13H10ORF38,NMT2                                          |
| 13 | 30,075,000 | 30,225,000 | 402 | 1150 | -1.235503519 | C13H10ORF38                                               |
| 13 | 30,150,000 | 30,300,000 | 403 | 1072 | -1.803499107 |                                                           |
| 13 | 30,225,000 | 30,375,000 | 404 | 966  | -0.248249456 | ITGA8                                                     |
| 13 | 30,300,000 | 30,450,000 | 405 | 1022 | 1.386300618  | ITGA8                                                     |
| 13 | 30,375,000 | 30,525,000 | 406 | 1015 | 0.837657988  | ITGA8                                                     |
| 13 | 30,450,000 | 30,600,000 | 407 | 905  | -0.688107632 | ITGA8                                                     |

|    |            |            |     |      |              |                           |
|----|------------|------------|-----|------|--------------|---------------------------|
| 13 | 30,525,000 | 30,675,000 | 408 | 757  | -0.78143493  | FAM188A,ITGA8             |
| 13 | 30,600,000 | 30,750,000 | 409 | 879  | 0.473167157  | FAM188A                   |
| 13 | 30,675,000 | 30,825,000 | 410 | 1257 | 0.699171779  | FAM188A                   |
| 13 | 30,750,000 | 30,900,000 | 411 | 1242 | 0.737594537  |                           |
| 13 | 30,825,000 | 30,975,000 | 412 | 867  | 0.738565259  |                           |
| 13 | 30,900,000 | 31,050,000 | 413 | 711  | 0.484149409  |                           |
| 13 | 30,975,000 | 31,125,000 | 414 | 746  | -0.054789458 |                           |
| 13 | 31,050,000 | 31,200,000 | 415 | 839  | 0.425331253  |                           |
| 13 | 31,125,000 | 31,275,000 | 416 | 896  | 1.247554195  | PTER                      |
| 13 | 31,200,000 | 31,350,000 | 417 | 785  | 1.387354382  | C1QL3,PTER,RSU1           |
| 13 | 31,275,000 | 31,425,000 | 418 | 1034 | 1.135641631  | C1QL3,PTER,RSU1           |
| 13 | 31,350,000 | 31,500,000 | 419 | 970  | 0.761769968  | RSU1                      |
| 13 | 31,425,000 | 31,575,000 | 420 | 692  | -1.708010532 | CUBN,RSU1                 |
| 13 | 31,500,000 | 31,650,000 | 421 | 1044 | -1.955952514 | CUBN,RSU1                 |
| 13 | 31,575,000 | 31,725,000 | 422 | 900  | -0.826639648 | CUBN                      |
| 13 | 31,650,000 | 31,800,000 | 423 | 742  | -0.645151132 | CUBN                      |
| 13 | 31,725,000 | 31,875,000 | 424 | 809  | -1.189431902 | CUBN,TRDMT1               |
| 13 | 31,800,000 | 31,950,000 | 425 | 806  | -0.589350523 | CUBN,TRDMT1,VIM           |
| 13 | 31,875,000 | 32,025,000 | 426 | 742  | -1.182936364 | TRDMT1,VIM                |
| 13 | 31,950,000 | 32,100,000 | 427 | 527  | -2.911991856 | ST8SIA6,VIM               |
| 13 | 32,025,000 | 32,175,000 | 428 | 386  | -2.304928817 | ST8SIA6                   |
| 13 | 32,100,000 | 32,250,000 | 429 | 299  | -0.720602086 | ST8SIA6                   |
| 13 | 32,175,000 | 32,325,000 | 430 | 282  | -0.647684873 | ST8SIA6                   |
| 13 | 32,250,000 | 32,400,000 | 431 | 349  | -1.006475497 | PTPLA,STAM                |
| 13 | 32,325,000 | 32,475,000 | 432 | 438  | -1.182991575 | PTPLA,STAM                |
| 13 | 32,400,000 | 32,550,000 | 433 | 434  | -1.175429473 | MRC1,STAM,TMEM236         |
| 13 | 32,475,000 | 32,625,000 | 434 | 546  | -1.562178387 | MRC1,TMEM236              |
| 13 | 32,550,000 | 32,700,000 | 435 | 618  | -1.366835025 | MRC1,SLC39A12             |
| 13 | 32,625,000 | 32,775,000 | 436 | 424  | -0.864575976 | MRC1,SLC39A12             |
| 13 | 32,700,000 | 32,850,000 | 437 | 397  | 0.159283675  | SLC39A12                  |
| 13 | 32,775,000 | 32,925,000 | 438 | 660  | 0.247827839  |                           |
| 13 | 32,850,000 | 33,000,000 | 439 | 834  | 0.414261816  |                           |
| 13 | 32,925,000 | 33,075,000 | 440 | 621  | 0.747698266  | CACNB2                    |
| 13 | 33,000,000 | 33,150,000 | 441 | 587  | 0.786154599  | CACNB2                    |
| 13 | 33,075,000 | 33,225,000 | 442 | 816  | -0.480478009 | CACNB2                    |
| 13 | 33,150,000 | 33,300,000 | 443 | 733  | -1.895806806 | CACNB2,ENSBTAG00000022003 |
| 13 | 33,225,000 | 33,375,000 | 444 | 564  | -2.100186268 | CACNB2,ENSBTAG00000022003 |
| 13 | 33,300,000 | 33,450,000 | 445 | 650  | -2.114033642 | ENSBTAG00000022003        |
| 13 | 33,375,000 | 33,525,000 | 446 | 593  | -1.294286366 | EPC1                      |
| 13 | 33,450,000 | 33,600,000 | 447 | 684  | -0.622425126 | EPC1                      |
| 13 | 33,525,000 | 33,675,000 | 448 | 948  | -0.535988858 | KIF5B                     |
| 13 | 33,600,000 | 33,750,000 | 449 | 584  | -0.158930178 | ARHGAP12,KIF5B            |
| 13 | 33,675,000 | 33,825,000 | 450 | 259  | 0.795999994  | ARHGAP12                  |
| 13 | 33,750,000 | 33,900,000 | 451 | 411  | 0.659495294  | ARHGAP12                  |
| 13 | 33,825,000 | 33,975,000 | 452 | 548  | -0.751243922 | ARHGAP12                  |
| 13 | 33,900,000 | 34,050,000 | 453 | 485  | -1.815011999 |                           |
| 13 | 33,975,000 | 34,125,000 | 454 | 440  | -1.561634138 | ZEB1                      |
| 13 | 34,050,000 | 34,200,000 | 455 | 399  | -1.596915087 | ZEB1                      |
| 13 | 34,125,000 | 34,275,000 | 456 | 340  | -1.052685628 | ZEB1                      |
| 13 | 34,200,000 | 34,350,000 | 457 | 350  | -0.091653332 | ZEB1                      |
| 13 | 34,275,000 | 34,425,000 | 458 | 415  | 0.520953771  |                           |
| 13 | 34,350,000 | 34,500,000 | 459 | 409  | 0.444609321  |                           |
| 13 | 34,425,000 | 34,575,000 | 460 | 378  | 0.432475094  | ZNF438                    |



|    |            |            |     |      |              |                          |
|----|------------|------------|-----|------|--------------|--------------------------|
| 13 | 34,500,000 | 34,650,000 | 461 | 363  | 0.68858248   | ZNF438                   |
| 13 | 34,575,000 | 34,725,000 | 462 | 286  | 0.535958774  | ZNF438                   |
| 13 | 34,650,000 | 34,800,000 | 463 | 446  | 0.186101922  | ZNF438                   |
| 13 | 34,725,000 | 34,875,000 | 464 | 606  | 0.332058779  | SVIL,ZNF438              |
| 13 | 34,800,000 | 34,950,000 | 465 | 590  | 0.246420429  | SVIL,ZNF438              |
| 13 | 34,875,000 | 35,025,000 | 466 | 683  | 0.297757946  | SVIL                     |
| 13 | 34,950,000 | 35,100,000 | 467 | 1052 | 0.176345181  | SVIL                     |
| 13 | 35,025,000 | 35,175,000 | 468 | 967  | -0.181941348 |                          |
| 13 | 35,100,000 | 35,250,000 | 469 | 542  | -0.250151606 |                          |
| 13 | 35,175,000 | 35,325,000 | 470 | 542  | 0.489277093  |                          |
| 13 | 35,250,000 | 35,400,000 | 471 | 456  | 0.423387134  | JCAD                     |
| 13 | 35,325,000 | 35,475,000 | 472 | 580  | 0.668758898  | JCAD                     |
| 13 | 35,400,000 | 35,550,000 | 473 | 862  | 0.708959804  | MTPAP                    |
| 13 | 35,475,000 | 35,625,000 | 474 | 756  | 0.12765554   | MAP3K8,MTPAP             |
| 13 | 35,550,000 | 35,700,000 | 475 | 600  | -0.023545096 | MAP3K8,MTPAP             |
| 13 | 35,625,000 | 35,775,000 | 476 | 552  | 0.361470695  | MAP3K8                   |
| 13 | 35,700,000 | 35,850,000 | 477 | 548  | 0.111716838  | LYZL1                    |
| 13 | 35,775,000 | 35,925,000 | 478 | 611  | -0.324359545 | LYZL1                    |
| 13 | 35,850,000 | 36,000,000 | 479 | 594  | -0.755137013 |                          |
| 13 | 35,925,000 | 36,075,000 | 480 | 468  | -1.159906125 |                          |
| 13 | 36,000,000 | 36,150,000 | 481 | 395  | -1.203537914 |                          |
| 13 | 36,075,000 | 36,225,000 | 482 | 512  | -1.49069639  |                          |
| 13 | 36,150,000 | 36,300,000 | 483 | 855  | -0.840470961 |                          |
| 13 | 36,225,000 | 36,375,000 | 484 | 1029 | -0.02053934  | BAMBI,WAC                |
| 13 | 36,300,000 | 36,450,000 | 485 | 780  | 0.340775287  | BAMBI,WAC                |
| 13 | 36,375,000 | 36,525,000 | 486 | 554  | 0.544155022  | WAC                      |
| 13 | 36,450,000 | 36,600,000 | 487 | 688  | 0.43303809   |                          |
| 13 | 36,525,000 | 36,675,000 | 488 | 836  | 0.55422921   | MPP7                     |
| 13 | 36,600,000 | 36,750,000 | 489 | 630  | 0.145288285  | MPP7                     |
| 13 | 36,675,000 | 36,825,000 | 490 | 491  | 0.146824873  | MPP7                     |
| 13 | 36,750,000 | 36,900,000 | 491 | 741  | 0.761090707  | ARMC4,MPP7               |
| 13 | 36,825,000 | 36,975,000 | 492 | 984  | 0.781090879  | ARMC4,MPP7               |
| 13 | 36,900,000 | 37,050,000 | 493 | 956  | 0.457364241  | ARMC4                    |
| 13 | 36,975,000 | 37,125,000 | 494 | 778  | -0.116387119 | ARMC4                    |
| 13 | 37,050,000 | 37,200,000 | 495 | 642  | 0.029055305  | MKX                      |
| 13 | 37,125,000 | 37,275,000 | 496 | 501  | 0.164713272  | MKX                      |
| 13 | 37,200,000 | 37,350,000 | 497 | 944  | 0.983372284  | RAB18                    |
| 13 | 37,275,000 | 37,425,000 | 498 | 1055 | 1.038939045  | RAB18,ENSBTAG00000048079 |
| 13 | 37,350,000 | 37,500,000 | 499 | 738  | -1.137513879 | ENSBTAG00000048079       |
| 13 | 37,425,000 | 37,575,000 | 500 | 838  | -1.144199331 |                          |
| 13 | 37,500,000 | 37,650,000 | 501 | 860  | -0.710849355 |                          |
| 13 | 37,575,000 | 37,725,000 | 502 | 834  | -0.5803996   |                          |
| 13 | 37,650,000 | 37,800,000 | 503 | 845  | 0.357431197  |                          |
| 13 | 37,725,000 | 37,875,000 | 504 | 748  | 0.03367846   | PCSK2                    |
| 13 | 37,800,000 | 37,950,000 | 505 | 490  | -1.195076108 | PCSK2                    |
| 13 | 37,875,000 | 38,025,000 | 506 | 481  | -0.157625148 | PCSK2                    |
| 13 | 37,950,000 | 38,100,000 | 507 | 711  | 0.932917066  | PCSK2,SLC6A9             |
| 13 | 38,025,000 | 38,175,000 | 508 | 780  | 1.200036012  | PCSK2,SLC6A9             |
| 13 | 38,100,000 | 38,250,000 | 509 | 677  | 0.593488472  | BFSP1,SLC6A9             |
| 13 | 38,175,000 | 38,325,000 | 510 | 576  | -0.438427679 | BFSP1,DSTN,RRBP1         |
| 13 | 38,250,000 | 38,400,000 | 511 | 446  | -2.464381765 | BANF2,DSTN,RRBP1         |
| 13 | 38,325,000 | 38,475,000 | 512 | 381  | -2.626043957 | BANF2                    |
| 13 | 38,400,000 | 38,550,000 | 513 | 432  | -0.118268545 | MGME1,SNX5               |

|    |            |            |     |      |              |                                      |
|----|------------|------------|-----|------|--------------|--------------------------------------|
| 13 | 38,475,000 | 38,625,000 | 514 | 548  | 0.337625286  | MGME1,OVOL2,SNX5                     |
| 13 | 38,550,000 | 38,700,000 | 515 | 756  | 0.511872961  | CSRP2BP,MGME1,OVOL2                  |
| 13 | 38,625,000 | 38,775,000 | 516 | 696  | 0.317907504  | CSRP2BP,ZNF133                       |
| 13 | 38,700,000 | 38,850,000 | 517 | 578  | -0.291543358 | C13H20ORF12,POLR3F,ZNF133            |
| 13 | 38,775,000 | 38,925,000 | 518 | 530  | -1.142871164 | C13H20ORF12,DTD1,POLR3F,RBBP9,SEC23B |
| 13 | 38,850,000 | 39,000,000 | 519 | 499  | -1.243249562 | DTD1,POLR3F,RBBP9,RPL5,SEC23B        |
| 13 | 38,925,000 | 39,075,000 | 520 | 797  | 0.505461609  | DTD1,RPL5,SCP2D1                     |
| 13 | 39,000,000 | 39,150,000 | 521 | 1208 | 0.842367538  | SCP2D1                               |
| 13 | 39,075,000 | 39,225,000 | 522 | 856  | 0.741351722  | SLC24A3                              |
| 13 | 39,150,000 | 39,300,000 | 523 | 423  | 0.621249187  | SLC24A3                              |
| 13 | 39,225,000 | 39,375,000 | 524 | 564  | 0.82128085   | SLC24A3                              |
| 13 | 39,300,000 | 39,450,000 | 525 | 718  | 0.189817876  | SLC24A3                              |
| 13 | 39,375,000 | 39,525,000 | 526 | 761  | 0.025435544  | SLC24A3                              |
| 13 | 39,450,000 | 39,600,000 | 527 | 938  | -0.12975964  | SLC24A3                              |
| 13 | 39,525,000 | 39,675,000 | 528 | 1297 | -0.026351573 | SLC24A3,ENSBTAG00000032893           |
| 13 | 39,600,000 | 39,750,000 | 529 | 1161 | 0.239695188  | SLC24A3,ENSBTAG00000032893           |
| 13 | 39,675,000 | 39,825,000 | 530 | 993  | 0.137158231  | RIN2                                 |
| 13 | 39,750,000 | 39,900,000 | 531 | 895  | 0.30608968   | NAA20,RIN2                           |
| 13 | 39,825,000 | 39,975,000 | 532 | 695  | 0.581614125  | CFAP61,CRNKL1,NAA20,RIN2             |
| 13 | 39,900,000 | 40,050,000 | 533 | 985  | 0.579909192  | CFAP61,CRNKL1,NAA20                  |
| 13 | 39,975,000 | 40,125,000 | 534 | 1198 | 0.472479085  | CFAP61                               |
| 13 | 40,050,000 | 40,200,000 | 535 | 910  | 0.536596589  | CFAP61                               |
| 13 | 40,125,000 | 40,275,000 | 536 | 716  | 0.776651497  | CFAP61,INSM1                         |
| 13 | 40,200,000 | 40,350,000 | 537 | 756  | 0.2477267    | CFAP61,INSM1,RALGAPA2                |
| 13 | 40,275,000 | 40,425,000 | 538 | 918  | 0.583833452  | RALGAPA2                             |
| 13 | 40,350,000 | 40,500,000 | 539 | 1112 | 1.055817323  | RALGAPA2                             |
| 13 | 40,425,000 | 40,575,000 | 540 | 1296 | 1.091692202  | RALGAPA2                             |
| 13 | 40,500,000 | 40,650,000 | 541 | 1174 | 0.921490744  | RALGAPA2                             |
| 13 | 40,575,000 | 40,725,000 | 542 | 917  | 0.021449208  |                                      |
| 13 | 40,650,000 | 40,800,000 | 543 | 955  | -0.631025334 |                                      |
| 13 | 40,725,000 | 40,875,000 | 544 | 954  | 0.156096681  | KIZ                                  |
| 13 | 40,800,000 | 40,950,000 | 545 | 812  | 0.525378413  | KIZ                                  |
| 13 | 40,875,000 | 41,025,000 | 546 | 788  | 0.652876091  | KIZ,XRN2                             |
| 13 | 40,950,000 | 41,100,000 | 547 | 627  | 0.963085618  | NKX2-4,XRN2                          |
| 13 | 41,025,000 | 41,175,000 | 548 | 506  | 0.862105154  | NAP1L1,NKX2-2,NKX2-4,XRN2            |
| 13 | 41,100,000 | 41,250,000 | 549 | 526  | 0.878618797  | NAP1L1,NKX2-2,PAX1                   |
| 13 | 41,175,000 | 41,325,000 | 550 | 471  | 0.929114621  | PAX1                                 |
| 13 | 41,250,000 | 41,400,000 | 551 | 636  | 0.845071383  | PAX1                                 |
| 13 | 41,325,000 | 41,475,000 | 552 | 673  | -0.959701992 |                                      |
| 13 | 41,400,000 | 41,550,000 | 553 | 566  | -0.538113607 |                                      |
| 13 | 41,475,000 | 41,625,000 | 554 | 497  | 0.745726564  |                                      |
| 13 | 41,550,000 | 41,700,000 | 555 | 723  | -0.824787898 |                                      |
| 13 | 41,625,000 | 41,775,000 | 556 | 1152 | 0.333192657  |                                      |
| 13 | 41,700,000 | 41,850,000 | 557 | 984  | 1.245415047  |                                      |
| 13 | 41,775,000 | 41,925,000 | 558 | 471  | 0.709618062  | FOXA2                                |
| 13 | 41,850,000 | 42,000,000 | 559 | 460  | -0.136083197 | FOXA2                                |
| 13 | 41,925,000 | 42,075,000 | 560 | 808  | -1.318949452 |                                      |
| 13 | 42,000,000 | 42,150,000 | 561 | 768  | -2.149204716 |                                      |
| 13 | 42,075,000 | 42,225,000 | 562 | 504  | -1.107573584 | THBD                                 |
| 13 | 42,150,000 | 42,300,000 | 563 | 513  | -0.47229459  | CD93,THBD                            |
| 13 | 42,225,000 | 42,375,000 | 564 | 1018 | 0.492916388  | CD93                                 |
| 13 | 42,300,000 | 42,450,000 | 565 | 1268 | 0.90242612   | GZF1,NAPB,NXT1                       |

|    |            |            |     |      |              |                                                                                                                 |
|----|------------|------------|-----|------|--------------|-----------------------------------------------------------------------------------------------------------------|
| 13 | 42,375,000 | 42,525,000 | 566 | 1074 | 0.708904586  | CST11,CST8,CSTL1,GZF1,MGC133636,NAPB,NXT1,ENSBTAG00000015949,ENSBTAG00000027420                                 |
| 13 | 42,450,000 | 42,600,000 | 567 | 641  | 0.176869074  | CST11,CST3,CST8,CSTL1,MGC133636,NAPB,ENSBTAG00000015949,ENSBTAG00000027420,ENSBTAG0000032687,ENSBTAG00000047137 |
| 13 | 42,525,000 | 42,675,000 | 568 | 253  | 0.296443183  | CST3,ENSBTAG00000015949,ENSBTAG00000032687,ENSBTAG00000047137                                                   |
| 13 | 42,600,000 | 42,750,000 | 569 | 384  | 0.024163844  |                                                                                                                 |
| 13 | 42,675,000 | 42,825,000 | 570 | 502  | -0.021923656 | SYNDIG1                                                                                                         |
| 13 | 42,750,000 | 42,900,000 | 571 | 445  | 0.113850568  | SYNDIG1                                                                                                         |
| 13 | 42,825,000 | 42,975,000 | 572 | 812  | -2.579259423 | APMAP,CST7,SYNDIG1                                                                                              |
| 13 | 42,900,000 | 43,050,000 | 573 | 1072 | -3.025932067 | ACSS1,APMAP,CST7,ENTPD6                                                                                         |
| 13 | 42,975,000 | 43,125,000 | 574 | 802  | -1.772189355 | ACSS1,APMAP,ENTPD6,VSX1                                                                                         |
| 13 | 43,050,000 | 43,200,000 | 575 | 917  | -0.235274045 | ABHD12,ACSS1,ENTPD6,PYGB,VSX1                                                                                   |
| 13 | 43,125,000 | 43,275,000 | 576 | 770  | -0.312375615 | ABHD12,ANKRD16,PYGB                                                                                             |
| 13 | 43,200,000 | 43,350,000 | 577 | 365  | -1.226632823 | ABHD12,ANKRD16,FAM208B,GDI2                                                                                     |
| 13 | 43,275,000 | 43,425,000 | 578 | 418  | -1.043476472 | ASB13,FAM208B,GDI2                                                                                              |
| 13 | 43,350,000 | 43,500,000 | 579 | 703  | 0.147511817  | ASB13,CALML3,FAM208B                                                                                            |
| 13 | 43,425,000 | 43,575,000 | 580 | 761  | 0.820612377  | CALML3,CALML5,NET1                                                                                              |
| 13 | 43,500,000 | 43,650,000 | 581 | 869  | 0.748055443  | CALML5,NET1,TUBAL3,UCN3                                                                                         |
| 13 | 43,575,000 | 43,725,000 | 582 | 801  | 0.541321756  | AKR1C4,TUBAL3,UCN3                                                                                              |
| 13 | 43,650,000 | 43,800,000 | 583 | 612  | 0.591575142  | AKR1C4,ENSBTAG00000039643,ENSBTAG00000039722                                                                    |
| 13 | 43,725,000 | 43,875,000 | 584 | 1088 | 0.76477968   | ENSBTAG00000017938,ENSBTAG00000027419,ENSBTAG00000039643,ENSBTAG00000039722                                     |
| 13 | 43,800,000 | 43,950,000 | 585 | 1126 | 1.005246934  | ENSBTAG00000017938,ENSBTAG00000022564,ENSBTAG00000022571,ENSBTAG00000027419,ENSBTAG000039643                    |
| 13 | 43,875,000 | 44,025,000 | 586 | 1007 | 0.714513497  | ENSBTAG00000021368,ENSBTAG00000022564,ENSBTAG00000022571,ENSBTAG00000039289                                     |
| 13 | 43,950,000 | 44,100,000 | 587 | 1306 | 0.546066518  | ENSBTAG00000021368,ENSBTAG00000022564,ENSBTAG00000022570,ENSBTAG00000039289                                     |
| 13 | 44,025,000 | 44,175,000 | 588 | 1171 | 0.919076548  | 20ALPHA-HSD,ENSBTAG00000021368,ENSBTAG00000022564,ENSBTAG00000022570                                            |
| 13 | 44,100,000 | 44,250,000 | 589 | 932  | 0.692482829  | 20ALPHA-HSD,AKR1E2,ENSBTAG00000017191,ENSBTAG00000022564                                                        |
| 13 | 44,175,000 | 44,325,000 | 590 | 781  | 0.538399601  | AKR1E2,ENSBTAG00000017191                                                                                       |
| 13 | 44,250,000 | 44,400,000 | 591 | 531  | -0.576439578 |                                                                                                                 |
| 13 | 44,325,000 | 44,475,000 | 592 | 594  | -1.189659142 |                                                                                                                 |
| 13 | 44,400,000 | 44,550,000 | 593 | 572  | -0.561891864 |                                                                                                                 |
| 13 | 44,475,000 | 44,625,000 | 594 | 626  | 0.751429398  |                                                                                                                 |
| 13 | 44,550,000 | 44,700,000 | 595 | 692  | 1.040427798  |                                                                                                                 |
| 13 | 44,625,000 | 44,775,000 | 596 | 455  | 0.739166959  |                                                                                                                 |
| 13 | 44,700,000 | 44,850,000 | 597 | 525  | 0.642146558  |                                                                                                                 |
| 13 | 44,775,000 | 44,925,000 | 598 | 609  | 0.019980916  |                                                                                                                 |
| 13 | 44,850,000 | 45,000,000 | 599 | 423  | -1.102217009 | KLF6                                                                                                            |
| 13 | 44,925,000 | 45,075,000 | 600 | 484  | -0.446437529 | KLF6                                                                                                            |
| 13 | 45,000,000 | 45,150,000 | 601 | 783  | -0.641237158 |                                                                                                                 |
| 13 | 45,075,000 | 45,225,000 | 602 | 794  | -0.705707064 |                                                                                                                 |
| 13 | 45,150,000 | 45,300,000 | 603 | 760  | 0.490878444  |                                                                                                                 |
| 13 | 45,225,000 | 45,375,000 | 604 | 1129 | 0.585739535  |                                                                                                                 |

|    |            |            |     |      |              |                                 |
|----|------------|------------|-----|------|--------------|---------------------------------|
| 13 | 45,300,000 | 45,450,000 | 605 | 1311 | 0.132998563  |                                 |
| 13 | 45,375,000 | 45,525,000 | 606 | 1373 | 0.345350585  | PFKP,PITRM1                     |
| 13 | 45,450,000 | 45,600,000 | 607 | 1410 | 0.493914477  | PFKP,PITRM1                     |
| 13 | 45,525,000 | 45,675,000 | 608 | 1127 | 0.538816287  | PFKP                            |
| 13 | 45,600,000 | 45,750,000 | 609 | 935  | 0.494206129  |                                 |
| 13 | 45,675,000 | 45,825,000 | 610 | 935  | 0.505825371  |                                 |
| 13 | 45,750,000 | 45,900,000 | 611 | 976  | 0.676693984  |                                 |
| 13 | 45,825,000 | 45,975,000 | 612 | 1050 | 0.541209441  |                                 |
| 13 | 45,900,000 | 46,050,000 | 613 | 1003 | 0.751944959  |                                 |
| 13 | 45,975,000 | 46,125,000 | 614 | 934  | 0.765818951  |                                 |
| 13 | 46,050,000 | 46,200,000 | 615 | 920  | 0.434477366  |                                 |
| 13 | 46,125,000 | 46,275,000 | 616 | 778  | 0.710559743  |                                 |
| 13 | 46,200,000 | 46,350,000 | 617 | 824  | 0.898072174  |                                 |
| 13 | 46,275,000 | 46,425,000 | 618 | 722  | 0.613448648  | ADARB2                          |
| 13 | 46,350,000 | 46,500,000 | 619 | 433  | -0.210964237 | ADARB2,ENSBTAG00000039356       |
| 13 | 46,425,000 | 46,575,000 | 620 | 384  | -0.33056605  | ADARB2,ENSBTAG00000039356       |
| 13 | 46,500,000 | 46,650,000 | 621 | 414  | -0.176830765 | ADARB2,WDR37,ENSBTAG00000039356 |
| 13 | 46,575,000 | 46,725,000 | 622 | 520  | -1.044072293 | ADARB2,GTPBP4,IDI1,WDR37        |
| 13 | 46,650,000 | 46,800,000 | 623 | 540  | -0.95814271  | GTPBP4,IDI1,LARP4B,WDR37        |
| 13 | 46,725,000 | 46,875,000 | 624 | 451  | -0.797308561 | LARP4B                          |
| 13 | 46,800,000 | 46,950,000 | 625 | 462  | -0.720999701 | LARP4B                          |
| 13 | 46,875,000 | 47,025,000 | 626 | 416  | 0.000764913  |                                 |
| 13 | 46,950,000 | 47,100,000 | 627 | 296  | 0.165970975  | DIP2C                           |
| 13 | 47,025,000 | 47,175,000 | 628 | 401  | 0.680986276  | DIP2C                           |
| 13 | 47,100,000 | 47,250,000 | 629 | 462  | 0.804067526  | DIP2C,ZMYND11                   |
| 13 | 47,175,000 | 47,325,000 | 630 | 379  | 0.528826195  | DIP2C,ZMYND11                   |
| 13 | 47,250,000 | 47,400,000 | 631 | 445  | -0.066058901 | ZMYND11                         |
| 13 | 47,325,000 | 47,475,000 | 632 | 570  | -0.351308264 | PRND,PRNP                       |
| 13 | 47,400,000 | 47,550,000 | 633 | 597  | 0.137409625  | PRND,PRNP,RASSF2                |
| 13 | 47,475,000 | 47,625,000 | 634 | 569  | 0.344265612  | RASSF2,SLC23A2                  |
| 13 | 47,550,000 | 47,700,000 | 635 | 565  | 0.267341968  | SLC23A2                         |
| 13 | 47,625,000 | 47,775,000 | 636 | 501  | -0.527040307 | SLC23A2                         |
| 13 | 47,700,000 | 47,850,000 | 637 | 423  | -0.71607289  | CDS2,PCNA,SLC23A2,TMEM230       |
| 13 | 47,775,000 | 47,925,000 | 638 | 690  | 0.636904638  | CDS2,PCNA,PROKR2,TMEM230        |
| 13 | 47,850,000 | 48,000,000 | 639 | 827  | 0.805648151  | CDS2,PROKR2                     |
| 13 | 47,925,000 | 48,075,000 | 640 | 974  | -0.143775968 |                                 |
| 13 | 48,000,000 | 48,150,000 | 641 | 842  | -0.34484335  | GPCPD1                          |
| 13 | 48,075,000 | 48,225,000 | 642 | 629  | 1.486084687  | GPCPD1                          |
| 13 | 48,150,000 | 48,300,000 | 643 | 1018 | 1.146957346  | C2orf196,GPCPD1                 |
| 13 | 48,225,000 | 48,375,000 | 644 | 1163 | 0.166953889  | C2orf196                        |
| 13 | 48,300,000 | 48,450,000 | 645 | 1143 | -1.040516847 | C2orf196,CHGB                   |
| 13 | 48,375,000 | 48,525,000 | 646 | 914  | -1.503977944 | C2orf196,CHGB,MCM8,TRMT6        |
| 13 | 48,450,000 | 48,600,000 | 647 | 614  | 0.320792639  | CRLS1,LRRN4,MCM8,TRMT6          |
| 13 | 48,525,000 | 48,675,000 | 648 | 809  | 0.716080222  | CRLS1,FERMT1,LRRN4,MCM8         |
| 13 | 48,600,000 | 48,750,000 | 649 | 1134 | 0.246882172  | FERMT1                          |
| 13 | 48,675,000 | 48,825,000 | 650 | 1049 | -0.567602147 |                                 |
| 13 | 48,750,000 | 48,900,000 | 651 | 655  | -1.620076744 |                                 |
| 13 | 48,825,000 | 48,975,000 | 652 | 470  | -1.372322011 |                                 |
| 13 | 48,900,000 | 49,050,000 | 653 | 652  | -0.588889313 |                                 |
| 13 | 48,975,000 | 49,125,000 | 654 | 740  | -1.114992182 |                                 |
| 13 | 49,050,000 | 49,200,000 | 655 | 613  | -1.152380652 |                                 |
| 13 | 49,125,000 | 49,275,000 | 656 | 589  | 0.236746868  |                                 |
| 13 | 49,200,000 | 49,350,000 | 657 | 591  | 0.960754534  |                                 |

|    |            |            |     |      |              |                                                                                                                                                                                                                         |
|----|------------|------------|-----|------|--------------|-------------------------------------------------------------------------------------------------------------------------------------------------------------------------------------------------------------------------|
| 13 | 49,275,000 | 49,425,000 | 658 | 451  | 1.130838829  |                                                                                                                                                                                                                         |
| 13 | 49,350,000 | 49,500,000 | 659 | 393  | 1.244921361  |                                                                                                                                                                                                                         |
| 13 | 49,425,000 | 49,575,000 | 660 | 338  | 1.166912909  | BMP2                                                                                                                                                                                                                    |
| 13 | 49,500,000 | 49,650,000 | 661 | 306  | 0.882050242  | BMP2                                                                                                                                                                                                                    |
| 13 | 49,575,000 | 49,725,000 | 662 | 391  | 1.068753307  |                                                                                                                                                                                                                         |
| 13 | 49,650,000 | 49,800,000 | 663 | 370  | 1.078585957  |                                                                                                                                                                                                                         |
| 13 | 49,725,000 | 49,875,000 | 664 | 332  | 0.861819785  |                                                                                                                                                                                                                         |
| 13 | 49,800,000 | 49,950,000 | 665 | 417  | 1.026820103  |                                                                                                                                                                                                                         |
| 13 | 49,875,000 | 50,025,000 | 666 | 649  | 1.140314838  |                                                                                                                                                                                                                         |
| 13 | 49,950,000 | 50,100,000 | 667 | 633  | 0.987023212  |                                                                                                                                                                                                                         |
| 13 | 50,025,000 | 50,175,000 | 668 | 567  | -0.013939626 |                                                                                                                                                                                                                         |
| 13 | 50,100,000 | 50,250,000 | 669 | 609  | -0.625385545 |                                                                                                                                                                                                                         |
| 13 | 50,175,000 | 50,325,000 | 670 | 685  | -2.355018357 |                                                                                                                                                                                                                         |
|    |            |            |     |      |              | UBE2D3,ENSBTAG00000045555,ENSBTAG00000045753,ENSBTAG00000046276,ENSBTAG00000046631,ENSBTAG00000046776,ENSBTAG00000047102,ENSBTAG00000047638,ENSBTAG00000047653,ENSBTAG00000047962,ENSBTAG00000048089,ENSBTAG00000048291 |
| 13 | 50,250,000 | 50,400,000 | 671 | 496  | -2.798415343 |                                                                                                                                                                                                                         |
|    |            |            |     |      |              | UBE2D3,ENSBTAG00000045555,ENSBTAG00000045753,ENSBTAG00000046276,ENSBTAG00000046631,ENSBTAG00000046776,ENSBTAG00000047102,ENSBTAG00000047638,ENSBTAG00000047653,ENSBTAG00000047962,ENSBTAG00000048089,ENSBTAG00000048291 |
| 13 | 50,325,000 | 50,475,000 | 672 | 286  | -1.044198445 |                                                                                                                                                                                                                         |
|    |            |            |     |      |              | ENSBTAG00000046631                                                                                                                                                                                                      |
| 13 | 50,400,000 | 50,550,000 | 673 | 495  | -1.225572124 |                                                                                                                                                                                                                         |
| 13 | 50,475,000 | 50,625,000 | 674 | 649  | -0.770704022 |                                                                                                                                                                                                                         |
| 13 | 50,550,000 | 50,700,000 | 675 | 740  | 0.185387583  |                                                                                                                                                                                                                         |
| 13 | 50,625,000 | 50,775,000 | 676 | 596  | 0.328235346  |                                                                                                                                                                                                                         |
| 13 | 50,700,000 | 50,850,000 | 677 | 408  | 0.387805362  |                                                                                                                                                                                                                         |
| 13 | 50,775,000 | 50,925,000 | 678 | 367  | 0.796302504  |                                                                                                                                                                                                                         |
| 13 | 50,850,000 | 51,000,000 | 679 | 596  | 0.915082651  |                                                                                                                                                                                                                         |
| 13 | 50,925,000 | 51,075,000 | 680 | 865  | 0.928990384  |                                                                                                                                                                                                                         |
| 13 | 51,000,000 | 51,150,000 | 681 | 775  | 0.788501367  | HAO1                                                                                                                                                                                                                    |
| 13 | 51,075,000 | 51,225,000 | 682 | 650  | 0.711429756  | HAO1,ENSBTAG00000032156                                                                                                                                                                                                 |
| 13 | 51,150,000 | 51,300,000 | 683 | 1311 | 0.953973899  | HAO1,ENSBTAG00000032156                                                                                                                                                                                                 |
| 13 | 51,225,000 | 51,375,000 | 684 | 1311 | 0.80178229   | ADRA1D                                                                                                                                                                                                                  |
| 13 | 51,300,000 | 51,450,000 | 685 | 889  | 0.525939355  | ADRA1D,SMOX                                                                                                                                                                                                             |
| 13 | 51,375,000 | 51,525,000 | 686 | 1083 | 1.025333289  | ADRA1D,SMOX                                                                                                                                                                                                             |
| 13 | 51,450,000 | 51,600,000 | 687 | 993  | 1.200593826  |                                                                                                                                                                                                                         |
| 13 | 51,525,000 | 51,675,000 | 688 | 838  | 0.799879631  | RNF24                                                                                                                                                                                                                   |
| 13 | 51,600,000 | 51,750,000 | 689 | 851  | 0.351487676  | PANK2,RNF24                                                                                                                                                                                                             |
| 13 | 51,675,000 | 51,825,000 | 690 | 1009 | 0.553501585  | MAVS,PANK2,RNF24                                                                                                                                                                                                        |
|    |            |            |     |      |              | C20ORF29,C20orf27,CDC25B,CENPB,MAVS,PANK2,SP                                                                                                                                                                            |
| 13 | 51,750,000 | 51,900,000 | 691 | 832  | 1.003809053  | EF1                                                                                                                                                                                                                     |
|    |            |            |     |      |              | ADAM33,C20ORF29,C20orf27,CDC25B,CENPB,HSPA12B,SIGLEC1,SPEF1,ENSBTAG00000027412                                                                                                                                          |
| 13 | 51,825,000 | 51,975,000 | 692 | 511  | 0.593808719  |                                                                                                                                                                                                                         |
|    |            |            |     |      |              | ADAM33,ATRN,C20orf27,GFRA4,HSPA12B,SIGLEC1,ENSBTAG00000027412                                                                                                                                                           |
| 13 | 51,900,000 | 52,050,000 | 693 | 325  | 0.210639145  |                                                                                                                                                                                                                         |
|    |            |            |     |      |              | ADAM33,ATRN,GFRA4                                                                                                                                                                                                       |
| 13 | 51,975,000 | 52,125,000 | 694 | 319  | -0.258090564 |                                                                                                                                                                                                                         |
| 13 | 52,050,000 | 52,200,000 | 695 | 372  | -0.256586116 | ATRN                                                                                                                                                                                                                    |
| 13 | 52,125,000 | 52,275,000 | 696 | 383  | -0.341477844 | ATRN,C13H20orf194                                                                                                                                                                                                       |
| 13 | 52,200,000 | 52,350,000 | 697 | 353  | -0.815143321 | C13H20orf194                                                                                                                                                                                                            |

|    |            |            |     |      |              |                                                                                                    |
|----|------------|------------|-----|------|--------------|----------------------------------------------------------------------------------------------------|
| 13 | 52,275,000 | 52,425,000 | 698 | 311  | -1.130707108 | C13H20orf194                                                                                       |
| 13 | 52,350,000 | 52,500,000 | 699 | 321  | -1.938015122 | C13H20orf194,DDR GK1,ITPA,SLC4A11,ENSBTAG0000020454                                                |
| 13 | 52,425,000 | 52,575,000 | 700 | 344  | -1.856233426 | AVP,DDR GK1,ITPA,SLC4A11,UBOX5,ENSBTAG00000020454                                                  |
| 13 | 52,500,000 | 52,650,000 | 701 | 289  | -0.565086441 | AVP,MRPS26,OXT,PTPRA,UBOX5,ENSBTAG00000020454                                                      |
| 13 | 52,575,000 | 52,725,000 | 702 | 221  | 0.878405461  | MRPS26,OXT,PTPRA                                                                                   |
| 13 | 52,650,000 | 52,800,000 | 703 | 259  | 0.871046944  | PTPRA,VPS16                                                                                        |
| 13 | 52,725,000 | 52,875,000 | 704 | 406  | 0.176521155  | CPXM,PCED1A,PTPRA,TMEM239,VPS16,ENSBTAG000021817                                                   |
| 13 | 52,800,000 | 52,950,000 | 705 | 769  | 0.191341135  | CPXM,EBF4,PCED1A,TMEM239,VPS16,ENSBTAG0000021817                                                   |
| 13 | 52,875,000 | 53,025,000 | 706 | 1089 | 0.525189763  | EBF4,IDH3B,NOP56,TMC2                                                                              |
| 13 | 52,950,000 | 53,100,000 | 707 | 1106 | 0.771592455  | IDH3B,NOP56,TMC2                                                                                   |
| 13 | 53,025,000 | 53,175,000 | 708 | 1178 | 0.981719896  | SNRPB,TGM6,TMC2                                                                                    |
| 13 | 53,100,000 | 53,250,000 | 709 | 1301 | 0.886514538  | SNRPB,TGM6,TMC2                                                                                    |
| 13 | 53,175,000 | 53,325,000 | 710 | 1069 | 0.582017457  | TGM3,TGM6,ENSBTAG00000022534                                                                       |
| 13 | 53,250,000 | 53,400,000 | 711 | 762  | 0.193741183  | TGM3,ENSBTAG00000022534                                                                            |
| 13 | 53,325,000 | 53,475,000 | 712 | 624  | -0.149989936 |                                                                                                    |
| 13 | 53,400,000 | 53,550,000 | 713 | 573  | 0.230445018  | STK35                                                                                              |
| 13 | 53,475,000 | 53,625,000 | 714 | 638  | 0.088551661  | PDYN,STK35                                                                                         |
| 13 | 53,550,000 | 53,700,000 | 715 | 1633 | 0.528751013  | PDYN,SIRPA                                                                                         |
| 13 | 53,625,000 | 53,775,000 | 716 | 1990 | 0.635328207  | SIRPA                                                                                              |
| 13 | 53,700,000 | 53,850,000 | 717 | 1477 | 0.818888732  | SIRPA,ENSBTAG00000039016,ENSBTAG00000048087                                                        |
| 13 | 53,775,000 | 53,925,000 | 718 | 1890 | -0.024515492 | SIRPB1,ENSBTAG00000039016,ENSBTAG00000048087                                                       |
| 13 | 53,850,000 | 54,000,000 | 719 | 2268 | -0.94582352  | SIRPB1,ENSBTAG00000039016                                                                          |
| 13 | 53,925,000 | 54,075,000 | 720 | 1968 | -0.766576065 | GINS1,SIRPB1,ENSBTAG00000011638,ENSBTAG0000027221                                                  |
| 13 | 54,000,000 | 54,150,000 | 721 | 1925 | -0.028836434 | GINS1,PCMTD2,ENSBTAG00000011638,ENSBTAG0000027221                                                  |
| 13 | 54,075,000 | 54,225,000 | 722 | 1549 | 0.210585428  | GINS1,MYT1,PCMTD2                                                                                  |
| 13 | 54,150,000 | 54,300,000 | 723 | 633  | 0.293737315  | LKAAEAR1,MYT1,NPBWR2,OPRL1,RGS19,SOX18,TCEA2                                                       |
| 13 | 54,225,000 | 54,375,000 | 724 | 343  | 0.407060374  | LKAAEAR1,NPBWR2,OPRL1,PRPF6,RGS19,SAMD10,SOX18,TCEA2,UCKL1,ZNF512B                                 |
| 13 | 54,300,000 | 54,450,000 | 725 | 260  | 0.022296034  | C13H20ORF135,DNAJC5,PRPF6,SAMD10,TPD52L2,UCKL1,ZNF512B                                             |
| 13 | 54,375,000 | 54,525,000 | 726 | 244  | 0.091674245  | ARFRP1,C13H20ORF135,DNAJC5,SLC2A4RG,TPD52L2,ZBTB46,ZGPAT,ENSBTAG00000007501                        |
| 13 | 54,450,000 | 54,600,000 | 727 | 287  | -0.175950742 | ARFRP1,C20orf195,GMEB2,PTK6,RTEL,RTEL1,SLC2A4RG,SRMS,STMN3,TNFRSF6B,ZBTB46,ZGPAT,ENSBTAG0000007501 |
| 13 | 54,525,000 | 54,675,000 | 728 | 326  | -1.10308819  | ARFRP1,C20orf195,EEF1A2,GMEB2,KCNQ2,PPDPF,PTK6,RTEL,RTEL1,SRMS,STMN3,TNFRSF6B                      |
| 13 | 54,600,000 | 54,750,000 | 729 | 533  | -0.538261333 | CHRNA4,COL20A1,EEF1A2,KCNQ2,PPDPF,PTK6                                                             |
| 13 | 54,675,000 | 54,825,000 | 730 | 693  | -0.79874347  | ARFGAP3,BIRC7,CHRNA4,COL20A1,KCNQ2,YTHDF1                                                          |
| 13 | 54,750,000 | 54,900,000 | 731 | 881  | -1.398725235 | ARFGAP3,BHLHE23,BIRC7,COL20A1,YTHDF1                                                               |
| 13 | 54,825,000 | 54,975,000 | 732 | 723  | -1.157385976 | BHLHE23,DIDO1,GID8,SLC17A9                                                                         |
| 13 | 54,900,000 | 55,050,000 | 733 | 294  | -0.167215983 | COL9A3,DIDO1,GID8,OGFR,SLC17A9,TCFL5                                                               |
| 13 | 54,975,000 | 55,125,000 | 734 | 496  | 0.898899483  | C13H20orf20,COL9A3,DIDO1,NTSR1,OGFR,TCFL5                                                          |
| 13 | 55,050,000 | 55,200,000 | 735 | 584  | 0.823128169  | C13H20orf20,NTSR1,OGFR,SLCO4A1                                                                     |

|    |            |            |     |      |              |                                                                |
|----|------------|------------|-----|------|--------------|----------------------------------------------------------------|
| 13 | 55,125,000 | 55,275,000 | 736 | 426  | 0.371854641  | NTSR1,SLCO4A1                                                  |
| 13 | 55,200,000 | 55,350,000 | 737 | 401  | 0.196253913  | CABLES2,GATA5,RBBP8NL                                          |
| 13 | 55,275,000 | 55,425,000 | 738 | 321  | 0.299781721  | CABLES2,GATA5,LAMA5,RBBP8NL,RPS21                              |
| 13 | 55,350,000 | 55,500,000 | 739 | 348  | 1.017858383  | ADRM1,CABLES2,LAMA5,OSBPL2,RPS21                               |
| 13 | 55,425,000 | 55,575,000 | 740 | 353  | 0.803313678  | ADRM1,GTPBP5,HRH3,LAMA5,OSBPL2,PSMA7,SS18L1,ENSBTAG00000021558 |
| 13 | 55,500,000 | 55,650,000 | 741 | 397  | -0.696047925 | GTPBP5,HRH3,PSMA7,SS18L1,TAF4,ENSBTAG00000021558               |
| 13 | 55,575,000 | 55,725,000 | 742 | 396  | -0.91480955  | CDH4,TAF4                                                      |
| 13 | 55,650,000 | 55,800,000 | 743 | 481  | -0.697960421 | CDH4,TAF4                                                      |
| 13 | 55,725,000 | 55,875,000 | 744 | 656  | -0.399298589 | CDH4                                                           |
| 13 | 55,800,000 | 55,950,000 | 745 | 668  | -0.284465006 | CDH4                                                           |
| 13 | 55,875,000 | 56,025,000 | 746 | 663  | -0.366884554 |                                                                |
| 13 | 55,950,000 | 56,100,000 | 747 | 748  | -0.093627818 |                                                                |
| 13 | 56,025,000 | 56,175,000 | 748 | 1000 | 0.439342375  |                                                                |
| 13 | 56,100,000 | 56,250,000 | 749 | 900  | 0.35864524   |                                                                |
| 13 | 56,175,000 | 56,325,000 | 750 | 814  | -0.554303172 |                                                                |
| 13 | 56,250,000 | 56,400,000 | 751 | 936  | 0.091755074  |                                                                |
| 13 | 56,325,000 | 56,475,000 | 752 | 856  | -0.178472076 |                                                                |
| 13 | 56,400,000 | 56,550,000 | 753 | 1165 | -1.584131098 |                                                                |
| 13 | 56,475,000 | 56,625,000 | 754 | 1244 | -1.029561805 |                                                                |
| 13 | 56,550,000 | 56,700,000 | 755 | 807  | -1.156725659 |                                                                |
| 13 | 56,625,000 | 56,775,000 | 756 | 641  | -1.961692853 |                                                                |
| 13 | 56,700,000 | 56,850,000 | 757 | 703  | -2.04061378  |                                                                |
| 13 | 56,775,000 | 56,925,000 | 758 | 909  | -1.107479299 |                                                                |
| 13 | 56,850,000 | 57,000,000 | 759 | 871  | -0.028074667 |                                                                |
| 13 | 56,925,000 | 57,075,000 | 760 | 875  | -0.021683632 | CDH26                                                          |
| 13 | 57,000,000 | 57,150,000 | 761 | 745  | -0.44957683  | CDH26,FAM217B,PPP1R3D,SYCP2                                    |
| 13 | 57,075,000 | 57,225,000 | 762 | 421  | -0.666935898 | CDH26,FAM217B,PHACTR3,PPP1R3D,SYCP2                            |
| 13 | 57,150,000 | 57,300,000 | 763 | 598  | -0.639057451 | PHACTR3,SYCP2                                                  |
| 13 | 57,225,000 | 57,375,000 | 764 | 744  | -0.598470496 | PHACTR3                                                        |
| 13 | 57,300,000 | 57,450,000 | 765 | 886  | -0.542464206 |                                                                |
| 13 | 57,375,000 | 57,525,000 | 766 | 770  | -1.524226279 |                                                                |
| 13 | 57,450,000 | 57,600,000 | 767 | 640  | -1.016932775 | EDN3                                                           |
| 13 | 57,525,000 | 57,675,000 | 768 | 874  | -0.223300215 | EDN3,ZNF831                                                    |
| 13 | 57,600,000 | 57,750,000 | 769 | 849  | -0.080603435 | ZNF831                                                         |
| 13 | 57,675,000 | 57,825,000 | 770 | 782  | 0.784775103  | ZNF831                                                         |
| 13 | 57,750,000 | 57,900,000 | 771 | 753  | 1.177165877  | ATP5E,CTSZ,NELFCD,SLMO2,TUBB1                                  |
| 13 | 57,825,000 | 57,975,000 | 772 | 689  | 0.978956854  | ATP5E,CTSZ,NELFCD,SLMO2,TUBB1                                  |
| 13 | 57,900,000 | 58,050,000 | 773 | 590  | -0.0659117   | GNAS,NELFCD                                                    |
| 13 | 57,975,000 | 58,125,000 | 774 | 419  | -0.290943383 | GNAS                                                           |
| 13 | 58,050,000 | 58,200,000 | 775 | 300  | -2.319454408 |                                                                |
| 13 | 58,125,000 | 58,275,000 | 776 | 224  | -2.665189694 | NPEPL1,ENSBTAG0000003872                                       |
| 13 | 58,200,000 | 58,350,000 | 777 | 212  | 0.880721884  | NPEPL1,ENSBTAG0000003872                                       |
| 13 | 58,275,000 | 58,425,000 | 778 | 256  | -0.392896313 |                                                                |
| 13 | 58,350,000 | 58,500,000 | 779 | 282  | -1.583562044 | APCDD1L,VAPB                                                   |
| 13 | 58,425,000 | 58,575,000 | 780 | 333  | -2.134089405 | APCDD1L,RAB22A,VAPB                                            |
| 13 | 58,500,000 | 58,650,000 | 781 | 399  | -0.676068479 | RAB22A,VAPB                                                    |
| 13 | 58,575,000 | 58,725,000 | 782 | 431  | -0.073437675 | ANKRD60,C13H20ORF85,RAB22A                                     |
| 13 | 58,650,000 | 58,800,000 | 783 | 321  | -0.217767606 | ANKRD60,C13H20ORF85                                            |
| 13 | 58,725,000 | 58,875,000 | 784 | 360  | 0.205255899  | C13H20ORF85                                                    |
| 13 | 58,800,000 | 58,950,000 | 785 | 577  | 0.706533705  |                                                                |
| 13 | 58,875,000 | 59,025,000 | 786 | 628  | 0.846653018  | PMEPA1                                                         |

|    |            |            |     |      |              |                                                                       |
|----|------------|------------|-----|------|--------------|-----------------------------------------------------------------------|
| 13 | 58,950,000 | 59,100,000 | 787 | 630  | 0.375133526  | PMEPA1,ZBP1                                                           |
| 13 | 59,025,000 | 59,175,000 | 788 | 718  | -0.309557595 | PCK1,PMEPA1,ZBP1                                                      |
| 13 | 59,100,000 | 59,250,000 | 789 | 787  | -0.933419006 | BORIS,PCK1,ZBP1                                                       |
| 13 | 59,175,000 | 59,325,000 | 790 | 651  | -0.788791553 | BORIS,RAE1,RBM38                                                      |
| 13 | 59,250,000 | 59,400,000 | 791 | 490  | 0.298581234  | RAE1,RBM38,SPO11                                                      |
| 13 | 59,325,000 | 59,475,000 | 792 | 554  | -1.45532206  | BMP7,RAE1,SPO11                                                       |
| 13 | 59,400,000 | 59,550,000 | 793 | 578  | -1.94275505  | BMP7                                                                  |
| 13 | 59,475,000 | 59,625,000 | 794 | 726  | -1.350527141 | BMP7                                                                  |
| 13 | 59,550,000 | 59,700,000 | 795 | 702  | -0.747801766 |                                                                       |
| 13 | 59,625,000 | 59,775,000 | 796 | 509  | 0.83214342   |                                                                       |
| 13 | 59,700,000 | 59,850,000 | 797 | 617  | 0.396383404  |                                                                       |
| 13 | 59,775,000 | 59,925,000 | 798 | 675  | 0.078976799  | TFAP2C                                                                |
| 13 | 59,850,000 | 60,000,000 | 799 | 556  | 0.519982569  | FAM209B,GCNT7,RTFDC1,TFAP2C,ENSBTAG00000024608                        |
| 13 | 59,925,000 | 60,075,000 | 800 | 419  | 0.090895794  | CASS4,FAM209B,GCNT7,RTFDC1,ENSBTAG00000024608                         |
| 13 | 60,000,000 | 60,150,000 | 801 | 381  | -0.684451779 | AURKA,C13H20ORF108,CASS4,CSTF1,GCNT7,RTFDC1                           |
| 13 | 60,075,000 | 60,225,000 | 802 | 306  | -1.195013522 | AURKA,C13H20ORF108,CSTF1,MC3R,SIRPD                                   |
| 13 | 60,150,000 | 60,300,000 | 803 | 315  | -2.207631923 | FKBP1A,MC3R,NSFL1C,SIRPB2,SIRPD                                       |
| 13 | 60,225,000 | 60,375,000 | 804 | 612  | -2.457598614 | FKBP1A,NSFL1C,SDCBP2,SIRPB2,SNPH                                      |
| 13 | 60,300,000 | 60,450,000 | 805 | 623  | -2.400218905 | FKBP1A,RAD21L1,SDCBP2,SNPH                                            |
| 13 | 60,375,000 | 60,525,000 | 806 | 1101 | -0.505587816 | PSMF1,RAD21L1,TMEM74B                                                 |
| 13 | 60,450,000 | 60,600,000 | 807 | 1415 | 0.069415533  | PSMF1,TMEM74B                                                         |
| 13 | 60,525,000 | 60,675,000 | 808 | 1116 | 0.470823328  | PSMF1                                                                 |
| 13 | 60,600,000 | 60,750,000 | 809 | 921  | 0.731238386  | ANGPTL4,RSPO4                                                         |
| 13 | 60,675,000 | 60,825,000 | 810 | 664  | 0.750827702  | ANGPTL4,FAM110A,RSPO4                                                 |
| 13 | 60,750,000 | 60,900,000 | 811 | 544  | 0.524243629  | ANGPTL4,FAM110A,SLC52A3                                               |
| 13 | 60,825,000 | 60,975,000 | 812 | 586  | 0.562106758  | SLC52A3,SRXN1                                                         |
| 13 | 60,900,000 | 61,050,000 | 813 | 570  | 0.766703515  | SRXN1,TCF15                                                           |
| 13 | 60,975,000 | 61,125,000 | 814 | 348  | 0.456114324  | CSNK2A1,TBC1D20,TCF15                                                 |
| 13 | 61,050,000 | 61,200,000 | 815 | 300  | 0.59194371   | C20ORF18,CSNK2A1,TBC1D20,TRIB3                                        |
| 13 | 61,125,000 | 61,275,000 | 816 | 326  | 1.093949332  | C20ORF18,C20orf96,NRSN2,TBC1D20,TRIB3,ZCCHC3                          |
| 13 | 61,200,000 | 61,350,000 | 817 | 468  | 1.304327772  | C20orf96,DEFB129,NRSN2,ZCCHC3                                         |
| 13 | 61,275,000 | 61,425,000 | 818 | 488  | 1.456239384  | C20orf96,DEFB129                                                      |
| 13 | 61,350,000 | 61,500,000 | 819 | 493  | 1.48300399   |                                                                       |
| 13 | 61,425,000 | 61,575,000 | 820 | 1155 | 0.888080578  | DEFB119,DEFB122,DEFB122A,ENSBTAG00000048009                           |
| 13 | 61,500,000 | 61,650,000 | 821 | 1254 | 0.495676017  | DEFB119,DEFB122,DEFB122A,DEFB123,DEFB124,HM13,REM1,ENSBTAG00000048009 |
| 13 | 61,575,000 | 61,725,000 | 822 | 675  | 0.070764937  | DEFB122,DEFB123,DEFB124,HM13,REM1                                     |
| 13 | 61,650,000 | 61,800,000 | 823 | 510  | 0.773794765  | BCL2L1,COX4I2,HM13,ID1                                                |
| 13 | 61,725,000 | 61,875,000 | 824 | 387  | 0.965244343  | BCL2L1,COX4I2,ID1,TPX2                                                |
| 13 | 61,800,000 | 61,950,000 | 825 | 342  | 0.606421567  | BCL2L1,DUSP15,FOXS1,MYLK2,TPX2,ENSBTAG00000031214                     |
| 13 | 61,875,000 | 62,025,000 | 826 | 408  | 0.799310248  | DUSP15,FOXS1,MYLK2,PDRG1,TPX2,TLL9,ENSBTAG00000031214                 |
| 13 | 61,950,000 | 62,100,000 | 827 | 426  | -0.584672286 | CCM2L,DUSP15,PDRG1,TLL9,XKR7                                          |
| 13 | 62,025,000 | 62,175,000 | 828 | 362  | -1.348574922 | CCM2L,HCK,TM9SF4,XKR7                                                 |
| 13 | 62,100,000 | 62,250,000 | 829 | 246  | -0.244172657 | HCK,PLAGL2,POFUT1,TM9SF4                                              |
| 13 | 62,175,000 | 62,325,000 | 830 | 223  | 0.618499831  | KIF3B,PLAGL2,POFUT1,TM9SF4                                            |
| 13 | 62,250,000 | 62,400,000 | 831 | 283  | 0.686759546  | ASXL1,KIF3B,POFUT1                                                    |
| 13 | 62,325,000 | 62,475,000 | 832 | 311  | 0.030772817  | ASXL1,KIF3B,NOL4L                                                     |
| 13 | 62,400,000 | 62,550,000 | 833 | 370  | -0.226216017 | ASXL1,NOL4L                                                           |



|    |            |            |     |      |              |                                                                         |
|----|------------|------------|-----|------|--------------|-------------------------------------------------------------------------|
| 13 | 62,475,000 | 62,625,000 | 834 | 593  | 0.835025417  | NOL4L                                                                   |
| 13 | 62,550,000 | 62,700,000 | 835 | 661  | 0.897410088  | COMMD7                                                                  |
| 13 | 62,625,000 | 62,775,000 | 836 | 437  | 0.671602137  | COMMD7,DNMT3B,MAPRE1                                                    |
| 13 | 62,700,000 | 62,850,000 | 837 | 674  | 0.957785093  | DNMT3B,MAPRE1,SPAG4L                                                    |
| 13 | 62,775,000 | 62,925,000 | 838 | 1053 | 0.383801568  | BPIFB2,BPIFB3,BPIFB6,SPAG4L                                             |
| 13 | 62,850,000 | 63,000,000 | 839 | 1405 | -0.15469822  | BPIFB2,BPIFB3,BPIFB4,BPIFB6,ENSBTAG00000038453                          |
| 13 | 62,925,000 | 63,075,000 | 840 | 1496 | 0.047474584  | BPIFB4,ENSBTAG00000009144,ENSBTAG00000038453                            |
| 13 | 63,000,000 | 63,150,000 | 841 | 1377 | 0.496115041  | BSP30C,BSP30D,ENSBTAG00000009144                                        |
| 13 | 63,075,000 | 63,225,000 | 842 | 1599 | 0.316844095  | BASE,BPIFA2B,BSP30C,BSP30D,ENSBTAG00000011704                           |
| 13 | 63,150,000 | 63,300,000 | 843 | 1495 | -0.646919194 | BASE,BPIFA1,BPIFA2B,BPIFB1,C13H20ORF71,ENSBTAG00000011704               |
| 13 | 63,225,000 | 63,375,000 | 844 | 1497 | -1.605060735 | BPIFA1,BPIFB1,C13H20ORF71,CDK5RAP1,ENSBTAG0000031354,ENSBTAG00000031361 |
| 13 | 63,300,000 | 63,450,000 | 845 | 1610 | -1.468890701 | BPIFB1,CDK5RAP1,SNTA1,ENSBTAG00000031354,ENSBTAG00000031361             |
| 13 | 63,375,000 | 63,525,000 | 846 | 965  | -0.741581056 | CDK5RAP1,SNTA1                                                          |
| 13 | 63,450,000 | 63,600,000 | 847 | 508  | 0.884253508  | SNTA1                                                                   |
| 13 | 63,525,000 | 63,675,000 | 848 | 566  | 0.676893803  | CBFA2T2                                                                 |
| 13 | 63,600,000 | 63,750,000 | 849 | 539  | 0.528289707  | ACTL10,C20orf144,CBFA2T2,E2F1,NECAB3,PXMP4                              |
| 13 | 63,675,000 | 63,825,000 | 850 | 827  | 1.196415228  | ACTL10,C20orf144,CHMP4B,E2F1,NECAB3,PXMP4,ZNF341                        |
| 13 | 63,750,000 | 63,900,000 | 851 | 1364 | 0.936945663  | CHMP4B,ZNF341                                                           |
| 13 | 63,825,000 | 63,975,000 | 852 | 1206 | 0.304314395  | CHMP4B,RALY                                                             |
| 13 | 63,900,000 | 64,050,000 | 853 | 924  | 0.034961997  | RALY                                                                    |
| 13 | 63,975,000 | 64,125,000 | 854 | 793  | 0.531216815  | EIF2S2,RALY                                                             |
| 13 | 64,050,000 | 64,200,000 | 855 | 745  | 0.879576767  | EIF2S2                                                                  |
| 13 | 64,125,000 | 64,275,000 | 856 | 738  | 0.849488317  | AHCY,ASIP                                                               |
| 13 | 64,200,000 | 64,350,000 | 857 | 576  | 0.49709639   | AHCY,ASIP                                                               |
| 13 | 64,275,000 | 64,425,000 | 858 | 603  | -0.169507147 | ITCH,ENSBTAG00000046623                                                 |
| 13 | 64,350,000 | 64,500,000 | 859 | 685  | -0.231297727 | DYNLRB1,ITCH,MAP1LC3A,PIGU,ENSBTAG00000046623                           |
| 13 | 64,425,000 | 64,575,000 | 860 | 759  | 0.520155181  | DYNLRB1,ITCH,MAP1LC3A,PIGU                                              |
| 13 | 64,500,000 | 64,650,000 | 861 | 692  | 1.025777973  | NCOA6,PIGU,TP53INP2                                                     |
| 13 | 64,575,000 | 64,725,000 | 862 | 596  | 1.088364275  | NCOA6,PIGU,TP53INP2                                                     |
| 13 | 64,650,000 | 64,800,000 | 863 | 716  | 0.646757589  | ACSS2,GGT7,NCOA6                                                        |
| 13 | 64,725,000 | 64,875,000 | 864 | 775  | 0.621531017  | ACSS2,GGT7,GSS,NCOA6                                                    |
| 13 | 64,800,000 | 64,950,000 | 865 | 566  | 0.912459897  | ACSS2,GSS,MYH7B,TRPC4AP                                                 |
| 13 | 64,875,000 | 65,025,000 | 866 | 744  | 0.452344278  | EDEM2,MYH7B,TRPC4AP                                                     |
| 13 | 64,950,000 | 65,100,000 | 867 | 1093 | 0.395355913  | EDEM2,PROCR,TRPC4AP                                                     |
| 13 | 65,025,000 | 65,175,000 | 868 | 992  | 0.403327568  | EDEM2,MMP24,PROCR                                                       |
| 13 | 65,100,000 | 65,250,000 | 869 | 934  | 0.613473204  | EIF6,FAM83C,MMP24,PROCR,UQCC                                            |
| 13 | 65,175,000 | 65,325,000 | 870 | 734  | 0.836049788  | EIF6,FAM83C,MMP24,UQCC                                                  |
| 13 | 65,250,000 | 65,400,000 | 871 | 396  | -0.21029511  | CEP250,GDF5,UQCC                                                        |
| 13 | 65,325,000 | 65,475,000 | 872 | 401  | -0.032833959 | C20orf173,CEP250,ERGIC3,GDF5,UQCC                                       |
| 13 | 65,400,000 | 65,550,000 | 873 | 342  | 0.370442002  | C20orf173,CEP250,CPNE1,ERGIC3,NFS1,RBM12,SPAG4                          |
| 13 | 65,475,000 | 65,625,000 | 874 | 273  | 0.529513713  | CPNE1,NFS1,PHF20,RBM12,RBM39,ROMO1,SPAG4                                |
| 13 | 65,550,000 | 65,700,000 | 875 | 329  | 0.114694741  | NFS1,PHF20,RBM39,ROMO1                                                  |
| 13 | 65,625,000 | 65,775,000 | 876 | 348  | -0.170065227 | CNBD2,PHF20,SCAND1                                                      |
| 13 | 65,700,000 | 65,850,000 | 877 | 577  | 0.106187678  | CNBD2,PHF20,SCAND1                                                      |
| 13 | 65,775,000 | 65,925,000 | 878 | 945  | 0.657493441  | CNBD2                                                                   |

|    |            |            |     |      |              |                                   |
|----|------------|------------|-----|------|--------------|-----------------------------------|
| 13 | 65,850,000 | 66,000,000 | 879 | 1007 | 1.260524135  | EPB41L1                           |
| 13 | 65,925,000 | 66,075,000 | 880 | 714  | 1.190521325  | AAR2,EPB41L1                      |
| 13 | 66,000,000 | 66,150,000 | 881 | 667  | 0.576488901  | AAR2,EPB41L1                      |
| 13 | 66,075,000 | 66,225,000 | 882 | 640  | 0.133590769  | DLGAP4                            |
| 13 | 66,150,000 | 66,300,000 | 883 | 521  | -0.067247897 | DLGAP4                            |
| 13 | 66,225,000 | 66,375,000 | 884 | 603  | 0.09680784   | DLGAP4,MYL9,RIP5,SLA2,TGIF2       |
| 13 | 66,300,000 | 66,450,000 | 885 | 501  | -1.032802902 | MYL9,NDRG3,RIP5,SLA2,TGIF2,TLDC2  |
| 13 | 66,375,000 | 66,525,000 | 886 | 417  | -2.832908673 | NDRG3,SAMHD1,SLA2,TLDC2           |
| 13 | 66,450,000 | 66,600,000 | 887 | 319  | -1.536764811 | NDRG3,RBL1,SAMHD1                 |
| 13 | 66,525,000 | 66,675,000 | 888 | 226  | -0.791228709 | DSN1,NDRG3,RBL1,SAMHD1,SOGA1      |
| 13 | 66,600,000 | 66,750,000 | 889 | 288  | -0.50157472  | DSN1,MROH8,RBL1,SOGA1             |
| 13 | 66,675,000 | 66,825,000 | 890 | 532  | -0.77085281  | MROH8,RBL1,RPN2                   |
| 13 | 66,750,000 | 66,900,000 | 891 | 674  | -0.43045437  | GHRH,MANBAL,MROH8,RPN2            |
| 13 | 66,825,000 | 66,975,000 | 892 | 604  | -0.089069373 | GHRH,MANBAL,RPN2                  |
| 13 | 66,900,000 | 67,050,000 | 893 | 583  | 0.473497711  | MANBAL,SRC                        |
| 13 | 66,975,000 | 67,125,000 | 894 | 543  | 1.056867932  | BLCAP,NNAT,SRC,ENSBTAG00000045928 |
| 13 | 67,050,000 | 67,200,000 | 895 | 696  | 0.638135266  | BLCAP,NNAT,ENSBTAG00000045928     |
| 13 | 67,125,000 | 67,275,000 | 896 | 904  | 0.096303795  | BLCAP,CTNNBL1                     |
| 13 | 67,200,000 | 67,350,000 | 897 | 869  | 0.05026093   | CTNNBL1                           |
| 13 | 67,275,000 | 67,425,000 | 898 | 719  | 0.273213659  | CTNNBL1                           |
| 13 | 67,350,000 | 67,500,000 | 899 | 650  | -0.799300321 | CTNNBL1,VSTM2L                    |
| 13 | 67,425,000 | 67,575,000 | 900 | 699  | -0.914542376 | CTNNBL1,RPRD1B,TTI1,VSTM2L        |
| 13 | 67,500,000 | 67,650,000 | 901 | 592  | -0.336445742 | RPRD1B,TTI1                       |
| 13 | 67,575,000 | 67,725,000 | 902 | 671  | -1.863668826 | RPRD1B,TGM2                       |
| 13 | 67,650,000 | 67,800,000 | 903 | 625  | -2.56068651  | KIAA1755,TGM2                     |
| 13 | 67,725,000 | 67,875,000 | 904 | 837  | -0.963782656 | BPI,KIAA1755,LBP                  |
| 13 | 67,800,000 | 67,950,000 | 905 | 1337 | -0.30891469  | BPI,LBP                           |
| 13 | 67,875,000 | 68,025,000 | 906 | 1088 | 0.241507105  | LBP,ENSBTAG00000047302            |
| 13 | 67,950,000 | 68,100,000 | 907 | 516  | 0.574836767  | RALGAPB,ENSBTAG00000047302        |
| 13 | 68,025,000 | 68,175,000 | 908 | 574  | -2.145455628 | ADIG,RALGAPB                      |
| 13 | 68,100,000 | 68,250,000 | 909 | 955  | -1.591636037 | ACTR5,ADIG,RALGAPB,SLC32A1        |
| 13 | 68,175,000 | 68,325,000 | 910 | 860  | -0.343056531 | ACTR5,PPP1R16B,SLC32A1            |
| 13 | 68,250,000 | 68,400,000 | 911 | 1055 | -0.546697327 | DHX35,FAM83D,PPP1R16B             |
| 13 | 68,325,000 | 68,475,000 | 912 | 1372 | -2.510268701 | DHX35,FAM83D,PPP1R16B             |
| 13 | 68,400,000 | 68,550,000 | 913 | 1586 | -2.927828387 | DHX35                             |
| 13 | 68,475,000 | 68,625,000 | 914 | 1355 | -1.061511583 |                                   |
| 13 | 68,550,000 | 68,700,000 | 915 | 1096 | 1.193979292  |                                   |
| 13 | 68,625,000 | 68,775,000 | 916 | 1223 | 0.82375986   |                                   |
| 13 | 68,700,000 | 68,850,000 | 917 | 987  | 0.726401254  |                                   |
| 13 | 68,775,000 | 68,925,000 | 918 | 611  | 1.238166914  |                                   |
| 13 | 68,850,000 | 69,000,000 | 919 | 614  | 1.374919103  |                                   |
| 13 | 68,925,000 | 69,075,000 | 920 | 895  | 1.162730655  |                                   |
| 13 | 69,000,000 | 69,150,000 | 921 | 1157 | 0.869692875  |                                   |
| 13 | 69,075,000 | 69,225,000 | 922 | 1029 | 0.589813429  |                                   |
| 13 | 69,150,000 | 69,300,000 | 923 | 928  | -0.206121299 |                                   |
| 13 | 69,225,000 | 69,375,000 | 924 | 1278 | 0.008230059  |                                   |
| 13 | 69,300,000 | 69,450,000 | 925 | 1177 | 0.462815164  |                                   |
| 13 | 69,375,000 | 69,525,000 | 926 | 1187 | 0.497624494  |                                   |
| 13 | 69,450,000 | 69,600,000 | 927 | 1367 | -0.200964295 |                                   |
| 13 | 69,525,000 | 69,675,000 | 928 | 1099 | -0.050281291 |                                   |
| 13 | 69,600,000 | 69,750,000 | 929 | 1149 | 0.689556266  |                                   |
| 13 | 69,675,000 | 69,825,000 | 930 | 1089 | 0.901768198  |                                   |
| 13 | 69,750,000 | 69,900,000 | 931 | 993  | -0.04715269  |                                   |

|    |            |            |     |      |              |                                          |
|----|------------|------------|-----|------|--------------|------------------------------------------|
| 13 | 69,825,000 | 69,975,000 | 932 | 964  | 0.012791632  |                                          |
| 13 | 69,900,000 | 70,050,000 | 933 | 617  | 0.558685036  |                                          |
| 13 | 69,975,000 | 70,125,000 | 934 | 400  | 0.130776389  | MAFB                                     |
| 13 | 70,050,000 | 70,200,000 | 935 | 574  | 0.338156895  | MAFB                                     |
| 13 | 70,125,000 | 70,275,000 | 936 | 1116 | 0.296489071  |                                          |
| 13 | 70,200,000 | 70,350,000 | 937 | 915  | 0.019119661  |                                          |
| 13 | 70,275,000 | 70,425,000 | 938 | 338  | -0.673137728 | TOP1                                     |
| 13 | 70,350,000 | 70,500,000 | 939 | 197  | -1.853720016 | TOP1                                     |
| 13 | 70,425,000 | 70,575,000 | 940 | 383  | -1.957659852 | PLCG1, TOP1, ZHX3                        |
| 13 | 70,500,000 | 70,650,000 | 941 | 663  | -0.299705373 | PLCG1, ZHX3                              |
| 13 | 70,575,000 | 70,725,000 | 942 | 598  | 0.575334467  | EMILIN3, LPIN3, ENSBTAG00000045671       |
| 13 | 70,650,000 | 70,800,000 | 943 | 875  | 0.283046965  | CHD6, EMILIN3, LPIN3, ENSBTAG00000045671 |
| 13 | 70,725,000 | 70,875,000 | 944 | 990  | -0.051536859 | CHD6                                     |
| 13 | 70,800,000 | 70,950,000 | 945 | 788  | -0.436276144 | CHD6                                     |
| 13 | 70,875,000 | 71,025,000 | 946 | 1099 | -0.340924714 |                                          |
| 13 | 70,950,000 | 71,100,000 | 947 | 1006 | -0.117499175 |                                          |
| 13 | 71,025,000 | 71,175,000 | 948 | 988  | -0.121954513 |                                          |
| 13 | 71,100,000 | 71,250,000 | 949 | 1198 | 0.414050169  |                                          |
| 13 | 71,175,000 | 71,325,000 | 950 | 929  | 0.034712601  |                                          |
| 13 | 71,250,000 | 71,400,000 | 951 | 685  | -1.646125619 | PTPRT, ENSBTAG00000046673                |
| 13 | 71,325,000 | 71,475,000 | 952 | 827  | -2.081004745 | PTPRT, ENSBTAG00000046673                |
| 13 | 71,400,000 | 71,550,000 | 953 | 1137 | -1.83073956  | PTPRT                                    |
| 13 | 71,475,000 | 71,625,000 | 954 | 1253 | -0.350779129 | PTPRT                                    |
| 13 | 71,550,000 | 71,700,000 | 955 | 948  | 0.69254959   | PTPRT                                    |
| 13 | 71,625,000 | 71,775,000 | 956 | 1066 | 0.665210057  | PTPRT                                    |
| 13 | 71,700,000 | 71,850,000 | 957 | 1634 | -0.270718737 |                                          |
| 13 | 71,775,000 | 71,925,000 | 958 | 1234 | -0.790813664 |                                          |
| 13 | 71,850,000 | 72,000,000 | 959 | 876  | -0.577354493 |                                          |
| 13 | 71,925,000 | 72,075,000 | 960 | 1306 | 0.067552265  |                                          |
| 13 | 72,000,000 | 72,150,000 | 961 | 1333 | 0.460067187  |                                          |
| 13 | 72,075,000 | 72,225,000 | 962 | 1225 | 0.56684071   |                                          |
| 13 | 72,150,000 | 72,300,000 | 963 | 1411 | 0.829540118  |                                          |
| 13 | 72,225,000 | 72,375,000 | 964 | 1128 | 0.287923876  |                                          |
| 13 | 72,300,000 | 72,450,000 | 965 | 809  | -0.794493604 |                                          |
| 13 | 72,375,000 | 72,525,000 | 966 | 932  | -0.496971854 |                                          |
| 13 | 72,450,000 | 72,600,000 | 967 | 1168 | 0.432147226  |                                          |
| 13 | 72,525,000 | 72,675,000 | 968 | 1070 | 0.99559526   |                                          |
| 13 | 72,600,000 | 72,750,000 | 969 | 921  | 0.686931583  |                                          |
| 13 | 72,675,000 | 72,825,000 | 970 | 859  | 0.733318191  | SRSF6                                    |
| 13 | 72,750,000 | 72,900,000 | 971 | 796  | 1.149859629  | IFT52, SGK2, SRSF6                       |
| 13 | 72,825,000 | 72,975,000 | 972 | 776  | 1.151342486  | IFT52, MYBL2, SGK2                       |
| 13 | 72,900,000 | 73,050,000 | 973 | 521  | 0.701922977  | GTSF1L, IFT52, MYBL2                     |
| 13 | 72,975,000 | 73,125,000 | 974 | 560  | 0.633655028  | GTSF1L                                   |
| 13 | 73,050,000 | 73,200,000 | 975 | 677  | 0.841014618  | TOX2                                     |
| 13 | 73,125,000 | 73,275,000 | 976 | 827  | 1.007243936  | TOX2                                     |
| 13 | 73,200,000 | 73,350,000 | 977 | 1055 | 1.080881397  | JPH2                                     |
| 13 | 73,275,000 | 73,425,000 | 978 | 802  | 0.183463577  | JPH2, OSER1                              |
| 13 | 73,350,000 | 73,500,000 | 979 | 561  | -2.02120472  | FITM2, GDAP1L1, JPH2, OSER1, R3HDML      |
| 13 | 73,425,000 | 73,575,000 | 980 | 635  | -1.236146454 | FITM2, GDAP1L1, HNF4A, R3HDML            |
| 13 | 73,500,000 | 73,650,000 | 981 | 751  | -0.436226547 | HNF4A, R3HDML, SERINC3, TTPAL            |
| 13 | 73,575,000 | 73,725,000 | 982 | 726  | -0.871683651 | PKIG, SERINC3, TTPAL                     |
| 13 | 73,650,000 | 73,800,000 | 983 | 759  | -0.868093864 | ADA, PKIG, SERINC3                       |
| 13 | 73,725,000 | 73,875,000 | 984 | 708  | -0.528670355 | ADA, KCNK15, PKIG, WISP2                 |

|    |            |            |      |      |              |                                                                                                           |
|----|------------|------------|------|------|--------------|-----------------------------------------------------------------------------------------------------------|
| 13 | 73,800,000 | 73,950,000 | 985  | 834  | 0.168609953  | KCNK15,RIMS4,WISP2                                                                                        |
| 13 | 73,875,000 | 74,025,000 | 986  | 1072 | 0.015254119  | RIMS4,YWHAB                                                                                               |
| 13 | 73,950,000 | 74,100,000 | 987  | 825  | -1.352801615 | PABPC1L,STK4,TOMM34,YWHAB                                                                                 |
| 13 | 74,025,000 | 74,175,000 | 988  | 966  | 0.328036232  | PABPC1L,STK4,TOMM34,YWHAB                                                                                 |
| 13 | 74,100,000 | 74,250,000 | 989  | 1315 | 0.907956334  | KCNS1,STK4,WFDC5,ENSBTAG00000020813,ENSBTAG00000046375                                                    |
| 13 | 74,175,000 | 74,325,000 | 990  | 1524 | 0.068519498  | KCNS1,PI3,STK4,WFDC5,ENSBTAG00000014329,ENSBTAG00000020813,ENSBTAG00000039446,ENSBTAG00000046375          |
| 13 | 74,250,000 | 74,400,000 | 991  | 1079 | -0.363243871 | MATN4,PI3,RBPJL,SDC4,ENSBTAG00000014329,ENSBTAG00000039446                                                |
| 13 | 74,325,000 | 74,475,000 | 992  | 409  | -0.361048521 | DBNDD2,MATN4,PIGT,RBPJL,SDC4,SYS1,TP53TG5                                                                 |
| 13 | 74,400,000 | 74,550,000 | 993  | 1050 | 0.968198075  | DBNDD2,PIGT,SDC4,SYS1,TP53TG5,ENSBTAG00000014345,ENSBTAG00000016127,ENSBTAG00000037942,ENSBTAG00000046614 |
| 13 | 74,475,000 | 74,625,000 | 994  | 1668 | 1.040342046  | PIGT,ENSBTAG00000014345,ENSBTAG00000016127,ENSBTAG00000037942,ENSBTAG00000046614                          |
| 13 | 74,550,000 | 74,700,000 | 995  | 1531 | 0.942131922  | ENSBTAG00000039693                                                                                        |
| 13 | 74,625,000 | 74,775,000 | 996  | 1136 | 0.836057356  | ENSBTAG00000018122,ENSBTAG00000039693,ENSBTAG00000046704                                                  |
| 13 | 74,700,000 | 74,850,000 | 997  | 681  | 0.555887827  | TKDP4,ENSBTAG00000018122,ENSBTAG00000038966,ENSBTAG00000046704                                            |
| 13 | 74,775,000 | 74,925,000 | 998  | 479  | 0.726279183  | TKDP1,TKDP4,ENSBTAG00000038966                                                                            |
| 13 | 74,850,000 | 75,000,000 | 999  | 807  | 0.494465685  | PTI,TKDP1,ENSBTAG00000045630                                                                              |
| 13 | 74,925,000 | 75,075,000 | 1000 | 1112 | 0.386897605  | PTI,ENSBTAG00000045630                                                                                    |
| 13 | 75,000,000 | 75,150,000 | 1001 | 818  | 0.706588735  | PTI,SPINLW1,WFDC2,WFDC8,ENSBTAG00000045630                                                                |
| 13 | 75,075,000 | 75,225,000 | 1002 | 590  | 1.189819962  | SPINLW1,WFDC10A,WFDC11,WFDC13,WFDC2,WFDC8,WFDC9,ENSBTAG00000030800,ENSBTAG00000030802                     |
| 13 | 75,150,000 | 75,300,000 | 1003 | 862  | -1.253070255 | DNTTIP1,SPINT4,WFDC10A,WFDC11,WFDC13,WFDC3,WFDC9,ENSBTAG00000030800,ENSBTAG00000030802                    |
| 13 | 75,225,000 | 75,375,000 | 1004 | 1015 | -1.2094107   | ACOT8,CTSA,DNTTIP1,NEURL2,PLTP,SPATA25,SPINT4,TNNC2,UBE2C,WFDC3,ZSWIM1,ZSWIM3                             |
| 13 | 75,300,000 | 75,450,000 | 1005 | 962  | 0.005235026  | ACOT8,CTSA,DNTTIP1,NEURL2,PCIF1,PLTP,SPATA25,TNNC2,UBE2C,ZNF335,ZSWIM1,ZSWIM3                             |
| 13 | 75,375,000 | 75,525,000 | 1006 | 767  | -0.097323171 | MMP9,NCOA5,PCIF1,PLTP,SLC12A5,ZNF335                                                                      |
| 13 | 75,450,000 | 75,600,000 | 1007 | 646  | 0.246436231  | CD40,MMP9,NCOA5,SLC12A5                                                                                   |
| 13 | 75,525,000 | 75,675,000 | 1008 | 666  | -0.076918637 | CD40,CDH22,NCOA5                                                                                          |
| 13 | 75,600,000 | 75,750,000 | 1009 | 629  | -0.271232102 | CDH22                                                                                                     |
| 13 | 75,675,000 | 75,825,000 | 1010 | 578  | -0.761920304 | CDH22,ELMO2,SLC35C2                                                                                       |
| 13 | 75,750,000 | 75,900,000 | 1011 | 572  | -2.517812931 | ELMO2,SLC35C2,ENSBTAG00000027328                                                                          |
| 13 | 75,825,000 | 75,975,000 | 1012 | 942  | -0.473639882 | ELMO2,OCSTAMP,ENSBTAG00000009675,ENSBTAG00000027328,ENSBTAG00000047336                                    |
| 13 | 75,900,000 | 76,050,000 | 1013 | 937  | 0.260511648  | OCSTAMP,SLC13A3,ENSBTAG00000009675,ENSBTAG00000047336                                                     |
| 13 | 75,975,000 | 76,125,000 | 1014 | 915  | -0.58138722  | SLC13A3,SLC2A10,TP53RK                                                                                    |
| 13 | 76,050,000 | 76,200,000 | 1015 | 813  | -0.382392804 | SLC13A3,SLC2A10,TP53RK                                                                                    |
| 13 | 76,125,000 | 76,275,000 | 1016 | 663  | -0.064677926 |                                                                                                           |
| 13 | 76,200,000 | 76,350,000 | 1017 | 757  | -0.590671294 | EYA2                                                                                                      |
| 13 | 76,275,000 | 76,425,000 | 1018 | 936  | 0.42008445   | EYA2                                                                                                      |
| 13 | 76,350,000 | 76,500,000 | 1019 | 1305 | 0.615683196  | EYA2                                                                                                      |
| 13 | 76,425,000 | 76,575,000 | 1020 | 1235 | -0.234306567 | EYA2,ZMYND8                                                                                               |

|    |            |            |      |      |              |                             |
|----|------------|------------|------|------|--------------|-----------------------------|
| 13 | 76,500,000 | 76,650,000 | 1021 | 905  | 0.279815537  | ZMYND8                      |
| 13 | 76,575,000 | 76,725,000 | 1022 | 868  | 0.515739299  | ZMYND8                      |
| 13 | 76,650,000 | 76,800,000 | 1023 | 678  | 0.323764969  |                             |
| 13 | 76,725,000 | 76,875,000 | 1024 | 598  | 0.036338385  | NCOA3                       |
| 13 | 76,800,000 | 76,950,000 | 1025 | 666  | -0.542105846 | NCOA3,SULF2                 |
| 13 | 76,875,000 | 77,025,000 | 1026 | 710  | -0.138732613 | NCOA3,SULF2                 |
| 13 | 76,950,000 | 77,100,000 | 1027 | 918  | 0.484940009  | SULF2                       |
| 13 | 77,025,000 | 77,175,000 | 1028 | 971  | 0.324329096  |                             |
| 13 | 77,100,000 | 77,250,000 | 1029 | 903  | 0.183300242  |                             |
| 13 | 77,175,000 | 77,325,000 | 1030 | 801  | -0.371149165 |                             |
| 13 | 77,250,000 | 77,400,000 | 1031 | 924  | 0.224837752  |                             |
| 13 | 77,325,000 | 77,475,000 | 1032 | 1341 | 1.105954563  |                             |
| 13 | 77,400,000 | 77,550,000 | 1033 | 1070 | 0.895840207  |                             |
| 13 | 77,475,000 | 77,625,000 | 1034 | 602  | -0.718415637 | PREX1                       |
| 13 | 77,550,000 | 77,700,000 | 1035 | 900  | -0.034431825 | PREX1                       |
| 13 | 77,625,000 | 77,775,000 | 1036 | 1004 | 0.332176263  | PREX1                       |
| 13 | 77,700,000 | 77,850,000 | 1037 | 853  | -0.694869717 | ARFGEF2                     |
| 13 | 77,775,000 | 77,925,000 | 1038 | 891  | -1.121592507 | ARFGEF2,CSE1L               |
| 13 | 77,850,000 | 78,000,000 | 1039 | 845  | -0.388797499 | ARFGEF2,CSE1L,STAU1         |
| 13 | 77,925,000 | 78,075,000 | 1040 | 943  | -0.09515432  | CSE1L,DDX27,STAU1           |
| 13 | 78,000,000 | 78,150,000 | 1041 | 1216 | -0.174243376 | DDX27,STAU1,ZNF1            |
| 13 | 78,075,000 | 78,225,000 | 1042 | 1001 | -0.328273945 | KCNB1,ZNF1                  |
| 13 | 78,150,000 | 78,300,000 | 1043 | 773  | -0.969605994 | KCNB1                       |
| 13 | 78,225,000 | 78,375,000 | 1044 | 859  | 0.196581778  | KCNB1,PTGIS                 |
| 13 | 78,300,000 | 78,450,000 | 1045 | 1059 | 1.010644856  | KCNB1,PTGIS                 |
| 13 | 78,375,000 | 78,525,000 | 1046 | 1073 | 0.363897692  | B4GALT5                     |
| 13 | 78,450,000 | 78,600,000 | 1047 | 1121 | -0.59666698  | B4GALT5                     |
| 13 | 78,525,000 | 78,675,000 | 1048 | 1258 | -0.240787679 | SLC9A8                      |
| 13 | 78,600,000 | 78,750,000 | 1049 | 977  | 0.357446834  | RNF114,SLC9A8,SPATA2        |
| 13 | 78,675,000 | 78,825,000 | 1050 | 723  | 0.678550483  | RNF114,SLC9A8,SNAI1,SPATA2  |
| 13 | 78,750,000 | 78,900,000 | 1051 | 690  | -1.529335147 | SNAI1,TMEM189,UBE2V1        |
| 13 | 78,825,000 | 78,975,000 | 1052 | 490  | -1.547829172 | TMEM189,UBE2V1              |
| 13 | 78,900,000 | 79,050,000 | 1053 | 510  | 1.318598215  | TMEM189                     |
| 13 | 78,975,000 | 79,125,000 | 1054 | 702  | 1.354434849  |                             |
| 13 | 79,050,000 | 79,200,000 | 1055 | 505  | 1.115052982  |                             |
| 13 | 79,125,000 | 79,275,000 | 1056 | 552  | 0.880750239  | PTPN1                       |
| 13 | 79,200,000 | 79,350,000 | 1057 | 479  | 0.57916542   | FAM65C,PTPN1                |
| 13 | 79,275,000 | 79,425,000 | 1058 | 489  | -0.030063911 | FAM65C,PTPN1                |
| 13 | 79,350,000 | 79,500,000 | 1059 | 919  | 0.486515698  | BCAS4,FAM65C,PARD6B         |
| 13 | 79,425,000 | 79,575,000 | 1060 | 877  | 0.938659219  | ADNP,BCAS4,PARD6B           |
| 13 | 79,500,000 | 79,650,000 | 1061 | 733  | 0.011440478  | ADNP,BCAS4,DPM1,KCNG1,MOCS3 |
| 13 | 79,575,000 | 79,725,000 | 1062 | 1072 | -0.640035107 | DPM1,KCNG1,MOCS3            |
| 13 | 79,650,000 | 79,800,000 | 1063 | 1865 | 0.397182133  | KCNG1                       |
| 13 | 79,725,000 | 79,875,000 | 1064 | 2008 | 0.022305967  |                             |
| 13 | 79,800,000 | 79,950,000 | 1065 | 1544 | -0.051533348 |                             |
| 13 | 79,875,000 | 80,025,000 | 1066 | 1386 | 0.67445747   | NFATC2                      |
| 13 | 79,950,000 | 80,100,000 | 1067 | 1099 | 0.587406696  | NFATC2                      |
| 13 | 80,025,000 | 80,175,000 | 1068 | 904  | -1.360623755 | ATP9A,NFATC2                |
| 13 | 80,100,000 | 80,250,000 | 1069 | 1264 | -1.469482554 | ATP9A,NFATC2                |
| 13 | 80,175,000 | 80,325,000 | 1070 | 1201 | -0.341421195 | ATP9A,SALL4                 |
| 13 | 80,250,000 | 80,400,000 | 1071 | 919  | 0.672611798  | ATP9A,SALL4                 |
| 13 | 80,325,000 | 80,475,000 | 1072 | 1149 | 0.747770654  | ENSBTAG00000030564          |
| 13 | 80,400,000 | 80,550,000 | 1073 | 1503 | 0.916508138  | ENSBTAG00000030564          |

|    |            |            |      |      |              |                    |
|----|------------|------------|------|------|--------------|--------------------|
| 13 | 80,475,000 | 80,625,000 | 1074 | 1622 | 0.806349654  | ZFP64              |
| 13 | 80,550,000 | 80,700,000 | 1075 | 1482 | -0.051561779 | ZFP64              |
| 13 | 80,625,000 | 80,775,000 | 1076 | 1477 | -0.11976464  |                    |
| 13 | 80,700,000 | 80,850,000 | 1077 | 1289 | 0.30551439   |                    |
| 13 | 80,775,000 | 80,925,000 | 1078 | 874  | 0.183837431  |                    |
| 13 | 80,850,000 | 81,000,000 | 1079 | 1048 | 0.211326938  |                    |
| 13 | 80,925,000 | 81,075,000 | 1080 | 1152 | 0.296716777  |                    |
| 13 | 81,000,000 | 81,150,000 | 1081 | 1073 | 0.223088173  |                    |
| 13 | 81,075,000 | 81,225,000 | 1082 | 1040 | -0.577272761 |                    |
| 13 | 81,150,000 | 81,300,000 | 1083 | 818  | -0.657547075 |                    |
| 13 | 81,225,000 | 81,375,000 | 1084 | 854  | 0.090391413  |                    |
| 13 | 81,300,000 | 81,450,000 | 1085 | 1121 | -0.156488315 |                    |
| 13 | 81,375,000 | 81,525,000 | 1086 | 1046 | -0.005830458 |                    |
| 13 | 81,450,000 | 81,600,000 | 1087 | 825  | -0.221179546 |                    |
| 13 | 81,525,000 | 81,675,000 | 1088 | 699  | -0.405959507 | TSHZ2              |
| 13 | 81,600,000 | 81,750,000 | 1089 | 539  | 0.039719029  | TSHZ2              |
| 13 | 81,675,000 | 81,825,000 | 1090 | 597  | -0.647461038 |                    |
| 13 | 81,750,000 | 81,900,000 | 1091 | 574  | -0.047800197 | ZNF217             |
| 13 | 81,825,000 | 81,975,000 | 1092 | 542  | 0.311653274  | ZNF217             |
| 13 | 81,900,000 | 82,050,000 | 1093 | 572  | 0.497063179  |                    |
| 13 | 81,975,000 | 82,125,000 | 1094 | 685  | 0.350701545  |                    |
| 13 | 82,050,000 | 82,200,000 | 1095 | 793  | -0.471216054 | BCAS1              |
| 13 | 82,125,000 | 82,275,000 | 1096 | 765  | -0.57168133  | BCAS1              |
| 13 | 82,200,000 | 82,350,000 | 1097 | 694  | -0.217205019 | BCAS1              |
| 13 | 82,275,000 | 82,425,000 | 1098 | 790  | 0.136882167  | CYP24A1,PFDN4      |
| 13 | 82,350,000 | 82,500,000 | 1099 | 1131 | 0.240451531  | CYP24A1,PFDN4      |
| 13 | 82,425,000 | 82,575,000 | 1100 | 1197 | -0.327359259 |                    |
| 13 | 82,500,000 | 82,650,000 | 1101 | 825  | -1.317679373 |                    |
| 13 | 82,575,000 | 82,725,000 | 1102 | 690  | -0.503448971 | DOK5               |
| 13 | 82,650,000 | 82,800,000 | 1103 | 1066 | 0.26314474   | DOK5               |
| 13 | 82,725,000 | 82,875,000 | 1104 | 1412 | -0.261843808 | DOK5               |
| 13 | 82,800,000 | 82,950,000 | 1105 | 1144 | -0.478924543 | DOK5               |
| 13 | 82,875,000 | 83,025,000 | 1106 | 965  | -0.204278182 |                    |
| 13 | 82,950,000 | 83,100,000 | 1107 | 1088 | -0.927141007 |                    |
| 13 | 83,025,000 | 83,175,000 | 1108 | 1587 | -0.904200582 |                    |
| 13 | 83,100,000 | 83,250,000 | 1109 | 1694 | 0.021746203  |                    |
| 13 | 83,175,000 | 83,325,000 | 1110 | 1619 | 0.405391338  |                    |
| 13 | 83,250,000 | 83,400,000 | 1111 | 1932 | 0.511147208  |                    |
| 13 | 83,325,000 | 83,475,000 | 1112 | 1400 | 0.662179406  |                    |
| 13 | 83,400,000 | 83,550,000 | 1113 | 972  | 0.519303649  |                    |
| 13 | 83,475,000 | 83,625,000 | 1114 | 1412 | 0.66130323   |                    |
| 13 | 83,550,000 | 83,700,000 | 1115 | 1395 | 0.090347845  |                    |
| 13 | 83,625,000 | 83,775,000 | 1116 | 1123 | -0.38947039  |                    |
| 13 | 83,700,000 | 83,850,000 | 1117 | 1105 | -0.073523366 |                    |
| 13 | 83,775,000 | 83,925,000 | 1118 | 1225 | -0.309634803 |                    |
| 13 | 83,850,000 | 84,000,000 | 1119 | 1262 | 0.055645593  |                    |
| 13 | 83,925,000 | 84,075,000 | 1120 | 940  | 0.823138379  | CBLN4              |
| 13 | 84,000,000 | 84,150,000 | 1121 | 676  | 0.715974293  | CBLN4              |
| 13 | 84,075,000 | 84,225,000 | 1122 | 467  | -0.018374087 |                    |
| 13 | 84,150,000 | 84,240,350 | 1123 | 249  | 0.036855626  | ENSBTAG00000038057 |
| 14 | 0          | 150,000    | 1    | 137  | -1.113913893 |                    |
| 14 | 75,000     | 225,000    | 2    | 148  | -2.91485836  |                    |
| 14 | 150,000    | 300,000    | 3    | 90   | -3.96536783  |                    |

|    |           |           |    |      |              |                                                                                                                   |
|----|-----------|-----------|----|------|--------------|-------------------------------------------------------------------------------------------------------------------|
| 14 | 225,000   | 375,000   | 4  | 156  | -0.406408961 | ENSBTAG00000034261                                                                                                |
| 14 | 300,000   | 450,000   | 5  | 120  | -1.593046816 | ENSBTAG00000034261                                                                                                |
| 14 | 375,000   | 525,000   | 6  | 62   | -2.212292455 |                                                                                                                   |
| 14 | 450,000   | 600,000   | 7  | 257  | -1.75018645  |                                                                                                                   |
| 14 | 525,000   | 675,000   | 8  | 354  | -2.438201685 |                                                                                                                   |
| 14 | 600,000   | 750,000   | 9  | 251  | -3.168823793 | ENSBTAG00000034176                                                                                                |
| 14 | 675,000   | 825,000   | 10 | 111  | -3.456813073 | ENSBTAG00000034176                                                                                                |
| 14 | 750,000   | 900,000   | 11 | 60   | -3.510898126 |                                                                                                                   |
| 14 | 825,000   | 975,000   | 12 | 109  | -2.711378773 |                                                                                                                   |
| 14 | 900,000   | 1,050,000 | 13 | 66   | -1.522402188 |                                                                                                                   |
| 14 | 975,000   | 1,125,000 | 14 | 111  | -0.931432575 |                                                                                                                   |
| 14 | 1,050,000 | 1,200,000 | 15 | 318  | 0.100079292  | ENSBTAG00000036098,ENSBTAG00000048001                                                                             |
| 14 | 1,125,000 | 1,275,000 | 16 | 542  | 0.79940529   | TMEM60,ENSBTAG00000036098,ENSBTAG00000048001                                                                      |
| 14 | 1,200,000 | 1,350,000 | 17 | 846  | 0.698307184  | TMEM60,ENSBTAG00000046435,ENSBTAG00000046932                                                                      |
| 14 | 1,275,000 | 1,425,000 | 18 | 923  | 0.527010591  | ENSBTAG00000046435,ENSBTAG00000046932                                                                             |
| 14 | 1,350,000 | 1,500,000 | 19 | 820  | -1.010622109 | C8orf33,ZNF34,ENSBTAG00000016203                                                                                  |
| 14 | 1,425,000 | 1,575,000 | 20 | 567  | -2.350169065 | ARHGAP39,C8orf33,COMMD5,RPL8,ZNF34,ZNF7,ENSBTAG00000016203                                                        |
| 14 | 1,500,000 | 1,650,000 | 21 | 245  | 0.28235136   | ARHGAP39,C14H8orf82,COMMD5,GPT,LRRRC14,LRRRC24,MFSD3,PPP1R16A,RECQL4,RPL8,ZNF34,ZNF7                              |
| 14 | 1,575,000 | 1,725,000 | 22 | 216  | 0.829964646  | ARHGAP39,C14H8orf82,CYHR1,FOXH1,GPT,KIFC2,LRRC14,LRRRC24,MFSD3,PPP1R16A,RECQL4,SLC39A4,TONSL,VPS28                |
| 14 | 1,650,000 | 1,800,000 | 23 | 221  | 0.893977647  | ADCK5,CPSF1,CYHR1,DGAT1,FBXL6,FOXH1,GPR172B,KIFC2,SCRT1,SLC39A4,TMEM249,TONSL,VPS28                               |
| 14 | 1,725,000 | 1,875,000 | 24 | 284  | 1.073251774  | ADCK5,BOP1,CPSF1,DGAT1,FBXL6,GPR172B,HSF1,MROH1,SCRT1,SCX,TMEM249                                                 |
| 14 | 1,800,000 | 1,950,000 | 25 | 400  | 1.196700464  | BOP1,CYC1,DGAT1,EXOSC4,GPAA1,HGH1,HSF1,KIAA1875,MAF1,MROH1,SCX,SHARPIN,ENSBTAG00000039978                         |
| 14 | 1,875,000 | 2,025,000 | 26 | 472  | 1.114347931  | CYC1,EXOSC4,GPAA1,GRINA,HGH1,KIAA1875,MAF1,MROH1,OPLAH,PARP10,SHARPIN,SPATC1,ENSBTAG0000015040,ENSBTAG00000039978 |
| 14 | 1,950,000 | 2,100,000 | 27 | 337  | 0.755708169  | GRINA,OPLAH,PARP10,PLEC,SPATC1,ENSBTAG00000015040                                                                 |
| 14 | 2,025,000 | 2,175,000 | 28 | 294  | 0.053542455  | NRBP2,PARP10,PLEC,PUF60                                                                                           |
| 14 | 2,100,000 | 2,250,000 | 29 | 338  | -1.421889815 | FAM83H,MAPK15,NRBP2,PUF60,SCRIB                                                                                   |
| 14 | 2,175,000 | 2,325,000 | 30 | 232  | -3.212963577 | CCDC166,EEF1D,FAM83H,MAPK15,PUF60,PYCRL,SCRIB,TIGD5,TSTA3,ZNF623,ENSBTAG00000046866                               |
| 14 | 2,250,000 | 2,400,000 | 31 | 280  | -4.473609375 | CCDC166,EEF1D,GSDMD,MROH6,NAPRT,PYCRL,TIGD5,TSTA3,ZC3H3,ZNF623,ENSBTAG00000046866                                 |
| 14 | 2,325,000 | 2,475,000 | 32 | 423  | -1.234587768 | EEF1D,GSDMD,MAFA,MROH6,NAPRT,RHPN1,ZC3H3                                                                          |
| 14 | 2,400,000 | 2,550,000 | 33 | 563  | 0.015362144  | MAFA,RHPN1,ZC3H3,ZNF16                                                                                            |
| 14 | 2,475,000 | 2,625,000 | 34 | 680  | -0.784686583 | LY6E,LY6H,ZNF16                                                                                                   |
| 14 | 2,550,000 | 2,700,000 | 35 | 815  | -1.135076549 | LY6E,LY6H                                                                                                         |
| 14 | 2,625,000 | 2,775,000 | 36 | 1149 | 0.123241242  | GML,LY6E,LY6K,ENSBTAG00000004596,ENSBTAG0000037824                                                                |
| 14 | 2,700,000 | 2,850,000 | 37 | 1202 | 0.859864942  | GML,LY6D,LY6K,LYNX1,LYPD2,SLURP1,THEM6,ENSBTAG00000004596,ENSBTAG00000037824                                      |
| 14 | 2,775,000 | 2,925,000 | 38 | 902  | 1.19638756   | ARC,LY6D,LYNX1,LYPD2,PSCA,SLURP1,THEM6,ENSBTAG00000026340,ENSBTAG00000037824                                      |

|    |           |           |    |      |              |                                       |
|----|-----------|-----------|----|------|--------------|---------------------------------------|
| 14 | 2,850,000 | 3,000,000 | 39 | 709  | 0.794887541  | ARC,BAI1,PSCA,ENSBTAG00000026340      |
| 14 | 2,925,000 | 3,075,000 | 40 | 553  | -0.658915235 | BAI1,TSNARE1,ENSBTAG00000026340       |
| 14 | 3,000,000 | 3,150,000 | 41 | 476  | -0.146885533 | BAI1,TSNARE1                          |
| 14 | 3,075,000 | 3,225,000 | 42 | 524  | 0.230395017  | TSNARE1                               |
| 14 | 3,150,000 | 3,300,000 | 43 | 649  | -0.356586933 | TSNARE1                               |
| 14 | 3,225,000 | 3,375,000 | 44 | 640  | -0.635687922 |                                       |
| 14 | 3,300,000 | 3,450,000 | 45 | 795  | -0.231095118 |                                       |
| 14 | 3,375,000 | 3,525,000 | 46 | 974  | -2.4652134   |                                       |
| 14 | 3,450,000 | 3,600,000 | 47 | 769  | -3.69078901  | MROH5,PTP4A3                          |
| 14 | 3,525,000 | 3,675,000 | 48 | 722  | 0.279972415  | GPR20,MROH5,PTP4A3                    |
| 14 | 3,600,000 | 3,750,000 | 49 | 621  | 0.34607894   | GPR20,SLC45A4                         |
| 14 | 3,675,000 | 3,825,000 | 50 | 517  | 0.689327838  | DENND3,SLC45A4                        |
| 14 | 3,750,000 | 3,900,000 | 51 | 721  | 0.403903342  | DENND3,PTK2                           |
| 14 | 3,825,000 | 3,975,000 | 52 | 729  | -0.002342984 | PTK2                                  |
| 14 | 3,900,000 | 4,050,000 | 53 | 643  | 0.196082071  | PTK2                                  |
| 14 | 3,975,000 | 4,125,000 | 54 | 691  | -0.784496179 | EIF2C2,PTK2                           |
| 14 | 4,050,000 | 4,200,000 | 55 | 646  | -1.272538646 | CHRAC1,EIF2C2,PTK2                    |
| 14 | 4,125,000 | 4,275,000 | 56 | 876  | 0.606086179  | CHRAC1,EIF2C2,TRAPPC9                 |
| 14 | 4,200,000 | 4,350,000 | 57 | 1242 | 1.1659166    | TRAPPC9                               |
| 14 | 4,275,000 | 4,425,000 | 58 | 1313 | 1.010013932  | TRAPPC9                               |
| 14 | 4,350,000 | 4,500,000 | 59 | 1328 | 0.286693655  | TRAPPC9                               |
| 14 | 4,425,000 | 4,575,000 | 60 | 1178 | -0.051786045 | TRAPPC9                               |
| 14 | 4,500,000 | 4,650,000 | 61 | 797  | -0.747169068 | KCNK9,TRAPPC9                         |
| 14 | 4,575,000 | 4,725,000 | 62 | 776  | -2.574485843 | KCNK9,TRAPPC9                         |
| 14 | 4,650,000 | 4,800,000 | 63 | 933  | -1.209904114 | KCNK9                                 |
| 14 | 4,725,000 | 4,875,000 | 64 | 857  | 0.407114636  | KCNK9                                 |
| 14 | 4,800,000 | 4,950,000 | 65 | 803  | 0.08070939   |                                       |
| 14 | 4,875,000 | 5,025,000 | 66 | 1165 | -0.474674876 |                                       |
| 14 | 4,950,000 | 5,100,000 | 67 | 1495 | -0.622481076 |                                       |
| 14 | 5,025,000 | 5,175,000 | 68 | 1163 | 0.082840586  | COL22A1                               |
| 14 | 5,100,000 | 5,250,000 | 69 | 1059 | 0.326725248  | COL22A1                               |
| 14 | 5,175,000 | 5,325,000 | 70 | 1561 | -0.499190213 | COL22A1                               |
| 14 | 5,250,000 | 5,400,000 | 71 | 1641 | 0.287221862  | COL22A1                               |
| 14 | 5,325,000 | 5,475,000 | 72 | 1251 | 1.108451237  | COL22A1,ENSBTAG00000018218            |
| 14 | 5,400,000 | 5,550,000 | 73 | 1237 | 0.801074806  | ENSBTAG00000018218                    |
| 14 | 5,475,000 | 5,625,000 | 74 | 1387 | 0.176761709  | ENSBTAG00000018218                    |
| 14 | 5,550,000 | 5,700,000 | 75 | 1486 | -0.108427119 | ENSBTAG00000018218,ENSBTAG00000048078 |
| 14 | 5,625,000 | 5,775,000 | 76 | 1441 | 0.021520016  | ENSBTAG00000018218,ENSBTAG00000048078 |
| 14 | 5,700,000 | 5,850,000 | 77 | 1188 | -0.718368694 |                                       |
| 14 | 5,775,000 | 5,925,000 | 78 | 867  | -2.264160428 |                                       |
| 14 | 5,850,000 | 6,000,000 | 79 | 954  | -1.555956487 |                                       |
| 14 | 5,925,000 | 6,075,000 | 80 | 1162 | -0.851162721 |                                       |
| 14 | 6,000,000 | 6,150,000 | 81 | 1402 | -0.210879661 |                                       |
| 14 | 6,075,000 | 6,225,000 | 82 | 1207 | 0.171714503  |                                       |
| 14 | 6,150,000 | 6,300,000 | 83 | 1106 | 0.453191113  |                                       |
| 14 | 6,225,000 | 6,375,000 | 84 | 1188 | 0.270755122  |                                       |
| 14 | 6,300,000 | 6,450,000 | 85 | 927  | 0.638200709  |                                       |
| 14 | 6,375,000 | 6,525,000 | 86 | 1103 | 1.186281212  |                                       |
| 14 | 6,450,000 | 6,600,000 | 87 | 1140 | 0.948672835  |                                       |
| 14 | 6,525,000 | 6,675,000 | 88 | 1247 | -0.034675304 |                                       |
| 14 | 6,600,000 | 6,750,000 | 89 | 1266 | -0.126299323 |                                       |
| 14 | 6,675,000 | 6,825,000 | 90 | 1273 | -0.438918366 |                                       |
| 14 | 6,750,000 | 6,900,000 | 91 | 1409 | 0.100041596  |                                       |



|    |            |            |     |      |              |                                                         |
|----|------------|------------|-----|------|--------------|---------------------------------------------------------|
| 14 | 6,825,000  | 6,975,000  | 92  | 1120 | 0.658131186  |                                                         |
| 14 | 6,900,000  | 7,050,000  | 93  | 824  | 0.024175092  |                                                         |
| 14 | 6,975,000  | 7,125,000  | 94  | 1145 | -0.96740181  |                                                         |
| 14 | 7,050,000  | 7,200,000  | 95  | 1524 | -0.193089576 |                                                         |
| 14 | 7,125,000  | 7,275,000  | 96  | 1300 | 0.45528201   |                                                         |
| 14 | 7,200,000  | 7,350,000  | 97  | 1008 | 0.249357514  |                                                         |
| 14 | 7,275,000  | 7,425,000  | 98  | 918  | 0.419759622  |                                                         |
| 14 | 7,350,000  | 7,500,000  | 99  | 718  | 0.613647251  | KHDRBS3                                                 |
| 14 | 7,425,000  | 7,575,000  | 100 | 479  | 0.164499895  | KHDRBS3                                                 |
| 14 | 7,500,000  | 7,650,000  | 101 | 691  | 0.563705793  | KHDRBS3                                                 |
| 14 | 7,575,000  | 7,725,000  | 102 | 758  | 0.619796739  | KHDRBS3                                                 |
| 14 | 7,650,000  | 7,800,000  | 103 | 492  | -0.352402241 |                                                         |
| 14 | 7,725,000  | 7,875,000  | 104 | 977  | 0.182282966  |                                                         |
| 14 | 7,800,000  | 7,950,000  | 105 | 1499 | 0.51930675   |                                                         |
| 14 | 7,875,000  | 8,025,000  | 106 | 1292 | 0.243701959  |                                                         |
| 14 | 7,950,000  | 8,100,000  | 107 | 747  | -0.278438278 |                                                         |
| 14 | 8,025,000  | 8,175,000  | 108 | 556  | -0.5456161   | ZFAT                                                    |
| 14 | 8,100,000  | 8,250,000  | 109 | 710  | -0.23815501  | ZFAT                                                    |
| 14 | 8,175,000  | 8,325,000  | 110 | 839  | 0.905602518  | ZFAT                                                    |
| 14 | 8,250,000  | 8,400,000  | 111 | 829  | 1.104376982  | ZFAT                                                    |
| 14 | 8,325,000  | 8,475,000  | 112 | 799  | -1.071499469 |                                                         |
| 14 | 8,400,000  | 8,550,000  | 113 | 747  | -1.760926162 |                                                         |
| 14 | 8,475,000  | 8,625,000  | 114 | 698  | -0.469521074 |                                                         |
| 14 | 8,550,000  | 8,700,000  | 115 | 648  | 0.063104418  |                                                         |
| 14 | 8,625,000  | 8,775,000  | 116 | 362  | 0.191958356  |                                                         |
| 14 | 8,700,000  | 8,850,000  | 117 | 691  | -1.637241928 |                                                         |
| 14 | 8,775,000  | 8,925,000  | 118 | 852  | -0.667320356 |                                                         |
| 14 | 8,850,000  | 9,000,000  | 119 | 1054 | 0.298135269  | ST3GAL1                                                 |
| 14 | 8,925,000  | 9,075,000  | 120 | 1292 | -0.680523488 | ST3GAL1                                                 |
| 14 | 9,000,000  | 9,150,000  | 121 | 979  | -1.075314758 | NDRG1                                                   |
| 14 | 9,075,000  | 9,225,000  | 122 | 714  | -0.421089598 | NDRG1,WISP1                                             |
| 14 | 9,150,000  | 9,300,000  | 123 | 721  | 0.175936653  | NDRG1,TG,WISP1                                          |
| 14 | 9,225,000  | 9,375,000  | 124 | 989  | 0.378210631  | SLA,TG                                                  |
| 14 | 9,300,000  | 9,450,000  | 125 | 661  | 0.137187784  | SLA,TG                                                  |
| 14 | 9,375,000  | 9,525,000  | 126 | 506  | -0.480657195 | TG                                                      |
| 14 | 9,450,000  | 9,600,000  | 127 | 652  | -0.372518723 | PHF20L1,TG                                              |
| 14 | 9,525,000  | 9,675,000  | 128 | 817  | -0.851079916 | LRRC6,PHF20L1,TMEM71                                    |
| 14 | 9,600,000  | 9,750,000  | 129 | 982  | -2.176783394 | LRRC6,TMEM71                                            |
| 14 | 9,675,000  | 9,825,000  | 130 | 1095 | -1.15582627  | KCNQ3,LRRC6                                             |
| 14 | 9,750,000  | 9,900,000  | 131 | 1295 | 0.854978944  | KCNQ3                                                   |
| 14 | 9,825,000  | 9,975,000  | 132 | 1058 | 0.621231265  | KCNQ3                                                   |
| 14 | 9,900,000  | 10,050,000 | 133 | 752  | 0.330971306  | KCNQ3                                                   |
| 14 | 9,975,000  | 10,125,000 | 134 | 584  | 0.343790955  | HHLA1,KCNQ3                                             |
| 14 | 10,050,000 | 10,200,000 | 135 | 663  | -0.372118359 | EFR3A,HHLA1,KCNQ3,ENSBTAG00000007731,ENSBTAG00000007736 |
| 14 | 10,125,000 | 10,275,000 | 136 | 813  | -0.163136815 | EFR3A,HHLA1,ENSBTAG00000007731,ENSBTAG0000007736        |
| 14 | 10,200,000 | 10,350,000 | 137 | 960  | 0.91826494   | EFR3A,ENSBTAG00000007731                                |
| 14 | 10,275,000 | 10,425,000 | 138 | 1169 | 0.467596955  |                                                         |
| 14 | 10,350,000 | 10,500,000 | 139 | 1292 | 0.252390494  |                                                         |
| 14 | 10,425,000 | 10,575,000 | 140 | 1321 | 0.809627882  |                                                         |
| 14 | 10,500,000 | 10,650,000 | 141 | 1070 | 0.888234037  |                                                         |
| 14 | 10,575,000 | 10,725,000 | 142 | 938  | 0.915268883  |                                                         |

|    |            |            |     |      |              |              |
|----|------------|------------|-----|------|--------------|--------------|
| 14 | 10,650,000 | 10,800,000 | 143 | 953  | 0.766339898  |              |
| 14 | 10,725,000 | 10,875,000 | 144 | 933  | 0.891676251  | ADCY8        |
| 14 | 10,800,000 | 10,950,000 | 145 | 951  | 0.728702448  | ADCY8        |
| 14 | 10,875,000 | 11,025,000 | 146 | 1021 | 0.951639292  | ADCY8        |
| 14 | 10,950,000 | 11,100,000 | 147 | 742  | 1.064295011  | ADCY8        |
| 14 | 11,025,000 | 11,175,000 | 148 | 388  | 0.571796856  | ADCY8        |
| 14 | 11,100,000 | 11,250,000 | 149 | 557  | 1.030912747  |              |
| 14 | 11,175,000 | 11,325,000 | 150 | 603  | 0.29628569   |              |
| 14 | 11,250,000 | 11,400,000 | 151 | 888  | -0.089007285 | ASAP1        |
| 14 | 11,325,000 | 11,475,000 | 152 | 1113 | -0.685909954 | ASAP1        |
| 14 | 11,400,000 | 11,550,000 | 153 | 1152 | -1.373768016 | ASAP1        |
| 14 | 11,475,000 | 11,625,000 | 154 | 1286 | -2.902815401 | ASAP1        |
| 14 | 11,550,000 | 11,700,000 | 155 | 1514 | -3.247339046 | ASAP1        |
| 14 | 11,625,000 | 11,775,000 | 156 | 1484 | -2.604402913 | ASAP1        |
| 14 | 11,700,000 | 11,850,000 | 157 | 947  | -1.504261399 | FAM49B       |
| 14 | 11,775,000 | 11,925,000 | 158 | 857  | -2.366677365 | FAM49B,GSDMC |
| 14 | 11,850,000 | 12,000,000 | 159 | 1136 | -1.828153784 | FAM49B,GSDMC |
| 14 | 11,925,000 | 12,075,000 | 160 | 1380 | -1.777830906 |              |
| 14 | 12,000,000 | 12,150,000 | 161 | 1135 | -2.041699172 |              |
| 14 | 12,075,000 | 12,225,000 | 162 | 1063 | 0.23380116   |              |
| 14 | 12,150,000 | 12,300,000 | 163 | 1301 | 0.729840991  |              |
| 14 | 12,225,000 | 12,375,000 | 164 | 1227 | -0.849908961 |              |
| 14 | 12,300,000 | 12,450,000 | 165 | 1099 | -0.575727442 |              |
| 14 | 12,375,000 | 12,525,000 | 166 | 1155 | 0.592389682  |              |
| 14 | 12,450,000 | 12,600,000 | 167 | 1230 | 0.136216959  |              |
| 14 | 12,525,000 | 12,675,000 | 168 | 1119 | 0.073382015  |              |
| 14 | 12,600,000 | 12,750,000 | 169 | 1166 | -0.343194152 |              |
| 14 | 12,675,000 | 12,825,000 | 170 | 1266 | 0.004473136  |              |
| 14 | 12,750,000 | 12,900,000 | 171 | 967  | 0.494924271  |              |
| 14 | 12,825,000 | 12,975,000 | 172 | 759  | 0.824884317  |              |
| 14 | 12,900,000 | 13,050,000 | 173 | 989  | 1.067458916  |              |
| 14 | 12,975,000 | 13,125,000 | 174 | 1025 | 1.044551496  |              |
| 14 | 13,050,000 | 13,200,000 | 175 | 1006 | 0.116233521  |              |
| 14 | 13,125,000 | 13,275,000 | 176 | 1027 | -0.246197915 |              |
| 14 | 13,200,000 | 13,350,000 | 177 | 705  | -0.059235873 |              |
| 14 | 13,275,000 | 13,425,000 | 178 | 539  | -0.374191892 |              |
| 14 | 13,350,000 | 13,500,000 | 179 | 936  | 0.567414028  |              |
| 14 | 13,425,000 | 13,575,000 | 180 | 1182 | 1.226078383  |              |
| 14 | 13,500,000 | 13,650,000 | 181 | 848  | 1.35806042   |              |
| 14 | 13,575,000 | 13,725,000 | 182 | 535  | 1.15554897   |              |
| 14 | 13,650,000 | 13,800,000 | 183 | 446  | 0.003170623  | MYC          |
| 14 | 13,725,000 | 13,875,000 | 184 | 797  | -0.709554622 | MYC          |
| 14 | 13,800,000 | 13,950,000 | 185 | 1238 | -0.075131258 |              |
| 14 | 13,875,000 | 14,025,000 | 186 | 1092 | 0.39911995   |              |
| 14 | 13,950,000 | 14,100,000 | 187 | 956  | 0.630463961  |              |
| 14 | 14,025,000 | 14,175,000 | 188 | 916  | 0.434575317  |              |
| 14 | 14,100,000 | 14,250,000 | 189 | 811  | -1.861427043 |              |
| 14 | 14,175,000 | 14,325,000 | 190 | 745  | -0.854144168 |              |
| 14 | 14,250,000 | 14,400,000 | 191 | 758  | 0.78152213   |              |
| 14 | 14,325,000 | 14,475,000 | 192 | 761  | 0.124274366  |              |
| 14 | 14,400,000 | 14,550,000 | 193 | 444  | -0.782665204 |              |
| 14 | 14,475,000 | 14,625,000 | 194 | 199  | -0.271711807 |              |
| 14 | 14,550,000 | 14,700,000 | 195 | 229  | -0.523709071 |              |

|    |            |            |     |      |              |                                                     |
|----|------------|------------|-----|------|--------------|-----------------------------------------------------|
| 14 | 14,625,000 | 14,775,000 | 196 | 400  | 0.263808354  |                                                     |
| 14 | 14,700,000 | 14,850,000 | 197 | 316  | 0.716187291  |                                                     |
| 14 | 14,775,000 | 14,925,000 | 198 | 251  | 0.22235936   |                                                     |
| 14 | 14,850,000 | 15,000,000 | 199 | 545  | -0.646897969 |                                                     |
| 14 | 14,925,000 | 15,075,000 | 200 | 643  | -0.089360742 |                                                     |
| 14 | 15,000,000 | 15,150,000 | 201 | 450  | 0.151409519  |                                                     |
| 14 | 15,075,000 | 15,225,000 | 202 | 243  | -0.430937847 |                                                     |
| 14 | 15,150,000 | 15,300,000 | 203 | 373  | 0.083586374  |                                                     |
| 14 | 15,225,000 | 15,375,000 | 204 | 438  | -0.132539326 |                                                     |
| 14 | 15,300,000 | 15,450,000 | 205 | 399  | -0.531730106 |                                                     |
| 14 | 15,375,000 | 15,525,000 | 206 | 717  | 0.105472709  | FAM84B                                              |
| 14 | 15,450,000 | 15,600,000 | 207 | 1040 | 0.314677577  | FAM84B                                              |
| 14 | 15,525,000 | 15,675,000 | 208 | 1158 | 0.084863077  |                                                     |
| 14 | 15,600,000 | 15,750,000 | 209 | 1218 | -0.045139796 |                                                     |
| 14 | 15,675,000 | 15,825,000 | 210 | 887  | -0.055263644 |                                                     |
| 14 | 15,750,000 | 15,900,000 | 211 | 589  | 0.327526328  |                                                     |
| 14 | 15,825,000 | 15,975,000 | 212 | 943  | -1.031032684 |                                                     |
| 14 | 15,900,000 | 16,050,000 | 213 | 1165 | -0.53444428  |                                                     |
| 14 | 15,975,000 | 16,125,000 | 214 | 1187 | 0.238879726  |                                                     |
| 14 | 16,050,000 | 16,200,000 | 215 | 1118 | 0.35398262   |                                                     |
| 14 | 16,125,000 | 16,275,000 | 216 | 853  | 0.868277272  |                                                     |
| 14 | 16,200,000 | 16,350,000 | 217 | 558  | 0.996815997  |                                                     |
| 14 | 16,275,000 | 16,425,000 | 218 | 419  | 0.732676219  | NSMCE2,TRIB1                                        |
| 14 | 16,350,000 | 16,500,000 | 219 | 419  | 0.551254976  | NSMCE2,TRIB1                                        |
| 14 | 16,425,000 | 16,575,000 | 220 | 356  | 0.0476823    | NSMCE2                                              |
| 14 | 16,500,000 | 16,650,000 | 221 | 291  | -0.276453973 | NSMCE2                                              |
| 14 | 16,575,000 | 16,725,000 | 222 | 388  | 0.364411042  | KIAA0196,NSMCE2,SQLE                                |
| 14 | 16,650,000 | 16,800,000 | 223 | 542  | 0.371886638  | KIAA0196,SQLE,ZNF572                                |
| 14 | 16,725,000 | 16,875,000 | 224 | 770  | 0.266612625  | SQLE,ZNF572                                         |
| 14 | 16,800,000 | 16,950,000 | 225 | 966  | 0.27838896   |                                                     |
| 14 | 16,875,000 | 17,025,000 | 226 | 682  | 0.563839705  | MTSS1                                               |
| 14 | 16,950,000 | 17,100,000 | 227 | 485  | 1.2645467    | MTSS1                                               |
| 14 | 17,025,000 | 17,175,000 | 228 | 470  | 0.653786821  | MTSS1,NDUFB9,RNF139,TATDN1                          |
| 14 | 17,100,000 | 17,250,000 | 229 | 592  | -0.049508645 | MTSS1,NDUFB9,RNF139,TATDN1,TRMT12,ENSBTAG0000010813 |
| 14 | 17,175,000 | 17,325,000 | 230 | 774  | -0.018573003 | RNF139,TMEM65,TRMT12,ENSBTAG00000010813             |
| 14 | 17,250,000 | 17,400,000 | 231 | 889  | 0.534823307  | TMEM65                                              |
| 14 | 17,325,000 | 17,475,000 | 232 | 1161 | 1.170244332  | FER1L6                                              |
| 14 | 17,400,000 | 17,550,000 | 233 | 1408 | 1.173287712  | FER1L6                                              |
| 14 | 17,475,000 | 17,625,000 | 234 | 1262 | 0.931588762  | FER1L6                                              |
| 14 | 17,550,000 | 17,700,000 | 235 | 1144 | 1.135833918  | FAM91A1,FER1L6                                      |
| 14 | 17,625,000 | 17,775,000 | 236 | 985  | 0.999913976  | ANXA13,FAM91A1,FER1L6                               |
| 14 | 17,700,000 | 17,850,000 | 237 | 957  | 0.103330386  | ANXA13,FAM91A1,KLHL38                               |
| 14 | 17,775,000 | 17,925,000 | 238 | 1222 | 0.164225091  | ANXA13,FBXO32,KLHL38                                |
| 14 | 17,850,000 | 18,000,000 | 239 | 1220 | 0.555675782  | FBXO32                                              |
| 14 | 17,925,000 | 18,075,000 | 240 | 998  | 1.14454964   | ATAD2,FBXO32,WDYHV1                                 |
| 14 | 18,000,000 | 18,150,000 | 241 | 566  | 0.838887556  | ATAD2,WDYHV1,ZHX1                                   |
| 14 | 18,075,000 | 18,225,000 | 242 | 479  | 0.284091925  | ATAD2,FAM83A,TBC1D31,ZHX1,ENSBTAG00000015319        |
| 14 | 18,150,000 | 18,300,000 | 243 | 690  | 0.290025992  | FAM83A,TBC1D31,ENSBTAG00000015319                   |
| 14 | 18,225,000 | 18,375,000 | 244 | 736  | 0.070287207  | DERL1,TBC1D31                                       |
| 14 | 18,300,000 | 18,450,000 | 245 | 948  | 0.497137129  | DERL1,ZHX2                                          |
| 14 | 18,375,000 | 18,525,000 | 246 | 1141 | 0.965551222  | ZHX2                                                |

|    |            |            |     |      |              |                                 |
|----|------------|------------|-----|------|--------------|---------------------------------|
| 14 | 18,450,000 | 18,600,000 | 247 | 896  | 0.84612088   |                                 |
| 14 | 18,525,000 | 18,675,000 | 248 | 727  | 0.120893582  |                                 |
| 14 | 18,600,000 | 18,750,000 | 249 | 634  | -0.482748604 |                                 |
| 14 | 18,675,000 | 18,825,000 | 250 | 461  | -0.646279583 |                                 |
| 14 | 18,750,000 | 18,900,000 | 251 | 687  | -1.506287103 |                                 |
| 14 | 18,825,000 | 18,975,000 | 252 | 869  | -1.687999175 |                                 |
| 14 | 18,900,000 | 19,050,000 | 253 | 982  | -0.260003587 |                                 |
| 14 | 18,975,000 | 19,125,000 | 254 | 1286 | 0.385303514  |                                 |
| 14 | 19,050,000 | 19,200,000 | 255 | 1165 | 0.70504141   |                                 |
| 14 | 19,125,000 | 19,275,000 | 256 | 1182 | 0.694136455  |                                 |
| 14 | 19,200,000 | 19,350,000 | 257 | 1242 | 0.52770627   |                                 |
| 14 | 19,275,000 | 19,425,000 | 258 | 862  | 0.526903293  |                                 |
| 14 | 19,350,000 | 19,500,000 | 259 | 837  | -0.688999611 |                                 |
| 14 | 19,425,000 | 19,575,000 | 260 | 979  | -1.173935044 |                                 |
| 14 | 19,500,000 | 19,650,000 | 261 | 848  | -0.249180972 |                                 |
| 14 | 19,575,000 | 19,725,000 | 262 | 525  | 0.540024166  | HAS2                            |
| 14 | 19,650,000 | 19,800,000 | 263 | 1114 | 0.908850113  | HAS2                            |
| 14 | 19,725,000 | 19,875,000 | 264 | 1238 | 0.301679545  | HAS2                            |
| 14 | 19,800,000 | 19,950,000 | 265 | 630  | -1.306498053 |                                 |
| 14 | 19,875,000 | 20,025,000 | 266 | 1027 | -0.114311997 |                                 |
| 14 | 19,950,000 | 20,100,000 | 267 | 1205 | 0.282727911  |                                 |
| 14 | 20,025,000 | 20,175,000 | 268 | 1073 | -0.309058607 |                                 |
| 14 | 20,100,000 | 20,250,000 | 269 | 1182 | 0.337196444  |                                 |
| 14 | 20,175,000 | 20,325,000 | 270 | 1421 | 0.906971345  |                                 |
| 14 | 20,250,000 | 20,400,000 | 271 | 1469 | 0.3027272    |                                 |
| 14 | 20,325,000 | 20,475,000 | 272 | 1225 | -0.019961532 |                                 |
| 14 | 20,400,000 | 20,550,000 | 273 | 1239 | 0.779832221  |                                 |
| 14 | 20,475,000 | 20,625,000 | 274 | 1298 | -0.642980221 | ENSBTAG00000009474              |
| 14 | 20,550,000 | 20,700,000 | 275 | 969  | -3.736367783 | ENSBTAG00000009474              |
| 14 | 20,625,000 | 20,775,000 | 276 | 562  | -3.520481329 | SPIDR,ENSBTAG00000040351        |
| 14 | 20,700,000 | 20,850,000 | 277 | 362  | 0.464902128  | SPIDR,ENSBTAG00000040351        |
| 14 | 20,775,000 | 20,925,000 | 278 | 428  | 0.583090155  | SPIDR                           |
| 14 | 20,850,000 | 21,000,000 | 279 | 653  | 0.34783518   | SPIDR                           |
| 14 | 20,925,000 | 21,075,000 | 280 | 1152 | 0.424910723  | H3F3C,PRKDC,SPIDR               |
| 14 | 21,000,000 | 21,150,000 | 281 | 1370 | 0.669265124  | H3F3C,PRKDC                     |
| 14 | 21,075,000 | 21,225,000 | 282 | 1016 | 0.867127873  | PRKDC,ENSBTAG00000046325        |
| 14 | 21,150,000 | 21,300,000 | 283 | 684  | 0.32557119   | PRKDC,UBE2V2,ENSBTAG00000046325 |
| 14 | 21,225,000 | 21,375,000 | 284 | 473  | -0.741298372 | UBE2V2                          |
| 14 | 21,300,000 | 21,450,000 | 285 | 353  | 0.894626207  |                                 |
| 14 | 21,375,000 | 21,525,000 | 286 | 362  | 0.663399828  | EFCAB1                          |
| 14 | 21,450,000 | 21,600,000 | 287 | 359  | 0.558786246  | EFCAB1,SNAI2                    |
| 14 | 21,525,000 | 21,675,000 | 288 | 670  | 1.042227599  | C14H8orf22,SNAI2                |
| 14 | 21,600,000 | 21,750,000 | 289 | 805  | 1.006198509  | C14H8orf22                      |
| 14 | 21,675,000 | 21,825,000 | 290 | 640  | -0.57398861  |                                 |
| 14 | 21,750,000 | 21,900,000 | 291 | 726  | -1.60528825  |                                 |
| 14 | 21,825,000 | 21,975,000 | 292 | 759  | -0.911133874 |                                 |
| 14 | 21,900,000 | 22,050,000 | 293 | 613  | -0.275582619 |                                 |
| 14 | 21,975,000 | 22,125,000 | 294 | 600  | -1.380700016 |                                 |
| 14 | 22,050,000 | 22,200,000 | 295 | 837  | -4.300494755 |                                 |
| 14 | 22,125,000 | 22,275,000 | 296 | 742  | -4.657189233 | SNTG1                           |
| 14 | 22,200,000 | 22,350,000 | 297 | 1068 | 0.42802758   | SNTG1                           |
| 14 | 22,275,000 | 22,425,000 | 298 | 1253 | 0.950775995  | SNTG1                           |
| 14 | 22,350,000 | 22,500,000 | 299 | 762  | 0.521039532  | SNTG1                           |

|    |            |            |     |      |              |                                               |
|----|------------|------------|-----|------|--------------|-----------------------------------------------|
| 14 | 22,425,000 | 22,575,000 | 300 | 494  | -0.078442845 |                                               |
| 14 | 22,500,000 | 22,650,000 | 301 | 421  | -0.651982343 |                                               |
| 14 | 22,575,000 | 22,725,000 | 302 | 347  | -0.731365361 | PCMTD1                                        |
| 14 | 22,650,000 | 22,800,000 | 303 | 405  | 0.444265702  | PCMTD1                                        |
| 14 | 22,725,000 | 22,875,000 | 304 | 671  | 0.598019767  | ST18                                          |
| 14 | 22,800,000 | 22,950,000 | 305 | 531  | 0.535508985  | ST18                                          |
| 14 | 22,875,000 | 23,025,000 | 306 | 525  | -0.622230539 |                                               |
| 14 | 22,950,000 | 23,100,000 | 307 | 788  | -0.40090203  | ENSBTAG00000026306                            |
| 14 | 23,025,000 | 23,175,000 | 308 | 775  | -0.186706046 | RB1CC1,ENSBTAG00000026306                     |
| 14 | 23,100,000 | 23,250,000 | 309 | 569  | -0.55297777  | RB1CC1                                        |
| 14 | 23,175,000 | 23,325,000 | 310 | 532  | -1.39681671  | NPBWR1,RB1CC1                                 |
| 14 | 23,250,000 | 23,400,000 | 311 | 552  | -3.973744439 | NPBWR1,OPRK1                                  |
| 14 | 23,325,000 | 23,475,000 | 312 | 427  | -5.141761575 | OPRK1                                         |
| 14 | 23,400,000 | 23,550,000 | 313 | 363  | -3.6354438   | ATP6V1H                                       |
| 14 | 23,475,000 | 23,625,000 | 314 | 321  | -3.172529902 | ATP6V1H,RGS20,TCEA1                           |
| 14 | 23,550,000 | 23,700,000 | 315 | 291  | -0.761653375 | ATP6V1H,LYPLA1,MRPL15,RGS20,TCEA1             |
| 14 | 23,625,000 | 23,775,000 | 316 | 306  | -2.201517342 | LYPLA1,MRPL15,POLR2K,TCEA1,ENSBTAG00000033627 |
| 14 | 23,700,000 | 23,850,000 | 317 | 283  | -4.128904838 | POLR2K,ENSBTAG00000033627                     |
| 14 | 23,775,000 | 23,925,000 | 318 | 274  | -2.073102254 | SOX17                                         |
| 14 | 23,850,000 | 24,000,000 | 319 | 616  | 0.89754815   | RP1,SOX17                                     |
| 14 | 23,925,000 | 24,075,000 | 320 | 864  | 0.171887617  | RP1,ENSBTAG00000047303                        |
| 14 | 24,000,000 | 24,150,000 | 321 | 909  | -0.248291003 | ENSBTAG00000047303                            |
| 14 | 24,075,000 | 24,225,000 | 322 | 967  | 0.377047927  | ENSBTAG00000047303                            |
| 14 | 24,150,000 | 24,300,000 | 323 | 827  | 0.574579901  | XKR4                                          |
| 14 | 24,225,000 | 24,375,000 | 324 | 810  | 0.755708697  | XKR4                                          |
| 14 | 24,300,000 | 24,450,000 | 325 | 1135 | 0.602433366  | XKR4                                          |
| 14 | 24,375,000 | 24,525,000 | 326 | 1164 | 0.756935615  | XKR4                                          |
| 14 | 24,450,000 | 24,600,000 | 327 | 719  | 0.600734532  | XKR4                                          |
| 14 | 24,525,000 | 24,675,000 | 328 | 424  | -0.872940942 | XKR4                                          |
| 14 | 24,600,000 | 24,750,000 | 329 | 589  | 1.197705407  | TGS1,TMEM68,XKR4                              |
| 14 | 24,675,000 | 24,825,000 | 330 | 594  | 1.529184572  | TGS1,TMEM68                                   |
| 14 | 24,750,000 | 24,900,000 | 331 | 411  | 1.364868236  | LYN,TGS1                                      |
| 14 | 24,825,000 | 24,975,000 | 332 | 464  | -0.248472043 | LYN,RPS20                                     |
| 14 | 24,900,000 | 25,050,000 | 333 | 368  | -0.813080505 | C-MOS,LYN,PLAG1,RPS20                         |
| 14 | 24,975,000 | 25,125,000 | 334 | 263  | 0.816765297  | C-MOS,CHCHD7,PLAG1,SDR16C5,ENSBTAG00000039031 |
| 14 | 25,050,000 | 25,200,000 | 335 | 251  | 1.117034504  | CHCHD7,SDR16C5,SDR16C6,ENSBTAG00000039031     |
| 14 | 25,125,000 | 25,275,000 | 336 | 448  | 0.36883897   | PENK,SDR16C6                                  |
| 14 | 25,200,000 | 25,350,000 | 337 | 714  | -0.659029322 | PENK                                          |
| 14 | 25,275,000 | 25,425,000 | 338 | 863  | -1.123311782 |                                               |
| 14 | 25,350,000 | 25,500,000 | 339 | 1157 | -0.621448014 |                                               |
| 14 | 25,425,000 | 25,575,000 | 340 | 1231 | -0.120911165 | IMPAD1                                        |
| 14 | 25,500,000 | 25,650,000 | 341 | 865  | -0.400925369 | IMPAD1                                        |
| 14 | 25,575,000 | 25,725,000 | 342 | 589  | -0.874000153 |                                               |
| 14 | 25,650,000 | 25,800,000 | 343 | 665  | 0.334872014  |                                               |
| 14 | 25,725,000 | 25,875,000 | 344 | 839  | 0.884194787  |                                               |
| 14 | 25,800,000 | 25,950,000 | 345 | 986  | 1.118534338  |                                               |
| 14 | 25,875,000 | 26,025,000 | 346 | 1240 | 0.872296519  |                                               |
| 14 | 25,950,000 | 26,100,000 | 347 | 1324 | 0.57055292   |                                               |
| 14 | 26,025,000 | 26,175,000 | 348 | 1217 | 0.472224056  | FAM110B                                       |
| 14 | 26,100,000 | 26,250,000 | 349 | 1060 | 0.732065964  | FAM110B,RPL39                                 |

|    |            |            |     |      |              |                    |
|----|------------|------------|-----|------|--------------|--------------------|
| 14 | 26,175,000 | 26,325,000 | 350 | 702  | 0.875416404  | RPL39,UBXN2B       |
| 14 | 26,250,000 | 26,400,000 | 351 | 559  | 0.922889493  | CYP7A1,UBXN2B      |
| 14 | 26,325,000 | 26,475,000 | 352 | 580  | 0.727093221  | CYP7A1,NSMAF,SDCBP |
| 14 | 26,400,000 | 26,550,000 | 353 | 690  | 0.429026754  | NSMAF,SDCBP        |
| 14 | 26,475,000 | 26,625,000 | 354 | 858  | -0.638630857 | NSMAF              |
| 14 | 26,550,000 | 26,700,000 | 355 | 600  | -0.971107999 | TOX                |
| 14 | 26,625,000 | 26,775,000 | 356 | 363  | 1.152344702  | TOX                |
| 14 | 26,700,000 | 26,850,000 | 357 | 317  | 1.359382376  | TOX                |
| 14 | 26,775,000 | 26,925,000 | 358 | 328  | 1.128908182  | TOX                |
| 14 | 26,850,000 | 27,000,000 | 359 | 548  | 1.069464537  | TOX                |
| 14 | 26,925,000 | 27,075,000 | 360 | 664  | 0.896178782  | TOX                |
| 14 | 27,000,000 | 27,150,000 | 361 | 700  | 0.54861195   |                    |
| 14 | 27,075,000 | 27,225,000 | 362 | 699  | 1.124666656  |                    |
| 14 | 27,150,000 | 27,300,000 | 363 | 634  | 0.675136551  |                    |
| 14 | 27,225,000 | 27,375,000 | 364 | 705  | -0.4702709   |                    |
| 14 | 27,300,000 | 27,450,000 | 365 | 864  | 0.54975786   |                    |
| 14 | 27,375,000 | 27,525,000 | 366 | 892  | 1.119633203  |                    |
| 14 | 27,450,000 | 27,600,000 | 367 | 941  | 0.606780202  |                    |
| 14 | 27,525,000 | 27,675,000 | 368 | 1108 | -0.972672865 | CA8                |
| 14 | 27,600,000 | 27,750,000 | 369 | 899  | -1.094285186 | CA8                |
| 14 | 27,675,000 | 27,825,000 | 370 | 805  | 0.389536972  | CA8                |
| 14 | 27,750,000 | 27,900,000 | 371 | 977  | 0.165556737  | RAB2A              |
| 14 | 27,825,000 | 27,975,000 | 372 | 910  | 0.256585762  | RAB2A              |
| 14 | 27,900,000 | 28,050,000 | 373 | 890  | 0.251929139  | CHD7,RAB2A         |
| 14 | 27,975,000 | 28,125,000 | 374 | 1122 | -0.718632076 | CHD7               |
| 14 | 28,050,000 | 28,200,000 | 375 | 1006 | -0.913816507 | CHD7               |
| 14 | 28,125,000 | 28,275,000 | 376 | 569  | -0.087065292 | CHD7               |
| 14 | 28,200,000 | 28,350,000 | 377 | 484  | 0.041741587  |                    |
| 14 | 28,275,000 | 28,425,000 | 378 | 769  | -1.784501957 |                    |
| 14 | 28,350,000 | 28,500,000 | 379 | 1018 | -1.220309397 |                    |
| 14 | 28,425,000 | 28,575,000 | 380 | 1027 | 0.580317807  | CLVS1              |
| 14 | 28,500,000 | 28,650,000 | 381 | 1257 | 0.59889846   | CLVS1              |
| 14 | 28,575,000 | 28,725,000 | 382 | 1036 | 0.191206881  | ASPH               |
| 14 | 28,650,000 | 28,800,000 | 383 | 570  | 0.173926042  | ASPH               |
| 14 | 28,725,000 | 28,875,000 | 384 | 700  | 0.737721851  | ASPH               |
| 14 | 28,800,000 | 28,950,000 | 385 | 1017 | -0.16446083  | ASPH               |
| 14 | 28,875,000 | 29,025,000 | 386 | 1302 | 0.28441956   | ASPH               |
| 14 | 28,950,000 | 29,100,000 | 387 | 1245 | 0.883161255  |                    |
| 14 | 29,025,000 | 29,175,000 | 388 | 860  | 0.627525358  |                    |
| 14 | 29,100,000 | 29,250,000 | 389 | 671  | -0.956867743 |                    |
| 14 | 29,175,000 | 29,325,000 | 390 | 947  | -2.20210769  |                    |
| 14 | 29,250,000 | 29,400,000 | 391 | 904  | -1.3268434   |                    |
| 14 | 29,325,000 | 29,475,000 | 392 | 735  | 0.781292358  |                    |
| 14 | 29,400,000 | 29,550,000 | 393 | 1153 | 1.042238085  |                    |
| 14 | 29,475,000 | 29,625,000 | 394 | 1204 | 0.937807044  |                    |
| 14 | 29,550,000 | 29,700,000 | 395 | 1129 | 0.092754134  |                    |
| 14 | 29,625,000 | 29,775,000 | 396 | 1083 | 0.274764446  | GGH,TTPA           |
| 14 | 29,700,000 | 29,850,000 | 397 | 649  | 1.285086224  | GGH,TTPA,YTHDF3    |
| 14 | 29,775,000 | 29,925,000 | 398 | 576  | 0.09213191   | TTPA,YTHDF3        |
| 14 | 29,850,000 | 30,000,000 | 399 | 946  | -0.651538478 | YTHDF3             |
| 14 | 29,925,000 | 30,075,000 | 400 | 990  | -0.396611521 |                    |
| 14 | 30,000,000 | 30,150,000 | 401 | 742  | 0.408226807  |                    |
| 14 | 30,075,000 | 30,225,000 | 402 | 664  | 0.728712938  |                    |

|    |            |            |     |      |              |                                  |
|----|------------|------------|-----|------|--------------|----------------------------------|
| 14 | 30,150,000 | 30,300,000 | 403 | 542  | 0.470357753  |                                  |
| 14 | 30,225,000 | 30,375,000 | 404 | 703  | -0.176595403 |                                  |
| 14 | 30,300,000 | 30,450,000 | 405 | 827  | -0.117039276 |                                  |
| 14 | 30,375,000 | 30,525,000 | 406 | 795  | -0.414560477 |                                  |
| 14 | 30,450,000 | 30,600,000 | 407 | 869  | -0.533342882 |                                  |
| 14 | 30,525,000 | 30,675,000 | 408 | 643  | -0.606866793 |                                  |
| 14 | 30,600,000 | 30,750,000 | 409 | 559  | -1.007161779 |                                  |
| 14 | 30,675,000 | 30,825,000 | 410 | 555  | -0.426472415 |                                  |
| 14 | 30,750,000 | 30,900,000 | 411 | 545  | 0.80087743   |                                  |
| 14 | 30,825,000 | 30,975,000 | 412 | 446  | 0.968075028  | BHLHE22                          |
| 14 | 30,900,000 | 31,050,000 | 413 | 335  | 0.692956591  | BHLHE22,CYP7B1                   |
| 14 | 30,975,000 | 31,125,000 | 414 | 423  | 0.320853499  | CYP7B1                           |
| 14 | 31,050,000 | 31,200,000 | 415 | 497  | -0.086938394 | CYP7B1                           |
| 14 | 31,125,000 | 31,275,000 | 416 | 685  | -0.078107963 | CYP7B1                           |
| 14 | 31,200,000 | 31,350,000 | 417 | 811  | 0.731168135  |                                  |
| 14 | 31,275,000 | 31,425,000 | 418 | 766  | 1.126976599  |                                  |
| 14 | 31,350,000 | 31,500,000 | 419 | 660  | 0.645723919  |                                  |
| 14 | 31,425,000 | 31,575,000 | 420 | 533  | 0.574474294  |                                  |
| 14 | 31,500,000 | 31,650,000 | 421 | 637  | 0.868033181  |                                  |
| 14 | 31,575,000 | 31,725,000 | 422 | 833  | 0.978265266  | ARMC1                            |
| 14 | 31,650,000 | 31,800,000 | 423 | 881  | 1.095639555  | ARMC1,MTFR1                      |
| 14 | 31,725,000 | 31,875,000 | 424 | 855  | 0.529613077  | MTFR1,PDE7A                      |
| 14 | 31,800,000 | 31,950,000 | 425 | 793  | -0.145564623 | PDE7A                            |
| 14 | 31,875,000 | 32,025,000 | 426 | 918  | 0.248687796  |                                  |
| 14 | 31,950,000 | 32,100,000 | 427 | 1051 | 0.237837334  | DNAJC5B                          |
| 14 | 32,025,000 | 32,175,000 | 428 | 883  | -0.357329252 | DNAJC5B,TRIM55                   |
| 14 | 32,100,000 | 32,250,000 | 429 | 751  | -1.018384967 | CRH,DNAJC5B,TRIM55               |
| 14 | 32,175,000 | 32,325,000 | 430 | 659  | -0.683321177 | CRH,TRIM55                       |
| 14 | 32,250,000 | 32,400,000 | 431 | 315  | -0.081594523 |                                  |
| 14 | 32,325,000 | 32,475,000 | 432 | 73   | -0.920857427 |                                  |
| 14 | 32,400,000 | 32,550,000 | 433 | 116  | -1.36343273  | ENSBTAG00000040021               |
| 14 | 32,475,000 | 32,625,000 | 434 | 367  | -1.442351654 | ENSBTAG00000040021               |
| 14 | 32,550,000 | 32,700,000 | 435 | 447  | -1.168660439 | RRS1                             |
| 14 | 32,625,000 | 32,775,000 | 436 | 320  | -0.414237456 | ADHFE1,C14H8orf46,RRS1           |
| 14 | 32,700,000 | 32,850,000 | 437 | 301  | -0.000955578 | ADHFE1,C14H8orf46,MYBL1,RRS1     |
| 14 | 32,775,000 | 32,925,000 | 438 | 247  | 0.558567971  | C14H8orf46,MYBL1,VCPIP1          |
| 14 | 32,850,000 | 33,000,000 | 439 | 209  | 1.38779799   | MYBL1,VCPIP1                     |
| 14 | 32,925,000 | 33,075,000 | 440 | 234  | 1.245074924  | MCMD2,ENSBTAG00000013284         |
| 14 | 33,000,000 | 33,150,000 | 441 | 234  | 0.647664799  | MCMD2,PPP1R42,ENSBTAG00000013284 |
| 14 | 33,075,000 | 33,225,000 | 442 | 444  | -1.180825047 | COPS5,MCMD2,PPP1R42              |
| 14 | 33,150,000 | 33,300,000 | 443 | 780  | -1.004405217 | COPS5,CSPP1,PPP1R42              |
| 14 | 33,225,000 | 33,375,000 | 444 | 1024 | 0.455850413  | ARFGF1,COPS5,CSPP1               |
| 14 | 33,300,000 | 33,450,000 | 445 | 1172 | -0.282984693 | ARFGF1,CSPP1                     |
| 14 | 33,375,000 | 33,525,000 | 446 | 909  | -1.690074251 | ARFGF1                           |
| 14 | 33,450,000 | 33,600,000 | 447 | 972  | -0.682456461 | ARFGF1,CPA6                      |
| 14 | 33,525,000 | 33,675,000 | 448 | 939  | -0.288757033 | CPA6                             |
| 14 | 33,600,000 | 33,750,000 | 449 | 557  | 0.166725343  | CPA6                             |
| 14 | 33,675,000 | 33,825,000 | 450 | 517  | -0.430985041 |                                  |
| 14 | 33,750,000 | 33,900,000 | 451 | 496  | -1.713606875 |                                  |
| 14 | 33,825,000 | 33,975,000 | 452 | 686  | -0.452579561 |                                  |
| 14 | 33,900,000 | 34,050,000 | 453 | 1031 | -0.446743772 | PREX2                            |
| 14 | 33,975,000 | 34,125,000 | 454 | 1092 | -0.352982121 | PREX2                            |
| 14 | 34,050,000 | 34,200,000 | 455 | 993  | 0.650554966  | PREX2                            |

|    |            |            |     |      |              |                                  |
|----|------------|------------|-----|------|--------------|----------------------------------|
| 14 | 34,125,000 | 34,275,000 | 456 | 1110 | 1.232473388  | PREX2                            |
| 14 | 34,200,000 | 34,350,000 | 457 | 1294 | 0.956232453  | PREX2                            |
| 14 | 34,275,000 | 34,425,000 | 458 | 1303 | 0.526726889  | PREX2                            |
| 14 | 34,350,000 | 34,500,000 | 459 | 1298 | 0.686059721  | C14H8orf34                       |
| 14 | 34,425,000 | 34,575,000 | 460 | 1304 | 0.346907059  | C14H8orf34                       |
| 14 | 34,500,000 | 34,650,000 | 461 | 1202 | -0.295527143 | C14H8orf34                       |
| 14 | 34,575,000 | 34,725,000 | 462 | 1157 | -2.594843174 | C14H8orf34                       |
| 14 | 34,650,000 | 34,800,000 | 463 | 1020 | -2.488510034 | C14H8orf34                       |
| 14 | 34,725,000 | 34,875,000 | 464 | 1012 | -0.14259328  | C14H8orf34                       |
| 14 | 34,800,000 | 34,950,000 | 465 | 929  | 0.412951915  | C14H8orf34                       |
| 14 | 34,875,000 | 35,025,000 | 466 | 777  | 0.549281711  |                                  |
| 14 | 34,950,000 | 35,100,000 | 467 | 904  | -0.634371159 |                                  |
| 14 | 35,025,000 | 35,175,000 | 468 | 840  | -1.180085844 |                                  |
| 14 | 35,100,000 | 35,250,000 | 469 | 782  | 0.185172162  |                                  |
| 14 | 35,175,000 | 35,325,000 | 470 | 664  | 0.329380933  |                                  |
| 14 | 35,250,000 | 35,400,000 | 471 | 379  | 0.150196406  |                                  |
| 14 | 35,325,000 | 35,475,000 | 472 | 523  | 0.41061648   |                                  |
| 14 | 35,400,000 | 35,550,000 | 473 | 802  | 0.065915472  | SULF1                            |
| 14 | 35,475,000 | 35,625,000 | 474 | 930  | 0.131975867  | SLCO5A1,SULF1,ENSBTAG00000037399 |
| 14 | 35,550,000 | 35,700,000 | 475 | 1018 | 0.509636193  | SLCO5A1,SULF1,ENSBTAG00000037399 |
| 14 | 35,625,000 | 35,775,000 | 476 | 993  | 1.069590132  | SLCO5A1                          |
| 14 | 35,700,000 | 35,850,000 | 477 | 903  | 1.092819694  | SLCO5A1                          |
| 14 | 35,775,000 | 35,925,000 | 478 | 987  | 0.78876854   | PRDM14                           |
| 14 | 35,850,000 | 36,000,000 | 479 | 879  | 0.672199188  | NCOA2,PRDM14                     |
| 14 | 35,925,000 | 36,075,000 | 480 | 717  | -1.020385087 | NCOA2                            |
| 14 | 36,000,000 | 36,150,000 | 481 | 673  | -0.71158038  | NCOA2                            |
| 14 | 36,075,000 | 36,225,000 | 482 | 542  | 1.190377967  | NCOA2                            |
| 14 | 36,150,000 | 36,300,000 | 483 | 717  | 1.344335063  |                                  |
| 14 | 36,225,000 | 36,375,000 | 484 | 1065 | 0.87514977   |                                  |
| 14 | 36,300,000 | 36,450,000 | 485 | 959  | 0.451019629  | LACTB2,TRAM1                     |
| 14 | 36,375,000 | 36,525,000 | 486 | 599  | 0.01517925   | LACTB2,TRAM1,XKR9                |
| 14 | 36,450,000 | 36,600,000 | 487 | 539  | -1.286931704 | LACTB2,XKR9                      |
| 14 | 36,525,000 | 36,675,000 | 488 | 677  | -1.029402347 |                                  |
| 14 | 36,600,000 | 36,750,000 | 489 | 916  | 0.65465538   |                                  |
| 14 | 36,675,000 | 36,825,000 | 490 | 1180 | 1.154724162  |                                  |
| 14 | 36,750,000 | 36,900,000 | 491 | 1083 | 1.220124475  | EYA1                             |
| 14 | 36,825,000 | 36,975,000 | 492 | 703  | 1.399359789  | EYA1                             |
| 14 | 36,900,000 | 37,050,000 | 493 | 586  | 1.265336217  | EYA1                             |
| 14 | 36,975,000 | 37,125,000 | 494 | 518  | 0.201418553  | EYA1                             |
| 14 | 37,050,000 | 37,200,000 | 495 | 395  | 0.896098955  | EYA1                             |
| 14 | 37,125,000 | 37,275,000 | 496 | 278  | 1.516047392  | EYA1                             |
| 14 | 37,200,000 | 37,350,000 | 497 | 368  | 1.433173107  | EYA1                             |
| 14 | 37,275,000 | 37,425,000 | 498 | 642  | 1.23271966   |                                  |
| 14 | 37,350,000 | 37,500,000 | 499 | 728  | 0.559768023  |                                  |
| 14 | 37,425,000 | 37,575,000 | 500 | 762  | 0.588957216  | MSC                              |
| 14 | 37,500,000 | 37,650,000 | 501 | 884  | 1.001121548  | MSC                              |
| 14 | 37,575,000 | 37,725,000 | 502 | 738  | 0.878949645  | TRPA1                            |
| 14 | 37,650,000 | 37,800,000 | 503 | 642  | 0.740444545  | TRPA1                            |
| 14 | 37,725,000 | 37,875,000 | 504 | 810  | 0.149403315  | TRPA1                            |
| 14 | 37,800,000 | 37,950,000 | 505 | 1161 | -0.590732834 |                                  |
| 14 | 37,875,000 | 38,025,000 | 506 | 1247 | -0.23195091  | KCNB2,ENSBTAG00000048040         |
| 14 | 37,950,000 | 38,100,000 | 507 | 657  | 0.291459075  | KCNB2,ENSBTAG00000048040         |
| 14 | 38,025,000 | 38,175,000 | 508 | 552  | -0.276884193 | KCNB2                            |



|    |            |            |     |      |              |                                 |
|----|------------|------------|-----|------|--------------|---------------------------------|
| 14 | 38,100,000 | 38,250,000 | 509 | 1145 | 0.628026044  | KCNB2                           |
| 14 | 38,175,000 | 38,325,000 | 510 | 1322 | 1.123023059  | KCNB2                           |
| 14 | 38,250,000 | 38,400,000 | 511 | 1354 | 1.104108588  | KCNB2                           |
| 14 | 38,325,000 | 38,475,000 | 512 | 1407 | 0.74435543   | KCNB2                           |
| 14 | 38,400,000 | 38,550,000 | 513 | 1049 | 0.314726784  | KCNB2,TERF1                     |
| 14 | 38,475,000 | 38,625,000 | 514 | 1055 | -0.623678116 | SBSPON,TERF1,ENSBTAG00000037470 |
| 14 | 38,550,000 | 38,700,000 | 515 | 1262 | -0.171395492 | SBSPON,ENSBTAG00000037470       |
| 14 | 38,625,000 | 38,775,000 | 516 | 1078 | 0.414298383  | RDH10,RPL7,ENSBTAG00000047607   |
| 14 | 38,700,000 | 38,850,000 | 517 | 853  | 0.463584182  | RDH10,RPL7,ENSBTAG00000047607   |
| 14 | 38,775,000 | 38,925,000 | 518 | 815  | 0.571823618  |                                 |
| 14 | 38,850,000 | 39,000,000 | 519 | 866  | 0.314456435  | STAU2                           |
| 14 | 38,925,000 | 39,075,000 | 520 | 907  | 0.569010596  | STAU2                           |
| 14 | 39,000,000 | 39,150,000 | 521 | 794  | 0.447055128  | STAU2                           |
| 14 | 39,075,000 | 39,225,000 | 522 | 741  | 0.164334256  |                                 |
| 14 | 39,150,000 | 39,300,000 | 523 | 950  | 0.652565519  | UBE2W                           |
| 14 | 39,225,000 | 39,375,000 | 524 | 976  | 0.493862062  | MD2,TCEB1,TMEM70,UBE2W          |
| 14 | 39,300,000 | 39,450,000 | 525 | 1067 | -0.627720752 | MD2,TCEB1,TMEM70                |
| 14 | 39,375,000 | 39,525,000 | 526 | 1338 | -1.613828563 | MD2                             |
| 14 | 39,450,000 | 39,600,000 | 527 | 1279 | -0.952295465 |                                 |
| 14 | 39,525,000 | 39,675,000 | 528 | 1024 | 0.128147217  | JPH1                            |
| 14 | 39,600,000 | 39,750,000 | 529 | 757  | -0.320566773 | JPH1                            |
| 14 | 39,675,000 | 39,825,000 | 530 | 627  | -0.326257661 | GDAP1,JPH1                      |
| 14 | 39,750,000 | 39,900,000 | 531 | 1010 | -0.195305942 | GDAP1                           |
| 14 | 39,825,000 | 39,975,000 | 532 | 1395 | -0.297086566 |                                 |
| 14 | 39,900,000 | 40,050,000 | 533 | 1464 | 0.647902839  |                                 |
| 14 | 39,975,000 | 40,125,000 | 534 | 1256 | 0.873214595  |                                 |
| 14 | 40,050,000 | 40,200,000 | 535 | 876  | 0.886630908  |                                 |
| 14 | 40,125,000 | 40,275,000 | 536 | 621  | 0.817501219  |                                 |
| 14 | 40,200,000 | 40,350,000 | 537 | 566  | 0.613926813  | PI15                            |
| 14 | 40,275,000 | 40,425,000 | 538 | 862  | 0.711339988  | CRISPLD1,PI15                   |
| 14 | 40,350,000 | 40,500,000 | 539 | 1085 | -0.756138488 | CRISPLD1                        |
| 14 | 40,425,000 | 40,575,000 | 540 | 833  | -1.472509106 | CRISPLD1                        |
| 14 | 40,500,000 | 40,650,000 | 541 | 590  | 0.943718485  |                                 |
| 14 | 40,575,000 | 40,725,000 | 542 | 795  | 0.854770724  |                                 |
| 14 | 40,650,000 | 40,800,000 | 543 | 984  | 0.831703111  |                                 |
| 14 | 40,725,000 | 40,875,000 | 544 | 1024 | -0.972932901 | HNF4G                           |
| 14 | 40,800,000 | 40,950,000 | 545 | 927  | -1.300244081 | HNF4G                           |
| 14 | 40,875,000 | 41,025,000 | 546 | 1051 | 0.353772256  | HNF4G                           |
| 14 | 40,950,000 | 41,100,000 | 547 | 1016 | 0.028354501  | HNF4G                           |
| 14 | 41,025,000 | 41,175,000 | 548 | 740  | -0.270926824 |                                 |
| 14 | 41,100,000 | 41,250,000 | 549 | 719  | -0.328962354 |                                 |
| 14 | 41,175,000 | 41,325,000 | 550 | 834  | -1.164618898 |                                 |
| 14 | 41,250,000 | 41,400,000 | 551 | 1200 | -0.744484607 |                                 |
| 14 | 41,325,000 | 41,475,000 | 552 | 1356 | -0.496535992 |                                 |
| 14 | 41,400,000 | 41,550,000 | 553 | 1483 | -0.968586362 |                                 |
| 14 | 41,475,000 | 41,625,000 | 554 | 1396 | -0.543136097 |                                 |
| 14 | 41,550,000 | 41,700,000 | 555 | 1102 | 0.267229358  |                                 |
| 14 | 41,625,000 | 41,775,000 | 556 | 1019 | 0.839502644  |                                 |
| 14 | 41,700,000 | 41,850,000 | 557 | 750  | 1.02717204   |                                 |
| 14 | 41,775,000 | 41,925,000 | 558 | 617  | 0.240048674  |                                 |
| 14 | 41,850,000 | 42,000,000 | 559 | 435  | -0.489534822 | ZFHX4                           |
| 14 | 41,925,000 | 42,075,000 | 560 | 139  | -0.998963087 | ZFHX4                           |
| 14 | 42,000,000 | 42,150,000 | 561 | 81   | -3.166376962 | ZFHX4                           |

|    |            |            |     |     |              |                               |
|----|------------|------------|-----|-----|--------------|-------------------------------|
| 14 | 42,075,000 | 42,225,000 | 562 | 74  | -3.312767707 | ZFHX4                         |
| 14 | 42,150,000 | 42,300,000 | 563 | 139 | -7.071609623 | ZFHX4,ENSBTAG00000047355      |
| 14 | 42,225,000 | 42,375,000 | 564 | 276 | -1.738905873 | PEX2,ENSBTAG00000047355       |
| 14 | 42,300,000 | 42,450,000 | 565 | 290 | 0.042869197  | PEX2                          |
| 14 | 42,375,000 | 42,525,000 | 566 | 214 | -1.073158178 |                               |
| 14 | 42,450,000 | 42,600,000 | 567 | 230 | -1.273647447 |                               |
| 14 | 42,525,000 | 42,675,000 | 568 | 328 | -2.244091887 | MRPL33                        |
| 14 | 42,600,000 | 42,750,000 | 569 | 399 | -3.254843337 | MRPL33                        |
| 14 | 42,675,000 | 42,825,000 | 570 | 487 | -3.625365422 |                               |
| 14 | 42,750,000 | 42,900,000 | 571 | 639 | -1.083508917 |                               |
| 14 | 42,825,000 | 42,975,000 | 572 | 842 | 0.407323421  |                               |
| 14 | 42,900,000 | 43,050,000 | 573 | 772 | 0.315617541  | ENSBTAG00000039499            |
| 14 | 42,975,000 | 43,125,000 | 574 | 495 | -0.880783509 | ENSBTAG00000039499            |
| 14 | 43,050,000 | 43,200,000 | 575 | 400 | -0.969336266 |                               |
| 14 | 43,125,000 | 43,275,000 | 576 | 652 | -0.575513066 |                               |
| 14 | 43,200,000 | 43,350,000 | 577 | 655 | -0.962962675 |                               |
| 14 | 43,275,000 | 43,425,000 | 578 | 680 | -1.274511779 |                               |
| 14 | 43,350,000 | 43,500,000 | 579 | 801 | -2.776219633 |                               |
| 14 | 43,425,000 | 43,575,000 | 580 | 598 | -2.496750054 |                               |
| 14 | 43,500,000 | 43,650,000 | 581 | 626 | -0.432179896 |                               |
| 14 | 43,575,000 | 43,725,000 | 582 | 606 | 0.199589355  | ENSBTAG00000017169            |
| 14 | 43,650,000 | 43,800,000 | 583 | 622 | -0.60982632  | ENSBTAG00000017169            |
| 14 | 43,725,000 | 43,875,000 | 584 | 502 | -2.699850323 |                               |
| 14 | 43,800,000 | 43,950,000 | 585 | 485 | -4.970289535 | PKIA                          |
| 14 | 43,875,000 | 44,025,000 | 586 | 517 | -4.053206925 | PKIA                          |
| 14 | 43,950,000 | 44,100,000 | 587 | 384 | 0.949866281  | IL7,PKIA,ZC2HC1A              |
| 14 | 44,025,000 | 44,175,000 | 588 | 674 | 0.597242262  | IL7,ZC2HC1A                   |
| 14 | 44,100,000 | 44,250,000 | 589 | 920 | 0.912337487  | IL7                           |
| 14 | 44,175,000 | 44,325,000 | 590 | 662 | 1.210095716  | IL7                           |
| 14 | 44,250,000 | 44,400,000 | 591 | 357 | 0.475086093  |                               |
| 14 | 44,325,000 | 44,475,000 | 592 | 365 | 0.118814582  |                               |
| 14 | 44,400,000 | 44,550,000 | 593 | 409 | 0.198244559  |                               |
| 14 | 44,475,000 | 44,625,000 | 594 | 521 | 0.19471875   |                               |
| 14 | 44,550,000 | 44,700,000 | 595 | 590 | 0.431223531  |                               |
| 14 | 44,625,000 | 44,775,000 | 596 | 676 | 0.638660418  |                               |
| 14 | 44,700,000 | 44,850,000 | 597 | 885 | 0.187321047  |                               |
| 14 | 44,775,000 | 44,925,000 | 598 | 837 | -1.185824075 |                               |
| 14 | 44,850,000 | 45,000,000 | 599 | 641 | -1.257229769 | STMN2                         |
| 14 | 44,925,000 | 45,075,000 | 600 | 794 | 0.691979909  | STMN2,ENSBTAG00000032812      |
| 14 | 45,000,000 | 45,150,000 | 601 | 880 | 0.846221301  | HEY1,STMN2,ENSBTAG00000032812 |
| 14 | 45,075,000 | 45,225,000 | 602 | 530 | 0.563124698  | HEY1                          |
| 14 | 45,150,000 | 45,300,000 | 603 | 441 | -0.065676556 | MRPS28                        |
| 14 | 45,225,000 | 45,375,000 | 604 | 691 | 0.700799184  | MRPS28                        |
| 14 | 45,300,000 | 45,450,000 | 605 | 592 | 0.875868755  | MRPS28                        |
| 14 | 45,375,000 | 45,525,000 | 606 | 503 | 0.922155893  | MRPS28,TPD52                  |
| 14 | 45,450,000 | 45,600,000 | 607 | 635 | 1.220812473  | MRPS28,TPD52                  |
| 14 | 45,525,000 | 45,675,000 | 608 | 468 | 1.257323292  | TPD52                         |
| 14 | 45,600,000 | 45,750,000 | 609 | 347 | 0.884095077  |                               |
| 14 | 45,675,000 | 45,825,000 | 610 | 368 | 0.562458985  |                               |
| 14 | 45,750,000 | 45,900,000 | 611 | 319 | 0.503745463  | ZBTB10                        |
| 14 | 45,825,000 | 45,975,000 | 612 | 408 | 0.217961759  | ZBTB10                        |
| 14 | 45,900,000 | 46,050,000 | 613 | 590 | 0.455774238  | ZNF704                        |
| 14 | 45,975,000 | 46,125,000 | 614 | 747 | 0.757176819  | ZNF704                        |

|    |            |            |     |      |              |                         |
|----|------------|------------|-----|------|--------------|-------------------------|
| 14 | 46,050,000 | 46,200,000 | 615 | 1045 | 0.656284091  |                         |
| 14 | 46,125,000 | 46,275,000 | 616 | 1065 | 0.201456776  |                         |
| 14 | 46,200,000 | 46,350,000 | 617 | 863  | 0.141155804  | PAG1                    |
| 14 | 46,275,000 | 46,425,000 | 618 | 1057 | 1.054854307  | PAG1                    |
| 14 | 46,350,000 | 46,500,000 | 619 | 1202 | 1.085838906  | PAG1                    |
| 14 | 46,425,000 | 46,575,000 | 620 | 1075 | 0.893889518  |                         |
| 14 | 46,500,000 | 46,650,000 | 621 | 983  | 0.873862024  | FABP5                   |
| 14 | 46,575,000 | 46,725,000 | 622 | 974  | 0.957559678  | FABP5                   |
| 14 | 46,650,000 | 46,800,000 | 623 | 1095 | 0.473920679  |                         |
| 14 | 46,725,000 | 46,875,000 | 624 | 1168 | 0.446200877  | FABP4,FABP9,PMP2        |
| 14 | 46,800,000 | 46,950,000 | 625 | 980  | 0.562765419  | FABP12,FABP4,FABP9,PMP2 |
| 14 | 46,875,000 | 47,025,000 | 626 | 966  | 0.195162208  | FABP12,NOV              |
| 14 | 46,950,000 | 47,100,000 | 627 | 1175 | -0.041762125 | NOV                     |
| 14 | 47,025,000 | 47,175,000 | 628 | 1162 | 0.093295051  | MAL2                    |
| 14 | 47,100,000 | 47,250,000 | 629 | 1179 | 0.850830314  | MAL2                    |
| 14 | 47,175,000 | 47,325,000 | 630 | 958  | 1.101981399  | COLEC10                 |
| 14 | 47,250,000 | 47,400,000 | 631 | 634  | 0.628151385  | COLEC10                 |
| 14 | 47,325,000 | 47,475,000 | 632 | 779  | 1.296779009  | TNFRSF11B               |
| 14 | 47,400,000 | 47,550,000 | 633 | 1017 | 1.478076537  | TNFRSF11B               |
| 14 | 47,475,000 | 47,625,000 | 634 | 967  | 1.359771972  |                         |
| 14 | 47,550,000 | 47,700,000 | 635 | 1102 | 0.495825224  |                         |
| 14 | 47,625,000 | 47,775,000 | 636 | 1060 | 0.200928317  |                         |
| 14 | 47,700,000 | 47,850,000 | 637 | 729  | 0.701089968  | SAMD12                  |
| 14 | 47,775,000 | 47,925,000 | 638 | 744  | -0.148530331 | SAMD12                  |
| 14 | 47,850,000 | 48,000,000 | 639 | 717  | 0.181071098  | SAMD12                  |
| 14 | 47,925,000 | 48,075,000 | 640 | 539  | 0.68908658   | SAMD12                  |
| 14 | 48,000,000 | 48,150,000 | 641 | 743  | 0.503540312  | SAMD12                  |
| 14 | 48,075,000 | 48,225,000 | 642 | 1064 | 0.510085666  | SAMD12                  |
| 14 | 48,150,000 | 48,300,000 | 643 | 918  | 0.467710029  | SAMD12                  |
| 14 | 48,225,000 | 48,375,000 | 644 | 546  | 0.415984814  | EXT1                    |
| 14 | 48,300,000 | 48,450,000 | 645 | 703  | -2.060580885 | EXT1                    |
| 14 | 48,375,000 | 48,525,000 | 646 | 960  | -2.291915063 | EXT1                    |
| 14 | 48,450,000 | 48,600,000 | 647 | 782  | -0.45647093  | EXT1                    |
| 14 | 48,525,000 | 48,675,000 | 648 | 754  | 0.707137166  | EXT1                    |
| 14 | 48,600,000 | 48,750,000 | 649 | 687  | 0.956579994  | EXT1                    |
| 14 | 48,675,000 | 48,825,000 | 650 | 753  | 0.927195994  |                         |
| 14 | 48,750,000 | 48,900,000 | 651 | 978  | 0.512574938  |                         |
| 14 | 48,825,000 | 48,975,000 | 652 | 863  | 0.208596868  | MED30                   |
| 14 | 48,900,000 | 49,050,000 | 653 | 749  | 0.914066998  | MED30                   |
| 14 | 48,975,000 | 49,125,000 | 654 | 669  | 1.07813049   |                         |
| 14 | 49,050,000 | 49,200,000 | 655 | 714  | 0.92714581   |                         |
| 14 | 49,125,000 | 49,275,000 | 656 | 789  | 1.11086691   |                         |
| 14 | 49,200,000 | 49,350,000 | 657 | 1039 | 1.215579057  |                         |
| 14 | 49,275,000 | 49,425,000 | 658 | 946  | 0.314284396  |                         |
| 14 | 49,350,000 | 49,500,000 | 659 | 537  | -1.418983979 | AARD                    |
| 14 | 49,425,000 | 49,575,000 | 660 | 658  | 0.213800522  | AARD,RAD21              |
| 14 | 49,500,000 | 49,650,000 | 661 | 577  | 0.565531205  | AARD,RAD21              |
| 14 | 49,575,000 | 49,725,000 | 662 | 436  | -0.545108912 | RAD21,UTP23             |
| 14 | 49,650,000 | 49,800,000 | 663 | 681  | -0.061683658 | EIF3H,UTP23             |
| 14 | 49,725,000 | 49,875,000 | 664 | 853  | 0.417918302  | EIF3H                   |
| 14 | 49,800,000 | 49,950,000 | 665 | 695  | -0.228189207 | EIF3H                   |
| 14 | 49,875,000 | 50,025,000 | 666 | 616  | 0.368391901  |                         |
| 14 | 49,950,000 | 50,100,000 | 667 | 505  | 0.874853234  |                         |

|    |            |            |     |      |              |       |
|----|------------|------------|-----|------|--------------|-------|
| 14 | 50,025,000 | 50,175,000 | 668 | 319  | 0.209458099  |       |
| 14 | 50,100,000 | 50,250,000 | 669 | 613  | -0.906496956 |       |
| 14 | 50,175,000 | 50,325,000 | 670 | 696  | -0.839401581 |       |
| 14 | 50,250,000 | 50,400,000 | 671 | 624  | -0.13463965  |       |
| 14 | 50,325,000 | 50,475,000 | 672 | 677  | 0.039134656  |       |
| 14 | 50,400,000 | 50,550,000 | 673 | 704  | 0.453967812  |       |
| 14 | 50,475,000 | 50,625,000 | 674 | 739  | 0.021740225  |       |
| 14 | 50,550,000 | 50,700,000 | 675 | 722  | 0.23105092   |       |
| 14 | 50,625,000 | 50,775,000 | 676 | 536  | 0.49081354   |       |
| 14 | 50,700,000 | 50,850,000 | 677 | 286  | 0.124430193  | TRPS1 |
| 14 | 50,775,000 | 50,925,000 | 678 | 426  | 0.148405519  | TRPS1 |
| 14 | 50,850,000 | 51,000,000 | 679 | 557  | 0.249450636  | TRPS1 |
| 14 | 50,925,000 | 51,075,000 | 680 | 505  | 0.333765569  | TRPS1 |
| 14 | 51,000,000 | 51,150,000 | 681 | 371  | 0.575937811  | TRPS1 |
| 14 | 51,075,000 | 51,225,000 | 682 | 684  | 0.277325407  |       |
| 14 | 51,150,000 | 51,300,000 | 683 | 938  | -0.024683119 |       |
| 14 | 51,225,000 | 51,375,000 | 684 | 718  | 0.04057769   |       |
| 14 | 51,300,000 | 51,450,000 | 685 | 830  | -0.446018163 |       |
| 14 | 51,375,000 | 51,525,000 | 686 | 1126 | -1.177592828 |       |
| 14 | 51,450,000 | 51,600,000 | 687 | 974  | -0.992407398 |       |
| 14 | 51,525,000 | 51,675,000 | 688 | 963  | -0.61828479  |       |
| 14 | 51,600,000 | 51,750,000 | 689 | 848  | -0.337662829 |       |
| 14 | 51,675,000 | 51,825,000 | 690 | 650  | 0.664765784  |       |
| 14 | 51,750,000 | 51,900,000 | 691 | 776  | 0.58195513   |       |
| 14 | 51,825,000 | 51,975,000 | 692 | 777  | -0.301462147 |       |
| 14 | 51,900,000 | 52,050,000 | 693 | 750  | -2.361364053 |       |
| 14 | 51,975,000 | 52,125,000 | 694 | 963  | -0.924647545 |       |
| 14 | 52,050,000 | 52,200,000 | 695 | 964  | 0.430375191  |       |
| 14 | 52,125,000 | 52,275,000 | 696 | 741  | 0.754549354  |       |
| 14 | 52,200,000 | 52,350,000 | 697 | 773  | 0.519987404  |       |
| 14 | 52,275,000 | 52,425,000 | 698 | 785  | 0.329707695  |       |
| 14 | 52,350,000 | 52,500,000 | 699 | 561  | 0.685636712  |       |
| 14 | 52,425,000 | 52,575,000 | 700 | 337  | 0.60242043   |       |
| 14 | 52,500,000 | 52,650,000 | 701 | 501  | -0.454048494 |       |
| 14 | 52,575,000 | 52,725,000 | 702 | 842  | -0.458814363 |       |
| 14 | 52,650,000 | 52,800,000 | 703 | 1267 | -2.490312988 |       |
| 14 | 52,725,000 | 52,875,000 | 704 | 1187 | -2.378111356 |       |
| 14 | 52,800,000 | 52,950,000 | 705 | 938  | -0.058064208 | CSMD3 |
| 14 | 52,875,000 | 53,025,000 | 706 | 683  | 0.24397298   | CSMD3 |
| 14 | 52,950,000 | 53,100,000 | 707 | 407  | 0.468439761  | CSMD3 |
| 14 | 53,025,000 | 53,175,000 | 708 | 670  | 0.357691508  |       |
| 14 | 53,100,000 | 53,250,000 | 709 | 990  | 0.112226349  |       |
| 14 | 53,175,000 | 53,325,000 | 710 | 800  | 0.110345194  |       |
| 14 | 53,250,000 | 53,400,000 | 711 | 653  | 0.663909803  |       |
| 14 | 53,325,000 | 53,475,000 | 712 | 841  | 0.818119178  |       |
| 14 | 53,400,000 | 53,550,000 | 713 | 950  | 0.995595235  |       |
| 14 | 53,475,000 | 53,625,000 | 714 | 714  | 1.067322496  |       |
| 14 | 53,550,000 | 53,700,000 | 715 | 439  | 1.132416969  |       |
| 14 | 53,625,000 | 53,775,000 | 716 | 520  | -0.666462161 |       |
| 14 | 53,700,000 | 53,850,000 | 717 | 504  | -2.617975426 |       |
| 14 | 53,775,000 | 53,925,000 | 718 | 531  | -2.126591127 | CSMD3 |
| 14 | 53,850,000 | 54,000,000 | 719 | 850  | -1.77219098  | CSMD3 |
| 14 | 53,925,000 | 54,075,000 | 720 | 858  | -0.967005892 | CSMD3 |

|    |            |            |     |      |              |                         |
|----|------------|------------|-----|------|--------------|-------------------------|
| 14 | 54,000,000 | 54,150,000 | 721 | 576  | -0.127882768 | CSMD3                   |
| 14 | 54,075,000 | 54,225,000 | 722 | 724  | 0.916116096  | CSMD3                   |
| 14 | 54,150,000 | 54,300,000 | 723 | 951  | -0.834241213 | CSMD3                   |
| 14 | 54,225,000 | 54,375,000 | 724 | 1196 | -2.49793238  | CSMD3                   |
| 14 | 54,300,000 | 54,450,000 | 725 | 1258 | -3.02556148  | CSMD3                   |
| 14 | 54,375,000 | 54,525,000 | 726 | 920  | -3.626571551 | CSMD3                   |
| 14 | 54,450,000 | 54,600,000 | 727 | 592  | -2.302675627 |                         |
| 14 | 54,525,000 | 54,675,000 | 728 | 411  | -0.557194982 |                         |
| 14 | 54,600,000 | 54,750,000 | 729 | 804  | -0.344762929 |                         |
| 14 | 54,675,000 | 54,825,000 | 730 | 1010 | -1.131551466 |                         |
| 14 | 54,750,000 | 54,900,000 | 731 | 898  | -1.759525682 |                         |
| 14 | 54,825,000 | 54,975,000 | 732 | 1082 | -1.710262439 |                         |
| 14 | 54,900,000 | 55,050,000 | 733 | 1050 | -2.395450597 |                         |
| 14 | 54,975,000 | 55,125,000 | 734 | 1021 | -0.340431211 |                         |
| 14 | 55,050,000 | 55,200,000 | 735 | 838  | 0.490925393  |                         |
| 14 | 55,125,000 | 55,275,000 | 736 | 685  | -0.613473038 |                         |
| 14 | 55,200,000 | 55,350,000 | 737 | 969  | -0.133143513 |                         |
| 14 | 55,275,000 | 55,425,000 | 738 | 1197 | -0.300310355 |                         |
| 14 | 55,350,000 | 55,500,000 | 739 | 1408 | 0.312920835  |                         |
| 14 | 55,425,000 | 55,575,000 | 740 | 1231 | 1.009465769  |                         |
| 14 | 55,500,000 | 55,650,000 | 741 | 985  | 1.027514577  |                         |
| 14 | 55,575,000 | 55,725,000 | 742 | 1061 | 1.173985694  |                         |
| 14 | 55,650,000 | 55,800,000 | 743 | 847  | 1.148222237  |                         |
| 14 | 55,725,000 | 55,875,000 | 744 | 565  | 0.535461859  |                         |
| 14 | 55,800,000 | 55,950,000 | 745 | 487  | 0.028627673  |                         |
| 14 | 55,875,000 | 56,025,000 | 746 | 634  | 0.199077654  |                         |
| 14 | 55,950,000 | 56,100,000 | 747 | 646  | -0.245760674 |                         |
| 14 | 56,025,000 | 56,175,000 | 748 | 714  | -0.926071696 |                         |
| 14 | 56,100,000 | 56,250,000 | 749 | 1040 | 0.039948338  |                         |
| 14 | 56,175,000 | 56,325,000 | 750 | 928  | 0.550807034  |                         |
| 14 | 56,250,000 | 56,400,000 | 751 | 1027 | 0.461588247  |                         |
| 14 | 56,325,000 | 56,475,000 | 752 | 1642 | -0.444883424 |                         |
| 14 | 56,400,000 | 56,550,000 | 753 | 1626 | -1.540014789 |                         |
| 14 | 56,475,000 | 56,625,000 | 754 | 1588 | -1.149738825 |                         |
| 14 | 56,550,000 | 56,700,000 | 755 | 1443 | -0.282614919 | KCNV1                   |
| 14 | 56,625,000 | 56,775,000 | 756 | 994  | 0.34214854   | KCNV1                   |
| 14 | 56,700,000 | 56,850,000 | 757 | 1018 | 1.036212822  | ENSBTAG00000021747      |
| 14 | 56,775,000 | 56,925,000 | 758 | 764  | 0.874975739  | SYBU,ENSBTAG00000021747 |
| 14 | 56,850,000 | 57,000,000 | 759 | 820  | -0.095223905 | SYBU                    |
| 14 | 56,925,000 | 57,075,000 | 760 | 835  | 0.014270034  | EBAG9,SYBU              |
| 14 | 57,000,000 | 57,150,000 | 761 | 511  | 0.033575569  | EBAG9                   |
| 14 | 57,075,000 | 57,225,000 | 762 | 1031 | -1.493405144 | PKHD1L1                 |
| 14 | 57,150,000 | 57,300,000 | 763 | 1070 | -1.27358698  | ENY2,NUDCD1,PKHD1L1     |
| 14 | 57,225,000 | 57,375,000 | 764 | 1014 | 1.11990105   | ENY2,NUDCD1             |
| 14 | 57,300,000 | 57,450,000 | 765 | 1595 | 0.870818151  | NUDCD1                  |
| 14 | 57,375,000 | 57,525,000 | 766 | 1399 | -1.820410628 | TRHR                    |
| 14 | 57,450,000 | 57,600,000 | 767 | 1181 | -1.289864537 | TRHR                    |
| 14 | 57,525,000 | 57,675,000 | 768 | 1157 | 0.818491135  |                         |
| 14 | 57,600,000 | 57,750,000 | 769 | 786  | 0.510644575  |                         |
| 14 | 57,675,000 | 57,825,000 | 770 | 609  | 0.650158119  | TMEM74                  |
| 14 | 57,750,000 | 57,900,000 | 771 | 786  | 1.124419856  | TMEM74                  |
| 14 | 57,825,000 | 57,975,000 | 772 | 611  | 1.140053953  |                         |
| 14 | 57,900,000 | 58,050,000 | 773 | 325  | -1.349946967 |                         |

|    |            |            |     |      |              |                           |
|----|------------|------------|-----|------|--------------|---------------------------|
| 14 | 57,975,000 | 58,125,000 | 774 | 360  | -3.102193768 |                           |
| 14 | 58,050,000 | 58,200,000 | 775 | 396  | 0.356159053  | EMC2                      |
| 14 | 58,125,000 | 58,275,000 | 776 | 316  | 0.728905225  | EMC2                      |
| 14 | 58,200,000 | 58,350,000 | 777 | 188  | -0.043099005 |                           |
| 14 | 58,275,000 | 58,425,000 | 778 | 275  | 0.130121913  | EIF3E                     |
| 14 | 58,350,000 | 58,500,000 | 779 | 440  | 0.30983052   | EIF3E                     |
| 14 | 58,425,000 | 58,575,000 | 780 | 647  | -1.035413756 | EIF3E,RSPO2               |
| 14 | 58,500,000 | 58,650,000 | 781 | 652  | -1.427497282 | RSPO2                     |
| 14 | 58,575,000 | 58,725,000 | 782 | 598  | -0.536496187 | RSPO2                     |
| 14 | 58,650,000 | 58,800,000 | 783 | 597  | 0.068096905  | RSPO2                     |
| 14 | 58,725,000 | 58,875,000 | 784 | 383  | 0.029870578  | IFT27                     |
| 14 | 58,800,000 | 58,950,000 | 785 | 266  | -0.12187187  | IFT27                     |
| 14 | 58,875,000 | 59,025,000 | 786 | 305  | 0.105756726  |                           |
| 14 | 58,950,000 | 59,100,000 | 787 | 296  | 0.086738632  |                           |
| 14 | 59,025,000 | 59,175,000 | 788 | 306  | 0.008108383  | ANGPT1,ENSBTAG00000008257 |
| 14 | 59,100,000 | 59,250,000 | 789 | 303  | -0.656253081 | ANGPT1,ENSBTAG00000008257 |
| 14 | 59,175,000 | 59,325,000 | 790 | 404  | -3.093795172 | ANGPT1                    |
| 14 | 59,250,000 | 59,400,000 | 791 | 700  | -1.094070374 | ANGPT1                    |
| 14 | 59,325,000 | 59,475,000 | 792 | 934  | 0.619867226  | ANGPT1                    |
| 14 | 59,400,000 | 59,550,000 | 793 | 1188 | 0.350939797  | ANGPT1                    |
| 14 | 59,475,000 | 59,625,000 | 794 | 1265 | 0.726713826  |                           |
| 14 | 59,550,000 | 59,700,000 | 795 | 1227 | 0.715785312  |                           |
| 14 | 59,625,000 | 59,775,000 | 796 | 1279 | 0.687312074  |                           |
| 14 | 59,700,000 | 59,850,000 | 797 | 848  | 0.905878804  |                           |
| 14 | 59,775,000 | 59,925,000 | 798 | 701  | 1.20606344   |                           |
| 14 | 59,850,000 | 60,000,000 | 799 | 871  | 1.138295165  | ABRA                      |
| 14 | 59,925,000 | 60,075,000 | 800 | 615  | 0.904034088  | ABRA,OXR1                 |
| 14 | 60,000,000 | 60,150,000 | 801 | 578  | 0.783441901  | OXR1                      |
| 14 | 60,075,000 | 60,225,000 | 802 | 1004 | -0.568485456 | OXR1                      |
| 14 | 60,150,000 | 60,300,000 | 803 | 913  | -1.050643934 |                           |
| 14 | 60,225,000 | 60,375,000 | 804 | 802  | 0.313781472  |                           |
| 14 | 60,300,000 | 60,450,000 | 805 | 805  | 0.565880444  |                           |
| 14 | 60,375,000 | 60,525,000 | 806 | 630  | -0.15552369  |                           |
| 14 | 60,450,000 | 60,600,000 | 807 | 983  | -0.166335828 |                           |
| 14 | 60,525,000 | 60,675,000 | 808 | 1502 | 0.045480315  |                           |
| 14 | 60,600,000 | 60,750,000 | 809 | 1337 | 0.398066199  |                           |
| 14 | 60,675,000 | 60,825,000 | 810 | 925  | 0.860659514  |                           |
| 14 | 60,750,000 | 60,900,000 | 811 | 1180 | 0.798169805  |                           |
| 14 | 60,825,000 | 60,975,000 | 812 | 1242 | 0.967113741  |                           |
| 14 | 60,900,000 | 61,050,000 | 813 | 981  | 0.799214194  | ZFPM2                     |
| 14 | 60,975,000 | 61,125,000 | 814 | 933  | -0.180931769 | ZFPM2                     |
| 14 | 61,050,000 | 61,200,000 | 815 | 807  | -1.203844867 | ZFPM2                     |
| 14 | 61,125,000 | 61,275,000 | 816 | 574  | -0.484097459 | ZFPM2                     |
| 14 | 61,200,000 | 61,350,000 | 817 | 754  | 0.942122743  | ZFPM2                     |
| 14 | 61,275,000 | 61,425,000 | 818 | 839  | 0.050789918  | ZFPM2                     |
| 14 | 61,350,000 | 61,500,000 | 819 | 561  | -2.747036704 | ZFPM2                     |
| 14 | 61,425,000 | 61,575,000 | 820 | 360  | -3.838774442 | ZFPM2                     |
| 14 | 61,500,000 | 61,650,000 | 821 | 288  | -1.972312041 | ZFPM2                     |
| 14 | 61,575,000 | 61,725,000 | 822 | 351  | -1.891543291 |                           |
| 14 | 61,650,000 | 61,800,000 | 823 | 558  | -1.873384956 |                           |
| 14 | 61,725,000 | 61,875,000 | 824 | 802  | -0.673576805 |                           |
| 14 | 61,800,000 | 61,950,000 | 825 | 696  | 0.865856726  |                           |
| 14 | 61,875,000 | 62,025,000 | 826 | 578  | 1.014868601  |                           |

|    |            |            |     |      |              |                             |
|----|------------|------------|-----|------|--------------|-----------------------------|
| 14 | 61,950,000 | 62,100,000 | 827 | 585  | 0.352345602  |                             |
| 14 | 62,025,000 | 62,175,000 | 828 | 639  | 0.349447043  |                             |
| 14 | 62,100,000 | 62,250,000 | 829 | 534  | 1.189915362  | DCSTAMP,LRP12               |
| 14 | 62,175,000 | 62,325,000 | 830 | 614  | 0.770562478  | DCSTAMP,LRP12               |
| 14 | 62,250,000 | 62,400,000 | 831 | 1056 | -0.309798661 | DCSTAMP,DPYS,LRP12          |
| 14 | 62,325,000 | 62,475,000 | 832 | 1115 | -0.304478973 | DCSTAMP,DPYS                |
| 14 | 62,400,000 | 62,550,000 | 833 | 1221 | 0.438517276  | DCSTAMP,DPYS,RIMS2          |
| 14 | 62,475,000 | 62,625,000 | 834 | 1211 | 0.216942994  | RIMS2                       |
| 14 | 62,550,000 | 62,700,000 | 835 | 1002 | 0.133625855  | RIMS2                       |
| 14 | 62,625,000 | 62,775,000 | 836 | 1052 | 0.139166725  | RIMS2                       |
| 14 | 62,700,000 | 62,850,000 | 837 | 836  | -0.060733784 | RIMS2                       |
| 14 | 62,775,000 | 62,925,000 | 838 | 492  | 0.21432655   | RIMS2                       |
| 14 | 62,850,000 | 63,000,000 | 839 | 571  | 0.445212968  | RIMS2                       |
| 14 | 62,925,000 | 63,075,000 | 840 | 643  | 0.169694996  |                             |
| 14 | 63,000,000 | 63,150,000 | 841 | 624  | 0.574007035  |                             |
| 14 | 63,075,000 | 63,225,000 | 842 | 569  | 0.738218153  |                             |
| 14 | 63,150,000 | 63,300,000 | 843 | 514  | 0.801705107  | DCAF13,SLC25A32             |
| 14 | 63,225,000 | 63,375,000 | 844 | 467  | 0.751899507  | CTHRC1,DCAF13,FZD6,SLC25A32 |
| 14 | 63,300,000 | 63,450,000 | 845 | 552  | -0.009236788 | BAALC,CTHRC1,FZD6           |
| 14 | 63,375,000 | 63,525,000 | 846 | 681  | -0.460951743 | BAALC,FZD6                  |
| 14 | 63,450,000 | 63,600,000 | 847 | 1088 | 0.40690951   | ATP6V1C1,BAALC              |
| 14 | 63,525,000 | 63,675,000 | 848 | 998  | 0.705842066  | ATP6V1C1,BAALC              |
| 14 | 63,600,000 | 63,750,000 | 849 | 553  | 0.317476934  | ATP6V1C1                    |
| 14 | 63,675,000 | 63,825,000 | 850 | 551  | 0.528889979  | AZIN1                       |
| 14 | 63,750,000 | 63,900,000 | 851 | 495  | 0.500333451  | AZIN1                       |
| 14 | 63,825,000 | 63,975,000 | 852 | 629  | 0.077120308  | TIEG1                       |
| 14 | 63,900,000 | 64,050,000 | 853 | 873  | 0.25197264   | ODF1,TIEG1                  |
| 14 | 63,975,000 | 64,125,000 | 854 | 797  | 0.374986208  | ODF1                        |
| 14 | 64,050,000 | 64,200,000 | 855 | 486  | -0.304334073 | UBR5                        |
| 14 | 64,125,000 | 64,275,000 | 856 | 402  | -0.003112775 | UBR5                        |
| 14 | 64,200,000 | 64,350,000 | 857 | 516  | 0.118476903  | RRM2B,UBR5                  |
| 14 | 64,275,000 | 64,425,000 | 858 | 559  | -2.743627643 | RRM2B,UBR5                  |
| 14 | 64,350,000 | 64,500,000 | 859 | 493  | -1.619446566 | RRM2B                       |
| 14 | 64,425,000 | 64,575,000 | 860 | 731  | 0.989176828  |                             |
| 14 | 64,500,000 | 64,650,000 | 861 | 884  | 0.08152387   |                             |
| 14 | 64,575,000 | 64,725,000 | 862 | 913  | -4.664037939 |                             |
| 14 | 64,650,000 | 64,800,000 | 863 | 886  | -4.019442964 |                             |
| 14 | 64,725,000 | 64,875,000 | 864 | 807  | -0.028134201 |                             |
| 14 | 64,800,000 | 64,950,000 | 865 | 1001 | -0.364599824 | GRHL2,NCALD                 |
| 14 | 64,875,000 | 65,025,000 | 866 | 1181 | 0.056208495  | GRHL2,NCALD                 |
| 14 | 64,950,000 | 65,100,000 | 867 | 972  | 0.444213806  | GRHL2                       |
| 14 | 65,025,000 | 65,175,000 | 868 | 961  | 0.545966807  | GRHL2                       |
| 14 | 65,100,000 | 65,250,000 | 869 | 1163 | -0.46712027  |                             |
| 14 | 65,175,000 | 65,325,000 | 870 | 1183 | 0.167829909  |                             |
| 14 | 65,250,000 | 65,400,000 | 871 | 764  | 1.145433839  | MGC133632                   |
| 14 | 65,325,000 | 65,475,000 | 872 | 717  | 0.544593892  | MGC133632                   |
| 14 | 65,400,000 | 65,550,000 | 873 | 1061 | 0.605816963  |                             |
| 14 | 65,475,000 | 65,625,000 | 874 | 838  | 0.297138754  | YWHAZ                       |
| 14 | 65,550,000 | 65,700,000 | 875 | 883  | -0.383322058 | YWHAZ                       |
| 14 | 65,625,000 | 65,775,000 | 876 | 917  | -0.438332091 |                             |
| 14 | 65,700,000 | 65,850,000 | 877 | 847  | -1.403938279 | PABPC1                      |
| 14 | 65,775,000 | 65,925,000 | 878 | 1103 | -0.999277478 | PABPC1,SNX31                |
| 14 | 65,850,000 | 66,000,000 | 879 | 1043 | 0.487581435  | ANKRD46,SNX31               |

|    |            |            |     |      |              |                                       |
|----|------------|------------|-----|------|--------------|---------------------------------------|
| 14 | 65,925,000 | 66,075,000 | 880 | 710  | 0.736687057  | ANKRD46,SNX31                         |
| 14 | 66,000,000 | 66,150,000 | 881 | 708  | 0.885261024  | ANKRD46                               |
| 14 | 66,075,000 | 66,225,000 | 882 | 718  | 0.732347291  |                                       |
| 14 | 66,150,000 | 66,300,000 | 883 | 449  | 0.284701623  | RNF19A                                |
| 14 | 66,225,000 | 66,375,000 | 884 | 399  | -0.391790557 | RNF19A,SPAG1                          |
| 14 | 66,300,000 | 66,450,000 | 885 | 597  | -0.136202586 | FBXO43,SPAG1                          |
| 14 | 66,375,000 | 66,525,000 | 886 | 689  | -1.013057256 | FBXO43,RGS22,SPAG1                    |
| 14 | 66,450,000 | 66,600,000 | 887 | 633  | -1.262349903 | RGS22                                 |
| 14 | 66,525,000 | 66,675,000 | 888 | 546  | 0.014402847  | COX6C,RGS22                           |
| 14 | 66,600,000 | 66,750,000 | 889 | 494  | -1.315421288 | COX6C                                 |
| 14 | 66,675,000 | 66,825,000 | 890 | 391  | -1.824113131 |                                       |
| 14 | 66,750,000 | 66,900,000 | 891 | 324  | 0.209869637  |                                       |
| 14 | 66,825,000 | 66,975,000 | 892 | 389  | 0.261452672  |                                       |
| 14 | 66,900,000 | 67,050,000 | 893 | 405  | 0.528878744  | ENSBTAG00000012357                    |
| 14 | 66,975,000 | 67,125,000 | 894 | 421  | 0.625724001  | ENSBTAG00000012357                    |
| 14 | 67,050,000 | 67,200,000 | 895 | 477  | 0.863479519  | ENSBTAG00000012357                    |
| 14 | 67,125,000 | 67,275,000 | 896 | 457  | 0.951519356  | ENSBTAG00000012357                    |
| 14 | 67,200,000 | 67,350,000 | 897 | 401  | 0.64215439   | ENSBTAG00000012357,ENSBTAG00000047534 |
| 14 | 67,275,000 | 67,425,000 | 898 | 326  | 0.375918863  | ENSBTAG00000026233,ENSBTAG00000047534 |
| 14 | 67,350,000 | 67,500,000 | 899 | 305  | 0.187621512  | ENSBTAG00000026233,ENSBTAG00000047534 |
| 14 | 67,425,000 | 67,575,000 | 900 | 365  | 0.276217433  | OSR2,ENSBTAG00000026233               |
| 14 | 67,500,000 | 67,650,000 | 901 | 411  | 0.879860282  | OSR2                                  |
| 14 | 67,575,000 | 67,725,000 | 902 | 556  | 0.969355231  | STK3                                  |
| 14 | 67,650,000 | 67,800,000 | 903 | 538  | 0.96804134   | STK3                                  |
| 14 | 67,725,000 | 67,875,000 | 904 | 430  | 1.026780996  | STK3                                  |
| 14 | 67,800,000 | 67,950,000 | 905 | 704  | 0.914826911  | STK3                                  |
| 14 | 67,875,000 | 68,025,000 | 906 | 1021 | 0.896135352  | STK3                                  |
| 14 | 67,950,000 | 68,100,000 | 907 | 990  | 0.666207615  | KCNS2,STK3                            |
| 14 | 68,025,000 | 68,175,000 | 908 | 1000 | 0.640882632  | KCNS2,ENSBTAG00000046739              |
| 14 | 68,100,000 | 68,250,000 | 909 | 962  | 0.704848604  | ENSBTAG00000046739                    |
| 14 | 68,175,000 | 68,325,000 | 910 | 591  | 0.696828758  | NIPAL2                                |
| 14 | 68,250,000 | 68,400,000 | 911 | 495  | 0.80649792   | NIPAL2,POP1                           |
| 14 | 68,325,000 | 68,475,000 | 912 | 744  | 1.034896717  | ERICH5,HRSP12,NIPAL2,POP1,RPL30       |
| 14 | 68,400,000 | 68,550,000 | 913 | 1014 | 1.231253149  | ERICH5,HRSP12,MATN2,POP1,RPL30        |
| 14 | 68,475,000 | 68,625,000 | 914 | 1069 | 0.135897308  | MATN2                                 |
| 14 | 68,550,000 | 68,700,000 | 915 | 1048 | -0.359876795 | LAPTM4B,MATN2                         |
| 14 | 68,625,000 | 68,775,000 | 916 | 839  | -0.129732024 | LAPTM4B,MATN2                         |
| 14 | 68,700,000 | 68,850,000 | 917 | 523  | -1.721395673 | LAPTM4B,MTDH                          |
| 14 | 68,775,000 | 68,925,000 | 918 | 810  | -0.824666366 | MTDH                                  |
| 14 | 68,850,000 | 69,000,000 | 919 | 1172 | -0.580927364 | MTDH,ENSBTAG00000032432               |
| 14 | 68,925,000 | 69,075,000 | 920 | 959  | -0.621692522 | ENSBTAG00000032432                    |
| 14 | 69,000,000 | 69,150,000 | 921 | 547  | -0.140114813 | TSPYL5                                |
| 14 | 69,075,000 | 69,225,000 | 922 | 385  | -0.200407014 | HNRNPH3,TSPYL5                        |
| 14 | 69,150,000 | 69,300,000 | 923 | 537  | 0.621196858  | CPQ,HNRNPH3                           |
| 14 | 69,225,000 | 69,375,000 | 924 | 591  | 0.037924362  | CPQ,ENSBTAG00000047205                |
| 14 | 69,300,000 | 69,450,000 | 925 | 537  | -1.398208266 | CPQ,ENSBTAG00000047205                |
| 14 | 69,375,000 | 69,525,000 | 926 | 558  | -3.173359346 | CPQ                                   |
| 14 | 69,450,000 | 69,600,000 | 927 | 740  | -3.260955738 | CPQ                                   |
| 14 | 69,525,000 | 69,675,000 | 928 | 832  | -2.0453084   | CPQ                                   |
| 14 | 69,600,000 | 69,750,000 | 929 | 865  | -1.636965926 | CPQ                                   |
| 14 | 69,675,000 | 69,825,000 | 930 | 1241 | -1.070981767 | CPQ                                   |
| 14 | 69,750,000 | 69,900,000 | 931 | 1391 | -1.827136097 | CPQ                                   |
| 14 | 69,825,000 | 69,975,000 | 932 | 1340 | -1.051074683 | CPQ,SDC2                              |



|    |            |            |     |      |              |                                |
|----|------------|------------|-----|------|--------------|--------------------------------|
| 14 | 69,900,000 | 70,050,000 | 933 | 1011 | 0.827661213  | SDC2                           |
| 14 | 69,975,000 | 70,125,000 | 934 | 903  | 0.997005032  | SDC2                           |
| 14 | 70,050,000 | 70,200,000 | 935 | 883  | 1.179145215  | SDC2                           |
| 14 | 70,125,000 | 70,275,000 | 936 | 488  | 1.187519798  | PTDSS1                         |
| 14 | 70,200,000 | 70,350,000 | 937 | 434  | 0.855418511  | MTERFD1,PTDSS1,UQCRB           |
| 14 | 70,275,000 | 70,425,000 | 938 | 457  | 0.302608604  | GDF6,MTERFD1,PTDSS1,UQCRB      |
| 14 | 70,350,000 | 70,500,000 | 939 | 484  | 0.142995792  | GDF6                           |
| 14 | 70,425,000 | 70,575,000 | 940 | 533  | 0.744565369  |                                |
| 14 | 70,500,000 | 70,650,000 | 941 | 585  | 0.687222751  |                                |
| 14 | 70,575,000 | 70,725,000 | 942 | 678  | 1.010874637  |                                |
| 14 | 70,650,000 | 70,800,000 | 943 | 514  | 1.201907633  |                                |
| 14 | 70,725,000 | 70,875,000 | 944 | 341  | -1.284593529 |                                |
| 14 | 70,800,000 | 70,950,000 | 945 | 426  | -0.886764219 |                                |
| 14 | 70,875,000 | 71,025,000 | 946 | 516  | 0.907739109  |                                |
| 14 | 70,950,000 | 71,100,000 | 947 | 635  | 0.147548747  |                                |
| 14 | 71,025,000 | 71,175,000 | 948 | 786  | -0.00498364  |                                |
| 14 | 71,100,000 | 71,250,000 | 949 | 787  | 0.695346633  |                                |
| 14 | 71,175,000 | 71,325,000 | 950 | 588  | 0.142388638  |                                |
| 14 | 71,250,000 | 71,400,000 | 951 | 648  | -0.197717235 | C8orf37                        |
| 14 | 71,325,000 | 71,475,000 | 952 | 793  | 0.634429259  | C8orf37                        |
| 14 | 71,400,000 | 71,550,000 | 953 | 906  | -0.006289523 | C8orf37,PLEKHF2                |
| 14 | 71,475,000 | 71,625,000 | 954 | 864  | -0.825544809 | NDUFAF6,PLEKHF2                |
| 14 | 71,550,000 | 71,700,000 | 955 | 633  | -0.690799433 | NDUFAF6                        |
| 14 | 71,625,000 | 71,775,000 | 956 | 528  | 0.014835684  | NDUFAF6,TP53INP1               |
| 14 | 71,700,000 | 71,850,000 | 957 | 442  | 0.569635886  | CCNE2,INTS8,TP53INP1           |
| 14 | 71,775,000 | 71,925,000 | 958 | 376  | 1.102558343  | CCNE2,DPY19L4,INTS8            |
| 14 | 71,850,000 | 72,000,000 | 959 | 294  | 0.867951066  | DPY19L4,ESRP1                  |
| 14 | 71,925,000 | 72,075,000 | 960 | 376  | -0.819521534 | DPY19L4,ESRP1                  |
| 14 | 72,000,000 | 72,150,000 | 961 | 478  | -0.676767799 | ESRP1,KIAA1429                 |
| 14 | 72,075,000 | 72,225,000 | 962 | 503  | 0.017138842  | FSBP,KIAA1429,RAD54B           |
| 14 | 72,150,000 | 72,300,000 | 963 | 631  | -0.86783739  | FSBP,KIAA1429,RAD54B           |
| 14 | 72,225,000 | 72,375,000 | 964 | 565  | -0.816199587 | FSBP,RAD54B                    |
| 14 | 72,300,000 | 72,450,000 | 965 | 482  | 0.405897002  | CDH17,GEM                      |
| 14 | 72,375,000 | 72,525,000 | 966 | 762  | 0.851267163  | CDH17,GEM                      |
| 14 | 72,450,000 | 72,600,000 | 967 | 933  | 1.244927742  | CDH17                          |
| 14 | 72,525,000 | 72,675,000 | 968 | 896  | 1.356618318  | CDH17                          |
| 14 | 72,600,000 | 72,750,000 | 969 | 940  | 1.34341726   | PDP1,ENSBTAG00000045865        |
| 14 | 72,675,000 | 72,825,000 | 970 | 904  | 1.376305167  | PDP1,TMEM67,ENSBTAG00000045865 |
| 14 | 72,750,000 | 72,900,000 | 971 | 740  | 1.184826472  | FAM92A1,RBM12B,TMEM67          |
| 14 | 72,825,000 | 72,975,000 | 972 | 1140 | 0.293153819  | FAM92A1,RBM12B                 |
| 14 | 72,900,000 | 73,050,000 | 973 | 1646 | 0.283750608  | FAM92A1                        |
| 14 | 72,975,000 | 73,125,000 | 974 | 1088 | 0.68343596   |                                |
| 14 | 73,050,000 | 73,200,000 | 975 | 581  | 1.298669077  |                                |
| 14 | 73,125,000 | 73,275,000 | 976 | 852  | 0.377916544  |                                |
| 14 | 73,200,000 | 73,350,000 | 977 | 1067 | 0.35412675   |                                |
| 14 | 73,275,000 | 73,425,000 | 978 | 983  | 0.815607131  |                                |
| 14 | 73,350,000 | 73,500,000 | 979 | 1007 | -0.040610795 |                                |
| 14 | 73,425,000 | 73,575,000 | 980 | 1061 | -0.606114208 |                                |
| 14 | 73,500,000 | 73,650,000 | 981 | 992  | 0.566610301  | TRIQQ                          |
| 14 | 73,575,000 | 73,725,000 | 982 | 926  | 0.593679523  | TRIQQ                          |
| 14 | 73,650,000 | 73,800,000 | 983 | 928  | -0.106211255 | TRIQQ                          |
| 14 | 73,725,000 | 73,875,000 | 984 | 924  | 0.237991707  | TRIQQ                          |
| 14 | 73,800,000 | 73,950,000 | 985 | 995  | 0.222693964  |                                |

|    |            |            |      |      |              |                                       |
|----|------------|------------|------|------|--------------|---------------------------------------|
| 14 | 73,875,000 | 74,025,000 | 986  | 1254 | -0.103826815 |                                       |
| 14 | 73,950,000 | 74,100,000 | 987  | 1119 | -0.014610897 |                                       |
| 14 | 74,025,000 | 74,175,000 | 988  | 885  | 0.05913467   |                                       |
| 14 | 74,100,000 | 74,250,000 | 989  | 864  | -0.004284595 |                                       |
| 14 | 74,175,000 | 74,325,000 | 990  | 945  | 0.748129391  |                                       |
| 14 | 74,250,000 | 74,400,000 | 991  | 1295 | 0.233023986  |                                       |
| 14 | 74,325,000 | 74,475,000 | 992  | 1397 | -0.159438    |                                       |
| 14 | 74,400,000 | 74,550,000 | 993  | 1348 | 0.251795024  |                                       |
| 14 | 74,475,000 | 74,625,000 | 994  | 1337 | 0.319667943  |                                       |
| 14 | 74,550,000 | 74,700,000 | 995  | 970  | 0.296255056  | RUNX1T1                               |
| 14 | 74,625,000 | 74,775,000 | 996  | 980  | -0.819604863 | RUNX1T1                               |
| 14 | 74,700,000 | 74,850,000 | 997  | 1177 | -0.440928269 | RUNX1T1                               |
| 14 | 74,775,000 | 74,925,000 | 998  | 1246 | 0.486402366  | RUNX1T1                               |
| 14 | 74,850,000 | 75,000,000 | 999  | 1447 | 0.898013454  |                                       |
| 14 | 74,925,000 | 75,075,000 | 1000 | 1493 | 1.016057324  |                                       |
| 14 | 75,000,000 | 75,150,000 | 1001 | 1328 | 1.088338895  |                                       |
| 14 | 75,075,000 | 75,225,000 | 1002 | 1223 | 1.088913098  |                                       |
| 14 | 75,150,000 | 75,300,000 | 1003 | 1430 | 0.261875638  |                                       |
| 14 | 75,225,000 | 75,375,000 | 1004 | 1529 | 0.210835228  |                                       |
| 14 | 75,300,000 | 75,450,000 | 1005 | 995  | 0.690647132  | SLC26A7                               |
| 14 | 75,375,000 | 75,525,000 | 1006 | 941  | -3.060335569 | SLC26A7                               |
| 14 | 75,450,000 | 75,600,000 | 1007 | 1499 | -1.34966334  | LRRRC69,SLC26A7                       |
| 14 | 75,525,000 | 75,675,000 | 1008 | 1622 | 1.126741377  | LRRRC69,OTUD6B,SLC26A7                |
| 14 | 75,600,000 | 75,750,000 | 1009 | 1451 | 0.927898442  | LRRRC69,OTUD6B,TMEM55A                |
| 14 | 75,675,000 | 75,825,000 | 1010 | 1076 | 0.849940172  | TMEM55A                               |
| 14 | 75,750,000 | 75,900,000 | 1011 | 620  | 0.912218514  | TMEM55A,TMEM64                        |
| 14 | 75,825,000 | 75,975,000 | 1012 | 542  | 1.073438857  | TMEM64                                |
| 14 | 75,900,000 | 76,050,000 | 1013 | 766  | -1.313133774 | CALB1,DECR1,TMEM64                    |
| 14 | 75,975,000 | 76,125,000 | 1014 | 730  | -2.302402957 | CALB1,DECR1,NBN                       |
| 14 | 76,050,000 | 76,200,000 | 1015 | 575  | -0.229217965 | DECR1,NBN,OSGIN2                      |
| 14 | 76,125,000 | 76,275,000 | 1016 | 575  | 0.655941053  | NBN,OSGIN2,RIPK2                      |
| 14 | 76,200,000 | 76,350,000 | 1017 | 859  | 0.565010681  | RIPK2                                 |
| 14 | 76,275,000 | 76,425,000 | 1018 | 1210 | 0.712643872  |                                       |
| 14 | 76,350,000 | 76,500,000 | 1019 | 1451 | 1.000590395  |                                       |
| 14 | 76,425,000 | 76,575,000 | 1020 | 1634 | 0.454018398  |                                       |
| 14 | 76,500,000 | 76,650,000 | 1021 | 1481 | 0.09371506   |                                       |
| 14 | 76,575,000 | 76,725,000 | 1022 | 1013 | 0.633218265  |                                       |
| 14 | 76,650,000 | 76,800,000 | 1023 | 965  | 0.553113582  | MMP-16                                |
| 14 | 76,725,000 | 76,875,000 | 1024 | 1059 | 0.48175404   | MMP-16,ENSBTAG00000046836             |
| 14 | 76,800,000 | 76,950,000 | 1025 | 736  | 0.247724611  | MMP-16,ENSBTAG00000046836             |
| 14 | 76,875,000 | 77,025,000 | 1026 | 486  | -0.083383328 | MMP-16                                |
| 14 | 76,950,000 | 77,100,000 | 1027 | 746  | 0.125872088  | MMP-16                                |
| 14 | 77,025,000 | 77,175,000 | 1028 | 786  | 0.436146347  | MMP-16                                |
| 14 | 77,100,000 | 77,250,000 | 1029 | 658  | 0.299729028  | MMP-16                                |
| 14 | 77,175,000 | 77,325,000 | 1030 | 952  | 0.453419975  | ENSBTAG00000007302                    |
| 14 | 77,250,000 | 77,400,000 | 1031 | 1044 | 0.283879626  | ENSBTAG00000007302,ENSBTAG00000048317 |
| 14 | 77,325,000 | 77,475,000 | 1032 | 977  | -1.712613624 | ENSBTAG00000048317                    |
| 14 | 77,400,000 | 77,550,000 | 1033 | 1095 | -1.278152622 |                                       |
| 14 | 77,475,000 | 77,625,000 | 1034 | 1301 | 0.572070332  |                                       |
| 14 | 77,550,000 | 77,700,000 | 1035 | 1276 | 0.936775944  |                                       |
| 14 | 77,625,000 | 77,775,000 | 1036 | 1123 | 0.072813082  |                                       |
| 14 | 77,700,000 | 77,850,000 | 1037 | 1268 | -2.391591809 |                                       |
| 14 | 77,775,000 | 77,925,000 | 1038 | 1281 | -1.817870851 |                                       |

|    |            |            |      |      |              |                                                        |
|----|------------|------------|------|------|--------------|--------------------------------------------------------|
| 14 | 77,850,000 | 78,000,000 | 1039 | 1219 | -0.109701572 |                                                        |
| 14 | 77,925,000 | 78,075,000 | 1040 | 1254 | 0.352578026  |                                                        |
| 14 | 78,000,000 | 78,150,000 | 1041 | 893  | 0.368200539  |                                                        |
| 14 | 78,075,000 | 78,225,000 | 1042 | 517  | 0.205634867  |                                                        |
| 14 | 78,150,000 | 78,300,000 | 1043 | 985  | 0.680528632  |                                                        |
| 14 | 78,225,000 | 78,375,000 | 1044 | 1514 | -0.140112419 |                                                        |
| 14 | 78,300,000 | 78,450,000 | 1045 | 1262 | -1.054975208 | CNGB3                                                  |
| 14 | 78,375,000 | 78,525,000 | 1046 | 1277 | 0.365150288  | CNGB3,CPNE3                                            |
| 14 | 78,450,000 | 78,600,000 | 1047 | 1321 | 1.104792564  | CNGB3,CPNE3,RMDN1,WWP1                                 |
| 14 | 78,525,000 | 78,675,000 | 1048 | 1217 | 1.1118959    | CPNE3,RMDN1,WWP1,ENSBTAG00000032233                    |
| 14 | 78,600,000 | 78,750,000 | 1049 | 1152 | 1.094581955  | WWP1,ENSBTAG00000032233                                |
| 14 | 78,675,000 | 78,825,000 | 1050 | 1097 | 1.060486053  | WWP1                                                   |
| 14 | 78,750,000 | 78,900,000 | 1051 | 1040 | 0.570744817  |                                                        |
| 14 | 78,825,000 | 78,975,000 | 1052 | 866  | -0.169538147 | ATP6V0D2                                               |
| 14 | 78,900,000 | 79,050,000 | 1053 | 936  | -0.485561932 | ATP6V0D2                                               |
| 14 | 78,975,000 | 79,125,000 | 1054 | 740  | -0.633571566 |                                                        |
| 14 | 79,050,000 | 79,200,000 | 1055 | 689  | 0.096755337  |                                                        |
| 14 | 79,125,000 | 79,275,000 | 1056 | 991  | 0.366434894  |                                                        |
| 14 | 79,200,000 | 79,350,000 | 1057 | 1204 | 0.662588422  | ENSBTAG00000002851,ENSBTAG00000046121                  |
| 14 | 79,275,000 | 79,425,000 | 1058 | 1034 | 0.716294175  | CA2,CA3,ENSBTAG00000002851,ENSBTAG00000046121          |
| 14 | 79,350,000 | 79,500,000 | 1059 | 997  | 0.566849127  | CA2,CA3                                                |
| 14 | 79,425,000 | 79,575,000 | 1060 | 1154 | 0.411714195  | CA1,ENSBTAG00000036116                                 |
| 14 | 79,500,000 | 79,650,000 | 1061 | 992  | 0.286321333  | CA1,ENSBTAG00000036116                                 |
| 14 | 79,575,000 | 79,725,000 | 1062 | 838  | 0.535385481  | CA13,ENSBTAG00000036116                                |
| 14 | 79,650,000 | 79,800,000 | 1063 | 776  | 0.328327517  | CA13,E2F5,ENSBTAG00000032227                           |
| 14 | 79,725,000 | 79,875,000 | 1064 | 972  | 0.505481908  | CA13,E2F5,LRRCC1,ENSBTAG00000032227,ENSBTAG00000040461 |
| 14 | 79,800,000 | 79,950,000 | 1065 | 1132 | 0.530151262  | LRRCC1,ENSBTAG00000038798,ENSBTAG00000040461           |
| 14 | 79,875,000 | 80,025,000 | 1066 | 1181 | 0.135902122  | ENSBTAG00000038798,ENSBTAG00000040461                  |
| 14 | 79,950,000 | 80,100,000 | 1067 | 1097 | 0.484967034  | RALYL                                                  |
| 14 | 80,025,000 | 80,175,000 | 1068 | 1016 | 0.491591931  | RALYL                                                  |
| 14 | 80,100,000 | 80,250,000 | 1069 | 1491 | 0.494756596  | RALYL                                                  |
| 14 | 80,175,000 | 80,325,000 | 1070 | 1814 | 0.864302494  | RALYL                                                  |
| 14 | 80,250,000 | 80,400,000 | 1071 | 1788 | 1.05278828   | RALYL                                                  |
| 14 | 80,325,000 | 80,475,000 | 1072 | 1676 | 1.039619356  |                                                        |
| 14 | 80,400,000 | 80,550,000 | 1073 | 1508 | 0.199797519  |                                                        |
| 14 | 80,475,000 | 80,625,000 | 1074 | 1624 | 0.445902892  |                                                        |
| 14 | 80,550,000 | 80,700,000 | 1075 | 1519 | 0.820390122  |                                                        |
| 14 | 80,625,000 | 80,775,000 | 1076 | 1157 | -0.850239004 |                                                        |
| 14 | 80,700,000 | 80,850,000 | 1077 | 1065 | -1.131346638 |                                                        |
| 14 | 80,775,000 | 80,925,000 | 1078 | 1204 | -0.048910596 |                                                        |
| 14 | 80,850,000 | 81,000,000 | 1079 | 1259 | -0.312749326 |                                                        |
| 14 | 80,925,000 | 81,075,000 | 1080 | 1237 | -0.951487226 |                                                        |
| 14 | 81,000,000 | 81,150,000 | 1081 | 1245 | -0.035615517 |                                                        |
| 14 | 81,075,000 | 81,225,000 | 1082 | 1063 | 0.671855878  |                                                        |
| 14 | 81,150,000 | 81,300,000 | 1083 | 716  | 0.308002858  |                                                        |
| 14 | 81,225,000 | 81,375,000 | 1084 | 581  | 0.374193388  |                                                        |
| 14 | 81,300,000 | 81,450,000 | 1085 | 1036 | 0.633524591  |                                                        |
| 14 | 81,375,000 | 81,525,000 | 1086 | 1408 | 0.178017631  |                                                        |
| 14 | 81,450,000 | 81,600,000 | 1087 | 1330 | 0.004650496  |                                                        |
| 14 | 81,525,000 | 81,675,000 | 1088 | 1416 | 0.528278742  |                                                        |

|    |            |            |      |      |              |                                                          |
|----|------------|------------|------|------|--------------|----------------------------------------------------------|
| 14 | 81,600,000 | 81,750,000 | 1089 | 1390 | 0.443147908  |                                                          |
| 14 | 81,675,000 | 81,825,000 | 1090 | 1113 | -0.159199244 |                                                          |
| 14 | 81,750,000 | 81,900,000 | 1091 | 1001 | -0.764635054 |                                                          |
| 14 | 81,825,000 | 81,975,000 | 1092 | 1158 | -0.720284263 |                                                          |
| 14 | 81,900,000 | 82,050,000 | 1093 | 1386 | -2.645696001 |                                                          |
| 14 | 81,975,000 | 82,125,000 | 1094 | 1134 | -2.83334615  |                                                          |
| 14 | 82,050,000 | 82,200,000 | 1095 | 1059 | -1.610467774 |                                                          |
| 14 | 82,125,000 | 82,275,000 | 1096 | 1238 | -0.729837199 |                                                          |
| 14 | 82,200,000 | 82,350,000 | 1097 | 1315 | -0.436167294 |                                                          |
| 14 | 82,275,000 | 82,425,000 | 1098 | 1500 | -0.606733961 |                                                          |
| 14 | 82,350,000 | 82,500,000 | 1099 | 1744 | 0.597865449  |                                                          |
| 14 | 82,425,000 | 82,575,000 | 1100 | 1686 | 0.416943723  |                                                          |
| 14 | 82,500,000 | 82,650,000 | 1101 | 1275 | -1.137197044 |                                                          |
| 14 | 82,575,000 | 82,725,000 | 1102 | 955  | -0.946693262 |                                                          |
| 14 | 82,650,000 | 82,800,000 | 1103 | 648  | 0.674476181  |                                                          |
| 14 | 82,725,000 | 82,875,000 | 1104 | 948  | 0.025151686  |                                                          |
| 14 | 82,800,000 | 82,950,000 | 1105 | 1055 | -1.07258266  |                                                          |
| 14 | 82,875,000 | 83,025,000 | 1106 | 508  | -1.886658818 |                                                          |
| 14 | 82,950,000 | 83,100,000 | 1107 | 630  | 0.553210967  |                                                          |
| 14 | 83,025,000 | 83,175,000 | 1108 | 893  | 0.46573277   | SNX16                                                    |
| 14 | 83,100,000 | 83,250,000 | 1109 | 890  | 0.104203054  | CHMP4C,SNX16,ZFAND1                                      |
| 14 | 83,175,000 | 83,325,000 | 1110 | 718  | -0.247652772 | CHMP4C,IMPA1,SLC10A5,SNX16,ZFAND1                        |
| 14 | 83,250,000 | 83,400,000 | 1111 | 423  | -1.095111604 | ENPP2,IMPA1,SLC10A5,ZFAND1                               |
| 14 | 83,325,000 | 83,475,000 | 1112 | 335  | -0.502862668 | ENPP2                                                    |
| 14 | 83,400,000 | 83,550,000 | 1113 | 305  | -0.580245826 | ENPP2                                                    |
| 14 | 83,475,000 | 83,625,000 | 1114 | 425  | -2.549989678 | TAF2                                                     |
| 14 | 83,550,000 | 83,700,000 | 1115 | 723  | -1.883796773 | DEPTOR,DSCC1,TAF2                                        |
| 14 | 83,625,000 | 83,775,000 | 1116 | 1093 | -0.484904244 | DEPTOR,DSCC1,TAF2                                        |
| 14 | 83,700,000 | 83,850,000 | 1117 | 1526 | -1.036553952 | DEPTOR                                                   |
| 14 | 83,775,000 | 83,925,000 | 1118 | 1279 | -1.339154346 | COL14A1,DEPTOR                                           |
| 14 | 83,850,000 | 84,000,000 | 1119 | 1074 | 0.509674602  | COL14A1                                                  |
| 14 | 83,925,000 | 84,075,000 | 1120 | 1214 | 0.487060682  | COL14A1                                                  |
| 14 | 84,000,000 | 84,150,000 | 1121 | 1179 | -1.041237829 | COL14A1,MRPL13                                           |
| 14 | 84,075,000 | 84,225,000 | 1122 | 1042 | -1.275698227 | COL14A1,MRPL13,MTBP                                      |
| 14 | 84,150,000 | 84,300,000 | 1123 | 982  | 0.788213012  | MRPL13,MTBP,SNTB1                                        |
| 14 | 84,225,000 | 84,375,000 | 1124 | 1456 | 0.613466476  | MTBP,SNTB1                                               |
| 14 | 84,300,000 | 84,450,000 | 1125 | 1453 | -0.22749786  | SNTB1                                                    |
| 14 | 84,375,000 | 84,525,000 | 1126 | 1040 | -0.654691525 | SNTB1                                                    |
| 14 | 84,450,000 | 84,600,000 | 1127 | 830  | -1.037306978 | SNTB1                                                    |
| 14 | 84,525,000 | 84,648,390 | 1128 | 652  | -1.438257893 |                                                          |
| 15 | 0          | 150,000    | 1    | 492  | -1.492111612 |                                                          |
| 15 | 75,000     | 225,000    | 2    | 699  | -0.750160895 | ENSBTAG00000038319,ENSBTAG00000046228                    |
| 15 | 150,000    | 300,000    | 3    | 647  | -0.664846067 | ENSBTAG00000038319,ENSBTAG00000045558,ENSBTAG00000046228 |
| 15 | 225,000    | 375,000    | 4    | 370  | -0.960691805 | ENSBTAG00000040008,ENSBTAG00000045558                    |
| 15 | 300,000    | 450,000    | 5    | 390  | -1.034632591 | ENSBTAG00000040008,ENSBTAG00000048221                    |
| 15 | 375,000    | 525,000    | 6    | 380  | -1.106923858 | ENSBTAG00000048221                                       |
| 15 | 450,000    | 600,000    | 7    | 475  | -0.380680257 | OR9G1                                                    |
| 15 | 525,000    | 675,000    | 8    | 829  | 0.389703551  | OR9G1                                                    |
| 15 | 600,000    | 750,000    | 9    | 791  | 0.406790845  |                                                          |
| 15 | 675,000    | 825,000    | 10   | 451  | 0.14473296   | ENSBTAG00000045790,ENSBTAG00000046028                    |
| 15 | 750,000    | 900,000    | 11   | 380  | -0.34765423  | ENSBTAG00000045790,ENSBTAG00000046028                    |
| 15 | 825,000    | 975,000    | 12   | 582  | -1.257073194 | ENSBTAG00000003930,ENSBTAG00000016807                    |

|    |           |           |    |      |              |                                                          |
|----|-----------|-----------|----|------|--------------|----------------------------------------------------------|
| 15 | 900,000   | 1,050,000 | 13 | 605  | -1.180726986 | ENSBTAG00000003930,ENSBTAG00000016807                    |
| 15 | 975,000   | 1,125,000 | 14 | 690  | 0.137308191  | ENSBTAG00000013156                                       |
| 15 | 1,050,000 | 1,200,000 | 15 | 1071 | 0.392972132  | ENSBTAG00000003023,ENSBTAG00000013156,ENSBTAG00000047007 |
| 15 | 1,125,000 | 1,275,000 | 16 | 1403 | 0.212711228  | ENSBTAG00000003023,ENSBTAG00000036025,ENSBTAG00000047007 |
| 15 | 1,200,000 | 1,350,000 | 17 | 1551 | -1.164543505 | ENSBTAG00000036025,ENSBTAG00000046387                    |
| 15 | 1,275,000 | 1,425,000 | 18 | 1170 | -1.533607453 | ENSBTAG00000046387                                       |
| 15 | 1,350,000 | 1,500,000 | 19 | 1032 | 0.2847012    |                                                          |
| 15 | 1,425,000 | 1,575,000 | 20 | 772  | 0.343884069  |                                                          |
| 15 | 1,500,000 | 1,650,000 | 21 | 480  | -0.578876747 | GPR83,MRE11A                                             |
| 15 | 1,575,000 | 1,725,000 | 22 | 508  | -1.160037219 | GPR83,MRE11A                                             |
| 15 | 1,650,000 | 1,800,000 | 23 | 458  | -0.59647608  | AASDHPPT,ANKRD49,MRE11A                                  |
| 15 | 1,725,000 | 1,875,000 | 24 | 536  | -0.100009142 | AASDHPPT,ANKRD49,KBTBD3                                  |
| 15 | 1,800,000 | 1,950,000 | 25 | 534  | -0.455271772 | AASDHPPT,KBTBD3                                          |
| 15 | 1,875,000 | 2,025,000 | 26 | 463  | -0.236304814 | KBTBD3,MSANTD4                                           |
| 15 | 1,950,000 | 2,100,000 | 27 | 433  | -0.050653597 | GRIA4,MSANTD4                                            |
| 15 | 2,025,000 | 2,175,000 | 28 | 514  | -0.046977261 | GRIA4                                                    |
| 15 | 2,100,000 | 2,250,000 | 29 | 587  | 0.428239589  | GRIA4                                                    |
| 15 | 2,175,000 | 2,325,000 | 30 | 628  | 0.831607472  |                                                          |
| 15 | 2,250,000 | 2,400,000 | 31 | 892  | 0.854004577  |                                                          |
| 15 | 2,325,000 | 2,475,000 | 32 | 1189 | 1.016622882  | ENSBTAG00000024639                                       |
| 15 | 2,400,000 | 2,550,000 | 33 | 1394 | 0.994786772  | ENSBTAG00000024639                                       |
| 15 | 2,475,000 | 2,625,000 | 34 | 1677 | 0.081736111  |                                                          |
| 15 | 2,550,000 | 2,700,000 | 35 | 1756 | -0.297865366 |                                                          |
| 15 | 2,625,000 | 2,775,000 | 36 | 1554 | 0.780844508  |                                                          |
| 15 | 2,700,000 | 2,850,000 | 37 | 1499 | 1.164234166  |                                                          |
| 15 | 2,775,000 | 2,925,000 | 38 | 1127 | 0.768831971  |                                                          |
| 15 | 2,850,000 | 3,000,000 | 39 | 1107 | -1.102042941 |                                                          |
| 15 | 2,925,000 | 3,075,000 | 40 | 1507 | -0.498443908 |                                                          |
| 15 | 3,000,000 | 3,150,000 | 41 | 1046 | 0.525365387  |                                                          |
| 15 | 3,075,000 | 3,225,000 | 42 | 619  | 0.192206291  |                                                          |
| 15 | 3,150,000 | 3,300,000 | 43 | 1316 | -2.405451552 |                                                          |
| 15 | 3,225,000 | 3,375,000 | 44 | 1448 | -2.517193818 |                                                          |
| 15 | 3,300,000 | 3,450,000 | 45 | 820  | -1.101091728 |                                                          |
| 15 | 3,375,000 | 3,525,000 | 46 | 622  | -1.169565236 | CASP13                                                   |
| 15 | 3,450,000 | 3,600,000 | 47 | 869  | -0.636205146 | CASP13                                                   |
| 15 | 3,525,000 | 3,675,000 | 48 | 1541 | -0.863856357 |                                                          |
| 15 | 3,600,000 | 3,750,000 | 49 | 1450 | -0.404781337 | ENSBTAG00000006093                                       |
| 15 | 3,675,000 | 3,825,000 | 50 | 1334 | 0.154994516  | ENSBTAG00000006093                                       |
| 15 | 3,750,000 | 3,900,000 | 51 | 1615 | 0.458477744  |                                                          |
| 15 | 3,825,000 | 3,975,000 | 52 | 1629 | 0.892533532  |                                                          |
| 15 | 3,900,000 | 4,050,000 | 53 | 1671 | 0.892487276  |                                                          |
| 15 | 3,975,000 | 4,125,000 | 54 | 1582 | 0.91604219   |                                                          |
| 15 | 4,050,000 | 4,200,000 | 55 | 1442 | 0.73896402   |                                                          |
| 15 | 4,125,000 | 4,275,000 | 56 | 1495 | 0.16781936   |                                                          |
| 15 | 4,200,000 | 4,350,000 | 57 | 1115 | -0.18624543  |                                                          |
| 15 | 4,275,000 | 4,425,000 | 58 | 898  | 0.465893413  |                                                          |
| 15 | 4,350,000 | 4,500,000 | 59 | 1069 | 1.017185795  |                                                          |
| 15 | 4,425,000 | 4,575,000 | 60 | 935  | 0.623553943  | PDGFD                                                    |
| 15 | 4,500,000 | 4,650,000 | 61 | 924  | -0.49680747  | DDI1,PDGFD                                               |
| 15 | 4,575,000 | 4,725,000 | 62 | 1142 | 0.475489166  | DDI1,PDGFD                                               |
| 15 | 4,650,000 | 4,800,000 | 63 | 962  | 0.931063422  | PDGFD                                                    |

|    |           |           |     |      |              |                                            |
|----|-----------|-----------|-----|------|--------------|--------------------------------------------|
| 15 | 4,725,000 | 4,875,000 | 64  | 738  | 0.50587795   | PDGFD                                      |
| 15 | 4,800,000 | 4,950,000 | 65  | 968  | -0.72590274  |                                            |
| 15 | 4,875,000 | 5,025,000 | 66  | 1260 | -1.728981848 |                                            |
| 15 | 4,950,000 | 5,100,000 | 67  | 1232 | -1.555062727 |                                            |
| 15 | 5,025,000 | 5,175,000 | 68  | 1135 | 0.148448019  |                                            |
| 15 | 5,100,000 | 5,250,000 | 69  | 1131 | -0.024384995 |                                            |
| 15 | 5,175,000 | 5,325,000 | 70  | 1409 | 0.07340782   | ENSBTAG00000047461                         |
| 15 | 5,250,000 | 5,400,000 | 71  | 1886 | 0.807446954  | ENSBTAG00000047461                         |
| 15 | 5,325,000 | 5,475,000 | 72  | 1535 | 0.640009133  | ENSBTAG00000047461                         |
| 15 | 5,400,000 | 5,550,000 | 73  | 1030 | 0.002140158  | ENSBTAG00000047461                         |
| 15 | 5,475,000 | 5,625,000 | 74  | 1344 | 0.115391778  |                                            |
| 15 | 5,550,000 | 5,700,000 | 75  | 1331 | 0.519582271  | ENSBTAG00000019309                         |
| 15 | 5,625,000 | 5,775,000 | 76  | 858  | 1.020080352  | DCUN1D5,ENSBTAG00000019309                 |
| 15 | 5,700,000 | 5,850,000 | 77  | 739  | 1.025616205  | DCUN1D5                                    |
| 15 | 5,775,000 | 5,925,000 | 78  | 798  | 0.266047095  | MMP13                                      |
| 15 | 5,850,000 | 6,000,000 | 79  | 1193 | 0.469210856  | MMP13                                      |
| 15 | 5,925,000 | 6,075,000 | 80  | 1700 | 1.024106894  | ENSBTAG00000037768                         |
| 15 | 6,000,000 | 6,150,000 | 81  | 1668 | 0.971119435  | MMP1,ENSBTAG00000020007,ENSBTAG00000037768 |
| 15 | 6,075,000 | 6,225,000 | 82  | 1643 | 0.836120522  | MMP1,MMP27,MMP8,ENSBTAG00000020007         |
| 15 | 6,150,000 | 6,300,000 | 83  | 1305 | 0.91930112   | MMP20,MMP27,MMP8,ENSBTAG00000020007        |
| 15 | 6,225,000 | 6,375,000 | 84  | 1133 | 0.839483159  | MMP20                                      |
| 15 | 6,300,000 | 6,450,000 | 85  | 1402 | 0.892699327  | MMP20,MMP7                                 |
| 15 | 6,375,000 | 6,525,000 | 86  | 1096 | 0.699968144  | MMP7                                       |
| 15 | 6,450,000 | 6,600,000 | 87  | 807  | 0.047162557  | BIRC2                                      |
| 15 | 6,525,000 | 6,675,000 | 88  | 829  | -0.202659337 | BIRC2,BIRC3                                |
| 15 | 6,600,000 | 6,750,000 | 89  | 993  | -0.044331233 | BIRC2,BIRC3,ENSBTAG00000047406             |
| 15 | 6,675,000 | 6,825,000 | 90  | 1024 | -1.268449069 | ENSBTAG00000039307,ENSBTAG00000047406      |
| 15 | 6,750,000 | 6,900,000 | 91  | 828  | -2.58398594  | ENSBTAG00000039307,ENSBTAG00000047406      |
| 15 | 6,825,000 | 6,975,000 | 92  | 565  | -1.444730012 | ENSBTAG00000015309,ENSBTAG00000047406      |
| 15 | 6,900,000 | 7,050,000 | 93  | 415  | 0.842908208  | KIAA1377,ENSBTAG00000015309                |
| 15 | 6,975,000 | 7,125,000 | 94  | 354  | -0.24544487  | KIAA1377                                   |
| 15 | 7,050,000 | 7,200,000 | 95  | 596  | -0.467287191 | ANGPTL5,KIAA1377                           |
| 15 | 7,125,000 | 7,275,000 | 96  | 992  | -0.924830487 | ANGPTL5                                    |
| 15 | 7,200,000 | 7,350,000 | 97  | 1115 | -0.517695523 |                                            |
| 15 | 7,275,000 | 7,425,000 | 98  | 929  | 0.241791154  |                                            |
| 15 | 7,350,000 | 7,500,000 | 99  | 990  | 0.769010816  |                                            |
| 15 | 7,425,000 | 7,575,000 | 100 | 1135 | 0.403746034  |                                            |
| 15 | 7,500,000 | 7,650,000 | 101 | 876  | -0.332739211 |                                            |
| 15 | 7,575,000 | 7,725,000 | 102 | 754  | -1.137856711 | TRPC6                                      |
| 15 | 7,650,000 | 7,800,000 | 103 | 981  | -0.970870127 | TRPC6                                      |
| 15 | 7,725,000 | 7,875,000 | 104 | 1142 | -0.163722315 |                                            |
| 15 | 7,800,000 | 7,950,000 | 105 | 1175 | -0.07630874  |                                            |
| 15 | 7,875,000 | 8,025,000 | 106 | 1016 | 0.818560658  |                                            |
| 15 | 7,950,000 | 8,100,000 | 107 | 1069 | 0.533204369  |                                            |
| 15 | 8,025,000 | 8,175,000 | 108 | 1382 | 0.213609458  | PGR                                        |
| 15 | 8,100,000 | 8,250,000 | 109 | 1424 | 0.249282716  | PGR                                        |
| 15 | 8,175,000 | 8,325,000 | 110 | 1434 | 0.063124799  | FLJ32810,PGR                               |
| 15 | 8,250,000 | 8,400,000 | 111 | 1553 | -0.325954069 | FLJ32810                                   |
| 15 | 8,325,000 | 8,475,000 | 112 | 1332 | -0.418641357 | FLJ32810                                   |
| 15 | 8,400,000 | 8,550,000 | 113 | 837  | -0.235865457 |                                            |
| 15 | 8,475,000 | 8,625,000 | 114 | 974  | 0.440298102  |                                            |
| 15 | 8,550,000 | 8,700,000 | 115 | 1002 | 0.607679579  |                                            |

|    |            |            |     |      |              |                    |
|----|------------|------------|-----|------|--------------|--------------------|
| 15 | 8,625,000  | 8,775,000  | 116 | 671  | 0.396236642  |                    |
| 15 | 8,700,000  | 8,850,000  | 117 | 832  | -0.337001986 |                    |
| 15 | 8,775,000  | 8,925,000  | 118 | 1147 | 0.218063825  | ENSBTAG00000047425 |
| 15 | 8,850,000  | 9,000,000  | 119 | 1338 | 0.408612718  | ENSBTAG00000047425 |
| 15 | 8,925,000  | 9,075,000  | 120 | 1234 | -1.15966422  |                    |
| 15 | 9,000,000  | 9,150,000  | 121 | 1333 | -1.267083894 |                    |
| 15 | 9,075,000  | 9,225,000  | 122 | 1575 | -0.159909151 |                    |
| 15 | 9,150,000  | 9,300,000  | 123 | 1439 | 0.307525713  |                    |
| 15 | 9,225,000  | 9,375,000  | 124 | 1568 | 0.332990498  |                    |
| 15 | 9,300,000  | 9,450,000  | 125 | 1912 | 0.54079943   |                    |
| 15 | 9,375,000  | 9,525,000  | 126 | 1761 | 0.958143583  |                    |
| 15 | 9,450,000  | 9,600,000  | 127 | 1800 | 0.957532799  |                    |
| 15 | 9,525,000  | 9,675,000  | 128 | 1727 | 0.590261663  | CNTN5              |
| 15 | 9,600,000  | 9,750,000  | 129 | 1104 | 0.416749633  | CNTN5              |
| 15 | 9,675,000  | 9,825,000  | 130 | 938  | -0.272049722 | CNTN5              |
| 15 | 9,750,000  | 9,900,000  | 131 | 1143 | -2.190475062 |                    |
| 15 | 9,825,000  | 9,975,000  | 132 | 1092 | -2.067248682 |                    |
| 15 | 9,900,000  | 10,050,000 | 133 | 1096 | 0.400891703  |                    |
| 15 | 9,975,000  | 10,125,000 | 134 | 1064 | 0.694618415  |                    |
| 15 | 10,050,000 | 10,200,000 | 135 | 1272 | 1.349536098  |                    |
| 15 | 10,125,000 | 10,275,000 | 136 | 1848 | 1.358079867  |                    |
| 15 | 10,200,000 | 10,350,000 | 137 | 1805 | 1.239795061  |                    |
| 15 | 10,275,000 | 10,425,000 | 138 | 1587 | 1.22057671   |                    |
| 15 | 10,350,000 | 10,500,000 | 139 | 1143 | 1.193149894  |                    |
| 15 | 10,425,000 | 10,575,000 | 140 | 796  | 0.589708243  |                    |
| 15 | 10,500,000 | 10,650,000 | 141 | 834  | 0.701136816  |                    |
| 15 | 10,575,000 | 10,725,000 | 142 | 763  | 0.951315199  |                    |
| 15 | 10,650,000 | 10,800,000 | 143 | 633  | 0.363412569  |                    |
| 15 | 10,725,000 | 10,875,000 | 144 | 509  | -0.421255457 |                    |
| 15 | 10,800,000 | 10,950,000 | 145 | 589  | -0.152175947 |                    |
| 15 | 10,875,000 | 11,025,000 | 146 | 695  | -0.061157674 |                    |
| 15 | 10,950,000 | 11,100,000 | 147 | 814  | -0.465379714 |                    |
| 15 | 11,025,000 | 11,175,000 | 148 | 1204 | -1.524382162 |                    |
| 15 | 11,100,000 | 11,250,000 | 149 | 1195 | -1.248682103 |                    |
| 15 | 11,175,000 | 11,325,000 | 150 | 907  | 0.178860352  |                    |
| 15 | 11,250,000 | 11,400,000 | 151 | 658  | 0.829658489  |                    |
| 15 | 11,325,000 | 11,475,000 | 152 | 710  | 1.110644715  |                    |
| 15 | 11,400,000 | 11,550,000 | 153 | 1556 | 0.942383936  |                    |
| 15 | 11,475,000 | 11,625,000 | 154 | 1819 | 0.421153591  |                    |
| 15 | 11,550,000 | 11,700,000 | 155 | 1339 | 0.332123304  |                    |
| 15 | 11,625,000 | 11,775,000 | 156 | 917  | 0.757931913  |                    |
| 15 | 11,700,000 | 11,850,000 | 157 | 656  | 0.625757459  |                    |
| 15 | 11,775,000 | 11,925,000 | 158 | 713  | 0.937354344  |                    |
| 15 | 11,850,000 | 12,000,000 | 159 | 752  | 1.053561872  |                    |
| 15 | 11,925,000 | 12,075,000 | 160 | 890  | -5.063960095 |                    |
| 15 | 12,000,000 | 12,150,000 | 161 | 1391 | -6.352483271 |                    |
| 15 | 12,075,000 | 12,225,000 | 162 | 1197 | -5.199894309 |                    |
| 15 | 12,150,000 | 12,300,000 | 163 | 557  | -2.179406217 |                    |
| 15 | 12,225,000 | 12,375,000 | 164 | 448  | -1.321947076 |                    |
| 15 | 12,300,000 | 12,450,000 | 165 | 460  | -2.478389709 |                    |
| 15 | 12,375,000 | 12,525,000 | 166 | 581  | -1.875357654 |                    |
| 15 | 12,450,000 | 12,600,000 | 167 | 1042 | -1.687397886 |                    |
| 15 | 12,525,000 | 12,675,000 | 168 | 1028 | -0.664895346 |                    |

|    |            |            |     |      |              |                                 |
|----|------------|------------|-----|------|--------------|---------------------------------|
| 15 | 12,600,000 | 12,750,000 | 169 | 681  | -0.517490577 |                                 |
| 15 | 12,675,000 | 12,825,000 | 170 | 1046 | -0.732012966 |                                 |
| 15 | 12,750,000 | 12,900,000 | 171 | 1085 | -0.172121972 |                                 |
| 15 | 12,825,000 | 12,975,000 | 172 | 749  | 0.606929984  |                                 |
| 15 | 12,900,000 | 13,050,000 | 173 | 801  | 0.600577688  |                                 |
| 15 | 12,975,000 | 13,125,000 | 174 | 788  | -0.22527986  |                                 |
| 15 | 13,050,000 | 13,200,000 | 175 | 625  | -0.314395441 |                                 |
| 15 | 13,125,000 | 13,275,000 | 176 | 749  | 0.285628823  |                                 |
| 15 | 13,200,000 | 13,350,000 | 177 | 1084 | 0.503058214  |                                 |
| 15 | 13,275,000 | 13,425,000 | 178 | 1272 | -1.855870281 |                                 |
| 15 | 13,350,000 | 13,500,000 | 179 | 1379 | -2.330076078 |                                 |
| 15 | 13,425,000 | 13,575,000 | 180 | 1726 | 0.389945667  |                                 |
| 15 | 13,500,000 | 13,650,000 | 181 | 2053 | 0.361717306  | ENSBTAG00000034724              |
| 15 | 13,575,000 | 13,725,000 | 182 | 1721 | -0.062344858 | ENSBTAG00000034724              |
| 15 | 13,650,000 | 13,800,000 | 183 | 1653 | 0.280500587  |                                 |
| 15 | 13,725,000 | 13,875,000 | 184 | 1360 | 0.201351987  |                                 |
| 15 | 13,800,000 | 13,950,000 | 185 | 1155 | 0.403646311  |                                 |
| 15 | 13,875,000 | 14,025,000 | 186 | 1683 | 0.9520774    |                                 |
| 15 | 13,950,000 | 14,100,000 | 187 | 1493 | 0.04693956   |                                 |
| 15 | 14,025,000 | 14,175,000 | 188 | 1047 | -1.034506309 | CCDC82,JRKL                     |
| 15 | 14,100,000 | 14,250,000 | 189 | 904  | -0.359622228 | CCDC82,JRKL                     |
| 15 | 14,175,000 | 14,325,000 | 190 | 746  | -0.886858423 |                                 |
| 15 | 14,250,000 | 14,400,000 | 191 | 701  | -0.666098253 |                                 |
| 15 | 14,325,000 | 14,475,000 | 192 | 999  | 0.203964846  | MAML2                           |
| 15 | 14,400,000 | 14,550,000 | 193 | 1394 | 0.01394683   | MAML2                           |
| 15 | 14,475,000 | 14,625,000 | 194 | 1418 | 0.181571788  | MAML2                           |
| 15 | 14,550,000 | 14,700,000 | 195 | 1372 | 1.070291271  | MAML2,MTMR2                     |
| 15 | 14,625,000 | 14,775,000 | 196 | 1508 | 0.337869409  | CEP57,FAM76B,MTMR2              |
| 15 | 14,700,000 | 14,850,000 | 197 | 1477 | 0.193126139  | CEP57,FAM76B,MTMR2              |
| 15 | 14,775,000 | 14,925,000 | 198 | 1210 | 0.669254262  | FAM76B                          |
| 15 | 14,850,000 | 15,000,000 | 199 | 1034 | 0.372134837  |                                 |
| 15 | 14,925,000 | 15,075,000 | 200 | 1049 | 0.259318885  |                                 |
| 15 | 15,000,000 | 15,150,000 | 201 | 1062 | -0.76884366  |                                 |
| 15 | 15,075,000 | 15,225,000 | 202 | 989  | -2.657174082 |                                 |
| 15 | 15,150,000 | 15,300,000 | 203 | 822  | -3.208679924 |                                 |
| 15 | 15,225,000 | 15,375,000 | 204 | 766  | -1.737341932 |                                 |
| 15 | 15,300,000 | 15,450,000 | 205 | 651  | -0.442899588 |                                 |
| 15 | 15,375,000 | 15,525,000 | 206 | 390  | 0.71939615   | SESN3                           |
| 15 | 15,450,000 | 15,600,000 | 207 | 851  | 1.132005217  | ENDOD1,SESN3                    |
| 15 | 15,525,000 | 15,675,000 | 208 | 1409 | 1.094476737  | ENDOD1,ENSBTAG00000001704       |
| 15 | 15,600,000 | 15,750,000 | 209 | 1019 | 0.784141563  | CWC15,ENDOD1,ENSBTAG00000001704 |
| 15 | 15,675,000 | 15,825,000 | 210 | 796  | 0.294307528  | AMOTL1,CWC15,ENSBTAG00000001704 |
| 15 | 15,750,000 | 15,900,000 | 211 | 674  | 0.265325097  | AMOTL1                          |
| 15 | 15,825,000 | 15,975,000 | 212 | 695  | 0.250955731  | AMOTL1                          |
| 15 | 15,900,000 | 16,050,000 | 213 | 986  | 0.341547556  |                                 |
| 15 | 15,975,000 | 16,125,000 | 214 | 1181 | 0.883884796  | PIWIL4                          |
| 15 | 16,050,000 | 16,200,000 | 215 | 1807 | 0.708085369  | PIWIL4                          |
| 15 | 16,125,000 | 16,275,000 | 216 | 1855 | 0.572908374  | FUT4,MGC137061,PIWIL4           |
| 15 | 16,200,000 | 16,350,000 | 217 | 1657 | -0.376633673 | CWF19L2,FUT4,MGC137061          |
| 15 | 16,275,000 | 16,425,000 | 218 | 1746 | -1.110558793 | CWF19L2,MGC137061               |
| 15 | 16,350,000 | 16,500,000 | 219 | 1663 | -1.036905455 | CWF19L2                         |
| 15 | 16,425,000 | 16,575,000 | 220 | 1479 | -0.642748555 | CWF19L2                         |
| 15 | 16,500,000 | 16,650,000 | 221 | 1058 | -0.327788566 | GUCY1A2                         |



|    |            |            |     |      |              |                                |
|----|------------|------------|-----|------|--------------|--------------------------------|
| 15 | 16,575,000 | 16,725,000 | 222 | 1189 | 0.006722148  | GUCY1A2                        |
| 15 | 16,650,000 | 16,800,000 | 223 | 1052 | 0.423354378  | GUCY1A2                        |
| 15 | 16,725,000 | 16,875,000 | 224 | 594  | 0.928604038  | GUCY1A2                        |
| 15 | 16,800,000 | 16,950,000 | 225 | 1408 | 1.15472017   | GUCY1A2                        |
| 15 | 16,875,000 | 17,025,000 | 226 | 1750 | 1.112794969  | GUCY1A2                        |
| 15 | 16,950,000 | 17,100,000 | 227 | 846  | 0.91782236   | GUCY1A2                        |
| 15 | 17,025,000 | 17,175,000 | 228 | 423  | 0.492089771  | GUCY1A2                        |
| 15 | 17,100,000 | 17,250,000 | 229 | 444  | 0.451815041  | ALKBH8,GUCY1A2                 |
| 15 | 17,175,000 | 17,325,000 | 230 | 430  | -0.236226564 | ALKBH8                         |
| 15 | 17,250,000 | 17,400,000 | 231 | 371  | 0.02457918   | ALKBH8,ELMOD1                  |
| 15 | 17,325,000 | 17,475,000 | 232 | 597  | 0.954423972  | ELMOD1                         |
| 15 | 17,400,000 | 17,550,000 | 233 | 1449 | 0.42099569   | ELMOD1                         |
| 15 | 17,475,000 | 17,625,000 | 234 | 1501 | -0.075235668 |                                |
| 15 | 17,550,000 | 17,700,000 | 235 | 1037 | -0.902967376 | ENSBTAG00000003661             |
| 15 | 17,625,000 | 17,775,000 | 236 | 1169 | -0.415443687 | RAB39,ENSBTAG00000003661       |
| 15 | 17,700,000 | 17,850,000 | 237 | 1081 | 0.17815789   | RAB39                          |
| 15 | 17,775,000 | 17,925,000 | 238 | 722  | 0.006667747  | CUL5,RAB39                     |
| 15 | 17,850,000 | 18,000,000 | 239 | 482  | 0.511868154  | ACAT1,CUL5                     |
| 15 | 17,925,000 | 18,075,000 | 240 | 531  | 0.034904559  | ACAT1,CUL5,NPAT                |
| 15 | 18,000,000 | 18,150,000 | 241 | 694  | 0.17284904   | ACAT1,ATM,NPAT                 |
| 15 | 18,075,000 | 18,225,000 | 242 | 947  | 0.217947943  | ATM,NPAT                       |
| 15 | 18,150,000 | 18,300,000 | 243 | 1169 | 0.008288751  | ATM                            |
| 15 | 18,225,000 | 18,375,000 | 244 | 1431 | 0.800424069  | ATM                            |
| 15 | 18,300,000 | 18,450,000 | 245 | 1515 | 1.004792827  | KDELC2                         |
| 15 | 18,375,000 | 18,525,000 | 246 | 1155 | 0.687755957  | EXPH5,KDELC2                   |
| 15 | 18,450,000 | 18,600,000 | 247 | 813  | 0.090745002  | EXPH5,KDELC2                   |
| 15 | 18,525,000 | 18,675,000 | 248 | 1100 | -1.292220234 | DDX10                          |
| 15 | 18,600,000 | 18,750,000 | 249 | 1197 | -1.069578008 | DDX10                          |
| 15 | 18,675,000 | 18,825,000 | 250 | 1371 | 0.904977903  | DDX10                          |
| 15 | 18,750,000 | 18,900,000 | 251 | 1573 | 1.002547888  | DDX10                          |
| 15 | 18,825,000 | 18,975,000 | 252 | 1351 | 0.680941928  | DDX10                          |
| 15 | 18,900,000 | 19,050,000 | 253 | 1644 | 0.838299878  | DDX10                          |
| 15 | 18,975,000 | 19,125,000 | 254 | 1638 | 0.534895536  |                                |
| 15 | 19,050,000 | 19,200,000 | 255 | 1275 | -0.016454786 |                                |
| 15 | 19,125,000 | 19,275,000 | 256 | 1343 | -1.706507736 |                                |
| 15 | 19,200,000 | 19,350,000 | 257 | 1797 | -0.725571613 |                                |
| 15 | 19,275,000 | 19,425,000 | 258 | 1463 | -0.129749388 |                                |
| 15 | 19,350,000 | 19,500,000 | 259 | 775  | -0.860314249 |                                |
| 15 | 19,425,000 | 19,575,000 | 260 | 861  | -0.639723427 |                                |
| 15 | 19,500,000 | 19,650,000 | 261 | 911  | -0.643305782 | C11orf87                       |
| 15 | 19,575,000 | 19,725,000 | 262 | 1204 | 0.606167759  | C11orf87                       |
| 15 | 19,650,000 | 19,800,000 | 263 | 1358 | 0.992024864  |                                |
| 15 | 19,725,000 | 19,875,000 | 264 | 1196 | 0.996713663  |                                |
| 15 | 19,800,000 | 19,950,000 | 265 | 1209 | 0.66675983   |                                |
| 15 | 19,875,000 | 20,025,000 | 266 | 876  | 0.274869686  |                                |
| 15 | 19,950,000 | 20,100,000 | 267 | 885  | 0.204758877  |                                |
| 15 | 20,025,000 | 20,175,000 | 268 | 1150 | 0.511031501  |                                |
| 15 | 20,100,000 | 20,250,000 | 269 | 1181 | 0.776365144  |                                |
| 15 | 20,175,000 | 20,325,000 | 270 | 1026 | 0.269319116  |                                |
| 15 | 20,250,000 | 20,400,000 | 271 | 1280 | 0.303500873  |                                |
| 15 | 20,325,000 | 20,475,000 | 272 | 1236 | 0.529512316  |                                |
| 15 | 20,400,000 | 20,550,000 | 273 | 757  | 0.131171218  | ZC3H12C                        |
| 15 | 20,475,000 | 20,625,000 | 274 | 876  | 0.068146032  | RDX,ZC3H12C,ENSBTAG00000047384 |

|    |            |            |     |      |              |                                                                           |
|----|------------|------------|-----|------|--------------|---------------------------------------------------------------------------|
| 15 | 20,550,000 | 20,700,000 | 275 | 1118 | -0.224903318 | RDX,ENSBTAG00000047384                                                    |
| 15 | 20,625,000 | 20,775,000 | 276 | 1180 | -0.108349288 | FDX1,RDX                                                                  |
| 15 | 20,700,000 | 20,850,000 | 277 | 917  | 0.303538246  | FDX1                                                                      |
| 15 | 20,775,000 | 20,925,000 | 278 | 830  | -0.94880039  | ARHGAP20,FDX1                                                             |
| 15 | 20,850,000 | 21,000,000 | 279 | 636  | -1.581148395 | ARHGAP20                                                                  |
| 15 | 20,925,000 | 21,075,000 | 280 | 676  | 1.040207333  | ARHGAP20                                                                  |
| 15 | 21,000,000 | 21,150,000 | 281 | 988  | 0.844774578  | ARHGAP20                                                                  |
| 15 | 21,075,000 | 21,225,000 | 282 | 1012 | 0.407580862  |                                                                           |
| 15 | 21,150,000 | 21,300,000 | 283 | 1072 | 0.546081888  |                                                                           |
| 15 | 21,225,000 | 21,375,000 | 284 | 964  | 0.786070882  |                                                                           |
| 15 | 21,300,000 | 21,450,000 | 285 | 745  | 0.576403789  |                                                                           |
| 15 | 21,375,000 | 21,525,000 | 286 | 620  | 0.032177006  |                                                                           |
| 15 | 21,450,000 | 21,600,000 | 287 | 742  | -0.877432824 |                                                                           |
| 15 | 21,525,000 | 21,675,000 | 288 | 959  | -1.170426723 |                                                                           |
| 15 | 21,600,000 | 21,750,000 | 289 | 1189 | -1.320082267 |                                                                           |
| 15 | 21,675,000 | 21,825,000 | 290 | 1223 | -0.80496071  |                                                                           |
| 15 | 21,750,000 | 21,900,000 | 291 | 1145 | 0.646087798  | C11orf53                                                                  |
| 15 | 21,825,000 | 21,975,000 | 292 | 1151 | 0.65890256   | C11orf53,POU2AF1                                                          |
| 15 | 21,900,000 | 22,050,000 | 293 | 1119 | 0.679600941  | POU2AF1                                                                   |
| 15 | 21,975,000 | 22,125,000 | 294 | 1358 | 0.038765432  | BTG4,POU2AF1                                                              |
| 15 | 22,050,000 | 22,200,000 | 295 | 1325 | 0.092907688  | BTG4,LAYN,MGC133619                                                       |
| 15 | 22,125,000 | 22,275,000 | 296 | 1194 | 0.904962667  | LAYN,MGC133619,SIK2                                                       |
| 15 | 22,200,000 | 22,350,000 | 297 | 1265 | 0.710740417  | SIK2                                                                      |
| 15 | 22,275,000 | 22,425,000 | 298 | 1009 | -0.796190692 | PPP2R1B,SIK2                                                              |
| 15 | 22,350,000 | 22,500,000 | 299 | 1072 | -0.483391595 | ALG9,PPP2R1B,SIK2                                                         |
| 15 | 22,425,000 | 22,575,000 | 300 | 1308 | 0.417320798  | ALG9,CRYAB,FDXACB1,HSPB2,MGC134087,ENSBTAG<br>00000045821                 |
| 15 | 22,500,000 | 22,650,000 | 301 | 1291 | 0.31896566   | ALG9,C11ORF52,CRYAB,DIXDC1,FDXACB1,HSPB2,MG<br>C134087,ENSBTAG00000045821 |
| 15 | 22,575,000 | 22,725,000 | 302 | 1216 | 0.36699305   | C11ORF52,DIXDC1,MGC143285,PIH1D2,SDHD,TIMM8<br>B,ENSBTAG00000010709       |
| 15 | 22,650,000 | 22,800,000 | 303 | 1141 | 0.522838036  | DIXDC1,MGC143285,PIH1D2,SDHD,TIMM8B,ENSBTA<br>G00000010709                |
| 15 | 22,725,000 | 22,875,000 | 304 | 1005 | 0.588070548  | BCO2,IL18,SDHD,TEX12                                                      |
| 15 | 22,800,000 | 22,950,000 | 305 | 866  | -0.65456306  | BCO2,IL18,PTS,TEX12                                                       |
| 15 | 22,875,000 | 23,025,000 | 306 | 1020 | -0.5935897   | BCO2,PLET1,PTS                                                            |
| 15 | 22,950,000 | 23,100,000 | 307 | 1432 | -0.112189665 | PLET1                                                                     |
| 15 | 23,025,000 | 23,175,000 | 308 | 1437 | 0.15881916   |                                                                           |
| 15 | 23,100,000 | 23,250,000 | 309 | 1250 | 0.538143572  |                                                                           |
| 15 | 23,175,000 | 23,325,000 | 310 | 1352 | 0.231141148  |                                                                           |
| 15 | 23,250,000 | 23,400,000 | 311 | 1133 | 0.362780807  |                                                                           |
| 15 | 23,325,000 | 23,475,000 | 312 | 804  | 0.721414045  |                                                                           |
| 15 | 23,400,000 | 23,550,000 | 313 | 943  | 0.533539325  |                                                                           |
| 15 | 23,475,000 | 23,625,000 | 314 | 1068 | 0.707737257  |                                                                           |
| 15 | 23,550,000 | 23,700,000 | 315 | 796  | 0.852578624  |                                                                           |
| 15 | 23,625,000 | 23,775,000 | 316 | 925  | 0.74163695   |                                                                           |
| 15 | 23,700,000 | 23,850,000 | 317 | 967  | 0.718816563  |                                                                           |
| 15 | 23,775,000 | 23,925,000 | 318 | 620  | -0.409473316 |                                                                           |
| 15 | 23,850,000 | 24,000,000 | 319 | 739  | -0.245500219 |                                                                           |
| 15 | 23,925,000 | 24,075,000 | 320 | 1106 | 0.077990116  |                                                                           |
| 15 | 24,000,000 | 24,150,000 | 321 | 986  | -0.362759449 | NCAM1                                                                     |
| 15 | 24,075,000 | 24,225,000 | 322 | 814  | 0.413379644  | NCAM1,TTC12                                                               |
| 15 | 24,150,000 | 24,300,000 | 323 | 680  | 0.663456969  | ANKK1,NCAM1,TTC12                                                         |

|    |            |            |     |      |              |                                                              |
|----|------------|------------|-----|------|--------------|--------------------------------------------------------------|
| 15 | 24,225,000 | 24,375,000 | 324 | 655  | 0.605154776  | ANKK1,DRD2,TTC12                                             |
| 15 | 24,300,000 | 24,450,000 | 325 | 905  | -0.293192261 | DRD2                                                         |
| 15 | 24,375,000 | 24,525,000 | 326 | 962  | -0.454779913 |                                                              |
| 15 | 24,450,000 | 24,600,000 | 327 | 926  | 0.35900523   | TMPRSS5                                                      |
| 15 | 24,525,000 | 24,675,000 | 328 | 805  | 1.01126166   | CLDN25,TMPRSS5,USP28,ZW10                                    |
| 15 | 24,600,000 | 24,750,000 | 329 | 621  | 0.706101287  | CLDN25,USP28,ZW10                                            |
| 15 | 24,675,000 | 24,825,000 | 330 | 707  | -0.248230856 | HTR3B,USP28                                                  |
| 15 | 24,750,000 | 24,900,000 | 331 | 772  | 0.183840903  | HTR3A,HTR3B                                                  |
| 15 | 24,825,000 | 24,975,000 | 332 | 441  | 0.792604848  | HTR3A,ZBTB16,ENSBTAG00000046254                              |
| 15 | 24,900,000 | 25,050,000 | 333 | 484  | 0.825685175  | ZBTB16,ENSBTAG00000046254                                    |
| 15 | 24,975,000 | 25,125,000 | 334 | 691  | 0.630122797  | ZBTB16                                                       |
| 15 | 25,050,000 | 25,200,000 | 335 | 925  | 0.801137204  | ZBTB16,ENSBTAG00000008564                                    |
| 15 | 25,125,000 | 25,275,000 | 336 | 741  | 0.923368778  | C15H11ORF71,RBM7,ENSBTAG00000008564                          |
| 15 | 25,200,000 | 25,350,000 | 337 | 439  | -0.891353523 | C15H11ORF71,RBM7,REXO2                                       |
| 15 | 25,275,000 | 25,425,000 | 338 | 732  | -0.887022248 | NXPE4,REXO2                                                  |
| 15 | 25,350,000 | 25,500,000 | 339 | 769  | 0.373656085  | NXPE4                                                        |
| 15 | 25,425,000 | 25,575,000 | 340 | 613  | -0.720987119 | NXPE2,NXPE4                                                  |
| 15 | 25,500,000 | 25,650,000 | 341 | 923  | -0.995266706 | NXPE2                                                        |
| 15 | 25,575,000 | 25,725,000 | 342 | 1103 | -1.068814666 |                                                              |
| 15 | 25,650,000 | 25,800,000 | 343 | 669  | -1.520053901 |                                                              |
| 15 | 25,725,000 | 25,875,000 | 344 | 726  | -2.318219361 |                                                              |
| 15 | 25,800,000 | 25,950,000 | 345 | 1077 | -0.949939043 |                                                              |
| 15 | 25,875,000 | 26,025,000 | 346 | 909  | 0.025181638  |                                                              |
| 15 | 25,950,000 | 26,100,000 | 347 | 743  | -0.826099181 |                                                              |
| 15 | 26,025,000 | 26,175,000 | 348 | 551  | -1.073928083 | CADM1                                                        |
| 15 | 26,100,000 | 26,250,000 | 349 | 502  | 0.272360864  | CADM1                                                        |
| 15 | 26,175,000 | 26,325,000 | 350 | 642  | -2.282347684 | CADM1                                                        |
| 15 | 26,250,000 | 26,400,000 | 351 | 693  | -2.793366093 | CADM1                                                        |
| 15 | 26,325,000 | 26,475,000 | 352 | 504  | 0.146152358  | CADM1                                                        |
| 15 | 26,400,000 | 26,550,000 | 353 | 425  | 0.444795636  | CADM1                                                        |
| 15 | 26,475,000 | 26,625,000 | 354 | 549  | 1.103593486  |                                                              |
| 15 | 26,550,000 | 26,700,000 | 355 | 599  | 0.468924533  |                                                              |
| 15 | 26,625,000 | 26,775,000 | 356 | 693  | -0.121274853 |                                                              |
| 15 | 26,700,000 | 26,850,000 | 357 | 733  | 0.877722688  |                                                              |
| 15 | 26,775,000 | 26,925,000 | 358 | 654  | 0.838482928  |                                                              |
| 15 | 26,850,000 | 27,000,000 | 359 | 755  | -0.227044191 |                                                              |
| 15 | 26,925,000 | 27,075,000 | 360 | 902  | -0.334002353 |                                                              |
| 15 | 27,000,000 | 27,150,000 | 361 | 754  | -0.342893204 |                                                              |
| 15 | 27,075,000 | 27,225,000 | 362 | 969  | -0.712937805 |                                                              |
| 15 | 27,150,000 | 27,300,000 | 363 | 1387 | -0.262656379 |                                                              |
| 15 | 27,225,000 | 27,375,000 | 364 | 1511 | 0.201979877  |                                                              |
| 15 | 27,300,000 | 27,450,000 | 365 | 1092 | -0.047690726 |                                                              |
| 15 | 27,375,000 | 27,525,000 | 366 | 779  | -0.006075645 |                                                              |
| 15 | 27,450,000 | 27,600,000 | 367 | 1077 | 0.364117238  |                                                              |
| 15 | 27,525,000 | 27,675,000 | 368 | 783  | 0.482530476  |                                                              |
| 15 | 27,600,000 | 27,750,000 | 369 | 335  | 0.414969692  |                                                              |
| 15 | 27,675,000 | 27,825,000 | 370 | 495  | 0.178515064  | ENSBTAG00000037657                                           |
| 15 | 27,750,000 | 27,900,000 | 371 | 665  | 0.403481377  | APOA5,BUD13,ZNF259,ENSBTAG00000037657                        |
| 15 | 27,825,000 | 27,975,000 | 372 | 801  | 0.86302325   | APOA1,APOA4,APOA5,APOC3,BUD13,SIK3,ZNF259,ENSBTAG00000037657 |
| 15 | 27,900,000 | 28,050,000 | 373 | 646  | 1.096807167  | APOA1,APOA4,APOC3,SIK3                                       |
| 15 | 27,975,000 | 28,125,000 | 374 | 373  | 0.78875485   | SIK3                                                         |
| 15 | 28,050,000 | 28,200,000 | 375 | 295  | 0.705345414  | SIK3                                                         |

|    |            |            |     |      |              |                                                                         |
|----|------------|------------|-----|------|--------------|-------------------------------------------------------------------------|
| 15 | 28,125,000 | 28,275,000 | 376 | 268  | 0.276097696  | PAFAH1B2                                                                |
| 15 | 28,200,000 | 28,350,000 | 377 | 372  | 0.250284608  | PAFAH1B2,PCSK7,SIDT2,TAGLN                                              |
| 15 | 28,275,000 | 28,425,000 | 378 | 534  | 0.098127504  | BACE1,PAFAH1B2,PCSK7,RNF214,SIDT2,TAGLN                                 |
| 15 | 28,350,000 | 28,500,000 | 379 | 545  | -0.056441431 | BACE1,CEP164,PCSK7,RNF214                                               |
| 15 | 28,425,000 | 28,575,000 | 380 | 508  | -0.194666679 | CEP164,DSCAML1                                                          |
| 15 | 28,500,000 | 28,650,000 | 381 | 503  | -0.384636494 | CEP164,DSCAML1                                                          |
| 15 | 28,575,000 | 28,725,000 | 382 | 771  | 0.365453479  | DSCAML1                                                                 |
| 15 | 28,650,000 | 28,800,000 | 383 | 828  | 0.781428785  |                                                                         |
| 15 | 28,725,000 | 28,875,000 | 384 | 502  | 0.820106908  |                                                                         |
| 15 | 28,800,000 | 28,950,000 | 385 | 387  | 0.100272409  | FXVD2,FXVD6,ENSBTAG00000047932                                          |
| 15 | 28,875,000 | 29,025,000 | 386 | 687  | 0.489733745  | FXVD2,FXVD6,TMPRSS13,ENSBTAG00000047932                                 |
| 15 | 28,950,000 | 29,100,000 | 387 | 819  | 0.237266294  | FXVD6,IL10RA,TMPRSS13                                                   |
| 15 | 29,025,000 | 29,175,000 | 388 | 659  | -0.321177882 | IL10RA                                                                  |
| 15 | 29,100,000 | 29,250,000 | 389 | 767  | 0.5303496    | IL10RA,TMPRSS4                                                          |
| 15 | 29,175,000 | 29,325,000 | 390 | 693  | 1.100774856  | AMICA1,SCN2B,SCN4B,TMPRSS4                                              |
| 15 | 29,250,000 | 29,400,000 | 391 | 418  | 1.032735224  | AMICA1,MPZL2,MPZL3,SCN2B,SCN4B                                          |
| 15 | 29,325,000 | 29,475,000 | 392 | 331  | 0.126314581  | AMICA1,CD3D,CD3E,CD3G,MPZL2,MPZL3                                       |
| 15 | 29,400,000 | 29,550,000 | 393 | 344  | -0.73367784  | ATP5L,CD3D,CD3E,CD3G,UBE4A                                              |
| 15 | 29,475,000 | 29,625,000 | 394 | 171  | 0.297542217  | ATP5L,UBE4A                                                             |
| 15 | 29,550,000 | 29,700,000 | 395 | 122  | 1.131960944  | KMT2A                                                                   |
| 15 | 29,625,000 | 29,775,000 | 396 | 224  | 0.643657715  | ARCN1,IFT46,KMT2A,TMEM25,TTC36                                          |
| 15 | 29,700,000 | 29,850,000 | 397 | 224  | 0.134581497  | ARCN1,IFT46,KMT2A,PHLDB1,TMEM25,TREH,TTC36                              |
| 15 | 29,775,000 | 29,925,000 | 398 | 262  | -0.508295368 | ARCN1,DDX6,PHLDB1,TREH                                                  |
| 15 | 29,850,000 | 30,000,000 | 399 | 338  | -0.492234634 | DDX6                                                                    |
| 15 | 29,925,000 | 30,075,000 | 400 | 383  | 0.06905948   | BCL9L,BLR1,UPK2                                                         |
| 15 | 30,000,000 | 30,150,000 | 401 | 395  | 0.0625914    | BCL9L,BLR1,CCDC84,FOXR1,RPS25,SLC37A4,TRAPPC4,UPK2                      |
| 15 | 30,075,000 | 30,225,000 | 402 | 351  | 0.13290904   | C2CD2L,CCDC84,DPAGT1,FOXR1,H2AFX,HMBS,HYOU1,RPS25,SLC37A4,TRAPPC4,VPS11 |
| 15 | 30,150,000 | 30,300,000 | 403 | 291  | 0.777458727  | ABCG4,C2CD2L,DPAGT1,H2AFX,HINFP,HMBS,HYOU1,NLRX1,PDZD3,VPS11            |
| 15 | 30,225,000 | 30,375,000 | 404 | 246  | 0.795113171  | ABCG4,CBL,CCDC153,HINFP,NLRX1,PDZD3                                     |
| 15 | 30,300,000 | 30,450,000 | 405 | 249  | -0.138990044 | C1QTNF5,CBL,CCDC153,MCAM,PDZD3,RNF26                                    |
| 15 | 30,375,000 | 30,525,000 | 406 | 312  | -0.390213736 | C1QTNF5,CBL,MCAM,MFRP,RNF26,THY1,USP2                                   |
| 15 | 30,450,000 | 30,600,000 | 407 | 676  | 0.132688282  | C1QTNF5,MFRP,THY1,USP2                                                  |
| 15 | 30,525,000 | 30,675,000 | 408 | 819  | 0.250304556  |                                                                         |
| 15 | 30,600,000 | 30,750,000 | 409 | 684  | 0.572669314  | HVEC,ENSBTAG00000027759                                                 |
| 15 | 30,675,000 | 30,825,000 | 410 | 686  | 0.128995727  | HVEC,ENSBTAG00000027759                                                 |
| 15 | 30,750,000 | 30,900,000 | 411 | 786  | -1.42207144  | HVEC                                                                    |
| 15 | 30,825,000 | 30,975,000 | 412 | 748  | -1.22131784  |                                                                         |
| 15 | 30,900,000 | 31,050,000 | 413 | 562  | 0.334130737  |                                                                         |
| 15 | 30,975,000 | 31,125,000 | 414 | 874  | 0.230430133  |                                                                         |
| 15 | 31,050,000 | 31,200,000 | 415 | 944  | 0.022503969  |                                                                         |
| 15 | 31,125,000 | 31,275,000 | 416 | 938  | 0.051196576  | TRIM29                                                                  |
| 15 | 31,200,000 | 31,350,000 | 417 | 857  | 0.043920169  | OAF,TRIM29                                                              |
| 15 | 31,275,000 | 31,425,000 | 418 | 425  | -0.132660242 | OAF,POU2F3                                                              |
| 15 | 31,350,000 | 31,500,000 | 419 | 323  | -0.04397927  | ARHGEF12,POU2F3,TMEM136                                                 |
| 15 | 31,425,000 | 31,575,000 | 420 | 443  | 0.918729953  | ARHGEF12,POU2F3,TMEM136                                                 |
| 15 | 31,500,000 | 31,650,000 | 421 | 643  | 0.891542607  | ARHGEF12                                                                |
| 15 | 31,575,000 | 31,725,000 | 422 | 673  | 0.441443057  | ARHGEF12                                                                |
| 15 | 31,650,000 | 31,800,000 | 423 | 553  | 0.606262626  |                                                                         |
| 15 | 31,725,000 | 31,875,000 | 424 | 847  | 1.266880387  |                                                                         |
| 15 | 31,800,000 | 31,950,000 | 425 | 1314 | 0.988812354  |                                                                         |

|    |            |            |     |      |              |                                            |
|----|------------|------------|-----|------|--------------|--------------------------------------------|
| 15 | 31,875,000 | 32,025,000 | 426 | 1470 | 0.292181774  |                                            |
| 15 | 31,950,000 | 32,100,000 | 427 | 1430 | 0.400646504  | GRIK4                                      |
| 15 | 32,025,000 | 32,175,000 | 428 | 1125 | 0.571633216  | GRIK4,ENSBTAG00000040051                   |
| 15 | 32,100,000 | 32,250,000 | 429 | 767  | 0.040116264  | GRIK4,LRRC35,ENSBTAG00000040051            |
| 15 | 32,175,000 | 32,325,000 | 430 | 1083 | 0.814349663  | LRRC35,TECTA                               |
| 15 | 32,250,000 | 32,400,000 | 431 | 1309 | 0.877803166  | TECTA                                      |
| 15 | 32,325,000 | 32,475,000 | 432 | 1113 | 0.898280137  | SC5DL,TECTA                                |
| 15 | 32,400,000 | 32,550,000 | 433 | 1344 | 1.0944452    | SC5DL                                      |
| 15 | 32,475,000 | 32,625,000 | 434 | 1255 | 0.790711649  | SORL1                                      |
| 15 | 32,550,000 | 32,700,000 | 435 | 1142 | -0.224438912 | SORL1                                      |
| 15 | 32,625,000 | 32,775,000 | 436 | 1139 | -0.316074556 | SORL1                                      |
| 15 | 32,700,000 | 32,850,000 | 437 | 842  | 0.520430032  | SORL1                                      |
| 15 | 32,775,000 | 32,925,000 | 438 | 697  | 0.828029497  |                                            |
| 15 | 32,850,000 | 33,000,000 | 439 | 674  | 0.90869716   |                                            |
| 15 | 32,925,000 | 33,075,000 | 440 | 751  | 0.974627085  |                                            |
| 15 | 33,000,000 | 33,150,000 | 441 | 710  | 0.367327817  |                                            |
| 15 | 33,075,000 | 33,225,000 | 442 | 662  | 0.44799017   |                                            |
| 15 | 33,150,000 | 33,300,000 | 443 | 664  | 1.110922622  |                                            |
| 15 | 33,225,000 | 33,375,000 | 444 | 536  | 0.83031399   |                                            |
| 15 | 33,300,000 | 33,450,000 | 445 | 449  | 0.366250323  |                                            |
| 15 | 33,375,000 | 33,525,000 | 446 | 322  | -0.512888345 |                                            |
| 15 | 33,450,000 | 33,600,000 | 447 | 334  | -1.346422642 |                                            |
| 15 | 33,525,000 | 33,675,000 | 448 | 532  | 0.14625887   |                                            |
| 15 | 33,600,000 | 33,750,000 | 449 | 672  | 0.575883855  |                                            |
| 15 | 33,675,000 | 33,825,000 | 450 | 758  | -0.542512455 |                                            |
| 15 | 33,750,000 | 33,900,000 | 451 | 533  | -2.300784398 |                                            |
| 15 | 33,825,000 | 33,975,000 | 452 | 331  | -0.212152184 | UBASH3B                                    |
| 15 | 33,900,000 | 34,050,000 | 453 | 715  | 0.864267168  | C11orf63,CRTAM,UBASH3B                     |
| 15 | 33,975,000 | 34,125,000 | 454 | 681  | 1.038515304  | C11orf63,CRTAM,UBASH3B                     |
| 15 | 34,050,000 | 34,200,000 | 455 | 542  | 0.093081106  | BSX,C11orf63                               |
| 15 | 34,125,000 | 34,275,000 | 456 | 629  | -0.069791508 | ASAM,BSX,HSPA8                             |
| 15 | 34,200,000 | 34,350,000 | 457 | 852  | 0.550755122  | ASAM,HSPA8                                 |
| 15 | 34,275,000 | 34,425,000 | 458 | 1087 | -0.247161169 | ASAM                                       |
| 15 | 34,350,000 | 34,500,000 | 459 | 1093 | -2.077314623 |                                            |
| 15 | 34,425,000 | 34,575,000 | 460 | 1141 | -1.247659266 |                                            |
| 15 | 34,500,000 | 34,650,000 | 461 | 1056 | -0.08069901  | GRAMD1B                                    |
| 15 | 34,575,000 | 34,725,000 | 462 | 878  | 0.261398602  | GRAMD1B                                    |
| 15 | 34,650,000 | 34,800,000 | 463 | 880  | 0.733883441  | GRAMD1B,SCN3B                              |
| 15 | 34,725,000 | 34,875,000 | 464 | 1148 | 0.703871812  | GRAMD1B,SCN3B,ZNF202                       |
| 15 | 34,800,000 | 34,950,000 | 465 | 969  | 0.652656336  | SAAL1,ZNF202                               |
| 15 | 34,875,000 | 35,025,000 | 466 | 564  | -0.345315778 | SAAL1,SERGEF,TPH1                          |
| 15 | 34,950,000 | 35,100,000 | 467 | 515  | -1.617653679 | SAAL1,SERGEF,TPH1                          |
| 15 | 35,025,000 | 35,175,000 | 468 | 692  | 0.111375322  | SERGEF                                     |
| 15 | 35,100,000 | 35,250,000 | 469 | 895  | 0.61635253   | SERGEF                                     |
| 15 | 35,175,000 | 35,325,000 | 470 | 952  | -0.316135814 | KCNC1,SERGEF                               |
| 15 | 35,250,000 | 35,400,000 | 471 | 792  | -0.309601776 | KCNC1,MYOD1,SERGEF                         |
| 15 | 35,325,000 | 35,475,000 | 472 | 624  | 0.504646971  | MYOD1,OTOG                                 |
| 15 | 35,400,000 | 35,550,000 | 473 | 878  | 0.481457399  | OTOG,USH1C                                 |
| 15 | 35,475,000 | 35,625,000 | 474 | 1146 | 0.320721496  | ABCC8,OTOG,USH1C                           |
| 15 | 35,550,000 | 35,700,000 | 475 | 916  | -0.290805549 | ABCC8,KCNJ11,NUCB2                         |
| 15 | 35,625,000 | 35,775,000 | 476 | 727  | -0.010941149 | ABCC8,KCNJ11,NUCB2                         |
| 15 | 35,700,000 | 35,850,000 | 477 | 538  | 0.929786294  | NUCB2,ENSBTAG00000015244,ENSBTAG0000003285 |

|    |            |            |     |      |              |                                                   |
|----|------------|------------|-----|------|--------------|---------------------------------------------------|
| 15 | 35,775,000 | 35,925,000 | 478 | 364  | 0.409858503  | PIK3C2A,ENSBTAG00000015244,ENSBTAG000000328<br>59 |
| 15 | 35,850,000 | 36,000,000 | 479 | 387  | 0.387221451  | PIK3C2A,RPS13                                     |
| 15 | 35,925,000 | 36,075,000 | 480 | 467  | 0.35372513   | RPS13                                             |
| 15 | 36,000,000 | 36,150,000 | 481 | 605  | -0.208222997 | PLEKHA7                                           |
| 15 | 36,075,000 | 36,225,000 | 482 | 698  | -0.891877613 | PLEKHA7,SMAP                                      |
| 15 | 36,150,000 | 36,300,000 | 483 | 663  | -0.178326402 | PLEKHA7,SMAP                                      |
| 15 | 36,225,000 | 36,375,000 | 484 | 449  | 0.469547105  | SMAP                                              |
| 15 | 36,300,000 | 36,450,000 | 485 | 373  | 0.07034141   |                                                   |
| 15 | 36,375,000 | 36,525,000 | 486 | 400  | -0.214393301 |                                                   |
| 15 | 36,450,000 | 36,600,000 | 487 | 288  | -0.245330225 |                                                   |
| 15 | 36,525,000 | 36,675,000 | 488 | 264  | -0.003416058 | SOX6                                              |
| 15 | 36,600,000 | 36,750,000 | 489 | 376  | -0.056803458 | SOX6                                              |
| 15 | 36,675,000 | 36,825,000 | 490 | 562  | 0.266678297  | SOX6                                              |
| 15 | 36,750,000 | 36,900,000 | 491 | 629  | -0.376434469 | SOX6                                              |
| 15 | 36,825,000 | 36,975,000 | 492 | 594  | -1.04104708  | SOX6                                              |
| 15 | 36,900,000 | 37,050,000 | 493 | 584  | 0.232665965  | SOX6                                              |
| 15 | 36,975,000 | 37,125,000 | 494 | 703  | -0.707738583 | SOX6                                              |
| 15 | 37,050,000 | 37,200,000 | 495 | 749  | -1.044360159 | SOX6                                              |
| 15 | 37,125,000 | 37,275,000 | 496 | 511  | -0.516692385 |                                                   |
| 15 | 37,200,000 | 37,350,000 | 497 | 635  | 0.040762584  |                                                   |
| 15 | 37,275,000 | 37,425,000 | 498 | 876  | 0.443876653  |                                                   |
| 15 | 37,350,000 | 37,500,000 | 499 | 982  | 0.737448257  |                                                   |
| 15 | 37,425,000 | 37,575,000 | 500 | 1068 | -0.137604915 |                                                   |
| 15 | 37,500,000 | 37,650,000 | 501 | 753  | -0.999736066 |                                                   |
| 15 | 37,575,000 | 37,725,000 | 502 | 649  | 0.596444684  |                                                   |
| 15 | 37,650,000 | 37,800,000 | 503 | 861  | 0.753672481  |                                                   |
| 15 | 37,725,000 | 37,875,000 | 504 | 687  | 0.526842237  | INSC                                              |
| 15 | 37,800,000 | 37,950,000 | 505 | 590  | -4.174528903 | INSC                                              |
| 15 | 37,875,000 | 38,025,000 | 506 | 597  | -4.354507165 | INSC                                              |
| 15 | 37,950,000 | 38,100,000 | 507 | 455  | -2.108774619 | CT,INSC                                           |
| 15 | 38,025,000 | 38,175,000 | 508 | 377  | -2.376899848 | CALC3,CT                                          |
| 15 | 38,100,000 | 38,250,000 | 509 | 378  | -0.563975962 | CALC3                                             |
| 15 | 38,175,000 | 38,325,000 | 510 | 536  | 0.181717952  |                                                   |
| 15 | 38,250,000 | 38,400,000 | 511 | 383  | -0.067899662 | CRSP1                                             |
| 15 | 38,325,000 | 38,475,000 | 512 | 197  | 1.177659831  | CRSP1,CYP2R1,PDE3B                                |
| 15 | 38,400,000 | 38,550,000 | 513 | 320  | -1.600761363 | CYP2R1,PDE3B                                      |
| 15 | 38,475,000 | 38,625,000 | 514 | 355  | -2.609776039 | PDE3B                                             |
| 15 | 38,550,000 | 38,700,000 | 515 | 450  | -0.409182405 | PDE3B                                             |
| 15 | 38,625,000 | 38,775,000 | 516 | 683  | 0.133935419  | COPB1,PDE3B,PSMA1                                 |
| 15 | 38,700,000 | 38,850,000 | 517 | 800  | -0.161434722 | COPB1,PSMA1                                       |
| 15 | 38,775,000 | 38,925,000 | 518 | 568  | -0.67283593  | COPB1,RRAS2                                       |
| 15 | 38,850,000 | 39,000,000 | 519 | 346  | -0.914379033 | RRAS2,SPON1                                       |
| 15 | 38,925,000 | 39,075,000 | 520 | 748  | 0.3887996    | RRAS2,SPON1                                       |
| 15 | 39,000,000 | 39,150,000 | 521 | 964  | 0.534647573  | SPON1                                             |
| 15 | 39,075,000 | 39,225,000 | 522 | 787  | 0.316945679  | SPON1                                             |
| 15 | 39,150,000 | 39,300,000 | 523 | 791  | -0.677418814 | SPON1                                             |
| 15 | 39,225,000 | 39,375,000 | 524 | 965  | -0.199818419 | SPON1                                             |
| 15 | 39,300,000 | 39,450,000 | 525 | 1053 | 0.054672178  | SPON1                                             |
| 15 | 39,375,000 | 39,525,000 | 526 | 727  | -0.768661486 |                                                   |
| 15 | 39,450,000 | 39,600,000 | 527 | 403  | -0.326652655 | FAR1                                              |
| 15 | 39,525,000 | 39,675,000 | 528 | 398  | -0.413128352 | FAR1                                              |
| 15 | 39,600,000 | 39,750,000 | 529 | 700  | 0.184835055  | FAR1,PTH                                          |

|    |            |            |     |      |              |                                             |
|----|------------|------------|-----|------|--------------|---------------------------------------------|
| 15 | 39,675,000 | 39,825,000 | 530 | 572  | 0.680049889  | BTBD10,PTH                                  |
| 15 | 39,750,000 | 39,900,000 | 531 | 367  | 0.888691351  | ARNTL,BTBD10                                |
| 15 | 39,825,000 | 39,975,000 | 532 | 483  | 0.830163056  | ARNTL,BTBD10                                |
| 15 | 39,900,000 | 40,050,000 | 533 | 354  | 0.946085678  | ARNTL                                       |
| 15 | 39,975,000 | 40,125,000 | 534 | 516  | 1.231034791  |                                             |
| 15 | 40,050,000 | 40,200,000 | 535 | 886  | 1.21657919   |                                             |
| 15 | 40,125,000 | 40,275,000 | 536 | 837  | 0.998328264  | RASSF10                                     |
| 15 | 40,200,000 | 40,350,000 | 537 | 790  | 0.047308084  | RASSF10,TEAD1                               |
| 15 | 40,275,000 | 40,425,000 | 538 | 779  | -0.598921405 | TEAD1                                       |
| 15 | 40,350,000 | 40,500,000 | 539 | 646  | -1.112800433 | TEAD1                                       |
| 15 | 40,425,000 | 40,575,000 | 540 | 704  | -0.249089733 | TEAD1                                       |
| 15 | 40,500,000 | 40,650,000 | 541 | 934  | 0.620161514  |                                             |
| 15 | 40,575,000 | 40,725,000 | 542 | 724  | 0.777809415  |                                             |
| 15 | 40,650,000 | 40,800,000 | 543 | 500  | 0.109860294  | PARVA                                       |
| 15 | 40,725,000 | 40,875,000 | 544 | 557  | 0.129134683  | PARVA,ENSBTAG00000047961                    |
| 15 | 40,800,000 | 40,950,000 | 545 | 526  | 0.526544967  | PARVA,ENSBTAG00000008193,ENSBTAG00000047961 |
| 15 | 40,875,000 | 41,025,000 | 546 | 570  | 0.697994475  | MICAL2,PARVA,ENSBTAG00000008193             |
| 15 | 40,950,000 | 41,100,000 | 547 | 584  | 1.039064082  | MICAL2,ENSBTAG00000008193                   |
| 15 | 41,025,000 | 41,175,000 | 548 | 608  | 0.667309035  | MICAL2                                      |
| 15 | 41,100,000 | 41,250,000 | 549 | 649  | 0.50304874   | DKK3,MICAL2                                 |
| 15 | 41,175,000 | 41,325,000 | 550 | 790  | 0.87006336   | DKK3,USP47                                  |
| 15 | 41,250,000 | 41,400,000 | 551 | 981  | 0.501640229  | DKK3,USP47                                  |
| 15 | 41,325,000 | 41,475,000 | 552 | 865  | 0.611108182  | USP47                                       |
| 15 | 41,400,000 | 41,550,000 | 553 | 845  | 0.519517238  |                                             |
| 15 | 41,475,000 | 41,625,000 | 554 | 1048 | -0.004185382 | GALNTL4                                     |
| 15 | 41,550,000 | 41,700,000 | 555 | 1114 | -0.004230396 | GALNTL4                                     |
| 15 | 41,625,000 | 41,775,000 | 556 | 1253 | -0.951902017 | GALNTL4                                     |
| 15 | 41,700,000 | 41,850,000 | 557 | 1446 | -0.453057124 | GALNTL4                                     |
| 15 | 41,775,000 | 41,925,000 | 558 | 1247 | -1.30176155  | GALNTL4                                     |
| 15 | 41,850,000 | 42,000,000 | 559 | 1207 | -2.901605294 | GALNTL4                                     |
| 15 | 41,925,000 | 42,075,000 | 560 | 1125 | -1.498412884 | GALNTL4                                     |
| 15 | 42,000,000 | 42,150,000 | 561 | 869  | -0.851481278 |                                             |
| 15 | 42,075,000 | 42,225,000 | 562 | 1039 | -2.496022853 |                                             |
| 15 | 42,150,000 | 42,300,000 | 563 | 1082 | -2.91529481  |                                             |
| 15 | 42,225,000 | 42,375,000 | 564 | 883  | -1.101338392 | C7H19orf53,ENSBTAG00000046636               |
| 15 | 42,300,000 | 42,450,000 | 565 | 631  | 0.248285158  | C7H19orf53,EIF4G2,ZBED5,ENSBTAG00000046636  |
| 15 | 42,375,000 | 42,525,000 | 566 | 542  | 0.394336187  | CTR9,EIF4G2,ZBED5                           |
| 15 | 42,450,000 | 42,600,000 | 567 | 701  | 0.293538662  | CTR9,MRVI1                                  |
| 15 | 42,525,000 | 42,675,000 | 568 | 719  | -0.111093247 | MRVI1                                       |
| 15 | 42,600,000 | 42,750,000 | 569 | 710  | -0.792093523 | LYVE1,MRVI1,RNF141                          |
| 15 | 42,675,000 | 42,825,000 | 570 | 821  | -2.588226073 | AMPD3,LYVE1,RNF141                          |
| 15 | 42,750,000 | 42,900,000 | 571 | 771  | -3.493537951 | AMPD3,RNF141                                |
| 15 | 42,825,000 | 42,975,000 | 572 | 611  | -1.495942719 | ADM,SBF2                                    |
| 15 | 42,900,000 | 43,050,000 | 573 | 614  | 1.237135765  | ADM,SBF2                                    |
| 15 | 42,975,000 | 43,125,000 | 574 | 664  | 1.33857908   | SBF2                                        |
| 15 | 43,050,000 | 43,200,000 | 575 | 564  | 0.594123654  | SBF2                                        |
| 15 | 43,125,000 | 43,275,000 | 576 | 545  | 0.344618243  | SBF2                                        |
| 15 | 43,200,000 | 43,350,000 | 577 | 493  | 0.113247395  | SBF2                                        |
| 15 | 43,275,000 | 43,425,000 | 578 | 435  | 0.068564454  | SBF2                                        |
| 15 | 43,350,000 | 43,500,000 | 579 | 552  | 0.070862997  | SBF2                                        |
| 15 | 43,425,000 | 43,575,000 | 580 | 761  | -0.445780531 | HSPC321,SBF2                                |
| 15 | 43,500,000 | 43,650,000 | 581 | 736  | 0.2537004    | HSPC321                                     |

|    |            |            |     |      |              |                                                                                                                           |
|----|------------|------------|-----|------|--------------|---------------------------------------------------------------------------------------------------------------------------|
| 15 | 43,575,000 | 43,725,000 | 582 | 539  | 0.959554723  | FAM92A1,HSPC321,WEE1,ENSBTAG00000016074                                                                                   |
| 15 | 43,650,000 | 43,800,000 | 583 | 351  | 0.889941188  | FAM92A1,IPO7,WEE1,ZNF143,ENSBTAG00000016074                                                                               |
| 15 | 43,725,000 | 43,875,000 | 584 | 521  | -0.073488828 | IPO7,ZNF143,ENSBTAG00000016074                                                                                            |
| 15 | 43,800,000 | 43,950,000 | 585 | 926  | -0.308993135 | IPO7,TMEM41B,ENSBTAG00000027723                                                                                           |
| 15 | 43,875,000 | 44,025,000 | 586 | 846  | -1.685648135 | DENND5A,TMEM41B,ENSBTAG00000027723                                                                                        |
| 15 | 43,950,000 | 44,100,000 | 587 | 697  | -2.241422406 | DENND5A,SCUBE2                                                                                                            |
| 15 | 44,025,000 | 44,175,000 | 588 | 639  | -0.892279158 | DENND5A,SCUBE2                                                                                                            |
| 15 | 44,100,000 | 44,250,000 | 589 | 388  | -0.212583678 | ASCL3,NRIP3,SCUBE2,TMEM9B                                                                                                 |
| 15 | 44,175,000 | 44,325,000 | 590 | 387  | -0.814112969 | AKIP1,ASCL3,C11ORF16,NRIP3,TMEM9B                                                                                         |
| 15 | 44,250,000 | 44,400,000 | 591 | 549  | -0.57250726  | AKIP1,C11ORF16,ST5                                                                                                        |
| 15 | 44,325,000 | 44,475,000 | 592 | 672  | 0.248246846  | RPL27A,ST5                                                                                                                |
| 15 | 44,400,000 | 44,550,000 | 593 | 834  | -0.203515513 | RPL27A,ST5,TRIM66                                                                                                         |
| 15 | 44,475,000 | 44,625,000 | 594 | 625  | -0.521569638 | STK33,TRIM66                                                                                                              |
| 15 | 44,550,000 | 44,700,000 | 595 | 444  | 0.075220794  | STK33                                                                                                                     |
| 15 | 44,625,000 | 44,775,000 | 596 | 724  | 0.63329343   | STK33                                                                                                                     |
| 15 | 44,700,000 | 44,850,000 | 597 | 701  | 0.818336492  | STK33                                                                                                                     |
| 15 | 44,775,000 | 44,925,000 | 598 | 733  | -0.543079515 | LMO1                                                                                                                      |
| 15 | 44,850,000 | 45,000,000 | 599 | 979  | -0.123736665 | LMO1,RIC3                                                                                                                 |
| 15 | 44,925,000 | 45,075,000 | 600 | 853  | -0.272031047 | RIC3,TUB                                                                                                                  |
| 15 | 45,000,000 | 45,150,000 | 601 | 927  | -1.513299168 | EIF3F,RIC3,TUB                                                                                                            |
| 15 | 45,075,000 | 45,225,000 | 602 | 1101 | -0.937264713 | EIF3F,ENSBTAG00000038641,ENSBTAG00000039405,<br>ENSBTAG00000040252                                                        |
| 15 | 45,150,000 | 45,300,000 | 603 | 1248 | 0.416065311  | ENSBTAG00000038641,ENSBTAG00000039405,ENSBT<br>AG00000040252,ENSBTAG00000046894                                           |
| 15 | 45,225,000 | 45,375,000 | 604 | 1221 | 0.710486909  | OR5P3,ENSBTAG00000021150,ENSBTAG0000004028<br>5,ENSBTAG00000046894                                                        |
| 15 | 45,300,000 | 45,450,000 | 605 | 1139 | 0.158472397  | OR5P3,ENSBTAG00000021150,ENSBTAG0000004028<br>5,ENSBTAG00000045639,ENSBTAG00000048176                                     |
| 15 | 45,375,000 | 45,525,000 | 606 | 1449 | -1.863085761 | ENSBTAG00000026826,ENSBTAG00000037384,ENSBT<br>AG00000045639,ENSBTAG00000048176                                           |
| 15 | 45,450,000 | 45,600,000 | 607 | 1643 | -2.318345561 | ENSBTAG00000026826,ENSBTAG00000037384,ENSBT<br>AG00000038245,ENSBTAG00000038317,ENSBTAG000<br>00038598,ENSBTAG00000047850 |
| 15 | 45,525,000 | 45,675,000 | 608 | 1443 | -0.400652282 | CYB5R2,OVCH2,PPFIBP2,ENSBTAG00000038245,ENSB<br>TAG00000038317,ENSBTAG00000038598,ENSBTAG00<br>000047850                  |
| 15 | 45,600,000 | 45,750,000 | 609 | 1136 | -0.115484544 | CYB5R2,OVCH2,PPFIBP2                                                                                                      |
| 15 | 45,675,000 | 45,825,000 | 610 | 826  | -0.689599881 | PPFIBP2                                                                                                                   |
| 15 | 45,750,000 | 45,900,000 | 611 | 868  | 0.543688163  | OLFML1,PPFIBP2                                                                                                            |
| 15 | 45,825,000 | 45,975,000 | 612 | 1106 | 0.323257622  | OLFML1,SYT9                                                                                                               |
| 15 | 45,900,000 | 46,050,000 | 613 | 1265 | -0.524210324 | SYT9                                                                                                                      |
| 15 | 45,975,000 | 46,125,000 | 614 | 1373 | -0.83296285  | SYT9                                                                                                                      |
| 15 | 46,050,000 | 46,200,000 | 615 | 1133 | 0.148113047  |                                                                                                                           |
| 15 | 46,125,000 | 46,275,000 | 616 | 1014 | 1.304993382  |                                                                                                                           |
| 15 | 46,200,000 | 46,350,000 | 617 | 1266 | 0.917485139  | NLRP14,RBMX                                                                                                               |
| 15 | 46,275,000 | 46,425,000 | 618 | 1598 | 0.637599748  | NLRP14,OR2D3,RBMX,ZNF214,ZNF215                                                                                           |
| 15 | 46,350,000 | 46,500,000 | 619 | 1792 | 0.306592271  | OR10A4,OR2D2,OR2D3,ZNF214,ZNF215,ENSBTAG000<br>00026441,ENSBTAG00000045599,ENSBTAG00000047<br>104                         |
| 15 | 46,425,000 | 46,575,000 | 620 | 2273 | 0.480070578  | OR10A4,OR2D2,OR6A2,ENSBTAG00000026441,ENSB<br>TAG00000032050,ENSBTAG00000032052,ENSBTAG00<br>000045599,ENSBTAG00000047104 |



|    |            |            |     |      |              |                                                                                                                                             |
|----|------------|------------|-----|------|--------------|---------------------------------------------------------------------------------------------------------------------------------------------|
| 15 | 46,500,000 | 46,650,000 | 621 | 2815 | 0.252962023  | OR6A2,ENSBTAG00000032050,ENSBTAG00000032052,ENSBTAG00000036031,ENSBTAG00000037603,ENSBTAG00000038031                                        |
| 15 | 46,575,000 | 46,725,000 | 622 | 3076 | 0.209608776  | ENSBTAG00000015791,ENSBTAG00000021147,ENSBTAG00000035675,ENSBTAG00000036031,ENSBTAG00000037603,ENSBTAG00000038031,ENSBTAG00000047025        |
| 15 | 46,650,000 | 46,800,000 | 623 | 3027 | 0.530265612  | ENSBTAG00000015791,ENSBTAG00000021147,ENSBTAG00000035675,ENSBTAG00000046196,ENSBTAG00000047025                                              |
| 15 | 46,725,000 | 46,875,000 | 624 | 2752 | 0.465679552  | ENSBTAG00000004443,ENSBTAG00000037937,ENSBTAG00000046196                                                                                    |
| 15 | 46,800,000 | 46,950,000 | 625 | 2127 | 0.035384029  | ENSBTAG00000004443,ENSBTAG00000037937,ENSBTAG00000037991                                                                                    |
| 15 | 46,875,000 | 47,025,000 | 626 | 1992 | -0.037965493 | MRPL17,ENSBTAG00000037991                                                                                                                   |
| 15 | 46,950,000 | 47,100,000 | 627 | 1835 | 0.130604157  | DCHS1,ILK,MRPL17,RRP8,TAF10,TPP1                                                                                                            |
| 15 | 47,025,000 | 47,175,000 | 628 | 1386 | 0.556981674  | APBB1,DCHS1,DNHD1,ILK,RRP8,TAF10,TPP1                                                                                                       |
| 15 | 47,100,000 | 47,250,000 | 629 | 1231 | 0.381736833  | APBB1,ARFIP2,DNHD1,FXC1,HPX,TRIM3                                                                                                           |
| 15 | 47,175,000 | 47,325,000 | 630 | 1296 | -1.068553265 | APBB1,ARFIP2,FXC1,HPX,SMPD1,TRIM3,ENSBTAG000009440                                                                                          |
| 15 | 47,250,000 | 47,400,000 | 631 | 1507 | -1.957722998 | APBB1,CCKBR,PRKCDBP,SMPD1,ENSBTAG00000009440                                                                                                |
| 15 | 47,325,000 | 47,475,000 | 632 | 1293 | -0.591772011 | C11orf42,CCKBR,CNGA4,FAM160A2,OR52W1,OR56B4,PRKCDBP                                                                                         |
| 15 | 47,400,000 | 47,550,000 | 633 | 1131 | 0.360135332  | C11orf42,CNGA4,FAM160A2,OR52B2,OR52W1,OR56B4                                                                                                |
| 15 | 47,475,000 | 47,625,000 | 634 | 1062 | 0.468559921  | OR52B2,OR56A1,ENSBTAG00000027443,ENSBTAG0000038977                                                                                          |
| 15 | 47,550,000 | 47,700,000 | 635 | 1300 | 1.154651836  | OR56A1,ENSBTAG00000027443,ENSBTAG00000032276,ENSBTAG00000038977,ENSBTAG00000047246,ENSBTAG00000048223                                       |
| 15 | 47,625,000 | 47,775,000 | 636 | 1738 | 1.25448663   | OR52E4,OR52E5,OR56A3,ENSBTAG00000023125,ENSBTAG00000032276,ENSBTAG00000047246,ENSBTAG00000048223                                            |
| 15 | 47,700,000 | 47,850,000 | 637 | 1782 | 0.961752531  | OR52E4,OR52E5,OR56A3,ENSBTAG0000000118,ENSBTAG00000020952,ENSBTAG00000023125,ENSBTAG00000027949,ENSBTAG00000037505,ENSBTAG00000038452       |
| 15 | 47,775,000 | 47,925,000 | 638 | 1618 | 0.484870528  | ENSBTAG0000000118,ENSBTAG00000020952,ENSBTAG00000027949,ENSBTAG00000036326,ENSBTAG00000037505,ENSBTAG00000038452,ENSBTAG00000040480         |
| 15 | 47,850,000 | 48,000,000 | 639 | 1708 | 0.508677363  | OR52N1,ENSBTAG00000027430,ENSBTAG00000036326,ENSBTAG00000036328,ENSBTAG00000040480                                                          |
| 15 | 47,925,000 | 48,075,000 | 640 | 1933 | 0.682052487  | OR52N1,ENSBTAG00000023912,ENSBTAG00000027430,ENSBTAG00000032255,ENSBTAG00000032256,ENSBTAG00000032259,ENSBTAG00000032262,ENSBTAG00000036328 |
| 15 | 48,000,000 | 48,150,000 | 641 | 1942 | 0.405815617  | ENSBTAG00000023912,ENSBTAG00000026929,ENSBTAG00000027889,ENSBTAG00000032255,ENSBTAG00000032256,ENSBTAG00000032259,ENSBTAG00000032262        |

|    |            |            |     |      |              |                                                                                                                                                                                        |
|----|------------|------------|-----|------|--------------|----------------------------------------------------------------------------------------------------------------------------------------------------------------------------------------|
| 15 | 48,075,000 | 48,225,000 | 642 | 1640 | -0.181923085 | ENSBTAG00000026924,ENSBTAG00000026929,ENSBTAG00000027889,ENSBTAG00000046618                                                                                                            |
| 15 | 48,150,000 | 48,300,000 | 643 | 1328 | -0.667122883 | ENSBTAG00000016119,ENSBTAG00000026922,ENSBTAG00000026924,ENSBTAG00000046618,ENSBTAG00000047088                                                                                         |
| 15 | 48,225,000 | 48,375,000 | 644 | 1277 | 0.134161728  | ENSBTAG00000005609,ENSBTAG00000016119,ENSBTAG00000026922,ENSBTAG00000047088                                                                                                            |
| 15 | 48,300,000 | 48,450,000 | 645 | 1662 | 0.896520203  | ENSBTAG00000002043,ENSBTAG00000005609,ENSBTAG00000038536                                                                                                                               |
| 15 | 48,375,000 | 48,525,000 | 646 | 1917 | 0.567874135  | ENSBTAG00000002043,ENSBTAG00000005251,ENSBTAG00000038536                                                                                                                               |
| 15 | 48,450,000 | 48,600,000 | 647 | 1671 | 0.072523141  | OR52B6,ENSBTAG00000005251,ENSBTAG00000037465                                                                                                                                           |
| 15 | 48,525,000 | 48,675,000 | 648 | 1535 | 0.20055976   | OR52B6,ENSBTAG00000037465,ENSBTAG00000046489,ENSBTAG00000046741,ENSBTAG00000048166,ENSBTAG00000048214                                                                                  |
| 15 | 48,600,000 | 48,750,000 | 649 | 1743 | 0.28484193   | MGC137098,UBQLN3,UBQLNL,ENSBTAG00000017647,ENSBTAG00000032224,ENSBTAG00000046441,ENSBTAG00000046489,ENSBTAG00000046741,ENSBTAG00000048166,ENSBTAG00000048214                           |
| 15 | 48,675,000 | 48,825,000 | 650 | 1987 | 0.334417136  | MGC137098,OR51I2,UBQLN3,UBQLNL,ENSBTAG00000017647,ENSBTAG00000018182,ENSBTAG00000032224,ENSBTAG00000038637,ENSBTAG00000039214,ENSBTAG00000046441,ENSBTAG00000046825,ENSBTAG00000047232 |
| 15 | 48,750,000 | 48,900,000 | 651 | 1859 | 0.29726823   | OR51I1,OR51I2,OR51Q1,ENSBTAG00000018182,ENSBTAG00000019544,ENSBTAG00000038637,ENSBTAG00000039088,ENSBTAG00000039214,ENSBTAG00000046825,ENSBTAG00000047232                              |
| 15 | 48,825,000 | 48,975,000 | 652 | 1963 | -0.002222264 | OR51I1,OR51M1,OR51Q1,ENSBTAG00000019544,ENSBTAG00000039088                                                                                                                             |
| 15 | 48,900,000 | 49,050,000 | 653 | 2189 | 0.564275682  | HBB,HBE2,HBE4,OR51M1,ENSBTAG00000037815,ENSBTAG00000039056                                                                                                                             |
| 15 | 48,975,000 | 49,125,000 | 654 | 1899 | 1.137584123  | HBB,HBE2,HBE4,OR51V1,ENSBTAG00000020673,ENSBTAG00000037644,ENSBTAG00000037815,ENSBTAG00000039056,ENSBTAG00000047477                                                                    |
| 15 | 49,050,000 | 49,200,000 | 655 | 1642 | 1.046707868  | HBE2,OR51V1,ENSBTAG00000020673,ENSBTAG00000037644,ENSBTAG00000046378,ENSBTAG00000047477,ENSBTAG00000048301                                                                             |
| 15 | 49,125,000 | 49,275,000 | 656 | 1720 | 1.011390879  | ENSBTAG00000038679,ENSBTAG00000046378,ENSBTAG00000046983,ENSBTAG00000048003,ENSBTAG00000048300,ENSBTAG00000048301                                                                      |
| 15 | 49,200,000 | 49,350,000 | 657 | 1705 | 0.843987669  | ENSBTAG00000038679,ENSBTAG00000039773,ENSBTAG00000046983,ENSBTAG00000047356,ENSBTAG00000047847,ENSBTAG00000048003,ENSBTAG00000048300                                                   |
| 15 | 49,275,000 | 49,425,000 | 658 | 1358 | 0.687250304  | ENSBTAG00000039773,ENSBTAG00000040017,ENSBTAG00000045959,ENSBTAG00000046829,ENSBTAG00000046921,ENSBTAG00000047356,ENSBTAG00000047847                                                   |
| 15 | 49,350,000 | 49,500,000 | 659 | 1246 | 0.77218393   | ENSBTAG00000039054,ENSBTAG00000040017,ENSBTAG00000045959,ENSBTAG00000046829,ENSBTAG00000046921                                                                                         |

|    |            |            |     |      |              |                                                                                                                                                         |
|----|------------|------------|-----|------|--------------|---------------------------------------------------------------------------------------------------------------------------------------------------------|
| 15 | 49,425,000 | 49,575,000 | 660 | 1388 | 0.692150809  | ENSBTAG00000038899,ENSBTAG00000039054,ENSBTAG00000040236,ENSBTAG00000047178,ENSBTAG00000047662                                                          |
| 15 | 49,500,000 | 49,650,000 | 661 | 1236 | 0.175811956  | OR51F2,OR51T1,ENSBTAG00000038899,ENSBTAG000039651,ENSBTAG00000040236,ENSBTAG00000047178,ENSBTAG00000047662                                              |
| 15 | 49,575,000 | 49,725,000 | 662 | 983  | -0.567931231 | OR51F2,OR51T1,ENSBTAG00000014853,ENSBTAG000038727,ENSBTAG00000039651                                                                                    |
| 15 | 49,650,000 | 49,800,000 | 663 | 1143 | 0.244970664  | ENSBTAG00000000763,ENSBTAG00000014853,ENSBTAG00000038161,ENSBTAG00000038727,ENSBTAG000045612                                                            |
| 15 | 49,725,000 | 49,875,000 | 664 | 1124 | 0.60824364   | OR52E2,ENSBTAG00000000763,ENSBTAG00000038161,ENSBTAG00000040408,ENSBTAG00000045612,ENSBTAG00000046913                                                   |
| 15 | 49,800,000 | 49,950,000 | 665 | 1229 | -0.738518477 | OR52E2,ENSBTAG00000035006,ENSBTAG00000035008,ENSBTAG00000040408,ENSBTAG00000046913                                                                      |
| 15 | 49,875,000 | 50,025,000 | 666 | 1570 | -0.530371287 | ENSBTAG00000008312,ENSBTAG00000035006,ENSBTAG00000035008,ENSBTAG00000045488                                                                             |
| 15 | 49,950,000 | 50,100,000 | 667 | 1342 | -0.985673855 | ENSBTAG00000008312,ENSBTAG00000035027,ENSBTAG00000045488,ENSBTAG00000046624,ENSBTAG00000047960                                                          |
| 15 | 50,025,000 | 50,175,000 | 668 | 1321 | -1.450667284 | ENSBTAG00000035027,ENSBTAG00000039298,ENSBTAG00000046624,ENSBTAG00000047960                                                                             |
| 15 | 50,100,000 | 50,250,000 | 669 | 1559 | -1.769895464 | ENSBTAG00000037875,ENSBTAG00000039298,ENSBTAG00000039735,ENSBTAG00000047945                                                                             |
| 15 | 50,175,000 | 50,325,000 | 670 | 1577 | -1.322289042 | ENSBTAG00000004765,ENSBTAG00000037875,ENSBTAG00000039330,ENSBTAG00000039735,ENSBTAG00000040339,ENSBTAG00000047945                                       |
| 15 | 50,250,000 | 50,400,000 | 671 | 1546 | -0.295910178 | ENSBTAG00000004765,ENSBTAG00000037886,ENSBTAG00000038636,ENSBTAG00000039330,ENSBTAG00000040339                                                          |
| 15 | 50,325,000 | 50,475,000 | 672 | 1748 | 0.052628623  | ENSBTAG00000017934,ENSBTAG00000037886,ENSBTAG00000038636,ENSBTAG00000040478,ENSBTAG00000047021                                                          |
| 15 | 50,400,000 | 50,550,000 | 673 | 1680 | 0.377932344  | ENSBTAG00000017934,ENSBTAG00000020033,ENSBTAG00000022368,ENSBTAG00000038075,ENSBTAG00000040478,ENSBTAG00000045850,ENSBTAG00000047021,ENSBTAG00000047489 |
| 15 | 50,475,000 | 50,625,000 | 674 | 1496 | -0.137562188 | ENSBTAG00000020033,ENSBTAG00000022368,ENSBTAG00000038075,ENSBTAG00000038579,ENSBTAG00000038787,ENSBTAG00000040119,ENSBTAG00000045850,ENSBTAG00000047489 |
| 15 | 50,550,000 | 50,700,000 | 675 | 1510 | 0.222641084  | OR51L1,ENSBTAG00000038579,ENSBTAG00000038787,ENSBTAG00000039503,ENSBTAG00000040119                                                                      |
| 15 | 50,625,000 | 50,775,000 | 676 | 1099 | 0.108424843  | OR51A7,OR51L1,ENSBTAG00000037474,ENSBTAG000038170,ENSBTAG00000039134,ENSBTAG00000039503,ENSBTAG00000046816                                              |
| 15 | 50,700,000 | 50,850,000 | 677 | 583  | -0.88089312  | OR51A7,ENSBTAG00000037474,ENSBTAG00000038170,ENSBTAG00000039134,ENSBTAG00000046816,ENSBTAG00000046853,ENSBTAG00000047498                                |
| 15 | 50,775,000 | 50,925,000 | 678 | 1166 | 0.688580757  | ENSBTAG00000031937,ENSBTAG00000031943,ENSBTAG00000046853,ENSBTAG00000047498                                                                             |

|    |            |            |     |      |              |                                                                                                                            |
|----|------------|------------|-----|------|--------------|----------------------------------------------------------------------------------------------------------------------------|
| 15 | 50,850,000 | 51,000,000 | 679 | 1773 | 0.613445912  | OR51E2,ENSBTAG00000027637,ENSBTAG00000031937,ENSBTAG00000031943,ENSBTAG00000034711                                         |
| 15 | 50,925,000 | 51,075,000 | 680 | 1745 | 0.575119111  | OR51D1,OR51E1,OR51E2,TRIM68,ENSBTAG00000027637,ENSBTAG00000034711,ENSBTAG00000047556,ENSBTAG00000047803,ENSBTAG00000048052 |
| 15 | 51,000,000 | 51,150,000 | 681 | 1137 | 0.33821486   | OR51D1,OR51E1,TRIM68,ENSBTAG00000047556,ENSBTAG00000047803,ENSBTAG00000048052                                              |
| 15 | 51,075,000 | 51,225,000 | 682 | 189  | -1.410641    |                                                                                                                            |
| 15 | 51,150,000 | 51,300,000 | 683 | 70   | -0.495693579 |                                                                                                                            |
| 15 | 51,225,000 | 51,375,000 | 684 | 1068 | 0.029501716  | OR52K2,ENSBTAG00000039467                                                                                                  |
| 15 | 51,300,000 | 51,450,000 | 685 | 1837 | 0.26268835   | OR52K1,OR52K2,OR52M1,ENSBTAG00000013683,ENSBTAG00000039467                                                                 |
| 15 | 51,375,000 | 51,525,000 | 686 | 1606 | 0.741956738  | OR52K1,OR52M1,TRIM21,ENSBTAG00000012325,ENSBTAG00000013683,ENSBTAG00000015357,ENSBTAG00000040075                           |
| 15 | 51,450,000 | 51,600,000 | 687 | 1698 | 0.121985237  | TRIM21,ENSBTAG00000012325,ENSBTAG00000015357,ENSBTAG00000031915,ENSBTAG00000040075,ENSBTAG00000047860                      |
| 15 | 51,525,000 | 51,675,000 | 688 | 1683 | -0.068523046 | ENSBTAG00000031907,ENSBTAG00000031915,ENSBTAG00000045696,ENSBTAG00000047860                                                |
| 15 | 51,600,000 | 51,750,000 | 689 | 1696 | 0.264124031  | ENSBTAG00000031903,ENSBTAG00000031907,ENSBTAG00000045556,ENSBTAG00000045696                                                |
| 15 | 51,675,000 | 51,825,000 | 690 | 1986 | 0.290965457  | RRM1,ENSBTAG00000005070,ENSBTAG00000031903,ENSBTAG00000035686,ENSBTAG00000045556                                           |
| 15 | 51,750,000 | 51,900,000 | 691 | 1898 | -0.175819122 | RRM1,STIM1,ENSBTAG00000005070,ENSBTAG00000035686                                                                           |
| 15 | 51,825,000 | 51,975,000 | 692 | 1644 | -0.097544758 | RRM1,STIM1                                                                                                                 |
| 15 | 51,900,000 | 52,050,000 | 693 | 1518 | 0.717281533  | STIM1                                                                                                                      |
| 15 | 51,975,000 | 52,125,000 | 694 | 1238 | 0.821890724  | NUP98,PGAP2,RHOG,STIM1                                                                                                     |
| 15 | 52,050,000 | 52,200,000 | 695 | 1185 | 0.262976779  | CHRNA10,NUP98,PGAP2,RHOG,ENSBTAG00000006345                                                                                |
| 15 | 52,125,000 | 52,275,000 | 696 | 1494 | -0.011612878 | ART1,CHRNA10,NUP98,ENSBTAG00000006345,ENSBTAG00000023648,ENSBTAG00000037826                                                |
| 15 | 52,200,000 | 52,350,000 | 697 | 1924 | -0.181559308 | ART1,RNF121,ENSBTAG00000006345,ENSBTAG00000011549,ENSBTAG00000023648,ENSBTAG00000026796,ENSBTAG00000037826                 |
| 15 | 52,275,000 | 52,425,000 | 698 | 1755 | 0.278903078  | IL18BP,NUMA1,RNF121,ENSBTAG00000011549,ENSBTAG00000026796                                                                  |
| 15 | 52,350,000 | 52,500,000 | 699 | 1263 | 1.228774504  | IL18BP,LRRC51,NUMA1,RNF121                                                                                                 |
| 15 | 52,425,000 | 52,575,000 | 700 | 1397 | 1.1574662    | ANAPC15,FOLR1,LAMTOR1,LRRC51,LRTOMT,NUMA1                                                                                  |
| 15 | 52,500,000 | 52,650,000 | 701 | 1483 | 0.806707248  | ANAPC15,FOLR1,FOLR2,INPPL1,LAMTOR1,LRRC51,LRTOMT,PHOX2A                                                                    |
| 15 | 52,575,000 | 52,725,000 | 702 | 1317 | 0.748090153  | CLPB,FOLR1,FOLR2,INPPL1,PHOX2A                                                                                             |
| 15 | 52,650,000 | 52,800,000 | 703 | 1212 | 0.94479199   | CLPB                                                                                                                       |
| 15 | 52,725,000 | 52,875,000 | 704 | 1285 | 0.637944042  | CLPB                                                                                                                       |
| 15 | 52,800,000 | 52,950,000 | 705 | 1303 | 0.291884127  | CLPB,PDE2A                                                                                                                 |
| 15 | 52,875,000 | 53,025,000 | 706 | 1056 | -0.053444236 | PDE2A,ENSBTAG00000002051                                                                                                   |
| 15 | 52,950,000 | 53,100,000 | 707 | 661  | -0.61833764  | PDE2A,STARD10,ENSBTAG00000002051                                                                                           |
| 15 | 53,025,000 | 53,175,000 | 708 | 466  | -1.130329339 | ATG16L2,FCHSD2,STARD10,ENSBTAG00000002051                                                                                  |
| 15 | 53,100,000 | 53,250,000 | 709 | 623  | -1.438588544 | ATG16L2,FCHSD2,STARD10                                                                                                     |
| 15 | 53,175,000 | 53,325,000 | 710 | 662  | -3.243298131 | FCHSD2                                                                                                                     |
| 15 | 53,250,000 | 53,400,000 | 711 | 538  | -3.752778474 | FCHSD2                                                                                                                     |

|    |            |            |     |      |              |                                                                       |
|----|------------|------------|-----|------|--------------|-----------------------------------------------------------------------|
| 15 | 53,325,000 | 53,475,000 | 712 | 504  | -2.032495438 | FCHSD2                                                                |
| 15 | 53,400,000 | 53,550,000 | 713 | 715  | 0.304468785  | FCHSD2,P2RY2                                                          |
| 15 | 53,475,000 | 53,625,000 | 714 | 777  | 0.054610587  | ARHGEF17,P2RY2,P2RY6                                                  |
| 15 | 53,550,000 | 53,700,000 | 715 | 624  | -0.772550579 | ARHGEF17,FAM168A,P2RY6,RELT                                           |
| 15 | 53,625,000 | 53,775,000 | 716 | 582  | -1.285446991 | ARHGEF17,FAM168A,RELT                                                 |
| 15 | 53,700,000 | 53,850,000 | 717 | 553  | -0.797874106 |                                                                       |
| 15 | 53,775,000 | 53,925,000 | 718 | 550  | 0.192398148  | PLEKHB1                                                               |
| 15 | 53,850,000 | 54,000,000 | 719 | 679  | 0.379736671  | PLEKHB1,ENSBTAG00000000025                                            |
| 15 | 53,925,000 | 54,075,000 | 720 | 977  | 0.602205901  | MRPL48,ENSBTAG00000000025                                             |
| 15 | 54,000,000 | 54,150,000 | 721 | 1118 | -1.253880484 | MRPL48,PAAF1,ENSBTAG00000000025                                       |
| 15 | 54,075,000 | 54,225,000 | 722 | 1138 | -2.20289973  | DNAJB13,MRPL48,PAAF1,UCP2,UCP3                                        |
| 15 | 54,150,000 | 54,300,000 | 723 | 1007 | -1.635173107 | C2CD3,DNAJB13,PAAF1,UCP2,UCP3                                         |
| 15 | 54,225,000 | 54,375,000 | 724 | 994  | 0.918052633  | C2CD3,PPME1                                                           |
| 15 | 54,300,000 | 54,450,000 | 725 | 829  | 1.182189114  | C2CD3,P4HA3,PPME1                                                     |
| 15 | 54,375,000 | 54,525,000 | 726 | 753  | -0.69361685  | P4HA3,PGM2L1,PPME1,RPL36A                                             |
| 15 | 54,450,000 | 54,600,000 | 727 | 974  | -1.079424952 | KCNE3,P4HA3,PGM2L1,RPL36A                                             |
| 15 | 54,525,000 | 54,675,000 | 728 | 646  | -0.729387453 | KCNE3,LIPT2,PGM2L1                                                    |
| 15 | 54,600,000 | 54,750,000 | 729 | 409  | -0.283992618 | LIPT2,POLD3                                                           |
| 15 | 54,675,000 | 54,825,000 | 730 | 559  | -0.091267999 | CHRD2,POLD3                                                           |
| 15 | 54,750,000 | 54,900,000 | 731 | 479  | 0.226001697  | CHRD2,RNF169                                                          |
| 15 | 54,825,000 | 54,975,000 | 732 | 469  | -0.165230823 | RNF169,XRRA1                                                          |
| 15 | 54,900,000 | 55,050,000 | 733 | 913  | 0.397519309  | NEU3,RNF169,SPCS2,XRRA1                                               |
| 15 | 54,975,000 | 55,125,000 | 734 | 1058 | 0.941193234  | NEU3,OR2AT4,SPCS2,XRRA1,ENSBTAG00000047344                            |
| 15 | 55,050,000 | 55,200,000 | 735 | 759  | 0.824935161  | OR2AT4,SLCO2B1,ENSBTAG00000047344                                     |
| 15 | 55,125,000 | 55,275,000 | 736 | 532  | -0.240830945 | ARRB1,SLCO2B1,TPBGL                                                   |
| 15 | 55,200,000 | 55,350,000 | 737 | 384  | -0.727123289 | ARRB1,SLCO2B1,TPBGL                                                   |
| 15 | 55,275,000 | 55,425,000 | 738 | 377  | -0.234529234 | ARRB1,GDPD5,KLHL35,RPS3                                               |
| 15 | 55,350,000 | 55,500,000 | 739 | 478  | 0.768024795  | GDPD5,KLHL35,RPS3                                                     |
| 15 | 55,425,000 | 55,575,000 | 740 | 451  | 0.851262124  | GDPD5,MAP6,SERPINH1                                                   |
| 15 | 55,500,000 | 55,650,000 | 741 | 422  | 0.547033041  | MAP6,SERPINH1                                                         |
| 15 | 55,575,000 | 55,725,000 | 742 | 506  | 0.029819427  | MAP6,MOGAT2,ENSBTAG00000047111                                        |
| 15 | 55,650,000 | 55,800,000 | 743 | 545  | -1.549190933 | MOGAT2,ENSBTAG00000047111                                             |
| 15 | 55,725,000 | 55,875,000 | 744 | 785  | -1.749906429 | ENSBTAG00000000628,ENSBTAG00000015091,ENSBTAG00000046149              |
| 15 | 55,800,000 | 55,950,000 | 745 | 764  | -1.040567586 | DGAT2,MOGAT2,ENSBTAG00000000628,ENSBTAG00000015091,ENSBTAG00000046149 |
| 15 | 55,875,000 | 56,025,000 | 746 | 769  | 0.135904062  | DGAT2,MOGAT2,UVRAG                                                    |
| 15 | 55,950,000 | 56,100,000 | 747 | 853  | -0.338196553 | DGAT2,UVRAG                                                           |
| 15 | 56,025,000 | 56,175,000 | 748 | 468  | -2.202614163 | UVRAG                                                                 |
| 15 | 56,100,000 | 56,250,000 | 749 | 257  | -3.302231435 | UVRAG                                                                 |
| 15 | 56,175,000 | 56,325,000 | 750 | 302  | -1.929654492 | UVRAG                                                                 |
| 15 | 56,250,000 | 56,400,000 | 751 | 409  | -0.890661884 | UVRAG,WNT11                                                           |
| 15 | 56,325,000 | 56,475,000 | 752 | 406  | -0.560875739 | WNT11                                                                 |
| 15 | 56,400,000 | 56,550,000 | 753 | 455  | 0.389052191  | PRKRIR,WNT11                                                          |
| 15 | 56,475,000 | 56,625,000 | 754 | 627  | 1.32645754   | PRKRIR                                                                |
| 15 | 56,550,000 | 56,700,000 | 755 | 505  | 1.243259391  | C11orf30,PRKRIR                                                       |
| 15 | 56,625,000 | 56,775,000 | 756 | 387  | 1.072335509  | C11orf30                                                              |
| 15 | 56,700,000 | 56,850,000 | 757 | 543  | 0.779633275  | C11orf30,LRRC32                                                       |
| 15 | 56,775,000 | 56,925,000 | 758 | 746  | 1.262405332  | LRRC32,ENSBTAG00000027438                                             |
| 15 | 56,850,000 | 57,000,000 | 759 | 643  | 1.226015587  | TSKU,ENSBTAG00000027438                                               |
| 15 | 56,925,000 | 57,075,000 | 760 | 401  | 0.846949261  | ACER3,TSKU                                                            |
| 15 | 57,000,000 | 57,150,000 | 761 | 282  | 0.943289092  | ACER3                                                                 |
| 15 | 57,075,000 | 57,225,000 | 762 | 365  | -0.320964879 | ACER3                                                                 |

|    |            |            |     |      |              |                                |
|----|------------|------------|-----|------|--------------|--------------------------------|
| 15 | 57,150,000 | 57,300,000 | 763 | 1207 | -0.056619944 | ACER3,B3GNT6,CAPN5             |
| 15 | 57,225,000 | 57,375,000 | 764 | 1502 | -0.123652211 | B3GNT6,CAPN5,MYO7A             |
| 15 | 57,300,000 | 57,450,000 | 765 | 1207 | -0.545499982 | CAPN5,MYO7A,ENSBTAG00000000886 |
| 15 | 57,375,000 | 57,525,000 | 766 | 1227 | -0.047481131 | MYO7A,ENSBTAG00000000886       |
| 15 | 57,450,000 | 57,600,000 | 767 | 1092 | -0.327594676 | ENSBTAG00000000886             |
| 15 | 57,525,000 | 57,675,000 | 768 | 991  | -1.865718171 |                                |
| 15 | 57,600,000 | 57,750,000 | 769 | 815  | -2.411334976 |                                |
| 15 | 57,675,000 | 57,825,000 | 770 | 892  | 0.21249714   |                                |
| 15 | 57,750,000 | 57,900,000 | 771 | 897  | 1.118144972  |                                |
| 15 | 57,825,000 | 57,975,000 | 772 | 1149 | 0.067599023  | ANO3                           |
| 15 | 57,900,000 | 58,050,000 | 773 | 1283 | -0.052811187 | ANO3                           |
| 15 | 57,975,000 | 58,125,000 | 774 | 1050 | 0.700482305  | ANO3,MUC15                     |
| 15 | 58,050,000 | 58,200,000 | 775 | 948  | 0.96673177   | ANO3,MUC15,SLC5A12             |
| 15 | 58,125,000 | 58,275,000 | 776 | 986  | 0.180681478  | ANO3,SLC5A12                   |
| 15 | 58,200,000 | 58,350,000 | 777 | 1235 | 0.008725287  |                                |
| 15 | 58,275,000 | 58,425,000 | 778 | 962  | -0.101265043 |                                |
| 15 | 58,350,000 | 58,500,000 | 779 | 759  | -0.33394551  | FIBIN                          |
| 15 | 58,425,000 | 58,575,000 | 780 | 822  | 0.101117723  | BBOX1,FIBIN                    |
| 15 | 58,500,000 | 58,650,000 | 781 | 835  | 0.332182542  | BBOX1                          |
| 15 | 58,575,000 | 58,725,000 | 782 | 723  | 0.121224643  | BBOX1                          |
| 15 | 58,650,000 | 58,800,000 | 783 | 701  | 0.46370791   |                                |
| 15 | 58,725,000 | 58,875,000 | 784 | 637  | -0.379878257 | CCDC34,LGR4                    |
| 15 | 58,800,000 | 58,950,000 | 785 | 396  | -1.775993904 | CCDC34,LGR4                    |
| 15 | 58,875,000 | 59,025,000 | 786 | 378  | -0.303143879 | LGR4,LIN7C                     |
| 15 | 58,950,000 | 59,100,000 | 787 | 660  | 0.85736752   | LGR4,LIN7C                     |
| 15 | 59,025,000 | 59,175,000 | 788 | 648  | 0.228043029  | BDNF                           |
| 15 | 59,100,000 | 59,250,000 | 789 | 467  | -0.698553526 | BDNF                           |
| 15 | 59,175,000 | 59,325,000 | 790 | 659  | 0.795023141  | BDNF                           |
| 15 | 59,250,000 | 59,400,000 | 791 | 904  | 0.625832383  |                                |
| 15 | 59,325,000 | 59,475,000 | 792 | 789  | 0.067234702  |                                |
| 15 | 59,400,000 | 59,550,000 | 793 | 383  | -0.716756066 | KIF18A                         |
| 15 | 59,475,000 | 59,625,000 | 794 | 176  | -1.966569237 | KIF18A,METTL15                 |
| 15 | 59,550,000 | 59,700,000 | 795 | 146  | -2.630201541 | KIF18A,METTL15                 |
| 15 | 59,625,000 | 59,775,000 | 796 | 129  | -2.678671221 | METTL15                        |
| 15 | 59,700,000 | 59,850,000 | 797 | 286  | -3.712385522 | METTL15                        |
| 15 | 59,775,000 | 59,925,000 | 798 | 361  | -3.276683994 | METTL15                        |
| 15 | 59,850,000 | 60,000,000 | 799 | 422  | -0.28926099  |                                |
| 15 | 59,925,000 | 60,075,000 | 800 | 537  | 0.270771158  |                                |
| 15 | 60,000,000 | 60,150,000 | 801 | 372  | -0.692071776 |                                |
| 15 | 60,075,000 | 60,225,000 | 802 | 441  | -1.311111376 |                                |
| 15 | 60,150,000 | 60,300,000 | 803 | 702  | -0.424589178 |                                |
| 15 | 60,225,000 | 60,375,000 | 804 | 550  | -0.620131642 |                                |
| 15 | 60,300,000 | 60,450,000 | 805 | 397  | -3.550657357 |                                |
| 15 | 60,375,000 | 60,525,000 | 806 | 447  | -1.880686228 |                                |
| 15 | 60,450,000 | 60,600,000 | 807 | 378  | -0.344570919 |                                |
| 15 | 60,525,000 | 60,675,000 | 808 | 631  | -0.134307839 |                                |
| 15 | 60,600,000 | 60,750,000 | 809 | 675  | 0.363273059  |                                |
| 15 | 60,675,000 | 60,825,000 | 810 | 604  | 0.935218766  |                                |
| 15 | 60,750,000 | 60,900,000 | 811 | 762  | 0.237485668  |                                |
| 15 | 60,825,000 | 60,975,000 | 812 | 685  | -0.253300713 |                                |
| 15 | 60,900,000 | 61,050,000 | 813 | 970  | 0.946222074  |                                |
| 15 | 60,975,000 | 61,125,000 | 814 | 1125 | 1.110264867  |                                |
| 15 | 61,050,000 | 61,200,000 | 815 | 956  | 0.543025548  |                                |

|    |            |            |     |      |              |                            |
|----|------------|------------|-----|------|--------------|----------------------------|
| 15 | 61,125,000 | 61,275,000 | 816 | 1124 | -0.358295925 |                            |
| 15 | 61,200,000 | 61,350,000 | 817 | 1326 | -0.473878998 |                            |
| 15 | 61,275,000 | 61,425,000 | 818 | 1336 | -1.349422201 |                            |
| 15 | 61,350,000 | 61,500,000 | 819 | 1309 | -0.952487065 |                            |
| 15 | 61,425,000 | 61,575,000 | 820 | 1035 | 0.464529232  | KCNA4                      |
| 15 | 61,500,000 | 61,650,000 | 821 | 861  | 0.361433922  | KCNA4                      |
| 15 | 61,575,000 | 61,725,000 | 822 | 866  | -0.788453612 | ENSBTAG00000039236         |
| 15 | 61,650,000 | 61,800,000 | 823 | 700  | -2.021286584 | FSHB,ENSBTAG00000039236    |
| 15 | 61,725,000 | 61,875,000 | 824 | 555  | -0.287513724 | ARL14EP,FSHB               |
| 15 | 61,800,000 | 61,950,000 | 825 | 605  | -0.175389762 | ARL14EP,MPPED2             |
| 15 | 61,875,000 | 62,025,000 | 826 | 769  | -0.459146204 | MPPED2                     |
| 15 | 61,950,000 | 62,100,000 | 827 | 653  | -1.10974099  | MPPED2                     |
| 15 | 62,025,000 | 62,175,000 | 828 | 486  | -1.309582476 | MPPED2                     |
| 15 | 62,100,000 | 62,250,000 | 829 | 499  | -0.496087727 | MPPED2                     |
| 15 | 62,175,000 | 62,325,000 | 830 | 496  | 0.114429717  |                            |
| 15 | 62,250,000 | 62,400,000 | 831 | 518  | 0.151869053  |                            |
| 15 | 62,325,000 | 62,475,000 | 832 | 684  | -0.076844604 | ENSBTAG00000048290         |
| 15 | 62,400,000 | 62,550,000 | 833 | 938  | -0.383637992 | DCDC1,ENSBTAG00000048290   |
| 15 | 62,475,000 | 62,625,000 | 834 | 1050 | -0.504693155 | DCDC1,ENSBTAG00000048290   |
| 15 | 62,550,000 | 62,700,000 | 835 | 1378 | 0.618495326  |                            |
| 15 | 62,625,000 | 62,775,000 | 836 | 1167 | 0.845518619  |                            |
| 15 | 62,700,000 | 62,850,000 | 837 | 718  | 0.197709163  | ENSBTAG00000045878         |
| 15 | 62,775,000 | 62,925,000 | 838 | 687  | 0.793143363  | DCDC1,ENSBTAG00000045878   |
| 15 | 62,850,000 | 63,000,000 | 839 | 397  | 1.221712079  | DCDC1,DNAJC24              |
| 15 | 62,925,000 | 63,075,000 | 840 | 395  | 1.070673399  | DCDC1,DNAJC24,IMMP1L       |
| 15 | 63,000,000 | 63,150,000 | 841 | 441  | 0.754745173  | DNAJC24,ELP4,IMMP1L        |
| 15 | 63,075,000 | 63,225,000 | 842 | 287  | 0.435418238  | ELP4,IMMP1L                |
| 15 | 63,150,000 | 63,300,000 | 843 | 481  | -0.93855347  | ELP4                       |
| 15 | 63,225,000 | 63,375,000 | 844 | 506  | -1.070526456 | ELP4,PAX6                  |
| 15 | 63,300,000 | 63,450,000 | 845 | 477  | -2.214820012 | ELP4,PAX6                  |
| 15 | 63,375,000 | 63,525,000 | 846 | 844  | -0.820308199 | PAX6                       |
| 15 | 63,450,000 | 63,600,000 | 847 | 812  | 0.625319133  |                            |
| 15 | 63,525,000 | 63,675,000 | 848 | 588  | 0.183842873  | RCN1                       |
| 15 | 63,600,000 | 63,750,000 | 849 | 846  | -0.29030686  | RCN1                       |
| 15 | 63,675,000 | 63,825,000 | 850 | 1266 | -0.413883776 |                            |
| 15 | 63,750,000 | 63,900,000 | 851 | 1012 | -0.135542754 |                            |
| 15 | 63,825,000 | 63,975,000 | 852 | 622  | 0.614576464  | WT1                        |
| 15 | 63,900,000 | 64,050,000 | 853 | 699  | 0.846580304  | WT1                        |
| 15 | 63,975,000 | 64,125,000 | 854 | 809  | 0.213901513  | CCDC73,EIF3M               |
| 15 | 64,050,000 | 64,200,000 | 855 | 637  | -0.825288265 | CCDC73,EIF3M               |
| 15 | 64,125,000 | 64,275,000 | 856 | 916  | -3.370826412 | CCDC73                     |
| 15 | 64,200,000 | 64,350,000 | 857 | 996  | -2.843360763 | CCDC73,PRRG4               |
| 15 | 64,275,000 | 64,425,000 | 858 | 583  | 0.30954478   | PRRG4,QSER1                |
| 15 | 64,350,000 | 64,500,000 | 859 | 585  | 1.066005887  | DEPDC7,QSER1,TCP11L1       |
| 15 | 64,425,000 | 64,575,000 | 860 | 567  | 0.591192663  | CSTF3,DEPDC7,QSER1,TCP11L1 |
| 15 | 64,500,000 | 64,650,000 | 861 | 585  | -1.352223458 | CSTF3,TCP11L1              |
| 15 | 64,575,000 | 64,725,000 | 862 | 555  | -0.934900016 | CSTF3,HIPK3                |
| 15 | 64,650,000 | 64,800,000 | 863 | 478  | 0.519387772  | HIPK3                      |
| 15 | 64,725,000 | 64,875,000 | 864 | 606  | 0.574450366  | HIPK3,ENSBTAG00000027578   |
| 15 | 64,800,000 | 64,950,000 | 865 | 900  | 0.856193475  | ENSBTAG00000027578         |
| 15 | 64,875,000 | 65,025,000 | 866 | 848  | 0.323749271  | KIAA1549L                  |
| 15 | 64,950,000 | 65,100,000 | 867 | 679  | -0.380988062 | KIAA1549L                  |
| 15 | 65,025,000 | 65,175,000 | 868 | 562  | 0.27781042   | C11orf91,CD59,KIAA1549L    |

|    |            |            |     |      |              |                                   |
|----|------------|------------|-----|------|--------------|-----------------------------------|
| 15 | 65,100,000 | 65,250,000 | 869 | 394  | -1.136630146 | C11orf91,CD59,FBXO3,KIAA1549L     |
| 15 | 65,175,000 | 65,325,000 | 870 | 827  | -1.246467626 | FBXO3                             |
| 15 | 65,250,000 | 65,400,000 | 871 | 1005 | 0.065084526  | LMO2                              |
| 15 | 65,325,000 | 65,475,000 | 872 | 887  | -1.492837221 | CAPRIN1,LMO2                      |
| 15 | 65,400,000 | 65,550,000 | 873 | 1057 | -1.488884838 | ABTB2,CAPRIN1,LMO2,NAT10          |
| 15 | 65,475,000 | 65,625,000 | 874 | 1137 | 0.571215258  | ABTB2,CAPRIN1,NAT10               |
| 15 | 65,550,000 | 65,700,000 | 875 | 1260 | 0.207673574  | ABTB2                             |
| 15 | 65,625,000 | 65,775,000 | 876 | 1252 | 0.111648984  | ABTB2                             |
| 15 | 65,700,000 | 65,850,000 | 877 | 1211 | 0.628583401  | ABTB2,CAT,ELF5                    |
| 15 | 65,775,000 | 65,925,000 | 878 | 1120 | 1.015648601  | CAT,ELF5                          |
| 15 | 65,850,000 | 66,000,000 | 879 | 1009 | 0.93957086   | EHF,ELF5                          |
| 15 | 65,925,000 | 66,075,000 | 880 | 682  | 0.564043502  | EHF                               |
| 15 | 66,000,000 | 66,150,000 | 881 | 550  | 0.84436708   | EHF                               |
| 15 | 66,075,000 | 66,225,000 | 882 | 837  | 0.668041901  | APIP                              |
| 15 | 66,150,000 | 66,300,000 | 883 | 1238 | 0.845206494  | APIP,PDHX                         |
| 15 | 66,225,000 | 66,375,000 | 884 | 1320 | 1.146276228  | APIP,PDHX                         |
| 15 | 66,300,000 | 66,450,000 | 885 | 1032 | 1.192561666  | PDHX                              |
| 15 | 66,375,000 | 66,525,000 | 886 | 784  | 0.425317831  | CD44                              |
| 15 | 66,450,000 | 66,600,000 | 887 | 606  | -1.378255998 | CD44,SLC1A2                       |
| 15 | 66,525,000 | 66,675,000 | 888 | 501  | -1.130773877 | CD44,SLC1A2                       |
| 15 | 66,600,000 | 66,750,000 | 889 | 470  | -0.328721342 | SLC1A2                            |
| 15 | 66,675,000 | 66,825,000 | 890 | 504  | -0.179888567 | PAMR1                             |
| 15 | 66,750,000 | 66,900,000 | 891 | 642  | 0.018474608  | PAMR1                             |
| 15 | 66,825,000 | 66,975,000 | 892 | 1111 | -0.309038668 | FJX1,PAMR1                        |
| 15 | 66,900,000 | 67,050,000 | 893 | 1274 | -0.557048062 | FJX1,TRIM44                       |
| 15 | 66,975,000 | 67,125,000 | 894 | 1175 | -0.533817126 | TRIM44                            |
| 15 | 67,050,000 | 67,200,000 | 895 | 1334 | -0.208536516 | TRIM44                            |
| 15 | 67,125,000 | 67,275,000 | 896 | 1154 | -0.08602236  | LDLRAD3                           |
| 15 | 67,200,000 | 67,350,000 | 897 | 933  | 0.039194607  | LDLRAD3                           |
| 15 | 67,275,000 | 67,425,000 | 898 | 1194 | -0.011001273 | LDLRAD3                           |
| 15 | 67,350,000 | 67,500,000 | 899 | 1153 | 0.137429882  | LDLRAD3                           |
| 15 | 67,425,000 | 67,575,000 | 900 | 954  | -0.086998945 | COMMD9,LDLRAD3                    |
| 15 | 67,500,000 | 67,650,000 | 901 | 946  | -0.742943768 | COMMD9,LDLRAD3                    |
| 15 | 67,575,000 | 67,725,000 | 902 | 1084 | 0.126139962  | COMMD9,PRR5L                      |
| 15 | 67,650,000 | 67,800,000 | 903 | 939  | 0.415092964  | PRR5L,TRAF6                       |
| 15 | 67,725,000 | 67,875,000 | 904 | 740  | 0.743583647  | C15H11ORF74,PRR5L,RAG1,RAG2,TRAF6 |
| 15 | 67,800,000 | 67,950,000 | 905 | 720  | 0.891098701  | C15H11ORF74,RAG1,RAG2             |
| 15 | 67,875,000 | 68,025,000 | 906 | 1141 | 0.649855023  | C15H11ORF74                       |
| 15 | 67,950,000 | 68,100,000 | 907 | 1427 | 0.847727455  |                                   |
| 15 | 68,025,000 | 68,175,000 | 908 | 1012 | 0.760929081  |                                   |
| 15 | 68,100,000 | 68,250,000 | 909 | 911  | -0.01331506  |                                   |
| 15 | 68,175,000 | 68,325,000 | 910 | 1384 | -0.450633903 |                                   |
| 15 | 68,250,000 | 68,400,000 | 911 | 1403 | -0.336893247 |                                   |
| 15 | 68,325,000 | 68,475,000 | 912 | 1285 | 0.509379402  |                                   |
| 15 | 68,400,000 | 68,550,000 | 913 | 1500 | 0.775791968  |                                   |
| 15 | 68,475,000 | 68,625,000 | 914 | 1483 | 0.919297802  |                                   |
| 15 | 68,550,000 | 68,700,000 | 915 | 1311 | 0.895815756  |                                   |
| 15 | 68,625,000 | 68,775,000 | 916 | 949  | 0.3017796    |                                   |
| 15 | 68,700,000 | 68,850,000 | 917 | 1019 | 0.391754643  |                                   |
| 15 | 68,775,000 | 68,925,000 | 918 | 1183 | 0.559196913  |                                   |
| 15 | 68,850,000 | 69,000,000 | 919 | 1464 | 0.772083115  |                                   |
| 15 | 68,925,000 | 69,075,000 | 920 | 1572 | 0.866389807  |                                   |
| 15 | 69,000,000 | 69,150,000 | 921 | 1475 | 0.756641085  |                                   |



|    |            |            |     |      |              |         |
|----|------------|------------|-----|------|--------------|---------|
| 15 | 69,075,000 | 69,225,000 | 922 | 1254 | 0.136707654  |         |
| 15 | 69,150,000 | 69,300,000 | 923 | 1073 | -1.158141915 |         |
| 15 | 69,225,000 | 69,375,000 | 924 | 1068 | -0.716567751 |         |
| 15 | 69,300,000 | 69,450,000 | 925 | 1097 | -1.223607069 |         |
| 15 | 69,375,000 | 69,525,000 | 926 | 989  | -1.602367689 |         |
| 15 | 69,450,000 | 69,600,000 | 927 | 941  | -0.093602067 |         |
| 15 | 69,525,000 | 69,675,000 | 928 | 919  | 0.099376878  |         |
| 15 | 69,600,000 | 69,750,000 | 929 | 869  | -0.205315401 |         |
| 15 | 69,675,000 | 69,825,000 | 930 | 893  | 0.178888692  |         |
| 15 | 69,750,000 | 69,900,000 | 931 | 674  | 0.750406236  |         |
| 15 | 69,825,000 | 69,975,000 | 932 | 890  | 0.687393717  |         |
| 15 | 69,900,000 | 70,050,000 | 933 | 1500 | 0.118403872  |         |
| 15 | 69,975,000 | 70,125,000 | 934 | 1380 | 0.07661959   |         |
| 15 | 70,050,000 | 70,200,000 | 935 | 841  | -0.456750893 |         |
| 15 | 70,125,000 | 70,275,000 | 936 | 949  | -2.694345037 |         |
| 15 | 70,200,000 | 70,350,000 | 937 | 1216 | -1.026457549 |         |
| 15 | 70,275,000 | 70,425,000 | 938 | 1084 | 0.387719557  |         |
| 15 | 70,350,000 | 70,500,000 | 939 | 1057 | -0.767591475 |         |
| 15 | 70,425,000 | 70,575,000 | 940 | 1125 | -0.982370103 |         |
| 15 | 70,500,000 | 70,650,000 | 941 | 1202 | -0.612202135 |         |
| 15 | 70,575,000 | 70,725,000 | 942 | 1039 | -0.753414418 |         |
| 15 | 70,650,000 | 70,800,000 | 943 | 674  | -0.210346434 |         |
| 15 | 70,725,000 | 70,875,000 | 944 | 506  | 0.456917903  |         |
| 15 | 70,800,000 | 70,950,000 | 945 | 504  | 0.656966976  |         |
| 15 | 70,875,000 | 71,025,000 | 946 | 862  | 0.187894795  |         |
| 15 | 70,950,000 | 71,100,000 | 947 | 901  | 0.196470175  |         |
| 15 | 71,025,000 | 71,175,000 | 948 | 1086 | 0.360402044  |         |
| 15 | 71,100,000 | 71,250,000 | 949 | 1133 | 0.40362185   | LRRC4C  |
| 15 | 71,175,000 | 71,325,000 | 950 | 885  | 0.486496054  | LRRC4C  |
| 15 | 71,250,000 | 71,400,000 | 951 | 861  | 0.281377569  |         |
| 15 | 71,325,000 | 71,475,000 | 952 | 693  | 0.386835096  |         |
| 15 | 71,400,000 | 71,550,000 | 953 | 762  | 0.198327866  |         |
| 15 | 71,475,000 | 71,625,000 | 954 | 900  | 0.093775373  |         |
| 15 | 71,550,000 | 71,700,000 | 955 | 1029 | 0.810132739  |         |
| 15 | 71,625,000 | 71,775,000 | 956 | 1357 | 0.93554367   |         |
| 15 | 71,700,000 | 71,850,000 | 957 | 1572 | 0.174409831  |         |
| 15 | 71,775,000 | 71,925,000 | 958 | 1402 | -0.729132096 |         |
| 15 | 71,850,000 | 72,000,000 | 959 | 761  | -0.68333659  |         |
| 15 | 71,925,000 | 72,075,000 | 960 | 639  | 0.466501658  |         |
| 15 | 72,000,000 | 72,150,000 | 961 | 1054 | 0.198541051  |         |
| 15 | 72,075,000 | 72,225,000 | 962 | 913  | 0.08371543   |         |
| 15 | 72,150,000 | 72,300,000 | 963 | 701  | 0.847586762  |         |
| 15 | 72,225,000 | 72,375,000 | 964 | 895  | 0.63213321   |         |
| 15 | 72,300,000 | 72,450,000 | 965 | 745  | 0.459493126  |         |
| 15 | 72,375,000 | 72,525,000 | 966 | 664  | 0.289629838  | MSANTD3 |
| 15 | 72,450,000 | 72,600,000 | 967 | 708  | 0.011230581  | MSANTD3 |
| 15 | 72,525,000 | 72,675,000 | 968 | 916  | 0.750043731  |         |
| 15 | 72,600,000 | 72,750,000 | 969 | 1384 | 0.932435521  |         |
| 15 | 72,675,000 | 72,825,000 | 970 | 1635 | 0.434699349  |         |
| 15 | 72,750,000 | 72,900,000 | 971 | 1338 | 0.182587137  |         |
| 15 | 72,825,000 | 72,975,000 | 972 | 988  | 0.306394841  |         |
| 15 | 72,900,000 | 73,050,000 | 973 | 1391 | 0.023270004  |         |
| 15 | 72,975,000 | 73,125,000 | 974 | 1618 | 0.127055604  |         |

|    |            |            |      |      |              |                                                        |
|----|------------|------------|------|------|--------------|--------------------------------------------------------|
| 15 | 73,050,000 | 73,200,000 | 975  | 1534 | -1.230848944 |                                                        |
| 15 | 73,125,000 | 73,275,000 | 976  | 1224 | -1.457988793 |                                                        |
| 15 | 73,200,000 | 73,350,000 | 977  | 937  | 0.551715573  |                                                        |
| 15 | 73,275,000 | 73,425,000 | 978  | 1170 | 0.942257279  | ENSBTAG00000000487                                     |
| 15 | 73,350,000 | 73,500,000 | 979  | 1182 | 0.781283037  | ENSBTAG00000000487                                     |
| 15 | 73,425,000 | 73,575,000 | 980  | 992  | 0.229387095  |                                                        |
| 15 | 73,500,000 | 73,650,000 | 981  | 1004 | 0.120860464  |                                                        |
| 15 | 73,575,000 | 73,725,000 | 982  | 1332 | 0.442622973  |                                                        |
| 15 | 73,650,000 | 73,800,000 | 983  | 1538 | 0.458658344  |                                                        |
| 15 | 73,725,000 | 73,875,000 | 984  | 1448 | 0.432325095  |                                                        |
| 15 | 73,800,000 | 73,950,000 | 985  | 1539 | 0.483110149  |                                                        |
| 15 | 73,875,000 | 74,025,000 | 986  | 1524 | 0.338921474  |                                                        |
| 15 | 73,950,000 | 74,100,000 | 987  | 1438 | 0.213011179  |                                                        |
| 15 | 74,025,000 | 74,175,000 | 988  | 1487 | -0.150154539 |                                                        |
| 15 | 74,100,000 | 74,250,000 | 989  | 1292 | -0.588636323 |                                                        |
| 15 | 74,175,000 | 74,325,000 | 990  | 1013 | -0.06262019  | API5                                                   |
| 15 | 74,250,000 | 74,400,000 | 991  | 1002 | 0.692752658  | API5,TTC17                                             |
| 15 | 74,325,000 | 74,475,000 | 992  | 1059 | -0.340515584 | TTC17                                                  |
| 15 | 74,400,000 | 74,550,000 | 993  | 903  | -0.971903831 | TTC17                                                  |
| 15 | 74,475,000 | 74,625,000 | 994  | 621  | -0.299328537 |                                                        |
| 15 | 74,550,000 | 74,700,000 | 995  | 459  | 0.344275184  | HSD17B12                                               |
| 15 | 74,625,000 | 74,775,000 | 996  | 387  | 0.326782614  | HSD17B12                                               |
| 15 | 74,700,000 | 74,850,000 | 997  | 483  | -1.705281855 | ALKBH3,HSD17B12                                        |
| 15 | 74,775,000 | 74,925,000 | 998  | 620  | -2.659623662 | ALKBH3,HSD17B12                                        |
| 15 | 74,850,000 | 75,000,000 | 999  | 1104 | -1.524829707 | ALKBH3                                                 |
| 15 | 74,925,000 | 75,075,000 | 1000 | 1222 | -1.128095614 | ACCSL,ACS,EXT2                                         |
| 15 | 75,000,000 | 75,150,000 | 1001 | 725  | 0.131434051  | ACCSL,ACS,EXT2                                         |
| 15 | 75,075,000 | 75,225,000 | 1002 | 526  | 1.075323808  | ALX4,EXT2                                              |
| 15 | 75,150,000 | 75,300,000 | 1003 | 398  | 0.973441671  | ALX4,EXT2                                              |
| 15 | 75,225,000 | 75,375,000 | 1004 | 449  | 0.944034992  | EXT2                                                   |
| 15 | 75,300,000 | 75,450,000 | 1005 | 522  | 0.129184208  |                                                        |
| 15 | 75,375,000 | 75,525,000 | 1006 | 738  | -0.429640017 | CD82                                                   |
| 15 | 75,450,000 | 75,600,000 | 1007 | 926  | 0.009548499  | CD82                                                   |
| 15 | 75,525,000 | 75,675,000 | 1008 | 1423 | -0.005101103 | CD82                                                   |
| 15 | 75,600,000 | 75,750,000 | 1009 | 1998 | 0.433420173  | TSPAN18                                                |
| 15 | 75,675,000 | 75,825,000 | 1010 | 1731 | 0.557667933  | TSPAN18                                                |
| 15 | 75,750,000 | 75,900,000 | 1011 | 1311 | 0.146923277  | TP53I11,TSPAN18                                        |
| 15 | 75,825,000 | 75,975,000 | 1012 | 1250 | -0.417135899 | TP53I11,TSPAN18                                        |
| 15 | 75,900,000 | 76,050,000 | 1013 | 1322 | 0.006769997  |                                                        |
| 15 | 75,975,000 | 76,125,000 | 1014 | 1231 | 1.121411452  | PRDM11                                                 |
| 15 | 76,050,000 | 76,200,000 | 1015 | 1426 | 1.083188591  | PRDM11,SYT13,ENSBTAG00000031210                        |
| 15 | 76,125,000 | 76,275,000 | 1016 | 1661 | 0.798053989  | PRDM11,SYT13,ENSBTAG00000031210                        |
| 15 | 76,200,000 | 76,350,000 | 1017 | 1642 | 0.556082827  | SYT13                                                  |
| 15 | 76,275,000 | 76,425,000 | 1018 | 1692 | -0.056442422 |                                                        |
| 15 | 76,350,000 | 76,500,000 | 1019 | 1748 | -0.745280878 |                                                        |
| 15 | 76,425,000 | 76,575,000 | 1020 | 1358 | -0.483115896 | CHST1                                                  |
| 15 | 76,500,000 | 76,650,000 | 1021 | 758  | 0.206564125  | CHST1                                                  |
| 15 | 76,575,000 | 76,725,000 | 1022 | 635  | -0.693979528 | CHST1                                                  |
| 15 | 76,650,000 | 76,800,000 | 1023 | 981  | -0.061994473 | CRY2,MAPK8IP1,SLC35C1                                  |
| 15 | 76,725,000 | 76,875,000 | 1024 | 892  | 0.67765088   | C15H11orf94,CRY2,GYLTL1B,MAPK8IP1,PEX16,PHF21A,SLC35C1 |
| 15 | 76,800,000 | 76,950,000 | 1025 | 567  | 0.396194425  | C15H11orf94,GYLTL1B,MAPK8IP1,PEX16,PHF21A              |
| 15 | 76,875,000 | 77,025,000 | 1026 | 507  | 0.48886298   | PHF21A                                                 |

|    |            |            |      |      |              |                                                                                                                                                        |
|----|------------|------------|------|------|--------------|--------------------------------------------------------------------------------------------------------------------------------------------------------|
| 15 | 76,950,000 | 77,100,000 | 1027 | 709  | -0.416003088 |                                                                                                                                                        |
| 15 | 77,025,000 | 77,175,000 | 1028 | 774  | -0.49676236  | CREB3L1                                                                                                                                                |
| 15 | 77,100,000 | 77,250,000 | 1029 | 590  | -0.104280109 | BMK,CREB3L1,DGKZ                                                                                                                                       |
| 15 | 77,175,000 | 77,325,000 | 1030 | 706  | -0.500945638 | AMBRA1,BMK,CHRM4,CREB3L1,DGKZ                                                                                                                          |
| 15 | 77,250,000 | 77,400,000 | 1031 | 815  | 0.199473735  | AMBRA1,BMK,CHRM4                                                                                                                                       |
| 15 | 77,325,000 | 77,475,000 | 1032 | 756  | 0.736852755  | AMBRA1,ATG13,HARBI1                                                                                                                                    |
| 15 | 77,400,000 | 77,550,000 | 1033 | 766  | 0.314444914  | AMBRA1,ARHGAP1,ATG13,CKAP5,F2,HARBI1,ZNF408                                                                                                            |
| 15 | 77,475,000 | 77,625,000 | 1034 | 689  | -0.271299197 | ARHGAP1,ATG13,CKAP5,F2,ZNF408                                                                                                                          |
| 15 | 77,550,000 | 77,700,000 | 1035 | 548  | -0.405266183 | CKAP5,LRP4                                                                                                                                             |
| 15 | 77,625,000 | 77,775,000 | 1036 | 484  | -0.206055575 | CKAP5,LRP4,ENSBTAG00000047298                                                                                                                          |
| 15 | 77,700,000 | 77,850,000 | 1037 | 426  | -0.267338016 | LRP4,ENSBTAG00000012546,ENSBTAG00000038160,ENSBTAG00000047298                                                                                          |
| 15 | 77,775,000 | 77,925,000 | 1038 | 427  | -0.140437705 | ENSBTAG00000012546,ENSBTAG00000016082,ENSBTAG00000038160                                                                                               |
| 15 | 77,850,000 | 78,000,000 | 1039 | 458  | -1.281782491 | ENSBTAG00000016082,ENSBTAG00000046354                                                                                                                  |
| 15 | 77,925,000 | 78,075,000 | 1040 | 514  | -0.874290667 | C11orf49,ENSBTAG00000046354                                                                                                                            |
| 15 | 78,000,000 | 78,150,000 | 1041 | 375  | 0.407172388  | C11orf49                                                                                                                                               |
| 15 | 78,075,000 | 78,225,000 | 1042 | 508  | 0.964527241  | C11orf49                                                                                                                                               |
| 15 | 78,150,000 | 78,300,000 | 1043 | 646  | 0.653855477  | ARFGAP2,C11orf49,DDB2,PACSN3                                                                                                                           |
| 15 | 78,225,000 | 78,375,000 | 1044 | 479  | 0.425820256  | ACP2,ARFGAP2,C11orf49,DDB2,MADD,NR1H3,PACSN3                                                                                                           |
| 15 | 78,300,000 | 78,450,000 | 1045 | 396  | 0.478651108  | ACP2,DDB2,MADD,MYBPC3,NR1H3,SLC39A13,SPI1                                                                                                              |
| 15 | 78,375,000 | 78,525,000 | 1046 | 416  | 0.879806562  | CUGBP1,MADD,MYBPC3,PSMC3,RAPSN,SLC39A13,SPI1                                                                                                           |
| 15 | 78,450,000 | 78,600,000 | 1047 | 453  | 0.793693874  | CUGBP1,KBTBD4,NDUFS3,PSMC3,PTPMT1,RAPSN,SLC39A13                                                                                                       |
| 15 | 78,525,000 | 78,675,000 | 1048 | 692  | 0.777006314  | CUGBP1,KBTBD4,MTCH2,NDUFS3,PTPMT1                                                                                                                      |
| 15 | 78,600,000 | 78,750,000 | 1049 | 819  | 0.872121487  | FNBP4,MTCH2,NUP160                                                                                                                                     |
| 15 | 78,675,000 | 78,825,000 | 1050 | 829  | 0.001389365  | FNBP4,NUP160                                                                                                                                           |
| 15 | 78,750,000 | 78,900,000 | 1051 | 1060 | -0.673921326 | NUP160                                                                                                                                                 |
| 15 | 78,825,000 | 78,975,000 | 1052 | 1052 | -0.444521011 |                                                                                                                                                        |
| 15 | 78,900,000 | 79,050,000 | 1053 | 1144 | 0.539054128  | PTPRJ                                                                                                                                                  |
| 15 | 78,975,000 | 79,125,000 | 1054 | 1067 | 0.747870779  | PTPRJ                                                                                                                                                  |
| 15 | 79,050,000 | 79,200,000 | 1055 | 947  | -0.23383439  | OR4X1,PTPRJ,ENSBTAG0000000926,ENSBTAG0000005914,ENSBTAG00000031025                                                                                     |
| 15 | 79,125,000 | 79,275,000 | 1056 | 1367 | 0.575977939  | OR4C5,OR4S1,OR4X1,ENSBTAG0000000926,ENSBTAG0000005914,ENSBTAG00000024788,ENSBTAG00000031025,ENSBTAG00000031027,ENSBTAG00000031028,ENSBTAG00000031029   |
| 15 | 79,200,000 | 79,350,000 | 1057 | 1691 | 0.919579275  | OR4C3,OR4C5,OR4S1,ENSBTAG00000016090,ENSBTAG00000024788,ENSBTAG00000030909,ENSBTAG00000031027,ENSBTAG00000031028,ENSBTAG00000031029,ENSBTAG00000031032 |
| 15 | 79,275,000 | 79,425,000 | 1058 | 1943 | 0.832245266  | OR4C3,ENSBTAG00000016090,ENSBTAG00000030909,ENSBTAG00000031032,ENSBTAG00000039821                                                                      |
| 15 | 79,350,000 | 79,500,000 | 1059 | 2176 | 0.800050588  | ENSBTAG00000039821,ENSBTAG00000047026,ENSBTAG00000048037                                                                                               |
| 15 | 79,425,000 | 79,575,000 | 1060 | 2361 | 0.61290228   | ENSBTAG00000027275,ENSBTAG00000035487,ENSBTAG00000035489,ENSBTAG00000047026,ENSBTAG00000048037                                                         |

|    |            |            |      |      |              |                                                                                                                                                        |
|----|------------|------------|------|------|--------------|--------------------------------------------------------------------------------------------------------------------------------------------------------|
| 15 | 79,500,000 | 79,650,000 | 1061 | 2117 | 0.630641019  | ENSBTAG00000010005,ENSBTAG00000027275,ENSBTAG00000035487,ENSBTAG00000035489,ENSBTAG0000037666,ENSBTAG00000046923                                       |
| 15 | 79,575,000 | 79,725,000 | 1062 | 1531 | -0.06204684  | ENSBTAG00000010005,ENSBTAG00000011521,ENSBTAG00000035485,ENSBTAG00000037666,ENSBTAG000039272,ENSBTAG00000040425,ENSBTAG00000046923                     |
| 15 | 79,650,000 | 79,800,000 | 1063 | 1611 | -0.332753007 | ENSBTAG00000005624,ENSBTAG00000007944,ENSBTAG00000011521,ENSBTAG00000035485,ENSBTAG000039272,ENSBTAG00000040341,ENSBTAG00000040425                     |
| 15 | 79,725,000 | 79,875,000 | 1064 | 1604 | 0.301191639  | ENSBTAG00000003056,ENSBTAG00000005087,ENSBTAG00000005624,ENSBTAG00000007944,ENSBTAG0000014594,ENSBTAG00000015876,ENSBTAG00000020746,ENSBTAG00000040341 |
| 15 | 79,800,000 | 79,950,000 | 1065 | 1418 | 0.072999954  | ENSBTAG00000003056,ENSBTAG00000005087,ENSBTAG00000014594,ENSBTAG00000015876,ENSBTAG0000020746,ENSBTAG00000023511,ENSBTAG00000046471,ENSBTAG00000048141 |
| 15 | 79,875,000 | 80,025,000 | 1066 | 1695 | 0.066727677  | ENSBTAG00000005874,ENSBTAG00000023511,ENSBTAG00000030920,ENSBTAG00000039331,ENSBTAG0000046471,ENSBTAG00000048141                                       |
| 15 | 79,950,000 | 80,100,000 | 1067 | 1892 | 0.122542627  | ENSBTAG00000005874,ENSBTAG00000030920,ENSBTAG00000039331                                                                                               |
| 15 | 80,025,000 | 80,175,000 | 1068 | 1630 | 0.344480772  | ENSBTAG00000030920                                                                                                                                     |
| 15 | 80,100,000 | 80,250,000 | 1069 | 1500 | 0.62642447   | ENSBTAG00000046527                                                                                                                                     |
| 15 | 80,175,000 | 80,325,000 | 1070 | 1979 | -0.234856799 | OR8I2,ENSBTAG00000001291,ENSBTAG00000014309,ENSBTAG00000046527                                                                                         |
| 15 | 80,250,000 | 80,400,000 | 1071 | 1871 | -0.511976163 | OR8I2,ENSBTAG00000001291,ENSBTAG00000014309,ENSBTAG00000037878,ENSBTAG00000045709,ENSBTAG00000046278                                                   |
| 15 | 80,325,000 | 80,475,000 | 1072 | 1070 | 0.072132718  | ENSBTAG00000035988,ENSBTAG00000037878,ENSBTAG00000045709,ENSBTAG00000046278                                                                            |
| 15 | 80,400,000 | 80,550,000 | 1073 | 727  | -0.746521295 | ENSBTAG00000035059,ENSBTAG00000035985,ENSBTAG00000035986,ENSBTAG00000035988,ENSBTAG0000046274,ENSBTAG00000046710                                       |
| 15 | 80,475,000 | 80,625,000 | 1074 | 1024 | -0.989327124 | ENSBTAG00000022858,ENSBTAG00000023310,ENSBTAG00000024423,ENSBTAG00000035059,ENSBTAG0000035985,ENSBTAG00000035986,ENSBTAG00000046274,ENSBTAG00000046710 |
| 15 | 80,550,000 | 80,700,000 | 1075 | 1579 | -0.476391887 | ENSBTAG00000022858,ENSBTAG00000023310,ENSBTAG00000024423,ENSBTAG00000035990,ENSBTAG0000038049,ENSBTAG00000039348,ENSBTAG00000046845                    |
| 15 | 80,625,000 | 80,775,000 | 1076 | 1641 | -0.499730178 | ENSBTAG00000035989,ENSBTAG00000035990,ENSBTAG00000038049,ENSBTAG00000039348,ENSBTAG0000046845                                                          |
| 15 | 80,700,000 | 80,850,000 | 1077 | 1369 | -0.008846311 | OR5J2,ENSBTAG00000035031,ENSBTAG00000035989,ENSBTAG00000045723                                                                                         |
| 15 | 80,775,000 | 80,925,000 | 1078 | 1468 | 0.573984929  | OR5J2,ENSBTAG00000035029,ENSBTAG00000035031,ENSBTAG00000045723,ENSBTAG00000046801,ENSBTAG00000047721                                                   |

|    |            |            |      |      |              |                                                                                                                                      |
|----|------------|------------|------|------|--------------|--------------------------------------------------------------------------------------------------------------------------------------|
| 15 | 80,850,000 | 81,000,000 | 1079 | 1707 | 0.454220588  | ENSBTAG00000035029,ENSBTAG00000038479,ENSBTAG00000039110,ENSBTAG00000045739,ENSBTAG0000046801,ENSBTAG00000047721                     |
| 15 | 80,925,000 | 81,075,000 | 1080 | 1994 | -0.223837513 | OR5M11,OR5M3,ENSBTAG00000038479,ENSBTAG0000039110,ENSBTAG00000045739                                                                 |
| 15 | 81,000,000 | 81,150,000 | 1081 | 2193 | -0.364519051 | OR5M11,OR5M3,ENSBTAG00000006421,ENSBTAG0000016146,ENSBTAG00000023542,ENSBTAG00000036130                                              |
| 15 | 81,075,000 | 81,225,000 | 1082 | 2170 | 0.659453018  | ENSBTAG00000006421,ENSBTAG00000016146,ENSBTAG00000023542,ENSBTAG00000036130,ENSBTAG00000036131,ENSBTAG00000039801,ENSBTAG00000040463 |
| 15 | 81,150,000 | 81,300,000 | 1083 | 1674 | 0.973806952  | ENSBTAG00000036131,ENSBTAG00000037928,ENSBTAG00000038539,ENSBTAG00000039801,ENSBTAG00000040463                                       |
| 15 | 81,225,000 | 81,375,000 | 1084 | 990  | 0.411718463  | ENSBTAG00000031017,ENSBTAG00000037928,ENSBTAG00000038539                                                                             |
| 15 | 81,300,000 | 81,450,000 | 1085 | 1430 | 0.539702805  | ENSBTAG00000023202,ENSBTAG00000031017,ENSBTAG00000038539                                                                             |
| 15 | 81,375,000 | 81,525,000 | 1086 | 1709 | 0.862146243  | OR5AK2,ENSBTAG00000023202,ENSBTAG00000031017,ENSBTAG00000039448                                                                      |
| 15 | 81,450,000 | 81,600,000 | 1087 | 1671 | 0.034614562  | OR5AK2,ENSBTAG00000023202,ENSBTAG00000039448                                                                                         |
| 15 | 81,525,000 | 81,675,000 | 1088 | 2014 | 0.069461572  | LRRC55                                                                                                                               |
| 15 | 81,600,000 | 81,750,000 | 1089 | 2043 | 0.819623372  | APLNR,LRRC55                                                                                                                         |
| 15 | 81,675,000 | 81,825,000 | 1090 | 1829 | 0.971217183  | APLNR,LRRC55,SSRP1,TNKS1BP1                                                                                                          |
| 15 | 81,750,000 | 81,900,000 | 1091 | 1415 | 0.772436928  | P2RX3,PRG3,SSRP1,TNKS1BP1                                                                                                            |
| 15 | 81,825,000 | 81,975,000 | 1092 | 1447 | 0.639574473  | P2RX3,PRG3,SSRP1,ENSBTAG00000040320                                                                                                  |
| 15 | 81,900,000 | 82,050,000 | 1093 | 1506 | 0.802537017  | PRG3,RTN4RL2,SLC43A3,ENSBTAG00000040320                                                                                              |
| 15 | 81,975,000 | 82,125,000 | 1094 | 1317 | 1.048912918  | RTN4RL2,SLC43A3,SMTNL1,TIMM10,UBE2L6                                                                                                 |
| 15 | 82,050,000 | 82,200,000 | 1095 | 1527 | 1.136841843  | SERPING1,SMTNL1,TIMM10,UBE2L6                                                                                                        |
| 15 | 82,125,000 | 82,275,000 | 1096 | 1381 | 1.10932691   | CLP1,SERPING1,UBE2L6                                                                                                                 |
| 15 | 82,200,000 | 82,350,000 | 1097 | 971  | 1.135347947  | CLP1,CTNND1,ZDHHC5                                                                                                                   |
| 15 | 82,275,000 | 82,425,000 | 1098 | 1117 | 0.111649596  | BTBD18,CTNND1,MED19,TMX2,ZDHHC5                                                                                                      |
| 15 | 82,350,000 | 82,500,000 | 1099 | 1522 | -0.931185275 | BTBD18,MED19,TMX2,ZDHHC5                                                                                                             |
| 15 | 82,425,000 | 82,575,000 | 1100 | 1928 | -0.613267818 | ENSBTAG0000007971,ENSBTAG00000047396                                                                                                 |
| 15 | 82,500,000 | 82,650,000 | 1101 | 1811 | 0.07331459   | OR9I1,ENSBTAG0000007971,ENSBTAG00000047396                                                                                           |
| 15 | 82,575,000 | 82,725,000 | 1102 | 1827 | 0.468907761  | OR9I1,ENSBTAG00000038267                                                                                                             |
| 15 | 82,650,000 | 82,800,000 | 1103 | 1646 | 0.393398122  | OR10Q1,OR9Q2,ENSBTAG00000038267,ENSBTAG00000040150                                                                                   |
| 15 | 82,725,000 | 82,875,000 | 1104 | 1560 | 0.213014985  | OR10Q1,OR10W1,OR5B3,OR9Q2,ENSBTAG00000039306,ENSBTAG00000040150                                                                      |
| 15 | 82,800,000 | 82,950,000 | 1105 | 1712 | -0.045831062 | OR10W1,OR5B17,OR5B3,ENSBTAG00000014572,ENSBTAG00000037853,ENSBTAG00000039306                                                         |
| 15 | 82,875,000 | 83,025,000 | 1106 | 1275 | 0.138892082  | OR5B17,OR5B2,OR5B3,ENSBTAG00000013503,ENSBTAG00000014572,ENSBTAG00000037853,ENSBTAG00000039592                                       |
| 15 | 82,950,000 | 83,100,000 | 1107 | 1392 | 0.637403452  | OR5B2,ENSBTAG00000013503,ENSBTAG00000027942,ENSBTAG00000036042,ENSBTAG00000039592,ENSBTAG00000047464                                 |
| 15 | 83,025,000 | 83,175,000 | 1108 | 1669 | 0.388628144  | ENSBTAG00000027942,ENSBTAG00000036042,ENSBTAG00000046380,ENSBTAG00000046460,ENSBTAG00000047464                                       |

|    |            |            |      |      |              |                                                                                                                                    |
|----|------------|------------|------|------|--------------|------------------------------------------------------------------------------------------------------------------------------------|
| 15 | 83,100,000 | 83,250,000 | 1109 | 1357 | 0.197664576  | LPXN,ENSBTAG00000024657,ENSBTAG00000046380,ENSBTAG00000046460                                                                      |
| 15 | 83,175,000 | 83,325,000 | 1110 | 1060 | 0.432584086  | CNTF,LPXN,ENSBTAG00000024657                                                                                                       |
| 15 | 83,250,000 | 83,400,000 | 1111 | 1079 | 0.094738979  | CNTF,MPEG1,ENSBTAG00000024657,ENSBTAG0000038058                                                                                    |
| 15 | 83,325,000 | 83,475,000 | 1112 | 990  | -0.13145361  | GLYAT,MPEG1,ENSBTAG00000012540,ENSBTAG0000038058                                                                                   |
| 15 | 83,400,000 | 83,550,000 | 1113 | 744  | 0.074439785  | GLYAT,GLYATL2,ENSBTAG00000012540,ENSBTAG0000038058                                                                                 |
| 15 | 83,475,000 | 83,625,000 | 1114 | 767  | 0.310252312  | FAM111A,FAM111B,GLYATL2,ENSBTAG00000012540                                                                                         |
| 15 | 83,550,000 | 83,700,000 | 1115 | 976  | 0.432201575  | DTX4,FAM111A,FAM111B                                                                                                               |
| 15 | 83,625,000 | 83,775,000 | 1116 | 881  | 0.255384309  | DTX4,ENSBTAG00000039760                                                                                                            |
| 15 | 83,700,000 | 83,850,000 | 1117 | 665  | -0.625541637 | ENSBTAG00000005255,ENSBTAG00000039760                                                                                              |
| 15 | 83,775,000 | 83,925,000 | 1118 | 612  | -1.457572717 | ENSBTAG00000005255,ENSBTAG00000040023,ENSBTAG00000046811                                                                           |
| 15 | 83,850,000 | 84,000,000 | 1119 | 1171 | 0.840062894  | OR4D6,OR5A1,ENSBTAG00000037538,ENSBTAG0000040023,ENSBTAG00000046811                                                                |
| 15 | 83,925,000 | 84,075,000 | 1120 | 1676 | 0.848342312  | OR4D6,OR4D9,OR5A1,ENSBTAG00000001432,ENSBTAG00000002071,ENSBTAG00000002679,ENSBTAG0000018259,ENSBTAG00000033519,ENSBTAG00000037538 |
| 15 | 84,000,000 | 84,150,000 | 1121 | 1156 | 0.626042356  | OR4D9,OSBP,ENSBTAG00000001432,ENSBTAG00000002071,ENSBTAG00000002679,ENSBTAG00000018259,ENSBTAG00000033506,ENSBTAG00000033519       |
| 15 | 84,075,000 | 84,225,000 | 1122 | 531  | 0.941628863  | OR4D9,OSBP,PATL1,ENSBTAG00000033506                                                                                                |
| 15 | 84,150,000 | 84,300,000 | 1123 | 508  | -0.148604014 | OR10V1,PATL1,ENSBTAG00000048032                                                                                                    |
| 15 | 84,225,000 | 84,375,000 | 1124 | 635  | -0.543360014 | GIF,MRPL16,OR10V1,STX3,ENSBTAG00000048032                                                                                          |
| 15 | 84,300,000 | 84,450,000 | 1125 | 872  | 0.004736118  | GIF,MRPL16,OOSP1,STX3,TCN1                                                                                                         |
| 15 | 84,375,000 | 84,525,000 | 1126 | 850  | -0.057140525 | GIF,MS4A2,MS4A3,OOSP1,TCN1                                                                                                         |
| 15 | 84,450,000 | 84,600,000 | 1127 | 887  | -0.109051174 | MS4A14,MS4A2,MS4A3,MS4A5,MS4A7                                                                                                     |
| 15 | 84,525,000 | 84,675,000 | 1128 | 900  | -0.346056459 | MS4A1,MS4A13,MS4A14,MS4A5,MS4A7                                                                                                    |
| 15 | 84,600,000 | 84,750,000 | 1129 | 503  | -1.307658744 | MS4A1,MS4A13,MS4A5                                                                                                                 |
| 15 | 84,675,000 | 84,825,000 | 1130 | 384  | -0.208445394 | MS4A13,NCAPD3                                                                                                                      |
| 15 | 84,750,000 | 84,900,000 | 1131 | 382  | -0.07512502  | ACAD8,NCAPD3,THYN1,VPS26B,ENSBTAG00000012229                                                                                       |
| 15 | 84,825,000 | 84,975,000 | 1132 | 482  | -0.033513026 | ACAD8,GLB1L2,GLB1L3,NCAPD3,THYN1,VPS26B,ENSBTAG00000012229                                                                         |
| 15 | 84,900,000 | 85,050,000 | 1133 | 570  | 0.705279859  | B3GAT1,GLB1L2,GLB1L3,ENSBTAG00000012229                                                                                            |
| 15 | 84,975,000 | 85,125,000 | 1134 | 432  | 1.071936     | B3GAT1,GLB1L2                                                                                                                      |
| 15 | 85,050,000 | 85,200,000 | 1135 | 579  | 1.255370393  |                                                                                                                                    |
| 15 | 85,125,000 | 85,275,000 | 1136 | 770  | 1.301087297  | ENSBTAG00000048316                                                                                                                 |
| 15 | 85,200,000 | 85,296,676 | 1137 | 428  | -0.679201025 | ENSBTAG00000048316                                                                                                                 |
| 16 | 0          | 150,000    | 1    | 611  | 0.423622783  |                                                                                                                                    |
| 16 | 75,000     | 225,000    | 2    | 627  | 0.625577201  |                                                                                                                                    |
| 16 | 150,000    | 300,000    | 3    | 509  | 0.533308741  | ENSBTAG00000035659                                                                                                                 |
| 16 | 225,000    | 375,000    | 4    | 654  | 0.263276763  | ENSBTAG00000015517,ENSBTAG00000035659                                                                                              |
| 16 | 300,000    | 450,000    | 5    | 938  | 0.423086036  | ENSBTAG00000015517,ENSBTAG00000039944,ENSBTAG00000047603                                                                           |
| 16 | 375,000    | 525,000    | 6    | 1014 | 0.806876933  | TMEM183,ENSBTAG00000039944,ENSBTAG00000047603                                                                                      |
| 16 | 450,000    | 600,000    | 7    | 1001 | 0.859776009  | MYOG,PPFIA4,TMEM183                                                                                                                |
| 16 | 525,000    | 675,000    | 8    | 879  | 0.262087529  | MYOG,PPFIA4,TMEM183                                                                                                                |
| 16 | 600,000    | 750,000    | 9    | 840  | -0.770339494 | ADORA1                                                                                                                             |

|    |           |           |    |      |              |                                                   |
|----|-----------|-----------|----|------|--------------|---------------------------------------------------|
| 16 | 675,000   | 825,000   | 10 | 1158 | -1.138511464 | ADORA1,CHI3L1,MYBPH                               |
| 16 | 750,000   | 900,000   | 11 | 1540 | -1.141884466 | ADORA1,BTG2,CHI3L1,MYBPH                          |
| 16 | 825,000   | 975,000   | 12 | 1707 | -0.156996238 | BTG2,FMOD                                         |
| 16 | 900,000   | 1,050,000 | 13 | 1967 | 0.743458777  | FMOD,PRELP                                        |
| 16 | 975,000   | 1,125,000 | 14 | 1855 | 0.726895249  | OPTC,PRELP                                        |
| 16 | 1,050,000 | 1,200,000 | 15 | 1445 | 0.805512067  | OPTC,PRELP                                        |
| 16 | 1,125,000 | 1,275,000 | 16 | 952  | 0.56755825   | ATP2B4                                            |
| 16 | 1,200,000 | 1,350,000 | 17 | 542  | -0.319062173 | ATP2B4,LAX1                                       |
| 16 | 1,275,000 | 1,425,000 | 18 | 477  | -0.099728374 | ATP2B4,LAX1,ZBED6,ZC3H11A                         |
| 16 | 1,350,000 | 1,500,000 | 19 | 871  | 0.480914387  | ZBED6,ZC3H11A                                     |
| 16 | 1,425,000 | 1,575,000 | 20 | 1327 | 0.241990103  | ZC3H11A                                           |
| 16 | 1,500,000 | 1,650,000 | 21 | 1244 | 0.056168367  |                                                   |
| 16 | 1,575,000 | 1,725,000 | 22 | 823  | -0.000976391 | SOX13                                             |
| 16 | 1,650,000 | 1,800,000 | 23 | 471  | -0.963405773 | ETNK2,GOLT1A,KISS1,REN,SOX13                      |
| 16 | 1,725,000 | 1,875,000 | 24 | 596  | -0.317701852 | ETNK2,GOLT1A,KISS1,PLEKHA6,REN,SOX13              |
| 16 | 1,800,000 | 1,950,000 | 25 | 587  | 0.641206345  | PLEKHA6                                           |
| 16 | 1,875,000 | 2,025,000 | 26 | 643  | 0.452388084  | PIK3C2B,PLEKHA6,PPP1R15B                          |
| 16 | 1,950,000 | 2,100,000 | 27 | 784  | 0.429971404  | MDM4,PIK3C2B,PPP1R15B                             |
| 16 | 2,025,000 | 2,175,000 | 28 | 955  | 0.243297636  | MDM4,PIK3C2B,ENSBTAG00000026068,ENSBTAG0000034611 |
| 16 | 2,100,000 | 2,250,000 | 29 | 1416 | 0.158461703  | LRRN5,MDM4,ENSBTAG00000026068,ENSBTAG0000034611   |
| 16 | 2,175,000 | 2,325,000 | 30 | 1440 | -0.352941292 | LRRN5                                             |
| 16 | 2,250,000 | 2,400,000 | 31 | 1574 | 0.165915084  |                                                   |
| 16 | 2,325,000 | 2,475,000 | 32 | 1948 | 0.863825287  |                                                   |
| 16 | 2,400,000 | 2,550,000 | 33 | 1747 | -0.776512073 |                                                   |
| 16 | 2,475,000 | 2,625,000 | 34 | 1081 | -1.907438535 | NFASC                                             |
| 16 | 2,550,000 | 2,700,000 | 35 | 518  | 0.048950438  | CNTN2,NFASC,RBBP5,TMEM81                          |
| 16 | 2,625,000 | 2,775,000 | 36 | 426  | 0.468533903  | CNTN2,DSTYK,NFASC,RBBP5,TMEM81                    |
| 16 | 2,700,000 | 2,850,000 | 37 | 527  | 0.648493821  | DSTYK,RBBP5,TMCC2                                 |
| 16 | 2,775,000 | 2,925,000 | 38 | 542  | 1.03000706   | DSTYK,NUAK2,TMCC2                                 |
| 16 | 2,850,000 | 3,000,000 | 39 | 813  | -0.107949834 | KLHDC8A,LEMD1,NUAK2,TMCC2                         |
| 16 | 2,925,000 | 3,075,000 | 40 | 876  | -0.589601843 | KLHDC8A,LEMD1                                     |
| 16 | 3,000,000 | 3,150,000 | 41 | 668  | 0.087513915  | LEMD1,PCTK3                                       |
| 16 | 3,075,000 | 3,225,000 | 42 | 628  | 0.160364463  | ELK4,MFSD4,PCTK3                                  |
| 16 | 3,150,000 | 3,300,000 | 43 | 441  | -0.194349516 | ELK4,MFSD4,SLC45A3                                |
| 16 | 3,225,000 | 3,375,000 | 44 | 331  | -0.140822783 | NUCKS1,RAB7L1,SLC41A1,SLC45A3                     |
| 16 | 3,300,000 | 3,450,000 | 45 | 343  | 0.319938925  | NUCKS1,PM20D1,RAB7L1,SLC41A1                      |
| 16 | 3,375,000 | 3,525,000 | 46 | 589  | 0.476608165  | PM20D1,SLC26A9,SLC41A1                            |
| 16 | 3,450,000 | 3,600,000 | 47 | 899  | 0.761506431  | PM20D1,RAB7B,SLC26A9                              |
| 16 | 3,525,000 | 3,675,000 | 48 | 1022 | 0.656140358  | RAB7B                                             |
| 16 | 3,600,000 | 3,750,000 | 49 | 749  | 0.501733627  | AVPR1B,C1orf186,RAB7B                             |
| 16 | 3,675,000 | 3,825,000 | 50 | 424  | 0.392482929  | AVPR1B,C1orf186                                   |
| 16 | 3,750,000 | 3,900,000 | 51 | 503  | 0.815732515  | FAM72A                                            |
| 16 | 3,825,000 | 3,975,000 | 52 | 448  | 0.975567289  | FAM72A                                            |
| 16 | 3,900,000 | 4,050,000 | 53 | 450  | 0.623569713  | ENSBTAG00000001483                                |
| 16 | 3,975,000 | 4,125,000 | 54 | 892  | 0.45329481   | IKBKE,ENSBTAG00000001483                          |
| 16 | 4,050,000 | 4,200,000 | 55 | 1250 | -0.936384662 | IKBKE,RASSF5,ENSBTAG00000001483                   |
| 16 | 4,125,000 | 4,275,000 | 56 | 1218 | -1.028582012 | DYRK3,EIF2D,IKBKE,RASSF5                          |
| 16 | 4,200,000 | 4,350,000 | 57 | 1069 | 0.817558699  | DYRK3,EIF2D,MAPKAPK2,RASSF5                       |
| 16 | 4,275,000 | 4,425,000 | 58 | 950  | 1.025340959  | DYRK3,IL10,MAPKAPK2                               |
| 16 | 4,350,000 | 4,500,000 | 59 | 797  | 0.95199692   | IL10,IL19,MAPKAPK2                                |
| 16 | 4,425,000 | 4,575,000 | 60 | 930  | 0.779873915  | FCAMR,IL19,IL20,PIGR                              |

|    |           |           |     |      |              |                                       |
|----|-----------|-----------|-----|------|--------------|---------------------------------------|
| 16 | 4,500,000 | 4,650,000 | 61  | 1112 | 0.621879734  | FAIM3,FCAMR,IL20,IL24,PIGR            |
| 16 | 4,575,000 | 4,725,000 | 62  | 805  | 0.826450171  | FAIM3,IL24,SARG,YOD1                  |
| 16 | 4,650,000 | 4,800,000 | 63  | 620  | 0.482192746  | C4BPA,C4BPB,PFKFB2,SARG,YOD1          |
| 16 | 4,725,000 | 4,875,000 | 64  | 705  | 0.873044845  | C4BPA,C4BPB,PFKFB2                    |
| 16 | 4,800,000 | 4,950,000 | 65  | 951  | 1.440248996  | C4BPA,ENSBTAG00000039196              |
| 16 | 4,875,000 | 5,025,000 | 66  | 1265 | 1.168849784  | ENSBTAG00000039196,ENSBTAG00000047621 |
| 16 | 4,950,000 | 5,100,000 | 67  | 1260 | 0.873187127  | ENSBTAG00000039196,ENSBTAG00000047621 |
| 16 | 5,025,000 | 5,175,000 | 68  | 917  | 0.27240238   | CD55                                  |
| 16 | 5,100,000 | 5,250,000 | 69  | 535  | -1.210550497 | CD55                                  |
| 16 | 5,175,000 | 5,325,000 | 70  | 573  | -0.293638389 | CR2                                   |
| 16 | 5,250,000 | 5,400,000 | 71  | 953  | 0.679358544  | CR2                                   |
| 16 | 5,325,000 | 5,475,000 | 72  | 1129 | 0.862540662  |                                       |
| 16 | 5,400,000 | 5,550,000 | 73  | 1308 | 0.576881706  | ENSBTAG00000023177                    |
| 16 | 5,475,000 | 5,625,000 | 74  | 1467 | 0.268387387  | ENSBTAG00000023177,ENSBTAG00000024647 |
| 16 | 5,550,000 | 5,700,000 | 75  | 1616 | 0.091566768  | ENSBTAG00000023177,ENSBTAG00000024647 |
| 16 | 5,625,000 | 5,775,000 | 76  | 2305 | 0.071447614  | ENSBTAG00000024647                    |
| 16 | 5,700,000 | 5,850,000 | 77  | 2165 | 0.216304974  | ENSBTAG00000024647,ENSBTAG00000040409 |
| 16 | 5,775,000 | 5,925,000 | 78  | 2070 | 0.339399311  | ENSBTAG00000024647,ENSBTAG00000040409 |
| 16 | 5,850,000 | 6,000,000 | 79  | 2151 | 0.495859846  | ENSBTAG00000024647,ENSBTAG00000040409 |
| 16 | 5,925,000 | 6,075,000 | 80  | 1973 | 0.54068847   | CFH,ENSBTAG00000024647                |
| 16 | 6,000,000 | 6,150,000 | 81  | 2109 | 0.607926689  | CFH                                   |
| 16 | 6,075,000 | 6,225,000 | 82  | 1662 | 0.833149381  | CFH                                   |
| 16 | 6,150,000 | 6,300,000 | 83  | 915  | 0.530016874  |                                       |
| 16 | 6,225,000 | 6,375,000 | 84  | 423  | -0.712656968 | KCNT2                                 |
| 16 | 6,300,000 | 6,450,000 | 85  | 527  | 0.263295539  | KCNT2                                 |
| 16 | 6,375,000 | 6,525,000 | 86  | 776  | 1.176688144  | KCNT2                                 |
| 16 | 6,450,000 | 6,600,000 | 87  | 785  | 1.045795634  | KCNT2                                 |
| 16 | 6,525,000 | 6,675,000 | 88  | 599  | -0.654325071 | KCNT2                                 |
| 16 | 6,600,000 | 6,750,000 | 89  | 750  | -0.646949004 | KCNT2                                 |
| 16 | 6,675,000 | 6,825,000 | 90  | 837  | 0.29912141   |                                       |
| 16 | 6,750,000 | 6,900,000 | 91  | 924  | -0.371254458 |                                       |
| 16 | 6,825,000 | 6,975,000 | 92  | 840  | -0.299319444 |                                       |
| 16 | 6,900,000 | 7,050,000 | 93  | 474  | 0.123301621  |                                       |
| 16 | 6,975,000 | 7,125,000 | 94  | 971  | -0.30153451  |                                       |
| 16 | 7,050,000 | 7,200,000 | 95  | 1141 | -0.25276481  |                                       |
| 16 | 7,125,000 | 7,275,000 | 96  | 692  | 0.112843137  |                                       |
| 16 | 7,200,000 | 7,350,000 | 97  | 607  | 0.078624131  |                                       |
| 16 | 7,275,000 | 7,425,000 | 98  | 866  | 0.097177988  |                                       |
| 16 | 7,350,000 | 7,500,000 | 99  | 1003 | -0.24840218  |                                       |
| 16 | 7,425,000 | 7,575,000 | 100 | 911  | -0.581987669 |                                       |
| 16 | 7,500,000 | 7,650,000 | 101 | 920  | -0.56060539  |                                       |
| 16 | 7,575,000 | 7,725,000 | 102 | 850  | 0.013522829  |                                       |
| 16 | 7,650,000 | 7,800,000 | 103 | 1215 | 0.412077186  |                                       |
| 16 | 7,725,000 | 7,875,000 | 104 | 1472 | 0.06249237   |                                       |
| 16 | 7,800,000 | 7,950,000 | 105 | 1306 | -1.076677839 |                                       |
| 16 | 7,875,000 | 8,025,000 | 106 | 1375 | 0.095861121  |                                       |
| 16 | 7,950,000 | 8,100,000 | 107 | 1404 | 1.243160039  |                                       |
| 16 | 8,025,000 | 8,175,000 | 108 | 1501 | 1.391655365  |                                       |
| 16 | 8,100,000 | 8,250,000 | 109 | 1552 | 1.389072109  | ENSBTAG00000025113                    |
| 16 | 8,175,000 | 8,325,000 | 110 | 1003 | 1.337326429  | ENSBTAG00000025113                    |
| 16 | 8,250,000 | 8,400,000 | 111 | 1031 | 1.077582977  |                                       |
| 16 | 8,325,000 | 8,475,000 | 112 | 1677 | 0.892873044  |                                       |
| 16 | 8,400,000 | 8,550,000 | 113 | 1585 | 0.565588769  |                                       |



|    |            |            |     |      |              |                    |
|----|------------|------------|-----|------|--------------|--------------------|
| 16 | 8,475,000  | 8,625,000  | 114 | 1143 | 0.337067065  |                    |
| 16 | 8,550,000  | 8,700,000  | 115 | 1237 | 0.9697552    |                    |
| 16 | 8,625,000  | 8,775,000  | 116 | 1585 | 1.247786163  |                    |
| 16 | 8,700,000  | 8,850,000  | 117 | 1176 | 1.216772906  |                    |
| 16 | 8,775,000  | 8,925,000  | 118 | 1063 | 0.504506575  |                    |
| 16 | 8,850,000  | 9,000,000  | 119 | 1675 | 0.644561342  |                    |
| 16 | 8,925,000  | 9,075,000  | 120 | 1670 | 1.027265912  |                    |
| 16 | 9,000,000  | 9,150,000  | 121 | 1549 | 0.699081965  |                    |
| 16 | 9,075,000  | 9,225,000  | 122 | 1479 | 0.624272872  |                    |
| 16 | 9,150,000  | 9,300,000  | 123 | 1417 | 1.047766426  |                    |
| 16 | 9,225,000  | 9,375,000  | 124 | 1501 | 1.053067178  |                    |
| 16 | 9,300,000  | 9,450,000  | 125 | 1522 | 1.019209641  |                    |
| 16 | 9,375,000  | 9,525,000  | 126 | 1155 | 0.822921787  |                    |
| 16 | 9,450,000  | 9,600,000  | 127 | 800  | 0.385656511  |                    |
| 16 | 9,525,000  | 9,675,000  | 128 | 1101 | 0.875294706  |                    |
| 16 | 9,600,000  | 9,750,000  | 129 | 1284 | 1.074957224  |                    |
| 16 | 9,675,000  | 9,825,000  | 130 | 1721 | 0.765760529  |                    |
| 16 | 9,750,000  | 9,900,000  | 131 | 1754 | 0.712856904  |                    |
| 16 | 9,825,000  | 9,975,000  | 132 | 1145 | 0.746045662  |                    |
| 16 | 9,900,000  | 10,050,000 | 133 | 1339 | -1.142382452 |                    |
| 16 | 9,975,000  | 10,125,000 | 134 | 1740 | -1.392965021 |                    |
| 16 | 10,050,000 | 10,200,000 | 135 | 1830 | 0.166708984  |                    |
| 16 | 10,125,000 | 10,275,000 | 136 | 1886 | 0.644182554  |                    |
| 16 | 10,200,000 | 10,350,000 | 137 | 1761 | 0.626029371  |                    |
| 16 | 10,275,000 | 10,425,000 | 138 | 2037 | 1.060913034  |                    |
| 16 | 10,350,000 | 10,500,000 | 139 | 2129 | 0.441871219  |                    |
| 16 | 10,425,000 | 10,575,000 | 140 | 2090 | -0.454856324 |                    |
| 16 | 10,500,000 | 10,650,000 | 141 | 2043 | -0.110994046 |                    |
| 16 | 10,575,000 | 10,725,000 | 142 | 1587 | 0.909818136  |                    |
| 16 | 10,650,000 | 10,800,000 | 143 | 1306 | 1.002041917  |                    |
| 16 | 10,725,000 | 10,875,000 | 144 | 1201 | 0.702401447  |                    |
| 16 | 10,800,000 | 10,950,000 | 145 | 1242 | 0.640982163  |                    |
| 16 | 10,875,000 | 11,025,000 | 146 | 991  | 0.74194227   |                    |
| 16 | 10,950,000 | 11,100,000 | 147 | 861  | 0.51834819   | ENSBTAG00000014862 |
| 16 | 11,025,000 | 11,175,000 | 148 | 1123 | -0.86195738  | ENSBTAG00000014862 |
| 16 | 11,100,000 | 11,250,000 | 149 | 919  | -1.320702358 |                    |
| 16 | 11,175,000 | 11,325,000 | 150 | 652  | 0.434472513  |                    |
| 16 | 11,250,000 | 11,400,000 | 151 | 1000 | 0.753692766  |                    |
| 16 | 11,325,000 | 11,475,000 | 152 | 1372 | 0.580044617  |                    |
| 16 | 11,400,000 | 11,550,000 | 153 | 1459 | 0.540906649  |                    |
| 16 | 11,475,000 | 11,625,000 | 154 | 1342 | 0.949107533  |                    |
| 16 | 11,550,000 | 11,700,000 | 155 | 1371 | 0.820929376  |                    |
| 16 | 11,625,000 | 11,775,000 | 156 | 1507 | -1.580251981 |                    |
| 16 | 11,700,000 | 11,850,000 | 157 | 1397 | -1.321538206 |                    |
| 16 | 11,775,000 | 11,925,000 | 158 | 1212 | 0.679105117  |                    |
| 16 | 11,850,000 | 12,000,000 | 159 | 1068 | 0.519795019  |                    |
| 16 | 11,925,000 | 12,075,000 | 160 | 987  | 0.53945141   |                    |
| 16 | 12,000,000 | 12,150,000 | 161 | 1040 | -0.926717912 |                    |
| 16 | 12,075,000 | 12,225,000 | 162 | 785  | -1.196829217 |                    |
| 16 | 12,150,000 | 12,300,000 | 163 | 674  | -0.183984583 |                    |
| 16 | 12,225,000 | 12,375,000 | 164 | 900  | -0.040681814 |                    |
| 16 | 12,300,000 | 12,450,000 | 165 | 655  | 0.309892754  |                    |
| 16 | 12,375,000 | 12,525,000 | 166 | 656  | -0.201939719 |                    |

|    |            |            |     |      |              |                                             |
|----|------------|------------|-----|------|--------------|---------------------------------------------|
| 16 | 12,450,000 | 12,600,000 | 167 | 830  | -1.09352459  | ENSBTAG00000012765                          |
| 16 | 12,525,000 | 12,675,000 | 168 | 567  | -2.132459419 | CDC73,ENSBTAG00000012765,ENSBTAG00000046060 |
| 16 | 12,600,000 | 12,750,000 | 169 | 329  | -1.449325083 | B3GALT2,CDC73,ENSBTAG00000046060            |
| 16 | 12,675,000 | 12,825,000 | 170 | 293  | -1.258990977 | B3GALT2,CDC73,GLRX2,TROVE2,UCHL5            |
| 16 | 12,750,000 | 12,900,000 | 171 | 331  | -0.312038922 | GLRX2,TROVE2,UCHL5                          |
| 16 | 12,825,000 | 12,975,000 | 172 | 461  | 1.161865833  | UCHL5                                       |
| 16 | 12,900,000 | 13,050,000 | 173 | 812  | 1.256378447  | RGS2                                        |
| 16 | 12,975,000 | 13,125,000 | 174 | 769  | 0.993051569  | RGS2                                        |
| 16 | 13,050,000 | 13,200,000 | 175 | 502  | 0.594646453  |                                             |
| 16 | 13,125,000 | 13,275,000 | 176 | 644  | 1.161838739  | RGS13                                       |
| 16 | 13,200,000 | 13,350,000 | 177 | 929  | 0.53484893   | RGS1,RGS13                                  |
| 16 | 13,275,000 | 13,425,000 | 178 | 903  | -0.468561064 | RGS1                                        |
| 16 | 13,350,000 | 13,500,000 | 179 | 922  | -1.00508484  |                                             |
| 16 | 13,425,000 | 13,575,000 | 180 | 1062 | -0.147410154 | RGS21                                       |
| 16 | 13,500,000 | 13,650,000 | 181 | 810  | 0.296057447  | RGS21                                       |
| 16 | 13,575,000 | 13,725,000 | 182 | 1085 | 0.001765781  |                                             |
| 16 | 13,650,000 | 13,800,000 | 183 | 1390 | 0.074507524  | RGS18                                       |
| 16 | 13,725,000 | 13,875,000 | 184 | 1096 | -0.436063997 | RGS18                                       |
| 16 | 13,800,000 | 13,950,000 | 185 | 841  | 0.005665171  |                                             |
| 16 | 13,875,000 | 14,025,000 | 186 | 1578 | 1.139076587  |                                             |
| 16 | 13,950,000 | 14,100,000 | 187 | 1903 | 1.089893547  |                                             |
| 16 | 14,025,000 | 14,175,000 | 188 | 1414 | 0.720449133  |                                             |
| 16 | 14,100,000 | 14,250,000 | 189 | 1564 | -0.535355027 |                                             |
| 16 | 14,175,000 | 14,325,000 | 190 | 1267 | -1.679044004 |                                             |
| 16 | 14,250,000 | 14,400,000 | 191 | 833  | -1.393050989 |                                             |
| 16 | 14,325,000 | 14,475,000 | 192 | 1186 | -0.771712026 |                                             |
| 16 | 14,400,000 | 14,550,000 | 193 | 1529 | -0.606840978 |                                             |
| 16 | 14,475,000 | 14,625,000 | 194 | 1233 | -0.231023808 |                                             |
| 16 | 14,550,000 | 14,700,000 | 195 | 762  | 0.575205184  |                                             |
| 16 | 14,625,000 | 14,775,000 | 196 | 838  | 0.875788904  |                                             |
| 16 | 14,700,000 | 14,850,000 | 197 | 1248 | 1.174841248  |                                             |
| 16 | 14,775,000 | 14,925,000 | 198 | 1200 | 1.216213965  |                                             |
| 16 | 14,850,000 | 15,000,000 | 199 | 1198 | -0.133484645 |                                             |
| 16 | 14,925,000 | 15,075,000 | 200 | 1138 | -0.553476003 |                                             |
| 16 | 15,000,000 | 15,150,000 | 201 | 1338 | 0.274507682  |                                             |
| 16 | 15,075,000 | 15,225,000 | 202 | 1454 | -0.198852875 |                                             |
| 16 | 15,150,000 | 15,300,000 | 203 | 1108 | -1.520271978 |                                             |
| 16 | 15,225,000 | 15,375,000 | 204 | 1049 | -0.559477375 |                                             |
| 16 | 15,300,000 | 15,450,000 | 205 | 805  | 0.430689652  |                                             |
| 16 | 15,375,000 | 15,525,000 | 206 | 518  | 0.431019744  |                                             |
| 16 | 15,450,000 | 15,600,000 | 207 | 638  | 0.889745943  |                                             |
| 16 | 15,525,000 | 15,675,000 | 208 | 1132 | 1.071279484  |                                             |
| 16 | 15,600,000 | 15,750,000 | 209 | 1387 | 0.334039756  |                                             |
| 16 | 15,675,000 | 15,825,000 | 210 | 1020 | -0.500088613 | BRINP3                                      |
| 16 | 15,750,000 | 15,900,000 | 211 | 717  | 0.205802952  | BRINP3                                      |
| 16 | 15,825,000 | 15,975,000 | 212 | 601  | 0.340552925  | BRINP3                                      |
| 16 | 15,900,000 | 16,050,000 | 213 | 900  | -0.42352214  | BRINP3                                      |
| 16 | 15,975,000 | 16,125,000 | 214 | 1190 | -0.083284344 | BRINP3                                      |
| 16 | 16,050,000 | 16,200,000 | 215 | 1300 | 0.699098648  | BRINP3                                      |
| 16 | 16,125,000 | 16,275,000 | 216 | 1635 | 0.034822588  | BRINP3                                      |
| 16 | 16,200,000 | 16,350,000 | 217 | 1700 | -0.294549788 | BRINP3                                      |
| 16 | 16,275,000 | 16,425,000 | 218 | 1613 | -0.034132602 |                                             |

|    |            |            |     |      |              |                          |
|----|------------|------------|-----|------|--------------|--------------------------|
| 16 | 16,350,000 | 16,500,000 | 219 | 1399 | 0.155795609  |                          |
| 16 | 16,425,000 | 16,575,000 | 220 | 1186 | 0.430598552  |                          |
| 16 | 16,500,000 | 16,650,000 | 221 | 969  | 0.309318087  |                          |
| 16 | 16,575,000 | 16,725,000 | 222 | 801  | -0.224300042 |                          |
| 16 | 16,650,000 | 16,800,000 | 223 | 633  | -0.314806782 |                          |
| 16 | 16,725,000 | 16,875,000 | 224 | 599  | -2.004277527 |                          |
| 16 | 16,800,000 | 16,950,000 | 225 | 981  | -0.670598425 |                          |
| 16 | 16,875,000 | 17,025,000 | 226 | 1573 | 0.868961529  |                          |
| 16 | 16,950,000 | 17,100,000 | 227 | 2005 | 0.463478693  |                          |
| 16 | 17,025,000 | 17,175,000 | 228 | 1724 | 0.237094413  |                          |
| 16 | 17,100,000 | 17,250,000 | 229 | 1656 | -0.249926368 |                          |
| 16 | 17,175,000 | 17,325,000 | 230 | 1980 | -0.697632528 |                          |
| 16 | 17,250,000 | 17,400,000 | 231 | 1934 | -1.01320723  |                          |
| 16 | 17,325,000 | 17,475,000 | 232 | 1578 | -1.740087262 |                          |
| 16 | 17,400,000 | 17,550,000 | 233 | 1101 | -2.029393449 |                          |
| 16 | 17,475,000 | 17,625,000 | 234 | 1045 | 0.274261526  |                          |
| 16 | 17,550,000 | 17,700,000 | 235 | 786  | 0.946735491  |                          |
| 16 | 17,625,000 | 17,775,000 | 236 | 699  | 0.637930736  |                          |
| 16 | 17,700,000 | 17,850,000 | 237 | 1215 | 1.219706534  |                          |
| 16 | 17,775,000 | 17,925,000 | 238 | 1019 | 1.021200182  |                          |
| 16 | 17,850,000 | 18,000,000 | 239 | 762  | -1.144257283 |                          |
| 16 | 17,925,000 | 18,075,000 | 240 | 948  | -1.50847618  |                          |
| 16 | 18,000,000 | 18,150,000 | 241 | 1182 | -0.362967817 |                          |
| 16 | 18,075,000 | 18,225,000 | 242 | 1129 | 0.55801129   |                          |
| 16 | 18,150,000 | 18,300,000 | 243 | 1164 | -1.643451433 |                          |
| 16 | 18,225,000 | 18,375,000 | 244 | 1248 | -2.74374906  |                          |
| 16 | 18,300,000 | 18,450,000 | 245 | 969  | -1.924430476 | ENSBTAG00000046655       |
| 16 | 18,375,000 | 18,525,000 | 246 | 795  | -0.361194285 | ENSBTAG00000046655       |
| 16 | 18,450,000 | 18,600,000 | 247 | 521  | 0.389947093  |                          |
| 16 | 18,525,000 | 18,675,000 | 248 | 748  | 0.379301992  |                          |
| 16 | 18,600,000 | 18,750,000 | 249 | 1023 | 0.039381061  |                          |
| 16 | 18,675,000 | 18,825,000 | 250 | 886  | -0.242608299 |                          |
| 16 | 18,750,000 | 18,900,000 | 251 | 882  | 0.749831772  |                          |
| 16 | 18,825,000 | 18,975,000 | 252 | 803  | 0.802484268  |                          |
| 16 | 18,900,000 | 19,050,000 | 253 | 832  | 0.850266194  |                          |
| 16 | 18,975,000 | 19,125,000 | 254 | 959  | -0.965733872 |                          |
| 16 | 19,050,000 | 19,200,000 | 255 | 1386 | -3.281562814 |                          |
| 16 | 19,125,000 | 19,275,000 | 256 | 1451 | -1.842363372 |                          |
| 16 | 19,200,000 | 19,350,000 | 257 | 879  | -1.27580048  |                          |
| 16 | 19,275,000 | 19,425,000 | 258 | 718  | -1.446063366 |                          |
| 16 | 19,350,000 | 19,500,000 | 259 | 744  | 0.385596894  |                          |
| 16 | 19,425,000 | 19,575,000 | 260 | 749  | 0.043526761  | KCTD3,USH2A              |
| 16 | 19,500,000 | 19,650,000 | 261 | 872  | -0.025340295 | KCTD3,USH2A              |
| 16 | 19,575,000 | 19,725,000 | 262 | 1161 | 0.95271624   | USH2A                    |
| 16 | 19,650,000 | 19,800,000 | 263 | 1273 | 1.090930921  | USH2A                    |
| 16 | 19,725,000 | 19,875,000 | 264 | 1167 | 0.995609094  | USH2A                    |
| 16 | 19,800,000 | 19,950,000 | 265 | 862  | 0.589779146  | USH2A,ENSBTAG00000007997 |
| 16 | 19,875,000 | 20,025,000 | 266 | 767  | -2.068486187 | USH2A,ENSBTAG00000007997 |
| 16 | 19,950,000 | 20,100,000 | 267 | 1016 | -3.568642857 | USH2A                    |
| 16 | 20,025,000 | 20,175,000 | 268 | 1286 | -3.51077527  | USH2A                    |
| 16 | 20,100,000 | 20,250,000 | 269 | 1251 | -2.950044355 | USH2A                    |
| 16 | 20,175,000 | 20,325,000 | 270 | 1232 | -1.180997815 | USH2A                    |
| 16 | 20,250,000 | 20,400,000 | 271 | 1342 | 0.353871364  | USH2A                    |

|    |            |            |     |      |              |                           |
|----|------------|------------|-----|------|--------------|---------------------------|
| 16 | 20,325,000 | 20,475,000 | 272 | 1233 | 0.824129185  | USH2A                     |
| 16 | 20,400,000 | 20,550,000 | 273 | 1330 | 0.781124595  | USH2A                     |
| 16 | 20,475,000 | 20,625,000 | 274 | 1112 | 0.238781633  | ESRRG,USH2A               |
| 16 | 20,550,000 | 20,700,000 | 275 | 797  | -0.012600522 | ESRRG                     |
| 16 | 20,625,000 | 20,775,000 | 276 | 964  | 0.272808599  | ESRRG                     |
| 16 | 20,700,000 | 20,850,000 | 277 | 835  | 0.634907811  | ESRRG                     |
| 16 | 20,775,000 | 20,925,000 | 278 | 509  | 0.529540152  | ESRRG                     |
| 16 | 20,850,000 | 21,000,000 | 279 | 577  | 0.343686921  |                           |
| 16 | 20,925,000 | 21,075,000 | 280 | 731  | -0.28477606  |                           |
| 16 | 21,000,000 | 21,150,000 | 281 | 868  | 0.030320322  |                           |
| 16 | 21,075,000 | 21,225,000 | 282 | 904  | 0.104777974  |                           |
| 16 | 21,150,000 | 21,300,000 | 283 | 795  | -1.168746745 |                           |
| 16 | 21,225,000 | 21,375,000 | 284 | 538  | -1.708004592 |                           |
| 16 | 21,300,000 | 21,450,000 | 285 | 863  | 0.320578411  |                           |
| 16 | 21,375,000 | 21,525,000 | 286 | 963  | 0.596637004  |                           |
| 16 | 21,450,000 | 21,600,000 | 287 | 750  | 0.365760078  |                           |
| 16 | 21,525,000 | 21,675,000 | 288 | 1159 | 0.508532871  |                           |
| 16 | 21,600,000 | 21,750,000 | 289 | 1088 | 0.174778951  |                           |
| 16 | 21,675,000 | 21,825,000 | 290 | 1151 | -0.377862413 | GPATCH2                   |
| 16 | 21,750,000 | 21,900,000 | 291 | 1362 | 0.1286099    | GPATCH2                   |
| 16 | 21,825,000 | 21,975,000 | 292 | 1083 | 0.633932472  |                           |
| 16 | 21,900,000 | 22,050,000 | 293 | 1116 | 1.040203546  |                           |
| 16 | 21,975,000 | 22,125,000 | 294 | 1278 | 1.042502215  |                           |
| 16 | 22,050,000 | 22,200,000 | 295 | 1230 | 0.561416191  |                           |
| 16 | 22,125,000 | 22,275,000 | 296 | 1384 | 0.298873749  |                           |
| 16 | 22,200,000 | 22,350,000 | 297 | 1173 | 0.542281178  |                           |
| 16 | 22,275,000 | 22,425,000 | 298 | 618  | 1.070767642  |                           |
| 16 | 22,350,000 | 22,500,000 | 299 | 399  | 1.207548397  | RRP15,TGFB2               |
| 16 | 22,425,000 | 22,575,000 | 300 | 543  | 0.518863416  | RRP15,TGFB2               |
| 16 | 22,500,000 | 22,650,000 | 301 | 571  | 0.606436808  | TGFB2                     |
| 16 | 22,575,000 | 22,725,000 | 302 | 496  | 1.402218998  | TGFB2                     |
| 16 | 22,650,000 | 22,800,000 | 303 | 618  | 1.299244401  |                           |
| 16 | 22,725,000 | 22,875,000 | 304 | 476  | 1.165649054  |                           |
| 16 | 22,800,000 | 22,950,000 | 305 | 278  | 1.14805296   |                           |
| 16 | 22,875,000 | 23,025,000 | 306 | 349  | 0.888372082  |                           |
| 16 | 22,950,000 | 23,100,000 | 307 | 432  | 0.231468084  |                           |
| 16 | 23,025,000 | 23,175,000 | 308 | 460  | -1.082629995 |                           |
| 16 | 23,100,000 | 23,250,000 | 309 | 836  | -2.019872104 |                           |
| 16 | 23,175,000 | 23,325,000 | 310 | 889  | -2.020582636 |                           |
| 16 | 23,250,000 | 23,400,000 | 311 | 578  | -1.235887204 | LYPLAL1                   |
| 16 | 23,325,000 | 23,475,000 | 312 | 521  | -0.505761011 | LYPLAL1                   |
| 16 | 23,400,000 | 23,550,000 | 313 | 670  | 0.512722564  |                           |
| 16 | 23,475,000 | 23,625,000 | 314 | 601  | 0.499928011  |                           |
| 16 | 23,550,000 | 23,700,000 | 315 | 386  | -0.428539041 |                           |
| 16 | 23,625,000 | 23,775,000 | 316 | 430  | -0.467001388 |                           |
| 16 | 23,700,000 | 23,850,000 | 317 | 477  | -0.440431035 |                           |
| 16 | 23,775,000 | 23,925,000 | 318 | 580  | -0.253511271 |                           |
| 16 | 23,850,000 | 24,000,000 | 319 | 1214 | -0.124481395 |                           |
| 16 | 23,925,000 | 24,075,000 | 320 | 1041 | -0.096955024 |                           |
| 16 | 24,000,000 | 24,150,000 | 321 | 463  | -0.021118221 | SLC30A10                  |
| 16 | 24,075,000 | 24,225,000 | 322 | 481  | 0.156918175  | EPRS,SLC30A10             |
| 16 | 24,150,000 | 24,300,000 | 323 | 630  | -1.771369444 | BPNT1,EPRS,IARS2          |
| 16 | 24,225,000 | 24,375,000 | 324 | 807  | -2.119822633 | BPNT1,EPRS,IARS2,RAB3GAP2 |

|    |            |            |     |      |              |                                     |
|----|------------|------------|-----|------|--------------|-------------------------------------|
| 16 | 24,300,000 | 24,450,000 | 325 | 580  | -0.70591357  | IARS2,RAB3GAP2                      |
| 16 | 24,375,000 | 24,525,000 | 326 | 573  | 1.061359926  | RAB3GAP2                            |
| 16 | 24,450,000 | 24,600,000 | 327 | 619  | 0.53950712   |                                     |
| 16 | 24,525,000 | 24,675,000 | 328 | 768  | -1.520333593 |                                     |
| 16 | 24,600,000 | 24,750,000 | 329 | 721  | -1.740628742 |                                     |
| 16 | 24,675,000 | 24,825,000 | 330 | 385  | -1.22849866  | MARK1                               |
| 16 | 24,750,000 | 24,900,000 | 331 | 401  | -0.292560482 | C16H1orf115,MARK1                   |
| 16 | 24,825,000 | 24,975,000 | 332 | 601  | 0.571296147  | C16H1orf115,MARC2,MARK1             |
| 16 | 24,900,000 | 25,050,000 | 333 | 604  | -0.040991668 | MARC1,MARC2                         |
| 16 | 24,975,000 | 25,125,000 | 334 | 442  | -1.137982271 | HLX,MARC1                           |
| 16 | 25,050,000 | 25,200,000 | 335 | 541  | -0.008757123 | HLX                                 |
| 16 | 25,125,000 | 25,275,000 | 336 | 570  | 0.497013506  |                                     |
| 16 | 25,200,000 | 25,350,000 | 337 | 431  | 0.702108867  |                                     |
| 16 | 25,275,000 | 25,425,000 | 338 | 373  | 0.347791225  |                                     |
| 16 | 25,350,000 | 25,500,000 | 339 | 300  | 0.367642715  |                                     |
| 16 | 25,425,000 | 25,575,000 | 340 | 338  | 0.932633253  |                                     |
| 16 | 25,500,000 | 25,650,000 | 341 | 484  | 1.041278788  |                                     |
| 16 | 25,575,000 | 25,725,000 | 342 | 682  | 0.002479166  |                                     |
| 16 | 25,650,000 | 25,800,000 | 343 | 647  | -1.267160537 |                                     |
| 16 | 25,725,000 | 25,875,000 | 344 | 435  | -0.399934496 |                                     |
| 16 | 25,800,000 | 25,950,000 | 345 | 423  | 0.904066546  | DUSP10                              |
| 16 | 25,875,000 | 26,025,000 | 346 | 502  | 1.121171584  | DUSP10                              |
| 16 | 25,950,000 | 26,100,000 | 347 | 515  | 0.562051809  |                                     |
| 16 | 26,025,000 | 26,175,000 | 348 | 427  | -0.246955705 |                                     |
| 16 | 26,100,000 | 26,250,000 | 349 | 397  | -0.377296274 |                                     |
| 16 | 26,175,000 | 26,325,000 | 350 | 373  | 0.059526302  |                                     |
| 16 | 26,250,000 | 26,400,000 | 351 | 534  | 1.490122859  |                                     |
| 16 | 26,325,000 | 26,475,000 | 352 | 849  | 1.5339994    |                                     |
| 16 | 26,400,000 | 26,550,000 | 353 | 960  | 1.447346549  |                                     |
| 16 | 26,475,000 | 26,625,000 | 354 | 833  | 1.367585591  |                                     |
| 16 | 26,550,000 | 26,700,000 | 355 | 1144 | 1.402070886  |                                     |
| 16 | 26,625,000 | 26,775,000 | 356 | 1713 | 1.416706442  | HHIPL2,TAF1A                        |
| 16 | 26,700,000 | 26,850,000 | 357 | 1338 | 1.3467916    | HHIPL2,MIA3,TAF1A                   |
| 16 | 26,775,000 | 26,925,000 | 358 | 864  | 1.016558866  | AIDA,BROX,MIA3,TAF1A                |
| 16 | 26,850,000 | 27,000,000 | 359 | 958  | 0.605399835  | AIDA,BROX,MIA3                      |
| 16 | 26,925,000 | 27,075,000 | 360 | 1021 | -0.593370117 | AUH,BROX                            |
| 16 | 27,000,000 | 27,150,000 | 361 | 967  | -0.829655669 | AUH                                 |
| 16 | 27,075,000 | 27,225,000 | 362 | 974  | 0.148314043  | DISP1                               |
| 16 | 27,150,000 | 27,300,000 | 363 | 968  | 0.267635049  | DISP1                               |
| 16 | 27,225,000 | 27,375,000 | 364 | 1111 | -0.10461773  | TLR5                                |
| 16 | 27,300,000 | 27,450,000 | 365 | 1251 | -1.107048468 | SUSD4,TLR5                          |
| 16 | 27,375,000 | 27,525,000 | 366 | 1082 | -1.256924833 | SUSD4                               |
| 16 | 27,450,000 | 27,600,000 | 367 | 979  | -1.001465682 | CCDC185,SUSD4                       |
| 16 | 27,525,000 | 27,675,000 | 368 | 1036 | -0.726039838 | CCDC185                             |
| 16 | 27,600,000 | 27,750,000 | 369 | 1107 | 0.888276049  | MGC151839                           |
| 16 | 27,675,000 | 27,825,000 | 370 | 1139 | 0.574415375  | CAPN2,MGC151839                     |
| 16 | 27,750,000 | 27,900,000 | 371 | 1121 | -0.746744896 | CAPN2,TP53BP2                       |
| 16 | 27,825,000 | 27,975,000 | 372 | 782  | -0.761000897 | CAPN2,TP53BP2                       |
| 16 | 27,900,000 | 28,050,000 | 373 | 482  | 0.397591458  | FBXO28,ENSBTAG00000022942           |
| 16 | 27,975,000 | 28,125,000 | 374 | 472  | 0.935362416  | DEGS1,FBXO28,NVL,ENSBTAG00000022942 |
| 16 | 28,050,000 | 28,200,000 | 375 | 398  | 1.004147035  | DEGS1,NVL                           |
| 16 | 28,125,000 | 28,275,000 | 376 | 350  | 0.025941766  | CNIH4,NVL,WDR26                     |
| 16 | 28,200,000 | 28,350,000 | 377 | 426  | -0.033754536 | CNIH4,NVL,WDR26                     |

|    |            |            |     |      |              |                                                           |
|----|------------|------------|-----|------|--------------|-----------------------------------------------------------|
| 16 | 28,275,000 | 28,425,000 | 378 | 788  | 0.405672044  | WDR26                                                     |
| 16 | 28,350,000 | 28,500,000 | 379 | 1338 | 0.575155694  | CNIH3                                                     |
| 16 | 28,425,000 | 28,575,000 | 380 | 1008 | 0.513067767  | CNIH3                                                     |
| 16 | 28,500,000 | 28,650,000 | 381 | 805  | 0.903775005  | CNIH3                                                     |
| 16 | 28,575,000 | 28,725,000 | 382 | 1031 | 0.756090005  | CNIH3                                                     |
| 16 | 28,650,000 | 28,800,000 | 383 | 1217 | -1.492307376 |                                                           |
| 16 | 28,725,000 | 28,875,000 | 384 | 1261 | -2.180590827 |                                                           |
| 16 | 28,800,000 | 28,950,000 | 385 | 1055 | -0.16674418  |                                                           |
| 16 | 28,875,000 | 29,025,000 | 386 | 1300 | -1.569626163 |                                                           |
| 16 | 28,950,000 | 29,100,000 | 387 | 926  | -2.134006454 | ENSBTAG00000008449                                        |
| 16 | 29,025,000 | 29,175,000 | 388 | 678  | -0.303843808 | LBR,ENSBTAG00000008449                                    |
| 16 | 29,100,000 | 29,250,000 | 389 | 746  | -1.443006663 | ENAH,LBR,ENSBTAG00000008449                               |
| 16 | 29,175,000 | 29,325,000 | 390 | 423  | -3.080730734 | ENAH,LBR                                                  |
| 16 | 29,250,000 | 29,400,000 | 391 | 789  | -1.202322678 | ENAH                                                      |
| 16 | 29,325,000 | 29,475,000 | 392 | 970  | -0.583330164 | ENAH                                                      |
| 16 | 29,400,000 | 29,550,000 | 393 | 762  | 0.133538271  | ENAH                                                      |
| 16 | 29,475,000 | 29,625,000 | 394 | 748  | 0.336521077  | EPHX1,SRP9,TMEM63A                                        |
| 16 | 29,550,000 | 29,700,000 | 395 | 665  | -1.491116859 | EPHX1,PYCR2,SRP9,TMEM63A,ENSBTAG00000002855               |
| 16 | 29,625,000 | 29,775,000 | 396 | 490  | -2.615278634 | PYCR2,SDE2,TMEM63A,ENSBTAG00000002855,ENSBTAG000000037896 |
| 16 | 29,700,000 | 29,850,000 | 397 | 273  | -2.826638143 | H3F3A,SDE2,ENSBTAG000000037896                            |
| 16 | 29,775,000 | 29,925,000 | 398 | 553  | -2.764021819 | ACBD3,H3F3A                                               |
| 16 | 29,850,000 | 30,000,000 | 399 | 875  | -0.762481696 | ACBD3,LIN9,MIXL1                                          |
| 16 | 29,925,000 | 30,075,000 | 400 | 720  | -0.000375839 | ACBD3,LIN9,MIXL1                                          |
| 16 | 30,000,000 | 30,150,000 | 401 | 751  | 0.837723685  | LIN9,PARP1                                                |
| 16 | 30,075,000 | 30,225,000 | 402 | 1121 | 0.56273257   | PARP1,ENSBTAG000000047233                                 |
| 16 | 30,150,000 | 30,300,000 | 403 | 1332 | 0.097170827  | PARP1,ENSBTAG000000047233                                 |
| 16 | 30,225,000 | 30,375,000 | 404 | 1081 | -0.155766087 | MGC151592                                                 |
| 16 | 30,300,000 | 30,450,000 | 405 | 732  | -0.373829311 | ITPKB,MGC151592,ENSBTAG000000033252                       |
| 16 | 30,375,000 | 30,525,000 | 406 | 669  | -0.155627022 | ITPKB,ENSBTAG000000033252                                 |
| 16 | 30,450,000 | 30,600,000 | 407 | 574  | -0.923561754 | ITPKB,PSEN2                                               |
| 16 | 30,525,000 | 30,675,000 | 408 | 775  | -1.735019462 | ADCK3,PSEN2                                               |
| 16 | 30,600,000 | 30,750,000 | 409 | 864  | -1.068907391 | ADCK3,CDC42BPA,PSEN2                                      |
| 16 | 30,675,000 | 30,825,000 | 410 | 602  | 0.602760274  | ADCK3,CDC42BPA                                            |
| 16 | 30,750,000 | 30,900,000 | 411 | 576  | -0.161058797 | CDC42BPA                                                  |
| 16 | 30,825,000 | 30,975,000 | 412 | 848  | -0.120795848 | CDC42BPA                                                  |
| 16 | 30,900,000 | 31,050,000 | 413 | 716  | -0.063036841 | CDC42BPA                                                  |
| 16 | 30,975,000 | 31,125,000 | 414 | 283  | -0.225465879 | CDC42BPA                                                  |
| 16 | 31,050,000 | 31,200,000 | 415 | 298  | 0.24291982   | AHCTF1                                                    |
| 16 | 31,125,000 | 31,275,000 | 416 | 404  | 0.590559754  | AHCTF1                                                    |
| 16 | 31,200,000 | 31,350,000 | 417 | 835  | 1.187409687  | AHCTF1,SCCPDH                                             |
| 16 | 31,275,000 | 31,425,000 | 418 | 1277 | 1.270954355  | H3F3C,SCCPDH                                              |
| 16 | 31,350,000 | 31,500,000 | 419 | 1087 | 1.190577847  | CNST,H3F3C,SCCPDH                                         |
| 16 | 31,425,000 | 31,575,000 | 420 | 721  | 0.357241827  | CNST,TFB2M                                                |
| 16 | 31,500,000 | 31,650,000 | 421 | 695  | -1.116061779 | CNST,SMYD3,TFB2M                                          |
| 16 | 31,575,000 | 31,725,000 | 422 | 678  | -1.498237636 | SMYD3                                                     |
| 16 | 31,650,000 | 31,800,000 | 423 | 634  | -0.921658073 | SMYD3                                                     |
| 16 | 31,725,000 | 31,875,000 | 424 | 694  | 0.224255296  | SMYD3                                                     |
| 16 | 31,800,000 | 31,950,000 | 425 | 628  | 0.54698892   | SMYD3                                                     |
| 16 | 31,875,000 | 32,025,000 | 426 | 598  | -0.243057261 | SMYD3                                                     |
| 16 | 31,950,000 | 32,100,000 | 427 | 645  | 0.044983911  | SMYD3                                                     |
| 16 | 32,025,000 | 32,175,000 | 428 | 982  | 0.669498567  | SMYD3                                                     |

|    |            |            |     |      |              |                                        |
|----|------------|------------|-----|------|--------------|----------------------------------------|
| 16 | 32,100,000 | 32,250,000 | 429 | 1100 | 0.416227728  | SMYD3                                  |
| 16 | 32,175,000 | 32,325,000 | 430 | 906  | -0.206683987 | SMYD3                                  |
| 16 | 32,250,000 | 32,400,000 | 431 | 771  | 0.11727611   | KIF26B,SMYD3                           |
| 16 | 32,325,000 | 32,475,000 | 432 | 1190 | -0.145891553 | KIF26B,SMYD3                           |
| 16 | 32,400,000 | 32,550,000 | 433 | 1566 | 0.17270012   | KIF26B                                 |
| 16 | 32,475,000 | 32,625,000 | 434 | 1167 | 0.696396077  |                                        |
| 16 | 32,550,000 | 32,700,000 | 435 | 769  | 0.505514179  |                                        |
| 16 | 32,625,000 | 32,775,000 | 436 | 793  | -0.094834922 |                                        |
| 16 | 32,700,000 | 32,850,000 | 437 | 976  | 0.067637718  |                                        |
| 16 | 32,775,000 | 32,925,000 | 438 | 895  | -0.113623943 |                                        |
| 16 | 32,850,000 | 33,000,000 | 439 | 1161 | 0.450143246  | EFCAB2                                 |
| 16 | 32,925,000 | 33,075,000 | 440 | 1573 | 0.899009259  | EFCAB2                                 |
| 16 | 33,000,000 | 33,150,000 | 441 | 1600 | 0.807840683  | EFCAB2                                 |
| 16 | 33,075,000 | 33,225,000 | 442 | 1570 | 0.976228557  | FAM36A,HNRNPU                          |
| 16 | 33,150,000 | 33,300,000 | 443 | 1603 | 1.211757183  | FAM36A,HNRNPU,PPPDE1                   |
| 16 | 33,225,000 | 33,375,000 | 444 | 1574 | 0.677863858  | C1orf101,PPPDE1                        |
| 16 | 33,300,000 | 33,450,000 | 445 | 1814 | -0.562611819 | C1orf101,PPPDE1                        |
| 16 | 33,375,000 | 33,525,000 | 446 | 1989 | -0.125487872 | C1orf101                               |
| 16 | 33,450,000 | 33,600,000 | 447 | 1776 | -0.203404749 | ADSS,C1orf100,C1orf101                 |
| 16 | 33,525,000 | 33,675,000 | 448 | 1951 | -0.715439779 | ADSS,C1orf100                          |
| 16 | 33,600,000 | 33,750,000 | 449 | 1818 | -0.289674023 |                                        |
| 16 | 33,675,000 | 33,825,000 | 450 | 1260 | 0.489101141  |                                        |
| 16 | 33,750,000 | 33,900,000 | 451 | 1083 | 1.231193317  |                                        |
| 16 | 33,825,000 | 33,975,000 | 452 | 879  | 1.198822406  | ZBTB18                                 |
| 16 | 33,900,000 | 34,050,000 | 453 | 1044 | 0.843192638  | ZBTB18                                 |
| 16 | 33,975,000 | 34,125,000 | 454 | 1241 | 0.78032527   |                                        |
| 16 | 34,050,000 | 34,200,000 | 455 | 1178 | 0.893403651  | AKT3                                   |
| 16 | 34,125,000 | 34,275,000 | 456 | 1422 | 0.304520358  | AKT3                                   |
| 16 | 34,200,000 | 34,350,000 | 457 | 1497 | 0.057744188  | AKT3                                   |
| 16 | 34,275,000 | 34,425,000 | 458 | 1210 | 0.399249272  | AKT3,SDCCAG8                           |
| 16 | 34,350,000 | 34,500,000 | 459 | 1235 | 0.446578052  | AKT3,SDCCAG8                           |
| 16 | 34,425,000 | 34,575,000 | 460 | 1277 | 0.680557201  | SDCCAG8                                |
| 16 | 34,500,000 | 34,650,000 | 461 | 907  | 1.233488392  | SDCCAG8                                |
| 16 | 34,575,000 | 34,725,000 | 462 | 637  | 0.967180276  | CEP170,SDCCAG8                         |
| 16 | 34,650,000 | 34,800,000 | 463 | 513  | 0.656794316  | CEP170,SDCCAG8                         |
| 16 | 34,725,000 | 34,875,000 | 464 | 932  | 0.727961135  | CEP170                                 |
| 16 | 34,800,000 | 34,950,000 | 465 | 1356 | 0.712296675  |                                        |
| 16 | 34,875,000 | 35,025,000 | 466 | 1454 | 0.931217935  |                                        |
| 16 | 34,950,000 | 35,100,000 | 467 | 1429 | 0.486356032  |                                        |
| 16 | 35,025,000 | 35,175,000 | 468 | 1200 | -3.99166739  |                                        |
| 16 | 35,100,000 | 35,250,000 | 469 | 1133 | -4.649909616 |                                        |
| 16 | 35,175,000 | 35,325,000 | 470 | 1157 | -1.179081466 |                                        |
| 16 | 35,250,000 | 35,400,000 | 471 | 1050 | 0.125559905  |                                        |
| 16 | 35,325,000 | 35,475,000 | 472 | 1325 | -0.032064517 | PLD5                                   |
| 16 | 35,400,000 | 35,550,000 | 473 | 1954 | 0.856668929  | PLD5                                   |
| 16 | 35,475,000 | 35,625,000 | 474 | 1643 | 1.235334573  | PLD5                                   |
| 16 | 35,550,000 | 35,700,000 | 475 | 974  | 0.687405677  | PLD5,ENSBTAG00000013700                |
| 16 | 35,625,000 | 35,775,000 | 476 | 863  | -1.017555288 | EXO1,MAP1LC3C,PLD5,ENSBTAG00000013700  |
| 16 | 35,700,000 | 35,850,000 | 477 | 1031 | -1.300353164 | EXO1,MAP1LC3C,WDR64,ENSBTAG00000013700 |
| 16 | 35,775,000 | 35,925,000 | 478 | 1133 | -1.002905185 | EXO1,WDR64                             |
| 16 | 35,850,000 | 36,000,000 | 479 | 981  | -0.209121666 | CHML,KMO,WDR64                         |
| 16 | 35,925,000 | 36,075,000 | 480 | 1025 | 0.201696525  | CHML,FH,KMO,WDR64                      |
| 16 | 36,000,000 | 36,150,000 | 481 | 1268 | 0.20741295   | FH,KMO                                 |

|    |            |            |     |      |              |                              |
|----|------------|------------|-----|------|--------------|------------------------------|
| 16 | 36,075,000 | 36,225,000 | 482 | 1171 | 0.448963863  | FH,RGS7                      |
| 16 | 36,150,000 | 36,300,000 | 483 | 694  | 0.489890009  | RGS7                         |
| 16 | 36,225,000 | 36,375,000 | 484 | 618  | 1.430059632  | RGS7                         |
| 16 | 36,300,000 | 36,450,000 | 485 | 1007 | 1.441162126  | RGS7                         |
| 16 | 36,375,000 | 36,525,000 | 486 | 1098 | 1.083747732  | RGS7                         |
| 16 | 36,450,000 | 36,600,000 | 487 | 621  | 0.556267759  | RGS7                         |
| 16 | 36,525,000 | 36,675,000 | 488 | 273  | -0.458835428 | RGS7                         |
| 16 | 36,600,000 | 36,750,000 | 489 | 430  | -0.446793415 | RGS7                         |
| 16 | 36,675,000 | 36,825,000 | 490 | 625  | -1.730090657 | RGS7                         |
| 16 | 36,750,000 | 36,900,000 | 491 | 611  | -0.789621998 |                              |
| 16 | 36,825,000 | 36,975,000 | 492 | 723  | 0.671178764  | ENSBTAG00000009943           |
| 16 | 36,900,000 | 37,050,000 | 493 | 929  | 0.588525844  | XCL1,ENSBTAG00000009943      |
| 16 | 36,975,000 | 37,125,000 | 494 | 790  | -0.128686144 | DPT,XCL1                     |
| 16 | 37,050,000 | 37,200,000 | 495 | 836  | -1.292309888 | DPT                          |
| 16 | 37,125,000 | 37,275,000 | 496 | 762  | -1.171901416 | DPT                          |
| 16 | 37,200,000 | 37,350,000 | 497 | 763  | -0.422271117 |                              |
| 16 | 37,275,000 | 37,425,000 | 498 | 880  | -0.253171388 |                              |
| 16 | 37,350,000 | 37,500,000 | 499 | 537  | -0.410963268 |                              |
| 16 | 37,425,000 | 37,575,000 | 500 | 360  | -0.778444376 | ATP1B1                       |
| 16 | 37,500,000 | 37,650,000 | 501 | 474  | 1.036664428  | ATP1B1,NME7                  |
| 16 | 37,575,000 | 37,725,000 | 502 | 803  | 1.259787095  | ATP1B1,NME7                  |
| 16 | 37,650,000 | 37,800,000 | 503 | 954  | 1.125483203  | NME7                         |
| 16 | 37,725,000 | 37,875,000 | 504 | 939  | 0.449629705  | BLZF1,NME7                   |
| 16 | 37,800,000 | 37,950,000 | 505 | 925  | -0.013548977 | BLZF1,CCDC181,NME7,SLC19A2   |
| 16 | 37,875,000 | 38,025,000 | 506 | 1057 | -0.001317382 | CCDC181,F5,SLC19A2           |
| 16 | 37,950,000 | 38,100,000 | 507 | 1360 | -1.224569283 | F5,SELP                      |
| 16 | 38,025,000 | 38,175,000 | 508 | 1176 | -1.621364041 | F5,SELL,SELP                 |
| 16 | 38,100,000 | 38,250,000 | 509 | 705  | -0.619443935 | METTTL18,SELE,SELL           |
| 16 | 38,175,000 | 38,325,000 | 510 | 661  | 0.448135228  | C1orf112,METTTL18,SCYL3,SELE |
| 16 | 38,250,000 | 38,400,000 | 511 | 801  | 0.394120186  | C1orf112,KIFAP3,SCYL3        |
| 16 | 38,325,000 | 38,475,000 | 512 | 642  | -0.088334118 | KIFAP3,SCYL3                 |
| 16 | 38,400,000 | 38,550,000 | 513 | 634  | 0.414414836  | KIFAP3                       |
| 16 | 38,475,000 | 38,625,000 | 514 | 858  | 0.397196776  | KIFAP3,METTTL11B             |
| 16 | 38,550,000 | 38,700,000 | 515 | 1132 | 0.167640793  | METTTL11B                    |
| 16 | 38,625,000 | 38,775,000 | 516 | 1334 | 0.182904613  |                              |
| 16 | 38,700,000 | 38,850,000 | 517 | 1306 | 0.29692045   |                              |
| 16 | 38,775,000 | 38,925,000 | 518 | 1424 | 0.350638596  | GORAB                        |
| 16 | 38,850,000 | 39,000,000 | 519 | 1178 | 0.257889047  | GORAB                        |
| 16 | 38,925,000 | 39,075,000 | 520 | 781  | 0.449255778  | PRRX1                        |
| 16 | 39,000,000 | 39,150,000 | 521 | 582  | 0.900446208  | PRRX1                        |
| 16 | 39,075,000 | 39,225,000 | 522 | 379  | 0.866489302  | PRRX1                        |
| 16 | 39,150,000 | 39,300,000 | 523 | 375  | 0.864969304  |                              |
| 16 | 39,225,000 | 39,375,000 | 524 | 664  | 0.757081186  | MROH9                        |
| 16 | 39,300,000 | 39,450,000 | 525 | 663  | 0.430117539  | MROH9                        |
| 16 | 39,375,000 | 39,525,000 | 526 | 424  | 0.066030296  | FMO3,MROH9                   |
| 16 | 39,450,000 | 39,600,000 | 527 | 433  | 0.299619372  | FMO3,FMO6P                   |
| 16 | 39,525,000 | 39,675,000 | 528 | 635  | 0.475457954  | FMO1,FMO2,FMO3,FMO6P         |
| 16 | 39,600,000 | 39,750,000 | 529 | 979  | 0.681816855  | FMO1,FMO2,FMO4               |
| 16 | 39,675,000 | 39,825,000 | 530 | 852  | 1.041472604  | FMO1,FMO4                    |
| 16 | 39,750,000 | 39,900,000 | 531 | 504  | 1.351709429  | FMO4,PRRC2C                  |
| 16 | 39,825,000 | 39,975,000 | 532 | 413  | 1.385331723  | MYOC,PRRC2C                  |
| 16 | 39,900,000 | 40,050,000 | 533 | 689  | 1.147026619  | METTTL13,MYOC,PRRC2C,VAMP4   |
| 16 | 39,975,000 | 40,125,000 | 534 | 940  | 0.941847739  | DNM3,METTTL13,VAMP4          |



|    |            |            |     |      |              |                                                 |
|----|------------|------------|-----|------|--------------|-------------------------------------------------|
| 16 | 40,050,000 | 40,200,000 | 535 | 868  | 0.238658297  | DNM3,METTL13                                    |
| 16 | 40,125,000 | 40,275,000 | 536 | 787  | -0.785619743 | DNM3                                            |
| 16 | 40,200,000 | 40,350,000 | 537 | 671  | -1.051863186 | DNM3                                            |
| 16 | 40,275,000 | 40,425,000 | 538 | 487  | -0.180174625 | DNM3                                            |
| 16 | 40,350,000 | 40,500,000 | 539 | 641  | 0.863978957  | DNM3                                            |
| 16 | 40,425,000 | 40,575,000 | 540 | 920  | 1.110887124  | DNM3                                            |
| 16 | 40,500,000 | 40,650,000 | 541 | 678  | 1.132341384  |                                                 |
| 16 | 40,575,000 | 40,725,000 | 542 | 326  | 1.27013971   |                                                 |
| 16 | 40,650,000 | 40,800,000 | 543 | 437  | 0.961910587  | PIGC                                            |
| 16 | 40,725,000 | 40,875,000 | 544 | 923  | 0.751324417  | PIGC                                            |
| 16 | 40,800,000 | 40,950,000 | 545 | 868  | 0.446803436  | SUCO                                            |
| 16 | 40,875,000 | 41,025,000 | 546 | 528  | -1.160975776 | SUCO                                            |
| 16 | 40,950,000 | 41,100,000 | 547 | 625  | -0.378714019 | FASLG,SUCO                                      |
| 16 | 41,025,000 | 41,175,000 | 548 | 708  | 0.511999643  | FASLG,ENSBTAG00000016347                        |
| 16 | 41,100,000 | 41,250,000 | 549 | 542  | 0.581587532  | ENSBTAG00000016347                              |
| 16 | 41,175,000 | 41,325,000 | 550 | 436  | 0.534938391  |                                                 |
| 16 | 41,250,000 | 41,400,000 | 551 | 506  | 0.378466913  |                                                 |
| 16 | 41,325,000 | 41,475,000 | 552 | 541  | 0.931912011  |                                                 |
| 16 | 41,400,000 | 41,550,000 | 553 | 637  | 1.31074021   | TNFSF18                                         |
| 16 | 41,475,000 | 41,625,000 | 554 | 664  | 1.179035603  | TNFSF18                                         |
| 16 | 41,550,000 | 41,700,000 | 555 | 411  | 1.124276182  | TNFSF18,TNFSF4                                  |
| 16 | 41,625,000 | 41,775,000 | 556 | 187  | 1.075177988  | TNFSF4                                          |
| 16 | 41,700,000 | 41,850,000 | 557 | 225  | 0.892558333  | TNFSF4                                          |
| 16 | 41,775,000 | 41,925,000 | 558 | 288  | 1.000462365  |                                                 |
| 16 | 41,850,000 | 42,000,000 | 559 | 375  | 0.639616378  | DHRS3                                           |
| 16 | 41,925,000 | 42,075,000 | 560 | 373  | 0.78932946   | DHRS3                                           |
| 16 | 42,000,000 | 42,150,000 | 561 | 248  | 0.924536253  | DHRS3,VPS13D                                    |
| 16 | 42,075,000 | 42,225,000 | 562 | 232  | 0.590165938  | VPS13D                                          |
| 16 | 42,150,000 | 42,300,000 | 563 | 237  | 0.392361609  | VPS13D                                          |
| 16 | 42,225,000 | 42,375,000 | 564 | 284  | 0.049238136  | VPS13D                                          |
| 16 | 42,300,000 | 42,450,000 | 565 | 290  | -0.127623934 | TNFRSF1B,TNFRSF8,VPS13D                         |
| 16 | 42,375,000 | 42,525,000 | 566 | 332  | 0.219600276  | TNFRSF1B,TNFRSF8                                |
| 16 | 42,450,000 | 42,600,000 | 567 | 514  | 0.215635946  | MFN2,MIIIP,PLOD1,TNFRSF8                        |
| 16 | 42,525,000 | 42,675,000 | 568 | 481  | 0.316110764  | KIAA2013,MFN2,MIIIP,PLOD1                       |
| 16 | 42,600,000 | 42,750,000 | 569 | 356  | 0.599241828  | CLCN6,KIAA2013,NPPA,NPPB,PLOD1                  |
| 16 | 42,675,000 | 42,825,000 | 570 | 468  | 0.213190166  | AGTRAP,C1orf167,CLCN6,MTHFR,NPPA,NPPB           |
| 16 | 42,750,000 | 42,900,000 | 571 | 840  | 0.366733276  | AGTRAP,C1orf167,CLCN6,DRAXIN,FBXO6,MAD2L2,MTHFR |
| 16 | 42,825,000 | 42,975,000 | 572 | 1050 | 0.717786992  | AGTRAP,DRAXIN,FBXO2,FBXO44,FBXO6,MAD2L2         |
| 16 | 42,900,000 | 43,050,000 | 573 | 1171 | 1.081941751  | FBXO2,FBXO44,PTCHD2                             |
| 16 | 42,975,000 | 43,125,000 | 574 | 1037 | 0.554579907  | PTCHD2                                          |
| 16 | 43,050,000 | 43,200,000 | 575 | 645  | 0.241052716  | PTCHD2                                          |
| 16 | 43,125,000 | 43,275,000 | 576 | 457  | 0.962372169  | UBIAD1                                          |
| 16 | 43,200,000 | 43,350,000 | 577 | 342  | 1.265894352  | ANGPTL7,MTOR,UBIAD1                             |
| 16 | 43,275,000 | 43,425,000 | 578 | 393  | 1.155232336  | ANGPTL7,EXOSC10,MTOR                            |
| 16 | 43,350,000 | 43,500,000 | 579 | 553  | 1.194124429  | EXOSC10,MASP2,MTOR,SRM,TARDBP                   |
| 16 | 43,425,000 | 43,575,000 | 580 | 420  | 1.072215991  | EXOSC10,MASP2,SRM,TARDBP                        |
| 16 | 43,500,000 | 43,650,000 | 581 | 460  | 0.519928646  |                                                 |
| 16 | 43,575,000 | 43,725,000 | 582 | 505  | 0.73425275   |                                                 |
| 16 | 43,650,000 | 43,800,000 | 583 | 314  | -0.176214124 | CASZ1                                           |
| 16 | 43,725,000 | 43,875,000 | 584 | 270  | -0.657802261 | CASZ1,PEX14                                     |
| 16 | 43,800,000 | 43,950,000 | 585 | 269  | 0.402604449  | CASZ1,PEX14                                     |
| 16 | 43,875,000 | 44,025,000 | 586 | 230  | 0.38965323   | APITD1,CORT,DFFA,PEX14                          |

|    |            |            |     |      |              |                                                             |
|----|------------|------------|-----|------|--------------|-------------------------------------------------------------|
| 16 | 43,950,000 | 44,100,000 | 587 | 378  | -0.391219665 | APITD1,CORT,DFFA,KIF1B,PEX14,PGD                            |
| 16 | 44,025,000 | 44,175,000 | 588 | 515  | -0.840040787 | APITD1,KIF1B,PGD                                            |
| 16 | 44,100,000 | 44,250,000 | 589 | 397  | -1.209784689 | KIF1B                                                       |
| 16 | 44,175,000 | 44,325,000 | 590 | 444  | -0.402036317 | KIF1B,UBE4B                                                 |
| 16 | 44,250,000 | 44,400,000 | 591 | 400  | 0.305855959  | UBE4B                                                       |
| 16 | 44,325,000 | 44,475,000 | 592 | 325  | 0.85225653   | NMNAT1,RBP7,UBE4B                                           |
| 16 | 44,400,000 | 44,550,000 | 593 | 437  | 1.292060382  | CTNNBIP1,NMNAT1,RBP7                                        |
| 16 | 44,475,000 | 44,625,000 | 594 | 379  | 1.214582561  | CTNNBIP1                                                    |
| 16 | 44,550,000 | 44,700,000 | 595 | 230  | 0.613062212  | CLSTN1,CTNNBIP1,PIK3CD                                      |
| 16 | 44,625,000 | 44,775,000 | 596 | 235  | 0.496322781  | CLSTN1,PIK3CD                                               |
| 16 | 44,700,000 | 44,850,000 | 597 | 291  | 0.823735409  | SLC25A33,TMEM201                                            |
| 16 | 44,775,000 | 44,925,000 | 598 | 397  | 0.98352617   | SLC25A33,TMEM201                                            |
| 16 | 44,850,000 | 45,000,000 | 599 | 635  | 1.031021324  | SPSB1                                                       |
| 16 | 44,925,000 | 45,075,000 | 600 | 781  | 0.904487755  | SPSB1                                                       |
| 16 | 45,000,000 | 45,150,000 | 601 | 842  | 0.853359176  | H6PD,SPSB1                                                  |
| 16 | 45,075,000 | 45,225,000 | 602 | 859  | 1.116786796  | GPR157,H6PD                                                 |
| 16 | 45,150,000 | 45,300,000 | 603 | 1148 | 1.276368585  | CA6,GPR157,SLC2A5                                           |
| 16 | 45,225,000 | 45,375,000 | 604 | 1177 | 1.216692419  | CA6,GPR157,SLC2A5                                           |
| 16 | 45,300,000 | 45,450,000 | 605 | 900  | 1.125805587  | CA6,ENSBTAG00000013411                                      |
| 16 | 45,375,000 | 45,525,000 | 606 | 678  | 1.273534711  | ENSBTAG00000013411                                          |
| 16 | 45,450,000 | 45,600,000 | 607 | 530  | 1.335168335  |                                                             |
| 16 | 45,525,000 | 45,675,000 | 608 | 645  | 1.184186833  | RERE                                                        |
| 16 | 45,600,000 | 45,750,000 | 609 | 712  | 1.069255047  | RERE                                                        |
| 16 | 45,675,000 | 45,825,000 | 610 | 705  | 1.156423922  | RERE                                                        |
| 16 | 45,750,000 | 45,900,000 | 611 | 819  | 1.06504396   | RERE,SLC45A1                                                |
| 16 | 45,825,000 | 45,975,000 | 612 | 871  | 1.051989514  | RERE,SLC45A1                                                |
| 16 | 45,900,000 | 46,050,000 | 613 | 759  | 1.409952016  | SLC45A1                                                     |
| 16 | 45,975,000 | 46,125,000 | 614 | 762  | 1.447986605  | ENSBTAG00000011650                                          |
| 16 | 46,050,000 | 46,200,000 | 615 | 694  | 1.317668737  | ENSBTAG00000011650                                          |
| 16 | 46,125,000 | 46,275,000 | 616 | 642  | 1.374228389  | ERRFI1,PARK7,ENSBTAG00000011650                             |
| 16 | 46,200,000 | 46,350,000 | 617 | 730  | 1.067578825  | ERRFI1,PARK7,TNFRSF9                                        |
| 16 | 46,275,000 | 46,425,000 | 618 | 892  | 0.653097041  | TNFRSF9                                                     |
| 16 | 46,350,000 | 46,500,000 | 619 | 808  | 0.743281091  | CAMTA1,VAMP3                                                |
| 16 | 46,425,000 | 46,575,000 | 620 | 710  | 1.143142961  | CAMTA1,VAMP3                                                |
| 16 | 46,500,000 | 46,650,000 | 621 | 910  | -0.164614018 | CAMTA1                                                      |
| 16 | 46,575,000 | 46,725,000 | 622 | 995  | -0.239774064 |                                                             |
| 16 | 46,650,000 | 46,800,000 | 623 | 1043 | -0.916876057 |                                                             |
| 16 | 46,725,000 | 46,875,000 | 624 | 1027 | -1.376843886 |                                                             |
| 16 | 46,800,000 | 46,950,000 | 625 | 1032 | 0.283968885  |                                                             |
| 16 | 46,875,000 | 47,025,000 | 626 | 1127 | 0.590424517  |                                                             |
| 16 | 46,950,000 | 47,100,000 | 627 | 1410 | 0.744575583  |                                                             |
| 16 | 47,025,000 | 47,175,000 | 628 | 1472 | 0.468924172  |                                                             |
| 16 | 47,100,000 | 47,250,000 | 629 | 1198 | -0.255007179 |                                                             |
| 16 | 47,175,000 | 47,325,000 | 630 | 1054 | 0.065118339  |                                                             |
| 16 | 47,250,000 | 47,400,000 | 631 | 741  | 0.970887053  |                                                             |
| 16 | 47,325,000 | 47,475,000 | 632 | 523  | 1.06019539   |                                                             |
| 16 | 47,400,000 | 47,550,000 | 633 | 583  | 0.507505506  |                                                             |
| 16 | 47,475,000 | 47,625,000 | 634 | 508  | -0.392618172 | DNAJC11,THAP3                                               |
| 16 | 47,550,000 | 47,700,000 | 635 | 309  | -1.922531033 | DNAJC11,KLHL21,NOL9,PHF13,TAS1R1,THAP3,ZBTB48               |
| 16 | 47,625,000 | 47,775,000 | 636 | 255  | -2.631415795 | ESPN,KLHL21,NOL9,PHF13,PLEKHG5,TAS1R1,THAP3,TNFRSF25,ZBTB48 |
| 16 | 47,700,000 | 47,850,000 | 637 | 393  | -3.087420652 | ACOT7,ESPN,HES2,PLEKHG5,TNFRSF25                            |

|    |            |            |     |      |              |                                                              |
|----|------------|------------|-----|------|--------------|--------------------------------------------------------------|
| 16 | 47,775,000 | 47,925,000 | 638 | 578  | -2.680618207 | ACOT7,ESPN,HES2                                              |
| 16 | 47,850,000 | 48,000,000 | 639 | 476  | -1.928067356 | ACOT7,GPR153,HES3,ICMT,RNF207,ENSBTAG00000014423             |
| 16 | 47,925,000 | 48,075,000 | 640 | 325  | -1.024493187 | ACOT7,CHD5,GPR153,HES3,ICMT,RNF207,ENSBTAG0000014423         |
| 16 | 48,000,000 | 48,150,000 | 641 | 408  | 0.315699831  | CHD5,KCNAB2,ENSBTAG00000014423                               |
| 16 | 48,075,000 | 48,225,000 | 642 | 566  | 0.705751781  | CHD5,KCNAB2,NPHP4                                            |
| 16 | 48,150,000 | 48,300,000 | 643 | 1216 | 1.270755531  | NPHP4                                                        |
| 16 | 48,225,000 | 48,375,000 | 644 | 1894 | 1.501253814  | NPHP4                                                        |
| 16 | 48,300,000 | 48,450,000 | 645 | 1681 | 1.415013094  | NPHP4                                                        |
| 16 | 48,375,000 | 48,525,000 | 646 | 1521 | -0.029105642 |                                                              |
| 16 | 48,450,000 | 48,600,000 | 647 | 1742 | -0.898323987 |                                                              |
| 16 | 48,525,000 | 48,675,000 | 648 | 1673 | -0.010151335 |                                                              |
| 16 | 48,600,000 | 48,750,000 | 649 | 1575 | 0.204715173  |                                                              |
| 16 | 48,675,000 | 48,825,000 | 650 | 1431 | -0.630668504 |                                                              |
| 16 | 48,750,000 | 48,900,000 | 651 | 1420 | -0.69035905  |                                                              |
| 16 | 48,825,000 | 48,975,000 | 652 | 1238 | -0.873619373 |                                                              |
| 16 | 48,900,000 | 49,050,000 | 653 | 1026 | 0.286031861  |                                                              |
| 16 | 48,975,000 | 49,125,000 | 654 | 1526 | -0.137926822 |                                                              |
| 16 | 49,050,000 | 49,200,000 | 655 | 1780 | -0.219255796 |                                                              |
| 16 | 49,125,000 | 49,275,000 | 656 | 1055 | 0.393349401  | LAD1,TNNT2,ENSBTAG00000047285,ENSBTAG00000048267             |
| 16 | 49,200,000 | 49,350,000 | 657 | 339  | 0.534886616  | CSRP1,LAD1,TNNI1,TNNT2,ENSBTAG00000047285,ENSBTAG00000048267 |
| 16 | 49,275,000 | 49,425,000 | 658 | 326  | -0.078296003 | CSRP1,LAD1,TNNI1                                             |
| 16 | 49,350,000 | 49,500,000 | 659 | 447  | 0.079398829  | CSRP1,NAV1,ENSBTAG00000046062                                |
| 16 | 49,425,000 | 49,575,000 | 660 | 506  | 0.421954529  | NAV1,ENSBTAG00000046062                                      |
| 16 | 49,500,000 | 49,650,000 | 661 | 444  | 0.318280741  | IPO9,LMOD1,NAV1,SHISA4                                       |
| 16 | 49,575,000 | 49,725,000 | 662 | 814  | -0.165551124 | IPO9,LMOD1,SHISA4,TIMM17A                                    |
| 16 | 49,650,000 | 49,800,000 | 663 | 1701 | -0.010423872 | LMOD1,TIMM17A                                                |
| 16 | 49,725,000 | 49,875,000 | 664 | 1933 | -0.093856959 | AJAP1                                                        |
| 16 | 49,800,000 | 49,950,000 | 665 | 1538 | 0.537932225  | AJAP1                                                        |
| 16 | 49,875,000 | 50,025,000 | 666 | 1574 | 1.273793219  |                                                              |
| 16 | 49,950,000 | 50,100,000 | 667 | 1823 | 1.102464687  |                                                              |
| 16 | 50,025,000 | 50,175,000 | 668 | 1745 | 0.746884546  |                                                              |
| 16 | 50,100,000 | 50,250,000 | 669 | 1624 | 0.214531827  |                                                              |
| 16 | 50,175,000 | 50,325,000 | 670 | 1581 | 0.492593749  |                                                              |
| 16 | 50,250,000 | 50,400,000 | 671 | 1619 | 1.141042291  |                                                              |
| 16 | 50,325,000 | 50,475,000 | 672 | 1443 | 1.196584771  | C16H1orf174                                                  |
| 16 | 50,400,000 | 50,550,000 | 673 | 1051 | 1.124117409  | C16H1orf174,CEP104,DFFB,LRRC47                               |
| 16 | 50,475,000 | 50,625,000 | 674 | 782  | 0.892072896  | C16H1orf174,CCDC27,CEP104,DFFB,LRRC47,SMIM1,TP73             |
| 16 | 50,550,000 | 50,700,000 | 675 | 842  | 0.260661592  | CCDC27,LRRC47,SMIM1,TP73,TPRG1L,WRAP73                       |
| 16 | 50,625,000 | 50,775,000 | 676 | 1057 | 0.244166332  | MEGF6,TP73,TPRG1L,WRAP73                                     |
| 16 | 50,700,000 | 50,850,000 | 677 | 1037 | 0.57200985   | ARHGEF16,MEGF6,PRDM16                                        |
| 16 | 50,775,000 | 50,925,000 | 678 | 805  | -0.215408711 | ARHGEF16,MEGF6,PRDM16                                        |
| 16 | 50,850,000 | 51,000,000 | 679 | 689  | -0.668028818 | PRDM16                                                       |
| 16 | 50,925,000 | 51,075,000 | 680 | 1204 | 0.016529257  |                                                              |
| 16 | 51,000,000 | 51,150,000 | 681 | 1239 | 0.317126222  |                                                              |
| 16 | 51,075,000 | 51,225,000 | 682 | 856  | -0.095694457 |                                                              |
| 16 | 51,150,000 | 51,300,000 | 683 | 794  | -0.138430566 | ACTRT2                                                       |
| 16 | 51,225,000 | 51,375,000 | 684 | 675  | 0.533367523  | ACTRT2                                                       |
| 16 | 51,300,000 | 51,450,000 | 685 | 884  | 0.339408604  |                                                              |

|    |            |            |     |      |              |                                                                                                                      |
|----|------------|------------|-----|------|--------------|----------------------------------------------------------------------------------------------------------------------|
| 16 | 51,375,000 | 51,525,000 | 686 | 1159 | 0.014853453  | MMEL1,TTC34                                                                                                          |
| 16 | 51,450,000 | 51,600,000 | 687 | 914  | -0.037913377 | FAM213B,HES5,MMEL1,PANK4,TTC34                                                                                       |
| 16 | 51,525,000 | 51,675,000 | 688 | 806  | -1.121993833 | FAM213B,HES5,MMEL1,PANK4,PLCH2                                                                                       |
| 16 | 51,600,000 | 51,750,000 | 689 | 796  | -1.123077843 | MORN1,PANK4,PEX10,PLCH2,RER1                                                                                         |
| 16 | 51,675,000 | 51,825,000 | 690 | 664  | 0.109355099  | MORN1,PEX10,RER1,SKI                                                                                                 |
| 16 | 51,750,000 | 51,900,000 | 691 | 817  | 0.214636877  | FAAP20,PRKCZ,SKI                                                                                                     |
| 16 | 51,825,000 | 51,975,000 | 692 | 803  | 0.617137658  | FAAP20,GABRD,PRKCZ                                                                                                   |
| 16 | 51,900,000 | 52,050,000 | 693 | 617  | 0.624658206  | GABRD,KIAA1751,PRKCZ                                                                                                 |
| 16 | 51,975,000 | 52,125,000 | 694 | 605  | 0.923595186  | CALML6,GNB1,KIAA1751,TMEM52,ENSBTAG00000024510                                                                       |
| 16 | 52,050,000 | 52,200,000 | 695 | 546  | 0.694396434  | CALML6,GNB1,KIAA1751,TMEM52,ENSBTAG00000024510                                                                       |
| 16 | 52,125,000 | 52,275,000 | 696 | 373  | 0.33573111   | CDC2L1,GNB1,MIB2,MMP23B,NADK,RPLP1,SLC35E2B                                                                          |
| 16 | 52,200,000 | 52,350,000 | 697 | 292  | 0.14393024   | ATAD3,C16H1orf70,C1orf233,CDC2L1,MIB2,MMP23B,NADK,RPLP1,SLC35E2B,SSU72                                               |
| 16 | 52,275,000 | 52,425,000 | 698 | 296  | 0.402658885  | ANKRD65,ATAD3,AURKAIP1,C16H1orf70,C1orf233,CCNL2,MIB2,MRPL20,MXRA8,RPLP1,SSU72,TMEM88B,VWA1                          |
| 16 | 52,350,000 | 52,500,000 | 699 | 362  | 1.254361314  | ANKRD65,ATAD3,AURKAIP1,B3GALT6,CCNL2,DVL1,FAM132A,MRPL20,MXRA8,RPLP1,SDF4,TMEM88B,TNFRSF18,TNFRSF4,TTL10,UBE2J2,VWA1 |
| 16 | 52,425,000 | 52,575,000 | 700 | 461  | 1.373523296  | B3GALT6,DVL1,FAM132A,GLTPD1,MXRA8,SDF4,TNFRSF18,TNFRSF4,TTL10,UBE2J2                                                 |
| 16 | 52,500,000 | 52,650,000 | 701 | 446  | 1.290083222  | ACAP3,CPSF3L,FLJ20584,GLTPD1,PUSL1,SCNN1D,TTL10                                                                      |
| 16 | 52,575,000 | 52,725,000 | 702 | 450  | 0.89297058   | ACAP3,AGRN,CPSF3L,FLJ20584,GLTPD1,HES4,ISG15,PUSL1,RNF223,SCNN1D,ENSBTAG00000024492                                  |
| 16 | 52,650,000 | 52,800,000 | 703 | 540  | 1.076586038  | AGRN,FLJ20584,HES4,ISG15,KLHL17,NOC2L,PERM1,PLEKHN1,RNF223,SAMD11,ENSBTAG00000024492                                 |
| 16 | 52,725,000 | 52,875,000 | 704 | 549  | 1.060864077  | HES4,KLHL17,NOC2L,PERM1,PLEKHN1,SAMD11,ZBTB17                                                                        |
| 16 | 52,800,000 | 52,950,000 | 705 | 467  | 0.742143466  | SPEN,ZBTB17                                                                                                          |
| 16 | 52,875,000 | 53,025,000 | 706 | 404  | 0.447548687  | SPEN,ZBTB17                                                                                                          |
| 16 | 52,950,000 | 53,100,000 | 707 | 662  | 0.963587714  | FBLIM1,PLEKHM2,SLC25A34,SPEN,TMEM82                                                                                  |
| 16 | 53,025,000 | 53,175,000 | 708 | 763  | 1.202798938  | DDI2,FBLIM1,PLEKHM2,RSC1A1,SLC25A34,TMEM82                                                                           |
| 16 | 53,100,000 | 53,250,000 | 709 | 550  | 1.276472302  | AGMAT,DDI2,DNAJC16,PLEKHM2,RSC1A1                                                                                    |
| 16 | 53,175,000 | 53,325,000 | 710 | 720  | -0.435366147 | AGMAT,CASP9,CTRC,DNAJC16,EFHD2,ELA2A                                                                                 |
| 16 | 53,250,000 | 53,400,000 | 711 | 1065 | -1.338625224 | CASP9,CTRC,EFHD2,ELA2A,FHAD1                                                                                         |
| 16 | 53,325,000 | 53,475,000 | 712 | 1211 | -0.198071544 | FHAD1                                                                                                                |
| 16 | 53,400,000 | 53,550,000 | 713 | 1009 | 0.79872616   | FHAD1,TMEM51                                                                                                         |
| 16 | 53,475,000 | 53,625,000 | 714 | 1170 | 1.07162854   | TMEM51                                                                                                               |
| 16 | 53,550,000 | 53,700,000 | 715 | 1305 | 0.95768159   | KAZN                                                                                                                 |
| 16 | 53,625,000 | 53,775,000 | 716 | 1405 | 0.571967475  | KAZN                                                                                                                 |
| 16 | 53,700,000 | 53,850,000 | 717 | 1647 | 0.305703331  | KAZN                                                                                                                 |
| 16 | 53,775,000 | 53,925,000 | 718 | 1345 | 0.439364561  |                                                                                                                      |
| 16 | 53,850,000 | 54,000,000 | 719 | 1119 | 0.319947379  |                                                                                                                      |
| 16 | 53,925,000 | 54,075,000 | 720 | 1135 | -0.275462064 |                                                                                                                      |
| 16 | 54,000,000 | 54,150,000 | 721 | 1058 | 0.005291203  |                                                                                                                      |
| 16 | 54,075,000 | 54,225,000 | 722 | 874  | 0.486001407  |                                                                                                                      |
| 16 | 54,150,000 | 54,300,000 | 723 | 847  | 0.140969747  |                                                                                                                      |
| 16 | 54,225,000 | 54,375,000 | 724 | 991  | 0.059438846  |                                                                                                                      |
| 16 | 54,300,000 | 54,450,000 | 725 | 1396 | 0.690282345  |                                                                                                                      |

|    |            |            |     |      |              |                                                                                                        |
|----|------------|------------|-----|------|--------------|--------------------------------------------------------------------------------------------------------|
| 16 | 54,375,000 | 54,525,000 | 726 | 1127 | 0.728143259  |                                                                                                        |
| 16 | 54,450,000 | 54,600,000 | 727 | 819  | 0.52142757   |                                                                                                        |
| 16 | 54,525,000 | 54,675,000 | 728 | 923  | 0.565596777  |                                                                                                        |
| 16 | 54,600,000 | 54,750,000 | 729 | 1359 | -0.340877775 |                                                                                                        |
| 16 | 54,675,000 | 54,825,000 | 730 | 1645 | -0.569551686 |                                                                                                        |
| 16 | 54,750,000 | 54,900,000 | 731 | 1330 | -0.466989991 |                                                                                                        |
| 16 | 54,825,000 | 54,975,000 | 732 | 1495 | -0.108694147 |                                                                                                        |
| 16 | 54,900,000 | 55,050,000 | 733 | 1480 | 0.384546105  |                                                                                                        |
| 16 | 54,975,000 | 55,125,000 | 734 | 1058 | 0.452212892  | PRDM2                                                                                                  |
| 16 | 55,050,000 | 55,200,000 | 735 | 654  | 0.177895281  | PRDM2                                                                                                  |
| 16 | 55,125,000 | 55,275,000 | 736 | 680  | 0.282755343  | KDM5B,PRDM2                                                                                            |
| 16 | 55,200,000 | 55,350,000 | 737 | 682  | 0.372570877  | KDM5B                                                                                                  |
| 16 | 55,275,000 | 55,425,000 | 738 | 895  | 0.4149598    | BOVAGGRUS,KDM5B                                                                                        |
| 16 | 55,350,000 | 55,500,000 | 739 | 1152 | 0.473583709  | BOVAGGRUS,KLHL12,RABIF                                                                                 |
| 16 | 55,425,000 | 55,575,000 | 740 | 766  | 0.270416531  | ADIPOR1,BOVAGGRUS,CYB5R1,KLHL12,RABIF,ENSBT<br>AG00000019931                                           |
| 16 | 55,500,000 | 55,650,000 | 741 | 1015 | 0.55015999   | ADIPOR1,CYB5R1,KLHL12,LRRC38,ENSBTAG00000019<br>931                                                    |
| 16 | 55,575,000 | 55,725,000 | 742 | 1419 | 0.74917723   | LRRC38,ENSBTAG00000024791                                                                              |
| 16 | 55,650,000 | 55,800,000 | 743 | 1024 | 0.062377585  | ENSBTAG00000012389,ENSBTAG00000024791,ENSBT<br>AG00000038000,ENSBTAG00000038222,ENSBTAG000<br>00040570 |
| 16 | 55,725,000 | 55,875,000 | 744 | 716  | -1.344694384 | ENSBTAG00000012389,ENSBTAG00000038000,ENSBT<br>AG00000038222,ENSBTAG00000038264,ENSBTAG000<br>00040570 |
| 16 | 55,800,000 | 55,950,000 | 745 | 716  | -0.724544431 | ENSBTAG00000031507,ENSBTAG00000038261,ENSBT<br>AG00000038264                                           |
| 16 | 55,875,000 | 56,025,000 | 746 | 757  | 0.628396526  | ENSBTAG00000031507,ENSBTAG00000038261,ENSBT<br>AG00000040419                                           |
| 16 | 55,950,000 | 56,100,000 | 747 | 954  | 1.022340158  | ENSBTAG00000001210,ENSBTAG00000015600,ENSBT<br>AG00000040419                                           |
| 16 | 56,025,000 | 56,175,000 | 748 | 1002 | 0.888147947  | ENSBTAG00000001210,ENSBTAG00000015600,ENSBT<br>AG00000040419,ENSBTAG00000046630                        |
| 16 | 56,100,000 | 56,250,000 | 749 | 789  | 0.643445074  | AADACL3,C16H1orf158,ENSBTAG00000046630                                                                 |
| 16 | 56,175,000 | 56,325,000 | 750 | 853  | 1.171205053  | AADACL3,C16H1orf158                                                                                    |
| 16 | 56,250,000 | 56,400,000 | 751 | 1064 | 0.634963552  | PRDX6                                                                                                  |
| 16 | 56,325,000 | 56,475,000 | 752 | 1130 | -0.051188414 | PRDX6,SLC9C2                                                                                           |
| 16 | 56,400,000 | 56,550,000 | 753 | 1021 | 0.133647751  | ANKRD45,SLC9C2,ENSBTAG00000046799                                                                      |
| 16 | 56,475,000 | 56,625,000 | 754 | 872  | 0.800918042  | ANKRD45,KLHL20,SLC9C2,ENSBTAG00000046799                                                               |
| 16 | 56,550,000 | 56,700,000 | 755 | 928  | 0.799691246  | CENPL,DARS2,KLHL20,ZBTB37                                                                              |
| 16 | 56,625,000 | 56,775,000 | 756 | 727  | 0.278394873  | CENPL,DARS2,SERPINC1,ZBTB37                                                                            |
| 16 | 56,700,000 | 56,850,000 | 757 | 466  | 0.202668264  | SERPINC1,ZBTB37                                                                                        |
| 16 | 56,775,000 | 56,925,000 | 758 | 622  | 0.870414105  |                                                                                                        |
| 16 | 56,850,000 | 57,000,000 | 759 | 769  | 0.835795535  | RABGAP1L                                                                                               |
| 16 | 56,925,000 | 57,075,000 | 760 | 746  | 0.740231536  | RABGAP1L                                                                                               |
| 16 | 57,000,000 | 57,150,000 | 761 | 758  | 0.806744103  | RABGAP1L                                                                                               |
| 16 | 57,075,000 | 57,225,000 | 762 | 758  | 0.633744113  | GPR52                                                                                                  |
| 16 | 57,150,000 | 57,300,000 | 763 | 865  | 0.982453818  | GPR52                                                                                                  |
| 16 | 57,225,000 | 57,375,000 | 764 | 791  | 1.114164857  |                                                                                                        |
| 16 | 57,300,000 | 57,450,000 | 765 | 856  | -2.541029026 |                                                                                                        |
| 16 | 57,375,000 | 57,525,000 | 766 | 1247 | -1.189913946 |                                                                                                        |
| 16 | 57,450,000 | 57,600,000 | 767 | 1413 | -0.232059848 | MGC157043                                                                                              |
| 16 | 57,525,000 | 57,675,000 | 768 | 1397 | -0.707696062 | MGC157043                                                                                              |

|    |            |            |     |      |              |                             |
|----|------------|------------|-----|------|--------------|-----------------------------|
| 16 | 57,600,000 | 57,750,000 | 769 | 1177 | -0.049093825 | CACYBP,MGC157043,MRPS14     |
| 16 | 57,675,000 | 57,825,000 | 770 | 933  | 0.311955127  | CACYBP,MGC157043,MRPS14,TNN |
| 16 | 57,750,000 | 57,900,000 | 771 | 713  | 0.594492825  | TNN                         |
| 16 | 57,825,000 | 57,975,000 | 772 | 791  | 0.625803313  | TNN                         |
| 16 | 57,900,000 | 58,050,000 | 773 | 815  | 0.218527058  | TNR                         |
| 16 | 57,975,000 | 58,125,000 | 774 | 515  | 0.267254493  | TNR                         |
| 16 | 58,050,000 | 58,200,000 | 775 | 832  | 0.881492024  | TNR                         |
| 16 | 58,125,000 | 58,275,000 | 776 | 1131 | 0.657092185  | TNR                         |
| 16 | 58,200,000 | 58,350,000 | 777 | 1211 | 0.363345432  |                             |
| 16 | 58,275,000 | 58,425,000 | 778 | 1223 | -0.106876073 |                             |
| 16 | 58,350,000 | 58,500,000 | 779 | 994  | -0.140659763 |                             |
| 16 | 58,425,000 | 58,575,000 | 780 | 1115 | 0.215298792  |                             |
| 16 | 58,500,000 | 58,650,000 | 781 | 1180 | 0.280174538  | RFWD2                       |
| 16 | 58,575,000 | 58,725,000 | 782 | 1003 | -0.064092429 | RFWD2                       |
| 16 | 58,650,000 | 58,800,000 | 783 | 1174 | -0.372480375 | RFWD2                       |
| 16 | 58,725,000 | 58,875,000 | 784 | 1209 | 0.346240274  | RFWD2                       |
| 16 | 58,800,000 | 58,950,000 | 785 | 1003 | 0.28055467   | RFWD2                       |
| 16 | 58,875,000 | 59,025,000 | 786 | 796  | 0.134218233  |                             |
| 16 | 58,950,000 | 59,100,000 | 787 | 805  | 0.480684216  |                             |
| 16 | 59,025,000 | 59,175,000 | 788 | 792  | 0.117488031  | PAPPA2                      |
| 16 | 59,100,000 | 59,250,000 | 789 | 544  | -0.558158648 | PAPPA2                      |
| 16 | 59,175,000 | 59,325,000 | 790 | 789  | -0.037185558 | PAPPA2                      |
| 16 | 59,250,000 | 59,400,000 | 791 | 762  | -0.078719751 | PAPPA2                      |
| 16 | 59,325,000 | 59,475,000 | 792 | 514  | 0.052004762  | PAPPA2                      |
| 16 | 59,400,000 | 59,550,000 | 793 | 884  | 0.682713071  | ASTN1,PAPPA2                |
| 16 | 59,475,000 | 59,625,000 | 794 | 1082 | 0.864494625  | ASTN1                       |
| 16 | 59,550,000 | 59,700,000 | 795 | 1074 | 0.719985963  | ASTN1                       |
| 16 | 59,625,000 | 59,775,000 | 796 | 871  | 0.03273338   | ASTN1                       |
| 16 | 59,700,000 | 59,850,000 | 797 | 814  | -0.048966562 | ASTN1                       |
| 16 | 59,775,000 | 59,925,000 | 798 | 1152 | 0.564841057  |                             |
| 16 | 59,850,000 | 60,000,000 | 799 | 1322 | 1.156094937  | BRINP2                      |
| 16 | 59,925,000 | 60,075,000 | 800 | 1182 | 0.598786638  | BRINP2                      |
| 16 | 60,000,000 | 60,150,000 | 801 | 1068 | -0.554508099 |                             |
| 16 | 60,075,000 | 60,225,000 | 802 | 1127 | -0.482138296 |                             |
| 16 | 60,150,000 | 60,300,000 | 803 | 1423 | -0.715765258 |                             |
| 16 | 60,225,000 | 60,375,000 | 804 | 1554 | -0.633336985 |                             |
| 16 | 60,300,000 | 60,450,000 | 805 | 1439 | 0.261445866  |                             |
| 16 | 60,375,000 | 60,525,000 | 806 | 1656 | 0.561641019  |                             |
| 16 | 60,450,000 | 60,600,000 | 807 | 1489 | 0.166029504  |                             |
| 16 | 60,525,000 | 60,675,000 | 808 | 1241 | -0.26464616  | ENSBTAG00000038238          |
| 16 | 60,600,000 | 60,750,000 | 809 | 1161 | -0.357337726 | SEC16B,ENSBTAG00000038238   |
| 16 | 60,675,000 | 60,825,000 | 810 | 925  | -0.25777246  | SEC16B                      |
| 16 | 60,750,000 | 60,900,000 | 811 | 560  | 0.135470259  | SEC16B,ENSBTAG00000046172   |
| 16 | 60,825,000 | 60,975,000 | 812 | 406  | 1.150348167  | ENSBTAG00000046172          |
| 16 | 60,900,000 | 61,050,000 | 813 | 519  | 1.171926932  |                             |
| 16 | 60,975,000 | 61,125,000 | 814 | 611  | 0.822639773  | RASAL2                      |
| 16 | 61,050,000 | 61,200,000 | 815 | 557  | 0.607436452  | RASAL2                      |
| 16 | 61,125,000 | 61,275,000 | 816 | 654  | -0.101514324 | RASAL2                      |
| 16 | 61,200,000 | 61,350,000 | 817 | 853  | 0.650424076  | RASAL2                      |
| 16 | 61,275,000 | 61,425,000 | 818 | 834  | 1.039506144  | RASAL2,TEX35                |
| 16 | 61,350,000 | 61,500,000 | 819 | 642  | 0.093678415  | TEX35                       |
| 16 | 61,425,000 | 61,575,000 | 820 | 869  | -0.501674633 | RALGPS2                     |
| 16 | 61,500,000 | 61,650,000 | 821 | 1140 | -0.323422941 | RALGPS2                     |

|    |            |            |     |      |              |                                             |
|----|------------|------------|-----|------|--------------|---------------------------------------------|
| 16 | 61,575,000 | 61,725,000 | 822 | 1003 | -0.110771965 | ANGPTL1,RALGPS2                             |
| 16 | 61,650,000 | 61,800,000 | 823 | 1077 | 0.069665412  | ANGPTL1,RALGPS2                             |
| 16 | 61,725,000 | 61,875,000 | 824 | 688  | -0.186033375 | FAM20B,TOR3A                                |
| 16 | 61,800,000 | 61,950,000 | 825 | 247  | -0.934564748 | ABL2,FAM20B,TOR3A                           |
| 16 | 61,875,000 | 62,025,000 | 826 | 265  | -0.618562417 | ABL2,TOR3A                                  |
| 16 | 61,950,000 | 62,100,000 | 827 | 588  | 0.517960346  | ABL2,SOAT1                                  |
| 16 | 62,025,000 | 62,175,000 | 828 | 884  | 0.628281185  | AXDND1,SOAT1                                |
| 16 | 62,100,000 | 62,250,000 | 829 | 839  | -0.118422024 | AXDND1,NPHS2,SOAT1                          |
| 16 | 62,175,000 | 62,325,000 | 830 | 720  | -0.154272767 | AXDND1,NPHS2,TDRD5                          |
| 16 | 62,250,000 | 62,400,000 | 831 | 704  | 0.541664674  | TDRD5                                       |
| 16 | 62,325,000 | 62,475,000 | 832 | 709  | 0.186405266  | FAM163A,TDRD5                               |
| 16 | 62,400,000 | 62,550,000 | 833 | 614  | -0.465076234 | FAM163A,IFRG15,TOR1AIP1,TOR1AIP2            |
| 16 | 62,475,000 | 62,625,000 | 834 | 634  | -0.349767594 | IFRG15,TOR1AIP1,TOR1AIP2                    |
| 16 | 62,550,000 | 62,700,000 | 835 | 578  | 0.065499841  | CEP350,TOR1AIP1                             |
| 16 | 62,625,000 | 62,775,000 | 836 | 422  | 0.810020753  | CEP350                                      |
| 16 | 62,700,000 | 62,850,000 | 837 | 476  | -1.97523661  | CEP350,QSOX1                                |
| 16 | 62,775,000 | 62,925,000 | 838 | 469  | -2.021262233 | LHX4,QSOX1                                  |
| 16 | 62,850,000 | 63,000,000 | 839 | 816  | 0.654584845  | LHX4                                        |
| 16 | 62,925,000 | 63,075,000 | 840 | 1219 | 0.313998655  | ACBD6                                       |
| 16 | 63,000,000 | 63,150,000 | 841 | 850  | -0.131648586 | ACBD6                                       |
| 16 | 63,075,000 | 63,225,000 | 842 | 423  | 0.158046282  | ACBD6                                       |
| 16 | 63,150,000 | 63,300,000 | 843 | 496  | -0.616345419 | XPR1                                        |
| 16 | 63,225,000 | 63,375,000 | 844 | 448  | -0.755438836 | XPR1                                        |
| 16 | 63,300,000 | 63,450,000 | 845 | 197  | -0.343012846 | XPR1                                        |
| 16 | 63,375,000 | 63,525,000 | 846 | 249  | -0.073906657 | XPR1                                        |
| 16 | 63,450,000 | 63,600,000 | 847 | 699  | -0.981683075 | KIAA1614,STX6,XPR1                          |
| 16 | 63,525,000 | 63,675,000 | 848 | 841  | -0.902791637 | KIAA1614,MR1,STX6                           |
| 16 | 63,600,000 | 63,750,000 | 849 | 667  | 0.43517061   | IER5,MR1,STX6                               |
| 16 | 63,675,000 | 63,825,000 | 850 | 1314 | -1.31400226  | IER5                                        |
| 16 | 63,750,000 | 63,900,000 | 851 | 1447 | -1.263623487 |                                             |
| 16 | 63,825,000 | 63,975,000 | 852 | 899  | 0.644841975  |                                             |
| 16 | 63,900,000 | 64,050,000 | 853 | 928  | 0.968739777  |                                             |
| 16 | 63,975,000 | 64,125,000 | 854 | 770  | 0.561078447  | CAV2.3                                      |
| 16 | 64,050,000 | 64,200,000 | 855 | 630  | -0.736132369 | CAV2.3                                      |
| 16 | 64,125,000 | 64,275,000 | 856 | 627  | -0.636048151 | CAV2.3                                      |
| 16 | 64,200,000 | 64,350,000 | 857 | 566  | -0.26977763  | CAV2.3                                      |
| 16 | 64,275,000 | 64,425,000 | 858 | 687  | -0.162547481 | CAV2.3                                      |
| 16 | 64,350,000 | 64,500,000 | 859 | 922  | 0.58815876   | CAV2.3                                      |
| 16 | 64,425,000 | 64,575,000 | 860 | 925  | 0.285241945  | CAV2.3                                      |
| 16 | 64,500,000 | 64,650,000 | 861 | 612  | -1.224831562 | ZNF648                                      |
| 16 | 64,575,000 | 64,725,000 | 862 | 596  | -0.545861903 | ZNF648                                      |
| 16 | 64,650,000 | 64,800,000 | 863 | 772  | 0.311516025  | ZNF648                                      |
| 16 | 64,725,000 | 64,875,000 | 864 | 876  | 0.875636914  |                                             |
| 16 | 64,800,000 | 64,950,000 | 865 | 1054 | 1.021765935  | GLUL                                        |
| 16 | 64,875,000 | 65,025,000 | 866 | 1296 | 1.181658341  | GLUL,TEDDM1,ENSBTAG00000000772              |
| 16 | 64,950,000 | 65,100,000 | 867 | 1285 | 0.630361278  | GLUL,RGSL1,RNASEL,TEDDM1,ENSBTAG00000000772 |
| 16 | 65,025,000 | 65,175,000 | 868 | 1200 | -0.158631728 | RGS16,RGSL1,RNASEL                          |
| 16 | 65,100,000 | 65,250,000 | 869 | 1246 | 0.081485424  | RGS16,RGS8,RNASEL                           |
| 16 | 65,175,000 | 65,325,000 | 870 | 954  | -0.251776425 | RGS8                                        |
| 16 | 65,250,000 | 65,400,000 | 871 | 886  | -1.173336875 | DHX9,NPL                                    |
| 16 | 65,325,000 | 65,475,000 | 872 | 974  | -0.778816353 | C16H1ORF14,DHX9,NPL                         |
| 16 | 65,400,000 | 65,550,000 | 873 | 914  | 0.359864572  | C16H1ORF14,DHX9,LAMC1                       |

|    |            |            |     |      |              |                                     |
|----|------------|------------|-----|------|--------------|-------------------------------------|
| 16 | 65,475,000 | 65,625,000 | 874 | 784  | 0.267254437  | LAMC1                               |
| 16 | 65,550,000 | 65,700,000 | 875 | 800  | 0.250422582  | LAMC1                               |
| 16 | 65,625,000 | 65,775,000 | 876 | 1116 | 0.727212394  | LAMC1,LAMC2                         |
| 16 | 65,700,000 | 65,850,000 | 877 | 1008 | 0.377156946  | LAMC2,NMNAT2                        |
| 16 | 65,775,000 | 65,925,000 | 878 | 1202 | 0.695978535  | NMNAT2                              |
| 16 | 65,850,000 | 66,000,000 | 879 | 1117 | 0.984038198  | NMNAT2                              |
| 16 | 65,925,000 | 66,075,000 | 880 | 662  | 1.074358721  | NMNAT2,SMG7                         |
| 16 | 66,000,000 | 66,150,000 | 881 | 926  | 0.555393896  | NCF2,SMG7                           |
| 16 | 66,075,000 | 66,225,000 | 882 | 1073 | -0.933762013 | APOBEC4,ARPC5,NCF2,SMG7             |
| 16 | 66,150,000 | 66,300,000 | 883 | 1160 | -0.410134131 | APOBEC4,ARPC5                       |
| 16 | 66,225,000 | 66,375,000 | 884 | 1227 | 0.400044689  | RGL1                                |
| 16 | 66,300,000 | 66,450,000 | 885 | 1242 | 0.691334113  | RGL1                                |
| 16 | 66,375,000 | 66,525,000 | 886 | 1359 | 0.788203899  | GLT25D2,RGL1                        |
| 16 | 66,450,000 | 66,600,000 | 887 | 1215 | 0.054918665  | GLT25D2,TSEN15                      |
| 16 | 66,525,000 | 66,675,000 | 888 | 1054 | -0.112580113 | GLT25D2,TSEN15                      |
| 16 | 66,600,000 | 66,750,000 | 889 | 1116 | 0.30247059   | TSEN15                              |
| 16 | 66,675,000 | 66,825,000 | 890 | 954  | 0.430120115  |                                     |
| 16 | 66,750,000 | 66,900,000 | 891 | 682  | -0.195768157 | ENSBTAG00000046091                  |
| 16 | 66,825,000 | 66,975,000 | 892 | 753  | -0.31952195  | C16H1ORF21,ENSBTAG00000046091       |
| 16 | 66,900,000 | 67,050,000 | 893 | 1015 | 0.431194331  | C16H1ORF21                          |
| 16 | 66,975,000 | 67,125,000 | 894 | 1137 | 0.496121421  | C16H1ORF21                          |
| 16 | 67,050,000 | 67,200,000 | 895 | 1039 | 0.678159685  | C16H1ORF21                          |
| 16 | 67,125,000 | 67,275,000 | 896 | 929  | 1.016260749  | C16H1ORF21,EDEM3                    |
| 16 | 67,200,000 | 67,350,000 | 897 | 685  | 0.637844532  | EDEM3,FAM129A                       |
| 16 | 67,275,000 | 67,425,000 | 898 | 943  | 0.844422653  | EDEM3,FAM129A                       |
| 16 | 67,350,000 | 67,500,000 | 899 | 923  | 0.893981086  | FAM129A                             |
| 16 | 67,425,000 | 67,575,000 | 900 | 738  | 0.41951503   | FAM129A                             |
| 16 | 67,500,000 | 67,650,000 | 901 | 844  | 0.610541709  | RNF2,TRMT1L                         |
| 16 | 67,575,000 | 67,725,000 | 902 | 663  | 0.925649743  | C16H1ORF26,RNF2,TRMT1L              |
| 16 | 67,650,000 | 67,800,000 | 903 | 738  | 0.848492885  | C16H1ORF26,IVNS1ABP,TRMT1L          |
| 16 | 67,725,000 | 67,875,000 | 904 | 749  | 0.808103699  | C16H1ORF26,IVNS1ABP                 |
| 16 | 67,800,000 | 67,950,000 | 905 | 621  | 1.266169168  |                                     |
| 16 | 67,875,000 | 68,025,000 | 906 | 634  | 0.724556613  |                                     |
| 16 | 67,950,000 | 68,100,000 | 907 | 1016 | -1.005263608 | SMIM20                              |
| 16 | 68,025,000 | 68,175,000 | 908 | 992  | -0.90788419  | SMIM20                              |
| 16 | 68,100,000 | 68,250,000 | 909 | 555  | -0.291094085 | HMCN1                               |
| 16 | 68,175,000 | 68,325,000 | 910 | 663  | -0.374771708 | HMCN1                               |
| 16 | 68,250,000 | 68,400,000 | 911 | 911  | 0.111077673  | HMCN1                               |
| 16 | 68,325,000 | 68,475,000 | 912 | 1029 | 0.568473001  | HMCN1                               |
| 16 | 68,400,000 | 68,550,000 | 913 | 1270 | 1.179209877  | HMCN1                               |
| 16 | 68,475,000 | 68,625,000 | 914 | 1163 | 1.276122628  | HMCN1                               |
| 16 | 68,550,000 | 68,700,000 | 915 | 971  | 0.568724477  | HMCN1                               |
| 16 | 68,625,000 | 68,775,000 | 916 | 976  | 0.002683573  | HMCN1                               |
| 16 | 68,700,000 | 68,850,000 | 917 | 1215 | -0.248517266 | HMCN1                               |
| 16 | 68,775,000 | 68,925,000 | 918 | 1676 | -1.885004503 | PRG4,TPR                            |
| 16 | 68,850,000 | 69,000,000 | 919 | 1884 | -2.484482245 | C1orf27,PRG4,TPR,ENSBTAG00000047559 |
| 16 | 68,925,000 | 69,075,000 | 920 | 1780 | -0.509908449 | C1orf27,PDC,TPR,ENSBTAG00000047559  |
| 16 | 69,000,000 | 69,150,000 | 921 | 1489 | 0.399079609  | PDC                                 |
| 16 | 69,075,000 | 69,225,000 | 922 | 1428 | 0.719732648  |                                     |
| 16 | 69,150,000 | 69,300,000 | 923 | 969  | 0.990168199  | PGHS-2                              |
| 16 | 69,225,000 | 69,375,000 | 924 | 731  | -0.749122562 | PGHS-2                              |
| 16 | 69,300,000 | 69,450,000 | 925 | 1152 | -1.549352573 | PLA2G4A                             |
| 16 | 69,375,000 | 69,525,000 | 926 | 1317 | -0.686626476 | PLA2G4A                             |



|    |            |            |     |      |              |                                                              |
|----|------------|------------|-----|------|--------------|--------------------------------------------------------------|
| 16 | 69,450,000 | 69,600,000 | 927 | 1171 | -1.67244951  | PLA2G4A                                                      |
| 16 | 69,525,000 | 69,675,000 | 928 | 1203 | -2.418466494 | PLA2G4A                                                      |
| 16 | 69,600,000 | 69,750,000 | 929 | 1396 | -0.012226849 | PLA2G4A                                                      |
| 16 | 69,675,000 | 69,825,000 | 930 | 1524 | -0.03257202  |                                                              |
| 16 | 69,750,000 | 69,900,000 | 931 | 1464 | -0.365898638 | KCNK2                                                        |
| 16 | 69,825,000 | 69,975,000 | 932 | 1162 | 0.072213237  | KCNK2                                                        |
| 16 | 69,900,000 | 70,050,000 | 933 | 1378 | -0.362032673 | KCNK2                                                        |
| 16 | 69,975,000 | 70,125,000 | 934 | 1412 | -0.550946621 | KCNK2                                                        |
| 16 | 70,050,000 | 70,200,000 | 935 | 941  | -0.073216839 | KCNK2                                                        |
| 16 | 70,125,000 | 70,275,000 | 936 | 808  | 0.286398799  |                                                              |
| 16 | 70,200,000 | 70,350,000 | 937 | 741  | 0.440228234  |                                                              |
| 16 | 70,275,000 | 70,425,000 | 938 | 1111 | 0.674896743  |                                                              |
| 16 | 70,350,000 | 70,500,000 | 939 | 1233 | 0.661906941  | CENPF                                                        |
| 16 | 70,425,000 | 70,575,000 | 940 | 925  | 0.48750212   | CENPF                                                        |
| 16 | 70,500,000 | 70,650,000 | 941 | 1096 | 0.201446503  | CENPF,PTPN14                                                 |
| 16 | 70,575,000 | 70,725,000 | 942 | 1132 | 0.02533623   | PTPN14                                                       |
| 16 | 70,650,000 | 70,800,000 | 943 | 1371 | 0.37357237   | PTPN14,SMYD2                                                 |
| 16 | 70,725,000 | 70,875,000 | 944 | 1193 | 0.589928984  | ELF3,PTPN14,RNPEP,SMYD2                                      |
| 16 | 70,800,000 | 70,950,000 | 945 | 490  | 0.769692138  | ARL8A,ELF3,GPR37L1,LGR6,PTPN7,RNPEP,SMYD2,ENSBTAG00000047073 |
| 16 | 70,875,000 | 71,025,000 | 946 | 332  | -1.113637729 | ARL8A,GPR37L1,LGR6,PTPN7,UBE2T,ENSBTAG00000047073            |
| 16 | 70,950,000 | 71,100,000 | 947 | 547  | -0.743485001 | LGR6,PPP1R12B,UBE2T                                          |
| 16 | 71,025,000 | 71,175,000 | 948 | 672  | 0.323683993  | PPP1R12B,SYT2                                                |
| 16 | 71,100,000 | 71,250,000 | 949 | 698  | 0.339833364  | PPP1R12B,SYT2                                                |
| 16 | 71,175,000 | 71,325,000 | 950 | 599  | -0.65417224  |                                                              |
| 16 | 71,250,000 | 71,400,000 | 951 | 437  | -2.241738009 |                                                              |
| 16 | 71,325,000 | 71,475,000 | 952 | 416  | -1.805794421 | PROX1                                                        |
| 16 | 71,400,000 | 71,550,000 | 953 | 697  | 0.169763348  | PROX1                                                        |
| 16 | 71,475,000 | 71,625,000 | 954 | 1171 | 0.416077495  |                                                              |
| 16 | 71,550,000 | 71,700,000 | 955 | 1384 | 0.707125694  |                                                              |
| 16 | 71,625,000 | 71,775,000 | 956 | 1506 | 0.366088484  |                                                              |
| 16 | 71,700,000 | 71,850,000 | 957 | 1645 | -0.041219837 |                                                              |
| 16 | 71,775,000 | 71,925,000 | 958 | 1590 | -0.102559406 |                                                              |
| 16 | 71,850,000 | 72,000,000 | 959 | 1445 | 0.705105812  |                                                              |
| 16 | 71,925,000 | 72,075,000 | 960 | 1658 | 1.09875492   |                                                              |
| 16 | 72,000,000 | 72,150,000 | 961 | 1715 | 0.962205428  |                                                              |
| 16 | 72,075,000 | 72,225,000 | 962 | 1592 | 0.817530325  |                                                              |
| 16 | 72,150,000 | 72,300,000 | 963 | 1367 | 0.695453967  | RPS6KC1                                                      |
| 16 | 72,225,000 | 72,375,000 | 964 | 1074 | -0.794833458 | RPS6KC1                                                      |
| 16 | 72,300,000 | 72,450,000 | 965 | 990  | -0.766571131 | RPS6KC1                                                      |
| 16 | 72,375,000 | 72,525,000 | 966 | 963  | 0.677507711  | ANGEL2,RPS6KC1,VASH2                                         |
| 16 | 72,450,000 | 72,600,000 | 967 | 849  | 0.441101315  | ANGEL2,FLVCR1,VASH2                                          |
| 16 | 72,525,000 | 72,675,000 | 968 | 976  | 0.064095831  | FLVCR1,NSL1,SPATA45,TATDN3,VASH2                             |
| 16 | 72,600,000 | 72,750,000 | 969 | 1063 | -0.402374339 | BATF3,NSL1,SPATA45,TATDN3                                    |
| 16 | 72,675,000 | 72,825,000 | 970 | 876  | -0.122478377 | ATF3,BATF3,FAM71A,NSL1                                       |
| 16 | 72,750,000 | 72,900,000 | 971 | 940  | 0.045122671  | ATF3,BATF3,FAM71A                                            |
| 16 | 72,825,000 | 72,975,000 | 972 | 1224 | 0.563456195  | ATF3                                                         |
| 16 | 72,900,000 | 73,050,000 | 973 | 1583 | 1.055370657  | NENF,TMEM206                                                 |
| 16 | 72,975,000 | 73,125,000 | 974 | 1302 | 0.741611601  | NENF,PPP2R5A,TMEM206                                         |
| 16 | 73,050,000 | 73,200,000 | 975 | 880  | 0.423189965  | PPP2R5A,TMEM206                                              |
| 16 | 73,125,000 | 73,275,000 | 976 | 1116 | 0.693705632  | PPP2R5A                                                      |
| 16 | 73,200,000 | 73,350,000 | 977 | 1188 | 0.060745839  | DTL                                                          |

|    |            |            |      |      |              |                               |
|----|------------|------------|------|------|--------------|-------------------------------|
| 16 | 73,275,000 | 73,425,000 | 978  | 1047 | -1.957491941 | DTL,INTS7                     |
| 16 | 73,350,000 | 73,500,000 | 979  | 956  | -1.574823646 | DTL,INTS7                     |
| 16 | 73,425,000 | 73,575,000 | 980  | 804  | 0.145670963  | INTS7,LPGAT1                  |
| 16 | 73,500,000 | 73,650,000 | 981  | 852  | 0.360911476  | LPGAT1                        |
| 16 | 73,575,000 | 73,725,000 | 982  | 1191 | -0.646068864 | LPGAT1,NEK2                   |
| 16 | 73,650,000 | 73,800,000 | 983  | 1227 | -0.40618261  | NEK2,SLC30A1                  |
| 16 | 73,725,000 | 73,875,000 | 984  | 1322 | 0.45590843   | RD3,SLC30A1                   |
| 16 | 73,800,000 | 73,950,000 | 985  | 1238 | 0.201280966  | RD3,TRAF5                     |
| 16 | 73,875,000 | 74,025,000 | 986  | 639  | 0.283310283  | RCOR3,TRAF5                   |
| 16 | 73,950,000 | 74,100,000 | 987  | 510  | 0.767216563  | RCOR3                         |
| 16 | 74,025,000 | 74,175,000 | 988  | 995  | 0.895369903  | KCNH1                         |
| 16 | 74,100,000 | 74,250,000 | 989  | 1432 | 0.936683244  | KCNH1                         |
| 16 | 74,175,000 | 74,325,000 | 990  | 1657 | 0.789448316  | KCNH1                         |
| 16 | 74,250,000 | 74,400,000 | 991  | 1602 | 0.431259762  | KCNH1                         |
| 16 | 74,325,000 | 74,475,000 | 992  | 1340 | 0.050528582  | KCNH1                         |
| 16 | 74,400,000 | 74,550,000 | 993  | 1531 | 0.307953471  | KCNH1                         |
| 16 | 74,475,000 | 74,625,000 | 994  | 1601 | 0.318672471  | KCNH1                         |
| 16 | 74,550,000 | 74,700,000 | 995  | 1546 | 0.348792477  |                               |
| 16 | 74,625,000 | 74,775,000 | 996  | 1552 | 0.367090964  |                               |
| 16 | 74,700,000 | 74,850,000 | 997  | 1585 | 0.135247096  |                               |
| 16 | 74,775,000 | 74,925,000 | 998  | 1351 | 0.199767004  |                               |
| 16 | 74,850,000 | 75,000,000 | 999  | 923  | 0.766262131  | SERTAD4                       |
| 16 | 74,925,000 | 75,075,000 | 1000 | 759  | 0.79475746   | SERTAD4,SYT14                 |
| 16 | 75,000,000 | 75,150,000 | 1001 | 898  | 1.101645262  | SERTAD4,SYT14                 |
| 16 | 75,075,000 | 75,225,000 | 1002 | 1087 | 0.793507874  | SYT14                         |
| 16 | 75,150,000 | 75,300,000 | 1003 | 1058 | -0.403102282 | SYT14                         |
| 16 | 75,225,000 | 75,375,000 | 1004 | 1080 | -1.869267917 | DIEXF                         |
| 16 | 75,300,000 | 75,450,000 | 1005 | 1128 | -0.741446091 | C1orf74,DIEXF,IRF6,TRAF3IP3   |
| 16 | 75,375,000 | 75,525,000 | 1006 | 1172 | 0.952955823  | C1orf74,HSD11B1,IRF6,TRAF3IP3 |
| 16 | 75,450,000 | 75,600,000 | 1007 | 1279 | 0.870415004  | GOS2,HSD11B1,LAMB3            |
| 16 | 75,525,000 | 75,675,000 | 1008 | 1232 | 0.622579409  | CAMK1G,GOS2,LAMB3             |
| 16 | 75,600,000 | 75,750,000 | 1009 | 1559 | -0.83456627  | CAMK1G,LAMB3                  |
| 16 | 75,675,000 | 75,825,000 | 1010 | 1670 | -1.672080134 |                               |
| 16 | 75,750,000 | 75,900,000 | 1011 | 1275 | -1.257997477 |                               |
| 16 | 75,825,000 | 75,975,000 | 1012 | 1075 | 0.292169045  |                               |
| 16 | 75,900,000 | 76,050,000 | 1013 | 1147 | 0.962749007  |                               |
| 16 | 75,975,000 | 76,125,000 | 1014 | 1077 | 0.442057218  |                               |
| 16 | 76,050,000 | 76,200,000 | 1015 | 1033 | 0.712950602  |                               |
| 16 | 76,125,000 | 76,275,000 | 1016 | 1329 | 0.805242506  |                               |
| 16 | 76,200,000 | 76,350,000 | 1017 | 1505 | -1.024135717 |                               |
| 16 | 76,275,000 | 76,425,000 | 1018 | 1106 | -0.921588523 |                               |
| 16 | 76,350,000 | 76,500,000 | 1019 | 631  | 0.853991398  |                               |
| 16 | 76,425,000 | 76,575,000 | 1020 | 844  | 0.93771505   |                               |
| 16 | 76,500,000 | 76,650,000 | 1021 | 1070 | 0.404846585  |                               |
| 16 | 76,575,000 | 76,725,000 | 1022 | 1424 | -1.225199987 |                               |
| 16 | 76,650,000 | 76,800,000 | 1023 | 1496 | -1.479460094 |                               |
| 16 | 76,725,000 | 76,875,000 | 1024 | 1154 | -0.516745177 |                               |
| 16 | 76,800,000 | 76,950,000 | 1025 | 1055 | -0.190552951 |                               |
| 16 | 76,875,000 | 77,025,000 | 1026 | 1069 | 0.229539963  |                               |
| 16 | 76,950,000 | 77,100,000 | 1027 | 869  | 0.105667179  | PLXNA2                        |
| 16 | 77,025,000 | 77,175,000 | 1028 | 741  | 0.583542152  | PLXNA2                        |
| 16 | 77,100,000 | 77,250,000 | 1029 | 818  | 1.339252311  | PLXNA2                        |
| 16 | 77,175,000 | 77,325,000 | 1030 | 950  | 1.320419753  | PLXNA2                        |

|    |            |            |      |      |              |                                    |
|----|------------|------------|------|------|--------------|------------------------------------|
| 16 | 77,250,000 | 77,400,000 | 1031 | 945  | 1.169611446  | CD34,PLXNA2                        |
| 16 | 77,325,000 | 77,475,000 | 1032 | 1040 | 1.337357207  | CD34                               |
| 16 | 77,400,000 | 77,550,000 | 1033 | 1154 | 1.100833099  | CD46                               |
| 16 | 77,475,000 | 77,625,000 | 1034 | 1525 | 0.637612886  | CD46                               |
| 16 | 77,550,000 | 77,700,000 | 1035 | 2003 | 0.417590477  |                                    |
| 16 | 77,625,000 | 77,775,000 | 1036 | 1497 | 0.40932075   | ENSBTAG00000030910                 |
| 16 | 77,700,000 | 77,850,000 | 1037 | 1138 | 1.238174067  | F13B,ENSBTAG00000030910            |
| 16 | 77,775,000 | 77,925,000 | 1038 | 1434 | 0.660197652  | ASPM,CFHR5,F13B,ENSBTAG00000030910 |
| 16 | 77,850,000 | 78,000,000 | 1039 | 1269 | -1.589780945 | ASPM,CFHR5,F13B                    |
| 16 | 77,925,000 | 78,075,000 | 1040 | 914  | -2.895633412 | ASPM,ZBTB41                        |
| 16 | 78,000,000 | 78,150,000 | 1041 | 1330 | -0.99879966  | CRB1,ZBTB41                        |
| 16 | 78,075,000 | 78,225,000 | 1042 | 1626 | -0.770098684 | CRB1                               |
| 16 | 78,150,000 | 78,300,000 | 1043 | 1216 | -0.284726015 | CRB1                               |
| 16 | 78,225,000 | 78,375,000 | 1044 | 1059 | 0.410474097  | CRB1                               |
| 16 | 78,300,000 | 78,450,000 | 1045 | 1110 | 0.861293925  | CRB1,DENND1B                       |
| 16 | 78,375,000 | 78,525,000 | 1046 | 942  | 0.914492199  | DENND1B                            |
| 16 | 78,450,000 | 78,600,000 | 1047 | 997  | 0.970846933  | DENND1B                            |
| 16 | 78,525,000 | 78,675,000 | 1048 | 1315 | 0.524174743  | DENND1B                            |
| 16 | 78,600,000 | 78,750,000 | 1049 | 1363 | 0.003428362  |                                    |
| 16 | 78,675,000 | 78,825,000 | 1050 | 913  | 0.003036292  | LHX9                               |
| 16 | 78,750,000 | 78,900,000 | 1051 | 484  | 0.018658333  | LHX9                               |
| 16 | 78,825,000 | 78,975,000 | 1052 | 735  | -4.21639203  |                                    |
| 16 | 78,900,000 | 79,050,000 | 1053 | 840  | -4.872008324 |                                    |
| 16 | 78,975,000 | 79,125,000 | 1054 | 572  | -0.958093461 | NEK7                               |
| 16 | 79,050,000 | 79,200,000 | 1055 | 398  | -0.569425907 | NEK7                               |
| 16 | 79,125,000 | 79,275,000 | 1056 | 485  | 0.357159972  | NEK7                               |
| 16 | 79,200,000 | 79,350,000 | 1057 | 1020 | 0.579005618  | ATP6V1G3                           |
| 16 | 79,275,000 | 79,425,000 | 1058 | 1226 | 0.589005059  | ATP6V1G3                           |
| 16 | 79,350,000 | 79,500,000 | 1059 | 850  | 0.71931318   | ATP6V1G3                           |
| 16 | 79,425,000 | 79,575,000 | 1060 | 1066 | 1.151965126  | PTPRC,ENSBTAG00000046345           |
| 16 | 79,500,000 | 79,650,000 | 1061 | 1241 | -0.368581788 | PTPRC,ENSBTAG00000046345           |
| 16 | 79,575,000 | 79,725,000 | 1062 | 1065 | -1.498429511 | PTPRC                              |
| 16 | 79,650,000 | 79,800,000 | 1063 | 1142 | -0.255582686 |                                    |
| 16 | 79,725,000 | 79,875,000 | 1064 | 1437 | 0.376723223  |                                    |
| 16 | 79,800,000 | 79,950,000 | 1065 | 1939 | 0.405896725  |                                    |
| 16 | 79,875,000 | 80,025,000 | 1066 | 1422 | 0.438899995  |                                    |
| 16 | 79,950,000 | 80,100,000 | 1067 | 973  | 0.781325517  |                                    |
| 16 | 80,025,000 | 80,175,000 | 1068 | 1104 | 0.194220688  |                                    |
| 16 | 80,100,000 | 80,250,000 | 1069 | 1597 | 0.516102046  |                                    |
| 16 | 80,175,000 | 80,325,000 | 1070 | 2134 | 0.643760106  |                                    |
| 16 | 80,250,000 | 80,400,000 | 1071 | 1830 | 0.363346381  |                                    |
| 16 | 80,325,000 | 80,475,000 | 1072 | 1830 | 0.494094387  |                                    |
| 16 | 80,400,000 | 80,550,000 | 1073 | 1941 | 0.593980263  |                                    |
| 16 | 80,475,000 | 80,625,000 | 1074 | 1457 | 1.069358912  |                                    |
| 16 | 80,550,000 | 80,700,000 | 1075 | 793  | 1.327224877  |                                    |
| 16 | 80,625,000 | 80,775,000 | 1076 | 533  | 0.638252231  | NR5A2                              |
| 16 | 80,700,000 | 80,850,000 | 1077 | 682  | 0.898340769  | NR5A2                              |
| 16 | 80,775,000 | 80,925,000 | 1078 | 804  | 0.852830133  | NR5A2                              |
| 16 | 80,850,000 | 81,000,000 | 1079 | 1103 | 0.441041924  | NR5A2                              |
| 16 | 80,925,000 | 81,075,000 | 1080 | 1015 | 0.472325272  | ZNF281                             |
| 16 | 81,000,000 | 81,150,000 | 1081 | 753  | 0.579268197  | KIF14,ZNF281                       |
| 16 | 81,075,000 | 81,225,000 | 1082 | 897  | 0.807936251  | DDX59,KIF14                        |
| 16 | 81,150,000 | 81,300,000 | 1083 | 808  | 0.728405912  | CAMSAP2,DDX59,KIF14                |

|    |            |            |      |      |              |                         |
|----|------------|------------|------|------|--------------|-------------------------|
| 16 | 81,225,000 | 81,375,000 | 1084 | 698  | 0.133181161  | C1orf106,CAMSAP2        |
| 16 | 81,300,000 | 81,450,000 | 1085 | 550  | -0.180335087 | C1orf106,CAMSAP2,KIF21B |
| 16 | 81,375,000 | 81,525,000 | 1086 | 620  | 0.378212894  | C1orf106,CACNA1S,KIF21B |
| 16 | 81,450,000 | 81,600,000 | 1087 | 674  | 0.028836025  | CACNA1S,TMEM9           |
| 16 | 81,525,000 | 81,675,000 | 1088 | 537  | -0.321711725 | CACNA1S,IGFN1,TMEM9     |
| 16 | 81,600,000 | 81,724,687 | 1089 | 447  | -1.15E-05    | IGFN1,PKP1              |
| 17 | 0          | 150,000    | 1    | 722  | -1.579866735 | ENSBTAG00000048129      |
| 17 | 75,000     | 225,000    | 2    | 629  | 0.516031029  | TMEM192                 |
| 17 | 150,000    | 300,000    | 3    | 867  | 1.191501938  | TMEM192                 |
| 17 | 225,000    | 375,000    | 4    | 821  | 1.007553021  | KLHL2                   |
| 17 | 300,000    | 450,000    | 5    | 843  | 0.499081827  | KLHL2                   |
| 17 | 375,000    | 525,000    | 6    | 1168 | 0.329456195  | KLHL2,SC4MOL            |
| 17 | 450,000    | 600,000    | 7    | 1585 | -0.197382659 | CPE,KLHL2,SC4MOL        |
| 17 | 525,000    | 675,000    | 8    | 1527 | -0.300020844 | CPE                     |
| 17 | 600,000    | 750,000    | 9    | 840  | -0.135784123 | CPE                     |
| 17 | 675,000    | 825,000    | 10   | 664  | -0.201793462 | CPE                     |
| 17 | 750,000    | 900,000    | 11   | 682  | -0.857938376 |                         |
| 17 | 825,000    | 975,000    | 12   | 833  | -0.610492788 |                         |
| 17 | 900,000    | 1,050,000  | 13   | 1243 | -1.060733081 |                         |
| 17 | 975,000    | 1,125,000  | 14   | 1450 | -0.363590566 |                         |
| 17 | 1,050,000  | 1,200,000  | 15   | 1557 | 0.592109191  |                         |
| 17 | 1,125,000  | 1,275,000  | 16   | 1384 | 0.298376549  |                         |
| 17 | 1,200,000  | 1,350,000  | 17   | 1087 | 0.059955907  |                         |
| 17 | 1,275,000  | 1,425,000  | 18   | 1111 | 0.054292675  |                         |
| 17 | 1,350,000  | 1,500,000  | 19   | 907  | -0.565084187 | TLL1                    |
| 17 | 1,425,000  | 1,575,000  | 20   | 768  | -1.259850625 | TLL1                    |
| 17 | 1,500,000  | 1,650,000  | 21   | 1040 | -1.235400241 | TLL1                    |
| 17 | 1,575,000  | 1,725,000  | 22   | 1390 | -1.535867671 | TLL1                    |
| 17 | 1,650,000  | 1,800,000  | 23   | 1280 | -0.285630087 | TLL1                    |
| 17 | 1,725,000  | 1,875,000  | 24   | 1051 | 0.705191068  | TLL1                    |
| 17 | 1,800,000  | 1,950,000  | 25   | 1314 | 0.580434006  | MAP9,TLL1               |
| 17 | 1,875,000  | 2,025,000  | 26   | 1730 | 0.97553258   | MAP9                    |
| 17 | 1,950,000  | 2,100,000  | 27   | 1364 | 1.192697899  | NPY2R                   |
| 17 | 2,025,000  | 2,175,000  | 28   | 872  | 0.940461117  | NPY2R                   |
| 17 | 2,100,000  | 2,250,000  | 29   | 951  | 0.892735513  |                         |
| 17 | 2,175,000  | 2,325,000  | 30   | 1212 | 0.550351868  |                         |
| 17 | 2,250,000  | 2,400,000  | 31   | 1965 | 0.303376917  |                         |
| 17 | 2,325,000  | 2,475,000  | 32   | 1809 | 0.025999072  |                         |
| 17 | 2,400,000  | 2,550,000  | 33   | 821  | -0.366626891 | RBM46                   |
| 17 | 2,475,000  | 2,625,000  | 34   | 830  | 0.325022643  | RBM46                   |
| 17 | 2,550,000  | 2,700,000  | 35   | 1137 | -0.000765261 | LRAT,RBM46              |
| 17 | 2,625,000  | 2,775,000  | 36   | 1307 | 0.15382424   | LRAT                    |
| 17 | 2,700,000  | 2,850,000  | 37   | 1389 | 0.813588913  | FGA,FGG                 |
| 17 | 2,775,000  | 2,925,000  | 38   | 1326 | 0.99840197   | FGA,FGB,FGG,PLRG1       |
| 17 | 2,850,000  | 3,000,000  | 39   | 1351 | 0.486451618  | FGB,PLRG1               |
| 17 | 2,925,000  | 3,075,000  | 40   | 1316 | -0.187806466 |                         |
| 17 | 3,000,000  | 3,150,000  | 41   | 1392 | 0.120809873  | DCHS2                   |
| 17 | 3,075,000  | 3,225,000  | 42   | 1343 | 0.013612942  | DCHS2                   |
| 17 | 3,150,000  | 3,300,000  | 43   | 1169 | 0.233092083  | DCHS2                   |
| 17 | 3,225,000  | 3,375,000  | 44   | 1295 | 1.202238816  | DCHS2                   |
| 17 | 3,300,000  | 3,450,000  | 45   | 1243 | 1.260079846  | DCHS2                   |
| 17 | 3,375,000  | 3,525,000  | 46   | 940  | 0.645292279  |                         |
| 17 | 3,450,000  | 3,600,000  | 47   | 951  | 0.784848388  |                         |

|    |           |           |     |      |              |                      |
|----|-----------|-----------|-----|------|--------------|----------------------|
| 17 | 3,525,000 | 3,675,000 | 48  | 1156 | 0.777574124  |                      |
| 17 | 3,600,000 | 3,750,000 | 49  | 968  | 0.508933797  |                      |
| 17 | 3,675,000 | 3,825,000 | 50  | 584  | 0.557898945  |                      |
| 17 | 3,750,000 | 3,900,000 | 51  | 1074 | -0.197045316 | RNF175,SFRP2         |
| 17 | 3,825,000 | 3,975,000 | 52  | 1596 | -0.14341644  | RNF175,SFRP2,TLR2    |
| 17 | 3,900,000 | 4,050,000 | 53  | 1388 | 0.588138454  | KIAA0922,RNF175,TLR2 |
| 17 | 3,975,000 | 4,125,000 | 54  | 939  | 0.969173147  | KIAA0922             |
| 17 | 4,050,000 | 4,200,000 | 55  | 845  | 0.571209555  | KIAA0922             |
| 17 | 4,125,000 | 4,275,000 | 56  | 1128 | -0.041846113 | MND1                 |
| 17 | 4,200,000 | 4,350,000 | 57  | 1446 | -0.017640568 | MND1,TRIM2           |
| 17 | 4,275,000 | 4,425,000 | 58  | 1776 | 0.604086768  | MND1,TRIM2           |
| 17 | 4,350,000 | 4,500,000 | 59  | 1497 | 0.674619271  | TRIM2                |
| 17 | 4,425,000 | 4,575,000 | 60  | 981  | 0.872192459  | TRIM2                |
| 17 | 4,500,000 | 4,650,000 | 61  | 1017 | 0.882792236  |                      |
| 17 | 4,575,000 | 4,725,000 | 62  | 1122 | 1.050870098  | FHDC1                |
| 17 | 4,650,000 | 4,800,000 | 63  | 1096 | 1.135603219  | ARFIP1,FHDC1         |
| 17 | 4,725,000 | 4,875,000 | 64  | 1535 | 0.197801409  | ARFIP1               |
| 17 | 4,800,000 | 4,950,000 | 65  | 1649 | -0.319070899 | ARFIP1,TIGD4         |
| 17 | 4,875,000 | 5,025,000 | 66  | 992  | -0.453697906 | TIGD4                |
| 17 | 4,950,000 | 5,100,000 | 67  | 821  | -0.248388543 |                      |
| 17 | 5,025,000 | 5,175,000 | 68  | 1055 | 0.560695612  |                      |
| 17 | 5,100,000 | 5,250,000 | 69  | 757  | 1.206758118  |                      |
| 17 | 5,175,000 | 5,325,000 | 70  | 406  | 0.185533896  | FBXW7                |
| 17 | 5,250,000 | 5,400,000 | 71  | 629  | -0.478412259 | FBXW7                |
| 17 | 5,325,000 | 5,475,000 | 72  | 980  | -0.443931297 | FBXW7                |
| 17 | 5,400,000 | 5,550,000 | 73  | 1136 | 0.137285535  |                      |
| 17 | 5,475,000 | 5,625,000 | 74  | 920  | 0.25720764   |                      |
| 17 | 5,550,000 | 5,700,000 | 75  | 589  | -0.324669683 |                      |
| 17 | 5,625,000 | 5,775,000 | 76  | 763  | -0.621118836 |                      |
| 17 | 5,700,000 | 5,850,000 | 77  | 1311 | -0.405655767 |                      |
| 17 | 5,775,000 | 5,925,000 | 78  | 1317 | 0.091520625  |                      |
| 17 | 5,850,000 | 6,000,000 | 79  | 888  | 0.429739883  | PET112L              |
| 17 | 5,925,000 | 6,075,000 | 80  | 724  | 0.815612184  | PET112L              |
| 17 | 6,000,000 | 6,150,000 | 81  | 998  | 0.608923946  | FAM160A1,PET112L     |
| 17 | 6,075,000 | 6,225,000 | 82  | 1099 | 0.666492467  | FAM160A1,PET112L     |
| 17 | 6,150,000 | 6,300,000 | 83  | 892  | 0.923194846  | FAM160A1             |
| 17 | 6,225,000 | 6,375,000 | 84  | 875  | 0.726134231  |                      |
| 17 | 6,300,000 | 6,450,000 | 85  | 1267 | -0.546283303 |                      |
| 17 | 6,375,000 | 6,525,000 | 86  | 1191 | -0.720704809 | PRSS48               |
| 17 | 6,450,000 | 6,600,000 | 87  | 808  | 1.091686053  | PRSS48               |
| 17 | 6,525,000 | 6,675,000 | 88  | 770  | 0.927137915  | PRSS48,SH3D19        |
| 17 | 6,600,000 | 6,750,000 | 89  | 916  | -0.422040125 | RPS3A,SH3D19         |
| 17 | 6,675,000 | 6,825,000 | 90  | 1110 | -0.38787921  | RPS3A,SH3D19         |
| 17 | 6,750,000 | 6,900,000 | 91  | 937  | -0.853153543 | LRBA                 |
| 17 | 6,825,000 | 6,975,000 | 92  | 606  | -1.795780467 | LRBA                 |
| 17 | 6,900,000 | 7,050,000 | 93  | 667  | -0.05820283  | LRBA                 |
| 17 | 6,975,000 | 7,125,000 | 94  | 1021 | 0.914684131  | LRBA                 |
| 17 | 7,050,000 | 7,200,000 | 95  | 1125 | 0.741454849  | LRBA                 |
| 17 | 7,125,000 | 7,275,000 | 96  | 807  | 0.311490247  | LRBA,MAB21L2         |
| 17 | 7,200,000 | 7,350,000 | 97  | 526  | -0.214411625 | LRBA,MAB21L2         |
| 17 | 7,275,000 | 7,425,000 | 98  | 532  | -0.151947802 | LRBA                 |
| 17 | 7,350,000 | 7,500,000 | 99  | 549  | 0.305190329  | LRBA                 |
| 17 | 7,425,000 | 7,575,000 | 100 | 880  | 0.782316724  | DCLK2,LRBA           |

|    |            |            |     |      |              |                           |
|----|------------|------------|-----|------|--------------|---------------------------|
| 17 | 7,500,000  | 7,650,000  | 101 | 708  | 0.794308316  | DCLK2,LRBA                |
| 17 | 7,575,000  | 7,725,000  | 102 | 479  | 0.105572395  | DCLK2                     |
| 17 | 7,650,000  | 7,800,000  | 103 | 781  | -1.595375484 | DCLK2                     |
| 17 | 7,725,000  | 7,875,000  | 104 | 991  | -1.237879674 | DCLK2                     |
| 17 | 7,800,000  | 7,950,000  | 105 | 1077 | -0.340355783 |                           |
| 17 | 7,875,000  | 8,025,000  | 106 | 865  | -0.700367665 |                           |
| 17 | 7,950,000  | 8,100,000  | 107 | 728  | -1.380766132 |                           |
| 17 | 8,025,000  | 8,175,000  | 108 | 622  | -2.123745332 |                           |
| 17 | 8,100,000  | 8,250,000  | 109 | 606  | -0.101254732 |                           |
| 17 | 8,175,000  | 8,325,000  | 110 | 1167 | 0.348414116  |                           |
| 17 | 8,250,000  | 8,400,000  | 111 | 1422 | 0.089035421  |                           |
| 17 | 8,325,000  | 8,475,000  | 112 | 1220 | -0.322180798 |                           |
| 17 | 8,400,000  | 8,550,000  | 113 | 1230 | 0.060384846  |                           |
| 17 | 8,475,000  | 8,625,000  | 114 | 1401 | 0.178819083  |                           |
| 17 | 8,550,000  | 8,700,000  | 115 | 1096 | -0.053339368 |                           |
| 17 | 8,625,000  | 8,775,000  | 116 | 948  | 0.58057836   |                           |
| 17 | 8,700,000  | 8,850,000  | 117 | 1652 | 0.51992204   |                           |
| 17 | 8,775,000  | 8,925,000  | 118 | 2322 | 0.390722535  | ENSBTAG00000045580        |
| 17 | 8,850,000  | 9,000,000  | 119 | 2354 | 0.3539076    | ENSBTAG00000045580        |
| 17 | 8,925,000  | 9,075,000  | 120 | 1374 | 0.33194955   |                           |
| 17 | 9,000,000  | 9,150,000  | 121 | 727  | 1.070265249  |                           |
| 17 | 9,075,000  | 9,225,000  | 122 | 785  | 0.787451295  |                           |
| 17 | 9,150,000  | 9,300,000  | 123 | 1140 | 0.104568914  |                           |
| 17 | 9,225,000  | 9,375,000  | 124 | 1252 | 0.332459128  |                           |
| 17 | 9,300,000  | 9,450,000  | 125 | 1124 | 0.602780664  |                           |
| 17 | 9,375,000  | 9,525,000  | 126 | 1074 | -0.123050428 |                           |
| 17 | 9,450,000  | 9,600,000  | 127 | 595  | -0.898389582 |                           |
| 17 | 9,525,000  | 9,675,000  | 128 | 578  | 0.01793174   |                           |
| 17 | 9,600,000  | 9,750,000  | 129 | 736  | 0.095397983  | NR3C2                     |
| 17 | 9,675,000  | 9,825,000  | 130 | 847  | 0.372098462  | NR3C2                     |
| 17 | 9,750,000  | 9,900,000  | 131 | 855  | 0.95247879   | NR3C2                     |
| 17 | 9,825,000  | 9,975,000  | 132 | 725  | 0.571464678  | NR3C2                     |
| 17 | 9,900,000  | 10,050,000 | 133 | 663  | 0.227307373  | NR3C2                     |
| 17 | 9,975,000  | 10,125,000 | 134 | 557  | 0.641328475  | NR3C2                     |
| 17 | 10,050,000 | 10,200,000 | 135 | 546  | -0.574976104 | ARHGAP10,NR3C2            |
| 17 | 10,125,000 | 10,275,000 | 136 | 822  | -1.948184318 | ARHGAP10,NR3C2            |
| 17 | 10,200,000 | 10,350,000 | 137 | 1074 | -0.48205627  | ARHGAP10                  |
| 17 | 10,275,000 | 10,425,000 | 138 | 1092 | 0.44133944   | ARHGAP10                  |
| 17 | 10,350,000 | 10,500,000 | 139 | 1087 | 0.392900861  | ARHGAP10                  |
| 17 | 10,425,000 | 10,575,000 | 140 | 861  | -0.135336199 | ARHGAP10                  |
| 17 | 10,500,000 | 10,650,000 | 141 | 867  | -0.010712011 | ARHGAP10,MGC151858,TMEM34 |
| 17 | 10,575,000 | 10,725,000 | 142 | 779  | 0.371113033  | MGC151858,TMEM34          |
| 17 | 10,650,000 | 10,800,000 | 143 | 921  | -0.923425133 | EDNRA,TMEM34              |
| 17 | 10,725,000 | 10,875,000 | 144 | 1311 | -2.27393076  | EDNRA                     |
| 17 | 10,800,000 | 10,950,000 | 145 | 1227 | -0.885319168 | EDNRA                     |
| 17 | 10,875,000 | 11,025,000 | 146 | 1124 | -0.629322658 |                           |
| 17 | 10,950,000 | 11,100,000 | 147 | 1042 | -0.939950559 |                           |
| 17 | 11,025,000 | 11,175,000 | 148 | 745  | -0.282401798 |                           |
| 17 | 11,100,000 | 11,250,000 | 149 | 677  | -0.930059512 |                           |
| 17 | 11,175,000 | 11,325,000 | 150 | 1103 | 0.014757754  |                           |
| 17 | 11,250,000 | 11,400,000 | 151 | 1146 | 0.59528871   |                           |
| 17 | 11,325,000 | 11,475,000 | 152 | 704  | -0.238184943 |                           |
| 17 | 11,400,000 | 11,550,000 | 153 | 711  | -0.990303788 | TTC29                     |

|    |            |            |     |      |              |                                |
|----|------------|------------|-----|------|--------------|--------------------------------|
| 17 | 11,475,000 | 11,625,000 | 154 | 751  | -0.399656085 | TTC29                          |
| 17 | 11,550,000 | 11,700,000 | 155 | 532  | -0.222228578 | TTC29                          |
| 17 | 11,625,000 | 11,775,000 | 156 | 678  | -1.738692326 | RNF146A,TTC29                  |
| 17 | 11,700,000 | 11,850,000 | 157 | 766  | -0.079124442 | POU4F2,RNF146A,TTC29           |
| 17 | 11,775,000 | 11,925,000 | 158 | 772  | 1.065992008  | POU4F2,SLC10A7                 |
| 17 | 11,850,000 | 12,000,000 | 159 | 1275 | 1.153285156  | SLC10A7                        |
| 17 | 11,925,000 | 12,075,000 | 160 | 1397 | 1.14639401   | SLC10A7                        |
| 17 | 12,000,000 | 12,150,000 | 161 | 1017 | -0.851769638 | SLC10A7                        |
| 17 | 12,075,000 | 12,225,000 | 162 | 1209 | -0.114781418 | ENSBTAG00000048020             |
| 17 | 12,150,000 | 12,300,000 | 163 | 1361 | -0.154317422 | ENSBTAG00000048020             |
| 17 | 12,225,000 | 12,375,000 | 164 | 1028 | -1.484393035 | LSM6,ENSBTAG00000048020        |
| 17 | 12,300,000 | 12,450,000 | 165 | 882  | 0.099590831  | LSM6                           |
| 17 | 12,375,000 | 12,525,000 | 166 | 1060 | 0.227085876  |                                |
| 17 | 12,450,000 | 12,600,000 | 167 | 1136 | -0.01353092  | ZNF827                         |
| 17 | 12,525,000 | 12,675,000 | 168 | 1067 | 0.210473185  | ZNF827                         |
| 17 | 12,600,000 | 12,750,000 | 169 | 1012 | 0.602394463  | ZNF827,ENSBTAG00000019880      |
| 17 | 12,675,000 | 12,825,000 | 170 | 1020 | 1.087999138  | MMAA,ZNF827,ENSBTAG00000019880 |
| 17 | 12,750,000 | 12,900,000 | 171 | 830  | 0.642678276  | MMAA                           |
| 17 | 12,825,000 | 12,975,000 | 172 | 605  | -0.609082284 | MMAA,SMAD1                     |
| 17 | 12,900,000 | 13,050,000 | 173 | 706  | 0.617931269  | SMAD1                          |
| 17 | 12,975,000 | 13,125,000 | 174 | 585  | 1.068175992  |                                |
| 17 | 13,050,000 | 13,200,000 | 175 | 253  | 0.544911587  |                                |
| 17 | 13,125,000 | 13,275,000 | 176 | 362  | -0.719520207 |                                |
| 17 | 13,200,000 | 13,350,000 | 177 | 543  | -0.339857005 | ABCE1,OTUD4                    |
| 17 | 13,275,000 | 13,425,000 | 178 | 537  | 0.718242774  | ABCE1,ANAPC10,OTUD4            |
| 17 | 13,350,000 | 13,500,000 | 179 | 606  | 0.968044481  | ABCE1,ANAPC10                  |
| 17 | 13,425,000 | 13,575,000 | 180 | 546  | 0.917356074  | ANAPC10                        |
| 17 | 13,500,000 | 13,650,000 | 181 | 492  | 0.921202638  | HHIP                           |
| 17 | 13,575,000 | 13,725,000 | 182 | 768  | 0.550204421  | HHIP                           |
| 17 | 13,650,000 | 13,800,000 | 183 | 1167 | 0.424275212  | HHIP                           |
| 17 | 13,725,000 | 13,875,000 | 184 | 1415 | 0.709681865  | HHIP                           |
| 17 | 13,800,000 | 13,950,000 | 185 | 1728 | 0.973943981  |                                |
| 17 | 13,875,000 | 14,025,000 | 186 | 1843 | 0.196115086  |                                |
| 17 | 13,950,000 | 14,100,000 | 187 | 1807 | -0.901974663 |                                |
| 17 | 14,025,000 | 14,175,000 | 188 | 1984 | -0.625994238 |                                |
| 17 | 14,100,000 | 14,250,000 | 189 | 1842 | -0.346204347 | GPA                            |
| 17 | 14,175,000 | 14,325,000 | 190 | 2396 | -0.044643591 | GPA,GYPB                       |
| 17 | 14,250,000 | 14,400,000 | 191 | 2820 | 0.463928075  | GPA,GYPB                       |
| 17 | 14,325,000 | 14,475,000 | 192 | 2763 | 0.432686675  | GYPB                           |
| 17 | 14,400,000 | 14,550,000 | 193 | 2671 | 0.338359334  | SMARCA5                        |
| 17 | 14,475,000 | 14,625,000 | 194 | 1978 | -0.034125415 | SMARCA5                        |
| 17 | 14,550,000 | 14,700,000 | 195 | 1740 | -0.147949558 | GAB1,SMARCA5                   |
| 17 | 14,625,000 | 14,775,000 | 196 | 1546 | -0.124588423 | GAB1                           |
| 17 | 14,700,000 | 14,850,000 | 197 | 1584 | -0.240767759 | GAB1                           |
| 17 | 14,775,000 | 14,925,000 | 198 | 1648 | 0.074528492  | USP38                          |
| 17 | 14,850,000 | 15,000,000 | 199 | 1694 | 0.556996901  | USP38                          |
| 17 | 14,925,000 | 15,075,000 | 200 | 2202 | 0.15107628   |                                |
| 17 | 15,000,000 | 15,150,000 | 201 | 2131 | -0.335535059 |                                |
| 17 | 15,075,000 | 15,225,000 | 202 | 1538 | -0.085297846 |                                |
| 17 | 15,150,000 | 15,300,000 | 203 | 1440 | -1.185340966 | ENSBTAG00000045665             |
| 17 | 15,225,000 | 15,375,000 | 204 | 1624 | -1.937947458 | ENSBTAG00000045665             |
| 17 | 15,300,000 | 15,450,000 | 205 | 1188 | -1.257089606 |                                |
| 17 | 15,375,000 | 15,525,000 | 206 | 678  | -1.367337063 |                                |

|    |            |            |     |      |              |                                                      |
|----|------------|------------|-----|------|--------------|------------------------------------------------------|
| 17 | 15,450,000 | 15,600,000 | 207 | 981  | -0.518578729 |                                                      |
| 17 | 15,525,000 | 15,675,000 | 208 | 1542 | 0.247481236  |                                                      |
| 17 | 15,600,000 | 15,750,000 | 209 | 1460 | 0.48560231   | INPP4B                                               |
| 17 | 15,675,000 | 15,825,000 | 210 | 1340 | 0.350049542  | INPP4B                                               |
| 17 | 15,750,000 | 15,900,000 | 211 | 1391 | 0.365581431  | INPP4B                                               |
| 17 | 15,825,000 | 15,975,000 | 212 | 1363 | 0.849715593  | INPP4B                                               |
| 17 | 15,900,000 | 16,050,000 | 213 | 1396 | 0.795577647  | INPP4B                                               |
| 17 | 15,975,000 | 16,125,000 | 214 | 1134 | 0.685751894  | INPP4B                                               |
| 17 | 16,050,000 | 16,200,000 | 215 | 978  | 0.980105224  | INPP4B                                               |
| 17 | 16,125,000 | 16,275,000 | 216 | 1199 | 1.120801693  |                                                      |
| 17 | 16,200,000 | 16,350,000 | 217 | 1123 | 0.119493173  | IL15                                                 |
| 17 | 16,275,000 | 16,425,000 | 218 | 801  | -0.632285643 | IL15                                                 |
| 17 | 16,350,000 | 16,500,000 | 219 | 773  | 0.174750761  | IL15                                                 |
| 17 | 16,425,000 | 16,575,000 | 220 | 1011 | 0.738598888  |                                                      |
| 17 | 16,500,000 | 16,650,000 | 221 | 1030 | 0.804847426  |                                                      |
| 17 | 16,575,000 | 16,725,000 | 222 | 847  | -0.299566953 |                                                      |
| 17 | 16,650,000 | 16,800,000 | 223 | 891  | -1.759878322 |                                                      |
| 17 | 16,725,000 | 16,875,000 | 224 | 984  | -3.850916301 | ZNF330                                               |
| 17 | 16,800,000 | 16,950,000 | 225 | 1000 | -4.262680858 | ZNF330                                               |
| 17 | 16,875,000 | 17,025,000 | 226 | 947  | -0.040845006 |                                                      |
| 17 | 16,950,000 | 17,100,000 | 227 | 906  | 0.964817803  |                                                      |
| 17 | 17,025,000 | 17,175,000 | 228 | 893  | 0.857434974  |                                                      |
| 17 | 17,100,000 | 17,250,000 | 229 | 689  | 0.102176915  |                                                      |
| 17 | 17,175,000 | 17,325,000 | 230 | 621  | -0.625933824 |                                                      |
| 17 | 17,250,000 | 17,400,000 | 231 | 973  | -2.066019589 | TBC1D9                                               |
| 17 | 17,325,000 | 17,475,000 | 232 | 1331 | -0.3416585   | TBC1D9,UCP1                                          |
| 17 | 17,400,000 | 17,550,000 | 233 | 1046 | 0.720762821  | ELMOD2,MGAT4D,TBC1D9,UCP1                            |
| 17 | 17,475,000 | 17,625,000 | 234 | 559  | 1.086509557  | CLGN,ELMOD2,MGAT4D                                   |
| 17 | 17,550,000 | 17,700,000 | 235 | 468  | 1.090537433  | CLGN,MGAT4D,SCOC                                     |
| 17 | 17,625,000 | 17,775,000 | 236 | 585  | 0.823750726  | SCOC                                                 |
| 17 | 17,700,000 | 17,850,000 | 237 | 771  | 1.215103885  |                                                      |
| 17 | 17,775,000 | 17,925,000 | 238 | 633  | 1.161894248  |                                                      |
| 17 | 17,850,000 | 18,000,000 | 239 | 455  | -0.924702644 |                                                      |
| 17 | 17,925,000 | 18,075,000 | 240 | 746  | -0.661908621 |                                                      |
| 17 | 18,000,000 | 18,150,000 | 241 | 729  | -0.030333188 | MAML3                                                |
| 17 | 18,075,000 | 18,225,000 | 242 | 482  | 0.68089694   | MAML3                                                |
| 17 | 18,150,000 | 18,300,000 | 243 | 696  | 0.679771595  | MAML3                                                |
| 17 | 18,225,000 | 18,375,000 | 244 | 843  | 0.16052134   | MAML3,MGST2                                          |
| 17 | 18,300,000 | 18,450,000 | 245 | 935  | -0.555737537 | MAML3,MGST2                                          |
| 17 | 18,375,000 | 18,525,000 | 246 | 680  | -1.090564714 | SETD7                                                |
| 17 | 18,450,000 | 18,600,000 | 247 | 416  | -1.48469052  | RAB33B,SETD7                                         |
| 17 | 18,525,000 | 18,675,000 | 248 | 412  | -1.362963007 | NAA15,RAB33B                                         |
| 17 | 18,600,000 | 18,750,000 | 249 | 308  | -0.656748089 | MGARP,NAA15,NDUFC1,THOC7                             |
| 17 | 18,675,000 | 18,825,000 | 250 | 302  | -0.457532759 | ELF2,MGARP,NAA15,NDUFC1,THOC7,ENSBTAG00000<br>015811 |
| 17 | 18,750,000 | 18,900,000 | 251 | 315  | -0.408863172 | CCRN4L,ELF2,ENSBTAG00000015811                       |
| 17 | 18,825,000 | 18,975,000 | 252 | 446  | -0.711518779 | CCRN4L,ELF2                                          |
| 17 | 18,900,000 | 19,050,000 | 253 | 594  | -0.046176028 | CCRN4L                                               |
| 17 | 18,975,000 | 19,125,000 | 254 | 710  | 1.141905229  |                                                      |
| 17 | 19,050,000 | 19,200,000 | 255 | 997  | 0.998038781  |                                                      |
| 17 | 19,125,000 | 19,275,000 | 256 | 1233 | -0.737419864 |                                                      |
| 17 | 19,200,000 | 19,350,000 | 257 | 1042 | -1.599785829 |                                                      |
| 17 | 19,275,000 | 19,425,000 | 258 | 873  | -0.50118293  |                                                      |



|    |            |            |     |      |              |                    |
|----|------------|------------|-----|------|--------------|--------------------|
| 17 | 19,350,000 | 19,500,000 | 259 | 1050 | 0.303726472  | ENSBTAG00000034089 |
| 17 | 19,425,000 | 19,575,000 | 260 | 1439 | 0.72471737   | ENSBTAG00000034089 |
| 17 | 19,500,000 | 19,650,000 | 261 | 1448 | 1.059285934  |                    |
| 17 | 19,575,000 | 19,725,000 | 262 | 1053 | 1.419854109  |                    |
| 17 | 19,650,000 | 19,800,000 | 263 | 906  | 1.162899345  | SLC7A11            |
| 17 | 19,725,000 | 19,875,000 | 264 | 1013 | 0.977889531  | SLC7A11            |
| 17 | 19,800,000 | 19,950,000 | 265 | 745  | 0.685693562  | SLC7A11            |
| 17 | 19,875,000 | 20,025,000 | 266 | 578  | -1.227818977 |                    |
| 17 | 19,950,000 | 20,100,000 | 267 | 689  | -1.331252066 |                    |
| 17 | 20,025,000 | 20,175,000 | 268 | 995  | 0.564876959  |                    |
| 17 | 20,100,000 | 20,250,000 | 269 | 1529 | 1.220316374  |                    |
| 17 | 20,175,000 | 20,325,000 | 270 | 1473 | 1.357517441  |                    |
| 17 | 20,250,000 | 20,400,000 | 271 | 1377 | 0.775124311  |                    |
| 17 | 20,325,000 | 20,475,000 | 272 | 1281 | 0.391680947  |                    |
| 17 | 20,400,000 | 20,550,000 | 273 | 967  | 0.443966726  |                    |
| 17 | 20,475,000 | 20,625,000 | 274 | 668  | -1.069960564 | PCDH18             |
| 17 | 20,550,000 | 20,700,000 | 275 | 419  | -1.687162491 | PCDH18             |
| 17 | 20,625,000 | 20,775,000 | 276 | 441  | -1.666003153 |                    |
| 17 | 20,700,000 | 20,850,000 | 277 | 616  | -4.173864872 |                    |
| 17 | 20,775,000 | 20,925,000 | 278 | 800  | -2.939433393 |                    |
| 17 | 20,850,000 | 21,000,000 | 279 | 869  | -0.788941162 |                    |
| 17 | 20,925,000 | 21,075,000 | 280 | 856  | -0.052306997 |                    |
| 17 | 21,000,000 | 21,150,000 | 281 | 963  | 0.479994515  |                    |
| 17 | 21,075,000 | 21,225,000 | 282 | 711  | 0.439305547  |                    |
| 17 | 21,150,000 | 21,300,000 | 283 | 378  | 0.343803198  |                    |
| 17 | 21,225,000 | 21,375,000 | 284 | 349  | -0.320188338 |                    |
| 17 | 21,300,000 | 21,450,000 | 285 | 427  | -1.468782727 |                    |
| 17 | 21,375,000 | 21,525,000 | 286 | 863  | -0.688742472 |                    |
| 17 | 21,450,000 | 21,600,000 | 287 | 1338 | 0.161309389  |                    |
| 17 | 21,525,000 | 21,675,000 | 288 | 1310 | 0.797475046  |                    |
| 17 | 21,600,000 | 21,750,000 | 289 | 1181 | 0.835969724  |                    |
| 17 | 21,675,000 | 21,825,000 | 290 | 1454 | 0.595484476  |                    |
| 17 | 21,750,000 | 21,900,000 | 291 | 1416 | -0.216351595 |                    |
| 17 | 21,825,000 | 21,975,000 | 292 | 1479 | -0.3470782   |                    |
| 17 | 21,900,000 | 22,050,000 | 293 | 1648 | -0.815807098 |                    |
| 17 | 21,975,000 | 22,125,000 | 294 | 1297 | -2.541507783 |                    |
| 17 | 22,050,000 | 22,200,000 | 295 | 744  | -3.272824381 |                    |
| 17 | 22,125,000 | 22,275,000 | 296 | 346  | -2.307263569 |                    |
| 17 | 22,200,000 | 22,350,000 | 297 | 518  | -4.595071367 |                    |
| 17 | 22,275,000 | 22,425,000 | 298 | 966  | -5.768527142 |                    |
| 17 | 22,350,000 | 22,500,000 | 299 | 798  | -4.806330143 |                    |
| 17 | 22,425,000 | 22,575,000 | 300 | 667  | -0.264997897 |                    |
| 17 | 22,500,000 | 22,650,000 | 301 | 840  | 0.184697792  |                    |
| 17 | 22,575,000 | 22,725,000 | 302 | 735  | 0.144230771  |                    |
| 17 | 22,650,000 | 22,800,000 | 303 | 814  | 0.781200832  |                    |
| 17 | 22,725,000 | 22,875,000 | 304 | 687  | 0.684835485  |                    |
| 17 | 22,800,000 | 22,950,000 | 305 | 603  | -0.156321026 |                    |
| 17 | 22,875,000 | 23,025,000 | 306 | 814  | -0.15898748  |                    |
| 17 | 22,950,000 | 23,100,000 | 307 | 934  | -0.555286203 |                    |
| 17 | 23,025,000 | 23,175,000 | 308 | 1080 | -2.235118609 |                    |
| 17 | 23,100,000 | 23,250,000 | 309 | 993  | -2.05750647  |                    |
| 17 | 23,175,000 | 23,325,000 | 310 | 855  | -0.393608787 |                    |
| 17 | 23,250,000 | 23,400,000 | 311 | 1265 | -0.118897845 |                    |

|    |            |            |     |      |              |                                             |
|----|------------|------------|-----|------|--------------|---------------------------------------------|
| 17 | 23,325,000 | 23,475,000 | 312 | 1698 | -0.693355574 |                                             |
| 17 | 23,400,000 | 23,550,000 | 313 | 1776 | -0.756604468 | ENSBTAG00000033967                          |
| 17 | 23,475,000 | 23,625,000 | 314 | 1789 | -0.304142863 | ENSBTAG00000033967                          |
| 17 | 23,550,000 | 23,700,000 | 315 | 1602 | -0.303116994 |                                             |
| 17 | 23,625,000 | 23,775,000 | 316 | 1183 | 0.49436803   |                                             |
| 17 | 23,700,000 | 23,850,000 | 317 | 1219 | 1.160213243  |                                             |
| 17 | 23,775,000 | 23,925,000 | 318 | 1268 | 0.939169228  |                                             |
| 17 | 23,850,000 | 24,000,000 | 319 | 1003 | 0.835499276  |                                             |
| 17 | 23,925,000 | 24,075,000 | 320 | 927  | 0.80612471   |                                             |
| 17 | 24,000,000 | 24,150,000 | 321 | 921  | 0.530158387  |                                             |
| 17 | 24,075,000 | 24,225,000 | 322 | 946  | 0.715401308  |                                             |
| 17 | 24,150,000 | 24,300,000 | 323 | 1098 | 0.870614254  |                                             |
| 17 | 24,225,000 | 24,375,000 | 324 | 1064 | 0.047373685  |                                             |
| 17 | 24,300,000 | 24,450,000 | 325 | 742  | -1.541508289 |                                             |
| 17 | 24,375,000 | 24,525,000 | 326 | 830  | -0.805519992 | ENSBTAG00000009722                          |
| 17 | 24,450,000 | 24,600,000 | 327 | 1085 | 0.314945016  | ENSBTAG00000009722                          |
| 17 | 24,525,000 | 24,675,000 | 328 | 1018 | 1.060769121  |                                             |
| 17 | 24,600,000 | 24,750,000 | 329 | 1000 | 0.550408108  |                                             |
| 17 | 24,675,000 | 24,825,000 | 330 | 1040 | -0.395219833 |                                             |
| 17 | 24,750,000 | 24,900,000 | 331 | 1276 | 0.397828303  |                                             |
| 17 | 24,825,000 | 24,975,000 | 332 | 1469 | 0.46015886   |                                             |
| 17 | 24,900,000 | 25,050,000 | 333 | 1057 | -0.625785169 | ENSBTAG00000035012                          |
| 17 | 24,975,000 | 25,125,000 | 334 | 602  | -1.354744205 | PRAME,ENSBTAG00000035012,ENSBTAG00000040370 |
| 17 | 25,050,000 | 25,200,000 | 335 | 706  | -1.265498323 | PRAME,ENSBTAG00000040370                    |
| 17 | 25,125,000 | 25,275,000 | 336 | 1460 | 0.721411608  |                                             |
| 17 | 25,200,000 | 25,350,000 | 337 | 1849 | 0.791248107  |                                             |
| 17 | 25,275,000 | 25,425,000 | 338 | 1622 | 0.889640219  |                                             |
| 17 | 25,350,000 | 25,500,000 | 339 | 1200 | 0.799536237  | PCDH10                                      |
| 17 | 25,425,000 | 25,575,000 | 340 | 1056 | 0.850130957  | PCDH10                                      |
| 17 | 25,500,000 | 25,650,000 | 341 | 1403 | 0.898560885  |                                             |
| 17 | 25,575,000 | 25,725,000 | 342 | 1706 | -0.32106017  |                                             |
| 17 | 25,650,000 | 25,800,000 | 343 | 1762 | -0.662806115 |                                             |
| 17 | 25,725,000 | 25,875,000 | 344 | 1467 | 0.555893876  |                                             |
| 17 | 25,800,000 | 25,950,000 | 345 | 1018 | 0.759745318  |                                             |
| 17 | 25,875,000 | 26,025,000 | 346 | 748  | -0.753228005 |                                             |
| 17 | 25,950,000 | 26,100,000 | 347 | 959  | -0.092921754 |                                             |
| 17 | 26,025,000 | 26,175,000 | 348 | 1444 | -0.529876252 |                                             |
| 17 | 26,100,000 | 26,250,000 | 349 | 1574 | -1.16465821  |                                             |
| 17 | 26,175,000 | 26,325,000 | 350 | 1339 | -0.248046966 |                                             |
| 17 | 26,250,000 | 26,400,000 | 351 | 1034 | 0.393994339  |                                             |
| 17 | 26,325,000 | 26,475,000 | 352 | 1119 | -0.389434573 |                                             |
| 17 | 26,400,000 | 26,550,000 | 353 | 1210 | 0.302931023  |                                             |
| 17 | 26,475,000 | 26,625,000 | 354 | 1205 | 0.762612271  |                                             |
| 17 | 26,550,000 | 26,700,000 | 355 | 1476 | 0.490411758  |                                             |
| 17 | 26,625,000 | 26,775,000 | 356 | 1555 | 0.299453922  |                                             |
| 17 | 26,700,000 | 26,850,000 | 357 | 1342 | 0.259177645  |                                             |
| 17 | 26,775,000 | 26,925,000 | 358 | 1260 | 0.473140349  |                                             |
| 17 | 26,850,000 | 27,000,000 | 359 | 1544 | -0.215725487 |                                             |
| 17 | 26,925,000 | 27,075,000 | 360 | 1724 | -0.409375561 |                                             |
| 17 | 27,000,000 | 27,150,000 | 361 | 1660 | 0.116824221  |                                             |
| 17 | 27,075,000 | 27,225,000 | 362 | 1444 | 0.658322059  |                                             |
| 17 | 27,150,000 | 27,300,000 | 363 | 1255 | 1.131797078  |                                             |

|    |            |            |     |      |              |                            |
|----|------------|------------|-----|------|--------------|----------------------------|
| 17 | 27,225,000 | 27,375,000 | 364 | 1116 | 1.266994892  |                            |
| 17 | 27,300,000 | 27,450,000 | 365 | 1083 | 1.20320276   |                            |
| 17 | 27,375,000 | 27,525,000 | 366 | 1541 | -1.004593328 |                            |
| 17 | 27,450,000 | 27,600,000 | 367 | 1734 | -0.951426891 |                            |
| 17 | 27,525,000 | 27,675,000 | 368 | 1373 | 0.968070444  |                            |
| 17 | 27,600,000 | 27,750,000 | 369 | 1454 | 0.393488844  |                            |
| 17 | 27,675,000 | 27,825,000 | 370 | 1696 | 0.180638804  |                            |
| 17 | 27,750,000 | 27,900,000 | 371 | 1560 | -0.737717383 |                            |
| 17 | 27,825,000 | 27,975,000 | 372 | 1197 | -1.126229134 |                            |
| 17 | 27,900,000 | 28,050,000 | 373 | 1153 | 0.640906023  |                            |
| 17 | 27,975,000 | 28,125,000 | 374 | 1130 | 0.394460817  |                            |
| 17 | 28,050,000 | 28,200,000 | 375 | 1019 | 0.131502046  |                            |
| 17 | 28,125,000 | 28,275,000 | 376 | 1551 | 0.475400282  |                            |
| 17 | 28,200,000 | 28,350,000 | 377 | 1772 | 0.045991399  |                            |
| 17 | 28,275,000 | 28,425,000 | 378 | 1399 | -1.286901277 |                            |
| 17 | 28,350,000 | 28,500,000 | 379 | 1249 | -1.975362345 |                            |
| 17 | 28,425,000 | 28,575,000 | 380 | 1179 | -0.667248838 |                            |
| 17 | 28,500,000 | 28,650,000 | 381 | 1193 | 0.126495435  |                            |
| 17 | 28,575,000 | 28,725,000 | 382 | 1212 | -0.566484168 |                            |
| 17 | 28,650,000 | 28,800,000 | 383 | 983  | -1.027969314 |                            |
| 17 | 28,725,000 | 28,875,000 | 384 | 1110 | 0.365253164  |                            |
| 17 | 28,800,000 | 28,950,000 | 385 | 1448 | -0.75543822  |                            |
| 17 | 28,875,000 | 29,025,000 | 386 | 1437 | 0.039496739  |                            |
| 17 | 28,950,000 | 29,100,000 | 387 | 1026 | 0.95556804   |                            |
| 17 | 29,025,000 | 29,175,000 | 388 | 973  | 0.945615924  | C4orf33                    |
| 17 | 29,100,000 | 29,250,000 | 389 | 1169 | 1.26259345   | C4orf33,SCLT1              |
| 17 | 29,175,000 | 29,325,000 | 390 | 804  | 1.194142371  | SCLT1                      |
| 17 | 29,250,000 | 29,400,000 | 391 | 519  | 0.591894832  | JADE1,SCLT1                |
| 17 | 29,325,000 | 29,475,000 | 392 | 439  | 0.139527792  | JADE1,SCLT1                |
| 17 | 29,400,000 | 29,550,000 | 393 | 451  | -0.648968877 | JADE1,ENSBTAG00000004743   |
| 17 | 29,475,000 | 29,625,000 | 394 | 597  | -0.354625198 | ENSBTAG00000004743         |
| 17 | 29,550,000 | 29,700,000 | 395 | 560  | -0.653363334 |                            |
| 17 | 29,625,000 | 29,775,000 | 396 | 393  | -1.285212898 |                            |
| 17 | 29,700,000 | 29,850,000 | 397 | 278  | -0.763193831 | COMMD6                     |
| 17 | 29,775,000 | 29,925,000 | 398 | 368  | -0.522539572 | COMMD6,PGRMC2              |
| 17 | 29,850,000 | 30,000,000 | 399 | 460  | -0.928421135 | LARP1B,PGRMC2              |
| 17 | 29,925,000 | 30,075,000 | 400 | 389  | -1.761846775 | LARP1B                     |
| 17 | 30,000,000 | 30,150,000 | 401 | 419  | -0.998226408 | LARP1B,MFSD8,MGC165715     |
| 17 | 30,075,000 | 30,225,000 | 402 | 436  | -0.821415853 | MFSD8,MGC165715,PLK4       |
| 17 | 30,150,000 | 30,300,000 | 403 | 389  | -0.922987216 | HSPA4L,MFSD8,PLK4,SLC25A31 |
| 17 | 30,225,000 | 30,375,000 | 404 | 358  | -0.302337534 | HSPA4L,INTU,SLC25A31       |
| 17 | 30,300,000 | 30,450,000 | 405 | 653  | 0.063731454  | INTU,SLC25A31              |
| 17 | 30,375,000 | 30,525,000 | 406 | 866  | -0.459208853 | INTU                       |
| 17 | 30,450,000 | 30,600,000 | 407 | 677  | -1.296117764 |                            |
| 17 | 30,525,000 | 30,675,000 | 408 | 868  | 0.281149309  | ENSBTAG00000005435         |
| 17 | 30,600,000 | 30,750,000 | 409 | 777  | 0.94329236   | ENSBTAG00000005435         |
| 17 | 30,675,000 | 30,825,000 | 410 | 365  | 0.587762438  |                            |
| 17 | 30,750,000 | 30,900,000 | 411 | 383  | -0.151065507 |                            |
| 17 | 30,825,000 | 30,975,000 | 412 | 435  | -0.02058335  |                            |
| 17 | 30,900,000 | 31,050,000 | 413 | 688  | 0.236701576  |                            |
| 17 | 30,975,000 | 31,125,000 | 414 | 1195 | 0.297645423  |                            |
| 17 | 31,050,000 | 31,200,000 | 415 | 1276 | -0.070949128 |                            |
| 17 | 31,125,000 | 31,275,000 | 416 | 995  | -0.415402556 |                            |

|    |            |            |     |      |              |                   |
|----|------------|------------|-----|------|--------------|-------------------|
| 17 | 31,200,000 | 31,350,000 | 417 | 1022 | -0.906728961 |                   |
| 17 | 31,275,000 | 31,425,000 | 418 | 930  | -0.840393131 |                   |
| 17 | 31,350,000 | 31,500,000 | 419 | 966  | 0.067699571  |                   |
| 17 | 31,425,000 | 31,575,000 | 420 | 1205 | -1.345667193 |                   |
| 17 | 31,500,000 | 31,650,000 | 421 | 848  | -2.276027504 |                   |
| 17 | 31,575,000 | 31,725,000 | 422 | 517  | -1.388527244 |                   |
| 17 | 31,650,000 | 31,800,000 | 423 | 670  | 0.831099906  |                   |
| 17 | 31,725,000 | 31,875,000 | 424 | 635  | 0.941412504  |                   |
| 17 | 31,800,000 | 31,950,000 | 425 | 546  | -0.418443358 |                   |
| 17 | 31,875,000 | 32,025,000 | 426 | 904  | -0.932358155 |                   |
| 17 | 31,950,000 | 32,100,000 | 427 | 889  | -0.71689565  |                   |
| 17 | 32,025,000 | 32,175,000 | 428 | 731  | 0.354677289  |                   |
| 17 | 32,100,000 | 32,250,000 | 429 | 786  | -0.193120566 |                   |
| 17 | 32,175,000 | 32,325,000 | 430 | 647  | -0.261203777 |                   |
| 17 | 32,250,000 | 32,400,000 | 431 | 577  | 0.305663075  |                   |
| 17 | 32,325,000 | 32,475,000 | 432 | 538  | 0.281395194  |                   |
| 17 | 32,400,000 | 32,550,000 | 433 | 564  | 0.468120637  |                   |
| 17 | 32,475,000 | 32,625,000 | 434 | 832  | -0.652717012 |                   |
| 17 | 32,550,000 | 32,700,000 | 435 | 989  | -2.208097696 |                   |
| 17 | 32,625,000 | 32,775,000 | 436 | 824  | -1.974831765 | FAT4              |
| 17 | 32,700,000 | 32,850,000 | 437 | 924  | -0.94602942  | FAT4              |
| 17 | 32,775,000 | 32,925,000 | 438 | 1149 | -0.918587    | FAT4              |
| 17 | 32,850,000 | 33,000,000 | 439 | 1473 | -0.171942318 | FAT4              |
| 17 | 32,925,000 | 33,075,000 | 440 | 1583 | 0.687056984  |                   |
| 17 | 33,000,000 | 33,150,000 | 441 | 1391 | 0.865385686  |                   |
| 17 | 33,075,000 | 33,225,000 | 442 | 1578 | 0.832140853  |                   |
| 17 | 33,150,000 | 33,300,000 | 443 | 1641 | 0.723289346  |                   |
| 17 | 33,225,000 | 33,375,000 | 444 | 1758 | 1.038816789  |                   |
| 17 | 33,300,000 | 33,450,000 | 445 | 1494 | 0.984417283  |                   |
| 17 | 33,375,000 | 33,525,000 | 446 | 847  | 0.615585313  | ANKRD50           |
| 17 | 33,450,000 | 33,600,000 | 447 | 751  | 0.555771512  | ANKRD50           |
| 17 | 33,525,000 | 33,675,000 | 448 | 791  | 0.017671889  | ANKRD50           |
| 17 | 33,600,000 | 33,750,000 | 449 | 1062 | 0.440101308  |                   |
| 17 | 33,675,000 | 33,825,000 | 450 | 1048 | 0.371883599  |                   |
| 17 | 33,750,000 | 33,900,000 | 451 | 1289 | -1.022497522 |                   |
| 17 | 33,825,000 | 33,975,000 | 452 | 1501 | -1.01738608  |                   |
| 17 | 33,900,000 | 34,050,000 | 453 | 1435 | -0.411591635 |                   |
| 17 | 33,975,000 | 34,125,000 | 454 | 1324 | -0.282247527 |                   |
| 17 | 34,050,000 | 34,200,000 | 455 | 1103 | -0.590410966 |                   |
| 17 | 34,125,000 | 34,275,000 | 456 | 1094 | -0.521721332 |                   |
| 17 | 34,200,000 | 34,350,000 | 457 | 1280 | -0.727575356 |                   |
| 17 | 34,275,000 | 34,425,000 | 458 | 1286 | -0.914606058 |                   |
| 17 | 34,350,000 | 34,500,000 | 459 | 901  | -0.704524288 |                   |
| 17 | 34,425,000 | 34,575,000 | 460 | 944  | -0.807568206 |                   |
| 17 | 34,500,000 | 34,650,000 | 461 | 884  | -0.754730411 |                   |
| 17 | 34,575,000 | 34,725,000 | 462 | 649  | -0.059766586 |                   |
| 17 | 34,650,000 | 34,800,000 | 463 | 768  | 0.388945857  | SPRY1             |
| 17 | 34,725,000 | 34,875,000 | 464 | 736  | 0.314954228  | SPRY1             |
| 17 | 34,800,000 | 34,950,000 | 465 | 548  | 0.455562897  | SPATA5            |
| 17 | 34,875,000 | 35,025,000 | 466 | 480  | 0.539127047  | SPATA5            |
| 17 | 34,950,000 | 35,100,000 | 467 | 519  | 0.250038254  | SPATA5            |
| 17 | 35,025,000 | 35,175,000 | 468 | 584  | 0.335780854  | NUDT6,SPATA5      |
| 17 | 35,100,000 | 35,250,000 | 469 | 487  | 0.155760373  | FGF2,NUDT6,SPATA5 |

|    |            |            |     |      |              |                                       |
|----|------------|------------|-----|------|--------------|---------------------------------------|
| 17 | 35,175,000 | 35,325,000 | 470 | 514  | 0.525850343  | FGF2,NUDT6                            |
| 17 | 35,250,000 | 35,400,000 | 471 | 576  | 0.066456654  | BBS12,CETN4,FGF2                      |
| 17 | 35,325,000 | 35,475,000 | 472 | 501  | -0.866365403 | BBS12,CETN4,IL21                      |
| 17 | 35,400,000 | 35,550,000 | 473 | 353  | -1.218314712 | IL21                                  |
| 17 | 35,475,000 | 35,625,000 | 474 | 278  | -2.74204102  | IL2                                   |
| 17 | 35,550,000 | 35,700,000 | 475 | 280  | -0.926938062 | IL2                                   |
| 17 | 35,625,000 | 35,775,000 | 476 | 428  | 0.122618301  | ENSBTAG00000046302                    |
| 17 | 35,700,000 | 35,850,000 | 477 | 322  | 0.284637059  | ENSBTAG00000046302                    |
| 17 | 35,775,000 | 35,925,000 | 478 | 82   | -0.352995774 | ENSBTAG00000045738,ENSBTAG00000045938 |
| 17 | 35,850,000 | 36,000,000 | 479 | 632  | 0.459191002  | ENSBTAG00000045738,ENSBTAG00000045938 |
| 17 | 35,925,000 | 36,075,000 | 480 | 981  | 0.395717913  | ADAD1,ENSBTAG00000035606              |
| 17 | 36,000,000 | 36,150,000 | 481 | 482  | -0.346299078 | ADAD1,ENSBTAG00000035606              |
| 17 | 36,075,000 | 36,225,000 | 482 | 224  | -0.180227294 | ADAD1                                 |
| 17 | 36,150,000 | 36,300,000 | 483 | 261  | 0.941247701  |                                       |
| 17 | 36,225,000 | 36,375,000 | 484 | 415  | 1.155422107  |                                       |
| 17 | 36,300,000 | 36,450,000 | 485 | 687  | 0.194449042  |                                       |
| 17 | 36,375,000 | 36,525,000 | 486 | 1057 | -1.204796566 |                                       |
| 17 | 36,450,000 | 36,600,000 | 487 | 1007 | -1.723921271 | TRPC3                                 |
| 17 | 36,525,000 | 36,675,000 | 488 | 1009 | -0.796651641 | TRPC3                                 |
| 17 | 36,600,000 | 36,750,000 | 489 | 1477 | -0.365462469 | TRPC3                                 |
| 17 | 36,675,000 | 36,825,000 | 490 | 1328 | -1.716379206 |                                       |
| 17 | 36,750,000 | 36,900,000 | 491 | 897  | -2.620973666 |                                       |
| 17 | 36,825,000 | 36,975,000 | 492 | 1250 | -2.632280493 |                                       |
| 17 | 36,900,000 | 37,050,000 | 493 | 1422 | -3.519320724 |                                       |
| 17 | 36,975,000 | 37,125,000 | 494 | 1487 | -3.956024078 |                                       |
| 17 | 37,050,000 | 37,200,000 | 495 | 1455 | -1.91791008  |                                       |
| 17 | 37,125,000 | 37,275,000 | 496 | 1145 | 0.603722277  |                                       |
| 17 | 37,200,000 | 37,350,000 | 497 | 1099 | 1.131156344  |                                       |
| 17 | 37,275,000 | 37,425,000 | 498 | 1237 | -0.050709206 | ENSBTAG00000046833                    |
| 17 | 37,350,000 | 37,500,000 | 499 | 1109 | -0.688417956 | ENSBTAG00000046833                    |
| 17 | 37,425,000 | 37,575,000 | 500 | 611  | -0.156345649 |                                       |
| 17 | 37,500,000 | 37,650,000 | 501 | 764  | 0.290876867  |                                       |
| 17 | 37,575,000 | 37,725,000 | 502 | 1087 | 0.610448673  |                                       |
| 17 | 37,650,000 | 37,800,000 | 503 | 893  | 0.552034979  |                                       |
| 17 | 37,725,000 | 37,875,000 | 504 | 563  | -0.078839334 | ENSBTAG00000047595                    |
| 17 | 37,800,000 | 37,950,000 | 505 | 627  | 0.475217246  | ENSBTAG00000047595                    |
| 17 | 37,875,000 | 38,025,000 | 506 | 870  | 0.687138048  | ENSBTAG00000047595                    |
| 17 | 37,950,000 | 38,100,000 | 507 | 1179 | 0.325578947  | ENSBTAG00000047595                    |
| 17 | 38,025,000 | 38,175,000 | 508 | 1235 | -1.340539541 | ENSBTAG00000047595                    |
| 17 | 38,100,000 | 38,250,000 | 509 | 1263 | -2.235023613 |                                       |
| 17 | 38,175,000 | 38,325,000 | 510 | 1262 | -0.882946986 |                                       |
| 17 | 38,250,000 | 38,400,000 | 511 | 1440 | -0.081157535 |                                       |
| 17 | 38,325,000 | 38,475,000 | 512 | 1410 | -0.253246928 |                                       |
| 17 | 38,400,000 | 38,550,000 | 513 | 1151 | 0.362710978  |                                       |
| 17 | 38,475,000 | 38,625,000 | 514 | 1740 | 1.259265478  |                                       |
| 17 | 38,550,000 | 38,700,000 | 515 | 2010 | 1.310743927  |                                       |
| 17 | 38,625,000 | 38,775,000 | 516 | 1366 | 1.156387727  |                                       |
| 17 | 38,700,000 | 38,850,000 | 517 | 1213 | 0.448176808  |                                       |
| 17 | 38,775,000 | 38,925,000 | 518 | 1217 | 0.145830127  |                                       |
| 17 | 38,850,000 | 39,000,000 | 519 | 1063 | 0.582700275  |                                       |
| 17 | 38,925,000 | 39,075,000 | 520 | 1254 | -1.021452116 |                                       |
| 17 | 39,000,000 | 39,150,000 | 521 | 931  | -2.988364985 |                                       |
| 17 | 39,075,000 | 39,225,000 | 522 | 502  | -3.517171222 |                                       |

|    |            |            |     |      |              |                                |
|----|------------|------------|-----|------|--------------|--------------------------------|
| 17 | 39,150,000 | 39,300,000 | 523 | 429  | -2.98664832  |                                |
| 17 | 39,225,000 | 39,375,000 | 524 | 373  | -2.45247753  |                                |
| 17 | 39,300,000 | 39,450,000 | 525 | 394  | -1.840987501 |                                |
| 17 | 39,375,000 | 39,525,000 | 526 | 480  | -1.751249472 |                                |
| 17 | 39,450,000 | 39,600,000 | 527 | 708  | -0.786714996 |                                |
| 17 | 39,525,000 | 39,675,000 | 528 | 873  | -0.088983342 |                                |
| 17 | 39,600,000 | 39,750,000 | 529 | 917  | 0.601411609  |                                |
| 17 | 39,675,000 | 39,825,000 | 530 | 922  | 0.787569752  |                                |
| 17 | 39,750,000 | 39,900,000 | 531 | 912  | 0.598462919  | ULBP3                          |
| 17 | 39,825,000 | 39,975,000 | 532 | 1278 | 1.128811755  | ULBP3                          |
| 17 | 39,900,000 | 40,050,000 | 533 | 1295 | 0.751164106  |                                |
| 17 | 39,975,000 | 40,125,000 | 534 | 1214 | -0.931729869 |                                |
| 17 | 40,050,000 | 40,200,000 | 535 | 1303 | -0.680344915 |                                |
| 17 | 40,125,000 | 40,275,000 | 536 | 1266 | -0.25963237  |                                |
| 17 | 40,200,000 | 40,350,000 | 537 | 1232 | 0.195364935  |                                |
| 17 | 40,275,000 | 40,425,000 | 538 | 1388 | 0.787398987  |                                |
| 17 | 40,350,000 | 40,500,000 | 539 | 1477 | 0.935414554  | RAPGEF2                        |
| 17 | 40,425,000 | 40,575,000 | 540 | 1232 | 0.02445681   | RAPGEF2                        |
| 17 | 40,500,000 | 40,650,000 | 541 | 1035 | -0.566189079 | RAPGEF2                        |
| 17 | 40,575,000 | 40,725,000 | 542 | 1112 | -0.47617108  | RAPGEF2                        |
| 17 | 40,650,000 | 40,800,000 | 543 | 1052 | -0.180008468 |                                |
| 17 | 40,725,000 | 40,875,000 | 544 | 985  | 0.51862699   | TNIP3                          |
| 17 | 40,800,000 | 40,950,000 | 545 | 1307 | 0.768735361  | C17H4orf45,TNIP3               |
| 17 | 40,875,000 | 41,025,000 | 546 | 1428 | 1.172092886  | C17H4orf45                     |
| 17 | 40,950,000 | 41,100,000 | 547 | 1355 | 0.999233265  | C17H4orf45, FNIP2              |
| 17 | 41,025,000 | 41,175,000 | 548 | 1106 | 0.366450211  | C17H4orf45, FNIP2              |
| 17 | 41,100,000 | 41,250,000 | 549 | 1087 | 0.605522035  | FNIP2, PPID                    |
| 17 | 41,175,000 | 41,325,000 | 550 | 1303 | 0.562130344  | C17H4orf46, ETFDH, PPID, RXFP1 |
| 17 | 41,250,000 | 41,400,000 | 551 | 1519 | -0.19226855  | C17H4orf46, ETFDH, PPID, RXFP1 |
| 17 | 41,325,000 | 41,475,000 | 552 | 1703 | -1.194719087 | RXFP1                          |
| 17 | 41,400,000 | 41,550,000 | 553 | 1936 | -0.726205129 | RXFP1                          |
| 17 | 41,475,000 | 41,625,000 | 554 | 1962 | 0.131034697  |                                |
| 17 | 41,550,000 | 41,700,000 | 555 | 1756 | 0.994041838  | TMEM144                        |
| 17 | 41,625,000 | 41,775,000 | 556 | 1788 | 1.436176229  | FAM198B, TMEM144               |
| 17 | 41,700,000 | 41,850,000 | 557 | 1589 | 1.408454478  | FAM198B, TMEM144               |
| 17 | 41,775,000 | 41,925,000 | 558 | 1309 | 1.126407015  | FAM198B                        |
| 17 | 41,850,000 | 42,000,000 | 559 | 1228 | 0.685343409  |                                |
| 17 | 41,925,000 | 42,075,000 | 560 | 1066 | -0.420574208 |                                |
| 17 | 42,000,000 | 42,150,000 | 561 | 1174 | -0.384002568 |                                |
| 17 | 42,075,000 | 42,225,000 | 562 | 1306 | 0.4658724    |                                |
| 17 | 42,150,000 | 42,300,000 | 563 | 1218 | 0.514428926  |                                |
| 17 | 42,225,000 | 42,375,000 | 564 | 973  | 0.04793614   |                                |
| 17 | 42,300,000 | 42,450,000 | 565 | 747  | -0.260417873 |                                |
| 17 | 42,375,000 | 42,525,000 | 566 | 739  | -0.44397821  |                                |
| 17 | 42,450,000 | 42,600,000 | 567 | 821  | -0.769383632 |                                |
| 17 | 42,525,000 | 42,675,000 | 568 | 998  | -0.059987437 |                                |
| 17 | 42,600,000 | 42,750,000 | 569 | 1041 | 0.73151838   |                                |
| 17 | 42,675,000 | 42,825,000 | 570 | 1079 | 0.78876192   | GRIA2                          |
| 17 | 42,750,000 | 42,900,000 | 571 | 866  | 0.37503954   | GRIA2                          |
| 17 | 42,825,000 | 42,975,000 | 572 | 837  | -2.044846574 | GRIA2                          |
| 17 | 42,900,000 | 43,050,000 | 573 | 929  | -2.22738064  | GLRB, GRIA2                    |
| 17 | 42,975,000 | 43,125,000 | 574 | 1039 | 0.563220173  | GLRB                           |
| 17 | 43,050,000 | 43,200,000 | 575 | 947  | 0.814080124  | GLRB                           |

|    |            |            |     |      |              |                                              |
|----|------------|------------|-----|------|--------------|----------------------------------------------|
| 17 | 43,125,000 | 43,275,000 | 576 | 697  | 0.661021544  | GLRB                                         |
| 17 | 43,200,000 | 43,350,000 | 577 | 763  | -0.02562016  | GLRB,PDGFC                                   |
| 17 | 43,275,000 | 43,425,000 | 578 | 957  | -0.833219313 | PDGFC                                        |
| 17 | 43,350,000 | 43,500,000 | 579 | 864  | -0.722808026 | PDGFC                                        |
| 17 | 43,425,000 | 43,575,000 | 580 | 482  | -0.151556525 | PDGFC                                        |
| 17 | 43,500,000 | 43,650,000 | 581 | 449  | 0.127305864  |                                              |
| 17 | 43,575,000 | 43,725,000 | 582 | 537  | 0.111649492  |                                              |
| 17 | 43,650,000 | 43,800,000 | 583 | 867  | 0.836741295  |                                              |
| 17 | 43,725,000 | 43,875,000 | 584 | 1159 | 0.668421634  |                                              |
| 17 | 43,800,000 | 43,950,000 | 585 | 923  | 0.176998614  |                                              |
| 17 | 43,875,000 | 44,025,000 | 586 | 499  | -0.061966234 |                                              |
| 17 | 43,950,000 | 44,100,000 | 587 | 378  | 0.035316011  |                                              |
| 17 | 44,025,000 | 44,175,000 | 588 | 419  | -0.630650402 |                                              |
| 17 | 44,100,000 | 44,250,000 | 589 | 544  | -2.237790963 |                                              |
| 17 | 44,175,000 | 44,325,000 | 590 | 1076 | -0.802232953 |                                              |
| 17 | 44,250,000 | 44,400,000 | 591 | 987  | -0.503601176 | CTSO,TDO2                                    |
| 17 | 44,325,000 | 44,475,000 | 592 | 477  | -0.63887285  | ASIC5,CTSO,TDO2                              |
| 17 | 44,400,000 | 44,550,000 | 593 | 735  | 0.804374585  | ASIC5,GUCY1B1                                |
| 17 | 44,475,000 | 44,625,000 | 594 | 916  | 0.634509284  | ASIC5,GUCY1A1,GUCY1B1                        |
| 17 | 44,550,000 | 44,700,000 | 595 | 725  | 0.302134797  | GUCY1A1,GUCY1B1                              |
| 17 | 44,625,000 | 44,775,000 | 596 | 860  | 0.832278329  | GUCY1A1                                      |
| 17 | 44,700,000 | 44,850,000 | 597 | 988  | 0.601547896  |                                              |
| 17 | 44,775,000 | 44,925,000 | 598 | 803  | -1.212846053 |                                              |
| 17 | 44,850,000 | 45,000,000 | 599 | 584  | -2.11002185  | ZNF605                                       |
| 17 | 44,925,000 | 45,075,000 | 600 | 392  | -2.741073202 | ZNF605,ENSBTAG00000013001                    |
| 17 | 45,000,000 | 45,150,000 | 601 | 503  | -7.699230794 | ZNF140,ZNF891,ENSBTAG00000013001             |
| 17 | 45,075,000 | 45,225,000 | 602 | 755  | -2.866733924 | ZNF10,ZNF140,ZNF268,ZNF891                   |
| 17 | 45,150,000 | 45,300,000 | 603 | 872  | 1.012813459  | ANHX,MBD3L1,ZNF10,ZNF268,ZNF891              |
| 17 | 45,225,000 | 45,375,000 | 604 | 721  | 0.938971672  | ANHX,MBD3L1                                  |
| 17 | 45,300,000 | 45,450,000 | 605 | 497  | 0.702352964  | CHFR,GOLGA3                                  |
| 17 | 45,375,000 | 45,525,000 | 606 | 432  | 0.706747885  | ANKLE2,CHFR,GOLGA3,PGAM5,POLE,PXMP2          |
| 17 | 45,450,000 | 45,600,000 | 607 | 484  | 0.235519785  | ANKLE2,GOLGA3,P2RX2,PGAM5,POLE,PXMP2         |
| 17 | 45,525,000 | 45,675,000 | 608 | 469  | -0.979733701 | FBRSL1,P2RX2,POLE                            |
| 17 | 45,600,000 | 45,750,000 | 609 | 511  | -0.720887927 | FBRSL1                                       |
| 17 | 45,675,000 | 45,825,000 | 610 | 971  | 0.519569545  | FBRSL1                                       |
| 17 | 45,750,000 | 45,900,000 | 611 | 1096 | 0.947820036  | WBSCR17                                      |
| 17 | 45,825,000 | 45,975,000 | 612 | 765  | 0.317907829  | WBSCR17                                      |
| 17 | 45,900,000 | 46,050,000 | 613 | 460  | -0.755845243 | DDX51,EP400,NOC4L,WBSCR17,ENSBTAG00000022084 |
| 17 | 45,975,000 | 46,125,000 | 614 | 299  | 0.666908775  | DDX51,EP400,NOC4L,ENSBTAG00000022084         |
| 17 | 46,050,000 | 46,200,000 | 615 | 545  | 1.047905113  | EP400,PUS1,ULK1                              |
| 17 | 46,125,000 | 46,275,000 | 616 | 703  | 1.122991369  | EP400,MMP17,PUS1,SFSWAP,ULK1                 |
| 17 | 46,200,000 | 46,350,000 | 617 | 710  | 1.055285527  | MMP17,SFSWAP                                 |
| 17 | 46,275,000 | 46,425,000 | 618 | 946  | 1.036977539  | SFSWAP                                       |
| 17 | 46,350,000 | 46,500,000 | 619 | 1276 | 1.070825818  | SFSWAP                                       |
| 17 | 46,425,000 | 46,575,000 | 620 | 1364 | 0.587216831  |                                              |
| 17 | 46,500,000 | 46,650,000 | 621 | 1407 | -0.127790078 |                                              |
| 17 | 46,575,000 | 46,725,000 | 622 | 1614 | -0.488408202 |                                              |
| 17 | 46,650,000 | 46,800,000 | 623 | 1577 | -0.389602781 |                                              |
| 17 | 46,725,000 | 46,875,000 | 624 | 1301 | -1.253861106 |                                              |
| 17 | 46,800,000 | 46,950,000 | 625 | 1234 | -1.030741333 |                                              |
| 17 | 46,875,000 | 47,025,000 | 626 | 1166 | 0.502055311  |                                              |
| 17 | 46,950,000 | 47,100,000 | 627 | 1198 | 0.515872888  | GPR133                                       |

|    |            |            |     |      |              |                                   |
|----|------------|------------|-----|------|--------------|-----------------------------------|
| 17 | 47,025,000 | 47,175,000 | 628 | 1412 | -0.708053636 | GPR133                            |
| 17 | 47,100,000 | 47,250,000 | 629 | 993  | -1.706797383 | GPR133                            |
| 17 | 47,175,000 | 47,325,000 | 630 | 632  | -1.114655928 | GPR133,STX2                       |
| 17 | 47,250,000 | 47,400,000 | 631 | 1050 | 0.497778801  | STX2                              |
| 17 | 47,325,000 | 47,475,000 | 632 | 1591 | 0.04626092   | STX2                              |
| 17 | 47,400,000 | 47,550,000 | 633 | 1811 | -0.371812984 |                                   |
| 17 | 47,475,000 | 47,625,000 | 634 | 1552 | -1.268304287 |                                   |
| 17 | 47,550,000 | 47,700,000 | 635 | 931  | -1.079596543 | RIMBP2                            |
| 17 | 47,625,000 | 47,775,000 | 636 | 678  | 0.933801678  | PIWIL1,RIMBP2                     |
| 17 | 47,700,000 | 47,850,000 | 637 | 647  | 0.402709063  | PIWIL1,RIMBP2                     |
| 17 | 47,775,000 | 47,925,000 | 638 | 634  | -0.524498681 |                                   |
| 17 | 47,850,000 | 48,000,000 | 639 | 696  | -0.001543933 | FZD10                             |
| 17 | 47,925,000 | 48,075,000 | 640 | 1209 | -0.021416662 | FZD10                             |
| 17 | 48,000,000 | 48,150,000 | 641 | 1690 | -0.822626569 |                                   |
| 17 | 48,075,000 | 48,225,000 | 642 | 979  | -1.230862185 |                                   |
| 17 | 48,150,000 | 48,300,000 | 643 | 428  | -5.417703027 |                                   |
| 17 | 48,225,000 | 48,375,000 | 644 | 522  | -3.978763332 |                                   |
| 17 | 48,300,000 | 48,450,000 | 645 | 787  | 0.641408885  |                                   |
| 17 | 48,375,000 | 48,525,000 | 646 | 928  | -0.566489529 |                                   |
| 17 | 48,450,000 | 48,600,000 | 647 | 1057 | -2.415831983 |                                   |
| 17 | 48,525,000 | 48,675,000 | 648 | 1385 | -1.152249956 |                                   |
| 17 | 48,600,000 | 48,750,000 | 649 | 1764 | -2.616392468 |                                   |
| 17 | 48,675,000 | 48,825,000 | 650 | 1900 | -3.148799409 |                                   |
| 17 | 48,750,000 | 48,900,000 | 651 | 1349 | -1.406467795 |                                   |
| 17 | 48,825,000 | 48,975,000 | 652 | 891  | -0.783910826 |                                   |
| 17 | 48,900,000 | 49,050,000 | 653 | 959  | -0.897099544 |                                   |
| 17 | 48,975,000 | 49,125,000 | 654 | 1161 | -0.770254278 | TMEM132D                          |
| 17 | 49,050,000 | 49,200,000 | 655 | 1387 | -0.472513523 | GLT1D1,TMEM132D                   |
| 17 | 49,125,000 | 49,275,000 | 656 | 1698 | 0.14022152   | GLT1D1,ENSBTAG00000046676         |
| 17 | 49,200,000 | 49,350,000 | 657 | 1433 | 0.788446291  | GLT1D1,SLC15A4,ENSBTAG00000046676 |
| 17 | 49,275,000 | 49,425,000 | 658 | 914  | 0.39642052   | GLT1D1,SLC15A4                    |
| 17 | 49,350,000 | 49,500,000 | 659 | 1261 | 0.746941011  | SLC15A4,TMEM132C                  |
| 17 | 49,425,000 | 49,575,000 | 660 | 1566 | 0.218559557  | TMEM132C                          |
| 17 | 49,500,000 | 49,650,000 | 661 | 1500 | 0.004141437  | TMEM132C                          |
| 17 | 49,575,000 | 49,725,000 | 662 | 1460 | 0.721818915  | TMEM132C                          |
| 17 | 49,650,000 | 49,800,000 | 663 | 1566 | 1.103299379  | TMEM132C                          |
| 17 | 49,725,000 | 49,875,000 | 664 | 1458 | 0.968337053  | TMEM132C                          |
| 17 | 49,800,000 | 49,950,000 | 665 | 1248 | 0.39868838   |                                   |
| 17 | 49,875,000 | 50,025,000 | 666 | 1548 | 0.379344203  |                                   |
| 17 | 49,950,000 | 50,100,000 | 667 | 1513 | 0.582521546  |                                   |
| 17 | 50,025,000 | 50,175,000 | 668 | 1207 | -0.059458157 |                                   |
| 17 | 50,100,000 | 50,250,000 | 669 | 1238 | 0.11823194   |                                   |
| 17 | 50,175,000 | 50,325,000 | 670 | 1162 | 0.91907809   |                                   |
| 17 | 50,250,000 | 50,400,000 | 671 | 1101 | 0.883733005  |                                   |
| 17 | 50,325,000 | 50,475,000 | 672 | 1133 | 1.082343299  |                                   |
| 17 | 50,400,000 | 50,550,000 | 673 | 1206 | 0.403387235  |                                   |
| 17 | 50,475,000 | 50,625,000 | 674 | 971  | 0.019780061  |                                   |
| 17 | 50,550,000 | 50,700,000 | 675 | 616  | 0.959324316  |                                   |
| 17 | 50,625,000 | 50,775,000 | 676 | 468  | 0.653933537  | ENSBTAG00000046439                |
| 17 | 50,700,000 | 50,850,000 | 677 | 241  | -5.376081622 | ENSBTAG00000046439                |
| 17 | 50,775,000 | 50,925,000 | 678 | 165  | -5.199315456 |                                   |
| 17 | 50,850,000 | 51,000,000 | 679 | 343  | 0.284863589  | ENSBTAG00000046657                |
| 17 | 50,925,000 | 51,075,000 | 680 | 810  | 0.285576995  | ENSBTAG00000046657                |



|    |            |            |     |      |              |                                                     |
|----|------------|------------|-----|------|--------------|-----------------------------------------------------|
| 17 | 51,000,000 | 51,150,000 | 681 | 866  | 0.221988752  |                                                     |
| 17 | 51,075,000 | 51,225,000 | 682 | 444  | 0.400953099  | ENSBTAG00000047597                                  |
| 17 | 51,150,000 | 51,300,000 | 683 | 385  | 1.188326723  | ENSBTAG00000033558,ENSBTAG00000047597               |
| 17 | 51,225,000 | 51,375,000 | 684 | 399  | 1.097052619  | HSFY2,PRAME,ENSBTAG00000033558                      |
| 17 | 51,300,000 | 51,450,000 | 685 | 225  | -1.435707915 | HSFY2,PRAME                                         |
| 17 | 51,375,000 | 51,525,000 | 686 | 355  | -2.178946772 | PRAME                                               |
| 17 | 51,450,000 | 51,600,000 | 687 | 314  | -3.199476066 | ENSBTAG00000039769                                  |
| 17 | 51,525,000 | 51,675,000 | 688 | 293  | -1.37381423  | ENSBTAG00000034761,ENSBTAG00000039769               |
| 17 | 51,600,000 | 51,750,000 | 689 | 797  | -0.884067727 | ENSBTAG00000020532,ENSBTAG00000034761               |
| 17 | 51,675,000 | 51,825,000 | 690 | 1064 | -0.694558434 | ENSBTAG00000020532,ENSBTAG00000046986               |
| 17 | 51,750,000 | 51,900,000 | 691 | 572  | -0.112974703 | ENSBTAG00000033620,ENSBTAG00000046986               |
| 17 | 51,825,000 | 51,975,000 | 692 | 397  | 0.576658276  | ENSBTAG00000033620                                  |
| 17 | 51,900,000 | 52,050,000 | 693 | 419  | 0.288441497  |                                                     |
| 17 | 51,975,000 | 52,125,000 | 694 | 541  | 0.265747012  |                                                     |
| 17 | 52,050,000 | 52,200,000 | 695 | 853  | 0.469339889  |                                                     |
| 17 | 52,125,000 | 52,275,000 | 696 | 654  | 0.132538432  |                                                     |
| 17 | 52,200,000 | 52,350,000 | 697 | 601  | -1.519479992 |                                                     |
| 17 | 52,275,000 | 52,425,000 | 698 | 1082 | -0.858810417 |                                                     |
| 17 | 52,350,000 | 52,500,000 | 699 | 1318 | -0.746491924 |                                                     |
| 17 | 52,425,000 | 52,575,000 | 700 | 1211 | -0.763842186 | TMEM132B                                            |
| 17 | 52,500,000 | 52,650,000 | 701 | 1050 | -0.68800122  | TMEM132B                                            |
| 17 | 52,575,000 | 52,725,000 | 702 | 942  | -0.927239769 | TMEM132B                                            |
| 17 | 52,650,000 | 52,800,000 | 703 | 1343 | -0.023753837 | TMEM132B                                            |
| 17 | 52,725,000 | 52,875,000 | 704 | 1161 | 0.462463214  | TMEM132B                                            |
| 17 | 52,800,000 | 52,950,000 | 705 | 719  | 0.523267512  |                                                     |
| 17 | 52,875,000 | 53,025,000 | 706 | 815  | -1.320961778 | AACS                                                |
| 17 | 52,950,000 | 53,100,000 | 707 | 848  | -1.585072165 | AACS,BRI3BP,DHX37                                   |
| 17 | 53,025,000 | 53,175,000 | 708 | 723  | -1.505397226 | AACS,BRI3BP,DHX37,UBC                               |
| 17 | 53,100,000 | 53,250,000 | 709 | 847  | -0.811825264 | DHX37,SCARB1,UBC                                    |
| 17 | 53,175,000 | 53,325,000 | 710 | 991  | 0.331419998  | SCARB1                                              |
| 17 | 53,250,000 | 53,400,000 | 711 | 952  | 0.440151662  | SCARB1                                              |
| 17 | 53,325,000 | 53,475,000 | 712 | 956  | 0.086301574  |                                                     |
| 17 | 53,400,000 | 53,550,000 | 713 | 842  | 0.24036267   |                                                     |
| 17 | 53,475,000 | 53,625,000 | 714 | 823  | 0.6341395    | NCOR2                                               |
| 17 | 53,550,000 | 53,700,000 | 715 | 814  | 0.581738852  | NCOR2                                               |
| 17 | 53,625,000 | 53,775,000 | 716 | 817  | -0.406110521 | FAM101A,NCOR2                                       |
| 17 | 53,700,000 | 53,850,000 | 717 | 933  | -0.793713307 | FAM101A,NCOR2                                       |
| 17 | 53,775,000 | 53,925,000 | 718 | 1194 | -0.268177002 |                                                     |
| 17 | 53,850,000 | 54,000,000 | 719 | 1203 | -0.53223771  | ZNF664                                              |
| 17 | 53,925,000 | 54,075,000 | 720 | 918  | -0.092056546 | CCDC92,DNAH10,ZNF664                                |
| 17 | 54,000,000 | 54,150,000 | 721 | 889  | 0.302786841  | CCDC92,DNAH10                                       |
| 17 | 54,075,000 | 54,225,000 | 722 | 1183 | -1.192478987 | ATP6V0A2,DNAH10                                     |
| 17 | 54,150,000 | 54,300,000 | 723 | 1420 | -0.558438216 | ATP6V0A2,DNAH10,EIF2B1,GTF2H3,TCTN2                 |
| 17 | 54,225,000 | 54,375,000 | 724 | 1214 | 0.851198256  | ATP6V0A2,DDX55,EIF2B1,GTF2H3,RILPL1,TCTN2,TME<br>D2 |
| 17 | 54,300,000 | 54,450,000 | 725 | 827  | 1.262314477  | DDX55,EIF2B1,RILPL1,RILPL2,SNRNP35,TMED2            |
| 17 | 54,375,000 | 54,525,000 | 726 | 542  | 1.270831478  | RILPL1,RILPL2,SBNO1,SETD8,SNRNP35                   |
| 17 | 54,450,000 | 54,600,000 | 727 | 507  | 0.426147434  | C12orf65,CDK2AP1,MPHOSPH9,RILPL2,SBNO1,SETD8        |
| 17 | 54,525,000 | 54,675,000 | 728 | 667  | 0.359030103  | C12orf65,CDK2AP1,MPHOSPH9,SBNO1                     |
| 17 | 54,600,000 | 54,750,000 | 729 | 718  | 0.029247335  | MPHOSPH9,PITPNM2                                    |
| 17 | 54,675,000 | 54,825,000 | 730 | 679  | -1.066971335 | ARL6IP4,OGFOD2,PITPNM2                              |
| 17 | 54,750,000 | 54,900,000 | 731 | 1043 | -1.384125525 | ABC9,ARL6IP4,OGFOD2,PITPNM2                         |

|    |            |            |     |      |              |                                                              |
|----|------------|------------|-----|------|--------------|--------------------------------------------------------------|
| 17 | 54,825,000 | 54,975,000 | 732 | 1101 | -0.601587312 | ABCB9,CCDC62,HIP1R                                           |
| 17 | 54,900,000 | 55,050,000 | 733 | 880  | -0.034358529 | CCDC62,GPR81,HIP1R,ENSBTAG00000032433                        |
| 17 | 54,975,000 | 55,125,000 | 734 | 940  | -0.847228534 | CCDC62,GPR81,KNTC1,ENSBTAG00000032433,ENSBT<br>AG00000047904 |
| 17 | 55,050,000 | 55,200,000 | 735 | 676  | -1.587891838 | KNTC1,RSRC2,ZCCHC8,ENSBTAG00000047904                        |
| 17 | 55,125,000 | 55,275,000 | 736 | 665  | -0.673142587 | CLIP1,KNTC1,RSRC2,ZCCHC8                                     |
| 17 | 55,200,000 | 55,350,000 | 737 | 967  | -1.80915791  | CLIP1,ZCCHC8                                                 |
| 17 | 55,275,000 | 55,425,000 | 738 | 952  | -1.643374083 | B3GNT4,CLIP1,DIABLO,LRRC43,VPS33A                            |
| 17 | 55,350,000 | 55,500,000 | 739 | 798  | 0.315339196  | B3GNT4,CLIP1,DIABLO,LRRC43,MLXIP,VPS33A                      |
| 17 | 55,425,000 | 55,575,000 | 740 | 792  | 0.231621     | BCL7A,LRRC43,MLXIP                                           |
| 17 | 55,500,000 | 55,650,000 | 741 | 902  | 0.704691155  | BCL7A,MLXIP,WDR66                                            |
| 17 | 55,575,000 | 55,725,000 | 742 | 808  | 0.887622996  | HPD,PSMD9,WDR66                                              |
| 17 | 55,650,000 | 55,800,000 | 743 | 565  | 0.545274116  | HPD,PSMD9,RHOF,SETD1B,TMEM120B,WDR66                         |
| 17 | 55,725,000 | 55,875,000 | 744 | 463  | -0.079906914 | MORN3,ORAI1,RHOF,SETD1B,TMEM120B                             |
| 17 | 55,800,000 | 55,950,000 | 745 | 612  | 0.693194341  | KDM2B,MORN3,ORAI1,TMEM120B                                   |
| 17 | 55,875,000 | 56,025,000 | 746 | 761  | 1.091607244  | KDM2B,RNF34                                                  |
| 17 | 55,950,000 | 56,100,000 | 747 | 762  | 0.950626713  | ANAPC5,KDM2B,RNF34                                           |
| 17 | 56,025,000 | 56,175,000 | 748 | 675  | 0.145239775  | ANAPC5,CAMKK2,P2RX4,RNF34                                    |
| 17 | 56,100,000 | 56,250,000 | 749 | 509  | -1.36039235  | ANAPC5,CAMKK2,P2RX4,P2RX7                                    |
| 17 | 56,175,000 | 56,325,000 | 750 | 477  | -1.817316425 | IFT81,P2RX4,P2RX7                                            |
| 17 | 56,250,000 | 56,400,000 | 751 | 422  | -1.20808417  | IFT81,P2RX7                                                  |
| 17 | 56,325,000 | 56,475,000 | 752 | 401  | -0.100135928 | ATP2A2,IFT81                                                 |
| 17 | 56,400,000 | 56,550,000 | 753 | 403  | 1.090036183  | ANAPC7,ATP2A2,IFT81                                          |
| 17 | 56,475,000 | 56,625,000 | 754 | 363  | 1.329625665  | ANAPC7,ARPC3,ATP2A2,FAM216A,GPN3,VPS29                       |
| 17 | 56,550,000 | 56,700,000 | 755 | 322  | 1.348835906  | ANAPC7,ARPC3,FAM216A,GPN3,PPTC7,RAD9B,VPS29                  |
| 17 | 56,625,000 | 56,775,000 | 756 | 318  | 0.827541163  | HVCN1,PPTC7,RAD9B,TCTN1                                      |
| 17 | 56,700,000 | 56,850,000 | 757 | 293  | 0.178256558  | HVCN1,PPP1CC,PPTC7,TCTN1                                     |
| 17 | 56,775,000 | 56,925,000 | 758 | 419  | -0.748785634 | CCDC63,PPP1CC                                                |
| 17 | 56,850,000 | 57,000,000 | 759 | 686  | -0.863641515 | CCDC63,MYL2                                                  |
| 17 | 56,925,000 | 57,075,000 | 760 | 831  | -0.759921273 | CCDC63,CUX2,MYL2                                             |
| 17 | 57,000,000 | 57,150,000 | 761 | 1112 | 0.081749468  | CUX2                                                         |
| 17 | 57,075,000 | 57,225,000 | 762 | 1181 | 0.464140681  | CUX2                                                         |
| 17 | 57,150,000 | 57,300,000 | 763 | 1111 | 0.834150551  | CUX2                                                         |
| 17 | 57,225,000 | 57,375,000 | 764 | 1206 | 0.89698244   | CUX2,FAM109A                                                 |
| 17 | 57,300,000 | 57,450,000 | 765 | 988  | 0.801281131  | ATXN2,CUX2,FAM109A,SH2B3                                     |
| 17 | 57,375,000 | 57,525,000 | 766 | 723  | 1.084367186  | ATXN2,SH2B3                                                  |
| 17 | 57,450,000 | 57,600,000 | 767 | 820  | 0.966194505  | ATXN2,BRAP                                                   |
| 17 | 57,525,000 | 57,675,000 | 768 | 1049 | 0.412935843  | ACAD10,ATXN2,BRAP                                            |
| 17 | 57,600,000 | 57,750,000 | 769 | 1124 | 0.342502154  | ACAD10                                                       |
| 17 | 57,675,000 | 57,825,000 | 770 | 1159 | 1.008615137  | ACAD10,CIT                                                   |
| 17 | 57,750,000 | 57,900,000 | 771 | 1302 | 1.134913011  | CIT                                                          |
| 17 | 57,825,000 | 57,975,000 | 772 | 1295 | 1.149054684  | CIT                                                          |
| 17 | 57,900,000 | 58,050,000 | 773 | 1473 | 1.1809678    | CIT,PRKAB1                                                   |
| 17 | 57,975,000 | 58,125,000 | 774 | 1704 | 1.255024077  | CCDC60,CIT,PRKAB1                                            |
| 17 | 58,050,000 | 58,200,000 | 775 | 1462 | 1.292594736  | CCDC60                                                       |
| 17 | 58,125,000 | 58,275,000 | 776 | 1381 | 0.041148751  | CCDC60                                                       |
| 17 | 58,200,000 | 58,350,000 | 777 | 1321 | -0.365592408 |                                                              |
| 17 | 58,275,000 | 58,425,000 | 778 | 1185 | -1.900134839 | HSPB8                                                        |
| 17 | 58,350,000 | 58,500,000 | 779 | 1214 | -2.146032439 | HSPB8,SRRM4                                                  |
| 17 | 58,425,000 | 58,575,000 | 780 | 1172 | 0.026210272  | SRRM4                                                        |
| 17 | 58,500,000 | 58,650,000 | 781 | 1178 | 0.835786934  |                                                              |
| 17 | 58,575,000 | 58,725,000 | 782 | 1025 | -0.224122392 |                                                              |

|    |            |            |     |      |              |                                      |
|----|------------|------------|-----|------|--------------|--------------------------------------|
| 17 | 58,650,000 | 58,800,000 | 783 | 747  | -0.835929426 |                                      |
| 17 | 58,725,000 | 58,875,000 | 784 | 760  | -0.254075237 |                                      |
| 17 | 58,800,000 | 58,950,000 | 785 | 902  | -0.408131819 |                                      |
| 17 | 58,875,000 | 59,025,000 | 786 | 1112 | -0.004423722 |                                      |
| 17 | 58,950,000 | 59,100,000 | 787 | 953  | 0.575275473  | SUDS3                                |
| 17 | 59,025,000 | 59,175,000 | 788 | 531  | 0.830035008  | SUDS3                                |
| 17 | 59,100,000 | 59,250,000 | 789 | 343  | 0.268695596  | SUDS3,TAOK3                          |
| 17 | 59,175,000 | 59,325,000 | 790 | 246  | -0.09602634  | TAOK3                                |
| 17 | 59,250,000 | 59,400,000 | 791 | 555  | 0.18570848   | PEBP1,TAOK3,VSIG10                   |
| 17 | 59,325,000 | 59,475,000 | 792 | 818  | 0.938492462  | PEBP1,RFC5,VSIG10,WSB2               |
| 17 | 59,400,000 | 59,550,000 | 793 | 794  | -0.167409876 | KSR2,RFC5,VSIG10,WSB2                |
| 17 | 59,475,000 | 59,625,000 | 794 | 1067 | -0.422183446 | KSR2                                 |
| 17 | 59,550,000 | 59,700,000 | 795 | 1386 | 0.476884937  | KSR2                                 |
| 17 | 59,625,000 | 59,775,000 | 796 | 1138 | 0.566818592  | KSR2                                 |
| 17 | 59,700,000 | 59,850,000 | 797 | 1103 | 0.918147731  | KSR2                                 |
| 17 | 59,775,000 | 59,925,000 | 798 | 1387 | 0.786625656  | KSR2                                 |
| 17 | 59,850,000 | 60,000,000 | 799 | 1488 | 0.630086847  | KSR2                                 |
| 17 | 59,925,000 | 60,075,000 | 800 | 1540 | 0.919438889  | NOS1                                 |
| 17 | 60,000,000 | 60,150,000 | 801 | 1445 | 1.09091288   | COX7B,NOS1,ENSBTAG00000046747        |
| 17 | 60,075,000 | 60,225,000 | 802 | 1216 | 1.209628386  | COX7B,FBXO21,NOS1,ENSBTAG00000046747 |
| 17 | 60,150,000 | 60,300,000 | 803 | 1088 | 1.133183334  | FBXO21,TESC                          |
| 17 | 60,225,000 | 60,375,000 | 804 | 1143 | 1.160045242  | FBXO21,FBXW8,TESC                    |
| 17 | 60,300,000 | 60,450,000 | 805 | 1067 | 1.181792566  | FBXW8,HRK,RNFT2,TESC                 |
| 17 | 60,375,000 | 60,525,000 | 806 | 808  | 1.120404965  | C12orf49,FBXW8,HRK,RNFT2             |
| 17 | 60,450,000 | 60,600,000 | 807 | 841  | 0.819916638  | C12orf49,RNFT2                       |
| 17 | 60,525,000 | 60,675,000 | 808 | 1158 | 0.763101611  |                                      |
| 17 | 60,600,000 | 60,750,000 | 809 | 1260 | 0.439792232  |                                      |
| 17 | 60,675,000 | 60,825,000 | 810 | 966  | 0.502923851  |                                      |
| 17 | 60,750,000 | 60,900,000 | 811 | 623  | 0.621050528  |                                      |
| 17 | 60,825,000 | 60,975,000 | 812 | 583  | -0.329075011 | MED13L                               |
| 17 | 60,900,000 | 61,050,000 | 813 | 575  | 0.007304944  | MED13L                               |
| 17 | 60,975,000 | 61,125,000 | 814 | 446  | 0.962013956  | MED13L                               |
| 17 | 61,050,000 | 61,200,000 | 815 | 605  | 0.970057326  | MED13L                               |
| 17 | 61,125,000 | 61,275,000 | 816 | 912  | 0.515783696  | MED13L                               |
| 17 | 61,200,000 | 61,350,000 | 817 | 850  | 0.322508451  |                                      |
| 17 | 61,275,000 | 61,425,000 | 818 | 693  | 0.537783415  |                                      |
| 17 | 61,350,000 | 61,500,000 | 819 | 895  | 0.872008955  |                                      |
| 17 | 61,425,000 | 61,575,000 | 820 | 1184 | 0.57181532   |                                      |
| 17 | 61,500,000 | 61,650,000 | 821 | 1195 | 0.666572103  |                                      |
| 17 | 61,575,000 | 61,725,000 | 822 | 1075 | 0.659039623  |                                      |
| 17 | 61,650,000 | 61,800,000 | 823 | 983  | 0.441227521  |                                      |
| 17 | 61,725,000 | 61,875,000 | 824 | 1121 | -0.189688937 |                                      |
| 17 | 61,800,000 | 61,950,000 | 825 | 938  | -0.872104542 |                                      |
| 17 | 61,875,000 | 62,025,000 | 826 | 731  | 0.376668856  |                                      |
| 17 | 61,950,000 | 62,100,000 | 827 | 768  | 0.79151003   |                                      |
| 17 | 62,025,000 | 62,175,000 | 828 | 763  | 0.192873584  |                                      |
| 17 | 62,100,000 | 62,250,000 | 829 | 834  | -0.459205864 |                                      |
| 17 | 62,175,000 | 62,325,000 | 830 | 643  | -0.458281269 |                                      |
| 17 | 62,250,000 | 62,400,000 | 831 | 406  | 0.324919107  | TBX3                                 |
| 17 | 62,325,000 | 62,475,000 | 832 | 457  | -0.058272091 | TBX3                                 |
| 17 | 62,400,000 | 62,550,000 | 833 | 519  | 0.319455715  | TBX5                                 |
| 17 | 62,475,000 | 62,625,000 | 834 | 576  | 0.245257673  | TBX5                                 |
| 17 | 62,550,000 | 62,700,000 | 835 | 732  | 0.270870112  | TBX5                                 |

|    |            |            |     |      |              |                                                                    |
|----|------------|------------|-----|------|--------------|--------------------------------------------------------------------|
| 17 | 62,625,000 | 62,775,000 | 836 | 922  | 1.095766613  |                                                                    |
| 17 | 62,700,000 | 62,850,000 | 837 | 894  | 0.84379191   |                                                                    |
| 17 | 62,775,000 | 62,925,000 | 838 | 1177 | 0.408282762  | RBM19                                                              |
| 17 | 62,850,000 | 63,000,000 | 839 | 1794 | 0.778148818  | RBM19                                                              |
| 17 | 62,925,000 | 63,075,000 | 840 | 1937 | 0.980379525  | RBM19                                                              |
| 17 | 63,000,000 | 63,150,000 | 841 | 1716 | 0.894851567  | RBM19                                                              |
| 17 | 63,075,000 | 63,225,000 | 842 | 1561 | 0.613541073  |                                                                    |
| 17 | 63,150,000 | 63,300,000 | 843 | 1339 | 0.21803364   | LHX5,SDSL                                                          |
| 17 | 63,225,000 | 63,375,000 | 844 | 1205 | 0.059655058  | DTX1,LHX5,PLBD2,SDS,SDSL                                           |
| 17 | 63,300,000 | 63,450,000 | 845 | 1206 | 0.289342459  | CCDC42B,DDX54,DTX1,PLBD2,RASAL1,SDS                                |
| 17 | 63,375,000 | 63,525,000 | 846 | 1300 | 0.737931818  | CCDC42B,DDX54,DTX1,IQCD,RASAL1,RITA1                               |
| 17 | 63,450,000 | 63,600,000 | 847 | 1591 | 0.401471537  | DDX54,IQCD,RITA1,SLC8B1,TPCN1                                      |
| 17 | 63,525,000 | 63,675,000 | 848 | 1896 | 0.217535299  | OAS1Y,OAS1Z,OAS2,SLC8B1,TPCN1                                      |
| 17 | 63,600,000 | 63,750,000 | 849 | 1927 | 0.199030001  | OAS1Y,OAS1Z,OAS2,RPH3A                                             |
| 17 | 63,675,000 | 63,825,000 | 850 | 1394 | -0.643484247 | OAS1Z,RPH3A                                                        |
| 17 | 63,750,000 | 63,900,000 | 851 | 873  | -0.886497509 |                                                                    |
| 17 | 63,825,000 | 63,975,000 | 852 | 920  | 0.097448918  |                                                                    |
| 17 | 63,900,000 | 64,050,000 | 853 | 1044 | 0.330442525  | PTPN11                                                             |
| 17 | 63,975,000 | 64,125,000 | 854 | 674  | 0.721241357  | PTPN11,RPL6                                                        |
| 17 | 64,050,000 | 64,200,000 | 855 | 491  | 0.186290353  | PTPN11,RPL6                                                        |
| 17 | 64,125,000 | 64,275,000 | 856 | 516  | 0.335260049  | ENSBTAG00000010958,ENSBTAG00000046730                              |
| 17 | 64,200,000 | 64,350,000 | 857 | 586  | 0.658215113  | TRAFD1,ENSBTAG00000008762,ENSBTAG00000010958,ENSBTAG00000046730    |
| 17 | 64,275,000 | 64,425,000 | 858 | 669  | 0.330962541  | ERP29,NAA25,TRAFD1,ENSBTAG00000008762,ENSBTAG00000046730           |
| 17 | 64,350,000 | 64,500,000 | 859 | 584  | 0.305510198  | ADAM1B,ERP29,NAA25,TMEM116                                         |
| 17 | 64,425,000 | 64,575,000 | 860 | 677  | 0.723714427  | ADAM1B,ALDH2,ERP29,MAPKAPK5,TMEM116                                |
| 17 | 64,500,000 | 64,650,000 | 861 | 809  | 0.915068217  | ALDH2,CCDC64,MAPKAPK5                                              |
| 17 | 64,575,000 | 64,725,000 | 862 | 681  | 0.778012823  | ALDH2,CCDC64,RAB35                                                 |
| 17 | 64,650,000 | 64,800,000 | 863 | 580  | 0.602872336  | CCDC64,GCN1L1,RAB35                                                |
| 17 | 64,725,000 | 64,875,000 | 864 | 673  | 0.874087552  | GCN1L1,PXN,RAB35,RPLP0                                             |
| 17 | 64,800,000 | 64,950,000 | 865 | 826  | 0.574465177  | GCN1L1,MSI1,PLA2G1B,PXN,RPLP0,SIRT4,ENSBTAG0000047084              |
| 17 | 64,875,000 | 65,025,000 | 866 | 736  | 0.146948331  | COX6A1,GATC,MSI1,PLA2G1B,SFRS9,SIRT4,TRIAP1,ENSBTAG00000047084     |
| 17 | 64,950,000 | 65,100,000 | 867 | 550  | -0.197165704 | COQ5,COX6A1,DYNLL1,GATC,RNF10,SFRS9,TRIAP1                         |
| 17 | 65,025,000 | 65,175,000 | 868 | 590  | 0.536190181  | CABP1,COQ5,DYNLL1,POP5,RNF10                                       |
| 17 | 65,100,000 | 65,250,000 | 869 | 903  | 1.192468535  | ACADS,CABP1,MLEC,POP5,RNF10,UNC119B                                |
| 17 | 65,175,000 | 65,325,000 | 870 | 1030 | 0.912454198  | ACADS,MLEC,SPPL3,UNC119B                                           |
| 17 | 65,250,000 | 65,400,000 | 871 | 800  | 0.182696522  | SPPL3                                                              |
| 17 | 65,325,000 | 65,475,000 | 872 | 836  | -0.312591921 | C12orf43,HNF1A,OASL,ENSBTAG00000046887                             |
| 17 | 65,400,000 | 65,550,000 | 873 | 935  | -0.323753029 | ANKRD13A,C12orf43,HNF1A,OASL,ENSBTAG00000032047,ENSBTAG00000046887 |
| 17 | 65,475,000 | 65,625,000 | 874 | 723  | -0.082957456 | ANKRD13A,GIT2,TCHP,ENSBTAG00000032047                              |
| 17 | 65,550,000 | 65,700,000 | 875 | 733  | -0.088904309 | ANKRD13A,GIT2,GLTP,TCHP,TRPV4                                      |
| 17 | 65,625,000 | 65,775,000 | 876 | 878  | 0.526465839  | FAM222A,GLTP,TRPV4                                                 |
| 17 | 65,700,000 | 65,850,000 | 877 | 1123 | -0.054359125 | FAM222A                                                            |
| 17 | 65,775,000 | 65,925,000 | 878 | 1413 | -0.226759134 | MMAB,MVK,UBE3B                                                     |
| 17 | 65,850,000 | 66,000,000 | 879 | 1342 | 0.339393276  | KCTD10,MMAB,MVK,MYO1H,UBE3B                                        |
| 17 | 65,925,000 | 66,075,000 | 880 | 1324 | 0.325961778  | FOXN4,KCTD10,MYO1H,UBE3B                                           |
| 17 | 66,000,000 | 66,150,000 | 881 | 1396 | 0.167684396  | ACACB,FOXN4,MYO1H                                                  |
| 17 | 66,075,000 | 66,225,000 | 882 | 1407 | 0.451389244  | ACACB,FOXN4,UNG                                                    |
| 17 | 66,150,000 | 66,300,000 | 883 | 1171 | 0.321387496  | ACACB,ALKBH2,SVOP,UNG,USP30                                        |

|    |            |            |     |      |              |                                          |
|----|------------|------------|-----|------|--------------|------------------------------------------|
| 17 | 66,225,000 | 66,375,000 | 884 | 1213 | 0.273242687  | ALKBH2,DAO,SVOP,UNG,USP30                |
| 17 | 66,300,000 | 66,450,000 | 885 | 1132 | 0.610794004  | DAO,SSH1,SVOP                            |
| 17 | 66,375,000 | 66,525,000 | 886 | 727  | 0.688566128  | CORO1C,SSH1,ENSBTAG00000023431           |
| 17 | 66,450,000 | 66,600,000 | 887 | 782  | 0.437452391  | CORO1C,SELPLG,TMEM119,ENSBTAG00000023431 |
| 17 | 66,525,000 | 66,675,000 | 888 | 1100 | 0.624549453  | CORO1C,FICD,SART3,SELPLG,TMEM119         |
| 17 | 66,600,000 | 66,750,000 | 889 | 1437 | 0.287528246  | FICD,ISCU,SART3                          |
| 17 | 66,675,000 | 66,825,000 | 890 | 1690 | 0.439507489  | ISCU                                     |
| 17 | 66,750,000 | 66,900,000 | 891 | 1892 | 0.75509627   | CMLKR1,WSCD2                             |
| 17 | 66,825,000 | 66,975,000 | 892 | 1884 | 0.906318084  | CMLKR1,WSCD2                             |
| 17 | 66,900,000 | 67,050,000 | 893 | 1915 | 0.854483476  | WSCD2                                    |
| 17 | 66,975,000 | 67,125,000 | 894 | 1621 | 0.051816533  |                                          |
| 17 | 67,050,000 | 67,200,000 | 895 | 884  | -0.690677494 |                                          |
| 17 | 67,125,000 | 67,275,000 | 896 | 987  | 0.050734061  | PIWIL3                                   |
| 17 | 67,200,000 | 67,350,000 | 897 | 1526 | 0.681506591  | PIWIL3,SGSM1,TMEM211                     |
| 17 | 67,275,000 | 67,425,000 | 898 | 1397 | 0.659084733  | KIAA1671,SGSM1,TMEM211                   |
| 17 | 67,350,000 | 67,500,000 | 899 | 1324 | 0.357965045  | KIAA1671                                 |
| 17 | 67,425,000 | 67,575,000 | 900 | 1428 | -0.206657977 | CRYBB2,CRYBB3,KIAA1671                   |
| 17 | 67,500,000 | 67,650,000 | 901 | 1329 | -0.42683625  | CRYBB2,CRYBB3,KIAA1671                   |
| 17 | 67,575,000 | 67,725,000 | 902 | 1244 | 0.413839911  | ADRBK2                                   |
| 17 | 67,650,000 | 67,800,000 | 903 | 1154 | 0.660004163  | ADRBK2,MYO18B                            |
| 17 | 67,725,000 | 67,875,000 | 904 | 1221 | -0.161515831 | ADRBK2,MYO18B                            |
| 17 | 67,800,000 | 67,950,000 | 905 | 1254 | 0.051798897  | MYO18B                                   |
| 17 | 67,875,000 | 68,025,000 | 906 | 1085 | 0.785502982  | MYO18B                                   |
| 17 | 67,950,000 | 68,100,000 | 907 | 983  | -0.160575188 | MYO18B                                   |
| 17 | 68,025,000 | 68,175,000 | 908 | 1015 | 0.640259122  |                                          |
| 17 | 68,100,000 | 68,250,000 | 909 | 1423 | 1.012362154  | SEZ6L                                    |
| 17 | 68,175,000 | 68,325,000 | 910 | 1674 | 0.668349907  | SEZ6L                                    |
| 17 | 68,250,000 | 68,400,000 | 911 | 1622 | 0.331212257  | ASPHD2,HPS4,SEZ6L,SRRD                   |
| 17 | 68,325,000 | 68,475,000 | 912 | 1795 | 0.254608945  | ASPHD2,HPS4,SRRD,TFIP11,TPST2            |
| 17 | 68,400,000 | 68,550,000 | 913 | 1576 | 0.162036457  | CRYBA4,CRYBB1,SRRD,TFIP11,TPST2          |
| 17 | 68,475,000 | 68,625,000 | 914 | 1201 | -1.006624398 | CRYBA4,CRYBB1,TPST2,ENSBTAG00000031468   |
| 17 | 68,550,000 | 68,700,000 | 915 | 1204 | -0.786894292 | ENSBTAG00000031468                       |
| 17 | 68,625,000 | 68,775,000 | 916 | 1103 | -0.6253664   |                                          |
| 17 | 68,700,000 | 68,850,000 | 917 | 895  | -1.288227213 |                                          |
| 17 | 68,775,000 | 68,925,000 | 918 | 1081 | 0.01589505   |                                          |
| 17 | 68,850,000 | 69,000,000 | 919 | 1294 | 0.720733787  |                                          |
| 17 | 68,925,000 | 69,075,000 | 920 | 1426 | 0.983672505  |                                          |
| 17 | 69,000,000 | 69,150,000 | 921 | 1340 | 0.05222155   |                                          |
| 17 | 69,075,000 | 69,225,000 | 922 | 1056 | -0.461693886 |                                          |
| 17 | 69,150,000 | 69,300,000 | 923 | 1154 | 0.098069779  |                                          |
| 17 | 69,225,000 | 69,375,000 | 924 | 1215 | -0.092632814 |                                          |
| 17 | 69,300,000 | 69,450,000 | 925 | 963  | 0.390799091  | MN1                                      |
| 17 | 69,375,000 | 69,525,000 | 926 | 732  | 1.122385656  | MN1                                      |
| 17 | 69,450,000 | 69,600,000 | 927 | 666  | 1.252506685  | MN1,PITPNB                               |
| 17 | 69,525,000 | 69,675,000 | 928 | 706  | 0.79840613   | PITPNB,TTC28                             |
| 17 | 69,600,000 | 69,750,000 | 929 | 702  | 0.43382001   | TTC28                                    |
| 17 | 69,675,000 | 69,825,000 | 930 | 736  | 0.646614078  | TTC28                                    |
| 17 | 69,750,000 | 69,900,000 | 931 | 723  | -0.623006442 | TTC28                                    |
| 17 | 69,825,000 | 69,975,000 | 932 | 514  | -1.292964163 | TTC28                                    |
| 17 | 69,900,000 | 70,050,000 | 933 | 404  | -1.191858768 | TTC28                                    |
| 17 | 69,975,000 | 70,125,000 | 934 | 356  | -1.90012237  |                                          |
| 17 | 70,050,000 | 70,200,000 | 935 | 347  | -0.009257507 |                                          |
| 17 | 70,125,000 | 70,275,000 | 936 | 326  | 0.889555044  | CHEK2                                    |

|    |            |            |     |      |              |                                                                                                                      |
|----|------------|------------|-----|------|--------------|----------------------------------------------------------------------------------------------------------------------|
| 17 | 70,200,000 | 70,350,000 | 937 | 622  | 0.264566252  | CCDC117,CHEK2,HSCB,XBP1                                                                                              |
| 17 | 70,275,000 | 70,425,000 | 938 | 924  | 0.172605556  | CCDC117,CHEK2,HSCB,XBP1                                                                                              |
| 17 | 70,350,000 | 70,500,000 | 939 | 957  | 0.174221614  |                                                                                                                      |
| 17 | 70,425,000 | 70,575,000 | 940 | 803  | 0.28389819   | C17H22orf31,KREMEN1,ZNRF3                                                                                            |
| 17 | 70,500,000 | 70,650,000 | 941 | 601  | 0.513041886  | C17H22orf31,EMID1,KREMEN1,ZNRF3                                                                                      |
| 17 | 70,575,000 | 70,725,000 | 942 | 576  | 0.756472804  | EMID1,EWSR1,GAS2L1,KREMEN1,RASL10A,RHBDD3                                                                            |
| 17 | 70,650,000 | 70,800,000 | 943 | 628  | 0.815767054  | AP1B1,EMID1,EWSR1,GAS2L1,RASL10A,RHBDD3                                                                              |
| 17 | 70,725,000 | 70,875,000 | 944 | 892  | 0.548232545  | AP1B1,NEFH,NIPSNAP1,RASL10A,THOC5                                                                                    |
| 17 | 70,800,000 | 70,950,000 | 945 | 940  | 0.27806419   | NEFH,NF2,NIPSNAP1,THOC5                                                                                              |
| 17 | 70,875,000 | 71,025,000 | 946 | 770  | -0.022967411 | CABP7,NF2,NIPSNAP1,ZMAT5                                                                                             |
| 17 | 70,950,000 | 71,100,000 | 947 | 836  | 0.428352391  | ASCC2,CABP7,NF2,UQCR10,ZMAT5                                                                                         |
| 17 | 71,025,000 | 71,175,000 | 948 | 894  | 0.17155444   | ASCC2,MTMR3,UQCR10,ZMAT5                                                                                             |
| 17 | 71,100,000 | 71,250,000 | 949 | 755  | 0.212604271  | MTMR3                                                                                                                |
| 17 | 71,175,000 | 71,325,000 | 950 | 838  | 0.891027754  | HORMAD2,MTMR3                                                                                                        |
| 17 | 71,250,000 | 71,400,000 | 951 | 938  | 0.142228795  | HORMAD2,MTMR3                                                                                                        |
| 17 | 71,325,000 | 71,475,000 | 952 | 774  | -0.58672319  | GATSL3,HORMAD2,LIF,OSM,TBC1D10A                                                                                      |
| 17 | 71,400,000 | 71,550,000 | 953 | 705  | -0.013428497 | CCDC157,GATSL3,LIF,OSM,RNF215,SF3A1,TBC1D10A                                                                         |
| 17 | 71,475,000 | 71,625,000 | 954 | 822  | 0.488221744  | CCDC157,MTP18,RNF215,SEC14L2,SEC14L3,SEC14L4,<br>SF3A1,ENSBTAG00000037993                                            |
| 17 | 71,550,000 | 71,700,000 | 955 | 1131 | 0.747367514  | GAL3ST1,MTP18,PES1,SEC14L2,SEC14L3,SEC14L4,ENS<br>BTAG00000037993                                                    |
| 17 | 71,625,000 | 71,775,000 | 956 | 1293 | 0.696004268  | C5orf52,DUSP18,GAL3ST1,OSBP2,PES1,SLC35E4,TCN2                                                                       |
| 17 | 71,700,000 | 71,850,000 | 957 | 1631 | 0.585494414  | C5orf52,DUSP18,OSBP2,PES1,SLC35E4,TCN2                                                                               |
| 17 | 71,775,000 | 71,925,000 | 958 | 1820 | 0.65155622   | MORC2,OSBP2                                                                                                          |
| 17 | 71,850,000 | 72,000,000 | 959 | 1182 | 0.755818864  | MORC2,OSBP2                                                                                                          |
| 17 | 71,925,000 | 72,075,000 | 960 | 857  | 0.07823955   | MORC2,SELM,SMTN                                                                                                      |
| 17 | 72,000,000 | 72,150,000 | 961 | 840  | 0.111689754  | INPP5J,LIMK2,PLA2G3,RNF185,SELM,SMTN                                                                                 |
| 17 | 72,075,000 | 72,225,000 | 962 | 907  | 0.897757854  | INPP5J,LIMK2,PIK3IP1,PLA2G3,RNF185                                                                                   |
| 17 | 72,150,000 | 72,300,000 | 963 | 980  | 0.941669526  | DRG1,EIF4ENIF1,LIMK2,PATZ1,PIK3IP1                                                                                   |
| 17 | 72,225,000 | 72,375,000 | 964 | 1087 | 0.852887579  | DRG1,EIF4ENIF1,PATZ1,SFI1                                                                                            |
| 17 | 72,300,000 | 72,450,000 | 965 | 1311 | 0.585309851  | EIF4ENIF1,PISD,SFI1                                                                                                  |
| 17 | 72,375,000 | 72,525,000 | 966 | 1099 | 0.474296079  | DEPDC5,PISD,PRR14L,SFI1                                                                                              |
| 17 | 72,450,000 | 72,600,000 | 967 | 1057 | 0.260587156  | DEPDC5,PISD,PRR14L                                                                                                   |
| 17 | 72,525,000 | 72,675,000 | 968 | 1226 | -0.83033738  | DEPDC5,YWHAH                                                                                                         |
| 17 | 72,600,000 | 72,750,000 | 969 | 1477 | -0.923924825 | SGLT1,SLC5A4,YWHAH                                                                                                   |
| 17 | 72,675,000 | 72,825,000 | 970 | 1585 | -0.254098086 | SGLT1,SLC5A4,ENSBTAG00000046584,ENSBTAG0000<br>0048030                                                               |
| 17 | 72,750,000 | 72,900,000 | 971 | 1398 | -0.368132466 | IGLL1,SLC5A4,ENSBTAG00000039237,ENSBTAG00000<br>046584,ENSBTAG00000047529,ENSBTAG0000004798<br>6,ENSBTAG00000048030  |
| 17 | 72,825,000 | 72,975,000 | 972 | 1569 | -0.18372376  | IGLL1,ENSBTAG00000039237,ENSBTAG00000047529,<br>ENSBTAG00000047986                                                   |
| 17 | 72,900,000 | 73,050,000 | 973 | 1742 | -0.112778934 | IGLL1,ZNF280A,ZNF280B,ENSBTAG00000033890                                                                             |
| 17 | 72,975,000 | 73,125,000 | 974 | 1872 | -0.429029455 | IGLL1,ZNF280A,ZNF280B,ENSBTAG00000033890,ENS<br>BTAG00000047121                                                      |
| 17 | 73,050,000 | 73,200,000 | 975 | 1806 | -0.059885051 | IGLL1,ZNF70,ENSBTAG00000047121                                                                                       |
| 17 | 73,125,000 | 73,275,000 | 976 | 1270 | 0.206494783  | C22orf15,CHCHD10,DERL3,IGLL1,MIF,MMP11,SMARC<br>B1,VPREB3,ZNF70,ENSBTAG00000018647,ENSBTAG0<br>0000047121            |
| 17 | 73,200,000 | 73,350,000 | 977 | 904  | 0.31791494   | C22orf15,CABIN1,CHCHD10,DDT,DERL3,GSTT1,GSTT3<br>,MIF,MMP11,SMARCB1,VPREB3,ENSBTAG0000000017<br>0,ENSBTAG00000018647 |

|    |            |            |      |      |              |                                                                                                                 |
|----|------------|------------|------|------|--------------|-----------------------------------------------------------------------------------------------------------------|
| 17 | 73,275,000 | 73,425,000 | 978  | 863  | 0.529646839  | CABIN1,DDT,GSTT1,GSTT3,SUSD2,ENSBTAG00000000170                                                                 |
| 17 | 73,350,000 | 73,500,000 | 979  | 1044 | 0.268805978  | C17H22orf13,CABIN1,GGT5,SNRPD3,SUSD2,ENSBTAG0000046900                                                          |
| 17 | 73,425,000 | 73,575,000 | 980  | 1590 | 0.576995112  | C17H22orf13,GGT5,SNRPD3,UPB1,ENSBTAG00000046900                                                                 |
| 17 | 73,500,000 | 73,650,000 | 981  | 1588 | 0.82903184   | SPECC1L,UPB1,ENSBTAG00000016944                                                                                 |
| 17 | 73,575,000 | 73,725,000 | 982  | 1306 | 0.345371547  | BCR,SPECC1L,ENSBTAG00000016944                                                                                  |
| 17 | 73,650,000 | 73,800,000 | 983  | 1257 | 0.184962114  | BCR,RAB36,RTDR1,SPECC1L                                                                                         |
| 17 | 73,725,000 | 73,875,000 | 984  | 953  | 0.222420815  | BCR,GNAZ,RAB36,RTDR1,ENSBTAG00000023007                                                                         |
| 17 | 73,800,000 | 73,950,000 | 985  | 1144 | -0.397243399 | GNAZ,RTDR1,VPREB,ENSBTAG00000023007                                                                             |
| 17 | 73,875,000 | 74,025,000 | 986  | 1268 | -0.137572279 | MAPK1,PPM1F,VPREB,ENSBTAG00000023007,ENSBTAG00000047805                                                         |
| 17 | 73,950,000 | 74,100,000 | 987  | 976  | 0.843401783  | DGCR6L,MAPK1,PPIL2,PPM1F,YPEL1,ENSBTAG00000022019,ENSBTAG00000047805                                            |
| 17 | 74,025,000 | 74,175,000 | 988  | 833  | 0.702128051  | CCDC116,DGCR6L,MAPK1,PPIL2,SDF2L1,UBE2L3,YDJC,YPEL1,ENSBTAG00000022019,ENSBTAG00000047538                       |
| 17 | 74,100,000 | 74,250,000 | 989  | 706  | 0.5559481    | CCDC116,HIC2,PI4KA,SDF2L1,SERPIND1,TMEM191B,UBE2L3,YDJC,ENSBTAG00000047538                                      |
| 17 | 74,175,000 | 74,325,000 | 990  | 739  | 0.316647423  | AIFM3,CRKL,HIC2,LZTR1,PI4KA,SERPIND1,SNAP29,TMEM191B                                                            |
| 17 | 74,250,000 | 74,400,000 | 991  | 868  | 0.466833231  | AIFM3,CRKL,LZTR1,MZT2,P2RX6,PI4KA,SLC7A4,SMPD4,SNAP29,THAP7,TUBA3E,ENSBTAG00000038258                           |
| 17 | 74,325,000 | 74,475,000 | 992  | 747  | 0.831852435  | LZTR1,MED15,MZT2,P2RX6,PRODH,SLC7A4,SMPD4,THAP7,TUBA3E,ENSBTAG00000031018,ENSBTAG00000038258,ENSBTAG00000046165 |
| 17 | 74,400,000 | 74,550,000 | 993  | 729  | 0.866674421  | KLHL22,MED15,PRODH,SCARF2,SMPD4,ENSBTAG00000031018,ENSBTAG00000046165                                           |
| 17 | 74,475,000 | 74,625,000 | 994  | 764  | 0.756088212  | DGCR14,DGCR2,GSC2,KLHL22,MED15,SCARF2,TSSK1B,TSSK2,ZNF74                                                        |
| 17 | 74,550,000 | 74,700,000 | 995  | 744  | -1.644534075 | DGCR14,DGCR2,GSC2,HIRA,SLC25A1,TSSK1B,TSSK2,ZNF74                                                               |
| 17 | 74,625,000 | 74,775,000 | 996  | 988  | -1.728875815 | C22orf39,CDC45L,CLDN5,HIRA,MRPL40,SLC25A1,UFD1L                                                                 |
| 17 | 74,700,000 | 74,850,000 | 997  | 914  | -0.190546441 | C22orf39,CDC45L,CLDN5,GP1BB,MRPL40,SEPT5,UFD1L                                                                  |
| 17 | 74,775,000 | 74,925,000 | 998  | 632  | 0.382221647  | GNB1L,GP1BB,SEPT5,TXNRD2,ENSBTAG00000047896                                                                     |
| 17 | 74,850,000 | 75,000,000 | 999  | 496  | 0.897587803  | ARVCF,COMT,DGCR8,GNB1L,TANGO2,TXNRD2,ENSBTAG00000047896                                                         |
| 17 | 74,925,000 | 75,075,000 | 1000 | 317  | 0.937901292  | ARVCF,COMT,DGCR8,RANBP1,TANGO2,TRMT2A,ZDHHC8,ENSBTAG00000046005,ENSBTAG00000047626                              |
| 17 | 75,000,000 | 75,150,000 | 1001 | 385  | 0.72588142   | DGCR8,RANBP1,RTN4R,TRMT2A,ZDHHC8,ENSBTAG0000046005,ENSBTAG00000046322,ENSBTAG00000047626                        |
| 17 | 75,075,000 | 75,158,596 | 1002 | 272  | 0.695988895  | RTN4R,ENSBTAG00000046322                                                                                        |
| 18 | 0          | 150,000    | 1    | 472  | 0.228285403  |                                                                                                                 |
| 18 | 75,000     | 225,000    | 2    | 427  | 0.631086872  |                                                                                                                 |
| 18 | 150,000    | 300,000    | 3    | 247  | 0.676434376  |                                                                                                                 |
| 18 | 225,000    | 375,000    | 4    | 214  | 0.899396736  |                                                                                                                 |
| 18 | 300,000    | 450,000    | 5    | 416  | 1.152446176  |                                                                                                                 |
| 18 | 375,000    | 525,000    | 6    | 437  | 0.867252441  |                                                                                                                 |

|    |           |           |    |      |              |                                                                         |
|----|-----------|-----------|----|------|--------------|-------------------------------------------------------------------------|
| 18 | 450,000   | 600,000   | 7  | 435  | -1.665014644 |                                                                         |
| 18 | 525,000   | 675,000   | 8  | 849  | -0.933215913 |                                                                         |
| 18 | 600,000   | 750,000   | 9  | 558  | -0.024129504 |                                                                         |
| 18 | 675,000   | 825,000   | 10 | 508  | -1.369026414 |                                                                         |
| 18 | 750,000   | 900,000   | 11 | 1502 | -1.043280084 |                                                                         |
| 18 | 825,000   | 975,000   | 12 | 1805 | -1.136531064 |                                                                         |
| 18 | 900,000   | 1,050,000 | 13 | 1860 | -0.829268345 | UQCRFS1                                                                 |
| 18 | 975,000   | 1,125,000 | 14 | 1755 | -0.041352785 | UQCRFS1                                                                 |
| 18 | 1,050,000 | 1,200,000 | 15 | 1508 | 0.066966395  |                                                                         |
| 18 | 1,125,000 | 1,275,000 | 16 | 1387 | -0.396389207 |                                                                         |
| 18 | 1,200,000 | 1,350,000 | 17 | 1027 | -0.594736982 | VSTM2B                                                                  |
| 18 | 1,275,000 | 1,425,000 | 18 | 1295 | -1.354102532 | VSTM2B                                                                  |
| 18 | 1,350,000 | 1,500,000 | 19 | 1184 | -1.638970753 | VAC14                                                                   |
| 18 | 1,425,000 | 1,575,000 | 20 | 739  | -1.677903635 | IL34,MTSS1L,VAC14                                                       |
| 18 | 1,500,000 | 1,650,000 | 21 | 787  | -0.997573022 | IL34,MTSS1L,SF3B3,VAC14                                                 |
| 18 | 1,575,000 | 1,725,000 | 22 | 1050 | 0.947272896  | COG4,FUK,IL34,SF3B3                                                     |
| 18 | 1,650,000 | 1,800,000 | 23 | 1382 | 1.077785346  | COG4,DDX19A,FUK,SF3B3,SIAT4B,ENSBTAG00000020714                         |
| 18 | 1,725,000 | 1,875,000 | 24 | 1382 | 1.077434245  | AARS,DDX19A,MRCL,SIAT4B,ENSBTAG00000020714                              |
| 18 | 1,800,000 | 1,950,000 | 25 | 1017 | 1.03138537   | AARS,MRCL,PDPR,ENSBTAG00000020714,ENSBTAG0000047937                     |
| 18 | 1,875,000 | 2,025,000 | 26 | 808  | 0.449329378  | GLG1,MRCL,PDPR,ENSBTAG00000047937                                       |
| 18 | 1,950,000 | 2,100,000 | 27 | 920  | 0.699996917  | GLG1,PDPR,ENSBTAG00000004526                                            |
| 18 | 2,025,000 | 2,175,000 | 28 | 779  | 0.077355925  | GLG1,MLKL,RFWD3,ENSBTAG00000004526                                      |
| 18 | 2,100,000 | 2,250,000 | 29 | 802  | -2.153875319 | FA2H,MLKL,RFWD3,ENSBTAG00000004526                                      |
| 18 | 2,175,000 | 2,325,000 | 30 | 916  | -1.438850659 | FA2H,MLKL,WDR59                                                         |
| 18 | 2,250,000 | 2,400,000 | 31 | 632  | -1.01434919  | WDR59,ZNRF1                                                             |
| 18 | 2,325,000 | 2,475,000 | 32 | 616  | -1.622567002 | WDR59,ZNRF1                                                             |
| 18 | 2,400,000 | 2,550,000 | 33 | 660  | 0.375262188  | LDHD,ZFP1,ZNRF1                                                         |
| 18 | 2,475,000 | 2,625,000 | 34 | 335  | 0.455575259  | BCAR1,CTRB1,LDHD,ZFP1,ZNRF1,ENSBTAG00000011995,ENSBTAG00000039914       |
| 18 | 2,550,000 | 2,700,000 | 35 | 373  | 0.258347923  | BCAR1,CFDP1,CTRB1,ENSBTAG00000011995,ENSBTAG00000039914                 |
| 18 | 2,625,000 | 2,775,000 | 36 | 577  | -0.590495327 | BCAR1,BCNT,CFDP1                                                        |
| 18 | 2,700,000 | 2,850,000 | 37 | 656  | 0.26337842   | BCNT,CFDP1,P97BCNT2,TMEM170A                                            |
| 18 | 2,775,000 | 2,925,000 | 38 | 823  | 0.304791023  | BCNT,GABARAPL2,P97BCNT2,TMEM170A,TMEM231,ENSBTAG00000040000             |
| 18 | 2,850,000 | 3,000,000 | 39 | 838  | 0.045466896  | ADAT1,EEF1A1,GABARAPL2,KARS,TERF2IP,TMEM170A,TMEM231,ENSBTAG00000040000 |
| 18 | 2,925,000 | 3,075,000 | 40 | 941  | -0.576211343 | ADAT1,EEF1A1,KARS,TERF2IP                                               |
| 18 | 3,000,000 | 3,150,000 | 41 | 1076 | -0.553238872 |                                                                         |
| 18 | 3,075,000 | 3,225,000 | 42 | 1186 | 0.310228721  |                                                                         |
| 18 | 3,150,000 | 3,300,000 | 43 | 1099 | 0.193537144  |                                                                         |
| 18 | 3,225,000 | 3,375,000 | 44 | 836  | 0.673662498  |                                                                         |
| 18 | 3,300,000 | 3,450,000 | 45 | 802  | 0.98241981   |                                                                         |
| 18 | 3,375,000 | 3,525,000 | 46 | 711  | 0.126964465  | CNTNAP4                                                                 |
| 18 | 3,450,000 | 3,600,000 | 47 | 717  | 0.58492006   | CNTNAP4                                                                 |
| 18 | 3,525,000 | 3,675,000 | 48 | 1126 | 0.682077586  | CNTNAP4                                                                 |
| 18 | 3,600,000 | 3,750,000 | 49 | 1472 | 0.782156484  | CNTNAP4                                                                 |
| 18 | 3,675,000 | 3,825,000 | 50 | 1391 | 0.912560598  | CNTNAP4                                                                 |
| 18 | 3,750,000 | 3,900,000 | 51 | 1386 | 0.195147432  |                                                                         |
| 18 | 3,825,000 | 3,975,000 | 52 | 1337 | -0.716675826 |                                                                         |
| 18 | 3,900,000 | 4,050,000 | 53 | 1118 | -0.096054235 |                                                                         |



|    |           |           |     |      |              |                                       |
|----|-----------|-----------|-----|------|--------------|---------------------------------------|
| 18 | 3,975,000 | 4,125,000 | 54  | 1179 | 0.950624861  |                                       |
| 18 | 4,050,000 | 4,200,000 | 55  | 1370 | 0.919745948  |                                       |
| 18 | 4,125,000 | 4,275,000 | 56  | 1359 | 0.790830463  |                                       |
| 18 | 4,200,000 | 4,350,000 | 57  | 1138 | 0.264210902  |                                       |
| 18 | 4,275,000 | 4,425,000 | 58  | 910  | -0.269290769 | ENSBTAG00000012131                    |
| 18 | 4,350,000 | 4,500,000 | 59  | 708  | 0.473226832  | MON1B,SYCE1L,ENSBTAG00000012131       |
| 18 | 4,425,000 | 4,575,000 | 60  | 845  | 0.236251051  | ADAMTS18,MON1B,SYCE1L                 |
| 18 | 4,500,000 | 4,650,000 | 61  | 1050 | 0.182150867  | ADAMTS18                              |
| 18 | 4,575,000 | 4,725,000 | 62  | 1206 | 0.299310384  | ADAMTS18                              |
| 18 | 4,650,000 | 4,800,000 | 63  | 1284 | 0.070276244  | ADAMTS18                              |
| 18 | 4,725,000 | 4,875,000 | 64  | 1189 | 0.580068884  |                                       |
| 18 | 4,800,000 | 4,950,000 | 65  | 1333 | 0.707622961  |                                       |
| 18 | 4,875,000 | 5,025,000 | 66  | 1480 | 0.207299255  | NUDT7                                 |
| 18 | 4,950,000 | 5,100,000 | 67  | 1533 | -0.193089764 | NUDT7,VAT1L                           |
| 18 | 5,025,000 | 5,175,000 | 68  | 1798 | 0.244943432  | VAT1L                                 |
| 18 | 5,100,000 | 5,250,000 | 69  | 2241 | 0.719484244  | CLEC3A,VAT1L                          |
| 18 | 5,175,000 | 5,325,000 | 70  | 2172 | 0.981930319  | CLEC3A,VAT1L,WWOX                     |
| 18 | 5,250,000 | 5,400,000 | 71  | 1751 | 0.691503469  | CLEC3A,WWOX                           |
| 18 | 5,325,000 | 5,475,000 | 72  | 1321 | -0.429729067 | WWOX                                  |
| 18 | 5,400,000 | 5,550,000 | 73  | 1079 | -0.567487385 | WWOX                                  |
| 18 | 5,475,000 | 5,625,000 | 74  | 1215 | 0.805279009  | WWOX                                  |
| 18 | 5,550,000 | 5,700,000 | 75  | 1156 | 0.654086296  | WWOX                                  |
| 18 | 5,625,000 | 5,775,000 | 76  | 981  | 0.145749926  | WWOX                                  |
| 18 | 5,700,000 | 5,850,000 | 77  | 987  | -0.90929204  | WWOX                                  |
| 18 | 5,775,000 | 5,925,000 | 78  | 841  | -0.665687615 | WWOX                                  |
| 18 | 5,850,000 | 6,000,000 | 79  | 596  | 0.604485736  | WWOX                                  |
| 18 | 5,925,000 | 6,075,000 | 80  | 552  | 0.475418555  | WWOX                                  |
| 18 | 6,000,000 | 6,150,000 | 81  | 647  | 0.073470652  | WWOX                                  |
| 18 | 6,075,000 | 6,225,000 | 82  | 1021 | -0.481371201 | WWOX                                  |
| 18 | 6,150,000 | 6,300,000 | 83  | 1069 | -0.375236574 | WWOX                                  |
| 18 | 6,225,000 | 6,375,000 | 84  | 951  | -1.406184474 |                                       |
| 18 | 6,300,000 | 6,450,000 | 85  | 1218 | -1.044402366 |                                       |
| 18 | 6,375,000 | 6,525,000 | 86  | 1229 | 0.231172314  |                                       |
| 18 | 6,450,000 | 6,600,000 | 87  | 959  | 0.383888396  | MAF                                   |
| 18 | 6,525,000 | 6,675,000 | 88  | 966  | 0.396670868  | MAF                                   |
| 18 | 6,600,000 | 6,750,000 | 89  | 870  | 0.924261596  |                                       |
| 18 | 6,675,000 | 6,825,000 | 90  | 985  | 0.892874735  |                                       |
| 18 | 6,750,000 | 6,900,000 | 91  | 1312 | 1.055501183  |                                       |
| 18 | 6,825,000 | 6,975,000 | 92  | 1140 | 0.580287062  |                                       |
| 18 | 6,900,000 | 7,050,000 | 93  | 1003 | -0.549124923 |                                       |
| 18 | 6,975,000 | 7,125,000 | 94  | 1016 | -0.267624017 |                                       |
| 18 | 7,050,000 | 7,200,000 | 95  | 1045 | 0.103778306  |                                       |
| 18 | 7,125,000 | 7,275,000 | 96  | 860  | 0.705648611  |                                       |
| 18 | 7,200,000 | 7,350,000 | 97  | 538  | 0.507339966  |                                       |
| 18 | 7,275,000 | 7,425,000 | 98  | 558  | -0.039657091 | CDYL2,DYNLRB2                         |
| 18 | 7,350,000 | 7,500,000 | 99  | 880  | 0.22993765   | CDYL2,DYNLRB2                         |
| 18 | 7,425,000 | 7,575,000 | 100 | 1091 | 0.399890719  | CDYL2                                 |
| 18 | 7,500,000 | 7,650,000 | 101 | 1174 | -0.064289784 |                                       |
| 18 | 7,575,000 | 7,725,000 | 102 | 1095 | -0.61209431  | CMC2                                  |
| 18 | 7,650,000 | 7,800,000 | 103 | 622  | -0.502358408 | ATMIN,C16orf46,CENPN,CMC2,GCSH        |
| 18 | 7,725,000 | 7,875,000 | 104 | 369  | 0.602357081  | ATMIN,C16orf46,CENPN,CMC2,GCSH,PKD1L2 |
| 18 | 7,800,000 | 7,950,000 | 105 | 660  | 0.805016883  | BCMO1,GCSH,PKD1L2                     |
| 18 | 7,875,000 | 8,025,000 | 106 | 1100 | 1.171422624  | BCMO1,GAN,PKD1L2                      |

|    |            |            |     |      |              |                                                    |
|----|------------|------------|-----|------|--------------|----------------------------------------------------|
| 18 | 7,950,000  | 8,100,000  | 107 | 1093 | 1.237227412  | BCMO1,GAN                                          |
| 18 | 8,025,000  | 8,175,000  | 108 | 717  | 0.92875013   | GAN                                                |
| 18 | 8,100,000  | 8,250,000  | 109 | 878  | -0.414094051 | CMIP                                               |
| 18 | 8,175,000  | 8,325,000  | 110 | 995  | -0.76953178  | CMIP                                               |
| 18 | 8,250,000  | 8,400,000  | 111 | 1069 | -0.335532563 | CMIP                                               |
| 18 | 8,325,000  | 8,475,000  | 112 | 1116 | -0.60375857  | PLCG2,ENSBTAG00000048177                           |
| 18 | 8,400,000  | 8,550,000  | 113 | 845  | -0.73908305  | PLCG2,ENSBTAG00000048177                           |
| 18 | 8,475,000  | 8,625,000  | 114 | 892  | -0.870357061 | PLCG2,SDR42E1                                      |
| 18 | 8,550,000  | 8,700,000  | 115 | 851  | -0.829399849 | HSD17B2,SDR42E1                                    |
| 18 | 8,625,000  | 8,775,000  | 116 | 555  | 0.393065781  | HSD17B2,MPHOSPH6                                   |
| 18 | 8,700,000  | 8,850,000  | 117 | 409  | 0.725468003  | HSD17B2,MPHOSPH6                                   |
| 18 | 8,775,000  | 8,925,000  | 118 | 507  | 0.401289984  | MPHOSPH6                                           |
| 18 | 8,850,000  | 9,000,000  | 119 | 621  | 0.153791708  |                                                    |
| 18 | 8,925,000  | 9,075,000  | 120 | 873  | 0.270862471  |                                                    |
| 18 | 9,000,000  | 9,150,000  | 121 | 1179 | 0.246984789  |                                                    |
| 18 | 9,075,000  | 9,225,000  | 122 | 1353 | 0.634357442  |                                                    |
| 18 | 9,150,000  | 9,300,000  | 123 | 1179 | 0.715072696  |                                                    |
| 18 | 9,225,000  | 9,375,000  | 124 | 731  | 0.180530377  |                                                    |
| 18 | 9,300,000  | 9,450,000  | 125 | 882  | 0.688083736  |                                                    |
| 18 | 9,375,000  | 9,525,000  | 126 | 925  | 0.498484541  | CDH13                                              |
| 18 | 9,450,000  | 9,600,000  | 127 | 985  | 0.192180098  | CDH13                                              |
| 18 | 9,525,000  | 9,675,000  | 128 | 1441 | 0.601613501  | CDH13                                              |
| 18 | 9,600,000  | 9,750,000  | 129 | 1362 | 0.814329002  | CDH13                                              |
| 18 | 9,675,000  | 9,825,000  | 130 | 990  | 0.195786868  | CDH13                                              |
| 18 | 9,750,000  | 9,900,000  | 131 | 902  | -0.301568605 | CDH13                                              |
| 18 | 9,825,000  | 9,975,000  | 132 | 757  | -0.423255597 | CDH13                                              |
| 18 | 9,900,000  | 10,050,000 | 133 | 939  | -0.070341043 | CDH13                                              |
| 18 | 9,975,000  | 10,125,000 | 134 | 1160 | -0.391204097 | CDH13                                              |
| 18 | 10,050,000 | 10,200,000 | 135 | 829  | -0.810843983 | CDH13,HSBP1                                        |
| 18 | 10,125,000 | 10,275,000 | 136 | 774  | 0.603027265  | CDH13,HSBP1,MLYCD                                  |
| 18 | 10,200,000 | 10,350,000 | 137 | 1190 | 1.020190621  | MLYCD,NECAB2,OSGIN1                                |
| 18 | 10,275,000 | 10,425,000 | 138 | 1442 | 0.983355023  | MBTPS1,NECAB2,OSGIN1,SLC38A8                       |
| 18 | 10,350,000 | 10,500,000 | 139 | 1320 | 0.987967078  | ADAD2,DNAAF1,HSDL1,MBTPS1,NECAB2,SLC38A8,TA<br>F1C |
| 18 | 10,425,000 | 10,575,000 | 140 | 1060 | 0.673510642  | ADAD2,DNAAF1,HSDL1,KCNG4,MBTPS1,TAF1C              |
| 18 | 10,500,000 | 10,650,000 | 141 | 939  | 0.482553035  | ATP2C2,KCNG4                                       |
| 18 | 10,575,000 | 10,725,000 | 142 | 1412 | 0.075505853  | ATP2C2,TLDC1                                       |
| 18 | 10,650,000 | 10,800,000 | 143 | 1547 | -1.37887441  | ATP2C2,COTL1,TLDC1                                 |
| 18 | 10,725,000 | 10,875,000 | 144 | 1053 | -1.926266148 | COTL1,KLHL36                                       |
| 18 | 10,800,000 | 10,950,000 | 145 | 770  | 0.533245138  | COTL1,KLHL36,USP10                                 |
| 18 | 10,875,000 | 11,025,000 | 146 | 652  | 0.703102165  | CRISPLD2,USP10                                     |
| 18 | 10,950,000 | 11,100,000 | 147 | 702  | 0.554050116  | CRISPLD2                                           |
| 18 | 11,025,000 | 11,175,000 | 148 | 902  | -2.263955196 | CRISPLD2,KIAA0513,ZDHHC7                           |
| 18 | 11,100,000 | 11,250,000 | 149 | 824  | -3.320528104 | FAM92B,KIAA0513,ZDHHC7                             |
| 18 | 11,175,000 | 11,325,000 | 150 | 654  | -0.362338314 | FAM92B,KIAA0513                                    |
| 18 | 11,250,000 | 11,400,000 | 151 | 841  | 0.071625409  |                                                    |
| 18 | 11,325,000 | 11,475,000 | 152 | 865  | -0.06499727  |                                                    |
| 18 | 11,400,000 | 11,550,000 | 153 | 703  | 0.23971232   |                                                    |
| 18 | 11,475,000 | 11,625,000 | 154 | 614  | 1.014941356  |                                                    |
| 18 | 11,550,000 | 11,700,000 | 155 | 451  | 1.291996285  | GINS2,GSE1                                         |
| 18 | 11,625,000 | 11,775,000 | 156 | 666  | 0.083324545  | GINS2,GSE1                                         |
| 18 | 11,700,000 | 11,850,000 | 157 | 852  | 0.146167195  | COX4I1,EMC8,GINS2                                  |
| 18 | 11,775,000 | 11,925,000 | 158 | 727  | 0.831305707  | COX4I1,EMC8,IRF8                                   |

|    |            |            |     |      |              |                                                                   |
|----|------------|------------|-----|------|--------------|-------------------------------------------------------------------|
| 18 | 11,850,000 | 12,000,000 | 159 | 752  | 0.705460686  | IRF8                                                              |
| 18 | 11,925,000 | 12,075,000 | 160 | 1040 | 0.522244171  |                                                                   |
| 18 | 12,000,000 | 12,150,000 | 161 | 947  | -0.254273649 |                                                                   |
| 18 | 12,075,000 | 12,225,000 | 162 | 470  | -1.89773636  |                                                                   |
| 18 | 12,150,000 | 12,300,000 | 163 | 307  | 0.230693185  |                                                                   |
| 18 | 12,225,000 | 12,375,000 | 164 | 374  | 0.948293188  |                                                                   |
| 18 | 12,300,000 | 12,450,000 | 165 | 384  | 0.222611577  | FOXC2,FOXF1,FOXL1,MTHFSD                                          |
| 18 | 12,375,000 | 12,525,000 | 166 | 301  | -0.879791689 | FOXC2,FOXF1,FOXL1,MTHFSD                                          |
| 18 | 12,450,000 | 12,600,000 | 167 | 298  | -0.233745163 |                                                                   |
| 18 | 12,525,000 | 12,675,000 | 168 | 448  | 0.251716457  |                                                                   |
| 18 | 12,600,000 | 12,750,000 | 169 | 625  | 0.095187387  |                                                                   |
| 18 | 12,675,000 | 12,825,000 | 170 | 542  | 0.371746844  |                                                                   |
| 18 | 12,750,000 | 12,900,000 | 171 | 360  | 0.531102129  |                                                                   |
| 18 | 12,825,000 | 12,975,000 | 172 | 305  | 0.335336694  | C16orf95,FBXO31                                                   |
| 18 | 12,900,000 | 13,050,000 | 173 | 250  | 0.858810757  | C16orf95,FBXO31,MAP1LC3B,ZCCHC14                                  |
| 18 | 12,975,000 | 13,125,000 | 174 | 228  | 1.002631617  | FBXO31,MAP1LC3B,ZCCHC14                                           |
| 18 | 13,050,000 | 13,200,000 | 175 | 333  | 0.467254438  | JPH3,ZCCHC14                                                      |
| 18 | 13,125,000 | 13,275,000 | 176 | 776  | -0.100598535 | JPH3,KLHDC4                                                       |
| 18 | 13,200,000 | 13,350,000 | 177 | 1057 | -0.067528989 | JPH3,KLHDC4,LAT                                                   |
| 18 | 13,275,000 | 13,425,000 | 178 | 803  | 0.255867805  | CA5A,KLHDC4,LAT                                                   |
| 18 | 13,350,000 | 13,500,000 | 179 | 541  | 0.123103467  | BANP,CA5A,LAT                                                     |
| 18 | 13,425,000 | 13,575,000 | 180 | 404  | -0.369584893 | BANP                                                              |
| 18 | 13,500,000 | 13,650,000 | 181 | 656  | -1.416334869 |                                                                   |
| 18 | 13,575,000 | 13,725,000 | 182 | 643  | -1.706935303 |                                                                   |
| 18 | 13,650,000 | 13,800,000 | 183 | 343  | -1.480742208 | ZNF469                                                            |
| 18 | 13,725,000 | 13,875,000 | 184 | 330  | -0.497092617 | ZFPM1,ZNF469,ENSBTAG00000018507                                   |
| 18 | 13,800,000 | 13,950,000 | 185 | 325  | 0.216653004  | CYBA,IL17C,MVD,ZC3H18,ZFPM1,ENSBTAG00000018507                    |
| 18 | 13,875,000 | 14,025,000 | 186 | 582  | 0.125481206  | CTU2,CYBA,IL17C,MVD,PIEZO1,RNF166,SNAI3,ZC3H18                    |
| 18 | 13,950,000 | 14,100,000 | 187 | 728  | -0.066437161 | APRT,CBFA2T3,CDT1,CTU2,GALNS,PABPN1L,PIEZO1,RNF166,SNAI3,TRAPPC2L |
| 18 | 14,025,000 | 14,175,000 | 188 | 441  | -0.836722021 | APRT,CBFA2T3,CDT1,GALNS,PABPN1L,TRAPPC2L                          |
| 18 | 14,100,000 | 14,250,000 | 189 | 411  | -0.950534271 | CBFA2T3                                                           |
| 18 | 14,175,000 | 14,325,000 | 190 | 335  | -0.586611826 | ACSF3,CDH15,MGC157263                                             |
| 18 | 14,250,000 | 14,400,000 | 191 | 227  | -0.687709687 | ACSF3,ANKRD11,CDH15,MGC157263                                     |
| 18 | 14,325,000 | 14,475,000 | 192 | 329  | -0.847782954 | ANKRD11,MGC157263                                                 |
| 18 | 14,400,000 | 14,550,000 | 193 | 434  | -1.089877444 | ANKRD11,CPNE7,RPL13,SPG7                                          |
| 18 | 14,475,000 | 14,625,000 | 194 | 418  | -1.308057538 | CDK10,CHMP1A,CPNE7,DPEP1,RPL13,SPATA2L,SPG7                       |
| 18 | 14,550,000 | 14,700,000 | 195 | 252  | -1.283444695 | CDK10,CHMP1A,CPNE7,DPEP1,FANCA,SPATA2L,SPIRE2,VPS9D1,ZNF276       |
| 18 | 14,625,000 | 14,775,000 | 196 | 190  | 0.543520151  | FANCA,MC1R,SPIRE2,TCF25,TUBB3,VPS9D1,ZNF276                       |
| 18 | 14,700,000 | 14,850,000 | 197 | 129  | 0.714954934  | DBNDD1,DEF8,GAS8,MC1R,SPIRE2,TCF25,TUBB3,ENSBTAG00000038051       |
| 18 | 14,775,000 | 14,925,000 | 198 | 132  | -1.239651948 | DBNDD1,DEF8,GAS8,ENSBTAG00000038051                               |
| 18 | 14,850,000 | 15,000,000 | 199 | 261  | -0.108094212 | SHCBP1                                                            |
| 18 | 14,925,000 | 15,075,000 | 200 | 506  | -0.751243922 | ORC6,SHCBP1,VPS35                                                 |
| 18 | 15,000,000 | 15,150,000 | 201 | 636  | -2.145427191 | MYLK3,ORC6,VPS35,ENSBTAG00000023726                               |
| 18 | 15,075,000 | 15,225,000 | 202 | 438  | -2.48019228  | C18H16orf87,MYLK3,ORC6,ENSBTAG00000023726                         |
| 18 | 15,150,000 | 15,300,000 | 203 | 653  | 0.957947719  | C18H16orf87                                                       |
| 18 | 15,225,000 | 15,375,000 | 204 | 1066 | 1.057408046  | GPT2                                                              |
| 18 | 15,300,000 | 15,450,000 | 205 | 1170 | 0.393583965  | DNAJA2,GPT2                                                       |

|    |            |            |     |      |              |                                       |
|----|------------|------------|-----|------|--------------|---------------------------------------|
| 18 | 15,375,000 | 15,525,000 | 206 | 1235 | 0.545871173  | DNAJA2,GPT2                           |
| 18 | 15,450,000 | 15,600,000 | 207 | 1091 | 1.028757163  | NETO2                                 |
| 18 | 15,525,000 | 15,675,000 | 208 | 784  | 0.737452248  | ITFG1,NETO2                           |
| 18 | 15,600,000 | 15,750,000 | 209 | 945  | 0.821089352  | ITFG1                                 |
| 18 | 15,675,000 | 15,825,000 | 210 | 1369 | 0.213499739  | ITFG1                                 |
| 18 | 15,750,000 | 15,900,000 | 211 | 1421 | -0.546288867 | ITFG1                                 |
| 18 | 15,825,000 | 15,975,000 | 212 | 1310 | 0.160728142  | ITFG1,PHKB                            |
| 18 | 15,900,000 | 16,050,000 | 213 | 976  | 0.700059695  | ITFG1,PHKB                            |
| 18 | 15,975,000 | 16,125,000 | 214 | 582  | 0.655140708  | PHKB                                  |
| 18 | 16,050,000 | 16,200,000 | 215 | 577  | 0.615983728  | PHKB                                  |
| 18 | 16,125,000 | 16,275,000 | 216 | 937  | -0.086546659 | PHKB                                  |
| 18 | 16,200,000 | 16,350,000 | 217 | 1041 | 0.281377712  |                                       |
| 18 | 16,275,000 | 16,425,000 | 218 | 772  | 1.101266355  |                                       |
| 18 | 16,350,000 | 16,500,000 | 219 | 885  | 0.565400541  |                                       |
| 18 | 16,425,000 | 16,575,000 | 220 | 1135 | 0.440210418  | ENSBTAG00000044191                    |
| 18 | 16,500,000 | 16,650,000 | 221 | 1087 | 0.78845978   | ENSBTAG00000044191                    |
| 18 | 16,575,000 | 16,725,000 | 222 | 901  | 0.089989759  | ENSBTAG00000010858,ENSBTAG00000044191 |
| 18 | 16,650,000 | 16,800,000 | 223 | 588  | -1.645778405 | LONP2,ENSBTAG00000010858              |
| 18 | 16,725,000 | 16,875,000 | 224 | 580  | -0.18755967  | LONP2,SIAH1,ENSBTAG00000010858        |
| 18 | 16,800,000 | 16,950,000 | 225 | 640  | -0.146507349 | LONP2,SIAH1                           |
| 18 | 16,875,000 | 17,025,000 | 226 | 679  | -2.395809204 |                                       |
| 18 | 16,950,000 | 17,100,000 | 227 | 624  | -2.438375454 | N4BP1                                 |
| 18 | 17,025,000 | 17,175,000 | 228 | 674  | -0.339441523 | N4BP1                                 |
| 18 | 17,100,000 | 17,250,000 | 229 | 961  | -0.546331729 |                                       |
| 18 | 17,175,000 | 17,325,000 | 230 | 941  | -0.267132759 |                                       |
| 18 | 17,250,000 | 17,400,000 | 231 | 973  | 0.375456861  |                                       |
| 18 | 17,325,000 | 17,475,000 | 232 | 1268 | -1.658187558 |                                       |
| 18 | 17,400,000 | 17,550,000 | 233 | 1156 | -2.133029537 |                                       |
| 18 | 17,475,000 | 17,625,000 | 234 | 804  | 0.167578493  |                                       |
| 18 | 17,550,000 | 17,700,000 | 235 | 1116 | -0.164879513 |                                       |
| 18 | 17,625,000 | 17,775,000 | 236 | 982  | -0.372978203 |                                       |
| 18 | 17,700,000 | 17,850,000 | 237 | 532  | -1.095693466 | CBLN1                                 |
| 18 | 17,775,000 | 17,925,000 | 238 | 563  | -2.067135442 | C18H16orf78,CBLN1                     |
| 18 | 17,850,000 | 18,000,000 | 239 | 862  | -0.319292116 | C18H16orf78                           |
| 18 | 17,925,000 | 18,075,000 | 240 | 975  | 0.33294933   | C18H16orf78,ZNF423                    |
| 18 | 18,000,000 | 18,150,000 | 241 | 1018 | -2.32897945  | ZNF423                                |
| 18 | 18,075,000 | 18,225,000 | 242 | 1081 | -2.433329347 | ZNF423                                |
| 18 | 18,150,000 | 18,300,000 | 243 | 823  | -0.585375975 | ZNF423                                |
| 18 | 18,225,000 | 18,375,000 | 244 | 690  | -0.655320823 | ZNF423                                |
| 18 | 18,300,000 | 18,450,000 | 245 | 572  | -0.073895221 | ZNF423                                |
| 18 | 18,375,000 | 18,525,000 | 246 | 462  | 1.309346115  | ZNF423                                |
| 18 | 18,450,000 | 18,600,000 | 247 | 442  | 0.412523086  | CNEP1R1,HEATR3                        |
| 18 | 18,525,000 | 18,675,000 | 248 | 530  | -1.14756648  | CNEP1R1,HEATR3                        |
| 18 | 18,600,000 | 18,750,000 | 249 | 481  | -1.938534511 | ADCY7,HEATR3,PAPD5                    |
| 18 | 18,675,000 | 18,825,000 | 250 | 459  | -1.814133761 | ADCY7,BRD7,PAPD5                      |
| 18 | 18,750,000 | 18,900,000 | 251 | 468  | -0.680333417 | ADCY7,BRD7                            |
| 18 | 18,825,000 | 18,975,000 | 252 | 407  | -0.88709379  | BRD7                                  |
| 18 | 18,900,000 | 19,050,000 | 253 | 475  | -1.428418336 | NKD1                                  |
| 18 | 18,975,000 | 19,125,000 | 254 | 482  | -1.522054095 | NKD1                                  |
| 18 | 19,050,000 | 19,200,000 | 255 | 477  | -4.451609862 | NKD1,NOD2,SNX20                       |
| 18 | 19,125,000 | 19,275,000 | 256 | 389  | -6.330801796 | CYLD,NOD2,SNX20                       |
| 18 | 19,200,000 | 19,350,000 | 257 | 442  | -3.909573386 | CYLD,NOD2                             |
| 18 | 19,275,000 | 19,425,000 | 258 | 724  | -1.466720156 | CYLD                                  |

|    |            |            |     |      |              |                     |
|----|------------|------------|-----|------|--------------|---------------------|
| 18 | 19,350,000 | 19,500,000 | 259 | 738  | -0.005011725 |                     |
| 18 | 19,425,000 | 19,575,000 | 260 | 883  | 0.321266742  |                     |
| 18 | 19,500,000 | 19,650,000 | 261 | 1002 | -0.111221372 | SALL1               |
| 18 | 19,575,000 | 19,725,000 | 262 | 896  | -0.367621635 | SALL1               |
| 18 | 19,650,000 | 19,800,000 | 263 | 1076 | 0.412919     | SALL1               |
| 18 | 19,725,000 | 19,875,000 | 264 | 1045 | 1.072480212  |                     |
| 18 | 19,800,000 | 19,950,000 | 265 | 1194 | 0.809147772  |                     |
| 18 | 19,875,000 | 20,025,000 | 266 | 1234 | 0.545383447  |                     |
| 18 | 19,950,000 | 20,100,000 | 267 | 929  | 0.995525021  |                     |
| 18 | 20,025,000 | 20,175,000 | 268 | 944  | 0.75115352   |                     |
| 18 | 20,100,000 | 20,250,000 | 269 | 1009 | -0.471525525 |                     |
| 18 | 20,175,000 | 20,325,000 | 270 | 784  | -0.233814878 | NKX6-2              |
| 18 | 20,250,000 | 20,400,000 | 271 | 597  | -0.646243918 | NKX6-2              |
| 18 | 20,325,000 | 20,475,000 | 272 | 720  | -1.316381422 |                     |
| 18 | 20,400,000 | 20,550,000 | 273 | 987  | -1.174001877 |                     |
| 18 | 20,475,000 | 20,625,000 | 274 | 753  | -1.158232051 |                     |
| 18 | 20,550,000 | 20,700,000 | 275 | 283  | -1.447088568 |                     |
| 18 | 20,625,000 | 20,775,000 | 276 | 596  | -0.379028032 |                     |
| 18 | 20,700,000 | 20,850,000 | 277 | 739  | -0.04577736  |                     |
| 18 | 20,775,000 | 20,925,000 | 278 | 575  | 0.061424107  |                     |
| 18 | 20,850,000 | 21,000,000 | 279 | 548  | 0.158463323  |                     |
| 18 | 20,925,000 | 21,075,000 | 280 | 466  | 0.442199127  | TOX3                |
| 18 | 21,000,000 | 21,150,000 | 281 | 529  | 1.099899553  | TOX3                |
| 18 | 21,075,000 | 21,225,000 | 282 | 824  | 1.031466635  | TOX3                |
| 18 | 21,150,000 | 21,300,000 | 283 | 1044 | 0.394859525  |                     |
| 18 | 21,225,000 | 21,375,000 | 284 | 805  | -0.157419542 |                     |
| 18 | 21,300,000 | 21,450,000 | 285 | 494  | -0.860315468 |                     |
| 18 | 21,375,000 | 21,525,000 | 286 | 645  | 0.07805303   |                     |
| 18 | 21,450,000 | 21,600,000 | 287 | 673  | 0.469491079  |                     |
| 18 | 21,525,000 | 21,675,000 | 288 | 571  | 0.015901686  |                     |
| 18 | 21,600,000 | 21,750,000 | 289 | 521  | -0.61668422  | CHD9                |
| 18 | 21,675,000 | 21,825,000 | 290 | 358  | -0.165015361 | CHD9                |
| 18 | 21,750,000 | 21,900,000 | 291 | 400  | -0.53106589  | CHD9,RBL2           |
| 18 | 21,825,000 | 21,975,000 | 292 | 769  | -0.739994365 | AKTIP,CHD9,RBL2     |
| 18 | 21,900,000 | 22,050,000 | 293 | 789  | -0.462915413 | AKTIP,RBL2,RPGRIP1L |
| 18 | 21,975,000 | 22,125,000 | 294 | 533  | 0.146219107  | FTO,RPGRIP1L        |
| 18 | 22,050,000 | 22,200,000 | 295 | 730  | 0.391264879  | FTO,RPGRIP1L        |
| 18 | 22,125,000 | 22,275,000 | 296 | 853  | 0.291676805  | FTO                 |
| 18 | 22,200,000 | 22,350,000 | 297 | 706  | 0.01631361   | FTO                 |
| 18 | 22,275,000 | 22,425,000 | 298 | 626  | 0.299277392  | FTO                 |
| 18 | 22,350,000 | 22,500,000 | 299 | 492  | 0.899268706  | FTO                 |
| 18 | 22,425,000 | 22,575,000 | 300 | 507  | 0.622862762  | FTO                 |
| 18 | 22,500,000 | 22,650,000 | 301 | 754  | 0.410136898  | FTO                 |
| 18 | 22,575,000 | 22,725,000 | 302 | 812  | 0.415648938  | IRX3                |
| 18 | 22,650,000 | 22,800,000 | 303 | 715  | 0.171183064  | IRX3                |
| 18 | 22,725,000 | 22,875,000 | 304 | 762  | 0.48410217   |                     |
| 18 | 22,800,000 | 22,950,000 | 305 | 600  | 0.517233808  |                     |
| 18 | 22,875,000 | 23,025,000 | 306 | 355  | -1.434521773 |                     |
| 18 | 22,950,000 | 23,100,000 | 307 | 387  | -0.774134495 |                     |
| 18 | 23,025,000 | 23,175,000 | 308 | 747  | -1.020821227 |                     |
| 18 | 23,100,000 | 23,250,000 | 309 | 855  | -1.381174314 |                     |
| 18 | 23,175,000 | 23,325,000 | 310 | 496  | -0.428464458 | IRX5                |
| 18 | 23,250,000 | 23,400,000 | 311 | 706  | -1.043026296 | IRX5                |

|    |            |            |     |      |              |                                                            |
|----|------------|------------|-----|------|--------------|------------------------------------------------------------|
| 18 | 23,325,000 | 23,475,000 | 312 | 916  | -0.387750457 |                                                            |
| 18 | 23,400,000 | 23,550,000 | 313 | 756  | 0.775651018  |                                                            |
| 18 | 23,475,000 | 23,625,000 | 314 | 905  | -0.256819567 |                                                            |
| 18 | 23,550,000 | 23,700,000 | 315 | 921  | -0.590892887 | IRX6                                                       |
| 18 | 23,625,000 | 23,775,000 | 316 | 865  | -0.721100568 | IRX6                                                       |
| 18 | 23,700,000 | 23,850,000 | 317 | 989  | -0.822618422 | MMP2                                                       |
| 18 | 23,775,000 | 23,925,000 | 318 | 808  | -1.360023297 | LPCAT2,MMP2                                                |
| 18 | 23,850,000 | 24,000,000 | 319 | 639  | -4.45229341  | LPCAT2,MMP2,SLC6A2                                         |
| 18 | 23,925,000 | 24,075,000 | 320 | 466  | -3.717072542 | CES1,LPCAT2,SLC6A2,ENSBTAG00000001851                      |
| 18 | 24,000,000 | 24,150,000 | 321 | 533  | 0.64158753   | CES1,MT1A,MT1E,MT2,MT3,SLC6A2,ENSBTAG00000001851           |
| 18 | 24,075,000 | 24,225,000 | 322 | 621  | -0.588452609 | BBS2,MT1A,MT1E,MT2,MT3,MT4,ENSBTAG00000001851              |
| 18 | 24,150,000 | 24,300,000 | 323 | 536  | -3.35945236  | AMFR,BBS2,MT4,NUDT21,OGFOD1                                |
| 18 | 24,225,000 | 24,375,000 | 324 | 732  | -0.698909017 | AMFR,BBS2,GNAO1,NUDT21,OGFOD1                              |
| 18 | 24,300,000 | 24,450,000 | 325 | 632  | 1.141471541  | AMFR,GNAO1                                                 |
| 18 | 24,375,000 | 24,525,000 | 326 | 395  | 0.763152355  | GNAO1                                                      |
| 18 | 24,450,000 | 24,600,000 | 327 | 288  | 0.736731797  | GNAO1                                                      |
| 18 | 24,525,000 | 24,675,000 | 328 | 292  | 0.870179144  |                                                            |
| 18 | 24,600,000 | 24,750,000 | 329 | 583  | 1.107408383  |                                                            |
| 18 | 24,675,000 | 24,825,000 | 330 | 905  | 1.246886161  | CES5A                                                      |
| 18 | 24,750,000 | 24,900,000 | 331 | 761  | 1.040511207  | BREH1,CES5A,NUP93                                          |
| 18 | 24,825,000 | 24,975,000 | 332 | 394  | 0.143998919  | BREH1,NUP93                                                |
| 18 | 24,900,000 | 25,050,000 | 333 | 309  | -0.677804365 | HERPUD1,NUP93,SLC12A3                                      |
| 18 | 24,975,000 | 25,125,000 | 334 | 595  | 0.22943408   | HERPUD1,NUP93,SLC12A3                                      |
| 18 | 25,050,000 | 25,200,000 | 335 | 675  | 0.182492135  | HERPUD1,NLRC5                                              |
| 18 | 25,125,000 | 25,275,000 | 336 | 665  | -0.062452717 | CPNE2,NIP30,NLRC5                                          |
| 18 | 25,200,000 | 25,350,000 | 337 | 673  | 0.576603659  | ARL2BP,CPNE2,NIP30,PLLP,RSPRY1                             |
| 18 | 25,275,000 | 25,425,000 | 338 | 661  | 1.087084075  | ARL2BP,NIP30,PLLP,RSPRY1                                   |
| 18 | 25,350,000 | 25,500,000 | 339 | 635  | 1.060793172  | CCL22,CX3CL1                                               |
| 18 | 25,425,000 | 25,575,000 | 340 | 625  | 0.75054733   | CCL17,CCL22,CIAPIN1,COQ9,CX3CL1,DOK4,POLR2C                |
| 18 | 25,500,000 | 25,650,000 | 341 | 897  | 0.915542033  | CCDC102A,CCL17,CIAPIN1,COQ9,DOK4,GPR114,POLR2C             |
| 18 | 25,575,000 | 25,725,000 | 342 | 873  | 0.531649954  | CCDC102A,GPR114,ENSBTAG00000038141,ENSBTAG00000046323      |
| 18 | 25,650,000 | 25,800,000 | 343 | 811  | -0.073636758 | CCDC135,GPR97,KATNB1,ENSBTAG00000038141,ENSBTAG00000046323 |
| 18 | 25,725,000 | 25,875,000 | 344 | 794  | 0.377372673  | CCDC135,GPR97,KATNB1,KIFC3                                 |
| 18 | 25,800,000 | 25,950,000 | 345 | 688  | 0.188858191  | CNGB1,KATNB1,KIFC3                                         |
| 18 | 25,875,000 | 26,025,000 | 346 | 529  | 0.163445778  | CNGB1,MMP15,TEPP,USB1,ZNF319                               |
| 18 | 25,950,000 | 26,100,000 | 347 | 499  | 0.068902786  | C18H16orf80,CNGB1,CSNK2A2,MMP15,TEPP,USB1,ZNF319           |
| 18 | 26,025,000 | 26,175,000 | 348 | 535  | -0.400138894 | C18H16orf80,CCDC113,CSNK2A2,MMP15                          |
| 18 | 26,100,000 | 26,250,000 | 349 | 686  | -0.286640453 | CCDC113,CSNK2A2,KLKBL4                                     |
| 18 | 26,175,000 | 26,325,000 | 350 | 1015 | -1.160811636 | CCDC113,GINS3,KLKBL4                                       |
| 18 | 26,250,000 | 26,400,000 | 351 | 903  | -1.825272966 | CNOT1,GINS3,NDRG4,SETD6                                    |
| 18 | 26,325,000 | 26,475,000 | 352 | 596  | -1.509433537 | CNOT1,NDRG4,SETD6                                          |
| 18 | 26,400,000 | 26,550,000 | 353 | 459  | -1.063846984 | CNOT1,GOT2,SLC38A7                                         |
| 18 | 26,475,000 | 26,625,000 | 354 | 1001 | 0.624867226  | GOT2,SLC38A7                                               |
| 18 | 26,550,000 | 26,700,000 | 355 | 1434 | 0.807307875  | GOT2                                                       |
| 18 | 26,625,000 | 26,775,000 | 356 | 976  | 0.288952741  |                                                            |
| 18 | 26,700,000 | 26,850,000 | 357 | 699  | 0.122860575  |                                                            |
| 18 | 26,775,000 | 26,925,000 | 358 | 812  | -0.028077558 |                                                            |

|    |            |            |     |      |              |                         |
|----|------------|------------|-----|------|--------------|-------------------------|
| 18 | 26,850,000 | 27,000,000 | 359 | 1009 | 0.155489291  |                         |
| 18 | 26,925,000 | 27,075,000 | 360 | 1351 | 0.329608387  |                         |
| 18 | 27,000,000 | 27,150,000 | 361 | 1225 | -0.032120788 |                         |
| 18 | 27,075,000 | 27,225,000 | 362 | 1086 | 0.021015431  |                         |
| 18 | 27,150,000 | 27,300,000 | 363 | 971  | -0.004295523 |                         |
| 18 | 27,225,000 | 27,375,000 | 364 | 924  | 0.087259109  |                         |
| 18 | 27,300,000 | 27,450,000 | 365 | 1443 | 0.229159084  |                         |
| 18 | 27,375,000 | 27,525,000 | 366 | 1947 | 0.590173644  |                         |
| 18 | 27,450,000 | 27,600,000 | 367 | 1957 | 0.340231031  |                         |
| 18 | 27,525,000 | 27,675,000 | 368 | 1606 | -1.601646705 |                         |
| 18 | 27,600,000 | 27,750,000 | 369 | 1529 | -2.866536331 |                         |
| 18 | 27,675,000 | 27,825,000 | 370 | 1240 | -1.693778744 |                         |
| 18 | 27,750,000 | 27,900,000 | 371 | 1037 | -0.742339397 |                         |
| 18 | 27,825,000 | 27,975,000 | 372 | 967  | -0.762420211 |                         |
| 18 | 27,900,000 | 28,050,000 | 373 | 901  | -3.32912723  |                         |
| 18 | 27,975,000 | 28,125,000 | 374 | 720  | -3.861690029 |                         |
| 18 | 28,050,000 | 28,200,000 | 375 | 662  | -0.441013082 |                         |
| 18 | 28,125,000 | 28,275,000 | 376 | 1142 | -1.806227386 |                         |
| 18 | 28,200,000 | 28,350,000 | 377 | 1235 | -1.579714552 |                         |
| 18 | 28,275,000 | 28,425,000 | 378 | 1100 | 0.395174273  |                         |
| 18 | 28,350,000 | 28,500,000 | 379 | 894  | 0.512320256  | ENSBTAG00000046851      |
| 18 | 28,425,000 | 28,575,000 | 380 | 941  | -0.545059285 | ENSBTAG00000046851      |
| 18 | 28,500,000 | 28,650,000 | 381 | 1244 | -0.784894765 |                         |
| 18 | 28,575,000 | 28,725,000 | 382 | 1118 | -1.312717259 |                         |
| 18 | 28,650,000 | 28,800,000 | 383 | 1235 | -2.979469275 |                         |
| 18 | 28,725,000 | 28,875,000 | 384 | 1055 | -2.476942442 |                         |
| 18 | 28,800,000 | 28,950,000 | 385 | 946  | 0.609470521  |                         |
| 18 | 28,875,000 | 29,025,000 | 386 | 966  | 0.850656781  |                         |
| 18 | 28,950,000 | 29,100,000 | 387 | 736  | 0.369993922  |                         |
| 18 | 29,025,000 | 29,175,000 | 388 | 1005 | 0.572232636  |                         |
| 18 | 29,100,000 | 29,250,000 | 389 | 856  | 0.542224701  |                         |
| 18 | 29,175,000 | 29,325,000 | 390 | 648  | 0.002394755  |                         |
| 18 | 29,250,000 | 29,400,000 | 391 | 1269 | 0.068351767  |                         |
| 18 | 29,325,000 | 29,475,000 | 392 | 1689 | 0.202374065  | ENSBTAG00000046749      |
| 18 | 29,400,000 | 29,550,000 | 393 | 1104 | 0.318436911  | CDH8,ENSBTAG00000046749 |
| 18 | 29,475,000 | 29,625,000 | 394 | 680  | 0.290094719  | CDH8,ENSBTAG00000046749 |
| 18 | 29,550,000 | 29,700,000 | 395 | 640  | 0.677330348  | CDH8                    |
| 18 | 29,625,000 | 29,775,000 | 396 | 444  | 0.920673756  | CDH8                    |
| 18 | 29,700,000 | 29,850,000 | 397 | 430  | 1.332024613  | CDH8                    |
| 18 | 29,775,000 | 29,925,000 | 398 | 469  | 1.100950109  | CDH8                    |
| 18 | 29,850,000 | 30,000,000 | 399 | 739  | -1.388315963 |                         |
| 18 | 29,925,000 | 30,075,000 | 400 | 996  | -0.405622132 |                         |
| 18 | 30,000,000 | 30,150,000 | 401 | 1203 | 0.80085254   |                         |
| 18 | 30,075,000 | 30,225,000 | 402 | 1231 | 0.555484553  |                         |
| 18 | 30,150,000 | 30,300,000 | 403 | 1290 | 0.399844409  |                         |
| 18 | 30,225,000 | 30,375,000 | 404 | 1199 | 0.376740533  |                         |
| 18 | 30,300,000 | 30,450,000 | 405 | 1185 | 0.736185058  |                         |
| 18 | 30,375,000 | 30,525,000 | 406 | 1405 | 0.506312666  |                         |
| 18 | 30,450,000 | 30,600,000 | 407 | 1059 | 0.220005425  |                         |
| 18 | 30,525,000 | 30,675,000 | 408 | 828  | 0.642814051  |                         |
| 18 | 30,600,000 | 30,750,000 | 409 | 1055 | 1.271014818  |                         |
| 18 | 30,675,000 | 30,825,000 | 410 | 1059 | 1.399874568  |                         |
| 18 | 30,750,000 | 30,900,000 | 411 | 650  | 1.387187273  |                         |

|    |            |            |     |      |              |                                                 |
|----|------------|------------|-----|------|--------------|-------------------------------------------------|
| 18 | 30,825,000 | 30,975,000 | 412 | 502  | 1.316119744  |                                                 |
| 18 | 30,900,000 | 31,050,000 | 413 | 349  | 1.119548833  |                                                 |
| 18 | 30,975,000 | 31,125,000 | 414 | 269  | 1.289919637  |                                                 |
| 18 | 31,050,000 | 31,200,000 | 415 | 333  | 1.442073213  |                                                 |
| 18 | 31,125,000 | 31,275,000 | 416 | 559  | 1.482860502  |                                                 |
| 18 | 31,200,000 | 31,350,000 | 417 | 784  | 1.430754205  |                                                 |
| 18 | 31,275,000 | 31,425,000 | 418 | 874  | 1.161595273  |                                                 |
| 18 | 31,350,000 | 31,500,000 | 419 | 1027 | 0.79804282   |                                                 |
| 18 | 31,425,000 | 31,575,000 | 420 | 911  | 0.395184431  |                                                 |
| 18 | 31,500,000 | 31,650,000 | 421 | 611  | -1.521222528 |                                                 |
| 18 | 31,575,000 | 31,725,000 | 422 | 407  | -2.680212678 |                                                 |
| 18 | 31,650,000 | 31,800,000 | 423 | 678  | -0.626106688 |                                                 |
| 18 | 31,725,000 | 31,875,000 | 424 | 1068 | -0.155158673 |                                                 |
| 18 | 31,800,000 | 31,950,000 | 425 | 1060 | 0.26753299   |                                                 |
| 18 | 31,875,000 | 32,025,000 | 426 | 720  | 0.051827975  |                                                 |
| 18 | 31,950,000 | 32,100,000 | 427 | 524  | -0.305134131 |                                                 |
| 18 | 32,025,000 | 32,175,000 | 428 | 448  | 0.5666996    |                                                 |
| 18 | 32,100,000 | 32,250,000 | 429 | 801  | 0.887079009  |                                                 |
| 18 | 32,175,000 | 32,325,000 | 430 | 1230 | 0.693020802  |                                                 |
| 18 | 32,250,000 | 32,400,000 | 431 | 1063 | -0.165117137 |                                                 |
| 18 | 32,325,000 | 32,475,000 | 432 | 926  | -0.6175678   |                                                 |
| 18 | 32,400,000 | 32,550,000 | 433 | 760  | -0.012176999 |                                                 |
| 18 | 32,475,000 | 32,625,000 | 434 | 652  | -0.581250776 |                                                 |
| 18 | 32,550,000 | 32,700,000 | 435 | 505  | -1.56439134  |                                                 |
| 18 | 32,625,000 | 32,775,000 | 436 | 568  | -0.85190144  |                                                 |
| 18 | 32,700,000 | 32,850,000 | 437 | 616  | -1.226884277 | CDH11                                           |
| 18 | 32,775,000 | 32,925,000 | 438 | 425  | -1.066122582 | CDH11                                           |
| 18 | 32,850,000 | 33,000,000 | 439 | 437  | 0.172283514  | CDH11                                           |
| 18 | 32,925,000 | 33,075,000 | 440 | 682  | 0.333013009  |                                                 |
| 18 | 33,000,000 | 33,150,000 | 441 | 978  | 0.496160987  |                                                 |
| 18 | 33,075,000 | 33,225,000 | 442 | 977  | 0.799614085  |                                                 |
| 18 | 33,150,000 | 33,300,000 | 443 | 812  | 0.928007639  |                                                 |
| 18 | 33,225,000 | 33,375,000 | 444 | 714  | 0.707819816  |                                                 |
| 18 | 33,300,000 | 33,450,000 | 445 | 765  | 1.068861021  |                                                 |
| 18 | 33,375,000 | 33,525,000 | 446 | 757  | 1.474945005  |                                                 |
| 18 | 33,450,000 | 33,600,000 | 447 | 1215 | 1.411791475  |                                                 |
| 18 | 33,525,000 | 33,675,000 | 448 | 1441 | 1.083131667  |                                                 |
| 18 | 33,600,000 | 33,750,000 | 449 | 1097 | -0.275385255 |                                                 |
| 18 | 33,675,000 | 33,825,000 | 450 | 979  | -1.006227388 |                                                 |
| 18 | 33,750,000 | 33,900,000 | 451 | 839  | 0.04091516   |                                                 |
| 18 | 33,825,000 | 33,975,000 | 452 | 1056 | 0.082842275  |                                                 |
| 18 | 33,900,000 | 34,050,000 | 453 | 1310 | 0.272008329  |                                                 |
| 18 | 33,975,000 | 34,125,000 | 454 | 1120 | 0.860484181  |                                                 |
| 18 | 34,050,000 | 34,200,000 | 455 | 1112 | 0.636661937  | ENSBTAG00000045692                              |
| 18 | 34,125,000 | 34,275,000 | 456 | 1356 | 0.082178733  | CDH5,ENSBTAG00000045692                         |
| 18 | 34,200,000 | 34,350,000 | 457 | 880  | -0.093131805 | BEAN1,CDH5,ENSBTAG00000045692                   |
| 18 | 34,275,000 | 34,425,000 | 458 | 399  | 0.208910035  | BEAN1,CKLF,TK2                                  |
| 18 | 34,350,000 | 34,500,000 | 459 | 610  | 0.401797033  | BEAN1,CKLF,CMTM2,CMTM3,CMTM4,TK2                |
| 18 | 34,425,000 | 34,575,000 | 460 | 608  | -0.000695187 | CMTM2,CMTM3,CMTM4                               |
| 18 | 34,500,000 | 34,650,000 | 461 | 301  | -0.214828839 | CCDC79,CMTM4,DYNC1LI2,NAE1                      |
| 18 | 34,575,000 | 34,725,000 | 462 | 211  | 0.903762073  | CA7,CCDC79,DYNC1LI2,NAE1,PDP2                   |
| 18 | 34,650,000 | 34,800,000 | 463 | 311  | 1.015321779  | CA7,CDH16,CES2,CES3,CES4A,FAM96B,NAE1,PDP2,RRAD |



|    |            |            |     |     |              |                                                                                                  |
|----|------------|------------|-----|-----|--------------|--------------------------------------------------------------------------------------------------|
| 18 | 34,725,000 | 34,875,000 | 464 | 414 | 1.25540718   | CBFB,CDH16,CES2,CES3,CES4A,FAM96B,RRAD                                                           |
| 18 | 34,800,000 | 34,950,000 | 465 | 431 | 1.165909325  | C16orf70,CBFB,CES4A,E2F4,EXOC3L1,FBXL8,HSF4,KIAA0895L,NOL3,TRADD                                 |
| 18 | 34,875,000 | 35,025,000 | 466 | 269 | 0.54057266   | C16orf70,E2F4,ELMO3,EXOC3L1,FBXL8,FHOD1,HSF4,KIAA0895L,LRRRC29,NOL3,PLEKHG4,SLC9A5,TMEM208,TRADD |
| 18 | 34,950,000 | 35,100,000 | 467 | 210 | -0.041087726 | E2F4,ELMO3,FHOD1,KCTD19,LRRRC29,LRRRC36,PLEKHG4,SLC9A5,TMEM208                                   |
| 18 | 35,025,000 | 35,175,000 | 468 | 241 | 0.473098802  | ATP6V0D1,HSD11B2,KCTD19,LRRRC36,PLEKHG4,TPPP3,ZDHHC1,ENSBTAG00000046690                          |
| 18 | 35,100,000 | 35,250,000 | 469 | 246 | 0.555815268  | AGRP,ATP6V0D1,FAM65A,HSD11B2,LRRRC36,TPPP3,ZDHHC1,ENSBTAG00000046690                             |
| 18 | 35,175,000 | 35,325,000 | 470 | 258 | -0.001215972 | AGRP,ATP6V0D1,CTCF,FAM65A,RLTPR                                                                  |
| 18 | 35,250,000 | 35,400,000 | 471 | 264 | -0.353335847 | ACD,C16orf86,CTCF,ENKD1,FAM65A,GFOD2,PARD6A,RANBP10,RLTPR                                        |
| 18 | 35,325,000 | 35,475,000 | 472 | 204 | -0.361099437 | ACD,C16orf86,CENPT,ENKD1,GFOD2,PARD6A,RANBP10,RLTPR,THAP11,TSNAXIP1                              |
| 18 | 35,400,000 | 35,550,000 | 473 | 192 | -0.303160029 | CENPT,EDC4,LCAT,NUTF2,PSKH1,PSMB10,RANBP10,SLC12A4,THAP11,TSNAXIP1                               |
| 18 | 35,475,000 | 35,625,000 | 474 | 231 | -0.294140757 | DDX28,DPEP2,DPEP3,DUS2L,EDC4,LCAT,NUTF2,PSKH1,PSMB10,SLC12A4                                     |
| 18 | 35,550,000 | 35,700,000 | 475 | 234 | -0.786911202 | DDX28,DPEP2,DPEP3,DUS2L,NFATC3,SLC12A4                                                           |
| 18 | 35,625,000 | 35,775,000 | 476 | 221 | -1.019038572 | DUS2L,ESRP2,NFATC3,PLA2G15,SLC7A6                                                                |
| 18 | 35,700,000 | 35,850,000 | 477 | 241 | -1.399822974 | ESRP2,NFATC3,PLA2G15,PRMT7,SLC7A6,SLC7A6OS,SMPD3                                                 |
| 18 | 35,775,000 | 35,925,000 | 478 | 280 | -1.137446403 | PRMT7,SLC7A6,SLC7A6OS,SMPD3                                                                      |
| 18 | 35,850,000 | 36,000,000 | 479 | 275 | -0.089424491 | SMPD3                                                                                            |
| 18 | 35,925,000 | 36,075,000 | 480 | 352 | -0.411111707 | ZFP90                                                                                            |
| 18 | 36,000,000 | 36,150,000 | 481 | 405 | -0.288584277 | CDH3,ZFP90                                                                                       |
| 18 | 36,075,000 | 36,225,000 | 482 | 685 | 0.769015476  | CDH3,E-CADHERIN                                                                                  |
| 18 | 36,150,000 | 36,300,000 | 483 | 765 | 0.893778623  | E-CADHERIN,TANGO6                                                                                |
| 18 | 36,225,000 | 36,375,000 | 484 | 396 | 0.691076952  | E-CADHERIN,TANGO6,ENSBTAG00000047471                                                             |
| 18 | 36,300,000 | 36,450,000 | 485 | 254 | 0.337363674  | HAS3,TANGO6,ENSBTAG00000047471                                                                   |
| 18 | 36,375,000 | 36,525,000 | 486 | 258 | 0.964255583  | CHTF8,CIRH1A,HAS3,SNTB2,TANGO6                                                                   |
| 18 | 36,450,000 | 36,600,000 | 487 | 258 | 1.201136138  | CHTF8,CIRH1A,HAS3,PDF,SNTB2,VPS4A                                                                |
| 18 | 36,525,000 | 36,675,000 | 488 | 299 | 1.071169954  | COG8,CYB5B,NIP7,PDF,SNTB2,TERF2,TMED6,VPS4A                                                      |
| 18 | 36,600,000 | 36,750,000 | 489 | 370 | 1.212425096  | COG8,CYB5B,NIP7,PDF,TERF2,TMED6                                                                  |
| 18 | 36,675,000 | 36,825,000 | 490 | 376 | 0.416461197  | CYB5B                                                                                            |
| 18 | 36,750,000 | 36,900,000 | 491 | 369 | -0.614480054 | NFAT5                                                                                            |
| 18 | 36,825,000 | 36,975,000 | 492 | 560 | 0.087439497  | NFAT5,NOB1,NQO1,WWP2                                                                             |
| 18 | 36,900,000 | 37,050,000 | 493 | 550 | 0.288596759  | NOB1,NQO1,WWP2                                                                                   |
| 18 | 36,975,000 | 37,125,000 | 494 | 379 | -0.347466224 | PSMD7,WWP2                                                                                       |
| 18 | 37,050,000 | 37,200,000 | 495 | 362 | -0.549274362 | PSMD7,WWP2                                                                                       |
| 18 | 37,125,000 | 37,275,000 | 496 | 335 | -0.648271867 |                                                                                                  |
| 18 | 37,200,000 | 37,350,000 | 497 | 610 | -0.14962024  |                                                                                                  |
| 18 | 37,275,000 | 37,425,000 | 498 | 598 | -0.089956753 |                                                                                                  |
| 18 | 37,350,000 | 37,500,000 | 499 | 382 | -2.873608656 |                                                                                                  |
| 18 | 37,425,000 | 37,575,000 | 500 | 614 | -1.519099763 |                                                                                                  |
| 18 | 37,500,000 | 37,650,000 | 501 | 755 | 0.129157865  |                                                                                                  |
| 18 | 37,575,000 | 37,725,000 | 502 | 570 | -1.262181236 |                                                                                                  |
| 18 | 37,650,000 | 37,800,000 | 503 | 504 | -2.086451041 |                                                                                                  |
| 18 | 37,725,000 | 37,875,000 | 504 | 723 | -0.587191279 |                                                                                                  |
| 18 | 37,800,000 | 37,950,000 | 505 | 979 | 0.229038224  |                                                                                                  |

|    |            |            |     |      |              |                                                        |
|----|------------|------------|-----|------|--------------|--------------------------------------------------------|
| 18 | 37,875,000 | 38,025,000 | 506 | 1102 | 0.573131212  |                                                        |
| 18 | 37,950,000 | 38,100,000 | 507 | 1093 | -0.716201987 |                                                        |
| 18 | 38,025,000 | 38,175,000 | 508 | 885  | -1.1437818   |                                                        |
| 18 | 38,100,000 | 38,250,000 | 509 | 722  | -0.096623377 |                                                        |
| 18 | 38,175,000 | 38,325,000 | 510 | 898  | 0.528025529  |                                                        |
| 18 | 38,250,000 | 38,400,000 | 511 | 977  | 1.042711957  | ZFH3                                                   |
| 18 | 38,325,000 | 38,475,000 | 512 | 857  | 0.764604121  | ZFH3                                                   |
| 18 | 38,400,000 | 38,550,000 | 513 | 671  | 0.666494314  | ZFH3                                                   |
| 18 | 38,475,000 | 38,625,000 | 514 | 613  | 0.758404849  | ZFH3                                                   |
| 18 | 38,550,000 | 38,700,000 | 515 | 667  | 0.675163465  |                                                        |
| 18 | 38,625,000 | 38,775,000 | 516 | 626  | 0.561216162  |                                                        |
| 18 | 38,700,000 | 38,850,000 | 517 | 541  | 0.425851271  |                                                        |
| 18 | 38,775,000 | 38,925,000 | 518 | 451  | 0.245296777  |                                                        |
| 18 | 38,850,000 | 39,000,000 | 519 | 745  | -0.21851938  |                                                        |
| 18 | 38,925,000 | 39,075,000 | 520 | 989  | -0.088014585 |                                                        |
| 18 | 39,000,000 | 39,150,000 | 521 | 921  | 0.139547815  | DHX38,PMFBP1                                           |
| 18 | 39,075,000 | 39,225,000 | 522 | 764  | 0.43148453   | DHODH,DHX38,HP,PKD1L3,PMFBP1,TXNL4B,ENSBTAG00000019887 |
| 18 | 39,150,000 | 39,300,000 | 523 | 1066 | -0.225185657 | DHODH,DHX38,HP,PKD1L3,TXNL4B,ENSBTAG00000019887        |
| 18 | 39,225,000 | 39,375,000 | 524 | 1067 | -0.524360809 | IST1,PKD1L3,ZNF821                                     |
| 18 | 39,300,000 | 39,450,000 | 525 | 629  | 0.232068935  | AP1G1,ATXN1L,IST1,PKD1L3,ZNF821,ENSBTAG00000047787     |
| 18 | 39,375,000 | 39,525,000 | 526 | 840  | 0.846255835  | AP1G1,ATXN1L,PHLPP2,ENSBTAG00000047787                 |
| 18 | 39,450,000 | 39,600,000 | 527 | 765  | 0.61687056   | AP1G1,MARVELD3,PHLPP2,TAT                              |
| 18 | 39,525,000 | 39,675,000 | 528 | 572  | 0.460547679  | CHST4,MARVELD3,PHLPP2,TAT                              |
| 18 | 39,600,000 | 39,750,000 | 529 | 684  | 0.214914997  | CHST4,TAT,ZNF19                                        |
| 18 | 39,675,000 | 39,825,000 | 530 | 852  | 0.441889614  | CALB2,ZNF19,ENSBTAG00000023617                         |
| 18 | 39,750,000 | 39,900,000 | 531 | 1123 | 0.930371195  | CALB2,ZNF19,ENSBTAG00000023617                         |
| 18 | 39,825,000 | 39,975,000 | 532 | 1534 | 1.283645662  | CALB2,CMTR2                                            |
| 18 | 39,900,000 | 40,050,000 | 533 | 1273 | 1.34613528   | CMTR2,HYDIN                                            |
| 18 | 39,975,000 | 40,125,000 | 534 | 707  | 0.070594038  | HYDIN                                                  |
| 18 | 40,050,000 | 40,200,000 | 535 | 617  | -0.749364057 | HYDIN                                                  |
| 18 | 40,125,000 | 40,275,000 | 536 | 483  | -0.715939601 | HYDIN                                                  |
| 18 | 40,200,000 | 40,350,000 | 537 | 1010 | 0.399252297  | HYDIN                                                  |
| 18 | 40,275,000 | 40,425,000 | 538 | 1119 | -0.373872582 | HYDIN,PLEKHF1,POP4                                     |
| 18 | 40,350,000 | 40,500,000 | 539 | 543  | -2.286822699 | PLEKHF1,POP4,ENSBTAG00000020434                        |
| 18 | 40,425,000 | 40,575,000 | 540 | 448  | -2.901819631 | CCNE1,PLEKHF1,ENSBTAG00000020434                       |
| 18 | 40,500,000 | 40,650,000 | 541 | 438  | -3.174385838 | CCNE1                                                  |
| 18 | 40,575,000 | 40,725,000 | 542 | 669  | -0.28747798  | URI1                                                   |
| 18 | 40,650,000 | 40,800,000 | 543 | 625  | -0.368209072 | URI1                                                   |
| 18 | 40,725,000 | 40,875,000 | 544 | 479  | -0.442911551 | URI1                                                   |
| 18 | 40,800,000 | 40,950,000 | 545 | 674  | -0.757568522 |                                                        |
| 18 | 40,875,000 | 41,025,000 | 546 | 630  | -0.426444526 |                                                        |
| 18 | 40,950,000 | 41,100,000 | 547 | 511  | -0.533985046 |                                                        |
| 18 | 41,025,000 | 41,175,000 | 548 | 543  | -0.415852055 | ZNF536                                                 |
| 18 | 41,100,000 | 41,250,000 | 549 | 613  | -0.02146616  | ZNF536                                                 |
| 18 | 41,175,000 | 41,325,000 | 550 | 748  | -0.055666964 | ZNF536                                                 |
| 18 | 41,250,000 | 41,400,000 | 551 | 686  | 0.285074786  |                                                        |
| 18 | 41,325,000 | 41,475,000 | 552 | 665  | 0.417972077  |                                                        |
| 18 | 41,400,000 | 41,550,000 | 553 | 1071 | 0.690037425  |                                                        |
| 18 | 41,475,000 | 41,625,000 | 554 | 1177 | 0.532462212  |                                                        |
| 18 | 41,550,000 | 41,700,000 | 555 | 1009 | 0.715707488  |                                                        |

|    |            |            |     |      |              |                                       |
|----|------------|------------|-----|------|--------------|---------------------------------------|
| 18 | 41,625,000 | 41,775,000 | 556 | 1110 | 0.925193357  |                                       |
| 18 | 41,700,000 | 41,850,000 | 557 | 820  | 0.076697731  |                                       |
| 18 | 41,775,000 | 41,925,000 | 558 | 400  | -0.913773762 |                                       |
| 18 | 41,850,000 | 42,000,000 | 559 | 373  | 0.607747085  | TSHZ3                                 |
| 18 | 41,925,000 | 42,075,000 | 560 | 461  | -0.17874772  | TSHZ3                                 |
| 18 | 42,000,000 | 42,150,000 | 561 | 661  | -0.181631168 |                                       |
| 18 | 42,075,000 | 42,225,000 | 562 | 728  | -0.023439889 |                                       |
| 18 | 42,150,000 | 42,300,000 | 563 | 729  | 0.415320002  |                                       |
| 18 | 42,225,000 | 42,375,000 | 564 | 963  | 0.751511384  |                                       |
| 18 | 42,300,000 | 42,450,000 | 565 | 825  | 0.348930264  |                                       |
| 18 | 42,375,000 | 42,525,000 | 566 | 659  | -0.00821969  |                                       |
| 18 | 42,450,000 | 42,600,000 | 567 | 795  | 0.301723966  |                                       |
| 18 | 42,525,000 | 42,675,000 | 568 | 854  | 0.060306234  |                                       |
| 18 | 42,600,000 | 42,750,000 | 569 | 859  | 0.351419423  |                                       |
| 18 | 42,675,000 | 42,825,000 | 570 | 905  | 0.173008345  |                                       |
| 18 | 42,750,000 | 42,900,000 | 571 | 983  | -0.103429441 |                                       |
| 18 | 42,825,000 | 42,975,000 | 572 | 638  | -0.032168056 |                                       |
| 18 | 42,900,000 | 43,050,000 | 573 | 401  | 0.097476208  | ZNF507                                |
| 18 | 42,975,000 | 43,125,000 | 574 | 571  | -1.18832721  | DPY19L3,ZNF507                        |
| 18 | 43,050,000 | 43,200,000 | 575 | 704  | -1.227568524 | DPY19L3,ZNF507                        |
| 18 | 43,125,000 | 43,275,000 | 576 | 793  | 0.282754895  | ANKRD27,DPY19L3,PDCD5                 |
| 18 | 43,200,000 | 43,350,000 | 577 | 818  | 1.152892288  | ANKRD27,NUDT19,PDCD5,RGS9BP           |
| 18 | 43,275,000 | 43,425,000 | 578 | 952  | 1.341284662  | ANKRD27,NUDT19,RGS9BP,TDRD12          |
| 18 | 43,350,000 | 43,500,000 | 579 | 1206 | 0.940191544  | CEP89,SLC7A9,TDRD12                   |
| 18 | 43,425,000 | 43,575,000 | 580 | 1017 | -0.982567936 | CEP89,FAAP24,RHPN2,SLC7A9,TDRD12      |
| 18 | 43,500,000 | 43,650,000 | 581 | 834  | -1.84657906  | CEP89,FAAP24,RHPN2                    |
| 18 | 43,575,000 | 43,725,000 | 582 | 1235 | 0.244591943  | GPATCH1,RHPN2,WDR88                   |
| 18 | 43,650,000 | 43,800,000 | 583 | 1225 | 0.412488512  | GPATCH1,WDR88                         |
| 18 | 43,725,000 | 43,875,000 | 584 | 776  | 0.483590286  | LRP3,SLC7A10,WDR88                    |
| 18 | 43,800,000 | 43,950,000 | 585 | 745  | 0.155128396  | LRP3,SLC7A10                          |
| 18 | 43,875,000 | 44,025,000 | 586 | 809  | 0.200481301  | CEBPG,PEPD                            |
| 18 | 43,950,000 | 44,100,000 | 587 | 1201 | -0.561086327 | CEBPG,PEPD                            |
| 18 | 44,025,000 | 44,175,000 | 588 | 1691 | -0.129830722 | PEPD                                  |
| 18 | 44,100,000 | 44,250,000 | 589 | 1613 | 0.488110238  | PEPD                                  |
| 18 | 44,175,000 | 44,325,000 | 590 | 1341 | 0.521331548  | CHST8                                 |
| 18 | 44,250,000 | 44,400,000 | 591 | 973  | 0.72627229   | CHST8                                 |
| 18 | 44,325,000 | 44,475,000 | 592 | 562  | 0.643835716  | CHST8,KCTD15                          |
| 18 | 44,400,000 | 44,550,000 | 593 | 642  | 0.775624527  | KCTD15                                |
| 18 | 44,475,000 | 44,625,000 | 594 | 820  | 0.974400694  |                                       |
| 18 | 44,550,000 | 44,700,000 | 595 | 863  | 1.04805302   |                                       |
| 18 | 44,625,000 | 44,775,000 | 596 | 987  | 0.46957644   |                                       |
| 18 | 44,700,000 | 44,850,000 | 597 | 758  | -0.131430005 | LSM14A                                |
| 18 | 44,775,000 | 44,925,000 | 598 | 497  | -0.101977149 | KIAA0355,LSM14A                       |
| 18 | 44,850,000 | 45,000,000 | 599 | 412  | -1.014835007 | GPI,KIAA0355,LSM14A                   |
| 18 | 44,925,000 | 45,075,000 | 600 | 340  | -4.268745908 | GPI,KIAA0355,PDCD2L,UBA2              |
| 18 | 45,000,000 | 45,150,000 | 601 | 389  | -7.301082955 | GPI,PDCD2L,UBA2,WTIP                  |
| 18 | 45,075,000 | 45,225,000 | 602 | 514  | -4.565435734 | WTIP                                  |
| 18 | 45,150,000 | 45,300,000 | 603 | 604  | -0.234003129 |                                       |
| 18 | 45,225,000 | 45,375,000 | 604 | 563  | 0.740295855  | ENSBTAG00000045737                    |
| 18 | 45,300,000 | 45,450,000 | 605 | 893  | 1.076039458  | ENSBTAG00000045737,ENSBTAG00000047571 |
| 18 | 45,375,000 | 45,525,000 | 606 | 1107 | 1.03708051   | ENSBTAG00000047571                    |
| 18 | 45,450,000 | 45,600,000 | 607 | 883  | 0.675467984  | ENSBTAG00000047724                    |
| 18 | 45,525,000 | 45,675,000 | 608 | 701  | 0.797880225  | ENSBTAG00000047724                    |

|    |            |            |     |      |              |                                                                                    |
|----|------------|------------|-----|------|--------------|------------------------------------------------------------------------------------|
| 18 | 45,600,000 | 45,750,000 | 609 | 484  | 0.055979303  | ZNF181,ZNF599,ENSBTAG00000023998                                                   |
| 18 | 45,675,000 | 45,825,000 | 610 | 949  | -0.251777065 | ZNF181,ZNF599,ENSBTAG00000023998                                                   |
| 18 | 45,750,000 | 45,900,000 | 611 | 1125 | -0.313826145 | ZNF792                                                                             |
| 18 | 45,825,000 | 45,975,000 | 612 | 670  | -0.455544536 | GRAMD1A,HPN,SCN1B,ZNF792                                                           |
| 18 | 45,900,000 | 46,050,000 | 613 | 650  | 0.075276715  | FXVD3,GRAMD1A,HPN,LGI4,SCN1B                                                       |
| 18 | 45,975,000 | 46,125,000 | 614 | 1000 | 0.873241513  | FXVD1,FXVD3,FXVD5,FXVD7,HPN,LGI4                                                   |
| 18 | 46,050,000 | 46,200,000 | 615 | 1132 | 1.191099319  | FAM187B,FXVD1,FXVD5,FXVD7,HAMP,LSR,MAG,USF2,ENSBTAG00000031420                     |
| 18 | 46,125,000 | 46,275,000 | 616 | 949  | 0.961743804  | CD22,FAM187B,FFAR1,GPR41,HAMP,LSR,MAG,USF2,ENSBTAG00000031420                      |
| 18 | 46,200,000 | 46,350,000 | 617 | 979  | 0.542597581  | CD22,FFAR1,GPR41,GPR43,KRTDAP,MAG,ENSBTAG0000045656                                |
| 18 | 46,275,000 | 46,425,000 | 618 | 1177 | 0.597022285  | ATP4A,DMKN,GAPDHS,GPR43,KRTDAP,SBSN,TMEM147,ENSBTAG00000045598,ENSBTAG00000045656  |
| 18 | 46,350,000 | 46,500,000 | 619 | 1171 | 0.129426167  | ATP4A,DMKN,GAPDHS,SBSN,TMEM147,ENSBTAG0000045598                                   |
| 18 | 46,425,000 | 46,575,000 | 620 | 948  | -0.025834699 | ETV2,HAUS5,PNKD,RBM42                                                              |
| 18 | 46,500,000 | 46,650,000 | 621 | 821  | 0.412833582  | ETV2,HAUS5,IGFLR1,KMT2B,LIN37,PNKD,PSENER,RBM42,U2AF1L4,UPK1A,ZBTB32               |
| 18 | 46,575,000 | 46,725,000 | 622 | 960  | -0.347554585 | ARHGAP33,HSPB6,IGFLR1,KMT2B,LIN37,NPHS1,PRODH2,PROSER3,PSENER,U2AF1L4,UPK1A,ZBTB32 |
| 18 | 46,650,000 | 46,800,000 | 623 | 870  | -0.414668152 | APLP1,ARHGAP33,HCST,HSPB6,KIRREL2,LIN37,NFKBID,NPHS1,PRODH2,PROSER3,TYROBP         |
| 18 | 46,725,000 | 46,875,000 | 624 | 619  | 0.761255913  | ALKBH6,APLP1,HCST,KIRREL2,LRFN3,NFKBID,NPHS1,SDHAF1,SYNE4,TYROBP                   |
| 18 | 46,800,000 | 46,950,000 | 625 | 720  | -0.350668975 | ALKBH6,CLIP3,LRFN3,SDHAF1,SYNE4,THAP8,WDR62                                        |
| 18 | 46,875,000 | 47,025,000 | 626 | 753  | -1.96010822  | ALKBH6,CAPNS1,CLIP3,COX7A1,OVOL3,POLR2I,TBCB,THAP8,WDR62,ZNF565                    |
| 18 | 46,950,000 | 47,100,000 | 627 | 623  | -1.83640511  | CAPNS1,COX7A1,OVOL3,POLR2I,TBCB,WDR62,ZNF565,ZNF567,ENSBTAG00000031687             |
| 18 | 47,025,000 | 47,175,000 | 628 | 1045 | 0.841176405  | ZNF382,ZNF461,ZNF565,ZNF567,ENSBTAG00000031687                                     |
| 18 | 47,100,000 | 47,250,000 | 629 | 985  | 0.836011435  | ZNF382,ZNF461,ZNF566,ZNF567,ENSBTAG00000033563                                     |
| 18 | 47,175,000 | 47,325,000 | 630 | 449  | 0.358027204  | ZNF382,ZNF546,ZNF566,ENSBTAG00000033563                                            |
| 18 | 47,250,000 | 47,400,000 | 631 | 433  | 0.357011175  | ZNF546,ZNF566,ZNF568                                                               |
| 18 | 47,325,000 | 47,475,000 | 632 | 688  | 0.372097974  | ZNF546,ZNF568,ZNF585A,ZNF793,ZNF829                                                |
| 18 | 47,400,000 | 47,550,000 | 633 | 726  | 0.538217715  | ZNF383,ZNF568,ZNF585A,ZNF793,ZNF829                                                |
| 18 | 47,475,000 | 47,625,000 | 634 | 806  | -0.400940053 | ZNF383,ZNF527,ZNF569                                                               |
| 18 | 47,550,000 | 47,700,000 | 635 | 851  | -0.616492247 | ZNF527,ZNF569,ZNF570                                                               |
| 18 | 47,625,000 | 47,775,000 | 636 | 539  | 0.154414929  | ZNF345,ZNF420,ZNF569,ZNF570                                                        |
| 18 | 47,700,000 | 47,850,000 | 637 | 600  | 0.639786385  | ZNF345,ZNF420                                                                      |
| 18 | 47,775,000 | 47,925,000 | 638 | 672  | 0.542044792  | ZNF345,ENSBTAG00000046367                                                          |
| 18 | 47,850,000 | 48,000,000 | 639 | 658  | 0.79149725   | WDR87,ENSBTAG00000040318,ENSBTAG00000046367                                        |
| 18 | 47,925,000 | 48,075,000 | 640 | 524  | 0.386008544  | WDR87,ENSBTAG00000040318                                                           |
| 18 | 48,000,000 | 48,150,000 | 641 | 581  | -1.537315515 | SIPA1L3                                                                            |
| 18 | 48,075,000 | 48,225,000 | 642 | 709  | -0.576128721 | SIPA1L3                                                                            |
| 18 | 48,150,000 | 48,300,000 | 643 | 522  | 0.332322073  | DPF1,PPP1R14A,SIPA1L3,SPINT2                                                       |
| 18 | 48,225,000 | 48,375,000 | 644 | 395  | -2.708793453 | C18H19orf33,DPF1,PPP1R14A,SIPA1L3,SPINT2,YIF1B                                     |
| 18 | 48,300,000 | 48,450,000 | 645 | 427  | -2.140018304 | C18H19orf33,CATSPERG,KCNK6,SPINT2,YIF1B                                            |
| 18 | 48,375,000 | 48,525,000 | 646 | 486  | -0.082487558 | CATSPERG,FAM98C,GGN,KCNK6,PSMD8,RASGRP4,RYR1,SPRED3                                |

|    |            |            |     |      |              |                                                                                               |
|----|------------|------------|-----|------|--------------|-----------------------------------------------------------------------------------------------|
| 18 | 48,450,000 | 48,600,000 | 647 | 702  | -0.22003387  | FAM98C,GGN,PSMD8,RASGRP4,RYR1,SPRED3                                                          |
| 18 | 48,525,000 | 48,675,000 | 648 | 610  | 0.048918091  | ACTN4,EIF3K,MAP4K1,RYR1                                                                       |
| 18 | 48,600,000 | 48,750,000 | 649 | 396  | 0.648152807  | ACTN4,CAPN12,EIF3K,MAP4K1,RYR1                                                                |
| 18 | 48,675,000 | 48,825,000 | 650 | 601  | -0.150642623 | ACTN4,CAPN12,ECH1,HNRNPL,LGALS4,ENSBTAG0000031538,ENSBTAG00000046365                          |
| 18 | 48,750,000 | 48,900,000 | 651 | 600  | -1.245849639 | CAPN12,CCER2,ECH1,HNRNPL,LGALS4,NFKBIB,RINL,SARS2,SIRT2,ENSBTAG00000031538,ENSBTAG00000046365 |
| 18 | 48,825,000 | 48,975,000 | 652 | 707  | -2.329999951 | CCER2,FBXO17,HNRNPL,MRPS12,NFKBIB,RINL,SARS2,SIRT2                                            |
| 18 | 48,900,000 | 49,050,000 | 653 | 880  | -1.013243476 | FBXO17,MRPS12,SARS2                                                                           |
| 18 | 48,975,000 | 49,125,000 | 654 | 1064 | -0.541946958 | ENSBTAG00000012590                                                                            |
| 18 | 49,050,000 | 49,200,000 | 655 | 1024 | -0.275627744 | NCCRP1,PAK4,SYCN,ENSBTAG00000012590                                                           |
| 18 | 49,125,000 | 49,275,000 | 656 | 666  | 1.165120467  | NCCRP1,PAK4,SYCN,ENSBTAG00000047307                                                           |
| 18 | 49,200,000 | 49,350,000 | 657 | 417  | 0.788912827  | GMFG,IFNL1,LRFN1,PAF1,SAMD4B,ENSBTAG00000047307                                               |
| 18 | 49,275,000 | 49,425,000 | 658 | 333  | 0.573467959  | GMFG,IFNL1,LRFN1,MED29,PAF1,PLEKHG2,RPS16,SAMD4B,SUPT5H,ZFP36                                 |
| 18 | 49,350,000 | 49,500,000 | 659 | 513  | 0.56332643   | DLL3,EID2,MED29,PAF1,PLEKHG2,RPS16,SAMD4B,SELV,SUPT5H,TIMM50,ZFP36                            |
| 18 | 49,425,000 | 49,575,000 | 660 | 852  | -1.060890116 | DLL3,EID2,SELV,SUPT5H,TIMM50,ENSBTAG00000047030                                               |
| 18 | 49,500,000 | 49,650,000 | 661 | 1166 | -0.131200243 | LEUTX,ENSBTAG00000015260,ENSBTAG00000047030                                                   |
| 18 | 49,575,000 | 49,725,000 | 662 | 708  | 0.903882042  | DYRK1B,FBL,LEUTX,PSMC4,ENSBTAG00000008502,ENSBTAG00000015260                                  |
| 18 | 49,650,000 | 49,800,000 | 663 | 386  | -0.844575862 | DYRK1B,FBL,FCGBP,PSMC4,ENSBTAG00000008502,ENSBTAG00000018242                                  |
| 18 | 49,725,000 | 49,875,000 | 664 | 727  | -0.739624868 | FCGBP,MAP3K10,ENSBTAG00000018242                                                              |
| 18 | 49,800,000 | 49,950,000 | 665 | 598  | -0.382210654 | AKT2,CNTD2,MAP3K10,TTC9B                                                                      |
| 18 | 49,875,000 | 50,025,000 | 666 | 294  | 0.277346719  | AKT2,C19orf47,CNTD2,HIPK4,MAP3K10,PLD3,PRX,TTC9B                                              |
| 18 | 49,950,000 | 50,100,000 | 667 | 387  | -0.114632164 | AKT2,BLVRB,C19orf47,HIPK4,PLD3,PRX,SERTAD1,SERTAD3,SPTBN4                                     |
| 18 | 50,025,000 | 50,175,000 | 668 | 443  | -0.372052621 | BLVRB,LTBP4,PRX,SERTAD1,SERTAD3,SHKBP1,SPTBN4                                                 |
| 18 | 50,100,000 | 50,250,000 | 669 | 493  | 0.137302394  | LTBP4,NUMBL,SHKBP1,SPTBN4                                                                     |
| 18 | 50,175,000 | 50,325,000 | 670 | 625  | 0.066003301  | ADCK4,C19orf54,ITPKC,LTBP4,MIA,NUMBL,SNRPA,ENSBTAG00000009079                                 |
| 18 | 50,250,000 | 50,400,000 | 671 | 561  | -0.163435047 | ADCK4,C19orf54,CYP2F1,EGLN2,ITPKC,MIA,NUMBL,SNRPA,ENSBTAG00000001350,ENSBTAG00000009079       |
| 18 | 50,325,000 | 50,475,000 | 672 | 485  | 0.128522208  | CYP2F1,EGLN2,ENSBTAG00000001350,ENSBTAG00000003272,ENSBTAG00000047815                         |
| 18 | 50,400,000 | 50,550,000 | 673 | 412  | -2.010886752 | ENSBTAG00000003272,ENSBTAG00000047815                                                         |
| 18 | 50,475,000 | 50,625,000 | 674 | 357  | -2.586375979 | C9orf3,CYP2B6                                                                                 |
| 18 | 50,550,000 | 50,700,000 | 675 | 450  | -0.899987915 | AXL,C9orf3,CYP2B6,CYP2S1                                                                      |
| 18 | 50,625,000 | 50,775,000 | 676 | 463  | -0.515681421 | AXL,CCDC97,CYP2S1,HNRNPUL1,TGFB1                                                              |
| 18 | 50,700,000 | 50,850,000 | 677 | 465  | 0.423642961  | ATP5SL,AXL,B3GNT8,B9D2,BCKDHA,CCDC97,EXOSC5,HNRNPUL1,TGFB1,TMEM91                             |
| 18 | 50,775,000 | 50,925,000 | 678 | 570  | -0.038557855 | ATP5SL,B3GNT8,B9D2,BCKDHA,ERICH4,EXOSC5,TGFB1,TMEM91                                          |
| 18 | 50,850,000 | 51,000,000 | 679 | 618  | -0.278636984 | ATP5SL,ERICH4                                                                                 |
| 18 | 50,925,000 | 51,075,000 | 680 | 562  | -0.198295934 |                                                                                               |

|    |            |            |     |      |              |                                                                                |
|----|------------|------------|-----|------|--------------|--------------------------------------------------------------------------------|
| 18 | 51,000,000 | 51,150,000 | 681 | 727  | 0.119429605  | CEACAM1                                                                        |
| 18 | 51,075,000 | 51,225,000 | 682 | 690  | 0.267425507  | CEACAM1,HSL                                                                    |
| 18 | 51,150,000 | 51,300,000 | 683 | 379  | 0.659262503  | CEACAM1,CNFN,HSL,MEGF8,TMEM145                                                 |
| 18 | 51,225,000 | 51,375,000 | 684 | 283  | 0.883024184  | CIC,CNFN,ERF,GSK3A,HSL,MEGF8,PAFAH1B3,PRR19,TMEM145,ZNF526                     |
| 18 | 51,300,000 | 51,450,000 | 685 | 315  | 0.259030472  | CIC,DEDD2,ERF,GSK3A,PAFAH1B3,PRR19,TMEM145,ZNF526                              |
| 18 | 51,375,000 | 51,525,000 | 686 | 345  | 0.157823745  | DEDD2,GRIK5,POU2F2,ZNF526,ZNF574                                               |
| 18 | 51,450,000 | 51,600,000 | 687 | 454  | -0.528227971 | ATP1A3,GRIK5,POU2F2,ZNF574                                                     |
| 18 | 51,525,000 | 51,675,000 | 688 | 650  | -0.338763196 | ARHGEF1,ATP1A3,GRIK5,RABAC1                                                    |
| 18 | 51,600,000 | 51,750,000 | 689 | 840  | 0.543071672  | ARHGEF1,ATP1A3,CD79A,DMRTC2,LYPD4,RABAC1,RPS19,ENSBTAG0000006859               |
| 18 | 51,675,000 | 51,825,000 | 690 | 1682 | 0.30790221   | ARHGEF1,CD79A,DMRTC2,LYPD4,RPS19,ENSBTAG0000006859                             |
| 18 | 51,750,000 | 51,900,000 | 691 | 1693 | -0.147662094 | CD177,CXCL17,TEX101,ENSBTAG0000006859                                          |
| 18 | 51,825,000 | 51,975,000 | 692 | 1041 | -1.160815009 | BSP1,BSP3,BSP5,CD177,CXCL17,TEX101                                             |
| 18 | 51,900,000 | 52,050,000 | 693 | 1221 | 0.829108775  | BSP1,BSP3,BSP5,ETHE1,LYPD3,PHLDB3,TEX101                                       |
| 18 | 51,975,000 | 52,125,000 | 694 | 1283 | 0.025641977  | ETHE1,LYPD3,PHLDB3,PINLYP,XRCC1,ZNF575                                         |
| 18 | 52,050,000 | 52,200,000 | 695 | 1061 | -1.728975948 | CADM4,ETHE1,IRGQ,PINLYP,XRCC1,ZNF428,ZNF575,ZNF576                             |
| 18 | 52,125,000 | 52,275,000 | 696 | 945  | -0.43453758  | CADM4,IRGC,IRGQ,PLAUR,SMG9,ZNF428,ZNF576,ENSBTAG00000023439,ENSBTAG00000030922 |
| 18 | 52,200,000 | 52,350,000 | 697 | 993  | -0.036022095 | IRGC,KCNN4,LYPD5,PLAUR,SMG9,ENSBTAG00000023439,ENSBTAG00000030922              |
| 18 | 52,275,000 | 52,425,000 | 698 | 826  | -0.365992935 | KCNN4,LYPD5,SMG9,ZNF283,ZNF404                                                 |
| 18 | 52,350,000 | 52,500,000 | 699 | 940  | -0.998187016 | ZNF226,ZNF283,ZNF404,ZNF45                                                     |
| 18 | 52,425,000 | 52,575,000 | 700 | 1251 | -2.745591388 | ZNF226,ZNF235,ZNF45                                                            |
| 18 | 52,500,000 | 52,650,000 | 701 | 823  | -3.621856581 | ZNF180,ZNF226,ZNF235,ENSBTAG00000040209                                        |
| 18 | 52,575,000 | 52,725,000 | 702 | 705  | 0.480763725  | CEACAM20,ZNF180,ENSBTAG00000040209                                             |
| 18 | 52,650,000 | 52,800,000 | 703 | 783  | 0.815757381  | CEACAM20,IGSF23,ZNF180                                                         |
| 18 | 52,725,000 | 52,875,000 | 704 | 399  | -0.616694826 | CEACAM19,IGSF23                                                                |
| 18 | 52,800,000 | 52,950,000 | 705 | 439  | -1.068203797 | BCL3,CBLC,CEACAM16,CEACAM19                                                    |
| 18 | 52,875,000 | 53,025,000 | 706 | 607  | 0.875990539  | BCAM,BCL3,CBLC,CEACAM16,PVRL2,TOMM40,ENSBTAG00000047345                        |
| 18 | 52,950,000 | 53,100,000 | 707 | 550  | 0.973601974  | APOC2,APOC4,APOE,BCAM,CBLC,CLPTM1,PVRL2,REL B,TOMM40,ENSBTAG00000047345        |
| 18 | 53,025,000 | 53,175,000 | 708 | 521  | 0.52204579   | APOC2,APOC4,APOE,CLASRP,CLPTM1,GEMIN7,PPP1R37,RELB,TOMM40,ZNF296               |
| 18 | 53,100,000 | 53,250,000 | 709 | 486  | 0.057615173  | BLOC1S3,CLASRP,GEMIN7,NKPD1,PPP1R37,RELB,TRAPPC6A,ZNF296                       |
| 18 | 53,175,000 | 53,325,000 | 710 | 781  | 0.688122106  | BLOC1S3,EXOC3L2,NKPD1,PPP1R37,TRAPPC6A,ENSBTAG00000030882                      |
| 18 | 53,250,000 | 53,400,000 | 711 | 936  | 1.104022862  | CKM,EXOC3L2,MARK4,ENSBTAG00000030882                                           |
| 18 | 53,325,000 | 53,475,000 | 712 | 750  | 0.979399615  | CD3EAP,CKM,ERCC1,ERCC2,KLC3,MARK4,PPP1R13L                                     |
| 18 | 53,400,000 | 53,550,000 | 713 | 524  | 0.830763812  | CD3EAP,ERCC1,ERCC2,FOSB,KLC3,MGC148938,OPA3,PPP1R13L,RTN2,VASP                 |
| 18 | 53,475,000 | 53,625,000 | 714 | 294  | -0.064783447 | FOSB,GPR4,MGC148938,OPA3,RTN2,VASP                                             |
| 18 | 53,550,000 | 53,700,000 | 715 | 529  | 0.520941632  | EML2,GIPR,GPR4,OPA3,QPCTL,SNRPD2                                               |
| 18 | 53,625,000 | 53,775,000 | 716 | 637  | 1.08194911   | DMPK,DMWD,EML2,GIPR,MYPOP,QPCTL,SIX5,SNRPD2                                    |
| 18 | 53,700,000 | 53,850,000 | 717 | 751  | 1.03892112   | DMPK,DMWD,FOXA3,MYPOP,RSPH6A,SIX5,SYMPK                                        |
| 18 | 53,775,000 | 53,925,000 | 718 | 785  | 1.062896817  | DMWD,FOXA3,NANOS2,NOVA2,RSPH6A,SYMPK                                           |
| 18 | 53,850,000 | 54,000,000 | 719 | 653  | 0.794593777  | CCDC61,HIF3A,IGFL1,NANOS2,NOVA2,PGLYRP1                                        |

|    |            |            |     |      |              |                                                                                               |
|----|------------|------------|-----|------|--------------|-----------------------------------------------------------------------------------------------|
| 18 | 53,925,000 | 54,075,000 | 720 | 801  | 0.37734471   | CCDC61,HIF3A,IGFL1,PGLYRP1,PPP5C                                                              |
| 18 | 54,000,000 | 54,150,000 | 721 | 936  | 0.568098976  | CCDC8,HIF3A,PNMAL1,PNMAL2,PPP5C,ENSBTAG0000046451                                             |
| 18 | 54,075,000 | 54,225,000 | 722 | 741  | 0.337691985  | CALM,CCDC8,DACT3,GNG8,PNMAL1,PNMAL2,PRKD2,PTGIR,ENSBTAG00000046451                            |
| 18 | 54,150,000 | 54,300,000 | 723 | 571  | -0.62305285  | CALM,DACT3,FKRP,GNG8,PRKD2,PTGIR,STRN4                                                        |
| 18 | 54,225,000 | 54,375,000 | 724 | 757  | -0.256105234 | AP2S1,FKRP,PRKD2,SLC1A5,STRN4                                                                 |
| 18 | 54,300,000 | 54,450,000 | 725 | 630  | 0.151176522  | AP2S1,ARHGAP35,SLC1A5                                                                         |
| 18 | 54,375,000 | 54,525,000 | 726 | 597  | -0.383176758 | ARHGAP35,NPAS1                                                                                |
| 18 | 54,450,000 | 54,600,000 | 727 | 654  | -0.178406706 | ARHGAP35,NPAS1,TMEM160,ZC3H4                                                                  |
| 18 | 54,525,000 | 54,675,000 | 728 | 514  | 0.676801179  | NPAS1,SAE1,TMEM160,ZC3H4                                                                      |
| 18 | 54,600,000 | 54,750,000 | 729 | 863  | -0.286766904 | CCDC9,SAE1                                                                                    |
| 18 | 54,675,000 | 54,825,000 | 730 | 1023 | -0.79381768  | C5AR1,CCDC9,DHX34,GPR77                                                                       |
| 18 | 54,750,000 | 54,900,000 | 731 | 565  | -1.18765613  | C5AR1,DHX34,GPR77,KPTN,MEIS3,SLC8A2                                                           |
| 18 | 54,825,000 | 54,975,000 | 732 | 523  | -0.049937314 | KPTN,MEIS3,NAPA,SLC8A2,ZNF541                                                                 |
| 18 | 54,900,000 | 55,050,000 | 733 | 753  | 1.247294544  | GLTSCR1,NAPA,ZNF541                                                                           |
| 18 | 54,975,000 | 55,125,000 | 734 | 723  | 0.841820704  | EHD2,GLTSCR1,GLTSCR2,SEPW1                                                                    |
| 18 | 55,050,000 | 55,200,000 | 735 | 750  | -0.083421628 | CRX,EHD2,GLTSCR1,GLTSCR2,SEPW1,SULT2A1,ENSBTAG00000039971                                     |
| 18 | 55,125,000 | 55,275,000 | 736 | 932  | -0.49692272  | CRX,SULT2A1,ENSBTAG00000039971,ENSBTAG00000040054                                             |
| 18 | 55,200,000 | 55,350,000 | 737 | 1019 | -0.285527086 | C19orf68,CABP5,ELSPBP1,LIG1,ENSBTAG00000039971,ENSBTAG00000040054                             |
| 18 | 55,275,000 | 55,425,000 | 738 | 1074 | 0.856672387  | C19orf68,CABP5,ELSPBP1,LIG1,ENSBTAG00000011119,ENSBTAG00000038322,ENSBTAG00000038986          |
| 18 | 55,350,000 | 55,500,000 | 739 | 987  | 0.870735713  | C19orf68,CCDC114,EMP3,TMEM143,ZNF114,ENSBTAG00000011119,ENSBTAG00000038322,ENSBTAG00000038986 |
| 18 | 55,425,000 | 55,575,000 | 740 | 633  | 0.58705227   | CCDC114,EMP3,GRIN2D,GRWD1,KDEL1,SYNGR4,TMEM143,ZNF114                                         |
| 18 | 55,500,000 | 55,650,000 | 741 | 636  | 0.538164518  | CYTH2,GRIN2D,GRWD1,KCNJ14,KDEL1,LMTK3,SYNGR4,TMEM143                                          |
| 18 | 55,575,000 | 55,725,000 | 742 | 931  | 0.267939239  | CYTH2,DBP,FAM83E,GRWD1,KCNJ14,LMTK3,RPL18,SPACA4,SPHK2,SULT2B1                                |
| 18 | 55,650,000 | 55,800,000 | 743 | 977  | 0.178158659  | CA11,DBP,FAM83E,FUT2,NTN5,RPL18,SPACA4,SPHK2,SULT2B1,ENSBTAG00000014514                       |
| 18 | 55,725,000 | 55,875,000 | 744 | 897  | 0.402468516  | BCAT2,CA11,DBP,FGF21,FUT1,FUT2,IZUMO1,MAMSTR,NTN5,RASIP1,ENSBTAG00000014514                   |
| 18 | 55,800,000 | 55,950,000 | 745 | 845  | -0.25176045  | BCAT2,FGF21,FUT1,HSD17B14,IZUMO1,MAMSTR,NUCB1,PLEKHA4,PPP1R15A,RASIP1,TULP2                   |
| 18 | 55,875,000 | 56,025,000 | 746 | 831  | 0.097424882  | BAX,BCAT2,DHDH,FTL,GYS1,HSD17B14,NUCB1,PLEKHA4,PPP1R15A,RUVBL2,TULP2                          |
| 18 | 55,950,000 | 56,100,000 | 747 | 638  | 0.537412149  | BAX,DHDH,FTL,GYS1,KCNA7,LHB,LIN7B,NTF4,NUCB1,PPFIA3,RUVBL2,SNRNP70                            |
| 18 | 56,025,000 | 56,175,000 | 748 | 490  | 0.302870757  | HRC,KCNA7,LHB,LIN7B,NTF4,PPFIA3,RUVBL2,SNRNP70,TRPM4                                          |
| 18 | 56,100,000 | 56,250,000 | 749 | 755  | 0.147988104  | HRC,PPFIA3,SLC6A16,TRPM4,ENSBTAG00000030502,ENSBTAG00000030505                                |
| 18 | 56,175,000 | 56,325,000 | 750 | 957  | 0.214094537  | CCDC155,CD37,DKKL1,SLC6A16,TEAD2,ENSBTAG00000030502,ENSBTAG00000030505                        |
| 18 | 56,250,000 | 56,400,000 | 751 | 926  | 0.062253889  | ALDH16A1,CCDC155,CD37,DKKL1,FLT3LG,PIH1D1,PTH2,RPL13A,SLC17A7,SLC6A16,TEAD2                   |

|    |            |            |     |      |              |                                                                                                                             |
|----|------------|------------|-----|------|--------------|-----------------------------------------------------------------------------------------------------------------------------|
| 18 | 56,325,000 | 56,475,000 | 752 | 635  | -0.067178883 | ALDH16A1,CCDC155,FCGRT,FLT3LG,NOSIP,PIH1D1,PRR12,PRRG2,PTH2,RCN3,RPL13A,RPS11,SLC17A7                                       |
| 18 | 56,400,000 | 56,550,000 | 753 | 470  | 0.647022623  | BCL2L12,CPT1C,FCGRT,HRMT1L2,IRF3,NOSIP,PRR12,PRRG2,RCN3,RPS11,RRAS,SCAF1                                                    |
| 18 | 56,475,000 | 56,625,000 | 754 | 562  | 0.844248852  | AP2A1,BCL2L12,CPT1C,FUZ,HRMT1L2,IRF3,PRR12,RRAS,SCAF1,TSKS                                                                  |
| 18 | 56,550,000 | 56,700,000 | 755 | 484  | 0.688523152  | AKT1S1,AP2A1,CPT1C,FUZ,IL4I1,MED25,PNKP,PTOV1,TBC1D17,TSKS                                                                  |
| 18 | 56,625,000 | 56,775,000 | 756 | 606  | 0.873946854  | AKT1S1,ATF5,FUZ,IL4I1,MED25,PNKP,PTOV1,TBC1D17,VRK3,ENSBTAG00000016997                                                      |
| 18 | 56,700,000 | 56,850,000 | 757 | 967  | 0.849024654  | ATF5,C18H19ORF41,IL4I1,VRK3,ZNF473,ENSBTAG00000016997                                                                       |
| 18 | 56,775,000 | 56,925,000 | 758 | 1391 | 0.836667662  | C18H19ORF41,MYH14,VRK3,ZNF473                                                                                               |
| 18 | 56,850,000 | 57,000,000 | 759 | 1069 | 0.660190621  | KCNC3,MYH14,NAPSA,NR1H2,ENSBTAG00000048283                                                                                  |
| 18 | 56,925,000 | 57,075,000 | 760 | 639  | -0.808251882 | EMC10,FAM71E1,KCNC3,MYBPC2,MYH14,NAPSA,NR1H2,POLD1,ENSBTAG00000043953,ENSBTAG00000048283                                    |
| 18 | 57,000,000 | 57,150,000 | 761 | 837  | -0.384002981 | ASPDH,EMC10,FAM71E1,JOSD2,LRRC4B,MYBPC2,NR1H2,POLD1,ENSBTAG00000043953                                                      |
| 18 | 57,075,000 | 57,225,000 | 762 | 828  | -0.025609307 | ASPDH,C19orf81,EMC10,JOSD2,LRRC4B,SHANK1,SYT3                                                                               |
| 18 | 57,150,000 | 57,300,000 | 763 | 941  | -0.123539677 | C19orf81,CLEC11A,SHANK1,SYT3                                                                                                |
| 18 | 57,225,000 | 57,375,000 | 764 | 1013 | 0.352143688  | ACPT,CLEC11A,KLK1,KLK15,KLK4,MGC137708,SHANK1                                                                               |
| 18 | 57,300,000 | 57,450,000 | 765 | 963  | 1.104143837  | ACPT,KLK1,KLK10,KLK15,KLK4,KLK5,KLK6,KLK7,KLK8,KLK9,MGC137708                                                               |
| 18 | 57,375,000 | 57,525,000 | 766 | 894  | 0.53566706   | CTU1,KLK10,KLK11,KLK12,KLK13,KLK14,KLK5,KLK6,KLK7,KLK8,KLK9                                                                 |
| 18 | 57,450,000 | 57,600,000 | 767 | 1164 | 0.158716237  | CEACAM18,CTU1,KLK10,KLK11,KLK12,KLK13,KLK14,ENSBTAG00000004608,ENSBTAG00000037537                                           |
| 18 | 57,525,000 | 57,675,000 | 768 | 1834 | -0.390691044 | CEACAM18,ENSBTAG00000004608,ENSBTAG00000030440,ENSBTAG00000037537,ENSBTAG00000037699,ENSBTAG00000037710,ENSBTAG00000047301  |
| 18 | 57,600,000 | 57,750,000 | 769 | 2188 | -0.410676905 | SIGLECL1,ENSBTAG00000030440,ENSBTAG00000037699,ENSBTAG00000037710,ENSBTAG00000038526,ENSBTAG00000047301                     |
| 18 | 57,675,000 | 57,825,000 | 770 | 1531 | -0.249668134 | CLDND2,ETFB,IGLON5,LIM2,NKG7,SIGLECL1,VSIG10L,ENSBTAG00000037699,ENSBTAG00000038526                                         |
| 18 | 57,750,000 | 57,900,000 | 771 | 1202 | 0.660106741  | CLDND2,ETFB,IGLON5,LIM2,NKG7,VSIG10L,ENSBTAG0000008851,ENSBTAG0000008852,ENSBTAG00000038526,ENSBTAG00000047675              |
| 18 | 57,825,000 | 57,975,000 | 772 | 1517 | 0.422649821  | LIM2,ZNF175,ENSBTAG0000008851,ENSBTAG0000008852,ENSBTAG00000023365,ENSBTAG00000035868,ENSBTAG00000045880,ENSBTAG00000047675 |
| 18 | 57,900,000 | 58,050,000 | 773 | 1441 | -0.181286991 | HAS1,ZNF175,ENSBTAG00000019227,ENSBTAG00000023365,ENSBTAG00000035868,ENSBTAG00000045880,ENSBTAG00000048204                  |
| 18 | 57,975,000 | 58,125,000 | 774 | 1294 | -0.236298063 | HAS1,ENSBTAG00000014593,ENSBTAG00000019227,ENSBTAG00000035868,ENSBTAG00000039111,ENSBTAG00000039491,ENSBTAG00000048204      |



|    |            |            |     |      |              |                                                                                                  |
|----|------------|------------|-----|------|--------------|--------------------------------------------------------------------------------------------------|
| 18 | 58,050,000 | 58,200,000 | 775 | 1087 | 0.649569654  | ZNF432,ZNF613,ZNF614,ENSBTAG00000014593,ENSBTAG000000037906,ENSBTAG000000039111,ENSBTAG000039491 |
| 18 | 58,125,000 | 58,275,000 | 776 | 1184 | 0.459553531  | ZNF350,ZNF432,ZNF613,ZNF614,ENSBTAG00000037906                                                   |
| 18 | 58,200,000 | 58,350,000 | 777 | 1470 | 0.437222993  | ZNF350,ENSBTAG00000037906                                                                        |
| 18 | 58,275,000 | 58,425,000 | 778 | 1705 | 0.9226376    |                                                                                                  |
| 18 | 58,350,000 | 58,500,000 | 779 | 2050 | 0.647222157  | PPP2R1A,VN1R4                                                                                    |
| 18 | 58,425,000 | 58,575,000 | 780 | 1785 | 0.595520254  | PPP2R1A,VN1R4,ENSBTAG00000046472,ENSBTAG000047617                                                |
| 18 | 58,500,000 | 58,650,000 | 781 | 1173 | 0.323539397  | ENSBTAG00000046472,ENSBTAG00000046510,ENSBTAG00000047617,ENSBTAG00000047761,ENSBTAG000047791     |
| 18 | 58,575,000 | 58,725,000 | 782 | 1138 | -0.665254386 | ENSBTAG00000030470,ENSBTAG00000038903,ENSBTAG00000046510,ENSBTAG00000047761,ENSBTAG000047791     |
| 18 | 58,650,000 | 58,800,000 | 783 | 1437 | -0.257629742 | ENSBTAG00000030470,ENSBTAG00000038125,ENSBTAG00000038903,ENSBTAG00000047761                      |
| 18 | 58,725,000 | 58,875,000 | 784 | 1456 | 0.105343813  | ENSBTAG00000017651,ENSBTAG00000030470,ENSBTAG00000038125                                         |
| 18 | 58,800,000 | 58,950,000 | 785 | 954  | 0.266221043  | ENSBTAG00000017651                                                                               |
| 18 | 58,875,000 | 59,025,000 | 786 | 666  | 0.583830616  | ZNF493,ENSBTAG00000017651                                                                        |
| 18 | 58,950,000 | 59,100,000 | 787 | 700  | 0.067493948  | ZNF493,ENSBTAG00000033604                                                                        |
| 18 | 59,025,000 | 59,175,000 | 788 | 951  | 0.198979523  | ENSBTAG00000033604,ENSBTAG00000045571                                                            |
| 18 | 59,100,000 | 59,250,000 | 789 | 1140 | 0.335452675  | ENSBTAG00000037440,ENSBTAG00000045571                                                            |
| 18 | 59,175,000 | 59,325,000 | 790 | 888  | 0.045741136  | ENSBTAG00000037440                                                                               |
| 18 | 59,250,000 | 59,400,000 | 791 | 876  | 0.432970806  | ENSBTAG00000011052,ENSBTAG00000030454                                                            |
| 18 | 59,325,000 | 59,475,000 | 792 | 1094 | 0.350343251  | ENSBTAG00000011052,ENSBTAG00000030454                                                            |
| 18 | 59,400,000 | 59,550,000 | 793 | 937  | 0.261681307  | ENSBTAG00000011052                                                                               |
| 18 | 59,475,000 | 59,625,000 | 794 | 994  | 1.300085648  |                                                                                                  |
| 18 | 59,550,000 | 59,700,000 | 795 | 1155 | 1.297765008  | ENSBTAG00000040411                                                                               |
| 18 | 59,625,000 | 59,775,000 | 796 | 948  | 1.029084626  | ENSBTAG00000040411                                                                               |
| 18 | 59,700,000 | 59,850,000 | 797 | 844  | 0.822799833  | ENSBTAG00000040411                                                                               |
| 18 | 59,775,000 | 59,925,000 | 798 | 825  | 0.499208646  | ENSBTAG00000015899,ENSBTAG00000021433                                                            |
| 18 | 59,850,000 | 60,000,000 | 799 | 638  | 0.413881685  | ENSBTAG00000015899,ENSBTAG00000021433                                                            |
| 18 | 59,925,000 | 60,075,000 | 800 | 540  | 1.106763022  | ENSBTAG00000011844,ENSBTAG00000021433                                                            |
| 18 | 60,000,000 | 60,150,000 | 801 | 632  | 1.378904165  | ENSBTAG00000011844,ENSBTAG00000047053                                                            |
| 18 | 60,075,000 | 60,225,000 | 802 | 468  | 1.268830849  | ENSBTAG00000011844,ENSBTAG00000047053                                                            |
| 18 | 60,150,000 | 60,300,000 | 803 | 658  | -0.641517025 | ENSBTAG00000004925,ENSBTAG00000045985                                                            |
| 18 | 60,225,000 | 60,375,000 | 804 | 893  | -0.696642361 | ZNF677,ENSBTAG00000004925,ENSBTAG00000039969,ENSBTAG00000045985                                  |
| 18 | 60,300,000 | 60,450,000 | 805 | 1080 | -0.606126109 | ZNF677,ENSBTAG00000004925,ENSBTAG00000017993,ENSBTAG00000039969                                  |
| 18 | 60,375,000 | 60,525,000 | 806 | 1422 | -0.341447817 | ZNF519,ENSBTAG00000017993                                                                        |
| 18 | 60,450,000 | 60,600,000 | 807 | 1341 | 0.011391214  | ZNF519,ENSBTAG00000034090,ENSBTAG00000038702,ENSBTAG00000039849                                  |
| 18 | 60,525,000 | 60,675,000 | 808 | 1248 | 0.426397796  | ENSBTAG00000034090,ENSBTAG00000038702,ENSBTAG00000039849                                         |
| 18 | 60,600,000 | 60,750,000 | 809 | 1247 | 0.889840672  | ENSBTAG00000034090,ENSBTAG00000038702,ENSBTAG00000045581                                         |
| 18 | 60,675,000 | 60,825,000 | 810 | 1353 | 0.279838093  | ENSBTAG00000033642,ENSBTAG00000045581                                                            |
| 18 | 60,750,000 | 60,900,000 | 811 | 1760 | -0.123596448 | ENSBTAG00000033642,ENSBTAG00000045581                                                            |
| 18 | 60,825,000 | 60,975,000 | 812 | 2009 | 0.32989595   | ENSBTAG00000038755,ENSBTAG00000045581                                                            |

|    |            |            |     |      |              |                                                                                                      |
|----|------------|------------|-----|------|--------------|------------------------------------------------------------------------------------------------------|
| 18 | 60,900,000 | 61,050,000 | 813 | 1673 | 0.371254305  | ZNF331,ENSBTAG00000015061,ENSBTAG00000038755,ENSBTAG00000045581                                      |
| 18 | 60,975,000 | 61,125,000 | 814 | 1661 | 0.384007203  | NLRP12,ZNF331,ENSBTAG00000015061,ENSBTAG000038755                                                    |
| 18 | 61,050,000 | 61,200,000 | 815 | 2008 | 0.038643318  | NLRP12                                                                                               |
| 18 | 61,125,000 | 61,275,000 | 816 | 2469 | 0.08614275   | NLRP12,ENSBTAG00000000336,ENSBTAG00000040392,ENSBTAG00000046961                                      |
| 18 | 61,200,000 | 61,350,000 | 817 | 2222 | 0.209663432  | MGC157082,ENSBTAG00000000336,ENSBTAG00000040392,ENSBTAG00000046961                                   |
| 18 | 61,275,000 | 61,425,000 | 818 | 2217 | 0.623055374  | MGC157082,ENSBTAG00000009171,ENSBTAG00000014953                                                      |
| 18 | 61,350,000 | 61,500,000 | 819 | 2200 | 0.69046175   | MGC157082,ENSBTAG00000009171,ENSBTAG00000014953                                                      |
| 18 | 61,425,000 | 61,575,000 | 820 | 1716 | 0.549143041  |                                                                                                      |
| 18 | 61,500,000 | 61,650,000 | 821 | 1896 | 0.833339229  | ENSBTAG00000014328,ENSBTAG00000047602                                                                |
| 18 | 61,575,000 | 61,725,000 | 822 | 1522 | 0.704517214  | ENSBTAG00000002290,ENSBTAG00000009364,ENSBTAG00000014328,ENSBTAG00000047602                          |
| 18 | 61,650,000 | 61,800,000 | 823 | 1414 | -0.592630645 | ENSBTAG00000002290,ENSBTAG00000009364                                                                |
| 18 | 61,725,000 | 61,875,000 | 824 | 1803 | -0.32486386  | ENSBTAG00000013345,ENSBTAG00000015987                                                                |
| 18 | 61,800,000 | 61,950,000 | 825 | 1699 | -0.341728315 | ENSBTAG00000013345,ENSBTAG00000015139,ENSBTAG00000015987                                             |
| 18 | 61,875,000 | 62,025,000 | 826 | 1708 | 0.326172054  | MYADM,ENSBTAG00000015139                                                                             |
| 18 | 61,950,000 | 62,100,000 | 827 | 1408 | 0.818201164  | CACNG7,CACNG8,MYADM,PRKCG,ENSBTAG00000015139                                                         |
| 18 | 62,025,000 | 62,175,000 | 828 | 1352 | 0.651969209  | CACNG6,CACNG7,CACNG8,PRKCG,VSTM1                                                                     |
| 18 | 62,100,000 | 62,250,000 | 829 | 1635 | 0.547093747  | CACNG6,NLRP9,VSTM1,ENSBTAG00000023349                                                                |
| 18 | 62,175,000 | 62,325,000 | 830 | 1050 | 0.173361644  | EPN1,NLRP9,ENSBTAG00000023349,ENSBTAG00000040294                                                     |
| 18 | 62,250,000 | 62,400,000 | 831 | 436  | -0.647220411 | CCDC106,EPN1,FIZ1,U2AF2,ZNF580,ZNF581,ZNF784,ENSBTAG00000037582,ENSBTAG00000040294                   |
| 18 | 62,325,000 | 62,475,000 | 832 | 278  | -1.246709915 | CCDC106,FIZ1,NAT14,SBK2,SSC5D,U2AF2,ZNF580,ZNF581,ZNF784,ENSBTAG00000037582                          |
| 18 | 62,400,000 | 62,550,000 | 833 | 305  | -0.344388335 | FIZ1,ISOC2,NAT14,RPL28,SBK2,SHISA7,SSC5D,UBE2S,ZNF628                                                |
| 18 | 62,475,000 | 62,625,000 | 834 | 333  | 0.567871926  | BRSK1,COX6B2,FAM71E2,IL11,ISOC2,RPL28,SHISA7,SUV420H2,TMEM150B,TMEM190,UBE2S,ZNF628                  |
| 18 | 62,550,000 | 62,700,000 | 835 | 626  | 1.032966499  | BRSK1,COX6B2,FAM71E2,HSPBP1,IL11,PPP6R1,PTPRH,SUV420H2,TMEM150B,TMEM190,TMEM86B,ENSBTAG00000044492   |
| 18 | 62,625,000 | 62,775,000 | 836 | 839  | 1.136731731  | BRSK1,DNAAF3,EP8L1,HSPBP1,PPP1R12C,PPP6R1,PTPRH,SYT5,TMEM86B,TNNI3,TNNT1,ENSBTAG00000044492          |
| 18 | 62,700,000 | 62,850,000 | 837 | 1391 | 1.16831195   | DNAAF3,EP8L1,FCAR,KIR2DL5A,PPP1R12C,RDH13,SYT5,TNNI3,TNNT1                                           |
| 18 | 62,775,000 | 62,925,000 | 838 | 1664 | 1.033676994  | FCAR,KIR2DL5A,NCR1,RDH13,ENSBTAG00000045854,ENSBTAG00000047473,ENSBTAG00000047953,ENSBTAG00000048184 |
| 18 | 62,850,000 | 63,000,000 | 839 | 1526 | 0.549840583  | GP6,KIR2DS1,NCR1,ENSBTAG00000045854,ENSBTAG00000047473,ENSBTAG00000047953,ENSBTAG00000048184         |
| 18 | 62,925,000 | 63,075,000 | 840 | 2067 | 0.35170283   | GP6,KIR2DS1,ENSBTAG00000026080,ENSBTAG00000038797,ENSBTAG00000039413,ENSBTAG00000047953              |

|    |            |            |     |      |              |                                                                                                                                                                                               |
|----|------------|------------|-----|------|--------------|-----------------------------------------------------------------------------------------------------------------------------------------------------------------------------------------------|
| 18 | 63,000,000 | 63,150,000 | 841 | 1963 | 0.366476333  | CDC42EP5,LENG8,LENG9,TTYH1,ENSBTAG00000019547,ENSBTAG00000026080,ENSBTAG00000038797,ENSBTAG00000039413                                                                                        |
| 18 | 63,075,000 | 63,225,000 | 842 | 1297 | 0.480975479  | CDC42EP5,LENG8,LENG9,LILRA4,TTYH1,ENSBTAG000004043,ENSBTAG00000019547,ENSBTAG00000037830,ENSBTAG00000039892,ENSBTAG00000039932                                                                |
| 18 | 63,150,000 | 63,300,000 | 843 | 739  | 0.417758463  | LILRA4,ENSBTAG0000000930,ENSBTAG00000004043,ENSBTAG00000019348,ENSBTAG00000019547,ENSBTAG00000037830,ENSBTAG00000039086,ENSBTAG00000039892,ENSBTAG00000039932,ENSBTAG00000048145              |
| 18 | 63,225,000 | 63,375,000 | 844 | 552  | 0.405083701  | ENSBTAG0000000930,ENSBTAG0000005841,ENSBTAG00000019348,ENSBTAG00000039086,ENSBTAG00000039691,ENSBTAG00000048145                                                                               |
| 18 | 63,300,000 | 63,450,000 | 845 | 1052 | 0.344275473  | CNOT3,LENG1,MBOAT7,PRPF31,RPS9,TMC4,TSEN34,ENSBTAG0000005841,ENSBTAG00000039691                                                                                                               |
| 18 | 63,375,000 | 63,525,000 | 846 | 1672 | 0.508369165  | CNOT3,LENG1,MBOAT7,NDUFA3,OSCAR,PRPF31,RPS9,TARM1,TFPT,TMC4,TSEN34,ENSBTAG00000038890                                                                                                         |
| 18 | 63,450,000 | 63,600,000 | 847 | 2306 | 0.805254656  | NDUFA3,OSCAR,PRPF31,TARM1,TFPT,ENSBTAG00000030360,ENSBTAG00000038416,ENSBTAG00000038890                                                                                                       |
| 18 | 63,525,000 | 63,675,000 | 848 | 2403 | 0.710922315  | NLRP13,NLRP5,NLRP8,ENSBTAG00000030360,ENSBTAG00000036215,ENSBTAG00000038416                                                                                                                   |
| 18 | 63,600,000 | 63,750,000 | 849 | 1585 | 0.560688279  | NLRP13,NLRP5,NLRP8,ZNF444,ZNF787,ENSBTAG00000034302,ENSBTAG00000036215                                                                                                                        |
| 18 | 63,675,000 | 63,825,000 | 850 | 1366 | 0.340144462  | NLRP5,ZNF444,ZNF787,ENSBTAG0000000688,ENSBTAG00000024895,ENSBTAG00000030344,ENSBTAG00000034302,ENSBTAG00000039081,ENSBTAG00000039628,ENSBTAG00000045803,ENSBTAG00000046087,ENSBTAG00000047236 |
| 18 | 63,750,000 | 63,900,000 | 851 | 1522 | -0.008893418 | ZNF667,ENSBTAG0000000688,ENSBTAG00000024895,ENSBTAG00000030344,ENSBTAG00000038022,ENSBTAG00000039081,ENSBTAG00000039628,ENSBTAG00000045803,ENSBTAG00000046087,ENSBTAG00000047236              |
| 18 | 63,825,000 | 63,975,000 | 852 | 1272 | -0.897250688 | ZNF583,ZNF667,ENSBTAG00000030348,ENSBTAG00000037881,ENSBTAG00000038022,ENSBTAG00000046947                                                                                                     |
| 18 | 63,900,000 | 64,050,000 | 853 | 1352 | 0.05427214   | ZFP28,ZNF583,ENSBTAG00000030348,ENSBTAG00000037881,ENSBTAG00000046101,ENSBTAG00000046947                                                                                                      |
| 18 | 63,975,000 | 64,125,000 | 854 | 1476 | 0.599907494  | ZFP28,ENSBTAG00000025288,ENSBTAG00000030348,ENSBTAG00000046101                                                                                                                                |
| 18 | 64,050,000 | 64,200,000 | 855 | 1249 | 0.278906037  | ZFP28,ZIM2,ENSBTAG00000025288,ENSBTAG00000038911,ENSBTAG00000045731                                                                                                                           |
| 18 | 64,125,000 | 64,275,000 | 856 | 825  | 0.096264061  | MGC157368,PEG3,ZIM2,ENSBTAG00000038326,ENSBTAG00000038911,ENSBTAG00000045731                                                                                                                  |
| 18 | 64,200,000 | 64,350,000 | 857 | 474  | -0.380500402 | MGC157368,PEG3,ENSBTAG00000038326                                                                                                                                                             |
| 18 | 64,275,000 | 64,425,000 | 858 | 518  | 0.343086763  | PEG3                                                                                                                                                                                          |
| 18 | 64,350,000 | 64,500,000 | 859 | 604  | 0.482168629  |                                                                                                                                                                                               |
| 18 | 64,425,000 | 64,575,000 | 860 | 940  | 0.69885267   |                                                                                                                                                                                               |
| 18 | 64,500,000 | 64,650,000 | 861 | 1434 | 0.79289458   | ENSBTAG00000003261,ENSBTAG00000038926                                                                                                                                                         |

|    |            |            |     |      |              |                                                                                                                    |
|----|------------|------------|-----|------|--------------|--------------------------------------------------------------------------------------------------------------------|
| 18 | 64,575,000 | 64,725,000 | 862 | 1635 | 0.811253095  | ZNF304,ENSBTAG00000003261,ENSBTAG00000003772<br>1,ENSBTAG000000038926                                              |
| 18 | 64,650,000 | 64,800,000 | 863 | 1750 | 0.869885249  | ZNF304,ENSBTAG000000011262,ENSBTAG00000003737<br>5,ENSBTAG000000037721,ENSBTAG000000039341                         |
| 18 | 64,725,000 | 64,875,000 | 864 | 1842 | 0.869492802  | ZNF772,ENSBTAG00000000195,ENSBTAG00000001126<br>2,ENSBTAG000000017613,ENSBTAG000000037375,ENS<br>BTAG000000039341  |
| 18 | 64,800,000 | 64,950,000 | 865 | 1806 | 0.564941525  | ZNF550,ZNF772,ENSBTAG00000000195,ENSBTAG000<br>00017613                                                            |
| 18 | 64,875,000 | 65,025,000 | 866 | 1689 | 0.36095538   | ZNF550,ZNF772,ENSBTAG000000017613,ENSBTAG000<br>00037981,ENSBTAG000000048261                                       |
| 18 | 64,950,000 | 65,100,000 | 867 | 1579 | 0.050213832  | VN1R1,ZNF134,ENSBTAG000000037981,ENSBTAG0000<br>0048261                                                            |
| 18 | 65,025,000 | 65,175,000 | 868 | 1615 | -0.045927736 | VN1R1,ZNF134,ENSBTAG000000038635                                                                                   |
| 18 | 65,100,000 | 65,250,000 | 869 | 1779 | -0.337336862 | ZNF211,ENSBTAG000000038635,ENSBTAG00000004016<br>9                                                                 |
| 18 | 65,175,000 | 65,325,000 | 870 | 1767 | -0.276882886 | ZNF211,ZNF551,ZSCAN4,ENSBTAG000000040169                                                                           |
| 18 | 65,250,000 | 65,400,000 | 871 | 1560 | -0.008825505 | ZNF551,ZSCAN4                                                                                                      |
| 18 | 65,325,000 | 65,475,000 | 872 | 1075 | -0.170673528 | ZNF814                                                                                                             |
| 18 | 65,400,000 | 65,550,000 | 873 | 885  | -0.28975148  | ZNF814,ENSBTAG000000038715,ENSBTAG00000004044<br>2                                                                 |
| 18 | 65,475,000 | 65,625,000 | 874 | 1111 | -0.45027341  | ZNF154,ENSBTAG000000027787,ENSBTAG00000003871<br>5,ENSBTAG000000040442                                             |
| 18 | 65,550,000 | 65,700,000 | 875 | 1315 | 0.32914756   | ZNF135,ZNF154,ZNF606,ENSBTAG000000027787,ENSB<br>TAG000000040442                                                   |
| 18 | 65,625,000 | 65,775,000 | 876 | 1039 | 0.07794662   | ZNF135,ZNF274,ZNF329,ZNF606                                                                                        |
| 18 | 65,700,000 | 65,850,000 | 877 | 605  | -1.297626087 | A1BG,RPS5,ZNF274,ZNF329,ZNF8                                                                                       |
| 18 | 65,775,000 | 65,925,000 | 878 | 424  | -0.710707808 | A1BG,RPS5,SLC27A5,ZNF132,ZNF446,ZNF584,ZNF8,E<br>NSBTAG000000039453                                                |
| 18 | 65,850,000 | 66,000,000 | 879 | 308  | -0.261283601 | CENPBD1,CHMP2A,MZF1,RPS5,SLC27A5,TRIM28,UBE<br>2M,ZNF132,ZNF446,ZNF584,ENSBTAG000000037595,E<br>NSBTAG000000039453 |
| 18 | 65,925,000 | 66,004,023 | 880 | 170  | -0.063652059 | CENPBD1,CHMP2A,MZF1,SLC27A5,TRIM28,UBE2M,E<br>NSBTAG000000037595                                                   |
| 19 | 0          | 150,000    | 1   | 417  | 0.617964917  | ENSBTAG000000045560,ENSBTAG000000048260                                                                            |
| 19 | 75,000     | 225,000    | 2   | 775  | 0.973254768  | ENSBTAG000000045560,ENSBTAG000000048260                                                                            |
| 19 | 150,000    | 300,000    | 3   | 875  | 0.881792586  | ENSBTAG000000045560                                                                                                |
| 19 | 225,000    | 375,000    | 4   | 943  | 1.004440277  |                                                                                                                    |
| 19 | 300,000    | 450,000    | 5   | 1447 | 1.372122146  |                                                                                                                    |
| 19 | 375,000    | 525,000    | 6   | 1747 | 1.395165995  |                                                                                                                    |
| 19 | 450,000    | 600,000    | 7   | 1393 | 1.286765689  |                                                                                                                    |
| 19 | 525,000    | 675,000    | 8   | 1241 | 1.225352364  | CA10                                                                                                               |
| 19 | 600,000    | 750,000    | 9   | 1075 | 1.30215942   | CA10                                                                                                               |
| 19 | 675,000    | 825,000    | 10  | 1091 | 1.376752859  | CA10                                                                                                               |
| 19 | 750,000    | 900,000    | 11  | 1180 | 1.216703064  | CA10                                                                                                               |
| 19 | 825,000    | 975,000    | 12  | 1350 | 1.041782449  | CA10                                                                                                               |
| 19 | 900,000    | 1,050,000  | 13  | 1478 | 1.301885204  | CA10                                                                                                               |
| 19 | 975,000    | 1,125,000  | 14  | 1147 | 0.61000538   | CA10                                                                                                               |
| 19 | 1,050,000  | 1,200,000  | 15  | 1091 | -0.085540591 | CA10                                                                                                               |
| 19 | 1,125,000  | 1,275,000  | 16  | 1534 | 1.086391994  | CA10                                                                                                               |
| 19 | 1,200,000  | 1,350,000  | 17  | 1556 | 1.350690105  | CA10                                                                                                               |
| 19 | 1,275,000  | 1,425,000  | 18  | 896  | 0.511414247  | CA10                                                                                                               |
| 19 | 1,350,000  | 1,500,000  | 19  | 626  | -2.45921656  | CA10                                                                                                               |

|    |           |           |    |      |              |                          |
|----|-----------|-----------|----|------|--------------|--------------------------|
| 19 | 1,425,000 | 1,575,000 | 20 | 1112 | -4.765045864 | CA10                     |
| 19 | 1,500,000 | 1,650,000 | 21 | 1355 | -4.353214396 |                          |
| 19 | 1,575,000 | 1,725,000 | 22 | 1342 | -2.450812835 |                          |
| 19 | 1,650,000 | 1,800,000 | 23 | 1479 | -1.174710362 |                          |
| 19 | 1,725,000 | 1,875,000 | 24 | 1822 | -0.035314556 |                          |
| 19 | 1,800,000 | 1,950,000 | 25 | 1893 | 0.601596722  |                          |
| 19 | 1,875,000 | 2,025,000 | 26 | 2017 | 0.952967333  |                          |
| 19 | 1,950,000 | 2,100,000 | 27 | 1881 | 0.365436995  |                          |
| 19 | 2,025,000 | 2,175,000 | 28 | 1100 | -1.089349492 |                          |
| 19 | 2,100,000 | 2,250,000 | 29 | 607  | -1.122336843 |                          |
| 19 | 2,175,000 | 2,325,000 | 30 | 555  | -0.119237992 |                          |
| 19 | 2,250,000 | 2,400,000 | 31 | 576  | -0.04399179  |                          |
| 19 | 2,325,000 | 2,475,000 | 32 | 621  | 0.440819715  |                          |
| 19 | 2,400,000 | 2,550,000 | 33 | 1350 | -2.812856652 |                          |
| 19 | 2,475,000 | 2,625,000 | 34 | 1759 | -2.108020254 |                          |
| 19 | 2,550,000 | 2,700,000 | 35 | 1438 | -0.271518192 |                          |
| 19 | 2,625,000 | 2,775,000 | 36 | 1382 | -0.987911112 |                          |
| 19 | 2,700,000 | 2,850,000 | 37 | 1512 | -0.325632957 |                          |
| 19 | 2,775,000 | 2,925,000 | 38 | 1832 | 0.068692324  |                          |
| 19 | 2,850,000 | 3,000,000 | 39 | 2160 | -0.223175822 |                          |
| 19 | 2,925,000 | 3,075,000 | 40 | 2201 | 0.05518589   |                          |
| 19 | 3,000,000 | 3,150,000 | 41 | 2185 | -0.365411731 |                          |
| 19 | 3,075,000 | 3,225,000 | 42 | 2219 | -0.281472347 |                          |
| 19 | 3,150,000 | 3,300,000 | 43 | 2136 | 0.196719484  |                          |
| 19 | 3,225,000 | 3,375,000 | 44 | 2100 | 0.22269626   |                          |
| 19 | 3,300,000 | 3,450,000 | 45 | 2228 | -0.143609577 | IGLV5-52                 |
| 19 | 3,375,000 | 3,525,000 | 46 | 2146 | -0.068061014 | IGLV5-52                 |
| 19 | 3,450,000 | 3,600,000 | 47 | 1884 | -0.284004024 |                          |
| 19 | 3,525,000 | 3,675,000 | 48 | 1941 | -0.942831985 |                          |
| 19 | 3,600,000 | 3,750,000 | 49 | 1872 | -0.37713102  |                          |
| 19 | 3,675,000 | 3,825,000 | 50 | 1614 | 0.543316822  |                          |
| 19 | 3,750,000 | 3,900,000 | 51 | 1690 | 0.587639589  | KIF2B                    |
| 19 | 3,825,000 | 3,975,000 | 52 | 1362 | 0.124262195  | KIF2B,ENSBTAG00000036115 |
| 19 | 3,900,000 | 4,050,000 | 53 | 801  | -2.996580302 | ENSBTAG00000036115       |
| 19 | 3,975,000 | 4,125,000 | 54 | 1017 | -3.001688373 | ENSBTAG00000036115       |
| 19 | 4,050,000 | 4,200,000 | 55 | 1412 | -0.956125925 |                          |
| 19 | 4,125,000 | 4,275,000 | 56 | 1397 | -0.880138747 |                          |
| 19 | 4,200,000 | 4,350,000 | 57 | 1242 | -0.46856318  |                          |
| 19 | 4,275,000 | 4,425,000 | 58 | 1014 | 0.541007083  |                          |
| 19 | 4,350,000 | 4,500,000 | 59 | 1207 | 0.757185114  |                          |
| 19 | 4,425,000 | 4,575,000 | 60 | 1500 | 0.440962757  |                          |
| 19 | 4,500,000 | 4,650,000 | 61 | 1300 | 0.146308743  |                          |
| 19 | 4,575,000 | 4,725,000 | 62 | 1299 | -1.585067287 |                          |
| 19 | 4,650,000 | 4,800,000 | 63 | 1386 | -1.558025932 |                          |
| 19 | 4,725,000 | 4,875,000 | 64 | 1331 | 0.677577583  |                          |
| 19 | 4,800,000 | 4,950,000 | 65 | 1290 | 0.508918429  |                          |
| 19 | 4,875,000 | 5,025,000 | 66 | 1036 | 0.018739825  |                          |
| 19 | 4,950,000 | 5,100,000 | 67 | 988  | -0.976531507 | ENSBTAG00000017221       |
| 19 | 5,025,000 | 5,175,000 | 68 | 1301 | -2.210879622 | ENSBTAG00000017221       |
| 19 | 5,100,000 | 5,250,000 | 69 | 1608 | -1.979648963 | TOM1L1                   |
| 19 | 5,175,000 | 5,325,000 | 70 | 1724 | -0.189008234 | COX11,STXBP4,TOM1L1      |
| 19 | 5,250,000 | 5,400,000 | 71 | 1805 | -0.886319783 | COX11,STXBP4,TOM1L1      |
| 19 | 5,325,000 | 5,475,000 | 72 | 1617 | -0.861107962 | STXBP4                   |

|    |           |           |     |      |              |                                                                  |
|----|-----------|-----------|-----|------|--------------|------------------------------------------------------------------|
| 19 | 5,400,000 | 5,550,000 | 73  | 1342 | -1.124242068 | STXBP4                                                           |
| 19 | 5,475,000 | 5,625,000 | 74  | 1240 | -1.40178072  | STXBP4                                                           |
| 19 | 5,550,000 | 5,700,000 | 75  | 1069 | -1.630975237 | HLF                                                              |
| 19 | 5,625,000 | 5,775,000 | 76  | 1177 | -1.253686116 | HLF                                                              |
| 19 | 5,700,000 | 5,850,000 | 77  | 1377 | 0.377680043  | HLF,MMD                                                          |
| 19 | 5,775,000 | 5,925,000 | 78  | 1325 | 0.835602226  | MMD                                                              |
| 19 | 5,850,000 | 6,000,000 | 79  | 1249 | 0.843409618  |                                                                  |
| 19 | 5,925,000 | 6,075,000 | 80  | 1043 | 1.008438548  |                                                                  |
| 19 | 6,000,000 | 6,150,000 | 81  | 978  | 0.249574879  |                                                                  |
| 19 | 6,075,000 | 6,225,000 | 82  | 1507 | -0.014871935 |                                                                  |
| 19 | 6,150,000 | 6,300,000 | 83  | 1527 | 0.067356814  | TMEM100                                                          |
| 19 | 6,225,000 | 6,375,000 | 84  | 1096 | -0.568930192 | TMEM100,ENSBTAG00000038770,ENSBTAG00000039563,ENSBTAG00000040237 |
| 19 | 6,300,000 | 6,450,000 | 85  | 987  | -0.697437352 | PCTP,ENSBTAG00000038770,ENSBTAG00000039563,ENSBTAG00000040237    |
| 19 | 6,375,000 | 6,525,000 | 86  | 1474 | -0.248171991 | PCTP,ENSBTAG00000039563                                          |
| 19 | 6,450,000 | 6,600,000 | 87  | 2099 | -0.214132012 | PCTP                                                             |
| 19 | 6,525,000 | 6,675,000 | 88  | 2248 | 0.570857844  |                                                                  |
| 19 | 6,600,000 | 6,750,000 | 89  | 2117 | 1.402025974  |                                                                  |
| 19 | 6,675,000 | 6,825,000 | 90  | 1662 | 1.362230867  |                                                                  |
| 19 | 6,750,000 | 6,900,000 | 91  | 1277 | 1.08966481   |                                                                  |
| 19 | 6,825,000 | 6,975,000 | 92  | 1217 | 0.460678322  |                                                                  |
| 19 | 6,900,000 | 7,050,000 | 93  | 1470 | -0.049817469 |                                                                  |
| 19 | 6,975,000 | 7,125,000 | 94  | 1409 | -0.027852339 |                                                                  |
| 19 | 7,050,000 | 7,200,000 | 95  | 1230 | 0.320351904  |                                                                  |
| 19 | 7,125,000 | 7,275,000 | 96  | 1273 | 0.108991249  |                                                                  |
| 19 | 7,200,000 | 7,350,000 | 97  | 1349 | -0.026367604 | ANKFN1                                                           |
| 19 | 7,275,000 | 7,425,000 | 98  | 1217 | 0.373300409  | ANKFN1                                                           |
| 19 | 7,350,000 | 7,500,000 | 99  | 733  | 0.450605403  | ANKFN1,ENSBTAG00000038823                                        |
| 19 | 7,425,000 | 7,575,000 | 100 | 782  | 0.271160964  | ANKFN1,ENSBTAG00000038823                                        |
| 19 | 7,500,000 | 7,650,000 | 101 | 1049 | 0.111362643  | NOG,ENSBTAG00000038823                                           |
| 19 | 7,575,000 | 7,725,000 | 102 | 1187 | 0.365535757  | NOG                                                              |
| 19 | 7,650,000 | 7,800,000 | 103 | 1023 | 0.869855792  |                                                                  |
| 19 | 7,725,000 | 7,875,000 | 104 | 1051 | -1.079906575 | C17orf67                                                         |
| 19 | 7,800,000 | 7,950,000 | 105 | 1034 | -2.371761458 | C17orf67,DGKE,TRIM25                                             |
| 19 | 7,875,000 | 8,025,000 | 106 | 896  | -0.527683642 | COIL,DGKE,SCPEP1,TRIM25                                          |
| 19 | 7,950,000 | 8,100,000 | 107 | 1370 | 0.646406111  | COIL,SCPEP1,TRIM25,ENSBTAG00000046559                            |
| 19 | 8,025,000 | 8,175,000 | 108 | 1217 | 0.592439276  | SCPEP1,ENSBTAG00000046559                                        |
| 19 | 8,100,000 | 8,250,000 | 109 | 751  | 0.691033045  | AKAP1                                                            |
| 19 | 8,175,000 | 8,325,000 | 110 | 803  | 0.587242307  | AKAP1                                                            |
| 19 | 8,250,000 | 8,400,000 | 111 | 799  | -0.034999862 |                                                                  |
| 19 | 8,325,000 | 8,475,000 | 112 | 526  | -0.123298327 |                                                                  |
| 19 | 8,400,000 | 8,550,000 | 113 | 792  | -0.043874669 |                                                                  |
| 19 | 8,475,000 | 8,625,000 | 114 | 1290 | 0.308522751  |                                                                  |
| 19 | 8,550,000 | 8,700,000 | 115 | 1130 | 0.418831484  | KLF5,MSI2                                                        |
| 19 | 8,625,000 | 8,775,000 | 116 | 827  | -0.569749221 | KLF5,MSI2                                                        |
| 19 | 8,700,000 | 8,850,000 | 117 | 843  | -1.104693498 | CCDC182,MSI2                                                     |
| 19 | 8,775,000 | 8,925,000 | 118 | 914  | -1.86519986  | CCDC182,CUEDC1,MRPS23                                            |
| 19 | 8,850,000 | 9,000,000 | 119 | 876  | -1.302187143 | CUEDC1,MRPS23                                                    |
| 19 | 8,925,000 | 9,075,000 | 120 | 865  | 0.400773594  | CUEDC1,SRSF1,VEZF1                                               |
| 19 | 9,000,000 | 9,150,000 | 121 | 1014 | -0.105663782 | DYNLL2,SRSF1,VEZF1                                               |
| 19 | 9,075,000 | 9,225,000 | 122 | 1127 | -0.808698824 | DYNLL2,ENSBTAG00000035001,ENSBTAG0000003742                      |

|    |            |            |     |      |              |                                                                                                                                     |
|----|------------|------------|-----|------|--------------|-------------------------------------------------------------------------------------------------------------------------------------|
| 19 | 9,150,000  | 9,300,000  | 123 | 1416 | -2.436048291 | ENSBTAG00000035001,ENSBTAG00000037424,ENSBTAG00000045606,ENSBTAG00000047689,ENSBTAG0000047870                                       |
| 19 | 9,225,000  | 9,375,000  | 124 | 1888 | -0.401558307 | ENSBTAG00000037424,ENSBTAG00000045606,ENSBTAG00000045769,ENSBTAG00000045921,ENSBTAG0000047689,ENSBTAG00000047770,ENSBTAG00000047870 |
| 19 | 9,300,000  | 9,450,000  | 125 | 1867 | 1.086360448  | LPO,MKS1,ENSBTAG00000045769,ENSBTAG00000045921,ENSBTAG00000047770                                                                   |
| 19 | 9,375,000  | 9,525,000  | 126 | 1506 | 1.111627507  | BZRAP1,LPO,MKS1,MPO                                                                                                                 |
| 19 | 9,450,000  | 9,600,000  | 127 | 1328 | 0.895160245  | BZRAP1,LPO,MPO,RNF43,SUPT4H1                                                                                                        |
| 19 | 9,525,000  | 9,675,000  | 128 | 1191 | 0.831144506  | HSF5,MTMR4,RNF43,SUPT4H1                                                                                                            |
| 19 | 9,600,000  | 9,750,000  | 129 | 1076 | 0.543271579  | C17orf47,HSF5,MTMR4,RNF43,SEPT4,TEX14                                                                                               |
| 19 | 9,675,000  | 9,825,000  | 130 | 1093 | 0.593290327  | C17orf47,MTMR4,SEPT4,TEX14                                                                                                          |
| 19 | 9,750,000  | 9,900,000  | 131 | 901  | 0.202936895  | MGC137055,RAD51C,TEX14,ENSBTAG00000046283                                                                                           |
| 19 | 9,825,000  | 9,975,000  | 132 | 799  | -0.387650858 | MGC137055,RAD51C,TEX14,ENSBTAG00000046283                                                                                           |
| 19 | 9,900,000  | 10,050,000 | 133 | 945  | 0.553545661  | RAD51C                                                                                                                              |
| 19 | 9,975,000  | 10,125,000 | 134 | 1078 | 1.088924976  |                                                                                                                                     |
| 19 | 10,050,000 | 10,200,000 | 135 | 981  | 1.195005824  | PPM1E,TRIM37                                                                                                                        |
| 19 | 10,125,000 | 10,275,000 | 136 | 741  | 0.834879479  | PPM1E,TRIM37,ENSBTAG00000025310                                                                                                     |
| 19 | 10,200,000 | 10,350,000 | 137 | 794  | 0.318544976  | SKA2,TRIM37,ENSBTAG00000025310                                                                                                      |
| 19 | 10,275,000 | 10,425,000 | 138 | 1040 | 0.077620063  | GDPD1,PRR11,SKA2,SMG8,TRIM37                                                                                                        |
| 19 | 10,350,000 | 10,500,000 | 139 | 1026 | 0.239617458  | GDPD1,PRR11,SKA2,SMG8                                                                                                               |
| 19 | 10,425,000 | 10,575,000 | 140 | 815  | 0.807948333  | GDPD1,YPEL2                                                                                                                         |
| 19 | 10,500,000 | 10,650,000 | 141 | 743  | 0.409255061  | YPEL2                                                                                                                               |
| 19 | 10,575,000 | 10,725,000 | 142 | 889  | 0.016323529  | YPEL2                                                                                                                               |
| 19 | 10,650,000 | 10,800,000 | 143 | 809  | -0.472081345 | DHX40                                                                                                                               |
| 19 | 10,725,000 | 10,875,000 | 144 | 673  | -1.221741593 | CLTC,DHX40                                                                                                                          |
| 19 | 10,800,000 | 10,950,000 | 145 | 787  | -1.360513339 | CLTC,DHX40,PTRH2,VMP1                                                                                                               |
| 19 | 10,875,000 | 11,025,000 | 146 | 741  | -0.003016477 | CLTC,PTRH2,VMP1                                                                                                                     |
| 19 | 10,950,000 | 11,100,000 | 147 | 811  | 0.591069382  | RPS6KB1,TUBD1,VMP1                                                                                                                  |
| 19 | 11,025,000 | 11,175,000 | 148 | 956  | 0.675531637  | RNFT1,RPS6KB1,TUBD1,VMP1                                                                                                            |
| 19 | 11,100,000 | 11,250,000 | 149 | 981  | 0.76868621   | RNFT1,RPS6KB1                                                                                                                       |
| 19 | 11,175,000 | 11,325,000 | 150 | 896  | 0.454894547  | MED13                                                                                                                               |
| 19 | 11,250,000 | 11,400,000 | 151 | 682  | 0.776130307  | MED13                                                                                                                               |
| 19 | 11,325,000 | 11,475,000 | 152 | 718  | 0.809979439  | INTS2,MED13                                                                                                                         |
| 19 | 11,400,000 | 11,550,000 | 153 | 682  | 1.003873216  | BRIP1,INTS2,TSPY-M2                                                                                                                 |
| 19 | 11,475,000 | 11,625,000 | 154 | 492  | 1.161687074  | BRIP1,TSPY-M2,ENSBTAG00000047777                                                                                                    |
| 19 | 11,550,000 | 11,700,000 | 155 | 728  | 1.059013594  | BRIP1,ENSBTAG00000047777                                                                                                            |
| 19 | 11,625,000 | 11,775,000 | 156 | 1083 | 1.115537793  | BRIP1                                                                                                                               |
| 19 | 11,700,000 | 11,850,000 | 157 | 1249 | 1.101483887  |                                                                                                                                     |
| 19 | 11,775,000 | 11,925,000 | 158 | 1086 | 0.716661152  | TBX4                                                                                                                                |
| 19 | 11,850,000 | 12,000,000 | 159 | 881  | 0.423246588  | TBX2,TBX4                                                                                                                           |
| 19 | 11,925,000 | 12,075,000 | 160 | 754  | 0.07775018   | TBX2                                                                                                                                |
| 19 | 12,000,000 | 12,150,000 | 161 | 539  | 0.036125756  |                                                                                                                                     |
| 19 | 12,075,000 | 12,225,000 | 162 | 658  | 0.805352379  |                                                                                                                                     |
| 19 | 12,150,000 | 12,300,000 | 163 | 787  | 0.580722575  | BCAS3,SNRPG                                                                                                                         |
| 19 | 12,225,000 | 12,375,000 | 164 | 643  | 0.393941457  | BCAS3,SNRPG                                                                                                                         |
| 19 | 12,300,000 | 12,450,000 | 165 | 716  | 0.939705104  | BCAS3                                                                                                                               |
| 19 | 12,375,000 | 12,525,000 | 166 | 829  | 1.247902024  | BCAS3                                                                                                                               |
| 19 | 12,450,000 | 12,600,000 | 167 | 520  | 0.956634028  | BCAS3,ENSBTAG00000033841,ENSBTAG00000045964                                                                                         |

|    |            |            |     |      |              |                                                                           |
|----|------------|------------|-----|------|--------------|---------------------------------------------------------------------------|
| 19 | 12,525,000 | 12,675,000 | 168 | 266  | -0.68799434  | BCAS3,PPM1D,ENSBTAG00000033841,ENSBTAG0000045964                          |
| 19 | 12,600,000 | 12,750,000 | 169 | 828  | -1.406364215 | PPM1D                                                                     |
| 19 | 12,675,000 | 12,825,000 | 170 | 1118 | -1.571377587 | APPBP2,C17orf64                                                           |
| 19 | 12,750,000 | 12,900,000 | 171 | 667  | -1.391702338 | APPBP2,C17orf64,ENSBTAG00000034433                                        |
| 19 | 12,825,000 | 12,975,000 | 172 | 461  | -0.248042628 | C17orf64,ENSBTAG00000034433                                               |
| 19 | 12,900,000 | 13,050,000 | 173 | 463  | 0.663218112  | ENSBTAG00000020089                                                        |
| 19 | 12,975,000 | 13,125,000 | 174 | 471  | 0.722662267  | CA4,ENSBTAG00000020089                                                    |
| 19 | 13,050,000 | 13,200,000 | 175 | 846  | 0.831553487  | CA4,MYO19,PIGW,ZNHIT3,ENSBTAG00000020089                                  |
| 19 | 13,125,000 | 13,275,000 | 176 | 1117 | 0.263836556  | DHRS11,GGNBP2,MRM1,MYO19,PIGW,ZNHIT3                                      |
| 19 | 13,200,000 | 13,350,000 | 177 | 1051 | -0.574452765 | DHRS11,GGNBP2,MRM1                                                        |
| 19 | 13,275,000 | 13,425,000 | 178 | 1124 | 0.620896949  |                                                                           |
| 19 | 13,350,000 | 13,500,000 | 179 | 1174 | 0.74297708   |                                                                           |
| 19 | 13,425,000 | 13,575,000 | 180 | 1145 | 0.561126032  | ENSBTAG00000000560                                                        |
| 19 | 13,500,000 | 13,650,000 | 181 | 788  | 0.756996059  | AATF,LHX1,ENSBTAG00000000560                                              |
| 19 | 13,575,000 | 13,725,000 | 182 | 508  | 0.286101152  | AATF,LHX1                                                                 |
| 19 | 13,650,000 | 13,800,000 | 183 | 542  | 0.353269416  | AATF,ACACA                                                                |
| 19 | 13,725,000 | 13,875,000 | 184 | 747  | 1.162401344  | AATF,ACACA                                                                |
| 19 | 13,800,000 | 13,950,000 | 185 | 689  | 1.263172862  | ACACA                                                                     |
| 19 | 13,875,000 | 14,025,000 | 186 | 519  | 0.791685003  | ACACA,C17orf78                                                            |
| 19 | 13,950,000 | 14,100,000 | 187 | 515  | 0.45474587   | ACACA,C17orf78,DUSP14,TADA2A                                              |
| 19 | 14,025,000 | 14,175,000 | 188 | 567  | -0.531853929 | DUSP14,SYNRG,TADA2A                                                       |
| 19 | 14,100,000 | 14,250,000 | 189 | 643  | -0.152760164 | DDX52,DUSP14,SYNRG                                                        |
| 19 | 14,175,000 | 14,325,000 | 190 | 654  | 0.790129232  | DDX52,HNF1B,SYNRG                                                         |
| 19 | 14,250,000 | 14,400,000 | 191 | 619  | 0.709642865  | HNF1B                                                                     |
| 19 | 14,325,000 | 14,475,000 | 192 | 1029 | -0.571341915 | HEATR6,HNF1B                                                              |
| 19 | 14,400,000 | 14,550,000 | 193 | 1593 | 0.125552518  | HEATR6,ENSBTAG00000025258                                                 |
| 19 | 14,475,000 | 14,625,000 | 194 | 1342 | 0.841429288  | HEATR6,WFDC18,ENSBTAG00000025258,ENSBTAG0000046944,ENSBTAG00000046975     |
| 19 | 14,550,000 | 14,700,000 | 195 | 849  | -0.46339181  | CCL3,CCL4,WFDC18,ENSBTAG00000039504,ENSBTAG00000046944,ENSBTAG00000046975 |
| 19 | 14,625,000 | 14,775,000 | 196 | 923  | -0.359420938 | CCL3,CCL4,ENSBTAG00000003289,ENSBTAG00000010155,ENSBTAG00000039504        |
| 19 | 14,700,000 | 14,850,000 | 197 | 1388 | -0.070622954 | CCL14,CCL16,CCL5,HEATR9,ENSBTAG00000003289,ENSBTAG00000010155             |
| 19 | 14,775,000 | 14,925,000 | 198 | 1081 | -0.428914806 | CCL14,CCL16,CCL5,HEATR9,MMP28,TAF15                                       |
| 19 | 14,850,000 | 15,000,000 | 199 | 470  | 0.110312916  | C17orf50,GAS2L2,HEATR9,MMP28,RASL10B,TAF15                                |
| 19 | 14,925,000 | 15,075,000 | 200 | 410  | 1.202912562  | AP2B1,C17orf50,GAS2L2,MMP28,RASL10B                                       |
| 19 | 15,000,000 | 15,150,000 | 201 | 588  | 0.449700852  | AP2B1,PEX12,SLFN14,ENSBTAG00000019437                                     |
| 19 | 15,075,000 | 15,225,000 | 202 | 721  | -1.034940114 | AP2B1,PEX12,SLFN14,ENSBTAG00000019437,ENSBTAG00000025219                  |
| 19 | 15,150,000 | 15,300,000 | 203 | 1214 | -1.129506361 | FNDC8,NLE1,RAD51D,UNC45B,ENSBTAG00000025219                               |
| 19 | 15,225,000 | 15,375,000 | 204 | 1339 | -0.512935801 | FNDC8,NLE1,RAD51D,UNC45B                                                  |
| 19 | 15,300,000 | 15,450,000 | 205 | 1023 | -1.156265899 | CCT6B,LIG3,RAD51D,RFFL,ZNF830                                             |
| 19 | 15,375,000 | 15,525,000 | 206 | 1001 | -1.229752736 | CCT6B,LIG3,RFFL,ZNF830                                                    |
| 19 | 15,450,000 | 15,600,000 | 207 | 1288 | 0.360591654  | CCT6B                                                                     |
| 19 | 15,525,000 | 15,675,000 | 208 | 1912 | 0.827646873  |                                                                           |
| 19 | 15,600,000 | 15,750,000 | 209 | 1834 | 1.060244599  |                                                                           |
| 19 | 15,675,000 | 15,825,000 | 210 | 1232 | -0.018620617 | TMEM132E                                                                  |
| 19 | 15,750,000 | 15,900,000 | 211 | 1019 | -0.401963896 | TMEM132E                                                                  |
| 19 | 15,825,000 | 15,975,000 | 212 | 1302 | 0.196928311  |                                                                           |
| 19 | 15,900,000 | 16,050,000 | 213 | 1687 | -0.740654424 |                                                                           |



|    |            |            |     |      |              |                                                                     |
|----|------------|------------|-----|------|--------------|---------------------------------------------------------------------|
| 19 | 15,975,000 | 16,125,000 | 214 | 1643 | -0.654954493 | CCL1                                                                |
| 19 | 16,050,000 | 16,200,000 | 215 | 1643 | -0.073098991 | CCL1,CCL11,CCL8                                                     |
| 19 | 16,125,000 | 16,275,000 | 216 | 1535 | 0.167109446  | CCL11,CCL2,CCL8                                                     |
| 19 | 16,200,000 | 16,350,000 | 217 | 1379 | 1.071259108  | CCL2                                                                |
| 19 | 16,275,000 | 16,425,000 | 218 | 1421 | 1.168932797  | ACCN1                                                               |
| 19 | 16,350,000 | 16,500,000 | 219 | 1415 | 1.164077867  | ACCN1                                                               |
| 19 | 16,425,000 | 16,575,000 | 220 | 1636 | 0.876138575  | ACCN1                                                               |
| 19 | 16,500,000 | 16,650,000 | 221 | 1775 | 0.812898222  | ACCN1                                                               |
| 19 | 16,575,000 | 16,725,000 | 222 | 1192 | 0.603041636  | ACCN1                                                               |
| 19 | 16,650,000 | 16,800,000 | 223 | 1019 | -0.107507018 | ACCN1                                                               |
| 19 | 16,725,000 | 16,875,000 | 224 | 1587 | 0.100244472  | ACCN1                                                               |
| 19 | 16,800,000 | 16,950,000 | 225 | 1321 | 0.257807501  | ACCN1                                                               |
| 19 | 16,875,000 | 17,025,000 | 226 | 976  | 0.688151205  | ACCN1                                                               |
| 19 | 16,950,000 | 17,100,000 | 227 | 1078 | 0.898649797  | ACCN1                                                               |
| 19 | 17,025,000 | 17,175,000 | 228 | 894  | 0.760132464  | ACCN1                                                               |
| 19 | 17,100,000 | 17,250,000 | 229 | 597  | 0.269053546  | ACCN1                                                               |
| 19 | 17,175,000 | 17,325,000 | 230 | 820  | -0.59274324  | ACCN1                                                               |
| 19 | 17,250,000 | 17,400,000 | 231 | 1257 | -0.025899023 | ACCN1                                                               |
| 19 | 17,325,000 | 17,475,000 | 232 | 1258 | 0.6174905    | ACCN1                                                               |
| 19 | 17,400,000 | 17,550,000 | 233 | 1191 | 0.655322653  | ACCN1                                                               |
| 19 | 17,475,000 | 17,625,000 | 234 | 1040 | 0.764214653  | ACCN1,SPACA3,TMEM98                                                 |
| 19 | 17,550,000 | 17,700,000 | 235 | 857  | 0.516569897  | ACCN1,MYO1D,SPACA3,TMEM98                                           |
| 19 | 17,625,000 | 17,775,000 | 236 | 1113 | 0.275204959  | MYO1D,TMEM98                                                        |
| 19 | 17,700,000 | 17,850,000 | 237 | 1309 | -0.182499963 | MYO1D                                                               |
| 19 | 17,775,000 | 17,925,000 | 238 | 1244 | -0.117573049 | MYO1D                                                               |
| 19 | 17,850,000 | 18,000,000 | 239 | 844  | -0.057673215 | MYO1D                                                               |
| 19 | 17,925,000 | 18,075,000 | 240 | 448  | -1.146427516 | CDK5R1,MYO1D,PSMD11                                                 |
| 19 | 18,000,000 | 18,150,000 | 241 | 444  | -0.515984276 | C17orf75,CDK5R1,MYO1D,PSMD11,ZNF207                                 |
| 19 | 18,075,000 | 18,225,000 | 242 | 631  | 0.053411532  | C17orf75,RHBDL3,ZNF207                                              |
| 19 | 18,150,000 | 18,300,000 | 243 | 825  | 0.62099402   | C17orf75,RHBDL3,RHOT1                                               |
| 19 | 18,225,000 | 18,375,000 | 244 | 776  | 0.083210874  | ADAP2,RHOT1,RNF135                                                  |
| 19 | 18,300,000 | 18,450,000 | 245 | 619  | -0.811414229 | ADAP2,ATAD5,C19H17orf42,RHOT1,RNF135                                |
| 19 | 18,375,000 | 18,525,000 | 246 | 544  | -0.570770993 | ADAP2,ATAD5,C19H17orf42,CRLF3,SUZ12                                 |
| 19 | 18,450,000 | 18,600,000 | 247 | 466  | -0.199507924 | CRLF3,SUZ12,UTP6                                                    |
| 19 | 18,525,000 | 18,675,000 | 248 | 468  | -0.72716298  | COPRS,SUZ12,UTP6                                                    |
| 19 | 18,600,000 | 18,750,000 | 249 | 565  | -0.962048225 | COPRS                                                               |
| 19 | 18,675,000 | 18,825,000 | 250 | 767  | -0.727059723 |                                                                     |
| 19 | 18,750,000 | 18,900,000 | 251 | 819  | -1.060518187 | RAB11FIP4                                                           |
| 19 | 18,825,000 | 18,975,000 | 252 | 642  | -0.974183178 | NF1,RAB11FIP4                                                       |
| 19 | 18,900,000 | 19,050,000 | 253 | 586  | 0.155734545  | EVI2A,EVI2B,NF1,OMG                                                 |
| 19 | 18,975,000 | 19,125,000 | 254 | 606  | 0.925775643  | EVI2A,EVI2B,NF1,OMG                                                 |
| 19 | 19,050,000 | 19,200,000 | 255 | 587  | 0.72044063   | NF1                                                                 |
| 19 | 19,125,000 | 19,275,000 | 256 | 570  | 0.673989306  | NF1                                                                 |
| 19 | 19,200,000 | 19,350,000 | 257 | 826  | 0.841059989  | NF1                                                                 |
| 19 | 19,275,000 | 19,425,000 | 258 | 742  | 0.852673307  | WSB1                                                                |
| 19 | 19,350,000 | 19,500,000 | 259 | 617  | 0.924302114  | WSB1                                                                |
| 19 | 19,425,000 | 19,575,000 | 260 | 887  | 0.513871719  | KSR1                                                                |
| 19 | 19,500,000 | 19,650,000 | 261 | 860  | -0.019400056 | KSR1,ENSBTAG00000046372                                             |
| 19 | 19,575,000 | 19,725,000 | 262 | 890  | -0.573497348 | KSR1,ENSBTAG00000046372                                             |
| 19 | 19,650,000 | 19,800,000 | 263 | 1039 | -1.479924873 | INOS,LGALS9,ENSBTAG00000046372                                      |
| 19 | 19,725,000 | 19,875,000 | 264 | 1036 | -1.09272817  | INOS,LGALS9,ULBP27                                                  |
| 19 | 19,800,000 | 19,950,000 | 265 | 1001 | -0.77927479  | INOS,ULBP27,ENSBTAG0000001836,ENSBTAG00000023970,ENSBTAG00000046595 |

|    |            |            |     |      |              |                                                                                                       |
|----|------------|------------|-----|------|--------------|-------------------------------------------------------------------------------------------------------|
| 19 | 19,875,000 | 20,025,000 | 266 | 957  | -0.574514603 | INOS,LYRM9,ULBP27,ENSBTAG00000001836,ENSBTA<br>G00000007238,ENSBTAG00000023970,ENSBTAG0000<br>0046595 |
| 19 | 19,950,000 | 20,100,000 | 267 | 1136 | -1.546805173 | INOS,LYRM9,ENSBTAG00000007238                                                                         |
| 19 | 20,025,000 | 20,175,000 | 268 | 1016 | -2.328453196 | LYRM9                                                                                                 |
| 19 | 20,100,000 | 20,250,000 | 269 | 598  | -0.80188669  | NLK                                                                                                   |
| 19 | 20,175,000 | 20,325,000 | 270 | 567  | 0.976241582  | NLK                                                                                                   |
| 19 | 20,250,000 | 20,400,000 | 271 | 666  | 1.379839597  | IFT20,NLK,POLDIP2,TMEM199,TMEM97,TNFAIP1                                                              |
| 19 | 20,325,000 | 20,475,000 | 272 | 724  | 0.432941987  | IFT20,POLDIP2,SARM1,SEBOX,SLC46A1,TMEM199,TM<br>EM97,TNFAIP1,VTN                                      |
| 19 | 20,400,000 | 20,550,000 | 273 | 633  | -0.696253726 | FOXN1,SARM1,SEBOX,SLC13A2,SLC46A1,TMEM199,V<br>TN                                                     |
| 19 | 20,475,000 | 20,625,000 | 274 | 508  | 0.191350526  | ALDOC,FOXN1,KIAA0100,PIGS,SLC13A2,SPAG5,UNC1<br>19,ENSBTAG00000011984                                 |
| 19 | 20,550,000 | 20,700,000 | 275 | 387  | 0.945134895  | ALDOC,FOXN1,KIAA0100,PIGS,PROCA1,RAB34,SDF2,S<br>PAG5,SUPT6H,UNC119,ENSBTAG00000011984                |
| 19 | 20,625,000 | 20,775,000 | 276 | 255  | 0.716688796  | FAM222B,KIAA0100,NEK8,PROCA1,RAB34,RPL23A,SD<br>F2,SUPT6H,TLCD1,TRAF4                                 |
| 19 | 20,700,000 | 20,850,000 | 277 | 414  | -0.356337805 | DHRS13,ERAL1,FAM222B,FLOT2,NEK8,PHF12,RAB34,R<br>PL23A,TLCD1,TRAF4                                    |
| 19 | 20,775,000 | 20,925,000 | 278 | 618  | 0.66180695   | DHRS13,ERAL1,FAM222B,FLOT2,PHF12,SEZ6                                                                 |
| 19 | 20,850,000 | 21,000,000 | 279 | 768  | 1.015859591  | MYO18A,PHF12,PIPOX,SEZ6                                                                               |
| 19 | 20,925,000 | 21,075,000 | 280 | 816  | -0.165941858 | MYO18A,PIPOX,SEZ6                                                                                     |
| 19 | 21,000,000 | 21,150,000 | 281 | 639  | -0.756987027 | COX7C,CRYBA1,MYO18A                                                                                   |
| 19 | 21,075,000 | 21,225,000 | 282 | 468  | 0.456365567  | COX7C,CRYBA1,MYO18A,NUFIP2                                                                            |
| 19 | 21,150,000 | 21,300,000 | 283 | 335  | 0.801403217  | CRYBA1,NUFIP2                                                                                         |
| 19 | 21,225,000 | 21,375,000 | 284 | 253  | 0.258112489  | TAOK1                                                                                                 |
| 19 | 21,300,000 | 21,450,000 | 285 | 300  | 0.06421543   | ABHD15,ANKRD13B,CORO6,GIT1,SSH2,TAOK1,TP53I1<br>3                                                     |
| 19 | 21,375,000 | 21,525,000 | 286 | 409  | -0.132101676 | ABHD15,ANKRD13B,CORO6,GIT1,SSH2,TP53I13                                                               |
| 19 | 21,450,000 | 21,600,000 | 287 | 578  | 0.61719159   | SSH2                                                                                                  |
| 19 | 21,525,000 | 21,675,000 | 288 | 561  | 1.176908375  |                                                                                                       |
| 19 | 21,600,000 | 21,750,000 | 289 | 591  | 1.287180459  | EFCAB5                                                                                                |
| 19 | 21,675,000 | 21,825,000 | 290 | 773  | 1.152062902  | EFCAB5,NSRP1                                                                                          |
| 19 | 21,750,000 | 21,900,000 | 291 | 644  | 0.180190633  | BLMH,EFCAB5,NSRP1,SLC6A4                                                                              |
| 19 | 21,825,000 | 21,975,000 | 292 | 397  | -0.598541524 | BLMH,NSRP1,SLC6A4,TMIGD1                                                                              |
| 19 | 21,900,000 | 22,050,000 | 293 | 501  | -0.158781919 | BLMH,CPD,TMIGD1                                                                                       |
| 19 | 21,975,000 | 22,125,000 | 294 | 644  | 0.216699387  | CPD,GOSR1                                                                                             |
| 19 | 22,050,000 | 22,200,000 | 295 | 833  | 0.45050578   | BHLHA9,CPD,GOSR1,TUSC5                                                                                |
| 19 | 22,125,000 | 22,275,000 | 296 | 941  | -0.833304104 | BHLHA9,GOSR1,TUSC5                                                                                    |
| 19 | 22,200,000 | 22,350,000 | 297 | 665  | -0.737242221 | ABR                                                                                                   |
| 19 | 22,275,000 | 22,425,000 | 298 | 684  | 0.305132482  | ABR                                                                                                   |
| 19 | 22,350,000 | 22,500,000 | 299 | 563  | -0.697784109 | ABR,NXN,TIMM22                                                                                        |
| 19 | 22,425,000 | 22,575,000 | 300 | 312  | -1.918995634 | ABR,NXN,TIMM22                                                                                        |
| 19 | 22,500,000 | 22,650,000 | 301 | 676  | -1.703477339 | GLOD4,NXN,RNMTL1                                                                                      |
| 19 | 22,575,000 | 22,725,000 | 302 | 809  | -2.774203944 | DBIL5,GEMIN4,GLOD4,MGC155170,NXN,RNMTL1,VPS<br>53                                                     |
| 19 | 22,650,000 | 22,800,000 | 303 | 574  | -3.047061419 | DBIL5,GEMIN4,GLOD4,MGC155170,VPS53                                                                    |
| 19 | 22,725,000 | 22,875,000 | 304 | 609  | -0.107930964 | C17orf97,FAM101B,RPH3AL,VPS53                                                                         |
| 19 | 22,800,000 | 22,950,000 | 305 | 1135 | 1.281416826  | C17orf97,FAM101B,RPH3AL,VPS53                                                                         |
| 19 | 22,875,000 | 23,025,000 | 306 | 1196 | 1.411749761  | RPH3AL                                                                                                |
| 19 | 22,950,000 | 23,100,000 | 307 | 655  | 0.916589442  | DOC2B,RPH3AL,YWHAE                                                                                    |
| 19 | 23,025,000 | 23,175,000 | 308 | 390  | -0.074033996 | CRK,DOC2B,MYO1C,YWHAE                                                                                 |

|    |            |            |     |      |              |                                                                                                                                                                                                     |
|----|------------|------------|-----|------|--------------|-----------------------------------------------------------------------------------------------------------------------------------------------------------------------------------------------------|
| 19 | 23,100,000 | 23,250,000 | 309 | 413  | 0.617328062  | CRK,INPP5K,MYO1C,PITPNA,YWHAE                                                                                                                                                                       |
| 19 | 23,175,000 | 23,325,000 | 310 | 599  | -0.228063887 | INPP5K,MYO1C,PITPNA,PRPF8,RILP,SCARF1,SLC43A2                                                                                                                                                       |
| 19 | 23,250,000 | 23,400,000 | 311 | 656  | -1.737043978 | PRPF8,RILP,SCARF1,SLC43A2,TLCD2,WDR81                                                                                                                                                               |
| 19 | 23,325,000 | 23,475,000 | 312 | 651  | -2.198466697 | PRPF8,SERPINF1,SERPINF2,SMYD4,TLCD2,WDR81                                                                                                                                                           |
| 19 | 23,400,000 | 23,550,000 | 313 | 724  | -3.606259278 | RPA1,SERPINF1,SERPINF2,SMYD4,WDR81                                                                                                                                                                  |
| 19 | 23,475,000 | 23,625,000 | 314 | 660  | -3.905730307 | RPA1,RTN4RL1,SMYD4                                                                                                                                                                                  |
| 19 | 23,550,000 | 23,700,000 | 315 | 499  | -0.32921041  | DPH1,HIC1,OVCA2,RTN4RL1,SMG6                                                                                                                                                                        |
| 19 | 23,625,000 | 23,775,000 | 316 | 526  | -0.002873958 | DPH1,HIC1,OVCA2,SMG6                                                                                                                                                                                |
| 19 | 23,700,000 | 23,850,000 | 317 | 544  | -0.420839317 | SMG6                                                                                                                                                                                                |
| 19 | 23,775,000 | 23,925,000 | 318 | 446  | -0.930087035 | SGSM2,SMG6,SRR,TSR1                                                                                                                                                                                 |
| 19 | 23,850,000 | 24,000,000 | 319 | 308  | -0.035416753 | METTL16,MNT,SGSM2,SMG6,SRR,TSR1                                                                                                                                                                     |
| 19 | 23,925,000 | 24,075,000 | 320 | 276  | 0.487259403  | METTL16,MNT                                                                                                                                                                                         |
| 19 | 24,000,000 | 24,150,000 | 321 | 296  | -0.09798435  | METTL16,PAFAH1B1                                                                                                                                                                                    |
| 19 | 24,075,000 | 24,225,000 | 322 | 369  | -0.544811493 | CLUH,PAFAH1B1                                                                                                                                                                                       |
| 19 | 24,150,000 | 24,300,000 | 323 | 562  | -1.857469094 | CLUH,PAFAH1B1                                                                                                                                                                                       |
| 19 | 24,225,000 | 24,375,000 | 324 | 805  | -0.690665777 |                                                                                                                                                                                                     |
| 19 | 24,300,000 | 24,450,000 | 325 | 1180 | -0.210555877 | RAP1GAP2                                                                                                                                                                                            |
| 19 | 24,375,000 | 24,525,000 | 326 | 1596 | -1.47377917  | OR1G1,RAP1GAP2,ENSBTAG00000008324,ENSBTAG0000008481,ENSBTAG00000040362                                                                                                                              |
| 19 | 24,450,000 | 24,600,000 | 327 | 2242 | -0.690312315 | OR1G1,RAP1GAP2,ENSBTAG00000008324,ENSBTAG0000008481,ENSBTAG00000019391,ENSBTAG00000039411,ENSBTAG00000039633,ENSBTAG00000040362,ENSBTAG00000048282                                                  |
| 19 | 24,525,000 | 24,675,000 | 328 | 1969 | 0.127082423  | OR3A1,ENSBTAG00000018221,ENSBTAG00000019391,ENSBTAG00000039411,ENSBTAG00000039633,ENSBTAG00000047049,ENSBTAG00000048099,ENSBTAG00000048282                                                          |
| 19 | 24,600,000 | 24,750,000 | 329 | 1010 | -0.948821961 | OR3A1,ENSBTAG00000018221,ENSBTAG00000032467,ENSBTAG00000037529,ENSBTAG00000038059,ENSBTAG00000045667,ENSBTAG00000046217,ENSBTAG00000046652,ENSBTAG00000046960,ENSBTAG00000047049,ENSBTAG00000048099 |
| 19 | 24,675,000 | 24,825,000 | 330 | 1441 | 0.110164053  | SPATA22,ENSBTAG00000032457,ENSBTAG00000032467,ENSBTAG00000037529,ENSBTAG00000038059,ENSBTAG00000045667,ENSBTAG00000045899,ENSBTAG00000046217,ENSBTAG00000046652,ENSBTAG00000047458                  |
| 19 | 24,750,000 | 24,900,000 | 331 | 1593 | 0.224134901  | ASPA,SPATA22,TRPV3,ENSBTAG00000018880,ENSBTAG00000032457,ENSBTAG00000045899,ENSBTAG00000046217,ENSBTAG00000047458                                                                                   |
| 19 | 24,825,000 | 24,975,000 | 332 | 1144 | -0.303550696 | ASPA,CARKL,CTNS,TAX1BP3,TRPV3,ENSBTAG00000018880                                                                                                                                                    |
| 19 | 24,900,000 | 25,050,000 | 333 | 1223 | -0.352219409 | CARKL,CTNS,EMC6,GSG2,ITGAE,TAX1BP3,ENSBTAG0000015258,ENSBTAG00000018880                                                                                                                             |
| 19 | 24,975,000 | 25,125,000 | 334 | 1152 | -0.474345111 | C1orf85,CAMKK1,EMC6,GSG2,ITGAE,TAX1BP3,ENSBTAG00000015258                                                                                                                                           |
| 19 | 25,050,000 | 25,200,000 | 335 | 1034 | 0.119267022  | ATP2A3,C1orf85,CAMKK1,P2RX1                                                                                                                                                                         |
| 19 | 25,125,000 | 25,275,000 | 336 | 1048 | 0.394594472  | ATP2A3,CAMKK1,P2RX1,ZZEF1                                                                                                                                                                           |
| 19 | 25,200,000 | 25,350,000 | 337 | 1002 | 0.199563441  | ANKFY1,CYB5D2,ZZEF1                                                                                                                                                                                 |
| 19 | 25,275,000 | 25,425,000 | 338 | 964  | 0.953089871  | ANKFY1,CYB5D2,UBE2G1,ZZEF1                                                                                                                                                                          |
| 19 | 25,350,000 | 25,500,000 | 339 | 838  | 1.40734748   | ANKFY1,UBE2G1                                                                                                                                                                                       |
| 19 | 25,425,000 | 25,575,000 | 340 | 967  | 1.163873441  | SPNS3,UBE2G1                                                                                                                                                                                        |
| 19 | 25,500,000 | 25,650,000 | 341 | 1140 | 0.703732986  | MYBBP1A,SPNS2,SPNS3                                                                                                                                                                                 |

|    |            |            |     |      |              |                                                                                                                              |
|----|------------|------------|-----|------|--------------|------------------------------------------------------------------------------------------------------------------------------|
| 19 | 25,575,000 | 25,725,000 | 342 | 831  | 0.34657298   | GGT6,MYBBP1A,SMTNL2,SPNS2,SPNS3,TEKT1                                                                                        |
| 19 | 25,650,000 | 25,800,000 | 343 | 735  | -0.110161154 | FBXO39,GGT6,MYBBP1A,SLC13A5,SMTNL2,TEKT1,XAF1                                                                                |
| 19 | 25,725,000 | 25,875,000 | 344 | 657  | -0.201419849 | FBXO39,KIAA0753,MED31,SLC13A5,TXNDC17,XAF1                                                                                   |
| 19 | 25,800,000 | 25,950,000 | 345 | 428  | 0.079785205  | KIAA0753,MED31,PITPNM3,SLC13A5,TXNDC17,ENSBTAG00000047858                                                                    |
| 19 | 25,875,000 | 26,025,000 | 346 | 565  | 0.172689221  | FAM64A,KIAA0753,PITPNM3,ENSBTAG00000047858                                                                                   |
| 19 | 25,950,000 | 26,100,000 | 347 | 807  | -1.634175969 | AIPL1,FAM64A,PITPNM3                                                                                                         |
| 19 | 26,025,000 | 26,175,000 | 348 | 954  | -1.786490878 | AIPL1,FAM64A                                                                                                                 |
| 19 | 26,100,000 | 26,250,000 | 349 | 962  | -0.700532973 |                                                                                                                              |
| 19 | 26,175,000 | 26,325,000 | 350 | 1041 | -0.573420499 | WSCD1                                                                                                                        |
| 19 | 26,250,000 | 26,400,000 | 351 | 1438 | -0.217264029 | WSCD1                                                                                                                        |
| 19 | 26,325,000 | 26,475,000 | 352 | 1399 | -0.287583092 |                                                                                                                              |
| 19 | 26,400,000 | 26,550,000 | 353 | 1233 | -0.274072764 |                                                                                                                              |
| 19 | 26,475,000 | 26,625,000 | 354 | 1388 | -0.410842271 |                                                                                                                              |
| 19 | 26,550,000 | 26,700,000 | 355 | 1220 | -0.387496487 | DERL2,MIS12,NLRP1,ENSBTAG00000025126                                                                                         |
| 19 | 26,625,000 | 26,775,000 | 356 | 981  | -0.426152389 | C1QBP,DERL2,DHX33,MIS12,NLRP1,NUP88,RABEP1,RPAIN,ENSBTAG00000025126                                                          |
| 19 | 26,700,000 | 26,850,000 | 357 | 770  | -1.396269171 | C1QBP,DHX33,NUP88,RABEP1,RPAIN                                                                                               |
| 19 | 26,775,000 | 26,925,000 | 358 | 754  | -2.014998865 | RABEP1,SCIMP                                                                                                                 |
| 19 | 26,850,000 | 27,000,000 | 359 | 733  | -0.678021503 | RABEP1,SCIMP,ZFP3,ENSBTAG00000013906                                                                                         |
| 19 | 26,925,000 | 27,075,000 | 360 | 604  | 0.067833007  | CAMTA2,ENO3,INCA1,KIF1C,SPAG7,ZFP3,ENSBTAG0000013906                                                                         |
| 19 | 27,000,000 | 27,150,000 | 361 | 740  | -0.207566588 | C17orf107,CAMTA2,CHRNE,ENO3,GP1BA,INCA1,KIF1C,MINK1,PFN1,RNF167,SLC25A11,SPAG7                                               |
| 19 | 27,075,000 | 27,225,000 | 362 | 670  | -0.297155551 | C17orf107,CHRNE,ENO3,GLTPD2,GP1BA,MINK1,PFN1,PLD2,PSMB6,RNF167,SLC25A11,TM4SF5,VMO1                                          |
| 19 | 27,150,000 | 27,300,000 | 363 | 586  | 0.071823975  | ARRB2,CXCL16,GLTPD2,MED11,MINK1,PELP1,PLD2,PSMB6,TM4SF5,VMO1,ZMYND15                                                         |
| 19 | 27,225,000 | 27,375,000 | 364 | 890  | 0.353828965  | ALOX12E,ALOX15,ARRB2,CXCL16,MED11,PELP1,ZMYND15                                                                              |
| 19 | 27,300,000 | 27,450,000 | 365 | 830  | 0.147228287  | ALOX12,ALOX12E,ALOX15,BAP18,BCL6B,PELP1,RNASEK                                                                               |
| 19 | 27,375,000 | 27,525,000 | 366 | 565  | 0.425495304  | ALOX12,ASGR2,BAP18,BCL6B,CLEC10A,RNASEK,SLC16A11,SLC16A13                                                                    |
| 19 | 27,450,000 | 27,600,000 | 367 | 542  | 0.063157964  | ACADVL,ASGR1,ASGR2,BCL6B,CLEC10A,CTDNBP1,DLG4,DVL2,ELP5,GABARAP,PHF23,SLC16A11,SLC16A13                                      |
| 19 | 27,525,000 | 27,675,000 | 368 | 416  | -1.166638319 | ACADVL,ACAP1,ASGR1,CLDN7,CTDNBP1,DLG4,DVL2,EIF5A,ELP5,GABARAP,GPS2,PHF23,SLC2A4,YBX2,ENSBTAG00000010519,ENSBTAG00000045892   |
| 19 | 27,600,000 | 27,750,000 | 369 | 288  | -3.590729576 | ACAP1,CLDN7,EIF5A,ELP5,GPS2,KCTD11,NLGN2,PLSCR3,SLC2A4,SPEM1,TMEM102,TMEM256,TNK1,YBX2,ENSBTAG00000010519,ENSBTAG00000045892 |
| 19 | 27,675,000 | 27,825,000 | 370 | 329  | -2.104195214 | ACAP1,CHRN1,FGF11,KCTD11,NLGN2,PLSCR3,POLR2A,SPEM1,TMEM102,TMEM256,TNK1,ZBTB4                                                |
| 19 | 27,750,000 | 27,900,000 | 371 | 636  | 0.155119056  | CHRN1,FGF11,POLR2A,TNFSF12,ZBTB4                                                                                             |
| 19 | 27,825,000 | 27,975,000 | 372 | 601  | 0.47562557   | ATP1B2,CD68,EIF4A1,FXR2,MPDU1,SAT2,SHBG,SOX15,TNFSF12,TNFSF13,ENSBTAG00000000131                                             |
| 19 | 27,900,000 | 28,050,000 | 373 | 373  | -0.521589112 | ATP1B2,CD68,DNAH2,EFNB3,EIF4A1,FXR2,MPDU1,SAT2,SHBG,SOX15,TNFSF12,TNFSF13,TP53,WRAP53,ENSBTAG00000000131                     |
| 19 | 27,975,000 | 28,125,000 | 374 | 447  | -1.182949808 | ATP1B2,DNAH2,EFNB3,TP53,WRAP53                                                                                               |

|    |            |            |     |      |              |                                                                   |
|----|------------|------------|-----|------|--------------|-------------------------------------------------------------------|
| 19 | 28,050,000 | 28,200,000 | 375 | 382  | -3.164682006 | CHD3,CYB5D1,DNAH2,KDM6B,NAA38,TMEM88                              |
| 19 | 28,125,000 | 28,275,000 | 376 | 365  | -4.658957915 | CHD3,CNTROB,CYB5D1,DNAH2,GUCY2D,KCNAB3,KDM6B,NAA38,TMEM88,TRAPPC1 |
| 19 | 28,200,000 | 28,350,000 | 377 | 460  | -4.580610398 | ALOX12B,ALOX15B,CHD3,CNTROB,GUCY2D,KCNAB3,TRAPPC1                 |
| 19 | 28,275,000 | 28,425,000 | 378 | 486  | -3.511122617 | ALOX12B,ALOX15B,ALOXE3,GUCY2D,HES7,PER1,VAMP2                     |
| 19 | 28,350,000 | 28,500,000 | 379 | 608  | -2.836151108 | ALOXE3,AURKB,C19H17orf59,CTC1,HES7,PER1,PFAS,TMEM107,VAMP2        |
| 19 | 28,425,000 | 28,575,000 | 380 | 663  | -2.93802385  | ARHGEF15,AURKB,C19H17orf59,CTC1,ODF4,PFAS,RANGRF,SLC25A35,TMEM107 |
| 19 | 28,500,000 | 28,650,000 | 381 | 688  | -2.356972337 | ARHGEF15,NDEL1,ODF4,PFAS,RANGRF,RNF222,RPL26,SLC25A35             |
| 19 | 28,575,000 | 28,725,000 | 382 | 755  | -1.497592412 | MYH10,NDEL1,RNF222,RPL26                                          |
| 19 | 28,650,000 | 28,800,000 | 383 | 754  | -0.903606449 | MYH10,NDEL1                                                       |
| 19 | 28,725,000 | 28,875,000 | 384 | 768  | -0.755420057 | CCDC42,MYH10                                                      |
| 19 | 28,800,000 | 28,950,000 | 385 | 876  | 0.017079865  | CCDC42,MFSD6L,MYH10,PIK3R6                                        |
| 19 | 28,875,000 | 29,025,000 | 386 | 959  | 0.648649441  | CCDC42,MFSD6L,PIK3R5,PIK3R6                                       |
| 19 | 28,950,000 | 29,100,000 | 387 | 764  | 0.779954377  | NTN1,PIK3R5,PIK3R6                                                |
| 19 | 29,025,000 | 29,175,000 | 388 | 688  | 0.618595709  | NTN1                                                              |
| 19 | 29,100,000 | 29,250,000 | 389 | 992  | 0.413386569  | NTN1                                                              |
| 19 | 29,175,000 | 29,325,000 | 390 | 1028 | 0.041031774  | NTN1,STX8                                                         |
| 19 | 29,250,000 | 29,400,000 | 391 | 868  | -0.549112057 | NTN1,STX8                                                         |
| 19 | 29,325,000 | 29,475,000 | 392 | 983  | -0.25368039  | STX8                                                              |
| 19 | 29,400,000 | 29,550,000 | 393 | 1191 | 0.191547464  | STX8,USP43,WDR16                                                  |
| 19 | 29,475,000 | 29,625,000 | 394 | 1394 | 0.348588424  | DHRS7C,GLP2R,STX8,USP43,WDR16,ENSBTAG0000005051                   |
| 19 | 29,550,000 | 29,700,000 | 395 | 1474 | 0.476896474  | DHRS7C,GAS7,GLP2R,RCVRN,USP43,ENSBTAG0000005051                   |
| 19 | 29,625,000 | 29,775,000 | 396 | 1159 | 0.210033996  | GAS7,GLP2R,RCVRN                                                  |
| 19 | 29,700,000 | 29,850,000 | 397 | 947  | 0.389222754  | GAS7                                                              |
| 19 | 29,775,000 | 29,925,000 | 398 | 805  | 0.821489166  | GAS7                                                              |
| 19 | 29,850,000 | 30,000,000 | 399 | 888  | 1.064282589  | GAS7,MYH13                                                        |
| 19 | 29,925,000 | 30,075,000 | 400 | 1156 | 0.889009203  | MYH13,MYHC-FETAL                                                  |
| 19 | 30,000,000 | 30,150,000 | 401 | 1027 | 0.535923919  | MYH1,MYH13,MYH2,MYH4,MYHC-FETAL                                   |
| 19 | 30,075,000 | 30,225,000 | 402 | 830  | 0.841637021  | MYH1,MYH2,MYH4                                                    |
| 19 | 30,150,000 | 30,300,000 | 403 | 637  | 0.974286599  | ADPRM,MYH2,MYHC-EMBRYONIC,SCO1                                    |
| 19 | 30,225,000 | 30,375,000 | 404 | 467  | 0.731447373  | ADPRM,MYHC-EMBRYONIC,SCO1,TMEM220                                 |
| 19 | 30,300,000 | 30,450,000 | 405 | 463  | 0.604906238  | ADPRM,PIRT,TMEM220                                                |
| 19 | 30,375,000 | 30,525,000 | 406 | 567  | 0.729405414  | PIRT                                                              |
| 19 | 30,450,000 | 30,600,000 | 407 | 668  | 0.59816111   |                                                                   |
| 19 | 30,525,000 | 30,675,000 | 408 | 684  | 0.02759577   |                                                                   |
| 19 | 30,600,000 | 30,750,000 | 409 | 715  | 0.281497943  |                                                                   |
| 19 | 30,675,000 | 30,825,000 | 410 | 826  | -0.870169818 |                                                                   |
| 19 | 30,750,000 | 30,900,000 | 411 | 790  | -1.161450824 |                                                                   |
| 19 | 30,825,000 | 30,975,000 | 412 | 567  | -0.025533236 | DNAH9                                                             |
| 19 | 30,900,000 | 31,050,000 | 413 | 446  | -0.032367195 | DNAH9                                                             |
| 19 | 30,975,000 | 31,125,000 | 414 | 930  | 0.984175554  | DNAH9                                                             |
| 19 | 31,050,000 | 31,200,000 | 415 | 1003 | 1.054462357  | DNAH9                                                             |
| 19 | 31,125,000 | 31,275,000 | 416 | 526  | 0.86979121   | DNAH9,ZNF18                                                       |
| 19 | 31,200,000 | 31,350,000 | 417 | 347  | 0.790079501  | DNAH9,MAP2K4,ZNF18                                                |
| 19 | 31,275,000 | 31,425,000 | 418 | 293  | 0.749414668  | MAP2K4                                                            |
| 19 | 31,350,000 | 31,500,000 | 419 | 330  | 1.064690814  | MAP2K4                                                            |

|    |            |            |     |      |              |                                                    |
|----|------------|------------|-----|------|--------------|----------------------------------------------------|
| 19 | 31,425,000 | 31,575,000 | 420 | 289  | 1.228665201  |                                                    |
| 19 | 31,500,000 | 31,650,000 | 421 | 239  | 1.090506683  |                                                    |
| 19 | 31,575,000 | 31,725,000 | 422 | 408  | 0.954228271  |                                                    |
| 19 | 31,650,000 | 31,800,000 | 423 | 575  | -0.095571141 | MYOCD                                              |
| 19 | 31,725,000 | 31,875,000 | 424 | 699  | -1.246124576 | MYOCD                                              |
| 19 | 31,800,000 | 31,950,000 | 425 | 671  | -1.299730114 | ARHGAP44,MYOCD                                     |
| 19 | 31,875,000 | 32,025,000 | 426 | 882  | -1.331272466 | ARHGAP44,ELAC2                                     |
| 19 | 31,950,000 | 32,100,000 | 427 | 1146 | -0.149916163 | ARHGAP44,ELAC2                                     |
| 19 | 32,025,000 | 32,175,000 | 428 | 1118 | 0.555389385  |                                                    |
| 19 | 32,100,000 | 32,250,000 | 429 | 1228 | 0.044218658  |                                                    |
| 19 | 32,175,000 | 32,325,000 | 430 | 1021 | -0.603663721 |                                                    |
| 19 | 32,250,000 | 32,400,000 | 431 | 722  | -0.882131164 | ENSBTAG00000031107                                 |
| 19 | 32,325,000 | 32,475,000 | 432 | 870  | 0.96492238   | ENSBTAG00000031107                                 |
| 19 | 32,400,000 | 32,550,000 | 433 | 1125 | 0.182831011  | ENSBTAG00000031107                                 |
| 19 | 32,475,000 | 32,625,000 | 434 | 1116 | 0.031164435  |                                                    |
| 19 | 32,550,000 | 32,700,000 | 435 | 938  | 0.182718947  | COX10                                              |
| 19 | 32,625,000 | 32,775,000 | 436 | 862  | 0.218133295  | COX10                                              |
| 19 | 32,700,000 | 32,850,000 | 437 | 1139 | 0.58764544   | COX10,HS3ST3B1                                     |
| 19 | 32,775,000 | 32,925,000 | 438 | 1373 | 0.727032398  | COX10,HS3ST3B1                                     |
| 19 | 32,850,000 | 33,000,000 | 439 | 1315 | 0.85396585   | HS3ST3B1                                           |
| 19 | 32,925,000 | 33,075,000 | 440 | 1200 | 0.576798376  |                                                    |
| 19 | 33,000,000 | 33,150,000 | 441 | 1021 | 0.646644082  |                                                    |
| 19 | 33,075,000 | 33,225,000 | 442 | 986  | 1.004892924  |                                                    |
| 19 | 33,150,000 | 33,300,000 | 443 | 1397 | 0.864913417  |                                                    |
| 19 | 33,225,000 | 33,375,000 | 444 | 1561 | 0.72570889   | PMP22                                              |
| 19 | 33,300,000 | 33,450,000 | 445 | 992  | 0.397738743  | PMP22,TEKT3                                        |
| 19 | 33,375,000 | 33,525,000 | 446 | 683  | -0.446722734 | CDRT4,PMP22,TEKT3                                  |
| 19 | 33,450,000 | 33,600,000 | 447 | 636  | 0.013336712  | CDRT4,TEKT3,TVP23B                                 |
| 19 | 33,525,000 | 33,675,000 | 448 | 852  | 1.312861046  | CDRT4,TVP23B,ZNF286A,ENSBTAG0000002605             |
| 19 | 33,600,000 | 33,750,000 | 449 | 864  | 1.333805693  | ZNF286A,ENSBTAG0000002605,ENSBTAG00000031071       |
| 19 | 33,675,000 | 33,825,000 | 450 | 603  | 1.110259952  | LRR75A,TRPV2,ZNF286A,ENSBTAG00000031071            |
| 19 | 33,750,000 | 33,900,000 | 451 | 641  | 1.207851202  | CENPV,LRR75A,PIGL,TRPV2,UBB                        |
| 19 | 33,825,000 | 33,975,000 | 452 | 544  | 0.291683028  | CENPV,NCOR1,PIGL,TRPV2,UBB                         |
| 19 | 33,900,000 | 34,050,000 | 453 | 509  | -0.411581646 | NCOR1,PIGL,TTC19                                   |
| 19 | 33,975,000 | 34,125,000 | 454 | 632  | 0.505478601  | ADORA2B,NCOR1,SPECC1,TTC19,ZSWIM7                  |
| 19 | 34,050,000 | 34,200,000 | 455 | 776  | 0.692304833  | ADORA2B,SPECC1,TTC19,ZSWIM7                        |
| 19 | 34,125,000 | 34,275,000 | 456 | 729  | 0.858442378  | SPECC1                                             |
| 19 | 34,200,000 | 34,350,000 | 457 | 845  | 0.518715602  | AKAP10                                             |
| 19 | 34,275,000 | 34,425,000 | 458 | 849  | 0.21176553   | AKAP10,ULK2                                        |
| 19 | 34,350,000 | 34,500,000 | 459 | 768  | 0.800361179  | AKAP10,ALDH3A1,ULK2                                |
| 19 | 34,425,000 | 34,575,000 | 460 | 822  | 0.930175896  | ALDH3A1,ALDH3A2,SLC47A2,ULK2                       |
| 19 | 34,500,000 | 34,650,000 | 461 | 838  | 0.150051044  | ALDH3A2,SLC47A1,SLC47A2                            |
| 19 | 34,575,000 | 34,725,000 | 462 | 830  | 0.313083104  | B9D1,EPN2,MAPK7,MFAP4,RNF112,SLC47A1               |
| 19 | 34,650,000 | 34,800,000 | 463 | 855  | 0.44603703   | B9D1,EPN2,GRAP,MAPK7,MFAP4,RNF112                  |
| 19 | 34,725,000 | 34,875,000 | 464 | 685  | -0.117339857 | EPN2,FAM83G,GRAP,SLC5A10                           |
| 19 | 34,800,000 | 34,950,000 | 465 | 422  | 0.23291414   | FAM83G,GRAP,PRPSAP2,SHMT1,SLC5A10,SMCR8            |
| 19 | 34,875,000 | 35,025,000 | 466 | 471  | 1.047420596  | FLII,LLGL1,MIEF2,PRPSAP2,SHMT1,SMCR8,TOP3A         |
| 19 | 34,950,000 | 35,100,000 | 467 | 527  | 0.42419314   | ALKBH5,DRG2,FLII,LLGL1,MIEF2,MYO15A,SMCR8,TOP3A    |
| 19 | 35,025,000 | 35,175,000 | 468 | 668  | 0.411305664  | ALKBH5,ATPAF2,C19H17ORF39,DRG2,LRR48,MYO15A,TOM1L2 |

|    |            |            |     |      |              |                                                  |
|----|------------|------------|-----|------|--------------|--------------------------------------------------|
| 19 | 35,100,000 | 35,250,000 | 469 | 609  | 0.44687182   | ATPAF2,C19H17ORF39,DRG2,LRRC48,SREBF1,TOM1L2     |
| 19 | 35,175,000 | 35,325,000 | 470 | 360  | 0.131567294  | RAI1,SREBF1,TOM1L2                               |
| 19 | 35,250,000 | 35,400,000 | 471 | 295  | 0.053380307  | PEMT,RAI1,SREBF1                                 |
| 19 | 35,325,000 | 35,475,000 | 472 | 568  | -0.340808995 | MED9,NT5M,PEMT,RASD1                             |
| 19 | 35,400,000 | 35,550,000 | 473 | 617  | -0.285465052 | COPS3,FLCN,MED9,NT5M,PEMT,PLD6,RASD1             |
| 19 | 35,475,000 | 35,625,000 | 474 | 483  | 0.110856532  | COPS3,FLCN,M-RIP,NT5M,PLD6                       |
| 19 | 35,550,000 | 35,700,000 | 475 | 519  | -0.28123152  | M-RIP                                            |
| 19 | 35,625,000 | 35,775,000 | 476 | 361  | -0.855053341 | DHRS7B,M-RIP,TNFRSF13B,USP22                     |
| 19 | 35,700,000 | 35,850,000 | 477 | 221  | -1.293956056 | DHRS7B,GTLF3B,TMEM11,TNFRSF13B,USP22             |
| 19 | 35,775,000 | 35,925,000 | 478 | 210  | -1.782498654 | DHRS7B,GTLF3B,MAP2K3,TMEM11                      |
| 19 | 35,850,000 | 36,000,000 | 479 | 227  | -0.467560534 | KCNJ12,MAP2K3                                    |
| 19 | 35,925,000 | 36,075,000 | 480 | 445  | 0.68518267   | KCNJ12,ENSBTAG00000018840                        |
| 19 | 36,000,000 | 36,150,000 | 481 | 707  | 0.716055342  | UTP18,ENSBTAG00000018840                         |
| 19 | 36,075,000 | 36,225,000 | 482 | 608  | 0.954266825  | MBTD1,NME1,NME2,UTP18                            |
| 19 | 36,150,000 | 36,300,000 | 483 | 737  | 0.574544356  | MBTD1,NME1,NME2                                  |
| 19 | 36,225,000 | 36,375,000 | 484 | 803  | 0.194687297  | NME1,SPAG9                                       |
| 19 | 36,300,000 | 36,450,000 | 485 | 571  | 0.24392846   | SPAG9,ENSBTAG00000037660                         |
| 19 | 36,375,000 | 36,525,000 | 486 | 537  | -0.163203337 | SPAG9,TOB1,ENSBTAG00000037660                    |
| 19 | 36,450,000 | 36,600,000 | 487 | 599  | -0.075776632 | TOB1,WFIKKN2                                     |
| 19 | 36,525,000 | 36,675,000 | 488 | 602  | 0.456072601  | ANKRD40,LUC7L3,WFIKKN2                           |
| 19 | 36,600,000 | 36,750,000 | 489 | 550  | 0.713012984  | ABCC3,ANKRD40,CACNA1G,LUC7L3                     |
| 19 | 36,675,000 | 36,825,000 | 490 | 596  | 0.922009797  | ABCC3,ANKRD40,CACNA1G,EPN3,MYCBPAP,SPATA20       |
| 19 | 36,750,000 | 36,900,000 | 491 | 656  | 0.518045896  | ACSF2,CACNA1G,CHAD,EPN3,MYCBPAP,RSAD1,SPATA20    |
| 19 | 36,825,000 | 36,975,000 | 492 | 693  | 0.359060971  | ACSF2,CHAD,EME1,LRRC59,MRPL27,MYCBPAP,RSAD1,XYL2 |
| 19 | 36,900,000 | 37,050,000 | 493 | 633  | 0.622346145  | ACSF2,EME1,LRRC59,MRPL27,TMEM92,XYL2             |
| 19 | 36,975,000 | 37,125,000 | 494 | 491  | 0.329962896  | COL1A1,SGCA,TMEM92,ENSBTAG00000043979            |
| 19 | 37,050,000 | 37,200,000 | 495 | 390  | -0.95115525  | COL1A1,ITGA3,PKK2,SAMD14,SGCA,ENSBTAG00000043979 |
| 19 | 37,125,000 | 37,275,000 | 496 | 755  | -1.612971114 | ITGA3,PKK2,SAMD14                                |
| 19 | 37,200,000 | 37,350,000 | 497 | 784  | -1.224461158 | DLX3,DLX4,ITGA3,ENSBTAG00000045805               |
| 19 | 37,275,000 | 37,425,000 | 498 | 320  | -2.060082108 | DLX3,DLX4,ENSBTAG00000045805                     |
| 19 | 37,350,000 | 37,500,000 | 499 | 549  | 0.445136767  | MYST2                                            |
| 19 | 37,425,000 | 37,575,000 | 500 | 521  | 0.965241717  | FAM117A,MYST2,SLC35B1,SPOP                       |
| 19 | 37,500,000 | 37,650,000 | 501 | 239  | -0.04442866  | FAM117A,SLC35B1,SPOP                             |
| 19 | 37,575,000 | 37,725,000 | 502 | 458  | 0.258901248  | NXP3,SPOP                                        |
| 19 | 37,650,000 | 37,800,000 | 503 | 745  | -0.539553649 | NGFR,NXP3,SPOP                                   |
| 19 | 37,725,000 | 37,875,000 | 504 | 643  | -0.532415128 | NGFR,PHB                                         |
| 19 | 37,800,000 | 37,950,000 | 505 | 375  | 0.959042987  | PHB,ZNF652                                       |
| 19 | 37,875,000 | 38,025,000 | 506 | 591  | 1.063376575  | ABI3,GNGT2,PHOSPHO1,ZNF652                       |
| 19 | 37,950,000 | 38,100,000 | 507 | 1131 | 1.008022414  | ABI3,B4GALNT2,GNGT2,PHOSPHO1                     |
| 19 | 38,025,000 | 38,175,000 | 508 | 1159 | 0.958109425  | B4GALNT2,IGF2BP1                                 |
| 19 | 38,100,000 | 38,250,000 | 509 | 798  | 0.986127302  | GIP,IGF2BP1,SNF8,UBE2Z                           |
| 19 | 38,175,000 | 38,325,000 | 510 | 658  | -0.524694364 | ATP5G1,CALCOCO2,GIP,IGF2BP1,SNF8,UBE2Z           |
| 19 | 38,250,000 | 38,400,000 | 511 | 569  | -0.551861323 | ATP5G1,CALCOCO2,TLL6                             |
| 19 | 38,325,000 | 38,475,000 | 512 | 437  | 0.226801649  | CALCOCO2,HOXB13,TLL6                             |
| 19 | 38,400,000 | 38,550,000 | 513 | 305  | -0.350062186 | HOXB13,HOXB5,HOXB7,HOXB9                         |
| 19 | 38,475,000 | 38,625,000 | 514 | 228  | -0.704305194 | HOXB1,HOXB2,HOXB3,HOXB4,HOXB5,HOXB7,HOXB9        |
| 19 | 38,550,000 | 38,700,000 | 515 | 287  | 0.443281915  | HOXB1,HOXB2,HOXB3,HOXB4,SKAP1                    |

|    |            |            |     |      |              |                                                                                                       |
|----|------------|------------|-----|------|--------------|-------------------------------------------------------------------------------------------------------|
| 19 | 38,625,000 | 38,775,000 | 516 | 382  | 1.299846707  | SKAP1                                                                                                 |
| 19 | 38,700,000 | 38,850,000 | 517 | 296  | 1.325285729  | SKAP1                                                                                                 |
| 19 | 38,775,000 | 38,925,000 | 518 | 203  | 1.174723035  | SKAP1                                                                                                 |
| 19 | 38,850,000 | 39,000,000 | 519 | 266  | 1.239254746  | SKAP1                                                                                                 |
| 19 | 38,925,000 | 39,075,000 | 520 | 247  | 1.288668519  | CBX1,NFE2L1,SKAP1,SNX11                                                                               |
| 19 | 39,000,000 | 39,150,000 | 521 | 274  | 0.959491718  | CBX1,CDK5RAP3,COPZ2,NFE2L1,SKAP1,SNX11                                                                |
| 19 | 39,075,000 | 39,225,000 | 522 | 447  | 0.3150644    | CDK5RAP3,COPZ2,PNPO,PRR15L,SP2                                                                        |
| 19 | 39,150,000 | 39,300,000 | 523 | 417  | -0.666832131 | LRRC46,MRPL10,OSBPL7,PNPO,PRR15L,SCRN2,SP2,SP6                                                        |
| 19 | 39,225,000 | 39,375,000 | 524 | 246  | -1.244885583 | LRRC46,MRPL10,OSBPL7,SCRN2,SP2,SP6,TBX21                                                              |
| 19 | 39,300,000 | 39,450,000 | 525 | 177  | -0.642000997 | KPNB1,TBKBP1,TBX21                                                                                    |
| 19 | 39,375,000 | 39,525,000 | 526 | 206  | 0.16418663   | KPNB1,NPEPPS,TBKBP1                                                                                   |
| 19 | 39,450,000 | 39,600,000 | 527 | 277  | -0.572927842 | NPEPPS                                                                                                |
| 19 | 39,525,000 | 39,675,000 | 528 | 302  | 0.269511594  | GPR179,MRPL45,NPEPPS,SOCS7                                                                            |
| 19 | 39,600,000 | 39,750,000 | 529 | 244  | 1.221283888  | ARHGAP23,GPR179,MRPL45,SOCS7,ENSBTAG00000046615                                                       |
| 19 | 39,675,000 | 39,825,000 | 530 | 252  | -0.030617244 | ARHGAP23,SRCIN1,ENSBTAG00000046615                                                                    |
| 19 | 39,750,000 | 39,900,000 | 531 | 305  | 0.159562054  | ARHGAP23,SRCIN1                                                                                       |
| 19 | 39,825,000 | 39,975,000 | 532 | 285  | 0.392605843  | C17orf96,CISD3,MLLT6,PCGF2,SRCIN1                                                                     |
| 19 | 39,900,000 | 40,050,000 | 533 | 464  | 0.670357779  | C17orf96,CCDC49,CISD3,MLLT6,PCGF2,PIP4K2B,PSMB3                                                       |
| 19 | 39,975,000 | 40,125,000 | 534 | 746  | 0.983311866  | C19H17orf98,CCDC49,LASP1,PIP4K2B,PSMB3,RPL23                                                          |
| 19 | 40,050,000 | 40,200,000 | 535 | 610  | 0.420605866  | C19H17orf98,FBXO47,LASP1,RPL23                                                                        |
| 19 | 40,125,000 | 40,275,000 | 536 | 510  | -0.204486577 | FBXO47,LASP1,PLXDC1                                                                                   |
| 19 | 40,200,000 | 40,350,000 | 537 | 469  | 0.346448733  | ARL5C,CACNB1,PLXDC1,RPL19,STAC2                                                                       |
| 19 | 40,275,000 | 40,425,000 | 538 | 378  | 0.155209907  | ARL5C,CACNB1,FBXL20,PLXDC1,RPL19,STAC2,ENSBTAG00000008368                                             |
| 19 | 40,350,000 | 40,500,000 | 539 | 330  | -0.156132312 | FBXL20,MED1,STAC2,ENSBTAG00000008368                                                                  |
| 19 | 40,425,000 | 40,575,000 | 540 | 277  | 0.724078837  | CDK12,FBXL20,MED1                                                                                     |
| 19 | 40,500,000 | 40,650,000 | 541 | 286  | 0.600693304  | CDK12,MED1,NEUROD2                                                                                    |
| 19 | 40,575,000 | 40,725,000 | 542 | 530  | 1.095390048  | ERBB2,NEUROD2,PGAP3,PNMT,PPP1R1B,STARD3,TCAP                                                          |
| 19 | 40,650,000 | 40,800,000 | 543 | 548  | 0.806132831  | ERBB2,GRB7,IKZF3,MIEN1,PGAP3,PNMT,PPP1R1B,STARD3,TCAP                                                 |
| 19 | 40,725,000 | 40,875,000 | 544 | 321  | -0.619063294 | ERBB2,GRB7,IKZF3,MIEN1,ZBP2                                                                           |
| 19 | 40,800,000 | 40,950,000 | 545 | 532  | -1.333852284 | GSDMA,GSDMB,IKZF3,LRR3C,ORMDL3,ZBP2                                                                   |
| 19 | 40,875,000 | 41,025,000 | 546 | 772  | -1.211202778 | CSF3,GSDMA,GSDMB,LRR3C,MED24,ORMDL3,PSMD3,THRA,ZBP2                                                   |
| 19 | 40,950,000 | 41,100,000 | 547 | 700  | 0.054776263  | CASC3,CSF3,GSDMA,MED24,MSL1,NR1D1,PSMD3,THRA                                                          |
| 19 | 41,025,000 | 41,175,000 | 548 | 617  | 0.534221384  | CASC3,MSL1,NR1D1,RAPGEFL1,THRA,WIPF2                                                                  |
| 19 | 41,100,000 | 41,250,000 | 549 | 476  | 0.232251435  | CASC3,CDC6,RAPGEFL1,RARA,WIPF2                                                                        |
| 19 | 41,175,000 | 41,325,000 | 550 | 313  | -0.463065202 | CDC6,RARA,TOP2A,WIPF2                                                                                 |
| 19 | 41,250,000 | 41,400,000 | 551 | 598  | -0.076946969 | IGFBP4,TNS4,TOP2A                                                                                     |
| 19 | 41,325,000 | 41,475,000 | 552 | 778  | 0.089006894  | CCR7,IGFBP4,TNS4                                                                                      |
| 19 | 41,400,000 | 41,550,000 | 553 | 738  | -0.102836959 | CCR7,KRT222,SMARCE1                                                                                   |
| 19 | 41,475,000 | 41,625,000 | 554 | 1039 | -0.085913076 | KRT222,KRT24,KRT25,KRT26,SMARCE1                                                                      |
| 19 | 41,550,000 | 41,700,000 | 555 | 1251 | -0.062998946 | KRT10,KRT24,KRT25,KRT26,KRT27,KRT28                                                                   |
| 19 | 41,625,000 | 41,775,000 | 556 | 1033 | 0.045848     | KRT10,KRT12,KRT20,KRT23,KRT27,KRT28                                                                   |
| 19 | 41,700,000 | 41,850,000 | 557 | 1066 | -1.472126669 | KRT12,KRT20,KRT23,KRT39,KRT40,KRTAP3-3                                                                |
| 19 | 41,775,000 | 41,925,000 | 558 | 891  | -2.228392578 | KRT23,KRT39,KRT40,KRTAP1-1,KRTAP3-1,KRTAP3-3,ENSBTAG00000024995,ENSBTAG00000038759,ENSBTAG00000046225 |



|    |            |            |     |      |              |                                                                                                                                                                                                                               |
|----|------------|------------|-----|------|--------------|-------------------------------------------------------------------------------------------------------------------------------------------------------------------------------------------------------------------------------|
| 19 | 41,850,000 | 42,000,000 | 559 | 711  | 0.622066886  | KRTAP1-1,KRTAP3-1,KRTAP4-7,RPL17,ENSBTAG00000024995,ENSBTAG00000037665,ENSBTAG00000037943,ENSBTAG00000038759,ENSBTAG00000039587,ENSBTAG00000039644,ENSBTAG0000040118,ENSBTAG00000046075,ENSBTAG00000046225,ENSBTAG00000046907 |
| 19 | 41,925,000 | 42,075,000 | 560 | 924  | 0.818973827  | KRTAP4-7,RPL17,ENSBTAG00000037665,ENSBTAG00000037943,ENSBTAG00000039587,ENSBTAG00000039644,ENSBTAG00000039880,ENSBTAG00000040118,ENSBTAG0000046075,ENSBTAG00000046907                                                         |
| 19 | 42,000,000 | 42,150,000 | 561 | 900  | 0.003021015  | KRTAP9-1,ENSBTAG00000001672,ENSBTAG00000039880                                                                                                                                                                                |
| 19 | 42,075,000 | 42,225,000 | 562 | 830  | -0.101887353 | KRT33A,KRTAP9-1,ENSBTAG00000001672,ENSBTAG00000030519                                                                                                                                                                         |
| 19 | 42,150,000 | 42,300,000 | 563 | 996  | 0.1100567    | HKA1,KRT31,KRT33A,ENSBTAG00000000573,ENSBTAG00000030519                                                                                                                                                                       |
| 19 | 42,225,000 | 42,375,000 | 564 | 1303 | 0.376918735  | HKA1,KRT15,KRT19,KRT31,KRT32,KRT35,KRT36,ENSBTAG00000000573                                                                                                                                                                   |
| 19 | 42,300,000 | 42,450,000 | 565 | 1182 | 0.336531392  | KRT14,KRT15,KRT19,KRT32,KRT35,KRT36,KRT9                                                                                                                                                                                      |
| 19 | 42,375,000 | 42,525,000 | 566 | 792  | 0.20889735   | KRT14,KRT16,KRT17,KRT9,ENSBTAG00000047262                                                                                                                                                                                     |
| 19 | 42,450,000 | 42,600,000 | 567 | 736  | 0.860968668  | EIF1,GAST,KRT16,KRT17,ENSBTAG00000047262                                                                                                                                                                                      |
| 19 | 42,525,000 | 42,675,000 | 568 | 614  | 1.064926787  | EIF1,FKBP10,GAST,JUP,KLHL10,LEPREL4,NT5C3L                                                                                                                                                                                    |
| 19 | 42,600,000 | 42,750,000 | 569 | 458  | 0.679181865  | ACLY,FKBP10,JUP,KLHL10,KLHL11,LEPREL4,NT5C3L,TT C25                                                                                                                                                                           |
| 19 | 42,675,000 | 42,825,000 | 570 | 469  | 0.440601845  | ACLY,CNP,DNAJC7,KLHL10,KLHL11,NKIRAS2,TTC25,ZNF385C                                                                                                                                                                           |
| 19 | 42,750,000 | 42,900,000 | 571 | 398  | -0.048435115 | CNP,DNAJC7,HSPB9,KAT2A,LGP2,NKIRAS2,RAB5C,TT C25,ZNF385C                                                                                                                                                                      |
| 19 | 42,825,000 | 42,975,000 | 572 | 370  | 0.190478182  | BORX,GHDC,HSPB9,KAT2A,KCNH4,LGP2,RAB5C,STAT 5B,ZNF385C                                                                                                                                                                        |
| 19 | 42,900,000 | 43,050,000 | 573 | 359  | 0.430985255  | BORX,GHDC,KCNH4,RAB5C,STAT5A,STAT5B                                                                                                                                                                                           |
| 19 | 42,975,000 | 43,125,000 | 574 | 567  | 0.60063055   | STAT3,STAT5A,STAT5B                                                                                                                                                                                                           |
| 19 | 43,050,000 | 43,200,000 | 575 | 515  | 0.783465352  | PTRF,STAT3,STAT5A                                                                                                                                                                                                             |
| 19 | 43,125,000 | 43,275,000 | 576 | 253  | 1.012792773  | ATP6V0A1,HSD17B1,NAGLU,PTRF,STAT3                                                                                                                                                                                             |
| 19 | 43,200,000 | 43,350,000 | 577 | 426  | 1.036885194  | ATP6V0A1,COASY,FAM134C,HSD17B1,MLX,NAGLU,PSMC3IP,TUBG1                                                                                                                                                                        |
| 19 | 43,275,000 | 43,425,000 | 578 | 390  | 0.824119987  | CCR10,CNTNAP1,COASY,EZH1,FAM134C,MLX,PLEKH H3,PSMC3IP,TUBG1,TUBG2                                                                                                                                                             |
| 19 | 43,350,000 | 43,500,000 | 579 | 203  | 0.779592148  | BECN1,CCR10,CNTD1,CNTNAP1,COA3,EZH1,PLEKHH 3,RAMP2,TUBG2,VPS25,WNK4                                                                                                                                                           |
| 19 | 43,425,000 | 43,575,000 | 580 | 544  | 0.675918642  | AOC2,AOC3,BECN1,CNTD1,COA3,EZH1,PSME3,RAMP 2,VPS25,WNK4,ENSBTAG00000001041,ENSBTAG0000 0030333,ENSBTAG00000039321                                                                                                             |
| 19 | 43,500,000 | 43,650,000 | 581 | 760  | 0.475139745  | AARSD1,AOC2,AOC3,G6PC,PSME3,ENSBTAG0000000 1041,ENSBTAG00000030333,ENSBTAG00000039321                                                                                                                                         |
| 19 | 43,575,000 | 43,725,000 | 582 | 613  | 0.069346435  | AARSD1,BRCA1,G6PC,IFI35,RND2,RPL27,RUNDC1,VAT 1                                                                                                                                                                               |
| 19 | 43,650,000 | 43,800,000 | 583 | 484  | -0.487511355 | AARSD1,BRCA1,IFI35,NBR1,RND2,RPL27,RUNDC1,VAT 1                                                                                                                                                                               |
| 19 | 43,725,000 | 43,875,000 | 584 | 463  | 0.23414973   | BRCA1,NBR1,SNRPE,TMEM106A                                                                                                                                                                                                     |
| 19 | 43,800,000 | 43,950,000 | 585 | 796  | 0.980851524  | ARL4D,NBR1,SNRPE,TMEM106A                                                                                                                                                                                                     |
| 19 | 43,875,000 | 44,025,000 | 586 | 848  | 0.843797912  | ARL4D                                                                                                                                                                                                                         |

|    |            |            |     |      |              |                                                                     |
|----|------------|------------|-----|------|--------------|---------------------------------------------------------------------|
| 19 | 43,950,000 | 44,100,000 | 587 | 605  | 0.178021731  | DHX8,ETV4                                                           |
| 19 | 44,025,000 | 44,175,000 | 588 | 396  | 0.296869569  | DHX8,ETV4,MEOX1                                                     |
| 19 | 44,100,000 | 44,250,000 | 589 | 211  | 0.770765313  | MEOX1                                                               |
| 19 | 44,175,000 | 44,325,000 | 590 | 324  | 0.619097586  | C17orf105,DUSP3,MEOX1,MPP3,SOST                                     |
| 19 | 44,250,000 | 44,400,000 | 591 | 517  | 0.529533013  | C17orf105,CD300LG,DUSP3,MPP2,MPP3,SOST                              |
| 19 | 44,325,000 | 44,475,000 | 592 | 684  | 0.458605812  | CD300LG,MPP2,MPP3,PPY,PYY,PYY2                                      |
| 19 | 44,400,000 | 44,550,000 | 593 | 566  | 0.583569363  | G6PC3,HDAC5,LSM12,MPP2,NAGS,PPY,PYY,PYY2,TME<br>M101                |
| 19 | 44,475,000 | 44,625,000 | 594 | 353  | 0.640390993  | ASB16,C17orf53,G6PC3,HDAC5,LSM12,NAGS,TMEM1<br>01                   |
| 19 | 44,550,000 | 44,700,000 | 595 | 295  | -0.381827469 | ASB16,ATXN7L3,BEB3,C17orf53,HDAC5,TMUB2,UBF                         |
| 19 | 44,625,000 | 44,775,000 | 596 | 230  | -0.651053493 | ATXN7L3,BEB3,RUNDC3A,SLC25A39,TMUB2,UBF                             |
| 19 | 44,700,000 | 44,850,000 | 597 | 199  | -0.828213784 | BEB3,FAM171A2,GPATCH8,GRN,ITGA2B,RUNDC3A,SL<br>C25A39               |
| 19 | 44,775,000 | 44,925,000 | 598 | 202  | -1.099026459 | FAM171A2,GPATCH8,GRN,ITGA2B                                         |
| 19 | 44,850,000 | 45,000,000 | 599 | 334  | -6.26857537  | FZD2,GPATCH8                                                        |
| 19 | 44,925,000 | 45,075,000 | 600 | 516  | -5.697882914 | C17orf104,CCDC43,DBF4B,FZD2                                         |
| 19 | 45,000,000 | 45,150,000 | 601 | 608  | -2.57498469  | ADAM11,C17orf104,CCDC43,DBF4B                                       |
| 19 | 45,075,000 | 45,225,000 | 602 | 683  | -1.665346594 | ADAM11,DBF4B,EFTUD2,GJC1,HIGD1B                                     |
| 19 | 45,150,000 | 45,300,000 | 603 | 652  | -0.822330432 | C1QL1,EFTUD2,FAM187A,GFAP,GJC1,HIGD1B,KIF18B,<br>ENSBTAG00000013529 |
| 19 | 45,225,000 | 45,375,000 | 604 | 647  | 1.265799957  | C1QL1,DCAKD,EFTUD2,FAM187A,GFAP,KIF18B,ENSBT<br>AG00000013529       |
| 19 | 45,300,000 | 45,450,000 | 605 | 655  | 1.13836684   | ACBD4,DCAKD,HEXIM1,NMT1,PLCD3                                       |
| 19 | 45,375,000 | 45,525,000 | 606 | 470  | 0.856700503  | ACBD4,FMNL1,HEXIM1,HEXIM2,NMT1,PLCD3,ENSBTA<br>G00000024975         |
| 19 | 45,450,000 | 45,600,000 | 607 | 343  | 0.852182593  | FMNL1,HEXIM2,MAP3K14,SPATA32,ENSBTAG000000<br>24975                 |
| 19 | 45,525,000 | 45,675,000 | 608 | 498  | 0.734662291  | MAP3K14,SPATA32,ENSBTAG00000024975                                  |
| 19 | 45,600,000 | 45,750,000 | 609 | 898  | 0.278128964  | ARHGAP27,PLEKHM1                                                    |
| 19 | 45,675,000 | 45,825,000 | 610 | 1021 | 0.10946322   | ARHGAP27,PLEKHM1,ENSBTAG00000027274                                 |
| 19 | 45,750,000 | 45,900,000 | 611 | 889  | 0.191707281  | LYZL6,PLEKHM1,RDM1,RPRML,ENSBTAG0000002727<br>4                     |
| 19 | 45,825,000 | 45,975,000 | 612 | 904  | 0.209512996  | GOSR2,LYZL6,RDM1,RPRML,WNT9B,ENSBTAG000000<br>27274                 |
| 19 | 45,900,000 | 46,050,000 | 613 | 648  | 0.127973064  | GOSR2,WNT9B                                                         |
| 19 | 45,975,000 | 46,125,000 | 614 | 399  | 0.515711102  | NSF,WNT3,WNT9B                                                      |
| 19 | 46,050,000 | 46,200,000 | 615 | 395  | 0.719797766  | NSF,WNT3                                                            |
| 19 | 46,125,000 | 46,275,000 | 616 | 309  | 0.594730035  | ARF2,NSF                                                            |
| 19 | 46,200,000 | 46,350,000 | 617 | 530  | 1.113493613  | ARF2,NSF                                                            |
| 19 | 46,275,000 | 46,425,000 | 618 | 851  | 1.133793833  |                                                                     |
| 19 | 46,350,000 | 46,500,000 | 619 | 712  | 0.735645447  | CRHR1,SPPL2C                                                        |
| 19 | 46,425,000 | 46,575,000 | 620 | 483  | 0.081013287  | CRHR1,MAPT,SPPL2C                                                   |
| 19 | 46,500,000 | 46,650,000 | 621 | 659  | 0.243406056  | MAPT                                                                |
| 19 | 46,575,000 | 46,725,000 | 622 | 631  | 0.333863328  | KANSL1,MAPT                                                         |
| 19 | 46,650,000 | 46,800,000 | 623 | 301  | 0.611549036  | KANSL1,ENSBTAG00000046260                                           |
| 19 | 46,725,000 | 46,875,000 | 624 | 302  | 1.185778462  | CDC27,KANSL1,ENSBTAG00000046260                                     |
| 19 | 46,800,000 | 46,950,000 | 625 | 432  | 1.248259952  | CDC27,MYL4                                                          |
| 19 | 46,875,000 | 47,025,000 | 626 | 616  | 0.169763739  | CDC27,INTB3,MYL4                                                    |
| 19 | 46,950,000 | 47,100,000 | 627 | 916  | -0.266448317 | EFCAB13,INTB3                                                       |
| 19 | 47,025,000 | 47,175,000 | 628 | 1026 | -0.267743765 | EFCAB13,INTB3,ENSBTAG00000045837                                    |
| 19 | 47,100,000 | 47,250,000 | 629 | 662  | -0.508660454 | ENSBTAG00000045837                                                  |
| 19 | 47,175,000 | 47,325,000 | 630 | 756  | -1.301330233 |                                                                     |

|    |            |            |     |      |              |                                                                       |        |
|----|------------|------------|-----|------|--------------|-----------------------------------------------------------------------|--------|
| 19 | 47,250,000 | 47,400,000 | 631 | 1138 | -2.843905344 |                                                                       |        |
| 19 | 47,325,000 | 47,475,000 | 632 | 783  | -4.21588063  | EFCAB3                                                                |        |
| 19 | 47,400,000 | 47,550,000 | 633 | 526  | -3.476230082 | EFCAB3,METTTL2                                                        |        |
| 19 | 47,475,000 | 47,625,000 | 634 | 454  | -0.774032482 | EFCAB3,METTTL2,TLK2                                                   |        |
| 19 | 47,550,000 | 47,700,000 | 635 | 324  | 0.793632928  | TLK2                                                                  |        |
| 19 | 47,625,000 | 47,775,000 | 636 | 331  | 0.383456546  | MARCH10,MRC2,TLK2                                                     |        |
| 19 | 47,700,000 | 47,850,000 | 637 | 473  | 0.36582294   | MARCH10,MRC2                                                          |        |
| 19 | 47,775,000 | 47,925,000 | 638 | 567  | 0.565622477  |                                                                       | 10-Mar |
| 19 | 47,850,000 | 48,000,000 | 639 | 676  | 0.899814753  |                                                                       | 10-Mar |
| 19 | 47,925,000 | 48,075,000 | 640 | 913  | 0.816864342  |                                                                       |        |
| 19 | 48,000,000 | 48,150,000 | 641 | 988  | 0.673036605  | TANC2                                                                 |        |
| 19 | 48,075,000 | 48,225,000 | 642 | 1009 | 0.857659595  | TANC2                                                                 |        |
| 19 | 48,150,000 | 48,300,000 | 643 | 879  | 0.851007666  | TANC2                                                                 |        |
| 19 | 48,225,000 | 48,375,000 | 644 | 777  | 0.423343918  | TANC2                                                                 |        |
| 19 | 48,300,000 | 48,450,000 | 645 | 688  | 0.517684333  | ACE,CYB561,TANC2,ENSBTAG00000047866                                   |        |
| 19 | 48,375,000 | 48,525,000 | 646 | 474  | 0.423120311  | ACE,CYB561,KCNH6,TANC2,WDR68,ENSBTAG00000038138,ENSBTAG00000047866    |        |
| 19 | 48,450,000 | 48,600,000 | 647 | 621  | 0.571761486  | ACE,KCNH6,MAP3K3,TACO1,WDR68,ENSBTAG00000038138                       |        |
| 19 | 48,525,000 | 48,675,000 | 648 | 697  | 0.435717365  | CCDC47,LIMD2,MAP3K3,STRADA,TACO1,WDR68                                |        |
| 19 | 48,600,000 | 48,750,000 | 649 | 750  | -0.497333368 | CCDC47,DDX42,FTSJ3,LIMD2,MAP3K3,PSMC5,SMARCD2,STRADA                  |        |
| 19 | 48,675,000 | 48,825,000 | 650 | 1057 | 0.350697268  | CCDC47,CD79B,DDX42,FTSJ3,GH1,PSMC5,SCN4A,SMARCD2,ENSBTAG00000024947   |        |
| 19 | 48,750,000 | 48,900,000 | 651 | 1568 | 0.665626332  | CD79B,GH1,ICAM2,SCN4A,ENSBTAG00000024947                              |        |
| 19 | 48,825,000 | 48,975,000 | 652 | 1657 | 0.393193222  | ERN1,ICAM2,SCN4A                                                      |        |
| 19 | 48,900,000 | 49,050,000 | 653 | 1310 | -0.639145444 | ERN1,TEX2                                                             |        |
| 19 | 48,975,000 | 49,125,000 | 654 | 1233 | -1.269461328 | TEX2                                                                  |        |
| 19 | 49,050,000 | 49,200,000 | 655 | 1045 | -0.974396959 | PECAM1,TEX2                                                           |        |
| 19 | 49,125,000 | 49,275,000 | 656 | 830  | -1.270594865 | MILR1,PECAM1                                                          |        |
| 19 | 49,200,000 | 49,350,000 | 657 | 797  | -1.833431119 | CEP95,DDX5,MILR1,PECAM1,POLG2                                         |        |
| 19 | 49,275,000 | 49,425,000 | 658 | 681  | -0.179626123 | CEP95,DDX5,MILR1,POLG2,SMURF2                                         |        |
| 19 | 49,350,000 | 49,500,000 | 659 | 526  | 0.804349376  | CEP95,SMURF2                                                          |        |
| 19 | 49,425,000 | 49,575,000 | 660 | 534  | 0.903862881  | KPNA2,SMURF2                                                          |        |
| 19 | 49,500,000 | 49,650,000 | 661 | 635  | 0.714144477  | BPTF,KPNA2                                                            |        |
| 19 | 49,575,000 | 49,725,000 | 662 | 734  | 0.303466351  | BPTF,KPNA2                                                            |        |
| 19 | 49,650,000 | 49,800,000 | 663 | 818  | 0.388895049  | BPTF,NOL11                                                            |        |
| 19 | 49,725,000 | 49,875,000 | 664 | 668  | 0.66808714   | NOL11,ENSBTAG00000044065                                              |        |
| 19 | 49,800,000 | 49,950,000 | 665 | 580  | 0.816547242  | NOL11,ENSBTAG00000044065                                              |        |
| 19 | 49,875,000 | 50,025,000 | 666 | 548  | 0.738350662  | ENSBTAG00000044065                                                    |        |
| 19 | 49,950,000 | 50,100,000 | 667 | 426  | 0.182052976  |                                                                       |        |
| 19 | 50,025,000 | 50,175,000 | 668 | 658  | 0.175715768  | PSMD12                                                                |        |
| 19 | 50,100,000 | 50,250,000 | 669 | 638  | 0.423538999  | METRNL,PSMD12                                                         |        |
| 19 | 50,175,000 | 50,325,000 | 670 | 425  | 0.324299167  | METRNL                                                                |        |
| 19 | 50,250,000 | 50,400,000 | 671 | 792  | -2.459774171 | METRNL,TBCD                                                           |        |
| 19 | 50,325,000 | 50,475,000 | 672 | 911  | -2.051373576 | TBCD                                                                  |        |
| 19 | 50,400,000 | 50,550,000 | 673 | 627  | -0.192875718 | FN3K,TBCD,ZNF750                                                      |        |
| 19 | 50,475,000 | 50,625,000 | 674 | 619  | 0.429172597  | FN3K,FN3KRP,RAB40B,TBCD,WDR45L,ZNF750                                 |        |
| 19 | 50,550,000 | 50,700,000 | 675 | 721  | 0.372207572  | FN3KRP,FOXK2,RAB40B,WDR45L                                            |        |
| 19 | 50,625,000 | 50,775,000 | 676 | 577  | 0.089308295  | C17orf62,FOXK2,HEXDC,NARF,WDR45L                                      |        |
| 19 | 50,700,000 | 50,850,000 | 677 | 376  | -0.215493064 | C17orf62,HEXDC,NARF,OGFOD3,UTS2R,ENSBTAG0000015299,ENSBTAG00000047667 |        |

|    |            |            |     |      |              |                                                                                                       |
|----|------------|------------|-----|------|--------------|-------------------------------------------------------------------------------------------------------|
| 19 | 50,775,000 | 50,925,000 | 678 | 941  | -0.036584593 | HEXDC,OGFOD3,UTS2R,ENSBTAG00000015299,ENSBTAG00000024934,ENSBTAG00000039765,ENSBTAG000047667          |
| 19 | 50,850,000 | 51,000,000 | 679 | 1402 | 0.292616125  | SECTM1,ENSBTAG00000024915,ENSBTAG00000024934,ENSBTAG00000039765                                       |
| 19 | 50,925,000 | 51,075,000 | 680 | 1188 | 0.114691961  | SECTM1,ENSBTAG00000024915                                                                             |
| 19 | 51,000,000 | 51,150,000 | 681 | 1151 | -0.873325192 | SECTM1                                                                                                |
| 19 | 51,075,000 | 51,225,000 | 682 | 842  | -0.756223997 | CD7,CSNK1D,SECTM1                                                                                     |
| 19 | 51,150,000 | 51,300,000 | 683 | 399  | -0.072357895 | CCDC57,CD7,CSNK1D,SLC16A3                                                                             |
| 19 | 51,225,000 | 51,375,000 | 684 | 401  | -1.999253435 | CCDC57,CSNK1D,SLC16A3                                                                                 |
| 19 | 51,300,000 | 51,450,000 | 685 | 422  | -1.758771158 | CCDC57,DUS1L,FASN,GPS1,RFNG                                                                           |
| 19 | 51,375,000 | 51,525,000 | 686 | 388  | -0.0150737   | DCXR,DUS1L,FASN,GPS1,LRRC45,RAC3,RFNG,STRA13,ENSBTAG0000004632,ENSBTAG00000047973                     |
| 19 | 51,450,000 | 51,600,000 | 687 | 303  | 0.443137514  | DCXR,LRRC45,MAFG,MYADML2,PCYT2,PYCR1,RAC3,SIRT7,STRA13,ENSBTAG0000004632,ENSBTAG00000047973           |
| 19 | 51,525,000 | 51,675,000 | 688 | 248  | 0.091776594  | ALYREF,ANAPC11,ARHGDIA,FAM195B,GCGR,MAFG,MYADML2,NPB,P4HB,PCYT2,PPP1R27,PYCR1,SIRT7,ENSBTAG0000004632 |
| 19 | 51,600,000 | 51,750,000 | 689 | 493  | 1.01549999   | ALYREF,ANAPC11,ARHGDIA,ARL16,FAM195B,GCGR,HGS,MRPL12,NPB,P4HB,PPP1R27                                 |
| 19 | 51,675,000 | 51,825,000 | 690 | 716  | 0.808270438  | ARL16,CCDC137,GCGR,HGS,MRPL12,NPLOC4,OXLD1,PDE6G,TSPAN10                                              |
| 19 | 51,750,000 | 51,900,000 | 691 | 552  | -0.111214372 | ACTG1,C17orf70,CCDC137,FSCN2,NPLOC4,OXLD1,PDE6G,TSPAN10                                               |
| 19 | 51,825,000 | 51,975,000 | 692 | 334  | -0.463712571 | ACTG1,BAHCC1,C17orf70,FSCN2,NPLOC4                                                                    |
| 19 | 51,900,000 | 52,050,000 | 693 | 342  | 0.397843074  | BAHCC1,SLC38A10                                                                                       |
| 19 | 51,975,000 | 52,125,000 | 694 | 653  | 0.612457494  | CEP131,ENTHD2,SLC38A10                                                                                |
| 19 | 52,050,000 | 52,200,000 | 695 | 966  | 0.695457569  | AATK,BAIAP2,CEP131,ENTHD2,SLC38A10                                                                    |
| 19 | 52,125,000 | 52,275,000 | 696 | 960  | 0.328305985  | AATK,BAIAP2                                                                                           |
| 19 | 52,200,000 | 52,350,000 | 697 | 934  | 0.11480818   | BAIAP2,CHMP6,RPTOR                                                                                    |
| 19 | 52,275,000 | 52,425,000 | 698 | 878  | 0.494091187  | CHMP6,RPTOR                                                                                           |
| 19 | 52,350,000 | 52,500,000 | 699 | 750  | 0.983594813  | RPTOR                                                                                                 |
| 19 | 52,425,000 | 52,575,000 | 700 | 554  | 0.604376163  | RPTOR                                                                                                 |
| 19 | 52,500,000 | 52,650,000 | 701 | 729  | 0.761953865  | RPTOR                                                                                                 |
| 19 | 52,575,000 | 52,725,000 | 702 | 730  | 0.957874352  | ENDOV,NPTX1,RPTOR                                                                                     |
| 19 | 52,650,000 | 52,800,000 | 703 | 411  | 0.921849244  | ENDOV,NPTX1,RNF213                                                                                    |
| 19 | 52,725,000 | 52,875,000 | 704 | 545  | 0.601989001  | ENDOV,RNF213                                                                                          |
| 19 | 52,800,000 | 52,950,000 | 705 | 824  | 0.483971062  | ENSBTAG00000017233                                                                                    |
| 19 | 52,875,000 | 53,025,000 | 706 | 983  | 0.612450038  | SLC26A11,ENSBTAG00000017233                                                                           |
| 19 | 52,950,000 | 53,100,000 | 707 | 1012 | 0.956051092  | CARD14,EIF4A3,SGSH,SLC26A11,ENSBTAG00000017233                                                        |
| 19 | 53,025,000 | 53,175,000 | 708 | 906  | 1.072633711  | CARD14,CCDC40,EIF4A3,GAA,SGSH,SLC26A11,USMG5                                                          |
| 19 | 53,100,000 | 53,250,000 | 709 | 626  | 0.648403107  | CCDC40,GAA,TBC1D16,USMG5                                                                              |
| 19 | 53,175,000 | 53,325,000 | 710 | 429  | 0.47079716   | CBX4,TBC1D16                                                                                          |
| 19 | 53,250,000 | 53,400,000 | 711 | 458  | 0.422714985  | CBX2,CBX4,CBX8                                                                                        |
| 19 | 53,325,000 | 53,475,000 | 712 | 971  | 0.279918322  | CBX2,CBX4,CBX8,ENPP7                                                                                  |
| 19 | 53,400,000 | 53,550,000 | 713 | 1343 | 0.343417035  | ENPP7                                                                                                 |
| 19 | 53,475,000 | 53,625,000 | 714 | 1625 | 0.74346344   | RBFOX3                                                                                                |
| 19 | 53,550,000 | 53,700,000 | 715 | 1844 | 0.744057234  | RBFOX3                                                                                                |
| 19 | 53,625,000 | 53,775,000 | 716 | 1493 | 0.446067901  | RBFOX3                                                                                                |
| 19 | 53,700,000 | 53,850,000 | 717 | 1559 | 0.148199241  | RBFOX3                                                                                                |

|    |            |            |     |      |              |                                                                     |        |
|----|------------|------------|-----|------|--------------|---------------------------------------------------------------------|--------|
| 19 | 53,775,000 | 53,925,000 | 718 | 1746 | 0.265456365  | RBFOX3                                                              |        |
| 19 | 53,850,000 | 54,000,000 | 719 | 1521 | 0.496750246  | C1QTNF1,ENGASE,RBFOX3                                               |        |
| 19 | 53,925,000 | 54,075,000 | 720 | 1508 | 0.604961185  | C1QTNF1,CANT1,ENGASE,LGALS3BP,RBFOX3                                |        |
| 19 | 54,000,000 | 54,150,000 | 721 | 1678 | 0.983753569  | CANT1,LGALS3BP,TIMP2,USP36                                          |        |
| 19 | 54,075,000 | 54,225,000 | 722 | 1580 | 0.970830222  | TIMP2,USP36                                                         |        |
| 19 | 54,150,000 | 54,300,000 | 723 | 1477 | 0.627520488  | CYTH1,USP36                                                         |        |
| 19 | 54,225,000 | 54,375,000 | 724 | 1952 | 0.579145338  | CYTH1,DNAH17                                                        |        |
| 19 | 54,300,000 | 54,450,000 | 725 | 2160 | 0.786294993  | DNAH17,PGS1                                                         |        |
| 19 | 54,375,000 | 54,525,000 | 726 | 1672 | 0.894900612  | DNAH17,PGS1,SOCS3                                                   |        |
| 19 | 54,450,000 | 54,600,000 | 727 | 1450 | 0.507343697  | AFMID,BIRC5,SOCS3,TK1,TMEM235,ENSBTAG00000009029                    |        |
| 19 | 54,525,000 | 54,675,000 | 728 | 1472 | 0.307608736  | AFMID,BIRC5,SYNGR2,TK1,TMC6,TMC8,TMEM235,TNRC6C,ENSBTAG00000009029  |        |
| 19 | 54,600,000 | 54,750,000 | 729 | 1236 | 0.178351331  | SYNGR2,TK1,TMC6,TMC8,TNRC6C                                         |        |
| 19 | 54,675,000 | 54,825,000 | 730 | 896  | 0.14969722   | TNRC6C                                                              |        |
| 19 | 54,750,000 | 54,900,000 | 731 | 964  | -0.677720645 |                                                                     |        |
| 19 | 54,825,000 | 54,975,000 | 732 | 1348 | -0.726523103 |                                                                     |        |
| 19 | 54,900,000 | 55,050,000 | 733 | 1385 | -0.165382061 |                                                                     |        |
| 19 | 54,975,000 | 55,125,000 | 734 | 1703 | 0.087033096  |                                                                     | 09-Sep |
| 19 | 55,050,000 | 55,200,000 | 735 | 1986 | -0.232851277 |                                                                     | 09-Sep |
| 19 | 55,125,000 | 55,275,000 | 736 | 1434 | -0.086082912 |                                                                     | 09-Sep |
| 19 | 55,200,000 | 55,350,000 | 737 | 1037 | -0.602080851 | SEC14L1                                                             |        |
| 19 | 55,275,000 | 55,425,000 | 738 | 935  | -2.453973052 | SEC14L1                                                             |        |
| 19 | 55,350,000 | 55,500,000 | 739 | 1281 | -1.510929668 | SEC14L1                                                             |        |
| 19 | 55,425,000 | 55,575,000 | 740 | 1704 | -0.041737499 | MGAT5B                                                              |        |
| 19 | 55,500,000 | 55,650,000 | 741 | 1539 | 0.45045242   | MFSD11,MGAT5B                                                       |        |
| 19 | 55,575,000 | 55,725,000 | 742 | 1223 | 0.550451514  | JMJD6,MFSD11,MGAT5B,SRSF2,ENSBTAG00000044138                        |        |
| 19 | 55,650,000 | 55,800,000 | 743 | 1132 | 0.655911764  | JMJD6,MFSD11,SRSF2,ST6GALNAC1,ENSBTAG00000044138                    |        |
| 19 | 55,725,000 | 55,875,000 | 744 | 895  | 0.794973765  | CYGB,PRCD,ST6GALNAC1,ST6GALNAC2                                     |        |
| 19 | 55,800,000 | 55,950,000 | 745 | 726  | 0.536590096  | AANAT,CYGB,PRCD,RHBDF2,ST6GALNAC2,UBE2O,ENSBTAG00000039119          |        |
| 19 | 55,875,000 | 56,025,000 | 746 | 922  | 0.49039034   | AANAT,PRPSAP1,RHBDF2,SPHK1,UBE2O,ENSBTAG00000039119                 |        |
| 19 | 55,950,000 | 56,100,000 | 747 | 923  | 0.915836786  | PRPSAP1,QRICH2,SPHK1,UBALD2,UBE2O                                   |        |
| 19 | 56,025,000 | 56,175,000 | 748 | 951  | 0.590368114  | FOXJ1,PRPSAP1,QRICH2,RNF157,UBALD2                                  |        |
| 19 | 56,100,000 | 56,250,000 | 749 | 1188 | -0.113079684 | EXOC7,FOXJ1,GALR2,RNF157,SRP68,ZACN                                 |        |
| 19 | 56,175,000 | 56,325,000 | 750 | 1162 | 0.366177864  | ACOX1,CDK3,EVPL,EXOC7,FOXJ1,GALR2,SRP68,TEN1,ZACN                   |        |
| 19 | 56,250,000 | 56,400,000 | 751 | 1024 | 0.721196837  | ACOX1,CDK3,EVPL,FBF1,MRPL38,TEN1,TRIM47,TRIM65,WBP2                 |        |
| 19 | 56,325,000 | 56,475,000 | 752 | 948  | 0.082501753  | FBF1,GALK1,H3F3A,ITGB4,MRPL38,TRIM47,TRIM65,UNC13D,UNK,WBP2         |        |
| 19 | 56,400,000 | 56,550,000 | 753 | 1102 | 0.289358122  | GALK1,H3F3A,ITGB4,SAP30BP,UNC13D,UNK,WBP2                           |        |
| 19 | 56,475,000 | 56,625,000 | 754 | 1276 | 0.595389894  | ITGB4,LLGL2,RECQL5,SAP30BP,SMIM5,SMIM6,ENSBTAG00000011713           |        |
| 19 | 56,550,000 | 56,700,000 | 755 | 1094 | 0.762962651  | CASKIN2,KIAA0195,LLGL2,RECQL5,SMIM5,SMIM6,TSEN54,ENSBTAG00000011713 |        |
| 19 | 56,625,000 | 56,775,000 | 756 | 1077 | 0.611433746  | CASKIN2,GRB2,KIAA0195,LLGL2,TSEN54                                  |        |
| 19 | 56,700,000 | 56,850,000 | 757 | 991  | 0.28531342   | GRB2,SLC25A19                                                       |        |
| 19 | 56,775,000 | 56,925,000 | 758 | 748  | 0.266917561  | GGA3,GRB2,MIF4GD,MRPS7,NUP85,SLC25A19,SUMO2                         |        |

|    |            |            |     |      |              |                                                                                  |
|----|------------|------------|-----|------|--------------|----------------------------------------------------------------------------------|
| 19 | 56,850,000 | 57,000,000 | 759 | 759  | 0.607128401  | ARMC7,GGA3,HN1,MIF4GD,MRPS7,NT5C,NUP85,SLC16A5,SLC25A19,SUMO2,ENSBTAG00000026645 |
| 19 | 56,925,000 | 57,075,000 | 760 | 797  | 0.841586733  | ARMC7,ATP5H,CDR2L,HN1,ICT1,KCTD2,NT5C,SLC16A5,SUMO2,ENSBTAG00000026645           |
| 19 | 57,000,000 | 57,150,000 | 761 | 1260 | 0.704418448  | ATP5H,CDR2L,FADS6,HID1,ICT1,KCTD2,OTOP2,OTOP3,USH1G,ENSBTAG00000017248           |
| 19 | 57,075,000 | 57,225,000 | 762 | 1439 | 0.680636376  | FADS6,FDXR,GRIN2C,HID1,OTOP2,OTOP3,USH1G,ENSBTAG00000017248                      |
| 19 | 57,150,000 | 57,300,000 | 763 | 1163 | 0.729479656  | FADS6,FDXR,GRIN2C,NAT9,RAB37,SLC9A3R1,TMEM104                                    |
| 19 | 57,225,000 | 57,375,000 | 764 | 880  | -0.184262625 | NAT9,RAB37,SLC9A3R1,TMEM104,ENSBTAG00000002773                                   |
| 19 | 57,300,000 | 57,450,000 | 765 | 888  | -1.347351684 | CD300E,RAB37,ENSBTAG00000002773                                                  |
| 19 | 57,375,000 | 57,525,000 | 766 | 1535 | 0.049747975  | CD300E,RAB37,ENSBTAG00000024901,ENSBTAG0000046693                                |
| 19 | 57,450,000 | 57,600,000 | 767 | 1897 | 0.446645537  | CD300LB,ENSBTAG00000008328,ENSBTAG00000024901,ENSBTAG00000046693                 |
| 19 | 57,525,000 | 57,675,000 | 768 | 1771 | 0.497417802  | CD300LB,GPRC5C,ENSBTAG00000000812,ENSBTAG0000008328                              |
| 19 | 57,600,000 | 57,750,000 | 769 | 1398 | -0.582144992 | BTBD17,GPR142,GPRC5C,KIF19,ENSBTAG00000000812                                    |
| 19 | 57,675,000 | 57,825,000 | 770 | 1668 | -0.354754095 | BTBD17,DNAI2,GPR142,KIF19,TTYH2                                                  |
| 19 | 57,750,000 | 57,900,000 | 771 | 1944 | 0.517591726  | DNAI2,KIF19,RPL38,TTYH2                                                          |
| 19 | 57,825,000 | 57,975,000 | 772 | 1892 | 0.241080858  | RPL38,TTYH2                                                                      |
| 19 | 57,900,000 | 58,050,000 | 773 | 1691 | 0.192280038  |                                                                                  |
| 19 | 57,975,000 | 58,125,000 | 774 | 1273 | 0.1001282    |                                                                                  |
| 19 | 58,050,000 | 58,200,000 | 775 | 1171 | -0.093075408 |                                                                                  |
| 19 | 58,125,000 | 58,275,000 | 776 | 1580 | 0.474261924  |                                                                                  |
| 19 | 58,200,000 | 58,350,000 | 777 | 1578 | 0.494887231  |                                                                                  |
| 19 | 58,275,000 | 58,425,000 | 778 | 1623 | 0.609103235  |                                                                                  |
| 19 | 58,350,000 | 58,500,000 | 779 | 1802 | 0.107697803  | SDK2                                                                             |
| 19 | 58,425,000 | 58,575,000 | 780 | 1228 | -0.743781531 | SDK2                                                                             |
| 19 | 58,500,000 | 58,650,000 | 781 | 986  | 0.34545656   | C17orf80,CDC42EP4,SDK2                                                           |
| 19 | 58,575,000 | 58,725,000 | 782 | 959  | -0.823489747 | C17orf80,CDC42EP4,COG1,MGC128049,SDK2,SSTR2                                      |
| 19 | 58,650,000 | 58,800,000 | 783 | 1373 | -0.632988106 | C17orf80,COG1,MGC128049,SLC39A11,SSTR2                                           |
| 19 | 58,725,000 | 58,875,000 | 784 | 1863 | 0.378921223  | SLC39A11                                                                         |
| 19 | 58,800,000 | 58,950,000 | 785 | 2209 | 0.236536008  | SLC39A11                                                                         |
| 19 | 58,875,000 | 59,025,000 | 786 | 2409 | -0.243908882 | SLC39A11                                                                         |
| 19 | 58,950,000 | 59,100,000 | 787 | 1945 | 0.116653714  | SLC39A11                                                                         |
| 19 | 59,025,000 | 59,175,000 | 788 | 1400 | 0.361072732  | SLC39A11                                                                         |
| 19 | 59,100,000 | 59,250,000 | 789 | 1250 | 0.451301433  |                                                                                  |
| 19 | 59,175,000 | 59,325,000 | 790 | 1449 | 1.086630501  |                                                                                  |
| 19 | 59,250,000 | 59,400,000 | 791 | 1723 | 0.859615748  |                                                                                  |
| 19 | 59,325,000 | 59,475,000 | 792 | 1771 | 0.719564995  |                                                                                  |
| 19 | 59,400,000 | 59,550,000 | 793 | 1401 | 0.699521668  | SOX9                                                                             |
| 19 | 59,475,000 | 59,625,000 | 794 | 1227 | 0.468452685  | SOX9                                                                             |
| 19 | 59,550,000 | 59,700,000 | 795 | 1136 | 0.075421495  |                                                                                  |
| 19 | 59,625,000 | 59,775,000 | 796 | 934  | 0.459515389  |                                                                                  |
| 19 | 59,700,000 | 59,850,000 | 797 | 1192 | 0.843786274  |                                                                                  |
| 19 | 59,775,000 | 59,925,000 | 798 | 1599 | 0.650265774  |                                                                                  |
| 19 | 59,850,000 | 60,000,000 | 799 | 1932 | 0.539888147  |                                                                                  |
| 19 | 59,925,000 | 60,075,000 | 800 | 1910 | 0.316524692  |                                                                                  |
| 19 | 60,000,000 | 60,150,000 | 801 | 1497 | 0.210263663  |                                                                                  |

|    |            |            |     |      |              |                                            |
|----|------------|------------|-----|------|--------------|--------------------------------------------|
| 19 | 60,075,000 | 60,225,000 | 802 | 1428 | 0.219209797  |                                            |
| 19 | 60,150,000 | 60,300,000 | 803 | 1230 | -0.102879211 |                                            |
| 19 | 60,225,000 | 60,375,000 | 804 | 924  | -0.091508519 |                                            |
| 19 | 60,300,000 | 60,450,000 | 805 | 831  | 0.112283498  |                                            |
| 19 | 60,375,000 | 60,525,000 | 806 | 673  | -0.113155637 |                                            |
| 19 | 60,450,000 | 60,600,000 | 807 | 919  | -1.922542291 |                                            |
| 19 | 60,525,000 | 60,675,000 | 808 | 934  | -1.841438957 |                                            |
| 19 | 60,600,000 | 60,750,000 | 809 | 833  | 0.949156413  |                                            |
| 19 | 60,675,000 | 60,825,000 | 810 | 954  | 1.215258575  |                                            |
| 19 | 60,750,000 | 60,900,000 | 811 | 810  | 0.877438978  |                                            |
| 19 | 60,825,000 | 60,975,000 | 812 | 1070 | 0.468563347  |                                            |
| 19 | 60,900,000 | 61,050,000 | 813 | 1214 | 0.329595687  |                                            |
| 19 | 60,975,000 | 61,125,000 | 814 | 969  | 0.028388848  |                                            |
| 19 | 61,050,000 | 61,200,000 | 815 | 760  | 0.664169454  | KCNJ2                                      |
| 19 | 61,125,000 | 61,275,000 | 816 | 1107 | 0.324650768  | KCNJ16,KCNJ2                               |
| 19 | 61,200,000 | 61,350,000 | 817 | 1294 | 0.384038233  | KCNJ16                                     |
| 19 | 61,275,000 | 61,425,000 | 818 | 1025 | 0.856328564  |                                            |
| 19 | 61,350,000 | 61,500,000 | 819 | 944  | 1.040892444  |                                            |
| 19 | 61,425,000 | 61,575,000 | 820 | 676  | 1.168541604  |                                            |
| 19 | 61,500,000 | 61,650,000 | 821 | 709  | -0.083716004 |                                            |
| 19 | 61,575,000 | 61,725,000 | 822 | 751  | -0.344407305 | MAP2K6                                     |
| 19 | 61,650,000 | 61,800,000 | 823 | 979  | -0.244349351 | MAP2K6                                     |
| 19 | 61,725,000 | 61,875,000 | 824 | 1184 | 0.076875718  | ABCA5,MAP2K6                               |
| 19 | 61,800,000 | 61,950,000 | 825 | 850  | 0.080555128  | ABCA5,MAP2K6                               |
| 19 | 61,875,000 | 62,025,000 | 826 | 880  | -1.386697547 | ABCA10,ABCA5                               |
| 19 | 61,950,000 | 62,100,000 | 827 | 847  | -1.755974214 | ABCA10,ABCA6,ABCA9                         |
| 19 | 62,025,000 | 62,175,000 | 828 | 844  | -0.484565135 | ABCA6,ABCA9                                |
| 19 | 62,100,000 | 62,250,000 | 829 | 1172 | 0.600538807  | ABCA9,ENSBTAG00000024899                   |
| 19 | 62,175,000 | 62,325,000 | 830 | 1112 | 1.023743304  | FAM20A,PRKAR1A,ENSBTAG00000024899          |
| 19 | 62,250,000 | 62,400,000 | 831 | 958  | 0.343574021  | ARSG,FAM20A,PRKAR1A                        |
| 19 | 62,325,000 | 62,475,000 | 832 | 946  | 0.085348182  | ARSG,MGC159964,PRKAR1A                     |
| 19 | 62,400,000 | 62,550,000 | 833 | 945  | 0.12485508   | AMZ2,ARSG,MGC159964,SLC16A6                |
| 19 | 62,475,000 | 62,625,000 | 834 | 842  | -0.394516923 | AMZ2,GNA13,RGS9,SLC16A6,ENSBTAG00000047055 |
| 19 | 62,550,000 | 62,700,000 | 835 | 857  | -0.443179007 | GNA13,RGS9,ENSBTAG00000047055              |
| 19 | 62,625,000 | 62,775,000 | 836 | 913  | -0.336438033 | RGS9                                       |
| 19 | 62,700,000 | 62,850,000 | 837 | 901  | -0.561830235 | AXIN2                                      |
| 19 | 62,775,000 | 62,925,000 | 838 | 920  | -0.682074655 | AXIN2                                      |
| 19 | 62,850,000 | 63,000,000 | 839 | 765  | -0.087639799 | AXIN2                                      |
| 19 | 62,925,000 | 63,075,000 | 840 | 681  | 0.148798569  | CEP112                                     |
| 19 | 63,000,000 | 63,150,000 | 841 | 793  | 0.145166391  | CEP112                                     |
| 19 | 63,075,000 | 63,225,000 | 842 | 829  | 0.507236009  | CEP112                                     |
| 19 | 63,150,000 | 63,300,000 | 843 | 794  | 0.947971639  | APOH,CEP112                                |
| 19 | 63,225,000 | 63,375,000 | 844 | 854  | 0.253831909  | APOH                                       |
| 19 | 63,300,000 | 63,450,000 | 845 | 891  | -0.395285643 |                                            |
| 19 | 63,375,000 | 63,525,000 | 846 | 962  | -0.508085378 | PRKCA                                      |
| 19 | 63,450,000 | 63,600,000 | 847 | 945  | -0.957436939 | PRKCA                                      |
| 19 | 63,525,000 | 63,675,000 | 848 | 877  | -0.620105783 | CACNG5,PRKCA                               |
| 19 | 63,600,000 | 63,750,000 | 849 | 847  | -0.788607564 | CACNG1,CACNG4,CACNG5                       |
| 19 | 63,675,000 | 63,825,000 | 850 | 650  | -2.830852654 | CACNG1,CACNG4,HELZ                         |
| 19 | 63,750,000 | 63,900,000 | 851 | 479  | -4.655810857 | HELZ                                       |
| 19 | 63,825,000 | 63,975,000 | 852 | 532  | -1.241967446 | HELZ                                       |
| 19 | 63,900,000 | 64,050,000 | 853 | 856  | 0.594187262  | HELZ                                       |
| 19 | 63,975,000 | 64,057,457 | 854 | 582  | 0.641743103  |                                            |

|    |           |           |    |      |              |                                                                             |
|----|-----------|-----------|----|------|--------------|-----------------------------------------------------------------------------|
| 20 | 0         | 150,000   | 1  | 347  | -0.091132332 | ENSBTAG00000000617,ENSBTAG00000038364,ENSBTAG00000038537,ENSBTAG00000047333 |
| 20 | 75,000    | 225,000   | 2  | 547  | -0.308843608 | PANK3,SPZ1,ENSBTAG00000047333                                               |
| 20 | 150,000   | 300,000   | 3  | 851  | -0.635846814 | PANK3,SPZ1                                                                  |
| 20 | 225,000   | 375,000   | 4  | 830  | -0.90172326  | SLIT3                                                                       |
| 20 | 300,000   | 450,000   | 5  | 794  | -0.463614978 | SLIT3                                                                       |
| 20 | 375,000   | 525,000   | 6  | 920  | -0.06511218  | SLIT3                                                                       |
| 20 | 450,000   | 600,000   | 7  | 785  | 0.719824421  | SLIT3                                                                       |
| 20 | 525,000   | 675,000   | 8  | 812  | 1.254604202  |                                                                             |
| 20 | 600,000   | 750,000   | 9  | 1045 | 0.59210577   |                                                                             |
| 20 | 675,000   | 825,000   | 10 | 1405 | 0.364097956  |                                                                             |
| 20 | 750,000   | 900,000   | 11 | 1237 | 0.442677698  |                                                                             |
| 20 | 825,000   | 975,000   | 12 | 668  | 0.131639948  |                                                                             |
| 20 | 900,000   | 1,050,000 | 13 | 512  | 0.224338266  |                                                                             |
| 20 | 975,000   | 1,125,000 | 14 | 577  | 0.111340481  |                                                                             |
| 20 | 1,050,000 | 1,200,000 | 15 | 565  | -0.867876895 |                                                                             |
| 20 | 1,125,000 | 1,275,000 | 16 | 476  | -1.788169834 |                                                                             |
| 20 | 1,200,000 | 1,350,000 | 17 | 720  | -1.649973483 |                                                                             |
| 20 | 1,275,000 | 1,425,000 | 18 | 827  | -0.24142157  | SPDL1                                                                       |
| 20 | 1,350,000 | 1,500,000 | 19 | 806  | 0.295956759  | DOCK2,SPDL1                                                                 |
| 20 | 1,425,000 | 1,575,000 | 20 | 988  | -1.648612142 | DOCK2                                                                       |
| 20 | 1,500,000 | 1,650,000 | 21 | 1154 | -0.715821211 | DOCK2                                                                       |
| 20 | 1,575,000 | 1,725,000 | 22 | 1512 | 0.290279977  | DOCK2,FAM196B                                                               |
| 20 | 1,650,000 | 1,800,000 | 23 | 1556 | 0.002410673  | DOCK2,FAM196B                                                               |
| 20 | 1,725,000 | 1,875,000 | 24 | 1110 | 0.203856336  | DOCK2                                                                       |
| 20 | 1,800,000 | 1,950,000 | 25 | 1110 | 0.109813748  | DOCK2,FOXI1,ENSBTAG00000046449                                              |
| 20 | 1,875,000 | 2,025,000 | 26 | 1137 | 0.214993272  | DOCK2,FOXI1,ENSBTAG00000046449                                              |
| 20 | 1,950,000 | 2,100,000 | 27 | 946  | 0.449106975  | LCP2                                                                        |
| 20 | 2,025,000 | 2,175,000 | 28 | 699  | 0.366316257  | KCNMB1,LCP2                                                                 |
| 20 | 2,100,000 | 2,250,000 | 29 | 645  | 0.418229825  | KCNMB1                                                                      |
| 20 | 2,175,000 | 2,325,000 | 30 | 1308 | -0.006077804 | KCNIP1                                                                      |
| 20 | 2,250,000 | 2,400,000 | 31 | 1517 | -0.672710351 | KCNIP1                                                                      |
| 20 | 2,325,000 | 2,475,000 | 32 | 1238 | -0.454214565 | KCNIP1                                                                      |
| 20 | 2,400,000 | 2,550,000 | 33 | 1086 | 0.596474654  | KCNIP1                                                                      |
| 20 | 2,475,000 | 2,625,000 | 34 | 913  | 0.70903869   | GABRP,KCNIP1                                                                |
| 20 | 2,550,000 | 2,700,000 | 35 | 577  | 0.439007646  | GABRP,RANBP17                                                               |
| 20 | 2,625,000 | 2,775,000 | 36 | 305  | 0.147692826  | RANBP17                                                                     |
| 20 | 2,700,000 | 2,850,000 | 37 | 284  | -0.660165563 | RANBP17                                                                     |
| 20 | 2,775,000 | 2,925,000 | 38 | 271  | -0.980300656 | RANBP17                                                                     |
| 20 | 2,850,000 | 3,000,000 | 39 | 307  | -0.895618236 | RANBP17                                                                     |
| 20 | 2,925,000 | 3,075,000 | 40 | 514  | 0.141304585  | RANBP17,TLX3,ENSBTAG00000022684                                             |
| 20 | 3,000,000 | 3,150,000 | 41 | 596  | 0.186505832  | FGF18,NPM1,RANBP17,TLX3,ENSBTAG00000022684                                  |
| 20 | 3,075,000 | 3,225,000 | 42 | 505  | -0.408176084 | FGF18,NPM1                                                                  |
| 20 | 3,150,000 | 3,300,000 | 43 | 515  | -1.077348691 | FGF18                                                                       |
| 20 | 3,225,000 | 3,375,000 | 44 | 522  | -0.884507104 |                                                                             |
| 20 | 3,300,000 | 3,450,000 | 45 | 533  | -0.711319274 |                                                                             |
| 20 | 3,375,000 | 3,525,000 | 46 | 476  | -0.609723413 | SMIM23                                                                      |
| 20 | 3,450,000 | 3,600,000 | 47 | 450  | -0.147892872 | FBXW11,SMIM23                                                               |
| 20 | 3,525,000 | 3,675,000 | 48 | 448  | 0.099336363  | FBXW11                                                                      |
| 20 | 3,600,000 | 3,750,000 | 49 | 328  | 0.593321848  | FBXW11                                                                      |
| 20 | 3,675,000 | 3,825,000 | 50 | 458  | -3.823010464 | STK10                                                                       |
| 20 | 3,750,000 | 3,900,000 | 51 | 597  | -2.708974266 | EFCAB9,STK10                                                                |
| 20 | 3,825,000 | 3,975,000 | 52 | 414  | -0.762519643 | EFCAB9,STK10,UBTD2                                                          |



|    |           |           |     |      |              |                                            |
|----|-----------|-----------|-----|------|--------------|--------------------------------------------|
| 20 | 3,900,000 | 4,050,000 | 53  | 422  | -1.382207833 | SH3PXD2B,UBTD2                             |
| 20 | 3,975,000 | 4,125,000 | 54  | 645  | -2.862286835 | SH3PXD2B                                   |
| 20 | 4,050,000 | 4,200,000 | 55  | 688  | -2.741617329 | SH3PXD2B                                   |
| 20 | 4,125,000 | 4,275,000 | 56  | 587  | -1.525997258 |                                            |
| 20 | 4,200,000 | 4,350,000 | 57  | 447  | -1.091648627 | NEURL1B                                    |
| 20 | 4,275,000 | 4,425,000 | 58  | 374  | 0.358248778  | NEURL1B                                    |
| 20 | 4,350,000 | 4,500,000 | 59  | 360  | 0.744483483  | DUSP1,NEURL1B                              |
| 20 | 4,425,000 | 4,575,000 | 60  | 813  | 0.337201676  | DUSP1,ERGIC1                               |
| 20 | 4,500,000 | 4,650,000 | 61  | 1168 | -0.400965153 | ATP6V0E1,ERGIC1,RPL26L1                    |
| 20 | 4,575,000 | 4,725,000 | 62  | 838  | -2.704518455 | ATP6V0E1,CREBRF,ERGIC1,RPL26L1             |
| 20 | 4,650,000 | 4,800,000 | 63  | 702  | -2.485552198 | ATP6V0E1,BNIP1,CREBRF                      |
| 20 | 4,725,000 | 4,875,000 | 64  | 742  | -0.786375996 | BNIP1,CREBRF,NKX2-5                        |
| 20 | 4,800,000 | 4,950,000 | 65  | 785  | -0.198413356 | NKX2-5,STC2                                |
| 20 | 4,875,000 | 5,025,000 | 66  | 680  | -0.014862243 | STC2                                       |
| 20 | 4,950,000 | 5,100,000 | 67  | 483  | 0.494454598  |                                            |
| 20 | 5,025,000 | 5,175,000 | 68  | 389  | 0.917446359  |                                            |
| 20 | 5,100,000 | 5,250,000 | 69  | 660  | 1.081725449  | BOD1                                       |
| 20 | 5,175,000 | 5,325,000 | 70  | 688  | 0.397741708  | BOD1                                       |
| 20 | 5,250,000 | 5,400,000 | 71  | 575  | -1.399956967 |                                            |
| 20 | 5,325,000 | 5,475,000 | 72  | 660  | -0.316237856 |                                            |
| 20 | 5,400,000 | 5,550,000 | 73  | 551  | 0.785295033  | CPEB4                                      |
| 20 | 5,475,000 | 5,625,000 | 74  | 616  | 0.840729828  | CPEB4                                      |
| 20 | 5,550,000 | 5,700,000 | 75  | 807  | 0.610158671  | CPEB4,NSG2                                 |
| 20 | 5,625,000 | 5,775,000 | 76  | 1029 | 0.53437155   | NSG2                                       |
| 20 | 5,700,000 | 5,850,000 | 77  | 1212 | 0.77334316   | NSG2                                       |
| 20 | 5,775,000 | 5,925,000 | 78  | 1459 | 1.006302572  |                                            |
| 20 | 5,850,000 | 6,000,000 | 79  | 1729 | 0.929103688  |                                            |
| 20 | 5,925,000 | 6,075,000 | 80  | 1405 | 0.108566487  |                                            |
| 20 | 6,000,000 | 6,150,000 | 81  | 955  | -0.347739622 |                                            |
| 20 | 6,075,000 | 6,225,000 | 82  | 808  | 0.061530713  |                                            |
| 20 | 6,150,000 | 6,300,000 | 83  | 812  | -0.409642925 |                                            |
| 20 | 6,225,000 | 6,375,000 | 84  | 799  | 0.222966243  | MSX2                                       |
| 20 | 6,300,000 | 6,450,000 | 85  | 770  | 0.214749492  | MSX2                                       |
| 20 | 6,375,000 | 6,525,000 | 86  | 1270 | -0.207634764 |                                            |
| 20 | 6,450,000 | 6,600,000 | 87  | 1446 | 0.182432279  | FAM169A                                    |
| 20 | 6,525,000 | 6,675,000 | 88  | 1274 | -1.294259214 | FAM169A,GFM2,NSA2                          |
| 20 | 6,600,000 | 6,750,000 | 89  | 1309 | -1.047537081 | FAM169A,GFM2,NSA2,ENSBTAG00000015512       |
| 20 | 6,675,000 | 6,825,000 | 90  | 1152 | -0.632027866 | GFM2,ENSBTAG00000015512,ENSBTAG00000034138 |
| 20 | 6,750,000 | 6,900,000 | 91  | 904  | -1.519812385 | ENC1,ENSBTAG00000015512,ENSBTAG00000034138 |
| 20 | 6,825,000 | 6,975,000 | 92  | 1148 | -0.214241893 | ENC1                                       |
| 20 | 6,900,000 | 7,050,000 | 93  | 1097 | -1.080856195 |                                            |
| 20 | 6,975,000 | 7,125,000 | 94  | 879  | -2.647921973 |                                            |
| 20 | 7,050,000 | 7,200,000 | 95  | 1056 | -0.84855959  |                                            |
| 20 | 7,125,000 | 7,275,000 | 96  | 949  | 0.227743856  |                                            |
| 20 | 7,200,000 | 7,350,000 | 97  | 969  | 0.224580745  |                                            |
| 20 | 7,275,000 | 7,425,000 | 98  | 1063 | -0.217446686 |                                            |
| 20 | 7,350,000 | 7,500,000 | 99  | 1051 | -0.630552673 |                                            |
| 20 | 7,425,000 | 7,575,000 | 100 | 1035 | -0.233982208 |                                            |
| 20 | 7,500,000 | 7,650,000 | 101 | 836  | 0.707827905  | RGNEF                                      |
| 20 | 7,575,000 | 7,725,000 | 102 | 867  | 0.693690454  | RGNEF                                      |
| 20 | 7,650,000 | 7,800,000 | 103 | 781  | 0.59009703   | RGNEF                                      |
| 20 | 7,725,000 | 7,875,000 | 104 | 858  | -0.125203452 |                                            |
| 20 | 7,800,000 | 7,950,000 | 105 | 1116 | -1.076594395 |                                            |

|    |            |            |     |      |              |                                          |
|----|------------|------------|-----|------|--------------|------------------------------------------|
| 20 | 7,875,000  | 8,025,000  | 106 | 695  | -1.812403587 | ANKRA2,UTP15                             |
| 20 | 7,950,000  | 8,100,000  | 107 | 587  | -0.942991877 | ANKRA2,BTF3,CALM,UTP15                   |
| 20 | 8,025,000  | 8,175,000  | 108 | 581  | -0.349016212 | BTF3,CALM                                |
| 20 | 8,100,000  | 8,250,000  | 109 | 550  | -0.202082349 |                                          |
| 20 | 8,175,000  | 8,325,000  | 110 | 877  | -0.354528611 |                                          |
| 20 | 8,250,000  | 8,400,000  | 111 | 1084 | 0.30732765   | TMEM174                                  |
| 20 | 8,325,000  | 8,475,000  | 112 | 1042 | 0.486600028  | FCHO2,TMEM171,TMEM174                    |
| 20 | 8,400,000  | 8,550,000  | 113 | 900  | 0.069879577  | FCHO2,TMEM171                            |
| 20 | 8,475,000  | 8,625,000  | 114 | 949  | -0.110893166 | FCHO2                                    |
| 20 | 8,550,000  | 8,700,000  | 115 | 897  | -0.469099577 | FCHO2,TNPO1                              |
| 20 | 8,625,000  | 8,775,000  | 116 | 718  | -0.613552514 | TNPO1                                    |
| 20 | 8,700,000  | 8,850,000  | 117 | 832  | 0.732090211  | SUBH2BV                                  |
| 20 | 8,775,000  | 8,925,000  | 118 | 1053 | 0.737363876  | SUBH2BV                                  |
| 20 | 8,850,000  | 9,000,000  | 119 | 1335 | 0.452809439  |                                          |
| 20 | 8,925,000  | 9,075,000  | 120 | 1334 | 0.580057235  |                                          |
| 20 | 9,000,000  | 9,150,000  | 121 | 1085 | 0.547205306  | ZNF366                                   |
| 20 | 9,075,000  | 9,225,000  | 122 | 1327 | 0.736812345  | MRPS27,PTCD2,ZNF366                      |
| 20 | 9,150,000  | 9,300,000  | 123 | 1371 | 0.602781143  | MRPS27,PTCD2                             |
| 20 | 9,225,000  | 9,375,000  | 124 | 1198 | 0.007472248  | MAP1B,MRPS27                             |
| 20 | 9,300,000  | 9,450,000  | 125 | 979  | 0.44596363   | MAP1B,MRPS27                             |
| 20 | 9,375,000  | 9,525,000  | 126 | 891  | -0.325391298 | MAP1B                                    |
| 20 | 9,450,000  | 9,600,000  | 127 | 1174 | -0.312545222 |                                          |
| 20 | 9,525,000  | 9,675,000  | 128 | 1328 | 1.0353072    |                                          |
| 20 | 9,600,000  | 9,750,000  | 129 | 1236 | 0.472536349  |                                          |
| 20 | 9,675,000  | 9,825,000  | 130 | 1098 | -0.479309263 | CARTPT                                   |
| 20 | 9,750,000  | 9,900,000  | 131 | 952  | -0.251381761 | CARTPT,MCCC2                             |
| 20 | 9,825,000  | 9,975,000  | 132 | 943  | -2.364358181 | BDP1,MCCC2                               |
| 20 | 9,900,000  | 10,050,000 | 133 | 757  | -2.995469186 | BDP1,MCCC2,SERF1,SMN1                    |
| 20 | 9,975,000  | 10,125,000 | 134 | 370  | -0.45342368  | BDP1,NAIP,SERF1,SMN1                     |
| 20 | 10,050,000 | 10,200,000 | 135 | 506  | -0.424828526 | GTF2H2,NAIP,OCLN,SMN1                    |
| 20 | 10,125,000 | 10,275,000 | 136 | 867  | 0.133131068  | GTF2H2,MARVELD2,OCLN,RAD17               |
| 20 | 10,200,000 | 10,350,000 | 137 | 782  | 0.493188744  | AK6,CCDC125,MARVELD2,OCLN,RAD17,TAF9     |
| 20 | 10,275,000 | 10,425,000 | 138 | 418  | -0.621928335 | AK6,CCDC125,CDK7,CENPH,MRPS36,RAD17,TAF9 |
| 20 | 10,350,000 | 10,500,000 | 139 | 351  | 0.229965575  | CCDC125,CCNB1,CDK7,CENPH,MRPS36,SLC30A5  |
| 20 | 10,425,000 | 10,575,000 | 140 | 700  | 1.021545877  | CCNB1,CENPH,SLC30A5                      |
| 20 | 10,500,000 | 10,650,000 | 141 | 924  | 0.774542885  |                                          |
| 20 | 10,575,000 | 10,725,000 | 142 | 985  | -0.18339998  |                                          |
| 20 | 10,650,000 | 10,800,000 | 143 | 839  | -0.598884257 |                                          |
| 20 | 10,725,000 | 10,875,000 | 144 | 641  | -0.84346651  |                                          |
| 20 | 10,800,000 | 10,950,000 | 145 | 809  | -0.298857819 |                                          |
| 20 | 10,875,000 | 11,025,000 | 146 | 884  | 0.220844285  |                                          |
| 20 | 10,950,000 | 11,100,000 | 147 | 894  | 0.155366923  |                                          |
| 20 | 11,025,000 | 11,175,000 | 148 | 805  | -0.448756183 |                                          |
| 20 | 11,100,000 | 11,250,000 | 149 | 788  | -0.54287705  |                                          |
| 20 | 11,175,000 | 11,325,000 | 150 | 1040 | -0.278134095 |                                          |
| 20 | 11,250,000 | 11,400,000 | 151 | 971  | -0.309555303 | PIK3R1                                   |
| 20 | 11,325,000 | 11,475,000 | 152 | 577  | -0.573257788 | PIK3R1                                   |
| 20 | 11,400,000 | 11,550,000 | 153 | 589  | -0.23136757  | PIK3R1                                   |
| 20 | 11,475,000 | 11,625,000 | 154 | 825  | 0.656820632  |                                          |
| 20 | 11,550,000 | 11,700,000 | 155 | 1079 | 0.771083412  |                                          |
| 20 | 11,625,000 | 11,775,000 | 156 | 1081 | 0.60485712   | DYNLL1                                   |
| 20 | 11,700,000 | 11,850,000 | 157 | 607  | 0.435355442  | DYNLL1                                   |
| 20 | 11,775,000 | 11,925,000 | 158 | 550  | 0.466039065  |                                          |

|    |            |            |     |      |              |                                                                           |
|----|------------|------------|-----|------|--------------|---------------------------------------------------------------------------|
| 20 | 11,850,000 | 12,000,000 | 159 | 525  | 0.666678284  |                                                                           |
| 20 | 11,925,000 | 12,075,000 | 160 | 612  | 1.2698757    |                                                                           |
| 20 | 12,000,000 | 12,150,000 | 161 | 1126 | 0.892889515  |                                                                           |
| 20 | 12,075,000 | 12,225,000 | 162 | 1113 | 0.041447258  |                                                                           |
| 20 | 12,150,000 | 12,300,000 | 163 | 765  | -0.696724163 |                                                                           |
| 20 | 12,225,000 | 12,375,000 | 164 | 882  | -1.806346048 | CD180                                                                     |
| 20 | 12,300,000 | 12,450,000 | 165 | 1132 | -1.423186813 | CD180,MAST4                                                               |
| 20 | 12,375,000 | 12,525,000 | 166 | 902  | -0.262483718 | MAST4                                                                     |
| 20 | 12,450,000 | 12,600,000 | 167 | 756  | 0.427040492  | MAST4                                                                     |
| 20 | 12,525,000 | 12,675,000 | 168 | 927  | 0.770289009  |                                                                           |
| 20 | 12,600,000 | 12,750,000 | 169 | 951  | 0.587094703  |                                                                           |
| 20 | 12,675,000 | 12,825,000 | 170 | 789  | -0.133698623 |                                                                           |
| 20 | 12,750,000 | 12,900,000 | 171 | 761  | -0.73972894  |                                                                           |
| 20 | 12,825,000 | 12,975,000 | 172 | 831  | -0.35412331  |                                                                           |
| 20 | 12,900,000 | 13,050,000 | 173 | 986  | 0.316619119  |                                                                           |
| 20 | 12,975,000 | 13,125,000 | 174 | 934  | 0.622666107  |                                                                           |
| 20 | 13,050,000 | 13,200,000 | 175 | 895  | 0.517303963  |                                                                           |
| 20 | 13,125,000 | 13,275,000 | 176 | 857  | 0.651309591  |                                                                           |
| 20 | 13,200,000 | 13,350,000 | 177 | 784  | -0.107244175 |                                                                           |
| 20 | 13,275,000 | 13,425,000 | 178 | 807  | -0.364373048 | SREK1                                                                     |
| 20 | 13,350,000 | 13,500,000 | 179 | 496  | -0.235692277 | ERBB2IP,SREK1                                                             |
| 20 | 13,425,000 | 13,575,000 | 180 | 393  | -0.075988337 | ERBB2IP,SREK1                                                             |
| 20 | 13,500,000 | 13,650,000 | 181 | 442  | 0.223622871  | ERBB2IP                                                                   |
| 20 | 13,575,000 | 13,725,000 | 182 | 672  | 0.35523028   | NLN                                                                       |
| 20 | 13,650,000 | 13,800,000 | 183 | 741  | 0.433422131  | NLN                                                                       |
| 20 | 13,725,000 | 13,875,000 | 184 | 848  | -0.51828163  | NLN,SGTB,TRAPPC13                                                         |
| 20 | 13,800,000 | 13,950,000 | 185 | 871  | -0.952832579 | PPWD1,SGTB,TRAPPC13,TRIM23,ENSBTAG00000047828                             |
| 20 | 13,875,000 | 14,025,000 | 186 | 425  | -1.610883746 | ADAMTS6,CENPK,PPWD1,TRAPPC13,TRIM23,ENSBTAG00000046810,ENSBTAG00000047828 |
| 20 | 13,950,000 | 14,100,000 | 187 | 262  | -2.058615503 | ADAMTS6,CENPK,PPWD1,ENSBTAG00000046810                                    |
| 20 | 14,025,000 | 14,175,000 | 188 | 245  | -1.800721735 | ADAMTS6                                                                   |
| 20 | 14,100,000 | 14,250,000 | 189 | 292  | -1.312551182 | ADAMTS6                                                                   |
| 20 | 14,175,000 | 14,325,000 | 190 | 398  | -0.811138941 | ADAMTS6                                                                   |
| 20 | 14,250,000 | 14,400,000 | 191 | 526  | -1.077754866 | ADAMTS6                                                                   |
| 20 | 14,325,000 | 14,475,000 | 192 | 596  | -0.760969493 | CWC27                                                                     |
| 20 | 14,400,000 | 14,550,000 | 193 | 492  | -0.097864183 | CWC27                                                                     |
| 20 | 14,475,000 | 14,625,000 | 194 | 330  | 0.22088194   | CWC27                                                                     |
| 20 | 14,550,000 | 14,700,000 | 195 | 430  | -0.017117731 | CWC27,SREK1IP1                                                            |
| 20 | 14,625,000 | 14,775,000 | 196 | 620  | 0.179805595  | CWC27,FAM159B,SREK1IP1                                                    |
| 20 | 14,700,000 | 14,850,000 | 197 | 679  | 0.80117253   | FAM159B,RGS7BP,SREK1IP1                                                   |
| 20 | 14,775,000 | 14,925,000 | 198 | 644  | 0.873446127  | RGS7BP                                                                    |
| 20 | 14,850,000 | 15,000,000 | 199 | 477  | 0.073129147  | RGS7BP                                                                    |
| 20 | 14,925,000 | 15,075,000 | 200 | 357  | -0.256141083 | RGS7BP                                                                    |
| 20 | 15,000,000 | 15,150,000 | 201 | 502  | 0.635250559  | RNF180                                                                    |
| 20 | 15,075,000 | 15,225,000 | 202 | 584  | 0.845896129  | RNF180                                                                    |
| 20 | 15,150,000 | 15,300,000 | 203 | 606  | 0.213305843  | RNF180                                                                    |
| 20 | 15,225,000 | 15,375,000 | 204 | 683  | -1.023339848 | RNF180                                                                    |
| 20 | 15,300,000 | 15,450,000 | 205 | 1177 | -0.477059084 | RNF180                                                                    |
| 20 | 15,375,000 | 15,525,000 | 206 | 1556 | 0.591328789  |                                                                           |
| 20 | 15,450,000 | 15,600,000 | 207 | 1444 | 1.042402331  | 5HTR1A                                                                    |
| 20 | 15,525,000 | 15,675,000 | 208 | 1514 | 0.303113448  | 5HTR1A                                                                    |
| 20 | 15,600,000 | 15,750,000 | 209 | 1436 | -0.683097984 |                                                                           |

|    |            |            |     |      |              |                   |
|----|------------|------------|-----|------|--------------|-------------------|
| 20 | 15,675,000 | 15,825,000 | 210 | 1230 | -0.178879118 |                   |
| 20 | 15,750,000 | 15,900,000 | 211 | 1170 | -0.141674001 |                   |
| 20 | 15,825,000 | 15,975,000 | 212 | 1063 | -0.8543569   |                   |
| 20 | 15,900,000 | 16,050,000 | 213 | 1183 | 0.244193655  |                   |
| 20 | 15,975,000 | 16,125,000 | 214 | 1293 | -0.008602193 |                   |
| 20 | 16,050,000 | 16,200,000 | 215 | 1246 | 0.8773428    |                   |
| 20 | 16,125,000 | 16,275,000 | 216 | 1285 | 0.800132565  |                   |
| 20 | 16,200,000 | 16,350,000 | 217 | 1353 | -0.030551643 |                   |
| 20 | 16,275,000 | 16,425,000 | 218 | 1585 | -1.021287416 |                   |
| 20 | 16,350,000 | 16,500,000 | 219 | 1522 | -2.480118541 |                   |
| 20 | 16,425,000 | 16,575,000 | 220 | 1328 | -3.69634579  |                   |
| 20 | 16,500,000 | 16,650,000 | 221 | 1285 | -1.209071362 |                   |
| 20 | 16,575,000 | 16,725,000 | 222 | 939  | -0.186193267 |                   |
| 20 | 16,650,000 | 16,800,000 | 223 | 1053 | -0.388539769 | IPO11             |
| 20 | 16,725,000 | 16,875,000 | 224 | 907  | 0.543625854  | IPO11             |
| 20 | 16,800,000 | 16,950,000 | 225 | 488  | 0.463983551  | IPO11             |
| 20 | 16,875,000 | 17,025,000 | 226 | 556  | 0.667946295  | DIMT1,IPO11,KIF2A |
| 20 | 16,950,000 | 17,100,000 | 227 | 482  | 0.507404925  | DIMT1,IPO11,KIF2A |
| 20 | 17,025,000 | 17,175,000 | 228 | 630  | 0.15609506   | KIF2A             |
| 20 | 17,100,000 | 17,250,000 | 229 | 1048 | -0.354366341 |                   |
| 20 | 17,175,000 | 17,325,000 | 230 | 916  | -0.264002405 |                   |
| 20 | 17,250,000 | 17,400,000 | 231 | 756  | 0.3590421    |                   |
| 20 | 17,325,000 | 17,475,000 | 232 | 772  | 0.446378727  |                   |
| 20 | 17,400,000 | 17,550,000 | 233 | 513  | 0.037215961  |                   |
| 20 | 17,475,000 | 17,625,000 | 234 | 840  | -0.316028535 |                   |
| 20 | 17,550,000 | 17,700,000 | 235 | 1090 | -0.476190436 |                   |
| 20 | 17,625,000 | 17,775,000 | 236 | 1043 | -0.620043417 |                   |
| 20 | 17,700,000 | 17,850,000 | 237 | 1088 | -0.023732441 | ZSWIM6            |
| 20 | 17,775,000 | 17,925,000 | 238 | 884  | 0.733864682  | ZSWIM6            |
| 20 | 17,850,000 | 18,000,000 | 239 | 591  | 0.793603778  | ZSWIM6            |
| 20 | 17,925,000 | 18,075,000 | 240 | 674  | 0.06953662   |                   |
| 20 | 18,000,000 | 18,150,000 | 241 | 908  | -0.178191471 |                   |
| 20 | 18,075,000 | 18,225,000 | 242 | 1068 | -0.134749746 | NDUFAF2           |
| 20 | 18,150,000 | 18,300,000 | 243 | 1328 | 0.517328411  | NDUFAF2           |
| 20 | 18,225,000 | 18,375,000 | 244 | 1165 | 0.518247793  | ERCC8,NDUFAF2     |
| 20 | 18,300,000 | 18,450,000 | 245 | 988  | 0.293054629  | ERCC8,NDUFAF2     |
| 20 | 18,375,000 | 18,525,000 | 246 | 1041 | 0.31025359   | ELOVL7,ERCC8      |
| 20 | 18,450,000 | 18,600,000 | 247 | 1161 | 0.748103713  | DEPDC1B,ELOVL7    |
| 20 | 18,525,000 | 18,675,000 | 248 | 1241 | 1.147634263  | DEPDC1B,ELOVL7    |
| 20 | 18,600,000 | 18,750,000 | 249 | 1140 | 1.029494814  | DEPDC1B           |
| 20 | 18,675,000 | 18,825,000 | 250 | 1099 | 0.932476091  |                   |
| 20 | 18,750,000 | 18,900,000 | 251 | 1213 | 0.464037697  |                   |
| 20 | 18,825,000 | 18,975,000 | 252 | 1641 | 0.011817196  |                   |
| 20 | 18,900,000 | 19,050,000 | 253 | 1671 | 0.131441383  |                   |
| 20 | 18,975,000 | 19,125,000 | 254 | 1341 | 0.471806073  |                   |
| 20 | 19,050,000 | 19,200,000 | 255 | 1328 | 0.425372642  |                   |
| 20 | 19,125,000 | 19,275,000 | 256 | 1242 | 0.223965909  |                   |
| 20 | 19,200,000 | 19,350,000 | 257 | 1028 | 0.029790679  |                   |
| 20 | 19,275,000 | 19,425,000 | 258 | 669  | 0.149145456  |                   |
| 20 | 19,350,000 | 19,500,000 | 259 | 745  | 0.762621704  |                   |
| 20 | 19,425,000 | 19,575,000 | 260 | 1193 | 0.807991846  |                   |
| 20 | 19,500,000 | 19,650,000 | 261 | 1275 | 0.489830798  |                   |
| 20 | 19,575,000 | 19,725,000 | 262 | 1510 | -0.086085498 |                   |

|    |            |            |     |      |              |                          |
|----|------------|------------|-----|------|--------------|--------------------------|
| 20 | 19,650,000 | 19,800,000 | 263 | 1504 | 0.068205891  |                          |
| 20 | 19,725,000 | 19,875,000 | 264 | 1271 | 0.599609209  |                          |
| 20 | 19,800,000 | 19,950,000 | 265 | 1312 | 0.81004641   |                          |
| 20 | 19,875,000 | 20,025,000 | 266 | 1521 | 0.394463076  |                          |
| 20 | 19,950,000 | 20,100,000 | 267 | 1517 | -0.194519303 | ENSBTAG00000039486       |
| 20 | 20,025,000 | 20,175,000 | 268 | 1345 | -0.095573648 | ENSBTAG00000039486       |
| 20 | 20,100,000 | 20,250,000 | 269 | 1271 | 0.290777819  | ENSBTAG00000039486       |
| 20 | 20,175,000 | 20,325,000 | 270 | 1134 | 0.101723559  | PDE4D,ENSBTAG00000039486 |
| 20 | 20,250,000 | 20,400,000 | 271 | 1112 | -2.204683108 | PDE4D                    |
| 20 | 20,325,000 | 20,475,000 | 272 | 1354 | -1.185994464 | RAB3C                    |
| 20 | 20,400,000 | 20,550,000 | 273 | 1544 | 0.671763832  | RAB3C                    |
| 20 | 20,475,000 | 20,625,000 | 274 | 1117 | -0.180711833 | RAB3C,ENSBTAG00000005229 |
| 20 | 20,550,000 | 20,700,000 | 275 | 867  | -1.354616807 | RAB3C,ENSBTAG00000005229 |
| 20 | 20,625,000 | 20,775,000 | 276 | 1095 | -0.457748349 | RAB3C                    |
| 20 | 20,700,000 | 20,850,000 | 277 | 1298 | -0.399500646 | GAPT,RAB3C               |
| 20 | 20,775,000 | 20,925,000 | 278 | 1160 | -0.407196248 | GAPT,PLK2                |
| 20 | 20,850,000 | 21,000,000 | 279 | 1131 | 0.311678522  | PLK2                     |
| 20 | 20,925,000 | 21,075,000 | 280 | 1506 | 1.023593506  |                          |
| 20 | 21,000,000 | 21,150,000 | 281 | 1417 | 1.070159213  |                          |
| 20 | 21,075,000 | 21,225,000 | 282 | 1241 | 0.916705649  |                          |
| 20 | 21,150,000 | 21,300,000 | 283 | 1236 | 0.936967637  |                          |
| 20 | 21,225,000 | 21,375,000 | 284 | 1487 | 0.600608167  |                          |
| 20 | 21,300,000 | 21,450,000 | 285 | 1564 | 0.825166239  |                          |
| 20 | 21,375,000 | 21,525,000 | 286 | 1482 | 0.87528316   |                          |
| 20 | 21,450,000 | 21,600,000 | 287 | 1572 | 0.655106216  |                          |
| 20 | 21,525,000 | 21,675,000 | 288 | 1644 | 0.637363071  |                          |
| 20 | 21,600,000 | 21,750,000 | 289 | 1620 | 0.527039044  |                          |
| 20 | 21,675,000 | 21,825,000 | 290 | 1320 | 0.425234895  |                          |
| 20 | 21,750,000 | 21,900,000 | 291 | 1329 | -0.170757756 |                          |
| 20 | 21,825,000 | 21,975,000 | 292 | 1218 | -0.410038401 | ENSBTAG00000026505       |
| 20 | 21,900,000 | 22,050,000 | 293 | 908  | -0.435964417 | GPBP1,ENSBTAG00000026505 |
| 20 | 21,975,000 | 22,125,000 | 294 | 967  | -2.251555873 | GPBP1                    |
| 20 | 22,050,000 | 22,200,000 | 295 | 968  | -2.180849169 | GPBP1,ENSBTAG00000047548 |
| 20 | 22,125,000 | 22,275,000 | 296 | 987  | -1.148583373 | ENSBTAG00000047548       |
| 20 | 22,200,000 | 22,350,000 | 297 | 1004 | -0.313924475 | MIER3,SETD9              |
| 20 | 22,275,000 | 22,425,000 | 298 | 774  | -0.086428868 | MAP3K1,MIER3,SETD9       |
| 20 | 22,350,000 | 22,500,000 | 299 | 943  | 0.745619206  | MAP3K1                   |
| 20 | 22,425,000 | 22,575,000 | 300 | 1110 | 1.016689664  | MAP3K1                   |
| 20 | 22,500,000 | 22,650,000 | 301 | 750  | 0.409438918  |                          |
| 20 | 22,575,000 | 22,725,000 | 302 | 874  | -0.72697533  |                          |
| 20 | 22,650,000 | 22,800,000 | 303 | 1221 | -0.771159864 |                          |
| 20 | 22,725,000 | 22,875,000 | 304 | 1082 | 0.060376964  |                          |
| 20 | 22,800,000 | 22,950,000 | 305 | 900  | 0.654159108  |                          |
| 20 | 22,875,000 | 23,025,000 | 306 | 1011 | 0.266505501  | ANKRD55                  |
| 20 | 22,950,000 | 23,100,000 | 307 | 1070 | 0.078143051  | ANKRD55                  |
| 20 | 23,025,000 | 23,175,000 | 308 | 906  | 0.292776576  | ANKRD55                  |
| 20 | 23,100,000 | 23,250,000 | 309 | 714  | 0.14102586   | ANKRD55,IL6ST            |
| 20 | 23,175,000 | 23,325,000 | 310 | 686  | -0.147644877 | IL31RA,IL6ST             |
| 20 | 23,250,000 | 23,400,000 | 311 | 933  | 0.50688416   | DDX4,IL31RA,IL6ST        |
| 20 | 23,325,000 | 23,475,000 | 312 | 1077 | 0.951039401  | DDX4,IL31RA,SLC38A9      |
| 20 | 23,400,000 | 23,550,000 | 313 | 733  | 0.961422276  | DDX4,SLC38A9             |
| 20 | 23,475,000 | 23,625,000 | 314 | 525  | -2.132097238 | SLC38A9                  |
| 20 | 23,550,000 | 23,700,000 | 315 | 610  | -1.798424805 | PPAP2A,SLC38A9           |

|    |            |            |     |      |              |                                       |
|----|------------|------------|-----|------|--------------|---------------------------------------|
| 20 | 23,625,000 | 23,775,000 | 316 | 546  | 0.085863379  | PPAP2A,SKIV2L2                        |
| 20 | 23,700,000 | 23,850,000 | 317 | 417  | 0.045654709  | PPAP2A,SKIV2L2                        |
| 20 | 23,775,000 | 23,925,000 | 318 | 596  | -0.888770975 | CCNO,DHX29,PPAP2A,SKIV2L2             |
| 20 | 23,850,000 | 24,000,000 | 319 | 945  | 0.045466284  | CCNO,CDC20B,DHX29,GPX8,MCIDAS,SKIV2L2 |
| 20 | 23,925,000 | 24,075,000 | 320 | 1107 | 1.330100877  | CCNO,CDC20B,GPX8,GZMA,MCIDAS          |
| 20 | 24,000,000 | 24,150,000 | 321 | 920  | 1.290519679  | CDC20B,ESM1,GZMA,GZMK                 |
| 20 | 24,075,000 | 24,225,000 | 322 | 777  | 1.15817101   | ESM1,GZMK                             |
| 20 | 24,150,000 | 24,300,000 | 323 | 1080 | 1.187654639  | ENSBTAG00000003200                    |
| 20 | 24,225,000 | 24,375,000 | 324 | 1081 | 1.171812817  | ENSBTAG00000003200                    |
| 20 | 24,300,000 | 24,450,000 | 325 | 853  | 0.494243294  | COX8A                                 |
| 20 | 24,375,000 | 24,525,000 | 326 | 974  | -0.461977246 | COX8A                                 |
| 20 | 24,450,000 | 24,600,000 | 327 | 958  | -0.588339317 | SNX18                                 |
| 20 | 24,525,000 | 24,675,000 | 328 | 905  | -3.184307958 | HSPB3,SNX18                           |
| 20 | 24,600,000 | 24,750,000 | 329 | 896  | -3.165179558 | HSPB3                                 |
| 20 | 24,675,000 | 24,825,000 | 330 | 999  | -0.615768646 |                                       |
| 20 | 24,750,000 | 24,900,000 | 331 | 1028 | -1.063639659 |                                       |
| 20 | 24,825,000 | 24,975,000 | 332 | 602  | -1.623637271 | ARL15                                 |
| 20 | 24,900,000 | 25,050,000 | 333 | 471  | -0.51647408  | ARL15                                 |
| 20 | 24,975,000 | 25,125,000 | 334 | 450  | 0.510393713  | ARL15                                 |
| 20 | 25,050,000 | 25,200,000 | 335 | 243  | 0.803664808  |                                       |
| 20 | 25,125,000 | 25,275,000 | 336 | 200  | 0.716807783  |                                       |
| 20 | 25,200,000 | 25,350,000 | 337 | 585  | 1.155365987  |                                       |
| 20 | 25,275,000 | 25,425,000 | 338 | 1014 | 1.193489153  | NDUFS4                                |
| 20 | 25,350,000 | 25,500,000 | 339 | 767  | 1.108914457  | NDUFS4                                |
| 20 | 25,425,000 | 25,575,000 | 340 | 520  | 0.340262423  | NDUFS4                                |
| 20 | 25,500,000 | 25,650,000 | 341 | 579  | -0.893195844 | FST,NDUFS4,ENSBTAG00000046997         |
| 20 | 25,575,000 | 25,725,000 | 342 | 714  | -0.094992485 | FST,ENSBTAG00000046997                |
| 20 | 25,650,000 | 25,800,000 | 343 | 917  | -0.382288275 |                                       |
| 20 | 25,725,000 | 25,875,000 | 344 | 776  | -0.773587373 |                                       |
| 20 | 25,800,000 | 25,950,000 | 345 | 548  | -0.446604484 |                                       |
| 20 | 25,875,000 | 26,025,000 | 346 | 613  | 0.069486376  | ITGA2,MOCS2                           |
| 20 | 25,950,000 | 26,100,000 | 347 | 682  | -0.251070221 | ITGA2,MOCS2                           |
| 20 | 26,025,000 | 26,175,000 | 348 | 557  | -1.354801002 | ITGA1,ITGA2,ENSBTAG00000046575        |
| 20 | 26,100,000 | 26,250,000 | 349 | 420  | 0.498318499  | ITGA1,ENSBTAG00000046575              |
| 20 | 26,175,000 | 26,325,000 | 350 | 495  | 0.649039618  | ITGA1,PELO                            |
| 20 | 26,250,000 | 26,400,000 | 351 | 917  | 0.554125464  | PELO                                  |
| 20 | 26,325,000 | 26,475,000 | 352 | 1063 | 0.739762162  |                                       |
| 20 | 26,400,000 | 26,550,000 | 353 | 844  | 0.620933253  |                                       |
| 20 | 26,475,000 | 26,625,000 | 354 | 854  | 0.207001625  |                                       |
| 20 | 26,550,000 | 26,700,000 | 355 | 864  | -0.335679052 |                                       |
| 20 | 26,625,000 | 26,775,000 | 356 | 818  | -0.431354465 |                                       |
| 20 | 26,700,000 | 26,850,000 | 357 | 967  | -0.125316377 |                                       |
| 20 | 26,775,000 | 26,925,000 | 358 | 751  | -0.238446772 |                                       |
| 20 | 26,850,000 | 27,000,000 | 359 | 737  | 0.853725897  |                                       |
| 20 | 26,925,000 | 27,075,000 | 360 | 1066 | -0.952896936 |                                       |
| 20 | 27,000,000 | 27,150,000 | 361 | 740  | -2.964652937 |                                       |
| 20 | 27,075,000 | 27,225,000 | 362 | 676  | 0.220753936  |                                       |
| 20 | 27,150,000 | 27,300,000 | 363 | 739  | 1.026964357  |                                       |
| 20 | 27,225,000 | 27,375,000 | 364 | 564  | 0.745359054  |                                       |
| 20 | 27,300,000 | 27,450,000 | 365 | 729  | 0.721360728  |                                       |
| 20 | 27,375,000 | 27,525,000 | 366 | 704  | 0.705445473  |                                       |
| 20 | 27,450,000 | 27,600,000 | 367 | 1013 | 0.298944996  |                                       |
| 20 | 27,525,000 | 27,675,000 | 368 | 1285 | -0.039054511 |                                       |

|    |            |            |     |      |              |                                       |
|----|------------|------------|-----|------|--------------|---------------------------------------|
| 20 | 27,600,000 | 27,750,000 | 369 | 772  | -0.112307779 | ISL1                                  |
| 20 | 27,675,000 | 27,825,000 | 370 | 558  | 0.600693642  | ISL1                                  |
| 20 | 27,750,000 | 27,900,000 | 371 | 827  | 0.855633576  | ISL1                                  |
| 20 | 27,825,000 | 27,975,000 | 372 | 784  | 0.447734644  |                                       |
| 20 | 27,900,000 | 28,050,000 | 373 | 820  | -5.615295229 |                                       |
| 20 | 27,975,000 | 28,125,000 | 374 | 846  | -5.297956764 |                                       |
| 20 | 28,050,000 | 28,200,000 | 375 | 758  | -0.420839832 |                                       |
| 20 | 28,125,000 | 28,275,000 | 376 | 1056 | -1.357755843 |                                       |
| 20 | 28,200,000 | 28,350,000 | 377 | 1158 | -1.164970491 | PARP8                                 |
| 20 | 28,275,000 | 28,425,000 | 378 | 1066 | 0.183309491  | PARP8                                 |
| 20 | 28,350,000 | 28,500,000 | 379 | 822  | 0.792634139  | PARP8                                 |
| 20 | 28,425,000 | 28,575,000 | 380 | 643  | -0.217669599 | PARP8                                 |
| 20 | 28,500,000 | 28,650,000 | 381 | 899  | -0.544898178 | PARP8                                 |
| 20 | 28,575,000 | 28,725,000 | 382 | 938  | -0.071218448 | EMB                                   |
| 20 | 28,650,000 | 28,800,000 | 383 | 660  | 0.71399103   | EMB                                   |
| 20 | 28,725,000 | 28,875,000 | 384 | 616  | 0.199548592  | EMB                                   |
| 20 | 28,800,000 | 28,950,000 | 385 | 731  | -0.126200392 |                                       |
| 20 | 28,875,000 | 29,025,000 | 386 | 784  | 0.223074073  |                                       |
| 20 | 28,950,000 | 29,100,000 | 387 | 946  | 0.20021775   |                                       |
| 20 | 29,025,000 | 29,175,000 | 388 | 1117 | 0.697338039  | HCN1                                  |
| 20 | 29,100,000 | 29,250,000 | 389 | 1002 | 0.359377744  | HCN1                                  |
| 20 | 29,175,000 | 29,325,000 | 390 | 1114 | -0.128975356 | HCN1                                  |
| 20 | 29,250,000 | 29,400,000 | 391 | 1093 | 0.307723208  | HCN1                                  |
| 20 | 29,325,000 | 29,475,000 | 392 | 607  | 0.597237404  | HCN1                                  |
| 20 | 29,400,000 | 29,550,000 | 393 | 422  | -0.024754838 | HCN1                                  |
| 20 | 29,475,000 | 29,625,000 | 394 | 577  | -0.448566265 | HCN1                                  |
| 20 | 29,550,000 | 29,700,000 | 395 | 889  | 0.209072427  | HCN1                                  |
| 20 | 29,625,000 | 29,775,000 | 396 | 1444 | 0.612374526  |                                       |
| 20 | 29,700,000 | 29,850,000 | 397 | 1366 | 0.365832593  |                                       |
| 20 | 29,775,000 | 29,925,000 | 398 | 960  | -0.373168528 |                                       |
| 20 | 29,850,000 | 30,000,000 | 399 | 1367 | -0.428495581 |                                       |
| 20 | 29,925,000 | 30,075,000 | 400 | 1324 | -0.33546609  | MRPS30                                |
| 20 | 30,000,000 | 30,150,000 | 401 | 829  | -0.164266379 | MRPS30                                |
| 20 | 30,075,000 | 30,225,000 | 402 | 580  | -0.168520907 | MRPS30                                |
| 20 | 30,150,000 | 30,300,000 | 403 | 381  | -0.089672825 |                                       |
| 20 | 30,225,000 | 30,375,000 | 404 | 455  | -0.840788574 |                                       |
| 20 | 30,300,000 | 30,450,000 | 405 | 444  | -0.959958395 | ENSBTAG00000011657                    |
| 20 | 30,375,000 | 30,525,000 | 406 | 266  | 0.540939637  | ENSBTAG00000011657                    |
| 20 | 30,450,000 | 30,600,000 | 407 | 240  | 1.069285257  |                                       |
| 20 | 30,525,000 | 30,675,000 | 408 | 412  | 0.821721234  |                                       |
| 20 | 30,600,000 | 30,750,000 | 409 | 496  | -0.706701005 |                                       |
| 20 | 30,675,000 | 30,825,000 | 410 | 340  | -2.26516041  |                                       |
| 20 | 30,750,000 | 30,900,000 | 411 | 211  | -3.226407559 |                                       |
| 20 | 30,825,000 | 30,975,000 | 412 | 301  | 0.53116869   |                                       |
| 20 | 30,900,000 | 31,050,000 | 413 | 368  | 1.205282704  |                                       |
| 20 | 30,975,000 | 31,125,000 | 414 | 266  | 0.786628479  |                                       |
| 20 | 31,050,000 | 31,200,000 | 415 | 251  | -0.027362076 | NNT,ENSBTAG00000033187                |
| 20 | 31,125,000 | 31,275,000 | 416 | 274  | -0.134633208 | NNT,ENSBTAG00000033187                |
| 20 | 31,200,000 | 31,350,000 | 417 | 256  | 0.024491337  | C20H5orf34,NNT,PAIP1                  |
| 20 | 31,275,000 | 31,425,000 | 418 | 386  | 0.516278123  | C20H5orf34,C5orf28,CCL28,PAIP1        |
| 20 | 31,350,000 | 31,500,000 | 419 | 498  | 0.351466854  | C20H5orf34,C5orf28,CCL28,HMGCS1,NIM1K |
| 20 | 31,425,000 | 31,575,000 | 420 | 479  | -0.824369272 | HMGCS1,NIM1K,ZNF131                   |
| 20 | 31,500,000 | 31,650,000 | 421 | 545  | -1.2018851   | NIM1K,ZNF131                          |

|    |            |            |     |      |              |                             |
|----|------------|------------|-----|------|--------------|-----------------------------|
| 20 | 31,575,000 | 31,725,000 | 422 | 1032 | -0.569924859 | ZNF131                      |
| 20 | 31,650,000 | 31,800,000 | 423 | 1297 | 0.024998445  | CCDC152                     |
| 20 | 31,725,000 | 31,875,000 | 424 | 1302 | 0.446267353  | CCDC152                     |
| 20 | 31,800,000 | 31,950,000 | 425 | 1103 | 0.468760827  | CCDC152,GHR                 |
| 20 | 31,875,000 | 32,025,000 | 426 | 834  | 0.282925542  | GHR                         |
| 20 | 31,950,000 | 32,100,000 | 427 | 1050 | 0.264595245  | GHR                         |
| 20 | 32,025,000 | 32,175,000 | 428 | 1115 | 0.85593599   | GHR                         |
| 20 | 32,100,000 | 32,250,000 | 429 | 700  | 1.068904446  | GHR                         |
| 20 | 32,175,000 | 32,325,000 | 430 | 314  | 0.472742294  | GHR                         |
| 20 | 32,250,000 | 32,400,000 | 431 | 223  | 0.946150074  |                             |
| 20 | 32,325,000 | 32,475,000 | 432 | 236  | 0.506889575  |                             |
| 20 | 32,400,000 | 32,550,000 | 433 | 312  | 0.373776916  |                             |
| 20 | 32,475,000 | 32,625,000 | 434 | 340  | 0.392480394  | FBXO4                       |
| 20 | 32,550,000 | 32,700,000 | 435 | 363  | 0.424430858  | C5orf51,FBXO4,OXCT1         |
| 20 | 32,625,000 | 32,775,000 | 436 | 478  | 0.150122961  | C5orf51,OXCT1               |
| 20 | 32,700,000 | 32,850,000 | 437 | 587  | 0.151822986  | OXCT1                       |
| 20 | 32,775,000 | 32,925,000 | 438 | 772  | 0.385457325  | OXCT1                       |
| 20 | 32,850,000 | 33,000,000 | 439 | 1184 | 0.402975308  |                             |
| 20 | 32,925,000 | 33,075,000 | 440 | 1073 | 0.377338036  | PLCXD3                      |
| 20 | 33,000,000 | 33,150,000 | 441 | 693  | -1.03631853  | PLCXD3                      |
| 20 | 33,075,000 | 33,225,000 | 442 | 674  | -0.82599127  | PLCXD3                      |
| 20 | 33,150,000 | 33,300,000 | 443 | 710  | 0.481822666  | PLCXD3                      |
| 20 | 33,225,000 | 33,375,000 | 444 | 868  | 0.806642712  | C6,PLCXD3                   |
| 20 | 33,300,000 | 33,450,000 | 445 | 1238 | 0.999752749  | C6                          |
| 20 | 33,375,000 | 33,525,000 | 446 | 1434 | 1.027098162  | C6,MROH2B                   |
| 20 | 33,450,000 | 33,600,000 | 447 | 1367 | -0.086571163 | C7,MROH2B                   |
| 20 | 33,525,000 | 33,675,000 | 448 | 1039 | -0.621748509 | C7,CARD6,MROH2B,RPL37       |
| 20 | 33,600,000 | 33,750,000 | 449 | 752  | 0.58624364   | C7,CARD6,PRKAA1,RPL37,TTC33 |
| 20 | 33,675,000 | 33,825,000 | 450 | 681  | 0.847624756  | PRKAA1,PTGER4,TTC33         |
| 20 | 33,750,000 | 33,900,000 | 451 | 537  | 1.109937102  | PTGER4                      |
| 20 | 33,825,000 | 33,975,000 | 452 | 487  | 0.837890617  |                             |
| 20 | 33,900,000 | 34,050,000 | 453 | 530  | 0.172820179  |                             |
| 20 | 33,975,000 | 34,125,000 | 454 | 509  | -0.202152314 |                             |
| 20 | 34,050,000 | 34,200,000 | 455 | 594  | 0.288769256  |                             |
| 20 | 34,125,000 | 34,275,000 | 456 | 636  | 0.452953558  |                             |
| 20 | 34,200,000 | 34,350,000 | 457 | 599  | -1.556731208 |                             |
| 20 | 34,275,000 | 34,425,000 | 458 | 897  | -2.099359204 |                             |
| 20 | 34,350,000 | 34,500,000 | 459 | 1064 | -1.262128609 |                             |
| 20 | 34,425,000 | 34,575,000 | 460 | 1216 | 0.372550753  |                             |
| 20 | 34,500,000 | 34,650,000 | 461 | 1446 | 0.478702325  |                             |
| 20 | 34,575,000 | 34,725,000 | 462 | 1364 | 0.214576404  |                             |
| 20 | 34,650,000 | 34,800,000 | 463 | 1289 | 0.997846956  |                             |
| 20 | 34,725,000 | 34,875,000 | 464 | 1274 | 0.971177923  |                             |
| 20 | 34,800,000 | 34,950,000 | 465 | 1290 | 0.80984426   |                             |
| 20 | 34,875,000 | 35,025,000 | 466 | 1130 | 0.824505049  | DAB2                        |
| 20 | 34,950,000 | 35,100,000 | 467 | 1023 | 0.775822472  | C9,DAB2                     |
| 20 | 35,025,000 | 35,175,000 | 468 | 1172 | 0.998191867  | C9,DAB2                     |
| 20 | 35,100,000 | 35,250,000 | 469 | 1048 | 0.95577895   | C9,FYB                      |
| 20 | 35,175,000 | 35,325,000 | 470 | 834  | 0.674330174  | FYB                         |
| 20 | 35,250,000 | 35,400,000 | 471 | 788  | 0.883466763  | FYB,RICTOR                  |
| 20 | 35,325,000 | 35,475,000 | 472 | 647  | 0.974080957  | FYB,RICTOR                  |
| 20 | 35,400,000 | 35,550,000 | 473 | 542  | -1.082655012 | OSMR,RICTOR                 |
| 20 | 35,475,000 | 35,625,000 | 474 | 707  | -1.692206773 | OSMR,RICTOR                 |



|    |            |            |     |      |              |                                 |
|----|------------|------------|-----|------|--------------|---------------------------------|
| 20 | 35,550,000 | 35,700,000 | 475 | 714  | -1.000378207 | OSMR                            |
| 20 | 35,625,000 | 35,775,000 | 476 | 628  | -0.81672619  |                                 |
| 20 | 35,700,000 | 35,850,000 | 477 | 664  | -1.64246499  |                                 |
| 20 | 35,775,000 | 35,925,000 | 478 | 625  | -0.690672943 | LIFR                            |
| 20 | 35,850,000 | 36,000,000 | 479 | 512  | -0.52887127  | EGFLAM,LIFR                     |
| 20 | 35,925,000 | 36,075,000 | 480 | 800  | -0.264230975 | EGFLAM,LIFR                     |
| 20 | 36,000,000 | 36,150,000 | 481 | 1426 | -0.272535841 | EGFLAM                          |
| 20 | 36,075,000 | 36,225,000 | 482 | 1245 | -0.238415205 | EGFLAM                          |
| 20 | 36,150,000 | 36,300,000 | 483 | 964  | 0.380873468  | EGFLAM                          |
| 20 | 36,225,000 | 36,375,000 | 484 | 1152 | 0.160543307  |                                 |
| 20 | 36,300,000 | 36,450,000 | 485 | 1048 | -0.214859873 |                                 |
| 20 | 36,375,000 | 36,525,000 | 486 | 1012 | 0.267822234  |                                 |
| 20 | 36,450,000 | 36,600,000 | 487 | 1115 | 0.660402685  |                                 |
| 20 | 36,525,000 | 36,675,000 | 488 | 955  | 0.224511456  | GDNF                            |
| 20 | 36,600,000 | 36,750,000 | 489 | 854  | -1.301278491 | GDNF,WDR70                      |
| 20 | 36,675,000 | 36,825,000 | 490 | 813  | -2.781497987 | WDR70                           |
| 20 | 36,750,000 | 36,900,000 | 491 | 860  | -0.956150917 | WDR70                           |
| 20 | 36,825,000 | 36,975,000 | 492 | 853  | 0.151396101  | WDR70                           |
| 20 | 36,900,000 | 37,050,000 | 493 | 711  | 0.065679295  | NUP155,WDR70                    |
| 20 | 36,975,000 | 37,125,000 | 494 | 955  | 0.452724288  | C5orf42,NUP155,WDR70            |
| 20 | 37,050,000 | 37,200,000 | 495 | 1376 | 0.177154828  | C5orf42,NIPBL                   |
| 20 | 37,125,000 | 37,275,000 | 496 | 1070 | -0.066058934 | C5orf42,NIPBL                   |
| 20 | 37,200,000 | 37,350,000 | 497 | 610  | -0.778290865 | NIPBL                           |
| 20 | 37,275,000 | 37,425,000 | 498 | 889  | 0.365019217  | NIPBL                           |
| 20 | 37,350,000 | 37,500,000 | 499 | 1142 | -0.514323052 | ENSBTAG00000047208              |
| 20 | 37,425,000 | 37,575,000 | 500 | 765  | -1.308097495 | ENSBTAG00000047208              |
| 20 | 37,500,000 | 37,650,000 | 501 | 551  | 0.761311285  | SLC1A3                          |
| 20 | 37,575,000 | 37,725,000 | 502 | 816  | 0.942159533  | SLC1A3                          |
| 20 | 37,650,000 | 37,800,000 | 503 | 921  | 0.41472427   | SLC1A3                          |
| 20 | 37,725,000 | 37,875,000 | 504 | 978  | -0.145685861 |                                 |
| 20 | 37,800,000 | 37,950,000 | 505 | 853  | 0.19255026   |                                 |
| 20 | 37,875,000 | 38,025,000 | 506 | 684  | 0.52547142   | RANBP3L                         |
| 20 | 37,950,000 | 38,100,000 | 507 | 840  | 0.691299356  | NADK2,RANBP3L,SKP2              |
| 20 | 38,025,000 | 38,175,000 | 508 | 875  | 0.809038705  | LMBRD2,NADK2,SKP2               |
| 20 | 38,100,000 | 38,250,000 | 509 | 834  | 1.105919587  | LMBRD2,SKP2,UGT3A1              |
| 20 | 38,175,000 | 38,325,000 | 510 | 694  | 1.088653345  | CAPSL,UGT3A1                    |
| 20 | 38,250,000 | 38,400,000 | 511 | 481  | 0.56291283   | CAPSL,IL7R                      |
| 20 | 38,325,000 | 38,475,000 | 512 | 523  | 0.566652091  | IL7R,SPEF2                      |
| 20 | 38,400,000 | 38,550,000 | 513 | 649  | 0.733904624  | SPEF2                           |
| 20 | 38,475,000 | 38,625,000 | 514 | 714  | 0.529382959  | SPEF2                           |
| 20 | 38,550,000 | 38,700,000 | 515 | 616  | 0.637971792  | SPEF2                           |
| 20 | 38,625,000 | 38,775,000 | 516 | 755  | 0.484303887  |                                 |
| 20 | 38,700,000 | 38,850,000 | 517 | 967  | 0.268405021  |                                 |
| 20 | 38,775,000 | 38,925,000 | 518 | 1234 | 0.80434557   |                                 |
| 20 | 38,850,000 | 39,000,000 | 519 | 1386 | 0.77368382   |                                 |
| 20 | 38,925,000 | 39,075,000 | 520 | 1222 | 0.714657511  | PRLR                            |
| 20 | 39,000,000 | 39,150,000 | 521 | 1079 | 0.739362356  | PRLR                            |
| 20 | 39,075,000 | 39,225,000 | 522 | 1105 | 0.102284496  | AGXT2,PRLR                      |
| 20 | 39,150,000 | 39,300,000 | 523 | 1081 | -0.070951299 | AGXT2,BRIX1,DNAJC21,RAD1,TTC23L |
| 20 | 39,225,000 | 39,375,000 | 524 | 683  | 0.232794191  | BRIX1,DNAJC21,RAD1,RAI14,TTC23L |
| 20 | 39,300,000 | 39,450,000 | 525 | 577  | 0.93951792   | RAI14,TTC23L                    |
| 20 | 39,375,000 | 39,525,000 | 526 | 796  | 0.624696463  | RAI14                           |
| 20 | 39,450,000 | 39,600,000 | 527 | 676  | 0.166435245  |                                 |

|    |            |            |     |      |              |                             |
|----|------------|------------|-----|------|--------------|-----------------------------|
| 20 | 39,525,000 | 39,675,000 | 528 | 725  | 0.620469918  |                             |
| 20 | 39,600,000 | 39,750,000 | 529 | 722  | 0.458024304  |                             |
| 20 | 39,675,000 | 39,825,000 | 530 | 636  | -1.426249818 | AMACR,C1QTNF3               |
| 20 | 39,750,000 | 39,900,000 | 531 | 788  | -0.93943498  | AMACR,C1QTNF3,RXFP3,SLC45A2 |
| 20 | 39,825,000 | 39,975,000 | 532 | 746  | -0.178259406 | ADAMTS12,RXFP3,SLC45A2      |
| 20 | 39,900,000 | 40,050,000 | 533 | 631  | -0.273483849 | ADAMTS12                    |
| 20 | 39,975,000 | 40,125,000 | 534 | 713  | 0.255690738  | ADAMTS12                    |
| 20 | 40,050,000 | 40,200,000 | 535 | 1001 | 0.462510605  | ADAMTS12                    |
| 20 | 40,125,000 | 40,275,000 | 536 | 1058 | -0.595490639 | ADAMTS12                    |
| 20 | 40,200,000 | 40,350,000 | 537 | 697  | -1.160470066 | ADAMTS12,TARS               |
| 20 | 40,275,000 | 40,425,000 | 538 | 469  | 0.340798639  | ADAMTS12,TARS               |
| 20 | 40,350,000 | 40,500,000 | 539 | 717  | 0.569295464  | TARS                        |
| 20 | 40,425,000 | 40,575,000 | 540 | 724  | 0.56558463   |                             |
| 20 | 40,500,000 | 40,650,000 | 541 | 551  | 0.110828567  |                             |
| 20 | 40,575,000 | 40,725,000 | 542 | 751  | -0.423399796 |                             |
| 20 | 40,650,000 | 40,800,000 | 543 | 987  | -0.498502647 |                             |
| 20 | 40,725,000 | 40,875,000 | 544 | 970  | -0.303771043 |                             |
| 20 | 40,800,000 | 40,950,000 | 545 | 881  | -1.846596867 |                             |
| 20 | 40,875,000 | 41,025,000 | 546 | 886  | -3.209776107 | NPR3                        |
| 20 | 40,950,000 | 41,100,000 | 547 | 845  | -1.630449675 | NPR3                        |
| 20 | 41,025,000 | 41,175,000 | 548 | 672  | 0.091166327  | NPR3,SUB1                   |
| 20 | 41,100,000 | 41,250,000 | 549 | 782  | 0.910818726  | SUB1                        |
| 20 | 41,175,000 | 41,325,000 | 550 | 680  | 1.345908773  | ZFR                         |
| 20 | 41,250,000 | 41,400,000 | 551 | 361  | 0.984401505  | MTMR12,ZFR                  |
| 20 | 41,325,000 | 41,475,000 | 552 | 403  | 0.755000575  | MTMR12,ZFR                  |
| 20 | 41,400,000 | 41,550,000 | 553 | 624  | -0.2474736   | GOLPH3,MTMR12               |
| 20 | 41,475,000 | 41,625,000 | 554 | 743  | -0.233939692 | GOLPH3,ENSBTAG00000014455   |
| 20 | 41,550,000 | 41,700,000 | 555 | 711  | 0.268933698  | GOLPH3,ENSBTAG00000014455   |
| 20 | 41,625,000 | 41,775,000 | 556 | 852  | -0.503979348 | ENSBTAG00000014455          |
| 20 | 41,700,000 | 41,850,000 | 557 | 919  | -0.281380796 | ENSBTAG00000038985          |
| 20 | 41,775,000 | 41,925,000 | 558 | 1005 | 0.505196712  | ENSBTAG00000038985          |
| 20 | 41,850,000 | 42,000,000 | 559 | 950  | 0.269466075  |                             |
| 20 | 41,925,000 | 42,075,000 | 560 | 888  | -0.261798302 | C20H5ORF22,DROSHA           |
| 20 | 42,000,000 | 42,150,000 | 561 | 1104 | 0.025797041  | C20H5ORF22,DROSHA           |
| 20 | 42,075,000 | 42,225,000 | 562 | 1072 | -0.411375594 | DROSHA                      |
| 20 | 42,150,000 | 42,300,000 | 563 | 1079 | -0.607496251 | CDH6,DROSHA                 |
| 20 | 42,225,000 | 42,375,000 | 564 | 951  | 0.041975615  | CDH6                        |
| 20 | 42,300,000 | 42,450,000 | 565 | 657  | -0.721019819 | CDH6                        |
| 20 | 42,375,000 | 42,525,000 | 566 | 647  | -1.019742137 | CDH6                        |
| 20 | 42,450,000 | 42,600,000 | 567 | 651  | -0.777107429 |                             |
| 20 | 42,525,000 | 42,675,000 | 568 | 772  | -1.183462034 |                             |
| 20 | 42,600,000 | 42,750,000 | 569 | 847  | -0.836706829 |                             |
| 20 | 42,675,000 | 42,825,000 | 570 | 868  | -0.259578372 |                             |
| 20 | 42,750,000 | 42,900,000 | 571 | 1024 | 0.292620422  |                             |
| 20 | 42,825,000 | 42,975,000 | 572 | 1091 | 0.42872713   |                             |
| 20 | 42,900,000 | 43,050,000 | 573 | 1078 | 0.05020209   |                             |
| 20 | 42,975,000 | 43,125,000 | 574 | 977  | -0.66388897  |                             |
| 20 | 43,050,000 | 43,200,000 | 575 | 954  | -0.613622842 |                             |
| 20 | 43,125,000 | 43,275,000 | 576 | 1047 | -0.231380343 |                             |
| 20 | 43,200,000 | 43,350,000 | 577 | 1207 | 0.401790699  |                             |
| 20 | 43,275,000 | 43,425,000 | 578 | 1195 | 0.728084016  |                             |
| 20 | 43,350,000 | 43,500,000 | 579 | 1089 | -0.285272204 |                             |
| 20 | 43,425,000 | 43,575,000 | 580 | 1273 | -0.386412915 |                             |

|    |            |            |     |      |              |                    |
|----|------------|------------|-----|------|--------------|--------------------|
| 20 | 43,500,000 | 43,650,000 | 581 | 1358 | -0.071016557 |                    |
| 20 | 43,575,000 | 43,725,000 | 582 | 1198 | -0.1197459   |                    |
| 20 | 43,650,000 | 43,800,000 | 583 | 1379 | 0.737415317  |                    |
| 20 | 43,725,000 | 43,875,000 | 584 | 1218 | 0.869906474  |                    |
| 20 | 43,800,000 | 43,950,000 | 585 | 942  | 0.682668076  |                    |
| 20 | 43,875,000 | 44,025,000 | 586 | 1402 | 0.640918977  |                    |
| 20 | 43,950,000 | 44,100,000 | 587 | 1500 | 0.637622605  |                    |
| 20 | 44,025,000 | 44,175,000 | 588 | 1201 | 0.7293052    |                    |
| 20 | 44,100,000 | 44,250,000 | 589 | 1134 | 0.766421683  |                    |
| 20 | 44,175,000 | 44,325,000 | 590 | 1468 | 0.507494868  |                    |
| 20 | 44,250,000 | 44,400,000 | 591 | 1572 | 0.206075255  |                    |
| 20 | 44,325,000 | 44,475,000 | 592 | 1436 | 0.595612096  |                    |
| 20 | 44,400,000 | 44,550,000 | 593 | 1333 | 0.821785716  |                    |
| 20 | 44,475,000 | 44,625,000 | 594 | 1344 | 0.705552745  |                    |
| 20 | 44,550,000 | 44,700,000 | 595 | 1462 | -0.885818122 |                    |
| 20 | 44,625,000 | 44,775,000 | 596 | 1551 | -1.319641213 |                    |
| 20 | 44,700,000 | 44,850,000 | 597 | 1588 | 0.024210638  |                    |
| 20 | 44,775,000 | 44,925,000 | 598 | 1299 | -1.319505053 |                    |
| 20 | 44,850,000 | 45,000,000 | 599 | 1039 | -2.359415742 |                    |
| 20 | 44,925,000 | 45,075,000 | 600 | 930  | -0.680745851 |                    |
| 20 | 45,000,000 | 45,150,000 | 601 | 1220 | 0.176189461  |                    |
| 20 | 45,075,000 | 45,225,000 | 602 | 979  | -0.126572154 |                    |
| 20 | 45,150,000 | 45,300,000 | 603 | 480  | -0.663625507 |                    |
| 20 | 45,225,000 | 45,375,000 | 604 | 1070 | 0.150890821  |                    |
| 20 | 45,300,000 | 45,450,000 | 605 | 1089 | 0.211558622  |                    |
| 20 | 45,375,000 | 45,525,000 | 606 | 1310 | -0.19577357  |                    |
| 20 | 45,450,000 | 45,600,000 | 607 | 1590 | -0.378161693 |                    |
| 20 | 45,525,000 | 45,675,000 | 608 | 1093 | -1.457718067 |                    |
| 20 | 45,600,000 | 45,750,000 | 609 | 1236 | -3.103885394 |                    |
| 20 | 45,675,000 | 45,825,000 | 610 | 1020 | -2.418254905 |                    |
| 20 | 45,750,000 | 45,900,000 | 611 | 802  | 0.504646817  |                    |
| 20 | 45,825,000 | 45,975,000 | 612 | 1212 | 0.138067589  |                    |
| 20 | 45,900,000 | 46,050,000 | 613 | 1378 | 0.06546634   |                    |
| 20 | 45,975,000 | 46,125,000 | 614 | 1282 | 0.126047211  |                    |
| 20 | 46,050,000 | 46,200,000 | 615 | 1253 | 0.291060472  |                    |
| 20 | 46,125,000 | 46,275,000 | 616 | 1190 | 0.65116889   |                    |
| 20 | 46,200,000 | 46,350,000 | 617 | 1298 | 0.622816148  |                    |
| 20 | 46,275,000 | 46,425,000 | 618 | 1275 | 0.81155238   |                    |
| 20 | 46,350,000 | 46,500,000 | 619 | 987  | 0.273702439  |                    |
| 20 | 46,425,000 | 46,575,000 | 620 | 1089 | 0.178493659  |                    |
| 20 | 46,500,000 | 46,650,000 | 621 | 919  | 0.882864156  |                    |
| 20 | 46,575,000 | 46,725,000 | 622 | 593  | 0.375439463  |                    |
| 20 | 46,650,000 | 46,800,000 | 623 | 834  | 0.354378785  | CDH9               |
| 20 | 46,725,000 | 46,875,000 | 624 | 828  | 0.554436667  | CDH9               |
| 20 | 46,800,000 | 46,950,000 | 625 | 539  | 0.60661733   |                    |
| 20 | 46,875,000 | 47,025,000 | 626 | 493  | 0.086529743  |                    |
| 20 | 46,950,000 | 47,100,000 | 627 | 567  | -0.489436418 |                    |
| 20 | 47,025,000 | 47,175,000 | 628 | 642  | -0.34765968  |                    |
| 20 | 47,100,000 | 47,250,000 | 629 | 783  | -0.280211946 | ENSBTAG00000048105 |
| 20 | 47,175,000 | 47,325,000 | 630 | 1054 | -1.444134028 | ENSBTAG00000048105 |
| 20 | 47,250,000 | 47,400,000 | 631 | 1333 | -1.340413113 |                    |
| 20 | 47,325,000 | 47,475,000 | 632 | 1644 | -0.52462807  |                    |
| 20 | 47,400,000 | 47,550,000 | 633 | 1374 | -0.524420391 |                    |

|    |            |            |     |      |              |                    |
|----|------------|------------|-----|------|--------------|--------------------|
| 20 | 47,475,000 | 47,625,000 | 634 | 922  | -1.716101433 |                    |
| 20 | 47,550,000 | 47,700,000 | 635 | 832  | -1.477399993 |                    |
| 20 | 47,625,000 | 47,775,000 | 636 | 890  | 0.772011738  |                    |
| 20 | 47,700,000 | 47,850,000 | 637 | 976  | 0.975138532  |                    |
| 20 | 47,775,000 | 47,925,000 | 638 | 1216 | 0.083235389  |                    |
| 20 | 47,850,000 | 48,000,000 | 639 | 1497 | -2.245706638 | ENSBTAG00000045813 |
| 20 | 47,925,000 | 48,075,000 | 640 | 1444 | -2.079878666 | ENSBTAG00000045813 |
| 20 | 48,000,000 | 48,150,000 | 641 | 1138 | -0.37124413  |                    |
| 20 | 48,075,000 | 48,225,000 | 642 | 751  | -0.532498913 |                    |
| 20 | 48,150,000 | 48,300,000 | 643 | 552  | 0.300569655  |                    |
| 20 | 48,225,000 | 48,375,000 | 644 | 527  | -0.195499266 |                    |
| 20 | 48,300,000 | 48,450,000 | 645 | 540  | -0.147431903 |                    |
| 20 | 48,375,000 | 48,525,000 | 646 | 604  | 0.637237703  |                    |
| 20 | 48,450,000 | 48,600,000 | 647 | 887  | -0.506403506 |                    |
| 20 | 48,525,000 | 48,675,000 | 648 | 946  | -1.21186163  |                    |
| 20 | 48,600,000 | 48,750,000 | 649 | 677  | -0.101988139 |                    |
| 20 | 48,675,000 | 48,825,000 | 650 | 623  | 0.785458886  |                    |
| 20 | 48,750,000 | 48,900,000 | 651 | 943  | 0.67138233   | CDH10              |
| 20 | 48,825,000 | 48,975,000 | 652 | 1409 | -1.78168124  | CDH10              |
| 20 | 48,900,000 | 49,050,000 | 653 | 1113 | -2.483929823 | CDH10              |
| 20 | 48,975,000 | 49,125,000 | 654 | 626  | -0.517060303 | CDH10              |
| 20 | 49,050,000 | 49,200,000 | 655 | 930  | 0.319373646  | CDH10              |
| 20 | 49,125,000 | 49,275,000 | 656 | 956  | 1.005900466  |                    |
| 20 | 49,200,000 | 49,350,000 | 657 | 1181 | 0.617811878  |                    |
| 20 | 49,275,000 | 49,425,000 | 658 | 1519 | 0.190758736  |                    |
| 20 | 49,350,000 | 49,500,000 | 659 | 1391 | -2.078070803 |                    |
| 20 | 49,425,000 | 49,575,000 | 660 | 1062 | -4.804437204 |                    |
| 20 | 49,500,000 | 49,650,000 | 661 | 1072 | -1.36624335  |                    |
| 20 | 49,575,000 | 49,725,000 | 662 | 1593 | -0.787212038 |                    |
| 20 | 49,650,000 | 49,800,000 | 663 | 1508 | -1.100167981 |                    |
| 20 | 49,725,000 | 49,875,000 | 664 | 1520 | -0.600316739 |                    |
| 20 | 49,800,000 | 49,950,000 | 665 | 1550 | -0.541540318 |                    |
| 20 | 49,875,000 | 50,025,000 | 666 | 1142 | -0.512840994 |                    |
| 20 | 49,950,000 | 50,100,000 | 667 | 897  | -0.134562052 |                    |
| 20 | 50,025,000 | 50,175,000 | 668 | 1009 | 0.083411871  |                    |
| 20 | 50,100,000 | 50,250,000 | 669 | 1233 | -0.519901694 |                    |
| 20 | 50,175,000 | 50,325,000 | 670 | 890  | -0.860918145 |                    |
| 20 | 50,250,000 | 50,400,000 | 671 | 839  | -2.159764531 |                    |
| 20 | 50,325,000 | 50,475,000 | 672 | 924  | -2.066006824 |                    |
| 20 | 50,400,000 | 50,550,000 | 673 | 874  | -0.361118213 |                    |
| 20 | 50,475,000 | 50,625,000 | 674 | 1000 | 0.218345045  |                    |
| 20 | 50,550,000 | 50,700,000 | 675 | 1224 | -0.054584535 |                    |
| 20 | 50,625,000 | 50,775,000 | 676 | 1320 | -0.539925701 |                    |
| 20 | 50,700,000 | 50,850,000 | 677 | 979  | -0.458914837 |                    |
| 20 | 50,775,000 | 50,925,000 | 678 | 1084 | -0.327582139 |                    |
| 20 | 50,850,000 | 51,000,000 | 679 | 1107 | -0.415341707 |                    |
| 20 | 50,925,000 | 51,075,000 | 680 | 947  | -0.200805273 |                    |
| 20 | 51,000,000 | 51,150,000 | 681 | 1011 | -1.559943031 |                    |
| 20 | 51,075,000 | 51,225,000 | 682 | 731  | -1.397415438 |                    |
| 20 | 51,150,000 | 51,300,000 | 683 | 462  | 0.125780303  |                    |
| 20 | 51,225,000 | 51,375,000 | 684 | 606  | -0.130225716 |                    |
| 20 | 51,300,000 | 51,450,000 | 685 | 721  | -0.008859492 |                    |
| 20 | 51,375,000 | 51,525,000 | 686 | 587  | 0.137866257  | CDH12              |

|    |            |            |     |      |              |       |
|----|------------|------------|-----|------|--------------|-------|
| 20 | 51,450,000 | 51,600,000 | 687 | 668  | -0.148608938 | CDH12 |
| 20 | 51,525,000 | 51,675,000 | 688 | 772  | 0.125236783  | CDH12 |
| 20 | 51,600,000 | 51,750,000 | 689 | 835  | 0.628623898  | CDH12 |
| 20 | 51,675,000 | 51,825,000 | 690 | 1162 | 1.023011061  |       |
| 20 | 51,750,000 | 51,900,000 | 691 | 1161 | 0.706257267  |       |
| 20 | 51,825,000 | 51,975,000 | 692 | 1007 | 0.665203329  |       |
| 20 | 51,900,000 | 52,050,000 | 693 | 1013 | 1.098958395  |       |
| 20 | 51,975,000 | 52,125,000 | 694 | 878  | 0.695486196  |       |
| 20 | 52,050,000 | 52,200,000 | 695 | 787  | 0.569462167  |       |
| 20 | 52,125,000 | 52,275,000 | 696 | 1142 | 0.849749104  |       |
| 20 | 52,200,000 | 52,350,000 | 697 | 1101 | 0.371055704  |       |
| 20 | 52,275,000 | 52,425,000 | 698 | 599  | -0.859188549 |       |
| 20 | 52,350,000 | 52,500,000 | 699 | 588  | -0.287817381 |       |
| 20 | 52,425,000 | 52,575,000 | 700 | 935  | 0.029027261  |       |
| 20 | 52,500,000 | 52,650,000 | 701 | 1303 | 0.371971889  |       |
| 20 | 52,575,000 | 52,725,000 | 702 | 1412 | 0.270598848  |       |
| 20 | 52,650,000 | 52,800,000 | 703 | 1613 | 0.319082292  |       |
| 20 | 52,725,000 | 52,875,000 | 704 | 1672 | 0.556270715  |       |
| 20 | 52,800,000 | 52,950,000 | 705 | 1437 | 1.050006315  |       |
| 20 | 52,875,000 | 53,025,000 | 706 | 1322 | 0.942590542  |       |
| 20 | 52,950,000 | 53,100,000 | 707 | 1409 | 0.000792737  |       |
| 20 | 53,025,000 | 53,175,000 | 708 | 1281 | -0.702977718 |       |
| 20 | 53,100,000 | 53,250,000 | 709 | 1089 | -0.632424242 |       |
| 20 | 53,175,000 | 53,325,000 | 710 | 1086 | -1.695892812 |       |
| 20 | 53,250,000 | 53,400,000 | 711 | 1420 | -2.196425216 |       |
| 20 | 53,325,000 | 53,475,000 | 712 | 1894 | -1.497217315 | CDH18 |
| 20 | 53,400,000 | 53,550,000 | 713 | 1935 | -0.71164104  | CDH18 |
| 20 | 53,475,000 | 53,625,000 | 714 | 1663 | 0.198552607  | CDH18 |
| 20 | 53,550,000 | 53,700,000 | 715 | 1418 | -0.14152971  | CDH18 |
| 20 | 53,625,000 | 53,775,000 | 716 | 1323 | -0.557890978 | CDH18 |
| 20 | 53,700,000 | 53,850,000 | 717 | 1033 | 0.056106736  | CDH18 |
| 20 | 53,775,000 | 53,925,000 | 718 | 899  | 1.196613063  | CDH18 |
| 20 | 53,850,000 | 54,000,000 | 719 | 1045 | 0.878155712  | CDH18 |
| 20 | 53,925,000 | 54,075,000 | 720 | 1235 | 0.920205305  | CDH18 |
| 20 | 54,000,000 | 54,150,000 | 721 | 1246 | 0.710134062  | CDH18 |
| 20 | 54,075,000 | 54,225,000 | 722 | 931  | -0.293476132 |       |
| 20 | 54,150,000 | 54,300,000 | 723 | 740  | -0.555316267 |       |
| 20 | 54,225,000 | 54,375,000 | 724 | 596  | 0.450243156  |       |
| 20 | 54,300,000 | 54,450,000 | 725 | 515  | -0.03052923  |       |
| 20 | 54,375,000 | 54,525,000 | 726 | 1188 | 0.656686824  |       |
| 20 | 54,450,000 | 54,600,000 | 727 | 1692 | 0.685448383  |       |
| 20 | 54,525,000 | 54,675,000 | 728 | 1159 | 0.116220281  |       |
| 20 | 54,600,000 | 54,750,000 | 729 | 980  | 0.673116815  |       |
| 20 | 54,675,000 | 54,825,000 | 730 | 1168 | 1.108806285  |       |
| 20 | 54,750,000 | 54,900,000 | 731 | 1383 | 1.028268772  |       |
| 20 | 54,825,000 | 54,975,000 | 732 | 1439 | 0.652008979  |       |
| 20 | 54,900,000 | 55,050,000 | 733 | 1222 | -0.475632583 |       |
| 20 | 54,975,000 | 55,125,000 | 734 | 1101 | -0.957400255 |       |
| 20 | 55,050,000 | 55,200,000 | 735 | 1149 | 0.564276521  |       |
| 20 | 55,125,000 | 55,275,000 | 736 | 1257 | 1.038581354  |       |
| 20 | 55,200,000 | 55,350,000 | 737 | 1105 | 0.49330579   |       |
| 20 | 55,275,000 | 55,425,000 | 738 | 1166 | -0.651163446 |       |
| 20 | 55,350,000 | 55,500,000 | 739 | 1415 | -1.2011354   |       |

|    |            |            |     |      |              |                                       |        |
|----|------------|------------|-----|------|--------------|---------------------------------------|--------|
| 20 | 55,425,000 | 55,575,000 | 740 | 1487 | -1.041562667 |                                       |        |
| 20 | 55,500,000 | 55,650,000 | 741 | 1487 | 0.410547664  |                                       |        |
| 20 | 55,575,000 | 55,725,000 | 742 | 1518 | 0.843734699  | ENSBTAG00000012971                    |        |
| 20 | 55,650,000 | 55,800,000 | 743 | 1044 | 0.760239445  | ENSBTAG00000005491,ENSBTAG00000012971 |        |
| 20 | 55,725,000 | 55,875,000 | 744 | 621  | 0.498021018  | ENSBTAG00000005491                    |        |
| 20 | 55,800,000 | 55,950,000 | 745 | 1107 | -0.113698214 |                                       |        |
| 20 | 55,875,000 | 56,025,000 | 746 | 1369 | 0.255791218  |                                       |        |
| 20 | 55,950,000 | 56,100,000 | 747 | 954  | 0.581870782  |                                       |        |
| 20 | 56,025,000 | 56,175,000 | 748 | 911  | 0.203774777  |                                       |        |
| 20 | 56,100,000 | 56,250,000 | 749 | 858  | 0.818736395  |                                       |        |
| 20 | 56,175,000 | 56,325,000 | 750 | 913  | 1.104590112  | MYO10                                 |        |
| 20 | 56,250,000 | 56,400,000 | 751 | 1067 | 0.707633842  | MYO10                                 |        |
| 20 | 56,325,000 | 56,475,000 | 752 | 1039 | 0.596928826  | MYO10                                 |        |
| 20 | 56,400,000 | 56,550,000 | 753 | 1123 | 0.773932443  | MYO10                                 |        |
| 20 | 56,475,000 | 56,625,000 | 754 | 1319 | -0.321675692 | MYO10                                 |        |
| 20 | 56,550,000 | 56,700,000 | 755 | 1754 | -0.073801814 | MYO10                                 |        |
| 20 | 56,625,000 | 56,775,000 | 756 | 1775 | 0.186464165  | FAM134B,ZNF622                        |        |
| 20 | 56,700,000 | 56,850,000 | 757 | 1567 | -0.127257543 | FAM134B,ZNF622                        |        |
| 20 | 56,775,000 | 56,925,000 | 758 | 1487 | 0.482604127  | ZNF622                                |        |
| 20 | 56,850,000 | 57,000,000 | 759 | 1516 | 0.753449382  |                                       |        |
| 20 | 56,925,000 | 57,075,000 | 760 | 1594 | 0.321825746  |                                       | 11-Mar |
| 20 | 57,000,000 | 57,150,000 | 761 | 1374 | 0.589547623  |                                       | 11-Mar |
| 20 | 57,075,000 | 57,225,000 | 762 | 855  | 0.870002513  |                                       | 11-Mar |
| 20 | 57,150,000 | 57,300,000 | 763 | 646  | 0.542357267  |                                       |        |
| 20 | 57,225,000 | 57,375,000 | 764 | 540  | 0.977970806  | FBXL7                                 |        |
| 20 | 57,300,000 | 57,450,000 | 765 | 663  | -0.26770281  | FBXL7                                 |        |
| 20 | 57,375,000 | 57,525,000 | 766 | 1084 | 0.158788926  |                                       |        |
| 20 | 57,450,000 | 57,600,000 | 767 | 984  | 0.677715629  |                                       |        |
| 20 | 57,525,000 | 57,675,000 | 768 | 744  | 0.662359404  |                                       |        |
| 20 | 57,600,000 | 57,750,000 | 769 | 842  | -3.115507783 |                                       |        |
| 20 | 57,675,000 | 57,825,000 | 770 | 815  | -3.253166173 |                                       |        |
| 20 | 57,750,000 | 57,900,000 | 771 | 782  | -0.354572692 |                                       |        |
| 20 | 57,825,000 | 57,975,000 | 772 | 668  | -0.886050794 |                                       |        |
| 20 | 57,900,000 | 58,050,000 | 773 | 710  | -0.491505604 |                                       |        |
| 20 | 57,975,000 | 58,125,000 | 774 | 1088 | -0.34715993  |                                       |        |
| 20 | 58,050,000 | 58,200,000 | 775 | 1098 | -0.193530849 |                                       |        |
| 20 | 58,125,000 | 58,275,000 | 776 | 749  | 0.134259476  |                                       |        |
| 20 | 58,200,000 | 58,350,000 | 777 | 610  | -0.850923968 |                                       |        |
| 20 | 58,275,000 | 58,425,000 | 778 | 856  | -0.541210716 | ANKH                                  |        |
| 20 | 58,350,000 | 58,500,000 | 779 | 914  | -0.031514532 | ANKH                                  |        |
| 20 | 58,425,000 | 58,575,000 | 780 | 949  | -1.636887184 | ANKH,OTULIN                           |        |
| 20 | 58,500,000 | 58,650,000 | 781 | 905  | -3.189547306 | ANKH,MGC143209,OTULIN                 |        |
| 20 | 58,575,000 | 58,725,000 | 782 | 986  | -0.718825517 | MGC143209,OTULIN,TRIO                 |        |
| 20 | 58,650,000 | 58,800,000 | 783 | 1072 | 0.266370288  | MGC143209,TRIO                        |        |
| 20 | 58,725,000 | 58,875,000 | 784 | 1062 | -0.087029364 | TRIO                                  |        |
| 20 | 58,800,000 | 58,950,000 | 785 | 1356 | -1.30203251  | TRIO                                  |        |
| 20 | 58,875,000 | 59,025,000 | 786 | 1093 | -1.418560386 | TRIO                                  |        |
| 20 | 58,950,000 | 59,100,000 | 787 | 618  | 1.020623692  |                                       |        |
| 20 | 59,025,000 | 59,175,000 | 788 | 1011 | 0.835613872  |                                       |        |
| 20 | 59,100,000 | 59,250,000 | 789 | 1139 | 0.654229865  |                                       |        |
| 20 | 59,175,000 | 59,325,000 | 790 | 834  | -0.904053488 | DNAH5                                 |        |
| 20 | 59,250,000 | 59,400,000 | 791 | 724  | -0.882313555 | DNAH5                                 |        |
| 20 | 59,325,000 | 59,475,000 | 792 | 1141 | -1.32031329  | DNAH5                                 |        |

|    |            |            |     |      |              |                                       |
|----|------------|------------|-----|------|--------------|---------------------------------------|
| 20 | 59,400,000 | 59,550,000 | 793 | 1489 | -1.997415793 | DNAH5                                 |
| 20 | 59,475,000 | 59,625,000 | 794 | 972  | -1.089131057 | DNAH5                                 |
| 20 | 59,550,000 | 59,700,000 | 795 | 784  | 0.481608468  | DNAH5                                 |
| 20 | 59,625,000 | 59,775,000 | 796 | 703  | -0.014781868 |                                       |
| 20 | 59,700,000 | 59,850,000 | 797 | 527  | -0.146722811 |                                       |
| 20 | 59,775,000 | 59,925,000 | 798 | 851  | 0.0933347502 |                                       |
| 20 | 59,850,000 | 60,000,000 | 799 | 1317 | 0.250712091  |                                       |
| 20 | 59,925,000 | 60,075,000 | 800 | 1448 | 0.512263844  |                                       |
| 20 | 60,000,000 | 60,150,000 | 801 | 1412 | 0.198554909  |                                       |
| 20 | 60,075,000 | 60,225,000 | 802 | 1673 | -0.223716351 |                                       |
| 20 | 60,150,000 | 60,300,000 | 803 | 1509 | 0.14494268   |                                       |
| 20 | 60,225,000 | 60,375,000 | 804 | 1133 | 1.097602857  |                                       |
| 20 | 60,300,000 | 60,450,000 | 805 | 1154 | 1.073203516  |                                       |
| 20 | 60,375,000 | 60,525,000 | 806 | 1321 | 0.930219655  |                                       |
| 20 | 60,450,000 | 60,600,000 | 807 | 1750 | 1.050387273  |                                       |
| 20 | 60,525,000 | 60,675,000 | 808 | 1822 | 0.164976302  |                                       |
| 20 | 60,600,000 | 60,750,000 | 809 | 1296 | -0.57558802  |                                       |
| 20 | 60,675,000 | 60,825,000 | 810 | 1118 | -0.148092012 |                                       |
| 20 | 60,750,000 | 60,900,000 | 811 | 1609 | 0.299608033  |                                       |
| 20 | 60,825,000 | 60,975,000 | 812 | 1812 | 0.811468716  |                                       |
| 20 | 60,900,000 | 61,050,000 | 813 | 1500 | 0.381742676  |                                       |
| 20 | 60,975,000 | 61,125,000 | 814 | 1353 | -0.000264115 |                                       |
| 20 | 61,050,000 | 61,200,000 | 815 | 1328 | 0.349555843  |                                       |
| 20 | 61,125,000 | 61,275,000 | 816 | 1443 | 1.007204262  |                                       |
| 20 | 61,200,000 | 61,350,000 | 817 | 1554 | 1.2841296    |                                       |
| 20 | 61,275,000 | 61,425,000 | 818 | 1514 | 1.136537126  |                                       |
| 20 | 61,350,000 | 61,500,000 | 819 | 1488 | 0.811904179  |                                       |
| 20 | 61,425,000 | 61,575,000 | 820 | 1528 | 0.400412147  |                                       |
| 20 | 61,500,000 | 61,650,000 | 821 | 1699 | 0.305950942  |                                       |
| 20 | 61,575,000 | 61,725,000 | 822 | 1793 | 0.67330984   |                                       |
| 20 | 61,650,000 | 61,800,000 | 823 | 1828 | 0.57803197   |                                       |
| 20 | 61,725,000 | 61,875,000 | 824 | 1709 | 0.459249737  |                                       |
| 20 | 61,800,000 | 61,950,000 | 825 | 1595 | -0.104995824 | CTNND2                                |
| 20 | 61,875,000 | 62,025,000 | 826 | 1580 | 0.367958784  | CTNND2                                |
| 20 | 61,950,000 | 62,100,000 | 827 | 1468 | 0.546429882  | CTNND2                                |
| 20 | 62,025,000 | 62,175,000 | 828 | 1697 | 0.052335895  | CTNND2                                |
| 20 | 62,100,000 | 62,250,000 | 829 | 1792 | -1.334381538 | CTNND2                                |
| 20 | 62,175,000 | 62,325,000 | 830 | 1236 | -2.274792532 | CTNND2                                |
| 20 | 62,250,000 | 62,400,000 | 831 | 973  | 0.093492755  | CTNND2                                |
| 20 | 62,325,000 | 62,475,000 | 832 | 1066 | -1.296146325 | CTNND2                                |
| 20 | 62,400,000 | 62,550,000 | 833 | 869  | -2.379126358 | CTNND2                                |
| 20 | 62,475,000 | 62,625,000 | 834 | 995  | 0.493760563  |                                       |
| 20 | 62,550,000 | 62,700,000 | 835 | 1485 | -1.480473938 | DAP                                   |
| 20 | 62,625,000 | 62,775,000 | 836 | 1145 | -2.274073486 | ANKRD33B,DAP                          |
| 20 | 62,700,000 | 62,850,000 | 837 | 774  | -1.437478725 | ANKRD33B                              |
| 20 | 62,775,000 | 62,925,000 | 838 | 851  | -1.179980353 | ANKRD33B,ROPN1L                       |
| 20 | 62,850,000 | 63,000,000 | 839 | 488  | -0.917346988 | MARCH6,ROPN1L                         |
| 20 | 62,925,000 | 63,075,000 | 840 | 407  | 0.382286835  | CMBL,MARCH6,ROPN1L,ENSBTAG00000022809 |
| 20 | 63,000,000 | 63,150,000 | 841 | 578  | 0.732883514  | CCT5,CMBL,FAM173B,ENSBTAG00000022809  |
| 20 | 63,075,000 | 63,225,000 | 842 | 739  | 0.620811127  | CCT5,CMBL,FAM173B                     |
| 20 | 63,150,000 | 63,300,000 | 843 | 743  | 0.355346763  |                                       |
| 20 | 63,225,000 | 63,375,000 | 844 | 712  | -0.00729787  |                                       |
| 20 | 63,300,000 | 63,450,000 | 845 | 856  | -0.911980585 |                                       |

|    |            |            |     |      |              |                    |
|----|------------|------------|-----|------|--------------|--------------------|
| 20 | 63,375,000 | 63,525,000 | 846 | 931  | -2.067406262 |                    |
| 20 | 63,450,000 | 63,600,000 | 847 | 786  | -2.211581024 |                    |
| 20 | 63,525,000 | 63,675,000 | 848 | 544  | -2.967400834 |                    |
| 20 | 63,600,000 | 63,750,000 | 849 | 565  | -1.939816019 | TAS2R1             |
| 20 | 63,675,000 | 63,825,000 | 850 | 524  | 0.121074141  | TAS2R1             |
| 20 | 63,750,000 | 63,900,000 | 851 | 478  | -0.134322799 |                    |
| 20 | 63,825,000 | 63,975,000 | 852 | 802  | 0.137923307  |                    |
| 20 | 63,900,000 | 64,050,000 | 853 | 1221 | -0.153714607 |                    |
| 20 | 63,975,000 | 64,125,000 | 854 | 1123 | -1.202271719 |                    |
| 20 | 64,050,000 | 64,200,000 | 855 | 1012 | -1.128942785 | SEMA5A             |
| 20 | 64,125,000 | 64,275,000 | 856 | 1148 | -0.241680655 | SEMA5A             |
| 20 | 64,200,000 | 64,350,000 | 857 | 1074 | -0.208508441 | SEMA5A             |
| 20 | 64,275,000 | 64,425,000 | 858 | 1369 | 0.863768654  | SEMA5A             |
| 20 | 64,350,000 | 64,500,000 | 859 | 1560 | 1.082958811  | SEMA5A             |
| 20 | 64,425,000 | 64,575,000 | 860 | 1168 | 0.792602829  |                    |
| 20 | 64,500,000 | 64,650,000 | 861 | 1094 | 0.789091397  |                    |
| 20 | 64,575,000 | 64,725,000 | 862 | 869  | 0.837452687  |                    |
| 20 | 64,650,000 | 64,800,000 | 863 | 896  | 0.69464771   |                    |
| 20 | 64,725,000 | 64,875,000 | 864 | 852  | 0.469660804  |                    |
| 20 | 64,800,000 | 64,950,000 | 865 | 578  | -0.689867683 |                    |
| 20 | 64,875,000 | 65,025,000 | 866 | 809  | -1.442550868 |                    |
| 20 | 64,950,000 | 65,100,000 | 867 | 937  | -2.484599535 |                    |
| 20 | 65,025,000 | 65,175,000 | 868 | 1122 | -1.539849639 |                    |
| 20 | 65,100,000 | 65,250,000 | 869 | 1440 | -0.164893941 |                    |
| 20 | 65,175,000 | 65,325,000 | 870 | 1898 | 0.409065852  |                    |
| 20 | 65,250,000 | 65,400,000 | 871 | 1951 | 0.278165067  |                    |
| 20 | 65,325,000 | 65,475,000 | 872 | 1716 | 0.534161999  | FASTKD3,MTRR       |
| 20 | 65,400,000 | 65,550,000 | 873 | 1635 | 0.755573679  | ADCY2,FASTKD3,MTRR |
| 20 | 65,475,000 | 65,625,000 | 874 | 1845 | 0.064487645  | ADCY2              |
| 20 | 65,550,000 | 65,700,000 | 875 | 2043 | 0.313033509  | ADCY2              |
| 20 | 65,625,000 | 65,775,000 | 876 | 1771 | 0.593588716  | ADCY2              |
| 20 | 65,700,000 | 65,850,000 | 877 | 1579 | 0.143465257  |                    |
| 20 | 65,775,000 | 65,925,000 | 878 | 1550 | 0.350031807  |                    |
| 20 | 65,850,000 | 66,000,000 | 879 | 1575 | 0.588849817  |                    |
| 20 | 65,925,000 | 66,075,000 | 880 | 1559 | 0.393332029  |                    |
| 20 | 66,000,000 | 66,150,000 | 881 | 1785 | 0.529053584  |                    |
| 20 | 66,075,000 | 66,225,000 | 882 | 1985 | -0.835434069 |                    |
| 20 | 66,150,000 | 66,300,000 | 883 | 1754 | -1.227464273 |                    |
| 20 | 66,225,000 | 66,375,000 | 884 | 1805 | 0.878109787  | ENSBTAG00000032442 |
| 20 | 66,300,000 | 66,450,000 | 885 | 2170 | 0.925995277  | ENSBTAG00000032442 |
| 20 | 66,375,000 | 66,525,000 | 886 | 2091 | 0.842916183  |                    |
| 20 | 66,450,000 | 66,600,000 | 887 | 1393 | 0.760173643  | PAPD7              |
| 20 | 66,525,000 | 66,675,000 | 888 | 699  | 0.564653882  | PAPD7              |
| 20 | 66,600,000 | 66,750,000 | 889 | 489  | 0.316235024  | NSUN2,PAPD7,SRD5A1 |
| 20 | 66,675,000 | 66,825,000 | 890 | 708  | -0.032321467 | NSUN2,SRD5A1       |
| 20 | 66,750,000 | 66,900,000 | 891 | 730  | 0.309209626  | NSUN2              |
| 20 | 66,825,000 | 66,975,000 | 892 | 605  | 0.620122101  | MED10              |
| 20 | 66,900,000 | 67,050,000 | 893 | 1317 | 0.088176565  | MED10              |
| 20 | 66,975,000 | 67,125,000 | 894 | 1915 | -1.152912403 |                    |
| 20 | 67,050,000 | 67,200,000 | 895 | 1956 | -0.847149966 |                    |
| 20 | 67,125,000 | 67,275,000 | 896 | 1936 | -0.330706418 |                    |
| 20 | 67,200,000 | 67,350,000 | 897 | 1816 | -1.378492463 |                    |
| 20 | 67,275,000 | 67,425,000 | 898 | 1594 | -0.873077865 |                    |



|    |            |            |     |      |              |                                     |
|----|------------|------------|-----|------|--------------|-------------------------------------|
| 20 | 67,350,000 | 67,500,000 | 899 | 1192 | -0.322059269 |                                     |
| 20 | 67,425,000 | 67,575,000 | 900 | 850  | -1.022273729 |                                     |
| 20 | 67,500,000 | 67,650,000 | 901 | 1062 | 0.260825793  |                                     |
| 20 | 67,575,000 | 67,725,000 | 902 | 1555 | -0.108570682 |                                     |
| 20 | 67,650,000 | 67,800,000 | 903 | 1563 | -0.502117262 | ICE1                                |
| 20 | 67,725,000 | 67,875,000 | 904 | 1171 | -0.33623006  | ICE1                                |
| 20 | 67,800,000 | 67,950,000 | 905 | 784  | -0.325801416 | ADAMTS16,ICE1                       |
| 20 | 67,875,000 | 68,025,000 | 906 | 572  | 0.351338203  | ADAMTS16                            |
| 20 | 67,950,000 | 68,100,000 | 907 | 440  | 0.381567665  | ADAMTS16                            |
| 20 | 68,025,000 | 68,175,000 | 908 | 529  | 0.373795088  | ADAMTS16                            |
| 20 | 68,100,000 | 68,250,000 | 909 | 952  | 0.790960629  |                                     |
| 20 | 68,175,000 | 68,325,000 | 910 | 939  | 0.888472838  |                                     |
| 20 | 68,250,000 | 68,400,000 | 911 | 618  | -0.235778312 |                                     |
| 20 | 68,325,000 | 68,475,000 | 912 | 1015 | -1.095132038 |                                     |
| 20 | 68,400,000 | 68,550,000 | 913 | 1421 | -0.267046967 |                                     |
| 20 | 68,475,000 | 68,625,000 | 914 | 1446 | 0.413583771  |                                     |
| 20 | 68,550,000 | 68,700,000 | 915 | 1119 | 0.377403136  |                                     |
| 20 | 68,625,000 | 68,775,000 | 916 | 1073 | -0.147839212 |                                     |
| 20 | 68,700,000 | 68,850,000 | 917 | 1243 | -0.0324646   |                                     |
| 20 | 68,775,000 | 68,925,000 | 918 | 1356 | -0.039965422 |                                     |
| 20 | 68,850,000 | 69,000,000 | 919 | 1559 | 0.08375092   |                                     |
| 20 | 68,925,000 | 69,075,000 | 920 | 1548 | -0.639689511 |                                     |
| 20 | 69,000,000 | 69,150,000 | 921 | 1725 | -0.144865209 |                                     |
| 20 | 69,075,000 | 69,225,000 | 922 | 1693 | 0.474464532  |                                     |
| 20 | 69,150,000 | 69,300,000 | 923 | 1354 | 0.124558175  |                                     |
| 20 | 69,225,000 | 69,375,000 | 924 | 1178 | 0.18912189   |                                     |
| 20 | 69,300,000 | 69,450,000 | 925 | 1071 | -0.063216028 |                                     |
| 20 | 69,375,000 | 69,525,000 | 926 | 1027 | -0.040610825 | IRX1                                |
| 20 | 69,450,000 | 69,600,000 | 927 | 999  | 0.604523171  | IRX1                                |
| 20 | 69,525,000 | 69,675,000 | 928 | 925  | 0.802592603  |                                     |
| 20 | 69,600,000 | 69,750,000 | 929 | 1042 | 0.704711817  |                                     |
| 20 | 69,675,000 | 69,825,000 | 930 | 1140 | 0.443330808  |                                     |
| 20 | 69,750,000 | 69,900,000 | 931 | 1170 | 0.254131856  |                                     |
| 20 | 69,825,000 | 69,975,000 | 932 | 1284 | 0.875224846  |                                     |
| 20 | 69,900,000 | 70,050,000 | 933 | 1436 | 1.079579207  |                                     |
| 20 | 69,975,000 | 70,125,000 | 934 | 1113 | 0.893246304  |                                     |
| 20 | 70,050,000 | 70,200,000 | 935 | 462  | 0.279865471  | IRX2                                |
| 20 | 70,125,000 | 70,275,000 | 936 | 741  | 0.386212244  | IRX2                                |
| 20 | 70,200,000 | 70,350,000 | 937 | 1372 | 0.762417851  |                                     |
| 20 | 70,275,000 | 70,425,000 | 938 | 1312 | 0.009179631  |                                     |
| 20 | 70,350,000 | 70,500,000 | 939 | 1288 | -3.133629531 |                                     |
| 20 | 70,425,000 | 70,575,000 | 940 | 1510 | -3.010121115 |                                     |
| 20 | 70,500,000 | 70,650,000 | 941 | 1309 | -1.362042399 |                                     |
| 20 | 70,575,000 | 70,725,000 | 942 | 1024 | 0.713630021  |                                     |
| 20 | 70,650,000 | 70,800,000 | 943 | 817  | 0.485147977  |                                     |
| 20 | 70,725,000 | 70,875,000 | 944 | 494  | -0.119832051 |                                     |
| 20 | 70,800,000 | 70,950,000 | 945 | 388  | 1.278276429  | IRX4                                |
| 20 | 70,875,000 | 71,025,000 | 946 | 477  | 1.300743697  | IRX4,MRPL36,NDUFS6                  |
| 20 | 70,950,000 | 71,100,000 | 947 | 797  | 1.054391464  | MRPL36,NDUFS6                       |
| 20 | 71,025,000 | 71,175,000 | 948 | 1122 | 0.75130388   | LPCAT1                              |
| 20 | 71,100,000 | 71,250,000 | 949 | 1237 | 0.163484574  | CLPTM1L,LPCAT1,SLC6A3               |
| 20 | 71,175,000 | 71,325,000 | 950 | 1145 | -0.1036875   | CLPTM1L,SLC6A18,SLC6A19,SLC6A3,TERT |
| 20 | 71,250,000 | 71,400,000 | 951 | 975  | -0.378266285 | SLC12A7,SLC6A18,SLC6A19,TERT        |

|    |            |            |     |      |              |                                                                |
|----|------------|------------|-----|------|--------------|----------------------------------------------------------------|
| 20 | 71,325,000 | 71,475,000 | 952 | 1024 | -0.414708216 | NKD2,SLC12A7,ENSBTAG00000046181                                |
| 20 | 71,400,000 | 71,550,000 | 953 | 1315 | -0.886699387 | BRD9,NKD2,SLC12A7,TRIP13,ENSBTAG00000034431,ENSBTAG00000046181 |
| 20 | 71,475,000 | 71,625,000 | 954 | 1233 | -1.063743849 | BRD9,CEP72,TPPP,TRIP13,ENSBTAG00000034431                      |
| 20 | 71,550,000 | 71,700,000 | 955 | 1351 | -0.444155802 | CEP72,TPPP                                                     |
| 20 | 71,625,000 | 71,775,000 | 956 | 1439 | -0.037207116 | CEP72,EXOC3,SLC9A3,ENSBTAG00000039409                          |
| 20 | 71,700,000 | 71,850,000 | 957 | 1149 | 0.695251328  | AHRR,EXOC3,SLC9A3,ENSBTAG00000039409                           |
| 20 | 71,775,000 | 71,925,000 | 958 | 1251 | 0.817562873  | AHRR,EXOC3,PDCD6,ENSBTAG00000048135                            |
| 20 | 71,850,000 | 72,000,000 | 959 | 1372 | 0.896195099  | AHRR,CCDC127,LRRC14B,PDCD6,SDHA,ENSBTAG00000048135             |
| 20 | 71,925,000 | 72,042,655 | 960 | 914  | 1.214606129  | CCDC127,LRRC14B,PDCD6,SDHA,ENSBTAG00000034577                  |
| 21 | 0          | 150,000    | 1   | 876  | 1.276233574  | SNRPN                                                          |
| 21 | 75,000     | 225,000    | 2   | 1059 | 1.267001918  |                                                                |
| 21 | 150,000    | 300,000    | 3   | 703  | 1.175139548  |                                                                |
| 21 | 225,000    | 375,000    | 4   | 531  | 1.30753723   |                                                                |
| 21 | 300,000    | 450,000    | 5   | 406  | 1.355144893  |                                                                |
| 21 | 375,000    | 525,000    | 6   | 451  | 1.25312296   |                                                                |
| 21 | 450,000    | 600,000    | 7   | 455  | 0.855569997  |                                                                |
| 21 | 525,000    | 675,000    | 8   | 339  | 0.368759248  |                                                                |
| 21 | 600,000    | 750,000    | 9   | 297  | 0.365850175  | NDN                                                            |
| 21 | 675,000    | 825,000    | 10  | 384  | 0.799930996  | MAGEL2,NDN                                                     |
| 21 | 750,000    | 900,000    | 11  | 341  | 0.843126655  | MAGEL2                                                         |
| 21 | 825,000    | 975,000    | 12  | 234  | 0.225549846  |                                                                |
| 21 | 900,000    | 1,050,000  | 13  | 262  | 0.012647071  |                                                                |
| 21 | 975,000    | 1,125,000  | 14  | 376  | 0.506056132  |                                                                |
| 21 | 1,050,000  | 1,200,000  | 15  | 419  | 0.856646708  |                                                                |
| 21 | 1,125,000  | 1,275,000  | 16  | 470  | 0.636939343  |                                                                |
| 21 | 1,200,000  | 1,350,000  | 17  | 733  | 0.762632639  |                                                                |
| 21 | 1,275,000  | 1,425,000  | 18  | 658  | 0.821272356  |                                                                |
| 21 | 1,350,000  | 1,500,000  | 19  | 414  | 0.374522171  | FZD3                                                           |
| 21 | 1,425,000  | 1,575,000  | 20  | 410  | 0.018934591  | FZD3                                                           |
| 21 | 1,500,000  | 1,650,000  | 21  | 719  | -0.644338858 | FZD3,ENSBTAG00000023079                                        |
| 21 | 1,575,000  | 1,725,000  | 22  | 977  | -1.373988927 | ENSBTAG00000023079                                             |
| 21 | 1,650,000  | 1,800,000  | 23  | 1011 | -1.513629449 | ENSBTAG00000006648                                             |
| 21 | 1,725,000  | 1,875,000  | 24  | 926  | -1.026526815 | ENSBTAG00000006648,ENSBTAG00000013567                          |
| 21 | 1,800,000  | 1,950,000  | 25  | 538  | -0.54889256  | ENSBTAG00000013567,ENSBTAG00000035333                          |
| 21 | 1,875,000  | 2,025,000  | 26  | 357  | 0.245238227  | ENSBTAG00000035333                                             |
| 21 | 1,950,000  | 2,100,000  | 27  | 255  | 0.86603573   |                                                                |
| 21 | 2,025,000  | 2,175,000  | 28  | 146  | 0.890931747  |                                                                |
| 21 | 2,100,000  | 2,250,000  | 29  | 205  | 1.127148889  |                                                                |
| 21 | 2,175,000  | 2,325,000  | 30  | 215  | 0.904372274  |                                                                |
| 21 | 2,250,000  | 2,400,000  | 31  | 211  | 0.276267701  | UBE3A                                                          |
| 21 | 2,325,000  | 2,475,000  | 32  | 266  | 0.011915459  | UBE3A                                                          |
| 21 | 2,400,000  | 2,550,000  | 33  | 273  | -0.163210214 | UBE3A                                                          |
| 21 | 2,475,000  | 2,625,000  | 34  | 286  | -0.068101962 |                                                                |
| 21 | 2,550,000  | 2,700,000  | 35  | 686  | -0.432373696 |                                                                |
| 21 | 2,625,000  | 2,775,000  | 36  | 1316 | 0.128716508  |                                                                |
| 21 | 2,700,000  | 2,850,000  | 37  | 1612 | 0.216173028  | ATP10A                                                         |
| 21 | 2,775,000  | 2,925,000  | 38  | 1578 | 0.201346051  | ATP10A                                                         |
| 21 | 2,850,000  | 3,000,000  | 39  | 1141 | 0.021075949  | ATP10A                                                         |
| 21 | 2,925,000  | 3,075,000  | 40  | 654  | -0.824439059 | ATP10A                                                         |
| 21 | 3,000,000  | 3,150,000  | 41  | 946  | -0.874335815 |                                                                |

|    |           |           |    |      |              |                          |
|----|-----------|-----------|----|------|--------------|--------------------------|
| 21 | 3,075,000 | 3,225,000 | 42 | 1612 | -0.341167701 |                          |
| 21 | 3,150,000 | 3,300,000 | 43 | 1436 | 0.479862805  |                          |
| 21 | 3,225,000 | 3,375,000 | 44 | 1336 | 1.003281838  |                          |
| 21 | 3,300,000 | 3,450,000 | 45 | 1357 | 0.790146398  |                          |
| 21 | 3,375,000 | 3,525,000 | 46 | 971  | -0.747200898 |                          |
| 21 | 3,450,000 | 3,600,000 | 47 | 1119 | 0.405006739  |                          |
| 21 | 3,525,000 | 3,675,000 | 48 | 839  | 1.448120567  |                          |
| 21 | 3,600,000 | 3,750,000 | 49 | 488  | 0.682249273  |                          |
| 21 | 3,675,000 | 3,825,000 | 50 | 577  | 0.672898931  |                          |
| 21 | 3,750,000 | 3,900,000 | 51 | 758  | 0.350491454  |                          |
| 21 | 3,825,000 | 3,975,000 | 52 | 770  | -0.071525194 |                          |
| 21 | 3,900,000 | 4,050,000 | 53 | 542  | -0.598133379 | GABRB3                   |
| 21 | 3,975,000 | 4,125,000 | 54 | 654  | -0.529007171 | GABRB3                   |
| 21 | 4,050,000 | 4,200,000 | 55 | 897  | 0.7717186    | GABRB3                   |
| 21 | 4,125,000 | 4,275,000 | 56 | 1024 | 0.98401048   |                          |
| 21 | 4,200,000 | 4,350,000 | 57 | 884  | 0.60158598   |                          |
| 21 | 4,275,000 | 4,425,000 | 58 | 641  | 0.413703524  | GABRA5                   |
| 21 | 4,350,000 | 4,500,000 | 59 | 473  | -0.199388241 | GABRA5                   |
| 21 | 4,425,000 | 4,575,000 | 60 | 410  | 0.027350004  | GABRA5                   |
| 21 | 4,500,000 | 4,650,000 | 61 | 315  | 1.167741207  |                          |
| 21 | 4,575,000 | 4,725,000 | 62 | 255  | 1.434844826  |                          |
| 21 | 4,650,000 | 4,800,000 | 63 | 697  | 1.357046575  |                          |
| 21 | 4,725,000 | 4,875,000 | 64 | 815  | 1.339949906  |                          |
| 21 | 4,800,000 | 4,950,000 | 65 | 551  | 1.271546597  |                          |
| 21 | 4,875,000 | 5,025,000 | 66 | 502  | 1.222511195  | ENSBTAG00000035184       |
| 21 | 4,950,000 | 5,100,000 | 67 | 820  | 0.22677533   | ENSBTAG00000035184       |
| 21 | 5,025,000 | 5,175,000 | 68 | 791  | 0.175559316  |                          |
| 21 | 5,100,000 | 5,250,000 | 69 | 441  | 1.02479536   |                          |
| 21 | 5,175,000 | 5,325,000 | 70 | 630  | 0.69122435   |                          |
| 21 | 5,250,000 | 5,400,000 | 71 | 820  | 0.050769316  | VIMP                     |
| 21 | 5,325,000 | 5,475,000 | 72 | 935  | -0.993916932 | CHSY,VIMP                |
| 21 | 5,400,000 | 5,550,000 | 73 | 1185 | -0.293551744 | CHSY                     |
| 21 | 5,475,000 | 5,625,000 | 74 | 1431 | -0.324911244 | CHSY                     |
| 21 | 5,550,000 | 5,700,000 | 75 | 1256 | -1.222337589 | LRRK1                    |
| 21 | 5,625,000 | 5,775,000 | 76 | 1295 | -1.118915904 | LRRK1                    |
| 21 | 5,700,000 | 5,850,000 | 77 | 1176 | -0.839204043 | ALDH1A3,LRRK1            |
| 21 | 5,775,000 | 5,925,000 | 78 | 938  | -0.425115285 | ALDH1A3                  |
| 21 | 5,850,000 | 6,000,000 | 79 | 1294 | -0.57415431  |                          |
| 21 | 5,925,000 | 6,075,000 | 80 | 1704 | -0.14729764  |                          |
| 21 | 6,000,000 | 6,150,000 | 81 | 1559 | 0.26306523   | ENSBTAG00000048048       |
| 21 | 6,075,000 | 6,225,000 | 82 | 1004 | 0.175086277  | ASB7,ENSBTAG00000048048  |
| 21 | 6,150,000 | 6,300,000 | 83 | 697  | -1.125081109 | ASB7,LASS3,LINS          |
| 21 | 6,225,000 | 6,375,000 | 84 | 527  | -1.696174238 | LASS3,LINS               |
| 21 | 6,300,000 | 6,450,000 | 85 | 448  | 0.475230153  | LASS3                    |
| 21 | 6,375,000 | 6,525,000 | 86 | 477  | 0.32122448   | ADAMTS17,LASS3           |
| 21 | 6,450,000 | 6,600,000 | 87 | 712  | 0.569416113  | ADAMTS17                 |
| 21 | 6,525,000 | 6,675,000 | 88 | 1122 | 0.450571892  | ADAMTS17                 |
| 21 | 6,600,000 | 6,750,000 | 89 | 1090 | 0.12976832   | ADAMTS17                 |
| 21 | 6,675,000 | 6,825,000 | 90 | 769  | -0.467314521 | ADAMTS17                 |
| 21 | 6,750,000 | 6,900,000 | 91 | 590  | 0.025435054  | ADAMTS17                 |
| 21 | 6,825,000 | 6,975,000 | 92 | 580  | -2.00852343  | ADAMTS17                 |
| 21 | 6,900,000 | 7,050,000 | 93 | 631  | -5.100811288 | ADAMTS17,MEF2A,MGC155141 |
| 21 | 6,975,000 | 7,125,000 | 94 | 615  | -5.526063333 | MEF2A,MGC155141          |

|    |            |            |     |      |              |                       |
|----|------------|------------|-----|------|--------------|-----------------------|
| 21 | 7,050,000  | 7,200,000  | 95  | 658  | -4.019653564 | MEF2A                 |
| 21 | 7,125,000  | 7,275,000  | 96  | 894  | -0.882433117 | MEF2A                 |
| 21 | 7,200,000  | 7,350,000  | 97  | 1211 | 0.665161548  | MEF2A                 |
| 21 | 7,275,000  | 7,425,000  | 98  | 1125 | 0.885502533  | LRRC28                |
| 21 | 7,350,000  | 7,500,000  | 99  | 605  | 1.014584349  | LRRC28                |
| 21 | 7,425,000  | 7,575,000  | 100 | 342  | 1.164772197  | LRRC28                |
| 21 | 7,500,000  | 7,650,000  | 101 | 306  | 1.294646106  | LRRC28,TTC23          |
| 21 | 7,575,000  | 7,725,000  | 102 | 247  | -0.596553095 | LRRC28,TTC23          |
| 21 | 7,650,000  | 7,800,000  | 103 | 289  | -1.535283811 | SYNM,TTC23            |
| 21 | 7,725,000  | 7,875,000  | 104 | 365  | -0.443032332 | SYNM,TTC23            |
| 21 | 7,800,000  | 7,950,000  | 105 | 504  | 0.550261953  |                       |
| 21 | 7,875,000  | 8,025,000  | 106 | 513  | -0.003158075 |                       |
| 21 | 7,950,000  | 8,100,000  | 107 | 709  | -0.839927996 |                       |
| 21 | 8,025,000  | 8,175,000  | 108 | 706  | -0.317401001 |                       |
| 21 | 8,100,000  | 8,250,000  | 109 | 422  | 0.23204803   | IGF1R                 |
| 21 | 8,175,000  | 8,325,000  | 110 | 480  | 0.207327709  | IGF1R,PGPEP1L         |
| 21 | 8,250,000  | 8,400,000  | 111 | 746  | 0.164092857  | FAM169B,IGF1R,PGPEP1L |
| 21 | 8,325,000  | 8,475,000  | 112 | 1157 | 0.066052265  | FAM169B               |
| 21 | 8,400,000  | 8,550,000  | 113 | 1403 | 0.187352116  | FAM169B               |
| 21 | 8,475,000  | 8,625,000  | 114 | 1310 | 0.370897833  |                       |
| 21 | 8,550,000  | 8,700,000  | 115 | 1203 | 0.5630187    |                       |
| 21 | 8,625,000  | 8,775,000  | 116 | 1267 | 0.001733885  |                       |
| 21 | 8,700,000  | 8,850,000  | 117 | 1397 | -0.413006775 |                       |
| 21 | 8,775,000  | 8,925,000  | 118 | 1335 | 0.228474923  | ARRDC4                |
| 21 | 8,850,000  | 9,000,000  | 119 | 1113 | 0.092757173  | ARRDC4                |
| 21 | 8,925,000  | 9,075,000  | 120 | 1179 | -0.488396704 | ARRDC4                |
| 21 | 9,000,000  | 9,150,000  | 121 | 1387 | -0.608238326 |                       |
| 21 | 9,075,000  | 9,225,000  | 122 | 1574 | -0.098589863 |                       |
| 21 | 9,150,000  | 9,300,000  | 123 | 1700 | 0.816387533  |                       |
| 21 | 9,225,000  | 9,375,000  | 124 | 1758 | 0.92660838   |                       |
| 21 | 9,300,000  | 9,450,000  | 125 | 1907 | 0.920451011  |                       |
| 21 | 9,375,000  | 9,525,000  | 126 | 1516 | 0.873755241  |                       |
| 21 | 9,450,000  | 9,600,000  | 127 | 1013 | 0.932291584  |                       |
| 21 | 9,525,000  | 9,675,000  | 128 | 1386 | -0.037926154 | ENSBTAG00000046611    |
| 21 | 9,600,000  | 9,750,000  | 129 | 1225 | -0.526514622 | ENSBTAG00000046611    |
| 21 | 9,675,000  | 9,825,000  | 130 | 966  | -0.516411481 |                       |
| 21 | 9,750,000  | 9,900,000  | 131 | 1319 | -0.19398846  |                       |
| 21 | 9,825,000  | 9,975,000  | 132 | 997  | 0.394673166  |                       |
| 21 | 9,900,000  | 10,050,000 | 133 | 686  | 0.706109249  |                       |
| 21 | 9,975,000  | 10,125,000 | 134 | 750  | 0.776872991  |                       |
| 21 | 10,050,000 | 10,200,000 | 135 | 745  | 0.300338611  |                       |
| 21 | 10,125,000 | 10,275,000 | 136 | 669  | 0.044341935  |                       |
| 21 | 10,200,000 | 10,350,000 | 137 | 608  | 0.243510475  |                       |
| 21 | 10,275,000 | 10,425,000 | 138 | 824  | 0.095796782  |                       |
| 21 | 10,350,000 | 10,500,000 | 139 | 1056 | -0.037264756 |                       |
| 21 | 10,425,000 | 10,575,000 | 140 | 768  | 0.134967802  |                       |
| 21 | 10,500,000 | 10,650,000 | 141 | 468  | 0.085818591  |                       |
| 21 | 10,575,000 | 10,725,000 | 142 | 539  | -0.576375256 |                       |
| 21 | 10,650,000 | 10,800,000 | 143 | 474  | -0.191740233 | NR2F2                 |
| 21 | 10,725,000 | 10,875,000 | 144 | 371  | 0.88224011   | NR2F2                 |
| 21 | 10,800,000 | 10,950,000 | 145 | 465  | 0.217245281  | NR2F2                 |
| 21 | 10,875,000 | 11,025,000 | 146 | 815  | 0.079434912  |                       |
| 21 | 10,950,000 | 11,100,000 | 147 | 1001 | 0.438488646  |                       |

|    |            |            |     |      |              |                                |
|----|------------|------------|-----|------|--------------|--------------------------------|
| 21 | 11,025,000 | 11,175,000 | 148 | 960  | -0.627108529 |                                |
| 21 | 11,100,000 | 11,250,000 | 149 | 829  | -0.691968148 |                                |
| 21 | 11,175,000 | 11,325,000 | 150 | 554  | 0.229615542  |                                |
| 21 | 11,250,000 | 11,400,000 | 151 | 764  | -1.158836409 |                                |
| 21 | 11,325,000 | 11,475,000 | 152 | 1015 | -0.762811083 |                                |
| 21 | 11,400,000 | 11,550,000 | 153 | 935  | 0.416033561  |                                |
| 21 | 11,475,000 | 11,625,000 | 154 | 823  | 0.40747714   |                                |
| 21 | 11,550,000 | 11,700,000 | 155 | 842  | 0.261992198  |                                |
| 21 | 11,625,000 | 11,775,000 | 156 | 994  | -1.333762195 |                                |
| 21 | 11,700,000 | 11,850,000 | 157 | 867  | -3.042093328 |                                |
| 21 | 11,775,000 | 11,925,000 | 158 | 832  | -1.518881005 |                                |
| 21 | 11,850,000 | 12,000,000 | 159 | 776  | 0.257683696  |                                |
| 21 | 11,925,000 | 12,075,000 | 160 | 757  | 0.450465357  |                                |
| 21 | 12,000,000 | 12,150,000 | 161 | 872  | 0.334274842  |                                |
| 21 | 12,075,000 | 12,225,000 | 162 | 902  | 0.527259785  |                                |
| 21 | 12,150,000 | 12,300,000 | 163 | 1252 | -0.674950668 |                                |
| 21 | 12,225,000 | 12,375,000 | 164 | 1349 | -0.479449528 |                                |
| 21 | 12,300,000 | 12,450,000 | 165 | 1042 | 0.521030794  |                                |
| 21 | 12,375,000 | 12,525,000 | 166 | 948  | -0.535347746 |                                |
| 21 | 12,450,000 | 12,600,000 | 167 | 1045 | -0.677354598 |                                |
| 21 | 12,525,000 | 12,675,000 | 168 | 939  | -0.031361342 |                                |
| 21 | 12,600,000 | 12,750,000 | 169 | 817  | 0.045371684  |                                |
| 21 | 12,675,000 | 12,825,000 | 170 | 1094 | 0.255132061  |                                |
| 21 | 12,750,000 | 12,900,000 | 171 | 1281 | 0.747355655  | MCTP2                          |
| 21 | 12,825,000 | 12,975,000 | 172 | 1348 | 0.927604159  | MCTP2                          |
| 21 | 12,900,000 | 13,050,000 | 173 | 1568 | 0.898428323  | MCTP2                          |
| 21 | 12,975,000 | 13,125,000 | 174 | 1702 | 0.639634126  | MCTP2                          |
| 21 | 13,050,000 | 13,200,000 | 175 | 1753 | -1.214996283 | MCTP2                          |
| 21 | 13,125,000 | 13,275,000 | 176 | 1362 | -1.892093348 |                                |
| 21 | 13,200,000 | 13,350,000 | 177 | 730  | -0.281576557 |                                |
| 21 | 13,275,000 | 13,425,000 | 178 | 1103 | -0.788858581 | ENSBTAG00000033335             |
| 21 | 13,350,000 | 13,500,000 | 179 | 1310 | -0.507963707 | ENSBTAG00000033335             |
| 21 | 13,425,000 | 13,575,000 | 180 | 929  | -1.133448633 |                                |
| 21 | 13,500,000 | 13,650,000 | 181 | 849  | -1.47149624  |                                |
| 21 | 13,575,000 | 13,725,000 | 182 | 959  | -0.120325779 |                                |
| 21 | 13,650,000 | 13,800,000 | 183 | 1191 | -0.561692616 |                                |
| 21 | 13,725,000 | 13,875,000 | 184 | 1111 | -0.629541325 |                                |
| 21 | 13,800,000 | 13,950,000 | 185 | 1029 | 0.226227619  |                                |
| 21 | 13,875,000 | 14,025,000 | 186 | 861  | 0.53947704   |                                |
| 21 | 13,950,000 | 14,100,000 | 187 | 694  | 0.344638517  |                                |
| 21 | 14,025,000 | 14,175,000 | 188 | 724  | 0.296653626  |                                |
| 21 | 14,100,000 | 14,250,000 | 189 | 1101 | -0.074995322 |                                |
| 21 | 14,175,000 | 14,325,000 | 190 | 1226 | -0.248227851 | ENSBTAG00000027075             |
| 21 | 14,250,000 | 14,400,000 | 191 | 741  | -0.548566486 | CHD2, RGMA, ENSBTAG00000027075 |
| 21 | 14,325,000 | 14,475,000 | 192 | 387  | -0.555040951 | CHD2, RGMA                     |
| 21 | 14,400,000 | 14,550,000 | 193 | 266  | -1.32959297  | CHD2                           |
| 21 | 14,475,000 | 14,625,000 | 194 | 581  | -1.414522602 | CHD2                           |
| 21 | 14,550,000 | 14,700,000 | 195 | 1235 | -0.043566447 | FAM174B                        |
| 21 | 14,625,000 | 14,775,000 | 196 | 1010 | -0.113668205 | FAM174B                        |
| 21 | 14,700,000 | 14,850,000 | 197 | 448  | -0.022830173 | FAM174B                        |
| 21 | 14,775,000 | 14,925,000 | 198 | 873  | 1.156740805  | ST8SIA2                        |
| 21 | 14,850,000 | 15,000,000 | 199 | 1203 | 1.176243134  | ST8SIA2                        |
| 21 | 14,925,000 | 15,075,000 | 200 | 1481 | 0.179018249  | ST8SIA2                        |

|    |            |            |     |      |              |                    |
|----|------------|------------|-----|------|--------------|--------------------|
| 21 | 15,000,000 | 15,150,000 | 201 | 1657 | -0.030096819 |                    |
| 21 | 15,075,000 | 15,225,000 | 202 | 1378 | -0.12064831  | SLCO3A1            |
| 21 | 15,150,000 | 15,300,000 | 203 | 1083 | -0.541997188 | SLCO3A1            |
| 21 | 15,225,000 | 15,375,000 | 204 | 1232 | 1.04211218   | SLCO3A1            |
| 21 | 15,300,000 | 15,450,000 | 205 | 1767 | 0.831161047  | SLCO3A1            |
| 21 | 15,375,000 | 15,525,000 | 206 | 1551 | 0.104139737  | SLCO3A1            |
| 21 | 15,450,000 | 15,600,000 | 207 | 1097 | 0.092156069  | SLCO3A1            |
| 21 | 15,525,000 | 15,675,000 | 208 | 1142 | 0.291923008  | SLCO3A1            |
| 21 | 15,600,000 | 15,750,000 | 209 | 996  | 0.711485399  |                    |
| 21 | 15,675,000 | 15,825,000 | 210 | 649  | 0.987670859  |                    |
| 21 | 15,750,000 | 15,900,000 | 211 | 623  | 0.904627727  |                    |
| 21 | 15,825,000 | 15,975,000 | 212 | 722  | 0.896282986  |                    |
| 21 | 15,900,000 | 16,050,000 | 213 | 1103 | 1.018197224  | ENSBTAG00000021064 |
| 21 | 15,975,000 | 16,125,000 | 214 | 1408 | 1.01733398   | ENSBTAG00000021064 |
| 21 | 16,050,000 | 16,200,000 | 215 | 1444 | 0.081236724  | ENSBTAG00000021064 |
| 21 | 16,125,000 | 16,275,000 | 216 | 1551 | -0.30440421  | SV2B               |
| 21 | 16,200,000 | 16,350,000 | 217 | 1111 | -0.31102219  | SV2B               |
| 21 | 16,275,000 | 16,425,000 | 218 | 680  | -0.50576119  | SV2B               |
| 21 | 16,350,000 | 16,500,000 | 219 | 538  | 0.976667763  | SV2B               |
| 21 | 16,425,000 | 16,575,000 | 220 | 395  | 0.992982569  | SV2B               |
| 21 | 16,500,000 | 16,650,000 | 221 | 469  | 0.192073871  |                    |
| 21 | 16,575,000 | 16,725,000 | 222 | 552  | -1.149111309 | AKAP13             |
| 21 | 16,650,000 | 16,800,000 | 223 | 668  | -1.21323182  | AKAP13             |
| 21 | 16,725,000 | 16,875,000 | 224 | 990  | 0.471680111  | AKAP13             |
| 21 | 16,800,000 | 16,950,000 | 225 | 1080 | 0.737876042  | AKAP13,KLHL25      |
| 21 | 16,875,000 | 17,025,000 | 226 | 1185 | 0.662521852  | AKAP13,KLHL25      |
| 21 | 16,950,000 | 17,100,000 | 227 | 1598 | 0.545241125  | KLHL25             |
| 21 | 17,025,000 | 17,175,000 | 228 | 1592 | 0.515583197  |                    |
| 21 | 17,100,000 | 17,250,000 | 229 | 1028 | 0.81111607   |                    |
| 21 | 17,175,000 | 17,325,000 | 230 | 1246 | 1.166015702  |                    |
| 21 | 17,250,000 | 17,400,000 | 231 | 1497 | 0.493534507  |                    |
| 21 | 17,325,000 | 17,475,000 | 232 | 874  | -1.049625151 |                    |
| 21 | 17,400,000 | 17,550,000 | 233 | 597  | -1.984272933 |                    |
| 21 | 17,475,000 | 17,625,000 | 234 | 656  | -0.873908821 |                    |
| 21 | 17,550,000 | 17,700,000 | 235 | 751  | 0.348849564  |                    |
| 21 | 17,625,000 | 17,775,000 | 236 | 768  | 0.40872746   |                    |
| 21 | 17,700,000 | 17,850,000 | 237 | 1096 | 0.424168382  |                    |
| 21 | 17,775,000 | 17,925,000 | 238 | 1260 | 0.718832268  |                    |
| 21 | 17,850,000 | 18,000,000 | 239 | 1106 | 0.891469243  |                    |
| 21 | 17,925,000 | 18,075,000 | 240 | 1053 | -0.154290463 |                    |
| 21 | 18,000,000 | 18,150,000 | 241 | 1296 | 0.076543643  |                    |
| 21 | 18,075,000 | 18,225,000 | 242 | 1327 | 0.488367404  |                    |
| 21 | 18,150,000 | 18,300,000 | 243 | 927  | 0.593655207  |                    |
| 21 | 18,225,000 | 18,375,000 | 244 | 863  | 0.225683796  |                    |
| 21 | 18,300,000 | 18,450,000 | 245 | 890  | 0.065489273  |                    |
| 21 | 18,375,000 | 18,525,000 | 246 | 779  | 0.7017734    |                    |
| 21 | 18,450,000 | 18,600,000 | 247 | 827  | 0.341755516  |                    |
| 21 | 18,525,000 | 18,675,000 | 248 | 1113 | 0.624088307  |                    |
| 21 | 18,600,000 | 18,750,000 | 249 | 1283 | 1.262481158  |                    |
| 21 | 18,675,000 | 18,825,000 | 250 | 1427 | 0.87626918   |                    |
| 21 | 18,750,000 | 18,900,000 | 251 | 1181 | 0.375797428  |                    |
| 21 | 18,825,000 | 18,975,000 | 252 | 725  | -0.195581615 |                    |
| 21 | 18,900,000 | 19,050,000 | 253 | 1199 | -1.157840546 |                    |

|    |            |            |     |      |              |                                                                                               |
|----|------------|------------|-----|------|--------------|-----------------------------------------------------------------------------------------------|
| 21 | 18,975,000 | 19,125,000 | 254 | 1444 | -1.033862291 |                                                                                               |
| 21 | 19,050,000 | 19,200,000 | 255 | 982  | 0.016919284  |                                                                                               |
| 21 | 19,125,000 | 19,275,000 | 256 | 925  | 0.116054816  | ENSBTAG00000011213                                                                            |
| 21 | 19,200,000 | 19,350,000 | 257 | 1114 | -0.030749651 | ENSBTAG00000011213                                                                            |
| 21 | 19,275,000 | 19,425,000 | 258 | 1203 | -1.068499009 | ENSBTAG00000011213                                                                            |
| 21 | 19,350,000 | 19,500,000 | 259 | 1327 | -0.620991407 | NTRK3                                                                                         |
| 21 | 19,425,000 | 19,575,000 | 260 | 1029 | 0.383994987  | NTRK3                                                                                         |
| 21 | 19,500,000 | 19,650,000 | 261 | 844  | -5.407755336 | NTRK3                                                                                         |
| 21 | 19,575,000 | 19,725,000 | 262 | 1230 | -3.542564202 |                                                                                               |
| 21 | 19,650,000 | 19,800,000 | 263 | 1170 | 0.01643415   |                                                                                               |
| 21 | 19,725,000 | 19,875,000 | 264 | 782  | 0.291749629  | MRPL46,MRPS11                                                                                 |
| 21 | 19,800,000 | 19,950,000 | 265 | 503  | -0.078944445 | DET1,MRPL46,MRPS11                                                                            |
| 21 | 19,875,000 | 20,025,000 | 266 | 627  | -0.069225211 | AEN,DET1,ISG20,MRPS11                                                                         |
| 21 | 19,950,000 | 20,100,000 | 267 | 1676 | 0.133394007  | AEN,DET1,ISG20,ENSBTAG00000001308,ENSBTAG0000047729                                           |
| 21 | 20,025,000 | 20,175,000 | 268 | 2108 | -0.152331382 | ISG20,ENSBTAG00000001308,ENSBTAG00000040580,ENSBTAG00000045929,ENSBTAG00000047729             |
| 21 | 20,100,000 | 20,250,000 | 269 | 2204 | -0.238428592 | ENSBTAG00000001308,ENSBTAG00000002786,ENSBTAG00000040580,ENSBTAG00000045929,ENSBTAG0000047729 |
| 21 | 20,175,000 | 20,325,000 | 270 | 2563 | -1.307981888 | ENSBTAG00000001308,ENSBTAG00000002786                                                         |
| 21 | 20,250,000 | 20,400,000 | 271 | 2172 | -2.645110042 | ENSBTAG00000012326,ENSBTAG00000038494                                                         |
| 21 | 20,325,000 | 20,475,000 | 272 | 2163 | -0.146135874 | ENSBTAG00000004339,ENSBTAG00000012326,ENSBTAG00000038494                                      |
| 21 | 20,400,000 | 20,550,000 | 273 | 2646 | 0.467467822  | ENSBTAG00000001526,ENSBTAG00000004339                                                         |
| 21 | 20,475,000 | 20,625,000 | 274 | 2203 | 0.099564225  | ENSBTAG00000001526,ENSBTAG00000036082,ENSBTAG00000046377,ENSBTAG00000046412                   |
| 21 | 20,550,000 | 20,700,000 | 275 | 1699 | -0.171158428 | ENSBTAG00000017054,ENSBTAG00000036082,ENSBTAG00000046377,ENSBTAG00000046412,ENSBTAG0000048096 |
| 21 | 20,625,000 | 20,775,000 | 276 | 1631 | -0.163157765 | ENSBTAG00000017054,ENSBTAG00000048096                                                         |
| 21 | 20,700,000 | 20,850,000 | 277 | 986  | 0.294141315  | ACAN                                                                                          |
| 21 | 20,775,000 | 20,925,000 | 278 | 484  | 0.617929366  | ACAN,HAPLN3,MFGE8                                                                             |
| 21 | 20,850,000 | 21,000,000 | 279 | 758  | 0.473793077  | ABHD2,ACAN,HAPLN3,MFGE8                                                                       |
| 21 | 20,925,000 | 21,075,000 | 280 | 1257 | 0.328467926  | ABHD2                                                                                         |
| 21 | 21,000,000 | 21,150,000 | 281 | 1464 | 0.397010534  | ABHD2,FANCI,RLBP1                                                                             |
| 21 | 21,075,000 | 21,225,000 | 282 | 1362 | 0.516038758  | ABHD2,FANCI,POLG,RLBP1                                                                        |
| 21 | 21,150,000 | 21,300,000 | 283 | 1110 | 0.339841845  | FANCI,POLG,RLBP1                                                                              |
| 21 | 21,225,000 | 21,375,000 | 284 | 1118 | 0.437209572  | RHCG,RLBP1                                                                                    |
| 21 | 21,300,000 | 21,450,000 | 285 | 1174 | 0.597107485  | RHCG,TICRR                                                                                    |
| 21 | 21,375,000 | 21,525,000 | 286 | 913  | -1.933905796 | KIF7,PEX11A,PLIN,RHCG,TICRR                                                                   |
| 21 | 21,450,000 | 21,600,000 | 287 | 542  | -4.002885449 | KIF7,PEX11A,PLIN,TICRR,WDR93                                                                  |
| 21 | 21,525,000 | 21,675,000 | 288 | 530  | -1.469203593 | ANPEP,MESP2,PEX11A,WDR93                                                                      |
| 21 | 21,600,000 | 21,750,000 | 289 | 668  | -0.423475239 | ANPEP,AP3S2,ARPIN,MESP2                                                                       |
| 21 | 21,675,000 | 21,825,000 | 290 | 920  | 0.351824105  | AP3S2,ARPIN                                                                                   |
| 21 | 21,750,000 | 21,900,000 | 291 | 1022 | 0.434642989  | ZNF710                                                                                        |
| 21 | 21,825,000 | 21,975,000 | 292 | 731  | 0.49614288   | IDH2,ZNF710                                                                                   |
| 21 | 21,900,000 | 22,050,000 | 293 | 489  | -0.583457816 | CIB1,GDPGP1,IDH2,SEMA4B                                                                       |
| 21 | 21,975,000 | 22,125,000 | 294 | 354  | -0.48134285  | CIB1,GDPGP1,NGRN,PRC1,SEMA4B,VPS33B                                                           |
| 21 | 22,050,000 | 22,200,000 | 295 | 310  | 0.666587053  | FES,GDPGP1,HDDC3,MAN2A2,NGRN,PRC1,RCCD1,UNC45A,VPS33B                                         |
| 21 | 22,125,000 | 22,275,000 | 296 | 331  | 0.391127491  | BLM,FES,FURIN,HDDC3,MAN2A2,RCCD1,UNC45A                                                       |
| 21 | 22,200,000 | 22,350,000 | 297 | 440  | -3.493599342 | BLM,FES,FURIN                                                                                 |

|    |            |            |     |      |              |                                        |
|----|------------|------------|-----|------|--------------|----------------------------------------|
| 21 | 22,275,000 | 22,425,000 | 298 | 548  | -4.789362471 | BLM,CRTC3                              |
| 21 | 22,350,000 | 22,500,000 | 299 | 460  | -2.997132648 | CRTC3                                  |
| 21 | 22,425,000 | 22,575,000 | 300 | 867  | -0.663294326 | CRTC3,IQGAP1                           |
| 21 | 22,500,000 | 22,650,000 | 301 | 1307 | -0.320376896 | IQGAP1                                 |
| 21 | 22,575,000 | 22,725,000 | 302 | 1331 | 0.846849069  | IQGAP1,ZNF774,ZSCAN2                   |
| 21 | 22,650,000 | 22,800,000 | 303 | 1292 | 1.238298242  | NMB,SEC11A,WDR73,ZNF774,ZSCAN2         |
| 21 | 22,725,000 | 22,875,000 | 304 | 1052 | 1.357977445  | NMB,SEC11A,WDR73,ZNF592                |
| 21 | 22,800,000 | 22,950,000 | 305 | 1065 | 1.311843498  | ALPK3,SLC28A1,ZNF592                   |
| 21 | 22,875,000 | 23,025,000 | 306 | 1220 | 1.161949913  | ALPK3,SLC28A1                          |
| 21 | 22,950,000 | 23,100,000 | 307 | 1479 | 0.685264379  | SLC28A1                                |
| 21 | 23,025,000 | 23,175,000 | 308 | 1232 | -0.018293626 | PDE8A,SLC28A1                          |
| 21 | 23,100,000 | 23,250,000 | 309 | 702  | -0.611819259 | PDE8A                                  |
| 21 | 23,175,000 | 23,325,000 | 310 | 733  | -0.632798289 | PDE8A,RPS17,ENSBTAG00000000623         |
| 21 | 23,250,000 | 23,400,000 | 311 | 787  | -0.235517697 | PDE8A,RPS17,ENSBTAG00000000623         |
| 21 | 23,325,000 | 23,475,000 | 312 | 693  | -0.068993426 | ENSBTAG00000000623,ENSBTAG000000008495 |
| 21 | 23,400,000 | 23,550,000 | 313 | 836  | -1.675834681 | FSD2,WHAMM,ENSBTAG000000008495         |
| 21 | 23,475,000 | 23,625,000 | 314 | 1008 | -1.255997641 | FSD2,HOMER2,WHAMM                      |
| 21 | 23,550,000 | 23,700,000 | 315 | 974  | -0.260661963 | HOMER2,WHAMM                           |
| 21 | 23,625,000 | 23,775,000 | 316 | 1073 | 0.241979591  | C21H15ORF40,HOMER2,MGC127733           |
| 21 | 23,700,000 | 23,850,000 | 317 | 1208 | 0.841501381  | C21H15ORF40,MGC127733                  |
| 21 | 23,775,000 | 23,925,000 | 318 | 1461 | 1.02138268   | ENSBTAG000000047366                    |
| 21 | 23,850,000 | 24,000,000 | 319 | 1120 | 0.951563248  | ENSBTAG000000047366                    |
| 21 | 23,925,000 | 24,075,000 | 320 | 404  | 0.823812913  |                                        |
| 21 | 24,000,000 | 24,150,000 | 321 | 267  | 1.236360345  |                                        |
| 21 | 24,075,000 | 24,225,000 | 322 | 277  | 1.08756796   |                                        |
| 21 | 24,150,000 | 24,300,000 | 323 | 316  | 1.283808426  |                                        |
| 21 | 24,225,000 | 24,375,000 | 324 | 481  | 1.303623546  | MEX3B                                  |
| 21 | 24,300,000 | 24,450,000 | 325 | 779  | 1.225368372  | EFTUD1,MEX3B                           |
| 21 | 24,375,000 | 24,525,000 | 326 | 1082 | 1.259255502  | EFTUD1,FAM154B                         |
| 21 | 24,450,000 | 24,600,000 | 327 | 999  | 1.192196706  | ADAMTSL3,EFTUD1,FAM154B                |
| 21 | 24,525,000 | 24,675,000 | 328 | 662  | 0.936964501  | ADAMTSL3,FAM154B                       |
| 21 | 24,600,000 | 24,750,000 | 329 | 479  | 0.639637353  | ADAMTSL3                               |
| 21 | 24,675,000 | 24,825,000 | 330 | 417  | -0.206307729 | ADAMTSL3                               |
| 21 | 24,750,000 | 24,900,000 | 331 | 440  | -0.254692566 | ADAMTSL3                               |
| 21 | 24,825,000 | 24,975,000 | 332 | 444  | -0.252948969 | ADAMTSL3                               |
| 21 | 24,900,000 | 25,050,000 | 333 | 663  | -0.612235203 | SH3GL3                                 |
| 21 | 24,975,000 | 25,125,000 | 334 | 717  | -0.176876111 | SH3GL3                                 |
| 21 | 25,050,000 | 25,200,000 | 335 | 436  | -0.293840176 |                                        |
| 21 | 25,125,000 | 25,275,000 | 336 | 299  | -1.066224916 | BNC1                                   |
| 21 | 25,200,000 | 25,350,000 | 337 | 261  | -1.67940499  | BNC1,HDGFRP3                           |
| 21 | 25,275,000 | 25,425,000 | 338 | 437  | -2.203470005 | HDGFRP3,TM6SF1                         |
| 21 | 25,350,000 | 25,500,000 | 339 | 438  | -1.46782817  | BTBD1,HDGFRP3,TM6SF1                   |
| 21 | 25,425,000 | 25,575,000 | 340 | 234  | 0.299508555  | BTBD1                                  |
| 21 | 25,500,000 | 25,650,000 | 341 | 288  | 0.178531072  | BTBD1                                  |
| 21 | 25,575,000 | 25,725,000 | 342 | 517  | 0.408729408  | CTSH,RASGRF1,ENSBTAG00000010988        |
| 21 | 25,650,000 | 25,800,000 | 343 | 507  | 0.753825589  | CTSH,RASGRF1,ENSBTAG00000010988        |
| 21 | 25,725,000 | 25,875,000 | 344 | 435  | 0.716960331  | RASGRF1                                |
| 21 | 25,800,000 | 25,950,000 | 345 | 502  | 0.630376315  | RASGRF1                                |
| 21 | 25,875,000 | 26,025,000 | 346 | 786  | 0.233300888  | ANKRD34C,TMED3                         |
| 21 | 25,950,000 | 26,100,000 | 347 | 825  | 0.103021662  | ANKRD34C,TMED3                         |
| 21 | 26,025,000 | 26,175,000 | 348 | 619  | 0.087952678  | KIAA1024                               |
| 21 | 26,100,000 | 26,250,000 | 349 | 659  | 0.091907798  | KIAA1024,ENSBTAG00000047935            |
| 21 | 26,175,000 | 26,325,000 | 350 | 726  | -0.87093841  | ENSBTAG00000047935                     |



|    |            |            |     |      |              |                                      |
|----|------------|------------|-----|------|--------------|--------------------------------------|
| 21 | 26,250,000 | 26,400,000 | 351 | 1329 | -1.946824173 |                                      |
| 21 | 26,325,000 | 26,475,000 | 352 | 1305 | -1.427457278 | MTHFS                                |
| 21 | 26,400,000 | 26,550,000 | 353 | 554  | -0.040464245 | BCL2A1,MTHFS,ZFAND6                  |
| 21 | 26,475,000 | 26,625,000 | 354 | 376  | 0.164234874  | BCL2A1,FAH,ZFAND6,ENSBTAG00000048314 |
| 21 | 26,550,000 | 26,700,000 | 355 | 452  | -0.879721387 | FAH,ZFAND6,ENSBTAG00000048314        |
| 21 | 26,625,000 | 26,775,000 | 356 | 610  | -0.726426886 | FAH                                  |
| 21 | 26,700,000 | 26,850,000 | 357 | 907  | 0.229240016  | ENSBTAG00000047587                   |
| 21 | 26,775,000 | 26,925,000 | 358 | 1102 | -0.774783342 | ARNT2,ENSBTAG00000047587             |
| 21 | 26,850,000 | 27,000,000 | 359 | 967  | -2.773952497 | ARNT2                                |
| 21 | 26,925,000 | 27,075,000 | 360 | 822  | -0.391822926 | ABHD17C,ARNT2                        |
| 21 | 27,000,000 | 27,150,000 | 361 | 655  | 0.827781287  | ABHD17C                              |
| 21 | 27,075,000 | 27,225,000 | 362 | 440  | 0.33679527   | ABHD17C                              |
| 21 | 27,150,000 | 27,300,000 | 363 | 406  | -0.100768957 | CEMIP                                |
| 21 | 27,225,000 | 27,375,000 | 364 | 445  | 0.189373167  | CEMIP,MESDC1,MESDC2                  |
| 21 | 27,300,000 | 27,450,000 | 365 | 589  | 0.268992951  | C21H15ORF26,MESDC1,MESDC2            |
| 21 | 27,375,000 | 27,525,000 | 366 | 866  | -0.447682763 | C21H15ORF26                          |
| 21 | 27,450,000 | 27,600,000 | 367 | 750  | -0.60975536  | C21H15ORF26,IL16                     |
| 21 | 27,525,000 | 27,675,000 | 368 | 598  | -1.942508295 | IL16,STARD5,TMC3                     |
| 21 | 27,600,000 | 27,750,000 | 369 | 919  | -1.550498058 | IL16,STARD5,TMC3                     |
| 21 | 27,675,000 | 27,825,000 | 370 | 1054 | -0.109176874 | TMC3                                 |
| 21 | 27,750,000 | 27,900,000 | 371 | 921  | 0.228464973  | MCEE                                 |
| 21 | 27,825,000 | 27,975,000 | 372 | 744  | 0.067053065  | FAN1,MCEE,MPHOSPH10,MTMR10           |
| 21 | 27,900,000 | 28,050,000 | 373 | 652  | 0.326989816  | FAN1,MCEE,MPHOSPH10,MTMR10,TRPM1     |
| 21 | 27,975,000 | 28,125,000 | 374 | 934  | 0.233171959  | MTMR10,TRPM1                         |
| 21 | 28,050,000 | 28,200,000 | 375 | 986  | 0.201840122  | TRPM1                                |
| 21 | 28,125,000 | 28,275,000 | 376 | 691  | 0.431200979  |                                      |
| 21 | 28,200,000 | 28,350,000 | 377 | 727  | 0.87813855   |                                      |
| 21 | 28,275,000 | 28,425,000 | 378 | 1304 | 1.333659668  |                                      |
| 21 | 28,350,000 | 28,500,000 | 379 | 1602 | 1.503959078  |                                      |
| 21 | 28,425,000 | 28,575,000 | 380 | 1235 | 1.359612303  | APBA2                                |
| 21 | 28,500,000 | 28,650,000 | 381 | 955  | 0.965324594  | APBA2,FAM189A1                       |
| 21 | 28,575,000 | 28,725,000 | 382 | 713  | 0.771512141  | APBA2,FAM189A1,NDNL2                 |
| 21 | 28,650,000 | 28,800,000 | 383 | 412  | 0.000259195  | FAM189A1,NDNL2                       |
| 21 | 28,725,000 | 28,875,000 | 384 | 293  | -1.017224653 |                                      |
| 21 | 28,800,000 | 28,950,000 | 385 | 395  | 0.27468764   | ZO1                                  |
| 21 | 28,875,000 | 29,025,000 | 386 | 353  | 0.699266099  | ZO1                                  |
| 21 | 28,950,000 | 29,100,000 | 387 | 223  | -0.316475786 | ZO1                                  |
| 21 | 29,025,000 | 29,175,000 | 388 | 218  | -0.678686697 |                                      |
| 21 | 29,100,000 | 29,250,000 | 389 | 231  | -0.196217555 |                                      |
| 21 | 29,175,000 | 29,325,000 | 390 | 431  | 0.784042019  | TARSL2                               |
| 21 | 29,250,000 | 29,400,000 | 391 | 451  | 1.021952568  | TARSL2,TM2D3                         |
| 21 | 29,325,000 | 29,475,000 | 392 | 260  | 1.109623494  | TARSL2,TM2D3                         |
| 21 | 29,400,000 | 29,550,000 | 393 | 266  | 1.209487672  |                                      |
| 21 | 29,475,000 | 29,625,000 | 394 | 529  | 0.881781647  | PCSK6                                |
| 21 | 29,550,000 | 29,700,000 | 395 | 889  | -2.136539894 | PCSK6,SNRPA1                         |
| 21 | 29,625,000 | 29,775,000 | 396 | 1038 | -3.483443705 | PCSK6,SNRPA1,ENSBTAG0000003957       |
| 21 | 29,700,000 | 29,850,000 | 397 | 930  | -3.598829163 | ENSBTAG0000003957                    |
| 21 | 29,775,000 | 29,925,000 | 398 | 816  | -1.807704288 |                                      |
| 21 | 29,850,000 | 30,000,000 | 399 | 975  | -0.46604094  | ENSBTAG00000047130                   |
| 21 | 29,925,000 | 30,075,000 | 400 | 942  | -1.197072335 | ENSBTAG00000047130                   |
| 21 | 30,000,000 | 30,150,000 | 401 | 815  | -0.026118332 | CHRNA7                               |
| 21 | 30,075,000 | 30,225,000 | 402 | 619  | -0.177663974 | CHRNA7                               |
| 21 | 30,150,000 | 30,300,000 | 403 | 400  | -1.591629018 |                                      |

|    |            |            |     |      |              |                                                       |
|----|------------|------------|-----|------|--------------|-------------------------------------------------------|
| 21 | 30,225,000 | 30,375,000 | 404 | 390  | -0.964650257 |                                                       |
| 21 | 30,300,000 | 30,450,000 | 405 | 775  | -0.443932603 |                                                       |
| 21 | 30,375,000 | 30,525,000 | 406 | 1030 | -0.54745945  |                                                       |
| 21 | 30,450,000 | 30,600,000 | 407 | 550  | -0.767290018 |                                                       |
| 21 | 30,525,000 | 30,675,000 | 408 | 370  | -0.61572896  | OTUD7A                                                |
| 21 | 30,600,000 | 30,750,000 | 409 | 632  | -1.115483916 | OTUD7A                                                |
| 21 | 30,675,000 | 30,825,000 | 410 | 756  | -1.100053871 | OTUD7A                                                |
| 21 | 30,750,000 | 30,900,000 | 411 | 676  | -0.522393694 | ADAMTS7,OTUD7A                                        |
| 21 | 30,825,000 | 30,975,000 | 412 | 660  | -0.658249062 | ADAMTS7,TBC1D2B                                       |
| 21 | 30,900,000 | 31,050,000 | 413 | 594  | -1.931967743 | CIB2,SH2D7,TBC1D2B                                    |
| 21 | 30,975,000 | 31,125,000 | 414 | 445  | -2.302648127 | ACSBG1,CIB2,IDH3A,SH2D7                               |
| 21 | 31,050,000 | 31,200,000 | 415 | 366  | 0.40303707   | ACSBG1,DNAJA4,IDH3A,WDR61                             |
| 21 | 31,125,000 | 31,275,000 | 416 | 309  | 0.625567578  | ACSBG1,CRABP1,DNAJA4,WDR61                            |
| 21 | 31,200,000 | 31,350,000 | 417 | 413  | -0.510160416 | CRABP1,WDR61                                          |
| 21 | 31,275,000 | 31,425,000 | 418 | 451  | -0.56980036  | HYKK,IREB2                                            |
| 21 | 31,350,000 | 31,500,000 | 419 | 483  | 0.319288583  | CHRNA5,HYKK,IREB2,PSMA4                               |
| 21 | 31,425,000 | 31,575,000 | 420 | 580  | -0.922609895 | CHRNA3,CHRNA5,CHRNB4,HYKK,PSMA4                       |
| 21 | 31,500,000 | 31,650,000 | 421 | 575  | -2.504237587 | CHRNA3,CHRNB4,UBE2Q2                                  |
| 21 | 31,575,000 | 31,725,000 | 422 | 399  | -2.337942916 | FBXO22,UBE2Q2                                         |
| 21 | 31,650,000 | 31,800,000 | 423 | 220  | -0.692571332 | FBXO22,UBE2Q2                                         |
| 21 | 31,725,000 | 31,875,000 | 424 | 195  | -1.187930895 | C15orf27,FBXO22                                       |
| 21 | 31,800,000 | 31,950,000 | 425 | 262  | -0.154154552 | C15orf27                                              |
| 21 | 31,875,000 | 32,025,000 | 426 | 368  | 0.728174792  | C15orf27,ETFA                                         |
| 21 | 31,950,000 | 32,100,000 | 427 | 387  | 1.285364674  | C15orf27,ETFA                                         |
| 21 | 32,025,000 | 32,175,000 | 428 | 419  | 1.246696431  | ETFA,ISL2,SCAPER                                      |
| 21 | 32,100,000 | 32,250,000 | 429 | 566  | 1.051486308  | ISL2,SCAPER                                           |
| 21 | 32,175,000 | 32,325,000 | 430 | 787  | 1.264499793  | SCAPER                                                |
| 21 | 32,250,000 | 32,400,000 | 431 | 815  | 1.277165678  | SCAPER                                                |
| 21 | 32,325,000 | 32,475,000 | 432 | 772  | 1.13042472   | SCAPER                                                |
| 21 | 32,400,000 | 32,550,000 | 433 | 925  | 0.236691694  | SCAPER                                                |
| 21 | 32,475,000 | 32,625,000 | 434 | 849  | 0.140428161  | RCN2,SCAPER                                           |
| 21 | 32,550,000 | 32,700,000 | 435 | 805  | 0.155975117  | PSTPIP1,RCN2                                          |
| 21 | 32,625,000 | 32,775,000 | 436 | 957  | 0.302517615  | PEAK1,PSTPIP1,TSPAN3                                  |
| 21 | 32,700,000 | 32,850,000 | 437 | 931  | 0.265992406  | PEAK1,TSPAN3                                          |
| 21 | 32,775,000 | 32,925,000 | 438 | 1030 | 0.33006097   | PEAK1                                                 |
| 21 | 32,850,000 | 33,000,000 | 439 | 1043 | 0.933945887  |                                                       |
| 21 | 32,925,000 | 33,075,000 | 440 | 886  | 1.104858721  |                                                       |
| 21 | 33,000,000 | 33,150,000 | 441 | 714  | -0.540963814 | HMG20A                                                |
| 21 | 33,075,000 | 33,225,000 | 442 | 826  | -1.319622015 | HMG20A                                                |
| 21 | 33,150,000 | 33,300,000 | 443 | 1119 | -0.584201347 | HMG20A,LINGO1                                         |
| 21 | 33,225,000 | 33,375,000 | 444 | 991  | -0.011635604 | LINGO1                                                |
| 21 | 33,300,000 | 33,450,000 | 445 | 783  | 1.06971812   |                                                       |
| 21 | 33,375,000 | 33,525,000 | 446 | 810  | 0.533615452  |                                                       |
| 21 | 33,450,000 | 33,600,000 | 447 | 672  | -0.40350086  | CSPG4,ODF3L1                                          |
| 21 | 33,525,000 | 33,675,000 | 448 | 554  | -0.51319954  | CSPG4,IMP3,ODF3L1,SNUPN,SNX33                         |
| 21 | 33,600,000 | 33,750,000 | 449 | 492  | -0.026718265 | CSPG4,IMP3,PTPN9,SNUPN,SNX33                          |
| 21 | 33,675,000 | 33,825,000 | 450 | 323  | 0.275163658  | PTPN9,SIN3A,SNUPN                                     |
| 21 | 33,750,000 | 33,900,000 | 451 | 404  | 0.195646698  | COMMD4,MAN2C1,NEIL1,PTPN9,SIN3A                       |
| 21 | 33,825,000 | 33,975,000 | 452 | 547  | -0.522910271 | C15orf39,COMMD4,MAN2C1,NEIL1,SIN3A,ENSBTAGO0000032631 |
| 21 | 33,900,000 | 34,050,000 | 453 | 675  | -1.136085043 | C15orf39,ENSBTAGO0000032631                           |
| 21 | 33,975,000 | 34,125,000 | 454 | 555  | -1.058184858 | MDS018,SCAMP5                                         |
| 21 | 34,050,000 | 34,200,000 | 455 | 421  | -0.159649633 | COX5A,FAM219B,MDS018,MPI,RPP25,SCAMP5                 |

|    |            |            |     |      |              |                                                                                                                                                              |
|----|------------|------------|-----|------|--------------|--------------------------------------------------------------------------------------------------------------------------------------------------------------|
| 21 | 34,125,000 | 34,275,000 | 456 | 424  | 0.694228591  | COX5A,CPLX3,CSK,FAM219B,LMAN1L,MPI,RPP25,SCAMP2,ULK3                                                                                                         |
| 21 | 34,200,000 | 34,350,000 | 457 | 643  | 0.648038215  | CPLX3,CSK,CYP1A1,CYP1A2,LMAN1L,SCAMP2,ULK3                                                                                                                   |
| 21 | 34,275,000 | 34,425,000 | 458 | 857  | -0.813331869 | CSK,CYP1A1,CYP1A2,FLJ21128                                                                                                                                   |
| 21 | 34,350,000 | 34,500,000 | 459 | 656  | -2.103257443 | ARID3B,CLK3,FLJ21128                                                                                                                                         |
| 21 | 34,425,000 | 34,575,000 | 460 | 549  | -1.423155896 | ARID3B,CLK3,FLJ21128                                                                                                                                         |
| 21 | 34,500,000 | 34,650,000 | 461 | 465  | -1.762290416 | ARID3B,BMSC-UBP,SEMA7A                                                                                                                                       |
| 21 | 34,575,000 | 34,725,000 | 462 | 566  | -3.753561505 | BMSC-UBP,CYP11A1,SEMA7A                                                                                                                                      |
| 21 | 34,650,000 | 34,800,000 | 463 | 749  | -1.890775888 | CCDC33,CYP11A1,SEMA7A                                                                                                                                        |
| 21 | 34,725,000 | 34,875,000 | 464 | 815  | 0.882760782  | CCDC33,CYP11A1                                                                                                                                               |
| 21 | 34,800,000 | 34,950,000 | 465 | 712  | 0.713224325  | CCDC33,ISLR,STRA6                                                                                                                                            |
| 21 | 34,875,000 | 35,025,000 | 466 | 749  | 0.723418949  | ISLR,ISLR2,PML,STRA6                                                                                                                                         |
| 21 | 34,950,000 | 35,100,000 | 467 | 791  | -0.056981919 | ISLR2,LOXL1,PML,STOML1                                                                                                                                       |
| 21 | 35,025,000 | 35,175,000 | 468 | 873  | -0.645295347 | GZMB,LOXL1,PML,STOML1,ENSBTAG00000013234,ENSBTAG00000027033,ENSBTAG00000037578,ENSBTAG00000038159                                                            |
| 21 | 35,100,000 | 35,250,000 | 469 | 872  | -1.077339028 | GZMB,ENSBTAG00000010828,ENSBTAG00000013055,ENSBTAG00000013234,ENSBTAG00000027033,ENSBTAG00000037578,ENSBTAG00000038080,ENSBTAG00000038159,ENSBTAG00000040134 |
| 21 | 35,175,000 | 35,325,000 | 470 | 644  | -1.375088482 | GZMB,ENSBTAG00000010828,ENSBTAG00000013055,ENSBTAG00000038080,ENSBTAG00000040134                                                                             |
| 21 | 35,250,000 | 35,400,000 | 471 | 1121 | -1.676939439 | GZMB                                                                                                                                                         |
| 21 | 35,325,000 | 35,475,000 | 472 | 1521 | -2.682477938 | STXBP6                                                                                                                                                       |
| 21 | 35,400,000 | 35,550,000 | 473 | 1473 | -0.956692409 | STXBP6                                                                                                                                                       |
| 21 | 35,475,000 | 35,625,000 | 474 | 1071 | 0.222289086  | STXBP6                                                                                                                                                       |
| 21 | 35,550,000 | 35,700,000 | 475 | 1071 | 0.269636318  | STXBP6                                                                                                                                                       |
| 21 | 35,625,000 | 35,775,000 | 476 | 1378 | -0.363018145 | STXBP6                                                                                                                                                       |
| 21 | 35,700,000 | 35,850,000 | 477 | 1456 | -1.149617662 |                                                                                                                                                              |
| 21 | 35,775,000 | 35,925,000 | 478 | 1668 | -0.578074033 |                                                                                                                                                              |
| 21 | 35,850,000 | 36,000,000 | 479 | 1626 | -0.593808786 |                                                                                                                                                              |
| 21 | 35,925,000 | 36,075,000 | 480 | 1152 | -0.341255964 |                                                                                                                                                              |
| 21 | 36,000,000 | 36,150,000 | 481 | 778  | 0.53103375   |                                                                                                                                                              |
| 21 | 36,075,000 | 36,225,000 | 482 | 1173 | 0.149700846  |                                                                                                                                                              |
| 21 | 36,150,000 | 36,300,000 | 483 | 1115 | 0.075404171  |                                                                                                                                                              |
| 21 | 36,225,000 | 36,375,000 | 484 | 703  | 0.1099891    |                                                                                                                                                              |
| 21 | 36,300,000 | 36,450,000 | 485 | 710  | -0.253505882 |                                                                                                                                                              |
| 21 | 36,375,000 | 36,525,000 | 486 | 719  | -0.968702184 |                                                                                                                                                              |
| 21 | 36,450,000 | 36,600,000 | 487 | 986  | -0.32031707  |                                                                                                                                                              |
| 21 | 36,525,000 | 36,675,000 | 488 | 948  | 0.073001333  |                                                                                                                                                              |
| 21 | 36,600,000 | 36,750,000 | 489 | 908  | -0.237142511 |                                                                                                                                                              |
| 21 | 36,675,000 | 36,825,000 | 490 | 1057 | 0.430024118  |                                                                                                                                                              |
| 21 | 36,750,000 | 36,900,000 | 491 | 1051 | -0.494601859 |                                                                                                                                                              |
| 21 | 36,825,000 | 36,975,000 | 492 | 1367 | 0.12750607   |                                                                                                                                                              |
| 21 | 36,900,000 | 37,050,000 | 493 | 1270 | 1.087058508  |                                                                                                                                                              |
| 21 | 36,975,000 | 37,125,000 | 494 | 1030 | 1.244068617  | NOVA1                                                                                                                                                        |
| 21 | 37,050,000 | 37,200,000 | 495 | 937  | 1.258667849  | NOVA1                                                                                                                                                        |
| 21 | 37,125,000 | 37,275,000 | 496 | 659  | 1.004555759  | NOVA1                                                                                                                                                        |
| 21 | 37,200,000 | 37,350,000 | 497 | 553  | 0.478878342  | NOVA1                                                                                                                                                        |
| 21 | 37,275,000 | 37,425,000 | 498 | 632  | 0.727267131  |                                                                                                                                                              |
| 21 | 37,350,000 | 37,500,000 | 499 | 949  | 1.049211589  |                                                                                                                                                              |
| 21 | 37,425,000 | 37,575,000 | 500 | 1276 | 0.822145657  |                                                                                                                                                              |
| 21 | 37,500,000 | 37,650,000 | 501 | 1179 | 0.858947603  |                                                                                                                                                              |

|    |            |            |     |      |              |                    |
|----|------------|------------|-----|------|--------------|--------------------|
| 21 | 37,575,000 | 37,725,000 | 502 | 935  | 1.080523799  |                    |
| 21 | 37,650,000 | 37,800,000 | 503 | 849  | 1.022635586  |                    |
| 21 | 37,725,000 | 37,875,000 | 504 | 983  | 1.012500821  |                    |
| 21 | 37,800,000 | 37,950,000 | 505 | 1071 | 0.596445555  |                    |
| 21 | 37,875,000 | 38,025,000 | 506 | 1174 | 0.74343196   |                    |
| 21 | 37,950,000 | 38,100,000 | 507 | 1113 | 0.552262485  |                    |
| 21 | 38,025,000 | 38,175,000 | 508 | 1087 | -0.123077845 |                    |
| 21 | 38,100,000 | 38,250,000 | 509 | 1458 | 0.139165318  |                    |
| 21 | 38,175,000 | 38,325,000 | 510 | 1466 | 0.198357358  | ENSBTAG00000031558 |
| 21 | 38,250,000 | 38,400,000 | 511 | 1095 | -0.37301865  | ENSBTAG00000031558 |
| 21 | 38,325,000 | 38,475,000 | 512 | 838  | -0.264441585 |                    |
| 21 | 38,400,000 | 38,550,000 | 513 | 1017 | 0.313499208  |                    |
| 21 | 38,475,000 | 38,625,000 | 514 | 994  | 0.23163062   |                    |
| 21 | 38,550,000 | 38,700,000 | 515 | 849  | 0.891826652  |                    |
| 21 | 38,625,000 | 38,775,000 | 516 | 1067 | 1.274892355  |                    |
| 21 | 38,700,000 | 38,850,000 | 517 | 1257 | 1.217441967  |                    |
| 21 | 38,775,000 | 38,925,000 | 518 | 1409 | 0.379119654  |                    |
| 21 | 38,850,000 | 39,000,000 | 519 | 1280 | 0.418863739  |                    |
| 21 | 38,925,000 | 39,075,000 | 520 | 987  | 0.999162376  |                    |
| 21 | 39,000,000 | 39,150,000 | 521 | 872  | 0.981397087  |                    |
| 21 | 39,075,000 | 39,225,000 | 522 | 1025 | 1.056370874  |                    |
| 21 | 39,150,000 | 39,300,000 | 523 | 1026 | 1.041374361  |                    |
| 21 | 39,225,000 | 39,375,000 | 524 | 1054 | 1.188634509  |                    |
| 21 | 39,300,000 | 39,450,000 | 525 | 1146 | 0.987433329  |                    |
| 21 | 39,375,000 | 39,525,000 | 526 | 906  | 0.360899793  |                    |
| 21 | 39,450,000 | 39,600,000 | 527 | 665  | -0.304081958 |                    |
| 21 | 39,525,000 | 39,675,000 | 528 | 639  | -2.394437977 |                    |
| 21 | 39,600,000 | 39,750,000 | 529 | 667  | -3.867799978 |                    |
| 21 | 39,675,000 | 39,825,000 | 530 | 688  | -2.24938222  |                    |
| 21 | 39,750,000 | 39,900,000 | 531 | 681  | 0.629025622  |                    |
| 21 | 39,825,000 | 39,975,000 | 532 | 687  | 0.651157025  |                    |
| 21 | 39,900,000 | 40,050,000 | 533 | 772  | 0.654260572  |                    |
| 21 | 39,975,000 | 40,125,000 | 534 | 826  | 0.554818108  |                    |
| 21 | 40,050,000 | 40,200,000 | 535 | 941  | 0.676079593  |                    |
| 21 | 40,125,000 | 40,275,000 | 536 | 716  | 0.33444982   |                    |
| 21 | 40,200,000 | 40,350,000 | 537 | 470  | -0.098029911 |                    |
| 21 | 40,275,000 | 40,425,000 | 538 | 698  | -0.391102571 |                    |
| 21 | 40,350,000 | 40,500,000 | 539 | 758  | -1.437167817 |                    |
| 21 | 40,425,000 | 40,575,000 | 540 | 580  | -2.275510914 | PRKD1              |
| 21 | 40,500,000 | 40,650,000 | 541 | 482  | -1.802050525 | PRKD1              |
| 21 | 40,575,000 | 40,725,000 | 542 | 738  | -0.185555903 | PRKD1              |
| 21 | 40,650,000 | 40,800,000 | 543 | 817  | 0.51604526   | PRKD1              |
| 21 | 40,725,000 | 40,875,000 | 544 | 565  | 0.006848548  |                    |
| 21 | 40,800,000 | 40,950,000 | 545 | 520  | 0.170685436  |                    |
| 21 | 40,875,000 | 41,025,000 | 546 | 395  | 0.3002423    |                    |
| 21 | 40,950,000 | 41,100,000 | 547 | 302  | -0.66561279  |                    |
| 21 | 41,025,000 | 41,175,000 | 548 | 329  | -0.772679468 |                    |
| 21 | 41,100,000 | 41,250,000 | 549 | 386  | -0.134631901 |                    |
| 21 | 41,175,000 | 41,325,000 | 550 | 525  | 0.251811052  |                    |
| 21 | 41,250,000 | 41,400,000 | 551 | 482  | 0.222153741  |                    |
| 21 | 41,325,000 | 41,475,000 | 552 | 284  | 0.064036897  |                    |
| 21 | 41,400,000 | 41,550,000 | 553 | 352  | 0.603702208  |                    |
| 21 | 41,475,000 | 41,625,000 | 554 | 446  | 0.173841688  |                    |

|    |            |            |     |      |              |                                     |
|----|------------|------------|-----|------|--------------|-------------------------------------|
| 21 | 41,550,000 | 41,700,000 | 555 | 421  | -0.533620736 | G2E3,SCFD1                          |
| 21 | 41,625,000 | 41,775,000 | 556 | 509  | 0.276654106  | G2E3,SCFD1                          |
| 21 | 41,700,000 | 41,850,000 | 557 | 1015 | -0.158389638 | SCFD1                               |
| 21 | 41,775,000 | 41,925,000 | 558 | 1315 | -0.856680826 | SCFD1                               |
| 21 | 41,850,000 | 42,000,000 | 559 | 863  | -0.862959871 | COCH,STRN3                          |
| 21 | 41,925,000 | 42,075,000 | 560 | 442  | 0.380463479  | AP4S1,COCH,STRN3                    |
| 21 | 42,000,000 | 42,150,000 | 561 | 350  | -0.02007029  | AP4S1,HECTD1,STRN3                  |
| 21 | 42,075,000 | 42,225,000 | 562 | 325  | -0.596739347 | AP4S1,HECTD1                        |
| 21 | 42,150,000 | 42,300,000 | 563 | 335  | -0.697286109 | HEATR5A,HECTD1                      |
| 21 | 42,225,000 | 42,375,000 | 564 | 801  | -0.129293814 | HEATR5A                             |
| 21 | 42,300,000 | 42,450,000 | 565 | 1139 | 0.275694438  | GPR33,HEATR5A,ENSBTAG00000038020    |
| 21 | 42,375,000 | 42,525,000 | 566 | 1450 | -0.380230696 | GPR33,NUBPL,ENSBTAG00000038020      |
| 21 | 42,450,000 | 42,600,000 | 567 | 1717 | -0.808760476 | NUBPL                               |
| 21 | 42,525,000 | 42,675,000 | 568 | 1293 | 0.026952769  | NUBPL                               |
| 21 | 42,600,000 | 42,750,000 | 569 | 706  | 0.598363917  | NUBPL                               |
| 21 | 42,675,000 | 42,825,000 | 570 | 479  | 0.85754222   | NUBPL                               |
| 21 | 42,750,000 | 42,900,000 | 571 | 532  | 0.894867543  |                                     |
| 21 | 42,825,000 | 42,975,000 | 572 | 394  | 0.515691192  | ARHGAP5                             |
| 21 | 42,900,000 | 43,050,000 | 573 | 428  | -1.102369863 | ARHGAP5                             |
| 21 | 42,975,000 | 43,125,000 | 574 | 748  | -0.880965952 | ARHGAP5                             |
| 21 | 43,050,000 | 43,200,000 | 575 | 865  | -0.284501336 | AKAP6                               |
| 21 | 43,125,000 | 43,275,000 | 576 | 800  | 0.406827613  | AKAP6                               |
| 21 | 43,200,000 | 43,350,000 | 577 | 771  | 0.493902544  | AKAP6                               |
| 21 | 43,275,000 | 43,425,000 | 578 | 854  | 0.770098276  | AKAP6                               |
| 21 | 43,350,000 | 43,500,000 | 579 | 638  | 0.969479289  | AKAP6                               |
| 21 | 43,425,000 | 43,575,000 | 580 | 398  | 0.461098629  | AKAP6                               |
| 21 | 43,500,000 | 43,650,000 | 581 | 1010 | 1.169203319  | AKAP6                               |
| 21 | 43,575,000 | 43,725,000 | 582 | 1101 | 1.043643607  | AKAP6                               |
| 21 | 43,650,000 | 43,800,000 | 583 | 618  | 0.836051683  |                                     |
| 21 | 43,725,000 | 43,875,000 | 584 | 706  | 0.583203613  |                                     |
| 21 | 43,800,000 | 43,950,000 | 585 | 901  | 0.575708725  |                                     |
| 21 | 43,875,000 | 44,025,000 | 586 | 890  | 0.555749949  |                                     |
| 21 | 43,950,000 | 44,100,000 | 587 | 671  | 0.007344472  |                                     |
| 21 | 44,025,000 | 44,175,000 | 588 | 761  | -0.280750396 |                                     |
| 21 | 44,100,000 | 44,250,000 | 589 | 777  | -0.093462824 |                                     |
| 21 | 44,175,000 | 44,325,000 | 590 | 533  | -0.339881582 |                                     |
| 21 | 44,250,000 | 44,400,000 | 591 | 534  | -0.099521693 |                                     |
| 21 | 44,325,000 | 44,475,000 | 592 | 749  | 0.14389133   |                                     |
| 21 | 44,400,000 | 44,550,000 | 593 | 707  | -0.242037724 |                                     |
| 21 | 44,475,000 | 44,625,000 | 594 | 434  | -0.445827055 |                                     |
| 21 | 44,550,000 | 44,700,000 | 595 | 498  | -1.652760386 | NPAS3                               |
| 21 | 44,625,000 | 44,775,000 | 596 | 671  | -0.784788868 | NPAS3                               |
| 21 | 44,700,000 | 44,850,000 | 597 | 794  | 0.646681059  | EGLN3,NPAS3                         |
| 21 | 44,775,000 | 44,925,000 | 598 | 1093 | 0.34442377   | EGLN3                               |
| 21 | 44,850,000 | 45,000,000 | 599 | 1013 | -0.204394794 |                                     |
| 21 | 44,925,000 | 45,075,000 | 600 | 761  | -1.689737961 |                                     |
| 21 | 45,000,000 | 45,150,000 | 601 | 878  | -0.969327598 |                                     |
| 21 | 45,075,000 | 45,225,000 | 602 | 1251 | -0.61084412  |                                     |
| 21 | 45,150,000 | 45,300,000 | 603 | 1308 | -0.889791215 | ENSBTAG00000047905                  |
| 21 | 45,225,000 | 45,375,000 | 604 | 790  | -0.870578202 | EAPP,SPTSSA,ENSBTAG00000047905      |
| 21 | 45,300,000 | 45,450,000 | 605 | 658  | -1.774544226 | EAPP,SNX6,SPTSSA,ENSBTAG00000047905 |
| 21 | 45,375,000 | 45,525,000 | 606 | 615  | -1.009934949 | CFL2,SNX6                           |
| 21 | 45,450,000 | 45,600,000 | 607 | 530  | 1.221937744  | BAZ1A,CFL2,SNX6                     |

|    |            |            |     |      |              |                                           |
|----|------------|------------|-----|------|--------------|-------------------------------------------|
| 21 | 45,525,000 | 45,675,000 | 608 | 594  | 1.3794907    | BAZ1A                                     |
| 21 | 45,600,000 | 45,750,000 | 609 | 866  | 0.982195835  | MGC142695,SRP54                           |
| 21 | 45,675,000 | 45,825,000 | 610 | 978  | 0.575500157  | FAM177A1,KIAA0391,MGC142695,PPP2R3C,SRP54 |
| 21 | 45,750,000 | 45,900,000 | 611 | 649  | 0.046841306  | FAM177A1,KIAA0391,PPP2R3C,SRP54           |
| 21 | 45,825,000 | 45,975,000 | 612 | 690  | -0.421768317 | KIAA0391,PSMA6                            |
| 21 | 45,900,000 | 46,050,000 | 613 | 1075 | -0.227438298 | KIAA0391,PSMA6                            |
| 21 | 45,975,000 | 46,125,000 | 614 | 1052 | 0.266260825  | BIKBA,PSMA6                               |
| 21 | 46,050,000 | 46,200,000 | 615 | 851  | 0.438578588  | BIKBA                                     |
| 21 | 46,125,000 | 46,275,000 | 616 | 595  | 0.146146753  | GARNL1                                    |
| 21 | 46,200,000 | 46,350,000 | 617 | 428  | 0.469854222  | GARNL1                                    |
| 21 | 46,275,000 | 46,425,000 | 618 | 607  | 0.320817045  | GARNL1                                    |
| 21 | 46,350,000 | 46,500,000 | 619 | 651  | 0.380483068  | BRMS1L,GARNL1                             |
| 21 | 46,425,000 | 46,575,000 | 620 | 689  | 0.205169755  | BRMS1L                                    |
| 21 | 46,500,000 | 46,650,000 | 621 | 764  | 0.562789001  |                                           |
| 21 | 46,575,000 | 46,725,000 | 622 | 850  | 0.694162415  |                                           |
| 21 | 46,650,000 | 46,800,000 | 623 | 962  | 0.13872869   |                                           |
| 21 | 46,725,000 | 46,875,000 | 624 | 909  | -1.017187328 |                                           |
| 21 | 46,800,000 | 46,950,000 | 625 | 829  | -1.27327518  | MBIP                                      |
| 21 | 46,875,000 | 47,025,000 | 626 | 839  | -0.229681509 | MBIP                                      |
| 21 | 46,950,000 | 47,100,000 | 627 | 728  | 0.256769467  |                                           |
| 21 | 47,025,000 | 47,175,000 | 628 | 535  | 0.518133853  | NKX2-1                                    |
| 21 | 47,100,000 | 47,250,000 | 629 | 427  | 0.082613477  | NKX2-1,NKX2-8                             |
| 21 | 47,175,000 | 47,325,000 | 630 | 316  | -0.215882086 | NKX2-8,PAX9,SLC25A21                      |
| 21 | 47,250,000 | 47,400,000 | 631 | 391  | 0.556840447  | PAX9,SLC25A21                             |
| 21 | 47,325,000 | 47,475,000 | 632 | 590  | 0.557867658  | SLC25A21                                  |
| 21 | 47,400,000 | 47,550,000 | 633 | 446  | 0.300150657  | SLC25A21                                  |
| 21 | 47,475,000 | 47,625,000 | 634 | 322  | -0.145495439 | SLC25A21                                  |
| 21 | 47,550,000 | 47,700,000 | 635 | 563  | -0.141775783 | SLC25A21                                  |
| 21 | 47,625,000 | 47,775,000 | 636 | 781  | 0.09602514   | SLC25A21                                  |
| 21 | 47,700,000 | 47,850,000 | 637 | 979  | 0.25766886   | SLC25A21                                  |
| 21 | 47,775,000 | 47,925,000 | 638 | 1294 | -0.227295819 | MIPOL1,SLC25A21                           |
| 21 | 47,850,000 | 48,000,000 | 639 | 1041 | -0.62682936  | MIPOL1                                    |
| 21 | 47,925,000 | 48,075,000 | 640 | 880  | -2.238210701 | MIPOL1                                    |
| 21 | 48,000,000 | 48,150,000 | 641 | 900  | -3.129951626 | MIPOL1                                    |
| 21 | 48,075,000 | 48,225,000 | 642 | 652  | -1.425353575 | FOXA1,MIPOL1                              |
| 21 | 48,150,000 | 48,300,000 | 643 | 534  | -0.254513318 | FOXA1,MIPOL1                              |
| 21 | 48,225,000 | 48,375,000 | 644 | 635  | -0.966285074 |                                           |
| 21 | 48,300,000 | 48,450,000 | 645 | 804  | -0.759168889 | TTC6                                      |
| 21 | 48,375,000 | 48,525,000 | 646 | 784  | 0.187319845  | TTC6                                      |
| 21 | 48,450,000 | 48,600,000 | 647 | 1040 | 0.75702208   |                                           |
| 21 | 48,525,000 | 48,675,000 | 648 | 1018 | 0.461075615  |                                           |
| 21 | 48,600,000 | 48,750,000 | 649 | 929  | -1.677699452 |                                           |
| 21 | 48,675,000 | 48,825,000 | 650 | 914  | -2.624827792 | SSTR1                                     |
| 21 | 48,750,000 | 48,900,000 | 651 | 730  | -1.683984006 | CLEC14A,SSTR1                             |
| 21 | 48,825,000 | 48,975,000 | 652 | 696  | -1.2030578   | CLEC14A                                   |
| 21 | 48,900,000 | 49,050,000 | 653 | 947  | -0.620890245 |                                           |
| 21 | 48,975,000 | 49,125,000 | 654 | 1198 | -0.421166163 |                                           |
| 21 | 49,050,000 | 49,200,000 | 655 | 1344 | -0.083149524 |                                           |
| 21 | 49,125,000 | 49,275,000 | 656 | 1295 | 0.336013168  |                                           |
| 21 | 49,200,000 | 49,350,000 | 657 | 1205 | 0.660957272  |                                           |
| 21 | 49,275,000 | 49,425,000 | 658 | 1256 | 0.415587273  |                                           |
| 21 | 49,350,000 | 49,500,000 | 659 | 1012 | -0.311401009 | SEC23A                                    |
| 21 | 49,425,000 | 49,575,000 | 660 | 623  | -0.844329455 | GEMIN2,SEC23A,ENSBTAG00000048042          |

|    |            |            |     |      |              |                                                                  |
|----|------------|------------|-----|------|--------------|------------------------------------------------------------------|
| 21 | 49,500,000 | 49,650,000 | 661 | 746  | -0.803046377 | GEMIN2,PNN,SEC23A,TRAPPC6B,ENSBTAG00000045986,ENSBTAG00000048042 |
| 21 | 49,575,000 | 49,725,000 | 662 | 796  | -0.782083471 | GEMIN2,PNN,TRAPPC6B,ENSBTAG0000006819,ENSBTAG00000045986         |
| 21 | 49,650,000 | 49,800,000 | 663 | 657  | 0.266647018  | FBXO33,ENSBTAG0000006819                                         |
| 21 | 49,725,000 | 49,875,000 | 664 | 553  | 0.58332612   | FBXO33,ENSBTAG0000006819                                         |
| 21 | 49,800,000 | 49,950,000 | 665 | 666  | -0.378272086 |                                                                  |
| 21 | 49,875,000 | 50,025,000 | 666 | 1139 | -0.569748845 |                                                                  |
| 21 | 49,950,000 | 50,100,000 | 667 | 1203 | -1.643251867 |                                                                  |
| 21 | 50,025,000 | 50,175,000 | 668 | 1002 | -2.830540624 |                                                                  |
| 21 | 50,100,000 | 50,250,000 | 669 | 847  | -1.617775426 |                                                                  |
| 21 | 50,175,000 | 50,325,000 | 670 | 757  | -0.703593093 | ODC1                                                             |
| 21 | 50,250,000 | 50,400,000 | 671 | 1003 | -0.759137856 | ODC1,ENSBTAG0000009980                                           |
| 21 | 50,325,000 | 50,475,000 | 672 | 915  | -0.545754147 | ENSBTAG0000009980                                                |
| 21 | 50,400,000 | 50,550,000 | 673 | 816  | -0.501067509 |                                                                  |
| 21 | 50,475,000 | 50,625,000 | 674 | 1207 | 0.026198763  |                                                                  |
| 21 | 50,550,000 | 50,700,000 | 675 | 1016 | 0.368511127  |                                                                  |
| 21 | 50,625,000 | 50,775,000 | 676 | 608  | 0.226012944  |                                                                  |
| 21 | 50,700,000 | 50,850,000 | 677 | 463  | 0.449875057  |                                                                  |
| 21 | 50,775,000 | 50,925,000 | 678 | 501  | 0.082801674  |                                                                  |
| 21 | 50,850,000 | 51,000,000 | 679 | 610  | -1.420840408 |                                                                  |
| 21 | 50,925,000 | 51,075,000 | 680 | 792  | -2.002188838 |                                                                  |
| 21 | 51,000,000 | 51,150,000 | 681 | 1108 | -2.728548085 |                                                                  |
| 21 | 51,075,000 | 51,225,000 | 682 | 1419 | -2.352854373 |                                                                  |
| 21 | 51,150,000 | 51,300,000 | 683 | 1483 | -0.260204298 |                                                                  |
| 21 | 51,225,000 | 51,375,000 | 684 | 948  | 0.857346054  |                                                                  |
| 21 | 51,300,000 | 51,450,000 | 685 | 601  | 0.197917492  |                                                                  |
| 21 | 51,375,000 | 51,525,000 | 686 | 717  | 0.177087071  |                                                                  |
| 21 | 51,450,000 | 51,600,000 | 687 | 849  | 0.405393293  |                                                                  |
| 21 | 51,525,000 | 51,675,000 | 688 | 834  | 0.043589022  |                                                                  |
| 21 | 51,600,000 | 51,750,000 | 689 | 1418 | -0.730076094 |                                                                  |
| 21 | 51,675,000 | 51,825,000 | 690 | 1458 | -0.785198201 | LRFN5                                                            |
| 21 | 51,750,000 | 51,900,000 | 691 | 582  | -0.683154705 | LRFN5                                                            |
| 21 | 51,825,000 | 51,975,000 | 692 | 404  | -0.417502072 | LRFN5                                                            |
| 21 | 51,900,000 | 52,050,000 | 693 | 394  | 0.372811351  | LRFN5                                                            |
| 21 | 51,975,000 | 52,125,000 | 694 | 818  | 0.336720546  | LRFN5                                                            |
| 21 | 52,050,000 | 52,200,000 | 695 | 1449 | -1.422066479 | LRFN5                                                            |
| 21 | 52,125,000 | 52,275,000 | 696 | 1429 | -1.587398412 |                                                                  |
| 21 | 52,200,000 | 52,350,000 | 697 | 1151 | 0.045955028  |                                                                  |
| 21 | 52,275,000 | 52,425,000 | 698 | 1100 | 1.01219754   |                                                                  |
| 21 | 52,350,000 | 52,500,000 | 699 | 850  | 1.310704854  |                                                                  |
| 21 | 52,425,000 | 52,575,000 | 700 | 669  | 1.124400796  |                                                                  |
| 21 | 52,500,000 | 52,650,000 | 701 | 696  | 0.619468581  |                                                                  |
| 21 | 52,575,000 | 52,725,000 | 702 | 539  | -0.05379049  |                                                                  |
| 21 | 52,650,000 | 52,800,000 | 703 | 621  | -0.332282    |                                                                  |
| 21 | 52,725,000 | 52,875,000 | 704 | 1001 | 0.062314781  |                                                                  |
| 21 | 52,800,000 | 52,950,000 | 705 | 1077 | -0.476007081 |                                                                  |
| 21 | 52,875,000 | 53,025,000 | 706 | 1288 | -1.067661244 |                                                                  |
| 21 | 52,950,000 | 53,100,000 | 707 | 1409 | -0.765900454 |                                                                  |
| 21 | 53,025,000 | 53,175,000 | 708 | 972  | -0.739044739 |                                                                  |
| 21 | 53,100,000 | 53,250,000 | 709 | 579  | 0.482933354  |                                                                  |
| 21 | 53,175,000 | 53,325,000 | 710 | 705  | 1.226555358  | ENSBTAG00000047710                                               |
| 21 | 53,250,000 | 53,400,000 | 711 | 751  | 0.852452233  | ENSBTAG00000047710                                               |

|    |            |            |     |      |              |                                                                                       |
|----|------------|------------|-----|------|--------------|---------------------------------------------------------------------------------------|
| 21 | 53,325,000 | 53,475,000 | 712 | 486  | 0.367253551  |                                                                                       |
| 21 | 53,400,000 | 53,550,000 | 713 | 591  | 1.217809505  |                                                                                       |
| 21 | 53,475,000 | 53,625,000 | 714 | 748  | 0.663901168  |                                                                                       |
| 21 | 53,550,000 | 53,700,000 | 715 | 862  | 0.165143911  |                                                                                       |
| 21 | 53,625,000 | 53,775,000 | 716 | 1219 | 0.529280994  |                                                                                       |
| 21 | 53,700,000 | 53,850,000 | 717 | 1463 | 0.351424303  |                                                                                       |
| 21 | 53,775,000 | 53,925,000 | 718 | 929  | -0.561301795 |                                                                                       |
| 21 | 53,850,000 | 54,000,000 | 719 | 462  | -0.597677673 |                                                                                       |
| 21 | 53,925,000 | 54,075,000 | 720 | 623  | 0.985724638  |                                                                                       |
| 21 | 54,000,000 | 54,150,000 | 721 | 552  | 0.858715241  |                                                                                       |
| 21 | 54,075,000 | 54,225,000 | 722 | 791  | -0.550518715 | ENSBTAG00000047240                                                                    |
| 21 | 54,150,000 | 54,300,000 | 723 | 1310 | -0.088612939 | ENSBTAG00000047240                                                                    |
| 21 | 54,225,000 | 54,375,000 | 724 | 1220 | 0.110592797  |                                                                                       |
| 21 | 54,300,000 | 54,450,000 | 725 | 1176 | -0.169338688 |                                                                                       |
| 21 | 54,375,000 | 54,525,000 | 726 | 1158 | 0.430934866  |                                                                                       |
| 21 | 54,450,000 | 54,600,000 | 727 | 893  | 0.310261643  |                                                                                       |
| 21 | 54,525,000 | 54,675,000 | 728 | 674  | -0.481595103 |                                                                                       |
| 21 | 54,600,000 | 54,750,000 | 729 | 432  | 0.170370651  | FSCB                                                                                  |
| 21 | 54,675,000 | 54,825,000 | 730 | 552  | 0.11993966   | FSCB                                                                                  |
| 21 | 54,750,000 | 54,900,000 | 731 | 622  | 0.333922555  | FSCB                                                                                  |
| 21 | 54,825,000 | 54,975,000 | 732 | 530  | 0.913320058  |                                                                                       |
| 21 | 54,900,000 | 55,050,000 | 733 | 816  | -0.610297347 |                                                                                       |
| 21 | 54,975,000 | 55,125,000 | 734 | 1303 | 0.299857299  |                                                                                       |
| 21 | 55,050,000 | 55,200,000 | 735 | 1380 | 1.120091233  | C14orf28,KLHL28                                                                       |
| 21 | 55,125,000 | 55,275,000 | 736 | 844  | 0.862710455  | C14orf28,FAM179B,KLHL28                                                               |
| 21 | 55,200,000 | 55,350,000 | 737 | 685  | 0.17223365   | FAM179B,FKBP3,KLHL28,PRPF39,ENSBTAG0000004702                                         |
| 21 | 55,275,000 | 55,425,000 | 738 | 1100 | -0.310591061 | FAM179B,FANCM,FKBP3,MIS18BP1,PRPF39,ENSBTAG00000047002                                |
| 21 | 55,350,000 | 55,500,000 | 739 | 1174 | -0.236870854 | FANCM,MIS18BP1,ENSBTAG00000047002                                                     |
| 21 | 55,425,000 | 55,575,000 | 740 | 727  | 0.05417803   | MIS18BP1,TGM5,TGM7                                                                    |
| 21 | 55,500,000 | 55,650,000 | 741 | 576  | -0.760717635 | ADAL,LCMT2,RPL17,TGM5,TGM7,TUBGCP4,ZSCAN29                                            |
| 21 | 55,575,000 | 55,725,000 | 742 | 706  | -0.959071257 | ADAL,LCMT2,RPL17,TGM7,TP53BP1,TUBGCP4,ZSCAN29                                         |
| 21 | 55,650,000 | 55,800,000 | 743 | 749  | -0.486808298 | TP53BP1,TUBGCP4                                                                       |
| 21 | 55,725,000 | 55,875,000 | 744 | 652  | 0.025576431  | MAP1A,PPIP5K1,TP53BP1                                                                 |
| 21 | 55,800,000 | 55,950,000 | 745 | 515  | 0.549731913  | CATSPER2,CKMT1,ELL3,MAP1A,PDIA3,PPIP5K1,STRC                                          |
| 21 | 55,875,000 | 56,025,000 | 746 | 769  | -0.239205621 | C21H15orf63,CATSPER2,CKMT1,ELL3,MFAP1,PDIA3,SE<br>RINC4,STRC,WDR76,ENSBTAG00000047694 |
| 21 | 55,950,000 | 56,100,000 | 747 | 1114 | -1.063829628 | C21H15orf63,ELL3,FRMD5,MFAP1,SERINC4,WDR76,ENSBTAG00000047694                         |
| 21 | 56,025,000 | 56,175,000 | 748 | 1157 | -0.691971474 | FRMD5,WDR76                                                                           |
| 21 | 56,100,000 | 56,250,000 | 749 | 921  | -0.114679629 |                                                                                       |
| 21 | 56,175,000 | 56,325,000 | 750 | 717  | -0.575917288 |                                                                                       |
| 21 | 56,250,000 | 56,400,000 | 751 | 822  | -1.265754296 |                                                                                       |
| 21 | 56,325,000 | 56,475,000 | 752 | 1032 | -0.340359841 |                                                                                       |
| 21 | 56,400,000 | 56,550,000 | 753 | 1150 | -0.620751056 | C14orf159                                                                             |
| 21 | 56,475,000 | 56,625,000 | 754 | 971  | -2.083988906 | C14orf159,GPR68                                                                       |
| 21 | 56,550,000 | 56,700,000 | 755 | 966  | -0.628289421 | C14orf159,CCDC88C,GPR68                                                               |
| 21 | 56,625,000 | 56,775,000 | 756 | 1008 | 0.541947004  | CCDC88C                                                                               |
| 21 | 56,700,000 | 56,850,000 | 757 | 673  | 0.398513824  | CCDC88C,SMEK1                                                                         |
| 21 | 56,775,000 | 56,925,000 | 758 | 680  | 0.294221743  | CATSPERB,SMEK1,UTP14A                                                                 |



|    |            |            |     |      |              |                                                              |
|----|------------|------------|-----|------|--------------|--------------------------------------------------------------|
| 21 | 56,850,000 | 57,000,000 | 759 | 836  | 0.547599297  | CATSPERB,UTP14A                                              |
| 21 | 56,925,000 | 57,075,000 | 760 | 682  | -0.178870121 | CATSPERB                                                     |
| 21 | 57,000,000 | 57,150,000 | 761 | 534  | -0.839278669 | CATSPERB,TC2N                                                |
| 21 | 57,075,000 | 57,225,000 | 762 | 466  | -0.362427576 | FBLN5,TC2N                                                   |
| 21 | 57,150,000 | 57,300,000 | 763 | 651  | 0.106572028  | FBLN5                                                        |
| 21 | 57,225,000 | 57,375,000 | 764 | 819  | 0.439453315  | ATXN3,FBLN5,TRIP11                                           |
| 21 | 57,300,000 | 57,450,000 | 765 | 788  | 0.363196482  | ATXN3,CPSF2,NDUFB1,TRIP11                                    |
| 21 | 57,375,000 | 57,525,000 | 766 | 1375 | 0.687109701  | ATXN3,CPSF2,NDUFB1                                           |
| 21 | 57,450,000 | 57,600,000 | 767 | 1686 | 0.721862375  | SLC24A4                                                      |
| 21 | 57,525,000 | 57,675,000 | 768 | 1527 | 0.455953394  | SLC24A4                                                      |
| 21 | 57,600,000 | 57,750,000 | 769 | 1317 | 0.562944162  | SLC24A4                                                      |
| 21 | 57,675,000 | 57,825,000 | 770 | 1078 | 0.705810118  | SLC24A4                                                      |
| 21 | 57,750,000 | 57,900,000 | 771 | 1021 | 0.658598505  | RIN3,SLC24A4                                                 |
| 21 | 57,825,000 | 57,975,000 | 772 | 790  | -0.803540675 | LGMN,RIN3                                                    |
| 21 | 57,900,000 | 58,050,000 | 773 | 668  | -2.249043806 | LGMN,RIN3                                                    |
| 21 | 57,975,000 | 58,125,000 | 774 | 819  | 0.288815676  | GOLGA5,LGMN                                                  |
| 21 | 58,050,000 | 58,200,000 | 775 | 824  | 0.26302602   | CHGA,GOLGA5,ITPK1                                            |
| 21 | 58,125,000 | 58,275,000 | 776 | 765  | -2.025773422 | CHGA,ITPK1                                                   |
| 21 | 58,200,000 | 58,350,000 | 777 | 723  | -1.95445943  | ITPK1                                                        |
| 21 | 58,275,000 | 58,425,000 | 778 | 685  | 0.330043357  | C21H14orf142,ITPK1,TMEM251,UBR7                              |
| 21 | 58,350,000 | 58,500,000 | 779 | 601  | 0.840839141  | BTBD7,C21H14orf142,TMEM251,UBR7                              |
| 21 | 58,425,000 | 58,575,000 | 780 | 576  | 1.087859915  | BTBD7,UBR7                                                   |
| 21 | 58,500,000 | 58,650,000 | 781 | 848  | 0.925129047  | BTBD7                                                        |
| 21 | 58,575,000 | 58,725,000 | 782 | 982  | 0.660734216  | UNC79                                                        |
| 21 | 58,650,000 | 58,800,000 | 783 | 777  | 0.34631891   | UNC79                                                        |
| 21 | 58,725,000 | 58,875,000 | 784 | 560  | 0.246093927  | UNC79                                                        |
| 21 | 58,800,000 | 58,950,000 | 785 | 490  | 0.711784559  | PRIMA1,UNC79                                                 |
| 21 | 58,875,000 | 59,025,000 | 786 | 722  | -0.130049977 | PRIMA1,UNC79                                                 |
| 21 | 58,950,000 | 59,100,000 | 787 | 1056 | -0.373024404 | PRIMA1                                                       |
| 21 | 59,025,000 | 59,175,000 | 788 | 1126 | -0.802614934 | ASB2,FAM181A                                                 |
| 21 | 59,100,000 | 59,250,000 | 789 | 1522 | -0.097855866 | ASB2,FAM181A,OTUB2,ENSBTAG00000016112                        |
| 21 | 59,175,000 | 59,325,000 | 790 | 1618 | 0.023096162  | DDX24,ISG12(B),OTUB2,ENSBTAG00000016112,ENSBTAG00000031834   |
| 21 | 59,250,000 | 59,400,000 | 791 | 1240 | -1.085149548 | DDX24,IFI27,IFI27L2,ISG12(B),OTUB2,PPP4R4,ENSBTAG00000031834 |
| 21 | 59,325,000 | 59,475,000 | 792 | 889  | -0.656632194 | IFI27,IFI27L2,PPP4R4                                         |
| 21 | 59,400,000 | 59,550,000 | 793 | 637  | 0.413893897  | PPP4R4,SERPINA10,SERPINA6                                    |
| 21 | 59,475,000 | 59,625,000 | 794 | 649  | 0.477240134  | PPP4R4,SERPINA1,SERPINA10,SERPINA6                           |
| 21 | 59,550,000 | 59,700,000 | 795 | 864  | -0.206698035 | SERPINA1,SERPINA11,ENSBTAG00000007392                        |
| 21 | 59,625,000 | 59,775,000 | 796 | 804  | -0.772576173 | SERPINA11,SERPINA12,SERPINA4,ENSBTAG00000007392              |
| 21 | 59,700,000 | 59,850,000 | 797 | 632  | -0.127083101 | SERPINA12,SERPINA3-1,SERPINA4,SERPINA5                       |
| 21 | 59,775,000 | 59,925,000 | 798 | 657  | -0.335633279 | SERPINA3-1,SERPINA5                                          |
| 21 | 59,850,000 | 60,000,000 | 799 | 785  | -0.390948967 |                                                              |
| 21 | 59,925,000 | 60,075,000 | 800 | 1237 | -0.298630278 |                                                              |
| 21 | 60,000,000 | 60,150,000 | 801 | 1119 | -0.167011371 |                                                              |
| 21 | 60,075,000 | 60,225,000 | 802 | 727  | 0.445460733  |                                                              |
| 21 | 60,150,000 | 60,300,000 | 803 | 806  | -1.168241383 |                                                              |
| 21 | 60,225,000 | 60,375,000 | 804 | 915  | -2.612971453 |                                                              |
| 21 | 60,300,000 | 60,450,000 | 805 | 705  | -1.537313951 |                                                              |
| 21 | 60,375,000 | 60,525,000 | 806 | 414  | -0.243490115 | ERICH1                                                       |
| 21 | 60,450,000 | 60,600,000 | 807 | 300  | -0.044967319 | ERICH1                                                       |
| 21 | 60,525,000 | 60,675,000 | 808 | 274  | 0.864622597  |                                                              |

|    |            |            |     |      |              |                                                                               |
|----|------------|------------|-----|------|--------------|-------------------------------------------------------------------------------|
| 21 | 60,600,000 | 60,750,000 | 809 | 434  | 1.159858951  |                                                                               |
| 21 | 60,675,000 | 60,825,000 | 810 | 369  | 0.949576603  |                                                                               |
| 21 | 60,750,000 | 60,900,000 | 811 | 146  | 0.467589429  | ENSBTAG00000024311                                                            |
|    |            |            |     |      |              | SERPINA3-                                                                     |
| 21 | 60,825,000 | 60,975,000 | 812 | 285  | 0.089002872  | 6,ENSBTAG00000007043,ENSBTAG00000024311,ENSBTAG00000026917                    |
|    |            |            |     |      |              | SERPINA3-                                                                     |
| 21 | 60,900,000 | 61,050,000 | 813 | 605  | -0.55957773  | 6,ENSBTAG00000003492,ENSBTAG00000007041,ENSBTAG00000007043,ENSBTAG00000026917 |
|    |            |            |     |      |              | ENSBTAG00000003492,ENSBTAG00000007041,ENSBTAG00000007043                      |
| 21 | 60,975,000 | 61,125,000 | 814 | 1089 | -0.061135831 | AG00000007043                                                                 |
| 21 | 61,050,000 | 61,200,000 | 815 | 976  | 0.507341981  | GSC                                                                           |
| 21 | 61,125,000 | 61,275,000 | 816 | 846  | 0.727518321  | GSC                                                                           |
| 21 | 61,200,000 | 61,350,000 | 817 | 1284 | -0.051633424 |                                                                               |
| 21 | 61,275,000 | 61,425,000 | 818 | 1484 | 0.075212807  |                                                                               |
| 21 | 61,350,000 | 61,500,000 | 819 | 1453 | 0.317078604  |                                                                               |
| 21 | 61,425,000 | 61,575,000 | 820 | 1113 | 0.249987108  | DICER1                                                                        |
| 21 | 61,500,000 | 61,650,000 | 821 | 1222 | 0.797135856  | CLMN,DICER1                                                                   |
| 21 | 61,575,000 | 61,725,000 | 822 | 1458 | 0.524620694  | CLMN,ENSBTAG00000048094                                                       |
| 21 | 61,650,000 | 61,800,000 | 823 | 1418 | 0.665903958  | CLMN,ENSBTAG00000048094                                                       |
| 21 | 61,725,000 | 61,875,000 | 824 | 1641 | 0.866742306  | SYNE3                                                                         |
| 21 | 61,800,000 | 61,950,000 | 825 | 1852 | 0.814958774  | SYNE3                                                                         |
| 21 | 61,875,000 | 62,025,000 | 826 | 1500 | 0.395957304  | GLRX5,SYNE3                                                                   |
| 21 | 61,950,000 | 62,100,000 | 827 | 1287 | -1.083488737 | GLRX5,SYNE3,TCL1B                                                             |
| 21 | 62,025,000 | 62,175,000 | 828 | 1232 | -1.411439996 | TCL1A,TCL1B                                                                   |
| 21 | 62,100,000 | 62,250,000 | 829 | 907  | -0.179836951 | TCL1A,TCL1B                                                                   |
| 21 | 62,175,000 | 62,325,000 | 830 | 787  | 0.995827119  |                                                                               |
| 21 | 62,250,000 | 62,400,000 | 831 | 907  | -0.129830626 |                                                                               |
| 21 | 62,325,000 | 62,475,000 | 832 | 1052 | -0.404143765 |                                                                               |
| 21 | 62,400,000 | 62,550,000 | 833 | 1305 | -1.420761186 |                                                                               |
| 21 | 62,475,000 | 62,625,000 | 834 | 1337 | -1.594070686 |                                                                               |
| 21 | 62,550,000 | 62,700,000 | 835 | 1425 | -1.975310096 |                                                                               |
| 21 | 62,625,000 | 62,775,000 | 836 | 1404 | -1.961331359 | BDKRB1,BDKRB2                                                                 |
| 21 | 62,700,000 | 62,850,000 | 837 | 695  | -0.005502203 | ATG2B,BDKRB1,BDKRB2                                                           |
| 21 | 62,775,000 | 62,925,000 | 838 | 589  | -1.442137882 | AK7,ATG2B,GSKIP                                                               |
| 21 | 62,850,000 | 63,000,000 | 839 | 731  | -1.914305297 | AK7,ATG2B,GSKIP,PAPOLA                                                        |
| 21 | 62,925,000 | 63,075,000 | 840 | 595  | -0.753482256 | AK7,PAPOLA                                                                    |
| 21 | 63,000,000 | 63,150,000 | 841 | 556  | 0.939649434  | PAPOLA                                                                        |
| 21 | 63,075,000 | 63,225,000 | 842 | 614  | 0.466859061  |                                                                               |
| 21 | 63,150,000 | 63,300,000 | 843 | 597  | 0.214024522  | VRK1                                                                          |
| 21 | 63,225,000 | 63,375,000 | 844 | 529  | 0.793456927  | VRK1                                                                          |
| 21 | 63,300,000 | 63,450,000 | 845 | 760  | 0.380612219  | VRK1                                                                          |
| 21 | 63,375,000 | 63,525,000 | 846 | 745  | 0.290340103  |                                                                               |
| 21 | 63,450,000 | 63,600,000 | 847 | 796  | 1.13377655   |                                                                               |
| 21 | 63,525,000 | 63,675,000 | 848 | 1105 | 0.89775945   |                                                                               |
| 21 | 63,600,000 | 63,750,000 | 849 | 1012 | 0.15113725   |                                                                               |
| 21 | 63,675,000 | 63,825,000 | 850 | 856  | -0.577877397 |                                                                               |
| 21 | 63,750,000 | 63,900,000 | 851 | 620  | -0.971714984 |                                                                               |
| 21 | 63,825,000 | 63,975,000 | 852 | 568  | 0.354663927  |                                                                               |
| 21 | 63,900,000 | 64,050,000 | 853 | 726  | 0.143769738  |                                                                               |
| 21 | 63,975,000 | 64,125,000 | 854 | 829  | 0.184545382  |                                                                               |
| 21 | 64,050,000 | 64,200,000 | 855 | 1121 | 0.319358735  |                                                                               |
| 21 | 64,125,000 | 64,275,000 | 856 | 1211 | 0.193571174  |                                                                               |

|    |            |            |     |      |              |                                                     |
|----|------------|------------|-----|------|--------------|-----------------------------------------------------|
| 21 | 64,200,000 | 64,350,000 | 857 | 1206 | 0.175177494  |                                                     |
| 21 | 64,275,000 | 64,425,000 | 858 | 1158 | -0.576984118 |                                                     |
| 21 | 64,350,000 | 64,500,000 | 859 | 929  | -0.639402433 |                                                     |
| 21 | 64,425,000 | 64,575,000 | 860 | 1045 | 0.133060942  |                                                     |
| 21 | 64,500,000 | 64,650,000 | 861 | 927  | 0.048019289  |                                                     |
| 21 | 64,575,000 | 64,725,000 | 862 | 502  | 0.172225719  |                                                     |
| 21 | 64,650,000 | 64,800,000 | 863 | 713  | -0.182895688 |                                                     |
| 21 | 64,725,000 | 64,875,000 | 864 | 1074 | 0.002885319  |                                                     |
| 21 | 64,800,000 | 64,950,000 | 865 | 880  | 0.723570579  |                                                     |
| 21 | 64,875,000 | 65,025,000 | 866 | 735  | 0.673784173  |                                                     |
| 21 | 64,950,000 | 65,100,000 | 867 | 920  | 0.010388557  |                                                     |
| 21 | 65,025,000 | 65,175,000 | 868 | 1086 | 0.486168704  |                                                     |
| 21 | 65,100,000 | 65,250,000 | 869 | 1161 | 0.965834203  |                                                     |
| 21 | 65,175,000 | 65,325,000 | 870 | 1228 | 0.629736178  |                                                     |
| 21 | 65,250,000 | 65,400,000 | 871 | 997  | 0.181364705  |                                                     |
| 21 | 65,325,000 | 65,475,000 | 872 | 610  | 0.391180237  |                                                     |
| 21 | 65,400,000 | 65,550,000 | 873 | 710  | 0.547613773  |                                                     |
| 21 | 65,475,000 | 65,625,000 | 874 | 929  | 0.110395508  |                                                     |
| 21 | 65,550,000 | 65,700,000 | 875 | 909  | 0.399686284  |                                                     |
| 21 | 65,625,000 | 65,775,000 | 876 | 702  | 0.114445681  |                                                     |
| 21 | 65,700,000 | 65,850,000 | 877 | 539  | -1.040805868 | BCL11B                                              |
| 21 | 65,775,000 | 65,925,000 | 878 | 464  | 0.696395771  | BCL11B                                              |
| 21 | 65,850,000 | 66,000,000 | 879 | 560  | 0.34044931   | BCL11B                                              |
| 21 | 65,925,000 | 66,075,000 | 880 | 615  | 0.35864975   | BCL11B,SETD3                                        |
| 21 | 66,000,000 | 66,150,000 | 881 | 551  | 0.783864758  | SETD3                                               |
| 21 | 66,075,000 | 66,225,000 | 882 | 804  | 0.384667203  | CCDC85C,CCNK,SETD3                                  |
| 21 | 66,150,000 | 66,300,000 | 883 | 1008 | 0.059893605  | CCDC85C,CCNK,HHIPL1                                 |
| 21 | 66,225,000 | 66,375,000 | 884 | 1031 | 0.108038109  | CCDC85C,CYP46A1,EMAPL,HHIPL1                        |
| 21 | 66,300,000 | 66,450,000 | 885 | 1046 | 0.00999239   | CYP46A1,EMAPL,HHIPL1                                |
| 21 | 66,375,000 | 66,525,000 | 886 | 1125 | 0.353568823  | EMAPL                                               |
| 21 | 66,450,000 | 66,600,000 | 887 | 948  | 0.621748777  | EMAPL                                               |
| 21 | 66,525,000 | 66,675,000 | 888 | 609  | 0.569542657  | EMAPL                                               |
| 21 | 66,600,000 | 66,750,000 | 889 | 611  | 0.978249803  | DEGS2,EVL                                           |
| 21 | 66,675,000 | 66,825,000 | 890 | 955  | 0.722961189  | DEGS2,EVL,YY1,ENSBTAG00000045497                    |
| 21 | 66,750,000 | 66,900,000 | 891 | 1106 | -0.131047577 | DEGS2,SLC25A29,SLC25A47,WARS,YY1,ENSBTAG00000045497 |
| 21 | 66,825,000 | 66,975,000 | 892 | 1165 | -0.803761609 | SLC25A29,SLC25A47,WARS,WDR25,YY1                    |
| 21 | 66,900,000 | 67,050,000 | 893 | 1347 | 0.37342922   | WARS,WDR25                                          |
| 21 | 66,975,000 | 67,125,000 | 894 | 921  | 0.586736599  | BEGAIN,WDR25                                        |
| 21 | 67,050,000 | 67,200,000 | 895 | 822  | 0.175661261  | BEGAIN,WDR25                                        |
| 21 | 67,125,000 | 67,275,000 | 896 | 704  | 0.329349869  | DLK                                                 |
| 21 | 67,200,000 | 67,350,000 | 897 | 311  | 0.457787771  | DLK                                                 |
| 21 | 67,275,000 | 67,425,000 | 898 | 419  | 0.18308623   | DLK                                                 |
| 21 | 67,350,000 | 67,500,000 | 899 | 439  | -0.055293222 | RTL1                                                |
| 21 | 67,425,000 | 67,575,000 | 900 | 506  | 0.86282907   | RTL1                                                |
| 21 | 67,500,000 | 67,650,000 | 901 | 426  | 0.918834916  |                                                     |
| 21 | 67,575,000 | 67,725,000 | 902 | 373  | -0.172978945 |                                                     |
| 21 | 67,650,000 | 67,800,000 | 903 | 519  | -0.310003135 |                                                     |
| 21 | 67,725,000 | 67,875,000 | 904 | 765  | 0.153773734  |                                                     |
| 21 | 67,800,000 | 67,950,000 | 905 | 961  | 0.229133657  |                                                     |
| 21 | 67,875,000 | 68,025,000 | 906 | 830  | 0.326286581  |                                                     |
| 21 | 67,950,000 | 68,100,000 | 907 | 605  | 0.329531747  |                                                     |
| 21 | 68,025,000 | 68,175,000 | 908 | 622  | -0.179774516 | DIO3                                                |

|    |            |            |     |      |              |                                                                                             |
|----|------------|------------|-----|------|--------------|---------------------------------------------------------------------------------------------|
| 21 | 68,100,000 | 68,250,000 | 909 | 608  | -0.046048025 | DIO3                                                                                        |
| 21 | 68,175,000 | 68,325,000 | 910 | 569  | 0.625978283  |                                                                                             |
| 21 | 68,250,000 | 68,400,000 | 911 | 739  | 0.470868261  | PPP2R5C                                                                                     |
| 21 | 68,325,000 | 68,475,000 | 912 | 656  | 0.432400212  | PPP2R5C                                                                                     |
| 21 | 68,400,000 | 68,550,000 | 913 | 400  | 1.2540533    | DYNC1H1,PPP2R5C                                                                             |
| 21 | 68,475,000 | 68,625,000 | 914 | 425  | 1.27462868   | DYNC1H1,HSP90AA1,MGC152337                                                                  |
| 21 | 68,550,000 | 68,700,000 | 915 | 476  | 0.709119463  | DYNC1H1,HSP90AA1,MGC152337,WDR20                                                            |
| 21 | 68,625,000 | 68,775,000 | 916 | 471  | -1.696249874 | MOK,RPL9,WDR20                                                                              |
| 21 | 68,700,000 | 68,850,000 | 917 | 452  | -1.705378027 | CINP,MOK,RPL9,TECPR2,ZNF839                                                                 |
| 21 | 68,775,000 | 68,925,000 | 918 | 353  | -0.101592249 | ANKRD9,CINP,TECPR2,ZNF839                                                                   |
| 21 | 68,850,000 | 69,000,000 | 919 | 324  | -0.037548257 | ANKRD9,RCOR1,TECPR2                                                                         |
| 21 | 68,925,000 | 69,075,000 | 920 | 336  | 0.042539417  | RCOR1                                                                                       |
| 21 | 69,000,000 | 69,150,000 | 921 | 382  | 0.374756536  | RCOR1                                                                                       |
| 21 | 69,075,000 | 69,225,000 | 922 | 503  | -0.206765565 | RCOR1                                                                                       |
| 21 | 69,150,000 | 69,300,000 | 923 | 657  | -0.290930845 | AMN,CDC42BPB,TRAF3                                                                          |
| 21 | 69,225,000 | 69,375,000 | 924 | 612  | -0.038848508 | AMN,CDC42BPB,TRAF3                                                                          |
| 21 | 69,300,000 | 69,450,000 | 925 | 872  | 0.00811242   | CDC42BPB,EXOC3L4                                                                            |
| 21 | 69,375,000 | 69,525,000 | 926 | 1328 | -0.135549481 | EXOC3L4,TNFAIP2                                                                             |
| 21 | 69,450,000 | 69,600,000 | 927 | 1066 | -0.026731903 | TNFAIP2,ENSBTAG00000047319                                                                  |
| 21 | 69,525,000 | 69,675,000 | 928 | 668  | -0.019475901 | EIF5,ENSBTAG00000047319                                                                     |
| 21 | 69,600,000 | 69,750,000 | 929 | 495  | -0.618938083 | EIF5,MARK3                                                                                  |
| 21 | 69,675,000 | 69,825,000 | 930 | 355  | 0.237678344  | CKB,MARK3,TRMT61A                                                                           |
| 21 | 69,750,000 | 69,900,000 | 931 | 704  | 0.549579227  | APOPT1,BAG5,CKB,KLC1,MARK3,TRMT61A                                                          |
| 21 | 69,825,000 | 69,975,000 | 932 | 841  | 0.499065034  | APOPT1,BAG5,KLC1,XRCC3                                                                      |
| 21 | 69,900,000 | 70,050,000 | 933 | 642  | -0.041148477 | KLC1,PPP1R13B,XRCC3,ZFYVE21                                                                 |
| 21 | 69,975,000 | 70,125,000 | 934 | 803  | -0.351039222 | MP68,PPP1R13B,TDRD9,ZFYVE21,ENSBTAG00000046186                                              |
| 21 | 70,050,000 | 70,200,000 | 935 | 1105 | -1.117254953 | MP68,PPP1R13B,RD3L,TDRD9,ENSBTAG00000046186                                                 |
| 21 | 70,125,000 | 70,275,000 | 936 | 1043 | -1.880969452 | ASPG,RD3L,TDRD9                                                                             |
| 21 | 70,200,000 | 70,350,000 | 937 | 789  | -1.579112306 | ASPG,KIF26A,TDRD9                                                                           |
| 21 | 70,275,000 | 70,425,000 | 938 | 869  | 0.47856747   | ASPG,KIF26A                                                                                 |
| 21 | 70,350,000 | 70,500,000 | 939 | 1226 | -0.503792098 | KIF26A                                                                                      |
| 21 | 70,425,000 | 70,575,000 | 940 | 1429 | -1.804103087 |                                                                                             |
| 21 | 70,500,000 | 70,650,000 | 941 | 1147 | -1.294592222 |                                                                                             |
| 21 | 70,575,000 | 70,725,000 | 942 | 1024 | 0.044996165  | C14orf180,TMEM179                                                                           |
| 21 | 70,650,000 | 70,800,000 | 943 | 928  | -1.213086664 | C14orf180,TMEM179                                                                           |
| 21 | 70,725,000 | 70,875,000 | 944 | 658  | -1.34388468  | ADSSL1,INF2,SIVA1,TMEM179                                                                   |
| 21 | 70,800,000 | 70,950,000 | 945 | 513  | -0.398545434 | ADSSL1,AKT1,CEP170B,INF2,SIVA1,ZBTB42                                                       |
| 21 | 70,875,000 | 71,025,000 | 946 | 454  | 0.283734681  | AHNAK2,AKT1,CEP170B,PLD4,ZBTB42                                                             |
| 21 | 70,950,000 | 71,100,000 | 947 | 510  | 0.428411106  | AHNAK2,C14orf79,CDCA4,CEP170B,GPR132,PLD4                                                   |
| 21 | 71,025,000 | 71,175,000 | 948 | 566  | -0.246881068 | C14orf79,CDCA4,GPR132,JAG2,NUDT14                                                           |
| 21 | 71,100,000 | 71,250,000 | 949 | 797  | 0.189872284  | BRF1,BTBD6,JAG2,NUDT14,ENSBTAG00000046364                                                   |
| 21 | 71,175,000 | 71,325,000 | 950 | 943  | 0.560041333  | BRF1,BTBD6,PACS2,ENSBTAG00000046364                                                         |
| 21 | 71,250,000 | 71,400,000 | 951 | 859  | 0.268875836  | C14orf80,CRIP1,MTA1,PACS2,ENSBTAG00000046364                                                |
| 21 | 71,325,000 | 71,475,000 | 952 | 1242 | -0.512238693 | C14orf80,CRIP1,IGHE,MTA1,TMEM121,ENSBTAG00000046364,ENSBTAG00000047700,ENSBTAG00000047970   |
| 21 | 71,400,000 | 71,550,000 | 953 | 1580 | -0.341673948 | IGHE,IGHM,TMEM121,ENSBTAG00000046161,ENSBTAG00000047700,ENSBTAG00000047970,ENSBTAG000048268 |
| 21 | 71,475,000 | 71,599,096 | 954 | 1112 | -0.059001035 | IGHM,ENSBTAG00000046076,ENSBTAG00000046161,ENSBTAG00000048268                               |

|    |           |           |    |      |              |                                                                             |
|----|-----------|-----------|----|------|--------------|-----------------------------------------------------------------------------|
| 22 | 0         | 150,000   | 1  | 661  | 0.559935612  | ENSBTAG00000023954,ENSBTAG00000045666,ENSBTAG00000046011,ENSBTAG00000046634 |
| 22 | 75,000    | 225,000   | 2  | 909  | 1.049476981  | MRPS24,URGCP,ENSBTAG00000023954                                             |
| 22 | 150,000   | 300,000   | 3  | 1036 | 1.245525224  | MRPS24,URGCP                                                                |
| 22 | 225,000   | 375,000   | 4  | 816  | 1.186767569  | DBNL,PGAM2,UBE2D4,URGCP                                                     |
| 22 | 300,000   | 450,000   | 5  | 614  | 1.095002244  | DBNL,PGAM2,UBE2D4                                                           |
| 22 | 375,000   | 525,000   | 6  | 598  | -0.21112791  | VOPP1                                                                       |
| 22 | 450,000   | 600,000   | 7  | 821  | 0.374921517  | VOPP1                                                                       |
| 22 | 525,000   | 675,000   | 8  | 1067 | 1.237516857  | VOPP1                                                                       |
| 22 | 600,000   | 750,000   | 9  | 1313 | 1.254523562  | LANCL2,VOPP1                                                                |
| 22 | 675,000   | 825,000   | 10 | 1545 | 1.031598412  | LANCL2,VOPP1                                                                |
| 22 | 750,000   | 900,000   | 11 | 1397 | 0.694128753  | EGFR,LANCL2                                                                 |
| 22 | 825,000   | 975,000   | 12 | 1101 | 0.56676269   | EGFR                                                                        |
| 22 | 900,000   | 1,050,000 | 13 | 762  | 0.50637516   | EGFR                                                                        |
| 22 | 975,000   | 1,125,000 | 14 | 423  | -0.342473779 | EGFR                                                                        |
| 22 | 1,050,000 | 1,200,000 | 15 | 339  | -0.426912079 | EGFR                                                                        |
| 22 | 1,125,000 | 1,275,000 | 16 | 803  | 0.254308017  |                                                                             |
| 22 | 1,200,000 | 1,350,000 | 17 | 1015 | 0.686200295  |                                                                             |
| 22 | 1,275,000 | 1,425,000 | 18 | 1131 | 0.933525701  |                                                                             |
| 22 | 1,350,000 | 1,500,000 | 19 | 1378 | 0.431739455  | NEK10,SEC61G                                                                |
| 22 | 1,425,000 | 1,575,000 | 20 | 1131 | 0.171859551  | NEK10,SEC61G                                                                |
| 22 | 1,500,000 | 1,650,000 | 21 | 1073 | 0.491798454  | NEK10                                                                       |
| 22 | 1,575,000 | 1,725,000 | 22 | 1112 | -0.495290848 | NEK10                                                                       |
| 22 | 1,650,000 | 1,800,000 | 23 | 842  | -1.669503446 | NEK10,SLC4A7                                                                |
| 22 | 1,725,000 | 1,875,000 | 24 | 504  | -1.3983179   | SLC4A7                                                                      |
| 22 | 1,800,000 | 1,950,000 | 25 | 568  | 0.740352959  | SLC4A7,ENSBTAG00000030494                                                   |
| 22 | 1,875,000 | 2,025,000 | 26 | 635  | 0.326413023  | SLC4A7,ENSBTAG00000030494                                                   |
| 22 | 1,950,000 | 2,100,000 | 27 | 614  | 0.255746115  |                                                                             |
| 22 | 2,025,000 | 2,175,000 | 28 | 809  | 0.658591551  | EOMES                                                                       |
| 22 | 2,100,000 | 2,250,000 | 29 | 919  | 0.598082584  | EOMES                                                                       |
| 22 | 2,175,000 | 2,325,000 | 30 | 752  | 0.58896294   |                                                                             |
| 22 | 2,250,000 | 2,400,000 | 31 | 822  | 0.328123952  |                                                                             |
| 22 | 2,325,000 | 2,475,000 | 32 | 902  | 0.201663144  |                                                                             |
| 22 | 2,400,000 | 2,550,000 | 33 | 741  | 0.555035132  |                                                                             |
| 22 | 2,475,000 | 2,625,000 | 34 | 1165 | 0.347453928  |                                                                             |
| 22 | 2,550,000 | 2,700,000 | 35 | 1294 | 0.303538008  | CMC1                                                                        |
| 22 | 2,625,000 | 2,775,000 | 36 | 849  | 0.477103437  | AZI2,CMC1                                                                   |
| 22 | 2,700,000 | 2,850,000 | 37 | 926  | 0.931739876  | AZI2,CMC1,ZCWPW2                                                            |
| 22 | 2,775,000 | 2,925,000 | 38 | 900  | 0.685181648  | AZI2,ZCWPW2                                                                 |
| 22 | 2,850,000 | 3,000,000 | 39 | 705  | 0.510571838  | ZCWPW2                                                                      |
| 22 | 2,925,000 | 3,075,000 | 40 | 800  | 0.380606716  | ZCWPW2                                                                      |
| 22 | 3,000,000 | 3,150,000 | 41 | 717  | 0.057398427  |                                                                             |
| 22 | 3,075,000 | 3,225,000 | 42 | 954  | 0.706735679  |                                                                             |
| 22 | 3,150,000 | 3,300,000 | 43 | 1283 | 0.897064428  |                                                                             |
| 22 | 3,225,000 | 3,375,000 | 44 | 1236 | 0.769657673  |                                                                             |
| 22 | 3,300,000 | 3,450,000 | 45 | 1180 | 0.66960361   |                                                                             |
| 22 | 3,375,000 | 3,525,000 | 46 | 1245 | 0.789753774  |                                                                             |
| 22 | 3,450,000 | 3,600,000 | 47 | 1405 | 1.241427174  |                                                                             |
| 22 | 3,525,000 | 3,675,000 | 48 | 1552 | 1.316325936  |                                                                             |
| 22 | 3,600,000 | 3,750,000 | 49 | 1464 | 1.165178093  |                                                                             |
| 22 | 3,675,000 | 3,825,000 | 50 | 1063 | 1.015943032  |                                                                             |
| 22 | 3,750,000 | 3,900,000 | 51 | 782  | 0.378428215  | RBMS3                                                                       |
| 22 | 3,825,000 | 3,975,000 | 52 | 698  | -0.452011294 | RBMS3                                                                       |

|    |           |           |     |      |              |                                           |
|----|-----------|-----------|-----|------|--------------|-------------------------------------------|
| 22 | 3,900,000 | 4,050,000 | 53  | 776  | -0.191006506 | RBMS3                                     |
| 22 | 3,975,000 | 4,125,000 | 54  | 718  | 0.692636984  | RBMS3                                     |
| 22 | 4,050,000 | 4,200,000 | 55  | 695  | 1.017503476  | RBMS3                                     |
| 22 | 4,125,000 | 4,275,000 | 56  | 703  | 0.665606882  | RBMS3                                     |
| 22 | 4,200,000 | 4,350,000 | 57  | 585  | 0.623509569  | RBMS3                                     |
| 22 | 4,275,000 | 4,425,000 | 58  | 896  | 0.101623435  | RBMS3                                     |
| 22 | 4,350,000 | 4,500,000 | 59  | 1229 | -0.502730585 | RBMS3                                     |
| 22 | 4,425,000 | 4,575,000 | 60  | 888  | -0.576306194 | RBMS3                                     |
| 22 | 4,500,000 | 4,650,000 | 61  | 587  | -0.799256084 | RBMS3                                     |
| 22 | 4,575,000 | 4,725,000 | 62  | 808  | -1.800065383 | RBMS3                                     |
| 22 | 4,650,000 | 4,800,000 | 63  | 1141 | -2.595534077 | RBMS3                                     |
| 22 | 4,725,000 | 4,875,000 | 64  | 1291 | -1.008555724 |                                           |
| 22 | 4,800,000 | 4,950,000 | 65  | 1092 | 0.742380051  |                                           |
| 22 | 4,875,000 | 5,025,000 | 66  | 1134 | 0.702918477  |                                           |
| 22 | 4,950,000 | 5,100,000 | 67  | 866  | 0.494174905  |                                           |
| 22 | 5,025,000 | 5,175,000 | 68  | 519  | 0.262722939  | TGFBR2                                    |
| 22 | 5,100,000 | 5,250,000 | 69  | 847  | 0.079953343  | TGFBR2                                    |
| 22 | 5,175,000 | 5,325,000 | 70  | 1116 | -0.271978016 | GADL1,TGFBR2                              |
| 22 | 5,250,000 | 5,400,000 | 71  | 1003 | -0.402209044 | GADL1                                     |
| 22 | 5,325,000 | 5,475,000 | 72  | 677  | -0.654569569 | GADL1                                     |
| 22 | 5,400,000 | 5,550,000 | 73  | 688  | -0.37024877  | GADL1                                     |
| 22 | 5,475,000 | 5,625,000 | 74  | 1224 | 0.452903633  |                                           |
| 22 | 5,550,000 | 5,700,000 | 75  | 1435 | 0.701148831  |                                           |
| 22 | 5,625,000 | 5,775,000 | 76  | 1221 | -0.156503252 |                                           |
| 22 | 5,700,000 | 5,850,000 | 77  | 937  | -0.86075765  |                                           |
| 22 | 5,775,000 | 5,925,000 | 78  | 780  | -0.162170586 |                                           |
| 22 | 5,850,000 | 6,000,000 | 79  | 1038 | 0.390612518  |                                           |
| 22 | 5,925,000 | 6,075,000 | 80  | 1354 | 0.860885016  |                                           |
| 22 | 6,000,000 | 6,150,000 | 81  | 1012 | 0.887565464  | STT3B                                     |
| 22 | 6,075,000 | 6,225,000 | 82  | 736  | 0.812967508  | OSBPL10,STT3B                             |
| 22 | 6,150,000 | 6,300,000 | 83  | 1056 | 0.381402181  | OSBPL10,STT3B                             |
| 22 | 6,225,000 | 6,375,000 | 84  | 1223 | 0.016703878  | OSBPL10                                   |
| 22 | 6,300,000 | 6,450,000 | 85  | 1112 | -0.279772207 |                                           |
| 22 | 6,375,000 | 6,525,000 | 86  | 931  | -0.502344867 |                                           |
| 22 | 6,450,000 | 6,600,000 | 87  | 749  | -1.489423214 |                                           |
| 22 | 6,525,000 | 6,675,000 | 88  | 828  | -1.457023131 | GPD1L                                     |
| 22 | 6,600,000 | 6,750,000 | 89  | 665  | -0.210918886 | GPD1L                                     |
| 22 | 6,675,000 | 6,825,000 | 90  | 771  | 0.801963271  | CMTM8,GPD1L                               |
| 22 | 6,750,000 | 6,900,000 | 91  | 940  | 0.246067856  | CMTM7,CMTM8                               |
| 22 | 6,825,000 | 6,975,000 | 92  | 732  | -0.287564838 | CMTM7,CMTM8                               |
| 22 | 6,900,000 | 7,050,000 | 93  | 883  | -0.899532301 | CMTM6,CMTM7,DYNC1LI1                      |
| 22 | 6,975,000 | 7,125,000 | 94  | 668  | -1.212901477 | CMTM6,DYNC1LI1,ENSBTAG00000025595         |
| 22 | 7,050,000 | 7,200,000 | 95  | 333  | 0.196766448  | CNOT10,DYNC1LI1,ENSBTAG00000025595        |
| 22 | 7,125,000 | 7,275,000 | 96  | 325  | -0.844516248 | CNOT10                                    |
| 22 | 7,200,000 | 7,350,000 | 97  | 372  | -0.949552336 | CNOT10,TRIM71                             |
| 22 | 7,275,000 | 7,425,000 | 98  | 633  | -0.592430954 | CCR4,GLB1,TRIM71                          |
| 22 | 7,350,000 | 7,500,000 | 99  | 729  | -0.195884067 | CCR4,GLB1                                 |
| 22 | 7,425,000 | 7,575,000 | 100 | 1048 | 0.490782494  | CRTAP,GLB1,SUSD5,ENSBTAG00000034871       |
| 22 | 7,500,000 | 7,650,000 | 101 | 1352 | -1.073439446 | CRTAP,FBXL2,GLB1,SUSD5,ENSBTAG00000034871 |
| 22 | 7,575,000 | 7,725,000 | 102 | 971  | -1.942013728 | FBXL2,SUSD5,UBP1                          |
| 22 | 7,650,000 | 7,800,000 | 103 | 590  | -0.715565948 | FBXL2,UBP1                                |
| 22 | 7,725,000 | 7,875,000 | 104 | 521  | 0.815599238  | CLASP2,UBP1                               |
| 22 | 7,800,000 | 7,950,000 | 105 | 564  | 0.522934966  | CLASP2                                    |

|    |            |            |     |      |              |                              |
|----|------------|------------|-----|------|--------------|------------------------------|
| 22 | 7,875,000  | 8,025,000  | 106 | 681  | -1.240209789 | CLASP2                       |
| 22 | 7,950,000  | 8,100,000  | 107 | 1153 | -1.511478431 | CLASP2,PDCD6IP               |
| 22 | 8,025,000  | 8,175,000  | 108 | 1161 | -0.355166946 | PDCD6IP                      |
| 22 | 8,100,000  | 8,250,000  | 109 | 1231 | 0.584908556  | PDCD6IP                      |
| 22 | 8,175,000  | 8,325,000  | 110 | 1461 | -0.345290269 |                              |
| 22 | 8,250,000  | 8,400,000  | 111 | 1186 | -0.765599028 |                              |
| 22 | 8,325,000  | 8,475,000  | 112 | 1230 | 0.294174961  |                              |
| 22 | 8,400,000  | 8,550,000  | 113 | 1127 | -0.203297107 |                              |
| 22 | 8,475,000  | 8,625,000  | 114 | 889  | -0.86862168  |                              |
| 22 | 8,550,000  | 8,700,000  | 115 | 1071 | 0.510793419  |                              |
| 22 | 8,625,000  | 8,775,000  | 116 | 898  | 0.764386017  |                              |
| 22 | 8,700,000  | 8,850,000  | 117 | 833  | 0.533418579  |                              |
| 22 | 8,775,000  | 8,925,000  | 118 | 1322 | 0.709408035  |                              |
| 22 | 8,850,000  | 9,000,000  | 119 | 1214 | 0.698825771  |                              |
| 22 | 8,925,000  | 9,075,000  | 120 | 968  | -0.042092654 |                              |
| 22 | 9,000,000  | 9,150,000  | 121 | 970  | 0.241961936  |                              |
| 22 | 9,075,000  | 9,225,000  | 122 | 819  | 0.720835263  |                              |
| 22 | 9,150,000  | 9,300,000  | 123 | 586  | -0.119222607 |                              |
| 22 | 9,225,000  | 9,375,000  | 124 | 476  | -0.412730423 |                              |
| 22 | 9,300,000  | 9,450,000  | 125 | 675  | -0.464212303 |                              |
| 22 | 9,375,000  | 9,525,000  | 126 | 768  | -0.994795591 |                              |
| 22 | 9,450,000  | 9,600,000  | 127 | 817  | -0.52502314  |                              |
| 22 | 9,525,000  | 9,675,000  | 128 | 652  | -0.003807824 | ARPP21                       |
| 22 | 9,600,000  | 9,750,000  | 129 | 581  | 0.279246816  | ARPP21                       |
| 22 | 9,675,000  | 9,825,000  | 130 | 859  | 0.061189176  | ARPP21                       |
| 22 | 9,750,000  | 9,900,000  | 131 | 934  | -0.987922563 | ARPP21                       |
| 22 | 9,825,000  | 9,975,000  | 132 | 764  | -1.339616854 |                              |
| 22 | 9,900,000  | 10,050,000 | 133 | 538  | -0.526178281 |                              |
| 22 | 9,975,000  | 10,125,000 | 134 | 959  | -0.303202667 |                              |
| 22 | 10,050,000 | 10,200,000 | 135 | 1151 | -0.122559903 | STAC                         |
| 22 | 10,125,000 | 10,275,000 | 136 | 1001 | 0.425067682  | STAC                         |
| 22 | 10,200,000 | 10,350,000 | 137 | 1111 | -0.669651779 | STAC                         |
| 22 | 10,275,000 | 10,425,000 | 138 | 654  | -2.456488451 | LRRFIP2                      |
| 22 | 10,350,000 | 10,500,000 | 139 | 300  | -0.153396903 | LRRFIP2,MLH1                 |
| 22 | 10,425,000 | 10,575,000 | 140 | 339  | 0.144084571  | LRRFIP2,MLH1                 |
| 22 | 10,500,000 | 10,650,000 | 141 | 480  | -0.246256342 | EPM2AIP1,MLH1                |
| 22 | 10,575,000 | 10,725,000 | 142 | 529  | -0.493735534 | EPM2AIP1,MLH1,TRANK1         |
| 22 | 10,650,000 | 10,800,000 | 143 | 526  | 0.623473932  | DCLK3,TRANK1                 |
| 22 | 10,725,000 | 10,875,000 | 144 | 403  | 0.990257941  | DCLK3,GOLGA4                 |
| 22 | 10,800,000 | 10,950,000 | 145 | 216  | 0.801713671  | GOLGA4,ITGA9                 |
| 22 | 10,875,000 | 11,025,000 | 146 | 532  | 0.506140275  | GOLGA4,ITGA9                 |
| 22 | 10,950,000 | 11,100,000 | 147 | 836  | 0.858965642  | ITGA9                        |
| 22 | 11,025,000 | 11,175,000 | 148 | 712  | 1.035571858  | ITGA9,ENSBTAG00000047965     |
| 22 | 11,100,000 | 11,250,000 | 149 | 773  | 0.759516876  | ITGA9,ENSBTAG00000047965     |
| 22 | 11,175,000 | 11,325,000 | 150 | 849  | 0.522265295  | ITGA9                        |
| 22 | 11,250,000 | 11,400,000 | 151 | 634  | 0.33752389   | CTDSPL,ITGA9                 |
| 22 | 11,325,000 | 11,475,000 | 152 | 731  | -0.038703408 | CTDSPL                       |
| 22 | 11,400,000 | 11,550,000 | 153 | 1179 | 0.368861942  | CTDSPL,DLEC1,PLCD1,VILL      |
| 22 | 11,475,000 | 11,625,000 | 154 | 1138 | 0.733315417  | ACAA1,DLEC1,PLCD1,VILL       |
| 22 | 11,550,000 | 11,700,000 | 155 | 821  | 0.404838342  | ACAA1,DLEC1,MYD88,OXSR1      |
| 22 | 11,625,000 | 11,775,000 | 156 | 771  | 0.208616483  | ACAA1,MYD88,OXSR1,SLC22A13   |
| 22 | 11,700,000 | 11,850,000 | 157 | 813  | 0.687889272  | OXSR1,SLC22A13,SLC22A14,XYLB |
| 22 | 11,775,000 | 11,925,000 | 158 | 981  | 0.761704613  | ACVR2B,EXOGL,SLC22A14,XYLB   |

|    |            |            |     |      |              |                                                                     |
|----|------------|------------|-----|------|--------------|---------------------------------------------------------------------|
| 22 | 11,850,000 | 12,000,000 | 159 | 1139 | -0.879602302 | ACVR2B,EXOG                                                         |
| 22 | 11,925,000 | 12,075,000 | 160 | 1187 | -0.939082917 | EXOG,SCN5A                                                          |
| 22 | 12,000,000 | 12,150,000 | 161 | 1131 | -0.034163104 | SCN10A,SCN5A                                                        |
| 22 | 12,075,000 | 12,225,000 | 162 | 1023 | 0.426974504  | SCN10A,SCN5A                                                        |
| 22 | 12,150,000 | 12,300,000 | 163 | 788  | 0.827572375  | SCN10A,SCN11A                                                       |
| 22 | 12,225,000 | 12,375,000 | 164 | 781  | 1.36632394   | SCN10A,SCN11A                                                       |
| 22 | 12,300,000 | 12,450,000 | 165 | 741  | 1.290723681  | SCN11A,WDR48                                                        |
| 22 | 12,375,000 | 12,525,000 | 166 | 445  | 0.890266061  | CSRNP1,GORASP1,TTC21A,WDR48                                         |
| 22 | 12,450,000 | 12,600,000 | 167 | 411  | 0.961197197  | CMYA1,CSRNP1,GORASP1,TTC21A,WDR48                                   |
| 22 | 12,525,000 | 12,675,000 | 168 | 493  | 0.349611082  | CMYA1,CSRNP1,CX3CR1                                                 |
| 22 | 12,600,000 | 12,750,000 | 169 | 557  | 0.622658536  | CCR8,CX3CR1,RPSA,SLC25A38,ENSBTAG00000009760<br>,ENSBTAG00000015493 |
| 22 | 12,675,000 | 12,825,000 | 170 | 519  | 0.261830231  | CCR8,MOBP,RPSA,SLC25A38,ENSBTAG00000009760,E<br>NSBTAG00000015493   |
| 22 | 12,750,000 | 12,900,000 | 171 | 662  | -1.643145271 | MOBP                                                                |
| 22 | 12,825,000 | 12,975,000 | 172 | 984  | -0.892880103 |                                                                     |
| 22 | 12,900,000 | 13,050,000 | 173 | 842  | -0.519265556 |                                                                     |
| 22 | 12,975,000 | 13,125,000 | 174 | 759  | -0.978061173 | MYRIP                                                               |
| 22 | 13,050,000 | 13,200,000 | 175 | 674  | -0.934357216 | MYRIP                                                               |
| 22 | 13,125,000 | 13,275,000 | 176 | 342  | -0.180247948 | EIF1B,ENTPD3,MYRIP                                                  |
| 22 | 13,200,000 | 13,350,000 | 177 | 284  | 0.606225222  | EIF1B,ENTPD3,RPL14,ENSBTAG00000018057                               |
| 22 | 13,275,000 | 13,425,000 | 178 | 319  | 0.920088953  | ENTPD3,RPL14,ENSBTAG00000018057                                     |
| 22 | 13,350,000 | 13,500,000 | 179 | 363  | 0.565871966  | ENSBTAG00000018057                                                  |
| 22 | 13,425,000 | 13,575,000 | 180 | 705  | 0.491115407  |                                                                     |
| 22 | 13,500,000 | 13,650,000 | 181 | 928  | 0.841857141  |                                                                     |
| 22 | 13,575,000 | 13,725,000 | 182 | 636  | 1.01124485   |                                                                     |
| 22 | 13,650,000 | 13,800,000 | 183 | 566  | 1.149069105  |                                                                     |
| 22 | 13,725,000 | 13,875,000 | 184 | 527  | 1.13912997   | CTNNB1                                                              |
| 22 | 13,800,000 | 13,950,000 | 185 | 352  | 0.376246704  | CTNNB1                                                              |
| 22 | 13,875,000 | 14,025,000 | 186 | 779  | 0.007352789  | CTNNB1                                                              |
| 22 | 13,950,000 | 14,100,000 | 187 | 1266 | 0.734322351  |                                                                     |
| 22 | 14,025,000 | 14,175,000 | 188 | 1225 | 1.002557609  |                                                                     |
| 22 | 14,100,000 | 14,250,000 | 189 | 891  | -0.533907632 |                                                                     |
| 22 | 14,175,000 | 14,325,000 | 190 | 970  | -1.344134669 |                                                                     |
| 22 | 14,250,000 | 14,400,000 | 191 | 988  | -0.519544933 |                                                                     |
| 22 | 14,325,000 | 14,475,000 | 192 | 548  | -0.458446577 | ABHD5                                                               |
| 22 | 14,400,000 | 14,550,000 | 193 | 579  | 0.625829684  | ABHD5                                                               |
| 22 | 14,475,000 | 14,625,000 | 194 | 629  | 0.617309214  | ABHD5                                                               |
| 22 | 14,550,000 | 14,700,000 | 195 | 536  | 0.551143109  |                                                                     |
| 22 | 14,625,000 | 14,775,000 | 196 | 608  | 0.917427833  |                                                                     |
| 22 | 14,700,000 | 14,850,000 | 197 | 688  | 0.609301143  |                                                                     |
| 22 | 14,775,000 | 14,925,000 | 198 | 636  | 0.237661595  |                                                                     |
| 22 | 14,850,000 | 15,000,000 | 199 | 533  | -0.139109282 |                                                                     |
| 22 | 14,925,000 | 15,075,000 | 200 | 809  | 0.49667668   |                                                                     |
| 22 | 15,000,000 | 15,150,000 | 201 | 833  | 0.509148096  | TRAK1                                                               |
| 22 | 15,075,000 | 15,225,000 | 202 | 648  | 0.236100547  | CCK,TRAK1,ENSBTAG00000047883                                        |
| 22 | 15,150,000 | 15,300,000 | 203 | 657  | 0.734515315  | CCK,LYZL4,TRAK1,VIPR1,ENSBTAG00000047883                            |
| 22 | 15,225,000 | 15,375,000 | 204 | 479  | 0.40755399   | LYZL4,NKTR,SEC22C,VIPR1                                             |
| 22 | 15,300,000 | 15,450,000 | 205 | 334  | 0.098488562  | KBTBD5,NKTR,SEC22C,VIPR1,ZBTB47                                     |
| 22 | 15,375,000 | 15,525,000 | 206 | 346  | 0.348208747  | CCDC13,HHATL,HIGD1D,KBTBD5,NKTR,ZBTB47                              |
| 22 | 15,450,000 | 15,600,000 | 207 | 526  | 0.535634111  | CCBP2,CCDC13,CYP8B1,HHATL,HIGD1D,KBTBD5                             |
| 22 | 15,525,000 | 15,675,000 | 208 | 695  | 0.685154738  | CCBP2,CYP8B1                                                        |
| 22 | 15,600,000 | 15,750,000 | 209 | 626  | 0.69862714   | POMGNT2                                                             |



|    |            |            |     |      |              |                                                                                  |
|----|------------|------------|-----|------|--------------|----------------------------------------------------------------------------------|
| 22 | 15,675,000 | 15,825,000 | 210 | 455  | 0.289243472  | POMGNT2                                                                          |
| 22 | 15,750,000 | 15,900,000 | 211 | 577  | 0.21048656   | SNRK,ENSBTAG00000008244                                                          |
| 22 | 15,825,000 | 15,975,000 | 212 | 585  | 0.611290396  | ANO10,SNRK,ENSBTAG00000008244                                                    |
| 22 | 15,900,000 | 16,050,000 | 213 | 463  | 0.852639842  | ANO10,SNRK                                                                       |
| 22 | 15,975,000 | 16,125,000 | 214 | 461  | 0.462774599  | ANO10                                                                            |
| 22 | 16,050,000 | 16,200,000 | 215 | 329  | 0.274491665  | ANO10                                                                            |
| 22 | 16,125,000 | 16,275,000 | 216 | 360  | 1.236024711  | ANO10,TOPAZ1                                                                     |
| 22 | 16,200,000 | 16,350,000 | 217 | 484  | -0.278179159 | TCAIM,TOPAZ1                                                                     |
| 22 | 16,275,000 | 16,425,000 | 218 | 805  | -0.262996622 | TCAIM,TOPAZ1,ZNF445,ZNF852,ENSBTAG00000030533                                    |
| 22 | 16,350,000 | 16,500,000 | 219 | 771  | -0.033572967 | ZNF197,ZNF35,ZNF445,ZNF852,ENSBTAG00000030533                                    |
| 22 | 16,425,000 | 16,575,000 | 220 | 643  | 0.099414236  | KIAA1143,KIF15,ZNF197,ZNF35,ZNF502,ZNF852                                        |
| 22 | 16,500,000 | 16,650,000 | 221 | 1155 | 0.623662055  | KIAA1143,KIF15,ZNF35,ZNF502,ENSBTAG00000047611                                   |
| 22 | 16,575,000 | 16,725,000 | 222 | 1325 | 0.794669381  | IRAK2,KIF15,ENSBTAG00000019479,ENSBTAG00000047611                                |
| 22 | 16,650,000 | 16,800,000 | 223 | 770  | 0.873338031  | C22H3ORF10,FANCD2,FANCD2OS,IRAK2,VHL,ENSBTAG00000019479                          |
| 22 | 16,725,000 | 16,875,000 | 224 | 328  | 0.190662931  | C22H3ORF10,CRELD1,EMC3,FANCD2,FANCD2OS,IL17RC,IRAK2,PRRT3,VHL                    |
| 22 | 16,800,000 | 16,950,000 | 225 | 326  | -0.292082872 | CIDEC,CRELD1,EMC3,FANCD2,IL17RC,IL17RE,JAGN1,PRRT3,RPUSD3,ENSBTAG00000007966     |
| 22 | 16,875,000 | 17,025,000 | 226 | 292  | -0.624367251 | ARPC4,BRPF1,CAMK1,CIDEC,IL17RC,IL17RE,JAGN1,OGG1,RPUSD3,TADA3,ENSBTAG00000007966 |
| 22 | 16,950,000 | 17,100,000 | 227 | 260  | -0.736699836 | ARPC4,BRPF1,CAMK1,CPNE9,MTMR14,OGG1,TADA3,ENSBTAG00000007966                     |
| 22 | 17,025,000 | 17,175,000 | 228 | 243  | -1.050763333 | CPNE9,LHFPL4,MTMR14                                                              |
| 22 | 17,100,000 | 17,250,000 | 229 | 179  | -1.263704564 | LHFPL4,SETD5                                                                     |
| 22 | 17,175,000 | 17,325,000 | 230 | 137  | -1.097193053 | SETD5,THUMPD3                                                                    |
| 22 | 17,250,000 | 17,400,000 | 231 | 193  | -0.018238882 | SRGAP3,THUMPD3                                                                   |
| 22 | 17,325,000 | 17,475,000 | 232 | 275  | 0.240513402  | SRGAP3                                                                           |
| 22 | 17,400,000 | 17,550,000 | 233 | 423  | 0.236502415  | SRGAP3                                                                           |
| 22 | 17,475,000 | 17,625,000 | 234 | 524  | 0.08224246   | SRGAP3                                                                           |
| 22 | 17,550,000 | 17,700,000 | 235 | 420  | -0.087085059 | RAD18,SRGAP3                                                                     |
| 22 | 17,625,000 | 17,775,000 | 236 | 360  | 0.175264143  | RAD18                                                                            |
| 22 | 17,700,000 | 17,850,000 | 237 | 475  | -0.57990517  | CAV3,OXTR,RAD18                                                                  |
| 22 | 17,775,000 | 17,925,000 | 238 | 616  | -0.433499645 | CAV3,OXTR,SSUH2                                                                  |
| 22 | 17,850,000 | 18,000,000 | 239 | 731  | 0.288885441  | LMCD1,SSUH2                                                                      |
| 22 | 17,925,000 | 18,075,000 | 240 | 706  | 0.739799289  | LMCD1                                                                            |
| 22 | 18,000,000 | 18,150,000 | 241 | 615  | 0.61917064   | LMCD1                                                                            |
| 22 | 18,075,000 | 18,225,000 | 242 | 789  | 0.421348002  |                                                                                  |
| 22 | 18,150,000 | 18,300,000 | 243 | 947  | -0.902992512 |                                                                                  |
| 22 | 18,225,000 | 18,375,000 | 244 | 878  | -2.26414219  |                                                                                  |
| 22 | 18,300,000 | 18,450,000 | 245 | 949  | -1.286579569 |                                                                                  |
| 22 | 18,375,000 | 18,525,000 | 246 | 1092 | -0.19337976  |                                                                                  |
| 22 | 18,450,000 | 18,600,000 | 247 | 1145 | 0.483287077  |                                                                                  |
| 22 | 18,525,000 | 18,675,000 | 248 | 861  | 0.365578553  |                                                                                  |
| 22 | 18,600,000 | 18,750,000 | 249 | 447  | -0.490899462 | GRM7                                                                             |
| 22 | 18,675,000 | 18,825,000 | 250 | 776  | -0.328954764 | GRM7                                                                             |
| 22 | 18,750,000 | 18,900,000 | 251 | 1387 | 0.095396784  | GRM7                                                                             |
| 22 | 18,825,000 | 18,975,000 | 252 | 1689 | 0.247463534  | GRM7                                                                             |
| 22 | 18,900,000 | 19,050,000 | 253 | 1690 | 0.18846065   | GRM7                                                                             |

|    |            |            |     |      |              |                    |
|----|------------|------------|-----|------|--------------|--------------------|
| 22 | 18,975,000 | 19,125,000 | 254 | 1390 | 0.462842708  | GRM7               |
| 22 | 19,050,000 | 19,200,000 | 255 | 1073 | 0.43451593   | GRM7               |
| 22 | 19,125,000 | 19,275,000 | 256 | 999  | 0.300572303  | GRM7               |
| 22 | 19,200,000 | 19,350,000 | 257 | 1416 | 0.361527093  | GRM7               |
| 22 | 19,275,000 | 19,425,000 | 258 | 1568 | 0.482053136  | GRM7               |
| 22 | 19,350,000 | 19,500,000 | 259 | 1404 | 1.169229259  | GRM7               |
| 22 | 19,425,000 | 19,575,000 | 260 | 1486 | 1.172153434  | GRM7               |
| 22 | 19,500,000 | 19,650,000 | 261 | 1431 | 0.162488965  | GRM7               |
| 22 | 19,575,000 | 19,725,000 | 262 | 1319 | -0.616199987 | GRM7               |
| 22 | 19,650,000 | 19,800,000 | 263 | 1267 | 0.119691874  |                    |
| 22 | 19,725,000 | 19,875,000 | 264 | 1372 | -1.842539284 |                    |
| 22 | 19,800,000 | 19,950,000 | 265 | 1617 | -3.368809543 |                    |
| 22 | 19,875,000 | 20,025,000 | 266 | 1434 | -2.116691431 |                    |
| 22 | 19,950,000 | 20,100,000 | 267 | 1149 | -0.01847365  |                    |
| 22 | 20,025,000 | 20,175,000 | 268 | 1003 | -0.675455663 |                    |
| 22 | 20,100,000 | 20,250,000 | 269 | 864  | -1.02647194  |                    |
| 22 | 20,175,000 | 20,325,000 | 270 | 854  | -0.277530921 |                    |
| 22 | 20,250,000 | 20,400,000 | 271 | 871  | -0.142956866 |                    |
| 22 | 20,325,000 | 20,475,000 | 272 | 1010 | -0.625223924 |                    |
| 22 | 20,400,000 | 20,550,000 | 273 | 1534 | -0.799786503 |                    |
| 22 | 20,475,000 | 20,625,000 | 274 | 1633 | -1.191452244 |                    |
| 22 | 20,550,000 | 20,700,000 | 275 | 975  | -1.483912756 |                    |
| 22 | 20,625,000 | 20,775,000 | 276 | 988  | 0.260691954  |                    |
| 22 | 20,700,000 | 20,850,000 | 277 | 1233 | -0.124374715 |                    |
| 22 | 20,775,000 | 20,925,000 | 278 | 1059 | -1.186977426 |                    |
| 22 | 20,850,000 | 21,000,000 | 279 | 795  | -0.445577892 |                    |
| 22 | 20,925,000 | 21,075,000 | 280 | 759  | 0.921301701  |                    |
| 22 | 21,000,000 | 21,150,000 | 281 | 1207 | 0.912639686  |                    |
| 22 | 21,075,000 | 21,225,000 | 282 | 1170 | 0.843408639  |                    |
| 22 | 21,150,000 | 21,300,000 | 283 | 742  | 0.482121475  | EDEM1              |
| 22 | 21,225,000 | 21,375,000 | 284 | 750  | 0.107116991  | ARL8B,EDEM1        |
| 22 | 21,300,000 | 21,450,000 | 285 | 738  | 0.31348463   | ARL8B              |
| 22 | 21,375,000 | 21,525,000 | 286 | 644  | -0.219177593 | BHLHE40            |
| 22 | 21,450,000 | 21,600,000 | 287 | 636  | -1.172714062 | BHLHE40            |
| 22 | 21,525,000 | 21,675,000 | 288 | 684  | -0.33298332  | ITPR1              |
| 22 | 21,600,000 | 21,750,000 | 289 | 739  | -1.39106638  | ITPR1              |
| 22 | 21,675,000 | 21,825,000 | 290 | 650  | -2.172028777 | ITPR1              |
| 22 | 21,750,000 | 21,900,000 | 291 | 648  | -0.31311686  | ITPR1              |
| 22 | 21,825,000 | 21,975,000 | 292 | 737  | 0.573925096  | ITPR1              |
| 22 | 21,900,000 | 22,050,000 | 293 | 908  | 0.504883372  | SUMF1              |
| 22 | 21,975,000 | 22,125,000 | 294 | 1054 | 0.513516724  | SETMAR,SHFM1,SUMF1 |
| 22 | 22,050,000 | 22,200,000 | 295 | 1165 | -0.003855451 | SETMAR,SHFM1,SUMF1 |
| 22 | 22,125,000 | 22,275,000 | 296 | 1021 | -0.406444454 |                    |
| 22 | 22,200,000 | 22,350,000 | 297 | 753  | -0.94537583  |                    |
| 22 | 22,275,000 | 22,425,000 | 298 | 1023 | 0.342396836  |                    |
| 22 | 22,350,000 | 22,500,000 | 299 | 1172 | 0.451916203  |                    |
| 22 | 22,425,000 | 22,575,000 | 300 | 1065 | -1.451715899 |                    |
| 22 | 22,500,000 | 22,650,000 | 301 | 1145 | -0.756893358 | LRRN1              |
| 22 | 22,575,000 | 22,725,000 | 302 | 1243 | -0.028127197 | LRRN1              |
| 22 | 22,650,000 | 22,800,000 | 303 | 1167 | -0.476159575 |                    |
| 22 | 22,725,000 | 22,875,000 | 304 | 1174 | 0.097303428  |                    |
| 22 | 22,800,000 | 22,950,000 | 305 | 1502 | 0.350346468  |                    |
| 22 | 22,875,000 | 23,025,000 | 306 | 1710 | 0.909472526  |                    |

|    |            |            |     |      |              |                        |
|----|------------|------------|-----|------|--------------|------------------------|
| 22 | 22,950,000 | 23,100,000 | 307 | 1719 | 0.508863093  |                        |
| 22 | 23,025,000 | 23,175,000 | 308 | 1620 | 0.010525725  |                        |
| 22 | 23,100,000 | 23,250,000 | 309 | 1751 | -0.089610923 | CRBN                   |
| 22 | 23,175,000 | 23,325,000 | 310 | 1776 | -0.549475534 | CRBN,IL5RA,TRNT1       |
| 22 | 23,250,000 | 23,400,000 | 311 | 1677 | 0.160293788  | CNTN4,CRBN,IL5RA,TRNT1 |
| 22 | 23,325,000 | 23,475,000 | 312 | 1546 | 0.722342629  | CNTN4,IL5RA            |
| 22 | 23,400,000 | 23,550,000 | 313 | 1486 | 0.412378811  | CNTN4                  |
| 22 | 23,475,000 | 23,625,000 | 314 | 1704 | 0.334198997  | CNTN4                  |
| 22 | 23,550,000 | 23,700,000 | 315 | 1634 | 0.083226951  | CNTN4                  |
| 22 | 23,625,000 | 23,775,000 | 316 | 1651 | 0.16541866   |                        |
| 22 | 23,700,000 | 23,850,000 | 317 | 1713 | 0.814053714  |                        |
| 22 | 23,775,000 | 23,925,000 | 318 | 1540 | 0.59515237   |                        |
| 22 | 23,850,000 | 24,000,000 | 319 | 1037 | -0.217054445 |                        |
| 22 | 23,925,000 | 24,075,000 | 320 | 826  | -0.935073899 |                        |
| 22 | 24,000,000 | 24,150,000 | 321 | 964  | 0.021503616  |                        |
| 22 | 24,075,000 | 24,225,000 | 322 | 809  | -0.043134497 |                        |
| 22 | 24,150,000 | 24,300,000 | 323 | 677  | -0.555770577 |                        |
| 22 | 24,225,000 | 24,375,000 | 324 | 606  | 0.417970139  |                        |
| 22 | 24,300,000 | 24,450,000 | 325 | 438  | 0.503910448  |                        |
| 22 | 24,375,000 | 24,525,000 | 326 | 596  | -0.492780021 |                        |
| 22 | 24,450,000 | 24,600,000 | 327 | 993  | -0.17810145  |                        |
| 22 | 24,525,000 | 24,675,000 | 328 | 866  | -0.446770287 |                        |
| 22 | 24,600,000 | 24,750,000 | 329 | 824  | -0.31941047  |                        |
| 22 | 24,675,000 | 24,825,000 | 330 | 955  | 1.013123617  |                        |
| 22 | 24,750,000 | 24,900,000 | 331 | 790  | 0.566076865  |                        |
| 22 | 24,825,000 | 24,975,000 | 332 | 1020 | -1.500845171 |                        |
| 22 | 24,900,000 | 25,050,000 | 333 | 1108 | -1.332099514 |                        |
| 22 | 24,975,000 | 25,125,000 | 334 | 690  | -0.184404258 | CNTN6                  |
| 22 | 25,050,000 | 25,200,000 | 335 | 599  | -0.314390327 | CNTN6                  |
| 22 | 25,125,000 | 25,275,000 | 336 | 603  | -0.04390124  | CNTN6                  |
| 22 | 25,200,000 | 25,350,000 | 337 | 1039 | -1.838417832 | CNTN6                  |
| 22 | 25,275,000 | 25,425,000 | 338 | 1537 | -1.507023316 |                        |
| 22 | 25,350,000 | 25,500,000 | 339 | 1605 | 0.19696183   |                        |
| 22 | 25,425,000 | 25,575,000 | 340 | 1173 | 0.732821798  |                        |
| 22 | 25,500,000 | 25,650,000 | 341 | 747  | 0.776127127  |                        |
| 22 | 25,575,000 | 25,725,000 | 342 | 827  | 0.960017512  |                        |
| 22 | 25,650,000 | 25,800,000 | 343 | 663  | 0.926582831  |                        |
| 22 | 25,725,000 | 25,875,000 | 344 | 511  | 0.801893914  |                        |
| 22 | 25,800,000 | 25,950,000 | 345 | 655  | 0.424740898  |                        |
| 22 | 25,875,000 | 26,025,000 | 346 | 908  | 0.393038281  |                        |
| 22 | 25,950,000 | 26,100,000 | 347 | 1141 | 0.649297061  |                        |
| 22 | 26,025,000 | 26,175,000 | 348 | 1099 | 0.383154703  | CHL1                   |
| 22 | 26,100,000 | 26,250,000 | 349 | 753  | 0.669235737  | CHL1                   |
| 22 | 26,175,000 | 26,325,000 | 350 | 925  | 0.793764275  | CHL1                   |
| 22 | 26,250,000 | 26,400,000 | 351 | 1063 | 0.472441794  | CHL1                   |
| 22 | 26,325,000 | 26,475,000 | 352 | 796  | 0.589930575  |                        |
| 22 | 26,400,000 | 26,550,000 | 353 | 480  | 0.565667025  |                        |
| 22 | 26,475,000 | 26,625,000 | 354 | 292  | 0.402815307  |                        |
| 22 | 26,550,000 | 26,700,000 | 355 | 373  | -0.065378488 |                        |
| 22 | 26,625,000 | 26,775,000 | 356 | 804  | 0.724833752  |                        |
| 22 | 26,700,000 | 26,850,000 | 357 | 1209 | 0.764931042  |                        |
| 22 | 26,775,000 | 26,925,000 | 358 | 897  | 0.533289263  |                        |
| 22 | 26,850,000 | 27,000,000 | 359 | 556  | 0.607658548  |                        |

|    |            |            |     |      |              |               |
|----|------------|------------|-----|------|--------------|---------------|
| 22 | 26,925,000 | 27,075,000 | 360 | 662  | 0.276402966  |               |
| 22 | 27,000,000 | 27,150,000 | 361 | 732  | -1.171700628 |               |
| 22 | 27,075,000 | 27,225,000 | 362 | 640  | -2.221127396 |               |
| 22 | 27,150,000 | 27,300,000 | 363 | 624  | -1.009646773 | CNTN3         |
| 22 | 27,225,000 | 27,375,000 | 364 | 1146 | 0.756736146  | CNTN3         |
| 22 | 27,300,000 | 27,450,000 | 365 | 1559 | 0.984936498  | CNTN3         |
| 22 | 27,375,000 | 27,525,000 | 366 | 1336 | 0.330414405  | CNTN3         |
| 22 | 27,450,000 | 27,600,000 | 367 | 1337 | 0.208498217  | CNTN3         |
| 22 | 27,525,000 | 27,675,000 | 368 | 1468 | 0.993921235  | CNTN3         |
| 22 | 27,600,000 | 27,750,000 | 369 | 1156 | 1.173971104  |               |
| 22 | 27,675,000 | 27,825,000 | 370 | 864  | 0.131208309  |               |
| 22 | 27,750,000 | 27,900,000 | 371 | 1222 | 0.498568029  |               |
| 22 | 27,825,000 | 27,975,000 | 372 | 1341 | 0.523046625  |               |
| 22 | 27,900,000 | 28,050,000 | 373 | 1091 | -0.510157701 |               |
| 22 | 27,975,000 | 28,125,000 | 374 | 948  | -1.413581438 |               |
| 22 | 28,050,000 | 28,200,000 | 375 | 912  | -0.970464035 |               |
| 22 | 28,125,000 | 28,275,000 | 376 | 965  | 1.22731022   | PDZRN3        |
| 22 | 28,200,000 | 28,350,000 | 377 | 1081 | 0.012193118  | PDZRN3        |
| 22 | 28,275,000 | 28,425,000 | 378 | 957  | -0.557267176 | PDZRN3        |
| 22 | 28,350,000 | 28,500,000 | 379 | 603  | 1.00552182   | PDZRN3        |
| 22 | 28,425,000 | 28,575,000 | 380 | 619  | 1.06953653   | PDZRN3        |
| 22 | 28,500,000 | 28,650,000 | 381 | 800  | 0.828313847  | PDZRN3        |
| 22 | 28,575,000 | 28,725,000 | 382 | 837  | 1.101647136  |               |
| 22 | 28,650,000 | 28,800,000 | 383 | 753  | 1.40765706   | PPP4R2        |
| 22 | 28,725,000 | 28,875,000 | 384 | 866  | 1.204066373  | GXYLT2,PPP4R2 |
| 22 | 28,800,000 | 28,950,000 | 385 | 1044 | 1.202815283  | GXYLT2,PPP4R2 |
| 22 | 28,875,000 | 29,025,000 | 386 | 887  | 0.944010007  | GXYLT2,SHQ1   |
| 22 | 28,950,000 | 29,100,000 | 387 | 660  | 0.53265455   | SHQ1          |
| 22 | 29,025,000 | 29,175,000 | 388 | 655  | 0.663706338  | SHQ1          |
| 22 | 29,100,000 | 29,250,000 | 389 | 636  | 0.780067245  |               |
| 22 | 29,175,000 | 29,325,000 | 390 | 521  | 0.794361293  | RYBP          |
| 22 | 29,250,000 | 29,400,000 | 391 | 487  | 0.229082626  | RYBP          |
| 22 | 29,325,000 | 29,475,000 | 392 | 656  | -0.624777925 | RYBP          |
| 22 | 29,400,000 | 29,550,000 | 393 | 807  | -0.086699525 |               |
| 22 | 29,475,000 | 29,625,000 | 394 | 592  | 0.576165458  |               |
| 22 | 29,550,000 | 29,700,000 | 395 | 380  | 0.523351838  |               |
| 22 | 29,625,000 | 29,775,000 | 396 | 326  | 0.323383081  |               |
| 22 | 29,700,000 | 29,850,000 | 397 | 618  | -0.723564896 |               |
| 22 | 29,775,000 | 29,925,000 | 398 | 832  | -0.104198894 |               |
| 22 | 29,850,000 | 30,000,000 | 399 | 513  | 0.627069092  |               |
| 22 | 29,925,000 | 30,075,000 | 400 | 402  | -0.294609082 | EIF4E3,PROK2  |
| 22 | 30,000,000 | 30,150,000 | 401 | 544  | -0.15293489  | EIF4E3,PROK2  |
| 22 | 30,075,000 | 30,225,000 | 402 | 539  | 0.191140803  | EIF4E3        |
| 22 | 30,150,000 | 30,300,000 | 403 | 503  | 0.159295298  |               |
| 22 | 30,225,000 | 30,375,000 | 404 | 466  | 0.043983079  |               |
| 22 | 30,300,000 | 30,450,000 | 405 | 332  | 0.36608904   | FOXP1         |
| 22 | 30,375,000 | 30,525,000 | 406 | 276  | 0.385649176  | FOXP1         |
| 22 | 30,450,000 | 30,600,000 | 407 | 341  | 0.678699202  | FOXP1         |
| 22 | 30,525,000 | 30,675,000 | 408 | 381  | 0.585478873  | FOXP1         |
| 22 | 30,600,000 | 30,750,000 | 409 | 390  | -3.30158126  | FOXP1         |
| 22 | 30,675,000 | 30,825,000 | 410 | 411  | -3.131567394 | FOXP1         |
| 22 | 30,750,000 | 30,900,000 | 411 | 376  | 0.528523945  | FOXP1         |
| 22 | 30,825,000 | 30,975,000 | 412 | 344  | 0.297346497  |               |

|    |            |            |     |      |              |                                |
|----|------------|------------|-----|------|--------------|--------------------------------|
| 22 | 30,900,000 | 31,050,000 | 413 | 358  | -0.615197365 |                                |
| 22 | 30,975,000 | 31,125,000 | 414 | 636  | 0.401259537  |                                |
| 22 | 31,050,000 | 31,200,000 | 415 | 775  | 0.971729822  |                                |
| 22 | 31,125,000 | 31,275,000 | 416 | 651  | -0.19767207  |                                |
| 22 | 31,200,000 | 31,350,000 | 417 | 812  | 0.035634375  |                                |
| 22 | 31,275,000 | 31,425,000 | 418 | 769  | 0.415667853  |                                |
| 22 | 31,350,000 | 31,500,000 | 419 | 585  | -0.731932519 |                                |
| 22 | 31,425,000 | 31,575,000 | 420 | 500  | -0.490209664 | ENSBTAG00000048050             |
| 22 | 31,500,000 | 31,650,000 | 421 | 472  | 0.79036295   | ENSBTAG00000048050             |
| 22 | 31,575,000 | 31,725,000 | 422 | 747  | 0.085352281  |                                |
| 22 | 31,650,000 | 31,800,000 | 423 | 717  | -0.579287694 | MITF                           |
| 22 | 31,725,000 | 31,875,000 | 424 | 348  | -2.104619461 | MITF                           |
| 22 | 31,800,000 | 31,950,000 | 425 | 297  | -2.965882268 |                                |
| 22 | 31,875,000 | 32,025,000 | 426 | 593  | -1.868515306 |                                |
| 22 | 31,950,000 | 32,100,000 | 427 | 735  | -0.960662873 |                                |
| 22 | 32,025,000 | 32,175,000 | 428 | 521  | 0.15420404   |                                |
| 22 | 32,100,000 | 32,250,000 | 429 | 719  | 0.322365429  |                                |
| 22 | 32,175,000 | 32,325,000 | 430 | 1111 | -0.359246784 |                                |
| 22 | 32,250,000 | 32,400,000 | 431 | 774  | -0.528081458 | FRMD4B                         |
| 22 | 32,325,000 | 32,475,000 | 432 | 341  | 0.81220248   | FRMD4B                         |
| 22 | 32,400,000 | 32,550,000 | 433 | 409  | 0.717217623  | FRMD4B,LMOD3                   |
| 22 | 32,475,000 | 32,625,000 | 434 | 384  | 0.723280947  | ARL6IP5,FRMD4B,LMOD3,TMF1,UBA3 |
| 22 | 32,550,000 | 32,700,000 | 435 | 313  | -0.617453788 | ARL6IP5,EOGT,LMOD3,TMF1,UBA3   |
| 22 | 32,625,000 | 32,775,000 | 436 | 475  | -0.429696832 | EOGT,FAM19A4,TMF1              |
| 22 | 32,700,000 | 32,850,000 | 437 | 841  | -0.546153497 | FAM19A4                        |
| 22 | 32,775,000 | 32,925,000 | 438 | 1087 | -0.127140946 | FAM19A4                        |
| 22 | 32,850,000 | 33,000,000 | 439 | 854  | 0.495697507  | FAM19A4                        |
| 22 | 32,925,000 | 33,075,000 | 440 | 843  | -0.180603498 | FAM19A1                        |
| 22 | 33,000,000 | 33,150,000 | 441 | 1067 | -1.369450384 | FAM19A1                        |
| 22 | 33,075,000 | 33,225,000 | 442 | 1181 | -0.573787663 | FAM19A1                        |
| 22 | 33,150,000 | 33,300,000 | 443 | 1329 | 0.626013502  | FAM19A1                        |
| 22 | 33,225,000 | 33,375,000 | 444 | 1556 | 0.725824542  | FAM19A1                        |
| 22 | 33,300,000 | 33,450,000 | 445 | 1356 | -0.142552801 | FAM19A1                        |
| 22 | 33,375,000 | 33,525,000 | 446 | 1019 | -1.327887571 | FAM19A1                        |
| 22 | 33,450,000 | 33,600,000 | 447 | 830  | 0.068714151  | FAM19A1                        |
| 22 | 33,525,000 | 33,675,000 | 448 | 821  | 0.455985093  | FAM19A1                        |
| 22 | 33,600,000 | 33,750,000 | 449 | 769  | 0.309121958  |                                |
| 22 | 33,675,000 | 33,825,000 | 450 | 907  | 0.590247609  |                                |
| 22 | 33,750,000 | 33,900,000 | 451 | 1214 | 0.565619015  |                                |
| 22 | 33,825,000 | 33,975,000 | 452 | 757  | 0.685206999  |                                |
| 22 | 33,900,000 | 34,050,000 | 453 | 335  | 1.18018527   | SUCLG2                         |
| 22 | 33,975,000 | 34,125,000 | 454 | 360  | 1.213068728  | SUCLG2                         |
| 22 | 34,050,000 | 34,200,000 | 455 | 407  | 1.235908222  | SUCLG2                         |
| 22 | 34,125,000 | 34,275,000 | 456 | 692  | 1.37654602   | SUCLG2                         |
| 22 | 34,200,000 | 34,350,000 | 457 | 652  | 1.379217522  | SUCLG2                         |
| 22 | 34,275,000 | 34,425,000 | 458 | 405  | 1.225440012  |                                |
| 22 | 34,350,000 | 34,500,000 | 459 | 573  | 1.155004787  |                                |
| 22 | 34,425,000 | 34,575,000 | 460 | 613  | 0.975823866  |                                |
| 22 | 34,500,000 | 34,650,000 | 461 | 739  | 0.774971372  | KBTD8                          |
| 22 | 34,575,000 | 34,725,000 | 462 | 718  | 0.862828022  | KBTD8                          |
| 22 | 34,650,000 | 34,800,000 | 463 | 444  | 1.09581785   |                                |
| 22 | 34,725,000 | 34,875,000 | 464 | 453  | 0.744760726  |                                |
| 22 | 34,800,000 | 34,950,000 | 465 | 761  | -0.513287967 |                                |

|    |            |            |     |      |              |                                             |
|----|------------|------------|-----|------|--------------|---------------------------------------------|
| 22 | 34,875,000 | 35,025,000 | 466 | 910  | -1.377797935 |                                             |
| 22 | 34,950,000 | 35,100,000 | 467 | 832  | -0.423079465 | LRIG1,ENSBTAG00000046330,ENSBTAG00000047851 |
| 22 | 35,025,000 | 35,175,000 | 468 | 886  | 0.310318594  | LRIG1,ENSBTAG00000046330,ENSBTAG00000047851 |
| 22 | 35,100,000 | 35,250,000 | 469 | 1016 | 0.169102345  | LRIG1,SLC25A26                              |
| 22 | 35,175,000 | 35,325,000 | 470 | 1193 | 0.420440092  | LRIG1,SLC25A26                              |
| 22 | 35,250,000 | 35,400,000 | 471 | 1365 | 0.939573004  | ATP5E,SLC25A26                              |
| 22 | 35,325,000 | 35,475,000 | 472 | 1259 | 0.904608927  | ATP5E,SLC25A26                              |
| 22 | 35,400,000 | 35,550,000 | 473 | 1177 | 0.135200347  |                                             |
| 22 | 35,475,000 | 35,625,000 | 474 | 1423 | 0.630901741  |                                             |
| 22 | 35,550,000 | 35,700,000 | 475 | 1386 | 1.05405125   |                                             |
| 22 | 35,625,000 | 35,775,000 | 476 | 1130 | 0.63284723   |                                             |
| 22 | 35,700,000 | 35,850,000 | 477 | 1220 | 0.62483744   |                                             |
| 22 | 35,775,000 | 35,925,000 | 478 | 1223 | 0.853682067  |                                             |
| 22 | 35,850,000 | 36,000,000 | 479 | 1126 | 1.046924397  |                                             |
| 22 | 35,925,000 | 36,075,000 | 480 | 943  | 0.838556308  | MAGI1                                       |
| 22 | 36,000,000 | 36,150,000 | 481 | 767  | 0.733176026  | MAGI1                                       |
| 22 | 36,075,000 | 36,225,000 | 482 | 1062 | 1.174180392  | MAGI1                                       |
| 22 | 36,150,000 | 36,300,000 | 483 | 1226 | 1.183716741  |                                             |
| 22 | 36,225,000 | 36,375,000 | 484 | 1124 | 0.921173363  |                                             |
| 22 | 36,300,000 | 36,450,000 | 485 | 1077 | 0.654553696  |                                             |
| 22 | 36,375,000 | 36,525,000 | 486 | 957  | 0.72349086   |                                             |
| 22 | 36,450,000 | 36,600,000 | 487 | 832  | 0.88783802   |                                             |
| 22 | 36,525,000 | 36,675,000 | 488 | 718  | 0.946420611  |                                             |
| 22 | 36,600,000 | 36,750,000 | 489 | 593  | 0.609853899  | ENSBTAG00000008534                          |
| 22 | 36,675,000 | 36,825,000 | 490 | 606  | -0.052592714 | ENSBTAG00000008534                          |
| 22 | 36,750,000 | 36,900,000 | 491 | 548  | -0.717775275 | ADAMTS9                                     |
| 22 | 36,825,000 | 36,975,000 | 492 | 509  | 0.013694341  | ADAMTS9                                     |
| 22 | 36,900,000 | 37,050,000 | 493 | 708  | 0.34297648   | ADAMTS9                                     |
| 22 | 36,975,000 | 37,125,000 | 494 | 896  | 0.202404334  | ADAMTS9                                     |
| 22 | 37,050,000 | 37,200,000 | 495 | 788  | 0.455932907  |                                             |
| 22 | 37,125,000 | 37,275,000 | 496 | 936  | 0.638517247  |                                             |
| 22 | 37,200,000 | 37,350,000 | 497 | 1067 | 1.200059911  | PRICKLE2                                    |
| 22 | 37,275,000 | 37,425,000 | 498 | 953  | 1.427737696  | PRICKLE2                                    |
| 22 | 37,350,000 | 37,500,000 | 499 | 906  | 1.250958666  | PRICKLE2                                    |
| 22 | 37,425,000 | 37,575,000 | 500 | 818  | 0.703159264  | PRICKLE2,PSMD6                              |
| 22 | 37,500,000 | 37,650,000 | 501 | 659  | -0.384906911 | ATXN7,PSMD6                                 |
| 22 | 37,575,000 | 37,725,000 | 502 | 392  | -1.735895597 | ATXN7                                       |
| 22 | 37,650,000 | 37,800,000 | 503 | 788  | 0.173194751  | ATXN7,C3orf49,ENSBTAG00000032872            |
| 22 | 37,725,000 | 37,875,000 | 504 | 1166 | -0.200290791 | C3orf49,SNTN,ENSBTAG00000032872             |
| 22 | 37,800,000 | 37,950,000 | 505 | 776  | -0.583543431 | SNTN,SYNPR                                  |
| 22 | 37,875,000 | 38,025,000 | 506 | 432  | 0.754355574  | SNTN,SYNPR                                  |
| 22 | 37,950,000 | 38,100,000 | 507 | 392  | 0.317432795  | SYNPR                                       |
| 22 | 38,025,000 | 38,175,000 | 508 | 414  | 0.503097362  | SYNPR                                       |
| 22 | 38,100,000 | 38,250,000 | 509 | 466  | 0.517880703  |                                             |
| 22 | 38,175,000 | 38,325,000 | 510 | 531  | 0.207113273  |                                             |
| 22 | 38,250,000 | 38,400,000 | 511 | 425  | 0.04384073   |                                             |
| 22 | 38,325,000 | 38,475,000 | 512 | 526  | -2.198598896 |                                             |
| 22 | 38,400,000 | 38,550,000 | 513 | 747  | -1.406594423 |                                             |
| 22 | 38,475,000 | 38,625,000 | 514 | 792  | 0.883309663  |                                             |
| 22 | 38,550,000 | 38,700,000 | 515 | 1023 | 0.409947731  | CADPS                                       |
| 22 | 38,625,000 | 38,775,000 | 516 | 948  | -0.24451659  | CADPS                                       |
| 22 | 38,700,000 | 38,850,000 | 517 | 1136 | 0.320677667  | CADPS                                       |
| 22 | 38,775,000 | 38,925,000 | 518 | 1231 | 0.440120041  | CADPS                                       |

|    |            |            |     |      |              |                         |
|----|------------|------------|-----|------|--------------|-------------------------|
| 22 | 38,850,000 | 39,000,000 | 519 | 757  | 0.293497088  | CADPS                   |
| 22 | 38,925,000 | 39,075,000 | 520 | 550  | 0.388777505  | CADPS,FEZF2             |
| 22 | 39,000,000 | 39,150,000 | 521 | 516  | -0.79666793  | C3orf14,CADPS,FEZF2     |
| 22 | 39,075,000 | 39,225,000 | 522 | 735  | -0.146162387 | C3orf14,PTPRG           |
| 22 | 39,150,000 | 39,300,000 | 523 | 1206 | -0.072889855 | PTPRG                   |
| 22 | 39,225,000 | 39,375,000 | 524 | 1401 | 0.062065088  | PTPRG                   |
| 22 | 39,300,000 | 39,450,000 | 525 | 1412 | -0.003314548 | PTPRG                   |
| 22 | 39,375,000 | 39,525,000 | 526 | 1127 | -0.377455334 | PTPRG                   |
| 22 | 39,450,000 | 39,600,000 | 527 | 643  | 0.560203982  | PTPRG                   |
| 22 | 39,525,000 | 39,675,000 | 528 | 777  | 0.838895312  | PTPRG                   |
| 22 | 39,600,000 | 39,750,000 | 529 | 1015 | 0.700011712  | PTPRG                   |
| 22 | 39,675,000 | 39,825,000 | 530 | 529  | 0.762467992  | PTPRG                   |
| 22 | 39,750,000 | 39,900,000 | 531 | 33   | -6.579657729 | PTPRG                   |
| 22 | 39,825,000 | 39,975,000 | 532 | 148  | -0.759921987 | PTPRG                   |
| 22 | 39,900,000 | 40,050,000 | 533 | 222  | -1.014241052 | PTPRG                   |
| 22 | 39,975,000 | 40,125,000 | 534 | 367  | -0.320169694 | PTPRG                   |
| 22 | 40,050,000 | 40,200,000 | 535 | 753  | 0.911153827  | PTPRG                   |
| 22 | 40,125,000 | 40,275,000 | 536 | 994  | 0.990675819  | PTPRG                   |
| 22 | 40,200,000 | 40,350,000 | 537 | 920  | 0.738482187  | PTPRG                   |
| 22 | 40,275,000 | 40,425,000 | 538 | 994  | -0.751264712 | PTPRG                   |
| 22 | 40,350,000 | 40,500,000 | 539 | 901  | -1.478338678 | PTPRG                   |
| 22 | 40,425,000 | 40,575,000 | 540 | 656  | -1.39644397  |                         |
| 22 | 40,500,000 | 40,650,000 | 541 | 899  | -0.801393356 |                         |
| 22 | 40,575,000 | 40,725,000 | 542 | 1216 | -0.119680945 |                         |
| 22 | 40,650,000 | 40,800,000 | 543 | 883  | 0.184475654  |                         |
| 22 | 40,725,000 | 40,875,000 | 544 | 300  | 0.370211748  |                         |
| 22 | 40,800,000 | 40,950,000 | 545 | 254  | 0.789068653  |                         |
| 22 | 40,875,000 | 41,025,000 | 546 | 495  | 0.184413225  |                         |
| 22 | 40,950,000 | 41,100,000 | 547 | 832  | -0.070716656 |                         |
| 22 | 41,025,000 | 41,175,000 | 548 | 914  | 0.165431775  |                         |
| 22 | 41,100,000 | 41,250,000 | 549 | 977  | 0.317361477  |                         |
| 22 | 41,175,000 | 41,325,000 | 550 | 1267 | -1.231827322 | FHIT                    |
| 22 | 41,250,000 | 41,400,000 | 551 | 1330 | -1.524164862 | FHIT                    |
| 22 | 41,325,000 | 41,475,000 | 552 | 1213 | -0.603508911 | FHIT,ENSBTAG00000047771 |
| 22 | 41,400,000 | 41,550,000 | 553 | 1179 | -0.753462528 | FHIT,ENSBTAG00000047771 |
| 22 | 41,475,000 | 41,625,000 | 554 | 873  | -0.297817796 | FHIT                    |
| 22 | 41,550,000 | 41,700,000 | 555 | 648  | -0.438905134 | FHIT                    |
| 22 | 41,625,000 | 41,775,000 | 556 | 877  | -0.828473583 | FHIT                    |
| 22 | 41,700,000 | 41,850,000 | 557 | 1137 | -0.231503927 | FHIT                    |
| 22 | 41,775,000 | 41,925,000 | 558 | 1159 | 0.195317019  | FHIT                    |
| 22 | 41,850,000 | 42,000,000 | 559 | 1108 | 0.452479552  | FHIT                    |
| 22 | 41,925,000 | 42,075,000 | 560 | 931  | 0.42980909   | FHIT                    |
| 22 | 42,000,000 | 42,150,000 | 561 | 698  | -0.029754439 | FHIT                    |
| 22 | 42,075,000 | 42,225,000 | 562 | 819  | -0.951790349 | FHIT                    |
| 22 | 42,150,000 | 42,300,000 | 563 | 991  | -0.340716314 |                         |
| 22 | 42,225,000 | 42,375,000 | 564 | 1204 | -0.013770035 |                         |
| 22 | 42,300,000 | 42,450,000 | 565 | 984  | 0.067787902  |                         |
| 22 | 42,375,000 | 42,525,000 | 566 | 1103 | -0.053506796 |                         |
| 22 | 42,450,000 | 42,600,000 | 567 | 1330 | -0.443083583 |                         |
| 22 | 42,525,000 | 42,675,000 | 568 | 1198 | -0.111650957 |                         |
| 22 | 42,600,000 | 42,750,000 | 569 | 1430 | -0.097115105 |                         |
| 22 | 42,675,000 | 42,825,000 | 570 | 1317 | -0.540179561 |                         |
| 22 | 42,750,000 | 42,900,000 | 571 | 1082 | -0.932044957 |                         |

|    |            |            |     |      |              |                                       |
|----|------------|------------|-----|------|--------------|---------------------------------------|
| 22 | 42,825,000 | 42,975,000 | 572 | 827  | -0.951624817 |                                       |
| 22 | 42,900,000 | 43,050,000 | 573 | 628  | -1.922515738 | C3orf67                               |
| 22 | 42,975,000 | 43,125,000 | 574 | 744  | -2.876981161 | C3orf67                               |
| 22 | 43,050,000 | 43,200,000 | 575 | 1135 | -2.961677718 | C3orf67                               |
| 22 | 43,125,000 | 43,275,000 | 576 | 1589 | -1.378845959 | C3orf67,FAM3D                         |
| 22 | 43,200,000 | 43,350,000 | 577 | 1690 | 0.021705405  | FAM3D,MGC143103                       |
| 22 | 43,275,000 | 43,425,000 | 578 | 1184 | -0.071813516 | ACOX2,KCTD6,MGC143103                 |
| 22 | 43,350,000 | 43,500,000 | 579 | 763  | -2.45317089  | ACOX2,KCTD6,MGC143103,PDHB,PXK        |
| 22 | 43,425,000 | 43,575,000 | 580 | 736  | -2.532016843 | ABHD6,PDHB,PXK,RPP14                  |
| 22 | 43,500,000 | 43,650,000 | 581 | 608  | 0.03569842   | ABHD6,DNASE1L3,PXK,RPP14              |
| 22 | 43,575,000 | 43,725,000 | 582 | 1079 | 0.976531822  | ABHD6,DNASE1L3,FLNB                   |
| 22 | 43,650,000 | 43,800,000 | 583 | 1252 | 0.901181514  | DNASE1L3,FLNB                         |
| 22 | 43,725,000 | 43,875,000 | 584 | 1036 | -0.045980431 | FLNB,SLMAP                            |
| 22 | 43,800,000 | 43,950,000 | 585 | 1037 | -0.485154832 | FLNB,SLMAP                            |
| 22 | 43,875,000 | 44,025,000 | 586 | 771  | 0.252486838  | SLMAP                                 |
| 22 | 43,950,000 | 44,100,000 | 587 | 590  | 0.651501607  | DENND6A,SLMAP                         |
| 22 | 44,025,000 | 44,175,000 | 588 | 448  | -0.219733339 | ARF4,DENND6A                          |
| 22 | 44,100,000 | 44,250,000 | 589 | 354  | -0.660765474 | ARF4,DENND6A,PDE12,ENSBTAG00000020802 |
| 22 | 44,175,000 | 44,325,000 | 590 | 391  | -2.262525506 | PDE12,ENSBTAG00000020802              |
| 22 | 44,250,000 | 44,400,000 | 591 | 415  | -2.358191969 | APPL1,DNAH12,ENSBTAG00000020802       |
| 22 | 44,325,000 | 44,475,000 | 592 | 340  | -0.075076791 | APPL1,DNAH12,HESX1,ENSBTAG00000020802 |
| 22 | 44,400,000 | 44,550,000 | 593 | 480  | 0.574870621  | APPL1,HESX1,IL17RD                    |
| 22 | 44,475,000 | 44,625,000 | 594 | 887  | 0.136832535  | IL17RD                                |
| 22 | 44,550,000 | 44,700,000 | 595 | 1085 | -0.152834348 |                                       |
| 22 | 44,625,000 | 44,775,000 | 596 | 1222 | -0.318302813 |                                       |
| 22 | 44,700,000 | 44,850,000 | 597 | 1165 | -0.373124847 | ARHGEF3                               |
| 22 | 44,775,000 | 44,925,000 | 598 | 852  | -0.138858716 | ARHGEF3,FAM208A                       |
| 22 | 44,850,000 | 45,000,000 | 599 | 552  | -0.049542553 | ARHGEF3,CCDC66,FAM208A                |
| 22 | 44,925,000 | 45,075,000 | 600 | 431  | -0.7867252   | CCDC66,FAM208A                        |
| 22 | 45,000,000 | 45,150,000 | 601 | 618  | -1.124656329 | ERC2                                  |
| 22 | 45,075,000 | 45,225,000 | 602 | 576  | -0.99697797  | ERC2                                  |
| 22 | 45,150,000 | 45,300,000 | 603 | 445  | -0.469456106 | ERC2                                  |
| 22 | 45,225,000 | 45,375,000 | 604 | 402  | -0.020345772 | ERC2                                  |
| 22 | 45,300,000 | 45,450,000 | 605 | 464  | 0.138044138  | ERC2                                  |
| 22 | 45,375,000 | 45,525,000 | 606 | 477  | 0.215006651  | ERC2                                  |
| 22 | 45,450,000 | 45,600,000 | 607 | 338  | 0.295279292  | ERC2                                  |
| 22 | 45,525,000 | 45,675,000 | 608 | 334  | 0.479105328  | ERC2                                  |
| 22 | 45,600,000 | 45,750,000 | 609 | 313  | 0.278655222  |                                       |
| 22 | 45,675,000 | 45,825,000 | 610 | 216  | -0.261093719 |                                       |
| 22 | 45,750,000 | 45,900,000 | 611 | 223  | -0.359600025 |                                       |
| 22 | 45,825,000 | 45,975,000 | 612 | 358  | -1.290913893 |                                       |
| 22 | 45,900,000 | 46,050,000 | 613 | 461  | -0.570374113 |                                       |
| 22 | 45,975,000 | 46,125,000 | 614 | 425  | 0.877113472  | WNT5A                                 |
| 22 | 46,050,000 | 46,200,000 | 615 | 850  | 0.67990986   | WNT5A                                 |
| 22 | 46,125,000 | 46,275,000 | 616 | 1020 | 0.504018449  |                                       |
| 22 | 46,200,000 | 46,350,000 | 617 | 573  | 0.16903522   |                                       |
| 22 | 46,275,000 | 46,425,000 | 618 | 522  | 0.000449262  |                                       |
| 22 | 46,350,000 | 46,500,000 | 619 | 722  | 0.932716132  | CACNA2D3                              |
| 22 | 46,425,000 | 46,575,000 | 620 | 648  | 1.308225234  | CACNA2D3                              |
| 22 | 46,500,000 | 46,650,000 | 621 | 618  | 1.357951507  | CACNA2D3,LRTM1                        |
| 22 | 46,575,000 | 46,725,000 | 622 | 1145 | 0.920997393  | CACNA2D3,LRTM1                        |
| 22 | 46,650,000 | 46,800,000 | 623 | 1231 | 0.55592461   | CACNA2D3                              |
| 22 | 46,725,000 | 46,875,000 | 624 | 891  | 0.164411045  | CACNA2D3                              |



|    |            |            |     |      |              |                                                                                            |
|----|------------|------------|-----|------|--------------|--------------------------------------------------------------------------------------------|
| 22 | 46,800,000 | 46,950,000 | 625 | 864  | 0.298212228  | CACNA2D3                                                                                   |
| 22 | 46,875,000 | 47,025,000 | 626 | 998  | 0.402039078  | CACNA2D3                                                                                   |
| 22 | 46,950,000 | 47,100,000 | 627 | 1184 | 0.086676081  |                                                                                            |
| 22 | 47,025,000 | 47,175,000 | 628 | 1205 | 0.044565136  |                                                                                            |
| 22 | 47,100,000 | 47,250,000 | 629 | 1043 | 1.000076959  |                                                                                            |
| 22 | 47,175,000 | 47,325,000 | 630 | 882  | 0.749406183  |                                                                                            |
| 22 | 47,250,000 | 47,400,000 | 631 | 1013 | 0.226523654  |                                                                                            |
| 22 | 47,325,000 | 47,475,000 | 632 | 1318 | -0.274075109 |                                                                                            |
| 22 | 47,400,000 | 47,550,000 | 633 | 1399 | -0.050239164 |                                                                                            |
| 22 | 47,475,000 | 47,625,000 | 634 | 1378 | 0.648298911  | ACTR8,IL17RB,SELK                                                                          |
| 22 | 47,550,000 | 47,700,000 | 635 | 1449 | 0.623189818  | ACTR8,CHDH,IL17RB,SELK                                                                     |
| 22 | 47,625,000 | 47,775,000 | 636 | 1528 | 0.983436463  | CACNA1D,CHDH,IL17RB                                                                        |
| 22 | 47,700,000 | 47,850,000 | 637 | 1535 | 1.03493906   | CACNA1D,CHDH                                                                               |
| 22 | 47,775,000 | 47,925,000 | 638 | 1227 | 0.75687434   | CACNA1D                                                                                    |
| 22 | 47,850,000 | 48,000,000 | 639 | 1049 | 0.898664574  | CACNA1D                                                                                    |
| 22 | 47,925,000 | 48,075,000 | 640 | 836  | 0.798674884  | CACNA1D                                                                                    |
| 22 | 48,000,000 | 48,150,000 | 641 | 493  | 0.124525878  | CACNA1D,CHCHD5                                                                             |
| 22 | 48,075,000 | 48,225,000 | 642 | 708  | 0.511014534  | CHCHD5,DCP1A                                                                               |
| 22 | 48,150,000 | 48,300,000 | 643 | 871  | 0.762581389  | DCP1A,TKT                                                                                  |
| 22 | 48,225,000 | 48,375,000 | 644 | 902  | 0.910777505  | DCP1A,PRKCD,TKT,ENSBTAG00000020973                                                         |
| 22 | 48,300,000 | 48,450,000 | 645 | 1070 | 0.857817408  | PRKCD,ENSBTAG00000020973                                                                   |
| 22 | 48,375,000 | 48,525,000 | 646 | 983  | 0.724663038  | SFMBT1,ENSBTAG00000020973                                                                  |
| 22 | 48,450,000 | 48,600,000 | 647 | 813  | 1.170355498  | SFMBT1,TMEM110                                                                             |
| 22 | 48,525,000 | 48,675,000 | 648 | 697  | 1.096700796  | ITIH1,ITIH3,ITIH4,MUSTN1,SFMBT1,TMEM110                                                    |
| 22 | 48,600,000 | 48,750,000 | 649 | 490  | 0.693665943  | GLT8D1,GNL3,ITIH1,ITIH3,ITIH4,MUSTN1,NEK4,PBRM1,SPCS1,TMEM110                              |
| 22 | 48,675,000 | 48,825,000 | 650 | 459  | -0.476391399 | GLT8D1,GNL3,NEK4,PBRM1,SPCS1                                                               |
| 22 | 48,750,000 | 48,900,000 | 651 | 619  | -0.797778279 | NT5DC2,PBRM1,SMIM4,STAB1                                                                   |
| 22 | 48,825,000 | 48,975,000 | 652 | 729  | -0.4217982   | NISCH,NT5DC2,PBRM1,SMIM4,STAB1                                                             |
| 22 | 48,900,000 | 49,050,000 | 653 | 592  | -0.050388726 | BAP1,DNAH1,NISCH,PHF7,SEMA3G,STAB1,TNNC1                                                   |
| 22 | 48,975,000 | 49,125,000 | 654 | 637  | 0.701932116  | BAP1,DNAH1,NISCH,PHF7,SEMA3G,TNNC1                                                         |
| 22 | 49,050,000 | 49,200,000 | 655 | 694  | 0.632523531  | DNAH1,GLYCTK,WDR82P1                                                                       |
| 22 | 49,125,000 | 49,275,000 | 656 | 658  | -0.838871901 | ALAS1,GLYCTK,PPM1M,TLR9,WDR82P1                                                            |
| 22 | 49,200,000 | 49,350,000 | 657 | 668  | -1.964696275 | ALAS1,POC1A,PPM1M,TLR9,WDR82P1                                                             |
| 22 | 49,275,000 | 49,425,000 | 658 | 772  | -2.287413271 | DUSP7,POC1A                                                                                |
| 22 | 49,350,000 | 49,500,000 | 659 | 958  | -1.383567942 | DUSP7,POC1A,RPL29                                                                          |
| 22 | 49,425,000 | 49,575,000 | 660 | 802  | -0.357120655 | ABHD14B,ACY1,GPR62,IQCF1,IQCF5,PARP3,PCBP4,RPL29,RRP9                                      |
| 22 | 49,500,000 | 49,650,000 | 661 | 646  | 0.3117889    | ABHD14B,ACY1,GPR62,IQCF1,IQCF2,IQCF3,IQCF5,IQCF6,PARP3,PCBP4,RPL29,RRP9,ENSBTAG00000037410 |
| 22 | 49,575,000 | 49,725,000 | 662 | 706  | 0.38761016   | GRM2,IQCF2,IQCF3,IQCF6,TEX264,ENSBTAG00000037410                                           |
| 22 | 49,650,000 | 49,800,000 | 663 | 704  | 0.565538795  | GRM2,RAD54L2,TEX264                                                                        |
| 22 | 49,725,000 | 49,875,000 | 664 | 537  | 0.944300417  | RAD54L2,VPRBP                                                                              |
| 22 | 49,800,000 | 49,950,000 | 665 | 403  | 1.088042353  | MANF,RBM15B,VPRBP                                                                          |
| 22 | 49,875,000 | 50,025,000 | 666 | 664  | 1.272438834  | DOCK3,MANF,RBM15B,VPRBP                                                                    |
| 22 | 49,950,000 | 50,100,000 | 667 | 737  | 1.296827291  | DOCK3,MANF                                                                                 |
| 22 | 50,025,000 | 50,175,000 | 668 | 534  | 1.267985942  | DOCK3                                                                                      |
| 22 | 50,100,000 | 50,250,000 | 669 | 704  | 1.260259754  | DOCK3                                                                                      |
| 22 | 50,175,000 | 50,325,000 | 670 | 625  | 1.260018901  | CISH,MAPKAPK3                                                                              |
| 22 | 50,250,000 | 50,400,000 | 671 | 443  | 1.123892453  | C22H3ORF18,CISH,HEMK1,MAPKAPK3                                                             |
| 22 | 50,325,000 | 50,475,000 | 672 | 412  | 1.136175705  | C22H3ORF18,CISH,HEMK1                                                                      |

|    |            |            |     |      |              |                                                                                                                            |
|----|------------|------------|-----|------|--------------|----------------------------------------------------------------------------------------------------------------------------|
| 22 | 50,400,000 | 50,550,000 | 673 | 404  | 1.307441913  | CACNA2D2                                                                                                                   |
| 22 | 50,475,000 | 50,625,000 | 674 | 431  | 0.901778397  | CACNA2D2,CYB561D2,HYAL1,HYAL2,IFRD2,NAT6,NP<br>RL2,RASSF1,TMEM115,TUSC2,ZMYND10,ENSBTAG00<br>000047200                     |
| 22 | 50,550,000 | 50,700,000 | 675 | 592  | 0.663832584  | CACNA2D2,CYB561D2,GNAI2,HYAL1,HYAL2,IFRD2,LS<br>MEM2,NAT6,NPRL2,RASSF1,SEMA3B,TMEM115,TUSC<br>2,ZMYND10,ENSBTAG00000047200 |
| 22 | 50,625,000 | 50,775,000 | 676 | 839  | 0.637466831  | GNAI2,GNAT1,IFRD2,LSMEM2,SEMA3B,SEMA3F,SLC3<br>8A3                                                                         |
| 22 | 50,700,000 | 50,850,000 | 677 | 769  | 0.449882304  | GNAT1,RBM5,RBM6,SEMA3F,SLC38A3                                                                                             |
| 22 | 50,775,000 | 50,925,000 | 678 | 653  | 0.300235372  | MON1A,RBM5,RBM6                                                                                                            |
| 22 | 50,850,000 | 51,000,000 | 679 | 702  | 0.533799466  | CAMKV,MON1A,MST1R,RBM6,TRAIP,UBA7,ENSBTAG<br>00000040083                                                                   |
| 22 | 50,925,000 | 51,075,000 | 680 | 716  | 0.804616115  | AMIGO3,CAMKV,CDHR4,FAM212A,GMPPB,IP6K1,MST<br>1R,RNF123,TRAIP,UBA7,ENSBTAG00000040083                                      |
| 22 | 51,000,000 | 51,150,000 | 681 | 737  | -0.803290618 | AMIGO3,APEH,BSN,CDHR4,FAM212A,GMPPB,IP6K1,<br>MST1,RNF123,UBA7                                                             |
| 22 | 51,075,000 | 51,225,000 | 682 | 892  | -1.811601179 | APEH,BSN,DAG1,MST1,RNF123                                                                                                  |
| 22 | 51,150,000 | 51,300,000 | 683 | 947  | -0.826429981 | AMT,BSN,DAG1,NICN1,RHOA,TCTA                                                                                               |
| 22 | 51,225,000 | 51,375,000 | 684 | 1072 | 0.55458895   | AMT,NICN1,RHOA,TCTA,USP4                                                                                                   |
| 22 | 51,300,000 | 51,450,000 | 685 | 1126 | 0.843959646  | C3orf62,CCDC36,CCDC71,KLHDC8B,MGC137053,RHO<br>A,USP4                                                                      |
| 22 | 51,375,000 | 51,525,000 | 686 | 861  | 0.845722037  | C3orf62,CCDC36,CCDC71,KLHDC8B,LAMC1,MGC1370<br>53,QARS,QRICH1,USP19                                                        |
| 22 | 51,450,000 | 51,600,000 | 687 | 914  | 0.987738084  | ARIH2,DALRD3,IMPDH2,LAMC1,NDUFAF3,P4HTM,QA<br>RS,QRICH1,USP19,WDR6                                                         |
| 22 | 51,525,000 | 51,675,000 | 688 | 1348 | 1.092582512  | ARIH2,DALRD3,IMPDH2,NDUFAF3,P4HTM,PRKAR2A,<br>QRICH1,SLC25A20,WDR6                                                         |
| 22 | 51,600,000 | 51,750,000 | 689 | 1390 | 0.953310752  | ARIH2,IP6K2,PRKAR2A,SLC25A20                                                                                               |
| 22 | 51,675,000 | 51,825,000 | 690 | 1247 | 0.503305714  | CELSR3,IP6K2,NCKIPSD,PRKAR2A,SLC26A6                                                                                       |
| 22 | 51,750,000 | 51,900,000 | 691 | 1275 | 0.24665294   | CELSR3,COL7A1,IP6K2,NCKIPSD,PFKFB4,SLC26A6,TME<br>M89,UCN2,UQCRC1                                                          |
| 22 | 51,825,000 | 51,975,000 | 692 | 1060 | 0.122821433  | ATRIP,COL7A1,PFKFB4,SHISA5,SLC26A6,TMEM89,TRE<br>X1,UCN2,UQCRC1                                                            |
| 22 | 51,900,000 | 52,050,000 | 693 | 886  | 0.486487911  | ATRIP,CCDC51,PFKFB4,PLXNB1,SHISA5,TREX1                                                                                    |
| 22 | 51,975,000 | 52,125,000 | 694 | 1187 | -0.079165776 | ATRIP,CCDC51,PLXNB1,SPINK8                                                                                                 |
| 22 | 52,050,000 | 52,200,000 | 695 | 1119 | -0.485223003 | CATHL1,CATHL2,CATHL3,CATHL7,NME6,SPINK8,ENSB<br>TAG00000016153,ENSBTAG00000039879                                          |
| 22 | 52,125,000 | 52,275,000 | 696 | 684  | -0.438002774 | CATHL1,CATHL2,CATHL3,CATHL5,CATHL6,CATHL7,CD<br>C25A,NME6,ENSBTAG00000016153,ENSBTAG000000<br>31594,ENSBTAG00000039879     |
| 22 | 52,200,000 | 52,350,000 | 697 | 696  | 0.05631386   | CATHL5,CATHL6,CDC25A,ENSBTAG00000031594                                                                                    |
| 22 | 52,275,000 | 52,425,000 | 698 | 720  | 0.293014403  | MAP4                                                                                                                       |
| 22 | 52,350,000 | 52,500,000 | 699 | 613  | -0.236460968 | DHX30,MAP4,ENSBTAG00000047174                                                                                              |
| 22 | 52,425,000 | 52,575,000 | 700 | 664  | -0.533153242 | DHX30,MAP4,SMARCC1,ENSBTAG00000047174                                                                                      |
| 22 | 52,500,000 | 52,650,000 | 701 | 766  | -0.351455347 | CSPG5,SMARCC1                                                                                                              |
| 22 | 52,575,000 | 52,725,000 | 702 | 863  | -0.226252061 | C22H3orf75,CSPG5,SMARCC1                                                                                                   |
| 22 | 52,650,000 | 52,800,000 | 703 | 878  | -0.29352471  | C22H3orf75,CSPG5,SCAP                                                                                                      |
| 22 | 52,725,000 | 52,875,000 | 704 | 853  | -0.361085393 | KLHL18,NGP,PTPN23,SCAP                                                                                                     |
| 22 | 52,800,000 | 52,950,000 | 705 | 853  | 0.576644692  | KIF9,KLHL18,NGP,PTPN23,SCAP                                                                                                |
| 22 | 52,875,000 | 53,025,000 | 706 | 657  | 0.605285518  | KIF9,KLHL18,SETD2                                                                                                          |
| 22 | 52,950,000 | 53,100,000 | 707 | 501  | -0.90569318  | KIF9,SETD2,ENSBTAG00000022598                                                                                              |
| 22 | 53,025,000 | 53,175,000 | 708 | 620  | 0.085491037  | CCDC12,PTH1R,SETD2,ENSBTAG00000022598                                                                                      |

|    |            |            |     |      |              |                                                     |
|----|------------|------------|-----|------|--------------|-----------------------------------------------------|
| 22 | 53,100,000 | 53,250,000 | 709 | 661  | 0.6517696    | CCDC12,MYL3,PRSS42,PTH1R                            |
| 22 | 53,175,000 | 53,325,000 | 710 | 679  | -0.146886342 | MYL3,PRSS42,PRSS45,PRSS46,PTH1R,ENSBTAG00000037821  |
| 22 | 53,250,000 | 53,400,000 | 711 | 813  | -0.035244457 | ALS2CL,PRSS45,PRSS46,PRSS50,TMIE,ENSBTAG00000037821 |
| 22 | 53,325,000 | 53,475,000 | 712 | 1038 | -0.495882264 | ALS2CL,LRRC2,PRSS46,PRSS50,TDGF1,TMIE               |
| 22 | 53,400,000 | 53,550,000 | 713 | 1300 | -1.590871863 | LRRC2,LTF,RTP3,TDGF1                                |
| 22 | 53,475,000 | 53,625,000 | 714 | 1166 | -0.818282847 | CCR2,CCR5,CCRL2,LRRC2,LTF,RTP3                      |
| 22 | 53,550,000 | 53,700,000 | 715 | 611  | 0.450512225  | CCR2,CCR5,CCRL2,LTF                                 |
| 22 | 53,625,000 | 53,775,000 | 716 | 475  | -0.485027007 | CCR3                                                |
| 22 | 53,700,000 | 53,850,000 | 717 | 691  | 0.538193793  | CCR3,ENSBTAG00000031355                             |
| 22 | 53,775,000 | 53,925,000 | 718 | 766  | 0.662749484  | CCR1,ENSBTAG00000031355                             |
| 22 | 53,850,000 | 54,000,000 | 719 | 840  | 0.322465633  | CCR1,CXCR6,FYCO1,XCR1                               |
| 22 | 53,925,000 | 54,075,000 | 720 | 1052 | 0.306519741  | CCR9,CXCR6,FYCO1,XCR1                               |
| 22 | 54,000,000 | 54,150,000 | 721 | 1338 | 0.588976125  | CCR9,CXCR6,FYCO1,LZTFL1,SLC6A20                     |
| 22 | 54,075,000 | 54,225,000 | 722 | 1189 | 0.777895626  | LZTFL1,SACM1L,SLC6A20                               |
| 22 | 54,150,000 | 54,300,000 | 723 | 1055 | 0.679670108  | LIMD1,SACM1L,SLC6A20                                |
| 22 | 54,225,000 | 54,375,000 | 724 | 1001 | 0.596171061  | LARS2,LIMD1,SACM1L                                  |
| 22 | 54,300,000 | 54,450,000 | 725 | 877  | -0.017963903 | LARS2,LIMD1                                         |
| 22 | 54,375,000 | 54,525,000 | 726 | 907  | -0.4344017   | LARS2                                               |
| 22 | 54,450,000 | 54,600,000 | 727 | 953  | -0.380368307 | LARS2                                               |
| 22 | 54,525,000 | 54,675,000 | 728 | 873  | 0.098162541  | TMEM158                                             |
| 22 | 54,600,000 | 54,750,000 | 729 | 798  | 0.528217051  | CDCP1,TMEM158,ENSBTAG00000026650                    |
| 22 | 54,675,000 | 54,825,000 | 730 | 857  | 0.442214945  | CDCP1,CLEC3B,EXOSC7,ENSBTAG00000026650              |
| 22 | 54,750,000 | 54,900,000 | 731 | 686  | 0.511210292  | CDCP1,CLEC3B,EXOSC7,ZDHHC3                          |
| 22 | 54,825,000 | 54,975,000 | 732 | 876  | -0.328008213 | EXOSC7,GHRL,SEC13,TMEM42,ZDHHC3                     |
| 22 | 54,900,000 | 55,050,000 | 733 | 908  | -0.32511763  | ATP2B2,GHRL,SEC13,TMEM42                            |
| 22 | 54,975,000 | 55,125,000 | 734 | 888  | 0.415660261  | ATP2B2,SEC13                                        |
| 22 | 55,050,000 | 55,200,000 | 735 | 829  | 0.000921485  | ATP2B2                                              |
| 22 | 55,125,000 | 55,275,000 | 736 | 689  | -1.28205766  | ATP2B2                                              |
| 22 | 55,200,000 | 55,350,000 | 737 | 840  | -0.436935607 | ATP2B2                                              |
| 22 | 55,275,000 | 55,425,000 | 738 | 711  | 0.626744019  | ATP2B2                                              |
| 22 | 55,350,000 | 55,500,000 | 739 | 612  | 1.027357849  | SLC6A11                                             |
| 22 | 55,425,000 | 55,575,000 | 740 | 701  | 1.227664339  | SLC6A11                                             |
| 22 | 55,500,000 | 55,650,000 | 741 | 880  | 1.119508643  | SLC6A11                                             |
| 22 | 55,575,000 | 55,725,000 | 742 | 1322 | -0.026532854 | SLC6A1,SLC6A11                                      |
| 22 | 55,650,000 | 55,800,000 | 743 | 1625 | -2.009123022 | SLC6A1                                              |
| 22 | 55,725,000 | 55,875,000 | 744 | 1212 | -1.599161379 |                                                     |
| 22 | 55,800,000 | 55,950,000 | 745 | 1041 | 0.073278753  | ATG7,HRH1                                           |
| 22 | 55,875,000 | 56,025,000 | 746 | 1045 | -0.04782726  | ATG7,HRH1                                           |
| 22 | 55,950,000 | 56,100,000 | 747 | 952  | -0.085927519 | ATG7,ENSBTAG00000031065                             |
| 22 | 56,025,000 | 56,175,000 | 748 | 1007 | -0.576843737 | ATG7,ENSBTAG00000031065                             |
| 22 | 56,100,000 | 56,250,000 | 749 | 811  | -1.147815282 | ATG7,VGLL4                                          |
| 22 | 56,175,000 | 56,325,000 | 750 | 729  | -0.099962072 | ATG7,VGLL4                                          |
| 22 | 56,250,000 | 56,400,000 | 751 | 870  | -0.046977692 | VGLL4                                               |
| 22 | 56,325,000 | 56,475,000 | 752 | 875  | -0.437924628 | TAMM41                                              |
| 22 | 56,400,000 | 56,550,000 | 753 | 1241 | -0.122209632 | TAMM41,TRH                                          |
| 22 | 56,475,000 | 56,625,000 | 754 | 1101 | -0.111893502 | TAMM41,TRH                                          |
| 22 | 56,550,000 | 56,700,000 | 755 | 600  | -0.282596663 |                                                     |
| 22 | 56,625,000 | 56,775,000 | 756 | 655  | 0.002209952  | PLXND1,TMCC1                                        |
| 22 | 56,700,000 | 56,850,000 | 757 | 876  | 0.350091966  | H1FOO,PLXND1,TMCC1                                  |
| 22 | 56,775,000 | 56,925,000 | 758 | 1266 | 0.668465642  | H1FOO,IFT122,PLXND1,RHO                             |
| 22 | 56,850,000 | 57,000,000 | 759 | 1535 | 0.828306948  | CAND2,EFCAB12,H1FOO,IFT122,MBD4,RHO,RPL32           |

|    |            |            |     |      |              |                                                              |
|----|------------|------------|-----|------|--------------|--------------------------------------------------------------|
| 22 | 56,925,000 | 57,075,000 | 760 | 1576 | 0.587911516  | CAND2,EFCAB12,IFT122,MBD4,RPL32,TMEM40                       |
| 22 | 57,000,000 | 57,150,000 | 761 | 1349 | 0.459769046  | CAND2,RAF1,TMEM40                                            |
| 22 | 57,075,000 | 57,225,000 | 762 | 936  | -0.733861622 | MKRN2,RAF1,ENSBTAG00000045748                                |
| 22 | 57,150,000 | 57,300,000 | 763 | 1078 | -0.679656584 | MKRN2,MKRN2OS,RAF1,TSEN2,ENSBTAG00000045748                  |
| 22 | 57,225,000 | 57,375,000 | 764 | 1542 | 0.771569092  | MKRN2OS,PPARG,TSEN2                                          |
| 22 | 57,300,000 | 57,450,000 | 765 | 1323 | 0.929023689  | PPARG,TSEN2                                                  |
| 22 | 57,375,000 | 57,525,000 | 766 | 781  | 0.738852579  | PPARG                                                        |
| 22 | 57,450,000 | 57,600,000 | 767 | 510  | 0.37382622   | PPARG,SYN2                                                   |
| 22 | 57,525,000 | 57,675,000 | 768 | 574  | 0.060358953  | SYN2,TIMP4                                                   |
| 22 | 57,600,000 | 57,750,000 | 769 | 703  | 0.112171147  | SYN2,TIMP4                                                   |
| 22 | 57,675,000 | 57,825,000 | 770 | 843  | 0.368739983  | ENSBTAG00000031115                                           |
| 22 | 57,750,000 | 57,900,000 | 771 | 864  | 0.947953237  | MRPS25,ZFYVE20,ENSBTAG00000031115                            |
| 22 | 57,825,000 | 57,975,000 | 772 | 606  | 1.20443052   | MRPS25,NR2C2,ZFYVE20                                         |
| 22 | 57,900,000 | 58,050,000 | 773 | 607  | 0.762499778  | FGD5,MRPS25,NR2C2                                            |
| 22 | 57,975,000 | 58,125,000 | 774 | 768  | 0.318115417  | FGD5                                                         |
| 22 | 58,050,000 | 58,200,000 | 775 | 873  | 0.250785868  | FGD5                                                         |
| 22 | 58,125,000 | 58,275,000 | 776 | 906  | -0.376965037 | C22H3ORF19,C3orf20,FGD5                                      |
| 22 | 58,200,000 | 58,350,000 | 777 | 860  | -0.836869518 | C22H3ORF19,C3orf20                                           |
| 22 | 58,275,000 | 58,425,000 | 778 | 893  | -0.888939086 | C22H3ORF19,GRIP2                                             |
| 22 | 58,350,000 | 58,500,000 | 779 | 710  | -1.789073138 | GRIP2,SLC6A6                                                 |
| 22 | 58,425,000 | 58,575,000 | 780 | 413  | -0.263828266 | SLC6A6                                                       |
| 22 | 58,500,000 | 58,650,000 | 781 | 835  | 1.34362042   |                                                              |
| 22 | 58,575,000 | 58,725,000 | 782 | 1448 | 0.909648114  | LSM3,XPC                                                     |
| 22 | 58,650,000 | 58,800,000 | 783 | 1337 | 0.604144094  | CHCHD4,LSM3,TMEM43,XPC,ENSBTAG00000017173,ENSBTAG00000023918 |
| 22 | 58,725,000 | 58,875,000 | 784 | 1098 | 0.596614447  | CHCHD4,TMEM43,WNT7A,ENSBTAG00000017173,ENSBTAG00000023918    |
| 22 | 58,800,000 | 58,950,000 | 785 | 1359 | 0.317418877  | WNT7A                                                        |
| 22 | 58,875,000 | 59,025,000 | 786 | 1658 | 0.431219923  | FBLN2                                                        |
| 22 | 58,950,000 | 59,100,000 | 787 | 1778 | 0.584986075  | FBLN2,HDAC11                                                 |
| 22 | 59,025,000 | 59,175,000 | 788 | 1628 | -0.090139535 | FBLN2,HDAC11,NUP210                                          |
| 22 | 59,100,000 | 59,250,000 | 789 | 1204 | -0.56434025  | HDAC11,NUP210                                                |
| 22 | 59,175,000 | 59,325,000 | 790 | 965  | 0.18368059   | NUP210                                                       |
| 22 | 59,250,000 | 59,400,000 | 791 | 1415 | 0.775658466  |                                                              |
| 22 | 59,325,000 | 59,475,000 | 792 | 1449 | 0.756861125  | IQSEC1                                                       |
| 22 | 59,400,000 | 59,550,000 | 793 | 777  | 0.446954756  | IQSEC1                                                       |
| 22 | 59,475,000 | 59,625,000 | 794 | 758  | -0.254009069 | ACAD9,IQSEC1,ENSBTAG00000003244                              |
| 22 | 59,550,000 | 59,700,000 | 795 | 1178 | 0.270737459  | ACAD9,EFCC1,GP9,KIAA1257,ENSBTAG00000003244                  |
| 22 | 59,625,000 | 59,775,000 | 796 | 1295 | 0.703126974  | CNBP,EFCC1,GP9,ISY1,KIAA1257                                 |
| 22 | 59,700,000 | 59,850,000 | 797 | 1015 | 0.64975333   | CNBP,COPG1,H1FX,HMCES,ISY1                                   |
| 22 | 59,775,000 | 59,925,000 | 798 | 1109 | 0.665921484  | COPG1,H1FX,HMCES,RAB7A,ENSBTAG00000030941                    |
| 22 | 59,850,000 | 60,000,000 | 799 | 1383 | 0.919674844  | RAB7A,RPN1,ENSBTAG00000030941                                |
| 22 | 59,925,000 | 60,075,000 | 800 | 974  | 0.900817178  | DNAJB8,EEFSEC,GATA2,RPN1                                     |
| 22 | 60,000,000 | 60,150,000 | 801 | 768  | -1.060444518 | DNAJB8,EEFSEC,GATA2                                          |
| 22 | 60,075,000 | 60,225,000 | 802 | 1082 | -0.740383591 | EEFSEC,RUVBL1,SEC61A1                                        |
| 22 | 60,150,000 | 60,300,000 | 803 | 1400 | 0.318902869  | EEFSEC,KBTBD12,RUVBL1,SEC61A1                                |
| 22 | 60,225,000 | 60,375,000 | 804 | 1614 | 0.428979328  | KBTBD12,SEC61A1                                              |
| 22 | 60,300,000 | 60,450,000 | 805 | 1721 | -0.048140069 | MGLL                                                         |
| 22 | 60,375,000 | 60,525,000 | 806 | 1516 | -0.074512846 | ABTB1,MGLL,PODXL2                                            |
| 22 | 60,450,000 | 60,600,000 | 807 | 832  | 0.17021744   | ABTB1,MCM2,MGLL,PODXL2,TPRA1                                 |
| 22 | 60,525,000 | 60,675,000 | 808 | 1009 | -0.124510516 | MCM2,PODXL2,TPRA1                                            |
| 22 | 60,600,000 | 60,750,000 | 809 | 1762 | -0.538422771 |                                                              |

|    |            |            |     |      |              |                                                  |
|----|------------|------------|-----|------|--------------|--------------------------------------------------|
| 22 | 60,675,000 | 60,825,000 | 810 | 1916 | -0.152444651 |                                                  |
| 22 | 60,750,000 | 60,900,000 | 811 | 1548 | 0.299172763  |                                                  |
| 22 | 60,825,000 | 60,975,000 | 812 | 980  | -0.016663064 | CHCHD6,PLXNA1                                    |
| 22 | 60,900,000 | 61,050,000 | 813 | 925  | 0.233410996  | CHCHD6,PLXNA1                                    |
| 22 | 60,975,000 | 61,125,000 | 814 | 1379 | 0.533618805  | C3H3orf22,CHCHD6,CHST13,TRXR3                    |
| 22 | 61,050,000 | 61,200,000 | 815 | 1297 | 0.52824427   | C3H3orf22,CHCHD6,CHST13,SLC41A3,TRXR3,UROC1,ZXDC |
| 22 | 61,125,000 | 61,275,000 | 816 | 1061 | 0.267027993  | ALDH1L1,CHST13,SLC41A3,UROC1,ZXDC                |
| 22 | 61,200,000 | 61,350,000 | 817 | 1313 | 0.745778992  | ALDH1L1,CCDC37,KLF15,SLC41A3                     |
| 22 | 61,275,000 | 61,425,000 | 818 | 1437 | 0.828292004  | CCDC37,KLF15                                     |
| 22 | 61,350,000 | 61,435,874 | 819 | 702  | 0.699067687  |                                                  |
| 23 | 0          | 150,000    | 1   | 877  | 0.670006936  |                                                  |
| 23 | 75,000     | 225,000    | 2   | 580  | 0.521464646  | KHDRBS2                                          |
| 23 | 150,000    | 300,000    | 3   | 374  | 0.894941412  | KHDRBS2                                          |
| 23 | 225,000    | 375,000    | 4   | 389  | 1.028290993  | KHDRBS2                                          |
| 23 | 300,000    | 450,000    | 5   | 757  | 0.484606814  | KHDRBS2                                          |
| 23 | 375,000    | 525,000    | 6   | 1115 | 0.37261099   | KHDRBS2                                          |
| 23 | 450,000    | 600,000    | 7   | 1147 | 0.542518498  | KHDRBS2                                          |
| 23 | 525,000    | 675,000    | 8   | 1092 | 0.619871588  | KHDRBS2                                          |
| 23 | 600,000    | 750,000    | 9   | 1050 | 0.608125383  | KHDRBS2                                          |
| 23 | 675,000    | 825,000    | 10  | 884  | 0.368211847  | KHDRBS2                                          |
| 23 | 750,000    | 900,000    | 11  | 871  | -0.06229387  | KHDRBS2                                          |
| 23 | 825,000    | 975,000    | 12  | 1008 | 0.097652223  | KHDRBS2                                          |
| 23 | 900,000    | 1,050,000  | 13  | 854  | 0.249705127  |                                                  |
| 23 | 975,000    | 1,125,000  | 14  | 952  | 0.175505953  |                                                  |
| 23 | 1,050,000  | 1,200,000  | 15  | 1258 | 0.428058551  |                                                  |
| 23 | 1,125,000  | 1,275,000  | 16  | 1233 | 0.529280275  |                                                  |
| 23 | 1,200,000  | 1,350,000  | 17  | 1176 | 0.041561587  |                                                  |
| 23 | 1,275,000  | 1,425,000  | 18  | 1134 | 0.123298244  |                                                  |
| 23 | 1,350,000  | 1,500,000  | 19  | 1236 | 0.691263502  |                                                  |
| 23 | 1,425,000  | 1,575,000  | 20  | 1127 | 0.099632204  |                                                  |
| 23 | 1,500,000  | 1,650,000  | 21  | 1024 | 0.079337008  |                                                  |
| 23 | 1,575,000  | 1,725,000  | 22  | 1217 | -0.325862873 |                                                  |
| 23 | 1,650,000  | 1,800,000  | 23  | 1206 | -2.7760808   |                                                  |
| 23 | 1,725,000  | 1,875,000  | 24  | 1065 | -3.099025984 |                                                  |
| 23 | 1,800,000  | 1,950,000  | 25  | 1141 | 0.782248863  |                                                  |
| 23 | 1,875,000  | 2,025,000  | 26  | 1420 | 0.730539959  |                                                  |
| 23 | 1,950,000  | 2,100,000  | 27  | 1298 | 0.273801131  |                                                  |
| 23 | 2,025,000  | 2,175,000  | 28  | 1379 | 0.260389644  |                                                  |
| 23 | 2,100,000  | 2,250,000  | 29  | 1701 | 0.474258223  |                                                  |
| 23 | 2,175,000  | 2,325,000  | 30  | 1654 | 0.170338872  |                                                  |
| 23 | 2,250,000  | 2,400,000  | 31  | 1207 | -0.283936543 |                                                  |
| 23 | 2,325,000  | 2,475,000  | 32  | 1094 | -0.352333092 |                                                  |
| 23 | 2,400,000  | 2,550,000  | 33  | 1202 | 0.257268736  | PRIM2                                            |
| 23 | 2,475,000  | 2,625,000  | 34  | 1182 | 0.498107198  | PRIM2                                            |
| 23 | 2,550,000  | 2,700,000  | 35  | 1067 | 0.193983492  | PRIM2                                            |
| 23 | 2,625,000  | 2,775,000  | 36  | 878  | 0.015587605  | PRIM2                                            |
| 23 | 2,700,000  | 2,850,000  | 37  | 1033 | 0.484038127  | PRIM2                                            |
| 23 | 2,775,000  | 2,925,000  | 38  | 1501 | 0.474725948  | PRIM2                                            |
| 23 | 2,850,000  | 3,000,000  | 39  | 1135 | 0.492103711  | BAG2,RAB23,ZNF451                                |
| 23 | 2,925,000  | 3,075,000  | 40  | 399  | 0.862218286  | BAG2,RAB23,ZNF451                                |
| 23 | 3,000,000  | 3,150,000  | 41  | 634  | 0.819106747  | BEND6,ZNF451                                     |
| 23 | 3,075,000  | 3,225,000  | 42  | 860  | 0.159369763  | BEND6                                            |

|    |           |           |    |      |              |                                                                   |
|----|-----------|-----------|----|------|--------------|-------------------------------------------------------------------|
| 23 | 3,150,000 | 3,300,000 | 43 | 757  | 0.088304629  |                                                                   |
| 23 | 3,225,000 | 3,375,000 | 44 | 1283 | 1.033947119  |                                                                   |
| 23 | 3,300,000 | 3,450,000 | 45 | 1957 | 0.783563116  | DST                                                               |
| 23 | 3,375,000 | 3,525,000 | 46 | 1709 | 0.482425302  | DST                                                               |
| 23 | 3,450,000 | 3,600,000 | 47 | 1200 | 0.517788888  | DST                                                               |
| 23 | 3,525,000 | 3,675,000 | 48 | 1170 | 0.335337233  | DST                                                               |
| 23 | 3,600,000 | 3,750,000 | 49 | 987  | 0.070426758  | DST                                                               |
| 23 | 3,675,000 | 3,825,000 | 50 | 935  | 0.370076027  | DST                                                               |
| 23 | 3,750,000 | 3,900,000 | 51 | 1318 | 0.574210083  |                                                                   |
| 23 | 3,825,000 | 3,975,000 | 52 | 1259 | -0.085229413 | COL21A1                                                           |
| 23 | 3,900,000 | 4,050,000 | 53 | 1349 | -0.341572469 | COL21A1                                                           |
| 23 | 3,975,000 | 4,125,000 | 54 | 1552 | 0.177116343  | COL21A1                                                           |
| 23 | 4,050,000 | 4,200,000 | 55 | 1626 | -0.37937464  | COL21A1,ENSBTAG00000046193                                        |
| 23 | 4,125,000 | 4,275,000 | 56 | 1304 | -0.492827459 | ENSBTAG00000046193                                                |
| 23 | 4,200,000 | 4,350,000 | 57 | 1153 | -0.474372613 |                                                                   |
| 23 | 4,275,000 | 4,425,000 | 58 | 1257 | -0.190543611 | BMP5                                                              |
| 23 | 4,350,000 | 4,500,000 | 59 | 1026 | -0.045781207 | BMP5                                                              |
| 23 | 4,425,000 | 4,575,000 | 60 | 957  | -0.323579076 | BMP5                                                              |
| 23 | 4,500,000 | 4,650,000 | 61 | 942  | 0.482535426  | BMP5                                                              |
| 23 | 4,575,000 | 4,725,000 | 62 | 984  | 0.477053496  | HMGCLL1                                                           |
| 23 | 4,650,000 | 4,800,000 | 63 | 1005 | 0.411297154  | HMGCLL1                                                           |
| 23 | 4,725,000 | 4,875,000 | 64 | 744  | 0.46087184   | HMGCLL1                                                           |
| 23 | 4,800,000 | 4,950,000 | 65 | 767  | 0.210366696  | HMGCLL1                                                           |
| 23 | 4,875,000 | 5,025,000 | 66 | 1397 | -0.285486687 | GFRAL,HMGCLL1                                                     |
| 23 | 4,950,000 | 5,100,000 | 67 | 1630 | -0.128912113 | GFRAL,HCRTR2                                                      |
| 23 | 5,025,000 | 5,175,000 | 68 | 1533 | 0.543940013  | HCRTR2                                                            |
| 23 | 5,100,000 | 5,250,000 | 69 | 1406 | 0.454623653  | HCRTR2                                                            |
| 23 | 5,175,000 | 5,325,000 | 70 | 1286 | -0.245410088 | HCRTR2                                                            |
| 23 | 5,250,000 | 5,400,000 | 71 | 1094 | -0.027780281 | FAM83B                                                            |
| 23 | 5,325,000 | 5,475,000 | 72 | 1007 | -0.543666719 | FAM83B                                                            |
| 23 | 5,400,000 | 5,550,000 | 73 | 1384 | -1.173635055 | FAM83B                                                            |
| 23 | 5,475,000 | 5,625,000 | 74 | 1806 | 0.394844277  | FAM83B                                                            |
| 23 | 5,550,000 | 5,700,000 | 75 | 1566 | 1.063993204  |                                                                   |
| 23 | 5,625,000 | 5,775,000 | 76 | 888  | -0.115156127 |                                                                   |
| 23 | 5,700,000 | 5,850,000 | 77 | 545  | -0.512629898 |                                                                   |
| 23 | 5,775,000 | 5,925,000 | 78 | 930  | 1.048031091  |                                                                   |
| 23 | 5,850,000 | 6,000,000 | 79 | 1055 | 1.129683544  | TINAG                                                             |
| 23 | 5,925,000 | 6,075,000 | 80 | 724  | 1.138166607  | TINAG                                                             |
| 23 | 6,000,000 | 6,150,000 | 81 | 860  | 1.120467333  | MLIP,TINAG                                                        |
| 23 | 6,075,000 | 6,225,000 | 82 | 683  | 0.756347273  | MLIP                                                              |
| 23 | 6,150,000 | 6,300,000 | 83 | 875  | 0.351146661  | MLIP                                                              |
| 23 | 6,225,000 | 6,375,000 | 84 | 1408 | -0.064621065 | MLIP                                                              |
| 23 | 6,300,000 | 6,450,000 | 85 | 1311 | -0.211708246 | MLIP                                                              |
| 23 | 6,375,000 | 6,525,000 | 86 | 1346 | 0.606678601  | MLIP                                                              |
| 23 | 6,450,000 | 6,600,000 | 87 | 1331 | 0.24797668   | LRRC1                                                             |
| 23 | 6,525,000 | 6,675,000 | 88 | 1397 | -1.755124417 | LRRC1                                                             |
| 23 | 6,600,000 | 6,750,000 | 89 | 1299 | -1.947438248 |                                                                   |
| 23 | 6,675,000 | 6,825,000 | 90 | 777  | -0.767637384 | KLHL31                                                            |
| 23 | 6,750,000 | 6,900,000 | 91 | 592  | -0.299872495 | KLHL31                                                            |
| 23 | 6,825,000 | 6,975,000 | 92 | 524  | -0.233543104 | GCLC                                                              |
| 23 | 6,900,000 | 7,050,000 | 93 | 861  | 1.085461291  | BOLA-DIB,BOLA-DYA,DSB,GCLC                                        |
| 23 | 6,975,000 | 7,125,000 | 94 | 1175 | 1.203838996  | BOLA-DIB,BOLA-DOB,BOLA-DYA,DSB,PSMB8,TAP1,TAP2,ENSBTAG00000003037 |

|    |            |            |     |      |              |                                                                                                                                                      |
|----|------------|------------|-----|------|--------------|------------------------------------------------------------------------------------------------------------------------------------------------------|
| 23 | 7,050,000  | 7,200,000  | 95  | 1254 | 0.817607498  | BOLA-DOB,H2B,HLA-<br>DMB,PSMB8,PSMB9,TAP1,TAP2,ENSBTAG0000000303<br>7                                                                                |
| 23 | 7,125,000  | 7,275,000  | 96  | 1193 | 0.09210413   | BOLA-DMA,BOLA-DNA,BRD2,H2B,HLA-<br>DMB,PSMB9,TAP1                                                                                                    |
| 23 | 7,200,000  | 7,350,000  | 97  | 682  | -0.275048888 | BOLA-DMA,BOLA-<br>DNA,BRD2,COL11A2,HSD17B8,RING1,RXRB,SLC39A7<br>B3GALT4,C6ORF11,COL11A2,HSD17B8,PFDN6,RGL2,R<br>ING1,RPS18,RXRB,SLC39A7,TAPBP,VPS52 |
| 23 | 7,275,000  | 7,425,000  | 98  | 614  | 0.668170494  | B3GALT4,C6ORF11,DAXX,PFDN6,RGL2,RPS18,TAPBP,V<br>PS52,ZBTB22                                                                                         |
| 23 | 7,350,000  | 7,500,000  | 99  | 910  | -0.496416828 | CUTA,DAXX,KIFC1,PHF1,SYNGAP1,TAPBP,ZBTB22,ZBT<br>B9                                                                                                  |
| 23 | 7,500,000  | 7,650,000  | 101 | 397  | -0.705842019 | CUTA,KIFC1,PHF1,SYNGAP1,ZBTB9                                                                                                                        |
| 23 | 7,575,000  | 7,725,000  | 102 | 608  | -0.45511908  | BAK1,GGNBP1,ITPR3                                                                                                                                    |
| 23 | 7,650,000  | 7,800,000  | 103 | 820  | 0.139490652  | BAK1,GGNBP1,ITPR3,UQCC2                                                                                                                              |
| 23 | 7,725,000  | 7,875,000  | 104 | 872  | 0.460062344  | ITPR3,LEMD2,MLN,UQCC2                                                                                                                                |
| 23 | 7,800,000  | 7,950,000  | 105 | 658  | 0.860305022  | LEMD2,MLN,UQCC2                                                                                                                                      |
| 23 | 7,875,000  | 8,025,000  | 106 | 657  | 0.86152122   |                                                                                                                                                      |
| 23 | 7,950,000  | 8,100,000  | 107 | 753  | 0.235190771  | GRM4                                                                                                                                                 |
| 23 | 8,025,000  | 8,175,000  | 108 | 816  | 0.274162998  | GRM4                                                                                                                                                 |
| 23 | 8,100,000  | 8,250,000  | 109 | 788  | 0.729248039  | GRM4                                                                                                                                                 |
| 23 | 8,175,000  | 8,325,000  | 110 | 477  | -0.599709145 | GRM4,HMGA1,NUDT3,ENSBTAG000000034519                                                                                                                 |
| 23 | 8,250,000  | 8,400,000  | 111 | 317  | -2.734577721 | HMGA1,NUDT3,ENSBTAG000000034519                                                                                                                      |
| 23 | 8,325,000  | 8,475,000  | 112 | 399  | -0.540111521 | NUDT3,PACSIN1,RPS10                                                                                                                                  |
| 23 | 8,400,000  | 8,550,000  | 113 | 629  | 0.285165163  | NUDT3,PACSIN1,RPS10,SPDEF                                                                                                                            |
| 23 | 8,475,000  | 8,625,000  | 114 | 545  | 0.270175523  | C6ORF106,PACSIN1,SPDEF                                                                                                                               |
| 23 | 8,550,000  | 8,700,000  | 115 | 336  | 0.673833242  | C6ORF106,SPDEF                                                                                                                                       |
| 23 | 8,625,000  | 8,775,000  | 116 | 344  | 0.619472347  | C6ORF106,SNRPC                                                                                                                                       |
| 23 | 8,700,000  | 8,850,000  | 117 | 404  | 0.408257208  | ANKS1A,SNRPC,TAF11,UHRF1BP1                                                                                                                          |
| 23 | 8,775,000  | 8,925,000  | 118 | 449  | 0.428699113  | ANKS1A,TAF11,UHRF1BP1                                                                                                                                |
| 23 | 8,850,000  | 9,000,000  | 119 | 614  | 0.342486098  | ANKS1A                                                                                                                                               |
| 23 | 8,925,000  | 9,075,000  | 120 | 763  | 0.167034486  | ANKS1A,TCP11                                                                                                                                         |
| 23 | 9,000,000  | 9,150,000  | 121 | 650  | 0.331934529  | ANKS1A,SCUBE3,TCP11                                                                                                                                  |
| 23 | 9,075,000  | 9,225,000  | 122 | 428  | 0.305122606  | SCUBE3,ZNF76                                                                                                                                         |
| 23 | 9,150,000  | 9,300,000  | 123 | 365  | 0.589851791  | DEF6,SCUBE3,ZNF76                                                                                                                                    |
| 23 | 9,225,000  | 9,375,000  | 124 | 545  | 0.833084021  | DEF6,PPARD,ZNF76                                                                                                                                     |
| 23 | 9,300,000  | 9,450,000  | 125 | 602  | -1.632069862 | FANCE,PPARD,RPL10A,TEAD3,TULP1                                                                                                                       |
| 23 | 9,375,000  | 9,525,000  | 126 | 648  | -1.441163117 | FANCE,FKBP5,RPL10A,TEAD3,TULP1                                                                                                                       |
| 23 | 9,450,000  | 9,600,000  | 127 | 578  | 0.034364044  | FKBP5                                                                                                                                                |
| 23 | 9,525,000  | 9,675,000  | 128 | 394  | 0.403428556  | FKBP5                                                                                                                                                |
| 23 | 9,600,000  | 9,750,000  | 129 | 726  | 0.163966819  | ARMC12,CLPS,FKBP5,LHFPL5                                                                                                                             |
| 23 | 9,675,000  | 9,825,000  | 130 | 840  | 0.284841622  | ARMC12,CLPS,LHFPL5,SRPK1                                                                                                                             |
| 23 | 9,750,000  | 9,900,000  | 131 | 592  | 0.273978426  | SLC26A8,SRPK1                                                                                                                                        |
| 23 | 9,825,000  | 9,975,000  | 132 | 584  | 0.559573843  | MAPK14,SLC26A8                                                                                                                                       |
| 23 | 9,900,000  | 10,050,000 | 133 | 511  | 1.144183797  | MAPK13,MAPK14,SLC26A8                                                                                                                                |
| 23 | 9,975,000  | 10,125,000 | 134 | 414  | 0.815590594  | BRPF3,MAPK13,MAPK14                                                                                                                                  |
| 23 | 10,050,000 | 10,200,000 | 135 | 518  | 0.534157542  | BRPF3,PNPLA1                                                                                                                                         |
| 23 | 10,125,000 | 10,275,000 | 136 | 868  | 1.232611487  | BRPF3,C6orf222,PNPLA1                                                                                                                                |
| 23 | 10,200,000 | 10,350,000 | 137 | 1253 | 1.3277536    | C6orf222,PNPLA1                                                                                                                                      |
| 23 | 10,275,000 | 10,425,000 | 138 | 1228 | 1.200407797  | KCTD20,STK38                                                                                                                                         |
| 23 | 10,350,000 | 10,500,000 | 139 | 1109 | 1.221799206  | KCTD20,SRSF3,STK38,ENSBTAG00000004219                                                                                                                |

|    |            |            |     |      |              |                                                                     |
|----|------------|------------|-----|------|--------------|---------------------------------------------------------------------|
| 23 | 10,425,000 | 10,575,000 | 140 | 1109 | 0.767947679  | CDKN1A,RPS4Y1,SRSF3,STK38,ENSBTAG00000004219<br>,ENSBTAG00000045551 |
| 23 | 10,500,000 | 10,650,000 | 141 | 1290 | 0.641883394  | CDKN1A,CPNE5,RAB44,RPS4Y1,ENSBTAG0000001073<br>0,ENSBTAG00000045551 |
| 23 | 10,575,000 | 10,725,000 | 142 | 1568 | 0.344757102  | CPNE5,RAB44,ENSBTAG00000010730,ENSBTAG00000<br>045551               |
| 23 | 10,650,000 | 10,800,000 | 143 | 1436 | 0.10618057   | C6orf89,CPNE5,PPIL1                                                 |
| 23 | 10,725,000 | 10,875,000 | 144 | 1421 | 0.925238977  | C6orf89,CPNE5,MTCH1,PI16,PPIL1                                      |
| 23 | 10,800,000 | 10,950,000 | 145 | 1641 | 0.763159709  | C6orf89,FGD2,MTCH1,PI16                                             |
| 23 | 10,875,000 | 11,025,000 | 146 | 1547 | 0.762676779  | FGD2                                                                |
| 23 | 10,950,000 | 11,100,000 | 147 | 1104 | 0.99234208   | PIM1,ENSBTAG00000045936                                             |
| 23 | 11,025,000 | 11,175,000 | 148 | 1064 | 0.843549805  | PIM1,TBC1D22B,TMEM217,ENSBTAG00000045936                            |
| 23 | 11,100,000 | 11,250,000 | 149 | 1174 | 0.580946996  | RNF8,TBC1D22B,TMEM217,ENSBTAG00000045936                            |
| 23 | 11,175,000 | 11,325,000 | 150 | 1182 | 0.464795435  | CMTR1,RNF8,TBC1D22B                                                 |
| 23 | 11,250,000 | 11,400,000 | 151 | 1166 | 0.495002968  | CCDC167,CMTR1,RNF8                                                  |
| 23 | 11,325,000 | 11,475,000 | 152 | 1412 | 0.61935978   | CCDC167,CMTR1                                                       |
| 23 | 11,400,000 | 11,550,000 | 153 | 1595 | 0.27861542   | MDGA1                                                               |
| 23 | 11,475,000 | 11,625,000 | 154 | 1496 | 0.557293781  | MDGA1                                                               |
| 23 | 11,550,000 | 11,700,000 | 155 | 1516 | 0.175286313  | MDGA1                                                               |
| 23 | 11,625,000 | 11,775,000 | 156 | 1337 | -1.669813731 | ZFAND3                                                              |
| 23 | 11,700,000 | 11,850,000 | 157 | 1126 | -2.372189311 | ZFAND3                                                              |
| 23 | 11,775,000 | 11,925,000 | 158 | 1057 | -2.675831163 | ZFAND3                                                              |
| 23 | 11,850,000 | 12,000,000 | 159 | 1185 | -3.980486772 | ZFAND3                                                              |
| 23 | 11,925,000 | 12,075,000 | 160 | 1210 | -2.952912474 | ZFAND3                                                              |
| 23 | 12,000,000 | 12,150,000 | 161 | 1031 | -0.052497998 | ZFAND3                                                              |
| 23 | 12,075,000 | 12,225,000 | 162 | 996  | 0.610602254  |                                                                     |
| 23 | 12,150,000 | 12,300,000 | 163 | 1041 | -0.222328061 |                                                                     |
| 23 | 12,225,000 | 12,375,000 | 164 | 889  | -1.038150831 |                                                                     |
| 23 | 12,300,000 | 12,450,000 | 165 | 897  | -0.157820846 | BTBD9                                                               |
| 23 | 12,375,000 | 12,525,000 | 166 | 1261 | -0.172584535 | BTBD9,GLO1                                                          |
| 23 | 12,450,000 | 12,600,000 | 167 | 1762 | 0.270038011  | BTBD9,DNAH8,GLO1                                                    |
| 23 | 12,525,000 | 12,675,000 | 168 | 1679 | 0.508690076  | DNAH8                                                               |
| 23 | 12,600,000 | 12,750,000 | 169 | 1504 | 0.422560718  | DNAH8                                                               |
| 23 | 12,675,000 | 12,825,000 | 170 | 1598 | 0.727601356  | DNAH8                                                               |
| 23 | 12,750,000 | 12,900,000 | 171 | 1650 | 0.944441287  | DNAH8                                                               |
| 23 | 12,825,000 | 12,975,000 | 172 | 1260 | 0.052784733  | DNAH8,GLP1R,SAYSD1                                                  |
| 23 | 12,900,000 | 13,050,000 | 173 | 1126 | -0.820172605 | GLP1R,SAYSD1                                                        |
| 23 | 12,975,000 | 13,125,000 | 174 | 1551 | 0.292919891  | KCNK5,ENSBTAG00000007140                                            |
| 23 | 13,050,000 | 13,200,000 | 175 | 1156 | 0.636327847  | KCNK16,KCNK17,KCNK5,ENSBTAG00000007140                              |
| 23 | 13,125,000 | 13,275,000 | 176 | 708  | 0.398530571  | KCNK16,KCNK17                                                       |
| 23 | 13,200,000 | 13,350,000 | 177 | 824  | 0.95584872   |                                                                     |
| 23 | 13,275,000 | 13,425,000 | 178 | 1123 | 0.835099008  | KIF6                                                                |
| 23 | 13,350,000 | 13,500,000 | 179 | 1408 | 0.809410819  | KIF6                                                                |
| 23 | 13,425,000 | 13,575,000 | 180 | 1151 | 0.824128985  | KIF6                                                                |
| 23 | 13,500,000 | 13,650,000 | 181 | 990  | 0.649159532  | KIF6                                                                |
| 23 | 13,575,000 | 13,725,000 | 182 | 1083 | 0.431000534  |                                                                     |
| 23 | 13,650,000 | 13,800,000 | 183 | 830  | 0.078565912  | DAAM2                                                               |
| 23 | 13,725,000 | 13,875,000 | 184 | 652  | 0.123849634  | DAAM2,MOCS1                                                         |
| 23 | 13,800,000 | 13,950,000 | 185 | 748  | 0.353746257  | DAAM2,MOCS1                                                         |
| 23 | 13,875,000 | 14,025,000 | 186 | 1135 | 0.208209894  |                                                                     |
| 23 | 13,950,000 | 14,100,000 | 187 | 1475 | 0.72673309   |                                                                     |
| 23 | 14,025,000 | 14,175,000 | 188 | 1431 | 1.110044013  |                                                                     |
| 23 | 14,100,000 | 14,250,000 | 189 | 1062 | 1.270314309  |                                                                     |



|    |            |            |     |      |              |                                                                         |
|----|------------|------------|-----|------|--------------|-------------------------------------------------------------------------|
| 23 | 14,175,000 | 14,325,000 | 190 | 537  | 1.35841613   | LRFN2                                                                   |
| 23 | 14,250,000 | 14,400,000 | 191 | 511  | -0.247576963 | LRFN2                                                                   |
| 23 | 14,325,000 | 14,475,000 | 192 | 799  | -0.356496493 | LRFN2                                                                   |
| 23 | 14,400,000 | 14,550,000 | 193 | 875  | -1.76E-05    |                                                                         |
| 23 | 14,475,000 | 14,625,000 | 194 | 1311 | 0.69672151   |                                                                         |
| 23 | 14,550,000 | 14,700,000 | 195 | 1767 | 0.917412646  |                                                                         |
| 23 | 14,625,000 | 14,775,000 | 196 | 1930 | -0.206043466 |                                                                         |
| 23 | 14,700,000 | 14,850,000 | 197 | 2069 | -0.781880546 |                                                                         |
| 23 | 14,775,000 | 14,925,000 | 198 | 2166 | -0.584523125 |                                                                         |
| 23 | 14,850,000 | 15,000,000 | 199 | 2017 | -0.332194578 | APOBEC2,TSPO2,UNC5CL                                                    |
| 23 | 14,925,000 | 15,075,000 | 200 | 1519 | 0.385644912  | APOBEC2,NFYA,OARD1,TSPO2,UNC5CL,ENSBTAG0000021359                       |
| 23 | 15,000,000 | 15,150,000 | 201 | 1399 | -1.164730593 | NFYA,OARD1,TREM1,TREM2,TREML1,TREML2,ENSBTAG00000021359                 |
| 23 | 15,075,000 | 15,225,000 | 202 | 1356 | -1.863869555 | TREM1,TREM2,TREML1,TREML2                                               |
| 23 | 15,150,000 | 15,300,000 | 203 | 1214 | 0.336259871  | TREM1                                                                   |
| 23 | 15,225,000 | 15,375,000 | 204 | 1343 | 0.340880751  |                                                                         |
| 23 | 15,300,000 | 15,450,000 | 205 | 1358 | 0.03201828   | FOXP4                                                                   |
| 23 | 15,375,000 | 15,525,000 | 206 | 1183 | 0.397695046  | FOXP4,MDFI,TFEB                                                         |
| 23 | 15,450,000 | 15,600,000 | 207 | 937  | 0.610405041  | FRS3,MDFI,PGC,TFEB                                                      |
| 23 | 15,525,000 | 15,675,000 | 208 | 839  | 0.67878992   | FRS3,PGC,TOMM6,USP49,ENSBTAG00000038916                                 |
| 23 | 15,600,000 | 15,750,000 | 209 | 875  | 0.006584791  | BYSL,CCND3,FRS3,MED20,TOMM6,USP49,ENSBTAG00000038916                    |
| 23 | 15,675,000 | 15,825,000 | 210 | 830  | -0.188456235 | BYSL,CCND3,MED20,TAF8                                                   |
| 23 | 15,750,000 | 15,900,000 | 211 | 725  | 0.803251514  | C6orf132,MGC137036,TAF8                                                 |
| 23 | 15,825,000 | 15,975,000 | 212 | 736  | 0.147221584  | C6orf132,GUCA1A,GUCA1B,MGC137036,MRPS10,TRERF1                          |
| 23 | 15,900,000 | 16,050,000 | 213 | 952  | -1.242097732 | GUCA1A,GUCA1B,MRPS10,TRERF1                                             |
| 23 | 15,975,000 | 16,125,000 | 214 | 861  | -1.735061847 | TRERF1                                                                  |
| 23 | 16,050,000 | 16,200,000 | 215 | 564  | -1.386305504 |                                                                         |
| 23 | 16,125,000 | 16,275,000 | 216 | 429  | -0.105444737 | UBR2                                                                    |
| 23 | 16,200,000 | 16,350,000 | 217 | 334  | -0.203429225 | UBR2                                                                    |
| 23 | 16,275,000 | 16,425,000 | 218 | 389  | 0.122081587  | PRPH2,TBCC,UBR2                                                         |
| 23 | 16,350,000 | 16,500,000 | 219 | 552  | 0.532930887  | GLTSCR1L,PRPH2,TBCC,UBR2                                                |
| 23 | 16,425,000 | 16,575,000 | 220 | 495  | 0.780736888  | CNPY3,GLTSCR1L,PTCRA,RPL7L1                                             |
| 23 | 16,500,000 | 16,650,000 | 221 | 378  | 0.871983583  | CNPY3,CUL7,GLTSCR1L,GNMT,KLHDC3,MEA1,PEX6,PPP2R5D,PTCRA,RPL7L1          |
| 23 | 16,575,000 | 16,725,000 | 222 | 387  | 0.194744286  | CUL7,GNMT,KLC4,KLHDC3,MEA1,MRPL2,PEX6,PPP2R5D,PTK7                      |
| 23 | 16,650,000 | 16,800,000 | 223 | 321  | 0.033480472  | CUL7,CUL9,DNPH1,KLC4,MRPL2,PTK7,SRF                                     |
| 23 | 16,725,000 | 16,875,000 | 224 | 296  | 0.790294459  | CRIP3,CUL9,DNPH1,PTK7,SLC22A7,SRF,ENSBTAG00000045499,ENSBTAG00000046107 |
| 23 | 16,800,000 | 16,950,000 | 225 | 349  | 0.689566705  | CRIP3,SLC22A7,ZNF318,ENSBTAG00000045499,ENSBTAG00000046107              |
| 23 | 16,875,000 | 17,025,000 | 226 | 568  | 0.101202824  | ABCC10,CRIP3,DLK2,TJAP1,ZNF318                                          |
| 23 | 16,950,000 | 17,100,000 | 227 | 803  | 0.260980529  | ABCC10,DLK2,LRRC73,POLH,POLR1C,TJAP1,XPO5,YIPF3                         |
| 23 | 17,025,000 | 17,175,000 | 228 | 916  | 0.87739705   | GTPBP2,LRRC73,MAD2L1BP,MRPS18A,POLH,POLR1C,RSPH9,TJAP1,XPO5,YIPF3       |
| 23 | 17,100,000 | 17,250,000 | 229 | 680  | 0.923417132  | GTPBP2,MAD2L1BP,MRPS18A,POLH,RSPH9                                      |
| 23 | 17,175,000 | 17,325,000 | 230 | 338  | 0.392283407  | VEGFA,ENSBTAG0000005339                                                 |
| 23 | 17,250,000 | 17,400,000 | 231 | 514  | 1.274672342  | VEGFA,ENSBTAG0000005339                                                 |
| 23 | 17,325,000 | 17,475,000 | 232 | 548  | 1.324814465  |                                                                         |

|    |            |            |     |      |              |                                                                   |
|----|------------|------------|-----|------|--------------|-------------------------------------------------------------------|
| 23 | 17,400,000 | 17,550,000 | 233 | 378  | 0.656745396  |                                                                   |
| 23 | 17,475,000 | 17,625,000 | 234 | 459  | 0.006479145  | AARS2                                                             |
| 23 | 17,550,000 | 17,700,000 | 235 | 599  | -0.220605434 | AARS2,MRPL14,TMEM63B                                              |
| 23 | 17,625,000 | 17,775,000 | 236 | 913  | 0.196263148  | AARS2,CDC5L,MRPL14,TMEM63B                                        |
| 23 | 17,700,000 | 17,850,000 | 237 | 890  | 0.148853385  | CAPN11,CDC5L,SLC29A1,TMEM63B                                      |
| 23 | 17,775,000 | 17,925,000 | 238 | 593  | -0.364331951 | CAPN11,NFKBIE,SLC29A1,SLC35B2,TMEM151B,TMEM63B,ENSBTAG00000000778 |
| 23 | 17,850,000 | 18,000,000 | 239 | 591  | 0.469485291  | NFKBIE,SLC29A1,SLC35B2,TMEM151B,ENSBTAG00000000778                |
| 23 | 17,925,000 | 18,075,000 | 240 | 592  | 0.603089108  |                                                                   |
| 23 | 18,000,000 | 18,150,000 | 241 | 539  | -0.237463114 |                                                                   |
| 23 | 18,075,000 | 18,225,000 | 242 | 682  | -0.239613977 |                                                                   |
| 23 | 18,150,000 | 18,300,000 | 243 | 872  | 0.361895429  | SUPT3H                                                            |
| 23 | 18,225,000 | 18,375,000 | 244 | 593  | 0.076664469  | SUPT3H                                                            |
| 23 | 18,300,000 | 18,450,000 | 245 | 309  | 0.255874106  | SUPT3H                                                            |
| 23 | 18,375,000 | 18,525,000 | 246 | 337  | 0.893126422  | SUPT3H                                                            |
| 23 | 18,450,000 | 18,600,000 | 247 | 341  | 0.445736888  | SUPT3H                                                            |
| 23 | 18,525,000 | 18,675,000 | 248 | 325  | 0.089921524  | RUNX2,SUPT3H                                                      |
| 23 | 18,600,000 | 18,750,000 | 249 | 361  | 0.990064635  | RUNX2,SUPT3H                                                      |
| 23 | 18,675,000 | 18,825,000 | 250 | 547  | 1.228222786  | RUNX2                                                             |
| 23 | 18,750,000 | 18,900,000 | 251 | 878  | 0.97162199   | RUNX2                                                             |
| 23 | 18,825,000 | 18,975,000 | 252 | 1343 | 0.521647074  |                                                                   |
| 23 | 18,900,000 | 19,050,000 | 253 | 1609 | 0.327535126  |                                                                   |
| 23 | 18,975,000 | 19,125,000 | 254 | 1597 | 0.227607226  |                                                                   |
| 23 | 19,050,000 | 19,200,000 | 255 | 1413 | 0.529725119  | CLIC5                                                             |
| 23 | 19,125,000 | 19,275,000 | 256 | 1490 | 0.744553318  | CLIC5                                                             |
| 23 | 19,200,000 | 19,350,000 | 257 | 1742 | -0.055847299 | CLIC5                                                             |
| 23 | 19,275,000 | 19,425,000 | 258 | 1624 | -0.184926364 | CLIC5,ENPP4,ENPP5                                                 |
| 23 | 19,350,000 | 19,500,000 | 259 | 1144 | 0.336019705  | ENPP4,ENPP5,RCAN2                                                 |
| 23 | 19,425,000 | 19,575,000 | 260 | 729  | -0.464526752 | RCAN2                                                             |
| 23 | 19,500,000 | 19,650,000 | 261 | 956  | -0.338534589 | RCAN2                                                             |
| 23 | 19,575,000 | 19,725,000 | 262 | 1595 | 0.621226407  | RCAN2                                                             |
| 23 | 19,650,000 | 19,800,000 | 263 | 1573 | 0.948693867  | CYP39A1,RCAN2                                                     |
| 23 | 19,725,000 | 19,875,000 | 264 | 1079 | 0.685802049  | CYP39A1,SLC25A27                                                  |
| 23 | 19,800,000 | 19,950,000 | 265 | 1054 | -0.213716586 | CYP39A1,PLA2G7,SLC25A27,TDRD6                                     |
| 23 | 19,875,000 | 20,025,000 | 266 | 1001 | -2.456802697 | ANKRD66,MEP1A,PLA2G7,SLC25A27,TDRD6                               |
| 23 | 19,950,000 | 20,100,000 | 267 | 950  | -2.486628972 | ANKRD66,GPR116,MEP1A                                              |
| 23 | 20,025,000 | 20,175,000 | 268 | 1197 | 0.697807233  | GPR116,MEP1A                                                      |
| 23 | 20,100,000 | 20,250,000 | 269 | 1377 | 0.588989314  | GPR110,GPR116                                                     |
| 23 | 20,175,000 | 20,325,000 | 270 | 1258 | -0.81026853  | GPR110                                                            |
| 23 | 20,250,000 | 20,400,000 | 271 | 1136 | -1.600909883 | GPR110                                                            |
| 23 | 20,325,000 | 20,475,000 | 272 | 1138 | -1.293182405 | TNFRSF21                                                          |
| 23 | 20,400,000 | 20,550,000 | 273 | 1180 | -1.728511454 | TNFRSF21                                                          |
| 23 | 20,475,000 | 20,625,000 | 274 | 1110 | -1.184321408 | CD2AP                                                             |
| 23 | 20,550,000 | 20,700,000 | 275 | 873  | -0.377293182 | CD2AP                                                             |
| 23 | 20,625,000 | 20,775,000 | 276 | 780  | 0.13988799   | CD2AP,GPR111,GPR115                                               |
| 23 | 20,700,000 | 20,850,000 | 277 | 898  | 0.678637653  | GPR111,GPR115,OPN5                                                |
| 23 | 20,775,000 | 20,925,000 | 278 | 779  | 0.811996521  | C23H6orf138,OPN5                                                  |
| 23 | 20,850,000 | 21,000,000 | 279 | 1006 | 0.59039441   | C23H6orf138                                                       |
| 23 | 20,925,000 | 21,075,000 | 280 | 1287 | -0.355295141 | C23H6orf138                                                       |
| 23 | 21,000,000 | 21,150,000 | 281 | 953  | -0.752322617 | C23H6orf138                                                       |
| 23 | 21,075,000 | 21,225,000 | 282 | 1189 | -0.716398692 | C23H6orf138                                                       |
| 23 | 21,150,000 | 21,300,000 | 283 | 1717 | -0.803176738 |                                                                   |

|    |            |            |     |      |              |                                                               |
|----|------------|------------|-----|------|--------------|---------------------------------------------------------------|
| 23 | 21,225,000 | 21,375,000 | 284 | 1903 | 0.047230868  |                                                               |
| 23 | 21,300,000 | 21,450,000 | 285 | 2472 | 0.107394473  |                                                               |
| 23 | 21,375,000 | 21,525,000 | 286 | 2712 | 0.265506912  |                                                               |
| 23 | 21,450,000 | 21,600,000 | 287 | 2355 | 0.555203069  |                                                               |
| 23 | 21,525,000 | 21,675,000 | 288 | 1799 | 0.583700256  |                                                               |
| 23 | 21,600,000 | 21,750,000 | 289 | 1632 | 0.246431453  |                                                               |
| 23 | 21,675,000 | 21,825,000 | 290 | 1613 | 0.021827193  |                                                               |
| 23 | 21,750,000 | 21,900,000 | 291 | 1586 | -0.435582459 |                                                               |
| 23 | 21,825,000 | 21,975,000 | 292 | 1818 | -0.44326522  | MUT                                                           |
| 23 | 21,900,000 | 22,050,000 | 293 | 1328 | 0.17431295   | C23H6orf141,CENPQ,GLYATL3,MUT                                 |
| 23 | 21,975,000 | 22,125,000 | 294 | 1255 | -0.001088332 | C23H6orf141,CENPQ,GLYATL3,MUT,RHAG                            |
| 23 | 22,050,000 | 22,200,000 | 295 | 1530 | 0.201859576  | CRISP2,CRISP3,RHAG                                            |
| 23 | 22,125,000 | 22,275,000 | 296 | 1164 | -0.293690818 | CRISP1,CRISP2,CRISP3                                          |
| 23 | 22,200,000 | 22,350,000 | 297 | 1229 | -0.84827893  | CRISP1                                                        |
| 23 | 22,275,000 | 22,425,000 | 298 | 1145 | -0.615054469 | DEFB112                                                       |
| 23 | 22,350,000 | 22,500,000 | 299 | 696  | -0.590919087 | DEFB112                                                       |
| 23 | 22,425,000 | 22,575,000 | 300 | 583  | -0.208572173 |                                                               |
| 23 | 22,500,000 | 22,650,000 | 301 | 491  | -0.453761007 |                                                               |
| 23 | 22,575,000 | 22,725,000 | 302 | 823  | -0.252452782 |                                                               |
| 23 | 22,650,000 | 22,800,000 | 303 | 1442 | -0.618535838 |                                                               |
| 23 | 22,725,000 | 22,875,000 | 304 | 1728 | -0.467081728 |                                                               |
| 23 | 22,800,000 | 22,950,000 | 305 | 1787 | 0.153813676  |                                                               |
| 23 | 22,875,000 | 23,025,000 | 306 | 1689 | 0.256913095  | TFAP2D                                                        |
| 23 | 22,950,000 | 23,100,000 | 307 | 1685 | -0.673735205 | TFAP2B,TFAP2D                                                 |
| 23 | 23,025,000 | 23,175,000 | 308 | 1616 | -0.829454325 | TFAP2B,TFAP2D                                                 |
| 23 | 23,100,000 | 23,250,000 | 309 | 1511 | -0.001047489 | TFAP2B                                                        |
| 23 | 23,175,000 | 23,325,000 | 310 | 1569 | 0.526848565  |                                                               |
| 23 | 23,250,000 | 23,400,000 | 311 | 1328 | 0.762245463  |                                                               |
| 23 | 23,325,000 | 23,475,000 | 312 | 1401 | -0.215921357 |                                                               |
| 23 | 23,400,000 | 23,550,000 | 313 | 1635 | 0.284907714  |                                                               |
| 23 | 23,475,000 | 23,625,000 | 314 | 1977 | 0.731628444  |                                                               |
| 23 | 23,550,000 | 23,700,000 | 315 | 2146 | 0.41222682   |                                                               |
| 23 | 23,625,000 | 23,775,000 | 316 | 2262 | 0.74016715   |                                                               |
| 23 | 23,700,000 | 23,850,000 | 317 | 2315 | 0.77880378   | PKHD1                                                         |
| 23 | 23,775,000 | 23,925,000 | 318 | 2198 | 0.451951753  | PKHD1                                                         |
| 23 | 23,850,000 | 24,000,000 | 319 | 2388 | 0.316056295  | PKHD1                                                         |
| 23 | 23,925,000 | 24,075,000 | 320 | 2291 | 0.199661357  | PKHD1                                                         |
| 23 | 24,000,000 | 24,150,000 | 321 | 2092 | 0.458879533  | PKHD1                                                         |
| 23 | 24,075,000 | 24,225,000 | 322 | 2343 | 0.436976686  | PKHD1                                                         |
| 23 | 24,150,000 | 24,300,000 | 323 | 2655 | 0.604640539  | PKHD1                                                         |
| 23 | 24,225,000 | 24,375,000 | 324 | 2209 | 0.716513409  | IL17,PKHD1                                                    |
| 23 | 24,300,000 | 24,450,000 | 325 | 1964 | -0.009185329 | IL17,IL17F,MCM3                                               |
| 23 | 24,375,000 | 24,525,000 | 326 | 2162 | -0.485071966 | IL17F,MCM3                                                    |
| 23 | 24,450,000 | 24,600,000 | 327 | 2480 | -0.616946082 | EFHC1,MCM3,PAQR8                                              |
| 23 | 24,525,000 | 24,675,000 | 328 | 2944 | -0.629368067 | EFHC1,PAQR8,TRAM2                                             |
| 23 | 24,600,000 | 24,750,000 | 329 | 2760 | -0.399770307 | EFHC1,TRAM2                                                   |
| 23 | 24,675,000 | 24,825,000 | 330 | 2503 | 0.037333427  | GSTA2,TMEM14A,TRAM2                                           |
| 23 | 24,750,000 | 24,900,000 | 331 | 2457 | -0.030025377 | GSTA1,GSTA2,GSTA5,TMEM14A,ENSBTAG00000025485                  |
| 23 | 24,825,000 | 24,975,000 | 332 | 2573 | 0.151412699  | GSTA1,GSTA2,GSTA4,GSTA5,ENSBTAG00000025485,ENSBTAG00000032642 |
| 23 | 24,900,000 | 25,050,000 | 333 | 2770 | 0.130561352  | FBXO9,GSTA4,GSTA5,ICK,ENSBTAG00000032642                      |
| 23 | 24,975,000 | 25,125,000 | 334 | 2913 | -0.015690847 | FBXO9,GCM-1,GSTA4,ICK                                         |

|    |            |            |     |      |              |                                                                                                                                                                |
|----|------------|------------|-----|------|--------------|----------------------------------------------------------------------------------------------------------------------------------------------------------------|
| 23 | 25,050,000 | 25,200,000 | 335 | 2585 | -0.222485066 | ELOVL5,FBXO9,GCM-1                                                                                                                                             |
| 23 | 25,125,000 | 25,275,000 | 336 | 2269 | -0.580563645 | ELOVL5                                                                                                                                                         |
| 23 | 25,200,000 | 25,350,000 | 337 | 3230 | -0.344351892 | ELOVL5                                                                                                                                                         |
| 23 | 25,275,000 | 25,425,000 | 338 | 2725 | -0.58692497  | BOLA-DQA2,BOLA-DQA5,BOLA-DQB,ENSBTAG00000003352                                                                                                                |
| 23 | 25,350,000 | 25,500,000 | 339 | 2741 | -1.029436382 | BOLA-DQA1,BOLA-DQA2,BOLA-DQA5,BOLA-DQB,BOLA-DRB3,ENSBTAG00000003352                                                                                            |
| 23 | 25,425,000 | 25,575,000 | 340 | 3687 | -0.556074263 | BOLA-DQA1,BOLA-DRB3,ENSBTAG000000038397                                                                                                                        |
| 23 | 25,500,000 | 25,650,000 | 341 | 3050 | -0.2344935   | BOLA-DRA,BTNL2,ENSBTAG00000007618,ENSBTAG000000034945,ENSBTAG000000038397                                                                                      |
| 23 | 25,575,000 | 25,725,000 | 342 | 2545 | 0.121138134  | BOLA-DRA,BTNL2,ENSBTAG00000007618,ENSBTAG000000034945,ENSBTAG000000038397                                                                                      |
| 23 | 25,650,000 | 25,800,000 | 343 | 2517 | 0.1993483    | ENSBTAG00000007618                                                                                                                                             |
| 23 | 25,725,000 | 25,875,000 | 344 | 3252 | -0.346475535 | BOLA-DQB                                                                                                                                                       |
| 23 | 25,800,000 | 25,950,000 | 345 | 3437 | -0.49068476  | BOLA-DQB                                                                                                                                                       |
| 23 | 25,875,000 | 26,025,000 | 346 | 2985 | 0.051637234  | ENSBTAG000000033979                                                                                                                                            |
| 23 | 25,950,000 | 26,100,000 | 347 | 3014 | 0.357583024  | ENSBTAG000000033979                                                                                                                                            |
| 23 | 26,025,000 | 26,175,000 | 348 | 2190 | 0.084288215  |                                                                                                                                                                |
| 23 | 26,100,000 | 26,250,000 | 349 | 1311 | -1.34616235  |                                                                                                                                                                |
| 23 | 26,175,000 | 26,325,000 | 350 | 2263 | 0.125213726  |                                                                                                                                                                |
| 23 | 26,250,000 | 26,400,000 | 351 | 2702 | -0.018459651 | ENSBTAG000000026163                                                                                                                                            |
| 23 | 26,325,000 | 26,475,000 | 352 | 2495 | -0.990625405 | ENSBTAG000000026163                                                                                                                                            |
| 23 | 26,400,000 | 26,550,000 | 353 | 2494 | -0.337955612 |                                                                                                                                                                |
| 23 | 26,475,000 | 26,625,000 | 354 | 2263 | -0.110338369 |                                                                                                                                                                |
| 23 | 26,550,000 | 26,700,000 | 355 | 2240 | -0.470904094 | ENSBTAG000000046116                                                                                                                                            |
| 23 | 26,625,000 | 26,775,000 | 356 | 2454 | -1.247399657 | C6orf10,ENSBTAG000000046116                                                                                                                                    |
| 23 | 26,700,000 | 26,850,000 | 357 | 2555 | -0.411161615 | C6orf10                                                                                                                                                        |
| 23 | 26,775,000 | 26,925,000 | 358 | 2654 | 0.146445295  | C6orf10,ENSBTAG000000023563                                                                                                                                    |
| 23 | 26,850,000 | 27,000,000 | 359 | 3064 | 0.074725221  | NOTCH4,ENSBTAG000000023563,ENSBTAG000000048304                                                                                                                 |
| 23 | 26,925,000 | 27,075,000 | 360 | 2349 | 0.204612157  | AGER,AGPAT1,ATF6B,EGFL8,FKBPL,NOTCH4,PBX2,PPT2,PRRT1,RNF5,ENSBTAG000000023563,ENSBTAG000000048304                                                              |
| 23 | 27,000,000 | 27,150,000 | 361 | 1591 | 0.149625297  | AGER,AGPAT1,ATF6B,EGFL8,FKBPL,PBX2,PPT2,PRRT1,RNF5,TNXB,ENSBTAG000000047039                                                                                    |
| 23 | 27,075,000 | 27,225,000 | 362 | 1618 | 0.49432597   | DOM3Z,NELFE,SKIV2L,STK19,TNXB,ENSBTAG00000001443,ENSBTAG00000006864,ENSBTAG000000037533,ENSBTAG000000047039                                                    |
| 23 | 27,150,000 | 27,300,000 | 363 | 1664 | 0.541824434  | BAT8,C2,CFB,DOM3Z,NELFE,SKIV2L,SLC44A4,STK19,ZBTB12,ENSBTAG00000001443,ENSBTAG00000006864,ENSBTAG000000037533                                                  |
| 23 | 27,225,000 | 27,375,000 | 364 | 1643 | -0.178761488 | BAT8,C2,CFB,HSPA1A,HSPA1L,LSM2,MGC151586,NELFE,NEU1,SLC44A4,VARS,VWA7,ZBTB12                                                                                   |
| 23 | 27,300,000 | 27,450,000 | 365 | 1455 | -0.425195456 | ABHD16A,C6ORF25,CLIC1,CSNK2B,DDAH2,HSPA1A,HSPA1L,LSM2,LY6G5B,LY6G5C,LY6G6C,LY6G6E,MGC151586,MSH5,NEU1,SLC44A4,VARS,VWA7,ENSBTAG0000000580,ENSBTAG000000038955  |
| 23 | 27,375,000 | 27,525,000 | 366 | 1438 | -0.150827291 | ABHD16A,AIF1,APOM,BAG6,BAT4,C23H6ORF47,C6ORF25,CLIC1,CSNK2B,DDAH2,LY6G5B,LY6G5C,LY6G6C,LY6G6E,MGC151586,MSH5,NCR3,PRRC2A,ENSBTAG0000000580,ENSBTAG000000038955 |

|    |            |            |     |      |              |                                                                                                                                                                                                                                                                            |
|----|------------|------------|-----|------|--------------|----------------------------------------------------------------------------------------------------------------------------------------------------------------------------------------------------------------------------------------------------------------------------|
| 23 | 27,450,000 | 27,600,000 | 367 | 1772 | 0.069195372  | AIF1,APOM,ATP6V1G2,BAG6,BAT4,C23H6ORF47,CSN<br>K2B,DDX39B,LTA,LTB,MCCD1,NCR3,NFKBIL1,PRRC2A,<br>TNF                                                                                                                                                                        |
| 23 | 27,525,000 | 27,675,000 | 368 | 2155 | 0.294739782  | ATP6V1G2,BOLA,DDX39B,LTA,LTB,MCCD1,NFKBIL1,T<br>NF,ENSBTAG00000008959,ENSBTAG00000010166,EN<br>SBTAG000000031905                                                                                                                                                           |
| 23 | 27,600,000 | 27,750,000 | 369 | 2556 | 0.443922894  | BOLA,ENSBTAG00000001476,ENSBTAG00000008959,<br>ENSBTAG00000010166,ENSBTAG00000012208,ENSBT<br>AG000000031905                                                                                                                                                               |
| 23 | 27,675,000 | 27,825,000 | 370 | 2513 | 0.582003627  | C6orf15,CCHCR1,CDSN,POU5F1,PSORS1C2,TCF19,EN<br>SBTAG00000001476,ENSBTAG00000010166,ENSBTAG<br>00000012208                                                                                                                                                                 |
| 23 | 27,750,000 | 27,900,000 | 371 | 2552 | 0.481040295  | BOLA,C6orf15,CCHCR1,CDSN,POU5F1,PSORS1C2,TCF<br>19,ENSBTAG00000007075                                                                                                                                                                                                      |
| 23 | 27,825,000 | 27,975,000 | 372 | 2247 | 0.359654123  | BOLA,GTF2H4,SFTA2,VAR2,ENSBTAG00000007075                                                                                                                                                                                                                                  |
| 23 | 27,900,000 | 28,050,000 | 373 | 1941 | 0.266504753  | DDR1,GTF2H4,SFTA2,VAR2                                                                                                                                                                                                                                                     |
| 23 | 27,975,000 | 28,125,000 | 374 | 2002 | 0.031017398  | DDR1,FLOT1,IER3,MDC1,NRM,TUBB5                                                                                                                                                                                                                                             |
| 23 | 28,050,000 | 28,200,000 | 375 | 1654 | 0.103257526  | ABCF1,ATAT1,C6orf136,DHX16,FLOT1,IER3,KIAA1949,<br>MDC1,MRPS18B,NRM,PPP1R10,TUBB5                                                                                                                                                                                          |
| 23 | 28,125,000 | 28,275,000 | 376 | 1724 | -0.225295742 | ABCF1,ATAT1,C6orf136,DHX16,GNL1,KIAA1949,MDC1<br>,MRPS18B,PPP1R10,PRR3,TRIM39-RPP21                                                                                                                                                                                        |
| 23 | 28,200,000 | 28,350,000 | 377 | 2216 | -0.128586649 | ABCF1,GNL1,PRR3,TRIM39-<br>RPP21,ENSBTAG00000005146,ENSBTAG00000038619                                                                                                                                                                                                     |
| 23 | 28,275,000 | 28,425,000 | 378 | 3346 | 0.169221446  | BOLA-<br>NC,ENSBTAG00000005146,ENSBTAG00000038619                                                                                                                                                                                                                          |
| 23 | 28,350,000 | 28,500,000 | 379 | 3862 | 0.063685483  | BOLA-NC,JSP.1                                                                                                                                                                                                                                                              |
| 23 | 28,425,000 | 28,575,000 | 380 | 3696 | -0.06080436  | BOLA,JSP.1,TRIM26,ENSBTAG000000037421                                                                                                                                                                                                                                      |
| 23 | 28,500,000 | 28,650,000 | 381 | 3835 | -0.279967246 | BOLA,TRIM10,TRIM15,TRIM26,TRIM40,ENSBTAG0000<br>0037421                                                                                                                                                                                                                    |
| 23 | 28,575,000 | 28,725,000 | 382 | 3355 | -0.564218291 | PPP1R11,TRIM10,TRIM15,TRIM26,TRIM31,TRIM40,ZN<br>RD1                                                                                                                                                                                                                       |
| 23 | 28,650,000 | 28,800,000 | 383 | 2540 | -0.798886988 | GABBR1,MOG,PPP1R11,TRIM31,ZFP57,ZNRD1                                                                                                                                                                                                                                      |
| 23 | 28,725,000 | 28,875,000 | 384 | 2577 | -0.296196851 | GABBR1,MOG,ZFP57,ENSBTAG000000025398,ENSBTA<br>G00000031825                                                                                                                                                                                                                |
| 23 | 28,800,000 | 28,950,000 | 385 | 2589 | 0.371929272  | GABBR1,UBD,ENSBTAG00000003250,ENSBTAG00000<br>017227,ENSBTAG000000025398,ENSBTAG0000002724<br>5,ENSBTAG000000031825                                                                                                                                                        |
| 23 | 28,875,000 | 29,025,000 | 386 | 2818 | 0.555119802  | UBD,ENSBTAG00000003250,ENSBTAG00000012956,E<br>NSBTAG00000017227,ENSBTAG00000027245,ENSBT<br>AG00000031832,ENSBTAG00000045586,ENSBTAG000<br>00046934,ENSBTAG00000047014,ENSBTAG00000047<br>644,ENSBTAG00000048194                                                          |
| 23 | 28,950,000 | 29,100,000 | 387 | 3774 | 0.407995324  | ENSBTAG00000012956,ENSBTAG00000031832,ENSBT<br>AG00000031835,ENSBTAG00000039390,ENSBTAG000<br>00045586,ENSBTAG00000046892,ENSBTAG00000046<br>934,ENSBTAG00000047014,ENSBTAG00000047644,E<br>NSBTAG00000047763,ENSBTAG00000047829,ENSBT<br>AG00000048019,ENSBTAG00000048194 |
| 23 | 29,025,000 | 29,175,000 | 388 | 3940 | 0.34972067   | OR12D2,OR12D3,ENSBTAG00000031835,ENSBTAG00<br>000039116,ENSBTAG00000039390,ENSBTAG0000003<br>9683,ENSBTAG00000046892,ENSBTAG00000047763,E<br>NSBTAG00000047829,ENSBTAG00000048019                                                                                          |

|    |            |            |     |      |              |                                                                                                                                                                            |
|----|------------|------------|-----|------|--------------|----------------------------------------------------------------------------------------------------------------------------------------------------------------------------|
| 23 | 29,100,000 | 29,250,000 | 389 | 3369 | 0.408525954  | OR12D2,OR12D3,OR14J1,OR5V1,ENSBTAG00000031843,ENSBTAG00000039116,ENSBTAG00000039534,ENSBTAG00000039683,ENSBTAG00000039901                                                  |
| 23 | 29,175,000 | 29,325,000 | 390 | 3330 | 0.441086427  | OR14J1,OR5V1,ENSBTAG00000031843,ENSBTAG0000038608,ENSBTAG00000039534,ENSBTAG00000039901,ENSBTAG00000046023,ENSBTAG00000046777,ENSBTAG00000047086                           |
| 23 | 29,250,000 | 29,400,000 | 391 | 3478 | 0.239750151  | ENSBTAG0000000228,ENSBTAG00000031850,ENSBTAG00000037628,ENSBTAG00000038608,ENSBTAG0000046023,ENSBTAG00000046777,ENSBTAG00000047086                                         |
| 23 | 29,325,000 | 29,475,000 | 392 | 3115 | -0.224535707 | ENSBTAG0000000228,ENSBTAG0000006339,ENSBTAG00000027955,ENSBTAG00000031850,ENSBTAG0000037628,ENSBTAG00000040582                                                             |
| 23 | 29,400,000 | 29,550,000 | 393 | 2820 | -0.721188952 | ENSBTAG0000006339,ENSBTAG00000027955,ENSBTAG00000038562,ENSBTAG00000038928,ENSBTAG0000040280,ENSBTAG00000040582,ENSBTAG00000047558                                         |
| 23 | 29,475,000 | 29,625,000 | 394 | 2877 | -0.562924544 | ENSBTAG00000037577,ENSBTAG00000038444,ENSBTAG00000038562,ENSBTAG00000038928,ENSBTAG00000039052,ENSBTAG00000040064,ENSBTAG00000040280,ENSBTAG00000047558,ENSBTAG00000047736 |
| 23 | 29,550,000 | 29,700,000 | 395 | 2661 | -0.189724288 | ENSBTAG00000015175,ENSBTAG00000037577,ENSBTAG00000038444,ENSBTAG00000039052,ENSBTAG00000040026,ENSBTAG00000040064,ENSBTAG00000040187,ENSBTAG00000040457,ENSBTAG00000047736 |
| 23 | 29,625,000 | 29,775,000 | 396 | 1795 | 0.384121011  | ENSBTAG0000000214,ENSBTAG00000015175,ENSBTAG00000040026,ENSBTAG00000040187,ENSBTAG00000040457                                                                              |
| 23 | 29,700,000 | 29,850,000 | 397 | 1743 | 0.015025103  | ENSBTAG0000000214,ENSBTAG00000047585                                                                                                                                       |
| 23 | 29,775,000 | 29,925,000 | 398 | 2269 | 0.050724799  | TRIM27,ZNF311,ENSBTAG00000047585                                                                                                                                           |
| 23 | 29,850,000 | 30,000,000 | 399 | 2042 | 0.284203168  | TRIM27,ZNF311                                                                                                                                                              |
| 23 | 29,925,000 | 30,075,000 | 400 | 1998 | 0.161383638  | ENSBTAG00000038782                                                                                                                                                         |
| 23 | 30,000,000 | 30,150,000 | 401 | 2319 | 0.5109582    | PGBD1,ZNF323,ZSCAN12,ENSBTAG00000038782                                                                                                                                    |
| 23 | 30,075,000 | 30,225,000 | 402 | 2371 | 0.344577835  | NKAPL,PGBD1,ZNF323,ZSCAN12,ZSCAN26,ZSCAN9,ENSBTAG00000003575                                                                                                               |
| 23 | 30,150,000 | 30,300,000 | 403 | 2368 | 0.667360392  | NKAPL,PGBD1,ZNF192,ZSCAN26,ZSCAN9,ENSBTAG0000002641,ENSBTAG00000003575                                                                                                     |
| 23 | 30,225,000 | 30,375,000 | 404 | 2633 | 0.704495038  | ZNF165,ZNF192,ZSCAN16,ENSBTAG00000002641,ENSBTAG00000013384                                                                                                                |
| 23 | 30,300,000 | 30,450,000 | 405 | 2329 | 0.536351644  | ZNF165,ZSCAN16,ENSBTAG00000013384,ENSBTAG0000038908,ENSBTAG00000039079                                                                                                     |
| 23 | 30,375,000 | 30,525,000 | 406 | 2417 | 0.887268529  | ENSBTAG00000031881,ENSBTAG00000038908,ENSBTAG00000038983,ENSBTAG00000039079,ENSBTAG0000040454,ENSBTAG00000040583                                                           |
| 23 | 30,450,000 | 30,600,000 | 407 | 3170 | 0.897772709  | ENSBTAG00000005885,ENSBTAG00000031881,ENSBTAG00000038983,ENSBTAG00000040171,ENSBTAG0000040307,ENSBTAG00000040454,ENSBTAG00000040583                                        |
| 23 | 30,525,000 | 30,675,000 | 408 | 3184 | 0.641232664  | OR2B6,ENSBTAG00000005885,ENSBTAG00000038597,ENSBTAG00000039145,ENSBTAG00000040171,ENSBTAG00000040307                                                                       |

|    |            |            |     |      |              |                                                                                                                                                                     |
|----|------------|------------|-----|------|--------------|---------------------------------------------------------------------------------------------------------------------------------------------------------------------|
| 23 | 30,600,000 | 30,750,000 | 409 | 2518 | 0.641311244  | H2B,HIST1H2AD,HIST1H2AG,HIST1H3B,HIST1H3F,HIST1H4D,OR2B6,ENSBTAG00000024179,ENSBTAG0000038597,ENSBTAG00000039145,ENSBTAG00000039274                                 |
| 23 | 30,675,000 | 30,825,000 | 410 | 1974 | 0.733427467  | H2B,HIST1H2AD,HIST1H2AG,HIST1H2AJ,HIST1H3B,HIST1H3F,HIST1H4D,ENSBTAG00000024175,ENSBTAG0000024178,ENSBTAG00000024179,ENSBTAG0000039274                              |
| 23 | 30,750,000 | 30,900,000 | 411 | 1817 | 0.609190858  | H2B,HIST1H2AG,HIST1H2AJ,ENSBTAG00000024175,ENSBTAG00000024178                                                                                                       |
| 23 | 30,825,000 | 30,975,000 | 412 | 1480 | 0.34639375   | ZNF184                                                                                                                                                              |
| 23 | 30,900,000 | 31,050,000 | 413 | 1433 | 0.36269306   | POM121L2,ZNF184,ZNF391                                                                                                                                              |
| 23 | 30,975,000 | 31,125,000 | 414 | 1588 | 0.951742506  | HIST1H2AG,HIST1H2BJ,POM121L2,PRSS16,ZNF184,ZNF391,ENSBTAG00000038173,ENSBTAG00000046096                                                                             |
| 23 | 31,050,000 | 31,200,000 | 415 | 1733 | 1.063399616  | HIST1H2AG,HIST1H2BJ,PRSS16,ENSBTAG00000038173,ENSBTAG00000046096                                                                                                    |
| 23 | 31,125,000 | 31,275,000 | 416 | 1883 | 0.846606252  | HIST1H2BJ,MGC157324,ENSBTAG00000027547,ENSBTAG00000037597                                                                                                           |
| 23 | 31,200,000 | 31,350,000 | 417 | 1822 | 0.970855518  | ABT1,HMGN4,MGC157324,ENSBTAG00000010852,ENSBTAG00000027547,ENSBTAG00000037597                                                                                       |
| 23 | 31,275,000 | 31,425,000 | 418 | 1861 | 1.004615003  | ABT1,BTN1A1,HMGN4,ENSBTAG00000010852                                                                                                                                |
| 23 | 31,350,000 | 31,500,000 | 419 | 1890 | 0.437291386  | BTN1A1,H2B,HIST1H1D,HIST1H2AG,HIST1H3A,HIST1H3G,HIST2H4B,ENSBTAG00000010852,ENSBTAG00000031762,ENSBTAG00000031763,ENSBTAG00000031766                                |
| 23 | 31,425,000 | 31,575,000 | 420 | 1852 | 0.512330148  | H2B,HIST1H1D,HIST1H1E,HIST1H2AG,HIST1H2BI,HIST1H3A,HIST1H3G,HIST2H4B,ENSBTAG00000031762,ENSBTAG00000031763,ENSBTAG00000031766,ENSBTAG00000031768,ENSBTAG00000040277 |
| 23 | 31,500,000 | 31,650,000 | 421 | 1795 | 0.930662513  | H2B,HFE,HIST1H1C,HIST1H1E,HIST1H2AC,HIST1H2AG,HIST1H2BB,HIST1H2BI,ENSBTAG00000025391,ENSBTAG00000031717,ENSBTAG00000031768,ENSBTAG00000040277                       |
| 23 | 31,575,000 | 31,725,000 | 422 | 1799 | 0.879413598  | H2B,HFE,HIST1H1A,HIST1H1C,HIST1H2AC,HIST1H2BB,HIST1H3D,HIST1H3I,HIST2H4A,SLC17A2,TRIM38,ENSBTAG00000025391,ENSBTAG00000031717,ENSBTAG00000031719,ENSBTAG00000031738 |
| 23 | 31,650,000 | 31,800,000 | 423 | 1726 | 0.802051821  | HIST1H1A,HIST1H3D,HIST1H3I,HIST2H4A,SLC17A1,SLC17A2,SLC17A3,TRIM38,ENSBTAG00000031719,ENSBTAG00000031738                                                            |
| 23 | 31,725,000 | 31,875,000 | 424 | 1608 | 0.263188535  | SLC17A1,SLC17A2,SLC17A3,SLC17A4                                                                                                                                     |
| 23 | 31,800,000 | 31,950,000 | 425 | 1994 | -0.062463283 | HIST1H2BA,SLC17A1,SLC17A4,ENSBTAG00000046992,ENSBTAG00000048235                                                                                                     |
| 23 | 31,875,000 | 32,025,000 | 426 | 2520 | -0.109019601 | HIST1H2BA,SCGN,ENSBTAG00000046992,ENSBTAG00000048235                                                                                                                |
| 23 | 31,950,000 | 32,100,000 | 427 | 2795 | 0.492284393  | LRRRC16A,SCGN                                                                                                                                                       |
| 23 | 32,025,000 | 32,175,000 | 428 | 2787 | 0.82517429   | LRRRC16A                                                                                                                                                            |
| 23 | 32,100,000 | 32,250,000 | 429 | 2477 | 0.587367301  | LRRRC16A                                                                                                                                                            |
| 23 | 32,175,000 | 32,325,000 | 430 | 2079 | 0.418487605  | LRRRC16A,ENSBTAG00000038783                                                                                                                                         |
| 23 | 32,250,000 | 32,400,000 | 431 | 1642 | 0.233405232  | LRRRC16A,ENSBTAG00000038783                                                                                                                                         |
| 23 | 32,325,000 | 32,475,000 | 432 | 1650 | -0.773222176 | LRRRC16A,ENSBTAG00000003892                                                                                                                                         |
| 23 | 32,400,000 | 32,550,000 | 433 | 1846 | -0.309590331 | ENSBTAG00000003892                                                                                                                                                  |

|    |            |            |     |      |              |                                                                     |
|----|------------|------------|-----|------|--------------|---------------------------------------------------------------------|
| 23 | 32,475,000 | 32,625,000 | 434 | 1929 | 0.664302139  | ENSBTAG00000003892                                                  |
| 23 | 32,550,000 | 32,700,000 | 435 | 1790 | 0.592341855  | FAM65B                                                              |
| 23 | 32,625,000 | 32,775,000 | 436 | 1648 | 0.289572822  | FAM65B                                                              |
| 23 | 32,700,000 | 32,850,000 | 437 | 1370 | -0.477553589 | C23H6ORF62,FAM65B,GMNN,TDP2,THEM2                                   |
| 23 | 32,775,000 | 32,925,000 | 438 | 1146 | 0.267466883  | C23H6ORF62,GMNN,KIAA0319,TDP2,THEM2                                 |
| 23 | 32,850,000 | 33,000,000 | 439 | 1597 | 0.968581894  | ALDH5A1,GPLD1,KIAA0319,TDP2                                         |
| 23 | 32,925,000 | 33,075,000 | 440 | 1683 | 0.871536202  | ALDH5A1,GPLD1,KIAA0319,MRS2                                         |
| 23 | 33,000,000 | 33,150,000 | 441 | 1466 | 0.315562516  | DCDC2,GPLD1,MRS2                                                    |
| 23 | 33,075,000 | 33,225,000 | 442 | 1451 | 0.054251958  | DCDC2,MRS2                                                          |
| 23 | 33,150,000 | 33,300,000 | 443 | 1383 | -0.22230923  | DCDC2,NRSN1                                                         |
| 23 | 33,225,000 | 33,375,000 | 444 | 1163 | -1.125403195 | DCDC2,NRSN1                                                         |
| 23 | 33,300,000 | 33,450,000 | 445 | 1128 | -0.694129839 |                                                                     |
| 23 | 33,375,000 | 33,525,000 | 446 | 1287 | -0.027257237 |                                                                     |
| 23 | 33,450,000 | 33,600,000 | 447 | 1064 | -0.203983648 |                                                                     |
| 23 | 33,525,000 | 33,675,000 | 448 | 1048 | 0.295524507  |                                                                     |
| 23 | 33,600,000 | 33,750,000 | 449 | 1195 | 0.659041397  |                                                                     |
| 23 | 33,675,000 | 33,825,000 | 450 | 1333 | 0.924320508  |                                                                     |
| 23 | 33,750,000 | 33,900,000 | 451 | 1368 | 1.008516023  |                                                                     |
| 23 | 33,825,000 | 33,975,000 | 452 | 1039 | 0.858155727  |                                                                     |
| 23 | 33,900,000 | 34,050,000 | 453 | 951  | 0.656935966  |                                                                     |
| 23 | 33,975,000 | 34,125,000 | 454 | 1154 | 0.193461857  |                                                                     |
| 23 | 34,050,000 | 34,200,000 | 455 | 922  | 0.322839268  |                                                                     |
| 23 | 34,125,000 | 34,275,000 | 456 | 915  | 0.83110055   |                                                                     |
| 23 | 34,200,000 | 34,350,000 | 457 | 1214 | 0.772230498  |                                                                     |
| 23 | 34,275,000 | 34,425,000 | 458 | 1124 | 0.900433676  | PRP5                                                                |
| 23 | 34,350,000 | 34,500,000 | 459 | 1191 | 0.978914136  | PRP5,PRP6,PRP8                                                      |
| 23 | 34,425,000 | 34,575,000 | 460 | 1303 | 0.87451071   | PRP1,PRP6,PRP8                                                      |
| 23 | 34,500,000 | 34,650,000 | 461 | 1037 | 0.535980148  | PRP1,ENSBTAG00000038718,ENSBTAG00000047671                          |
| 23 | 34,575,000 | 34,725,000 | 462 | 788  | 0.240282143  | PRP14,PRP9,ENSBTAG00000036106,ENSBTAG00000038718,ENSBTAG00000047671 |
| 23 | 34,650,000 | 34,800,000 | 463 | 764  | 0.510693603  | PRP14,PRP9,ENSBTAG00000036106,ENSBTAG00000047671                    |
| 23 | 34,725,000 | 34,875,000 | 464 | 771  | 0.71944788   | PRP7,PRP9,ENSBTAG00000031640                                        |
| 23 | 34,800,000 | 34,950,000 | 465 | 998  | -0.232363433 | PRP7,ENSBTAG00000031640                                             |
| 23 | 34,875,000 | 35,025,000 | 466 | 812  | -0.806631682 | ENSBTAG00000040136                                                  |
| 23 | 34,950,000 | 35,100,000 | 467 | 630  | -1.105532991 | CSH1,ENSBTAG00000040136                                             |
| 23 | 35,025,000 | 35,175,000 | 468 | 661  | -0.667222356 | CSH1,PRL                                                            |
| 23 | 35,100,000 | 35,250,000 | 469 | 794  | 0.786431332  | PRL                                                                 |
| 23 | 35,175,000 | 35,325,000 | 470 | 1303 | 0.279534578  |                                                                     |
| 23 | 35,250,000 | 35,400,000 | 471 | 1448 | -0.15794676  |                                                                     |
| 23 | 35,325,000 | 35,475,000 | 472 | 918  | -0.760305541 | HDGFL1                                                              |
| 23 | 35,400,000 | 35,550,000 | 473 | 600  | -1.090626151 | HDGFL1                                                              |
| 23 | 35,475,000 | 35,625,000 | 474 | 863  | -0.495533133 |                                                                     |
| 23 | 35,550,000 | 35,700,000 | 475 | 738  | -0.44818804  |                                                                     |
| 23 | 35,625,000 | 35,775,000 | 476 | 361  | 0.003142701  |                                                                     |
| 23 | 35,700,000 | 35,850,000 | 477 | 509  | -0.201058788 |                                                                     |
| 23 | 35,775,000 | 35,925,000 | 478 | 763  | -0.309277846 |                                                                     |
| 23 | 35,850,000 | 36,000,000 | 479 | 796  | -0.172548224 |                                                                     |
| 23 | 35,925,000 | 36,075,000 | 480 | 634  | -0.324441195 |                                                                     |
| 23 | 36,000,000 | 36,150,000 | 481 | 517  | -0.699356855 |                                                                     |
| 23 | 36,075,000 | 36,225,000 | 482 | 469  | -0.143180341 |                                                                     |
| 23 | 36,150,000 | 36,300,000 | 483 | 534  | 0.711598504  | SOX4                                                                |
| 23 | 36,225,000 | 36,375,000 | 484 | 852  | 0.773856578  | SOX4                                                                |



|    |            |            |     |      |              |                       |
|----|------------|------------|-----|------|--------------|-----------------------|
| 23 | 36,300,000 | 36,450,000 | 485 | 899  | 0.508027059  |                       |
| 23 | 36,375,000 | 36,525,000 | 486 | 850  | -0.244495008 |                       |
| 23 | 36,450,000 | 36,600,000 | 487 | 953  | -0.851943684 |                       |
| 23 | 36,525,000 | 36,675,000 | 488 | 1071 | -0.169862195 | CDKAL1                |
| 23 | 36,600,000 | 36,750,000 | 489 | 969  | 0.828451109  | CDKAL1                |
| 23 | 36,675,000 | 36,825,000 | 490 | 1123 | 0.512182589  | CDKAL1                |
| 23 | 36,750,000 | 36,900,000 | 491 | 1056 | -0.236975894 | CDKAL1                |
| 23 | 36,825,000 | 36,975,000 | 492 | 713  | -0.82118437  | CDKAL1                |
| 23 | 36,900,000 | 37,050,000 | 493 | 852  | 0.484608169  | CDKAL1                |
| 23 | 36,975,000 | 37,125,000 | 494 | 1041 | -0.463614092 | CDKAL1                |
| 23 | 37,050,000 | 37,200,000 | 495 | 1182 | -0.347036186 | CDKAL1                |
| 23 | 37,125,000 | 37,275,000 | 496 | 1134 | 0.938511763  | CDKAL1,E2F3           |
| 23 | 37,200,000 | 37,350,000 | 497 | 1141 | -0.228326675 | CDKAL1,E2F3           |
| 23 | 37,275,000 | 37,425,000 | 498 | 1138 | -0.494207314 | E2F3                  |
| 23 | 37,350,000 | 37,500,000 | 499 | 831  | -0.21694094  | MBOAT1                |
| 23 | 37,425,000 | 37,575,000 | 500 | 895  | 0.184819528  | MBOAT1                |
| 23 | 37,500,000 | 37,650,000 | 501 | 1227 | 0.375260598  | MBOAT1                |
| 23 | 37,575,000 | 37,725,000 | 502 | 1050 | 0.145152694  | MBOAT1                |
| 23 | 37,650,000 | 37,800,000 | 503 | 573  | -0.282925357 |                       |
| 23 | 37,725,000 | 37,875,000 | 504 | 461  | 0.70335282   |                       |
| 23 | 37,800,000 | 37,950,000 | 505 | 541  | -0.120176775 |                       |
| 23 | 37,875,000 | 38,025,000 | 506 | 682  | -0.641902594 |                       |
| 23 | 37,950,000 | 38,100,000 | 507 | 858  | 0.34736599   |                       |
| 23 | 38,025,000 | 38,175,000 | 508 | 943  | 1.055811247  |                       |
| 23 | 38,100,000 | 38,250,000 | 509 | 1197 | 1.112116602  |                       |
| 23 | 38,175,000 | 38,325,000 | 510 | 1239 | 1.153269931  |                       |
| 23 | 38,250,000 | 38,400,000 | 511 | 1502 | 1.311946322  |                       |
| 23 | 38,325,000 | 38,475,000 | 512 | 1822 | 1.236682008  |                       |
| 23 | 38,400,000 | 38,550,000 | 513 | 1554 | 0.872583984  |                       |
| 23 | 38,475,000 | 38,625,000 | 514 | 1237 | -0.912281836 |                       |
| 23 | 38,550,000 | 38,700,000 | 515 | 1261 | -0.83109071  |                       |
| 23 | 38,625,000 | 38,775,000 | 516 | 1262 | 0.615439202  |                       |
| 23 | 38,700,000 | 38,850,000 | 517 | 1054 | 0.471850687  |                       |
| 23 | 38,775,000 | 38,925,000 | 518 | 1066 | -1.020077444 |                       |
| 23 | 38,850,000 | 39,000,000 | 519 | 982  | -1.710933058 | RNF144B               |
| 23 | 38,925,000 | 39,075,000 | 520 | 821  | -1.181609753 | RNF144B               |
| 23 | 39,000,000 | 39,150,000 | 521 | 680  | -0.578779497 | DEK,RNF144B           |
| 23 | 39,075,000 | 39,225,000 | 522 | 508  | 0.411098438  | DEK,KDM1B,TPMT        |
| 23 | 39,150,000 | 39,300,000 | 523 | 705  | 0.822638046  | DEK,KDM1B,NHLRC1,TPMT |
| 23 | 39,225,000 | 39,375,000 | 524 | 1004 | 0.449514317  | NHLRC1,TPMT           |
| 23 | 39,300,000 | 39,450,000 | 525 | 1102 | 0.235828979  | KIF13A                |
| 23 | 39,375,000 | 39,525,000 | 526 | 885  | 0.183666984  | KIF13A                |
| 23 | 39,450,000 | 39,600,000 | 527 | 587  | -0.831991555 | KIF13A,NUP153         |
| 23 | 39,525,000 | 39,675,000 | 528 | 522  | -1.254582274 | CAP2,FAM8A1,NUP153    |
| 23 | 39,600,000 | 39,750,000 | 529 | 670  | -0.166343662 | CAP2,FAM8A1,NUP153    |
| 23 | 39,675,000 | 39,825,000 | 530 | 589  | 0.370131947  | CAP2                  |
| 23 | 39,750,000 | 39,900,000 | 531 | 574  | -0.523563644 | CAP2,RBM24            |
| 23 | 39,825,000 | 39,975,000 | 532 | 730  | -2.016493732 | RBM24,STMND1          |
| 23 | 39,900,000 | 40,050,000 | 533 | 565  | -2.618118559 | STMND1                |
| 23 | 39,975,000 | 40,125,000 | 534 | 672  | -1.657350559 |                       |
| 23 | 40,050,000 | 40,200,000 | 535 | 780  | -0.146562038 |                       |
| 23 | 40,125,000 | 40,275,000 | 536 | 558  | 1.190348742  |                       |
| 23 | 40,200,000 | 40,350,000 | 537 | 528  | 0.000492648  |                       |

|    |            |            |     |      |              |                               |
|----|------------|------------|-----|------|--------------|-------------------------------|
| 23 | 40,275,000 | 40,425,000 | 538 | 712  | -0.481289144 |                               |
| 23 | 40,350,000 | 40,500,000 | 539 | 992  | 0.287602385  |                               |
| 23 | 40,425,000 | 40,575,000 | 540 | 901  | 0.331744438  |                               |
| 23 | 40,500,000 | 40,650,000 | 541 | 674  | -0.154605504 | ATXN1,GMPR,ENSBTAG00000019672 |
| 23 | 40,575,000 | 40,725,000 | 542 | 979  | -0.279318103 | ATXN1,GMPR,ENSBTAG00000019672 |
| 23 | 40,650,000 | 40,800,000 | 543 | 1010 | -0.667557235 | GMPR,MYLIP                    |
| 23 | 40,725,000 | 40,875,000 | 544 | 932  | -0.245896649 | MYLIP                         |
| 23 | 40,800,000 | 40,950,000 | 545 | 1217 | 0.723930122  |                               |
| 23 | 40,875,000 | 41,025,000 | 546 | 1518 | 0.541970515  |                               |
| 23 | 40,950,000 | 41,100,000 | 547 | 1544 | 0.176656929  | DTNBP1                        |
| 23 | 41,025,000 | 41,175,000 | 548 | 1310 | 0.147411799  | DTNBP1,JARID2                 |
| 23 | 41,100,000 | 41,250,000 | 549 | 876  | 0.116119902  | DTNBP1,JARID2                 |
| 23 | 41,175,000 | 41,325,000 | 550 | 416  | 0.616255226  | JARID2                        |
| 23 | 41,250,000 | 41,400,000 | 551 | 308  | -0.145634537 | JARID2                        |
| 23 | 41,325,000 | 41,475,000 | 552 | 504  | 0.327461822  |                               |
| 23 | 41,400,000 | 41,550,000 | 553 | 870  | 0.609047793  |                               |
| 23 | 41,475,000 | 41,625,000 | 554 | 839  | 0.664269252  |                               |
| 23 | 41,550,000 | 41,700,000 | 555 | 521  | 1.00025151   |                               |
| 23 | 41,625,000 | 41,775,000 | 556 | 464  | 0.909390253  |                               |
| 23 | 41,700,000 | 41,850,000 | 557 | 575  | 0.770262639  |                               |
| 23 | 41,775,000 | 41,925,000 | 558 | 652  | 0.520280715  |                               |
| 23 | 41,850,000 | 42,000,000 | 559 | 818  | -0.036307942 |                               |
| 23 | 41,925,000 | 42,075,000 | 560 | 860  | 0.00732174   |                               |
| 23 | 42,000,000 | 42,150,000 | 561 | 1009 | 0.209559644  |                               |
| 23 | 42,075,000 | 42,225,000 | 562 | 1117 | 0.496593913  |                               |
| 23 | 42,150,000 | 42,300,000 | 563 | 725  | 0.59569292   |                               |
| 23 | 42,225,000 | 42,375,000 | 564 | 734  | 0.62024238   | CD83                          |
| 23 | 42,300,000 | 42,450,000 | 565 | 1251 | 0.80913238   | CD83                          |
| 23 | 42,375,000 | 42,525,000 | 566 | 1064 | -0.595063674 | RNF182                        |
| 23 | 42,450,000 | 42,600,000 | 567 | 782  | -2.414477351 | CCDC90A,RNF182                |
| 23 | 42,525,000 | 42,675,000 | 568 | 1167 | -0.531600892 | CCDC90A                       |
| 23 | 42,600,000 | 42,750,000 | 569 | 1291 | 0.246920072  | RANBP9                        |
| 23 | 42,675,000 | 42,825,000 | 570 | 1210 | 0.050931973  | NOL7,RANBP9,SIRT5             |
| 23 | 42,750,000 | 42,900,000 | 571 | 1067 | 0.250228077  | NOL7,RANBP9,SIRT5             |
| 23 | 42,825,000 | 42,975,000 | 572 | 666  | 0.127373322  | SIRT5                         |
| 23 | 42,900,000 | 43,050,000 | 573 | 492  | -0.766567907 | TBC1D7                        |
| 23 | 42,975,000 | 43,125,000 | 574 | 848  | -0.253945962 | PHACTR1,TBC1D7                |
| 23 | 43,050,000 | 43,200,000 | 575 | 1519 | 0.043122289  | PHACTR1                       |
| 23 | 43,125,000 | 43,275,000 | 576 | 1744 | 0.244370653  | PHACTR1                       |
| 23 | 43,200,000 | 43,350,000 | 577 | 1454 | 0.564256677  | PHACTR1                       |
| 23 | 43,275,000 | 43,425,000 | 578 | 1323 | 0.858651314  | PHACTR1                       |
| 23 | 43,350,000 | 43,500,000 | 579 | 1776 | 0.765565365  | PHACTR1                       |
| 23 | 43,425,000 | 43,575,000 | 580 | 1980 | 0.345567653  | PHACTR1                       |
| 23 | 43,500,000 | 43,650,000 | 581 | 1331 | 0.177480975  | PHACTR1                       |
| 23 | 43,575,000 | 43,725,000 | 582 | 1072 | 0.380590569  | PHACTR1                       |
| 23 | 43,650,000 | 43,800,000 | 583 | 1223 | 0.374622143  |                               |
| 23 | 43,725,000 | 43,875,000 | 584 | 1022 | -0.06243238  |                               |
| 23 | 43,800,000 | 43,950,000 | 585 | 1003 | -0.208591937 |                               |
| 23 | 43,875,000 | 44,025,000 | 586 | 1060 | 0.118456557  | EDN1                          |
| 23 | 43,950,000 | 44,100,000 | 587 | 974  | 0.001264234  | EDN1                          |
| 23 | 44,025,000 | 44,175,000 | 588 | 1158 | 0.694555813  | HIVEP1                        |
| 23 | 44,100,000 | 44,250,000 | 589 | 1209 | 1.06125775   | HIVEP1                        |
| 23 | 44,175,000 | 44,325,000 | 590 | 1042 | 0.78975078   | HIVEP1                        |

|    |            |            |     |      |              |                                        |
|----|------------|------------|-----|------|--------------|----------------------------------------|
| 23 | 44,250,000 | 44,400,000 | 591 | 1018 | 0.272688615  |                                        |
| 23 | 44,325,000 | 44,475,000 | 592 | 1171 | -0.380062588 | C23H6ORF105                            |
| 23 | 44,400,000 | 44,550,000 | 593 | 1209 | -0.647393653 | C23H6ORF105                            |
| 23 | 44,475,000 | 44,625,000 | 594 | 1419 | -0.188098782 | C23H6ORF105                            |
| 23 | 44,550,000 | 44,700,000 | 595 | 1556 | 0.565108505  | TMEM170B                               |
| 23 | 44,625,000 | 44,775,000 | 596 | 1381 | 0.99666051   | TMEM170B                               |
| 23 | 44,700,000 | 44,850,000 | 597 | 1106 | 0.664203964  |                                        |
| 23 | 44,775,000 | 44,925,000 | 598 | 741  | 0.366341832  | NEDD9                                  |
| 23 | 44,850,000 | 45,000,000 | 599 | 746  | 0.042982937  | NEDD9                                  |
| 23 | 44,925,000 | 45,075,000 | 600 | 975  | 0.201679624  | NEDD9,SMIM13                           |
| 23 | 45,000,000 | 45,150,000 | 601 | 1244 | 0.054738882  | ELOVL2,SMIM13,SYCP2L                   |
| 23 | 45,075,000 | 45,225,000 | 602 | 1086 | -0.225014117 | ELOVL2,GCM2,MAK,SYCP2L                 |
| 23 | 45,150,000 | 45,300,000 | 603 | 748  | -0.129416397 | GCM2,MAK,PAK1IP1,SYCP2L,TMEM14C        |
| 23 | 45,225,000 | 45,375,000 | 604 | 929  | 0.053817586  | GCNT2,MAK,PAK1IP1,TMEM14C              |
| 23 | 45,300,000 | 45,450,000 | 605 | 1026 | 0.330483647  | GCNT2                                  |
| 23 | 45,375,000 | 45,525,000 | 606 | 696  | 0.226678132  | TFAP2A                                 |
| 23 | 45,450,000 | 45,600,000 | 607 | 560  | -0.131920925 | TFAP2A                                 |
| 23 | 45,525,000 | 45,675,000 | 608 | 611  | 0.30828933   |                                        |
| 23 | 45,600,000 | 45,750,000 | 609 | 670  | 0.599023674  |                                        |
| 23 | 45,675,000 | 45,825,000 | 610 | 1274 | 0.434320533  |                                        |
| 23 | 45,750,000 | 45,900,000 | 611 | 1353 | 0.720152442  | OFCC1                                  |
| 23 | 45,825,000 | 45,975,000 | 612 | 756  | 0.999256717  | OFCC1                                  |
| 23 | 45,900,000 | 46,050,000 | 613 | 800  | 0.320284703  |                                        |
| 23 | 45,975,000 | 46,125,000 | 614 | 854  | 0.393679907  |                                        |
| 23 | 46,050,000 | 46,200,000 | 615 | 887  | 0.213037151  |                                        |
| 23 | 46,125,000 | 46,275,000 | 616 | 987  | 0.004506896  |                                        |
| 23 | 46,200,000 | 46,350,000 | 617 | 1079 | 0.407838224  |                                        |
| 23 | 46,275,000 | 46,425,000 | 618 | 1412 | 0.949222767  |                                        |
| 23 | 46,350,000 | 46,500,000 | 619 | 1524 | 1.040527178  |                                        |
| 23 | 46,425,000 | 46,575,000 | 620 | 1634 | 0.699644647  |                                        |
| 23 | 46,500,000 | 46,650,000 | 621 | 1765 | 0.64454332   |                                        |
| 23 | 46,575,000 | 46,725,000 | 622 | 1754 | 0.663995085  |                                        |
| 23 | 46,650,000 | 46,800,000 | 623 | 1452 | 0.415975954  |                                        |
| 23 | 46,725,000 | 46,875,000 | 624 | 1144 | 0.139733038  |                                        |
| 23 | 46,800,000 | 46,950,000 | 625 | 1002 | -0.730688947 |                                        |
| 23 | 46,875,000 | 47,025,000 | 626 | 1049 | 0.040756713  | SLC35B3                                |
| 23 | 46,950,000 | 47,100,000 | 627 | 930  | 0.258206582  | SLC35B3                                |
| 23 | 47,025,000 | 47,175,000 | 628 | 654  | -0.53172889  | SLC35B3                                |
| 23 | 47,100,000 | 47,250,000 | 629 | 738  | 0.379333207  | BLOC1S5,EEF1E1                         |
| 23 | 47,175,000 | 47,325,000 | 630 | 744  | 0.790321613  | BLOC1S5,EEF1E1                         |
| 23 | 47,250,000 | 47,400,000 | 631 | 579  | 0.838780459  | BLOC1S5,BMP6,TXNDC5,ENSBTAG00000046839 |
| 23 | 47,325,000 | 47,475,000 | 632 | 629  | 0.616271163  | BMP6,TXNDC5,ENSBTAG00000046839         |
| 23 | 47,400,000 | 47,550,000 | 633 | 528  | 0.42919825   | BMP6                                   |
| 23 | 47,475,000 | 47,625,000 | 634 | 528  | 0.603254418  | BMP6,ENSBTAG00000008517                |
| 23 | 47,550,000 | 47,700,000 | 635 | 882  | 0.473823051  | DSP,SNRNP48,ENSBTAG00000008517         |
| 23 | 47,625,000 | 47,775,000 | 636 | 1512 | 0.259567462  | DSP,SNRNP48                            |
| 23 | 47,700,000 | 47,850,000 | 637 | 1516 | 0.130900661  | CAGE1,DSP,RIOK1                        |
| 23 | 47,775,000 | 47,925,000 | 638 | 834  | -0.005544968 | CAGE1,RIOK1,RREB1,SSR1                 |
| 23 | 47,850,000 | 48,000,000 | 639 | 552  | 0.162012242  | RREB1,SSR1                             |
| 23 | 47,925,000 | 48,075,000 | 640 | 516  | 0.227966858  | RREB1                                  |
| 23 | 48,000,000 | 48,150,000 | 641 | 830  | -0.103399277 |                                        |
| 23 | 48,075,000 | 48,225,000 | 642 | 931  | 0.113944636  |                                        |
| 23 | 48,150,000 | 48,300,000 | 643 | 797  | 0.116470926  |                                        |

|    |            |            |     |      |              |                                                                   |
|----|------------|------------|-----|------|--------------|-------------------------------------------------------------------|
| 23 | 48,225,000 | 48,375,000 | 644 | 720  | -0.397896751 |                                                                   |
| 23 | 48,300,000 | 48,450,000 | 645 | 816  | 0.412907354  | LY86                                                              |
| 23 | 48,375,000 | 48,525,000 | 646 | 905  | 0.543721884  | LY86                                                              |
| 23 | 48,450,000 | 48,600,000 | 647 | 939  | -0.703285928 |                                                                   |
| 23 | 48,525,000 | 48,675,000 | 648 | 1112 | -0.787304922 | F13A1                                                             |
| 23 | 48,600,000 | 48,750,000 | 649 | 1410 | -1.015974791 | F13A1                                                             |
| 23 | 48,675,000 | 48,825,000 | 650 | 1542 | -0.528235049 | F13A1                                                             |
| 23 | 48,750,000 | 48,900,000 | 651 | 1116 | 0.739937438  | F13A1,NRN1                                                        |
| 23 | 48,825,000 | 48,975,000 | 652 | 1566 | 0.983473788  | FARS2,NRN1,ENSBTAG00000010640                                     |
| 23 | 48,900,000 | 49,050,000 | 653 | 1601 | 0.950834983  | FARS2,ENSBTAG00000010640                                          |
| 23 | 48,975,000 | 49,125,000 | 654 | 1321 | 0.994944094  | FARS2                                                             |
| 23 | 49,050,000 | 49,200,000 | 655 | 1655 | 1.172914327  | FARS2                                                             |
| 23 | 49,125,000 | 49,275,000 | 656 | 1122 | 1.097927136  | FARS2                                                             |
| 23 | 49,200,000 | 49,350,000 | 657 | 1090 | -0.204132021 | FARS2,LYRM4                                                       |
| 23 | 49,275,000 | 49,425,000 | 658 | 1157 | -0.87804643  | LYRM4,PPP1R3G,RPP40                                               |
| 23 | 49,350,000 | 49,500,000 | 659 | 829  | -0.36046148  | CDYL,LYRM4,PPP1R3G,RPP40                                          |
| 23 | 49,425,000 | 49,575,000 | 660 | 1110 | 0.235334661  | CDYL                                                              |
| 23 | 49,500,000 | 49,650,000 | 661 | 1207 | 0.419580593  | CDYL                                                              |
| 23 | 49,575,000 | 49,725,000 | 662 | 986  | 0.481494859  | CDYL                                                              |
| 23 | 49,650,000 | 49,800,000 | 663 | 897  | 0.451203185  |                                                                   |
| 23 | 49,725,000 | 49,875,000 | 664 | 934  | 0.545181359  |                                                                   |
| 23 | 49,800,000 | 49,950,000 | 665 | 897  | 0.662724773  | C6orf201,FAM217A,PECI                                             |
| 23 | 49,875,000 | 50,025,000 | 666 | 608  | 0.567939887  | C6orf201,FAM217A,PECI,PRPF4B                                      |
| 23 | 49,950,000 | 50,100,000 | 667 | 816  | 0.403363434  | PRPF4B,PXDC1                                                      |
| 23 | 50,025,000 | 50,175,000 | 668 | 820  | -0.205528692 | PXDC1                                                             |
| 23 | 50,100,000 | 50,250,000 | 669 | 672  | -1.679669542 | SLC22A23                                                          |
| 23 | 50,175,000 | 50,325,000 | 670 | 896  | -0.240796472 | SLC22A23                                                          |
| 23 | 50,250,000 | 50,400,000 | 671 | 782  | 0.428176591  | BPHL,PSMG4,SLC22A23,TUBB2B                                        |
| 23 | 50,325,000 | 50,475,000 | 672 | 529  | -0.55290847  | BPHL,PSMG4,RIPK1,TUBB2B                                           |
| 23 | 50,400,000 | 50,550,000 | 673 | 568  | 0.365031594  | BPHL,NQO2,RIPK1,ENSBTAG00000017483                                |
| 23 | 50,475,000 | 50,625,000 | 674 | 832  | 0.659821483  | NQO2,ENSBTAG00000017483,ENSBTAG00000017949<br>,ENSBTAG00000025280 |
| 23 | 50,550,000 | 50,700,000 | 675 | 771  | 0.403063012  | SERPINB1,SERPINB9,ENSBTAG00000017949,ENSBTAG<br>00000025280       |
| 23 | 50,625,000 | 50,775,000 | 676 | 597  | -0.116707012 | MYLK4,SERPINB1,SERPINB9,WRNIP1                                    |
| 23 | 50,700,000 | 50,850,000 | 677 | 717  | 0.030437936  | MYLK4,WRNIP1                                                      |
| 23 | 50,775,000 | 50,925,000 | 678 | 819  | -0.128821673 | MYLK4                                                             |
| 23 | 50,850,000 | 51,000,000 | 679 | 775  | -0.17000259  |                                                                   |
| 23 | 50,925,000 | 51,075,000 | 680 | 724  | 0.278094147  |                                                                   |
| 23 | 51,000,000 | 51,150,000 | 681 | 607  | 0.461288646  | GMDS                                                              |
| 23 | 51,075,000 | 51,225,000 | 682 | 509  | 0.32395877   | GMDS                                                              |
| 23 | 51,150,000 | 51,300,000 | 683 | 528  | 0.77032272   | GMDS                                                              |
| 23 | 51,225,000 | 51,375,000 | 684 | 578  | 0.623814137  | GMDS                                                              |
| 23 | 51,300,000 | 51,450,000 | 685 | 795  | -0.316831326 | GMDS                                                              |
| 23 | 51,375,000 | 51,525,000 | 686 | 886  | 0.158024828  | GMDS                                                              |
| 23 | 51,450,000 | 51,600,000 | 687 | 807  | 0.540926846  | FOXF2,GMDS                                                        |
| 23 | 51,525,000 | 51,675,000 | 688 | 901  | 0.085054826  | FOXF2                                                             |
| 23 | 51,600,000 | 51,750,000 | 689 | 1370 | 0.236384455  |                                                                   |
| 23 | 51,675,000 | 51,825,000 | 690 | 1383 | 0.316117356  |                                                                   |
| 23 | 51,750,000 | 51,900,000 | 691 | 951  | -0.342188465 |                                                                   |
| 23 | 51,825,000 | 51,975,000 | 692 | 737  | -0.506683203 | EXOC2                                                             |
| 23 | 51,900,000 | 52,050,000 | 693 | 613  | -0.102275743 | EXOC2                                                             |
| 23 | 51,975,000 | 52,125,000 | 694 | 833  | 0.349284579  | DUSP22,EXOC2,IRF4                                                 |

|    |            |            |     |      |              |                                                          |
|----|------------|------------|-----|------|--------------|----------------------------------------------------------|
| 23 | 52,050,000 | 52,200,000 | 695 | 932  | 0.614193031  | DUSP22,IRF4                                              |
| 23 | 52,125,000 | 52,275,000 | 696 | 906  | -0.230553007 | DUSP22                                                   |
| 23 | 52,200,000 | 52,350,000 | 697 | 922  | -0.695119357 |                                                          |
| 23 | 52,275,000 | 52,425,000 | 698 | 829  | -0.302973306 | ENSBTAG00000047812                                       |
| 23 | 52,350,000 | 52,500,000 | 699 | 711  | 0.13319904   | ENSBTAG00000047485,ENSBTAG00000047516,ENSBTAG00000047812 |
| 23 | 52,425,000 | 52,530,062 | 700 | 429  | 0.246302755  | ENSBTAG00000047485,ENSBTAG00000047516                    |
| 24 | 0          | 150,000    | 1   | 408  | -3.61964778  |                                                          |
| 24 | 75,000     | 225,000    | 2   | 551  | -3.669767163 | ENSBTAG00000013809                                       |
| 24 | 150,000    | 300,000    | 3   | 411  | -2.789894544 | ENSBTAG00000013809                                       |
| 24 | 225,000    | 375,000    | 4   | 521  | -1.433644973 | ENSBTAG00000045511                                       |
| 24 | 300,000    | 450,000    | 5   | 1100 | 1.091320696  | ENSBTAG00000045511                                       |
| 24 | 375,000    | 525,000    | 6   | 1248 | 1.141370721  | ENSBTAG00000046170,ENSBTAG00000047013                    |
| 24 | 450,000    | 600,000    | 7   | 1040 | 0.618232026  | PARD6G,ENSBTAG00000046170,ENSBTAG00000047013             |
| 24 | 525,000    | 675,000    | 8   | 978  | 0.096292846  | PARD6G                                                   |
| 24 | 600,000    | 750,000    | 9   | 735  | -0.572000297 | ADNP2,PARD6G,RBFA,ENSBTAG00000036298                     |
| 24 | 675,000    | 825,000    | 10  | 678  | -0.593382355 | ADNP2,PQLC1,RBFA,TXNL4A,ENSBTAG00000036298               |
| 24 | 750,000    | 900,000    | 11  | 719  | -0.018664721 | KCNG2,PQLC1,TXNL4A,ENSBTAG00000036298                    |
| 24 | 825,000    | 975,000    | 12  | 624  | 0.422565732  | KCNG2,PQLC1                                              |
| 24 | 900,000    | 1,050,000  | 13  | 468  | 0.569255607  | NFATC1                                                   |
| 24 | 975,000    | 1,125,000  | 14  | 351  | 0.782723522  | ATP9B,NFATC1                                             |
| 24 | 1,050,000  | 1,200,000  | 15  | 339  | 0.581146402  | ATP9B,NFATC1                                             |
| 24 | 1,125,000  | 1,275,000  | 16  | 493  | 0.506204739  | ATP9B                                                    |
| 24 | 1,200,000  | 1,350,000  | 17  | 669  | 0.78339602   | ATP9B                                                    |
| 24 | 1,275,000  | 1,425,000  | 18  | 918  | 0.877605888  |                                                          |
| 24 | 1,350,000  | 1,500,000  | 19  | 926  | 0.534065519  |                                                          |
| 24 | 1,425,000  | 1,575,000  | 20  | 871  | -0.106382206 |                                                          |
| 24 | 1,500,000  | 1,650,000  | 21  | 888  | -0.09752699  |                                                          |
| 24 | 1,575,000  | 1,725,000  | 22  | 895  | 0.460811829  |                                                          |
| 24 | 1,650,000  | 1,800,000  | 23  | 900  | 0.310123233  |                                                          |
| 24 | 1,725,000  | 1,875,000  | 24  | 1222 | 0.86800131   |                                                          |
| 24 | 1,800,000  | 1,950,000  | 25  | 1268 | 1.057542022  |                                                          |
| 24 | 1,875,000  | 2,025,000  | 26  | 850  | 0.682565493  |                                                          |
| 24 | 1,950,000  | 2,100,000  | 27  | 763  | -0.175083266 |                                                          |
| 24 | 2,025,000  | 2,175,000  | 28  | 874  | -0.911815839 |                                                          |
| 24 | 2,100,000  | 2,250,000  | 29  | 1117 | -1.48791811  |                                                          |
| 24 | 2,175,000  | 2,325,000  | 30  | 1101 | -2.048472631 |                                                          |
| 24 | 2,250,000  | 2,400,000  | 31  | 775  | -1.473124709 |                                                          |
| 24 | 2,325,000  | 2,475,000  | 32  | 562  | -0.000705856 | GALR1                                                    |
| 24 | 2,400,000  | 2,550,000  | 33  | 941  | 0.364066095  | GALR1                                                    |
| 24 | 2,475,000  | 2,625,000  | 34  | 1127 | 0.160901718  | MBP,ZNF236                                               |
| 24 | 2,550,000  | 2,700,000  | 35  | 687  | 0.276230754  | MBP,ZNF236                                               |
| 24 | 2,625,000  | 2,775,000  | 36  | 564  | 0.765114759  | ZNF236                                                   |
| 24 | 2,700,000  | 2,850,000  | 37  | 708  | 0.852900937  |                                                          |
| 24 | 2,775,000  | 2,925,000  | 38  | 847  | 0.788409425  | ZNF516                                                   |
| 24 | 2,850,000  | 3,000,000  | 39  | 1190 | 0.934789331  | ZNF516                                                   |
| 24 | 2,925,000  | 3,075,000  | 40  | 1349 | 1.111162722  |                                                          |
| 24 | 3,000,000  | 3,150,000  | 41  | 1112 | 0.485725189  |                                                          |
| 24 | 3,075,000  | 3,225,000  | 42  | 1072 | -0.494937741 |                                                          |
| 24 | 3,150,000  | 3,300,000  | 43  | 1141 | -0.154700879 |                                                          |
| 24 | 3,225,000  | 3,375,000  | 44  | 832  | -0.575532103 |                                                          |
| 24 | 3,300,000  | 3,450,000  | 45  | 758  | -1.369746194 |                                                          |

|    |           |           |    |      |              |                             |
|----|-----------|-----------|----|------|--------------|-----------------------------|
| 24 | 3,375,000 | 3,525,000 | 46 | 921  | -0.067192561 |                             |
| 24 | 3,450,000 | 3,600,000 | 47 | 1021 | 0.201003568  |                             |
| 24 | 3,525,000 | 3,675,000 | 48 | 872  | -0.009623771 | TSHZ1                       |
| 24 | 3,600,000 | 3,750,000 | 49 | 632  | -0.342009697 | TSHZ1                       |
| 24 | 3,675,000 | 3,825,000 | 50 | 747  | 0.204642288  | TSHZ1,ZADH2                 |
| 24 | 3,750,000 | 3,900,000 | 51 | 965  | 0.507868027  | ZADH2,ZNF407                |
| 24 | 3,825,000 | 3,975,000 | 52 | 929  | 0.35702698   | ZNF407                      |
| 24 | 3,900,000 | 4,050,000 | 53 | 607  | 0.499190195  | ZNF407                      |
| 24 | 3,975,000 | 4,125,000 | 54 | 398  | 0.310647137  | ZNF407                      |
| 24 | 4,050,000 | 4,200,000 | 55 | 451  | 0.476974767  | ZNF407                      |
| 24 | 4,125,000 | 4,275,000 | 56 | 570  | 0.735301392  | CNDP1,CNDP2,ZNF407          |
| 24 | 4,200,000 | 4,350,000 | 57 | 766  | 0.764801563  | CNDP1,CNDP2,FAM69C          |
| 24 | 4,275,000 | 4,425,000 | 58 | 649  | 0.247126747  | C18orf63,CNDP2,CYB5A,FAM69C |
| 24 | 4,350,000 | 4,500,000 | 59 | 488  | -0.493584665 | C18orf63,CYB5A              |
| 24 | 4,425,000 | 4,575,000 | 60 | 704  | -0.002398263 | CYB5A,FBXO15,TIMM21         |
| 24 | 4,500,000 | 4,650,000 | 61 | 888  | 0.080888112  | FBXO15,TIMM21               |
| 24 | 4,575,000 | 4,725,000 | 62 | 1084 | -0.315858613 |                             |
| 24 | 4,650,000 | 4,800,000 | 63 | 1454 | 0.544761811  |                             |
| 24 | 4,725,000 | 4,875,000 | 64 | 1542 | 1.16823389   |                             |
| 24 | 4,800,000 | 4,950,000 | 65 | 1256 | -1.512931917 |                             |
| 24 | 4,875,000 | 5,025,000 | 66 | 1106 | -3.006480646 |                             |
| 24 | 4,950,000 | 5,100,000 | 67 | 1073 | -0.048626655 |                             |
| 24 | 5,025,000 | 5,175,000 | 68 | 1201 | 0.184202279  |                             |
| 24 | 5,100,000 | 5,250,000 | 69 | 1136 | 0.462731551  |                             |
| 24 | 5,175,000 | 5,325,000 | 70 | 1211 | 0.651101041  |                             |
| 24 | 5,250,000 | 5,400,000 | 71 | 1584 | 0.232982343  | NETO1                       |
| 24 | 5,325,000 | 5,475,000 | 72 | 1585 | 0.005336006  | NETO1                       |
| 24 | 5,400,000 | 5,550,000 | 73 | 1416 | 0.214795338  | NETO1                       |
| 24 | 5,475,000 | 5,625,000 | 74 | 1286 | 0.734174533  | CBLN2                       |
| 24 | 5,550,000 | 5,700,000 | 75 | 992  | 0.281522244  | CBLN2                       |
| 24 | 5,625,000 | 5,775,000 | 76 | 903  | -0.798833802 |                             |
| 24 | 5,700,000 | 5,850,000 | 77 | 1081 | -0.242825755 |                             |
| 24 | 5,775,000 | 5,925,000 | 78 | 858  | -0.986351105 |                             |
| 24 | 5,850,000 | 6,000,000 | 79 | 929  | -0.730684457 |                             |
| 24 | 5,925,000 | 6,075,000 | 80 | 1331 | 0.409469411  |                             |
| 24 | 6,000,000 | 6,150,000 | 81 | 1275 | 0.323976889  |                             |
| 24 | 6,075,000 | 6,225,000 | 82 | 1280 | 0.598363169  |                             |
| 24 | 6,150,000 | 6,300,000 | 83 | 1403 | 0.624397185  |                             |
| 24 | 6,225,000 | 6,375,000 | 84 | 1420 | 0.778886818  |                             |
| 24 | 6,300,000 | 6,450,000 | 85 | 1829 | -0.298139919 |                             |
| 24 | 6,375,000 | 6,525,000 | 86 | 1943 | -1.404026172 |                             |
| 24 | 6,450,000 | 6,600,000 | 87 | 1584 | -1.194238301 |                             |
| 24 | 6,525,000 | 6,675,000 | 88 | 1492 | 0.37585089   |                             |
| 24 | 6,600,000 | 6,750,000 | 89 | 1549 | 1.082676782  |                             |
| 24 | 6,675,000 | 6,825,000 | 90 | 1450 | 0.976638839  |                             |
| 24 | 6,750,000 | 6,900,000 | 91 | 1565 | -1.230081935 |                             |
| 24 | 6,825,000 | 6,975,000 | 92 | 1587 | -1.796123214 |                             |
| 24 | 6,900,000 | 7,050,000 | 93 | 1576 | -1.111648907 |                             |
| 24 | 6,975,000 | 7,125,000 | 94 | 1754 | -0.314659781 |                             |
| 24 | 7,050,000 | 7,200,000 | 95 | 1513 | -0.159535776 |                             |
| 24 | 7,125,000 | 7,275,000 | 96 | 1381 | -0.229899131 |                             |
| 24 | 7,200,000 | 7,350,000 | 97 | 1598 | 0.882711107  | SOCS6                       |
| 24 | 7,275,000 | 7,425,000 | 98 | 1962 | 1.379441849  | RTTN,SOCS6                  |

|    |            |            |     |      |              |               |
|----|------------|------------|-----|------|--------------|---------------|
| 24 | 7,350,000  | 7,500,000  | 99  | 1941 | 1.450240252  | RTTN          |
| 24 | 7,425,000  | 7,575,000  | 100 | 2074 | 1.309997436  | RTTN          |
| 24 | 7,500,000  | 7,650,000  | 101 | 2281 | 1.100754494  | CD226,RTTN    |
| 24 | 7,575,000  | 7,725,000  | 102 | 2192 | 0.206356327  | CD226,DOK6    |
| 24 | 7,650,000  | 7,800,000  | 103 | 2017 | -1.061573165 | CD226,DOK6    |
| 24 | 7,725,000  | 7,875,000  | 104 | 1827 | -1.343851215 | DOK6          |
| 24 | 7,800,000  | 7,950,000  | 105 | 1663 | -0.856090302 | DOK6          |
| 24 | 7,875,000  | 8,025,000  | 106 | 1499 | -0.102773213 | DOK6          |
| 24 | 7,950,000  | 8,100,000  | 107 | 1370 | -0.140286608 | DOK6          |
| 24 | 8,025,000  | 8,175,000  | 108 | 1267 | -0.403110355 | DOK6          |
| 24 | 8,100,000  | 8,250,000  | 109 | 1048 | 0.577922453  | DOK6          |
| 24 | 8,175,000  | 8,325,000  | 110 | 863  | -0.810827571 |               |
| 24 | 8,250,000  | 8,400,000  | 111 | 1181 | -1.063392505 |               |
| 24 | 8,325,000  | 8,475,000  | 112 | 1224 | -0.650188581 |               |
| 24 | 8,400,000  | 8,550,000  | 113 | 1084 | -0.336666608 |               |
| 24 | 8,475,000  | 8,625,000  | 114 | 1166 | -0.119326797 | CCDC102B      |
| 24 | 8,550,000  | 8,700,000  | 115 | 960  | 0.504193093  | CCDC102B      |
| 24 | 8,625,000  | 8,775,000  | 116 | 925  | 0.158321071  | CCDC102B,TMX3 |
| 24 | 8,700,000  | 8,850,000  | 117 | 901  | -0.884337141 | HIGD1D,TMX3   |
| 24 | 8,775,000  | 8,925,000  | 118 | 505  | -0.219851648 | HIGD1D,TMX3   |
| 24 | 8,850,000  | 9,000,000  | 119 | 584  | 0.817594747  |               |
| 24 | 8,925,000  | 9,075,000  | 120 | 848  | 0.489975784  |               |
| 24 | 9,000,000  | 9,150,000  | 121 | 867  | -0.230112523 |               |
| 24 | 9,075,000  | 9,225,000  | 122 | 1039 | -0.679956676 |               |
| 24 | 9,150,000  | 9,300,000  | 123 | 1476 | -1.3055173   |               |
| 24 | 9,225,000  | 9,375,000  | 124 | 1633 | -0.916855985 |               |
| 24 | 9,300,000  | 9,450,000  | 125 | 1152 | 0.601808859  |               |
| 24 | 9,375,000  | 9,525,000  | 126 | 930  | 1.403316887  |               |
| 24 | 9,450,000  | 9,600,000  | 127 | 892  | 1.095015913  |               |
| 24 | 9,525,000  | 9,675,000  | 128 | 1003 | 0.432550258  |               |
| 24 | 9,600,000  | 9,750,000  | 129 | 1234 | -0.17735341  | DSEL          |
| 24 | 9,675,000  | 9,825,000  | 130 | 1403 | -0.229445611 | DSEL          |
| 24 | 9,750,000  | 9,900,000  | 131 | 1589 | 0.399151991  |               |
| 24 | 9,825,000  | 9,975,000  | 132 | 1628 | -0.351364758 |               |
| 24 | 9,900,000  | 10,050,000 | 133 | 1596 | -1.762152866 |               |
| 24 | 9,975,000  | 10,125,000 | 134 | 1456 | -0.44808299  |               |
| 24 | 10,050,000 | 10,200,000 | 135 | 1400 | 0.730134563  |               |
| 24 | 10,125,000 | 10,275,000 | 136 | 1187 | -0.761410014 |               |
| 24 | 10,200,000 | 10,350,000 | 137 | 1357 | -1.714894613 |               |
| 24 | 10,275,000 | 10,425,000 | 138 | 1629 | -0.927997915 |               |
| 24 | 10,350,000 | 10,500,000 | 139 | 1516 | -0.572853472 | CDH19         |
| 24 | 10,425,000 | 10,575,000 | 140 | 1312 | -0.566446775 | CDH19         |
| 24 | 10,500,000 | 10,650,000 | 141 | 1420 | 0.439379597  | CDH19         |
| 24 | 10,575,000 | 10,725,000 | 142 | 1397 | 0.758733579  |               |
| 24 | 10,650,000 | 10,800,000 | 143 | 1047 | 0.84915748   |               |
| 24 | 10,725,000 | 10,875,000 | 144 | 1067 | 0.448292278  |               |
| 24 | 10,800,000 | 10,950,000 | 145 | 1111 | 0.268459367  |               |
| 24 | 10,875,000 | 11,025,000 | 146 | 1038 | 0.621237276  |               |
| 24 | 10,950,000 | 11,100,000 | 147 | 1300 | 0.843492905  | CDH7          |
| 24 | 11,025,000 | 11,175,000 | 148 | 1369 | 0.575972834  | CDH7          |
| 24 | 11,100,000 | 11,250,000 | 149 | 1246 | 0.551861365  | CDH7          |
| 24 | 11,175,000 | 11,325,000 | 150 | 1575 | 0.900715611  | CDH7          |
| 24 | 11,250,000 | 11,400,000 | 151 | 1642 | 0.758723764  |               |

|    |            |            |     |      |              |                                      |
|----|------------|------------|-----|------|--------------|--------------------------------------|
| 24 | 11,325,000 | 11,475,000 | 152 | 1404 | 0.608572156  |                                      |
| 24 | 11,400,000 | 11,550,000 | 153 | 1244 | 0.348739873  |                                      |
| 24 | 11,475,000 | 11,625,000 | 154 | 1423 | 0.218116212  |                                      |
| 24 | 11,550,000 | 11,700,000 | 155 | 1453 | 0.013525631  |                                      |
| 24 | 11,625,000 | 11,775,000 | 156 | 1346 | 0.491651448  |                                      |
| 24 | 11,700,000 | 11,850,000 | 157 | 1310 | 1.202415775  |                                      |
| 24 | 11,775,000 | 11,925,000 | 158 | 1226 | 0.481575492  |                                      |
| 24 | 11,850,000 | 12,000,000 | 159 | 923  | -0.80636717  |                                      |
| 24 | 11,925,000 | 12,075,000 | 160 | 768  | -1.533213767 |                                      |
| 24 | 12,000,000 | 12,150,000 | 161 | 778  | -0.217245757 |                                      |
| 24 | 12,075,000 | 12,225,000 | 162 | 1125 | 0.677301122  |                                      |
| 24 | 12,150,000 | 12,300,000 | 163 | 1074 | 0.964223047  |                                      |
| 24 | 12,225,000 | 12,375,000 | 164 | 508  | -0.250146355 |                                      |
| 24 | 12,300,000 | 12,450,000 | 165 | 476  | -1.103769068 |                                      |
| 24 | 12,375,000 | 12,525,000 | 166 | 680  | -1.042898485 |                                      |
| 24 | 12,450,000 | 12,600,000 | 167 | 1109 | -1.846449159 |                                      |
| 24 | 12,525,000 | 12,675,000 | 168 | 1113 | -2.322059324 |                                      |
| 24 | 12,600,000 | 12,750,000 | 169 | 1311 | -0.147798561 | SERPINB2,SERPINB8                    |
| 24 | 12,675,000 | 12,825,000 | 170 | 1454 | 0.281980639  | SERPINB2,SERPINB8,ENSBTAG00000034656 |
| 24 | 12,750,000 | 12,900,000 | 171 | 1912 | 0.009579257  | SERPINB2,ENSBTAG00000034656          |
| 24 | 12,825,000 | 12,975,000 | 172 | 1948 | 0.003063042  | SYT4                                 |
| 24 | 12,900,000 | 13,050,000 | 173 | 1358 | -0.49655322  | SYT4                                 |
| 24 | 12,975,000 | 13,125,000 | 174 | 1268 | -0.550146475 |                                      |
| 24 | 13,050,000 | 13,200,000 | 175 | 1443 | 0.699160923  |                                      |
| 24 | 13,125,000 | 13,275,000 | 176 | 2175 | 0.755594449  |                                      |
| 24 | 13,200,000 | 13,350,000 | 177 | 2189 | 0.409591733  |                                      |
| 24 | 13,275,000 | 13,425,000 | 178 | 1924 | -0.767007853 |                                      |
| 24 | 13,350,000 | 13,500,000 | 179 | 1506 | -0.735295995 |                                      |
| 24 | 13,425,000 | 13,575,000 | 180 | 1608 | 1.107068857  |                                      |
| 24 | 13,500,000 | 13,650,000 | 181 | 2137 | 1.292604048  |                                      |
| 24 | 13,575,000 | 13,725,000 | 182 | 1773 | 1.265350773  |                                      |
| 24 | 13,650,000 | 13,800,000 | 183 | 1317 | 1.130981872  |                                      |
| 24 | 13,725,000 | 13,875,000 | 184 | 1400 | 0.323379596  |                                      |
| 24 | 13,800,000 | 13,950,000 | 185 | 1329 | 0.08999074   |                                      |
| 24 | 13,875,000 | 14,025,000 | 186 | 1121 | 0.524383247  |                                      |
| 24 | 13,950,000 | 14,100,000 | 187 | 1293 | 0.605463798  |                                      |
| 24 | 14,025,000 | 14,175,000 | 188 | 1458 | 0.628755598  |                                      |
| 24 | 14,100,000 | 14,250,000 | 189 | 1406 | 0.11488694   | PIK3C3                               |
| 24 | 14,175,000 | 14,325,000 | 190 | 1056 | 0.032815962  | PIK3C3                               |
| 24 | 14,250,000 | 14,400,000 | 191 | 1241 | 0.37448825   | PIK3C3                               |
| 24 | 14,325,000 | 14,475,000 | 192 | 1361 | 0.671718654  | PIK3C3                               |
| 24 | 14,400,000 | 14,550,000 | 193 | 881  | 0.214259038  |                                      |
| 24 | 14,475,000 | 14,625,000 | 194 | 652  | -0.480434292 |                                      |
| 24 | 14,550,000 | 14,700,000 | 195 | 997  | 1.11715909   |                                      |
| 24 | 14,625,000 | 14,775,000 | 196 | 1033 | 0.886032499  |                                      |
| 24 | 14,700,000 | 14,850,000 | 197 | 966  | 0.661999711  |                                      |
| 24 | 14,775,000 | 14,925,000 | 198 | 1115 | 1.25574047   |                                      |
| 24 | 14,850,000 | 15,000,000 | 199 | 1331 | 1.040463083  |                                      |
| 24 | 14,925,000 | 15,075,000 | 200 | 1329 | 0.102469215  |                                      |
| 24 | 15,000,000 | 15,150,000 | 201 | 1135 | 0.206586776  |                                      |
| 24 | 15,075,000 | 15,225,000 | 202 | 1363 | 0.829007398  |                                      |
| 24 | 15,150,000 | 15,300,000 | 203 | 1450 | -0.954063811 |                                      |
| 24 | 15,225,000 | 15,375,000 | 204 | 989  | -0.954628878 |                                      |



|    |            |            |     |      |              |
|----|------------|------------|-----|------|--------------|
| 24 | 15,300,000 | 15,450,000 | 205 | 520  | 0.075758511  |
| 24 | 15,375,000 | 15,525,000 | 206 | 448  | 0.079049897  |
| 24 | 15,450,000 | 15,600,000 | 207 | 572  | 0.20375736   |
| 24 | 15,525,000 | 15,675,000 | 208 | 656  | 0.407743961  |
| 24 | 15,600,000 | 15,750,000 | 209 | 655  | 1.093218847  |
| 24 | 15,675,000 | 15,825,000 | 210 | 869  | 1.033480527  |
| 24 | 15,750,000 | 15,900,000 | 211 | 1077 | 1.137352112  |
| 24 | 15,825,000 | 15,975,000 | 212 | 987  | 1.224925706  |
| 24 | 15,900,000 | 16,050,000 | 213 | 583  | 0.220033838  |
| 24 | 15,975,000 | 16,125,000 | 214 | 742  | -1.118920023 |
| 24 | 16,050,000 | 16,200,000 | 215 | 858  | -0.920236644 |
| 24 | 16,125,000 | 16,275,000 | 216 | 629  | -0.932899774 |
| 24 | 16,200,000 | 16,350,000 | 217 | 602  | -0.096741676 |
| 24 | 16,275,000 | 16,425,000 | 218 | 451  | 0.833734546  |
| 24 | 16,350,000 | 16,500,000 | 219 | 505  | 0.838817113  |
| 24 | 16,425,000 | 16,575,000 | 220 | 789  | 1.036400062  |
| 24 | 16,500,000 | 16,650,000 | 221 | 1352 | 0.449737618  |
| 24 | 16,575,000 | 16,725,000 | 222 | 1438 | 0.32717099   |
| 24 | 16,650,000 | 16,800,000 | 223 | 1098 | 0.729690347  |
| 24 | 16,725,000 | 16,875,000 | 224 | 853  | 0.190748777  |
| 24 | 16,800,000 | 16,950,000 | 225 | 648  | 0.428147017  |
| 24 | 16,875,000 | 17,025,000 | 226 | 876  | -0.530887271 |
| 24 | 16,950,000 | 17,100,000 | 227 | 1587 | -1.953963209 |
| 24 | 17,025,000 | 17,175,000 | 228 | 1677 | -1.52996033  |
| 24 | 17,100,000 | 17,250,000 | 229 | 1403 | -0.486339221 |
| 24 | 17,175,000 | 17,325,000 | 230 | 1253 | -0.405672536 |
| 24 | 17,250,000 | 17,400,000 | 231 | 1004 | 0.196641482  |
| 24 | 17,325,000 | 17,475,000 | 232 | 987  | 0.939071794  |
| 24 | 17,400,000 | 17,550,000 | 233 | 1079 | 1.054381348  |
| 24 | 17,475,000 | 17,625,000 | 234 | 1379 | 1.146900524  |
| 24 | 17,550,000 | 17,700,000 | 235 | 1612 | 1.176856186  |
| 24 | 17,625,000 | 17,775,000 | 236 | 1653 | 1.151978203  |
| 24 | 17,700,000 | 17,850,000 | 237 | 1808 | 0.741919011  |
| 24 | 17,775,000 | 17,925,000 | 238 | 1844 | 0.682721169  |
| 24 | 17,850,000 | 18,000,000 | 239 | 1635 | 0.92129724   |
| 24 | 17,925,000 | 18,075,000 | 240 | 1559 | 0.822897291  |
| 24 | 18,000,000 | 18,150,000 | 241 | 1459 | 0.497203183  |
| 24 | 18,075,000 | 18,225,000 | 242 | 1436 | 0.783644189  |
| 24 | 18,150,000 | 18,300,000 | 243 | 1534 | 1.288510657  |
| 24 | 18,225,000 | 18,375,000 | 244 | 1507 | 1.162296685  |
| 24 | 18,300,000 | 18,450,000 | 245 | 1815 | 0.910275578  |
| 24 | 18,375,000 | 18,525,000 | 246 | 2029 | 0.923246148  |
| 24 | 18,450,000 | 18,600,000 | 247 | 1803 | 0.731470178  |
| 24 | 18,525,000 | 18,675,000 | 248 | 1880 | 0.532923946  |
| 24 | 18,600,000 | 18,750,000 | 249 | 1862 | 0.492734136  |
| 24 | 18,675,000 | 18,825,000 | 250 | 1528 | 0.394319912  |
| 24 | 18,750,000 | 18,900,000 | 251 | 1710 | 0.956770751  |
| 24 | 18,825,000 | 18,975,000 | 252 | 2039 | 1.314134014  |
| 24 | 18,900,000 | 19,050,000 | 253 | 1705 | 1.286804147  |
| 24 | 18,975,000 | 19,125,000 | 254 | 1610 | 1.093827808  |
| 24 | 19,050,000 | 19,200,000 | 255 | 1978 | 0.880196987  |
| 24 | 19,125,000 | 19,275,000 | 256 | 1833 | 0.634246031  |
| 24 | 19,200,000 | 19,350,000 | 257 | 1471 | 0.373887734  |

|    |            |            |     |      |              |                                        |
|----|------------|------------|-----|------|--------------|----------------------------------------|
| 24 | 19,275,000 | 19,425,000 | 258 | 1501 | 0.195801299  |                                        |
| 24 | 19,350,000 | 19,500,000 | 259 | 1321 | 0.353769443  |                                        |
| 24 | 19,425,000 | 19,575,000 | 260 | 1201 | -0.027684725 |                                        |
| 24 | 19,500,000 | 19,650,000 | 261 | 1152 | -0.780287141 |                                        |
| 24 | 19,575,000 | 19,725,000 | 262 | 1114 | 0.255009544  |                                        |
| 24 | 19,650,000 | 19,800,000 | 263 | 1103 | 0.557632391  |                                        |
| 24 | 19,725,000 | 19,875,000 | 264 | 888  | 0.08298848   | BRUNOL4                                |
| 24 | 19,800,000 | 19,950,000 | 265 | 1206 | 0.256573844  | BRUNOL4                                |
| 24 | 19,875,000 | 20,025,000 | 266 | 1414 | -0.176008832 | BRUNOL4                                |
| 24 | 19,950,000 | 20,100,000 | 267 | 1339 | -0.016563281 | BRUNOL4                                |
| 24 | 20,025,000 | 20,175,000 | 268 | 1228 | 0.507937785  | BRUNOL4                                |
| 24 | 20,100,000 | 20,250,000 | 269 | 1336 | 0.224775537  | BRUNOL4                                |
| 24 | 20,175,000 | 20,325,000 | 270 | 1392 | 0.12221981   | KIAA1328                               |
| 24 | 20,250,000 | 20,400,000 | 271 | 957  | 0.122854552  | KIAA1328                               |
| 24 | 20,325,000 | 20,475,000 | 272 | 600  | 0.214019857  |                                        |
| 24 | 20,400,000 | 20,550,000 | 273 | 557  | 0.494930019  |                                        |
| 24 | 20,475,000 | 20,625,000 | 274 | 672  | 0.75216396   | C24H18ORF10                            |
| 24 | 20,550,000 | 20,700,000 | 275 | 736  | 0.342661083  | C24H18ORF10,FHOD3                      |
| 24 | 20,625,000 | 20,775,000 | 276 | 929  | -0.525587322 | C24H18ORF10,FHOD3                      |
| 24 | 20,700,000 | 20,850,000 | 277 | 1310 | 0.261862104  | FHOD3                                  |
| 24 | 20,775,000 | 20,925,000 | 278 | 1287 | 0.487704398  | FHOD3                                  |
| 24 | 20,850,000 | 21,000,000 | 279 | 1056 | -0.13102117  | FHOD3                                  |
| 24 | 20,925,000 | 21,075,000 | 280 | 1373 | 0.256799327  | FHOD3                                  |
| 24 | 21,000,000 | 21,150,000 | 281 | 1721 | 0.735888785  | FHOD3                                  |
| 24 | 21,075,000 | 21,225,000 | 282 | 1868 | 0.695775898  | FHOD3,MOCOS                            |
| 24 | 21,150,000 | 21,300,000 | 283 | 1720 | 0.146466614  | ELP2,FHOD3,MOCOS                       |
| 24 | 21,225,000 | 21,375,000 | 284 | 1340 | 0.181466876  | ELP2,MOCOS,RPRD1A,SLC39A6              |
| 24 | 21,300,000 | 21,450,000 | 285 | 1372 | 0.511832644  | C18orf21,ELP2,RPRD1A,SLC39A6           |
| 24 | 21,375,000 | 21,525,000 | 286 | 1674 | 0.566363842  | C18orf21,RPRD1A                        |
| 24 | 21,450,000 | 21,600,000 | 287 | 1815 | 1.051038918  | C18orf21                               |
| 24 | 21,525,000 | 21,675,000 | 288 | 1840 | 1.255422504  |                                        |
| 24 | 21,600,000 | 21,750,000 | 289 | 1609 | 0.760644881  | GALNT1                                 |
| 24 | 21,675,000 | 21,825,000 | 290 | 1468 | 0.432161548  | GALNT1                                 |
| 24 | 21,750,000 | 21,900,000 | 291 | 1703 | 0.400894054  | GALNT1,INO80C                          |
| 24 | 21,825,000 | 21,975,000 | 292 | 1799 | 0.468256213  | INO80C                                 |
| 24 | 21,900,000 | 22,050,000 | 293 | 1446 | 1.058803014  | INO80C,ZNF24                           |
| 24 | 21,975,000 | 22,125,000 | 294 | 1270 | 1.103692223  | ZNF24,ZNF397                           |
| 24 | 22,050,000 | 22,200,000 | 295 | 1432 | 0.008362375  | MAPRE2,ZNF24,ZNF397,ENSBTAG00000015315 |
| 24 | 22,125,000 | 22,275,000 | 296 | 1628 | -1.077768259 | MAPRE2,ENSBTAG00000015315              |
| 24 | 22,200,000 | 22,350,000 | 297 | 1468 | -0.403620944 | MAPRE2                                 |
| 24 | 22,275,000 | 22,425,000 | 298 | 1341 | 0.307635706  | MAPRE2                                 |
| 24 | 22,350,000 | 22,500,000 | 299 | 1370 | 0.225184677  | DTNA                                   |
| 24 | 22,425,000 | 22,575,000 | 300 | 1286 | 0.333475836  | DTNA                                   |
| 24 | 22,500,000 | 22,650,000 | 301 | 1457 | 0.553332704  | DTNA                                   |
| 24 | 22,575,000 | 22,725,000 | 302 | 1554 | 0.537099806  | DTNA                                   |
| 24 | 22,650,000 | 22,800,000 | 303 | 1614 | -0.062031721 | DTNA                                   |
| 24 | 22,725,000 | 22,875,000 | 304 | 1427 | -0.340595764 | DTNA                                   |
| 24 | 22,800,000 | 22,950,000 | 305 | 1327 | 0.49129299   |                                        |
| 24 | 22,875,000 | 23,025,000 | 306 | 1460 | 0.92352836   |                                        |
| 24 | 22,950,000 | 23,100,000 | 307 | 1749 | 1.049653235  |                                        |
| 24 | 23,025,000 | 23,175,000 | 308 | 1683 | 1.118596428  | NOL4                                   |
| 24 | 23,100,000 | 23,250,000 | 309 | 1440 | 0.989947651  | NOL4                                   |
| 24 | 23,175,000 | 23,325,000 | 310 | 1392 | -0.405429663 | NOL4                                   |

|    |            |            |     |      |              |                                       |
|----|------------|------------|-----|------|--------------|---------------------------------------|
| 24 | 23,250,000 | 23,400,000 | 311 | 1219 | -1.398207048 | NOL4                                  |
| 24 | 23,325,000 | 23,475,000 | 312 | 1014 | -0.389062987 | NOL4                                  |
| 24 | 23,400,000 | 23,550,000 | 313 | 893  | -1.737080883 | NOL4                                  |
| 24 | 23,475,000 | 23,625,000 | 314 | 1269 | -0.33346183  | NOL4                                  |
| 24 | 23,550,000 | 23,700,000 | 315 | 1318 | 1.070750112  | NOL4                                  |
| 24 | 23,625,000 | 23,775,000 | 316 | 739  | 1.210713147  | ASXL3,NOL4                            |
| 24 | 23,700,000 | 23,850,000 | 317 | 588  | -0.085997119 | ASXL3                                 |
| 24 | 23,775,000 | 23,925,000 | 318 | 709  | -0.688540517 | ASXL3                                 |
| 24 | 23,850,000 | 24,000,000 | 319 | 755  | 0.519556116  | ASXL3                                 |
| 24 | 23,925,000 | 24,075,000 | 320 | 600  | 1.27419722   | ASXL3                                 |
| 24 | 24,000,000 | 24,150,000 | 321 | 315  | 1.4784127    | CCDC178                               |
| 24 | 24,075,000 | 24,225,000 | 322 | 360  | -0.73160309  | CCDC178                               |
| 24 | 24,150,000 | 24,300,000 | 323 | 379  | -2.231799805 | CCDC178                               |
| 24 | 24,225,000 | 24,375,000 | 324 | 565  | -0.313649304 | CCDC178                               |
| 24 | 24,300,000 | 24,450,000 | 325 | 590  | 0.187065611  | ENSBTAG00000048303                    |
| 24 | 24,375,000 | 24,525,000 | 326 | 495  | 0.115565463  | ENSBTAG00000048303                    |
| 24 | 24,450,000 | 24,600,000 | 327 | 637  | -0.136092986 |                                       |
| 24 | 24,525,000 | 24,675,000 | 328 | 662  | -0.175098971 | KLHL14                                |
| 24 | 24,600,000 | 24,750,000 | 329 | 969  | -1.063165051 | KLHL14                                |
| 24 | 24,675,000 | 24,825,000 | 330 | 1194 | -1.01728854  | KLHL14                                |
| 24 | 24,750,000 | 24,900,000 | 331 | 1087 | -0.027977938 | KLHL14                                |
| 24 | 24,825,000 | 24,975,000 | 332 | 1171 | 0.947791688  |                                       |
| 24 | 24,900,000 | 25,050,000 | 333 | 1027 | 0.782782582  | GAREM                                 |
| 24 | 24,975,000 | 25,125,000 | 334 | 576  | 0.284842849  | GAREM                                 |
| 24 | 25,050,000 | 25,200,000 | 335 | 450  | 0.129574182  | GAREM                                 |
| 24 | 25,125,000 | 25,275,000 | 336 | 441  | 0.455851164  | GAREM                                 |
| 24 | 25,200,000 | 25,350,000 | 337 | 458  | 0.293327715  | GAREM,MEP1B                           |
| 24 | 25,275,000 | 25,425,000 | 338 | 551  | 0.210033557  | MEP1B,RNF138                          |
| 24 | 25,350,000 | 25,500,000 | 339 | 663  | -0.063546352 | RNF125,RNF138                         |
| 24 | 25,425,000 | 25,575,000 | 340 | 833  | -0.945406267 | RNF125,RNF138,ENSBTAG00000039296      |
| 24 | 25,500,000 | 25,650,000 | 341 | 831  | -1.350274058 | ENSBTAG00000007696,ENSBTAG00000039296 |
| 24 | 25,575,000 | 25,725,000 | 342 | 859  | -0.571610075 | ENSBTAG00000007696,ENSBTAG00000039296 |
| 24 | 25,650,000 | 25,800,000 | 343 | 821  | -0.111470649 | B4GALT6,ENSBTAG00000007696            |
| 24 | 25,725,000 | 25,875,000 | 344 | 646  | -0.111686853 | B4GALT6,TTR                           |
| 24 | 25,800,000 | 25,950,000 | 345 | 1014 | 0.144441464  | B4GALT6,DSG2,TTR                      |
| 24 | 25,875,000 | 26,025,000 | 346 | 885  | -0.280662518 | DSG2,DSG3                             |
| 24 | 25,950,000 | 26,100,000 | 347 | 619  | -1.954608474 | DSG1,DSG2,DSG3,DSG4                   |
| 24 | 26,025,000 | 26,175,000 | 348 | 1090 | -0.956368197 | DSG1,DSG4                             |
| 24 | 26,100,000 | 26,250,000 | 349 | 1390 | 0.151194989  | DSG1                                  |
| 24 | 26,175,000 | 26,325,000 | 350 | 1429 | 0.401436794  | DSC1                                  |
| 24 | 26,250,000 | 26,400,000 | 351 | 1392 | 0.49242317   | DSC1,DSC2,DSC3                        |
| 24 | 26,325,000 | 26,475,000 | 352 | 1360 | 0.496986014  | DSC2,DSC3                             |
| 24 | 26,400,000 | 26,550,000 | 353 | 1462 | 0.366799339  | DSC3                                  |
| 24 | 26,475,000 | 26,625,000 | 354 | 1407 | 0.858929093  |                                       |
| 24 | 26,550,000 | 26,700,000 | 355 | 1183 | -0.16504041  |                                       |
| 24 | 26,625,000 | 26,775,000 | 356 | 1330 | 0.281773014  |                                       |
| 24 | 26,700,000 | 26,850,000 | 357 | 1590 | -0.195095656 |                                       |
| 24 | 26,775,000 | 26,925,000 | 358 | 1753 | -0.137151377 |                                       |
| 24 | 26,850,000 | 27,000,000 | 359 | 1724 | 0.804678379  |                                       |
| 24 | 26,925,000 | 27,075,000 | 360 | 1565 | 0.503856887  |                                       |
| 24 | 27,000,000 | 27,150,000 | 361 | 1352 | 0.656287991  |                                       |
| 24 | 27,075,000 | 27,225,000 | 362 | 1145 | 0.446247036  |                                       |
| 24 | 27,150,000 | 27,300,000 | 363 | 1044 | -0.156101344 |                                       |

|    |            |            |     |      |              |                    |
|----|------------|------------|-----|------|--------------|--------------------|
| 24 | 27,225,000 | 27,375,000 | 364 | 784  | 0.561859898  |                    |
| 24 | 27,300,000 | 27,450,000 | 365 | 587  | -0.171005527 |                    |
| 24 | 27,375,000 | 27,525,000 | 366 | 1214 | 0.309648721  |                    |
| 24 | 27,450,000 | 27,600,000 | 367 | 1398 | 0.662617393  |                    |
| 24 | 27,525,000 | 27,675,000 | 368 | 1519 | -0.243366556 |                    |
| 24 | 27,600,000 | 27,750,000 | 369 | 1873 | -0.320995759 |                    |
| 24 | 27,675,000 | 27,825,000 | 370 | 1334 | -0.064389212 |                    |
| 24 | 27,750,000 | 27,900,000 | 371 | 1530 | 0.689930815  |                    |
| 24 | 27,825,000 | 27,975,000 | 372 | 1807 | 0.793122417  |                    |
| 24 | 27,900,000 | 28,050,000 | 373 | 1437 | 0.903756955  |                    |
| 24 | 27,975,000 | 28,125,000 | 374 | 1172 | 1.229716094  |                    |
| 24 | 28,050,000 | 28,200,000 | 375 | 1156 | 1.137111179  |                    |
| 24 | 28,125,000 | 28,275,000 | 376 | 1274 | 1.198368816  |                    |
| 24 | 28,200,000 | 28,350,000 | 377 | 1577 | 1.084788645  |                    |
| 24 | 28,275,000 | 28,425,000 | 378 | 1689 | 1.031997641  |                    |
| 24 | 28,350,000 | 28,500,000 | 379 | 1230 | 0.921062724  |                    |
| 24 | 28,425,000 | 28,575,000 | 380 | 1131 | -0.247781597 |                    |
| 24 | 28,500,000 | 28,650,000 | 381 | 1159 | -0.159318288 |                    |
| 24 | 28,575,000 | 28,725,000 | 382 | 1057 | 0.506897384  |                    |
| 24 | 28,650,000 | 28,800,000 | 383 | 1362 | -2.473869804 |                    |
| 24 | 28,725,000 | 28,875,000 | 384 | 1737 | -2.004296846 |                    |
| 24 | 28,800,000 | 28,950,000 | 385 | 1627 | -0.691676305 |                    |
| 24 | 28,875,000 | 29,025,000 | 386 | 1274 | 0.053399991  | CDH2               |
| 24 | 28,950,000 | 29,100,000 | 387 | 1165 | 0.492102143  | CDH2               |
| 24 | 29,025,000 | 29,175,000 | 388 | 1234 | 0.813194568  | CDH2               |
| 24 | 29,100,000 | 29,250,000 | 389 | 1125 | 0.840589446  | CDH2               |
| 24 | 29,175,000 | 29,325,000 | 390 | 1125 | -0.339131216 | CDH2               |
| 24 | 29,250,000 | 29,400,000 | 391 | 1004 | -0.669031869 |                    |
| 24 | 29,325,000 | 29,475,000 | 392 | 774  | 0.528384799  |                    |
| 24 | 29,400,000 | 29,550,000 | 393 | 881  | -0.409459351 | ENSBTAG00000044212 |
| 24 | 29,475,000 | 29,625,000 | 394 | 999  | 0.278139964  | ENSBTAG00000044212 |
| 24 | 29,550,000 | 29,700,000 | 395 | 949  | 1.009603972  |                    |
| 24 | 29,625,000 | 29,775,000 | 396 | 826  | 0.615413616  |                    |
| 24 | 29,700,000 | 29,850,000 | 397 | 975  | 0.317190682  |                    |
| 24 | 29,775,000 | 29,925,000 | 398 | 1102 | 0.031059844  |                    |
| 24 | 29,850,000 | 30,000,000 | 399 | 1003 | 0.661515003  |                    |
| 24 | 29,925,000 | 30,075,000 | 400 | 1108 | 1.210921361  | CHST9              |
| 24 | 30,000,000 | 30,150,000 | 401 | 1261 | 0.203139769  | CHST9              |
| 24 | 30,075,000 | 30,225,000 | 402 | 1641 | -0.135363181 | CHST9              |
| 24 | 30,150,000 | 30,300,000 | 403 | 1742 | -0.119282886 | CHST9              |
| 24 | 30,225,000 | 30,375,000 | 404 | 1365 | 0.065860676  | AQP4,CHST9         |
| 24 | 30,300,000 | 30,450,000 | 405 | 1367 | 0.80242927   | AQP4,CHST9         |
| 24 | 30,375,000 | 30,525,000 | 406 | 1469 | 0.294388843  | AQP4               |
| 24 | 30,450,000 | 30,600,000 | 407 | 1404 | 0.096432772  |                    |
| 24 | 30,525,000 | 30,675,000 | 408 | 1389 | 0.860542941  |                    |
| 24 | 30,600,000 | 30,750,000 | 409 | 1198 | 0.597625787  | KCTD1              |
| 24 | 30,675,000 | 30,825,000 | 410 | 1109 | 0.55941174   | KCTD1              |
| 24 | 30,750,000 | 30,900,000 | 411 | 1105 | 1.113479274  | KCTD1,TAF4B        |
| 24 | 30,825,000 | 30,975,000 | 412 | 1133 | 1.184526978  | TAF4B              |
| 24 | 30,900,000 | 31,050,000 | 413 | 1216 | 1.135386388  | PSMA8,SS18,TAF4B   |
| 24 | 30,975,000 | 31,125,000 | 414 | 940  | 0.648656411  | PSMA8,SS18         |
| 24 | 31,050,000 | 31,200,000 | 415 | 1089 | 0.94955963   | SS18               |
| 24 | 31,125,000 | 31,275,000 | 416 | 1446 | 1.423659349  |                    |

|    |            |            |     |      |              |                                       |
|----|------------|------------|-----|------|--------------|---------------------------------------|
| 24 | 31,200,000 | 31,350,000 | 417 | 1388 | 1.358235573  |                                       |
| 24 | 31,275,000 | 31,425,000 | 418 | 1058 | 1.195143134  |                                       |
| 24 | 31,350,000 | 31,500,000 | 419 | 856  | 0.142135997  |                                       |
| 24 | 31,425,000 | 31,575,000 | 420 | 884  | -2.072526074 |                                       |
| 24 | 31,500,000 | 31,650,000 | 421 | 933  | -3.554968602 |                                       |
| 24 | 31,575,000 | 31,725,000 | 422 | 859  | -3.715351723 | ZNF521                                |
| 24 | 31,650,000 | 31,800,000 | 423 | 832  | -3.026966077 | ZNF521                                |
| 24 | 31,725,000 | 31,875,000 | 424 | 728  | -2.428288019 | ZNF521                                |
| 24 | 31,800,000 | 31,950,000 | 425 | 576  | -0.423813043 | ZNF521                                |
| 24 | 31,875,000 | 32,025,000 | 426 | 759  | 0.251324597  | ZNF521                                |
| 24 | 31,950,000 | 32,100,000 | 427 | 1240 | -0.10196255  | ZNF521                                |
| 24 | 32,025,000 | 32,175,000 | 428 | 1378 | -0.031391785 | ZNF521                                |
| 24 | 32,100,000 | 32,250,000 | 429 | 1395 | 0.887570467  |                                       |
| 24 | 32,175,000 | 32,325,000 | 430 | 1127 | 0.790781692  |                                       |
| 24 | 32,250,000 | 32,400,000 | 431 | 944  | -0.629298657 |                                       |
| 24 | 32,325,000 | 32,475,000 | 432 | 1375 | -1.22950366  |                                       |
| 24 | 32,400,000 | 32,550,000 | 433 | 1442 | -0.313673767 |                                       |
| 24 | 32,475,000 | 32,625,000 | 434 | 1327 | 0.184328072  | HRH4,IMPACT                           |
| 24 | 32,550,000 | 32,700,000 | 435 | 1278 | -1.161015279 | HRH4,IMPACT,OSBPL1A                   |
| 24 | 32,625,000 | 32,775,000 | 436 | 1210 | -1.9340736   | IMPACT,OSBPL1A                        |
| 24 | 32,700,000 | 32,850,000 | 437 | 873  | -1.099426064 | OSBPL1A                               |
| 24 | 32,775,000 | 32,925,000 | 438 | 615  | -0.580654878 | CABYR,OSBPL1A,TTC39C                  |
| 24 | 32,850,000 | 33,000,000 | 439 | 681  | -4.230466578 | CABYR,OSBPL1A,TTC39C                  |
| 24 | 32,925,000 | 33,075,000 | 440 | 755  | -2.187448056 | LAMA3,TTC39C                          |
| 24 | 33,000,000 | 33,150,000 | 441 | 933  | 1.067090199  | LAMA3                                 |
| 24 | 33,075,000 | 33,225,000 | 442 | 1117 | 1.062408166  | LAMA3                                 |
| 24 | 33,150,000 | 33,300,000 | 443 | 1397 | 0.620986186  | LAMA3                                 |
| 24 | 33,225,000 | 33,375,000 | 444 | 1506 | 0.332863864  | LAMA3,ENSBTAG00000039850              |
| 24 | 33,300,000 | 33,450,000 | 445 | 1566 | 0.317150776  | ANKRD29,LAMA3,NPC1,ENSBTAG00000039850 |
| 24 | 33,375,000 | 33,525,000 | 446 | 1690 | 0.514785249  | ANKRD29,C18orf8,NPC1,RIOK3            |
| 24 | 33,450,000 | 33,600,000 | 447 | 1509 | 0.718719347  | C18orf8,NPC1,RIOK3,TMEM241            |
| 24 | 33,525,000 | 33,675,000 | 448 | 1559 | 0.706085389  | RIOK3,TMEM241                         |
| 24 | 33,600,000 | 33,750,000 | 449 | 1628 | 0.291334652  | CABLES1,TMEM241                       |
| 24 | 33,675,000 | 33,825,000 | 450 | 1306 | -0.261077959 | CABLES1                               |
| 24 | 33,750,000 | 33,900,000 | 451 | 1064 | -0.538885914 | CABLES1,RBBP8                         |
| 24 | 33,825,000 | 33,975,000 | 452 | 766  | -0.750087594 | RBBP8                                 |
| 24 | 33,900,000 | 34,050,000 | 453 | 463  | 0.506156835  | RBBP8                                 |
| 24 | 33,975,000 | 34,125,000 | 454 | 643  | 0.764120863  |                                       |
| 24 | 34,050,000 | 34,200,000 | 455 | 828  | 0.516567177  |                                       |
| 24 | 34,125,000 | 34,275,000 | 456 | 879  | 0.702203598  |                                       |
| 24 | 34,200,000 | 34,350,000 | 457 | 837  | 1.095507453  |                                       |
| 24 | 34,275,000 | 34,425,000 | 458 | 769  | 1.143329305  |                                       |
| 24 | 34,350,000 | 34,500,000 | 459 | 747  | 1.081417008  |                                       |
| 24 | 34,425,000 | 34,575,000 | 460 | 861  | 0.942049015  | GATA6                                 |
| 24 | 34,500,000 | 34,650,000 | 461 | 876  | 0.802711621  | GATA6,ENSBTAG00000047113              |
| 24 | 34,575,000 | 34,725,000 | 462 | 584  | 0.832351824  | GATA6,ENSBTAG00000047113              |
| 24 | 34,650,000 | 34,800,000 | 463 | 358  | 0.934862755  |                                       |
| 24 | 34,725,000 | 34,875,000 | 464 | 317  | 0.602675745  | MIB1                                  |
| 24 | 34,800,000 | 34,950,000 | 465 | 510  | 0.506838766  | ABHD3,MIB1                            |
| 24 | 34,875,000 | 35,025,000 | 466 | 547  | 0.581524208  | ABHD3,ESCO1,MIB1,SNRPD1               |
| 24 | 34,950,000 | 35,100,000 | 467 | 361  | 0.746754093  | ABHD3,ESCO1,GREB1L,SNRPD1             |
| 24 | 35,025,000 | 35,175,000 | 468 | 545  | -2.874358328 | ESCO1,GREB1L                          |
| 24 | 35,100,000 | 35,250,000 | 469 | 608  | -3.478708551 | GREB1L                                |

|    |            |            |     |      |              |                                 |
|----|------------|------------|-----|------|--------------|---------------------------------|
| 24 | 35,175,000 | 35,325,000 | 470 | 451  | -1.029427311 |                                 |
| 24 | 35,250,000 | 35,400,000 | 471 | 584  | 0.384830848  | MGC133647                       |
| 24 | 35,325,000 | 35,475,000 | 472 | 548  | 0.479092517  | MGC133647,ROCK1                 |
| 24 | 35,400,000 | 35,550,000 | 473 | 422  | 0.021347215  | ROCK1,USP14                     |
| 24 | 35,475,000 | 35,625,000 | 474 | 784  | 0.3325373    | ROCK1,THOC1,USP14               |
| 24 | 35,550,000 | 35,700,000 | 475 | 1154 | 0.792746149  | COLEC12,THOC1,USP14             |
| 24 | 35,625,000 | 35,775,000 | 476 | 1098 | 0.955702677  | COLEC12                         |
| 24 | 35,700,000 | 35,850,000 | 477 | 837  | 0.611180045  | COLEC12                         |
| 24 | 35,775,000 | 35,925,000 | 478 | 846  | 0.36559129   | CETN1,CLUL1,COLEC12             |
| 24 | 35,850,000 | 36,000,000 | 479 | 928  | 0.440271395  | CETN1,CLUL1,ENOSF1,TYMS,YES1    |
| 24 | 35,925,000 | 36,075,000 | 480 | 852  | 0.414546022  | CLUL1,ENOSF1,TYMS,YES1          |
| 24 | 36,000,000 | 36,150,000 | 481 | 663  | 0.356583069  | ADCYAP1,YES1                    |
| 24 | 36,075,000 | 36,225,000 | 482 | 688  | 0.148569546  | ADCYAP1                         |
| 24 | 36,150,000 | 36,300,000 | 483 | 714  | 0.106131952  |                                 |
| 24 | 36,225,000 | 36,375,000 | 484 | 396  | 0.022714962  |                                 |
| 24 | 36,300,000 | 36,450,000 | 485 | 288  | -0.695347559 |                                 |
| 24 | 36,375,000 | 36,525,000 | 486 | 407  | -0.684875049 |                                 |
| 24 | 36,450,000 | 36,600,000 | 487 | 855  | 0.500855038  |                                 |
| 24 | 36,525,000 | 36,675,000 | 488 | 1115 | 0.488858658  |                                 |
| 24 | 36,600,000 | 36,750,000 | 489 | 1129 | -0.845217215 |                                 |
| 24 | 36,675,000 | 36,825,000 | 490 | 1168 | -0.637116283 |                                 |
| 24 | 36,750,000 | 36,900,000 | 491 | 1258 | -0.040082565 |                                 |
| 24 | 36,825,000 | 36,975,000 | 492 | 1449 | -0.440063463 |                                 |
| 24 | 36,900,000 | 37,050,000 | 493 | 1231 | -0.671928791 |                                 |
| 24 | 36,975,000 | 37,125,000 | 494 | 985  | -0.149162216 |                                 |
| 24 | 37,050,000 | 37,200,000 | 495 | 1015 | -0.913095842 |                                 |
| 24 | 37,125,000 | 37,275,000 | 496 | 1229 | -1.596506906 | METTL4                          |
| 24 | 37,200,000 | 37,350,000 | 497 | 1273 | -0.724177649 | METTL4,NDC80,SMCHD1             |
| 24 | 37,275,000 | 37,425,000 | 498 | 1174 | 0.813840899  | METTL4,NDC80,SMCHD1             |
| 24 | 37,350,000 | 37,500,000 | 499 | 1120 | 0.807643101  | EMILIN2,SMCHD1                  |
| 24 | 37,425,000 | 37,575,000 | 500 | 1340 | 0.444904595  | EMILIN2,LPIN2,SMCHD1            |
| 24 | 37,500,000 | 37,650,000 | 501 | 1779 | 0.861359166  | EMILIN2,LPIN2                   |
| 24 | 37,575,000 | 37,725,000 | 502 | 1587 | 1.25202544   | LPIN2,MYOM1                     |
| 24 | 37,650,000 | 37,800,000 | 503 | 1200 | 1.335680767  | MYOM1                           |
| 24 | 37,725,000 | 37,875,000 | 504 | 1142 | 1.063967279  | MYL12B,MYL9,MYOM1               |
| 24 | 37,800,000 | 37,950,000 | 505 | 1057 | 0.950671121  | MYL12B,MYL9,TGIF1               |
| 24 | 37,875,000 | 38,025,000 | 506 | 1014 | 1.122293141  | MYL12B,TGIF1,ENSBTAG00000005372 |
| 24 | 37,950,000 | 38,100,000 | 507 | 868  | 1.160998906  | ENSBTAG00000005372              |
| 24 | 38,025,000 | 38,175,000 | 508 | 930  | 0.78601061   | ENSBTAG00000005372              |
| 24 | 38,100,000 | 38,250,000 | 509 | 1218 | -0.261118671 | ENSBTAG00000005372              |
| 24 | 38,175,000 | 38,325,000 | 510 | 1191 | -0.50435249  | ENSBTAG00000005372              |
| 24 | 38,250,000 | 38,400,000 | 511 | 1084 | -0.651016836 | ENSBTAG00000005372              |
| 24 | 38,325,000 | 38,475,000 | 512 | 1141 | -1.181419409 |                                 |
| 24 | 38,400,000 | 38,550,000 | 513 | 1382 | -0.287862727 |                                 |
| 24 | 38,475,000 | 38,625,000 | 514 | 1146 | -0.104587474 |                                 |
| 24 | 38,550,000 | 38,700,000 | 515 | 860  | -0.005902778 |                                 |
| 24 | 38,625,000 | 38,775,000 | 516 | 954  | 0.088062418  |                                 |
| 24 | 38,700,000 | 38,850,000 | 517 | 884  | 0.560238572  |                                 |
| 24 | 38,775,000 | 38,925,000 | 518 | 885  | 0.750287454  |                                 |
| 24 | 38,850,000 | 39,000,000 | 519 | 1024 | 0.607518957  |                                 |
| 24 | 38,925,000 | 39,075,000 | 520 | 1131 | -0.06517674  |                                 |
| 24 | 39,000,000 | 39,150,000 | 521 | 1112 | -0.116948574 | ENSBTAG00000046269              |
| 24 | 39,075,000 | 39,225,000 | 522 | 835  | 0.410832047  | ENSBTAG00000046269              |

|    |            |            |     |      |              |                      |
|----|------------|------------|-----|------|--------------|----------------------|
| 24 | 39,150,000 | 39,300,000 | 523 | 664  | 0.575397645  | ZBTB14               |
| 24 | 39,225,000 | 39,375,000 | 524 | 837  | 0.75157473   | EPB41L3,ZBTB14       |
| 24 | 39,300,000 | 39,450,000 | 525 | 1013 | 0.661506507  | EPB41L3              |
| 24 | 39,375,000 | 39,525,000 | 526 | 1048 | -2.70525017  | EPB41L3              |
| 24 | 39,450,000 | 39,600,000 | 527 | 868  | -5.003455866 |                      |
| 24 | 39,525,000 | 39,675,000 | 528 | 697  | -3.140805702 |                      |
| 24 | 39,600,000 | 39,750,000 | 529 | 791  | -1.414991042 | TMEM200C             |
| 24 | 39,675,000 | 39,825,000 | 530 | 875  | 0.144183641  | TMEM200C             |
| 24 | 39,750,000 | 39,900,000 | 531 | 755  | 0.468340438  |                      |
| 24 | 39,825,000 | 39,975,000 | 532 | 802  | -0.319495759 |                      |
| 24 | 39,900,000 | 40,050,000 | 533 | 1149 | -0.29550666  |                      |
| 24 | 39,975,000 | 40,125,000 | 534 | 1306 | -0.174952121 |                      |
| 24 | 40,050,000 | 40,200,000 | 535 | 1438 | -1.678691372 |                      |
| 24 | 40,125,000 | 40,275,000 | 536 | 1424 | -2.112917227 |                      |
| 24 | 40,200,000 | 40,350,000 | 537 | 1270 | -1.24430381  | ARHGAP28             |
| 24 | 40,275,000 | 40,425,000 | 538 | 1253 | -1.007304553 | ARHGAP28,LAMA1       |
| 24 | 40,350,000 | 40,500,000 | 539 | 1321 | 0.357199183  | ARHGAP28,LAMA1       |
| 24 | 40,425,000 | 40,575,000 | 540 | 1501 | 0.384339828  | LAMA1,MGC160046      |
| 24 | 40,500,000 | 40,650,000 | 541 | 1444 | 0.528493185  | LAMA1,MGC160046      |
| 24 | 40,575,000 | 40,725,000 | 542 | 1529 | 0.588823893  |                      |
| 24 | 40,650,000 | 40,800,000 | 543 | 1759 | -0.28873343  | PTPRM                |
| 24 | 40,725,000 | 40,875,000 | 544 | 1724 | -0.529839094 | PTPRM                |
| 24 | 40,800,000 | 40,950,000 | 545 | 1534 | 0.040289995  | PTPRM                |
| 24 | 40,875,000 | 41,025,000 | 546 | 1455 | 0.691423758  | PTPRM                |
| 24 | 40,950,000 | 41,100,000 | 547 | 1281 | 1.244594382  | PTPRM                |
| 24 | 41,025,000 | 41,175,000 | 548 | 872  | 1.082506143  | PTPRM                |
| 24 | 41,100,000 | 41,250,000 | 549 | 693  | 0.996168999  | PTPRM                |
| 24 | 41,175,000 | 41,325,000 | 550 | 968  | 1.146099203  | PTPRM                |
| 24 | 41,250,000 | 41,400,000 | 551 | 1562 | 0.770540011  | PTPRM                |
| 24 | 41,325,000 | 41,475,000 | 552 | 1754 | 0.558168316  | PTPRM                |
| 24 | 41,400,000 | 41,550,000 | 553 | 1155 | 0.458257157  | PTPRM,RAB12          |
| 24 | 41,475,000 | 41,625,000 | 554 | 971  | 0.064054986  | MTCL1,RAB12          |
| 24 | 41,550,000 | 41,700,000 | 555 | 1101 | 0.466384026  | MTCL1                |
| 24 | 41,625,000 | 41,775,000 | 556 | 718  | 0.729640307  | MTCL1                |
| 24 | 41,700,000 | 41,850,000 | 557 | 582  | -0.001661802 |                      |
| 24 | 41,775,000 | 41,925,000 | 558 | 533  | -0.009260232 | ANKRD12,NDUFV2       |
| 24 | 41,850,000 | 42,000,000 | 559 | 405  | -0.245602851 | ANKRD12,NDUFV2,TWSG1 |
| 24 | 41,925,000 | 42,075,000 | 560 | 462  | 0.47504943   | ANKRD12,RALBP1,TWSG1 |
| 24 | 42,000,000 | 42,150,000 | 561 | 429  | 0.821752427  | PPP4R1,RALBP1,TWSG1  |
| 24 | 42,075,000 | 42,225,000 | 562 | 407  | 0.314601057  | PPP4R1,RALBP1        |
| 24 | 42,150,000 | 42,300,000 | 563 | 526  | 0.599172981  | RAB31                |
| 24 | 42,225,000 | 42,375,000 | 564 | 691  | 0.664219461  | RAB31,TXNDC2,VAPA    |
| 24 | 42,300,000 | 42,450,000 | 565 | 662  | 0.167693751  | RAB31,TXNDC2,VAPA    |
| 24 | 42,375,000 | 42,525,000 | 566 | 654  | -0.131985148 |                      |
| 24 | 42,450,000 | 42,600,000 | 567 | 621  | -0.656487463 | APCDD1               |
| 24 | 42,525,000 | 42,675,000 | 568 | 429  | -1.543680483 | APCDD1,NAPG,PIEZO2   |
| 24 | 42,600,000 | 42,750,000 | 569 | 446  | 0.06962784   | NAPG,PIEZO2          |
| 24 | 42,675,000 | 42,825,000 | 570 | 508  | 1.109053735  | PIEZO2               |
| 24 | 42,750,000 | 42,900,000 | 571 | 388  | 1.054295109  | PIEZO2               |
| 24 | 42,825,000 | 42,975,000 | 572 | 308  | -0.563785222 |                      |
| 24 | 42,900,000 | 43,050,000 | 573 | 350  | -0.801318948 |                      |
| 24 | 42,975,000 | 43,125,000 | 574 | 508  | 0.834990687  | GNAL                 |
| 24 | 43,050,000 | 43,200,000 | 575 | 681  | 1.329076148  | GNAL,IMPA2,MPPE1     |

|    |            |            |     |      |              |                                                         |
|----|------------|------------|-----|------|--------------|---------------------------------------------------------|
| 24 | 43,125,000 | 43,275,000 | 576 | 440  | 1.000617796  | AFG3L2,CIDEA,GNAL,IMPA2,MPPE1,TUBB6,ENSBTAG0000046547   |
| 24 | 43,200,000 | 43,350,000 | 577 | 207  | -0.937651307 | AFG3L2,CIDEA,IMPA2,SLMO1,SPIRE1,TUBB6,ENSBTAG0000046547 |
| 24 | 43,275,000 | 43,425,000 | 578 | 197  | -0.390900145 | SLMO1,SPIRE1                                            |
| 24 | 43,350,000 | 43,500,000 | 579 | 193  | 0.741056065  | SPIRE1                                                  |
| 24 | 43,425,000 | 43,575,000 | 580 | 204  | 0.595966953  | CEP76,PSMG2,PTPN2,SPIRE1                                |
| 24 | 43,500,000 | 43,650,000 | 581 | 225  | 0.32714722   | CEP76,PSMG2,PTPN2,SEH1L                                 |
| 24 | 43,575,000 | 43,725,000 | 582 | 208  | 0.257290442  | CEP192,PTPN2,SEH1L                                      |
| 24 | 43,650,000 | 43,800,000 | 583 | 234  | 0.168011553  | CEP192,SEH1L                                            |
| 24 | 43,725,000 | 43,875,000 | 584 | 279  | -0.145215393 | CEP192,LDLRAD4                                          |
| 24 | 43,800,000 | 43,950,000 | 585 | 247  | -0.567964798 | FAM210A,LDLRAD4,RNMT                                    |
| 24 | 43,875,000 | 44,025,000 | 586 | 245  | -0.416573805 | FAM210A,LDLRAD4,MC2R,MC5R,RNMT                          |
| 24 | 43,950,000 | 44,100,000 | 587 | 507  | -2.34585939  | MC2R,MC5R,RNMT                                          |
| 24 | 44,025,000 | 44,175,000 | 588 | 749  | -1.506014786 |                                                         |
| 24 | 44,100,000 | 44,250,000 | 589 | 829  | 0.778121194  |                                                         |
| 24 | 44,175,000 | 44,325,000 | 590 | 896  | 1.026159485  |                                                         |
| 24 | 44,250,000 | 44,400,000 | 591 | 558  | 0.769743705  |                                                         |
| 24 | 44,325,000 | 44,475,000 | 592 | 238  | -1.499771852 |                                                         |
| 24 | 44,400,000 | 44,550,000 | 593 | 391  | -1.174850527 |                                                         |
| 24 | 44,475,000 | 44,625,000 | 594 | 607  | -1.697268305 |                                                         |
| 24 | 44,550,000 | 44,700,000 | 595 | 611  | -3.441095956 |                                                         |
| 24 | 44,625,000 | 44,775,000 | 596 | 519  | -2.717280767 |                                                         |
| 24 | 44,700,000 | 44,850,000 | 597 | 459  | 0.757835451  |                                                         |
| 24 | 44,775,000 | 44,925,000 | 598 | 461  | -1.651263934 |                                                         |
| 24 | 44,850,000 | 45,000,000 | 599 | 510  | -0.922463173 |                                                         |
| 24 | 44,925,000 | 45,075,000 | 600 | 479  | 0.552236638  | SETBP1                                                  |
| 24 | 45,000,000 | 45,150,000 | 601 | 591  | 0.283073771  | SETBP1                                                  |
| 24 | 45,075,000 | 45,225,000 | 602 | 874  | 0.855567338  | SETBP1                                                  |
| 24 | 45,150,000 | 45,300,000 | 603 | 925  | 1.026241097  |                                                         |
| 24 | 45,225,000 | 45,375,000 | 604 | 1014 | 1.168324541  |                                                         |
| 24 | 45,300,000 | 45,450,000 | 605 | 1188 | 0.899720143  |                                                         |
| 24 | 45,375,000 | 45,525,000 | 606 | 1236 | 0.592206405  |                                                         |
| 24 | 45,450,000 | 45,600,000 | 607 | 964  | 0.260103391  |                                                         |
| 24 | 45,525,000 | 45,675,000 | 608 | 1043 | -0.091091868 |                                                         |
| 24 | 45,600,000 | 45,750,000 | 609 | 1400 | 0.350100574  |                                                         |
| 24 | 45,675,000 | 45,825,000 | 610 | 1470 | 0.791523663  | SLC14A2                                                 |
| 24 | 45,750,000 | 45,900,000 | 611 | 1044 | 0.642593025  | SLC14A2                                                 |
| 24 | 45,825,000 | 45,975,000 | 612 | 865  | 0.163700876  | SLC14A1,SLC14A2                                         |
| 24 | 45,900,000 | 46,050,000 | 613 | 1323 | 0.466654142  | EPG5,SIGLEC15,SLC14A1                                   |
| 24 | 45,975,000 | 46,125,000 | 614 | 1244 | 0.919977619  | EPG5,SIGLEC15                                           |
| 24 | 46,050,000 | 46,200,000 | 615 | 666  | 1.209424766  | EPG5,PSTPIP2                                            |
| 24 | 46,125,000 | 46,275,000 | 616 | 336  | 0.454738911  | EPG5,PSTPIP2                                            |
| 24 | 46,200,000 | 46,350,000 | 617 | 713  | -0.623817805 | ATP5A1,HAUS1,PSTPIP2                                    |
| 24 | 46,275,000 | 46,425,000 | 618 | 737  | -0.593849667 | ATP5A1,C24H18orf25,HAUS1,PSTPIP2                        |
| 24 | 46,350,000 | 46,500,000 | 619 | 473  | -0.140688435 | C24H18orf25                                             |
| 24 | 46,425,000 | 46,575,000 | 620 | 688  | -1.817784011 | C24H18orf25                                             |
| 24 | 46,500,000 | 46,650,000 | 621 | 991  | -1.450868442 | RNF165                                                  |
| 24 | 46,575,000 | 46,725,000 | 622 | 1029 | -1.140398782 | RNF165                                                  |
| 24 | 46,650,000 | 46,800,000 | 623 | 776  | -1.767144461 | LOXHD1                                                  |
| 24 | 46,725,000 | 46,875,000 | 624 | 701  | 0.369242012  | LOXHD1                                                  |
| 24 | 46,800,000 | 46,950,000 | 625 | 1024 | 0.696118892  | LOXHD1,ST8SIA5                                          |
| 24 | 46,875,000 | 47,025,000 | 626 | 807  | 0.159564979  | PIAS2,ST8SIA5                                           |



|    |            |            |     |      |              |                                          |
|----|------------|------------|-----|------|--------------|------------------------------------------|
| 24 | 46,950,000 | 47,100,000 | 627 | 314  | 0.980710006  | PIAS2                                    |
| 24 | 47,025,000 | 47,175,000 | 628 | 405  | 1.423226537  | PIAS2                                    |
| 24 | 47,100,000 | 47,250,000 | 629 | 566  | 1.074360871  | HDHD2,KATNAL2                            |
| 24 | 47,175,000 | 47,325,000 | 630 | 660  | 0.66654308   | HDHD2,IER3IP1,KATNAL2,ENSBTAG00000047809 |
| 24 | 47,250,000 | 47,400,000 | 631 | 716  | 0.708415049  | HDHD2,IER3IP1,SKOR2,ENSBTAG00000047809   |
| 24 | 47,325,000 | 47,475,000 | 632 | 822  | 0.309683142  | SKOR2                                    |
| 24 | 47,400,000 | 47,550,000 | 633 | 899  | 0.414815798  |                                          |
| 24 | 47,475,000 | 47,625,000 | 634 | 964  | 0.394990347  |                                          |
| 24 | 47,550,000 | 47,700,000 | 635 | 990  | 0.462981061  |                                          |
| 24 | 47,625,000 | 47,775,000 | 636 | 971  | 0.324086162  |                                          |
| 24 | 47,700,000 | 47,850,000 | 637 | 674  | -1.173698418 |                                          |
| 24 | 47,775,000 | 47,925,000 | 638 | 406  | -2.583583839 |                                          |
| 24 | 47,850,000 | 48,000,000 | 639 | 332  | -3.047703604 | SMAD2                                    |
| 24 | 47,925,000 | 48,075,000 | 640 | 227  | -2.312219092 | SMAD2                                    |
| 24 | 48,000,000 | 48,150,000 | 641 | 572  | -0.526781828 | SMAD2                                    |
| 24 | 48,075,000 | 48,225,000 | 642 | 772  | -0.669314863 | ZBTB7C                                   |
| 24 | 48,150,000 | 48,300,000 | 643 | 721  | -2.986225741 | ZBTB7C                                   |
| 24 | 48,225,000 | 48,375,000 | 644 | 786  | -3.773484283 |                                          |
| 24 | 48,300,000 | 48,450,000 | 645 | 896  | -1.40967169  |                                          |
| 24 | 48,375,000 | 48,525,000 | 646 | 868  | 0.044574182  |                                          |
| 24 | 48,450,000 | 48,600,000 | 647 | 815  | 0.53104482   |                                          |
| 24 | 48,525,000 | 48,675,000 | 648 | 992  | -0.861649918 |                                          |
| 24 | 48,600,000 | 48,750,000 | 649 | 1029 | -0.833779186 |                                          |
| 24 | 48,675,000 | 48,825,000 | 650 | 852  | 0.78899268   | CTIF                                     |
| 24 | 48,750,000 | 48,900,000 | 651 | 643  | -0.240829894 | CTIF                                     |
| 24 | 48,825,000 | 48,975,000 | 652 | 436  | -2.001682358 | CTIF                                     |
| 24 | 48,900,000 | 49,050,000 | 653 | 521  | -0.388215698 | CTIF                                     |
| 24 | 48,975,000 | 49,125,000 | 654 | 539  | 0.194068515  | CTIF,SMAD7                               |
| 24 | 49,050,000 | 49,200,000 | 655 | 416  | 0.873526783  | DYM,SMAD7                                |
| 24 | 49,125,000 | 49,275,000 | 656 | 383  | 0.850372287  | DYM                                      |
| 24 | 49,200,000 | 49,350,000 | 657 | 295  | 1.020480148  | DYM                                      |
| 24 | 49,275,000 | 49,425,000 | 658 | 269  | 1.413311148  | DYM                                      |
| 24 | 49,350,000 | 49,500,000 | 659 | 296  | 1.260915643  | DYM                                      |
| 24 | 49,425,000 | 49,575,000 | 660 | 292  | 0.986946979  | DYM                                      |
| 24 | 49,500,000 | 49,650,000 | 661 | 301  | 1.019370985  | C24H18orf32,DYM,RPL17                    |
| 24 | 49,575,000 | 49,725,000 | 662 | 307  | 0.950596019  | C24H18orf32,DYM,RPL17                    |
| 24 | 49,650,000 | 49,800,000 | 663 | 401  | -0.595901317 |                                          |
| 24 | 49,725,000 | 49,875,000 | 664 | 684  | -0.578208633 | ENSBTAG00000039248                       |
| 24 | 49,800,000 | 49,950,000 | 665 | 751  | 0.559473244  | ACAA2,ENSBTAG00000039248                 |
| 24 | 49,875,000 | 50,025,000 | 666 | 858  | 1.374004332  | ACAA2,MYO5B                              |
| 24 | 49,950,000 | 50,100,000 | 667 | 1078 | 1.366634683  | MYO5B                                    |
| 24 | 50,025,000 | 50,175,000 | 668 | 1102 | -0.817693043 | MYO5B                                    |
| 24 | 50,100,000 | 50,250,000 | 669 | 933  | -1.736602533 | MYO5B                                    |
| 24 | 50,175,000 | 50,325,000 | 670 | 1051 | 0.087877646  | CCDC11                                   |
| 24 | 50,250,000 | 50,400,000 | 671 | 889  | 0.516130556  | CCDC11,MBD1                              |
| 24 | 50,325,000 | 50,475,000 | 672 | 402  | 1.215627972  | CCDC11,CXXC1,MBD1,SKA1                   |
| 24 | 50,400,000 | 50,550,000 | 673 | 386  | 1.090647216  | CXXC1,SKA1                               |
| 24 | 50,475,000 | 50,625,000 | 674 | 540  | 0.340798639  |                                          |
| 24 | 50,550,000 | 50,700,000 | 675 | 819  | -0.289143726 | MAPK4                                    |
| 24 | 50,625,000 | 50,775,000 | 676 | 1439 | -0.284117741 | MAPK4                                    |
| 24 | 50,700,000 | 50,850,000 | 677 | 1652 | 0.137167888  | MAPK4,MRO                                |
| 24 | 50,775,000 | 50,925,000 | 678 | 1097 | 0.929836013  | ME2,MRO                                  |
| 24 | 50,850,000 | 51,000,000 | 679 | 945  | 1.300080067  | ELAC1,ME2,SMAD4                          |

|    |            |            |     |      |              |                                         |
|----|------------|------------|-----|------|--------------|-----------------------------------------|
| 24 | 50,925,000 | 51,075,000 | 680 | 934  | 0.423872476  | ELAC1,ME2,SMAD4                         |
| 24 | 51,000,000 | 51,150,000 | 681 | 763  | -0.481599954 | MEX3C,SMAD4                             |
| 24 | 51,075,000 | 51,225,000 | 682 | 891  | 1.324281387  | AP3S1,MEX3C                             |
| 24 | 51,150,000 | 51,300,000 | 683 | 1288 | 1.468555245  | AP3S1                                   |
| 24 | 51,225,000 | 51,375,000 | 684 | 1255 | 1.288783939  |                                         |
| 24 | 51,300,000 | 51,450,000 | 685 | 990  | 0.136108315  |                                         |
| 24 | 51,375,000 | 51,525,000 | 686 | 1131 | 0.08211914   |                                         |
| 24 | 51,450,000 | 51,600,000 | 687 | 1535 | 0.398747317  |                                         |
| 24 | 51,525,000 | 51,675,000 | 688 | 1756 | 0.484721988  |                                         |
| 24 | 51,600,000 | 51,750,000 | 689 | 1565 | 0.692823221  |                                         |
| 24 | 51,675,000 | 51,825,000 | 690 | 1106 | -0.028118514 |                                         |
| 24 | 51,750,000 | 51,900,000 | 691 | 1152 | 0.058978108  |                                         |
| 24 | 51,825,000 | 51,975,000 | 692 | 1657 | 0.906480991  |                                         |
| 24 | 51,900,000 | 52,050,000 | 693 | 1756 | 0.805535836  |                                         |
| 24 | 51,975,000 | 52,125,000 | 694 | 1514 | 0.540124143  |                                         |
| 24 | 52,050,000 | 52,200,000 | 695 | 1399 | 0.320723244  |                                         |
| 24 | 52,125,000 | 52,275,000 | 696 | 1388 | -1.166091998 |                                         |
| 24 | 52,200,000 | 52,350,000 | 697 | 1240 | -0.762473637 |                                         |
| 24 | 52,275,000 | 52,425,000 | 698 | 1164 | 0.227105535  |                                         |
| 24 | 52,350,000 | 52,500,000 | 699 | 993  | 0.111743994  |                                         |
| 24 | 52,425,000 | 52,575,000 | 700 | 1099 | 0.007511719  |                                         |
| 24 | 52,500,000 | 52,650,000 | 701 | 1350 | 0.355909419  |                                         |
| 24 | 52,575,000 | 52,725,000 | 702 | 1184 | 1.194225276  |                                         |
| 24 | 52,650,000 | 52,800,000 | 703 | 1049 | 0.57061769   |                                         |
| 24 | 52,725,000 | 52,875,000 | 704 | 913  | -0.047782121 |                                         |
| 24 | 52,800,000 | 52,950,000 | 705 | 1178 | 0.713632819  |                                         |
| 24 | 52,875,000 | 53,025,000 | 706 | 1584 | 1.091602903  |                                         |
| 24 | 52,950,000 | 53,100,000 | 707 | 1660 | 0.854099152  |                                         |
| 24 | 53,025,000 | 53,175,000 | 708 | 1785 | 0.419075265  |                                         |
| 24 | 53,100,000 | 53,250,000 | 709 | 1483 | -0.850380829 |                                         |
| 24 | 53,175,000 | 53,325,000 | 710 | 1065 | -2.306650665 |                                         |
| 24 | 53,250,000 | 53,400,000 | 711 | 930  | -4.048425054 |                                         |
| 24 | 53,325,000 | 53,475,000 | 712 | 813  | -4.234722192 |                                         |
| 24 | 53,400,000 | 53,550,000 | 713 | 1183 | -0.225679553 |                                         |
| 24 | 53,475,000 | 53,625,000 | 714 | 1857 | 0.933387028  |                                         |
| 24 | 53,550,000 | 53,700,000 | 715 | 1618 | 0.954986825  |                                         |
| 24 | 53,625,000 | 53,775,000 | 716 | 1044 | 0.336016576  |                                         |
| 24 | 53,700,000 | 53,850,000 | 717 | 1020 | 0.644038685  |                                         |
| 24 | 53,775,000 | 53,925,000 | 718 | 1126 | 0.905981757  |                                         |
| 24 | 53,850,000 | 54,000,000 | 719 | 1118 | 0.1372581    |                                         |
| 24 | 53,925,000 | 54,075,000 | 720 | 1026 | 0.238587744  | MBD2                                    |
| 24 | 54,000,000 | 54,150,000 | 721 | 861  | 0.288243579  | MBD2                                    |
| 24 | 54,075,000 | 54,225,000 | 722 | 999  | 0.500333312  | C18orf54,MBD2,POLI,STARD6               |
| 24 | 54,150,000 | 54,300,000 | 723 | 1153 | 0.988834231  | C18orf54,POLI,STARD6,ENSBTAG00000046901 |
| 24 | 54,225,000 | 54,375,000 | 724 | 1139 | 0.917909471  | C18orf54,ENSBTAG00000046901             |
| 24 | 54,300,000 | 54,450,000 | 725 | 1430 | 0.541863766  |                                         |
| 24 | 54,375,000 | 54,525,000 | 726 | 1773 | 0.44673588   | ENSBTAG00000013871                      |
| 24 | 54,450,000 | 54,600,000 | 727 | 1799 | 0.354413872  | RAB27B,ENSBTAG00000013871               |
| 24 | 54,525,000 | 54,675,000 | 728 | 1489 | 0.729425198  | RAB27B                                  |
| 24 | 54,600,000 | 54,750,000 | 729 | 1021 | 1.141647919  | CCDC68,RAB27B                           |
| 24 | 54,675,000 | 54,825,000 | 730 | 1018 | 0.384435355  | CCDC68,RAB27B                           |
| 24 | 54,750,000 | 54,900,000 | 731 | 933  | 0.030185241  | CCDC68                                  |
| 24 | 54,825,000 | 54,975,000 | 732 | 548  | 0.143843703  |                                         |

|    |            |            |     |      |              |                                 |
|----|------------|------------|-----|------|--------------|---------------------------------|
| 24 | 54,900,000 | 55,050,000 | 733 | 710  | 0.59062142   |                                 |
| 24 | 54,975,000 | 55,125,000 | 734 | 641  | 0.241566071  | TCF7L2                          |
| 24 | 55,050,000 | 55,200,000 | 735 | 331  | -2.277330795 | TCF7L2                          |
| 24 | 55,125,000 | 55,275,000 | 736 | 305  | -4.154027254 | TCF7L2                          |
| 24 | 55,200,000 | 55,350,000 | 737 | 384  | -1.428401974 | TCF7L2                          |
| 24 | 55,275,000 | 55,425,000 | 738 | 415  | -0.337273359 | TCF7L2                          |
| 24 | 55,350,000 | 55,500,000 | 739 | 567  | 0.121347555  | TCF7L2                          |
| 24 | 55,425,000 | 55,575,000 | 740 | 916  | 1.145933031  | TCF7L2                          |
| 24 | 55,500,000 | 55,650,000 | 741 | 874  | 1.366219286  |                                 |
| 24 | 55,575,000 | 55,725,000 | 742 | 665  | 1.076263114  |                                 |
| 24 | 55,650,000 | 55,800,000 | 743 | 721  | 0.312626047  |                                 |
| 24 | 55,725,000 | 55,875,000 | 744 | 915  | 0.435605501  |                                 |
| 24 | 55,800,000 | 55,950,000 | 745 | 1109 | 0.218180501  |                                 |
| 24 | 55,875,000 | 56,025,000 | 746 | 1343 | 0.062532945  |                                 |
| 24 | 55,950,000 | 56,100,000 | 747 | 1352 | 0.688006865  |                                 |
| 24 | 56,025,000 | 56,175,000 | 748 | 1182 | 0.533427288  |                                 |
| 24 | 56,100,000 | 56,250,000 | 749 | 806  | -0.863390068 |                                 |
| 24 | 56,175,000 | 56,325,000 | 750 | 455  | -2.305625052 |                                 |
| 24 | 56,250,000 | 56,400,000 | 751 | 378  | -1.082289166 |                                 |
| 24 | 56,325,000 | 56,475,000 | 752 | 468  | -2.404973002 | TXNL1,WDR7                      |
| 24 | 56,400,000 | 56,550,000 | 753 | 540  | -1.97278115  | TXNL1,WDR7                      |
| 24 | 56,475,000 | 56,625,000 | 754 | 548  | 0.345455156  | WDR7                            |
| 24 | 56,550,000 | 56,700,000 | 755 | 545  | 0.026327962  | WDR7                            |
| 24 | 56,625,000 | 56,775,000 | 756 | 469  | -1.986320341 | WDR7                            |
| 24 | 56,700,000 | 56,850,000 | 757 | 569  | -0.749044783 | WDR7                            |
| 24 | 56,775,000 | 56,925,000 | 758 | 734  | 0.009275296  | WDR7                            |
| 24 | 56,850,000 | 57,000,000 | 759 | 701  | 0.044813797  |                                 |
| 24 | 56,925,000 | 57,075,000 | 760 | 682  | 0.51445344   |                                 |
| 24 | 57,000,000 | 57,150,000 | 761 | 704  | 0.529222418  | ST8SIA3                         |
| 24 | 57,075,000 | 57,225,000 | 762 | 602  | 0.697432072  | ONECUT2,ST8SIA3                 |
| 24 | 57,150,000 | 57,300,000 | 763 | 548  | 0.821703974  | FECH,ONECUT2                    |
| 24 | 57,225,000 | 57,375,000 | 764 | 554  | 0.635850117  | FECH,ONECUT2,ENSBTAG00000019271 |
| 24 | 57,300,000 | 57,450,000 | 765 | 604  | 0.603639287  | ATP8B1,FECH,ENSBTAG00000019271  |
| 24 | 57,375,000 | 57,525,000 | 766 | 481  | 0.657477362  | ATP8B1                          |
| 24 | 57,450,000 | 57,600,000 | 767 | 673  | 0.138004102  | ATP8B1                          |
| 24 | 57,525,000 | 57,675,000 | 768 | 793  | 0.129082925  |                                 |
| 24 | 57,600,000 | 57,750,000 | 769 | 726  | -0.126568714 |                                 |
| 24 | 57,675,000 | 57,825,000 | 770 | 978  | 0.654100548  |                                 |
| 24 | 57,750,000 | 57,900,000 | 771 | 908  | 1.127789525  |                                 |
| 24 | 57,825,000 | 57,975,000 | 772 | 849  | 0.486403192  | NEDD4L                          |
| 24 | 57,900,000 | 58,050,000 | 773 | 1016 | -0.542243961 | NEDD4L                          |
| 24 | 57,975,000 | 58,125,000 | 774 | 1475 | -1.723275494 | ALPK2,NEDD4L                    |
| 24 | 58,050,000 | 58,200,000 | 775 | 1577 | -0.962857195 | ALPK2,NEDD4L                    |
| 24 | 58,125,000 | 58,275,000 | 776 | 901  | 0.276727596  | ALPK2                           |
| 24 | 58,200,000 | 58,350,000 | 777 | 450  | 1.009890144  | ALPK2,MALT1                     |
| 24 | 58,275,000 | 58,425,000 | 778 | 535  | -0.000182876 | MALT1                           |
| 24 | 58,350,000 | 58,500,000 | 779 | 648  | -0.6050019   | ZNF532                          |
| 24 | 58,425,000 | 58,575,000 | 780 | 867  | -2.609638228 | ZNF532,ENSBTAG00000022829       |
| 24 | 58,500,000 | 58,650,000 | 781 | 1143 | -1.406645517 | ZNF532,ENSBTAG00000022829       |
| 24 | 58,575,000 | 58,725,000 | 782 | 1277 | 0.48669225   | GRP,SEC11C,ENSBTAG00000022829   |
| 24 | 58,650,000 | 58,800,000 | 783 | 1068 | 0.648297707  | CPLX4,GRP,LMAN1,RAX,SEC11C      |
| 24 | 58,725,000 | 58,875,000 | 784 | 697  | 0.573822514  | CPLX4,LMAN1,RAX                 |
| 24 | 58,800,000 | 58,950,000 | 785 | 811  | 0.499605574  | CCBE1,LMAN1                     |

|    |            |            |     |      |              |                                                                                          |
|----|------------|------------|-----|------|--------------|------------------------------------------------------------------------------------------|
| 24 | 58,875,000 | 59,025,000 | 786 | 970  | 0.85856928   | CCBE1                                                                                    |
| 24 | 58,950,000 | 59,100,000 | 787 | 1018 | 0.646328468  |                                                                                          |
| 24 | 59,025,000 | 59,175,000 | 788 | 960  | 0.587916355  |                                                                                          |
| 24 | 59,100,000 | 59,250,000 | 789 | 954  | 0.589813932  |                                                                                          |
| 24 | 59,175,000 | 59,325,000 | 790 | 968  | 0.424357378  |                                                                                          |
| 24 | 59,250,000 | 59,400,000 | 791 | 1207 | 0.641092785  |                                                                                          |
| 24 | 59,325,000 | 59,475,000 | 792 | 1757 | 0.998915888  |                                                                                          |
| 24 | 59,400,000 | 59,550,000 | 793 | 1781 | 1.1477128    |                                                                                          |
| 24 | 59,475,000 | 59,625,000 | 794 | 1048 | 1.04974882   |                                                                                          |
| 24 | 59,550,000 | 59,700,000 | 795 | 583  | 0.93736708   | MC4R                                                                                     |
| 24 | 59,625,000 | 59,775,000 | 796 | 716  | 0.247234924  | MC4R                                                                                     |
| 24 | 59,700,000 | 59,850,000 | 797 | 915  | 0.710967117  | ENSBTAG00000000531                                                                       |
| 24 | 59,775,000 | 59,925,000 | 798 | 1121 | 1.036329587  | ENSBTAG00000000531                                                                       |
| 24 | 59,850,000 | 60,000,000 | 799 | 916  | 0.942636837  |                                                                                          |
| 24 | 59,925,000 | 60,075,000 | 800 | 902  | 0.589129007  |                                                                                          |
| 24 | 60,000,000 | 60,150,000 | 801 | 1053 | 0.644552927  |                                                                                          |
| 24 | 60,075,000 | 60,225,000 | 802 | 862  | 1.123455741  |                                                                                          |
| 24 | 60,150,000 | 60,300,000 | 803 | 643  | 1.289303623  |                                                                                          |
| 24 | 60,225,000 | 60,375,000 | 804 | 580  | 0.708640909  | ENSBTAG00000047569                                                                       |
| 24 | 60,300,000 | 60,450,000 | 805 | 793  | 0.304392517  | ENSBTAG00000047569                                                                       |
| 24 | 60,375,000 | 60,525,000 | 806 | 775  | -0.216273425 |                                                                                          |
| 24 | 60,450,000 | 60,600,000 | 807 | 1065 | 0.490881308  | CDH20                                                                                    |
| 24 | 60,525,000 | 60,675,000 | 808 | 1242 | 0.348604096  | CDH20                                                                                    |
| 24 | 60,600,000 | 60,750,000 | 809 | 858  | -0.449521603 |                                                                                          |
| 24 | 60,675,000 | 60,825,000 | 810 | 931  | 0.599793278  |                                                                                          |
| 24 | 60,750,000 | 60,900,000 | 811 | 1035 | 0.896181508  |                                                                                          |
| 24 | 60,825,000 | 60,975,000 | 812 | 963  | 0.977971684  |                                                                                          |
| 24 | 60,900,000 | 61,050,000 | 813 | 905  | 0.908818341  | PIGN                                                                                     |
| 24 | 60,975,000 | 61,125,000 | 814 | 700  | 0.586977054  | KIAA1468,PIGN                                                                            |
| 24 | 61,050,000 | 61,200,000 | 815 | 502  | 0.464391618  | KIAA1468,PIGN                                                                            |
| 24 | 61,125,000 | 61,275,000 | 816 | 693  | -0.095806624 | KIAA1468,TNFRSF11A                                                                       |
| 24 | 61,200,000 | 61,350,000 | 817 | 1117 | -0.241376352 | KIAA1468,TNFRSF11A                                                                       |
| 24 | 61,275,000 | 61,425,000 | 818 | 987  | 0.206784426  | TNFRSF11A                                                                                |
| 24 | 61,350,000 | 61,500,000 | 819 | 906  | 0.56893656   |                                                                                          |
| 24 | 61,425,000 | 61,575,000 | 820 | 1335 | 0.566843996  |                                                                                          |
| 24 | 61,500,000 | 61,650,000 | 821 | 1691 | 0.332558888  |                                                                                          |
| 24 | 61,575,000 | 61,725,000 | 822 | 1403 | -0.147626831 | PHLPP1                                                                                   |
| 24 | 61,650,000 | 61,800,000 | 823 | 1056 | -0.484219822 | PHLPP1                                                                                   |
| 24 | 61,725,000 | 61,875,000 | 824 | 1234 | -0.024298149 | PHLPP1                                                                                   |
| 24 | 61,800,000 | 61,950,000 | 825 | 1158 | 0.085559423  | BCL2                                                                                     |
| 24 | 61,875,000 | 62,025,000 | 826 | 884  | -0.284737909 | BCL2                                                                                     |
| 24 | 61,950,000 | 62,100,000 | 827 | 712  | 0.157593143  | BCL2                                                                                     |
| 24 | 62,025,000 | 62,175,000 | 828 | 508  | 0.445556751  | BCL2,KDSR                                                                                |
| 24 | 62,100,000 | 62,250,000 | 829 | 789  | -0.255622826 | BCL2,KDSR,SERPINB5,VPS4B                                                                 |
| 24 | 62,175,000 | 62,325,000 | 830 | 1311 | -0.375991786 | SERPINB12,SERPINB5,VPS4B                                                                 |
| 24 | 62,250,000 | 62,400,000 | 831 | 1182 | -0.474315266 | HMSD,SERPINB12,SERPINB13,SERPINB4,SERPINB5,ENSBTAG00000037554                            |
| 24 | 62,325,000 | 62,475,000 | 832 | 1490 | -0.134140328 | HMSD,SERPINB12,SERPINB13,SERPINB4,ENSBTAG000035224,ENSBTAG00000037554,ENSBTAG00000040586 |
| 24 | 62,400,000 | 62,550,000 | 833 | 1641 | -0.234437311 | SERPINB7,ENSBTAG0000005324,ENSBTAG00000035224,ENSBTAG00000037554,ENSBTAG00000040586      |

|    |            |            |     |      |              |                                                                                                                                                              |
|----|------------|------------|-----|------|--------------|--------------------------------------------------------------------------------------------------------------------------------------------------------------|
| 24 | 62,475,000 | 62,625,000 | 834 | 1238 | -0.415372489 | SERPINB10,SERPINB2,SERPINB7,ENSBTAG00000005324                                                                                                               |
| 24 | 62,550,000 | 62,700,000 | 835 | 1314 | 0.0778839    | SERPINB10,SERPINB2                                                                                                                                           |
| 24 | 62,625,000 | 62,714,930 | 836 | 728  | -0.534893283 | SERPINB10                                                                                                                                                    |
| 25 | 0          | 150,000    | 1   | 304  | -2.617233508 | IL9R,MPG,NPRL3,POLR3K,RHBDF1,SNRNP25                                                                                                                         |
| 25 | 75,000     | 225,000    | 2   | 311  | -3.047490125 | HBA,HBM,HBQ1,IL9R,MPG,NPRL3,POLR3K,RHBDF1,SNRNP25,ENSBTAG00000032198,ENSBTAG00000034024,ENSBTAG00000038921                                                   |
| 25 | 150,000    | 300,000    | 3   | 326  | -1.239051826 | HBA,HBM,HBQ1,ITFG3,LUC7L,NPRL3,RGS11,ENSBTAG00000032198,ENSBTAG00000034024,ENSBTAG00000038921                                                                |
| 25 | 225,000    | 375,000    | 4   | 390  | -0.401479697 | ARHGDIG,AXIN1,ITFG3,LUC7L,MRPL28,PDIA2,RGS11,TMEM8                                                                                                           |
| 25 | 300,000    | 450,000    | 5   | 347  | -1.145462645 | ARHGDIG,AXIN1,DECR2,MRPL28,NME4,PDIA2,RAB11FIP3,TMEM8                                                                                                        |
| 25 | 375,000    | 525,000    | 6   | 276  | -1.79389528  | CAPN15,DECR2,NHLRC4,NME4,PIGQ,PRR35,RAB11FIP3,RAB40C                                                                                                         |
| 25 | 450,000    | 600,000    | 7   | 249  | -1.983113637 | C25H16ORF13,CAPN15,FAM195A,FBXL16,JMJD8,NHLRC4,PIGQ,PRR35,RAB11FIP3,RAB40C,RHBDL1,RHOT2,STUB1,WDR24,WDR90,WFIKKN1,ENSBTAG00000038330                         |
| 25 | 525,000    | 675,000    | 8   | 522  | 0.360142935  | C25H16ORF13,CCDC78,CHTF18,FAM173A,FAM195A,FBXL16,HAGHL,JMJD8,METRNL,MSLN,MSLNL,NARFL,RAB40C,RHBDL1,RHOT2,RPUSD1,STUB1,WDR24,WDR90,WFIKKN1,ENSBTAG00000038330 |
| 25 | 600,000    | 750,000    | 9   | 738  | 0.322314226  | CCDC78,CHTF18,FAM173A,FBXL16,GNG13,HAGHL,LMF1,METRNL,MSLN,MSLNL,NARFL,RPUSD1                                                                                 |
| 25 | 675,000    | 825,000    | 10  | 525  | -0.030168434 | CHTF18,GNG13,LMF1,SOX8                                                                                                                                       |
| 25 | 750,000    | 900,000    | 11  | 371  | 0.133374951  | C1QTNF8,LMF1,SOX8,SSTR5,TEKT4                                                                                                                                |
| 25 | 825,000    | 975,000    | 12  | 431  | 0.068026133  | C1QTNF8,CACNA1H,SSTR5,TEKT4                                                                                                                                  |
| 25 | 900,000    | 1,050,000  | 13  | 592  | -0.99874041  | CACNA1H,TPSB1,UBE2I,ENSBTAG00000046722,ENSBTAG00000046965                                                                                                    |
| 25 | 975,000    | 1,125,000  | 14  | 1015 | -1.282747652 | BAIAP3,C25H16ORF42,CACNA1H,CCSMST1,GNPTG,TPSB1,UBE2I,UNKL,ENSBTAG00000046722,ENSBTAG00000046965                                                              |
| 25 | 1,050,000  | 1,200,000  | 15  | 1144 | -0.581604693 | BAIAP3,C25H16ORF42,CCDC154,CCSMST1,CLCN7,GNPTG,IFT140,PTX4,TELO2,TMEM204,UNKL                                                                                |
| 25 | 1,125,000  | 1,275,000  | 16  | 854  | 0.63519964   | CCDC154,CLCN7,CRAMP1L,IFT140,PTX4,TELO2,TMEM204                                                                                                              |
| 25 | 1,200,000  | 1,350,000  | 17  | 834  | 0.68768676   | CRAMP1L,HN1L,IFT140,MAPK8IP3,MRPS34,NME3,TMEM204                                                                                                             |
| 25 | 1,275,000  | 1,425,000  | 18  | 823  | 0.6879718    | CRAMP1L,EME2,FAHD1,HAGH,HN1L,IGFALS,MAPK8IP3,MEIOB,MRPS34,NME3,NUBP2,SPSB3,TPT1                                                                              |
| 25 | 1,350,000  | 1,500,000  | 19  | 915  | 0.046664338  | EME2,FAHD1,HAGH,HS3ST6,IGFALS,MEIOB,MRPS34,NUBP2,SPSB3,TPT1                                                                                                  |
| 25 | 1,425,000  | 1,575,000  | 20  | 635  | -0.20523633  | GFER,HS3ST6,MEIOB,NDUFB10,NOXO1,NPW,RNF151,RPL3L,RPS2,SYNGR3,TBL3,ZNF598                                                                                     |
| 25 | 1,500,000  | 1,650,000  | 21  | 214  | -0.068777013 | GFER,NDUFB10,NOXO1,NPW,NTHL1,PKD1,RNF151,RPL3L,RPS2,SLC9A3R2,SYNGR3,TBL3,TSC2,ZNF598                                                                         |
| 25 | 1,575,000  | 1,725,000  | 22  | 253  | 0.766648481  | CASKIN1,NTHL1,PKD1,RAB26,SLC9A3R2,TRAF7,TSC2                                                                                                                 |
| 25 | 1,650,000  | 1,800,000  | 23  | 461  | 1.220494955  | ABCA3,BRICD5,CASKIN1,DNASE1L2,E4F1,ECI1,MLST8,PGP,PKD1,RAB26,RNPS1,TRAF7                                                                                     |

|    |           |           |    |      |              |                                                                                                                      |
|----|-----------|-----------|----|------|--------------|----------------------------------------------------------------------------------------------------------------------|
| 25 | 1,725,000 | 1,875,000 | 24 | 711  | 1.200129513  | ABCA3,BRICD5,CASKIN1,DNASE1L2,E4F1,ECI1,MLST8,PGP,RNPS1,ENSBTAG00000034643                                           |
| 25 | 1,800,000 | 1,950,000 | 25 | 754  | 0.665204671  | ABCA3,CCNF,ENSBTAG00000034643                                                                                        |
| 25 | 1,875,000 | 2,025,000 | 26 | 533  | -0.001837568 | AMDHD2,ATP6V0C,C16orf59,CCNF,NTN3,ENSBTAG0000005458,ENSBTAG00000034643                                               |
| 25 | 1,950,000 | 2,100,000 | 27 | 502  | -0.264151958 | AMDHD2,ATP6V0C,C16orf59,CCNF,NTN3,PDPK1,ENSBTAG00000005458                                                           |
| 25 | 2,025,000 | 2,175,000 | 28 | 718  | -0.976485852 | AMDHD2,KCTD5,PDPK1,PRSS27                                                                                            |
| 25 | 2,100,000 | 2,250,000 | 29 | 1136 | 0.024321971  | KCTD5,PRSS21,PRSS22,PRSS27,ENSBTAG00000019103,ENSBTAG00000034372,ENSBTAG00000047368                                  |
| 25 | 2,175,000 | 2,325,000 | 30 | 1019 | 0.165887825  | FLYWCH2,PRSS21,PRSS22,PRSS33,SRRM2,TCEB2,ENSBTAG00000019103,ENSBTAG00000034372,ENSBTAG00000038568,ENSBTAG00000047368 |
| 25 | 2,250,000 | 2,400,000 | 31 | 367  | -0.601083933 | FLYWCH1,FLYWCH2,KREMEN2,PAQR4,PKMYT1,PRSS33,SRRM2,TCEB2,ENSBTAG00000038568                                           |
| 25 | 2,325,000 | 2,475,000 | 32 | 263  | 1.007194143  | CCDC64B,CLDN6,CLDN9,FLYWCH1,FLYWCH2,HCFC1R1,KREMEN2,PAQR4,PKMYT1,THOC6,TNFRSF12A                                     |
| 25 | 2,400,000 | 2,550,000 | 33 | 624  | 0.259993784  | CCDC64B,CLDN6,CLDN9,HCFC1R1,MMP25,THOC6,TNFRSF12A,ZSCAN10                                                            |
| 25 | 2,475,000 | 2,625,000 | 34 | 686  | -0.192932314 | CASP16,MMP25,ZNF205,ZNF213,ZSCAN10                                                                                   |
| 25 | 2,550,000 | 2,700,000 | 35 | 839  | -0.244229434 | CASP16,MEFV,ZNF200,ZNF205,ZNF213,ENSBTAG00000040438,ENSBTAG00000046326,ENSBTAG00000047634                            |
| 25 | 2,625,000 | 2,775,000 | 36 | 1247 | 0.393422277  | MEFV,TIGD7,ZNF200,ZNF263,ZNF75A,ENSBTAG00000040438,ENSBTAG00000046326,ENSBTAG00000047634                             |
| 25 | 2,700,000 | 2,850,000 | 37 | 1380 | 0.998021836  | MEFV,OR2C1,TIGD7,ZNF174,ZNF263,ZNF75A                                                                                |
| 25 | 2,775,000 | 2,925,000 | 38 | 972  | 1.253059927  | C16orf90,CLUAP1,NAT15,OR2C1,ZNF174,ZNF597                                                                            |
| 25 | 2,850,000 | 3,000,000 | 39 | 376  | 1.108320177  | C16orf90,CLUAP1,DNASE1,NAT15,NLRC3,SLX4,TRAP1,ZNF597                                                                 |
| 25 | 2,925,000 | 3,075,000 | 40 | 311  | 0.602434948  | CREBBP,DNASE1,NLRC3,SLX4,TRAP1                                                                                       |
| 25 | 3,000,000 | 3,150,000 | 41 | 357  | -0.426556007 | CREBBP,TRAP1                                                                                                         |
| 25 | 3,075,000 | 3,225,000 | 42 | 372  | -0.18902539  | CREBBP                                                                                                               |
| 25 | 3,150,000 | 3,300,000 | 43 | 330  | 0.736094599  | ADCY9,CREBBP                                                                                                         |
| 25 | 3,225,000 | 3,375,000 | 44 | 249  | -0.480949527 | ADCY9                                                                                                                |
| 25 | 3,300,000 | 3,450,000 | 45 | 357  | -1.452656358 | ADCY9,SRL,TFAP4                                                                                                      |
| 25 | 3,375,000 | 3,525,000 | 46 | 516  | -1.247014095 | CORO7,GLIS2,PAM16,SRL,TFAP4,VASN                                                                                     |
| 25 | 3,450,000 | 3,600,000 | 47 | 624  | -0.076802595 | CORO7,DNAJA3,GLIS2,PAM16,TFAP4,VASN                                                                                  |
| 25 | 3,525,000 | 3,675,000 | 48 | 754  | 0.266252169  | CDIP1,CORO7,DNAJA3,HMOX2,NMRAL1,VASN                                                                                 |
| 25 | 3,600,000 | 3,750,000 | 49 | 909  | 0.12277765   | CDIP1,DNAJA3,HMOX2,MGC142811,NMRAL1,ENSBTAG00000047316                                                               |
| 25 | 3,675,000 | 3,825,000 | 50 | 901  | 0.312886193  | ANKS3,C25H16ORF71,MGC142811,MGRN1,NUDT16L1,ENSBTAG00000047316                                                        |
| 25 | 3,750,000 | 3,900,000 | 51 | 645  | 0.311771814  | ANKS3,C25H16ORF71,MGRN1,NUDT16L1,ROGDI,SEPT12,ZNF500                                                                 |
| 25 | 3,825,000 | 3,975,000 | 52 | 637  | 0.320575931  | C25H16ORF71,GLYR1,PPL,ROGDI,SEPT12,UBN1,ZNF500                                                                       |
| 25 | 3,900,000 | 4,050,000 | 53 | 974  | 0.582304812  | GLYR1,PPL,ROGDI,SEC14L5,UBN1                                                                                         |
| 25 | 3,975,000 | 4,125,000 | 54 | 1064 | 0.317694744  | ALG1,C16orf89,FAM86A,NAGPA,PPL,SEC14L5                                                                               |
| 25 | 4,050,000 | 4,200,000 | 55 | 1197 | 0.245560574  | ALG1,C16orf89,FAM86A,NAGPA,SEC14L5,ENSBTAG0000026383                                                                 |
| 25 | 4,125,000 | 4,275,000 | 56 | 1416 | -0.739870926 | FAM86A,ENSBTAG00000026383                                                                                            |
| 25 | 4,200,000 | 4,350,000 | 57 | 1608 | -0.810567334 |                                                                                                                      |

|    |           |           |     |      |              |                                |
|----|-----------|-----------|-----|------|--------------|--------------------------------|
| 25 | 4,275,000 | 4,425,000 | 58  | 1721 | 0.356374745  |                                |
| 25 | 4,350,000 | 4,500,000 | 59  | 1285 | 0.967962015  |                                |
| 25 | 4,425,000 | 4,575,000 | 60  | 810  | 0.023837144  |                                |
| 25 | 4,500,000 | 4,650,000 | 61  | 802  | 0.493097363  |                                |
| 25 | 4,575,000 | 4,725,000 | 62  | 1078 | 0.555561474  |                                |
| 25 | 4,650,000 | 4,800,000 | 63  | 1174 | -0.298253683 |                                |
| 25 | 4,725,000 | 4,875,000 | 64  | 1025 | -0.794615638 |                                |
| 25 | 4,800,000 | 4,950,000 | 65  | 1040 | -0.87351861  |                                |
| 25 | 4,875,000 | 5,025,000 | 66  | 998  | 0.043250362  |                                |
| 25 | 4,950,000 | 5,100,000 | 67  | 799  | 1.037577796  |                                |
| 25 | 5,025,000 | 5,175,000 | 68  | 1083 | 0.61396583   |                                |
| 25 | 5,100,000 | 5,250,000 | 69  | 1281 | -0.29790813  |                                |
| 25 | 5,175,000 | 5,325,000 | 70  | 877  | -0.695898674 |                                |
| 25 | 5,250,000 | 5,400,000 | 71  | 793  | -0.028650479 |                                |
| 25 | 5,325,000 | 5,475,000 | 72  | 907  | 0.27874671   |                                |
| 25 | 5,400,000 | 5,550,000 | 73  | 1149 | 0.613411857  |                                |
| 25 | 5,475,000 | 5,625,000 | 74  | 1145 | 0.358139239  |                                |
| 25 | 5,550,000 | 5,700,000 | 75  | 1005 | -0.392468972 |                                |
| 25 | 5,625,000 | 5,775,000 | 76  | 1124 | -0.260813373 |                                |
| 25 | 5,700,000 | 5,850,000 | 77  | 1022 | -0.120660008 |                                |
| 25 | 5,775,000 | 5,925,000 | 78  | 1438 | 0.393441926  |                                |
| 25 | 5,850,000 | 6,000,000 | 79  | 1550 | 0.686818785  |                                |
| 25 | 5,925,000 | 6,075,000 | 80  | 1034 | 0.486028099  |                                |
| 25 | 6,000,000 | 6,150,000 | 81  | 1248 | 0.190732479  |                                |
| 25 | 6,075,000 | 6,225,000 | 82  | 1211 | 0.279161698  |                                |
| 25 | 6,150,000 | 6,300,000 | 83  | 859  | 1.002420137  |                                |
| 25 | 6,225,000 | 6,375,000 | 84  | 1024 | 0.537562236  |                                |
| 25 | 6,300,000 | 6,450,000 | 85  | 1086 | -1.438132167 |                                |
| 25 | 6,375,000 | 6,525,000 | 86  | 974  | -0.662606093 | RBFOX1                         |
| 25 | 6,450,000 | 6,600,000 | 87  | 777  | 0.633958597  | RBFOX1                         |
| 25 | 6,525,000 | 6,675,000 | 88  | 657  | 0.036632789  | RBFOX1                         |
| 25 | 6,600,000 | 6,750,000 | 89  | 1102 | 0.072856618  | RBFOX1                         |
| 25 | 6,675,000 | 6,825,000 | 90  | 1298 | 0.472236099  | RBFOX1                         |
| 25 | 6,750,000 | 6,900,000 | 91  | 1370 | 1.054997211  |                                |
| 25 | 6,825,000 | 6,975,000 | 92  | 1539 | 0.863301117  |                                |
| 25 | 6,900,000 | 7,050,000 | 93  | 1439 | 0.722802866  |                                |
| 25 | 6,975,000 | 7,125,000 | 94  | 1406 | 0.87316593   |                                |
| 25 | 7,050,000 | 7,200,000 | 95  | 1313 | -0.128847379 |                                |
| 25 | 7,125,000 | 7,275,000 | 96  | 1278 | 0.364210205  |                                |
| 25 | 7,200,000 | 7,350,000 | 97  | 1049 | 1.168741895  |                                |
| 25 | 7,275,000 | 7,425,000 | 98  | 968  | 0.591043329  |                                |
| 25 | 7,350,000 | 7,500,000 | 99  | 1052 | -0.490044536 |                                |
| 25 | 7,425,000 | 7,575,000 | 100 | 896  | -0.887522849 | METTL22,TMEM114                |
| 25 | 7,500,000 | 7,650,000 | 101 | 886  | -0.403345327 | ABAT,METTL22,TMEM114           |
| 25 | 7,575,000 | 7,725,000 | 102 | 658  | -0.571701601 | ABAT,METTL22,PMM2,TMEM186      |
| 25 | 7,650,000 | 7,800,000 | 103 | 336  | 0.163250401  | ABAT,CARHSP1,PMM2,TMEM186,USP7 |
| 25 | 7,725,000 | 7,875,000 | 104 | 458  | 0.822690022  | CARHSP1,PMM2,USP7              |
| 25 | 7,800,000 | 7,950,000 | 105 | 675  | 0.805719967  | C25H16ORF72                    |
| 25 | 7,875,000 | 8,025,000 | 106 | 861  | 0.933695617  | C25H16ORF72                    |
| 25 | 7,950,000 | 8,100,000 | 107 | 1057 | 0.565467218  | C25H16ORF72                    |
| 25 | 8,025,000 | 8,175,000 | 108 | 1288 | -0.357063712 |                                |
| 25 | 8,100,000 | 8,250,000 | 109 | 1238 | -0.525964799 |                                |
| 25 | 8,175,000 | 8,325,000 | 110 | 1195 | 0.426500456  |                                |

|    |            |            |     |      |              |                                       |
|----|------------|------------|-----|------|--------------|---------------------------------------|
| 25 | 8,250,000  | 8,400,000  | 111 | 1189 | 0.877692821  |                                       |
| 25 | 8,325,000  | 8,475,000  | 112 | 864  | 0.739686462  |                                       |
| 25 | 8,400,000  | 8,550,000  | 113 | 803  | 0.439729718  |                                       |
| 25 | 8,475,000  | 8,625,000  | 114 | 725  | 0.40250336   | GRIN2A                                |
| 25 | 8,550,000  | 8,700,000  | 115 | 477  | 0.354662427  | GRIN2A                                |
| 25 | 8,625,000  | 8,775,000  | 116 | 820  | 0.311652119  | GRIN2A                                |
| 25 | 8,700,000  | 8,850,000  | 117 | 1333 | 0.58091303   |                                       |
| 25 | 8,775,000  | 8,925,000  | 118 | 1560 | 0.94734838   |                                       |
| 25 | 8,850,000  | 9,000,000  | 119 | 1122 | 0.927412073  | ENSBTAG00000045680                    |
| 25 | 8,925,000  | 9,075,000  | 120 | 1029 | 0.471248543  | ENSBTAG00000045680                    |
| 25 | 9,000,000  | 9,150,000  | 121 | 1292 | 0.761838894  |                                       |
| 25 | 9,075,000  | 9,225,000  | 122 | 864  | 0.238897902  |                                       |
| 25 | 9,150,000  | 9,300,000  | 123 | 458  | -0.36975909  | ATF7IP2                               |
| 25 | 9,225,000  | 9,375,000  | 124 | 790  | 0.679177978  | ATF7IP2,EMP2                          |
| 25 | 9,300,000  | 9,450,000  | 125 | 1187 | 0.230451802  | EMP2,TEKT5                            |
| 25 | 9,375,000  | 9,525,000  | 126 | 1189 | 0.176157302  | NUBP1,TEKT5,TVP23A                    |
| 25 | 9,450,000  | 9,600,000  | 127 | 1072 | 0.703362106  | NUBP1,TEKT5,TVP23A                    |
| 25 | 9,525,000  | 9,675,000  | 128 | 1225 | 0.674818009  | CIITA,DEXI                            |
| 25 | 9,600,000  | 9,750,000  | 129 | 1222 | -0.023159985 | CIITA,CLEC16A,DEXI                    |
| 25 | 9,675,000  | 9,825,000  | 130 | 821  | -0.413010515 | CLEC16A,DEXI                          |
| 25 | 9,750,000  | 9,900,000  | 131 | 802  | 0.082285329  | CLEC16A                               |
| 25 | 9,825,000  | 9,975,000  | 132 | 785  | -0.473103284 | CLEC16A                               |
| 25 | 9,900,000  | 10,050,000 | 133 | 923  | -0.89689477  | CLEC16A,PRM1,PRM2,PRM3,SOCS1,TNP2     |
| 25 | 9,975,000  | 10,125,000 | 134 | 1087 | -0.60086097  | PRM1,PRM2,PRM3,RMI2,SOCS1,TNP2        |
| 25 | 10,050,000 | 10,200,000 | 135 | 1178 | -0.065157961 | RMI2,ENSBTAG00000013305               |
| 25 | 10,125,000 | 10,275,000 | 136 | 1116 | 0.147430107  | ENSBTAG00000013305                    |
| 25 | 10,200,000 | 10,350,000 | 137 | 771  | 0.192845363  | LITAF,ENSBTAG00000013305              |
| 25 | 10,275,000 | 10,425,000 | 138 | 615  | -0.537517514 | LITAF,SNN                             |
| 25 | 10,350,000 | 10,500,000 | 139 | 936  | -0.32605983  | SNN,TXNDC11,ZC3H7A                    |
| 25 | 10,425,000 | 10,575,000 | 140 | 1071 | 0.092203887  | SNN,TXNDC11,ZC3H7A                    |
| 25 | 10,500,000 | 10,650,000 | 141 | 860  | 0.648966269  | BCAR4,GSPT1,RSL1D1,ZC3H7A             |
| 25 | 10,575,000 | 10,725,000 | 142 | 736  | 0.81437377   | BCAR4,GSPT1,RSL1D1,ENSBTAG00000007295 |
| 25 | 10,650,000 | 10,800,000 | 143 | 1048 | 0.92796742   | GSPT1,SNX29,ENSBTAG00000007295        |
| 25 | 10,725,000 | 10,875,000 | 144 | 1673 | 0.64375946   | SNX29                                 |
| 25 | 10,800,000 | 10,950,000 | 145 | 2220 | 0.26448096   | SNX29                                 |
| 25 | 10,875,000 | 11,025,000 | 146 | 2348 | 0.144058898  | SNX29                                 |
| 25 | 10,950,000 | 11,100,000 | 147 | 1930 | 0.164814839  | SNX29                                 |
| 25 | 11,025,000 | 11,175,000 | 148 | 1440 | -0.221530958 | SNX29                                 |
| 25 | 11,100,000 | 11,250,000 | 149 | 1469 | -0.016578217 | SNX29                                 |
| 25 | 11,175,000 | 11,325,000 | 150 | 1617 | 0.004353816  | SNX29                                 |
| 25 | 11,250,000 | 11,400,000 | 151 | 1412 | -0.366660572 | SNX29                                 |
| 25 | 11,325,000 | 11,475,000 | 152 | 1553 | -0.006215154 | ENSBTAG00000046216                    |
| 25 | 11,400,000 | 11,550,000 | 153 | 1453 | -0.447908745 | CPPED1,ENSBTAG00000046216             |
| 25 | 11,475,000 | 11,625,000 | 154 | 1426 | -1.016865554 | CPPED1                                |
| 25 | 11,550,000 | 11,700,000 | 155 | 1334 | -0.852329165 | CPPED1                                |
| 25 | 11,625,000 | 11,775,000 | 156 | 1177 | 0.407545936  | SHISA9                                |
| 25 | 11,700,000 | 11,850,000 | 157 | 1621 | 0.384212205  | SHISA9                                |
| 25 | 11,775,000 | 11,925,000 | 158 | 1470 | 0.383850988  |                                       |
| 25 | 11,850,000 | 12,000,000 | 159 | 1414 | 0.818208302  |                                       |
| 25 | 11,925,000 | 12,075,000 | 160 | 1441 | 0.869762549  |                                       |
| 25 | 12,000,000 | 12,150,000 | 161 | 1005 | 0.607148219  |                                       |
| 25 | 12,075,000 | 12,225,000 | 162 | 1095 | 0.650511539  |                                       |
| 25 | 12,150,000 | 12,300,000 | 163 | 1115 | 0.798665645  |                                       |



|    |            |            |     |      |              |                                      |
|----|------------|------------|-----|------|--------------|--------------------------------------|
| 25 | 12,225,000 | 12,375,000 | 164 | 1102 | 0.741353947  |                                      |
| 25 | 12,300,000 | 12,450,000 | 165 | 1262 | 0.204381228  |                                      |
| 25 | 12,375,000 | 12,525,000 | 166 | 1347 | 0.440490135  |                                      |
| 25 | 12,450,000 | 12,600,000 | 167 | 1083 | 0.823001531  |                                      |
| 25 | 12,525,000 | 12,675,000 | 168 | 720  | 1.262710345  |                                      |
| 25 | 12,600,000 | 12,750,000 | 169 | 1004 | 0.620819138  |                                      |
| 25 | 12,675,000 | 12,825,000 | 170 | 864  | -0.376532812 |                                      |
| 25 | 12,750,000 | 12,900,000 | 171 | 546  | -0.484182792 |                                      |
| 25 | 12,825,000 | 12,975,000 | 172 | 685  | 0.409721598  | ERCC4,ENSBTAG00000032643             |
| 25 | 12,900,000 | 13,050,000 | 173 | 760  | 0.607960851  | ERCC4,ENSBTAG00000032643             |
| 25 | 12,975,000 | 13,125,000 | 174 | 603  | 0.805978699  | MKL2,ENSBTAG00000026365              |
| 25 | 13,050,000 | 13,200,000 | 175 | 346  | 0.749314139  | MKL2,ENSBTAG00000026365              |
| 25 | 13,125,000 | 13,275,000 | 176 | 284  | 1.090109665  | MKL2                                 |
| 25 | 13,200,000 | 13,350,000 | 177 | 442  | 1.213370213  | MKL2                                 |
| 25 | 13,275,000 | 13,425,000 | 178 | 743  | 0.587273682  | MKL2                                 |
| 25 | 13,350,000 | 13,500,000 | 179 | 863  | -0.411299283 | PARN                                 |
| 25 | 13,425,000 | 13,575,000 | 180 | 970  | -0.56492998  | PARN                                 |
| 25 | 13,500,000 | 13,650,000 | 181 | 1080 | -0.050255216 | BFAR,PARN                            |
| 25 | 13,575,000 | 13,725,000 | 182 | 1160 | 0.274422651  | BFAR,PARN,PLA2G10                    |
| 25 | 13,650,000 | 13,800,000 | 183 | 977  | 0.402093165  | BFAR,PLA2G10,RRN3                    |
| 25 | 13,725,000 | 13,875,000 | 184 | 570  | 0.676788974  | NTAN1,PDXDC1,RRN3                    |
| 25 | 13,800,000 | 13,950,000 | 185 | 756  | -0.056664346 | NTAN1,PDXDC1,RRN3,ENSBTAG00000047520 |
| 25 | 13,875,000 | 14,025,000 | 186 | 1290 | -2.619753491 | MGC140681,PDXDC1,ENSBTAG00000047520  |
| 25 | 13,950,000 | 14,100,000 | 187 | 1195 | -2.182595363 | MGC140681                            |
| 25 | 14,025,000 | 14,175,000 | 188 | 758  | -0.14250511  | MARF1,MGC140681                      |
| 25 | 14,100,000 | 14,250,000 | 189 | 780  | -0.422614859 | MARF1,MGC140681,MYH11,NDE1           |
| 25 | 14,175,000 | 14,325,000 | 190 | 1362 | -0.177986692 | MYH11,NDE1                           |
| 25 | 14,250,000 | 14,400,000 | 191 | 1193 | -0.422158113 | FOPNL,MYH11                          |
| 25 | 14,325,000 | 14,475,000 | 192 | 575  | -1.152605701 | ABCC1,FOPNL,MYH11                    |
| 25 | 14,400,000 | 14,550,000 | 193 | 618  | -0.361215355 | ABCC1                                |
| 25 | 14,475,000 | 14,625,000 | 194 | 812  | -0.056114579 | ABCC1,ABCC6                          |
| 25 | 14,550,000 | 14,700,000 | 195 | 949  | -0.223647671 | ABCC1,ABCC6,ENSBTAG00000017759       |
| 25 | 14,625,000 | 14,775,000 | 196 | 784  | -0.256306456 | ABCC6,ENSBTAG00000017759             |
| 25 | 14,700,000 | 14,850,000 | 197 | 548  | 0.060344549  | ENSBTAG00000017759                   |
| 25 | 14,775,000 | 14,925,000 | 198 | 739  | 0.81084233   |                                      |
| 25 | 14,850,000 | 15,000,000 | 199 | 1144 | 0.804016201  |                                      |
| 25 | 14,925,000 | 15,075,000 | 200 | 975  | 0.054812906  |                                      |
| 25 | 15,000,000 | 15,150,000 | 201 | 824  | -1.618092966 |                                      |
| 25 | 15,075,000 | 15,225,000 | 202 | 1136 | -1.769896251 |                                      |
| 25 | 15,150,000 | 15,300,000 | 203 | 1193 | -0.446006675 |                                      |
| 25 | 15,225,000 | 15,375,000 | 204 | 1059 | 0.74533668   |                                      |
| 25 | 15,300,000 | 15,450,000 | 205 | 1166 | 1.189776851  |                                      |
| 25 | 15,375,000 | 15,525,000 | 206 | 1379 | 0.535455639  |                                      |
| 25 | 15,450,000 | 15,600,000 | 207 | 1414 | -0.091628144 |                                      |
| 25 | 15,525,000 | 15,675,000 | 208 | 1199 | 0.093582772  |                                      |
| 25 | 15,600,000 | 15,750,000 | 209 | 918  | -0.060060507 |                                      |
| 25 | 15,675,000 | 15,825,000 | 210 | 1045 | -0.213974404 | XYLT1                                |
| 25 | 15,750,000 | 15,900,000 | 211 | 907  | -0.002624788 | XYLT1                                |
| 25 | 15,825,000 | 15,975,000 | 212 | 1014 | 0.514548844  | XYLT1                                |
| 25 | 15,900,000 | 16,050,000 | 213 | 1552 | 0.840486512  | XYLT1                                |
| 25 | 15,975,000 | 16,125,000 | 214 | 1554 | 1.024053643  | XYLT1                                |
| 25 | 16,050,000 | 16,200,000 | 215 | 1568 | 1.186926134  |                                      |
| 25 | 16,125,000 | 16,275,000 | 216 | 1765 | 0.987160652  |                                      |

|    |            |            |     |      |              |                                             |
|----|------------|------------|-----|------|--------------|---------------------------------------------|
| 25 | 16,200,000 | 16,350,000 | 217 | 1706 | 0.886394808  |                                             |
| 25 | 16,275,000 | 16,425,000 | 218 | 2059 | 0.26703621   |                                             |
| 25 | 16,350,000 | 16,500,000 | 219 | 2219 | 0.085048472  |                                             |
| 25 | 16,425,000 | 16,575,000 | 220 | 1583 | 0.260581162  | ARL6IP1,RPS15A,ENSBTAG00000020735           |
| 25 | 16,500,000 | 16,650,000 | 221 | 1243 | 0.569411004  | ARL6IP1,RPS15A,ENSBTAG00000020735           |
| 25 | 16,575,000 | 16,725,000 | 222 | 1298 | 0.720129018  | ENSBTAG00000020735                          |
| 25 | 16,650,000 | 16,800,000 | 223 | 1195 | -0.262070662 | CLEC19A                                     |
| 25 | 16,725,000 | 16,875,000 | 224 | 791  | -0.097690347 | CLEC19A,SYT17                               |
| 25 | 16,800,000 | 16,950,000 | 225 | 597  | -0.320546906 | CLEC19A,SYT17                               |
| 25 | 16,875,000 | 17,025,000 | 226 | 803  | -0.923476508 | COQ7,ITPRIPL2,SYT17                         |
| 25 | 16,950,000 | 17,100,000 | 227 | 974  | 0.40302286   | COQ7,ITPRIPL2,TMC7                          |
| 25 | 17,025,000 | 17,175,000 | 228 | 824  | 0.516468232  | COQ7,TMC5,TMC7                              |
| 25 | 17,100,000 | 17,250,000 | 229 | 765  | 0.857944645  | CCP110,GDE1,TMC5                            |
| 25 | 17,175,000 | 17,325,000 | 230 | 803  | 1.402815342  | C16orf62,CCP110,GDE1,TMC5                   |
| 25 | 17,250,000 | 17,400,000 | 231 | 1251 | 1.452063147  | C16orf62,CCP110                             |
| 25 | 17,325,000 | 17,475,000 | 232 | 1402 | 1.492143961  | C16orf62,IQCK,KNOP1                         |
| 25 | 17,400,000 | 17,550,000 | 233 | 749  | 1.263047136  | C16orf62,IQCK,KNOP1                         |
| 25 | 17,475,000 | 17,625,000 | 234 | 807  | 1.12072385   | GPRC5B,IQCK                                 |
| 25 | 17,550,000 | 17,700,000 | 235 | 1089 | 0.93334834   | GPRC5B,IQCK                                 |
| 25 | 17,625,000 | 17,775,000 | 236 | 1006 | 0.298435738  | GPR139                                      |
| 25 | 17,700,000 | 17,850,000 | 237 | 1223 | 0.746863117  | GPR139                                      |
| 25 | 17,775,000 | 17,925,000 | 238 | 1440 | 1.13545858   | GPR139                                      |
| 25 | 17,850,000 | 18,000,000 | 239 | 1552 | 0.533451136  |                                             |
| 25 | 17,925,000 | 18,075,000 | 240 | 1272 | -0.954525253 |                                             |
| 25 | 18,000,000 | 18,150,000 | 241 | 1023 | -0.576915735 | GP2,PDILT,UMOD                              |
| 25 | 18,075,000 | 18,225,000 | 242 | 1086 | 0.272961024  | ACSM5,GP2,PDILT,UMOD                        |
| 25 | 18,150,000 | 18,300,000 | 243 | 777  | -0.713010009 | ACSM2A,ACSM5,PDILT                          |
| 25 | 18,225,000 | 18,375,000 | 244 | 644  | -0.463762938 | ACSM1,ACSM2A,ACSM5                          |
| 25 | 18,300,000 | 18,450,000 | 245 | 932  | 0.314330254  | ACSM1,ACSM2A                                |
| 25 | 18,375,000 | 18,525,000 | 246 | 960  | -0.970974628 | ACSM1                                       |
| 25 | 18,450,000 | 18,600,000 | 247 | 937  | -1.323008556 | ACSM4,THUMPD1                               |
| 25 | 18,525,000 | 18,675,000 | 248 | 882  | -1.100530747 | ACSM3,ACSM4,ERI2,THUMPD1,ENSBTAG00000006449 |
| 25 | 18,600,000 | 18,750,000 | 249 | 538  | -1.525459203 | ACSM3,DCUN1D3,ERI2,ENSBTAG00000006449       |
| 25 | 18,675,000 | 18,825,000 | 250 | 421  | 0.398469926  | DCUN1D3,LYRM1,ENSBTAG00000006449            |
| 25 | 18,750,000 | 18,900,000 | 251 | 739  | 0.653220912  | DCUN1D3,DNAH3,LYRM1                         |
| 25 | 18,825,000 | 18,975,000 | 252 | 887  | 0.559761216  | DNAH3,LYRM1                                 |
| 25 | 18,900,000 | 19,050,000 | 253 | 701  | 0.723216315  | DNAH3                                       |
| 25 | 18,975,000 | 19,125,000 | 254 | 1000 | 0.516277796  | DNAH3                                       |
| 25 | 19,050,000 | 19,200,000 | 255 | 897  | 0.546224861  | DNAH3,TMEM159                               |
| 25 | 19,125,000 | 19,275,000 | 256 | 382  | 0.288940266  | ANKS4B,DNAH3,TMEM159,ZP2                    |
| 25 | 19,200,000 | 19,350,000 | 257 | 353  | -0.009333462 | ANKS4B,CRYM,TMEM159,ZP2,ENSBTAG00000006717  |
| 25 | 19,275,000 | 19,425,000 | 258 | 454  | -1.19292598  | ANKS4B,CRYM,ENSBTAG00000006717              |
| 25 | 19,350,000 | 19,500,000 | 259 | 566  | -0.743155446 | ENSBTAG00000006717                          |
| 25 | 19,425,000 | 19,575,000 | 260 | 933  | 0.590224917  | ENSBTAG00000006717                          |
| 25 | 19,500,000 | 19,650,000 | 261 | 1913 | 0.206590993  | ENSBTAG00000006717,ENSBTAG00000035915       |
| 25 | 19,575,000 | 19,725,000 | 262 | 1818 | 0.072168202  | ENSBTAG00000006717,ENSBTAG00000035915       |
| 25 | 19,650,000 | 19,800,000 | 263 | 1293 | 0.619907663  | ENSBTAG00000035915                          |
| 25 | 19,725,000 | 19,875,000 | 264 | 1033 | 0.895937187  | UQCRC2,ENSBTAG00000035915                   |
| 25 | 19,800,000 | 19,950,000 | 265 | 737  | 1.185177412  | PDZD9,UQCRC2,ENSBTAG00000035915             |
| 25 | 19,875,000 | 20,025,000 | 266 | 967  | 0.817871213  | C16orf52,PDZD9,UQCRC2,VWA3A                 |
| 25 | 19,950,000 | 20,100,000 | 267 | 686  | -0.529612612 | C16orf52,SDR42E2,VWA3A                      |

|    |            |            |     |      |              |                                             |
|----|------------|------------|-----|------|--------------|---------------------------------------------|
| 25 | 20,025,000 | 20,175,000 | 268 | 483  | -0.345356154 | EEF2K,SDR42E2,VWA3A                         |
| 25 | 20,100,000 | 20,250,000 | 269 | 532  | 0.354540479  | CDR2,EEF2K,POLR3E,ENSBTAG00000032373        |
| 25 | 20,175,000 | 20,325,000 | 270 | 395  | -1.206312139 | CDR2,METTL9,POLR3E,ENSBTAG00000032373       |
| 25 | 20,250,000 | 20,400,000 | 271 | 415  | -2.232061113 | IGSF6,METTL9,OTOA,ENSBTAG00000032373        |
| 25 | 20,325,000 | 20,475,000 | 272 | 567  | -3.056605795 | IGSF6,METTL9,OTOA                           |
| 25 | 20,400,000 | 20,550,000 | 273 | 957  | -3.347715439 | OTOA                                        |
| 25 | 20,475,000 | 20,625,000 | 274 | 1192 | -1.562735498 | ENSBTAG00000018195                          |
| 25 | 20,550,000 | 20,700,000 | 275 | 715  | 0.491058291  | HS3ST2,ENSBTAG00000018195                   |
| 25 | 20,625,000 | 20,775,000 | 276 | 283  | 0.733561886  | HS3ST2                                      |
| 25 | 20,700,000 | 20,850,000 | 277 | 515  | 1.192161222  | HS3ST2                                      |
| 25 | 20,775,000 | 20,925,000 | 278 | 1399 | 1.205604955  | HS3ST2                                      |
| 25 | 20,850,000 | 21,000,000 | 279 | 1754 | 0.82583078   | USP31                                       |
| 25 | 20,925,000 | 21,075,000 | 280 | 1133 | 0.572996097  | USP31                                       |
| 25 | 21,000,000 | 21,150,000 | 281 | 665  | 0.550925948  | SCNN1G,USP31                                |
| 25 | 21,075,000 | 21,225,000 | 282 | 549  | -0.351616666 | SCNN1G                                      |
| 25 | 21,150,000 | 21,300,000 | 283 | 482  | -0.441322674 | COG7,SCNN1B                                 |
| 25 | 21,225,000 | 21,375,000 | 284 | 701  | 0.387381817  | COG7,SCNN1B                                 |
| 25 | 21,300,000 | 21,450,000 | 285 | 1114 | 0.746715665  | COG7,EARS2,GGA2                             |
| 25 | 21,375,000 | 21,525,000 | 286 | 822  | 0.779214654  | COG7,EARS2,GGA2,NDUFAB1,PALB2,UBFD1         |
| 25 | 21,450,000 | 21,600,000 | 287 | 574  | 0.20253817   | EARS2,ERN2,MGC3248,NDUFAB1,PALB2,PLK1,UBFD1 |
| 25 | 21,525,000 | 21,675,000 | 288 | 965  | 0.513865201  | CHP2,ERN2,MGC3248,PALB2,PLK1                |
| 25 | 21,600,000 | 21,750,000 | 289 | 1150 | 0.273554292  | CHP2,ERN2                                   |
| 25 | 21,675,000 | 21,825,000 | 290 | 1041 | 0.1267343    | PRKCB                                       |
| 25 | 21,750,000 | 21,900,000 | 291 | 859  | 0.705524535  | PRKCB                                       |
| 25 | 21,825,000 | 21,975,000 | 292 | 1081 | 0.359481012  | PRKCB                                       |
| 25 | 21,900,000 | 22,050,000 | 293 | 1471 | 0.017221059  | PRKCB                                       |
| 25 | 21,975,000 | 22,125,000 | 294 | 1423 | 0.078541344  | PRKCB                                       |
| 25 | 22,050,000 | 22,200,000 | 295 | 1307 | 0.281902171  | CACNG3,PRKCB                                |
| 25 | 22,125,000 | 22,275,000 | 296 | 1539 | 0.775229011  | CACNG3,PRKCB                                |
| 25 | 22,200,000 | 22,350,000 | 297 | 1583 | 0.856905599  | CACNG3                                      |
| 25 | 22,275,000 | 22,425,000 | 298 | 1278 | 0.369847035  | CACNG3                                      |
| 25 | 22,350,000 | 22,500,000 | 299 | 985  | 0.442460414  | RBBP6                                       |
| 25 | 22,425,000 | 22,575,000 | 300 | 866  | 0.921001666  | RBBP6                                       |
| 25 | 22,500,000 | 22,650,000 | 301 | 1111 | 1.080477554  |                                             |
| 25 | 22,575,000 | 22,725,000 | 302 | 1143 | 1.08924186   | TNRC6A                                      |
| 25 | 22,650,000 | 22,800,000 | 303 | 1028 | 0.752931693  | SLC5A11,TNRC6A                              |
| 25 | 22,725,000 | 22,875,000 | 304 | 1370 | -0.008599151 | ARHGAP17,SLC5A11,TNRC6A                     |
| 25 | 22,800,000 | 22,950,000 | 305 | 1216 | -1.408198825 | ARHGAP17,SLC5A11,ENSBTAG00000046132         |
| 25 | 22,875,000 | 23,025,000 | 306 | 641  | -3.907627248 | ARHGAP17,LCMT1,ENSBTAG00000046132           |
| 25 | 22,950,000 | 23,100,000 | 307 | 1034 | -1.88840561  | AQP8,LCMT1,ZKSCAN2,ENSBTAG00000046132       |
| 25 | 23,025,000 | 23,175,000 | 308 | 1080 | -0.842756259 | AQP8,LCMT1,ZKSCAN2                          |
| 25 | 23,100,000 | 23,250,000 | 309 | 809  | 0.136597841  | ZKSCAN2                                     |
| 25 | 23,175,000 | 23,325,000 | 310 | 1057 | -0.142790455 |                                             |
| 25 | 23,250,000 | 23,400,000 | 311 | 815  | -0.432331137 |                                             |
| 25 | 23,325,000 | 23,475,000 | 312 | 697  | 0.451832935  |                                             |
| 25 | 23,400,000 | 23,550,000 | 313 | 847  | 0.599331683  |                                             |
| 25 | 23,475,000 | 23,625,000 | 314 | 1045 | 0.159674544  |                                             |
| 25 | 23,550,000 | 23,700,000 | 315 | 1534 | 0.161008121  |                                             |
| 25 | 23,625,000 | 23,775,000 | 316 | 1634 | -0.271183478 |                                             |
| 25 | 23,700,000 | 23,850,000 | 317 | 1519 | -0.434747014 |                                             |
| 25 | 23,775,000 | 23,925,000 | 318 | 1353 | -0.035528358 |                                             |
| 25 | 23,850,000 | 24,000,000 | 319 | 1107 | -0.446020729 |                                             |
| 25 | 23,925,000 | 24,075,000 | 320 | 1029 | -1.488796069 |                                             |

|    |            |            |     |      |              |                                                                                                                                 |
|----|------------|------------|-----|------|--------------|---------------------------------------------------------------------------------------------------------------------------------|
| 25 | 24,000,000 | 24,150,000 | 321 | 953  | -2.005543885 |                                                                                                                                 |
| 25 | 24,075,000 | 24,225,000 | 322 | 968  | -1.197953508 |                                                                                                                                 |
| 25 | 24,150,000 | 24,300,000 | 323 | 1095 | 0.133101029  |                                                                                                                                 |
| 25 | 24,225,000 | 24,375,000 | 324 | 883  | 0.407398685  |                                                                                                                                 |
| 25 | 24,300,000 | 24,450,000 | 325 | 888  | 0.158705894  |                                                                                                                                 |
| 25 | 24,375,000 | 24,525,000 | 326 | 1105 | 0.386377621  |                                                                                                                                 |
| 25 | 24,450,000 | 24,600,000 | 327 | 1097 | 1.095638135  |                                                                                                                                 |
| 25 | 24,525,000 | 24,675,000 | 328 | 919  | 0.44134095   |                                                                                                                                 |
| 25 | 24,600,000 | 24,750,000 | 329 | 1237 | 0.096112706  |                                                                                                                                 |
| 25 | 24,675,000 | 24,825,000 | 330 | 1573 | 0.294737174  |                                                                                                                                 |
| 25 | 24,750,000 | 24,900,000 | 331 | 1260 | 0.074794008  |                                                                                                                                 |
| 25 | 24,825,000 | 24,975,000 | 332 | 1816 | -0.390776932 | C25H16orf82                                                                                                                     |
| 25 | 24,900,000 | 25,050,000 | 333 | 1857 | -0.310714433 | C25H16orf82                                                                                                                     |
| 25 | 24,975,000 | 25,125,000 | 334 | 1112 | 0.42974129   | KDM8,NSMCE1                                                                                                                     |
| 25 | 25,050,000 | 25,200,000 | 335 | 979  | -0.114692372 | IL4R,KDM8,NSMCE1                                                                                                                |
| 25 | 25,125,000 | 25,275,000 | 336 | 1211 | -0.009972642 | IL21R,IL4R                                                                                                                      |
| 25 | 25,200,000 | 25,350,000 | 337 | 1413 | 0.536897935  | GTF3C1,IL21R                                                                                                                    |
| 25 | 25,275,000 | 25,425,000 | 338 | 1543 | 0.45830728   | GTF3C1,KIAA0556                                                                                                                 |
| 25 | 25,350,000 | 25,500,000 | 339 | 2093 | 0.007262393  | GTF3C1,KIAA0556                                                                                                                 |
| 25 | 25,425,000 | 25,575,000 | 340 | 2539 | -0.695976984 | KIAA0556                                                                                                                        |
| 25 | 25,500,000 | 25,650,000 | 341 | 2293 | -0.308750529 | GSG1L,KIAA0556                                                                                                                  |
| 25 | 25,575,000 | 25,725,000 | 342 | 2113 | 0.781626226  | GSG1L,KIAA0556                                                                                                                  |
| 25 | 25,650,000 | 25,800,000 | 343 | 1947 | 0.960862219  | GSG1L                                                                                                                           |
| 25 | 25,725,000 | 25,875,000 | 344 | 1610 | 0.923687802  | GSG1L                                                                                                                           |
| 25 | 25,800,000 | 25,950,000 | 345 | 1533 | 0.926470606  | GSG1L,XPO6                                                                                                                      |
| 25 | 25,875,000 | 26,025,000 | 346 | 1675 | 0.877293773  | XPO6                                                                                                                            |
| 25 | 25,950,000 | 26,100,000 | 347 | 1408 | 1.00109405   | SBK1,XPO6                                                                                                                       |
| 25 | 26,025,000 | 26,175,000 | 348 | 1161 | 1.189595097  | CD19,LAT,NFATC2IP,SBK1,SPNS1                                                                                                    |
| 25 | 26,100,000 | 26,250,000 | 349 | 1129 | 0.911710356  | ATP2A1,ATXN2L,CD19,LAT,NFATC2IP,RABEP2,SH2B1,SPNS1,TUFM                                                                         |
| 25 | 26,175,000 | 26,325,000 | 350 | 1338 | 0.578893602  | APOBR,ATP2A1,ATXN2L,EIF3C,IL27,RABEP2,SH2B1,TU<br>FM,ENSBTAG00000018000                                                         |
| 25 | 26,250,000 | 26,400,000 | 351 | 1701 | 0.797471393  | APOBR,CORO1A,EIF3C,IL27,NUPR1,SLX1A,SULT1A1,E<br>NSBTAG00000008632,ENSBTAG00000016883,ENSBT<br>AG00000018000,ENSBTAG00000048253 |
| 25 | 26,325,000 | 26,475,000 | 352 | 1532 | 1.113338289  | ALDOA,CORO1A,GDPD3,MAPK3,NUPR1,PPP4C,SLX1A<br>,SULT1A1,TBX6,YPEL3,ENSBTAG00000008632,ENSBT<br>A00000016883,ENSBTAG00000048253   |
| 25 | 26,400,000 | 26,550,000 | 353 | 1199 | 1.20813686   | ALDOA,DOC2A,FAM57B,GDPD3,HIRIP3,INO80E,MAPK<br>3,PPP4C,TAOK2,TBX6,TMEM219,YPEL3                                                 |
| 25 | 26,475,000 | 26,625,000 | 354 | 1023 | 0.846604489  | ALDOA,ASPHD1,DOC2A,FAM57B,HIRIP3,INO80E,KCT<br>D13,SEZ6L2,TAOK2,TMEM219                                                         |
| 25 | 26,550,000 | 26,700,000 | 355 | 1274 | 0.379152904  | ASPHD1,CDIPT,KCTD13,KIF22,MVP,PAGR1,PRRT2,SEZ<br>6L2,TMEM219                                                                    |
| 25 | 26,625,000 | 26,775,000 | 356 | 1556 | 0.73917967   | C16orf54,CDIPT,KIF22,MVP,PAGR1,PRRT2,QPRT,SEZ6L<br>2,SPN,ZG16                                                                   |
| 25 | 26,700,000 | 26,850,000 | 357 | 1263 | 1.02994168   | C16orf54,CD2BP2,KIF22,MYLPF,QPRT,SEPT1,SPN,TBC1<br>D10B,ZG16,ZNF48,ZNF771,ENSBTAG00000046855                                    |
| 25 | 26,775,000 | 26,925,000 | 358 | 1021 | 0.593037626  | CD2BP2,DCTPP1,ITGAL,MYLPF,SEPHS2,SEPT1,TBC1D1<br>0B,ZNF48,ZNF771,ENSBTAG00000046855                                             |
| 25 | 26,850,000 | 27,000,000 | 359 | 1070 | 0.696011245  | DCTPP1,ITGAL,SEPHS2,ZNF688,ENSBTAG0000004397<br>4                                                                               |

|    |            |            |     |      |              |                                                                                        |
|----|------------|------------|-----|------|--------------|----------------------------------------------------------------------------------------|
| 25 | 26,925,000 | 27,075,000 | 360 | 775  | 0.996148383  | FBRS,ITGAL,PRR14,ZNF688,ZNF689,ENSBTAG00000043974                                      |
| 25 | 27,000,000 | 27,150,000 | 361 | 526  | 0.797670582  | C16orf93,FBRS,PHKG2,PRR14,RNF40,SRCAP,ZNF689                                           |
| 25 | 27,075,000 | 27,225,000 | 362 | 684  | 0.15046639   | BCL7C,C16orf93,CTF1,PHKG2,RNF40,SRCAP,ZNF629                                           |
| 25 | 27,150,000 | 27,300,000 | 363 | 941  | 0.130882974  | BCL7C,CTF1,RNF40,ZNF629,ENSBTAG00000035373                                             |
| 25 | 27,225,000 | 27,375,000 | 364 | 859  | 0.193641244  | CTF1,FBXL19,OAI3,SETD1A,ENSBTAG00000035373                                             |
| 25 | 27,300,000 | 27,450,000 | 365 | 650  | 0.483910971  | FBXL19,HSD3B7,OAI3,SETD1A,STX1B,STX4,ZNF646,ZNF668                                     |
| 25 | 27,375,000 | 27,525,000 | 366 | 585  | 0.619273529  | BCKDK,FUS,HSD3B7,KAT8,PRSS36,PRSS53,PRSS8,STX1B,STX4,VKORC1,ZNF646,ZNF668              |
| 25 | 27,450,000 | 27,600,000 | 367 | 843  | -0.723302466 | BCKDK,FUS,KAT8,PRSS36,PRSS53,PRSS8,TRIM72,VKORC1,ENSBTAG00000020535                    |
| 25 | 27,525,000 | 27,675,000 | 368 | 1114 | -0.636568443 | FUS,ITGAM,TRIM72,ENSBTAG00000020535                                                    |
| 25 | 27,600,000 | 27,750,000 | 369 | 1160 | -0.184982708 | COX6A2,ITGAD,ITGAM                                                                     |
| 25 | 27,675,000 | 27,825,000 | 370 | 876  | -0.073560049 | AHSP,ARMC5,C16orf58,COX6A2,ITGAD,SLC5A2,TGFB1I1,ENSBTAG00000040319                     |
| 25 | 27,750,000 | 27,900,000 | 371 | 862  | 0.356571448  | AHSP,ARMC5,C16orf58,SEPT14,SLC5A2,TGFB1I1,ZNF713,ENSBTAG00000037462,ENSBTAG00000040319 |
| 25 | 27,825,000 | 27,975,000 | 372 | 1067 | -0.50527796  | GBAS,MRPS17,PSPH,SEPT14,ZNF713,ENSBTAG00000037462                                      |
| 25 | 27,900,000 | 28,050,000 | 373 | 1091 | -1.36717442  | CCT6A,CHCHD9,GBAS,MRPS17,NUPR1L,PHKG1,PSPH,SUMF2,ENSBTAG00000031582                    |
| 25 | 27,975,000 | 28,125,000 | 374 | 1039 | -0.812495148 | CCT6A,CHCHD9,NUPR1L,PHKG1,PSPH,SUMF2,ENSBTAG00000014448,ENSBTAG00000031582             |
| 25 | 28,050,000 | 28,200,000 | 375 | 712  | 0.349185222  | GUSB,ENSBTAG00000014448                                                                |
| 25 | 28,125,000 | 28,275,000 | 376 | 704  | 0.515437589  | CRCP,GUSB,ENSBTAG00000014448,ENSBTAG00000015314                                        |
| 25 | 28,200,000 | 28,350,000 | 377 | 841  | 0.704268927  | CRCP,TPST1,ENSBTAG00000015314                                                          |
| 25 | 28,275,000 | 28,425,000 | 378 | 589  | 0.103989158  | CRCP,TPST1                                                                             |
| 25 | 28,350,000 | 28,500,000 | 379 | 368  | -1.334218949 | KCTD7,TPST1                                                                            |
| 25 | 28,425,000 | 28,575,000 | 380 | 300  | -0.741722472 | KCTD7,RABGEF1,TMEM248,TPST1                                                            |
| 25 | 28,500,000 | 28,650,000 | 381 | 652  | 0.651307661  | RABGEF1,SBDS,TMEM248,TYW1                                                              |
| 25 | 28,575,000 | 28,725,000 | 382 | 791  | 0.380449776  | SBDS,TMEM248,TYW1                                                                      |
| 25 | 28,650,000 | 28,800,000 | 383 | 569  | -0.335794116 | TYW1                                                                                   |
| 25 | 28,725,000 | 28,875,000 | 384 | 470  | -0.189702831 | TYW1                                                                                   |
| 25 | 28,800,000 | 28,950,000 | 385 | 254  | -0.040449705 | CALN1                                                                                  |
| 25 | 28,875,000 | 29,025,000 | 386 | 422  | -0.687435526 | CALN1                                                                                  |
| 25 | 28,950,000 | 29,100,000 | 387 | 561  | -0.888214175 | CALN1                                                                                  |
| 25 | 29,025,000 | 29,175,000 | 388 | 577  | 0.509628242  | CALN1                                                                                  |
| 25 | 29,100,000 | 29,250,000 | 389 | 508  | 1.123325704  | CALN1                                                                                  |
| 25 | 29,175,000 | 29,325,000 | 390 | 375  | 0.60899165   | CALN1                                                                                  |
| 25 | 29,250,000 | 29,400,000 | 391 | 494  | 0.031856109  | CALN1,WBSCR17                                                                          |
| 25 | 29,325,000 | 29,475,000 | 392 | 1027 | -0.172305428 | CALN1,WBSCR17                                                                          |
| 25 | 29,400,000 | 29,550,000 | 393 | 1318 | 0.343384374  | WBSCR17                                                                                |
| 25 | 29,475,000 | 29,625,000 | 394 | 1284 | 0.868986549  | WBSCR17                                                                                |
| 25 | 29,550,000 | 29,700,000 | 395 | 1526 | 0.765859771  | WBSCR17                                                                                |
| 25 | 29,625,000 | 29,775,000 | 396 | 1707 | 0.316950682  | WBSCR17                                                                                |
| 25 | 29,700,000 | 29,850,000 | 397 | 1673 | 0.286859811  | WBSCR17                                                                                |
| 25 | 29,775,000 | 29,925,000 | 398 | 1586 | 0.774797751  | WBSCR17                                                                                |
| 25 | 29,850,000 | 30,000,000 | 399 | 1593 | 1.183611898  |                                                                                        |
| 25 | 29,925,000 | 30,075,000 | 400 | 1709 | 1.175719424  | AUTS2                                                                                  |
| 25 | 30,000,000 | 30,150,000 | 401 | 1462 | 0.97554937   | AUTS2                                                                                  |
| 25 | 30,075,000 | 30,225,000 | 402 | 940  | 0.767328868  | AUTS2                                                                                  |

|    |            |            |     |      |              |                                                          |
|----|------------|------------|-----|------|--------------|----------------------------------------------------------|
| 25 | 30,150,000 | 30,300,000 | 403 | 579  | 0.069492312  |                                                          |
| 25 | 30,225,000 | 30,375,000 | 404 | 195  | -1.612066224 |                                                          |
| 25 | 30,300,000 | 30,450,000 | 405 | 349  | -2.175059091 |                                                          |
| 25 | 30,375,000 | 30,525,000 | 406 | 899  | -0.758706141 |                                                          |
| 25 | 30,450,000 | 30,600,000 | 407 | 1040 | 0.102821558  |                                                          |
| 25 | 30,525,000 | 30,675,000 | 408 | 861  | 0.039315486  |                                                          |
| 25 | 30,600,000 | 30,750,000 | 409 | 686  | -0.231026376 |                                                          |
| 25 | 30,675,000 | 30,825,000 | 410 | 710  | 0.094050564  |                                                          |
| 25 | 30,750,000 | 30,900,000 | 411 | 681  | 0.584857829  |                                                          |
| 25 | 30,825,000 | 30,975,000 | 412 | 475  | 0.271590345  |                                                          |
| 25 | 30,900,000 | 31,050,000 | 413 | 325  | 0.39386243   |                                                          |
| 25 | 30,975,000 | 31,125,000 | 414 | 307  | 0.684782866  | ENSBTAG00000047342                                       |
| 25 | 31,050,000 | 31,200,000 | 415 | 303  | 0.35741704   | ENSBTAG00000047342                                       |
| 25 | 31,125,000 | 31,275,000 | 416 | 439  | 0.677493285  |                                                          |
| 25 | 31,200,000 | 31,350,000 | 417 | 593  | 0.41042133   |                                                          |
| 25 | 31,275,000 | 31,425,000 | 418 | 687  | -1.036957505 |                                                          |
| 25 | 31,350,000 | 31,500,000 | 419 | 902  | -0.193088349 |                                                          |
| 25 | 31,425,000 | 31,575,000 | 420 | 918  | 0.97333491   |                                                          |
| 25 | 31,500,000 | 31,650,000 | 421 | 765  | 0.311886861  |                                                          |
| 25 | 31,575,000 | 31,725,000 | 422 | 841  | -0.192396688 |                                                          |
| 25 | 31,650,000 | 31,800,000 | 423 | 1273 | 0.696609543  |                                                          |
| 25 | 31,725,000 | 31,875,000 | 424 | 1616 | 0.770017198  |                                                          |
| 25 | 31,800,000 | 31,950,000 | 425 | 1938 | 0.6476822    |                                                          |
| 25 | 31,875,000 | 32,025,000 | 426 | 2236 | 0.596237632  |                                                          |
| 25 | 31,950,000 | 32,100,000 | 427 | 2229 | 0.283310096  |                                                          |
| 25 | 32,025,000 | 32,175,000 | 428 | 1821 | 0.197041944  |                                                          |
| 25 | 32,100,000 | 32,250,000 | 429 | 1399 | 0.647135695  |                                                          |
| 25 | 32,175,000 | 32,325,000 | 430 | 1364 | 0.573448579  |                                                          |
| 25 | 32,250,000 | 32,400,000 | 431 | 1401 | 0.3001821    | ENSBTAG00000047264                                       |
| 25 | 32,325,000 | 32,475,000 | 432 | 725  | 0.157704748  | ENSBTAG00000047264                                       |
| 25 | 32,400,000 | 32,550,000 | 433 | 842  | 0.565002323  |                                                          |
| 25 | 32,475,000 | 32,625,000 | 434 | 1796 | 0.352559585  |                                                          |
| 25 | 32,550,000 | 32,700,000 | 435 | 1449 | 0.313824677  |                                                          |
| 25 | 32,625,000 | 32,775,000 | 436 | 816  | -0.274039582 |                                                          |
| 25 | 32,700,000 | 32,850,000 | 437 | 1228 | -0.834166111 |                                                          |
| 25 | 32,775,000 | 32,925,000 | 438 | 1771 | 0.680335019  |                                                          |
| 25 | 32,850,000 | 33,000,000 | 439 | 1701 | 1.039237974  |                                                          |
| 25 | 32,925,000 | 33,075,000 | 440 | 1675 | 0.430287407  |                                                          |
| 25 | 33,000,000 | 33,150,000 | 441 | 1274 | 0.055050648  |                                                          |
| 25 | 33,075,000 | 33,225,000 | 442 | 1020 | -0.281791982 | WBSCR16,ENSBTAG00000014417,ENSBTAG00000026286            |
| 25 | 33,150,000 | 33,300,000 | 443 | 1132 | -0.515630454 | GTF2I,NCF1,WBSCR16,ENSBTAG00000014417,ENSBTAG00000026286 |
| 25 | 33,225,000 | 33,375,000 | 444 | 841  | -0.434349248 | GTF2I,NCF1,ENSBTAG00000026286                            |
| 25 | 33,300,000 | 33,450,000 | 445 | 885  | 0.392556538  | GTF2I,GTF2IRD1                                           |
| 25 | 33,375,000 | 33,525,000 | 446 | 1414 | 0.262663667  | GTF2IRD1                                                 |
| 25 | 33,450,000 | 33,600,000 | 447 | 1477 | 0.042860047  | CLIP2,GTF2IRD1                                           |
| 25 | 33,525,000 | 33,675,000 | 448 | 1261 | 0.292680546  | CLIP2,RFC2                                               |
| 25 | 33,600,000 | 33,750,000 | 449 | 1258 | 0.39776188   | CLIP2,LAT2,RFC2,WBSCR1                                   |
| 25 | 33,675,000 | 33,825,000 | 450 | 1155 | 0.519989248  | ELN,LAT2,LIMK1,RFC2,WBSCR1                               |
| 25 | 33,750,000 | 33,900,000 | 451 | 1019 | 0.081492379  | ELN,LIMK1                                                |
| 25 | 33,825,000 | 33,975,000 | 452 | 796  | -0.280082389 | WBSCR28                                                  |
| 25 | 33,900,000 | 34,050,000 | 453 | 816  | -0.324458833 | ABHD11,CLDN3,CLDN4,WBSCR27,WBSCR28                       |

|    |            |            |     |      |              |                                                                                          |
|----|------------|------------|-----|------|--------------|------------------------------------------------------------------------------------------|
| 25 | 33,975,000 | 34,125,000 | 454 | 909  | -0.109281515 | ABHD11,CLDN3,CLDN4,DNAJC30,STX1A,VPS37D,WBSCR22,WBSCR27                                  |
| 25 | 34,050,000 | 34,200,000 | 455 | 805  | 0.576491632  | BAZ1B,BCL7B,DNAJC30,MLXIPL,STX1A,TBL2,VPS37D,WBSCR22                                     |
| 25 | 34,125,000 | 34,275,000 | 456 | 644  | 0.405536538  | BAZ1B,BCL7B,FZD9,MLXIPL,TBL2                                                             |
| 25 | 34,200,000 | 34,350,000 | 457 | 652  | 0.028926174  | BAZ1B,FKBP6,FZD9,NSUN5,TRIM50,ENSBTAG00000017939                                         |
| 25 | 34,275,000 | 34,425,000 | 458 | 825  | 0.157072268  | FKBP6,HIP1,NSUN5,TRIM50,ENSBTAG00000017939                                               |
| 25 | 34,350,000 | 34,500,000 | 459 | 847  | -0.12145184  | HIP1,ENSBTAG00000017939                                                                  |
| 25 | 34,425,000 | 34,575,000 | 460 | 964  | -0.481757687 | HIP1                                                                                     |
| 25 | 34,500,000 | 34,650,000 | 461 | 1183 | 0.095271162  | CCL24,HIP1,RHBDD2                                                                        |
| 25 | 34,575,000 | 34,725,000 | 462 | 1160 | 0.660606896  | CCL24,POR,RHBDD2                                                                         |
| 25 | 34,650,000 | 34,800,000 | 463 | 1011 | 0.137490708  | MDH2,POR,SRRM3,STYXL1,TMEM120A                                                           |
| 25 | 34,725,000 | 34,875,000 | 464 | 1034 | -0.743068443 | HSPB1,MDH2,POR,SRRM3,STYXL1,TMEM120A                                                     |
| 25 | 34,800,000 | 34,950,000 | 465 | 992  | -1.296475585 | HSPB1,SRRM3,SSC4D,YWHAG                                                                  |
| 25 | 34,875,000 | 35,025,000 | 466 | 997  | -0.104574655 | DTX2,SSC4D,UPK3B,YWHAG,ZP3                                                               |
| 25 | 34,950,000 | 35,100,000 | 467 | 980  | 0.656090708  | DKFZP434K1815,DTX2,POLR2J,UPK3B,ZP3,ENSBTAG0000005448,ENSBTAG00000020524                 |
| 25 | 35,025,000 | 35,175,000 | 468 | 832  | 0.043388009  | ALKBH4,DKFZP434K1815,ORAI2,POLR2J,PRKRIP1,ENSBTAG0000005448,ENSBTAG00000020524           |
| 25 | 35,100,000 | 35,250,000 | 469 | 747  | -0.367283477 | ALKBH4,CUX1,DKFZP434K1815,ORAI2,PRKRIP1,SH2B2,ENSBTAG00000047266                         |
| 25 | 35,175,000 | 35,325,000 | 470 | 691  | 0.223970537  | CUX1,SH2B2,ENSBTAG00000047266                                                            |
| 25 | 35,250,000 | 35,400,000 | 471 | 688  | 0.365866216  | CUX1                                                                                     |
| 25 | 35,325,000 | 35,475,000 | 472 | 543  | -0.199611966 | CUX1                                                                                     |
| 25 | 35,400,000 | 35,550,000 | 473 | 353  | -0.121044502 | CUX1                                                                                     |
| 25 | 35,475,000 | 35,625,000 | 474 | 309  | 0.54039339   | CUX1                                                                                     |
| 25 | 35,550,000 | 35,700,000 | 475 | 705  | -1.697460646 |                                                                                          |
| 25 | 35,625,000 | 35,775,000 | 476 | 1018 | -0.750361614 | MYL10                                                                                    |
| 25 | 35,700,000 | 35,850,000 | 477 | 1104 | 0.293477193  | COL26A1,MYL10                                                                            |
| 25 | 35,775,000 | 35,925,000 | 478 | 1167 | -0.256943248 | COL26A1                                                                                  |
| 25 | 35,850,000 | 36,000,000 | 479 | 919  | -0.365994317 | COL26A1,IFT22,ENSBTAG00000047808                                                         |
| 25 | 35,925,000 | 36,075,000 | 480 | 1003 | 0.525836081  | CLDN15,COL26A1,FIS1,IFT22,PLOD3,ZNHIT1,ENSBTAG00000047808                                |
| 25 | 36,000,000 | 36,150,000 | 481 | 1163 | 0.652614329  | CLDN15,FIS1,MUC3A,PLOD3,ZNHIT1,ENSBTAG00000020157                                        |
| 25 | 36,075,000 | 36,225,000 | 482 | 911  | 0.338310765  | AP1S1,MUC3A,SERPINE1,VGF,ENSBTAG00000020157                                              |
| 25 | 36,150,000 | 36,300,000 | 483 | 772  | 0.524047415  | AP1S1,MUC12,SERPINE1,TRIM56,VGF,ENSBTAG00000047125                                       |
| 25 | 36,225,000 | 36,375,000 | 484 | 827  | 0.799177822  | ACHE,EPHB4,MUC12,SLC12A9,SRRT,TRIM56,TRIP6,UFSP1,ZAN,ENSBTAG00000047125                  |
| 25 | 36,300,000 | 36,450,000 | 485 | 725  | 1.195024726  | ACHE,EPHB4,EPO,GIGYF1,GNB2,POP7,SLC12A9,SRRT,TRIP6,UFSP1,ZAN                             |
| 25 | 36,375,000 | 36,525,000 | 486 | 610  | 1.229442955  | ACTL6B,EPO,FBXO24,GIGYF1,GNB2,LRCH4,MOSPD3,PCOLCE,POP7,SAP25,TFR2,ZAN,ENSBTAG00000046753 |
| 25 | 36,450,000 | 36,600,000 | 487 | 552  | 0.289081127  | ACTL6B,AGFG2,FBXO24,GNB2,LRCH4,MOSPD3,PCOLCE,SAP25,TFR2,ENSBTAG00000046753               |
| 25 | 36,525,000 | 36,675,000 | 488 | 555  | 0.111721208  | AGFG2,BCDIN3,C7orf61,NYAP1,PILRA,PPP1R35,TSC22D4,ZCWPW1,ENSBTAG00000015272               |
| 25 | 36,600,000 | 36,750,000 | 489 | 1121 | 0.655138756  | BCDIN3,C7orf61,NYAP1,PILRA,PPP1R35,PVRIG,STAG3,TSC22D4,ZCWPW1,ENSBTAG00000015272         |

|    |            |            |     |      |              |                                                                                                             |
|----|------------|------------|-----|------|--------------|-------------------------------------------------------------------------------------------------------------|
| 25 | 36,675,000 | 36,825,000 | 490 | 1203 | 0.686291144  | C7orf43,GAL3ST4,GPC2,LAMTOR4,PILRA,PVRIG,STAG3,ENSBTAG00000011470                                           |
| 25 | 36,750,000 | 36,900,000 | 491 | 974  | 0.783184136  | AP4M1,C7orf43,CNPY4,COPS6,GAL3ST4,GPC2,LAMTOR4,MBLAC1,MCM7,STAG3,TAF6,ENSBTAG00000011470,ENSBTAG00000012668 |
| 25 | 36,825,000 | 36,975,000 | 492 | 1209 | -1.117307724 | AP4M1,CNPY4,COPS6,MBLAC1,MCM7,TAF6,ZKSCAN1,ZNF3,ZSCAN21,ENSBTAG00000012668                                  |
| 25 | 36,900,000 | 37,050,000 | 493 | 1305 | -0.79363524  | AZGP1,CYP3A5,GJC3,ZKSCAN1,ZNF3,ZSCAN21                                                                      |
| 25 | 36,975,000 | 37,125,000 | 494 | 1605 | 0.173225204  | AZGP1,CYP3A5,GJC3,OR2AE1                                                                                    |
| 25 | 37,050,000 | 37,200,000 | 495 | 1436 | 0.222626394  | CYP3A5,OR2AE1,ENSBTAG00000047379                                                                            |
| 25 | 37,125,000 | 37,275,000 | 496 | 747  | 0.457298246  | CYP3A5,ENSBTAG00000047379                                                                                   |
| 25 | 37,200,000 | 37,350,000 | 497 | 332  | -0.868882199 | CYP3A5,ZSCAN25,ENSBTAG00000019435                                                                           |
| 25 | 37,275,000 | 37,425,000 | 498 | 294  | -0.872880827 | ZNF655,ZNF789,ZSCAN25,ENSBTAG00000019435,ENSBTAG00000039720                                                 |
| 25 | 37,350,000 | 37,500,000 | 499 | 355  | 0.498103465  | ATP5J2,ZNF394,ZNF655,ZNF789,ENSBTAG00000039720,ENSBTAG00000040568                                           |
| 25 | 37,425,000 | 37,575,000 | 500 | 528  | 0.40461675   | ARPC1A,ARPC1B,ATP5J2,BUD31,CPSF4,PDAP1,ZNF394,ENSBTAG00000020440,ENSBTAG00000040568                         |
| 25 | 37,500,000 | 37,650,000 | 501 | 808  | 0.18403412   | ARPC1A,ARPC1B,BUD31,CPSF4,PDAP1,ENSBTAG00000020440                                                          |
| 25 | 37,575,000 | 37,725,000 | 502 | 1174 | 0.319482069  | ARPC1A,KPNA7                                                                                                |
| 25 | 37,650,000 | 37,800,000 | 503 | 1199 | 0.026644594  | KPNA7,SMURF1                                                                                                |
| 25 | 37,725,000 | 37,875,000 | 504 | 1092 | -0.157897049 | SMURF1,TRRAP                                                                                                |
| 25 | 37,800,000 | 37,950,000 | 505 | 1331 | 0.347872928  | SMURF1,TMEM130,TRRAP                                                                                        |
| 25 | 37,875,000 | 38,025,000 | 506 | 1434 | 0.4993133    | TMEM130,TRRAP                                                                                               |
| 25 | 37,950,000 | 38,100,000 | 507 | 1606 | 0.666575771  | NPTX2                                                                                                       |
| 25 | 38,025,000 | 38,175,000 | 508 | 1622 | 0.363489815  | NPTX2                                                                                                       |
| 25 | 38,100,000 | 38,250,000 | 509 | 1354 | 0.452506799  | BAIAP2L1                                                                                                    |
| 25 | 38,175,000 | 38,325,000 | 510 | 1334 | 1.139502309  | BAIAP2L1,BRI3                                                                                               |
| 25 | 38,250,000 | 38,400,000 | 511 | 1007 | 1.139829121  | BAIAP2L1,BHLHA15,BRI3,LMTK2                                                                                 |
| 25 | 38,325,000 | 38,475,000 | 512 | 944  | 0.985643497  | BHLHA15,LMTK2                                                                                               |
| 25 | 38,400,000 | 38,550,000 | 513 | 1310 | 0.787926651  | CCZ1,ENSBTAG00000005908,ENSBTAG00000046943                                                                  |
| 25 | 38,475,000 | 38,625,000 | 514 | 1273 | 0.737794796  | AIMP2,ANKRD61,CCZ1,EIF2AK1,PMS2,ENSBTAG00000005908,ENSBTAG00000046943                                       |
| 25 | 38,550,000 | 38,700,000 | 515 | 1086 | 0.541163838  | AIMP2,ANKRD61,CYTH3,EIF2AK1,PMS2,USP42,ENSBTAG00000005908                                                   |
| 25 | 38,625,000 | 38,775,000 | 516 | 1101 | -0.656677997 | CYTH3,USP42,ENSBTAG00000046517                                                                              |
| 25 | 38,700,000 | 38,850,000 | 517 | 1369 | -1.409670947 | DAGLB,RAC1,ENSBTAG00000046517                                                                               |
| 25 | 38,775,000 | 38,925,000 | 518 | 1461 | -0.597031604 | DAGLB,GRID2IP,KDELR2,RAC1                                                                                   |
| 25 | 38,850,000 | 39,000,000 | 519 | 1344 | 0.611509187  | C25H7ORF26,DAGLB,GRID2IP,KDELR2,ZDHHC4                                                                      |
| 25 | 38,925,000 | 39,075,000 | 520 | 1135 | 0.237290333  | C25H7ORF26,GRID2IP,ZDHHC4,ZNF12,ZNF316,ENSBTAG00000038613,ENSBTAG00000040014                                |
| 25 | 39,000,000 | 39,150,000 | 521 | 1313 | 0.424775892  | RBAK,ZNF12,ZNF316,ENSBTAG00000005600,ENSBTAG00000038613,ENSBTAG00000038627,ENSBTAG00000040014               |
| 25 | 39,075,000 | 39,225,000 | 522 | 1219 | 0.490399304  | RBAK,RNF216,ENSBTAG00000005600,ENSBTAG00000038627,ENSBTAG00000040014,ENSBTAG00000048231                     |
| 25 | 39,150,000 | 39,300,000 | 523 | 834  | -0.63562189  | FSCN1,RNF216,ENSBTAG00000048231                                                                             |
| 25 | 39,225,000 | 39,375,000 | 524 | 872  | 0.085209656  | ACTB,FBXL18,FSCN1,RNF216,ENSBTAG00000047781                                                                 |
| 25 | 39,300,000 | 39,450,000 | 525 | 810  | 0.483124645  | ACTB,FBXL18,FSCN1,TNRC18,ENSBTAG00000047781                                                                 |
| 25 | 39,375,000 | 39,525,000 | 526 | 566  | 0.274566439  | FBXL18,SLC29A4,TNRC18                                                                                       |
| 25 | 39,450,000 | 39,600,000 | 527 | 681  | 0.280020995  | SLC29A4,TNRC18,WIPI2                                                                                        |



|    |            |            |     |      |              |                                                              |
|----|------------|------------|-----|------|--------------|--------------------------------------------------------------|
| 25 | 39,525,000 | 39,675,000 | 528 | 1144 | 0.314753763  | MMD2,SLC29A4,WIPI2                                           |
| 25 | 39,600,000 | 39,750,000 | 529 | 1105 | 0.150298276  | KIAA0415,MMD2,RADIL                                          |
| 25 | 39,675,000 | 39,825,000 | 530 | 818  | -0.153875455 | FOXK1,KIAA0415,RADIL                                         |
| 25 | 39,750,000 | 39,900,000 | 531 | 866  | -0.66466346  | FOXK1                                                        |
| 25 | 39,825,000 | 39,975,000 | 532 | 1020 | -0.100113294 |                                                              |
| 25 | 39,900,000 | 40,050,000 | 533 | 1192 | 0.158416531  | SDK1                                                         |
| 25 | 39,975,000 | 40,125,000 | 534 | 1379 | 0.155931403  | SDK1                                                         |
| 25 | 40,050,000 | 40,200,000 | 535 | 1356 | 0.125161889  | SDK1                                                         |
| 25 | 40,125,000 | 40,275,000 | 536 | 1313 | -0.515995185 | SDK1                                                         |
| 25 | 40,200,000 | 40,350,000 | 537 | 1471 | -0.797423095 |                                                              |
| 25 | 40,275,000 | 40,425,000 | 538 | 1967 | -0.291962957 |                                                              |
| 25 | 40,350,000 | 40,500,000 | 539 | 1933 | 0.11982034   |                                                              |
| 25 | 40,425,000 | 40,575,000 | 540 | 1341 | -0.133763556 |                                                              |
| 25 | 40,500,000 | 40,650,000 | 541 | 1237 | 0.382580457  |                                                              |
| 25 | 40,575,000 | 40,725,000 | 542 | 1282 | 1.146139175  |                                                              |
| 25 | 40,650,000 | 40,800,000 | 543 | 1224 | 1.200231128  |                                                              |
| 25 | 40,725,000 | 40,875,000 | 544 | 1488 | 0.995362765  |                                                              |
| 25 | 40,800,000 | 40,950,000 | 545 | 1738 | 0.713175301  |                                                              |
| 25 | 40,875,000 | 41,025,000 | 546 | 1406 | 0.403596163  | CARD11                                                       |
| 25 | 40,950,000 | 41,100,000 | 547 | 891  | -0.287232411 | CARD11,GNA12                                                 |
| 25 | 41,025,000 | 41,175,000 | 548 | 794  | -1.115583871 | CARD11,GNA12                                                 |
| 25 | 41,100,000 | 41,250,000 | 549 | 811  | -0.982801726 | AMZ1,BRAT1,GNA12,IQCE                                        |
| 25 | 41,175,000 | 41,325,000 | 550 | 625  | -0.948683409 | AMZ1,BRAT1,IQCE,LFNG,TTYH3                                   |
| 25 | 41,250,000 | 41,400,000 | 551 | 688  | -0.423104944 | CHST12,GRIFIN,IQCE,LFNG,TTYH3                                |
| 25 | 41,325,000 | 41,475,000 | 552 | 734  | -0.252880436 | CHST12,EIF3B,GRIFIN,ENSBTAG00000038978                       |
| 25 | 41,400,000 | 41,550,000 | 553 | 967  | 0.172188817  | EIF3B,FTSJ2,MAD1L1,NUDT1,SNX8,ENSBTAG00000038978             |
| 25 | 41,475,000 | 41,625,000 | 554 | 1337 | 0.588685127  | FTSJ2,MAD1L1,NUDT1,SNX8                                      |
| 25 | 41,550,000 | 41,700,000 | 555 | 1000 | -0.01516263  | MAD1L1                                                       |
| 25 | 41,625,000 | 41,775,000 | 556 | 589  | -1.045090392 | MAD1L1                                                       |
| 25 | 41,700,000 | 41,850,000 | 557 | 880  | -0.33295825  | ELFN1,MAD1L1                                                 |
| 25 | 41,775,000 | 41,925,000 | 558 | 986  | -0.537127112 | ELFN1,MAD1L1                                                 |
| 25 | 41,850,000 | 42,000,000 | 559 | 746  | -1.272272574 | INTS1,MAFK,PSMG3,TMEM184A                                    |
| 25 | 41,925,000 | 42,075,000 | 560 | 695  | -1.530635268 | INTS1,MAFK,MICALL2,PSMG3,TMEM184A                            |
| 25 | 42,000,000 | 42,150,000 | 561 | 696  | -0.232242684 | INTS1,MICALL2                                                |
| 25 | 42,075,000 | 42,225,000 | 562 | 729  | 0.558051757  | UNCX,ZFAND2A                                                 |
| 25 | 42,150,000 | 42,300,000 | 563 | 536  | 0.359849467  | C25H7ORF50,GPER1,GPR146,UNCX,ZFAND2A                         |
| 25 | 42,225,000 | 42,375,000 | 564 | 315  | 0.624437932  | ADAP1,C25H7ORF50,COX19,CYP2W1,GPER1,GPR146,ZFAND2A           |
| 25 | 42,300,000 | 42,450,000 | 565 | 316  | 0.944119617  | ADAP1,C25H7ORF50,COX19,CYP2W1,GET4,HEATR2,ENSBTAG00000046498 |
| 25 | 42,375,000 | 42,525,000 | 566 | 576  | 0.208049949  | GET4,HEATR2,PRKAR1B,ENSBTAG00000046498                       |
| 25 | 42,450,000 | 42,600,000 | 567 | 561  | -0.103852861 | HEATR2,PDGFA,PRKAR1B                                         |
| 25 | 42,525,000 | 42,675,000 | 568 | 409  | -1.483812406 | PDGFA,PRKAR1B                                                |
| 25 | 42,600,000 | 42,750,000 | 569 | 623  | -1.337105623 | FAM20C                                                       |
| 25 | 42,675,000 | 42,825,000 | 570 | 564  | -1.897871128 | FAM20C,ENSBTAG00000006239                                    |
| 25 | 42,750,000 | 42,900,000 | 571 | 522  | -2.668300311 | ENSBTAG00000006239                                           |
| 25 | 42,825,000 | 42,904,170 | 572 | 333  | -2.177841166 |                                                              |
| 26 | 0          | 150,000    | 1   | 186  | 0.030113683  | ENSBTAG00000038930,ENSBTAG00000040222                        |
| 26 | 75,000     | 225,000    | 2   | 165  | -0.080729371 | ENSBTAG00000040222                                           |
| 26 | 150,000    | 300,000    | 3   | 139  | 0.122396717  |                                                              |
| 26 | 225,000    | 375,000    | 4   | 123  | 1.044505951  | ENSBTAG00000008152                                           |

|    |           |           |    |      |              |                                                            |
|----|-----------|-----------|----|------|--------------|------------------------------------------------------------|
| 26 | 300,000   | 450,000   | 5  | 129  | 1.05046079   | ENSBTAG00000008152,ENSBTAG000000035282,ENSBTAG000000046109 |
| 26 | 375,000   | 525,000   | 6  | 105  | 1.136776685  | ENSBTAG000000035282,ENSBTAG000000046109                    |
| 26 | 450,000   | 600,000   | 7  | 123  | 1.043902875  |                                                            |
| 26 | 525,000   | 675,000   | 8  | 155  | 0.851465516  | UBE2D1                                                     |
| 26 | 600,000   | 750,000   | 9  | 193  | 0.830810125  | CISD1,UBE2D1                                               |
| 26 | 675,000   | 825,000   | 10 | 329  | 0.993548625  | CISD1,IPMK,UBE2D1                                          |
| 26 | 750,000   | 900,000   | 11 | 434  | 1.169802272  | CISD1,IPMK                                                 |
| 26 | 825,000   | 975,000   | 12 | 722  | 0.703602262  |                                                            |
| 26 | 900,000   | 1,050,000 | 13 | 1063 | 0.704840954  |                                                            |
| 26 | 975,000   | 1,125,000 | 14 | 1095 | 0.316507822  |                                                            |
| 26 | 1,050,000 | 1,200,000 | 15 | 1281 | 0.339992815  |                                                            |
| 26 | 1,125,000 | 1,275,000 | 16 | 1433 | 0.701856942  |                                                            |
| 26 | 1,200,000 | 1,350,000 | 17 | 1461 | 0.456238971  |                                                            |
| 26 | 1,275,000 | 1,425,000 | 18 | 1402 | 0.668657104  |                                                            |
| 26 | 1,350,000 | 1,500,000 | 19 | 929  | 0.715749717  |                                                            |
| 26 | 1,425,000 | 1,575,000 | 20 | 722  | -0.186717979 |                                                            |
| 26 | 1,500,000 | 1,650,000 | 21 | 1006 | 0.339135417  |                                                            |
| 26 | 1,575,000 | 1,725,000 | 22 | 1306 | 0.67924528   |                                                            |
| 26 | 1,650,000 | 1,800,000 | 23 | 1223 | 0.348245037  |                                                            |
| 26 | 1,725,000 | 1,875,000 | 24 | 1387 | -1.222918378 |                                                            |
| 26 | 1,800,000 | 1,950,000 | 25 | 1487 | -1.507131756 |                                                            |
| 26 | 1,875,000 | 2,025,000 | 26 | 1241 | -0.498254477 |                                                            |
| 26 | 1,950,000 | 2,100,000 | 27 | 1084 | -0.467425937 |                                                            |
| 26 | 2,025,000 | 2,175,000 | 28 | 1114 | -0.335301464 |                                                            |
| 26 | 2,100,000 | 2,250,000 | 29 | 1128 | 0.068323002  |                                                            |
| 26 | 2,175,000 | 2,325,000 | 30 | 1119 | 0.176736519  |                                                            |
| 26 | 2,250,000 | 2,400,000 | 31 | 1248 | 0.678372074  |                                                            |
| 26 | 2,325,000 | 2,475,000 | 32 | 1393 | 0.218952129  |                                                            |
| 26 | 2,400,000 | 2,550,000 | 33 | 1318 | 0.095949967  |                                                            |
| 26 | 2,475,000 | 2,625,000 | 34 | 829  | 0.423416054  |                                                            |
| 26 | 2,550,000 | 2,700,000 | 35 | 900  | 0.347132366  |                                                            |
| 26 | 2,625,000 | 2,775,000 | 36 | 1102 | 0.541619833  |                                                            |
| 26 | 2,700,000 | 2,850,000 | 37 | 1657 | 0.441133532  |                                                            |
| 26 | 2,775,000 | 2,925,000 | 38 | 1849 | -0.601030585 | ENSBTAG00000002655                                         |
| 26 | 2,850,000 | 3,000,000 | 39 | 1431 | -1.70684218  | ENSBTAG00000002655                                         |
| 26 | 2,925,000 | 3,075,000 | 40 | 1076 | -0.563837896 |                                                            |
| 26 | 3,000,000 | 3,150,000 | 41 | 541  | 0.418975214  |                                                            |
| 26 | 3,075,000 | 3,225,000 | 42 | 831  | 0.795312634  |                                                            |
| 26 | 3,150,000 | 3,300,000 | 43 | 1608 | 0.45199236   |                                                            |
| 26 | 3,225,000 | 3,375,000 | 44 | 1710 | 0.224502384  |                                                            |
| 26 | 3,300,000 | 3,450,000 | 45 | 1421 | 0.112096971  |                                                            |
| 26 | 3,375,000 | 3,525,000 | 46 | 1125 | 0.41347746   |                                                            |
| 26 | 3,450,000 | 3,600,000 | 47 | 1365 | 0.990924191  |                                                            |
| 26 | 3,525,000 | 3,675,000 | 48 | 1483 | 0.221908172  |                                                            |
| 26 | 3,600,000 | 3,750,000 | 49 | 1152 | -1.641732487 |                                                            |
| 26 | 3,675,000 | 3,825,000 | 50 | 1097 | -1.029429836 |                                                            |
| 26 | 3,750,000 | 3,900,000 | 51 | 1281 | 0.563597224  |                                                            |
| 26 | 3,825,000 | 3,975,000 | 52 | 1177 | 0.831786869  |                                                            |
| 26 | 3,900,000 | 4,050,000 | 53 | 1120 | -0.499715992 |                                                            |
| 26 | 3,975,000 | 4,125,000 | 54 | 1261 | -0.636949099 |                                                            |
| 26 | 4,050,000 | 4,200,000 | 55 | 1252 | -0.092810194 |                                                            |
| 26 | 4,125,000 | 4,275,000 | 56 | 1489 | -0.379713576 |                                                            |

|    |           |           |     |      |              |              |
|----|-----------|-----------|-----|------|--------------|--------------|
| 26 | 4,200,000 | 4,350,000 | 57  | 1310 | 0.600577255  |              |
| 26 | 4,275,000 | 4,425,000 | 58  | 1166 | 0.669602678  |              |
| 26 | 4,350,000 | 4,500,000 | 59  | 1166 | 0.453329033  |              |
| 26 | 4,425,000 | 4,575,000 | 60  | 1253 | -0.046427687 |              |
| 26 | 4,500,000 | 4,650,000 | 61  | 1285 | -0.36492398  |              |
| 26 | 4,575,000 | 4,725,000 | 62  | 1119 | -0.910736966 |              |
| 26 | 4,650,000 | 4,800,000 | 63  | 1425 | -2.618617096 |              |
| 26 | 4,725,000 | 4,875,000 | 64  | 1366 | -3.280910256 |              |
| 26 | 4,800,000 | 4,950,000 | 65  | 1231 | -0.987239739 |              |
| 26 | 4,875,000 | 5,025,000 | 66  | 1568 | 0.020416427  | PCDH15       |
| 26 | 4,950,000 | 5,100,000 | 67  | 1701 | -0.069971613 | PCDH15       |
| 26 | 5,025,000 | 5,175,000 | 68  | 1931 | 0.404713507  | PCDH15       |
| 26 | 5,100,000 | 5,250,000 | 69  | 2019 | 0.385619057  | PCDH15       |
| 26 | 5,175,000 | 5,325,000 | 70  | 1990 | -0.087349641 | PCDH15       |
| 26 | 5,250,000 | 5,400,000 | 71  | 1327 | -0.426507831 | PCDH15       |
| 26 | 5,325,000 | 5,475,000 | 72  | 940  | 0.555476772  | PCDH15       |
| 26 | 5,400,000 | 5,550,000 | 73  | 1394 | 0.272364281  | PCDH15       |
| 26 | 5,475,000 | 5,625,000 | 74  | 1486 | -0.704855699 | PCDH15       |
| 26 | 5,550,000 | 5,700,000 | 75  | 1819 | -0.438827571 | PCDH15       |
| 26 | 5,625,000 | 5,775,000 | 76  | 1821 | -0.091949684 |              |
| 26 | 5,700,000 | 5,850,000 | 77  | 1283 | 0.177087418  |              |
| 26 | 5,775,000 | 5,925,000 | 78  | 1170 | 0.343042136  |              |
| 26 | 5,850,000 | 6,000,000 | 79  | 1246 | 0.693450654  |              |
| 26 | 5,925,000 | 6,075,000 | 80  | 1379 | 0.313892473  |              |
| 26 | 6,000,000 | 6,150,000 | 81  | 1487 | 0.442216489  |              |
| 26 | 6,075,000 | 6,225,000 | 82  | 1379 | 0.613761062  |              |
| 26 | 6,150,000 | 6,300,000 | 83  | 1085 | 0.314220853  |              |
| 26 | 6,225,000 | 6,375,000 | 84  | 825  | 1.083831736  | MBL          |
| 26 | 6,300,000 | 6,450,000 | 85  | 1177 | 1.30682154   | MBL          |
| 26 | 6,375,000 | 6,525,000 | 86  | 1267 | 1.119528458  |              |
| 26 | 6,450,000 | 6,600,000 | 87  | 823  | 0.87674364   |              |
| 26 | 6,525,000 | 6,675,000 | 88  | 986  | -0.047246468 |              |
| 26 | 6,600,000 | 6,750,000 | 89  | 1403 | 0.181637988  |              |
| 26 | 6,675,000 | 6,825,000 | 90  | 1417 | 0.830614708  |              |
| 26 | 6,750,000 | 6,900,000 | 91  | 1144 | 0.896609556  | DKK1         |
| 26 | 6,825,000 | 6,975,000 | 92  | 965  | 1.074922647  | DKK1,PRKG1   |
| 26 | 6,900,000 | 7,050,000 | 93  | 987  | 0.60183069   | PRKG1        |
| 26 | 6,975,000 | 7,125,000 | 94  | 779  | -0.067449042 | PRKG1        |
| 26 | 7,050,000 | 7,200,000 | 95  | 772  | 0.695007952  | PRKG1        |
| 26 | 7,125,000 | 7,275,000 | 96  | 1134 | -0.048813371 | PRKG1        |
| 26 | 7,200,000 | 7,350,000 | 97  | 934  | -1.059898317 | PRKG1        |
| 26 | 7,275,000 | 7,425,000 | 98  | 583  | -0.779688066 | PRKG1        |
| 26 | 7,350,000 | 7,500,000 | 99  | 771  | -0.507912675 | CSTF2T,PRKG1 |
| 26 | 7,425,000 | 7,575,000 | 100 | 1007 | -0.805744434 | CSTF2T,PRKG1 |
| 26 | 7,500,000 | 7,650,000 | 101 | 1175 | 0.297304341  | PRKG1        |
| 26 | 7,575,000 | 7,725,000 | 102 | 1569 | 0.856236094  | PRKG1        |
| 26 | 7,650,000 | 7,800,000 | 103 | 1572 | 0.288913509  | PRKG1        |
| 26 | 7,725,000 | 7,875,000 | 104 | 1416 | -0.010425001 | PRKG1        |
| 26 | 7,800,000 | 7,950,000 | 105 | 1691 | 0.481082674  | PRKG1        |
| 26 | 7,875,000 | 8,025,000 | 106 | 1706 | 0.367479578  | PRKG1        |
| 26 | 7,950,000 | 8,100,000 | 107 | 1665 | 0.454533633  | PRKG1        |
| 26 | 8,025,000 | 8,175,000 | 108 | 1469 | 0.275648436  | PRKG1        |
| 26 | 8,100,000 | 8,250,000 | 109 | 966  | 0.266315065  | PRKG1        |

|    |            |            |     |      |              |                                       |
|----|------------|------------|-----|------|--------------|---------------------------------------|
| 26 | 8,175,000  | 8,325,000  | 110 | 649  | -0.070397056 | PRKG1                                 |
| 26 | 8,250,000  | 8,400,000  | 111 | 795  | -1.319877724 | PRKG1                                 |
| 26 | 8,325,000  | 8,475,000  | 112 | 1118 | -0.216992302 | PRKG1                                 |
| 26 | 8,400,000  | 8,550,000  | 113 | 1185 | 0.534669008  | A1CF                                  |
| 26 | 8,475,000  | 8,625,000  | 114 | 919  | -0.029584611 | A1CF                                  |
| 26 | 8,550,000  | 8,700,000  | 115 | 847  | -0.667242193 | A1CF,ENSBTAG00000003529               |
| 26 | 8,625,000  | 8,775,000  | 116 | 1073 | -0.368959254 | SGMS1,ENSBTAG00000003529              |
| 26 | 8,700,000  | 8,850,000  | 117 | 1028 | -0.808231072 | SGMS1                                 |
| 26 | 8,775,000  | 8,925,000  | 118 | 798  | -0.635574707 | SGMS1                                 |
| 26 | 8,850,000  | 9,000,000  | 119 | 748  | -0.073910646 |                                       |
| 26 | 8,925,000  | 9,075,000  | 120 | 668  | -0.148897189 |                                       |
| 26 | 9,000,000  | 9,150,000  | 121 | 543  | -0.367844717 |                                       |
| 26 | 9,075,000  | 9,225,000  | 122 | 473  | -0.52086261  | MINPP1                                |
| 26 | 9,150,000  | 9,300,000  | 123 | 541  | 0.352259649  | MINPP1                                |
| 26 | 9,225,000  | 9,375,000  | 124 | 685  | -0.86669644  | MINPP1,PAPSS2                         |
| 26 | 9,300,000  | 9,450,000  | 125 | 540  | -2.266042802 | ATAD1,PAPSS2                          |
| 26 | 9,375,000  | 9,525,000  | 126 | 499  | -0.908384037 | ATAD1,PAPSS2,PTEN                     |
| 26 | 9,450,000  | 9,600,000  | 127 | 506  | -0.154423969 | PTEN                                  |
| 26 | 9,525,000  | 9,675,000  | 128 | 779  | -0.098851088 | PTEN                                  |
| 26 | 9,600,000  | 9,750,000  | 129 | 860  | -0.202177003 |                                       |
| 26 | 9,675,000  | 9,825,000  | 130 | 552  | -1.044803014 |                                       |
| 26 | 9,750,000  | 9,900,000  | 131 | 524  | -1.529505348 |                                       |
| 26 | 9,825,000  | 9,975,000  | 132 | 537  | -2.148625871 |                                       |
| 26 | 9,900,000  | 10,050,000 | 133 | 490  | -1.025644811 |                                       |
| 26 | 9,975,000  | 10,125,000 | 134 | 675  | 0.176698794  |                                       |
| 26 | 10,050,000 | 10,200,000 | 135 | 872  | 0.158506627  |                                       |
| 26 | 10,125,000 | 10,275,000 | 136 | 1193 | 0.204806534  | LIPJ                                  |
| 26 | 10,200,000 | 10,350,000 | 137 | 1401 | -0.496390842 | LIPJ                                  |
| 26 | 10,275,000 | 10,425,000 | 138 | 1225 | -0.890056385 |                                       |
| 26 | 10,350,000 | 10,500,000 | 139 | 1195 | -0.62895116  | LIPF,LIPK,LIPN                        |
| 26 | 10,425,000 | 10,575,000 | 140 | 1096 | -0.061469495 | ANKRD22,LIPF,LIPK,LIPM,LIPN           |
| 26 | 10,500,000 | 10,650,000 | 141 | 788  | 0.746820417  | ANKRD22,LIPM,STAMBPL1                 |
| 26 | 10,575,000 | 10,725,000 | 142 | 551  | 0.782788066  | ACTA2,FAS,STAMBPL1                    |
| 26 | 10,650,000 | 10,800,000 | 143 | 688  | -0.412317429 | ACTA2,FAS,STAMBPL1                    |
| 26 | 10,725,000 | 10,875,000 | 144 | 753  | -1.051315348 | FAS                                   |
| 26 | 10,800,000 | 10,950,000 | 145 | 695  | 0.170112114  |                                       |
| 26 | 10,875,000 | 11,025,000 | 146 | 1168 | 0.997939592  | CH25H,LIPA                            |
| 26 | 10,950,000 | 11,100,000 | 147 | 1403 | 0.517871405  | CH25H,IFIT2,IFIT3,LIPA                |
| 26 | 11,025,000 | 11,175,000 | 148 | 956  | -0.025887396 | IFIT1,IFIT2,IFIT3,IFIT5,LIPA,SLC16A12 |
| 26 | 11,100,000 | 11,250,000 | 149 | 788  | 0.212233979  | IFIT1,IFIT5,SLC16A12                  |
| 26 | 11,175,000 | 11,325,000 | 150 | 914  | -0.109363081 | PANK1                                 |
| 26 | 11,250,000 | 11,400,000 | 151 | 812  | 0.462203837  | PANK1,ENSBTAG00000005708              |
| 26 | 11,325,000 | 11,475,000 | 152 | 750  | 0.258472989  | PANK1,ENSBTAG00000005708              |
| 26 | 11,400,000 | 11,550,000 | 153 | 855  | -0.44767991  | ENSBTAG00000005708                    |
| 26 | 11,475,000 | 11,625,000 | 154 | 843  | -0.127323559 |                                       |
| 26 | 11,550,000 | 11,700,000 | 155 | 631  | -0.357070317 |                                       |
| 26 | 11,625,000 | 11,775,000 | 156 | 1019 | 0.333820542  |                                       |
| 26 | 11,700,000 | 11,850,000 | 157 | 1324 | 0.650794648  |                                       |
| 26 | 11,775,000 | 11,925,000 | 158 | 1127 | 0.414674622  |                                       |
| 26 | 11,850,000 | 12,000,000 | 159 | 1186 | -0.262354518 |                                       |
| 26 | 11,925,000 | 12,075,000 | 160 | 1143 | -1.043693272 |                                       |
| 26 | 12,000,000 | 12,150,000 | 161 | 917  | -0.431667133 |                                       |
| 26 | 12,075,000 | 12,225,000 | 162 | 808  | -0.579433947 |                                       |

|    |            |            |     |      |              |                                                        |
|----|------------|------------|-----|------|--------------|--------------------------------------------------------|
| 26 | 12,150,000 | 12,300,000 | 163 | 707  | -1.104139822 | ENSBTAG00000034597                                     |
| 26 | 12,225,000 | 12,375,000 | 164 | 765  | 0.391256502  | ENSBTAG00000034597                                     |
| 26 | 12,300,000 | 12,450,000 | 165 | 828  | 1.033132379  | HTR7                                                   |
| 26 | 12,375,000 | 12,525,000 | 166 | 665  | 1.126127697  | HTR7                                                   |
| 26 | 12,450,000 | 12,600,000 | 167 | 603  | 1.092878542  | ANKRD1,HTR7,RPP30                                      |
| 26 | 12,525,000 | 12,675,000 | 168 | 528  | 1.243607475  | ANKRD1,RPP30                                           |
| 26 | 12,600,000 | 12,750,000 | 169 | 491  | 0.935565865  |                                                        |
| 26 | 12,675,000 | 12,825,000 | 170 | 694  | 0.50477848   |                                                        |
| 26 | 12,750,000 | 12,900,000 | 171 | 652  | 0.826018277  | PCGF5                                                  |
| 26 | 12,825,000 | 12,975,000 | 172 | 533  | 1.254949729  | PCGF5                                                  |
| 26 | 12,900,000 | 13,050,000 | 173 | 548  | 1.08944565   | PCGF5                                                  |
| 26 | 12,975,000 | 13,125,000 | 174 | 717  | 0.701877619  | HECTD2                                                 |
| 26 | 13,050,000 | 13,200,000 | 175 | 931  | 0.600344618  | HECTD2                                                 |
| 26 | 13,125,000 | 13,275,000 | 176 | 808  | -0.501196534 | HECTD2,PPP1R3C                                         |
| 26 | 13,200,000 | 13,350,000 | 177 | 569  | -1.069874815 | PPP1R3C                                                |
| 26 | 13,275,000 | 13,425,000 | 178 | 531  | -0.381379892 | TNKS2                                                  |
| 26 | 13,350,000 | 13,500,000 | 179 | 823  | -0.27374513  | FGFBP3,TNKS2                                           |
| 26 | 13,425,000 | 13,575,000 | 180 | 756  | -0.632681831 | BTAF1,FGFBP3,TNKS2                                     |
| 26 | 13,500,000 | 13,650,000 | 181 | 705  | 0.181643141  | BTAF1,CPEB3                                            |
| 26 | 13,575,000 | 13,725,000 | 182 | 836  | 0.807191989  | BTAF1,CPEB3                                            |
| 26 | 13,650,000 | 13,800,000 | 183 | 778  | 0.537391187  | CPEB3                                                  |
| 26 | 13,725,000 | 13,875,000 | 184 | 670  | 0.621068186  | CPEB3,MARCH5                                           |
| 26 | 13,800,000 | 13,950,000 | 185 | 926  | 1.015638951  | IDE,MARCH5                                             |
| 26 | 13,875,000 | 14,025,000 | 186 | 1213 | -0.693463717 | IDE                                                    |
| 26 | 13,950,000 | 14,100,000 | 187 | 932  | -0.951355077 | IDE,KIF11                                              |
| 26 | 14,025,000 | 14,175,000 | 188 | 780  | 0.331428609  | HHEX,KIF11                                             |
| 26 | 14,100,000 | 14,250,000 | 189 | 741  | -0.884574708 | HHEX                                                   |
| 26 | 14,175,000 | 14,325,000 | 190 | 498  | -1.615186719 | EXOC6                                                  |
| 26 | 14,250,000 | 14,400,000 | 191 | 323  | -0.169482365 | EXOC6                                                  |
| 26 | 14,325,000 | 14,475,000 | 192 | 286  | 0.09424749   | CYP26A1,CYP26C1,EXOC6                                  |
| 26 | 14,400,000 | 14,550,000 | 193 | 553  | 0.9988005    | CYP26A1,CYP26C1,EXOC6                                  |
| 26 | 14,475,000 | 14,625,000 | 194 | 811  | 0.866369501  |                                                        |
| 26 | 14,550,000 | 14,700,000 | 195 | 991  | 0.748680914  | MYOF                                                   |
| 26 | 14,625,000 | 14,775,000 | 196 | 1171 | 1.074515265  | MYOF                                                   |
| 26 | 14,700,000 | 14,850,000 | 197 | 1339 | 0.687137749  | MYOF                                                   |
| 26 | 14,775,000 | 14,925,000 | 198 | 1461 | 1.135375999  | CEP55,FFAR4,MYOF                                       |
| 26 | 14,850,000 | 15,000,000 | 199 | 1312 | 1.22723257   | CEP55,FFAR4,PDE6C,RBP4                                 |
| 26 | 14,925,000 | 15,075,000 | 200 | 847  | 0.150577407  | C26H10ORF4,FFAR4,PDE6C,RBP4                            |
| 26 | 15,000,000 | 15,150,000 | 201 | 735  | -0.514962741 | C26H10ORF4,PDE6C,ENSBTAG00000005106,ENSBTAG00000048118 |
| 26 | 15,075,000 | 15,225,000 | 202 | 1090 | 0.082921431  | ENSBTAG00000005106,ENSBTAG00000048118                  |
| 26 | 15,150,000 | 15,300,000 | 203 | 1071 | 0.758464934  | TMEM20                                                 |
| 26 | 15,225,000 | 15,375,000 | 204 | 863  | 0.538332328  | PLCE1,TMEM20                                           |
| 26 | 15,300,000 | 15,450,000 | 205 | 831  | 0.713919344  | PLCE1                                                  |
| 26 | 15,375,000 | 15,525,000 | 206 | 685  | 0.563887481  | PLCE1                                                  |
| 26 | 15,450,000 | 15,600,000 | 207 | 646  | 0.327734725  | PLCE1                                                  |
| 26 | 15,525,000 | 15,675,000 | 208 | 825  | 0.719794865  | PLCE1                                                  |
| 26 | 15,600,000 | 15,750,000 | 209 | 764  | 0.875570017  | NOC3L,PLCE1                                            |
| 26 | 15,675,000 | 15,825,000 | 210 | 444  | 0.873476089  | NOC3L,PLCE1,TBC1D12                                    |
| 26 | 15,750,000 | 15,900,000 | 211 | 244  | 0.646655894  | HELLS,TBC1D12                                          |
| 26 | 15,825,000 | 15,975,000 | 212 | 375  | 0.715341819  | CYP2C18,HELLS,TBC1D12                                  |
| 26 | 15,900,000 | 16,050,000 | 213 | 741  | 0.952715671  | CYP2C18,CYP2C87                                        |
| 26 | 15,975,000 | 16,125,000 | 214 | 759  | 1.047057578  | CYP2C87                                                |

|    |            |            |     |      |              |                                                               |
|----|------------|------------|-----|------|--------------|---------------------------------------------------------------|
| 26 | 16,050,000 | 16,200,000 | 215 | 647  | 0.735647234  | CYP2C87,ENSBTAG00000020375                                    |
| 26 | 16,125,000 | 16,275,000 | 216 | 715  | 0.638049032  | ENSBTAG00000020375,ENSBTAG00000023955                         |
| 26 | 16,200,000 | 16,350,000 | 217 | 595  | -0.447886216 | CYP2C19,ENSBTAG00000023955                                    |
| 26 | 16,275,000 | 16,425,000 | 218 | 548  | -1.363809145 | CYP2C19,ENSBTAG00000023955,ENSBTAG00000024700                 |
| 26 | 16,350,000 | 16,500,000 | 219 | 608  | -0.821987673 | CYP2C19,ENSBTAG00000024700,ENSBTAG00000047324                 |
| 26 | 16,425,000 | 16,575,000 | 220 | 951  | 0.080562886  | ENSBTAG00000024700,ENSBTAG00000047324                         |
| 26 | 16,500,000 | 16,650,000 | 221 | 1316 | 0.512032352  | PDLIM1,ENSBTAG00000047324                                     |
| 26 | 16,575,000 | 16,725,000 | 222 | 1123 | -0.93907668  | PDLIM1,SORBS1                                                 |
| 26 | 16,650,000 | 16,800,000 | 223 | 629  | -1.562811619 | SORBS1                                                        |
| 26 | 16,725,000 | 16,875,000 | 224 | 811  | 0.283150674  | SORBS1                                                        |
| 26 | 16,800,000 | 16,950,000 | 225 | 1118 | -0.253363336 | SORBS1                                                        |
| 26 | 16,875,000 | 17,025,000 | 226 | 1232 | -0.648280875 | ALDH18A1,SORBS1,TCTN3                                         |
| 26 | 16,950,000 | 17,100,000 | 227 | 1125 | -1.346942185 | ALDH18A1,ENTPD1,TCTN3                                         |
| 26 | 17,025,000 | 17,175,000 | 228 | 909  | -0.714973127 | ENTPD1,ENSBTAG00000039132                                     |
| 26 | 17,100,000 | 17,250,000 | 229 | 1285 | 0.531873608  | ENTPD1,ENSBTAG00000039132                                     |
| 26 | 17,175,000 | 17,325,000 | 230 | 1112 | -0.105876547 | CCNJ,ENSBTAG00000039132                                       |
| 26 | 17,250,000 | 17,400,000 | 231 | 469  | -0.650168339 | BLNK,CCNJ,ZNF518A,ENSBTAG00000039132                          |
| 26 | 17,325,000 | 17,475,000 | 232 | 642  | 0.104934668  | BLNK,ZNF518A                                                  |
| 26 | 17,400,000 | 17,550,000 | 233 | 1257 | 0.499084879  | BLNK,DNTT,OPALIN                                              |
| 26 | 17,475,000 | 17,625,000 | 234 | 1150 | 0.676569743  | DNTT,OPALIN,TLL2                                              |
| 26 | 17,550,000 | 17,700,000 | 235 | 871  | -0.153475999 | OPALIN,TLL2                                                   |
| 26 | 17,625,000 | 17,775,000 | 236 | 633  | -0.316456306 | TLL2,TM9SF3                                                   |
| 26 | 17,700,000 | 17,850,000 | 237 | 434  | 0.1454025    | PIK3AP1,TM9SF3                                                |
| 26 | 17,775,000 | 17,925,000 | 238 | 474  | -0.325912136 | PIK3AP1                                                       |
| 26 | 17,850,000 | 18,000,000 | 239 | 478  | -0.107430706 |                                                               |
| 26 | 17,925,000 | 18,075,000 | 240 | 524  | 0.696168002  |                                                               |
| 26 | 18,000,000 | 18,150,000 | 241 | 468  | 0.973726524  | C10orf12,LCOR,SLIT1                                           |
| 26 | 18,075,000 | 18,225,000 | 242 | 717  | 1.074565551  | C10orf12,LCOR,SLIT1                                           |
| 26 | 18,150,000 | 18,300,000 | 243 | 1005 | 0.162224361  | SLIT1                                                         |
| 26 | 18,225,000 | 18,375,000 | 244 | 689  | -0.915558993 | ENSBTAG00000040427                                            |
| 26 | 18,300,000 | 18,450,000 | 245 | 417  | -0.369102687 | FRAT2,ENSBTAG0000007956,ENSBTAG00000040427                    |
| 26 | 18,375,000 | 18,525,000 | 246 | 648  | 0.557678822  | EXOSC1,FRAT2,PGAM1,RRP12,ENSBTAG0000007956,ENSBTAG00000040427 |
| 26 | 18,450,000 | 18,600,000 | 247 | 806  | 1.090435147  | EXOSC1,MMS19,PGAM1,RRP12,UBTD1,ZDHHC16                        |
| 26 | 18,525,000 | 18,675,000 | 248 | 1203 | 0.003450031  | ANKRD2,EXOSC1,HOGA1,MMS19,MORN4,UBTD1,ZDHHC16                 |
| 26 | 18,600,000 | 18,750,000 | 249 | 1434 | -0.026157694 | ANKRD2,AVPI1,HOGA1,MARVELD1,MORN4,PI4K2A,UBTD1                |
| 26 | 18,675,000 | 18,825,000 | 250 | 1383 | 0.77192771   | AVPI1,MARVELD1,PI4K2A,SFRP5,ZFYVE27                           |
| 26 | 18,750,000 | 18,900,000 | 251 | 1543 | 0.117466105  | CRTAC1,GOLGA7B,SFRP5,ZFYVE27                                  |
| 26 | 18,825,000 | 18,975,000 | 252 | 1555 | -0.127406612 | CRTAC1,GOLGA7B                                                |
| 26 | 18,900,000 | 19,050,000 | 253 | 1572 | 0.534442971  | CRTAC1                                                        |
| 26 | 18,975,000 | 19,125,000 | 254 | 1818 | 0.735806173  | CRTAC1                                                        |
| 26 | 19,050,000 | 19,200,000 | 255 | 1792 | 0.710536998  | R3HCC1L                                                       |
| 26 | 19,125,000 | 19,275,000 | 256 | 1654 | 0.574930543  | LOXL4,R3HCC1L,ENSBTAG00000046848                              |
| 26 | 19,200,000 | 19,350,000 | 257 | 1320 | -0.144172548 | LOXL4,PYROXD2,ENSBTAG00000046848                              |
| 26 | 19,275,000 | 19,425,000 | 258 | 916  | -0.895776929 | HPS1,PYROXD2                                                  |
| 26 | 19,350,000 | 19,500,000 | 259 | 846  | -0.365998876 | HPS1,PYROXD2                                                  |
| 26 | 19,425,000 | 19,575,000 | 260 | 744  | 0.031080167  |                                                               |
| 26 | 19,500,000 | 19,650,000 | 261 | 742  | 0.635312879  |                                                               |

|    |            |            |     |      |              |                                                                            |
|----|------------|------------|-----|------|--------------|----------------------------------------------------------------------------|
| 26 | 19,575,000 | 19,725,000 | 262 | 600  | -0.294812676 |                                                                            |
| 26 | 19,650,000 | 19,800,000 | 263 | 345  | -1.321798682 |                                                                            |
| 26 | 19,725,000 | 19,875,000 | 264 | 278  | 0.201471881  |                                                                            |
| 26 | 19,800,000 | 19,950,000 | 265 | 498  | 0.220499205  |                                                                            |
| 26 | 19,875,000 | 20,025,000 | 266 | 852  | 0.800537943  |                                                                            |
| 26 | 19,950,000 | 20,100,000 | 267 | 1071 | 1.275714734  |                                                                            |
| 26 | 20,025,000 | 20,175,000 | 268 | 906  | 1.100468485  |                                                                            |
| 26 | 20,100,000 | 20,250,000 | 269 | 865  | 1.102762938  | CNNM1                                                                      |
| 26 | 20,175,000 | 20,325,000 | 270 | 1067 | 1.084698874  | CNNM1,GOT1                                                                 |
| 26 | 20,250,000 | 20,400,000 | 271 | 1249 | 0.10660215   | CNNM1,GOT1                                                                 |
| 26 | 20,325,000 | 20,475,000 | 272 | 1341 | -0.203214412 | NKX2-3,SLC25A28                                                            |
| 26 | 20,400,000 | 20,550,000 | 273 | 1233 | 0.235759618  | COX15,ENTPD7,NKX2-3,SLC25A28,ENSBTAG00000023629                            |
| 26 | 20,475,000 | 20,625,000 | 274 | 1147 | 0.477091026  | ABCC2,COX15,CUTC,ENTPD7,SLC25A28,ENSBTAG000023629                          |
| 26 | 20,550,000 | 20,700,000 | 275 | 1291 | 0.605281567  | ABCC2,COX15,CUTC,DNMBP                                                     |
| 26 | 20,625,000 | 20,775,000 | 276 | 1492 | 0.786985561  | ABCC2,DNMBP                                                                |
| 26 | 20,700,000 | 20,850,000 | 277 | 1310 | 0.69122862   | CPN1,DNMBP                                                                 |
| 26 | 20,775,000 | 20,925,000 | 278 | 967  | 0.658816597  | CPN1,DNMBP,ERLIN1,ENSBTAG00000023939                                       |
| 26 | 20,850,000 | 21,000,000 | 279 | 959  | 0.701412098  | CHUK,CPN1,ERLIN1,ENSBTAG00000023939                                        |
| 26 | 20,925,000 | 21,075,000 | 280 | 1020 | 0.426261154  | BLOC1S2,CHUK,CWF19L1,ERLIN1,PKD2L1                                         |
| 26 | 21,000,000 | 21,150,000 | 281 | 786  | 0.068885648  | BLOC1S2,CHUK,CWF19L1,PKD2L1,SCD                                            |
| 26 | 21,075,000 | 21,225,000 | 282 | 664  | -0.039387868 | PKD2L1,SCD                                                                 |
| 26 | 21,150,000 | 21,300,000 | 283 | 656  | 0.482036298  | HIF1AN,NDUFB8,SEC31B,WNT8B                                                 |
| 26 | 21,225,000 | 21,375,000 | 284 | 747  | 0.030398624  | HIF1AN,NDUFB8,SEC31B,WNT8B                                                 |
| 26 | 21,300,000 | 21,450,000 | 285 | 600  | -0.343878052 | HIF1AN                                                                     |
| 26 | 21,375,000 | 21,525,000 | 286 | 362  | 0.232111737  | PAX2                                                                       |
| 26 | 21,450,000 | 21,600,000 | 287 | 396  | 0.01338023   | PAX2                                                                       |
| 26 | 21,525,000 | 21,675,000 | 288 | 300  | 0.132249658  | C26H10ORF6,PAX2                                                            |
| 26 | 21,600,000 | 21,750,000 | 289 | 230  | 0.093326596  | C26H10ORF2,C26H10ORF6,LZTS2,MRPL43,PDZD7,SEMA4G,SFXN3,ENSBTAG00000039834   |
| 26 | 21,675,000 | 21,825,000 | 290 | 323  | -0.504492369 | C26H10ORF2,KAZALD1,LZTS2,MRPL43,PDZD7,SEMA4G,SFXN3,TLX1,ENSBTAG00000039834 |
| 26 | 21,750,000 | 21,900,000 | 291 | 509  | -0.165757282 | KAZALD1,LBX1,TLX1                                                          |
| 26 | 21,825,000 | 21,975,000 | 292 | 573  | 0.598278582  | LBX1,TLX1                                                                  |
| 26 | 21,900,000 | 22,050,000 | 293 | 556  | 0.988611605  | BTRC                                                                       |
| 26 | 21,975,000 | 22,125,000 | 294 | 386  | 0.937899502  | BTRC                                                                       |
| 26 | 22,050,000 | 22,200,000 | 295 | 428  | 0.730248201  | BTRC,POLL                                                                  |
| 26 | 22,125,000 | 22,275,000 | 296 | 516  | 0.477729283  | BTRC,DPCD,FBXW4,POLL                                                       |
| 26 | 22,200,000 | 22,350,000 | 297 | 442  | 0.34729501   | DPCD,FBXW4,POLL                                                            |
| 26 | 22,275,000 | 22,425,000 | 298 | 537  | -0.232478215 | FBXW4,FGF8,KCNIP2,MGEA5,NPM3                                               |
| 26 | 22,350,000 | 22,500,000 | 299 | 624  | 0.300538844  | C10orf76,FGF8,KCNIP2,MGEA5,NPM3                                            |
| 26 | 22,425,000 | 22,575,000 | 300 | 592  | 0.373213966  | C10orf76,KCNIP2                                                            |
| 26 | 22,500,000 | 22,650,000 | 301 | 455  | -0.306750195 | C10orf76,HPS6                                                              |
| 26 | 22,575,000 | 22,725,000 | 302 | 483  | 0.080702696  | C10orf76,HPS6,LDB1,NOLC1,PPRC1                                             |
| 26 | 22,650,000 | 22,800,000 | 303 | 546  | 0.745846868  | ELOVL3,GBF1,LDB1,NOLC1,PITX3,PPRC1                                         |
| 26 | 22,725,000 | 22,875,000 | 304 | 441  | 0.470296368  | ELOVL3,GBF1,PITX3                                                          |
| 26 | 22,800,000 | 22,950,000 | 305 | 485  | 0.082210564  | CUEDC2,FBXL15,GBF1,NFKB2,PSD,TMEM180                                       |
| 26 | 22,875,000 | 23,025,000 | 306 | 757  | 0.220430208  | ACTR1A,CUEDC2,FBXL15,GBF1,NFKB2,PSD,TMEM180                                |
| 26 | 22,950,000 | 23,100,000 | 307 | 1757 | 0.820928451  | ACTR1A,TMEM180                                                             |
| 26 | 23,025,000 | 23,175,000 | 308 | 2485 | 0.694919055  |                                                                            |
| 26 | 23,100,000 | 23,250,000 | 309 | 2248 | 0.243646094  |                                                                            |

|    |            |            |     |      |              |                                                                        |
|----|------------|------------|-----|------|--------------|------------------------------------------------------------------------|
| 26 | 23,175,000 | 23,325,000 | 310 | 2449 | -0.058583917 |                                                                        |
| 26 | 23,250,000 | 23,400,000 | 311 | 2884 | 0.11186463   |                                                                        |
| 26 | 23,325,000 | 23,475,000 | 312 | 2516 | 0.422929355  | SUFU                                                                   |
| 26 | 23,400,000 | 23,550,000 | 313 | 1260 | 0.555891299  | SUFU,TRIM8                                                             |
| 26 | 23,475,000 | 23,625,000 | 314 | 630  | 0.307690734  | ARL3,SFXN2,SUFU,TRIM8                                                  |
| 26 | 23,550,000 | 23,700,000 | 315 | 857  | 0.409342106  | ARL3,CYP17A1,SFXN2,WBP1L                                               |
| 26 | 23,625,000 | 23,775,000 | 316 | 690  | 0.3910337    | ARL3,AS3MT,CYP17A1,WBP1L,ENSBTAG00000021246                            |
| 26 | 23,700,000 | 23,850,000 | 317 | 584  | 0.452422879  | ARL3,AS3MT,CNNM2,CYP17A1,ENSBTAG00000021246                            |
| 26 | 23,775,000 | 23,925,000 | 318 | 1198 | 0.548619052  | CNNM2                                                                  |
| 26 | 23,850,000 | 24,000,000 | 319 | 1238 | 0.419582288  | CNNM2,NT5C2                                                            |
| 26 | 23,925,000 | 24,075,000 | 320 | 793  | 0.628193656  | CNNM2,NT5C2                                                            |
| 26 | 24,000,000 | 24,150,000 | 321 | 647  | 0.694022551  | INA,NT5C2                                                              |
| 26 | 24,075,000 | 24,225,000 | 322 | 593  | 0.178188399  | INA,NT5C2,TAF5,ENSBTAG00000009879,ENSBTAG000038993                     |
| 26 | 24,150,000 | 24,300,000 | 323 | 874  | 0.284154133  | CALHM1,CALHM2,PDCD11,TAF5,USMG5,ENSBTAG000009879,ENSBTAG00000038993    |
| 26 | 24,225,000 | 24,375,000 | 324 | 1157 | 0.73381099   | CALHM1,CALHM2,CALHM3,NEURL1,PDCD11,TAF5,USMG5                          |
| 26 | 24,300,000 | 24,450,000 | 325 | 1122 | 0.367412814  | CALHM3,NEURL1,SH3PXD2A                                                 |
| 26 | 24,375,000 | 24,525,000 | 326 | 959  | 0.232191569  | NEURL1,SH3PXD2A                                                        |
| 26 | 24,450,000 | 24,600,000 | 327 | 1051 | -0.051282953 | SH3PXD2A                                                               |
| 26 | 24,525,000 | 24,675,000 | 328 | 1136 | -0.548543218 | ASMTL                                                                  |
| 26 | 24,600,000 | 24,750,000 | 329 | 1091 | -0.259582813 | ASMTL,OBFC1                                                            |
| 26 | 24,675,000 | 24,825,000 | 330 | 1327 | 0.195891344  | ASMTL,OBFC1,SLK                                                        |
| 26 | 24,750,000 | 24,900,000 | 331 | 1342 | 0.269371748  | COL17A1,SLK                                                            |
| 26 | 24,825,000 | 24,975,000 | 332 | 1061 | 0.555583058  | CFAP43,COL17A1,SFR1,SLK                                                |
| 26 | 24,900,000 | 25,050,000 | 333 | 1043 | 0.65034558   | CFAP43,SFR1                                                            |
| 26 | 24,975,000 | 25,125,000 | 334 | 1208 | 0.911458721  | CFAP43,GSTO2,ENSBTAG00000003989,ENSBTAG0000038540                      |
| 26 | 25,050,000 | 25,200,000 | 335 | 1421 | 0.731738026  | CFAP43,CFAP58,GSTO2,ITPRIP,ENSBTAG00000003989,ENSBTAG00000038540       |
| 26 | 25,125,000 | 25,275,000 | 336 | 1478 | -0.038279348 | CFAP58,ITPRIP                                                          |
| 26 | 25,200,000 | 25,350,000 | 337 | 1207 | -0.129325263 | CFAP58                                                                 |
| 26 | 25,275,000 | 25,425,000 | 338 | 1057 | 0.040393714  | CFAP58                                                                 |
| 26 | 25,350,000 | 25,500,000 | 339 | 1034 | -0.574079821 |                                                                        |
| 26 | 25,425,000 | 25,575,000 | 340 | 1100 | -0.795818134 |                                                                        |
| 26 | 25,500,000 | 25,650,000 | 341 | 1402 | 0.182770563  |                                                                        |
| 26 | 25,575,000 | 25,725,000 | 342 | 1419 | 0.275464504  | ENSBTAG00000010522                                                     |
| 26 | 25,650,000 | 25,800,000 | 343 | 1424 | 0.025799163  | ENSBTAG00000010522,ENSBTAG00000046727                                  |
| 26 | 25,725,000 | 25,875,000 | 344 | 1556 | -0.112952654 | ECHS1,FUOM,MTG1,PAOX,SPRN,ENSBTAG00000010522,ENSBTAG00000046727        |
| 26 | 25,800,000 | 25,950,000 | 345 | 1726 | -0.035776252 | CALY,ECHS1,FUOM,MTG1,PAOX,PRAP1,SPRN,TUBGCP2,ZNF511,ENSBTAG00000046499 |
| 26 | 25,875,000 | 26,025,000 | 346 | 1572 | 0.32555263   | ADAM8,CALY,FUOM,PRAP1,TUBGCP2,UTF1,ZNF511,ENSBTAG00000046499           |
| 26 | 25,950,000 | 26,100,000 | 347 | 1385 | 0.804463367  | ADAM8,TUBGCP2,UTF1                                                     |
| 26 | 26,025,000 | 26,175,000 | 348 | 1322 | 0.890540234  |                                                                        |
| 26 | 26,100,000 | 26,250,000 | 349 | 1004 | 0.057381611  |                                                                        |
| 26 | 26,175,000 | 26,325,000 | 350 | 1142 | -0.475905179 | SORCS3                                                                 |
| 26 | 26,250,000 | 26,400,000 | 351 | 1374 | -0.158634764 | SORCS3                                                                 |
| 26 | 26,325,000 | 26,475,000 | 352 | 1344 | -0.25718496  | SORCS3                                                                 |



|    |            |            |     |      |              |        |
|----|------------|------------|-----|------|--------------|--------|
| 26 | 26,400,000 | 26,550,000 | 353 | 1220 | -0.162051441 |        |
| 26 | 26,475,000 | 26,625,000 | 354 | 1069 | 0.24861906   |        |
| 26 | 26,550,000 | 26,700,000 | 355 | 1055 | -0.202778247 |        |
| 26 | 26,625,000 | 26,775,000 | 356 | 1346 | 0.29268677   |        |
| 26 | 26,700,000 | 26,850,000 | 357 | 1330 | 0.481049409  |        |
| 26 | 26,775,000 | 26,925,000 | 358 | 752  | 0.408267441  |        |
| 26 | 26,850,000 | 27,000,000 | 359 | 573  | -1.041496884 |        |
| 26 | 26,925,000 | 27,075,000 | 360 | 805  | -1.25281897  |        |
| 26 | 27,000,000 | 27,150,000 | 361 | 992  | -0.05138339  |        |
| 26 | 27,075,000 | 27,225,000 | 362 | 1036 | -0.313445462 |        |
| 26 | 27,150,000 | 27,300,000 | 363 | 912  | -0.709676698 |        |
| 26 | 27,225,000 | 27,375,000 | 364 | 1119 | 0.516917083  |        |
| 26 | 27,300,000 | 27,450,000 | 365 | 956  | 0.984167483  |        |
| 26 | 27,375,000 | 27,525,000 | 366 | 725  | 0.924330101  |        |
| 26 | 27,450,000 | 27,600,000 | 367 | 1138 | 0.106472821  |        |
| 26 | 27,525,000 | 27,675,000 | 368 | 1215 | -0.381977368 |        |
| 26 | 27,600,000 | 27,750,000 | 369 | 1339 | 0.651570102  |        |
| 26 | 27,675,000 | 27,825,000 | 370 | 1520 | 1.092030308  | SORCS1 |
| 26 | 27,750,000 | 27,900,000 | 371 | 1408 | 1.034186477  | SORCS1 |
| 26 | 27,825,000 | 27,975,000 | 372 | 1192 | 0.609476046  | SORCS1 |
| 26 | 27,900,000 | 28,050,000 | 373 | 1060 | -0.07575499  | SORCS1 |
| 26 | 27,975,000 | 28,125,000 | 374 | 773  | -0.331481691 | SORCS1 |
| 26 | 28,050,000 | 28,200,000 | 375 | 843  | -1.357756521 | SORCS1 |
| 26 | 28,125,000 | 28,275,000 | 376 | 952  | -1.155058463 | SORCS1 |
| 26 | 28,200,000 | 28,350,000 | 377 | 917  | -0.393305634 | SORCS1 |
| 26 | 28,275,000 | 28,425,000 | 378 | 1001 | 0.208402818  | SORCS1 |
| 26 | 28,350,000 | 28,500,000 | 379 | 759  | 0.952572442  | SORCS1 |
| 26 | 28,425,000 | 28,575,000 | 380 | 750  | -0.5170831   |        |
| 26 | 28,500,000 | 28,650,000 | 381 | 1037 | -0.787204616 |        |
| 26 | 28,575,000 | 28,725,000 | 382 | 904  | -0.507127353 |        |
| 26 | 28,650,000 | 28,800,000 | 383 | 894  | -0.761846918 |        |
| 26 | 28,725,000 | 28,875,000 | 384 | 1018 | -0.814583265 |        |
| 26 | 28,800,000 | 28,950,000 | 385 | 553  | -0.672512912 |        |
| 26 | 28,875,000 | 29,025,000 | 386 | 219  | -0.605100996 |        |
| 26 | 28,950,000 | 29,100,000 | 387 | 208  | -0.569085509 |        |
| 26 | 29,025,000 | 29,175,000 | 388 | 609  | -0.050532283 |        |
| 26 | 29,100,000 | 29,250,000 | 389 | 918  | -0.029554695 |        |
| 26 | 29,175,000 | 29,325,000 | 390 | 1055 | 0.410419443  |        |
| 26 | 29,250,000 | 29,400,000 | 391 | 985  | 0.957718868  |        |
| 26 | 29,325,000 | 29,475,000 | 392 | 1067 | 0.759806614  |        |
| 26 | 29,400,000 | 29,550,000 | 393 | 1265 | 0.729387937  |        |
| 26 | 29,475,000 | 29,625,000 | 394 | 1074 | 0.656772624  |        |
| 26 | 29,550,000 | 29,700,000 | 395 | 1171 | 0.476913926  |        |
| 26 | 29,625,000 | 29,775,000 | 396 | 1153 | 0.399680974  |        |
| 26 | 29,700,000 | 29,850,000 | 397 | 1086 | 0.36517424   |        |
| 26 | 29,775,000 | 29,925,000 | 398 | 1095 | 0.040786735  |        |
| 26 | 29,850,000 | 30,000,000 | 399 | 1137 | 0.143126586  |        |
| 26 | 29,925,000 | 30,075,000 | 400 | 1404 | 0.713208609  |        |
| 26 | 30,000,000 | 30,150,000 | 401 | 1567 | 0.984264958  |        |
| 26 | 30,075,000 | 30,225,000 | 402 | 1368 | 0.90075008   |        |
| 26 | 30,150,000 | 30,300,000 | 403 | 1328 | -0.018537766 |        |
| 26 | 30,225,000 | 30,375,000 | 404 | 1223 | -0.345043154 |        |
| 26 | 30,300,000 | 30,450,000 | 405 | 1091 | 0.647799796  |        |

|    |            |            |     |      |              |                                      |
|----|------------|------------|-----|------|--------------|--------------------------------------|
| 26 | 30,375,000 | 30,525,000 | 406 | 1137 | 0.947991944  |                                      |
| 26 | 30,450,000 | 30,600,000 | 407 | 877  | 0.547834738  |                                      |
| 26 | 30,525,000 | 30,675,000 | 408 | 856  | 0.204445425  |                                      |
| 26 | 30,600,000 | 30,750,000 | 409 | 1199 | 0.339902222  | XPNPEP1                              |
| 26 | 30,675,000 | 30,825,000 | 410 | 1175 | 0.678341726  | XPNPEP1                              |
| 26 | 30,750,000 | 30,900,000 | 411 | 885  | 0.774919274  | ADD3                                 |
| 26 | 30,825,000 | 30,975,000 | 412 | 864  | 0.073296798  | ADD3                                 |
| 26 | 30,900,000 | 31,050,000 | 413 | 888  | -0.062115428 | ADD3,MXI1                            |
| 26 | 30,975,000 | 31,125,000 | 414 | 964  | 0.425692805  | MXI1                                 |
| 26 | 31,050,000 | 31,200,000 | 415 | 1036 | 0.50989329   | MXI1,SMNDC1                          |
| 26 | 31,125,000 | 31,275,000 | 416 | 985  | 0.2726572    | MXI1,SMNDC1                          |
| 26 | 31,200,000 | 31,350,000 | 417 | 1020 | 0.475455206  | DUSP5                                |
| 26 | 31,275,000 | 31,425,000 | 418 | 914  | 0.489407046  | DUSP5,SMC3                           |
| 26 | 31,350,000 | 31,500,000 | 419 | 719  | 0.801449501  | RBM20,SMC3                           |
| 26 | 31,425,000 | 31,575,000 | 420 | 909  | 0.555252267  | RBM20,SMC3                           |
| 26 | 31,500,000 | 31,650,000 | 421 | 1133 | 0.175769941  | RBM20,ENSBTAG00000047270             |
| 26 | 31,575,000 | 31,725,000 | 422 | 810  | 0.323972152  | PDCD4,RBM20,ENSBTAG00000047270       |
| 26 | 31,650,000 | 31,800,000 | 423 | 348  | 0.46544894   | PDCD4,RBM20,SHOC2,ENSBTAG00000046362 |
| 26 | 31,725,000 | 31,875,000 | 424 | 262  | -0.243045707 | PDCD4,SHOC2,ENSBTAG00000046362       |
| 26 | 31,800,000 | 31,950,000 | 425 | 333  | -0.173516302 | SHOC2                                |
| 26 | 31,875,000 | 32,025,000 | 426 | 439  | 0.243342662  |                                      |
| 26 | 31,950,000 | 32,100,000 | 427 | 799  | 0.45499814   |                                      |
| 26 | 32,025,000 | 32,175,000 | 428 | 1295 | 0.271299508  |                                      |
| 26 | 32,100,000 | 32,250,000 | 429 | 1048 | 0.173214129  |                                      |
| 26 | 32,175,000 | 32,325,000 | 430 | 880  | 0.807240068  |                                      |
| 26 | 32,250,000 | 32,400,000 | 431 | 1172 | 0.902928553  |                                      |
| 26 | 32,325,000 | 32,475,000 | 432 | 1218 | 0.279657039  |                                      |
| 26 | 32,400,000 | 32,550,000 | 433 | 1096 | -0.018414891 |                                      |
| 26 | 32,475,000 | 32,625,000 | 434 | 899  | 0.554511439  |                                      |
| 26 | 32,550,000 | 32,700,000 | 435 | 664  | -0.330598343 |                                      |
| 26 | 32,625,000 | 32,775,000 | 436 | 780  | -0.729178913 |                                      |
| 26 | 32,700,000 | 32,850,000 | 437 | 1124 | -0.062166184 |                                      |
| 26 | 32,775,000 | 32,925,000 | 438 | 1116 | -0.231393836 |                                      |
| 26 | 32,850,000 | 33,000,000 | 439 | 685  | -0.807561981 | GPAM                                 |
| 26 | 32,925,000 | 33,075,000 | 440 | 305  | -1.318554405 | GPAM                                 |
| 26 | 33,000,000 | 33,150,000 | 441 | 433  | -0.642315914 | GPAM,TECTB                           |
| 26 | 33,075,000 | 33,225,000 | 442 | 725  | 0.614591785  | ACSL5,TECTB                          |
| 26 | 33,150,000 | 33,300,000 | 443 | 828  | 0.775886077  | ACSL5,VTI1A,ZDHHC6                   |
| 26 | 33,225,000 | 33,375,000 | 444 | 700  | -0.527537381 | ACSL5,VTI1A,ZDHHC6                   |
| 26 | 33,300,000 | 33,450,000 | 445 | 785  | -0.232775305 | VTI1A                                |
| 26 | 33,375,000 | 33,525,000 | 446 | 920  | -0.000483976 |                                      |
| 26 | 33,450,000 | 33,600,000 | 447 | 901  | -0.333850125 |                                      |
| 26 | 33,525,000 | 33,675,000 | 448 | 914  | 0.016403159  |                                      |
| 26 | 33,600,000 | 33,750,000 | 449 | 1107 | 0.116776887  |                                      |
| 26 | 33,675,000 | 33,825,000 | 450 | 1052 | -0.138312643 | TCFL2                                |
| 26 | 33,750,000 | 33,900,000 | 451 | 800  | 0.258412702  | TCFL2                                |
| 26 | 33,825,000 | 33,975,000 | 452 | 699  | 0.161012172  | TCFL2                                |
| 26 | 33,900,000 | 34,050,000 | 453 | 664  | -0.498540107 | TCFL2                                |
| 26 | 33,975,000 | 34,125,000 | 454 | 868  | -1.504809831 |                                      |
| 26 | 34,050,000 | 34,200,000 | 455 | 792  | -1.658871484 |                                      |
| 26 | 34,125,000 | 34,275,000 | 456 | 698  | 0.234691956  |                                      |
| 26 | 34,200,000 | 34,350,000 | 457 | 1031 | 0.435241957  | HABP2,NRAP                           |
| 26 | 34,275,000 | 34,425,000 | 458 | 1211 | 0.675343383  | HABP2,NRAP                           |

|    |            |            |     |      |              |                                 |
|----|------------|------------|-----|------|--------------|---------------------------------|
| 26 | 34,350,000 | 34,500,000 | 459 | 962  | 0.631009453  | CASP7,NRAP                      |
| 26 | 34,425,000 | 34,575,000 | 460 | 618  | 0.31746401   | CASP7,DCLRE1A,PLEKHS1           |
| 26 | 34,500,000 | 34,650,000 | 461 | 459  | 0.628895926  | DCLRE1A,NHLRC2,PLEKHS1          |
| 26 | 34,575,000 | 34,725,000 | 462 | 573  | 0.325445219  | DCLRE1A,NHLRC2                  |
| 26 | 34,650,000 | 34,800,000 | 463 | 638  | -0.395357643 |                                 |
| 26 | 34,725,000 | 34,875,000 | 464 | 483  | -0.524754643 | ADRB1                           |
| 26 | 34,800,000 | 34,950,000 | 465 | 414  | 0.490026928  | ADRB1,CCDC186,TDRD1             |
| 26 | 34,875,000 | 35,025,000 | 466 | 635  | 0.588856827  | CCDC186,TDRD1,VWA2              |
| 26 | 34,950,000 | 35,100,000 | 467 | 851  | 0.193107055  | AFAP1L2,TDRD1,VWA2              |
| 26 | 35,025,000 | 35,175,000 | 468 | 765  | -0.555082966 | AFAP1L2,VWA2                    |
| 26 | 35,100,000 | 35,250,000 | 469 | 940  | -0.881988643 | ABLIM1,AFAP1L2                  |
| 26 | 35,175,000 | 35,325,000 | 470 | 1119 | -0.510486777 | ABLIM1                          |
| 26 | 35,250,000 | 35,400,000 | 471 | 1040 | -0.858015949 | ABLIM1                          |
| 26 | 35,325,000 | 35,475,000 | 472 | 1012 | -0.168764191 | ABLIM1,ENSBTAG00000013820       |
| 26 | 35,400,000 | 35,550,000 | 473 | 1074 | 0.553639982  | ENSBTAG00000013820              |
| 26 | 35,475,000 | 35,625,000 | 474 | 1137 | -0.149208648 | FAM160B1                        |
| 26 | 35,550,000 | 35,700,000 | 475 | 1090 | -0.309145206 | FAM160B1,TRUB1                  |
| 26 | 35,625,000 | 35,775,000 | 476 | 1127 | 0.29927744   | TRUB1                           |
| 26 | 35,700,000 | 35,850,000 | 477 | 1060 | 0.663161107  | TRUB1                           |
| 26 | 35,775,000 | 35,925,000 | 478 | 1043 | 1.049308641  | ATRNL1                          |
| 26 | 35,850,000 | 36,000,000 | 479 | 1019 | 1.121325067  | ATRNL1                          |
| 26 | 35,925,000 | 36,075,000 | 480 | 1255 | 0.974005088  | ATRNL1                          |
| 26 | 36,000,000 | 36,150,000 | 481 | 1113 | 0.916215447  | ATRNL1                          |
| 26 | 36,075,000 | 36,225,000 | 482 | 604  | 0.408917344  | ATRNL1                          |
| 26 | 36,150,000 | 36,300,000 | 483 | 626  | -0.405164438 | ATRNL1                          |
| 26 | 36,225,000 | 36,375,000 | 484 | 809  | -0.741207484 |                                 |
| 26 | 36,300,000 | 36,450,000 | 485 | 824  | 0.087620989  |                                 |
| 26 | 36,375,000 | 36,525,000 | 486 | 770  | 0.586513262  |                                 |
| 26 | 36,450,000 | 36,600,000 | 487 | 918  | 0.347465821  |                                 |
| 26 | 36,525,000 | 36,675,000 | 488 | 1194 | 0.642837716  |                                 |
| 26 | 36,600,000 | 36,750,000 | 489 | 1417 | -0.161972121 |                                 |
| 26 | 36,675,000 | 36,825,000 | 490 | 1351 | -1.069887323 | GFRA1                           |
| 26 | 36,750,000 | 36,900,000 | 491 | 811  | -0.511322088 | GFRA1                           |
| 26 | 36,825,000 | 36,975,000 | 492 | 653  | -0.797331052 | GFRA1                           |
| 26 | 36,900,000 | 37,050,000 | 493 | 953  | -0.185122703 | GFRA1                           |
| 26 | 36,975,000 | 37,125,000 | 494 | 757  | 0.628480867  | CCDC172,GFRA1                   |
| 26 | 37,050,000 | 37,200,000 | 495 | 564  | 0.12738415   | CCDC172,PNLIPRP3                |
| 26 | 37,125,000 | 37,275,000 | 496 | 561  | 0.357554613  | CCDC172,PNLIPRP3                |
| 26 | 37,200,000 | 37,350,000 | 497 | 787  | 0.964260138  | PNLIP,PNLIPRP2,PNLIPRP3         |
| 26 | 37,275,000 | 37,425,000 | 498 | 932  | 0.329485834  | C10orf82,HSPA12A,PNLIP,PNLIPRP2 |
| 26 | 37,350,000 | 37,500,000 | 499 | 749  | -1.530077596 | C10orf82,HSPA12A,PNLIPRP2       |
| 26 | 37,425,000 | 37,575,000 | 500 | 535  | -1.288899571 | ENO4,HSPA12A                    |
| 26 | 37,500,000 | 37,650,000 | 501 | 458  | -0.396880545 | ENO4,KIAA1598                   |
| 26 | 37,575,000 | 37,725,000 | 502 | 532  | -2.168076259 | ENO4,KIAA1598                   |
| 26 | 37,650,000 | 37,800,000 | 503 | 506  | -1.807738802 | KIAA1598,VAX1                   |
| 26 | 37,725,000 | 37,875,000 | 504 | 742  | -0.034978206 | KCNK18,VAX1                     |
| 26 | 37,800,000 | 37,950,000 | 505 | 966  | 0.227453334  | KCNK18,PDZD8,SLC18A2,VAX1       |
| 26 | 37,875,000 | 38,025,000 | 506 | 645  | 0.214015314  | PDZD8,SLC18A2                   |
| 26 | 37,950,000 | 38,100,000 | 507 | 611  | -0.593533948 | PDZD8                           |
| 26 | 38,025,000 | 38,175,000 | 508 | 751  | -1.075561819 | EMX2                            |
| 26 | 38,100,000 | 38,250,000 | 509 | 608  | -1.285852015 | EMX2                            |
| 26 | 38,175,000 | 38,325,000 | 510 | 533  | -0.369675137 |                                 |
| 26 | 38,250,000 | 38,400,000 | 511 | 500  | 0.66829302   |                                 |

|    |            |            |     |      |              |                                  |
|----|------------|------------|-----|------|--------------|----------------------------------|
| 26 | 38,325,000 | 38,475,000 | 512 | 551  | 1.21815328   |                                  |
| 26 | 38,400,000 | 38,550,000 | 513 | 477  | 1.136358733  |                                  |
| 26 | 38,475,000 | 38,625,000 | 514 | 254  | 0.678596911  | RAB11FIP2                        |
| 26 | 38,550,000 | 38,700,000 | 515 | 318  | 0.363918236  | RAB11FIP2                        |
| 26 | 38,625,000 | 38,775,000 | 516 | 474  | 0.932230232  | RAB11FIP2                        |
| 26 | 38,700,000 | 38,850,000 | 517 | 586  | 0.742356905  |                                  |
| 26 | 38,775,000 | 38,925,000 | 518 | 690  | 0.425030519  | FAM204A                          |
| 26 | 38,850,000 | 39,000,000 | 519 | 657  | 0.021232328  | FAM204A                          |
| 26 | 38,925,000 | 39,075,000 | 520 | 707  | -0.859776786 | FAM204A                          |
| 26 | 39,000,000 | 39,150,000 | 521 | 707  | -0.169299006 |                                  |
| 26 | 39,075,000 | 39,225,000 | 522 | 603  | 0.400993346  | PRLHR                            |
| 26 | 39,150,000 | 39,300,000 | 523 | 458  | 0.02636535   | CACUL1,PRLHR                     |
| 26 | 39,225,000 | 39,375,000 | 524 | 403  | 1.062241858  | CACUL1                           |
| 26 | 39,300,000 | 39,450,000 | 525 | 494  | 1.206799462  | CACUL1                           |
| 26 | 39,375,000 | 39,525,000 | 526 | 613  | 0.306078334  |                                  |
| 26 | 39,450,000 | 39,600,000 | 527 | 591  | -0.090712713 | EIF3A                            |
| 26 | 39,525,000 | 39,675,000 | 528 | 489  | -0.134543235 | EIF3A,FAM45A,PRDX3,SFXN4         |
| 26 | 39,600,000 | 39,750,000 | 529 | 477  | -0.340161535 | EIF3A,FAM45A,GRK5,PRDX3,SFXN4    |
| 26 | 39,675,000 | 39,825,000 | 530 | 571  | 0.010028012  | GRK5,PRDX3                       |
| 26 | 39,750,000 | 39,900,000 | 531 | 673  | -0.278082314 | GRK5                             |
| 26 | 39,825,000 | 39,975,000 | 532 | 1040 | 0.270118365  | GRK5                             |
| 26 | 39,900,000 | 40,050,000 | 533 | 1286 | 0.46388848   | GRK5,RGS10,TIAL1                 |
| 26 | 39,975,000 | 40,125,000 | 534 | 1107 | 0.737223132  | BAG3,RGS10,TIAL1                 |
| 26 | 40,050,000 | 40,200,000 | 535 | 907  | 0.86490176   | BAG3,TIAL1                       |
| 26 | 40,125,000 | 40,275,000 | 536 | 597  | 0.392225542  | BAG3                             |
| 26 | 40,200,000 | 40,350,000 | 537 | 676  | 0.974414386  | MCMBP,SEC23IP,ENSBTAG00000021801 |
| 26 | 40,275,000 | 40,425,000 | 538 | 1046 | 0.122498007  | MCMBP,SEC23IP,ENSBTAG00000021801 |
| 26 | 40,350,000 | 40,500,000 | 539 | 986  | -0.919528114 | SEC23IP                          |
| 26 | 40,425,000 | 40,575,000 | 540 | 1233 | 0.068804869  |                                  |
| 26 | 40,500,000 | 40,650,000 | 541 | 1590 | 0.681108053  |                                  |
| 26 | 40,575,000 | 40,725,000 | 542 | 1626 | -2.802042917 |                                  |
| 26 | 40,650,000 | 40,800,000 | 543 | 1306 | -3.366072498 |                                  |
| 26 | 40,725,000 | 40,875,000 | 544 | 994  | -0.446844339 |                                  |
| 26 | 40,800,000 | 40,950,000 | 545 | 1032 | 0.028742848  | PPAPDC1A                         |
| 26 | 40,875,000 | 41,025,000 | 546 | 1012 | 0.339204791  | PPAPDC1A                         |
| 26 | 40,950,000 | 41,100,000 | 547 | 1105 | 0.761736846  | PPAPDC1A                         |
| 26 | 41,025,000 | 41,175,000 | 548 | 1274 | 0.322896995  | PPAPDC1A                         |
| 26 | 41,100,000 | 41,250,000 | 549 | 1262 | -0.304658426 | BRWD2                            |
| 26 | 41,175,000 | 41,325,000 | 550 | 885  | -0.061184841 | BRWD2                            |
| 26 | 41,250,000 | 41,400,000 | 551 | 586  | 0.252743011  | BRWD2                            |
| 26 | 41,325,000 | 41,475,000 | 552 | 603  | 0.063687902  |                                  |
| 26 | 41,400,000 | 41,550,000 | 553 | 813  | -1.174362246 |                                  |
| 26 | 41,475,000 | 41,625,000 | 554 | 1042 | -0.086356174 |                                  |
| 26 | 41,550,000 | 41,700,000 | 555 | 1366 | 1.134554983  |                                  |
| 26 | 41,625,000 | 41,775,000 | 556 | 1693 | 0.78577461   |                                  |
| 26 | 41,700,000 | 41,850,000 | 557 | 1594 | 0.575577531  | FGFR2                            |
| 26 | 41,775,000 | 41,925,000 | 558 | 1063 | 0.652545414  | FGFR2                            |
| 26 | 41,850,000 | 42,000,000 | 559 | 892  | 1.037512801  | FGFR2                            |
| 26 | 41,925,000 | 42,075,000 | 560 | 894  | 1.020280503  | ATE1,FGFR2                       |
| 26 | 42,000,000 | 42,150,000 | 561 | 670  | 0.680788535  | ATE1                             |
| 26 | 42,075,000 | 42,225,000 | 562 | 759  | 0.846858379  | ATE1,NSMCE4A,ENSBTAG00000047642  |
| 26 | 42,150,000 | 42,300,000 | 563 | 864  | 0.820817836  | ATE1,NSMCE4A,ENSBTAG00000047642  |
| 26 | 42,225,000 | 42,375,000 | 564 | 908  | 0.480834472  | NSMCE4A,TACC2                    |

|    |            |            |     |      |              |                                                                            |
|----|------------|------------|-----|------|--------------|----------------------------------------------------------------------------|
| 26 | 42,300,000 | 42,450,000 | 565 | 1235 | 0.59787465   | TACC2                                                                      |
| 26 | 42,375,000 | 42,525,000 | 566 | 1443 | 0.377979764  | BTBD16,TACC2                                                               |
| 26 | 42,450,000 | 42,600,000 | 567 | 1443 | -0.161649871 | BTBD16,PLEKHA1,TACC2                                                       |
| 26 | 42,525,000 | 42,675,000 | 568 | 1327 | 0.432802409  | BTBD16,HTRA1,PLEKHA1                                                       |
| 26 | 42,600,000 | 42,750,000 | 569 | 1651 | 1.123126177  | HTRA1,PLEKHA1                                                              |
| 26 | 42,675,000 | 42,825,000 | 570 | 1655 | 0.889706738  | DMBT1,HTRA1,ENSBTAG00000038684                                             |
| 26 | 42,750,000 | 42,900,000 | 571 | 1451 | 0.391808186  | C26H10orf120,DMBT1,SPADH1,SPADH2,ENSBTAG00000038684                        |
| 26 | 42,825,000 | 42,975,000 | 572 | 1835 | 0.648072987  | C26H10orf120,SPADH1,SPADH2,ENSBTAG00000038684,ENSBTAG00000039755           |
| 26 | 42,900,000 | 43,050,000 | 573 | 1897 | 1.03473566   | ENSBTAG00000023845,ENSBTAG00000039755                                      |
| 26 | 42,975,000 | 43,125,000 | 574 | 1424 | 0.976487548  | IKZF5,PSTK,ENSBTAG00000023845,ENSBTAG0000003846,ENSBTAG00000039755         |
| 26 | 43,050,000 | 43,200,000 | 575 | 1051 | 0.416756692  | ACADSB,IKZF5,PSTK,ENSBTAG00000023845,ENSBTAG00000023846,ENSBTAG00000048256 |
| 26 | 43,125,000 | 43,275,000 | 576 | 905  | 0.792153602  | ACADSB,HMX2,HMX3,IKZF5,ENSBTAG00000048256                                  |
| 26 | 43,200,000 | 43,350,000 | 577 | 925  | 1.262658043  | BUB3,HMX2,HMX3                                                             |
| 26 | 43,275,000 | 43,425,000 | 578 | 1351 | 1.131829459  | BUB3                                                                       |
| 26 | 43,350,000 | 43,500,000 | 579 | 1271 | 0.652005973  |                                                                            |
| 26 | 43,425,000 | 43,575,000 | 580 | 936  | 0.536322627  |                                                                            |
| 26 | 43,500,000 | 43,650,000 | 581 | 1112 | 0.469825095  |                                                                            |
| 26 | 43,575,000 | 43,725,000 | 582 | 1394 | -0.400527123 |                                                                            |
| 26 | 43,650,000 | 43,800,000 | 583 | 1494 | -0.706079323 | GPR26                                                                      |
| 26 | 43,725,000 | 43,875,000 | 584 | 1166 | -0.800890336 | CPXM2,GPR26                                                                |
| 26 | 43,800,000 | 43,950,000 | 585 | 843  | -1.58620788  | CPXM2                                                                      |
| 26 | 43,875,000 | 44,025,000 | 586 | 1109 | -0.748201669 | CPXM2                                                                      |
| 26 | 43,950,000 | 44,100,000 | 587 | 1414 | 0.19999051   | CHST15,CPXM2                                                               |
| 26 | 44,025,000 | 44,175,000 | 588 | 1165 | -0.095894467 | CHST15                                                                     |
| 26 | 44,100,000 | 44,250,000 | 589 | 1083 | 0.408463059  |                                                                            |
| 26 | 44,175,000 | 44,325,000 | 590 | 1344 | 0.649947942  |                                                                            |
| 26 | 44,250,000 | 44,400,000 | 591 | 1433 | 0.139584755  | OAT                                                                        |
| 26 | 44,325,000 | 44,475,000 | 592 | 1483 | -0.00848033  | LHPP,NKX1-2,OAT                                                            |
| 26 | 44,400,000 | 44,550,000 | 593 | 1526 | 0.115033441  | LHPP,NKX1-2                                                                |
| 26 | 44,475,000 | 44,625,000 | 594 | 1227 | 0.296513927  | FAM53B,LHPP                                                                |
| 26 | 44,550,000 | 44,700,000 | 595 | 708  | 0.754111288  | FAM53B,LHPP                                                                |
| 26 | 44,625,000 | 44,775,000 | 596 | 484  | 1.162285581  | FAM175B,FAM53B                                                             |
| 26 | 44,700,000 | 44,850,000 | 597 | 404  | -0.264151463 | FAM175B,ZRANB1                                                             |
| 26 | 44,775,000 | 44,925,000 | 598 | 518  | -0.381588954 | CTBP2,ZRANB1                                                               |
| 26 | 44,850,000 | 45,000,000 | 599 | 977  | 0.611801501  | CTBP2,ZRANB1                                                               |
| 26 | 44,925,000 | 45,075,000 | 600 | 907  | 0.876869662  | CTBP2                                                                      |
| 26 | 45,000,000 | 45,150,000 | 601 | 748  | 0.680921998  |                                                                            |
| 26 | 45,075,000 | 45,225,000 | 602 | 1033 | 0.051412266  |                                                                            |
| 26 | 45,150,000 | 45,300,000 | 603 | 1138 | 0.076038326  |                                                                            |
| 26 | 45,225,000 | 45,375,000 | 604 | 1166 | 0.167520191  |                                                                            |
| 26 | 45,300,000 | 45,450,000 | 605 | 1210 | 0.414559534  |                                                                            |
| 26 | 45,375,000 | 45,525,000 | 606 | 1446 | 1.177526809  |                                                                            |
| 26 | 45,450,000 | 45,600,000 | 607 | 1831 | 1.349419868  | EDRF1,TEX36                                                                |
| 26 | 45,525,000 | 45,675,000 | 608 | 2132 | 0.872971478  | BCCIP,EDRF1,TEX36,UROS                                                     |
| 26 | 45,600,000 | 45,750,000 | 609 | 2299 | 0.679940917  | BCCIP,DHX32,EDRF1,FANK1,UROS                                               |
| 26 | 45,675,000 | 45,825,000 | 610 | 2059 | 0.718597145  | BCCIP,DHX32,FANK1                                                          |
| 26 | 45,750,000 | 45,900,000 | 611 | 1703 | 0.59055085   | ADAM12,FANK1                                                               |
| 26 | 45,825,000 | 45,975,000 | 612 | 1336 | 0.596318887  | ADAM12,FANK1                                                               |
| 26 | 45,900,000 | 46,050,000 | 613 | 1419 | 1.042826938  | ADAM12                                                                     |

|    |            |            |     |      |              |                         |
|----|------------|------------|-----|------|--------------|-------------------------|
| 26 | 45,975,000 | 46,125,000 | 614 | 1418 | 0.888070322  | ADAM12                  |
| 26 | 46,050,000 | 46,200,000 | 615 | 1258 | 0.005897882  | ADAM12                  |
| 26 | 46,125,000 | 46,275,000 | 616 | 1380 | 0.369264502  | ADAM12,C10orf90         |
| 26 | 46,200,000 | 46,350,000 | 617 | 1007 | 0.540367913  | ADAM12,C10orf90         |
| 26 | 46,275,000 | 46,425,000 | 618 | 746  | 0.34698985   | C10orf90                |
| 26 | 46,350,000 | 46,500,000 | 619 | 785  | -0.378443145 | C10orf90                |
| 26 | 46,425,000 | 46,575,000 | 620 | 1166 | -4.658057531 |                         |
| 26 | 46,500,000 | 46,650,000 | 621 | 1412 | -3.053359126 |                         |
| 26 | 46,575,000 | 46,725,000 | 622 | 1246 | 0.123842372  |                         |
| 26 | 46,650,000 | 46,800,000 | 623 | 1023 | -0.526671605 | DOCK1                   |
| 26 | 46,725,000 | 46,875,000 | 624 | 1311 | 0.740241833  | DOCK1                   |
| 26 | 46,800,000 | 46,950,000 | 625 | 1598 | 0.239144982  | DOCK1                   |
| 26 | 46,875,000 | 47,025,000 | 626 | 1271 | -0.502094342 | DOCK1,FAM196A           |
| 26 | 46,950,000 | 47,100,000 | 627 | 1169 | 0.210758942  | DOCK1,FAM196A           |
| 26 | 47,025,000 | 47,175,000 | 628 | 1647 | 0.024390309  | DOCK1                   |
| 26 | 47,100,000 | 47,250,000 | 629 | 1915 | -0.081580588 | DOCK1                   |
| 26 | 47,175,000 | 47,325,000 | 630 | 1670 | 0.199212211  | DOCK1                   |
| 26 | 47,250,000 | 47,400,000 | 631 | 1549 | -0.719918498 | DOCK1                   |
| 26 | 47,325,000 | 47,475,000 | 632 | 1359 | -0.712792873 |                         |
| 26 | 47,400,000 | 47,550,000 | 633 | 1382 | 0.687980393  | FOXI2                   |
| 26 | 47,475,000 | 47,625,000 | 634 | 1739 | 0.525405578  | FOXI2                   |
| 26 | 47,550,000 | 47,700,000 | 635 | 1783 | 0.646491666  | CLRN3                   |
| 26 | 47,625,000 | 47,775,000 | 636 | 1382 | 0.921658877  | CLRN3                   |
| 26 | 47,700,000 | 47,850,000 | 637 | 1124 | 0.39098259   | PTPRE                   |
| 26 | 47,775,000 | 47,925,000 | 638 | 1166 | -0.360528228 | MKI67,PTPRE             |
| 26 | 47,850,000 | 48,000,000 | 639 | 1257 | -0.266555787 | MKI67                   |
| 26 | 47,925,000 | 48,075,000 | 640 | 1181 | 0.632434573  |                         |
| 26 | 48,000,000 | 48,150,000 | 641 | 1610 | 1.168641419  |                         |
| 26 | 48,075,000 | 48,225,000 | 642 | 2374 | 0.683697097  |                         |
| 26 | 48,150,000 | 48,300,000 | 643 | 2294 | 0.335112606  |                         |
| 26 | 48,225,000 | 48,375,000 | 644 | 2081 | 0.958485076  |                         |
| 26 | 48,300,000 | 48,450,000 | 645 | 2130 | 1.066418522  |                         |
| 26 | 48,375,000 | 48,525,000 | 646 | 2060 | 0.632307751  |                         |
| 26 | 48,450,000 | 48,600,000 | 647 | 1844 | 0.455738902  |                         |
| 26 | 48,525,000 | 48,675,000 | 648 | 1707 | 0.264244132  |                         |
| 26 | 48,600,000 | 48,750,000 | 649 | 1662 | 0.197607596  |                         |
| 26 | 48,675,000 | 48,825,000 | 650 | 1488 | 0.791918301  |                         |
| 26 | 48,750,000 | 48,900,000 | 651 | 1291 | 0.46511054   |                         |
| 26 | 48,825,000 | 48,975,000 | 652 | 1229 | 0.084789104  |                         |
| 26 | 48,900,000 | 49,050,000 | 653 | 1168 | 0.357365614  |                         |
| 26 | 48,975,000 | 49,125,000 | 654 | 1099 | 0.286191165  |                         |
| 26 | 49,050,000 | 49,200,000 | 655 | 1168 | 0.469830557  |                         |
| 26 | 49,125,000 | 49,275,000 | 656 | 1111 | 0.380692459  |                         |
| 26 | 49,200,000 | 49,350,000 | 657 | 942  | 0.172632316  |                         |
| 26 | 49,275,000 | 49,425,000 | 658 | 1194 | 0.357419025  |                         |
| 26 | 49,350,000 | 49,500,000 | 659 | 1282 | 0.749771207  |                         |
| 26 | 49,425,000 | 49,575,000 | 660 | 865  | 1.048790542  | EBF3                    |
| 26 | 49,500,000 | 49,650,000 | 661 | 537  | 0.42188094   | EBF3,ENSBTAG00000047164 |
| 26 | 49,575,000 | 49,725,000 | 662 | 538  | -3.023273516 | ENSBTAG00000047164      |
| 26 | 49,650,000 | 49,800,000 | 663 | 861  | -1.713410908 | GLRX3                   |
| 26 | 49,725,000 | 49,875,000 | 664 | 1423 | -0.57260314  | GLRX3                   |
| 26 | 49,800,000 | 49,950,000 | 665 | 1695 | -0.418501302 |                         |
| 26 | 49,875,000 | 50,025,000 | 666 | 1652 | 0.359262846  |                         |

|    |            |            |     |      |              |                                                                                        |
|----|------------|------------|-----|------|--------------|----------------------------------------------------------------------------------------|
| 26 | 49,950,000 | 50,100,000 | 667 | 1400 | -0.660695194 |                                                                                        |
| 26 | 50,025,000 | 50,175,000 | 668 | 1038 | -1.477529202 |                                                                                        |
| 26 | 50,100,000 | 50,250,000 | 669 | 1069 | 0.280448278  |                                                                                        |
| 26 | 50,175,000 | 50,325,000 | 670 | 1171 | 0.523820815  |                                                                                        |
| 26 | 50,250,000 | 50,400,000 | 671 | 1627 | 0.760864307  |                                                                                        |
| 26 | 50,325,000 | 50,475,000 | 672 | 1952 | 0.767556671  |                                                                                        |
| 26 | 50,400,000 | 50,550,000 | 673 | 1472 | 0.234090777  | SYCE1                                                                                  |
| 26 | 50,475,000 | 50,625,000 | 674 | 1039 | 0.182644252  | CYP2E1,SYCE1,ENSBTAG00000005267                                                        |
| 26 | 50,550,000 | 50,700,000 | 675 | 1201 | 0.340413522  | CYP2E1,ENSBTAG00000005267,ENSBTAG0000000724<br>8,ENSBTAG00000010461,ENSBTAG00000026185 |
| 26 | 50,625,000 | 50,775,000 | 676 | 1895 | 0.847113889  | ENSBTAG0000007248,ENSBTAG00000010461,ENSBT<br>AG00000026185                            |
| 26 | 50,700,000 | 50,850,000 | 677 | 2079 | 0.43249418   | KNDC1                                                                                  |
| 26 | 50,775,000 | 50,925,000 | 678 | 1576 | 0.077410524  | GPR123,KNDC1                                                                           |
| 26 | 50,850,000 | 51,000,000 | 679 | 1497 | 0.547143826  | GPR123                                                                                 |
| 26 | 50,925,000 | 51,075,000 | 680 | 1736 | 0.271901969  | CFAP46                                                                                 |
| 26 | 51,000,000 | 51,150,000 | 681 | 1502 | 0.198228009  | CFAP46,INPP5A,ENSBTAG00000015651                                                       |
| 26 | 51,075,000 | 51,225,000 | 682 | 1341 | 0.860776226  | INPP5A,ENSBTAG00000015651                                                              |
| 26 | 51,150,000 | 51,300,000 | 683 | 1584 | 0.86986906   | INPP5A                                                                                 |
| 26 | 51,225,000 | 51,375,000 | 684 | 1831 | 0.33858058   | BNIP3                                                                                  |
| 26 | 51,300,000 | 51,450,000 | 685 | 2135 | 0.030968325  | BNIP3                                                                                  |
| 26 | 51,375,000 | 51,525,000 | 686 | 1941 | 0.192460834  | DPYSL4,JAKMIP3                                                                         |
| 26 | 51,450,000 | 51,600,000 | 687 | 1739 | 0.501222394  | DPYSL4,JAKMIP3,STK32C                                                                  |
| 26 | 51,525,000 | 51,675,000 | 688 | 1551 | 0.565197644  | DPYSL4,LRRC27,PWWP2B,STK32C                                                            |
| 26 | 51,600,000 | 51,681,464 | 689 | 655  | 0.347810915  | LRRC27,PWWP2B,STK32C                                                                   |
| 27 | 0          | 150,000    | 1   | 722  | -0.471134039 | CLN8                                                                                   |
| 27 | 75,000     | 225,000    | 2   | 1319 | 0.041251867  | ARHGEF10,CLN8                                                                          |
| 27 | 150,000    | 300,000    | 3   | 1436 | 0.412937018  | ARHGEF10,KBTBD11                                                                       |
| 27 | 225,000    | 375,000    | 4   | 1165 | 0.467826264  | ARHGEF10,KBTBD11,MYOM2                                                                 |
| 27 | 300,000    | 450,000    | 5   | 827  | -1.077576131 | MYOM2                                                                                  |
| 27 | 375,000    | 525,000    | 6   | 656  | -2.416211789 | MYOM2                                                                                  |
| 27 | 450,000    | 600,000    | 7   | 572  | -1.895081375 |                                                                                        |
| 27 | 525,000    | 675,000    | 8   | 418  | -0.188116451 |                                                                                        |
| 27 | 600,000    | 750,000    | 9   | 343  | -0.069588598 |                                                                                        |
| 27 | 675,000    | 825,000    | 10  | 630  | -4.253004135 |                                                                                        |
| 27 | 750,000    | 900,000    | 11  | 1020 | -2.530886195 |                                                                                        |
| 27 | 825,000    | 975,000    | 12  | 862  | -0.280465218 |                                                                                        |
| 27 | 900,000    | 1,050,000  | 13  | 980  | 0.368499276  | CSMD1                                                                                  |
| 27 | 975,000    | 1,125,000  | 14  | 1201 | 0.564816167  | CSMD1                                                                                  |
| 27 | 1,050,000  | 1,200,000  | 15  | 947  | 0.603912773  | CSMD1                                                                                  |
| 27 | 1,125,000  | 1,275,000  | 16  | 961  | 0.02543792   | CSMD1                                                                                  |
| 27 | 1,200,000  | 1,350,000  | 17  | 1524 | 0.388229576  | CSMD1                                                                                  |
| 27 | 1,275,000  | 1,425,000  | 18  | 1909 | 0.776679174  | CSMD1                                                                                  |
| 27 | 1,350,000  | 1,500,000  | 19  | 1434 | 0.887640061  | CSMD1                                                                                  |
| 27 | 1,425,000  | 1,575,000  | 20  | 1257 | 0.952625228  |                                                                                        |
| 27 | 1,500,000  | 1,650,000  | 21  | 1641 | 0.933928817  |                                                                                        |
| 27 | 1,575,000  | 1,725,000  | 22  | 1481 | 0.008615922  |                                                                                        |
| 27 | 1,650,000  | 1,800,000  | 23  | 1389 | -0.422668392 |                                                                                        |
| 27 | 1,725,000  | 1,875,000  | 24  | 1369 | 0.895010684  |                                                                                        |
| 27 | 1,800,000  | 1,950,000  | 25  | 1176 | 1.102091533  |                                                                                        |
| 27 | 1,875,000  | 2,025,000  | 26  | 1253 | 1.152938618  |                                                                                        |
| 27 | 1,950,000  | 2,100,000  | 27  | 1454 | 0.918784924  |                                                                                        |
| 27 | 2,025,000  | 2,175,000  | 28  | 1700 | 0.516163055  |                                                                                        |

|    |           |           |    |      |              |                                                                                       |
|----|-----------|-----------|----|------|--------------|---------------------------------------------------------------------------------------|
| 27 | 2,100,000 | 2,250,000 | 29 | 1559 | 0.370104205  |                                                                                       |
| 27 | 2,175,000 | 2,325,000 | 30 | 1172 | 0.627774333  |                                                                                       |
| 27 | 2,250,000 | 2,400,000 | 31 | 998  | 0.87506457   |                                                                                       |
| 27 | 2,325,000 | 2,475,000 | 32 | 953  | 1.004686949  |                                                                                       |
| 27 | 2,400,000 | 2,550,000 | 33 | 1193 | 0.212178673  |                                                                                       |
| 27 | 2,475,000 | 2,625,000 | 34 | 1531 | 0.005622461  |                                                                                       |
| 27 | 2,550,000 | 2,700,000 | 35 | 1702 | 0.515383676  |                                                                                       |
| 27 | 2,625,000 | 2,775,000 | 36 | 1823 | 0.832704121  |                                                                                       |
| 27 | 2,700,000 | 2,850,000 | 37 | 1715 | 0.030786148  |                                                                                       |
| 27 | 2,775,000 | 2,925,000 | 38 | 1549 | -0.442338866 |                                                                                       |
| 27 | 2,850,000 | 3,000,000 | 39 | 1328 | 0.050193049  |                                                                                       |
| 27 | 2,925,000 | 3,075,000 | 40 | 1137 | -1.060110142 |                                                                                       |
| 27 | 3,000,000 | 3,150,000 | 41 | 1067 | -0.777952948 |                                                                                       |
| 27 | 3,075,000 | 3,225,000 | 42 | 1050 | -0.079707624 | ENSBTAG00000035013                                                                    |
| 27 | 3,150,000 | 3,300,000 | 43 | 1223 | -0.707164279 | ENSBTAG00000035013                                                                    |
| 27 | 3,225,000 | 3,375,000 | 44 | 1476 | -0.289174769 |                                                                                       |
| 27 | 3,300,000 | 3,450,000 | 45 | 1357 | 0.273650855  |                                                                                       |
| 27 | 3,375,000 | 3,525,000 | 46 | 1336 | -0.73013646  |                                                                                       |
| 27 | 3,450,000 | 3,600,000 | 47 | 1685 | 0.143921901  |                                                                                       |
| 27 | 3,525,000 | 3,675,000 | 48 | 1678 | 0.722167679  |                                                                                       |
| 27 | 3,600,000 | 3,750,000 | 49 | 1453 | -0.343177444 |                                                                                       |
| 27 | 3,675,000 | 3,825,000 | 50 | 1077 | -0.553503358 |                                                                                       |
| 27 | 3,750,000 | 3,900,000 | 51 | 1166 | 0.241655161  |                                                                                       |
| 27 | 3,825,000 | 3,975,000 | 52 | 1081 | 0.577379627  |                                                                                       |
| 27 | 3,900,000 | 4,050,000 | 53 | 469  | 0.136800453  |                                                                                       |
| 27 | 3,975,000 | 4,125,000 | 54 | 378  | -0.470205554 |                                                                                       |
| 27 | 4,050,000 | 4,200,000 | 55 | 408  | 0.095189888  |                                                                                       |
| 27 | 4,125,000 | 4,275,000 | 56 | 753  | 1.251170952  |                                                                                       |
| 27 | 4,200,000 | 4,350,000 | 57 | 1056 | 1.051897888  | MCPH1                                                                                 |
| 27 | 4,275,000 | 4,425,000 | 58 | 642  | 0.348682947  | ANGPT2,MCPH1                                                                          |
| 27 | 4,350,000 | 4,500,000 | 59 | 393  | 0.838180283  | ANGPT2,MCPH1                                                                          |
| 27 | 4,425,000 | 4,575,000 | 60 | 757  | 1.053067178  | ANGPT2,MCPH1                                                                          |
| 27 | 4,500,000 | 4,650,000 | 61 | 894  | 1.087541422  | MCPH1                                                                                 |
| 27 | 4,575,000 | 4,725,000 | 62 | 744  | 0.176271502  | AGPAT5                                                                                |
| 27 | 4,650,000 | 4,800,000 | 63 | 942  | 0.0229981    | AGPAT5,XKR5,ENSBTAG00000007477,ENSBTAG00000008519                                     |
| 27 | 4,725,000 | 4,875,000 | 64 | 1082 | 0.145802887  | AGPAT5,XKR5,ENSBTAG00000007477,ENSBTAG00000008519                                     |
| 27 | 4,800,000 | 4,950,000 | 65 | 910  | 0.065227603  | DEFB300,SPAG11,TAP,ENSBTAG00000007477,ENSBTAG00000008519                              |
| 27 | 4,875,000 | 5,025,000 | 66 | 669  | 0.437278059  | DEFB300,SPAG11,TAP,ZNF705A,ENSBTAG00000007340                                         |
| 27 | 4,950,000 | 5,100,000 | 67 | 1020 | 0.888375406  | ZNF705A,ENSBTAG00000007340                                                            |
| 27 | 5,025,000 | 5,175,000 | 68 | 1172 | 0.542692064  | LAP,ENSBTAG00000007340,ENSBTAG00000046937,ENSBTAG00000047421                          |
| 27 | 5,100,000 | 5,250,000 | 69 | 708  | 0.01919285   | DEFB7,LAP,ENSBTAG00000039856,ENSBTAG00000046937,ENSBTAG00000047421,ENSBTAG00000047740 |
| 27 | 5,175,000 | 5,325,000 | 70 | 990  | 0.559242911  | DEFB7,ENSBTAG00000039856,ENSBTAG00000047740                                           |
| 27 | 5,250,000 | 5,400,000 | 71 | 1510 | 0.771781357  | ENSBTAG00000023157,ENSBTAG00000047363                                                 |
| 27 | 5,325,000 | 5,475,000 | 72 | 1273 | 0.823659468  | DEFB,ENSBTAG00000023157,ENSBTAG00000047284,ENSBTAG00000047363                         |
| 27 | 5,400,000 | 5,550,000 | 73 | 1069 | 0.45966822   | DEFB,EBD,ENSBTAG00000047284                                                           |



|    |           |           |     |      |              |                                             |
|----|-----------|-----------|-----|------|--------------|---------------------------------------------|
| 27 | 5,475,000 | 5,625,000 | 74  | 878  | 0.430245544  | DEFB5,EBD                                   |
| 27 | 5,550,000 | 5,700,000 | 75  | 560  | 0.485833383  | DEFB5                                       |
| 27 | 5,625,000 | 5,775,000 | 76  | 775  | 0.600455102  | ENSBTAG00000010248                          |
| 27 | 5,700,000 | 5,850,000 | 77  | 1201 | 0.790620186  | DEFB1,ENSBTAG00000010248,ENSBTAG00000046405 |
| 27 | 5,775,000 | 5,925,000 | 78  | 1069 | 0.656127269  | DEFB1,ENSBTAG00000046405                    |
| 27 | 5,850,000 | 6,000,000 | 79  | 1286 | 0.331431387  |                                             |
| 27 | 5,925,000 | 6,075,000 | 80  | 1233 | 0.354730467  | ENSBTAG00000038504                          |
| 27 | 6,000,000 | 6,150,000 | 81  | 317  | 0.383979669  | ENSBTAG00000038504                          |
| 27 | 6,075,000 | 6,225,000 | 82  | 386  | 0.310952174  | DEFB405                                     |
| 27 | 6,150,000 | 6,300,000 | 83  | 962  | -0.005193625 | DEFB405,GPM6A                               |
| 27 | 6,225,000 | 6,375,000 | 84  | 1250 | 0.179133406  | GPM6A                                       |
| 27 | 6,300,000 | 6,450,000 | 85  | 1379 | 0.754431869  | GPM6A                                       |
| 27 | 6,375,000 | 6,525,000 | 86  | 1577 | 0.010982807  | GPM6A,ENSBTAG00000046071                    |
| 27 | 6,450,000 | 6,600,000 | 87  | 1524 | -0.263639026 | ENSBTAG00000046071                          |
| 27 | 6,525,000 | 6,675,000 | 88  | 1412 | 0.688878178  | SPATA4,WDR17                                |
| 27 | 6,600,000 | 6,750,000 | 89  | 1325 | 0.917620535  | ASB5,SPATA4,WDR17                           |
| 27 | 6,675,000 | 6,825,000 | 90  | 1061 | 0.494262978  | ASB5,SPATA4,SPCS3                           |
| 27 | 6,750,000 | 6,900,000 | 91  | 992  | 0.516848965  | SPCS3                                       |
| 27 | 6,825,000 | 6,975,000 | 92  | 977  | -1.037510096 |                                             |
| 27 | 6,900,000 | 7,050,000 | 93  | 644  | -1.585150172 | VEGFC                                       |
| 27 | 6,975,000 | 7,125,000 | 94  | 311  | 0.407302624  | VEGFC                                       |
| 27 | 7,050,000 | 7,200,000 | 95  | 346  | 0.661165456  | VEGFC                                       |
| 27 | 7,125,000 | 7,275,000 | 96  | 417  | 1.216016997  |                                             |
| 27 | 7,200,000 | 7,350,000 | 97  | 536  | 1.369650828  |                                             |
| 27 | 7,275,000 | 7,425,000 | 98  | 659  | 1.118922228  |                                             |
| 27 | 7,350,000 | 7,500,000 | 99  | 682  | 0.865964395  |                                             |
| 27 | 7,425,000 | 7,575,000 | 100 | 808  | 0.038256127  | NEIL3                                       |
| 27 | 7,500,000 | 7,650,000 | 101 | 959  | -0.098172828 | NEIL3                                       |
| 27 | 7,575,000 | 7,725,000 | 102 | 750  | 0.104528961  | AGA,NEIL3                                   |
| 27 | 7,650,000 | 7,800,000 | 103 | 786  | 0.416662867  | AGA                                         |
| 27 | 7,725,000 | 7,875,000 | 104 | 878  | 0.389571883  |                                             |
| 27 | 7,800,000 | 7,950,000 | 105 | 1032 | -0.412511555 |                                             |
| 27 | 7,875,000 | 8,025,000 | 106 | 1194 | 0.097174873  |                                             |
| 27 | 7,950,000 | 8,100,000 | 107 | 1000 | 0.27975218   |                                             |
| 27 | 8,025,000 | 8,175,000 | 108 | 744  | -1.181092045 |                                             |
| 27 | 8,100,000 | 8,250,000 | 109 | 712  | -1.408400312 |                                             |
| 27 | 8,175,000 | 8,325,000 | 110 | 1040 | -0.575895206 |                                             |
| 27 | 8,250,000 | 8,400,000 | 111 | 1184 | -0.003453207 |                                             |
| 27 | 8,325,000 | 8,475,000 | 112 | 1169 | -0.20372861  |                                             |
| 27 | 8,400,000 | 8,550,000 | 113 | 900  | -1.299816851 |                                             |
| 27 | 8,475,000 | 8,625,000 | 114 | 513  | -1.593939896 |                                             |
| 27 | 8,550,000 | 8,700,000 | 115 | 532  | -2.60958169  |                                             |
| 27 | 8,625,000 | 8,775,000 | 116 | 576  | -2.901280795 |                                             |
| 27 | 8,700,000 | 8,850,000 | 117 | 1106 | 0.627681097  |                                             |
| 27 | 8,775,000 | 8,925,000 | 118 | 1450 | 0.453552007  |                                             |
| 27 | 8,850,000 | 9,000,000 | 119 | 1196 | 0.018844893  |                                             |
| 27 | 8,925,000 | 9,075,000 | 120 | 1335 | -0.283381354 |                                             |
| 27 | 9,000,000 | 9,150,000 | 121 | 1447 | 0.515819403  |                                             |
| 27 | 9,075,000 | 9,225,000 | 122 | 1086 | 0.918777586  |                                             |
| 27 | 9,150,000 | 9,300,000 | 123 | 600  | -0.0179101   |                                             |
| 27 | 9,225,000 | 9,375,000 | 124 | 841  | 0.667393206  |                                             |
| 27 | 9,300,000 | 9,450,000 | 125 | 971  | 0.911459647  |                                             |

|    |            |            |     |      |              |                                           |
|----|------------|------------|-----|------|--------------|-------------------------------------------|
| 27 | 9,375,000  | 9,525,000  | 126 | 832  | 0.027688413  |                                           |
| 27 | 9,450,000  | 9,600,000  | 127 | 865  | -0.64096407  |                                           |
| 27 | 9,525,000  | 9,675,000  | 128 | 656  | -0.245434849 |                                           |
| 27 | 9,600,000  | 9,750,000  | 129 | 410  | 0.478748174  |                                           |
| 27 | 9,675,000  | 9,825,000  | 130 | 508  | 0.85903871   |                                           |
| 27 | 9,750,000  | 9,900,000  | 131 | 683  | 0.936942396  |                                           |
| 27 | 9,825,000  | 9,975,000  | 132 | 959  | 0.539147626  |                                           |
| 27 | 9,900,000  | 10,050,000 | 133 | 901  | -0.514048906 |                                           |
| 27 | 9,975,000  | 10,125,000 | 134 | 747  | -1.519192625 |                                           |
| 27 | 10,050,000 | 10,200,000 | 135 | 848  | 0.151895097  |                                           |
| 27 | 10,125,000 | 10,275,000 | 136 | 799  | -0.973227633 |                                           |
| 27 | 10,200,000 | 10,350,000 | 137 | 909  | -0.770966579 |                                           |
| 27 | 10,275,000 | 10,425,000 | 138 | 943  | 0.624545268  |                                           |
| 27 | 10,350,000 | 10,500,000 | 139 | 1191 | 0.978199778  |                                           |
| 27 | 10,425,000 | 10,575,000 | 140 | 1320 | 1.079584946  |                                           |
| 27 | 10,500,000 | 10,650,000 | 141 | 821  | 0.990767457  |                                           |
| 27 | 10,575,000 | 10,725,000 | 142 | 679  | -0.246251399 |                                           |
| 27 | 10,650,000 | 10,800,000 | 143 | 942  | 0.052090173  |                                           |
| 27 | 10,725,000 | 10,875,000 | 144 | 1066 | -1.375538146 |                                           |
| 27 | 10,800,000 | 10,950,000 | 145 | 1192 | -0.445761603 |                                           |
| 27 | 10,875,000 | 11,025,000 | 146 | 1235 | 0.891117045  |                                           |
| 27 | 10,950,000 | 11,100,000 | 147 | 1408 | 0.605179591  |                                           |
| 27 | 11,025,000 | 11,175,000 | 148 | 1185 | 0.681396511  |                                           |
| 27 | 11,100,000 | 11,250,000 | 149 | 801  | 0.831163766  |                                           |
| 27 | 11,175,000 | 11,325,000 | 150 | 827  | 0.737688757  |                                           |
| 27 | 11,250,000 | 11,400,000 | 151 | 875  | 0.450831148  |                                           |
| 27 | 11,325,000 | 11,475,000 | 152 | 1099 | 0.614620656  |                                           |
| 27 | 11,400,000 | 11,550,000 | 153 | 1241 | 0.943304539  |                                           |
| 27 | 11,475,000 | 11,625,000 | 154 | 1229 | 1.154836713  |                                           |
| 27 | 11,550,000 | 11,700,000 | 155 | 1209 | 0.953664782  |                                           |
| 27 | 11,625,000 | 11,775,000 | 156 | 955  | 0.549877382  |                                           |
| 27 | 11,700,000 | 11,850,000 | 157 | 533  | 0.248230618  |                                           |
| 27 | 11,775,000 | 11,925,000 | 158 | 583  | -2.027232925 |                                           |
| 27 | 11,850,000 | 12,000,000 | 159 | 566  | -2.177920794 |                                           |
| 27 | 11,925,000 | 12,075,000 | 160 | 659  | -0.129614569 |                                           |
| 27 | 12,000,000 | 12,150,000 | 161 | 828  | 0.316078645  |                                           |
| 27 | 12,075,000 | 12,225,000 | 162 | 597  | 0.568070871  |                                           |
| 27 | 12,150,000 | 12,300,000 | 163 | 665  | 0.202494233  |                                           |
| 27 | 12,225,000 | 12,375,000 | 164 | 869  | 0.371664769  | ENSBTAG00000047749                        |
| 27 | 12,300,000 | 12,450,000 | 165 | 912  | 0.319128164  | ENSBTAG00000047749                        |
| 27 | 12,375,000 | 12,525,000 | 166 | 1078 | 0.222180305  | ENSBTAG00000047749                        |
| 27 | 12,450,000 | 12,600,000 | 167 | 1209 | -0.268490679 |                                           |
| 27 | 12,525,000 | 12,675,000 | 168 | 1042 | -0.446319008 | ENSBTAG00000021133                        |
| 27 | 12,600,000 | 12,750,000 | 169 | 1087 | -0.210182208 | ENSBTAG00000021133                        |
| 27 | 12,675,000 | 12,825,000 | 170 | 1004 | -0.175915703 | ENSBTAG00000021133                        |
| 27 | 12,750,000 | 12,900,000 | 171 | 1056 | 0.962506302  | ENSBTAG00000021133                        |
| 27 | 12,825,000 | 12,975,000 | 172 | 1300 | 0.631546703  | DCTD                                      |
| 27 | 12,900,000 | 13,050,000 | 173 | 886  | -0.004569684 | DCTD                                      |
| 27 | 12,975,000 | 13,125,000 | 174 | 482  | 0.337402607  |                                           |
| 27 | 13,050,000 | 13,200,000 | 175 | 640  | 0.510123511  | WWC2                                      |
| 27 | 13,125,000 | 13,275,000 | 176 | 842  | 0.589508869  | WWC2,ENSBTAG00000012207,ENSBTAG0000001220 |

|    |            |            |     |      |              |                                                          |
|----|------------|------------|-----|------|--------------|----------------------------------------------------------|
| 27 | 13,200,000 | 13,350,000 | 177 | 677  | -0.218067443 | CDKN2AIP,ING2,WWC2,ENSBTAG00000012207,ENSBTAG00000012209 |
| 27 | 13,275,000 | 13,425,000 | 178 | 783  | -1.159936059 | CDKN2AIP,ING2,RWDD4A,TRAPPC11                            |
| 27 | 13,350,000 | 13,500,000 | 179 | 880  | -1.560216495 | RWDD4A,STOX2,TRAPPC11                                    |
| 27 | 13,425,000 | 13,575,000 | 180 | 793  | -1.013905957 | STOX2,TRAPPC11                                           |
| 27 | 13,500,000 | 13,650,000 | 181 | 639  | 0.001317842  | STOX2                                                    |
| 27 | 13,575,000 | 13,725,000 | 182 | 409  | 0.930517169  | STOX2                                                    |
| 27 | 13,650,000 | 13,800,000 | 183 | 417  | 0.923990756  | ENPP6,STOX2                                              |
| 27 | 13,725,000 | 13,875,000 | 184 | 466  | -1.005667033 | ENPP6                                                    |
| 27 | 13,800,000 | 13,950,000 | 185 | 518  | -2.749773245 | ENPP6,IRF2                                               |
| 27 | 13,875,000 | 14,025,000 | 186 | 540  | -2.509629764 | IRF2                                                     |
| 27 | 13,950,000 | 14,100,000 | 187 | 706  | -0.205933084 | CASP3,IRF2                                               |
| 27 | 14,025,000 | 14,175,000 | 188 | 1021 | 0.474888804  | CASP3,CENPU,PRIMPOL                                      |
| 27 | 14,100,000 | 14,250,000 | 189 | 1215 | 0.713289304  | ACSL1,CASP3,CENPU,PRIMPOL                                |
| 27 | 14,175,000 | 14,325,000 | 190 | 873  | -0.57366379  | ACSL1,CENPU                                              |
| 27 | 14,250,000 | 14,400,000 | 191 | 603  | -2.059177936 | ACSL1                                                    |
| 27 | 14,325,000 | 14,475,000 | 192 | 478  | -0.880103172 | HELT                                                     |
| 27 | 14,400,000 | 14,550,000 | 193 | 596  | -0.364170331 | HELT,SLC25A4                                             |
| 27 | 14,475,000 | 14,625,000 | 194 | 729  | -0.361578633 | CFAP97,SLC25A4,SNX25                                     |
| 27 | 14,550,000 | 14,700,000 | 195 | 931  | 0.852793369  | CFAP97,LRP2BP,SLC25A4,SNX25                              |
| 27 | 14,625,000 | 14,775,000 | 196 | 942  | 0.905697519  | ANKRD37,C4orf47,CCDC110,LRP2BP,PDLIM3,SNX25,UFSP2        |
| 27 | 14,700,000 | 14,850,000 | 197 | 521  | 0.280072645  | ANKRD37,C4orf47,CCDC110,PDLIM3,UFSP2                     |
| 27 | 14,775,000 | 14,925,000 | 198 | 659  | 0.627246177  | PDLIM3,SORBS2                                            |
| 27 | 14,850,000 | 15,000,000 | 199 | 947  | -0.16269441  | SORBS2                                                   |
| 27 | 14,925,000 | 15,075,000 | 200 | 1026 | -0.150775805 | SORBS2                                                   |
| 27 | 15,000,000 | 15,150,000 | 201 | 992  | 0.773440094  | SORBS2                                                   |
| 27 | 15,075,000 | 15,225,000 | 202 | 1071 | 0.213525796  |                                                          |
| 27 | 15,150,000 | 15,300,000 | 203 | 1173 | -0.274570349 | FAM149A,TLR3                                             |
| 27 | 15,225,000 | 15,375,000 | 204 | 1135 | -0.940540657 | CYP4V2,F11,FAM149A,KLKB1,TLR3                            |
| 27 | 15,300,000 | 15,450,000 | 205 | 1348 | -0.690728716 | CYP4V2,F11,FAM149A,KLKB1,MTNR1A                          |
| 27 | 15,375,000 | 15,525,000 | 206 | 1329 | -0.142665493 | FAT1,MTNR1A                                              |
| 27 | 15,450,000 | 15,600,000 | 207 | 1073 | 0.008906368  | FAT1,MTNR1A                                              |
| 27 | 15,525,000 | 15,675,000 | 208 | 1138 | 0.637444143  | FAT1                                                     |
| 27 | 15,600,000 | 15,750,000 | 209 | 1258 | -0.160520166 | FAT1                                                     |
| 27 | 15,675,000 | 15,825,000 | 210 | 1072 | -1.220276319 |                                                          |
| 27 | 15,750,000 | 15,900,000 | 211 | 748  | -0.644601126 |                                                          |
| 27 | 15,825,000 | 15,975,000 | 212 | 747  | -0.932349189 |                                                          |
| 27 | 15,900,000 | 16,050,000 | 213 | 942  | -0.306746086 |                                                          |
| 27 | 15,975,000 | 16,125,000 | 214 | 800  | 0.21236665   |                                                          |
| 27 | 16,050,000 | 16,200,000 | 215 | 682  | 0.837023183  |                                                          |
| 27 | 16,125,000 | 16,275,000 | 216 | 787  | 0.929038675  |                                                          |
| 27 | 16,200,000 | 16,350,000 | 217 | 854  | 0.297728725  |                                                          |
| 27 | 16,275,000 | 16,425,000 | 218 | 909  | 0.18365213   |                                                          |
| 27 | 16,350,000 | 16,500,000 | 219 | 842  | -0.988321846 |                                                          |
| 27 | 16,425,000 | 16,575,000 | 220 | 846  | -0.849176548 |                                                          |
| 27 | 16,500,000 | 16,650,000 | 221 | 786  | 0.232005123  | ZFP42                                                    |
| 27 | 16,575,000 | 16,725,000 | 222 | 1023 | 0.151534175  | TRIML2,ZFP42                                             |
| 27 | 16,650,000 | 16,800,000 | 223 | 1414 | 0.351913792  | TRIML1,TRIML2                                            |
| 27 | 16,725,000 | 16,875,000 | 224 | 1446 | -0.047888229 | TRIML1,ENSBTAG00000045531                                |
| 27 | 16,800,000 | 16,950,000 | 225 | 1365 | 0.121532555  | ENSBTAG00000045531                                       |
| 27 | 16,875,000 | 17,025,000 | 226 | 1379 | 0.379495136  |                                                          |
| 27 | 16,950,000 | 17,100,000 | 227 | 1083 | -0.610877719 |                                                          |

|    |            |            |     |      |              |                           |
|----|------------|------------|-----|------|--------------|---------------------------|
| 27 | 17,025,000 | 17,175,000 | 228 | 775  | -1.823623893 |                           |
| 27 | 17,100,000 | 17,250,000 | 229 | 965  | -0.487211824 |                           |
| 27 | 17,175,000 | 17,325,000 | 230 | 812  | 0.699453597  |                           |
| 27 | 17,250,000 | 17,400,000 | 231 | 600  | 0.755423319  |                           |
| 27 | 17,325,000 | 17,475,000 | 232 | 698  | 0.790122301  |                           |
| 27 | 17,400,000 | 17,550,000 | 233 | 589  | 0.12802261   | ENSBTAG00000047159        |
| 27 | 17,475,000 | 17,625,000 | 234 | 499  | -0.136593948 | ENSBTAG00000047159        |
| 27 | 17,550,000 | 17,700,000 | 235 | 700  | -1.630354957 |                           |
| 27 | 17,625,000 | 17,775,000 | 236 | 797  | -2.620308225 |                           |
| 27 | 17,700,000 | 17,850,000 | 237 | 1078 | -0.923053048 |                           |
| 27 | 17,775,000 | 17,925,000 | 238 | 1015 | -0.098610662 |                           |
| 27 | 17,850,000 | 18,000,000 | 239 | 377  | 0.40176441   |                           |
| 27 | 17,925,000 | 18,075,000 | 240 | 152  | -0.177393742 |                           |
| 27 | 18,000,000 | 18,150,000 | 241 | 137  | 0.496614462  |                           |
| 27 | 18,075,000 | 18,225,000 | 242 | 347  | 1.323923399  |                           |
| 27 | 18,150,000 | 18,300,000 | 243 | 484  | 0.830216123  | ASAH1,FRG1                |
| 27 | 18,225,000 | 18,375,000 | 244 | 297  | 0.319578294  | ASAH1,FRG1,PCM1           |
| 27 | 18,300,000 | 18,450,000 | 245 | 215  | 1.081756784  | ASAH1,PCM1                |
| 27 | 18,375,000 | 18,525,000 | 246 | 337  | 1.31202499   | FGL1,PCM1                 |
| 27 | 18,450,000 | 18,600,000 | 247 | 404  | 1.225368916  | FGL1,MTUS1                |
| 27 | 18,525,000 | 18,675,000 | 248 | 817  | 0.443499425  | MTUS1                     |
| 27 | 18,600,000 | 18,750,000 | 249 | 1164 | 0.032587413  | MTUS1,PDGFRL              |
| 27 | 18,675,000 | 18,825,000 | 250 | 980  | 0.057184124  | MTUS1,PDGFRL,SLC7A2       |
| 27 | 18,750,000 | 18,900,000 | 251 | 598  | 0.307861191  | PDGFRL,SLC7A2             |
| 27 | 18,825,000 | 18,975,000 | 252 | 379  | 0.56699658   | MTMR7                     |
| 27 | 18,900,000 | 19,050,000 | 253 | 536  | -1.325562141 | MTMR7,VPS37A              |
| 27 | 18,975,000 | 19,125,000 | 254 | 685  | -1.810931976 | CNOT7,MTMR7,VPS37A,ZDHHC2 |
| 27 | 19,050,000 | 19,200,000 | 255 | 511  | -0.555958844 | CNOT7,MICU3,VPS37A,ZDHHC2 |
| 27 | 19,125,000 | 19,275,000 | 256 | 264  | 0.338007687  | FGF20,MICU3               |
| 27 | 19,200,000 | 19,350,000 | 257 | 539  | 0.02751061   | FGF20,MICU3               |
| 27 | 19,275,000 | 19,425,000 | 258 | 771  | 0.574861178  | FGF20                     |
| 27 | 19,350,000 | 19,500,000 | 259 | 742  | 1.132690408  |                           |
| 27 | 19,425,000 | 19,575,000 | 260 | 857  | 1.252024128  |                           |
| 27 | 19,500,000 | 19,650,000 | 261 | 951  | 1.382475838  |                           |
| 27 | 19,575,000 | 19,725,000 | 262 | 681  | 0.723474464  |                           |
| 27 | 19,650,000 | 19,800,000 | 263 | 467  | -0.858382395 |                           |
| 27 | 19,725,000 | 19,875,000 | 264 | 574  | -0.439090731 |                           |
| 27 | 19,800,000 | 19,950,000 | 265 | 757  | 0.685419815  |                           |
| 27 | 19,875,000 | 20,025,000 | 266 | 741  | 0.779804738  | MSR1                      |
| 27 | 19,950,000 | 20,100,000 | 267 | 808  | 0.453432622  | MSR1                      |
| 27 | 20,025,000 | 20,175,000 | 268 | 940  | 0.725446585  | MSR1                      |
| 27 | 20,100,000 | 20,250,000 | 269 | 875  | 0.69696531   | ENSBTAG00000022767        |
| 27 | 20,175,000 | 20,325,000 | 270 | 902  | -0.558773954 | ENSBTAG00000022767        |
| 27 | 20,250,000 | 20,400,000 | 271 | 1043 | -0.455063773 |                           |
| 27 | 20,325,000 | 20,475,000 | 272 | 806  | 0.147243864  | TUSC3                     |
| 27 | 20,400,000 | 20,550,000 | 273 | 572  | 0.534472042  | TUSC3                     |
| 27 | 20,475,000 | 20,625,000 | 274 | 1051 | 1.146675034  | TUSC3,ENSBTAG00000045830  |
| 27 | 20,550,000 | 20,700,000 | 275 | 1152 | 1.333044558  | TUSC3,ENSBTAG00000045830  |
| 27 | 20,625,000 | 20,775,000 | 276 | 849  | 0.454691823  | TUSC3                     |
| 27 | 20,700,000 | 20,850,000 | 277 | 1214 | -0.132762706 |                           |
| 27 | 20,775,000 | 20,925,000 | 278 | 1428 | 0.012493707  |                           |
| 27 | 20,850,000 | 21,000,000 | 279 | 1060 | 0.38379846   |                           |
| 27 | 20,925,000 | 21,075,000 | 280 | 1068 | 0.989227559  |                           |

|    |            |            |     |      |              |                               |
|----|------------|------------|-----|------|--------------|-------------------------------|
| 27 | 21,000,000 | 21,150,000 | 281 | 1219 | 1.275776112  |                               |
| 27 | 21,075,000 | 21,225,000 | 282 | 989  | 1.303263731  |                               |
| 27 | 21,150,000 | 21,300,000 | 283 | 688  | 1.006083483  |                               |
| 27 | 21,225,000 | 21,375,000 | 284 | 811  | -0.176979928 |                               |
| 27 | 21,300,000 | 21,450,000 | 285 | 1022 | -0.300239431 |                               |
| 27 | 21,375,000 | 21,525,000 | 286 | 749  | 0.081255313  |                               |
| 27 | 21,450,000 | 21,600,000 | 287 | 550  | 0.597072479  |                               |
| 27 | 21,525,000 | 21,675,000 | 288 | 968  | -0.35837059  |                               |
| 27 | 21,600,000 | 21,750,000 | 289 | 1325 | -0.537507294 |                               |
| 27 | 21,675,000 | 21,825,000 | 290 | 965  | -0.202183312 |                               |
| 27 | 21,750,000 | 21,900,000 | 291 | 629  | -0.408339404 |                               |
| 27 | 21,825,000 | 21,975,000 | 292 | 1302 | -0.675433338 |                               |
| 27 | 21,900,000 | 22,050,000 | 293 | 1245 | -0.414358345 |                               |
| 27 | 21,975,000 | 22,125,000 | 294 | 1064 | 0.300788282  |                               |
| 27 | 22,050,000 | 22,200,000 | 295 | 1294 | 0.143590086  |                               |
| 27 | 22,125,000 | 22,275,000 | 296 | 1113 | 0.125166521  |                               |
| 27 | 22,200,000 | 22,350,000 | 297 | 1138 | -0.017575191 |                               |
| 27 | 22,275,000 | 22,425,000 | 298 | 1074 | -0.092854479 | ENSBTAG00000045990            |
| 27 | 22,350,000 | 22,500,000 | 299 | 971  | 0.851268215  | C27H8orf48,ENSBTAG00000045990 |
| 27 | 22,425,000 | 22,575,000 | 300 | 754  | 0.311227683  | C27H8orf48,ENSBTAG00000024526 |
| 27 | 22,500,000 | 22,650,000 | 301 | 506  | -1.339841033 | C27H8orf48,ENSBTAG00000024526 |
| 27 | 22,575,000 | 22,725,000 | 302 | 460  | -0.030289219 | ENSBTAG00000024526            |
| 27 | 22,650,000 | 22,800,000 | 303 | 531  | 0.627724062  |                               |
| 27 | 22,725,000 | 22,875,000 | 304 | 444  | 0.610155927  | DLC1                          |
| 27 | 22,800,000 | 22,950,000 | 305 | 494  | 0.406809711  | DLC1                          |
| 27 | 22,875,000 | 23,025,000 | 306 | 510  | 0.327662874  | DLC1                          |
| 27 | 22,950,000 | 23,100,000 | 307 | 499  | 0.470026385  | DLC1,KIAA1456                 |
| 27 | 23,025,000 | 23,175,000 | 308 | 736  | -0.327956707 | KIAA1456                      |
| 27 | 23,100,000 | 23,250,000 | 309 | 1066 | -1.170031772 | KIAA1456                      |
| 27 | 23,175,000 | 23,325,000 | 310 | 1090 | -0.631360948 | LONRF1                        |
| 27 | 23,250,000 | 23,400,000 | 311 | 709  | 0.052732531  | LONRF1                        |
| 27 | 23,325,000 | 23,475,000 | 312 | 661  | 0.301865738  | LONRF1,ENSBTAG00000000357     |
| 27 | 23,400,000 | 23,550,000 | 313 | 663  | 0.262367066  | ENSBTAG00000000357            |
| 27 | 23,475,000 | 23,625,000 | 314 | 562  | 0.579041151  | ENSBTAG00000000357            |
| 27 | 23,550,000 | 23,700,000 | 315 | 584  | 0.368470097  |                               |
| 27 | 23,625,000 | 23,775,000 | 316 | 455  | -0.397262553 |                               |
| 27 | 23,700,000 | 23,850,000 | 317 | 477  | -0.133906679 |                               |
| 27 | 23,775,000 | 23,925,000 | 318 | 578  | 0.257718699  | CLDN23                        |
| 27 | 23,850,000 | 24,000,000 | 319 | 802  | 0.460941074  | CLDN23                        |
| 27 | 23,925,000 | 24,075,000 | 320 | 893  | 0.314705863  |                               |
| 27 | 24,000,000 | 24,150,000 | 321 | 572  | 0.004235164  | MFHAS1                        |
| 27 | 24,075,000 | 24,225,000 | 322 | 430  | 0.299502174  | MFHAS1,THEX1                  |
| 27 | 24,150,000 | 24,300,000 | 323 | 540  | 0.490484399  | THEX1                         |
| 27 | 24,225,000 | 24,375,000 | 324 | 602  | 0.55400234   | PPP1R3B                       |
| 27 | 24,300,000 | 24,450,000 | 325 | 592  | 0.731018953  | PPP1R3B                       |
| 27 | 24,375,000 | 24,525,000 | 326 | 665  | 0.183927518  |                               |
| 27 | 24,450,000 | 24,600,000 | 327 | 671  | -0.056364902 |                               |
| 27 | 24,525,000 | 24,675,000 | 328 | 908  | 0.471083927  | TNKS                          |
| 27 | 24,600,000 | 24,750,000 | 329 | 1358 | 0.764654602  | TNKS                          |
| 27 | 24,675,000 | 24,825,000 | 330 | 992  | 0.8514034    | DUSP4,TNKS                    |
| 27 | 24,750,000 | 24,900,000 | 331 | 527  | 0.100030373  | DUSP4,TNKS                    |
| 27 | 24,825,000 | 24,975,000 | 332 | 459  | -0.195781142 | DUSP4                         |
| 27 | 24,900,000 | 25,050,000 | 333 | 445  | 0.503607786  |                               |

|    |            |            |     |      |              |                               |
|----|------------|------------|-----|------|--------------|-------------------------------|
| 27 | 24,975,000 | 25,125,000 | 334 | 496  | 0.390168876  |                               |
| 27 | 25,050,000 | 25,200,000 | 335 | 632  | 0.940767516  |                               |
| 27 | 25,125,000 | 25,275,000 | 336 | 817  | 0.908607396  |                               |
| 27 | 25,200,000 | 25,350,000 | 337 | 972  | 0.37766334   |                               |
| 27 | 25,275,000 | 25,425,000 | 338 | 1238 | 0.61409243   | LEPROTL1,TMEM66               |
| 27 | 25,350,000 | 25,500,000 | 339 | 1061 | 0.811555411  | DCTN6,LEPROTL1,MBOAT4,TMEM66  |
| 27 | 25,425,000 | 25,575,000 | 340 | 896  | 0.471184496  | DCTN6,LEPROTL1,MBOAT4         |
| 27 | 25,500,000 | 25,650,000 | 341 | 1152 | -0.124090747 | RBPMS                         |
| 27 | 25,575,000 | 25,725,000 | 342 | 1182 | -0.116468279 | RBPMS                         |
| 27 | 25,650,000 | 25,800,000 | 343 | 1180 | 0.25618154   | RBPMS                         |
| 27 | 25,725,000 | 25,875,000 | 344 | 1113 | 0.702446766  | GTF2E2,RPMS                   |
| 27 | 25,800,000 | 25,950,000 | 345 | 892  | 0.732213975  | GSR,GTF2E2,RPMS               |
| 27 | 25,875,000 | 26,025,000 | 346 | 763  | 0.577888721  | GSR,GTF2E2,UBXN8              |
| 27 | 25,950,000 | 26,100,000 | 347 | 790  | -0.35839112  | GSR,PPP2CB,TEX15,UBXN8        |
| 27 | 26,025,000 | 26,175,000 | 348 | 612  | -0.669921068 | PPP2CB,TEX15,UBXN8            |
| 27 | 26,100,000 | 26,250,000 | 349 | 682  | 0.769345489  |                               |
| 27 | 26,175,000 | 26,325,000 | 350 | 1193 | 1.180313771  | PURG,WRN                      |
| 27 | 26,250,000 | 26,400,000 | 351 | 733  | 1.390438111  | PURG,WRN                      |
| 27 | 26,325,000 | 26,475,000 | 352 | 661  | 0.507535671  | WRN                           |
| 27 | 26,400,000 | 26,550,000 | 353 | 853  | 0.554942387  | WRN                           |
| 27 | 26,475,000 | 26,625,000 | 354 | 1053 | 0.642093162  |                               |
| 27 | 26,550,000 | 26,700,000 | 355 | 1477 | 0.751668146  |                               |
| 27 | 26,625,000 | 26,775,000 | 356 | 1135 | 0.944495952  |                               |
| 27 | 26,700,000 | 26,850,000 | 357 | 1060 | 0.596395402  |                               |
| 27 | 26,775,000 | 26,925,000 | 358 | 1061 | 0.288441497  |                               |
| 27 | 26,850,000 | 27,000,000 | 359 | 918  | 0.174810541  |                               |
| 27 | 26,925,000 | 27,075,000 | 360 | 1026 | 0.497521555  |                               |
| 27 | 27,000,000 | 27,150,000 | 361 | 1080 | 0.193784398  |                               |
| 27 | 27,075,000 | 27,225,000 | 362 | 737  | -0.289344581 |                               |
| 27 | 27,150,000 | 27,300,000 | 363 | 522  | 0.064612714  |                               |
| 27 | 27,225,000 | 27,375,000 | 364 | 663  | 0.455333765  |                               |
| 27 | 27,300,000 | 27,450,000 | 365 | 989  | -0.026951794 |                               |
| 27 | 27,375,000 | 27,525,000 | 366 | 1282 | -0.188731371 |                               |
| 27 | 27,450,000 | 27,600,000 | 367 | 1174 | 0.166302356  |                               |
| 27 | 27,525,000 | 27,675,000 | 368 | 962  | 0.721237527  | GGFBPP5                       |
| 27 | 27,600,000 | 27,750,000 | 369 | 1004 | 1.088252317  | GGFBPP5                       |
| 27 | 27,675,000 | 27,825,000 | 370 | 873  | -0.283699357 | GGFBPP5                       |
| 27 | 27,750,000 | 27,900,000 | 371 | 803  | -0.287616819 | GGFBPP5                       |
| 27 | 27,825,000 | 27,975,000 | 372 | 1007 | 0.714884942  | GGFBPP5                       |
| 27 | 27,900,000 | 28,050,000 | 373 | 1054 | 0.201178404  |                               |
| 27 | 27,975,000 | 28,125,000 | 374 | 1223 | -1.305504223 |                               |
| 27 | 28,050,000 | 28,200,000 | 375 | 1143 | -0.972362191 |                               |
| 27 | 28,125,000 | 28,275,000 | 376 | 930  | 0.81057978   |                               |
| 27 | 28,200,000 | 28,350,000 | 377 | 845  | -0.604748506 | FUT10,PSIP1                   |
| 27 | 28,275,000 | 28,425,000 | 378 | 759  | -0.85274084  | C27H8ORF41,FUT10,MAK16,PSIP1  |
| 27 | 28,350,000 | 28,500,000 | 379 | 580  | -0.251899532 | C27H8ORF41,FUT10,MAK16,RNF122 |
| 27 | 28,425,000 | 28,575,000 | 380 | 187  | -0.823895009 | C27H8ORF41,RNF122             |
| 27 | 28,500,000 | 28,650,000 | 381 | 3    | -4.50786958  |                               |
| 27 | 28,575,000 | 28,725,000 | 382 | 5    | -0.237944925 |                               |
| 27 | 28,650,000 | 28,800,000 | 383 | 6    | -0.874623316 |                               |
| 27 | 28,725,000 | 28,875,000 | 384 | 4    | 0.433026847  |                               |
| 27 | 28,800,000 | 28,950,000 | 385 | 40   | -4.589520984 |                               |
| 27 | 28,875,000 | 29,025,000 | 386 | 519  | 0.050084754  | DUSP26                        |

|    |            |            |     |      |              |                                       |
|----|------------|------------|-----|------|--------------|---------------------------------------|
| 27 | 28,950,000 | 29,100,000 | 387 | 755  | -0.217717495 | DUSP26                                |
| 27 | 29,025,000 | 29,175,000 | 388 | 583  | -0.933807767 |                                       |
| 27 | 29,100,000 | 29,250,000 | 389 | 736  | 0.187906463  |                                       |
| 27 | 29,175,000 | 29,325,000 | 390 | 946  | -0.450040438 |                                       |
| 27 | 29,250,000 | 29,400,000 | 391 | 1388 | 0.346879955  |                                       |
| 27 | 29,325,000 | 29,475,000 | 392 | 1394 | 1.174805312  |                                       |
| 27 | 29,400,000 | 29,550,000 | 393 | 914  | 1.062157119  |                                       |
| 27 | 29,475,000 | 29,625,000 | 394 | 577  | -0.690464176 |                                       |
| 27 | 29,550,000 | 29,700,000 | 395 | 395  | -1.481212983 |                                       |
| 27 | 29,625,000 | 29,775,000 | 396 | 627  | 0.113867294  |                                       |
| 27 | 29,700,000 | 29,850,000 | 397 | 1031 | 0.622739331  |                                       |
| 27 | 29,775,000 | 29,925,000 | 398 | 1141 | 0.928977977  |                                       |
| 27 | 29,850,000 | 30,000,000 | 399 | 874  | 0.681034255  |                                       |
| 27 | 29,925,000 | 30,075,000 | 400 | 966  | -0.113514843 |                                       |
| 27 | 30,000,000 | 30,150,000 | 401 | 1026 | 0.273678132  |                                       |
| 27 | 30,075,000 | 30,225,000 | 402 | 671  | -0.067685656 |                                       |
| 27 | 30,150,000 | 30,300,000 | 403 | 757  | -0.538179068 |                                       |
| 27 | 30,225,000 | 30,375,000 | 404 | 813  | -0.800782576 |                                       |
| 27 | 30,300,000 | 30,450,000 | 405 | 849  | -0.12595428  | UNC5D                                 |
| 27 | 30,375,000 | 30,525,000 | 406 | 1128 | 0.197370869  | UNC5D                                 |
| 27 | 30,450,000 | 30,600,000 | 407 | 1077 | -0.282370275 | UNC5D                                 |
| 27 | 30,525,000 | 30,675,000 | 408 | 1172 | -0.739300372 | UNC5D                                 |
| 27 | 30,600,000 | 30,750,000 | 409 | 1328 | -0.740794719 | UNC5D                                 |
| 27 | 30,675,000 | 30,825,000 | 410 | 1190 | -0.294509412 | UNC5D                                 |
| 27 | 30,750,000 | 30,900,000 | 411 | 950  | 0.263633455  | UNC5D                                 |
| 27 | 30,825,000 | 30,975,000 | 412 | 658  | 0.17629988   | UNC5D                                 |
| 27 | 30,900,000 | 31,050,000 | 413 | 610  | -1.009479548 | UNC5D                                 |
| 27 | 30,975,000 | 31,125,000 | 414 | 700  | 0.163920336  | UNC5D                                 |
| 27 | 31,050,000 | 31,200,000 | 415 | 604  | -0.328713546 | UNC5D,ENSBTAG00000026515              |
| 27 | 31,125,000 | 31,275,000 | 416 | 835  | -1.724513788 | ENSBTAG00000026515                    |
| 27 | 31,200,000 | 31,350,000 | 417 | 1136 | -0.908182586 |                                       |
| 27 | 31,275,000 | 31,425,000 | 418 | 717  | -0.096029425 |                                       |
| 27 | 31,350,000 | 31,500,000 | 419 | 678  | -0.108922451 |                                       |
| 27 | 31,425,000 | 31,575,000 | 420 | 776  | -0.917178224 |                                       |
| 27 | 31,500,000 | 31,650,000 | 421 | 486  | -1.694610998 |                                       |
| 27 | 31,575,000 | 31,725,000 | 422 | 704  | -0.223614574 |                                       |
| 27 | 31,650,000 | 31,800,000 | 423 | 1041 | 0.624601799  |                                       |
| 27 | 31,725,000 | 31,875,000 | 424 | 1057 | 0.662808954  | KCNU1                                 |
| 27 | 31,800,000 | 31,950,000 | 425 | 1103 | 0.189605495  | KCNU1                                 |
| 27 | 31,875,000 | 32,025,000 | 426 | 1251 | 0.199708939  | KCNU1                                 |
| 27 | 31,950,000 | 32,100,000 | 427 | 1235 | 0.542260377  | KCNU1                                 |
| 27 | 32,025,000 | 32,175,000 | 428 | 951  | 1.024284623  |                                       |
| 27 | 32,100,000 | 32,250,000 | 429 | 1119 | 1.163855312  |                                       |
| 27 | 32,175,000 | 32,325,000 | 430 | 1112 | 0.556391403  |                                       |
| 27 | 32,250,000 | 32,400,000 | 431 | 743  | -0.431573221 |                                       |
| 27 | 32,325,000 | 32,475,000 | 432 | 642  | -0.257279305 | ENSBTAG00000033381                    |
| 27 | 32,400,000 | 32,550,000 | 433 | 759  | 0.314869768  | ENSBTAG00000033381                    |
| 27 | 32,475,000 | 32,625,000 | 434 | 912  | 0.940632912  |                                       |
| 27 | 32,550,000 | 32,700,000 | 435 | 622  | 1.023735394  | ZNF703                                |
| 27 | 32,625,000 | 32,775,000 | 436 | 484  | 0.576044058  | ERLIN2,GPR124,PROSC,ZNF703            |
| 27 | 32,700,000 | 32,850,000 | 437 | 764  | -0.053382288 | BRF2,ERLIN2,GPR124,PROSC,RAB11FIP1    |
| 27 | 32,775,000 | 32,925,000 | 438 | 992  | -0.286905745 | ADRB3,BRF2,GOT1L1,GPR124,RAB11FIP1    |
| 27 | 32,850,000 | 33,000,000 | 439 | 1042 | -0.766075073 | ADRB3,ASH2L,EIF4EBP1,GOT1L1,RAB11FIP1 |

|    |            |            |     |      |              |                                             |
|----|------------|------------|-----|------|--------------|---------------------------------------------|
| 27 | 32,925,000 | 33,075,000 | 440 | 871  | -0.767700129 | ASH2L,BAG4,EIF4EBP1,LSM1,PPAPDC1B,STAR      |
| 27 | 33,000,000 | 33,150,000 | 441 | 519  | -0.062574972 | ASH2L,BAG4,DDHD2,LSM1,PPAPDC1B,STAR,WHSC1L1 |
| 27 | 33,075,000 | 33,225,000 | 442 | 388  | -0.282598965 | BAG4,DDHD2,WHSC1L1                          |
| 27 | 33,150,000 | 33,300,000 | 443 | 442  | -0.58633165  | FGFR1,LETM2,WHSC1L1                         |
| 27 | 33,225,000 | 33,375,000 | 444 | 476  | -0.447180397 | FGFR1,LETM2,WHSC1L1                         |
| 27 | 33,300,000 | 33,450,000 | 445 | 487  | 0.457080248  |                                             |
| 27 | 33,375,000 | 33,525,000 | 446 | 678  | 0.389151487  |                                             |
| 27 | 33,450,000 | 33,600,000 | 447 | 1222 | -0.42516456  | TACC1                                       |
| 27 | 33,525,000 | 33,675,000 | 448 | 1271 | 0.344080901  | TACC1                                       |
| 27 | 33,600,000 | 33,750,000 | 449 | 864  | 0.413229619  | PLEKHA2,TACC1                               |
| 27 | 33,675,000 | 33,825,000 | 450 | 745  | -0.040184381 | ADAM-9,HTRA4,PLEKHA2,TM2D2                  |
| 27 | 33,750,000 | 33,900,000 | 451 | 741  | 0.308483969  | ADAM-9,HTRA4,PLEKHA2,TM2D2                  |
| 27 | 33,825,000 | 33,975,000 | 452 | 899  | 0.537060301  | ADAM-9,ADAM32                               |
| 27 | 33,900,000 | 34,050,000 | 453 | 1061 | 0.838553103  | ADAM32                                      |
| 27 | 33,975,000 | 34,125,000 | 454 | 778  | 0.571970941  | ADAM32,ENSBTAG00000040445                   |
| 27 | 34,050,000 | 34,200,000 | 455 | 540  | 0.478981897  | ADAM32,ENSBTAG00000040445                   |
| 27 | 34,125,000 | 34,275,000 | 456 | 581  | 0.318916608  | ADAM2,ENSBTAG00000009406,ENSBTAG00000040445 |
| 27 | 34,200,000 | 34,350,000 | 457 | 628  | -0.105538362 | ADAM2,ENSBTAG00000009406,ENSBTAG00000040445 |
| 27 | 34,275,000 | 34,425,000 | 458 | 931  | 0.883262093  | ADAM2,ENSBTAG00000033312                    |
| 27 | 34,350,000 | 34,500,000 | 459 | 1113 | 1.130095414  | ADAM2,ENSBTAG00000033312                    |
| 27 | 34,425,000 | 34,575,000 | 460 | 766  | 0.835725228  | ADAM18,ENSBTAG00000033312                   |
| 27 | 34,500,000 | 34,650,000 | 461 | 886  | 0.884501903  | ADAM18                                      |
| 27 | 34,575,000 | 34,725,000 | 462 | 1157 | 0.33244588   | ADAM18,IDO1,IDO2                            |
| 27 | 34,650,000 | 34,800,000 | 463 | 995  | -0.380623527 | IDO1,IDO2                                   |
| 27 | 34,725,000 | 34,875,000 | 464 | 844  | 0.380331726  | IDO2                                        |
| 27 | 34,800,000 | 34,950,000 | 465 | 598  | 0.695901191  | C27H8orf4,ENSBTAG00000018713                |
| 27 | 34,875,000 | 35,025,000 | 466 | 740  | 0.447814617  | C27H8orf4,ENSBTAG00000018713                |
| 27 | 34,950,000 | 35,100,000 | 467 | 1337 | 0.595757211  |                                             |
| 27 | 35,025,000 | 35,175,000 | 468 | 1532 | 0.517039794  |                                             |
| 27 | 35,100,000 | 35,250,000 | 469 | 1419 | 0.131909717  | ZMAT4                                       |
| 27 | 35,175,000 | 35,325,000 | 470 | 1656 | 0.498299789  | ZMAT4                                       |
| 27 | 35,250,000 | 35,400,000 | 471 | 1597 | 1.028537062  | ZMAT4                                       |
| 27 | 35,325,000 | 35,475,000 | 472 | 1246 | 0.95324602   | ZMAT4                                       |
| 27 | 35,400,000 | 35,550,000 | 473 | 1049 | 0.339311238  | ZMAT4                                       |
| 27 | 35,475,000 | 35,625,000 | 474 | 920  | 0.471329264  | ZMAT4                                       |
| 27 | 35,550,000 | 35,700,000 | 475 | 1060 | 0.890052488  | ZMAT4                                       |
| 27 | 35,625,000 | 35,775,000 | 476 | 1300 | 1.025942068  |                                             |
| 27 | 35,700,000 | 35,850,000 | 477 | 1006 | 0.509080631  |                                             |
| 27 | 35,775,000 | 35,925,000 | 478 | 704  | 0.226440482  | SFRP1                                       |
| 27 | 35,850,000 | 36,000,000 | 479 | 862  | 0.309449186  | SFRP1                                       |
| 27 | 35,925,000 | 36,075,000 | 480 | 982  | 0.222803924  | SFRP1                                       |
| 27 | 36,000,000 | 36,150,000 | 481 | 803  | 0.484478878  | GINS4,GOLGA7                                |
| 27 | 36,075,000 | 36,225,000 | 482 | 634  | -0.259498728 | AGPAT6,GINS4,GOLGA7                         |
| 27 | 36,150,000 | 36,300,000 | 483 | 807  | -0.3058376   | AGPAT6,ANK1,GINS4,NKX6-3                    |
| 27 | 36,225,000 | 36,375,000 | 484 | 1357 | 0.456462551  | AGPAT6,ANK1,NKX6-3                          |
| 27 | 36,300,000 | 36,450,000 | 485 | 1730 | 0.518751703  | ANK1                                        |
| 27 | 36,375,000 | 36,525,000 | 486 | 1486 | 0.61203289   |                                             |
| 27 | 36,450,000 | 36,600,000 | 487 | 933  | 0.908849047  | KAT6A                                       |
| 27 | 36,525,000 | 36,675,000 | 488 | 525  | 0.967844936  | KAT6A                                       |
| 27 | 36,600,000 | 36,750,000 | 489 | 428  | 0.609969471  | AP3M2,KAT6A,PLAT                            |



|    |            |            |     |      |              |                               |
|----|------------|------------|-----|------|--------------|-------------------------------|
| 27 | 36,675,000 | 36,825,000 | 490 | 491  | 0.816711965  | AP3M2,IKBKB,PLAT              |
| 27 | 36,750,000 | 36,900,000 | 491 | 739  | 1.21117326   | IKBKB,PLAT,POLB               |
| 27 | 36,825,000 | 36,975,000 | 492 | 783  | 1.032429035  | DKK4,IKBKB,POLB,SLC20A2,VDAC3 |
| 27 | 36,900,000 | 37,050,000 | 493 | 798  | 0.011923505  | DKK4,POLB,SLC20A2,VDAC3       |
| 27 | 36,975,000 | 37,125,000 | 494 | 870  | -0.032913438 | SLC20A2,SMIM19                |
| 27 | 37,050,000 | 37,200,000 | 495 | 899  | 0.320388707  | CHRNA6,CHRN3,SMIM19           |
| 27 | 37,125,000 | 37,275,000 | 496 | 1015 | 0.537644085  | CHRNA6,CHRN3,RNF170,THAP1     |
| 27 | 37,200,000 | 37,350,000 | 497 | 1313 | 0.764314459  | CHRNA6,HOOK3,RNF170,THAP1     |
| 27 | 37,275,000 | 37,425,000 | 498 | 1684 | 1.045497909  | FNTA,HOOK3,POMK               |
| 27 | 37,350,000 | 37,500,000 | 499 | 1690 | 1.194988304  | FNTA,HGSNAT,HOOK3,INTS10,POMK |
| 27 | 37,425,000 | 37,575,000 | 500 | 988  | -0.268112054 | HGSNAT,INTS10,POMK            |
| 27 | 37,500,000 | 37,650,000 | 501 | 189  | -2.742643286 | INTS10                        |
| 27 | 37,575,000 | 37,725,000 | 502 | 201  | 0.111697673  |                               |
| 27 | 37,650,000 | 37,800,000 | 503 | 574  | 0.062696611  |                               |
| 27 | 37,725,000 | 37,875,000 | 504 | 824  | 0.459961477  | CSGALNACT1                    |
| 27 | 37,800,000 | 37,950,000 | 505 | 1049 | -0.037428046 | CSGALNACT1                    |
| 27 | 37,875,000 | 38,025,000 | 506 | 1044 | -0.026566167 | CSGALNACT1                    |
| 27 | 37,950,000 | 38,100,000 | 507 | 1128 | 0.475395843  | CSGALNACT1,SH2D4A             |
| 27 | 38,025,000 | 38,175,000 | 508 | 1628 | -0.012183943 | SH2D4A                        |
| 27 | 38,100,000 | 38,250,000 | 509 | 2070 | -0.036201271 |                               |
| 27 | 38,175,000 | 38,325,000 | 510 | 2013 | 0.401694782  |                               |
| 27 | 38,250,000 | 38,400,000 | 511 | 1743 | 0.912719782  |                               |
| 27 | 38,325,000 | 38,475,000 | 512 | 1721 | 1.06255614   |                               |
| 27 | 38,400,000 | 38,550,000 | 513 | 1587 | 1.01846361   | PSD3                          |
| 27 | 38,475,000 | 38,625,000 | 514 | 1317 | 0.518808702  | PSD3                          |
| 27 | 38,550,000 | 38,700,000 | 515 | 1268 | -0.165937676 | PSD3                          |
| 27 | 38,625,000 | 38,775,000 | 516 | 1738 | -0.603433161 | PSD3                          |
| 27 | 38,700,000 | 38,850,000 | 517 | 1627 | -1.43070395  | PSD3                          |
| 27 | 38,775,000 | 38,925,000 | 518 | 1262 | -1.168739806 | NAT1,PSD3                     |
| 27 | 38,850,000 | 39,000,000 | 519 | 1456 | 0.544169171  | NAT1                          |
| 27 | 38,925,000 | 39,075,000 | 520 | 1682 | 0.052424895  |                               |
| 27 | 39,000,000 | 39,150,000 | 521 | 1390 | -1.345414204 | LRRC3B                        |
| 27 | 39,075,000 | 39,225,000 | 522 | 824  | -0.152916248 | LRRC3B                        |
| 27 | 39,150,000 | 39,300,000 | 523 | 788  | 1.174647187  |                               |
| 27 | 39,225,000 | 39,375,000 | 524 | 1096 | 0.864375314  |                               |
| 27 | 39,300,000 | 39,450,000 | 525 | 1158 | 0.382662866  |                               |
| 27 | 39,375,000 | 39,525,000 | 526 | 1070 | -0.114661528 |                               |
| 27 | 39,450,000 | 39,600,000 | 527 | 1129 | -0.58187666  |                               |
| 27 | 39,525,000 | 39,675,000 | 528 | 957  | -2.298865157 |                               |
| 27 | 39,600,000 | 39,750,000 | 529 | 796  | -2.277943019 |                               |
| 27 | 39,675,000 | 39,825,000 | 530 | 1092 | -0.331052811 |                               |
| 27 | 39,750,000 | 39,900,000 | 531 | 1065 | -0.168019671 | NGLY1,OXSM                    |
| 27 | 39,825,000 | 39,975,000 | 532 | 887  | 0.429631107  | NGLY1,OXSM                    |
| 27 | 39,900,000 | 40,050,000 | 533 | 1109 | -0.245369231 | NGLY1,TOP2B                   |
| 27 | 39,975,000 | 40,125,000 | 534 | 1213 | -1.413243213 | TOP2B                         |
| 27 | 40,050,000 | 40,200,000 | 535 | 1439 | -1.477130694 | RARB,TOP2B                    |
| 27 | 40,125,000 | 40,275,000 | 536 | 944  | -1.239275064 | RARB                          |
| 27 | 40,200,000 | 40,350,000 | 537 | 378  | 0.342091467  | RARB                          |
| 27 | 40,275,000 | 40,425,000 | 538 | 606  | 0.62026844   |                               |
| 27 | 40,350,000 | 40,500,000 | 539 | 936  | 0.484219592  |                               |
| 27 | 40,425,000 | 40,575,000 | 540 | 1011 | 0.653834885  |                               |
| 27 | 40,500,000 | 40,650,000 | 541 | 898  | 1.006165653  |                               |
| 27 | 40,575,000 | 40,725,000 | 542 | 836  | 0.38676616   |                               |

|    |            |            |     |      |              |                         |
|----|------------|------------|-----|------|--------------|-------------------------|
| 27 | 40,650,000 | 40,800,000 | 543 | 698  | -0.377222435 |                         |
| 27 | 40,725,000 | 40,875,000 | 544 | 761  | -0.803206748 |                         |
| 27 | 40,800,000 | 40,950,000 | 545 | 840  | -0.717992131 |                         |
| 27 | 40,875,000 | 41,025,000 | 546 | 644  | 0.251451101  |                         |
| 27 | 40,950,000 | 41,100,000 | 547 | 518  | 0.686157407  | MCM4,ENSBTAG00000045690 |
| 27 | 41,025,000 | 41,175,000 | 548 | 562  | 0.306898667  | MCM4,ENSBTAG00000045690 |
| 27 | 41,100,000 | 41,250,000 | 549 | 593  | -0.049163913 |                         |
| 27 | 41,175,000 | 41,325,000 | 550 | 938  | 0.297025912  |                         |
| 27 | 41,250,000 | 41,400,000 | 551 | 1209 | 0.138858481  |                         |
| 27 | 41,325,000 | 41,475,000 | 552 | 898  | -0.301629595 |                         |
| 27 | 41,400,000 | 41,550,000 | 553 | 609  | -0.755335188 |                         |
| 27 | 41,475,000 | 41,625,000 | 554 | 626  | -0.583058259 |                         |
| 27 | 41,550,000 | 41,700,000 | 555 | 744  | 0.252152801  | THRB                    |
| 27 | 41,625,000 | 41,775,000 | 556 | 872  | -0.541479486 | THRB                    |
| 27 | 41,700,000 | 41,850,000 | 557 | 786  | -1.02121926  | THRB                    |
| 27 | 41,775,000 | 41,925,000 | 558 | 544  | 0.218279612  | NR1D2                   |
| 27 | 41,850,000 | 42,000,000 | 559 | 563  | 0.661725933  | NKIRAS1,NR1D2,RPL15     |
| 27 | 41,925,000 | 42,075,000 | 560 | 575  | 0.773211225  | NKIRAS1,RPL15           |
| 27 | 42,000,000 | 42,150,000 | 561 | 468  | 0.557255621  |                         |
| 27 | 42,075,000 | 42,225,000 | 562 | 522  | -0.088062967 | UBE2E2                  |
| 27 | 42,150,000 | 42,300,000 | 563 | 659  | -0.80767479  | UBE2E2                  |
| 27 | 42,225,000 | 42,375,000 | 564 | 732  | -1.454640418 | UBE2E2                  |
| 27 | 42,300,000 | 42,450,000 | 565 | 602  | -0.961498677 | ENSBTAG00000021882      |
| 27 | 42,375,000 | 42,525,000 | 566 | 456  | 0.795918625  | ENSBTAG00000021882      |
| 27 | 42,450,000 | 42,600,000 | 567 | 504  | 0.725460745  | ENSBTAG00000021882      |
| 27 | 42,525,000 | 42,675,000 | 568 | 487  | 0.952550882  |                         |
| 27 | 42,600,000 | 42,750,000 | 569 | 632  | 1.024962964  |                         |
| 27 | 42,675,000 | 42,825,000 | 570 | 973  | 0.153176009  |                         |
| 27 | 42,750,000 | 42,900,000 | 571 | 1280 | 0.471348838  |                         |
| 27 | 42,825,000 | 42,975,000 | 572 | 1410 | 1.182124817  |                         |
| 27 | 42,900,000 | 43,050,000 | 573 | 937  | 0.983182592  |                         |
| 27 | 42,975,000 | 43,125,000 | 574 | 941  | 0.600090658  |                         |
| 27 | 43,050,000 | 43,200,000 | 575 | 988  | 0.52966995   |                         |
| 27 | 43,125,000 | 43,275,000 | 576 | 990  | 0.818116391  |                         |
| 27 | 43,200,000 | 43,350,000 | 577 | 1574 | -0.122284664 |                         |
| 27 | 43,275,000 | 43,425,000 | 578 | 1791 | -1.764471473 |                         |
| 27 | 43,350,000 | 43,500,000 | 579 | 1496 | -2.71592372  |                         |
| 27 | 43,425,000 | 43,575,000 | 580 | 712  | -3.123493592 |                         |
| 27 | 43,500,000 | 43,650,000 | 581 | 501  | -1.719035827 |                         |
| 27 | 43,575,000 | 43,725,000 | 582 | 931  | -0.529784524 |                         |
| 27 | 43,650,000 | 43,800,000 | 583 | 1226 | -0.32306502  |                         |
| 27 | 43,725,000 | 43,875,000 | 584 | 1457 | 0.044376563  |                         |
| 27 | 43,800,000 | 43,950,000 | 585 | 1233 | 0.362137134  |                         |
| 27 | 43,875,000 | 44,025,000 | 586 | 933  | 0.110959224  |                         |
| 27 | 43,950,000 | 44,100,000 | 587 | 1108 | 0.47905675   |                         |
| 27 | 44,025,000 | 44,175,000 | 588 | 1285 | 0.511516234  |                         |
| 27 | 44,100,000 | 44,250,000 | 589 | 1006 | 0.110005833  |                         |
| 27 | 44,175,000 | 44,325,000 | 590 | 1084 | 0.749369579  |                         |
| 27 | 44,250,000 | 44,400,000 | 591 | 1300 | 0.919959674  |                         |
| 27 | 44,325,000 | 44,475,000 | 592 | 1151 | -0.372655898 |                         |
| 27 | 44,400,000 | 44,550,000 | 593 | 920  | -1.586150869 |                         |
| 27 | 44,475,000 | 44,625,000 | 594 | 787  | 0.130746188  |                         |
| 27 | 44,550,000 | 44,700,000 | 595 | 1035 | 0.814901464  |                         |

|    |            |            |     |      |              |                                              |
|----|------------|------------|-----|------|--------------|----------------------------------------------|
| 27 | 44,625,000 | 44,775,000 | 596 | 1015 | 0.62839084   |                                              |
| 27 | 44,700,000 | 44,850,000 | 597 | 726  | 0.53543761   |                                              |
| 27 | 44,775,000 | 44,925,000 | 598 | 682  | 0.327941245  |                                              |
| 27 | 44,850,000 | 45,000,000 | 599 | 825  | -0.354734012 |                                              |
| 27 | 44,925,000 | 45,075,000 | 600 | 981  | -0.250629844 |                                              |
| 27 | 45,000,000 | 45,150,000 | 601 | 1007 | -0.004314987 |                                              |
| 27 | 45,075,000 | 45,225,000 | 602 | 857  | 0.57707477   |                                              |
| 27 | 45,150,000 | 45,300,000 | 603 | 1313 | 0.312496664  |                                              |
| 27 | 45,225,000 | 45,375,000 | 604 | 1102 | -0.152262272 |                                              |
| 27 | 45,300,000 | 45,407,902 | 605 | 389  | -1.17739966  |                                              |
| 28 | 0          | 150,000    | 1   | 1109 | 0.215300178  |                                              |
| 28 | 75,000     | 225,000    | 2   | 1223 | -0.516416857 | RAB4A                                        |
| 28 | 150,000    | 300,000    | 3   | 1422 | -0.56035919  | CCSAP,RAB4A                                  |
| 28 | 225,000    | 375,000    | 4   | 1620 | -1.595131419 | CCSAP,RAB4A                                  |
| 28 | 300,000    | 450,000    | 5   | 1172 | -2.185842608 | ACTA1,NUP133                                 |
| 28 | 375,000    | 525,000    | 6   | 779  | -0.080278425 | ABCB10,ACTA1,NUP133                          |
| 28 | 450,000    | 600,000    | 7   | 644  | 0.667014606  | ABCB10,NUP133,TAF5L,URB2                     |
| 28 | 525,000    | 675,000    | 8   | 884  | -0.148537581 | ABCB10,TAF5L,URB2                            |
| 28 | 600,000    | 750,000    | 9   | 1013 | 0.019490922  | URB2                                         |
| 28 | 675,000    | 825,000    | 10  | 838  | 0.105484028  |                                              |
| 28 | 750,000    | 900,000    | 11  | 762  | -0.357924109 |                                              |
| 28 | 825,000    | 975,000    | 12  | 506  | 0.378595176  |                                              |
| 28 | 900,000    | 1,050,000  | 13  | 1031 | 0.643045618  |                                              |
| 28 | 975,000    | 1,125,000  | 14  | 1024 | 0.586941046  |                                              |
| 28 | 1,050,000  | 1,200,000  | 15  | 683  | 0.578506363  | GALNT2                                       |
| 28 | 1,125,000  | 1,275,000  | 16  | 1121 | 0.728117965  | GALNT2                                       |
| 28 | 1,200,000  | 1,350,000  | 17  | 1172 | -0.345896848 | GALNT2,PGBD5                                 |
| 28 | 1,275,000  | 1,425,000  | 18  | 1321 | -1.077508576 | GALNT2,PGBD5                                 |
| 28 | 1,350,000  | 1,500,000  | 19  | 1658 | 0.418611097  | PGBD5                                        |
| 28 | 1,425,000  | 1,575,000  | 20  | 1747 | 0.822473235  |                                              |
| 28 | 1,500,000  | 1,650,000  | 21  | 1990 | 0.022122915  |                                              |
| 28 | 1,575,000  | 1,725,000  | 22  | 2045 | 0.074346051  | ENSBTAG00000048153                           |
| 28 | 1,650,000  | 1,800,000  | 23  | 1647 | 0.452855276  | ENSBTAG00000048153                           |
| 28 | 1,725,000  | 1,875,000  | 24  | 1595 | 0.440338812  | ENSBTAG00000048153                           |
| 28 | 1,800,000  | 1,950,000  | 25  | 1283 | -1.091503412 |                                              |
| 28 | 1,875,000  | 2,025,000  | 26  | 976  | -1.383218599 |                                              |
| 28 | 1,950,000  | 2,100,000  | 27  | 1256 | 0.503457763  |                                              |
| 28 | 2,025,000  | 2,175,000  | 28  | 1234 | 1.05042894   | RHOU                                         |
| 28 | 2,100,000  | 2,250,000  | 29  | 1011 | 0.583595195  | RHOU                                         |
| 28 | 2,175,000  | 2,325,000  | 30  | 1018 | 0.380469723  | RHOU                                         |
| 28 | 2,250,000  | 2,400,000  | 31  | 1057 | 0.575762057  |                                              |
| 28 | 2,325,000  | 2,475,000  | 32  | 874  | 0.474422293  |                                              |
| 28 | 2,400,000  | 2,550,000  | 33  | 967  | 0.482104704  |                                              |
| 28 | 2,475,000  | 2,625,000  | 34  | 959  | -0.180886478 | OR5AS1,ENSBTAG00000033555,ENSBTAG00000039837 |
| 28 | 2,550,000  | 2,700,000  | 35  | 533  | -2.289748472 | OR5AS1,ENSBTAG00000033555,ENSBTAG00000039837 |
| 28 | 2,625,000  | 2,775,000  | 36  | 298  | -1.155629017 | OR5D14,ENSBTAG00000038418                    |
| 28 | 2,700,000  | 2,850,000  | 37  | 297  | -0.847014327 | OR5D14,ENSBTAG00000004217,ENSBTAG00000038418 |
| 28 | 2,775,000  | 2,925,000  | 38  | 635  | -0.061765101 | OR4P4,ENSBTAG00000004217                     |
| 28 | 2,850,000  | 3,000,000  | 39  | 1092 | 0.420443606  | OR4P4                                        |
| 28 | 2,925,000  | 3,075,000  | 40  | 1087 | 0.235964358  | TSNAX                                        |

|    |           |           |    |      |              |                                                   |
|----|-----------|-----------|----|------|--------------|---------------------------------------------------|
| 28 | 3,000,000 | 3,150,000 | 41 | 1088 | 0.455494591  | TSNAX                                             |
| 28 | 3,075,000 | 3,225,000 | 42 | 857  | 0.855661805  | TSNAX,ENSBTAG00000004624                          |
| 28 | 3,150,000 | 3,300,000 | 43 | 519  | 0.146234539  | ENSBTAG00000004624,ENSBTAG000000045608            |
| 28 | 3,225,000 | 3,375,000 | 44 | 490  | -0.028182595 | EXOC8,SPRTN,ENSBTAG00000010500,ENSBTAG00000045608 |
| 28 | 3,300,000 | 3,450,000 | 45 | 556  | 0.292788607  | C1orf131,EXOC8,GNPAT,SPRTN,ENSBTAG00000010500     |
| 28 | 3,375,000 | 3,525,000 | 46 | 707  | 0.191978652  | C1orf131,GNPAT,TRIM67                             |
| 28 | 3,450,000 | 3,600,000 | 47 | 963  | 0.467438655  | C1orf131,TRIM67                                   |
| 28 | 3,525,000 | 3,675,000 | 48 | 787  | 0.74458614   | FAM89A                                            |
| 28 | 3,600,000 | 3,750,000 | 49 | 390  | 0.486579682  | ARV1,FAM89A,TTC13                                 |
| 28 | 3,675,000 | 3,825,000 | 50 | 749  | 0.980629028  | ARV1,FAM89A,TTC13                                 |
| 28 | 3,750,000 | 3,900,000 | 51 | 1053 | 0.725862385  | C1orf198,TTC13                                    |
| 28 | 3,825,000 | 3,975,000 | 52 | 988  | 0.283875435  | C1orf198,ENSBTAG00000045932                       |
| 28 | 3,900,000 | 4,050,000 | 53 | 1384 | -1.062243054 | ENSBTAG00000039845,ENSBTAG00000045932             |
| 28 | 3,975,000 | 4,125,000 | 54 | 1304 | -1.656212373 | FMN2,ENSBTAG00000039845                           |
| 28 | 4,050,000 | 4,200,000 | 55 | 797  | -1.680079041 | FMN2                                              |
| 28 | 4,125,000 | 4,275,000 | 56 | 529  | -0.786813532 | FMN2                                              |
| 28 | 4,200,000 | 4,350,000 | 57 | 348  | 0.239704526  | FMN2                                              |
| 28 | 4,275,000 | 4,425,000 | 58 | 483  | -0.06659351  | FMN2                                              |
| 28 | 4,350,000 | 4,500,000 | 59 | 651  | 0.024116363  | FMN2                                              |
| 28 | 4,425,000 | 4,575,000 | 60 | 668  | 0.698505135  | FMN2                                              |
| 28 | 4,500,000 | 4,650,000 | 61 | 1046 | 0.392659281  |                                                   |
| 28 | 4,575,000 | 4,725,000 | 62 | 1124 | 0.33400089   |                                                   |
| 28 | 4,650,000 | 4,800,000 | 63 | 793  | 0.47205937   |                                                   |
| 28 | 4,725,000 | 4,875,000 | 64 | 947  | 0.846847708  |                                                   |
| 28 | 4,800,000 | 4,950,000 | 65 | 1157 | 0.878342737  |                                                   |
| 28 | 4,875,000 | 5,025,000 | 66 | 987  | -0.10035322  |                                                   |
| 28 | 4,950,000 | 5,100,000 | 67 | 695  | -0.286490618 |                                                   |
| 28 | 5,025,000 | 5,175,000 | 68 | 982  | 0.675264923  |                                                   |
| 28 | 5,100,000 | 5,250,000 | 69 | 1248 | 0.835000485  |                                                   |
| 28 | 5,175,000 | 5,325,000 | 70 | 1146 | 1.015700223  | SIPA1L2                                           |
| 28 | 5,250,000 | 5,400,000 | 71 | 1108 | 1.000131572  | SIPA1L2                                           |
| 28 | 5,325,000 | 5,475,000 | 72 | 864  | 0.026261564  | SIPA1L2                                           |
| 28 | 5,400,000 | 5,550,000 | 73 | 841  | 0.52111549   |                                                   |
| 28 | 5,475,000 | 5,625,000 | 74 | 1220 | 0.863691745  |                                                   |
| 28 | 5,550,000 | 5,700,000 | 75 | 1011 | 0.636290256  |                                                   |
| 28 | 5,625,000 | 5,775,000 | 76 | 1020 | 0.84670398   | MAP10                                             |
| 28 | 5,700,000 | 5,850,000 | 77 | 1414 | 1.10489355   | MAP10                                             |
| 28 | 5,775,000 | 5,925,000 | 78 | 1748 | 1.32829061   | NTPCR,PCNXL2                                      |
| 28 | 5,850,000 | 6,000,000 | 79 | 1706 | 0.892025662  | NTPCR,PCNXL2                                      |
| 28 | 5,925,000 | 6,075,000 | 80 | 1072 | -0.000775511 | PCNXL2                                            |
| 28 | 6,000,000 | 6,150,000 | 81 | 746  | 0.473890481  | PCNXL2                                            |
| 28 | 6,075,000 | 6,225,000 | 82 | 708  | 1.054481473  | PCNXL2                                            |
| 28 | 6,150,000 | 6,300,000 | 83 | 752  | 1.399992676  | PCNXL2,ENSBTAG00000021183                         |
| 28 | 6,225,000 | 6,375,000 | 84 | 1160 | 1.38995512   | PCNXL2,ENSBTAG00000021183                         |
| 28 | 6,300,000 | 6,450,000 | 85 | 1328 | 1.4402828    |                                                   |
| 28 | 6,375,000 | 6,525,000 | 86 | 1107 | 1.277641672  | KCNK1                                             |
| 28 | 6,450,000 | 6,600,000 | 87 | 1574 | 0.759361155  | KCNK1                                             |
| 28 | 6,525,000 | 6,675,000 | 88 | 1667 | 0.78399049   | KCNK1                                             |
| 28 | 6,600,000 | 6,750,000 | 89 | 1442 | 1.135009524  |                                                   |
| 28 | 6,675,000 | 6,825,000 | 90 | 1166 | 0.945880106  | SLC35F3                                           |
| 28 | 6,750,000 | 6,900,000 | 91 | 1251 | 0.673149569  | SLC35F3                                           |

|    |            |            |     |      |              |                            |
|----|------------|------------|-----|------|--------------|----------------------------|
| 28 | 6,825,000  | 6,975,000  | 92  | 1501 | 0.407471937  | SLC35F3                    |
| 28 | 6,900,000  | 7,050,000  | 93  | 1299 | 0.108332523  | SLC35F3                    |
| 28 | 6,975,000  | 7,125,000  | 94  | 1105 | -0.75433115  | SLC35F3                    |
| 28 | 7,050,000  | 7,200,000  | 95  | 641  | -2.047484903 | SLC35F3                    |
| 28 | 7,125,000  | 7,275,000  | 96  | 585  | -0.420343951 | SLC35F3,TARBP1             |
| 28 | 7,200,000  | 7,350,000  | 97  | 1033 | 0.663618327  | TARBP1                     |
| 28 | 7,275,000  | 7,425,000  | 98  | 924  | 0.863027872  | TARBP1                     |
| 28 | 7,350,000  | 7,500,000  | 99  | 527  | 0.800443315  | IRF2BP2                    |
| 28 | 7,425,000  | 7,575,000  | 100 | 605  | -0.259553266 | IRF2BP2                    |
| 28 | 7,500,000  | 7,650,000  | 101 | 700  | -1.265558878 |                            |
| 28 | 7,575,000  | 7,725,000  | 102 | 691  | -1.516386465 |                            |
| 28 | 7,650,000  | 7,800,000  | 103 | 618  | -0.889378612 |                            |
| 28 | 7,725,000  | 7,875,000  | 104 | 769  | -0.485811283 |                            |
| 28 | 7,800,000  | 7,950,000  | 105 | 767  | -0.042485653 | RBM34,TOMM20               |
| 28 | 7,875,000  | 8,025,000  | 106 | 501  | 0.535857128  | ARID4B,RBM34,TOMM20        |
| 28 | 7,950,000  | 8,100,000  | 107 | 375  | -0.226793444 | ARID4B,RBM34               |
| 28 | 8,025,000  | 8,175,000  | 108 | 386  | -0.372254089 | ARID4B,GGPS1,TBCE          |
| 28 | 8,100,000  | 8,250,000  | 109 | 748  | 0.084723843  | ARID4B,B3GALNT2,GGPS1,TBCE |
| 28 | 8,175,000  | 8,325,000  | 110 | 1246 | -0.047036078 | B3GALNT2,TBCE              |
| 28 | 8,250,000  | 8,400,000  | 111 | 1834 | -0.074210264 | B3GALNT2,GNG4              |
| 28 | 8,325,000  | 8,475,000  | 112 | 1652 | -0.204150512 | GNG4,LYST                  |
| 28 | 8,400,000  | 8,550,000  | 113 | 848  | -0.478587369 | GNG4,LYST                  |
| 28 | 8,475,000  | 8,625,000  | 114 | 750  | 0.925347119  | LYST                       |
| 28 | 8,550,000  | 8,700,000  | 115 | 917  | 0.639991439  | LYST                       |
| 28 | 8,625,000  | 8,775,000  | 116 | 1031 | 0.526017406  | NID1                       |
| 28 | 8,700,000  | 8,850,000  | 117 | 724  | 0.481131198  | NID1                       |
| 28 | 8,775,000  | 8,925,000  | 118 | 447  | -0.93833466  | GPR137B,NID1               |
| 28 | 8,850,000  | 9,000,000  | 119 | 404  | -2.415849878 | ERO1LB,GPR137B             |
| 28 | 8,925,000  | 9,075,000  | 120 | 534  | -2.857434263 | ERO1LB,GPR137B             |
| 28 | 9,000,000  | 9,150,000  | 121 | 1121 | -2.19231267  | EDARADD,ERO1LB             |
| 28 | 9,075,000  | 9,225,000  | 122 | 1145 | -1.385885987 | EDARADD,LGALS8             |
| 28 | 9,150,000  | 9,300,000  | 123 | 787  | -0.089591443 | EDARADD,HEATR1,LGALS8      |
| 28 | 9,225,000  | 9,375,000  | 124 | 835  | -0.551504317 | HEATR1,LGALS8              |
| 28 | 9,300,000  | 9,450,000  | 125 | 663  | -0.411033112 | ACTN2                      |
| 28 | 9,375,000  | 9,525,000  | 126 | 483  | -0.365073623 | ACTN2,MTR                  |
| 28 | 9,450,000  | 9,600,000  | 127 | 706  | 0.414185189  | ACTN2,MTR                  |
| 28 | 9,525,000  | 9,675,000  | 128 | 1233 | 0.469485447  | MTR                        |
| 28 | 9,600,000  | 9,750,000  | 129 | 1221 | -0.15219814  |                            |
| 28 | 9,675,000  | 9,825,000  | 130 | 658  | -0.890549487 |                            |
| 28 | 9,750,000  | 9,900,000  | 131 | 755  | -1.27216919  |                            |
| 28 | 9,825,000  | 9,975,000  | 132 | 1237 | -1.284562666 | RYR2                       |
| 28 | 9,900,000  | 10,050,000 | 133 | 1221 | -0.881082747 | RYR2                       |
| 28 | 9,975,000  | 10,125,000 | 134 | 1190 | -2.476684348 | RYR2                       |
| 28 | 10,050,000 | 10,200,000 | 135 | 1528 | -1.075818036 | RYR2                       |
| 28 | 10,125,000 | 10,275,000 | 136 | 1366 | 0.856512835  | RYR2                       |
| 28 | 10,200,000 | 10,350,000 | 137 | 1254 | 0.833175235  | RYR2                       |
| 28 | 10,275,000 | 10,425,000 | 138 | 1121 | 0.666106309  | RYR2                       |
| 28 | 10,350,000 | 10,500,000 | 139 | 643  | 0.232046167  | RYR2                       |
| 28 | 10,425,000 | 10,575,000 | 140 | 852  | 0.088326097  | RYR2                       |
| 28 | 10,500,000 | 10,650,000 | 141 | 1351 | -0.580650732 | RYR2                       |
| 28 | 10,575,000 | 10,725,000 | 142 | 1151 | 0.063921448  | ZP4                        |
| 28 | 10,650,000 | 10,800,000 | 143 | 1088 | 0.562015116  | ZP4                        |
| 28 | 10,725,000 | 10,875,000 | 144 | 1024 | -0.070812175 |                            |

|    |            |            |     |      |              |                                             |
|----|------------|------------|-----|------|--------------|---------------------------------------------|
| 28 | 10,800,000 | 10,950,000 | 145 | 983  | 0.377165633  |                                             |
| 28 | 10,875,000 | 11,025,000 | 146 | 1357 | 0.663609862  |                                             |
| 28 | 10,950,000 | 11,100,000 | 147 | 1005 | 0.742020219  |                                             |
| 28 | 11,025,000 | 11,175,000 | 148 | 648  | 0.880419589  |                                             |
| 28 | 11,100,000 | 11,250,000 | 149 | 997  | 0.829835206  |                                             |
| 28 | 11,175,000 | 11,325,000 | 150 | 1174 | 1.06587919   | ENSBTAG00000004702                          |
| 28 | 11,250,000 | 11,400,000 | 151 | 792  | 1.063563172  | ENSBTAG00000004702                          |
| 28 | 11,325,000 | 11,475,000 | 152 | 555  | 0.449314543  |                                             |
| 28 | 11,400,000 | 11,550,000 | 153 | 824  | 1.000037979  |                                             |
| 28 | 11,475,000 | 11,625,000 | 154 | 1289 | 0.108072983  |                                             |
| 28 | 11,550,000 | 11,700,000 | 155 | 1285 | -0.32004793  |                                             |
| 28 | 11,625,000 | 11,775,000 | 156 | 987  | 0.501139265  |                                             |
| 28 | 11,700,000 | 11,850,000 | 157 | 1030 | -0.382748315 |                                             |
| 28 | 11,775,000 | 11,925,000 | 158 | 1237 | -0.920666414 |                                             |
| 28 | 11,850,000 | 12,000,000 | 159 | 1195 | -0.110316428 |                                             |
| 28 | 11,925,000 | 12,075,000 | 160 | 793  | 0.250216836  |                                             |
| 28 | 12,000,000 | 12,150,000 | 161 | 813  | -0.60687592  |                                             |
| 28 | 12,075,000 | 12,225,000 | 162 | 1157 | -0.342845686 |                                             |
| 28 | 12,150,000 | 12,300,000 | 163 | 1190 | 0.435383562  |                                             |
| 28 | 12,225,000 | 12,375,000 | 164 | 881  | 0.576808039  |                                             |
| 28 | 12,300,000 | 12,450,000 | 165 | 636  | 0.751204157  |                                             |
| 28 | 12,375,000 | 12,525,000 | 166 | 453  | 1.103593365  |                                             |
| 28 | 12,450,000 | 12,600,000 | 167 | 394  | 0.334776453  |                                             |
| 28 | 12,525,000 | 12,675,000 | 168 | 729  | 0.293567752  |                                             |
| 28 | 12,600,000 | 12,750,000 | 169 | 770  | 0.284370451  |                                             |
| 28 | 12,675,000 | 12,825,000 | 170 | 627  | 0.712379702  | CHRM3                                       |
| 28 | 12,750,000 | 12,900,000 | 171 | 884  | 0.273687116  | CHRM3                                       |
| 28 | 12,825,000 | 12,975,000 | 172 | 1123 | 0.451985959  | ZNF33B,ENSBTAG00000018960                   |
| 28 | 12,900,000 | 13,050,000 | 173 | 1161 | 0.926153461  | ZNF33B,ENSBTAG00000018960                   |
| 28 | 12,975,000 | 13,125,000 | 174 | 914  | 0.723355921  | ENSBTAG00000047340                          |
| 28 | 13,050,000 | 13,200,000 | 175 | 559  | 0.306546246  | ZNF25,ENSBTAG00000002955,ENSBTAG00000047340 |
| 28 | 13,125,000 | 13,275,000 | 176 | 531  | 0.21335473   | ZNF248,ZNF25,ENSBTAG00000002955             |
| 28 | 13,200,000 | 13,350,000 | 177 | 861  | 0.893104894  | BMS1,ZNF248                                 |
| 28 | 13,275,000 | 13,425,000 | 178 | 1310 | 0.509226592  | BMS1                                        |
| 28 | 13,350,000 | 13,500,000 | 179 | 1624 | -0.597527568 |                                             |
| 28 | 13,425,000 | 13,575,000 | 180 | 1218 | -0.728292096 | RET                                         |
| 28 | 13,500,000 | 13,650,000 | 181 | 981  | -1.370752685 | RET                                         |
| 28 | 13,575,000 | 13,725,000 | 182 | 1023 | -1.095723239 | CSGALNACT2,RASGEF1A,RET                     |
| 28 | 13,650,000 | 13,800,000 | 183 | 1026 | -0.255166783 | CSGALNACT2,RASGEF1A                         |
| 28 | 13,725,000 | 13,875,000 | 184 | 1178 | -0.287600393 |                                             |
| 28 | 13,800,000 | 13,950,000 | 185 | 810  | -0.070875845 | HNRNPF                                      |
| 28 | 13,875,000 | 14,025,000 | 186 | 629  | -0.051479424 | HNRNPF                                      |
| 28 | 13,950,000 | 14,100,000 | 187 | 565  | -0.594254525 |                                             |
| 28 | 14,025,000 | 14,175,000 | 188 | 775  | 0.060753486  |                                             |
| 28 | 14,100,000 | 14,250,000 | 189 | 951  | 0.685746133  |                                             |
| 28 | 14,175,000 | 14,325,000 | 190 | 617  | 0.737191954  |                                             |
| 28 | 14,250,000 | 14,400,000 | 191 | 568  | 0.017079466  | BICC1                                       |
| 28 | 14,325,000 | 14,475,000 | 192 | 605  | -0.09522836  | BICC1                                       |
| 28 | 14,400,000 | 14,550,000 | 193 | 603  | 0.835430107  | BICC1                                       |
| 28 | 14,475,000 | 14,625,000 | 194 | 653  | 0.205124665  |                                             |
| 28 | 14,550,000 | 14,700,000 | 195 | 774  | -0.77653722  |                                             |
| 28 | 14,625,000 | 14,775,000 | 196 | 734  | -0.420370689 |                                             |

|    |            |            |     |      |              |                |
|----|------------|------------|-----|------|--------------|----------------|
| 28 | 14,700,000 | 14,850,000 | 197 | 574  | 0.350482583  |                |
| 28 | 14,775,000 | 14,925,000 | 198 | 521  | 0.553534946  | PHYHIPL        |
| 28 | 14,850,000 | 15,000,000 | 199 | 711  | 0.757132109  | FAM13C,PHYHIPL |
| 28 | 14,925,000 | 15,075,000 | 200 | 863  | 0.900038632  | FAM13C,PHYHIPL |
| 28 | 15,000,000 | 15,150,000 | 201 | 778  | 0.485935394  | FAM13C         |
| 28 | 15,075,000 | 15,225,000 | 202 | 617  | 0.153910852  | FAM13C         |
| 28 | 15,150,000 | 15,300,000 | 203 | 566  | 0.41176227   |                |
| 28 | 15,225,000 | 15,375,000 | 204 | 476  | 0.580239159  |                |
| 28 | 15,300,000 | 15,450,000 | 205 | 240  | 0.338551935  | SLC16A9        |
| 28 | 15,375,000 | 15,525,000 | 206 | 502  | -0.123232607 | SLC16A9        |
| 28 | 15,450,000 | 15,600,000 | 207 | 728  | 0.200272393  | CCDC6,SLC16A9  |
| 28 | 15,525,000 | 15,675,000 | 208 | 728  | 0.53986588   | CCDC6          |
| 28 | 15,600,000 | 15,750,000 | 209 | 798  | 0.511056892  | CCDC6          |
| 28 | 15,675,000 | 15,825,000 | 210 | 796  | 0.619835239  | ANK3           |
| 28 | 15,750,000 | 15,900,000 | 211 | 612  | 0.608147744  | ANK3           |
| 28 | 15,825,000 | 15,975,000 | 212 | 568  | 0.052412567  | ANK3           |
| 28 | 15,900,000 | 16,050,000 | 213 | 835  | 0.711424382  | ANK3           |
| 28 | 15,975,000 | 16,125,000 | 214 | 939  | 0.827800787  | ANK3           |
| 28 | 16,050,000 | 16,200,000 | 215 | 895  | 0.419183525  | ANK3           |
| 28 | 16,125,000 | 16,275,000 | 216 | 771  | 0.746861777  |                |
| 28 | 16,200,000 | 16,350,000 | 217 | 626  | 0.070391154  |                |
| 28 | 16,275,000 | 16,425,000 | 218 | 784  | -0.249763552 |                |
| 28 | 16,350,000 | 16,500,000 | 219 | 993  | 0.817112025  |                |
| 28 | 16,425,000 | 16,575,000 | 220 | 1215 | 0.852649408  |                |
| 28 | 16,500,000 | 16,650,000 | 221 | 1226 | 0.204369286  | CDK1           |
| 28 | 16,575,000 | 16,725,000 | 222 | 888  | -0.589809439 | CDK1           |
| 28 | 16,650,000 | 16,800,000 | 223 | 814  | -1.41686389  | RHOBTB1        |
| 28 | 16,725,000 | 16,875,000 | 224 | 849  | -1.892794392 | RHOBTB1        |
| 28 | 16,800,000 | 16,950,000 | 225 | 1189 | 0.064334578  | RHOBTB1        |
| 28 | 16,875,000 | 17,025,000 | 226 | 1089 | 0.231658675  |                |
| 28 | 16,950,000 | 17,100,000 | 227 | 609  | -0.369017998 |                |
| 28 | 17,025,000 | 17,175,000 | 228 | 686  | 0.52495283   |                |
| 28 | 17,100,000 | 17,250,000 | 229 | 921  | 0.87432601   |                |
| 28 | 17,175,000 | 17,325,000 | 230 | 994  | 0.797571033  |                |
| 28 | 17,250,000 | 17,400,000 | 231 | 1026 | 0.522703566  | TMEM26         |
| 28 | 17,325,000 | 17,475,000 | 232 | 783  | 0.832353792  | TMEM26         |
| 28 | 17,400,000 | 17,550,000 | 233 | 581  | 0.575241134  | TMEM26         |
| 28 | 17,475,000 | 17,625,000 | 234 | 695  | 0.22977264   |                |
| 28 | 17,550,000 | 17,700,000 | 235 | 692  | 0.372153115  | C10ORF107      |
| 28 | 17,625,000 | 17,775,000 | 236 | 627  | 0.493613904  | C10ORF107      |
| 28 | 17,700,000 | 17,850,000 | 237 | 458  | 0.437371636  | C10ORF107      |
| 28 | 17,775,000 | 17,925,000 | 238 | 712  | 1.126718868  |                |
| 28 | 17,850,000 | 18,000,000 | 239 | 1055 | 1.277364774  |                |
| 28 | 17,925,000 | 18,075,000 | 240 | 904  | 0.895287185  | ARID5B         |
| 28 | 18,000,000 | 18,150,000 | 241 | 706  | -0.210493229 | ARID5B         |
| 28 | 18,075,000 | 18,225,000 | 242 | 534  | -1.061612936 | ARID5B         |
| 28 | 18,150,000 | 18,300,000 | 243 | 384  | -0.554652249 | ARID5B         |
| 28 | 18,225,000 | 18,375,000 | 244 | 366  | 0.2638076    | RTKN2          |
| 28 | 18,300,000 | 18,450,000 | 245 | 366  | 0.578814463  | RTKN2          |
| 28 | 18,375,000 | 18,525,000 | 246 | 494  | 0.519170231  | RTKN2          |
| 28 | 18,450,000 | 18,600,000 | 247 | 603  | -0.229478093 | RTKN2,ZNF365   |
| 28 | 18,525,000 | 18,675,000 | 248 | 532  | -0.777813672 | ZNF365         |
| 28 | 18,600,000 | 18,750,000 | 249 | 450  | 0.0572502    |                |

|    |            |            |     |      |              |              |
|----|------------|------------|-----|------|--------------|--------------|
| 28 | 18,675,000 | 18,825,000 | 250 | 329  | 0.711381646  |              |
| 28 | 18,750,000 | 18,900,000 | 251 | 240  | 0.503430889  |              |
| 28 | 18,825,000 | 18,975,000 | 252 | 373  | 1.018642265  |              |
| 28 | 18,900,000 | 19,050,000 | 253 | 562  | 0.727401762  | ADO,EGR2     |
| 28 | 18,975,000 | 19,125,000 | 254 | 630  | 0.261829821  | ADO,EGR2     |
| 28 | 19,050,000 | 19,200,000 | 255 | 553  | 0.437465659  |              |
| 28 | 19,125,000 | 19,275,000 | 256 | 606  | 0.357595543  |              |
| 28 | 19,200,000 | 19,350,000 | 257 | 791  | -0.52595348  |              |
| 28 | 19,275,000 | 19,425,000 | 258 | 599  | -0.694076754 | JMJD1C,NRBF2 |
| 28 | 19,350,000 | 19,500,000 | 259 | 323  | 0.342172253  | JMJD1C,NRBF2 |
| 28 | 19,425,000 | 19,575,000 | 260 | 646  | 0.857703849  | JMJD1C       |
| 28 | 19,500,000 | 19,650,000 | 261 | 881  | 0.513731443  | JMJD1C       |
| 28 | 19,575,000 | 19,725,000 | 262 | 804  | 0.101980884  | JMJD1C,REEP3 |
| 28 | 19,650,000 | 19,800,000 | 263 | 654  | 0.259569904  | JMJD1C,REEP3 |
| 28 | 19,725,000 | 19,875,000 | 264 | 671  | 0.635675916  | REEP3        |
| 28 | 19,800,000 | 19,950,000 | 265 | 758  | -0.06844253  | REEP3        |
| 28 | 19,875,000 | 20,025,000 | 266 | 568  | -0.603585153 |              |
| 28 | 19,950,000 | 20,100,000 | 267 | 524  | 0.111894581  |              |
| 28 | 20,025,000 | 20,175,000 | 268 | 961  | 0.39717185   |              |
| 28 | 20,100,000 | 20,250,000 | 269 | 987  | 0.241289859  |              |
| 28 | 20,175,000 | 20,325,000 | 270 | 762  | 0.291698313  |              |
| 28 | 20,250,000 | 20,400,000 | 271 | 943  | 0.412217618  |              |
| 28 | 20,325,000 | 20,475,000 | 272 | 925  | 0.559612879  |              |
| 28 | 20,400,000 | 20,550,000 | 273 | 1477 | 0.929001182  |              |
| 28 | 20,475,000 | 20,625,000 | 274 | 1881 | 0.553616634  |              |
| 28 | 20,550,000 | 20,700,000 | 275 | 1460 | 0.085806781  |              |
| 28 | 20,625,000 | 20,775,000 | 276 | 1275 | -0.607511958 |              |
| 28 | 20,700,000 | 20,850,000 | 277 | 1584 | -1.015627473 |              |
| 28 | 20,775,000 | 20,925,000 | 278 | 1694 | -0.59836105  |              |
| 28 | 20,850,000 | 21,000,000 | 279 | 1363 | -0.439810046 |              |
| 28 | 20,925,000 | 21,075,000 | 280 | 1244 | -0.04608842  |              |
| 28 | 21,000,000 | 21,150,000 | 281 | 1479 | 0.718302867  |              |
| 28 | 21,075,000 | 21,225,000 | 282 | 1698 | 0.97215037   |              |
| 28 | 21,150,000 | 21,300,000 | 283 | 1654 | 0.664484007  |              |
| 28 | 21,225,000 | 21,375,000 | 284 | 1855 | 0.326110851  |              |
| 28 | 21,300,000 | 21,450,000 | 285 | 2139 | 0.868886372  |              |
| 28 | 21,375,000 | 21,525,000 | 286 | 1611 | 1.213249852  |              |
| 28 | 21,450,000 | 21,600,000 | 287 | 1231 | 0.666164585  |              |
| 28 | 21,525,000 | 21,675,000 | 288 | 1791 | 0.809002728  |              |
| 28 | 21,600,000 | 21,750,000 | 289 | 1970 | 0.546883322  |              |
| 28 | 21,675,000 | 21,825,000 | 290 | 1992 | 0.128345191  |              |
| 28 | 21,750,000 | 21,900,000 | 291 | 2030 | 0.070536196  |              |
| 28 | 21,825,000 | 21,975,000 | 292 | 1383 | 0.045640321  |              |
| 28 | 21,900,000 | 22,050,000 | 293 | 1408 | 1.034128966  |              |
| 28 | 21,975,000 | 22,125,000 | 294 | 1694 | 0.980810982  |              |
| 28 | 22,050,000 | 22,200,000 | 295 | 1639 | 1.139376958  |              |
| 28 | 22,125,000 | 22,275,000 | 296 | 1780 | 0.931378483  |              |
| 28 | 22,200,000 | 22,350,000 | 297 | 1783 | -0.127421479 |              |
| 28 | 22,275,000 | 22,425,000 | 298 | 1941 | 0.07859855   | CTNNA3       |
| 28 | 22,350,000 | 22,500,000 | 299 | 1868 | 0.401994206  | CTNNA3       |
| 28 | 22,425,000 | 22,575,000 | 300 | 1545 | 0.213621274  | CTNNA3       |
| 28 | 22,500,000 | 22,650,000 | 301 | 1578 | 0.555343364  | CTNNA3       |
| 28 | 22,575,000 | 22,725,000 | 302 | 1340 | 0.899968223  | CTNNA3       |



|    |            |            |     |      |              |                                               |
|----|------------|------------|-----|------|--------------|-----------------------------------------------|
| 28 | 22,650,000 | 22,800,000 | 303 | 1097 | 0.670825122  | CTNNA3                                        |
| 28 | 22,725,000 | 22,875,000 | 304 | 1167 | 0.804347721  | CTNNA3                                        |
| 28 | 22,800,000 | 22,950,000 | 305 | 1435 | 1.086357489  | CTNNA3                                        |
| 28 | 22,875,000 | 23,025,000 | 306 | 1459 | 0.934367721  | CTNNA3                                        |
| 28 | 22,950,000 | 23,100,000 | 307 | 1441 | 0.636384726  | CTNNA3                                        |
| 28 | 23,025,000 | 23,175,000 | 308 | 1617 | 0.756334632  | CTNNA3                                        |
| 28 | 23,100,000 | 23,250,000 | 309 | 1461 | 0.875697157  | CTNNA3                                        |
| 28 | 23,175,000 | 23,325,000 | 310 | 1335 | 0.636218773  | CTNNA3                                        |
| 28 | 23,250,000 | 23,400,000 | 311 | 1441 | 0.759273345  | CTNNA3                                        |
| 28 | 23,325,000 | 23,475,000 | 312 | 1464 | 0.559070764  | CTNNA3                                        |
| 28 | 23,400,000 | 23,550,000 | 313 | 1258 | 0.52710542   | CTNNA3,LRRTM3                                 |
| 28 | 23,475,000 | 23,625,000 | 314 | 1219 | 0.987846854  | CTNNA3,LRRTM3                                 |
| 28 | 23,550,000 | 23,700,000 | 315 | 1337 | 0.472526123  | CTNNA3,LRRTM3                                 |
| 28 | 23,625,000 | 23,775,000 | 316 | 1352 | 0.682544338  | CTNNA3,LRRTM3,ENSBTAG00000045493              |
| 28 | 23,700,000 | 23,850,000 | 317 | 1132 | 0.407397037  | CTNNA3,LRRTM3,ENSBTAG00000045493              |
| 28 | 23,775,000 | 23,925,000 | 318 | 668  | -0.485730613 | CTNNA3                                        |
| 28 | 23,850,000 | 24,000,000 | 319 | 402  | 0.312505107  | CTNNA3                                        |
| 28 | 23,925,000 | 24,075,000 | 320 | 452  | -0.061747552 | CTNNA3                                        |
| 28 | 24,000,000 | 24,150,000 | 321 | 441  | -0.015255415 | CTNNA3                                        |
| 28 | 24,075,000 | 24,225,000 | 322 | 727  | 1.256975017  | CTNNA3                                        |
| 28 | 24,150,000 | 24,300,000 | 323 | 978  | 1.049321718  | CTNNA3                                        |
| 28 | 24,225,000 | 24,375,000 | 324 | 1066 | 0.719031532  | CTNNA3                                        |
| 28 | 24,300,000 | 24,450,000 | 325 | 991  | 0.782565513  | DNAJC12                                       |
| 28 | 24,375,000 | 24,525,000 | 326 | 900  | 0.97708337   | DNAJC12                                       |
| 28 | 24,450,000 | 24,600,000 | 327 | 830  | 1.001460804  | HERC4,SIRT1                                   |
| 28 | 24,525,000 | 24,675,000 | 328 | 513  | 0.801904473  | HERC4,SIRT1                                   |
| 28 | 24,600,000 | 24,750,000 | 329 | 358  | 0.954366611  | HERC4,MYPN                                    |
| 28 | 24,675,000 | 24,825,000 | 330 | 300  | 0.803408964  | HERC4,MYPN                                    |
| 28 | 24,750,000 | 24,900,000 | 331 | 316  | 0.038612208  | ATOH7,MYPN,PBLD                               |
| 28 | 24,825,000 | 24,975,000 | 332 | 356  | -0.450395895 | ATOH7,DNA2,MYPN,PBLD,RUFY2,ENSBTAG00000014316 |
| 28 | 24,900,000 | 25,050,000 | 333 | 362  | 0.169687755  | DNA2,RUFY2,SLC25A16,ENSBTAG00000014316        |
| 28 | 24,975,000 | 25,125,000 | 334 | 440  | 0.635004441  | DNA2,SLC25A16,TET1                            |
| 28 | 25,050,000 | 25,200,000 | 335 | 412  | 0.829144675  | TET1                                          |
| 28 | 25,125,000 | 25,275,000 | 336 | 333  | 1.042009497  | CCAR1,STOX1,TET1,ENSBTAG00000033457           |
| 28 | 25,200,000 | 25,350,000 | 337 | 428  | 1.113685049  | CCAR1,DDX50,STOX1,ENSBTAG00000033457          |
| 28 | 25,275,000 | 25,425,000 | 338 | 830  | 0.990648856  | DDX21,DDX50,KBP,STOX1                         |
| 28 | 25,350,000 | 25,500,000 | 339 | 953  | 0.580197504  | DDX21,DDX50,KBP                               |
| 28 | 25,425,000 | 25,575,000 | 340 | 1354 | -0.851340541 | KBP                                           |
| 28 | 25,500,000 | 25,650,000 | 341 | 1647 | -0.623107794 | SRGN                                          |
| 28 | 25,575,000 | 25,725,000 | 342 | 917  | 0.374191694  | SRGN,SUPV3L1,VPS26A                           |
| 28 | 25,650,000 | 25,800,000 | 343 | 925  | -2.5524728   | HKDC1,SUPV3L1,VPS26A                          |
| 28 | 25,725,000 | 25,875,000 | 344 | 1143 | -2.123612148 | HK1,HKDC1,SUPV3L1                             |
| 28 | 25,800,000 | 25,950,000 | 345 | 1136 | -0.115663707 | HK1,TACR2                                     |
| 28 | 25,875,000 | 26,025,000 | 346 | 1176 | 0.416464966  | HK1,TACR2,TSPAN15                             |
| 28 | 25,950,000 | 26,100,000 | 347 | 1132 | 0.194042471  | NEUROG3,TSPAN15                               |
| 28 | 26,025,000 | 26,175,000 | 348 | 1335 | -1.068843228 | C28H10ORF35,NEUROG3                           |
| 28 | 26,100,000 | 26,250,000 | 349 | 1168 | -0.489111117 | C28H10ORF35                                   |
| 28 | 26,175,000 | 26,325,000 | 350 | 959  | -0.708185686 | COL13A1                                       |
| 28 | 26,250,000 | 26,400,000 | 351 | 1101 | -0.936185029 | COL13A1                                       |
| 28 | 26,325,000 | 26,475,000 | 352 | 1138 | 0.189331547  | COL13A1,H2AFY2                                |
| 28 | 26,400,000 | 26,550,000 | 353 | 926  | -0.142436654 | AIFM2,COL13A1,H2AFY2,SAR1A,TYSND1             |
| 28 | 26,475,000 | 26,625,000 | 354 | 884  | 0.181647144  | AIFM2,H2AFY2,PPA1,SAR1A,TYSND1                |

|    |            |            |     |      |              |                                                       |
|----|------------|------------|-----|------|--------------|-------------------------------------------------------|
| 28 | 26,550,000 | 26,700,000 | 355 | 1028 | 0.87866269   | LRRC20,NPFFR1,PPA1,SAR1A                              |
| 28 | 26,625,000 | 26,775,000 | 356 | 801  | -0.006754016 | EIF4EBP2,LRRC20,NPFFR1                                |
| 28 | 26,700,000 | 26,850,000 | 357 | 638  | -0.318335983 | EIF4EBP2,LRRC20,NODAL                                 |
| 28 | 26,775,000 | 26,925,000 | 358 | 928  | 0.59496463   | EIF4EBP2,KIAA1274,NODAL,ENSBTAG00000047227            |
| 28 | 26,850,000 | 27,000,000 | 359 | 870  | 0.605318512  | ADAMTS14,KIAA1274,PRF1,ENSBTAG00000047227             |
| 28 | 26,925,000 | 27,075,000 | 360 | 842  | -0.233261082 | ADAMTS14,PRF1                                         |
| 28 | 27,000,000 | 27,150,000 | 361 | 939  | -0.012152777 | ADAMTS14,SGPL1,TBATA                                  |
| 28 | 27,075,000 | 27,225,000 | 362 | 614  | 0.667945287  | ADAMTS14,SGPL1,TBATA                                  |
| 28 | 27,150,000 | 27,300,000 | 363 | 637  | -0.006263028 | PCBD1,SGPL1                                           |
| 28 | 27,225,000 | 27,375,000 | 364 | 917  | 0.327168524  | PCBD1                                                 |
| 28 | 27,300,000 | 27,450,000 | 365 | 935  | 0.844358508  |                                                       |
| 28 | 27,375,000 | 27,525,000 | 366 | 751  | 0.678648245  | UNC5B                                                 |
| 28 | 27,450,000 | 27,600,000 | 367 | 795  | 0.504278818  | UNC5B                                                 |
| 28 | 27,525,000 | 27,675,000 | 368 | 935  | 0.116322508  | UNC5B,ENSBTAG00000047119                              |
| 28 | 27,600,000 | 27,750,000 | 369 | 1030 | -0.069676171 | CDH23,SLC29A3,ENSBTAG00000047119                      |
| 28 | 27,675,000 | 27,825,000 | 370 | 1171 | -0.762295097 | CDH23,SLC29A3                                         |
| 28 | 27,750,000 | 27,900,000 | 371 | 1068 | -1.418765995 | CDH23                                                 |
| 28 | 27,825,000 | 27,975,000 | 372 | 1086 | 0.252294305  | CDH23                                                 |
| 28 | 27,900,000 | 28,050,000 | 373 | 926  | -0.161874431 | C10orf105,CDH23                                       |
| 28 | 27,975,000 | 28,125,000 | 374 | 1044 | -0.248375014 | C10orf105,CDH23,MGC151567,PSAP                        |
| 28 | 28,050,000 | 28,200,000 | 375 | 1325 | 0.678346306  | CDH23,MGC151567,PSAP                                  |
| 28 | 28,125,000 | 28,275,000 | 376 | 1159 | 0.398949339  | CHST3,PSAP                                            |
| 28 | 28,200,000 | 28,350,000 | 377 | 1147 | -1.189630881 | ASCC1,CHST3,SPOCK2                                    |
| 28 | 28,275,000 | 28,425,000 | 378 | 1284 | -2.563725195 | ASCC1,SPOCK2                                          |
| 28 | 28,350,000 | 28,500,000 | 379 | 1201 | -1.729592239 | ANAPC16,ASCC1,DDIT4                                   |
| 28 | 28,425,000 | 28,575,000 | 380 | 1029 | -0.714832433 | ANAPC16,ASCC1,DDIT4,DNAJB12,MICU1                     |
| 28 | 28,500,000 | 28,650,000 | 381 | 1278 | -0.49062358  | DNAJB12,MICU1                                         |
| 28 | 28,575,000 | 28,725,000 | 382 | 1507 | -0.527852061 | MICU1                                                 |
| 28 | 28,650,000 | 28,800,000 | 383 | 1457 | -0.342980007 | MICU1                                                 |
| 28 | 28,725,000 | 28,875,000 | 384 | 1793 | -1.002294128 | MCU,MICU1                                             |
| 28 | 28,800,000 | 28,950,000 | 385 | 2010 | -1.024776371 | MCU                                                   |
| 28 | 28,875,000 | 29,025,000 | 386 | 1575 | -0.372826813 | MCU                                                   |
| 28 | 28,950,000 | 29,100,000 | 387 | 1200 | -0.36598447  | MCU,ENSBTAG00000009348,ENSBTAG00000047323             |
| 28 | 29,025,000 | 29,175,000 | 388 | 1408 | 0.323888573  | MCU,PLA2G12B,ENSBTAG00000009348,ENSBTAG000047323      |
| 28 | 29,100,000 | 29,250,000 | 389 | 1972 | 0.900731177  | P4HA1,PLA2G12B,ENSBTAG00000009348                     |
| 28 | 29,175,000 | 29,325,000 | 390 | 1559 | 1.145732326  | P4HA1                                                 |
| 28 | 29,250,000 | 29,400,000 | 391 | 986  | 1.067757057  | ECD,FAM149B1,NUDT13,P4HA1                             |
| 28 | 29,325,000 | 29,475,000 | 392 | 1005 | 0.21554631   | DNAJC9,ECD,FAM149B1,MRPS16,NUDT13,P4HA1               |
| 28 | 29,400,000 | 29,550,000 | 393 | 1155 | 0.100250623  | DNAJC9,FAM149B1,MRPS16                                |
| 28 | 29,475,000 | 29,625,000 | 394 | 1061 | 0.507873677  | ANXA7,MSS51,PPP3CB,ENSBTAG00000019525                 |
| 28 | 29,550,000 | 29,700,000 | 395 | 715  | 0.891571032  | ANXA7,MSS51,PPP3CB,USP54,ENSBTAG00000019525           |
| 28 | 29,625,000 | 29,775,000 | 396 | 783  | 0.680161195  | USP54,ENSBTAG00000019525                              |
| 28 | 29,700,000 | 29,850,000 | 397 | 750  | 0.781750392  | FUT11,MYOZ1,SEC24C,SYNPO2L,USP54                      |
| 28 | 29,775,000 | 29,925,000 | 398 | 714  | 0.23181699   | CAMK2G,CHCHD1,FUT11,MYOZ1,NDST2,SEC24C,SYNPO2L,ZSWIM8 |
| 28 | 29,850,000 | 30,000,000 | 399 | 912  | -0.191068629 | CAMK2G,CHCHD1,NDST2,PLAU,ZSWIM8                       |
| 28 | 29,925,000 | 30,075,000 | 400 | 1061 | 0.43860591   | CAMK2G,PLAU,VCL,ENSBTAG00000046355,ENSBTAG00000048036 |
| 28 | 30,000,000 | 30,150,000 | 401 | 1045 | 1.022106964  | VCL,ENSBTAG00000046355,ENSBTAG00000048036             |
| 28 | 30,075,000 | 30,225,000 | 402 | 891  | 0.222201009  | AP3M1,VCL,ENSBTAG00000011072                          |
| 28 | 30,150,000 | 30,300,000 | 403 | 1061 | 0.104610644  | AP3M1,VCL,ENSBTAG00000011072                          |

|    |            |            |     |      |              |                                       |
|----|------------|------------|-----|------|--------------|---------------------------------------|
| 28 | 30,225,000 | 30,375,000 | 404 | 1032 | 0.851216534  | ENSBTAG00000011072                    |
| 28 | 30,300,000 | 30,450,000 | 405 | 1239 | 0.566487552  | ENSBTAG00000011072                    |
| 28 | 30,375,000 | 30,525,000 | 406 | 1522 | 0.256719912  | ENSBTAG00000011072                    |
| 28 | 30,450,000 | 30,600,000 | 407 | 937  | 0.275197171  | ENSBTAG00000011072                    |
| 28 | 30,525,000 | 30,675,000 | 408 | 760  | 0.694473108  | ENSBTAG00000011072                    |
| 28 | 30,600,000 | 30,750,000 | 409 | 751  | 0.78969083   | ENSBTAG00000011072                    |
| 28 | 30,675,000 | 30,825,000 | 410 | 632  | 0.484237315  | KAT6B,ENSBTAG00000011072              |
| 28 | 30,750,000 | 30,900,000 | 411 | 676  | 0.555402588  | KAT6B                                 |
| 28 | 30,825,000 | 30,975,000 | 412 | 698  | 0.641199872  | KAT6B                                 |
| 28 | 30,900,000 | 31,050,000 | 413 | 879  | 0.23754398   | DUPD1,KAT6B,ENSBTAG00000023039        |
| 28 | 30,975,000 | 31,125,000 | 414 | 850  | 0.045403115  | DUPD1,KAT6B,SAMD8,ENSBTAG00000023039  |
| 28 | 31,050,000 | 31,200,000 | 415 | 729  | 0.250246063  | COMTD1,SAMD8,VDAC2,ENSBTAG00000023039 |
| 28 | 31,125,000 | 31,275,000 | 416 | 787  | 0.419478918  | COMTD1,VDAC2,ENSBTAG00000013585       |
| 28 | 31,200,000 | 31,350,000 | 417 | 779  | 0.4622956    | ZNF503,ENSBTAG00000013585             |
| 28 | 31,275,000 | 31,425,000 | 418 | 763  | 0.409409918  | ZNF503                                |
| 28 | 31,350,000 | 31,500,000 | 419 | 845  | 0.293061192  |                                       |
| 28 | 31,425,000 | 31,575,000 | 420 | 866  | 0.571152051  |                                       |
| 28 | 31,500,000 | 31,650,000 | 421 | 839  | 0.93490491   |                                       |
| 28 | 31,575,000 | 31,725,000 | 422 | 1127 | 0.379352749  |                                       |
| 28 | 31,650,000 | 31,800,000 | 423 | 1205 | 0.386339577  |                                       |
| 28 | 31,725,000 | 31,875,000 | 424 | 955  | 0.741686518  |                                       |
| 28 | 31,800,000 | 31,950,000 | 425 | 883  | 0.795664823  |                                       |
| 28 | 31,875,000 | 32,025,000 | 426 | 1013 | 0.748561611  |                                       |
| 28 | 31,950,000 | 32,100,000 | 427 | 1292 | 0.820613297  |                                       |
| 28 | 32,025,000 | 32,175,000 | 428 | 1482 | 0.919722914  |                                       |
| 28 | 32,100,000 | 32,250,000 | 429 | 1484 | 0.747931615  |                                       |
| 28 | 32,175,000 | 32,325,000 | 430 | 1441 | 0.445858373  |                                       |
| 28 | 32,250,000 | 32,400,000 | 431 | 1143 | -0.160868665 |                                       |
| 28 | 32,325,000 | 32,475,000 | 432 | 772  | -0.736736553 |                                       |
| 28 | 32,400,000 | 32,550,000 | 433 | 576  | -0.481595026 |                                       |
| 28 | 32,475,000 | 32,625,000 | 434 | 645  | 0.044473288  |                                       |
| 28 | 32,550,000 | 32,700,000 | 435 | 908  | 0.262165791  |                                       |
| 28 | 32,625,000 | 32,775,000 | 436 | 1264 | 0.140983964  |                                       |
| 28 | 32,700,000 | 32,850,000 | 437 | 1228 | -0.014666684 | KCNMA1                                |
| 28 | 32,775,000 | 32,925,000 | 438 | 939  | 0.103336768  | KCNMA1,ENSBTAG00000047535             |
| 28 | 32,850,000 | 33,000,000 | 439 | 775  | 0.371213386  | KCNMA1,ENSBTAG00000047535             |
| 28 | 32,925,000 | 33,075,000 | 440 | 532  | 0.10815079   | KCNMA1                                |
| 28 | 33,000,000 | 33,150,000 | 441 | 568  | -0.003647457 | KCNMA1                                |
| 28 | 33,075,000 | 33,225,000 | 442 | 552  | 0.38842375   | KCNMA1                                |
| 28 | 33,150,000 | 33,300,000 | 443 | 549  | 0.684281145  | KCNMA1                                |
| 28 | 33,225,000 | 33,375,000 | 444 | 688  | 0.102158288  | KCNMA1                                |
| 28 | 33,300,000 | 33,450,000 | 445 | 1059 | -0.316911199 | KCNMA1                                |
| 28 | 33,375,000 | 33,525,000 | 446 | 1541 | -0.114751581 | KCNMA1                                |
| 28 | 33,450,000 | 33,600,000 | 447 | 1300 | 0.245035172  | KCNMA1                                |
| 28 | 33,525,000 | 33,675,000 | 448 | 612  | 0.07940685   | KCNMA1                                |
| 28 | 33,600,000 | 33,750,000 | 449 | 239  | -1.497056087 | DLG5                                  |
| 28 | 33,675,000 | 33,825,000 | 450 | 416  | 0.098040852  | DLG5                                  |
| 28 | 33,750,000 | 33,900,000 | 451 | 652  | -0.08774688  | DLG5,POLR3A                           |
| 28 | 33,825,000 | 33,975,000 | 452 | 786  | 0.180150573  | DLG5,POLR3A,RPS24                     |
| 28 | 33,900,000 | 34,050,000 | 453 | 1257 | 0.88503575   | POLR3A,RPS24                          |
| 28 | 33,975,000 | 34,125,000 | 454 | 1499 | 0.131614031  |                                       |
| 28 | 34,050,000 | 34,200,000 | 455 | 1456 | -0.104359179 |                                       |
| 28 | 34,125,000 | 34,275,000 | 456 | 1310 | -0.174927037 |                                       |

|    |            |            |     |      |              |                                         |
|----|------------|------------|-----|------|--------------|-----------------------------------------|
| 28 | 34,200,000 | 34,350,000 | 457 | 1221 | 0.301162674  |                                         |
| 28 | 34,275,000 | 34,425,000 | 458 | 1269 | 0.744224516  |                                         |
| 28 | 34,350,000 | 34,500,000 | 459 | 1509 | 0.808875331  |                                         |
| 28 | 34,425,000 | 34,575,000 | 460 | 1469 | 0.467026156  |                                         |
| 28 | 34,500,000 | 34,650,000 | 461 | 938  | 0.581100655  |                                         |
| 28 | 34,575,000 | 34,725,000 | 462 | 642  | 0.771246798  |                                         |
| 28 | 34,650,000 | 34,800,000 | 463 | 622  | -0.378201553 |                                         |
| 28 | 34,725,000 | 34,875,000 | 464 | 751  | -0.557842608 |                                         |
| 28 | 34,800,000 | 34,950,000 | 465 | 655  | -0.464187683 |                                         |
| 28 | 34,875,000 | 35,025,000 | 466 | 578  | 0.568628745  |                                         |
| 28 | 34,950,000 | 35,100,000 | 467 | 719  | 0.353760985  | ZMIZ1                                   |
| 28 | 35,025,000 | 35,175,000 | 468 | 855  | 0.158536916  | PIIF,ZMIZ1                              |
| 28 | 35,100,000 | 35,250,000 | 469 | 1093 | 0.510883788  | PIIF,ZCCHC24,ZMIZ1                      |
| 28 | 35,175,000 | 35,325,000 | 470 | 1068 | 1.028992573  | ANXA11,ZCCHC24                          |
| 28 | 35,250,000 | 35,400,000 | 471 | 776  | 1.116302919  | ANXA11,PLAC9,ZCCHC24                    |
| 28 | 35,325,000 | 35,475,000 | 472 | 934  | -0.386470207 | ANXA11,PLAC9,TMEM254,ENSBTAG00000045788 |
| 28 | 35,400,000 | 35,550,000 | 473 | 1309 | -0.453983491 | TMEM254,ENSBTAG00000045788              |
| 28 | 35,475,000 | 35,625,000 | 474 | 1052 | 0.593315933  | CGN1                                    |
| 28 | 35,550,000 | 35,700,000 | 475 | 751  | 0.425318224  | CGN1,CL46                               |
| 28 | 35,625,000 | 35,775,000 | 476 | 745  | 0.066428808  | CL43,CL46                               |
| 28 | 35,700,000 | 35,850,000 | 477 | 954  | 0.702714085  | CL43,CL46,SFTPA1,SFTPD                  |
| 28 | 35,775,000 | 35,925,000 | 478 | 1281 | 0.580314218  | DYDC1,MAT1A,SFTPA1,SFTPD                |
| 28 | 35,850,000 | 36,000,000 | 479 | 1284 | 0.231176508  | DYDC1,DYDC2,MAT1A,SFTPA1                |
| 28 | 35,925,000 | 36,075,000 | 480 | 1171 | 0.27675186   | DYDC1,DYDC2,FAM213A                     |
| 28 | 36,000,000 | 36,150,000 | 481 | 776  | -0.353030192 | FAM213A,SH2D4B,TSPAN14                  |
| 28 | 36,075,000 | 36,225,000 | 482 | 860  | -1.318324168 | SH2D4B,TSPAN14                          |
| 28 | 36,150,000 | 36,300,000 | 483 | 1091 | -1.897457363 | SH2D4B                                  |
| 28 | 36,225,000 | 36,375,000 | 484 | 1353 | -1.283847472 |                                         |
| 28 | 36,300,000 | 36,450,000 | 485 | 1419 | -0.422707432 |                                         |
| 28 | 36,375,000 | 36,525,000 | 486 | 1115 | 0.175783232  |                                         |
| 28 | 36,450,000 | 36,600,000 | 487 | 1312 | 0.117374914  |                                         |
| 28 | 36,525,000 | 36,675,000 | 488 | 1310 | -0.039858276 |                                         |
| 28 | 36,600,000 | 36,750,000 | 489 | 1302 | 0.577602713  |                                         |
| 28 | 36,675,000 | 36,825,000 | 490 | 969  | 0.729560789  |                                         |
| 28 | 36,750,000 | 36,900,000 | 491 | 709  | -0.502923817 |                                         |
| 28 | 36,825,000 | 36,975,000 | 492 | 844  | -0.287633348 |                                         |
| 28 | 36,900,000 | 37,050,000 | 493 | 941  | 0.214929155  |                                         |
| 28 | 36,975,000 | 37,125,000 | 494 | 913  | -0.078015429 |                                         |
| 28 | 37,050,000 | 37,200,000 | 495 | 836  | -4.031445123 |                                         |
| 28 | 37,125,000 | 37,275,000 | 496 | 762  | -4.09991327  |                                         |
| 28 | 37,200,000 | 37,350,000 | 497 | 722  | 0.112284756  |                                         |
| 28 | 37,275,000 | 37,425,000 | 498 | 928  | 0.342283977  |                                         |
| 28 | 37,350,000 | 37,500,000 | 499 | 867  | -0.094849606 |                                         |
| 28 | 37,425,000 | 37,575,000 | 500 | 861  | -0.237268157 |                                         |
| 28 | 37,500,000 | 37,650,000 | 501 | 1026 | -0.300599455 |                                         |
| 28 | 37,575,000 | 37,725,000 | 502 | 1278 | -1.021403016 |                                         |
| 28 | 37,650,000 | 37,800,000 | 503 | 1539 | -0.871025309 |                                         |
| 28 | 37,725,000 | 37,875,000 | 504 | 1605 | -0.171731941 |                                         |
| 28 | 37,800,000 | 37,950,000 | 505 | 1435 | 0.340757063  |                                         |
| 28 | 37,875,000 | 38,025,000 | 506 | 1545 | -0.098030295 |                                         |
| 28 | 37,950,000 | 38,100,000 | 507 | 1721 | -0.397288467 |                                         |
| 28 | 38,025,000 | 38,175,000 | 508 | 1847 | -0.472533374 |                                         |
| 28 | 38,100,000 | 38,250,000 | 509 | 1833 | -0.451785141 |                                         |

|    |            |            |     |      |              |                                            |
|----|------------|------------|-----|------|--------------|--------------------------------------------|
| 28 | 38,175,000 | 38,325,000 | 510 | 1251 | -0.702206258 | NRG3                                       |
| 28 | 38,250,000 | 38,400,000 | 511 | 959  | -1.577984857 | NRG3                                       |
| 28 | 38,325,000 | 38,475,000 | 512 | 750  | -1.131977292 | NRG3                                       |
| 28 | 38,400,000 | 38,550,000 | 513 | 746  | 0.572157667  |                                            |
| 28 | 38,475,000 | 38,625,000 | 514 | 960  | 1.176786996  |                                            |
| 28 | 38,550,000 | 38,700,000 | 515 | 1219 | 1.195879548  |                                            |
| 28 | 38,625,000 | 38,775,000 | 516 | 1499 | 1.325940005  |                                            |
| 28 | 38,700,000 | 38,850,000 | 517 | 1397 | 0.707834447  |                                            |
| 28 | 38,775,000 | 38,925,000 | 518 | 1428 | -0.547508487 |                                            |
| 28 | 38,850,000 | 39,000,000 | 519 | 1397 | 0.077857191  |                                            |
| 28 | 38,925,000 | 39,075,000 | 520 | 1459 | 0.818918667  |                                            |
| 28 | 39,000,000 | 39,150,000 | 521 | 1231 | 0.515865725  |                                            |
| 28 | 39,075,000 | 39,225,000 | 522 | 831  | -1.529936083 |                                            |
| 28 | 39,150,000 | 39,300,000 | 523 | 783  | -1.748197187 |                                            |
| 28 | 39,225,000 | 39,375,000 | 524 | 404  | -0.960926557 |                                            |
| 28 | 39,300,000 | 39,450,000 | 525 | 770  | 0.139810353  | GHITM                                      |
| 28 | 39,375,000 | 39,525,000 | 526 | 1318 | 0.450591874  | CDHR1,GHITM,LRIT1,LRIT2                    |
| 28 | 39,450,000 | 39,600,000 | 527 | 1146 | 0.538109747  | CDHR1,LRIT1,LRIT2,RGR                      |
| 28 | 39,525,000 | 39,675,000 | 528 | 956  | 0.408864494  | CCSER2,LRIT1,RGR                           |
| 28 | 39,600,000 | 39,750,000 | 529 | 645  | -0.472298589 | CCSER2                                     |
| 28 | 39,675,000 | 39,825,000 | 530 | 940  | -1.965447233 | CCSER2                                     |
| 28 | 39,750,000 | 39,900,000 | 531 | 1109 | -2.039242113 |                                            |
| 28 | 39,825,000 | 39,975,000 | 532 | 921  | -0.946366714 |                                            |
| 28 | 39,900,000 | 40,050,000 | 533 | 874  | 0.00531373   |                                            |
| 28 | 39,975,000 | 40,125,000 | 534 | 653  | 0.216294995  |                                            |
| 28 | 40,050,000 | 40,200,000 | 535 | 682  | 0.54712623   |                                            |
| 28 | 40,125,000 | 40,275,000 | 536 | 579  | 0.929099045  |                                            |
| 28 | 40,200,000 | 40,350,000 | 537 | 538  | 0.800377974  |                                            |
| 28 | 40,275,000 | 40,425,000 | 538 | 705  | 0.803331918  |                                            |
| 28 | 40,350,000 | 40,500,000 | 539 | 748  | 0.169580883  |                                            |
| 28 | 40,425,000 | 40,575,000 | 540 | 1017 | 0.490053492  |                                            |
| 28 | 40,500,000 | 40,650,000 | 541 | 1156 | 0.608198701  |                                            |
| 28 | 40,575,000 | 40,725,000 | 542 | 1085 | -0.475356768 |                                            |
| 28 | 40,650,000 | 40,800,000 | 543 | 975  | -0.96758679  | GRID1                                      |
| 28 | 40,725,000 | 40,875,000 | 544 | 1009 | -0.963244482 | GRID1                                      |
| 28 | 40,800,000 | 40,950,000 | 545 | 1161 | 0.086060071  | GRID1                                      |
| 28 | 40,875,000 | 41,025,000 | 546 | 1279 | 0.372645579  | GRID1                                      |
| 28 | 40,950,000 | 41,100,000 | 547 | 1211 | -0.076243105 | GRID1                                      |
| 28 | 41,025,000 | 41,175,000 | 548 | 813  | 0.12468953   |                                            |
| 28 | 41,100,000 | 41,250,000 | 549 | 844  | 0.704958495  |                                            |
| 28 | 41,175,000 | 41,325,000 | 550 | 936  | 0.093286503  |                                            |
| 28 | 41,250,000 | 41,400,000 | 551 | 988  | -0.328672386 |                                            |
| 28 | 41,325,000 | 41,475,000 | 552 | 1022 | -0.453210474 |                                            |
| 28 | 41,400,000 | 41,550,000 | 553 | 592  | -0.997238704 | WAPAL                                      |
| 28 | 41,475,000 | 41,625,000 | 554 | 316  | -0.467926687 | WAPAL                                      |
| 28 | 41,550,000 | 41,700,000 | 555 | 543  | -1.218277338 | LDB3,OPN4,WAPAL                            |
| 28 | 41,625,000 | 41,775,000 | 556 | 754  | -0.552611751 | LDB3,OPN4                                  |
| 28 | 41,700,000 | 41,850,000 | 557 | 978  | 0.898752406  | BMPR-IA,LDB3                               |
|    |            |            |     |      |              | BMPR-                                      |
| 28 | 41,775,000 | 41,925,000 | 558 | 1072 | 0.981936817  | IA,C28H10ORF116,MMRN2,SNCG,ENSBTAG00000017 |
|    |            |            |     |      |              | 946                                        |

|    |            |            |     |      |              |                                                                 |
|----|------------|------------|-----|------|--------------|-----------------------------------------------------------------|
| 28 | 41,850,000 | 42,000,000 | 559 | 966  | 1.133129332  | BMPR-<br>IA,C28H10ORF116,GLUD1,MMRN2,SNCG,ENSBTAG0000017946     |
| 28 | 41,925,000 | 42,075,000 | 560 | 860  | 0.055202265  | FAM35A,GLUD1                                                    |
| 28 | 42,000,000 | 42,150,000 | 561 | 847  | -0.564152136 | FAM35A,GPRIN2,ENSBTAG00000018356                                |
| 28 | 42,075,000 | 42,225,000 | 562 | 996  | -0.188011537 | FAM35A,GPRIN2,ENSBTAG00000018356                                |
| 28 | 42,150,000 | 42,300,000 | 563 | 989  | -0.652424597 | ANXA8,PPYR1                                                     |
| 28 | 42,225,000 | 42,375,000 | 564 | 743  | -0.957463098 | ANTXRL,ANXA8,PPYR1                                              |
| 28 | 42,300,000 | 42,450,000 | 565 | 716  | 0.031915361  | ANTXRL,ANXA8                                                    |
| 28 | 42,375,000 | 42,525,000 | 566 | 887  | 0.161450805  |                                                                 |
| 28 | 42,450,000 | 42,600,000 | 567 | 1122 | 0.076117582  | RBP3                                                            |
| 28 | 42,525,000 | 42,675,000 | 568 | 1063 | 0.228370796  | GDF10,GDF2,RBP3                                                 |
| 28 | 42,600,000 | 42,750,000 | 569 | 799  | 0.125102705  | GDF10,GDF2,RBP3                                                 |
| 28 | 42,675,000 | 42,825,000 | 570 | 1029 | -0.916610976 |                                                                 |
| 28 | 42,750,000 | 42,900,000 | 571 | 1291 | -0.669367888 | ENSBTAG00000014938                                              |
| 28 | 42,825,000 | 42,975,000 | 572 | 1025 | 0.253144746  | ENSBTAG00000005568,ENSBTAG00000014938                           |
| 28 | 42,900,000 | 43,050,000 | 573 | 680  | 0.114573066  | ENSBTAG00000005568                                              |
| 28 | 42,975,000 | 43,125,000 | 574 | 526  | -0.224391722 | ENSBTAG00000005568                                              |
| 28 | 43,050,000 | 43,200,000 | 575 | 396  | -0.636246025 | MAPK8                                                           |
| 28 | 43,125,000 | 43,275,000 | 576 | 515  | -1.640122421 | ARHGAP22,MAPK8                                                  |
| 28 | 43,200,000 | 43,350,000 | 577 | 915  | -0.041352201 | ARHGAP22                                                        |
| 28 | 43,275,000 | 43,425,000 | 578 | 904  | 0.577437719  |                                                                 |
| 28 | 43,350,000 | 43,500,000 | 579 | 766  | 0.31294427   | WDFY4                                                           |
| 28 | 43,425,000 | 43,575,000 | 580 | 900  | -0.008946126 | WDFY4                                                           |
| 28 | 43,500,000 | 43,650,000 | 581 | 1264 | -0.605710013 | LRRC18,WDFY4                                                    |
| 28 | 43,575,000 | 43,725,000 | 582 | 1365 | -0.436161085 | LRRC18,VSTM4,WDFY4                                              |
| 28 | 43,650,000 | 43,800,000 | 583 | 958  | -0.169271074 | FAM170B,VSTM4,WDFY4                                             |
| 28 | 43,725,000 | 43,875,000 | 584 | 777  | -0.079567956 | C10orf128,FAM170B,VSTM4                                         |
| 28 | 43,800,000 | 43,950,000 | 585 | 885  | 0.207131745  | C10orf128,C10orf71                                              |
| 28 | 43,875,000 | 44,025,000 | 586 | 1175 | 0.452962356  | C10orf71,DRGX,ERCC6                                             |
| 28 | 43,950,000 | 44,100,000 | 587 | 1483 | 0.537121849  | DRGX,ERCC6                                                      |
| 28 | 44,025,000 | 44,175,000 | 588 | 1617 | -0.055418453 | CHAT,ERCC6,SLC18A3                                              |
| 28 | 44,100,000 | 44,250,000 | 589 | 1211 | -0.734614727 | C28H10orf53,CHAT,OGDHL,SLC18A3                                  |
| 28 | 44,175,000 | 44,325,000 | 590 | 821  | -0.534589931 | C28H10orf53,CHAT,OGDHL,PARG                                     |
| 28 | 44,250,000 | 44,400,000 | 591 | 670  | -0.210624902 | OGDHL,PARG,TIMM23                                               |
| 28 | 44,325,000 | 44,475,000 | 592 | 850  | -2.127379981 | MSMB,NCOA4,PARG,TIMM23                                          |
| 28 | 44,400,000 | 44,550,000 | 593 | 1239 | -1.081205787 | ANUBL1,MSMB,NCOA4,TIMM23,ENSBTAG00000018915                     |
| 28 | 44,475,000 | 44,625,000 | 594 | 1118 | -0.109494361 | ANUBL1,MARCH8,ENSBTAG00000018915                                |
| 28 | 44,550,000 | 44,700,000 | 595 | 818  | 0.362625673  | ANUBL1,MARCH8                                                   |
| 28 | 44,625,000 | 44,775,000 | 596 | 829  | 0.635433721  | ALOX5,MARCH8                                                    |
| 28 | 44,700,000 | 44,850,000 | 597 | 865  | 0.415749242  | ALOX5,MARCH8,OR13A1,ENSBTAG00000009763                          |
| 28 | 44,775,000 | 44,925,000 | 598 | 666  | 0.485118364  | ALOX5,OR13A1,ENSBTAG00000009763,ENSBTAG000048311                |
| 28 | 44,850,000 | 45,000,000 | 599 | 546  | 0.274143953  | C28H10ORF10,RASSF4,ENSBTAG00000024811,ENSBTAG00000048311        |
| 28 | 44,925,000 | 45,075,000 | 600 | 573  | 0.110954485  | C28H10ORF10,RASSF4,TMEM72,ENSBTAG00000024811,ENSBTAG00000047666 |
| 28 | 45,000,000 | 45,150,000 | 601 | 712  | 0.092985215  | RASSF4,TMEM72,ENSBTAG00000047666                                |
| 28 | 45,075,000 | 45,225,000 | 602 | 973  | 0.066256584  |                                                                 |
| 28 | 45,150,000 | 45,300,000 | 603 | 1146 | 0.324542189  |                                                                 |
| 28 | 45,225,000 | 45,375,000 | 604 | 1309 | 0.680454455  |                                                                 |
| 28 | 45,300,000 | 45,450,000 | 605 | 1055 | 0.277462613  | CXCL12                                                          |

|    |            |            |     |      |              |                                            |
|----|------------|------------|-----|------|--------------|--------------------------------------------|
| 28 | 45,375,000 | 45,525,000 | 606 | 765  | -1.589028218 | CXCL12                                     |
| 28 | 45,450,000 | 45,600,000 | 607 | 679  | -1.029040016 |                                            |
| 28 | 45,525,000 | 45,675,000 | 608 | 889  | 0.582653561  |                                            |
| 28 | 45,600,000 | 45,750,000 | 609 | 1276 | -0.132956896 |                                            |
| 28 | 45,675,000 | 45,825,000 | 610 | 1059 | -1.295376914 |                                            |
| 28 | 45,750,000 | 45,900,000 | 611 | 853  | -1.908427184 |                                            |
| 28 | 45,825,000 | 45,975,000 | 612 | 788  | -1.059317998 |                                            |
| 28 | 45,900,000 | 46,050,000 | 613 | 915  | 0.044870073  | ZNF32,ENSBTAG00000032655                   |
| 28 | 45,975,000 | 46,125,000 | 614 | 1152 | 0.564953201  | TFAM,ZNF239,ZNF32,ENSBTAG00000032655       |
| 28 | 46,050,000 | 46,200,000 | 615 | 996  | 0.390792444  | AGT,COG2,TFAM,ZNF239                       |
| 28 | 46,125,000 | 46,275,000 | 616 | 662  | -1.01687596  | AGT,COG2                                   |
| 28 | 46,200,000 | 46,312,546 | 617 | 401  | -0.569344938 | COG2                                       |
| 29 | 0          | 150,000    | 1   | 134  | -0.020392796 | ENSBTAG00000005930                         |
| 29 | 75,000     | 225,000    | 2   | 108  | 0.729132821  | ENSBTAG00000005930                         |
| 29 | 150,000    | 300,000    | 3   | 102  | 0.974532188  |                                            |
| 29 | 225,000    | 375,000    | 4   | 109  | 0.330950606  |                                            |
| 29 | 300,000    | 450,000    | 5   | 143  | -0.149322934 |                                            |
| 29 | 375,000    | 525,000    | 6   | 162  | -0.061015531 |                                            |
| 29 | 450,000    | 600,000    | 7   | 231  | 0.195083387  | PANX1                                      |
| 29 | 525,000    | 675,000    | 8   | 484  | 0.170614889  | HEPHL1,PANX1                               |
| 29 | 600,000    | 750,000    | 9   | 620  | -0.472074246 | HEPHL1,PANX1                               |
| 29 | 675,000    | 825,000    | 10  | 434  | -0.878468565 | HEPHL1                                     |
| 29 | 750,000    | 900,000    | 11  | 416  | 0.867648209  |                                            |
| 29 | 825,000    | 975,000    | 12  | 679  | 0.829813019  |                                            |
| 29 | 900,000    | 1,050,000  | 13  | 795  | -0.476038286 | C11orf54,MED17,VSTM5                       |
| 29 | 975,000    | 1,125,000  | 14  | 612  | -1.110807452 | C11orf54,KIAA1731,MED17,TAF1D,VSTM5        |
| 29 | 1,050,000  | 1,200,000  | 15  | 1057 | -0.553105134 | C11orf54,KIAA1731,TAF1D                    |
| 29 | 1,125,000  | 1,275,000  | 16  | 1469 | -0.806016647 |                                            |
| 29 | 1,200,000  | 1,350,000  | 17  | 1567 | -0.935044899 | SMCO4                                      |
| 29 | 1,275,000  | 1,425,000  | 18  | 1410 | -0.780056044 | CCDC67,SMCO4                               |
| 29 | 1,350,000  | 1,500,000  | 19  | 992  | -1.987837707 | CCDC67,SMCO4                               |
| 29 | 1,425,000  | 1,575,000  | 20  | 1214 | -4.229009995 | CCDC67                                     |
| 29 | 1,500,000  | 1,650,000  | 21  | 1442 | -2.747962414 |                                            |
| 29 | 1,575,000  | 1,725,000  | 22  | 1405 | -0.604888931 | SLC36A4                                    |
| 29 | 1,650,000  | 1,800,000  | 23  | 1274 | -0.314915725 | SLC36A4                                    |
| 29 | 1,725,000  | 1,875,000  | 24  | 1155 | 0.312345557  |                                            |
| 29 | 1,800,000  | 1,950,000  | 25  | 1117 | 0.07812638   | ENSBTAG00000013398,ENSBTAG00000047614      |
| 29 | 1,875,000  | 2,025,000  | 26  | 1049 | -0.184028624 | FAT3,ENSBTAG00000013398,ENSBTAG00000047614 |
| 29 | 1,950,000  | 2,100,000  | 27  | 885  | -0.64303646  | FAT3                                       |
| 29 | 2,025,000  | 2,175,000  | 28  | 1022 | 0.313501487  | FAT3                                       |
| 29 | 2,100,000  | 2,250,000  | 29  | 1349 | 0.614359708  | FAT3                                       |
| 29 | 2,175,000  | 2,325,000  | 30  | 1676 | 0.290280662  | FAT3                                       |
| 29 | 2,250,000  | 2,400,000  | 31  | 1874 | 0.568447771  | FAT3                                       |
| 29 | 2,325,000  | 2,475,000  | 32  | 1805 | 0.918862757  | FAT3                                       |
| 29 | 2,400,000  | 2,550,000  | 33  | 1915 | 0.281394457  | FAT3                                       |
| 29 | 2,475,000  | 2,625,000  | 34  | 2065 | -0.699587693 | FAT3                                       |
| 29 | 2,550,000  | 2,700,000  | 35  | 1804 | -0.473295751 | FAT3                                       |
| 29 | 2,625,000  | 2,775,000  | 36  | 1634 | 0.498277528  |                                            |
| 29 | 2,700,000  | 2,850,000  | 37  | 1698 | 0.647176123  |                                            |
| 29 | 2,775,000  | 2,925,000  | 38  | 1876 | 0.101620014  |                                            |
| 29 | 2,850,000  | 3,000,000  | 39  | 2095 | 0.173009072  |                                            |
| 29 | 2,925,000  | 3,075,000  | 40  | 2066 | 0.015609128  |                                            |
| 29 | 3,000,000  | 3,150,000  | 41  | 1468 | 0.014722371  |                                            |

|    |           |           |    |      |              |                                                                 |
|----|-----------|-----------|----|------|--------------|-----------------------------------------------------------------|
| 29 | 3,075,000 | 3,225,000 | 42 | 1224 | -0.370425402 |                                                                 |
| 29 | 3,150,000 | 3,300,000 | 43 | 1288 | 0.015136585  |                                                                 |
| 29 | 3,225,000 | 3,375,000 | 44 | 1150 | 0.034505523  |                                                                 |
| 29 | 3,300,000 | 3,450,000 | 45 | 1063 | -0.937241364 |                                                                 |
| 29 | 3,375,000 | 3,525,000 | 46 | 1042 | -2.509397125 |                                                                 |
| 29 | 3,450,000 | 3,600,000 | 47 | 1077 | -3.236098034 |                                                                 |
| 29 | 3,525,000 | 3,675,000 | 48 | 803  | -2.611836004 |                                                                 |
| 29 | 3,600,000 | 3,750,000 | 49 | 1042 | -0.495597036 |                                                                 |
| 29 | 3,675,000 | 3,825,000 | 50 | 1264 | -0.25471706  |                                                                 |
| 29 | 3,750,000 | 3,900,000 | 51 | 1443 | -0.529739018 |                                                                 |
| 29 | 3,825,000 | 3,975,000 | 52 | 1430 | 0.095109611  |                                                                 |
| 29 | 3,900,000 | 4,050,000 | 53 | 1269 | 0.018990797  |                                                                 |
| 29 | 3,975,000 | 4,125,000 | 54 | 1362 | -0.547976444 |                                                                 |
| 29 | 4,050,000 | 4,200,000 | 55 | 1277 | -0.266413931 |                                                                 |
| 29 | 4,125,000 | 4,275,000 | 56 | 1130 | 0.082412154  |                                                                 |
| 29 | 4,200,000 | 4,350,000 | 57 | 1562 | -1.130026275 |                                                                 |
| 29 | 4,275,000 | 4,425,000 | 58 | 2308 | 0.154969535  |                                                                 |
| 29 | 4,350,000 | 4,500,000 | 59 | 2366 | 1.226622356  |                                                                 |
| 29 | 4,425,000 | 4,575,000 | 60 | 1949 | 1.160963453  |                                                                 |
| 29 | 4,500,000 | 4,650,000 | 61 | 1399 | 0.18433272   |                                                                 |
| 29 | 4,575,000 | 4,725,000 | 62 | 1016 | -0.307333231 |                                                                 |
| 29 | 4,650,000 | 4,800,000 | 63 | 1159 | 0.288048867  |                                                                 |
| 29 | 4,725,000 | 4,875,000 | 64 | 989  | -0.239954463 |                                                                 |
| 29 | 4,800,000 | 4,950,000 | 65 | 709  | -1.756284773 |                                                                 |
| 29 | 4,875,000 | 5,025,000 | 66 | 1196 | 0.539284711  |                                                                 |
| 29 | 4,950,000 | 5,100,000 | 67 | 1331 | 0.849351488  | CHORDC1,NAALAD2                                                 |
| 29 | 5,025,000 | 5,175,000 | 68 | 1039 | -1.183914497 | CHORDC1,NAALAD2                                                 |
| 29 | 5,100,000 | 5,250,000 | 69 | 1075 | -2.519794454 | NAALAD2,RNF18,ENSBTAG00000034940,ENSBTAG0000046740              |
| 29 | 5,175,000 | 5,325,000 | 70 | 1084 | -1.262805567 | RNF18,ENSBTAG00000034940,ENSBTAG00000046740,ENSBTAG00000046789  |
| 29 | 5,250,000 | 5,400,000 | 71 | 1023 | -0.503587884 | ENSBTAG00000033656,ENSBTAG00000046789                           |
| 29 | 5,325,000 | 5,475,000 | 72 | 1371 | 0.147537347  | ENSBTAG00000033656,ENSBTAG00000046202                           |
| 29 | 5,400,000 | 5,550,000 | 73 | 1398 | -0.655892036 | ENSBTAG00000046202                                              |
| 29 | 5,475,000 | 5,625,000 | 74 | 1064 | -0.674053379 |                                                                 |
| 29 | 5,550,000 | 5,700,000 | 75 | 1185 | -0.702350135 | TRIM43,ENSBTAG00000034891                                       |
| 29 | 5,625,000 | 5,775,000 | 76 | 1354 | -0.551813437 | TRIM43,ENSBTAG00000034891,ENSBTAG00000034921,ENSBTAG00000038209 |
| 29 | 5,700,000 | 5,850,000 | 77 | 1062 | -0.162995708 | ENSBTAG00000034921,ENSBTAG00000038169,ENSBTAG00000038209        |
| 29 | 5,775,000 | 5,925,000 | 78 | 1070 | -0.256237717 | FOLH1,ENSBTAG00000038169,ENSBTAG00000039825                     |
| 29 | 5,850,000 | 6,000,000 | 79 | 1376 | -0.251805931 | FOLH1,ENSBTAG00000038169,ENSBTAG00000039825                     |
| 29 | 5,925,000 | 6,075,000 | 80 | 1594 | -0.259276006 | FOLH1                                                           |
| 29 | 6,000,000 | 6,150,000 | 81 | 1431 | 0.206404541  | NOX4                                                            |
| 29 | 6,075,000 | 6,225,000 | 82 | 1461 | 0.244720305  | NOX4                                                            |
| 29 | 6,150,000 | 6,300,000 | 83 | 1739 | -1.382501341 | NOX4                                                            |
| 29 | 6,225,000 | 6,375,000 | 84 | 1281 | -3.154715487 | NOX4,TYR                                                        |
| 29 | 6,300,000 | 6,450,000 | 85 | 1088 | -1.802208094 | NOX4,TYR                                                        |
| 29 | 6,375,000 | 6,525,000 | 86 | 974  | 0.042450485  | TYR                                                             |
| 29 | 6,450,000 | 6,600,000 | 87 | 928  | -0.315868578 | TYR                                                             |
| 29 | 6,525,000 | 6,675,000 | 88 | 1325 | -1.03656823  |                                                                 |



|    |            |            |     |      |              |                                       |
|----|------------|------------|-----|------|--------------|---------------------------------------|
| 29 | 6,600,000  | 6,750,000  | 89  | 1527 | -1.640591017 |                                       |
| 29 | 6,675,000  | 6,825,000  | 90  | 1536 | -1.762975232 |                                       |
| 29 | 6,750,000  | 6,900,000  | 91  | 1317 | -0.291799657 |                                       |
| 29 | 6,825,000  | 6,975,000  | 92  | 967  | 0.520933681  |                                       |
| 29 | 6,900,000  | 7,050,000  | 93  | 1074 | 0.377711465  |                                       |
| 29 | 6,975,000  | 7,125,000  | 94  | 1209 | 0.503976272  |                                       |
| 29 | 7,050,000  | 7,200,000  | 95  | 1233 | 0.733432042  | GRM5                                  |
| 29 | 7,125,000  | 7,275,000  | 96  | 1418 | 0.813052936  | GRM5                                  |
| 29 | 7,200,000  | 7,350,000  | 97  | 1234 | 0.172486599  | GRM5                                  |
| 29 | 7,275,000  | 7,425,000  | 98  | 1291 | -0.98158601  | ENSBTAG00000034845                    |
| 29 | 7,350,000  | 7,500,000  | 99  | 1507 | -0.462997437 | CTSC,ENSBTAG00000034845               |
| 29 | 7,425,000  | 7,575,000  | 100 | 1643 | -0.045428819 | CTSC,RAB38,ENSBTAG00000046360         |
| 29 | 7,500,000  | 7,650,000  | 101 | 1596 | 0.00264562   | RAB38,ENSBTAG00000046360              |
| 29 | 7,575,000  | 7,725,000  | 102 | 1814 | 0.882975592  | DENR,RAB38                            |
| 29 | 7,650,000  | 7,800,000  | 103 | 1753 | 0.994694692  | DENR                                  |
| 29 | 7,725,000  | 7,875,000  | 104 | 1220 | 1.285070205  | DENR                                  |
| 29 | 7,800,000  | 7,950,000  | 105 | 1153 | 1.419484185  |                                       |
| 29 | 7,875,000  | 8,025,000  | 106 | 1182 | 0.638980225  |                                       |
| 29 | 7,950,000  | 8,100,000  | 107 | 1196 | 0.843914121  |                                       |
| 29 | 8,025,000  | 8,175,000  | 108 | 1179 | 0.7885869    |                                       |
| 29 | 8,100,000  | 8,250,000  | 109 | 1380 | -0.68215328  |                                       |
| 29 | 8,175,000  | 8,325,000  | 110 | 1187 | -2.302190906 | TMEM135                               |
| 29 | 8,250,000  | 8,400,000  | 111 | 806  | -2.142133051 | TMEM135                               |
| 29 | 8,325,000  | 8,475,000  | 112 | 604  | -0.130662623 | TMEM135                               |
| 29 | 8,400,000  | 8,550,000  | 113 | 417  | -0.470197581 |                                       |
| 29 | 8,475,000  | 8,625,000  | 114 | 339  | -0.610442724 |                                       |
| 29 | 8,550,000  | 8,700,000  | 115 | 429  | -0.675571425 | FZD4                                  |
| 29 | 8,625,000  | 8,775,000  | 116 | 1197 | 0.645936541  | FZD4                                  |
| 29 | 8,700,000  | 8,850,000  | 117 | 1466 | 0.571921797  | PRSS23                                |
| 29 | 8,775,000  | 8,925,000  | 118 | 1065 | 0.316935224  | PRSS23                                |
| 29 | 8,850,000  | 9,000,000  | 119 | 1117 | 0.287722372  | ME3                                   |
| 29 | 8,925,000  | 9,075,000  | 120 | 1732 | -0.150673457 | ME3                                   |
| 29 | 9,000,000  | 9,150,000  | 121 | 2134 | 0.150483663  | ME3                                   |
| 29 | 9,075,000  | 9,225,000  | 122 | 1774 | 0.502879228  | CCDC81,ME3                            |
| 29 | 9,150,000  | 9,300,000  | 123 | 1133 | 0.357417648  | C29H11orf73,CCDC81,ME3                |
| 29 | 9,225,000  | 9,375,000  | 124 | 659  | -0.3714938   | C29H11orf73,CCDC81,EED                |
| 29 | 9,300,000  | 9,450,000  | 125 | 525  | -0.39222514  | C29H11orf73,EED                       |
| 29 | 9,375,000  | 9,525,000  | 126 | 795  | 0.514428378  |                                       |
| 29 | 9,450,000  | 9,600,000  | 127 | 724  | 0.643306213  |                                       |
| 29 | 9,525,000  | 9,675,000  | 128 | 322  | -0.564121625 | PICALM                                |
| 29 | 9,600,000  | 9,750,000  | 129 | 366  | -2.425793901 | CCDC83,PICALM                         |
| 29 | 9,675,000  | 9,825,000  | 130 | 469  | -1.53094097  | CCDC83,SYTL2                          |
| 29 | 9,750,000  | 9,900,000  | 131 | 656  | -0.815938418 | CCDC83,SYTL2                          |
| 29 | 9,825,000  | 9,975,000  | 132 | 991  | 0.047452598  | CCDC89,CREBZF,SYTL2,TMEM126A          |
| 29 | 9,900,000  | 10,050,000 | 133 | 1114 | 0.338946185  | CCDC89,CREBZF,SYTL2,TMEM126A,TMEM126B |
| 29 | 9,975,000  | 10,125,000 | 134 | 928  | -0.991233987 | TMEM126B                              |
| 29 | 10,050,000 | 10,200,000 | 135 | 847  | -0.323665711 |                                       |
| 29 | 10,125,000 | 10,275,000 | 136 | 992  | 0.847472177  |                                       |
| 29 | 10,200,000 | 10,350,000 | 137 | 1151 | 0.580207415  |                                       |
| 29 | 10,275,000 | 10,425,000 | 138 | 1402 | 0.736059461  |                                       |
| 29 | 10,350,000 | 10,500,000 | 139 | 1369 | 1.06358824   |                                       |
| 29 | 10,425,000 | 10,575,000 | 140 | 1218 | 0.379082308  |                                       |
| 29 | 10,500,000 | 10,650,000 | 141 | 1372 | -2.485089318 |                                       |

|    |            |            |     |      |              |                         |
|----|------------|------------|-----|------|--------------|-------------------------|
| 29 | 10,575,000 | 10,725,000 | 142 | 1213 | -3.743640036 |                         |
| 29 | 10,650,000 | 10,800,000 | 143 | 986  | -1.589659099 | ENSBTAG00000047436      |
| 29 | 10,725,000 | 10,875,000 | 144 | 1298 | -1.147746755 | ENSBTAG00000047436      |
| 29 | 10,800,000 | 10,950,000 | 145 | 1391 | -0.826259649 |                         |
| 29 | 10,875,000 | 11,025,000 | 146 | 1366 | -0.216814965 |                         |
| 29 | 10,950,000 | 11,100,000 | 147 | 1750 | -0.360525117 |                         |
| 29 | 11,025,000 | 11,175,000 | 148 | 1657 | -0.307668263 |                         |
| 29 | 11,100,000 | 11,250,000 | 149 | 979  | -0.024385432 |                         |
| 29 | 11,175,000 | 11,325,000 | 150 | 1073 | 0.58267976   |                         |
| 29 | 11,250,000 | 11,400,000 | 151 | 1413 | 0.468258742  |                         |
| 29 | 11,325,000 | 11,475,000 | 152 | 1043 | -0.087372663 |                         |
| 29 | 11,400,000 | 11,550,000 | 153 | 790  | -1.121596018 |                         |
| 29 | 11,475,000 | 11,625,000 | 154 | 920  | -1.407754613 |                         |
| 29 | 11,550,000 | 11,700,000 | 155 | 1115 | -0.181041668 |                         |
| 29 | 11,625,000 | 11,775,000 | 156 | 1140 | 0.098504304  |                         |
| 29 | 11,700,000 | 11,850,000 | 157 | 1083 | -1.234773958 |                         |
| 29 | 11,775,000 | 11,925,000 | 158 | 1352 | -1.080765732 |                         |
| 29 | 11,850,000 | 12,000,000 | 159 | 1573 | 0.324137769  |                         |
| 29 | 11,925,000 | 12,075,000 | 160 | 1092 | 0.346507679  |                         |
| 29 | 12,000,000 | 12,150,000 | 161 | 728  | -2.307125926 | DLG2                    |
| 29 | 12,075,000 | 12,225,000 | 162 | 824  | -0.837615346 | DLG2,ENSBTAG00000017735 |
| 29 | 12,150,000 | 12,300,000 | 163 | 840  | 0.112060624  | DLG2,ENSBTAG00000017735 |
| 29 | 12,225,000 | 12,375,000 | 164 | 785  | -0.001978039 | DLG2                    |
| 29 | 12,300,000 | 12,450,000 | 165 | 940  | -0.786988768 | DLG2                    |
| 29 | 12,375,000 | 12,525,000 | 166 | 873  | -1.51946708  | ANKRD42,CCDC90B         |
| 29 | 12,450,000 | 12,600,000 | 167 | 487  | -0.711641371 | ANKRD42,CCDC90B,PCF11   |
| 29 | 12,525,000 | 12,675,000 | 168 | 600  | 0.517604601  | ANKRD42,PCF11,RAB30     |
| 29 | 12,600,000 | 12,750,000 | 169 | 904  | 0.113462882  | RAB30                   |
| 29 | 12,675,000 | 12,825,000 | 170 | 618  | -0.383928641 | DDIAS,PRCP,RAB30        |
| 29 | 12,750,000 | 12,900,000 | 171 | 276  | 0.872696959  | DDIAS,PRCP,RAB30        |
| 29 | 12,825,000 | 12,975,000 | 172 | 372  | 0.861399635  | PRCP                    |
| 29 | 12,900,000 | 13,050,000 | 173 | 560  | 0.151079071  | FAM181B,PRCP            |
| 29 | 12,975,000 | 13,125,000 | 174 | 970  | 0.569387794  | FAM181B                 |
| 29 | 13,050,000 | 13,200,000 | 175 | 1141 | 1.168519446  |                         |
| 29 | 13,125,000 | 13,275,000 | 176 | 1410 | 0.876704942  |                         |
| 29 | 13,200,000 | 13,350,000 | 177 | 1793 | 0.830325874  |                         |
| 29 | 13,275,000 | 13,425,000 | 178 | 1184 | 1.22809416   |                         |
| 29 | 13,350,000 | 13,500,000 | 179 | 699  | -0.047522807 | ENSBTAG00000010970      |
| 29 | 13,425,000 | 13,575,000 | 180 | 843  | 0.078741505  | ENSBTAG00000010970      |
| 29 | 13,500,000 | 13,650,000 | 181 | 1204 | 0.020556431  | ENSBTAG00000022427      |
| 29 | 13,575,000 | 13,725,000 | 182 | 1439 | -0.51050422  | ENSBTAG00000022427      |
| 29 | 13,650,000 | 13,800,000 | 183 | 1338 | -0.647193116 |                         |
| 29 | 13,725,000 | 13,875,000 | 184 | 1292 | -0.488830522 |                         |
| 29 | 13,800,000 | 13,950,000 | 185 | 1367 | 0.621629109  |                         |
| 29 | 13,875,000 | 14,025,000 | 186 | 1605 | 0.77432669   |                         |
| 29 | 13,950,000 | 14,100,000 | 187 | 1432 | 0.25758122   |                         |
| 29 | 14,025,000 | 14,175,000 | 188 | 1173 | -0.31345854  |                         |
| 29 | 14,100,000 | 14,250,000 | 189 | 1101 | 0.430698197  |                         |
| 29 | 14,175,000 | 14,325,000 | 190 | 871  | 0.216324478  |                         |
| 29 | 14,250,000 | 14,400,000 | 191 | 806  | 0.075644579  |                         |
| 29 | 14,325,000 | 14,475,000 | 192 | 768  | 0.079881251  |                         |
| 29 | 14,400,000 | 14,550,000 | 193 | 907  | 0.570731652  |                         |
| 29 | 14,475,000 | 14,625,000 | 194 | 1042 | 0.749002164  |                         |

|    |            |            |     |      |              |                                 |
|----|------------|------------|-----|------|--------------|---------------------------------|
| 29 | 14,550,000 | 14,700,000 | 195 | 1064 | -1.573073699 |                                 |
| 29 | 14,625,000 | 14,775,000 | 196 | 1747 | -0.634524966 |                                 |
| 29 | 14,700,000 | 14,850,000 | 197 | 1730 | 0.3239951    |                                 |
| 29 | 14,775,000 | 14,925,000 | 198 | 1211 | 0.212613403  |                                 |
| 29 | 14,850,000 | 15,000,000 | 199 | 1330 | -1.144897669 |                                 |
| 29 | 14,925,000 | 15,075,000 | 200 | 1149 | -1.021734561 |                                 |
| 29 | 15,000,000 | 15,150,000 | 201 | 980  | 1.058787286  |                                 |
| 29 | 15,075,000 | 15,225,000 | 202 | 1259 | -0.374439355 |                                 |
| 29 | 15,150,000 | 15,300,000 | 203 | 1466 | -0.913127361 |                                 |
| 29 | 15,225,000 | 15,375,000 | 204 | 1367 | 0.245948058  |                                 |
| 29 | 15,300,000 | 15,450,000 | 205 | 1442 | 0.251651725  |                                 |
| 29 | 15,375,000 | 15,525,000 | 206 | 1139 | -0.360501418 |                                 |
| 29 | 15,450,000 | 15,600,000 | 207 | 806  | 0.427383406  |                                 |
| 29 | 15,525,000 | 15,675,000 | 208 | 1111 | 0.696244873  |                                 |
| 29 | 15,600,000 | 15,750,000 | 209 | 1428 | 0.302118596  |                                 |
| 29 | 15,675,000 | 15,825,000 | 210 | 1741 | 0.229578571  |                                 |
| 29 | 15,750,000 | 15,900,000 | 211 | 1755 | 0.2204695    |                                 |
| 29 | 15,825,000 | 15,975,000 | 212 | 1055 | -0.841910418 |                                 |
| 29 | 15,900,000 | 16,050,000 | 213 | 819  | -1.295431029 |                                 |
| 29 | 15,975,000 | 16,125,000 | 214 | 1239 | 0.438748099  |                                 |
| 29 | 16,050,000 | 16,200,000 | 215 | 1350 | -0.054602209 |                                 |
| 29 | 16,125,000 | 16,275,000 | 216 | 1155 | -0.784698116 |                                 |
| 29 | 16,200,000 | 16,350,000 | 217 | 1147 | -0.605104641 |                                 |
| 29 | 16,275,000 | 16,425,000 | 218 | 1119 | -1.61078988  |                                 |
| 29 | 16,350,000 | 16,500,000 | 219 | 967  | -1.799534965 |                                 |
| 29 | 16,425,000 | 16,575,000 | 220 | 1028 | -0.040389313 |                                 |
| 29 | 16,500,000 | 16,650,000 | 221 | 1053 | 0.099237191  |                                 |
| 29 | 16,575,000 | 16,725,000 | 222 | 860  | 0.435660638  |                                 |
| 29 | 16,650,000 | 16,800,000 | 223 | 769  | -0.587307748 |                                 |
| 29 | 16,725,000 | 16,875,000 | 224 | 1106 | -0.888900412 |                                 |
| 29 | 16,800,000 | 16,950,000 | 225 | 1137 | -0.569298429 |                                 |
| 29 | 16,875,000 | 17,025,000 | 226 | 893  | -0.351133335 |                                 |
| 29 | 16,950,000 | 17,100,000 | 227 | 1021 | 0.062502165  | TENM4                           |
| 29 | 17,025,000 | 17,175,000 | 228 | 1073 | 0.462739942  | TENM4                           |
| 29 | 17,100,000 | 17,250,000 | 229 | 1014 | 0.521421626  | TENM4                           |
| 29 | 17,175,000 | 17,325,000 | 230 | 1328 | 0.505699855  | TENM4                           |
| 29 | 17,250,000 | 17,400,000 | 231 | 1613 | 0.204093007  | TENM4                           |
| 29 | 17,325,000 | 17,475,000 | 232 | 1625 | -0.886516949 | TENM4                           |
| 29 | 17,400,000 | 17,550,000 | 233 | 1310 | -1.196122361 | NARS2,TENM4,ENSBTAG00000040202  |
| 29 | 17,475,000 | 17,625,000 | 234 | 773  | -0.920599719 | NARS2,TENM4,ENSBTAG00000040202  |
| 29 | 17,550,000 | 17,700,000 | 235 | 516  | -1.161781673 | NARS2                           |
| 29 | 17,625,000 | 17,775,000 | 236 | 416  | -1.996474237 | NARS2                           |
| 29 | 17,700,000 | 17,850,000 | 237 | 290  | -2.604754169 | ENSBTAG00000002922              |
| 29 | 17,775,000 | 17,925,000 | 238 | 366  | -0.775411656 | USP35,ENSBTAG00000002922        |
| 29 | 17,850,000 | 18,000,000 | 239 | 365  | -0.699365196 | KCTD21,USP35,ENSBTAG00000002922 |
| 29 | 17,925,000 | 18,075,000 | 240 | 232  | -1.759261541 | ALG8,KCTD21,NDUFC2,USP35        |
| 29 | 18,000,000 | 18,150,000 | 241 | 227  | -2.231543242 | ALG8,INTS4,KCTD14,NDUFC2,THRSP  |
| 29 | 18,075,000 | 18,225,000 | 242 | 250  | -1.167093636 | INTS4,KCTD14,NDUFC2,THRSP       |
| 29 | 18,150,000 | 18,300,000 | 243 | 232  | 0.740406162  | AAMDC,INTS4,RSF1                |
| 29 | 18,225,000 | 18,375,000 | 244 | 251  | 0.65586378   | AAMDC,INTS4,RSF1                |
| 29 | 18,300,000 | 18,450,000 | 245 | 400  | 0.699313275  | CLNS1A,RSF1                     |
| 29 | 18,375,000 | 18,525,000 | 246 | 640  | 0.928400275  | AQP11,CLNS1A,RSF1               |
| 29 | 18,450,000 | 18,600,000 | 247 | 845  | 0.74416389   | AQP11,CLNS1A                    |

|    |            |            |     |      |              |                    |
|----|------------|------------|-----|------|--------------|--------------------|
| 29 | 18,525,000 | 18,675,000 | 248 | 956  | 0.339830611  |                    |
| 29 | 18,600,000 | 18,750,000 | 249 | 946  | 0.510956024  | PAK1               |
| 29 | 18,675,000 | 18,825,000 | 250 | 704  | 0.629313639  | PAK1               |
| 29 | 18,750,000 | 18,900,000 | 251 | 643  | 0.103241054  | PAK1               |
| 29 | 18,825,000 | 18,975,000 | 252 | 949  | 0.277570264  |                    |
| 29 | 18,900,000 | 19,050,000 | 253 | 1110 | -1.027327983 |                    |
| 29 | 18,975,000 | 19,125,000 | 254 | 1061 | -2.038166245 | ENSBTAG00000034536 |
| 29 | 19,050,000 | 19,200,000 | 255 | 907  | -1.706832979 | ENSBTAG00000034536 |
| 29 | 19,125,000 | 19,275,000 | 256 | 1264 | -0.114671074 | ENSBTAG00000034536 |
| 29 | 19,200,000 | 19,350,000 | 257 | 1668 | 0.413190785  |                    |
| 29 | 19,275,000 | 19,425,000 | 258 | 1344 | 0.75114979   |                    |
| 29 | 19,350,000 | 19,500,000 | 259 | 1114 | 1.079908321  |                    |
| 29 | 19,425,000 | 19,575,000 | 260 | 1098 | 1.019216678  |                    |
| 29 | 19,500,000 | 19,650,000 | 261 | 1103 | 0.852373152  |                    |
| 29 | 19,575,000 | 19,725,000 | 262 | 1339 | 1.109735444  |                    |
| 29 | 19,650,000 | 19,800,000 | 263 | 1785 | 0.972405454  |                    |
| 29 | 19,725,000 | 19,875,000 | 264 | 1909 | 0.889099494  |                    |
| 29 | 19,800,000 | 19,950,000 | 265 | 1835 | 0.723809717  |                    |
| 29 | 19,875,000 | 20,025,000 | 266 | 1635 | 0.906613796  |                    |
| 29 | 19,950,000 | 20,100,000 | 267 | 1177 | 0.712607195  |                    |
| 29 | 20,025,000 | 20,175,000 | 268 | 1246 | -0.916043672 |                    |
| 29 | 20,100,000 | 20,250,000 | 269 | 1469 | 0.076410517  |                    |
| 29 | 20,175,000 | 20,325,000 | 270 | 1446 | -0.165352512 | MGC157332          |
| 29 | 20,250,000 | 20,400,000 | 271 | 1093 | -0.474252213 | MGC157332          |
| 29 | 20,325,000 | 20,475,000 | 272 | 1140 | -0.69344854  | MGC157332          |
| 29 | 20,400,000 | 20,550,000 | 273 | 1207 | -0.917926712 | MGC157332          |
| 29 | 20,475,000 | 20,625,000 | 274 | 1093 | 0.767519521  | MGC157332          |
| 29 | 20,550,000 | 20,700,000 | 275 | 1125 | 0.775543901  | MGC157332          |
| 29 | 20,625,000 | 20,775,000 | 276 | 1193 | 0.825868522  |                    |
| 29 | 20,700,000 | 20,850,000 | 277 | 1472 | 1.055869511  |                    |
| 29 | 20,775,000 | 20,925,000 | 278 | 1450 | 1.181775159  |                    |
| 29 | 20,850,000 | 21,000,000 | 279 | 1477 | 1.19186883   |                    |
| 29 | 20,925,000 | 21,075,000 | 280 | 1750 | 0.920449665  |                    |
| 29 | 21,000,000 | 21,150,000 | 281 | 2035 | 0.091633712  |                    |
| 29 | 21,075,000 | 21,225,000 | 282 | 1610 | -0.423633541 |                    |
| 29 | 21,150,000 | 21,300,000 | 283 | 1345 | 0.073225481  |                    |
| 29 | 21,225,000 | 21,375,000 | 284 | 1660 | 0.309083939  |                    |
| 29 | 21,300,000 | 21,450,000 | 285 | 1778 | 0.463631242  |                    |
| 29 | 21,375,000 | 21,525,000 | 286 | 1699 | -0.108210781 |                    |
| 29 | 21,450,000 | 21,600,000 | 287 | 1413 | 0.526910044  |                    |
| 29 | 21,525,000 | 21,675,000 | 288 | 1397 | 1.010043909  |                    |
| 29 | 21,600,000 | 21,750,000 | 289 | 1509 | 0.852199937  |                    |
| 29 | 21,675,000 | 21,825,000 | 290 | 1033 | 0.724991015  |                    |
| 29 | 21,750,000 | 21,900,000 | 291 | 807  | 0.569531264  |                    |
| 29 | 21,825,000 | 21,975,000 | 292 | 1048 | -0.345088116 |                    |
| 29 | 21,900,000 | 22,050,000 | 293 | 1019 | -1.157741399 |                    |
| 29 | 21,975,000 | 22,125,000 | 294 | 879  | 0.193134629  |                    |
| 29 | 22,050,000 | 22,200,000 | 295 | 1143 | 0.272021444  |                    |
| 29 | 22,125,000 | 22,275,000 | 296 | 1115 | 0.411967571  |                    |
| 29 | 22,200,000 | 22,350,000 | 297 | 1015 | 0.432302949  | GAS2               |
| 29 | 22,275,000 | 22,425,000 | 298 | 802  | 0.141249839  | GAS2               |
| 29 | 22,350,000 | 22,500,000 | 299 | 326  | 0.411468713  | FANCF,GAS2         |
| 29 | 22,425,000 | 22,575,000 | 300 | 617  | -0.819762192 | FANCF              |

|    |            |            |     |      |              |                                  |
|----|------------|------------|-----|------|--------------|----------------------------------|
| 29 | 22,500,000 | 22,650,000 | 301 | 805  | -0.434737287 |                                  |
| 29 | 22,575,000 | 22,725,000 | 302 | 761  | 0.55816954   | SLC17A6                          |
| 29 | 22,650,000 | 22,800,000 | 303 | 564  | 0.572455692  | ANO5,SLC17A6                     |
| 29 | 22,725,000 | 22,875,000 | 304 | 464  | 0.644148661  | ANO5,SLC17A6                     |
| 29 | 22,800,000 | 22,950,000 | 305 | 1092 | 0.456589899  | ANO5                             |
| 29 | 22,875,000 | 23,025,000 | 306 | 1789 | 0.703521432  |                                  |
| 29 | 22,950,000 | 23,100,000 | 307 | 1889 | 0.732718036  |                                  |
| 29 | 23,025,000 | 23,175,000 | 308 | 1364 | -0.216164241 |                                  |
| 29 | 23,100,000 | 23,250,000 | 309 | 965  | 0.728232314  |                                  |
| 29 | 23,175,000 | 23,325,000 | 310 | 964  | 1.039827147  |                                  |
| 29 | 23,250,000 | 23,400,000 | 311 | 1409 | 0.636644246  |                                  |
| 29 | 23,325,000 | 23,475,000 | 312 | 1835 | 0.59549894   |                                  |
| 29 | 23,400,000 | 23,550,000 | 313 | 1662 | 0.561148093  |                                  |
| 29 | 23,475,000 | 23,625,000 | 314 | 1669 | 0.274228521  |                                  |
| 29 | 23,550,000 | 23,700,000 | 315 | 1604 | 0.223212564  |                                  |
| 29 | 23,625,000 | 23,775,000 | 316 | 1280 | 0.313415312  |                                  |
| 29 | 23,700,000 | 23,850,000 | 317 | 1178 | 0.517275383  |                                  |
| 29 | 23,775,000 | 23,925,000 | 318 | 1370 | 0.387188006  |                                  |
| 29 | 23,850,000 | 24,000,000 | 319 | 1821 | -0.201510926 |                                  |
| 29 | 23,925,000 | 24,075,000 | 320 | 1677 | -0.14875738  |                                  |
| 29 | 24,000,000 | 24,150,000 | 321 | 1004 | 0.353923856  |                                  |
| 29 | 24,075,000 | 24,225,000 | 322 | 655  | 0.755669729  |                                  |
| 29 | 24,150,000 | 24,300,000 | 323 | 1176 | 0.625778759  |                                  |
| 29 | 24,225,000 | 24,375,000 | 324 | 1198 | 0.241260515  |                                  |
| 29 | 24,300,000 | 24,450,000 | 325 | 624  | -1.364129552 |                                  |
| 29 | 24,375,000 | 24,525,000 | 326 | 768  | -1.858493461 |                                  |
| 29 | 24,450,000 | 24,600,000 | 327 | 884  | -0.635113023 | SLC6A5                           |
| 29 | 24,525,000 | 24,675,000 | 328 | 676  | -0.399175387 | SLC6A5                           |
| 29 | 24,600,000 | 24,750,000 | 329 | 519  | -0.40176276  | PRMT3,SLC6A5                     |
| 29 | 24,675,000 | 24,825,000 | 330 | 451  | 1.012730799  | HTATIP2,PRMT3                    |
| 29 | 24,750,000 | 24,900,000 | 331 | 385  | 0.738118668  | HTATIP2,PRMT3,ENSBTAG00000008684 |
| 29 | 24,825,000 | 24,975,000 | 332 | 711  | 0.450252737  | ENSBTAG00000008684               |
| 29 | 24,900,000 | 25,050,000 | 333 | 998  | 0.422677103  | DBX1,NAV2                        |
| 29 | 24,975,000 | 25,125,000 | 334 | 937  | 0.909905029  | DBX1,NAV2                        |
| 29 | 25,050,000 | 25,200,000 | 335 | 1011 | 0.576614633  | NAV2                             |
| 29 | 25,125,000 | 25,275,000 | 336 | 939  | -0.544271439 | NAV2                             |
| 29 | 25,200,000 | 25,350,000 | 337 | 769  | -0.02497292  | NAV2                             |
| 29 | 25,275,000 | 25,425,000 | 338 | 669  | 0.046044326  | NAV2                             |
| 29 | 25,350,000 | 25,500,000 | 339 | 944  | -0.031769428 | NAV2                             |
| 29 | 25,425,000 | 25,575,000 | 340 | 956  | -0.575222602 |                                  |
| 29 | 25,500,000 | 25,650,000 | 341 | 587  | -2.249498632 |                                  |
| 29 | 25,575,000 | 25,725,000 | 342 | 787  | -2.212997831 |                                  |
| 29 | 25,650,000 | 25,800,000 | 343 | 1002 | -1.382777121 |                                  |
| 29 | 25,725,000 | 25,875,000 | 344 | 877  | 0.356134109  |                                  |
| 29 | 25,800,000 | 25,950,000 | 345 | 839  | 0.863629401  | E2F8                             |
| 29 | 25,875,000 | 26,025,000 | 346 | 753  | 0.525449078  | CSRP3,E2F8,ZDHHC13               |
| 29 | 25,950,000 | 26,100,000 | 347 | 569  | -0.0010599   | CSRP3,E2F8,ZDHHC13               |
| 29 | 26,025,000 | 26,175,000 | 348 | 610  | -0.255686053 | MRGPRX2,ZDHHC13                  |
| 29 | 26,100,000 | 26,250,000 | 349 | 710  | -0.551959701 | MRGPRX2,PTPN5                    |
| 29 | 26,175,000 | 26,325,000 | 350 | 732  | -0.403887685 | PTPN5,TMEM86A                    |
| 29 | 26,250,000 | 26,400,000 | 351 | 802  | 0.210433539  | PTPN5,SPTY2D1,TMEM86A,UEVLD      |
| 29 | 26,325,000 | 26,475,000 | 352 | 829  | -0.132780389 | SPTY2D1,TSG101,UEVLD             |
| 29 | 26,400,000 | 26,550,000 | 353 | 692  | -2.122055467 | LDHA,LDHC,TSG101,UEVLD           |

|    |            |            |     |      |              |                                                                                                                                                                                        |
|----|------------|------------|-----|------|--------------|----------------------------------------------------------------------------------------------------------------------------------------------------------------------------------------|
| 29 | 26,475,000 | 26,625,000 | 354 | 703  | -2.479078432 | GTF2H1,HPS5,LDHA,LDHC,TSG101                                                                                                                                                           |
| 29 | 26,550,000 | 26,700,000 | 355 | 880  | -2.21290881  | GTF2H1,HPS5,LDHA,SAA3,ENSBTAG00000022395                                                                                                                                               |
| 29 | 26,625,000 | 26,775,000 | 356 | 1094 | -0.836248766 | HPS5,M-<br>SAA3.2,SAA1,SAA3,SAA4,ENSBTAG00000022395                                                                                                                                    |
| 29 | 26,700,000 | 26,850,000 | 357 | 1131 | -0.196887993 | M-SAA3.2,OR4D5,OR6M1,OR8D4,SAA1,SAA4<br>OR4D5,OR6M1,OR8D4,ENSBTAG00000038590,ENSBT                                                                                                     |
| 29 | 26,775,000 | 26,925,000 | 358 | 1080 | -0.491182961 | AG00000046745,ENSBTAG00000047090,ENSBTAG000<br>00048240<br>ENSBTAG00000038590,ENSBTAG00000046459,ENSBT                                                                                 |
| 29 | 26,850,000 | 27,000,000 | 359 | 1213 | 0.651973223  | AG00000046745,ENSBTAG00000047090,ENSBTAG000<br>00048222,ENSBTAG00000048240<br>OR10G6,ENSBTAG00000046459,ENSBTAG000000473                                                               |
| 29 | 26,925,000 | 27,075,000 | 360 | 1507 | 0.601188839  | 04,ENSBTAG00000047557,ENSBTAG00000048192,EN<br>SBTAG00000048222<br>OR10G6,ENSBTAG00000047267,ENSBTAG000000473                                                                          |
| 29 | 27,000,000 | 27,150,000 | 361 | 1503 | 0.703851981  | 04,ENSBTAG00000047463,ENSBTAG00000047557,EN<br>SBTAG00000048192<br>VWA5A,ENSBTAG00000022384,ENSBTAG0000003975                                                                          |
| 29 | 27,075,000 | 27,225,000 | 362 | 1334 | 0.639817088  | 7,ENSBTAG00000047267,ENSBTAG00000047463,ENS<br>BTAG00000047934<br>OR10D3,VWA5A,ENSBTAG00000022384,ENSBTAG000                                                                           |
| 29 | 27,150,000 | 27,300,000 | 363 | 1522 | 0.119594099  | 00039517,ENSBTAG00000039757,ENSBTAG00000047<br>934,ENSBTAG00000048043<br>OR10D3,ENSBTAG00000005112,ENSBTAG000000395                                                                    |
| 29 | 27,225,000 | 27,375,000 | 364 | 1576 | -0.109525172 | 17,ENSBTAG00000046247,ENSBTAG00000047530,EN<br>SBTAG00000048043<br>ENSBTAG00000005112,ENSBTAG00000039964,ENSBT                                                                         |
| 29 | 27,300,000 | 27,450,000 | 365 | 1529 | -0.568510629 | AG00000046247,ENSBTAG00000046299,ENSBTAG000<br>00047530<br>ENSBTAG00000039964,ENSBTAG00000040239,ENSBT                                                                                 |
| 29 | 27,375,000 | 27,525,000 | 366 | 1711 | 0.195677029  | AG00000046299<br>TMEM225,ENSBTAG00000040239                                                                                                                                            |
| 29 | 27,450,000 | 27,600,000 | 367 | 2092 | 0.506656286  | TMEM225,ENSBTAG00000047151,ENSBTAG00000047<br>916<br>ENSBTAG00000017495,ENSBTAG00000046665,ENSBT                                                                                       |
| 29 | 27,525,000 | 27,675,000 | 368 | 2269 | -0.364731955 | AG00000047151,ENSBTAG00000047916<br>ENSBTAG00000017495,ENSBTAG00000035631,ENSBT                                                                                                        |
| 29 | 27,600,000 | 27,750,000 | 369 | 2435 | -0.864794429 | AG00000047151,ENSBTAG00000047916<br>ENSBTAG00000017495,ENSBTAG00000035631,ENSBT                                                                                                        |
| 29 | 27,675,000 | 27,825,000 | 370 | 2071 | -0.605506635 | AG00000037623,ENSBTAG00000040250,ENSBTAG000<br>00046665<br>ENSBTAG00000035631,ENSBTAG00000037623,ENSBT                                                                                 |
| 29 | 27,750,000 | 27,900,000 | 371 | 1430 | -0.247628764 | AG00000040250,ENSBTAG00000046086,ENSBTAG000<br>00047100,ENSBTAG00000047204,ENSBTAG00000047<br>753,ENSBTAG00000047840<br>ENSBTAG00000046086,ENSBTAG00000046130,ENSBT                    |
| 29 | 27,825,000 | 27,975,000 | 372 | 1455 | -0.494171998 | AG00000047020,ENSBTAG00000047100,ENSBTAG000<br>00047204,ENSBTAG00000047310,ENSBTAG00000047<br>730,ENSBTAG00000047753,ENSBTAG00000047840<br>ENSBTAG00000046130,ENSBTAG00000047020,ENSBT |
| 29 | 27,900,000 | 28,050,000 | 373 | 1556 | 0.11716635   | AG00000047310,ENSBTAG00000047730<br>ENSBTAG00000005199,ENSBTAG00000006629,ENSBT                                                                                                        |
| 29 | 27,975,000 | 28,125,000 | 374 | 1398 | 1.010842461  | AG00000014305,ENSBTAG00000037467                                                                                                                                                       |

|    |            |            |     |      |              |                                                                                                                                                                                                                                                                                                                                                                                                                                                        |
|----|------------|------------|-----|------|--------------|--------------------------------------------------------------------------------------------------------------------------------------------------------------------------------------------------------------------------------------------------------------------------------------------------------------------------------------------------------------------------------------------------------------------------------------------------------|
| 29 | 28,050,000 | 28,200,000 | 375 | 1190 | 0.801376423  | OR8B8,ENSBTAG00000005199,ENSBTAG0000000662<br>9,ENSBTAG00000014305,ENSBTAG00000033480,ENS<br>BTAG00000037467                                                                                                                                                                                                                                                                                                                                           |
| 29 | 28,125,000 | 28,275,000 | 376 | 1233 | 0.476966506  | OR8B8,ENSBTAG00000033480,ENSBTAG0000004641<br>0,ENSBTAG00000047716,ENSBTAG00000048018<br>ENSBTAG00000022376,ENSBTAG00000022378,ENSBT<br>AG00000033476,ENSBTAG00000033477,ENSBTAG000<br>00038182,ENSBTAG00000039676,ENSBTAG00000046<br>410,ENSBTAG00000047716,ENSBTAG00000048018<br>ENSBTAG00000022376,ENSBTAG00000022378,ENSBT<br>AG00000024769,ENSBTAG00000033476,ENSBTAG000<br>00033477,ENSBTAG00000038182,ENSBTAG00000039<br>676,ENSBTAG00000040090 |
| 29 | 28,200,000 | 28,350,000 | 377 | 1284 | 0.368674105  | PANX3,SIAE,TBRG1,ENSBTAG00000024769,ENSBTAG<br>00000033476,ENSBTAG00000040090                                                                                                                                                                                                                                                                                                                                                                          |
| 29 | 28,275,000 | 28,425,000 | 378 | 1211 | 0.424640889  | PANX3,SIAE,SPA17,TBRG1                                                                                                                                                                                                                                                                                                                                                                                                                                 |
| 29 | 28,350,000 | 28,500,000 | 379 | 1045 | 0.304298396  | ESAM,MSANTD2,NRGN,SIAE,SPA17,VSIG2                                                                                                                                                                                                                                                                                                                                                                                                                     |
| 29 | 28,425,000 | 28,575,000 | 380 | 1027 | -1.531888261 | ESAM,MSANTD2,NRGN,ROBO3,ROBO4,VSIG2                                                                                                                                                                                                                                                                                                                                                                                                                    |
| 29 | 28,500,000 | 28,650,000 | 381 | 1051 | -2.242397664 | CCDC15,HEPACAM,ROBO3,ROBO4                                                                                                                                                                                                                                                                                                                                                                                                                             |
| 29 | 28,575,000 | 28,725,000 | 382 | 945  | 0.048701396  | CCDC15,HEPACAM,ROBO4,SLC37A2                                                                                                                                                                                                                                                                                                                                                                                                                           |
| 29 | 28,650,000 | 28,800,000 | 383 | 1007 | -0.350799235 | CCDC15,SLC37A2,TMEM218                                                                                                                                                                                                                                                                                                                                                                                                                                 |
| 29 | 28,725,000 | 28,875,000 | 384 | 879  | -0.498608115 | SLC37A2,TMEM218                                                                                                                                                                                                                                                                                                                                                                                                                                        |
| 29 | 28,800,000 | 28,950,000 | 385 | 729  | 0.868630758  |                                                                                                                                                                                                                                                                                                                                                                                                                                                        |
| 29 | 28,875,000 | 29,025,000 | 386 | 844  | -0.182536525 |                                                                                                                                                                                                                                                                                                                                                                                                                                                        |
| 29 | 28,950,000 | 29,100,000 | 387 | 748  | -0.714179833 |                                                                                                                                                                                                                                                                                                                                                                                                                                                        |
| 29 | 29,025,000 | 29,175,000 | 388 | 812  | 0.597826719  |                                                                                                                                                                                                                                                                                                                                                                                                                                                        |
| 29 | 29,100,000 | 29,250,000 | 389 | 972  | 0.190984699  | PKNOX2                                                                                                                                                                                                                                                                                                                                                                                                                                                 |
| 29 | 29,175,000 | 29,325,000 | 390 | 1165 | 0.224314862  | FEZ1,PKNOX2                                                                                                                                                                                                                                                                                                                                                                                                                                            |
| 29 | 29,250,000 | 29,400,000 | 391 | 1124 | -0.032594183 | EI24,FEZ1,PKNOX2,STT3A                                                                                                                                                                                                                                                                                                                                                                                                                                 |
| 29 | 29,325,000 | 29,475,000 | 392 | 663  | -1.339854639 | ACRV1,CHEK1,EI24,SSLP1,STT3A                                                                                                                                                                                                                                                                                                                                                                                                                           |
| 29 | 29,400,000 | 29,550,000 | 393 | 799  | -0.679959302 | ACRV1,CHEK1,SSLP1,ENSBTAG00000023300,ENSBTA<br>G00000023301                                                                                                                                                                                                                                                                                                                                                                                            |
| 29 | 29,475,000 | 29,625,000 | 394 | 735  | -0.2026443   | HYLS1,PATE2,PUS3,ENSBTAG00000023300,ENSBTAG0<br>0000023301,ENSBTAG00000033377                                                                                                                                                                                                                                                                                                                                                                          |
| 29 | 29,550,000 | 29,700,000 | 395 | 269  | -0.658558093 | CDON,DDX25,HYLS1,PATE2,PUS3,ENSBTAG00000033<br>377                                                                                                                                                                                                                                                                                                                                                                                                     |
| 29 | 29,625,000 | 29,775,000 | 396 | 468  | -2.776505424 | CDON,DDX25,HYLS1                                                                                                                                                                                                                                                                                                                                                                                                                                       |
| 29 | 29,700,000 | 29,850,000 | 397 | 701  | -0.990985325 | CDON                                                                                                                                                                                                                                                                                                                                                                                                                                                   |
| 29 | 29,775,000 | 29,925,000 | 398 | 957  | -0.088678598 | RPUSD4                                                                                                                                                                                                                                                                                                                                                                                                                                                 |
| 29 | 29,850,000 | 30,000,000 | 399 | 1023 | -1.143603651 | FAM118B,FOXRED1,RPUSD4,SRPR,ENSBTAG0000004<br>8137                                                                                                                                                                                                                                                                                                                                                                                                     |
| 29 | 29,925,000 | 30,075,000 | 400 | 934  | -2.340240322 | DCPS,FAM118B,FOXRED1,RPUSD4,SRPR,ST3GAL-<br>IV,TIRAP,ENSBTAG00000048137                                                                                                                                                                                                                                                                                                                                                                                |
| 29 | 30,000,000 | 30,150,000 | 401 | 1039 | -1.29388537  | DCPS,KIRREL3,ST3GAL-IV,TIRAP                                                                                                                                                                                                                                                                                                                                                                                                                           |
| 29 | 30,075,000 | 30,225,000 | 402 | 851  | -0.515890666 | KIRREL3,ST3GAL-IV                                                                                                                                                                                                                                                                                                                                                                                                                                      |
| 29 | 30,150,000 | 30,300,000 | 403 | 332  | -0.244775023 | KIRREL3                                                                                                                                                                                                                                                                                                                                                                                                                                                |
| 29 | 30,225,000 | 30,375,000 | 404 | 5    | -2.434033962 |                                                                                                                                                                                                                                                                                                                                                                                                                                                        |
| 29 | 30,300,000 | 30,450,000 | 405 | 315  | 0.421591039  |                                                                                                                                                                                                                                                                                                                                                                                                                                                        |
| 29 | 30,375,000 | 30,525,000 | 406 | 821  | -0.233795017 |                                                                                                                                                                                                                                                                                                                                                                                                                                                        |
| 29 | 30,450,000 | 30,600,000 | 407 | 895  | 0.224859363  |                                                                                                                                                                                                                                                                                                                                                                                                                                                        |
| 29 | 30,525,000 | 30,675,000 | 408 | 990  | -0.737926345 |                                                                                                                                                                                                                                                                                                                                                                                                                                                        |
| 29 | 30,600,000 | 30,750,000 | 409 | 1179 | -1.065957458 |                                                                                                                                                                                                                                                                                                                                                                                                                                                        |
| 29 | 30,675,000 | 30,825,000 | 410 | 1298 | 0.114974611  |                                                                                                                                                                                                                                                                                                                                                                                                                                                        |
| 29 | 30,750,000 | 30,900,000 | 411 | 1304 | -0.092225771 |                                                                                                                                                                                                                                                                                                                                                                                                                                                        |
| 29 | 30,825,000 | 30,975,000 | 412 | 1135 | 0.091705973  |                                                                                                                                                                                                                                                                                                                                                                                                                                                        |

|    |            |            |     |      |              |                      |
|----|------------|------------|-----|------|--------------|----------------------|
| 29 | 30,900,000 | 31,050,000 | 413 | 1159 | 0.524032941  |                      |
| 29 | 30,975,000 | 31,125,000 | 414 | 1093 | 0.519945052  |                      |
| 29 | 31,050,000 | 31,200,000 | 415 | 1163 | 0.189588879  |                      |
| 29 | 31,125,000 | 31,275,000 | 416 | 1279 | -0.396549825 |                      |
| 29 | 31,200,000 | 31,350,000 | 417 | 1286 | -1.318547495 |                      |
| 29 | 31,275,000 | 31,425,000 | 418 | 1539 | -0.517672189 |                      |
| 29 | 31,350,000 | 31,500,000 | 419 | 1526 | -0.417668247 |                      |
| 29 | 31,425,000 | 31,575,000 | 420 | 1515 | -0.319710481 |                      |
| 29 | 31,500,000 | 31,650,000 | 421 | 1878 | 0.046293948  |                      |
| 29 | 31,575,000 | 31,725,000 | 422 | 2284 | -1.255900558 |                      |
| 29 | 31,650,000 | 31,800,000 | 423 | 2349 | -0.731176037 |                      |
| 29 | 31,725,000 | 31,875,000 | 424 | 1934 | 0.674537601  |                      |
| 29 | 31,800,000 | 31,950,000 | 425 | 1613 | 0.269162591  |                      |
| 29 | 31,875,000 | 32,025,000 | 426 | 1668 | 0.428293139  |                      |
| 29 | 31,950,000 | 32,100,000 | 427 | 1464 | 0.781327524  |                      |
| 29 | 32,025,000 | 32,175,000 | 428 | 1068 | 1.044627008  |                      |
| 29 | 32,100,000 | 32,250,000 | 429 | 858  | 0.867646879  |                      |
| 29 | 32,175,000 | 32,325,000 | 430 | 913  | 0.147932013  |                      |
| 29 | 32,250,000 | 32,400,000 | 431 | 1139 | 0.83978671   | ETS1                 |
| 29 | 32,325,000 | 32,475,000 | 432 | 990  | 1.046426246  | ETS1                 |
| 29 | 32,400,000 | 32,550,000 | 433 | 1095 | -0.007885111 | ETS1                 |
| 29 | 32,475,000 | 32,625,000 | 434 | 1072 | -0.180922241 |                      |
| 29 | 32,550,000 | 32,700,000 | 435 | 756  | 0.199827947  | FLI1                 |
| 29 | 32,625,000 | 32,775,000 | 436 | 791  | -0.140128529 | FLI1,KCNJ1           |
| 29 | 32,700,000 | 32,850,000 | 437 | 1124 | -0.706965868 | FLI1,KCNJ1,KCNJ5     |
| 29 | 32,775,000 | 32,925,000 | 438 | 1273 | -0.547531928 | ARHGAP32,KCNJ1,KCNJ5 |
| 29 | 32,850,000 | 33,000,000 | 439 | 1039 | 0.13312612   | ARHGAP32             |
| 29 | 32,925,000 | 33,075,000 | 440 | 692  | 0.526911122  | ARHGAP32             |
| 29 | 33,000,000 | 33,150,000 | 441 | 418  | 0.702516934  | ARHGAP32             |
| 29 | 33,075,000 | 33,225,000 | 442 | 420  | 0.395035557  |                      |
| 29 | 33,150,000 | 33,300,000 | 443 | 548  | 0.037547355  | BARX2                |
| 29 | 33,225,000 | 33,375,000 | 444 | 714  | -0.27358339  | BARX2                |
| 29 | 33,300,000 | 33,450,000 | 445 | 785  | -0.600095345 |                      |
| 29 | 33,375,000 | 33,525,000 | 446 | 1081 | 0.13095535   |                      |
| 29 | 33,450,000 | 33,600,000 | 447 | 1446 | 0.115461137  | JAM3                 |
| 29 | 33,525,000 | 33,675,000 | 448 | 1201 | 0.030070842  | JAM3                 |
| 29 | 33,600,000 | 33,750,000 | 449 | 766  | 0.608335476  | IGSF9B               |
| 29 | 33,675,000 | 33,825,000 | 450 | 686  | -0.15633857  | IGSF9B,SPATA19       |
| 29 | 33,750,000 | 33,900,000 | 451 | 651  | -0.698394877 | SPATA19              |
| 29 | 33,825,000 | 33,975,000 | 452 | 1011 | 0.392726724  |                      |
| 29 | 33,900,000 | 34,050,000 | 453 | 1551 | 0.521286616  |                      |
| 29 | 33,975,000 | 34,125,000 | 454 | 1414 | 0.705495815  |                      |
| 29 | 34,050,000 | 34,200,000 | 455 | 1434 | 0.719656833  |                      |
| 29 | 34,125,000 | 34,275,000 | 456 | 1679 | 0.735657155  |                      |
| 29 | 34,200,000 | 34,350,000 | 457 | 1229 | 0.504493256  |                      |
| 29 | 34,275,000 | 34,425,000 | 458 | 807  | -0.185969247 |                      |
| 29 | 34,350,000 | 34,500,000 | 459 | 967  | 0.755665702  |                      |
| 29 | 34,425,000 | 34,575,000 | 460 | 1037 | 0.563227587  | OPCML                |
| 29 | 34,500,000 | 34,650,000 | 461 | 906  | 0.196683444  | OPCML                |
| 29 | 34,575,000 | 34,725,000 | 462 | 984  | -0.254127024 | OPCML                |
| 29 | 34,650,000 | 34,800,000 | 463 | 1066 | -0.622927978 | OPCML                |
| 29 | 34,725,000 | 34,875,000 | 464 | 954  | -0.452522513 | OPCML                |
| 29 | 34,800,000 | 34,950,000 | 465 | 748  | 0.382372405  | OPCML                |



|    |            |            |     |      |              |                                                                                                |
|----|------------|------------|-----|------|--------------|------------------------------------------------------------------------------------------------|
| 29 | 34,875,000 | 35,025,000 | 466 | 909  | -0.527664037 | OPCML                                                                                          |
| 29 | 34,950,000 | 35,100,000 | 467 | 1340 | -0.481176544 | OPCML,ENSBTAG00000033030                                                                       |
| 29 | 35,025,000 | 35,175,000 | 468 | 1332 | 0.157830127  | NTM,OPCML,ENSBTAG00000033030                                                                   |
| 29 | 35,100,000 | 35,250,000 | 469 | 1026 | 0.342253567  | NTM                                                                                            |
| 29 | 35,175,000 | 35,325,000 | 470 | 1338 | -0.438612997 | NTM                                                                                            |
| 29 | 35,250,000 | 35,400,000 | 471 | 1294 | -0.564978824 | NTM                                                                                            |
| 29 | 35,325,000 | 35,475,000 | 472 | 982  | 0.314714254  | NTM                                                                                            |
| 29 | 35,400,000 | 35,550,000 | 473 | 1066 | 0.520921728  | NTM                                                                                            |
| 29 | 35,475,000 | 35,625,000 | 474 | 652  | 0.425593687  | NTM                                                                                            |
| 29 | 35,550,000 | 35,700,000 | 475 | 538  | 0.661803019  | NTM                                                                                            |
| 29 | 35,625,000 | 35,775,000 | 476 | 977  | 0.681618252  |                                                                                                |
| 29 | 35,700,000 | 35,850,000 | 477 | 994  | 0.308114742  |                                                                                                |
| 29 | 35,775,000 | 35,925,000 | 478 | 841  | -0.046158338 |                                                                                                |
| 29 | 35,850,000 | 36,000,000 | 479 | 688  | 0.631090333  |                                                                                                |
| 29 | 35,925,000 | 36,075,000 | 480 | 703  | 0.316894371  |                                                                                                |
| 29 | 36,000,000 | 36,150,000 | 481 | 1031 | -2.383679878 |                                                                                                |
| 29 | 36,075,000 | 36,225,000 | 482 | 1266 | -2.172848605 |                                                                                                |
| 29 | 36,150,000 | 36,300,000 | 483 | 1149 | -0.228719772 |                                                                                                |
| 29 | 36,225,000 | 36,375,000 | 484 | 900  | -0.600741944 |                                                                                                |
| 29 | 36,300,000 | 36,450,000 | 485 | 1045 | -0.229520454 |                                                                                                |
| 29 | 36,375,000 | 36,525,000 | 486 | 1304 | 0.624540459  |                                                                                                |
| 29 | 36,450,000 | 36,600,000 | 487 | 1612 | 0.623351729  |                                                                                                |
| 29 | 36,525,000 | 36,675,000 | 488 | 1354 | 0.56719693   | NFRKB,TMEM45B                                                                                  |
| 29 | 36,600,000 | 36,750,000 | 489 | 864  | 0.326642739  | NFRKB,PRDM10,TMEM45B                                                                           |
| 29 | 36,675,000 | 36,825,000 | 490 | 801  | -0.283997616 | NFRKB,PRDM10,ZNF740                                                                            |
| 29 | 36,750,000 | 36,900,000 | 491 | 767  | -0.075533298 | APLP2,ZNF740                                                                                   |
| 29 | 36,825,000 | 36,975,000 | 492 | 925  | 0.755176528  | APLP2,ST14,ENSBTAG00000033237                                                                  |
| 29 | 36,900,000 | 37,050,000 | 493 | 785  | 0.556313154  | APLP2,ST14,ZBTB44,ENSBTAG00000033237                                                           |
| 29 | 36,975,000 | 37,125,000 | 494 | 542  | 0.293547718  | ADAMTS8,ZBTB44                                                                                 |
| 29 | 37,050,000 | 37,200,000 | 495 | 770  | 0.411406153  | ADAMTS15,ADAMTS8                                                                               |
| 29 | 37,125,000 | 37,275,000 | 496 | 1008 | 0.58558988   | ADAMTS15                                                                                       |
| 29 | 37,200,000 | 37,350,000 | 497 | 908  | 0.807566934  |                                                                                                |
| 29 | 37,275,000 | 37,425,000 | 498 | 624  | 1.030430344  |                                                                                                |
| 29 | 37,350,000 | 37,500,000 | 499 | 726  | 0.962497593  | ENSBTAG00000046647                                                                             |
| 29 | 37,425,000 | 37,575,000 | 500 | 1132 | 0.582244635  | SNX19,ENSBTAG00000046647                                                                       |
| 29 | 37,500,000 | 37,650,000 | 501 | 1229 | 0.643715038  | MS4A8B,SNX19                                                                                   |
| 29 | 37,575,000 | 37,725,000 | 502 | 958  | 0.692376775  | MS4A10,MS4A15,MS4A18,MS4A8B                                                                    |
| 29 | 37,650,000 | 37,800,000 | 503 | 774  | 0.868525632  | MS4A10,MS4A15,MS4A18,MS4A8B,PTGDR2,ENSBTAG00000014215                                          |
| 29 | 37,725,000 | 37,875,000 | 504 | 726  | 0.885686734  | MS4A10,PRPF19,PTGDR2,SLC15A3,TMEM109,TMEM132A,ENSBTAG00000014215                               |
| 29 | 37,800,000 | 37,950,000 | 505 | 1029 | 0.5388174    | CD6,PRPF19,SLC15A3,TMEM109,TMEM132A                                                            |
| 29 | 37,875,000 | 38,025,000 | 506 | 1177 | 0.903865429  | CD5,CD6                                                                                        |
| 29 | 37,950,000 | 38,100,000 | 507 | 1113 | 1.159716558  | CD5,VPS37C                                                                                     |
| 29 | 38,025,000 | 38,175,000 | 508 | 1204 | 0.84333418   | CD5,PAG10,PAG2,VPS37C                                                                          |
| 29 | 38,100,000 | 38,250,000 | 509 | 1218 | 0.516220649  | PAG10,PAG12,PAG2                                                                               |
| 29 | 38,175,000 | 38,325,000 | 510 | 1320 | 0.48223578   | PAG12,ENSBTAG00000024611,ENSBTAG00000045802,ENSBTAG00000048298                                 |
| 29 | 38,250,000 | 38,400,000 | 511 | 1604 | 0.449150268  | ENSBTAG00000024611,ENSBTAG00000045802,ENSBTAG00000046127,ENSBTAG00000047145,ENSBTAG00000048298 |

|    |            |            |     |      |              |                                                                                 |
|----|------------|------------|-----|------|--------------|---------------------------------------------------------------------------------|
| 29 | 38,325,000 | 38,475,000 | 512 | 1645 | -0.297878089 | PAG-<br>18,ENSBTAG00000045802,ENSBTAG00000046127,EN<br>SBTAG00000047145         |
| 29 | 38,400,000 | 38,550,000 | 513 | 1283 | -0.618910677 | PAG-18,PAG7,ENSBTAG00000047145                                                  |
| 29 | 38,475,000 | 38,625,000 | 514 | 1683 | 0.771216919  | PAG7,ENSBTAG00000007849,ENSBTAG00000045670                                      |
| 29 | 38,550,000 | 38,700,000 | 515 | 2141 | 0.969046683  | PAG-<br>15,PAG7,ENSBTAG00000007849,ENSBTAG000000456<br>70                       |
| 29 | 38,625,000 | 38,775,000 | 516 | 1707 | 0.256921641  | PAG-15,ENSBTAG00000046038                                                       |
| 29 | 38,700,000 | 38,850,000 | 517 | 1443 | 0.099497832  | PAG4,ENSBTAG00000040140,ENSBTAG00000046038                                      |
| 29 | 38,775,000 | 38,925,000 | 518 | 1532 | 0.541239857  | PAG4,ENSBTAG00000040140,ENSBTAG00000046497,<br>ENSBTAG00000047989               |
| 29 | 38,850,000 | 39,000,000 | 519 | 1246 | 1.129219356  | ENSBTAG00000039045,ENSBTAG00000039970,ENSBT<br>AG00000046497,ENSBTAG00000047989 |
| 29 | 38,925,000 | 39,075,000 | 520 | 1054 | 1.339436523  | PAG-<br>21,PAG20,ENSBTAG00000039045,ENSBTAG00000039<br>970,ENSBTAG00000047989   |
| 29 | 39,000,000 | 39,150,000 | 521 | 1662 | 1.002026463  | PAG-21,PAG20,ENSBTAG00000047758                                                 |
| 29 | 39,075,000 | 39,225,000 | 522 | 1740 | 0.878323426  | PAG1,ENSBTAG00000047758,ENSBTAG00000048202                                      |
| 29 | 39,150,000 | 39,300,000 | 523 | 1557 | 1.102278503  | PAG1,PAG19,ENSBTAG00000048202                                                   |
| 29 | 39,225,000 | 39,375,000 | 524 | 1548 | 0.78532395   | PAG19,ENSBTAG00000034244,ENSBTAG00000047419<br>,ENSBTAG00000048202              |
| 29 | 39,300,000 | 39,450,000 | 525 | 1332 | -0.142580433 | ENSBTAG00000034244,ENSBTAG00000047419,ENSBT<br>AG00000048073                    |
| 29 | 39,375,000 | 39,525,000 | 526 | 1451 | -0.873374122 | MGC157408,ENSBTAG00000047419,ENSBTAG000000<br>48073                             |
| 29 | 39,450,000 | 39,600,000 | 527 | 1494 | -0.691411929 | MGC157408,ENSBTAG00000035736,ENSBTAG000000<br>38918                             |
| 29 | 39,525,000 | 39,675,000 | 528 | 1437 | 0.007024666  | PAG17,ENSBTAG00000035736,ENSBTAG00000038918<br>,ENSBTAG00000046085              |
| 29 | 39,600,000 | 39,750,000 | 529 | 1940 | -0.354661139 | MGC157405,PAG17,ENSBTAG00000038918,ENSBTAG<br>00000046085,ENSBTAG00000046686    |
| 29 | 39,675,000 | 39,825,000 | 530 | 1973 | -0.993684377 | MGC157405,ENSBTAG00000038506,ENSBTAG000000<br>46686                             |
| 29 | 39,750,000 | 39,900,000 | 531 | 1528 | -0.790618225 | PAG9,ENSBTAG00000003236,ENSBTAG00000038506,<br>ENSBTAG00000048190               |
| 29 | 39,825,000 | 39,975,000 | 532 | 1524 | 0.317320131  | HRASLS5,PAG9,ENSBTAG00000003236,ENSBTAG0000<br>0048190                          |
| 29 | 39,900,000 | 40,050,000 | 533 | 1287 | 0.407479206  | HRASLS5,ENSBTAG00000003236,ENSBTAG000000223<br>48,ENSBTAG00000047172            |
| 29 | 39,975,000 | 40,125,000 | 534 | 1075 | -0.274436213 | PAG6,ENSBTAG00000022348,ENSBTAG00000046870,<br>ENSBTAG00000047172               |
| 29 | 40,050,000 | 40,200,000 | 535 | 1194 | -0.255442881 | PAG6,ENSBTAG00000022759,ENSBTAG00000046870                                      |
| 29 | 40,125,000 | 40,275,000 | 536 | 1305 | 0.608682212  | ENSBTAG00000013214,ENSBTAG00000022759                                           |
| 29 | 40,200,000 | 40,350,000 | 537 | 1397 | 0.297296011  | ENSBTAG00000013214,ENSBTAG00000040257                                           |
| 29 | 40,275,000 | 40,425,000 | 538 | 1292 | -0.413627893 | ENSBTAG00000019226,ENSBTAG00000040257                                           |
| 29 | 40,350,000 | 40,500,000 | 539 | 1186 | -0.157979241 | PGA,VWCE,ENSBTAG00000019226                                                     |
| 29 | 40,425,000 | 40,575,000 | 540 | 927  | 0.472586429  | CYB561A3,DAK,DDB1,PGA,TMEM138,VWCE,ENSBTAG<br>00000019226                       |
| 29 | 40,500,000 | 40,650,000 | 541 | 630  | 0.218463042  | CPSF7,CYB561A3,DAK,DDB1,PPP1R32,SDHAF2,TMEM<br>138,TMEM216,VWCE                 |
| 29 | 40,575,000 | 40,725,000 | 542 | 656  | 0.693221429  | CPSF7,LRR10B,PPP1R32,SDHAF2,SYT7,TMEM216                                        |
| 29 | 40,650,000 | 40,800,000 | 543 | 794  | 0.373169308  | LRR10B,PPP1R32,SYT7                                                             |

|    |            |            |     |      |              |                                                                                                                                                     |
|----|------------|------------|-----|------|--------------|-----------------------------------------------------------------------------------------------------------------------------------------------------|
| 29 | 40,725,000 | 40,875,000 | 544 | 910  | -0.171061445 | DAGLA                                                                                                                                               |
| 29 | 40,800,000 | 40,950,000 | 545 | 719  | -0.293371796 | DAGLA,FADS1,FEN1,MYRF,TMEM258                                                                                                                       |
| 29 | 40,875,000 | 41,025,000 | 546 | 719  | -0.027675117 | DAGLA,FADS1,FEN1,MYRF,TMEM258                                                                                                                       |
| 29 | 40,950,000 | 41,100,000 | 547 | 906  | 0.337526688  | FADS1,FADS2,FADS3                                                                                                                                   |
| 29 | 41,025,000 | 41,175,000 | 548 | 868  | 0.293896291  | BEST1,FADS2,FADS3,FTH1,RAB3IL1                                                                                                                      |
| 29 | 41,100,000 | 41,250,000 | 549 | 954  | -0.05449824  | BEST1,FADS3,FTH1,RAB3IL1                                                                                                                            |
| 29 | 41,175,000 | 41,325,000 | 550 | 1200 | -0.898836466 | FTH1                                                                                                                                                |
| 29 | 41,250,000 | 41,400,000 | 551 | 1309 | -0.975023443 | SCGB1D,SCGB2A2                                                                                                                                      |
| 29 | 41,325,000 | 41,475,000 | 552 | 1048 | -0.281777389 | ASRGL1,SCGB1D,SCGB2A2                                                                                                                               |
| 29 | 41,400,000 | 41,550,000 | 553 | 821  | -0.773193351 | ASRGL1,SCGB1A1,SCGB2A2                                                                                                                              |
| 29 | 41,475,000 | 41,625,000 | 554 | 830  | -0.655417768 | AHNAK,EEF1G,SCGB1A1                                                                                                                                 |
| 29 | 41,550,000 | 41,700,000 | 555 | 616  | 0.163988847  | AHNAK,B3GAT3,EEF1G,EML3,GANAB,KIAA1698,METT<br>L12,MGC134282,MTA2,ROM1,TUT1,UQCC3                                                                   |
| 29 | 41,625,000 | 41,775,000 | 556 | 759  | -0.262345178 | B3GAT3,BSCL2,EML3,GANAB,GNG3,HNRNPUL2,KIAA1<br>698,LRRN4CL,METTL12,MGC134282,MTA2,ROM1,TTC<br>9C,TUT1,UBXN1,UQCC3,ZBTB3                             |
| 29 | 41,700,000 | 41,850,000 | 557 | 894  | -0.100621943 | BSCL2,GNG3,HNRNPUL2,LRRN4CL,NXF1,POLR2G,STX<br>5,TAF6L,TMEM179B,TMEM223,TTC9C,UBXN1,WDR74,<br>ZBTB3                                                 |
| 29 | 41,775,000 | 41,925,000 | 558 | 720  | 0.247155128  | CHRM1,NXF1,POLR2G,SLC3A2,STX5,TAF6L,TMEM179<br>B,TMEM223,WDR74                                                                                      |
| 29 | 41,850,000 | 42,000,000 | 559 | 677  | 0.132181884  | CHRM1,SLC22A6,SLC3A2,ENSBTAG00000047110                                                                                                             |
| 29 | 41,925,000 | 42,075,000 | 560 | 793  | 0.326132284  | OAT3,SLC22A6,ENSBTAG00000000518,ENSBTAG0000<br>0047110                                                                                              |
| 29 | 42,000,000 | 42,150,000 | 561 | 992  | 0.17461568   | OAT3,ENSBTAG00000000518,ENSBTAG00000037570                                                                                                          |
| 29 | 42,075,000 | 42,225,000 | 562 | 895  | 0.377594228  | ENSBTAG00000000518,ENSBTAG00000037570                                                                                                               |
| 29 | 42,150,000 | 42,300,000 | 563 | 790  | 0.540919294  | ENSBTAG00000014584,ENSBTAG00000037570,ENSBT<br>AG00000038655                                                                                        |
| 29 | 42,225,000 | 42,375,000 | 564 | 1106 | 0.267378508  | ENSBTAG00000014584,ENSBTAG00000038655,ENSBT<br>AG00000039463                                                                                        |
| 29 | 42,300,000 | 42,450,000 | 565 | 1428 | 0.109270055  | LGALS12,ENSBTAG00000014584,ENSBTAG000000376<br>45,ENSBTAG00000039463,ENSBTAG00000039511                                                             |
| 29 | 42,375,000 | 42,525,000 | 566 | 1823 | -0.272090177 | LGALS12,ENSBTAG00000011019,ENSBTAG000000376<br>45,ENSBTAG00000039511                                                                                |
| 29 | 42,450,000 | 42,600,000 | 567 | 1818 | -1.074695748 | PLA2G16,ENSBTAG00000011019,ENSBTAG000000376<br>45                                                                                                   |
| 29 | 42,525,000 | 42,675,000 | 568 | 1155 | -1.305738432 | ATL3,PLA2G16,RTN3                                                                                                                                   |
| 29 | 42,600,000 | 42,750,000 | 569 | 722  | -0.013899704 | ATL3,C11orf95,PLA2G16,RTN3,ENSBTAG00000045971                                                                                                       |
| 29 | 42,675,000 | 42,825,000 | 570 | 661  | -0.01191634  | C11orf95,C29H11orf84,RTN3,ENSBTAG00000045971                                                                                                        |
| 29 | 42,750,000 | 42,900,000 | 571 | 611  | -0.202656973 | C29H11orf84,MACROD1,MARK2,OTUB1,RCOR2,RTN3                                                                                                          |
| 29 | 42,825,000 | 42,975,000 | 572 | 522  | -1.654384249 | MACROD1,MARK2,OTUB1,RCOR2                                                                                                                           |
| 29 | 42,900,000 | 43,050,000 | 573 | 635  | -1.333797485 | FLRT1,MACROD1,NAT11,ENSBTAG00000006386                                                                                                              |
| 29 | 42,975,000 | 43,125,000 | 574 | 588  | -0.61540605  | FLRT1,MACROD1,NAT11,STIP1,ENSBTAG0000000638<br>6                                                                                                    |
| 29 | 43,050,000 | 43,200,000 | 575 | 403  | -2.578828375 | BAD,DNAJC4,FERMT3,FKBP2,FLRT1,MACROD1,NUDT<br>22,PLCB3,STIP1,TRPT1,VEGFB,ENSBTAG00000016551,<br>ENSBTAG00000047265                                  |
| 29 | 43,125,000 | 43,275,000 | 576 | 376  | -2.628814206 | BAD,CCDC88B,DNAJC4,ESRRA,FERMT3,FKBP2,GPR13<br>7,KCNK4,NUDT22,PLCB3,PRDX5,RPS6KA4,TRMT112,T<br>RPT1,VEGFB,ENSBTAG00000016551,ENSBTAG000000<br>47265 |

|    |            |            |     |      |              |                                                                                                                                   |
|----|------------|------------|-----|------|--------------|-----------------------------------------------------------------------------------------------------------------------------------|
| 29 | 43,200,000 | 43,350,000 | 577 | 744  | 0.222893027  | BAD,CCDC88B,ESRRA,GPR137,KCNK4,PRDX5,RPS6KA4,TRMT112                                                                              |
| 29 | 43,275,000 | 43,425,000 | 578 | 948  | -0.081439829 | RPS6KA4,SLC22A11                                                                                                                  |
| 29 | 43,350,000 | 43,500,000 | 579 | 658  | -0.577730609 | NRXN2,SLC22A11,SLC22A12                                                                                                           |
| 29 | 43,425,000 | 43,575,000 | 580 | 383  | 0.306947407  | NRXN2,SLC22A11,SLC22A12                                                                                                           |
| 29 | 43,500,000 | 43,650,000 | 581 | 309  | 0.126887346  | MAP4K2,NRXN2,PYGM,RASGRP2,SF1                                                                                                     |
| 29 | 43,575,000 | 43,725,000 | 582 | 337  | -0.87586133  | CDC42BPG,EHD1,MAP4K2,MEN1,NRXN2,PYGM,RASGRP2,SF1                                                                                  |
| 29 | 43,650,000 | 43,800,000 | 583 | 355  | -0.837927413 | ATG2A,C11orf85,CDC42BPG,EHD1,GPHA2,MAP4K2,MEN1,PPP2R5B                                                                            |
| 29 | 43,725,000 | 43,875,000 | 584 | 440  | 0.767457672  | ARL2,ATG2A,BATF2,C11orf85,GPHA2,PPP2R5B                                                                                           |
| 29 | 43,800,000 | 43,950,000 | 585 | 470  | 1.180210997  | ARL2,BATF2,C11orf85,CDCA5,NAALADL1,SAC3D1,SNX15                                                                                   |
| 29 | 43,875,000 | 44,025,000 | 586 | 574  | 0.859671254  | CDCA5,FAU,MRPL49,NAALADL1,SAC3D1,SNX15,SYVN1,TM7SF2,VPS51,ZFPL1,ZNHIT2                                                            |
| 29 | 43,950,000 | 44,100,000 | 587 | 751  | 0.81982591   | CAPN1,CDCA5,FAU,MRPL49,SPDYC,SYVN1,TM7SF2,VPS51,ZFPL1,ZNHIT2,ENSBTAG00000010233                                                   |
| 29 | 44,025,000 | 44,175,000 | 588 | 997  | 0.497574771  | CAPN1,POLA2,SPDYC,ENSBTAG00000010233                                                                                              |
| 29 | 44,100,000 | 44,250,000 | 589 | 1038 | -0.499544156 | CDC42EP2,DPF2,FRMD8,POLA2,SLC25A45,TIGD3,ENSBTAG00000010233                                                                       |
| 29 | 44,175,000 | 44,325,000 | 590 | 892  | -1.035416328 | CDC42EP2,DPF2,FRMD8,SLC25A45,TIGD3                                                                                                |
| 29 | 44,250,000 | 44,400,000 | 591 | 760  | -0.537601876 | FRMD8,LTBP3,SCYL1                                                                                                                 |
| 29 | 44,325,000 | 44,475,000 | 592 | 431  | -0.427677603 | EHBP1L1,KCNK7,LTBP3,MAP3K11,MGC140823,PCNXL3,SCYL1,SSSCA1                                                                         |
| 29 | 44,400,000 | 44,550,000 | 593 | 330  | 1.346126101  | EHBP1L1,KAT5,KCNK7,LTBP3,MAP3K11,MGC140823,PCNXL3,RELA,SIPA1,SSSCA1                                                               |
| 29 | 44,475,000 | 44,625,000 | 594 | 472  | 1.127152746  | AP5B1,KAT5,OVOL1,PCNXL3,RELA,RNASEH2C,SIPA1,ENSBTAG00000046150,ENSBTAG00000047811                                                 |
| 29 | 44,550,000 | 44,700,000 | 595 | 501  | 1.048551007  | AP5B1,C29H11orf68,CCDC85B,CFL1,CTSW,DRAP1,EFEMP2,FIBP,FOSL1,KAT5,MUS81,OVOL1,RNASEH2C,SNX32,ENSBTAG00000046150,ENSBTAG00000047811 |
| 29 | 44,625,000 | 44,775,000 | 596 | 482  | 1.294447872  | BANF1,C29H11orf68,CATSPER1,CCDC85B,CFL1,CST6,CTSW,DRAP1,EFEMP2,EIF1AD,FIBP,FOSL1,MUS81,SART1,SNX32,TSGA10IP,ENSBTAG00000046587    |
| 29 | 44,700,000 | 44,850,000 | 597 | 405  | 1.13460528   | BANF1,CATSPER1,CST6,EIF1AD,GAL3ST3,SART1,SF3B2,TSGA10IP,ENSBTAG00000046587                                                        |
| 29 | 44,775,000 | 44,925,000 | 598 | 376  | -0.430657227 | CATSPER1,GAL3ST3,PACS1,SF3B2                                                                                                      |
| 29 | 44,850,000 | 45,000,000 | 599 | 413  | -1.427861359 | KLC2,PACS1,RAB1B,TMEM151A,YIF1A                                                                                                   |
| 29 | 44,925,000 | 45,075,000 | 600 | 359  | -0.619114952 | B3GNT1,BRMS1,CD248,KLC2,PACS1,RAB1B,RIN1,SLC29A2,TMEM151A,YIF1A                                                                   |
| 29 | 45,000,000 | 45,150,000 | 601 | 422  | 0.091468007  | B3GNT1,BRMS1,CD248,MRPL11,NPAS4,RIN1,SLC29A2                                                                                      |
| 29 | 45,075,000 | 45,225,000 | 602 | 407  | -0.562748909 | DPP3,MRPL11,NPAS4,PELI3,ZDHHC24,ENSBTAG0000020147                                                                                 |
| 29 | 45,150,000 | 45,300,000 | 603 | 395  | -1.077191756 | ACTN3,CCDC87,CCS,CTSF,DPP3,PELI3,RBM14,ZDHHC24,ENSBTAG00000020147                                                                 |
| 29 | 45,225,000 | 45,375,000 | 604 | 606  | -0.025954959 | ACTN3,CCDC87,CCS,CTSF,RBM14,RBM4,RBM4B,SPTBN2,ZDHHC24                                                                             |
| 29 | 45,300,000 | 45,450,000 | 605 | 768  | 0.232146571  | C11orf80,RBM14,RBM4,RBM4B,SPTBN2                                                                                                  |
| 29 | 45,375,000 | 45,525,000 | 606 | 722  | 0.313049246  | C11orf80,LRFN4,PC,RCE1,SPTBN2                                                                                                     |
| 29 | 45,450,000 | 45,600,000 | 607 | 861  | -4.109711018 | C11orf80,LRFN4,PC,RCE1                                                                                                            |
| 29 | 45,525,000 | 45,675,000 | 608 | 899  | -3.742568627 | C29H11orf86,PC,SYT12                                                                                                              |
| 29 | 45,600,000 | 45,750,000 | 609 | 700  | 0.269681319  | C29H11orf86,PC,RHOD,SYT12                                                                                                         |

|    |            |            |     |      |              |                                                                                                                                    |
|----|------------|------------|-----|------|--------------|------------------------------------------------------------------------------------------------------------------------------------|
| 29 | 45,675,000 | 45,825,000 | 610 | 640  | 0.712917977  | KDM2A,RHOD,SYT12                                                                                                                   |
| 29 | 45,750,000 | 45,900,000 | 611 | 391  | 0.579471654  | ADRBK1,ANKRD13D,KDM2A,POLD4,SSH3                                                                                                   |
| 29 | 45,825,000 | 45,975,000 | 612 | 244  | 0.033379987  | ADRBK1,ANKRD13D,CARNS1,CLCF1,CORO1B,POLD4,<br>PTPRCAP,RAD9A,RPS6KB2,SSH3,TBC1D10C,ENSBTAG<br>00000012146                           |
| 29 | 45,900,000 | 46,050,000 | 613 | 325  | 0.070907462  | AIP,CABP2,CABP4,CARNS1,CDK2AP2,CLCF1,CORO1B,<br>GPR152,PITPNM1,POLD4,PTPRCAP,RAD9A,RPS6KB2,T<br>BC1D10C,TMEM134,ENSBTAG00000012146 |
| 29 | 45,975,000 | 46,125,000 | 614 | 612  | -3.560284886 | AIP,CABP2,CABP4,CDK2AP2,CORO1B,DOC2G,GPR152,<br>GSTP1,NDUFV1,NUDT8,PITPNM1,TMEM134,ENSBTA<br>G00000038054                          |
| 29 | 46,050,000 | 46,200,000 | 615 | 784  | -2.910324022 | ALDH3B1,ALDH3B2,DOC2G,GSTP1,NDUFV1,NUDT8,T<br>BX10,UNC93B1,ENSBTAG00000038054                                                      |
| 29 | 46,125,000 | 46,275,000 | 616 | 527  | -0.06959167  | ALDH3B1,ALDH3B2,CHKA,NDUFS8,NUDT8,TBX10,TCI<br>RG1,UNC93B1                                                                         |
| 29 | 46,200,000 | 46,350,000 | 617 | 393  | -0.136768462 | ALDH3B1,CHKA,NDUFS8,SUV420H1,TCIRG1                                                                                                |
| 29 | 46,275,000 | 46,425,000 | 618 | 474  | 0.074390685  | C11orf24,SUV420H1                                                                                                                  |
| 29 | 46,350,000 | 46,500,000 | 619 | 469  | 0.872260021  | C11orf24,LRP5                                                                                                                      |
| 29 | 46,425,000 | 46,575,000 | 620 | 713  | 1.136158652  | LRP5                                                                                                                               |
| 29 | 46,500,000 | 46,650,000 | 621 | 762  | 0.916547685  | LRP5,SAPS3                                                                                                                         |
| 29 | 46,575,000 | 46,725,000 | 622 | 433  | 0.437013038  | SAPS3                                                                                                                              |
| 29 | 46,650,000 | 46,800,000 | 623 | 421  | 0.042601875  | GAL,SAPS3                                                                                                                          |
| 29 | 46,725,000 | 46,875,000 | 624 | 712  | -1.196495233 | CPT1A,GAL                                                                                                                          |
| 29 | 46,800,000 | 46,950,000 | 625 | 708  | -1.501592208 | CPT1A,IGHMBP2,MRPL21                                                                                                               |
| 29 | 46,875,000 | 47,025,000 | 626 | 735  | -1.821656995 | IGHMBP2,MRGPRF,MRPL21,ENSBTAG00000016774,E<br>NSBTAG00000046090                                                                    |
| 29 | 46,950,000 | 47,100,000 | 627 | 872  | -0.824450421 | MRGPRF,TPCN2,ENSBTAG00000016774,ENSBTAG000<br>00046090                                                                             |
| 29 | 47,025,000 | 47,175,000 | 628 | 788  | 0.314723475  | TPCN2                                                                                                                              |
| 29 | 47,100,000 | 47,250,000 | 629 | 668  | -0.017070429 |                                                                                                                                    |
| 29 | 47,175,000 | 47,325,000 | 630 | 710  | -0.371748884 |                                                                                                                                    |
| 29 | 47,250,000 | 47,400,000 | 631 | 744  | -0.367221274 |                                                                                                                                    |
| 29 | 47,325,000 | 47,475,000 | 632 | 558  | 0.633433111  |                                                                                                                                    |
| 29 | 47,400,000 | 47,550,000 | 633 | 655  | -0.880057085 | CCND1                                                                                                                              |
| 29 | 47,475,000 | 47,625,000 | 634 | 778  | -0.411477333 | CCND1,FGF19,ORAOV1                                                                                                                 |
| 29 | 47,550,000 | 47,700,000 | 635 | 683  | 0.543309473  | CCND1,FGF19,FGF3,FGF4,ORAOV1                                                                                                       |
| 29 | 47,625,000 | 47,775,000 | 636 | 732  | 0.697238957  | FGF3,FGF4                                                                                                                          |
| 29 | 47,700,000 | 47,850,000 | 637 | 973  | 0.624293024  |                                                                                                                                    |
| 29 | 47,775,000 | 47,925,000 | 638 | 1162 | 0.863066228  | ANO1                                                                                                                               |
| 29 | 47,850,000 | 48,000,000 | 639 | 910  | 1.064352926  | ANO1                                                                                                                               |
| 29 | 47,925,000 | 48,075,000 | 640 | 721  | 1.13857459   | ANO1,FADD,ENSBTAG00000008477                                                                                                       |
| 29 | 48,000,000 | 48,150,000 | 641 | 728  | 1.122412293  | ANO1,FADD,PPFIA1,ENSBTAG00000008477                                                                                                |
| 29 | 48,075,000 | 48,225,000 | 642 | 561  | 0.43602305   | CTTN,PPFIA1,SHANK2                                                                                                                 |
| 29 | 48,150,000 | 48,300,000 | 643 | 824  | 0.457195933  | CTTN,PPFIA1,SHANK2                                                                                                                 |
| 29 | 48,225,000 | 48,375,000 | 644 | 1359 | -0.071548113 | SHANK2                                                                                                                             |
| 29 | 48,300,000 | 48,450,000 | 645 | 1338 | -0.432298639 | SHANK2                                                                                                                             |
| 29 | 48,375,000 | 48,525,000 | 646 | 1037 | 0.039958529  | SHANK2                                                                                                                             |
| 29 | 48,450,000 | 48,600,000 | 647 | 1243 | 0.656459918  |                                                                                                                                    |
| 29 | 48,525,000 | 48,675,000 | 648 | 1744 | 0.780925381  |                                                                                                                                    |
| 29 | 48,600,000 | 48,750,000 | 649 | 1903 | 0.08820381   |                                                                                                                                    |
| 29 | 48,675,000 | 48,825,000 | 650 | 1520 | 0.260024287  |                                                                                                                                    |
| 29 | 48,750,000 | 48,900,000 | 651 | 1237 | 0.354773641  | ENSBTAG00000004212                                                                                                                 |
| 29 | 48,825,000 | 48,975,000 | 652 | 1089 | -0.087307719 | DHCR7,NADSYN1,ENSBTAG00000004212                                                                                                   |

|    |            |            |     |      |              |                                                               |
|----|------------|------------|-----|------|--------------|---------------------------------------------------------------|
| 29 | 48,900,000 | 49,050,000 | 653 | 1191 | 0.713431589  | DHCR7,MRGPRG,NADSYN1,ENSBTAG00000000776,ENSBTAG00000004212    |
| 29 | 48,975,000 | 49,125,000 | 654 | 1090 | 0.569321546  | MRGPRG,NADSYN1,OSBPL5,ENSBTAG00000000776                      |
| 29 | 49,050,000 | 49,200,000 | 655 | 857  | 0.701975164  | OSBPL5,TNFRSF10A                                              |
| 29 | 49,125,000 | 49,275,000 | 656 | 1005 | 0.488162286  | CARS,NAP1L4,OSBPL5,TNFRSF10A                                  |
| 29 | 49,200,000 | 49,350,000 | 657 | 739  | -0.03708134  | CARS,NAP1L4,PHLDA2,SLC22A18                                   |
| 29 | 49,275,000 | 49,425,000 | 658 | 486  | 0.404281468  | CDKN1C,NAP1L4,PHLDA2,SLC22A18                                 |
| 29 | 49,350,000 | 49,500,000 | 659 | 456  | 0.080578544  | CDKN1C,SLC22A18                                               |
| 29 | 49,425,000 | 49,575,000 | 660 | 348  | -1.955200534 |                                                               |
| 29 | 49,500,000 | 49,650,000 | 661 | 268  | -3.014681695 |                                                               |
| 29 | 49,575,000 | 49,725,000 | 662 | 291  | -3.816609062 | KCNQ1                                                         |
| 29 | 49,650,000 | 49,800,000 | 663 | 402  | -3.491440411 | KCNQ1,ENSBTAG00000047349                                      |
| 29 | 49,725,000 | 49,875,000 | 664 | 409  | -1.65481578  | CD81,TRPM5,TSSC4,ENSBTAG00000047349                           |
| 29 | 49,800,000 | 49,950,000 | 665 | 463  | -0.173800427 | CD81,TRPM5,TSPAN32,TSSC4                                      |
| 29 | 49,875,000 | 50,025,000 | 666 | 595  | -0.125312657 | ASCL2,TSPAN32                                                 |
| 29 | 49,950,000 | 50,100,000 | 667 | 530  | -0.099047693 | ASCL2,IGF2,INS,TH                                             |
| 29 | 50,025,000 | 50,175,000 | 668 | 452  | 0.017635166  | IGF2,INS,TH                                                   |
| 29 | 50,100,000 | 50,250,000 | 669 | 443  | -0.071775309 | LSP1,MRPL23,TNNT3                                             |
| 29 | 50,175,000 | 50,325,000 | 670 | 556  | 0.213813219  | LSP1,MRPL23,SYT8,TNNI2,TNNT3                                  |
| 29 | 50,250,000 | 50,400,000 | 671 | 1149 | 0.19936672   | CATD,CRLF2,LSP1,SYT8,TNNI2                                    |
| 29 | 50,325,000 | 50,475,000 | 672 | 1552 | 0.324694843  | AP2A2,CATD,CRLF2,IFITM10                                      |
| 29 | 50,400,000 | 50,550,000 | 673 | 1390 | 0.569171178  | AP2A2,CHID1,IFITM10                                           |
| 29 | 50,475,000 | 50,625,000 | 674 | 1328 | 0.597489853  | CHID1,TSPAN4                                                  |
| 29 | 50,550,000 | 50,700,000 | 675 | 1523 | -0.401295546 | CD151,CHID1,POLR2L,TSPAN4,ENSBTAG00000019579                  |
| 29 | 50,625,000 | 50,775,000 | 676 | 1366 | -0.948556362 | CD151,CRACR2B,PIDD1,PNPLA2,POLR2L,RPLP2,ENSBTAG00000019579    |
| 29 | 50,700,000 | 50,850,000 | 677 | 1111 | 0.028580611  | CD151,CEND1,CRACR2B,PDDC1,PIDD1,PNPLA2,RPLP2,SCT,SLC25A22     |
| 29 | 50,775,000 | 50,925,000 | 678 | 1146 | 0.88995893   | CEND1,DUSP8,IRF7,MUPCDH,PDDC1,PHRF1,PIDD1,SCT,SLC25A22,TALDO1 |
| 29 | 50,850,000 | 51,000,000 | 679 | 1268 | 0.690347782  | DUSP8,EP8L2,IRF7,MOB2,MUPCDH,PDDC1,PHRF1,TALDO1               |
| 29 | 50,925,000 | 51,075,000 | 680 | 1034 | 0.194542551  | BRSK2,DUSP8,EP8L2,LMNTD2,MOB2,PHRF1,RASSF7,TMEM80             |
| 29 | 51,000,000 | 51,150,000 | 681 | 776  | -0.640074374 | BRSK2,HRAS,LMNTD2,LRRC56,MOB2,RASSF7,TMEM80                   |
| 29 | 51,075,000 | 51,225,000 | 682 | 1005 | -0.741166178 | BRSK2,HRAS,LMNTD2,LRRC56,ENSBTAG00000047697                   |
| 29 | 51,150,000 | 51,300,000 | 683 | 1355 | -0.343796277 | B4GALNT4,PKP3,SIGIRR,ENSBTAG00000047697                       |
| 29 | 51,225,000 | 51,375,000 | 684 | 1340 | -0.19998667  | B4GALNT4,IFITM3,MUC5B,PKP3,SIGIRR,TOLLIP                      |
| 29 | 51,300,000 | 51,450,000 | 685 | 1195 | 0.167263701  | B4GALNT4,IFITM3,MUC5B,TOLLIP,ENSBTAG00000038262               |
| 29 | 51,375,000 | 51,505,224 | 686 | 1229 | 0.084058094  | MUC5B,ENSBTAG00000038262                                      |
